# Supplementary material
Source: PubMed Central journal article supplement (PMC1952668)
Supplement: 07_049_Haase_Suppl_Table1.pdf [file 07_049_Haase_Suppl_Table1.pdf]

| ID        | Replicate 1         |                   | ID        | Replicate 2         |                   | ID        | Replicate 3         |                   |
|-----------|---------------------|-------------------|-----------|---------------------|-------------------|-----------|---------------------|-------------------|
|           | 50uM zinc<br>AMPCH1 | control<br>AMPCH2 |           | 50uM zinc<br>AMPCH1 | control<br>AMPCH2 |           | 50uM zinc<br>AMPCH1 | control<br>AMPCH2 |
| CY3Cy5    | 23025.018           | 4103.205          | CY3Cy5    | 18433.049           | 2317.272          | CY3Cy5    | 15872.693           | 1613.433          |
| NM_000041 | 4228.908            | 5070.414          | NM_000041 | 65888.242           | 61827.359         | NM_000041 | 53550.738           | 59073.43          |
| AA449931  | 1012.906            | 928.1             | W69211    | 954.309             | 1526.702          | W69211    | 1308.168            | 1336.07           |
| AA877347  | 1329.883            | 1658.027          | AA449931  | 10018.439           | 11498.414         | AA449931  | 12816.142           | 13878.901         |
| S57235    | 3478.651            | 4254.459          | AA877347  | 20561.848           | 22688.48          | AA877347  | 14704.676           | 17119.021         |
| AI376272  | 1235.674            | 1471.235          | R54049    | 695.593             | 683.778           | R54049    | 796.382             | 594.213           |
| BF242229  | 1071.966            | 1205.873          | BI755551  | 555.033             | 861.451           | BI755551  | 576.501             | 602.915           |
| X75756    | 6011.888            | 7134.004          | S57235    | 23477.396           | 24508.252         | S57235    | 22674.045           | 24696             |
| AI754623  | 1315.131            | 1604.41           | AI376272  | 6072.241            | 6034.668          | AI376272  | 10179.837           | 11274.218         |
| AA401326  | 2291.519            | 2878.33           | BF242229  | 3872.406            | 3734.483          | BF242229  | 2726.868            | 3375.933          |
| AA504482  | 802.863             | 836.911           | X75756    | 59816.207           | 59725.063         | X75756    | 62532.137           | 63176.898         |
| NM_006555 | 1272.25             | 1536.09           | AI754623  | 4986.255            | 5616.884          | AI754623  | 3065.681            | 3099.678          |
| SR1       | 25489.18            | 28438.682         | AA401326  | 21046.877           | 24455.166         | AA401326  | 22621.758           | 24116.055         |
| SR3       | 701.482             | 1020.254          | BI602175  | 1718.922            | 2163.696          | N55461    | 819.448             | 933.75            |
| SR7       | 126.094             | 1470.14           | NM_006003 | 24950.844           | 40644.871         | AA504482  | 9163.048            | 10392.058         |
| CY3Cy5    | 22966.502           | 7021.64           | NM_006555 | 3352.752            | 3936.339          | BI602175  | 2565.067            | 2853.158          |
| NM_006869 | 6085.697            | 6463.76           | SR5       | 6144.088            | 9217.525          | NM_006003 | 16697.281           | 19389.045         |
| NM_006611 | 479.959             | 1127.037          | SR9       | 39642.363           | 9991.006          | NM_006555 | 1791.699            | 2028.295          |
| NM_004963 | 645.237             | 723.66            | CY3Cy5    | 18137.469           | 2373.163          | SR5       | 4771.948            | 5375.126          |
| NM_005535 | 2574.372            | 2799.057          | NM_006869 | 53222.617           | 56114.074         | SR7       | 5589.466            | 42197.727         |
| AB037857  | 863.856             | 784.518           | NM_006611 | 957.576             | 1120.336          | SR9       | 22043.6             | 4416.731          |
| AF218021  | 594.716             | 798.897           | NM_004963 | 3620.54             | 4336.346          | CY3Cy5    | 7214.551            | 652.499           |
| NM_013262 | 1241.475            | 1921.902          | NM_001181 | 998.376             | 1135.21           | NM_006869 | 55284.039           | 53753.07          |
| NM_007185 | 1733.944            | 2160.022          | NM_005535 | 26120.863           | 28256.803         | NM_015364 | 538.698             | 598.583           |
| NM_003221 | 769.345             | 496.897           | AB037857  | 2639.536            | 2466.828          | NM_006611 | 615.04              | 745.893           |
| NM_003357 | 2969.836            | 3360.061          | AF218021  | 2122.756            | 1987.06           | NM_004963 | 2936.827            | 3170.329          |
| AK023261  | 3091.457            | 3902.766          | NM_013262 | 12327.32            | 12846.977         | NM_001181 | 1125.529            | 1399.432          |
| NM_014057 | 366.603             | 471.554           | NM_007185 | 15066.611           | 18251.352         | NM_005535 | 37722.242           | 34157.145         |
| NM_001550 | 2035.392            | 2845.753          | NM_003221 | 1092.807            | 1181.385          | AB037857  | 3774.772            | 3803.813          |
| NM_018677 | 750.772             | 802.346           | NM_003357 | 17911.912           | 17134.674         | AF218021  | 2346.792            | 2412.29           |
| NM_016582 | 1847.21             | 2941.174          | AF195420  | 574.811             | 972.644           | NM_013262 | 7814.346            | 8770.546          |
| NM_014229 | 1293.188            | 1916.136          | AK023261  | 6372.96             | 9801.297          | NM_007185 | 12518.619           | 13936.33          |
| NM_013265 | 1543.114            | 1474.807          | NM_005097 | 1634.795            | 2089.784          | NM_003221 | 1382.676            | 1253.418          |
| NM_014964 | 759.336             | 457.283           | NM_012278 | 1897.103            | 2483.74           | NM_003357 | 18762.682           | 18803.346         |
| NM_014016 | 4971.269            | 5696.641          | AF023142  | 1349.862            | 1197.629          | AF195420  | 730.576             | 1370.752          |
| NM_013433 | 1040.434            | 1283.618          | NM_016100 | 1753.606            | 1947.667          | AK023261  | 3970.411            | 4482.295          |
| NM_003794 | 3077.36             | 3868.04           | NM_014057 | 2249.764            | 2877.025          | NM_005097 | 1573.643            | 1938.727          |
| NM_019892 | 1616.286            | 1449.38           | NM_001550 | 24677.268           | 21149.182         | NM_012278 | 1088.578            | 1355.518          |
| NM_016169 | 1560.422            | 1739.082          | NM_018677 | 1512.2              | 1447.299          | AF023142  | 595.841             | 301.409           |
| BF307652  | 455.806             | 734.495           | NM_002785 | 2546.778            | 2572.385          | NM_016100 | 1137.967            | 1122.667          |
| NM_017772 | 574.8               | 750.619           | X78947    | 961.991             | 1011.587          | NM_014057 | 2095.622            | 2427.907          |
| AF116574  | 551.806             | 816.358           | NM_016582 | 13374.002           | 15422.74          | NM_001550 | 19148.449           | 16403.777         |
| NM_005529 | 571.133             | 820.919           | NM_014229 | 2574.733            | 2725.352          | AK026849  | 14181.938           | 15187.993         |
| NM_005869 | 1339.684            | 1599.321          | NM_013265 | 17388.379           | 18155.713         | NM_018677 | 1170.502            | 900.334           |
| AF105067  | 304.397             | 551.388           | NM_014964 | 3725.872            | 4231.643          | NM_002785 | 3623.441            | 4002.048          |
| NM_018676 | 663.356             | 544.414           | NM_014016 | 21768.891           | 21270.342         | X78947    | 740.97              | 639.606           |
| NM_006014 | 338.565             | 722.657           | NM_013433 | 2804.168            | 3060.384          | NM_016582 | 16493.277           | 20004.539         |
| NM_006280 | 15524.637           | 19664.049         | NM_003794 | 9024.78             | 9248.026          | NM_014229 | 1904.596            | 2163.649          |
| NM_007355 | 55152.789           | 63637.477         | NM_019892 | 10887.766           | 9123.797          | NM_013265 | 11408.37            | 13391.042         |

|           |           |           |           |           |           |           |           |           |
|-----------|-----------|-----------|-----------|-----------|-----------|-----------|-----------|-----------|
| NM_00609E | 3228.869  | 5216.525  | NM_01616E | 6944.497  | 6846.915  | NM_01496A | 2971.786  | 3856.825  |
| NM_01228E | 2493.691  | 3018.364  | BF307652  | 3669.051  | 3889.731  | NM_01401E | 18008.344 | 17183.117 |
| NM_00526A | 726.767   | 711.176   | NM_01777Z | 3956.892  | 4767.955  | NM_01343Z | 2047.244  | 3175.412  |
| NM_00071A | 8127.563  | 9488.146  | AF116574  | 2857.697  | 2686.248  | AJ224867  | 555.09    | 1000.862  |
| NM_00255E | 1476.438  | 1892.825  | NM_00552E | 2986.483  | 3657.607  | NM_00379A | 8562.175  | 7256.967  |
| NM_01808E | 1650.576  | 1767.98   | NM_00586E | 6467.583  | 8290.74   | NM_01989Z | 7631.055  | 6621.402  |
| L21934    | 1057.79   | 1365.626  | AF105067  | 2829.329  | 3382.235  | NM_01616E | 8984.563  | 9195.144  |
| AL117442  | 1938.991  | 2442.701  | NM_01867E | 2383.267  | 2617.678  | NM_00453Z | 361.723   | 466.57    |
| AF299075  | 592.134   | 363.249   | NM_01207Z | 1126.898  | 1131.526  | BF307652  | 7442.927  | 7469.083  |
| NM_00121A | 1281.353  | 1533.542  | NM_00601A | 3001.958  | 2864.229  | NM_01777Z | 2192.008  | 2456.523  |
| U16851    | 6086.043  | 7857.521  | NM_00628C | 70521.398 | 67486.047 | AF116574  | 3219.75   | 3160.557  |
| NM_014341 | 1154.98   | 1524.185  | NM_00206E | 980.803   | 1111.012  | NM_00552E | 1902.665  | 2025.916  |
| NM_02030E | 640.826   | 1003.133  | NM_00735E | 69665.242 | 80714.688 | NM_00586E | 4060.706  | 4219.969  |
| AK023533  | 193.795   | 520.17    | NM_00609E | 5670.378  | 6804.814  | AF105067  | 1401.579  | 1754.813  |
| NM_01245C | 1117.248  | 1178.152  | NM_01228E | 4920.173  | 5100.353  | NM_01867E | 1229.834  | 1329.971  |
| NM_007071 | 1230.461  | 1608.341  | NM_00526A | 3371.327  | 3210.138  | NM_01207Z | 988.411   | 882.524   |
| NM_00681Z | 2351.208  | 2052.695  | NM_02037Z | 3695.68   | 3289.156  | NM_00601A | 1691.085  | 1670.488  |
| AK024434  | 1931.646  | 1850.41   | NM_00071A | 67034.375 | 63032.645 | NM_00628C | 61334.375 | 58993.539 |
| NM_00238E | 6649.199  | 5507.96   | NM_01808E | 5154.321  | 4588.352  | NM_00206E | 1523.588  | 1627.063  |
| NM_01606E | 6937.481  | 7886.497  | L21934    | 2261.976  | 1846.4    | NM_00735E | 60843.195 | 63378.785 |
| NM_01761Z | 1705.078  | 2048.177  | AL117442  | 8999.177  | 9193.277  | NM_00609E | 2674.997  | 3318.959  |
| NM_013357 | 360.478   | 516.196   | NM_00469E | 939.492   | 1126.551  | NM_01228E | 3653.115  | 4254.059  |
| NM_01323E | 7184.26   | 10187.72  | AF299075  | 1405.452  | 1735.982  | NM_00526A | 2273.633  | 2608.64   |
| NM_017841 | 1326.913  | 1407.759  | NM_00034C | 962.09    | 1064.14   | NM_02037Z | 1822.886  | 2186.015  |
| NM_00125A | 1601.424  | 1558.327  | NM_00718E | 3821.428  | 5981.434  | NM_00071A | 58437.285 | 56963.492 |
| NM_02041Z | 3409.078  | 3487.986  | NM_00121A | 13090.358 | 15113.047 | NM_00255E | 1897.567  | 1705.987  |
| NM_00303Z | 1826.525  | 2132.129  | AK022409  | 1875.182  | 1776.436  | NM_01808E | 3231.714  | 3083.786  |
| NM_01745Z | 1639.629  | 1804.79   | U16851    | 23639.291 | 21202.029 | L21934    | 770.944   | 1026.656  |
| AF038564  | 1755.542  | 1960.797  | NM_000341 | 1741.482  | 1804.9    | AL117442  | 10348.96  | 11651.917 |
| AB033768  | 431.164   | 442.591   | AK023533  | 1331.073  | 1211.993  | NM_00469E | 1565.847  | 1213.855  |
| NM_01765E | 1026.095  | 1641.625  | NM_01245C | 2287.389  | 2385.849  | AF299075  | 3560.826  | 3344.211  |
| NM_00690A | 2896.99   | 4529.834  | NM_007071 | 8309.02   | 8899.103  | NM_00034C | 721.545   | 590.499   |
| NM_004217 | 1612.782  | 1798.37   | NM_01213E | 606.18    | 734.076   | NM_00718E | 1901.33   | 2304.723  |
| NM_006347 | 11314.761 | 12281.489 | NM_00681Z | 17547.963 | 17651.061 | NM_00121A | 10443.239 | 10964.606 |
| NM_02040E | 566.543   | 517.572   | AK024434  | 10028.511 | 9975.657  | AK022409  | 1204.783  | 1330.125  |
| NM_01468E | 716.224   | 1102.613  | NM_00238E | 8073.181  | 7208.152  | U16851    | 11350.58  | 10507.585 |
| NM_00155C | 4043.144  | 3558.828  | NM_01606E | 33302.09  | 39336.246 | NM_014341 | 4613.927  | 5265.72   |
| AK026849  | 905.245   | 631.474   | NM_01761Z | 2849.171  | 2902.31   | NM_02030E | 2257.429  | 2655.917  |
| NM_018677 | 907.823   | 787.321   | NM_01323E | 12283.692 | 12680.445 | NM_000341 | 913.425   | 1273.657  |
| NM_00278E | 829.971   | 652.789   | NM_017841 | 6005.969  | 5500.612  | AK023533  | 788.395   | 1123.627  |
| NM_000041 | 10168.395 | 11102.958 | NM_00125A | 4668.773  | 4101.878  | NM_01245C | 2572.147  | 2768.208  |
| W69211    | 710.756   | 573.696   | NM_02041Z | 25075.193 | 27808.238 | NM_007071 | 6099.847  | 6231.972  |
| AA449931  | 2390.915  | 1952.888  | NM_00303Z | 14824.26  | 15746.883 | NM_01213E | 775.647   | 757.631   |
| AA877347  | 3998.24   | 5062.72   | NM_01745Z | 19943.629 | 25380.453 | NM_00681Z | 8894.252  | 10996.575 |
| S57235    | 6546.024  | 7283.322  | AF038564  | 7447.586  | 8940.668  | AK024434  | 9621.162  | 9226.871  |
| AI376272  | 1527.2    | 1920.224  | AB033768  | 2448.439  | 3742.929  | NM_00238E | 4049.364  | 3604.399  |
| BF242229  | 1270.022  | 1471.644  | NM_01765E | 4163.133  | 4634.527  | NM_01606E | 24814.773 | 21663.342 |
| X75756    | 11348.024 | 10606.18  | NM_00690A | 9450.936  | 7903.363  | NM_01761Z | 1684.908  | 1594.258  |
| AI754623  | 1896.609  | 2035.433  | NM_004217 | 8929.982  | 9471.208  | NM_01323E | 5516.477  | 5900.067  |
| AA401326  | 3831.105  | 4189.057  | NM_006347 | 34045.52  | 34098.609 | NM_017841 | 3238.948  | 3205.264  |
| AA504482  | 901.091   | 1138.627  | NM_02040E | 3077.813  | 2754.093  | NM_00125A | 2281.039  | 2144.205  |
| NM_00600Z | 656.688   | 1073.188  | NM_01468E | 27022.15  | 40229.652 | NM_02041Z | 20797.811 | 18686.576 |
| NM_00655E | 1273.128  | 1452.676  | NM_00155C | 26582.875 | 26311.994 | NM_00303Z | 7521.549  | 6903.122  |

|           |           |           |           |           |           |           |           |           |
|-----------|-----------|-----------|-----------|-----------|-----------|-----------|-----------|-----------|
| NM_016516 | 440.047   | 547.184   | AK026849  | 21947.877 | 21665.359 | NM_017453 | 12317.679 | 11795.699 |
| AF263538  | 389.585   | 587.538   | NM_018677 | 1515.96   | 1840.508  | AF038564  | 4141.311  | 4591.595  |
| NM_006280 | 28900.654 | 28680.242 | NM_002785 | 3190.416  | 3360.014  | AB033768  | 1272.205  | 1895.792  |
| NM_007355 | 64378.477 | 57849.914 | NM_000041 | 60986.816 | 53248.574 | NM_017655 | 3120.547  | 3159.18   |
| NM_006096 | 4752.388  | 4585.196  | W69211    | 1210.811  | 1500.072  | NM_006904 | 4850.336  | 5516.069  |
| NM_006865 | 14059.323 | 12813.383 | AA449931  | 10636.483 | 10837.836 | NM_004217 | 10860.16  | 12512.135 |
| NM_004963 | 892.563   | 1029.575  | AA877347  | 21870.928 | 24807.92  | NM_006347 | 21939.041 | 21803.717 |
| NM_005535 | 5430.531  | 6089.45   | R54049    | 1313.308  | 1124.362  | NM_020406 | 3525.881  | 3440.835  |
| AB037857  | 781.231   | 868.087   | BI755551  | 417.748   | 613.536   | NM_014685 | 17186.627 | 18136.529 |
| AF218021  | 966.251   | 972.231   | S57235    | 23846.635 | 28120.256 | NM_001550 | 15076.516 | 16039.609 |
| NM_013262 | 3810.245  | 4039.263  | AI376272  | 6816.002  | 7116.731  | AK026849  | 11134.876 | 14327.915 |
| NM_007185 | 2993.743  | 2715.008  | BF242229  | 3811.903  | 3773.79   | NM_018677 | 1241.047  | 1307.693  |
| NM_003357 | 3763.837  | 3568.74   | X75756    | 60281.25  | 56457.969 | NM_002785 | 4694.277  | 5288.352  |
| AK023261  | 2575.377  | 3758.466  | AI754623  | 4950.157  | 5288.371  | X78947    | 1001.971  | 1032.264  |
| NM_005097 | 818.376   | 804.286   | AA401326  | 27636.402 | 37849.32  | NM_000041 | 54015.188 | 55533.801 |
| NM_012278 | 679.237   | 949.372   | BI602175  | 2196.664  | 2115.506  | W69211    | 1157.191  | 1200.805  |
| AF023142  | 490.312   | 672.681   | NM_006003 | 27307.883 | 39417.438 | AA449931  | 15002.604 | 14138.418 |
| NM_016100 | 513.797   | 867.335   | NM_006555 | 3170.922  | 3653.714  | AA877347  | 15519.354 | 16988.955 |
| NM_014057 | 903.128   | 1030.836  | NM_016516 | 4476.938  | 5556.768  | R54049    | 1207.795  | 1115.972  |
| NM_020309 | 552.2     | 867.467   | AF263538  | 1190.393  | 1499.445  | BI755551  | 562.643   | 521.084   |
| NM_012450 | 882.871   | 1011.583  | NM_006280 | 67194.172 | 69338.547 | S57235    | 25507.604 | 21539.232 |
| NM_007071 | 2284.125  | 2023.124  | NM_002155 | 1509.265  | 1060.549  | AI376272  | 10818.964 | 10697.99  |
| NM_016582 | 1711.042  | 1801.333  | NM_001771 | 854.361   | 798.327   | BF242229  | 2994.972  | 3603.458  |
| NM_014229 | 1238.809  | 1482.204  | NM_002066 | 1333.684  | 1574.265  | X75756    | 62640.973 | 68476.781 |
| NM_013265 | 4029.684  | 4240.05   | NM_007355 | 69153.914 | 76845.031 | AI754623  | 3132.965  | 2812.669  |
| NM_014964 | 774.896   | 730.137   | NM_006096 | 5624.674  | 6996.058  | AA401326  | 20727.25  | 21405.961 |
| NM_014016 | 6069.387  | 7530.108  | NM_006865 | 57562.883 | 56556.406 | N55461    | 583.013   | 613.662   |
| NM_013433 | 1422.569  | 1762.777  | NM_015364 | 631.893   | 620.377   | AA504482  | 10416.819 | 11130.612 |
| NM_003794 | 3468.035  | 3958.931  | NM_006611 | 1286.782  | 865.597   | BI602175  | 2811.519  | 3032.37   |
| NM_019892 | 2092.094  | 2258.929  | NM_004963 | 3526.298  | 3901.343  | NM_006003 | 18821.256 | 32160.469 |
| NM_016169 | 1973.156  | 2157.87   | NM_001181 | 1049.272  | 1510.905  | NM_006555 | 1831.801  | 2965.808  |
| BF307652  | 717.202   | 350.603   | NM_005535 | 38832.266 | 41664.855 | NM_016516 | 2507.282  | 2597.898  |
| NM_017772 | 889.068   | 795.713   | AB037857  | 2139.606  | 2186.197  | AF263538  | 890.13    | 1019.206  |
| AF116574  | 582.653   | 985.712   | AF218021  | 2151.774  | 2597.866  | NM_001771 | 1065.482  | 1310.405  |
| NM_005529 | 541.388   | 719.35    | NM_013262 | 11691.808 | 11437.229 | NM_002066 | 2177.058  | 2335.183  |
| NM_005869 | 2112.468  | 2123.566  | NM_007185 | 14845.014 | 16771.826 | NM_007355 | 56539.074 | 61128.883 |
| AF105067  | 911.38    | 1205.587  | NM_003221 | 1322.825  | 1370.024  | NM_006096 | 2892.646  | 2661.566  |
| NM_018676 | 873.435   | 1032.824  | AF195420  | 366.267   | 1232.908  | NM_006865 | 52225.367 | 43849.859 |
| NM_012072 | 519.919   | 734.974   | AK023261  | 6549.203  | 7335.825  | NM_015364 | 446.315   | 587.331   |
| NM_006014 | 1097.593  | 1786.635  | NM_005097 | 1935.705  | 2216.159  | NM_006611 | 520.503   | 488.114   |
| NM_006904 | 4465.174  | 4021.536  | NM_012278 | 2205.766  | 2071.66   | NM_004963 | 3642.366  | 3272.296  |
| NM_004217 | 2393.971  | 1854.503  | AF023142  | 687.664   | 823.378   | NM_001181 | 742.15    | 846.006   |
| NM_006347 | 14837.271 | 10877.501 | NM_016100 | 1549.879  | 2136.899  | NM_005535 | 44549.586 | 37064.859 |
| NM_020406 | 768.535   | 666.139   | NM_014057 | 2345.968  | 3040.607  | AB037857  | 4267.595  | 3739.281  |
| NM_014685 | 5429.469  | 5650.292  | NM_000341 | 1819.601  | 1947.228  | NM_005012 | 542.534   | 616.843   |
| NM_012288 | 2749.629  | 2985.48   | AK023533  | 1272.596  | 1629.499  | AF218021  | 2103.063  | 2032.504  |
| NM_005264 | 784.259   | 921.414   | NM_012450 | 4091.996  | 5270.745  | NM_013262 | 7305.867  | 6843.112  |
| NM_020373 | 451.898   | 599.834   | NM_007071 | 9258.185  | 11602.372 | NM_007185 | 8203.052  | 8859.914  |
| NM_000714 | 16650.121 | 20625.695 | NM_014229 | 3576.715  | 4098.141  | NM_003221 | 794.737   | 1082.232  |
| NM_002556 | 2092.604  | 2004.153  | NM_013265 | 21466.467 | 24063.531 | NM_003357 | 18278.273 | 18119.967 |
| NM_018089 | 1745.672  | 1570.098  | NM_014964 | 3864.639  | 3905.782  | AF195420  | 515.549   | 714.57    |
| L21934    | 1286.683  | 1305.298  | NM_014016 | 17205.398 | 17596.357 | AK023261  | 4411.141  | 6119.089  |
| AL117442  | 3094.45   | 3541.942  | NM_013433 | 2511.732  | 3281.285  | NM_005097 | 1675.879  | 2737.019  |

|           |           |           |           |           |           |           |           |           |
|-----------|-----------|-----------|-----------|-----------|-----------|-----------|-----------|-----------|
| NM_004695 | 560.664   | 474.496   | AJ224867  | 313.117   | 429.6     | NM_012278 | 1198.751  | 1959.174  |
| AF299075  | 579.769   | 646.977   | NM_003794 | 9529.415  | 8442.606  | NM_016100 | 954.225   | 1187.208  |
| NM_007188 | 763.121   | 1143.893  | NM_019892 | 11444.576 | 10515.953 | NM_014057 | 1914.238  | 2757.321  |
| NM_001214 | 1949.984  | 2363.351  | NM_016169 | 5677.347  | 5644.155  | NM_000341 | 1083.236  | 937.715   |
| AK022409  | 533.157   | 736.411   | BF307652  | 3244.734  | 2977.392  | AK023533  | 784.701   | 1050.229  |
| U16851    | 9346.12   | 12179.463 | AF116574  | 3297.333  | 3696.446  | NM_012450 | 2982.604  | 2668.277  |
| NM_014341 | 3840.275  | 5175.643  | NM_005529 | 3531.973  | 3975.107  | NM_007071 | 5712.31   | 5312.869  |
| NM_006555 | 1798.046  | 1886.194  | NM_005869 | 7772.69   | 7440.683  | NM_016582 | 17324.752 | 16595.719 |
| NM_016510 | 912.353   | 822.991   | AF105067  | 3141.161  | 2926.544  | NM_014229 | 1897.432  | 2087.768  |
| AF263538  | 606.04    | 374.422   | NM_018676 | 1814.57   | 1967.156  | NM_013265 | 13428.997 | 11739.313 |
| NM_006812 | 2446.942  | 2709.524  | NM_012072 | 1352.601  | 1711.551  | NM_014964 | 4090.818  | 3633.939  |
| AK024434  | 2545.314  | 2637.933  | NM_006014 | 3756.056  | 5043.098  | NM_014010 | 17837.457 | 15249.71  |
| NM_002388 | 6251.535  | 6053.589  | NM_006904 | 9566.649  | 9423.946  | NM_013433 | 1985.492  | 2124.309  |
| NM_016069 | 5989.129  | 5740.304  | NM_004217 | 11205.172 | 9976.437  | NM_003794 | 7720.108  | 7585.363  |
| NM_017612 | 1462.851  | 1529.016  | NM_006347 | 31755.453 | 33044.098 | NM_019892 | 7041.697  | 6576.884  |
| NM_019042 | 470.694   | 243.726   | NM_020406 | 3683.675  | 4234.613  | NM_016169 | 5638.089  | 4982.683  |
| NM_013236 | 7563.243  | 6701.688  | NM_014685 | 25795.814 | 40753.547 | NM_004533 | 348.731   | 324.849   |
| NM_017841 | 1813.393  | 1734.679  | NM_005264 | 3595.861  | 3692.154  | BF307652  | 4784.662  | 5611.01   |
| NM_001254 | 1881.372  | 1542.567  | NM_020373 | 3648.378  | 3243.462  | NM_017772 | 2247.004  | 2947.701  |
| NM_020412 | 3678.073  | 3582.138  | NM_000714 | 65670.852 | 63314.922 | AF116574  | 3227.808  | 4051.25   |
| NM_003032 | 2122.479  | 2327.036  | NM_002556 | 2917.623  | 3345.328  | NM_005529 | 1922.687  | 2824.748  |
| NM_017453 | 2926.028  | 3621.777  | NM_018089 | 4320.39   | 3979.728  | NM_005869 | 4072.003  | 6260.833  |
| AF038564  | 3439.733  | 4174.048  | L21934    | 2145.307  | 1784.844  | AF105067  | 1812.777  | 1910.787  |
| AB033768  | 701.753   | 1478.909  | AL117442  | 11907.328 | 10818.182 | NM_018676 | 1225.609  | 1360.229  |
| NM_017659 | 1808.655  | 1928.954  | NM_004695 | 1299.147  | 1053.974  | NM_012072 | 786.047   | 688.83    |
| NM_005097 | 787.272   | 903.901   | AF299075  | 1656.902  | 1827.746  | NM_006014 | 1502.11   | 1912.142  |
| NM_012278 | 896.144   | 821.43    | NM_000340 | 1078.541  | 1151.399  | NM_006904 | 4651.825  | 4108.782  |
| AF023142  | 505.522   | 553.176   | NM_007188 | 3494.285  | 3624.743  | NM_004217 | 12791.623 | 11283.771 |
| NM_016100 | 696.156   | 669.58    | NM_001214 | 8661.967  | 8644.534  | NM_006347 | 19938.01  | 17282.398 |
| NM_014057 | 939.976   | 966.112   | AK022409  | 1389.892  | 1454.186  | NM_020406 | 3775.658  | 3897.157  |
| NM_001550 | 5285.393  | 5125.446  | NM_006555 | 3556.565  | 4175.366  | NM_014685 | 15759.874 | 16871.053 |
| AK026849  | 2317.86   | 2558.118  | NM_016510 | 4520.225  | 4737.629  | NM_012288 | 3973.836  | 4292.048  |
| NM_018677 | 995.212   | 911.828   | AF263538  | 1242.164  | 1313.46   | NM_005264 | 2530.546  | 2253.059  |
| NM_002785 | 659.276   | 761.007   | NM_012135 | 626.49    | 603.672   | NM_020373 | 1919.646  | 1343.577  |
| NM_000041 | 11664.639 | 12257.584 | NM_006812 | 18252.992 | 19655.51  | NM_000714 | 55462.152 | 50665.145 |
| AA449931  | 1836.718  | 1345.129  | AK024434  | 7709.264  | 9831.363  | NM_002556 | 1743.86   | 1952.605  |
| AA877347  | 5699.474  | 5578.607  | NM_002388 | 9145.373  | 7504.08   | NM_018089 | 3226.362  | 3042.981  |
| S57235    | 6441.497  | 5088.974  | NM_016069 | 20909.268 | 21377.365 | L21934    | 829.856   | 1044.795  |
| AI376272  | 1962.662  | 1845.792  | NM_017612 | 2775.552  | 3101.572  | AL117442  | 10586.281 | 11854.313 |
| BF242229  | 1806.234  | 1573.898  | NM_013236 | 12081.697 | 10985.772 | NM_004695 | 1234.742  | 1232.933  |
| X75756    | 13601.092 | 13533.715 | NM_017841 | 6008.455  | 6891.243  | AF299075  | 4524.772  | 6421.154  |
| AI754623  | 2475.565  | 2831.759  | NM_001254 | 5531.833  | 6624.981  | NM_000340 | 653.951   | 996.889   |
| AA401326  | 4108.282  | 5261.622  | NM_020412 | 21233.977 | 24721.754 | NM_007188 | 2154.805  | 3274.253  |
| N55461    | 399.863   | 562.287   | NM_003032 | 15416.981 | 14642.546 | NM_001214 | 6735.529  | 8710.126  |
| AA504482  | 1742.772  | 2385.473  | NM_017453 | 19006.512 | 22247.293 | AK022409  | 1189.45   | 1464.303  |
| NM_005529 | 1749.456  | 1487.182  | AF038564  | 6828.044  | 8806.851  | U16851    | 11219.813 | 10459.574 |
| NM_005869 | 3611.375  | 2710.405  | AB033768  | 3393.175  | 4458.935  | NM_014341 | 4692.449  | 5310.268  |
| AF105067  | 1106.96   | 962.209   | NM_017659 | 4111.298  | 5540.549  | NM_006003 | 16218.976 | 17399.553 |
| NM_018676 | 883.898   | 859.764   | NM_005097 | 2288.009  | 2729.736  | NM_006555 | 1638.607  | 1972.656  |
| NM_012072 | 539.251   | 356.645   | NM_012278 | 1882.091  | 2229.278  | NM_016510 | 2727.553  | 2760.855  |
| NM_006014 | 1194.054  | 989.701   | AF023142  | 777.709   | 591.29    | AF263538  | 1043.319  | 1151.257  |
| NM_006280 | 51313.832 | 46032     | NM_016100 | 1724.692  | 1694.557  | NM_012135 | 2063.932  | 1468.947  |
| NM_001771 | 329.155   | 288.068   | NM_014057 | 2317.18   | 2619.336  | NM_006812 | 8955.946  | 6989.463  |



|           |           |           |           |           |           |           |           |           |
|-----------|-----------|-----------|-----------|-----------|-----------|-----------|-----------|-----------|
| NM_002066 | 537.649   | 583.855   | NM_001550 | 24755.924 | 24942.088 | AK024434  | 10230.089 | 9002.664  |
| NM_006096 | 4250.307  | 4488.546  | AK026849  | 16633.426 | 17839.176 | NM_002388 | 5088.167  | 3165.198  |
| NM_006866 | 12148.842 | 10946.563 | NM_018677 | 1514.547  | 1477.988  | NM_016066 | 29624.93  | 26316.154 |
| NM_004963 | 1335.221  | 1119.065  | NM_002785 | 2621.958  | 2620.022  | NM_017612 | 1955.857  | 1741.998  |
| NM_001181 | 755.298   | 371.456   | X78947    | 536.943   | 562.117   | NM_013236 | 6439.879  | 8341.907  |
| NM_005535 | 7670.418  | 5586.522  | NM_000041 | 51155.602 | 51644.031 | NM_017841 | 3359.324  | 4847.396  |
| AB037857  | 1012.55   | 880.17    | W69211    | 1081.738  | 1092.14   | NM_001254 | 2349.368  | 2754.857  |
| AF218021  | 1197.957  | 1074.67   | AA449931  | 6707.265  | 6712.781  | NM_020412 | 21879.623 | 26379.455 |
| NM_013262 | 4850.742  | 5908.832  | AA877347  | 19485.406 | 22050.031 | NM_003032 | 8926.257  | 11691.421 |
| NM_007185 | 4024.819  | 4557.116  | S57235    | 20502.789 | 21041.713 | NM_017453 | 12267.345 | 15546.418 |
| NM_003221 | 529.151   | 480.358   | AI376272  | 5935.794  | 6181.547  | AF038564  | 4577.24   | 5574.998  |
| NM_003357 | 5975.891  | 7085.727  | BF242229  | 3948.829  | 4487.063  | AB033768  | 1376.723  | 2062.893  |
| AF195420  | 633.712   | 657.024   | X75756    | 61712.457 | 58387.895 | NM_017656 | 2861.465  | 3053.48   |
| NM_007188 | 1399.892  | 1285.632  | AI754623  | 4529.572  | 4973.386  | AK023261  | 3953.578  | 4036.525  |
| NM_001214 | 2162.745  | 2067.294  | AA401326  | 24314.93  | 27425.482 | NM_005097 | 1786.169  | 2158.759  |
| U16851    | 13020.375 | 10156.322 | N55461    | 848.297   | 717.215   | NM_012278 | 1141.16   | 1238.789  |
| NM_014341 | 5200.465  | 4928.779  | AA504482  | 10613.401 | 13777.261 | AF023142  | 517.519   | 563.538   |
| NM_020309 | 1922.246  | 2146.808  | BI602175  | 1687.785  | 1757.504  | NM_016100 | 712.437   | 815.644   |
| NM_000341 | 746.458   | 870.475   | NM_005529 | 3863.979  | 3689.607  | NM_014057 | 1716.985  | 1897.677  |
| AK023533  | 502.697   | 824.517   | NM_005869 | 6866.326  | 7117.542  | NM_001550 | 16118.605 | 12625.343 |
| NM_007071 | 4311.2    | 3442.625  | AF105067  | 2528.083  | 2646.939  | AK026849  | 14763.616 | 13878.865 |
| NM_016582 | 1631.817  | 1503.978  | NM_018676 | 2253.564  | 2403.384  | NM_018677 | 1071.427  | 652.652   |
| NM_014229 | 1525.761  | 1151.693  | NM_012072 | 1222.418  | 976.868   | NM_002785 | 3390.796  | 2943.355  |
| NM_013265 | 6217.793  | 5027.268  | NM_006014 | 2699.467  | 2526.268  | X78947    | 696.492   | 560.201   |
| NM_014964 | 1068.685  | 1018.157  | NM_006280 | 68927.477 | 67341.648 | NM_000041 | 49555.016 | 51592.551 |
| NM_014016 | 7337.83   | 5636.412  | NM_002155 | 1011.747  | 998.486   | W69211    | 1113.389  | 997.224   |
| NM_013433 | 1856.344  | 1357.123  | NM_001771 | 983.866   | 824.188   | AA449931  | 13161.381 | 13159.056 |
| NM_003794 | 4849.745  | 4379.691  | NM_002066 | 995.699   | 1034.31   | AA877347  | 16678.359 | 17417.123 |
| NM_019892 | 3438.986  | 3169.7    | NM_007355 | 70038.195 | 78800.75  | R54049    | 813.245   | 800.638   |
| NM_016169 | 2306.177  | 3057.706  | NM_006096 | 5438.905  | 6622.445  | S57235    | 19515.129 | 25640.324 |
| BF307652  | 768.636   | 995.838   | NM_006869 | 28103.109 | 29321.324 | AI376272  | 6443.028  | 8409.399  |
| NM_017772 | 1522.856  | 2525.733  | NM_015364 | 597.002   | 570.667   | BF242229  | 2662.15   | 3397.279  |
| AF116574  | 941.325   | 1186.972  | NM_006611 | 438.649   | 487.2     | X75756    | 58669.918 | 66083.906 |
| NM_020412 | 3847.406  | 3401.781  | NM_004963 | 3274.872  | 3245.843  | AI754623  | 2816.673  | 3662.286  |
| NM_003032 | 3620.175  | 2991.733  | NM_001181 | 834.806   | 1188.093  | AA401326  | 25480.191 | 41233.961 |
| NM_017453 | 9390.509  | 8738.648  | NM_005535 | 25497.299 | 26843.801 | N55461    | 813.565   | 651.204   |
| AF038564  | 3453.513  | 3031.754  | AB037857  | 2407.923  | 2382.003  | AA504482  | 9624.885  | 10202.487 |
| AB033768  | 1216.925  | 1431.016  | AF218021  | 1971.104  | 2016.148  | BI602175  | 2205.599  | 2083.863  |
| NM_017656 | 2295.885  | 2081.082  | NM_013262 | 12773.212 | 13116.005 | NM_005529 | 1594.319  | 1427.269  |
| NM_006904 | 6552.412  | 6187.197  | NM_007185 | 16392.438 | 16833.527 | NM_005869 | 3614.666  | 3387.909  |
| NM_004217 | 4679.211  | 4110.541  | NM_003357 | 15842.245 | 14341.173 | AF105067  | 1377.066  | 1461.716  |
| NM_006347 | 20329.418 | 18038.828 | AF195420  | 666.423   | 581.382   | NM_018676 | 1427.614  | 1203.693  |
| NM_020406 | 882.385   | 945.865   | NM_000340 | 813.658   | 902.452   | NM_012072 | 1038.164  | 725.229   |
| NM_014685 | 8089.089  | 7905.582  | NM_001214 | 9953.553  | 11336.417 | NM_006014 | 1631.588  | 1409.955  |
| NM_012288 | 2517.424  | 2000.406  | AK022409  | 1852.192  | 1674.692  | NM_006280 | 61128.57  | 49553.707 |
| NM_005264 | 859.394   | 443.871   | NM_012450 | 2534.045  | 2741.624  | NM_002155 | 787.447   | 774.7     |
| NM_020373 | 562.07    | 538.523   | NM_007071 | 7272.663  | 7956.824  | NM_001771 | 822.841   | 675.185   |
| NM_000714 | 23928.014 | 26198.951 | NM_014229 | 2698.422  | 3191.329  | NM_002066 | 1309.819  | 1148.273  |
| NM_018089 | 2335.388  | 2509.854  | NM_013265 | 17484.029 | 19097.969 | NM_007355 | 60672.246 | 61343.5   |
| L21934    | 1622.135  | 1657.49   | NM_014964 | 3323.173  | 3060.144  | NM_006096 | 2804.845  | 2329.492  |
| AL117442  | 3950.835  | 4981.53   | NM_014016 | 18670.203 | 17428.703 | NM_006869 | 55257.086 | 50577.617 |
| NM_004695 | 550.326   | 678.255   | NM_013433 | 2882.989  | 2860.916  | NM_015364 | 336.401   | 432.678   |
| AF299075  | 533.379   | 654.092   | NM_003794 | 9815.141  | 8434.61   | NM_006611 | 557.606   | 734.138   |

|           |           |           |           |           |           |           |           |           |
|-----------|-----------|-----------|-----------|-----------|-----------|-----------|-----------|-----------|
| AK026663  | 863.409   | 673.49    | NM_019892 | 11483.599 | 10538.188 | NM_004963 | 3087.329  | 3287.817  |
| NM_001174 | 1316.179  | 1231.515  | NM_016169 | 6313.038  | 5775.045  | NM_001181 | 658.052   | 811.55    |
| U69645    | 4123.352  | 4016.259  | BF307652  | 2717.402  | 2329.885  | NM_005535 | 45336.609 | 46282.16  |
| NM_019082 | 4432.496  | 4214.747  | NM_017772 | 4502.241  | 4744.944  | AB037857  | 3585.961  | 3978.783  |
| NM_001424 | 1121.535  | 1095.205  | AF116574  | 3117.178  | 3404.751  | AF218021  | 2045.13   | 2782.646  |
| AB040950  | 1299.824  | 1185.136  | NM_020412 | 25644.711 | 26222.537 | NM_013262 | 8097.069  | 9766.771  |
| NM_014003 | 2745.339  | 2696.368  | NM_003032 | 17140.727 | 16633.756 | NM_007185 | 13174.315 | 16193.501 |
| NM_001356 | 785.67    | 727.405   | NM_017453 | 19354.758 | 22177.172 | NM_003221 | 952.475   | 930.285   |
| AB002282  | 54117.246 | 49908.992 | AF038564  | 6223.977  | 6494.815  | NM_003357 | 16113.632 | 14941.959 |
| AB037805  | 2637.852  | 2302.179  | AB033768  | 2462.848  | 3251.678  | AF195420  | 531.05    | 511.922   |
| NM_016516 | 1061.563  | 1243.082  | NM_017659 | 3823.165  | 4294.58   | NM_000340 | 688.557   | 579.987   |
| AF263538  | 483.644   | 393.23    | NM_006904 | 8772.3    | 8768.441  | NM_007188 | 1779.935  | 2213.569  |
| NM_006812 | 5655.826  | 10196.586 | NM_004217 | 8136.861  | 7592.24   | NM_001214 | 8587.028  | 8606.953  |
| AK024434  | 3394.402  | 4779.572  | NM_006347 | 33810.969 | 30866.318 | AK022409  | 1111.029  | 996.949   |
| NM_002388 | 7403.811  | 4991.17   | NM_020406 | 3296.291  | 2943.917  | U16851    | 9472.393  | 8274.092  |
| NM_016069 | 14004.305 | 15699.218 | NM_014685 | 26010.965 | 32502.561 | NM_014341 | 3551.8    | 3143.748  |
| NM_017612 | 2330.503  | 2375.876  | NM_012288 | 6455.764  | 5977.798  | NM_020309 | 2089.972  | 1542.245  |
| NM_013236 | 8520.941  | 10228.964 | NM_005264 | 3287.405  | 3321.51   | NM_000341 | 873.475   | 1214.033  |
| NM_017841 | 3545.122  | 4427.203  | NM_020373 | 3094.886  | 2999.805  | AK023533  | 697.603   | 546.031   |
| NM_001254 | 3164.763  | 3259.802  | NM_000714 | 65197.074 | 53389.781 | NM_012450 | 2740.405  | 2322.844  |
| NM_004389 | 610.799   | 347.015   | NM_002556 | 3121.811  | 2870.431  | NM_007071 | 5105.777  | 4988.312  |
| NM_003952 | 998.225   | 928.414   | NM_018089 | 5098.101  | 4251.749  | NM_016582 | 12101.267 | 13705.586 |
| NM_005424 | 874.474   | 476.994   | L21934    | 1970.292  | 1748.829  | NM_014229 | 1994.276  | 2491.344  |
| NM_005975 | 4625.836  | 4158.109  | AL117442  | 11106.256 | 9616.505  | NM_013265 | 14415.668 | 16143.94  |
| AY007220  | 4116.107  | 3749.922  | NM_004695 | 1303.555  | 970.963   | NM_014964 | 3914.413  | 4130.16   |
| NM_004438 | 1222.472  | 1047.002  | AF299075  | 1761.731  | 1356.331  | NM_014016 | 14752.853 | 14696.425 |
| X89399    | 1612.6    | 1581.885  | AK026663  | 3806.678  | 3806.59   | NM_013433 | 1644.122  | 2471.026  |
| NM_003808 | 1052.213  | 932.214   | NM_001174 | 2638.053  | 2294.828  | AJ224867  | 434.887   | 575.567   |
| AK023666  | 914.057   | 759.507   | U69645    | 9737.965  | 9556.908  | NM_003794 | 7184.547  | 7923.495  |
| NM_005399 | 1069.255  | 682.486   | NM_019082 | 7640.823  | 6320.392  | NM_019892 | 8289.631  | 10146.383 |
| NM_006573 | 890.718   | 578.044   | NM_001424 | 2767.52   | 2292.851  | NM_016169 | 7124.223  | 7595.737  |
| NM_015185 | 1243.364  | 1898.682  | AB040950  | 2511.272  | 2446.338  | BF307652  | 4886.338  | 4843.346  |
| NM_003632 | 821.517   | 859.594   | NM_014003 | 5086.892  | 5030.002  | NM_017772 | 2217.597  | 1954.776  |
| NM_002194 | 1696.959  | 2079.988  | NM_001356 | 1845.1    | 1360.587  | NM_020412 | 19091.219 | 16282.006 |
| NM_000530 | 554.929   | 666.174   | AB002282  | 61000.141 | 57338.676 | NM_003032 | 8870.835  | 7657.946  |
| AB028989  | 491.639   | 503.695   | AB037805  | 6979.943  | 6770.77   | NM_017453 | 11254.655 | 9601.373  |
| NM_016166 | 7674.8    | 8444.67   | NM_016516 | 3738.502  | 3856.587  | AF038564  | 3693.045  | 3994.182  |
| NM_002086 | 21009.666 | 22169.168 | AF263538  | 925.247   | 1132.051  | AB033768  | 1534.702  | 1639.822  |
| NM_016248 | 1476.789  | 1695.658  | NM_012135 | 594.016   | 791.499   | NM_017659 | 2904.961  | 2286.284  |
| NM_005489 | 5512.407  | 5782.22   | NM_006812 | 19843.145 | 19351.365 | NM_006904 | 4755.138  | 2975.042  |
| NM_020482 | 1244.797  | 1135.881  | AK024434  | 10418.774 | 9807.737  | NM_004217 | 10330.159 | 8091.844  |
| NM_002398 | 524.833   | 462.906   | NM_002388 | 10380.376 | 8474.992  | NM_006347 | 20450.016 | 15893.12  |
| NM_005417 | 449.569   | 532.77    | NM_016069 | 46635.344 | 49598.109 | NM_020406 | 3551.289  | 2899.549  |
| NM_002649 | 3032.166  | 2872.929  | NM_017612 | 3394.8    | 3122.975  | NM_014685 | 15943.821 | 14076.684 |
| AK025329  | 7268.361  | 6698.01   | NM_013236 | 12945.511 | 11568.624 | NM_012288 | 3602.423  | 4231.093  |
| NM_001259 | 1171.335  | 931.493   | NM_017841 | 5932.489  | 5983.561  | NM_005264 | 2752.122  | 2823.173  |
| AL137679  | 1308.788  | 1398.586  | NM_001254 | 5219.79   | 3980.103  | NM_020373 | 2190.506  | 2412.638  |
| NM_001786 | 6236.367  | 4904.088  | NM_004389 | 1625.73   | 1337.487  | NM_000714 | 57190.48  | 59619.918 |
| AB040965  | 925.548   | 553.933   | NM_003952 | 2577.071  | 2415.787  | NM_002556 | 1986.489  | 1977.489  |
| AK025026  | 646.105   | 335.107   | NM_005424 | 2428.404  | 2003.984  | NM_018089 | 2961.775  | 3638.641  |
| AK023052  | 632.886   | 236.44    | NM_005975 | 6780.168  | 8687.882  | L21934    | 884.892   | 885.428   |
| NM_006455 | 17077.238 | 11467.435 | AY007220  | 11091.196 | 9941.271  | AL117442  | 13583.531 | 12948.032 |
| NM_018460 | 5015.379  | 3849.132  | NM_004438 | 2859.188  | 2768.71   | NM_004695 | 927.865   | 765.997   |

|           |           |           |           |           |           |           |           |           |
|-----------|-----------|-----------|-----------|-----------|-----------|-----------|-----------|-----------|
| NM_002705 | 1824.219  | 1059.127  | X89399    | 2309.061  | 2353.189  | AF299075  | 2495.66   | 2213.768  |
| NM_005591 | 4657.897  | 3302.645  | NM_003808 | 1101.298  | 1482.456  | AK026663  | 3125.076  | 2788.797  |
| NM_002373 | 636.839   | 491.636   | AK023666  | 1391.813  | 1595.427  | NM_001174 | 2491.23   | 2091.24   |
| NM_003128 | 261.459   | 344.034   | NM_005399 | 2001.484  | 1585.481  | U69645    | 5349.708  | 5918.439  |
| NM_017734 | 478.395   | 522.066   | NM_006573 | 1596.919  | 1806.589  | NM_019082 | 3578.912  | 3032.623  |
| AK024251  | 1309.029  | 1583.866  | NM_005118 | 444.499   | 417.052   | NM_001424 | 1509.935  | 1271.376  |
| NM_002545 | 1346.425  | 1261.773  | NM_015185 | 3328.466  | 2648.118  | AB040950  | 1018.078  | 978.147   |
| NM_006688 | 38448.195 | 40662.801 | NM_005374 | 729.667   | 784.304   | NM_014003 | 3331.22   | 2601.033  |
| NM_005411 | 2812.348  | 2670.52   | AF011757  | 455.095   | 493.722   | NM_001356 | 2006.45   | 1622.215  |
| NM_004855 | 3207.719  | 2495.448  | NM_003632 | 2881.311  | 3678.572  | AB002282  | 54912.859 | 57389.641 |
| NM_006952 | 395.435   | 386.251   | NM_002194 | 3766.459  | 3932.86   | AB037805  | 13071.301 | 9800.363  |
| NM_004808 | 587.033   | 540.474   | NM_000530 | 988.164   | 863.588   | NM_016516 | 2598.255  | 2338.37   |
| NM_004617 | 670.792   | 664.232   | AB028989  | 627.763   | 455.14    | AF263538  | 971.657   | 862.915   |
| NM_005668 | 2664.746  | 1947.744  | NM_016166 | 17816.412 | 15946.928 | NM_012135 | 681.12    | 820.305   |
| NM_006748 | 368.61    | 384.128   | NM_002086 | 24864.111 | 23638.471 | NM_006812 | 10944.309 | 14130.963 |
| NM_012177 | 3811.792  | 2969.461  | NM_016248 | 1412.063  | 1942.66   | AK024434  | 11777.159 | 11923.829 |
| NM_006666 | 8744.964  | 8474.032  | NM_005489 | 14855.274 | 14481.388 | NM_002388 | 5420.468  | 4070.09   |
| NM_002807 | 3855.415  | 3246.244  | NM_020482 | 4012.231  | 4046.853  | NM_016066 | 35655.336 | 34068.02  |
| NM_002799 | 23593.061 | 21179.346 | NM_002398 | 508.846   | 411.32    | NM_017612 | 1815.473  | 1789.633  |
| NM_002790 | 22727.846 | 14858.342 | NM_005417 | 1182.466  | 1291.688  | NM_013236 | 6914.473  | 6496.734  |
| NM_018386 | 4130.746  | 1886.106  | NM_002649 | 4994.184  | 4734.898  | NM_017841 | 2904.963  | 3145.363  |
| NM_004335 | 2228.64   | 1228.406  | AK025329  | 14278.682 | 13228.356 | NM_001254 | 2248.87   | 1860.996  |
| AF040965  | 4538.292  | 1950.698  | NM_001259 | 1303.174  | 670.673   | NM_004388 | 845.28    | 478.562   |
| AB037840  | 3713.335  | 2891.163  | AL137679  | 2467.291  | 2547.953  | NM_003952 | 1370.9    | 1113.101  |
| NM_007011 | 7884.604  | 8085.362  | NM_001786 | 8467.609  | 6353.567  | NM_005424 | 2362.801  | 1440.892  |
| Y10210    | 3875.328  | 4544.387  | AB040965  | 760.701   | 882.185   | NM_005975 | 3629.942  | 3468.367  |
| AB020689  | 1781.643  | 1995.468  | AK025026  | 2135.59   | 1929.351  | AY007220  | 18231.621 | 12386.025 |
| AK023916  | 1013.584  | 1299.257  | AK023052  | 1388.732  | 1442.519  | NM_004438 | 1500.806  | 1082.186  |
| NM_003203 | 5924.746  | 5847.922  | AB018350  | 997.818   | 982.026   | X89399    | 1394.813  | 1053.609  |
| NM_002514 | 738.361   | 666.98    | NM_006455 | 58381.531 | 48109.582 | NM_003808 | 1076.263  | 1070.623  |
| AF177238  | 2081.787  | 1022.857  | NM_018460 | 8092.504  | 6497.255  | AK023666  | 1084.794  | 955.24    |
| AL096747  | 475.474   | 362.886   | NM_002705 | 11593.41  | 10233.895 | NM_005399 | 1334.911  | 1385.966  |
| AB021641  | 490.326   | 208.89    | NM_005591 | 12486.227 | 14245.855 | NM_006573 | 956.573   | 1034.214  |
| NM_012406 | 4510.048  | 3777.038  | NM_002373 | 863.854   | 927.825   | NM_005118 | 586.568   | 743.157   |
| NM_014947 | 7292.153  | 5859.716  | AK024251  | 2224.179  | 2162.432  | NM_015185 | 2715.102  | 3539.874  |
| AB033112  | 1767.117  | 1837.349  | NM_002545 | 2473.583  | 2066.304  | NM_005374 | 352.478   | 577.027   |
| NM_005674 | 1052.064  | 654.499   | NM_006688 | 41774.719 | 39631.398 | NM_003632 | 4417.268  | 3994.017  |
| AK023243  | 812.465   | 431.172   | NM_005411 | 9210.337  | 7633.734  | NM_002194 | 2278.667  | 2615.556  |
| NM_014409 | 1326.781  | 1186.052  | NM_004855 | 5917.347  | 5026.757  | NM_016166 | 15367.585 | 11692.233 |
| NM_001422 | 1943.25   | 3529.574  | NM_006952 | 834.203   | 741.255   | NM_002086 | 12588.996 | 10060.867 |
| AK022358  | 1237.339  | 509.711   | NM_004808 | 1226.056  | 854.721   | NM_016248 | 961.215   | 894.157   |
| NM_000977 | 14025.681 | 12708.151 | NM_004617 | 2259.166  | 2097.607  | NM_005488 | 12075.795 | 11069.816 |
| NM_014205 | 22002.789 | 26694.543 | NM_005668 | 4080.375  | 3984.266  | NM_020482 | 2717.143  | 2575.419  |
| NM_018141 | 14906.97  | 15366.244 | NM_006748 | 806.684   | 723.672   | NM_005417 | 556.236   | 504.153   |
| NM_016504 | 46792.141 | 51299.766 | NM_012177 | 5368.874  | 4190.757  | NM_002649 | 3002.087  | 2242.506  |
| U25752    | 59137.414 | 61259.852 | NM_006666 | 25823.887 | 24694.951 | AK025329  | 7392.22   | 5550.266  |
| X96646    | 35840.492 | 37289.508 | NM_002807 | 9260.234  | 8027.879  | NM_001259 | 778.847   | 691.215   |
| AB032991  | 5527.6    | 4695.344  | NM_002799 | 63234.219 | 57399.355 | AL137679  | 1065.161  | 1320.075  |
| AK026985  | 2578.358  | 2099.794  | NM_002790 | 42307.234 | 45656.535 | NM_001786 | 4326.959  | 3166.389  |
| AF007153  | 350.085   | 196.371   | NM_018386 | 5834.173  | 4413.474  | AB040965  | 672.998   | 508.597   |
| AK000855  | 1080.154  | 949.29    | BF217579  | 14359.829 | 12096.454 | AK025026  | 2669.609  | 2889.23   |
| NM_004109 | 1615.307  | 1456.964  | NM_004335 | 4811.021  | 3915.24   | AK023052  | 2151.144  | 2124.987  |
| NM_003198 | 3466.15   | 3035.697  | AF040965  | 18188.002 | 16566.58  | AB018350  | 478.913   | 628.629   |

|           |           |           |           |           |           |           |           |           |
|-----------|-----------|-----------|-----------|-----------|-----------|-----------|-----------|-----------|
| NM_005174 | 22431.021 | 18597.629 | AB037840  | 8201.975  | 7723.589  | NM_00645E | 52627.32  | 56498.766 |
| NM_00036E | 1435.083  | 1137.347  | NM_007011 | 9396.212  | 8840.333  | NM_01846C | 4151.266  | 3587.412  |
| NM_01345C | 2069.509  | 3530.525  | Y10210    | 5614.619  | 5007.916  | NM_00270E | 10911.429 | 9888.365  |
| NM_003077 | 1950.205  | 3447.058  | AB020689  | 2700.337  | 2732.692  | NM_005591 | 8911.641  | 7843.141  |
| NM_00210E | 1202.35   | 1011.353  | AK023916  | 1064.344  | 1177.818  | NM_00237E | 643.208   | 839.207   |
| NM_01848E | 2557.067  | 2270.199  | NM_00320E | 6425.999  | 6296.984  | AK024251  | 1013.484  | 1111.26   |
| L13203    | 2692.3    | 2964.484  | NM_002514 | 1061.383  | 849.022   | NM_00254E | 2153.538  | 1833.667  |
| NM_01804C | 1804.862  | 1529.037  | AF177238  | 3418.89   | 1286.184  | NM_00668E | 49603.004 | 42868.133 |
| AB042646  | 4192.338  | 4369.425  | AB021641  | 772.48    | 750.771   | NM_005411 | 10513.259 | 8926.464  |
| NM_003431 | 2159.419  | 2152.182  | NM_01240E | 8587.145  | 7576.521  | NM_00485E | 2859.006  | 2198.28   |
| M29581    | 1678.501  | 1533.038  | NM_014947 | 21065.879 | 18746.564 | NM_00695E | 306.683   | 301.974   |
| AL359622  | 394.966   | 471.681   | AB033112  | 3339.8    | 2470.578  | NM_00505E | 480.365   | 320.75    |
| AL050204  | 921.262   | 771.927   | NM_005674 | 1201.907  | 854.705   | NM_00480E | 540.47    | 342.059   |
| AF085999  | 382.025   | 392.113   | AK023243  | 2550.602  | 2047.98   | NM_004617 | 1059.614  | 866.114   |
| AK025316  | 1983.826  | 1816.762  | NM_01440E | 1973.174  | 1790.84   | NM_00566E | 2225.357  | 1487.71   |
| AK026357  | 2228.973  | 2232.219  | NM_00142E | 2759.215  | 2390.361  | NM_012177 | 3482.225  | 2278.439  |
| NM_01832E | 2825.349  | 2321.22   | AK022358  | 2026.738  | 1618.045  | NM_00666E | 41538.762 | 33464.148 |
| NM_01423E | 3099.517  | 2965.863  | NM_000977 | 25563.566 | 27839.055 | NM_002807 | 5229.41   | 4405.126  |
| AK026922  | 3681.076  | 3351.29   | NM_01420E | 48935.23  | 51298.973 | NM_00279E | 50428.047 | 50179.809 |
| AK022006  | 7962.045  | 8426.405  | NM_018141 | 21430.664 | 18854.15  | NM_00279C | 27179.473 | 41278.332 |
| AF070552  | 24552.352 | 22839.693 | NM_016504 | 57162.398 | 54819.242 | NM_01838E | 3337.9    | 4754.292  |
| AK022282  | 312.137   | 855.267   | U25752    | 63757.109 | 57585.988 | NM_01494E | 708.046   | 1332.398  |
| NM_01826E | 4997.666  | 4889.888  | X96646    | 45217.27  | 50195.375 | BF217579  | 17678.672 | 20248.588 |
| NM_004867 | 260.488   | 580.463   | AB032991  | 10336.337 | 10422.763 | NM_00433E | 4322.011  | 3237.611  |
| AL050021  | 9145.098  | 8606.843  | AK026985  | 5069.303  | 4835.467  | AF040965  | 13942.548 | 13117.237 |
| AB002448  | 439.037   | 737.144   | AK000855  | 1960.975  | 1748.469  | AB037840  | 6463.378  | 7122.681  |
| NM_00383E | 1565.831  | 1657.843  | NM_00410E | 3562.507  | 3288.651  | NM_007011 | 5049.847  | 5328.515  |
| AK023089  | 2952.769  | 2031.095  | NM_00319E | 7533.091  | 8558.762  | Y10210    | 3245.893  | 4036.771  |
| AK026059  | 13696.95  | 9634.718  | AF220415  | 821.432   | 685.77    | AB020689  | 1900.797  | 2289.521  |
| AK026942  | 1987.617  | 1296.263  | NM_005174 | 66274.711 | 55693.492 | AK023916  | 651.735   | 626.36    |
| AK025814  | 1961.36   | 1489.699  | NM_00036E | 2880.286  | 2516.388  | NM_00320E | 2915.985  | 2648.47   |
| AK000655  | 3224.457  | 2595.172  | AF110322  | 1186.442  | 753.004   | NM_002514 | 751.258   | 777.962   |
| AL117611  | 541.018   | 624.496   | NM_01345C | 3972.697  | 3330.703  | AF177238  | 1810.176  | 342.433   |
| NM_01793E | 1861.987  | 1251.439  | NM_00453E | 1502.727  | 1291.84   | AL096747  | 1175.414  | 853.627   |
| Y12018    | 20745.055 | 21869.49  | NM_003077 | 2053.345  | 1521.369  | AB021641  | 444.852   | 372.644   |
| NM_01402E | 54036.988 | 51313.035 | NM_00210E | 2152.124  | 2112.061  | NM_01240E | 6628.072  | 4296.309  |
| Z83937    | 663.142   | 806.952   | NM_01848E | 4010.26   | 4247.121  | NM_014947 | 18015.709 | 11228.617 |
| L08443    | 869.087   | 990.675   | L13203    | 6001.374  | 5297.48   | AB033112  | 1441.331  | 819.972   |
| L38936    | 588.959   | 475.314   | NM_01804C | 2895.326  | 2209.573  | NM_005674 | 629.39    | 481.181   |
| D55643    | 1497.68   | 1796.374  | AB042646  | 9457.438  | 10517.814 | AK023243  | 1444.6    | 1491.534  |
| AK025818  | 12711.919 | 11931.6   | NM_003431 | 4162.532  | 4042.687  | NM_01440E | 1407.937  | 1660.908  |
| AK023185  | 3748.767  | 2952.807  | M29581    | 3454.81   | 4669.542  | BE791857  | 907.664   | 1276.711  |
| AK026345  | 881.181   | 458.084   | AL359622  | 930.551   | 799.695   | NM_006867 | 409.715   | 488.732   |
| NM_01827E | 974.81    | 454.802   | AL050204  | 4142.356  | 3395.057  | NM_00142E | 2594.053  | 3261.579  |
| AK026328  | 484.865   | 189.71    | AF085999  | 935.66    | 994.45    | AK022358  | 1424.826  | 1623.336  |
| AK000864  | 706.688   | 794.129   | AK025316  | 3269.203  | 2581.848  | NM_000977 | 19124.77  | 22562.432 |
| AK022414  | 369.338   | 424.676   | AK026357  | 3973.3    | 3740.776  | NM_01420E | 33924.922 | 54583.117 |
| NM_017624 | 4858.487  | 4522.169  | NM_01832E | 4603.484  | 3949.427  | NM_018141 | 12303.998 | 13930.62  |
| AK000907  | 2567.04   | 1867.753  | NM_01423E | 5153.434  | 4358.33   | NM_016504 | 31765.584 | 24365.4   |
| AK024390  | 441.263   | 529.576   | AK026922  | 5610.194  | 4999.307  | U25752    | 55082.809 | 56633.539 |
| AK024517  | 1939.684  | 2455.011  | NM_01435E | 764.428   | 808.969   | X96646    | 29870.754 | 26247.07  |
| AK024585  | 539.257   | 528.215   | AK022006  | 30822.309 | 25614.221 | AB032991  | 4753.845  | 4199.892  |
| AK024887  | 2682.434  | 2036.891  | AF070552  | 27480.477 | 23401.906 | AK026985  | 3017.762  | 2630.298  |

|            |           |           |           |           |           |           |           |           |
|------------|-----------|-----------|-----------|-----------|-----------|-----------|-----------|-----------|
| AK025005   | 476.26    | 684.895   | NM_004271 | 8777.267  | 6868.248  | AK000855  | 906.055   | 596.283   |
| AK095587   | 7707.025  | 6469.491  | AF129928  | 755.663   | 674.108   | NM_004105 | 1900.266  | 1322.134  |
| AF086043   | 895.248   | 653.443   | AK022282  | 1131.929  | 725.753   | NM_003195 | 4861.142  | 3969.363  |
| AK000038   | 1044.477  | 915.406   | NM_018266 | 6627.097  | 6193.635  | NM_005174 | 59266.824 | 54595.816 |
| BC010084   | 791.959   | 404.989   | AL050021  | 18941.906 | 16691.104 | NM_000365 | 2346.788  | 2389.591  |
| U10513     | 1623.092  | 1289.016  | AB002448  | 1134.281  | 1104.316  | AF110322  | 746.887   | 873.697   |
| AK022203   | 715.867   | 497.739   | NM_003835 | 2741.23   | 2725.454  | NM_013450 | 5548.676  | 5034.492  |
| AK023037   | 713.527   | 385.071   | AK023089  | 5657.315  | 6274.432  | NM_004535 | 2147.945  | 2186.798  |
| unknown (S | 628.548   | 478.363   | AK026059  | 61043.398 | 50008.953 | NM_003077 | 1689.924  | 2593.621  |
| AK055950   | 848.647   | 779.618   | AK026942  | 3398.654  | 2696.185  | NM_002105 | 1125.076  | 1125.334  |
| AL050122   | 948.343   | 908.34    | AK025814  | 3960.838  | 4543.379  | NM_018485 | 2309.98   | 3921.444  |
| AK024209   | 469.712   | 237.37    | AK000655  | 6518.552  | 5937.205  | L13203    | 4777.651  | 4868.14   |
| AK000839   | 3690.623  | 2809.748  | AL117611  | 652.938   | 482.453   | NM_018040 | 1636.579  | 1227.977  |
| AF086195   | 579.31    | 601.03    | NM_017936 | 3203.426  | 3124.215  | AB042646  | 9943.605  | 8022.096  |
| AK002209   | 641.685   | 734.726   | D63134    | 995.754   | 664.536   | NM_003431 | 2610.135  | 1994.169  |
| NM_014354  | 1918.075  | 1598.448  | AJ227893  | 685.764   | 459.303   | M29581    | 2948.317  | 2364.561  |
| AL137548   | 5924.914  | 4463.993  | Y12018    | 65281.918 | 49883.863 | AL359622  | 603.225   | 409.548   |
| AK095051   | 656.867   | 443.622   | Y10513    | 2074.084  | 1604      | AL050204  | 2876.789  | 2137.518  |
| AK024929   | 3255.599  | 2902.834  | M21536    | 1244.089  | 1308.047  | AF085999  | 640.42    | 483.431   |
| D17232     | 2327.488  | 1841.922  | NM_014029 | 64336.512 | 50641.441 | AK025316  | 1384.732  | 1174.771  |
| NM_005260  | 834.912   | 611.307   | Z83937    | 883.509   | 960.489   | AK026357  | 2043.87   | 1519.975  |
| AF085880   | 7262.668  | 7461.041  | L08443    | 997.652   | 1038.228  | NM_018323 | 2771.014  | 2252.188  |
| AF000990   | 1037.05   | 1366.569  | L38936    | 716.985   | 731.65    | NM_014235 | 3513.866  | 3037.711  |
| NM_016094  | 4085.2    | 4114.279  | D55643    | 2091.167  | 2457.427  | AK026922  | 3249.403  | 2554.169  |
| NM_001427  | 1205.936  | 975.054   | AK025818  | 13534.519 | 10301.955 | AK022426  | 1072.766  | 951.985   |
| NM_016175  | 1158.517  | 1185.325  | AK023185  | 3773.042  | 3722.016  | AK022645  | 430.423   | 520.559   |
| M15639     | 4794.913  | 5348.085  | AK022183  | 744.878   | 858.876   | NM_014353 | 793.774   | 1037.984  |
| AF130084   | 2579.522  | 2412.392  | AK026345  | 2198.289  | 1647.21   | AF070541  | 640.672   | 537.459   |
| AF133334   | 5133.359  | 4048.065  | NM_018275 | 4544.934  | 3527.835  | AK022006  | 47475.484 | 40824.512 |
| NM_016290  | 2990.831  | 3022.015  | AK000864  | 5476.455  | 3635.569  | AF070552  | 14646.959 | 12159.8   |
| AK026498   | 1300.612  | 932.613   | AK022414  | 852.407   | 872.389   | NM_004271 | 10275.296 | 9930.404  |
| NM_003894  | 1893.144  | 2152.091  | NM_017624 | 7092.52   | 4577.246  | AF129928  | 1209.184  | 1020.589  |
| AK001007   | 4835.531  | 6060.246  | AK000907  | 4174.283  | 3530.471  | AK022282  | 852.652   | 840.875   |
| NM_014485  | 482.536   | 790.528   | AK024390  | 1561.153  | 1187.985  | NM_018266 | 2965.733  | 3115.849  |
| AF116655   | 10866.508 | 15816.747 | AK024517  | 3341.146  | 3037.916  | NM_004867 | 592.115   | 607.116   |
| AF086134   | 828.634   | 567.613   | AK024585  | 598.652   | 598.632   | AL050021  | 9681.044  | 7993.643  |
| AF009308   | 26445.396 | 33104.426 | AK024887  | 5179.704  | 4045.603  | AB002448  | 838.32    | 722.571   |
| AB032969   | 21913.594 | 24201.074 | AK025005  | 836.196   | 1066.598  | NM_003835 | 2415.033  | 2218.505  |
| Y11610     | 567.692   | 534.957   | AK095587  | 11883.866 | 13264.572 | AK023089  | 3810.956  | 4389.945  |
| L37695     | 1181.467  | 1565.718  | AF086043  | 1356.285  | 1050.946  | AK026059  | 57734.473 | 60778.906 |
| NM_004627  | 3855.271  | 5948.938  | AK024174  | 906.303   | 515.44    | AK026942  | 1731.248  | 1506.462  |
| AK026523   | 1150.295  | 1473.67   | AK000038  | 1771.545  | 1674.925  | AK025814  | 3114.31   | 2178.418  |
| L37704     | 594.871   | 216.966   | BC010084  | 813.421   | 666.732   | AK000655  | 6472.308  | 5088.637  |
| NM_005162  | 2007.599  | 1551.036  | U10513    | 2197.521  | 1954.2    | AL117611  | 548.197   | 378.893   |
| AB007968   | 1354.975  | 1008.014  | L10151    | 726.927   | 637.112   | NM_017936 | 3849.129  | 2697.412  |
| AL117544   | 837.824   | 601.372   | AK023037  | 895.129   | 952.574   | Y10209    | 440.377   | 540.023   |
| NM_005664  | 13939.238 | 11758.112 | AK055950  | 953.977   | 929.442   | D63134    | 1552.474  | 1309.279  |
| NM_006270  | 32232.01  | 33464.293 | AL050122  | 1228.429  | 961.43    | AJ227893  | 550.391   | 578.254   |
| U50277     | 968.967   | 1055.61   | AK000839  | 6368.975  | 6211.888  | Y12018    | 58139.188 | 57999.656 |
| Z48633     | 4377.604  | 3328.238  | AF086195  | 630.796   | 513.577   | X64990    | 448.716   | 512.992   |
| M62627     | 24949.994 | 27493.08  | AK002209  | 1043.744  | 970.956   | Y10513    | 3163.865  | 2821.551  |
| NM_006685  | 6628.774  | 5874.474  | NM_014354 | 2370.674  | 2514.92   | M21536    | 907.386   | 965.841   |
| CY3Cy5     | 14381.19  | 1778.554  | AL137548  | 6407.184  | 5684.816  | NM_014025 | 44675.523 | 45252.043 |

|           |           |           |           |           |           |           |           |           |
|-----------|-----------|-----------|-----------|-----------|-----------|-----------|-----------|-----------|
| AI889961  | 781.579   | 2196.442  | AK095051  | 855.518   | 892.929   | Z83937    | 545.196   | 649.003   |
| AI360116  | 974.441   | 1435.671  | AK024929  | 3132.881  | 2469.336  | L08443    | 971.079   | 926.218   |
| NM_013983 | 272.032   | 654.503   | D17232    | 8938.884  | 8514.463  | L38936    | 531.382   | 550.689   |
| AI572835  | 939.676   | 1101.013  | NM_005260 | 2042.335  | 1981.898  | D55643    | 1206.764  | 1342.904  |
| R20392    | 2109.075  | 2389.818  | AF085880  | 6097.811  | 5707.982  | AK025818  | 7549.293  | 5839.881  |
| AA486367  | 3566.214  | 4175.324  | AF000990  | 1162.664  | 1211.076  | AK023185  | 2458.713  | 1906.903  |
| N56684    | 750.815   | 829.25    | NM_016094 | 4725.461  | 3522.664  | AK022183  | 531.524   | 494.763   |
| AL136131  | 1478.197  | 1634.203  | AK025003  | 2539.057  | 1961.549  | AK026345  | 4029.179  | 2716.418  |
| NM_033357 | 961.353   | 1023.359  | NM_001427 | 1797.635  | 2662.833  | AB007971  | 544.479   | 583.611   |
| U59911    | 4030.754  | 5348.193  | NM_016175 | 1421.996  | 1885.626  | NM_018278 | 4170.818  | 3614.086  |
| SR2       | 2315.507  | 2560.453  | M15639    | 5406.983  | 6426.169  | AK026328  | 554.385   | 314.987   |
| SR4       | 753.848   | 910.549   | AF130084  | 4129.593  | 3382.694  | AK000417  | 528.05    | 625.58    |
| SR8       | 293.012   | 710.2     | AF133334  | 8603.111  | 7629.974  | AK000864  | 8181.005  | 7140.763  |
| CY3Cy5    | 15376.379 | 2121.596  | NM_016290 | 3971.457  | 4008.677  | AK022414  | 515.096   | 1072.409  |
| NM_000865 | 495.232   | 357.487   | AK026498  | 1712.771  | 1144.151  | NM_017624 | 8897.214  | 8219.2    |
| AF076642  | 553.573   | 465.905   | NM_003894 | 2261.247  | 1799.471  | NM_017928 | 514.968   | 658.938   |
| NM_002386 | 1112.091  | 1031.086  | AK001007  | 5809.852  | 5643.44   | AK000907  | 2281.159  | 1851.532  |
| NM_005314 | 1002.097  | 1214.664  | AF116655  | 10604.218 | 11587.399 | AK024390  | 1239.381  | 1105.194  |
| NM_004885 | 842.884   | 902.341   | AF086134  | 771.396   | 421.021   | AK024517  | 2456.529  | 1789.345  |
| NM_005145 | 482.307   | 535.425   | AF009308  | 28652.09  | 29487.178 | AK024585  | 439.808   | 355.392   |
| NM_012152 | 1250.676  | 1220.681  | AB032969  | 26891.594 | 23297.395 | AK024887  | 2727.088  | 1864.851  |
| NM_001940 | 592.214   | 632.681   | Y11610    | 851.113   | 901.687   | AK025005  | 509.202   | 323.699   |
| U83115    | 481.415   | 399.521   | L37695    | 1380.751  | 1312.184  | AK095587  | 6460.693  | 7215.04   |
| NM_001264 | 1722.663  | 1603.304  | NM_004627 | 3576.679  | 4065.845  | AF086043  | 829.321   | 686.213   |
| NM_013364 | 846.765   | 1039.289  | AK026523  | 2890.827  | 3122.163  | AK000038  | 1256.049  | 976.319   |
| NM_014368 | 177.709   | 75.742    | AL050217  | 11464.199 | 11277.5   | BC010084  | 856.13    | 915.444   |
| NM_000850 | 1589.858  | 2174.075  | L37704    | 917.631   | 751.487   | U10513    | 1297.942  | 1076.688  |
| NM_001994 | 1502.322  | 1443.493  | NM_005162 | 2026.247  | 1707.512  | L10151    | 599.849   | 523.692   |
| J00129    | 1431.591  | 1997.532  | AB007968  | 1893.425  | 1724.075  | AK022203  | 689.711   | 565.67    |
| NM_003320 | 549.377   | 715.298   | NM_005664 | 30366.463 | 33658.09  | BC032236  | 419.224   | 708.801   |
| L10146    | 1602.419  | 1544.353  | NM_006270 | 44048.438 | 48035.262 | AK023037  | 1328.782  | 1259.378  |
| NM_000685 | 928.817   | 896.02    | U50277    | 1176.338  | 1395.617  | AK055950  | 820.257   | 780.843   |
| AK025657  | 8666.54   | 11394.06  | Z48633    | 4215.669  | 2897.377  | AL050122  | 785.585   | 462.295   |
| AF142063  | 416.389   | 412.601   | M62627    | 23423.369 | 25063.721 | AK000839  | 4427.196  | 4079.334  |
| W42849    | 838.246   | 1099.237  | NM_006686 | 6122.674  | 4778.652  | AF086195  | 654.113   | 1030.763  |
| AK022790  | 2242.473  | 1913.742  | AL136131  | 38296.922 | 45573.762 | AK021963  | 539.716   | 837.288   |
| NM_004311 | 672.287   | 1050.489  | NM_000865 | 2483.125  | 2532.178  | AK002209  | 684.59    | 647.594   |
| NM_005624 | 565.696   | 1028.511  | NM_000867 | 1392.037  | 1687.699  | NM_017854 | 51212.504 | 47067.699 |
| AF263462  | 652.901   | 634.619   | AF076642  | 2619.867  | 2875.017  | NM_014354 | 2198.234  | 1929.066  |
| NM_000942 | 21865.211 | 30246.215 | NM_002386 | 9209.841  | 7965.635  | AL137548  | 4110.999  | 2908.785  |
| NM_002982 | 236.248   | 738.388   | NM_005314 | 2799.845  | 2788.704  | AK095051  | 366.375   | 206.517   |
| AK056773  | 1500.495  | 1662.516  | NM_004885 | 3570.46   | 4111.905  | AK024929  | 3059.838  | 1975.916  |
| NM_002182 | 1157.223  | 1322.923  | NM_005145 | 1575.002  | 1971.67   | D17232    | 4808.722  | 3442.8    |
| NM_016470 | 773.017   | 582.052   | NM_012152 | 21462.197 | 25152.84  | NM_005260 | 4313.491  | 3138.633  |
| AL365408  | 5292.414  | 5544.031  | AK024093  | 5079.771  | 6068.217  | AF085880  | 5349.191  | 4438.132  |
| AK026204  | 1816.59   | 1643.176  | NM_001940 | 5758.536  | 7013.8    | AF000990  | 951.494   | 818.6     |
| NM_014635 | 761.438   | 893.539   | U83115    | 5883.848  | 6661.813  | NM_016094 | 2660.588  | 2798.4    |
| NM_004145 | 1361.666  | 1580.912  | NM_013364 | 32371.895 | 37178.23  | AK025003  | 1883.028  | 1702.729  |
| AK023196  | 530.578   | 750.667   | NM_014368 | 1625.821  | 2180.361  | AK023601  | 534.101   | 651.857   |
| NM_018278 | 1697.653  | 2458.457  | NM_007193 | 897.648   | 423.898   | NM_001427 | 1592.408  | 1328.719  |
| AK024014  | 603.671   | 488.944   | NM_001994 | 5585.391  | 4848.64   | NM_016175 | 867.84    | 934.013   |
| NM_016234 | 2771.181  | 3265.761  | AK022790  | 54508.746 | 52739.699 | M15639    | 3119.93   | 3913.419  |
| NM_001876 | 2020.776  | 2206.117  | NM_004311 | 7113.532  | 9544.597  | AF130084  | 4658.029  | 5433.424  |

|           |           |           |           |           |           |           |           |           |
|-----------|-----------|-----------|-----------|-----------|-----------|-----------|-----------|-----------|
| NM_016144 | 1005.4    | 1131.047  | NM_005624 | 3892.244  | 3603.186  | AF133334  | 7107.083  | 8621.048  |
| AL133099  | 546.705   | 603.77    | NM_002302 | 1221.345  | 1154.578  | NM_01629C | 2432.565  | 2963.107  |
| NM_016082 | 1171.398  | 1579.251  | AB020672  | 728.888   | 777.464   | AK026498  | 1197.185  | 1395.902  |
| NM_000433 | 1047.97   | 1541.064  | AK026958  | 785.582   | 1008.141  | NM_003894 | 1751.931  | 1049.703  |
| NM_00019C | 2199.167  | 2615.448  | NM_000579 | 1068.695  | 1204.159  | NM_006373 | 16208.282 | 10904.271 |
| X15667    | 646.385   | 835.457   | NM_00148C | 556.556   | 558.952   | AK001007  | 2318.772  | 1438.145  |
| NM_017512 | 678.101   | 537.851   | AF263462  | 3124.349  | 3286.009  | AF116655  | 8631.583  | 6940.736  |
| NM_002239 | 6025.414  | 6692.209  | AB040962  | 814.886   | 861.155   | AF086134  | 599.314   | 347.603   |
| NM_002249 | 3208.284  | 3712.54   | AV697672  | 709.798   | 855.452   | AF009308  | 17858.078 | 17739.656 |
| NM_015684 | 920.739   | 1285.924  | NM_000942 | 55695.504 | 49498.043 | AB032969  | 22859.773 | 24014.736 |
| NM_003945 | 2414.26   | 2803.708  | NM_002982 | 432.576   | 681.521   | Y11610    | 1178.098  | 1383.885  |
| NM_004981 | 787.939   | 914.286   | NM_00219C | 447.35    | 690.079   | AF085940  | 865.676   | 724.071   |
| NM_016524 | 521.66    | 539.093   | AK056773  | 9673.495  | 8901.899  | L37695    | 1295.946  | 1315.433  |
| NM_007126 | 5571.343  | 6670.675  | NM_002182 | 12717.337 | 11948.088 | NM_004627 | 2241.274  | 2934.402  |
| AL137631  | 670.271   | 883.219   | NM_01647C | 4260.59   | 4426.456  | AK026523  | 2732.647  | 3269.836  |
| NM_016057 | 4135.583  | 5202.256  | AL365408  | 37867.078 | 41322.031 | AL050217  | 11397.626 | 14124.729 |
| NM_015599 | 666.171   | 801.794   | AK026204  | 9389.9    | 8503.832  | L37704    | 828.093   | 805.271   |
| NM_018696 | 1137.935  | 1541.827  | NM_014635 | 6076.988  | 4090.529  | NM_005162 | 1792.062  | 2310.687  |
| NM_000136 | 4069.78   | 3823.039  | NM_004145 | 11868.931 | 12623.699 | AB007968  | 1255.319  | 1389.69   |
| NM_00038C | 971.724   | 1225.141  | AK023196  | 2030.808  | 2331.628  | AL117544  | 720.257   | 590.219   |
| AF085734  | 189.489   | 290.561   | NM_018728 | 7455.489  | 6337.449  | NM_005664 | 26595.742 | 29319.342 |
| NM_014876 | 1261.508  | 1065.483  | AK024014  | 5835.272  | 6355.122  | NM_00627C | 37424.246 | 39137.785 |
| NM_005406 | 2279.816  | 3091.382  | NM_016234 | 13345.636 | 14078.551 | U50277    | 1661.436  | 2110.576  |
| X93921    | 2361.566  | 2748.596  | NM_001876 | 5460.417  | 5518.431  | Z48633    | 2622.73   | 2277.774  |
| NM_00599C | 2447.958  | 3193.095  | NM_016144 | 10977.052 | 11992.811 | M62627    | 12801.852 | 18197.879 |
| NM_016276 | 4784.841  | 5536.209  | AL133099  | 18779.143 | 25891.051 | NM_006686 | 3339.79   | 4031.955  |
| NM_017762 | 461.464   | 504.037   | NM_016082 | 3734.179  | 4113.095  | CY3Cy5    | 3043.444  | 221.928   |
| NM_001863 | 1057.816  | 1228.146  | NM_000433 | 3304.572  | 3872.736  | AI360116  | 5627.641  | 4760.007  |
| NM_000921 | 1286.152  | 1763.429  | NM_00019C | 8334.938  | 9966.509  | NM_013983 | 1080.348  | 1265.154  |
| NM_000096 | 1810.862  | 2305.961  | X15667    | 17674.566 | 26149.021 | N56684    | 2280.339  | 3330.619  |
| NM_000016 | 2577.432  | 2912.539  | NM_017512 | 2592.241  | 3373.763  | AK097322  | 877.833   | 463.594   |
| AK026913  | 1137.316  | 1341.809  | NM_018661 | 1095.297  | 1181.616  | AL136131  | 25641.121 | 24655.723 |
| L10146    | 2500.942  | 2652.035  | NM_001678 | 1475.208  | 544.457   | NM_033357 | 2429.294  | 2277.996  |
| NM_000685 | 1780.335  | 1664.486  | AK023078  | 5561.981  | 5877.04   | AF335109  | 1132.04   | 1179.132  |
| AK025657  | 12725.241 | 13343.289 | NM_002239 | 43538.707 | 45951.527 | NM_003263 | 865.245   | 736.594   |
| W42849    | 2041.977  | 2182.632  | NM_002249 | 46879.457 | 43875.379 | U59911    | 5921.735  | 5037.205  |
| AI889961  | 1717.961  | 2105.187  | NM_015684 | 3708.459  | 3152.949  | NM_002054 | 1361.11   | 1081.766  |
| AI360116  | 1620.187  | 2182.65   | NM_003945 | 27779.533 | 32902.637 | SR6       | 1944.535  | 1708.234  |
| NM_013983 | 613.662   | 611.498   | NM_004981 | 6577.958  | 6234.365  | SR8       | 4317.162  | 13298.631 |
| AI572835  | 1709.49   | 1607.1    | AK096507  | 2445.403  | 2821.764  | SR10      | 19265.199 | 6058.877  |
| R20392    | 2172.614  | 2589.757  | NM_016524 | 3274.643  | 3039.511  | CY3Cy5    | 6348.722  | 488.947   |
| AA486367  | 3104.183  | 3297.713  | NM_007126 | 41361.434 | 48434.211 | NM_000865 | 2118.596  | 2543.24   |
| N56684    | 639.972   | 750.681   | AL137631  | 12882.562 | 15178.283 | NM_000867 | 911.685   | 1110.655  |
| AF414120  | 193.561   | 181.101   | NM_016057 | 16512.848 | 15629.608 | AF076642  | 1446.14   | 1635.235  |
| AK097322  | 406.95    | 396.731   | NM_014677 | 1339.431  | 1579.606  | NM_002386 | 7521.907  | 6397.157  |
| AL136131  | 1139.252  | 1393.443  | NM_006855 | 1674.53   | 2230.701  | NM_005314 | 2444.011  | 2404.765  |
| NM_033357 | 909.091   | 1127.664  | NM_015599 | 3373.766  | 2562.813  | NM_004885 | 2071.079  | 2520.704  |
| U59911    | 3757.628  | 4536.064  | AB037902  | 332.827   | 600.56    | NM_005145 | 830.032   | 1469.052  |
| AK026204  | 2082.473  | 2157.115  | NM_018696 | 20542.629 | 19549.303 | NM_012152 | 25553.699 | 39842.781 |
| NM_014635 | 1431.62   | 1279.36   | NM_000136 | 21862.244 | 22794.717 | AK024093  | 2916.163  | 4393.926  |
| NM_004145 | 4486.006  | 4663.858  | AL157456  | 1450.498  | 1752.732  | NM_00194C | 4112.603  | 3742.006  |
| AK023196  | 1497.818  | 1024.572  | AL162056  | 1432.977  | 1698.072  | U83115    | 4033.493  | 3790.072  |
| NM_018728 | 4574.728  | 4676.939  | NM_00038C | 8307.911  | 8926.363  | NM_001264 | 9527.729  | 8524.058  |

|           |           |           |           |           |           |           |           |           |
|-----------|-----------|-----------|-----------|-----------|-----------|-----------|-----------|-----------|
| AK024014  | 1422.171  | 1743.253  | NM_004628 | 2678.609  | 2514.735  | NM_013364 | 24713.219 | 20432.49  |
| NM_000865 | 964.377   | 985.874   | NM_014876 | 2041.205  | 2058.622  | NM_014368 | 1657.8    | 1463.996  |
| NM_000867 | 442.242   | 657.253   | NM_005406 | 5155.326  | 4339.204  | NM_000850 | 2698.964  | 2735.777  |
| AF076642  | 948.014   | 1186.841  | NM_003328 | 5211.919  | 4674.927  | NM_004676 | 1128.071  | 1404.16   |
| NM_002386 | 2173.164  | 2136.909  | X93921    | 6100.068  | 6937.114  | NM_007193 | 362.557   | 579.04    |
| NM_005314 | 1132.006  | 1107.634  | AF073482  | 6458.529  | 7333.56   | NM_001994 | 6608.312  | 5393.381  |
| NM_004885 | 852.571   | 1070.04   | NM_005990 | 5415.788  | 4188.581  | J00129    | 12897.397 | 12091.292 |
| NM_005145 | 400.445   | 255.209   | NM_016276 | 36641.953 | 36482.965 | NM_003320 | 2459.99   | 2581.425  |
| NM_012152 | 1839.889  | 2252.394  | NM_017762 | 5571.875  | 5259.683  | AF142063  | 708.27    | 779.528   |
| NM_001940 | 560.652   | 965.188   | NM_001863 | 58860.965 | 52814.051 | AK022790  | 52333.848 | 49894.695 |
| U83115    | 478.479   | 597.184   | NM_000921 | 13281.278 | 13754.876 | NM_004311 | 4529.838  | 4988.267  |
| NM_001264 | 1920.248  | 1884.611  | NM_000098 | 3662.558  | 3809.988  | NM_005624 | 4242.923  | 3546.077  |
| NM_013364 | 959.328   | 1027.56   | NM_000016 | 21645.084 | 23627.047 | NM_002302 | 943.288   | 1126.972  |
| NM_014368 | 379.577   | 348.14    | AK026913  | 5835.216  | 5317.544  | AB020672  | 624.395   | 504.86    |
| NM_000850 | 1812.476  | 1581.232  | W42849    | 694.182   | 1211.018  | AK026958  | 865.578   | 1141.1    |
| NM_004676 | 193.285   | 267.604   | AL136131  | 40229.809 | 42934.477 | NM_000579 | 873.358   | 688.125   |
| J00129    | 3142.119  | 3786.63   | NM_004482 | 609.886   | 513.444   | NM_001480 | 513.554   | 501.408   |
| NM_003320 | 1342.146  | 1056.464  | AK026204  | 11157.623 | 11894.253 | AF263462  | 3036.12   | 3610.007  |
| NM_016524 | 1124.543  | 1087.866  | NM_014635 | 6609.781  | 5059.83   | AB040962  | 1041.75   | 1029.11   |
| NM_007126 | 13352.667 | 13589.868 | NM_004145 | 12445.45  | 13745.856 | AV697672  | 821.891   | 654.311   |
| AL137631  | 3189.841  | 4907.591  | AK023196  | 2322.271  | 2977.154  | NM_000942 | 49979.164 | 41220.184 |
| NM_016057 | 11006.644 | 12656.845 | NM_018728 | 6121.046  | 6134.614  | NM_002982 | 737.369   | 565.804   |
| NM_014677 | 830.891   | 759.481   | AK024014  | 8967.129  | 11478.928 | NM_002190 | 314.418   | 431.136   |
| NM_006855 | 1204.742  | 1188.855  | NM_000865 | 2398.586  | 3085.452  | AK056773  | 7710.755  | 6728.386  |
| AK022790  | 17534.371 | 16399.424 | NM_000867 | 1749.459  | 2736.875  | NM_002182 | 18683.271 | 17656.357 |
| NM_004311 | 1588.798  | 2417.237  | AF076642  | 3253.746  | 5045.161  | NM_016470 | 2161.823  | 2175.836  |
| NM_005624 | 1314.824  | 1131.559  | NM_002386 | 8834.622  | 10326.441 | AL365408  | 47480.273 | 45398.969 |
| NM_000579 | 384.781   | 378.823   | NM_005314 | 2374.289  | 2985.762  | AK026204  | 5427.273  | 4188.352  |
| AF263462  | 628.935   | 370.726   | NM_004885 | 3058.033  | 3138.853  | NM_014635 | 3353.078  | 1953.139  |
| NM_000942 | 29951.555 | 36883.418 | NM_012152 | 14285.629 | 11821.819 | NM_004145 | 10203.848 | 9687.145  |
| NM_016470 | 906.544   | 894.109   | AK024093  | 4321.31   | 5140.053  | AK023196  | 1767.375  | 1873.971  |
| AL365408  | 11241.645 | 11506.206 | NM_001940 | 4694.409  | 4826.364  | NM_018728 | 4176.681  | 4004.814  |
| NM_017762 | 864.643   | 984.02    | U83115    | 5079.043  | 5660.024  | AK024014  | 9676.765  | 9399.5    |
| NM_001863 | 5924.461  | 7114.363  | NM_013364 | 31431.088 | 36543.531 | NM_016234 | 8172.96   | 10039.607 |
| NM_000921 | 3582.214  | 5046.293  | NM_014368 | 1650.998  | 3282.468  | NM_001876 | 4750.837  | 4670.24   |
| NM_000098 | 2638.422  | 2589.336  | NM_004676 | 738.222   | 1032.386  | NM_016144 | 6767.101  | 6613.13   |
| NM_000016 | 10041.771 | 11333.919 | NM_001994 | 7455.188  | 8634.667  | AL133099  | 12318.363 | 12695.453 |
| AK026913  | 2632.672  | 2992.549  | NM_016524 | 4302.832  | 5779.002  | NM_016082 | 1683.209  | 1571.001  |
| NM_016234 | 6386.062  | 8200.469  | NM_007126 | 48806.234 | 49356.809 | NM_000433 | 1983.16   | 1763.061  |
| NM_001876 | 3573.604  | 3388.497  | AL137631  | 14511.564 | 17721.889 | NM_000190 | 6265.063  | 8262.832  |
| NM_016144 | 4182.966  | 4394.271  | NM_016057 | 20168.867 | 20911.018 | X15667    | 13679.55  | 16696.857 |
| AL133099  | 5040.262  | 6051.228  | NM_014677 | 1795.443  | 1993.837  | NM_017512 | 1477.702  | 1592.576  |
| NM_016082 | 2081.244  | 1997.062  | NM_006855 | 1843.364  | 1953.117  | NM_018661 | 898.97    | 1147.245  |
| NM_000433 | 1800.536  | 1967.117  | AK022790  | 56412.113 | 52065.336 | NM_001678 | 1108.132  | 892.424   |
| NM_000190 | 2431.881  | 2260.327  | NM_004311 | 6926.993  | 9871.632  | AK023078  | 4504.672  | 4496.031  |
| X15667    | 803.327   | 1265.304  | NM_005624 | 3897.512  | 4958.874  | NM_002239 | 50672.762 | 44871.031 |
| NM_017512 | 992.715   | 891.624   | NM_002302 | 1150.002  | 1463.396  | NM_002249 | 55499.113 | 54372.102 |
| NM_002239 | 9728.595  | 10365.496 | AB020672  | 568.763   | 487.942   | NM_015684 | 2561.175  | 2099.081  |
| NM_002249 | 5456.196  | 5939.074  | AK026958  | 609.233   | 512.167   | NM_003945 | 17971.236 | 16435.787 |
| NM_015684 | 1051.034  | 1360.674  | NM_000579 | 711.106   | 874.964   | NM_004981 | 16139.061 | 15878.531 |
| NM_003945 | 2290.671  | 3653.806  | NM_001480 | 851.904   | 397.665   | AK096507  | 1302.818  | 1036.023  |
| NM_004981 | 1194.786  | 1076.031  | AF263462  | 2083.66   | 1719.036  | NM_016524 | 2167.319  | 1929.561  |
| AK096507  | 357.122   | 618.467   | AB040962  | 858.742   | 528.994   | NM_007126 | 48110.383 | 42984.055 |



|           |           |           |           |           |           |           |           |           |
|-----------|-----------|-----------|-----------|-----------|-----------|-----------|-----------|-----------|
| NM_00627E | 548.882   | 574.22    | NM_000639 | 170.163   | 478.91    | AL137631  | 7785.093  | 8520.881  |
| NM_01559E | 1315.142  | 1421.478  | AV697672  | 815.288   | 613.599   | NM_016057 | 10781.413 | 10531.547 |
| NM_01869E | 5729.778  | 5141.204  | NM_000942 | 58576.555 | 51275.012 | NM_014677 | 1759.417  | 2097.559  |
| NM_00205E | 155.323   | 193.58    | NM_002982 | 972.19    | 2257.412  | NM_00685E | 903.566   | 985.09    |
| NM_00013E | 7353.458  | 6810.906  | NM_00219C | 476.582   | 424.238   | NM_01559E | 2163.361  | 1563.697  |
| AL157456  | 685.401   | 650.573   | AK056773  | 8999.973  | 9271.133  | NM_01869E | 15922.6   | 13083.491 |
| AL162056  | 553.768   | 923.837   | NM_002182 | 19054.389 | 21083.742 | NM_00013E | 17176.129 | 16157.597 |
| NM_00038C | 1172.089  | 1099.183  | NM_01647C | 3553.459  | 2953.674  | AL157456  | 1412.893  | 1261.011  |
| AF085734  | 364.841   | 295.788   | AL365408  | 45835.793 | 45930.441 | AL162056  | 810.25    | 1102.574  |
| NM_006502 | 218.678   | 116.642   | NM_017762 | 5922.801  | 6527.383  | NM_00038C | 16401.254 | 16131.102 |
| NM_01487E | 1539.991  | 1538.104  | NM_001863 | 58971.855 | 48505.738 | NM_00462E | 2041.307  | 2174.242  |
| NM_00540E | 2834.679  | 3829.793  | NM_000921 | 15222.648 | 14256.847 | NM_01487E | 1841.159  | 1514.14   |
| NM_00332E | 415.668   | 603.911   | NM_00009E | 3059.161  | 3883.073  | NM_00540E | 3944.286  | 3086.86   |
| X93921    | 5125.899  | 5700.376  | NM_00001E | 22713.139 | 25893.299 | NM_00332E | 3236.623  | 2601.633  |
| NM_00599C | 2415.952  | 2468.027  | AK026913  | 5846.174  | 5404.246  | X93921    | 4718.973  | 4155.952  |
| NM_01627E | 14266.513 | 14281.552 | NM_016234 | 13370.134 | 16125.87  | AF073482  | 3944.221  | 3351.225  |
| NM_00085C | 3074.821  | 3296.478  | NM_00187E | 6263.989  | 6918.365  | NM_00599C | 3949.229  | 3994.603  |
| NM_00467E | 344.153   | 584.644   | NM_016144 | 9953.343  | 12296.527 | NM_01627E | 52252.43  | 53921.5   |
| NM_001994 | 2701.984  | 2598.164  | AL133099  | 17843.869 | 24552.1   | NM_017762 | 2900.22   | 3161.162  |
| J00129    | 9627.406  | 11386.428 | NM_016082 | 2894.207  | 3359.768  | NM_001863 | 59025.035 | 58991.66  |
| NM_00332C | 3062.121  | 3032.996  | NM_000433 | 2610.092  | 2658.598  | NM_000921 | 8764.35   | 8247.572  |
| L10146    | 4342.031  | 3686.518  | NM_00019C | 6990.464  | 6103.449  | NM_00009E | 1982.805  | 2218.665  |
| NM_00068E | 4129.924  | 4537.669  | X15667    | 14343.206 | 13218.048 | NM_00001E | 15663.042 | 17299.256 |
| AK025657  | 15726.647 | 15313.479 | NM_017512 | 1565.379  | 1457.602  | AK026913  | 3847.342  | 3990.329  |
| AF142063  | 608.545   | 849.416   | NM_018661 | 892.891   | 992.495   | AF142063  | 659.472   | 814.778   |
| W42849    | 2150.713  | 1989.408  | NM_00167E | 1597.107  | 627.644   | AI360116  | 6036.006  | 5459.576  |
| AI889961  | 4031.832  | 4079.176  | AK023078  | 5889.35   | 7895.419  | NM_013983 | 1401.474  | 1403.49   |
| AI360116  | 3802.356  | 4961.541  | NM_002239 | 47206.398 | 47016.18  | AL136131  | 27084.217 | 26698.342 |
| NM_013983 | 811.809   | 669.197   | NM_002249 | 41471.945 | 42276.895 | NM_033357 | 2400.584  | 2244.917  |
| AI572835  | 4405.96   | 3433.338  | NM_015684 | 3890.23   | 3499.017  | AF335109  | 2143.833  | 2272.383  |
| R20392    | 5348.778  | 5564.598  | NM_003945 | 27285.627 | 31178.445 | U59911    | 5690.02   | 5317.411  |
| AA486367  | 5387.323  | 5318.023  | NM_004981 | 9663.46   | 8828.846  | NM_002054 | 1305.166  | 1607.441  |
| N56684    | 1265.171  | 1692.747  | AK096507  | 1795.413  | 1931.459  | NM_004482 | 488.536   | 700.556   |
| M55153    | 653.904   | 1065.25   | NM_004482 | 583.158   | 898.086   | AK026204  | 9261.199  | 12040.668 |
| AF414120  | 562.682   | 437.547   | NM_000352 | 483.124   | 647.417   | NM_01463E | 4522.752  | 4192.98   |
| AL136131  | 15466.83  | 15316.552 | NM_01559E | 2356.616  | 1799.195  | NM_00414E | 9607.538  | 9784.918  |
| NM_033357 | 2411.062  | 2195.39   | AB037902  | 426.886   | 480.312   | AK023196  | 2090.715  | 2749.604  |
| AF335109  | 1377.426  | 1691.607  | NM_01869E | 18684.137 | 23689.645 | NM_01872E | 4340.614  | 4431.545  |
| NM_003263 | 383.521   | 517.154   | NM_00013E | 15039.142 | 11598.976 | AK024014  | 12465.137 | 11366.594 |
| U59911    | 4319.597  | 4353.533  | AL157456  | 303.977   | 486.498   | NM_00086E | 1966.335  | 1590.312  |
| NM_00219C | 170.976   | 225.913   | AL162056  | 1141.349  | 850.086   | NM_000867 | 1014.219  | 1402.908  |
| AK056773  | 4273.837  | 4553.176  | NM_00038C | 5664.873  | 4727.503  | AF076642  | 1516.458  | 1952.164  |
| NM_002182 | 2796.707  | 3121.432  | NM_00462E | 2318.198  | 2156.964  | NM_00238E | 6142.068  | 5547.39   |
| NM_01647C | 1811.013  | 2181.435  | NM_01487E | 2422.667  | 2295.947  | NM_005314 | 2330.061  | 2114.26   |
| AL365408  | 18695.809 | 17839.867 | NM_00540E | 5645.612  | 5422.794  | NM_00488E | 2005.201  | 2300.191  |
| AK026204  | 5218.769  | 4873.741  | NM_00332E | 5060.244  | 4664.021  | NM_00514E | 938.672   | 804.397   |
| NM_01463E | 3676.042  | 2556.153  | X93921    | 10129.675 | 11062.897 | NM_012152 | 17542.992 | 14523.788 |
| NM_00414E | 6196.811  | 5301.884  | AF073482  | 5586.36   | 6113.412  | AK024093  | 2864.172  | 2769.18   |
| AK023196  | 1263.86   | 1093.438  | NM_00599C | 5334.179  | 5275.692  | NM_00194C | 4094.477  | 3849.464  |
| NM_01872E | 4450.535  | 4151.582  | NM_01627E | 46244.18  | 39986.863 | U83115    | 4089.167  | 3550.205  |
| AK024014  | 1750.358  | 1343.31   | NM_00467E | 1412.57   | 1568.704  | NM_001264 | 8625.981  | 8115.56   |
| NM_00086E | 1709.428  | 1660.857  | NM_007193 | 697.789   | 1577.637  | NM_013364 | 22383.941 | 24657.057 |
| NM_000867 | 859.913   | 769.985   | NM_001994 | 8083.263  | 11002.118 | NM_01436E | 1224.665  | 1682.129  |

|           |           |           |           |           |           |           |           |           |
|-----------|-----------|-----------|-----------|-----------|-----------|-----------|-----------|-----------|
| AF076642  | 1123.536  | 1348.506  | AL136131  | 35355.711 | 45511.777 | NM_00085C | 2450.261  | 2725.928  |
| NM_00238E | 2359.933  | 2301.177  | NM_002982 | 937.362   | 872.383   | NM_00467E | 1173.455  | 1155.479  |
| NM_005314 | 1555.867  | 1776.285  | NM_00219C | 351.933   | 538.025   | NM_007193 | 523.233   | 422.325   |
| NM_00488E | 1475.078  | 2010.746  | AK056773  | 8507.16   | 12642.464 | NM_001994 | 6779.318  | 8235.505  |
| NM_00514E | 876.142   | 841.858   | NM_002182 | 17800.357 | 25197.154 | J00129    | 15786.403 | 20682.793 |
| NM_012152 | 4150.927  | 3788.303  | NM_01647C | 4375.939  | 4810.26   | NM_00332C | 3581.196  | 7648.014  |
| AK024093  | 1010.816  | 1010.333  | AL365408  | 49125.828 | 45831.582 | NM_016524 | 3123.065  | 4054.302  |
| NM_00194C | 3325.618  | 3290.192  | AK026204  | 9071.948  | 8803.206  | NM_00712E | 56477.102 | 58954.938 |
| U83115    | 3480.228  | 3861.601  | NM_01463E | 5624.159  | 3733.26   | AL137631  | 9129.754  | 11075.89  |
| NM_001264 | 5794.616  | 4660.937  | NM_00414E | 10349.66  | 10590.758 | NM_016057 | 10617.873 | 9623.552  |
| NM_013364 | 8895.597  | 7761.585  | NM_01872E | 6135.075  | 5582.752  | NM_014677 | 1912.22   | 1905.355  |
| NM_01436E | 1003.509  | 1339.113  | AK024014  | 5671.356  | 5453.841  | NM_00685E | 1081.903  | 803.875   |
| NM_015684 | 2443.43   | 2485.073  | NM_00086E | 2067.118  | 2012.981  | AK022790  | 51874.582 | 42951.055 |
| NM_00394E | 13252.183 | 16117.5   | NM_000867 | 1375.827  | 1245.923  | NM_004311 | 4210.484  | 4961.472  |
| NM_004981 | 2914.529  | 2706.789  | AF076642  | 1946.182  | 2006.974  | NM_005624 | 3812.383  | 4035.091  |
| AK096507  | 1437.162  | 1570.698  | NM_00238E | 7093.784  | 7766.673  | NM_002302 | 1156.723  | 1199.729  |
| NM_016524 | 1580.265  | 1892.609  | NM_005314 | 2140.687  | 3565.422  | AB020672  | 590.129   | 451.066   |
| NM_00712E | 20286.174 | 19809.803 | NM_00488E | 3028.277  | 3845.675  | AK026958  | 615.412   | 715.445   |
| AL137631  | 6694.22   | 7268.398  | NM_00514E | 999.161   | 1227.411  | NM_00057E | 610.136   | 526.308   |
| NM_016057 | 13287.941 | 13260.5   | NM_012152 | 16615.559 | 16004.773 | AF263462  | 2039.378  | 1716.13   |
| NM_014677 | 586.55    | 791.544   | AK024093  | 3907.463  | 5014.965  | AB040962  | 902.898   | 747.893   |
| NM_00685E | 1066.06   | 855.347   | NM_00194C | 4916.638  | 5373.641  | AV697672  | 726.662   | 667.593   |
| AK022790  | 40728.223 | 37454.535 | U83115    | 5127.453  | 7104.057  | NM_000942 | 51092.359 | 48988.301 |
| NM_004311 | 3154.68   | 4129.565  | NM_013364 | 13701.969 | 15929.858 | NM_002982 | 798.613   | 1041.054  |
| NM_005624 | 952.111   | 1517.983  | NM_00223E | 53687.133 | 46026.563 | NM_00219C | 586.257   | 608.981   |
| NM_002302 | 378.264   | 549.812   | NM_00224E | 36934.363 | 37113.281 | AK056773  | 6971.375  | 8043.253  |
| AK026958  | 217.744   | 199.673   | NM_015684 | 3811.798  | 4119.881  | NM_002182 | 17030.727 | 20703.572 |
| NM_00057E | 377.249   | 311.588   | NM_00394E | 24667.836 | 36806.879 | NM_01647C | 2414.088  | 2869.127  |
| AF263462  | 1517.905  | 1161.631  | NM_004981 | 7278.384  | 7914.357  | AL365408  | 44326.883 | 55743.168 |
| AB040962  | 522.821   | 631.23    | AK096507  | 2308.789  | 2343.874  | NM_000921 | 9414.693  | 9844.61   |
| AV697672  | 254.884   | 260.497   | NM_016524 | 3147.15   | 3111.598  | NM_00009E | 1760.464  | 1786.29   |
| NM_000942 | 43888.109 | 51563.449 | NM_00712E | 38398.281 | 41606.906 | NM_00001E | 14768.473 | 13300.567 |
| NM_00540E | 5488.195  | 5037.271  | AL137631  | 8805.196  | 8638.487  | AK026913  | 3552.222  | 2679.682  |
| NM_00332E | 1972.56   | 1956.207  | NM_016057 | 17629.852 | 16395.025 | NM_016234 | 7743.967  | 9342.846  |
| X93921    | 6402.202  | 6151.773  | NM_014677 | 1486.27   | 1465.218  | NM_00187E | 3520.738  | 3606.679  |
| AF073482  | 1626.227  | 1607.992  | NM_00685E | 1765.532  | 1570.739  | NM_016144 | 7218.981  | 7692.579  |
| NM_00599C | 4488.062  | 4290.781  | NM_004311 | 6614.356  | 6997.945  | AL133099  | 11901.38  | 12279.944 |
| NM_01627E | 17797.563 | 17767.926 | NM_005624 | 3607.91   | 3164.56   | NM_016082 | 1742.244  | 1291.467  |
| NM_017762 | 3605.779  | 4317.129  | NM_002302 | 1260.433  | 1287.942  | NM_000433 | 1602.521  | 1586.642  |
| NM_001863 | 37511.656 | 35529.559 | AB020672  | 350.983   | 618.461   | NM_00019C | 5353.277  | 4874.707  |
| NM_000921 | 10134.522 | 9820.813  | AK026958  | 670.262   | 696.578   | X15667    | 15443.229 | 15919.241 |
| NM_00009E | 2765.328  | 3209.427  | NM_00148C | 838.885   | 436.211   | NM_017512 | 704.361   | 698.364   |
| NM_00001E | 14766.522 | 15499.224 | AF263462  | 2614.828  | 2222.754  | NM_018661 | 1019.437  | 1084.25   |
| AK026913  | 3845.121  | 3434.285  | AB040962  | 687.633   | 714.08    | AK023078  | 4433.367  | 5987.91   |
| NM_016234 | 5160.643  | 6453.274  | AV697672  | 1113.042  | 1343.233  | NM_00223E | 49437.898 | 52839.984 |
| NM_00187E | 4351.295  | 3998.338  | NM_004833 | 277.597   | 1708.607  | NM_00224E | 50851.801 | 56054.902 |
| NM_016144 | 2619.553  | 3642.393  | NM_000942 | 59613.594 | 49229.922 | NM_015684 | 2477.835  | 2953.198  |
| AL133099  | 1503.189  | 1657.943  | NM_00540E | 5489.903  | 5086.16   | NM_00394E | 17191.834 | 20951.908 |
| NM_016082 | 1858.428  | 1770.447  | NM_00332E | 6242.123  | 4979.506  | NM_004981 | 13445.804 | 15928.404 |
| NM_000433 | 1540.799  | 1996.17   | X93921    | 9554.335  | 9953.322  | AK096507  | 1213.543  | 1497.055  |
| NM_00019C | 3373.285  | 3116.14   | AF073482  | 7238.654  | 9219.828  | NM_004482 | 438.947   | 584.379   |
| X15667    | 1859.508  | 1411.658  | NM_00599C | 6343.686  | 5685.918  | NM_000352 | 269.077   | 158.975   |
| NM_017512 | 928.709   | 1134.718  | NM_01627E | 46721.426 | 40923.531 | NM_01559E | 2256.36   | 1336.452  |

|           |           |           |           |           |           |           |           |           |
|-----------|-----------|-----------|-----------|-----------|-----------|-----------|-----------|-----------|
| NM_018661 | 320.859   | 366.306   | NM_017762 | 4609.071  | 4313.515  | NM_018696 | 14766.117 | 11714.04  |
| AK023078  | 971.994   | 1226.348  | NM_001863 | 63938.52  | 46351.492 | NM_000136 | 12446.968 | 9422.298  |
| NM_014737 | 3558.224  | 3066.338  | NM_000921 | 11533.057 | 11009.638 | AL157456  | 573.524   | 635.463   |
| NM_003488 | 5191.607  | 4999.962  | NM_000098 | 3128.316  | 2829.223  | AL162056  | 516.246   | 442.058   |
| NM_001454 | 66921.102 | 54898.438 | NM_000016 | 21428.111 | 18034.623 | NM_000380 | 15482.642 | 13342.912 |
| NM_006558 | 723.368   | 571.186   | AK026913  | 3873.413  | 2689.463  | NM_004628 | 1770.776  | 1580.58   |
| Z22780    | 502.042   | 557.718   | NM_001876 | 4894.063  | 4388.781  | AF085734  | 501.897   | 974.698   |
| NM_005797 | 518.12    | 657.388   | NM_016144 | 8446.052  | 9067.268  | NM_014876 | 1326.633  | 1270.421  |
| NM_004824 | 1484.247  | 1351.609  | AL133099  | 19625.891 | 24390.738 | NM_005406 | 3898.311  | 4015.764  |
| M17733    | 67080.336 | 56703.207 | NM_016082 | 3003.208  | 3026.269  | NM_003328 | 3567.275  | 3831.983  |
| U83191    | 836.894   | 1174.538  | NM_000433 | 3375.365  | 3686.854  | X93921    | 4634.832  | 5321.194  |
| NM_013952 | 4136.793  | 5011.942  | NM_000190 | 7487.651  | 6579.117  | AF073482  | 3981.493  | 5098.265  |
| NM_015596 | 1247.125  | 1563.094  | X15667    | 18478.688 | 19002.436 | NM_005990 | 4509.648  | 4296.316  |
| NM_018696 | 5821.539  | 5435.901  | NM_017512 | 1963.519  | 1591.552  | NM_016276 | 53681.871 | 58256.758 |
| NM_000136 | 7633.604  | 7636.057  | NM_001678 | 1295.636  | 190.837   | NM_000850 | 2701.603  | 2909.199  |
| AL157456  | 593.33    | 919.942   | AK023078  | 6280.614  | 7191.282  | NM_004676 | 1857.707  | 2167.467  |
| AL162056  | 732.54    | 861.994   | NM_014737 | 5053.281  | 4871.149  | NM_007193 | 594.355   | 881.371   |
| NM_000380 | 1833.085  | 1848.127  | NM_003488 | 6743.875  | 5465.682  | NM_001994 | 7663.637  | 7203.098  |
| NM_004628 | 878.53    | 1126.205  | NM_001454 | 59105.582 | 51950.469 | AL136131  | 25291.709 | 28963.627 |
| NM_006502 | 217.542   | 158.614   | NM_006558 | 1643.75   | 1315.042  | U59911    | 5754.083  | 6944.706  |
| NM_014876 | 1785.536  | 1851.624  | Z22780    | 1448.035  | 914.478   | NM_002982 | 655.666   | 628.7     |
| AB032958  | 763.113   | 639.387   | NM_005797 | 1561.109  | 1312.72   | NM_002190 | 443.227   | 320.752   |
| AK024427  | 4440.825  | 4117.934  | U83191    | 1253.231  | 1046.144  | AK056773  | 6037.093  | 7343.15   |
| NM_003006 | 1496.513  | 1162.254  | NM_013952 | 6357.006  | 6346.456  | NM_002182 | 18221.098 | 18871.477 |
| NM_000493 | 527.752   | 500.324   | NM_000352 | 589.495   | 273.727   | NM_016470 | 2566.856  | 2829.66   |
| AF272035  | 2129.17   | 2106.229  | NM_015596 | 2895.997  | 2234.119  | AL365408  | 46390.188 | 46756.32  |
| AY009133  | 674.225   | 531.399   | AB037902  | 663.729   | 584.11    | AK026204  | 7144.531  | 5566.237  |
| NM_013403 | 3149.249  | 3034.539  | AL162056  | 1408.746  | 1165.426  | NM_014635 | 3406.721  | 2378.481  |
| NM_000674 | 834.105   | 1117.773  | NM_000380 | 10542.358 | 8796.448  | NM_004145 | 9067.556  | 7862.126  |
| AB020671  | 666.518   | 692.939   | NM_004628 | 1984.239  | 1792.993  | AK023196  | 1281.572  | 1111.489  |
| NM_000206 | 429.716   | 309.231   | AF085734  | 531.689   | 436.122   | NM_018728 | 3461.784  | 2916.19   |
| NM_018255 | 3994.755  | 4103.659  | NM_014876 | 3100.739  | 2983.535  | AK024014  | 6958.06   | 6692.274  |
| NM_016232 | 614.43    | 451.104   | AB032958  | 2101.728  | 1535.166  | NM_000865 | 1600.725  | 1440.95   |
| AF178930  | 880.924   | 791.013   | AK024427  | 4925.077  | 4794.852  | NM_000867 | 570.318   | 546.512   |
| M74161    | 3078.646  | 2231.399  | NM_003006 | 1381.891  | 1437.529  | AF076642  | 1499.398  | 1632.031  |
| NM_016542 | 6860.208  | 7245.169  | NM_000493 | 680.82    | 629.725   | NM_002386 | 5967.06   | 5823.351  |
| NM_000484 | 1793.049  | 1784.005  | AF272035  | 2916.888  | 2991.648  | NM_005314 | 1667.257  | 2035.126  |
| S40369    | 3586.877  | 3569.127  | AY009133  | 901.561   | 758.331   | NM_004885 | 1862.367  | 2250.239  |
| NM_015831 | 3467.478  | 3654.241  | NM_000965 | 523.812   | 680.183   | NM_005145 | 879.625   | 1179.627  |
| AK023154  | 2044.09   | 2440.151  | NM_013403 | 3468.177  | 3286.175  | NM_012152 | 14686.885 | 15087.065 |
| Z36820    | 912.445   | 1017.5    | NM_000206 | 652.285   | 483.413   | AK024093  | 2814.885  | 3504.43   |
| NM_003967 | 2807.971  | 3455.845  | NM_018255 | 6069.145  | 4933.4    | NM_001940 | 3202.592  | 3773.614  |
| NM_012451 | 1286.158  | 924.66    | NM_016232 | 995.858   | 831.086   | U83115    | 4087.742  | 4832.979  |
| NM_002510 | 988.544   | 985.329   | AF178930  | 918.26    | 961.638   | NM_001264 | 5904.072  | 5730.233  |
| NM_020386 | 229.486   | 149.965   | M74161    | 2521.477  | 2867.616  | NM_013364 | 15023.95  | 17046.881 |
| NM_006624 | 4491.769  | 3886.197  | NM_016542 | 8217.525  | 8275.453  | NM_014368 | 1524.852  | 1868.714  |
| NM_007069 | 309.344   | 148.761   | NM_000484 | 2107.296  | 1791.643  | NM_002236 | 40270.066 | 38902.895 |
| AF130079  | 498.181   | 322.195   | S40369    | 20083.617 | 17224.033 | NM_002246 | 44452.359 | 47443.012 |
| NM_017667 | 771.854   | 505.998   | NM_015831 | 4642.755  | 5539.197  | NM_015684 | 2396.744  | 2455.44   |
| AK002211  | 1702.024  | 1679.718  | AK023154  | 3434.499  | 3573.682  | NM_003945 | 16610.84  | 16090.138 |
| NM_012127 | 4501.764  | 5523.877  | Z36820    | 1807.928  | 1564.344  | NM_004981 | 14324.445 | 12674.077 |
| NM_014454 | 1428.333  | 1899.753  | NM_003967 | 3362.975  | 3432.417  | AK096507  | 1327.688  | 1151.607  |
| NM_017488 | 1238.545  | 1624.666  | NM_012451 | 2513.807  | 2162.425  | NM_016524 | 2220.298  | 2235.284  |

|           |           |           |           |           |           |           |           |           |
|-----------|-----------|-----------|-----------|-----------|-----------|-----------|-----------|-----------|
| NM_002824 | 11830.324 | 11212.574 | NM_002510 | 1273.846  | 1223.954  | NM_007126 | 37818.074 | 31335.598 |
| NM_006835 | 18725.938 | 19267.469 | NM_006624 | 6112.509  | 5198.159  | AL137631  | 6790.189  | 6995.905  |
| NM_006023 | 4208.119  | 4661.324  | NM_017667 | 1060.947  | 502.226   | NM_016057 | 9417.898  | 8146.497  |
| NM_014673 | 1964.527  | 2133.458  | AK002211  | 3068.626  | 2574.936  | NM_014677 | 1303.987  | 1489.453  |
| AB002330  | 2650.555  | 3016.601  | NM_012127 | 7025.751  | 6386.887  | NM_006855 | 826.03    | 902.108   |
| AL137509  | 13467.526 | 13169.974 | NM_014454 | 1246.837  | 1117.47   | AK022790  | 50660.305 | 42242.25  |
| NM_006535 | 3660.698  | 2819.558  | NM_017489 | 2403.031  | 2379.047  | NM_004311 | 3764.527  | 4036.28   |
| NM_019887 | 7052.796  | 6189.764  | NM_002824 | 9867.966  | 8100.046  | NM_005624 | 2753.569  | 2427.209  |
| NM_004050 | 4891.104  | 4352.899  | NM_006835 | 28608.584 | 29798.133 | NM_002302 | 797.933   | 805.02    |
| NM_006024 | 9066.001  | 10845.237 | NM_006023 | 16308.587 | 14738.626 | AK026958  | 597.935   | 1322.814  |
| NM_020191 | 972.184   | 841.899   | NM_014673 | 4669.349  | 3365.284  | NM_000575 | 442.537   | 735.056   |
| NM_017434 | 1032.122  | 730.373   | AB002330  | 3144.156  | 3148.003  | AF263462  | 1713.471  | 2156.305  |
| NM_020182 | 510.596   | 631.763   | AL137509  | 12550.207 | 9244.278  | AB040962  | 839.107   | 988.321   |
| AL137669  | 1084.46   | 1035.617  | NM_006535 | 2221.032  | 2266.451  | NM_000635 | 656.958   | 520.241   |
| NM_004793 | 12526.115 | 9449.926  | NM_019887 | 7858.452  | 7763.64   | AV697672  | 643.242   | 837.237   |
| NM_004390 | 2152.747  | 1579.544  | NM_004050 | 11063.063 | 8724.79   | NM_000942 | 47516.691 | 49718.898 |
| NM_014263 | 5592.313  | 4016.834  | NM_006024 | 19735.893 | 19725.254 | NM_005406 | 3828.718  | 4117.042  |
| NM_015907 | 1079.56   | 1168.11   | NM_020191 | 3908.357  | 3856.951  | NM_003325 | 4283.135  | 4032.751  |
| NM_001912 | 2167.889  | 2566.332  | NM_017434 | 4111.793  | 4864.611  | X93921    | 4728.231  | 5655.744  |
| NM_013267 | 1740.945  | 1732.545  | NM_020405 | 427.642   | 1685.389  | AF073482  | 3729.704  | 3850.887  |
| NM_002454 | 3441.833  | 3523.463  | NM_020182 | 1383.467  | 1757.508  | NM_005990 | 4235.219  | 3492.734  |
| NM_001917 | 755.731   | 663.389   | AL137669  | 2665.756  | 2664.921  | NM_016275 | 46082.684 | 48713.758 |
| NM_005956 | 7918.306  | 6433.877  | AJ275213  | 848.405   | 1287.929  | NM_017762 | 3438.528  | 2751.007  |
| NM_003043 | 1571.267  | 1606.734  | NM_004793 | 15724.551 | 11996.964 | NM_001863 | 55074.641 | 50818.262 |
| D87077    | 1141.04   | 903.751   | NM_004390 | 2195.614  | 1764.268  | NM_000921 | 7433.983  | 6566.172  |
| NM_014305 | 199.812   | 225.593   | NM_014263 | 3669.736  | 2689.854  | NM_000095 | 1952.002  | 1363.683  |
| L07033    | 1444.066  | 1634.424  | NM_020361 | 844.598   | 714.717   | NM_000016 | 13382.368 | 12964.876 |
| AK000142  | 654.263   | 533.89    | NM_015907 | 1651.282  | 986.021   | AK026913  | 2815.221  | 2912.844  |
| NM_005993 | 2344.798  | 2026.618  | AK026343  | 214.48    | 217.003   | NM_016234 | 7870.418  | 9855.003  |
| AK026341  | 555.475   | 586.921   | NM_001912 | 2824.35   | 2353.643  | NM_001875 | 3734.346  | 3518.224  |
| NM_018943 | 2893.944  | 2528.832  | NM_013267 | 2190.098  | 2168.079  | NM_016144 | 6099.945  | 6870.843  |
| AJ292757  | 537.909   | 671.289   | NM_002454 | 1896.12   | 2108.663  | AL133099  | 12311.325 | 13483.752 |
| NM_003995 | 1027.469  | 732.43    | NM_001917 | 4728.055  | 4498.354  | NM_016082 | 1686.859  | 1663.932  |
| NM_003433 | 3493.595  | 3070.822  | NM_005956 | 26533.072 | 23989.982 | NM_000433 | 1893.699  | 2172.138  |
| NM_005221 | 2604.574  | 2754.36   | NM_003043 | 4179.654  | 3796.787  | NM_000190 | 6431.977  | 6437.463  |
| NM_005870 | 823.4     | 530.828   | D87077    | 1108.71   | 1260.499  | X15667    | 14646.899 | 17840.264 |
| NM_018561 | 2245.83   | 1714.557  | L07033    | 1172.137  | 979.021   | NM_017512 | 1386.905  | 1508.759  |
| NM_001270 | 3586.206  | 3362.74   | AK000142  | 739.53    | 461.729   | NM_018661 | 824.365   | 1020.998  |
| NM_001952 | 5838.861  | 5371.419  | NM_005993 | 5300.286  | 5616.642  | NM_001675 | 1016.149  | 755.64    |
| NM_003223 | 6261.815  | 6671.25   | AK026341  | 2573.519  | 3198.211  | AK023078  | 5051.129  | 5623.74   |
| NM_016015 | 4525.715  | 5115.514  | NM_018943 | 5062.901  | 7191.605  | NM_014737 | 3978.504  | 4483.677  |
| NM_012245 | 5145.077  | 4060.27   | AJ292757  | 441.527   | 929.407   | NM_003485 | 3890.251  | 4722.446  |
| NM_001533 | 9226.905  | 10206.084 | U01922    | 1398.009  | 1812.948  | NM_001454 | 53168.969 | 57791.027 |
| NM_006925 | 3413.094  | 3488.187  | NM_003995 | 633.361   | 1094.246  | NM_006555 | 771.285   | 776.69    |
| NM_003977 | 9757.514  | 8724.818  | NM_004465 | 755.792   | 3127.829  | Z22780    | 788.824   | 595.509   |
| NM_005995 | 28000.607 | 27213.721 | NM_018561 | 1801.322  | 1569.773  | NM_005797 | 1149.106  | 972.443   |
| U28424    | 3008.091  | 2725.958  | NM_001270 | 3204.39   | 2780.881  | NM_004824 | 1873.994  | 1407.522  |
| BF541372  | 2432.524  | 2094.67   | NM_001952 | 12131.533 | 8411.963  | M17733    | 56118.676 | 55716.324 |
| AF092137  | 703.359   | 794.708   | NM_003223 | 6563.621  | 5626.431  | U83191    | 539.441   | 579.315   |
| NM_004623 | 1566.526  | 1952.044  | NM_006713 | 58432.602 | 46821.438 | NM_013952 | 3930.252  | 3658.521  |
| NM_016551 | 3062.035  | 2631.22   | NM_020201 | 3136.034  | 2924.845  | NM_015595 | 1821.139  | 1665.282  |
| AK024631  | 1324.107  | 976.715   | U81557    | 455.187   | 668.716   | AB037902  | 566.023   | 696.917   |
| AF087977  | 559.23    | 699.398   | NM_016015 | 8625.551  | 7419.146  | NM_018695 | 16368.906 | 20228.477 |

|           |           |           |           |           |           |           |           |           |
|-----------|-----------|-----------|-----------|-----------|-----------|-----------|-----------|-----------|
| AK026949  | 778.116   | 505.107   | NM_012245 | 11319.754 | 8261.648  | NM_000136 | 17802.916 | 17818.941 |
| NM_004957 | 3797.081  | 2811.641  | NM_003986 | 557.18    | 389.621   | AL157456  | 1262.381  | 1573.223  |
| AL050028  | 4193.285  | 3880.524  | NM_001533 | 17854.387 | 17392.465 | AL162056  | 1052.79   | 1189.394  |
| NM_017803 | 1198.738  | 1137.194  | NM_006929 | 10862.95  | 10050.286 | NM_000380 | 19356.309 | 27324.668 |
| NM_005994 | 1368.714  | 1172.892  | NM_003977 | 28434.432 | 33175.707 | NM_004628 | 1866.266  | 2207.329  |
| AB027508  | 880.403   | 898.399   | AF092137  | 9641.618  | 10605.842 | NM_014876 | 2213.336  | 2213.686  |
| NM_016331 | 1808.302  | 1897.947  | NM_016551 | 4001.73   | 3623.922  | AB032958  | 2178.387  | 3300.357  |
| NM_014360 | 6762.146  | 6288.244  | AK024631  | 2653.347  | 1925.709  | AK024427  | 3710.695  | 7565.972  |
| AB033053  | 1050.413  | 1099.57   | AF087977  | 825.045   | 578.33    | NM_003006 | 795.14    | 759.935   |
| NM_007358 | 5148.595  | 5061.549  | AK026949  | 750.85    | 787.191   | AF272035  | 1330.229  | 1447.764  |
| NM_001571 | 2519.942  | 2353.581  | AL050028  | 4700.348  | 3831.623  | AY009133  | 681.771   | 498.454   |
| AF126749  | 640.685   | 504.201   | BE732255  | 6905.091  | 5669.02   | NM_013403 | 3462.508  | 2693.703  |
| NM_018108 | 2334.296  | 1831.966  | NM_004955 | 1808.636  | 1499.4    | NM_004123 | 517.284   | 478.816   |
| NM_003408 | 448.815   | 264.943   | NM_003364 | 2641.551  | 2690.011  | AB020671  | 331.892   | 454.545   |
| NM_003450 | 1352.703  | 1030.978  | NM_017803 | 1710.527  | 1261.189  | NM_018255 | 2858.833  | 2380.233  |
| AK021577  | 1649.669  | 1505.178  | NM_015863 | 904.593   | 1876.125  | NM_016232 | 702.912   | 795.917   |
| AF075019  | 877.023   | 626.255   | NM_005994 | 6026.121  | 6232.847  | AF178930  | 815.121   | 931.121   |
| AF147388  | 843.502   | 375.66    | NM_004432 | 494.16    | 792.053   | M74161    | 1452.438  | 1755.027  |
| AK021498  | 2139.691  | 1839.041  | AB027508  | 3534.963  | 4155.357  | NM_016542 | 4240.954  | 4145.394  |
| AF085874  | 2760.81   | 2125.909  | NM_016331 | 2125.525  | 2711.726  | NM_000484 | 1542.859  | 1438.458  |
| AF147346  | 767.215   | 689.312   | NM_014360 | 22229.01  | 20298.34  | S40369    | 14167.034 | 14041.258 |
| AK026959  | 2555.349  | 2651.273  | NM_018952 | 326.534   | 530.525   | NM_015831 | 3252.494  | 4524.47   |
| NM_019556 | 2387.052  | 2169.851  | AB033053  | 1022.43   | 1481.216  | AK023154  | 2713.708  | 3948.366  |
| NM_004753 | 3465.144  | 3049.971  | NM_007358 | 4359.977  | 4115.939  | Z36820    | 1603.381  | 1485.238  |
| NM_015462 | 2497.241  | 2503.673  | NM_003408 | 390.629   | 712.562   | NM_003967 | 3265.753  | 4197.733  |
| AK026700  | 668.278   | 476.211   | NM_003450 | 1502.243  | 1592.134  | NM_012451 | 2098.932  | 2273.139  |
| AF086242  | 652.18    | 457.007   | AK021577  | 1566.308  | 1555.262  | NM_002510 | 1046.179  | 893.02    |
| AF086370  | 389.843   | 637.282   | AF147390  | 955.201   | 418.369   | NM_020386 | 1266.004  | 1126.521  |
| AF086332  | 4378.547  | 4328.005  | AF085879  | 677.815   | 477.826   | NM_006624 | 3596.675  | 3295.779  |
| AJ404614  | 897.17    | 561.97    | AF075019  | 1662.982  | 1716.047  | AF130079  | 424.942   | 353.493   |
| AF086347  | 2279.588  | 1695.892  | AF147388  | 820.26    | 531.952   | NM_017667 | 654.013   | 355.473   |
| AF086388  | 540.41    | 459.116   | AK021498  | 1983.377  | 1583.879  | AK002211  | 3188.679  | 2217.931  |
| AF086444  | 599.54    | 581.667   | AF085874  | 1954.083  | 1791.149  | NM_012127 | 4206.59   | 3240.606  |
| AK001043  | 3540.041  | 2949.29   | AF147346  | 670.751   | 596.094   | NM_014454 | 945.667   | 798.048   |
| AK024535  | 5090.349  | 4274.492  | AK026959  | 2256.922  | 2538.312  | NM_017488 | 1451.146  | 967.278   |
| AL359608  | 1236.38   | 919.828   | NM_019556 | 1928.097  | 1210.024  | NM_002824 | 11246.417 | 8730.646  |
| NM_016498 | 12678.63  | 13975.422 | NM_004753 | 6041.208  | 5686.898  | NM_006835 | 13910.885 | 13728.454 |
| AF088025  | 434.242   | 420.362   | NM_015462 | 5516.41   | 5364.559  | NM_006023 | 8152.988  | 8050.773  |
| AF085934  | 1179.834  | 827.355   | AF086370  | 900.92    | 735.357   | NM_014673 | 2186.127  | 1755.663  |
| AF075088  | 970.047   | 642.679   | AF086332  | 15351.354 | 15038.891 | AB002330  | 2206.49   | 1843.172  |
| AK023971  | 19331.809 | 15852.919 | AJ404614  | 1065.247  | 748.901   | AL137509  | 11941.508 | 11490.382 |
| AK024738  | 1650.959  | 981.184   | AF086347  | 3308.167  | 2338.512  | NM_006538 | 2208.378  | 2153.223  |
| AL133103  | 1524.496  | 1222.135  | AF086388  | 1203.612  | 1029.107  | NM_019887 | 6256.881  | 5464.839  |
| BC015321  | 1584.78   | 1330.745  | AF086444  | 504.085   | 560.452   | NM_004050 | 23042.096 | 22403.098 |
| AL157450  | 868.055   | 856       | AK001043  | 4420.134  | 4609.354  | NM_006024 | 15121.416 | 16971.316 |
| AL359594  | 682.542   | 644.888   | AK024535  | 7576.522  | 7611.682  | NM_020191 | 2255.463  | 2096.257  |
| AL137293  | 1121.951  | 1123.995  | AL359608  | 1715.846  | 1461.637  | NM_017434 | 6230.134  | 7059.887  |
| AL137458  | 799.598   | 805.989   | NM_016498 | 24885.281 | 23503.428 | NM_020182 | 875.414   | 944.381   |
| AL157490  | 10114.252 | 7955.939  | AF088025  | 796.385   | 718.523   | AL137669  | 1798.666  | 1945.9    |
| AL390167  | 1212.28   | 1461.936  | AF085934  | 1809.351  | 1524.214  | AJ275213  | 479.625   | 670.838   |
| AK023657  | 1445.348  | 1427.344  | AF075088  | 1023.241  | 1123.333  | NM_004793 | 7115.84   | 7103.502  |
| AF086068  | 1252.781  | 838.156   | AK023971  | 22582.965 | 21714.219 | NM_004390 | 1106.597  | 937.724   |
| AF075018  | 630.105   | 489.052   | AK024738  | 1296.69   | 1299.605  | NM_014263 | 1944.252  | 1333.963  |

|           |           |           |           |           |           |           |           |           |
|-----------|-----------|-----------|-----------|-----------|-----------|-----------|-----------|-----------|
| AK021838  | 6771.912  | 4910.468  | AL133103  | 1195.054  | 1126.935  | NM_020361 | 799.33    | 767.273   |
| AK021990  | 389.2     | 409.898   | BC015321  | 1632.46   | 1489.181  | NM_015907 | 956.232   | 778.458   |
| AF083118  | 1437.175  | 1467.811  | AL157450  | 955.175   | 763.727   | NM_001912 | 1806.651  | 1272.633  |
| AF211977  | 736.358   | 679.984   | AL359594  | 2222.268  | 2612.938  | NM_013267 | 2302.822  | 2073.92   |
| AF089811  | 543.432   | 582.067   | AL137293  | 2117.194  | 2046.724  | NM_002454 | 1701.198  | 1205.616  |
| AK021909  | 1426.883  | 1081.929  | AL137458  | 1430.437  | 1583.199  | NM_001917 | 2783.541  | 2493.718  |
| AK022043  | 453.953   | 422.886   | AL157490  | 20645.42  | 20175.996 | NM_005956 | 33811.469 | 29852.543 |
| AK022168  | 829.176   | 661.474   | AL390167  | 4903.675  | 5012.279  | NM_003043 | 6283.424  | 6692.194  |
| AK022201  | 452.206   | 161.434   | AK023657  | 1808.675  | 1526.037  | D87077    | 1306.692  | 970.106   |
| AK022353  | 1202.818  | 913.437   | AF086068  | 1186.64   | 1093.133  | NM_014308 | 423.033   | 272.162   |
| AK026868  | 409.528   | 271.249   | AF086059  | 767.655   | 1810.109  | L07033    | 1011.68   | 1118.847  |
| AK022200  | 1834.183  | 1752.914  | AF086091  | 547.421   | 631.943   | AK023934  | 321.813   | 543.536   |
| AK026967  | 302.271   | 149.393   | AK021838  | 13155.861 | 10664.774 | AK000142  | 518.691   | 510.945   |
| AK023396  | 291.731   | 430.562   | AF083118  | 1792.698  | 1246.891  | NM_005993 | 4462.964  | 4806.872  |
| AF264625  | 390.272   | 494.113   | AF089811  | 722.118   | 634.725   | AK026341  | 1937.056  | 1752.748  |
| NM_018101 | 3120.502  | 2395.579  | AF147444  | 837.687   | 800.242   | NM_018943 | 3858.166  | 4163.315  |
| AF293366  | 646.431   | 847.234   | AK021909  | 1509.864  | 1826.979  | AJ292757  | 314.636   | 640.418   |
| BF526704  | 2009.306  | 1776.281  | AK022168  | 1545.804  | 1524.074  | U01922    | 846.968   | 839.607   |
| AJ491695  | 3030.917  | 2183.273  | AK022327  | 1131.399  | 863.05    | NM_003996 | 930.546   | 1159.964  |
| AF052107  | 4766.693  | 3422.385  | AK022061  | 324.079   | 485.3     | NM_004466 | 523.615   | 677.252   |
| AK022430  | 1044.62   | 562.339   | AK022201  | 642.026   | 711.481   | NM_003433 | 4258.229  | 3947.144  |
| AK001022  | 2825.709  | 2061.96   | AK022353  | 2411.593  | 2065.353  | NM_005221 | 1615.087  | 1472.596  |
| AL049351  | 1767.502  | 1351.461  | AK026868  | 622.351   | 563.779   | NM_005870 | 406.391   | 409.726   |
| AL137508  | 233.186   | 384.332   | AK022200  | 3552.037  | 2723.898  | NM_018561 | 1263.85   | 873.238   |
| AK021826  | 2146.983  | 1840.565  | AF264625  | 845.84    | 715.734   | NM_001270 | 1917.436  | 1401.179  |
| AK025341  | 302.738   | 283.634   | NM_018101 | 2584.909  | 2323.926  | NM_001952 | 9052.443  | 6153.272  |
| AK024138  | 4510.739  | 4192.664  | AF293366  | 658.809   | 552.974   | NM_003223 | 5107.236  | 3961.289  |
| Y10505    | 1728.636  | 1554.07   | BF526704  | 1520.152  | 1437.974  | NM_006713 | 49303.582 | 36449.754 |
| U00946    | 6449.343  | 4531.704  | AJ491695  | 3241.615  | 3127.494  | NM_020201 | 3222.96   | 3172.053  |
| NM_005615 | 1315.681  | 1100.722  | AF052107  | 7912.112  | 7541.47   | U81557    | 320.507   | 242.455   |
| Z34290    | 837.875   | 822.268   | AK022430  | 1642.917  | 2509.546  | NM_014878 | 1249.454  | 1078.958  |
| AF070642  | 7791.757  | 5303.556  | AK001022  | 5463.875  | 4262.426  | AK023530  | 471.486   | 419.312   |
| AK027125  | 2473.055  | 1733.798  | AL049351  | 6955.162  | 6576.998  | NM_016019 | 5623.683  | 3697.57   |
| AK025311  | 544.943   | 323.675   | AK021826  | 3445.486  | 2984.491  | NM_012245 | 6418.61   | 4205.332  |
| D16918    | 1468.708  | 1273.804  | AK024138  | 3630.593  | 3056.312  | NM_003986 | 364.559   | 824.102   |
| D16467    | 2371.997  | 1972.317  | Y10505    | 1550.711  | 1328.666  | NM_001533 | 11823.105 | 10690.771 |
| AF090932  | 1102.349  | 663.772   | U00946    | 6589.186  | 6669.584  | NM_006926 | 14193.611 | 14544.816 |
| AF166125  | 2239.65   | 1968.896  | NM_005615 | 2741.845  | 2873.696  | NM_003977 | 26561.832 | 22592.57  |
| AF225425  | 946.931   | 627.69    | Z34290    | 1153.413  | 768.545   | NM_005996 | 20654.178 | 22991.348 |
| AF064848  | 9298.142  | 6005.706  | AF070642  | 8572.514  | 7947.144  | U28424    | 1727.286  | 1744.594  |
| U61089    | 5332.96   | 2340.737  | AK027125  | 2699.818  | 2580.871  | BF541372  | 3001.957  | 2791.172  |
| AK001036  | 3812.821  | 3205.016  | AK025311  | 543.452   | 454.392   | AF092137  | 4312.37   | 5390.827  |
| AK024858  | 7494.881  | 5222.488  | D16918    | 1698.477  | 1419.283  | NM_004623 | 1210.778  | 1451.227  |
| NM_001049 | 4198.521  | 2970.405  | D16467    | 1879.262  | 2286.494  | NM_016551 | 1983.846  | 1795.019  |
| AK024554  | 1034.04   | 657.964   | AF090932  | 1209.568  | 1488.934  | AK024631  | 1521.335  | 1517.929  |
| AF068294  | 1304.82   | 1399.884  | AF166125  | 2946.223  | 3174.541  | NM_004957 | 3338.151  | 2435.085  |
| AK025909  | 2104.052  | 2461.438  | AF225425  | 1556.777  | 1682.141  | AL050028  | 2109.842  | 1098.451  |
| AK026138  | 1832.892  | 1490.126  | AF064848  | 8061.413  | 9963.354  | NM_000371 | 500.118   | 368.374   |
| Z70706    | 277.085   | 344.782   | U61089    | 3074.734  | 4430.514  | BE732255  | 3455.96   | 2705.591  |
| AK021434  | 9359.358  | 8108.217  | AK001036  | 3847.971  | 5391.061  | NM_004955 | 941.894   | 849.739   |
| NM_016479 | 5595.559  | 7229.291  | AK024858  | 11733.672 | 11385.754 | NM_003364 | 1649.843  | 1558.458  |
| AK000933  | 15627.745 | 21863.135 | Y16697    | 640.866   | 711.039   | NM_017803 | 796.653   | 832.815   |
| Y10205    | 1425.716  | 906.971   | NM_001049 | 5323.283  | 4576.939  | NM_005994 | 6516.355  | 5277.879  |

|           |           |           |           |           |           |           |           |           |
|-----------|-----------|-----------|-----------|-----------|-----------|-----------|-----------|-----------|
| NM_014626 | 2399.921  | 1656.515  | AK024554  | 1230.498  | 737.823   | AB027508  | 3775.305  | 3322.161  |
| AK025277  | 1184.161  | 734.453   | AF068294  | 3446.333  | 2874.887  | NM_016331 | 1476.422  | 1583.682  |
| AF086095  | 1909.896  | 1080.932  | AK025909  | 2184.729  | 3664.927  | NM_014360 | 30617.963 | 28831.145 |
| NM_018352 | 1979.312  | 1259.702  | AK026138  | 1476.609  | 1331.472  | AB033053  | 1024.714  | 916.646   |
| AK026880  | 3016.781  | 2690.883  | AK021434  | 9447.311  | 6720.076  | NM_00735E | 4321.189  | 3883.998  |
| AF086061  | 483.803   | 538.051   | NM_016479 | 6721.729  | 5547.958  | NM_001571 | 2701.29   | 2446.882  |
| AL080092  | 2752.057  | 2762.267  | AK000933  | 12132.018 | 12019.378 | AF126749  | 408.808   | 248.357   |
| NM_005422 | 473.006   | 266.578   | Y10205    | 1429.161  | 1967.871  | NM_01810E | 1035.707  | 1017.117  |
| AL137279  | 2463.262  | 1884.865  | NM_014626 | 1728.92   | 1996.544  | NM_00340E | 978.4     | 749.939   |
| AK023981  | 2244.529  | 1400.463  | AK025277  | 1608.514  | 1867.05   | NM_00345C | 813.832   | 611.042   |
| AK025037  | 1551.792  | 873.075   | AF086095  | 1127.791  | 1226.42   | AK021577  | 1135.044  | 1159.673  |
| AK021874  | 4002.427  | 2918.03   | NM_018352 | 1587.041  | 1559.962  | AF075019  | 1108.882  | 946.932   |
| AF086384  | 66818.047 | 54901.531 | AK026880  | 2814.5    | 3128.068  | AK021498  | 2187.453  | 1838.564  |
| M77818    | 14851.816 | 9729.957  | AF086061  | 680.712   | 1215.546  | AF085874  | 3350.061  | 2774.695  |
| AF009267  | 1235.633  | 1154.11   | AL080092  | 6112.915  | 7150.797  | AF147346  | 566.006   | 591.623   |
| AK027129  | 2752.271  | 2447.709  | AF075069  | 394.557   | 518.424   | AK026959  | 1958.231  | 2166.199  |
| NM_01569E | 2589.145  | 2093.957  | NM_005422 | 505.279   | 668.779   | NM_01955E | 969.303   | 1244.369  |
| CY3Cy5    | 29633.064 | 6871.067  | AL137279  | 2515.528  | 2484.793  | NM_004753 | 6156.697  | 5117.575  |
| BG696293  | 1292.229  | 1341.044  | AK023981  | 1445.478  | 2114.339  | NM_015462 | 2886.57   | 3004.679  |
| BC013135  | 3218.802  | 3758.948  | AK025037  | 1339.614  | 1350.395  | AK026700  | 364.928   | 460.396   |
| AA281652  | 3043.5    | 4001.695  | AK021874  | 5626.045  | 5779.501  | AF086242  | 764.816   | 702.907   |
| X52479    | 622.666   | 646.883   | AF009267  | 1363.349  | 1023.401  | AF086370  | 633.928   | 561.871   |
| AW408832  | 769.375   | 1218.694  | AK027129  | 3537.806  | 3324.999  | AF086332  | 16439.174 | 14569.469 |
| AA486364  | 613.343   | 565.758   | NM_01569E | 2972.283  | 2558.874  | AJ404614  | 598.281   | 470.237   |
| M15476    | 7190.091  | 7956.205  | CY3Cy5    | 16444.123 | 1310.336  | AF086347  | 4871.734  | 4467.015  |
| U57456    | 752.982   | 918.494   | BG696293  | 6298.867  | 6515.189  | AF086388  | 1076.07   | 836.542   |
| N70057    | 5980.983  | 6780.528  | BG113873  | 1667.837  | 1322.04   | AK001043  | 3734.767  | 3331.727  |
| NM_006497 | 2198.701  | 2986.316  | BC013135  | 43123.773 | 45047.465 | AK024535  | 6615.563  | 5556.397  |
| NM_006892 | 1841.522  | 1448.792  | AI625002  | 1541.305  | 1321.304  | AL359608  | 1034.447  | 1156.206  |
| SR1       | 30073.004 | 33137.125 | AA281652  | 7754.689  | 7572.799  | NM_01649E | 16761.689 | 16771.869 |
| SR3       | 1568.729  | 1760.304  | U31905    | 3454.653  | 2865.545  | AF088025  | 616.026   | 648.735   |
| SR7       | 868.289   | 9056.882  | X52479    | 2555.527  | 2067.459  | AF085934  | 1407.33   | 1247.204  |
| SR9       | 1014.982  | 311.683   | AW408832  | 8550.092  | 8219.901  | AF075088  | 970.604   | 637.251   |
| CY3Cy5    | 27962.152 | 5618.948  | AA486364  | 7590.742  | 7522.183  | AK023971  | 16649.389 | 12995.542 |
| AY009090  | 479.188   | 475.064   | M15476    | 36251.348 | 40288.328 | AK024738  | 1031.569  | 792.053   |
| NM_002303 | 251.08    | 470.725   | U57456    | 3527.985  | 4305.733  | AL133103  | 935.897   | 831.71    |
| NM_01229E | 590.751   | 509.249   | N70057    | 61887.652 | 60065.09  | BC015321  | 1104.519  | 843.091   |
| NM_00453E | 715.824   | 815.833   | NM_006497 | 15546.172 | 18064.254 | AL157450  | 1098.325  | 710.526   |
| NM_014672 | 1062.275  | 1438.232  | NM_006892 | 2490.282  | 1846.559  | AL359594  | 1592.875  | 1480.534  |
| AB058719  | 674.68    | 167.585   | SR9       | 34122.582 | 7114.697  | AL137293  | 1770.05   | 1734.278  |
| AK025935  | 692.143   | 375.935   | CY3Cy5    | 17823.924 | 1435.522  | AL137458  | 1098.651  | 1236.412  |
| NM_016441 | 915.644   | 1126.482  | AF254067  | 3061.872  | 2940.774  | AL157490  | 16002.26  | 14842.319 |
| NM_006334 | 605.311   | 614.64    | NM_016363 | 3600.876  | 3962.793  | AL390167  | 4119.854  | 4169.662  |
| NM_00462E | 2026.81   | 2205.195  | AY009090  | 1426.316  | 1906.285  | AK023657  | 1399.595  | 1148.051  |
| NM_00717E | 2603.936  | 3001.098  | NM_005592 | 1491.241  | 656.315   | NM_014332 | 470.52    | 555.79    |
| NM_00130E | 702.353   | 1024.944  | U81380    | 941.077   | 686.181   | AF086068  | 1445.849  | 1706.481  |
| AB046861  | 458.038   | 664.122   | NM_002303 | 796.881   | 1190.052  | AF086059  | 504.912   | 726.39    |
| AF061034  | 5743.207  | 5724.24   | NM_01650E | 1079.984  | 700.074   | AF086091  | 941.376   | 309.656   |
| X03655    | 723.533   | 836.919   | AF041038  | 2651.923  | 2445.366  | AF075018  | 838.714   | 749.471   |
| AY007135  | 6068.985  | 7534.889  | NM_00453E | 2311.281  | 2214.291  | AK021838  | 11493.442 | 8031.146  |
| AF202889  | 5740.742  | 5950.418  | NM_014672 | 2795.554  | 3097.558  | AF083118  | 1257.061  | 637.62    |
| NM_005833 | 768.32    | 688.406   | AB058719  | 1559.318  | 1524.587  | AK000957  | 371.075   | 482.713   |
| NM_00310C | 939.727   | 1384.636  | AK025935  | 1167.941  | 1388.192  | AF089811  | 667.382   | 606.58    |

|           |           |           |           |           |           |           |           |           |
|-----------|-----------|-----------|-----------|-----------|-----------|-----------|-----------|-----------|
| NM_00676E | 1185.825  | 1287.244  | AB032953  | 913.334   | 1140.255  | AF147444  | 756.313   | 596.225   |
| NM_005387 | 1347.141  | 1542.967  | NM_016441 | 1378.306  | 1455.168  | AK021909  | 1252.789  | 1474.102  |
| AL137938  | 7370.146  | 8579.691  | NM_006334 | 934.769   | 1008.509  | AK022043  | 634.722   | 679.94    |
| AF228704  | 1392.75   | 1731.8    | NM_004625 | 7028.773  | 6199.757  | AK022168  | 1188.461  | 1463.383  |
| AK022746  | 768.934   | 1075.113  | NM_007179 | 19847.369 | 21285.344 | AK022327  | 871.65    | 1089.507  |
| NM_00656E | 892.16    | 1869.472  | NM_001306 | 2297.543  | 1896.974  | AK022201  | 764.566   | 912.367   |
| NM_00644C | 1553.03   | 1516.428  | AB046861  | 1549.182  | 1433.021  | AK022353  | 3402.458  | 3801.44   |
| NM_004847 | 2506.393  | 3054.144  | NM_00594C | 901.954   | 636.115   | AK026868  | 839.654   | 986.972   |
| NM_00225E | 504.128   | 480.466   | AF061034  | 12685.803 | 12207.678 | AK022200  | 4201.052  | 5162.526  |
| AF151889  | 1768.058  | 2083.353  | X03655    | 1580.984  | 1294.532  | AK023396  | 450.515   | 760.268   |
| BC034483  | 1323.808  | 773.056   | AK022746  | 3706.184  | 3706.739  | AF264625  | 528.714   | 964.606   |
| NM_00362C | 1408.16   | 1484.401  | BC034483  | 4840.543  | 2661.586  | NM_018101 | 3151.772  | 3105.515  |
| NM_01328E | 238.452   | 597.162   | NM_005227 | 3425.085  | 3198.026  | AF293366  | 1002.805  | 1134.785  |
| AA586375  | 591.942   | 785.345   | NM_00028E | 21561.596 | 15316.72  | BF526704  | 1024.88   | 1116.084  |
| BE910339  | 11674.125 | 11523.945 | NM_016454 | 17936.291 | 16540.381 | AJ491695  | 4342.985  | 4825.291  |
| NM_00028E | 4141.177  | 5587.201  | NM_00346E | 3732.364  | 4114.877  | AF052107  | 10593.234 | 12878.197 |
| NM_016454 | 2825.36   | 3921.661  | NM_00085E | 5179.999  | 4253.772  | AK022430  | 2001.609  | 2440.807  |
| NM_00346E | 564.715   | 576.263   | NM_00548C | 2364.913  | 2568.037  | unknown ( | 290.592   | 766.369   |
| NM_00085E | 4099.315  | 4663.364  | AB034694  | 1302.377  | 1592.845  | AK001022  | 1617.908  | 1784.843  |
| NM_00327E | 348.506   | 609.028   | NM_00327E | 3280.163  | 3604.614  | AL049351  | 9343.929  | 9707.86   |
| AK026404  | 465.373   | 570.721   | AK026404  | 2370.2    | 2419.28   | AK021826  | 3203.934  | 3631.887  |
| NM_00039E | 551.661   | 673.129   | NM_01794E | 9229.14   | 10282.517 | AK024541  | 416.23    | 502.758   |
| AF082657  | 1236.479  | 1621.819  | NM_00039E | 2632.646  | 2999.284  | AK025341  | 977.63    | 854.867   |
| AF297659  | 448.919   | 326.974   | AF082657  | 2567.443  | 2686.463  | AK024138  | 2270.934  | 2604.968  |
| NM_018231 | 951.11    | 739.196   | NM_006744 | 2210.39   | 2011.017  | Y10505    | 1240.713  | 1286.761  |
| NM_00058E | 1306.341  | 1123.265  | AF297659  | 1331.988  | 838.852   | U00946    | 4209.074  | 4425.741  |
| NM_004254 | 1283.524  | 1356.702  | NM_018231 | 3976.107  | 3039.637  | NM_00561E | 5230.386  | 6334.764  |
| AB046833  | 510.694   | 818.061   | NM_00058E | 5626.663  | 4730.759  | Z34290    | 673.677   | 726.729   |
| NM_014914 | 2179.487  | 2543.089  | NM_014914 | 4287.529  | 3849.649  | AF070642  | 5923.484  | 7812.873  |
| NM_004484 | 3756.767  | 4424.479  | NM_004484 | 5533.22   | 4603.679  | AK027125  | 2028.101  | 2201.924  |
| NM_01828E | 1282.972  | 1665.963  | NM_01828E | 2341.007  | 2152.63   | D16918    | 928.203   | 964.948   |
| AB018260  | 289.577   | 759.956   | AB018260  | 2872.881  | 3097.573  | D16467    | 1151.495  | 1688.394  |
| NM_01476E | 724.305   | 854.1     | NM_01476E | 3354.197  | 3348.147  | AF090932  | 852.786   | 717.677   |
| NM_016627 | 572.094   | 960.972   | NM_016627 | 5919.827  | 4907.124  | AF166125  | 2036.382  | 2765.299  |
| NM_016121 | 1501.902  | 1734.235  | NM_016121 | 4496.189  | 4849.793  | AF225425  | 2725.984  | 3442.399  |
| NM_01476E | 768.678   | 630.375   | NM_01476E | 3039.726  | 2899.5    | AF064848  | 8430.206  | 9468.77   |
| NM_00634E | 5387.649  | 6948.891  | AK026264  | 16640.148 | 15158.127 | U61089    | 2131.164  | 1874.963  |
| AK026264  | 5758.161  | 6255.888  | AF222927  | 1236.931  | 803.917   | AK001036  | 805.533   | 999.922   |
| AF222927  | 637.177   | 817.805   | NM_01434E | 4320.174  | 3249.353  | AK024858  | 5463.085  | 6160.142  |
| NM_01434E | 2244.612  | 2643.347  | NM_018217 | 13123.696 | 14472.146 | Y16697    | 341.777   | 640.008   |
| AF241831  | 677.187   | 999.603   | AF241831  | 1874.152  | 1664.297  | NM_00104E | 2500.358  | 2365.704  |
| NM_00303E | 1629.897  | 2225.863  | NM_00303E | 3677.489  | 3215.624  | AF068294  | 963.373   | 957.865   |
| U96113    | 856.609   | 844.267   | U96113    | 1205.115  | 615.997   | AK025909  | 789.516   | 833.885   |
| M31008    | 604.174   | 783.036   | NM_00273E | 2372.45   | 1843.044  | AK026138  | 1185.327  | 1461.433  |
| NM_016224 | 3022.247  | 3204.127  | M31008    | 1578.548  | 1529.15   | Z70706    | 433.967   | 645.584   |
| AB046861  | 571.752   | 631.373   | NM_00628E | 1006.278  | 796.283   | NM_00054E | 561.376   | 998.109   |
| AF061034  | 6988.327  | 7565.323  | NM_016224 | 5678.884  | 5676.778  | AK021434  | 6505.958  | 5685.958  |
| X03655    | 909.494   | 1120.768  | AB046861  | 996.793   | 1152.786  | NM_01647E | 6344.51   | 6406.653  |
| BG696293  | 2605.263  | 2489.727  | NM_00594C | 938.139   | 745.737   | AK000933  | 8009.219  | 8975.051  |
| BC013135  | 4512.167  | 5198.751  | AF061034  | 13503.603 | 14117.13  | Y10205    | 1126.472  | 1055.298  |
| AA281652  | 3563.285  | 3700.625  | X03655    | 1570.375  | 1355.599  | NM_013937 | 474.802   | 1231.822  |
| U31905    | 544.225   | 638.931   | BG696293  | 6075.905  | 5049.042  | AK025277  | 1337.089  | 1711.534  |
| X52479    | 763.763   | 916.575   | BG113873  | 1302.273  | 1247.926  | AF086095  | 752.835   | 1227.325  |



|           |           |           |           |           |           |           |           |           |
|-----------|-----------|-----------|-----------|-----------|-----------|-----------|-----------|-----------|
| AW408832  | 1868.288  | 2163.962  | BC013135  | 49958.938 | 48839.203 | NM_018352 | 828.908   | 1304.579  |
| AA486364  | 850.9     | 516.19    | AI625002  | 1355.403  | 952.701   | AK026880  | 1870.607  | 2178.641  |
| M15476    | 11054.392 | 11330.856 | AA281652  | 7514.116  | 6987.304  | AF086061  | 512.531   | 562.019   |
| U57456    | 1760.392  | 1518.466  | X52479    | 2684.729  | 2139.016  | AL080092  | 2626.574  | 3037.223  |
| N70057    | 24411.488 | 32198.633 | BC013200  | 458.205   | 398.956   | NM_005422 | 820.682   | 1009.17   |
| NM_006497 | 6823.317  | 6750.605  | AW408832  | 8054.814  | 8823.887  | AL137279  | 2220.015  | 1904.288  |
| NM_006892 | 1974.001  | 1799.064  | AA486364  | 8024.986  | 7668.326  | AK023981  | 686.363   | 436.626   |
| AK000124  | 1184.724  | 1370.208  | M15476    | 40814.715 | 37358.938 | AK025037  | 350.192   | 329.152   |
| NM_004480 | 1763.439  | 2093.454  | U57456    | 3440.58   | 2728.927  | AK021874  | 5655.76   | 3739.024  |
| BC034483  | 1504.855  | 1094.466  | N70057    | 59401.895 | 54909.004 | AK021877  | 3439.284  | 5430.077  |
| NM_003620 | 2012.051  | 1842.192  | NM_006497 | 16442.125 | 16223.947 | AF086384  | 54782.699 | 61003.984 |
| NM_013289 | 597.006   | 440.055   | NM_006892 | 2350.185  | 2120.731  | M77818    | 9900.579  | 7226.155  |
| AA586375  | 743.043   | 777.516   | AK000124  | 1613.738  | 1688.75   | AF009267  | 1349.568  | 1018.035  |
| BE910339  | 17286.859 | 15902.278 | NM_004480 | 2507.456  | 2412.689  | AK027129  | 1042.615  | 732.619   |
| AF254067  | 714.279   | 464.738   | BC034483  | 3246.369  | 1846.82   | NM_015698 | 2383.821  | 2643.677  |
| NM_016363 | 790.576   | 820.202   | AF254067  | 2741.901  | 2847.504  | CY3Cy5    | 11570.287 | 1354.667  |
| AY009090  | 604.987   | 134.085   | NM_016363 | 3408.858  | 3076.714  | BG696293  | 3339.155  | 4165.327  |
| NM_012296 | 1234.114  | 1256.25   | AY009090  | 1579.104  | 1227.556  | BG113873  | 1008.933  | 1262.422  |
| AF041038  | 668.056   | 634.52    | U81380    | 573.228   | 672.75    | BC013135  | 38101.75  | 39845.375 |
| NM_004536 | 1153.069  | 1174.275  | NM_002303 | 953.343   | 919.901   | AI625002  | 774.387   | 718.562   |
| NM_014672 | 1074.37   | 1567.934  | NM_016509 | 1221.438  | 999.047   | AA281652  | 3745.022  | 4023.246  |
| AB058719  | 665.138   | 613.925   | AF041038  | 2932.119  | 2852.751  | U31905    | 2605.169  | 3514.099  |
| AK025935  | 748.862   | 748.821   | NM_004536 | 4162.246  | 3328.694  | X52479    | 1603.289  | 1546.905  |
| AB032953  | 910.344   | 913.584   | NM_014672 | 2802.061  | 2686.682  | BC013200  | 444.153   | 443.113   |
| NM_016441 | 1662.215  | 1553.358  | AB058719  | 1771.96   | 2002.891  | AW408832  | 5023.554  | 4381.301  |
| NM_006334 | 1043.574  | 1259.909  | AK025935  | 1995.539  | 1254.764  | AA486364  | 8642.83   | 8019.138  |
| NM_004625 | 2892.761  | 3326.946  | AB032953  | 924.612   | 955.094   | M15476    | 41729.277 | 28616.109 |
| NM_007179 | 6067.152  | 5912.399  | NM_016441 | 1569.78   | 1810.559  | U57456    | 1914.563  | 1926.703  |
| NM_001306 | 1360.714  | 1532.085  | NM_006334 | 1075.119  | 1006.958  | N70057    | 38309.84  | 32990.965 |
| AF297659  | 418.159   | 460.766   | NM_003474 | 1322.071  | 1301.173  | NM_006497 | 17036.113 | 13906.104 |
| NM_018231 | 1326.992  | 1313.136  | NM_004625 | 7287.896  | 5370.408  | SR5       | 3975.811  | 3438.807  |
| NM_000583 | 3782.054  | 2866.24   | NM_007179 | 18977.631 | 15101.121 | SR7       | 4782.016  | 25808.865 |
| NM_004254 | 2199.464  | 1865.423  | NM_001306 | 2616.471  | 2133.268  | SR9       | 19283.311 | 2420.001  |
| AY007135  | 20272.094 | 17920.029 | AF297659  | 819.51    | 237.955   | CY3Cy5    | 5643.788  | 507.13    |
| AF202889  | 18846.695 | 18562.982 | NM_018231 | 4439.732  | 3751.667  | AF254067  | 2448.692  | 2994.543  |
| NM_005833 | 1598.557  | 1774.228  | NM_007163 | 308.927   | 1989.208  | NM_016363 | 3239.547  | 3217.619  |
| NM_003100 | 976.277   | 1262.817  | NM_000583 | 5534.184  | 5019.311  | AY009090  | 791.824   | 711.384   |
| NM_006768 | 1616.677  | 1788.727  | NM_006846 | 598.56    | 430.411   | NM_005592 | 477.389   | 262.811   |
| NM_013322 | 1323.863  | 1441.316  | AK022746  | 3606      | 2758.712  | U81380    | 512.817   | 561.477   |
| AB020627  | 398.697   | 502.35    | NM_002733 | 2235.984  | 2679.34   | NM_016509 | 572.391   | 519.122   |
| NM_005387 | 3176.727  | 3718      | M31008    | 1481.643  | 1428.641  | NM_012296 | 9330.594  | 12884.177 |
| AL137938  | 11233.886 | 13026.727 | NM_006288 | 1042.238  | 1097.471  | AF041038  | 3027.478  | 3481.404  |
| AF228704  | 1841.436  | 2216.277  | NM_016224 | 6561.452  | 7424.487  | NM_004536 | 3182.517  | 2784.133  |
| AK022746  | 1708.311  | 1752.171  | NM_005227 | 3287.876  | 2912.996  | NM_014672 | 2094.066  | 2017.53   |
| NM_006568 | 3170.761  | 3438.462  | NM_000286 | 18814.561 | 13003.994 | AB058719  | 2565.739  | 2322.144  |
| NM_006440 | 4798.217  | 4457.353  | NM_016454 | 17644.973 | 17168.951 | AK025935  | 1476.529  | 1245.735  |
| NM_004847 | 8366.85   | 7668.098  | NM_003469 | 4307.427  | 3987.34   | AB032953  | 752.512   | 857.314   |
| NM_002255 | 1058.305  | 778.993   | NM_016433 | 408.907   | 294.814   | NM_016441 | 1482.302  | 1494.655  |
| AF151889  | 10887.146 | 10177.843 | NM_000859 | 5979.03   | 5540.968  | NM_004625 | 7838.276  | 5529.329  |
| U96113    | 910.907   | 777.689   | NM_005480 | 2310.461  | 2548.48   | NM_007179 | 25215.811 | 19102.377 |
| NM_002733 | 566.22    | 770.862   | AB034694  | 1462.349  | 1010.923  | NM_001306 | 2160.701  | 1497      |
| M31008    | 793.446   | 850.134   | NM_003273 | 3363.002  | 3756.423  | AB046861  | 988.104   | 904.413   |
| NM_006288 | 467.551   | 455.96    | AK026404  | 2417.003  | 2566.295  | AB028173  | 362.851   | 207.165   |

|           |           |           |           |           |           |           |           |           |
|-----------|-----------|-----------|-----------|-----------|-----------|-----------|-----------|-----------|
| NM_016224 | 2866.892  | 2576.61   | NM_017948 | 8790.124  | 9907.878  | NM_005940 | 331.994   | 297.832   |
| NM_005227 | 697.603   | 671.315   | NM_000392 | 3821.522  | 5304.149  | AF061034  | 12629.656 | 9494.246  |
| NM_000286 | 4419.25   | 3345.445  | AF082657  | 2779.294  | 2066.698  | X03655    | 1289.432  | 633.819   |
| NM_016454 | 7122.409  | 6285.404  | NM_006744 | 1900.172  | 1473.86   | NM_005833 | 2017.355  | 2331.05   |
| NM_003469 | 301.149   | 770.087   | NM_006497 | 8481.178  | 7050.063  | NM_003100 | 2691.027  | 3362.951  |
| NM_016433 | 344.664   | 316.178   | NM_006892 | 2334.161  | 1980.102  | NM_006768 | 2874.44   | 3138.18   |
| NM_000859 | 3958.063  | 5046.219  | AK000124  | 1512.521  | 1962.106  | NM_013322 | 4125.602  | 4798.857  |
| NM_005480 | 305.296   | 634.065   | NM_004480 | 2189.821  | 2571.75   | NM_005387 | 3643.615  | 5964.555  |
| NM_003273 | 1295.457  | 1928.45   | NM_014914 | 6712.696  | 6007.762  | AL137938  | 19040.08  | 17544.457 |
| AK026404  | 1012.304  | 1389.265  | NM_004484 | 5758.381  | 5028.769  | AF228704  | 2128.01   | 1827.293  |
| NM_017948 | 1624.411  | 1830.829  | NM_018289 | 3015.44   | 2883.228  | AK022746  | 2391.323  | 1924.275  |
| NM_000392 | 1201.62   | 959.287   | AB018260  | 3046.653  | 3222.197  | NM_006568 | 3390.014  | 3040.249  |
| AF082657  | 2527.07   | 2336.373  | NM_014766 | 3705.998  | 3707.911  | NM_004847 | 18751.576 | 15052.24  |
| NM_006744 | 873.479   | 934.123   | NM_016627 | 5842.556  | 5504.074  | NM_002255 | 1968.851  | 1624.206  |
| NM_006497 | 5174.242  | 5494.566  | NM_016121 | 4892.119  | 4796.98   | AF151889  | 12659.191 | 9308.285  |
| NM_006892 | 1172.971  | 1184.696  | NM_014769 | 2938.317  | 2826.656  | BC034483  | 2850.473  | 1390.29   |
| AK000124  | 1397.935  | 1195.623  | AF222927  | 1045.913  | 788.603   | NM_003620 | 2413.863  | 1719.855  |
| NM_004480 | 1072.027  | 1407.895  | NM_014345 | 4411.298  | 3633.291  | NM_013289 | 297.695   | 239.538   |
| NM_014914 | 1346.111  | 1081.375  | NM_018217 | 12825.734 | 12058.336 | AA586375  | 1231.147  | 1093.702  |
| NM_004484 | 1025.245  | 1013.774  | AF241831  | 1938.206  | 1393.086  | BE910339  | 23554.201 | 12873.534 |
| NM_018289 | 1264.155  | 1057.042  | NM_003033 | 3704.138  | 2858.531  | U89715    | 655.858   | 525.344   |
| AB018260  | 635.068   | 846.837   | NM_016441 | 1609.938  | 1622.711  | NM_005227 | 1210.542  | 2035.231  |
| NM_014766 | 884.641   | 1075.874  | NM_006334 | 1173.158  | 886.1     | NM_000286 | 10768.605 | 10706.383 |
| NM_016627 | 3071.996  | 3217.641  | NM_004625 | 5441.505  | 5103.631  | NM_016454 | 9126.383  | 10207.659 |
| NM_016121 | 2455.247  | 3100.291  | NM_007179 | 14174.719 | 14762.075 | NM_003469 | 1758.83   | 2663.207  |
| NM_014769 | 1691.694  | 1740.277  | NM_001306 | 2371.499  | 3205.12   | NM_000859 | 1563.901  | 1953.209  |
| NM_006349 | 27861.336 | 28900.418 | AB046861  | 1796.461  | 2006.802  | NM_005480 | 1412.979  | 1539.756  |
| AK026264  | 10982.027 | 10650.901 | NM_005940 | 969.7     | 878.935   | AB034694  | 723.297   | 915.597   |
| AF222927  | 826.223   | 686.877   | AF061034  | 15146.186 | 16453.424 | NM_003273 | 1831.958  | 2136.089  |
| NM_014345 | 3572.893  | 3548.271  | X03655    | 1938.476  | 1822.147  | AK026404  | 1534.115  | 1495.311  |
| NM_018217 | 5108.972  | 7088.81   | BG696293  | 5774.143  | 5882.512  | NM_017948 | 5523.53   | 5518.108  |
| AF241831  | 1093.538  | 1090.044  | BG113873  | 1195.732  | 1382.237  | NM_000392 | 1583.442  | 1485.724  |
| NM_003033 | 2962.768  | 2557.15   | BC013135  | 43680.957 | 46088.379 | AF208536  | 839.104   | 1053.528  |
| NM_016441 | 1112.317  | 1176.918  | AI625002  | 1463.696  | 1110.464  | AB037848  | 1206.546  | 1230.429  |
| NM_004625 | 4158.808  | 4249.985  | AA281652  | 6244.673  | 5967.411  | AF082657  | 1728.144  | 1272.144  |
| NM_007179 | 8815.39   | 7637.43   | X52479    | 3261.229  | 2672.93   | NM_006744 | 1133.371  | 807.481   |
| NM_001306 | 982.219   | 868.042   | AW408832  | 7784.313  | 6327.496  | AF297659  | 1090.492  | 545.243   |
| AF061034  | 8483.992  | 6787.292  | AA486364  | 6554.452  | 5835.696  | NM_018231 | 5184.453  | 2828.919  |
| X03655    | 852.075   | 412.649   | M15476    | 36304.25  | 31743.91  | NM_000583 | 4608.69   | 3209.54   |
| BG696293  | 1762.437  | 2298.251  | U57456    | 3217.007  | 2648.963  | NM_004254 | 1784.579  | 1058.839  |
| BG113873  | 652.977   | 289.724   | N70057    | 54250.363 | 48212.84  | AB046833  | 438.949   | 316.857   |
| BC013135  | 16212.147 | 15665.279 | AK022746  | 2352.385  | 2160.915  | NM_014914 | 3940.768  | 5012.984  |
| AI625002  | 765.628   | 605.892   | BC034483  | 4707.521  | 2532.389  | NM_004484 | 3378.478  | 4161.929  |
| AA281652  | 7042.667  | 6599.343  | AF254067  | 3329.063  | 3163.015  | NM_018289 | 2090.555  | 2101.615  |
| U31905    | 1725.646  | 1629.763  | NM_016363 | 3100.074  | 1897.072  | AB018260  | 1726.465  | 2266.158  |
| X52479    | 2282.529  | 1631.393  | NM_005592 | 776.614   | 1220.658  | NM_014766 | 2277.625  | 2624.269  |
| AW408832  | 5669.438  | 5546.769  | U81380    | 778.355   | 724.627   | NM_016627 | 2842.6    | 2785.123  |
| AA486364  | 5184.348  | 5188.888  | NM_016509 | 1180.428  | 862.349   | NM_016121 | 2140.869  | 2349.731  |
| M15476    | 21710.424 | 21334.939 | AF041038  | 2817.796  | 2274.333  | NM_014769 | 3515.395  | 2839.776  |
| U57456    | 2705.868  | 2677.314  | NM_004536 | 3300.262  | 2613.19   | NM_006349 | 20212.074 | 20161.828 |
| N70057    | 44410.215 | 45037.82  | NM_014672 | 2438.512  | 2449.886  | AK026264  | 14603.697 | 11721.275 |
| AK022746  | 1430.624  | 1104.239  | AB058719  | 1614.573  | 1238.287  | AF222927  | 712.169   | 584.376   |
| NM_006568 | 3013.824  | 2993.102  | AK025935  | 1027.511  | 982.389   | NM_014345 | 3458.807  | 3106.999  |

|           |           |           |           |           |           |           |           |           |
|-----------|-----------|-----------|-----------|-----------|-----------|-----------|-----------|-----------|
| NM_00644C | 2544.569  | 2312.936  | AB032953  | 1194.352  | 669.29    | NM_018217 | 6991.55   | 6442.122  |
| NM_004847 | 9563.956  | 8732.478  | AF082657  | 2274.208  | 2796.634  | NM_003033 | 2856.032  | 2613.585  |
| NM_00225E | 1449.178  | 891.728   | NM_006744 | 1992.361  | 2399.546  | U96113    | 615.278   | 463.715   |
| AF151889  | 5249.906  | 3673.297  | AF297659  | 1348.389  | 666.299   | NM_002733 | 1244.912  | 922.968   |
| BC034483  | 1323.918  | 695.325   | NM_018231 | 4728.027  | 4058.333  | M31008    | 999.687   | 643.894   |
| AA586375  | 838.045   | 643.678   | NM_000583 | 6225.876  | 6166.986  | NM_00628E | 746.545   | 440.29    |
| BE910339  | 14012.033 | 13061.317 | AF222927  | 749.567   | 635.494   | NM_016224 | 4460.676  | 2990.655  |
| AF254067  | 774.211   | 1197.152  | NM_01434E | 4747.593  | 5106.052  | AB046861  | 2800.683  | 4813.349  |
| NM_016363 | 2045.35   | 1553.161  | NM_018217 | 14285.258 | 15109.576 | AB028173  | 356.847   | 1211.272  |
| AY009090  | 1063.1    | 920.573   | AF241831  | 1976.01   | 2262.564  | NM_00594C | 448.681   | 530.415   |
| NM_002303 | 713.794   | 510.988   | NM_003033 | 3540.345  | 4093.238  | AF061034  | 14400.222 | 14646.583 |
| NM_01650E | 998.227   | 1000.755  | U96113    | 1325.874  | 1234.027  | X03655    | 1864.619  | 2024.866  |
| NM_01229E | 13369.613 | 11351.517 | NM_002733 | 2378.455  | 2410.014  | BG696293  | 4201.63   | 4509.569  |
| AF041038  | 1550.691  | 1312.938  | M31008    | 1279.112  | 1755.626  | AA777410  | 740.526   | 542.206   |
| NM_00453E | 1729.65   | 1374.394  | NM_00628E | 1409.094  | 1214.396  | BG113873  | 1220.88   | 1334.997  |
| NM_014672 | 2503.028  | 2293.394  | NM_016224 | 6880.507  | 8451.678  | BC013135  | 39218.266 | 39682.488 |
| AB058719  | 1166.244  | 1224.453  | NM_005227 | 3794.594  | 3792.282  | AI625002  | 855.33    | 737.56    |
| AK025935  | 1013.79   | 1218.357  | NM_00028E | 19405.436 | 16728.871 | H07899    | 388.627   | 326.107   |
| AB032953  | 841.107   | 713.788   | NM_016454 | 19222.908 | 19824.857 | AA281652  | 3797.588  | 2860.12   |
| AF082657  | 1720.44   | 1964.242  | NM_00346E | 5071.994  | 6253.158  | U31905    | 2942.406  | 2740.91   |
| AF297659  | 299.735   | 153.704   | NM_016433 | 709.727   | 903.256   | X52479    | 2271.598  | 1955.332  |
| NM_018231 | 1297.335  | 1094.437  | NM_00085E | 7873.163  | 7399.935  | AW408832  | 5618.032  | 5737.57   |
| NM_000583 | 2154.261  | 2145.701  | NM_00548C | 2561.573  | 2324.444  | AA486364  | 11187.737 | 16315.547 |
| NM_004254 | 1633.969  | 1607.267  | AB034694  | 1570.302  | 1381.05   | M15476    | 40703.883 | 30508.357 |
| AY007135  | 32857.121 | 39785.359 | NM_003273 | 3799.11   | 3942.597  | U57456    | 2268.365  | 1848.852  |
| AF202889  | 31257.447 | 31849.801 | AK026404  | 2079.683  | 1726.907  | NM_006892 | 1487.432  | 1206.168  |
| NM_005833 | 3423      | 3367.877  | NM_01794E | 7518.331  | 6904.975  | AK000124  | 1463.291  | 1948.739  |
| NM_00310C | 6027.469  | 6787.599  | NM_000392 | 3132.811  | 2778.834  | NM_00448C | 1152.213  | 638.036   |
| NM_006344 | 557.069   | 285.817   | NM_000267 | 2603.229  | 3311.952  | BC034483  | 3294.37   | 2983.024  |
| NM_00676E | 4549.084  | 5292.834  | NM_016603 | 4187.331  | 4262.565  | NM_00362C | 2681.635  | 2808.68   |
| NM_013322 | 6440.326  | 6879.53   | NM_00439E | 60195.969 | 52964.379 | AA586375  | 1381.649  | 1784.203  |
| AB020627  | 2345.423  | 2144.783  | NM_016181 | 1332.746  | 1394.703  | BE910339  | 26155.279 | 25376.256 |
| NM_002003 | 1208.236  | 1094.169  | NM_01496E | 8383.011  | 9310.985  | U89715    | 828.949   | 849.577   |
| NM_005387 | 5996.077  | 5477.303  | NM_014962 | 1644.458  | 2159.272  | AF254067  | 2596.546  | 2762.72   |
| NM_00684E | 527.152   | 685.099   | D87684    | 13738.326 | 11510.991 | NM_016363 | 3575.247  | 3621.5    |
| AL137938  | 28313.529 | 38564.742 | NM_006317 | 55930.281 | 53074.219 | AY009090  | 796.733   | 856.403   |
| AF228704  | 3882.504  | 3497.17   | NM_00121E | 7548.404  | 7232.904  | NM_005592 | 664.385   | 385.706   |
| NM_00421E | 4335.704  | 5480.555  | AK000124  | 1822.893  | 1998.274  | U81380    | 584.399   | 691.137   |
| NM_01434E | 1738.266  | 1586.594  | NM_00448C | 2270.885  | 2810.899  | NM_01650E | 993.373   | 671.811   |
| NM_018217 | 972.497   | 1145.142  | NM_014914 | 7185.429  | 7457.57   | NM_01229E | 8665      | 8054.196  |
| AF241831  | 766.879   | 671.715   | NM_004484 | 6143.354  | 6374.11   | AF041038  | 3311.479  | 3199.314  |
| NM_003033 | 1529.109  | 1360.085  | NM_01828E | 3566.079  | 4396.934  | NM_00453E | 4324.425  | 3814.71   |
| NM_002733 | 663.361   | 708.279   | AB018260  | 4007.085  | 5213.717  | NM_014672 | 2331.73   | 2336.324  |
| M31008    | 626.016   | 551.649   | NM_01598E | 786.818   | 678.354   | AB058719  | 2388.057  | 2395.086  |
| NM_016224 | 2539.113  | 3332.666  | NM_01476E | 3942.397  | 3067.497  | AK025935  | 1482.792  | 1205.75   |
| NM_005227 | 1220.157  | 1254.712  | NM_016627 | 5462.423  | 4882.844  | AB032953  | 788.027   | 544.726   |
| NM_00028E | 6217.635  | 6027.37   | NM_016121 | 4155.521  | 4091.056  | NM_016441 | 1893.346  | 1217.837  |
| NM_016454 | 14267.782 | 14990.173 | NM_00634E | 27721.639 | 28469.129 | NM_006334 | 1129.783  | 1034.207  |
| NM_00346E | 2687.935  | 2740.363  | AK026264  | 15857.28  | 13331.143 | NM_00462E | 8890.744  | 5766.646  |
| NM_016433 | 621.116   | 600.458   | NM_00438E | 2651.742  | 2656.251  | NM_00717E | 26728.914 | 19659.844 |
| NM_00085E | 7353.38   | 7698.539  | NM_00587E | 31067.131 | 35902.359 | NM_00130E | 1738.677  | 1043.43   |
| NM_00548C | 2281.134  | 2637.599  | AF284436  | 1182.979  | 1380.921  | AF297659  | 1485.71   | 1827.985  |
| AB034694  | 1143.121  | 1576.308  | NM_00444E | 1345.785  | 1237.942  | NM_018231 | 3286.179  | 4169.511  |

|           |           |           |           |           |           |           |           |           |
|-----------|-----------|-----------|-----------|-----------|-----------|-----------|-----------|-----------|
| NM_003273 | 3381.305  | 3355.477  | U39657    | 10946.825 | 11676.671 | NM_000583 | 4574.42   | 4587.199  |
| AK026404  | 2627.229  | 2529.717  | NM_016340 | 2227.426  | 3214.127  | NM_004254 | 2550.462  | 3228.469  |
| NM_017948 | 5587.248  | 8294.428  | NM_018373 | 663.713   | 861.742   | NM_005833 | 1583.115  | 2009.743  |
| NM_000392 | 3267.916  | 4274.95   | NM_006449 | 9599.521  | 8927.704  | NM_003100 | 4188.517  | 4419.53   |
| NM_016603 | 863.804   | 1054.836  | BF216030  | 7484.677  | 6467.898  | NM_006768 | 3686.88   | 3409.003  |
| NM_004398 | 11966.116 | 9367.196  | NM_002757 | 3250.765  | 3815.515  | AB020627  | 1581.545  | 1662.95   |
| NM_016181 | 730.536   | 861.553   | NM_003684 | 5267.537  | 5467.166  | NM_005387 | 4113.598  | 4617.356  |
| NM_014966 | 1285.844  | 1410.016  | NM_005657 | 2363.967  | 3965.479  | AL137938  | 19571.047 | 16309.77  |
| NM_014962 | 444.996   | 553.037   | NM_001715 | 3033.121  | 2490.501  | AF228704  | 2212.618  | 1820.885  |
| D87684    | 4239.914  | 2634.588  | NM_004395 | 8776.264  | 7229.908  | AK022746  | 2510.804  | 1628.895  |
| NM_006317 | 31738.949 | 37393.008 | NM_002663 | 1296.987  | 1290.923  | NM_006568 | 3432.015  | 2442.827  |
| NM_001219 | 3881.975  | 4724.366  | NM_006094 | 3779.523  | 4124.852  | NM_006440 | 4863.575  | 3390.145  |
| AK000124  | 1269.652  | 1471.546  | AF080158  | 2134.518  | 2056.553  | NM_002255 | 2123.626  | 1510.176  |
| NM_004480 | 1801.357  | 1785.036  | AB037794  | 1098.183  | 959.457   | AF151889  | 11468.821 | 7581.15   |
| NM_014914 | 4073.52   | 4437.557  | NM_005935 | 1669.686  | 2523.783  | U96113    | 702.617   | 936.631   |
| NM_004484 | 3683.182  | 4630.445  | NM_012415 | 1592.167  | 1773.81   | M31008    | 895.323   | 856.334   |
| NM_018289 | 1530.31   | 1862.597  | NM_014178 | 7293.405  | 7585.215  | NM_006288 | 684.443   | 1088.149  |
| AB018260  | 2092.176  | 2433.827  | NM_004789 | 1452.956  | 1633.035  | NM_016224 | 5253.468  | 5751.083  |
| NM_014766 | 3429.501  | 3645.752  | AB011112  | 4896.283  | 5370.864  | NM_005227 | 1946.533  | 2285.809  |
| NM_016627 | 5450.558  | 5058.655  | NM_018669 | 2768.011  | 3574.316  | NM_000286 | 10705.615 | 9458.804  |
| NM_016121 | 4057.316  | 3778.284  | NM_002623 | 3009.212  | 3553.015  | NM_016454 | 9750.688  | 9193.438  |
| NM_014769 | 2283.819  | 2446.776  | NM_018844 | 8594.594  | 8372.85   | NM_003469 | 3030.862  | 2957.538  |
| NM_006349 | 24426.148 | 31166.723 | AF279778  | 1670.354  | 1221.346  | NM_000859 | 2592.866  | 2335.164  |
| AK026264  | 11488.088 | 11169.425 | NM_015477 | 6909.98   | 7129.295  | NM_005480 | 1627.234  | 1415.601  |
| NM_004385 | 934.709   | 806.07    | AK023212  | 5490.195  | 5639.668  | AB034694  | 512.542   | 658.723   |
| NM_005876 | 6334.405  | 5283.126  | AL353943  | 1501.086  | 1988.993  | NM_003273 | 1683.319  | 1774.266  |
| NM_004445 | 1272.191  | 1529.009  | BE568801  | 4030.117  | 4580.067  | AK026404  | 1709.911  | 1615.455  |
| U39657    | 5105.345  | 5434.848  | AB002336  | 1401.345  | 1556.484  | NM_017948 | 5429.688  | 4874.836  |
| NM_016340 | 1120.173  | 1344.21   | NM_006082 | 63215.934 | 64736.82  | NM_000392 | 1957.95   | 1761.93   |
| NM_006449 | 6919.701  | 8545.165  | NM_006633 | 1744.241  | 1381.436  | AF208536  | 1087.182  | 791.961   |
| BF216030  | 5140.245  | 4930.469  | NM_016262 | 4024.919  | 3624.309  | AB037848  | 873.85    | 641.968   |
| NM_002757 | 1822.987  | 2249.088  | AB011116  | 12891.562 | 12704.851 | AF082657  | 1694.762  | 1245.091  |
| NM_003684 | 2776.877  | 2816.047  | AB037858  | 1560.416  | 1416.415  | NM_006744 | 1043.78   | 659.641   |
| NM_005657 | 2010.456  | 1951.818  | NM_005775 | 2796.882  | 1915.267  | NM_006497 | 22354.621 | 30885.857 |
| NM_017671 | 847.919   | 787.391   | NM_017639 | 1190.973  | 416.332   | NM_006892 | 1397.103  | 2001.709  |
| NM_018639 | 3918.708  | 5147.289  | NM_003270 | 2028.576  | 1850.162  | AK000124  | 1441.907  | 1902.076  |
| AF264628  | 654.741   | 824.694   | AL157437  | 13271.636 | 13419.299 | NM_004480 | 1573.775  | 1735.558  |
| NM_001715 | 1726.601  | 1743.677  | AJ245539  | 861.142   | 1737.546  | NM_014914 | 4572.046  | 4431.145  |
| NM_004395 | 5130.197  | 4231.131  | AF050199  | 793.992   | 556.445   | NM_004484 | 3771.567  | 3383.297  |
| NM_002663 | 751.088   | 837.848   | NM_003340 | 26221.162 | 30299.861 | NM_018289 | 2314.685  | 1887.822  |
| NM_006094 | 3437.588  | 3483.682  | U46752    | 1790.344  | 1833.855  | AB018260  | 1632.707  | 1748.342  |
| AF080158  | 2957.543  | 3282.679  | NM_002794 | 22932.098 | 26153.459 | NM_014766 | 2138.018  | 1885.138  |
| AB037794  | 863.405   | 792.04    | BF244646  | 48716.723 | 47873.449 | NM_016627 | 2871.997  | 2789.59   |
| NM_005935 | 1735.506  | 2002.446  | NM_002055 | 3221.231  | 3392.994  | NM_016121 | 2803.808  | 2403.83   |
| NM_012415 | 385.546   | 351.616   | NM_005803 | 9371.565  | 8809.226  | NM_014769 | 3862.801  | 3099.548  |
| NM_014178 | 1354.522  | 848.164   | NM_015515 | 7656.596  | 4976.484  | NM_006349 | 20831.006 | 19970.16  |
| NM_001251 | 8599.496  | 6489.024  | AK001579  | 16377.807 | 14840.535 | AK026264  | 15962.992 | 12343.441 |
| NM_004789 | 895.739   | 948.464   | NM_002670 | 5602.016  | 6264.266  | AF222927  | 793.232   | 519.558   |
| AB011112  | 3006.589  | 2888.884  | AF163302  | 4724.396  | 3502.437  | NM_014345 | 3092.417  | 2092.357  |
| NM_018669 | 1725.895  | 2001.807  | NM_006408 | 2269.747  | 2291.052  | NM_018217 | 7623.149  | 4907.701  |
| AF279778  | 1345.086  | 1302.205  | NM_002419 | 4556.083  | 3018.398  | AF241831  | 1633.109  | 1001.848  |
| NM_015477 | 4954.208  | 4646.781  | NM_001989 | 6196.4    | 6364.379  | NM_003033 | 2053.879  | 1287.812  |
| AK023212  | 2637.314  | 2529.749  | NM_002653 | 13061.49  | 16872.973 | NM_016441 | 1375.65   | 2219.88   |

|           |           |           |           |           |           |           |           |           |
|-----------|-----------|-----------|-----------|-----------|-----------|-----------|-----------|-----------|
| AL353943  | 1128.058  | 1254.738  | NM_005604 | 2033.388  | 1741.813  | NM_004625 | 6852.5    | 7110.474  |
| BE568801  | 1629.724  | 2072.29   | S69023    | 2102.241  | 2329.668  | NM_007179 | 21757.504 | 26844.389 |
| AB002336  | 742.522   | 687.341   | M82882    | 238.671   | 1209.512  | NM_001306 | 2144.867  | 2462.792  |
| NM_013286 | 2577.316  | 3266.083  | NM_006885 | 1042.803  | 877.982   | AB046861  | 905.65    | 1239.513  |
| NM_006082 | 72058.508 | 71148.195 | M25077    | 6155.585  | 5835.2    | AB028173  | 446.671   | 522.196   |
| NM_016262 | 1739.467  | 1520.817  | NM_018702 | 5157.914  | 5222.664  | NM_005940 | 543.463   | 1084.106  |
| AB011116  | 8062.375  | 7108.225  | M62843    | 852.403   | 1233.769  | AF061034  | 12372.402 | 13140.359 |
| AB037858  | 1088.961  | 961.052   | U96131    | 823.693   | 799.577   | X03655    | 1607.316  | 1683.78   |
| NM_005775 | 2840.231  | 2231.884  | NM_001032 | 64376.238 | 57898.266 | BG696293  | 4310.23   | 3884.725  |
| NM_017639 | 697.414   | 512.254   | NM_018084 | 31274.316 | 35316.797 | AA777410  | 427.17    | 646.266   |
| NM_003270 | 1321.668  | 1341.205  | NM_017840 | 36660.027 | 43140.832 | BG113873  | 1255.533  | 950.194   |
| AL157437  | 3311.612  | 2307.335  | AK001052  | 62804.938 | 50090.16  | BC013135  | 48706.996 | 45184.434 |
| L25629    | 522.349   | 438.384   | NM_001415 | 64308.547 | 50224.48  | AI625002  | 829.432   | 497.553   |
| AB033052  | 4476.417  | 4765.704  | NM_004564 | 9497.406  | 7768.549  | H07899    | 301.443   | 150.451   |
| NM_018227 | 2003.919  | 2368.295  | NM_000968 | 63616.688 | 52571.406 | AA281652  | 4303.362  | 3645.445  |
| NM_003340 | 20990.844 | 22398.539 | AL355743  | 5241.566  | 5179.002  | U31905    | 3289.508  | 2733.753  |
| U46752    | 725.406   | 756.037   | X81896    | 744.147   | 1345.526  | X52479    | 2526.887  | 1920.533  |
| NM_002794 | 10127.896 | 10127.106 | AF070595  | 1037.67   | 886.707   | BC013200  | 452.054   | 373.754   |
| BF244646  | 22584.023 | 20086.633 | NM_002202 | 2575.329  | 3013.209  | AW408832  | 5039.09   | 3482.451  |
| AK024030  | 3136.934  | 2782.7    | NM_006005 | 2285.426  | 2524.398  | AA486364  | 10072.103 | 7576.665  |
| AF275808  | 814.27    | 886.634   | NM_002629 | 51380.105 | 49910.375 | M15476    | 37216.605 | 22964.83  |
| AK024038  | 5501.038  | 6164.588  | NM_014364 | 2096.375  | 1740.403  | U57456    | 1987.859  | 1406.997  |
| NM_002055 | 1405.234  | 1451.881  | NM_001685 | 57144.004 | 51320.02  | N70057    | 37365.273 | 32335.66  |
| NM_005803 | 5877.78   | 6728.029  | NM_000284 | 8693.167  | 8530.907  | AK022746  | 2393.577  | 2966.755  |
| NM_015515 | 4700.492  | 4278.608  | NM_004813 | 5763.253  | 5924.306  | NM_006440 | 4271.208  | 5098.836  |
| AK001579  | 11305.432 | 10913.331 | AK023008  | 3203.593  | 2932.233  | NM_002255 | 1380.466  | 1466.165  |
| NM_002670 | 5660.442  | 4760.708  | NM_004689 | 6444.112  | 6555.904  | AF151889  | 10811.076 | 13210.63  |
| AF163302  | 3193.32   | 2684.989  | AB040956  | 5272.937  | 6109.868  | BC034483  | 2062.198  | 1347.565  |
| NM_006408 | 2202.149  | 1876.525  | Z11773    | 2381.538  | 1940.456  | NM_003620 | 1006.179  | 1067.054  |
| NM_002419 | 4699.347  | 4409.355  | NM_003446 | 30463.1   | 31066.857 | NM_013289 | 309.375   | 537.528   |
| NM_001989 | 2702.492  | 2507.665  | NM_001485 | 7105.635  | 5109.7    | AA586375  | 1137.244  | 1173.232  |
| NM_002653 | 3553.455  | 3394.741  | NM_002702 | 1254.77   | 326.144   | BE910339  | 31231.432 | 25330.121 |
| NM_005604 | 801.523   | 678.652   | AK021510  | 1152.071  | 1242.368  | U89715    | 608.589   | 596.731   |
| S69023    | 1085.757  | 1011.019  | AK022711  | 2270.63   | 2297.393  | AF254067  | 2592.6    | 2483.356  |
| NM_017908 | 1754.363  | 2125.531  | AK023039  | 547.4     | 1400.303  | NM_016363 | 4240.88   | 2907.937  |
| M25077    | 3704.526  | 3565.77   | AL109688  | 2719.027  | 2607.2    | AY009090  | 957.036   | 1035.889  |
| NM_018702 | 2915.078  | 2908.167  | AF074981  | 1155.396  | 1154.556  | NM_005592 | 589.922   | 411.745   |
| M62843    | 852.728   | 561.33    | AK025863  | 1486.663  | 1341.503  | U81380    | 558.703   | 456.891   |
| NM_004593 | 1863.66   | 2040.23   | D42044    | 3158.809  | 4377.555  | NM_002303 | 609.17    | 384.696   |
| NM_005778 | 8241.882  | 9147.064  | AF038185  | 5705.842  | 5275.637  | NM_016509 | 897.103   | 784.471   |
| NM_001032 | 57111.445 | 56265.684 | AK025305  | 1695.242  | 1834.09   | NM_012296 | 8741.479  | 7357.582  |
| NM_018084 | 7971.405  | 8698.131  | AK025665  | 10085.245 | 11347.353 | AF041038  | 3583.007  | 2899.118  |
| NM_017840 | 26047.889 | 29027.201 | AF191492  | 1050.787  | 319.25    | NM_004536 | 3244.165  | 2426.942  |
| AK001052  | 56755.805 | 53401.063 | BC037530  | 22919.17  | 20563.512 | NM_014672 | 1946.201  | 1549.341  |
| NM_001415 | 59829.48  | 53702.23  | NM_014851 | 7768.947  | 5743.787  | AB058719  | 2126.734  | 2105.732  |
| NM_004564 | 1170.666  | 1291.609  | AK022811  | 767.727   | 951.62    | AK025935  | 1349.438  | 907       |
| NM_000968 | 62604.578 | 58414.203 | AL117635  | 2051.853  | 2178.894  | AB032953  | 679.315   | 509.859   |
| AL355743  | 3651.582  | 3446.029  | AK025332  | 1993.794  | 2460.661  | AF208536  | 1208.008  | 1342.315  |
| L77571    | 587.575   | 635.951   | AB020735  | 1022.285  | 881.583   | AB037848  | 829.912   | 1211.018  |
| X81896    | 680.481   | 611.951   | AJ011596  | 5011.804  | 5483.103  | AF082657  | 1862.557  | 1964.292  |
| NM_002202 | 1951.602  | 2601.521  | U17639    | 869.909   | 1926.573  | NM_006744 | 1043.096  | 1288.543  |
| NM_002629 | 42512.527 | 46050.414 | X51779    | 1589.669  | 1924.51   | AF297659  | 938.203   | 1195.834  |
| NM_014364 | 1415.642  | 1395.112  | AL049254  | 1410.889  | 1788.35   | NM_018231 | 4994.025  | 5529.44   |

|           |           |           |           |           |           |           |           |           |
|-----------|-----------|-----------|-----------|-----------|-----------|-----------|-----------|-----------|
| NM_001685 | 44778.957 | 49156.227 | Z83954    | 3776.796  | 4249.359  | NM_000583 | 3987.313  | 3535.528  |
| NM_000284 | 6838.158  | 6375.242  | M74093    | 3908.759  | 3534.27   | NM_004254 | 2691.314  | 2936.589  |
| NM_004813 | 2554.113  | 3268.289  | M28219    | 3295.426  | 3257.087  | AF202889  | 90.811    | 1206.776  |
| AK023008  | 2042.343  | 2026.767  | L17326    | 1125.703  | 1112.558  | NM_005387 | 3645.78   | 2926.978  |
| NM_004689 | 4924.959  | 3680.385  | D17207    | 4893.271  | 4505.743  | AF228704  | 2141.663  | 1547.694  |
| NM_006026 | 11046.357 | 7855.184  | D55640    | 2569.219  | 2417.983  | AF222927  | 714.371   | 1114.296  |
| BG339855  | 1122.165  | 1006.663  | AF085897  | 1069.402  | 798.424   | NM_014345 | 3220.859  | 3859.15   |
| AB040956  | 1737.268  | 2068.243  | AF085822  | 1068.199  | 1122.362  | NM_018217 | 7828.036  | 9887.366  |
| NM_016587 | 1876.068  | 1894.924  | AK021551  | 2429.067  | 2637.279  | AF241831  | 1835.395  | 3570.037  |
| NM_003516 | 7288.688  | 9964.447  | AK025117  | 1021.344  | 820.958   | NM_003033 | 2127.917  | 2826.283  |
| NM_017953 | 2016.13   | 1952.887  | AK022357  | 4212.774  | 9477.889  | U96113    | 739.779   | 645.81    |
| Z11773    | 1963.844  | 2472.722  | AK000024  | 12806.159 | 12681.777 | NM_002733 | 897.676   | 1496.363  |
| NM_006914 | 783.044   | 338.853   | AK026693  | 1454.604  | 1735.987  | M31008    | 966.319   | 1397.421  |
| NM_003446 | 29283.963 | 25435.043 | AK000794  | 4746.703  | 4349.065  | NM_006288 | 916.765   | 1110.38   |
| NM_001485 | 4137.249  | 2825.342  | AK000950  | 3711.113  | 4179.951  | NM_016224 | 5688.823  | 5224.341  |
| NM_002702 | 1015.349  | 897.975   | AK026812  | 2552.896  | 2376.403  | NM_005227 | 2254.113  | 1867.65   |
| AK021510  | 1115.16   | 779.242   | AK000176  | 1288.447  | 1701.96   | NM_000286 | 9088.28   | 5351.1    |
| AK022711  | 977.496   | 1035.203  | AK000831  | 4090.481  | 4251.325  | NM_016454 | 9854.619  | 8423.639  |
| AK024310  | 522.506   | 492.361   | AK000981  | 1246.484  | 1365.528  | NM_003466 | 2841.566  | 2630.568  |
| AF074981  | 512.534   | 607.122   | AK025054  | 2687.12   | 2363.723  | NM_000859 | 2704.481  | 2420.344  |
| AK025863  | 1113.878  | 1353.846  | AK024556  | 1407.062  | 1511.674  | NM_005480 | 1341.197  | 1452.502  |
| D42044    | 2646.199  | 2955.547  | AK024935  | 1225.347  | 818.011   | AB034694  | 433.739   | 399.63    |
| AK023009  | 734.035   | 582.181   | AK025325  | 3720.586  | 3546.917  | NM_003273 | 1837.23   | 1512.802  |
| AF038185  | 4060.217  | 3256.214  | S75762    | 1131.049  | 2640.02   | AK026404  | 1582.869  | 1243.068  |
| AB027011  | 8230.776  | 6507.344  | U50531    | 5016.517  | 5659.203  | NM_017948 | 5163.056  | 3891.067  |
| AK025305  | 1482.376  | 967.031   | NM_005318 | 20818.582 | 23711.223 | NM_000392 | 2232.285  | 1906.619  |
| AL117415  | 10841.186 | 10272.563 | NM_005421 | 2278.76   | 2151.356  | NM_000267 | 2646.063  | 3453.649  |
| AK023616  | 1014.432  | 1160.862  | AK024580  | 26915.975 | 25659.891 | NM_016603 | 2401.168  | 3106.155  |
| AK025665  | 9436.114  | 10471.705 | AL442093  | 8484.165  | 8405.418  | NM_004398 | 45094.414 | 45243.828 |
| AL355694  | 1108.797  | 783.697   | AK024331  | 1310.922  | 1314.018  | NM_016181 | 500.749   | 888.109   |
| AF191492  | 662.065   | 598.974   | AK024452  | 1563.978  | 1542.082  | NM_014966 | 3924.917  | 4976.169  |
| BC037530  | 16381.388 | 13306.534 | AJ249975  | 533.269   | 630.023   | NM_014962 | 1384.455  | 1317.801  |
| NM_014851 | 5353.783  | 4420.52   | AK021733  | 1949.359  | 1930.07   | D87684    | 7535.39   | 5989.326  |
| AK022811  | 949.584   | 335.64    | AK000543  | 14373.957 | 14693.642 | NM_001586 | 372.356   | 586.248   |
| AL117635  | 1276.636  | 880.218   | AK026683  | 4138.291  | 4042.95   | NM_006317 | 37528.516 | 38328.359 |
| AK025332  | 1571.884  | 1522.115  | D16906    | 6512.308  | 7971.636  | NM_001219 | 4059.01   | 4247.014  |
| D17010    | 2496.489  | 2717.55   | AL079309  | 5196.738  | 6257.7    | AK000124  | 613.848   | 632.22    |
| AJ011596  | 1972.554  | 1759.91   | AK022335  | 1448.335  | 1335.885  | NM_004480 | 1358.991  | 1632.875  |
| AL049215  | 17708.186 | 14125.997 | AL110280  | 2662.316  | 2604.386  | NM_014914 | 4688.349  | 3487.012  |
| X51779    | 1165.587  | 1140.208  | NM_017458 | 1485.552  | 1994.159  | NM_004484 | 3530.04   | 4447.608  |
| X81001    | 504.924   | 470.912   | AF086196  | 1076.813  | 1005.182  | NM_018289 | 3065.252  | 2611.171  |
| AL049254  | 841.357   | 894.28    | AF075087  | 1150.454  | 2325.404  | AB018260  | 1777.859  | 1696.931  |
| Z83954    | 3244.538  | 2734.233  | NM_005542 | 45063.207 | 47349.945 | NM_014766 | 2389.897  | 2256.323  |
| M74093    | 3071.851  | 2752.051  | X95095    | 2338.354  | 3191.807  | NM_016627 | 2722.491  | 2218.778  |
| M28219    | 2595.275  | 2796.135  | AF078528  | 18714.813 | 17121.51  | NM_016121 | 2476.909  | 2387.586  |
| L17326    | 958.634   | 1064.487  | AF161411  | 2976.667  | 3346.327  | NM_014769 | 2979.44   | 2586.615  |
| D17207    | 3236.829  | 3062.6    | AK000450  | 21695.049 | 21473.092 | NM_006349 | 19303.857 | 16830.6   |
| D55640    | 1996.388  | 1955.921  | NM_018224 | 11750.933 | 9186.125  | AK026264  | 15528.588 | 11772.397 |
| AF085897  | 985.466   | 977.079   | NM_019896 | 4986.416  | 4754.903  | NM_004385 | 3818.451  | 4635.498  |
| AF085822  | 1453.76   | 1175.11   | NM_018569 | 4228.76   | 4405.394  | NM_005876 | 39628.082 | 42708.176 |
| AK021551  | 2408.98   | 1923.162  | J04118    | 1183.73   | 1143.953  | AF039697  | 371.496   | 437.896   |
| AK025117  | 1337.298  | 920.684   | NM_000730 | 6161.862  | 7212.3    | AF284436  | 665.43    | 672.78    |
| AK000024  | 5649.837  | 5374.147  | U31734    | 51401.051 | 49416.418 | NM_004445 | 732.712   | 710.023   |

|           |           |           |           |           |           |           |           |           |
|-----------|-----------|-----------|-----------|-----------|-----------|-----------|-----------|-----------|
| AK026693  | 2094.282  | 1684.703  | AK026569  | 71015.125 | 61927.164 | U39657    | 6202.396  | 7250.01   |
| NM_01228E | 676.223   | 726.703   | AL049974  | 1687.086  | 1995.628  | NM_01634C | 1446.304  | 1564.826  |
| AK000794  | 2534.604  | 2069.915  | AK022953  | 828.447   | 1484.428  | NM_01837E | 525.742   | 639.726   |
| AK000950  | 2681.203  | 2184.962  | AF009319  | 2888.146  | 2502.001  | NM_00644E | 5386.898  | 4834.123  |
| AK026812  | 1626.206  | 1674.871  | AL365519  | 959.632   | 1013.522  | BF216030  | 4690.21   | 3995.072  |
| AK000176  | 1103.974  | 856.994   | NM_01846E | 6052.494  | 5536.259  | NM_002757 | 2074.265  | 1812.158  |
| AK000831  | 2048.531  | 2030.807  | Z36845    | 1755.892  | 1447.467  | NM_003684 | 2261.152  | 1906.901  |
| AK000981  | 886.496   | 901.257   | M73792    | 958.608   | 1088.616  | NM_005657 | 1382.446  | 1316.657  |
| AK024615  | 758.799   | 557.371   | NM_016127 | 9817.704  | 9056.423  | NM_017671 | 1114.552  | 1129.789  |
| AK025054  | 2468.788  | 1751.751  | AF085939  | 1621.554  | 1482.903  | AB040883  | 1079.921  | 934.869   |
| AK024556  | 1061.706  | 797.829   | NM_006792 | 33937.242 | 41356.531 | NM_01863E | 4194.216  | 3920.479  |
| AK024935  | 840.266   | 336.274   | Z36874    | 41343.797 | 41805.293 | AF264628  | 1087.652  | 1332.491  |
| AK025325  | 3320.818  | 2799.924  | AK095477  | 4254.979  | 3947.159  | NM_00171E | 2540.027  | 2135.808  |
| U50531    | 2688.129  | 2392.022  | AK023326  | 1397.902  | 1152.271  | NM_00439E | 8898.257  | 5724.718  |
| L09099    | 1437.247  | 759.759   | AK022462  | 1882.629  | 1633.493  | NM_00266E | 1138.998  | 548.751   |
| NM_005421 | 1634.769  | 1371.546  | NM_02053C | 1613.156  | 1847.706  | NM_006094 | 4324.296  | 2936.103  |
| AK024580  | 17778.227 | 16362.813 | AK022418  | 4115.262  | 3600.9    | AF080158  | 2120.926  | 1773.131  |
| AL442093  | 7446.135  | 7721.489  | AF279777  | 1769.147  | 1648.804  | AB037794  | 990.989   | 785.06    |
| AK024331  | 1073.447  | 1065.888  | AK021748  | 28910.033 | 32181.369 | NM_00593E | 1371.435  | 1908.01   |
| AK024452  | 1312.204  | 1098.834  | AK021771  | 932.025   | 427.468   | NM_01241E | 1041.176  | 1278.878  |
| AJ249975  | 697.144   | 420.368   | AL137257  | 12581.86  | 13116.844 | NM_01417E | 8981.788  | 10491.609 |
| AK021733  | 1526.738  | 1268.367  | AF086503  | 822.524   | 896.978   | NM_001251 | 17984.355 | 18785.479 |
| AK000543  | 15225.798 | 11900.785 | CY3Cy5    | 13748.992 | 1258.492  | NM_00478E | 758.973   | 919.615   |
| AK026683  | 3518.538  | 3151.788  | AA778392  | 13683.792 | 12349.662 | AB011112  | 2313.565  | 2437.635  |
| D16906    | 5739.726  | 3604.436  | AI478178  | 3068.253  | 3672.721  | NM_01866E | 1448.84   | 1865.797  |
| AJ012492  | 366.285   | 304.211   | AA101279  | 839.011   | 1088.233  | NM_00262E | 1556.597  | 2268.504  |
| AL079309  | 5438.872  | 4132.2    | M19154    | 4542.827  | 4636.62   | NM_018844 | 5057.955  | 5381.752  |
| AK022335  | 1389.387  | 1059.508  | AA399410  | 10089.728 | 9301.827  | NM_015477 | 4171.692  | 4045.51   |
| AL110280  | 2217.419  | 1657.982  | AA137031  | 3704.681  | 2953.402  | AK023212  | 2696.363  | 3160.734  |
| AK024235  | 3661.635  | 2708.802  | AA292226  | 12075.549 | 11976.278 | AL353943  | 964.155   | 794.539   |
| AF014457  | 1287.565  | 864.581   | NM_00050C | 3246.365  | 3014.671  | BE568801  | 3100.118  | 2278.521  |
| NM_01745E | 1089.007  | 1238.448  | J04449    | 560.029   | 1269.003  | AB002336  | 792.619   | 578.733   |
| AF086196  | 1006.826  | 967.3     | BC007031  | 5919.942  | 7365.827  | NM_01328E | 5860.85   | 3544.135  |
| NM_00554E | 40566.539 | 38063.195 | AF129756  | 13716.57  | 16344.717 | NM_00608E | 53140.348 | 63796.359 |
| X95095    | 1720.77   | 1435.739  | NM_002957 | 16671.713 | 23055.736 | NM_00663E | 910.704   | 429.833   |
| AF078528  | 11537.254 | 9218.118  | BC036369  | 3472.028  | 4367.018  | NM_01626E | 2380.126  | 1571.355  |
| AF161411  | 2775.36   | 2701.51   | X12492    | 17484.914 | 24296.453 | AB011116  | 7614.723  | 5736.546  |
| AK000450  | 19588.592 | 20829.227 | U93051    | 17400.689 | 18217.934 | AB037858  | 1025.876  | 659.734   |
| NM_018224 | 8078.239  | 7960.797  | SR2       | 62291.152 | 55433.492 | NM_00017E | 1192.442  | 1888.894  |
| NM_01989E | 4852.176  | 5024.911  | SR4       | 22375.453 | 45183.902 | NM_00577E | 2096.107  | 2233.82   |
| NM_01856E | 4128.661  | 4353.531  | SR6       | 2870.723  | 7013.894  | NM_01763E | 986.744   | 847.966   |
| NM_00053E | 329.467   | 903.536   | SR8       | 11252.199 | 51885.66  | NM_00327C | 1480.695  | 2257.419  |
| J04118    | 1098.078  | 836.028   | SR10      | 37805.238 | 28678.9   | NM_016591 | 553.619   | 900.421   |
| NM_00073C | 7143.541  | 5458.712  | CY3Cy5    | 8263.026  | 1236.888  | AL157437  | 13765.508 | 15507.483 |
| U31734    | 53842.266 | 37241.629 | NM_00040E | 464.659   | 475.035   | L25629    | 2316.434  | 2649.887  |
| AF085885  | 2969.063  | 1668.207  | NM_00568E | 2111.082  | 2239.302  | NM_00149C | 2121.53   | 2453.24   |
| M24751    | 1599.193  | 1070.688  | NM_00292E | 2006.636  | 2161.64   | NM_01774C | 2587.35   | 2528.062  |
| AK022953  | 992.879   | 676.68    | NM_00023E | 349.875   | 555.666   | AB033052  | 4004.473  | 3574.529  |
| AF009319  | 2400.705  | 1811.504  | NM_018697 | 1944.732  | 1993.95   | NM_018227 | 1717.014  | 1491.186  |
| AL365519  | 1099.675  | 1023.733  | AF090116  | 380.671   | 601.823   | AF050199  | 478.198   | 348.168   |
| NM_01846E | 6323.092  | 6609.209  | NM_000254 | 9105.405  | 8683.197  | NM_00334C | 16593.943 | 13895.775 |
| Z36845    | 1347.448  | 1454.207  | Z21967    | 7339.083  | 6752.264  | U46752    | 2547.028  | 1931.864  |
| M73792    | 1472.484  | 1267.203  | NM_00373E | 632.819   | 703.005   | NM_002794 | 13037.297 | 10992.875 |

|           |           |           |           |           |           |           |           |           |
|-----------|-----------|-----------|-----------|-----------|-----------|-----------|-----------|-----------|
| NM_016127 | 7669.768  | 6278.977  | NM_016185 | 22990.479 | 33865.313 | BF244646  | 48945.703 | 38559.063 |
| AF085939  | 1321.906  | 1154.583  | NM_012110 | 7212.619  | 10029.255 | AK024030  | 2252.885  | 1675.916  |
| NM_006792 | 33567.57  | 29958.049 | NM_005461 | 1184.219  | 1919.287  | AF275808  | 1352.943  | 803.005   |
| Z36874    | 41098.262 | 35820.891 | AF052693  | 2703.079  | 4336.397  | AK024038  | 4890.509  | 3643.264  |
| AK095477  | 3468.884  | 2867.402  | NM_001129 | 19521.949 | 19949.275 | NM_002055 | 1785.296  | 1639.229  |
| AK023326  | 1777.621  | 1429.065  | L09100    | 927.7     | 1325.942  | NM_005803 | 7815.79   | 6668.464  |
| AK022462  | 1674.719  | 1732.495  | NM_005472 | 1301.4    | 1790.619  | NM_015515 | 4609.59   | 3526.255  |
| NM_020530 | 1345.323  | 1379.972  | NM_004313 | 763.343   | 1218.362  | AK001579  | 19067.496 | 16930.98  |
| AK022418  | 2633.89   | 2392.569  | NM_013435 | 610.101   | 1027.608  | NM_002670 | 4597.541  | 8705.928  |
| AF279777  | 1636.084  | 1139.442  | NM_000132 | 16453.08  | 19711.428 | AF163302  | 5099.693  | 5669.844  |
| AK021748  | 15530.483 | 14373.542 | NM_001727 | 1760.731  | 3800.168  | NM_006408 | 5430.329  | 6666.972  |
| AK021771  | 730.28    | 809.624   | NM_004076 | 1891.014  | 3421.696  | NM_002419 | 5598.466  | 6375.031  |
| AL137257  | 14177.068 | 16131.407 | NM_007123 | 25401.881 | 47100.074 | NM_001989 | 5883.208  | 7153.335  |
| AF086503  | 1023.64   | 811.663   | BG717460  | 1354.655  | 2645.752  | NM_002653 | 9975.852  | 10841.321 |
| CY3Cy5    | 24079.34  | 3223.044  | NM_004161 | 16859.313 | 16397.904 | NM_005604 | 1693.763  | 1203.295  |
| AA778392  | 5582.532  | 7155.568  | NM_001295 | 2309.263  | 3114.728  | S69023    | 1628.877  | 1457      |
| AI478178  | 939.936   | 1393.794  | NM_005161 | 2063.143  | 2094.745  | NM_003454 | 1950.819  | 2429.656  |
| M19154    | 1288.208  | 1522.858  | AB037749  | 638.885   | 630.622   | NM_003418 | 17026.236 | 14451.873 |
| AA399410  | 5184.274  | 5469.166  | NM_020347 | 1483.716  | 1267.149  | NM_017908 | 2231.67   | 2073.535  |
| AA137031  | 1945.665  | 1904.902  | NM_001462 | 2160.195  | 2146.14   | NM_006885 | 793.641   | 853.868   |
| AA292226  | 5133.093  | 6593.577  | NM_004072 | 1231.755  | 1644.714  | M25077    | 3681.958  | 5748.009  |
| NM_000500 | 2214.116  | 2278.926  | AF068286  | 770.179   | 656.837   | NM_018702 | 3157.713  | 4261.248  |
| BC007031  | 3068.682  | 3080.321  | AB040957  | 3976.356  | 2863.506  | U96131    | 403.704   | 423.364   |
| AF129756  | 8016.591  | 8160.619  | NM_003110 | 3548.113  | 3712.567  | NM_004593 | 1608.079  | 1577.807  |
| NM_002957 | 14559.354 | 12093.076 | NM_003612 | 2047.606  | 2490.594  | NM_005778 | 13876.255 | 18922.396 |
| BC036369  | 2638.672  | 2029.193  | NM_013230 | 2847.274  | 3801.988  | NM_001032 | 50255.438 | 66116.336 |
| X12492    | 17157.912 | 14404.995 | X72308    | 2851.376  | 4099.461  | NM_018084 | 21897.92  | 32269.721 |
| U93051    | 12625.094 | 8787.312  | NM_005408 | 531.769   | 900.639   | AF164797  | 51034.969 | 60849.816 |
| SR2       | 63923.059 | 55309.445 | BC008376  | 10618.271 | 13149.706 | NM_017840 | 26269.779 | 34656.586 |
| SR4       | 24906.566 | 16449.061 | AK024908  | 4623.802  | 7459.978  | AK001052  | 43630.742 | 53200.477 |
| SR6       | 3285.966  | 2296.837  | NM_018270 | 6006.225  | 10174.115 | NM_001415 | 51710.227 | 54782.07  |
| SR8       | 12255.297 | 26757.676 | NM_000260 | 8020.553  | 12892.938 | NM_004564 | 5335.633  | 6513.635  |
| SR10      | 41068.875 | 11516.325 | NM_014160 | 9913.251  | 17795.4   | NM_000968 | 54488.547 | 60905.07  |
| CY3Cy5    | 10960.873 | 987.382   | AF230877  | 1470.423  | 2659.604  | AL355743  | 3070.233  | 4121.116  |
| NM_005682 | 1617.75   | 1625.794  | NM_017668 | 2208.884  | 3692.931  | L77571    | 581.803   | 711.679   |
| NM_002926 | 673.815   | 1037.797  | AB033049  | 1065.859  | 2098.3    | X81896    | 803.185   | 841.93    |
| NM_018697 | 1215.137  | 1467.515  | NM_004377 | 4420.677  | 4728.885  | AF070595  | 661.476   | 570.301   |
| AF090116  | 353.698   | 645.705   | AB037815  | 12379.82  | 13194.408 | NM_002202 | 1461.268  | 1746.259  |
| NM_014030 | 20292.746 | 20597.037 | NM_003645 | 8784.447  | 10062.768 | NM_006005 | 1301.411  | 1499.126  |
| NM_004224 | 1237.25   | 1391.385  | AF263613  | 3251.637  | 3903.216  | NM_002629 | 34708.215 | 34124.434 |
| NM_000254 | 5659.958  | 5793.745  | NM_017750 | 2348.469  | 2158.178  | NM_014364 | 2340.915  | 2708.386  |
| Z21967    | 4444.799  | 4013.323  | AK026196  | 2010.212  | 2356.994  | NM_001685 | 42052.391 | 60848.961 |
| NM_003738 | 946.326   | 823.551   | AL137668  | 1064.857  | 795.929   | NM_006067 | 23037.332 | 30331.176 |
| NM_016185 | 20947.641 | 23021.1   | NM_013348 | 1978.453  | 2177.345  | NM_000284 | 5700.185  | 8135.588  |
| NM_012110 | 5118.586  | 5437.25   | NM_004977 | 3283.558  | 3685.534  | NM_004813 | 3716.016  | 5747.582  |
| NM_005461 | 1122.98   | 1102.672  | NM_012283 | 13650.543 | 14271.79  | AK023008  | 2402.671  | 3798.875  |
| AF052693  | 3446.257  | 2592.013  | NM_004700 | 1878.339  | 3209.213  | NM_004689 | 5045.183  | 7842.231  |
| NM_001129 | 22696.563 | 16400.416 | NM_007166 | 4611.289  | 7240.497  | NM_006026 | 9141.444  | 12685.701 |
| L09100    | 1213.951  | 1080.688  | NM_006755 | 8093.496  | 8736.224  | BG339855  | 771.88    | 1291.237  |
| NM_005472 | 1369.941  | 1027.325  | NM_005881 | 1392.481  | 1357.947  | AB040956  | 4002.361  | 5242.459  |
| NM_004313 | 951.852   | 821.096   | NM_005794 | 231.5     | 544.927   | NM_016587 | 2075.357  | 2303.68   |
| NM_013435 | 729.558   | 754.971   | L40519    | 2405.237  | 2278.065  | NM_003516 | 8581.863  | 14753.696 |
| NM_000132 | 14537.198 | 10408.382 | NM_004204 | 2071.128  | 2268.859  | NM_017953 | 1933.321  | 2871.823  |



|           |           |           |           |           |           |           |           |           |
|-----------|-----------|-----------|-----------|-----------|-----------|-----------|-----------|-----------|
| NM_001727 | 3444.002  | 2744.098  | AK002181  | 925.651   | 1102.185  | BC000124  | 14294.687 | 22027.871 |
| NM_004076 | 3427.227  | 2874.062  | AK025769  | 5555.309  | 4940.795  | Z11773    | 1560.216  | 1761.975  |
| NM_007123 | 66450.328 | 62419.141 | AW945166  | 1564.697  | 1667.946  | NM_006914 | 802.746   | 935.452   |
| BG717460  | 4733.979  | 3956.866  | NM_005236 | 4305.409  | 3736.75   | NM_003446 | 31906.23  | 33720.152 |
| NM_018086 | 4689.384  | 5870.203  | AL133077  | 32472.299 | 52890.754 | NM_001485 | 8424.117  | 9119.947  |
| NM_004161 | 11267.583 | 13834.199 | U06715    | 1506.056  | 2411.141  | NM_002702 | 1002.625  | 1175.917  |
| NM_001295 | 1472.125  | 1793.681  | NM_013402 | 17301.721 | 26012.035 | AK021510  | 965.926   | 1551.322  |
| NM_005161 | 1171.673  | 1420.855  | NM_002662 | 750.862   | 1323.733  | AK022711  | 1689.017  | 3158.337  |
| AB037749  | 516.494   | 698.388   | NM_000132 | 14959.958 | 12487.44  | AK024310  | 608.976   | 917.563   |
| NM_020347 | 905.517   | 1109.989  | NM_001727 | 5221.49   | 6109.839  | AK023039  | 430.653   | 649.08    |
| NM_001462 | 1330.101  | 1586.355  | NM_004076 | 4021.559  | 4623.734  | AL109688  | 3174.284  | 4275.914  |
| NM_004072 | 758.062   | 1258.819  | BG717460  | 4366.71   | 4897.784  | AF074981  | 1169.293  | 1453.055  |
| AF068286  | 664.749   | 602.02    | AA778392  | 13915.975 | 13582.168 | AK025863  | 717.244   | 879.305   |
| AB040957  | 3375.179  | 2197.457  | AI478178  | 2533.051  | 2768.344  | D42044    | 2686.759  | 3533.91   |
| NM_003110 | 3112.62   | 3033.86   | AA101279  | 674.107   | 779.892   | AK026149  | 2343.421  | 3010.413  |
| NM_003612 | 1802.516  | 1304.063  | M19154    | 4122.66   | 4598.864  | AF038185  | 5468.877  | 6944.903  |
| NM_013230 | 2696.75   | 2601.951  | AA399410  | 10590.601 | 10136.207 | AB027011  | 15245.12  | 19462.58  |
| X72308    | 2376.304  | 2077.244  | AA137031  | 3389.953  | 2782.109  | AK025305  | 1010.383  | 1355.89   |
| NM_005408 | 610.04    | 753.384   | AA292226  | 11864.749 | 11702.19  | AF131788  | 331.582   | 437.97    |
| BC008376  | 13552.777 | 10054.062 | NM_000500 | 3112.328  | 3649.621  | AL117415  | 9006.847  | 11467.153 |
| AB041269  | 914.74    | 973.431   | BC007031  | 6506.977  | 4844.661  | AK023616  | 1133.759  | 1173.216  |
| AK024908  | 4484.609  | 3825.899  | AF129756  | 12819.715 | 14214.745 | AK022249  | 619.998   | 711.935   |
| NM_018270 | 5822.77   | 4656.402  | NM_002957 | 12683.025 | 14179.74  | AK025665  | 6573.549  | 8331.734  |
| NM_000260 | 26040.125 | 22315.768 | BC036369  | 3231.604  | 3762.799  | U92981    | 380.782   | 223.946   |
| NM_014160 | 9425.619  | 7780.774  | NM_017540 | 971.382   | 1959.152  | AL355694  | 1131.05   | 1145.176  |
| AF230877  | 4631.186  | 4413.51   | NM_018270 | 5445.525  | 6152.975  | BC037530  | 41268.695 | 48672.672 |
| NM_017668 | 3670.593  | 2951.71   | NM_000260 | 34559.43  | 41326.258 | NM_014851 | 6280.75   | 7783.541  |
| AB033049  | 22083.436 | 17640.797 | NM_014160 | 9462.936  | 10608.838 | AK022811  | 541.48    | 827.793   |
| NM_004377 | 1753.341  | 1761.362  | NM_017668 | 4187.587  | 3579.385  | AL117635  | 1147.554  | 1480.43   |
| AB037815  | 5977.946  | 6233.929  | AB033049  | 40083.363 | 40714.527 | AK025332  | 1718.995  | 2571.916  |
| NM_003645 | 4791.981  | 5731.938  | NM_000406 | 406.624   | 341.029   | AB040929  | 458.674   | 954.606   |
| AF263613  | 1765.331  | 2458.223  | NM_005682 | 2132.534  | 2008.274  | AB020735  | 854.65    | 1161.785  |
| NM_000097 | 2568.355  | 2949.208  | NM_002926 | 1995.979  | 1975.24   | AL109700  | 384.9     | 413.646   |
| NM_001509 | 693.015   | 945.922   | NM_000233 | 601.92    | 542.298   | D17010    | 424.897   | 196.425   |
| AK022878  | 3118.717  | 4460.872  | NM_018697 | 1785.039  | 2057.196  | AJ011596  | 5825.522  | 5569.88   |
| NM_018099 | 3000.045  | 3596.68   | AF090116  | 827.36    | 561.697   | U17639    | 705.797   | 741.403   |
| AF217187  | 17614.258 | 19323.443 | NM_014030 | 46489.227 | 41780.813 | AL049215  | 44419.281 | 47281.125 |
| NM_017750 | 1775.881  | 1679.729  | NM_004224 | 4566.963  | 6550.075  | X51779    | 1721.034  | 2399.679  |
| AK027122  | 12193.304 | 11020.025 | NM_000254 | 9361.488  | 7945.377  | X81001    | 407.407   | 636.221   |
| AK026196  | 2476.9    | 1590.313  | Z21967    | 6643.985  | 5053.127  | AL049254  | 1289.816  | 1547.535  |
| AL137668  | 914.095   | 896.707   | NM_003738 | 505.118   | 846.839   | Z83954    | 5383.982  | 6308.995  |
| NM_013348 | 1459.277  | 1294.199  | NM_016185 | 23797.197 | 35084.996 | M74093    | 3787.316  | 4083.893  |
| NM_004977 | 3763.563  | 2747.793  | NM_012110 | 5923.589  | 7724.635  | M28219    | 3088.019  | 4115.655  |
| NM_004888 | 28189.588 | 24715.564 | NM_005461 | 1065.976  | 2330.743  | L17326    | 1361.871  | 1731.019  |
| NM_012283 | 31497.74  | 23968.141 | NM_001129 | 18227.867 | 26161.9   | D17207    | 6705.688  | 8421.302  |
| NM_004700 | 1996.135  | 1880.507  | L09100    | 820.176   | 1787.691  | D55640    | 2017.483  | 3048.529  |
| NM_004162 | 12464.176 | 10511.483 | NM_005472 | 862.277   | 1826.32   | AF085897  | 933.252   | 1321.601  |
| NM_006868 | 9319.971  | 6628.135  | NM_004313 | 634.321   | 1215.024  | AF085822  | 1072.627  | 943.151   |
| AB020706  | 6919.679  | 4925.944  | NM_013435 | 601.13    | 1209.647  | AK021551  | 1582.082  | 2286.597  |
| NM_007166 | 5151.386  | 4660.89   | NM_004161 | 15959.527 | 15919.138 | AK000024  | 13700.733 | 17060.152 |
| NM_002869 | 5521.635  | 4244.958  | NM_001295 | 2326.015  | 2999.487  | AK026693  | 1529.513  | 2278.369  |
| NM_006755 | 820.079   | 921.737   | NM_005161 | 1626.544  | 1723.834  | NM_012285 | 1162.846  | 1271.847  |
| NM_005881 | 1405.344  | 2169.084  | NM_020347 | 1123.49   | 943.096   | AK001128  | 495.844   | 621.138   |

|           |           |           |           |           |           |           |           |           |
|-----------|-----------|-----------|-----------|-----------|-----------|-----------|-----------|-----------|
| L40519    | 1649.872  | 1763.633  | NM_001462 | 2502.891  | 2002.382  | AK000090  | 758.035   | 1234.29   |
| NM_004204 | 1409.278  | 1634.084  | NM_004072 | 1540.788  | 1255.322  | AK000794  | 5883.744  | 7505.104  |
| AK002181  | 838.972   | 1052.948  | AF068286  | 899.929   | 840.841   | AK000950  | 2789.182  | 4338.902  |
| BC015750  | 66158.977 | 62844.289 | AB040957  | 3731.817  | 2251.98   | AK026812  | 2064.576  | 2365.181  |
| AK025769  | 4738.193  | 4025.162  | NM_003110 | 4056.782  | 4463.386  | AK000176  | 1020.887  | 1343.531  |
| AW945166  | 1288.91   | 1060.942  | NM_003612 | 1526.747  | 1872.463  | AK000831  | 2935.007  | 3163.824  |
| NM_005236 | 4680.324  | 3474.569  | NM_013230 | 3048.332  | 4456.739  | AK000981  | 925.299   | 895.484   |
| NM_006384 | 11730.604 | 10793.942 | X72308    | 1398.943  | 2231.882  | AK024615  | 855.002   | 623.411   |
| NM_013257 | 2858.198  | 2499.106  | NM_005408 | 726.124   | 998.562   | AK025054  | 2596.109  | 2019.664  |
| AB044546  | 1321.093  | 1177.484  | BC008376  | 7692.088  | 11336.041 | AK024556  | 1750.665  | 1606.637  |
| NM_014225 | 51134.895 | 50535.531 | AB041269  | 785.206   | 1085.572  | AK024935  | 1154.132  | 716.151   |
| AF163473  | 1138.925  | 1033.433  | AK024908  | 4455.347  | 6534.933  | AK025325  | 3856.893  | 5391.469  |
| NM_006256 | 4731.538  | 3460.614  | AL133077  | 24444.557 | 30342.316 | S75762    | 367.394   | 340.995   |
| NM_002846 | 1700.572  | 6257.5    | U06715    | 1601.058  | 1326.511  | AK023838  | 687.45    | 1305.874  |
| NM_002837 | 5657.179  | 4717.532  | NM_013402 | 19725.656 | 18191.334 | U50531    | 2948.633  | 3794.615  |
| AL133077  | 28005.172 | 27482.797 | NM_004377 | 4106.29   | 3442.012  | NM_005318 | 10751.108 | 17305.6   |
| AK025211  | 2817.644  | 2705.771  | AB037815  | 10669.215 | 9815.681  | AB015434  | 386.492   | 400.712   |
| U06715    | 1353.03   | 1075.762  | NM_003645 | 6893.549  | 7475.86   | U85653    | 393.793   | 409.242   |
| NM_002662 | 1249.237  | 984.117   | NM_017750 | 2090.725  | 2359.013  | L09099    | 1500.148  | 2228.786  |
| NM_000132 | 9959.447  | 10168.197 | AK026196  | 2180.497  | 2077.843  | AL117474  | 428.219   | 490.29    |
| NM_001727 | 2820.168  | 3651.797  | AL137668  | 1068.59   | 1718.662  | NM_005421 | 3182.262  | 4422.544  |
| NM_004076 | 3326.813  | 4008.378  | NM_013348 | 733.033   | 1489.488  | AK024580  | 42834.555 | 52758.184 |
| BG717460  | 3905.993  | 4782.828  | NM_004977 | 1575.892  | 2629.971  | AL442093  | 6438.116  | 9079.738  |
| AA778392  | 10684.163 | 11588.301 | NM_004888 | 30507.809 | 47141.754 | AK024331  | 1335.628  | 1173.63   |
| AI478178  | 2372.619  | 3018.337  | NM_012283 | 10223.608 | 13031.499 | AK024452  | 1320.84   | 1036.387  |
| AA101279  | 788.082   | 855.584   | NM_004700 | 1881.893  | 2710.899  | AJ249975  | 441.016   | 379.046   |
| AA399410  | 8540.48   | 9416.241  | U93051    | 18609.707 | 16485.75  | AK021733  | 1792.924  | 1105.445  |
| AA137031  | 2281.915  | 2398.194  | NM_017540 | 1356.081  | 1478.985  | NM_012446 | 527.096   | 385.778   |
| AA292226  | 8682.171  | 9653.57   | NM_006755 | 7532.857  | 6632.971  | AK000543  | 9678.432  | 11234.815 |
| NM_000500 | 3545.214  | 3725.125  | NM_005881 | 1460.821  | 1271.163  | AK026683  | 3456.089  | 3785.89   |
| M29873    | 994.969   | 1379.508  | L40519    | 2598.126  | 2141.964  | D16906    | 4156.345  | 4420.213  |
| J04449    | 734.46    | 757.17    | NM_004204 | 1526.623  | 1606.392  | AL079309  | 3648.775  | 3881.115  |
| BC007031  | 4824.421  | 4865.744  | AK002181  | 970.161   | 876.447   | AK022335  | 870.296   | 813.208   |
| AF129756  | 11746.13  | 10560.36  | AK025769  | 5320.765  | 4032.087  | AL110280  | 2723.373  | 2338.913  |
| NM_002957 | 15146.007 | 12749.529 | AW945166  | 1240.014  | 905.755   | AK024235  | 261.233   | 215.553   |
| BC036369  | 2803.266  | 2508.35   | AF052693  | 4517.86   | 4187.26   | AF014457  | 329.516   | 275.537   |
| X12492    | 19102.74  | 16013.581 | NM_001129 | 24005.684 | 22051.432 | NM_017458 | 1018.196  | 1105.201  |
| U93051    | 13839.531 | 10874.798 | L09100    | 2044.429  | 2855.941  | AF086196  | 749.622   | 606.761   |
| NM_017540 | 1128.841  | 825.378   | NM_005472 | 2119.662  | 2407.686  | NM_005542 | 32125.971 | 23730.547 |
| NM_018270 | 5158.358  | 6115.768  | NM_013435 | 1047.321  | 1046.107  | X95095    | 3499.871  | 2201.383  |
| NM_000260 | 34856.563 | 37982.063 | NM_000132 | 13742.349 | 10068.249 | AB007902  | 504.186   | 384.429   |
| NM_014160 | 8829.656  | 10873.556 | NM_001727 | 5117.952  | 4778.265  | AF078528  | 11976.646 | 6197.648  |
| NM_017668 | 3179.538  | 3335.137  | NM_004076 | 3285.629  | 3611.382  | AF161411  | 2187.013  | 1211.918  |
| AB033049  | 25746.914 | 27344.973 | BG717460  | 3756.73   | 4564.92   | AK000450  | 12157.956 | 9781.968  |
| NM_000406 | 569.63    | 520.837   | AA778392  | 11535.332 | 10425.994 | NM_018224 | 10866.065 | 7472.927  |
| NM_005682 | 2180.572  | 1773.505  | AI478178  | 2376.625  | 2338.007  | NM_019896 | 2668.087  | 2203.606  |
| NM_002926 | 2409.216  | 2203.688  | AA101279  | 1136.976  | 1230.544  | NM_018566 | 2858.982  | 1903.162  |
| NM_000233 | 1194.006  | 1543.857  | AA137031  | 4175.702  | 2802.6    | J04118    | 619.927   | 388.603   |
| NM_018697 | 1737.176  | 2293.645  | AA292226  | 9399.699  | 8274.72   | NM_000730 | 4747.496  | 4957.023  |
| AF090116  | 543.015   | 760.703   | NM_000500 | 3736.615  | 4384.818  | U31734    | 44159.621 | 40376.398 |
| NM_014030 | 39458.695 | 44831.504 | M29873    | 474.838   | 750.049   | AF085885  | 1590.539  | 1251.84   |
| NM_004224 | 3345.533  | 4571.236  | J04449    | 725.605   | 1033.32   | M24751    | 1217.222  | 868.161   |
| NM_000254 | 8453.89   | 10709.763 | BC007031  | 1625.069  | 2192.537  | AK026569  | 64781.031 | 68202.07  |

|           |           |           |           |           |           |           |           |           |
|-----------|-----------|-----------|-----------|-----------|-----------|-----------|-----------|-----------|
| Z21967    | 6449.778  | 6242.197  | NM_002957 | 6748.083  | 9255.796  | AL049974  | 1119.572  | 936.575   |
| NM_00373E | 780.721   | 949.157   | BC036369  | 2296.287  | 4196.819  | AF009319  | 2509.335  | 2147.022  |
| NM_01618E | 23963.826 | 25019.17  | X12492    | 18829.023 | 27181.225 | AL365519  | 632.681   | 827.371   |
| NM_012110 | 5029.593  | 4489.411  | X72308    | 3231.482  | 3252.874  | NM_01846E | 3227.983  | 2688.371  |
| NM_005461 | 1174.815  | 1197.462  | NM_00540E | 918.684   | 751.173   | Z36845    | 1427.098  | 1280.666  |
| AF052693  | 2508.372  | 2104.696  | BC008376  | 17253.039 | 15052.402 | M73792    | 695.74    | 431.81    |
| NM_001129 | 22927.502 | 16737.861 | AB041269  | 1683.7    | 1690.141  | NM_016127 | 7522.362  | 5344.646  |
| L09100    | 1207.953  | 1001.112  | AK024908  | 4690.317  | 4410.495  | AF085939  | 1195.762  | 835.297   |
| NM_005472 | 1384.151  | 890.508   | NM_018270 | 6653.426  | 5813.339  | NM_006792 | 22818.6   | 17673.811 |
| NM_004313 | 863.252   | 739.005   | NM_000260 | 41554.305 | 40133.641 | Z36874    | 25056.992 | 18568.883 |
| NM_01343E | 588.4     | 944.215   | NM_014160 | 9680.245  | 9559.471  | AK095477  | 1959.05   | 1508.846  |
| NM_004162 | 9864.651  | 10969.776 | NM_01766E | 3808.34   | 3225.761  | AK023326  | 707.691   | 606.277   |
| NM_00686E | 7656.89   | 8413.951  | AB033049  | 35673.629 | 35475.063 | AK022462  | 1176.55   | 896.788   |
| AB020706  | 6019.755  | 6639.946  | NM_005682 | 1948.921  | 1772.473  | NM_020530 | 1462.275  | 1298.372  |
| NM_00716E | 5776.759  | 6928.439  | NM_00292E | 2227.135  | 2190.352  | AK022418  | 4527.468  | 3108.849  |
| NM_00286E | 5054.406  | 5463.677  | NM_000233 | 385.215   | 418.134   | AF279777  | 1140.226  | 726.339   |
| NM_01808E | 8455.154  | 9010.663  | NM_018697 | 1714.851  | 1895.004  | AK021748  | 32662.693 | 23100.922 |
| NM_004161 | 16181.998 | 17882.42  | AF090116  | 364.447   | 451.812   | AL137257  | 8904.475  | 5698.75   |
| NM_00129E | 3791.137  | 4846.395  | NM_014030 | 10993.727 | 8545.752  | AF086503  | 383.591   | 340.283   |
| NM_005161 | 2451.227  | 2785.139  | NM_004224 | 1388.833  | 2592.079  | CY3Cy5    | 5070.001  | 437.978   |
| AB037749  | 626.623   | 792.547   | NM_000254 | 10176.661 | 16923.611 | AA778392  | 9363.72   | 7377.902  |
| NM_020347 | 1294.715  | 1300.374  | Z21967    | 4152.864  | 6767.145  | AI478178  | 1864.583  | 1647.732  |
| NM_001462 | 2243.622  | 2443.637  | NM_00373E | 606.3     | 949.068   | AA101279  | 592.33    | 636.152   |
| NM_006890 | 810.683   | 711.065   | NM_012110 | 4836.891  | 8006.26   | M19154    | 3332.969  | 2125.013  |
| NM_003110 | 3426.668  | 3406.656  | NM_005461 | 887.053   | 1809.38   | AA399410  | 5430.657  | 4256.02   |
| NM_003612 | 1215.418  | 961.605   | NM_01334E | 2279.788  | 2473.146  | AA137031  | 2240.486  | 1580.036  |
| NM_013230 | 2649.123  | 2352.146  | NM_004977 | 4983.485  | 4266.058  | AA292226  | 6370.04   | 6176.014  |
| X72308    | 1751.121  | 1387.865  | NM_00488E | 26242.305 | 26911.439 | NM_000500 | 1814.675  | 2303.033  |
| NM_00540E | 641.814   | 596.373   | NM_012283 | 54332.246 | 42296.969 | M29873    | 477.679   | 214.375   |
| BC008376  | 10253.544 | 7623.406  | NM_004700 | 2154.665  | 2180.694  | J04449    | 388.32    | 519.551   |
| AB041269  | 847.476   | 918.235   | NM_004161 | 17816.402 | 14433.599 | BC007031  | 5559.792  | 6693.389  |
| AK024908  | 4503.175  | 4061.413  | NM_00129E | 2334.714  | 3585.757  | AF129756  | 12281.656 | 16007.808 |
| NM_002837 | 2662.625  | 3231.382  | NM_005161 | 2114.707  | 1925.123  | NM_002957 | 7014.242  | 8145.396  |
| AL133077  | 18486.035 | 25664.994 | NM_020347 | 1347.503  | 684.487   | BC036369  | 1352.019  | 1588.51   |
| AK025211  | 1951.961  | 2753.756  | NM_001462 | 1745.48   | 1426.747  | X12492    | 10048.966 | 11785.69  |
| U06715    | 1322.778  | 1623.155  | NM_004072 | 1459.906  | 1642.273  | U93051    | 9162.956  | 6983.394  |
| NM_002662 | 1653.688  | 1967.527  | AF068286  | 724.32    | 1080.253  | SR2       | 55777.824 | 57737.75  |
| NM_004377 | 3556.452  | 4115.48   | AB040957  | 3894.693  | 4419.601  | SR4       | 12360.597 | 9282.104  |
| AB037815  | 8302.648  | 8212.324  | NM_006890 | 679.009   | 780.829   | SR6       | 2060.007  | 1762.005  |
| NM_00364E | 7452.709  | 8395.6    | NM_003612 | 568.835   | 646.512   | SR8       | 7512.795  | 24145.725 |
| AF263613  | 3476.283  | 4755.99   | NM_013230 | 2662.555  | 4009.629  | SR10      | 21494.555 | 4235.48   |
| NM_000097 | 1982.226  | 1941.05   | NM_01422E | 46793.539 | 46423.102 | CY3Cy5    | 3885.986  | 321.959   |
| NM_00150E | 1544.05   | 1732.268  | AL133077  | 25806.541 | 28025.051 | NM_00040E | 463.711   | 377.144   |
| AK022878  | 3476.451  | 3734.005  | U06715    | 1788.146  | 1729.381  | NM_005682 | 1724.141  | 1795.296  |
| AK027122  | 14828.168 | 19284.795 | NM_004377 | 4289.613  | 4379.005  | NM_00292E | 1122.798  | 810.853   |
| AK026196  | 1987.424  | 2256.85   | AB037815  | 13831.049 | 11999.379 | NM_018697 | 997.239   | 703.783   |
| AL137668  | 982.037   | 664.853   | NM_00364E | 9086.78   | 8535.837  | AF090116  | 529.407   | 440.357   |
| NM_01334E | 910.599   | 775.739   | NM_017750 | 2108.604  | 3675.959  | NM_014030 | 27471.654 | 21049.039 |
| NM_004977 | 2268.459  | 1648.995  | AK026196  | 1728.744  | 2975.876  | NM_004224 | 3382.568  | 4422.238  |
| NM_00488E | 28253.889 | 25598.539 | AL137668  | 1156.527  | 1733.21   | NM_000254 | 5106.636  | 3709.973  |
| NM_002251 | 532.84    | 299.5     | NM_016444 | 1195.166  | 1160.641  | Z21967    | 3863.407  | 2518.742  |
| NM_012283 | 32573.16  | 27109.016 | NM_01783E | 2321.991  | 2731.001  | NM_00373E | 483.912   | 667.553   |
| NM_004700 | 1867.248  | 2005.906  | NM_003707 | 10799.146 | 10923.896 | NM_01618E | 14535.052 | 15729.718 |

|           |           |           |           |           |           |           |           |           |
|-----------|-----------|-----------|-----------|-----------|-----------|-----------|-----------|-----------|
| U93051    | 15007.754 | 14957.151 | AL137718  | 1496.1    | 1790.273  | NM_012110 | 4439.562  | 5535.889  |
| NM_017540 | 1172.519  | 1231.499  | NM_003460 | 8623.335  | 7743.374  | NM_005461 | 753.908   | 1095.164  |
| NM_006755 | 4694.251  | 6317.586  | U94354    | 784.396   | 539.208   | AF052693  | 2535.022  | 1973.285  |
| NM_005881 | 1813.304  | 1925.569  | NM_002904 | 23164.238 | 24885.371 | NM_001129 | 13862.597 | 10256.566 |
| L40519    | 2400.272  | 2260.542  | NM_014189 | 4723.52   | 4421.926  | L09100    | 1352.089  | 1222.605  |
| NM_004204 | 2168.343  | 3290.505  | NM_005686 | 4772.645  | 4182.861  | NM_005472 | 880.081   | 835.542   |
| AK002181  | 846.027   | 939.741   | NM_006767 | 824.651   | 689.813   | NM_013435 | 646.755   | 700.698   |
| AK025769  | 5514.618  | 5596.118  | NM_017540 | 1770.864  | 1402.461  | NM_000132 | 7901.422  | 5962.671  |
| AW945166  | 1605.232  | 1421.796  | NM_006755 | 8599.775  | 7500.604  | NM_001727 | 2513.767  | 1177.734  |
| NM_005236 | 4275.48   | 3703.267  | NM_005881 | 1564.401  | 1254.964  | NM_004076 | 1959.597  | 876.904   |
| NM_006384 | 11048.7   | 8138.972  | L40519    | 2340.749  | 1987.842  | NM_007123 | 38222.98  | 20985.883 |
| NM_013257 | 2585.418  | 2332.646  | NM_004204 | 2016.767  | 1771.521  | BG717460  | 2493.483  | 1164.256  |
| AB044546  | 1684.776  | 1374.392  | AK002181  | 1212.085  | 877.053   | NM_018086 | 10340.207 | 8329.771  |
| NM_014225 | 48701.859 | 47650.945 | BC015750  | 7428.54   | 9744.081  | NM_004161 | 10128.769 | 7999.776  |
| AF163473  | 1625.974  | 1163.351  | AK025769  | 5340.922  | 7691.238  | NM_001295 | 1747.956  | 1742.595  |
| NM_006256 | 5056.991  | 4009.306  | AW945166  | 1095.367  | 2229.346  | NM_005161 | 1031.33   | 939.359   |
| NM_002846 | 1732.548  | 6838.866  | NM_002589 | 7150.828  | 6140.577  | NM_020347 | 522.055   | 210.104   |
| AF052693  | 4016.894  | 4632.09   | AF064846  | 1636.201  | 1677.249  | NM_001462 | 1211.173  | 854.962   |
| NM_001129 | 22694.373 | 23201.98  | AL110227  | 2446.679  | 2103.681  | NM_004072 | 918.367   | 751.821   |
| L09100    | 1685.544  | 2288.809  | NM_001400 | 4267.1    | 3406.768  | AB040957  | 2707.434  | 3003.189  |
| NM_005472 | 1847.321  | 2384.57   | AB033281  | 3856.911  | 4100.683  | NM_006890 | 641.69    | 1010.832  |
| NM_004313 | 635.269   | 965.875   | NM_002882 | 28698.48  | 24176.955 | NM_003110 | 2230.007  | 2622.795  |
| NM_013435 | 727.256   | 962.946   | AB011161  | 1799.476  | 1402.118  | NM_003612 | 792.848   | 902.946   |
| NM_000132 | 13650.556 | 13732.581 | NM_000827 | 815.666   | 418.342   | NM_013230 | 1705.3    | 1931.806  |
| NM_001727 | 4109.655  | 4639.406  | NM_002944 | 1687.455  | 1517.382  | X72308    | 3544.508  | 5012.77   |
| NM_004076 | 3488.17   | 4060.163  | AF327354  | 2163.958  | 1695.686  | NM_005408 | 567.311   | 574.188   |
| BG717460  | 5491.008  | 8162.756  | NM_003961 | 67105.984 | 54691.012 | BC008376  | 10787.033 | 11544.734 |
| AA778392  | 11192.04  | 13218.983 | AB014513  | 7002.37   | 5547.66   | AB041269  | 873.863   | 1114.632  |
| AI478178  | 2683.008  | 3108.51   | NM_004747 | 1488.594  | 1145.635  | AK024908  | 3216.551  | 2746.633  |
| AA101279  | 907.126   | 1145.691  | AK024430  | 60573.852 | 48429.852 | NM_018270 | 4441.456  | 3321.159  |
| AA137031  | 2937.936  | 2635.697  | NM_002341 | 6426.064  | 7052.839  | NM_000260 | 25739.535 | 13319.984 |
| AA292226  | 9086.634  | 10710.982 | AL137651  | 2231.915  | 1775.43   | NM_014160 | 5509.812  | 2972.64   |
| NM_000500 | 3407.229  | 2762.991  | NM_018945 | 3640.031  | 2973.791  | AF230877  | 5511.024  | 2689.55   |
| J04449    | 655.874   | 527.49    | AB029018  | 2172.474  | 1754.589  | NM_017668 | 2920.872  | 1160.504  |
| BC007031  | 3356.623  | 2674.86   | NM_006650 | 1772.596  | 2498.604  | AB033049  | 20229.074 | 13513.377 |
| AF129756  | 8574.106  | 8139.183  | AK024436  | 6040.92   | 7914.603  | NM_004377 | 3950.177  | 3260.796  |
| NM_002957 | 13161.597 | 12249.627 | NM_006648 | 929.985   | 1604.43   | AB037815  | 16596.648 | 13408.217 |
| BC036369  | 3131.805  | 2392.088  | NM_000868 | 697.783   | 974.747   | NM_003645 | 6194.222  | 5703.333  |
| X12492    | 17511.186 | 15765.034 | NM_004711 | 5466.776  | 7920.688  | AF263613  | 2096.502  | 1078.058  |
| X72308    | 2845.239  | 2607.015  | AF161361  | 963.089   | 672.16    | NM_000097 | 1705.317  | 1097.957  |
| NM_005408 | 986.3     | 1241.788  | NM_006463 | 12835.932 | 12163.733 | NM_001509 | 1796.243  | 1272.166  |
| X87895    | 674.496   | 1073.481  | NM_001444 | 8584.435  | 7261.35   | AK022878  | 3832.017  | 1894.272  |
| AB041269  | 1050.552  | 1202.351  | AK027208  | 599.627   | 710.853   | NM_018099 | 1671.63   | 1295.053  |
| AK024908  | 3387.388  | 4005.55   | NM_016521 | 7952.939  | 6594.133  | AF217187  | 13881.188 | 20916.541 |
| NM_018270 | 5610.735  | 6364.009  | X98494    | 10523.278 | 7511.972  | AK027122  | 7321.584  | 13013.754 |
| NM_014160 | 8736.845  | 10420.627 | NM_001240 | 2666.842  | 1821.428  | AK026196  | 1267.349  | 2109.565  |
| NM_017668 | 3976.84   | 3763.529  | NM_002709 | 9013.485  | 7864.5    | AL137668  | 618.047   | 477.669   |
| AB033049  | 29325.232 | 31421.582 | NM_001099 | 2139.704  | 2183.224  | NM_013348 | 1950.46   | 1856.692  |
| NM_005682 | 1868.88   | 1719.139  | NM_006823 | 1996.103  | 1972.977  | NM_004977 | 2843.119  | 2805.965  |
| NM_002926 | 2675.789  | 3114.439  | NM_016567 | 10393.952 | 8088.966  | NM_004888 | 15074.901 | 13695.171 |
| NM_000233 | 666.761   | 835.75    | NM_007031 | 1643.224  | 1171.446  | NM_012283 | 38204.008 | 29605.34  |
| NM_018697 | 1817.291  | 2299.473  | NM_002657 | 2286.257  | 1940.663  | NM_004700 | 1342.728  | 1262.838  |
| AF090116  | 580.891   | 487.839   | NM_004089 | 28460.203 | 25061.543 | NM_004162 | 7865.759  | 4370.895  |

|           |           |           |           |           |           |           |           |           |
|-----------|-----------|-----------|-----------|-----------|-----------|-----------|-----------|-----------|
| NM_01403C | 14414.064 | 11606.193 | NM_00135C | 12304.972 | 10387.711 | NM_00686E | 4226.867  | 1705.671  |
| NM_004224 | 1298.994  | 1541.5    | NM_014809 | 2002.671  | 1939.081  | AB020706  | 3275.384  | 1889.824  |
| NM_000254 | 8480.178  | 7124.729  | NM_016074 | 46552.906 | 42858.918 | NM_00716E | 2963.658  | 3093.162  |
| Z21967    | 3665.837  | 3108.679  | NM_003921 | 2535.913  | 1417.462  | NM_01622E | 58262.332 | 59600.719 |
| NM_00373E | 664.597   | 532.103   | NM_00420E | 17785.443 | 12754.521 | NM_00286E | 3093.238  | 3151.395  |
| NM_01618E | 23287.354 | 23360.387 | NM_00633E | 1091.425  | 1261.867  | NM_00675E | 4185.474  | 2759.416  |
| NM_012110 | 5755.054  | 5273.334  | NM_00184E | 1316.928  | 2055.406  | NM_005881 | 883.065   | 611.425   |
| NM_005461 | 917.005   | 1164.455  | NM_00041E | 1088.042  | 1650.777  | L40519    | 1024.155  | 559.763   |
| NM_01334E | 1163.32   | 1150.761  | NM_01776E | 3974.592  | 6451.601  | NM_004204 | 1284.567  | 746.128   |
| NM_004977 | 4418.43   | 4285.626  | NM_00277E | 1869.426  | 1276.134  | AK002181  | 1037.433  | 666.58    |
| NM_01228E | 46113.672 | 48472.52  | AK023398  | 2925.696  | 2304.414  | NM_001641 | 13830.434 | 19085.82  |
| NM_00470C | 2023.937  | 2397.673  | NM_00005C | 1049.548  | 873.974   | AK025769  | 3551.877  | 5482.149  |
| NM_00416E | 8862.011  | 8730.726  | NM_000481 | 1646.494  | 1146.189  | AW945166  | 1036.485  | 1650.363  |
| AB020706  | 6188.809  | 6567.801  | AK025681  | 2175.632  | 1969.095  | NM_00523E | 2667.307  | 2435.063  |
| NM_00716E | 5018.222  | 5446.678  | NM_01490E | 5044.879  | 3770.655  | NM_006384 | 6447.023  | 6466.936  |
| NM_01622E | 60928.508 | 51316.949 | NM_012137 | 3685.023  | 3254.055  | NM_013257 | 1548.923  | 1398.776  |
| NM_00286E | 5657.208  | 5138.532  | NM_00448E | 24724.512 | 25160.445 | AB044546  | 1145.712  | 1635.429  |
| NM_01808E | 9388.783  | 8679.756  | NM_00151E | 60232.586 | 44299.57  | NM_01422E | 28717.35  | 30693.852 |
| NM_004161 | 17384.744 | 17891.139 | NM_001281 | 3813.788  | 3150.22   | AF163473  | 925.011   | 1432.98   |
| NM_00129E | 2581.908  | 3373.452  | NM_01683E | 1109.235  | 737.654   | NM_00625E | 3090.688  | 1862.952  |
| NM_005161 | 2097.092  | 1470.376  | NM_003981 | 19942.242 | 15787.245 | NM_00284E | 1177.203  | 3498.005  |
| AB037749  | 829.989   | 652.308   | U26596    | 24044.432 | 18486.533 | NM_002837 | 2734.045  | 1456.194  |
| NM_020347 | 722.977   | 527.199   | AF070600  | 60433.973 | 43206.734 | AL133077  | 15303.93  | 10131.288 |
| NM_00146E | 1730.777  | 1665.753  | AB014522  | 11981.232 | 10747.343 | AK025211  | 1843.627  | 2008.622  |
| NM_00407E | 879.71    | 914.588   | NM_01487E | 6810.499  | 8281.793  | U06715    | 1062.808  | 1461.528  |
| AF068286  | 807.966   | 740.28    | AB033023  | 9405.391  | 13748.061 | NM_01340E | 10930.581 | 11014.915 |
| AB040957  | 3233.238  | 1777.008  | BC027895  | 1193.942  | 1903.68   | NM_00266E | 786.439   | 959.036   |
| NM_00689C | 596.06    | 633.067   | AF116238  | 3748.462  | 2684.504  | NM_00013E | 8417.878  | 5611.429  |
| NM_003110 | 2969.045  | 3218.72   | NM_00698E | 1304.819  | 1522.801  | NM_001727 | 6562.741  | 5132.299  |
| NM_00361E | 1328.795  | 1180.418  | AB033085  | 3724.396  | 2203.26   | NM_00407E | 3033.439  | 1948.553  |
| NM_01323C | 2271.198  | 2300.609  | AF024703  | 18897.531 | 14320.978 | NM_00712E | 40850.781 | 29553.332 |
| NM_013257 | 2264.978  | 2583.083  | NM_016531 | 2406.341  | 2034.813  | BG717460  | 2650.592  | 2032.295  |
| AB044546  | 1105.449  | 1330.756  | NM_00359E | 11890.243 | 9005.266  | AA778392  | 8234.134  | 5995.138  |
| NM_01422E | 50957.125 | 54286.844 | NM_000244 | 3413.704  | 3414.787  | AI478178  | 1825.828  | 1508.21   |
| AF163473  | 1381.832  | 1450.811  | NM_01428E | 2726.606  | 1539.931  | M19154    | 3085.251  | 2831.533  |
| NM_00625E | 4717.948  | 4991.097  | NM_00471E | 4517.924  | 2813.297  | AA399410  | 6544.503  | 10658.085 |
| NM_00284E | 2033.507  | 9584.934  | NM_01855E | 3059.391  | 2797.301  | AA137031  | 2673.268  | 3148.046  |
| NM_002837 | 5317.606  | 5857.581  | NM_004704 | 3109.11   | 2537.498  | AA292226  | 7219.414  | 14735.174 |
| AL133077  | 28359.371 | 32987.582 | NM_00545E | 6501.03   | 4797.004  | NM_00050C | 1952.739  | 2839.791  |
| AK025211  | 2925.536  | 3816.845  | NM_01463E | 2770.01   | 2263.113  | M29873    | 619.653   | 870.097   |
| U06715    | 1849.664  | 2077.551  | NM_00197C | 33947.785 | 31545.535 | J04449    | 411.962   | 632.503   |
| NM_01340E | 18242.457 | 17770.629 | NM_00681C | 18087.127 | 11165.662 | BC007031  | 5457.605  | 6094.405  |
| NM_00266E | 1226.386  | 1188.57   | AK024054  | 6518.786  | 5445.734  | AF129756  | 9826.436  | 9269.148  |
| NM_004377 | 4193.101  | 3950.365  | NM_00196E | 1236.591  | 837.92    | NM_002957 | 14539.344 | 15229.466 |
| AB037815  | 11568.132 | 10050.779 | NM_00411E | 4591.807  | 7072.569  | BC036369  | 2322.178  | 1868.822  |
| NM_00364E | 7738.838  | 6678.461  | AK024508  | 4855.982  | 6635.75   | X12492    | 10362.807 | 6746.093  |
| AF263613  | 3640.779  | 3765.967  | AK027213  | 7684.873  | 12006.313 | U93051    | 9282.252  | 6045.11   |
| NM_000097 | 3323.286  | 3230.637  | AL096749  | 10480.038 | 8985.087  | NM_01754C | 871.223   | 1172.462  |
| AK022878  | 1658.478  | 1659.93   | AK023620  | 2785.16   | 1832.335  | NM_01827C | 6852.043  | 5354.663  |
| NM_01809E | 3819.75   | 4132.214  | AF086189  | 2808.75   | 2580.855  | NM_00026C | 56199.504 | 49688.398 |
| AF217187  | 20571.293 | 17339.449 | AL050055  | 5420.036  | 5867.971  | NM_01416C | 6011.137  | 5306.349  |
| NM_01775C | 2237.923  | 1801.928  | NM_00500E | 15663.264 | 14830.3   | AF230877  | 14006.501 | 10660.605 |
| AK027122  | 12389.501 | 10870.303 | NM_01459E | 7099.515  | 5603.524  | NM_01766E | 3035.011  | 1678.446  |

|           |           |           |           |           |           |           |           |           |
|-----------|-----------|-----------|-----------|-----------|-----------|-----------|-----------|-----------|
| AK026196  | 1966.628  | 1612.3    | NM_006703 | 16280.995 | 12449.775 | AB033049  | 46377.293 | 34881.129 |
| AL137668  | 998.994   | 1035      | NM_004037 | 2423.517  | 1977.011  | NM_000406 | 416.332   | 230.857   |
| NM_016444 | 1264.431  | 1314.256  | NM_005116 | 2225.831  | 2281.984  | NM_005682 | 1372.44   | 1124.2    |
| NM_017839 | 3700.991  | 4149.578  | NM_002766 | 5356.462  | 4026.516  | NM_002926 | 1183.178  | 792.66    |
| NM_003707 | 9546.815  | 10627.965 | AJ404857  | 1295.526  | 968.674   | NM_000233 | 369.03    | 637.596   |
| AL137718  | 1562.495  | 1622.135  | AF254088  | 2252.074  | 1373.692  | NM_018697 | 1357.952  | 2140.508  |
| NM_003460 | 5670.689  | 6208.581  | NM_001420 | 1564.161  | 1062.106  | NM_014030 | 33454.539 | 41711.512 |
| U94354    | 714.772   | 945.102   | NM_000248 | 1886.753  | 1503.176  | NM_004224 | 2776.618  | 3467.353  |
| NM_002904 | 28400.916 | 40082.676 | AB031046  | 2000.047  | 1510.943  | NM_000254 | 5640.66   | 6148.844  |
| NM_014189 | 6349.745  | 7513.589  | NM_002449 | 23776.613 | 20791.359 | Z21967    | 3724.467  | 3738.429  |
| NM_005686 | 2865.776  | 3503.231  | AK025388  | 1533.014  | 1212.066  | NM_003738 | 518.219   | 561.511   |
| NM_006767 | 807.623   | 990.882   | AB006631  | 1472.483  | 1019.656  | NM_016185 | 14567.797 | 12566.909 |
| NM_017540 | 1274.638  | 1357.903  | AF291181  | 1325.924  | 1175.28   | NM_012110 | 5142.735  | 4796.983  |
| NM_006755 | 8518.483  | 7835.959  | NM_005741 | 2516.792  | 1780.825  | NM_005461 | 830.479   | 732.492   |
| NM_005881 | 1785.013  | 1473.912  | NM_000964 | 3476.645  | 2887.623  | AF052693  | 2734.679  | 2013.687  |
| L40519    | 2957.385  | 2487.042  | BF343886  | 686.975   | 1664.048  | NM_001129 | 17049.41  | 22714.664 |
| NM_004204 | 1695.76   | 1591.023  | NM_013263 | 8872.518  | 12970.054 | L09100    | 1987.088  | 2759.963  |
| AK002181  | 580.819   | 654.604   | AL137407  | 2616.474  | 2186.326  | NM_005472 | 1171.241  | 1904.007  |
| AF118064  | 492.424   | 1236.04   | AF085839  | 794.207   | 541.797   | NM_004313 | 720.565   | 1152.878  |
| NM_001641 | 23524     | 23735.932 | NM_018178 | 13605.193 | 9605.497  | NM_013435 | 607.828   | 1047.734  |
| BC015750  | 61172.418 | 58562.809 | AK025204  | 1164.764  | 1054.546  | NM_004162 | 13926.815 | 11516.596 |
| AK025769  | 5149.879  | 4045.523  | AK027256  | 495.545   | 650.232   | NM_006868 | 5400.601  | 2896.635  |
| AW945166  | 1433.198  | 1027.074  | AF143330  | 1492.51   | 1359.003  | AB020706  | 3170.13   | 2427.372  |
| NM_005236 | 4327.51   | 3728.22   | AK025178  | 2682.32   | 2223.384  | NM_007166 | 3831.644  | 2705.629  |
| NM_006384 | 11783.609 | 8811.04   | AF147359  | 1234.456  | 758.608   | NM_002866 | 2936.646  | 2487.994  |
| NM_002589 | 6860.304  | 7637.154  | NM_014835 | 9665.324  | 9381.098  | NM_018086 | 8251.261  | 5910.759  |
| AF064846  | 1453.862  | 1623.984  | AK001822  | 4223.612  | 3144.55   | NM_004161 | 9177.02   | 4082.987  |
| AL110227  | 1931.645  | 2915.045  | AK026969  | 1895.901  | 1739.211  | NM_001295 | 1540.608  | 1334.142  |
| NM_001400 | 2263.94   | 2883.235  | AF086287  | 1896.664  | 1397.98   | NM_005161 | 943.688   | 483.596   |
| AB033281  | 4351.752  | 6656.827  | AF086409  | 1375.676  | 753.063   | NM_020347 | 763.619   | 747.712   |
| NM_002882 | 17742.99  | 21629.752 | AK024268  | 3355.327  | 2583.243  | NM_001462 | 1748.374  | 2334.252  |
| AB011161  | 1678.775  | 2311.252  | AF086295  | 1415.471  | 1313.306  | AF068286  | 465.765   | 215.533   |
| NM_000827 | 906.628   | 1280.467  | AF086344  | 5475.026  | 3989.889  | AB040957  | 2163.844  | 1510.393  |
| NM_002944 | 1595.156  | 1783.44   | AF086424  | 1136.793  | 941.413   | NM_006890 | 535.104   | 425.88    |
| AF327354  | 1809.333  | 2544.566  | AL110130  | 686.932   | 457.197   | NM_003110 | 2076.597  | 1940.651  |
| NM_003961 | 62645.5   | 56599.656 | AF052116  | 1225.87   | 573.613   | NM_003612 | 1518.649  | 1107.102  |
| AB014513  | 5492.552  | 4413.563  | NM_018087 | 5117.894  | 3969.435  | NM_013230 | 1640.858  | 1392.216  |
| NM_004747 | 1270.475  | 1276.363  | AL360260  | 1502.987  | 1709.559  | X72308    | 3208.725  | 4501.981  |
| AK024430  | 47145.27  | 49149.043 | AK023647  | 641.584   | 1055.879  | NM_005408 | 592.467   | 1049.19   |
| NM_002341 | 8641.827  | 13218.436 | AL137366  | 1379.977  | 1241.719  | BC008376  | 12613.732 | 17696.285 |
| AL137651  | 1568.416  | 1627.363  | AL359598  | 950.126   | 830.186   | X87895    | 137.459   | 839.935   |
| NM_018945 | 3018.753  | 3113.359  | AF085980  | 1148.223  | 1394.091  | AB041269  | 1152.154  | 1973.14   |
| NM_000818 | 2851.638  | 2166.937  | AF085927  | 2037.943  | 1851.046  | AK024908  | 3376.901  | 5252.653  |
| NM_006650 | 1725.473  | 1335.444  | AF085954  | 2899.102  | 3826.889  | NM_002837 | 2795.871  | 2007.136  |
| AK024436  | 4787.629  | 4313.232  | AL137337  | 1463.42   | 1125.673  | AL133077  | 14750.233 | 10240.604 |
| NM_006648 | 1283.822  | 1216.117  | AL137541  | 599.66    | 417.012   | AK025211  | 1673.528  | 1314.743  |
| NM_000868 | 998.082   | 688.078   | AL161969  | 1339.421  | 1014.111  | U06715    | 1057.812  | 761.913   |
| NM_004711 | 5290.131  | 3946.726  | AL442095  | 3306.18   | 2567.294  | NM_002662 | 1028.846  | 793.222   |
| AF161361  | 871.441   | 1056.188  | AL137378  | 2184.625  | 1488.238  | NM_004377 | 4007.497  | 2441.226  |
| NM_006463 | 12360.331 | 14923.571 | AL137609  | 35634.316 | 25266.074 | AB037815  | 9681.839  | 5638.204  |
| AK023050  | 410.567   | 1072.811  | AL353946  | 5572.61   | 4379.957  | NM_003645 | 4884.562  | 3028.367  |
| NM_001444 | 11325.875 | 16905.695 | X69081    | 7793.342  | 5747.7    | AF263613  | 1738.917  | 1000.039  |
| NM_016521 | 8376.253  | 11323.553 | NM_005714 | 3331.103  | 2264.634  | NM_000097 | 1749.626  | 977.813   |

|           |           |           |           |           |           |           |           |           |
|-----------|-----------|-----------|-----------|-----------|-----------|-----------|-----------|-----------|
| X98494    | 10247.935 | 10294.171 | AL359931  | 5575.042  | 3616.008  | AK022878  | 3061.689  | 3190.211  |
| NM_001240 | 2485.423  | 2607.7    | AK000954  | 2306.974  | 1595.919  | NM_018095 | 1932.986  | 1754.653  |
| NM_006823 | 2137.552  | 2650.416  | AK025800  | 4142.347  | 2476.765  | AF217187  | 11511.472 | 8907.788  |
| NM_016567 | 8269.564  | 7806.583  | AK022333  | 1255.178  | 1645.044  | NM_017750 | 1168.738  | 916.812   |
| NM_007031 | 1107.194  | 1010.07   | AK023294  | 874.105   | 1139.136  | AK027122  | 6987.183  | 10153.92  |
| NM_002657 | 2502.872  | 2590.288  | AF095854  | 1561.839  | 1213.238  | AK026196  | 1272.319  | 1330.317  |
| NM_004085 | 23427.332 | 26342.791 | NM_014162 | 994.099   | 1120.172  | AL137668  | 655.455   | 407.519   |
| NM_001350 | 16469.082 | 20715.83  | AF159093  | 3353.58   | 3354.532  | NM_013345 | 1847.688  | 3034.125  |
| NM_014805 | 1895.034  | 2179.845  | AF113679  | 1301.833  | 1200.961  | NM_004977 | 2992.338  | 4172.541  |
| NM_016074 | 26645.811 | 24421.711 | AK021997  | 4031.249  | 3236.845  | NM_004885 | 18995.473 | 26557.77  |
| NM_003921 | 2571.633  | 2038.216  | AK022125  | 1680.273  | 1124.283  | NM_012283 | 40234.664 | 46261.914 |
| NM_004205 | 20931.41  | 24955.877 | AK022244  | 5349.114  | 3569.981  | NM_004700 | 1578.875  | 1954.085  |
| NM_001843 | 1247.667  | 1015.769  | AK022381  | 7535.678  | 5965.117  | U93051    | 15165.281 | 9837.387  |
| NM_000415 | 915.311   | 551.809   | AK022012  | 1261.887  | 869.9     | NM_017540 | 1179.001  | 668.663   |
| NM_017765 | 3485.236  | 2838.633  | AK022149  | 1047.81   | 378.101   | NM_006755 | 3656.958  | 2225.62   |
| NM_002775 | 1502.739  | 1917.021  | AK022286  | 3231.497  | 2554.777  | NM_005881 | 894.862   | 532.076   |
| AK023398  | 3780.814  | 5006.77   | AK022613  | 5754.353  | 3904.58   | L40519    | 746.785   | 455.56    |
| NM_001907 | 2123.658  | 2347.461  | AL359557  | 1618.153  | 1019.422  | NM_004204 | 959.921   | 1014.984  |
| NM_000481 | 1929.794  | 2223.332  | AK024582  | 1467.967  | 610.017   | AK002181  | 888.116   | 589.083   |
| AK025681  | 2364.337  | 3129.33   | AK024143  | 765.122   | 579.763   | AK025769  | 3556.177  | 4333.476  |
| NM_014905 | 4709.563  | 4094.305  | AK022099  | 1923.592  | 1443.147  | AW945166  | 938.254   | 626.802   |
| NM_012137 | 2799.212  | 2721.813  | NM_014367 | 1476.249  | 1929.262  | NM_005235 | 2317.995  | 1345.714  |
| NM_004483 | 25011.85  | 25211.111 | AK025835  | 1021.539  | 724.599   | NM_006384 | 7082.634  | 6793.881  |
| NM_001513 | 48829.699 | 44375.633 | NM_002365 | 2441.608  | 2410.054  | NM_013257 | 1758.851  | 2601.233  |
| NM_001281 | 4321.942  | 3944.02   | AF161441  | 3543.863  | 3319.558  | AB044546  | 1269.545  | 1917.998  |
| NM_016835 | 823.892   | 727.174   | AL137474  | 2495.229  | 1387.497  | NM_014225 | 32724.826 | 43516.984 |
| NM_003981 | 21132.961 | 16179.585 | AK021572  | 1844.85   | 926.593   | AF163473  | 979.771   | 1580.739  |
| U26596    | 25004.365 | 24691.371 | AK026757  | 1103.663  | 931.256   | NM_006255 | 3401.956  | 4529.33   |
| AF070600  | 56194.207 | 51267.254 | AF119908  | 2306.602  | 2745.998  | NM_002845 | 1519.65   | 11249.482 |
| AB014522  | 14039.857 | 15064.55  | U50539    | 943.182   | 603.7     | AF052693  | 5862.819  | 4033.728  |
| NM_014875 | 5796.932  | 4011.986  | AK000653  | 11240.351 | 10086.019 | NM_001129 | 23357.014 | 15787.908 |
| AB033023  | 8867.74   | 7664.448  | AK000908  | 1366.565  | 803.377   | L09100    | 3941.059  | 3604.907  |
| BC027895  | 942.75    | 751.047   | Z70696    | 1701.91   | 873.222   | NM_005472 | 2086.578  | 1687.489  |
| AF116238  | 3732.333  | 4690.064  | NM_005792 | 7055.432  | 5235.322  | NM_004313 | 439.017   | 469.814   |
| NM_006982 | 1604.875  | 1949.547  | AF048847  | 4257.47   | 4197.25   | NM_013435 | 809.748   | 844.526   |
| AB033085  | 3196.222  | 3782.907  | L37718    | 68675.016 | 51985.59  | NM_000132 | 9461.529  | 7283.014  |
| AF024703  | 18104.934 | 24683.637 | AL137717  | 3250.407  | 1627.2    | NM_001727 | 6511.297  | 4177.007  |
| NM_016531 | 1730.851  | 1804.288  | AF035297  | 1317.046  | 957.56    | NM_004075 | 2588.037  | 1822.774  |
| NM_003593 | 12221.688 | 13276.272 | NM_014035 | 2358.208  | 2015.818  | NM_007123 | 39261.648 | 27903.725 |
| NM_000244 | 3300.875  | 4960.221  | S67154    | 5271.28   | 3987.949  | BG717460  | 2810.12   | 4048.823  |
| NM_014285 | 3238.95   | 3416.89   | AK026181  | 4793.027  | 3401.672  | AA778392  | 6678.155  | 4511      |
| NM_004715 | 4858.573  | 4208.614  | AK021451  | 1517.69   | 1795.642  | AI478178  | 2028.586  | 1390.174  |
| NM_018553 | 2743.041  | 2226.362  | AK001971  | 814.523   | 860.052   | AA101279  | 722.123   | 558.666   |
| NM_004704 | 3353.214  | 3082.892  | AF086468  | 2139.976  | 1752.173  | M19154    | 2586.488  | 2142.956  |
| NM_005455 | 6485.113  | 6061.509  | AK027239  | 2014.646  | 1840.551  | AA399410  | 5079.473  | 3343.311  |
| NM_014633 | 3791.857  | 2806.049  | AF005082  | 25201.299 | 23768.084 | AA137031  | 2287.411  | 1414.127  |
| NM_001970 | 39199.867 | 38780.656 | AL117595  | 3089.688  | 3153.357  | AA292226  | 6791.403  | 4807.105  |
| NM_006810 | 20638.131 | 18511.125 | AB028988  | 13603.139 | 9287.727  | NM_000500 | 1845.865  | 1329.627  |
| AK024054  | 7098.703  | 6453.037  | AK023072  | 2233.366  | 2008.415  | M29873    | 461.991   | 1069.026  |
| NM_001965 | 799.64    | 478.54    | AF086105  | 6973.402  | 6066.177  | J04449    | 487.157   | 624.824   |
| NM_004116 | 4299.411  | 2931.262  | Y10697    | 1329.284  | 700.69    | BC007031  | 5923.733  | 8380.805  |
| AK024508  | 4924.329  | 3065.551  | AY007166  | 11582.596 | 6512.228  | AF129756  | 10536.867 | 14236.836 |
| AK027213  | 6396.541  | 4865.619  | NM_004937 | 2784.748  | 2149.675  | NM_002957 | 13408.743 | 18254.09  |

|           |           |           |           |           |           |           |           |           |
|-----------|-----------|-----------|-----------|-----------|-----------|-----------|-----------|-----------|
| AL096749  | 6621.632  | 8460.428  | CY3Cy5    | 12661.696 | 1762.907  | BC036369  | 2577.163  | 3573.58   |
| AK023620  | 4235.299  | 4546.326  | AI298884  | 30032.311 | 33453.43  | X12492    | 12123.927 | 16846.764 |
| AF086189  | 3001.458  | 3086.302  | D87845    | 1299.941  | 1669.964  | X72308    | 6481.289  | 4492.929  |
| AL050055  | 4942.937  | 6768.838  | X53279    | 1020.997  | 905.84    | NM_005408 | 1266.491  | 1137.356  |
| NM_005009 | 15543.377 | 18897.273 | M83254    | 4100.373  | 4217.851  | BC008376  | 22497.271 | 17994.947 |
| NM_014596 | 7873.744  | 7171.783  | S56770    | 1468.207  | 1547.364  | AB041269  | 1978.876  | 1558.062  |
| NM_006703 | 17879.283 | 15856.045 | AI193606  | 695.53    | 788.626   | AK024908  | 3420.961  | 3125      |
| NM_004037 | 1428.576  | 1316.63   | H58872    | 16495.705 | 16056.776 | NM_018270 | 7730.863  | 7093.614  |
| NM_005116 | 2205.648  | 2328.991  | J02938    | 1238.02   | 1572.235  | NM_000260 | 58368.785 | 53030.117 |
| NM_002766 | 5290.94   | 4835.613  | J04543    | 8012.048  | 8972.472  | NM_014160 | 5555.477  | 5052.708  |
| AJ404857  | 1468.489  | 1323.759  | S60415    | 1202.248  | 1131.209  | AF230877  | 8837.55   | 5846.713  |
| AF254088  | 1928.935  | 2134.634  | AA456295  | 1536.416  | 2014.712  | NM_017668 | 2917.76   | 1584.76   |
| NM_001420 | 1009.289  | 855.876   | BG762340  | 4782.22   | 5344.438  | AB033049  | 30870.307 | 18350.676 |
| NM_000248 | 1411.43   | 1385.634  | AA009484  | 836.419   | 1427.577  | NM_005682 | 792.158   | 527.258   |
| AB031046  | 1905.617  | 1317.024  | NM_005456 | 4235.875  | 5064.726  | NM_002926 | 1208.99   | 1181.751  |
| NM_002449 | 24379.568 | 23337.891 | NM_006534 | 6818.479  | 7974.872  | NM_000233 | 418.037   | 307.067   |
| AK025388  | 1307.898  | 1118.435  | SR9       | 33697.934 | 9960.037  | NM_018697 | 1129.307  | 816.935   |
| AB006631  | 1096.669  | 1002.37   | CY3Cy5    | 11734.319 | 1486.209  | AF090116  | 533.625   | 131.493   |
| AF291181  | 1187.048  | 1062.077  | NM_016453 | 1856.28   | 1950.586  | NM_014030 | 34952.297 | 44176.313 |
| NM_005741 | 2546.11   | 2536.038  | NM_017701 | 1000.367  | 1023.606  | NM_004224 | 4297.259  | 7346.23   |
| NM_000964 | 2579.751  | 1918.975  | NM_014226 | 3364.3    | 3123.852  | NM_000254 | 5782.752  | 10678.332 |
| BF343886  | 869.572   | 480.203   | AF142567  | 1591.738  | 1480.3    | Z21967    | 4578.532  | 7131.383  |
| NM_013263 | 5974.333  | 4753.787  | NM_017410 | 22834.111 | 22379.268 | NM_003738 | 437.898   | 546.454   |
| AL137407  | 2103.479  | 1616.66   | AY009398  | 324.514   | 738.561   | NM_016185 | 16943.846 | 24685.178 |
| AF147439  | 847.813   | 635.807   | X99680    | 13793.778 | 18200.924 | NM_012110 | 4574.119  | 6987.962  |
| AF085839  | 873.931   | 753.861   | NM_001448 | 3675.941  | 4743.774  | NM_005461 | 844.691   | 1436.317  |
| NM_018178 | 15446.658 | 14089.759 | NM_016072 | 5718.213  | 8368.809  | NM_013348 | 4042.681  | 2874.061  |
| AK025204  | 923.849   | 929.733   | AK026349  | 7785.831  | 8506.605  | NM_004977 | 4975.453  | 3487.627  |
| AK027256  | 626.447   | 725.145   | NM_014733 | 1869.234  | 2039.611  | NM_004888 | 16865.172 | 13113.332 |
| AL365406  | 1077.483  | 956.993   | D12485    | 2410.395  | 2472.143  | NM_012283 | 56524.41  | 55805.793 |
| AF143330  | 1598.194  | 1477.086  | AK023204  | 5589.246  | 5699.232  | NM_004700 | 1947.987  | 2557.825  |
| AK025178  | 2071.163  | 2330.583  | NM_003449 | 2747.465  | 3707.228  | NM_004162 | 15227.104 | 14495.273 |
| AF147359  | 946.329   | 982.57    | NM_002478 | 3085.163  | 3281.293  | NM_006868 | 6072.789  | 4709.822  |
| NM_014835 | 7826.078  | 9289.445  | D38163    | 1201.532  | 1285.799  | AB020706  | 3502.397  | 3098.388  |
| AK001822  | 3949.164  | 5717.201  | D28449    | 1727.352  | 2032.038  | NM_007166 | 4028.827  | 4069.92   |
| AK026969  | 1624.775  | 1814.937  | NM_003281 | 1800.825  | 2115.918  | NM_016223 | 56403.387 | 57794.91  |
| AF086287  | 1814.186  | 1299.057  | AA460480  | 1273.087  | 1302.925  | NM_002866 | 3213.905  | 2660.613  |
| AF086409  | 1087.275  | 1360.138  | S78774    | 5131.235  | 4991.979  | NM_018086 | 5988.947  | 5009.762  |
| AK024268  | 2705.007  | 2506.401  | NM_003059 | 1441.761  | 1873.946  | NM_004161 | 10540.533 | 7004.143  |
| AF086295  | 1461.495  | 1550.682  | NM_004922 | 6792.227  | 9018.602  | NM_001295 | 1847.554  | 1613.602  |
| AF086344  | 5750.311  | 5303.936  | NM_002871 | 746.73    | 1014.798  | NM_005161 | 970.832   | 599.85    |
| AF086424  | 930.159   | 704.249   | NM_006987 | 889.369   | 910.638   | AB037749  | 588.569   | 567.776   |
| AL110130  | 586.746   | 721.892   | NM_001282 | 4182.667  | 3709.166  | NM_020347 | 691.933   | 855.396   |
| NM_018087 | 4740.051  | 4043.05   | U44105    | 1263.486  | 891.411   | NM_001462 | 1416.669  | 2633.264  |
| AL360260  | 627.522   | 531.596   | NM_016103 | 2189.344  | 3179.631  | NM_004072 | 1071.747  | 1799.568  |
| AL137366  | 1443.516  | 1556.199  | NM_018643 | 2708.534  | 2696.265  | AF068286  | 495.872   | 769.325   |
| BC031635  | 1012.049  | 991.77    | NM_016186 | 632.04    | 555.754   | AB040957  | 2575.411  | 2684.723  |
| AF085916  | 595.79    | 685.264   | M30142    | 4621.123  | 4132.75   | NM_006890 | 428.932   | 720.251   |
| AL359598  | 1140.016  | 953.419   | NM_005018 | 1015.765  | 1191.743  | NM_003110 | 2410.613  | 3611.605  |
| AF085980  | 1165.089  | 1322.456  | NM_013378 | 10266.652 | 9564.824  | NM_003612 | 1465.056  | 2094.298  |
| AF085927  | 2225.277  | 1508.015  | NM_001085 | 1121.805  | 1217.11   | NM_013230 | 1630.313  | 2610.906  |
| AF085954  | 2609.723  | 2677.23   | NM_006110 | 1450.289  | 1428.902  | NM_013257 | 1588.231  | 1079.397  |
| AL137337  | 1316.803  | 1180.88   | NM_002860 | 4949.32   | 5247.062  | AB044546  | 1549.886  | 1547.427  |



|           |           |           |           |           |           |           |           |           |
|-----------|-----------|-----------|-----------|-----------|-----------|-----------|-----------|-----------|
| AL161969  | 1083.407  | 1067.607  | NM_006169 | 3940.895  | 3874.387  | NM_014225 | 29849.99  | 24669.373 |
| AL442095  | 2795.997  | 2953.34   | NM_001218 | 1062.017  | 1222.341  | AF163473  | 947.103   | 620.566   |
| AL137378  | 1567.807  | 2310.378  | NM_014183 | 11629.561 | 17748.906 | NM_006256 | 4007.544  | 3206.46   |
| AL137609  | 28554.725 | 35328.34  | NM_018353 | 6983.303  | 4830.737  | NM_002846 | 2713.701  | 9381.996  |
| AL353946  | 3764.816  | 5095.187  | NM_001801 | 862.043   | 331.623   | NM_002837 | 3213.359  | 3290.013  |
| X69081    | 6328.616  | 6624.1    | NM_003560 | 21417.652 | 22054.85  | AL133077  | 16177.84  | 15161.553 |
| NM_005714 | 2994.478  | 2695.697  | NM_014403 | 3541.918  | 3347.229  | AK025211  | 1913.597  | 2002.121  |
| AL359931  | 5977.487  | 4598.561  | AL050100  | 2386.111  | 2617.893  | U06715    | 1224.109  | 1363.811  |
| AK000954  | 2209.454  | 2162.421  | AL080207  | 600.563   | 810.968   | NM_013402 | 11959.645 | 8891.293  |
| AK021922  | 449.44    | 398.999   | NM_000748 | 18306.801 | 20125.592 | NM_002662 | 781.95    | 390.989   |
| AK025800  | 3530.52   | 2700.908  | U53531    | 795.405   | 1068.576  | NM_004377 | 3736.139  | 3378.138  |
| AK022333  | 683.196   | 450.103   | NM_004925 | 4689.06   | 6383.593  | AB037815  | 7633.292  | 5463.034  |
| AK023294  | 815.013   | 820.093   | NM_003234 | 17507.73  | 20706.879 | NM_003645 | 4123.976  | 3787.876  |
| NM_017808 | 872.781   | 606.555   | NM_004858 | 2469.289  | 2462.013  | AF263613  | 2157.631  | 2199.009  |
| AF095854  | 1218.902  | 1084.768  | AB051826  | 2238.981  | 2228.931  | NM_000097 | 2112.069  | 3133.585  |
| NM_014162 | 984.631   | 997.703   | M20697    | 1053.663  | 1281.988  | NM_001509 | 1892.008  | 2903.194  |
| AF159093  | 3901.019  | 3156.977  | NM_015046 | 3478.346  | 4105.98   | AK022878  | 4568.418  | 6204.915  |
| AF113679  | 1107.824  | 761.177   | NM_002014 | 10333.567 | 9539.93   | NM_018099 | 1892.252  | 3037.315  |
| AK021997  | 3333.054  | 4091.21   | NM_002538 | 10801.864 | 12744.99  | AF217187  | 14027.072 | 18816.168 |
| AK022125  | 1039.552  | 1365.947  | NM_006927 | 11578.934 | 13112.199 | NM_017750 | 1380.819  | 2116.099  |
| AK022244  | 4900.129  | 5203.368  | NM_014601 | 3502.583  | 4531.867  | AK027122  | 6839.891  | 13327.729 |
| AK022381  | 5191.024  | 5729.455  | NM_017761 | 13625.034 | 16666.355 | AK026196  | 1498.185  | 1914.141  |
| AK022012  | 878.392   | 1057.313  | NM_006928 | 1086.52   | 1092.751  | AL137668  | 578.317   | 922.538   |
| AK022149  | 663.449   | 592.607   | AF237700  | 1318.737  | 951.054   | NM_017839 | 2595.698  | 1901.175  |
| AK022286  | 2308.198  | 2484.717  | D38163    | 1001.509  | 880.831   | NM_003707 | 7413.204  | 5294.159  |
| AK022411  | 482.94    | 659.892   | D28449    | 1379.811  | 1647.395  | AL137718  | 1197.436  | 710.532   |
| AK022613  | 5053.82   | 3888.406  | NM_003281 | 1493.73   | 1649.171  | NM_003460 | 12786.619 | 8325.246  |
| AL359557  | 1305.939  | 1153.927  | AA460480  | 1494.462  | 1429.349  | U94354    | 496.545   | 536.036   |
| AK027257  | 822.857   | 800.236   | AI298884  | 28795.182 | 30125.494 | NM_002904 | 21357.609 | 18653.217 |
| AK024582  | 965.959   | 942.914   | D87845    | 1523.287  | 1490.411  | NM_014189 | 4418.202  | 3339.854  |
| NM_014367 | 1729.027  | 2041.463  | X53279    | 1093.127  | 1102.651  | NM_005686 | 4475.253  | 3517.88   |
| BF205340  | 630.719   | 1209.891  | M83254    | 3824.723  | 3525.191  | NM_006767 | 600.69    | 433.22    |
| AK024901  | 736.969   | 952.089   | S56770    | 1976.45   | 1725.686  | NM_017540 | 1611.317  | 1253.112  |
| NM_019073 | 436.414   | 764.346   | AI193606  | 751.784   | 646.627   | NM_006755 | 4707.045  | 4710.448  |
| AK025835  | 915.545   | 940.339   | H58872    | 17779.803 | 19873.059 | NM_005881 | 1161.324  | 1000.037  |
| NM_002365 | 2462.449  | 2057.555  | J02938    | 1100.306  | 1339.348  | NM_005794 | 594.902   | 575.968   |
| AF161441  | 2112.624  | 1763.875  | J04543    | 8167.492  | 8656.243  | L40519    | 1623.848  | 1777.089  |
| AK023959  | 1664.588  | 1629.09   | S60415    | 1062.366  | 1195.703  | NM_004204 | 1234.122  | 1636.975  |
| AL137474  | 2988.97   | 2514.465  | AA456295  | 1734.146  | 1732.997  | AK002181  | 1129.07   | 1296.42   |
| AL133023  | 464.089   | 559.886   | BE733577  | 5192.708  | 5666.857  | NM_001641 | 14010.13  | 19239.053 |
| AK023484  | 329.904   | 529.32    | AI817942  | 1541.96   | 1622.151  | BC015750  | 50636.059 | 55695.805 |
| AK021572  | 1243.896  | 1059.394  | BG762340  | 3772.064  | 4125.192  | AK025769  | 3519.893  | 5099.839  |
| AF119908  | 2404.217  | 2493.888  | AA009484  | 782.417   | 759.127   | AW945166  | 949.996   | 1364.26   |
| U50539    | 713.767   | 590.537   | NM_005456 | 3674.753  | 3842.632  | NM_005236 | 2916.618  | 3947.196  |
| AK000653  | 10699.849 | 10718.272 | NM_006534 | 6017.4    | 7342.511  | NM_006384 | 5326.578  | 8397.777  |
| AK000908  | 1519.865  | 1643.733  | NM_016186 | 584.366   | 529.996   | NM_002589 | 5680.726  | 3189.388  |
| L77586    | 896.513   | 919.044   | M30142    | 4434.72   | 3273.239  | AF064846  | 1144.639  | 1061.877  |
| X96660    | 4038.42   | 3408.3    | NM_005018 | 707.243   | 855.465   | AL110227  | 1575.313  | 1376.189  |
| AK000993  | 1241.67   | 997.571   | NM_013378 | 9114.786  | 8152.382  | NM_001400 | 5824.035  | 3734.102  |
| AK023519  | 2223.055  | 2093.828  | NM_001085 | 1379.981  | 1360.33   | AB033281  | 3086.423  | 2346.298  |
| Z70696    | 743.831   | 685.004   | NM_006110 | 1606.143  | 1231.016  | NM_002882 | 17730.029 | 12709.584 |
| NM_005792 | 7620.328  | 6404.525  | NM_016453 | 1493.981  | 1484.045  | AB011161  | 1710.687  | 1239.268  |
| AF048847  | 4718.296  | 4845.036  | NM_017701 | 1565.821  | 1410.123  | NM_000827 | 708.604   | 469.82    |

|           |           |           |           |           |           |           |           |           |
|-----------|-----------|-----------|-----------|-----------|-----------|-----------|-----------|-----------|
| AL137717  | 4558.264  | 2865.805  | NM_014226 | 3929.445  | 2848.881  | NM_002944 | 2405.125  | 2514.241  |
| AF035297  | 1726.63   | 2103.593  | AF142567  | 1357.94   | 1463.751  | AF327354  | 1661.895  | 2130.911  |
| NM_014039 | 2848.517  | 2877.431  | NM_006202 | 55891.871 | 56615.52  | NM_006259 | 277.252   | 552.817   |
| S67154    | 6654.395  | 5078.818  | NM_017410 | 22364.266 | 20847.426 | NM_003961 | 55593.727 | 65124.207 |
| AK026181  | 1715.124  | 1458.085  | AY009398  | 543.264   | 1020.25   | AB014513  | 5199.975  | 5820.198  |
| AK021451  | 2455.181  | 1768.148  | X99680    | 12568.705 | 14492.066 | NM_004747 | 1109.039  | 1147.664  |
| AK001971  | 1138.033  | 1295.93   | NM_001448 | 3414.863  | 4349.918  | AK024430  | 46119     | 47229.727 |
| AF086468  | 2301.513  | 3095.796  | NM_016072 | 5304.845  | 6383.18   | NM_002341 | 4674.07   | 6148.562  |
| AK027239  | 2070.699  | 2073.575  | AK026349  | 6843.271  | 7185.303  | AL137651  | 1966.113  | 2155.757  |
| AF005082  | 30921.951 | 29547.354 | NM_014733 | 1810.492  | 1588.957  | NM_018945 | 2487.403  | 3220.096  |
| AL117595  | 3500.14   | 3088.026  | D12485    | 2109.54   | 2746.669  | AB029018  | 1263.604  | 2309.322  |
| AB028988  | 17914.814 | 14397.684 | AK023204  | 5180.081  | 6053.404  | NM_000818 | 2273.636  | 3083.673  |
| AK023072  | 2404.457  | 2226.169  | NM_003449 | 2566.248  | 2817.021  | NM_006650 | 1248.456  | 1649.254  |
| AF086105  | 5097.311  | 3937.406  | NM_002478 | 3006.049  | 2849.932  | AK024436  | 3286.804  | 4677.424  |
| AK026600  | 922.351   | 1006.824  | NM_003234 | 18043.283 | 17289.662 | NM_006648 | 1006.674  | 1474.505  |
| AF251189  | 721.949   | 865.185   | NM_004858 | 2827.528  | 2111.211  | NM_000868 | 576.57    | 946.6     |
| AK026733  | 556.881   | 512.166   | S78774    | 4496.37   | 3586.877  | NM_004711 | 2720.261  | 3881.277  |
| AF161429  | 6688.669  | 6837.539  | NM_004922 | 6020.008  | 6212.059  | U63542    | 489.411   | 185.685   |
| AK021495  | 3083.091  | 2435.751  | NM_002871 | 967.659   | 690.803   | AF161361  | 695.399   | 623.45    |
| AF067777  | 54528.582 | 45437.988 | BE873653  | 52385.988 | 50967.43  | NM_006463 | 7970.444  | 8149.732  |
| U17613    | 532.362   | 521.819   | NM_006987 | 1048.366  | 1333.133  | NM_001444 | 5763.67   | 6566.092  |
| AK027211  | 711.751   | 492.752   | NM_001282 | 4576.548  | 3971.131  | AK027208  | 1009.277  | 1117.478  |
| AJ299406  | 1277.8    | 1376.605  | NM_016830 | 4006.022  | 3884.553  | NM_016521 | 7849.797  | 11145.984 |
| Y10697    | 1230.058  | 1226.74   | U44105    | 891.477   | 895.883   | X98494    | 8741.815  | 10278.333 |
| AY007166  | 11853.863 | 10657.04  | NM_016103 | 2396.73   | 2773.526  | NM_001240 | 4423.069  | 4990.618  |
| NM_004937 | 2182.874  | 1917.689  | AL133654  | 6440.267  | 6236.174  | NM_002709 | 7515.838  | 9298.446  |
| L13197    | 2520.308  | 2605.589  | AL137262  | 1616.891  | 2171.949  | NM_001099 | 1470.118  | 1937.837  |
| CY3Cy5    | 9040.326  | 1930.135  | NM_018643 | 2497.102  | 1827.686  | NM_006823 | 1854.38   | 2049.694  |
| AI298884  | 24183.109 | 21610.494 | NM_006927 | 9210.893  | 7951.009  | NM_016567 | 6664.671  | 8463.563  |
| D87845    | 1164.122  | 1555.519  | NM_014601 | 3745.278  | 2759.152  | NM_007031 | 768.501   | 766.694   |
| X53279    | 466.339   | 443.215   | NM_017761 | 11542.081 | 10309.233 | NM_002657 | 1578.767  | 1630.164  |
| M83254    | 1535.922  | 1298.202  | NM_006928 | 1337.397  | 783.265   | NM_004089 | 17843.699 | 16833.9   |
| S56770    | 778.292   | 923.506   | AF237700  | 1017.234  | 608.997   | NM_001350 | 7666.48   | 7142.004  |
| AI193606  | 493.651   | 341.938   | NM_002860 | 3844.893  | 3487.084  | NM_014809 | 1374.08   | 1561.899  |
| H58872    | 10906.663 | 12492.388 | NM_006169 | 4343.521  | 4156.918  | NM_016074 | 14213.197 | 20524.426 |
| J02938    | 750.035   | 805.448   | NM_001218 | 878.692   | 535.875   | NM_003921 | 1698.919  | 1892.188  |
| S60415    | 734.591   | 1214.926  | NM_014183 | 10766.336 | 10486.682 | NM_004208 | 11700.472 | 17355.639 |
| AA456295  | 713.487   | 1531.055  | AB046780  | 14341.629 | 14680.012 | NM_006336 | 220.733   | 882.493   |
| BG762340  | 3048.768  | 2736.445  | NM_018353 | 6903.988  | 4934.973  | NM_001843 | 1584.594  | 2091.795  |
| AA009484  | 635.493   | 718.892   | NM_001801 | 648.332   | 764.756   | NM_013266 | 498.149   | 801.505   |
| NM_005456 | 1974.653  | 2241.759  | NM_003560 | 30326.328 | 41325.016 | NM_000419 | 854.808   | 924.389   |
| NM_006534 | 5071.411  | 6950.314  | NM_014403 | 3590.795  | 3645.819  | NM_017768 | 2730.596  | 3164.076  |
| SR5       | 4853.94   | 5624.922  | AL050100  | 2622.639  | 3103.335  | NM_002776 | 2481.34   | 2873.733  |
| SR7       | 6201.279  | 46206.547 | NM_020139 | 1507.108  | 1620.577  | AK023398  | 2685.363  | 2954.577  |
| SR9       | 30293.451 | 8125.106  | AL080207  | 498.898   | 525.391   | NM_001907 | 720.295   | 502.176   |
| CY3Cy5    | 9663.33   | 1961.269  | NM_000748 | 17881.324 | 19031.391 | NM_015711 | 56308.828 | 61696.285 |
| NM_016453 | 1657.628  | 1741.185  | NM_000048 | 4129.163  | 6015.671  | NM_000050 | 1538.977  | 1480.736  |
| NM_017701 | 632.56    | 654.689   | AF104032  | 26996.631 | 32923.523 | NM_000481 | 1059.837  | 1365.096  |
| NM_014226 | 1423.092  | 1024.932  | U53531    | 910.324   | 878.205   | AK025681  | 2140.664  | 1997.551  |
| AF142567  | 882.515   | 901.486   | NM_004925 | 4387.702  | 4642.261  | NM_014905 | 4014.885  | 4652.484  |
| NM_006202 | 35592.285 | 30423.008 | NM_005456 | 2242.799  | 1650.55   | NM_012137 | 3717.56   | 3307.984  |
| AY009398  | 242.033   | 1189.199  | NM_006534 | 5299.87   | 4507.642  | NM_004483 | 17042.438 | 18929.773 |
| X99680    | 4768.279  | 8835.536  | AB051826  | 2143.239  | 1770.404  | NM_001513 | 28283.387 | 26339.119 |

|           |           |           |           |           |           |           |           |           |
|-----------|-----------|-----------|-----------|-----------|-----------|-----------|-----------|-----------|
| NM_016072 | 4400.982  | 3848.102  | M20697    | 881.297   | 927.521   | NM_001281 | 2301.507  | 1953.833  |
| AK026349  | 5930.267  | 5649.948  | NM_015046 | 2828.062  | 3188.342  | NM_016835 | 577.39    | 565.153   |
| NM_014733 | 1233.404  | 1324.217  | NM_002014 | 8555.204  | 8629.17   | NM_003981 | 12623.906 | 16103.24  |
| D12485    | 1612.451  | 1877.773  | NM_002538 | 10520.304 | 12297.371 | U26596    | 14426.29  | 20983.221 |
| AK023204  | 4363.772  | 5334.47   | NM_016585 | 9309.021  | 10625.328 | AF070600  | 40945.199 | 39604.633 |
| NM_002478 | 1915.146  | 2193.089  | NM_003333 | 63836.59  | 60611.578 | AB014522  | 7927.086  | 10912.898 |
| D38163    | 776.942   | 941.978   | NM_002013 | 8643.61   | 9517.663  | NM_014875 | 4511.814  | 6409.773  |
| NM_004967 | 476.244   | 540.483   | AK026349  | 4828.388  | 3888.414  | AB033023  | 6706.92   | 9230.019  |
| D28449    | 1305.139  | 2321.613  | NM_014733 | 1697.348  | 1201.748  | BC027895  | 517.118   | 947.483   |
| NM_003281 | 1113.292  | 2593.779  | D12485    | 2067.984  | 1912.805  | AF116238  | 3215.902  | 4288.76   |
| AA460480  | 548.693   | 1303.385  | AK023204  | 4693.461  | 3799.657  | NM_006982 | 1172.958  | 1245.71   |
| S78774    | 2003.207  | 2085.403  | NM_003449 | 2308.122  | 2455.22   | AB033085  | 3241.615  | 2734.644  |
| NM_003059 | 421.04    | 225.885   | NM_002478 | 3426.19   | 2796.801  | AF024703  | 19520.057 | 17423.668 |
| NM_004922 | 4370.906  | 3981.965  | D38163    | 1245.8    | 1224.894  | NM_016531 | 1516.042  | 1836.658  |
| NM_002871 | 727.614   | 723.05    | NM_004967 | 377.513   | 387.204   | NM_003593 | 9843.104  | 10467.839 |
| BE873653  | 22603.627 | 18482.113 | D28449    | 1677.951  | 1685.384  | NM_014383 | 40162.445 | 37595.375 |
| NM_006987 | 557.818   | 696.471   | NM_003281 | 1565.667  | 1788.797  | NM_000244 | 2325.416  | 2772.91   |
| NM_001282 | 3313.62   | 2596.587  | AA460480  | 1230.638  | 1184.127  | NM_014285 | 1822.305  | 1711.378  |
| NM_016830 | 1769.497  | 2085.83   | AI298884  | 35343.832 | 42133.543 | AF026816  | 16159.75  | 16981.975 |
| U44105    | 796.996   | 889.023   | D87845    | 1770.273  | 2110.42   | NM_004719 | 3776.687  | 3419.055  |
| NM_016103 | 1604.19   | 1335.942  | X53279    | 1038.865  | 1000.336  | NM_018553 | 2396.044  | 2494.503  |
| AL133654  | 4398.674  | 4167.369  | M83254    | 3915.729  | 4255.644  | NM_004704 | 3710.084  | 3825.32   |
| NM_018643 | 1161.142  | 1694.623  | S56770    | 1530.823  | 1601.772  | NM_005455 | 4155.796  | 5142.055  |
| NM_016186 | 656.903   | 856.512   | AI193606  | 661.177   | 833.696   | NM_014633 | 2046.194  | 2246.158  |
| M30142    | 3858.608  | 4060.952  | H58872    | 18050.701 | 20565.875 | NM_001970 | 23209.4   | 31755.828 |
| NM_005018 | 847.726   | 1195.205  | J04543    | 7226.747  | 8227.354  | NM_006810 | 11223     | 15615.126 |
| NM_013378 | 6079.944  | 7795.047  | S60415    | 970.479   | 1415.831  | AK024054  | 3958.046  | 5748.354  |
| NM_001085 | 1101.504  | 1335.317  | AA456295  | 1069.857  | 1628.778  | NM_001969 | 584.427   | 420.327   |
| NM_006110 | 1104.004  | 1639.064  | BE733577  | 3880.621  | 3864.579  | NM_004116 | 2703.1    | 4150.971  |
| NM_002860 | 3072.099  | 2978.862  | AI817942  | 1154.038  | 1168.258  | AK024508  | 2783.667  | 3407.614  |
| NM_006169 | 1864.901  | 1618.111  | BG762340  | 4148.664  | 3394.491  | AK027213  | 3637.457  | 5209.488  |
| NM_001218 | 513.224   | 281.937   | NM_002077 | 123.984   | 303.124   | AL096749  | 16301.197 | 19331.711 |
| NM_014183 | 8453.013  | 8794.643  | NM_018643 | 2498.273  | 1600.236  | AK023620  | 2844.794  | 3532.822  |
| AB046780  | 11989.429 | 10436.685 | NM_016186 | 726.508   | 597.062   | AF086189  | 3477.709  | 3950.385  |
| NM_018353 | 5307.529  | 3542.797  | M30142    | 4128.766  | 3130.476  | AL050055  | 4634.556  | 7140.673  |
| NM_001801 | 425.249   | 667.915   | NM_005018 | 1110.561  | 828.643   | NM_005009 | 12167.505 | 15064.941 |
| NM_016373 | 422.896   | 350.675   | NM_013378 | 12107.303 | 10023.074 | NM_014596 | 3978.51   | 4100.18   |
| NM_003560 | 29639.51  | 30237.729 | NM_001085 | 1380.203  | 1015.197  | NM_006703 | 12433.467 | 12882.455 |
| NM_014403 | 2159.708  | 1929.851  | NM_006110 | 1545.513  | 1927.624  | NM_004037 | 1752.216  | 1993.617  |
| AL050100  | 1917.578  | 1814.903  | NM_016453 | 1937.548  | 2553.071  | NM_005116 | 1876.504  | 2494.446  |
| NM_000748 | 10027.979 | 9390.287  | NM_017701 | 1346.87   | 1515.05   | NM_002766 | 3545.063  | 4743.773  |
| NM_000048 | 3249.727  | 3662.682  | NM_014226 | 3384.364  | 3349.826  | AJ404857  | 1052.802  | 1493.644  |
| U53531    | 826.094   | 835.6     | AF142567  | 1331.116  | 1821.298  | NM_000788 | 10937.502 | 14542.656 |
| NM_004925 | 4186.312  | 5692.57   | NM_017410 | 19367.037 | 17116.459 | AF254088  | 1717.1    | 1789.903  |
| NM_002246 | 192.484   | 187.088   | X99680    | 7610.591  | 8576.761  | NM_001420 | 1834.097  | 1856.737  |
| NM_003234 | 16841.219 | 21052.25  | NM_001448 | 3062.776  | 3599.553  | NM_000248 | 1591.405  | 1550.402  |
| NM_004858 | 2447.392  | 3592.775  | NM_016072 | 4802.053  | 5515.015  | AB031046  | 1362.502  | 1503.501  |
| AB051826  | 1463.981  | 1108.986  | NM_000748 | 17079.754 | 13891.041 | NM_002449 | 12314.288 | 11551.295 |
| M20697    | 1028.218  | 1020.191  | NM_000048 | 3681.903  | 3457.224  | AK025388  | 1017.679  | 1205.714  |
| NM_015046 | 2429.984  | 2765.154  | AF104032  | 27176.654 | 24157.838 | NM_006147 | 425.418   | 752.138   |
| NM_002014 | 7280.761  | 6976.078  | U53531    | 686.75    | 635.772   | AB006631  | 1019.082  | 1800.046  |
| NM_002538 | 8677.525  | 9773.759  | NM_004925 | 3848.151  | 4148.631  | AF291181  | 695.75    | 1144.793  |
| NM_016585 | 7201.708  | 7481.245  | NM_003234 | 17692.447 | 15574.678 | NM_005741 | 2392.675  | 3225.534  |

|           |           |           |           |           |           |           |           |           |
|-----------|-----------|-----------|-----------|-----------|-----------|-----------|-----------|-----------|
| NM_006927 | 8212.163  | 10597.539 | NM_004858 | 2820.317  | 2817.638  | NM_000964 | 1973.809  | 2874.73   |
| NM_014601 | 2265.248  | 3441.5    | S78774    | 5736.312  | 7237.16   | BF343886  | 680.97    | 1233.146  |
| NM_017761 | 13103.591 | 17574.289 | NM_003059 | 536.805   | 670.443   | NM_013263 | 4587.023  | 6990.962  |
| NM_006928 | 980.65    | 1196.344  | NM_004922 | 6738.125  | 7853.785  | AL137407  | 2899.816  | 4002.187  |
| AF237700  | 1352.575  | 794.822   | NM_002871 | 1119.845  | 1069.195  | AF085839  | 555.494   | 741.655   |
| D28449    | 1070.44   | 1043.395  | BE873653  | 48669.566 | 47185.941 | NM_018178 | 10591.507 | 12029.288 |
| NM_003281 | 744.647   | 1003.058  | NM_006987 | 1072.184  | 943.811   | AK025204  | 1445.628  | 1398.589  |
| AA460480  | 446.646   | 513.188   | NM_016830 | 3611.095  | 3313.673  | AK027256  | 607.675   | 962.467   |
| AI298884  | 25702.758 | 25700.414 | U44105    | 605.772   | 789.924   | NM_019000 | 610.713   | 699.227   |
| D87845    | 1691.754  | 1876.04   | NM_016103 | 2196.224  | 2365.988  | AF143330  | 1250.807  | 1652.542  |
| X53279    | 684.761   | 424.884   | AL133654  | 5062.093  | 4414.699  | AK025178  | 2412.024  | 3082.296  |
| M83254    | 1936.052  | 2106.236  | AL137262  | 1727.469  | 1359.292  | AF147359  | 1158.536  | 1442.38   |
| S56770    | 824.111   | 826.983   | NM_002014 | 7993.678  | 5413.323  | NM_014835 | 11376.064 | 16130.573 |
| AI193606  | 332.877   | 317.165   | NM_002538 | 8925.294  | 7966.376  | AK001822  | 5008.92   | 6622.168  |
| H58872    | 12938.255 | 15471.724 | NM_016585 | 8928.449  | 7552.159  | AK026969  | 1314.449  | 1794.275  |
| J02938    | 768.658   | 940.873   | NM_003333 | 73677.766 | 67540.953 | AF086287  | 1517.368  | 1806.618  |
| J04543    | 6267.484  | 6683.831  | NM_002013 | 6782.143  | 6744.194  | AF086409  | 992.643   | 876.068   |
| S60415    | 647.951   | 867.862   | NM_006927 | 11607.502 | 11000.676 | AK024268  | 2064.981  | 1987.893  |
| AA456295  | 834.853   | 963.873   | NM_014601 | 3049.521  | 2521.409  | AF086295  | 1219.658  | 1861.535  |
| BE733577  | 2495.027  | 3135.148  | NM_017761 | 13018.068 | 10317.001 | AF086344  | 3775.915  | 5864.146  |
| AI817942  | 979.093   | 1208.188  | NM_006928 | 1006.559  | 798.588   | AF086424  | 719.257   | 1111.327  |
| BG762340  | 3106.262  | 3171.679  | AF237700  | 1694.835  | 1083.49   | AL110130  | 443.555   | 719.759   |
| AA009484  | 497.644   | 979.32    | NM_002860 | 5931.816  | 6546.86   | AF052116  | 753.853   | 1039.14   |
| NM_005456 | 2095.194  | 2394.171  | NM_006169 | 5133.361  | 5860.814  | NM_018087 | 3036.968  | 3950.027  |
| NM_006534 | 5064.679  | 7128.08   | NM_001218 | 705.529   | 902.986   | AL360260  | 531.122   | 903.751   |
| NM_016186 | 320.095   | 360.055   | NM_014183 | 9434.251  | 7823.631  | AK023647  | 511.018   | 603.384   |
| M30142    | 2374.62   | 2122.096  | AB046780  | 15453.381 | 15053.962 | AL137366  | 1141.892  | 1680.948  |
| NM_005018 | 680.624   | 482.858   | NM_018353 | 6237.573  | 4792.077  | BC031635  | 1320.456  | 1246.266  |
| NM_013378 | 3673.445  | 3381.151  | NM_001801 | 312.878   | 358.75    | AF085916  | 520.23    | 431.074   |
| NM_001085 | 624.803   | 758.013   | NM_003560 | 16116.2   | 18089.068 | AF085950  | 487.233   | 326.082   |
| NM_016453 | 1928.802  | 2134.381  | NM_014403 | 2873.705  | 3588.425  | AL359598  | 689.271   | 635.974   |
| NM_017701 | 947.523   | 875.297   | AL050100  | 2365.204  | 2255.743  | AF085980  | 742.69    | 673.494   |
| NM_014226 | 1743.935  | 1676.933  | NM_020139 | 1272.075  | 1246.87   | AF085927  | 1417.388  | 1254.027  |
| AF142567  | 985.599   | 1104.855  | NM_017730 | 3555.575  | 3238.168  | AF085954  | 3800.971  | 4315.72   |
| NM_006202 | 32863.586 | 32759.455 | AB051826  | 2665.368  | 2449.753  | AL137337  | 1139.995  | 935.07    |
| NM_017410 | 16489.539 | 14571.938 | M20697    | 954.331   | 1001.046  | AL161969  | 2372.697  | 2036.394  |
| AY009398  | 242.541   | 422.715   | NM_015046 | 3783.072  | 3467.973  | AL442095  | 4028.75   | 3412.208  |
| X99680    | 3557.828  | 4353.19   | AF231022  | 15699.978 | 18416.738 | AL137378  | 2005.12   | 2055.781  |
| NM_001448 | 2645.004  | 3334.069  | NM_016327 | 3089.234  | 3373.022  | AL137609  | 23943.65  | 27353.943 |
| NM_016072 | 3857.005  | 5200.408  | NM_006322 | 1704.585  | 1859.501  | AL353946  | 3523.665  | 5160.912  |
| AK026349  | 5643.96   | 6945.278  | U66702    | 43553.352 | 44651.277 | X69081    | 5015.722  | 6450.005  |
| NM_014733 | 1500      | 1734.608  | AJ278478  | 921.071   | 1485.708  | NM_005714 | 2927.627  | 2964.764  |
| D12485    | 1810.285  | 2956.369  | AF216381  | 16025.147 | 13452.01  | AL359931  | 3851.414  | 4071.869  |
| AK023204  | 5487.918  | 9417.853  | L08442    | 439.789   | 846.93    | AK000954  | 1671.802  | 2202.529  |
| NM_003449 | 2671.665  | 5860.595  | AB014593  | 1756.118  | 2774.012  | AF086099  | 394.481   | 610.841   |
| NM_002478 | 2098.202  | 2475.781  | AK074832  | 16869.926 | 15060.453 | AK021922  | 386.313   | 425.101   |
| NM_003234 | 8484.037  | 8660.754  | NM_006235 | 941.597   | 824.555   | AK025800  | 2943.607  | 3782.922  |
| NM_004858 | 1724.407  | 1842.673  | AK026353  | 1340.849  | 750.628   | AK022333  | 547.151   | 821.285   |
| S78774    | 2923.192  | 2720.244  | L24123    | 2345.523  | 2189.204  | AF095854  | 1694.33   | 910.512   |
| NM_003059 | 431.761   | 311.616   | AF071111  | 514.396   | 610.441   | NM_014162 | 1599.675  | 1122.145  |
| NM_004922 | 5335.845  | 6383.91   | U00954    | 632.844   | 731.258   | AF113689  | 345.115   | 467.863   |
| NM_002871 | 601.887   | 495.482   | NM_015942 | 3690.564  | 3585.189  | AF159093  | 3098.215  | 2365.73   |
| BE873653  | 28171.975 | 28269.164 | NM_017907 | 6322.71   | 5784.428  | AF113679  | 916.233   | 883.295   |

|           |           |           |           |           |           |           |           |           |
|-----------|-----------|-----------|-----------|-----------|-----------|-----------|-----------|-----------|
| NM_006987 | 900.395   | 1133.653  | NM_002044 | 7969.769  | 7266.194  | AK021997  | 2867.76   | 2411.695  |
| NM_001282 | 3590.573  | 2688.841  | AJ272267  | 1255.979  | 1186.443  | AK022125  | 1448.282  | 1130.003  |
| NM_016830 | 1192.182  | 1081.285  | NM_004668 | 842.422   | 918.652   | AK022244  | 5010.643  | 4954.158  |
| U44105    | 850.437   | 1054.32   | NM_000673 | 604.714   | 311.517   | AK022381  | 5333.756  | 5047.163  |
| NM_016103 | 1651.54   | 1825.41   | NM_002103 | 6712.293  | 6168.029  | AK022012  | 868.031   | 941.186   |
| AL133654  | 3939.824  | 3906.822  | NM_006665 | 3859.267  | 3647.326  | AK022149  | 456.262   | 558.334   |
| AL137262  | 1116.125  | 1029.897  | NM_000270 | 7766.538  | 6810.467  | AK022286  | 2421.78   | 2817.156  |
| NM_020437 | 370.687   | 375.833   | AK026670  | 597.074   | 668.146   | AK022613  | 4750.645  | 6975.842  |
| X87888    | 231.093   | 385.964   | NM_002876 | 3951.556  | 2749.084  | AK023843  | 319.258   | 600.975   |
| NM_018643 | 1430.503  | 1238.903  | AK022332  | 2657.677  | 2030.273  | AL359557  | 921.891   | 1153.794  |
| NM_006927 | 6172.422  | 5840.428  | NM_006465 | 1366.243  | 1609.48   | AK027257  | 538.677   | 734.065   |
| NM_014601 | 1560.021  | 1530.008  | NM_006769 | 8238.589  | 7265.991  | AK024582  | 750.583   | 972.274   |
| NM_017761 | 9674.102  | 9367.161  | NM_001189 | 2775.066  | 3226.41   | AK024143  | 804.875   | 811.607   |
| NM_006928 | 695.737   | 745.254   | NM_006992 | 1079.396  | 952.511   | AK022099  | 498.847   | 539.798   |
| AF237700  | 960.865   | 678.045   | AF055009  | 11178.11  | 8286.092  | NM_014367 | 1418.06   | 950.197   |
| NM_002860 | 4465.249  | 4975.678  | AL365370  | 3340.157  | 3404.695  | NM_019073 | 352.805   | 337.821   |
| NM_006169 | 2653.523  | 2957.321  | AK022204  | 823.576   | 774.988   | AK025835  | 557.75    | 405.885   |
| NM_001218 | 523.913   | 731.901   | AF085912  | 1111.304  | 807.635   | NM_002365 | 1961.297  | 1677.142  |
| NM_014183 | 4954.785  | 6107.925  | AK001127  | 644.385   | 910.461   | AF161441  | 2842.59   | 2206.281  |
| AB046780  | 11070.455 | 12105.192 | U79256    | 9832.724  | 9352.8    | AL137474  | 1771.873  | 2279.25   |
| NM_018353 | 6638.95   | 4380.738  | AL832550  | 936.155   | 665.316   | AK021572  | 1092.036  | 1413.271  |
| NM_001801 | 662.692   | 669.33    | AF131798  | 624.361   | 438.359   | AK021631  | 413.637   | 528.755   |
| NM_016373 | 432.11    | 495.411   | AF143876  | 857.167   | 943.549   | AK026757  | 846.979   | 879.307   |
| NM_003560 | 30852.908 | 34500.688 | AF052176  | 867.807   | 823.315   | AF119908  | 1755.549  | 995.572   |
| NM_014403 | 2420.752  | 2134.445  | NM_001412 | 5073.662  | 3693.795  | U50539    | 468.555   | 426.625   |
| AL050100  | 1658.869  | 1895.824  | AF095771  | 643.322   | 455.872   | AK000653  | 7679.962  | 5774.856  |
| NM_020139 | 554.599   | 644.539   | AF086154  | 1488.806  | 1553.572  | AK000908  | 885.193   | 517.347   |
| AL080207  | 343.958   | 334.518   | AF086205  | 1433.594  | 1145.189  | AF086211  | 230.412   | 434.136   |
| NM_000748 | 11311.443 | 12974.593 | AK024169  | 877.902   | 666.01    | X96660    | 1667.997  | 1557.911  |
| NM_000048 | 3895.659  | 5518.865  | AF147395  | 1293.838  | 1390.534  | AK000993  | 717.14    | 484.798   |
| U53531    | 917.7     | 1172.344  | AF085985  | 1014.813  | 1067.602  | AK023519  | 1177.634  | 802.264   |
| NM_004925 | 4407.769  | 4896.093  | AK025217  | 1757.771  | 1834.849  | Z70696    | 1281.797  | 928.52    |
| NM_005456 | 1451.037  | 1475.367  | AL137342  | 1876.744  | 2856.978  | NM_005792 | 4149.376  | 3324.083  |
| NM_006534 | 3461.886  | 3629.938  | AF075105  | 902.52    | 915.324   | AF048847  | 2590.724  | 3042.443  |
| AB051826  | 1822.858  | 1898.3    | U03241    | 1168.696  | 977.871   | AL137717  | 2858.647  | 2556.536  |
| M20697    | 734.922   | 1030.634  | NM_005117 | 1498.839  | 1645.243  | AF035297  | 1006.445  | 1358.344  |
| NM_015046 | 2261.523  | 2489.314  | AJ007733  | 573.704   | 348.671   | NM_014039 | 1983.363  | 2599.689  |
| NM_002014 | 6801.189  | 6418.629  | AK021625  | 3391.526  | 2540.198  | S67154    | 3347.856  | 4890.275  |
| NM_002538 | 10021.271 | 12222.88  | AK021679  | 879.89    | 690.69    | AK026181  | 3720.924  | 3722.206  |
| NM_016585 | 7836.963  | 9612.161  | AK001380  | 2490.868  | 1500.46   | AK021451  | 1223.906  | 957.438   |
| AK026349  | 4646.818  | 4256.953  | AL117553  | 2309.387  | 2755.569  | AK001971  | 440.576   | 358.958   |
| NM_014733 | 1179.672  | 950.249   | AK024938  | 518.126   | 570.008   | AF086468  | 1615.119  | 1186.8    |
| D12485    | 1234.556  | 1164.821  | AK025312  | 2321.421  | 2252.821  | AK027239  | 1753.676  | 1152.077  |
| AK023204  | 3757.448  | 3840.675  | AK027205  | 1311.098  | 1552.307  | AF005082  | 15088.712 | 9088.462  |
| NM_003449 | 2021.043  | 1774.726  | NM_018606 | 1846.321  | 1986.187  | AL117595  | 3531.331  | 1765.515  |
| NM_002478 | 1767.463  | 1993.253  | AK026493  | 747.39    | 544.97    | AB028988  | 18360.824 | 11012.396 |
| D38163    | 828.341   | 906.635   | AK002042  | 501.018   | 470.683   | AK023072  | 1423.945  | 760.126   |
| NM_004967 | 506.379   | 302.762   | AK023963  | 13354.982 | 12682.371 | AF086105  | 9976.04   | 7112.191  |
| D28449    | 1261.679  | 1715.675  | AK022473  | 2759.401  | 3058.063  | AK026600  | 504.754   | 540.942   |
| NM_003281 | 1028.318  | 1499.144  | AK023810  | 1358.26   | 1211.037  | AF251189  | 453.608   | 318.373   |
| AA460480  | 610.123   | 622.13    | U80761    | 6540.173  | 7370.665  | AK026733  | 561.407   | 585.756   |
| AI298884  | 26788.514 | 28903.801 | U61100    | 983.116   | 367.713   | AF161429  | 4494.765  | 2922.985  |
| D87845    | 1514.212  | 1921.495  | NM_018582 | 901.598   | 540.685   | AK021495  | 2584.753  | 1704.711  |

|           |           |           |           |           |           |           |           |           |
|-----------|-----------|-----------|-----------|-----------|-----------|-----------|-----------|-----------|
| X53279    | 503.96    | 589.087   | M21539    | 8372.775  | 6071.151  | AF067777  | 40206.668 | 26965.041 |
| M83254    | 1563.161  | 1977.975  | AF130117  | 1104.79   | 2710.107  | U17613    | 445.391   | 471.641   |
| S56770    | 943.726   | 987.893   | AK024125  | 678.524   | 775.13    | AK027211  | 570.943   | 350.243   |
| H58872    | 12720.604 | 15340.756 | AK024761  | 6799.505  | 7248.41   | AJ299406  | 1207.725  | 1022.545  |
| J02938    | 690.329   | 932.555   | M55536    | 6343.25   | 5883.523  | Y10697    | 898.325   | 1407.661  |
| J04543    | 5990.704  | 7204.726  | NM_014335 | 15574.269 | 14935.482 | AY007166  | 8948.449  | 12090.079 |
| S60415    | 537.512   | 831.203   | AF086067  | 3153.78   | 3312.615  | NM_004937 | 1958.032  | 2891.926  |
| AA456295  | 826.307   | 1062.331  | AK024967  | 5817.446  | 4928.693  | L13197    | 1932.843  | 2852.997  |
| BE733577  | 2975.281  | 3609.74   | AK025102  | 1785.908  | 1319.945  | CY3Cy5    | 14423.369 | 1066.157  |
| AI817942  | 1089.554  | 1140.337  | AF086562  | 1110.11   | 968.616   | AI298884  | 24636.955 | 27748.838 |
| BG762340  | 3679.85   | 3264.065  | AJ011980  | 527.021   | 582.346   | D87845    | 1084.625  | 1902.952  |
| AA009484  | 519.655   | 627.302   | AY007113  | 2351.45   | 1625.283  | X53279    | 958.197   | 1271.423  |
| NM_018643 | 1116.71   | 981.135   | AF130083  | 16620.07  | 12052.152 | M83254    | 11003.454 | 12703.817 |
| M30142    | 3133.342  | 3419.002  | AL110185  | 67790.992 | 53175.422 | S56770    | 2172.12   | 2841.648  |
| NM_005018 | 702.978   | 736.669   | NM_002700 | 18026.27  | 10846.886 | AI193606  | 866.119   | 1295.525  |
| NM_013378 | 4652.454  | 4545.526  | AB002437  | 28944.436 | 24184.633 | H58872    | 14334.129 | 17756.475 |
| NM_001085 | 795.702   | 700.496   | AK024013  | 2382.314  | 1514.032  | J02938    | 893.145   | 1568.111  |
| NM_006110 | 1276.162  | 1049.149  | AK023496  | 794.877   | 585.823   | J04543    | 5213.865  | 6152.256  |
| NM_016453 | 2086.225  | 2339.686  | NM_006777 | 2789.605  | 2490.187  | S60415    | 882.594   | 1395.589  |
| NM_017701 | 780.704   | 751.167   | AK024969  | 4553.383  | 4847.427  | AA456295  | 1441.627  | 1698.418  |
| NM_014226 | 1614.556  | 1401.826  | AK022250  | 2951.766  | 2247.144  | BE733577  | 4921.045  | 5254.065  |
| AF142567  | 756.269   | 882.284   | J05063    | 739.486   | 823.1     | AI817942  | 1244.331  | 1490.137  |
| NM_005621 | 292.615   | 187.174   | NM_012369 | 1448.062  | 1214.672  | BG762340  | 3270.207  | 3553.906  |
| NM_003391 | 259.247   | 122.523   | AK025092  | 2496.143  | 2095.51   | AA009484  | 594.775   | 912.169   |
| NM_017410 | 16089.201 | 14990.67  | AF130047  | 959.12    | 691.508   | NM_005456 | 4561.625  | 5303.596  |
| X99680    | 5858.226  | 5654.743  | Z83944    | 782.578   | 457.027   | NM_006534 | 6127.907  | 8290.014  |
| NM_001448 | 2624.791  | 3224.426  | AF085871  | 820.789   | 648.828   | SR9       | 19556.514 | 5023.976  |
| NM_016072 | 3994.312  | 3690.82   | AF026564  | 1115.384  | 986.324   | CY3Cy5    | 7391.89   | 811.416   |
| NM_000748 | 6683.488  | 5584.514  | X97301    | 3516.268  | 2628.164  | NM_016453 | 1422.897  | 1784.043  |
| NM_000048 | 3188.711  | 2816.571  | NM_019063 | 21585.143 | 22836.463 | NM_017701 | 1343.479  | 1845.974  |
| U53531    | 606.284   | 542.552   | NM_014336 | 1643.803  | 1906.939  | NM_014226 | 4790.622  | 5924.037  |
| NM_004925 | 3485.604  | 3809.289  | NM_012456 | 10953.033 | 8987.267  | AF142567  | 2189.28   | 3110.255  |
| NM_002246 | 197.568   | 132.2     | AB002308  | 850.642   | 561.453   | NM_017410 | 13070.626 | 13337.418 |
| NM_003234 | 13270.424 | 14948.249 | NM_012143 | 4327.767  | 4723.657  | AY009398  | 498.618   | 418.044   |
| NM_004858 | 2572.264  | 2827.129  | AF085892  | 2703.003  | 2353.03   | X99680    | 11662.566 | 12418.636 |
| S78774    | 2958.603  | 2611.096  | AF075114  | 6970.533  | 7391.791  | NM_001448 | 1929.546  | 2278.295  |
| NM_003059 | 426.626   | 561.691   | AK022218  | 66406.516 | 52859.973 | NM_016072 | 3553.365  | 3421.027  |
| NM_004922 | 6037.478  | 6397.598  | NM_007112 | 4514.286  | 4745.354  | AK026349  | 4570.678  | 4563.527  |
| NM_002871 | 724.523   | 695.142   | S82075    | 2728.905  | 2466.559  | NM_014733 | 923.221   | 1266.536  |
| BE873653  | 25809.521 | 23560.531 | AK000660  | 3248.976  | 2611.22   | D12485    | 1787.234  | 1675.071  |
| NM_006987 | 521.044   | 751.568   | NM_014711 | 1601.086  | 1285.172  | AK023204  | 2909.267  | 3445.478  |
| NM_016830 | 1653.458  | 2018.459  | AK022015  | 2097.831  | 1861.447  | NM_002478 | 2231.192  | 2206.794  |
| U44105    | 817.456   | 1300.344  | D63135    | 1071.315  | 1712.636  | D38163    | 1071.598  | 1009.495  |
| NM_016103 | 1731.318  | 2005.449  | AB033083  | 3799.955  | 3513.929  | D28449    | 1020.326  | 993.662   |
| AL133654  | 4226.659  | 4305.492  | CY3Cy5    | 8864.256  | 714.065   | NM_003281 | 882.357   | 915.069   |
| AL137262  | 1220.725  | 1459.164  | H41522    | 5576.523  | 5205.767  | AA460480  | 713.736   | 770.21    |
| NM_020437 | 261.831   | 320.556   | AA460291  | 15216.33  | 15359.415 | S78774    | 6006.285  | 6306.649  |
| NM_002014 | 5868.393  | 4487.711  | BI821333  | 18464.412 | 20638.621 | NM_004922 | 4468.848  | 5393.754  |
| NM_002538 | 8004.191  | 6720.566  | X51841    | 26332.625 | 36612.41  | NM_002871 | 450.36    | 324.862   |
| NM_016585 | 6694.096  | 5575.131  | AF051344  | 21739.912 | 32225.73  | NM_006987 | 812.124   | 648.704   |
| NM_006927 | 7952.32   | 8343.031  | BG506100  | 7532.53   | 10056.809 | NM_001282 | 3345.88   | 2590.532  |
| NM_014601 | 2432.204  | 2664.337  | X53586    | 1111.976  | 1582.114  | U44105    | 812.685   | 742.077   |
| NM_017761 | 12210.661 | 13443.351 | M17176    | 2742.367  | 2580.937  | NM_016103 | 1217.142  | 1442.826  |

|           |           |           |           |           |           |           |           |           |
|-----------|-----------|-----------|-----------|-----------|-----------|-----------|-----------|-----------|
| NM_00692E | 936.709   | 816.202   | M26576    | 1848.477  | 2111.176  | AL133654  | 3172.637  | 2818.347  |
| AF237700  | 1244.965  | 756.178   | M32972    | 5480.749  | 5110.026  | AL137262  | 1370.286  | 1128.329  |
| NM_00286C | 4902.457  | 5162.973  | D11151    | 761.299   | 601.91    | NM_01864E | 1786.788  | 1911.313  |
| NM_00616E | 2736.739  | 2850.162  | D89854    | 966.508   | 1103.955  | NM_01618E | 450.353   | 495.785   |
| NM_00121E | 706.153   | 839.733   | M13207    | 1747.848  | 2044.196  | M30142    | 2113.812  | 2251.837  |
| NM_01418E | 7341.465  | 8129.524  | M97815    | 2103.061  | 2256.635  | NM_00501E | 717.669   | 677.477   |
| AB046780  | 12954.608 | 14486.716 | NM_00632E | 3913.692  | 4379.363  | NM_01337E | 7349.794  | 6848.936  |
| NM_01835E | 5622.827  | 4222.368  | SR2       | 68080.672 | 75249.859 | NM_00108E | 476.009   | 501.88    |
| NM_001801 | 545.47    | 791.138   | SR4       | 19770.031 | 21988.813 | NM_00611C | 539.749   | 704.257   |
| NM_00356C | 27840.99  | 30474.51  | SR6       | 2736.734  | 3470.438  | NM_00286C | 2576.19   | 2362.192  |
| NM_01440E | 2491.431  | 2341.088  | SR8       | 9571.834  | 32437.096 | NM_00616E | 3947.395  | 2589.876  |
| AL050100  | 2087.71   | 2223.399  | SR10      | 38084.168 | 19491.566 | NM_00121E | 525.581   | 342.188   |
| NM_02013E | 739.33    | 801.213   | CY3Cy5    | 11009.791 | 909.736   | NM_01418E | 5687.322  | 4320.427  |
| NM_01773C | 3415.194  | 3732.151  | NM_00318E | 3831.621  | 3688.297  | NM_01835E | 4891.482  | 2661.801  |
| NM_01463C | 1430.928  | 1272.602  | NM_00711E | 940.595   | 648.827   | NM_00356C | 17898.098 | 15545.303 |
| AB051826  | 1765.974  | 1605.665  | U59431    | 3657.402  | 3717.912  | NM_01440E | 2331.197  | 2313.173  |
| M20697    | 993.814   | 1017.007  | U49349    | 1578.135  | 2074.57   | AL050100  | 1683.612  | 2311.758  |
| NM_01504E | 2631.806  | 2635.588  | NM_02015E | 3104.66   | 3855.617  | NM_02013E | 1903.903  | 3594.854  |
| AF231022  | 7404.227  | 6305.011  | NM_013404 | 2405.874  | 2846.034  | AL080207  | 427.303   | 712.676   |
| NM_01632E | 2765.834  | 2350.52   | AF300648  | 2099.954  | 2249.834  | NM_00074E | 12230.537 | 13159.749 |
| NM_00632E | 1794.643  | 1775.077  | X06710    | 3563.826  | 5435.013  | NM_00004E | 2161.854  | 2783.655  |
| AK002081  | 874.765   | 863.711   | AK000896  | 1805.184  | 2146.553  | U53531    | 634.495   | 582.773   |
| NM_01430C | 30.084    | 645.973   | NM_020384 | 3009.833  | 3480.273  | NM_00492E | 2697.912  | 3497.934  |
| AF216381  | 15811.22  | 13995.943 | NM_00605E | 20357.609 | 29803.51  | NM_003234 | 8437.129  | 9063.214  |
| L08442    | 301.845   | 425.75    | NM_00662E | 11748.949 | 12375.897 | NM_00485E | 1446.596  | 1846.216  |
| AB014593  | 971.939   | 874.757   | M97496    | 12444.529 | 10569.354 | AB051826  | 1061.238  | 1111.943  |
| NM_00623E | 800.059   | 827.401   | AK026074  | 1582.711  | 1553.294  | M20697    | 529.058   | 906.192   |
| NM_01425E | 360.184   | 519.375   | NM_00317E | 5608.728  | 5877.693  | NM_01504E | 2089.777  | 3873.994  |
| AK026353  | 1177.301  | 1158.597  | NM_00480E | 3116.507  | 3014.206  | NM_002014 | 5427.265  | 5618.773  |
| L24123    | 2047.882  | 1400.04   | AA903183  | 1065.859  | 1270.653  | NM_00253E | 5339.912  | 6538.938  |
| AK024288  | 821.316   | 845.216   | NM_01781E | 7039.233  | 6833.602  | NM_01658E | 7158.632  | 8046.77   |
| AF071111  | 508.68    | 687.735   | AB046823  | 1658.099  | 1394.664  | NM_00692E | 5365.592  | 4640.362  |
| U00954    | 366.975   | 320.636   | NM_00492E | 1657.364  | 1331.916  | NM_014601 | 2549.602  | 2324.996  |
| NM_01594E | 2949.811  | 2545.762  | NM_00466E | 1491.68   | 1143.742  | NM_017761 | 6638.839  | 7571.786  |
| NM_01790E | 5046.768  | 4587.139  | NM_01663E | 38863.043 | 43250.336 | NM_00692E | 498.252   | 648.878   |
| NM_002044 | 8254.607  | 6051.436  | U61739    | 15952.779 | 16729.098 | AF237700  | 2517.096  | 4563.723  |
| AJ272267  | 858.544   | 794.349   | AJ132089  | 1320.996  | 1533.785  | D38163    | 1315.096  | 1385.339  |
| NM_00466E | 319.125   | 175.121   | U92819    | 38301.449 | 45194.742 | NM_00496E | 377.899   | 288.632   |
| NM_00067E | 414.121   | 479.819   | AB020626  | 1352.908  | 1396.252  | D28449    | 1103.524  | 1318.562  |
| NM_00267E | 1772.339  | 1732.575  | NM_00203E | 13345.426 | 12690.963 | NM_003281 | 1135.225  | 1345.496  |
| NM_00210E | 5119.306  | 4338.45   | NM_01240C | 843.527   | 737.642   | AA460480  | 1213.964  | 1338.323  |
| NM_00666E | 2999.908  | 2698.467  | NM_00685C | 1174.825  | 1754.366  | AI298884  | 20442.578 | 20349.342 |
| AK026256  | 265.58    | 539.097   | AB013103  | 1082.406  | 1753.246  | D87845    | 1013.208  | 1464.034  |
| NM_00027C | 4814.674  | 3803.592  | AF019225  | 4196.76   | 5004.868  | X53279    | 999.903   | 1229.353  |
| U89277    | 409.354   | 211.368   | Z36803    | 6543.391  | 7029.786  | M83254    | 6055.879  | 10130.052 |
| AB046837  | 401.224   | 470.892   | NM_013371 | 1156.529  | 999.786   | S56770    | 1613.779  | 2385.41   |
| AK026670  | 395.082   | 616.848   | NM_00070E | 8839.099  | 10104.53  | AI193606  | 529.473   | 691.381   |
| NM_00287E | 3495.512  | 2973.416  | AF202092  | 14702.639 | 15448.998 | H58872    | 11647.693 | 13077.627 |
| AK022332  | 2273.711  | 2395.511  | NM_003201 | 4813.973  | 4160.635  | J02938    | 720.106   | 859.23    |
| NM_00646E | 1205.321  | 1229.314  | AB011139  | 2578.522  | 2342.958  | J04543    | 3956.889  | 5431.585  |
| NM_00676E | 7198.894  | 5310.568  | NM_00691E | 1772.712  | 1551.848  | S60415    | 624.165   | 1014.445  |
| NM_00118E | 2385.522  | 2340.895  | AK022625  | 17305.809 | 16565.432 | AA456295  | 850.779   | 1162.762  |
| AF055009  | 6148.913  | 4826.819  | AK023084  | 6134.838  | 5516.531  | BE733577  | 3060.448  | 3570.842  |

|           |           |           |           |           |           |           |           |           |
|-----------|-----------|-----------|-----------|-----------|-----------|-----------|-----------|-----------|
| AL365370  | 2494.277  | 2855.534  | BC012333  | 8554.618  | 8774.473  | AI817942  | 875.175   | 1020.534  |
| AK022204  | 553.436   | 409.695   | AF237952  | 4510.313  | 3637.677  | BG762340  | 2306.122  | 2319.152  |
| AF086147  | 475.902   | 471.306   | AL079287  | 3521.438  | 3337.3    | NM_005456 | 2170.296  | 1921.696  |
| AK027065  | 1155.803  | 939.247   | NM_014427 | 4998.965  | 4179.201  | NM_006534 | 4153.132  | 3610.239  |
| AK001127  | 692.922   | 599.536   | AB046769  | 4067.58   | 3721.674  | NM_016186 | 422.036   | 604.807   |
| U79256    | 5562.955  | 4293.189  | NM_015922 | 13303.815 | 15253.234 | M30142    | 2326.158  | 1348.043  |
| AL832550  | 660.125   | 743.688   | NM_020381 | 3774.483  | 4099.281  | NM_005016 | 1183.481  | 1111.003  |
| AF131798  | 459.386   | 681.548   | NM_002957 | 11012.515 | 11426.609 | NM_013376 | 9900.283  | 8547.789  |
| AK001731  | 1223.003  | 1240.896  | NM_018106 | 8761.392  | 8666.506  | NM_001085 | 929.635   | 859.546   |
| AF052176  | 371.913   | 223.278   | NM_003725 | 776.457   | 796.994   | NM_006110 | 882.203   | 832.923   |
| NM_001412 | 3495.466  | 2989.754  | BE899154  | 2063.424  | 2411.314  | NM_016453 | 1354.052  | 1568.75   |
| AF095771  | 437.278   | 578.773   | NM_004863 | 2566.071  | 2614.55   | NM_017701 | 1014.345  | 1415.918  |
| AF086154  | 1601.85   | 1246.289  | AK024573  | 4088.76   | 4421.746  | NM_014226 | 3489.505  | 4641.156  |
| AF086205  | 951.754   | 718.894   | NM_002299 | 3865.025  | 3386.979  | AF142567  | 1418.644  | 2081.29   |
| AK024169  | 681.025   | 377.244   | D79998    | 16578.363 | 24396.645 | NM_006202 | 50709.691 | 49305.02  |
| AF147395  | 892.609   | 752.975   | NM_000385 | 659.256   | 3648.242  | NM_017410 | 11079.839 | 11743.831 |
| AF085985  | 624.835   | 359.154   | AF301013  | 5107.882  | 6726.682  | AY009398  | 320.052   | 600.98    |
| AK026384  | 661.84    | 593.766   | U15688    | 3982.107  | 3954.359  | X99680    | 8149.759  | 8500.823  |
| AK025217  | 619.7     | 521.212   | NM_000483 | 50176.418 | 41092.582 | NM_001446 | 1547.224  | 1737.74   |
| AL137342  | 2362.235  | 2183.839  | NM_018446 | 6691.763  | 6631.042  | NM_016072 | 3066.591  | 3116.604  |
| AF075105  | 1146.63   | 814.153   | NM_001659 | 17300.375 | 17150.654 | AK026349  | 3478.791  | 3113.71   |
| U62539    | 276.268   | 156.334   | AB020663  | 16726.27  | 16998.369 | NM_014733 | 742.262   | 776.949   |
| NM_002237 | 312.969   | 206.396   | AF297866  | 1652.66   | 1503.975  | D12485    | 1312.925  | 1432.006  |
| NM_005117 | 1022.563  | 686.128   | NM_002864 | 2046.543  | 1823.76   | AK023204  | 2271.041  | 2497.069  |
| AJ007733  | 449.27    | 249.427   | NM_014305 | 4279.95   | 3603.226  | NM_003446 | 1088.069  | 1587.653  |
| AK021625  | 2062.86   | 1621.539  | NM_012123 | 10565.605 | 9778.637  | NM_002476 | 1630.34   | 1894.487  |
| AK021679  | 821.833   | 577.302   | U87972    | 2069.645  | 1386.203  | NM_003234 | 8883.364  | 7931.057  |
| AK001380  | 2287.545  | 1305.511  | NM_017925 | 3723.749  | 3433.514  | NM_004856 | 1307.01   | 1214.467  |
| AK024938  | 459.442   | 285.177   | AK022208  | 31486.938 | 27906.049 | S78774    | 4565.285  | 5374.557  |
| AK025312  | 1506.397  | 1146.918  | NM_003171 | 4728.018  | 4088.913  | NM_003056 | 323.57    | 487.295   |
| NM_018606 | 273.232   | 546.756   | NM_006437 | 15875.518 | 16000.809 | NM_004922 | 3910.6    | 4940.575  |
| AK026493  | 662.588   | 612.763   | NM_017890 | 1480.517  | 1555.713  | NM_006987 | 670.331   | 761.645   |
| AK002042  | 628.289   | 439.109   | AK021654  | 2247.247  | 2287.65   | NM_001282 | 2881.483  | 2760.18   |
| AK023963  | 10631.156 | 10485.308 | NM_016481 | 1040.024  | 1450.896  | NM_016830 | 2133.62   | 2712.81   |
| AK022473  | 1718.441  | 1660.589  | NM_003925 | 12511.595 | 15933.134 | U44105    | 707.342   | 862.082   |
| AK023810  | 819.916   | 729.843   | Z15114    | 4563.362  | 5730.555  | NM_016103 | 1275.726  | 1862.404  |
| AK024133  | 384.382   | 503.795   | NM_017625 | 3239.762  | 9225.861  | AL133654  | 3027.464  | 3422.658  |
| U80761    | 2776.55   | 2601.341  | NM_006285 | 5921.925  | 8406      | AL137262  | 1066.046  | 1213.127  |
| U61100    | 869.986   | 578.094   | NM_001346 | 2479.755  | 2564.075  | NM_018643 | 1651.324  | 1355.576  |
| NM_018582 | 823.357   | 491.48    | NM_000215 | 8555.204  | 9048.76   | NM_006927 | 9257.128  | 6674.86   |
| M21539    | 8208.314  | 5158.064  | AK027148  | 15233.677 | 15434.215 | NM_017761 | 8084.09   | 7789.766  |
| AF130117  | 454.466   | 308.797   | NM_005084 | 6000.674  | 6584.171  | NM_006926 | 642.319   | 479.656   |
| AK024125  | 561.917   | 367.332   | NM_007283 | 1145.335  | 1347.873  | AF237700  | 827.865   | 392.319   |
| AK024761  | 5279.551  | 4914.121  | NM_006111 | 7060.45   | 6110.461  | NM_002860 | 3228.387  | 5445.628  |
| M55536    | 3997.055  | 3791.708  | AK026071  | 6770.693  | 5733.157  | NM_006166 | 4283.054  | 6976.212  |
| NM_014335 | 14676.37  | 10887.849 | NM_002309 | 536.069   | 1200.719  | NM_001216 | 448.25    | 629.352   |
| AF086067  | 2875.967  | 2522.062  | AK026074  | 4792.868  | 4556.863  | NM_014183 | 6164.599  | 7768.845  |
| AK024967  | 6633.855  | 5518.672  | NM_003172 | 5503.467  | 5645.945  | NM_018353 | 4173.374  | 3274.582  |
| AK025102  | 1745.639  | 1607.233  | NM_004809 | 4014.941  | 3304.422  | NM_003560 | 16132.46  | 17369.877 |
| AF086562  | 672.456   | 723.786   | AA903183  | 810.466   | 471.854   | NM_014403 | 1938.261  | 3015.166  |
| AJ011980  | 434.2     | 379.115   | H41522    | 4304.844  | 3606.047  | AL050100  | 1577.151  | 2705.457  |
| AY007113  | 1963.472  | 1651.985  | AA460291  | 13239.637 | 12495.67  | NM_020136 | 1725.205  | 1520.12   |
| AF130083  | 12190.828 | 8849.146  | BI821333  | 16895.078 | 18443.635 | AL080207  | 1100.484  | 978.64    |



|           |           |           |           |           |           |           |           |           |
|-----------|-----------|-----------|-----------|-----------|-----------|-----------|-----------|-----------|
| AL110185  | 59832.879 | 47392.129 | X51841    | 18835.537 | 18377.844 | NM_00074E | 9671.182  | 7828.573  |
| NM_00270C | 6743.338  | 5236.587  | AF051344  | 14315.377 | 13349.266 | NM_00004E | 2101.058  | 2036.362  |
| AB002437  | 26615.223 | 16046.275 | BG506100  | 8045.385  | 7815.82   | AF104032  | 17562.57  | 14615.417 |
| AK024013  | 2654.386  | 1685.795  | X53586    | 2050.264  | 3397.64   | U53531    | 646.712   | 494.564   |
| AK023496  | 519.765   | 528.629   | M17176    | 2678.238  | 2883.664  | NM_00492E | 2251.274  | 2403.879  |
| NM_006777 | 2517.428  | 1962.382  | M26576    | 2043.383  | 2682.416  | NM_00545E | 3686.125  | 3413.491  |
| AK024969  | 3630.535  | 3604.185  | M32972    | 4558.705  | 6097.588  | AB051826  | 1156.165  | 1032.879  |
| AK022250  | 688.831   | 808.208   | D11151    | 670.617   | 905.079   | M20697    | 807.166   | 946.974   |
| AK025092  | 2336.277  | 1991.684  | D89854    | 1080.366  | 690.602   | NM_01504E | 1689.665  | 1587.671  |
| AF130047  | 664.053   | 393.363   | M13207    | 1072.766  | 1395.551  | NM_002014 | 3752.337  | 1925.573  |
| Z83944    | 884.84    | 809.155   | M97815    | 1981.761  | 2286.333  | NM_00253E | 5210.039  | 4643.754  |
| AF085871  | 910.799   | 713.381   | NM_00632E | 7004.095  | 10130.146 | NM_01658E | 6458.347  | 6107.476  |
| AF026564  | 956.703   | 776.589   | AF085893  | 1709.22   | 1433.042  | NM_00333E | 58020.414 | 61342.609 |
| X97301    | 1771.223  | 1448.224  | NM_003201 | 6584.059  | 5393.143  | NM_00201E | 3914.384  | 3474.916  |
| NM_01906E | 21786.24  | 13084.933 | AB011139  | 2585.342  | 2358.218  | AK026349  | 3987.479  | 3665.053  |
| NM_01433E | 847.237   | 485.628   | NM_00691E | 1674.345  | 1535.019  | NM_01473E | 813.545   | 1097.083  |
| NM_01245E | 6954.432  | 4573.287  | AK022625  | 17201.908 | 16062.813 | D12485    | 1796.793  | 1811.995  |
| AB002308  | 1055.399  | 594.122   | NM_00542E | 1057.192  | 718.116   | AK023204  | 2847.961  | 3013.249  |
| NM_003324 | 4712.729  | 3147.778  | AK023084  | 5753.169  | 4548.727  | NM_00344E | 1515.167  | 1472.721  |
| NM_01214E | 4774.45   | 3991.89   | AK025588  | 4385.337  | 4425.469  | NM_00247E | 2248.477  | 2250.369  |
| AF085892  | 2445.037  | 1940.598  | NM_00318E | 4085.912  | 3514.952  | D38163    | 987.593   | 1205.304  |
| AF075114  | 4562.395  | 2497.646  | NM_00711E | 785.174   | 903.336   | D28449    | 910.825   | 940.616   |
| S82075    | 3974.579  | 2893.897  | U59431    | 4078.07   | 3662.879  | NM_003281 | 914.987   | 1310.155  |
| Z70766    | 723.949   | 445.174   | U49349    | 1653.215  | 1559.193  | AA460480  | 1022.498  | 1158.372  |
| AK000660  | 5585.505  | 5397.49   | NM_02015E | 3085.212  | 3485.724  | AI298884  | 19461.52  | 18625.189 |
| NM_014711 | 1973.747  | 1579.79   | NM_013404 | 2210.264  | 3540.273  | D87845    | 820.245   | 1133.196  |
| AK022015  | 1793.415  | 1843.067  | AF300648  | 3350.148  | 5534.871  | X53279    | 601.617   | 628.93    |
| AK002208  | 1366.477  | 927.284   | NM_006157 | 883.256   | 1903.457  | M83254    | 3178.447  | 2967.334  |
| D63135    | 889.097   | 711.534   | AK024443  | 68957.219 | 64619.199 | S56770    | 1214.374  | 1067.472  |
| AB033083  | 3536.804  | 2863.22   | X06710    | 4060.326  | 5830.798  | H58872    | 8934.257  | 9859.519  |
| CY3Cy5    | 9214.339  | 1101.276  | AK000896  | 1912.641  | 2654.592  | J02938    | 499.774   | 485.776   |
| H41522    | 2009.136  | 2501.586  | AV682011  | 998.139   | 1514.069  | J04543    | 3135.639  | 2982.56   |
| AA460291  | 6233.749  | 6609.812  | NM_020384 | 3785.51   | 4387.294  | S60415    | 553.946   | 495.698   |
| BI821333  | 15677.161 | 18261.582 | NM_00605E | 19485.063 | 26903.99  | AA456295  | 782.288   | 887.323   |
| X51841    | 13188.463 | 11663.242 | NM_00662E | 12920.737 | 14913.133 | BE733577  | 2529.831  | 2057.733  |
| AF051344  | 10940.423 | 11024.849 | M97496    | 17522.949 | 17392.436 | AI817942  | 739.579   | 492.418   |
| BG506100  | 7109.74   | 8468.964  | NM_01844E | 5699.825  | 5658.097  | BG762340  | 1766.254  | 1518.98   |
| X53586    | 1503.53   | 1795.602  | NM_00165E | 15955.704 | 15374.05  | AA009484  | 261.749   | 376.194   |
| M17176    | 2191.165  | 2202.499  | AB020663  | 16148.635 | 15172.303 | NM_01864E | 1768.269  | 1293.346  |
| M26576    | 1714.436  | 2522.031  | AF297866  | 1788.681  | 1579.895  | NM_01618E | 799.137   | 1028.077  |
| M32972    | 3790.183  | 6634.848  | NM_002864 | 2177.96   | 1946.006  | M30142    | 1846.974  | 2125.042  |
| D11151    | 680.039   | 1904.955  | NM_017817 | 7421.175  | 7689.424  | NM_00501E | 987.245   | 1026.126  |
| D89854    | 975.554   | 1519.975  | NM_018184 | 30051.127 | 41561.301 | NM_01337E | 8708.518  | 7260.251  |
| M13207    | 795.028   | 1378.971  | AB046823  | 1732.7    | 1814.109  | NM_00108E | 1029.547  | 1105.792  |
| X14885    | 418.949   | 348.255   | NM_00492E | 1548.414  | 1561.272  | NM_006110 | 1011.125  | 774.891   |
| M97815    | 1002.306  | 1364.618  | NM_00466E | 1432.779  | 1295.552  | NM_01645E | 1211.838  | 1355.298  |
| NM_00632E | 4925.395  | 5754.06   | NM_01663E | 40389.988 | 44329.395 | NM_017701 | 646.133   | 908.508   |
| SR2       | 58188.844 | 59133.879 | U61739    | 13513.492 | 13304.834 | NM_01422E | 2271.856  | 2368.939  |
| SR4       | 15167.446 | 16355.138 | AJ132089  | 1734.334  | 1989.804  | AF142567  | 1191.517  | 1587.928  |
| SR6       | 1898.698  | 1781.932  | U92819    | 41454.637 | 51378.66  | NM_01741C | 11108.599 | 8349.753  |
| SR8       | 9505.008  | 32678.451 | NM_00203E | 9364.78   | 11867.351 | X99680    | 5743.252  | 4612.915  |
| SR10      | 29929.508 | 13001.812 | NM_01240C | 1069.513  | 1162.964  | NM_00144E | 1661.094  | 1636.407  |
| CY3Cy5    | 11144.011 | 1473.314  | NM_005384 | 3343.013  | 3783.688  | NM_01607E | 2828.871  | 2776.032  |

|           |           |           |           |           |           |           |           |           |
|-----------|-----------|-----------|-----------|-----------|-----------|-----------|-----------|-----------|
| AK025588  | 2524.851  | 2973.297  | NM_006850 | 1238.425  | 1631.745  | NM_00074E | 14134.94  | 18190.018 |
| NM_00318E | 2869.615  | 2997.179  | AB013103  | 1025.708  | 1166.394  | NM_00004E | 3116.849  | 5377.085  |
| NM_007118 | 626.959   | 747.023   | AF019225  | 3334.012  | 3286.853  | NM_00492E | 2458.638  | 2242.732  |
| U59431    | 1646.387  | 1482.292  | Z36803    | 10551.886 | 11741.642 | NM_003234 | 8829.064  | 8093.081  |
| U49349    | 1057.755  | 1364.315  | NM_013371 | 995.045   | 936.785   | NM_00485E | 1393.407  | 1484.171  |
| NM_020152 | 2856.062  | 3299.516  | NM_000707 | 7919.596  | 9138.597  | S78774    | 3530.086  | 3054.195  |
| NM_013404 | 1527.449  | 1410.029  | AF202092  | 15051.127 | 14821.581 | NM_004922 | 3085.721  | 2804.532  |
| AF300648  | 2965.858  | 3685.858  | AK027148  | 13794.255 | 14733.775 | BE873653  | 40803.063 | 35926.875 |
| NM_00396E | 596.79    | 1477.027  | NM_005084 | 4763.658  | 5425.041  | NM_006987 | 684.054   | 548.851   |
| X06710    | 4108.572  | 6913.47   | NM_007283 | 1000.289  | 1135.964  | NM_01683C | 1979.553  | 1864.635  |
| AK000896  | 1676.28   | 1735.69   | NM_006111 | 7725.207  | 6613.217  | U44105    | 480.825   | 539.96    |
| NM_020384 | 3425.897  | 4873.275  | AK026071  | 7499.706  | 6430.655  | NM_016103 | 871.498   | 856.933   |
| NM_00605E | 16234.471 | 22216.117 | BC012333  | 8430.864  | 10507.632 | AL133654  | 2088.962  | 1350.527  |
| AK026074  | 1531.199  | 1668.861  | AF237952  | 4678.345  | 5213.097  | AL137262  | 896.502   | 657.523   |
| NM_003172 | 4064.924  | 4781.143  | AL079287  | 3435.424  | 4426.777  | NM_002014 | 5658.468  | 4717.657  |
| NM_00480E | 2639.315  | 3104.41   | NM_014427 | 4312.406  | 4089.314  | NM_00253E | 5100.582  | 6228.782  |
| AA903183  | 1300.73   | 1937.826  | AB046769  | 4291.884  | 4374.605  | NM_01658E | 8391.622  | 10948.093 |
| NM_017817 | 5916.684  | 7012.418  | NM_015922 | 14163.334 | 13718.12  | NM_002013 | 4352.233  | 3783.552  |
| NM_018184 | 29403.08  | 36111.363 | NM_020381 | 4168.157  | 5182.737  | NM_006927 | 7552.629  | 6996.316  |
| AB046823  | 1528.242  | 1399.923  | NM_002957 | 10506.657 | 11074.393 | NM_014601 | 2947.79   | 2272.153  |
| NM_00492E | 1519.291  | 1657.159  | NM_01810E | 8748.796  | 9792.393  | NM_017761 | 7922.058  | 8983.132  |
| NM_004662 | 1383.747  | 1598.664  | BE899154  | 2135.759  | 1752.916  | NM_00692E | 918.698   | 1597.395  |
| NM_01663E | 24278.201 | 20826.674 | NM_004863 | 2380.695  | 2912.592  | AF237700  | 649.432   | 270.507   |
| U61739    | 7467.738  | 6154.416  | AK024573  | 3401.669  | 4474.561  | NM_00286C | 2706.787  | 3118.162  |
| AJ132089  | 1648.96   | 1667.294  | NM_00229E | 3263.252  | 3167.327  | NM_00616E | 2770.583  | 2577.985  |
| U92819    | 42485.434 | 50840.465 | D79998    | 15995.966 | 18452.781 | NM_00121E | 383.589   | 305.321   |
| AB020626  | 938.008   | 1469.679  | AB032963  | 2138.501  | 1933.58   | NM_014183 | 5753.907  | 5012.449  |
| NM_00203E | 5593.386  | 7905.772  | NM_00038E | 1489.013  | 1303.43   | AB046780  | 9490.298  | 8354.307  |
| NM_01240C | 1122.667  | 1351.227  | AF301013  | 5410.43   | 6092.523  | NM_018353 | 3483.982  | 2387.743  |
| NM_00685C | 1316.386  | 1594.758  | NM_018992 | 69046.75  | 58409.016 | NM_00356C | 14576.881 | 12388.938 |
| AB013103  | 940.88    | 1288.611  | U15688    | 3027.876  | 3689.439  | NM_014403 | 1083.229  | 891.376   |
| AF019225  | 3182.56   | 3848.168  | NM_00632E | 6166.621  | 6512.341  | AL050100  | 1181.662  | 794.962   |
| Z36803    | 8038.366  | 10827.653 | AF085893  | 1802.311  | 1835.853  | NM_02013E | 1207.583  | 941.738   |
| NM_013371 | 911.296   | 1770.695  | NM_01430E | 4237.248  | 4919.974  | NM_01773C | 2423.693  | 2656.302  |
| NM_000707 | 7388.415  | 9858.875  | NM_012123 | 10511.581 | 10583.318 | AB051826  | 847.835   | 623.478   |
| AF202092  | 11154.802 | 12565.192 | U87972    | 1852.663  | 1607.558  | M20697    | 423.117   | 455.918   |
| NM_003201 | 5624.084  | 4737.728  | NM_01792E | 3585.185  | 3320.863  | NM_01504E | 1956.704  | 1572.901  |
| AB011139  | 1621.413  | 1416.795  | AK022208  | 24612.527 | 19649.125 | AF231022  | 21131.883 | 17693.893 |
| NM_00691E | 1545.336  | 1431.48   | NM_003171 | 5004.677  | 4886.366  | NM_016327 | 2046.869  | 1670.538  |
| AK022625  | 4810.212  | 4981.142  | NM_006437 | 15637.989 | 17825.459 | NM_006322 | 1009.802  | 850.967   |
| AK023084  | 4489.404  | 4851.951  | NM_01789C | 1930.406  | 1587.39   | AF216381  | 7427.076  | 6455.649  |
| BC012333  | 7515.558  | 9612.463  | AK021654  | 2794.03   | 2822.782  | AB014593  | 1040.241  | 1151.527  |
| AF237952  | 4351.484  | 5177.492  | NM_016481 | 1303.251  | 1257.113  | NM_00623E | 784.423   | 608.02    |
| AL079287  | 3878.807  | 4302.229  | NM_00392E | 15874.517 | 16291.691 | AK026353  | 668.066   | 411.882   |
| NM_014427 | 3292.842  | 2801.38   | Z15114    | 3832.856  | 4365.531  | L24123    | 1236.237  | 702.672   |
| AB046769  | 3753.792  | 4338.067  | AB040812  | 22664.383 | 22312.734 | AF071111  | 415.226   | 624.14    |
| NM_015922 | 12464.498 | 12954.069 | NM_00628E | 5536.494  | 6892.687  | NM_015942 | 2133.087  | 3030.318  |
| NM_020381 | 3355.215  | 3055.958  | NM_00365E | 58636.695 | 51075.297 | NM_017907 | 4459.813  | 6526.767  |
| NM_002957 | 7836.541  | 7793.743  | NM_00134E | 3807.16   | 8657.262  | NM_002044 | 5378.389  | 6068.18   |
| NM_01810E | 7527.648  | 8310.91   | NM_020384 | 4040.774  | 5491.819  | AJ272267  | 888.478   | 850.673   |
| NM_00372E | 634.146   | 753.206   | NM_00605E | 21058.816 | 24284.949 | NM_002103 | 2587.807  | 2276.652  |
| BE899154  | 2472.788  | 2314.945  | NM_00662E | 14128.449 | 14285.163 | NM_00666E | 1466.357  | 1216.196  |
| NM_004863 | 2333.8    | 2781.907  | M97496    | 19666.824 | 24365.074 | NM_00027C | 3821.911  | 2653.468  |

|           |           |           |           |           |           |           |           |           |
|-----------|-----------|-----------|-----------|-----------|-----------|-----------|-----------|-----------|
| AK024573  | 4359.212  | 5969.13   | NM_002309 | 1167.529  | 2074.053  | NM_002876 | 1796.629  | 1045.552  |
| NM_002296 | 3728.435  | 3723.582  | AK026074  | 1333.33   | 2277.188  | AK022332  | 1159.157  | 932.94    |
| D79998    | 14848.798 | 15977.485 | NM_003172 | 5099.8    | 5760.017  | NM_006465 | 627.405   | 768.138   |
| AB032963  | 2175.579  | 2784.766  | NM_004809 | 3245.363  | 3309.7    | NM_006765 | 3422.431  | 2493.096  |
| NM_000385 | 1181.026  | 1309.185  | H41522    | 4288.138  | 4011.93   | NM_001189 | 1325.498  | 878.107   |
| AF301013  | 4106.055  | 5781.559  | AA460291  | 12728.82  | 10408.769 | AF055009  | 7089.383  | 3941.341  |
| NM_018992 | 62119.746 | 60726.477 | BI821333  | 17373.932 | 18593.707 | AL365370  | 2060.796  | 2033.421  |
| U15688    | 2480.81   | 2478.961  | X51841    | 24672.676 | 27528.42  | AK022204  | 894.227   | 1422.037  |
| NM_000483 | 49314.68  | 53650.004 | AF051344  | 13190.926 | 11003.516 | AF086147  | 705.056   | 913.666   |
| NM_018448 | 4448.371  | 4677.36   | BG506100  | 7452.455  | 7468.399  | AF085912  | 399.571   | 435.697   |
| NM_001659 | 11916.1   | 12948.826 | X53586    | 1580.231  | 1704.617  | AK001127  | 605.21    | 422.724   |
| AB020663  | 10961.811 | 12105.091 | M17176    | 2576.574  | 2037.744  | U79256    | 9246.132  | 9121.132  |
| AF297866  | 1130.633  | 967.137   | M26576    | 1454.196  | 1081.412  | AF131798  | 429.669   | 367.61    |
| NM_002864 | 1826.503  | 1897.401  | M32972    | 3850.734  | 3723.402  | AF052176  | 369.69    | 338.685   |
| NM_014305 | 4408.055  | 4750.251  | D89854    | 1673.917  | 2319.793  | NM_001412 | 2195.252  | 1149.175  |
| NM_012123 | 9328.156  | 8541.837  | M13207    | 1399.129  | 1752.646  | AF086205  | 1367.656  | 1679.682  |
| U87972    | 995.885   | 899.144   | M97815    | 1951.752  | 2105.073  | AK024169  | 400.265   | 367.659   |
| NM_017925 | 3733.784  | 3927.935  | AB013103  | 1314.781  | 1213.019  | AF147395  | 897.445   | 619.369   |
| AK022208  | 30429.219 | 21517.203 | AF019225  | 5694.352  | 6543.447  | AF085985  | 649.421   | 402.981   |
| NM_003171 | 4623.67   | 3649.779  | Z36803    | 11518.593 | 13914.494 | AK025217  | 379.539   | 384.24    |
| NM_006437 | 18259.627 | 19313.975 | NM_013371 | 1014.288  | 1095.516  | AF075105  | 3412.999  | 5562.46   |
| NM_017890 | 2000.685  | 1865.151  | NM_000707 | 9179.771  | 9512.24   | U03241    | 552.921   | 375.094   |
| AK021654  | 1990.782  | 1908.045  | AF202092  | 15365.424 | 17783.738 | NM_005117 | 847.433   | 967.655   |
| NM_016481 | 1124.219  | 1273.5    | NM_003201 | 7563.882  | 9296.431  | AJ007733  | 514.728   | 756.282   |
| NM_003925 | 14750.343 | 15950.165 | AB011139  | 2644.552  | 2726.387  | AK021625  | 2762.26   | 3269.594  |
| Z15114    | 4040.47   | 3793.843  | NM_006919 | 1407.277  | 1760.527  | AK021679  | 500.555   | 338.492   |
| AB040812  | 23113.518 | 25780.465 | AK022625  | 15764.44  | 16333.185 | AK001380  | 1642.875  | 682.142   |
| NM_006285 | 6073.574  | 7721.344  | NM_005425 | 850.265   | 588.39    | AK024938  | 485.661   | 582.591   |
| NM_003656 | 52272.547 | 55050.145 | AK023084  | 5906.644  | 5877.143  | AK025312  | 1022.565  | 708.16    |
| NM_001348 | 1707.05   | 2164.197  | AK025588  | 3871.249  | 4027.743  | AK023963  | 7052.858  | 5443.837  |
| NM_000215 | 7042.853  | 7278.03   | NM_003188 | 3197.96   | 3485.029  | AK022473  | 2907.454  | 2274.813  |
| AK027148  | 5652.126  | 5962.344  | U59431    | 4310.082  | 3474.327  | AK023810  | 707.874   | 607.02    |
| NM_005084 | 5128.974  | 5939.335  | U49349    | 1444.308  | 1566.849  | AK024133  | 344.464   | 403.537   |
| NM_007283 | 959.754   | 1249.061  | NM_013404 | 2254.041  | 2510.302  | U80761    | 5222.646  | 5648.732  |
| NM_006111 | 6667.251  | 7454.502  | AF300648  | 3541.183  | 3619.029  | U61100    | 422.319   | 559.145   |
| AK026071  | 4129.629  | 3574.959  | NM_003966 | 947.76    | 1000.354  | M21539    | 3989.987  | 2544.035  |
| AK026074  | 1529.222  | 1608.498  | AK024443  | 66618.328 | 61405.813 | AK024125  | 702.841   | 323.279   |
| NM_003172 | 4997.003  | 5339.656  | X06710    | 4137.142  | 4923.178  | AK024761  | 3013.119  | 2119.926  |
| NM_004809 | 2644.045  | 1781.931  | AK000896  | 1796.57   | 2303.108  | M55536    | 1539.242  | 721.845   |
| AA903183  | 661.449   | 652.927   | D79998    | 33736.258 | 48190.348 | NM_014335 | 7413.429  | 5724.419  |
| H41522    | 2380.179  | 2233.514  | AB032963  | 2808.041  | 3134.773  | AF086067  | 1479.13   | 1265.831  |
| AA460291  | 7335.792  | 7735.877  | NM_000385 | 1536.783  | 1629.449  | AK024967  | 3664.681  | 3171.431  |
| BI821333  | 15802.982 | 16162.364 | AF301013  | 5557.415  | 6835.141  | AK025102  | 1320.492  | 917.308   |
| X51841    | 9801.727  | 8278.455  | NM_018992 | 67111.688 | 62053.809 | AF086562  | 1612.056  | 1528.928  |
| AF051344  | 12213.992 | 12348.742 | U15688    | 3406.323  | 3636.547  | AY007113  | 1530.642  | 1346.962  |
| BG506100  | 7028.535  | 7601.958  | NM_000483 | 55899.273 | 54122.84  | AF130083  | 7979.478  | 7732.867  |
| X53586    | 1080.222  | 1135.838  | NM_018448 | 5214.261  | 5559.916  | AL110185  | 50081.336 | 51069.391 |
| M17176    | 2369.12   | 2277.923  | NM_001659 | 15270.223 | 16242.147 | NM_002700 | 18039.084 | 17354.256 |
| M26576    | 1839.641  | 2088.188  | AB020663  | 15506.846 | 16898.176 | AB002437  | 16216.229 | 9768.37   |
| M32972    | 3921.314  | 3882.329  | AF297866  | 1725.657  | 1687.396  | NM_006777 | 1450.055  | 1353.829  |
| D11151    | 636.181   | 824.316   | NM_002864 | 1906.547  | 2374.823  | AK024969  | 1999.669  | 1565.179  |
| D89854    | 1168.531  | 1225.64   | NM_017817 | 7539.816  | 6227.456  | NM_012365 | 417.966   | 413.382   |
| M13207    | 1069.364  | 1241.262  | NM_018184 | 27797.527 | 35154.211 | AK025092  | 1185.161  | 886.254   |

|           |           |           |           |           |           |           |           |           |
|-----------|-----------|-----------|-----------|-----------|-----------|-----------|-----------|-----------|
| X14885    | 612.404   | 1174.072  | AB046823  | 1740.504  | 1857.158  | AF130047  | 790.857   | 601.659   |
| M97815    | 1128.105  | 1525.651  | NM_004929 | 1915.682  | 1680.326  | Z83944    | 650.038   | 473.765   |
| NM_006325 | 5028.009  | 4870.971  | NM_004662 | 1330.478  | 1185.831  | AF085871  | 621.745   | 627.443   |
| AF085893  | 2161.617  | 2502.992  | U61739    | 14049.016 | 12828.141 | X97301    | 1532.186  | 1246.02   |
| NM_003201 | 6582.612  | 4976.365  | AJ132089  | 1452.104  | 1485.148  | NM_019063 | 13168.34  | 8767.649  |
| AB011139  | 2776.462  | 2255.581  | U92819    | 40594.254 | 46378.754 | NM_014336 | 1089.57   | 866.423   |
| NM_006919 | 1244.474  | 1136.802  | AB020626  | 1791.1    | 1739.72   | NM_012456 | 6174.432  | 8136.624  |
| AK022625  | 4881.611  | 4674.533  | NM_002036 | 9339.006  | 8844.84   | NM_003324 | 1619.76   | 1242.558  |
| NM_005425 | 755.614   | 785.268   | NM_012400 | 822.857   | 988.027   | NM_012143 | 2338.608  | 2001.186  |
| AK023084  | 5429.611  | 5493.133  | NM_005384 | 3088.013  | 2266.092  | AF085892  | 1234.387  | 887.266   |
| AK025588  | 2763.577  | 2879.252  | NM_006850 | 1090.129  | 1112.667  | AF075114  | 4969.464  | 2866.463  |
| NM_003188 | 2910.043  | 2762.869  | Z15114    | 5331.72   | 5325.768  | AK022218  | 52412.895 | 33383.859 |
| NM_007118 | 803.354   | 614.916   | AB040812  | 25600.67  | 29825.469 | NM_007112 | 1548.333  | 1087.895  |
| U59431    | 2247.65   | 1882.08   | NM_017625 | 531.805   | 621.087   | S82075    | 2358.068  | 1766.944  |
| U49349    | 1505.216  | 1406.367  | NM_006285 | 6426.057  | 7657.939  | AK000660  | 2844.83   | 2236.991  |
| NM_020152 | 2690.651  | 2586.431  | NM_003656 | 60286.496 | 52177.285 | NM_014711 | 890.035   | 697.554   |
| NM_013404 | 1946.711  | 2225.045  | NM_001348 | 2272.826  | 2372.213  | AK022015  | 1422.472  | 980.919   |
| AF300648  | 3159.186  | 3026.955  | NM_000215 | 8263.441  | 8878.342  | D63135    | 968.522   | 802.868   |
| NM_003966 | 513.552   | 760.636   | AK027148  | 18545.064 | 20413.311 | AB033083  | 2804.446  | 2416.276  |
| AK024443  | 61777.438 | 62788.523 | NM_005084 | 5676.823  | 6235.18   | CY3Cy5    | 7637.808  | 794.006   |
| X06710    | 4218.671  | 5326.197  | NM_007283 | 1178.96   | 1064.057  | H41522    | 5108.506  | 6002.051  |
| AK000896  | 1544.44   | 1552.271  | NM_006111 | 7915.299  | 6507.63   | AA460291  | 12915.972 | 12667.23  |
| NM_020384 | 3635.735  | 4576.143  | AK026071  | 6665.325  | 6058.003  | BI821333  | 8765.344  | 8478.453  |
| NM_006058 | 15944.073 | 21222.828 | BC012333  | 9261.85   | 10631.444 | X51841    | 38912.535 | 26818.738 |
| NM_006628 | 12503.485 | 13787.672 | AF237952  | 5127.901  | 4613.015  | AF051344  | 16382.149 | 12993.651 |
| M97496    | 18308.711 | 16497.289 | AL079287  | 4181.421  | 4297.495  | BG506100  | 4569.109  | 3778.788  |
| NM_000483 | 53373.277 | 49349.289 | NM_014427 | 4302.103  | 4241.98   | X53586    | 852.475   | 855.427   |
| NM_018448 | 5976.309  | 5765.982  | AB046769  | 4436.461  | 3256.702  | M17176    | 1826.835  | 1324.167  |
| NM_001659 | 12581.997 | 10896.697 | NM_015922 | 14976.599 | 17369.33  | M26576    | 1479.925  | 1312.908  |
| AB020663  | 15185.992 | 13122.765 | NM_020381 | 4481.148  | 3936.163  | M32972    | 4038.05   | 3601.938  |
| AF297866  | 1689.121  | 1319.859  | NM_002957 | 13127.979 | 12780.454 | D11151    | 405.46    | 368.863   |
| NM_002864 | 2411.089  | 2495.769  | NM_018106 | 8688.351  | 8013.885  | M13207    | 1254.684  | 860.024   |
| NM_017817 | 5927.885  | 6635.973  | NM_003725 | 548.771   | 615.505   | X14885    | 786.07    | 1207.988  |
| NM_018184 | 28369.4   | 29929.68  | BE899154  | 2369.002  | 2305.285  | M97815    | 566.119   | 545.444   |
| AB046823  | 1604.971  | 1391.024  | NM_004863 | 2488.393  | 1873.782  | NM_006325 | 2237.669  | 2318.808  |
| NM_004929 | 1490.945  | 1701.844  | AK024573  | 4209.813  | 3827.921  | SR2       | 35884.43  | 36392.129 |
| NM_004662 | 1599.221  | 1585.972  | NM_002299 | 4716.703  | 3739.417  | SR4       | 8188.877  | 8110.695  |
| NM_016639 | 25828.773 | 22841.734 | NM_003830 | 1507.575  | 1680.893  | SR6       | 691.285   | 569.102   |
| U61739    | 7534.251  | 6731.09   | NM_000842 | 842.565   | 1166.58   | SR8       | 2489.8    | 8887.322  |
| AJ132089  | 1626.19   | 1602.378  | NM_015642 | 1542.851  | 2765.146  | SR10      | 11520.182 | 2758.5    |
| U92819    | 41398.352 | 44535.852 | NM_004640 | 27574.361 | 33627.461 | CY3Cy5    | 6448.022  | 603.286   |
| AB020626  | 1197.027  | 1365.658  | NM_002901 | 7909.821  | 6586.582  | AK025588  | 5577.819  | 5055.23   |
| NM_002036 | 6049.431  | 6139.607  | NM_016222 | 9414.814  | 10266.348 | NM_003188 | 2673.746  | 2213.075  |
| NM_012400 | 914.556   | 954.027   | AB037823  | 5531.235  | 5972.798  | NM_007118 | 594.343   | 639.833   |
| NM_005384 | 2534.549  | 2963.72   | NM_015380 | 12672.445 | 12822.251 | U59431    | 7516.972  | 6339.074  |
| NM_006850 | 1045.42   | 1211.247  | BE254485  | 2134.676  | 2200.847  | U49349    | 1692.666  | 1458.722  |
| AB013103  | 892.966   | 1099.111  | NM_002732 | 1378.439  | 1111.154  | NM_020152 | 1976.755  | 1643.239  |
| AF019225  | 4610.958  | 5144.071  | AF085893  | 2368.207  | 2025.647  | NM_013404 | 2121.217  | 2452.654  |
| Z36803    | 9824.239  | 10878.597 | NM_014305 | 4476.197  | 4641.413  | AF300648  | 1957.092  | 2261.593  |
| NM_013371 | 663.279   | 865.823   | NM_012123 | 9813.54   | 9481.03   | NM_003966 | 377.657   | 430.815   |
| NM_000707 | 7252.244  | 7942.71   | U87972    | 1225.014  | 1013.152  | X06710    | 1509.381  | 2232.848  |
| AF202092  | 11125.797 | 13187.824 | NM_017925 | 3610.195  | 3257.043  | AK000896  | 1225.06   | 1066.893  |
| NM_000215 | 6512.452  | 5905.153  | AK022208  | 33398.289 | 27729.113 | NM_020384 | 1671.796  | 1880.402  |

|           |           |           |           |           |           |           |           |           |
|-----------|-----------|-----------|-----------|-----------|-----------|-----------|-----------|-----------|
| AK027148  | 10022.276 | 9041.915  | NM_003171 | 4554.028  | 3719.768  | NM_00605E | 4734.879  | 5021.618  |
| NM_005084 | 5314.156  | 5698.834  | NM_006437 | 20175.799 | 18193.863 | NM_00662E | 6194.555  | 6367.853  |
| NM_007283 | 1169.276  | 1032.659  | NM_01789C | 2269.522  | 1880.134  | M97496    | 18926.861 | 18014.17  |
| NM_006111 | 6396.921  | 6638.866  | AK021654  | 2334.792  | 2015.345  | NM_00230E | 308.844   | 497.276   |
| AK026071  | 5035.151  | 4417.309  | NM_016481 | 1069.69   | 1176.388  | AK026074  | 746.957   | 725.257   |
| BC012333  | 7572.422  | 8530.18   | NM_00392E | 16981.014 | 15677.241 | NM_00317E | 1146.174  | 955.121   |
| AF237952  | 3788.834  | 3641.906  | AF217974  | 8224.107  | 8001.256  | NM_00480E | 3141.766  | 2782.474  |
| AL079287  | 3697.898  | 3963.514  | NM_00328E | 1246.807  | 1353.098  | AA903183  | 574.981   | 627.686   |
| NM_014427 | 3474.912  | 3172.957  | NM_00088E | 4069.007  | 4225.868  | NM_017817 | 4382.015  | 5291.726  |
| AB046769  | 3701.485  | 3724.099  | NM_00059E | 5429.023  | 5179.11   | NM_018184 | 17076.082 | 21864.297 |
| NM_01592E | 12920.679 | 13673.856 | X99663    | 5823.416  | 6773.163  | AB046823  | 11775.669 | 10820.227 |
| NM_020381 | 3413.219  | 3370.433  | NM_01655E | 3295.846  | 4835.421  | NM_00492E | 1359.112  | 1248.856  |
| NM_002957 | 7806.727  | 8453.575  | NM_00356E | 4977.161  | 4856.299  | NM_00466E | 2344.313  | 2596.958  |
| NM_01810E | 6948.105  | 7943.932  | NM_004841 | 3316.531  | 3856.545  | NM_01663E | 30273.023 | 28227.803 |
| NM_00372E | 1189.671  | 1178.688  | NM_01844C | 7706.019  | 7113.753  | U61739    | 11075.301 | 10323.467 |
| BE899154  | 2209.315  | 2546.691  | M35410    | 4650.138  | 4801.309  | AJ132089  | 1039.877  | 830.084   |
| NM_00486E | 2546.399  | 2703.604  | AB023227  | 758.773   | 1055.036  | U92819    | 22184.934 | 24527.617 |
| AK024573  | 3783.587  | 4473.937  | NM_00577E | 13389.331 | 11976.339 | AB020626  | 1110.776  | 1174.157  |
| NM_00229E | 3154.223  | 3218.72   | AK023071  | 5241.85   | 4827.888  | NM_00203E | 12880.931 | 15293.086 |
| D79998    | 7613.666  | 8455.441  | NM_004041 | 1469.005  | 1610.547  | NM_01240C | 741.349   | 798.039   |
| AB032963  | 2107.131  | 2584.972  | AK022888  | 4041.111  | 4910.978  | NM_00685C | 477.074   | 348.72    |
| NM_00038E | 1380.019  | 1725.187  | AK024484  | 10699.907 | 10680.088 | AF019225  | 1239.735  | 2117.446  |
| AF301013  | 3850.576  | 4658.472  | NM_00195E | 59058.41  | 52859.102 | Z36803    | 4317.785  | 4272.558  |
| NM_01899E | 62151.797 | 61594.371 | NM_00229E | 4245.078  | 4024.302  | NM_000707 | 3503.708  | 3832.877  |
| U15688    | 3382.518  | 3363.871  | NM_00016E | 1462.808  | 1116.74   | AF202092  | 3292.951  | 3081.581  |
| NM_00632E | 5673.633  | 5401.011  | AF305200  | 948.198   | 644.925   | AB011139  | 977.784   | 802.25    |
| AF085893  | 1122.127  | 969.125   | AL570170  | 3477.615  | 3464.746  | NM_00691E | 834.539   | 887.086   |
| NM_01430E | 3851.441  | 3513.028  | D56495    | 1317.811  | 1615.23   | AK022625  | 14980.766 | 13047.819 |
| NM_01212E | 9702.718  | 9769.857  | NM_01458E | 915.743   | 583.306   | AK023084  | 7737.326  | 8201.753  |
| U87972    | 1011.929  | 1137.832  | NM_00661E | 11548.54  | 10807.235 | BC012333  | 4865.379  | 6713.911  |
| NM_01792E | 4112.21   | 4234.863  | NM_00463E | 18496.959 | 16983.523 | AF237952  | 3090.098  | 3370.466  |
| AK022208  | 24017.383 | 20925.172 | NM_00537E | 622.594   | 678.657   | AL079287  | 2290.904  | 2431.679  |
| NM_003171 | 4047.238  | 3357.48   | L40027    | 3075.006  | 2144.99   | NM_014427 | 4177.916  | 3797.645  |
| NM_006437 | 17321.029 | 18807.777 | NM_00371E | 47455.273 | 45770.441 | AB046769  | 3467.605  | 3053.998  |
| NM_01789C | 2332.992  | 2461.754  | NM_00706E | 1204.251  | 1518.685  | NM_01592E | 8294.475  | 8281.973  |
| AK021654  | 2497.99   | 2677.355  | NM_01418C | 20418.443 | 20256.521 | NM_020381 | 2625.67   | 2136.062  |
| NM_016481 | 1184.791  | 1252.946  | NM_01770E | 3183.477  | 3235.647  | NM_002957 | 7143.075  | 6393.9    |
| NM_00392E | 12987.711 | 14078.332 | AF334406  | 2898.894  | 2778.985  | NM_01810E | 4502.168  | 4682.796  |
| Z15114    | 4533.524  | 4633.229  | NM_017444 | 4646.316  | 5355.194  | NM_00372E | 558.572   | 357.105   |
| AB040812  | 23190.607 | 25320.029 | NM_01802E | 3304.781  | 3897.156  | BE899154  | 1593.625  | 1754.849  |
| NM_01762E | 444.672   | 489.874   | NM_01599E | 7139.81   | 6875.822  | NM_00486E | 2151.653  | 2508.676  |
| NM_00628E | 5668.706  | 7468.052  | NM_003804 | 8906.342  | 6360.375  | AK024573  | 2053.976  | 2921.695  |
| NM_00365E | 60956.371 | 61935.871 | NM_01845E | 6506.999  | 6318.237  | NM_00229E | 2681.405  | 2682.426  |
| NM_00134E | 2245.275  | 2304.89   | NM_00470E | 68045.039 | 56261.277 | D79998    | 22883.08  | 28050.453 |
| NM_020384 | 3159.902  | 3238.836  | NM_016001 | 12080.642 | 10710.009 | NM_00038E | 585.576   | 756.397   |
| NM_00605E | 16875.328 | 18494.971 | NM_01610E | 25551.682 | 21888.938 | AF301013  | 610.976   | 911.192   |
| NM_00662E | 14264.698 | 13194.586 | S49432    | 3028.208  | 2676.171  | U15688    | 1430.275  | 1517.175  |
| M97496    | 17096.158 | 14975.186 | D86984    | 2019.841  | 1910.955  | NM_00048E | 24968.936 | 22999.424 |
| AK026074  | 1478.039  | 1325.197  | NM_01595E | 1035.227  | 1048.8    | NM_01844E | 1347.563  | 1130.274  |
| NM_00317E | 4818.052  | 6444.78   | AK026904  | 4222.538  | 4269.774  | NM_00165E | 9501.225  | 8903.452  |
| NM_00480E | 2722.175  | 2454.803  | NM_00191C | 1668.397  | 1549.906  | AB020663  | 2139.015  | 2469.969  |
| AA903183  | 1268.851  | 1380.552  | J03210    | 2944.445  | 3252.593  | AF297866  | 1242.791  | 1284.251  |
| H41522    | 781.432   | 1049.742  | NM_00190E | 8746.101  | 8355.224  | NM_002864 | 1728.633  | 1934.559  |

|           |           |           |           |           |           |           |           |           |
|-----------|-----------|-----------|-----------|-----------|-----------|-----------|-----------|-----------|
| AA460291  | 3466.555  | 3849.542  | NM_012198 | 3203.349  | 3297.512  | NM_003102 | 357.092   | 380.584   |
| BI821333  | 16581.223 | 19746.303 | NM_003368 | 4268.047  | 3304.764  | NM_014305 | 2689.987  | 2747.147  |
| X51841    | 4730.892  | 3930.207  | AB040886  | 1331.781  | 1617.998  | NM_012123 | 5422.774  | 4402.021  |
| AF051344  | 3714.146  | 3600.728  | AB029020  | 2305.298  | 2480.671  | U87972    | 805.664   | 702.729   |
| BG506100  | 6674.542  | 7580.314  | AK022759  | 3904.384  | 4062.328  | NM_017925 | 2023.347  | 1769.738  |
| M17176    | 2090.465  | 2005.927  | NM_012333 | 9836.894  | 7850.436  | AK022208  | 21407.863 | 15523.157 |
| M26576    | 1635.861  | 1967.741  | AF217798  | 2170.722  | 1686.671  | NM_003171 | 2519.165  | 2239.743  |
| M32972    | 4319.393  | 4671.481  | AF161472  | 3933.242  | 3526.453  | NM_006437 | 9520.657  | 9734.936  |
| D11151    | 776.11    | 1085.464  | AL133642  | 7801.64   | 8678.667  | NM_017890 | 1469.906  | 1453.391  |
| D89854    | 989.318   | 1021.7    | AB011154  | 955.992   | 1130.549  | AK021654  | 2476.574  | 2483.338  |
| M13207    | 1159.794  | 968.911   | AF124432  | 3320.45   | 3562.708  | NM_016481 | 998.368   | 1004.078  |
| X14885    | 564.326   | 792.502   | NM_006330 | 13462.293 | 11947.353 | NM_003925 | 9780.379  | 11375.04  |
| M97815    | 1357.881  | 1846.072  | NM_015873 | 3759.527  | 3408.777  | Z15114    | 4005.25   | 4800.827  |
| AB013103  | 965.849   | 950.85    | NM_000377 | 4834.851  | 3986.034  | AB040812  | 10158.938 | 10767.506 |
| AF019225  | 4140.396  | 3617.874  | NM_006818 | 1492.55   | 999.135   | NM_006285 | 961.43    | 1103.789  |
| Z36803    | 7816.502  | 6865.13   | NM_016823 | 3407.675  | 3247.752  | NM_001348 | 1114.405  | 1102.485  |
| NM_013371 | 665.261   | 761.234   | NM_003120 | 18485.227 | 18743.566 | NM_000215 | 3369.16   | 3289.252  |
| NM_000707 | 8013.562  | 7541.567  | X52360    | 2954.204  | 2583.552  | AK027148  | 5128.416  | 5236.77   |
| AF202092  | 13151.887 | 11678.64  | NM_002636 | 29778.814 | 28956.297 | NM_005084 | 1483.621  | 1755.174  |
| NM_003201 | 6765.569  | 4903.37   | NM_016494 | 34750.434 | 32767.484 | NM_006111 | 2946.091  | 3451.833  |
| AB011139  | 2597.924  | 1607.425  | U09410    | 7940.877  | 7506.234  | AK026071  | 7477.284  | 8102.614  |
| NM_006919 | 1646.775  | 1658.256  | NM_020229 | 1352.615  | 1294.997  | NM_002309 | 329.636   | 401.46    |
| AK022625  | 6760.979  | 8102.516  | NM_001186 | 6752.576  | 6184.344  | AK026074  | 1186.215  | 1416.497  |
| NM_005425 | 1339.804  | 1937.145  | NM_004502 | 3930.15   | 3551.061  | NM_003172 | 3103.922  | 2882.805  |
| AK023084  | 1663.393  | 1802.368  | AF000560  | 11610.981 | 11310.189 | NM_004809 | 3345.921  | 2511.071  |
| AK025588  | 856.193   | 1251.152  | NM_013282 | 6431.053  | 5963.673  | AA903183  | 526.62    | 622.256   |
| NM_003188 | 3004.963  | 2869.705  | NM_005777 | 8675.018  | 8251.05   | H41522    | 4638.774  | 3870.755  |
| U59431    | 626.15    | 586.053   | NM_012345 | 3045.5    | 2569.33   | AA460291  | 13754.401 | 12549.987 |
| U49349    | 1496.452  | 1923.302  | NM_005826 | 15750.497 | 13920.209 | BI821333  | 7750.662  | 8232.294  |
| NM_013404 | 1843.795  | 2179.907  | NM_004592 | 3118.4    | 3401.593  | X51841    | 37905.723 | 30072.443 |
| AF300648  | 2814.527  | 2733.02   | NM_015001 | 5037.058  | 3156.706  | AF051344  | 15286.434 | 15657.156 |
| NM_006157 | 1670.408  | 2774.774  | NM_019027 | 1832.293  | 1836.529  | BG506100  | 4639.991  | 6610.069  |
| NM_003966 | 850.566   | 947.541   | NM_016107 | 4588.838  | 4434.803  | M17176    | 1576.284  | 1947.106  |
| AK024443  | 56953.68  | 60743.551 | NM_002567 | 26672.541 | 28806.342 | M26576    | 1166.433  | 1643.509  |
| X06710    | 3878.352  | 5025.511  | NM_001404 | 4058.196  | 3814.13   | M32972    | 4026.997  | 5243.677  |
| AK000896  | 1717.436  | 2249.238  | NM_001605 | 43495.258 | 43561.926 | D11151    | 663.378   | 945.406   |
| D79998    | 14188.35  | 14156.165 | AF225422  | 13355.134 | 10680.591 | D89854    | 549.291   | 531.273   |
| AB032963  | 2386.769  | 1992.225  | AB040960  | 12017.21  | 9407.609  | M13207    | 861.953   | 979.75    |
| NM_000385 | 1032.824  | 972.885   | NM_015946 | 3542.123  | 3155.479  | M97815    | 736.885   | 776.65    |
| AF301013  | 4772.332  | 4501.222  | NM_006303 | 8590.373  | 6746.884  | NM_006325 | 1865.654  | 1995.784  |
| NM_018992 | 63374.215 | 57665.445 | AL080059  | 779.287   | 1138.924  | AF085893  | 2773.675  | 2469.397  |
| U15688    | 2783.588  | 2543.588  | AL080219  | 5148.776  | 4780.566  | NM_003201 | 3642.096  | 3464.658  |
| NM_000483 | 55195.805 | 50927.301 | AK024165  | 820.052   | 636.095   | AB011139  | 1801.578  | 1609.158  |
| NM_018448 | 6488.329  | 5305.724  | NM_003001 | 2153.04   | 1634.542  | NM_006919 | 922.953   | 719.63    |
| NM_001659 | 13565.147 | 14325.881 | NM_001985 | 4710.892  | 3779.795  | AK022625  | 19794.492 | 16376.929 |
| AB020663  | 15556.426 | 17333.977 | NM_000102 | 1822.471  | 1630.192  | NM_005425 | 560.138   | 552.826   |
| AF297866  | 1500.254  | 2338.342  | NM_002490 | 20688.291 | 19484.264 | AK023084  | 5344.787  | 4229.688  |
| NM_002864 | 2872.589  | 3449.168  | BE563532  | 1590.638  | 1136.1    | AK025588  | 5218.345  | 4592.023  |
| NM_017817 | 6532.41   | 7056.003  | NM_001916 | 9672.281  | 8624.17   | NM_003188 | 2067.629  | 1839.764  |
| NM_018184 | 30726.014 | 37916.125 | NM_002491 | 1495.15   | 1550.358  | NM_007118 | 475.426   | 583.582   |
| AB046823  | 1264.043  | 1436.072  | NM_015425 | 2514.522  | 2079.681  | U59431    | 8737.678  | 8930.49   |
| NM_004929 | 1808.66   | 2542.467  | NM_015153 | 6210.133  | 5716.277  | U49349    | 1457.728  | 2226.035  |
| NM_004662 | 1489.425  | 2713.438  | AB032966  | 19406.322 | 18595.189 | AF300648  | 1690.429  | 2152.151  |

|           |           |           |           |           |           |           |           |           |
|-----------|-----------|-----------|-----------|-----------|-----------|-----------|-----------|-----------|
| U61739    | 8785.87   | 9051.377  | NM_014820 | 8506.514  | 7327.654  | NM_006157 | 617.647   | 424.328   |
| AJ132089  | 1599.684  | 1552.995  | NM_005035 | 1850.078  | 1758.011  | NM_003966 | 734.368   | 1900.03   |
| U92819    | 42653.402 | 54337.066 | NM_019014 | 5622.116  | 5197.527  | AK024443  | 57305.375 | 63275.051 |
| AB020626  | 2051.016  | 3140.493  | NM_002097 | 22181.115 | 18730.506 | X06710    | 2829.489  | 5311.918  |
| NM_002036 | 7933.39   | 10772.941 | X04706    | 3187.104  | 2464.866  | AK000896  | 1878.09   | 2342.181  |
| NM_012400 | 784.496   | 962.164   | NM_018039 | 1342.256  | 1160.66   | NM_020384 | 1882.858  | 2009.562  |
| NM_005384 | 2317.927  | 2363.179  | NM_006494 | 4900.668  | 4326.247  | NM_006058 | 3962.768  | 3878.6    |
| NM_006850 | 1089.626  | 1347.748  | X52343    | 3483.257  | 2985.029  | NM_006628 | 11156.908 | 13773.893 |
| Z15114    | 3694.962  | 3467.405  | NM_005853 | 14272.027 | 13481.962 | M97496    | 27959.865 | 30789.963 |
| AB040812  | 24162.229 | 21041.053 | X99681    | 829.657   | 988.856   | NM_000483 | 33675.27  | 33581.27  |
| NM_006285 | 6435.096  | 6098.55   | NM_014068 | 987.817   | 956.893   | NM_018448 | 2592.191  | 2983.713  |
| NM_003656 | 57726.203 | 55140.363 | NM_017814 | 3225.195  | 3346.392  | NM_001659 | 9787.447  | 7953.775  |
| NM_001348 | 2217.274  | 2570.129  | AF074996  | 957.391   | 805.653   | AB020663  | 5666.294  | 4655.612  |
| NM_000215 | 6906.775  | 7271.439  | AF131811  | 1684.801  | 1090.305  | AF297866  | 1399.256  | 1270.543  |
| AK027148  | 7706.583  | 6081.673  | AF293026  | 11326.271 | 11523.577 | NM_002864 | 747.29    | 570.754   |
| NM_005084 | 5629.94   | 6605.042  | AF236158  | 1338.096  | 1192.016  | NM_017817 | 3488.306  | 3590.202  |
| NM_006111 | 7284.979  | 8727.278  | AF217986  | 4884.494  | 5635.542  | NM_018184 | 17517.861 | 20303.207 |
| AK026071  | 2173.429  | 2319.079  | AK026320  | 1282.767  | 1814.113  | AB046823  | 1065.084  | 1054.382  |
| BC012333  | 7859.2    | 9338.032  | NM_015953 | 8613.158  | 7982.461  | NM_004929 | 1167.983  | 1450.506  |
| AF237952  | 4476.891  | 5061.772  | AF147310  | 979.626   | 776.212   | NM_004662 | 843.917   | 1043.654  |
| AL079287  | 4100.785  | 4614.576  | AK024775  | 3935.34   | 3456.126  | AJ132089  | 732.717   | 1080.896  |
| NM_014427 | 2112.788  | 2407.801  | AK025562  | 2588.033  | 1571.136  | U92819    | 20366.322 | 25654.992 |
| AB046769  | 4179.033  | 7404.791  | AF088024  | 1883.603  | 1588.004  | AB020626  | 920.711   | 864.797   |
| NM_020381 | 2997.122  | 4614.27   | AK025887  | 1482.291  | 1562.016  | NM_002036 | 8591.946  | 9577.196  |
| NM_002957 | 11010.938 | 15332.52  | AB037719  | 2629.456  | 2635.123  | NM_012400 | 439.546   | 251.185   |
| NM_018106 | 7641.08   | 12129.632 | AF086229  | 957.274   | 352.938   | NM_005384 | 667.343   | 546.506   |
| NM_003725 | 2543.965  | 4679.885  | AK026143  | 2384.21   | 1779.169  | NM_006850 | 1572.539  | 2836.828  |
| BE899154  | 2568.917  | 2831.824  | AL137578  | 731.207   | 1045.816  | AB013103  | 926.794   | 1153.985  |
| NM_004863 | 2332.992  | 2474.819  | AL110252  | 915.764   | 983.591   | AF019225  | 829.13    | 1103.094  |
| AK024573  | 3490.532  | 3951.277  | AL050143  | 1543.863  | 1892.638  | Z36803    | 6557.905  | 5900.347  |
| NM_002299 | 3809.659  | 3345.494  | AL137616  | 2428.576  | 2391.204  | NM_013371 | 669.813   | 626.844   |
| NM_003830 | 1376.771  | 1482.874  | AK021752  | 1496.006  | 1114.921  | NM_000707 | 8821.522  | 10199.581 |
| NM_000842 | 1022.251  | 750.846   | AL050012  | 867.077   | 472.999   | AF202092  | 10143.447 | 12459.353 |
| NM_015642 | 1223.917  | 1162.926  | AL109706  | 7483.955  | 8104.106  | NM_000215 | 4505.492  | 4993.337  |
| NM_004640 | 25163.375 | 20975.861 | AK001118  | 970.096   | 1824.402  | AK027148  | 11040.03  | 10951.105 |
| NM_002901 | 7098.276  | 5853.561  | AF035291  | 59342.613 | 49942.84  | NM_005084 | 2659.941  | 2660.097  |
| NM_016222 | 10320.302 | 9722.068  | AK026291  | 5038.669  | 5857.553  | NM_007283 | 547.066   | 599.335   |
| AB037823  | 2869.668  | 2925.735  | AK021924  | 421.365   | 682.299   | NM_006111 | 4019.673  | 3378.976  |
| NM_015380 | 11969.284 | 10392.461 | AL049285  | 282.124   | 988.771   | AK026071  | 5881.312  | 4685.813  |
| BE254485  | 1303.548  | 1619.681  | AL117520  | 641.143   | 593.233   | BC012333  | 4838.221  | 5066.167  |
| AF085893  | 1113.726  | 857.381   | AL049303  | 811.271   | 712.314   | AF237952  | 2349.018  | 2577.257  |
| NM_014305 | 4966.497  | 4400.724  | AL080208  | 1871.432  | 1467.831  | AL079287  | 2036.736  | 2561.868  |
| NM_012123 | 9890.246  | 11985.74  | L35592    | 7847.589  | 8189.212  | NM_014427 | 3912.619  | 3647.189  |
| U87972    | 1375.301  | 1804.043  | NM_012079 | 1372.411  | 1401.371  | AB046769  | 3337.719  | 4512.242  |
| NM_017925 | 3527.33   | 4859.115  | BC017695  | 650.014   | 766.845   | NM_020381 | 2788.084  | 3173.716  |
| NM_006437 | 18988.682 | 25631.092 | AL360274  | 11264.598 | 8263.349  | NM_002957 | 7155.787  | 8941.184  |
| NM_017890 | 2701.621  | 3233.433  | AK021858  | 1698.961  | 1481.299  | NM_018106 | 3137.085  | 4013.395  |
| AK021654  | 2638.535  | 2933.162  | NM_014050 | 6101.855  | 5022.774  | BE899154  | 1183.585  | 1176.414  |
| NM_016481 | 1245.595  | 1404.377  | AF085854  | 1644.217  | 1242.201  | NM_004863 | 1074.564  | 1074.218  |
| NM_003925 | 13384.07  | 13789.772 | AF074997  | 1328.858  | 929.259   | AK024573  | 1011.922  | 1303.303  |
| AF217974  | 5716.855  | 4229.622  | AK027027  | 977.746   | 1134.259  | NM_002299 | 2681.952  | 2546.472  |
| NM_000888 | 2785.61   | 2112.547  | NM_014911 | 683.276   | 708.302   | D79998    | 28646.365 | 37313.082 |
| NM_000595 | 2938.686  | 2437.145  | AF009289  | 4533.852  | 4797.542  | AB032963  | 742.337   | 930.232   |

|           |           |           |            |           |           |           |           |           |
|-----------|-----------|-----------|------------|-----------|-----------|-----------|-----------|-----------|
| X99663    | 4193.979  | 4342.677  | AF040247   | 1976.538  | 1471.24   | NM_00038E | 984.644   | 869.845   |
| NM_01655Z | 1817.418  | 1587.741  | AF056439   | 1124.998  | 1946.735  | AF301013  | 3371.341  | 4358.636  |
| NM_00356E | 4254.534  | 4154.151  | AF007835   | 444.172   | 886.778   | NM_01899Z | 55074.785 | 62275.91  |
| NM_01844C | 6037.354  | 4800.715  | AF009303   | 2843.741  | 3204.19   | U15688    | 2194.214  | 2711.724  |
| AK025470  | 950.058   | 856.537   | NM_004474  | 2822.725  | 3070.175  | NM_00632E | 4005.429  | 4005.227  |
| M35410    | 4993.833  | 5279.508  | AF056449   | 1362.224  | 1188.951  | AF085893  | 2441.63   | 1631.443  |
| AB023227  | 1173.975  | 965.471   | AK001033   | 1654.544  | 1480.897  | NM_00310Z | 472.448   | 550.843   |
| NM_00577E | 15285.202 | 14423.021 | AK001781   | 868.829   | 827.791   | NM_01430E | 2072.74   | 1851.93   |
| AK023071  | 4544.353  | 5361.309  | AK021463   | 1068.983  | 1265.783  | NM_01212Z | 6146.108  | 6761.429  |
| NM_004041 | 2196.08   | 2235.278  | AK001082   | 2806.974  | 6105.063  | U87972    | 1041.195  | 1283.581  |
| AK022888  | 4028.812  | 4317.777  | AK001871   | 1272.673  | 3232.96   | NM_01792E | 1921.15   | 2797.531  |
| AK024484  | 7791.159  | 11209.38  | AK021521   | 590.708   | 830.223   | AK022208  | 19949.209 | 16928.27  |
| NM_00195Z | 53378.105 | 55459.828 | AK021743   | 1909.563  | 1899.537  | NM_003171 | 2152.351  | 2013.989  |
| NM_00140E | 863.461   | 642.705   | AK026699   | 1063.815  | 759.062   | NM_006437 | 7007.901  | 7433.555  |
| NM_00229Z | 3057.987  | 3837.236  | AK025589   | 4300.119  | 3367.959  | NM_01789C | 1079.339  | 824.673   |
| NM_00016E | 1250.355  | 1386.597  | NM_01663Z  | 19066.723 | 19603.824 | AK021654  | 1246.24   | 993.649   |
| AF305200  | 1288.246  | 1786.318  | AK023250   | 6807.978  | 7910.078  | NM_016481 | 728.35    | 944.186   |
| AL570170  | 3374.474  | 2949.19   | AK024882   | 3913.271  | 4551.229  | NM_00392E | 6908.938  | 11289.766 |
| D56495    | 1222.658  | 822.72    | NM_01406Z  | 22984.629 | 29089.623 | Z15114    | 3576.073  | 3284.272  |
| NM_01458Z | 609.227   | 349.222   | NM_006304  | 46211.488 | 54006.262 | AB040812  | 9637.449  | 8890.313  |
| NM_00661Z | 8217.611  | 6396.817  | X74804     | 1257.378  | 1390.326  | NM_00628E | 4222.355  | 5446.138  |
| NM_00463E | 19405.215 | 18995.672 | AF293367   | 2041.651  | 2394.237  | NM_00365E | 56841.895 | 61209.762 |
| NM_00537Z | 730.75    | 1166.22   | AF086231   | 4530.309  | 3661.805  | NM_00134E | 2477.92   | 3186.568  |
| L40027    | 3456.003  | 3198.888  | AK001494   | 1080.588  | 970.036   | NM_020384 | 2944.547  | 2519.818  |
| NM_00371E | 39185.344 | 29245.434 | AL133438   | 2487.7    | 2348.376  | NM_00605E | 11172.631 | 9304.942  |
| NM_00706Z | 1456.027  | 1108.102  | unknown (S | 1046.263  | 444.445   | NM_00662E | 9549.095  | 8322.085  |
| NM_01418C | 17571.672 | 16048.093 | AK021784   | 1294.982  | 464.64    | M97496    | 25140.799 | 18462.32  |
| NM_01770E | 3212.164  | 2450.111  | AF230800   | 1029.026  | 484.825   | NM_00230E | 404.488   | 497.981   |
| AF334406  | 2616.373  | 1997.454  | NM_01852C  | 1215.882  | 684.415   | AK026074  | 1243.637  | 1108.134  |
| NM_017444 | 5325.251  | 4227.521  | AK026647   | 1577.535  | 1380.766  | NM_00317Z | 2797.074  | 2725.745  |
| NM_01802E | 2309.41   | 2126.416  | AK022152   | 1421.143  | 1029.011  | NM_00480E | 3796.883  | 3147.765  |
| NM_01599E | 7253.695  | 6130.571  | NM_003534  | 64548.949 | 60533.75  | AA903183  | 656.861   | 873.224   |
| NM_003804 | 8323.402  | 7301.671  | L08437     | 4560.032  | 6676.752  | H41522    | 4593.331  | 4796.278  |
| NM_01845Z | 5813.785  | 5226.438  | AK057143   | 13470.27  | 18249.854 | AA460291  | 12245.237 | 11501.143 |
| NM_00470E | 61654.105 | 65203.039 | NM_015594  | 18099.531 | 16450.816 | BI821333  | 6562.946  | 7046.982  |
| NM_016001 | 9087.106  | 9906.12   | AF056423   | 2061.217  | 2059.354  | X51841    | 30392.879 | 24266.979 |
| NM_01610E | 18796.826 | 18058.281 | X04293     | 1298.96   | 1349.325  | AF051344  | 10714.207 | 9450.297  |
| S49432    | 1814.158  | 1795.305  | AK026475   | 415.262   | 1719.863  | BG506100  | 2384.229  | 2052.552  |
| D86984    | 2203.236  | 2192.133  | K01884     | 1118.754  | 1288.71   | M17176    | 1334.596  | 1199.481  |
| NM_01595E | 1372.185  | 925.42    | U00962     | 12791.667 | 11388.655 | M32972    | 6344.447  | 5318.36   |
| AK026904  | 3833.182  | 4176.607  | NM_00052Z  | 6108.176  | 3647.248  | D89854    | 467.304   | 671.021   |
| NM_00191C | 1223.072  | 1315.8    | AK026130   | 15268.204 | 14385.424 | M13207    | 962.644   | 1122.761  |
| J03210    | 3342.928  | 5180.739  | NM_01248C  | 2726.277  | 2314.949  | X14885    | 877.414   | 577.565   |
| NM_00336E | 4389.732  | 3182.573  | AK024144   | 7265.842  | 6658.397  | M97815    | 1679.996  | 1841.355  |
| AB040886  | 1250.164  | 965.316   | NM_00534E  | 6233.827  | 6061.99   | AB013103  | 725.459   | 927.387   |
| AB029020  | 3025.694  | 2238.083  | AF086047   | 1423.227  | 2079.413  | AF019225  | 3365.294  | 2726.972  |
| AK022759  | 3672.373  | 2653.792  | NM_00534Z  | 21489.451 | 23189.088 | Z36803    | 9362.942  | 7308.866  |
| NM_01233Z | 10381.864 | 7522.771  | AF196865   | 1583.783  | 1069.482  | NM_013371 | 906.355   | 610.157   |
| AF217798  | 2014.401  | 1729.976  | AJ008114   | 49044.434 | 38763.492 | NM_000707 | 6386.362  | 5529.383  |
| AF161472  | 3376.871  | 2458.966  | AF147432   | 2389.15   | 1196.647  | AF202092  | 8434.263  | 7387.448  |
| AL133642  | 7611.936  | 6951.839  | AK024690   | 2012.471  | 1350.964  | NM_003201 | 3813.615  | 3022.886  |
| AB011154  | 660.806   | 626.823   | BC005946   | 61159.832 | 56913.863 | AB011139  | 1628.622  | 1320.305  |
| AF124432  | 2900.922  | 2359.388  | AK021893   | 3495.578  | 3881.942  | NM_00691E | 1224.369  | 1266.169  |



|           |           |           |           |           |           |           |           |           |
|-----------|-----------|-----------|-----------|-----------|-----------|-----------|-----------|-----------|
| NM_00633C | 10165.404 | 9020.418  | NM_00104E | 13780.912 | 12520.089 | AK022625  | 20422.51  | 16936.232 |
| NM_015873 | 2957.174  | 2524.633  | AK026497  | 6978.2    | 6386.228  | NM_00542E | 498.895   | 636.518   |
| NM_000377 | 3635.299  | 3115.657  | BE958139  | 1249.848  | 1293.281  | AK023084  | 5890.165  | 5572.979  |
| NM_00681E | 712.029   | 802.726   | AF085359  | 977.925   | 853.097   | AK025588  | 5291.352  | 4854.322  |
| NM_016823 | 2324.352  | 2027.14   | AF086516  | 1529.247  | 1342.172  | NM_00318E | 1615.667  | 1371.47   |
| NM_00312C | 19139.783 | 18321.184 | D86978    | 6397.449  | 5710.402  | U59431    | 4173.132  | 4111.574  |
| X52360    | 2194.815  | 2004.198  | AL080060  | 4491.497  | 4020.594  | U49349    | 509.561   | 553.323   |
| NM_00263E | 17074.074 | 13118.319 | NM_005267 | 2625.664  | 2669.6    | NM_02015Z | 1391.381  | 1514.194  |
| NM_016494 | 31662.707 | 26960.564 | U80763    | 980.457   | 693.23    | NM_013404 | 1608.593  | 1825.815  |
| AF000560  | 10858.95  | 9599.128  | AF086017  | 1585.008  | 1522.702  | AF300648  | 1129.608  | 1145.681  |
| NM_01328Z | 6974.257  | 5104.903  | AK024978  | 7903.504  | 6580.038  | NM_00396E | 539.529   | 645.813   |
| NM_005777 | 8149.421  | 7082.774  | U12897    | 4902.754  | 5112.06   | AK024443  | 58145.953 | 63527.086 |
| NM_01234E | 2605.589  | 1688.531  | NM_020357 | 13462.452 | 11013.007 | X06710    | 2262.517  | 3129.769  |
| U94387    | 383.038   | 239.987   | AK026836  | 1849.982  | 1517.516  | AK000896  | 1681.351  | 2168.332  |
| NM_00582E | 12866.315 | 9877.315  | T59562    | 37342.5   | 28591.232 | D79998    | 33767.563 | 36376.277 |
| NM_00459Z | 3454.185  | 2988.058  | NM_018219 | 1674.699  | 1185.007  | AB032963  | 1340.255  | 1369.928  |
| NM_015001 | 6158.59   | 5379.423  | NM_014114 | 2601.839  | 2623.112  | NM_00038E | 1139.614  | 952.311   |
| NM_019027 | 1871.875  | 1397.118  | U62822    | 5681.825  | 4162.266  | AF301013  | 2894.558  | 2589.895  |
| NM_016107 | 4864.168  | 3457.857  | CY3Cy5    | 18275.436 | 1991.841  | NM_01899Z | 53989.199 | 60026.273 |
| NM_002567 | 20520.766 | 16500.875 | U36798    | 595.189   | 1202.427  | U15688    | 2263.965  | 1518.376  |
| NM_001404 | 4286.762  | 3202.804  | AA220921  | 9317.103  | 14840.498 | NM_000483 | 36318.566 | 30234.357 |
| NM_00160E | 39922.285 | 28915.332 | N67770    | 1391.05   | 1299.982  | NM_01844E | 3222.111  | 3026.521  |
| AF225422  | 10440.5   | 8050.024  | AA486200  | 61747.379 | 55447.238 | NM_00165E | 12265.366 | 11535.753 |
| AB040960  | 8094.377  | 6081.045  | U90065    | 673.877   | 1173.502  | AB020663  | 8899.266  | 8046.543  |
| NM_01594E | 2138.015  | 1672.59   | AJ005898  | 3980.417  | 4183.319  | AF297866  | 1899.272  | 2023.453  |
| NM_006303 | 5936.344  | 4524.897  | X57303    | 4141.667  | 5260.227  | NM_002864 | 1155.297  | 1186.156  |
| AL080059  | 741.343   | 860.788   | AA463224  | 1428.693  | 1315.264  | NM_017817 | 4121.632  | 4307.452  |
| AL080219  | 4384.018  | 4030      | BG248802  | 7866.588  | 8942.298  | NM_018184 | 17272.021 | 22192.83  |
| AK024165  | 540.668   | 560.383   | L19605    | 2094.05   | 2366.141  | NM_00492E | 1106.817  | 1452.867  |
| NM_003001 | 2739.109  | 3115.093  | AA876532  | 6457.273  | 6899.66   | NM_00466Z | 638.423   | 775.094   |
| NM_00249C | 21326.213 | 16148.382 | S74349    | 2396.64   | 2191.76   | NM_01663E | 46874.922 | 50614.105 |
| BE563532  | 1307.671  | 1390.24   | X07979    | 44926.766 | 49978.711 | U61739    | 10748.136 | 10506.175 |
| NM_00191E | 10159.472 | 8202.587  | BG324670  | 1143.097  | 1307.692  | AJ132089  | 732.024   | 989.959   |
| NM_002491 | 819.872   | 929.798   | BG744224  | 17708.029 | 18962.58  | U92819    | 17079.814 | 17133.25  |
| NM_01542E | 3166.844  | 2434.253  | NM_006079 | 39840.078 | 40119.035 | AB020626  | 1010.363  | 1055.227  |
| NM_015153 | 6580.388  | 5111.287  | NM_00669E | 3890.644  | 4587.822  | NM_00203E | 17125.045 | 21128.18  |
| AB032966  | 9927.808  | 8086.334  | SR7       | 8231.272  | 47641.656 | NM_01240C | 773.021   | 785.817   |
| NM_01482C | 8211.12   | 5840.232  | SR9       | 37263.188 | 10836.793 | NM_005384 | 1981.163  | 2077.338  |
| NM_00503E | 1675.075  | 1258.141  | CY3Cy5    | 14453.33  | 1809.387  | NM_00685C | 546.552   | 628.627   |
| NM_019014 | 4296.825  | 3382.44   | AK002163  | 3873.593  | 3718.815  | Z15114    | 4802.637  | 3553.162  |
| NM_002097 | 12709.23  | 9370.594  | NM_002287 | 14774.497 | 16782.152 | AB040812  | 15979.035 | 12098.97  |
| X04706    | 1695.433  | 1407.085  | NM_012344 | 2097.515  | 2093.781  | NM_00628E | 3398.483  | 2533.491  |
| NM_01803E | 919.377   | 841.548   | NM_002351 | 2174.959  | 2245.41   | NM_00365E | 55811.926 | 55520.328 |
| NM_006494 | 4152.697  | 3106.428  | NM_01438E | 1677.353  | 1549.354  | NM_00134E | 1649.175  | 1450.424  |
| X52343    | 3523.439  | 2420.9    | NM_001704 | 1916.903  | 2128.854  | NM_00021E | 4699.019  | 4923.81   |
| NM_005853 | 8771.592  | 6689.628  | AB036432  | 13417.268 | 14476.951 | AK027148  | 13825.017 | 13533.896 |
| X99681    | 620.816   | 666.965   | NM_01487Z | 9152.069  | 9756.08   | NM_005084 | 3900.942  | 3418.301  |
| NM_01406E | 632.947   | 999.857   | NM_003643 | 1571.266  | 1510.049  | NM_007283 | 620.277   | 727.128   |
| NM_017814 | 3409.274  | 3743.998  | NM_00348C | 3026.074  | 2826.248  | NM_006111 | 4382.319  | 4523.768  |
| AF131811  | 1279.071  | 984.719   | NM_00089E | 1552.962  | 1043.135  | AK026071  | 5805.801  | 5665.518  |
| AF293026  | 11067.98  | 11738.66  | NM_032951 | 4831.882  | 5053.996  | BC012333  | 4322.477  | 4454.21   |
| AF236158  | 1666.718  | 2146.767  | NM_000503 | 6684.138  | 6635.632  | AF237952  | 2610.687  | 3042.972  |
| AL137530  | 3058.096  | 1813.59   | NM_00240E | 2173.37   | 3056.28   | AL079287  | 1551.015  | 1960.746  |

|           |           |           |           |           |           |           |           |           |
|-----------|-----------|-----------|-----------|-----------|-----------|-----------|-----------|-----------|
| NM_015953 | 8129.296  | 6465.732  | AK000004  | 1814.473  | 2487.357  | NM_014427 | 2091.667  | 1825.305  |
| AF147310  | 1147.014  | 989.249   | NM_012421 | 40395.828 | 44160.645 | AB046769  | 1658.238  | 1563.804  |
| AK024775  | 4393.159  | 3308.183  | AB014601  | 2799.555  | 2057.709  | NM_015922 | 4598.321  | 4891.817  |
| AK025562  | 2699.705  | 1564.974  | AF022654  | 1648.608  | 2171.896  | NM_020381 | 2040.11   | 2260.423  |
| AF088024  | 1784.894  | 1330.268  | NM_003282 | 679.255   | 460.077   | NM_002957 | 5826.703  | 6163.983  |
| AK025887  | 1636.25   | 1074.437  | AK022638  | 8694.465  | 9867.022  | NM_018106 | 2057.24   | 2192.254  |
| AB037719  | 2008.816  | 2069.567  | BG698409  | 2646.77   | 2475.683  | BE899154  | 2111.709  | 2417.747  |
| AK026143  | 1873.671  | 1101.248  | AF224741  | 1397.577  | 1323.501  | NM_004863 | 2042.12   | 2518.226  |
| AL137578  | 841.762   | 1001.27   | NM_006594 | 3544.61   | 3803.486  | AK024573  | 2737.355  | 3178.619  |
| AL110252  | 566.119   | 433.927   | NM_004177 | 1585.388  | 1319.812  | NM_002295 | 4042.541  | 4103.025  |
| AL050143  | 1508.179  | 1028.79   | NM_012429 | 1322.438  | 1731.219  | NM_003830 | 933.89    | 742.841   |
| AL137616  | 1792.401  | 2623.026  | NM_004871 | 6040.609  | 6727.155  | NM_000842 | 782.393   | 533.373   |
| AK021752  | 1237.946  | 960.542   | NM_005698 | 10754.971 | 11384.852 | NM_015642 | 731.113   | 694.791   |
| AL050012  | 386.767   | 554.973   | AF202146  | 8219.544  | 6584.324  | NM_004640 | 14660.325 | 12067.852 |
| AL109706  | 5949.215  | 4816.938  | NM_006393 | 2816.469  | 2560.612  | NM_002901 | 4137.931  | 2978.559  |
| AK001118  | 1096.986  | 1701.021  | NM_014923 | 1962.645  | 1960.278  | NM_016222 | 4648.218  | 3966.802  |
| AF035291  | 49397.652 | 44756.699 | NM_005477 | 12327.271 | 13097.967 | AB037823  | 4370.244  | 4016.241  |
| AK026291  | 5206.38   | 4933.36   | NM_007018 | 565.414   | 729.055   | NM_015380 | 6451.532  | 6515.315  |
| AL080106  | 649.029   | 579.629   | NM_004318 | 1394.809  | 1263.497  | BE254485  | 1285.293  | 1361.209  |
| AL049303  | 888.284   | 710.796   | NM_002640 | 2131.628  | 2056.198  | NM_002732 | 735.515   | 537.086   |
| AL080208  | 1048.177  | 939.46    | NM_000949 | 1895.814  | 2788.942  | AF085893  | 2203.464  | 1812.992  |
| L35592    | 8054.019  | 5963.664  | M15530    | 10047.222 | 8782.694  | NM_014305 | 2181.728  | 2304.715  |
| NM_012079 | 1144.564  | 1039.297  | NM_001877 | 1951.329  | 1784.606  | NM_012123 | 1995.984  | 2833.672  |
| AL360274  | 11834.255 | 8437.291  | NM_014207 | 9690.561  | 9606.024  | U87972    | 475.544   | 490.284   |
| AK021858  | 1335.223  | 983.053   | NM_004059 | 712.255   | 535.014   | NM_003171 | 1620.503  | 1479.502  |
| NM_014050 | 5618.933  | 4548.613  | NM_001634 | 22664.393 | 18645.316 | NM_006437 | 11369.628 | 13728.632 |
| AF085854  | 842.908   | 626.474   | NM_002267 | 7036.187  | 6645.862  | NM_017890 | 1905.693  | 2769.557  |
| AF074997  | 553.042   | 524.733   | NM_006412 | 11250.077 | 12991.246 | AK021654  | 2901.071  | 3105.476  |
| AK027027  | 793.703   | 864.284   | NM_003063 | 6318.467  | 5266.516  | NM_016481 | 896.888   | 1022.574  |
| AF009289  | 2990.06   | 2777.919  | NM_014041 | 29380.699 | 43533.273 | NM_003925 | 12041.836 | 17881.342 |
| AF040247  | 1393.839  | 943.832   | NM_007169 | 5147.172  | 6902.51   | AF217974  | 5875.217  | 4130.764  |
| AF009303  | 2037.845  | 1854.885  | NM_014313 | 1034.868  | 1043.727  | NM_004948 | 255.163   | 119.721   |
| NM_004474 | 2053.521  | 1649.281  | AK024966  | 2801.531  | 2459.273  | NM_003285 | 796.526   | 690.814   |
| AF056449  | 1155.368  | 705.124   | AF178941  | 19558.268 | 21673.219 | NM_000888 | 2752.327  | 2396.684  |
| AK001033  | 1161.376  | 1233.941  | NM_016033 | 8086.718  | 8905.878  | NM_000595 | 6453.793  | 4771.441  |
| AK001781  | 418.001   | 729.633   | NM_017585 | 6498.593  | 7711.267  | X99663    | 5309.452  | 4250.348  |
| AK021463  | 760.097   | 584.26    | U61737    | 34889.535 | 36020.891 | NM_016552 | 4174.559  | 3098.058  |
| AK001082  | 1786.306  | 1436.421  | X06389    | 517.759   | 588.51    | AK025340  | 586.948   | 602.907   |
| AK001871  | 614.751   | 828.627   | NM_000033 | 2293.706  | 3192.206  | NM_003565 | 2692.936  | 2384.661  |
| AK021521  | 874.988   | 985.205   | NM_014861 | 1221.802  | 1189.908  | NM_004841 | 2078.383  | 1905.482  |
| AK021743  | 1525.553  | 1210.117  | NM_012434 | 1747.921  | 1791.115  | NM_018440 | 3743.82   | 3350.486  |
| AK026699  | 565.149   | 709.759   | NM_005694 | 11119.801 | 9348.742  | AK025470  | 611.471   | 682.925   |
| AK025589  | 2312.924  | 3671.198  | AK022983  | 708.245   | 920.839   | M35410    | 2271.829  | 2540.323  |
| NM_016633 | 14628.645 | 13071.698 | NM_014868 | 5639.374  | 5985.466  | AB023227  | 1188.477  | 1465.422  |
| AK023250  | 6498.544  | 4698.29   | AL442089  | 10476.9   | 11807.672 | NM_005776 | 4130.434  | 4718.86   |
| AK024882  | 3551.808  | 2758.758  | X83412    | 1340.355  | 4162.381  | AK023071  | 2617.941  | 3974.471  |
| NM_014062 | 19787.439 | 15360.034 | NM_001200 | 2580.228  | 2983.732  | NM_004041 | 1221.874  | 1063.596  |
| NM_006304 | 42982.059 | 37091.348 | AF128541  | 4076.073  | 5033.938  | AK022888  | 1646.971  | 1843.396  |
| X74804    | 984.838   | 921.662   | AK026305  | 4561.645  | 5222.925  | AK024484  | 2362.439  | 2651.877  |
| AF293367  | 1891.986  | 1510.298  | NM_002552 | 3490.561  | 3999.14   | NM_002632 | 447.943   | 680.413   |
| AF086231  | 4306.555  | 2746.561  | NM_014321 | 8174.111  | 8745.819  | NM_001953 | 54911.242 | 56986.988 |
| AK001494  | 947.618   | 815.66    | AK022733  | 1637.839  | 1786.653  | NM_001406 | 883.265   | 902.465   |
| AL133438  | 2570.022  | 2610.967  | AB011132  | 5763.931  | 6081.393  | NM_002292 | 4451.752  | 5746.532  |

|           |           |           |           |           |           |           |           |           |
|-----------|-----------|-----------|-----------|-----------|-----------|-----------|-----------|-----------|
| unknown ( | 522.851   | 498.142   | NM_020362 | 4038.449  | 4777.116  | NM_000166 | 912.675   | 1409.735  |
| AK022310  | 490.745   | 916.017   | AB040937  | 6892.375  | 7229.625  | AF305200  | 1174.429  | 1454.089  |
| AK021784  | 1290.102  | 1225.809  | AF275798  | 28309.316 | 33368.129 | AL570170  | 1633.277  | 1315.586  |
| AF230800  | 1137.45   | 1330.363  | NM_005441 | 10713.979 | 11880.581 | D56495    | 1335.211  | 718.466   |
| AK026647  | 3613.841  | 3452.01   | NM_016079 | 23156.141 | 25937.186 | NM_014583 | 660.138   | 430.902   |
| AK022152  | 1435.445  | 909.567   | AK023108  | 2727.868  | 2915.546  | NM_006613 | 9730.724  | 7523.711  |
| NM_003534 | 61320.129 | 55860.832 | AK026409  | 22487.035 | 18600.064 | NM_004638 | 11406.338 | 10209.018 |
| L08437    | 3680.46   | 4231.97   | AF097025  | 8591.455  | 10836.279 | NM_005373 | 268.923   | 374.057   |
| AK057143  | 11970.618 | 12680.842 | Y11339    | 5377.052  | 5801.666  | L40027    | 1391.242  | 1066.098  |
| NM_015594 | 11562.059 | 8030.946  | AB030176  | 971.597   | 1207.141  | NM_003718 | 29293.799 | 22194.826 |
| AF056423  | 2050.296  | 1372.71   | NM_003937 | 4503.698  | 4890.153  | NM_007062 | 713.03    | 520.439   |
| X04293    | 1268.573  | 729.037   | NM_002537 | 7731.379  | 7647.774  | NM_014180 | 8545.977  | 8456.351  |
| AK026475  | 709.644   | 535.986   | NM_003139 | 5904.61   | 5082.36   | NM_017706 | 1555.457  | 1436.779  |
| K01884    | 816.087   | 669.246   | NM_012316 | 3919.763  | 3753.714  | AF334406  | 1343.183  | 1158.947  |
| U00962    | 9573.371  | 8160.076  | AF022654  | 1839.147  | 2893.074  | NM_017444 | 2670.772  | 3101.627  |
| NM_000522 | 5755.675  | 3000.51   | NM_001143 | 1153.688  | 1653.657  | NM_018025 | 1856.252  | 3088.505  |
| AK026130  | 14997.399 | 11964.259 | NM_003282 | 643.753   | 1111.776  | NM_015995 | 2907.643  | 3225.194  |
| NM_012480 | 3407.729  | 2601.975  | AK022638  | 7847.708  | 9670.275  | NM_003804 | 5245.556  | 4760.439  |
| AK024144  | 9048.137  | 7299.863  | BG698409  | 2434.219  | 2404.661  | NM_018453 | 1317.945  | 1220.572  |
| Y08959    | 974.728   | 650.262   | U36798    | 486.831   | 836.335   | NM_004708 | 55672.277 | 63072.809 |
| NM_005346 | 5372.732  | 5608.946  | AA220921  | 9618.522  | 13851.061 | NM_016001 | 6171.629  | 8383.675  |
| AF196865  | 791.518   | 800.131   | N67770    | 1194.245  | 1214.944  | NM_016108 | 14020.925 | 17296.203 |
| AJ008114  | 42366.203 | 37777.844 | AA486200  | 60486.414 | 55495.188 | S49432    | 3629.256  | 4153.274  |
| AF147432  | 2348.712  | 1269.675  | U90065    | 641.314   | 979.611   | D86984    | 1581.74   | 1932.485  |
| AK024690  | 957.313   | 891.151   | AJ005898  | 4973.364  | 4540.462  | NM_015955 | 900.294   | 1185.939  |
| BC005946  | 53851.867 | 49687.434 | X57303    | 4848.445  | 5468.452  | AK026904  | 2249.884  | 1649.809  |
| AK021893  | 2479.841  | 1837.469  | AA463224  | 1528.603  | 1495.874  | AB002364  | 380.528   | 276.248   |
| NM_001048 | 13629.984 | 8756.47   | BG248802  | 8151.718  | 9328.137  | NM_001910 | 1086.818  | 1257.348  |
| AK026497  | 5816.315  | 4348.206  | L19605    | 2202.632  | 2267.656  | J03210    | 1123.558  | 1383.88   |
| BE958139  | 1183.068  | 783.988   | AA876532  | 6771.357  | 7882.715  | NM_001905 | 4464.542  | 4334.717  |
| AF085359  | 822.47    | 475.611   | S74349    | 2040.625  | 2539.827  | NM_012198 | 2491.022  | 2531.859  |
| AF086516  | 1519.313  | 1016.74   | X07979    | 36504.637 | 36151.656 | NM_003368 | 1514.542  | 1117.95   |
| D86978    | 6330.877  | 4403.539  | BG324670  | 1082.388  | 1406.911  | AB040886  | 548.605   | 546.646   |
| AL080060  | 3168.822  | 1599.938  | BG744224  | 17026.738 | 19767.441 | AB029020  | 1030.774  | 1016.506  |
| NM_005267 | 3036.533  | 2121.376  | NM_006079 | 39772.586 | 52960.547 | AK022759  | 1478.856  | 1650.491  |
| U80763    | 678.327   | 462.951   | NM_006696 | 3895.063  | 4975.154  | NM_012333 | 4834.981  | 4921.482  |
| AF086017  | 1678.737  | 1368.264  | NM_018026 | 2763.387  | 2565.235  | AF161472  | 912.349   | 875.387   |
| AK024978  | 7217.67   | 7166.002  | NM_001707 | 22877.436 | 20447.619 | AL133642  | 4388.198  | 4833.795  |
| AK026836  | 2383.904  | 2496.852  | X03084    | 735.171   | 578.74    | AB011154  | 762.56    | 1123.55   |
| T59562    | 27915.121 | 26790.305 | M15530    | 9711.8    | 9739.059  | AF124432  | 1773.47   | 3266.718  |
| NM_018219 | 878.767   | 931.091   | NM_000488 | 781.074   | 465.627   | NM_006330 | 7792.733  | 8870.891  |
| NM_014114 | 1590.118  | 1260.946  | NM_001877 | 1519.811  | 1692.381  | NM_015873 | 5125.319  | 6436.74   |
| U62822    | 4418.354  | 1873.33   | NM_014207 | 8361.378  | 8983.138  | NM_000377 | 2868.754  | 2924.055  |
| CY3Cy5    | 17383.67  | 3757.722  | AK002163  | 3493.48   | 3939.573  | NM_006818 | 1135.227  | 2139.418  |
| AA220921  | 994.576   | 1339.738  | NM_002287 | 14557.579 | 16875.299 | NM_016823 | 2107.478  | 4310.315  |
| AA486200  | 48821.145 | 45313.418 | NM_012344 | 2094.338  | 2273.409  | NM_003120 | 8615.527  | 6970.79   |
| AJ005898  | 2959.405  | 2777.443  | NM_002351 | 2364.391  | 2255.044  | X52360    | 2073.964  | 1577.651  |
| X57303    | 3740.58   | 6296.575  | NM_014385 | 1892.282  | 1761.431  | NM_002636 | 25142.387 | 23869.814 |
| AA463224  | 1596.793  | 2693.27   | NM_001704 | 2229.426  | 2268.594  | NM_016494 | 28078.691 | 27991.305 |
| AA876532  | 6795.865  | 9593.772  | AB036432  | 13797.562 | 14081.688 | U09410    | 3492.328  | 3539.043  |
| S74349    | 2159.57   | 2561.262  | NM_014872 | 8861.497  | 8908.641  | NM_020225 | 1279.167  | 1018.717  |
| X07979    | 32017.842 | 27747.879 | NM_003643 | 1638.966  | 1571.656  | NM_001186 | 3880.048  | 3241.551  |
| BG324670  | 1038.146  | 1241.354  | NM_003480 | 1999.458  | 1802      | NM_004502 | 2049.446  | 1886.772  |

|           |           |           |           |           |           |           |           |           |
|-----------|-----------|-----------|-----------|-----------|-----------|-----------|-----------|-----------|
| BG744224  | 15505.814 | 17709.26  | NM_000899 | 1134.294  | 1411.821  | AF000560  | 5505.787  | 4921.781  |
| NM_006079 | 38900.688 | 50124.32  | NM_032951 | 4203.634  | 4303.159  | NM_013282 | 2554.123  | 2061.801  |
| NM_006696 | 3649.148  | 5318.875  | NM_000503 | 4620.101  | 4433.276  | NM_005777 | 3227.048  | 2933.114  |
| SR5       | 5801.146  | 7722.362  | NM_002405 | 2056.144  | 2718.902  | NM_012345 | 1745.3    | 1358.573  |
| SR7       | 9345.322  | 62116.465 | AK000004  | 1866.399  | 2107.354  | NM_005826 | 10555.314 | 9292.645  |
| SR9       | 48628.996 | 18617.168 | NM_012421 | 39237.223 | 46727.906 | NM_004592 | 1349.34   | 1546.17   |
| CY3Cy5    | 11657.374 | 2190.852  | AB014601  | 3033.45   | 2694.639  | NM_015001 | 6407.393  | 6179.956  |
| AK002163  | 692.036   | 729.061   | AK001393  | 9249.194  | 9985.047  | NM_019027 | 470.872   | 632.854   |
| NM_002287 | 3220.158  | 2263.583  | NM_000023 | 5607.082  | 5261.396  | NM_016107 | 1481.195  | 1359.87   |
| NM_012344 | 463.648   | 417.308   | NM_014861 | 1170.236  | 1519.23   | NM_002567 | 10502.869 | 10612.313 |
| NM_014385 | 681.512   | 463.896   | NM_012434 | 1835.655  | 1950.761  | NM_001404 | 2371.297  | 2696.088  |
| AB036432  | 12642.579 | 12536.274 | NM_005694 | 9323.446  | 9173.546  | NM_001605 | 25932.125 | 26446.373 |
| NM_014872 | 10155.229 | 11209.613 | AF224741  | 1321.307  | 1295.813  | AF225422  | 12942.741 | 17876.205 |
| NM_003643 | 1241.868  | 1450.562  | NM_006594 | 3576.291  | 3866.043  | AB040960  | 6921.119  | 7911.58   |
| NM_003480 | 2306.884  | 2906.919  | NM_004177 | 1462.399  | 1520.926  | NM_015946 | 2365.16   | 3485.433  |
| NM_000899 | 1129.086  | 1294.28   | NM_012429 | 1400.356  | 1915.715  | NM_006303 | 5452.004  | 9069.738  |
| NM_032951 | 4468.056  | 4899.544  | NM_004871 | 7270.16   | 7687.933  | AL080059  | 515.541   | 409.577   |
| NM_000503 | 2916.614  | 2624.542  | NM_005698 | 10914.368 | 10486.988 | AL080219  | 3401.557  | 2645.905  |
| NM_002405 | 2413.327  | 3148.816  | AF202146  | 9080.458  | 7770.554  | AK026709  | 684.272   | 468.433   |
| AK000004  | 1762.673  | 2489.503  | NM_006393 | 2161.417  | 2012.427  | AK024165  | 468.853   | 564.302   |
| NM_012421 | 44481.063 | 55119.242 | NM_014923 | 2080.2    | 2769.725  | NM_003001 | 1216.643  | 1395.746  |
| AB014601  | 2438.241  | 3999.926  | NM_005477 | 7836.237  | 8870.637  | NM_001985 | 1942.068  | 1902.172  |
| AK001393  | 7504.22   | 9205.787  | NM_007018 | 1103.424  | 885.323   | NM_000102 | 1903.318  | 1405.123  |
| AF022654  | 1462.238  | 1905.456  | NM_004318 | 1401.823  | 1198.258  | NM_002490 | 9898.018  | 8995.454  |
| NM_001143 | 865.519   | 1234.465  | L09089    | 692.965   | 426.765   | BE563532  | 704.933   | 485.269   |
| NM_003282 | 670.078   | 951.144   | NM_002640 | 1905.505  | 1633.229  | NM_001916 | 3473.038  | 3124.457  |
| AK022638  | 7893.167  | 10182.047 | Y11339    | 5080.24   | 5262.54   | NM_002491 | 577.922   | 567.401   |
| BG698409  | 1950.952  | 1925.118  | AB030176  | 1183.468  | 1217.81   | NM_015425 | 1325.841  | 1156.502  |
| AF224741  | 384.846   | 454.314   | NM_003937 | 4796.007  | 5568.512  | NM_015153 | 2892.947  | 2227.04   |
| NM_006594 | 368.106   | 416.832   | NM_002537 | 8385.143  | 8591.649  | AB032966  | 19745.518 | 18944.143 |
| NM_004871 | 803.676   | 1018.253  | NM_004059 | 668.447   | 491.539   | M26747    | 379.095   | 559.681   |
| NM_005698 | 5938.434  | 6834.036  | NM_001634 | 23540.453 | 20802.506 | NM_014820 | 1707.053  | 2677.883  |
| AF202146  | 8053.068  | 7408.022  | NM_002267 | 8139.901  | 7903.177  | NM_005035 | 512.783   | 490.881   |
| NM_006393 | 1280.679  | 1429.32   | NM_006412 | 12125.596 | 12727.829 | NM_019014 | 3171.971  | 3385.452  |
| NM_014923 | 1830.363  | 1734.874  | NM_003063 | 6607.051  | 6401.725  | NM_002097 | 13208.016 | 13410.913 |
| NM_005477 | 5770.57   | 5637.057  | NM_014041 | 35511.688 | 42589.578 | X04706    | 4791.988  | 4762.126  |
| NM_007018 | 981.05    | 758.429   | NM_007169 | 4104.101  | 4209.906  | NM_018039 | 712.784   | 668.379   |
| NM_004318 | 1361.941  | 1449.589  | NM_014313 | 912.584   | 757.974   | NM_006494 | 5062.269  | 5459.452  |
| L09089    | 438.187   | 1116.75   | AK024966  | 2902.015  | 3264.865  | X52343    | 4395.518  | 4736.241  |
| NM_002640 | 2111.188  | 2598.188  | AF178941  | 18298.654 | 16105.56  | NM_005853 | 7592.284  | 9133.289  |
| X03084    | 436.47    | 880.837   | NM_016033 | 7547.746  | 6121.139  | X99681    | 1017.203  | 1133.602  |
| NM_000949 | 563.029   | 672.935   | NM_017585 | 5770.452  | 9074.464  | NM_014068 | 686.991   | 496.734   |
| M15530    | 9878.965  | 12624.415 | U61737    | 25223.289 | 29352.117 | NM_017814 | 2917.792  | 2228.88   |
| NM_000488 | 485.455   | 1309.189  | Y10506    | 222.996   | 633.593   | AF074996  | 1065.036  | 952.375   |
| NM_001877 | 1652.111  | 2350.036  | X06389    | 819.761   | 507.85    | AF131811  | 2190.357  | 1812.279  |
| NM_014207 | 8737.457  | 9491.468  | NM_000033 | 2028.125  | 2408.556  | AF293026  | 6310.21   | 8554.231  |
| NM_004059 | 330.402   | 273.335   | NM_006079 | 37564.852 | 44009.09  | AF236158  | 1339.179  | 1218.787  |
| NM_001634 | 8264.885  | 4604.359  | NM_006696 | 3737.261  | 4669.137  | AF217986  | 3987.142  | 6038.299  |
| NM_002267 | 2505.138  | 6073.343  | NM_018026 | 2779.434  | 2881.302  | AK026320  | 709.328   | 786.717   |
| NM_006412 | 3333.969  | 3656.32   | NM_001707 | 20928.559 | 15728.104 | AL137530  | 2219.056  | 1839.623  |
| NM_003063 | 1377.391  | 1043.646  | AK022983  | 1356.617  | 1231.501  | NM_015953 | 3518.422  | 3725.684  |
| NM_014041 | 12657.894 | 9608.544  | NM_014868 | 6420.005  | 6216.758  | AF147310  | 839.795   | 660.595   |
| NM_007169 | 1835.33   | 1538.048  | AL442089  | 11296.426 | 11477.978 | AK024775  | 3889.829  | 3626.303  |

|           |           |           |           |           |           |           |           |           |
|-----------|-----------|-----------|-----------|-----------|-----------|-----------|-----------|-----------|
| AK024966  | 1883.281  | 1633.279  | NM_001200 | 2677.718  | 2655.751  | AK025562  | 2804.785  | 1519.041  |
| AF178941  | 16408.619 | 15744.233 | AB007964  | 116.265   | 1144.012  | AF088024  | 710.332   | 639.283   |
| NM_016033 | 7297.563  | 6513.504  | AF128541  | 3784.77   | 3930.103  | AK025887  | 1205.901  | 802.534   |
| NM_017585 | 4727.721  | 5795.239  | AK026305  | 4904.575  | 4305.549  | AB037719  | 1390.186  | 1834.129  |
| U61737    | 36465.73  | 37265.93  | NM_002552 | 3216.467  | 2958.632  | U00791    | 557.808   | 623.388   |
| Y10506    | 495.144   | 678.484   | NM_014321 | 7988.416  | 7221.862  | AF086229  | 471.014   | 458.396   |
| X06389    | 524.47    | 937.309   | AK022733  | 1530.224  | 1801.907  | AK026143  | 1481.244  | 1239.152  |
| NM_000033 | 2323.499  | 2740.231  | AB011132  | 5869.415  | 5602.625  | AL137578  | 403.045   | 440.138   |
| NM_014861 | 1198.002  | 1476.252  | NM_020362 | 3646.088  | 2696.914  | AL110252  | 568.293   | 642.54    |
| NM_012434 | 2117.572  | 2426.394  | AB040937  | 6851.876  | 6413.062  | AL050143  | 1068.661  | 1350.509  |
| NM_005694 | 9985.011  | 8235.62   | AF275798  | 28377.213 | 36164.359 | AL137616  | 1104.582  | 1078.823  |
| AK022983  | 307.039   | 320.167   | NM_005441 | 12069.97  | 14194.917 | AK021752  | 679.578   | 321.048   |
| NM_014865 | 1978.717  | 1687.538  | NM_016079 | 24566.629 | 27735.023 | AL050012  | 387.481   | 476.151   |
| AL442089  | 3362.299  | 2800.243  | AK023108  | 3114.387  | 3160.952  | AL109706  | 5579.674  | 4856.422  |
| X83412    | 2424.807  | 2342.324  | AK026409  | 21666.057 | 19568.689 | AK001118  | 800.605   | 731.435   |
| AF128541  | 959.529   | 661.339   | AF097025  | 9296.52   | 11217.419 | AF035291  | 49255.344 | 47991.902 |
| AK026305  | 2125.197  | 1161.699  | NM_002405 | 2293.054  | 2912.044  | AK026291  | 2709.152  | 2329.332  |
| NM_002552 | 1307.73   | 866.907   | AK000004  | 1997.495  | 2608.62   | AL049285  | 457.02    | 302.16    |
| NM_014321 | 6386.883  | 4631.682  | NM_012421 | 36895.434 | 45800.797 | AL117520  | 785.071   | 562.141   |
| AK022733  | 1046.184  | 951.193   | AB014601  | 2668.758  | 2963.226  | AL049303  | 728.836   | 725.376   |
| AB011132  | 4340.498  | 4038.238  | AK001393  | 9135.985  | 10151.773 | AL080208  | 576.217   | 726.477   |
| NM_020362 | 3436.601  | 3501.895  | NM_000023 | 5329.517  | 5059.58   | L35592    | 8387.98   | 7638.489  |
| AB040937  | 6281.477  | 5591.91   | AF022654  | 1330.568  | 1088.097  | NM_012075 | 800.481   | 749.43    |
| AF275798  | 29480.42  | 26832.387 | NM_001143 | 803.673   | 738.57    | BC017695  | 478.066   | 876.548   |
| NM_005441 | 11364.315 | 11067.229 | NM_003282 | 418.965   | 918.484   | AL360274  | 12472.86  | 12150.057 |
| NM_016079 | 24640.828 | 24709.967 | AK022638  | 8714.341  | 9611.063  | AK021858  | 1165.192  | 1784.355  |
| AK023108  | 2627.916  | 3198.499  | BG698409  | 2402.392  | 2383.663  | NM_014050 | 5469.782  | 5982.364  |
| AK026409  | 21379.236 | 21246.828 | U36798    | 683.898   | 735.17    | AF085854  | 991.831   | 1496.934  |
| AF097025  | 9462.67   | 12113.805 | AA220921  | 10004.977 | 12809.409 | AF074997  | 725.355   | 1130.334  |
| Y11339    | 6152.276  | 7407.68   | N67770    | 1344.177  | 1107.44   | AK027027  | 633.774   | 540.717   |
| AB030176  | 871.955   | 1050.048  | AA486200  | 63375.488 | 53673.395 | NM_014911 | 547.841   | 444.747   |
| NM_003937 | 4383.438  | 5320.067  | U90065    | 561.473   | 1532.185  | AF009289  | 3019.69   | 2450.494  |
| NM_002537 | 6789.328  | 6668.519  | AJ005898  | 4339.901  | 3966.964  | AF040247  | 605.996   | 448.259   |
| NM_003139 | 5813.389  | 5252.172  | X57303    | 3626      | 3821.094  | AF056439  | 1142.97   | 853.295   |
| NM_012316 | 3475.852  | 3399.149  | AA463224  | 1349.084  | 1025.43   | AF007835  | 407.162   | 450.064   |
| AF022654  | 855.1     | 1369.569  | BG248802  | 9045.847  | 9280.008  | AF009303  | 2154.309  | 1511.448  |
| NM_001143 | 722.577   | 928.555   | L19605    | 2088.144  | 2114.866  | NM_004474 | 2406.312  | 1798.281  |
| NM_003282 | 514.673   | 365.644   | AA876532  | 6879.058  | 7672.685  | AF056449  | 719.313   | 564.94    |
| AK022638  | 3255.822  | 3168.05   | S74349    | 2231.905  | 2369.653  | AK001033  | 537.967   | 706.234   |
| BG698409  | 763.411   | 704.787   | X07979    | 37396.504 | 37483.574 | AK001781  | 277.647   | 293.406   |
| AA220921  | 1753.555  | 1811.188  | BG324670  | 977.451   | 826.744   | AK001082  | 3147.739  | 2677.689  |
| N67770    | 562.65    | 413.725   | BG744224  | 16401.553 | 14756.001 | AK021521  | 608.509   | 857.526   |
| AA486200  | 59869.664 | 57247.152 | NM_005477 | 11889.692 | 10835.605 | AK021743  | 3891.577  | 3614.017  |
| AJ005898  | 3134.048  | 2725.995  | NM_007018 | 1128.658  | 457.695   | AK026699  | 720.018   | 739.524   |
| X57303    | 3241.565  | 3249.171  | NM_004318 | 1423.61   | 1045.288  | AK025589  | 2067.713  | 2241.631  |
| AA463224  | 1321.223  | 1338.301  | L09089    | 657.672   | 779.313   | AK026734  | 708.918   | 837.258   |
| BG248802  | 8532.451  | 8054.15   | NM_002640 | 1821.119  | 1542.695  | NM_016633 | 25421.188 | 20028.508 |
| L19605    | 1817.524  | 1848.992  | NM_000949 | 652.689   | 346.045   | AK023250  | 2961.712  | 2239.885  |
| AA876532  | 6500.925  | 7741.661  | M15530    | 10020.872 | 9336.238  | AK024882  | 1710.974  | 1493.314  |
| S74349    | 1793.164  | 1858.975  | NM_000488 | 837.077   | 1151.158  | NM_014062 | 10726.475 | 8631.056  |
| X07979    | 41599.574 | 38369.063 | NM_001877 | 2217.045  | 2208.428  | NM_006304 | 32779.531 | 25770.729 |
| BG324670  | 824.977   | 1216.862  | NM_014207 | 9226.032  | 9439.821  | X74804    | 720.048   | 385.012   |
| BG744224  | 17459.723 | 19271.652 | AK002163  | 3397.959  | 3538.638  | AF293367  | 990.392   | 996.628   |

|           |           |           |           |           |           |            |           |           |
|-----------|-----------|-----------|-----------|-----------|-----------|------------|-----------|-----------|
| NM_00669E | 3425.307  | 3361.583  | NM_002287 | 14117.001 | 13793.034 | AF086231   | 2389.258  | 1885.723  |
| NM_01802E | 2936.306  | 2997.407  | NM_012344 | 1915.626  | 1837.891  | AK001494   | 612.543   | 686.509   |
| NM_001707 | 22548.416 | 17700.059 | NM_002351 | 2097.823  | 2349.754  | AL133438   | 1457.278  | 1398.429  |
| X03084    | 870.136   | 969.275   | NM_01438E | 1401.448  | 1245.536  | unknown (S | 1.024     | 1393.95   |
| NM_00094E | 380.138   | 864.793   | NM_001704 | 1798.253  | 1807.236  | AK022310   | 774.662   | 696.693   |
| M15530    | 5401.559  | 5918.079  | AB036432  | 12251.474 | 10531.449 | AK021784   | 894.869   | 754.25    |
| NM_00048E | 598.922   | 814.767   | NM_01487E | 8936.586  | 8953.387  | AF230800   | 873.39    | 701.19    |
| NM_001877 | 583.559   | 844.783   | NM_00364E | 1792.878  | 1632.525  | NM_01852C  | 1349.395  | 958.29    |
| NM_014207 | 2299.717  | 2521.744  | NM_00348C | 2136.23   | 2043.68   | AK026647   | 1239.25   | 1255.267  |
| AK002163  | 3092.085  | 2463.164  | NM_00089E | 1307.966  | 1809.739  | AK022152   | 1431.254  | 1562.221  |
| NM_002287 | 13675.166 | 9548.475  | NM_032951 | 4378.865  | 4107.155  | NM_003534  | 37842.395 | 30404.326 |
| NM_012344 | 1503.633  | 1717.588  | NM_00050E | 4664.351  | 4297.023  | L08437     | 2081.721  | 1514.896  |
| NM_002351 | 2289.931  | 2393.706  | NM_01758E | 6404.917  | 6873.466  | AK057143   | 5849.421  | 4505.13   |
| NM_01438E | 1202.503  | 1185.846  | U61737    | 31417.082 | 33645.855 | NM_015594  | 15417.691 | 10072.949 |
| NM_001704 | 2005.314  | 1876.371  | X06389    | 829.451   | 803.129   | AF056423   | 1729      | 1152.389  |
| AB036432  | 13366.26  | 7877.938  | NM_00003E | 1975.97   | 2080.538  | X04293     | 824.484   | 687.726   |
| NM_01487E | 8688.828  | 6908.45   | NM_014861 | 1517.975  | 1402.356  | K01884     | 368.929   | 456.961   |
| NM_00364E | 1530.096  | 1440.067  | NM_012434 | 603.933   | 823.044   | U00962     | 12784.763 | 14628.121 |
| NM_00348C | 2041.072  | 1946.755  | NM_005694 | 9438.541  | 8532.37   | NM_00052E  | 3402.249  | 2189.765  |
| NM_00089E | 1186.966  | 1503.545  | AF224741  | 1466.115  | 1207.901  | AK026130   | 13605.641 | 12995.282 |
| NM_032951 | 4115.182  | 4500.14   | NM_006594 | 3878.673  | 3385.666  | NM_01248C  | 2409.453  | 1993.83   |
| NM_00050E | 4220.9    | 4520.781  | NM_004177 | 1709.55   | 1236.948  | AK024144   | 6121.897  | 5741.596  |
| AK000004  | 1586.255  | 1731.848  | NM_01242E | 1784.391  | 1724.786  | Y08959     | 1191.467  | 1119.168  |
| NM_01242E | 42381.465 | 43565     | NM_004871 | 7302.578  | 6693.128  | NM_00534E  | 6556.814  | 6754.248  |
| AB014601  | 2704.612  | 2873.807  | NM_00569E | 10725.085 | 10613.318 | NM_00534E  | 19531.631 | 21242.494 |
| AK001393  | 7089.387  | 7652.142  | AF202146  | 9412.373  | 7530.316  | AB032985   | 1194.13   | 1379.114  |
| NM_00002E | 5255.506  | 5281.356  | NM_00639E | 2801.461  | 2149.448  | AF196865   | 929.635   | 881.879   |
| NM_014861 | 519.631   | 726.694   | NM_01492E | 2182.096  | 1685.622  | AJ008114   | 50058.375 | 46858.965 |
| NM_012434 | 1212.2    | 1162.867  | AF275798  | 27659.594 | 31313.725 | AF147432   | 2152.226  | 1683.646  |
| NM_005694 | 5527.557  | 6132.179  | NM_005441 | 10732.491 | 10401.261 | AK024690   | 1390.519  | 1000.988  |
| AF224741  | 1169.518  | 1156.946  | NM_01607E | 23931.029 | 28168.482 | BC005946   | 49633.551 | 43373.043 |
| NM_006594 | 2836.626  | 1856.237  | AK023108  | 2730.531  | 2978.426  | AK021893   | 2852.575  | 1586.494  |
| NM_004177 | 1387.327  | 1217.53   | AK026409  | 24600.361 | 25248.951 | NM_00104E  | 6161.917  | 4571.313  |
| NM_01242E | 1489.017  | 1227.431  | AF097025  | 8520.422  | 8012.016  | AK026497   | 3565.842  | 2522.275  |
| NM_004871 | 6144.1    | 4742.422  | Y11339    | 5186.312  | 5724.095  | BE958139   | 709.613   | 641.59    |
| NM_00569E | 10314.665 | 8503.428  | AB030176  | 1059.819  | 1526.209  | AF085359   | 639.805   | 487.451   |
| AF202146  | 7184.326  | 6224.215  | NM_003937 | 4996.436  | 5940.983  | AF086516   | 592.632   | 687.023   |
| NM_00639E | 1460.499  | 1277.843  | NM_002537 | 8512.325  | 10781.919 | D86978     | 2485.483  | 2742.698  |
| NM_01492E | 1687.174  | 2003.769  | NM_00313E | 5195.54   | 5722.557  | U80763     | 537.487   | 464.857   |
| NM_005477 | 6745.503  | 6635.614  | NM_01231E | 3886.348  | 4011.811  | AF086017   | 771.749   | 767.815   |
| NM_00701E | 870.092   | 749.823   | NM_00405E | 370.979   | 686.791   | AK024978   | 8303.64   | 9310.804  |
| NM_00431E | 1182.143  | 1064.505  | NM_001634 | 25599.543 | 21720.166 | U12897     | 3465.637  | 4088.088  |
| L09089    | 621.747   | 661.95    | NM_002267 | 9106.291  | 9135.327  | AJ227894   | 624.038   | 485.54    |
| NM_00264C | 2079.999  | 2069.597  | NM_00641E | 13056.604 | 13387.858 | NM_020357  | 9775.479  | 9061.431  |
| NM_003937 | 1635.829  | 2353.11   | NM_00306E | 7084.571  | 6742.199  | AK026836   | 1326.61   | 1069.009  |
| NM_002537 | 4298.56   | 4348.048  | NM_014041 | 39137.441 | 42591.91  | T59562     | 34007.898 | 24181.811 |
| NM_00313E | 3710.449  | 3459.362  | NM_00716E | 4577.781  | 4503.641  | NM_01821E  | 1568.658  | 1342.678  |
| NM_01231E | 2411.99   | 2936.996  | NM_01431E | 1023.652  | 994.567   | AK026368   | 622.791   | 520.057   |
| NM_00405E | 361.138   | 519.12    | AK024966  | 3286.275  | 2802.515  | NM_014114  | 1726.996  | 1801.768  |
| NM_001634 | 23009.582 | 16618.863 | AF178941  | 21034.902 | 17370.754 | U62822     | 5521.955  | 3084.334  |
| NM_002267 | 6679.68   | 5960.481  | NM_01603E | 8479.971  | 7636.197  | CY3Cy5     | 8140.987  | 1456.765  |
| NM_00641E | 12038.826 | 9948.241  | NM_01343E | 25546.904 | 29768.986 | U36798     | 454.245   | 666.834   |
| NM_00306E | 6089.947  | 5067.875  | NM_00340E | 29883.318 | 35202.664 | AA220921   | 5260.296  | 9114.409  |

|           |           |           |           |           |           |           |           |           |
|-----------|-----------|-----------|-----------|-----------|-----------|-----------|-----------|-----------|
| NM_014041 | 33003.094 | 26378.104 | NM_018316 | 2210.374  | 2962.412  | N67770    | 1058.797  | 1569.877  |
| NM_007169 | 3844.123  | 3341.719  | AB011180  | 2257.978  | 2577.579  | AA486200  | 52456.527 | 62310.801 |
| NM_014313 | 981.696   | 1138.736  | NM_007167 | 7749.217  | 7770.15   | U90065    | 433.322   | 347.071   |
| AK024966  | 2217.948  | 2535.104  | NM_014832 | 2888.529  | 3225.375  | AJ005898  | 4781.635  | 6814.465  |
| AF178941  | 10797.422 | 10532.947 | NM_003243 | 1614.24   | 951.775   | X57303    | 3067.992  | 4013.014  |
| NM_016033 | 7209.771  | 7348.641  | NM_013359 | 1461.515  | 1759.175  | AA463224  | 892.017   | 847.58    |
| NM_017585 | 4380.605  | 5286.921  | NM_002477 | 12075.813 | 13185.106 | BG248802  | 3968.231  | 5563.122  |
| U61737    | 34283.293 | 34014.277 | NM_004673 | 719.13    | 527.406   | L19605    | 1397.824  | 1595.034  |
| X06389    | 488.516   | 695.517   | NM_018026 | 3151.977  | 3062.283  | AA876532  | 3857.605  | 4221.226  |
| NM_000033 | 2201.787  | 2760.525  | NM_001707 | 25045.287 | 23421.449 | S74349    | 1191.565  | 1199.964  |
| NM_018026 | 1826.496  | 1427.854  | AK022983  | 1015.14   | 1527.206  | X07979    | 40566.824 | 32833.453 |
| NM_001707 | 20146.859 | 15424.235 | NM_014868 | 6445.374  | 4657.663  | BG324670  | 440.333   | 480.228   |
| AK022983  | 520.981   | 574.366   | AL442089  | 12388.626 | 13592.196 | BG744224  | 14255.536 | 13646.148 |
| NM_014868 | 6519.2    | 6826.393  | NM_001200 | 3507.092  | 3083.803  | NM_006079 | 22901.512 | 19639.707 |
| AL442089  | 9269.751  | 8634.68   | AF128541  | 4304.582  | 4083.195  | NM_006696 | 2134.52   | 2464.345  |
| NM_001200 | 2725.565  | 2333.267  | AK026305  | 6804.854  | 6302.692  | SR5       | 3629.794  | 3886.704  |
| AF128541  | 3562.397  | 3484.318  | NM_002552 | 3921.113  | 3621.29   | SR7       | 4347.941  | 35361.375 |
| AK026305  | 4325.625  | 2974.565  | NM_014321 | 8384.568  | 8503.001  | SR9       | 17246.121 | 3047.638  |
| NM_002552 | 2866.189  | 2552.014  | AK022733  | 1541.551  | 1576.697  | CY3Cy5    | 4749.019  | 520.91    |
| NM_014321 | 8363.778  | 6376.649  | AB011132  | 5944.926  | 5185.081  | AF169158  | 233.853   | 615.878   |
| AK022733  | 1451.323  | 1333.824  | NM_020362 | 4227.424  | 3694.84   | AK002163  | 2184.304  | 3016.888  |
| AB011132  | 4643.372  | 6072.286  | AB040937  | 7585.816  | 6269.08   | NM_002287 | 6894.666  | 10575.365 |
| NM_020362 | 3270.572  | 3640.756  | NM_000095 | 2520.819  | 3192.015  | NM_012344 | 1470.518  | 1975.101  |
| AB040937  | 6507.148  | 5930.52   | AL137493  | 1042.542  | 1860.243  | NM_002351 | 1246.323  | 1702.469  |
| AF275798  | 30573.285 | 27575.01  | NM_004797 | 556.619   | 828.144   | NM_014385 | 1152.683  | 1431.459  |
| NM_005441 | 12273.243 | 11923.288 | NM_002457 | 3225.23   | 9184.365  | NM_001704 | 1486.412  | 1929.61   |
| NM_016079 | 21615.467 | 20536.902 | NM_001338 | 2802.059  | 2955.804  | AB036432  | 12405.638 | 15345.261 |
| AK023108  | 2146.17   | 2438.64   | NM_003637 | 784.545   | 882.336   | NM_014872 | 4467.4    | 5314.329  |
| AK026409  | 15925.507 | 15917.395 | BC035133  | 1284.39   | 1600.909  | NM_003643 | 898.2     | 1093.434  |
| AF097025  | 8550.008  | 14872.216 | NM_004233 | 2729.834  | 3010.383  | NM_003480 | 2144.508  | 2419.088  |
| NM_002405 | 2045.626  | 3353.316  | NM_001544 | 11171.271 | 9372.065  | NM_000895 | 831.16    | 749.163   |
| AK000004  | 1212.934  | 1584.162  | X58531    | 1802.168  | 1773.93   | NM_032951 | 2409.802  | 2868.812  |
| NM_012421 | 30167.242 | 36381.457 | AB011168  | 3834.541  | 3911.795  | NM_000503 | 8793.556  | 8490.104  |
| AB014601  | 680.626   | 787.289   | BE794262  | 2615.648  | 2479.91   | NM_002405 | 1357.732  | 1608.384  |
| AK001393  | 3901.319  | 4484.813  | NM_003212 | 14271.383 | 11798.697 | AK000004  | 1147.698  | 1008.392  |
| NM_000023 | 3984.492  | 4290.929  | NM_006382 | 1453.892  | 1309.495  | NM_012421 | 24184.375 | 22621.307 |
| AF022654  | 1420.528  | 1738.195  | NM_004811 | 1755.675  | 1512.387  | AB014601  | 1794.934  | 1831.702  |
| NM_001143 | 835.397   | 707.279   | AK021910  | 64014.242 | 52765.566 | AK001393  | 7951.834  | 8692.258  |
| NM_003282 | 609.619   | 840.452   | M62402    | 1299.905  | 1351.341  | NM_000023 | 6439.209  | 5916.681  |
| AK022638  | 7289.244  | 9442.476  | NM_002547 | 215.365   | 2126.217  | AF022654  | 766.548   | 829.054   |
| BG698409  | 2069.277  | 2076.367  | NM_004748 | 5663.254  | 4877.019  | NM_001143 | 1228.692  | 1365.115  |
| U36798    | 713.258   | 808.137   | NM_002668 | 13738.349 | 12493.121 | NM_003282 | 372.283   | 367.067   |
| AA220921  | 8659.075  | 10265.544 | NM_001058 | 2037.905  | 2334.642  | AK022638  | 4491.51   | 5195.689  |
| N67770    | 879.085   | 879.464   | NM_014316 | 9643.626  | 8748.621  | BG698409  | 2922.442  | 2775.933  |
| AA486200  | 62174.102 | 61193.551 | NM_004054 | 4650.858  | 4674.687  | AF224741  | 624.759   | 875.812   |
| U90065    | 632.939   | 576.322   | NM_001138 | 3802.134  | 3467.575  | NM_006594 | 2146.055  | 2469.318  |
| AJ005898  | 4098.313  | 5093.661  | NM_004219 | 45389.438 | 46908.031 | NM_004177 | 840.736   | 1372.931  |
| X57303    | 3487.804  | 5081.41   | NM_003443 | 52206.098 | 48456.199 | NM_012421 | 1043.826  | 1614.884  |
| AA463224  | 1052.073  | 1547.846  | NM_002025 | 1650.694  | 2105.771  | NM_004871 | 2892.305  | 4799.33   |
| BG248802  | 7640.767  | 9244.503  | AB015228  | 1604.963  | 1731.055  | NM_005696 | 3825.26   | 5058.318  |
| L19605    | 2052.583  | 1925.667  | AL049685  | 3063.893  | 2831.943  | AF202146  | 4421.542  | 4369.958  |
| AA876532  | 6181.69   | 7894.305  | AK026800  | 10114.73  | 10022.428 | NM_006393 | 2022.255  | 2280.437  |
| S74349    | 1558.406  | 2137.749  | NM_001442 | 1680.708  | 1697.514  | NM_014923 | 1154.583  | 1059.269  |

|           |           |           |           |           |           |           |           |           |
|-----------|-----------|-----------|-----------|-----------|-----------|-----------|-----------|-----------|
| X07979    | 37642.246 | 36354.203 | NM_017775 | 4966.323  | 5807.69   | NM_005477 | 13361.578 | 12161.575 |
| BG744224  | 14772.49  | 19414.115 | AK001958  | 1180.36   | 1470.939  | NM_007018 | 232.51    | 458.399   |
| NM_005477 | 10254.3   | 11415.78  | AK025947  | 2679.863  | 2653.398  | NM_004318 | 710.829   | 524.269   |
| NM_007018 | 728.511   | 958.968   | AF217973  | 4480.968  | 5062.822  | L09089    | 473.94    | 404.776   |
| NM_002640 | 1048.213  | 1230.709  | NM_007033 | 10208.23  | 10562.359 | NM_002640 | 1350.84   | 1142.19   |
| X03084    | 484.422   | 442.321   | AF226048  | 5153.9    | 5305.882  | M15530    | 5774.19   | 4935.547  |
| NM_000948 | 639.038   | 489.616   | NM_005573 | 12584.783 | 13015.984 | NM_001877 | 899.431   | 843.438   |
| M15530    | 9862.029  | 9627.271  | D50918    | 7522.863  | 6708.595  | NM_014207 | 5339.232  | 3988.069  |
| NM_000488 | 996.869   | 1032.48   | U48734    | 17434.063 | 6098.004  | NM_004058 | 337.043   | 503.488   |
| NM_001877 | 1368.632  | 1615.333  | NM_006400 | 5151.85   | 6305.045  | NM_001634 | 14384.414 | 14639.858 |
| NM_014207 | 8208.345  | 7795.75   | NM_003903 | 5831.59   | 4620.318  | NM_002267 | 3734.206  | 4968.324  |
| AF169158  | 406.42    | 496.926   | NM_017955 | 3483.455  | 2706.383  | NM_006412 | 6661.308  | 9583.575  |
| AK002163  | 3215.29   | 2790.063  | NM_016060 | 4471.763  | 3919.034  | NM_003063 | 5291.015  | 8676.244  |
| NM_002287 | 14056.422 | 13228.045 | NM_002208 | 5949.726  | 5193.247  | NM_014041 | 20898.563 | 25698.943 |
| NM_012344 | 1984.036  | 2245.285  | NM_007216 | 2518.923  | 2298.928  | NM_007168 | 2810.326  | 3837.543  |
| NM_002351 | 2074.933  | 3275.938  | AK023518  | 1590.193  | 1212.119  | NM_014313 | 548.418   | 451.271   |
| NM_014385 | 1491.877  | 2069.94   | NM_000944 | 9185.945  | 13003.961 | AK024966  | 2434.166  | 2316.914  |
| NM_001704 | 1968.121  | 2781.588  | NM_012239 | 1561.168  | 1705.409  | AF178941  | 25632.357 | 26363.898 |
| AB036432  | 12181.15  | 11847.705 | NM_012262 | 1075.213  | 1169.527  | NM_016033 | 4364.774  | 4542.59   |
| NM_014872 | 7943.882  | 7089.671  | NM_013390 | 7382.101  | 7966.924  | NM_017585 | 8537.317  | 8309.583  |
| NM_003643 | 1749.664  | 2953.363  | NM_002829 | 1851.795  | 2201.987  | U61737    | 39701.633 | 31962.676 |
| NM_003480 | 1744.742  | 2492.687  | J02783    | 66925.805 | 58363.48  | X06389    | 1193.093  | 977.9     |
| NM_000898 | 1215.093  | 1353.754  | NM_006577 | 28566.367 | 34855.746 | NM_000033 | 2208.612  | 2185.542  |
| NM_032951 | 4341.289  | 4726.248  | NM_004413 | 985.131   | 529.797   | NM_014861 | 846.204   | 893.738   |
| NM_000503 | 3372.61   | 3567.036  | NM_005317 | 1233.739  | 1478.863  | NM_012434 | 731.051   | 602.554   |
| Y10506    | 786.631   | 1619.209  | AF120493  | 945.14    | 765.937   | NM_005694 | 3878.488  | 2781.509  |
| X06389    | 1373.979  | 1754.033  | U12597    | 1573.877  | 1929.828  | AK022983  | 551.671   | 907.882   |
| NM_000033 | 2176.941  | 2723.627  | U28055    | 767.902   | 660.689   | NM_014868 | 3549.735  | 4743.013  |
| NM_014861 | 1116.502  | 1404.571  | AB044343  | 3155.133  | 2969.725  | AL442089  | 9167.311  | 10710.876 |
| NM_012434 | 2080.867  | 1607.304  | NM_018409 | 485.148   | 530.448   | NM_001200 | 1598.068  | 1937.885  |
| NM_005694 | 9314.915  | 7325.552  | NM_014662 | 1299.671  | 1043.85   | AB007964  | 372.192   | 712.112   |
| AF224741  | 1247.619  | 1236.74   | NM_005178 | 5983.77   | 6017.713  | AF128541  | 3496.767  | 3985.16   |
| NM_006594 | 3053.153  | 3396.341  | NM_017702 | 3986.315  | 3700.762  | AK026305  | 4055.768  | 5105.973  |
| NM_004177 | 1497.148  | 2130.95   | AB014516  | 6729.02   | 6246.521  | NM_002552 | 2134.419  | 2773.707  |
| NM_005698 | 11689.126 | 15326.14  | Z83950    | 1177.9    | 1090.766  | NM_014321 | 4198.477  | 4802.208  |
| AF202146  | 6507.331  | 7101.827  | AL080063  | 2571.051  | 2494.36   | AK022733  | 763.175   | 1049.793  |
| NM_006393 | 1836.907  | 1899.121  | NM_005625 | 13518.074 | 12169.736 | AB011132  | 3294.904  | 3497.725  |
| NM_014923 | 1795.264  | 2051.196  | X15262    | 4923.861  | 4299.746  | NM_020362 | 2343.331  | 2382.163  |
| AF275798  | 27404.486 | 29931.732 | NM_005475 | 1145.622  | 675.194   | AB040937  | 3342.743  | 3249.725  |
| NM_016079 | 17408.707 | 17182.645 | AB040918  | 3810.097  | 3104.719  | AF275798  | 15829.372 | 14952.819 |
| AK023108  | 2189.755  | 2464.516  | NM_015859 | 2064.112  | 1603.105  | NM_005441 | 5353.915  | 4818.643  |
| AK026409  | 19727.998 | 18675.924 | X60152    | 1634.925  | 1459.38   | NM_016079 | 13398.31  | 11879.311 |
| AF097025  | 9748.713  | 11050.981 | NM_002316 | 3882.829  | 4507.092  | AK023108  | 2199.021  | 1734.669  |
| Y11339    | 6690.06   | 6552.997  | AB023232  | 1987.716  | 2608.471  | AK026409  | 36868.535 | 27532.643 |
| AB030176  | 1483.855  | 1688.909  | AL137589  | 1804.089  | 1872.698  | AF097025  | 8335.467  | 9634.234  |
| NM_003937 | 4196.004  | 4277.677  | NM_002502 | 2165.735  | 2168.764  | Y11339    | 5613.957  | 5000.204  |
| NM_002537 | 7308.189  | 6796.622  | AF226732  | 3004.937  | 1726.269  | AB030176  | 543.302   | 663.323   |
| NM_003138 | 5830.455  | 5644.477  | NM_006312 | 11359.049 | 10258.374 | NM_003937 | 2426.849  | 2689.933  |
| NM_012316 | 3703.437  | 3332.925  | NM_002805 | 1019.878  | 711.354   | NM_002537 | 5238.745  | 4855.759  |
| NM_004058 | 896.89    | 873.287   | NM_003662 | 2874.662  | 2704.22   | NM_003138 | 2488.297  | 1794.931  |
| NM_001634 | 25565.518 | 16437.777 | NM_002939 | 15146.328 | 15523.186 | NM_012316 | 3002.706  | 2457.305  |
| NM_007168 | 4468.031  | 5877.639  | NM_015836 | 33925.219 | 36784.113 | AF022654  | 718.873   | 1300.06   |
| NM_014313 | 748.891   | 715.097   | NM_004713 | 3507.9    | 2645.973  | NM_001143 | 705.661   | 1265.248  |



|           |           |           |           |           |           |           |           |           |
|-----------|-----------|-----------|-----------|-----------|-----------|-----------|-----------|-----------|
| AK024966  | 2606.772  | 2493.898  | NM_003769 | 831.458   | 925.148   | NM_003282 | 462.999   | 449.406   |
| AF178941  | 16827.984 | 15719.449 | NM_001698 | 13155.26  | 11046.069 | AK022638  | 4619.582  | 6990.304  |
| NM_016033 | 7753.587  | 6567.073  | NM_000661 | 68065.023 | 57108.664 | BG698409  | 2599.329  | 3929.711  |
| NM_013439 | 23454.912 | 29039.123 | NM_000973 | 67466.172 | 56983.566 | U36798    | 388.081   | 593.066   |
| NM_018316 | 2398.977  | 2538.061  | AF086431  | 2245.974  | 1513.436  | AA220921  | 4870.463  | 7938.974  |
| AB011180  | 1325.482  | 1619.135  | NM_014188 | 55495.813 | 51971.461 | N67770    | 856.201   | 1486.849  |
| NM_007167 | 7765.2    | 8680.233  | AK026365  | 3102.124  | 3604.59   | AA486200  | 52740.109 | 61629.129 |
| NM_014832 | 2601.916  | 4177.423  | AF105378  | 1727.297  | 1665.477  | U90065    | 453.194   | 417.417   |
| NM_013359 | 778.967   | 979.682   | NM_000167 | 5506.26   | 6444.222  | AJ005898  | 5285.995  | 6575.948  |
| NM_002477 | 8866.724  | 9081.169  | AY007125  | 3413.744  | 3305.858  | X57303    | 4089.808  | 4477.339  |
| NM_018026 | 2635.755  | 2593.125  | AB032987  | 1286.579  | 1129.483  | AA463224  | 920.43    | 1166.534  |
| NM_001707 | 27661.203 | 20835.592 | NM_017567 | 6965.791  | 6394.571  | BG248802  | 4322.272  | 5044.508  |
| AK022983  | 880.603   | 808.833   | NM_000691 | 1799.315  | 1276.172  | L19605    | 1465.41   | 1492.699  |
| NM_014868 | 7110.551  | 6714.029  | Y18643    | 709.129   | 792.555   | AA876532  | 4467.562  | 5108.249  |
| AL442089  | 12110.109 | 14201.812 | NM_000305 | 2442.113  | 2317.636  | S74349    | 1047.539  | 1064.668  |
| NM_002552 | 3504.5    | 4296.669  | D86971    | 11375.195 | 11234.479 | X07979    | 39077.75  | 28059.004 |
| NM_014321 | 7190.766  | 6706.383  | NM_003073 | 8086.39   | 6715.812  | BG324670  | 428.592   | 489.807   |
| AK022733  | 1391.287  | 1791.813  | NM_014048 | 899.919   | 652.1     | BG744224  | 18229.049 | 17774.088 |
| AB011132  | 5640.93   | 6194.94   | AF274863  | 855.985   | 930.76    | NM_006079 | 24306.16  | 22424.367 |
| NM_020362 | 3127.468  | 3473.052  | AF319458  | 928.65    | 1524.387  | NM_006696 | 2038.014  | 2085.697  |
| AB040937  | 6901.896  | 6388.446  | AF024697  | 2988.954  | 2976.109  | NM_018026 | 2119.529  | 1624.413  |
| NM_001338 | 5059.795  | 5776.675  | NM_005612 | 4650.456  | 3176.132  | NM_001707 | 13503.222 | 8969.401  |
| NM_003637 | 868.396   | 958.454   | AK025281  | 819.429   | 570.089   | NM_000946 | 284.293   | 484.675   |
| BC035133  | 776.651   | 829.908   | AF088026  | 878.607   | 557.393   | M15530    | 5362.23   | 7074.527  |
| NM_004233 | 2155.889  | 2727.866  | D17018    | 1269.898  | 1346.332  | NM_000488 | 286.768   | 335.993   |
| NM_001544 | 18464.01  | 15752.781 | AF086167  | 1224.868  | 1187.699  | NM_001877 | 998.869   | 1659.432  |
| X58531    | 1155.638  | 1096.369  | AF085891  | 3528.674  | 4011.697  | NM_014207 | 5214.589  | 6538.957  |
| AB011168  | 4664.153  | 5161.724  | AF019618  | 1526.42   | 1496.423  | AK002163  | 2106.015  | 2473.697  |
| BE794262  | 1714.155  | 1824.314  | AK025656  | 2520.291  | 2316.916  | NM_002287 | 6084.857  | 7987.454  |
| NM_003212 | 16784.25  | 11585.586 | AF161414  | 2552.696  | 2655.045  | NM_012344 | 1577.846  | 1818.478  |
| NM_006382 | 1301.412  | 1068.718  | AK025967  | 1123.966  | 1249.694  | NM_002351 | 1219.432  | 1813.059  |
| NM_004811 | 1317.074  | 1360.213  | AL110177  | 3017.355  | 3368.459  | NM_014385 | 1188.916  | 1098.739  |
| NM_002668 | 13787.652 | 15168.058 | NM_002763 | 5658.198  | 5524.756  | NM_001704 | 1442.845  | 1399.443  |
| NM_001058 | 1888.07   | 1913.847  | AF070628  | 663.178   | 706.645   | AB036432  | 14424.303 | 14306.004 |
| NM_014316 | 8946.079  | 7656.761  | U79293    | 1378.593  | 798.667   | NM_014872 | 4624.964  | 4604.799  |
| NM_004054 | 3717.041  | 3712.325  | NM_015434 | 4099.668  | 3979.419  | NM_003643 | 898.485   | 855.668   |
| NM_001138 | 3447.553  | 3590.823  | NM_014055 | 2066.399  | 1879.825  | NM_003480 | 2177.437  | 2399.487  |
| NM_002025 | 1649.768  | 1997.114  | AF086488  | 2837.572  | 66.324    | NM_000896 | 730.436   | 817.09    |
| AB015228  | 1284.964  | 1617.885  | NM_018691 | 2263.738  | 1502.76   | NM_032951 | 2353.254  | 2889.543  |
| AL049685  | 2919.365  | 3778.889  | AK001020  | 873.869   | 756.127   | NM_000503 | 8592.44   | 8228.162  |
| AK026800  | 12794.775 | 8257.935  | AK022098  | 1772.417  | 1440.668  | NM_002405 | 1436.62   | 1745.567  |
| NM_001442 | 1605.307  | 1331.87   | AK026751  | 797.396   | 1073.588  | AK000004  | 1158.646  | 1374.76   |
| NM_017775 | 4260.252  | 3256.45   | AB040933  | 1324.511  | 1442.957  | NM_012421 | 25275.205 | 25016.693 |
| AK001958  | 950.201   | 1184.72   | AK026900  | 3067.206  | 3892.492  | AB014601  | 1609.448  | 1392.975  |
| AK025947  | 2663.691  | 2958.213  | AK025020  | 6055.205  | 6663.621  | AK001393  | 7259.782  | 6284.272  |
| AF217973  | 3372.295  | 2718.021  | AF086009  | 1061.289  | 1168.591  | NM_000023 | 6189.53   | 5022.68   |
| NM_007033 | 8269.405  | 6828.638  | AF086463  | 2270.722  | 2513.24   | NM_014861 | 594.521   | 919.167   |
| AF226048  | 4552.814  | 3104.008  | AK024130  | 537.951   | 890.425   | NM_012434 | 692.128   | 1098.854  |
| NM_003903 | 5429.992  | 6249.433  | AL137270  | 423.991   | 586.005   | NM_005694 | 3956.179  | 5018.958  |
| NM_017955 | 3796.989  | 3321.52   | AK024598  | 2144.104  | 1918.861  | AF224741  | 576.281   | 597.947   |
| NM_016060 | 2956.644  | 1967.113  | AF087983  | 1350.813  | 1040.552  | NM_006594 | 1653.086  | 1884.85   |
| NM_002208 | 5594.964  | 4843.449  | NM_020234 | 5409.227  | 6006.684  | NM_004177 | 732.208   | 706.478   |
| NM_007216 | 1990.196  | 1783.735  | Z36825    | 10394.561 | 9477.656  | NM_012425 | 1100.873  | 1642.612  |

|           |           |           |           |           |           |           |           |           |
|-----------|-----------|-----------|-----------|-----------|-----------|-----------|-----------|-----------|
| AK023518  | 1049.599  | 1135.872  | Z36846    | 1059.341  | 530.393   | NM_004871 | 3284.482  | 3521.882  |
| NM_000944 | 1073.55   | 996.488   | AF086127  | 486.295   | 1500.945  | NM_00569E | 4870.888  | 4254.294  |
| NM_01339C | 1152.884  | 1227.929  | AF086157  | 2602.365  | 2079.507  | AF202146  | 5303.039  | 3249.823  |
| NM_00282E | 664.8     | 800.159   | AL109710  | 978.896   | 381.445   | NM_00639E | 4249.155  | 2787.384  |
| J02783    | 63758.484 | 64294.43  | AK021986  | 849.184   | 1712.099  | NM_01492E | 1253.442  | 1077.741  |
| NM_018137 | 1314.485  | 1294.679  | AK023793  | 4862.419  | 4041.69   | NM_005477 | 13372.954 | 11622.277 |
| NM_006577 | 27994.281 | 23967.416 | AK022185  | 577.358   | 599.641   | NM_00701E | 306.666   | 197.143   |
| NM_005317 | 1033.938  | 717.771   | AK023286  | 2297.998  | 2118.995  | NM_00431E | 618.841   | 483.325   |
| AF120493  | 604.766   | 715.809   | AK021544  | 829.932   | 971.602   | L09089    | 357.386   | 209.689   |
| U12597    | 1583.595  | 1329.711  | AL079282  | 881.004   | 1080.406  | NM_00264C | 1060.931  | 809.565   |
| U28055    | 705.443   | 699.121   | AL122104  | 777.458   | 1049.44   | Y11339    | 5258.84   | 7569.487  |
| AB044343  | 2105.063  | 1353.672  | AF116714  | 596.709   | 1257.495  | AB030176  | 638.815   | 684.488   |
| NM_01770Z | 3695.617  | 3881.332  | NM_01405E | 2142.975  | 1151.402  | NM_003937 | 2851.645  | 3793.508  |
| AB014516  | 6813.784  | 5791.339  | AK026340  | 783.622   | 665.035   | NM_002537 | 4093.104  | 5047.486  |
| Z83950    | 1015.549  | 862.047   | AK022686  | 5588.779  | 4610.305  | NM_00313E | 2344.605  | 2825.094  |
| AL080063  | 2351.61   | 2056.103  | AK023516  | 2686.532  | 2246.527  | NM_01231E | 2917.706  | 3927.323  |
| NM_01659C | 522.472   | 427.116   | AK023864  | 3431.112  | 2777.842  | NM_001634 | 13124.328 | 12946.294 |
| NM_00562E | 14171.736 | 10832.235 | AK023017  | 5005.927  | 4653.354  | NM_002267 | 4658.045  | 4701.43   |
| X15262    | 4861.895  | 4000.514  | AK023908  | 2925.594  | 2276.647  | NM_00641E | 6804.326  | 8599.875  |
| NM_00547E | 1006.793  | 848.787   | AK024236  | 970.349   | 1057.255  | NM_00306E | 7079.916  | 6038.899  |
| AB040918  | 1406.261  | 992.197   | Z24724    | 8892.814  | 6341.836  | NM_014041 | 19308.18  | 19092.334 |
| NM_00231E | 2888.051  | 2358.615  | AK022712  | 8554.823  | 8237.147  | NM_00716E | 2980.139  | 2813.818  |
| NM_00457E | 851.937   | 1504.239  | AK024132  | 1593.093  | 2055.017  | NM_01431E | 537.179   | 441.911   |
| AB023232  | 2277.875  | 2554.351  | AK021863  | 24615.396 | 19303.795 | AK024966  | 2586.965  | 2440.828  |
| AL137589  | 1377.657  | 1395.016  | AK024208  | 716.856   | 508.917   | AF178941  | 25183.4   | 21506.51  |
| NM_00250Z | 2083.198  | 1396.171  | NM_005684 | 1148.8    | 1039.181  | NM_01603E | 4372.686  | 4109.278  |
| AF226732  | 4484.689  | 3273.499  | AK022293  | 1349.767  | 1255.762  | NM_01758E | 8549.486  | 8463.301  |
| NM_00631Z | 11335.229 | 8132.657  | AL117439  | 1226.613  | 1230.648  | U61737    | 36711.344 | 31693.867 |
| NM_00280E | 1063.013  | 478.477   | AL133065  | 2474.689  | 2011.191  | X06389    | 1174.575  | 879.809   |
| NM_00429C | 314.174   | 275.26    | NM_005297 | 7291.648  | 6365.119  | NM_00003E | 2203.348  | 1851.434  |
| NM_00293E | 16820.188 | 11135.304 | U80769    | 1508.901  | 1413.275  | NM_00607E | 24540.229 | 31800.232 |
| NM_01583E | 41136.285 | 28742.441 | AJ011377  | 833.124   | 704.85    | NM_00669E | 2023.178  | 3371.918  |
| NM_00471E | 2781.36   | 2127.075  | AL137734  | 828.597   | 610.118   | NM_01802E | 2011.268  | 2303.803  |
| NM_00376E | 943.644   | 807.283   | AK023784  | 1100.098  | 867.228   | NM_001707 | 14001.595 | 13804.265 |
| NM_00169E | 14482.847 | 10778.447 | AK026323  | 1483.254  | 1034.741  | AK022983  | 498.27    | 693.382   |
| NM_000661 | 54710.043 | 59077.305 | AL133430  | 18011.146 | 16526.779 | NM_01486E | 3648.318  | 4079.789  |
| NM_00097E | 68759.836 | 72919.547 | AF070633  | 44842.266 | 41825.047 | AL442089  | 9091.135  | 9776.615  |
| NM_01418E | 38895.461 | 25383.959 | S51971    | 72977.555 | 60857.566 | NM_00120C | 1601.428  | 1564.967  |
| S70004    | 1355.557  | 1125.076  | NM_01837C | 1150.454  | 1204.709  | AF128541  | 3774.06   | 3204.193  |
| AF105378  | 1236.744  | 973.068   | AF054996  | 9653.222  | 9300.417  | AK026305  | 5796.594  | 4027.439  |
| NM_000167 | 4469.679  | 4644.976  | AF090098  | 2525.089  | 2154.377  | NM_00255Z | 2295.211  | 1693.323  |
| AY007125  | 2687.543  | 2233.25   | AF146694  | 3076.888  | 2677.438  | NM_014321 | 4287.953  | 3421.743  |
| AB032987  | 1677.331  | 1097.312  | AK057104  | 1623.676  | 1819.643  | AK022733  | 742.856   | 688.065   |
| NM_017567 | 6130.046  | 4234.528  | AL133555  | 3625.074  | 3629.083  | AB011132  | 2962.277  | 2910.479  |
| NM_000691 | 1931.142  | 1605.096  | AK024979  | 16693.654 | 16454.338 | NM_02036Z | 2474.254  | 2088.217  |
| Y18643    | 608.443   | 454.073   | AF233648  | 1341.524  | 1226.625  | AB040937  | 3485.264  | 2649.51   |
| NM_00030E | 1945.976  | 1092.56   | NM_018584 | 1475.603  | 1326.344  | AF275798  | 15182.574 | 14713.444 |
| D86971    | 11662.961 | 5669.424  | AY007126  | 14402.553 | 13976.193 | NM_005441 | 5649.25   | 5449.009  |
| NM_00307E | 6738.449  | 4953.126  | AF085951  | 2582.84   | 2538.377  | NM_01607E | 12828.091 | 12664.13  |
| NM_01404E | 806.47    | 462.227   | AF087989  | 2297.914  | 1538.929  | AK023108  | 2353.77   | 2269.455  |
| AF274863  | 921.293   | 493.438   | Z70715    | 1080.743  | 1101.627  | AK026409  | 32937.641 | 24009.064 |
| AF319458  | 600.384   | 441.744   | NM_01818Z | 5180.569  | 3839.349  | AF097025  | 7136.752  | 5414.336  |
| AF024697  | 2888.389  | 2363.44   | U80771    | 6972.803  | 4748.503  | NM_00240E | 1594.629  | 2346.985  |

|           |           |           |           |           |           |           |           |           |
|-----------|-----------|-----------|-----------|-----------|-----------|-----------|-----------|-----------|
| NM_018651 | 861.289   | 933.814   | AJ272173  | 12978.12  | 9826.746  | AK000004  | 1073.701  | 1789.542  |
| NM_005612 | 4781.269  | 3195.103  | NM_005649 | 2843.731  | 2083.907  | NM_012421 | 23517.703 | 28959.426 |
| AK025281  | 565.172   | 773.578   | AK021566  | 877.095   | 794.255   | AB014601  | 1918.672  | 2131.053  |
| AF085891  | 2883.474  | 2033.23   | NM_016346 | 1121.26   | 1118.017  | AK001393  | 6948.19   | 9829.696  |
| AF019618  | 1182.444  | 1121.003  | NM_020157 | 16943.01  | 14467.424 | NM_000023 | 5067.786  | 6261.086  |
| AK025656  | 1798.403  | 1635.489  | X64991    | 1004.125  | 836.064   | AF022654  | 1038      | 1211.403  |
| AF138859  | 553.577   | 425.937   | NM_014320 | 4484.317  | 4635.884  | NM_001143 | 628.902   | 742.528   |
| AF161414  | 1994.196  | 1563.042  | AK025703  | 6838.976  | 5907.417  | NM_003282 | 409.066   | 369.476   |
| AK025967  | 959.998   | 666.725   | NM_018185 | 2642.844  | 2856.417  | AK022638  | 4549.71   | 5011.438  |
| AL110177  | 2690.091  | 1679.74   | AK022598  | 4191.288  | 4269.226  | BG698409  | 2927.949  | 2960.93   |
| NM_002763 | 6273.108  | 7345.091  | AK024306  | 2197.759  | 1466.767  | U36798    | 404.891   | 519.848   |
| NM_015434 | 3911.985  | 3209.954  | NM_018322 | 6114.631  | 5578.083  | AA220921  | 4577.213  | 5458.286  |
| NM_014055 | 1845.241  | 1459.196  | AK025862  | 39839.832 | 41296.641 | N67770    | 1067.259  | 877.114   |
| NM_018691 | 1697.45   | 1755.464  | AK026495  | 4590.532  | 3945.856  | AA486200  | 55173.543 | 48621.164 |
| AK001020  | 883.796   | 834.957   | AK025052  | 2107.719  | 1974.489  | U90065    | 427.147   | 335.921   |
| AK022072  | 274.425   | 1070.218  | NM_014388 | 2092.932  | 1933.562  | AJ005898  | 4846.719  | 4016.644  |
| AK026900  | 2759.419  | 1681.421  | U85044    | 1194.742  | 1584.904  | X57303    | 3421.896  | 3478.184  |
| AK025020  | 3919.936  | 2753.461  | BC018880  | 734.857   | 958.428   | AA463224  | 712.44    | 531.708   |
| AF086009  | 1471.246  | 2540.61   | AF086090  | 1384.712  | 1232.512  | BG248802  | 3972.725  | 3922.511  |
| AF086463  | 1710.556  | 1955.834  | AK002173  | 25487.93  | 30099.975 | L19605    | 1396.753  | 1188.274  |
| AK024130  | 431.881   | 444.533   | NM_017746 | 2137.19   | 2180.233  | AA876532  | 4213.315  | 5141.753  |
| AK024598  | 1742.805  | 976.644   | NM_020188 | 13498.453 | 11634.959 | S74349    | 1222.562  | 1207.3    |
| AF087983  | 1167.841  | 934.44    | U88897    | 13606.324 | 10484.975 | X07979    | 37875.063 | 28298.543 |
| NM_020234 | 4953.872  | 3657.637  | CY3Cy5    | 5759.961  | 821.019   | BG744224  | 15973.864 | 13868.214 |
| U10514    | 456.568   | 2209.497  | U37448    | 1125.834  | 1178.068  | NM_005477 | 14014.862 | 17497.332 |
| Z36825    | 9864.638  | 6707.237  | AA927698  | 3245.915  | 4339.679  | NM_007018 | 613.786   | 613.182   |
| Z36846    | 890.89    | 646.952   | AI498426  | 1115.212  | 1322.907  | NM_004318 | 702.777   | 847.07    |
| AF086127  | 671.624   | 600.977   | BG824773  | 1240.782  | 1299.165  | NM_002465 | 421.502   | 528.827   |
| AF086157  | 2636.56   | 2342.143  | D01038    | 22446.908 | 24902.736 | L09089    | 286.257   | 603.856   |
| AK023793  | 2779.995  | 1694.453  | AB019205  | 1649.951  | 1830.737  | NM_002640 | 1151.564  | 1617.355  |
| AK022185  | 495.147   | 274.578   | J05008    | 1715.283  | 1853.191  | NM_000949 | 246.167   | 389.209   |
| AK023286  | 2081.595  | 1036.673  | U11087    | 1388.755  | 1236.128  | M15530    | 5071.396  | 5549.889  |
| AK022079  | 859.278   | 530.072   | D50640    | 1918.707  | 1921.741  | NM_000488 | 255.899   | 331.734   |
| NM_014058 | 1734.464  | 981.907   | D43747    | 583.686   | 690.501   | NM_001877 | 1129.394  | 1351.322  |
| AK026340  | 483.284   | 275.893   | M98776    | 900.204   | 961.59    | NM_014207 | 5046.289  | 4898.688  |
| AK022388  | 825.158   | 4235.38   | AF009744  | 1656.147  | 2113.207  | AK002163  | 1945.183  | 1673.449  |
| AK022686  | 4664.581  | 3180.409  | NM_172140 | 4435.559  | 4361.321  | NM_002287 | 6467.369  | 6088.321  |
| AK023516  | 2612.337  | 1954.306  | SR2       | 42190.727 | 47565.41  | NM_012344 | 1447.157  | 1259.844  |
| AK023864  | 2244.984  | 1730.041  | SR4       | 15831.091 | 16155.963 | NM_002351 | 1275.042  | 968.178   |
| AK023017  | 4705.645  | 4148.367  | SR6       | 1984.156  | 2093.679  | NM_014385 | 885.95    | 809.718   |
| AK023908  | 2740.286  | 2722.534  | SR8       | 6729.534  | 23875.998 | NM_001704 | 1309.633  | 1097.716  |
| AK024236  | 903.305   | 869.286   | SR10      | 30456.068 | 12699.903 | AB036432  | 14873.722 | 13886.682 |
| Z24724    | 1352.882  | 2176.954  | CY3Cy5    | 6241.683  | 572.712   | NM_014872 | 4989.424  | 4654.87   |
| AK022712  | 3348.738  | 2492.048  | NM_005311 | 3850.87   | 4556.707  | NM_003643 | 979.222   | 776.65    |
| AK021863  | 26725.057 | 21147.932 | NM_005905 | 1463.782  | 1169.405  | NM_003480 | 2212.011  | 2074.961  |
| NM_020428 | 483.745   | 497.532   | NM_016235 | 467.528   | 516.012   | NM_000899 | 693.969   | 799.335   |
| AL117439  | 1009.597  | 1133.54   | NM_000960 | 560.072   | 1097.093  | NM_032951 | 2376.199  | 2681.563  |
| AL133065  | 2057.833  | 1905.613  | NM_005359 | 991.554   | 1042.455  | NM_000503 | 6394.11   | 5651.578  |
| NM_005297 | 7442.135  | 5853.374  | NM_002511 | 1166.677  | 1671.22   | NM_017585 | 6535.596  | 9326.592  |
| U80769    | 986.014   | 765.605   | NM_000794 | 459.459   | 572.594   | U61737    | 26609.482 | 29745.871 |
| AF147400  | 154.166   | 2234.38   | AF295378  | 3031.442  | 3619.304  | X06389    | 1142.589  | 1725.416  |
| AK021678  | 478.359   | 548.318   | NM_004085 | 4589.059  | 6073.836  | NM_000033 | 2000.291  | 2879.519  |
| AJ011377  | 588.378   | 362.712   | NM_012445 | 19455.217 | 22931.25  | NM_014861 | 686.798   | 828.236   |

|           |           |           |           |           |           |           |           |           |
|-----------|-----------|-----------|-----------|-----------|-----------|-----------|-----------|-----------|
| AL137734  | 961.712   | 753.701   | NM_018104 | 3353.479  | 4413.856  | NM_012434 | 834.431   | 842.473   |
| AK023784  | 1099.607  | 1093.931  | NM_006080 | 642.968   | 1017.262  | NM_005694 | 3733.774  | 3291.934  |
| AK026323  | 1589.168  | 1994.44   | U64564    | 1703.767  | 1743.228  | AF224741  | 487.702   | 285.439   |
| AL133430  | 4741.674  | 3950.56   | NM_006470 | 2591.184  | 2529.7    | NM_006594 | 2019.603  | 1489.367  |
| AF070633  | 24937.957 | 14336.68  | NM_002855 | 5603.821  | 6008.537  | NM_004177 | 649.336   | 605.064   |
| S51971    | 64747.758 | 59459.234 | AB038463  | 1502.679  | 1461.657  | NM_012425 | 856.921   | 830.207   |
| NM_018370 | 453.425   | 553.049   | M30262    | 2312.567  | 2297.611  | NM_004871 | 3730.362  | 2802.281  |
| AF054996  | 6253.25   | 4130.125  | NM_005460 | 1113.465  | 896.019   | NM_005695 | 4909.802  | 4762.738  |
| AF090098  | 2325.312  | 1434.308  | AF160477  | 2505.909  | 2813.936  | AF202146  | 5399.651  | 3969.283  |
| AF146694  | 2722.363  | 2204.48   | NM_003226 | 570.128   | 509.646   | NM_006393 | 3687.536  | 3633.156  |
| AK057104  | 1324.865  | 698.133   | M12883    | 1489.193  | 1525.357  | NM_014923 | 1005.72   | 833.281   |
| AL133555  | 3330.231  | 2143.047  | BG288747  | 434.56    | 714.909   | AF275798  | 18710.139 | 40600.727 |
| AK024979  | 12006.729 | 7223.799  | AI524814  | 5719.223  | 6778.411  | NM_005441 | 6217.385  | 8855.031  |
| AF233648  | 1271.245  | 900.238   | AB024411  | 865.051   | 1236.922  | NM_016075 | 14025.951 | 17663.152 |
| NM_018584 | 1134.541  | 1059.653  | NM_002444 | 40531.688 | 42039.055 | AK023108  | 1897.268  | 2323.754  |
| AY007126  | 13658.486 | 8183.152  | NM_001104 | 2072.29   | 1842.586  | AK026409  | 34847.859 | 34934.098 |
| AF085951  | 2744.422  | 1572.318  | NM_002989 | 6005.544  | 8007.471  | AF097025  | 7959.18   | 10766.633 |
| AF087989  | 1567.864  | 1227.282  | U88898    | 3101.245  | 3592.371  | Y11339    | 4555.839  | 4882.717  |
| Z70715    | 2688.789  | 414.42    | NM_020154 | 28832.486 | 36261.66  | AB030176  | 792.591   | 795.883   |
| NM_018182 | 4219.579  | 3603.546  | NM_004665 | 2079.98   | 2062.986  | NM_003937 | 3186.054  | 3507.915  |
| U80771    | 6263.117  | 4977.253  | NM_005300 | 1946.828  | 2365.214  | NM_002537 | 6627.25   | 6288.481  |
| NM_006185 | 1031.839  | 1317.367  | NM_000893 | 994.173   | 1278.737  | NM_003135 | 2716.911  | 2773.212  |
| AJ272173  | 13393.465 | 16635.291 | NM_000695 | 18444.314 | 21273.676 | NM_012315 | 3002.222  | 2876.998  |
| NM_016345 | 1081.073  | 1234.376  | NM_005091 | 819.635   | 661.938   | NM_004055 | 378.748   | 320.646   |
| NM_020157 | 11225.382 | 7526.517  | AF031167  | 720.896   | 505.419   | NM_001634 | 13424.236 | 10423.08  |
| NM_014320 | 3355.066  | 2507.124  | NM_003204 | 3517.186  | 3739.666  | NM_002267 | 3649.302  | 3193.001  |
| AK025703  | 4780.053  | 3362.302  | AF254069  | 2405.02   | 2571.491  | NM_006412 | 5995.077  | 4860.567  |
| NM_018185 | 2961.493  | 2099.296  | AL117600  | 10628.832 | 10123.909 | NM_003063 | 6129.071  | 3943.335  |
| AK022598  | 4061.582  | 2704.233  | NM_001712 | 786.834   | 622.888   | NM_014041 | 20612.496 | 20543.887 |
| AK024306  | 1677.168  | 831.277   | NM_004487 | 16536.629 | 16127.599 | NM_007165 | 3230.292  | 3500.232  |
| NM_018322 | 5660.525  | 4031.427  | AB029000  | 7911.823  | 7613.579  | NM_014313 | 481.699   | 775.274   |
| AK025862  | 36085.504 | 18479.563 | AK026965  | 9176.864  | 8963.134  | AK024966  | 2641.267  | 2651.202  |
| AK026495  | 3785.76   | 2605.377  | AK025859  | 5085.601  | 3280.528  | AF178941  | 23903.977 | 18576.014 |
| AK025052  | 1714.927  | 1105.407  | AL117499  | 6871.321  | 6245.007  | NM_016033 | 4126.642  | 4189.835  |
| NM_014385 | 2578.365  | 3189.171  | AK000160  | 1216.847  | 1277.224  | NM_013435 | 14757.926 | 21242.266 |
| U85044    | 1221.995  | 1034.363  | NM_006032 | 2785.931  | 2948.357  | NM_003405 | 14532.439 | 19326.783 |
| BC018880  | 704.608   | 702.078   | NM_014785 | 1636.56   | 1840.893  | NM_018315 | 2390.369  | 2602.847  |
| AF086090  | 1320.356  | 1253.625  | NM_002153 | 337.904   | 447.468   | AB011180  | 1897.843  | 2322.526  |
| AK002173  | 25247.688 | 22504.646 | AB040890  | 1539.719  | 1992.353  | NM_007167 | 5339.591  | 6196.562  |
| NM_017745 | 2156.978  | 1623.509  | AK024233  | 1232.382  | 1556.981  | NM_014832 | 1725.933  | 2208.584  |
| NM_020185 | 10515.445 | 8322.046  | AK021870  | 2012.976  | 3039.442  | NM_003243 | 768.3     | 981.876   |
| M87929    | 614.075   | 887.728   | U06680    | 3157.879  | 3599.397  | NM_013355 | 616.871   | 613.039   |
| U88897    | 14225.747 | 17769.318 | NM_017859 | 364.336   | 576.428   | NM_002477 | 8446.072  | 11595.375 |
| CY3Cy5    | 6748.753  | 700.061   | NM_005123 | 940.039   | 1035.47   | NM_018025 | 2467.289  | 2590.604  |
| BG617923  | 610.966   | 796.405   | NM_015584 | 6441.237  | 8666.378  | NM_001707 | 16628.598 | 12187.662 |
| U37448    | 1200.825  | 1237.35   | NM_001697 | 44804.281 | 47135.449 | AK022983  | 481.405   | 427.036   |
| AA927698  | 3181.829  | 3777.696  | NM_016095 | 23185.373 | 23583.732 | NM_014865 | 3857.906  | 3948.396  |
| AI498426  | 1725.771  | 2018.699  | NM_002063 | 753.884   | 750.537   | AL442089  | 10576.036 | 8986.107  |
| BG824773  | 1289.597  | 1587.763  | NM_006667 | 28709.084 | 28484.422 | NM_001200 | 1768.836  | 1408.722  |
| D01038    | 25195.598 | 27704.123 | AK025125  | 5544.825  | 6750.495  | AF128541  | 3705.563  | 2888.695  |
| AB019205  | 2626.136  | 3416.065  | NM_000815 | 1421.063  | 1316.713  | AK026305  | 8057.238  | 5108.467  |
| J05008    | 1850.755  | 3091.421  | NM_001293 | 1001.99   | 925.159   | NM_002552 | 2343.875  | 2012.628  |
| U11087    | 1288.123  | 1580.997  | AB023173  | 5901.583  | 5573.792  | NM_014321 | 4589.507  | 4019.036  |

|           |           |           |           |           |           |           |           |           |
|-----------|-----------|-----------|-----------|-----------|-----------|-----------|-----------|-----------|
| D50640    | 2406.197  | 2414.763  | AF156548  | 2399.181  | 2092.439  | AK022733  | 784.859   | 817.725   |
| D43747    | 900.878   | 733.496   | NM_000387 | 10868.754 | 9449.043  | AB011132  | 3241.119  | 2850.992  |
| M98776    | 1197.729  | 1070.195  | NM_004663 | 1689.509  | 1415.926  | NM_020362 | 2318.452  | 1699.445  |
| AF009744  | 1943.936  | 2291.49   | NM_015310 | 1687.906  | 1279.727  | AB040937  | 3277.073  | 2499.426  |
| NM_172140 | 4198.873  | 5293.226  | NM_016154 | 11581.971 | 11573.641 | NM_000095 | 3105.628  | 4841.969  |
| SR6       | 3337.872  | 2842.445  | NM_005013 | 47676.93  | 38859.121 | AL137493  | 696.503   | 917.718   |
| SR8       | 12275.982 | 34254.766 | AB002338  | 1548.21   | 1268.32   | NM_002457 | 346.634   | 360.724   |
| SR10      | 41391.746 | 13563.79  | NM_001072 | 1176.496  | 1299.451  | NM_001335 | 7443.644  | 7807.53   |
| CY3Cy5    | 6167.301  | 553.584   | NM_014070 | 1631.023  | 1215.001  | NM_003637 | 923.039   | 1024.022  |
| NM_005311 | 4631.653  | 4922.995  | NM_016280 | 21135.385 | 20275.945 | BC035133  | 1028.115  | 1029.715  |
| NM_005905 | 1776.125  | 1328.247  | NM_016027 | 2641.543  | 3138.061  | NM_004233 | 1170.707  | 1487.944  |
| NM_000960 | 680.236   | 682.514   | NM_014297 | 8621.362  | 9909.551  | NM_001544 | 6596.897  | 7642.148  |
| AF172932  | 409.412   | 617.956   | NM_018156 | 14322.719 | 14722.788 | X58531    | 1663.274  | 1608.624  |
| NM_005355 | 1544.217  | 1609.161  | X98266    | 989.606   | 964.666   | AB011168  | 5561.247  | 5315.872  |
| NM_002511 | 1588.54   | 1534.004  | U00930    | 19664.197 | 24160.455 | BE794262  | 2313.712  | 2149.677  |
| NM_000794 | 1143.897  | 813.483   | AK024958  | 1117.309  | 1199.111  | NM_003212 | 11765.749 | 8003.417  |
| AF295378  | 3656.73   | 4863.697  | NM_014575 | 3596.515  | 3864.064  | NM_006382 | 2051.244  | 1499.83   |
| AF320908  | 317.741   | 767.768   | NM_002439 | 4647.464  | 5316.888  | NM_004811 | 1000.823  | 870.636   |
| NM_004085 | 5754.246  | 5967.595  | AL117552  | 1559.419  | 1887.107  | AK021910  | 58975.91  | 52932.172 |
| NM_012445 | 29071.01  | 31687.471 | NM_002692 | 8731.221  | 8202.872  | M62402    | 638.484   | 617.016   |
| NM_018104 | 3924.869  | 3900.95   | AB023190  | 13394.447 | 12997.396 | NM_002547 | 422.809   | 333.487   |
| NM_006080 | 669.685   | 1065.145  | NM_007064 | 1625.804  | 1493.088  | NM_004745 | 5115.265  | 4301.748  |
| U64564    | 1638.496  | 2092.748  | NM_006281 | 2074.963  | 2153.452  | NM_002665 | 6916.502  | 4918.337  |
| NM_006470 | 2819.261  | 3061.326  | NM_002735 | 8620.506  | 9866.363  | NM_001055 | 1076.283  | 981.709   |
| NM_002855 | 3406.863  | 4035.889  | U23460    | 27592.475 | 32747.752 | NM_014316 | 5648.144  | 4954.472  |
| AB038463  | 1833.671  | 1927.275  | NM_005356 | 1319.294  | 1317.436  | NM_004054 | 5031.28   | 5197.666  |
| M30262    | 3347.808  | 3401.888  | Z25434    | 4151.658  | 3165.668  | NM_001138 | 3678.856  | 3045.064  |
| NM_005460 | 1507.506  | 1729.637  | NM_005884 | 8988.681  | 11175.758 | NM_007285 | 363.264   | 798.911   |
| AF160477  | 3001.123  | 3123.552  | NM_012399 | 10888.884 | 9371.12   | NM_004219 | 31543.854 | 41200.801 |
| NM_003226 | 698.507   | 557.13    | AF229804  | 30777.563 | 27653.422 | NM_003443 | 49068.879 | 59503.02  |
| M12883    | 2236.821  | 2011.286  | AF151638  | 1140.649  | 1076.078  | NM_002025 | 534.851   | 455.402   |
| BG288747  | 826.87    | 957.846   | U90552    | 7870.943  | 6203.016  | AB015228  | 1159.267  | 1440.663  |
| AI524814  | 7458.347  | 7971.531  | NM_005460 | 935.345   | 1495.484  | AL049685  | 1707.63   | 1964.258  |
| AB024411  | 1236.567  | 1169.936  | AF160477  | 2390.937  | 3807.85   | AK026800  | 6504.099  | 6840.636  |
| NM_002444 | 47696.473 | 49465.719 | NM_003226 | 262.758   | 692.486   | NM_001442 | 1311.037  | 1666.812  |
| NM_001104 | 1631.619  | 1479.461  | M12883    | 1816.897  | 1605.087  | NM_017775 | 3314.172  | 3885.72   |
| NM_002985 | 7284.97   | 8250.929  | BG288747  | 904.696   | 1267.67   | AK001958  | 674.347   | 707.766   |
| U88898    | 3884.411  | 4655.654  | BG617923  | 606.898   | 889.529   | AK025947  | 1659.242  | 1941.384  |
| NM_020154 | 34526.461 | 37184.004 | U37448    | 1194.764  | 920.64    | AF217973  | 3736.014  | 3276.743  |
| NM_004665 | 2519.012  | 3209.974  | AA927698  | 3036.943  | 4328.541  | NM_007033 | 4700.486  | 4013.527  |
| NM_005300 | 2084.313  | 2747.067  | AI498426  | 994.035   | 1300.761  | AF226048  | 3042.725  | 2630.364  |
| NM_000695 | 26579.051 | 33140.277 | BG824773  | 874.129   | 1170.975  | NM_005573 | 6951.057  | 5369.552  |
| NM_005091 | 562.767   | 1055.931  | D01038    | 18082.859 | 19300.934 | D50918    | 3648.829  | 2216.774  |
| AF031167  | 537.823   | 746.127   | AB019205  | 1500.797  | 1967.785  | U48734    | 9104.332  | 5680.568  |
| NM_003204 | 3629.466  | 3643.556  | J05008    | 1879.187  | 1781.788  | NM_006400 | 3031.735  | 3643.074  |
| AF254069  | 2231.7    | 2724.585  | U11087    | 1234.732  | 1059.377  | NM_003903 | 2642.569  | 2209.236  |
| AL117600  | 9276.662  | 11100.199 | D50640    | 2468.56   | 2552.493  | NM_017955 | 2105.02   | 1891.117  |
| NM_001712 | 545.417   | 1116.225  | D43747    | 670.479   | 783.651   | NM_016060 | 2189.899  | 2019.373  |
| NM_004487 | 14961.479 | 14504.046 | M98776    | 912.91    | 700.142   | NM_002205 | 3240.365  | 2893.666  |
| AB029000  | 7801.529  | 9493.143  | X99135    | 61126.563 | 53862.449 | NM_007216 | 1287.717  | 1167.448  |
| AK026965  | 7549.987  | 7032.002  | AF009744  | 1629.842  | 1811.449  | AK023518  | 1104.176  | 880.218   |
| AK025859  | 14373.473 | 8428.411  | NM_172140 | 3831.787  | 4272.973  | NM_000944 | 4174.991  | 6160.532  |
| AL117499  | 12558.156 | 12889.383 | AF086109  | 830.749   | 177.092   | NM_012235 | 1089.019  | 1398.55   |

|           |           |           |           |           |           |           |           |           |
|-----------|-----------|-----------|-----------|-----------|-----------|-----------|-----------|-----------|
| NM_007054 | 532.271   | 465.406   | AK026965  | 7786.01   | 10261.926 | NM_012262 | 633.921   | 650.583   |
| AB007957  | 531.473   | 416.903   | AK025859  | 6032.111  | 7133.123  | NM_01339C | 2730.743  | 3719.488  |
| AK000160  | 1343.924  | 1161.034  | AL117499  | 9806.347  | 10374.017 | NM_00282C | 1160.756  | 1810.34   |
| NM_006032 | 3007.51   | 2755.037  | NM_007054 | 536.102   | 827.447   | NM_018137 | 672.671   | 717.27    |
| NM_01478E | 2207.964  | 2103.968  | AB007957  | 739.917   | 726.289   | NM_006577 | 16188.973 | 18911.303 |
| NM_002153 | 751.729   | 519.564   | AK000160  | 1204.62   | 1462.38   | NM_004413 | 531.26    | 497.608   |
| AB040890  | 1800.561  | 1955.714  | NM_005311 | 3777.319  | 4319.061  | NM_005317 | 1450.848  | 1307.323  |
| AK024233  | 1131.74   | 1337.221  | NM_005905 | 1340.911  | 1494.743  | AF120493  | 605.661   | 628.298   |
| AK021870  | 2461.66   | 3123.618  | NM_00096C | 488.816   | 259.843   | U12597    | 1375.817  | 1209.183  |
| U06680    | 5040.967  | 5133.808  | AF172932  | 250.425   | 646.658   | U28055    | 380.419   | 382.224   |
| NM_01785E | 692.857   | 639.675   | NM_00535E | 816.537   | 769.986   | AB044343  | 5364.309  | 3922.572  |
| NM_005123 | 1121.788  | 1577.796  | NM_002511 | 755.456   | 685.964   | NM_00128E | 362.477   | 289.575   |
| AB032525  | 457.118   | 676.381   | AF295378  | 3315.356  | 2709.261  | NM_01840E | 547.767   | 381.358   |
| NM_002063 | 922.376   | 972.181   | NM_00408E | 3361.329  | 3586.56   | NM_014662 | 379.52    | 357.025   |
| AK025125  | 5111.193  | 7267.905  | NM_01244E | 15733.035 | 18469.207 | NM_00517E | 6619.804  | 4802.804  |
| NM_00081E | 1311.678  | 1623.398  | NM_018104 | 2413.471  | 2924.623  | NM_017702 | 2035.293  | 1567.143  |
| NM_001293 | 937.826   | 1041.573  | NM_00608C | 683.292   | 624.13    | AB014516  | 4967.732  | 3739.853  |
| AB023173  | 5273.223  | 5598.4    | NM_00442E | 3323.752  | 3970.294  | Z83950    | 879.091   | 767.212   |
| AF156548  | 2395.309  | 2355.026  | U64564    | 1488.381  | 1321.084  | AL080063  | 1226.012  | 1077.555  |
| NM_000387 | 9973.16   | 10009.591 | NM_00647C | 2165.737  | 2212.973  | NM_01659C | 295.61    | 354.82    |
| NM_004663 | 1984.761  | 2244.005  | NM_00285E | 5176.61   | 5437.306  | NM_00562E | 6578.721  | 5193.126  |
| NM_01531C | 1827.286  | 1687.996  | AB038463  | 1443.958  | 1418.427  | X15262    | 3508.627  | 2710.357  |
| NM_016154 | 13940.832 | 14586.496 | M30262    | 3056.989  | 2815.493  | NM_00547E | 484.76    | 446.158   |
| NM_005013 | 49174.383 | 44682.074 | NM_000387 | 8709.963  | 10464.555 | AB040918  | 2239.795  | 3088.951  |
| AB002338  | 1296.635  | 1673.47   | NM_004663 | 1774.958  | 2103.722  | NM_01585E | 1288.631  | 1793.324  |
| NM_001072 | 1305.288  | 1361.606  | NM_01531C | 864.457   | 1009.523  | X60152    | 1109.67   | 1206.022  |
| NM_01407C | 1694.112  | 1348.76   | NM_016154 | 9745.726  | 13049.431 | NM_00231E | 3407.784  | 7364.041  |
| NM_01628C | 26581.57  | 23345.287 | NM_005013 | 46972.707 | 55007.895 | AL137589  | 1133.973  | 1056.78   |
| NM_016027 | 2828.017  | 2576.539  | AB002338  | 1178.949  | 1792.659  | NM_002502 | 1794.795  | 1601.498  |
| NM_014297 | 9248.199  | 8998.095  | AI524814  | 5917.484  | 7030.261  | AF226732  | 5350.238  | 5174.053  |
| NM_01815E | 20259.609 | 20666.063 | AB024411  | 649.725   | 935.283   | NM_006312 | 5341.334  | 4196.207  |
| X98266    | 1340.551  | 1326.798  | NM_002444 | 42437.895 | 46915.742 | NM_00280E | 496.979   | 359.479   |
| U00930    | 21755.498 | 30024.617 | Z83802    | 426.215   | 414.627   | NM_003662 | 1319.358  | 850.087   |
| AL117552  | 1683.893  | 2176.75   | NM_001104 | 1156.189  | 1483.519  | NM_00293E | 7688.302  | 5450.632  |
| NM_002692 | 10352.429 | 11185.766 | NM_00298E | 4996.517  | 6318.081  | NM_01583E | 17203.678 | 12552.336 |
| NM_007064 | 1610.262  | 1764.169  | U88898    | 3052.987  | 2953.788  | NM_004713 | 1313.546  | 846.333   |
| NM_006281 | 2374.915  | 2891.468  | NM_020154 | 28788.34  | 33064.301 | NM_00169E | 7024.101  | 5506.35   |
| NM_00273E | 9728.766  | 11641.234 | NM_00466E | 2195.218  | 2145.504  | NM_000661 | 50893.422 | 59437.941 |
| U23460    | 27950.754 | 32508.6   | NM_00530C | 1956.333  | 2114.178  | NM_000973 | 51591.137 | 62286.883 |
| NM_00535E | 1506.496  | 1671.22   | NM_000893 | 835.374   | 690.336   | AF086431  | 1697.441  | 1914.154  |
| Z25434    | 5286.106  | 4104.575  | NM_00069E | 16863.488 | 16751.5   | AL110204  | 645.879   | 932.661   |
| NM_005884 | 11738.149 | 15810.073 | NM_005091 | 707.067   | 890.974   | NM_01418E | 49779.902 | 46638.656 |
| NM_01239E | 11296.973 | 12443.066 | AF031167  | 561.299   | 476.16    | AK026365  | 1475.735  | 2232.578  |
| AF229804  | 31241.59  | 28879.258 | NM_003204 | 2345.66   | 2465.396  | S70004    | 1427.013  | 1342.317  |
| AF151638  | 1601.036  | 1712.001  | AF254069  | 2142.976  | 2113.983  | AF105378  | 1646.178  | 1433.298  |
| U90552    | 6803.428  | 6903.669  | AL117600  | 9079.97   | 8055.927  | NM_000167 | 2824.428  | 2968.741  |
| NM_00546C | 1447.677  | 1254.067  | NM_001712 | 655.837   | 638.841   | AY007125  | 2127.082  | 1990.52   |
| AF160477  | 2913.875  | 2766.223  | NM_004487 | 15742.367 | 12717.063 | AB032987  | 1343.364  | 1058.426  |
| NM_00322E | 732.805   | 501.973   | AB029000  | 8479.583  | 6787.562  | NM_017567 | 5647.46   | 4969.172  |
| M12883    | 2429.838  | 2008.814  | Z25434    | 3395.076  | 3589.273  | NM_000691 | 1626.464  | 1254.635  |
| BG288747  | 927.713   | 956.935   | NM_005884 | 9568.566  | 15501.499 | Y18643    | 381.641   | 518.199   |
| BG617923  | 1035.926  | 715.805   | NM_01239E | 10733.664 | 11028.241 | NM_00030E | 1299.261  | 942.786   |
| U37448    | 1160.609  | 1398.297  | AF229804  | 26529.736 | 31559.535 | D86971    | 10526.859 | 6541.972  |

|           |           |           |           |           |           |           |          |          |
|-----------|-----------|-----------|-----------|-----------|-----------|-----------|----------|----------|
| AA927698  | 3129.95   | 3942.485  | AF151638  | 1665.581  | 2046.216  | NM_003073 | 3353.166 | 2120.094 |
| AI498426  | 2220.247  | 2254.19   | U90552    | 6489.862  | 6454.513  | NM_014048 | 398.167  | 270.651  |
| D01038    | 26418.467 | 28454.494 | NM_006032 | 2780.193  | 3234.519  | AF274863  | 431.035  | 730.676  |
| AB019205  | 2297.253  | 2351.37   | NM_014788 | 1627.15   | 1878.304  | AF319458  | 320.717  | 261.17   |
| J05008    | 2320.345  | 2509.226  | NM_002153 | 432.137   | 597.946   | AF024697  | 2672.204 | 1859.906 |
| U11087    | 1160.253  | 1463.51   | AB040890  | 1574.389  | 1937.21   | NM_018651 | 539.242  | 361.372  |
| D50640    | 2359.241  | 2673.511  | AK024233  | 1032.85   | 1194.202  | NM_005612 | 2031.401 | 1135.55  |
| D43747    | 886.999   | 816.147   | AK021870  | 1927.197  | 2928.33   | AK025281  | 565.876  | 287.969  |
| M98776    | 1124.138  | 908.122   | U06680    | 2339.58   | 2040.299  | D17018    | 783.505  | 798.708  |
| X99135    | 61693.555 | 58683.949 | NM_005123 | 758.58    | 1052.679  | AB046852  | 377.742  | 410.445  |
| AF009744  | 3133.652  | 3398.779  | NM_015584 | 5969.882  | 6389.994  | AF086167  | 681.828  | 736.559  |
| NM_172140 | 4247.817  | 5309.871  | NM_001697 | 42249.027 | 46127.477 | AL109727  | 621.263  | 538.143  |
| AK026965  | 9538.108  | 8481.294  | NM_016098 | 20788.85  | 19653.371 | AF085891  | 3460.306 | 3841.49  |
| AK025859  | 7041.458  | 5501.235  | AB032525  | 475.126   | 931.924   | AF019618  | 1179.984 | 1061.589 |
| AL117499  | 12479.041 | 11702.723 | NM_002063 | 755.876   | 643.052   | AK025656  | 1090.58  | 846.243  |
| NM_007054 | 658.483   | 675.482   | NM_006667 | 23978.199 | 23409.816 | AF161414  | 2383.389 | 2289.412 |
| AB007957  | 646.008   | 749.332   | AK025125  | 5014.084  | 5529.615  | AK025967  | 539.061  | 505.222  |
| AK000160  | 1469.596  | 1646.275  | NM_000815 | 1330.028  | 1164.032  | AL110177  | 1288.205 | 863.065  |
| NM_005311 | 4915.7    | 4818.716  | NM_001293 | 684.712   | 786.849   | NM_002763 | 3606.593 | 2256.587 |
| NM_005905 | 1668.319  | 1633.479  | AB023173  | 5255.472  | 3958.982  | U79293    | 403.02   | 261.024  |
| NM_016235 | 520.238   | 617.919   | AF156548  | 2286.092  | 1710.714  | NM_015434 | 2255.12  | 2040.982 |
| NM_000960 | 634.956   | 640.366   | NM_172140 | 2940.139  | 3703.445  | NM_014055 | 1283.733 | 1003.356 |
| AF172932  | 1129.429  | 1358.825  | AF086109  | 761.95    | 790.417   | NM_018691 | 945.199  | 715.984  |
| NM_005355 | 1486.036  | 1741.579  | NM_001072 | 1237.344  | 1044.157  | AK001020  | 608.354  | 383.866  |
| AF295378  | 3567.385  | 3274.661  | NM_014070 | 1159.83   | 1084.026  | AK022098  | 1019.448 | 1246.422 |
| NM_004085 | 5425.492  | 5679.369  | NM_016280 | 21394.473 | 20551.791 | AK026751  | 243.134  | 306.929  |
| NM_012445 | 27499.953 | 31266.982 | NM_016027 | 2601.337  | 3016.771  | AB040933  | 707.828  | 1256.691 |
| NM_018104 | 3518.361  | 3696.327  | NM_014297 | 8441.364  | 9111.693  | AK021875  | 570.911  | 639.783  |
| NM_006080 | 956.671   | 785.563   | NM_018156 | 14024.274 | 15418.729 | AK022072  | 537.707  | 461.21   |
| NM_004425 | 4328.11   | 4817.45   | U00930    | 19413.391 | 23297.654 | AK026900  | 2012.262 | 2510.365 |
| U64564    | 1736.774  | 1952.925  | AK024958  | 847.803   | 1422.186  | AK025020  | 3147.409 | 3420.192 |
| NM_006470 | 2657.364  | 2760.646  | NM_014575 | 3387.709  | 3424.67   | AF086009  | 522.6    | 652.623  |
| NM_002855 | 5366.36   | 4975.117  | NM_002439 | 4568.779  | 4426.047  | AF086463  | 1863.138 | 2399.48  |
| AB038463  | 1694.778  | 1526.559  | AL117552  | 1667.097  | 1733.894  | AF086031  | 1214.709 | 1106.295 |
| M30262    | 3440.44   | 3714.98   | NM_002692 | 8372.554  | 7366.934  | AK024130  | 519.852  | 618.172  |
| NM_000387 | 9465.354  | 8993.85   | AB023190  | 10216.993 | 9949.895  | AK024598  | 1305.693 | 879.867  |
| NM_004663 | 1876.075  | 1986.864  | NM_007064 | 1440.216  | 1181.15   | AF087983  | 750.276  | 509.266  |
| NM_015310 | 1707.59   | 1858.082  | NM_006281 | 1848.568  | 1694.408  | NM_020234 | 2632.665 | 2025.583 |
| NM_016154 | 11038.944 | 11455.048 | NM_002738 | 7980.213  | 8152.513  | Z36825    | 6450.818 | 4975.413 |
| NM_005013 | 51042.391 | 47623.102 | U23460    | 23051.771 | 22155.084 | U52838    | 497.655  | 485.606  |
| AB002338  | 1318.898  | 1293.71   | NM_005356 | 1530.438  | 1377.186  | Z36846    | 359.481  | 415.404  |
| AI524814  | 7246.213  | 8832.006  | NM_004429 | 4049.33   | 5418.218  | AF086127  | 347.042  | 388.389  |
| AB024411  | 1342.583  | 1320.313  | U64564    | 1420.067  | 1831.312  | AF086157  | 1306.428 | 924.819  |
| NM_002444 | 51110.586 | 56897.551 | NM_006470 | 2036.098  | 2505.903  | AL109710  | 531.86   | 532.685  |
| NM_001104 | 1645.554  | 1828.448  | NM_002855 | 3968.712  | 4186.82   | AK021538  | 497.924  | 413.225  |
| NM_002989 | 6569.14   | 7396.173  | AB038463  | 1308.655  | 1784.276  | AK023793  | 4185.041 | 4058.257 |
| NM_020154 | 32165.646 | 34599.609 | M30262    | 2283.655  | 2838.384  | AK022185  | 321.921  | 506.315  |
| NM_004665 | 1947.106  | 2204.794  | NM_005460 | 1071.764  | 1228.626  | AK023286  | 2282.702 | 2413.876 |
| NM_005300 | 2367.957  | 2834.277  | AF160477  | 2050.862  | 2489.079  | AK021544  | 1135.23  | 1278.477 |
| NM_000893 | 1066.79   | 1537.103  | NM_003226 | 415.524   | 586.414   | AL079282  | 487.158  | 502.691  |
| NM_005091 | 742.208   | 712.914   | M12883    | 924.286   | 1397.588  | AK022079  | 546.831  | 531.861  |
| AF031167  | 658.134   | 666.625   | BG288747  | 796.25    | 926.15    | AF116714  | 539.491  | 491.465  |
| NM_003204 | 3686.806  | 3446.303  | BG617923  | 549.556   | 695.36    | NM_014058 | 1846.214 | 1289.385 |

|           |           |           |           |           |           |           |           |           |
|-----------|-----------|-----------|-----------|-----------|-----------|-----------|-----------|-----------|
| AF254069  | 2000.786  | 2338.176  | U37448    | 880.732   | 934.844   | AK026340  | 466.66    | 391.463   |
| AL117600  | 9435.472  | 8920.957  | AA927698  | 2523.14   | 2933.245  | AK022686  | 6760.94   | 4278.165  |
| NM_001712 | 679.112   | 527.591   | AI498426  | 1068.414  | 1358.623  | AK023516  | 1728.452  | 935.348   |
| NM_004487 | 18034.709 | 16537.086 | BG824773  | 931.976   | 1038.281  | AK023864  | 4319.33   | 2979.028  |
| AB029000  | 7453.392  | 8212.38   | D01038    | 14797.318 | 13142.065 | AK023017  | 3698.497  | 3554.157  |
| Z25434    | 5431.748  | 4260.858  | AB019205  | 1493.994  | 1680.704  | AK023908  | 3056.939  | 2466.737  |
| NM_005884 | 11213.511 | 13246.668 | J05008    | 2101.74   | 1490.995  | AK024236  | 692.231   | 558.552   |
| NM_012398 | 10559.127 | 11652.743 | U11087    | 1167.172  | 940.525   | Z24724    | 6550.124  | 7820.726  |
| AF229804  | 28254.203 | 27814.152 | D50640    | 2323.432  | 2035.049  | AK022712  | 7021.342  | 7782.952  |
| AF151638  | 1455.831  | 1662.651  | D43747    | 638.922   | 402.442   | AK024132  | 820.142   | 1234.794  |
| U90552    | 6387.398  | 7517.717  | M98776    | 941.747   | 690.406   | AK021863  | 14335.685 | 17297.967 |
| NM_006032 | 3974.886  | 3984.736  | X99135    | 50140.852 | 41144.59  | AK024208  | 455.429   | 532.115   |
| NM_014788 | 1966.202  | 2302.536  | AF009744  | 1521.14   | 1526.484  | NM_020428 | 388.644   | 413.896   |
| NM_002153 | 580.755   | 725.647   | NM_003204 | 3407.07   | 4532.922  | AK022293  | 753.795   | 741.856   |
| AB040890  | 1542.837  | 1860.603  | AF254069  | 1807.18   | 2246.986  | AL117439  | 981.078   | 889.38    |
| AK024233  | 1236.476  | 1193.245  | AL117600  | 9340.771  | 9710.818  | AL133065  | 1277.733  | 1284.86   |
| AK021870  | 2376.422  | 2864.748  | NM_001712 | 581.262   | 701.33    | NM_005297 | 6459.583  | 5837.865  |
| U06680    | 4517.786  | 5497.772  | NM_004487 | 13068.635 | 14917.38  | U80769    | 865.525   | 952.361   |
| NM_017858 | 404.23    | 378.211   | AB029000  | 6981.604  | 8157.608  | AL137734  | 780.669   | 472.441   |
| NM_005123 | 989.74    | 1174.103  | AK026965  | 5050.278  | 5174.834  | AK023784  | 998.524   | 633.852   |
| NM_015584 | 7073.694  | 7841.525  | AK025859  | 5575.698  | 5010.635  | AK026323  | 1062.247  | 755.789   |
| NM_001697 | 47506.949 | 50518.035 | AL117499  | 10755.748 | 11841.422 | AL133430  | 14425.634 | 14025.039 |
| AB032525  | 423.481   | 439.079   | AB007957  | 477.745   | 498.579   | AF070633  | 29738.666 | 23619.084 |
| NM_002063 | 779.854   | 770.748   | AK000160  | 964.599   | 1080.79   | S51971    | 61622.969 | 71241.383 |
| NM_006667 | 38190.379 | 37888.129 | NM_005311 | 3904.549  | 3884.425  | NM_018370 | 943.415   | 1015.908  |
| AK025125  | 2921.513  | 3278.581  | NM_005905 | 1030.628  | 896.019   | AF054996  | 5044.755  | 5501.583  |
| NM_000815 | 1398.16   | 1541.692  | NM_005359 | 734.77    | 911.589   | AF090098  | 2007.886  | 1505.622  |
| NM_001293 | 858.973   | 994.016   | AF295378  | 3059.131  | 3060.081  | AF146694  | 2427.941  | 2249.517  |
| AB023173  | 5304.826  | 5261.876  | NM_004085 | 2816.106  | 2775.092  | AK057104  | 923.271   | 631.202   |
| AF156548  | 2541.602  | 2395.815  | NM_012445 | 13268.472 | 14527.437 | AL133555  | 2121.844  | 2237.236  |
| NM_172140 | 3324.714  | 3772.382  | NM_018104 | 2447.668  | 2074.805  | AK024979  | 23017.754 | 20548.145 |
| AF086109  | 1188.63   | 971.466   | NM_006080 | 737.714   | 750.14    | AF233648  | 1059.322  | 772.219   |
| NM_001072 | 1473.224  | 1353.197  | NM_006667 | 38841.316 | 44963.332 | AK021781  | 255.336   | 158.896   |
| NM_014070 | 1874.702  | 1463.513  | AK025125  | 5057.856  | 7531.758  | NM_018584 | 503.372   | 419.178   |
| NM_016280 | 26003.336 | 24084.93  | NM_000815 | 1381.99   | 1628.05   | AY007126  | 17200.344 | 11012.172 |
| NM_016027 | 2633.545  | 2142.847  | NM_001293 | 526.361   | 826.334   | AF085951  | 2195.712  | 2132.904  |
| NM_014297 | 8945.931  | 9054.119  | AB023173  | 5321.837  | 5780.952  | AF131787  | 509.998   | 454.801   |
| NM_018156 | 20357.371 | 24348.979 | AF156548  | 2341.154  | 2681.224  | AF087989  | 1972.224  | 1009.326  |
| X98266    | 1455.35   | 1471.329  | NM_000387 | 5507.926  | 5732.599  | Z70715    | 614.725   | 618.851   |
| U00930    | 22517.791 | 25432.852 | NM_004663 | 1565.483  | 1677.503  | NM_018182 | 3058.634  | 2602.165  |
| AK024958  | 1085.022  | 1410.253  | NM_015310 | 1181.186  | 1434.17   | U80771    | 3271.326  | 2176.55   |
| NM_014575 | 4389.909  | 4105.806  | NM_016154 | 5505.646  | 6247.93   | NM_006188 | 349.941   | 207.807   |
| NM_002438 | 5074.706  | 4744.124  | NM_005013 | 44116.016 | 47874.715 | AJ272173  | 8848.644  | 6681.351  |
| AL117552  | 1850.349  | 1997.553  | AB002338  | 1226.333  | 1540.102  | NM_005648 | 1869.46   | 1803.847  |
| NM_002692 | 9752.4    | 10082.684 | AI524814  | 5474.641  | 6507.543  | AK021566  | 208.251   | 346.538   |
| AB023190  | 18064.875 | 15588.906 | AB024411  | 607.447   | 763.681   | NM_016348 | 1015.187  | 1132.947  |
| NM_007064 | 2374.096  | 2149.377  | NM_002444 | 39985.465 | 43803.754 | NM_020157 | 17270.512 | 14969.058 |
| NM_006281 | 2536.903  | 2276.949  | Z83802    | 362.736   | 440.698   | X64991    | 820.678   | 658.584   |
| NM_002738 | 9579.579  | 10154.111 | NM_001104 | 1073.596  | 1093.681  | NM_014320 | 1858.56   | 2356.26   |
| U23460    | 41804.945 | 41066.34  | NM_002989 | 4843.971  | 4869.223  | AK025703  | 3510.13   | 3380.183  |
| NM_005358 | 1488.997  | 1383.521  | U88898    | 3178.119  | 2856.777  | NM_018185 | 1792.722  | 1326.059  |
| NM_004428 | 3176.659  | 3267.065  | NM_020154 | 27532.586 | 24721.934 | AK022598  | 2462.195  | 2105.334  |
| U64564    | 1337.124  | 1356.495  | NM_004665 | 1867.575  | 1656.168  | AK024306  | 964.801   | 837.325   |



|           |           |           |           |           |           |           |           |           |
|-----------|-----------|-----------|-----------|-----------|-----------|-----------|-----------|-----------|
| NM_00647C | 2528.124  | 2873.638  | NM_00530C | 1905.243  | 1608.711  | NM_01832C | 4310.724  | 3777.237  |
| NM_00285E | 3371.195  | 4151.808  | NM_00089C | 766.044   | 610.692   | AK025862  | 19982.211 | 13616.149 |
| AB038463  | 1799.698  | 2549.863  | NM_00069E | 14183.938 | 13157.262 | AK026495  | 2159.145  | 1593.2    |
| M30262    | 2994.55   | 3393.328  | NM_005091 | 720.581   | 410.82    | AK025052  | 967.213   | 873.719   |
| NM_00546C | 1237.509  | 1404.692  | AF031167  | 378.144   | 487.33    | NM_01438E | 857.761   | 362.333   |
| AF160477  | 2885.27   | 3206.224  | AB023190  | 21497.576 | 23625.535 | NM_00254E | 346.13    | 214.195   |
| NM_00322E | 526.531   | 728.283   | NM_007064 | 1840.961  | 2240.816  | U85044    | 632.446   | 425.737   |
| M12883    | 2098.883  | 2195.153  | NM_006281 | 2069.552  | 2436.778  | BC018880  | 474.206   | 377.79    |
| BG288747  | 922.438   | 943.157   | NM_00273E | 8535.531  | 9740.374  | AF086090  | 759.802   | 489.759   |
| BG617923  | 593.627   | 700.229   | U23460    | 29376.656 | 36843.074 | AK002173  | 14130.121 | 13025.499 |
| U37448    | 1245.433  | 1356.073  | NM_00535E | 1375.852  | 1452.45   | NM_01774E | 972.744   | 792.499   |
| BG435851  | 259.549   | 646.489   | Z25434    | 3066.803  | 2513.328  | NM_02018E | 10256.376 | 8921.138  |
| AA927698  | 2939.6    | 3716.492  | NM_005884 | 9423.672  | 12550.961 | U88897    | 7652.522  | 5551.418  |
| AI498426  | 1236.431  | 1395.199  | NM_01239E | 9874.96   | 9483.813  | CY3Cy5    | 2074.947  | 364.443   |
| BG824773  | 1113.451  | 1139.665  | AF229804  | 10357.934 | 10877.613 | BG617923  | 323.606   | 396.933   |
| D01038    | 23589.576 | 21897.771 | AF151638  | 1333.786  | 1447.463  | U37448    | 748.597   | 807.511   |
| AB019205  | 2065.215  | 1930.08   | U90552    | 6190.538  | 5700.759  | AA927698  | 2046.584  | 2839.018  |
| J05008    | 2065.112  | 2393.492  | NM_00603C | 2158.593  | 1905.183  | AI498426  | 610.143   | 1025.098  |
| U11087    | 1238.63   | 1240.889  | NM_01478E | 1535.34   | 1500.974  | BG824773  | 693.482   | 689.706   |
| D50640    | 2376.017  | 2734.048  | NM_00215C | 541.174   | 737.37    | D01038    | 23719.467 | 23712.211 |
| D43747    | 608.598   | 839.007   | AB040890  | 1691.918  | 1795.517  | AB019205  | 1093.578  | 1358.067  |
| M98776    | 1643.613  | 1107.227  | AK024233  | 1076.91   | 1430.41   | J05008    | 1215.78   | 1204.714  |
| X99135    | 60940.203 | 60238.34  | AK021870  | 2176.026  | 2642.312  | U11087    | 1067.99   | 986.922   |
| AF009744  | 1773.923  | 1752.722  | U06680    | 2383.364  | 2474.871  | D50640    | 1286.317  | 1685.425  |
| NM_003204 | 4062.446  | 4000.285  | NM_00512C | 952.075   | 779.037   | D43747    | 531.276   | 691.096   |
| AF254069  | 2512.5    | 2412.018  | NM_015584 | 6141.552  | 5847.885  | M98776    | 921.635   | 966.039   |
| AL117600  | 9500.42   | 9199.691  | NM_001697 | 39261.5   | 31386.008 | X99135    | 50761.34  | 67248.414 |
| NM_00171C | 446.653   | 649.712   | NM_01609E | 20459.389 | 14877.088 | AF009744  | 864.062   | 1092.099  |
| NM_004487 | 15074.896 | 15825.23  | AL137479  | 632.653   | 1167.409  | NM_17214C | 3738.094  | 4299.56   |
| AB029000  | 7095.748  | 9340.492  | NM_004211 | 1504.705  | 1626.004  | SR2       | 46278.223 | 53632.813 |
| AK026965  | 9965.346  | 10882.701 | Y10776    | 1999.24   | 2494.529  | SR6       | 1794.081  | 5024.991  |
| AK025859  | 6779.91   | 7120.752  | AK027241  | 1891.823  | 1784.82   | SR8       | 6629.87   | 50821.391 |
| AL117499  | 12864.896 | 13101.796 | NM_00697E | 8410.329  | 9896.86   | SR10      | 23474.02  | 18998.637 |
| NM_007054 | 369.181   | 589.698   | NM_004561 | 795.919   | 702.891   | CY3Cy5    | 5368.366  | 990.883   |
| AB007957  | 526.993   | 534.812   | AK024812  | 1948.062  | 2005.348  | NM_005311 | 2088.131  | 2682.345  |
| AK000160  | 1551.298  | 1675.539  | AK026412  | 1339.007  | 1884.6    | NM_00590E | 1818.815  | 2386.046  |
| NM_005311 | 4528.565  | 5227.817  | X89669    | 1060.008  | 1076.563  | NM_00096C | 598.832   | 717.546   |
| NM_00590E | 1462.608  | 1339.4    | AF086109  | 641.581   | 563.942   | NM_00535E | 767.045   | 874.573   |
| NM_01623E | 320.305   | 507.3     | NM_00107C | 1145.299  | 1063.42   | NM_002511 | 1183.037  | 1453.469  |
| NM_00535E | 1046.653  | 1010.75   | NM_01407C | 1683.464  | 1706.856  | AF295378  | 1603.09   | 1313.678  |
| NM_002511 | 862.537   | 1045.002  | NM_01628C | 22374.936 | 15512.451 | NM_01244E | 24235.447 | 28887.486 |
| NM_000794 | 396.433   | 495.785   | NM_016027 | 2467.533  | 1927.409  | NM_018104 | 2919.532  | 3960.083  |
| AF295378  | 3468.017  | 3011.744  | NM_014297 | 8324.532  | 6517.998  | NM_00608C | 329.184   | 388.761   |
| NM_00408E | 4708.859  | 4769.845  | NM_01815E | 13744.188 | 11534.828 | NM_00442E | 5025.004  | 7155.517  |
| NM_01244E | 27814.164 | 30284.207 | X98266    | 1023.698  | 644.971   | U64564    | 1284.163  | 1771.798  |
| NM_018104 | 4479.314  | 4381.836  | U00930    | 21556.984 | 18177.912 | NM_00647C | 1686.229  | 1936.805  |
| NM_006667 | 41550.652 | 46765.609 | AK024958  | 1098.104  | 1016.061  | AB038463  | 867.971   | 1145.367  |
| AK025125  | 5459.617  | 6210.883  | NM_01457E | 3387.79   | 2184.713  | NM_00546C | 795.09    | 2132.311  |
| NM_00081E | 1301.154  | 1337.973  | NM_00243E | 4411.784  | 3663.437  | AF160477  | 2001.901  | 5805.538  |
| NM_00129C | 692.626   | 1018.971  | AL117552  | 1673.981  | 1315.318  | NM_00322E | 372.156   | 452.506   |
| AB023173  | 5836.504  | 5988.634  | NM_00269C | 9533.473  | 6847.09   | M12883    | 1153.165  | 2958.903  |
| AF156548  | 2410.168  | 2353.616  | X55525    | 1376.597  | 1458.819  | BG288747  | 566.28    | 1376.396  |
| NM_000387 | 9208.821  | 9552.062  | AB040878  | 810.54    | 921.372   | AI524814  | 3393.065  | 4606.539  |

|           |           |           |           |           |           |           |           |           |
|-----------|-----------|-----------|-----------|-----------|-----------|-----------|-----------|-----------|
| NM_004663 | 1987.271  | 2213.115  | S74647    | 900.557   | 667.78    | AB024411  | 997.891   | 1193.99   |
| NM_015310 | 1931.311  | 1954.905  | NM_003506 | 901.411   | 1089.665  | NM_002444 | 23086.648 | 26113.488 |
| NM_016154 | 13069.945 | 14844.583 | NM_018093 | 5702.744  | 5635.316  | NM_001104 | 2005.465  | 2372.685  |
| NM_005013 | 48260.559 | 49248.297 | NM_003012 | 445.475   | 393.979   | NM_002983 | 5185.901  | 5630.191  |
| AB002338  | 1365.953  | 1445.344  | NM_003389 | 1917.983  | 1896.999  | U88898    | 1580.827  | 1734.122  |
| AI524814  | 6754.591  | 8159.489  | NM_000430 | 703.361   | 844.458   | NM_020154 | 15133.979 | 16773.65  |
| AB024411  | 1100.782  | 1403.368  | AB033030  | 576.038   | 466.773   | NM_004665 | 1346.081  | 1694.049  |
| NM_002444 | 49348.484 | 55584.57  | NM_015963 | 4647.608  | 4128.579  | NM_005300 | 977.246   | 1177.528  |
| NM_001104 | 1828.838  | 1542.889  | AB007871  | 1303.269  | 1102.944  | NM_000893 | 884.518   | 846.893   |
| NM_002983 | 6273.88   | 6255.674  | NM_017813 | 2168.284  | 1807.126  | NM_005091 | 352.407   | 304.466   |
| U88898    | 3590.897  | 2948.517  | NM_003840 | 2914.523  | 2666.019  | NM_003204 | 2915.168  | 3858.289  |
| NM_020154 | 30587.051 | 30514.191 | NM_018378 | 821.282   | 533.638   | AF254069  | 1212.238  | 1483.048  |
| NM_004665 | 2003.499  | 2024.098  | NM_018423 | 926.667   | 613.154   | AL117600  | 7769.647  | 8168.46   |
| NM_005300 | 2151.707  | 2103.486  | NM_001741 | 9202.57   | 7967.402  | AB029000  | 4108.537  | 5542.709  |
| NM_000893 | 1117.682  | 1375.64   | NM_000745 | 774.461   | 1213.177  | AK026965  | 6278.283  | 9720.928  |
| NM_000693 | 28532.063 | 27529.656 | AF116705  | 9225.27   | 5928.257  | AL117499  | 7812.846  | 21122.719 |
| NM_005091 | 919.264   | 761.183   | NM_006072 | 1458.403  | 1167.28   | NM_007054 | 314.28    | 535.711   |
| AF031167  | 546.525   | 521.839   | NM_003561 | 1241.651  | 1032.42   | AB007957  | 392.619   | 612.71    |
| AB023190  | 20290.863 | 29624.508 | NM_004071 | 3117.22   | 3364.516  | AK000160  | 759.362   | 1928.859  |
| NM_007064 | 2234.215  | 2162.464  | NM_001316 | 9355.109  | 9570.876  | NM_006032 | 4573.762  | 5170.243  |
| NM_006281 | 2550.379  | 2962.2    | AJ008149  | 4139.97   | 4730.815  | NM_014783 | 1252.647  | 1331.916  |
| NM_002733 | 10162.999 | 11919.893 | NM_012153 | 1366.462  | 1350.175  | AB040890  | 744.705   | 1000.802  |
| U23460    | 30998.15  | 33175.551 | NM_013241 | 2786.064  | 2571.023  | AK024233  | 762.362   | 818.025   |
| NM_005353 | 1364.736  | 1695.337  | NM_017983 | 34253.941 | 35422.141 | AK021870  | 837.643   | 1182.221  |
| Z25434    | 4725.783  | 4926.513  | NM_015535 | 749.016   | 17730.912 | U06680    | 2923.781  | 3100.12   |
| NM_005884 | 13116.36  | 20298.191 | AF161362  | 3956.822  | 3140.146  | NM_005123 | 425.446   | 749.605   |
| NM_012393 | 11223.785 | 13199.921 | NM_003923 | 54048.738 | 56719.484 | NM_015584 | 3066.15   | 3869.419  |
| AF229804  | 27654.852 | 27541.477 | M57399    | 42865.77  | 31342.537 | NM_001697 | 21466.906 | 20957.426 |
| AF151638  | 1539.847  | 1796.907  | NM_015939 | 3716.419  | 2833.195  | NM_016093 | 11091.757 | 8902.088  |
| U90552    | 7022.829  | 7738.917  | AB046840  | 3567.906  | 3544.999  | AB032525  | 238.937   | 168.918   |
| NM_006032 | 4021.169  | 4165.981  | AF174487  | 1047.095  | 796.913   | NM_002063 | 579.531   | 706.058   |
| NM_014783 | 2528.233  | 2531.609  | NM_005041 | 953.76    | 613.489   | AK025125  | 2414.186  | 3055.477  |
| NM_002153 | 804.017   | 1007.168  | NM_006407 | 10510.745 | 7549.705  | NM_000815 | 704.8     | 754.594   |
| AB040890  | 1745.228  | 2386.827  | NM_007373 | 3800.391  | 1404.844  | NM_001293 | 414.668   | 541.996   |
| AK024233  | 1391.208  | 1250.988  | M34572    | 711.287   | 238.62    | AB023173  | 2905.475  | 3069.349  |
| AK021870  | 2286.082  | 2517.636  | NM_006263 | 12923.042 | 6693.745  | AF156548  | 1218.888  | 1710.777  |
| U06680    | 5055.853  | 3563.199  | NM_004791 | 849.495   | 290.338   | NM_000387 | 7637.349  | 10358.677 |
| NM_017853 | 442.081   | 527.179   | Z36876    | 3223.745  | 3467.165  | NM_015310 | 1249.603  | 3752.922  |
| NM_005123 | 859.328   | 1224.584  | NM_000892 | 885.107   | 1059.904  | NM_016154 | 7348.742  | 16962.949 |
| NM_015584 | 7431.63   | 7308.596  | NM_005046 | 514.078   | 587.144   | NM_005013 | 30310.174 | 50272.387 |
| NM_001697 | 44853.023 | 43778.805 | NM_001873 | 1408.778  | 1373.984  | AB002338  | 775.259   | 1608.657  |
| NM_016093 | 25760.266 | 23264.924 | AB029025  | 1512.793  | 2136.928  | NM_001072 | 616.341   | 493.496   |
| AB032525  | 399.168   | 569.434   | NM_007100 | 28482.551 | 28205.514 | NM_014070 | 1405.16   | 1194.973  |
| NM_002063 | 974.433   | 995.555   | NM_003940 | 857.902   | 566.838   | NM_016280 | 10244.603 | 8321.686  |
| AL137479  | 976.443   | 1306.029  | NM_016572 | 1246.298  | 1090.279  | NM_016027 | 1211.916  | 1114.605  |
| NM_004211 | 1765.307  | 1408.631  | NM_000027 | 1444.706  | 901.441   | NM_014297 | 3472.351  | 3745.298  |
| Y10776    | 2293.079  | 2529.277  | NM_001824 | 1101.474  | 532.6     | NM_018153 | 13910.724 | 14063.234 |
| AK027241  | 2364.628  | 1765.215  | NM_017543 | 19462.139 | 16210.328 | X98266    | 753.595   | 885.585   |
| NM_006973 | 9581.502  | 10476.825 | AF134802  | 1274.204  | 1109.713  | U00930    | 9789.205  | 12159.11  |
| NM_004561 | 851.49    | 736.877   | NM_018222 | 729.79    | 725.918   | AK024958  | 427.754   | 424.775   |
| AK024812  | 2361.165  | 3087.694  | NM_005740 | 1686.499  | 1387.06   | NM_014575 | 1913.529  | 2298.482  |
| M20642    | 956.161   | 1189.312  | NM_004303 | 14638.229 | 12836.585 | NM_002433 | 3176.671  | 2532.586  |
| AK026412  | 1815.075  | 2027.165  | AF112366  | 1045.032  | 929.74    | AL117552  | 729.446   | 640.405   |

|           |           |           |           |           |           |           |           |           |
|-----------|-----------|-----------|-----------|-----------|-----------|-----------|-----------|-----------|
| X89669    | 1920.193  | 2065.362  | NM_004274 | 1208.965  | 878.314   | NM_002692 | 4470.896  | 4081.138  |
| AF086109  | 953.447   | 955.448   | AK024002  | 3859.283  | 2656.224  | NM_007064 | 1570.065  | 1306.449  |
| NM_001072 | 1373.774  | 1449.149  | NM_020399 | 5819.555  | 3426.63   | NM_006281 | 1072.412  | 1140.739  |
| NM_014070 | 1911.829  | 1890.809  | AB011117  | 1539.27   | 903.61    | NM_002738 | 4451.933  | 4877.687  |
| NM_016280 | 28156.59  | 25440.486 | AF060935  | 4217.336  | 3562.93   | U23460    | 37091.664 | 33654.832 |
| NM_016027 | 2667.052  | 2704.889  | AK026886  | 1162.799  | 994.427   | NM_005356 | 768.337   | 857.536   |
| NM_014297 | 9698.525  | 8358.304  | D83778    | 1234.347  | 1387.531  | Z25434    | 2163.099  | 2056.584  |
| NM_018156 | 22004.518 | 19894.783 | NM_004264 | 1525.062  | 1418.236  | NM_012396 | 8419.196  | 21291.26  |
| X98266    | 1440.9    | 1534.819  | AK024788  | 1504.837  | 1108.139  | AF229804  | 23181.701 | 43305.684 |
| U00930    | 24936.861 | 28201.746 | NM_004473 | 609.981   | 789.77    | AF151638  | 1032.594  | 2203.921  |
| AK024958  | 1183.736  | 1206.255  | NM_001206 | 2064.668  | 1700.403  | U90552    | 4893.518  | 10166.554 |
| NM_014575 | 4451.721  | 3786.336  | NM_005016 | 998.966   | 786.161   | NM_005460 | 593.529   | 690.181   |
| NM_002439 | 5971.631  | 5655.066  | NM_014469 | 1392.689  | 983.547   | AF160477  | 2470.526  | 2974.625  |
| AL117552  | 1958.509  | 1731.798  | NM_014852 | 1299.724  | 663.615   | NM_003226 | 357.967   | 419.673   |
| NM_002692 | 10337.589 | 10086.631 | NM_000344 | 14102.712 | 10759.561 | M12883    | 1513.968  | 1523.161  |
| X55525    | 1489.105  | 1300.673  | AF248650  | 3306.235  | 2543.717  | BG288747  | 646.862   | 719.242   |
| NM_000242 | 566.846   | 494.994   | S74678    | 42216.543 | 30730.334 | BG617923  | 404.803   | 472.563   |
| AB040878  | 602.901   | 769.521   | AF248651  | 1125.086  | 1085.248  | U37448    | 705.498   | 771.136   |
| S74647    | 1090.035  | 1176.257  | NM_001358 | 18880.447 | 16341.537 | AA927698  | 1890.958  | 2827.014  |
| NM_003506 | 899.725   | 1223.831  | NM_004836 | 6048.106  | 4701.878  | AI498426  | 601.739   | 725.185   |
| NM_018093 | 7227.417  | 7132.337  | AB037751  | 4795.318  | 3427.464  | BG824773  | 731.805   | 859.173   |
| NM_003012 | 477.589   | 653.83    | S79281    | 5415.037  | 4000.535  | D01038    | 18653.922 | 13648.782 |
| NM_003389 | 2523.877  | 2612.426  | AK025585  | 3311.762  | 2669.59   | AB019205  | 1078.761  | 1296.73   |
| NM_000430 | 1135.625  | 1267.916  | NM_001414 | 5192.013  | 4330.16   | J05008    | 1112.713  | 1325.726  |
| AB033030  | 774.176   | 873.965   | D16891    | 3086.266  | 1885.21   | U11087    | 1047.491  | 995.095   |
| NM_016656 | 725.218   | 744.704   | NM_017760 | 4792.812  | 3227.537  | D50640    | 1018.383  | 1384.712  |
| NM_015963 | 5427.738  | 5251.988  | NM_015936 | 4756.702  | 2770.098  | D43747    | 269.616   | 366.623   |
| AB007871  | 2619.935  | 2326.569  | AL109698  | 1815.314  | 1545.703  | M98776    | 808.918   | 836.396   |
| NM_017813 | 3101.3    | 3151.455  | AF217980  | 4796.814  | 4981.599  | X99135    | 51183.211 | 63997.867 |
| NM_003840 | 5684.003  | 5971.261  | AL117461  | 2124.635  | 2675.07   | AF009744  | 917.114   | 1072.676  |
| NM_018378 | 902.008   | 1009.048  | NM_016499 | 2563.401  | 2306.029  | NM_172140 | 2616.561  | 2663.817  |
| NM_018423 | 921.1     | 946.098   | AF104921  | 19507.676 | 17963.512 |           | 620.797   | 1334.961  |
| NM_001741 | 12097.559 | 11293.015 | NM_000126 | 20749.607 | 17188.865 | AF086109  | 418.322   | 1048.44   |
| NM_000745 | 1362.883  | 1306.016  | AK022291  | 814.319   | 616.776   | AK026965  | 12646.318 | 13149.169 |
| AF116705  | 10636.202 | 9796.95   | BF239974  | 1657.226  | 1504.896  | AK025859  | 3718.592  | 3799.525  |
| NM_004460 | 779.452   | 981.24    | NM_000104 | 1246.13   | 1130.93   | AL117499  | 5715.303  | 6437.312  |
| NM_006072 | 1987.379  | 2014.643  | NM_005015 | 16525.217 | 13220.127 | NM_007054 | 196.884   | 166.118   |
| BE794490  | 951.582   | 1005.773  | NM_004255 | 57182.277 | 52135.02  | AB007957  | 284.413   | 301.257   |
| NM_003561 | 3286.392  | 2882.063  | NM_000269 | 23481.373 | 14485.226 | AK000160  | 1214.696  | 1560.841  |
| NM_002991 | 1061.078  | 914.249   | AF182288  | 4397.691  | 2867.465  | NM_005311 | 1960.012  | 2323.168  |
| NM_004071 | 4168.399  | 3105.36   | NM_004491 | 1967.241  | 1032.726  | NM_005905 | 1677.688  | 1629.235  |
| NM_001316 | 8720.563  | 6331.348  | AK026810  | 2620.927  | 1592.555  | NM_000960 | 519.052   | 501.906   |
| AJ008149  | 5018.458  | 4350.193  | NM_015629 | 6025.232  | 4352.029  | AF172932  | 368.081   | 391.57    |
| NM_001192 | 451.251   | 295.435   | AF218032  | 4049.394  | 2663.552  | NM_005356 | 616.07    | 568.4     |
| NM_012153 | 1992.477  | 2558.025  | NM_017542 | 6878.776  | 4709.333  | NM_002511 | 1044.982  | 1318.366  |
| NM_013241 | 4131.708  | 5622.912  | AK024407  | 1004.175  | 583.415   | AF295378  | 1473.558  | 1585.656  |
| NM_017988 | 57498.66  | 53679.453 | NM_004182 | 12619.952 | 9573.95   | NM_004085 | 5570.457  | 6880.06   |
| Z24725    | 514.449   | 905.454   | NM_018419 | 1158.016  | 1242.129  | NM_012445 | 24761.111 | 25518.996 |
| AF161362  | 6359.335  | 8206.302  | NM_014240 | 1191.968  | 885.287   | NM_018104 | 3337.437  | 3835.41   |
| AK024078  | 482.475   | 493.164   | BE379399  | 1844.895  | 1568.337  | NM_004426 | 4689.991  | 5340.587  |
| NM_003928 | 55966.242 | 58755.836 | NM_015877 | 2511.854  | 1312.078  | U64564    | 796.903   | 1131.767  |
| M57399    | 57720.289 | 52943.004 | AL117598  | 1809.988  | 1851.122  | NM_006470 | 1277.556  | 1770.412  |
| NM_015939 | 5290.712  | 5252.574  | AL109670  | 1105.488  | 1009.412  | AB038463  | 969.495   | 2892.083  |

|           |           |           |           |           |           |           |           |           |
|-----------|-----------|-----------|-----------|-----------|-----------|-----------|-----------|-----------|
| AB046840  | 5582.682  | 6077.657  | AF085831  | 1200.245  | 1105.082  | M30262    | 1579.783  | 3825.534  |
| AF174487  | 1313.224  | 1365.208  | AL832149  | 3666.566  | 3615.881  | NM_000387 | 11526.41  | 12072.919 |
| NM_017699 | 312.842   | 324.924   | AK022839  | 2187.799  | 1947.549  | NM_004663 | 1033.45   | 1146.473  |
| NM_005041 | 1079.712  | 764.604   | NM_018350 | 1081.361  | 1028.284  | NM_015310 | 1207.885  | 1534.736  |
| NM_006407 | 13465.974 | 11190.721 | AK025839  | 555.722   | 557.853   | NM_016154 | 9541.179  | 11973.128 |
| NM_007373 | 5684.001  | 2356.949  | NM_003946 | 1035.287  | 912.116   | NM_005013 | 23599.34  | 24415.305 |
| M34572    | 886.746   | 710.668   | AB045292  | 2485.466  | 1984.665  | AB002338  | 1075.963  | 1153.437  |
| NM_006263 | 19499.695 | 17757.428 | AK022998  | 836.583   | 430.751   | AI524814  | 3038.749  | 3870.175  |
| NM_004791 | 1665.702  | 1284.634  | AK025699  | 8980.402  | 6417.112  | AB024411  | 990.556   | 956.624   |
| Z36876    | 4226.015  | 3221.318  | NM_018024 | 3804.212  | 2737.422  | NM_002444 | 21036.129 | 21989.434 |
| NM_000892 | 687.491   | 718.906   | AK027173  | 693.176   | 392.48    | NM_001104 | 1783.973  | 1949.423  |
| NM_005046 | 535.23    | 411.283   | AK026783  | 804.571   | 589.723   | NM_002989 | 4110.141  | 4093.079  |
| NM_001873 | 1702.273  | 1440.856  | AK021814  | 798.553   | 868.162   | U88898    | 1479.642  | 1726.792  |
| AB029025  | 1981.191  | 2509.297  | AF086221  | 492.429   | 285.457   | NM_020154 | 14045.078 | 14044.919 |
| NM_007100 | 35333.156 | 32783.512 | AF088035  | 2082.027  | 1689.085  | NM_005300 | 1073.334  | 1225.883  |
| NM_002954 | 60915.473 | 61170.945 | AF086251  | 470.958   | 606.287   | NM_000893 | 902.737   | 983.51    |
| NM_003940 | 961.255   | 997.043   | NM_018092 | 5301.953  | 5234.766  | NM_000699 | 23001.307 | 21665.936 |
| NM_016572 | 1340.798  | 1292.267  | NM_005842 | 11666.861 | 10073.054 | NM_005091 | 317.266   | 260.906   |
| NM_000027 | 1785.918  | 1935.72   | AF147419  | 1183.282  | 982.556   | NM_003204 | 2313.255  | 2176.963  |
| NM_001824 | 1612.618  | 1009.589  | AF075036  | 743.045   | 792.812   | AF254069  | 1204.922  | 1506.119  |
| NM_017548 | 23956.002 | 20562.682 | NM_014797 | 1441.886  | 1195.729  | AL117600  | 5627.24   | 5290.649  |
| AF134802  | 1580.962  | 1595.347  | AK027139  | 700.962   | 516.88    | NM_004487 | 12324.156 | 27666.1   |
| NM_018222 | 998.735   | 809.441   | AL831841  | 1068.072  | 934.248   | AB029000  | 4222.52   | 9692.848  |
| NM_005740 | 2463.491  | 2249.33   | AL110165  | 971.693   | 698.542   | Z25434    | 3154.501  | 2651.826  |
| NM_004308 | 17065.814 | 16704.965 | AL050168  | 1094.589  | 826.592   | NM_005884 | 4863.894  | 9034.696  |
| AF112366  | 1916.219  | 1900.086  | AL122122  | 2846.156  | 2097.842  | NM_012399 | 5138.813  | 5540.668  |
| NM_004274 | 1748.44   | 1583.54   | AK000122  | 4053.314  | 3194.58   | AF229804  | 34855.77  | 28920.172 |
| AK024002  | 7903.531  | 6771.813  | AK023159  | 2066.095  | 2267.28   | AF151638  | 673.165   | 700.682   |
| NM_020399 | 7930.277  | 8157.416  | AK001091  | 1970.072  | 2069.857  | U90552    | 4672.728  | 4854.222  |
| AB011117  | 2008.493  | 1732.876  | U80775    | 251.063   | 469.019   | NM_006032 | 4610.73   | 4371.9    |
| AF060935  | 5560.051  | 3351.982  | AF086428  | 1332.119  | 1756.297  | NM_014788 | 1159.354  | 1854.767  |
| AK026886  | 1018.753  | 987.696   | AK025310  | 2281.065  | 1773.627  | AB040890  | 867.531   | 857.57    |
| D83778    | 1834.433  | 1820.104  | AL049353  | 1492.947  | 894.745   | AK024233  | 660.615   | 1004.713  |
| NM_004264 | 2109.194  | 1690.208  | NM_014896 | 288.581   | 480.307   | AK021870  | 836.94    | 1052.905  |
| AK024788  | 1837.203  | 1461.786  | AF009269  | 1757.687  | 1805.422  | U06680    | 2586.75   | 3068.973  |
| NM_004473 | 1187.75   | 668.348   | AF009313  | 1482.559  | 1405.496  | NM_005123 | 453.408   | 643.442   |
| AK022696  | 3306.616  | 2051.855  | AF090887  | 1016.345  | 960.08    | NM_015584 | 3141.849  | 3410.427  |
| NM_001206 | 2725.717  | 2741.538  | NM_015883 | 1191.518  | 1032.254  | NM_001697 | 19107.648 | 18519.918 |
| NM_005016 | 1685.957  | 1508.986  | AF056429  | 685.148   | 386.122   | NM_016099 | 10726.242 | 9043.959  |
| NM_014469 | 1442.513  | 1241.215  | AF070547  | 966.411   | 629.276   | NM_002063 | 629.047   | 576.401   |
| NM_014852 | 1537.355  | 1572.464  | AK001110  | 4638.681  | 3201.929  | NM_006667 | 26245.264 | 20570.158 |
| NM_000344 | 14810.254 | 14973.934 | AK021609  | 439.636   | 418.654   | AK025125  | 2516.781  | 3974.649  |
| AF248650  | 4672.269  | 3968.272  | AK002184  | 914.335   | 555.679   | NM_000815 | 637.8     | 693.364   |
| S74678    | 51002.137 | 48681.586 | AK021652  | 724.741   | 608.13    | NM_001293 | 449.254   | 405.565   |
| AF248651  | 1628.359  | 1267.969  | AK021859  | 955.491   | 604.335   | AF156548  | 1492.573  | 3244.711  |
| NM_001358 | 25980.635 | 20785.367 | AK025826  | 638.514   | 994.653   | NM_172140 | 3042.141  | 3634.789  |
| NM_004836 | 7253.32   | 6289.46   | AK026439  | 980.312   | 1346.926  | AF086109  | 239.157   | 503.346   |
| AB037751  | 5887.954  | 4655.53   | AK025278  | 543.283   | 946.144   | NM_001072 | 620.969   | 753.32    |
| S79281    | 7221.324  | 6133.276  | AK026466  | 493.638   | 345.065   | NM_014070 | 1603.931  | 1347.921  |
| AK025585  | 4119.062  | 2939.161  | AY007163  | 4343.984  | 4182.525  | NM_016280 | 9842.269  | 7133.811  |
| NM_001414 | 6344.816  | 5362.684  | NM_006236 | 25375.693 | 25858.877 | NM_016027 | 1302.277  | 1327.41   |
| D16891    | 4045.258  | 3325.07   | D17265    | 38345.523 | 38892.434 | NM_014297 | 3372.895  | 2911.907  |
| NM_017760 | 6026.114  | 4276.708  | AF085827  | 964.419   | 1074.835  | NM_018156 | 14475.569 | 14645.58  |

|           |           |           |           |           |           |           |           |           |
|-----------|-----------|-----------|-----------|-----------|-----------|-----------|-----------|-----------|
| NM_015936 | 7470.597  | 6157.459  | Y08266    | 11817.48  | 11317.771 | X98266    | 694.812   | 732.787   |
| AL109698  | 1879.034  | 1511.226  | AK002171  | 5715.407  | 5640.353  | U00930    | 9404.258  | 10010.487 |
| AF217980  | 5803.47   | 4905.441  | AJ002572  | 1780.383  | 1428.78   | AK024958  | 512.984   | 463.181   |
| AL117461  | 2461.514  | 2465.333  | AK026897  | 3028.379  | 2879.279  | NM_014575 | 1974.819  | 1834.234  |
| NM_016495 | 2882.826  | 2860.836  | AB037861  | 3653.952  | 2401.208  | NM_002435 | 3166.504  | 3192.181  |
| AF104921  | 22340.906 | 15333.704 | AK021887  | 3609.561  | 1958.522  | AL117552  | 662.022   | 752.926   |
| NM_000125 | 22765.785 | 16725.527 | AF086180  | 9715.283  | 6721.152  | NM_002692 | 4829.941  | 4389.167  |
| AK022291  | 893.505   | 644.666   | AK022135  | 2271.423  | 2611.53   | AB023190  | 21868.926 | 18013.471 |
| BF239974  | 2765.066  | 2076.16   | AK022898  | 1380.531  | 2566.883  | NM_007064 | 1217.436  | 1223.891  |
| NM_000104 | 1543.612  | 1521.682  | NM_017555 | 5729.255  | 7916.595  | NM_006281 | 885.526   | 968.874   |
| NM_005015 | 19661.1   | 16712.273 | AK024897  | 464.271   | 514.593   | NM_002735 | 4080.653  | 4650.628  |
| NM_004255 | 60003.859 | 51630.797 | NM_003547 | 478.814   | 347.264   | NM_005355 | 655.231   | 1847.005  |
| NM_000265 | 23809.08  | 20989.816 | AL049980  | 2464.068  | 2927.096  | NM_004425 | 5325.503  | 7151.033  |
| AF182288  | 5214.441  | 4709.947  | NM_006683 | 702.168   | 948.868   | U64564    | 1173.519  | 1350.996  |
| NM_004491 | 3010.777  | 1512.188  | AF070529  | 865.952   | 637.353   | NM_006470 | 1495.807  | 2029.201  |
| L14787    | 633.451   | 613.924   | AK022978  | 2763.152  | 2541.792  | NM_002855 | 6017.418  | 6509.682  |
| AK026810  | 3231.392  | 2664.711  | AK021447  | 2129.939  | 1918.511  | AB038463  | 661.303   | 768.753   |
| NM_015625 | 7555.666  | 5980.633  | AF131774  | 1506.464  | 1273.508  | M30262    | 3627.185  | 4571.752  |
| AF218032  | 4861.075  | 3391.75   | AK025793  | 836.973   | 575.302   | NM_005460 | 634.778   | 704.454   |
| NM_017542 | 9624.985  | 7346.172  | AK000151  | 514.509   | 447.495   | AF160477  | 2337.54   | 2359.307  |
| AK024407  | 1432.559  | 938.404   | D17052    | 903.198   | 612.686   | NM_003225 | 304.413   | 321.166   |
| NM_004182 | 16120.686 | 14335.271 | D28378    | 61775.324 | 55405.293 | M12883    | 1330.107  | 1523.548  |
| NM_018415 | 1641.731  | 1671.847  | M64700    | 413.218   | 563.576   | BG288747  | 737.507   | 666.488   |
| NM_014240 | 1830.709  | 1598.651  | NM_001267 | 426.657   | 986.803   | U37448    | 634.09    | 674.416   |
| BE379399  | 3323.95   | 2723.538  | L41143    | 5262.315  | 9717.701  | AA927698  | 1636.761  | 2325.359  |
| NM_015877 | 4508.641  | 3130.731  | NM_005331 | 12229.838 | 19518.09  | AI498426  | 627.555   | 755.278   |
| AL117598  | 2056.018  | 1843.088  | NM_014111 | 985.909   | 1765.897  | BG824773  | 635.483   | 803.201   |
| AL109670  | 1234.746  | 1106.018  | S85075    | 897.268   | 993.198   | D01038    | 18966.59  | 16507.918 |
| AF085831  | 1200.233  | 1057.583  | AJ008129  | 2560.654  | 4391.592  | AB019205  | 1244.737  | 1207.032  |
| AL832149  | 4364.255  | 3507.631  | AJ008158  | 404.769   | 871.01    | J05008    | 1183.21   | 1221.286  |
| AK022839  | 2885.547  | 2298.682  | AF161451  | 8234.773  | 13489.669 | U11087    | 883.397   | 724.56    |
| NM_018350 | 1263.899  | 1123.149  | X02067    | 38729.969 | 39233.164 | D50640    | 1064.31   | 1235.803  |
| NM_003945 | 1124.827  | 946.124   | U92013    | 13449.43  | 11852.034 | D43747    | 387.869   | 317.594   |
| AB045292  | 3063.937  | 2738.885  | AK023965  | 2033.683  | 2078.97   | M98776    | 608.867   | 393.318   |
| AK022998  | 1067.027  | 880.69    | AK026211  | 1102.155  | 1335.253  | X99135    | 37025.59  | 30124.602 |
| AK025699  | 14160.971 | 11000.723 | X58968    | 1954.24   | 1850.199  | NM_003204 | 2819.501  | 3373.81   |
| AF147353  | 726.196   | 406       | U92020    | 4079.925  | 4012.5    | AF254069  | 1175.759  | 1596.645  |
| NM_018024 | 4785.097  | 4690.98   | AL117542  | 780.845   | 799.699   | AL117600  | 7827.684  | 7533.269  |
| AK027173  | 898.849   | 538.461   | AL109712  | 4031.007  | 3364.228  | NM_004487 | 16219.243 | 15232.563 |
| AK026783  | 811.134   | 887.975   | X04215    | 844.383   | 941.124   | AB029000  | 3939.068  | 3717.193  |
| AF088040  | 296.741   | 628.09    | NM_017782 | 3273.318  | 2895.176  | AK026965  | 13317.681 | 14217.273 |
| AK021814  | 877.891   | 625.233   | NM_018145 | 1977.685  | 1153.834  | AK025859  | 3391.091  | 2868.892  |
| AF086221  | 435.296   | 401.223   | NM_018465 | 13102.101 | 10631.619 | AL117499  | 5788.017  | 5712.099  |
| AF088035  | 2357.294  | 2038.545  | Z36814    | 1506.145  | 898.282   | AB007957  | 347.452   | 296.245   |
| AF086251  | 692.391   | 515.421   | D17045    | 836.299   | 852.137   | AK000160  | 1142.458  | 1112.183  |
| AL137344  | 353.448   | 526.348   | AK000827  | 2772.106  | 3123.62   | NM_005311 | 1848.241  | 1982.255  |
| NM_018092 | 6683.363  | 5946.337  | NM_002503 | 14345.058 | 16844.824 | NM_005905 | 1339.241  | 1105.717  |
| NM_005842 | 13351.546 | 14216.67  | NM_005315 | 7005.006  | 9028.847  | NM_000960 | 438.835   | 438.863   |
| NM_003787 | 444.411   | 543.841   | NM_019055 | 586.033   | 1309.915  | AF172932  | 198.485   | 245.366   |
| AK024492  | 276.022   | 465.132   | AK022351  | 2065.322  | 4172.972  | NM_005355 | 678.296   | 561.895   |
| AF147419  | 1386.62   | 995.771   | S74319    | 381.999   | 931.317   | NM_002511 | 1003.099  | 1135.82   |
| AK024280  | 924.237   | 722.059   | AK022059  | 1504.832  | 2343.669  | AF295378  | 1598.628  | 1527.098  |
| AF075036  | 1115.386  | 842.969   | NM_020194 | 5371.99   | 9911.809  | NM_004085 | 2752.048  | 3861.918  |

|           |           |           |           |           |           |           |           |           |
|-----------|-----------|-----------|-----------|-----------|-----------|-----------|-----------|-----------|
| NM_014797 | 2772.958  | 2365.186  | AK026853  | 456.099   | 614.993   | NM_012445 | 8420.022  | 9840.587  |
| AL831841  | 2706.316  | 2072.994  | AF038183  | 21284.916 | 38539.758 | NM_018104 | 1277.522  | 1325.253  |
| AL110165  | 2444.828  | 1655.765  | NM_017882 | 3404.472  | 6525.854  | NM_006080 | 457.47    | 493.438   |
| AL117652  | 849.468   | 457.679   | NM_003521 | 1211.114  | 2325.526  | NM_006667 | 40669.195 | 41757.879 |
| AL050168  | 2186.757  | 1713.955  | CY3Cy5    | 24810.725 | 3478.844  | AK025125  | 2744.987  | 3997.278  |
| AL122122  | 4205.948  | 3329.242  | J03571    | 32996.613 | 46321.551 | NM_000815 | 828.829   | 1064.895  |
| AK000122  | 6172.496  | 5350.297  | T57791    | 4158.759  | 3935.069  | NM_001293 | 438.574   | 514.906   |
| AK023159  | 2490.819  | 2245.424  | X56134    | 2175.96   | 2417.407  | AB023173  | 2626.593  | 2507.628  |
| AK001091  | 3346.081  | 2306.583  | NM_001456 | 902.422   | 946.815   | AF156548  | 1336.95   | 917.794   |
| U80775    | 392.757   | 315.325   | H44784    | 842.357   | 746.393   | NM_000387 | 11335.898 | 11030.328 |
| AF086428  | 1734.274  | 1621.708  | BG685843  | 10118.25  | 11850.781 | NM_004663 | 1123.044  | 1114.152  |
| AK025310  | 2417.318  | 1803.075  | BI490011  | 5463.792  | 10787.385 | NM_015310 | 1322.989  | 1219.272  |
| AL049353  | 1667.549  | 1127.533  | AF035771  | 1277.827  | 1627.729  | NM_016154 | 8811.81   | 10424.238 |
| NM_014896 | 360.814   | 332.845   | N20475    | 7245.071  | 7798.383  | NM_005013 | 23216.764 | 23765.816 |
| AF009269  | 874.336   | 615.421   | BI199286  | 628.852   | 872.837   | AB002338  | 817.404   | 702.828   |
| AF009313  | 2175.326  | 1745.802  | AA026626  | 1385.938  | 1244.151  | AI524814  | 3300.889  | 4155.896  |
| AF090887  | 1143.402  | 911.333   | NM_004774 | 4017.493  | 4082.814  | AB024411  | 751.492   | 901.716   |
| AF009279  | 486.089   | 792.072   | NM_005234 | 5680.943  | 5544.846  | NM_002444 | 21507.865 | 21798.645 |
| NM_015883 | 1829.014  | 1684.885  | SR9       | 33754.977 | 6874.553  | NM_001104 | 1547.029  | 1609.232  |
| AF056429  | 828.855   | 940.888   | CY3Cy5    | 16873.979 | 1652.964  | NM_002985 | 4234.214  | 3532.228  |
| AF070547  | 1808.75   | 1405.901  | NM_018404 | 1046.923  | 1398.658  | U88898    | 1596.524  | 1572.101  |
| AK001110  | 8142.726  | 6379.696  | M27544    | 5092.651  | 4233.727  | NM_020154 | 14120.819 | 13553.836 |
| AK021609  | 381.3     | 444.587   | NM_001118 | 2560.448  | 2639.293  | NM_004665 | 1152.315  | 1242.033  |
| AK021801  | 397.686   | 689.212   | AL133097  | 8589.651  | 8328.232  | NM_005300 | 1053.863  | 1180.049  |
| AK002184  | 806.671   | 840.936   | U90908    | 1142.46   | 1568.406  | NM_000893 | 552.018   | 644.877   |
| AK021652  | 1126.263  | 1057.204  | NM_006458 | 8978.097  | 10720.423 | NM_000698 | 8177.174  | 7815.47   |
| AK021859  | 1107.186  | 852.754   | NM_014459 | 1357.239  | 1587.224  | AB023190  | 36003.977 | 29264.91  |
| AK025826  | 1870.797  | 1638.49   | NM_004093 | 552.16    | 838.85    | NM_007064 | 1811.716  | 2238.897  |
| AK026439  | 1071.959  | 760.328   | NM_001449 | 1921.573  | 1964.361  | NM_006281 | 1027.917  | 1155.962  |
| AK026466  | 396.884   | 325.366   | AF086122  | 1791.305  | 2096.935  | NM_002738 | 4279.805  | 5284.293  |
| AY007163  | 6375.186  | 5327.981  | AK024397  | 14026.149 | 15247.988 | U23460    | 36975.023 | 32276.27  |
| NM_006236 | 32271.801 | 31572.537 | AF073931  | 1050.478  | 1140.757  | Z25434    | 2928.456  | 2929.9    |
| AK023734  | 985.592   | 998.848   | NM_018047 | 1642.837  | 1314.122  | NM_005884 | 5320.355  | 8370.488  |
| D17265    | 47448.973 | 52480.645 | NM_001288 | 1437.704  | 1145.7    | NM_012395 | 5518.139  | 5143.035  |
| AF085827  | 1802.786  | 1959.48   | NM_003564 | 2674.927  | 2375.112  | AF229804  | 31399.584 | 23983.668 |
| Y08266    | 18345.576 | 15957.117 | AF317516  | 5607.961  | 5143.724  | AF151638  | 796.987   | 809.387   |
| AK002171  | 7102.037  | 6971.334  | NM_002581 | 1360.755  | 1613.27   | U90552    | 4810.423  | 4061.292  |
| AJ002572  | 2611.307  | 2037.765  | AI417964  | 986.235   | 939.723   | NM_006032 | 4012.013  | 4652.233  |
| AK026897  | 3773.26   | 4559.771  | NM_005638 | 14524.436 | 9231.059  | NM_014788 | 1091.073  | 876.16    |
| AB037861  | 5194.063  | 5038.395  | NM_007235 | 14329.611 | 10496.863 | NM_002153 | 332.117   | 255.136   |
| AK021887  | 4681.761  | 6000.087  | NM_007269 | 5331.968  | 5789.095  | AB040890  | 967.337   | 908.387   |
| AF086180  | 13612.937 | 14369.536 | AK026014  | 3031.303  | 3457.437  | AK024233  | 658.044   | 1010.138  |
| AK022135  | 1499.617  | 1198.77   | NM_014845 | 2427.614  | 2373.444  | AK021870  | 1053.352  | 1350.5    |
| AK022898  | 1206.346  | 1206.004  | NM_004298 | 5231.711  | 6451.2    | U06680    | 2116.484  | 2095.031  |
| NM_017559 | 5613.339  | 5320.783  | NM_001232 | 2060.442  | 2714.858  | NM_005123 | 497.817   | 348.144   |
| AL117592  | 350.328   | 379.065   | NM_007181 | 834.825   | 1268.305  | NM_015584 | 2949.053  | 2996.194  |
| NM_003547 | 580.037   | 929.322   | NM_004997 | 14768.118 | 13125.018 | NM_001697 | 17674.658 | 17278.129 |
| AL049980  | 3017.24   | 4067.204  | NM_005923 | 2285.868  | 2115.229  | NM_016098 | 8494.415  | 8206.17   |
| NM_006683 | 1000.445  | 1111.495  | NM_003465 | 1748.033  | 2096.297  | NM_002063 | 392.462   | 242.197   |
| AF070529  | 977.653   | 930.588   | AF289028  | 1671.766  | 1379.387  | AL137479  | 581.741   | 542.152   |
| AK022978  | 3206.937  | 2667.954  | NM_005127 | 923.179   | 892.816   | NM_004211 | 1271.063  | 1463.696  |
| AK021447  | 3413.229  | 2563.063  | NM_005567 | 8288.067  | 8049.017  | Y10776    | 1016.149  | 1177.199  |
| AK025096  | 812.689   | 1033.283  | NM_005216 | 15838.118 | 14110.226 | AK027241  | 2510.976  | 2578.49   |

|           |           |           |           |           |           |           |           |           |
|-----------|-----------|-----------|-----------|-----------|-----------|-----------|-----------|-----------|
| L31955    | 816.966   | 1047.869  | NM_006626 | 888.373   | 851.795   | NM_006978 | 3851.029  | 3653.307  |
| AF131774  | 2036.606  | 2599.265  | NM_003965 | 1864.368  | 1631.553  | NM_004561 | 404.489   | 417.609   |
| AK025793  | 838.21    | 1081.733  | NM_004584 | 2147.838  | 1539.06   | AK024812  | 1068.458  | 1265.378  |
| AK000151  | 1045.367  | 1559.601  | X15183    | 57770.055 | 56938.875 | M20642    | 554.101   | 629.66    |
| AL389942  | 574.315   | 680.996   | AK023618  | 2863.114  | 3765.23   | AK026412  | 792.725   | 898.974   |
| D17052    | 1619.356  | 1894.631  | NM_001492 | 1714.701  | 2785.716  | X89669    | 1422.018  | 1495.519  |
| D28378    | 55900.336 | 56888.199 | AB012643  | 21470.969 | 34418.867 | AF086109  | 263.293   | 134.442   |
| M64700    | 759.013   | 732.888   | AB023170  | 2441.671  | 4283.068  | NM_001072 | 702.803   | 658.544   |
| NM_001267 | 602.797   | 643.328   | NM_002296 | 14891.623 | 9436.045  | NM_014070 | 1309.122  | 1371.251  |
| L41143    | 5413.864  | 4968.988  | NM_000414 | 8273.734  | 5975.385  | NM_016280 | 10082.738 | 7694.337  |
| NM_005331 | 18596.572 | 15917.794 | AL133033  | 1459.82   | 2532.19   | NM_016027 | 1310.858  | 1134.747  |
| NM_014111 | 888.494   | 844.608   | NM_018845 | 6908.893  | 7219.849  | NM_014297 | 3383.856  | 2343.433  |
| S85075    | 571.372   | 505.457   | NM_005505 | 6944.791  | 8626.16   | NM_018156 | 11802.009 | 11469.164 |
| AJ008129  | 2534.735  | 1823.047  | AK026964  | 1220.039  | 1134.791  | X98266    | 694.476   | 722.967   |
| AF161451  | 8224.035  | 6481.114  | NM_001134 | 1194.433  | 1103.778  | U00930    | 9334.694  | 8565.766  |
| X02067    | 50757.133 | 40989.438 | NM_016016 | 2431.248  | 2512.914  | AK024958  | 403.78    | 505.691   |
| U92013    | 19384.877 | 15500.003 | NM_020407 | 1288.65   | 1320.385  | NM_014575 | 1657.069  | 1415.719  |
| AK023965  | 2433.157  | 3490.456  | AF118274  | 5718.353  | 4911.716  | NM_002439 | 1884.197  | 2086.777  |
| AK026211  | 1388.903  | 1473.983  | NM_018344 | 1291.245  | 1163.485  | AL117552  | 734.481   | 716.383   |
| X58968    | 2260.032  | 1876.377  | NM_000079 | 7710.039  | 6494.553  | NM_002692 | 3290.885  | 2160.299  |
| U92020    | 5116.361  | 3772.899  | NM_000083 | 1701.47   | 1757.901  | X55525    | 1056.369  | 1224.99   |
| AL117542  | 1055.689  | 776.402   | AL110245  | 2102.578  | 2095.493  | NM_000242 | 363.933   | 386.299   |
| AL109712  | 7237.325  | 6419.054  | NM_005628 | 21636.652 | 17847.113 | AB040878  | 829.537   | 697.766   |
| X04215    | 1264.305  | 966.277   | NM_016605 | 22469.166 | 29328.789 | S74647    | 648.119   | 515.97    |
| NM_017782 | 3566.897  | 3453.568  | NM_004172 | 871.909   | 1293.392  | NM_003506 | 952.279   | 746.81    |
| NM_018149 | 2696.098  | 2186.378  | X74609    | 30950.363 | 49516.508 | NM_018093 | 4666.299  | 4054.015  |
| D16944    | 613.153   | 832.323   | NM_013363 | 1085.84   | 888.577   | NM_003389 | 1123.468  | 1129.572  |
| NM_018468 | 15478.287 | 17812.836 | NM_000947 | 6272.859  | 5543.954  | NM_000430 | 624.354   | 389.797   |
| Z36814    | 2731.453  | 4051.335  | AL096750  | 27599.613 | 33951.816 | AB033030  | 496.475   | 372.341   |
| D17045    | 1460.56   | 2349.28   | NM_016061 | 5429.812  | 6789.678  | NM_016656 | 359.793   | 310.816   |
| AK000827  | 3653.119  | 4280.979  | NM_016062 | 27712.02  | 36573.781 | NM_015963 | 1796.201  | 1101.775  |
| NM_002503 | 33594.723 | 31833.723 | NM_004153 | 4006.683  | 4284.878  | AB007871  | 2879.511  | 2343.793  |
| NM_005319 | 8877.059  | 7376.34   | AF078164  | 1234.424  | 1056.528  | NM_017813 | 1422.159  | 1441.587  |
| NM_019058 | 881.89    | 1452.66   | NM_019049 | 3180.063  | 3939.962  | NM_003840 | 3592.271  | 2977.855  |
| AK022351  | 2082.606  | 1436.754  | NM_005447 | 694.282   | 1030.523  | NM_018378 | 439.551   | 437.582   |
| S74319    | 562.341   | 169.894   | AF130101  | 795.749   | 981.94    | NM_018423 | 464.838   | 489.792   |
| AK022059  | 1329.841  | 1360.113  | NM_004656 | 3718.372  | 3200.532  | NM_001741 | 4325.739  | 3960.146  |
| NM_020194 | 5020.199  | 5292.852  | AF071569  | 2813.869  | 2244.959  | NM_000745 | 485.684   | 553.474   |
| AF038183  | 22892.996 | 19169.541 | NM_002269 | 4170.589  | 4035.074  | AF116705  | 6102.401  | 4323.096  |
| NM_017882 | 3991.624  | 2628.342  | J04948    | 1927.228  | 1461.285  | NM_004460 | 436.198   | 370.203   |
| NM_003521 | 1454.602  | 1016.737  | NM_003564 | 2776.766  | 4915.072  | NM_006072 | 1006.828  | 830.705   |
| CY3Cy5    | 5602.482  | 1031.501  | AK023414  | 861.153   | 1196.48   | BE794490  | 813.317   | 593.666   |
| J03571    | 12058.52  | 12170.395 | AF317516  | 7259.956  | 11019.983 | NM_003561 | 813.716   | 687.786   |
| T57791    | 3552.314  | 3755.645  | AI417964  | 1554.087  | 1181.941  | NM_002991 | 394.024   | 403.297   |
| X56134    | 1021.268  | 1286.252  | J03571    | 27552.615 | 24910.781 | NM_004071 | 1593.028  | 1436.352  |
| NM_001456 | 608.649   | 684.079   | T57791    | 4812.481  | 4942.577  | NM_001316 | 4194.517  | 4514.918  |
| BI759091  | 2307.618  | 3045.433  | X56134    | 2221.767  | 2348.174  | AJ008149  | 5702.682  | 5781.743  |
| BG685843  | 6800.855  | 6498.82   | NM_001456 | 1867.119  | 2480.73   | NM_012153 | 746.969   | 716.849   |
| BI490011  | 2210.369  | 2176.065  | H44784    | 1136.055  | 1405.212  | NM_013241 | 1499.152  | 1267.361  |
| AF035771  | 1379.685  | 1630.248  | AI421041  | 3584.713  | 3112.629  | NM_017988 | 47187.344 | 55777.285 |
| N20475    | 7605.591  | 9973.646  | BI759091  | 1958.85   | 2121.06   | Z24725    | 301.762   | 205.915   |
| BI199286  | 796.266   | 1480.88   | BG685843  | 9343.812  | 8132.62   | AF161362  | 1869.462  | 1165.085  |
| AA026626  | 1536.093  | 1413.114  | BI490011  | 3517.202  | 3576.085  | NM_003928 | 43055.422 | 70200.813 |

|                  |           |           |                  |           |           |                  |           |           |
|------------------|-----------|-----------|------------------|-----------|-----------|------------------|-----------|-----------|
| <b>H61726</b>    | 1409.479  | 1838.693  | <b>AF035771</b>  | 2052.908  | 1881.004  | <b>M57399</b>    | 33179.668 | 27323.445 |
| <b>NM_004774</b> | 4623.819  | 5461.294  | <b>N20475</b>    | 10117.294 | 10405.368 | <b>NM_01593E</b> | 1999.632  | 1881.057  |
| <b>NM_005234</b> | 4770.279  | 6488.661  | <b>BI199286</b>  | 1888.38   | 2059.515  | <b>AB046840</b>  | 1842.16   | 1850.858  |
| <b>SR5</b>       | 4369.433  | 6547.851  | <b>AA026626</b>  | 2194.846  | 2341.542  | <b>AF174487</b>  | 834.474   | 674.157   |
| <b>SR7</b>       | 6346.794  | 60590.301 | <b>H61726</b>    | 1667.316  | 1801.403  | <b>NM_005041</b> | 340.31    | 207.3     |
| <b>SR9</b>       | 26523.883 | 9462.489  | <b>NM_004774</b> | 6479.439  | 6620.652  | <b>NM_006407</b> | 4576.149  | 3521.303  |
| <b>CY3Cy5</b>    | 11057.486 | 2917.825  | <b>NM_005234</b> | 5515.673  | 5729.173  | <b>NM_00737E</b> | 1871.266  | 907.129   |
| <b>AF212842</b>  | 593.85    | 2081.525  | <b>NM_00521E</b> | 16273.542 | 23605.459 | <b>NM_00626E</b> | 6569.183  | 4232.026  |
| <b>NM_018404</b> | 376.637   | 438.277   | <b>NM_00662E</b> | 634.788   | 1258.348  | <b>NM_004791</b> | 186.665   | 324.974   |
| <b>M27544</b>    | 1945.876  | 1857.979  | <b>NM_00396E</b> | 645.805   | 1208.508  | <b>Z36876</b>    | 1482.543  | 1610.55   |
| <b>NM_00225E</b> | 389.394   | 406.546   | <b>X15183</b>    | 49925.824 | 45509.531 | <b>NM_00089E</b> | 1026.532  | 1218.453  |
| <b>NM_001118</b> | 1001.593  | 912.248   | <b>AK023618</b>  | 2431.666  | 2097.739  | <b>NM_00504E</b> | 693.404   | 759.234   |
| <b>AL133097</b>  | 5721.82   | 5870.012  | <b>AF212842</b>  | 1140.493  | 4363.941  | <b>NM_00187E</b> | 711.356   | 620.266   |
| <b>NM_00116E</b> | 1562.604  | 1747.766  | <b>NM_018404</b> | 737.481   | 863.386   | <b>AB029025</b>  | 972.372   | 973.071   |
| <b>U90908</b>    | 725.286   | 1061.643  | <b>M27544</b>    | 5629.326  | 5882.4    | <b>NM_00710C</b> | 14898.01  | 12058.37  |
| <b>NM_00645E</b> | 4960.204  | 5467.229  | <b>NM_00225E</b> | 652.451   | 586.096   | <b>NM_002954</b> | 42374.203 | 62567.91  |
| <b>NM_01445E</b> | 686.121   | 1001.478  | <b>NM_001118</b> | 897.444   | 1202.968  | <b>NM_00394C</b> | 245.943   | 173.012   |
| <b>NM_00409E</b> | 1205.855  | 1253.95   | <b>AL133097</b>  | 3773.799  | 3719.336  | <b>NM_01657E</b> | 540.109   | 507.501   |
| <b>NM_00144E</b> | 5206.776  | 6617.891  | <b>NM_00116E</b> | 2558.678  | 2184.393  | <b>NM_000027</b> | 612.905   | 530.556   |
| <b>NM_001387</b> | 581.89    | 1167.302  | <b>NM_001381</b> | 67211.523 | 59493.5   | <b>NM_001824</b> | 359.774   | 333.883   |
| <b>AF086122</b>  | 1647.306  | 1978.022  | <b>U90908</b>    | 1041.413  | 1372.274  | <b>NM_01754E</b> | 11880.12  | 8243.018  |
| <b>AK024397</b>  | 8934.212  | 11232.617 | <b>NM_00645E</b> | 7164.268  | 6772.336  | <b>AF134802</b>  | 649.058   | 410.026   |
| <b>AF073931</b>  | 890.795   | 1303.799  | <b>NM_01445E</b> | 730.487   | 956.728   | <b>NM_01822E</b> | 470.379   | 383.005   |
| <b>NM_018047</b> | 1533.445  | 1744.93   | <b>NM_00409E</b> | 1785.565  | 1594.922  | <b>NM_00574C</b> | 856.265   | 761.614   |
| <b>NM_00128E</b> | 856.289   | 1425.946  | <b>NM_00144E</b> | 7574.861  | 7482.893  | <b>NM_00430E</b> | 7349.098  | 6928.349  |
| <b>NM_003564</b> | 1416.813  | 1918.573  | <b>AF086122</b>  | 2475.705  | 3007.703  | <b>AF112366</b>  | 1016.33   | 715.283   |
| <b>AK023414</b>  | 572.516   | 1096.769  | <b>AK024397</b>  | 10364.886 | 10942.426 | <b>NM_004274</b> | 891.187   | 692.854   |
| <b>AF317516</b>  | 4890.713  | 9436.68   | <b>AF073931</b>  | 1417.902  | 1457.58   | <b>AK024002</b>  | 2450.288  | 2183.182  |
| <b>NM_002581</b> | 1319.271  | 3040.869  | <b>NM_018047</b> | 1683.182  | 1375.157  | <b>NM_02039E</b> | 2567.877  | 1719.785  |
| <b>AI417964</b>  | 613.966   | 1599.77   | <b>NM_00502E</b> | 1551.287  | 2004.414  | <b>AB011117</b>  | 682.56    | 464.223   |
| <b>S78203</b>    | 880.334   | 1173.736  | <b>NM_00128E</b> | 907.015   | 1387.35   | <b>AF060935</b>  | 2039.065  | 1883.618  |
| <b>NM_01620E</b> | 11065.757 | 11552.657 | <b>NM_00008E</b> | 1586.599  | 2335.177  | <b>AK026886</b>  | 689.016   | 821.28    |
| <b>NM_00163E</b> | 301.116   | 416.491   | <b>AL110245</b>  | 3407.819  | 5439.847  | <b>NM_004264</b> | 814.684   | 807.078   |
| <b>NM_00563E</b> | 13745.378 | 15158.379 | <b>NM_00562E</b> | 21544.563 | 33171.785 | <b>AK024788</b>  | 744.743   | 690.575   |
| <b>NM_00723E</b> | 17680.516 | 18324.787 | <b>NM_01660E</b> | 22287.744 | 14402.881 | <b>NM_00447E</b> | 265.645   | 202.818   |
| <b>NM_00726E</b> | 4098.424  | 4746.028  | <b>NM_00417E</b> | 815.73    | 618.137   | <b>AK022696</b>  | 1342.355  | 1337.023  |
| <b>AK026014</b>  | 2117.522  | 2616.117  | <b>S78203</b>    | 1696.576  | 1565.802  | <b>NM_00120E</b> | 1125.577  | 1053.888  |
| <b>NM_00429E</b> | 3626.894  | 3987.771  | <b>NM_01620E</b> | 17327.252 | 19395.42  | <b>NM_00501E</b> | 672.209   | 617.576   |
| <b>NM_00123E</b> | 1300.263  | 1713.624  | <b>NM_00563E</b> | 1557.237  | 1894.413  | <b>NM_01446E</b> | 909.095   | 660.789   |
| <b>NM_007181</b> | 737.094   | 975.742   | <b>NM_00723E</b> | 20053.688 | 20686.059 | <b>NM_01485E</b> | 1402.547  | 620.069   |
| <b>AB007857</b>  | 775.089   | 923.941   | <b>NM_00726E</b> | 4629.814  | 4980.5    | <b>NM_000344</b> | 6829.225  | 5281.095  |
| <b>NM_004997</b> | 11670.36  | 13474.512 | <b>AK026014</b>  | 2437.986  | 2801.417  | <b>AF248650</b>  | 1369.577  | 1001.155  |
| <b>NM_00592E</b> | 3680.408  | 3515.31   | <b>NM_01484E</b> | 2025.703  | 2070.253  | <b>S74678</b>    | 18782.822 | 11151.041 |
| <b>NM_00346E</b> | 1064.563  | 1196.147  | <b>NM_00429E</b> | 4590.561  | 4588.584  | <b>AF248651</b>  | 537.291   | 506.188   |
| <b>AF289028</b>  | 1149.357  | 1166.61   | <b>NM_00123E</b> | 2549.107  | 2927.065  | <b>NM_00135E</b> | 9370.907  | 6323.064  |
| <b>NM_005127</b> | 530.902   | 834.163   | <b>NM_007181</b> | 1032.501  | 845.573   | <b>NM_00483E</b> | 3156.375  | 1885.511  |
| <b>NM_005567</b> | 2343.624  | 3022.421  | <b>AB007857</b>  | 916.69    | 1182.705  | <b>AB037751</b>  | 1687.04   | 1673.997  |
| <b>NM_00521E</b> | 14096.395 | 17668.051 | <b>NM_004997</b> | 14270.643 | 11671.724 | <b>S79281</b>    | 2339.783  | 2094.647  |
| <b>NM_00662E</b> | 525.774   | 568.762   | <b>NM_00592E</b> | 3710.503  | 3806.984  | <b>AK025585</b>  | 1591.17   | 711.213   |
| <b>NM_00396E</b> | 384.071   | 781.852   | <b>NM_00346E</b> | 1337.917  | 1264.615  | <b>NM_001414</b> | 2591.651  | 1745.09   |
| <b>NM_004584</b> | 1685.646  | 2550.528  | <b>AF289028</b>  | 1561.868  | 1087.623  | <b>D16891</b>    | 1447.35   | 1087.47   |
| <b>X15183</b>    | 49819.68  | 66294.227 | <b>NM_005127</b> | 953.791   | 630.895   | <b>NM_01776C</b> | 2192.845  | 1577.13   |
| <b>AK023618</b>  | 2741.867  | 5048.324  | <b>NM_005567</b> | 7230.919  | 6720.494  | <b>NM_01593E</b> | 1958.611  | 1188.433  |



|           |           |           |           |           |           |           |           |           |
|-----------|-----------|-----------|-----------|-----------|-----------|-----------|-----------|-----------|
| NM_001492 | 1937.884  | 2454.908  | AF071569  | 3360.439  | 4404.647  | AL109698  | 987.563   | 1395.992  |
| AB012643  | 6141.556  | 5533.053  | NM_002269 | 4195.972  | 6052.796  | AF217980  | 4601.113  | 3992.747  |
| AB023170  | 922.815   | 733.4     | NM_018043 | 734.886   | 274.61    | AL117461  | 1237.461  | 1252.894  |
| NM_014153 | 10489.441 | 11799.375 | AK022564  | 65478.719 | 57829.25  | NM_016495 | 1316.753  | 1229.193  |
| NM_002296 | 14684.667 | 12562.44  | NM_001492 | 2603.588  | 2415.35   | AF104921  | 7778.275  | 5904.283  |
| NM_000414 | 5650.415  | 4785.557  | AB012643  | 18862.674 | 16802.951 | NM_000126 | 8639.554  | 6359.25   |
| AL133033  | 496.975   | 276.269   | NM_002296 | 10855.702 | 11548.732 | BF239974  | 1202.839  | 814.656   |
| NM_018845 | 6072.449  | 6589.59   | NM_000414 | 7411.2    | 7271.692  | NM_000104 | 509.971   | 726.167   |
| NM_005505 | 5754.77   | 6138.587  | NM_018845 | 7433.809  | 8133.799  | NM_005015 | 7199.509  | 5108.372  |
| AK026964  | 784.525   | 916.221   | NM_005505 | 6965.806  | 6987.087  | NM_004255 | 37638.621 | 23782.904 |
| NM_001134 | 1464.669  | 1692.631  | AK026964  | 806.106   | 844.36    | NM_000265 | 16186.649 | 10050.364 |
| NM_016016 | 4957.483  | 5338.12   | NM_001134 | 2353.074  | 2304.973  | AF182288  | 2061.078  | 1448.895  |
| NM_020407 | 805.099   | 959.375   | NM_016016 | 4810.265  | 4203.592  | NM_004491 | 983.538   | 426.355   |
| AF118274  | 2528.128  | 2512.517  | NM_020407 | 1026.636  | 776.358   | L14787    | 175.271   | 129.871   |
| NM_018344 | 1128.221  | 1021.855  | AF118274  | 4016.348  | 3332.66   | AK026810  | 1217.124  | 1175.75   |
| NM_000079 | 5258.903  | 9012.015  | NM_018344 | 1207.958  | 1255.45   | NM_015625 | 2590.777  | 1798.688  |
| NM_000083 | 1149.967  | 1416.241  | NM_000079 | 6944.662  | 6626.355  | AF218032  | 1673.79   | 825.181   |
| AL110245  | 1198.107  | 1456.11   | NM_004774 | 6402.294  | 10673.778 | NM_017542 | 3201.766  | 2537.95   |
| NM_005625 | 18157.941 | 21766.928 | NM_005234 | 7510.846  | 12209.731 | AK024407  | 485.81    | 275.662   |
| NM_003951 | 327.894   | 424.102   | X74609    | 28959.371 | 31242.982 | NM_004182 | 5909.209  | 4672.113  |
| NM_016605 | 15754.928 | 21170.188 | AB002316  | 762.335   | 658.95    | NM_018415 | 613.73    | 408.428   |
| NM_004172 | 661.875   | 971.105   | NM_013363 | 776.735   | 710.821   | NM_014240 | 465.613   | 410.505   |
| X74609    | 13050.434 | 11486.558 | NM_000947 | 5817.545  | 5843.572  | BE379399  | 1123.625  | 666.265   |
| NM_018990 | 517.876   | 416.631   | AL096750  | 35357.199 | 42625.211 | NM_015877 | 1185.827  | 970.512   |
| NM_013363 | 721.171   | 512.925   | NM_016061 | 4593.654  | 6059.652  | AL117598  | 1088.465  | 797.034   |
| NM_000947 | 3962.408  | 3872.104  | NM_016062 | 25057.369 | 27276.133 | AL109670  | 1100.559  | 949.177   |
| AL096750  | 20726.916 | 19679.658 | NM_004153 | 3790.459  | 2977.976  | AF085831  | 571.736   | 596.41    |
| NM_016061 | 3827.574  | 4713.689  | AK024740  | 2244.364  | 2244.058  | AL832149  | 2019.64   | 1896.445  |
| NM_016062 | 22176.383 | 19133.436 | AF078164  | 9830.299  | 7993.364  | AK022839  | 1095.063  | 1068.359  |
| NM_004153 | 2835.837  | 2810.444  | NM_019049 | 2554.914  | 2697.719  | NM_018350 | 763.14    | 866.878   |
| AK024740  | 1833.248  | 2092.107  | AF130101  | 859.128   | 737.972   | NM_003946 | 686.588   | 513.572   |
| AF078164  | 8202.91   | 7100.755  | NM_004656 | 3466.19   | 2680.273  | AB045292  | 1151.949  | 794.266   |
| NM_019049 | 2614.311  | 3075.86   | AF086122  | 2282.611  | 3306.35   | AK022998  | 423.97    | 438.355   |
| NM_005447 | 433.239   | 555.462   | AK024397  | 17808.555 | 27653.051 | AK025699  | 7011.25   | 4785.559  |
| NM_012413 | 472.894   | 392.804   | AF073931  | 1572.887  | 2662.724  | AF147353  | 318.51    | 215.432   |
| AF130101  | 720.113   | 1010.262  | NM_005022 | 1204.13   | 1225.199  | NM_018024 | 3168.666  | 2382.546  |
| NM_004656 | 3124.494  | 3865.299  | NM_001288 | 1223.147  | 1333.979  | AK027173  | 334.54    | 321.109   |
| AF071569  | 2654.103  | 2504.985  | NM_003564 | 2686.311  | 3177.772  | AK026783  | 521.894   | 326.425   |
| NM_002269 | 2779.905  | 3668.902  | AK023414  | 663.784   | 846.871   | AK021814  | 390.222   | 274.772   |
| J04948    | 1380.298  | 1891.743  | AF317516  | 2399.366  | 2389.956  | AF086221  | 223.795   | 249.994   |
| NM_018043 | 657.37    | 874.921   | NM_002581 | 1379.073  | 1482.727  | AF088035  | 1067.481  | 1005.723  |
| AK022564  | 52634.824 | 62612.129 | AI417964  | 1061.196  | 1503.538  | AF086251  | 268.848   | 337.1     |
| NM_003564 | 1501.028  | 1610.13   | J03571    | 24369.371 | 25180.838 | NM_018092 | 2266.312  | 1777.222  |
| AK023414  | 618.422   | 771.672   | T57791    | 4435.345  | 4892.288  | NM_005842 | 5189.771  | 3966.843  |
| AF317516  | 4472.41   | 4428.602  | X56134    | 1224.215  | 1588.661  | AF147419  | 1376.152  | 1094.413  |
| NM_002581 | 767.065   | 766.107   | NM_001456 | 1379.519  | 1198.29   | AK024280  | 488.277   | 444.272   |
| AI417964  | 470.246   | 435.904   | AI421041  | 26581.51  | 26808.064 | AF075036  | 974.693   | 489.468   |
| J03571    | 14150.555 | 13696.13  | BI759091  | 2826.646  | 2947.934  | NM_014797 | 1590.265  | 1303.62   |
| T57791    | 3535.531  | 4409.009  | BG685843  | 7104.96   | 6266.092  | AL831841  | 1792.903  | 1477.967  |
| X56134    | 1271.282  | 1269.403  | BI490011  | 2233.55   | 2258.668  | AL110165  | 1946.944  | 1224.526  |
| NM_001456 | 588.751   | 369.548   | AF035771  | 1668.553  | 1683.779  | AL117652  | 361.441   | 202.651   |
| H44784    | 562.4     | 351.316   | N20475    | 8106.865  | 8391.906  | AL050168  | 1754.059  | 1119.926  |
| AI421041  | 24468.408 | 24686.893 | BI199286  | 820.678   | 795.905   | AL122122  | 2411.799  | 1786.971  |

|           |           |           |           |           |           |           |           |           |
|-----------|-----------|-----------|-----------|-----------|-----------|-----------|-----------|-----------|
| BI759091  | 2291.376  | 2643.928  | AA026626  | 1738.424  | 1631.998  | AK000122  | 4387.762  | 3250.829  |
| BG685843  | 6967.174  | 6491.355  | H61726    | 1515.814  | 1660.881  | AK023159  | 1031.768  | 538.299   |
| BI490011  | 2077.727  | 2122.075  | NM_004997 | 23007.998 | 34001.156 | AK001091  | 2502.032  | 1931.413  |
| AF035771  | 1475.652  | 1535.02   | NM_005923 | 5414.303  | 7354.359  | U80775    | 190.237   | 195.653   |
| N20475    | 7792.915  | 9763.57   | NM_003465 | 1491.614  | 2304.663  | AF086428  | 574.168   | 655.389   |
| BI199286  | 774.176   | 829.756   | NM_005567 | 8632.146  | 8623.463  | AK025310  | 1123.992  | 1206.992  |
| AA026626  | 1545.58   | 2016.965  | NM_005216 | 16154.844 | 17501.787 | AL049353  | 620.737   | 262.214   |
| H61726    | 1589.778  | 2519.392  | NM_004584 | 1598.539  | 1927.463  | AF009269  | 1296.187  | 1223.402  |
| NM_004774 | 4844.718  | 5283.34   | X15183    | 51158.586 | 53831.465 | AF009313  | 1157.406  | 951.799   |
| NM_005234 | 4714.696  | 5963.496  | AK023618  | 2081.074  | 2893.53   | AF090887  | 344.189   | 227.687   |
| NM_016436 | 469.281   | 145.467   | AF212842  | 667.556   | 2967.916  | NM_015883 | 1164.325  | 1040.303  |
| NM_005216 | 13190.717 | 12293.388 | NM_018404 | 729.349   | 517.712   | AF056429  | 456.68    | 365.943   |
| NM_006626 | 434.989   | 510.491   | M27544    | 4660.667  | 4416.823  | AF070547  | 1274.364  | 923.663   |
| NM_003965 | 403.372   | 290.828   | NM_001118 | 1257.639  | 1242.709  | AK001110  | 6996.456  | 4142.803  |
| NM_004584 | 1363.774  | 1259.149  | AL133097  | 5384.13   | 4957.579  | AK021801  | 218.638   | 154.8     |
| NM_018404 | 467.35    | 552.16    | NM_001165 | 1414.094  | 1035.374  | AK002184  | 443.51    | 273.838   |
| M27544    | 2405.76   | 2046.149  | NM_001381 | 65820.023 | 60806.75  | AK021652  | 377.247   | 483.834   |
| NM_002258 | 411.819   | 415.693   | U90908    | 597.769   | 989.295   | AK021859  | 777.567   | 329.384   |
| NM_001118 | 890.337   | 967.4     | NM_006458 | 4781.961  | 4432.078  | AK025826  | 654.076   | 514.493   |
| AL133097  | 5349.087  | 5554.509  | NM_014459 | 750.497   | 647.022   | AK026439  | 1110.316  | 906.394   |
| NM_001165 | 1680.263  | 1580.011  | NM_004093 | 1218.902  | 1236.07   | AK025278  | 516.572   | 345.118   |
| NM_001381 | 59069.152 | 65160.18  | NM_001449 | 6660.155  | 5551.351  | AK026466  | 162.533   | 117.29    |
| U90908    | 606.117   | 862.668   | NM_016016 | 6064.659  | 9072.446  | AY007163  | 4532.084  | 4863.547  |
| NM_006458 | 4570.013  | 4992.59   | NM_020407 | 1715.12   | 2096.427  | NM_006236 | 27180.215 | 26514.049 |
| NM_014459 | 652.746   | 989.331   | NM_018344 | 1266.733  | 608.293   | AK023734  | 732.784   | 514.841   |
| NM_004093 | 1149.047  | 1354.7    | NM_000079 | 7382.197  | 8611.034  | D17265    | 18377.541 | 14682.576 |
| NM_001449 | 5018.367  | 6707.001  | NM_000083 | 1749.923  | 2169.606  | AF085827  | 382.067   | 392.807   |
| AF086122  | 1612.558  | 2149.927  | AL110245  | 2167.007  | 2099.77   | Y08266    | 12662.39  | 10638.257 |
| AK024397  | 9155.989  | 11594.048 | NM_005628 | 8259.64   | 7247.908  | AK002171  | 3089.169  | 2895.362  |
| AF073931  | 1091.063  | 1038.301  | NM_016605 | 21693.684 | 25284.471 | AJ002572  | 1225.259  | 909.459   |
| NM_018047 | 1448.381  | 1481.873  | NM_004172 | 633.413   | 737.315   | AK026897  | 2366.271  | 2150.573  |
| NM_005022 | 1103.939  | 1494.746  | S78203    | 1061.484  | 1336.475  | AB037861  | 3047.38   | 2065.48   |
| NM_001288 | 860.273   | 1097.527  | NM_016208 | 13338.696 | 14123.397 | AK021887  | 1891.213  | 1361.86   |
| NM_000083 | 1045.586  | 1184.183  | NM_005638 | 20159.189 | 20004.395 | AF086180  | 5757.173  | 3569.282  |
| AL110245  | 1133.448  | 867.39    | NM_007235 | 22987.736 | 20917.445 | AK022135  | 1435.504  | 712.407   |
| NM_005628 | 14503.7   | 12528.256 | NM_007269 | 4797.352  | 5806.446  | AK022898  | 637.173   | 420.05    |
| NM_004172 | 608.96    | 393.176   | AK026014  | 2301.981  | 2562.587  | NM_017559 | 6926.505  | 5801.121  |
| S78203    | 1043.671  | 1204.724  | NM_014845 | 1800.83   | 1874.104  | NM_003547 | 489.055   | 657.391   |
| NM_016208 | 12160.638 | 12515.615 | NM_004298 | 2529.76   | 2621.142  | AL049980  | 1353.839  | 1600.754  |
| NM_001635 | 538.795   | 301.859   | NM_001232 | 2251.322  | 1840.855  | NM_006683 | 405.595   | 447.258   |
| NM_005638 | 14611.753 | 17045.26  | NM_007181 | 784.253   | 682.519   | AF070529  | 487.724   | 431.748   |
| NM_007235 | 17259.834 | 17221.721 | AB007857  | 784.813   | 745.858   | AK022978  | 1372.894  | 1126.605  |
| NM_007269 | 4054.863  | 3999.96   | NM_019049 | 3756.809  | 5909.162  | AK021447  | 2990.555  | 1976.947  |
| AK026014  | 2054.411  | 2599.69   | NM_005447 | 396.394   | 1150.345  | AK025096  | 658.493   | 558.035   |
| NM_014845 | 1481.452  | 1396.848  | NM_012413 | 451.941   | 1239.772  | AF131774  | 1111.471  | 815.255   |
| NM_004298 | 3556.84   | 4137.396  | NM_004656 | 2009.296  | 1113.473  | AK025793  | 476.749   | 226.526   |
| NM_001232 | 1931.267  | 2248.379  | AF247820  | 328.041   | 1192.287  | AL389942  | 375.189   | 524.513   |
| NM_007181 | 789.938   | 732.346   | AF071569  | 2916.37   | 2829.36   | D17052    | 419.592   | 354.275   |
| AB007857  | 737.14    | 989.941   | J04948    | 1509.734  | 1222.197  | D28378    | 42138.215 | 28764.381 |
| NM_001778 | 390.293   | 613.893   | NM_018043 | 736.78    | 543.935   | M64700    | 289.82    | 259.556   |
| NM_004997 | 10116.012 | 10471.795 | AK022564  | 64902.301 | 59523.789 | NM_001267 | 229.254   | 186.955   |
| NM_005923 | 3733.938  | 4218.487  | NM_001492 | 1657.157  | 1537.349  | L41143    | 1770.109  | 1302.19   |
| NM_003465 | 1200.094  | 1087.225  | AB012643  | 15494.319 | 13269.319 | NM_005331 | 14254.802 | 11918.81  |

|           |           |           |           |           |           |           |           |           |
|-----------|-----------|-----------|-----------|-----------|-----------|-----------|-----------|-----------|
| AF289028  | 1090.127  | 1003.237  | AB023170  | 2241.518  | 2053.162  | NM_014111 | 601.622   | 366.927   |
| NM_005127 | 605.302   | 790.046   | NM_014153 | 8488.044  | 9554.247  | AJ008129  | 1166.643  | 862.136   |
| NM_005567 | 2410.813  | 3233.37   | NM_002296 | 15589.505 | 14615.794 | AJ008158  | 248.6     | 479.651   |
| AF071569  | 2395.297  | 1444.982  | NM_000414 | 7599.915  | 6052.844  | AF161451  | 3512.805  | 2506.278  |
| NM_002269 | 2247.968  | 2263.444  | NM_018845 | 6986.376  | 5437.643  | X02067    | 21218.064 | 10900.135 |
| J04948    | 900.574   | 988.935   | NM_005505 | 6152.622  | 5534.899  | U92013    | 7835.145  | 6006.833  |
| NM_018043 | 430.641   | 695.605   | AK026964  | 995.414   | 650.923   | AK023965  | 1011.146  | 1009.32   |
| AK022564  | 57832.086 | 56356.746 | NM_001134 | 2706.603  | 2020.647  | AK026211  | 524.932   | 640.329   |
| NM_001492 | 2086.679  | 2272.75   | NM_006695 | 1890.353  | 2968.885  | X58968    | 1774.36   | 1580.85   |
| AB012643  | 8577.15   | 7770.878  | NM_004815 | 1712.988  | 2616.859  | U92020    | 4240.08   | 2994.769  |
| AB023170  | 950.397   | 1171.59   | AB046820  | 2630.521  | 3023.419  | AL117542  | 1587.064  | 1193.579  |
| NM_014153 | 10282.742 | 10856.985 | AK025922  | 685.365   | 694.459   | AL109712  | 9256.911  | 7744.447  |
| NM_002296 | 14627.921 | 14177.11  | NM_014646 | 1070.804  | 789.714   | X04215    | 527.939   | 326.737   |
| NM_000414 | 5879.632  | 4633.81   | NM_006375 | 1258.307  | 1335.331  | NM_017782 | 1631.154  | 1279.745  |
| AL133033  | 174.31    | 479.809   | AF123659  | 2819.905  | 2749.339  | NM_018145 | 1039.51   | 730.225   |
| NM_018845 | 6199.589  | 6310.599  | X74609    | 25117.916 | 23801.521 | NM_018465 | 5714.729  | 5096.805  |
| AY008372  | 41.488    | 1182.75   | NM_018990 | 620.154   | 868.557   | Z36814    | 870.196   | 576.099   |
| NM_005505 | 5840.595  | 5777.136  | NM_000947 | 4306.203  | 3169.269  | D17045    | 418.2     | 263.161   |
| AK026964  | 1036.935  | 869.493   | AL096750  | 37737.34  | 36284.469 | AK000827  | 1251.579  | 968.796   |
| NM_001134 | 1375.495  | 1646.88   | NM_016061 | 4647.811  | 4421.12   | NM_002503 | 15915.748 | 9489.216  |
| NM_016016 | 4740.752  | 4784.78   | NM_016062 | 27921.748 | 25724.088 | NM_005315 | 3208.268  | 2084.242  |
| NM_020407 | 687.253   | 1051.851  | NM_004153 | 3656.483  | 2722.112  | AK022351  | 728.146   | 478.464   |
| AF118274  | 2361.656  | 2509.164  | AK024740  | 2433.413  | 1780.594  | AK022059  | 441.34    | 298.338   |
| NM_018344 | 1117.372  | 934.098   | AF078164  | 10890.283 | 7048.674  | NM_020194 | 2270.006  | 1833.884  |
| NM_000079 | 5179.908  | 7641.422  | NM_005704 | 1206.701  | 1762.461  | AF038183  | 9112.986  | 7764.887  |
| NM_004774 | 4107.915  | 3705.422  | AF097021  | 1299.638  | 810.482   | NM_017882 | 1550.973  | 1195.181  |
| NM_005234 | 3704.825  | 3382.445  | NM_001365 | 2738.538  | 2731.332  | NM_003521 | 429.267   | 391.54    |
| X74609    | 16759.316 | 14345.955 | NM_000677 | 11455.206 | 13754.703 | CY3Cy5    | 4875.94   | 492.499   |
| NM_013363 | 776.625   | 834.006   | BF308728  | 2527.582  | 2079.015  | J03571    | 19328.572 | 24716.205 |
| NM_000947 | 3698.485  | 3543.771  | NM_013280 | 2639.613  | 2803.353  | T57791    | 1961.464  | 2447.442  |
| AL096750  | 21574.652 | 20119.057 | NM_018315 | 18933.227 | 17200.613 | X56134    | 1173.707  | 987.247   |
| NM_016061 | 4012.748  | 4745.231  | AF051151  | 1072.026  | 1268.686  | NM_001456 | 390.87    | 518.977   |
| NM_016062 | 22267.564 | 20623.061 | AF142421  | 10607.694 | 10921.644 | H44784    | 313.934   | 356.227   |
| NM_004153 | 3037.418  | 2950.465  | AB037836  | 4982.01   | 4552.662  | BI759091  | 1609.305  | 2365.973  |
| AK024740  | 1681.342  | 1962.048  | NM_014247 | 1060.592  | 1603.793  | BG685843  | 3742.005  | 3428.155  |
| AF078164  | 8161.97   | 7671.059  | NM_018695 | 59588.313 | 56836.523 | BI490011  | 2279.75   | 1895.888  |
| NM_019049 | 2700.861  | 3262.593  | NM_006343 | 807.197   | 959.088   | AF035771  | 917.208   | 653.287   |
| NM_012413 | 328.62    | 549.843   | NM_014786 | 1482.057  | 1229.11   | N20475    | 4128.295  | 3905.106  |
| AF130101  | 726.372   | 1015.904  | NM_001423 | 943.238   | 1254.387  | BI199286  | 599.742   | 553.979   |
| NM_004656 | 3421.243  | 3002.162  | NM_015716 | 4857.368  | 3698.24   | AA026626  | 1189.593  | 1255.72   |
| AF086122  | 1480.949  | 1576.804  | AB023166  | 1373.205  | 788.266   | H61726    | 789.827   | 541.168   |
| AK024397  | 5967.801  | 5477.753  | AB028966  | 8164.019  | 5334.608  | NM_004774 | 2796.554  | 2427.191  |
| AF073931  | 880.04    | 875.737   | NM_005758 | 6939.336  | 8632.63   | NM_005234 | 3212.247  | 3132.364  |
| NM_018047 | 1193.168  | 1247.996  | AF044774  | 1996.427  | 2092.064  | SR5       | 2836.392  | 3104.262  |
| NM_005022 | 919.833   | 990.174   | NM_005402 | 5422.921  | 8045.197  | SR7       | 3375.712  | 30095.473 |
| NM_001288 | 783.49    | 751.485   | AF055027  | 2329.726  | 3267.062  | SR9       | 12724.184 | 2560.915  |
| NM_003564 | 1424.913  | 1731.824  | U63541    | 3032.065  | 2533.795  | CY3Cy5    | 5536.991  | 746.857   |
| AK023414  | 529.009   | 596.093   | AB033045  | 2132.516  | 1844.364  | AF212842  | 658.432   | 2011.11   |
| AF317516  | 4454.667  | 5430.534  | AF055006  | 12140.725 | 12431.145 | NM_018404 | 518.557   | 731.443   |
| NM_002581 | 933.42    | 820.118   | NM_004935 | 2981.2    | 2305.445  | M27544    | 4618.392  | 4981.984  |
| AI417964  | 547.665   | 814.869   | NM_006951 | 1418.032  | 1297.16   | NM_002258 | 649.506   | 835.979   |
| J03571    | 14093.61  | 13193.16  | NM_001896 | 6386.463  | 5276.368  | NM_001118 | 1011.021  | 954.778   |
| T57791    | 3718.532  | 4191.936  | NM_014023 | 767.169   | 586.893   | AL133097  | 3801.256  | 3851.624  |

|           |           |           |           |           |           |           |           |           |
|-----------|-----------|-----------|-----------|-----------|-----------|-----------|-----------|-----------|
| X56134    | 1031.709  | 1217.338  | NM_002745 | 8047.307  | 7557.721  | U90908    | 352.866   | 564.33    |
| NM_001456 | 419.01    | 591.511   | D26488    | 5586.209  | 4961.481  | NM_006458 | 3944.72   | 4051.706  |
| H44784    | 594.814   | 187.488   | NM_001432 | 804.955   | 1264.765  | NM_004093 | 852.398   | 727.622   |
| AI421041  | 24120.057 | 23697.924 | AK002193  | 482.538   | 757.248   | NM_001448 | 3372.776  | 3372.108  |
| BI759091  | 2329.408  | 3365.556  | AB014554  | 2056.776  | 2098.545  | AF086122  | 805.218   | 725.626   |
| BG685843  | 6877.529  | 7661.868  | AF097431  | 7862.458  | 8251.958  | AK024397  | 8443.527  | 6590.183  |
| BI490011  | 1990.227  | 2334.323  | NM_001978 | 722.994   | 522.172   | AF073931  | 553.073   | 525.252   |
| AF035771  | 1636.962  | 1777.124  | NM_005897 | 447.274   | 1233.103  | NM_018047 | 1015.217  | 780.346   |
| N20475    | 7766.986  | 9461.308  | NM_002579 | 1424.672  | 1072.318  | NM_003564 | 1572.954  | 1530.678  |
| BI199286  | 798.235   | 714.556   | NM_004221 | 1097.716  | 1166.359  | AF317516  | 2322.304  | 2397.151  |
| AA026626  | 1645.049  | 1656.719  | NM_003019 | 1179.454  | 374.247   | NM_002581 | 772.145   | 901.962   |
| H61726    | 1469.164  | 1680.032  | AL109790  | 1040.108  | 371.919   | AI417964  | 945.544   | 1215.7    |
| NM_004997 | 8354.073  | 7176.284  | NM_006923 | 3693.064  | 5173.417  | S78203    | 635.926   | 814.461   |
| NM_005923 | 3258.125  | 2395.621  | AF119889  | 12988.848 | 15306.757 | NM_016208 | 8115.025  | 10278.43  |
| NM_003465 | 1127.111  | 854.531   | M90657    | 1289.108  | 675.809   | NM_005638 | 7747.002  | 8669.306  |
| AF289028  | 847.35    | 679.857   | NM_006699 | 2602.281  | 2191.448  | NM_007235 | 9819.397  | 8678.479  |
| NM_005127 | 616.548   | 525.94    | AK025645  | 2969.494  | 2348.832  | NM_007268 | 2192.99   | 2280.061  |
| NM_005567 | 2273.199  | 2062.209  | AK023266  | 1209.619  | 1310.631  | AK026014  | 1492.606  | 1947.412  |
| NM_005216 | 13599.985 | 11817.164 | NM_006814 | 6895.13   | 6257.969  | NM_004298 | 2047.613  | 2454.824  |
| NM_006626 | 615.194   | 360.305   | NM_005067 | 6157.728  | 5327.189  | NM_001232 | 984.635   | 1031.963  |
| NM_003965 | 308.766   | 364.177   | AB007899  | 761.282   | 847.481   | NM_007181 | 479.514   | 334.56    |
| NM_004584 | 1422.421  | 1443.353  | NM_002817 | 4300.49   | 3862.515  | AB007857  | 694.656   | 669.134   |
| AK023618  | 2139.709  | 2274.416  | NM_002801 | 13429.959 | 16305.51  | NM_001778 | 548.114   | 492.441   |
| AF212842  | 679.279   | 1740.032  | BE905810  | 867.459   | 713.25    | NM_004997 | 13342.579 | 9312.387  |
| M27544    | 2223.6    | 1981.388  | NM_014730 | 7612.369  | 9262.501  | NM_005923 | 2329.661  | 1770.448  |
| NM_002258 | 479.849   | 287.184   | NM_014167 | 2060.551  | 2471.996  | NM_003465 | 575.938   | 372.793   |
| NM_001118 | 897.769   | 887.247   | NM_016063 | 1975.235  | 2096.351  | AF289028  | 599.586   | 432.555   |
| AL133097  | 4715.618  | 5019.976  | U82987    | 2929.559  | 2442.13   | NM_005127 | 355.356   | 455.033   |
| NM_001165 | 1589.393  | 1664.432  | NM_005732 | 1875.886  | 1486.74   | NM_005567 | 7580.247  | 8104.22   |
| U90908    | 546.678   | 1015.242  | NM_014890 | 823.601   | 792.589   | NM_005216 | 6412.777  | 6470.629  |
| NM_006458 | 5453.385  | 5269.836  | AK056481  | 3381.784  | 2598.669  | NM_004584 | 647.595   | 521.143   |
| NM_014458 | 668.927   | 886.682   | NM_005433 | 1246.142  | 837.592   | X15183    | 30300.932 | 30163.104 |
| NM_004093 | 1245.574  | 1125.198  | NM_018118 | 1438.8    | 1853.048  | AK023618  | 1486.429  | 1501.857  |
| NM_001448 | 4577.074  | 5595.489  | L35035    | 3347.585  | 4211.02   | NM_001492 | 1022.31   | 1038.409  |
| NM_016016 | 3870.128  | 3631.947  | NM_007152 | 4015.576  | 4654.117  | AB012643  | 12711.228 | 18375.469 |
| NM_020407 | 622.627   | 560.875   | NM_018293 | 2020.522  | 2116.863  | AB023170  | 1357.055  | 1560.815  |
| AF118274  | 2147.385  | 1934.867  | NM_002955 | 802.342   | 528.959   | NM_014153 | 5929.595  | 7039.126  |
| NM_018344 | 778.164   | 688.902   | NM_001938 | 5035.187  | 4354.031  | NM_002296 | 6772.807  | 6209.701  |
| NM_000079 | 4819.681  | 5367.551  | AF230808  | 3729.79   | 2891.424  | NM_000414 | 4058.166  | 3127.689  |
| NM_000083 | 1123.536  | 1174.019  | U18910    | 1225.149  | 992.339   | NM_018845 | 2690.245  | 2607.255  |
| AL110245  | 1162.216  | 1075.722  | NM_005238 | 3049.501  | 2262.776  | NM_005505 | 2473.379  | 2320.149  |
| NM_005628 | 16201.427 | 14700.212 | AK075306  | 6080.002  | 5724.999  | AK026964  | 552.082   | 613.63    |
| NM_004172 | 702.622   | 588.495   | AB037820  | 762.857   | 994.772   | NM_001134 | 2549.326  | 2201.168  |
| S78203    | 1140.251  | 1270.285  | NM_001280 | 5590.965  | 5859.858  | NM_016016 | 2185.584  | 1663.605  |
| NM_016208 | 12060.285 | 13429.702 | AB019572  | 68067.32  | 58039.816 | NM_020407 | 630.742   | 508.675   |
| NM_001635 | 490.307   | 443.949   | NM_002948 | 67400.391 | 57429.465 | AF118274  | 3385.851  | 2824.421  |
| NM_005638 | 13622.478 | 16657.658 | AF113008  | 2489.116  | 2371.12   | NM_018344 | 840.252   | 674.298   |
| NM_007235 | 15817.106 | 17897.301 | NM_020217 | 2651.943  | 2351.536  | NM_000079 | 3511.512  | 3984.067  |
| NM_007268 | 4265.488  | 4840.69   | NM_018135 | 64773.277 | 53513.34  | NM_000083 | 591.437   | 564.212   |
| NM_014845 | 1583.414  | 1829.947  | AF205435  | 18696.246 | 10545.701 | AL110245  | 1636.344  | 1525.79   |
| NM_004298 | 3611.87   | 3805.962  | AF085983  | 3763.12   | 3358.239  | NM_005628 | 7164.528  | 6746.116  |
| NM_001232 | 2030.121  | 2639.024  | AF052105  | 2298.937  | 2574.679  | NM_016605 | 16609.127 | 15016.801 |
| NM_007181 | 766.156   | 673.499   | AK001204  | 4358.503  | 3465.314  | NM_004172 | 420.674   | 346.489   |

|           |           |           |           |           |           |           |           |           |
|-----------|-----------|-----------|-----------|-----------|-----------|-----------|-----------|-----------|
| AB007857  | 816.561   | 983.603   | M15465    | 4413.028  | 2963.505  | X74609    | 22731.729 | 19693.182 |
| NM_019049 | 2436.637  | 2163.315  | J03866    | 7191.7    | 6383.188  | AB002316  | 483.615   | 381.367   |
| AF130101  | 709.328   | 738.972   | AK022836  | 3933.048  | 3420.347  | NM_013363 | 423.264   | 416.314   |
| NM_004656 | 2946.845  | 1907.148  | NM_012343 | 13902.298 | 10945.077 | NM_000947 | 2336.836  | 1800.724  |
| AF071569  | 2129.36   | 1505.981  | NM_000397 | 876.649   | 713.001   | AL096750  | 33076.781 | 25264.201 |
| NM_002269 | 2497.669  | 2496.628  | NM_002046 | 67534.438 | 60197.453 | NM_016061 | 2148.419  | 2458.644  |
| J04948    | 1171.949  | 1288.612  | NM_003078 | 945.178   | 856.829   | NM_016062 | 12220.552 | 10376.733 |
| NM_018043 | 561.921   | 614.596   | AL137703  | 1167.273  | 605.149   | NM_004153 | 1431.11   | 1085.082  |
| AK022564  | 62087.961 | 55789.109 | NM_001809 | 5380.616  | 4265.465  | AK024740  | 1046.988  | 987.918   |
| NM_001492 | 2302.49   | 2565.423  | AL117477  | 2101.904  | 1905.3    | AF078164  | 4438.813  | 3648.879  |
| AB012643  | 8439.449  | 7832.191  | NM_012107 | 5071.102  | 4613.763  | NM_019049 | 1528.223  | 1469.176  |
| AB023170  | 1294.281  | 1213.378  | AB037760  | 2354.506  | 1608.68   | AF130101  | 471.586   | 283.577   |
| NM_014153 | 10122.636 | 10845.045 | NM_015680 | 2403.494  | 1488.609  | NM_004656 | 1627.73   | 1429.376  |
| NM_002296 | 15178.798 | 14813.68  | M22637    | 8157.974  | 4971.823  | AF071569  | 1056.966  | 790.53    |
| NM_000414 | 5824.892  | 5179.724  | AB037770  | 1066.238  | 198.336   | NM_002269 | 1931.002  | 2154.592  |
| AL133033  | 524.297   | 478.188   | NM_018364 | 11621.279 | 10931.339 | J04948    | 1058.851  | 920.746   |
| NM_018845 | 6037.557  | 6282.625  | AK021601  | 652.445   | 948.473   | NM_018043 | 505.221   | 283.98    |
| NM_005505 | 6009.815  | 6415.237  | NM_006778 | 1099.438  | 1003.132  | AK022564  | 54374.711 | 60585.551 |
| AK026964  | 1026.291  | 1107.817  | NM_007022 | 2402.843  | 1906.485  | NM_003564 | 989.616   | 1172.846  |
| NM_001134 | 1364.423  | 1409.996  | AL049943  | 10900.591 | 9603.078  | AK023414  | 285.368   | 435.802   |
| NM_006695 | 854.184   | 586.937   | AL137303  | 3260.788  | 2395.408  | AF317516  | 2304.093  | 2965.103  |
| NM_004815 | 1198.714  | 958.278   | AL355708  | 689.757   | 828.748   | NM_002581 | 907.788   | 996.361   |
| NM_004147 | 746.738   | 579.554   | AL161980  | 1134.319  | 909.648   | AI417964  | 952.499   | 1176.49   |
| AK000959  | 296.076   | 281.775   | AB002449  | 2451.779  | 2477.541  | J03571    | 15596.447 | 14230.221 |
| AB037743  | 1611.865  | 1417.015  | NM_016480 | 17875.85  | 19140.881 | T57791    | 1916.844  | 1766.093  |
| AB046820  | 2043.644  | 1981.716  | AK001489  | 2095.972  | 1920.233  | X56134    | 1141.715  | 1012.295  |
| AK025922  | 543.824   | 407.8     | NM_015681 | 2419.524  | 2030.868  | NM_001456 | 266.61    | 486.103   |
| NM_014646 | 728.405   | 793.167   | AF070582  | 1875.02   | 1620.782  | AI421041  | 13662.37  | 13787.678 |
| NM_006375 | 1134.622  | 1073.959  | NM_006383 | 3551.936  | 2630.6    | BI759091  | 1614.747  | 1766.435  |
| AF123659  | 2228.363  | 2048.277  | NM_015400 | 9355.374  | 9295.116  | BG685843  | 4369.78   | 3676.477  |
| NM_016436 | 492.569   | 395.503   | AL359561  | 732.437   | 736.875   | BI490011  | 2199.933  | 2089.145  |
| X74609    | 19201.928 | 17281.822 | AK026464  | 1567.356  | 1311.383  | AF035771  | 1044.214  | 1055.37   |
| AB002316  | 316.698   | 205.781   | AK001362  | 944.756   | 839.522   | N20475    | 4173.293  | 4629.234  |
| NM_018990 | 454.329   | 580.99    | AK022400  | 1829.911  | 1343.365  | BI199286  | 666.47    | 665.517   |
| NM_013363 | 757.444   | 714.025   | AF052100  | 1498.534  | 962.384   | AA026626  | 1337.724  | 1447.736  |
| NM_000947 | 3822.154  | 4024.164  | AL110235  | 2697.055  | 1548.827  | H61726    | 704.901   | 786.242   |
| AL096750  | 21152.6   | 20244.111 | AF086124  | 1075.209  | 859.177   | NM_004774 | 3000.795  | 2544.61   |
| NM_016061 | 3963.879  | 4527.267  | AK024820  | 1129.459  | 1084.31   | NM_005234 | 3634.292  | 3293.036  |
| NM_016062 | 24044.852 | 22712.729 | AB033105  | 956.664   | 732.793   | NM_005216 | 4274.066  | 5119.851  |
| NM_004153 | 3233.861  | 3160.367  | AF038192  | 876.372   | 854.363   | NM_004584 | 917.839   | 910.114   |
| AK024740  | 1827.466  | 2228.984  | AJ001865  | 1479.636  | 1404.52   | X15183    | 30996.164 | 30634.463 |
| AF078164  | 9529.771  | 10809.37  | D61704    | 8632.851  | 7276.224  | AK023618  | 1406.198  | 1666.018  |
| NM_003628 | 2235.396  | 1836.924  | AJ227889  | 1308.382  | 928.905   | AF212842  | 499.53    | 1179.027  |
| NM_004648 | 2154.01   | 1664.401  | Y12017    | 737.761   | 1064.706  | NM_018404 | 853.469   | 625.694   |
| AF029325  | 1216.914  | 1141.382  | X64989    | 814.476   | 460.374   | M27544    | 3773.316  | 3042.684  |
| AF097021  | 609.041   | 587.38    | L34409    | 17293.586 | 21718.043 | NM_001118 | 1235.278  | 1031.484  |
| NM_001365 | 2040.581  | 1619.419  | U12210    | 5853.47   | 7389.831  | AL133097  | 4392.319  | 4042.977  |
| NM_000677 | 10528.834 | 10803.363 | Z83936    | 2158.776  | 1870.565  | NM_001165 | 1837.575  | 1833.31   |
| BF308728  | 918.66    | 1018.282  | L08440    | 2644.046  | 2315.247  | NM_001381 | 54042.258 | 65073.766 |
| NM_013280 | 2546.1    | 2194.427  | M73799    | 1518.183  | 499.323   | U90908    | 352.543   | 507.873   |
| NM_018315 | 8853.258  | 8100.465  | NM_003782 | 1001.356  | 493.48    | NM_006458 | 3941.196  | 4465.971  |
| AF051151  | 719.215   | 613.355   | AL442096  | 1853.635  | 1760.415  | NM_014459 | 422.263   | 608.147   |
| AF142421  | 9057.601  | 8347.444  | NM_017790 | 1243.104  | 750.494   | NM_004093 | 878.26    | 987.373   |

|           |           |           |           |           |           |           |           |           |
|-----------|-----------|-----------|-----------|-----------|-----------|-----------|-----------|-----------|
| AF257238  | 365.658   | 511.999   | AK000861  | 1137.621  | 617.922   | NM_001446 | 3558.017  | 4997.958  |
| AB037836  | 7319.995  | 6743.8    | AK000023  | 2165.105  | 1470.479  | AF086122  | 961.78    | 966.418   |
| NM_014247 | 602.523   | 629.885   | AK024351  | 2059.685  | 2248.281  | AK024397  | 10701.359 | 10250.912 |
| NM_018695 | 30310.525 | 22744.525 | AK024867  | 1972.753  | 1315.223  | AF073931  | 742.156   | 801.95    |
| NM_006343 | 794.08    | 1363.028  | AK025002  | 2099.587  | 1207.255  | NM_018047 | 1051.735  | 1161.529  |
| NM_014786 | 1355.194  | 1457.944  | AK024011  | 1034.492  | 899.339   | NM_005022 | 1034.197  | 1453.384  |
| NM_001423 | 678.661   | 616.77    | AL390145  | 891.979   | 471.052   | NM_001286 | 578.733   | 665.755   |
| NM_015716 | 3968.899  | 4148.524  | AF119913  | 2466.298  | 2102.98   | NM_000083 | 851.699   | 1546.765  |
| NM_003955 | 553.698   | 861.773   | AF049883  | 1610.221  | 1723.625  | AL110245  | 2491.979  | 2900.96   |
| NM_005739 | 462.609   | 828.266   | L10148    | 5172.27   | 3413.84   | NM_005626 | 9302.425  | 9990.747  |
| AB023166  | 1133.372  | 1812.547  | AK026247  | 1398.176  | 1360.573  | NM_016605 | 12198.759 | 13331.082 |
| AB028966  | 3865.762  | 3769.74   | AL110175  | 1169.672  | 893.989   | S78203    | 602.157   | 683.558   |
| NM_005758 | 5092.285  | 4230.131  | AK027156  | 18861.012 | 9772.105  | NM_016206 | 7310.317  | 7913.164  |
| AF044774  | 1246.937  | 784.59    | AL157504  | 4045.069  | 2767.097  | NM_007235 | 10353.644 | 10745.637 |
| NM_005402 | 3452.141  | 2963.995  | AK023328  | 8793.37   | 5593.41   | NM_007266 | 2293.105  | 2602.451  |
| AF055027  | 2217.914  | 2064.634  | AJ012499  | 72087.008 | 59685.207 | AK026014  | 1271.926  | 1615.774  |
| U63541    | 2225.266  | 1871.816  | AK024900  | 4787.671  | 5268.016  | NM_014845 | 1035.503  | 1338.936  |
| AB033045  | 1667.622  | 1114.688  | AK026249  | 1000.376  | 1611.375  | NM_004296 | 2134.166  | 2714.246  |
| AF055006  | 8593.786  | 7574.831  | AF119879  | 31428.283 | 31949.164 | NM_001232 | 1219.782  | 1476.265  |
| NM_004935 | 2101.154  | 2034.828  | Y10482    | 17179.16  | 15425.639 | NM_007181 | 373.878   | 584.904   |
| NM_006951 | 1494.848  | 1286.154  | AL161992  | 7180.704  | 6602.676  | AB007857  | 648.719   | 623.245   |
| NM_001896 | 5132.116  | 4544.543  | D16991    | 3925.219  | 3195.899  | NM_001776 | 414.28    | 367.365   |
| NM_014023 | 708.159   | 649.809   | AK023538  | 1187.825  | 1074.869  | NM_004997 | 13341.088 | 12259.011 |
| NM_002745 | 7882.148  | 7167.322  | AF075086  | 59193.414 | 52006.207 | NM_005923 | 2417.766  | 2379.362  |
| D26488    | 5535.052  | 4404.403  | X77485    | 6784.891  | 7024.917  | NM_003465 | 848.276   | 978.322   |
| NM_001432 | 1111.446  | 1290.324  | NM_016945 | 1087.585  | 4301.375  | AF289028  | 805.554   | 539.25    |
| AK002193  | 519.435   | 365.684   | AB046765  | 2730.466  | 2652.901  | NM_005127 | 502.328   | 394.181   |
| AB014554  | 1073.284  | 639.529   | AF133333  | 4108.182  | 2895.678  | NM_005567 | 8063.521  | 8621.219  |
| AF097431  | 7434.71   | 6941.798  | NM_018366 | 2106.036  | 1855.568  | AF071569  | 1141.2    | 1163.668  |
| NM_001976 | 561.079   | 305.621   | NM_002516 | 12406.745 | 14615.122 | NM_002266 | 1918.217  | 2241.601  |
| NM_005897 | 347.504   | 513.091   | NM_004881 | 17926.883 | 19234.135 | J04948    | 902.917   | 963.612   |
| NM_002579 | 1337.442  | 1331.823  | U94903    | 1179.953  | 1765.737  | NM_018043 | 406.458   | 496.488   |
| NM_004221 | 839.014   | 1210.885  | NM_019095 | 8466.533  | 7760.104  | AK022564  | 54234.293 | 65375.461 |
| NM_003019 | 488.337   | 1942.303  | U80764    | 18577.574 | 21687.582 | NM_001492 | 1016.224  | 946.247   |
| AL109790  | 599.093   | 790.625   | AF077036  | 70405.367 | 62020.402 | AB012643  | 9166.154  | 10897.101 |
| NM_006923 | 2567.005  | 1977.234  | NM_020421 | 1282.634  | 1395.64   | AB023170  | 1331.69   | 1092.847  |
| AF119889  | 5619.264  | 4290.074  | L37690    | 14413.35  | 13798.737 | NM_014153 | 4692.555  | 4875.374  |
| M90657    | 551.788   | 413.293   | L37703    | 12818.439 | 11749.328 | NM_000414 | 4389.497  | 4019.321  |
| NM_006696 | 2264.481  | 1881.983  | AK023767  | 3643.852  | 4191.551  | NM_018845 | 2677.223  | 3814.572  |
| AK025645  | 1141.881  | 876.032   | AF084516  | 798.168   | 857.163   | AK026964  | 487.338   | 581.231   |
| AK023266  | 860.896   | 1008.228  | AL137554  | 888.777   | 829.149   | NM_001134 | 2323.037  | 2233.775  |
| NM_006814 | 6107.28   | 5530.056  | AJ001907  | 1802.221  | 1224.907  | NM_016016 | 2610.602  | 2422.686  |
| NM_005067 | 4716.365  | 3557.721  | M32220    | 5032.659  | 3449.944  | NM_020407 | 817.771   | 894.8     |
| AB007899  | 891.76    | 626.115   | D17188    | 15008.789 | 8334.111  | AF118274  | 4208.54   | 3860.471  |
| NM_002817 | 4164.167  | 3777.361  | AJ001432  | 23361.24  | 15840.768 | NM_018344 | 677.459   | 696.755   |
| NM_002801 | 12580.632 | 11509.485 | NM_020435 | 17020.428 | 19690.875 | NM_000079 | 3971.814  | 3862.367  |
| BE905810  | 604.061   | 410.483   | AF052169  | 1906.525  | 1589.577  | NM_004774 | 2799.857  | 3716.94   |
| NM_014780 | 1465.327  | 1190.473  | CY3Cy5    | 10764.894 | 830.91    | NM_005234 | 3228.672  | 4180.201  |
| NM_014730 | 6301.959  | 5535.869  | BF942101  | 5091.416  | 5784.933  | NM_018990 | 317.71    | 506.023   |
| NM_014167 | 1209.25   | 1347.84   | BI825012  | 21150.018 | 20230.355 | NM_013363 | 623.072   | 438.349   |
| NM_016063 | 1650.364  | 1633.452  | M21574    | 1017.016  | 945.98    | NM_000947 | 1979.069  | 2103.847  |
| U82987    | 2408.748  | 2537.631  | BM051302  | 945.186   | 1385.684  | AL096750  | 34871.246 | 42734.129 |
| NM_005732 | 2044.783  | 2062.996  | BE314182  | 19012.477 | 19813.311 | NM_016061 | 2827.365  | 6549.288  |

|           |           |           |           |           |           |           |           |           |
|-----------|-----------|-----------|-----------|-----------|-----------|-----------|-----------|-----------|
| NM_01489C | 721.869   | 795.741   | AI808029  | 1406.953  | 1624.34   | NM_004153 | 1936.374  | 2332.864  |
| AK056481  | 3141.263  | 4649.106  | AI971217  | 941.327   | 1429.305  | AK024740  | 1127.736  | 1273.109  |
| NM_005433 | 1305.594  | 1670.086  | X03225    | 4821.346  | 5778.343  | AF078164  | 4928.037  | 4618.181  |
| NM_018118 | 1326.36   | 1104.102  | AK097395  | 7995.667  | 8519.173  | NM_019040 | 1547.965  | 1628.447  |
| L35035    | 3201.932  | 2562.574  | M12783    | 2258.632  | 2695.102  | NM_012413 | 373.055   | 226.723   |
| NM_007152 | 2605.79   | 1756.596  | AK091535  | 3041.331  | 3375.656  | AF130101  | 472.526   | 372.89    |
| NM_018293 | 1789.266  | 1283.132  | AF085357  | 4463      | 4665.53   | NM_004650 | 1885.423  | 1458.872  |
| NM_002955 | 818.791   | 541.64    | NM_003841 | 10062.273 | 8512.862  | AF086122  | 767.874   | 1295.428  |
| NM_001938 | 4839.579  | 3430.067  | AF296673  | 799.819   | 641.869   | AK024397  | 10702.716 | 13550.384 |
| AF230808  | 2365.894  | 1789.56   | NM_080824 | 778.485   | 854.574   | AF073931  | 575.897   | 918.917   |
| U18910    | 860.172   | 634.015   | SR2       | 68182.969 | 65737.797 | NM_018047 | 1081.71   | 934.227   |
| NM_005238 | 1880.989  | 1305.53   | SR4       | 19070.834 | 23593.438 | NM_005022 | 982.857   | 1632.215  |
| AK075306  | 5899.136  | 4863.057  | SR6       | 2763.204  | 3434.115  | NM_001288 | 749.133   | 1730.69   |
| AB037820  | 881.742   | 695.875   | SR8       | 9634.335  | 35214.465 | NM_003564 | 1436.271  | 2161.615  |
| U37689    | 245.267   | 339.577   | SR10      | 33683.148 | 14433.59  | AK023414  | 407.572   | 807.381   |
| NM_001280 | 5650.456  | 5653.887  | CY3Cy5    | 7563.345  | 524.012   | NM_002581 | 823.507   | 698.073   |
| AB019572  | 55733.859 | 65315.742 | NM_014322 | 1835.972  | 2278.17   | AI417964  | 1770.194  | 1711.868  |
| NM_002948 | 53284.121 | 48001.637 | NM_004122 | 3281.453  | 2978.349  | J03571    | 17278.902 | 15958.086 |
| AF113008  | 1948.561  | 2090.455  | NM_002928 | 15204.043 | 14591.808 | T57791    | 2060.11   | 2633.256  |
| NM_020217 | 2809.733  | 3229.219  | NM_000160 | 2870.664  | 2400.749  | X56134    | 1108.464  | 1685.409  |
| AF085983  | 2645.948  | 2365.325  | NM_003301 | 1000.795  | 997.55    | NM_001450 | 395.045   | 559.685   |
| AF052105  | 1163.048  | 1088.345  | NM_000955 | 1599.724  | 1322.19   | H44784    | 265.258   | 242.451   |
| AK001204  | 6814.995  | 4653.33   | U27768    | 2057.133  | 1769.114  | AI421041  | 14299.261 | 15569.925 |
| M15465    | 3168.297  | 1569.473  | AF305550  | 1989.109  | 2354.174  | BI759091  | 1807.866  | 2321.386  |
| J03866    | 6358.013  | 4187.618  | U66582    | 18783.648 | 22498.91  | BG685843  | 4235.873  | 3748.342  |
| AK022836  | 3647.549  | 3072.094  | S73288    | 642.779   | 694.8     | BI490011  | 2302.909  | 1932.603  |
| NM_012343 | 7919.166  | 5588.1    | NM_006198 | 2654.763  | 3126.217  | AF035771  | 1151.814  | 1111.25   |
| NM_000397 | 620.353   | 491.38    | NM_003812 | 1267.051  | 1391.89   | N20475    | 4221.652  | 4946.962  |
| NM_002040 | 66341.414 | 68036.602 | NM_000849 | 6824.203  | 6725.9    | BI199286  | 636.284   | 677.069   |
| AL157461  | 1495.339  | 759.117   | NM_004678 | 2080.694  | 2391.308  | AA026626  | 1420.847  | 1396.281  |
| NM_003078 | 1943.587  | 1571.948  | NM_000950 | 21730.893 | 20623.723 | H61726    | 726.232   | 795.711   |
| AL137703  | 1115.105  | 648.377   | NM_005139 | 6776.142  | 7744.203  | NM_004997 | 12171.816 | 13139.567 |
| NM_001809 | 5090.206  | 4136.428  | L10139    | 710.655   | 687.769   | NM_005923 | 2626.554  | 4325.094  |
| AL117477  | 1994.533  | 1481.038  | NM_000039 | 69661.727 | 67189.313 | NM_003465 | 612.632   | 871.681   |
| NM_012107 | 4160.533  | 4469.038  | NM_020470 | 5022.179  | 4449.143  | AF289028  | 596.699   | 652.728   |
| AB037760  | 2059.038  | 2390.909  | NM_006574 | 793.09    | 826.225   | NM_005127 | 462.083   | 494.314   |
| NM_015680 | 2329.287  | 2310.281  | AA478950  | 2351.331  | 2123.419  | NM_005567 | 7820.857  | 11157.688 |
| M22637    | 6856.451  | 6716.334  | AB029033  | 10405.652 | 11928.929 | NM_005210 | 5900.593  | 6950.16   |
| AB037770  | 538.957   | 304.999   | AF091034  | 3373.329  | 3278.033  | NM_003965 | 278.677   | 384.523   |
| NM_018364 | 7352.706  | 7836.184  | NM_005301 | 21479.197 | 22804.225 | NM_004584 | 894.99    | 1026.489  |
| NM_006778 | 507.832   | 408.887   | NM_004167 | 536.441   | 538.247   | X15183    | 28056.113 | 26402.111 |
| NM_007022 | 2648.036  | 2109.682  | NM_016653 | 3035.3    | 2898.712  | AK023618  | 2180.628  | 2496.814  |
| AL049943  | 9023.433  | 5850.503  | AB035124  | 4218.352  | 2813.212  | AF212842  | 505.34    | 1491.312  |
| AL137303  | 2401.689  | 1572.193  | AF060170  | 769.794   | 868.794   | M27544    | 3843.789  | 4155.218  |
| AL161980  | 737.342   | 455.949   | NM_016602 | 991.471   | 841.392   | NM_001118 | 1145.077  | 953.932   |
| AB002449  | 2123.621  | 1387.278  | NM_004409 | 10699.569 | 10065.126 | AL133097  | 3927.204  | 3650.683  |
| U79248    | 486.153   | 390.821   | AK023397  | 2520.354  | 3106.653  | NM_001165 | 1621.792  | 1511.445  |
| NM_016480 | 16172.773 | 13649.42  | NM_001725 | 1427.571  | 1658.302  | NM_001381 | 57035.453 | 62794.488 |
| AK001489  | 2153.052  | 2372.246  | NM_004079 | 15896.022 | 16184.059 | U90908    | 346.84    | 433.948   |
| NM_015681 | 1528.446  | 1277.944  | NM_000383 | 372.802   | 818.596   | NM_006458 | 4121.921  | 4590.934  |
| AF070582  | 2122.299  | 2229.211  | NM_004633 | 954.503   | 987.495   | NM_014450 | 299.573   | 425.97    |
| NM_006383 | 3098.5    | 2316.122  | X01394    | 30849.617 | 33454.926 | NM_004093 | 926.93    | 895.96    |
| NM_015400 | 5860.585  | 5942.332  | NM_000041 | 46655.492 | 54234.449 | NM_001440 | 3539.851  | 3560.514  |

|           |           |           |           |           |           |           |           |           |
|-----------|-----------|-----------|-----------|-----------|-----------|-----------|-----------|-----------|
| AL359561  | 499.729   | 477.285   | NM_002984 | 2584.038  | 2350.806  | NM_016016 | 2108.455  | 2176.949  |
| AK026464  | 1401.197  | 1101.334  | AB037752  | 6118.783  | 6916.607  | NM_020407 | 729.901   | 1085.851  |
| AK001362  | 520.933   | 364.554   | AK024821  | 12974.107 | 12673.568 | AF118274  | 4249.088  | 5034.542  |
| AK022400  | 881.972   | 807.272   | AB002340  | 2841.162  | 2357.067  | NM_018344 | 953.384   | 965.024   |
| AF052100  | 1171.304  | 1037.233  | NM_000224 | 2814.531  | 2453.309  | NM_000079 | 3086.888  | 5934.646  |
| AL110235  | 2205.348  | 1799.336  | NM_014328 | 4713.406  | 4670.807  | NM_000083 | 699.424   | 787.384   |
| U79245    | 670.599   | 489.014   | NM_006414 | 5780      | 6105.074  | AL110245  | 2249.148  | 2742.323  |
| AF086124  | 426.719   | 755.3     | NM_018479 | 8696.896  | 10556.493 | NM_005628 | 8917.876  | 9685.189  |
| AK024820  | 725.926   | 870.327   | NM_014362 | 3695.906  | 3556.585  | NM_016605 | 17156.629 | 17841.424 |
| AF052117  | 394.599   | 392.908   | NM_018308 | 1651.425  | 1176.089  | S78203    | 555.841   | 762.485   |
| AB033105  | 1694.178  | 1081.337  | NM_001832 | 10246.354 | 10576.502 | NM_016208 | 7697.272  | 8949.005  |
| AF038192  | 500.431   | 259.758   | NM_017774 | 12066.75  | 11495.061 | NM_001635 | 414.745   | 529.19    |
| AJ001865  | 829.531   | 784.266   | AB037716  | 4128.791  | 3799.782  | NM_005638 | 9376.904  | 9574.213  |
| AJ227875  | 303.16    | 263.821   | NM_001926 | 745.627   | 141.064   | NM_007235 | 9182.471  | 10342.226 |
| D61704    | 4643.874  | 3499.398  | NM_016297 | 3877.096  | 4080.496  | NM_007265 | 2347.456  | 2366.668  |
| AJ227889  | 702.935   | 641.232   | NM_001752 | 10952.519 | 11465.276 | AK026014  | 1438.591  | 1700.907  |
| Y12017    | 630.275   | 767.107   | AL137672  | 925.181   | 1297.84   | NM_014845 | 1182.623  | 846.872   |
| Y10512    | 518.31    | 336.187   | X64177    | 58438.922 | 10026.517 | NM_004298 | 2430.3    | 2936.997  |
| L34409    | 11262.187 | 10807.742 | NM_015994 | 4106.813  | 4218.779  | NM_001232 | 1063.029  | 1083.172  |
| U12210    | 6711.003  | 5741.343  | NM_002235 | 521.04    | 450.289   | NM_007181 | 419.203   | 610.14    |
| Z83936    | 701.196   | 668.023   | NM_002241 | 387.793   | 694.445   | AB007857  | 570.282   | 496.458   |
| L08440    | 1698.053  | 1495.188  | NM_014065 | 2309.249  | 2520.605  | NM_001778 | 319.885   | 258.949   |
| M73799    | 913.463   | 740.823   | NM_001695 | 2594.532  | 2902.868  | NM_019045 | 1165.363  | 1327.976  |
| AF086119  | 873.142   | 524.158   | NM_002248 | 1834.035  | 2064.036  | AF130101  | 362.012   | 575.026   |
| NM_003782 | 768.477   | 623.084   | NM_012281 | 1827.544  | 1957.414  | NM_004656 | 1513.358  | 1913.367  |
| AL353947  | 444.411   | 1126.924  | AK025772  | 1913.931  | 1980.529  | AF071569  | 1726.166  | 1817.291  |
| AL442096  | 655.121   | 583.128   | NM_005509 | 1648.5    | 1480.691  | NM_002265 | 2210.579  | 2839.85   |
| NM_018228 | 470.48    | 288.911   | NM_152747 | 2652.25   | 2472.886  | J04948    | 1076.409  | 1243.676  |
| AJ270693  | 494.479   | 327.052   | NM_017415 | 1769.693  | 1799.937  | NM_018043 | 423.032   | 747.955   |
| NM_01779C | 1156.88   | 905.762   | AB046834  | 1033.165  | 976.534   | AK022564  | 55276.484 | 62886.117 |
| AK000861  | 717.152   | 535.32    | NM_000262 | 2671.828  | 2830.163  | NM_001492 | 1070.101  | 1232.22   |
| AK000023  | 1333.211  | 986.423   | NM_017831 | 2755.298  | 2567.496  | AB012643  | 13087.844 | 11218.381 |
| AK000901  | 750.591   | 448.33    | AK022537  | 7259.234  | 8621.604  | AB023170  | 1455.126  | 1255.57   |
| AK024351  | 1226.351  | 1218.423  | AF064597  | 1471.428  | 1505.972  | NM_014153 | 5863.409  | 8009.721  |
| AK024867  | 476.841   | 300.658   | NM_006345 | 3285.394  | 2649.94   | NM_002296 | 9054.717  | 7947.445  |
| AK025002  | 2012.902  | 1225.973  | NM_006875 | 2152.059  | 2247.279  | NM_000414 | 4872.714  | 4149.42   |
| AK024011  | 1278.827  | 2538.214  | D87119    | 2684.595  | 3423.594  | NM_018845 | 2986.344  | 2674.93   |
| AL390145  | 552.469   | 660.879   | AL050040  | 1377.043  | 1871.443  | NM_005505 | 2625.823  | 2718.978  |
| AF119913  | 1623.237  | 491.128   | NM_006556 | 10746.809 | 13388.067 | AK026964  | 369.169   | 408.793   |
| NM_01834C | 1181.104  | 694.795   | AL133066  | 532.873   | 805.886   | NM_001134 | 2414.77   | 1816.904  |
| AF049883  | 1138.04   | 818.023   | AF264717  | 1752.365  | 1524.256  | NM_006695 | 1448.812  | 1466.994  |
| L10148    | 3259.279  | 1738.6    | NM_01226C | 7013.427  | 5860.431  | NM_004815 | 866.709   | 1267.026  |
| AK026247  | 894.305   | 793.79    | NM_001141 | 1579.456  | 1859.622  | NM_004147 | 679.806   | 1460.642  |
| AL110175  | 585.006   | 671.086   | AB028992  | 995.517   | 901.231   | AB037743  | 962.053   | 1259.826  |
| AF288406  | 478.456   | 476.295   | L10139    | 894.507   | 1044.682  | AB046820  | 1158.004  | 1500.602  |
| AK027156  | 11914.135 | 11682.327 | NM_02047C | 5312.412  | 4788.805  | AK025922  | 361.389   | 544.938   |
| AL157504  | 2347.088  | 2495.945  | AA478950  | 2455.143  | 2087.948  | NM_014646 | 508.914   | 1016.529  |
| AK023328  | 5362.028  | 5808.518  | BF942101  | 4741.021  | 5670.644  | NM_006375 | 625.249   | 875.253   |
| AJ012499  | 62044.355 | 73294.477 | BI825012  | 19714.76  | 24253.148 | AF123659  | 2177.418  | 3266.693  |
| AK024900  | 3306.777  | 4112.739  | M21574    | 1003.194  | 1343.646  | X74609    | 25486.652 | 22022.063 |
| AF119879  | 18034.467 | 9739.146  | BM051302  | 874.608   | 1112.148  | AB002316  | 473.929   | 354.998   |
| Y10482    | 5978.426  | 3636.875  | BE314182  | 19321.705 | 22462.348 | NM_01899C | 743.94    | 934.857   |
| AF086244  | 1244.029  | 760.636   | AI808029  | 1637.289  | 1848.022  | NM_000947 | 2593.383  | 2331.391  |



|           |           |           |           |           |           |           |           |           |
|-----------|-----------|-----------|-----------|-----------|-----------|-----------|-----------|-----------|
| AL161992  | 4692.39   | 3684.875  | AI971217  | 1009.189  | 1505.094  | AL096750  | 39492.773 | 33634.984 |
| AK023551  | 408.877   | 253.72    | X03225    | 5703.689  | 6193.895  | NM_016061 | 2413.167  | 2896.812  |
| AK023910  | 1294.022  | 826.157   | AK097395  | 8430.64   | 9248.805  | NM_016062 | 12898.087 | 11531.487 |
| D16991    | 3246.892  | 2560.622  | M12783    | 2881.475  | 3449.876  | NM_004153 | 1609.087  | 1269.977  |
| AK023538  | 732.431   | 786.78    | AK091535  | 3333.503  | 3525.063  | AK024740  | 1244.398  | 990.261   |
| U17620    | 990.245   | 1284.225  | AF085357  | 4652.433  | 5444.271  | AF078164  | 4815.742  | 4102.774  |
| X77485    | 4284.242  | 3623.272  | AK092768  | 742.588   | 2103.507  | NM_003628 | 1115.174  | 1003.778  |
| AK021555  | 609.781   | 607.254   | NM_003841 | 15371.81  | 18068.977 | NM_004648 | 867.161   | 1126.3    |
| AB046765  | 2072.124  | 1562.069  | AF296673  | 839.185   | 1068.559  | AF029325  | 806.411   | 1215.945  |
| AF133333  | 2971.912  | 2374.698  | NM_080824 | 740.21    | 710.093   | NM_005704 | 812.051   | 1022.591  |
| NM_018368 | 1650.14   | 1158.403  | AB032956  | 536.015   | 558.306   | AF097021  | 749.289   | 837.647   |
| NM_004881 | 5265.952  | 5134.504  | NM_018002 | 3310.982  | 3544.33   | NM_001365 | 1606.328  | 1885.074  |
| U94903    | 501.7     | 160.77    | AB002340  | 2331.936  | 2171.299  | NM_000677 | 6718.629  | 8912.681  |
| NM_005155 | 4410.345  | 2282.911  | NM_000224 | 3246.651  | 3107.238  | BF308728  | 1635.151  | 1885.815  |
| NM_019095 | 8508.782  | 5822.221  | NM_014328 | 4809.625  | 5247.552  | NM_013280 | 1277.046  | 2396.77   |
| U80764    | 13800.896 | 10610.912 | NM_006414 | 5634.4    | 5996.588  | AF142421  | 5373.458  | 6764.502  |
| AB020684  | 7655.285  | 6029.128  | NM_014322 | 2179.336  | 3734.249  | AB037836  | 3507.7    | 3974.491  |
| AF077036  | 57569.656 | 46834.855 | NM_004122 | 2972.705  | 3909.573  | NM_014247 | 613.408   | 589.891   |
| NM_020421 | 1114.09   | 848.533   | NM_002928 | 15037.027 | 19175.523 | NM_018695 | 53575.961 | 41977.785 |
| D17094    | 1945.084  | 1862.936  | NM_000160 | 2769.111  | 4027.511  | NM_006343 | 523.997   | 732.569   |
| L37690    | 10056.484 | 7783.651  | NM_003301 | 1118.253  | 2022.112  | NM_014786 | 1101.415  | 1085.774  |
| D61707    | 994.443   | 800.957   | NM_000955 | 1306.832  | 1408.636  | NM_015716 | 3855.718  | 3595.543  |
| AK021610  | 2456.45   | 3328.805  | U27768    | 1704.845  | 2184.279  | AB023166  | 660.973   | 573.707   |
| Z36835    | 4134.612  | 4734.108  | NM_001742 | 249.243   | 483.202   | AB028966  | 7136.541  | 5432.69   |
| AK023767  | 2999.511  | 2590.504  | AF305550  | 3060.031  | 3236.104  | NM_005758 | 1967.199  | 2011.041  |
| AF084516  | 773.861   | 722.488   | U66582    | 18982.9   | 24296.428 | AF044774  | 521.808   | 483.865   |
| AL137554  | 893.216   | 827.398   | NM_006198 | 3684.493  | 4135.379  | NM_005402 | 2131.347  | 2581.822  |
| AJ001907  | 1043.382  | 658.48    | NM_003812 | 1156.628  | 1142.467  | AF055027  | 1111.952  | 1181.612  |
| M32220    | 2916.606  | 2275.12   | NM_000849 | 7369.533  | 7451.672  | U63541    | 1239.22   | 1391.787  |
| D17188    | 11368.38  | 10491.91  | NM_004678 | 1798.292  | 1986.137  | AB033045  | 1155.189  | 1187.103  |
| AJ001432  | 14933.674 | 12510.607 | NM_000950 | 23452.793 | 21197.537 | AF055006  | 5194.02   | 6302.598  |
| NM_020435 | 13428.141 | 13383.163 | NM_005139 | 6650.809  | 6182.285  | NM_004935 | 1257.48   | 1489.789  |
| AF052169  | 1271.334  | 797.003   | NM_000322 | 69734.906 | 63769.816 | NM_006951 | 793.573   | 1273.887  |
| CY3Cy5    | 5200.597  | 602.426   | AK025772  | 2403.575  | 2191.83   | NM_001896 | 3495.983  | 5029.916  |
| BF942101  | 4118.713  | 5280.368  | NM_005509 | 1685.91   | 1462.727  | NM_014023 | 407.568   | 518.284   |
| BI825012  | 16075.878 | 14945.854 | NM_152747 | 2020.773  | 1864.173  | NM_002745 | 3782.47   | 4532.578  |
| M21574    | 719.352   | 782.36    | NM_017415 | 1505.417  | 1222.584  | D26488    | 3323.549  | 2419.515  |
| BM051302  | 926.684   | 1000.396  | NM_001667 | 21262.807 | 23478.928 | NM_001432 | 741.048   | 636.948   |
| BE314182  | 17120.316 | 16408.199 | AB046834  | 704.329   | 940.733   | AB014554  | 1173.826  | 756.029   |
| AI808029  | 1527.908  | 1085.36   | AB029033  | 10074.176 | 12605.727 | AF097431  | 4771.047  | 4329.095  |
| AI971217  | 947.847   | 1171.473  | AF091034  | 2823.98   | 4179.203  | NM_001978 | 673.151   | 461.063   |
| X03225    | 3985.395  | 4979.175  | NM_005301 | 17576.521 | 22169.898 | NM_002579 | 811.379   | 617.689   |
| AK097395  | 6038.259  | 6088.586  | NM_004167 | 490.315   | 873.675   | NM_004221 | 729.571   | 650.091   |
| M12783    | 1752.434  | 2194.802  | NM_016653 | 3677.053  | 4395.478  | NM_003019 | 1070.112  | 825.158   |
| AK091535  | 2816.11   | 3533.591  | AB035124  | 3917.695  | 3643.508  | AL109790  | 564.317   | 303.815   |
| AF085357  | 4081.591  | 5703.98   | AF060170  | 627.529   | 1054.257  | NM_006923 | 1111.763  | 1195.118  |
| AF296673  | 732.833   | 1391.114  | NM_016602 | 431.869   | 821.075   | AF119889  | 8833.141  | 8286.439  |
| NM_080824 | 1457.107  | 2186.687  | NM_004409 | 10934.892 | 11437.413 | NM_006699 | 1726.331  | 1905.407  |
| SR6       | 2143.592  | 2513.24   | AK023397  | 3782.804  | 4485.844  | AK025645  | 1653.854  | 2670.529  |
| SR8       | 7522.722  | 26778.877 | NM_001725 | 3004.559  | 3780.444  | AK023266  | 598.813   | 825.085   |
| SR10      | 20791.303 | 7063.747  | NM_004079 | 14306.89  | 9275.394  | NM_006814 | 5106.235  | 5746.645  |
| CY3Cy5    | 4768.845  | 612.169   | NM_002996 | 1344.92   | 1652.074  | NM_005067 | 2367.378  | 2332.508  |
| NM_014322 | 1505.732  | 2495.282  | NM_000383 | 724.444   | 1581.868  | AB007899  | 486.375   | 498.918   |

|           |           |           |           |           |           |           |           |           |
|-----------|-----------|-----------|-----------|-----------|-----------|-----------|-----------|-----------|
| NM_004122 | 2758.285  | 3249.089  | NM_004633 | 569.099   | 845.394   | NM_002817 | 2291.365  | 2331.273  |
| NM_00292E | 11390.403 | 11978.746 | X01394    | 26669.719 | 31187.213 | NM_002801 | 7108.767  | 6187.478  |
| NM_00016C | 2537.5    | 3145.836  | NM_000041 | 38752.395 | 43732.098 | BE905810  | 821.311   | 521.226   |
| NM_003301 | 842.571   | 804.997   | NM_002984 | 1713.644  | 1582.106  | NM_01478C | 743.629   | 649.462   |
| NM_00095E | 1003.573  | 967.708   | AF317425  | 3917.629  | 2913.003  | NM_01473C | 4002.717  | 3401.572  |
| U27768    | 1261.523  | 959.428   | AF264717  | 1840.958  | 1763.646  | NM_014167 | 880.946   | 774.26    |
| AF305550  | 1921.647  | 2182.88   | NM_01226C | 6900.948  | 6142.283  | NM_01606E | 985.403   | 748.993   |
| U66582    | 16412.912 | 17254.506 | NM_001141 | 871.052   | 730.889   | U82987    | 2160.253  | 1780.156  |
| NM_00619E | 2224.979  | 3058.463  | NM_00001E | 8671.966  | 10685.393 | NM_00573E | 1334.681  | 1229.594  |
| NM_00095C | 7735.964  | 12260.373 | AB028992  | 371.986   | 1052.401  | NM_01489C | 401.101   | 277.074   |
| NM_00513E | 5920.761  | 11087.28  | NM_01847E | 9850.722  | 11754.166 | AK056481  | 1631.187  | 1855.826  |
| L10139    | 517.418   | 482.764   | NM_01436E | 3282.621  | 4637.946  | NM_00543E | 628.682   | 434.423   |
| NM_02047C | 2867.187  | 3244.33   | NM_01830E | 1672.475  | 1603.932  | NM_01811E | 452.348   | 441.998   |
| AA478950  | 715.609   | 623.892   | NM_00183E | 10780.106 | 13783.688 | L35035    | 1738.653  | 1709.414  |
| AB029033  | 7659.624  | 8876.662  | NM_017774 | 13115.097 | 19687.443 | NM_00715E | 1434.819  | 1421.285  |
| AF091034  | 2805.47   | 4037.677  | AB037716  | 4014.604  | 4560.854  | NM_01829E | 1226.096  | 980.387   |
| NM_005301 | 15220.632 | 14945.876 | NM_016297 | 4445.685  | 5203.193  | NM_00295E | 474.823   | 334.076   |
| NM_004167 | 536.737   | 710.629   | NM_00175E | 12017.371 | 12873.146 | NM_00193E | 2123.477  | 1780.573  |
| NM_01665E | 2720.188  | 3315.93   | AL137672  | 1856.617  | 1611.72   | AF230808  | 2175.353  | 1867.218  |
| AB035124  | 3435.635  | 2940.513  | X64177    | 57290.656 | 11441.753 | U18910    | 644.82    | 723.008   |
| AF060170  | 493.517   | 482.771   | NM_015994 | 4996.506  | 5835.737  | NM_00523E | 2249.859  | 1684.489  |
| NM_01660E | 542.647   | 525.523   | NM_01406E | 2257.505  | 2067.082  | AK075306  | 3243.57   | 2858.524  |
| NM_00440E | 7215.191  | 6550.629  | NM_00169E | 2414.405  | 2189.414  | AB037820  | 425.794   | 363.602   |
| AK023397  | 2156.498  | 2105.884  | NM_00224E | 1609.42   | 1637.098  | NM_00128C | 3525.43   | 3258.73   |
| NM_00172E | 1166.967  | 1194.024  | NM_012281 | 1904.573  | 1536.399  | AB019572  | 51917.141 | 49421.836 |
| NM_00407E | 11648.619 | 11031.359 | NM_080824 | 853.746   | 772.108   | NM_00294E | 42690.188 | 27047.885 |
| NM_00038E | 664.484   | 783.074   | AB032956  | 443.741   | 1469.194  | AF113008  | 863.166   | 685.611   |
| AB037752  | 3974.115  | 7531.525  | NM_015957 | 905.529   | 2760.042  | NM_020217 | 1656.828  | 1447.903  |
| AK024821  | 7927.386  | 11305.473 | NM_00026E | 2920.333  | 3428.493  | NM_01813E | 46097.637 | 33421.777 |
| NM_000224 | 2446.422  | 2555.526  | NM_017831 | 2199.079  | 2077.895  | AF205435  | 7349.237  | 5695.072  |
| NM_01432E | 1575.088  | 1723.641  | AK024393  | 2193.438  | 2410.209  | AF085983  | 1691.843  | 1194.893  |
| NM_006414 | 1425.256  | 1322.97   | AK022537  | 7462.582  | 8518.808  | AF052105  | 754.017   | 710.549   |
| NM_01847E | 7361.245  | 8487.567  | NM_00634E | 3082.138  | 2750.064  | AK001204  | 3761.995  | 3922.169  |
| NM_01436E | 2668.726  | 2879.185  | NM_00687E | 2506.185  | 2382.438  | M15465    | 2905.323  | 2606.704  |
| NM_01830E | 1032.273  | 864.909   | D87119    | 1221.62   | 1524.557  | J03866    | 3055.136  | 2360.976  |
| NM_00183E | 5460.185  | 5214.606  | AL050040  | 1210.664  | 964.129   | AK022836  | 1788.216  | 1518.501  |
| NM_017774 | 7503.563  | 7737.562  | NM_00655E | 11074.869 | 11336.278 | NM_01234E | 6605.206  | 4799.136  |
| AB037716  | 3009.385  | 2934.07   | AL133066  | 626.193   | 594.656   | NM_000397 | 335.286   | 228.048   |
| NM_016297 | 3123.264  | 3004.18   | NM_00084E | 7257.15   | 5516.427  | NM_00204E | 60778.363 | 58723.496 |
| NM_00175E | 7983.035  | 6820.015  | NM_00467E | 1734.09   | 1552.421  | AL157461  | 439.77    | 399.148   |
| AL137672  | 941.775   | 832.256   | NM_00095C | 23228.027 | 17852.037 | NM_00307E | 1195.253  | 1017.241  |
| X64177    | 43935.34  | 6646.052  | NM_00513E | 7544.006  | 6577.301  | AL137703  | 648.751   | 506.676   |
| NM_015994 | 3352.144  | 4160.105  | NM_00032E | 66140.125 | 59819.418 | NM_00180E | 2572.983  | 1820.779  |
| NM_00224E | 1299.662  | 2444.243  | NM_02047C | 5417.722  | 7548.501  | AL117477  | 936.113   | 733.97    |
| NM_00550E | 1237.91   | 1770.081  | NM_006574 | 381.623   | 625.576   | NM_012107 | 2032.156  | 1741.868  |
| NM_152747 | 1722.182  | 2449.106  | AA478950  | 2238.807  | 2237.576  | AB037760  | 1302.71   | 993.563   |
| NM_01741E | 798.839   | 1080.436  | BF942101  | 4341.808  | 4987.028  | NM_01568C | 1154.44   | 945.518   |
| NM_001667 | 9444.306  | 9346.27   | BI825012  | 18763.459 | 18947.469 | M22637    | 3732.887  | 3232.62   |
| NM_00026E | 2097.385  | 1382.701  | M21574    | 819.347   | 821.902   | AB037770  | 413.287   | 349.123   |
| NM_017831 | 2336.801  | 1878.148  | BM051302  | 2987.685  | 3360.263  | NM_018364 | 4502.977  | 3163.056  |
| AK022537  | 5186.099  | 5317.127  | BE314182  | 17029.404 | 18894.453 | NM_00677E | 579.281   | 493.514   |
| AF116632  | 386.682   | 383.681   | X03225    | 4682.547  | 4512.928  | NM_00702E | 1529.75   | 2250.193  |
| AF064597  | 1043.456  | 1058.393  | AK097395  | 8560.465  | 7250.404  | AL049943  | 10543.095 | 14830.399 |

|           |           |           |           |           |           |           |          |          |
|-----------|-----------|-----------|-----------|-----------|-----------|-----------|----------|----------|
| AF198444  | 308.762   | 323.896   | M12783    | 2833.358  | 2936.25   | AL137303  | 1372.271 | 1277.979 |
| NM_00634E | 2178.73   | 2465.098  | AK091535  | 3092.55   | 3317.914  | AL161980  | 491.766  | 408.477  |
| D87119    | 1626.683  | 2546.81   | AF085357  | 4512.016  | 3919.75   | AB002449  | 1239.164 | 809.979  |
| AL133066  | 659.396   | 1080.331  | AK092768  | 376.217   | 478.783   | NM_01648C | 7700.319 | 5179.161 |
| AF264717  | 1526.429  | 1618.436  | NM_003841 | 14554.77  | 14405.466 | AK001489  | 1357.343 | 1297.481 |
| NM_01226C | 4389.681  | 5280.949  | AF296673  | 968.147   | 645.611   | NM_015681 | 1956.577 | 1147.979 |
| NM_001141 | 451.834   | 360.627   | X01394    | 33181.313 | 29543.029 | AF070582  | 1361.244 | 1032.976 |
| NM_00001E | 4641.123  | 6846.085  | NM_000041 | 45219.602 | 45107.078 | NM_00638E | 3477.713 | 2367.656 |
| L10139    | 439.107   | 434.344   | NM_002984 | 2449.427  | 2232.008  | NM_01540C | 5104.681 | 4301.981 |
| NM_02047C | 3329.862  | 3388.638  | AF317425  | 4063.91   | 3571.648  | AK026464  | 938.961  | 774.933  |
| AA478950  | 1430.979  | 1684.238  | NM_018002 | 3232.56   | 4409.896  | AK001362  | 610.553  | 467.851  |
| BF942101  | 4308.421  | 3934.196  | AB002340  | 2801.386  | 3317.44   | AK022400  | 1221.127 | 1056.943 |
| BI825012  | 14079.984 | 12031.197 | NM_000224 | 3332.899  | 3226.066  | AF052100  | 1243.413 | 948.51   |
| M21574    | 640.242   | 526.643   | NM_01432E | 4121.063  | 5247.12   | AL110235  | 1376.99  | 1166.382 |
| BM051302  | 813.568   | 700.646   | NM_006414 | 5885.867  | 6460.833  | U79245    | 576.064  | 611.813  |
| BE314182  | 14546.172 | 14848.244 | NM_014322 | 1974.819  | 2192.342  | AF086124  | 549.978  | 662.892  |
| AI808029  | 1434.787  | 1392.129  | NM_004122 | 2726.187  | 2748.708  | AK024820  | 416.959  | 369.401  |
| AI971217  | 878.219   | 1111.505  | NM_00292E | 16589.48  | 18858.951 | AF052117  | 285.686  | 397.527  |
| X03225    | 4326.742  | 6683.31   | NM_00016C | 4766.532  | 5503.643  | AB033105  | 962.241  | 1636.356 |
| AK097395  | 6551.274  | 7969.769  | NM_003301 | 1343.396  | 1647.313  | AF038192  | 423.135  | 326.56   |
| M12783    | 2334.909  | 2779.645  | NM_00095E | 1536.141  | 1543.993  | AJ001865  | 494.248  | 315.112  |
| AK091535  | 2418.94   | 3359.106  | U27768    | 2758.943  | 2711.61   | D61704    | 6176.045 | 4215.396 |
| AK092768  | 780.456   | 1025.057  | NM_001742 | 1481.402  | 1249.856  | AJ227889  | 732.167  | 476.011  |
| NM_003841 | 7208.599  | 9547.944  | AF305550  | 2431.016  | 2209.734  | Y12017    | 368.363  | 186.508  |
| AF296673  | 672.096   | 882.172   | U66582    | 18423.4   | 18390.723 | X64989    | 587.8    | 489.053  |
| NM_080824 | 607.691   | 842.452   | S73288    | 829.491   | 763.755   | Y10512    | 448.474  | 322.563  |
| NM_018002 | 2448.197  | 2460.891  | NM_00619E | 4234.499  | 2486.162  | L34409    | 11227.03 | 7850.017 |
| AB002340  | 1724.743  | 1695.411  | NM_003812 | 897.151   | 1055.622  | U12210    | 3125.97  | 2811.174 |
| NM_000224 | 2060.781  | 1618.08   | NM_002241 | 758.023   | 243.513   | Z83936    | 472.047  | 410.396  |
| NM_01432E | 3993.913  | 4480.951  | NM_01406E | 1822.125  | 1420.264  | L08440    | 4201.701 | 3891.167 |
| NM_006414 | 4000.202  | 3879.02   | NM_00169E | 2578.813  | 2070.731  | M73799    | 1728.42  | 1331.05  |
| NM_014322 | 1064.848  | 1501.252  | NM_00224E | 1700.861  | 1579.786  | AF086119  | 883.171  | 629.814  |
| NM_004122 | 2518.788  | 1994.6    | NM_012281 | 2237.584  | 1530.903  | NM_00378E | 604.858  | 556.116  |
| NM_00292E | 10736.043 | 10375.16  | AK025772  | 1982.271  | 2339.022  | AL353947  | 284.716  | 283.327  |
| NM_00016C | 2667.659  | 2491.914  | NM_00550E | 1570.57   | 1886.195  | AL442096  | 994.302  | 980.682  |
| NM_003301 | 880.298   | 933.27    | NM_152747 | 2291.991  | 2340.294  | AK023299  | 457.562  | 987.059  |
| NM_00095E | 1041.422  | 1213.653  | NM_01741E | 1111.463  | 1352.261  | NM_01822E | 534.274  | 244.501  |
| U27768    | 1538.128  | 1738.038  | NM_001667 | 21619.873 | 24798.217 | AJ270693  | 462.043  | 218.033  |
| NM_001742 | 214.217   | 246.254   | AB046834  | 921.428   | 734.28    | NM_01779C | 738.764  | 522.542  |
| AF305550  | 1902.229  | 2379.471  | AB029033  | 8810.949  | 9729.383  | AK000861  | 462.014  | 241.065  |
| S73288    | 620.213   | 874.896   | AF091034  | 3032.403  | 3397.25   | AK000023  | 1215.454 | 826.02   |
| NM_00619E | 2169.64   | 3391.763  | NM_005301 | 21057.674 | 31164.49  | AK000901  | 510.827  | 456.855  |
| NM_003812 | 1203.266  | 1394.233  | NM_004167 | 1868.799  | 2231.7    | AK024351  | 1738.034 | 1193.132 |
| NM_00084E | 5960.211  | 6348.824  | NM_01665E | 4703.763  | 5121.64   | AK024867  | 345.12   | 406.236  |
| NM_00467E | 1578.51   | 2153.848  | AB035124  | 4870.807  | 4211.855  | AK025002  | 2239.483 | 2006.969 |
| NM_00095C | 15423.663 | 16322.142 | AF060170  | 1663.951  | 1635.738  | AK024011  | 377.267  | 409.052  |
| NM_00513E | 4149.6    | 4991.772  | NM_016602 | 923.309   | 842.488   | AF119913  | 754.203  | 572.862  |
| AK025772  | 1412.423  | 1485.588  | NM_00440E | 9780.474  | 7983.83   | NM_01834C | 622.497  | 1202.728 |
| NM_00550E | 1506.161  | 1477.492  | AK023397  | 2625.894  | 2664.63   | AF049883  | 651.471  | 524.14   |
| NM_152747 | 1655.561  | 1625.915  | NM_00172E | 1062.465  | 903.719   | L10148    | 2594.332 | 1391.862 |
| NM_01741E | 1138.143  | 919.394   | NM_00407E | 15277.373 | 12000.633 | AK026247  | 599.468  | 440.727  |
| NM_001667 | 14570.978 | 13912.804 | NM_00299E | 1433.688  | 2042.534  | AL110175  | 854.132  | 643.671  |
| AB046834  | 385.736   | 418.304   | NM_00038E | 616.136   | 379.216   | AF288406  | 381.085  | 295.127  |

|           |           |           |           |           |           |           |           |           |
|-----------|-----------|-----------|-----------|-----------|-----------|-----------|-----------|-----------|
| AB029033  | 6217.575  | 6261.387  | NM_006875 | 1807.208  | 1194.825  | AK027156  | 10426.589 | 8256.023  |
| AF091034  | 2292.023  | 1870.284  | D87119    | 2475.287  | 1806.126  | AL157504  | 2089.378  | 2150.903  |
| NM_005301 | 15865.109 | 13673.656 | AB037769  | 818.247   | 327.084   | AK023328  | 4517.33   | 4497.618  |
| NM_004167 | 435.019   | 488.093   | AL050040  | 1171.123  | 864.158   | AF119879  | 26461.695 | 28576.807 |
| NM_016653 | 2541.981  | 2484.976  | NM_006556 | 10597.13  | 10709.723 | Y10482    | 14529.56  | 11027.971 |
| AB035124  | 3300.37   | 2744.073  | AL133066  | 887.918   | 435.269   | AF086244  | 1537.886  | 963.857   |
| AF060170  | 613.241   | 799.148   | AF264717  | 2040.236  | 1665.983  | AL161992  | 2492.572  | 1489.784  |
| NM_016602 | 629.819   | 807.823   | NM_012260 | 8339.588  | 8215.944  | AK023910  | 1181.414  | 751.982   |
| NM_004409 | 7344.27   | 7565.603  | NM_001141 | 855.41    | 902.468   | D16991    | 1896.121  | 1089.87   |
| AK023397  | 2427.662  | 2421.857  | NM_000018 | 9058.785  | 11381.538 | AK023538  | 702.174   | 538.103   |
| NM_004079 | 12708.6   | 14558.615 | AB028992  | 677.24    | 647.21    | AF075086  | 44016.324 | 26264.381 |
| NM_002996 | 498.543   | 897.017   | NM_018479 | 9047.655  | 9584.13   | X77485    | 9972.252  | 6617.521  |
| NM_000383 | 460.712   | 389.077   | NM_014362 | 3424.948  | 3633.656  | NM_014495 | 365.413   | 427.656   |
| NM_004633 | 561.383   | 582.031   | NM_018308 | 2007.644  | 1711.277  | AK021555  | 445.553   | 374.804   |
| X01394    | 30348.529 | 28859.992 | NM_001832 | 12044.743 | 13907.229 | AB046765  | 1264.03   | 1076.952  |
| NM_000041 | 36055.031 | 37658.738 | NM_017774 | 12488.407 | 12385.938 | AF133333  | 2135.878  | 1470.954  |
| NM_002984 | 2756.323  | 2669.525  | AB037716  | 4505.589  | 4326.455  | NM_018366 | 772.439   | 586.818   |
| AB037752  | 3493.465  | 3824.074  | NM_016297 | 3997.836  | 3394.452  | NM_004881 | 8903.189  | 8009.613  |
| AF264717  | 1435.313  | 1604.622  | NM_001752 | 10786.175 | 9785.542  | U94903    | 909.155   | 928.593   |
| NM_012260 | 3949.034  | 3842.645  | AL137672  | 750.268   | 903.306   | NM_005155 | 6180.992  | 5725.423  |
| NM_001141 | 615.092   | 466.827   | X64177    | 41381.18  | 4367.244  | NM_019095 | 5099.513  | 3960.603  |
| NM_000018 | 7810.278  | 7841.579  | NM_015994 | 3863.656  | 3159.196  | U80764    | 7501.609  | 6494.291  |
| AB028992  | 481.673   | 694.998   | NM_018476 | 12933.52  | 7968.441  | AB020684  | 4127.536  | 3530.591  |
| NM_018479 | 7383.54   | 7620.201  | AF220492  | 6050.882  | 4932.525  | AF077036  | 41819.637 | 25238.668 |
| NM_014362 | 2455.735  | 2237.867  | X89671    | 1545.175  | 1124.408  | D17094    | 1817.812  | 1119.986  |
| NM_018308 | 1261.755  | 957.06    | NM_014941 | 5760.003  | 4109.694  | L37690    | 12090.51  | 7745.638  |
| NM_001832 | 7007.703  | 6619.207  | NM_018372 | 7750.9    | 5591.194  | AK021610  | 1552.714  | 900.503   |
| NM_017774 | 7504.16   | 6324.609  | NM_013253 | 1575.836  | 996.507   | Z36835    | 3845.095  | 2203.058  |
| AB037716  | 2994.244  | 2797.004  | NM_005895 | 5924.351  | 4351.913  | L37703    | 15253.709 | 10635.102 |
| NM_004827 | 324.513   | 694.91    | D82345    | 479.144   | 749.746   | AK023767  | 2871.134  | 1612.521  |
| NM_016297 | 3119.399  | 2871.727  | NM_003814 | 1315.675  | 1196.441  | AL137554  | 390.302   | 555.597   |
| NM_001752 | 8260.215  | 7801.618  | NM_002968 | 802.672   | 760.925   | AJ001907  | 882.028   | 736.299   |
| AL137672  | 907.126   | 1099.36   | NM_000262 | 3260.841  | 3343.441  | M32220    | 3062.469  | 2376.482  |
| X64177    | 44315.008 | 8199.291  | NM_017831 | 3351.031  | 2706.423  | D17188    | 4747.496  | 4635.068  |
| NM_015994 | 3414.859  | 3006.562  | AK022537  | 8355.486  | 7934.281  | AJ001432  | 11629.977 | 9156.379  |
| NM_002241 | 424.82    | 222.677   | AF116632  | 501.1     | 558.194   | NM_020435 | 8456.698  | 8901.944  |
| NM_014065 | 2002.231  | 2106.552  | AF064597  | 1493.926  | 1251.307  | AF052169  | 1181.004  | 1095.963  |
| NM_001695 | 1511.256  | 1399.249  | NM_006345 | 3474.164  | 2676.448  | CY3Cy5    | 4448.973  | 496.423   |
| NM_002248 | 1905.65   | 1578.462  | NM_003259 | 19803.768 | 13500.376 | BF942101  | 2963.605  | 2639.275  |
| NM_012281 | 1427.845  | 1103.724  | AL080128  | 3191.773  | 2042.611  | BI825012  | 17520.016 | 14881.419 |
| NM_080824 | 538.07    | 428.124   | AB037787  | 2592.04   | 1650.572  | M21574    | 565.176   | 592.806   |
| NM_000262 | 1833.552  | 1448.543  | AB033072  | 671.758   | 528.294   | BM051302  | 712.563   | 571.5     |
| NM_017831 | 2304.952  | 1962.571  | AB040892  | 1745.22   | 1012.746  | BE314182  | 9801.421  | 10950.966 |
| AK022537  | 5546.344  | 5802.766  | NM_018268 | 20735.896 | 15304.703 | AI808029  | 905.536   | 1098.767  |
| AF116632  | 315.097   | 487.052   | AF230904  | 7415.587  | 6218.062  | AI971217  | 614.901   | 895.963   |
| AF064597  | 1093.918  | 1152.109  | NM_017596 | 1580.637  | 1298.866  | X03225    | 3848.759  | 4472.002  |
| NM_006345 | 2458.382  | 1970.897  | AL157480  | 4187.282  | 4074.096  | AK097395  | 8826.855  | 16743.596 |
| NM_006875 | 1982.539  | 1870.687  | NM_014386 | 2003.553  | 1797.576  | M12783    | 2169      | 3392.951  |
| D87119    | 1757.633  | 1812.287  | NM_018110 | 2496.875  | 2328.129  | AK091535  | 1804.502  | 2905.297  |
| AB037769  | 421.896   | 549.939   | AF312678  | 1289.59   | 1171.155  | AF085357  | 2707.256  | 3367.172  |
| AL050040  | 373.317   | 454.585   | NM_006253 | 2467.073  | 2740.844  | NM_003841 | 14006.494 | 15514.991 |
| NM_006556 | 8032.033  | 8908.745  | NM_003866 | 1099.68   | 1144.751  | AF296673  | 562.932   | 638.837   |
| AL133066  | 418.163   | 246.226   | NM_018262 | 1720      | 2588.808  | SR2       | 46452.063 | 46135.273 |

|           |           |           |           |           |           |           |           |           |
|-----------|-----------|-----------|-----------|-----------|-----------|-----------|-----------|-----------|
| NM_000849 | 5526.463  | 4609.791  | NM_006207 | 1624.23   | 1668.638  | SR4       | 10813.801 | 10426.973 |
| NM_004678 | 1531.582  | 1436.259  | NM_003220 | 1889.337  | 1960.028  | SR6       | 1156.151  | 1359.129  |
| NM_000950 | 10527.986 | 9741.39   | AF009674  | 6085.537  | 6507.761  | SR8       | 4491.116  | 17268.762 |
| NM_000039 | 60560.207 | 56189.383 | NM_000360 | 1627.07   | 1311.112  | SR10      | 16731.332 | 5545.594  |
| NM_020470 | 3804.668  | 2984.984  | NM_000844 | 1425.637  | 1912.4    | CY3Cy5    | 4789.279  | 386.008   |
| NM_006574 | 201.6     | 307.424   | NM_005510 | 6237.058  | 6003.918  | NM_014322 | 855.163   | 795.58    |
| AA478950  | 1438.557  | 1380.579  | Z36817    | 1587.788  | 1247.35   | NM_004122 | 2006.734  | 1669.507  |
| BF942101  | 4232.152  | 3715.322  | NM_014505 | 15896.752 | 12986.718 | NM_002928 | 9324.596  | 8703.757  |
| BI825012  | 15367.175 | 15301.399 | NM_004209 | 7777.241  | 7594.648  | NM_000160 | 1537.917  | 1686.99   |
| M21574    | 859.553   | 943.313   | NM_016162 | 1989.343  | 1061.62   | NM_003301 | 596.155   | 766.432   |
| BM051302  | 906.369   | 1057.186  | AF130056  | 1904.658  | 1077.917  | NM_000955 | 1034.194  | 1061.898  |
| BE314182  | 16551.846 | 17867.248 | NM_002201 | 53535.426 | 37596.77  | U27768    | 1115.528  | 1160.438  |
| AI808029  | 1379.028  | 1793.401  | AK025047  | 1823.786  | 913.053   | AF305550  | 1227.826  | 1828.218  |
| AI971217  | 914.479   | 1118.198  | NM_006806 | 2032.297  | 1290.223  | S73288    | 470.949   | 795.591   |
| X03225    | 4387.75   | 4376.108  | NM_006763 | 1485.206  | 605.595   | NM_006198 | 1835.524  | 2249.853  |
| AK097395  | 6149.004  | 5934.782  | NM_006119 | 6235.511  | 3246.894  | NM_003812 | 791.366   | 800.913   |
| M12783    | 2211.618  | 2221.953  | NM_004465 | 1415.54   | 1013.216  | NM_000849 | 3074.893  | 3020.628  |
| AK091535  | 2243.929  | 2561.781  | AK026927  | 2649.949  | 1923.764  | NM_004678 | 784.35    | 1236.119  |
| AF085357  | 3595.829  | 4054.503  | NM_014059 | 6503.393  | 5560.045  | NM_000950 | 25938.645 | 25549.539 |
| NM_003841 | 8457.952  | 7303.726  | NM_001761 | 2753.334  | 1965.242  | NM_005139 | 2975.953  | 4929.359  |
| AF296673  | 536.15    | 509.532   | BE884341  | 2486.688  | 2444.25   | L10139    | 759.965   | 999.751   |
| NM_004633 | 508.93    | 358.308   | AF231997  | 1533.732  | 1274.937  | NM_000039 | 53223.719 | 64071.992 |
| X01394    | 26968.852 | 20843.322 | NM_007125 | 826.86    | 950.516   | NM_020470 | 3625.285  | 3719.743  |
| NM_000041 | 32419.303 | 30006.979 | NM_002598 | 9327.157  | 9958.115  | NM_006574 | 275.067   | 412.703   |
| NM_002984 | 2378.371  | 1932.811  | NM_020184 | 1440.358  | 1828.051  | AA478950  | 1299.168  | 1623.546  |
| NM_018002 | 2552.858  | 2364.132  | NM_005815 | 2039.599  | 2367.719  | AB029033  | 7935.912  | 8303.375  |
| AK024821  | 8618.914  | 6359.755  | NM_001229 | 1920.363  | 2439.664  | AF091034  | 1871.146  | 1901.381  |
| AB002340  | 1600.989  | 1313.899  | NM_000250 | 2040.213  | 2189.329  | NM_005301 | 17930.305 | 17498.354 |
| NM_000224 | 2132.632  | 1628.727  | NM_018147 | 16977.996 | 18389.969 | NM_004167 | 527.173   | 323.362   |
| NM_014328 | 4068.66   | 3597.36   | NM_018967 | 2660.033  | 2901.522  | NM_016653 | 1704.671  | 1656.441  |
| NM_006414 | 3728.75   | 3420.954  | NM_001850 | 694.214   | 809.888   | AB035124  | 1791.602  | 1567.344  |
| NM_014322 | 1294.655  | 1744.747  | NM_002160 | 1719.882  | 1317.552  | AF060170  | 535.243   | 694.673   |
| NM_004122 | 2927.609  | 2801.533  | NM_005675 | 1249.253  | 1342.901  | NM_016602 | 508.974   | 541.979   |
| NM_002928 | 10649.359 | 11557.837 | NM_002770 | 1253.063  | 659.82    | NM_004409 | 6866.76   | 7653.27   |
| NM_000160 | 2793.023  | 2593.535  | BC030636  | 2743.531  | 1169.221  | AK023397  | 1672.822  | 2190.859  |
| NM_003301 | 891.11    | 867.694   | NM_002812 | 4541.062  | 2473.262  | NM_001725 | 1475.716  | 2087.979  |
| NM_000955 | 1097.936  | 1047.443  | NM_020365 | 3513.063  | 2023.473  | NM_002996 | 375.37    | 448.421   |
| U27768    | 1495.385  | 1318.087  | NM_003982 | 2069.08   | 1406.681  | NM_000383 | 497.786   | 655.378   |
| AF305550  | 1875.127  | 1845.935  | NM_002079 | 3599.282  | 2825.204  | NM_004633 | 420.48    | 561.797   |
| U66582    | 16510.373 | 22286.123 | NM_002112 | 10254.409 | 6319.541  | X01394    | 41513.98  | 41886.43  |
| S73288    | 553.128   | 903.494   | NM_004121 | 4106.695  | 3552.164  | NM_000041 | 38607.922 | 39294.434 |
| NM_006198 | 1778.175  | 2102.367  | AY007092  | 2193.167  | 2686.217  | NM_002984 | 1764.83   | 1676.538  |
| NM_003812 | 893.95    | 1109.04   | NM_001902 | 1334.385  | 1736.455  | AB037752  | 4891.213  | 5203.351  |
| NM_002241 | 363.657   | 397.044   | AL137605  | 18327.291 | 18990.93  | AK024821  | 5000.225  | 4709.975  |
| NM_014065 | 1624.24   | 1423.998  | NM_016261 | 2525.499  | 2862.545  | AB002340  | 1267.436  | 1261.056  |
| NM_001695 | 1940.63   | 1800.272  | NM_006519 | 1449.714  | 1737.081  | NM_000224 | 2583.266  | 2201.784  |
| NM_002248 | 2481.072  | 1876.897  | NM_012076 | 930.752   | 1137.265  | NM_014328 | 1650.328  | 2081.38   |
| NM_012281 | 1614.983  | 1191.486  | NM_007285 | 15439.168 | 16467.396 | NM_006414 | 2437.719  | 2841.735  |
| AK025772  | 1349.816  | 1240.217  | D14678    | 4966.639  | 6920.18   | NM_018479 | 4482.842  | 4624.157  |
| NM_005509 | 1272.615  | 1005.959  | NM_016221 | 4477.816  | 7243.817  | NM_014362 | 1587.534  | 1854.29   |
| NM_152747 | 1507.722  | 1563.08   | NM_018113 | 1071.399  | 1010.724  | NM_018308 | 1278.72   | 999.431   |
| NM_017415 | 925.911   | 998.486   | NM_005187 | 2179.377  | 2049.06   | NM_001832 | 12326.2   | 12908.92  |
| NM_001667 | 15093.911 | 12186.531 | U73377    | 4046.349  | 3979.023  | NM_017774 | 6863.644  | 6493.623  |

|           |           |           |           |           |           |           |           |           |
|-----------|-----------|-----------|-----------|-----------|-----------|-----------|-----------|-----------|
| AB046834  | 408.091   | 274.513   | NM_002199 | 2628.289  | 2075.7    | AB037716  | 2242.664  | 1967.529  |
| AB029033  | 6321.757  | 6066.186  | BC005219  | 4456.913  | 2414.495  | NM_001926 | 321.575   | 434.267   |
| AF091034  | 2682.816  | 2786.028  | NM_004268 | 1146.167  | 546.905   | NM_016297 | 2248.56   | 2317.311  |
| NM_005301 | 14637.37  | 13199.654 | NM_006662 | 6794.916  | 4401.039  | NM_001752 | 5744.827  | 6058.685  |
| NM_004167 | 499.059   | 508.185   | NM_004031 | 933.69    | 305.612   | AL137672  | 622.99    | 810.807   |
| NM_016653 | 2596.627  | 2834.731  | NM_004514 | 3250.167  | 1934.54   | X64177    | 39419.797 | 4434.283  |
| AB035124  | 3486.152  | 3445.035  | NM_006163 | 2266.719  | 1760.314  | NM_015994 | 1900.924  | 2093.613  |
| AF060170  | 678.275   | 634.475   | NM_001272 | 7800.845  | 3825.429  | NM_002241 | 344.408   | 464.094   |
| NM_016602 | 534.353   | 503.047   | NM_006196 | 50142.434 | 39621.684 | NM_014065 | 1266.098  | 1381.368  |
| NM_004409 | 8015.543  | 7477.981  | AV733560  | 1675.891  | 1237.992  | NM_001695 | 1018.485  | 1017.228  |
| AK023397  | 2104.621  | 2381.579  | D17129    | 52151.262 | 55647.465 | NM_002248 | 1236.767  | 1291.64   |
| NM_001725 | 1434.169  | 1675.374  | NM_003091 | 19434.398 | 15375.962 | NM_012281 | 1730.562  | 1820.442  |
| NM_004079 | 7228.763  | 8593.266  | NM_004247 | 4244.853  | 4339.774  | AK025772  | 916.827   | 1037.417  |
| NM_002996 | 372.913   | 455.805   | NM_017722 | 4068.785  | 4154.54   | NM_005509 | 668.074   | 409.278   |
| NM_000383 | 444.728   | 511.421   | NM_004500 | 33881.52  | 46397.398 | NM_152747 | 870.129   | 763.866   |
| NM_006875 | 1566.651  | 1403.783  | AL137681  | 2799.962  | 4050.893  | NM_017415 | 498.866   | 797.789   |
| D87119    | 1583.187  | 1528.457  | AK025694  | 47066.664 | 47328.898 | NM_001667 | 11832.33  | 12724.185 |
| AB037769  | 416.343   | 357.947   | NM_002157 | 59461.297 | 51384.117 | AB046834  | 574.614   | 477.197   |
| AL050040  | 832.138   | 800.689   | NM_004095 | 24641.701 | 27829.467 | NM_000262 | 1341.608  | 1321.298  |
| NM_006556 | 9172.698  | 10143.68  | NM_014365 | 1011.587  | 1209.711  | NM_017831 | 2142.047  | 2544.431  |
| AL133066  | 392.588   | 293.174   | NM_005147 | 3365.565  | 3463.01   | AK024393  | 246.662   | 384.548   |
| AF264717  | 1147.521  | 961.262   | NM_014665 | 4378.092  | 3839.393  | AK022537  | 3574.341  | 3995.648  |
| NM_012260 | 5361.273  | 4497.617  | AK023609  | 1904.196  | 1822.048  | AF064597  | 809.905   | 825.005   |
| NM_001141 | 702.858   | 558.073   | NM_018019 | 2102.643  | 1892.411  | AF198444  | 167.767   | 467.83    |
| NM_000018 | 7215.344  | 6426.818  | AK027220  | 1631.18   | 1145.78   | NM_006345 | 1377.453  | 1367.244  |
| AB028992  | 485.078   | 324.785   | NM_018011 | 5586.292  | 3818.715  | NM_006875 | 942.171   | 974.568   |
| NM_018479 | 6884.166  | 6358.706  | NM_000476 | 1037.872  | 619.567   | D87119    | 1822.677  | 2050.487  |
| NM_014362 | 2540.441  | 2401.433  | AF132733  | 4117.771  | 2889.425  | AL050040  | 509.115   | 378.609   |
| NM_018308 | 1123.46   | 946.629   | NM_001071 | 8227.063  | 4729.985  | NM_006556 | 5231.67   | 6700.745  |
| NM_001832 | 7059.567  | 6740.426  | NM_020354 | 3675.338  | 2698.043  | AL133066  | 628.706   | 598.002   |
| NM_017774 | 7875.175  | 7692.158  | AF202637  | 7696.476  | 4772.276  | AF264717  | 1352.001  | 1548.495  |
| AB037716  | 3210.185  | 3551.6    | NM_000026 | 30915.473 | 20020.111 | NM_012260 | 6577.44   | 7012.088  |
| NM_001926 | 524.24    | 691.865   | D87452    | 2141.637  | 2313.417  | NM_001141 | 581.218   | 632.557   |
| NM_016297 | 2844.046  | 3387.534  | AK024322  | 1468.921  | 2854.973  | NM_000018 | 3280.074  | 5087      |
| NM_001752 | 7545.109  | 8710.641  | BF382513  | 2902.725  | 3370.746  | L10139    | 1173.859  | 1219.509  |
| AL137672  | 673.933   | 853.099   | AB020713  | 13956.58  | 12622.497 | NM_000039 | 56530.527 | 52740.617 |
| X64177    | 40141.363 | 5081.496  | AK025426  | 925.573   | 1134.934  | NM_020470 | 4519.834  | 3655.455  |
| NM_015994 | 2532.688  | 2742.609  | NM_016558 | 5667.134  | 4782.406  | NM_006574 | 432.969   | 340.731   |
| NM_018476 | 6262.266  | 5846.755  | NM_007145 | 9695.917  | 8208.941  | AA478950  | 1962.353  | 1629.765  |
| AF220492  | 5098.735  | 4674.714  | AL133112  | 1064.835  | 890.708   | BF942101  | 3324.257  | 3535.77   |
| X89671    | 1050.559  | 1021.686  | AK002078  | 2110.753  | 2160.056  | BI825012  | 22400.814 | 24235.73  |
| NM_014941 | 3971.334  | 4198.445  | AF085837  | 1548.178  | 1538.63   | M21574    | 726.521   | 690.387   |
| NM_018372 | 4974.029  | 6328.191  | AK023165  | 1359.38   | 1372.476  | BM051302  | 718.181   | 932.32    |
| NM_013253 | 1380.622  | 1191.068  | AK023857  | 640.622   | 345.631   | BE314182  | 8866.306  | 10675.937 |
| NM_005895 | 4740.441  | 4623.838  | NM_016115 | 2515.753  | 2355.536  | AI808029  | 962.776   | 1135.85   |
| D82345    | 417.464   | 495.052   | NM_014950 | 3333.173  | 3704.953  | AI971217  | 699.107   | 747.844   |
| NM_003814 | 651.681   | 824.677   | AL080180  | 750.029   | 706.24    | X03225    | 2714.589  | 3026.179  |
| NM_002968 | 457.546   | 429.56    | X89067    | 909.539   | 691.081   | AK097395  | 7355.752  | 7349.266  |
| AB032956  | 298.98    | 227.551   | AF147376  | 919.362   | 940.828   | M12783    | 1359.623  | 1421.196  |
| NM_000262 | 1916.14   | 1490.367  | AK027190  | 877.566   | 668.676   | AK091535  | 1167.652  | 1743.634  |
| NM_017831 | 2274.366  | 1921.801  | AL360136  | 3703.76   | 4245.734  | AF085357  | 2151.264  | 2459.522  |
| AK024393  | 333.016   | 279.635   | AF086328  | 1219.153  | 2254.917  | NM_003841 | 17504.123 | 16900.729 |
| AK022537  | 6062.319  | 6987.436  | AF086427  | 1229.971  | 1811.133  | AF296673  | 526.279   | 702.719   |

|           |           |           |           |           |           |           |           |           |
|-----------|-----------|-----------|-----------|-----------|-----------|-----------|-----------|-----------|
| AF116632  | 544.287   | 1185.435  | AK023753  | 1428.08   | 1683.275  | NM_080824 | 558.454   | 781.604   |
| AF064597  | 949.766   | 2039.9    | AF086441  | 3386.244  | 3253.729  | AB032956  | 615.738   | 1052.282  |
| AF198444  | 693.674   | 1209.862  | AK027255  | 872.304   | 648.247   | NM_018002 | 1731.587  | 1651.434  |
| NM_006345 | 2153.399  | 2369.838  | AK022487  | 5442.1    | 4748.233  | AK024821  | 6183.995  | 4502.912  |
| NM_003255 | 16092.409 | 14800.822 | AL355728  | 764.138   | 668.367   | AB002340  | 1885.207  | 1327.84   |
| AL080128  | 2821.416  | 2407.648  | NM_014117 | 1001.139  | 1012.712  | NM_000224 | 3685.229  | 3236.087  |
| AB037787  | 1575.836  | 2453.985  | AF086087  | 4608.745  | 3788.132  | NM_014325 | 2585.193  | 2734.723  |
| AB033072  | 659.1     | 997.714   | AK000671  | 27661.631 | 19004.24  | NM_006414 | 3176.952  | 3147.971  |
| AB040892  | 1365.439  | 2003.768  | AK094020  | 829.924   | 1024.094  | NM_014322 | 1001.648  | 1101.447  |
| NM_018265 | 10144.117 | 6880.434  | AL137425  | 1479.889  | 1576.333  | NM_004122 | 2050.614  | 2074.696  |
| AF230904  | 5862.25   | 4299.057  | AL137637  | 946.458   | 635.084   | NM_002925 | 9396.958  | 10955.191 |
| NM_017595 | 1175.266  | 1219.059  | AL359584  | 1447.728  | 689.967   | NM_000160 | 1780.931  | 1782.106  |
| AL157480  | 3521.233  | 3275.722  | AL137285  | 1277.702  | 611.006   | NM_003301 | 755.727   | 922.096   |
| NM_014385 | 1393.988  | 1060.408  | AL137456  | 1956.193  | 1818.32   | NM_000955 | 764.382   | 969.729   |
| NM_018110 | 2037.975  | 1324.628  | AK021649  | 796.388   | 968.016   | U27768    | 1111.015  | 1283.237  |
| AF312678  | 999.233   | 986.875   | AF088007  | 954.527   | 981.206   | AF305550  | 1094.528  | 1378.962  |
| NM_006253 | 1918.006  | 2012.824  | AK024874  | 955.932   | 1612.086  | U66582    | 10476.405 | 12560.315 |
| NM_003865 | 483.218   | 507.328   | AK021847  | 1178.432  | 1459.198  | S73288    | 513.173   | 520.177   |
| NM_018262 | 1382.754  | 1084.098  | AK023086  | 1432.789  | 1092.755  | NM_006195 | 1606.908  | 2038.255  |
| NM_003220 | 901.022   | 804.92    | AF241534  | 687.502   | 808.911   | NM_003812 | 847.59    | 844.933   |
| AF009674  | 3669.904  | 3560.817  | NM_017621 | 3941.953  | 2585.788  | NM_000845 | 3547.605  | 3481.849  |
| NM_000360 | 1264.129  | 1338.36   | AK023574  | 1120.318  | 879.48    | NM_004675 | 1047.39   | 1241.946  |
| NM_000844 | 1038.229  | 1506.393  | AF131767  | 2097.26   | 2055.924  | NM_000950 | 33136.68  | 31314.658 |
| NM_005510 | 5359.576  | 6519.048  | AF211976  | 648.077   | 436.229   | NM_005135 | 3334.828  | 3678.102  |
| Z36817    | 1202.734  | 1833.029  | AK021907  | 2240.395  | 2214.904  | NM_001275 | 54252.328 | 61914.434 |
| NM_014505 | 11639.942 | 12336.536 | AK022029  | 881.793   | 718.973   | NM_000322 | 56621.75  | 64664.551 |
| NM_004205 | 5378.355  | 6972.577  | AK022320  | 1167.641  | 778.881   | AK025772  | 1024.533  | 1014.437  |
| NM_016162 | 2230.336  | 1480.135  | AK022196  | 878.323   | 1311.964  | NM_005505 | 1087.202  | 847.807   |
| AF130056  | 2158.988  | 1584.946  | AK022350  | 742.641   | 1042.969  | NM_152747 | 968.165   | 834.729   |
| NM_002201 | 41539.305 | 32437.957 | NM_018280 | 594.91    | 638.532   | NM_017415 | 795.017   | 940.223   |
| AK025047  | 911.369   | 1012.911  | AK025763  | 815.55    | 597.676   | NM_001667 | 21043.215 | 20409.285 |
| NM_006805 | 1865.989  | 2335.742  | AK026503  | 990.859   | 952.911   | AB046834  | 607.119   | 506.716   |
| NM_006763 | 1040.43   | 984.081   | AK026671  | 1215.014  | 889.463   | AB029033  | 8460.438  | 8800.327  |
| NM_006119 | 5088.853  | 3797.709  | AK025522  | 9055.242  | 8023.355  | AF091034  | 1761.457  | 2174.927  |
| NM_004465 | 1093.62   | 818.124   | AK025464  | 41544.078 | 44923.777 | NM_005301 | 17123.867 | 20032.92  |
| AK026927  | 1953.46   | 1570.355  | AL049962  | 2468.286  | 3832.933  | NM_016653 | 1597.433  | 1958.624  |
| NM_014055 | 7160.577  | 4964.932  | NM_020405 | 1261.175  | 1403.464  | AB035124  | 1947.536  | 1698.639  |
| NM_001761 | 2272.502  | 1333.138  | NM_004985 | 6712.367  | 4512.705  | AF060170  | 779.307   | 1260.711  |
| BE884341  | 1290.359  | 682.833   | AL080151  | 2556.415  | 2768.138  | NM_016602 | 580.905   | 641.579   |
| AF231997  | 1157.669  | 569.645   | AK001308  | 625.405   | 530.12    | NM_004405 | 7705.372  | 7536.486  |
| NM_007125 | 742.82    | 746.125   | AK024127  | 1144.101  | 922.271   | AK023397  | 1349.645  | 1951.087  |
| NM_002595 | 7526.175  | 7071.03   | AK024243  | 932.942   | 938.421   | NM_001725 | 1482.581  | 1546.35   |
| NM_020184 | 833.524   | 770.252   | AK021574  | 565.179   | 505.468   | NM_004075 | 9716.117  | 9075.673  |
| NM_005815 | 1704.648  | 1262.228  | AF119911  | 9514.963  | 13364.635 | NM_002995 | 288.71    | 293.622   |
| NM_001225 | 1580.671  | 1431.809  | AF116656  | 5258.771  | 7902.036  | NM_000383 | 517.681   | 594.27    |
| NM_014915 | 471.958   | 392.862   | NM_001050 | 4791.678  | 5667.053  | NM_004633 | 491.558   | 514.586   |
| NM_000250 | 1585.874  | 1369.74   | AF132206  | 2417.603  | 3428.531  | X01394    | 42817.531 | 43753.66  |
| NM_018147 | 14315.652 | 15602.25  | AJ001869  | 4667.136  | 5820.259  | NM_000041 | 43544.348 | 47290.273 |
| NM_018967 | 2707.096  | 3185.342  | AJ002969  | 477.571   | 695.441   | NM_002984 | 1897.564  | 1517.347  |
| NM_001850 | 749.108   | 704.131   | NM_005295 | 1655.646  | 1707.505  | AB037752  | 4469.808  | 4725.486  |
| NM_002160 | 1484.319  | 1354.95   | NM_020213 | 3764.367  | 3818.762  | AF317425  | 1623.221  | 1401.666  |
| NM_005675 | 1099.62   | 1238.37   | D17267    | 10307.67  | 13563.079 | AF264717  | 1277.518  | 858.12    |
| NM_005585 | 188.802   | 178.786   | AF200341  | 566.838   | 640.776   | NM_012260 | 6231.129  | 4930.103  |

|           |           |           |           |           |           |           |           |           |
|-----------|-----------|-----------|-----------|-----------|-----------|-----------|-----------|-----------|
| BC030636  | 2979.423  | 2644.802  | AJ238214  | 1174.775  | 778.084   | NM_001141 | 715.416   | 698.865   |
| NM_006587 | 327.315   | 336.746   | AB040944  | 2195.088  | 1600.102  | NM_000018 | 5535.959  | 6612.668  |
| D21064    | 1051.101  | 951.583   | NM_018145 | 3039.881  | 1798.29   | AB028992  | 394.816   | 409.885   |
| NM_002812 | 4293.2    | 2662.075  | AK024538  | 773.75    | 967.275   | NM_018479 | 4721.845  | 5285.772  |
| NM_020365 | 3113.516  | 2122.224  | AF086467  | 2097.746  | 1953.274  | NM_014362 | 1629.013  | 1578.791  |
| NM_003982 | 1544.989  | 1249.84   | AL137345  | 1935.581  | 1842.17   | NM_018308 | 1127.406  | 1043.45   |
| NM_002079 | 2675.121  | 1633.172  | AK000967  | 1886.597  | 2478.905  | NM_001832 | 10321.229 | 12599.063 |
| NM_002112 | 5336.42   | 2600.557  | AK021583  | 2015.096  | 2327.951  | NM_017774 | 7361.95   | 8225.548  |
| NM_004121 | 2059.758  | 1482.921  | AL137442  | 3037.491  | 3092.146  | AB037716  | 2103.566  | 2374.62   |
| AY007092  | 1782.565  | 1682.015  | AL049281  | 883.734   | 797.464   | NM_016297 | 2000.138  | 2079.677  |
| NM_001902 | 626.203   | 696.544   | NM_001208 | 18595.287 | 15997.557 | NM_001752 | 5545.149  | 5610.575  |
| AL137605  | 10824.005 | 7368.165  | AL050061  | 760.657   | 773.287   | AL137672  | 828.956   | 750.905   |
| NM_016261 | 1684.39   | 1739.276  | AL050206  | 1873.405  | 2386.421  | X64177    | 40613.512 | 4933.995  |
| NM_006519 | 1169.078  | 1103.424  | AK026898  | 7201.031  | 5140.083  | NM_015994 | 1954.997  | 2122.327  |
| NM_004607 | 52833.297 | 52072.988 | NM_006637 | 1311.147  | 1225.542  | NM_002241 | 382.979   | 362.895   |
| NM_012076 | 853.279   | 633.901   | AK022419  | 927.003   | 720.798   | NM_014065 | 1463.376  | 1506.676  |
| D14678    | 4819.904  | 4417.055  | AJ251832  | 721.612   | 227.322   | NM_001695 | 1059.913  | 975.293   |
| NM_016221 | 4349.202  | 4296.149  | NM_014624 | 38719.934 | 44514.98  | NM_002248 | 1273.749  | 1211.882  |
| NM_018113 | 867.608   | 778.977   | NM_013936 | 758.573   | 1108.408  | NM_012281 | 1767.159  | 1481.342  |
| NM_005187 | 1788.175  | 1616.56   | AF086145  | 1829.464  | 2299.419  | NM_000262 | 1534.035  | 1397.409  |
| U73377    | 3597.509  | 2854.369  | Z70709    | 819.403   | 1203.818  | NM_017831 | 2041.535  | 4053.32   |
| NM_002199 | 1970.873  | 1762.806  | BC002538  | 4987.551  | 9189.627  | AK022537  | 3409.537  | 3654.721  |
| BC005219  | 4832.272  | 3533.495  | AK022355  | 691.243   | 954.273   | AF064597  | 691.677   | 737.386   |
| NM_004268 | 1073.139  | 1441.359  | NM_017836 | 3380.41   | 5287.18   | NM_006345 | 1496.941  | 1396.592  |
| NM_006662 | 3440.613  | 3760.611  | AK096584  | 15745.746 | 8723.253  | NM_006875 | 926.322   | 1175.265  |
| NM_004031 | 686.948   | 1010.123  | Z29070    | 866.575   | 321.986   | D87119    | 2544.19   | 2736.374  |
| NM_004514 | 3419.337  | 3703.834  | AL078636  | 960.878   | 567.666   | AL050040  | 423.785   | 508.1     |
| NM_006163 | 2097.158  | 1383.007  | AK022382  | 605.475   | 439.775   | NM_006556 | 5094.318  | 5209.351  |
| NM_001272 | 7128.877  | 3253.814  | AF147365  | 684.4     | 739.267   | NM_000849 | 3183.279  | 2261.354  |
| NM_006196 | 48325.816 | 26267.869 | S72917    | 1227.769  | 1461.528  | NM_004678 | 1085.227  | 728.233   |
| AV733560  | 1474.204  | 784.337   | AF076617  | 62621.797 | 56006.41  | NM_000950 | 29351.117 | 20339.088 |
| D17129    | 50004.094 | 33350.121 | M91159    | 1257.762  | 1903.736  | NM_005139 | 3474.442  | 3840.984  |
| NM_003091 | 14531.193 | 9624.879  | AK025129  | 754.61    | 925.678   | L10139    | 1212.965  | 1607.39   |
| NM_004247 | 3509.487  | 2344.12   | NM_014392 | 2468.178  | 1977.463  | NM_000039 | 50670.926 | 51014.188 |
| NM_017722 | 2951.194  | 2340.855  | AK023291  | 5946.221  | 6139.32   | NM_020470 | 3622.094  | 3587.654  |
| AL137730  | 2902.379  | 2215.215  | BF541820  | 1293.836  | 1522.98   | NM_006574 | 431.001   | 399.624   |
| NM_004500 | 30881.744 | 21957.33  | CY3Cy5    | 12191.424 | 1122.945  | AA478950  | 1741.658  | 1696.144  |
| NM_003276 | 7324.336  | 4051.756  | BG752013  | 1217.171  | 1309.653  | BF942101  | 3655.8    | 4220.721  |
| AL137681  | 2347.019  | 2007.463  | X07696    | 3557.471  | 2969.582  | BI825012  | 20881.928 | 20880.26  |
| NM_004095 | 22056.213 | 18465.34  | AA481015  | 868.291   | 815.784   | M21574    | 558.649   | 499.387   |
| NM_014365 | 916.545   | 889.68    | AI925826  | 8166.355  | 8051.538  | BM051302  | 753.999   | 793.312   |
| NM_005147 | 2660.865  | 1914.47   | U04209    | 5022.512  | 4297.132  | BE314182  | 11044.342 | 12441.751 |
| NM_014665 | 3784.296  | 2836.295  | Z15108    | 1873.738  | 2080.668  | AI808029  | 859.352   | 1219.167  |
| AK023609  | 1701.597  | 1439.209  | M55284    | 505.596   | 948.343   | AI971217  | 661.64    | 681.991   |
| NM_018019 | 2278.24   | 1695.721  | AA001218  | 700.852   | 965.948   | X03225    | 2941.653  | 3446.934  |
| AK027220  | 1809.952  | 2260.142  | AA679391  | 1027.22   | 959.324   | AK097395  | 12806.527 | 12757.482 |
| NM_018011 | 4644.897  | 5626.201  | BG682146  | 4244.917  | 5190.136  | M12783    | 1545.995  | 1505.593  |
| NM_000476 | 1061.199  | 1944.6    | AA884709  | 1796.268  | 3238.159  | AK091535  | 1438.93   | 1789.927  |
| AF132733  | 3721.942  | 4704.458  | NM_005060 | 3636.984  | 3872.47   | AF085357  | 2588.663  | 2624.942  |
| NM_001071 | 7678.19   | 4689.229  | NM_005437 | 9377.401  | 8731.606  | NM_003841 | 16829.959 | 14447.287 |
| NM_006187 | 592.024   | 258.283   | SR9       | 30910.746 | 6411.059  | AF296673  | 584.062   | 557.687   |
| NM_020354 | 3961.054  | 3112.18   | CY3Cy5    | 10066.623 | 910.499   | NM_004633 | 380.54    | 386.187   |
| AF202637  | 7048.754  | 4401.429  | NM_003974 | 1407.107  | 1830.107  | X01394    | 42710.887 | 30555.459 |



|           |           |           |           |           |           |           |           |           |
|-----------|-----------|-----------|-----------|-----------|-----------|-----------|-----------|-----------|
| NM_00002E | 26677.055 | 14305.765 | NM_00606E | 2524.991  | 2581.618  | NM_00004I | 40217.258 | 33002.121 |
| AB033016  | 9477.547  | 6083.119  | NM_01433E | 36258.176 | 43111.16  | NM_00298A | 2201.976  | 1531.819  |
| D87452    | 1302.541  | 1103.203  | NM_00149E | 1572.539  | 1341.009  | AB037752  | 5973.035  | 6067.23   |
| AB037864  | 2387.498  | 2196.041  | NM_00228E | 2637.667  | 2457.565  | AF317425  | 2196.299  | 1809.161  |
| L26494    | 850.451   | 875.245   | NM_00441E | 1077.239  | 539.898   | NM_01800Z | 1506.039  | 1538.57   |
| AK024322  | 929.329   | 1103.543  | NM_00062E | 10891.228 | 11509.462 | AK024821  | 5708.941  | 4949.269  |
| BF382513  | 3109.198  | 3269.234  | AK000184  | 1403.187  | 2093.686  | AB002340  | 1837.023  | 1739.666  |
| AB020713  | 10747.339 | 10158.757 | AF055020  | 10096.373 | 11307.093 | NM_000224 | 3348.36   | 3321.876  |
| AK025426  | 781.888   | 703.627   | NM_00698E | 1344.201  | 1610.238  | NM_01432E | 2585.146  | 2858.538  |
| NM_01655E | 5251.167  | 4994.377  | AF272043  | 4464.208  | 4730.088  | NM_006414 | 3229.433  | 3420.244  |
| NM_00714E | 6451.064  | 5642.827  | NM_002587 | 10670.752 | 8956.165  | NM_01432Z | 938.879   | 1249.714  |
| AL133112  | 681.804   | 513.106   | NM_00223E | 2009.167  | 2327.958  | NM_00412Z | 2218.613  | 2322.703  |
| AF085855  | 296.617   | 294.047   | NM_00486E | 3309.578  | 3873.279  | NM_00292E | 9961.113  | 10586.018 |
| AK002078  | 2138.789  | 3305.51   | AF130728  | 797.651   | 1024.905  | NM_00016C | 1763.297  | 2280.493  |
| AF085837  | 1190.292  | 1523.678  | NM_00128E | 19167.666 | 19435.35  | NM_003301 | 757.232   | 689.374   |
| AK023165  | 1579.32   | 3085.897  | NM_002414 | 16387.957 | 15805.428 | NM_00095E | 1081.347  | 1138.235  |
| AK023857  | 828.461   | 1709.91   | NM_00035E | 1840.848  | 1776.452  | U27768    | 1422.748  | 1299.937  |
| NM_01611E | 1711      | 2140.705  | AL133580  | 2986.917  | 2934.526  | AF305550  | 1295.093  | 1589.358  |
| NM_01495C | 2184.264  | 1396.295  | NM_01466E | 14287.696 | 13687.208 | U66582    | 11969.643 | 12380.345 |
| AL080180  | 393.827   | 297.73    | NM_005451 | 3241.432  | 3210.046  | S73288    | 503.697   | 402.513   |
| X89067    | 604.304   | 512.517   | NM_00717Z | 3102.009  | 2700.908  | NM_00619E | 1829.407  | 1622.082  |
| AF147376  | 713.737   | 629.806   | NM_00615Z | 3808.12   | 2871.079  | NM_00381Z | 897.573   | 702.08    |
| AK027190  | 590.669   | 380.342   | NM_01333Z | 22128.955 | 29016.557 | NM_002241 | 457.034   | 421.857   |
| AL360136  | 3008.636  | 2752.803  | NM_00233Z | 5032.794  | 4874.454  | NM_01406E | 1369.098  | 1297.275  |
| AF086259  | 840.177   | 595.017   | NM_00670E | 4929.171  | 5730.125  | NM_00169E | 1305.05   | 1100.487  |
| AF086369  | 380.382   | 337.447   | NM_01443E | 1075.934  | 1484.646  | NM_00224E | 1476.896  | 1205.278  |
| AF086328  | 966.373   | 1102.98   | NM_00558Z | 2190.267  | 3119.362  | NM_012281 | 2391.485  | 2270.291  |
| AF086427  | 532.927   | 473.209   | NM_01226E | 4148.344  | 5223.258  | AK025772  | 1056.063  | 915.099   |
| AK024196  | 694.476   | 1231.33   | NM_00455E | 2588.42   | 2690.649  | NM_00550E | 930.871   | 798.723   |
| AK001099  | 344.641   | 602.429   | X56692    | 5736.052  | 5727.585  | NM_15274Z | 947.627   | 1141.697  |
| AK023753  | 1424.446  | 1836.128  | AK024467  | 1288.368  | 1522.868  | NM_01741E | 781.987   | 796.345   |
| AF086441  | 6118.907  | 5300.22   | NM_01427E | 2036.709  | 1885.9    | NM_00166Z | 19891.096 | 20985.035 |
| AK027255  | 643.13    | 774.46    | NM_00583E | 1330.208  | 573.976   | AB046834  | 520.645   | 567.002   |
| AK022487  | 4335.372  | 4901.814  | NM_000734 | 3399.143  | 3565.518  | AB029033  | 8619.604  | 9138.506  |
| NM_014117 | 1407.762  | 1177.843  | NM_012331 | 3581.845  | 3219.928  | AF091034  | 1759.278  | 2220.854  |
| AF086087  | 2928.135  | 1962.275  | NM_00658Z | 72497.57  | 8588.142  | NM_005301 | 20311.559 | 21485.424 |
| AF147422  | 920.037   | 1595.255  | X82693    | 9121.185  | 7887.762  | NM_00416Z | 367.362   | 458.977   |
| AF075091  | 899.385   | 616.106   | NM_00717E | 11300.355 | 11575.69  | NM_01665Z | 1814.703  | 1908.672  |
| AK000671  | 11820.276 | 13043.972 | NM_00272Z | 1618.021  | 1921.505  | AB035124  | 2407.19   | 1933.772  |
| AK094020  | 396.055   | 254.385   | AF317058  | 1642.254  | 404.715   | AF060170  | 443.223   | 661.914   |
| AL137425  | 1232.683  | 803.759   | AK025965  | 217.397   | 3418.685  | NM_01660Z | 646.697   | 731.235   |
| AL137637  | 421.488   | 245.185   | M22538    | 16842.381 | 19839.814 | NM_00440E | 7927.073  | 6622.628  |
| AL359584  | 921.15    | 626.884   | NM_00602E | 889.703   | 2311.796  | AK023397  | 1607.897  | 1519.471  |
| AL137285  | 649.808   | 532.334   | NM_014904 | 986.442   | 928.103   | NM_00172E | 1543.752  | 1548.571  |
| AL137456  | 1253.986  | 1055.995  | AL137576  | 10976.833 | 11921.431 | NM_00407E | 9642.42   | 7722.136  |
| AL157489  | 822.593   | 528.553   | NM_01835E | 4101      | 4345.179  | NM_00038Z | 896.726   | 625.192   |
| AL390157  | 1043.866  | 911.227   | AF131781  | 3332.441  | 3218.048  | NM_00687E | 847.677   | 778.479   |
| AK021649  | 448.99    | 349.558   | NM_00651E | 18055.002 | 17182.082 | D87119    | 2658.175  | 2297.993  |
| AK024874  | 596.688   | 625.628   | NM_00305E | 6249.201  | 5979.278  | AL050040  | 622.038   | 697.333   |
| AK021847  | 1303.227  | 1773.528  | NM_00507E | 1004.49   | 1217.196  | NM_00655E | 5510.476  | 5906.984  |
| AK023086  | 2043.008  | 1751.799  | NM_006841 | 821.506   | 877.045   | AL133066  | 529.255   | 539.532   |
| AF241534  | 560.083   | 437.24    | NM_014824 | 2040.281  | 1729.63   | AF264717  | 1105.78   | 972.136   |
| NM_017621 | 3788.242  | 2611.405  | NM_014504 | 2622.312  | 2525.582  | NM_01226C | 6797.557  | 6779.089  |

|           |           |           |           |           |           |           |           |           |
|-----------|-----------|-----------|-----------|-----------|-----------|-----------|-----------|-----------|
| AK023574  | 989.812   | 817.088   | NM_014408 | 6159.452  | 6356.084  | NM_001141 | 552.302   | 637.961   |
| AF131767  | 1322.309  | 1154.984  | NM_014741 | 2486.052  | 2305.875  | NM_000018 | 4776.044  | 6879.277  |
| AF211976  | 370.475   | 350.416   | AF212247  | 5834.968  | 4712.936  | AB028992  | 444.901   | 479.094   |
| AK021807  | 662.984   | 621.409   | AF161407  | 18313.055 | 18650.111 | NM_018479 | 5140.204  | 5612.353  |
| NM_013343 | 368.289   | 504.613   | NM_014738 | 3068.786  | 3280.762  | NM_014362 | 1800.385  | 1800.397  |
| AK021907  | 1241.558  | 856.548   | NM_018080 | 6254.404  | 7471.201  | NM_018308 | 1444.187  | 1120.441  |
| AK022029  | 566.246   | 265.975   | AF174605  | 721.496   | 1061.84   | NM_001832 | 10938.253 | 11301.893 |
| AK022167  | 319.263   | 240.014   | NM_014453 | 15889.997 | 16253.884 | NM_017774 | 7311.895  | 7095.995  |
| AK022320  | 900.749   | 869.101   | NM_005713 | 1649.369  | 2169.564  | AB037716  | 1478.177  | 1404.853  |
| AK022058  | 730.11    | 465.282   | AK021951  | 1129.652  | 1428.043  | NM_016297 | 2256.491  | 1962.359  |
| AK022196  | 928.971   | 1750.082  | AK023553  | 1685.846  | 2013.614  | NM_001752 | 5783.244  | 5145.745  |
| AK022429  | 294.765   | 173.111   | NM_014600 | 915.152   | 638.685   | AL137672  | 687.843   | 655.058   |
| NM_018280 | 865.904   | 1770.117  | NM_016733 | 1377.758  | 1534.723  | X64177    | 39894.453 | 3738.644  |
| AK025763  | 492.699   | 539.382   | AF181994  | 3556.576  | 3789.496  | NM_015994 | 2072.04   | 1898.329  |
| AK024381  | 617.642   | 456.033   | NM_018962 | 1330.408  | 1379.963  | NM_018476 | 11833.155 | 9049.408  |
| AK026503  | 816.766   | 885.982   | AF125100  | 3739.436  | 3353.12   | AF220492  | 4125.306  | 3675.24   |
| AK026671  | 1244.199  | 947.691   | NM_006114 | 11068.073 | 10523.018 | X89671    | 1158.32   | 1032.795  |
| AK025522  | 8374.907  | 5979.411  | AF130728  | 901.739   | 725.81    | NM_014941 | 3639.36   | 3162.727  |
| AK025464  | 30391.535 | 21555.533 | NM_004987 | 904.128   | 992.845   | NM_018372 | 3320.205  | 2970.062  |
| AL049962  | 1922.103  | 1798.811  | NM_001289 | 19481.742 | 21915.953 | NM_013253 | 1379.088  | 920.805   |
| NM_005190 | 218.692   | 307.547   | NM_001131 | 39020.699 | 46073.57  | NM_005895 | 2452.744  | 2007.439  |
| NM_020408 | 1049.371  | 811.345   | BG752013  | 756.815   | 1163.401  | NM_003814 | 719.778   | 841.76    |
| NM_004988 | 4090.182  | 2200.869  | X07696    | 4339.648  | 4027.429  | NM_002968 | 556.464   | 625.108   |
| AL080151  | 1392.739  | 1896.774  | AA481015  | 1044.327  | 1020.4    | AB032956  | 358.829   | 242.926   |
| AL050085  | 318.718   | 609.28    | M55284    | 836.614   | 1041.983  | NM_015957 | 440.898   | 42.36     |
| AK024127  | 831.378   | 781.373   | AA001218  | 700.331   | 563.03    | NM_000262 | 1863.718  | 1733.499  |
| AK024243  | 511.155   | 612.34    | AA679391  | 1573.012  | 1613.486  | NM_017831 | 1777.713  | 1526.195  |
| AK021574  | 1288.467  | 1000.559  | BG682146  | 3435.088  | 3757.398  | AK022537  | 3818.377  | 3609.756  |
| AF119911  | 10733.082 | 10162.44  | AA884709  | 891.727   | 865.881   | AF064597  | 966.379   | 924.464   |
| AF116656  | 3661.926  | 3509.87   | NM_005060 | 3296.632  | 3361.004  | NM_006345 | 1477.551  | 1198.846  |
| NM_001050 | 2944.641  | 2075.458  | NM_005437 | 9577.887  | 10201.864 | NM_003255 | 15457.474 | 13321.716 |
| AF132206  | 1751.707  | 1420.715  | AK022417  | 2957.132  | 2664.127  | AL080128  | 2717.646  | 2312.892  |
| AJ001869  | 2066.548  | 1912.632  | U50534    | 1340.192  | 1416.752  | AB037787  | 1944.048  | 1624.307  |
| NM_005295 | 601.507   | 442.998   | NM_014278 | 1864.44   | 1436.202  | AB033072  | 428.964   | 519.256   |
| NM_020213 | 3008.999  | 2048.473  | NM_005838 | 1075.306  | 500.538   | AB040892  | 1451.526  | 938.67    |
| D17267    | 8336.517  | 6660.77   | NM_000734 | 2680.77   | 2389.517  | NM_018268 | 14755.096 | 12497.357 |
| AJ238214  | 797.902   | 562.025   | NM_012331 | 3114.21   | 3270.849  | AF230904  | 3975.516  | 4029.388  |
| AB040944  | 1925.926  | 1476.223  | NM_006644 | 4542.625  | 3816.89   | NM_017596 | 881.204   | 926.784   |
| NM_018145 | 2421.916  | 1611.359  | NM_006583 | 75701.945 | 10058.279 | AL157480  | 2293.61   | 2938      |
| AK024326  | 767.377   | 474.419   | NM_003974 | 1729.595  | 1768.948  | NM_014386 | 1141.98   | 1288.058  |
| U61088    | 626.715   | 510.094   | NM_006065 | 2575.796  | 1990.474  | NM_018110 | 1794.343  | 1951.824  |
| AF086467  | 1717.259  | 1863.931  | NM_014339 | 41183.66  | 41078.363 | AF312678  | 589.644   | 601.887   |
| AL137345  | 1399.478  | 1152.199  | NM_001495 | 1423.089  | 1110.647  | NM_006253 | 1134.882  | 1244.145  |
| AK000967  | 1871.263  | 2066.254  | NM_002288 | 2850.857  | 3380.533  | NM_003866 | 622.108   | 679.146   |
| AK021583  | 1575.51   | 1518.248  | NM_004416 | 820.621   | 1308.595  | NM_018262 | 802.889   | 754.654   |
| AL137442  | 2733.551  | 2583.702  | NM_000628 | 11439.982 | 17342.516 | NM_006207 | 956.385   | 797.586   |
| AL049281  | 1362.652  | 1604.443  | AF015041  | 1724.152  | 2312.28   | NM_003220 | 1001.603  | 1006.503  |
| NM_001208 | 23568.996 | 17760.4   | NM_002363 | 1556.199  | 1900.167  | AF009674  | 4217.15   | 3362.12   |
| AL050061  | 772.318   | 889.649   | AK000184  | 1804.42   | 2871.944  | NM_000360 | 806.912   | 795.955   |
| AL050206  | 906.991   | 887.965   | NM_006986 | 1482.261  | 1449.658  | NM_000844 | 1027.856  | 1085.354  |
| AK026898  | 6619.512  | 4609.69   | AF272043  | 3748.431  | 4051.297  | NM_005510 | 3548.904  | 2758.851  |
| NM_006637 | 1104.499  | 769.435   | NM_002587 | 10833.496 | 10194.622 | Z36817    | 961.51    | 955.592   |
| AK022419  | 505.577   | 497.796   | NM_002238 | 1748.096  | 1681.012  | NM_014505 | 14381.249 | 9892.466  |

|           |           |           |           |           |           |           |           |           |
|-----------|-----------|-----------|-----------|-----------|-----------|-----------|-----------|-----------|
| AJ251832  | 472.636   | 283.598   | NM_004868 | 2221.583  | 2741.958  | NM_004208 | 4021.725  | 3555.493  |
| NM_014624 | 38486.203 | 27358.527 | NM_004669 | 3208.681  | 4453.664  | NM_016162 | 1240.82   | 948.656   |
| NM_013936 | 660.165   | 534.913   | NM_007028 | 8437.314  | 9154.415  | AF130056  | 1227.366  | 1198.002  |
| AF086145  | 1455.004  | 796.55    | AF131781  | 2882.536  | 3094.32   | NM_002201 | 43216.703 | 32235.488 |
| Z70709    | 433.408   | 434.594   | NM_006516 | 18020.564 | 15244.485 | AK025047  | 1126.167  | 837.774   |
| BC002538  | 3850.804  | 2481.781  | NM_015865 | 716.825   | 750.298   | NM_006806 | 987.568   | 690.079   |
| NM_017836 | 2420.006  | 1383.627  | NM_003055 | 4016.852  | 3944.628  | NM_006763 | 778.469   | 597.202   |
| AK096584  | 5891.883  | 3086.335  | NM_005075 | 1227.651  | 1427.878  | NM_006119 | 3363.425  | 2681.65   |
| Z29070    | 450.899   | 379.682   | NM_002414 | 13180.588 | 13726.136 | NM_004465 | 965.057   | 980.286   |
| AL078636  | 859.946   | 604.754   | AL133580  | 2152.073  | 2040.405  | AK026927  | 1197.292  | 1390.832  |
| AK022382  | 442.068   | 200.359   | NM_014666 | 13620.783 | 14228.733 | NM_014058 | 5127.606  | 5039.835  |
| AF147362  | 401.834   | 556.515   | NM_005451 | 3226.016  | 4010.344  | NM_001761 | 1762.517  | 1869.984  |
| S72917    | 817.908   | 888.761   | NM_007172 | 2982.26   | 3867.497  | BE884341  | 1670.047  | 1713.544  |
| AF076617  | 53233.832 | 54993.426 | NM_002333 | 5155.292  | 8467.279  | AF231997  | 1113.073  | 1103.841  |
| M91159    | 441.544   | 515.354   | NM_003400 | 11159.979 | 12763.335 | NM_007125 | 420.399   | 498.278   |
| NM_014392 | 2877.667  | 2559.669  | NM_003692 | 873.439   | 1858.159  | NM_002598 | 4956.365  | 4203.031  |
| AK023291  | 5852.761  | 5331.625  | NM_006705 | 3141.425  | 3709.911  | NM_020184 | 644.248   | 473.615   |
| CY3Cy5    | 9810.478  | 1268.073  | NM_005582 | 1875.569  | 2154.135  | NM_005815 | 939.832   | 943.812   |
| BG752013  | 537.454   | 1259.605  | NM_012266 | 4234.681  | 4224.514  | NM_001228 | 1136.659  | 1120.973  |
| AA481015  | 590.537   | 677.265   | NM_004559 | 2993.032  | 2948.8    | NM_014916 | 381.329   | 250.96    |
| AI925826  | 8201.991  | 6468.085  | X56692    | 5967.445  | 6526.854  | NM_000250 | 1329.271  | 1060.477  |
| U04209    | 4052.008  | 2277.734  | NM_014476 | 714.192   | 838.344   | NM_018147 | 9077.261  | 8096.111  |
| Z15108    | 1219.135  | 1210.632  | NM_014600 | 956.034   | 796.163   | NM_018967 | 3006.314  | 2819.128  |
| M55284    | 819.722   | 841.776   | AF181994  | 2487.477  | 2190.274  | NM_001850 | 737.221   | 527.082   |
| AA001218  | 662.365   | 455.374   | NM_018962 | 1184.506  | 1147.259  | NM_002160 | 1252.752  | 1176.953  |
| AA679391  | 841.066   | 986.755   | AF125100  | 3352.314  | 3106.552  | NM_005675 | 761.143   | 637.856   |
| BG682146  | 3518.767  | 5566.247  | NM_006114 | 10538.473 | 10716.011 | BC030636  | 1066.637  | 856.93    |
| NM_005437 | 9364.524  | 11676.879 | X82693    | 8100.87   | 6761.979  | D21064    | 388.58    | 420.132   |
| SR9       | 30516.389 | 6492.981  | NM_007176 | 8694.809  | 8749.043  | NM_002812 | 2112.268  | 2114.526  |
| CY3Cy5    | 7942.768  | 1021.808  | NM_002722 | 1599.044  | 1531.804  | NM_020365 | 2205.323  | 4554.576  |
| NM_006065 | 649.23    | 674.951   | NM_006028 | 1066.14   | 1196.226  | NM_003982 | 1001.881  | 1469.128  |
| NM_014339 | 34763.27  | 32712.32  | NM_014904 | 976.953   | 735.441   | NM_002079 | 1759.216  | 2502.085  |
| NM_001495 | 864.741   | 859.186   | AL137576  | 12497.358 | 11770.985 | NM_002112 | 6436.742  | 6497.909  |
| NM_002288 | 2201.511  | 2472.317  | NM_018358 | 4023.586  | 4843.03   | NM_004121 | 2736.172  | 2898.562  |
| NM_004416 | 617.288   | 609.925   | NM_013356 | 548.131   | 638.475   | AY007092  | 1290.081  | 1450.05   |
| NM_000628 | 8381.674  | 8934.841  | NM_005060 | 2754.085  | 2421.2    | NM_001902 | 405.012   | 457.538   |
| AB005216  | 5031.778  | 4437.709  | NM_005437 | 6003.641  | 4232.523  | AL137605  | 22917.092 | 19609.436 |
| NM_000325 | 9787.147  | 9054.371  | AK022417  | 3051.298  | 2817.674  | NM_016261 | 1168.963  | 1212.157  |
| AF015041  | 1243.516  | 989.222   | U50534    | 1040.502  | 1286.803  | NM_006519 | 739.11    | 661.256   |
| NM_002363 | 647.211   | 525.565   | NM_014824 | 1930.225  | 1782.903  | NM_004607 | 46353.008 | 41726.242 |
| AK000184  | 897.306   | 979.505   | NM_014504 | 2306.162  | 2578.894  | NM_012076 | 670.629   | 607.335   |
| AF055020  | 5821.888  | 4678.518  | NM_014408 | 7592.016  | 8656.375  | NM_007285 | 7670.456  | 7315.429  |
| NM_006986 | 994.588   | 1216.087  | NM_014741 | 3158.674  | 3487.174  | D14678    | 4209.196  | 3209.282  |
| AF272043  | 4287.651  | 8129.6    | AF212247  | 6125.132  | 6360.772  | NM_016221 | 2096.922  | 1483.703  |
| NM_004868 | 1877.949  | 3600.802  | NM_018080 | 6744.192  | 7153.071  | NM_018113 | 470.553   | 417.759   |
| NM_007028 | 7458.032  | 8023.548  | AF174605  | 865.69    | 835.926   | NM_005187 | 954.139   | 753.839   |
| AF130728  | 652.966   | 851.841   | NM_014453 | 13093.258 | 12767.405 | U73377    | 1885.609  | 1210.05   |
| NM_001289 | 17668.502 | 18999.158 | NM_005713 | 1444.76   | 1683.673  | NM_002198 | 1684.446  | 2052.391  |
| NM_002414 | 559.594   | 1228.822  | AK021951  | 926.177   | 718.478   | BC005219  | 3053.678  | 3238.72   |
| NM_000355 | 901.073   | 1392.059  | AF272043  | 3989.299  | 4031.803  | NM_004268 | 624.032   | 413.53    |
| AL133580  | 1316.28   | 1242.986  | NM_002587 | 6338.039  | 5289.166  | NM_006662 | 6251.409  | 5381.269  |
| NM_014666 | 3849.457  | 3945.745  | NM_002238 | 1477.902  | 1293.596  | NM_004031 | 827.87    | 685.24    |
| NM_005451 | 2347.481  | 2181.78   | NM_004868 | 2493.373  | 2418.066  | NM_004514 | 1831.835  | 1635.198  |

|           |           |           |           |           |           |           |           |           |
|-----------|-----------|-----------|-----------|-----------|-----------|-----------|-----------|-----------|
| NM_007172 | 2188.979  | 1905.523  | NM_004669 | 2829.541  | 3216.663  | NM_006163 | 1187.487  | 1401.405  |
| NM_006152 | 3105.119  | 2195.842  | NM_007028 | 8071.296  | 7697.794  | NM_001272 | 6013.402  | 6209.25   |
| NM_013333 | 20863.025 | 20045.369 | NM_001289 | 19908.023 | 23906.982 | NM_003091 | 9876.126  | 9294.276  |
| NM_002333 | 4221.114  | 3398.11   | NM_001131 | 41903.695 | 46917.066 | NM_004247 | 2209.473  | 1892.256  |
| NM_003400 | 8447.28   | 6980.929  | BG752013  | 1126.11   | 986.619   | NM_017722 | 1653.597  | 1764.983  |
| NM_006705 | 2890.622  | 1826.89   | X07696    | 3922.795  | 3406.014  | AL137730  | 2881.566  | 2486.52   |
| NM_014439 | 781.018   | 699.838   | AA481015  | 1065.945  | 935.469   | NM_004500 | 17297.99  | 13739.097 |
| NM_005582 | 1586.821  | 1134.178  | AI925826  | 9623.674  | 10697.906 | NM_003276 | 4690.591  | 2422.642  |
| NM_012266 | 3916.073  | 5961.042  | U04209    | 5784.429  | 4263.043  | AL137681  | 1490.004  | 1253.257  |
| AK024467  | 490.935   | 689.796   | Z15108    | 2008.193  | 1838.954  | AK025694  | 48678.969 | 46817.719 |
| NM_014476 | 705.652   | 882.603   | M55284    | 1156.613  | 1029.087  | NM_002157 | 40065.582 | 26687.656 |
| NM_014278 | 1979.292  | 2190.024  | AA001218  | 487.042   | 982.301   | NM_004095 | 10926.947 | 7686.241  |
| NM_005838 | 858.27    | 336.667   | AA679391  | 1246.16   | 1301.807  | NM_014365 | 478.266   | 511.874   |
| NM_000734 | 1991.118  | 1865.887  | BG682146  | 3768.354  | 4470.636  | NM_005147 | 1050.386  | 759.627   |
| NM_012331 | 2858.949  | 2387.982  | NM_012266 | 3797.154  | 2868.586  | NM_014665 | 1805.815  | 1127.991  |
| NM_006583 | 54380.496 | 4989.317  | NM_004559 | 2730.503  | 2261.039  | AK023609  | 981.45    | 1017.499  |
| X82693    | 2307.842  | 1494.766  | X56692    | 6139.075  | 5933.957  | NM_018019 | 1875.97   | 1558.464  |
| NM_007176 | 4554.87   | 4663.282  | NM_014278 | 1490.759  | 1369.21   | AK027220  | 1068.331  | 876.958   |
| NM_002722 | 864.892   | 1098.523  | NM_005838 | 1156.683  | 428.636   | NM_018011 | 3450.386  | 3932.293  |
| AF317058  | 695.714   | 319.161   | NM_000734 | 2296.82   | 2217.108  | NM_000476 | 615.925   | 799.33    |
| M22538    | 12942.91  | 13396.248 | NM_012331 | 3306.398  | 2817.601  | AF132733  | 2133.008  | 1923.702  |
| NM_006028 | 392.494   | 479.149   | NM_006644 | 3984.533  | 3712.879  | NM_001071 | 4976.117  | 4109.554  |
| NM_014904 | 739.367   | 634.035   | NM_006065 | 2431.779  | 2578.13   | NM_006187 | 433.112   | 492.6     |
| AL137576  | 10561.684 | 12733.245 | NM_014339 | 41693.43  | 46818.699 | NM_020354 | 2190.736  | 3497.028  |
| AF131781  | 3360.585  | 3296.809  | NM_001495 | 1365.25   | 1268.443  | NM_000026 | 21663.223 | 37816.195 |
| NM_006516 | 13171.18  | 11152.463 | NM_002288 | 2900.719  | 3746.613  | AB033016  | 7430.066  | 6342.309  |
| NM_015865 | 773.649   | 622.979   | NM_000325 | 13794.743 | 12671.353 | D87452    | 1193.988  | 1131.529  |
| NM_003055 | 4447.035  | 3740.452  | AF015041  | 1961.374  | 1937.002  | AB037864  | 1565.907  | 1495.729  |
| NM_005075 | 1260.945  | 1032.68   | NM_002363 | 843.372   | 823.831   | L26494    | 955.53    | 683.744   |
| NM_014504 | 1775.434  | 2036.86   | AK000184  | 1364.735  | 1227.711  | AK024322  | 679.022   | 550.026   |
| NM_014408 | 5663.048  | 4268.853  | AF055020  | 7458.396  | 8971.365  | BF382513  | 3076.238  | 2234.925  |
| NM_014741 | 2720.826  | 2342.256  | NM_006986 | 1337.747  | 2177.83   | AB020713  | 6429.134  | 4487.848  |
| AF212247  | 4747.119  | 3524.448  | NM_014904 | 882.016   | 729.858   | AK025426  | 700.715   | 501.468   |
| AF161407  | 11982.211 | 10302.296 | AL137576  | 10930.022 | 6940.408  | NM_016558 | 1701.831  | 981.835   |
| NM_014738 | 2833.288  | 2128.706  | NM_018358 | 4463.294  | 4347.159  | NM_007145 | 3673.586  | 2364.314  |
| NM_016406 | 2081.665  | 1954.907  | NM_016321 | 755.575   | 937.092   | AL133112  | 457.882   | 277.428   |
| NM_018080 | 4395.926  | 3098.25   | NM_013356 | 683.729   | 599.7     | AF085855  | 286.988   | 140.411   |
| AF174605  | 540.699   | 459.176   | AF131781  | 2928.78   | 3218.214  | AK002078  | 1266.543  | 1099.456  |
| AL050107  | 425.28    | 680.665   | NM_006516 | 16361.05  | 14490.833 | AF085837  | 1260.505  | 1165.24   |
| NM_014453 | 13090.265 | 16348.499 | NM_003055 | 4419.892  | 4132.833  | AK023165  | 608.704   | 578.705   |
| NM_005713 | 2005.307  | 2543.823  | NM_005075 | 552.81    | 938.24    | NM_016115 | 1571.536  | 1419.67   |
| AK021951  | 315.526   | 868.32    | NM_006841 | 745.425   | 1027.938  | NM_014950 | 2693.312  | 2157.088  |
| AK023553  | 1037.617  | 1049.938  | NM_002414 | 15275.684 | 17563.986 | AL080180  | 684.533   | 1095.462  |
| NM_014600 | 745.737   | 684.38    | NM_000355 | 1543.401  | 1491.568  | AF147376  | 798.924   | 1525.578  |
| NM_016733 | 1286.266  | 1237.139  | AL133580  | 3215.973  | 3822.289  | AK027190  | 850.263   | 1214.197  |
| AF181994  | 2703.328  | 3069.286  | NM_005451 | 5113.047  | 5634.784  | AL360136  | 2394.57   | 3105.322  |
| NM_018962 | 995.8     | 679.903   | NM_007172 | 2822.973  | 2803.936  | AF086259  | 1314.194  | 1034.743  |
| AF125100  | 2927.219  | 2501.122  | NM_006152 | 3773.679  | 3472.407  | AF086369  | 541.763   | 379.552   |
| NM_006114 | 9348.843  | 6547.768  | NM_013333 | 22501.563 | 29654.023 | AF086328  | 3186.113  | 3068.271  |
| BG752013  | 564.08    | 735.801   | NM_002333 | 5081.051  | 6063.84   | AF086427  | 456.018   | 369.329   |
| X07696    | 3160.655  | 2135.708  | NM_003400 | 10955.781 | 12180.972 | AK024196  | 474.662   | 541.054   |
| AA481015  | 756.935   | 616.481   | NM_006705 | 2975.538  | 3201.361  | AK001099  | 431.679   | 157.666   |
| AI925826  | 8105.619  | 6805.996  | NM_014439 | 991.327   | 1427.171  | AK023753  | 1453.167  | 1226.641  |

|           |           |           |           |           |           |           |           |           |
|-----------|-----------|-----------|-----------|-----------|-----------|-----------|-----------|-----------|
| U04209    | 4548.068  | 2634.567  | NM_005582 | 1155.858  | 1527.365  | AF086441  | 15839.353 | 11161.374 |
| Z15108    | 1028.818  | 960.749   | NM_014453 | 13118.42  | 12003.875 | AK022487  | 1714.327  | 1425.261  |
| M55284    | 646.489   | 806.08    | NM_005713 | 1357.261  | 1925.561  | NM_014117 | 1503.709  | 1072.25   |
| AA001218  | 648.73    | 1076.626  | AK023553  | 1422.67   | 1302.157  | AF086087  | 2866.009  | 2242.348  |
| AA679391  | 1597.129  | 2864.093  | NM_014600 | 1086.768  | 800.063   | AK000671  | 32778.688 | 25934.363 |
| BG682146  | 3515.443  | 4850.597  | NM_016733 | 1283.538  | 1514.908  | AK094020  | 465.761   | 499.951   |
| AA884709  | 542.704   | 755.906   | AF181994  | 3027.023  | 2978.97   | AL137637  | 941.61    | 1864.807  |
| NM_005060 | 2657.16   | 2169.191  | NM_018962 | 1401.456  | 1139.942  | AL359584  | 4200.209  | 5681.535  |
| NM_005437 | 8850.274  | 8027.198  | AF125100  | 3956.994  | 3377.956  | AL137285  | 2553.539  | 2753.655  |
| AK022417  | 2322.365  | 1621.852  | NM_006114 | 10579.973 | 10449.015 | AL137456  | 1184.631  | 1853.327  |
| U50534    | 944.274   | 795.836   | X82693    | 7618.018  | 7492.395  | AL157489  | 464.247   | 488.19    |
| NM_005838 | 584.159   | 603.241   | NM_007176 | 12075.423 | 13559.009 | AL390157  | 708.44    | 813.436   |
| NM_006644 | 3567.724  | 3354.624  | M22538    | 15554.915 | 18918.125 | AK021649  | 441.158   | 323.307   |
| NM_006583 | 65875.594 | 6663.942  | NM_006028 | 817.37    | 776.644   | AK024874  | 409.258   | 275.555   |
| NM_003974 | 1629.309  | 1137.177  | NM_012297 | 7560.29   | 5574.313  | AK021847  | 574.035   | 334.064   |
| NM_006065 | 2050.669  | 1732.923  | AB007925  | 24790.424 | 13498.05  | AK023086  | 1521.66   | 1164.749  |
| NM_014339 | 32701.336 | 26433.174 | NM_018180 | 1534.25   | 1535.649  | AF241534  | 563.449   | 437.136   |
| NM_001495 | 886.699   | 834.871   | NM_000361 | 9160.792  | 9328.341  | NM_017621 | 3645.892  | 2895.717  |
| NM_002288 | 2373.806  | 1906.16   | NM_002475 | 24424.582 | 26206.887 | AK023574  | 763.61    | 751.359   |
| NM_004416 | 3303.743  | 564.685   | NM_003836 | 3784.307  | 3257.059  | AF131767  | 2348.035  | 2247.443  |
| NM_000325 | 8569.617  | 8955.011  | NM_017987 | 805.901   | 753.946   | AF211976  | 342.993   | 540.301   |
| AF015041  | 1376.072  | 1552.221  | NM_018203 | 838.759   | 836.155   | AK021907  | 1281.213  | 2132.221  |
| NM_002363 | 773.549   | 1199.04   | NM_014244 | 1493.61   | 1492.06   | AK022167  | 1237.326  | 625.817   |
| AK000184  | 1449.259  | 2637.35   | AK022417  | 3075.241  | 2277.353  | AK022320  | 842.116   | 1171.479  |
| AF055020  | 5924.038  | 8406.563  | U50534    | 1075.338  | 1244.636  | AK022058  | 536.699   | 724.129   |
| NM_006986 | 1191.082  | 1423.835  | NM_014824 | 2231.411  | 1889.967  | AK022196  | 637.052   | 547.042   |
| AF272043  | 4027.092  | 4328.855  | AK000782  | 1318.504  | 1711.585  | NM_018280 | 528.792   | 450.555   |
| NM_002587 | 8248.285  | 7683.347  | NM_014408 | 6674.371  | 7305.599  | AK024381  | 459.495   | 201.153   |
| NM_002238 | 1493.684  | 1458.757  | NM_014741 | 3083.053  | 3201.176  | AK026503  | 583.626   | 724.615   |
| NM_004868 | 1879.994  | 2414.965  | AF212247  | 6132.254  | 6240.266  | AK026671  | 841.021   | 534.225   |
| NM_004669 | 2785.212  | 2471.297  | AF161407  | 21034.367 | 24014.951 | AK025522  | 5422.185  | 4491.879  |
| NM_007028 | 6672.971  | 5224.342  | NM_014738 | 3577.548  | 3391.327  | AK025464  | 33725.805 | 30490.389 |
| AF131781  | 1426.416  | 1844.485  | NM_016406 | 2805.932  | 2772.556  | AL049962  | 1846.011  | 2022.734  |
| NM_006516 | 7538.618  | 8038.9    | NM_018080 | 6140.135  | 5609.729  | NM_020408 | 669.548   | 1350.18   |
| NM_003055 | 6461.911  | 6246.683  | NM_007115 | 988.249   | 990.558   | NM_004988 | 6643.601  | 10620.152 |
| NM_005075 | 1050.148  | 1321.353  | NM_004360 | 1012.192  | 854.438   | AL080151  | 512.454   | 574.361   |
| NM_006841 | 523.299   | 669.53    | NM_003821 | 2210.365  | 1928.139  | AL050085  | 599.485   | 641.444   |
| NM_002414 | 12058.725 | 11311.124 | NM_017692 | 4637.798  | 3868.317  | AK024127  | 528.848   | 418.589   |
| NM_000355 | 1040.361  | 967.204   | NM_003975 | 1083.451  | 1286.213  | AK024243  | 516.029   | 440.187   |
| AL133580  | 2281.096  | 2556.552  | NM_004834 | 3822.109  | 3133.782  | AK021574  | 1224.571  | 831.487   |
| NM_014666 | 9552.029  | 8701.691  | NM_000812 | 1339.804  | 1218.546  | AF119911  | 6029.229  | 5740.38   |
| NM_005451 | 2760.15   | 2965.838  | AK024747  | 17092.02  | 14052.218 | AF116656  | 2795.993  | 2548.57   |
| NM_007172 | 1832.343  | 1314.949  | NM_006390 | 2863.701  | 2429.357  | NM_001050 | 1987.876  | 2005.581  |
| NM_006152 | 3260.587  | 2350.256  | NM_003580 | 5156.309  | 5138.009  | AF132206  | 1111.71   | 1029.505  |
| NM_013333 | 20090.625 | 17213.287 | NM_006506 | 1801.137  | 1725.254  | AJ001869  | 5217.363  | 4692.983  |
| NM_002333 | 2898.068  | 3060.353  | NM_003235 | 6620.954  | 5418.925  | AJ002969  | 438.734   | 186.409   |
| NM_003400 | 9563.79   | 11316.371 | AB042562  | 1723.788  | 1782.188  | AF070579  | 267.908   | 446.237   |
| NM_006705 | 3574.567  | 5575.981  | NM_002378 | 4652.393  | 5926.131  | NM_005295 | 1629.855  | 1290.576  |
| NM_014439 | 744.388   | 678.856   | NM_001364 | 896.617   | 1145.756  | NM_020213 | 2245.152  | 2379.505  |
| NM_005582 | 1573.097  | 1786.919  | NM_006097 | 9145.931  | 10655.531 | D17267    | 5372.53   | 6466.869  |
| NM_012266 | 3525.351  | 3443.459  | NM_006113 | 4227.908  | 4330.107  | AF200341  | 434.793   | 706.461   |
| NM_004559 | 2647.049  | 2368.132  | NM_015313 | 6765.821  | 7070.808  | AJ238214  | 682.979   | 789.511   |
| X56692    | 5077.16   | 4769.653  | AK022287  | 4138.923  | 3978.72   | AB040944  | 1997.465  | 2372.987  |

|           |           |           |           |           |           |           |           |           |
|-----------|-----------|-----------|-----------|-----------|-----------|-----------|-----------|-----------|
| NM_014476 | 552.747   | 460.234   | NM_015897 | 1938.415  | 1594.043  | NM_018145 | 2416.405  | 2404.943  |
| NM_016733 | 776.409   | 948.285   | NM_005436 | 4914.745  | 4698.473  | AK024326  | 928.55    | 1107.926  |
| AF181994  | 2636.228  | 2591.944  | AF177473  | 15346.359 | 14019.978 | U61088    | 738.932   | 613.375   |
| NM_018962 | 912.787   | 992.126   | NM_000546 | 4891.134  | 4728.699  | AF086467  | 1182.575  | 1104.824  |
| AF125100  | 2916.066  | 3604.502  | AB023223  | 954.831   | 921.486   | AL137345  | 881.419   | 1193      |
| NM_006114 | 9064.258  | 8598.875  | AB018257  | 2954.405  | 2399.841  | AK000967  | 706.421   | 587.934   |
| X82693    | 7190.604  | 7720.456  | NM_002708 | 17387.313 | 17514.012 | AK021583  | 755.571   | 584.449   |
| NM_007176 | 10194.772 | 12429.318 | AK001059  | 1716.563  | 1633.631  | AL137442  | 1886.353  | 1559.355  |
| NM_002722 | 1646.094  | 1711.023  | NM_007282 | 4037.572  | 3963.375  | AL049281  | 982.535   | 793.55    |
| AF016693  | 120.078   | 944.071   | NM_017770 | 609.478   | 700.213   | NM_001208 | 18858.709 | 14227.63  |
| M22538    | 14755.787 | 20047.287 | NM_017610 | 1334.882  | 1448.785  | AL050061  | 1819.891  | 1112.01   |
| NM_006028 | 625.139   | 810.991   | AL122070  | 525.062   | 560.213   | AL050206  | 753.432   | 444.738   |
| NM_014904 | 827.953   | 811.516   | AK025133  | 35100.941 | 36773.895 | AK026898  | 4109.398  | 2987.151  |
| AL137576  | 9591.594  | 8402.746  | AB020704  | 1767.129  | 2181.241  | NM_006637 | 791.033   | 580.15    |
| NM_018358 | 3078.696  | 3386.217  | NM_020197 | 518.299   | 1262.36   | AK022419  | 646.857   | 582.337   |
| NM_016321 | 651.582   | 495.756   | NM_004087 | 3814.809  | 5068.605  | NM_014624 | 21261.904 | 20256.592 |
| NM_013356 | 616.236   | 624.983   | NM_018700 | 1345.569  | 1458.134  | NM_013936 | 554.706   | 579.067   |
| NM_005060 | 2111.599  | 1939.96   | NM_000119 | 9003.833  | 9462.291  | AF086145  | 1130.456  | 1576.173  |
| NM_005437 | 6330.816  | 6213.701  | NM_001065 | 12680.589 | 13374.739 | BC002538  | 2256.755  | 2488.747  |
| AK022417  | 2629.228  | 2744.111  | AK027100  | 1259.101  | 1281.067  | AK022355  | 389.58    | 473.643   |
| U50534    | 1074.372  | 1223.12   | NM_003622 | 1933.773  | 1137.702  | NM_017836 | 1661.767  | 1721.761  |
| NM_014824 | 1996.328  | 3412.935  | NM_001774 | 19049.766 | 21223.869 | AK096584  | 17822.328 | 18553.945 |
| AK000782  | 1008.09   | 3439.63   | AK021645  | 2673.96   | 2138.221  | AL078636  | 890.005   | 907.985   |
| NM_014504 | 2198.646  | 2656.867  | NM_013339 | 2291.177  | 2439.374  | AK022382  | 450.036   | 329.782   |
| NM_014408 | 5758.275  | 5056.676  | NM_001491 | 2284.344  | 2196.917  | S72917    | 509.331   | 503.322   |
| NM_014741 | 2655.025  | 2007.753  | NM_002642 | 726.285   | 744.046   | AF076617  | 52138.875 | 54980.707 |
| AF212247  | 4799.282  | 5903.887  | AK026541  | 2222.14   | 2428.584  | AK025129  | 397.988   | 382.003   |
| AF161407  | 13797.354 | 22310.389 | NM_005899 | 12973.462 | 11405.466 | NM_014392 | 3035.86   | 2704.111  |
| NM_014738 | 3144.215  | 4241.838  | D42055    | 14160.204 | 15594.094 | AK023291  | 3789.646  | 3727.797  |
| NM_018080 | 4734.555  | 5553.676  | AL137349  | 1272.042  | 1317.189  | CY3Cy5    | 5780.98   | 944.61    |
| AF174605  | 451.579   | 736.777   | NM_003339 | 913.686   | 1515.739  | BG752013  | 774.529   | 1409.475  |
| NM_014453 | 10539.995 | 11337.126 | NM_016476 | 41741.863 | 43693.586 | X07696    | 2912.895  | 3356.215  |
| NM_005713 | 1639.651  | 1547.44   | NM_015902 | 1364.935  | 1208.775  | AA481015  | 474.613   | 797.272   |
| AK021951  | 426.845   | 517.261   | NM_020155 | 2343.717  | 2729.397  | AI925826  | 8666.033  | 10590.025 |
| AK023553  | 1039.445  | 1078.962  | BE874471  | 3942.755  | 4711.612  | U04209    | 2777.688  | 2807.906  |
| AF272043  | 3132.575  | 3731.76   | NM_006121 | 2167.737  | 3318.521  | Z15108    | 2180.578  | 2809.646  |
| NM_002587 | 7936.483  | 8472.25   | AK023520  | 6450.092  | 6269.592  | M55284    | 476.049   | 611.152   |
| NM_002238 | 1375.097  | 1452.841  | NM_004693 | 892.064   | 938.761   | AA001218  | 550.555   | 934.835   |
| NM_004868 | 1796.255  | 1884.248  | NM_007211 | 4542.39   | 3821.563  | AA679391  | 784.225   | 825.242   |
| NM_004669 | 2753.297  | 2844.992  | AB011152  | 2082.042  | 2148.841  | BG682146  | 2219.234  | 2224.961  |
| NM_007028 | 6935.274  | 6697.521  | NM_014956 | 7243.879  | 6366.63   | AA884709  | 403.349   | 487.189   |
| AF130728  | 673.967   | 865.602   | NM_016952 | 1526.597  | 1262.628  | NM_005060 | 2027.508  | 1580.846  |
| NM_004987 | 399.45    | 941.209   | NM_001654 | 3999.816  | 2981.706  | NM_005437 | 4142.659  | 3102.018  |
| NM_001289 | 18033.371 | 17118.092 | NM_014519 | 1012.993  | 1008.472  | SR5       | 2954.685  | 3158.532  |
| NM_001131 | 34163.273 | 37462.145 | NM_002517 | 773.329   | 830.238   | SR7       | 3688.741  | 31400.863 |
| AA831963  | 818.882   | 725.145   | NM_007147 | 6451.386  | 5858.633  | SR9       | 16524.883 | 3046.485  |
| M54894    | 1957.13   | 219.811   | X65463    | 5801.111  | 5733.983  | CY3Cy5    | 3264.006  | 348.835   |
| BG752013  | 641.786   | 592.586   | AK024418  | 1779.098  | 1045.757  | NM_003974 | 699.095   | 963.754   |
| X07696    | 2953.095  | 2926.492  | NM_003367 | 4074.502  | 3080.04   | NM_006065 | 1137.426  | 1473.519  |
| AA481015  | 839.728   | 1658.461  | NM_005194 | 10048.862 | 8927.205  | NM_014339 | 26646.834 | 29601.891 |
| AI925826  | 10216.136 | 15582.629 | AB002296  | 1897.615  | 1663.407  | NM_001495 | 1068.527  | 1526.396  |
| U04209    | 4751.091  | 5247.874  | NM_014315 | 3737.388  | 2950.724  | NM_002288 | 1251.884  | 1932.503  |
| M55284    | 628.468   | 638.514   | NM_012087 | 1720.116  | 1603.048  | NM_000628 | 5811.088  | 8902.514  |

|           |           |           |           |           |           |           |           |           |
|-----------|-----------|-----------|-----------|-----------|-----------|-----------|-----------|-----------|
| AA001218  | 481.626   | 775.346   | AF165520  | 1902.441  | 1341.021  | AB005216  | 387.213   | 725.757   |
| AA679391  | 940.591   | 1145.759  | AK026072  | 1590.837  | 1746.009  | NM_00032E | 6692.062  | 8847.314  |
| BG682146  | 3356.296  | 3503.785  | NM_004289 | 664.701   | 786.108   | AK000184  | 923.706   | 1025.362  |
| AA884709  | 449.418   | 389.118   | NM_015679 | 4078.703  | 4546.239  | AF055020  | 7509.73   | 9291.744  |
| NM_01226E | 2690.013  | 3009.146  | AF299118  | 35117.266 | 29856.514 | NM_00698E | 1086.625  | 1204.923  |
| NM_00455E | 2050.565  | 1991.25   | AK025353  | 20127.063 | 18391.709 | AF272043  | 2040.043  | 2445.177  |
| X56692    | 4737.292  | 4582.913  | AK056896  | 47414.547 | 46666.875 | NM_002587 | 14053     | 12926.018 |
| NM_01447E | 743.875   | 650.592   | AK022763  | 25318.348 | 24082.418 | NM_00223E | 808.127   | 717.006   |
| NM_01427E | 1501.718  | 1559.802  | NM_00097E | 62263.098 | 57604.66  | NM_00486E | 1481.63   | 1144.326  |
| NM_00583E | 1114.424  | 512.211   | NM_00100C | 64876.27  | 52524.926 | NM_00702E | 3363.981  | 2927.338  |
| NM_000734 | 1323.056  | 878.362   | AF288207  | 25654.42  | 26841.619 | AF130728  | 694.315   | 633.502   |
| NM_012331 | 2851.226  | 2459.285  | NM_001001 | 61574.328 | 53828.465 | NM_004987 | 349.32    | 330.559   |
| NM_006644 | 3679.882  | 2378.449  | NM_00571E | 4025.666  | 4679.289  | NM_00128E | 9106.378  | 9677.167  |
| NM_00658E | 68735.063 | 7031.143  | AK026992  | 4353.673  | 4971.701  | NM_002414 | 5101.301  | 7653.958  |
| NM_003974 | 1507.146  | 1246.025  | X81895    | 1137.251  | 1286.792  | NM_00035E | 1140.967  | 1291.263  |
| NM_00606E | 2014.139  | 1737.044  | AL137343  | 727.353   | 873.922   | AL133580  | 846.201   | 1177.708  |
| NM_01433E | 36047.695 | 42948.543 | NM_004541 | 55711.582 | 50119.133 | NM_01466E | 4581.088  | 6596.288  |
| NM_00149E | 1034.671  | 2068.895  | NM_00683C | 46086.875 | 42732.156 | NM_005451 | 1444.577  | 1861.493  |
| NM_00228E | 3163.939  | 5459.808  | AK026414  | 9075.045  | 6815.078  | NM_00717E | 1418.148  | 1822.158  |
| NM_00441E | 776.891   | 1517.28   | D17297    | 994.672   | 748.583   | NM_00615E | 2600.314  | 3227.912  |
| NM_00062E | 9843.854  | 15612.208 | NM_004074 | 27452.396 | 23454.721 | NM_01333E | 11294.534 | 18974.326 |
| NM_00032E | 10852.316 | 12667.273 | NM_00262E | 36490.195 | 31692.785 | NM_00233E | 3567.331  | 5483.315  |
| AF015041  | 1033.913  | 1296.915  | NM_01843E | 13442.831 | 11200.134 | NM_00340C | 6324.762  | 9906.191  |
| NM_00236E | 598.8     | 745.621   | AF157115  | 4014.134  | 3851.091  | NM_00670E | 2910.785  | 3250.553  |
| AK000184  | 1030.751  | 1168.46   | AJ223353  | 7574.904  | 7580.167  | NM_01443E | 1209.276  | 1312.699  |
| AF055020  | 4856.738  | 4593.56   | NM_012241 | 7313.134  | 7352.982  | NM_00558E | 2454.597  | 3407.636  |
| NM_00698E | 901.312   | 852.216   | NM_01848E | 3199.047  | 3610.56   | NM_01226E | 2243.123  | 2646.334  |
| NM_014904 | 489.09    | 782.959   | NM_005324 | 23897.156 | 21097.432 | NM_00455E | 1453.867  | 1108.19   |
| AL137576  | 5724.011  | 7107.27   | AL080201  | 17689.115 | 15425.762 | X56692    | 5525.824  | 4250.896  |
| NM_01835E | 3600.132  | 3830.303  | NM_00180E | 9182.477  | 8273.152  | NM_01427E | 1171.196  | 993.042   |
| NM_016321 | 589.695   | 572.018   | AB040941  | 3597.705  | 2990.426  | NM_00583E | 831.813   | 423.096   |
| NM_01335E | 633.253   | 1074.694  | AL137241  | 1485.475  | 809.679   | NM_000734 | 2692.944  | 2302.751  |
| AF131781  | 3151.652  | 2927.776  | AB037742  | 2491.722  | 1615.778  | NM_012331 | 1904.202  | 1710.375  |
| NM_00651E | 13102.647 | 10298.18  | AF272375  | 1810.433  | 1471.761  | NM_00658E | 38141.883 | 2425.712  |
| NM_01586E | 516.431   | 571.426   | AK025078  | 1528.863  | 1337.574  | X82693    | 8710.118  | 10912.467 |
| NM_00305E | 4879.886  | 3946.579  | AK021689  | 714.075   | 674.365   | NM_00717E | 3384.264  | 4982.383  |
| NM_00507E | 1159.765  | 1142.67   | AK024737  | 2036.864  | 2226.691  | NM_00272E | 1042.743  | 1424.388  |
| NM_006841 | 548.365   | 537.082   | AB007890  | 8232.729  | 6834.193  | M22538    | 8107.12   | 9002.309  |
| NM_002414 | 12461.224 | 9833.425  | AF070591  | 1620.465  | 1429.769  | NM_00602E | 533.28    | 546.257   |
| NM_00035E | 1087.031  | 754.866   | NM_020411 | 63829.984 | 55322.715 | NM_014904 | 483.536   | 701.967   |
| AL133580  | 2332.19   | 3421.481  | AF275800  | 2083.467  | 1642.848  | AL137576  | 5526.149  | 5462.429  |
| NM_01466E | 14107.631 | 33140.684 | AL359605  | 2057.631  | 2154.55   | NM_01835E | 2514.984  | 2262.661  |
| NM_00717E | 2898.28   | 3921.067  | AB020633  | 4144.078  | 4342.009  | NM_016321 | 306.312   | 376.758   |
| NM_00615E | 3293.985  | 3327.799  | AK025445  | 7239.338  | 4342.911  | NM_01335E | 292.874   | 152.954   |
| NM_01333E | 22915.473 | 26178.602 | AL357200  | 1811.689  | 1617.52   | AF131781  | 1973.444  | 1679.258  |
| NM_00233E | 4807.16   | 5346.93   | NM_017727 | 14623.069 | 17375.789 | NM_00651E | 8621.681  | 6594.901  |
| NM_00340C | 9247.332  | 9162.497  | NM_01831E | 3012.319  | 2901.655  | NM_01586E | 605.959   | 549.72    |
| NM_00670E | 2796.825  | 3723.835  | AL359559  | 1115.063  | 1063.422  | NM_00305E | 7234.717  | 5829.802  |
| NM_01443E | 387.404   | 970.565   | AY008301  | 1124.768  | 1370.305  | NM_00507E | 842.697   | 636.759   |
| NM_00558E | 943.164   | 1497.468  | AK024063  | 1615.682  | 1353.984  | NM_006841 | 549.67    | 536.883   |
| AF174605  | 608.737   | 818.589   | AK021714  | 1197.552  | 769.107   | NM_014824 | 452.785   | 534.302   |
| AL050107  | 353.311   | 1033.047  | NM_020314 | 5080.23   | 5119.412  | NM_014504 | 700.917   | 862.293   |
| NM_01445E | 12022.804 | 12764.351 | AK022972  | 3981.331  | 3152.757  | NM_01440E | 2802.361  | 3123.908  |

|           |           |           |           |           |           |           |           |           |
|-----------|-----------|-----------|-----------|-----------|-----------|-----------|-----------|-----------|
| NM_005713 | 1279.43   | 1595.454  | AK025996  | 3994.399  | 3348.021  | NM_014741 | 1446.322  | 2044.926  |
| AK021951  | 1030.8    | 1132.292  | NM_017598 | 676.526   | 256.217   | AF212247  | 2894.578  | 3551.347  |
| AK023553  | 1382.25   | 1980.829  | AF088015  | 910.016   | 737.29    | AF161407  | 14619.983 | 17705.381 |
| NM_014600 | 802.605   | 548.34    | AK026702  | 620.989   | 792.238   | NM_014738 | 1446.775  | 1700.236  |
| NM_016733 | 1340.161  | 975.586   | AF086168  | 717.692   | 390.127   | NM_016406 | 1248.345  | 1694.798  |
| AF181994  | 2806.651  | 2359.514  | AF007132  | 1286.939  | 1174.812  | NM_018080 | 4580.96   | 4587.845  |
| NM_018962 | 1070.459  | 727.08    | AK026711  | 8494.621  | 7320.542  | AF174605  | 339.804   | 335.443   |
| AF125100  | 3005.541  | 2952.621  | NM_017864 | 6397.614  | 6064.5    | NM_014453 | 8051.029  | 5507.391  |
| NM_006114 | 9219.2    | 7706.386  | NM_004869 | 5602.019  | 5272.285  | NM_005713 | 757.287   | 643.216   |
| X82693    | 11604.999 | 9572.127  | AF136408  | 1545.977  | 1393.719  | AK023553  | 879.899   | 725.937   |
| NM_007176 | 9770.804  | 14650.189 | AL110203  | 1235.136  | 1177.872  | NM_014600 | 762.037   | 493.053   |
| NM_002722 | 1770.15   | 3494.919  | AJ011602  | 856.222   | 812.193   | NM_016733 | 918.933   | 702.506   |
| AK025965  | 596.105   | 246.238   | AJ002787  | 4169.256  | 5324.628  | AF181994  | 1706.516  | 1670.701  |
| M22538    | 13948.898 | 16593.279 | Z70764    | 1857.532  | 1907.62   | NM_018962 | 1118.161  | 987.583   |
| NM_006028 | 588.757   | 819.966   | AL049252  | 952.961   | 897.272   | AF125100  | 1988.807  | 1990.858  |
| NM_012297 | 4950.843  | 5534.032  | Z83948    | 876.059   | 700.297   | NM_006114 | 6337.388  | 5258.308  |
| AB007925  | 34915.52  | 43213.191 | M25785    | 2126.744  | 1932.904  | AF130728  | 559.376   | 1223.34   |
| NM_018180 | 1865.222  | 2384.093  | M32443    | 2019.164  | 1778.589  | NM_001288 | 6004.231  | 7459.23   |
| NM_000361 | 9133.363  | 10023.585 | D16908    | 776.266   | 952.142   | BG752013  | 563.053   | 901.141   |
| NM_002475 | 31721.451 | 29419.26  | D16477    | 1329.273  | 1218.997  | X07696    | 2854.426  | 3481.965  |
| NM_003836 | 7897.77   | 6276.601  | AK022309  | 705.462   | 1004.491  | AA481015  | 398.941   | 612.145   |
| NM_017987 | 622.577   | 679.859   | AK000063  | 909.749   | 1049.117  | AI925826  | 7683.506  | 9349.287  |
| NM_018203 | 749.025   | 648.337   | AK000792  | 483.574   | 1151.872  | U04209    | 2874.25   | 2812.174  |
| NM_014244 | 1105.125  | 974.751   | AK000949  | 1765.78   | 2566.068  | Z15108    | 2306.392  | 2383.811  |
| AK022417  | 3018.636  | 2180.757  | AK027068  | 951.593   | 1096.94   | M55284    | 474.151   | 537.54    |
| U50534    | 1071.645  | 895.388   | AK000974  | 1521.218  | 1325.212  | AA001218  | 672.146   | 485.904   |
| NM_014824 | 1740.578  | 1118.794  | AK025051  | 970.733   | 976.918   | AA679391  | 623.947   | 916.406   |
| NM_014504 | 2166.917  | 3840.161  | AK024553  | 23226.262 | 20558.797 | BG682146  | 2358.597  | 2307.006  |
| NM_014408 | 6578.447  | 8204.616  | AK024930  | 751.992   | 501.564   | AA884709  | 550.877   | 513.71    |
| NM_014741 | 3312.362  | 3327.133  | AF143879  | 4115.313  | 5010.667  | NM_005060 | 2650.215  | 2220.651  |
| AF212247  | 5467.483  | 4548.495  | AK024621  | 22528.127 | 25531.16  | NM_005437 | 4518.36   | 3916.031  |
| AF161407  | 13576.357 | 11786.333 | AL157449  | 21840.619 | 26734.723 | AK022417  | 2048.226  | 1897.097  |
| NM_014738 | 2950.57   | 2526.506  | AL117582  | 1746.697  | 1832.929  | U50534    | 843.604   | 619.807   |
| NM_016406 | 2230.351  | 2422.68   | AK001134  | 1846.469  | 1567.52   | NM_014278 | 809.086   | 1475.681  |
| NM_018080 | 5014.239  | 4376.617  | NM_018233 | 10596.707 | 9438.265  | NM_005838 | 556.482   | 468.885   |
| NM_007115 | 1128.642  | 2504.267  | AV740891  | 1381.66   | 1683.416  | NM_000734 | 1894.426  | 2208.55   |
| NM_004616 | 999.807   | 1558.445  | AF143329  | 979.745   | 945.513   | NM_006644 | 1029.209  | 1053.196  |
| NM_004360 | 492.093   | 855.613   | AF090916  | 855.015   | 1160.945  | NM_006583 | 38174.027 | 1975.139  |
| NM_003821 | 2079.094  | 1844.288  | AK026860  | 8833.094  | 8746.682  | NM_006065 | 2688.598  | 5097.315  |
| NM_017692 | 3304.785  | 2953.283  | AK024211  | 873.129   | 848.917   | NM_014338 | 30660.83  | 37623.73  |
| NM_003975 | 1049.87   | 704.399   | NM_014898 | 743.409   | 758.875   | NM_001495 | 1252.293  | 1496.013  |
| NM_004834 | 3668.61   | 2750.003  | AK023435  | 802.511   | 682.997   | NM_002288 | 1126.068  | 1804.859  |
| NM_000812 | 872.537   | 582.149   | AF086035  | 12279.327 | 15907.111 | NM_000325 | 7009.542  | 11718.459 |
| AK024747  | 14346.99  | 8632.404  | AK022159  | 2908.737  | 2305.47   | AF015041  | 1550.169  | 2126.246  |
| NM_006390 | 2404.453  | 1557.253  | U25750    | 4706.265  | 5281.467  | NM_002363 | 358.245   | 268.371   |
| NM_003580 | 4637.55   | 3912.129  | AK023691  | 5367.324  | 4642.968  | AK000184  | 831.885   | 789.792   |
| NM_006506 | 1332.796  | 960.979   | AK026744  | 884.617   | 1325.429  | AF055020  | 8126.905  | 6458.345  |
| NM_003235 | 6928.128  | 8414.791  | AK002105  | 774.919   | 952.916   | NM_006986 | 1006.277  | 843.899   |
| AB042562  | 1977.365  | 2909.614  | NM_005234 | 7621.41   | 5956.068  | AF272043  | 2202.177  | 1703.586  |
| NM_016009 | 4269.336  | 6073.309  | BC023536  | 1594.097  | 2143.617  | NM_002587 | 14857.665 | 13557.489 |
| NM_002378 | 4013.652  | 4332.223  | NM_001803 | 4769.14   | 6420.814  | NM_002238 | 902.424   | 891.624   |
| NM_001364 | 964.408   | 976.254   | NM_006233 | 13946.16  | 12351.84  | NM_004868 | 1454.228  | 1776.552  |
| NM_017431 | 496.852   | 445.509   | AK021889  | 937.947   | 1233.984  | NM_004668 | 1707.298  | 1791.31   |



|           |           |           |           |           |           |           |           |           |
|-----------|-----------|-----------|-----------|-----------|-----------|-----------|-----------|-----------|
| NM_006097 | 8075.292  | 7337.184  | AK000992  | 1030.599  | 821.631   | NM_00702E | 3794.271  | 4431.773  |
| NM_006113 | 3566.074  | 3120.968  | L23544    | 26307.158 | 19265.727 | AF131781  | 1411.398  | 1954.495  |
| NM_015313 | 5464.875  | 5740.38   | NM_019020 | 2270.966  | 1883.209  | NM_00651E | 6938.339  | 10853.451 |
| AK022287  | 3659.961  | 2692.668  | NM_016474 | 1591.382  | 1634.146  | NM_01586E | 473.909   | 711.589   |
| NM_015897 | 1274.623  | 1200.857  | NM_000910 | 1898.797  | 1893.645  | NM_00305E | 4841.599  | 5521.132  |
| NM_00543E | 3440.552  | 4940.478  | AF086001  | 29467.205 | 18190.172 | NM_00507E | 391.768   | 690.7     |
| AF177473  | 13119.883 | 17381.789 | AL117560  | 24611.846 | 31243.385 | NM_006841 | 294.492   | 551.18    |
| NM_00054E | 4917.934  | 6091.869  | M24749    | 7739.2    | 10750.586 | NM_002414 | 1747.065  | 2380.969  |
| AB023223  | 611.263   | 873.542   | NM_000554 | 37374.547 | 40748.141 | NM_00035E | 1656.323  | 2524.937  |
| AB018257  | 3107.993  | 1520.597  | AF009317  | 7507.766  | 7125.516  | AL133580  | 1429.204  | 2421.362  |
| NM_00270E | 15330.907 | 12877.36  | AK026583  | 3782.794  | 3433.422  | NM_01466E | 7503.475  | 10875.414 |
| AK001059  | 1587.519  | 809.097   | AF218031  | 5029.77   | 4887.17   | NM_005451 | 1709.259  | 2579.388  |
| NM_00728E | 3614.183  | 2579.253  | AF210650  | 3424.171  | 2900.661  | NM_00717E | 1539.658  | 1921.083  |
| NM_017770 | 431.221   | 448.635   | NM_01835E | 5719.627  | 4716.425  | NM_00615E | 2648.893  | 3294.888  |
| NM_017610 | 1358.442  | 956.301   | AF085896  | 1618.789  | 1271.919  | NM_01333E | 11002.281 | 18488.184 |
| AL122070  | 551.382   | 410.359   | X74613    | 20612.273 | 17741.506 | NM_00233E | 3892.543  | 4683.711  |
| AK025133  | 29324.707 | 40024.16  | AF075080  | 15085.504 | 12203.466 | NM_003400 | 5680.922  | 7728.07   |
| AB020704  | 972.14    | 941.145   | Y13897    | 1428.323  | 1192.931  | NM_00670E | 3221.574  | 2647.878  |
| NM_020197 | 313.376   | 772.975   | AK001857  | 1097.94   | 1072.335  | NM_01443E | 891.005   | 824.51    |
| NM_004087 | 3654.071  | 4171.95   | AL133577  | 4423.291  | 3488.966  | NM_00558E | 2343.059  | 2043.745  |
| NM_018700 | 1120.597  | 1159.364  | AK025378  | 1235.707  | 1056.987  | NM_01226E | 2650.719  | 2387.976  |
| NM_000119 | 9205.117  | 8163.744  | NM_00047E | 1519.753  | 1445.441  | NM_00455E | 1415.432  | 1052.848  |
| NM_00106E | 10285.851 | 7244.272  | AF038199  | 3719.894  | 3827.425  | X56692    | 5890.938  | 5338.968  |
| AK027100  | 739.338   | 455.116   | CY3Cy5    | 6506.753  | 708.752   | NM_01447E | 510.94    | 440.229   |
| NM_00362E | 1543.998  | 666.897   | BE908993  | 17119.504 | 17564.029 | NM_014600 | 490.074   | 698.121   |
| NM_001774 | 19794.373 | 24521.203 | AB012701  | 2098.029  | 2083.052  | NM_01673E | 493.597   | 705.685   |
| NM_00502E | 482.664   | 1022.404  | M61156    | 1129.127  | 1158.272  | AF181994  | 1273.815  | 2018.431  |
| AK021645  | 2566.004  | 2915.533  | R44005    | 2182.257  | 1952.817  | NM_01896E | 975.398   | 1022.963  |
| NM_01333E | 2001.254  | 2297.906  | AI942392  | 3955.969  | 3812.424  | AF125100  | 1218.45   | 1651.801  |
| NM_001491 | 1874.385  | 1441.375  | M55040    | 961.711   | 851.553   | NM_006114 | 4048.334  | 4977.781  |
| AK026541  | 2383.1    | 2213.735  | AW009739  | 3523.293  | 3020.887  | X82693    | 6156.601  | 6289.263  |
| NM_00589E | 9938.229  | 5526.526  | BC036805  | 7469.234  | 5227.64   | NM_00717E | 5706.813  | 9541.066  |
| D42055    | 13577.273 | 11275.928 | Z74615    | 17020.568 | 12217.591 | NM_00272E | 1704.906  | 4211.857  |
| AL137349  | 1280.121  | 1048.533  | X03884    | 2640.691  | 2188.095  | AK025965  | 473.742   | 759.561   |
| NM_00333E | 651.645   | 619.419   | U36759    | 1450.096  | 2299.892  | M22538    | 7316.361  | 6612.827  |
| NM_00456E | 501.163   | 175.02    | X91625    | 3416.381  | 4370.456  | NM_00602E | 580.39    | 467.037   |
| NM_01647E | 33838.227 | 20782.611 | AF090901  | 604.078   | 973.469   | NM_014904 | 406.726   | 244.585   |
| NM_01590E | 1541.697  | 1518.129  | AF004231  | 818.344   | 993.515   | AL137576  | 5715.955  | 4849.994  |
| NM_02015E | 2403.841  | 4336.841  | AF001862  | 4038.712  | 5633.652  | NM_01835E | 2729.546  | 2555.401  |
| BE874471  | 3755.448  | 4588.085  | NM_058197 | 617.645   | 1381.084  | NM_016321 | 484.659   | 431.09    |
| NM_006121 | 2055.212  | 2174.575  | SR6       | 2733.204  | 5845.816  | NM_005060 | 1864.219  | 2350.729  |
| AK023520  | 5888.02   | 6091.229  | SR8       | 10527.352 | 52413.57  | NM_005437 | 3001.645  | 3317.355  |
| NM_00469E | 1040.326  | 855.787   | SR10      | 36486.613 | 22604.73  | AK022417  | 1711.936  | 2052.658  |
| NM_007211 | 3535.427  | 2603.533  | CY3Cy5    | 11195.015 | 1509.912  | U50534    | 459.863   | 464.802   |
| AB011152  | 1495.772  | 1272.62   | U87460    | 8565.497  | 10542.14  | NM_014824 | 915.19    | 1272.698  |
| NM_01495E | 7816.116  | 6093.158  | NM_003617 | 813.475   | 935.231   | AK000782  | 628.328   | 1432.899  |
| AB014592  | 796.306   | 713.618   | NM_001841 | 1035.868  | 1135.736  | NM_014504 | 1178.018  | 1629.699  |
| NM_01695E | 1114.006  | 906.965   | NM_002054 | 3945.369  | 3563.313  | NM_01440E | 3604.633  | 6227.02   |
| NM_001654 | 2999.146  | 1841.399  | AF300649  | 1334.016  | 909.665   | NM_014741 | 1836.623  | 2419.704  |
| NM_01451E | 754.767   | 1007.905  | NM_00412E | 967.928   | 983.519   | AF212247  | 3257.837  | 3554.409  |
| NM_002517 | 525.135   | 380.8     | NM_00082E | 1574.372  | 1403.129  | AF161407  | 13687.739 | 11523.572 |
| NM_007147 | 4584.122  | 4265.395  | NM_004414 | 1423.583  | 1109.522  | NM_01473E | 1590.502  | 1447.771  |
| X65463    | 5622.155  | 5187.401  | NM_003317 | 3400.239  | 2526.393  | NM_01640E | 2244.294  | 2235.86   |

|           |           |           |           |           |           |           |           |           |
|-----------|-----------|-----------|-----------|-----------|-----------|-----------|-----------|-----------|
| AK024418  | 1792.547  | 1368.795  | NM_001139 | 2792.814  | 2302.746  | NM_01808C | 5199.429  | 4162.482  |
| NM_003367 | 4274.392  | 3193.85   | NM_004609 | 21733.732 | 19981.146 | AL050107  | 288.299   | 256.428   |
| NM_005194 | 10632.275 | 8307.766  | NM_003772 | 1145.729  | 1789.208  | NM_014453 | 9678.333  | 7728.773  |
| AB002296  | 1678.381  | 1306.139  | NM_001541 | 2271.256  | 3051.645  | NM_005713 | 876.155   | 650.216   |
| NM_014315 | 3198.634  | 1934.03   | NM_005416 | 1549.328  | 2138.723  | AK021951  | 493.016   | 1062.816  |
| NM_012087 | 1792.069  | 1034.397  | NM_004670 | 925       | 1290.208  | AK023553  | 775.223   | 712.746   |
| AF165520  | 1159.731  | 964.757   | L09081    | 3838.477  | 7135.822  | AF272043  | 1704.646  | 2471.359  |
| AK026072  | 757.162   | 462.286   | NM_000218 | 72118.836 | 64279.777 | NM_002587 | 10765.846 | 11652.137 |
| NM_004289 | 523.25    | 980.091   | NM_016113 | 3397.969  | 5746.569  | NM_002238 | 585.772   | 781.057   |
| NM_015679 | 3649.056  | 5655.807  | NM_014222 | 5069.821  | 8392.515  | NM_004868 | 1426.969  | 2075.633  |
| AF299118  | 52847.234 | 62261.598 | L14819    | 514.195   | 992.78    | NM_004668 | 1404.078  | 1802.461  |
| AK025353  | 20009.375 | 19495.627 | NM_000509 | 3236.76   | 3580.171  | NM_007028 | 3031.884  | 3777.8    |
| AK056896  | 44037.309 | 43430.301 | NM_004542 | 884.531   | 1542.301  | AF130728  | 644.686   | 805.927   |
| AK022763  | 24013.676 | 20685.227 | X06182    | 1517.786  | 2507.283  | NM_004987 | 427.776   | 704.345   |
| NM_000976 | 56537.02  | 64267.699 | BF217496  | 4027.885  | 4006.031  | NM_001288 | 10127.324 | 19346.328 |
| NM_001000 | 51654.832 | 64584.984 | NM_004762 | 3164.796  | 3403.342  | NM_001131 | 46932.422 | 74996.961 |
| AF288207  | 24750.617 | 24294.945 | NM_006641 | 43764.477 | 44223.008 | BG752013  | 760.242   | 884.564   |
| NM_001001 | 50450.738 | 35787.516 | NM_000634 | 7166.391  | 6469.26   | X07696    | 3002.297  | 3169.37   |
| NM_005715 | 2928.245  | 3070.125  | NM_014679 | 26663.541 | 21234.715 | AA481015  | 518.885   | 376.088   |
| AK026992  | 3437.676  | 3220.617  | AB040969  | 1922.444  | 2175.548  | AI925826  | 8592.249  | 6196.538  |
| X81895    | 397.765   | 643.101   | NM_003467 | 3353.586  | 2443.047  | U04209    | 2882.13   | 1680.848  |
| AL137343  | 642.982   | 667.161   | NM_014936 | 760.747   | 622.441   | AI393201  | 4478.08   | 4560.137  |
| NM_004541 | 45790.473 | 35069.926 | NM_003943 | 1323.377  | 1425.242  | M34664    | 38566.445 | 35112.418 |
| NM_006830 | 39179.563 | 29009.348 | NM_019052 | 4333.97   | 4225.717  | Z15108    | 2420.549  | 2056.785  |
| AK026414  | 9657.642  | 8493.78   | NM_003202 | 792.918   | 637.887   | M55284    | 449.198   | 416.235   |
| D17297    | 1037.5    | 1108.933  | AF119902  | 1054.844  | 802.765   | AA001218  | 553.511   | 689.327   |
| NM_004074 | 26107.324 | 18231.213 | NM_020525 | 3488.035  | 3841.32   | AA679391  | 780.037   | 926.29    |
| NM_002626 | 35560.254 | 21620.639 | NM_003890 | 2221.495  | 3185.157  | AA884709  | 452.165   | 734.978   |
| NM_018436 | 12756.947 | 7116.06   | BF127978  | 1830.799  | 3103.178  | NM_012266 | 1760.449  | 2160.223  |
| AF157115  | 3414.24   | 2109.597  | AF110801  | 506.935   | 710.951   | X56692    | 5123.655  | 5237.307  |
| AJ223353  | 7482.845  | 11150.234 | NM_016579 | 9177.91   | 16495.648 | NM_014476 | 332.365   | 477.031   |
| NM_012241 | 7674.238  | 12088.13  | AB018297  | 1025.304  | 2258.696  | NM_014278 | 1213.443  | 1469.186  |
| NM_018486 | 2789.294  | 2983.321  | AB033076  | 1712.875  | 1807.329  | NM_005838 | 1013.163  | 622.14    |
| NM_005324 | 21712.955 | 20829.852 | AK022876  | 1221.521  | 2099.717  | NM_000734 | 3064.841  | 3533.844  |
| AL080201  | 14572.521 | 13995.813 | AF134894  | 5219.294  | 7663.782  | NM_012331 | 2226.844  | 2873.397  |
| NM_015363 | 760.795   | 624.292   | NM_003938 | 8288.39   | 10369.395 | NM_006644 | 2084.868  | 2085.136  |
| NM_001806 | 7356.765  | 4357.945  | NM_014827 | 19347.42  | 24025.09  | NM_006583 | 42495.461 | 2923.967  |
| AB040941  | 3335.898  | 3012.409  | NM_001441 | 1497.753  | 1535.341  | NM_003974 | 1061.155  | 1422.194  |
| AL137241  | 1257.1    | 1610.038  | NM_018324 | 535.694   | 1005.329  | NM_006065 | 1480.219  | 1552.746  |
| AB037742  | 1540.233  | 922.817   | AF064255  | 19949.945 | 17962.5   | NM_014338 | 31373.422 | 26583.094 |
| AF272375  | 1158.971  | 774.448   | NM_016368 | 32122.721 | 30170.816 | NM_001495 | 1023.832  | 1266.588  |
| AK025078  | 1118.475  | 1025.629  | U08853    | 2777.844  | 3003.458  | NM_002288 | 1276.811  | 1188.117  |
| AK023754  | 740.043   | 557.52    | NM_004261 | 18883.9   | 16085.882 | NM_004416 | 540.972   | 408.292   |
| AK024737  | 1523.43   | 1461.57   | NM_016006 | 1604.008  | 1529.289  | NM_000628 | 5752.36   | 6008.906  |
| AB007890  | 6809.773  | 5815.195  | NM_016245 | 17158.266 | 12735.574 | NM_000325 | 7387.273  | 6035.478  |
| AF070591  | 1615.818  | 2005.25   | AF005632  | 1879.411  | 1304.023  | AF015041  | 1396.491  | 929.687   |
| NM_020411 | 50925.84  | 39315.438 | NM_000903 | 11549.899 | 10060.184 | NM_002363 | 369.61    | 464.744   |
| AF275800  | 1314.891  | 863.802   | NM_004493 | 9881.701  | 8662.862  | AK000184  | 701.478   | 744.851   |
| AL359605  | 1617.173  | 1179.101  | NM_004047 | 32146.615 | 36485.738 | AF055020  | 7960.601  | 6560.005  |
| AB020633  | 3276.62   | 2377.766  | AF287303  | 243.609   | 697.465   | NM_006986 | 849.039   | 1425.675  |
| AK025445  | 10064.395 | 5152.75   | NM_004823 | 1545.696  | 1966.396  | NM_016321 | 438.779   | 417.123   |
| AL357200  | 3227.083  | 5038.737  | Y17179    | 71808.125 | 59662.145 | AF131781  | 1872.582  | 2435.559  |
| NM_017727 | 14853.915 | 27639.387 | NM_000891 | 650.814   | 1154.569  | NM_006516 | 8713.283  | 9338.688  |

|           |           |           |           |           |           |           |           |           |
|-----------|-----------|-----------|-----------|-----------|-----------|-----------|-----------|-----------|
| NM_018319 | 2460.474  | 3806.546  | AF239613  | 6056.699  | 9850.641  | NM_015865 | 701.817   | 811.806   |
| AL359559  | 940.692   | 1299.389  | AK026840  | 1780.492  | 3042.031  | NM_003055 | 6093.041  | 6761.446  |
| AY008301  | 1145.574  | 1266.852  | NM_000288 | 2141.391  | 3102.821  | NM_005075 | 652.18    | 611.57    |
| AK024063  | 585.063   | 488.943   | AK026317  | 7636.668  | 11722.968 | NM_006841 | 632.771   | 793.455   |
| AK021714  | 907.23    | 1067.693  | X82207    | 9303.336  | 13483.397 | NM_002414 | 6974.38   | 8211.946  |
| NM_020314 | 3688.316  | 2609.145  | NM_015044 | 3854.879  | 5631.96   | NM_000355 | 1538.844  | 1491.949  |
| AK022972  | 2873.659  | 2417.258  | NM_002867 | 426.243   | 1090.485  | AL133580  | 1306.474  | 1498.628  |
| AK025996  | 3954.152  | 3866.069  | NM_000520 | 5277.302  | 5010.602  | NM_014666 | 6897.646  | 7443.508  |
| AF088015  | 822.854   | 518.068   | NM_000289 | 1607.056  | 1310.624  | NM_005451 | 1902.631  | 1796.09   |
| AK026702  | 564.256   | 406.025   | NM_001500 | 2649.935  | 1796.044  | NM_007172 | 1487.96   | 1069.71   |
| AF086168  | 575.466   | 603.822   | NM_004388 | 3454.09   | 3221.895  | NM_006152 | 2368.492  | 1770.446  |
| AF007132  | 1073.671  | 982.919   | NM_020379 | 512.197   | 458.65    | NM_013333 | 11418.173 | 12195.008 |
| AK026711  | 7771.25   | 5420.256  | AL110127  | 1442.55   | 1236.271  | NM_002333 | 3671.198  | 3146.464  |
| NM_017864 | 4726.688  | 4324.975  | NM_002528 | 1514.028  | 943.812   | NM_003400 | 5372.291  | 4575.794  |
| NM_004869 | 5195.027  | 5001.269  | D38438    | 2217.902  | 1500.52   | NM_006705 | 2918.904  | 2639.4    |
| AF136408  | 1405.301  | 1959.537  | AV714945  | 672.517   | 541.182   | NM_014439 | 886.253   | 872.046   |
| AL110203  | 1132.942  | 2465.123  | AF007872  | 2379.795  | 2256.877  | NM_005582 | 2247.718  | 2227.019  |
| AJ011602  | 669.253   | 529.836   | M30938    | 5786.055  | 9717.163  | NM_014453 | 7073.467  | 7598.493  |
| AJ002787  | 2921.956  | 1811.616  | NM_015148 | 1449.196  | 2419.648  | NM_005713 | 743.101   | 744.538   |
| Z70764    | 2143.58   | 5009.625  | NM_004714 | 1163.219  | 1892.631  | AK021951  | 253.19    | 181.392   |
| AL049252  | 1255.95   | 2321.849  | NM_002497 | 8463.722  | 12921.121 | AK023553  | 679.397   | 804.893   |
| Z83948    | 899.825   | 1438.602  | AB025194  | 4631.184  | 6145.479  | NM_014600 | 922.222   | 880.524   |
| M25785    | 1827.292  | 2221.797  | NM_006239 | 1005.957  | 1765.68   | NM_016733 | 886.7     | 934.647   |
| M32443    | 2145.995  | 1993.377  | BC020863  | 765.354   | 1070.998  | AF181994  | 1647.322  | 2051.169  |
| AK093402  | 343.637   | 335.319   | NM_017897 | 3336.673  | 4848.521  | NM_018962 | 1254.334  | 1360.452  |
| D16908    | 634.051   | 409.499   | NM_004265 | 21399.926 | 32932.664 | AF125100  | 1753.73   | 2093.158  |
| D16477    | 792.563   | 957.373   | NM_002572 | 2190.477  | 3328.696  | NM_006114 | 6059.388  | 5953.353  |
| AK022309  | 762.876   | 687.398   | L14819    | 328.871   | 526.335   | X82693    | 11755.976 | 12162.312 |
| AK000063  | 698.817   | 395.343   | NM_000509 | 2766.035  | 2348.719  | NM_007176 | 6031.65   | 7318.425  |
| AK000949  | 961.83    | 412.149   | NM_004542 | 645.551   | 937.248   | NM_002722 | 1572.968  | 1972.28   |
| AK027068  | 423.748   | 1200.497  | X06182    | 1400.199  | 1095.766  | M22538    | 7940.265  | 7141.182  |
| AK000165  | 1337.613  | 2273.207  | BE908993  | 17543.865 | 14677.429 | NM_006028 | 554.791   | 770.878   |
| AK000974  | 1228.498  | 1773.208  | AB012701  | 1625.931  | 1472.624  | NM_018180 | 1257.978  | 1211.334  |
| AK025051  | 860.132   | 510.772   | M61156    | 791.203   | 622.121   | NM_000361 | 4681.039  | 4448.846  |
| AK024553  | 18903.496 | 11493.561 | R44005    | 2459.154  | 1690.217  | NM_002475 | 20863.512 | 17945.316 |
| AK024930  | 485.373   | 605.071   | AI942392  | 4445.923  | 3495.543  | NM_003836 | 7578.591  | 5682.849  |
| AF143879  | 4395.084  | 3053.264  | M55040    | 837.805   | 557.735   | NM_017987 | 588.224   | 387.141   |
| AK024621  | 24710.838 | 19641.133 | AW009739  | 3844.621  | 3273.805  | NM_018203 | 394.138   | 429.126   |
| AL157449  | 20640.381 | 15535.489 | BC036805  | 8317.399  | 11080.662 | NM_014244 | 639.392   | 850.543   |
| AL117582  | 1844.405  | 1061.914  | Z74615    | 16572.67  | 22532.783 | AK022417  | 1957.226  | 2418.168  |
| AK025525  | 921.112   | 561.925   | X03884    | 3602.559  | 5953.632  | U50534    | 983.205   | 1091.072  |
| NM_018233 | 10827.324 | 5595.565  | U36759    | 1790.545  | 5131.041  | NM_014824 | 1070.4    | 1030.004  |
| AV740891  | 1080.785  | 806.471   | X91625    | 3572.673  | 4440.64   | NM_014504 | 1006.778  | 830.602   |
| AF143329  | 672.9     | 530.008   | AF090901  | 798.435   | 871.419   | NM_014408 | 3262.844  | 3295.619  |
| AF090916  | 571.788   | 290.787   | AF004231  | 853.361   | 1377.245  | NM_014741 | 1570.661  | 1517.868  |
| AK026860  | 7183.169  | 4893.919  | AF001862  | 5060.563  | 6301.777  | AF212247  | 2770.197  | 2218.287  |
| AK024211  | 575.649   | 514.098   | NM_058197 | 874.588   | 1231.607  | AF161407  | 12745.323 | 8623.307  |
| NM_014895 | 626.567   | 494.171   | NM_016044 | 1766.472  | 2214.035  | NM_014738 | 1456.026  | 1127.803  |
| AK023435  | 650.098   | 566.944   | AK023151  | 2316.295  | 1920.047  | NM_016406 | 1404.779  | 1467.898  |
| AF086035  | 13545.913 | 11318.982 | AB033076  | 1283.839  | 1298.385  | NM_018080 | 4860.571  | 4199.102  |
| AK022159  | 4181.381  | 3360.607  | AK022876  | 1008.888  | 1405.389  | NM_004616 | 859.991   | 643.796   |
| AJ012491  | 805.729   | 566.69    | AF134894  | 5103.272  | 4461.824  | NM_003821 | 985.61    | 918.638   |
| AF007136  | 612.427   | 674.731   | NM_003938 | 6535.478  | 6430.792  | NM_017692 | 1680.43   | 1829.782  |

|           |           |           |           |           |           |           |           |           |
|-----------|-----------|-----------|-----------|-----------|-----------|-----------|-----------|-----------|
| U25750    | 5368.24   | 4779.953  | NM_014827 | 15598.613 | 13432.555 | NM_003975 | 733.471   | 735.574   |
| AK023691  | 5447.729  | 3960.198  | U87460    | 9302.465  | 8035.304  | NM_004834 | 2235.602  | 2358.463  |
| AK023502  | 552.023   | 552.834   | NM_003617 | 707.662   | 899.431   | NM_000812 | 578.751   | 660.439   |
| AK026744  | 722.393   | 404.71    | NM_001841 | 1188.312  | 898.89    | AK024747  | 8156.642  | 7654.306  |
| AK002105  | 893.272   | 606.397   | NM_002054 | 3867.107  | 2838.466  | NM_006390 | 1154.274  | 1224.237  |
| NM_005234 | 6532.742  | 4554.07   | AF300649  | 1388.73   | 1552.374  | NM_003580 | 2407.987  | 3679.341  |
| BC023536  | 2062.193  | 3497.815  | NM_004125 | 1112.969  | 1606.462  | NM_006500 | 909.146   | 1406.146  |
| NM_001803 | 4862.793  | 4959.333  | NM_000823 | 1838.38   | 2878.229  | NM_003235 | 6758.774  | 5759.12   |
| NM_006233 | 13066.088 | 18473.045 | NM_004414 | 1934.27   | 3463.982  | AB042562  | 964.941   | 827.357   |
| AK021889  | 1241.62   | 2519.506  | NM_003317 | 2594.275  | 4625.929  | NM_016009 | 2088.187  | 1396.322  |
| AK023736  | 2030.805  | 2721.561  | NM_001139 | 3151.917  | 4202.002  | NM_002378 | 2576.52   | 1642.47   |
| AK000992  | 885.188   | 1264.871  | NM_004609 | 20772.932 | 25011.309 | NM_001364 | 589.638   | 570.33    |
| L23544    | 19631.455 | 21653.996 | NM_003772 | 1449.484  | 2632.086  | NM_017431 | 440.964   | 539.652   |
| NM_019020 | 2309.055  | 2016.676  | NM_001541 | 1739.688  | 2305.197  | NM_006097 | 4651.784  | 3605.818  |
| NM_016474 | 1177.185  | 807.931   | NM_005416 | 1759.854  | 2298.574  | NM_006113 | 1937.884  | 1129.458  |
| NM_000910 | 1837.399  | 1900.091  | NM_004670 | 947.374   | 1603.009  | NM_015313 | 2581.313  | 1932.808  |
| AF086001  | 46146.535 | 38568.133 | L09081    | 3402.083  | 3809.319  | AK022287  | 2704.402  | 2570.88   |
| AL117560  | 24398.195 | 20676.906 | NM_000218 | 64483.695 | 56777.164 | NM_015897 | 1010.291  | 1166.55   |
| M24749    | 7877.462  | 7453.086  | NM_016113 | 3532.561  | 5558.79   | NM_000540 | 2723.347  | 2252.975  |
| AF009317  | 7520.104  | 5017.586  | NM_014222 | 4821.049  | 7219.379  | AB023223  | 484.698   | 393.927   |
| AK026583  | 2877.433  | 1387.992  | AK026840  | 1350.947  | 1452.563  | AB018257  | 1530.708  | 1038.918  |
| AF218031  | 4550.704  | 3122.99   | NM_000288 | 1733.932  | 1850.112  | NM_002708 | 7961.391  | 9537.018  |
| AF210650  | 4339.399  | 2944.706  | AK026317  | 8773.404  | 8955.368  | AK001059  | 1076.408  | 1108.845  |
| NM_018350 | 5159.523  | 3445.155  | X82207    | 11619.996 | 11150.435 | NM_007282 | 2018.366  | 1875.27   |
| AF085896  | 1970.989  | 2210.948  | NM_015044 | 3990.284  | 3930.743  | NM_017610 | 546.517   | 656.259   |
| X74613    | 22502.387 | 18307.236 | BF217496  | 2753.296  | 2150.734  | AL122070  | 585.443   | 640.538   |
| AF075080  | 10881.43  | 12780.166 | NM_004762 | 2820.571  | 1881.628  | AK025133  | 16558.154 | 15077.618 |
| Y13897    | 3118.781  | 5890.044  | NM_006641 | 38150.398 | 28393.309 | AB020704  | 768.832   | 777.772   |
| AK001857  | 1313.301  | 1857.092  | NM_000634 | 5448.035  | 4186.838  | NM_004087 | 1979.768  | 1833.814  |
| AK021525  | 375.294   | 713.452   | NM_014679 | 21952.531 | 15108.209 | NM_018700 | 832.477   | 771.2     |
| AL133577  | 3646.81   | 3655.165  | AB040969  | 2064.699  | 2242.685  | NM_000119 | 6514.715  | 6017.707  |
| AK025378  | 1020.879  | 790.153   | NM_003467 | 3442.827  | 3889.806  | NM_001065 | 6753.688  | 4779.54   |
| NM_000479 | 1230.99   | 819.189   | NM_014936 | 954.834   | 2188.81   | AK027100  | 345.487   | 287.326   |
| AF038199  | 3115.613  | 3528.569  | NM_003943 | 1814.491  | 3096.084  | NM_003622 | 920.511   | 675.246   |
| CY3Cy5    | 6860.77   | 641.137   | NM_019052 | 4903.311  | 8146.512  | AK021645  | 1053.481  | 961.268   |
| BE908993  | 19359.359 | 16866.893 | NM_003202 | 851.259   | 1418.426  | NM_013330 | 1179.057  | 1120.485  |
| AB012701  | 2594.839  | 2754.383  | AF119902  | 928.876   | 1668.708  | NM_001491 | 1884.424  | 1468.208  |
| M61156    | 1363.23   | 1140.225  | NM_020525 | 3690.189  | 5403.351  | AK026541  | 1139.84   | 1349.273  |
| R44005    | 2621.648  | 2597.382  | NM_003890 | 2222.544  | 3074.156  | NM_005890 | 13005.603 | 10423.367 |
| AI942392  | 5082.235  | 5571.826  | BF127978  | 2047.101  | 2313.29   | D42055    | 7085.808  | 7986.923  |
| M55040    | 1091.258  | 1192.494  | AF110801  | 227.849   | 787.389   | AL137349  | 772.539   | 848.11    |
| AW009739  | 4255.756  | 4066.186  | NM_016579 | 9496.658  | 10542.199 | NM_003330 | 472.138   | 552.98    |
| BC036805  | 9585.229  | 8208.97   | AB018297  | 1062.175  | 1813.51   | NM_016470 | 20510.094 | 18821.996 |
| Z74615    | 18945.941 | 18814.498 | AK022565  | 14520.205 | 19718.531 | NM_015902 | 748.571   | 720.525   |
| X03884    | 4761.953  | 5772.781  | AB025194  | 4382.924  | 4119.222  | NM_020155 | 1589.963  | 1850.517  |
| U36759    | 1815.805  | 3433.954  | NM_006239 | 979.833   | 1120.971  | BE874471  | 1634.838  | 1295.81   |
| X91625    | 2997.732  | 3632.223  | BC020863  | 691.692   | 735.231   | NM_006121 | 1051.743  | 831.433   |
| AF090901  | 534.726   | 648.966   | NM_017897 | 2847.342  | 2473.152  | AK023520  | 3086.711  | 2456.604  |
| AF004231  | 813.945   | 1201.217  | NM_004265 | 18449.258 | 18787.477 | NM_004693 | 467.701   | 427.422   |
| AF001862  | 4499.798  | 4648.511  | NM_002572 | 1988.144  | 2088.052  | NM_007211 | 3382.042  | 2326.113  |
| NM_058197 | 766.614   | 1262.926  | NM_001441 | 1246.567  | 850.287   | AB011152  | 1004      | 678.125   |
| SR6       | 2764.213  | 2943.78   | NM_018324 | 661.512   | 737.489   | NM_014950 | 4110.412  | 2561.848  |
| SR8       | 10065.319 | 29333.867 | AF064255  | 13213.092 | 8377.743  | AB014592  | 328.232   | 288.52    |

|           |           |           |           |           |           |           |           |           |
|-----------|-----------|-----------|-----------|-----------|-----------|-----------|-----------|-----------|
| SR10      | 35118.887 | 12237.787 | NM_016368 | 19616.811 | 14114.188 | NM_016952 | 769.104   | 608.254   |
| CY3Cy5    | 6897.835  | 704.624   | U08853    | 2939.414  | 2527.76   | NM_001654 | 1721.492  | 1455.981  |
| NM_004126 | 458.572   | 468.589   | NM_004261 | 20250.293 | 26515.254 | NM_014519 | 756.395   | 397.561   |
| U87460    | 10305.05  | 8797.976  | NM_016006 | 1844.083  | 2470.225  | NM_002517 | 206.283   | 297.911   |
| NM_003617 | 993.784   | 941.605   | NM_016245 | 21045.373 | 32216.666 | NM_007147 | 8015.512  | 6843.321  |
| NM_001841 | 1033.519  | 1013.163  | AF005632  | 2365.484  | 3902.138  | X65463    | 2869.687  | 2154.377  |
| NM_002054 | 4673.257  | 3462.549  | NM_000903 | 14104.735 | 21427.047 | AK024418  | 1204.614  | 889.269   |
| AF300649  | 2129.42   | 1729.465  | NM_004493 | 11404.825 | 15042.423 | NM_003367 | 1915.571  | 1219.634  |
| NM_004125 | 1091.273  | 1381.309  | NM_004047 | 34757.43  | 51692.922 | NM_005194 | 4232.589  | 3835.283  |
| NM_000823 | 2071.592  | 1977.691  | NM_004823 | 1438.014  | 2307.466  | AB002296  | 980.86    | 854.974   |
| NM_004414 | 1677.089  | 1302.595  | AB013889  | 286.402   | 786.733   | NM_014315 | 1569.698  | 1058.509  |
| NM_003317 | 5108.846  | 4999.393  | Y17179    | 65023.848 | 56410.199 | NM_012087 | 610.078   | 451.733   |
| NM_001139 | 3293.078  | 4353.7    | NM_000891 | 473.03    | 937.36    | AF165520  | 763.277   | 500.164   |
| NM_003772 | 1433.487  | 2026.899  | AF239613  | 5289.783  | 4809.439  | AK026072  | 383.889   | 302.44    |
| NM_001541 | 2846.344  | 3218.037  | NM_058197 | 438.973   | 588.088   | NM_015679 | 1683.497  | 1228.7    |
| NM_005416 | 1814.48   | 2195.982  | NM_016044 | 1455.992  | 1605.562  | AF299118  | 43862.117 | 50831.738 |
| NM_004670 | 536.435   | 941.5     | NM_000520 | 6153.245  | 3722.799  | AK025353  | 9517.862  | 7829.853  |
| L09081    | 3347.651  | 4968.933  | NM_000289 | 1442.927  | 748.484   | AK056896  | 22717.17  | 17791.342 |
| NM_000218 | 56763.746 | 64237.578 | NM_001500 | 2495.033  | 1197.6    | AK022763  | 11525.329 | 7328.299  |
| NM_016113 | 3537.232  | 4933.086  | NM_004388 | 2938.148  | 1890.313  | NM_000976 | 48025.684 | 56625.629 |
| NM_014222 | 4283.85   | 6066.792  | NM_020379 | 279.063   | 385.72    | NM_001000 | 48253.547 | 57635.945 |
| L14819    | 460.12    | 558.592   | AL110127  | 1829.96   | 2516.433  | AF288207  | 11926.149 | 7883.608  |
| NM_000509 | 3126.163  | 2338.777  | NM_002528 | 2244.447  | 3627.845  | NM_001001 | 36916.895 | 24938.732 |
| NM_004542 | 682.091   | 910.288   | D38438    | 2599.688  | 3576.453  | NM_005715 | 3614.835  | 3685.516  |
| X06182    | 1681.725  | 1738.542  | AV714945  | 1096.953  | 1364.62   | AK026992  | 1654.433  | 1719.942  |
| BF217496  | 3592.146  | 3294.212  | AF089897  | 584.729   | 690.768   | AL137343  | 348.394   | 287.027   |
| NM_004762 | 3093.009  | 2368.988  | AF007872  | 2227.34   | 3007.243  | NM_004541 | 24148.264 | 14993.635 |
| NM_006641 | 49366.922 | 41296.938 | M30938    | 6056.256  | 6607.699  | NM_006830 | 21047.35  | 14499.363 |
| NM_000634 | 8785.945  | 8000.987  | NM_015148 | 1197.025  | 1401.167  | AK026414  | 4402.234  | 3049.057  |
| NM_014679 | 28027.014 | 19070.576 | NM_004714 | 966.594   | 1664.247  | D17297    | 319.863   | 370.485   |
| AB040969  | 2310.991  | 2033.638  | NM_017677 | 207.517   | 808.259   | NM_004074 | 12663.937 | 11276.138 |
| NM_003467 | 3870.778  | 3678.067  | NM_002497 | 7802.952  | 8541.063  | NM_002626 | 16602.982 | 12041.441 |
| NM_014936 | 1061.539  | 988.32    | NM_005416 | 1536.862  | 1528.349  | NM_018436 | 5852.642  | 4354.138  |
| NM_003943 | 1734.328  | 1762.438  | NM_004670 | 687.113   | 686.075   | AF157115  | 1946.02   | 1672.891  |
| NM_019052 | 5259.004  | 5744.738  | L09081    | 4991.047  | 3503.271  | AJ223353  | 4586.195  | 4790.776  |
| NM_003202 | 748.486   | 834.555   | NM_000218 | 64366.676 | 55139.078 | NM_012241 | 3649.436  | 8044.994  |
| AF119902  | 992.546   | 1183.931  | NM_016113 | 3398.498  | 3602.604  | NM_018486 | 1424.702  | 929.689   |
| X62468    | 477.492   | 547.722   | NM_014222 | 3816.862  | 3745.409  | NM_005324 | 10845.879 | 7324.037  |
| NM_003890 | 3763.204  | 4017.774  | L14819    | 577.722   | 341.506   | AL080201  | 7966.795  | 5525.293  |
| BF127978  | 2160.223  | 2227.742  | NM_000509 | 2982.79   | 1771.869  | NM_015363 | 667.64    | 408.658   |
| AF110801  | 587.063   | 599.686   | NM_004542 | 736.841   | 715.15    | NM_001806 | 3906.518  | 2152.963  |
| NM_016579 | 8988.821  | 12176.791 | X06182    | 1173.256  | 1161.63   | AB040941  | 2141.633  | 1127.275  |
| AB018297  | 1392.874  | 2735.448  | BE908993  | 17307.604 | 16367.83  | AL137241  | 646.791   | 198.126   |
| AK022565  | 9870.004  | 14715.131 | AB012701  | 2139.797  | 3600.848  | AB037742  | 1008.264  | 487.257   |
| AK023151  | 1998.929  | 2131.067  | M61156    | 1167.81   | 1440.642  | AF272375  | 851.096   | 518.484   |
| AB033076  | 1305.109  | 1428.553  | R44005    | 2326.827  | 4238.23   | AK025078  | 492.004   | 456.919   |
| AK022876  | 1217.826  | 1140.558  | AI942392  | 4711.776  | 7681.584  | AK023754  | 380.866   | 236.901   |
| AF134894  | 5409.533  | 5068.816  | M55040    | 1029.448  | 1328.673  | AK024737  | 634.13    | 616.624   |
| NM_003938 | 7729.155  | 5806.378  | AW009739  | 3715.618  | 4276.994  | AB007890  | 5224.011  | 3765.849  |
| NM_014827 | 16218.129 | 16830.002 | BC036805  | 7860.141  | 9113.677  | AF070591  | 1198.584  | 1097.112  |
| NM_001441 | 1447.834  | 993.862   | Z74615    | 13084.207 | 14908.785 | NM_020411 | 34393.48  | 26407.273 |
| NM_018324 | 922.032   | 612.753   | X03884    | 2967.075  | 4259.55   | AF275800  | 720.739   | 482.061   |
| AF064255  | 26302.18  | 22502.791 | U36759    | 1843.691  | 3702.361  | AL359605  | 1648.384  | 1424.836  |

|           |           |           |           |           |           |           |           |           |
|-----------|-----------|-----------|-----------|-----------|-----------|-----------|-----------|-----------|
| NM_01636E | 40954.102 | 37374.387 | X91625    | 3300.226  | 2928.484  | AB020633  | 1571.771  | 1658.728  |
| U08853    | 3279.359  | 2612.609  | AF090901  | 746.224   | 871.419   | AK025445  | 6651.621  | 4531.113  |
| NM_004261 | 18976.441 | 18354.826 | AF004231  | 741.292   | 987.228   | AL357200  | 1556.519  | 1596.366  |
| NM_01600E | 1953.717  | 2647.887  | AF001862  | 4211.156  | 4415.762  | NM_017727 | 7307.167  | 10871.428 |
| NM_01624E | 18153.846 | 14907.075 | NM_00389C | 2549.895  | 2653.465  | NM_01831E | 1645.966  | 1338.946  |
| AF005632  | 2903.205  | 2842.541  | BF127978  | 1893.172  | 1593.229  | AL359559  | 373.065   | 469.084   |
| NM_00090E | 13713.6   | 15105.346 | NM_01657E | 10291.715 | 9479.927  | AY008301  | 577.641   | 746.453   |
| NM_00449E | 10404.604 | 11321.98  | AB018297  | 804.338   | 1005.78   | AK021714  | 740.841   | 764.112   |
| AF309489  | 837.227   | 700.126   | AK022565  | 10419.964 | 8767.421  | NM_020314 | 2398.688  | 1648.946  |
| NM_004047 | 31149.512 | 35971.219 | AK023151  | 2209.858  | 1368.774  | AK022972  | 1629.256  | 883.733   |
| AF287303  | 366.261   | 416.464   | AB033076  | 1320.683  | 712.645   | AK025996  | 1966.772  | 1271.5    |
| NM_00482E | 1931.373  | 1953.556  | AK022876  | 1097.652  | 848.983   | AF086168  | 289.082   | 221.388   |
| AB013889  | 192.197   | 357.291   | AF134894  | 4902.397  | 3191.45   | AF007132  | 340.986   | 435.174   |
| Y17179    | 52674.664 | 58117.793 | NM_00393E | 7463.782  | 6933.913  | AK026711  | 3616.726  | 2476.535  |
| NM_000891 | 596.212   | 1135.379  | NM_014827 | 15096.854 | 15671.584 | NM_017864 | 2376.047  | 2009.163  |
| NM_004974 | 212.526   | 473.584   | NM_00412E | 429.879   | 884.727   | NM_00486E | 2440.386  | 2180.237  |
| AF239613  | 5711.277  | 8579.508  | U87460    | 10301.503 | 17300.971 | AF136408  | 662.542   | 797.246   |
| AK026840  | 1374.751  | 1629.957  | NM_003617 | 993.926   | 1877.649  | AL110203  | 475.883   | 454.696   |
| NM_00028E | 1750.368  | 2124.108  | NM_001841 | 1156.534  | 1739.393  | AJ011602  | 389.099   | 399.848   |
| AK026317  | 6085.726  | 6804.114  | NM_002054 | 3945.324  | 5013.031  | AJ002787  | 3179.436  | 2691.697  |
| X82207    | 8882.017  | 9064.22   | AF300649  | 1383.601  | 1965.721  | Z70764    | 1063.061  | 992.238   |
| NM_015044 | 4059.716  | 4460.443  | NM_00412E | 1120.917  | 1448.688  | AL049252  | 469.827   | 344.141   |
| NM_002867 | 546.163   | 518.624   | NM_00082E | 1593.468  | 1509.818  | Z83948    | 686.963   | 374.163   |
| NM_00052C | 5960.876  | 3526.68   | NM_004414 | 1800.72   | 2115.878  | M25785    | 716.468   | 819.431   |
| NM_00028E | 1346.572  | 698.206   | NM_003317 | 2485.634  | 2986.904  | M32443    | 1943.171  | 1234.423  |
| NM_00150C | 2653.72   | 2552.652  | NM_001139 | 3041.163  | 3753.628  | D16908    | 481.216   | 422.028   |
| NM_00438E | 3667.26   | 4500.563  | NM_00460E | 14842.462 | 17055.488 | D16477    | 650.061   | 602.178   |
| NM_02037E | 515.966   | 526.515   | NM_00377E | 1921.961  | 2528.87   | AK024759  | 311.319   | 168.989   |
| AL110127  | 1751.695  | 1931.401  | NM_001541 | 1329.1    | 1912.131  | AK022309  | 696.715   | 410.752   |
| AK001997  | 309.939   | 647.943   | NM_00482E | 1456.979  | 1523.768  | AK000063  | 594.075   | 523.187   |
| NM_00252E | 2012.412  | 2184.016  | Y17179    | 60094.852 | 51646.988 | AK000949  | 535.414   | 450.939   |
| D38438    | 3303.559  | 3994.765  | NM_000891 | 528.476   | 717.679   | AK027068  | 376.166   | 407.658   |
| AV714945  | 837.562   | 1044.896  | AF239613  | 5230.438  | 5668.926  | AK000974  | 621.886   | 467.982   |
| AF089897  | 562.708   | 506.516   | NM_00028E | 1831.111  | 1104.335  | AK025051  | 504.833   | 559.694   |
| AF007872  | 2526.471  | 3475.017  | AK026317  | 5742.716  | 4518.453  | AK024553  | 28892.605 | 15232.994 |
| M30938    | 6424.298  | 7522.538  | X82207    | 8071.879  | 6258.285  | AK024930  | 429.413   | 422.288   |
| NM_01514E | 1218.749  | 1346.553  | NM_015044 | 3816.279  | 4157.39   | AF143879  | 2334.495  | 2238.575  |
| NM_004714 | 1166.136  | 1312.611  | BF217496  | 2907.492  | 4364.241  | AK024621  | 10794.669 | 9885.687  |
| NM_005401 | 615.979   | 640.718   | NM_00476E | 2646.365  | 4512.87   | AL157449  | 10669.42  | 10459.542 |
| NM_017677 | 310.963   | 934.681   | NM_006641 | 34634.605 | 46227.156 | AL117582  | 934.237   | 545.133   |
| NM_002497 | 7901.824  | 9297.733  | NM_000634 | 5119.461  | 7601.322  | AK025525  | 1029.898  | 622.553   |
| AB025194  | 4455.637  | 3946.054  | NM_01467E | 19059.748 | 18287.084 | NM_01823E | 11526.524 | 8385.812  |
| NM_00623E | 669.222   | 726.159   | AB040969  | 2156.09   | 2932.603  | AV740891  | 793.201   | 916.987   |
| BC020863  | 757.232   | 809.4     | NM_003467 | 3161.463  | 4966.817  | AF143329  | 402.523   | 328.732   |
| NM_017897 | 2542.016  | 2593.052  | NM_01493E | 1013.543  | 1242.848  | AF090916  | 450.361   | 355.93    |
| NM_00426E | 18968.016 | 17215.178 | NM_00394E | 1651.902  | 2497.698  | AF086214  | 904.689   | 1151.223  |
| NM_00257E | 2345.553  | 2499.681  | NM_01905E | 5199.521  | 7337.729  | AK026860  | 4499.355  | 3337.978  |
| NM_00050E | 3183.145  | 1705.362  | NM_00320E | 661.624   | 844.686   | AK024211  | 542.628   | 308.49    |
| NM_00454E | 856.688   | 1985.986  | AF119902  | 964.749   | 1073.623  | NM_01489E | 318.501   | 372.982   |
| X06182    | 1445.554  | 1318.269  | NM_02052E | 2421.633  | 2564.741  | AK023435  | 512.006   | 400.273   |
| AB012701  | 2757.919  | 2720.13   | NM_01514E | 1112.673  | 995.223   | AF086035  | 5754.586  | 6237.526  |
| M61156    | 1866.172  | 1817.444  | NM_004714 | 1119.472  | 962.605   | AK022159  | 2454.041  | 2164.804  |
| R44005    | 2951.003  | 4979.286  | NM_005401 | 448.755   | 484.174   | AF007136  | 366.707   | 263.778   |

|           |           |           |           |           |           |           |           |           |
|-----------|-----------|-----------|-----------|-----------|-----------|-----------|-----------|-----------|
| AI942392  | 5126.999  | 7713.115  | NM_002497 | 7504.995  | 5511.438  | U25750    | 4551.619  | 3049.223  |
| M55040    | 1186.132  | 1297.529  | AB025194  | 3495.073  | 2858.836  | AK023691  | 2735.401  | 1854.957  |
| AW009739  | 4249.351  | 5304.747  | BC020863  | 848.944   | 467.129   | AK026744  | 597.689   | 445.045   |
| BC036805  | 10792.507 | 12056.383 | NM_017897 | 2390.215  | 1688.168  | NM_005234 | 4782.992  | 3555.304  |
| Z74615    | 32623.854 | 34916.406 | NM_004265 | 17481.693 | 18692.209 | BC023536  | 1603.959  | 2208.337  |
| X03884    | 4918.83   | 5883.065  | NM_002572 | 1825.444  | 1543.362  | NM_001803 | 2897.688  | 4321.142  |
| U36759    | 1711.015  | 3754.819  | NM_001441 | 1272.437  | 2025.79   | NM_006233 | 6497.384  | 6566.402  |
| X91625    | 2797.117  | 3189.419  | NM_018324 | 729.399   | 1431.353  | AK021889  | 522.181   | 566.135   |
| AF090901  | 537.313   | 867.465   | AF064255  | 8908.048  | 13555.857 | L23544    | 13320.771 | 10780.354 |
| AF004231  | 576.548   | 729.267   | NM_016368 | 16146.255 | 20127.918 | NM_019020 | 1417.624  | 1037.245  |
| AF001862  | 4572.513  | 5354.188  | U08853    | 3800.803  | 5144.821  | NM_016474 | 632.135   | 339.271   |
| NM_058197 | 662.846   | 716.878   | NM_004261 | 21316.26  | 23704.266 | NM_000910 | 954.157   | 866.013   |
| SB        | 438.23    | 132.97    | NM_016006 | 1809.016  | 2081.04   | AF086001  | 38120.371 | 29035.656 |
| NM_016044 | 1284.601  | 1298.255  | NM_016245 | 18952.713 | 18282.406 | AL117560  | 11438.33  | 10590.382 |
| AK023151  | 1966.194  | 1408.836  | AF005632  | 1446.139  | 1547.986  | M24749    | 3244.616  | 2671.788  |
| AB033076  | 1407.037  | 957.19    | NM_000903 | 13245.542 | 16484.506 | NM_000554 | 19790.762 | 14029.431 |
| AK022876  | 1531.035  | 3233.473  | NM_004493 | 9446.587  | 11967.968 | AF009317  | 3793.277  | 2541.057  |
| AF134894  | 6254.658  | 10441.805 | NM_004047 | 26444.32  | 28174.525 | AK026583  | 1843.011  | 1166.935  |
| NM_003938 | 8205.495  | 7364.66   | NM_006773 | 1673.896  | 1679.822  | AF218031  | 2773.495  | 2288.902  |
| NM_004126 | 327.513   | 538.45    | AK024439  | 6916.028  | 6788.36   | AF210650  | 1933.213  | 1361.022  |
| U87460    | 9464.58   | 8000.731  | X89676    | 642.546   | 760.618   | NM_018356 | 2536.335  | 1760.944  |
| NM_003617 | 1182.575  | 2409.273  | Z32684    | 1662.185  | 1706.615  | AF085896  | 655.367   | 515.86    |
| NM_001841 | 1671.067  | 3061.562  | NM_017488 | 5085.987  | 4576.011  | X74613    | 20396.232 | 15771.462 |
| NM_002054 | 4491.226  | 6257.688  | NM_016044 | 1441.606  | 1266.539  | AF075080  | 14912.994 | 13421.132 |
| AF300649  | 1815.48   | 2735.516  | NM_000520 | 6925.359  | 12697.894 | AL390183  | 282.435   | 273.408   |
| NM_004125 | 1491.233  | 2188.02   | NM_000289 | 1244.671  | 1716.335  | Y13897    | 954.357   | 602.419   |
| NM_000823 | 2480.717  | 2733.385  | NM_001500 | 2922.98   | 3622.791  | AK001857  | 547.45    | 428.092   |
| NM_004414 | 1603.729  | 1657.036  | NM_004388 | 3318.802  | 4943.6    | AL133577  | 2333.25   | 1514.069  |
| NM_003317 | 2962.761  | 3627.013  | NM_020379 | 490.604   | 536.658   | AK025378  | 1359.427  | 1096.408  |
| NM_001139 | 3624.78   | 4149.786  | AL110127  | 1814.321  | 2099.052  | NM_000479 | 1158.921  | 699.084   |
| NM_004609 | 21046.176 | 20829.84  | AK001997  | 399.835   | 755.641   | AF038199  | 1800.332  | 1583.092  |
| NM_003772 | 1333.238  | 1681.073  | NM_002528 | 1908.686  | 2128.255  | CY3Cy5    | 1805.256  | 291.701   |
| NM_001541 | 1468.94   | 1729.366  | D38438    | 1708.793  | 1844.22   | BE908993  | 6720.959  | 9589.644  |
| NM_005416 | 1603.109  | 1679.39   | AV714945  | 945.585   | 890.693   | AB012701  | 1610.807  | 1876.522  |
| NM_004670 | 558.894   | 745.161   | AF089897  | 475.872   | 586.133   | M61156    | 1039.483  | 1365.981  |
| L09081    | 3008.539  | 2544.748  | AF007872  | 2058.649  | 2137.797  | R44005    | 2658.554  | 3364.318  |
| NM_000218 | 66334.359 | 70270.555 | M30938    | 5102.984  | 4828.861  | AI942392  | 1980.405  | 2185.787  |
| NM_016113 | 3358.312  | 3639.611  | NM_017586 | 7009.058  | 5810.405  | M55040    | 529.02    | 410.756   |
| NM_014222 | 4286.009  | 5963.151  | NM_004148 | 4056.959  | 3770.174  | AW009739  | 1588.899  | 1711.841  |
| AK026840  | 1492.252  | 1206.76   | X03168    | 1013.01   | 877.81    | BC036805  | 3503.626  | 3175.789  |
| NM_000288 | 1652.671  | 1291.618  | NM_005168 | 1821.255  | 1876.731  | Z74615    | 26692.729 | 25169.879 |
| AK026317  | 10610.658 | 13804.804 | NM_017801 | 8042.523  | 6917.987  | X03884    | 2770.42   | 2465.508  |
| X82207    | 13790.171 | 15255.724 | NM_007348 | 5162.549  | 3995.93   | U36759    | 934.39    | 1248.866  |
| NM_015044 | 4373.761  | 4224.983  | U65473    | 1790.78   | 1314.283  | X91625    | 1176.822  | 1779.842  |
| NM_002867 | 445.291   | 739.214   | D63481    | 1904.69   | 1238.756  | AF004231  | 1143.401  | 916.904   |
| BF217496  | 3225.296  | 2849.902  | AL157424  | 581.501   | 665.963   | AF001862  | 1848.826  | 1792.652  |
| NM_004762 | 2851.512  | 2551.49   | AK024422  | 1901.663  | 2001.984  | SR2       | 32331.799 | 28583.096 |
| NM_000634 | 7605.34   | 10175.202 | NM_002673 | 3697.73   | 7481.372  | SR4       | 7363.528  | 6141.747  |
| NM_014679 | 30366.344 | 33225.473 | NM_003876 | 3822.692  | 7445.521  | SR6       | 1031.982  | 1183.241  |
| AB040969  | 2172.908  | 2887.531  | AJ276310  | 333.715   | 575.984   | SR8       | 3801.782  | 12025.098 |
| NM_003467 | 4154.11   | 5677.198  | NM_012295 | 3974.72   | 4074.854  | SR10      | 12496.859 | 4698.121  |
| NM_014936 | 953.736   | 1394.636  | NM_015910 | 675.937   | 769.035   | CY3Cy5    | 1862.46   | 412.758   |
| NM_003943 | 1711.023  | 1974.396  | NM_000663 | 601.48    | 487.143   | NM_004126 | 258.882   | 475.137   |

|           |           |           |           |           |           |           |           |           |
|-----------|-----------|-----------|-----------|-----------|-----------|-----------|-----------|-----------|
| NM_019052 | 5076.659  | 6879.41   | NM_004710 | 3826.79   | 2691.914  | U87460    | 4485.581  | 6078.737  |
| NM_003202 | 748.235   | 900.481   | NM_004396 | 12904.937 | 8163.846  | NM_003617 | 390.808   | 511.183   |
| AF119902  | 984.358   | 1332.196  | NM_017999 | 2715.415  | 1739.656  | NM_001841 | 530.15    | 753.665   |
| NM_020525 | 2435.071  | 2375.867  | NM_015989 | 16848.902 | 10425.797 | NM_002054 | 2222.892  | 2372.753  |
| NM_003890 | 1871.708  | 2026.003  | NM_001043 | 837.946   | 582.175   | AF300649  | 1486.954  | 1502.712  |
| BF127978  | 1264.107  | 1293.142  | NM_004779 | 6604.969  | 5613.332  | NM_004125 | 765.854   | 942.584   |
| NM_016579 | 9107.696  | 9478.632  | NM_019071 | 3231.01   | 2351.938  | NM_000823 | 1822.845  | 1897.365  |
| AB018297  | 952.731   | 1053.566  | AF113685  | 688.06    | 784.615   | NM_004414 | 899.237   | 844.05    |
| AK022565  | 9502.129  | 9907.76   | NM_005470 | 2404.642  | 1726.509  | NM_003317 | 4521.909  | 4374.956  |
| AB025194  | 4879.458  | 4190.492  | NM_004225 | 7418.367  | 5911.646  | NM_001139 | 1311.667  | 1243.915  |
| NM_006239 | 953.188   | 793.698   | NM_003862 | 861.035   | 559.128   | NM_001541 | 2939.55   | 3384.141  |
| BC020863  | 810.273   | 615.82    | NM_002873 | 2023.307  | 1039.895  | NM_005416 | 651.677   | 546.379   |
| NM_017897 | 2883.563  | 2841.053  | NM_015571 | 7410.748  | 5045.622  | L09081    | 3786.974  | 3482.601  |
| NM_004265 | 19621.211 | 16833.938 | NM_004701 | 3521.404  | 3002.587  | NM_000218 | 47387.008 | 65232.641 |
| NM_002572 | 2531.014  | 2541.717  | AK025554  | 2394.114  | 3494.599  | NM_016113 | 3408.392  | 4329.434  |
| NM_001441 | 1643.682  | 1475.849  | BI824151  | 3991.993  | 7007.382  | NM_014222 | 1943.652  | 3038.031  |
| NM_018324 | 954.087   | 938.945   | AK021791  | 2530.159  | 3334.3    | L14819    | 315.464   | 359.24    |
| NM_016368 | 38121.16  | 38039.359 | NM_004052 | 10024.969 | 7802.03   | NM_000509 | 1128.525  | 1095.726  |
| U08853    | 3189.153  | 3981.265  | NM_004394 | 14254.563 | 14659.21  | NM_004542 | 336.696   | 245.359   |
| NM_004261 | 19034.486 | 20697.057 | NM_005727 | 4052.848  | 2979.719  | X06182    | 634       | 503.937   |
| NM_016006 | 2128.425  | 2306.724  | AK027242  | 2125.161  | 1166.526  | BF217496  | 4633.312  | 6990.004  |
| NM_016245 | 19503.369 | 20299.779 | NM_001279 | 9709.466  | 6540.673  | NM_004762 | 1494.434  | 2793.906  |
| AF005632  | 2089.945  | 2410.421  | NM_005010 | 671.586   | 409.465   | NM_006641 | 34641.035 | 43043.73  |
| NM_000903 | 13810.083 | 18013.434 | NM_019055 | 1488.604  | 1005.499  | NM_000634 | 5021.274  | 6350.122  |
| NM_004493 | 11125.139 | 12437.457 | U96136    | 779.356   | 457.464   | NM_014679 | 14857.773 | 14154.786 |
| AF309489  | 361.569   | 351.2     | AF188747  | 337.561   | 561.823   | AB040969  | 934.071   | 1226.315  |
| NM_004047 | 30535.328 | 31389.832 | NM_005941 | 407.93    | 447.592   | NM_003467 | 1335.615  | 1638.829  |
| NM_004823 | 1173.287  | 1473.107  | AF201380  | 2165.24   | 1998.014  | NM_014936 | 326.297   | 392.174   |
| AB013889  | 76.921    | 365.263   | NM_003619 | 2640.241  | 1804.15   | NM_003943 | 758.906   | 968.931   |
| Y17179    | 55953.523 | 57222.23  | NM_012392 | 3087.117  | 2102.51   | NM_019052 | 1935.59   | 2462.223  |
| NM_000891 | 490.307   | 712.027   | NM_014833 | 9168.479  | 4902.173  | NM_003202 | 409.811   | 190.159   |
| AF239613  | 5579.202  | 6680.363  | NM_000045 | 251.236   | 283.062   | AF119902  | 428.586   | 406.85    |
| NM_058197 | 793.068   | 623.253   | NM_003878 | 4124.778  | 2910.919  | NM_003890 | 2464.491  | 2876.9    |
| NM_016044 | 1704.008  | 1160.021  | NM_004832 | 441.226   | 704.614   | BF127978  | 1624.841  | 1318.199  |
| NM_000520 | 6293.667  | 4161.77   | NM_005957 | 569.627   | 1450.215  | NM_016579 | 8612.992  | 8352.224  |
| NM_000289 | 1748.372  | 1115.874  | AK024374  | 1183.783  | 1198.178  | AB018297  | 422.473   | 301.722   |
| NM_001500 | 2858.197  | 2173.64   | NM_018234 | 2380.411  | 2663.038  | AK022565  | 5455.274  | 5632.339  |
| NM_004388 | 3894.775  | 3811.726  | AB033062  | 721.039   | 486.939   | AK023151  | 1046.45   | 850.089   |
| NM_020379 | 625.098   | 432.989   | NM_016437 | 6437.906  | 3147.388  | AB033076  | 581.035   | 515.519   |
| AL110127  | 1952.552  | 2475.739  | NM_002720 | 6324.458  | 3113.42   | AK022876  | 580.214   | 700.789   |
| AK001997  | 503.446   | 532.628   | AK024716  | 13484.824 | 7567.999  | AF134894  | 2008.691  | 2075.646  |
| NM_002528 | 2093.722  | 2015.266  | X67155    | 741.761   | 410.08    | NM_003938 | 2985.487  | 2741.825  |
| D38438    | 2074.983  | 2550.456  | NM_020380 | 4804.94   | 3027.178  | NM_014827 | 6480.402  | 6237.487  |
| AV714945  | 923.099   | 1326.021  | NM_002890 | 26746.197 | 13860.337 | NM_001441 | 1160.449  | 1743.943  |
| AF089897  | 459.876   | 605.259   | NM_001330 | 16018.134 | 7297.515  | NM_018324 | 652.346   | 891.304   |
| AF007872  | 2248.724  | 2510.549  | NM_015927 | 402.533   | 205.205   | AF064255  | 22358.027 | 23819.385 |
| M30938    | 6643.54   | 6060.244  | NM_005122 | 267.379   | 408.676   | NM_016368 | 27940.658 | 29360.406 |
| NM_015148 | 1086.344  | 947.116   | NM_014552 | 2272.321  | 1452.428  | U08853    | 1212.858  | 1514.156  |
| NM_004714 | 839.201   | 829.284   | NM_003072 | 8405.078  | 5501.508  | NM_004261 | 8064.711  | 9611.481  |
| NM_005401 | 564.905   | 380.695   | NM_001913 | 2928.654  | 2003.185  | NM_016006 | 789.309   | 1210.719  |
| NM_002497 | 7182.225  | 5347.198  | AK025594  | 976.124   | 508.951   | NM_016245 | 6893.228  | 7144.57   |
| NM_005416 | 2183.741  | 2301.976  | AB040931  | 2907.852  | 1441.971  | AF005632  | 2198.206  | 2217.856  |
| NM_004670 | 706.002   | 928.231   | NM_003599 | 1234.532  | 741.288   | NM_000903 | 5212.078  | 4799.779  |



|           |           |           |           |           |           |           |           |           |
|-----------|-----------|-----------|-----------|-----------|-----------|-----------|-----------|-----------|
| L09081    | 6887.716  | 5044.537  | NM_015911 | 1658.288  | 747.054   | NM_004493 | 3669.391  | 4698.833  |
| NM_000218 | 58799.504 | 58158.121 | BC011826  | 3648.144  | 1952.098  | AF309489  | 293.29    | 293.672   |
| NM_016113 | 3327.018  | 3029.743  | NM_017647 | 3168.111  | 3282.878  | NM_004047 | 11126.033 | 11568.636 |
| NM_014222 | 4850.814  | 5250.212  | NM_012091 | 1488.736  | 2475.598  | NM_004823 | 1032.785  | 893.706   |
| L14819    | 396.497   | 477.95    | NM_012321 | 2272.275  | 3061.019  | Y17179    | 41871.645 | 36916.957 |
| NM_000509 | 2752.497  | 2098.66   | D13642    | 4838.995  | 3264.184  | NM_000891 | 329.761   | 175.802   |
| NM_004542 | 821.514   | 813.924   | NM_004741 | 6695.693  | 3224.03   | AF239613  | 1890.7    | 2142.087  |
| X06182    | 1682.411  | 1737.198  | NM_018032 | 3266.253  | 2060.175  | AK026840  | 567.16    | 530.499   |
| AB012701  | 2510.764  | 2979.033  | NM_003675 | 4865.816  | 2241.209  | NM_000288 | 886.001   | 690.784   |
| M61156    | 1058.577  | 1346.363  | NM_017518 | 2176.657  | 989.4     | AK026317  | 4818.321  | 4981.476  |
| R44005    | 1893.223  | 2290.59   | NM_004117 | 7919.612  | 3849.965  | X82207    | 8862.745  | 8680.346  |
| AI942392  | 5203.919  | 5306.162  | NM_016594 | 1918.818  | 1017.219  | NM_015044 | 1655.413  | 1806.823  |
| M55040    | 1015.309  | 1106.479  | NM_030752 | 5498.39   | 3589.659  | NM_002867 | 208.539   | 221.901   |
| AW009739  | 4034.451  | 4627.776  | D26068    | 23199.287 | 9940.812  | NM_000520 | 2012.983  | 3275.485  |
| BC036805  | 8345.144  | 7884.544  | NM_018559 | 5572.327  | 3421.953  | NM_000289 | 730.664   | 1083.343  |
| Z74615    | 13001.364 | 12672.128 | NM_017593 | 782.868   | 324.264   | NM_001500 | 964.383   | 856.701   |
| X03884    | 2891.389  | 2977.414  | NM_004282 | 10516.096 | 5674.366  | NM_004388 | 1242.281  | 1807.511  |
| U36759    | 1739.101  | 2742.609  | AK025695  | 1057.677  | 1201.649  | AL110127  | 955.201   | 1014.066  |
| X91625    | 2490.858  | 2596.204  | AK025442  | 5032.804  | 4851.627  | NM_002528 | 827.784   | 970.001   |
| AF090901  | 38.571    | 4004.198  | AL050041  | 1026.656  | 1151.569  | D38438    | 2090.677  | 1780.379  |
| AF001862  | 4517.874  | 4247.955  | NM_002451 | 1977.712  | 1373.223  | AV714945  | 402.706   | 605.586   |
| NM_003890 | 4200.997  | 5275.175  | NM_013411 | 1202.304  | 920.265   | AF007872  | 794.893   | 856.553   |
| BF127978  | 2849.611  | 4914.996  | AB007956  | 352.25    | 193.688   | M30938    | 1734.767  | 1631.295  |
| NM_016579 | 13649.365 | 11589.827 | NM_020200 | 413.381   | 358.571   | NM_015148 | 439.561   | 288.696   |
| AB018297  | 984.015   | 813.227   | NM_000180 | 1568.61   | 1917.621  | NM_004714 | 439.165   | 360.438   |
| AK022565  | 9297.4    | 7492.009  | NM_000858 | 5742.184  | 10449.246 | NM_002497 | 2689.538  | 1724.04   |
| AK023151  | 2202.661  | 1739.836  | AF254087  | 2266.962  | 3522.635  | AB025194  | 2371.121  | 2288.27   |
| AB033076  | 1353.841  | 1073.378  | NM_017715 | 950.349   | 633.371   | NM_006239 | 452.173   | 358.823   |
| AK022876  | 1362.008  | 1279.7    | AL117607  | 1595.273  | 951.995   | BC020863  | 347.996   | 348.939   |
| AF134894  | 5436.871  | 4296.609  | AB037774  | 1662.187  | 946.427   | NM_017897 | 1026.393  | 1132.304  |
| NM_003938 | 8238.093  | 6558.863  | NM_005438 | 947.441   | 430.953   | NM_004265 | 6930.008  | 7046.536  |
| NM_004126 | 313.983   | 680.994   | AK024361  | 1172.358  | 642.267   | NM_002572 | 1051.409  | 1267.496  |
| U87460    | 10142.495 | 11239.223 | NM_004350 | 1584.787  | 895.791   | L14819    | 361.823   | 432.089   |
| NM_003617 | 840.568   | 1077.271  | NM_018044 | 2801.154  | 1381.84   | NM_000509 | 1072.211  | 1534.886  |
| NM_001841 | 1175.646  | 1572.029  | AF274347  | 1294.07   | 1018.703  | NM_004542 | 403.1     | 632.592   |
| NM_002054 | 3730.575  | 3939.049  | NM_018555 | 1533.789  | 1105.778  | X06182    | 800.697   | 940.946   |
| AF300649  | 1407.257  | 1763.69   | AK023525  | 4173.4    | 3295.874  | BE908993  | 7180.426  | 8425.256  |
| NM_004125 | 1027.42   | 1103.679  | AF085829  | 1215.156  | 1155.842  | AB012701  | 1623.72   | 1941.283  |
| NM_000823 | 1357.194  | 1269.861  | AK021903  | 4221.856  | 3075.88   | M61156    | 1153.136  | 1277.516  |
| NM_004414 | 1341.286  | 1480.966  | AL390143  | 3108.244  | 2050.221  | R44005    | 2738.863  | 3123.411  |
| NM_003317 | 2947.301  | 2519.492  | AL162075  | 2049.824  | 1216.618  | AI942392  | 1872.855  | 1819.203  |
| NM_001139 | 3277.03   | 3517.273  | AK021595  | 1325.214  | 745.572   | M55040    | 467.863   | 430.558   |
| NM_004609 | 22556.008 | 22140.094 | AK021648  | 3251.073  | 2613.626  | AW009739  | 1584.372  | 1266.107  |
| NM_003772 | 1143.313  | 1316.945  | AF147358  | 5640.677  | 5413.024  | BC036805  | 3739.443  | 3646.271  |
| NM_001541 | 1487.13   | 1494.185  | AL110290  | 340.255   | 983.538   | Z74615    | 24870.9   | 20808.15  |
| NM_004823 | 1939.563  | 2068.418  | NM_018410 | 1753.734  | 2183.643  | X03884    | 2929.172  | 2908.694  |
| Y17179    | 56850.512 | 56671.371 | AF086355  | 500.549   | 308.04    | U36759    | 672.241   | 1044.126  |
| NM_000891 | 806.551   | 694.39    | AF086452  | 486.975   | 269.095   | X91625    | 1199.422  | 1178.136  |
| AF239613  | 4858.285  | 4823.019  | AF086419  | 4010.853  | 2385.451  | AF090901  | 308.472   | 200.71    |
| AK026840  | 1470.16   | 1498.44   | AF086461  | 839.65    | 761.113   | AF004231  | 933.318   | 705.968   |
| NM_000288 | 1693.052  | 2020.932  | AF131795  | 793.234   | 1533.746  | AF001862  | 2042.806  | 2023.231  |
| AK026317  | 11770.897 | 9360.741  | AL833296  | 1771.247  | 1288.495  | NM_058197 | 249.133   | 195.218   |
| X82207    | 15791.718 | 12649.144 | AL110240  | 5120.809  | 3807.082  | NM_016044 | 568.897   | 805.049   |

|           |           |           |           |           |           |           |           |           |
|-----------|-----------|-----------|-----------|-----------|-----------|-----------|-----------|-----------|
| NM_015044 | 4698.391  | 4106.047  | AF085919  | 1339.761  | 1092.315  | AK023151  | 1201.577  | 1779.736  |
| NM_002867 | 476.441   | 369.068   | AF085933  | 806.983   | 776.935   | AB033076  | 666.112   | 773.571   |
| BF217496  | 3157.303  | 3432.864  | AK026422  | 4622.161  | 3362.062  | AK022876  | 836.27    | 1206.909  |
| NM_004762 | 2451.435  | 3024.788  | AK022264  | 959.199   | 599.876   | AF134894  | 2077.169  | 2735.582  |
| NM_006641 | 36298.293 | 37099.988 | AL137331  | 1027.903  | 498.521   | NM_00393E | 3355.457  | 3703.75   |
| NM_000634 | 5511.086  | 6668.309  | AL162040  | 1673.393  | 1980.824  | NM_014827 | 6616.782  | 7365.545  |
| NM_01467E | 24453.855 | 22070.373 | AL442084  | 1481.649  | 2111.354  | U87460    | 4151.154  | 4950.8    |
| AB040969  | 2259.488  | 2738.725  | AL137371  | 10859.992 | 6961.372  | NM_003617 | 419.715   | 389.339   |
| NM_003467 | 3857.224  | 4559.096  | AL137596  | 3942.76   | 1477.499  | NM_001841 | 440.793   | 375.319   |
| NM_01493E | 1013.647  | 1322.696  | AL353942  | 14776.479 | 6166.601  | NM_002054 | 2465.488  | 2129.806  |
| NM_003943 | 1524.775  | 1634.001  | Z38010    | 1716.892  | 904.549   | AF300649  | 1489.921  | 1243.64   |
| NM_019052 | 5063.138  | 5565.426  | AK024713  | 955.976   | 820.177   | NM_00412E | 775.976   | 932.903   |
| NM_003202 | 753.246   | 728.349   | AK024204  | 698.492   | 726.558   | NM_000823 | 1856.093  | 1484.801  |
| AF119902  | 989.1     | 994.112   | AK023737  | 1343.631  | 1541.969  | NM_004414 | 924.038   | 890.495   |
| NM_02052E | 3480.447  | 3252.674  | NM_006609 | 1579.14   | 1535.716  | NM_003317 | 4526.994  | 3626.031  |
| X62468    | 323.445   | 655.489   | NM_014118 | 512.266   | 330.448   | NM_001139 | 1590.669  | 1756.87   |
| NM_01514E | 955.852   | 1546.576  | AF095853  | 375.482   | 426.01    | NM_00460E | 27315.09  | 23433.209 |
| NM_004714 | 1554.469  | 2083.962  | NM_014157 | 836.402   | 951.227   | NM_003772 | 507.143   | 581.189   |
| NM_005401 | 701.648   | 441.705   | AF111851  | 1944.542  | 1236.872  | NM_001541 | 2835.962  | 3300.692  |
| NM_017677 | 260.181   | 365.953   | AL360200  | 687.078   | 398.834   | NM_00541E | 739.393   | 560.48    |
| NM_002497 | 7061.347  | 4734.259  | AK021992  | 614.709   | 1346.528  | NM_00467C | 269.643   | 452.068   |
| AB025194  | 5678.029  | 4457.193  | AK022102  | 870.37    | 582.651   | L09081    | 3196.55   | 3855.844  |
| NM_00623E | 619.131   | 856.006   | AK022378  | 2351.074  | 1061.431  | NM_00021E | 47342.922 | 62930.262 |
| BC020863  | 686.136   | 551.525   | AK027254  | 819.897   | 660.526   | NM_016113 | 2924.983  | 3120.056  |
| NM_017897 | 2652.846  | 2564.087  | AK021772  | 1261.019  | 924.031   | NM_014222 | 2063.055  | 2941.273  |
| NM_00426E | 20073.227 | 18230.332 | AK054831  | 15511.14  | 10586.817 | AK026840  | 699.393   | 915.914   |
| NM_002572 | 2365.489  | 2344.735  | AK021770  | 1227.552  | 1149.222  | NM_00028E | 833.083   | 1068.702  |
| NM_001441 | 1197.505  | 1276.121  | AK027248  | 1258.15   | 1306.982  | AK026317  | 6292.297  | 9000.85   |
| NM_018324 | 649.357   | 699.539   | AK022804  | 10357.942 | 8698.623  | X82207    | 12537.453 | 15852.168 |
| AF064255  | 14853.269 | 21562.227 | AF009263  | 1587.441  | 894.197   | NM_015044 | 1910.125  | 2306.389  |
| NM_01636E | 20227.02  | 22326.207 | AF086329  | 3068.387  | 2418.369  | NM_002867 | 182.132   | 293.42    |
| U08853    | 3439.865  | 4004.773  | AK022857  | 628.753   | 867.886   | BF217496  | 3894.599  | 4966.591  |
| NM_004261 | 18982.127 | 21628.342 | NM_004821 | 276.922   | 868.853   | NM_004762 | 1340.261  | 1713.05   |
| NM_01600E | 1863.876  | 2815.128  | AK024292  | 1368.52   | 1412.006  | NM_006641 | 31416.305 | 31728.986 |
| NM_01624E | 18364.1   | 22057.426 | AK026263  | 1108.139  | 1181.956  | NM_000634 | 4323.231  | 4559.865  |
| AF005632  | 2397.824  | 2075.66   | U50526    | 762.674   | 587.781   | NM_01467E | 14532.183 | 11204.428 |
| NM_000903 | 13332.485 | 14344.604 | S75105    | 2274.031  | 1969.12   | AB040969  | 993.513   | 999.535   |
| NM_004493 | 9937.716  | 9865.956  | AF056455  | 5079.918  | 4593.551  | NM_003467 | 1445.342  | 1289.367  |
| AF309489  | 420.148   | 489.339   | NM_01851C | 1215.75   | 1033.438  | NM_01493E | 408.728   | 320.357   |
| NM_004047 | 29047.229 | 27366.432 | AK024988  | 669.396   | 318.565   | NM_003943 | 796.201   | 816.237   |
| NM_006773 | 2319.635  | 4308.096  | AK025719  | 376.242   | 322.406   | NM_019052 | 1992.609  | 2562.251  |
| AK024439  | 6724.175  | 8406.225  | AF026943  | 1407.584  | 885.835   | NM_003202 | 308.349   | 400.127   |
| X89676    | 885.428   | 553.707   | NM_02044E | 989.048   | 1173.28   | AF119902  | 423.669   | 474.396   |
| Z32684    | 1459.922  | 1104.098  | NM_00541E | 3297.82   | 1993.525  | NM_02052E | 3652.973  | 3736.919  |
| NM_016512 | 401.82    | 479.478   | NM_00347E | 9170.977  | 4238.058  | X62468    | 272.194   | 294.895   |
| NM_01748E | 6169.417  | 5986.57   | NM_020224 | 4737.358  | 3091.704  | NM_00389C | 1910.63   | 1830.543  |
| AY009400  | 341.751   | 449.685   | U17617    | 612.468   | 459.332   | BF127978  | 1378.222  | 1273.868  |
| NM_00506E | 934.687   | 837.49    | BF218888  | 994.603   | 1039.583  | NM_01657E | 6683.97   | 7518.022  |
| NM_016044 | 2054.933  | 1900.868  | AF086401  | 2752.583  | 1854.949  | AB018297  | 461.796   | 801.429   |
| NM_00052C | 6064.135  | 5417.647  | L23869    | 1395.886  | 1167.682  | AK022565  | 5070.84   | 4658.077  |
| NM_00028E | 1031.571  | 1085.165  | Z21853    | 1748.928  | 1062.389  | AB025194  | 3611.909  | 5933.497  |
| NM_00150C | 3016.02   | 2412.639  | U80770    | 544.589   | 481.143   | NM_00623E | 604.415   | 840.651   |
| NM_00438E | 3625.135  | 4495.199  | AB075846  | 605.666   | 395.344   | BC020863  | 431.428   | 299.57    |

|           |           |           |           |           |           |           |           |           |
|-----------|-----------|-----------|-----------|-----------|-----------|-----------|-----------|-----------|
| NM_020379 | 284.248   | 470.221   | BC020260  | 990.537   | 470.127   | NM_017897 | 1113.601  | 1288.582  |
| AL110127  | 1675.368  | 2404.849  | D17156    | 3287.5    | 1978.505  | NM_004265 | 7204.963  | 8432.349  |
| AK001997  | 1023.578  | 2022.146  | L04461    | 412.424   | 275.547   | NM_002572 | 1067.383  | 1533.114  |
| NM_002528 | 1839.598  | 1632.991  | AK026938  | 4671.766  | 3772.446  | NM_001441 | 896.955   | 1251.867  |
| D38438    | 2230.397  | 2028.631  | AK024373  | 8089.954  | 4450.037  | NM_018324 | 443.819   | 689.195   |
| AV714945  | 934.122   | 742.68    | AK022343  | 3970.758  | 1965.779  | AF064255  | 21053.219 | 19464.146 |
| AF089897  | 461.956   | 449.354   | U92989    | 3692.21   | 2488.108  | NM_016368 | 23126.035 | 19553.637 |
| AF007872  | 2463.654  | 1683.309  | AF075102  | 2329.627  | 1455.763  | U08853    | 1254.406  | 1186.814  |
| M30938    | 6663.56   | 5745.076  | NM_018463 | 2491.207  | 1586.861  | NM_004261 | 7368.363  | 6379.574  |
| NM_017586 | 9027.283  | 12523.79  | X74956    | 6346.669  | 6486.518  | NM_016006 | 825.347   | 938.628   |
| NM_004148 | 4292.334  | 5726.578  | AK025546  | 515.074   | 387.548   | NM_016245 | 6380.74   | 4786.213  |
| X03168    | 989.117   | 466.908   | AF278761  | 210.04    | 402.25    | AF005632  | 2123.198  | 1656.697  |
| NM_005168 | 6719.076  | 4739.055  | AK023800  | 828.225   | 767.051   | NM_000903 | 4936.353  | 4384.409  |
| NM_017801 | 5818.603  | 3681.103  | AK024120  | 971.782   | 976.514   | NM_004493 | 3591.42   | 3759.792  |
| NM_007348 | 6861.012  | 5840.929  | CY3Cy5    | 17045.355 | 1880.292  | AF309489  | 402.137   | 663.206   |
| U65473    | 2651.219  | 2291.59   | W96179    | 3714.363  | 4548.879  | NM_004047 | 10467.764 | 9302.29   |
| D63481    | 6068.954  | 7507.043  | AW247841  | 9087.931  | 10887.968 | NM_004823 | 880.024   | 617.335   |
| AY009951  | 626.112   | 1022.997  | BG568198  | 1315.349  | 1472.37   | AB013889  | 133.372   | 472.184   |
| AL157424  | 831.405   | 1014.925  | M76559    | 6411.644  | 7546.771  | Y17179    | 38873.23  | 38658.406 |
| AK024422  | 2334.257  | 2729.561  | U11058    | 471.224   | 915.436   | NM_000891 | 333.148   | 512.174   |
| NM_002673 | 3624.378  | 3113.059  | AI222585  | 1296.308  | 1703.109  | AF239613  | 1791.459  | 2444.364  |
| NM_003876 | 3933.155  | 4241.573  | AA411678  | 8567.795  | 9209.223  | NM_058197 | 271.117   | 368.266   |
| AJ276310  | 513.511   | 479.099   | AA862813  | 25888.59  | 25007.252 | NM_016044 | 631.052   | 880.828   |
| NM_012295 | 4589.38   | 3989.82   | AA398427  | 1652.992  | 1198.217  | NM_000520 | 1659.017  | 1852.833  |
| NM_000222 | 315.573   | 499.365   | T55728    | 4391.338  | 3811.104  | NM_000288 | 556.737   | 352.6     |
| AL133666  | 865.215   | 961.216   | H20856    | 2139.226  | 1262.586  | NM_001500 | 793.823   | 568.581   |
| NM_000663 | 678.693   | 568.435   | N62586    | 2920.763  | 2287.205  | NM_004388 | 1311.945  | 1565.686  |
| NM_004710 | 4224.597  | 2651.266  | AA242743  | 6766.04   | 4296.781  | AL110127  | 935.155   | 718.043   |
| NM_004396 | 14303.539 | 12254.388 | NM_004758 | 1902.025  | 1375.035  | NM_002528 | 875.874   | 668.234   |
| NM_017999 | 3072.656  | 2815.553  | NM_005163 | 3575.753  | 3061.323  | D38438    | 1635.566  | 1614.162  |
| NM_015988 | 35812.738 | 26283.732 | SR7       | 6333.544  | 43963.98  | AV714945  | 391.393   | 379.149   |
| NM_001043 | 957.033   | 886.101   | SR9       | 25905.291 | 6096.368  | AF007872  | 884.513   | 803.467   |
| NM_004779 | 6751.492  | 7729.95   | CY3Cy5    | 15051.582 | 1778.112  | M30938    | 2008.168  | 1468.761  |
| NM_019071 | 2885.7    | 3280.372  | NM_016382 | 1961.6    | 3107.195  | NM_015148 | 497.676   | 378.764   |
| AF113685  | 751.817   | 726.009   | AK023117  | 3032.046  | 4699.668  | NM_004714 | 492.333   | 459.34    |
| NM_005470 | 2769.279  | 1473.174  | AL122046  | 529.517   | 644.054   | NM_005401 | 299.785   | 234.442   |
| AF142570  | 733.64    | 458.282   | NM_000855 | 2747.887  | 4217.514  | NM_002497 | 2792.456  | 2348.951  |
| NM_004225 | 10752.064 | 8124.82   | NM_005536 | 6257.246  | 8653.438  | NM_005416 | 714.522   | 1163.195  |
| NM_003862 | 1079.029  | 979.317   | NM_005077 | 2686.022  | 3994.156  | NM_004670 | 277.615   | 437.484   |
| NM_002873 | 3380.902  | 4057.144  | NM_004423 | 5302.108  | 7424.085  | L09081    | 4966.007  | 6887.203  |
| NM_015571 | 10763.433 | 20849.775 | NM_001990 | 1136.282  | 1459.995  | NM_000218 | 44200.641 | 87501.438 |
| NM_004701 | 4928.09   | 7302.949  | NM_002141 | 1724.473  | 2038.031  | NM_016113 | 4001.438  | 5569.833  |
| AK025554  | 2115.887  | 2304.407  | NM_001804 | 443.786   | 747.318   | NM_014222 | 2084.499  | 3132.463  |
| BI824151  | 3211.381  | 3055.031  | NM_003311 | 7753.663  | 9110.857  | L14819    | 263.427   | 506.948   |
| AK021791  | 2463.415  | 3199.701  | NM_003776 | 3865.322  | 5080.046  | NM_000509 | 1021.583  | 945.884   |
| NM_005019 | 579.364   | 569.534   | NM_007098 | 1691.729  | 1740.898  | NM_004542 | 319.784   | 395.194   |
| NM_004052 | 10772.896 | 11553.525 | NM_015719 | 2128.647  | 2563.162  | X06182    | 868.066   | 506.377   |
| NM_004394 | 13775.19  | 15593.548 | NM_006129 | 2714.478  | 2662.593  | BE908993  | 6533.7    | 5002.728  |
| NM_005727 | 9928.033  | 9874.698  | NM_000582 | 4555.691  | 4123.393  | AB012701  | 1441.446  | 1505.154  |
| AK027242  | 1803.425  | 2432.86   | NM_005593 | 2431.297  | 1619.324  | M61156    | 1128.848  | 716.607   |
| NM_001279 | 13147.81  | 11903.535 | NM_004684 | 738.586   | 1000.64   | R44005    | 2473.176  | 2986.555  |
| M35675    | 562.68    | 355.83    | BF338709  | 1054.272  | 1665.961  | AI942392  | 1746.204  | 1601.389  |
| NM_005010 | 837.465   | 707.451   | AF204171  | 797.174   | 1257.999  | M55040    | 513.013   | 682.31    |

|           |           |           |           |           |           |           |           |           |
|-----------|-----------|-----------|-----------|-----------|-----------|-----------|-----------|-----------|
| NM_01905E | 1361.839  | 1217.955  | AF100756  | 7202.905  | 8034.088  | AW009739  | 1452.961  | 1699.005  |
| NM_02019E | 571.144   | 460.144   | NM_00682E | 11100.43  | 15713.028 | BC036805  | 3590.334  | 2726.691  |
| U96136    | 713.215   | 500.546   | NM_00486E | 3783.219  | 4909.289  | Z74615    | 24597.461 | 20637.896 |
| AF188747  | 504.034   | 392.594   | NM_001661 | 1495.987  | 1985.879  | X03884    | 2463.294  | 1859.689  |
| NM_005941 | 661.516   | 420.896   | NM_01456E | 5076.601  | 6209.651  | U36759    | 820.399   | 1527.748  |
| NM_015884 | 544.453   | 378.614   | NM_02015C | 3335.539  | 4967.998  | X91625    | 1301.339  | 1292.108  |
| AF201380  | 2860.298  | 3268.928  | NM_00715C | 5831.848  | 5922.929  | AF090901  | 269.807   | 355.455   |
| NM_00361E | 3367.062  | 2710.462  | NM_006831 | 4389.078  | 5147.297  | AF004231  | 854.638   | 817.301   |
| NM_01239E | 4118.123  | 2957.399  | AL162044  | 5293.164  | 6858.171  | AF001862  | 1830.371  | 1931.917  |
| NM_01483E | 13393.164 | 15884.172 | AK024004  | 694.368   | 796.495   | NM_00389C | 3602.621  | 5873.643  |
| NM_00004E | 475.548   | 879.682   | AK022365  | 265.468   | 495.692   | BF127978  | 2290.655  | 2787.008  |
| NM_00387E | 3238.394  | 3415.115  | BE892273  | 55073.828 | 52830.305 | AF110801  | 251.678   | 120.087   |
| NM_00483E | 629.961   | 707.077   | AF026929  | 799.101   | 803.909   | NM_01657E | 10308.804 | 12639.977 |
| NM_005957 | 766.111   | 862.357   | NM_016734 | 1192.836  | 1190.002  | AB018297  | 448.467   | 522.727   |
| AK024374  | 1295.484  | 1713.493  | AB023144  | 301.566   | 421.279   | AK022565  | 5621.321  | 7206.71   |
| NM_007101 | 861.741   | 1500.781  | AF035803  | 798.188   | 764.322   | AK023151  | 1221.794  | 972.708   |
| NM_018234 | 3060.951  | 4237.65   | Y08147    | 4527.336  | 3140.802  | AB033076  | 663.417   | 405.571   |
| AB033062  | 914.768   | 1282.289  | D00174    | 11181.083 | 10676.94  | AK022876  | 715.471   | 985.044   |
| NM_016437 | 11474.358 | 9398.208  | AB000520  | 1983.525  | 1710.896  | AF134894  | 2027.531  | 1717.825  |
| NM_00272C | 8462.654  | 8612.327  | NM_006907 | 1285.833  | 2049.936  | NM_00393E | 2976.379  | 2722.195  |
| AK024716  | 17750.852 | 20635.84  | NM_00268E | 1112.662  | 1395.691  | NM_014827 | 6010.111  | 4573.924  |
| X67155    | 868.703   | 715.555   | NM_00126E | 711.195   | 936.629   | NM_00412E | 238.841   | 158.203   |
| NM_02038C | 4738.113  | 4373.192  | AK023982  | 675.149   | 859.185   | U87460    | 4006.26   | 3399.094  |
| AL137519  | 511.385   | 530.934   | NM_01846E | 1481.1    | 2054.393  | NM_003617 | 406.394   | 410.853   |
| NM_00289C | 32665.26  | 29338.395 | Y11312    | 757.806   | 1293.869  | NM_001841 | 440.202   | 498.608   |
| NM_00133C | 21253.936 | 13828.4   | AF020774  | 413.359   | 452.108   | NM_002054 | 2166.272  | 1599.207  |
| NM_015927 | 811.699   | 620.173   | AB014533  | 5011.977  | 6362.299  | AF300649  | 1406.179  | 1161.37   |
| NM_00512E | 560.138   | 359.926   | NM_000744 | 486.478   | 1015.103  | NM_00412E | 853.258   | 738.419   |
| AL133055  | 488.063   | 226.625   | NM_00303E | 8126.912  | 10730.305 | NM_00082E | 1711.027  | 1524.105  |
| NM_01455E | 2698.48   | 1769.852  | NM_01450E | 1094.354  | 1193.837  | NM_004414 | 843.296   | 681.533   |
| NM_00307E | 9454.418  | 6115.116  | NM_02037E | 3768.817  | 4535.553  | NM_003317 | 3977.01   | 3594.383  |
| NM_00191E | 2817.812  | 1566.135  | NM_00497E | 1567.781  | 1357.229  | NM_00113E | 1493.362  | 1968.291  |
| AK025594  | 1079.399  | 608.94    | NM_016077 | 5036.636  | 4806.535  | NM_00460E | 25185.766 | 21637.406 |
| AB040931  | 4052.343  | 2706.458  | NM_015537 | 4714.354  | 4304.282  | NM_00377E | 389.037   | 669.971   |
| NM_00359E | 1413.719  | 1068.724  | NM_01652C | 7316.484  | 5123.692  | NM_001541 | 2233.798  | 2184.906  |
| NM_015911 | 2139.296  | 1732.164  | AB018353  | 1659.897  | 1459.693  | NM_00482E | 1517.477  | 2126.745  |
| BC011826  | 3948.984  | 2812.255  | NM_002617 | 1952.244  | 2673.738  | Y17179    | 38209.254 | 50130.75  |
| NM_017647 | 3151.095  | 3066.402  | NM_00331E | 9457.543  | 12157.747 | NM_000891 | 568.513   | 504.212   |
| NM_012091 | 1300.387  | 1003.35   | AF090907  | 1993.033  | 2670.591  | AF239613  | 1927.037  | 2643.777  |
| NM_012321 | 1890.295  | 1679.488  | AK024476  | 1998.502  | 2819.115  | AK026840  | 666.124   | 662.005   |
| D13642    | 7324.366  | 9387.366  | X74794    | 8800.736  | 10916.511 | NM_00028E | 768.353   | 810       |
| NM_004741 | 9498.581  | 15923.511 | AL050298  | 3686.164  | 4222.772  | AK026317  | 5405.493  | 6448.288  |
| NM_01803E | 4026.768  | 5813.892  | NM_00291E | 857.159   | 768.167   | X82207    | 10332.966 | 9497.863  |
| NM_00367E | 6279.478  | 5409.136  | NM_00673E | 884.463   | 986.294   | NM_015044 | 1739.747  | 1755.582  |
| NM_01751E | 2945.894  | 2578.855  | NM_00364C | 1620.295  | 1785.93   | NM_002867 | 253.121   | 188.431   |
| NM_004117 | 10579.967 | 9599.081  | NM_014444 | 3966.969  | 5462.775  | BF217496  | 3375.56   | 3247.841  |
| NM_016594 | 2716.623  | 1940.483  | NM_01224E | 4478.837  | 5497.438  | NM_00476E | 1274.891  | 1308.15   |
| NM_03075E | 6811.733  | 5141.388  | NM_01439E | 4405.704  | 5894.082  | NM_006641 | 28083.828 | 26370.531 |
| D26068    | 26059.563 | 17389.934 | NM_00422E | 8801.072  | 9552.092  | NM_000634 | 4198.626  | 3885.165  |
| NM_01855E | 6248.324  | 4792.772  | NM_00681E | 703.074   | 1157.757  | NM_01467E | 13648.804 | 9865.882  |
| NM_01759E | 929.317   | 409.78    | NM_00135E | 12944.732 | 14039.159 | AB040969  | 1005.067  | 982.717   |
| NM_00428E | 11509.813 | 10698.074 | U63336    | 1028.775  | 1218.645  | NM_003467 | 1214.456  | 1270.052  |
| AK025695  | 1196.198  | 1217.165  | AJ224741  | 662.19    | 941.278   | NM_01493E | 369.618   | 366.56    |

|           |          |          |           |           |           |           |           |           |
|-----------|----------|----------|-----------|-----------|-----------|-----------|-----------|-----------|
| AK025442  | 5547.27  | 4491.751 | NM_004684 | 636.973   | 590.313   | NM_003943 | 740.011   | 839.792   |
| AL050041  | 1169.136 | 1219.889 | BF338709  | 780.305   | 708.539   | NM_019052 | 2056.6    | 3042.806  |
| NM_002451 | 1747.625 | 1622.656 | W96179    | 3203.678  | 3068.415  | NM_003202 | 293.577   | 220.185   |
| NM_013411 | 1558.541 | 1129.808 | AW247841  | 10350.704 | 10319.221 | AF119902  | 424.324   | 329.351   |
| AB007956  | 530.64   | 551.697  | BG568198  | 733.051   | 545.04    | NM_020525 | 3728.228  | 4372.581  |
| NM_001245 | 136.033  | 397.944  | M76559    | 5152.379  | 5525.396  | X62468    | 325.975   | 418.784   |
| NM_000180 | 1826.27  | 1644.624 | AF043473  | 504.584   | 1252.902  | NM_015145 | 412.84    | 635.9     |
| NM_000855 | 4987.837 | 3285.05  | U03884    | 592.043   | 672.818   | NM_004714 | 715.553   | 1074.828  |
| AF254087  | 2225.792 | 2092.111 | AA398427  | 1902.492  | 2175.093  | NM_005401 | 421.131   | 572.836   |
| NM_017715 | 1055.726 | 1782.559 | T55728    | 5996.278  | 8551.82   | NM_002497 | 2982.958  | 2701.514  |
| AL117607  | 2241.141 | 2468.364 | H20856    | 2160.809  | 2409.114  | AB025194  | 1905.822  | 2629.942  |
| AB037774  | 2000.201 | 1999.692 | N62586    | 4253.902  | 5486.082  | NM_006235 | 509.027   | 644.993   |
| NM_005435 | 1459.606 | 1303.673 | AA242743  | 9675.385  | 10472.103 | BC020863  | 302.427   | 275.412   |
| AK024361  | 1406.782 | 1621.968 | NM_004755 | 2759.609  | 2765.118  | NM_017897 | 1121.315  | 995.677   |
| NM_004350 | 1871.301 | 1510.264 | NM_005163 | 5685.477  | 6974.997  | NM_004265 | 7056.345  | 7454.811  |
| NM_018044 | 3766.21  | 2879.698 | NM_004310 | 730.947   | 358.407   | NM_002572 | 917.3     | 862.434   |
| NM_004503 | 466.376  | 448.924  | M16006    | 364.715   | 503.928   | NM_001441 | 1043.097  | 1443.132  |
| NM_001717 | 393.844  | 258.221  | AF035803  | 488.283   | 666.889   | NM_018324 | 524.491   | 295.107   |
| AF274347  | 3065.033 | 2036.211 | Y08147    | 4534.116  | 3731.082  | AF064255  | 17427.559 | 13666.485 |
| AK001144  | 487.188  | 47.702   | D00174    | 10083.056 | 8915.14   | NM_016365 | 19606.287 | 16024.198 |
| NM_018555 | 2337.352 | 1882.819 | AB000520  | 1600      | 1615.804  | U08853    | 1313.733  | 1197.656  |
| AK023525  | 4322.913 | 2983.494 | NM_016382 | 1605.397  | 2000.338  | NM_004261 | 7360.688  | 5416.837  |
| AF085829  | 1287.527 | 893.954  | AK023117  | 2570.978  | 3072.305  | NM_016005 | 673.017   | 772.793   |
| AK021903  | 3869.784 | 3184.374 | AL122046  | 479.698   | 667.52    | NM_016245 | 6753.609  | 6096.983  |
| AL390143  | 3478.77  | 2894.956 | NM_000855 | 2235.068  | 1953.786  | AF005632  | 1955.625  | 1405.672  |
| AL162075  | 2521.689 | 2199.688 | NM_005536 | 4555.507  | 4076.65   | NM_000903 | 5161.844  | 5947.304  |
| AF147384  | 893.637  | 592.888  | NM_001990 | 1265.064  | 2258.993  | NM_004493 | 3609.986  | 3751.656  |
| AK021595  | 1163.258 | 972.831  | NM_002141 | 2367.388  | 2831.78   | AF309489  | 299.101   | 230.308   |
| AK021648  | 3293.304 | 2776.82  | NM_003311 | 9030.284  | 10360.791 | NM_004047 | 10247.26  | 9880.773  |
| AF147358  | 8040.417 | 5461.751 | NM_003776 | 4730.551  | 5097.63   | NM_006773 | 735.482   | 1213.884  |
| AL110290  | 459.232  | 312.51   | NM_007095 | 2567.782  | 2849.644  | AK024439  | 3124.384  | 4216.931  |
| NM_018410 | 1872.912 | 1732.068 | NM_015719 | 2434.341  | 3971.465  | X89676    | 577.236   | 725.137   |
| AF147404  | 335.669  | 418.4    | NM_012464 | 602.991   | 631.859   | NM_012444 | 251.807   | 277.242   |
| AF086278  | 501.223  | 492.792  | NM_006129 | 3722.699  | 4764.475  | Z32684    | 724.415   | 980.289   |
| AF086355  | 586.706  | 668.082  | NM_005593 | 2257.872  | 1967.437  | NM_016512 | 393.389   | 403.49    |
| AF086403  | 447.973  | 412.2    | NM_004979 | 1311.743  | 1010.717  | NM_017485 | 2548.708  | 2541.084  |
| AF086452  | 506.943  | 367.611  | NM_016077 | 3769.665  | 4179.77   | NM_005065 | 402.99    | 240.179   |
| AF086314  | 546.742  | 498.486  | AF100756  | 7884.228  | 6618.456  | NM_016044 | 655.713   | 466.32    |
| NM_016364 | 382.743  | 365.64   | NM_006825 | 9118.484  | 9197.337  | NM_000520 | 1854.929  | 1250.724  |
| AF086419  | 4600.543 | 4097.175 | NM_004862 | 3299.134  | 3017.531  | NM_000285 | 715.478   | 511.883   |
| AF086461  | 1090.38  | 927.625  | NM_001661 | 1252.702  | 1425.98   | NM_001500 | 975.812   | 763.667   |
| AF131795  | 358.173  | 378.622  | NM_014563 | 3013.291  | 3063.633  | NM_004385 | 1306.141  | 944.43    |
| AL833296  | 1712.212 | 1005.814 | NM_020150 | 2602.797  | 2839.717  | NM_020375 | 224.914   | 208.6     |
| AL110240  | 3886.019 | 3634.248 | NM_007150 | 4191.274  | 3663.653  | AL110127  | 930.887   | 730.723   |
| AF075081  | 280.848  | 508.225  | NM_006831 | 3394.897  | 2768.555  | AK001997  | 233.246   | 235.586   |
| NM_015372 | 475.212  | 259.924  | AL162044  | 5875.629  | 4594.996  | NM_002525 | 932.994   | 853.805   |
| AF085919  | 1402.18  | 1194.039 | AK022365  | 1036.318  | 1216.065  | D38438    | 1908.695  | 1794.388  |
| AF085933  | 833.03   | 777.027  | BE892273  | 58438.598 | 55140.246 | AV714945  | 422.619   | 436.601   |
| AF147431  | 532.942  | 835.417  | NM_016734 | 1240.666  | 1081.488  | AF007872  | 883.599   | 880.095   |
| AK026422  | 5723.587 | 6267.841 | NM_014393 | 3419.33   | 3975.652  | M30938    | 1911.891  | 1793.821  |
| AK022264  | 918.82   | 1114.512 | NM_004223 | 8397.051  | 8606.35   | NM_017585 | 6128.364  | 7943.325  |
| AL137331  | 1098.62  | 897.858  | NM_006813 | 784.498   | 527.573   | NM_004145 | 2299.035  | 3033.202  |
| AL162040  | 1885.731 | 1533.219 | NM_001355 | 7801.872  | 6819.267  | X03168    | 810.275   | 781.97    |

|           |           |           |           |           |           |           |           |           |
|-----------|-----------|-----------|-----------|-----------|-----------|-----------|-----------|-----------|
| AL442084  | 1377.628  | 1090.165  | U63336    | 891.589   | 1126.608  | NM_00516E | 1116.632  | 1315.837  |
| AL137371  | 9513.74   | 8324.601  | NM_006907 | 1391.872  | 1431.169  | NM_017801 | 3627.604  | 4158.799  |
| AL137596  | 3375.665  | 3132.58   | NM_00268E | 572.65    | 679.178   | NM_00734E | 2078.404  | 2174.823  |
| AL353942  | 12217.491 | 11122.34  | NM_006267 | 1448.38   | 1053.942  | NM_01695E | 275.375   | 408.898   |
| Z38010    | 2650.176  | 1998.625  | NM_002661 | 7939.353  | 7330.202  | U65473    | 2187.28   | 2103.953  |
| AF088003  | 472.701   | 545.66    | NM_00126E | 688.33    | 915.612   | D63481    | 5530.478  | 5302.696  |
| AK024713  | 1179.775  | 785.059   | NM_01846E | 1159.917  | 1027.262  | AL157424  | 330.058   | 294.858   |
| AK024204  | 592.493   | 733.584   | AB014533  | 3917.735  | 2975.925  | AK024422  | 895.068   | 1143.588  |
| AK023737  | 647.68    | 673.289   | NM_00303E | 7702.433  | 5688.936  | NM_00267E | 1179.721  | 963.091   |
| NM_00660E | 1491.768  | 1017.219  | NM_01450E | 889.712   | 500.682   | NM_00387E | 1227.197  | 955.788   |
| NM_01411E | 522.95    | 453.857   | U26662    | 501.464   | 472.363   | AJ276310  | 290.996   | 214.672   |
| AK023643  | 521.128   | 622.748   | NM_02037E | 6922.129  | 5645.326  | NM_01229E | 1858.436  | 1200.496  |
| AL390159  | 415.422   | 521.079   | NM_00263E | 60843.055 | 57332.492 | NM_01591C | 286.623   | 285.28    |
| AF095853  | 521.342   | 636.586   | NM_00475E | 1934.571  | 1869.052  | NM_00022E | 373.28    | 134.446   |
| NM_014157 | 661.07    | 1202.115  | NM_00516E | 4569.709  | 6014.546  | AL133666  | 569.7     | 439.125   |
| AF090933  | 854.167   | 1435.571  | NM_015361 | 6549.162  | 5196.675  | NM_00066E | 283.829   | 373.588   |
| AF111851  | 2793.956  | 3144.699  | NM_015537 | 3550.271  | 3080.158  | NM_00471C | 1746.036  | 1290.613  |
| AF152529  | 403.861   | 636.194   | NM_01652C | 6260.379  | 5035.583  | NM_00439E | 5196.995  | 3862.385  |
| AL360200  | 707.968   | 837.498   | AB018353  | 1919.061  | 1739.864  | NM_01799E | 1126.563  | 1049.508  |
| NM_01408E | 327.274   | 193.91    | NM_00703E | 1770.362  | 1239.083  | NM_01598E | 18819.156 | 15177.614 |
| AK021992  | 487.243   | 474.612   | NM_002617 | 1322.568  | 1317.14   | NM_00104E | 395.198   | 261.567   |
| AK022102  | 489.954   | 466.742   | NM_00331E | 7678.416  | 6021.038  | NM_00477E | 3536.954  | 4400.451  |
| AK022235  | 588.543   | 775.617   | AF090907  | 1816.506  | 1556.306  | NM_019071 | 1350.681  | 1784.929  |
| AK022378  | 2051.989  | 1811.322  | AK024476  | 2168.458  | 2074.678  | AF113685  | 500.932   | 543.36    |
| AK022009  | 512.487   | 558.264   | X74794    | 7416.437  | 6800.689  | NM_00547C | 1143.392  | 1155.199  |
| AK022274  | 524.642   | 355.679   | AL050298  | 3503.681  | 2855.097  | AF142570  | 351.047   | 399.562   |
| AK022401  | 485.484   | 412.868   | NM_00707E | 30996.141 | 24450.633 | NM_00422E | 4521.891  | 4809.347  |
| AK027174  | 630.134   | 295.424   | M20696    | 4231.573  | 2211.641  | NM_00386E | 447.006   | 430.863   |
| AL110173  | 451.042   | 308.532   | NM_00291E | 594.416   | 436.075   | NM_00287E | 1232.431  | 1007.67   |
| AK027254  | 706.935   | 364.023   | NM_00673E | 662.116   | 319.637   | NM_015571 | 3224.83   | 2341.094  |
| AK021772  | 1367.329  | 723.448   | NM_00364C | 1213.947  | 640.251   | NM_004701 | 1404.978  | 984.363   |
| AK026297  | 513.665   | 421.446   | NM_014444 | 3983.919  | 2147.482  | AK025554  | 749.038   | 593.774   |
| AK054831  | 11346.462 | 11070.883 | NM_01224E | 6809.473  | 3951.939  | BI824151  | 1436.266  | 937.25    |
| AK021770  | 1314.903  | 1477.861  | NM_01497C | 5680.018  | 3761.044  | AK021791  | 976.763   | 562.603   |
| AK027248  | 1470.778  | 1346.332  | NM_00709E | 2026.964  | 2026.934  | NM_00501E | 246.549   | 324.773   |
| AK022804  | 13101.562 | 11709.789 | NM_01571E | 2371.465  | 4465.292  | NM_00405E | 3425.777  | 2392.16   |
| AF009263  | 1588.135  | 1241.069  | NM_012464 | 336.026   | 385.277   | NM_004394 | 5139.904  | 4006.995  |
| AF086329  | 4098.97   | 3581.25   | NM_00612E | 2188.653  | 2540.831  | NM_00572E | 8307.636  | 8015.997  |
| AK022857  | 403.826   | 405.176   | NM_00058E | 4219.254  | 4253.53   | AK027242  | 636.589   | 725.292   |
| AL110206  | 467.066   | 348.008   | NM_00559E | 2074.73   | 1497.865  | NM_00127E | 4461.188  | 3403.114  |
| NM_004821 | 703.342   | 576.615   | AJ224741  | 661.035   | 649.078   | NM_00501C | 542.885   | 410.307   |
| AK024292  | 1043.661  | 762.993   | NM_004684 | 603.621   | 383.483   | NM_01905E | 711.976   | 573.635   |
| AK026263  | 1106.936  | 864.642   | BF338709  | 868.26    | 804.809   | NM_02019E | 207.472   | 144.722   |
| U50526    | 752.045   | 1608.633  | AF204171  | 617.37    | 762.253   | U96136    | 205.133   | 247.983   |
| S75105    | 2493.153  | 3017.627  | W96179    | 2906.243  | 2793.497  | NM_005941 | 420.681   | 297.914   |
| AF056455  | 6093.388  | 4180.461  | AW247841  | 12568.743 | 12448.751 | NM_015884 | 293.071   | 368.167   |
| NM_01851C | 1429.32   | 1225.561  | BG568198  | 741.187   | 574.975   | AF201380  | 1139.815  | 1819.75   |
| U50537    | 592.137   | 659       | M76559    | 6120.69   | 6405.92   | NM_00361E | 1247.103  | 1959.012  |
| AK024988  | 1037.06   | 826.003   | U11058    | 612.08    | 720.05    | NM_01239E | 1531.346  | 1513.338  |
| AV749548  | 318.881   | 300.718   | AI222585  | 1360.375  | 885.085   | NM_01483E | 6070.618  | 6267.503  |
| AK025719  | 642.419   | 752.711   | AA411678  | 9628.319  | 6311.216  | NM_00004E | 429.704   | 480.862   |
| AF026943  | 2053.614  | 1665.72   | AA862813  | 25315.688 | 13251.952 | NM_00387E | 1538.122  | 1336.605  |
| L77582    | 424.914   | 256.377   | AA398427  | 1595.567  | 922.025   | NM_00483E | 278.739   | 240.893   |

|           |           |           |           |           |           |           |           |           |
|-----------|-----------|-----------|-----------|-----------|-----------|-----------|-----------|-----------|
| NM_02044E | 868.055   | 872.686   | T55728    | 4618.081  | 2308.851  | NM_005957 | 285.157   | 181.498   |
| NM_00541E | 3861.895  | 3284.21   | H20856    | 2434.993  | 862.73    | AK024374  | 584.275   | 442.134   |
| L31956    | 331.581   | 525.096   | N62586    | 3473.503  | 2592.202  | NM_007101 | 395.671   | 598.667   |
| NM_00347E | 11810.507 | 11358.098 | AK022365  | 421.623   | 618.501   | NM_018234 | 989.475   | 912.281   |
| AK022078  | 416.589   | 500.597   | BE892273  | 62601.672 | 58336.934 | AB033062  | 669.092   | 317.535   |
| AF075101  | 393.353   | 241.284   | NM_016734 | 771.433   | 501.418   | NM_016437 | 6633.452  | 4158.822  |
| NM_020224 | 4674.725  | 3008.435  | AF035803  | 710.017   | 574.543   | NM_00272C | 2491.1    | 1822.903  |
| U17617    | 1122.635  | 790.414   | Y08147    | 5171.887  | 3733.562  | AK024716  | 5670.124  | 3621.526  |
| AK022952  | 4899.019  | 3014.37   | D00174    | 11164.93  | 10731.557 | X67155    | 365.163   | 101.724   |
| BF218888  | 783.611   | 696.43    | AB000520  | 1864.261  | 2098.551  | NM_02038C | 1791.296  | 1939.321  |
| AF086401  | 3129.216  | 3398.253  | NM_016382 | 1686.366  | 1622.27   | AL137519  | 165.678   | 274.012   |
| L23869    | 1780.988  | 1695.013  | AK023117  | 3292.925  | 3769.984  | NM_00289C | 12389.688 | 11235.288 |
| Z21853    | 2019.862  | 1136.008  | AL122046  | 828.938   | 810.68    | NM_00133C | 16491.941 | 10149.747 |
| AL050183  | 335.473   | 209.951   | NM_00085E | 1990.699  | 1933.868  | NM_015927 | 512.162   | 424.085   |
| U80770    | 634.314   | 564.163   | NM_00553E | 5624.596  | 3391.953  | NM_00512E | 317.132   | 211.094   |
| AB075846  | 809.838   | 701.256   | NM_005077 | 2540.578  | 1250.548  | NM_01455E | 1729.901  | 1956.242  |
| NM_01834E | 1049.398  | 1247.146  | NM_00442E | 3984.213  | 2515.066  | NM_00307E | 3814.35   | 3390.83   |
| BC020260  | 1655.798  | 2788.698  | NM_00199C | 742.623   | 354.274   | NM_00191E | 1035.783  | 1218.945  |
| D17156    | 4215.755  | 4305.827  | NM_002141 | 1564.547  | 671.408   | AK025594  | 369.91    | 396.684   |
| L04461    | 537.58    | 492.756   | NM_000744 | 851.034   | 798.816   | AB040931  | 1423.593  | 1392.341  |
| AK026938  | 5244.343  | 4709.335  | NM_00303E | 9226.49   | 15814.145 | NM_00359E | 517.245   | 425.263   |
| AK024373  | 6802.346  | 6122.39   | NM_01450E | 713.891   | 709.893   | NM_015911 | 836.469   | 751.991   |
| AK022343  | 3909.474  | 3249.633  | NM_02037E | 4106.051  | 3200.753  | BC011826  | 1456.25   | 965.311   |
| AK026400  | 510.639   | 678.928   | NM_00263E | 58676.793 | 51862.023 | NM_017647 | 1150.9    | 996.915   |
| U92989    | 4081.227  | 4554.834  | NM_00497E | 999.025   | 923.456   | NM_012091 | 411.103   | 236.241   |
| AF075102  | 2067.66   | 1701.275  | NM_016077 | 4535.258  | 4412.622  | NM_012321 | 872.021   | 466.229   |
| NM_01846E | 3064.118  | 2373.319  | AF100756  | 12232.284 | 12228.627 | D13642    | 1399.881  | 947.482   |
| X74956    | 11351.285 | 6941.382  | NM_00682E | 10379.945 | 9393.195  | NM_004741 | 3739.295  | 2154.383  |
| AK025546  | 734.627   | 591.129   | NM_00486E | 4142.354  | 4168.807  | NM_01803E | 1108.607  | 811.605   |
| AL137487  | 1960.676  | 1378.923  | NM_001661 | 1319.807  | 804.953   | NM_00367E | 2259.818  | 1147.916  |
| AK023800  | 579.589   | 524.418   | NM_01456E | 3689.068  | 1581.6    | NM_01751E | 827.43    | 660.07    |
| AK024120  | 1143.324  | 906.036   | NM_02015C | 2704.516  | 1675.651  | NM_004117 | 3043.509  | 2013.024  |
| CY3Cy5    | 4694.991  | 915.66    | NM_00715C | 4286.18   | 2160.32   | NM_016594 | 774.44    | 406.365   |
| W96179    | 2333.522  | 1622.824  | AL162044  | 6607.994  | 9365.376  | NM_03075E | 2173.599  | 1553.679  |
| AW247841  | 6971.018  | 5136.642  | AK024004  | 845.722   | 1001.937  | D26068    | 8524.056  | 5372.486  |
| BG568198  | 351.891   | 146.877   | NM_00673E | 712.579   | 608.909   | NM_01855E | 4651.518  | 3393.231  |
| M76559    | 3954.6    | 3742.427  | NM_00364C | 1375.944  | 1704.586  | NM_01759E | 487.215   | 424.832   |
| U03884    | 228.657   | 209.332   | NM_014444 | 2590.818  | 2914.051  | NM_00428E | 4644.062  | 3844.306  |
| U11058    | 337.884   | 308.902   | NM_01224E | 2082.069  | 1869.599  | AK025695  | 553.957   | 704.577   |
| AI222585  | 716.316   | 852.147   | NM_01497C | 5533.466  | 5312.943  | AK025442  | 2138.921  | 3208.481  |
| AA411678  | 6204.947  | 7009.062  | NM_01439E | 2879.813  | 3379.931  | AL050041  | 523.958   | 740.535   |
| AA862813  | 23963.916 | 21460.438 | NM_00422E | 7695.998  | 7247.322  | NM_002451 | 902.06    | 824.885   |
| AA398427  | 1030.901  | 1492.066  | NM_00681E | 798.628   | 635.711   | NM_013411 | 573.349   | 681.858   |
| T55728    | 3535.57   | 4603.725  | NM_00135E | 11243.943 | 10637.161 | AB007956  | 300.169   | 80.849    |
| H20856    | 1706.344  | 1752.576  | U63336    | 1817.248  | 2348.03   | NM_02020C | 262.015   | 100.14    |
| N62586    | 2393.462  | 3097.337  | NM_006907 | 1377.267  | 1792.378  | NM_00018C | 2886.755  | 2239.897  |
| AA242743  | 2179.834  | 2527.141  | NM_00268E | 481.562   | 582.388   | NM_00085E | 1180.172  | 795.258   |
| NM_00475E | 1175.972  | 1185.984  | NM_006267 | 1838.448  | 1526.115  | AF254087  | 605.376   | 366.781   |
| NM_00516E | 3933.869  | 4493.338  | NM_002661 | 12510.464 | 10413.056 | NM_01771E | 417.413   | 241.738   |
| SR5       | 3277.615  | 3713.921  | AK023982  | 831.594   | 170.639   | AL117607  | 1565.155  | 738.248   |
| SR7       | 4639.133  | 37281.18  | NM_01846E | 1171.608  | 618.151   | AB037774  | 602.607   | 548.378   |
| SR9       | 20530.123 | 4472.088  | Y11312    | 841.67    | 264.247   | NM_00543E | 640.051   | 233.901   |
| CY3Cy5    | 4615.251  | 1027.776  | AB014533  | 3838.779  | 5326.564  | AK024361  | 443.298   | 272.372   |

|           |           |           |           |           |           |           |          |          |
|-----------|-----------|-----------|-----------|-----------|-----------|-----------|----------|----------|
| NM_016382 | 1178.667  | 1006.86   | M11427    | 545.93    | 1163.047  | NM_00435C | 646.335  | 720.307  |
| AK023117  | 1696.708  | 1349.4    | AK022097  | 1799.002  | 1504.654  | NM_018044 | 1143.985 | 668.195  |
| AL122046  | 479.576   | 406.918   | NM_002166 | 8177.512  | 7417.019  | AF274347  | 1778.752 | 1029.272 |
| AF119914  | 171.593   | 237.221   | NM_00466C | 10757.536 | 10005.087 | NM_01855E | 1543.796 | 978.88   |
| NM_00085E | 794.882   | 907.884   | NM_00616E | 2596.773  | 2338.662  | AK023525  | 1793.229 | 2274.489 |
| NM_00553E | 3035.728  | 2837.842  | NM_016011 | 10728.73  | 10659.307 | AF085829  | 666.111  | 594.853  |
| NM_005077 | 1511.817  | 1598      | AL035307  | 1135.291  | 856.975   | AF075029  | 274.665  | 243.615  |
| NM_004423 | 2152.408  | 2133.367  | NM_012234 | 4944.04   | 5099.979  | AK021903  | 2376.984 | 2058.563 |
| NM_00199C | 577.749   | 605.253   | NM_015361 | 10294.684 | 8867.894  | AL390143  | 1680.763 | 1505.145 |
| NM_001804 | 229.58    | 261.894   | NM_00431C | 340.095   | 746.026   | AL162075  | 913.56   | 973.368  |
| NM_003311 | 5058.238  | 5469.716  | NM_015537 | 5417.819  | 6293.536  | AF147384  | 647.123  | 805.322  |
| NM_00377E | 3425.538  | 4796.107  | NM_01652C | 8047.725  | 6109.621  | AK021595  | 416.398  | 401.59   |
| NM_00709E | 1636.362  | 1863.927  | AB018353  | 2470.525  | 2565.765  | AK021648  | 1112.375 | 1474.92  |
| NM_01571E | 1977.033  | 3843.266  | NM_00703E | 2306.269  | 1742.274  | AF147358  | 4914.322 | 3617.93  |
| NM_012464 | 244.018   | 356.862   | NM_002617 | 1895.402  | 1018.734  | NM_01841C | 705.749  | 640.553  |
| NM_00612E | 2406.577  | 2870.242  | NM_003313 | 11652.68  | 5311.376  | AF086278  | 253.92   | 168.976  |
| NM_005593 | 1116.768  | 1211.706  | AF090907  | 1884.063  | 987.589   | NM_016364 | 417.782  | 245.318  |
| AJ224741  | 251.678   | 252.902   | AK024476  | 2487.694  | 1198.02   | AF086419  | 1922.308 | 1070.023 |
| NM_004684 | 362.09    | 300.953   | NM_00707E | 37373.672 | 51750.961 | AF086461  | 462.152  | 458.925  |
| BF338709  | 483.682   | 667.875   | M20696    | 5625.144  | 6520.067  | AF131795  | 251.814  | 327.948  |
| AF204171  | 509.246   | 636.627   | NM_00291E | 1074.304  | 1361.909  | AL833296  | 816.431  | 601.119  |
| M18182    | 251.381   | 210.113   | NM_005203 | 1052.179  | 703.545   | AL110240  | 1942.293 | 1642.453 |
| AF100756  | 7290.025  | 4979.496  | AK026154  | 9849.572  | 6238.834  | NM_015372 | 237.671  | 233.355  |
| NM_00682E | 5266.806  | 3904.458  | AL117546  | 26142.504 | 18417.283 | AF085919  | 619.699  | 775.725  |
| NM_004862 | 2709.801  | 2030.777  | AK027073  | 687.387   | 552.003   | AF085933  | 430.854  | 453.348  |
| NM_001661 | 887.977   | 768.884   | NM_000384 | 692.409   | 489.712   | AF147431  | 399.191  | 252.191  |
| NM_014563 | 2835.968  | 2016.411  | AB018325  | 3901.018  | 3275.415  | AK026422  | 3101.425 | 3581.396 |
| NM_02015C | 2150.217  | 2510.092  | AL157482  | 8144.134  | 5652.509  | AF085938  | 186.6    | 380.681  |
| NM_00715C | 3211.262  | 2973.187  | NM_00542E | 4811.386  | 4707.607  | AK022264  | 428.345  | 405.657  |
| NM_006831 | 2694.998  | 2845.616  | NM_017974 | 1032.169  | 751.682   | AL137331  | 592.925  | 488.461  |
| AL162044  | 4080.593  | 3974.401  | NM_00397E | 1062.262  | 1608.206  | AL162040  | 1236.603 | 1095.278 |
| AK024004  | 421.281   | 384.322   | X14677    | 3992.444  | 4532.67   | AL442084  | 378.561  | 220.887  |
| AK022365  | 309.937   | 365.853   | NM_005863 | 15185.616 | 14133.617 | AL137371  | 3895.909 | 2451.107 |
| BE892273  | 25784.596 | 24499.721 | U17077    | 2725.114  | 2051.053  | AL137596  | 1499.031 | 1219.555 |
| AF026929  | 368.986   | 480.381   | NM_00091E | 1930.877  | 1624.309  | AL353942  | 5797.054 | 3805.463 |
| NM_016734 | 579.819   | 441.002   | NM_002344 | 992.872   | 803.227   | Z38010    | 3928.169 | 2474.761 |
| M16006    | 309.41    | 195.44    | AK024475  | 2473.697  | 1019.375  | AF088003  | 259.018  | 152.842  |
| AB023144  | 288.122   | 243.95    | AB026542  | 15678.043 | 11623.636 | AK024713  | 317.256  | 369.118  |
| AF035803  | 365.468   | 267.847   | NM_014433 | 1242.711  | 1931.257  | AF086114  | 123.342  | 177.891  |
| Y08147    | 2080.377  | 1808.194  | NM_002062 | 12861.363 | 15910.063 | AK024204  | 293.116  | 328.348  |
| D00174    | 5684.444  | 5429.395  | NM_014394 | 54458.375 | 52974.836 | AK023737  | 336.513  | 199.465  |
| AB000520  | 1280.691  | 1324.084  | NM_005243 | 16640.879 | 16003.563 | AF086130  | 21.002   | 129.698  |
| NM_006907 | 1182.854  | 1265.924  | NM_00621E | 2596.909  | 2672.6    | NM_00660E | 797.408  | 608.304  |
| NM_00268E | 288.223   | 278.751   | NM_01814C | 2577.473  | 2836.2    | AK023643  | 357.152  | 750.32   |
| NM_006267 | 1045.935  | 705.329   | NM_01694E | 1167.066  | 1165.911  | AL390159  | 202.402  | 233.604  |
| NM_002661 | 6383.105  | 4459.391  | NM_000142 | 1280.645  | 716.913   | NM_014157 | 528.37   | 679.59   |
| NM_001263 | 256.869   | 188.288   | AF272372  | 23346.91  | 17094.031 | AF090933  | 240.414  | 267.376  |
| AK023982  | 326.971   | 252.974   | AK097045  | 2274.633  | 1636.084  | AF111851  | 2081.106 | 1811.409 |
| NM_01846E | 858.968   | 896.074   | AF161356  | 60242.805 | 55058.352 | AK021992  | 306.292  | 317.654  |
| Y11312    | 515.055   | 540.703   | AB014548  | 2936.016  | 1825.359  | AK022235  | 422.324  | 528.506  |
| AB014533  | 2075.284  | 2416.326  | NM_01825E | 3996.782  | 2494.276  | AK022378  | 1063.783 | 1000.856 |
| M11427    | 361.139   | 209.058   | AK025150  | 1186.951  | 585.039   | AK022009  | 197.451  | 156.104  |
| NM_000744 | 361.034   | 332.391   | AK024611  | 11230.047 | 6608.347  | AK027174  | 249.092  | 173.895  |



|           |           |           |           |           |           |           |           |           |
|-----------|-----------|-----------|-----------|-----------|-----------|-----------|-----------|-----------|
| NM_003039 | 5990.434  | 7732.105  | BC010420  | 5686.061  | 4420.329  | AL110173  | 220.118   | 217.154   |
| NM_014509 | 592.8     | 692.052   | NM_012280 | 21041.279 | 15346.882 | AK027254  | 731.759   | 418.554   |
| U26662    | 234.222   | 333.569   | NM_018172 | 4120.97   | 3330.2    | AK021772  | 896.471   | 625.874   |
| NM_020372 | 1134.544  | 1177.635  | U03886    | 675.462   | 552.071   | AK026297  | 253.523   | 163.007   |
| NM_004979 | 704.531   | 892.856   | AK022040  | 956.748   | 554.815   | AK054831  | 16503.729 | 18180.373 |
| NM_016077 | 3050.237  | 2545.786  | AK022722  | 1203.102  | 503.985   | AK021770  | 597.928   | 582.441   |
| NM_015537 | 2298.445  | 2216.268  | NM_003591 | 25873.582 | 18421.23  | AK027248  | 661.374   | 995.802   |
| NM_016520 | 4336.385  | 1675.034  | AL080111  | 3150.891  | 2005.678  | AK022804  | 4422.128  | 4875.249  |
| AB018353  | 1573.822  | 943.731   | NM_003550 | 11497.285 | 10027.336 | AF009263  | 833.645   | 1309.705  |
| NM_007036 | 1230.444  | 642.72    | NM_014642 | 6671.837  | 7872.405  | AF086329  | 2465.553  | 2311.02   |
| NM_002617 | 1103.101  | 965.927   | NM_003829 | 1875.106  | 2488.109  | AK025799  | 278.79    | 160.074   |
| NM_003313 | 5326.347  | 4522.495  | AL110168  | 4116.332  | 5776.868  | AL110206  | 452.097   | 199.176   |
| AF090907  | 1091.592  | 948.079   | NM_014522 | 775.064   | 625.786   | NM_004821 | 549.227   | 488.814   |
| AK024476  | 1760.437  | 1309.027  | NM_002831 | 22453.311 | 33506.945 | AK024292  | 537.086   | 453.645   |
| X74794    | 6058.627  | 4346.782  | AL833409  | 4650.597  | 7019.167  | AK026263  | 670.157   | 388.439   |
| AL050298  | 2780.354  | 2583.566  | NM_015966 | 376.205   | 615.126   | U50526    | 246.327   | 470.981   |
| NM_007079 | 18171.219 | 16465.881 | NM_016147 | 2851.551  | 4416.655  | S75105    | 1904.199  | 2704.409  |
| M20696    | 2111.789  | 1725.914  | NM_002833 | 2190.24   | 2652.725  | AF056455  | 4791.162  | 6186.668  |
| NM_002915 | 840.053   | 680.352   | NM_016592 | 952.184   | 1098.857  | NM_018510 | 614.102   | 536.72    |
| NM_006736 | 584.695   | 747.769   | NM_018527 | 937.355   | 1305.977  | U50537    | 238.845   | 404.3     |
| NM_003640 | 922.84    | 1263.011  | NM_018326 | 2100.569  | 1752.682  | AK024988  | 464.294   | 582.42    |
| NM_014444 | 3114.902  | 3524.953  | NM_014773 | 748.085   | 337.576   | AK025719  | 212.024   | 280.004   |
| NM_012248 | 5897.336  | 7175.539  | NM_005606 | 633.81    | 353.797   | AF026943  | 733.21    | 755.808   |
| NM_014393 | 2423.642  | 2959.447  | NM_001223 | 3455.465  | 2598.452  | NM_020448 | 452.953   | 444.364   |
| NM_004223 | 4986.062  | 6714.556  | BE730629  | 1240.603  | 810.683   | NM_005419 | 1101.592  | 761.407   |
| NM_006813 | 423.868   | 366.369   | AK027167  | 2458.393  | 2187.743  | NM_003479 | 2406.042  | 1798.081  |
| NM_001355 | 7868.98   | 7082.221  | AK025265  | 5079.387  | 3374.873  | NM_020224 | 2028.522  | 1304.265  |
| NM_001216 | 183.563   | 156.45    | NM_013279 | 196.009   | 971.756   | U17617    | 603.436   | 519.809   |
| U63336    | 423.385   | 582.353   | NM_018652 | 14883.712 | 19746.494 | AK022952  | 1837.99   | 1361.678  |
| AJ224741  | 170.891   | 552.763   | AB011166  | 1884.968  | 2775.753  | BF218888  | 326.28    | 186.495   |
| NM_004684 | 340.563   | 343.673   | AK024460  | 3395.636  | 4760.859  | AF086401  | 1678.921  | 2121.223  |
| BF338709  | 371.202   | 266.849   | NM_006606 | 9517.115  | 9893.881  | L23869    | 804.418   | 1158.615  |
| AF204171  | 433.881   | 331.512   | S78570    | 523.472   | 962.715   | Z21853    | 845.079   | 808.422   |
| W96179    | 2769.226  | 2332.962  | AK000564  | 737.254   | 646.958   | U80770    | 239.438   | 290.479   |
| AW247841  | 7969.174  | 7310.67   | X60155    | 606.472   | 1110.799  | AB075846  | 286.044   | 289.585   |
| BG568198  | 444.231   | 354.502   | NM_016265 | 1794.803  | 2181.097  | NM_018342 | 476.494   | 485.633   |
| M76559    | 4656.441  | 4088.088  | NM_002095 | 1119.009  | 1142.573  | BC020260  | 753.575   | 1032.785  |
| U03884    | 239.89    | 311.497   | NM_006268 | 1631.514  | 2214.331  | D17156    | 1364.871  | 1816.48   |
| U11058    | 396.208   | 404.905   | NM_006442 | 21770.982 | 23429.887 | L04461    | 225.549   | 201.638   |
| AI222585  | 768.083   | 1302.066  | NM_003902 | 11927.705 | 12291.711 | AK026938  | 3341.034  | 3221.908  |
| AA411678  | 6488.23   | 8529.046  | NM_016427 | 5183.204  | 5152.004  | AK024373  | 3782.723  | 2340.759  |
| AA862813  | 23891.133 | 29341.295 | NM_006706 | 1196.655  | 647.563   | AK022343  | 2948.363  | 2239.484  |
| AA398427  | 1193.759  | 2011.924  | U80741    | 7172.972  | 7011.352  | AK026400  | 298.107   | 288.754   |
| T55728    | 3423.973  | 5970.154  | NM_014497 | 3160.685  | 2409.272  | U92989    | 1340.351  | 1027.011  |
| H20856    | 1790.605  | 1871.09   | AL133598  | 11057.855 | 9386.544  | AF075102  | 904.544   | 758.727   |
| N62586    | 2442.902  | 3691.527  | NM_015511 | 5737.477  | 7734.11   | NM_018463 | 2643.532  | 1337.934  |
| AA242743  | 2352.931  | 3065.426  | NM_006625 | 6758.681  | 8075.073  | X74956    | 8635.956  | 3577.365  |
| NM_004758 | 1138.888  | 1191.633  | NM_004891 | 24495.213 | 37474.434 | AK025546  | 280.825   | 150.711   |
| NM_005163 | 3646.337  | 4111.347  | NM_000158 | 83.009    | 713.234   | AL137487  | 993.707   | 878.368   |
| NM_015361 | 5701.666  | 5367.899  | NM_006416 | 1980.472  | 2666.076  | AK023800  | 266.742   | 343.331   |
| NM_004310 | 268.888   | 164.145   | NM_000151 | 1227.499  | 1542.177  | AK024120  | 974.617   | 929.07    |
| M16006    | 237.343   | 196.626   | NM_002879 | 1036.661  | 1115.939  | CY3Cy5    | 6502.041  | 761.323   |
| AB023144  | 268.655   | 271.637   | AB018348  | 789.358   | 1110.958  | W96179    | 1043.928  | 1380.427  |

|           |           |           |           |           |           |           |           |           |
|-----------|-----------|-----------|-----------|-----------|-----------|-----------|-----------|-----------|
| Y08147    | 1666.273  | 1097.261  | NM_013369 | 824.125   | 1144.738  | AW247841  | 7362.222  | 8590.342  |
| D00174    | 4168.119  | 2613.584  | NM_003686 | 970.375   | 1147.782  | BG568198  | 584.84    | 570.514   |
| AB000520  | 1154.568  | 1048.625  | NM_003206 | 1069.622  | 1685.154  | M76559    | 2691.349  | 2296.123  |
| NM_016382 | 1012.543  | 1086.476  | AK001921  | 1850.943  | 1552.65   | AI222585  | 376.873   | 468.028   |
| AK023117  | 2075.321  | 2101.262  | AF086149  | 1130.166  | 1306.28   | AA411678  | 3889.515  | 3392.086  |
| AL122046  | 1116.597  | 1369.161  | NM_018273 | 1416.007  | 1653.879  | AA862813  | 10901.26  | 6785.424  |
| AF119914  | 171.704   | 98.172    | AK024944  | 912.397   | 704.684   | AA398427  | 614.589   | 528.187   |
| NM_000855 | 1165.536  | 1871.984  | AF075068  | 29766.805 | 34671.898 | T55728    | 2119.182  | 1769.167  |
| NM_005536 | 3289.374  | 3385.243  | S81893    | 7542.857  | 10155.609 | H20856    | 847.838   | 461.926   |
| NM_005077 | 1839.167  | 2044.264  | AK022034  | 1037.215  | 2009.118  | N62586    | 1530.589  | 1534.455  |
| NM_004423 | 2702.109  | 3693.989  | NM_007202 | 878.309   | 1378.063  | AA242743  | 6151.989  | 4541.327  |
| NM_001990 | 851.893   | 1709.121  | NM_003663 | 4704.499  | 5678.727  | NM_004758 | 1052.736  | 893.571   |
| NM_002141 | 1175.882  | 3293.99   | AK025785  | 2203.886  | 2356.857  | NM_005163 | 2191.529  | 1868.874  |
| NM_001804 | 214.95    | 388.815   | AF143877  | 1265.684  | 1216.289  | SR5       | 2254.644  | 2068.536  |
| NM_003311 | 4861.872  | 6061.439  | AF086529  | 554.765   | 574.977   | SR7       | 3109.299  | 24919.934 |
| NM_003776 | 3323.401  | 4431.541  | AF086023  | 2031.817  | 3001.727  | SR9       | 12831.245 | 2469.504  |
| NM_007098 | 1693.635  | 1930.853  | AF131803  | 4024.449  | 6884.198  | CY3Cy5    | 8182.713  | 1307.606  |
| NM_015719 | 1798.426  | 3193.95   | AK022171  | 658.803   | 895.604   | NM_016382 | 579.298   | 759.149   |
| NM_012464 | 236.086   | 244.161   | NM_016500 | 2094.103  | 1713.082  | AK023117  | 1498.894  | 1826.93   |
| NM_006129 | 2359.737  | 2371.772  | NM_018354 | 2981.025  | 2741.497  | AL122046  | 533.106   | 743.965   |
| NM_000582 | 1959.431  | 2657.235  | AF085987  | 1812.611  | 1821.92   | NM_000855 | 1578.064  | 1535.402  |
| NM_005593 | 1270.964  | 1041.183  | AF087985  | 576.818   | 675.295   | NM_005536 | 1744.096  | 1712.858  |
| NM_004979 | 655.134   | 609.071   | AF085953  | 606.926   | 993.185   | NM_005077 | 1004.333  | 794.036   |
| J04755    | 149.47    | 102.447   | AF087971  | 959.322   | 424.525   | NM_004423 | 3054.99   | 2473.093  |
| NM_005623 | 132.504   | 101.375   | AF087974  | 2219.151  | 1890.925  | NM_002141 | 973.794   | 815.548   |
| NM_016077 | 2979.439  | 1627.855  | NM_018004 | 2617.298  | 3275.488  | NM_003311 | 3725.566  | 2793.227  |
| AF100756  | 8086.079  | 6602.57   | X78938    | 1124.83   | 1422.055  | NM_003776 | 1649.594  | 1850.737  |
| NM_006825 | 6799.365  | 8622.544  | U84517    | 4363.374  | 5835.445  | NM_007098 | 841.468   | 857.658   |
| NM_004862 | 2903.81   | 3179.37   | AB033113  | 936.487   | 1150.883  | NM_015719 | 1278.539  | 2120.148  |
| NM_003388 | 124.902   | 82.953    | AK025877  | 998.428   | 1469.53   | NM_006129 | 1340.725  | 1088.007  |
| NM_001661 | 779.211   | 822.176   | AK025231  | 42154.547 | 36982.094 | NM_000582 | 3861.243  | 3282.771  |
| NM_014563 | 2680.794  | 3436.663  | AK001439  | 555.325   | 235.602   | NM_005593 | 1410.963  | 1186.393  |
| NM_020150 | 2564.699  | 4079.655  | AF210649  | 1397.375  | 1546.272  | AJ224741  | 370.228   | 249.184   |
| NM_007150 | 3515.757  | 5054.162  | AK001115  | 2417.193  | 1575.468  | NM_004684 | 403.272   | 516.113   |
| NM_006831 | 2867.357  | 3220.472  | NM_014099 | 4815.46   | 2985.612  | BF338709  | 658.115   | 780.959   |
| AL162044  | 4170.711  | 5092.816  | AK027233  | 1477.707  | 1288.328  | AF204171  | 439.247   | 393.697   |
| AK022365  | 403.812   | 503.855   | AK023343  | 818.279   | 817.94    | AF100756  | 4642.506  | 4205.043  |
| BE892273  | 28666.648 | 22673.41  | AK023292  | 130.728   | 1083.32   | NM_006825 | 5622.733  | 5001.03   |
| AF026929  | 429.255   | 299.35    | AK023752  | 587.6     | 874.753   | NM_004862 | 1253.439  | 1051.581  |
| NM_016734 | 723.077   | 505.506   | AK022452  | 666.772   | 639.999   | NM_001661 | 650.243   | 1462.461  |
| NM_014393 | 2034.965  | 2260.343  | AK023375  | 879.602   | 1137.731  | NM_014563 | 1242.685  | 1165.589  |
| NM_004223 | 4141.021  | 3778.689  | AK023781  | 681.978   | 765.28    | NM_020150 | 1346.636  | 1076.473  |
| NM_001355 | 6770.4    | 4575.532  | AF085881  | 707.615   | 948.507   | NM_007150 | 2103.143  | 1353.302  |
| U63336    | 303.615   | 223.429   | AK022737  | 4314.587  | 3995.049  | NM_006831 | 1585.863  | 959.879   |
| NM_006907 | 1238.735  | 904.511   | NM_003472 | 11688.442 | 6791.485  | AL162044  | 2732.308  | 1999.275  |
| NM_002686 | 381.972   | 309.218   | U92980    | 806.977   | 874.44    | AK024004  | 279.419   | 197.782   |
| NM_020401 | 138.566   | 237.457   | AF133658  | 775.513   | 687.052   | AK022365  | 212.166   | 85.774    |
| NM_006267 | 1142.38   | 876.267   | AB048287  | 5677.301  | 3672.488  | BE892273  | 44508.914 | 28654.246 |
| NM_002661 | 7671.195  | 10178.157 | Y11159    | 1064.149  | 716.975   | AF026929  | 338.237   | 242.395   |
| NM_001263 | 370.791   | 197.941   | AB020648  | 1880.257  | 1453.695  | NM_016734 | 506.151   | 367.219   |
| AK023982  | 354.731   | 468.085   | AK025798  | 22338.342 | 18511.938 | AF035803  | 249.326   | 511.533   |
| NM_018466 | 971.846   | 1162.828  | AK025164  | 568.099   | 697.056   | Y08147    | 3512.94   | 3511.028  |
| Y11312    | 627.328   | 788.309   | NM_018366 | 7285.011  | 5581.382  | D00174    | 6726.313  | 5595.997  |

|           |           |           |           |           |           |           |           |           |
|-----------|-----------|-----------|-----------|-----------|-----------|-----------|-----------|-----------|
| AF020774  | 179.597   | 540.405   | AB040290  | 1495.551  | 1022.371  | AB000520  | 889.116   | 1264.308  |
| AB014533  | 2107.621  | 2257.436  | NM_019848 | 6094.226  | 3787.163  | NM_006907 | 425.539   | 479.679   |
| NM_000744 | 375.609   | 455.797   | AK021425  | 759.104   | 605.688   | NM_006267 | 701.68    | 577.698   |
| NM_003039 | 6106.39   | 6086.163  | AK021497  | 1241.129  | 1773.224  | NM_002661 | 6998.907  | 5692.275  |
| NM_014509 | 617.736   | 614.886   | AK025615  | 10346.766 | 14858.166 | NM_001263 | 198.915   | 222.209   |
| U26662    | 285.19    | 242.028   | AK023803  | 1047.859  | 1268.938  | AK023982  | 152.751   | 144.902   |
| NM_020372 | 1532.851  | 1348.743  | AK026947  | 17977.025 | 19327.74  | NM_018466 | 424.986   | 536.186   |
| NM_002635 | 43182.461 | 32985.168 | U84526    | 2049.078  | 1998.8    | Y11312    | 291.548   | 241.012   |
| NM_004758 | 1176.084  | 1445.802  | L23401    | 985.455   | 394.95    | AB014533  | 3145.723  | 2552.3    |
| NM_005163 | 3098.191  | 3189.31   | NM_018090 | 61129.488 | 50898.992 | M11427    | 278.214   | 211.702   |
| NM_015361 | 4494.906  | 2708.936  | AK022728  | 14156.188 | 13528.714 | NM_000744 | 469.47    | 524.458   |
| NM_004310 | 287.101   | 168.462   | AL109678  | 1476.711  | 1576.87   | NM_003039 | 3477.345  | 2722.125  |
| NM_015537 | 2492.733  | 1773.185  | AL137524  | 1488.819  | 1087.652  | NM_014509 | 485.132   | 311.566   |
| NM_016520 | 4937.459  | 3361.049  | AF218008  | 9406.324  | 8667.391  | NM_020372 | 4098.871  | 3044.001  |
| AB018353  | 1843.734  | 1320.072  | M22404    | 16439.357 | 11136.025 | NM_004979 | 415.207   | 360.34    |
| NM_007036 | 1815.14   | 2341.492  | Z70711    | 784.549   | 630.691   | NM_005623 | 132.785   | 68.305    |
| NM_002617 | 1314.687  | 1552.015  | AF116653  | 905.271   | 443.498   | NM_016077 | 1816.841  | 2482.858  |
| NM_003313 | 6340.136  | 6888.762  | NM_012368 | 1052.017  | 809.394   | NM_015537 | 2506.302  | 2463.931  |
| AF090907  | 1225.797  | 1669.07   | AK025323  | 805.445   | 528.38    | NM_016520 | 3296.953  | 2210.257  |
| AK024476  | 1921.642  | 2052.276  | NM_013326 | 3841.23   | 2624.978  | AB018353  | 923.234   | 883.085   |
| X74794    | 6054.223  | 5743.377  | BC037322  | 1618.952  | 1358.02   | NM_007036 | 840.631   | 543.11    |
| AL050298  | 2782.771  | 2698.68   | Y10202    | 949.576   | 734.427   | NM_002617 | 722.396   | 474.862   |
| NM_007079 | 17975.158 | 16733.332 | Y12022    | 1604.715  | 2024.284  | NM_003313 | 5990.252  | 4271.779  |
| M20696    | 2211.474  | 1880.211  | AK001375  | 1290.54   | 1216.046  | AF090907  | 1059.816  | 919.198   |
| NM_002915 | 630.668   | 560.943   | NM_019597 | 9275.497  | 13403.35  | AK024476  | 1505.864  | 1063.432  |
| NM_006736 | 493.815   | 561.983   | AL137559  | 1796.716  | 2181.799  | X74794    | 3127.736  | 1964.811  |
| NM_003640 | 934.322   | 976.213   | AF026944  | 3052.96   | 3835.695  | AL050298  | 1464.829  | 894.715   |
| NM_014444 | 2859.742  | 3010.444  | AK021493  | 2875.951  | 3932.259  | NM_007079 | 19131.582 | 10276.769 |
| NM_012248 | 5796.559  | 5638.926  | NM_006161 | 5698.297  | 6793.201  | M20696    | 1666.945  | 973.515   |
| NM_014970 | 4445.34   | 3386.665  | NM_006192 | 556.549   | 1227.537  | NM_006736 | 279.357   | 253.715   |
| NM_007098 | 1526.074  | 2203.975  | NM_012155 | 1386.249  | 1361.902  | NM_003640 | 445.625   | 361.765   |
| NM_015719 | 1758.428  | 3571.169  | AF144700  | 1090.136  | 741.551   | NM_014444 | 1761.027  | 1298.845  |
| NM_012464 | 205.189   | 139.809   | NM_004105 | 6399.149  | 4119.109  | NM_012248 | 3051.757  | 2840.288  |
| NM_006129 | 1988.097  | 1476.38   | AB046825  | 3332.841  | 3260.775  | NM_014393 | 1282.541  | 1157.097  |
| NM_000582 | 1521.928  | 1581.115  | X64975    | 1401.256  | 1209.553  | NM_004223 | 4304.409  | 3736.032  |
| NM_005593 | 1053.125  | 698.52    | AK026966  | 1802.101  | 2886.889  | NM_001355 | 5526.162  | 8232.271  |
| AJ224741  | 265.812   | 213.909   | AK025268  | 1920.859  | 1602.313  | NM_001216 | 432.351   | 1669.774  |
| NM_004684 | 348.028   | 321.299   | AL833005  | 2762.85   | 1905.752  | U63336    | 476.589   | 1219.731  |
| BF338709  | 479.081   | 358.123   | L43366    | 2275.747  | 1936.785  | AJ224741  | 353.164   | 313.639   |
| AF204171  | 500.382   | 615.026   | AK026124  | 4411.596  | 3260.212  | NM_004684 | 169.775   | 283.714   |
| M18182    | 308.606   | 513.131   | NM_015509 | 2405.774  | 2237.217  | BF338709  | 483.239   | 445.578   |
| W96179    | 3132.808  | 3461.728  | AL110157  | 21550.223 | 18516.834 | AF204171  | 354.479   | 460.435   |
| AW247841  | 8659.774  | 10274.301 | NM_002319 | 8853.721  | 11635.341 | W96179    | 1044.777  | 890.909   |
| BG568198  | 431.803   | 335.658   | L38712    | 7126.429  | 8722.873  | AW247841  | 6240.93   | 4545.941  |
| M76559    | 4640.469  | 5973.294  | U84508    | 1089.986  | 1231.38   | BG568198  | 452.484   | 393.128   |
| U03884    | 214.914   | 195.186   | NM_017793 | 3686.609  | 5139.672  | M76559    | 3020.18   | 2382.941  |
| U11058    | 276.446   | 524.284   | NM_012131 | 2464.812  | 3511.106  | AI222585  | 433.797   | 451.612   |
| AI222585  | 714.436   | 1275.79   | S41540    | 2034.602  | 2800.742  | AA411678  | 3053.207  | 2148.027  |
| AA411678  | 6230.9    | 7028.718  | CY3Cy5    | 4298.959  | 311.071   | AA862813  | 10792.214 | 6629.132  |
| AA862813  | 23597.066 | 22409.904 | AI417481  | 512.458   | 686.233   | AA398427  | 598.951   | 529.371   |
| AA398427  | 1039.517  | 1206.706  | BI906766  | 1835.675  | 1670.085  | T55728    | 2160.385  | 1452.206  |
| T55728    | 3705.684  | 3316.334  | U60519    | 2039.808  | 2198.515  | H20856    | 1017.374  | 467.736   |
| H20856    | 1698.564  | 1329.51   | AA282906  | 2833.008  | 2791.948  | N62586    | 1513.554  | 1359.569  |

|           |           |           |           |           |           |           |          |           |
|-----------|-----------|-----------|-----------|-----------|-----------|-----------|----------|-----------|
| N62586    | 2363.627  | 2584.27   | L02870    | 7610.295  | 5489.175  | AA242743  | 6496.144 | 4643.882  |
| AA242743  | 1843.293  | 1836.759  | BG755482  | 6598.902  | 5384.027  | NM_00475E | 1090.465 | 777.108   |
| AK022365  | 256.145   | 362.211   | AI480307  | 4185.32   | 3340.738  |           | 45.228   | 2369.171  |
| BE892273  | 22384.057 | 17494.643 | X51420    | 3166.337  | 3218.385  | NM_015361 | 6081.124 | 10771.461 |
| AF026929  | 385.738   | 302.11    | D28235    | 754.616   | 1499.117  | M16006    | 125.953  | 123.273   |
| NM_016734 | 574.846   | 517.285   | X51757    | 984.438   | 301.822   | Y08147    | 3602.879 | 2588.159  |
| M16006    | 254.384   | 275.637   | L24038    | 1311.139  | 1244.21   | D00174    | 5001.195 | 3244.587  |
| AF035803  | 305.404   | 271.013   | NM_05305E | 5142.208  | 7054      | AB000520  | 802.207  | 691.715   |
| Y08147    | 1754.61   | 1478.261  | NM_00618E | 1176.952  | 1190.743  | NM_01638E | 581.658  | 534.235   |
| D00174    | 5285.689  | 5127.744  | NM_002751 | 1698.916  | 2470.308  | AK023117  | 1515.277 | 1486.069  |
| AB000520  | 1509.248  | 1846.153  | M55593    | 5749.769  | 7489.541  | AL122046  | 368.429  | 314.214   |
| NM_01638E | 1170.714  | 1424.041  | SB        | 729.901   | 618.26    | NM_00085E | 1400.481 | 1093.619  |
| AK023117  | 2209.427  | 3012.678  | NM_078467 | 4330.232  | 3742.627  | NM_00553E | 1991.767 | 1299.215  |
| AL122046  | 497.581   | 391.717   | SR2       | 58968.75  | 58858.953 | NM_005077 | 1029.518 | 945.034   |
| NM_00085E | 975.173   | 1048.401  | SR4       | 15736.266 | 18216.041 | NM_00442E | 3011.563 | 2235.134  |
| NM_00553E | 3298.364  | 3442.599  | SR6       | 2718.418  | 4035.548  | NM_00199C | 407.606  | 438.401   |
| NM_005077 | 1481.408  | 1858.615  | CY3Cy5    | 4764.75   | 476.967   | NM_002141 | 716.677  | 680.571   |
| NM_00442E | 2712.73   | 2964.977  | NM_01684E | 4370.798  | 4681.708  | NM_003311 | 3629.682 | 2581.765  |
| NM_00199C | 1443.721  | 3214.24   | NM_000514 | 4854.977  | 4407.099  | NM_00377E | 1865.065 | 1921.405  |
| NM_002141 | 759.306   | 672.091   | AL137432  | 2210.255  | 3004.599  | NM_00709E | 813.16   | 862.117   |
| NM_001804 | 188.967   | 245.725   | NM_000957 | 2496.459  | 1501.771  | NM_00612E | 2150.752 | 3797.785  |
| NM_003311 | 4792.817  | 4553.464  | NM_01904E | 2809.916  | 2797.959  | NM_00058E | 3807.63  | 7227.289  |
| NM_00377E | 3345.53   | 3017.33   | NM_00324C | 5464.017  | 4283.202  | NM_00559E | 1774.085 | 2909.755  |
| NM_000744 | 421.899   | 726.075   | NM_016564 | 30870.75  | 42150.258 | NM_00497E | 396.341  | 345.235   |
| NM_00303E | 5441.671  | 6148.231  | AF279656  | 1054.94   | 1354.14   | NM_016077 | 1600.686 | 1160.64   |
| NM_01450E | 428.822   | 344.844   | AK021660  | 560.675   | 1022.238  | AF100756  | 4396.713 | 3629.04   |
| U26662    | 202.331   | 248.896   | AB007933  | 42629.711 | 31040.473 | NM_00682E | 4051.275 | 3491.838  |
| NM_02037E | 969.061   | 623.541   | NM_00670E | 4985.428  | 4155.174  | NM_00486E | 1534.717 | 1188.051  |
| NM_00497E | 713.487   | 428.92    | NM_00139E | 4944.126  | 4514.448  | NM_001661 | 560.008  | 490.807   |
| NM_016077 | 3693.137  | 4053.967  | NM_014474 | 2500.826  | 3354.448  | NM_01456E | 1255.194 | 815.174   |
| AF100756  | 8248.677  | 8167.792  | NM_01624E | 1808.383  | 2005.197  | NM_02015C | 1578.891 | 1400.272  |
| NM_00682E | 6782.884  | 7704.376  | NM_006181 | 1210.957  | 1687.933  | NM_00715C | 2104.279 | 1236.553  |
| NM_00486E | 3124.966  | 3282.604  | NM_00379E | 15415.847 | 15956.638 | NM_006831 | 1638.052 | 1117.26   |
| NM_001661 | 980.533   | 1431.263  | NM_00297E | 3434.976  | 4541.385  | AL162044  | 2872.676 | 1917.338  |
| NM_01456E | 2854.207  | 2775.81   | NM_00443E | 46560.02  | 47757.801 | AK024004  | 349.819  | 355.647   |
| NM_02015C | 2470.905  | 2387.341  | NM_00658C | 9245.742  | 8024.537  | BE892273  | 48940.84 | 37003.016 |
| NM_00715C | 3442.582  | 2750.997  | NM_00130E | 1287.182  | 901.455   | AF026929  | 419.068  | 703.733   |
| NM_006831 | 2594.806  | 2205.92   | BG611243  | 2781.056  | 1797.145  | NM_016734 | 499.767  | 828.621   |
| AL162044  | 4007.453  | 3317.331  | AK023221  | 6830.416  | 4842.211  | NM_01439E | 932.869  | 1059.176  |
| NM_00673E | 483.955   | 651.397   | NM_003664 | 5739.248  | 3362.394  | NM_00422E | 3154.031 | 2922.267  |
| NM_00364C | 788.731   | 892.968   | NM_00242E | 2284.621  | 1587.049  | NM_00681E | 394.261  | 310.819   |
| NM_014444 | 2389.392  | 1372.743  | AK027182  | 1085.792  | 724.594   | NM_00135E | 4904.18  | 3778.093  |
| NM_01224E | 5165.452  | 3520.964  | J03651    | 5064.954  | 3607.999  | U63336    | 268.213  | 114.532   |
| NM_01439E | 2305.264  | 2116.19   | U61738    | 5475.818  | 5585.032  | NM_006907 | 589.395  | 542.618   |
| NM_00422E | 5304.61   | 4967.054  | AJ132087  | 1015.656  | 759.176   | NM_00268E | 324.203  | 233.151   |
| NM_00681E | 385.229   | 311.591   | U92818    | 3284.009  | 2285.838  | NM_006267 | 732.955  | 519.766   |
| NM_00135E | 8413.581  | 8396.941  | NM_00044E | 13261.521 | 17866.432 | NM_002661 | 7173.062 | 9090.53   |
| NM_00121E | 202.419   | 224.547   | NM_002934 | 62183.566 | 58389.43  | NM_00126E | 347.985  | 193.637   |
| U63336    | 485.186   | 631.301   | AK023011  | 17501.012 | 12148.164 | AK023982  | 271.64   | 247.78    |
| NM_006907 | 1311.307  | 1284.421  | NM_01681E | 2033.786  | 1419.682  | NM_01846E | 430.012  | 470.647   |
| NM_00268E | 323.888   | 384.573   | L17325    | 2541.598  | 2489.637  | Y11312    | 345.094  | 245.529   |
| NM_020401 | 131.51    | 119.822   | NM_01771E | 1836.838  | 1727.73   | AB014533  | 3096.262 | 2943.85   |
| NM_006267 | 1427.779  | 1087.034  | M58603    | 6086.645  | 7089.308  | M11427    | 351.507  | 342.517   |

|           |           |           |           |           |           |           |           |           |
|-----------|-----------|-----------|-----------|-----------|-----------|-----------|-----------|-----------|
| NM_002661 | 8066.985  | 8454.502  | NM_003639 | 4343.832  | 4507.476  | NM_000744 | 441.733   | 431.934   |
| NM_001263 | 330.006   | 316.992   | NM_001549 | 1286.586  | 1418.55   | NM_003039 | 4240.622  | 3080.362  |
| AK023982  | 431.169   | 870.175   | NM_000115 | 3649.087  | 2699.238  | NM_014509 | 579.792   | 681.631   |
| NM_018466 | 1058.903  | 1183.11   | AF308801  | 5086.951  | 5294.45   | U26662    | 161.446   | 195.782   |
| Y11312    | 526.226   | 683.011   | NM_007318 | 58780.758 | 51757.191 | NM_020372 | 4947.989  | 5404.882  |
| AF020774  | 227.219   | 163.412   | NM_014874 | 1678.669  | 1317.943  | NM_004758 | 804.856   | 561.69    |
| AB014533  | 2457.619  | 2334.058  | NM_005765 | 22534.08  | 24934.666 | NM_005163 | 1588.279  | 1614.464  |
| M11427    | 227.27    | 172.468   | NM_002762 | 1206.707  | 883       | NM_015361 | 3822.446  | 2379.829  |
| AK022097  | 1312.472  | 803.563   | NM_006324 | 8827.628  | 7611.871  | NM_004310 | 259.295   | 249.442   |
| NM_002166 | 13247.728 | 8201.854  | NM_005469 | 8313.458  | 7121.788  | NM_015537 | 2645.315  | 3788.425  |
| NM_004660 | 6814.26   | 3740.152  | NM_016361 | 3415.725  | 3253.427  | NM_016520 | 3413.587  | 2076.95   |
| NM_006165 | 2219.076  | 1759.085  | NM_003708 | 38961.816 | 36949.703 | AB018353  | 1052.138  | 1074.195  |
| NM_016011 | 4204.099  | 3424.829  | NM_014349 | 7608.686  | 5470.067  | NM_007036 | 956.729   | 696.646   |
| AL035307  | 741.322   | 508.939   | AB040895  | 550.883   | 432.628   | NM_002617 | 838.426   | 780.305   |
| AK023772  | 210.135   | 289.762   | NM_004820 | 322.034   | 674.701   | NM_003313 | 7237.765  | 5643.39   |
| NM_012234 | 3530.759  | 3801.053  | NM_018210 | 1836.068  | 1586.953  | AF090907  | 1045.686  | 991.329   |
| NM_015361 | 7061.667  | 9558.486  | NM_001096 | 7741.328  | 6958.419  | AK024476  | 1584.885  | 1458.855  |
| NM_004310 | 434.986   | 598.031   | NM_016014 | 2194.612  | 1449.032  | X74794    | 3305.119  | 2569.891  |
| NM_015537 | 2980.274  | 2614.335  | NM_000198 | 335.175   | 825.008   | AL050298  | 1578.598  | 1223.614  |
| NM_016520 | 5335.491  | 4817.479  | NM_018327 | 825.943   | 893.845   | NM_007079 | 20210.012 | 13757.321 |
| AB018353  | 1976.954  | 1902.386  | NM_017581 | 3477.415  | 2569.889  | M20696    | 2414.407  | 1476.659  |
| NM_007036 | 1662.597  | 1455.843  | AA488804  | 11391.576 | 11443.83  | NM_002915 | 315.03    | 297.696   |
| NM_002617 | 1215.162  | 1122.918  | NM_006539 | 992.03    | 1288.325  | NM_006736 | 379.875   | 376.745   |
| NM_003313 | 6779.461  | 7547.177  | NM_001684 | 1624.592  | 1796.503  | NM_003640 | 636.275   | 645.748   |
| AF090907  | 1354.077  | 1863.857  | AB028977  | 1483.478  | 1955.798  | NM_014444 | 1841.228  | 2283.954  |
| AK024476  | 2052.344  | 2434.377  | NM_000808 | 687.874   | 540.364   | NM_012248 | 3265.526  | 3428.73   |
| X74794    | 6879.121  | 6977.253  | NM_016318 | 12086.902 | 11167.246 | NM_007098 | 534.274   | 587.235   |
| AL050298  | 3133.937  | 3089.203  | NM_013309 | 1045.258  | 848.336   | NM_015719 | 1012.312  | 1591.181  |
| NM_007079 | 17781.744 | 18094.617 | NM_019891 | 1710.943  | 1500.196  | NM_012464 | 227.153   | 319.61    |
| M20696    | 2689.023  | 2661.089  | AF038186  | 1425.669  | 1199.385  | NM_006129 | 1599.769  | 1639.612  |
| AK026015  | 246.473   | 259.049   | NM_016277 | 5072.644  | 5169.656  | NM_000582 | 3111.639  | 2599.877  |
| NM_006566 | 160.824   | 111.348   | NM_007247 | 2670.716  | 3101.74   | NM_005593 | 1339.558  | 1240.279  |
| AK026154  | 6120.88   | 3270.919  | NM_006554 | 4959.247  | 3420.02   | AJ224741  | 293.722   | 314.257   |
| AL117546  | 10724.446 | 4935.403  | X99962    | 8280.824  | 7551      | NM_004684 | 362.293   | 403.484   |
| AK027073  | 327.826   | 335.998   | AL050114  | 1841.876  | 1887.462  | BF338709  | 534.271   | 521.195   |
| NM_000384 | 424.744   | 396.915   | AK021492  | 2384.437  | 2652.032  | AF204171  | 313.631   | 393.288   |
| AB018325  | 2568.43   | 2312.307  | AK023794  | 12411.408 | 12144.784 | W96179    | 1402.64   | 1492.585  |
| AL157482  | 3372.218  | 2806.358  | NM_019885 | 2802.553  | 3157.087  | AW247841  | 7312.494  | 7301.088  |
| NM_003603 | 244.867   | 356.103   | AB033103  | 2006.242  | 1784.231  | BG568198  | 546.869   | 464.908   |
| NM_005428 | 3935.485  | 8228.939  | NM_002907 | 1423.76   | 888.986   | M76559    | 3189.175  | 2765.784  |
| NM_017974 | 752.1     | 1363.804  | AK024098  | 887.086   | 1007.247  | U11058    | 185.656   | 180.177   |
| NM_003979 | 432.863   | 343.099   | AK022371  | 3359.917  | 2516.271  | AI222585  | 512.079   | 595.419   |
| X14677    | 1680.603  | 1550.181  | D42045    | 3097.686  | 2280.618  | AA411678  | 4034.823  | 3738.74   |
| NM_005863 | 10515.774 | 9440.913  | AB007953  | 1943.047  | 1693.57   | AA862813  | 12293.505 | 10396.946 |
| U17077    | 1263.514  | 1104.669  | NM_014002 | 5856.122  | 5197.495  | AA398427  | 739.825   | 703.999   |
| NM_000915 | 1238.977  | 1466.838  | NM_004197 | 8179.646  | 7663.141  | T55728    | 2326.183  | 2513.685  |
| NM_002344 | 837.918   | 885.257   | NM_004073 | 1235.73   | 1316.732  | H20856    | 981.307   | 834.336   |
| NM_019846 | 1667.329  | 2217.719  | NM_001278 | 3495.102  | 3605.312  | N62586    | 1602.453  | 1774.84   |
| NM_014433 | 522.692   | 921.422   | NM_019105 | 2938.916  | 2474.042  | AA242743  | 5552.358  | 5780.346  |
| NM_002062 | 4678.679  | 4579.46   | NM_000294 | 4149.52   | 4568.126  | AK022365  | 172.63    | 253.595   |
| NM_014394 | 31325.68  | 19885.465 | AJ272212  | 1987.866  | 1771.789  | BE892273  | 48536.492 | 47594.738 |
| NM_005243 | 11082.431 | 8971.072  | NM_001626 | 20750.828 | 18538.613 | AF026929  | 374.372   | 377.313   |
| NM_006218 | 1226.932  | 859.812   | NM_005677 | 4223.116  | 3056.608  | NM_016734 | 463.667   | 429.876   |

|           |           |           |           |           |           |           |           |          |
|-----------|-----------|-----------|-----------|-----------|-----------|-----------|-----------|----------|
| NM_01814C | 2798      | 1520.208  | AF229803  | 955.785   | 752.929   | M16006    | 171.65    | 137.09   |
| NM_01694E | 691.192   | 433.246   | AF151810  | 636.626   | 787.133   | AF035803  | 264.573   | 244.422  |
| NM_00014Z | 1054.39   | 665.428   | NM_00213C | 36253.734 | 30013.936 | Y08147    | 4992.958  | 4271.566 |
| AF272372  | 14798.312 | 9736.908  | NM_00130E | 2953.75   | 2759.68   | D00174    | 7615.837  | 6488.197 |
| AK097045  | 1169.9    | 910       | NM_00508Z | 1436.836  | 1473.694  | AB000520  | 976.662   | 1009.539 |
| AF161356  | 49091.949 | 72444.82  | D17028    | 18418.771 | 20734.266 | NM_01638Z | 763.047   | 889.845  |
| AB014548  | 3089.585  | 2466.408  | NM_01344Z | 27739.715 | 38086.16  | AK023117  | 1616.783  | 1926.48  |
| NM_01825E | 2612.102  | 2461.323  | BG611243  | 1900.911  | 1942.078  | AL122046  | 407.525   | 415.966  |
| AK025150  | 641.636   | 2250.35   | BI906766  | 2230.019  | 1855.066  | AF119914  | 139.455   | 327.885  |
| AK024611  | 8930.923  | 15031.327 | U60519    | 2025.734  | 2528.781  | NM_00085E | 1425.737  | 1596.528 |
| BC010420  | 3986.375  | 5031.634  | AA282906  | 4590.002  | 4553.419  | NM_00553E | 2180.714  | 2211.86  |
| NM_01228C | 12207.975 | 12826.16  | L02870    | 7650.449  | 7443.098  | NM_005077 | 1120.389  | 1211.293 |
| NM_01817Z | 2715.296  | 3677.669  | BG755482  | 6608.331  | 8208.051  | NM_00442Z | 3338.219  | 3541.977 |
| U03886    | 475.527   | 440.405   | AI480307  | 5898.438  | 6213.35   | NM_00199C | 457.974   | 493.087  |
| AK022040  | 848.039   | 750.843   | X51420    | 3884.857  | 4598.162  | NM_002141 | 1038.581  | 1262.298 |
| AK022722  | 738.523   | 1120.518  | D28235    | 770.107   | 1164.707  | NM_003311 | 3918.403  | 3534.469 |
| NM_01464Z | 3744.526  | 6153.973  | X51757    | 1377.828  | 2032.579  | NM_00377E | 1746.495  | 2414.317 |
| NM_00382E | 2643.061  | 2729.206  | L24038    | 1683.836  | 2113.199  | NM_000744 | 229.304   | 390.485  |
| AL110168  | 2099.026  | 2864.433  | NM_05305E | 6147.306  | 7350.152  | NM_00303E | 3657.921  | 4358.032 |
| NM_01452Z | 294.982   | 294.958   | NM_00618E | 1094.703  | 768.334   | NM_01450E | 564.093   | 844.651  |
| NM_002831 | 11616.947 | 7018.573  | NM_002751 | 3545.889  | 3000.705  | NM_02037Z | 5714.829  | 5420.414 |
| AL833409  | 1601.003  | 1031.888  | M55593    | 4684.121  | 4069.566  | NM_00497E | 701.383   | 775.815  |
| NM_01596E | 473.289   | 417.615   | NM_078467 | 8595.209  | 6038.822  | NM_016077 | 2227.283  | 2163.458 |
| NM_016147 | 1909.584  | 1075.509  | AK001883  | 15935.004 | 9828.89   | AF100756  | 4960.314  | 4947.379 |
| NM_00283Z | 1339.697  | 759.442   | NM_01462E | 2394.422  | 2087.321  | NM_00682E | 6159.242  | 6725.275 |
| NM_01659Z | 291.653   | 322.855   | NM_00731E | 56834.27  | 52332.137 | NM_00486Z | 1834.319  | 2087.007 |
| NM_018527 | 445.985   | 345.467   | NM_014874 | 1788.642  | 1545.902  | NM_001661 | 618.925   | 732.982  |
| NM_01832E | 1301.822  | 928.858   | NM_012397 | 561.123   | 323.751   | NM_01456Z | 1646.418  | 1691.022 |
| NM_00186E | 412.507   | 201.956   | NM_00576E | 22666.713 | 30582.775 | NM_02015C | 1791.693  | 2707.661 |
| NM_01477Z | 779.688   | 1112.606  | NM_00276Z | 814.278   | 1253.8    | NM_00715C | 2755.958  | 2346.245 |
| AF134707  | 428.016   | 459.394   | NM_006324 | 11464.106 | 11422.214 | NM_006831 | 1749.767  | 1864.51  |
| NM_00122Z | 2153.439  | 2751.097  | NM_01684E | 6304.344  | 7427.912  | AL162044  | 3148.53   | 3301.713 |
| BE730629  | 456.675   | 790.099   | NM_000514 | 6279.551  | 5759.367  | AK024004  | 403.659   | 375.833  |
| AK027167  | 1209.904  | 1637.375  | AL137432  | 2897.388  | 3399.558  | NM_00364C | 502.921   | 781.153  |
| AK025265  | 3449.178  | 9332.431  | NM_000957 | 2682.615  | 2588.633  | NM_014444 | 1424.538  | 2054.46  |
| NM_01327E | 708.223   | 3465.852  | NM_01904Z | 4131.385  | 4976.683  | NM_01224E | 2542.591  | 3500.969 |
| NM_01865Z | 7130.175  | 10146.181 | NM_00324C | 6772.189  | 7045.097  | NM_01439Z | 1528.768  | 2967.354 |
| AB011166  | 1191.589  | 1319.871  | NM_016564 | 34942.734 | 50938.285 | NM_00422Z | 5135.534  | 7185.532 |
| AK024460  | 2124.902  | 3726.74   | AF279656  | 1742.071  | 2322.119  | NM_00681Z | 410.902   | 420.445  |
| X60155    | 211.412   | 155.443   | AK021660  | 970.389   | 1097.253  | NM_00135E | 6776.251  | 8434.432 |
| AB037901  | 426.86    | 238.38    | AB007933  | 55022.703 | 53966.914 | NM_00121E | 213.703   | 235.693  |
| NM_01626E | 1107.611  | 1415.913  | NM_00670Z | 5490.746  | 4874.912  | U63336    | 313.715   | 571.064  |
| NM_00209E | 566.197   | 348.395   | NM_00139E | 5750.458  | 4989.884  | NM_006907 | 681.378   | 1154.384 |
| AK022814  | 231.733   | 405.668   | NM_014474 | 2870.383  | 3081.116  | NM_00268E | 319.03    | 702.977  |
| NM_00626E | 1231.051  | 819.157   | NM_01624E | 2209.663  | 2196.349  | NM_006267 | 880.104   | 1046.615 |
| NM_00644Z | 10790.99  | 13842.318 | NM_006181 | 1286.649  | 1786.137  | NM_002661 | 7343.382  | 8955.671 |
| NM_00390Z | 5381.119  | 5701.055  | NM_00379E | 16937.164 | 18960.219 | NM_00126Z | 460.449   | 494.288  |
| NM_00509E | 221.05    | 245.056   | NM_00297Z | 3890.051  | 5747.761  | NM_01846E | 701.537   | 729.278  |
| NM_016427 | 2618.463  | 3060.974  | NM_00443E | 50677.215 | 50627.289 | Y11312    | 521.104   | 709.564  |
| NM_00670E | 547.446   | 301.671   | NM_00658C | 10222.127 | 10718.05  | AB014533  | 4120.306  | 5748.347 |
| U80741    | 4140.224  | 4869.704  | NM_019891 | 2096.083  | 1565.55   | M11427    | 516.088   | 654.252  |
| NM_014497 | 1808.844  | 1908.212  | AF038186  | 2279.708  | 2036.29   | AK022097  | 1078.043  | 1836.408 |
| AL133598  | 7182.797  | 12546.581 | NM_016277 | 4929.818  | 5835.085  | NM_00216E | 10022.914 | 12327.14 |

|           |           |           |           |           |           |           |           |           |
|-----------|-----------|-----------|-----------|-----------|-----------|-----------|-----------|-----------|
| NM_015511 | 3635.787  | 5058.24   | NM_007247 | 2646.564  | 2845.779  | NM_00466C | 4279.556  | 4936.28   |
| NM_00662E | 3651.603  | 4447.545  | NM_006554 | 5404.574  | 5114.702  | NM_00616E | 1226.021  | 1945.182  |
| NM_00477E | 214.298   | 185.269   | X99962    | 8700.961  | 10080.582 | NM_016011 | 5071.97   | 5565.963  |
| AK023353  | 525.356   | 247.214   | AK023221  | 8572.717  | 9297.896  | AL035307  | 687.101   | 1006.973  |
| NM_00641E | 1150.758  | 898.192   | NM_003664 | 8472.272  | 7685.322  | AK023772  | 256.776   | 437.474   |
| NM_000151 | 773.104   | 397.469   | NM_00242E | 3170.771  | 2779.693  | NM_012234 | 3063.278  | 4188.483  |
| NM_00287E | 413.785   | 684.947   | AK027182  | 1484.834  | 1522.178  | NM_015361 | 6281.707  | 7483.712  |
| AB028999  | 570.878   | 2756.725  | J03651    | 5795.997  | 5888.934  | NM_00431C | 386.214   | 742.583   |
| AB018348  | 944.29    | 1315.026  | U61738    | 6822.234  | 7923.36   | NM_015537 | 3739.427  | 5581.259  |
| NM_01336E | 285.152   | 330.824   | AJ132087  | 1887.67   | 1820.929  | NM_01652C | 4490.802  | 5490.422  |
| NM_00368E | 624.225   | 621.572   | U92818    | 4229.86   | 5105.556  | AB018353  | 1581.075  | 2554.719  |
| NM_004641 | 1365.109  | 3549.628  | NM_00044E | 15463.847 | 18898.184 | NM_00703E | 1257.625  | 1800.943  |
| NM_00320E | 570.892   | 719.789   | NM_002934 | 62411.352 | 58801.23  | NM_002617 | 1004.886  | 1836.409  |
| NM_01814E | 191.538   | 163.052   | AK023011  | 22015.75  | 25881.863 | NM_00331E | 10112.828 | 12442.659 |
| AK001921  | 2347.856  | 2304.64   | NM_01681E | 2181.605  | 2712.544  | AF090907  | 1575.761  | 2293.405  |
| AF088004  | 222.36    | 124.876   | L17325    | 2889.14   | 3807.436  | AK024476  | 1576.693  | 2343.702  |
| AF086149  | 882.055   | 1281.093  | NM_01771E | 1921.202  | 2252.121  | X74794    | 4704.996  | 5860.665  |
| NM_01827E | 645.659   | 611.896   | M58603    | 6717.039  | 9348.352  | AL050298  | 2857.996  | 3987.485  |
| AK024944  | 318.633   | 197.313   | NM_00363E | 4392.857  | 5587.574  | M20696    | 2962.256  | 4295.68   |
| AF075068  | 9834.328  | 7431.761  | NM_00154E | 1442.802  | 1701.628  | NM_00291E | 449.299   | 629.138   |
| S81893    | 3216.389  | 2060.478  | NM_000115 | 5422.024  | 7528.138  | NM_00520E | 426.247   | 555.726   |
| AK022034  | 156.445   | 236.26    | AF308801  | 5712.719  | 8677.754  | NM_00656E | 478.565   | 895.312   |
| NM_00720E | 611.21    | 686.646   | AJ272212  | 2210.653  | 2212.92   | AK026154  | 5542.439  | 6827.966  |
| NM_00366E | 3572.864  | 3237.715  | NM_00162E | 21484.941 | 23950.08  | AL117546  | 16344.428 | 18702.875 |
| AK021777  | 226.978   | 252.498   | NM_005677 | 4543.657  | 4577.949  | AK027073  | 576.174   | 965.508   |
| AL117623  | 422.953   | 597.088   | AF229803  | 1062.39   | 1551.104  | NM_000384 | 420.602   | 679.042   |
| AK025785  | 916.932   | 1164.203  | AF151810  | 873.872   | 730.237   | AB018325  | 2314.247  | 3631.025  |
| AF143877  | 279.675   | 330.809   | NM_00213C | 35542.102 | 40185.242 | AL157482  | 3828.735  | 5275.31   |
| AF086474  | 257.465   | 414.055   | NM_00546E | 9899.922  | 10687.568 | NM_00542E | 2246.832  | 3657.556  |
| AF086529  | 220.302   | 231.789   | NM_016361 | 4670.179  | 4518.642  | NM_017974 | 540.865   | 1000.108  |
| AF086023  | 2653.402  | 2040.432  | NM_00370E | 48135.672 | 44394.691 | NM_00397E | 533.457   | 771.756   |
| AF131803  | 3557.37   | 3246.466  | NM_01434E | 9236.482  | 8348.364  | X14677    | 2894.282  | 3701.892  |
| AK024366  | 244.243   | 303.615   | AB040895  | 1019.461  | 1035.981  | NM_00586E | 8437.856  | 9334.646  |
| AK022171  | 234.014   | 374.164   | NM_00482C | 405.076   | 792.507   | U17077    | 2029.925  | 2774.895  |
| AK025913  | 447.272   | 246.137   | NM_01821C | 2340.222  | 3496.494  | NM_00091E | 977.498   | 1305.35   |
| AF147389  | 145.08    | 102.738   | NM_00109E | 9507.582  | 15556.88  | AK024475  | 1206.351  | 1795.37   |
| NM_01650C | 1440.306  | 927.336   | NM_016014 | 2268.3    | 3303.836  | AB026542  | 9113.237  | 11526.094 |
| NM_018354 | 1503.528  | 1352.425  | NM_00019E | 491.971   | 672.149   | NM_01984E | 2476.834  | 3040.152  |
| AF085987  | 2992.024  | 2182.546  | NM_018327 | 960.344   | 1187.973  | NM_014394 | 40610.781 | 46084.77  |
| AF087985  | 153.091   | 75.11     | NM_017581 | 3261.493  | 3932.966  | NM_00524E | 4227.127  | 6277.185  |
| AF087974  | 863.978   | 885.715   | AA488804  | 11362.199 | 12834.542 | NM_00621E | 686.046   | 1075.346  |
| NM_018004 | 1837.955  | 2223.64   | NM_00653E | 1093.36   | 1237.478  | NM_01814C | 1582.239  | 1915.532  |
| X78938    | 616.776   | 567.874   | NM_001684 | 1438.41   | 2153.34   | NM_01694E | 845.426   | 1209.151  |
| U84517    | 1239.484  | 850.301   | NM_00080E | 931.116   | 1142.248  | NM_00014E | 720.492   | 1082.217  |
| U47646    | 149.415   | 105.579   | NM_01631E | 12769.097 | 16973.521 | AF272372  | 12204.998 | 14700.865 |
| AB033113  | 406.357   | 537.019   | NM_01330E | 901.303   | 1200.277  | AK097045  | 917.689   | 1312.573  |
| AK025877  | 741.847   | 521.994   | NM_078467 | 7836.456  | 6715.991  | AF161356  | 47742.141 | 63739.887 |
| AK022379  | 236.79    | 100.991   |           | 338.117   | 1072.27   | AB014548  | 2408.762  | 2866.737  |
| AK025231  | 17010.207 | 11726.249 |           | 457.532   | 601.102   | NM_01825E | 2554.482  | 2526.916  |
| AK025338  | 175.76    | 211.349   | AK001883  | 10296.015 | 7922.867  | AK025150  | 829.129   | 1107.027  |
| AK023296  | 183.74    | 204.54    | NM_01462E | 2932.787  | 3374.226  | AK024611  | 7293.251  | 8397.718  |
| AK023462  | 257.356   | 231.753   | AL050114  | 1967.18   | 1851.806  | BC010420  | 2574.271  | 3614.524  |
| AF210649  | 160.341   | 180.685   | AK021492  | 3962.479  | 3740.818  | NM_01228C | 12749.758 | 14585.636 |

|           |           |           |           |           |           |           |           |           |
|-----------|-----------|-----------|-----------|-----------|-----------|-----------|-----------|-----------|
| AK001115  | 642.135   | 361.558   | AK023794  | 17900.82  | 17402.941 | NM_018172 | 2117.507  | 3199.746  |
| AL117586  | 184.754   | 485.998   | NM_019885 | 3309.294  | 3679.909  | U03886    | 561.658   | 610.638   |
| NM_014095 | 1554.899  | 1253.849  | AB033103  | 2617.326  | 3546.684  | AK022040  | 472.972   | 649.706   |
| AL133050  | 75.907    | 1738.087  | NM_002907 | 1285.538  | 2097.212  | AK022722  | 541.092   | 878.385   |
| AK027233  | 990.553   | 1043.322  | AK024098  | 1413.898  | 1634.793  | NM_003591 | 16455.207 | 25150.084 |
| AK023752  | 306.462   | 154.204   | AK001116  | 617.223   | 635.914   | AL080111  | 1704.562  | 2518.591  |
| AK023948  | 153.609   | 116.291   | AK022371  | 2838.718  | 3318.583  | NM_003550 | 5797.932  | 7999.993  |
| AK022452  | 259.838   | 222.318   | D42045    | 3781.208  | 4647.207  | NM_014642 | 2823.359  | 3954.701  |
| AK023375  | 272.947   | 231.051   | AB007953  | 2279.089  | 2752.846  | NM_002831 | 5577.408  | 8199.287  |
| AK023781  | 218.637   | 159.032   | NM_014002 | 6678.624  | 7973.705  | AL833409  | 2625.533  | 3815.468  |
| AF085881  | 626.922   | 398.449   | NM_004197 | 8306.845  | 10119.705 | NM_015966 | 457.852   | 630.901   |
| AK022737  | 5399.154  | 3705.78   | NM_004073 | 1278.329  | 1602.443  | NM_016147 | 1389.408  | 1988.842  |
| NM_003472 | 18991.045 | 7920.481  | NM_001278 | 4662.113  | 5654.443  | NM_002833 | 1099.913  | 1748.259  |
| U92980    | 585.757   | 397.287   | NM_019105 | 4568.249  | 6220.673  | NM_016592 | 535.229   | 833.648   |
| AF133658  | 481.413   | 346.056   | NM_000294 | 4394.985  | 7080.112  | NM_018527 | 446.35    | 1027.635  |
| AB048287  | 2317.271  | 1488.212  | NM_016249 | 2056.817  | 2196.521  | NM_018326 | 1232.011  | 1843.626  |
| Y11159    | 539.881   | 322.792   | NM_006181 | 1951.922  | 1838.91   | NM_001866 | 586.425   | 725.442   |
| AB020648  | 1362.329  | 1318.465  | NM_003796 | 16590.736 | 14541.303 | NM_014773 | 443.67    | 729.172   |
| AK025798  | 14804.859 | 15836.463 | NM_002973 | 2777.107  | 3524.904  | NM_005606 | 460.369   | 484.807   |
| AF086173  | 232.898   | 168.802   | NM_004436 | 40669.191 | 36124.563 | AF134707  | 603.278   | 962.279   |
| AK025164  | 418.221   | 782.633   | NM_006580 | 8881.468  | 5916.687  | NM_001223 | 1451.29   | 2560.156  |
| NM_018366 | 4799.553  | 4842.734  | NM_001305 | 2653.127  | 1938.264  | BE730629  | 593.518   | 1283.196  |
| AB040290  | 722.73    | 763.441   | NM_005082 | 1359.347  | 1573.566  | AK027167  | 1879.675  | 2971.225  |
| NM_019848 | 3507.756  | 4472.398  | D17028    | 18761.965 | 17092.422 | AK025265  | 2487.281  | 2918.256  |
| AK021497  | 646.022   | 419.324   | NM_013442 | 29155.326 | 31117.988 | NM_013279 | 293.784   | 520.648   |
| AF124367  | 261.051   | 394.641   | BG611243  | 2627.632  | 2340.096  | AK000564  | 215.784   | 206.626   |
| AK025615  | 6571.819  | 5232.438  | AI417481  | 1024.144  | 1401.88   | AB037901  | 702.219   | 900.686   |
| AK023803  | 568.165   | 348.129   | BI906766  | 2157.566  | 2233.91   | NM_006266 | 706.977   | 640.34    |
| AK026947  | 5992.979  | 2279.998  | U60519    | 1988.604  | 2971.146  | NM_006442 | 10775.525 | 9501.439  |
| U84526    | 5328.244  | 3583.085  | AA282906  | 4526.146  | 5580.435  | NM_003902 | 3633.869  | 2948.535  |
| L23401    | 766.026   | 376.43    | L02870    | 9198.01   | 11939.245 | NM_016427 | 1734.81   | 1589.163  |
| NM_018090 | 22406.23  | 10358.304 | BG755482  | 8057.578  | 10149.633 | U80741    | 2633.685  | 2305.135  |
| AK022728  | 6016      | 3518.638  | AI480307  | 5391.926  | 5605.755  | NM_014497 | 1209.363  | 828.473   |
| AL109678  | 701.38    | 448.136   | X51420    | 3997.909  | 5013.348  | AL133598  | 4172.403  | 3835.607  |
| AL137524  | 554.381   | 360.544   | D28235    | 658.604   | 891.658   | NM_015511 | 1935.283  | 2054.056  |
| AF218008  | 6087.227  | 4607.196  | X51757    | 1010.561  | 975.767   | NM_006625 | 1957.368  | 1907.337  |
| M22404    | 5462.569  | 4283.197  | L24038    | 1684.892  | 1836.78   | NM_004891 | 9793.814  | 7297.422  |
| AF052115  | 678.359   | 493.028   | NM_053056 | 5985.635  | 8336.039  | AF086538  | 565.081   | 581.16    |
| NM_014019 | 10888.646 | 9014.512  | NM_006186 | 1442.451  | 2073.93   | NM_006416 | 646.129   | 400.063   |
| Z70711    | 568.121   | 626.67    | NM_002751 | 4367.356  | 5110.383  | AF086149  | 580.378   | 428.589   |
| NM_012366 | 569.388   | 1042.563  | M55593    | 8419.081  | 10835.029 | AF075068  | 9158.025  | 6445.572  |
| AK025323  | 323.308   | 591.962   | NM_017716 | 1558.043  | 2254.79   | S81893    | 1914.029  | 1276.182  |
| NM_013326 | 2069.881  | 1869.982  | M58603    | 6020.045  | 8971.525  | AK022034  | 207.888   | 104.313   |
| BC037322  | 1098.969  | 965.419   | NM_003639 | 3782.972  | 4905.371  | NM_003663 | 1250.625  | 758.628   |
| Y10202    | 174.288   | 160.286   | NM_001549 | 1837.593  | 1392.338  | AF085988  | 188.176   | 677.264   |
| Y12022    | 926.187   | 1229.408  | NM_000115 | 3730.999  | 2726.382  | AK025785  | 857.127   | 598.953   |
| AK001375  | 720.72    | 603.854   | AF308801  | 4354.113  | 3251.768  | AF143877  | 390.907   | 283.938   |
| NM_019597 | 5052.591  | 4914.018  | NM_007318 | 58085.406 | 48918.461 | AF086023  | 805.313   | 341.767   |
| AL137559  | 964.936   | 791.317   | NM_014874 | 1546.087  | 882.678   | AF131803  | 1030.797  | 767.081   |
| AF026944  | 1618.321  | 1470.022  | NM_005765 | 22668.895 | 14693.284 | AK024366  | 439.334   | 427.11    |
| AK021493  | 2012.861  | 1816.175  | NM_002762 | 1172.856  | 562.769   | AK022171  | 267.17    | 267.428   |
| NM_006161 | 1981.246  | 1652.387  | NM_006324 | 10344.462 | 7621.818  | AK025913  | 492.508   | 425.929   |
| NM_006192 | 218.594   | 152.339   | NM_016848 | 7112.44   | 5920.01   | AK021930  | 242.913   | 220.046   |



|           |           |           |           |           |           |           |           |           |
|-----------|-----------|-----------|-----------|-----------|-----------|-----------|-----------|-----------|
| NM_01215E | 3779.281  | 1916.333  | NM_000514 | 5188.422  | 4147.2    | NM_01650C | 708.654   | 433.181   |
| AF144700  | 972.686   | 452.459   | AL137432  | 3106.248  | 3222.559  | NM_018354 | 1002.164  | 751.514   |
| NM_00259E | 360.329   | 575.92    | NM_000957 | 3008.317  | 2978.473  | AF085987  | 766.052   | 445.921   |
| NM_00410E | 2596.224  | 1374.633  | AF279656  | 1696.201  | 2082.616  | AF087974  | 914.527   | 618.867   |
| AB046825  | 1998.121  | 1374.774  | AK021660  | 1076.692  | 1004.549  | NM_018004 | 799.343   | 1105.419  |
| X64975    | 386.963   | 324.373   | AB007933  | 53219.047 | 49072.078 | X78938    | 720.369   | 617.361   |
| AL050297  | 1777.257  | 1861.553  | NM_006702 | 5185.937  | 6928.118  | U58665    | 18.467    | 725.208   |
| AK026966  | 1229.213  | 1391.646  | NM_00139E | 5487.176  | 6396.381  | U84517    | 1609.38   | 1181.782  |
| AF185573  | 882.378   | 2542.517  | NM_014474 | 2554.841  | 4360.507  | AK022379  | 421.687   | 273.409   |
| AJ009817  | 762.681   | 1594.849  | NM_00653E | 1025.471  | 1599.305  | AK025231  | 27819.764 | 39328.941 |
| AK025268  | 1300.412  | 1754.753  | NM_001684 | 1641.069  | 2533.777  | AK022321  | 126.908   | 202.844   |
| AL833005  | 1640.432  | 1452.898  | AB028977  | 539.154   | 650.099   | AK023462  | 409.605   | 312.183   |
| L43366    | 1039.377  | 860.15    | NM_00080E | 755.004   | 1134.542  | AK001115  | 1182.887  | 712.376   |
| AK026124  | 2703.885  | 2530.136  | NM_01631E | 11625.869 | 14003.317 | NM_01409E | 1944.697  | 1745.28   |
| NM_01550E | 1158.041  | 1101.18   | NM_01330E | 1210.12   | 1082.393  | AL133050  | 353.376   | 142.763   |
| AL110157  | 11747.505 | 10046.192 | NM_019891 | 1675.276  | 1230.304  | AK027233  | 792.786   | 733.449   |
| NM_00231E | 3482.569  | 2597.072  | AF038186  | 1448.915  | 734.741   | AK022452  | 228.984   | 138.094   |
| L38712    | 2883.251  | 1922.683  | NM_016277 | 4014.217  | 2399.732  | AK023375  | 216.619   | 211.633   |
| U84508    | 355.676   | 187.545   | NM_007247 | 2700.019  | 1388.491  | AF085881  | 544.833   | 491.568   |
| NM_01779E | 2109.768  | 1874.109  | NM_006554 | 4127.523  | 1514.285  | AK022737  | 4008.876  | 5281.469  |
| NM_012131 | 2209.258  | 1924.862  | X99962    | 8307.783  | 5815.042  | NM_00347E | 16928.508 | 17895.066 |
| S41540    | 1017.528  | 634.73    | AK023221  | 8182.288  | 6978.789  | U92980    | 590.019   | 656.489   |
| CY3Cy5    | 1873.953  | 429.571   | NM_003664 | 6871.565  | 5964.504  | AF133658  | 487.354   | 348.291   |
| BI906766  | 1511.318  | 1218.534  | NM_00242E | 2906.984  | 2489.318  | AB048287  | 2249.782  | 1535.924  |
| U60519    | 1317.759  | 1388.502  | AK027182  | 1358.679  | 1115.14   | Y11159    | 474.875   | 403.795   |
| AA282906  | 2462.157  | 2332.809  | J03651    | 5068.128  | 2614.185  | AB020648  | 777.557   | 965.115   |
| L02870    | 3442.763  | 3207.474  | U61738    | 8226.292  | 6386.003  | AK025798  | 11065.309 | 7567.706  |
| BG755482  | 4224.106  | 4759.005  | AJ132087  | 1367.867  | 1341.425  | AK025164  | 316.491   | 169.42    |
| AI480307  | 2638.088  | 2037.843  | U92818    | 4831.571  | 4163.802  | NM_01836E | 3438.699  | 5458.648  |
| X51420    | 2293.431  | 1765.381  | NM_01681E | 2768.268  | 3388.338  | AB040290  | 597.765   | 293.172   |
| X51757    | 480.02    | 556.419   | L17325    | 3771.503  | 3934.027  | NM_01984E | 3422.222  | 2317.617  |
| L24038    | 809.753   | 1008.755  | NM_01400E | 6654.085  | 10034.217 | AK021497  | 781.726   | 417.403   |
| NM_05305E | 4149.208  | 4419.903  | NM_004197 | 7986.85   | 12531.476 | AF124367  | 389.241   | 359.494   |
| NM_00618E | 678.514   | 630.338   | NM_00407E | 1341.652  | 1741.111  | AK025615  | 4073.504  | 2245.286  |
| NM_002751 | 1494.435  | 2025.829  | NM_00127E | 4335.331  | 5616.09   | AK023803  | 497.378   | 300.379   |
| M55593    | 6638.906  | 19762.607 | NM_01910E | 3879.052  | 4659.604  | AK026947  | 15130.68  | 10611.122 |
| NM_078467 | 4658.603  | 4614.601  | NM_000294 | 4175.624  | 5393.753  | U84526    | 3665.267  | 3725.68   |
| SR2       | 48433.289 | 45381.051 | AJ272212  | 2358.832  | 2173.656  | L23401    | 794.981   | 947.047   |
| SR4       | 16342.617 | 12012.922 | NM_00162E | 19148.914 | 13486.567 | AL109678  | 414.546   | 312.913   |
| SR6       | 2157.602  | 2551.51   | NM_005677 | 3487.218  | 2118.055  | AL137524  | 777.361   | 479.188   |
| SR8       | 9199.354  | 29247.492 | AF229803  | 662.609   | 674.187   | AF218008  | 3901.281  | 2400.656  |
| SR10      | 29607.264 | 10306.368 | AF151810  | 909.206   | 368.277   | M22404    | 12371.068 | 6754.08   |
| CY3Cy5    | 2294.042  | 403.6     | NM_00213E | 26442.143 | 18891.137 | AF052115  | 676.156   | 447.802   |
| NM_000514 | 2840.804  | 3888.432  | NM_00546E | 7430.569  | 7592.493  | NM_01401E | 8169.921  | 4782.996  |
| AL137432  | 1858.38   | 2295.325  | NM_016361 | 3556.069  | 4054.457  | Z70711    | 375.127   | 250.273   |
| NM_000957 | 1550.64   | 1344.32   | NM_00370E | 46748.172 | 46055.938 | AF116653  | 302.882   | 159.867   |
| NM_01904E | 2263.2    | 1949.862  | NM_01434E | 8922.701  | 7845.466  | NM_01236E | 449.194   | 318.235   |
| NM_00324E | 3893.327  | 2985.412  | AB040895  | 471.273   | 744.5     | AK025323  | 309.201   | 276.35    |
| NM_016564 | 22655.131 | 15792.488 | NM_01821E | 2264.422  | 2243.737  | NM_01332E | 2369.802  | 1705.195  |
| AF279656  | 660.447   | 604.399   | NM_00109E | 9787.132  | 9138.236  | BC037322  | 619.086   | 438.561   |
| AK021660  | 450.652   | 212.537   | NM_016014 | 2414.639  | 2354.01   | Y12022    | 668.039   | 459.645   |
| AB007933  | 22112.014 | 17433.992 | NM_00019E | 551.549   | 371.077   | AK001375  | 421.534   | 239.249   |
| NM_00670E | 2596.52   | 3151.407  | NM_018327 | 886.491   | 1225.066  | NM_019597 | 2713.124  | 1677.096  |

|           |           |           |           |           |           |           |           |           |
|-----------|-----------|-----------|-----------|-----------|-----------|-----------|-----------|-----------|
| NM_001396 | 2790.06   | 2504.197  | NM_017581 | 3615.564  | 3438.955  | AL137559  | 605.213   | 307.188   |
| NM_014474 | 1631.287  | 1566.771  | AA488804  | 12749.742 | 14786.493 | AF026944  | 1052.082  | 506.485   |
| NM_016249 | 660.282   | 896.719   | L29496    | 6035.662  | 7685.944  | AK021493  | 879.806   | 342.217   |
| NM_006181 | 988.424   | 1771.384  | NM_000928 | 704.632   | 998.825   | NM_006161 | 2139.393  | 941.557   |
| NM_003796 | 10957.726 | 11172.767 | NM_007002 | 9582.426  | 12020.825 | NM_012155 | 2497.776  | 1984.901  |
| NM_002973 | 2922.052  | 3460.632  | NM_012121 | 1800.735  | 2220.756  | AF144700  | 513.7     | 709.542   |
| NM_004436 | 36976.914 | 33674.953 | NM_003255 | 6852.428  | 9262.586  | NM_004105 | 2420.805  | 1105.273  |
| NM_006580 | 8238.538  | 7142.817  | NM_014155 | 2186.133  | 3504.884  | AB046825  | 1080.402  | 691.713   |
| NM_001305 | 1764.157  | 1828.95   | AK026331  | 13112.361 | 16147.918 | X64975    | 630.406   | 465.633   |
| NM_005082 | 957.824   | 1554.257  | M30773    | 2400.251  | 2468.695  | AL050297  | 1222.967  | 998.098   |
| D17028    | 15836.919 | 20550.754 | NM_016338 | 9823.413  | 5339.948  | AK026966  | 764.461   | 601.287   |
| NM_013442 | 21444.738 | 29407.914 | AF113699  | 15500.863 | 4654.956  | AF147398  | 308.11    | 181.824   |
| BG611243  | 1414.54   | 1692.543  | AK001883  | 14081.364 | 4130.524  | AF185573  | 281.997   | 129.051   |
| AK027182  | 788.948   | 2067.896  | NM_014629 | 2825.589  | 2205.908  | AK025268  | 766.486   | 582.146   |
| J03651    | 3077.722  | 3647.765  | AL050114  | 1415.274  | 1758.308  | AL833005  | 1276.892  | 844.186   |
| U61738    | 2934.843  | 2104.532  | AK021492  | 4081.877  | 3937.599  | L43366    | 937.035   | 551.718   |
| AJ132087  | 674.334   | 637.938   | AK023794  | 20154.844 | 20023.244 | AK026124  | 1728.162  | 839.73    |
| U92818    | 2107.245  | 1386.892  | NM_019885 | 3109.281  | 3041.178  | NM_015505 | 585.431   | 307.845   |
| NM_000442 | 8840.577  | 6199.406  | AB033103  | 2282.976  | 2105.412  | AL110157  | 7314.43   | 3179.883  |
| NM_002934 | 47854.922 | 27947.934 | NM_002907 | 1143.278  | 1100.238  | NM_002315 | 2509.974  | 1353.157  |
| AK023011  | 10499.658 | 9080.8    | AK024098  | 2147.177  | 2486.523  | L38712    | 4168.807  | 1908.706  |
| NM_016816 | 1536.854  | 1635.18   | AK022371  | 3330.172  | 2904.176  | U84508    | 469.725   | 212.073   |
| L17325    | 1504.829  | 1639.285  | D42045    | 3352.323  | 3169.627  | NM_017793 | 1264.754  | 513.57    |
| NM_017716 | 1172.605  | 1439.704  | AB007953  | 2103.164  | 1652.109  | NM_012131 | 975.448   | 572.783   |
| M58603    | 3835.405  | 4359.946  | NM_017820 | 761.824   | 1227.31   | S41540    | 577.65    | 211.973   |
| NM_003639 | 2746.631  | 3272.894  | NM_001849 | 2523.281  | 4551.091  | CY3Cy5    | 2600.413  | 242.23    |
| NM_001549 | 687.786   | 1022.076  | NM_003734 | 9376.473  | 11186.298 | AI417481  | 343.137   | 318.056   |
| NM_000115 | 2658.202  | 2498.025  | NM_014935 | 6493.869  | 7876.862  | BI906766  | 967.821   | 873.904   |
| AF308801  | 3786.167  | 3962.103  | X99660    | 11314.528 | 15187.568 | U60519    | 1005.434  | 1023.733  |
| NM_007318 | 47751.074 | 53337.855 | X03635    | 4371.276  | 4623.024  | D28235    | 675.565   | 1087.836  |
| NM_014874 | 1212.889  | 1376.109  | X97671    | 978.694   | 1025.371  | X51757    | 537.771   | 406.955   |
| NM_005765 | 18940.727 | 27404.115 | NM_004351 | 6236.975  | 4335.991  | L24038    | 971.548   | 883.938   |
| NM_002762 | 951.544   | 2122.469  | NM_004236 | 10407.403 | 5520.708  | NM_053056 | 3603.398  | 3551.215  |
| NM_006324 | 6567.382  | 8366.17   | AB011093  | 4286.322  | 1335.428  | NM_006186 | 943.678   | 977.155   |
| NM_005469 | 5934.637  | 8289.133  | NM_005618 | 6977.365  | 6846.135  | NM_078467 | 5614.287  | 4817.329  |
| NM_016361 | 3487.282  | 7774.949  | NM_020533 | 6733.114  | 7821.786  | SR2       | 46148.695 | 44993.902 |
| NM_003708 | 19142.754 | 37132.008 | NM_001894 | 9418.771  | 9615.173  | SR4       | 12306.012 | 20951.107 |
| NM_014349 | 5256.699  | 9168.728  | NM_000614 | 897.13    | 1023.928  | SR6       | 1557.238  | 1568.563  |
| AB040895  | 307.51    | 737.122   | AK022884  | 668.579   | 597.82    | SR8       | 6019.9    | 19585.834 |
| NM_018210 | 1466.003  | 1638.087  | AF305072  | 531.271   | 548.939   | SR10      | 19419.543 | 4695.191  |
| NM_001096 | 6626.27   | 4340.477  | NM_006620 | 7435.018  | 5986.752  | CY3Cy5    | 1881.417  | 131.375   |
| NM_016014 | 1445.037  | 1015.847  | NM_001397 | 886.904   | 893.633   | NM_016848 | 5126.338  | 3908.742  |
| NM_018327 | 275.083   | 424.705   | NM_005543 | 473.958   | 781.163   | NM_000514 | 4043.598  | 3497.101  |
| NM_017581 | 2516.355  | 2794.449  | NM_004772 | 10690.096 | 7896.947  | AL137432  | 1340.153  | 1375.756  |
| AA488804  | 8937.325  | 10585.011 | NM_003714 | 5568.4    | 3988.923  | NM_003240 | 905.568   | 835.466   |
| NM_006539 | 692.887   | 1151.164  | NM_004004 | 596.631   | 410.198   | NM_016564 | 4602.676  | 4284.807  |
| NM_001684 | 1064.084  | 1334.715  | AF024540  | 1443.143  | 1649.75   | NM_000796 | 426.834   | 488.236   |
| NM_000808 | 431.114   | 437.731   | NM_002189 | 2739.004  | 3328.174  | AK021660  | 773.81    | 659.029   |
| NM_016318 | 7139.921  | 7888.895  | U42977    | 3713.006  | 4930.76   | AB007933  | 42939.652 | 34901.645 |
| NM_013309 | 382.506   | 588.39    | NM_002881 | 9447.065  | 11054.024 | NM_006702 | 3405.706  | 3748.76   |
| NM_019891 | 1509.626  | 3106.983  | NM_003666 | 3795.655  | 4452.316  | NM_001396 | 5310.019  | 5636.947  |
| AF038186  | 1385.306  | 1795.745  | NM_003288 | 7612.762  | 10814.118 | NM_006181 | 810.791   | 1453.072  |
| NM_016277 | 3486.229  | 5139.368  | NM_018242 | 570.946   | 697.895   | NM_003796 | 6203.945  | 6068.043  |

|           |           |           |           |           |           |           |           |           |
|-----------|-----------|-----------|-----------|-----------|-----------|-----------|-----------|-----------|
| NM_007247 | 2134.801  | 3090.62   | M83822    | 3615.331  | 3112.442  | NM_00658C | 6149.002  | 6389.471  |
| NM_006554 | 4049.437  | 5517.975  | NM_018434 | 3659.584  | 2953.29   | NM_00130E | 1944.036  | 1740.05   |
| X99962    | 6550.346  | 7691.997  | NM_003914 | 6277.077  | 2948.654  | NM_00508Z | 767.558   | 806.027   |
| AL050114  | 1069.348  | 1710.37   | NM_020423 | 1348.494  | 624.19    | D17028    | 10456.684 | 8641.941  |
| AK021492  | 1945.14   | 2956.594  | AK021437  | 2259.766  | 1169.524  | NM_01344Z | 14443.834 | 11173.021 |
| AK023794  | 8739.427  | 12598.901 | NM_003831 | 16237.262 | 14902.777 | BG611243  | 938.717   | 809.528   |
| NM_01988E | 2190.09   | 2296.869  | NM_001759 | 826.327   | 927.003   | AK023221  | 3422.085  | 2818.104  |
| AB033103  | 1375.538  | 1475.668  | AB007965  | 7595.098  | 9434.837  | NM_003664 | 3686.571  | 2644.885  |
| NM_002907 | 774.652   | 694.041   | NM_017649 | 1002.23   | 1455.352  | NM_00242E | 1876.212  | 1613.843  |
| AK024098  | 626.391   | 300.099   | NM_00006E | 730.639   | 829.381   | AK027182  | 607.638   | 717.851   |
| AK022371  | 2011.181  | 1883.899  | NM_00119E | 14022.442 | 13087.893 | U61738    | 2046.38   | 1598.229  |
| D42045    | 2715.684  | 2785.966  | NM_01600E | 1665.05   | 1531.876  | AJ132087  | 674.272   | 446.302   |
| AB007953  | 1430.863  | 1473.061  | NM_017744 | 2326.635  | 1542.909  | U92818    | 955.035   | 857.334   |
| NM_01400Z | 5098.291  | 6486.758  | NM_001924 | 1951.175  | 1678.493  | NM_002934 | 41514.246 | 30554.232 |
| NM_004197 | 3654.735  | 4651.078  | NM_01770E | 13627.47  | 12802.019 | AK023011  | 14606.244 | 10847.936 |
| NM_00407Z | 697.986   | 753.881   | NM_00179E | 1484.029  | 795.041   | NM_01681E | 1656.827  | 1475.994  |
| NM_00127E | 3058.658  | 3642.866  | AB040880  | 1524.315  | 1213.844  | L17325    | 1551.542  | 1185.633  |
| NM_01910E | 2107.068  | 2720.156  | NM_009587 | 15441.613 | 9978.871  | NM_00011E | 1475.463  | 1234.591  |
| NM_000294 | 2782.226  | 3586.313  | AL133566  | 1037.423  | 1576.951  | NM_00731E | 37975.719 | 40557.543 |
| AJ272212  | 1502.745  | 1701.248  | M36118    | 4173.478  | 5465.341  | NM_014874 | 922.79    | 848.081   |
| NM_00162E | 14293.655 | 14220.511 | NM_00339E | 15316.837 | 19248.023 | NM_012397 | 333.554   | 207.83    |
| NM_005677 | 2902.276  | 3955.707  | NM_00263C | 1676.672  | 2094.942  | NM_00576E | 13381.445 | 10383.194 |
| AF229803  | 894.583   | 974.134   | AJ295149  | 26355.967 | 33536.707 | NM_00276Z | 1072.815  | 914.961   |
| AF151810  | 586.997   | 808.205   | NM_01343E | 6157.875  | 7960.25   | NM_006324 | 4982.118  | 3448.266  |
| NM_00213C | 26584.734 | 23071.781 | NM_00509E | 3514.744  | 3206.907  | NM_00546E | 4475.763  | 4945.176  |
| NM_00130E | 1415.337  | 1671.74   | NM_017481 | 804.27    | 384.269   | NM_016361 | 1804.122  | 1754.406  |
| NM_00508Z | 1097.528  | 1452.495  | NM_01468E | 6619.655  | 2400.169  | NM_00370E | 38391.152 | 36620.668 |
| D17028    | 13312.816 | 15679.169 | AB037784  | 566.585   | 130.797   | NM_01434E | 4640.753  | 7002.148  |
| NM_01344Z | 20878.941 | 25493.379 | AL359623  | 1717.122  | 1226.892  | NM_01821C | 1239.009  | 1102.69   |
| AI417481  | 1070.702  | 3737.261  | NM_00667E | 1224.788  | 1580.406  | NM_00109E | 3447.772  | 2752.747  |
| U60519    | 1171.79   | 948.704   | AK026920  | 3910.458  | 4487.281  | NM_018327 | 618.548   | 646.38    |
| AA282906  | 2251.392  | 1665.448  | AL137255  | 1407.132  | 1184.304  | NM_017581 | 2002.489  | 1796.194  |
| L02870    | 3782.304  | 2640.787  | NM_00337C | 23549.713 | 27558.936 | AA488804  | 6807.382  | 6766.19   |
| BG755482  | 5739.269  | 4200.654  | AB037715  | 3971.43   | 3503.881  | NM_00080E | 573.235   | 619.605   |
| AI480307  | 3146.036  | 2362.413  | AF250924  | 11648.463 | 8859.393  | NM_01631E | 4314.45   | 4066.254  |
| X51420    | 2208.307  | 2271.412  | D86979    | 1170.805  | 1599.84   | NM_01330E | 460.22    | 722.142   |
| D28235    | 417.629   | 308.229   | AB023230  | 711.054   | 581.575   | NM_016277 | 2776.561  | 2466.083  |
| X51757    | 607.94    | 1285.963  | AF018081  | 22845.371 | 19120.453 | NM_007247 | 1869.524  | 1375.893  |
| L24038    | 910.812   | 1571.812  | NM_02020Z | 15173.138 | 8998.448  | NM_006554 | 2556.555  | 1515.645  |
| NM_05305E | 4536.189  | 5231.769  | AK022889  | 23109.5   | 31021.832 | X99962    | 5547.092  | 4376.423  |
| NM_00618E | 696.848   | 893.386   | X52357    | 43006.879 | 50286.293 | AL050114  | 619.196   | 800.109   |
| NM_002751 | 1757.606  | 1778.034  | AF211891  | 1449.147  | 2481.902  | AK021492  | 1417.02   | 2618.583  |
| M55593    | 5248.817  | 5949.262  | NM_005641 | 1714.713  | 2463.299  | AB033103  | 1434.808  | 931.618   |
| NM_078467 | 4885.883  | 4058.955  | NM_00166E | 5535.437  | 6068.991  | AK022371  | 1872.251  | 1467.752  |
| AK001883  | 8420.725  | 5633.188  | AK025362  | 1764.34   | 2085.68   | D42045    | 1538.895  | 1287.828  |
| NM_01462E | 2026.023  | 1465.868  | AK021776  | 3218.975  | 4078.556  | AB007953  | 1121.764  | 928.323   |
| NM_00731E | 55231.547 | 50900.492 | AK026042  | 2205.214  | 1736.971  | NM_004197 | 2298.004  | 1918.874  |
| NM_014874 | 1479.938  | 1237.111  | NM_01423Z | 13568.392 | 10281.561 | NM_00407Z | 809.743   | 867.868   |
| NM_012397 | 325.653   | 396.532   | NM_002137 | 54170.734 | 34013.008 | NM_00127E | 1737.328  | 2161.641  |
| NM_00576E | 18449.275 | 18654.367 | NM_002911 | 1960.411  | 764.127   | NM_01910E | 1771.725  | 2090.222  |
| NM_00276Z | 516.417   | 742.735   | U94386    | 1102.131  | 825.273   | NM_000294 | 2615.581  | 2748.819  |
| NM_006324 | 6795.466  | 8889.001  | NM_01600C | 7744.558  | 6495.828  | AJ272212  | 1531.398  | 1534.105  |
| NM_000514 | 3259.385  | 3074.923  | NM_00637Z | 9188.445  | 9535.078  | NM_005677 | 3333.624  | 2753.845  |

|           |           |           |           |           |           |           |           |           |
|-----------|-----------|-----------|-----------|-----------|-----------|-----------|-----------|-----------|
| AL137432  | 2019.613  | 2266.815  | NM_014150 | 1900.448  | 3190.361  | AF229803  | 771.714   | 715.121   |
| NM_000957 | 1427.248  | 1077.05   | NM_006805 | 27266.219 | 29524.375 | AF151810  | 485.33    | 252.183   |
| NM_019043 | 2371.588  | 1689.619  | AF132027  | 19609.152 | 15836.156 | NM_002130 | 20874.842 | 12757.324 |
| NM_003240 | 3043.389  | 1850.993  | NM_004681 | 5241.018  | 4184.979  | NM_001305 | 1303.359  | 1517.397  |
| NM_016564 | 24443.943 | 19316.016 | AB033096  | 9629.518  | 9804.561  | BG755482  | 5754.248  | 5305.708  |
| NM_000796 | 278.042   | 798.984   | NM_014886 | 1467.272  | 1253.613  | AI480307  | 2853.826  | 2096.679  |
| AF279656  | 1029.135  | 2635.561  | L31408    | 10340.883 | 7645.683  | X51420    | 1776.98   | 1546.217  |
| AK021660  | 139.281   | 1002.46   | NM_001545 | 10116.822 | 6165.426  | D28235    | 642.831   | 647.926   |
| AB007933  | 28147.119 | 25551.521 | AF070625  | 3030.671  | 3591.662  | NM_053056 | 2526.863  | 2575.004  |
| NM_006702 | 2699.505  | 3611.199  | AL365512  | 2090.241  | 2944.144  | NM_006186 | 469.925   | 381.866   |
| NM_001396 | 2848.026  | 2349.733  | AK001740  | 4770.148  | 5285.718  | NM_002751 | 611.288   | 527.313   |
| NM_014474 | 1441.18   | 1570.325  | AF131793  | 1191.733  | 1566.554  | M55593    | 2586.078  | 3722.949  |
| NM_016249 | 763.063   | 870.119   | NM_005918 | 30309.484 | 38943.184 | AK001883  | 11310.917 | 6873.017  |
| NM_006181 | 653.782   | 1489.075  | J02625    | 12101.657 | 16302.551 | NM_014629 | 1424.914  | 1032.398  |
| NM_003796 | 11518.077 | 10772.646 | NM_005333 | 19144.07  | 22801.969 | NM_007318 | 49818.09  | 57523.012 |
| NM_002973 | 2995.879  | 3533.382  | NM_000767 | 699.131   | 948.68    | NM_014874 | 772.264   | 939.978   |
| NM_004436 | 38489.895 | 33222.836 | AK026161  | 1704.29   | 1155.701  | NM_012397 | 1768.002  | 2593.928  |
| NM_006580 | 9543.88   | 8356.55   | NM_004553 | 30397.305 | 12289.674 | NM_005765 | 12452.954 | 22948.295 |
| NM_019891 | 1176.855  | 1051.789  | D63484    | 2342.449  | 1218.563  | NM_002762 | 994.207   | 1121.227  |
| AF038186  | 1275.108  | 987.947   | AK026745  | 3214.63   | 2511.663  | NM_006324 | 4295.163  | 3434.732  |
| NM_016277 | 3334.483  | 3160.576  | AL157440  | 2828.159  | 2331.168  | NM_016848 | 4701.136  | 3595.209  |
| NM_007247 | 2370.072  | 2238.374  | NM_016423 | 5889.139  | 5029.282  | NM_000514 | 3256.39   | 2744.99   |
| NM_006554 | 3716.507  | 3870.769  | AB040975  | 2325.76   | 2492.598  | NM_000957 | 2189.229  | 1510.707  |
| X99962    | 6243.046  | 7886.994  | NM_005119 | 7042.954  | 4212.559  | NM_019043 | 1681.253  | 1320.558  |
| NM_002426 | 1953.915  | 2259.737  | NM_003168 | 12294.938 | 10148.148 | NM_003240 | 6211.203  | 4626.317  |
| AK027182  | 612.759   | 1314.761  | X52342    | 613.799   | 469.885   | NM_016564 | 33967.613 | 27956.41  |
| J03651    | 2738.014  | 2452.839  | NM_003131 | 14318.465 | 9892.74   | NM_000796 | 637.851   | 701.164   |
| U61738    | 2644.928  | 1760.891  | NM_005239 | 2785.572  | 1387.291  | AF279656  | 1245.565  | 1904.986  |
| AJ132087  | 846.161   | 826.54    | AB014526  | 381.258   | 794.794   | AB007933  | 6108.999  | 6596.345  |
| U92818    | 3032.307  | 5795.375  | NM_018538 | 3660.208  | 5692.142  | NM_006702 | 1738.272  | 2155.307  |
| NM_000442 | 10562.718 | 13800.484 | NM_013346 | 1072.618  | 1946.938  | NM_001396 | 1277.925  | 888.903   |
| NM_002934 | 45510.426 | 40488.633 | AF131784  | 401.753   | 769.269   | NM_014474 | 1158.417  | 1018.446  |
| AK023011  | 14567.988 | 13718.91  | NM_017851 | 1714.756  | 1870.237  | NM_003796 | 10743.503 | 8737.245  |
| NM_016816 | 1256.83   | 1221.635  | AK026182  | 63659.117 | 56954.586 | NM_002973 | 2023.487  | 1949.874  |
| L17325    | 1598.678  | 1513.392  | NM_016085 | 14778.676 | 15199.653 | NM_004436 | 30332.621 | 20734.311 |
| NM_017716 | 922.889   | 1315.175  | AK025768  | 6326.808  | 6518.711  | NM_006580 | 7533.645  | 5867.939  |
| M58603    | 3809.81   | 3953.115  | AL117502  | 2664.116  | 2312.782  | NM_019891 | 773.252   | 889.375   |
| NM_003639 | 2850.713  | 2880.135  | AK001846  | 1087.278  | 568.217   | AF038186  | 855.624   | 987.461   |
| NM_001549 | 797.001   | 999.791   | AK024637  | 873.461   | 601.014   | NM_016277 | 2308.5    | 2697.096  |
| NM_000115 | 2785.212  | 3004.732  | AK024108  | 809.602   | 741.584   | NM_007247 | 2196.204  | 2930.079  |
| AF308801  | 3443.091  | 3571.417  | NM_013345 | 942.616   | 998.172   | NM_006554 | 2480.184  | 2459.565  |
| AJ272212  | 1138.776  | 1045.591  | AL117454  | 20526.566 | 15649.717 | X99962    | 4915.173  | 4204.404  |
| NM_001626 | 12785.781 | 8435.732  | AF272890  | 6197.12   | 5136.326  | AK023221  | 3823.063  | 2669.319  |
| NM_005677 | 2290.727  | 2386.012  | U00684    | 1125.954  | 972.725   | NM_003664 | 4023.865  | 2650.54   |
| AF229803  | 537.183   | 1059.477  | NM_016459 | 7704.577  | 6553.886  | AK027182  | 740.193   | 729.73    |
| AF151810  | 507.572   | 528.603   | AF086227  | 1830.808  | 2174.22   | J03651    | 4122.266  | 4169.562  |
| NM_002130 | 26731.984 | 24491.965 | AK026246  | 2436.139  | 2142.912  | U61738    | 5747.838  | 4724.727  |
| NM_005469 | 6606.711  | 8698.814  | AF070524  | 681.286   | 356.582   | AJ132087  | 826.109   | 1032.695  |
| NM_003708 | 25881.576 | 28327.961 | AF035281  | 2035.765  | 1135.827  | U92818    | 2459.819  | 2526.753  |
| NM_014349 | 5746.398  | 7641.33   | AK026304  | 925.146   | 555.703   | NM_000442 | 9691.633  | 9624.889  |
| AB040895  | 477.388   | 411.269   | AK021754  | 181.054   | 680.869   | M58603    | 3313.918  | 2851.844  |
| NM_018210 | 1686.668  | 1402.5    | AK023501  | 227.132   | 660.096   | NM_003639 | 1768.398  | 1847.752  |
| NM_001096 | 7255.056  | 6286.097  | AL133446  | 2745.752  | 4178.256  | NM_001549 | 692.297   | 340.3     |

|           |           |           |           |           |           |           |           |           |
|-----------|-----------|-----------|-----------|-----------|-----------|-----------|-----------|-----------|
| NM_016014 | 1444.724  | 1942.491  | AF147406  | 440.172   | 724.544   | NM_000115 | 2385.359  | 1825.484  |
| NM_018327 | 491.123   | 635.124   | NM_006553 | 524.891   | 1203.813  | AF308801  | 2907.586  | 2483.139  |
| NM_017581 | 2306.585  | 2472.018  | U56251    | 1209.384  | 1776.329  | AJ272212  | 1419.19   | 2059.795  |
| AA488804  | 8912.816  | 12951.111 | AK024689  | 744.171   | 678.581   | NM_001626 | 19496.309 | 19705.854 |
| NM_006539 | 761.838   | 1384.202  | BC035667  | 1234.19   | 1348.157  | NM_005677 | 2914.938  | 2771.151  |
| NM_001684 | 1088.184  | 1960.221  | AL049277  | 1758.894  | 1315.591  | AF229803  | 769.117   | 690.143   |
| NM_000808 | 527.734   | 666.867   | AL049988  | 947.661   | 611.99    | NM_003708 | 42738.336 | 33430.195 |
| NM_016318 | 7017.267  | 7822.909  | AL080104  | 700.332   | 1012.145  | NM_014348 | 5294.375  | 5174.38   |
| NM_013308 | 421.11    | 457.532   | AL049302  | 520.658   | 591.386   | AB040895  | 492.086   | 734.523   |
| NM_078467 | 4983.962  | 2902.612  | AL050043  | 1234.129  | 697.269   | NM_018210 | 1176.492  | 1369.752  |
| AK001883  | 8851.578  | 5572.336  | AL117571  | 2548.805  | 2276.538  | NM_001096 | 4779.299  | 4784.255  |
| NM_014628 | 1897.792  | 1622.82   | L22263    | 885.623   | 1701.548  | NM_016014 | 1613.702  | 1773.585  |
| AK023794  | 12818.688 | 14156.978 | AF131814  | 2075.919  | 1676.404  | NM_000198 | 460.804   | 552.001   |
| NM_019885 | 2268.912  | 2445.793  | AL359600  | 557.055   | 580.084   | NM_018327 | 527.828   | 465.704   |
| AB033103  | 1229.108  | 1197.938  | AL360144  | 2473.057  | 2005.874  | NM_017581 | 2205.624  | 1934.147  |
| NM_002907 | 871.439   | 675.114   | BC028617  | 3274.507  | 3460.024  | AA488804  | 7540.993  | 8076.355  |
| AK024098  | 780.283   | 858.49    | AL117653  | 696.904   | 496.877   | NM_006539 | 727.767   | 685.444   |
| AK022371  | 1972.467  | 2784.831  | AF087999  | 894.905   | 678.015   | NM_001684 | 795.631   | 944.935   |
| D42045    | 2516.543  | 3782.395  | NM_003740 | 4467.933  | 2293.228  | NM_000808 | 594.847   | 398.91    |
| AB007953  | 2074.73   | 3063.543  | AL050078  | 1648.473  | 975.253   | NM_016318 | 9698.53   | 7629.227  |
| NM_014002 | 6358.134  | 15219.048 | AK021616  | 499.051   | 848.737   | NM_013308 | 653.252   | 404.46    |
| NM_004197 | 3490.911  | 5691.794  | AK022933  | 602.245   | 977.468   | NM_078467 | 5386.588  | 5440.006  |
| NM_004073 | 647.611   | 962.867   | NM_014276 | 2821.076  | 3175.469  | AK001883  | 8227.442  | 6338.318  |
| NM_001278 | 3100.233  | 3882.685  | AF056438  | 1660.007  | 2116.512  | NM_014628 | 1393.266  | 940.014   |
| NM_019105 | 2403.021  | 3183.948  | AF003737  | 28828.201 | 35549.41  | AL050114  | 597.284   | 895.897   |
| NM_000294 | 2942.75   | 3383.568  | AF009296  | 1729.49   | 2286.912  | AK021492  | 1975.251  | 1769.377  |
| NM_016249 | 785.777   | 416.219   | AF041410  | 293.117   | 660.426   | AK023794  | 9713.402  | 9209.417  |
| NM_006181 | 757.566   | 618.055   | AF056448  | 1010.339  | 840.536   | NM_019885 | 1614.349  | 2576.092  |
| NM_003796 | 9539.498  | 8635.327  | AK001011  | 3666.994  | 2280.163  | AB033103  | 1299.267  | 1594.707  |
| NM_002973 | 2455.779  | 2849.547  | AK001398  | 538.565   | 735.983   | AK024098  | 776.033   | 1099.646  |
| NM_004436 | 35997.02  | 29583.211 | AK021457  | 823.997   | 524.303   | AK001116  | 151.891   | 387.905   |
| NM_006580 | 8735.685  | 8270.987  | AK021690  | 1228.927  | 1017.244  | AK022371  | 1931.217  | 2487.012  |
| NM_001305 | 1368.461  | 1418.256  | AK001840  | 1441.516  | 1240.318  | D42045    | 1858.031  | 1808.005  |
| NM_013442 | 21965.33  | 29300.691 | AK021486  | 651.03    | 505.715   | AB007953  | 1085.809  | 1306.863  |
| BG611243  | 1238.005  | 1563.755  | AK025148  | 528.854   | 383.793   | NM_014002 | 4139.818  | 3737.229  |
| BI906766  | 1495.593  | 891.64    | AK026238  | 714.563   | 497.365   | NM_004197 | 6143.68   | 5012.53   |
| U60519    | 941.107   | 1432.36   | AK026694  | 699.762   | 613.007   | NM_004073 | 762.577   | 905.159   |
| AA282906  | 2922.385  | 2350.779  | AK025564  | 1836.628  | 1342.512  | NM_001278 | 2178.885  | 1985.175  |
| L02870    | 3266.244  | 2992.463  | AK026286  | 1543.602  | 931.427   | NM_019105 | 3106.118  | 3381.843  |
| BG755482  | 7034.371  | 13020.875 | AK026731  | 954.115   | 612.522   | NM_000294 | 2883.283  | 3122.965  |
| AI480307  | 3538.563  | 4126.643  | NM_004192 | 1636.427  | 2147.914  | NM_016249 | 1094.536  | 991.152   |
| X51420    | 2383.677  | 3839.196  | AK024160  | 1014.315  | 1248.679  | NM_006181 | 593.347   | 905.972   |
| D28235    | 630.782   | 4638.122  | AK025077  | 1622.55   | 2372.588  | NM_003796 | 9525.484  | 7599.922  |
| X51757    | 880.51    | 2245.74   | NM_006417 | 2626.817  | 3469.281  | NM_002973 | 2235.736  | 2485.016  |
| L24038    | 1268.303  | 2095.426  | L43350    | 1223.522  | 1418.303  | NM_004436 | 27908.189 | 24145.928 |
| NM_053056 | 4282.645  | 6320.581  | NM_020317 | 8417.85   | 11303.292 | NM_006580 | 6806.193  | 5694.246  |
| NM_002751 | 1601.316  | 1923.897  | AL080234  | 8797.299  | 11381.58  | NM_001305 | 2254.581  | 2514.252  |
| M55593    | 3776.272  | 5558.645  | AK027025  | 1302.041  | 1466.774  | NM_005082 | 454.881   | 697.467   |
| NM_017716 | 1051.918  | 1026.367  | AK025105  | 857.54    | 1212.014  | D17028    | 9420.965  | 9007.913  |
| M58603    | 3724.905  | 2699.47   | AK021675  | 1363.64   | 989.805   | NM_013442 | 13561.352 | 14466.321 |
| NM_003639 | 2814.032  | 1999.768  | AB002446  | 1486.152  | 970.681   | BG611243  | 913.614   | 1111.875  |
| NM_001549 | 535.82    | 285.514   | AF212220  | 2346.213  | 1410.579  | AI417481  | 324.469   | 487.977   |
| NM_000115 | 2485.99   | 1981.501  | AL137709  | 1228.9    | 1260.271  | BI906766  | 1163.807  | 1038.304  |

|           |           |           |           |           |           |           |           |           |
|-----------|-----------|-----------|-----------|-----------|-----------|-----------|-----------|-----------|
| AF308801  | 3527.269  | 3631.235  | AK023277  | 1235.175  | 752.62    | U60519    | 1040.593  | 1231.808  |
| NM_00731E | 50344.27  | 44874.789 | AK000425  | 1142.964  | 831.764   | AA282906  | 3479.956  | 3165.506  |
| NM_014874 | 1265.812  | 2747.32   | Z27200    | 2248.195  | 2525.56   | L02870    | 10173.525 | 9556.939  |
| NM_00576E | 18777.166 | 23526.656 | AF070571  | 5271.761  | 6566.889  | BG755482  | 6581.827  | 6846.523  |
| NM_00276E | 637.636   | 805.283   | AK023554  | 1204.44   | 1963.555  | AI480307  | 2859.818  | 2910.427  |
| NM_006324 | 6066.486  | 4072.623  | NM_003513 | 4552.652  | 6905.846  | X51420    | 1880.459  | 1936.747  |
| NM_01684E | 4415.447  | 3754.359  | AK024844  | 1036.439  | 1568.196  | D28235    | 453.557   | 611.334   |
| NM_000514 | 3167.592  | 3122.212  | AL049437  | 1058.719  | 1061.033  | X51757    | 481.833   | 454.555   |
| AL137432  | 1874.353  | 1773.604  | AF161427  | 58605.328 | 53184.691 | L24038    | 881.003   | 914.684   |
| NM_000957 | 1095.554  | 1109.854  | AK021715  | 9789.568  | 9176.287  | NM_05305E | 3666.549  | 4437.682  |
| NM_01904E | 2304.404  | 1856.894  | AK023248  | 1539.958  | 916.586   | NM_00618E | 971.744   | 666.785   |
| NM_00324C | 4677      | 5146.512  | NM_012404 | 21235.373 | 11302.864 | NM_002751 | 2227.369  | 1743.754  |
| NM_016564 | 29351.785 | 30991.473 | AF251190  | 928.269   | 502.695   | M55593    | 4147.036  | 4429.846  |
| AF279656  | 597.418   | 924.374   | AF130075  | 8905.555  | 6344.611  | NM_01771E | 783.905   | 878.58    |
| AK021660  | 442.02    | 887.525   | NM_005444 | 1572.275  | 1461.603  | M58603    | 2432.969  | 1879.824  |
| AB007933  | 25865.148 | 32901.383 | V00589    | 29369.184 | 23355.266 | NM_00363E | 1698.019  | 1949.988  |
| NM_00670E | 5740.89   | 8694.938  | AL390163  | 747.992   | 695.14    | NM_00154E | 523.576   | 530.893   |
| NM_00139E | 2422.929  | 2691.341  | NM_01857E | 1532.091  | 1117.881  | NM_000115 | 2587.917  | 2397.264  |
| NM_014474 | 2062.854  | 4543.185  | AK024838  | 633.665   | 115.967   | AF308801  | 2497.989  | 2798.327  |
| NM_00653E | 441.347   | 539.448   | AK000175  | 3220.934  | 2557.711  | NM_00731E | 50250.48  | 54962     |
| NM_001684 | 998.415   | 1131.139  | AL137736  | 4423.159  | 4467.108  | NM_014874 | 864.265   | 877.019   |
| NM_00080E | 420.84    | 253.234   | AF143870  | 986.083   | 868.397   | NM_00576E | 13718.866 | 17431.721 |
| NM_01631E | 6682.955  | 5023.132  | AK021897  | 9988.409  | 12617.183 | NM_00276E | 1263.949  | 1342.328  |
| NM_01330E | 420.818   | 317.445   | AK001051  | 1635.974  | 2061.046  | NM_006324 | 5569.813  | 6630.692  |
| NM_019891 | 1088.189  | 921.94    | NM_018317 | 481.431   | 645.784   | NM_01684E | 6176.09   | 8120.939  |
| AF038186  | 1597.324  | 2223.101  | AF086051  | 1138.769  | 1354.691  | NM_000514 | 5381.962  | 6946.828  |
| NM_016277 | 3595.422  | 6110.492  | AK026434  | 472.394   | 994.572   | AL137432  | 1866.71   | 2229.783  |
| NM_007247 | 3278.829  | 6017.39   | AK024356  | 1754.98   | 1806.315  | NM_000957 | 2979.171  | 2639.888  |
| NM_006554 | 4134.251  | 5024.574  | AL049370  | 1520.81   | 2529.941  | NM_01904E | 1572.603  | 1914.924  |
| X99962    | 5407.11   | 4737.799  | AL365410  | 11505.037 | 13973.973 | NM_00324C | 6315.803  | 7753.375  |
| AK023221  | 4614.706  | 3323.698  | D17082    | 22775.58  | 24211.664 | NM_016564 | 41209.582 | 42578.961 |
| NM_003664 | 4391.356  | 3519.578  | D16476    | 1185.195  | 428.801   | NM_00079E | 489.122   | 695.985   |
| NM_00242E | 2104.893  | 1997.508  | NM_00367E | 3141.562  | 2047.012  | AF279656  | 1205.588  | 1506.435  |
| AK027182  | 872.849   | 1197.271  | Z36823    | 2551.011  | 1939.987  | AK021660  | 755.069   | 958.724   |
| J03651    | 3714.646  | 3167.308  | AF147387  | 3894.509  | 2905.802  | AB007933  | 49033.684 | 58112.129 |
| U61738    | 2858.45   | 2333.731  | NM_012081 | 1452.767  | 1272.975  | NM_00670E | 3264.049  | 4762.247  |
| AJ132087  | 760.991   | 978.265   | AL137463  | 822.347   | 621.887   | NM_00139E | 6297.489  | 8378.391  |
| U92818    | 2000.655  | 2179.59   | AF085909  | 16565.684 | 13538.696 | NM_014474 | 1505.09   | 2263.996  |
| NM_00044E | 9064.759  | 8701.4    | AF090888  | 809.101   | 686.086   | NM_00653E | 531.496   | 608.412   |
| NM_002934 | 46729.117 | 48380.871 | AK027193  | 1199.278  | 851.758   | NM_001684 | 857.83    | 876.345   |
| AK023011  | 12853.117 | 13180.056 | AF086471  | 3331.321  | 1760.239  | NM_00080E | 605.188   | 598.941   |
| NM_01681E | 1221.596  | 1684.746  | NM_01845E | 6988.757  | 4698.244  | NM_01631E | 10033.197 | 11768.427 |
| L17325    | 1322.073  | 1813.502  | AF113018  | 858.041   | 640.245   | NM_01330E | 859.081   | 1048.58   |
| NM_01400E | 4380.456  | 3707.807  | AK021996  | 1514.825  | 1137.77   | NM_019891 | 1150.231  | 1705.107  |
| NM_004197 | 4243.046  | 3850.154  | AL049337  | 2853.887  | 1701.357  | AF038186  | 1299.003  | 1643.861  |
| NM_00407E | 586.332   | 477.057   | CY3Cy5    | 13615.189 | 2000.521  | NM_016277 | 2824.326  | 4208.87   |
| NM_00127E | 3132.148  | 2750.62   | U13697    | 3728.233  | 4631.478  | NM_007247 | 2300.096  | 3164.756  |
| NM_01910E | 2100.051  | 2110.672  | X75308    | 677.795   | 1144.746  | NM_006554 | 3277.019  | 4515.938  |
| NM_000294 | 2921.935  | 3368.972  | L02840    | 1863.781  | 1200.339  | X99962    | 5793.071  | 7290.602  |
| AJ272212  | 1643.72   | 1385.418  | BG569143  | 533.337   | 596.657   | AK023221  | 4807.323  | 6092.336  |
| NM_00162E | 18095.758 | 26535.779 | BG676364  | 5005.559  | 5254.222  | NM_003664 | 5035.484  | 5900.708  |
| NM_00213C | 24445.855 | 14534.018 | BG181154  | 1018.182  | 1154.194  | NM_00242E | 2312.891  | 2828.599  |
| NM_00546E | 5690.456  | 5420.155  | AA843679  | 4107.279  | 4344.685  | AK027182  | 947.238   | 1280.031  |

|           |           |           |           |           |           |           |           |           |
|-----------|-----------|-----------|-----------|-----------|-----------|-----------|-----------|-----------|
| NM_016361 | 2903.334  | 2681.237  | NM_004957 | 2782.022  | 2836.378  | J03651    | 4234.949  | 5005.159  |
| NM_00370E | 31803.125 | 18966.889 | NM_005252 | 1396.595  | 1538.571  | U61738    | 6340.11   | 7117.032  |
| NM_01434E | 5922.225  | 4733.63   | SR9       | 29486.762 | 6290.969  | AJ132087  | 786.248   | 1314.242  |
| NM_01821C | 1601.381  | 1514.149  | CY3Cy5    | 11565.455 | 1036.561  | U92818    | 2840.35   | 4102.217  |
| NM_00109E | 5027.416  | 4703.824  | U86813    | 733.699   | 1073.787  | NM_00044E | 11733.739 | 17359.393 |
| NM_016014 | 1285.513  | 1082.375  | D26070    | 7266.587  | 7548.717  | NM_002934 | 48442.449 | 61688.938 |
| NM_00019E | 229.507   | 203.236   | NM_00164E | 32644.492 | 42930.617 | AK023011  | 17365.613 | 20632.037 |
| NM_018327 | 352.65    | 465.095   | NM_00339E | 1059.828  | 1113.48   | NM_01681E | 1944.625  | 2861.149  |
| NM_017581 | 1582.46   | 1582.941  | NM_01519E | 998.676   | 1124.31   | L17325    | 2171.966  | 3025.258  |
| AA488804  | 6230.479  | 6888.13   | NM_00703E | 13276.725 | 16270.329 | NM_01400E | 4516.862  | 6273.71   |
| L29496    | 3703.302  | 2315.769  | AB019562  | 1345.444  | 1464.428  | NM_004197 | 6372.797  | 7967.554  |
| NM_00700E | 6687.724  | 4654.015  | AF036364  | 4042.516  | 5519.822  | NM_00407E | 1195.854  | 1593.343  |
| NM_012121 | 897.136   | 878.971   | NM_02020E | 2879.355  | 2909.703  | NM_00127E | 2289.144  | 3865.4    |
| NM_00325E | 3982.093  | 3438.837  | U20582    | 25691.303 | 32878.664 | NM_01910E | 3699.385  | 5867.473  |
| NM_01415E | 1859.951  | 1691.395  | NM_000337 | 1269.344  | 1215.011  | NM_000294 | 3020.057  | 4500.889  |
| AK026331  | 8375.701  | 5612.117  | NM_00207E | 3828.687  | 3770.667  | AJ272212  | 1675.123  | 2378.181  |
| M30773    | 1693.46   | 3507.428  | NM_00032E | 846.876   | 969.138   | NM_00162E | 29349.283 | 32180.135 |
| NM_01462E | 1994.372  | 1485.83   | AL122120  | 3114.31   | 2414.095  | NM_005677 | 3307.35   | 4184.179  |
| AL050114  | 1101.886  | 1039.381  | NM_017571 | 5588.986  | 3591.7    | AF229803  | 724.074   | 1110.23   |
| AK021492  | 2862.444  | 2248.375  | AB007946  | 580.302   | 673.878   | AF151810  | 471.022   | 611.628   |
| AK023794  | 12833.368 | 9164.231  | NM_00192E | 61945.992 | 59761.535 | NM_00213C | 22007.025 | 25829.662 |
| NM_01988E | 2977.44   | 2197.75   | NM_00639E | 829.441   | 744.862   | NM_00546E | 5433.025  | 6702.662  |
| AB033103  | 1284.359  | 1000.148  | NM_00105E | 11336.262 | 9510.279  | NM_016361 | 2799.288  | 3954.697  |
| NM_002907 | 899.647   | 631.929   | NM_01587E | 1326.76   | 1566.273  | NM_00370E | 46561.781 | 53926.32  |
| AK024098  | 691.638   | 705.731   | NM_002271 | 55444.066 | 61523.566 | NM_01434E | 6298.449  | 7900.34   |
| AK022371  | 1540.817  | 2374.719  | NM_018361 | 4895.154  | 5426.582  | AB040895  | 424.137   | 699.354   |
| D42045    | 2281.619  | 3968.925  | NM_01989E | 923.289   | 905.99    | NM_00109E | 6262.758  | 8085.321  |
| AB007953  | 981.469   | 1426.082  | AB040966  | 5155.819  | 6087.777  | NM_016014 | 1677.266  | 2611.409  |
| NM_01782C | 620.576   | 565.215   | NM_02013E | 5436.786  | 5934.103  | NM_00019E | 319.09    | 509.462   |
| NM_00184E | 1642.709  | 1307.081  | NM_016467 | 14143.24  | 13816.016 | NM_018327 | 845.935   | 1056.809  |
| NM_003734 | 5098.72   | 3307.668  | NM_00725E | 3930.303  | 3047.064  | NM_017581 | 2569.415  | 4015.772  |
| NM_01493E | 3264.981  | 2271.162  | NM_01910E | 1628.611  | 1856.76   | AA488804  | 9280.307  | 12824.392 |
| X99660    | 6439.512  | 4595.85   | L08436    | 900.919   | 1093.787  | L29496    | 3031.687  | 3445.276  |
| X03635    | 2361.097  | 1530.515  | AB033002  | 435.458   | 593.361   | NM_00092E | 943.487   | 1040.017  |
| X97671    | 503.652   | 768.426   | NM_00055E | 4585.169  | 4285.798  | NM_00700E | 5327.929  | 6954.131  |
| NM_00456C | 305.368   | 631.819   | NM_01417C | 3561.642  | 3331.016  | NM_012121 | 1265.389  | 1586.289  |
| NM_00561E | 4705.159  | 4293.065  | AF116652  | 32987.406 | 38821.02  | NM_00325E | 3919.795  | 5063.434  |
| NM_02053E | 4247.824  | 3409.407  | NM_00083E | 982.623   | 1249.665  | NM_01415E | 1462.594  | 1952.433  |
| NM_001894 | 5366.319  | 4350.459  | AK000271  | 1143.56   | 1091.766  | AK026331  | 9703.486  | 13229.69  |
| AK022884  | 442.981   | 532.296   | NM_01883E | 1344.66   | 1057.864  | M30773    | 1079.805  | 1930.113  |
| AF305072  | 348.358   | 483.072   | NM_003401 | 2466.84   | 2595.678  | NM_01633E | 8032.917  | 8203.559  |
| NM_00662C | 4040.419  | 3345.41   | AL137724  | 1596.873  | 1927.393  | AF113699  | 15029.421 | 16288.411 |
| NM_001397 | 422.202   | 451.455   | NM_00475E | 1900.757  | 1716.772  | AK001883  | 13820.134 | 16371.107 |
| NM_00477E | 4183.398  | 4311.502  | NM_00291E | 2533.61   | 2614.146  | NM_01462E | 1858.082  | 2413.963  |
| NM_003714 | 2315.129  | 2853.328  | AK022797  | 1154.479  | 1245.581  | AK025587  | 196.907   | 567.428   |
| AF024540  | 998.878   | 634.96    | NM_00737C | 2781.017  | 2517.964  | AL050114  | 988.991   | 1520.991  |
| NM_00218E | 1270.481  | 1029.313  | NM_006231 | 935.972   | 874.637   | AK021492  | 2488.552  | 3772.742  |
| U42977    | 2520.207  | 1958.911  | AK023471  | 1827.746  | 2325.599  | AK023794  | 15477.022 | 21526.76  |
| NM_002881 | 5736.124  | 3428.322  | AF044578  | 1926.497  | 2002.907  | NM_01988E | 2263.378  | 2935.63   |
| NM_00366E | 1821.306  | 1144.442  | NM_00194E | 2051.22   | 2748.817  | NM_00532E | 376.147   | 808.474   |
| NM_00328E | 5044.948  | 3832.342  | NM_001067 | 6561.157  | 5892.467  | AB033103  | 1852.039  | 2397.727  |
| NM_01824E | 331.666   | 238.804   | NM_00533E | 15418.503 | 19278.32  | NM_002907 | 745.274   | 978.119   |
| M83822    | 2446.281  | 3715.814  | J04474    | 8342.938  | 11525.525 | AK024098  | 1227.607  | 2114.116  |

|           |           |           |           |           |           |           |           |           |
|-----------|-----------|-----------|-----------|-----------|-----------|-----------|-----------|-----------|
| AK021437  | 1913.516  | 964.046   | NM_003761 | 44135.801 | 54698.309 | AK001116  | 394.009   | 857.596   |
| NM_003831 | 10459.924 | 5476.904  | NM_004726 | 397.731   | 544.489   | AK022371  | 2865.776  | 4343.206  |
| NM_001759 | 521.265   | 480.682   | NM_014011 | 6997.15   | 6319.286  | D42045    | 2514.636  | 3885.572  |
| AB007965  | 3818.624  | 2447.158  | AK025994  | 2032.814  | 2367.678  | AB007953  | 1872.783  | 2733.31   |
| NM_017649 | 868.907   | 864.499   | L29306    | 960.583   | 961.625   | NM_017820 | 377.462   | 966.466   |
| NM_000066 | 461.447   | 433.782   | NM_013989 | 2963.813  | 2377.296  | NM_001849 | 2500.846  | 3450.965  |
| NM_001196 | 10557.059 | 10524.357 | NM_001738 | 1557.459  | 1768.676  | NM_003734 | 5878.842  | 7656.451  |
| NM_016008 | 1139.885  | 841.246   | NM_002270 | 592.055   | 608.13    | NM_014935 | 7383.501  | 8919.594  |
| NM_017744 | 1003.112  | 953.89    | NM_020203 | 2442.505  | 2743.578  | X99660    | 14137.251 | 18588.473 |
| NM_001924 | 1102.41   | 1014.562  | L40992    | 315.936   | 459.643   | X03635    | 2795.796  | 3805.687  |
| NM_017705 | 7014.747  | 5745.472  | U20582    | 22254.281 | 30538.014 | X97671    | 556.115   | 827.548   |
| NM_001796 | 756.715   | 740.063   | NM_000337 | 1787.542  | 1842.59   | NM_004351 | 5788.668  | 7499.075  |
| AB040880  | 861.9     | 802.816   | NM_002079 | 4110.838  | 4557.445  | NM_004236 | 7098.086  | 10089.201 |
| NM_009587 | 8675.632  | 6046.094  | U13697    | 4690.34   | 4756.305  | AB011093  | 2739.526  | 3641.677  |
| AL133566  | 635.418   | 571.244   | L02840    | 2160.351  | 1410.997  | NM_002462 | 443.353   | 622.147   |
| M36118    | 1369.534  | 870.354   | BG569143  | 786.461   | 1325.348  | NM_004560 | 390.48    | 428.623   |
| NM_003399 | 8557.508  | 5405.069  | AA927528  | 1451.598  | 1891.858  | NM_005618 | 3487.051  | 3503.86   |
| NM_002630 | 846.21    | 787.018   | BG181154  | 838.752   | 988.889   | NM_020533 | 4891.254  | 4334.31   |
| AJ295149  | 17672.92  | 9974.665  | AA843679  | 4103.361  | 4685.565  | NM_001894 | 5388.069  | 5048.782  |
| NM_013438 | 3962.017  | 2414.991  | H68922    | 418.452   | 501.654   | NM_000614 | 460.655   | 469.626   |
| NM_005099 | 2526.356  | 2776.466  | NM_004957 | 3453.278  | 4071.231  | AK022884  | 338.226   | 422.935   |
| NM_014688 | 4921.917  | 5118.821  | NM_005252 | 1761.545  | 1948.077  | NM_006620 | 3640.447  | 3966.204  |
| AB037784  | 838.489   | 3410.882  | AF090906  | 1134.382  | 1109.9    | NM_001397 | 474.811   | 641.145   |
| AL359623  | 1192.125  | 602.176   | AB023219  | 3321.083  | 2838.317  | NM_005543 | 633.211   | 905.199   |
| AK026920  | 2039.04   | 2281.606  | NM_001928 | 59735.824 | 58726.254 | Y08770    | 297.587   | 645.972   |
| AL137255  | 730.2     | 1075.33   | U86813    | 477.575   | 567.094   | NM_004772 | 5988.92   | 5982.655  |
| NM_003370 | 14128.08  | 13202.346 | D26070    | 7311.748  | 7348.374  | NM_003714 | 3824.574  | 4153.508  |
| AB037715  | 1199.555  | 1272.759  | NM_001642 | 32645.752 | 39715.59  | AF024540  | 1126.777  | 979.408   |
| AF250924  | 4398.496  | 3205.605  | NM_003392 | 983.586   | 1204.221  | NM_002189 | 2030.845  | 2353.339  |
| D86979    | 386.575   | 237.685   | NM_015193 | 661.722   | 982.892   | U42977    | 1936.455  | 2928.993  |
| AF018081  | 15516.195 | 10179.365 | NM_007035 | 12543.599 | 15607.643 | NM_002881 | 5021.772  | 6418.663  |
| NM_020202 | 9580.482  | 6109.61   | AB019562  | 1630.415  | 1791.869  | NM_003666 | 3324.585  | 3504.859  |
| AK022889  | 16866.852 | 8173.076  | AF036364  | 3663.534  | 4255.022  | NM_003288 | 3679.814  | 5746.743  |
| X52357    | 29904.785 | 16080.707 | NM_001681 | 408.283   | 552.179   | NM_018242 | 571.327   | 1246.47   |
| AF211891  | 1028.926  | 912.58    | AK000271  | 860.699   | 1301.965  | M83822    | 1455.213  | 1651.006  |
| NM_005641 | 1577.03   | 930.427   | NM_000328 | 892.338   | 845.992   | NM_018434 | 1849.214  | 1704.555  |
| NM_001668 | 3297.791  | 2179.296  | AL122120  | 3146.015  | 2808.982  | NM_003914 | 3646.179  | 3707.252  |
| AK025362  | 1112.857  | 720.575   | NM_017571 | 5481.862  | 3583.492  | NM_020423 | 836.831   | 1053.502  |
| AK021776  | 2177.783  | 1385.853  | AB007946  | 721.558   | 631.88    | AK021437  | 1683.392  | 1265.556  |
| AK026042  | 1088.267  | 738.141   | NM_014011 | 6971.944  | 10549.617 | NM_003831 | 7581.964  | 6457.246  |
| NM_014233 | 10815.482 | 7988.444  | AK025994  | 2739.321  | 4183.166  | NM_001759 | 391.315   | 248.612   |
| NM_002137 | 47802.32  | 29429.369 | L29306    | 857.782   | 1583.34   | AB007965  | 3570.05   | 2618.928  |
| NM_002911 | 1854.206  | 1444.991  | NM_013989 | 3495.99   | 4652.21   | NM_017649 | 535.131   | 651.1     |
| U94386    | 766.447   | 431.336   | NM_001738 | 2113.051  | 2798.576  | NM_000066 | 552.837   | 578.626   |
| NM_016000 | 3868.872  | 1972.203  | NM_002270 | 691.103   | 1028.406  | NM_001196 | 7321.508  | 6811.055  |
| NM_006372 | 5533.006  | 3496.353  | NM_001055 | 17472.49  | 24901.832 | NM_016008 | 880.139   | 866.305   |
| NM_014150 | 655.803   | 542.078   | NM_015878 | 1348.094  | 2345.478  | NM_017744 | 1160.565  | 1016.882  |
| NM_006805 | 16597.662 | 14559.158 | NM_001217 | 627.005   | 895.898   | NM_001924 | 1264.068  | 1414.295  |
| AF132027  | 14907.802 | 30298.533 | NM_019893 | 1020.113  | 1284.713  | NM_017705 | 7639.293  | 9049.152  |
| NM_004681 | 2696.25   | 2313.217  | AB040966  | 5883.761  | 7941.181  | NM_001796 | 1616.524  | 1445.6    |
| AB033096  | 6786.846  | 4254.654  | NM_020132 | 5223.501  | 6986.914  | AB040880  | 952.229   | 804.677   |
| NM_014886 | 907.268   | 737.097   | NM_016467 | 15468.139 | 18273.875 | NM_009587 | 11424.557 | 9847.654  |
| L31408    | 7273.081  | 4689.119  | NM_007253 | 4670.293  | 4328.596  | AL133566  | 572.691   | 421.277   |



|           |           |           |           |           |           |           |           |           |
|-----------|-----------|-----------|-----------|-----------|-----------|-----------|-----------|-----------|
| NM_00154E | 6216.747  | 4054.71   | NM_01910E | 1822.963  | 2104.398  | M36118    | 3658.469  | 2584.515  |
| NM_00444E | 10318.18  | 6161.009  | L08436    | 1498.832  | 1766.062  | NM_00339E | 8389.977  | 7212.856  |
| AF070625  | 1604.495  | 1180.054  | AB033002  | 472.456   | 601.584   | NM_00263C | 671.149   | 729.497   |
| AL365512  | 1332.076  | 845.316   | NM_00055E | 3457.483  | 3396.714  | AJ295149  | 23831.799 | 20766.188 |
| AK001740  | 2869.48   | 2229.474  | NM_00419E | 535.914   | 587.842   | NM_01343E | 3290.434  | 3226.933  |
| AF131793  | 612.64    | 673.182   | NM_01417C | 3174.314  | 2538.137  | NM_00509E | 1400.223  | 1539.158  |
| NM_00591E | 21578.297 | 12705.443 | AF116652  | 32851.449 | 28984.713 | NM_01468E | 4936.305  | 4127.634  |
| J02625    | 6176.987  | 4178.953  | NM_00083E | 1157.614  | 879.882   | AB037784  | 208.287   | 419.396   |
| Y17175    | 62674.934 | 61419.047 | NM_004957 | 4682.306  | 6095.007  | AL359623  | 850.827   | 799.489   |
| NM_00454E | 14439.586 | 8166.581  | NM_00525E | 2376.648  | 3298.495  | AK026920  | 2511.86   | 1990.7    |
| NM_00533E | 14614.255 | 8500.813  | AF090906  | 1498.49   | 2007.848  | AL137255  | 897.132   | 874.475   |
| AK026161  | 1472.454  | 913.722   | AB023219  | 3807.469  | 4415.521  | NM_00337C | 13130.271 | 11726.084 |
| NM_00455E | 26545.029 | 13889.397 | NM_01414E | 476.599   | 778.578   | AB037715  | 2507.27   | 2159.334  |
| D63484    | 1473.657  | 689.942   | NM_01883E | 1440.183  | 1823.582  | AF250924  | 7109.876  | 5486.821  |
| AK026745  | 2169.337  | 989.065   | NM_003401 | 3079.595  | 3692.837  | AB023230  | 490.504   | 488.268   |
| AL157440  | 1782.052  | 1101.304  | AL137724  | 1467.834  | 2328.662  | AF018081  | 17280.051 | 12337.012 |
| NM_01642E | 4331.985  | 3122.475  | NM_00475E | 2505.335  | 3408.932  | NM_02020E | 10300.463 | 7485.47   |
| AB040975  | 1415.831  | 1312.466  | NM_00291E | 2627.238  | 4260.021  | AK022889  | 9475.744  | 6097.994  |
| NM_00511E | 3508.688  | 2048.219  | AK022797  | 1209.259  | 1829.13   | X52357    | 24388.789 | 13301.132 |
| NM_00316E | 7681.905  | 6148.64   | NM_00737C | 3311.581  | 4407.756  | AF211891  | 688.727   | 471.417   |
| AK055844  | 494.44    | 428.069   | NM_006231 | 1246.177  | 1560.115  | NM_005641 | 543.809   | 343.326   |
| NM_01828E | 15721.718 | 9562.232  | AK023471  | 2450.21   | 4445.354  | NM_00166E | 2023.969  | 1460.38   |
| NM_00314E | 2521.84   | 1869.748  | AF044578  | 2385.426  | 3945.948  | AK025362  | 710.995   | 604.733   |
| X52342    | 310.937   | 234.754   | NM_00194E | 3675.802  | 5928.78   | AK021776  | 1399.113  | 1339.88   |
| NM_003131 | 10936.938 | 10027.543 | NM_001067 | 8370.547  | 10921.539 | AK026042  | 754.564   | 789.045   |
| NM_00523E | 1283.514  | 1174.02   | NM_014034 | 3952.8    | 4167.249  | NM_01423E | 11049.438 | 12535.604 |
| NM_01853E | 2601.432  | 1694.777  | NM_00533E | 16671.15  | 16596.617 | NM_00213E | 42246.402 | 43188.07  |
| NM_01334E | 844.674   | 754.661   | J04474    | 8216.019  | 7211.242  | NM_002911 | 1287.327  | 1047.731  |
| NM_017851 | 854.469   | 637.992   | NM_003761 | 43156.59  | 33796.156 | U94386    | 704.115   | 761.167   |
| AK026182  | 58072.238 | 54765.09  | NM_00472E | 799.318   | 624.439   | NM_00637E | 4107.609  | 3263.656  |
| AK025603  | 948.845   | 818.503   | NM_01519E | 1069.604  | 1537.455  | NM_01415C | 800.157   | 587.843   |
| NM_01608E | 10584.368 | 5765.32   | NM_00703E | 12283.901 | 20595.139 | NM_00680E | 17240.752 | 15191.612 |
| AK025768  | 4399.592  | 2876.652  | AF036364  | 4088.536  | 5889.628  | AF132027  | 12352.072 | 8749.35   |
| AL117502  | 1973.273  | 1627.139  | NM_02020E | 3308.351  | 4255.684  | NM_004681 | 2487.498  | 2128.377  |
| AK024637  | 419.713   | 333       | L40992    | 543.579   | 907.89    | AB033096  | 5363.84   | 4469.304  |
| NM_01334E | 434.156   | 419.968   | U20582    | 25940.033 | 43516.789 | NM_01488E | 778.264   | 620.76    |
| AL117454  | 8131.962  | 6654.819  | NM_000337 | 1705.599  | 1867.385  | L31408    | 6427.61   | 4312.56   |
| AF272890  | 3390.687  | 2609.286  | NM_00207E | 4434.198  | 6207.454  | NM_00154E | 5550.989  | 3626.022  |
| U00684    | 515.083   | 686.358   | U13697    | 5522.511  | 8288.237  | NM_00444E | 9958.01   | 6870.961  |
| NM_01645E | 3055.933  | 2397.004  | X75308    | 1245.054  | 1615.526  | AF070625  | 1996.898  | 1208.796  |
| AF086227  | 699.806   | 595.75    | Z34820    | 540.477   | 789.121   | AL365512  | 858.143   | 576.595   |
| AK026246  | 1194.151  | 1111.377  | L02840    | 2056.851  | 1901.713  | AK001740  | 2485.127  | 1520.588  |
| AF070524  | 337.626   | 321.806   | AA927528  | 1766.488  | 2510.755  | AF131793  | 515.899   | 389.471   |
| AF035281  | 853.627   | 867.703   | BG181154  | 1420.716  | 2014.411  | NM_00591E | 10913.663 | 6797.635  |
| AK026304  | 488.364   | 363.503   | AA843679  | 5196.035  | 6045.278  | J02625    | 5438.155  | 4258.299  |
| AL133446  | 1732.817  | 960.637   | H68922    | 745.839   | 998.485   | Y17175    | 56135.543 | 62766.883 |
| NM_00655E | 414.196   | 372.699   | NM_017571 | 6843.62   | 6274.703  | NM_00454E | 10363.026 | 11806.177 |
| U56251    | 826.68    | 1217.343  | AB007946  | 856.189   | 898.593   | NM_00533E | 10104.165 | 15758.856 |
| BC035667  | 685.959   | 537.809   | NM_00192E | 68828.539 | 69398.969 | AK026161  | 851.415   | 1282.238  |
| AL049277  | 1847.919  | 3175.889  | NM_00639E | 803.834   | 1027.155  | NM_00455E | 18927.275 | 17909.285 |
| AL117571  | 1116.1    | 984.315   | U86813    | 571.562   | 942.475   | D63484    | 1067.444  | 979.201   |
| L22263    | 340.673   | 253.425   | D26070    | 8188.993  | 11302.548 | AL157440  | 1059.432  | 886.678   |
| AF131814  | 1067.138  | 1089.411  | NM_00164E | 40644.004 | 59215.078 | NM_01642E | 3206.935  | 2578.638  |

|           |           |           |           |           |           |           |           |           |
|-----------|-----------|-----------|-----------|-----------|-----------|-----------|-----------|-----------|
| AL360144  | 1078.309  | 1002.052  | NM_001542 | 161.5     | 1118.103  | AB040975  | 1245.711  | 1341.064  |
| BC028617  | 1837.056  | 1649.919  | NM_003392 | 1099.03   | 1647.713  | NM_005119 | 3597.566  | 2197.791  |
| AF087999  | 613.6     | 504.171   | AB033002  | 626.404   | 932.853   | NM_00316E | 6174.217  | 4938.994  |
| NM_00374C | 2522.936  | 2571.31   | NM_00055E | 6241.987  | 7484.846  | AK055844  | 580.924   | 470.929   |
| AL050078  | 513.843   | 362.243   | NM_01417C | 4228.318  | 4959.413  | NM_01828E | 11534.111 | 10774.01  |
| NM_01427E | 1040.605  | 599.925   | AF116652  | 54868.375 | 53603.875 | NM_00314E | 2322.606  | 1890.993  |
| AF056438  | 866.133   | 681.356   | NM_00083E | 1462.803  | 1781.069  | NM_003131 | 9069.903  | 6846.23   |
| AF003737  | 8483.509  | 4690.351  | AK000271  | 1058.23   | 1742.729  | NM_00523E | 1617.282  | 1134.589  |
| AF009296  | 981.067   | 1106.268  | NM_005173 | 488.441   | 622.333   | NM_01853E | 1521.156  | 861.135   |
| AK021690  | 622.474   | 538.591   | NM_00183C | 410.752   | 865.307   | NM_01334E | 660.379   | 489.425   |
| AK001840  | 660.818   | 601.778   | NM_00032E | 238.749   | 1668.999  | NM_017851 | 638.609   | 376.887   |
| AK026238  | 343.208   | 290.614   | AL122120  | 4275.328  | 5420.554  | AK026182  | 54270.602 | 59160.277 |
| AK025564  | 1115.031  | 857.216   | NM_014034 | 4744.482  | 5985.783  | AK025603  | 769.524   | 1019.029  |
| AK026286  | 700.598   | 659.166   | NM_00533E | 18736.27  | 28454.164 | NM_01608E | 7859.415  | 10332.634 |
| AK026731  | 521.203   | 425.981   | J04474    | 10035.981 | 13135.358 | AL117502  | 1437.306  | 2134.724  |
| NM_004192 | 901.906   | 656.326   | NM_014011 | 8152.958  | 12309.568 | AK001846  | 799.545   | 854.169   |
| AK024160  | 729.965   | 577.756   | AK025994  | 3226.69   | 4007.076  | AF147300  | 394.804   | 342.594   |
| AK025077  | 1164.466  | 808.735   | L29306    | 1186.084  | 1535.439  | AK024108  | 580.659   | 563.646   |
| NM_006417 | 1134.542  | 740.863   | NM_01398E | 4130.609  | 4817.75   | AL110293  | 932.214   | 1061.167  |
| L43350    | 449.669   | 419.267   | NM_00173E | 1942.662  | 3124.131  | NM_01334E | 591.096   | 1060.224  |
| NM_020317 | 5192.769  | 3224.62   | NM_00227C | 404.732   | 886.646   | AL117454  | 11477.628 | 7377.021  |
| AL080234  | 5103.46   | 2725.601  | NM_00105E | 19348.754 | 26664.764 | AF272890  | 2670.177  | 2318.281  |
| AK027025  | 581.504   | 482.488   | NM_01587E | 1351.618  | 2169.276  | U00684    | 676.906   | 587.53    |
| AL137709  | 712.288   | 778.082   | NM_018361 | 5284.502  | 7323.331  | NM_01645E | 4902.249  | 3809.875  |
| AK023277  | 588.935   | 584.986   | NM_019893 | 1185.893  | 1543.886  | AF086227  | 1006.194  | 1117.728  |
| AK000425  | 505.317   | 341.522   | AB040966  | 6145.938  | 8606.48   | AK026246  | 1717.346  | 1679.869  |
| Z27200    | 1037.187  | 882.059   | NM_020132 | 6369.101  | 8287.629  | AF070524  | 440.161   | 395.509   |
| AF070571  | 3625.308  | 2355.708  | NM_016467 | 17338.084 | 26080.117 | AF035281  | 818.911   | 752.19    |
| AK023554  | 836.414   | 632.519   | NM_007253 | 5451.753  | 7019.787  | AK026304  | 498.333   | 334.07    |
| NM_003513 | 4891.178  | 2762.173  | NM_01910E | 2139.806  | 3380.176  | AL133446  | 1495.741  | 1024.545  |
| AK024844  | 654.17    | 552.755   | L08436    | 1210.264  | 1845.501  | AF147406  | 438.892   | 250.379   |
| AF161427  | 33523.16  | 18940.855 | NM_005607 | 2713.003  | 1998.097  | NM_006553 | 465.679   | 255.923   |
| AF130075  | 3541.111  | 2824.962  | NM_006761 | 49589.676 | 43180.813 | U56251    | 633.414   | 577.858   |
| NM_005444 | 774.897   | 641.906   | NM_014897 | 1434.225  | 913.963   | BC035667  | 787.126   | 873.192   |
| V00589    | 14525.197 | 14079.419 | NM_003453 | 8413.739  | 6000.442  | AL049277  | 1082.862  | 1712.504  |
| AL390163  | 385.864   | 428.532   | NM_01439C | 17319.217 | 16299.127 | AL049302  | 148.866   | 505.326   |
| NM_018572 | 974.467   | 1037.977  | NM_018143 | 695.146   | 947.062   | AL050043  | 1157.421  | 2306.129  |
| AK000175  | 1335.694  | 1441.844  | X78924    | 12503.93  | 12477.645 | AL117571  | 1076.745  | 1055.491  |
| AL137736  | 1870.131  | 2284.911  | NM_01325C | 1129.788  | 1994.62   | L22263    | 401.694   | 488.829   |
| AF143870  | 483.643   | 229.428   | AF090906  | 1928.988  | 2285.132  | AF131814  | 1008.364  | 959.297   |
| AK021897  | 8111.412  | 4710.492  | AB023219  | 4519.233  | 4866.611  | AL359600  | 417.682   | 542.381   |
| AK001051  | 1226.095  | 822.337   | NM_01414E | 689.624   | 1254.36   | AL360144  | 1339.338  | 1232.401  |
| AF086051  | 780.81    | 875.183   | NM_01883E | 1635.523  | 1999.717  | BC028617  | 1598.354  | 1887.995  |
| AK024356  | 918.837   | 783.763   | NM_003401 | 2978.515  | 4181.531  | AL117653  | 1125.515  | 2882.506  |
| AL049370  | 526.656   | 606.907   | NM_00475E | 3022.766  | 3869.764  | AF087999  | 419.352   | 491.806   |
| AL365410  | 7814.09   | 4009.734  | NM_002913 | 3213.031  | 4669.823  | NM_00374C | 2193.038  | 1518.161  |
| D17082    | 15920.854 | 8875.111  | AK022797  | 1664.143  | 1988.924  | AL050078  | 1700.469  | 1200.844  |
| Z36823    | 1267.345  | 990.903   | NM_00737C | 3378.84   | 4276.525  | AK021616  | 969.19    | 528.601   |
| AF147387  | 1112.295  | 1020.286  | NM_006231 | 1195.937  | 1790.287  | NM_01427E | 1420.159  | 855.907   |
| NM_012081 | 1040.974  | 1249.518  | AK023471  | 2831.953  | 4306.407  | AF056438  | 840.065   | 767.237   |
| AL137463  | 647.591   | 738.331   | AF044578  | 2975.547  | 3475.552  | AF003737  | 30009.037 | 22126.619 |
| AF085909  | 11165.041 | 11080.255 | NM_00194E | 2791.453  | 4046.071  | AF009296  | 679.725   | 705.999   |
| AF090888  | 506.784   | 956.415   | NM_001067 | 8163.764  | 9889.406  | AK001011  | 2715.734  | 3059.537  |

|           |           |           |           |           |           |           |           |           |
|-----------|-----------|-----------|-----------|-----------|-----------|-----------|-----------|-----------|
| AK027193  | 384.722   | 423.855   | AF063936  | 698.797   | 297.378   | AK021457  | 1173.731  | 1600.38   |
| AF086471  | 2319.208  | 1906.968  | AK025337  | 1483.413  | 1222.865  | AK021690  | 991.608   | 577.819   |
| NM_01845E | 4253.771  | 3329.785  | AB028984  | 684.726   | 509.314   | AK001840  | 974.504   | 735.256   |
| AF113018  | 524.854   | 499.821   | NM_005602 | 1740.692  | 1666.335  | AK021486  | 532.479   | 642.744   |
| AK021996  | 1206.249  | 1187.955  | NM_003573 | 7408.634  | 8405.818  | AK021740  | 487.976   | 682.715   |
| AL049337  | 1227.835  | 1498.178  | NM_000296 | 6963.5    | 5973.143  | AK025148  | 352.492   | 319.476   |
| CY3Cy5    | 7391.194  | 1016.544  | NM_012302 | 5529.589  | 4482.654  | AK026238  | 392.087   | 347.899   |
| AI660957  | 833.29    | 879.865   | NM_017422 | 7529.284  | 4654.216  | AK026694  | 365.376   | 534.047   |
| U13697    | 4483.981  | 5670.991  | NM_001393 | 385.993   | 415.737   | AK025564  | 1190.701  | 1431.022  |
| X75308    | 493.704   | 587.034   | NM_005879 | 1143.466  | 1225.373  | AK026286  | 863.518   | 1019.135  |
| U04270    | 6703.264  | 5933.617  | AF147790  | 1234.798  | 1359.777  | AK026731  | 568.302   | 599.869   |
| L02840    | 924.511   | 322.944   | NM_018969 | 946.543   | 1183.439  | NM_004192 | 1094.322  | 614.938   |
| AA629719  | 68019.773 | 67809.656 | NM_004112 | 3882.414  | 3752.536  | AK024160  | 483.741   | 323.167   |
| BG676364  | 7502.621  | 14318.249 | AY007233  | 505.615   | 913.865   | AK025077  | 872.295   | 632.03    |
| BG181154  | 1737.667  | 2669.578  | AK025592  | 5793.559  | 5654.917  | NM_006417 | 1831.387  | 1318.862  |
| AA843679  | 4359.147  | 7891.785  | NM_002659 | 2616.465  | 3220.896  | L43350    | 671.353   | 468.176   |
| H68922    | 424.396   | 1092.225  | NM_015686 | 534.088   | 849.147   | NM_020317 | 3650.646  | 2330.365  |
| NM_004957 | 2941.508  | 4505.206  | NM_004838 | 374.205   | 828.645   | AL080234  | 3595.706  | 2658.997  |
| NM_005252 | 1670.67   | 2044.924  | Z36776    | 3920.972  | 5348.428  | AK027025  | 876.405   | 930.624   |
| SR5       | 4443.91   | 2712.745  | AB029015  | 1699.367  | 2479.715  | AK021675  | 423.775   | 134.827   |
| SR7       | 6005.627  | 34574.523 | NM_006150 | 2848.128  | 2388.065  | AF212220  | 1402.12   | 1116.205  |
| SR9       | 27549.625 | 3306.494  | NM_020345 | 1094.168  | 908.203   | AK025010  | 387.948   | 244.664   |
| CY3Cy5    | 5634.963  | 701.832   | NM_003287 | 1133.065  | 1063.949  | AK023277  | 706.945   | 671.116   |
| NM_002930 | 528.411   | 523.768   | NM_012325 | 14843.713 | 12778.186 | AK000425  | 719.564   | 706.529   |
| NM_004380 | 10656.35  | 8883.672  | NM_014434 | 1512.419  | 1475.533  | Z27200    | 1269.872  | 651.55    |
| U86813    | 411.235   | 326.836   | NM_019607 | 7945.056  | 6321.676  | AF070571  | 2051.41   | 1056.511  |
| NM_004119 | 2718.153  | 2392.283  | U79260    | 18883.014 | 17801.463 | AK023554  | 602.427   | 392.809   |
| AY007378  | 1417.986  | 1198.925  | NM_001895 | 8189.528  | 9178.354  | NM_003513 | 2863.269  | 1968.609  |
| D26070    | 5574.969  | 3863.644  | NM_006447 | 3361.264  | 4023.193  | AK024844  | 474.548   | 388.779   |
| NM_001642 | 27065.014 | 18762.934 | AF119851  | 867.829   | 1049.503  | AL049437  | 285.797   | 162.239   |
| NM_001542 | 650.276   | 402.144   | NM_014129 | 9284.167  | 11971.053 | AK021715  | 3370.873  | 2636.527  |
| NM_003392 | 982.632   | 786.848   | D87455    | 3450.812  | 2689.651  | AK000315  | 3048.608  | 2778.572  |
| NM_000114 | 3591.488  | 5566.803  | AF080577  | 1698.114  | 1692.224  | AK023248  | 820.14    | 1036.822  |
| NM_005156 | 2386.437  | 3875.724  | L22005    | 6979.458  | 5369.412  | NM_012404 | 11467.269 | 9667.337  |
| NM_015193 | 687.156   | 868.032   | NM_012291 | 16287.462 | 13054.042 | AF251190  | 482.536   | 619.942   |
| NM_007035 | 13129.192 | 20601.23  | NM_013368 | 2717.977  | 2635.201  | AF130075  | 3083.713  | 1996.611  |
| AB019562  | 1510.819  | 2790.853  | NM_003807 | 15681.253 | 11132.189 | NM_005444 | 704.456   | 682.956   |
| NM_020203 | 2284.486  | 1568.129  | NM_001790 | 2161.142  | 2118.586  | V00589    | 21480.539 | 17646.207 |
| U20582    | 25107.582 | 22286.721 | NM_018243 | 4644.843  | 2999.486  | AL390163  | 538.554   | 168.243   |
| NM_000337 | 1237.312  | 1023.066  | NM_014939 | 5050.244  | 4815.497  | NM_018572 | 951.956   | 962.634   |
| NM_002079 | 3335.655  | 2399.699  | Y17866    | 961.548   | 913.802   | AL137736  | 1931.92   | 1646.112  |
| NM_001149 | 474.164   | 526.698   | AK024247  | 656.962   | 583.933   | AF143870  | 786.631   | 700.865   |
| NM_006808 | 27074.922 | 21172.104 | NM_000873 | 1419.88   | 1508.581  | AK021897  | 4498.873  | 2146.167  |
| NM_006634 | 1661.871  | 1228.834  | NM_002842 | 3394.494  | 2611.64   | AK001051  | 843.092   | 459.758   |
| NM_016465 | 1730.506  | 1593.076  | NM_012126 | 970.91    | 797.777   | AF086051  | 940.555   | 1802.662  |
| NM_013399 | 3086.215  | 2149.043  | AB033025  | 654.007   | 472.856   | AK024356  | 752.052   | 573.461   |
| NM_002410 | 943.165   | 770.967   | NM_004418 | 1665.296  | 1737.82   | AL049370  | 693.708   | 579.289   |
| AL122120  | 3190.264  | 2607.012  | NM_000917 | 16746.166 | 11133.721 | D17082    | 8727.279  | 6958.114  |
| NM_014684 | 1604.914  | 2280.844  | NM_005389 | 12567.9   | 9248.728  | D17252    | 23076.566 | 18544.953 |
| AK027247  | 2405.663  | 4346.191  | NM_014445 | 43224.73  | 33563.129 | D16476    | 620.904   | 642.85    |
| NM_002480 | 7208.495  | 14393.412 | AL832826  | 1621.129  | 2776.832  | NM_003673 | 1616.586  | 1306.583  |
| NM_017571 | 5106.997  | 4118.463  | NM_016123 | 1716.697  | 2635.862  | Z36823    | 997.548   | 883.522   |
| AB007946  | 381.255   | 923.868   | AB048365  | 1056.289  | 1062.236  | AF147387  | 2436.873  | 2545.302  |

|           |           |           |           |           |           |           |           |           |
|-----------|-----------|-----------|-----------|-----------|-----------|-----------|-----------|-----------|
| L03169    | 783.482   | 1529.339  | NM_000391 | 6521.323  | 6429.913  | NM_012081 | 1053.887  | 1269.134  |
| M81349    | 400.285   | 482.695   | AF229179  | 803.732   | 936.265   | AL137463  | 589.168   | 427.352   |
| NM_00105E | 13287.058 | 9841.285  | NM_014771 | 8931.913  | 8061.254  | AF085909  | 11624.413 | 11686.762 |
| NM_01587E | 969.986   | 725.791   | NM_00227E | 3322.801  | 2430.663  | AF090888  | 632.973   | 499.179   |
| NM_002271 | 54016.457 | 39778.945 | AK025215  | 10536.045 | 8731.722  | AK027193  | 860.448   | 681.953   |
| NM_018361 | 4003.337  | 3294.301  | BF569160  | 700.291   | 525.333   | AF086471  | 2489.424  | 2344.889  |
| NM_01989E | 695.042   | 468.332   | AK024625  | 889.855   | 804.608   | NM_01845E | 3864.832  | 3319      |
| AB040966  | 5413.114  | 6409.721  | NM_018131 | 2252.102  | 1735.546  | AF113018  | 630.907   | 610.961   |
| NM_02013E | 4767.962  | 3319.725  | NM_014834 | 504.28    | 737.636   | AK021996  | 992.181   | 803.956   |
| NM_016467 | 11915.745 | 10652.229 | NM_01763E | 29370.846 | 23575.787 | AL049337  | 2133.099  | 2583.451  |
| NM_00725E | 3711.457  | 3552.239  | NM_01246E | 1015.068  | 828.147   | CY3Cy5    | 3952.39   | 483.733   |
| NM_01910E | 1639.937  | 3281.603  | M27877    | 25978.861 | 20087.066 | U13697    | 1795.932  | 1596.643  |
| L08436    | 927.15    | 2048.736  | D70836    | 56956.723 | 46299.199 | U04270    | 5358.859  | 3972.599  |
| AB033002  | 349.898   | 637.379   | D16878    | 1189.702  | 1058.213  | L02840    | 1815.772  | 623.235   |
| NM_00055E | 3611.273  | 3758.203  | NM_01494E | 2647.648  | 2155.967  | AA629719  | 53250.004 | 44613.352 |
| NM_01417C | 3407.361  | 3904.909  | AK024392  | 3028.132  | 2151.221  | AA927528  | 935.31    | 1270.721  |
| AF116652  | 44771.297 | 48074.57  | NM_01326C | 1279.303  | 848.981   | X02152    | 56206.398 | 64630.023 |
| NM_00083E | 956.446   | 1388.856  | NM_01830C | 1457.578  | 1742.776  | BG676364  | 3245.459  | 2738.437  |
| AK000271  | 723.377   | 545.961   | NM_00487E | 3437.238  | 3938.882  | BG181154  | 458.104   | 521.721   |
| NM_01883E | 1300.893  | 896.617   | NM_018254 | 7854.493  | 6875.126  | AA843679  | 2902.163  | 2742.185  |
| NM_003401 | 2267.608  | 1659.709  | NM_01774E | 3730.463  | 3615.912  | H68922    | 285.017   | 527.51    |
| AL137724  | 1298.281  | 1153.375  | NM_01843E | 3848.425  | 3146.589  | NM_004957 | 2902.589  | 2734.623  |
| NM_00475E | 1538.277  | 1003.54   | NM_000937 | 558.773   | 587.548   | NM_00525E | 1656.283  | 1430.208  |
| NM_00291E | 2085.762  | 1952.657  | AB028451  | 923.606   | 955.008   | SR5       | 2495.955  | 1078.119  |
| AK022797  | 1340.534  | 2716.696  | AK024810  | 17246.998 | 12349.946 | SR7       | 3585.967  | 16336.371 |
| NM_00737C | 2642.453  | 2045.526  | AK022615  | 50474.449 | 42935.117 | SR9       | 15650.639 | 1678.144  |
| NM_006231 | 890.537   | 974.265   | NM_00404E | 8373.985  | 6112.638  | CY3Cy5    | 3586.572  | 414.606   |
| AK023471  | 1773.038  | 2531.848  | BM458096  | 19745.779 | 16739.789 | NM_00438C | 6143.797  | 4939.171  |
| AF044578  | 2332.957  | 3934.667  | NM_00562E | 10719.601 | 8942.878  | NM_00411E | 1304.129  | 901.348   |
| NM_00194E | 2938.333  | 4293.07   | D29958    | 20744.471 | 16793.744 | AY007378  | 727.693   | 492.137   |
| NM_001067 | 6634.113  | 8617.206  | NM_015971 | 15550.357 | 12056.889 | D26070    | 2614.105  | 1677.563  |
| NM_014034 | 3341.152  | 3334.502  | D17257    | 61055.191 | 56104.25  | NM_00164E | 14397.126 | 9564.772  |
| NM_00533E | 14238.93  | 15752.861 | AK000724  | 3215.984  | 2461.645  | NM_00154E | 313.315   | 235.265   |
| J04474    | 8045.313  | 8809.715  | NM_00372C | 14496.941 | 10155.394 | NM_00339E | 454.716   | 622.418   |
| NM_003761 | 39169.68  | 46208.359 | AF097159  | 1402.46   | 908.131   | NM_000501 | 35134.637 | 30676.314 |
| NM_014011 | 6410.403  | 6563.394  | NM_00391E | 1626.647  | 1378.5    | NM_000114 | 2961.962  | 3782.084  |
| AK025994  | 2239.729  | 2641.783  | NM_004807 | 1960.961  | 1492.569  | NM_00515E | 1306.252  | 1417.702  |
| L29306    | 813.03    | 805.636   | J03569    | 49910.25  | 49550.133 | NM_01519E | 807.885   | 866.148   |
| NM_01398E | 2575.454  | 1988.535  | NM_003115 | 11630.637 | 10480.414 | NM_00703E | 6288.678  | 4384.112  |
| NM_00173E | 1637.498  | 1266.559  | NM_000687 | 28232.813 | 36538.41  | AB019562  | 706.709   | 308.867   |
| NM_00227C | 466.79    | 274.773   | NM_01820C | 2039.237  | 1441.179  | AF036364  | 1614.729  | 964.482   |
| NM_02020E | 2214.327  | 1953.514  | NM_01483E | 2497.913  | 2377.837  | AK022847  | 1512.373  | 775.804   |
| L40992    | 695.776   | 535.325   | NM_00721E | 3177.196  | 2227.905  | NM_02020E | 1871.839  | 935.588   |
| U20582    | 27214.094 | 24047.941 | AF005067  | 2612.009  | 2412.981  | U20582    | 13021.519 | 13048.093 |
| NM_000337 | 1542.576  | 1651.483  | NM_00571C | 12575.562 | 9139.145  | NM_000337 | 808.362   | 817.584   |
| U13697    | 4563.241  | 6777.29   | AF252284  | 2411.486  | 2068.803  | NM_00207E | 2097.661  | 1610.896  |
| L02840    | 1743.828  | 2076.911  | NM_01493C | 1433.492  | 904.399   | NM_00680E | 10255.117 | 6922.216  |
| BG569143  | 565.109   | 927.328   | NM_00153C | 1988.827  | 1658.825  | NM_006634 | 665.547   | 566.18    |
| X02152    | 60645.355 | 65825.156 | U80232    | 15896.055 | 8868.435  | NM_01646E | 857.182   | 707.778   |
| BG676364  | 5159.489  | 5700.78   | AF086526  | 998.441   | 403.736   | NM_00032E | 223.654   | 255.174   |
| BG181154  | 1456.323  | 2717.696  | AK025788  | 2776.475  | 1732.584  | NM_01339E | 1722.066  | 1185.321  |
| NM_004957 | 3498.023  | 3282.151  | AF086164  | 2074.099  | 1432.43   | AL122120  | 1210.622  | 767.935   |
| NM_00525E | 1638.615  | 2963.399  | AK025577  | 2707.355  | 1782.678  | NM_014684 | 691.303   | 506.647   |

|           |           |           |           |           |           |           |           |           |
|-----------|-----------|-----------|-----------|-----------|-----------|-----------|-----------|-----------|
| AF090906  | 773.349   | 600.554   | AK000216  | 4014.628  | 2687.283  | AK027247  | 608.062   | 784.087   |
| AB023219  | 3281.524  | 1991.185  | AK023440  | 1402.394  | 1032.261  | NM_00248C | 3123.705  | 2580.683  |
| NM_00192E | 54753.215 | 36343.988 | AB033041  | 14271.629 | 11153.456 | NM_017571 | 2643.468  | 2002.318  |
| NM_01896E | 4003.084  | 4434.28   | NM_014894 | 63498.746 | 55328.559 | L03169    | 459.271   | 273.944   |
| NM_00293C | 510.487   | 830.475   | AY007155  | 2551.824  | 2171.853  | NM_00192E | 26723.66  | 10192.826 |
| NM_00438C | 11742.975 | 14470.977 | AK027160  | 8719.165  | 3871.284  | NM_01896E | 2133.254  | 2039.156  |
| NM_004119 | 2825.803  | 3285.441  | AL359211  | 570.693   | 615.239   | NM_00018E | 5409.373  | 7899.215  |
| AY007378  | 1556.719  | 2862.053  | AF070526  | 698.918   | 538.211   | Y00816    | 837.852   | 1585.63   |
| D26070    | 6921.862  | 12898.331 | U79264    | 3722.734  | 2402.705  | NM_00451I | 3877.645  | 5819.192  |
| NM_00164I | 32676.158 | 51235.352 | NM_01569C | 7204.608  | 4676.883  | NM_00105E | 9279.962  | 8968.528  |
| NM_00339I | 855.118   | 888.201   | AK023619  | 732.491   | 240.646   | NM_01587E | 256.938   | 256.14    |
| NM_00050I | 17467.975 | 25718.314 | AF070530  | 19247.996 | 15100.238 | NM_00227I | 30463.021 | 19180.338 |
| NM_00703E | 11892.803 | 13212.884 | NM_00642C | 2066.052  | 1463.14   | NM_01836I | 1419.706  | 898.351   |
| AB019562  | 1195.876  | 1388.325  | AF131855  | 1853.339  | 1326.075  | NM_01989I | 324.986   | 213.881   |
| AF036364  | 3381.63   | 3146.068  | AF086046  | 6119.634  | 4074.678  | AB040966  | 2008.278  | 1266.683  |
| AK000271  | 995.336   | 944.669   | AK024962  | 1373.19   | 898.286   | NM_02013I | 2431.981  | 1308.736  |
| NM_001149 | 396.719   | 563.235   | AK022164  | 987.502   | 336.297   | NM_016467 | 6043.364  | 3525.344  |
| NM_00680E | 29329.303 | 35253.547 | AK025135  | 8301.64   | 5745.449  | NM_00725I | 2362.397  | 1316.694  |
| NM_006634 | 1737.078  | 3153.852  | NM_01792C | 3671.481  | 2829.438  | NM_01910E | 1065.014  | 2759.435  |
| NM_01646E | 2160.236  | 4509.45   | AY007145  | 1788.005  | 1227.464  | L08436    | 497.769   | 1064.127  |
| NM_00032E | 476.514   | 403.618   | AK021573  | 795.607   | 424.288   | AB033002  | 263.386   | 698.951   |
| NM_01339E | 3137.935  | 2597.552  | D38549    | 4511.755  | 3620.449  | NM_00055E | 3728.769  | 6868.71   |
| NM_00241C | 775.355   | 596.749   | AK024780  | 1397.278  | 1134.553  | NM_01417C | 1518.622  | 741.644   |
| AL122120  | 3644.714  | 2316.165  | AF085947  | 929.289   | 998.733   | AF116652  | 36509.684 | 12940.817 |
| NM_014684 | 1782.204  | 1923.442  | AF086000  | 680.003   | 645.861   | NM_00083E | 359.952   | 221.049   |
| AK027247  | 961.329   | 1955.397  | AK022123  | 691.402   | 668.15    | AK000271  | 390.509   | 310.118   |
| NM_00248C | 5595.776  | 7198.687  | U10510    | 8005.141  | 5338.624  | NM_01883E | 591.794   | 511.499   |
| NM_017571 | 5006.198  | 4609.687  | Z36818    | 838.042   | 493.996   | NM_00340I | 957.656   | 824.593   |
| AB007946  | 412.887   | 385.024   | Z36842    | 1138.204  | 710.658   | AL137724  | 723.33    | 422.162   |
| L03169    | 877.815   | 1012.602  | AF086137  | 761.298   | 427.161   | NM_00475E | 1068.139  | 415.802   |
| NM_014011 | 5708.417  | 3762.796  | AF086155  | 1643.815  | 1073.4    | NM_00291I | 787.417   | 530.744   |
| AK025994  | 2204.797  | 1550.35   | NM_01415C | 5816.499  | 2956.427  | AK022797  | 481.251   | 302.059   |
| L29306    | 831.808   | 578.066   | AK021795  | 914.29    | 838.126   | NM_00737C | 1180.994  | 629.712   |
| NM_01398E | 2057.51   | 1727.88   | AL162042  | 2178.961  | 2961.446  | NM_00623I | 337.989   | 324.725   |
| NM_00173E | 1127.952  | 1531.946  | AK026131  | 914.285   | 818.994   | AK023471  | 956.174   | 582.553   |
| NM_00105E | 11225.835 | 8649.096  | AK023312  | 1705.548  | 1821.631  | AF044578  | 1281.949  | 1413.146  |
| NM_01587E | 454.593   | 710.671   | AK022483  | 876.682   | 837.274   | NM_00194E | 875.232   | 1186.065  |
| NM_00227I | 51066.887 | 60776.383 | AL133570  | 1893.559  | 1645.889  | NM_001067 | 2956.336  | 2483.296  |
| NM_01836I | 4483.503  | 8596.653  | AK022678  | 1009.51   | 471.21    | NM_014034 | 1788.066  | 2116.896  |
| NM_01989I | 1055.061  | 1651.016  | AK023473  | 940.862   | 436.637   | NM_00533E | 7235.948  | 3287.633  |
| AB040966  | 4609.943  | 3519.859  | AK023835  | 1933.883  | 1340.767  | J04474    | 3367.578  | 1240.124  |
| NM_02013I | 4542.504  | 3495.531  | AK023012  | 1017.408  | 1086.649  | NM_00376I | 19213.117 | 7441.037  |
| NM_016467 | 12435.575 | 10513.519 | AK023906  | 4305.408  | 2693.279  | NM_014011 | 2996.325  | 2163.814  |
| NM_00725I | 3145.668  | 2731.515  | NM_01240C | 2103.872  | 1801.214  | AK025994  | 1191.719  | 898.783   |
| NM_01910E | 1289.281  | 1837.234  | AK021708  | 985.388   | 556.417   | L29306    | 319.754   | 216.058   |
| L08436    | 916.628   | 1638.51   | AL050205  | 6721.64   | 5107.95   | NM_01398E | 2156.624  | 1492.992  |
| AB033002  | 480.836   | 1174.714  | AK023947  | 835.014   | 651.16    | NM_00173E | 784.133   | 719.249   |
| NM_00055E | 3432.867  | 2443.892  | NM_00569I | 1904.51   | 1539.844  | NM_02020I | 1974.609  | 1768.402  |
| NM_01417C | 2905.432  | 2035.964  | AK023814  | 1094.588  | 1053.786  | U20582    | 12999.114 | 13462.324 |
| AF116652  | 31780.262 | 26459.051 | AF130063  | 616.266   | 616.437   | NM_000337 | 657.92    | 453.102   |
| NM_00083E | 901.324   | 879.184   | AF086528  | 728.966   | 950.563   | NM_00207E | 1623.029  | 1283.412  |
| NM_004957 | 2461.533  | 1851.788  | AL162043  | 703.462   | 591.758   | U13697    | 1706.976  | 1204.104  |
| NM_00525I | 1195.448  | 1061.604  | AF251187  | 787.015   | 457.347   | U04270    | 6411.287  | 4646.489  |

|           |           |           |           |           |           |           |           |           |
|-----------|-----------|-----------|-----------|-----------|-----------|-----------|-----------|-----------|
| AF090906  | 877.367   | 837.701   | NM_006543 | 1292.363  | 1053.341  | L02840    | 1821.614  | 973.637   |
| AB023219  | 2593.452  | 1560.147  | AK024171  | 612.13    | 412.15    | AA629719  | 56905.617 | 49818.617 |
| NM_018835 | 758.485   | 486.22    | AK023018  | 1330.685  | 580.075   | AA927528  | 535.236   | 550.937   |
| NM_003401 | 1848.897  | 2577.373  | AK022672  | 1752.805  | 1308.919  | X02152    | 56304.07  | 42376.969 |
| AL137724  | 1231.156  | 1581.935  | AK023870  | 1391.831  | 996.145   | BG676364  | 3314.878  | 1759.11   |
| NM_004755 | 1865.371  | 2474.932  | AK021599  | 1568.141  | 995.828   | BG181154  | 431.351   | 224.779   |
| NM_002913 | 2434.253  | 3112.767  | AK024263  | 1296.916  | 1018.482  | AA843679  | 2576.322  | 1252.209  |
| AK022797  | 1298.633  | 684.855   | NM_016613 | 2910.919  | 2328.59   | NM_004957 | 3005.614  | 3029.36   |
| NM_007370 | 2945.499  | 2002.121  | AF086414  | 2162.893  | 1878.749  | NM_005252 | 1446.613  | 973.973   |
| NM_006231 | 760.783   | 805.064   | AJ012490  | 8123.01   | 5608.725  | AF090906  | 957.458   | 1211.462  |
| AK023471  | 2012.757  | 2222.566  | U84516    | 20064.141 | 13870.741 | AB023219  | 1833.803  | 1683.628  |
| AF044578  | 1988.821  | 1762.993  | AL049270  | 1547.307  | 979.373   | NM_001925 | 35995.332 | 28840.875 |
| NM_001945 | 2347.81   | 2478.475  | U88834    | 3748.915  | 3229.157  | NM_006395 | 222.466   | 334.377   |
| NM_001067 | 7837.03   | 16723.145 | AK023564  | 2999.366  | 2758.945  | NM_018965 | 1877.828  | 2200.623  |
| NM_014034 | 3086.939  | 2030.083  | NM_003533 | 1829.271  | 2063.45   | NM_000185 | 3949.508  | 2940.313  |
| NM_005335 | 13422.441 | 9574.346  | AL157478  | 585.599   | 559.359   | Y00816    | 535.042   | 554.641   |
| J04474    | 7188.307  | 5006.64   | AK023726  | 3094.12   | 2296.472  | NM_004512 | 3731.797  | 2879.417  |
| NM_003761 | 36431.688 | 32467.627 | AK024906  | 839.908   | 457.178   | NM_004380 | 7817.803  | 6925.127  |
| NM_015193 | 573.925   | 470.52    | AF131836  | 1565.933  | 1279.608  | U86813    | 382.012   | 345.162   |
| NM_007035 | 9626.066  | 7552.969  | AF275804  | 26549.547 | 19568.475 | NM_004119 | 1418.985  | 1140.153  |
| AB019562  | 980.146   | 588.971   | AL137488  | 1439.089  | 1165.908  | AY007378  | 944.738   | 799.955   |
| AF036364  | 2452.221  | 2181.147  | AL049447  | 45431.938 | 30953.938 | D26070    | 3313.225  | 3034.497  |
| AK022847  | 1597.047  | 1039.787  | NM_020527 | 2591.048  | 1751.274  | NM_001642 | 16516.201 | 15968.683 |
| NM_020203 | 1950.731  | 1607.133  | AB020637  | 1079.234  | 559.054   | NM_001542 | 485.037   | 371.19    |
| U20582    | 21377.482 | 33692.863 | NM_005286 | 3305.797  | 1943.711  | NM_003392 | 449.743   | 497.6     |
| NM_000337 | 1030.546  | 3013.254  | AK024365  | 4109.776  | 2691.247  | NM_000501 | 32375.781 | 18537.295 |
| NM_002075 | 2845.382  | 5143.543  | AJ251759  | 1248.12   | 858.232   | X98834    | 1785.211  | 3303.876  |
| U13697    | 3146.784  | 4236.48   | AK024371  | 1785.417  | 1457.959  | NM_007035 | 3315.003  | 7572.258  |
| Z34820    | 843.991   | 1043.105  | NM_005454 | 1014.164  | 997.523   | AB019562  | 1026.165  | 2150.334  |
| L02840    | 1484.515  | 1011.267  | AB019569  | 66274.906 | 51465.969 | AF036364  | 2455.431  | 5898.197  |
| BG569143  | 718.962   | 1332.438  | NM_001889 | 5013.459  | 3164.89   | AK022847  | 2128.204  | 4884.021  |
| AA927528  | 1314.606  | 2250.457  | NM_004999 | 1985.149  | 1654.554  | AK000271  | 494.465   | 562.507   |
| X02152    | 59106.102 | 63890.988 | X89668    | 16774.408 | 15631.869 | NM_006805 | 12973.879 | 10380.972 |
| BG676364  | 5006.219  | 3421.005  | NM_004455 | 9211.519  | 8206.215  | NM_006634 | 678.678   | 511.911   |
| BG181154  | 826.5     | 587.536   | NM_006901 | 2333.801  | 2084.696  | NM_016465 | 1281.198  | 1330.909  |
| AA843679  | 3731.255  | 4786.075  | NM_018530 | 5388.056  | 3911.895  | NM_000325 | 474.267   | 224.966   |
| H68922    | 565.92    | 1052.478  | AJ003145  | 684.04    | 826.76    | NM_013395 | 1680.066  | 1517.244  |
| NM_017571 | 3249.792  | 1057.942  | AK022855  | 9106.268  | 10640.169 | NM_002410 | 291.2     | 294.728   |
| L03169    | 402.158   | 393.817   | AL050102  | 1206.915  | 1040.666  | AL122120  | 1322.056  | 783.533   |
| NM_001925 | 50325.57  | 33206.262 | AF305686  | 2194.246  | 1716.091  | NM_014684 | 767.211   | 1194.434  |
| NM_006395 | 386.612   | 476.259   | AF085832  | 1382.834  | 1209.572  | NM_002480 | 4105.498  | 7816.355  |
| NM_018965 | 3195.856  | 5587.163  | AK025981  | 1334.89   | 816.733   | NM_017571 | 3139.466  | 4936.061  |
| NM_000185 | 4131.813  | 7864.893  | AF113212  | 760.343   | 557.025   | L03169    | 581.505   | 1325.065  |
| Y00816    | 957.5     | 1972.914  | AF086266  | 1188.603  | 900.81    | NM_014011 | 3188.351  | 3748.195  |
| NM_004512 | 2640.014  | 2812.67   | AF086252  | 1455.259  | 1092.841  | AK025994  | 1247.668  | 1504.198  |
| NM_002930 | 411.438   | 501.71    | AK026703  | 2343.898  | 1705.376  | L29306    | 405.066   | 474.016   |
| NM_004380 | 9012.63   | 5305.913  | NM_017866 | 5175.039  | 2997.009  | NM_013985 | 1921.022  | 2043.214  |
| NM_004119 | 2187.622  | 1750.866  | AJ131244  | 802.469   | 460.03    | NM_001735 | 806.509   | 929.848   |
| AY007378  | 1348.373  | 1388.57   | NM_003536 | 1495.724  | 1154.157  | NM_001055 | 10061.503 | 10769.572 |
| D26070    | 6136.642  | 6271.732  | AF116707  | 976.914   | 720.972   | NM_015875 | 360.387   | 326.264   |
| NM_001642 | 29715.693 | 30281.779 | U90910    | 3704.117  | 2358.358  | NM_002271 | 32533.363 | 25249.533 |
| NM_001542 | 811.305   | 860.936   | AK025765  | 1060.331  | 696.716   | NM_018361 | 1985.957  | 1720.4    |
| NM_003392 | 1026.018  | 1316.661  | CY3Cy5    | 5984.516  | 625.601   | NM_019893 | 347.555   | 400.922   |

|           |           |           |           |           |           |           |           |           |
|-----------|-----------|-----------|-----------|-----------|-----------|-----------|-----------|-----------|
| NM_017459 | 381.227   | 333.29    | AA143087  | 8514.675  | 4507.161  | AB040966  | 2718.748  | 2839.531  |
| NM_000501 | 22603.865 | 16150.214 | U25804    | 5947.251  | 3847.74   | NM_020132 | 2892.684  | 3367.302  |
| NM_005156 | 1912.356  | 1869.975  | BI870965  | 2587.615  | 1432.324  | NM_016467 | 6515.419  | 7539.576  |
| NM_000558 | 2486.636  | 1577.547  | NM_001903 | 12265.019 | 6778.948  | NM_007253 | 2523.13   | 2460.219  |
| NM_014170 | 1173.556  | 778.029   | BI835536  | 10437.151 | 5094.872  | NM_019106 | 892.493   | 2064.456  |
| AF116652  | 33669.785 | 19900.098 | BF205051  | 3936.991  | 1565.096  | L08436    | 500.275   | 1010.261  |
| AK000271  | 547.175   | 1117.296  | X02761    | 1645.647  | 494.541   | AB033002  | 299.383   | 671.598   |
| NM_006808 | 26255.461 | 21173.787 | M91463    | 1740.417  | 806.237   | NM_000558 | 3808.321  | 5598.226  |
| NM_006634 | 1548.874  | 1158.069  | J03060    | 2885.823  | 1169.753  | NM_014170 | 1690.546  | 2834.153  |
| NM_016465 | 2028.266  | 1940.775  | NM_003743 | 1553.433  | 776.43    | AF116652  | 43130.863 | 58331.352 |
| NM_000328 | 868.972   | 967.764   | AA829383  | 5350.166  | 4261.185  | NM_000835 | 590.927   | 904.12    |
| AL122120  | 2676.665  | 1428.011  | SB        | 832.706   | 996.434   | NM_004957 | 3158.306  | 4203.116  |
| NM_002480 | 5088.6    | 3565.827  | SR10      | 38863.113 | 15360.35  | NM_005252 | 1326.058  | 1636.842  |
| NM_014034 | 918.471   | 446.621   | CY3Cy5    | 5008.093  | 342.219   | AF090906  | 687.582   | 1078.745  |
| NM_005335 | 6486.371  | 2951.643  | NM_018842 | 773.344   | 605.147   | AB023219  | 1684.847  | 1546.921  |
| J04474    | 2860.351  | 1887.181  | NM_005902 | 4168.426  | 3748.075  | NM_018835 | 646.816   | 1094.308  |
| NM_003761 | 22041.367 | 10957.645 | NM_002850 | 69265.055 | 64827.461 | NM_003401 | 1437.747  | 2236.474  |
| NM_004726 | 864.962   | 698.622   | NM_005903 | 1473.25   | 404.976   | AL137724  | 942.346   | 1379.587  |
| NM_014011 | 2824.297  | 2191.627  | NM_000861 | 1125.747  | 273.478   | NM_004758 | 1685.495  | 1860.062  |
| L29306    | 571.182   | 1836.237  | NM_003873 | 724.417   | 695.748   | NM_002913 | 1168.699  | 1977.392  |
| NM_013989 | 1761.38   | 2568.102  | AB001451  | 7363.919  | 11023.168 | AK022797  | 795.241   | 1340.894  |
| NM_001738 | 540.697   | 1112.189  | Y16132    | 11780.199 | 13898.785 | NM_007370 | 1861.707  | 2387.903  |
| NM_001055 | 10702.219 | 7764.438  | NM_002521 | 983.24    | 1885.211  | NM_006231 | 524.243   | 479.2     |
| NM_015878 | 801.819   | 355.585   | NM_001150 | 3245.205  | 5084.336  | AK023471  | 1353.172  | 1348.067  |
| NM_002271 | 51239.406 | 48600.672 | NM_003225 | 1275.693  | 1620.109  | AF044578  | 1331.845  | 2061.572  |
| NM_018361 | 3585.982  | 4235.032  | NM_000096 | 1906.571  | 2306.906  | NM_001948 | 1019.149  | 1982.296  |
| NM_019893 | 965.141   | 950.213   | NM_019045 | 1605.185  | 1861.116  | NM_001067 | 3562.644  | 4778.975  |
| AB040966  | 5706.093  | 7005.187  | NM_006380 | 2184.304  | 1876.977  | NM_014034 | 1742.697  | 2848.346  |
| NM_020132 | 5145.524  | 5983.377  | AB020710  | 2093.213  | 1435.977  | NM_005335 | 8692.741  | 15372.404 |
| NM_016467 | 11543.158 | 6981.698  | NM_016174 | 6592.573  | 3599.725  | J04474    | 4250.411  | 7234.251  |
| NM_007253 | 3230.773  | 1764.38   | NM_020377 | 1572.765  | 579.731   | NM_003761 | 24508.223 | 32220.535 |
| NM_019106 | 1190.526  | 1065.06   | U88896    | 4309.925  | 1749.004  | NM_004726 | 451.396   | 632.259   |
| L08436    | 754.689   | 579.784   | AF116702  | 58922.902 | 33011.098 | NM_015193 | 788.935   | 1538.208  |
| NM_005607 | 1067.298  | 571.589   | NM_005724 | 11706.906 | 3831.236  | NM_007035 | 7010.53   | 15869.578 |
| NM_006761 | 30803.141 | 14783.087 | X58794    | 59341.938 | 35974.336 | AB019562  | 968.395   | 1972.396  |
| NM_014897 | 449.012   | 255.081   | NM_001735 | 2824.061  | 1345.53   | AF036364  | 2108.273  | 4267.926  |
| NM_003453 | 3336.632  | 1403.452  | NM_002349 | 2050.555  | 1069.597  | AK022847  | 1731.89   | 3662.741  |
| NM_018371 | 8583.379  | 3936.257  | NM_005080 | 40519.723 | 25055.363 | NM_020203 | 2533.976  | 4138.283  |
| NM_014390 | 8933.248  | 4621.809  | NM_014795 | 11032.314 | 10763.341 | L40992    | 391.379   | 637.404   |
| X78924    | 5602.261  | 8234.36   | NM_002986 | 1308.317  | 1780.687  | U20582    | 16084.969 | 27843.846 |
| NM_013250 | 410.891   | 750.319   | NM_014396 | 4152.565  | 5992.001  | NM_000337 | 969.866   | 1749.021  |
| AB023219  | 2281.495  | 1689.304  | AK027201  | 5239.974  | 6194.523  | NM_002079 | 2262.576  | 3655.772  |
| NM_018835 | 635.66    | 284.893   | NM_000489 | 9490.151  | 9226.442  | U13697    | 2421.95   | 4069.325  |
| NM_003401 | 1583.774  | 2002.699  | X98507    | 2791.02   | 3648.656  | U04270    | 7349.985  | 11222.471 |
| AL137724  | 1230.89   | 1418.629  | NM_014669 | 15644.309 | 14976.158 | L02840    | 1885.635  | 1778.573  |
| NM_004758 | 1593.488  | 2049.436  | AK026686  | 1433.79   | 885.379   | AA629719  | 65420.805 | 73502.063 |
| NM_002913 | 2001.618  | 1719.823  | AL133064  | 2746.308  | 2832.066  | AA927528  | 657.464   | 1287.295  |
| AK022797  | 1133.57   | 1053.708  | NM_006227 | 4107.293  | 4236.721  | X02152    | 56360.043 | 73942.297 |
| NM_007370 | 2963.128  | 4081.514  | NM_002905 | 7820.747  | 4953.405  | BG676364  | 3634.486  | 6367.247  |
| NM_006231 | 939.242   | 760.307   | NM_000700 | 4023.851  | 3026.294  | BG181154  | 612.67    | 939.439   |
| AK023471  | 1782.65   | 1504.563  | NM_019028 | 4856.7    | 2918.74   | AA843679  | 3220.968  | 4338.691  |
| AF044578  | 1777.949  | 1383.393  | NM_000431 | 3173.001  | 1569.178  | NM_017571 | 2832.319  | 4045.917  |
| NM_001948 | 1866.524  | 1012.456  | NM_013421 | 1141.411  | 464.922   | L03169    | 599.864   | 1319.619  |

|           |           |           |           |           |           |           |           |           |
|-----------|-----------|-----------|-----------|-----------|-----------|-----------|-----------|-----------|
| NM_001067 | 6213.225  | 3150.113  | NM_012474 | 6093.248  | 2702.123  | M81349    | 238.25    | 816.806   |
| AK025337  | 684.935   | 370.116   | AB033118  | 6111.342  | 2915.266  | NM_001928 | 44481.859 | 55913.707 |
| NM_005602 | 1137.857  | 502.053   | NM_019606 | 3211.115  | 911.265   | NM_006398 | 915.705   | 1501.554  |
| NM_003573 | 5456.756  | 2439.741  | NM_001690 | 7066.293  | 3174.563  | NM_018965 | 1397.28   | 2659.729  |
| NM_000296 | 3962.406  | 1525.465  | AF034374  | 4994.5    | 2679.571  | NM_000185 | 5025.287  | 4869.09   |
| NM_012302 | 3308.707  | 1866.505  | NM_016118 | 4464.574  | 2976.142  | Y00816    | 831.343   | 1046.666  |
| NM_017422 | 4280.275  | 2536.642  | NM_001683 | 17067.318 | 18649.342 | NM_004512 | 4154.498  | 6755.81   |
| NM_006149 | 472.278   | 1190.785  | NM_001682 | 2348.899  | 3032.141  | NM_004380 | 8794.012  | 14346.502 |
| NM_005879 | 867.798   | 1370.373  | NM_014405 | 2131.258  | 3243.192  | U86813    | 562.843   | 701.845   |
| AF147790  | 886.474   | 936.304   | NM_000816 | 1887.581  | 1938.855  | NM_004119 | 1996.993  | 2859.965  |
| NM_018969 | 452.877   | 515.268   | NM_014928 | 949.57    | 986.406   | AY007378  | 1120.677  | 1473.045  |
| NM_004112 | 1703.781  | 814.299   | NM_017875 | 1294.755  | 2021.284  | D26070    | 3647.918  | 6107.177  |
| AK023023  | 6793.498  | 9067.745  | AK023232  | 2552.797  | 3102.021  | NM_001642 | 19447.932 | 27100.189 |
| NM_015993 | 3155.996  | 3980.554  | NM_018209 | 3625.077  | 5403.603  | NM_001542 | 427.822   | 796.633   |
| Z36776    | 1932.68   | 997.617   | Z70701    | 18424.725 | 10003.333 | NM_003392 | 500.795   | 1012.718  |
| AB029015  | 892.795   | 792.815   | AB040972  | 2338.931  | 1808.414  | NM_002280 | 402.755   | 844.515   |
| NM_002067 | 23249.781 | 10584.431 | AF148505  | 2222.39   | 1534.803  | NM_000501 | 42179.426 | 51110.348 |
| NM_001059 | 61662.707 | 66001.68  | NM_018686 | 6487.037  | 3249.722  | NM_000114 | 3084.498  | 4220.878  |
| NM_006150 | 1653.574  | 924.59    | NM_017676 | 2068.947  | 776.129   | NM_005156 | 1344.437  | 1978.481  |
| NM_020345 | 526.592   | 677.67    | NM_005431 | 2250.929  | 666.376   | AB033002  | 362.53    | 858.112   |
| NM_003287 | 488.483   | 334.675   | AB036063  | 2247.703  | 729.689   | NM_000558 | 3523.027  | 6650.687  |
| NM_012325 | 7277.521  | 3855.717  | NM_002894 | 4980.008  | 1776.969  | NM_004198 | 270.614   | 484.714   |
| NM_014434 | 1242.41   | 803.175   | NM_004629 | 6024.643  | 2250.96   | NM_014170 | 1731.328  | 3064.778  |
| NM_019607 | 4501.202  | 2357.316  | NM_004260 | 6373.629  | 4401.413  | AF116652  | 43670.422 | 53260.297 |
| U79260    | 12831.547 | 8458.056  | NM_004972 | 10427.21  | 12393.755 | NM_000835 | 534.995   | 849.101   |
| NM_001895 | 5596.776  | 9371.527  | NM_006251 | 9000.189  | 12324.75  | AK000271  | 454.929   | 859.945   |
| NM_006447 | 2221.864  | 3905.092  | NM_004103 | 9639.357  | 12790.691 | NM_006808 | 18277.623 | 25243.406 |
| AF119851  | 628.442   | 1183.398  | NM_002314 | 12676.513 | 15273.049 | NM_006634 | 783.756   | 1319.197  |
| NM_014129 | 7876.325  | 10679.431 | NM_001744 | 4079.862  | 5460.779  | NM_016465 | 1287.986  | 2313.176  |
| D87455    | 2038.929  | 2152.677  | Z25433    | 2994.445  | 4613.346  | NM_000328 | 287.976   | 752.268   |
| AF080577  | 1137.862  | 766.889   | NM_005922 | 10738.294 | 15634.126 | NM_013398 | 2257.564  | 3645.107  |
| L22005    | 4756.343  | 7115.966  | NM_018638 | 3954.3    | 5345.199  | NM_002410 | 539.579   | 1230.17   |
| NM_003807 | 9130.321  | 11092.29  | AL137593  | 12915.159 | 14967.489 | AL122120  | 1819.129  | 2974.857  |
| NM_004358 | 1332.26   | 1879.197  | NM_000382 | 3815.853  | 4086.581  | NM_014684 | 926.636   | 1890.669  |
| NM_018243 | 4938.015  | 5335.892  | NM_001150 | 2516.098  | 2584.835  | AK027247  | 807.245   | 1169.776  |
| Y17866    | 377.457   | 458.979   | NM_002856 | 3005.804  | 2192.014  | NM_002480 | 3911.701  | 5991.547  |
| NM_003005 | 4437.855  | 2532.436  | NM_003225 | 1264.134  | 927.865   | NM_014034 | 1871.718  | 3772.105  |
| NM_000873 | 1156.365  | 781.06    | NM_000096 | 1717.036  | 1131.796  | NM_005335 | 8974.31   | 20737.816 |
| NM_002842 | 1535.849  | 906.365   | AA143087  | 10475.997 | 4477.104  | J04474    | 4679.077  | 9421.261  |
| NM_012126 | 402.561   | 165.922   | U25804    | 6320.333  | 3261.428  | NM_003761 | 29997.676 | 43915.656 |
| AB033025  | 319.036   | 275.361   | BI870965  | 3442.83   | 1684.91   | NM_004726 | 350.047   | 969.262   |
| NM_004418 | 905.41    | 694.149   | NM_001903 | 11615.784 | 4697.368  | NM_014011 | 3845.648  | 6880.463  |
| NM_000917 | 7188.514  | 3103.392  | BI835536  | 11610.695 | 3907.825  | AK025994  | 1609.062  | 2666.464  |
| NM_005389 | 8480.182  | 3955.128  | BF205051  | 4149.532  | 1290.979  | L29306    | 628.269   | 1238.25   |
| NM_014445 | 28354.004 | 19233.623 | X02761    | 1748.129  | 392.438   | NM_013988 | 2813.274  | 4335.978  |
| NM_016123 | 1662.519  | 3088.493  | M91463    | 2145.71   | 1262.02   | NM_001738 | 1372.95   | 2514.476  |
| AB048365  | 546.952   | 937.935   | J03060    | 4120.482  | 6241.41   | NM_002270 | 524.85    | 958.12    |
| NM_000391 | 4432.351  | 5323.212  | X54156    | 998.102   | 1285.34   | NM_001055 | 8342.104  | 15365.219 |
| AF229179  | 586.667   | 885.977   | NM_003743 | 2150.003  | 2546.604  | NM_015878 | 945.648   | 1524.836  |
| NM_002275 | 2446.446  | 3568.844  | AA829383  | 7193.688  | 9787.816  | NM_001217 | 384.22    | 718.361   |
| AB032945  | 398.137   | 985.489   | AF012434  | 17459.969 | 21743.375 | NM_002271 | 44049.691 | 59388.285 |
| AK025215  | 9300.736  | 16160.784 | NM_033334 | 359.905   | 789.512   | NM_018361 | 2586.7    | 3861.059  |
| NM_018131 | 1856.501  | 997.597   | AB037791  | 2118.137  | 2755.436  | NM_019893 | 644.56    | 1251.073  |



|           |           |           |           |           |           |           |           |           |
|-----------|-----------|-----------|-----------|-----------|-----------|-----------|-----------|-----------|
| NM_014834 | 543.377   | 315.942   | NM_018124 | 10880.157 | 11582.611 | AB040966  | 2919.113  | 4269.468  |
| NM_017636 | 22993.332 | 16032.161 | NM_000489 | 12333.752 | 8113.663  | NM_020132 | 3265.309  | 5040.176  |
| NM_012468 | 546.698   | 433.419   | X98507    | 2900.886  | 1969.08   | NM_016467 | 7447.222  | 13682.663 |
| M27877    | 14548.348 | 5890.999  | NM_016030 | 45279.098 | 34387.703 | NM_007253 | 3248.413  | 4447.708  |
| D70836    | 39507.113 | 15695.929 | NM_014669 | 10194.92  | 5876.574  | NM_019106 | 1089.968  | 2247.832  |
| D16878    | 934.815   | 502.732   | NM_005652 | 6265.28   | 4067.65   | L08436    | 442.862   | 917.446   |
| NM_014943 | 1593.119  | 936.038   | AK026686  | 1170.799  | 331.722   | NM_005607 | 1673.364  | 3017.963  |
| AK024392  | 1732.271  | 894.408   | NM_018842 | 966.494   | 272.254   | NM_006761 | 30946.654 | 48480.84  |
| NM_013260 | 866.557   | 637.432   | NM_005902 | 4543.323  | 2817.658  | NM_014897 | 813.378   | 1455.833  |
| NM_018300 | 1112.624  | 2232.694  | NM_002850 | 64044.723 | 49603.098 | NM_003453 | 4245.394  | 6651.251  |
| NM_004875 | 2441.608  | 4413.564  | NM_005903 | 1383.175  | 359.527   | NM_018371 | 13905.165 | 22029.869 |
| NM_018254 | 4576.903  | 4888.422  | AB037734  | 947.096   | 1130.845  | NM_014390 | 8435.184  | 10159.2   |
| NM_017745 | 2859.986  | 3560.133  | U77493    | 526.412   | 1094.695  | X78924    | 6602.936  | 6225.313  |
| NM_018433 | 3508.327  | 3809.911  | NM_003873 | 684.862   | 1383.937  | NM_013250 | 386.138   | 461.231   |
| NM_000937 | 466.816   | 699.918   | NM_000263 | 3815.147  | 4721.107  | AF090906  | 742.583   | 1009.798  |
| AK024810  | 14936.135 | 17923.291 | AF073519  | 3838.424  | 4945.68   | AB023219  | 1909.03   | 1710.028  |
| AK022615  | 48261.066 | 57955.938 | AB001451  | 7245.812  | 9535.577  | NM_018835 | 866.264   | 1241.654  |
| BM458096  | 15773.097 | 10284.165 | NM_017583 | 8369.283  | 9679.515  | NM_003401 | 1296.095  | 1705.38   |
| NM_005626 | 8951.859  | 5089.677  | Y16132    | 13892.257 | 15131.119 | AL137724  | 1039.796  | 1028.039  |
| D29958    | 18247.635 | 8858.871  | NM_016593 | 1549.799  | 2117.704  | NM_004755 | 1264.649  | 1182.956  |
| NM_015971 | 13451.083 | 9943.291  | NM_002521 | 1789.221  | 2168.935  | AK022797  | 732.669   | 1320.156  |
| D17257    | 53091.625 | 54783.863 | NM_017875 | 1085.669  | 950.861   | NM_007370 | 1841.06   | 2614.786  |
| AK000724  | 1466.433  | 773.18    | AK023232  | 2973.588  | 2360.907  | NM_006231 | 490.634   | 1127.357  |
| NM_003720 | 5908.043  | 2477.484  | NM_000271 | 8210.733  | 6155.862  | AK023471  | 1200.482  | 2317.329  |
| AF097159  | 546.389   | 276.058   | NM_018209 | 3471.404  | 2727.535  | AF044578  | 1696.704  | 3064.035  |
| NM_003918 | 849.841   | 360.253   | NM_006184 | 30674.643 | 27402.471 | NM_001948 | 1174.038  | 2335.572  |
| NM_004807 | 970.928   | 660.173   | AB018268  | 4223.871  | 2956.818  | NM_001067 | 3970.25   | 5988.613  |
| NM_003115 | 7544.333  | 13165.395 | NM_019045 | 1684.23   | 637.232   | AF063936  | 402.965   | 815.903   |
| NM_000687 | 27800.512 | 39295.672 | NM_006380 | 2459.515  | 1350.339  | AK025337  | 672.952   | 1024.29   |
| NM_000446 | 1803.591  | 1841.736  | AB020710  | 2383.162  | 853.697   | AB028984  | 184.192   | 372.989   |
| NM_018200 | 1659.687  | 1596.173  | NM_016174 | 7168.816  | 2726.554  | NM_005602 | 982.16    | 1246.15   |
| NM_014838 | 2298.995  | 2902.973  | NM_020377 | 1442.84   | 535.523   | NM_003573 | 4841.699  | 4603.128  |
| NM_007212 | 2241.721  | 3398.052  | U88896    | 7698.287  | 6335.664  | NM_000296 | 3819.043  | 3513.81   |
| AF005067  | 2517.696  | 2927.091  | NM_005724 | 17132.383 | 22296.924 | NM_012302 | 2492.426  | 2270.133  |
| NM_005710 | 10158.678 | 6322.245  | NM_001735 | 4044.525  | 5226.025  | NM_017422 | 9149.786  | 7041.68   |
| AF252284  | 2416.383  | 1253.129  | NM_002349 | 2495.128  | 3565.198  | NM_006146 | 166.985   | 174.012   |
| NM_014930 | 1340.299  | 696.797   | NM_005080 | 46397.871 | 58907.223 | NM_005879 | 629.262   | 636.205   |
| NM_001530 | 1885.324  | 898.069   | NM_004887 | 16651.629 | 15141.849 | AF147790  | 517.77    | 626.305   |
| U80232    | 12817.921 | 6130.452  | NM_006404 | 1065.581  | 1365.205  | NM_018966 | 496.302   | 380.939   |
| AF086526  | 523.756   | 333.141   | NM_014795 | 9904.1    | 9387.919  | NM_004112 | 2401.046  | 1705.205  |
| AK025788  | 1809.487  | 876.462   | NM_002986 | 1677.077  | 2185.784  | AK025592  | 2272.025  | 1295.14   |
| AF086164  | 1397.908  | 675.325   | M15330    | 1898.616  | 2798.691  | NM_004635 | 7449.325  | 6721.897  |
| AK025577  | 1574.468  | 942.76    | NM_014396 | 4147.536  | 5847.302  | AK023023  | 4566.759  | 2775.899  |
| AK000216  | 2555.351  | 1427.438  | AK027201  | 4799.962  | 5373.737  | NM_015993 | 2653.736  | 2566.114  |
| AK023440  | 1062.585  | 961.153   | Z25433    | 2656.531  | 2520.583  | Z36776    | 2484.592  | 3491.771  |
| AB033041  | 9643.025  | 18470.33  | NM_005922 | 8885.104  | 8421.656  | AB029015  | 758.706   | 1186.605  |
| AL359599  | 836.867   | 1958.056  | NM_018638 | 3842.32   | 3076.638  | NM_002430 | 315.959   | 499.196   |
| NM_014894 | 52537.766 | 61551.461 | AL137593  | 13945.486 | 7652.513  | NM_006150 | 1624.955  | 1616.15   |
| AY007155  | 2066.229  | 1714.064  | NM_003915 | 2803.873  | 1909.525  | NM_020345 | 340.26    | 579.632   |
| AK027160  | 6477.364  | 3372.613  | NM_000382 | 2627.738  | 1874.936  | NM_003287 | 403.514   | 728.219   |
| AF070526  | 744.171   | 1336.688  | AL133064  | 3187.269  | 1998.258  | NM_012325 | 6352.244  | 5891.583  |
| U79264    | 3862.46   | 5138.954  | NM_006227 | 4615.729  | 3346.187  | NM_014434 | 753.398   | 984.842   |
| NM_015695 | 6804.604  | 7862.928  | NM_002905 | 8473.246  | 3661.096  | NM_019607 | 3758.357  | 2466.357  |

|           |           |          |           |           |           |           |           |           |
|-----------|-----------|----------|-----------|-----------|-----------|-----------|-----------|-----------|
| AK023619  | 455.793   | 1614.021 | NM_000700 | 3779.751  | 2026.356  | U79260    | 8764.844  | 6959.595  |
| AF070530  | 15335.229 | 9357.286 | NM_019028 | 5621.958  | 3223.27   | NM_001895 | 4036.061  | 3215.145  |
| AF086487  | 443.634   | 405.758  | NM_000431 | 4084.491  | 3411.349  | NM_006447 | 1372.655  | 1437.983  |
| NM_006420 | 2047.236  | 879.829  | NM_013421 | 1432.471  | 1683.134  | AF119851  | 437.616   | 338.797   |
| AF131855  | 2079.391  | 1302.907 | AB033118  | 8962.888  | 12695.911 | NM_014125 | 4804.809  | 5784.667  |
| AF086046  | 4900.897  | 3157.208 | NM_001690 | 11206.997 | 12758.068 | D87455    | 2207.552  | 1296.25   |
| AK024962  | 959.159   | 572.191  | AF034374  | 9354.37   | 11562.893 | AF080577  | 711.737   | 556.39    |
| AK025135  | 4705.769  | 2674.406 | NM_016118 | 4889.405  | 5498.999  | L22005    | 3887.623  | 2396.502  |
| NM_017926 | 2295.845  | 1500.372 | NM_018674 | 15524.965 | 16587.348 | NM_012291 | 7458.563  | 5332.062  |
| AY007145  | 750.607   | 479.288  | NM_001683 | 15081.816 | 15457.091 | NM_013365 | 961.226   | 564.445   |
| D38549    | 2962.294  | 1677.833 | NM_001682 | 2235.645  | 2794.161  | NM_003807 | 8474.337  | 5060.942  |
| AK024780  | 922.033   | 910.148  | NM_014405 | 2589.312  | 3397.326  | NM_004355 | 961.501   | 599.956   |
| AF085947  | 574.464   | 1273.47  | NM_000816 | 1744.328  | 2039.629  | NM_001790 | 1055.199  | 1059.307  |
| AF086000  | 772.015   | 1970.478 | NM_014928 | 1226.892  | 1511.622  | NM_014935 | 2680.199  | 5294.604  |
| AK022389  | 875.74    | 1982.228 | AK025130  | 8564.522  | 9016.227  | Y17866    | 538.526   | 1173.092  |
| AK022123  | 639.576   | 1551.074 | AB037791  | 1670.123  | 598.833   | NM_000873 | 938.382   | 1864.47   |
| U10510    | 7313.686  | 5864.992 | NM_018124 | 8170.751  | 5400.996  | NM_002842 | 2535.409  | 2408.065  |
| Z36818    | 696.592   | 861.596  | Z70701    | 19852.311 | 9533.47   | AF290204  | 39.871    | 1532.692  |
| Z36842    | 866.479   | 760.457  | AB040972  | 2859.458  | 1644.309  | NM_012126 | 295.356   | 341.491   |
| AF086137  | 739.842   | 580.943  | AF148505  | 2279.922  | 2166.663  | NM_004418 | 1092.484  | 795.271   |
| AF086155  | 1235.31   | 1204.103 | BE260997  | 1330.617  | 1269.454  | NM_000917 | 7578.46   | 5464.231  |
| NM_014155 | 2958.404  | 1117.153 | NM_018686 | 8273.092  | 6784.974  | NM_005385 | 5550.411  | 3273.123  |
| AK021795  | 552.898   | 569.149  | NM_017676 | 2503.698  | 4105.557  | NM_014445 | 20424.168 | 12628.037 |
| AL162042  | 1218.176  | 1083.744 | AK021764  | 565.046   | 906.451   | AL832826  | 536.223   | 377.485   |
| AK026131  | 486.772   | 196.172  | NM_005431 | 2737.787  | 3961.46   | NM_016123 | 821.248   | 394.644   |
| AK023312  | 746.395   | 1298.312 | AB036063  | 2576.301  | 3659.311  | AB048365  | 414.02    | 354.835   |
| AF113687  | 117.489   | 2233.771 | NM_002894 | 7004.537  | 7588.997  | NM_000391 | 3198.789  | 2252.696  |
| AL133570  | 1708.401  | 2341.466 | NM_004629 | 8174.95   | 9476.104  | AF229179  | 288.911   | 205.862   |
| AK021462  | 466.872   | 420.702  | NM_004260 | 8624.683  | 9710.438  | NM_014771 | 4337.604  | 2726.467  |
| AK022678  | 509.812   | 502.147  | AL050067  | 1862.264  | 2271.695  | NM_002275 | 2124.448  | 1088.084  |
| AK023473  | 573.614   | 914.393  | NM_004972 | 8163.622  | 9374.055  | AK025215  | 4759.303  | 4273.514  |
| AK023835  | 1523.929  | 1307.473 | NM_006251 | 8107.414  | 9257.83   | BF569160  | 567.743   | 292.518   |
| AK024159  | 502.113   | 864.577  | NM_004103 | 11022.083 | 11773.492 | M27877    | 13550.664 | 9605.167  |
| AK023012  | 743.799   | 533.733  | NM_002314 | 12707.955 | 14696.902 | D70836    | 27171.301 | 13145.9   |
| AK023906  | 3472.861  | 3032.91  | NM_001744 | 4182.927  | 5388.721  | D16878    | 440.908   | 246.96    |
| AK024234  | 385.93    | 378.868  | NM_006296 | 6268.685  | 7834.45   | NM_014943 | 1353.219  | 982.022   |
| NM_012405 | 1347.38   | 839.945  | AF073519  | 3093.901  | 2458.743  | AK024392  | 1208.109  | 506.212   |
| AL050205  | 4324.311  | 2526.305 | AB001451  | 5079.585  | 5041.594  | NM_013260 | 436.399   | 349.528   |
| NM_005691 | 1138.688  | 792.129  | NM_017583 | 6542.113  | 6217.505  | NM_018300 | 500.895   | 248.062   |
| AK023814  | 943.037   | 1548.492 | Y16132    | 11760.755 | 9609.155  | NM_004875 | 928.211   | 518.988   |
| AF130063  | 679.57    | 795.165  | NM_016593 | 1494.37   | 1637.089  | NM_018254 | 4688.866  | 2066.4    |
| AF086528  | 460.31    | 896.357  | NM_002521 | 1069.396  | 1129.359  | NM_017745 | 1819.635  | 911.208   |
| AL162043  | 426.619   | 1357.281 | NM_001150 | 3319.981  | 3257.063  | NM_018433 | 1662.295  | 910.958   |
| AF251187  | 806.569   | 1379.136 | NM_002856 | 5160.123  | 4675.232  | AB028451  | 418.131   | 231.973   |
| NM_006543 | 1102.492  | 1356.118 | NM_003225 | 1665.815  | 1358.928  | AK024810  | 7831.723  | 3754.615  |
| AK023018  | 917.099   | 713.669  | NM_000096 | 1969.862  | 1941.034  | AK022615  | 25461.268 | 13871.88  |
| AK022672  | 2678.045  | 2892.088 | AA418251  | 802.694   | 487.643   | NM_004043 | 3014.791  | 1796.527  |
| AK023870  | 1282.807  | 1762.82  | AA143087  | 13368.864 | 9373.934  | BM458096  | 8478.127  | 4762.008  |
| AK021599  | 1392.016  | 1367.698 | U25804    | 8060.782  | 10246.675 | NM_005626 | 5057.791  | 4064.935  |
| AK024263  | 1087.921  | 806.603  | BI870965  | 3779.855  | 4844.802  | D29958    | 8902.912  | 7169.475  |
| NM_016613 | 2281.141  | 1658.018 | BI835536  | 14564.188 | 18811.293 | NM_015971 | 7347.533  | 6067.014  |
| AF086414  | 1216.57   | 652.694  | BF205051  | 5942.31   | 6886.724  | D17257    | 43331.98  | 35869.332 |
| AJ012490  | 5660.418  | 2876.473 | X02761    | 2069.603  | 2401.532  | AK000724  | 1408.674  | 903.081   |

|           |           |           |           |           |           |           |           |           |
|-----------|-----------|-----------|-----------|-----------|-----------|-----------|-----------|-----------|
| U84516    | 14878.967 | 8338.313  | M91463    | 2138.837  | 2073.221  | NM_00372C | 5881.246  | 3923.333  |
| AL049270  | 1413.145  | 671.21    | U88317    | 585.012   | 723.334   | AF097159  | 500.125   | 371.442   |
| U88834    | 4354.765  | 2714.266  | J03060    | 4395.691  | 5739.071  | NM_00391E | 502.237   | 448.966   |
| BC025324  | 798.589   | 431.3     | X54156    | 862.347   | 1218.53   | NM_004807 | 671.609   | 365.323   |
| NM_006087 | 61440.484 | 65554.633 | NM_003743 | 2069.647  | 2463.544  | J03569    | 36346.559 | 13558.323 |
| AK023564  | 2614.839  | 3222.495  | AA829383  | 6923.553  | 9290.625  | NM_003115 | 5326.373  | 2187.285  |
| NM_003533 | 1586.185  | 2215.601  | AF012434  | 18788.08  | 24580.939 | NM_000687 | 11763.967 | 5256.688  |
| AK023726  | 2130.845  | 3823.975  | NM_006404 | 1235.641  | 1298.826  | NM_01820C | 729.206   | 317.249   |
| AK024906  | 511.216   | 497.054   | NM_01479E | 9026.461  | 8409.83   | NM_01483E | 972.698   | 633.757   |
| AF131836  | 941.026   | 393.431   | NM_00298E | 1350.241  | 1635.679  | NM_007212 | 1128.916  | 658.496   |
| AF275804  | 19096.605 | 10206.443 | M15330    | 1608.669  | 1801.656  | AF005067  | 945.383   | 751.657   |
| AL137488  | 1118.482  | 799.773   | NM_01439E | 4061.273  | 4555.693  | NM_00571C | 5553.456  | 2693.384  |
| AL049447  | 37485.59  | 24295.229 | AK027201  | 4543.25   | 4841.791  | AF252284  | 1434.005  | 859.871   |
| NM_020527 | 2572.434  | 1968.596  | NM_00048E | 12336.017 | 10999.709 | NM_01493C | 788.387   | 443.822   |
| AB020637  | 756.458   | 860.439   | X98507    | 3247.635  | 2795.244  | NM_00153C | 792.161   | 680.177   |
| NM_00528E | 2915.219  | 3521.154  | NM_01603C | 48895.277 | 46023.266 | U80232    | 9175.686  | 4533.628  |
| AK024365  | 4057.185  | 2819.85   | NM_01466E | 12148.014 | 8507.654  | AF086526  | 419.792   | 507.367   |
| AJ251759  | 1092.405  | 841.851   | NM_005652 | 8064.075  | 5904.71   | AK025788  | 1184.098  | 871.305   |
| AK024371  | 1033.526  | 639.696   | AK026686  | 1168.252  | 1393.405  | AF086164  | 621.465   | 422.509   |
| NM_005454 | 744.826   | 528.903   | NM_018842 | 924.439   | 1230.322  | AK025577  | 1106.714  | 684.347   |
| AB019569  | 61512.223 | 67639.109 | NM_005902 | 6212.693  | 7890.498  | AK000216  | 1550.877  | 966.004   |
| NM_00188E | 4416.972  | 2820.224  | NM_004302 | 736.902   | 1134.538  | AK023440  | 461.302   | 438.372   |
| NM_00499E | 1141.289  | 1089.036  | NM_005903 | 1952.34   | 2316.611  | AB033041  | 6187.612  | 2461.92   |
| X89668    | 10739.913 | 5149.571  | NM_000861 | 1415.581  | 1752.067  | NM_014894 | 46953.891 | 29023.355 |
| NM_00445E | 3437.725  | 1965.68   | NM_000024 | 1313.303  | 1987.514  | AY007155  | 931.596   | 440.387   |
| NM_006901 | 1017.34   | 574.948   | AB037734  | 552.766   | 1022.065  | AK027160  | 3888.957  | 1188.267  |
| NM_01853C | 3150.127  | 1242.594  | U77493    | 688.849   | 1054.491  | AF070526  | 372.653   | 273.295   |
| AK022855  | 11028.719 | 8151.241  | NM_019062 | 722.641   | 1009.727  | U79264    | 3599.716  | 2024.974  |
| AK023816  | 1772.843  | 3808.65   | NM_003873 | 876.131   | 1412.737  | NM_01569E | 6237.797  | 3688.395  |
| AL050102  | 796.868   | 1232.515  | NM_000263 | 4528.69   | 5620.455  | AF070530  | 8716.628  | 6151.821  |
| AF305686  | 2084.8    | 2364.195  | NM_001683 | 15573.207 | 13784.553 | NM_00642C | 1073.847  | 775.396   |
| AF085832  | 1936.757  | 4140.062  | NM_001682 | 2085.806  | 2430.36   | AF131855  | 465.187   | 438.432   |
| AK025981  | 1772.577  | 3315.953  | NM_01440E | 1966.563  | 2458.785  | AF086046  | 3663.814  | 2259.925  |
| AF113212  | 846.387   | 907.606   | NM_00081E | 1648.656  | 2014.353  | AK024962  | 772.603   | 623.861   |
| AF086266  | 1566.918  | 1115.418  | NM_01492E | 957.688   | 1060.725  | AK025135  | 2938.892  | 1933.546  |
| AF086252  | 921.734   | 412.72    | AK025130  | 7315.189  | 7331.358  | NM_01792E | 956.553   | 521.971   |
| AK026703  | 1637.498  | 779.009   | NM_01787E | 1553.387  | 1651.985  | AY007145  | 1039.44   | 657.891   |
| NM_01786E | 4261.376  | 3354.104  | AK023232  | 3535.97   | 3511.802  | D38549    | 2302.797  | 1082.547  |
| AJ131244  | 766.942   | 296.679   | NM_000271 | 10252.687 | 8784.708  | AK024780  | 471.48    | 334.201   |
| NM_00353E | 1363.676  | 1204.874  | NM_01820E | 4244.528  | 3573.037  | AF085947  | 285.61    | 197.112   |
| AF116707  | 805.225   | 719.857   | NM_006184 | 36624.434 | 39834.43  | AF086000  | 262.351   | 168.475   |
| U90910    | 2665.369  | 1530.678  | AB018268  | 4900.47   | 6433.181  | U10510    | 4224.067  | 2204.836  |
| AL049979  | 579.316   | 404.318   | NM_01904E | 1757.51   | 2700.802  | Z36842    | 571.363   | 544.522   |
| AK025765  | 1010.496  | 849.201   | NM_00638C | 3234.229  | 4299.377  | AF086137  | 354.271   | 317.773   |
| CY3Cy5    | 4380.434  | 689.762   | NM_016174 | 9264.864  | 10535.04  | AF086155  | 643.786   | 637.807   |
| AA143087  | 8816.143  | 6119.158  | NM_020377 | 1841.162  | 2595.624  | NM_01415E | 2465.573  | 1029.635  |
| U25804    | 4393.405  | 4119.517  | U88896    | 8269.93   | 8847.838  | AK021795  | 528.389   | 380.519   |
| BI870965  | 2037.368  | 1649.3    | X58794    | 63776.582 | 61774.465 | AL162042  | 1325.204  | 1254.275  |
| NM_00190E | 9947.721  | 10501.383 | NM_00173E | 4239.146  | 4978.238  | AK026131  | 364.267   | 328.603   |
| BI835536  | 8500.172  | 9310.163  | NM_00234E | 2600.493  | 3931.645  | AK023312  | 522.312   | 334.293   |
| BF205051  | 3370.053  | 3226.361  | NM_00508C | 50100.078 | 57739.055 | AL133570  | 747.703   | 350.669   |
| X02761    | 1276.806  | 2109.333  | NM_004887 | 16912.291 | 16362.016 | AK024576  | 27.536    | 5994.943  |
| M91463    | 1459.622  | 3173.443  | NM_004972 | 7476.403  | 8094.988  | AK022678  | 284.912   | 300.651   |

|           |           |           |           |           |           |           |           |           |
|-----------|-----------|-----------|-----------|-----------|-----------|-----------|-----------|-----------|
| U88317    | 462.451   | 812.205   | NM_006251 | 7173.221  | 7620.788  | AK023835  | 1216.545  | 992.173   |
| J03060    | 2285.631  | 4002.738  | NM_004103 | 9890.199  | 10407.44  | AK023012  | 432.483   | 399.96    |
| X54156    | 560.373   | 1101.675  | NM_002314 | 11113.241 | 13204.938 | AK023906  | 2598.359  | 1872.434  |
| NM_003743 | 1085.258  | 2055.704  | NM_001744 | 4182.289  | 4175.12   | NM_012405 | 1359.593  | 1737.774  |
| AA829383  | 4473.803  | 12725.129 | NM_006296 | 5541.435  | 5831.868  | AL050205  | 2617.548  | 1337.619  |
| L22524    | 722.519   | 1665.999  | Z25433    | 2809.8    | 2966.741  | NM_005691 | 650.992   | 521.636   |
| AF012434  | 9935.308  | 15466.105 | NM_005922 | 9479.836  | 11111.636 | AF086528  | 348.385   | 251.913   |
| NM_033334 | 396.542   | 328.1     | NM_018638 | 4252.055  | 3554.747  | AL162043  | 256.576   | 403.122   |
| SR2       | 50961.926 | 53231.379 | AL137593  | 17892.451 | 11935.934 | AF251187  | 283.584   | 243.238   |
| SR4       | 15216.548 | 14600.796 | NM_003915 | 3149.139  | 4204.658  | NM_006543 | 445.271   | 231.669   |
| SR6       | 2195.832  | 1886.465  | NM_000382 | 3047.12   | 4269.653  | AK022672  | 1009.706  | 637.549   |
| SR8       | 8317.069  | 19795.676 | AL133064  | 4049.836  | 4632.849  | AK023870  | 665.852   | 503.459   |
| SR10      | 27682.48  | 9654.153  | NM_006227 | 5852.042  | 8041.037  | AK021599  | 890.661   | 535.422   |
| CY3Cy5    | 3734.309  | 592.299   | NM_002905 | 10200.651 | 11640.162 | AK024263  | 623.861   | 935.484   |
| NM_018842 | 713.4     | 938.591   | NM_000700 | 5410.497  | 6828.342  | NM_016613 | 1462.705  | 1369.236  |
| NM_005902 | 3422.705  | 3264.874  | NM_019028 | 7026.5    | 8644.832  | AF086414  | 1087.592  | 647.787   |
| NM_002850 | 61254.059 | 61860.348 | NM_000431 | 4079.906  | 6336.992  | AJ012490  | 3741.54   | 1919.799  |
| NM_005302 | 263.45    | 445.537   | NM_013421 | 1249.147  | 1850.828  | U84516    | 8794.862  | 4285.845  |
| NM_004302 | 385.528   | 449.756   | NM_012474 | 8759.257  | 10062.874 | AL049270  | 648.893   | 336.48    |
| NM_005903 | 1195.172  | 1440.422  | AB033118  | 8763.418  | 11943.204 | U88834    | 3048.193  | 1641.004  |
| NM_000861 | 825.572   | 843.813   | NM_019606 | 4059.584  | 5608.854  | BC025324  | 508.503   | 281.483   |
| NM_000024 | 726.77    | 1160.436  | NM_001690 | 10375.389 | 12358.951 | NM_006087 | 54292.98  | 66166.344 |
| AB037734  | 479.067   | 735.313   | AF034374  | 11550.699 | 13020.385 | AK023564  | 1200.514  | 408.775   |
| U77493    | 455.652   | 718.408   | NM_016118 | 2809.004  | 2554.799  | NM_003533 | 643.728   | 354.915   |
| NM_003873 | 405.24    | 1023.466  | NM_018674 | 15740.901 | 18618.248 | AL157478  | 347.863   | 294.727   |
| NM_014253 | 237.657   | 699.207   | NM_000068 | 1945.687  | 1800.943  | AK023726  | 2092.022  | 916.289   |
| NM_000263 | 2602.335  | 4734.102  | AB033046  | 11516.486 | 10916.259 | AF131836  | 696.037   | 390.744   |
| AF073519  | 2006.589  | 3454.813  | NM_015918 | 7669.915  | 8463.2    | AF275804  | 9801.153  | 4391.596  |
| AB001451  | 3962.479  | 5792.213  | AK023228  | 878.228   | 1059.823  | AL137488  | 1000.893  | 629.917   |
| Y16132    | 5360.76   | 5967.005  | NM_013249 | 1719.075  | 2181.296  | AL049447  | 20102.77  | 10468.642 |
| NM_016593 | 1099.608  | 1261.827  | AB029041  | 15299.951 | 12313.688 | NM_020527 | 1596.455  | 846.085   |
| NM_002521 | 615.277   | 539.921   | AK026642  | 3910.063  | 4211.729  | NM_005286 | 2571.428  | 1260.891  |
| NM_001150 | 1977.148  | 1881.477  | AL359063  | 1131.949  | 1148.071  | AK024365  | 3189.107  | 1763.057  |
| NM_002856 | 2253.621  | 2097.536  | AL079292  | 5263.672  | 5194.093  | AJ251759  | 540.22    | 370.554   |
| NM_003225 | 740.585   | 805.113   | X89667    | 2288.34   | 1762.153  | AK024371  | 1369.929  | 879.956   |
| NM_000096 | 1120.697  | 1038.517  | AB037791  | 1498.607  | 1801.836  | NM_005454 | 597.482   | 366.165   |
| AA418251  | 482.581   | 367.056   | NM_018124 | 13459.274 | 15259.612 | AB019569  | 50952.766 | 56727.27  |
| NM_019045 | 966.37    | 1908.511  | Z70701    | 23303.906 | 25494.387 | NM_001889 | 3576.084  | 2521.236  |
| NM_006380 | 2071.384  | 3075.7    | AB040972  | 3558.518  | 4498.358  | NM_004999 | 804.375   | 813.763   |
| AB020710  | 1515.881  | 1285.408  | AF148505  | 2919.679  | 3353.665  | X89668    | 10212.915 | 6185.753  |
| NM_016174 | 4285.037  | 3373.18   | BE260997  | 1199.273  | 1454.697  | NM_004458 | 3835.208  | 2553.721  |
| NM_020377 | 869.416   | 882.612   | NM_018686 | 8987.271  | 10204.903 | NM_006901 | 830.802   | 628.908   |
| U88896    | 3818.853  | 3009.151  | NM_017676 | 2654.588  | 3673.27   | NM_018530 | 3573.279  | 2175.25   |
| AF116702  | 54852.555 | 48631.848 | AK021764  | 865.475   | 694.017   | AK022855  | 7720.531  | 4857.111  |
| NM_005724 | 10058.001 | 12664.631 | NM_005431 | 2830.574  | 3307.027  | AK023816  | 542.159   | 382.675   |
| NM_001735 | 2251.535  | 4587.906  | AB036063  | 2327.251  | 3566.475  | AL050102  | 346.785   | 227.211   |
| NM_002349 | 1228.861  | 2908.819  | NM_002894 | 7347.582  | 7688.795  | AF305686  | 909.322   | 445.054   |
| NM_005080 | 36180.762 | 70771.43  | NM_004629 | 8787.562  | 9871.657  | AF085832  | 720.205   | 469.646   |
| NM_004887 | 7289.134  | 13827.976 | NM_004260 | 9306.248  | 9398.77   | AK025981  | 568.615   | 232.591   |
| NM_006404 | 486.735   | 919.044   | AL050067  | 2319.343  | 2912.14   | AF086266  | 410.719   | 246.007   |
| NM_014795 | 5081.868  | 6035.075  | AK024732  | 3535.352  | 4214.362  | AF086252  | 664.882   | 573.016   |
| NM_002986 | 774.512   | 1070.196  | NM_015564 | 2243.8    | 2743.289  | AK026703  | 1402.217  | 702.24    |
| NM_014396 | 2229.597  | 2414.266  | AF160476  | 804.495   | 955.321   | NM_017866 | 1971.536  | 1282.929  |

|           |           |           |           |           |           |           |           |           |
|-----------|-----------|-----------|-----------|-----------|-----------|-----------|-----------|-----------|
| AK027201  | 2171.524  | 2312.132  | L22650    | 1976.207  | 1728.142  | NM_003536 | 615.853   | 664.7     |
| NM_000489 | 4499.622  | 4609.845  | AB014520  | 21141.627 | 15759.53  | AF116707  | 753.491   | 577.431   |
| X98507    | 1600.877  | 1418.692  | AF161420  | 1731.744  | 1914.894  | U90910    | 5641.067  | 5286.292  |
| NM_016030 | 15131.347 | 12409.396 | NM_004907 | 2671.893  | 2845.825  | AK025765  | 675.298   | 412.465   |
| NM_014669 | 6651.705  | 6630.993  | NM_002891 | 1232.395  | 1079.093  | CY3Cy5    | 1358.35   | 427.369   |
| NM_005652 | 2916.086  | 2382.088  | NM_001775 | 1654.228  | 1327.114  | AA143087  | 6270.086  | 7459.777  |
| AK026686  | 645.502   | 695.07    | BE083789  | 553.715   | 1159.43   | U25804    | 1951.218  | 2780.828  |
| AL133064  | 2148.24   | 4742.069  | X04526    | 18206.381 | 20595.414 | BI870965  | 1588.895  | 2294.851  |
| NM_006227 | 4733      | 12527.937 | D26067    | 4479.768  | 4669.095  | NM_001903 | 4047.745  | 6473.572  |
| NM_002905 | 4981.171  | 6087.85   | AF227924  | 5133.577  | 5748.264  | BI835536  | 3280.563  | 4215.26   |
| NM_000700 | 2673.952  | 3562.117  | NM_005716 | 10934.074 | 11857.669 | BF205051  | 1971.137  | 2093.786  |
| NM_019028 | 3459.071  | 2577.066  | NM_006183 | 3167.553  | 4373.34   | X02761    | 1116.384  | 1450.005  |
| NM_000431 | 2470.457  | 1942.681  | NM_016087 | 1244.731  | 1882.883  | M91463    | 616.377   | 665.702   |
| NM_013421 | 588.919   | 509.988   | S59184    | 4189.869  | 5740.682  | U88317    | 374.335   | 489.839   |
| NM_012474 | 4627.686  | 4312.677  | NM_005130 | 674.196   | 1110.434  | J03060    | 1281.884  | 967.826   |
| AB033118  | 5203.72   | 6651.99   | NM_006661 | 2219.67   | 2777.426  | NM_003743 | 451.423   | 409.611   |
| NM_001690 | 6405.602  | 9255.718  | NM_005746 | 15091.734 | 14167.871 | AA829383  | 1511.388  | 1633.65   |
| AF034374  | 3294.148  | 7444.776  | NM_004588 | 1264.401  | 1440.214  | AF012434  | 3931.852  | 3269.22   |
| NM_016118 | 2969.665  | 5660.378  | U16126    | 1254.525  | 1687.395  | SR2       | 24656.281 | 16639.818 |
| NM_018674 | 3086.075  | 6463.383  | NM_004572 | 1046.67   | 1088.726  | SR4       | 5800.107  | 3881.859  |
| NM_001683 | 5263.498  | 7036.729  | NM_002172 | 20580.486 | 21123.016 | SR6       | 908.707   | 946.7     |
| NM_001682 | 1314.779  | 2010.46   | NM_002614 | 1010.148  | 1057.218  | SR8       | 3378.873  | 7718.334  |
| NM_014405 | 1062.812  | 1427.903  | NM_005655 | 2208.158  | 2732.561  | SR10      | 11314.819 | 3750.579  |
| NM_000816 | 835.071   | 1090.308  | AJ008144  | 959.488   | 1227.988  | CY3Cy5    | 894.447   | 258.76    |
| NM_014928 | 363.868   | 319.619   | NM_007314 | 3172.239  | 3593.998  | NM_018842 | 357.529   | 494.311   |
| AK025130  | 4136.873  | 4844.728  | NM_016073 | 936.557   | 626.67    | NM_005902 | 1570.957  | 2581.15   |
| NM_017875 | 800.837   | 1031.426  | NM_006600 | 20040.918 | 16465.457 | NM_005903 | 565.764   | 790.633   |
| AK023232  | 1305.742  | 1298.637  | AF297709  | 2440.985  | 2844.376  | NM_000861 | 384.78    | 603.921   |
| NM_000271 | 3139.284  | 3062.009  | L77564    | 1736.102  | 1890.422  | NM_000024 | 351.045   | 615.21    |
| NM_018209 | 2058.149  | 2233.411  | NM_015384 | 7474.007  | 6071.863  | AB037734  | 161.359   | 161.702   |
| AB018268  | 1698.304  | 1956.141  | AK023327  | 2294.865  | 1408.489  | U77493    | 244.299   | 336.059   |
| Z70701    | 16432.307 | 26102.109 | AB046858  | 1263.92   | 2132.427  | NM_019062 | 307.156   | 385.385   |
| AB040972  | 1865.602  | 1678.77   | D50914    | 7470.791  | 8166.154  | NM_003873 | 238.442   | 362.321   |
| AF148505  | 1471.241  | 1366.041  | BE878692  | 396.496   | 839.548   | NM_000263 | 867.708   | 721.5     |
| BE260997  | 410.333   | 357.25    | NM_002007 | 593.768   | 881.5     | AF073519  | 985.808   | 745.149   |
| NM_018686 | 4184.104  | 3635.689  | NM_015896 | 2171.99   | 3498.21   | AB001451  | 1395.135  | 1486.815  |
| NM_017676 | 1617.999  | 1375.928  | NM_002305 | 62194.031 | 59060.855 | NM_017583 | 1742.91   | 1497.541  |
| AK021764  | 308.023   | 206.634   | AK025439  | 4297.11   | 5266.34   | Y16132    | 3958.335  | 2337.972  |
| NM_005431 | 1531.666  | 1698.237  | NM_001737 | 2147.899  | 2394.288  | NM_016593 | 440.506   | 574.487   |
| AB036063  | 1098.171  | 1380.599  | Z36784    | 1196.033  | 1543.139  | NM_002521 | 262.882   | 183.526   |
| NM_002894 | 3709.476  | 4615.641  | NM_016626 | 13550.187 | 14909.567 | NM_001150 | 885.143   | 847.391   |
| NM_004629 | 4589.091  | 6234.785  | NM_007213 | 1118.833  | 1210.371  | NM_002856 | 1200.882  | 1026.715  |
| NM_004260 | 4022.463  | 6110.495  | NM_019064 | 1141.008  | 1073.645  | NM_003225 | 355.153   | 500.577   |
| AL050067  | 603.909   | 744.338   | NM_000094 | 3908.967  | 4807.541  | NM_000096 | 446.665   | 664.178   |
| NM_004972 | 3770.075  | 4967.484  | AJ295148  | 1519.52   | 755.866   | NM_019045 | 366.23    | 365.638   |
| NM_006251 | 4863.201  | 6025.318  | AF176701  | 785.781   | 789.447   | NM_006380 | 923.307   | 1130.425  |
| NM_004103 | 4800.44   | 5502.136  | NM_016302 | 3158.297  | 2903.83   | AB020710  | 948.489   | 1543.843  |
| NM_002314 | 7229.198  | 6797.826  | NM_004159 | 47063.133 | 50566.051 | NM_016174 | 2654.731  | 3207.721  |
| NM_001744 | 2333.351  | 2194.631  | AK021866  | 1397.763  | 1196.068  | NM_020377 | 679.467   | 907.275   |
| NM_006296 | 3139.881  | 2674.925  | NM_003249 | 10447.31  | 9732.83   | U88896    | 3048.965  | 3135.802  |
| Z25433    | 1452.77   | 1811.106  | M21897    | 1680.234  | 1588.191  | AF116702  | 24085.848 | 25545.957 |
| NM_005922 | 5773.554  | 6864.56   | AF301463  | 2038.726  | 1742.34   | NM_005724 | 3381.324  | 4431.593  |
| NM_018638 | 1560.237  | 1545.02   | NM_015984 | 6870.549  | 4521.209  | X58794    | 21645.545 | 22289.365 |

|           |           |           |           |           |           |           |           |           |
|-----------|-----------|-----------|-----------|-----------|-----------|-----------|-----------|-----------|
| AL137593  | 5665.604  | 5053.515  | AK022471  | 977.902   | 1115.726  | NM_00173E | 945.07    | 1054.272  |
| NM_000382 | 1803.773  | 2295.655  | NM_006894 | 1606.097  | 2028.142  | NM_00234E | 855.702   | 1055.985  |
| NM_001150 | 2272.963  | 4303.424  | AK023031  | 6021.148  | 6851.334  | NM_00508C | 11747.352 | 13097.56  |
| NM_00285E | 3032.376  | 4907.333  | NM_005717 | 40574.426 | 50526.113 | NM_004887 | 3864.722  | 3424.749  |
| NM_00322E | 699.984   | 593.728   | NM_01209C | 1883.516  | 2222.252  | NM_006404 | 258.192   | 402.672   |
| NM_00009E | 1126.92   | 980.894   | BE793385  | 783.127   | 1076.79   | NM_01479E | 2200.348  | 1265.149  |
| AA418251  | 399.57    | 406.363   | AF177292  | 1487.999  | 1299.344  | NM_00298E | 364.846   | 307.378   |
| AA143087  | 8647.2    | 7202.849  | NM_00308E | 9224.649  | 9413.415  | M15330    | 526.971   | 574.576   |
| U25804    | 4599.215  | 3858.585  | AF043290  | 417.171   | 695.054   | NM_01439E | 1068.293  | 704.91    |
| BI870965  | 2594.589  | 1668.11   | NM_004082 | 3840.575  | 5014.655  | AK027201  | 1087.027  | 814.386   |
| NM_001903 | 9023.41   | 9363.69   | NM_01439E | 2689.976  | 2426.982  | NM_00048E | 4320.029  | 3112.365  |
| BI835536  | 7784.044  | 8099.385  | NM_005934 | 13044.653 | 13661.354 | X98507    | 826.008   | 773.984   |
| BF205051  | 2702.374  | 2696.077  | NM_007129 | 15576.497 | 8394.027  | NM_01603C | 20773.527 | 15734.931 |
| X02761    | 549.1     | 544.551   | AY004253  | 7042.676  | 4355.762  | NM_01466E | 3019.266  | 2371.167  |
| M91463    | 996.021   | 1198.662  | Z46967    | 767.527   | 471.89    | NM_005652 | 2224.149  | 1850.446  |
| U88317    | 370.244   | 249.386   | NM_00269E | 1120.757  | 844.706   | AK026686  | 223.031   | 157.259   |
| J03060    | 2004.601  | 2283.448  | NM_00214E | 1724.689  | 1645.9    | AL133064  | 1035.658  | 2868.689  |
| X54156    | 576.17    | 748.109   | NM_017691 | 930.294   | 620.932   | NM_006227 | 2024.842  | 3233.562  |
| NM_003743 | 1182.232  | 843.137   | AL137449  | 1264.785  | 1015.596  | NM_00290E | 2983.932  | 3665.215  |
| AA829383  | 3996.528  | 3911.285  | U88153    | 2011.58   | 1210.262  | NM_00070C | 1592.66   | 2303.326  |
| AF012434  | 9991.188  | 8518.886  | X03910    | 15620.566 | 14535.086 | NM_01902E | 2758.723  | 3819.043  |
| NM_033334 | 382.163   | 287.424   | NM_01842E | 12613.811 | 13077.447 | NM_000431 | 889.764   | 1268.547  |
| AB037791  | 1038.032  | 502.681   | NM_00505E | 687.708   | 737.195   | NM_013421 | 470.549   | 975.598   |
| NM_018124 | 6218.314  | 6234.802  | NM_006924 | 28310.787 | 31867.877 | NM_012474 | 2093.491  | 2982.977  |
| NM_00048E | 8208.591  | 10757.475 | NM_016024 | 11216.517 | 10073.104 | AB033118  | 2110.498  | 3246.027  |
| X98507    | 2250.144  | 3235.411  | NM_018107 | 2731.855  | 3068.38   | NM_01960E | 824.851   | 1161.485  |
| NM_01603C | 33484.828 | 25933.387 | NM_012279 | 1146.185  | 1793.61   | NM_00169C | 2091.245  | 2055.53   |
| NM_01466E | 6720.923  | 5302.653  | NM_018387 | 17371.52  | 15271.609 | AF034374  | 4629.459  | 4911.678  |
| NM_005652 | 4581.318  | 4127.06   | BF310673  | 2549.242  | 3384.093  | NM_01611E | 1168.669  | 1282.573  |
| AK026686  | 685.868   | 577.797   | R97012    | 47666.656 | 56527.691 | NM_018674 | 6781.664  | 7549.848  |
| NM_018842 | 616.16    | 507.135   | U77700    | 17419.166 | 20944.016 | NM_001683 | 6844.274  | 5218.594  |
| NM_005902 | 3574.843  | 3078.583  | NM_006567 | 7206.843  | 8825.593  | NM_001682 | 488.626   | 476.733   |
| NM_00285C | 59839.551 | 68460.578 | AF038554  | 19542.764 | 23912.77  | NM_01440E | 725.83    | 769.04    |
| NM_004302 | 359.847   | 269.66    | AF264621  | 8860.751  | 9593.527  | NM_00081E | 400.862   | 270.524   |
| NM_005903 | 958.146   | 980.127   | NM_00587E | 22277.293 | 25968.576 | NM_01492E | 356.791   | 382.354   |
| NM_000861 | 724.937   | 915.847   | NM_004184 | 10719.073 | 10297.619 | AK025130  | 1690.473  | 1585.562  |
| NM_000024 | 648.833   | 920.841   | AK026571  | 2459.541  | 1996.79   | NM_01787E | 327.665   | 363.616   |
| AB037734  | 493.276   | 394.1     | AK024673  | 7389.7    | 4999.962  | AK023232  | 1038.753  | 981.614   |
| U77493    | 494.729   | 334.842   | AF070618  | 1227.585  | 664.071   | NM_000271 | 2860.557  | 2867.156  |
| NM_003873 | 306.236   | 435.198   | AF131748  | 3909.018  | 2114.36   | NM_01820E | 995.011   | 1294.661  |
| NM_000263 | 2625.208  | 2077.646  | NM_00045E | 2987.142  | 1803.277  | NM_006184 | 9614.659  | 10076.31  |
| AF073519  | 1867.107  | 1848.267  | NM_00249E | 9033.417  | 7726.803  | AB018268  | 1350.108  | 1518.963  |
| AB001451  | 3984.493  | 3802.762  | NM_016243 | 2447.44   | 2627.929  | Z70701    | 7607.239  | 8752.42   |
| NM_017583 | 4143.718  | 3878.338  | X53943    | 11809.556 | 1864.77   | AB040972  | 1327.239  | 1633.072  |
| Y16132    | 5823.696  | 6628.421  | NM_00464E | 7922.466  | 9378.547  | AF148505  | 720.459   | 817.825   |
| NM_016593 | 1059.151  | 1351.683  | NM_00654C | 3942.685  | 5167.946  | BE260997  | 352.8     | 373.257   |
| NM_002521 | 531.246   | 400.981   | NM_01776E | 1769.176  | 1935.964  | NM_01868E | 2207.646  | 3322.186  |
| NM_01787E | 864.184   | 1159.392  | NM_002811 | 13494.418 | 13417.241 | NM_01767E | 604.581   | 982.734   |
| AK023232  | 2107.585  | 2529.519  | NM_02031C | 3004.254  | 4245.848  | NM_005431 | 895.471   | 1193.755  |
| NM_000271 | 4773.197  | 4090.948  | AK024444  | 1081.516  | 1174.125  | AB036063  | 814.731   | 893.35    |
| NM_01820E | 2597.692  | 2391.171  | NM_005802 | 5097.763  | 5390.715  | NM_002894 | 1558.257  | 1593.402  |
| NM_006184 | 23537.795 | 20131.457 | AB002331  | 4236.674  | 4069.83   | NM_00462E | 2001.943  | 1569.149  |
| AB018268  | 4815.761  | 4423.629  | NM_002504 | 4178.796  | 5170.912  | NM_00426C | 2654.455  | 2782.765  |

|           |           |           |           |           |           |           |           |           |
|-----------|-----------|-----------|-----------|-----------|-----------|-----------|-----------|-----------|
| NM_00638C | 1890.347  | 1752.269  | AB046775  | 2182.252  | 2539.317  | AL050067  | 673.173   | 396.246   |
| AB020710  | 1560.648  | 1448.383  | X74862    | 1964.056  | 1881.374  | NM_004972 | 2559.789  | 2412.092  |
| Z83801    | 325.978   | 274.334   | X65663    | 5943.392  | 7816.575  | NM_006251 | 1719.47   | 1299.009  |
| NM_016174 | 3502.948  | 3208.105  | NM_003185 | 7627.205  | 8880.956  | NM_004103 | 2387.789  | 2291.225  |
| NM_020377 | 865.382   | 922.554   | NM_004456 | 6794.559  | 8353.633  | NM_002314 | 2640.625  | 2372.861  |
| U88896    | 2424.908  | 2160.681  | NM_004284 | 36912.289 | 50194.82  | NM_001744 | 1090.69   | 939.475   |
| NM_001735 | 2706.254  | 3638.488  | NM_012243 | 4083.858  | 2731.072  | NM_006296 | 1311.06   | 1195.328  |
| NM_002349 | 1050.472  | 1425.705  | AK025743  | 1111.671  | 647.367   | Z25433    | 824.767   | 779.17    |
| NM_00508C | 29059.006 | 25276.623 | AL137466  | 812.995   | 488.553   | NM_005922 | 2508.299  | 2623.525  |
| NM_004887 | 6601.679  | 5957.304  | AL122040  | 967.06    | 442.622   | NM_018638 | 1636.981  | 1460.16   |
| NM_006404 | 413.776   | 514.708   | AK023974  | 2309.818  | 1124.656  | AL137593  | 5034.577  | 5131.407  |
| NM_014795 | 5077.878  | 3347.906  | AK023768  | 1625.53   | 944.259   | NM_003915 | 698.843   | 556.302   |
| NM_002986 | 810.166   | 826.531   | NM_014729 | 956.128   | 300.664   | NM_000382 | 817.299   | 797.094   |
| M15330    | 1017.212  | 1811.091  | AF147335  | 1422.852  | 1151.464  | NM_001150 | 1068.287  | 1758.663  |
| NM_014396 | 2219.824  | 2336.925  | NM_016323 | 3614.173  | 810.811   | NM_002856 | 1404.917  | 1279.282  |
| AK027201  | 2519.477  | 2720.896  | BI768072  | 1040.144  | 1281.267  | NM_003225 | 360.072   | 481.478   |
| Z25433    | 1791.552  | 2680.032  | AK022216  | 3428.615  | 3750.563  | NM_000096 | 632.797   | 863.267   |
| NM_005922 | 6234.277  | 9126.458  | AK025812  | 3678.649  | 4027.655  | AA418251  | 182.298   | 161.199   |
| NM_018638 | 2486.025  | 2102.747  | AK021459  | 485.826   | 515.996   | AA143087  | 6244.898  | 6333.705  |
| AL137593  | 10036.311 | 8355.797  | U00960    | 1920.543  | 2070.322  | U25804    | 1994.719  | 2681.025  |
| NM_003915 | 1809.341  | 1601.688  | AK022262  | 1181.144  | 1749.023  | BI870965  | 1698.865  | 2243.811  |
| NM_000382 | 1575.226  | 1307.882  | AF088039  | 58240.164 | 54254.883 | NM_001903 | 3727.077  | 5015.378  |
| AL133064  | 1888.26   | 2191.73   | AF143888  | 941.019   | 1367.363  | BI835536  | 3268.343  | 3697.36   |
| NM_006227 | 3435.687  | 3646.587  | AF086220  | 2550.742  | 2970.843  | BF205051  | 1910.11   | 1807.966  |
| NM_002905 | 5324.998  | 5237.28   | AK023941  | 1647.61   | 2056.15   | X02761    | 992.15    | 880.773   |
| NM_00070C | 2632.026  | 2681.037  | AF086265  | 664.75    | 672.917   | M91463    | 532.976   | 381.382   |
| NM_019028 | 2693.303  | 2509.671  | AL390083  | 8153.492  | 8718.32   | J03060    | 1199.233  | 1117.332  |
| NM_000431 | 2384.729  | 2380.016  | AB020702  | 879.387   | 1259.098  | NM_003743 | 490.718   | 321.798   |
| NM_013421 | 471.809   | 504.858   | AL050227  | 362.11    | 753.816   | AA829383  | 1445.01   | 1386.296  |
| AB033118  | 5298.841  | 7631.247  | AF085905  | 570.387   | 1089.952  | AF012434  | 3667.978  | 2917.725  |
| NM_00169C | 6110.24   | 7205.037  | NM_013355 | 1578.383  | 1106.301  | AB037791  | 370.57    | 205.781   |
| AF034374  | 1402.197  | 1514.02   | NM_003847 | 9726.197  | 5426.01   | NM_018124 | 2233.076  | 1897.41   |
| NM_016118 | 2833.143  | 1812.649  | AL110155  | 1414.436  | 348.683   | NM_000489 | 7291.524  | 11265.961 |
| NM_018674 | 2788.078  | 3118.408  | AL050165  | 56489.75  | 56289.75  | X98507    | 1212.042  | 1714.749  |
| NM_001683 | 4099.954  | 3941.735  | AL117445  | 1651.073  | 2126.65   | NM_01603C | 29164.363 | 24929.5   |
| NM_001682 | 1059.128  | 1019.091  | AL122113  | 6305.81   | 7611.251  | NM_014669 | 3279.372  | 2632.276  |
| NM_014405 | 1206.388  | 1147.822  | AK024415  | 4276.182  | 4245.31   | NM_005652 | 3027.162  | 2698.771  |
| NM_000816 | 884.407   | 1178.357  | AL049365  | 2410.685  | 2549.958  | AK026686  | 274.307   | 235.152   |
| NM_014928 | 388.158   | 489.013   | AK025132  | 1444.467  | 1588.263  | NM_005902 | 1468.419  | 2101.59   |
| AK025130  | 4537.888  | 7085.547  | AK025157  | 7773.893  | 8322.859  | NM_00285C | 41812.801 | 60833.598 |
| NM_033334 | 455.57    | 838.369   | NM_020215 | 481.786   | 865.343   | NM_005903 | 420.834   | 351.458   |
| AB037791  | 1007.495  | 607.033   | AK022001  | 5135.852  | 5624.625  | NM_000861 | 393.651   | 451.597   |
| NM_018124 | 7489.87   | 5694.642  | AK022633  | 1231.417  | 1186.817  | NM_000024 | 302.21    | 269.504   |
| Z70701    | 13820.542 | 9168.852  | AK027199  | 751.571   | 1192.703  | U77493    | 231.199   | 194.88    |
| AB040972  | 2037.328  | 2174.052  | AK000079  | 4637.511  | 5964.466  | NM_003873 | 258.475   | 250.603   |
| AF148505  | 1532.14   | 1530.9    | AJ227874  | 1289.83   | 714.231   | NM_000263 | 953.993   | 549.089   |
| BE260997  | 460.889   | 346.199   | AF009276  | 1251.648  | 547.074   | AF073519  | 947.366   | 621.193   |
| NM_018686 | 4198.288  | 3767.189  | AF056428  | 6836.49   | 3036.036  | AB001451  | 1630.178  | 1575.061  |
| NM_017676 | 1470.486  | 1574.431  | AK001995  | 466.312   | 1029.215  | NM_017583 | 1697.668  | 1800.048  |
| AK021764  | 472.513   | 567.727   | AK021594  | 350.945   | 767.208   | Y16132    | 4045.35   | 3722.851  |
| NM_005431 | 1735.953  | 2138.605  | AK002150  | 1100.579  | 1057.356  | NM_016593 | 339.988   | 257.978   |
| AB036063  | 1115.761  | 2386.294  | AK021635  | 1453.063  | 2193.262  | NM_002521 | 344.722   | 326.449   |
| NM_002894 | 4178.137  | 4653.924  | AK021856  | 1485.725  | 2114.212  | NM_017875 | 613.697   | 1551.776  |

|           |           |           |           |           |           |           |           |           |
|-----------|-----------|-----------|-----------|-----------|-----------|-----------|-----------|-----------|
| NM_004629 | 4424.264  | 3452.951  | AK026789  | 339.056   | 744.539   | AK023232  | 1977.146  | 3692.816  |
| NM_004260 | 3833.791  | 3159.899  | AK025276  | 2350.853  | 2511.567  | NM_000271 | 5301.77   | 7193.927  |
| AL050067  | 443.574   | 345.972   | AK026027  | 1065.14   | 1346.6    | NM_018209 | 1561.752  | 1190.902  |
| NM_004972 | 4032.245  | 3579.904  | AK026457  | 3956.394  | 4125.223  | NM_006184 | 10063.108 | 12487.899 |
| NM_006251 | 4091.296  | 4289.791  | AJ008131  | 14360.926 | 8565.8    | AB018268  | 2194.85   | 3077.884  |
| NM_004103 | 4251.058  | 3588.823  | AK024303  | 1120.767  | 597.584   | NM_019045 | 423.303   | 445.632   |
| NM_002314 | 7830.532  | 8885.599  | AL160131  | 5516.707  | 3281.837  | NM_006380 | 859.64    | 1325.76   |
| NM_001744 | 2480.781  | 2797.318  | AF086045  | 3411.672  | 1905.391  | AB020710  | 732.74    | 911.479   |
| NM_006296 | 3104.514  | 3380.807  | AK027028  | 3858.249  | 2450.887  | NM_016174 | 2431.855  | 2706.761  |
| AF073519  | 2098.747  | 2258.025  | AK027069  | 5865.583  | 2656.255  | NM_020377 | 528.336   | 488.02    |
| AB001451  | 3880.598  | 4460.135  | AK026916  | 2362.416  | 802.831   | U88896    | 2889.839  | 2715.417  |
| NM_017583 | 4249.901  | 4696.725  | AK026914  | 3089.531  | 2001.102  | AF116702  | 22106.635 | 17712.684 |
| Y16132    | 8575.42   | 8692.075  | Y11166    | 2112.073  | 3476.426  | NM_005724 | 3246.94   | 3326.676  |
| NM_016593 | 860.739   | 899.469   | AK023515  | 2699.554  | 3495.592  | X58794    | 19672.645 | 16820.297 |
| NM_002521 | 742.228   | 551.96    | AL137623  | 10975.785 | 11270.146 | NM_001735 | 998.766   | 776.791   |
| NM_001150 | 2286.127  | 2136.805  | AK026485  | 479.196   | 953.753   | NM_002345 | 924.914   | 799.424   |
| NM_002856 | 2539.814  | 2797.601  | NM_003546 | 2516.049  | 1403.81   | NM_005080 | 11083.432 | 9812.355  |
| NM_003225 | 685.453   | 655.955   | AF118077  | 2083.759  | 1229.035  | NM_004887 | 5068.821  | 3849.7    |
| NM_000096 | 1155.907  | 1329.268  | AK025750  | 2276.449  | 944.315   | NM_006404 | 321.408   | 261.644   |
| AA418251  | 288.039   | 498.609   | BF031253  | 1072.079  | 398.51    | NM_014795 | 2315.672  | 1781.302  |
| AA143087  | 3775.969  | 3036.268  | AK025783  | 1439.711  | 701.917   | NM_002986 | 500.434   | 479.86    |
| U25804    | 4642.61   | 4844.949  | AF113675  | 1106.209  | 371.041   | M15330    | 530.402   | 1056      |
| BI870965  | 1154.679  | 1266.228  | AK024514  | 1455.218  | 249.281   | NM_014396 | 1048.586  | 1004.936  |
| NM_001903 | 9260.949  | 11296.862 | NM_020119 | 2547.095  | 1404.395  | AK027201  | 1174.784  | 1052.588  |
| BI835536  | 8394.478  | 9634.37   | AK023507  | 1140.335  | 1691.808  | Z25433    | 1441.73   | 5497.537  |
| BF205051  | 1914.469  | 1942.935  | NM_005169 | 2367.844  | 2590.364  | NM_005922 | 3096.044  | 10320.979 |
| M91463    | 1061.313  | 849.488   | AL109818  | 661.61    | 719.189   | NM_018636 | 2012.968  | 3650.94   |
| U88317    | 362.633   | 273.105   | NM_017929 | 898.172   | 1281.641  | AL137593  | 7265.104  | 6491.071  |
| J03060    | 1876.399  | 1495.192  | NM_018472 | 1552.544  | 948.478   | NM_003915 | 801.688   | 714.273   |
| X54156    | 601.733   | 492.987   | AF085923  | 561.702   | 675.531   | NM_000382 | 888.982   | 1142.818  |
| NM_003743 | 1103.209  | 785.521   | AJ008128  | 26110.729 | 30424.24  | AL133064  | 1218.793  | 1715.998  |
| AA829383  | 4243.847  | 4968.082  | AL449243  | 12104.198 | 13359.035 | NM_006227 | 1947.754  | 2935.724  |
| AF012434  | 9175.549  | 9135.583  | M12211    | 758.884   | 1332.182  | NM_002905 | 2547.847  | 3233.747  |
| NM_006404 | 525.425   | 527.12    | AK026449  | 4861.619  | 2650.751  | NM_000700 | 1264.29   | 1785.073  |
| NM_014795 | 4938.133  | 3446.514  | NM_014027 | 5119.956  | 3062.191  | NM_019028 | 2821.35   | 3340.969  |
| NM_002986 | 933.339   | 1269.07   | AF116621  | 4309.85   | 2251.188  | NM_000431 | 804.477   | 796.996   |
| M15330    | 860.364   | 1987.111  | AF086554  | 2267.858  | 1259.547  | NM_013421 | 414.585   | 502.072   |
| NM_014396 | 2482.492  | 2474.926  | AL390136  | 14945.173 | 5458.236  | NM_012474 | 1891.741  | 1742.045  |
| AK027201  | 2253.979  | 3070.977  | AF086398  | 58584.926 | 33424.047 | AB033118  | 2074.848  | 2297.013  |
| NM_000489 | 8996.919  | 8152.363  | AK023444  | 1060.075  | 610.63    | NM_019606 | 955.628   | 876.296   |
| X98507    | 2076.617  | 2420.342  | NM_003180 | 1533.471  | 2291.296  | NM_001690 | 2069.317  | 1791.097  |
| NM_014669 | 7455.273  | 10234.395 | AF086406  | 14060.995 | 14797.793 | AF034374  | 4101.906  | 3748.609  |
| NM_005652 | 4399.054  | 4838.826  | D17216    | 5340.726  | 5925.301  | NM_016118 | 1114.223  | 567.147   |
| AK026686  | 551.244   | 400.038   | AL137581  | 1640.757  | 2414.481  | NM_018674 | 5801.094  | 5373.212  |
| NM_018842 | 525.806   | 408.678   | AK024942  | 1722.854  | 2282.136  | NM_001683 | 5252.514  | 3254.263  |
| NM_005902 | 3381.852  | 3718.464  | AJ227873  | 19900.355 | 18140.469 | NM_001682 | 538.509   | 523.153   |
| NM_002850 | 49216.238 | 45740.254 | AK022886  | 4983.689  | 6128.711  | NM_014405 | 760.05    | 928.401   |
| NM_004302 | 332.155   | 479.195   | AK024665  | 8294.755  | 8997.905  | NM_000816 | 380.294   | 415.254   |
| NM_005903 | 1189.027  | 811.132   | AF147363  | 888.944   | 1136.961  | NM_014928 | 370.488   | 516.801   |
| NM_000861 | 648.935   | 636.048   | AJ227880  | 848.576   | 1286.137  | AK025130  | 2092.859  | 2135.63   |
| NM_000024 | 608.028   | 869.938   | AK000691  | 1164.626  | 1386.053  | AB037791  | 428.362   | 397.387   |
| AB037734  | 1054.781  | 964.283   | AK001448  | 1952.425  | 1900.737  | NM_018124 | 2594.275  | 2972.604  |
| U77493    | 359.678   | 187.8     | AK026890  | 931.634   | 968.086   | Z70701    | 7390.297  | 7150.661  |



|           |           |           |           |           |           |           |           |           |
|-----------|-----------|-----------|-----------|-----------|-----------|-----------|-----------|-----------|
| NM_003873 | 399.18    | 356.724   | AL049321  | 7671.02   | 6921.374  | AB040972  | 1226.338  | 1424.888  |
| NM_000263 | 2591.517  | 2548.273  | CY3Cy5    | 9680.983  | 1543.405  | AF148505  | 651.961   | 994.982   |
| NM_001683 | 13036.958 | 10911.61  | M58603    | 3212.812  | 3758.37   | BE260997  | 364.258   | 463.768   |
| NM_001682 | 1170.782  | 1171.49   | AA443286  | 1250.946  | 973.849   | NM_018686 | 1913.733  | 2072.308  |
| NM_014405 | 1445.247  | 1401.397  | AB003334  | 4067.434  | 4250.543  | NM_017676 | 651.147   | 698.186   |
| NM_000816 | 802.957   | 1129.887  | AW276315  | 1766.695  | 1997.381  | NM_005431 | 748.669   | 976.64    |
| NM_014928 | 518.047   | 470.83    | AA490737  | 2626.837  | 2082.448  | AB036063  | 780.982   | 719.711   |
| AK025130  | 3729.263  | 4556.908  | AI878886  | 26742.432 | 33412.07  | NM_002894 | 1508.543  | 952.569   |
| NM_017875 | 804.869   | 749.808   | BG697179  | 7135.533  | 7824.34   | NM_004625 | 2052.533  | 1451.501  |
| AK023232  | 1979.142  | 2250.954  | NM_002136 | 66309.859 | 66969     | NM_004260 | 2335.342  | 1841.224  |
| NM_018209 | 2722.662  | 3905.467  | BM012504  | 9134.671  | 8982.49   | AL050067  | 803.259   | 436.839   |
| NM_006184 | 25674.039 | 33293.758 | AA664145  | 1651.253  | 1738.41   | NM_004972 | 2231.251  | 1846.903  |
| AB018268  | 2310.301  | 2432.791  | X72308    | 28368.637 | 28644.586 | NM_006251 | 1688.652  | 1703.609  |
| NM_019045 | 1037.757  | 990.942   | T50790    | 2493.379  | 2513.846  | NM_004103 | 2518.546  | 2353.431  |
| NM_006380 | 1951.401  | 2217.518  | R48168    | 15573.088 | 20331.912 | NM_002314 | 2664.268  | 2394.105  |
| AB020710  | 1309.045  | 1032.426  | NM_003942 | 2706.888  | 3844.863  | NM_001744 | 1052.488  | 967.646   |
| Z83801    | 302.666   | 353.587   | SR9       | 29243.168 | 11265.542 | NM_006296 | 1368.334  | 1296.617  |
| NM_016174 | 3178.122  | 2640.921  | CY3Cy5    | 14843.955 | 2038.7    | AF073519  | 1445.797  | 5004.859  |
| NM_020377 | 752.405   | 672.371   | NM_013246 | 474.606   | 805.739   | AB001451  | 2182.253  | 9187.966  |
| U88896    | 2268.506  | 1654.984  | NM_000591 | 1716.275  | 2370.735  | NM_017583 | 2370.285  | 5032.96   |
| AF116702  | 49507.785 | 45998.313 | NM_000565 | 7618.565  | 8091.803  | Y16132    | 4727.537  | 5877.976  |
| NM_005724 | 9270.123  | 8199.678  | AF253318  | 1870.389  | 1893.184  | NM_016593 | 398.802   | 487.405   |
| X58794    | 48479.121 | 46576.551 | AK024848  | 6233.818  | 5710.473  | NM_002521 | 303.469   | 409.173   |
| NM_001735 | 2404.731  | 2277.961  | NM_004852 | 811.019   | 574.012   | NM_001150 | 1033.608  | 1351.885  |
| NM_002349 | 1030.703  | 905.712   | NM_000543 | 969.153   | 898.449   | NM_002856 | 1502.903  | 2150.398  |
| NM_005080 | 29168.621 | 26628.512 | U06699    | 7069.456  | 7436.64   | NM_003225 | 364.469   | 830.04    |
| NM_004887 | 7126.444  | 7100.659  | NM_006148 | 585.141   | 743.468   | NM_000096 | 459.19    | 427.309   |
| NM_004972 | 4686.514  | 4336.649  | AJ290954  | 5172.817  | 5728.067  | AA143087  | 4321.681  | 2880.263  |
| NM_006251 | 4559.495  | 4677.583  | AK024396  | 17207.348 | 10545.952 | U25804    | 1730.935  | 1933.721  |
| NM_004103 | 6102.125  | 4957.483  | U58514    | 1933.479  | 3970.896  | BI870965  | 1321.41   | 1260.519  |
| NM_002314 | 6729.702  | 6017.575  | NM_000544 | 2440.722  | 3884.178  | NM_001903 | 3607.112  | 3626.381  |
| NM_001744 | 2195.986  | 1720.009  | AV681967  | 1483.454  | 1860.036  | BI835536  | 3048.066  | 2949.786  |
| NM_006296 | 3038.293  | 2363.68   | NM_018250 | 1124.9    | 1217.801  | BF205051  | 1459.299  | 1038.99   |
| Z25433    | 1850.792  | 1510.825  | NM_016553 | 6228.885  | 6970.645  | X02761    | 838.257   | 593.693   |
| NM_005922 | 6213.61   | 6070.068  | NM_005701 | 2048.818  | 2613.943  | M91463    | 610.69    | 364.358   |
| NM_018638 | 2603.614  | 2322.693  | NM_001231 | 704.307   | 647.863   | J03060    | 1150.179  | 699.94    |
| AL137593  | 10084.842 | 8409.334  | NM_014744 | 2294.382  | 2102.074  | NM_003743 | 420.1     | 356.647   |
| NM_003915 | 1910.068  | 1723.921  | AF146759  | 1255.778  | 1063.256  | AA829383  | 1549.131  | 1458.351  |
| NM_000382 | 1785.358  | 1524.435  | AB032993  | 4940.113  | 3363.368  | AF012434  | 3654.493  | 2957.378  |
| AL133064  | 1876.878  | 2215.505  | NM_000854 | 3553.576  | 2987.273  | NM_006404 | 361.864   | 1798.499  |
| NM_006227 | 3314.135  | 4249.743  | AL117423  | 4785.952  | 4693.367  | NM_014795 | 3008.417  | 9744.749  |
| NM_002905 | 4725.48   | 4156.585  | NM_006140 | 779.956   | 844.888   | NM_002986 | 690.295   | 1160.897  |
| NM_000700 | 2646.201  | 2648.358  | AK023317  | 357.417   | 624.919   | M15330    | 481.866   | 1690.718  |
| NM_019028 | 2760.588  | 2465.835  | NM_003651 | 11364.823 | 20422.137 | NM_014396 | 1330.992  | 1430.807  |
| NM_000431 | 2841.418  | 2098.986  | NM_003262 | 3493.229  | 4087.777  | AK027201  | 1246.333  | 1413.452  |
| NM_013421 | 419.169   | 416.313   | AK022832  | 2581.57   | 2888.274  | NM_000489 | 6319.293  | 7889.475  |
| NM_012474 | 4729.898  | 4487.73   | NM_014641 | 3555.508  | 2727.287  | X98507    | 1096.102  | 1299.877  |
| AB033118  | 4861.22   | 5366.321  | NM_004462 | 13160.424 | 9651.603  | NM_016030 | 29992.123 | 32188.012 |
| NM_019606 | 2319.729  | 1899.63   | AB020664  | 3966.925  | 2874.627  | NM_014669 | 3232.431  | 3518.736  |
| NM_001690 | 5104.484  | 4187.48   | NM_006640 | 2640.68   | 2544.865  | NM_005652 | 3313.489  | 3513.44   |
| AF034374  | 820.719   | 707.128   | NM_000343 | 914.161   | 901.789   | NM_005902 | 1247.812  | 1252.352  |
| NM_016118 | 2770.639  | 1733.465  | NM_019112 | 5527.952  | 3764.395  | NM_002850 | 40175.367 | 40672     |
| NM_018674 | 1823.483  | 2194.811  | NM_012336 | 6249.605  | 5139.231  | NM_005903 | 335.415   | 360.845   |

|           |           |           |           |           |           |           |           |           |
|-----------|-----------|-----------|-----------|-----------|-----------|-----------|-----------|-----------|
| NM_00006E | 1673.741  | 1387.067  | NM_02024E | 2128.811  | 2275.515  | NM_000861 | 327.556   | 226.565   |
| AB033046  | 5854.614  | 5506.158  | NM_00303E | 2886.822  | 4573.555  | NM_000024 | 255.516   | 304.147   |
| NM_01591E | 4051.386  | 3066.972  | NM_004731 | 1232.864  | 2792.443  | U77493    | 229.894   | 367.409   |
| AK023228  | 617.358   | 512.084   | AB023139  | 3239.177  | 4672.507  | NM_00387E | 210.536   | 181.407   |
| NM_01324E | 1048.036  | 620.991   | NM_01788E | 884.142   | 861.383   | NM_00026E | 988.356   | 592.8     |
| AB029041  | 9208.821  | 6289.051  | D80004    | 3986.761  | 3486.72   | NM_00168E | 9944.514  | 29722.5   |
| AK026642  | 2354.076  | 1992.074  | NM_00094E | 3825.383  | 3153.549  | NM_00168E | 784.759   | 2746.894  |
| AL359063  | 722.033   | 760.633   | NM_01607C | 1410.366  | 1266.062  | NM_01440E | 1264.607  | 3527.802  |
| AL079292  | 3189.344  | 2973.016  | NM_01639C | 1389.723  | 1126.861  | NM_00081E | 415.562   | 639.959   |
| X89667    | 1229.665  | 1117.943  | NM_016101 | 6764.073  | 5917.588  | NM_01492E | 507.647   | 424.812   |
| AB037791  | 1112.824  | 862.167   | NM_00585E | 30647.088 | 26810.256 | AK025130  | 2034.423  | 3208.406  |
| NM_018124 | 6882.673  | 5468.144  | NM_02031E | 763.557   | 501.951   | NM_01787E | 367.61    | 568.478   |
| Z70701    | 13425.438 | 11587.938 | NM_01462E | 4141.716  | 3216.02   | AK023232  | 1607.397  | 1963.892  |
| AB040972  | 1596.52   | 1895.359  | AK025630  | 1526.341  | 1696.87   | NM_000271 | 4624.086  | 5859.483  |
| AF148505  | 1734.088  | 1571.045  | AL365404  | 10048.751 | 9769.955  | NM_01820E | 1355.24   | 1470.79   |
| NM_01868E | 4120.008  | 3150.942  | AK022907  | 1478.967  | 1338.749  | NM_006184 | 11031.199 | 15003.321 |
| NM_01767E | 1766.563  | 1534.473  | NM_01479E | 2602.793  | 2538.897  | AB018268  | 1650.597  | 1989.563  |
| NM_005431 | 1390.018  | 1129.352  | NM_00424E | 1735.486  | 1605.219  | NM_01904E | 347.793   | 460.132   |
| AB036063  | 1064.859  | 1004.377  | NM_003241 | 2095.547  | 2416.659  | NM_00638C | 725.692   | 813.403   |
| NM_002894 | 3776.566  | 2980.417  | AF039023  | 3290.643  | 5052.601  | AB020710  | 679.286   | 821.783   |
| NM_00462E | 4759.99   | 3531.962  | NM_005511 | 5982.505  | 9715.432  | NM_016174 | 1806.584  | 1688.875  |
| NM_00426C | 3192.04   | 2413.782  | NM_01469E | 16129.389 | 28626.5   | NM_020377 | 511.305   | 589.553   |
| AL050067  | 277.834   | 324.014   | NM_01847E | 6731.733  | 12864.004 | U88896    | 2265.161  | 1432.301  |
| AK024732  | 1888.704  | 1644.64   | X52005    | 18408.371 | 27613.484 | AF116702  | 22005.75  | 15353.693 |
| J05158    | 255.452   | 155.164   | NM_001047 | 3651.146  | 6466.725  | NM_005724 | 3203.379  | 2520.619  |
| NM_015564 | 1403.985  | 914.603   | AK024396  | 1054.752  | 1303.826  | X58794    | 19965.16  | 17745.25  |
| AF160476  | 330.76    | 282.216   | U58514    | 1502.247  | 1974.315  | NM_00173E | 1155.476  | 1230.306  |
| L22650    | 945.822   | 714.83    | W74254    | 2128.796  | 2701.654  | NM_00234E | 750.562   | 656.632   |
| AB014520  | 12586.48  | 6933.312  | M58603    | 3458.874  | 4609.353  | NM_00508C | 10820.821 | 9217.186  |
| AF161420  | 1437.242  | 1040.597  | AA443286  | 824.672   | 517.232   | NM_004887 | 5345.65   | 6078.898  |
| NM_004907 | 1224.169  | 982.912   | AB003334  | 4141.781  | 3405.555  | NM_00497E | 3811.383  | 11471.146 |
| NM_002891 | 834.974   | 517.651   | AW276315  | 1514.066  | 1170.554  | NM_006251 | 2631.805  | 9512.104  |
| NM_00177E | 988.796   | 529.72    | AA490737  | 2790.737  | 2544.448  | NM_00410E | 3559.048  | 8090.571  |
| BE083789  | 406.606   | 383.485   | BG697179  | 7638.523  | 6235.773  | NM_002314 | 2901.842  | 3572.566  |
| X04526    | 10593.972 | 6524.888  | NM_00213E | 56333.793 | 54721.32  | NM_001744 | 798.51    | 1067.869  |
| D26067    | 2190.534  | 1636.467  | BM012504  | 9507.092  | 8839.875  | NM_00629E | 1423.874  | 1854.066  |
| AF227924  | 2430.073  | 2495.027  | AA664145  | 1637.949  | 1758.624  | Z25433    | 1090.64   | 1586.412  |
| NM_00571E | 5404.092  | 4825.091  | T50790    | 2758.817  | 2892.133  | NM_00592E | 2749.303  | 4150.536  |
| NM_00618E | 1991.051  | 1920.747  | R48168    | 16915.996 | 24663.08  | NM_01863E | 1507.738  | 1982.877  |
| NM_016087 | 640.508   | 627.656   | NM_00394E | 3086.856  | 4835.16   | AL137593  | 6379.255  | 6772.613  |
| S59184    | 2164.973  | 1852.381  | NM_002081 | 1525.422  | 2163.736  | NM_00391E | 847.63    | 995.211   |
| NM_00513C | 263.602   | 446.019   | NM_002084 | 2210.167  | 3490.048  | NM_00038E | 746.554   | 830.176   |
| NM_006661 | 854.146   | 877.529   | D16892    | 38169.57  | 61870.441 | AL133064  | 1038.104  | 1118.591  |
| NM_00574E | 7739.619  | 6933.463  | NM_00475C | 1210.951  | 945.607   | NM_006227 | 1582.402  | 1917.781  |
| NM_00457E | 367.89    | 241.378   | NM_00729E | 4375.786  | 3627.492  | NM_00290E | 3133.494  | 2699.8    |
| NM_00217E | 4145.59   | 3606.365  | NM_003651 | 8812.014  | 9506.168  | NM_00070C | 1314.117  | 1835.595  |
| NM_00565E | 1522.728  | 1755.738  | NM_01324E | 544.067   | 637.358   | NM_01902E | 1482.395  | 1237.038  |
| AJ008144  | 330.703   | 218.306   | NM_000591 | 1810.85   | 1694.552  | NM_000431 | 688.365   | 531.125   |
| NM_007314 | 1604.256  | 1237.176  | AF253318  | 1647.625  | 1111.707  | NM_013421 | 307.365   | 248.579   |
| NM_00660C | 10099.261 | 5651.219  | AK024848  | 7087.4    | 7513.85   | NM_012474 | 1881.304  | 1674.597  |
| AF297709  | 1694.656  | 993.392   | NM_00485E | 658       | 775.273   | AB033118  | 1946.176  | 1676.608  |
| L77564    | 1148.948  | 975.504   | NM_00363E | 716.889   | 1127.332  | NM_01960E | 811.925   | 948.464   |
| NM_015384 | 3743.626  | 2298.16   | NM_00054E | 1738.844  | 2845.76   | NM_00169C | 2152.908  | 1971.788  |

|           |           |           |           |           |           |           |           |           |
|-----------|-----------|-----------|-----------|-----------|-----------|-----------|-----------|-----------|
| AK023327  | 1030.713  | 488.806   | U06699    | 7485.593  | 11015.828 | AF034374  | 3627.17   | 3246.448  |
| AB046858  | 814.718   | 529.075   | NM_006148 | 720.919   | 1287.811  | NM_016118 | 1267.343  | 1080.748  |
| D50914    | 3829.748  | 2862.18   | NM_002783 | 2552.867  | 4030.404  | NM_018674 | 5554.403  | 5869.221  |
| BE878692  | 352.988   | 395.192   | NM_000084 | 2560.456  | 2690.708  | NM_000068 | 852.178   | 3044.379  |
| NM_002007 | 416.512   | 535.346   | NM_016354 | 1141.226  | 1754.95   | AB033046  | 3929.705  | 11473.803 |
| NM_015896 | 1192.483  | 1786.694  | NM_003038 | 971.365   | 869.468   | NM_015918 | 2159.397  | 3561.71   |
| NM_002305 | 46971.055 | 56697.465 | NM_018155 | 6325.802  | 7268.897  | AK023228  | 214.594   | 367.698   |
| AK025439  | 2226.947  | 3441.435  | AL050358  | 1894.923  | 2241.969  | NM_013248 | 409.054   | 481.114   |
| NM_001737 | 749.273   | 547.989   | NM_004731 | 989.669   | 1033.263  | AB029041  | 10229.524 | 12552.883 |
| Z36784    | 851.461   | 907.674   | NM_000544 | 2887.214  | 4119.12   | AK026642  | 899.972   | 1295.051  |
| NM_016626 | 6924.692  | 6063.619  | NM_004644 | 701.778   | 755.536   | AL359063  | 371.046   | 421.226   |
| NM_007213 | 621.973   | 687.394   | AV681967  | 1539.21   | 1759.505  | AL079292  | 1327.047  | 1461.385  |
| NM_019064 | 409.418   | 371.7     | NM_018250 | 1056.398  | 957.592   | X89667    | 966.723   | 968.323   |
| NM_018938 | 357.673   | 166.068   | NM_016553 | 6396.544  | 5972      | AB037791  | 407.129   | 331.72    |
| NM_000094 | 1062.912  | 1030.968  | NM_003795 | 39797.535 | 37697.508 | NM_018124 | 2707.616  | 2029.654  |
| AJ295148  | 1148.292  | 1427.615  | NM_014232 | 1456.263  | 1384.469  | Z70701    | 6432.063  | 5240.259  |
| AF176701  | 457.848   | 404.958   | NM_005701 | 2679.422  | 2405.886  | AB040972  | 1236.506  | 1471.887  |
| NM_016302 | 2024.361  | 1511.05   | NM_001231 | 1894.571  | 1876.31   | AF148505  | 582.709   | 515.014   |
| NM_004158 | 29691.762 | 21117.975 | NM_006819 | 33832.313 | 28013.945 | BE260997  | 264.097   | 268.303   |
| AK021866  | 423.418   | 403.658   | NM_014744 | 2652.133  | 2116.799  | NM_018686 | 1655.971  | 1637.922  |
| NM_003248 | 6504.194  | 4192.688  | AF146759  | 1401.387  | 1428.866  | NM_017676 | 527.334   | 436.954   |
| M21897    | 962.576   | 413.216   | AB032993  | 5182.128  | 3684.225  | NM_005431 | 614.789   | 445.725   |
| AF301463  | 1098.14   | 664.813   | NM_000854 | 4472.923  | 5018.68   | AB036063  | 648.787   | 886.807   |
| NM_015984 | 4276.446  | 2225.173  | AL117423  | 5067.103  | 6610.347  | NM_002894 | 1352.673  | 1335.834  |
| AK022471  | 403.94    | 260.749   | NM_002685 | 3748.107  | 5119.949  | NM_004628 | 1824.934  | 1535.132  |
| AK025969  | 157.545   | 264.54    | AK024504  | 1165.946  | 1702.809  | NM_004260 | 2237.28   | 1901.014  |
| NM_006894 | 1074.231  | 1106.241  | AF039023  | 1054.035  | 1020.464  | AL050067  | 772.271   | 642.188   |
| AK023031  | 3201.426  | 4640.343  | NM_005511 | 4160.878  | 4170.841  | NM_015564 | 584.159   | 686.268   |
| NM_005717 | 21005.051 | 12114.459 | NM_014698 | 13804.653 | 15591.355 | AF160476  | 307.864   | 178.764   |
| NM_012090 | 817.179   | 735.491   | NM_018475 | 5531.667  | 5401.567  | AB014520  | 8503.737  | 8463.525  |
| AF177292  | 786.636   | 818.794   | NM_003262 | 4101.425  | 4640.583  | AF161420  | 522.664   | 924.316   |
| NM_003088 | 5665.02   | 13304.173 | AK022832  | 2550.528  | 2771.547  | NM_004907 | 1083.519  | 1198.033  |
| NM_004082 | 2333.268  | 2538.199  | NM_014641 | 3400.634  | 2252.316  | NM_002891 | 636.865   | 449.217   |
| NM_014398 | 795.808   | 900.536   | NM_004462 | 14603.075 | 11508.213 | NM_001775 | 467.403   | 519.087   |
| NM_005934 | 5894.954  | 5465.544  | AB020664  | 4256.946  | 3773.887  | BE083789  | 219.416   | 299.771   |
| NM_007128 | 11352.179 | 10292.416 | NM_006640 | 4975.397  | 4677.218  | X04526    | 4055.065  | 2844.017  |
| AY004253  | 5111.205  | 4809.971  | NM_000343 | 1052.452  | 1268.326  | D26067    | 842.079   | 717.863   |
| Z46967    | 342.659   | 258.533   | NM_019112 | 4992.129  | 4382.901  | AF227924  | 1203.211  | 1028.059  |
| NM_002698 | 469.811   | 369.032   | NM_012336 | 10104.689 | 9966.792  | NM_005716 | 4220.161  | 3255.977  |
| NM_002148 | 916.95    | 883.825   | NM_003942 | 2965.231  | 6153.846  | NM_006183 | 680.871   | 543.58    |
| AL137449  | 759.206   | 569.663   | NM_004452 | 2086.804  | 3625.212  | NM_016087 | 212.409   | 165.495   |
| U88153    | 905.853   | 436.224   | AB040954  | 4172.316  | 3625.482  | S59184    | 906.578   | 695.957   |
| X03910    | 8029.274  | 5742.057  | NM_002081 | 1509.437  | 1317.016  | NM_005130 | 865.181   | 1518.378  |
| NM_018428 | 6192.742  | 5172.906  | AB023139  | 3418.421  | 4316.55   | NM_006661 | 865.11    | 630.583   |
| NM_006924 | 19764.391 | 45432.172 | NM_017885 | 1593.515  | 1665.495  | NM_005746 | 2999.07   | 1863.575  |
| NM_016024 | 5923.769  | 10231.656 | D80004    | 4470.473  | 4382.617  | NM_004588 | 266.443   | 229.44    |
| NM_018107 | 1467.904  | 1915.754  | NM_000946 | 3895.314  | 3009.986  | U16126    | 216.365   | 130.786   |
| NM_012279 | 872.651   | 1051.683  | NM_016070 | 1486.921  | 1623.184  | NM_002172 | 5790.225  | 4643.753  |
| NM_018387 | 9066.271  | 4755.29   | NM_016390 | 1384.226  | 1152.877  | NM_005655 | 588.399   | 927.71    |
| BF310673  | 1814.923  | 1392.9    | NM_016101 | 6714.331  | 5569.237  | AJ008144  | 200.408   | 183.842   |
| R97012    | 29427.885 | 27855.871 | NM_005859 | 30582.643 | 26817.232 | NM_007314 | 812.502   | 1153.351  |
| U77700    | 10177.798 | 12622.663 | NM_014628 | 3887.979  | 3055.107  | NM_006600 | 4536.865  | 4563.541  |
| NM_006567 | 5083.779  | 6481.172  | AK025630  | 1819.641  | 1318.632  | AF297709  | 746.592   | 674.672   |

|           |           |           |           |           |           |           |           |           |
|-----------|-----------|-----------|-----------|-----------|-----------|-----------|-----------|-----------|
| AF038554  | 10328.256 | 14287.92  | AL365404  | 10612.186 | 9747.506  | L77564    | 623.114   | 680.422   |
| AF264621  | 5615.112  | 5668.016  | AK022907  | 2687.014  | 2114.36   | NM_015384 | 1817.401  | 1537.74   |
| NM_005875 | 10770.516 | 9941.331  | NM_014793 | 2836.919  | 2496.576  | AK023327  | 629.349   | 501.126   |
| NM_004184 | 5993.917  | 5359.027  | NM_004245 | 2358.718  | 1795.066  | AB046858  | 317.639   | 332.422   |
| AK075087  | 439.848   | 636.349   | NM_003241 | 1861.635  | 2277.978  | D50914    | 1312.435  | 1194.684  |
| AK026571  | 1706.572  | 1668.589  | NM_000543 | 720.734   | 1336.833  | NM_015896 | 407.99    | 640.603   |
| AK024673  | 5273.015  | 5587.332  | U06699    | 6333.531  | 9632.231  | NM_002305 | 20775.363 | 20002.914 |
| AF070618  | 973.143   | 1431.63   | AJ290954  | 4930.266  | 6058.229  | AK025439  | 706.498   | 476.345   |
| AF131748  | 3328.693  | 2751.671  | AK025451  | 5572.146  | 6749.717  | NM_001737 | 720.75    | 609.11    |
| NM_000456 | 2122.496  | 1807.839  | NM_002783 | 1687.878  | 1791.113  | NM_016626 | 2470.84   | 1653.784  |
| NM_002496 | 4881.079  | 3584.657  | X52005    | 22503.826 | 24950.553 | NM_007213 | 244.083   | 301.845   |
| NM_016243 | 1857.681  | 995.251   | NM_001047 | 3755.101  | 4080.542  | NM_019064 | 215.861   | 181.77    |
| X53943    | 315.919   | 216.833   | AK024396  | 1563.616  | 2180.694  | NM_000094 | 1309.828  | 1024.79   |
| NM_017766 | 1288.719  | 2637.683  | U58514    | 1773.574  | 1850.671  | NM_000436 | 231.143   | 154.17    |
| NM_002811 | 7477.078  | 10451.572 | W74254    | 1816.149  | 2292.495  | AJ295148  | 397.13    | 673.119   |
| NM_020310 | 1807.301  | 2408.669  | M58603    | 3014.981  | 2995.994  | AF176701  | 186.07    | 345.592   |
| AK024444  | 655.352   | 716.587   | AA443286  | 1057.22   | 706.089   | NM_016302 | 870.645   | 1165.387  |
| NM_005802 | 2838.542  | 1997.457  | AB003334  | 3848.476  | 2920.76   | NM_004156 | 12593.33  | 12508.897 |
| AB002331  | 2457.534  | 1709.465  | AW276315  | 1739.876  | 1136.687  | AK021866  | 227.172   | 222.728   |
| NM_002504 | 2795.945  | 2094.646  | AA490737  | 3104.404  | 2299.936  | NM_003246 | 2640.717  | 2320.799  |
| AB046775  | 1100.156  | 1384.782  | AI878886  | 27266.307 | 24015.449 | M21897    | 455.151   | 337.281   |
| X74862    | 1033.117  | 1521.677  | BG697179  | 8101.191  | 5747.916  | AF301463  | 457.576   | 559.286   |
| X65663    | 4148.446  | 8066.337  | NM_002136 | 53741.164 | 53424.949 | NM_015984 | 1731.793  | 1488.637  |
| NM_003185 | 4828.676  | 4169.183  | BM012504  | 9495.032  | 7637.369  | AK023031  | 1284.001  | 949.502   |
| NM_004456 | 4133.813  | 3477.051  | AA664145  | 1763.076  | 1748.668  | NM_005717 | 10935.628 | 7253.837  |
| NM_004284 | 24820.668 | 23296.045 | T50790    | 3651.111  | 3156.016  | NM_012090 | 441.786   | 326.633   |
| NM_012243 | 3401.972  | 4361.942  | R48168    | 16142.011 | 19401.217 | BE793385  | 184.062   | 261.994   |
| AK025743  | 604.73    | 1088.873  | AB032993  | 5526.062  | 7536.879  | AF177292  | 259.814   | 345.364   |
| AL137466  | 543.547   | 674.972   | NM_000854 | 3147.542  | 5187.468  | NM_003086 | 2033.461  | 1556.352  |
| AL122040  | 635.348   | 902.24    | AL117423  | 4572.377  | 5487.977  | NM_004082 | 746.931   | 735.727   |
| AK023974  | 1529.461  | 1771.231  | NM_006140 | 718.638   | 660.169   | NM_014396 | 658.906   | 569.332   |
| AK023768  | 1492.922  | 2227.484  | NM_002084 | 2395.523  | 2097.99   | NM_005934 | 5110.692  | 3178.681  |
| NM_014726 | 525.754   | 507.343   | D16892    | 36027.598 | 34643.703 | NM_007126 | 4883.091  | 5496.353  |
| AF147335  | 636.293   | 430.299   | NM_004750 | 1868.832  | 1711.497  | AY004253  | 2853.215  | 3526.011  |
| NM_016323 | 604.22    | 361.395   | NM_007295 | 3719.378  | 2414.49   | NM_002146 | 316.496   | 264.042   |
| AK025812  | 2826.722  | 2553.953  | NM_003651 | 10022.896 | 10094.281 | AL137449  | 273.797   | 207.754   |
| AK021459  | 338.366   | 532.79    | NM_000416 | 687.218   | 626.417   | U88153    | 432.685   | 337.503   |
| U00960    | 1066.888  | 1059.275  | NM_013246 | 572.735   | 485.566   | X03910    | 4344.03   | 3528.267  |
| AK022262  | 674.428   | 806.675   | NM_000591 | 2082.389  | 1840.753  | NM_018426 | 2970.757  | 2261.052  |
| AF088039  | 46369.031 | 39722.465 | NM_000565 | 8307.219  | 7350.397  | NM_006924 | 6766.417  | 5378.903  |
| AF143888  | 599.395   | 900.964   | AF253318  | 2690.144  | 2136.027  | NM_016024 | 1954.003  | 1715.011  |
| AF086220  | 1787.009  | 1429.982  | AK024848  | 5873.238  | 5717.437  | NM_018107 | 503.864   | 420.168   |
| AK023941  | 1219.936  | 1610.584  | NM_004852 | 952.25    | 1158.448  | NM_012276 | 238.853   | 268.937   |
| AL390083  | 5424.246  | 8910.305  | NM_003633 | 587.624   | 667.219   | NM_018387 | 3856.753  | 2257.34   |
| AB020702  | 552.702   | 605.346   | NM_000343 | 772.029   | 1291.614  | BF310673  | 427.174   | 309.445   |
| AF085905  | 282.709   | 441.761   | NM_019112 | 3494.043  | 3827.205  | R97012    | 10590.606 | 7501.704  |
| NM_014361 | 331.253   | 549.176   | NM_012336 | 9567.468  | 11300.138 | U77700    | 3940.336  | 2734.161  |
| NM_013355 | 1068.151  | 1197.04   | NM_020161 | 509.455   | 617.394   | NM_006567 | 1633.22   | 968.716   |
| NM_003847 | 5466.884  | 6162.141  | NM_020246 | 1927.195  | 2350.902  | AF038554  | 4384.577  | 3159.44   |
| NM_007197 | 474.31    | 611.522   | NM_000084 | 1680.597  | 2130.114  | AF264621  | 2035.813  | 1625.738  |
| AK021973  | 552.162   | 690.24    | NM_016354 | 1056.872  | 1126.578  | NM_005875 | 4459.663  | 2382.66   |
| AL049342  | 191.975   | 123.045   | NM_003036 | 1884.178  | 1681.02   | NM_004184 | 1849.037  | 1024.839  |
| AL050116  | 239.411   | 113.353   | NM_018155 | 5914.7    | 5216.49   | AK075087  | 213.489   | 226.317   |

|           |           |           |           |           |           |           |           |           |
|-----------|-----------|-----------|-----------|-----------|-----------|-----------|-----------|-----------|
| AL110155  | 190.705   | 195.193   | AL050358  | 1373.683  | 1919.446  | AK026571  | 1048.262  | 1277.873  |
| AL117638  | 394.929   | 186.906   | NM_004731 | 745.94    | 1157.451  | AK024673  | 1830.522  | 2283.628  |
| AL049918  | 243.807   | 146.801   | NM_000544 | 2993.992  | 3269.896  | AF070618  | 482.129   | 412.149   |
| AL050165  | 44338.672 | 36458.438 | NM_001044 | 472.295   | 433.032   | AF131748  | 1048.957  | 923.705   |
| AL117445  | 970.811   | 1004.421  | NM_004644 | 810.27    | 701.599   | NM_000456 | 858.12    | 914.397   |
| AL122113  | 4620.082  | 5343.188  | AV681967  | 1568.332  | 1749.524  | NM_002496 | 3332.303  | 3343.114  |
| AK024415  | 2699.564  | 4164.288  | NM_018250 | 1083.699  | 1079.618  | NM_016243 | 613.384   | 622.122   |
| AL049365  | 1736.542  | 1314.687  | NM_016553 | 6402.051  | 5400.594  | X53943    | 204.907   | 102.249   |
| AB007877  | 236.009   | 264.057   | NM_003795 | 39342.707 | 32759.469 | NM_014402 | 15492.825 | 14379.729 |
| AK025132  | 1001.474  | 873.452   | NM_014232 | 2086.965  | 1715.024  | NM_004646 | 1602.177  | 1532.314  |
| AK025157  | 4757.896  | 5202.86   | NM_005701 | 2830.138  | 2148.716  | NM_006540 | 845.552   | 763.818   |
| NM_020215 | 384.273   | 399.441   | NM_001231 | 1259.146  | 783.033   | NM_017766 | 326.488   | 416.36    |
| AK022001  | 2590.051  | 2874.114  | NM_006819 | 40458.297 | 35331.574 | NM_002811 | 2373.481  | 1516.629  |
| AK022633  | 673.304   | 703.934   | NM_014744 | 2435.939  | 3671.947  | NM_020310 | 563.783   | 276.302   |
| AK000079  | 3344.406  | 2701.844  | AF146759  | 1732.84   | 1965.752  | NM_005802 | 1058.757  | 624.583   |
| AJ227874  | 892.412   | 1998.772  | AL365404  | 12808.944 | 16896.195 | AB002331  | 754.669   | 416.507   |
| AF009268  | 413.91    | 884.155   | AK022907  | 2763.09   | 3302.288  | NM_002504 | 788.208   | 462.589   |
| AF009312  | 655.167   | 908.903   | NM_014793 | 2474.181  | 2573.663  | AB046775  | 395.064   | 263.49    |
| AF127772  | 465.314   | 368.598   | NM_004245 | 1500.933  | 1629.298  | X74862    | 373.576   | 381.626   |
| AF009276  | 1157.591  | 706.486   | NM_003241 | 1480.506  | 1690.889  | X65663    | 1419.669  | 1021.737  |
| AF056428  | 6094.187  | 3670.154  | NM_002685 | 3872.5    | 3673.884  | NM_003185 | 1333.369  | 1278.052  |
| AF069136  | 655.466   | 426.279   | AK024504  | 991.836   | 620.099   | NM_004456 | 1149.129  | 730.683   |
| AK001097  | 223.389   | 186.75    | AF039023  | 2061.502  | 2349.544  | NM_004284 | 7999.901  | 5524.452  |
| AK001995  | 310.142   | 371.696   | NM_005511 | 4806.014  | 4883.04   | NM_012243 | 1247.193  | 1249.833  |
| AK021594  | 457.423   | 484.148   | NM_014698 | 11784.209 | 13085.198 | AK025743  | 450.952   | 663.519   |
| AK002150  | 658.895   | 799.362   | NM_018475 | 6351.126  | 7043.268  | AL137466  | 282.836   | 267.873   |
| AK021635  | 1509.045  | 1256.025  | NM_003262 | 4077.168  | 4264.97   | AL122040  | 303.376   | 236.925   |
| AK021856  | 1260.792  | 988.889   | NM_020125 | 629.817   | 520.752   | AK023974  | 859.81    | 865.207   |
| AK025202  | 170.02    | 394.508   | AB028127  | 520.182   | 293.97    | AK023768  | 477.645   | 564.117   |
| AK025670  | 285.93    | 639.661   | AK022832  | 2572.621  | 2377.556  | BI768072  | 186.739   | 211.082   |
| AK025276  | 1579.338  | 1490.735  | NM_014641 | 3442.917  | 2070.682  | AK022216  | 1318.412  | 1248.563  |
| AK026027  | 673.58    | 558.266   | NM_004462 | 16044.506 | 9415.6    | AK025812  | 1194.049  | 1136.49   |
| AK026457  | 2275.106  | 1283.029  | AB020664  | 4756.983  | 6304.21   | U00960    | 304.721   | 234.894   |
| AK026825  | 228.422   | 414.732   | NM_006640 | 5166.218  | 7232.458  | AK022262  | 286.712   | 201.784   |
| AJ008131  | 11054.354 | 13918.898 | NM_000857 | 1679.708  | 1856.64   | AF088039  | 20016.311 | 16416.119 |
| AF086338  | 465.218   | 624.56    | L20688    | 29949.396 | 33966.98  | AF086220  | 676.972   | 740.646   |
| NM_006272 | 472.226   | 522.95    | X69111    | 3668.961  | 4193.914  | AK023941  | 449.315   | 248.912   |
| AK024303  | 1098.036  | 1335.536  | AF252283  | 726.501   | 696.245   | AF086265  | 194.054   | 123.316   |
| AL160131  | 4233.594  | 3960.691  | AB037799  | 3787.05   | 3424.159  | AL390083  | 2288.014  | 1140.213  |
| AF086045  | 2636.908  | 2759.813  | AB007950  | 12080.86  | 11708.305 | AB020702  | 197.776   | 325.316   |
| AK027028  | 3137.436  | 3259.432  | AK025593  | 1234.273  | 1147.759  | NM_013355 | 546.857   | 783.282   |
| AK027069  | 4080.397  | 2966.786  | AB018304  | 2985.206  | 3026.463  | NM_003847 | 4674.554  | 4189.231  |
| AK026916  | 1617.334  | 808.981   | NM_007061 | 15579.074 | 16167.179 | AK021973  | 292.793   | 237.879   |
| AK026914  | 1494.945  | 1036.954  | AB040954  | 3781.655  | 4247.967  | AF075054  | 181.527   | 160.453   |
| Y13808    | 257.992   | 178.756   | NM_002081 | 827.242   | 1052.835  | AL050165  | 26587.92  | 23417.139 |
| Y11166    | 1319.97   | 1274.629  | AB023139  | 2387.048  | 2297.353  | AL117445  | 534.873   | 331.654   |
| AK023515  | 1815.809  | 1381.196  | NM_017885 | 1298.704  | 1242.902  | AL122113  | 2010.509  | 1819.206  |
| AL137623  | 8505.583  | 5814.681  | D80004    | 4967.447  | 3416.208  | AK024415  | 862.164   | 704.63    |
| AK026485  | 555.886   | 509.59    | NM_000946 | 4306.132  | 2565.474  | AL049365  | 682.716   | 570.504   |
| NM_003546 | 2346.548  | 3266.416  | NM_016070 | 2514.688  | 1870.359  | AK025132  | 328.595   | 228.013   |
| AF118077  | 2097.982  | 3362.118  | NM_016390 | 1329.723  | 828.908   | AK025157  | 1476.465  | 986.543   |
| AL137625  | 712.46    | 2604.341  | NM_016101 | 8104.217  | 6093.817  | AK022001  | 1059.663  | 754.017   |
| AK025750  | 1776.581  | 2939.464  | NM_005859 | 44902.039 | 35688.414 | AK022633  | 259.19    | 255.655   |

|           |           |           |           |           |           |           |           |          |
|-----------|-----------|-----------|-----------|-----------|-----------|-----------|-----------|----------|
| BF031253  | 442.405   | 340.478   | NM_020313 | 1245.268  | 845.888   | AK027199  | 156.497   | 212.392  |
| AK025783  | 1398.592  | 1312.822  | NM_014628 | 4353.225  | 5225.369  | AK000079  | 1011.605  | 673.383  |
| AF113675  | 673.192   | 495.074   | AK025630  | 2160.093  | 3647.963  | AJ227874  | 377.737   | 554.982  |
| AK024514  | 824.251   | 758.887   | NM_014718 | 1920.672  | 2329.367  | AF009268  | 234.484   | 218.099  |
| NM_020119 | 1726.733  | 1116.147  | NM_000632 | 778.015   | 1160.938  | AF009312  | 251.228   | 287.383  |
| AL049417  | 10783.852 | 8303.573  | AK024488  | 996.779   | 909.148   | AF009276  | 441.489   | 317.562  |
| AK023507  | 721.019   | 612.493   | AK023249  | 53316.547 | 57921.258 | AF056428  | 4331.667  | 4229.148 |
| NM_005169 | 1581.405  | 1247.458  | NM_017442 | 3862.575  | 3964.101  | AK021594  | 184.562   | 258.787  |
| AL109818  | 412.92    | 257.212   | NM_000743 | 1135.587  | 1097.372  | AK021635  | 339.657   | 301.283  |
| S97393    | 229.761   | 357.4     | NM_007218 | 1079.275  | 1125.127  | AK021856  | 367.203   | 250.372  |
| NM_017929 | 606.515   | 369.203   | Z25436    | 1946.257  | 1741.252  | AK025276  | 780.698   | 590.97   |
| NM_018472 | 723.513   | 571.327   | NM_005275 | 4224.607  | 3535.209  | AK026027  | 285.501   | 191.963  |
| AJ008128  | 14527.13  | 10119.027 | NM_003844 | 14479.604 | 11917.432 | AK026457  | 1195.529  | 609.086  |
| AL449243  | 6375.021  | 3852.589  | NM_002005 | 16928.117 | 15440.009 | AJ008131  | 8808.806  | 12947.98 |
| M12211    | 770.476   | 643.876   | NM_012324 | 2917.917  | 2430.394  | AF086338  | 187.527   | 218.681  |
| AK026449  | 4449.841  | 3937.031  | AK000039  | 1357.859  | 968.16    | NM_006272 | 143.348   | 167.62   |
| NM_014027 | 4576.572  | 4703.848  | AL137352  | 3100.686  | 2108.972  | AK024303  | 287.561   | 400.043  |
| NM_020467 | 570.821   | 1310.025  | NM_014749 | 3156.396  | 2367.332  | AL160131  | 1751.599  | 1573.885 |
| AF116621  | 3261.374  | 4441.642  | NM_004489 | 4565.794  | 2994.247  | AF086045  | 991.907   | 739.753  |
| AF086554  | 1703.837  | 1245.839  | BI461699  | 954.102   | 622.823   | AK027028  | 1401.7    | 1685.804 |
| AL390136  | 16988.688 | 12834.826 | AF172264  | 1560.491  | 1821.25   | AK027069  | 2801.488  | 2695.153 |
| AK023156  | 309.39    | 249.196   | Y08267    | 1538.548  | 2025.754  | AK026916  | 665.511   | 538.988  |
| AF086398  | 52958.395 | 38231.855 | U80756    | 14310.079 | 13243.448 | AK026914  | 981.012   | 1057.288 |
| AK023444  | 590.024   | 346.347   | NM_018161 | 1191.083  | 1606.615  | Y11166    | 444.894   | 878.128  |
| AK025953  | 747.425   | 720.951   | NM_005248 | 1180.632  | 1354.859  | AK023515  | 541.762   | 438.338  |
| NM_00318C | 739.829   | 481.315   | NM_00481C | 952.002   | 1122.176  | AL137623  | 4148.038  | 3604.991 |
| AF086406  | 8110.905  | 5187.029  | AL117629  | 3046.523  | 2732.15   | NM_00354E | 872.886   | 1173.918 |
| D17216    | 3231.55   | 2058.507  | NM_002595 | 1411.86   | 1372.42   | AF118077  | 970.479   | 1379.76  |
| AL137581  | 1029.366  | 786.66    | NM_015726 | 1389.749  | 1151.545  | AL137625  | 269.309   | 491.474  |
| AK024942  | 961.281   | 884.972   | AF174604  | 1599.341  | 1602.357  | AK025750  | 570.535   | 619.071  |
| AJ227873  | 11492.104 | 8427.161  | AB002379  | 4674.052  | 4170.451  | BF031253  | 318.037   | 239.916  |
| AK022886  | 3304.465  | 2539.026  | AF113223  | 1013.428  | 2174.14   | AK025783  | 620.92    | 668.87   |
| AK024665  | 5448.932  | 3600.978  | AB046851  | 1571.531  | 1696.243  | AF113675  | 383.346   | 415.798  |
| AF147363  | 639.956   | 507.307   | NM_018174 | 1201.644  | 1097.912  | AK024514  | 334.408   | 262.695  |
| AJ227880  | 574.323   | 595.564   | NM_014548 | 2819.209  | 2591.134  | NM_020119 | 674.113   | 647.861  |
| AK000691  | 799.46    | 501.473   | NM_004437 | 657.638   | 333.081   | AL049417  | 5162.545  | 5065.468 |
| AK001448  | 1082.11   | 572.838   | AK025875  | 1778.66   | 1099.282  | NM_005169 | 1006.858  | 824.035  |
| AL049321  | 4450.023  | 3359.382  | BC014152  | 73439.453 | 58026.418 | NM_017929 | 204.821   | 197.678  |
| CY3Cy5    | 1851.633  | 401.569   | NM_000226 | 1464.224  | 730.599   | NM_018472 | 296.116   | 233.312  |
| W74254    | 1225.151  | 908.435   | AB037779  | 36875.176 | 24124.48  | AJ008128  | 9319.733  | 6420.426 |
| M58603    | 1991.612  | 1561.965  | NM_000393 | 1470.467  | 1048.116  | AL449243  | 2294.786  | 1334.463 |
| AB003334  | 2581.742  | 2046.749  | NM_000889 | 1817.967  | 1273.461  | M12211    | 416.434   | 269.257  |
| AW276315  | 1237.314  | 1057.032  | NM_003859 | 13523.184 | 15787.316 | AK026449  | 4322.063  | 5074.93  |
| AA490737  | 1936.489  | 1513.343  | NM_000236 | 1894.672  | 2534.435  | NM_014027 | 1795.591  | 2315.259 |
| AI878886  | 19528.672 | 17830.482 | NM_002903 | 22014.721 | 21332.438 | AF116621  | 1345.442  | 1329.758 |
| BG697179  | 6239.922  | 5726.276  | NM_012339 | 1992.38   | 1845.634  | AF086554  | 891.138   | 867.334  |
| NM_00213E | 48342.543 | 39680.926 | NM_005787 | 25001.563 | 27411.592 | AL390136  | 7906.895  | 6866.351 |
| BM012504  | 5547.95   | 5314.604  | NM_002143 | 3513.214  | 2988.72   | AF086398  | 26782.408 | 27261.32 |
| AA664145  | 1446.162  | 2083.713  | AF284421  | 8763.984  | 7629.71   | AK023444  | 238.765   | 155.99   |
| X72308    | 12812.68  | 15149.149 | NM_006048 | 3280.433  | 3497.99   | AK025953  | 280.133   | 273.876  |
| T50790    | 1469.21   | 1472.063  | NM_00636C | 32625.525 | 31034.215 | NM_00318C | 399.689   | 256.752  |
| R48168    | 11564.05  | 11468.19  | NM_00396E | 6569.875  | 6001.787  | AF086406  | 2852.054  | 2228.538 |
| NM_003942 | 2198.592  | 3114.616  | NM_00278E | 2675.582  | 2688.664  | D17216    | 1175.238  | 911.51   |

|           |           |           |           |           |           |           |           |           |
|-----------|-----------|-----------|-----------|-----------|-----------|-----------|-----------|-----------|
| NM_004452 | 960.115   | 1324.319  | NM_003343 | 11034.638 | 10096.424 | AL137581  | 428.727   | 344.8     |
| SR7       | 5461.867  | 27089.959 | NM_002789 | 30129.844 | 27745.574 | AK024942  | 448.431   | 296.903   |
| SR9       | 19362.914 | 2546.764  | NM_003470 | 4252.674  | 3433.738  | AJ227873  | 5675.908  | 3831.131  |
| CY3Cy5    | 2437.467  | 479.65    | AL080137  | 444.279   | 749.067   | AK022886  | 1085.621  | 796.647   |
| NM_000591 | 1041.715  | 937.863   | NM_017679 | 1590.016  | 1392.421  | AK024665  | 1704.295  | 1166.731  |
| NM_000565 | 5964.034  | 5710.829  | AF155103  | 1073.08   | 661.662   | AJ227880  | 185.468   | 284.49    |
| AF253318  | 764.633   | 910.876   | NM_017704 | 2216.89   | 1273.199  | AK000691  | 354.215   | 293.65    |
| NM_004852 | 544.497   | 546.296   | BC006359  | 1324.434  | 812.046   | AK001448  | 418.198   | 307.272   |
| NM_000543 | 712.27    | 728.439   | AK026127  | 527.1     | 244.922   | AK026890  | 297.465   | 247.998   |
| U06699    | 3717.984  | 3864.514  | BC016062  | 11330.739 | 7563.165  | AL049321  | 1686.137  | 1040.674  |
| AJ290954  | 3460.938  | 3723.162  | NM_002814 | 3095.163  | 2112.474  | CY3Cy5    | 2879.377  | 432.887   |
| NM_002783 | 1003.752  | 1006.418  | NM_012250 | 843.559   | 332.408   | W74254    | 625.28    | 822.976   |
| NM_001047 | 4731.502  | 26395.209 | NM_006283 | 5023.482  | 3009.57   | M58603    | 1090.887  | 1251.795  |
| AK024396  | 11871.138 | 3795.896  | NM_002701 | 902.079   | 1261.497  | AA443286  | 658.949   | 499.546   |
| U58514    | 1237.294  | 1369.853  | X97303    | 6257.287  | 5595.844  | AB003334  | 1197.022  | 1019.729  |
| NM_000544 | 1871.421  | 1049.283  | NM_017530 | 4302.86   | 3856.315  | AW276315  | 742.565   | 723.094   |
| AV681967  | 1073.126  | 1061.602  | AL360183  | 1297.515  | 2029.907  | AA490737  | 1111.266  | 1292.918  |
| NM_018250 | 469.054   | 597.198   | AK027046  | 1404.433  | 1352.012  | AI878886  | 11276.521 | 13118.439 |
| NM_016553 | 4320.311  | 4806.755  | NM_003113 | 2891.509  | 2437.135  | BG697179  | 3103.238  | 3561.564  |
| NM_005701 | 2031.843  | 2424.103  | NM_016578 | 5045.653  | 4008.194  | NM_002136 | 27303.168 | 24773.6   |
| NM_001231 | 445.812   | 611.914   | NM_015832 | 6583.3    | 5420.677  | BM012504  | 3707.24   | 4324.807  |
| AF146759  | 621.701   | 1000.028  | NM_014319 | 1561.775  | 1404.42   | AA664145  | 634.465   | 612.065   |
| AB032993  | 3556.965  | 2939.49   | NM_004865 | 2008.143  | 2452.719  | X72308    | 12974.455 | 10621.7   |
| NM_000854 | 2142.213  | 2148.387  | AB019566  | 66964.359 | 65388.945 | T50790    | 1500.426  | 1361.631  |
| AL117423  | 3102.121  | 3831.276  | NM_000981 | 64738.094 | 61930.668 | R48168    | 5688.775  | 6006.045  |
| NM_006140 | 605.021   | 411.496   | NM_002047 | 23969.172 | 14035.854 | NM_003942 | 999.268   | 1378.685  |
| NM_002084 | 1576.891  | 1535.167  | NM_001031 | 74868.391 | 63129.758 | NM_004452 | 716.351   | 677.313   |
| NM_004750 | 1489.04   | 1412.322  | NM_007208 | 14162.71  | 8675.915  | SR5       | 2306.154  | 1941.563  |
| NM_007295 | 2584.192  | 1670.632  | NM_000999 | 76809.156 | 63252.129 | SR7       | 2504.3    | 16390.328 |
| NM_003651 | 8527.542  | 8337.271  | NM_000985 | 27233.189 | 13969.506 | SR9       | 8880.837  | 1193.629  |
| NM_003262 | 2172.203  | 1053.759  | BF130622  | 11617.585 | 6488.882  | CY3Cy5    | 2308.636  | 323.888   |
| AB028127  | 454.429   | 162.937   | BU165106  | 3027.704  | 4965.589  | NM_000591 | 748.407   | 996.552   |
| AK022832  | 1700.205  | 1669.837  | AF038202  | 1722.244  | 2630.283  | NM_000565 | 3231.002  | 3814.012  |
| NM_014641 | 2287.861  | 2587.043  | AB040925  | 756.264   | 829.703   | AF253318  | 946.968   | 938.527   |
| NM_004462 | 12228.51  | 13416.577 | BC008837  | 1013.307  | 1139.506  | AK024848  | 3166.737  | 3622.353  |
| AB020664  | 3039.464  | 4128.535  | NM_001861 | 1060.927  | 1414.942  | NM_000543 | 250.514   | 254.305   |
| NM_006640 | 3109.641  | 3934.167  | AK025558  | 6484.524  | 5735.053  | U06699    | 3052.504  | 2643.654  |
| NM_019112 | 2257.547  | 2153.956  | AK024355  | 696.852   | 680.067   | NM_006148 | 173.68    | 330.438   |
| NM_012336 | 6664.812  | 8012.677  | NM_001864 | 20983.986 | 18519.836 | AJ290954  | 1976.573  | 1754.907  |
| NM_020246 | 990.018   | 1286.349  | NM_003477 | 7902.606  | 6156.3    | NM_002783 | 1005.646  | 773.322   |
| NM_000084 | 1432.06   | 1346.72   | NM_002654 | 19032.219 | 20856.699 | X52005    | 8611.273  | 6534.112  |
| NM_016354 | 1048.595  | 843.502   | NM_020382 | 2511.042  | 2147.17   | NM_001047 | 2086.677  | 13682.63  |
| NM_003038 | 1845.571  | 1545.766  | NM_007192 | 7213.662  | 5889.355  | AK024396  | 5880.474  | 1991.718  |
| NM_018155 | 3739.706  | 3310.91   | AB002337  | 10798.498 | 6979.559  | U58514    | 773.084   | 854.238   |
| AL050358  | 670.622   | 751.116   | NM_014933 | 7450.039  | 6174.795  | NM_000544 | 840.927   | 1235.807  |
| NM_004731 | 839.8     | 1009.401  | NM_003076 | 18626.225 | 15040.277 | AV681967  | 740.07    | 1256.897  |
| AB023139  | 1740.583  | 1167.143  | NM_006385 | 1029.476  | 647.548   | NM_018250 | 516.335   | 742.421   |
| NM_017885 | 937.009   | 600.993   | NM_003456 | 4263.571  | 3251.184  | NM_016553 | 2026.546  | 2966.621  |
| D80004    | 3197.577  | 1976.742  | NM_002585 | 1797.856  | 1448.255  | AB023136  | 1307.555  | 2717.828  |
| NM_000946 | 4242.185  | 7425.29   | AB029016  | 2387.234  | 1264.973  | NM_014232 | 568.069   | 717.445   |
| NM_016070 | 1200.807  | 1566.636  | AK000445  | 1083.857  | 816.173   | NM_005701 | 904.156   | 913.542   |
| NM_016390 | 954.07    | 1067.227  | AL049390  | 2367.75   | 2945.123  | NM_001231 | 367.474   | 576.827   |
| NM_016101 | 5709.889  | 9664.936  | AK000584  | 5762.938  | 8656.341  | NM_014744 | 1140.006  | 994.09    |

|           |           |           |           |           |           |           |           |           |
|-----------|-----------|-----------|-----------|-----------|-----------|-----------|-----------|-----------|
| NM_005859 | 14753.698 | 13915.927 | AJ297363  | 1721.502  | 1546.786  | AF146759  | 463.766   | 344.313   |
| NM_020313 | 473.024   | 290.902   | AK026379  | 3324.881  | 3027.18   | AB032993  | 1938.988  | 1191.44   |
| NM_014628 | 3467.956  | 6596.049  | AF075002  | 726.991   | 1392.362  | NM_000854 | 1302.551  | 1247.672  |
| AK025630  | 1368.557  | 2007.608  | AK022965  | 1570      | 1764.838  | AL117423  | 1666.532  | 1302.802  |
| AL365404  | 5994.285  | 6492.447  | AK024278  | 8959.369  | 10201.657 | NM_002084 | 924.22    | 763.453   |
| AK022907  | 779.007   | 1032.372  | AK026982  | 1602.416  | 1351.901  | D16892    | 14409.128 | 11655.767 |
| NM_014793 | 1331.6    | 867.376   | NM_018022 | 3095.114  | 2915.887  | NM_004750 | 792.675   | 823.582   |
| NM_004245 | 745.492   | 561.321   | AB056722  | 6050.212  | 4814.041  | NM_007295 | 1898.264  | 1659.279  |
| NM_003241 | 883.78    | 1205.685  | NM_013242 | 4372.465  | 3485.68   | NM_003651 | 3848.812  | 4295.309  |
| NM_002685 | 3117.575  | 2650.07   | AK023198  | 739.306   | 1069.935  | NM_003262 | 1812.432  | 1922.088  |
| AK024504  | 972.986   | 764.574   | NM_012066 | 10536.42  | 9133.903  | AK022832  | 1252.9    | 1616.017  |
| AF039023  | 1575.861  | 1551.267  | AF052168  | 5190.554  | 6465.362  | NM_014641 | 1169.448  | 963.076   |
| NM_005511 | 2789.21   | 2618.204  | NM_014650 | 1348.376  | 912.406   | NM_004462 | 5238.896  | 5316.132  |
| NM_014698 | 5384.062  | 4166.826  | AK022632  | 4294.662  | 3168.948  | AB020664  | 1791.587  | 1835.6    |
| NM_018475 | 4693.283  | 4745.333  | AK021554  | 3372.056  | 2184.568  | NM_006640 | 1888.231  | 1568.54   |
| X52005    | 18432.672 | 6919.405  | NM_020235 | 2377.848  | 1998.691  | NM_019112 | 1535.883  | 1223.341  |
| NM_001047 | 2710.765  | 2163.732  | AK000532  | 973.767   | 1163.302  | NM_012336 | 4044.589  | 3529.497  |
| AK024396  | 785.218   | 602.907   | AL162039  | 3228.352  | 1906.177  | NM_020161 | 359.88    | 134.879   |
| U58514    | 1053.84   | 1035.658  | AK024896  | 2309.138  | 1849.325  | NM_020246 | 713.256   | 678.592   |
| W74254    | 1376.44   | 1619.401  | AK095125  | 734.621   | 1068.108  | NM_000084 | 885.595   | 708.032   |
| M58603    | 2470.746  | 3293.205  | AK024059  | 1285.209  | 1755.479  | NM_016354 | 593.687   | 648.244   |
| AA443286  | 408.308   | 463.778   | AK023663  | 2630.591  | 2344.996  | NM_003038 | 482.656   | 573.857   |
| AB003334  | 3096.193  | 4170.559  | AB007928  | 946.466   | 769.185   | NM_018155 | 2150.499  | 2121.636  |
| AW276315  | 2082.763  | 3880.826  | AK023645  | 831.917   | 1006.706  | AL050358  | 675.529   | 864.107   |
| AA490737  | 2162.839  | 2177.874  | D83543    | 1580.757  | 1488.151  | NM_004731 | 411.767   | 753.902   |
| BG697179  | 6847.915  | 8767.245  | NM_016930 | 2019.198  | 1883.606  | AB023139  | 1182.601  | 1628.791  |
| NM_002136 | 50925.566 | 53265.207 | AJ001861  | 1429.699  | 1464.079  | NM_017885 | 508.514   | 1129.009  |
| BM012504  | 5430.583  | 5822.041  | X64981    | 1379.143  | 1066.442  | D80004    | 1863.647  | 2217.139  |
| AA664145  | 1567.44   | 2098.156  | X75692    | 4090.81   | 3362.678  | NM_000946 | 1319.855  | 1260.845  |
| T50790    | 1747.043  | 1820.713  | Y10511    | 6866.762  | 5317.006  | NM_016070 | 674.317   | 1020.421  |
| R48168    | 12916.73  | 14123.681 | AF018254  | 3379.653  | 5471.621  | NM_016390 | 548.738   | 874.286   |
| NM_003942 | 2324.135  | 2754.113  | NM_016240 | 1482.143  | 690.091   | NM_016101 | 3128.662  | 5032.094  |
| NM_004452 | 915.093   | 1194.179  | AK025238  | 770.874   | 1118.309  | NM_005859 | 20197.928 | 44877.207 |
| AB040954  | 2525.865  | 1923.055  | AK026416  | 16670.846 | 14014.537 | NM_020313 | 321.073   | 441.716   |
| NM_002081 | 761.818   | 535.216   | AK025797  | 915.888   | 768.057   | NM_014628 | 1787.716  | 1723.384  |
| NM_002084 | 1313.845  | 804.556   | AK000019  | 803.991   | 740.173   | AK025630  | 600.883   | 470.879   |
| D16892    | 26510.281 | 10640.679 | AK024864  | 2032.385  | 1926.068  | AL365404  | 4938.962  | 5312.379  |
| NM_004750 | 1261.474  | 568.471   | AK024947  | 2437.639  | 1687.981  | AK022907  | 976.981   | 937.256   |
| NM_007295 | 2231.155  | 1399.694  | AK024606  | 3854.914  | 5259.765  | NM_014793 | 944.101   | 671.685   |
| NM_003651 | 8055.805  | 6566.106  | NM_016417 | 6036.845  | 6906.614  | NM_004245 | 618.094   | 651.944   |
| NM_000418 | 489.176   | 539.643   | NM_019108 | 1099.698  | 1200.588  | NM_003241 | 719.818   | 893.366   |
| NM_013246 | 608.421   | 717.951   | AL080118  | 3837.992  | 3757.539  | NM_002685 | 1418.675  | 1100.036  |
| NM_000591 | 1112.299  | 1493.561  | AL049378  | 4462.14   | 4001.459  | AK024504  | 408.973   | 587.49    |
| AF253318  | 575.354   | 705.796   | L09086    | 836.681   | 832.876   | AF039023  | 747.272   | 791.64    |
| AK024848  | 4230.587  | 5985.113  | AK021505  | 2123.137  | 1308.98   | NM_005511 | 2034.604  | 2073.419  |
| NM_004852 | 530.462   | 602.753   | AK021598  | 4654.449  | 2624.371  | NM_014698 | 7239.912  | 8255.133  |
| NM_003633 | 347.639   | 619.56    | AJ012498  | 879.683   | 1634.322  | NM_018475 | 2233.509  | 3110.341  |
| NM_000543 | 631.592   | 651.242   | NM_005973 | 13298.57  | 20389.807 | X52005    | 10128.661 | 10894.214 |
| U06699    | 4234.463  | 4443.976  | X04547    | 2756.255  | 2586.407  | NM_001047 | 1347.735  | 2368.221  |
| AJ290954  | 3398.342  | 3403.68   | AK025823  | 1439.456  | 1512.509  | AK024396  | 1376.282  | 4074.436  |
| AK025451  | 4206.979  | 3919.22   | AK026691  | 1033.429  | 950.803   | U58514    | 1077.325  | 1913.42   |
| NM_002783 | 1134.77   | 1080.404  | AL359941  | 2931.33   | 2687.788  | M57627    | 339.889   | 361.302   |
| NM_003038 | 1481.377  | 772.217   | U52076    | 1164.208  | 1212.39   | W74254    | 1140.328  | 1097.129  |



|           |           |           |           |           |           |           |           |           |
|-----------|-----------|-----------|-----------|-----------|-----------|-----------|-----------|-----------|
| NM_01815E | 3356.062  | 2594.28   | AF035278  | 1281.845  | 864.412   | M58603    | 1093.114  | 1342.352  |
| AL050358  | 629.856   | 513.87    | AL050202  | 1121.111  | 1316.151  | AA443286  | 696.794   | 605.518   |
| NM_004731 | 768.786   | 730.586   | U32999    | 7402.066  | 7248.768  | AB003334  | 1723.526  | 1596.201  |
| NM_000544 | 2266.251  | 2614.204  | U66052    | 3570.096  | 3594.17   | AW276315  | 877.604   | 1266.736  |
| NM_001044 | 382.214   | 552.764   | AK024156  | 1661.163  | 1174.814  | AA490737  | 1353.922  | 1500.884  |
| NM_004644 | 433.51    | 600.805   | AF086288  | 1129.13   | 1049.531  | BG697179  | 3603.124  | 3422.172  |
| AV681967  | 1369.74   | 2162.771  | AK023109  | 1035.154  | 975.25    | NM_00213E | 26909.418 | 19310.873 |
| NM_01825C | 789.903   | 684.78    | NM_005293 | 12743.285 | 9789.413  | BM012504  | 3765.817  | 3690.3    |
| NM_016553 | 4994.79   | 5811.041  | AF133332  | 1999.619  | 1148.843  | AA664145  | 691.087   | 821.687   |
| NM_014232 | 1112.98   | 1626.476  | AK022805  | 717.682   | 461.733   | X72308    | 10012.5   | 7875.11   |
| NM_005701 | 2113.106  | 2203.271  | NM_00108E | 7564.147  | 10566.198 | T50790    | 1304.176  | 1190.13   |
| NM_00681E | 22137.865 | 19025.592 | BC015991  | 5273.136  | 7107.492  | R48168    | 6449.602  | 7446.797  |
| NM_014744 | 1730.357  | 1984.493  | U94902    | 669.428   | 876.405   | NM_003942 | 1084.937  | 1359.38   |
| AF146759  | 810.379   | 997.904   | U46214    | 3381.126  | 3556.23   | NM_004452 | 907.657   | 942.541   |
| AB032993  | 3396.331  | 2648.242  | NM_00031C | 41436.246 | 35912.035 | AB040954  | 2230.829  | 3001.098  |
| NM_000854 | 2483.647  | 2644.392  | AF161343  | 3658.002  | 3378.672  | NM_002081 | 839.303   | 1165.012  |
| AL117423  | 3051.223  | 3113.662  | NM_004765 | 3069.641  | 2944.37   | NM_002084 | 981.113   | 1020.173  |
| NM_00268E | 2366.742  | 1154.548  | AK022246  | 941.929   | 814.009   | D16892    | 16081.68  | 16398.428 |
| AK024504  | 731.157   | 620.955   | X75684    | 2190.085  | 2049.963  | NM_00475C | 910.681   | 1222.763  |
| AF039023  | 1072.722  | 635.011   | AF113701  | 11275.788 | 10943.612 | NM_00729E | 1669.477  | 1660.479  |
| NM_005511 | 2493.38   | 1952.08   | Y11158    | 928.876   | 991.079   | NM_003651 | 4404.79   | 5363.2    |
| NM_01469E | 4491.408  | 3146.314  | NM_006771 | 10916.716 | 9859.132  | NM_00041E | 221.763   | 412.882   |
| NM_01847E | 4527.931  | 4139.202  | L37702    | 7787.824  | 6829.677  | NM_01324E | 229.527   | 369.551   |
| NM_003262 | 2761.884  | 2818.726  | AK022812  | 959.462   | 667.085   | NM_018431 | 193.853   | 225.728   |
| AB028127  | 393.603   | 585.914   | U79301    | 2548.002  | 1548.118  | NM_000591 | 1030.958  | 1493.725  |
| AK022832  | 1953.889  | 2166.942  | AK022260  | 3989.548  | 2668.455  | AF253318  | 990.863   | 1033.383  |
| NM_014641 | 2455.628  | 2403.242  | M32219    | 5608.927  | 4009.948  | NM_017767 | 4864.439  | 4253.915  |
| NM_004462 | 12961.529 | 11487.648 | BC018868  | 709.309   | 416.185   | AK024848  | 3138.524  | 4281.953  |
| AB020664  | 2802.053  | 3194.609  | AF007128  | 3289.373  | 1386.816  | NM_000543 | 296.251   | 304.659   |
| NM_00664C | 3353.32   | 3858.402  | CY3Cy5    | 11632.668 | 1438.901  | U06699    | 4091.922  | 6032.48   |
| NM_000343 | 719.785   | 812.042   | AI351740  | 3708.844  | 8021.8    | AJ290954  | 1923.862  | 2930.928  |
| NM_019112 | 2032.944  | 3128.504  | AA444051  | 1499.493  | 2708.986  | AK025451  | 2561.402  | 4495.286  |
| NM_01233E | 7078.888  | 8426.78   | NM_007164 | 5468.679  | 9384.601  | NM_002783 | 1263.89   | 2152.19   |
| NM_020161 | 526.962   | 449.229   | BE783826  | 18261.092 | 28926.566 | NM_016354 | 676.821   | 835.299   |
| NM_02024E | 1116.417  | 1262.94   | X04827    | 2427.505  | 4580.753  | NM_00303E | 598.325   | 668.187   |
| NM_003942 | 1985.552  | 1195.012  | H07088    | 1665.262  | 2425.574  | NM_01815E | 3192.574  | 3765.871  |
| NM_004452 | 782.248   | 470.187   | BC020596  | 2825.212  | 2075.715  | AL050358  | 919.071   | 1741.795  |
| AB040954  | 2213.243  | 1968.764  | AF116606  | 54522.707 | 57102.375 | NM_004731 | 494.931   | 1226.453  |
| NM_002081 | 814.666   | 956.43    | X98922    | 2598.223  | 4104.379  | NM_000544 | 1424.556  | 2441.036  |
| AB023139  | 2814.042  | 2878.714  | AF230496  | 926.998   | 1653.481  | NM_004644 | 336.982   | 792.778   |
| NM_01788E | 1079.443  | 922.116   | M16801    | 1259.71   | 2056.6    | AV681967  | 712.136   | 1226.308  |
| D80004    | 4240.596  | 3376.055  | NM_145904 | 37983.008 | 53666.988 | NM_01825C | 543.821   | 778.362   |
| NM_00094E | 3415.547  | 2513.573  | SR8       | 7733.652  | 28575.486 | NM_016553 | 2519.245  | 3864.151  |
| NM_01607C | 1146.956  | 1178.829  | SR10      | 28702.08  | 9012.952  | AB023136  | 300.208   | 797.559   |
| NM_01639C | 1064.915  | 836.182   | CY3Cy5    | 5741.715  | 482.915   | NM_00379E | 15751.214 | 16522.797 |
| NM_016101 | 4918.898  | 5166.992  | NM_00241E | 751.208   | 1544.584  | NM_014232 | 554.912   | 861.581   |
| NM_00585E | 12676.957 | 11117.88  | NM_00448E | 1204.105  | 1931.054  | NM_005701 | 1008.765  | 1202.643  |
| NM_01462E | 2856.367  | 3095.338  | NM_01329E | 8090.909  | 13945.438 | NM_00681E | 14963.384 | 16479.385 |
| AK025630  | 1660.592  | 1976.156  | AL117478  | 1752.518  | 3007.018  | NM_014744 | 1145.148  | 1244.664  |
| AL365404  | 5746.899  | 5412.154  | NM_005307 | 1465.379  | 2238.048  | AF146759  | 832.758   | 619.952   |
| AK022907  | 1074.989  | 1327.36   | NM_01343E | 1436.04   | 1644.768  | AB032993  | 2154.194  | 1656.199  |
| NM_00424E | 683.231   | 516.565   | AF225426  | 984.419   | 1262.358  | NM_000854 | 1633.822  | 2182.861  |
| NM_000543 | 551.389   | 334.835   | NM_00520E | 7781.499  | 8295.414  | AL117423  | 2209.223  | 4782.29   |

|           |           |           |           |           |           |           |           |           |
|-----------|-----------|-----------|-----------|-----------|-----------|-----------|-----------|-----------|
| U06699    | 3312.344  | 1819.973  | NM_000421 | 612.802   | 947.451   | NM_00268E | 1638.844  | 1778.896  |
| AJ290954  | 2929.781  | 2447.394  | AK025687  | 16426.035 | 20452.922 | AK024504  | 430.181   | 712.554   |
| AK025451  | 3814.522  | 3291.274  | AF218941  | 1113.142  | 1604.443  | AF039023  | 826.488   | 1421.311  |
| NM_00278E | 1248.365  | 1337.18   | AL137264  | 9052.099  | 11140.512 | NM_005511 | 2212.964  | 2611.49   |
| X52005    | 23709.16  | 16243.173 | NM_00222E | 1857.295  | 2311.291  | NM_01469E | 9636.78   | 11837.704 |
| NM_001047 | 3046.767  | 3773.159  | X84370    | 5380.578  | 7685.283  | NM_01847E | 2521.605  | 2978.929  |
| AK024396  | 949.12    | 1233.308  | NM_00403E | 1307.131  | 2210.646  | NM_00326E | 2191.269  | 2888.097  |
| U58514    | 1325.314  | 1502.165  | AB014558  | 1036.13   | 1757.441  | NM_02012E | 162.426   | 430.465   |
| W74254    | 1689.531  | 1977.005  | NM_00091E | 8157.377  | 7837.621  | AK022832  | 1271.37   | 1778.759  |
| M58603    | 2340.922  | 2615.524  | NM_00129E | 724.292   | 386.696   | NM_014641 | 1148.355  | 808.307   |
| AB003334  | 3027.944  | 2367.907  | BG325046  | 2046.151  | 1189.542  | NM_00446E | 5692.996  | 5287.328  |
| AW276315  | 1397.424  | 1180.285  | AK026248  | 1984.686  | 3350.822  | AB020664  | 2105.561  | 2470.959  |
| AA490737  | 2133.365  | 1751.439  | NM_00457E | 3887.863  | 7490.46   | NM_00664E | 2592.456  | 2403.333  |
| AI878886  | 21280.852 | 20060.672 | NM_000647 | 1382.381  | 2707.663  | NM_00034E | 411.165   | 563.674   |
| BG697179  | 6304.478  | 6857.684  | AB046793  | 610.421   | 841.232   | NM_01911E | 1660.431  | 1955.913  |
| NM_00213E | 47253.551 | 44954.738 | NM_017604 | 1413.429  | 2989.061  | NM_01233E | 4087.237  | 4930.464  |
| BM012504  | 6456.344  | 6129.731  | NM_01773E | 5477.548  | 8362.816  | NM_020161 | 255.944   | 432.674   |
| AA664145  | 1506.356  | 1836.519  | NM_016557 | 1042.633  | 1531.378  | NM_02024E | 870.054   | 1089.705  |
| T70999    | 188.95    | 1150.09   | AF161348  | 3525.636  | 2630.637  | NM_00394E | 1176.912  | 1733.986  |
| T50790    | 1329.698  | 1798.577  | NM_018467 | 10036.37  | 10174.631 | NM_00445E | 1067.882  | 1304.693  |
| R48168    | 11448.938 | 12091.493 | NM_00606E | 1664.546  | 1702.1    | AB040954  | 2065.077  | 1939.133  |
| AB032993  | 2622.158  | 989.49    | NM_002704 | 540.931   | 716.004   | NM_002081 | 863.778   | 651.781   |
| NM_000854 | 1845.743  | 1058.403  | U16752    | 963.584   | 1541.346  | AB023139  | 1627.903  | 2425.485  |
| AL117423  | 2460.47   | 1924.574  | M30134    | 595.52    | 816.773   | NM_01788E | 411.482   | 548.456   |
| NM_00614E | 542.23    | 438.062   | NM_00203E | 5226.26   | 6312.213  | D80004    | 1966.912  | 2678.976  |
| NM_00700E | 1481.778  | 148.976   | NM_00572E | 17731.242 | 27073.543 | X63966    | 268.461   | 599.912   |
| NM_002084 | 1647.347  | 1478.949  | NM_01549E | 1584.726  | 2284.661  | NM_00094E | 1882.49   | 1769.142  |
| D16892    | 33222.879 | 22985.521 | NM_003747 | 2499.063  | 4511.809  | NM_01607E | 640.393   | 543.886   |
| NM_00475E | 1305.798  | 1188.157  | AB037744  | 4372.298  | 5663.954  | NM_01639E | 607.798   | 445.003   |
| NM_00729E | 2476.232  | 2292.4    | AF141901  | 830.032   | 773.253   | NM_016101 | 2881.284  | 2766.973  |
| AK023317  | 454.927   | 1070.901  | AL109708  | 1312.75   | 720.974   | NM_00585E | 13956.354 | 16959.1   |
| NM_003651 | 7502.046  | 7239.241  | L29143    | 872.886   | 458.59    | NM_01462E | 1512.556  | 2046.685  |
| NM_00041E | 538.774   | 684.446   | AF234532  | 3215.419  | 1722.108  | AK025630  | 736.808   | 765.777   |
| NM_01324E | 420.937   | 439.991   | AF099740  | 1554.677  | 1961.993  | AL365404  | 5449.354  | 5898.119  |
| NM_000591 | 1139.333  | 1365.084  | NM_006117 | 9378.09   | 17206.336 | AK022907  | 1040.626  | 1179.224  |
| NM_00056E | 6203.334  | 7122.766  | NM_00222E | 3248.715  | 4688.961  | NM_01479E | 1210.309  | 1030.292  |
| AF253318  | 695.072   | 713.595   | NM_00622E | 768.89    | 1592.306  | NM_00424E | 713.773   | 645.283   |
| AK024848  | 4780.547  | 7812.163  | NM_00255E | 2394.144  | 3439.677  | NM_00054E | 292.218   | 522.343   |
| NM_00485E | 645.704   | 604.722   | NM_00030E | 2123.45   | 1805.921  | U06699    | 5415.094  | 7078.924  |
| NM_00363E | 420.466   | 376.15    | NM_00452E | 41725.809 | 39734.41  | NM_00614E | 220.671   | 243.536   |
| NM_01911E | 2054.624  | 1144.424  | AK026381  | 13218.926 | 13329.246 | AJ290954  | 2179.248  | 2505.708  |
| NM_01233E | 6319.821  | 4914.161  | NM_00245E | 60029.898 | 17120.754 | AK025451  | 2729.124  | 3601.979  |
| NM_000084 | 1186.811  | 1799.458  | NM_00168E | 1113.253  | 1429.04   | NM_00278E | 1507.365  | 1799.763  |
| NM_016354 | 1001.555  | 1119.453  | NM_00070E | 497.197   | 836.599   | X52005    | 12858.64  | 18102.32  |
| NM_00303E | 1722.248  | 1622.88   | NM_004231 | 50965.258 | 54637.691 | NM_001047 | 1502.095  | 2623.583  |
| NM_01815E | 4213.126  | 4497.935  | NM_016577 | 1030.377  | 723.204   | AK024396  | 940.391   | 1485.111  |
| AL050358  | 778.936   | 1032.329  | AK023107  | 7495.203  | 7598.069  | U58514    | 1111.569  | 3030.57   |
| NM_004731 | 4399.91   | 5412.343  | NM_006854 | 20421.348 | 15927.55  | M57627    | 1019.017  | 3127.656  |
| NM_000544 | 2583.591  | 2405.202  | NM_00458E | 15455.816 | 11284.709 | W74254    | 1007.343  | 3206.588  |
| AV681967  | 1322.646  | 1652.1    | NM_020387 | 23784.648 | 15922.129 | M58603    | 1159.716  | 1321.501  |
| NM_01825E | 685.085   | 776.958   | NM_00724E | 1848.637  | 1217.607  | AA443286  | 353.713   | 367.584   |
| NM_01655E | 4882.447  | 5806.875  | NM_01829E | 89.073    | 708.687   | AB003334  | 1770.31   | 1290.389  |
| NM_01423E | 1061.743  | 1250.475  | NM_01818E | 1900.385  | 2283.974  | AW276315  | 722.24    | 649.008   |

|           |           |           |           |           |           |           |           |           |
|-----------|-----------|-----------|-----------|-----------|-----------|-----------|-----------|-----------|
| NM_005701 | 2525.709  | 3014.1    | NM_012382 | 3057.383  | 3315.724  | AA490737  | 1236.352  | 1770.836  |
| NM_001231 | 486.506   | 680.532   | BF038366  | 1220.3    | 1555.011  | AI878886  | 12176.719 | 22562.488 |
| NM_006819 | 24955.67  | 24189.447 | NM_002452 | 11640.344 | 13835.68  | BG697179  | 3503.55   | 4490.192  |
| NM_014744 | 2017.931  | 1954.728  | NM_016440 | 14549.419 | 15302.439 | NM_002136 | 29352.775 | 28792.336 |
| AF146759  | 482.624   | 629.625   | NM_007194 | 2862.242  | 2452.417  | BM012504  | 3837.475  | 4297.528  |
| AL365404  | 4973.289  | 2290.46   | NM_000314 | 6191.493  | 5710.775  | AA664145  | 588.318   | 656.724   |
| AK022907  | 1069.163  | 573.579   | AB002369  | 1644.337  | 1876.321  | X72308    | 14890.337 | 13610.338 |
| NM_014793 | 1098.243  | 684.176   | S74620    | 485.481   | 420.269   | T50790    | 1438.672  | 1362.47   |
| NM_004245 | 493.298   | 350.184   | AF305239  | 1612.371  | 1301.676  | R48168    | 5899.36   | 8569.047  |
| NM_003241 | 901.236   | 1124.252  | NM_002827 | 4832.195  | 4104.539  | AB032993  | 2389.584  | 1615.837  |
| NM_002685 | 3324.488  | 4266.986  | NM_001946 | 2299.673  | 1955.219  | NM_000854 | 1656.642  | 1481.315  |
| AK024504  | 907.146   | 904.319   | BF035425  | 34658.16  | 26509.65  | AL117423  | 1877.95   | 1913.708  |
| AF039023  | 1553.746  | 1730.379  | NM_000159 | 50428.527 | 42493.957 | NM_002084 | 1153.549  | 1267.285  |
| NM_005511 | 3108.545  | 3128.929  | NM_014638 | 2202.537  | 1496.143  | D16892    | 18144.135 | 19589.213 |
| NM_014698 | 7306.21   | 6816.907  | NM_006287 | 738.947   | 1676.691  | NM_004750 | 1045.654  | 1296.293  |
| NM_018475 | 4775.644  | 4922.273  | NM_000118 | 398.093   | 1412.643  | NM_007295 | 1841.007  | 3441.642  |
| NM_003262 | 3213.145  | 3365.93   | NM_000913 | 10302.769 | 21429.363 | NM_003651 | 5046.101  | 13517.545 |
| AB028127  | 21625.076 | 40682.438 | NM_001298 | 918.389   | 1436.544  | NM_013246 | 206.589   | 295.146   |
| AK022832  | 2090.159  | 2220.838  | BG325046  | 1911.671  | 2876.296  | NM_000591 | 899.416   | 1277.925  |
| NM_014641 | 2515.397  | 2210.154  | NM_007164 | 6756.327  | 5763.399  | NM_000565 | 3242.497  | 5537.913  |
| NM_004462 | 13394.649 | 12178.185 | BE783826  | 24714.678 | 26516.455 | AF253318  | 965.293   | 887.264   |
| AB020664  | 2750.045  | 2866.372  | X04827    | 2215.801  | 2208.138  | NM_017767 | 5248.261  | 4605.775  |
| NM_006640 | 2906.047  | 2943.913  | H07088    | 1562.404  | 1953.109  | AK024848  | 4132.991  | 3880.127  |
| NM_000857 | 575.469   | 236.106   | AI004656  | 2424.282  | 3683.741  | NM_000343 | 360.58    | 525.559   |
| L20688    | 16577.49  | 6562.4    | BC020596  | 2965.931  | 3769.27   | NM_019112 | 1766.901  | 1762.259  |
| X69111    | 3446.6    | 1442.274  | AF116606  | 59272.18  | 51153.512 | NM_012336 | 4351.007  | 5237.806  |
| AF252283  | 430.552   | 221.845   | X98922    | 2835.263  | 3936.34   | NM_020161 | 414.498   | 419.428   |
| AB037799  | 1838.257  | 1159.645  | AK098435  | 3325.228  | 3698.733  | NM_020246 | 917.064   | 861.682   |
| AB007950  | 4717.881  | 3170.969  | AK092872  | 4537.835  | 5179.85   | NM_000084 | 894.13    | 1543.418  |
| AK025593  | 1098.864  | 1112.234  | AF230496  | 539.594   | 755.383   | NM_016354 | 891.196   | 1091.535  |
| AB018304  | 2210.269  | 1888.838  | M16801    | 852.412   | 789.666   | NM_003038 | 687.51    | 1054.329  |
| NM_007061 | 8501.544  | 7097.883  | NM_145904 | 40028.074 | 41578.387 | NM_018155 | 2218.053  | 3417.171  |
| AB040954  | 2322.609  | 2439.109  | NM_021969 | 481.151   | 433.87    | AL050358  | 810.212   | 1895.97   |
| NM_002081 | 615.344   | 438.743   | NM_013334 | 5789.533  | 3930.778  | NM_004731 | 480.399   | 1277.464  |
| AB023139  | 1888.566  | 2297.984  | AB037744  | 4594.271  | 8122.303  | NM_000544 | 1098.586  | 1094.017  |
| NM_017885 | 1085.687  | 1016.076  | AF141901  | 1041.318  | 1652.834  | AV681967  | 739.173   | 899.337   |
| D80004    | 3750.102  | 3387.601  | NM_007008 | 923.662   | 1207.985  | NM_018250 | 337.175   | 535.587   |
| X63966    | 270.681   | 571.349   | NM_002418 | 1193.343  | 1499.259  | NM_016553 | 2478.357  | 3379.361  |
| NM_000946 | 3611.071  | 3201.909  | NM_004485 | 1147.838  | 977.505   | NM_003795 | 15585.816 | 18163.408 |
| NM_016070 | 1454.903  | 1758.085  | NM_013296 | 8394.309  | 9527.357  | NM_014232 | 508.877   | 713.001   |
| NM_016390 | 1132.548  | 1302.371  | AL117478  | 1502.541  | 2238.041  | NM_005701 | 872.468   | 1079.415  |
| NM_016101 | 5515.536  | 7313.644  | NM_005307 | 1579.921  | 2025.175  | NM_006819 | 14178.302 | 11468.374 |
| NM_005859 | 20641.682 | 24346.742 | NM_005958 | 2479.277  | 2902.558  | NM_014744 | 1148.76   | 974.409   |
| NM_020313 | 603.057   | 693.988   | NM_013436 | 752.06    | 1167.68   | AF146759  | 705.646   | 715.407   |
| NM_014628 | 3153.428  | 3716.516  | AF225426  | 1014.574  | 1364.576  | AL365404  | 7026.726  | 8948.104  |
| AK025630  | 1504.127  | 1507.508  | NM_005208 | 7098.303  | 8225.016  | AK022907  | 1783.994  | 1935.043  |
| NM_000632 | 434.847   | 328.419   | NM_000421 | 547.509   | 631.835   | NM_014793 | 1190.346  | 1073.5    |
| AK024488  | 805.427   | 678.174   | AK025687  | 13578.432 | 13560.939 | NM_004245 | 873.248   | 884.088   |
| AK023249  | 50204.73  | 45967.809 | AF218941  | 1180.511  | 1407.148  | NM_003241 | 603.063   | 827.523   |
| NM_017442 | 3559.317  | 3558.682  | AL137264  | 8518.844  | 9212.382  | NM_002685 | 1713.351  | 2412.352  |
| NM_000743 | 763.084   | 658.608   | NM_002226 | 2681.893  | 2173.395  | AK024504  | 446.839   | 581.315   |
| NM_007218 | 783.364   | 900.637   | X84370    | 5993.043  | 5721.942  | AF039023  | 1060.042  | 1515.148  |
| Z25436    | 1459.906  | 1753.673  | NM_004039 | 1599.357  | 1467.538  | NM_005511 | 2208.959  | 2650.358  |

|           |           |           |           |           |           |           |           |           |
|-----------|-----------|-----------|-----------|-----------|-----------|-----------|-----------|-----------|
| NM_005275 | 3841.296  | 3699.552  | NM_000508 | 515.879   | 412.21    | NM_01469E | 7528.3    | 10236.12  |
| NM_003844 | 5619.739  | 3592.274  | AB014558  | 1332.244  | 1300.958  | NM_01847E | 2293.293  | 3513.222  |
| NM_00200E | 13356.599 | 13195.063 | NM_00724E | 1691.648  | 1390.864  | NM_00326E | 1857.481  | 1303.293  |
| NM_012324 | 1366.676  | 1905.776  | AK026248  | 2170.75   | 2867.085  | AK022832  | 1015.463  | 880.742   |
| AK000039  | 1034.325  | 2906.658  | NM_00457E | 4185.304  | 5121.322  | NM_014641 | 1225.937  | 754.416   |
| AL137352  | 817.225   | 1056.579  | NM_000647 | 1198.015  | 1374.26   | NM_00446E | 6089.526  | 4348.511  |
| NM_01474E | 1904.77   | 2189.164  | AB046793  | 319.234   | 449.363   | AB020664  | 2036.002  | 1648.124  |
| NM_00448E | 2165.401  | 2852.271  | NM_017604 | 1566.466  | 2645.788  | NM_00664C | 2522.189  | 2124.093  |
| BF240063  | 475.17    | 552.783   | NM_01773E | 7103.492  | 9711.633  | NM_000857 | 603.748   | 748.751   |
| BI461699  | 595.706   | 1920.447  | NM_016557 | 707.766   | 1191.95   | L20688    | 10342.93  | 10803.922 |
| AF172264  | 1569.878  | 1527.945  | NM_00062E | 4812.332  | 4786.698  | X69111    | 1412.458  | 1565.089  |
| Y08267    | 587.729   | 211.902   | AF161348  | 3377.679  | 3348.03   | AB037799  | 1674.525  | 1634.744  |
| U80756    | 6890.978  | 2673.655  | NM_018467 | 8767.886  | 8268.748  | AB007950  | 6359.257  | 6850.108  |
| NM_018161 | 854.354   | 622.698   | NM_00606E | 1505.724  | 1581.494  | AK025593  | 538.002   | 490.868   |
| NM_00524E | 779.799   | 712.239   | NM_002704 | 917.218   | 741.068   | AB018304  | 1570.709  | 1507.272  |
| NM_00481C | 598.717   | 429.18    | U16752    | 1351.13   | 1347.387  | NM_007061 | 8538.881  | 9632.368  |
| AL117629  | 2954.153  | 2860.446  | M30134    | 772.893   | 985.471   | AB040954  | 1390.314  | 1318.798  |
| NM_00259E | 1160.386  | 2191.566  | NM_00203E | 5472.581  | 4821.317  | NM_002081 | 423.357   | 306.83    |
| NM_01572E | 1384.99   | 1274.386  | NM_00572E | 19702.426 | 15184.429 | AB023139  | 813.513   | 705.536   |
| AF174604  | 1472.487  | 1250.653  | NM_01549E | 1772.681  | 1709.607  | NM_01788E | 454.57    | 338.309   |
| AB002379  | 2197.323  | 2335.387  | NM_003747 | 2167.835  | 1424.676  | D80004    | 1785.858  | 1275.162  |
| AB046851  | 1702.572  | 1862.894  | NM_002827 | 5510.082  | 5212.967  | NM_00094E | 1761.648  | 1072.937  |
| NM_018174 | 1180.015  | 890.088   | NM_00194E | 2238.776  | 2043.833  | NM_01607C | 829.947   | 848.659   |
| NM_01454E | 1778.684  | 1963.589  | NM_00015E | 51166.77  | 49260.371 | NM_01639C | 584.055   | 388.933   |
| NM_004437 | 643.512   | 851.014   | NM_01463E | 2354.077  | 2246.11   | NM_016101 | 2811.505  | 2208.185  |
| AK025875  | 1689.377  | 1775.25   | AF099740  | 1479.616  | 2563.067  | NM_00585E | 16727.816 | 14136.585 |
| BC014152  | 49209.906 | 42188.066 | NM_006117 | 9441.699  | 12803.1   | NM_02031E | 254.52    | 274.584   |
| NM_01241E | 406.598   | 776.089   | NM_00222E | 3258.405  | 3286.626  | NM_01462E | 1614.396  | 1430.772  |
| NM_00022E | 342.879   | 732.908   | NM_00622E | 753.588   | 801.529   | AK025630  | 671.621   | 663.831   |
| AB037779  | 16011.529 | 25044.979 | NM_01541E | 20010.262 | 21631.473 | NM_01471E | 994.502   | 844.581   |
| NM_00065E | 675.066   | 2208.76   | NM_004897 | 1319.282  | 1526.729  | NM_00063E | 445.771   | 504.84    |
| NM_00088E | 501.421   | 736.644   | NM_00255E | 2702.389  | 3080.901  | AB002298  | 293.512   | 255.73    |
| NM_00385E | 7857.203  | 2638.626  | AF225418  | 581.881   | 1288.473  | AK024488  | 453.739   | 522.823   |
| NM_00290E | 10546.854 | 4131.454  | NM_00030E | 1721.442  | 2047.196  | AK023249  | 31142.02  | 30551.434 |
| NM_01233E | 931.498   | 640.036   | NM_00452E | 40708.734 | 44661.402 | NM_01744E | 1718.295  | 1639.988  |
| NM_005787 | 18319.152 | 16912.592 | AK026381  | 11690.029 | 14815.673 | NM_00074E | 439.839   | 509.136   |
| NM_00214E | 2456.349  | 2982.054  | NM_00245C | 58496.391 | 20860.346 | NM_00721E | 384.568   | 170.083   |
| AF284421  | 4629.018  | 12705.023 | NM_00168E | 980.848   | 1567.124  | Z25436    | 881.413   | 609.985   |
| NM_00604E | 1672.733  | 2828.693  | NM_00070E | 589.896   | 702.299   | NM_00527E | 1827.707  | 1065.838  |
| NM_00636C | 28295.814 | 21473.805 | NM_004231 | 54410.063 | 50396.301 | NM_003844 | 5170.213  | 2908.802  |
| NM_00396E | 4636.709  | 4351.073  | NM_00224E | 510.709   | 795.487   | NM_00200E | 6169.438  | 4476.463  |
| NM_00278E | 2077.187  | 1882.004  | NM_145904 | 38292.141 | 41206.445 | NM_012324 | 813.703   | 447.585   |
| NM_00281C | 29574.342 | 21767.686 | NM_013334 | 4318.851  | 3936.297  | AK000039  | 576.482   | 228.369   |
| NM_00334E | 6780.218  | 5882.514  | AF150735  | 4392.561  | 4523.863  | NM_01474E | 1180.983  | 1065.177  |
| NM_00278E | 23578.359 | 18889.098 | NM_01818E | 1468.646  | 2277.202  | NM_00448E | 1256.433  | 725.392   |
| NM_00347C | 3568.629  | 3885.13   | NM_01238E | 2961.419  | 2713.022  | BF240063  | 452.924   | 471.47    |
| AL080137  | 460.622   | 495.507   | BF038366  | 787.067   | 653.036   | BI461699  | 478.601   | 463.747   |
| NM_01767E | 786.228   | 988.85    | NM_00245E | 11843.733 | 12392.151 | AF172264  | 751.445   | 658.839   |
| AF155103  | 556.277   | 779.493   | NM_012304 | 1010.505  | 750.606   | Y08267    | 686.696   | 651.948   |
| NM_017704 | 1455.549  | 1676.978  | NM_01644C | 14391.383 | 10827.526 | U80756    | 6915.805  | 6788.758  |
| BC006359  | 1000.186  | 1343.705  | NM_007194 | 2548.843  | 2055.66   | NM_018161 | 612.471   | 626.275   |
| AK026127  | 538.961   | 892.2     | NM_000314 | 7637.253  | 5170.399  | NM_00524E | 696.399   | 620.049   |
| BC016062  | 10076.423 | 16091.447 | AB002369  | 1807.089  | 1614.607  | NM_00481C | 432.979   | 425.688   |

|           |           |           |           |           |           |           |           |           |
|-----------|-----------|-----------|-----------|-----------|-----------|-----------|-----------|-----------|
| NM_002814 | 2093.322  | 4266.945  | S74620    | 798.091   | 456.545   | AL117629  | 1335.379  | 1107.031  |
| NM_012250 | 641.395   | 737.668   | AF305239  | 1799.086  | 1197.571  | NM_002595 | 594.141   | 541.479   |
| NM_006283 | 2184.842  | 1690.063  | AL137264  | 10556.711 | 9911.355  | NM_015726 | 635.569   | 616.78    |
| X97303    | 3724.661  | 1304.992  | NM_002226 | 2314.875  | 2002.947  | AF174604  | 853.744   | 595.421   |
| NM_017530 | 2157.841  | 1283.063  | X84370    | 5759.204  | 5114.493  | AB002379  | 2564.589  | 2335.389  |
| AL360183  | 1510.565  | 1600.695  | NM_004039 | 1407.615  | 1610.192  | AB046851  | 550.492   | 328.824   |
| AK027046  | 1458.255  | 2120.557  | NM_000508 | 451.926   | 488.207   | NM_018174 | 431.208   | 289.617   |
| NM_003113 | 2549.788  | 3224.746  | AB014558  | 1062.716  | 1139.716  | NM_014548 | 1198.47   | 679.172   |
| NM_016578 | 3344.506  | 3412.635  | NM_006287 | 614.4     | 657.776   | AK025875  | 577.505   | 467.389   |
| NM_015832 | 4840.928  | 4192.234  | NM_000118 | 465.06    | 688.042   | BC014152  | 30415.268 | 24575.416 |
| NM_001326 | 3361.896  | 2899.346  | NM_000913 | 8331.92   | 10156.447 | AB037779  | 10334.867 | 8322.259  |
| NM_014319 | 990.81    | 872.994   | NM_001298 | 600.542   | 892.422   | NM_000393 | 575.204   | 491.237   |
| NM_004865 | 1541.98   | 1538.344  | BG325046  | 1956.636  | 2134.587  | NM_000889 | 392.914   | 187.137   |
| AB019566  | 55134.676 | 76061.906 | AI351740  | 3967.394  | 4998.448  | NM_003859 | 5381.912  | 4606.342  |
| NM_000981 | 60418.66  | 75948.32  | AA444051  | 1643.565  | 1586.648  | NM_000236 | 800.483   | 815.992   |
| NM_002047 | 19362.441 | 17467.652 | NM_007164 | 6686.65   | 6563.221  | NM_002903 | 14464.248 | 12671.074 |
| NM_001031 | 57195.469 | 76906.336 | H07088    | 1469.553  | 1947.755  | NM_012339 | 712.114   | 876.369   |
| NM_007208 | 11658.142 | 17418.277 | AI004656  | 1934.829  | 1572.063  | NM_005787 | 9858.63   | 9325.116  |
| NM_000999 | 55604.441 | 85112.063 | BC020596  | 2614.287  | 2023.645  | NM_002143 | 1613.874  | 1634.872  |
| NM_000985 | 22392.398 | 15479.265 | AF116606  | 58801.922 | 48277.496 | AF284421  | 5413.395  | 4209.796  |
| BF130622  | 11665.889 | 8614.76   | X98922    | 2979.587  | 2758.518  | NM_006048 | 1674.295  | 1461.125  |
| BU165106  | 1723.079  | 725.874   | AK098435  | 3794.614  | 3640.086  | NM_006360 | 13725.98  | 10752.829 |
| AF038202  | 849.302   | 315.122   | AK092872  | 4481.599  | 4154.53   | NM_003968 | 2589.03   | 1694.372  |
| BC008837  | 522.702   | 287.056   | AF230496  | 698.02    | 738.167   | NM_002786 | 919.41    | 453.568   |
| NM_001861 | 849.931   | 543.44    | M16801    | 771.271   | 499.647   | NM_003343 | 3975.615  | 1986.228  |
| AK025558  | 4213.562  | 3514.903  | M30134    | 511.723   | 614.412   | NM_002789 | 11300.149 | 6526.695  |
| AK024355  | 746.128   | 735.604   | NM_002038 | 4666.056  | 4260.845  | NM_003470 | 1732.018  | 1039.956  |
| NM_001864 | 19321.039 | 13620.721 | NM_005729 | 17795.654 | 14598.358 | AL080137  | 298.484   | 416.224   |
| NM_003477 | 6743.026  | 5771.995  | NM_015493 | 1829.979  | 1708.365  | NM_017679 | 557.969   | 391.224   |
| NM_002654 | 21202.83  | 17470.053 | NM_003747 | 1970.682  | 1569.154  | AF155103  | 371.93    | 195.836   |
| NM_020382 | 2241.67   | 1376.724  | AB037744  | 4329.193  | 4165.999  | NM_017704 | 768.266   | 603.17    |
| NM_007192 | 6297.136  | 6156.112  | AF141901  | 945.102   | 1005.521  | BC006359  | 505.996   | 294.133   |
| AB002337  | 6361.849  | 5976.563  | AL109708  | 2020.921  | 2003.629  | BC016062  | 4268.296  | 2826.233  |
| NM_014933 | 5765.8    | 4276.09   | L29143    | 1713.93   | 1940.441  | NM_002814 | 1056.737  | 1519.481  |
| NM_003076 | 18219.578 | 19975.326 | AF234532  | 3393.033  | 2996.969  | NM_012250 | 362.575   | 458.758   |
| NM_006385 | 770.666   | 927.042   | NM_002418 | 1060.121  | 768.897   | NM_006283 | 1148.913  | 1034.66   |
| NM_003456 | 3132.233  | 8058.732  | NM_004485 | 827.87    | 1229.742  | NM_002701 | 344.355   | 341.971   |
| AB029016  | 1716.572  | 1266.499  | NM_013296 | 7710.298  | 8325.592  | X97303    | 2529.876  | 1653.016  |
| AK000445  | 830.374   | 764.562   | AL117478  | 1579.187  | 1344.908  | NM_017530 | 2261.789  | 2075.511  |
| AL049390  | 903.805   | 284.951   | NM_005307 | 1789.14   | 1365.639  | AL360183  | 717.645   | 515.492   |
| AK000584  | 3662.945  | 1672.891  | NM_005958 | 2183.911  | 2098.429  | AK027046  | 569.901   | 631.538   |
| AJ297363  | 704.674   | 267.609   | NM_013436 | 1060.532  | 1205.202  | NM_003113 | 1243.835  | 938.214   |
| AK026379  | 1476.567  | 969.589   | AF225426  | 1480.566  | 1566.073  | NM_016578 | 2145.792  | 1681.213  |
| AK022965  | 1541.57   | 1461.266  | NM_005208 | 8860.495  | 7521.535  | NM_015832 | 2281.382  | 1398.176  |
| AK024278  | 5913.385  | 5308.709  | NM_000421 | 786.631   | 671.734   | NM_014319 | 549.3     | 230.458   |
| AK026982  | 1095.351  | 868.329   | AK025687  | 18172.83  | 13782.867 | NM_004865 | 789.082   | 573.83    |
| NM_018022 | 2473.921  | 2333.969  | AF218941  | 1096.441  | 927.283   | AB019566  | 37834.648 | 32375.479 |
| AB056722  | 1956.262  | 2365.468  | NM_004978 | 322.591   | 509.338   | NM_000981 | 38477.902 | 29280.545 |
| NM_013242 | 3511.744  | 3310.463  | NM_000705 | 791.104   | 858.833   | NM_002047 | 8048.984  | 4510.264  |
| NM_012066 | 6267.265  | 6175.965  | NM_004231 | 51217.641 | 44313.234 | NM_001031 | 36554.254 | 38080.586 |
| AF052168  | 1853.944  | 1579.101  | NM_016577 | 501.515   | 618.172   | NM_007208 | 5029.76   | 2619.904  |
| NM_014650 | 997.08    | 1156.687  | AK023107  | 7073.084  | 7221.417  | NM_000999 | 43845.867 | 59789.039 |
| AK022632  | 3777.767  | 3693.202  | NM_006854 | 20686.643 | 18946.691 | NM_000985 | 11428.512 | 7999.086  |

|           |           |           |           |           |           |           |          |          |
|-----------|-----------|-----------|-----------|-----------|-----------|-----------|----------|----------|
| AK021554  | 776.35    | 921.095   | NM_007246 | 1710.176  | 1526.96   | BF130622  | 5381.43  | 3411.232 |
| AF070620  | 1090.739  | 5731.091  | AK026248  | 2144.686  | 2020.445  | BU165106  | 1185.826 | 1546.299 |
| NM_02023E | 1896.72   | 2859.497  | NM_00457E | 3960.036  | 4548.278  | AF038202  | 500.619  | 629.388  |
| AK000532  | 530.181   | 701.924   | NM_000647 | 1135.159  | 1161.519  | NM_001861 | 395.652  | 462.744  |
| AL162039  | 2175.066  | 2770.9    | AB046793  | 733.77    | 1062.209  | AK025558  | 2447.579 | 1783.6   |
| AK024896  | 1704.015  | 2155.927  | NM_017604 | 1033.501  | 1203.801  | AK024355  | 370.656  | 218.576  |
| AK023663  | 1349.18   | 637.265   | NM_01773E | 7176.188  | 5516.866  | NM_001864 | 9046.359 | 7166.821 |
| D83543    | 1053.552  | 661.521   | NM_016557 | 758.309   | 672.599   | NM_003477 | 2794.596 | 1245.625 |
| NM_01693C | 1582.21   | 1498.333  | NM_000623 | 4021.081  | 3436.051  | NM_002654 | 7766.987 | 4464.241 |
| AJ001861  | 676.887   | 586.39    | AF161348  | 3396.891  | 2809.472  | NM_020382 | 920.913  | 311.277  |
| X64981    | 697.937   | 1012.42   | NM_018467 | 10315.504 | 9826.35   | NM_007192 | 2592.146 | 1270.127 |
| X75692    | 2368.884  | 1835.237  | NM_00606E | 1700.765  | 1371.692  | AB002337  | 3695.26  | 1726.644 |
| Y10511    | 4014.535  | 5472.51   | NM_002704 | 674.732   | 614.703   | NM_014933 | 2844.774 | 1609.083 |
| M26147    | 776.999   | 2255.809  | U16752    | 1087.523  | 993.454   | NM_00307E | 9189.639 | 5658.342 |
| AF018254  | 1809.866  | 2567.027  | NM_01644C | 17155.328 | 20092.291 | AK024250  | 543.653  | 379.648  |
| NM_01624C | 767.436   | 584.864   | NM_007194 | 2459.91   | 2445.841  | NM_00345E | 1571.469 | 1115     |
| AK025238  | 427.528   | 244.358   | NM_000314 | 7362.828  | 6373.896  | AB029016  | 600.625  | 519.71   |
| AK026416  | 4743.405  | 3737.924  | AB002369  | 1516.63   | 1580.319  | AK000445  | 399.589  | 275.381  |
| AK025797  | 573.854   | 339.489   | S74620    | 754.141   | 623.101   | AL049390  | 1040.084 | 1115.638 |
| AK000019  | 649.797   | 1256.63   | AF305239  | 1512.996  | 1059.42   | AK000584  | 2246.655 | 2589.721 |
| AK024330  | 369.634   | 2513.946  | NM_002827 | 6237.788  | 5444.302  | AJ297363  | 691.419  | 701.207  |
| AK024864  | 595.327   | 870.021   | NM_00194E | 2392.813  | 2611.398  | AK026379  | 1495.025 | 2028.511 |
| AK024947  | 1236.187  | 1448.389  | BF035425  | 38079.117 | 36569.367 | AK022965  | 671.627  | 654.647  |
| AK024606  | 1006.854  | 331.966   | NM_000159 | 55475.484 | 54846.859 | AK024278  | 4102.135 | 3519.792 |
| NM_016417 | 4009.935  | 2705.759  | NM_01463E | 2656.958  | 2247.661  | AK026982  | 550.074  | 355.389  |
| NM_01910E | 695.335   | 745.018   | AF099740  | 1205.156  | 1252.611  | NM_018022 | 1322.905 | 1064.347 |
| AL080118  | 2853.549  | 3836.31   | NM_006117 | 9141.216  | 9985.857  | AB056722  | 2912.254 | 1744.095 |
| AL049378  | 3232.062  | 2729.694  | NM_00222E | 2928.615  | 2542.007  | NM_013242 | 1326.08  | 550.76   |
| AK021505  | 982.159   | 1159.373  | NM_006229 | 743.557   | 809.312   | NM_01206E | 3916.989 | 1791.416 |
| AK021598  | 2955.5    | 2329.557  | NM_01541E | 22395.701 | 16718.057 | AF052168  | 1996.622 | 823.465  |
| AJ012498  | 479.4     | 263.157   | NM_004897 | 1247.686  | 1283.227  | NM_01465C | 648.147  | 286.043  |
| NM_005973 | 5360.491  | 2303.973  | NM_00255E | 2767.259  | 1728.626  | AK022632  | 1599.228 | 939.811  |
| X04547    | 1643.213  | 802.645   | AF225418  | 686.933   | 716.036   | AK021554  | 467.154  | 270.212  |
| AK025823  | 664.853   | 885.793   | NM_000309 | 1844.432  | 2260.367  | NM_02023E | 911.781  | 527.918  |
| AL359941  | 1452.761  | 919.401   | NM_00452E | 40705.836 | 44833.023 | AL162039  | 961.946  | 526.032  |
| U52076    | 693.147   | 554.331   | AK026381  | 15022.74  | 12926.396 | AK024896  | 835.215  | 545.726  |
| AF035278  | 782.904   | 953.515   | NM_00245C | 58190.191 | 15515.233 | AK024059  | 250.205  | 305.859  |
| U32999    | 4747.541  | 3594.276  | NM_00168E | 963.837   | 1229.968  | AK023663  | 970.048  | 1084.4   |
| U66052    | 1429.11   | 1633.191  | NM_014723 | 759.96    | 1306.818  | AB007928  | 394.87   | 344.959  |
| AK024156  | 1305.043  | 1128.119  | AB011106  | 1294.609  | 1234.404  | AK023645  | 410.621  | 361.323  |
| AF086288  | 740.272   | 895.099   | D26362    | 4569.677  | 3627.996  | D83543    | 671.735  | 514.53   |
| AK023109  | 737.675   | 924.353   | NM_013452 | 2081.062  | 1534.726  | NM_01693C | 821.903  | 637.172  |
| NM_005293 | 3366.915  | 3794.369  | AY009402  | 1740.776  | 1311.85   | AJ001861  | 539.855  | 648.316  |
| AF133332  | 1530.985  | 1665.4    | NM_018451 | 1702.498  | 1228.191  | X64981    | 389.361  | 395.668  |
| AK022805  | 501.07    | 451.11    | NM_012443 | 608.427   | 653.487   | X75692    | 1279.477 | 750.575  |
| NM_00108E | 1840.729  | 510.088   | NM_007009 | 514.32    | 643.884   | Y10511    | 2840.84  | 1855.74  |
| BC015991  | 3246.448  | 1547.804  | NM_002584 | 6674.436  | 7190.033  | AF018254  | 518.389  | 347.759  |
| U46214    | 1137.148  | 443.438   | NM_013334 | 6688.812  | 5633.187  | NM_01624C | 460.294  | 310.623  |
| NM_00031C | 32912.934 | 17314.373 | AF150735  | 5341.387  | 4380.786  | AK025238  | 254.057  | 386.906  |
| AF161343  | 1839.51   | 1107.268  | NM_018183 | 1638.214  | 1855.208  | AK026416  | 7172.968 | 4727.903 |
| NM_00476E | 2420.304  | 1443.02   | NM_012382 | 2709.532  | 2798.657  | AK025797  | 367.244  | 272.35   |
| AK022246  | 556.362   | 266.667   | BF038366  | 919.601   | 877.44    | AK000019  | 339.762  | 249.938  |
| X75684    | 1844.6    | 1562.944  | NM_002452 | 11012.018 | 9268.616  | AK000645  | 462.768  | 420.933  |

|           |           |           |           |           |           |           |           |           |
|-----------|-----------|-----------|-----------|-----------|-----------|-----------|-----------|-----------|
| D17200    | 566.772   | 499.781   | NM_012304 | 696.588   | 629.232   | AK024947  | 510.492   | 196.275   |
| AF113701  | 9404.03   | 8559.755  | AF245505  | 888.955   | 1145.717  | AK024606  | 2117.884  | 2768.41   |
| Y11158    | 1025.711  | 845.923   | AB037776  | 688.769   | 891.951   | NM_016417 | 3451.54   | 3633.542  |
| NM_006771 | 6715.817  | 4888.845  | AF196976  | 4872.987  | 4308.647  | NM_019108 | 346.463   | 354.005   |
| L37702    | 5156.16   | 4811.616  | AL050379  | 1150.529  | 693.749   | AL080118  | 1534.483  | 1508.075  |
| AK022812  | 632.473   | 530.73    | NM_003161 | 1484.244  | 1297.204  | AL049378  | 2425.114  | 1847.681  |
| U79301    | 1363.726  | 1779.218  | NM_014496 | 665.301   | 790.738   | AK021505  | 664.795   | 555.817   |
| AK022260  | 2756.227  | 2760.958  | NM_016215 | 15121.146 | 19014.789 | AK021598  | 1774.672  | 1103.821  |
| M32219    | 4361.042  | 4868.309  | AK026919  | 475.293   | 328.088   | AJ012498  | 381.897   | 310.39    |
| AF007128  | 2355.407  | 2752.112  | NM_001501 | 4758.374  | 5370.156  | NM_005973 | 4996.17   | 4652.343  |
| CY3Cy5    | 2180.38   | 368.776   | NM_006176 | 30546.762 | 28935.898 | X04547    | 1387.016  | 2039.729  |
| AI351740  | 2731.255  | 2692.392  | AL137459  | 1184.623  | 948.448   | AK025823  | 551.507   | 681.915   |
| AA444051  | 1135.636  | 914.532   | AB037812  | 268.084   | 504.328   | AL359941  | 1438.062  | 1033.447  |
| NM_007164 | 3006.444  | 1866.296  | AB007932  | 1858.456  | 1596.936  | U52076    | 593.143   | 521.848   |
| BE783826  | 13355.772 | 10203.923 | AF219257  | 20881.143 | 16541.828 | AF035278  | 647.627   | 423.09    |
| X04827    | 1374.845  | 1046.144  | NM_003978 | 1294.214  | 1165.757  | U32999    | 3161.128  | 1717.451  |
| H07088    | 1215.259  | 942.365   | NM_002561 | 3001.313  | 2542.886  | U66052    | 1500.275  | 786.261   |
| AI004656  | 1593.298  | 1052.286  | NM_006103 | 28278.863 | 26071.23  | AK024156  | 530.465   | 296.314   |
| BC008428  | 166.341   | 1348.655  | AL359933  | 13485.686 | 17125.791 | AF086288  | 403.251   | 476.42    |
| BC020596  | 1423.03   | 1011      | NM_001302 | 874.385   | 1094.74   | AK023109  | 391.303   | 192.542   |
| AF116606  | 48054.238 | 28823.475 | M17783    | 6399.587  | 5601.83   | NM_005293 | 5573.778  | 4815.299  |
| X98922    | 1499.062  | 1349.15   | NM_018590 | 6527.043  | 5541.111  | AF133332  | 872.155   | 518.748   |
| AK098435  | 2293.771  | 1674.844  | NM_003178 | 1570.942  | 1305.609  | AK022805  | 189.276   | 94.153    |
| AK092872  | 3036.958  | 2736.788  | NM_012437 | 8665.184  | 8712.678  | NM_001088 | 4139.978  | 3795.541  |
| AF230496  | 501.476   | 548.83    | AF090944  | 831.036   | 718.98    | BC015991  | 2147.943  | 1609.281  |
| M16801    | 369.609   | 617.079   | NM_002607 | 892.351   | 500.574   | U46214    | 1794.035  | 2447.194  |
| NM_145904 | 30944.719 | 31508.875 | AF116712  | 374.268   | 451.816   | NM_000310 | 21590.848 | 23561.791 |
| NM_021968 | 182.008   | 174.152   | AF116626  | 3129.252  | 3190.409  | AF161343  | 1254.907  | 1249.275  |
| SR2       | 45011.141 | 42058.566 | NM_001760 | 29954.359 | 30327.754 | NM_004765 | 1434.37   | 1444.227  |
| SR4       | 12202.43  | 11617.604 | NM_002527 | 1479.508  | 1211.782  | AK022246  | 430.513   | 479.944   |
| SR6       | 1601.834  | 1755.277  | NM_005890 | 1446.402  | 946.254   | X75684    | 902.745   | 660.388   |
| SR8       | 5633.273  | 19267.576 | NM_007065 | 40379.434 | 44014.176 | AF113701  | 3777.992  | 2461.976  |
| SR10      | 19066.793 | 7409.032  | AF149785  | 4590.4    | 3788.199  | Y11158    | 476.99    | 348.197   |
| CY3Cy5    | 3352.82   | 596.142   | NM_012068 | 15254.714 | 11110.567 | NM_006771 | 4478.913  | 2119.764  |
| NM_002418 | 736.314   | 485.251   | NM_004064 | 7225.896  | 6040.918  | L37702    | 4052.159  | 2863.019  |
| NM_004485 | 698.888   | 506.654   | NM_001256 | 2852.096  | 2250.706  | AK022812  | 442.985   | 192.149   |
| NM_013296 | 5274.61   | 4672.633  | NM_014704 | 3213.613  | 3308.025  | U79301    | 1162.345  | 811.019   |
| AL117478  | 1152.502  | 840.035   | NM_020205 | 936.766   | 781.39    | AK022260  | 1552.503  | 1033.995  |
| NM_005307 | 505.917   | 252.088   | AK024815  | 516.078   | 253.186   | M32219    | 2836.126  | 2275.194  |
| NM_005958 | 1508.705  | 844.025   | NM_001227 | 965.271   | 747.927   | AF007128  | 1284.697  | 740.879   |
| AF225426  | 760.13    | 496.445   | NM_001191 | 3629.34   | 2780.868  | CY3Cy5    | 3194.1    | 338.897   |
| NM_005208 | 3417.898  | 2379.164  | U15174    | 821.751   | 776.669   | AI351740  | 2337.603  | 2796.771  |
| NM_000421 | 539.393   | 431.094   | NM_013342 | 2031.127  | 2150.75   | NM_007164 | 4647.562  | 9130.453  |
| AK025687  | 8282.124  | 6301.886  | NM_014344 | 1159.204  | 980.201   | X04827    | 1310.06   | 2476.479  |
| AF218941  | 766.999   | 687.41    | AB040917  | 970.78    | 813.766   | H07088    | 652.24    | 872.094   |
| AL137264  | 3238.413  | 2624.541  | AL110261  | 7401.635  | 5355.944  | AI004656  | 1174.149  | 1172.948  |
| NM_002228 | 1368.01   | 1435.521  | AA203539  | 723.745   | 502.143   | BC020596  | 1156.628  | 1320.655  |
| X84370    | 3922.429  | 5306.902  | NM_005932 | 1118.127  | 691.423   | AF116606  | 36681.617 | 31795.305 |
| NM_004038 | 925.065   | 1280.171  | NM_004279 | 7279.274  | 5580.929  | X98922    | 1375.671  | 2037.313  |
| NM_000508 | 310.706   | 205.162   | NM_004851 | 704.788   | 1369.162  | AK092872  | 2070.392  | 3757.17   |
| AB014558  | 863.325   | 804.323   | NM_001908 | 2888.033  | 3051.161  | SR6       | 1488.071  | 1536.377  |
| NM_006287 | 278.88    | 302.532   | NM_000285 | 5974.781  | 5409.443  | SR8       | 5411.25   | 16999.945 |
| NM_000118 | 265.587   | 287.211   | NM_005911 | 25563.262 | 23982.115 | SR10      | 19017.947 | 6304.846  |

|           |           |           |           |           |           |           |           |           |
|-----------|-----------|-----------|-----------|-----------|-----------|-----------|-----------|-----------|
| NM_000913 | 5651.588  | 7839.397  | AV702690  | 1705.298  | 1168.379  | CY3Cy5    | 4016.268  | 441.134   |
| NM_00129E | 406.226   | 1409.756  | AL117452  | 3088.046  | 2415.879  | NM_00241E | 970.24    | 722.752   |
| BG325046  | 805.497   | 1585.375  | NM_012230 | 984.293   | 888.514   | NM_005307 | 985.669   | 1151.762  |
| AK026248  | 1533.286  | 1274.774  | NM_01403E | 7990.273  | 6645.827  | NM_00595E | 1213.75   | 1165.89   |
| NM_00457E | 2957.922  | 2586.213  | NM_002061 | 3866.955  | 4189.902  | NM_01343E | 809.553   | 1080.252  |
| NM_000647 | 845.475   | 455.029   | AF169974  | 2300.137  | 2130.174  | AF225426  | 717.991   | 616.107   |
| NM_017604 | 782.724   | 926.577   | NM_004522 | 537.536   | 507.07    | NM_00520E | 4175.843  | 3504.787  |
| NM_01773E | 3602.479  | 2394.688  | NM_005733 | 1943.393  | 1685.436  | AK025687  | 4823.691  | 4958.842  |
| NM_016557 | 424.313   | 464.485   | NM_01813E | 2313.404  | 2046.088  | NM_00403E | 865.569   | 2282.078  |
| NM_000623 | 2795.018  | 1838.654  | NM_01961E | 3911.648  | 3113.722  | AB014558  | 801.625   | 1668.801  |
| AF161348  | 2224.864  | 1468.012  | AF183411  | 2468.166  | 1524.828  | NM_006287 | 832.746   | 1146.21   |
| NM_018467 | 5547.162  | 3773.515  | BF244591  | 1246.899  | 840.625   | NM_000913 | 6057.019  | 6375.917  |
| NM_00606E | 945.383   | 875.392   | NM_00588E | 9766.106  | 8619.438  | NM_00129E | 468.635   | 563.827   |
| U16752    | 551.938   | 438.919   | U63785    | 1242.666  | 1004.677  | BG325046  | 1452.371  | 1274.978  |
| M30134    | 343.823   | 458.228   | NM_00596E | 1729.96   | 1185.704  | AK026248  | 1140.55   | 953.048   |
| NM_00203E | 2212.241  | 3122.648  | NM_00315E | 1514.236  | 840.905   | NM_00457E | 1879.136  | 1817.641  |
| NM_015493 | 1100.059  | 1618.365  | NM_00310E | 624.555   | 208.945   | NM_000647 | 306.637   | 446.354   |
| NM_003747 | 973.229   | 1189.748  | NM_013310 | 4242.376  | 2981.11   | NM_017604 | 296.023   | 801.261   |
| AB037744  | 1876.481  | 1807.437  | BC004958  | 1827.64   | 1144.731  | NM_01773E | 3680.393  | 3578.493  |
| AF141901  | 542.366   | 542.179   | NM_005762 | 8885.192  | 6669.188  | NM_016557 | 566.8     | 675.975   |
| NM_00700E | 318.557   | 353.181   | NM_006473 | 488.012   | 827.198   | NM_000623 | 2077.373  | 1840.564  |
| AL109708  | 748.396   | 737.581   | NM_014643 | 2394.584  | 2100.344  | AF161348  | 1707.243  | 1307.24   |
| L29143    | 468.508   | 502.704   | NM_005653 | 2105.188  | 1807.005  | NM_018467 | 5715.458  | 5322.61   |
| AF234532  | 2099.789  | 2070.876  | NM_014553 | 1180      | 1282.279  | NM_00606E | 918.432   | 794.557   |
| AF099740  | 910.114   | 729.476   | NM_003440 | 2486.718  | 2067.9    | NM_002704 | 402.51    | 500.571   |
| NM_006117 | 6948.628  | 5355.255  | NM_00469E | 14689.08  | 12589.404 | NM_00203E | 4125.176  | 6589.031  |
| NM_00222E | 2050.387  | 1574.188  | U41387    | 24266.971 | 18026.664 | NM_00572E | 10816.286 | 20054.027 |
| NM_00622E | 395.216   | 367.789   | NM_00451E | 7475.263  | 10031.724 | NM_015493 | 902.619   | 1798.778  |
| NM_01541E | 12559.769 | 9507.74   | NM_006513 | 1487.23   | 1136.346  | NM_003747 | 973.905   | 1588.703  |
| NM_004897 | 931.814   | 963.667   | NM_00368E | 21009.104 | 16428.121 | AB037744  | 2298.035  | 3030.536  |
| NM_00255E | 1644.738  | 1235.438  | NM_00248E | 633.332   | 523.696   | AF141901  | 472.189   | 742.481   |
| AF225418  | 348.777   | 247.263   | NM_00629E | 10433.928 | 10778.528 | NM_00700E | 202.852   | 409.925   |
| NM_00030E | 1410.22   | 999.325   | NM_001540 | 2758.397  | 2061.766  | AL109708  | 691.46    | 498.695   |
| NM_00452E | 25256.789 | 16824.592 | NM_012111 | 9407.504  | 6580.53   | L29143    | 585.966   | 593.531   |
| AK026381  | 5002.035  | 4372.011  | NM_004470 | 13993.909 | 9291.841  | AF234532  | 2176.253  | 1637.428  |
| NM_002450 | 45783.699 | 9095.469  | NM_00141E | 6494.05   | 4656.735  | AF099740  | 429.16    | 540.293   |
| NM_00168E | 811.955   | 883.943   | NM_00375E | 37484.16  | 21659.199 | NM_006117 | 4182.318  | 3795.147  |
| NM_00070E | 536.796   | 818.206   | AL049680  | 3748.825  | 2374.538  | NM_00222E | 1358.919  | 1516.786  |
| NM_002243 | 253.684   | 243.186   | AL133660  | 764.077   | 719.738   | NM_01541E | 9555.224  | 9630.354  |
| NM_016577 | 371.047   | 230.675   | AK001595  | 1322.903  | 1045.305  | NM_004897 | 592.997   | 696.882   |
| AK023107  | 5517.556  | 5616.257  | NM_01801E | 578.998   | 510.428   | NM_00255E | 1159.542  | 1235.109  |
| NM_006854 | 12493.415 | 14510.269 | NM_00371E | 8218.487  | 6776.223  | NM_00030E | 537.553   | 408.066   |
| NM_004580 | 10134.397 | 13294.834 | M94065    | 1585.604  | 865.126   | NM_00452E | 20287.346 | 18121.053 |
| NM_020387 | 17580.287 | 17294.262 | BF036874  | 1319.954  | 1135.664  | AK026381  | 7307.838  | 6502.061  |
| NM_00724E | 1349.983  | 1547.904  | AF182419  | 1429.824  | 1658.633  | NM_002450 | 45133.211 | 7853.792  |
| AF113125  | 125.612   | 136.295   | NM_004293 | 573.982   | 367.894   | NM_00497E | 138.544   | 546.033   |
| NM_018290 | 143.775   | 115.62    | NM_00701E | 1356.743  | 1286.927  | NM_00070E | 366.822   | 835.552   |
| AF150735  | 2311.644  | 1926.1    | NM_002703 | 4185.636  | 3733.059  | NM_004231 | 36086.508 | 41216.949 |
| NM_018183 | 1314.673  | 1114.711  | NM_00537E | 14691.404 | 10658.341 | NM_016577 | 453.452   | 556.942   |
| NM_012382 | 1483.492  | 1082.945  | NM_00598E | 4523.516  | 4267.25   | AK023107  | 4674.899  | 5042.136  |
| BF038366  | 564.056   | 381.318   | NM_01590E | 4155.684  | 4458.9    | NM_006854 | 11194.196 | 10697.036 |
| NM_002452 | 7459.386  | 6702.711  | AK023759  | 1955.048  | 1978.363  | NM_004580 | 9149.186  | 7380.389  |
| NM_012304 | 889.963   | 1120.963  | L25270    | 17291.805 | 14221.795 | NM_020387 | 20604.186 | 18966.439 |



|           |           |           |           |           |           |           |           |           |
|-----------|-----------|-----------|-----------|-----------|-----------|-----------|-----------|-----------|
| NM_01644C | 8563.881  | 7683.389  | AB033111  | 944.35    | 660.521   | NM_00724E | 976.636   | 1041.819  |
| NM_007194 | 1789.736  | 1982.956  | AJ276316  | 1358.872  | 894.34    | AF150735  | 2993.748  | 2856.782  |
| NM_000314 | 5757.048  | 6333.619  | AF229246  | 11202.301 | 7739.562  | NM_01818E | 966.79    | 1238.516  |
| AB002369  | 1116.151  | 1485.062  | S64709    | 4297.731  | 3221.453  | NM_01238E | 893.37    | 855.433   |
| S74620    | 330.94    | 214.316   | NM_01848E | 953.446   | 811.76    | BF038366  | 379.241   | 887.173   |
| AF305239  | 1244.589  | 1065.927  | X56465    | 554.553   | 220.776   | NM_00245E | 4942.604  | 5259.563  |
| NM_002827 | 3125.404  | 2611.567  | NM_003071 | 8406.488  | 6936.614  | NM_012304 | 401.048   | 712.555   |
| NM_00194E | 1714.908  | 1798.77   | AK021494  | 1391.953  | 814.86    | NM_01644C | 10579.58  | 12157.62  |
| BF035425  | 11425.845 | 12300.527 | AK022117  | 497.056   | 532.044   | NM_007194 | 1715.648  | 1985.498  |
| NM_00160E | 241.541   | 162.43    | AF075023  | 511.317   | 399.881   | NM_000314 | 5132.318  | 5929.353  |
| NM_00015E | 35642.926 | 37208.59  | AL360160  | 14360.751 | 11236.336 | AB002369  | 911.536   | 1095.457  |
| NM_01463E | 1673.306  | 1632.059  | AK001092  | 28699.279 | 38933.102 | S74620    | 516.334   | 612.39    |
| NM_006287 | 388.799   | 424.762   | NM_014144 | 1858.906  | 1865.404  | AF305239  | 1144.725  | 746.78    |
| NM_000118 | 310.279   | 361.219   | AF147345  | 1032.779  | 1100.259  | NM_002827 | 4121.86   | 3703.767  |
| NM_00091E | 7300.208  | 5754.554  | AF147373  | 4192.851  | 3343.916  | NM_00194E | 1325.373  | 1372.161  |
| NM_00129E | 529.287   | 529.782   | AK026209  | 259.679   | 600.064   | BF035425  | 41962.023 | 39633.094 |
| BG325046  | 1159.202  | 794.741   | AF086253  | 1083.137  | 1214.492  | NM_00015E | 45150.184 | 55524.809 |
| AI351740  | 2940.882  | 2795.26   | AF086303  | 713.525   | 839.814   | NM_01463E | 1340.435  | 1717.974  |
| AA444051  | 1058.012  | 841.979   | AF086434  | 1243.611  | 1816.333  | NM_006287 | 279.241   | 516.592   |
| NM_007164 | 2292.618  | 1756.168  | AK022063  | 4003.052  | 3700.502  | NM_00091E | 5391.112  | 11116.693 |
| BE783826  | 13251.803 | 10794.886 | AF086345  | 3631.593  | 2946.398  | NM_00129E | 279.566   | 987.109   |
| X04827    | 1181.27   | 1134.264  | AF086464  | 822.913   | 1224.984  | BG325046  | 1288.034  | 1704.669  |
| H07088    | 1069.17   | 876.669   | AL049278  | 2901.106  | 2916.508  | AI351740  | 2828.661  | 3994.417  |
| AI004656  | 1604.316  | 1980.333  | NM_00506C | 615.874   | 330.145   | AA444051  | 739.28    | 1048.202  |
| BC020596  | 1025.398  | 949.375   | AF085935  | 560.908   | 424.448   | NM_007164 | 4963.883  | 3690.727  |
| AF116606  | 47930.32  | 43631.934 | AL035369  | 1468.005  | 1208.014  | BE783826  | 20411.217 | 19418.352 |
| X98922    | 1812.067  | 2137.767  | AF075097  | 3370.543  | 3097.968  | X04827    | 663.934   | 1054.132  |
| AK098435  | 2340.089  | 2713.092  | AK022801  | 284.078   | 831.755   | H07088    | 831.206   | 1061.17   |
| AK092872  | 3631.378  | 4009.326  | AL133075  | 7119.116  | 6990.732  | AI004656  | 1466.417  | 2388.052  |
| AF230496  | 403.572   | 482.088   | AL137630  | 3081.333  | 3590.162  | BC020596  | 729.7     | 1208.93   |
| M16801    | 474.826   | 484.803   | AL137277  | 7465.097  | 6443.577  | AF116606  | 38842.605 | 48558.012 |
| NM_145904 | 32997.727 | 29696.258 | AL137447  | 883.138   | 919.966   | X98922    | 1543.751  | 2284.702  |
| NM_02196E | 237.114   | 238.254   | AL157467  | 714.235   | 1006.299  | AK098435  | 1885.414  | 2483.632  |
| NM_013334 | 2664.122  | 2284.795  | BC023609  | 1108.281  | 1281.185  | AK092872  | 2822.813  | 3861.315  |
| AB037744  | 3362.752  | 4414.112  | AK025100  | 3289.159  | 3488.441  | AF230496  | 463.762   | 615.521   |
| AF141901  | 642.417   | 991.006   | AF086395  | 1525.174  | 1681.092  | M16801    | 469.359   | 552.892   |
| NM_00700E | 347.279   | 223.274   | AF086049  | 2034.411  | 1630.15   | L29143    | 637.171   | 1173.093  |
| AL109708  | 874.018   | 554.334   | AF114263  | 858.921   | 720.654   | AF234532  | 2075.805  | 2539.8    |
| L29143    | 576.204   | 378.74    | AK026142  | 4654.401  | 4401.449  | NM_00241E | 886.259   | 770.324   |
| AF234532  | 2249.094  | 1721.728  | AF161369  | 2348.138  | 1409.181  | NM_00448E | 635.606   | 653.568   |
| NM_00241E | 682.199   | 570.896   | AK027176  | 2471.958  | 1654.505  | NM_01343E | 549.53    | 1120.146  |
| NM_00448E | 841.32    | 602.221   | AF073328  | 730.269   | 612.125   | AF225426  | 671.863   | 951.534   |
| NM_01329E | 5037.938  | 3973.688  | AF129266  | 446.457   | 434.014   | NM_00520E | 2921.76   | 3345.173  |
| AL117478  | 1165.97   | 1293.431  | Y12019    | 3727.824  | 2870.301  | NM_000421 | 634.712   | 1382.258  |
| NM_005307 | 878.826   | 1016.987  | AL137326  | 946.28    | 761.132   | AK025687  | 10824.259 | 12856.151 |
| NM_00595E | 1634.628  | 1843.372  | AK021898  | 1508.74   | 1220.617  | AF218941  | 972.47    | 977.592   |
| NM_01343E | 681.381   | 928.831   | AK022024  | 2807.043  | 2235.608  | NM_00222E | 1208.13   | 1570.213  |
| AF225426  | 570.237   | 831.976   | AK022301  | 1537.894  | 1465.96   | X84370    | 4035.656  | 4911.622  |
| NM_00520E | 3929.318  | 4221      | AK021948  | 1507.636  | 1426.63   | NM_00403E | 1469.065  | 2841.045  |
| NM_000421 | 348.483   | 505.814   | AK022054  | 1148.51   | 1124.263  | NM_016577 | 378.67    | 365.723   |
| AK025687  | 8036.906  | 7643.709  | AK022191  | 1438.801  | 1324.532  | AK023107  | 4260.797  | 4629.908  |
| AF218941  | 866.151   | 1038.507  | AK022341  | 655.912   | 481.855   | NM_006854 | 10690.337 | 14287.588 |
| AL137264  | 4530.069  | 4543.452  | AK026861  | 499.492   | 460.12    | NM_00458C | 8673.222  | 12413.342 |

|           |           |           |           |           |           |           |           |           |
|-----------|-----------|-----------|-----------|-----------|-----------|-----------|-----------|-----------|
| NM_00222E | 1611.553  | 1729.438  | AK021642  | 4689.278  | 3634.748  | NM_020387 | 19998.385 | 23886.08  |
| X84370    | 4667.002  | 7498.143  | AK022455  | 896.345   | 646.729   | NM_00724E | 892.726   | 1043.792  |
| NM_00403E | 1066.801  | 2088.596  | AK021987  | 1091.001  | 775.003   | AK026248  | 1287.817  | 1419.207  |
| NM_00050E | 466.957   | 456.44    | AK026905  | 1325.611  | 1080.795  | NM_00457E | 2038.594  | 2584.315  |
| AB014558  | 978.162   | 1278.17   | AK023449  | 609.333   | 211.206   | NM_000647 | 704.436   | 907.177   |
| NM_016577 | 507.662   | 1089.038  | AK026704  | 1054.486  | 737.088   | AF161348  | 1893.083  | 1892.469  |
| AK023107  | 5605.979  | 7795.718  | NM_00663E | 2808.003  | 2258.948  | NM_018467 | 7024.333  | 6954.153  |
| NM_006854 | 12396.771 | 7928.476  | X14675    | 1620.647  | 990.752   | NM_00606E | 993.651   | 1660.37   |
| NM_00458C | 9867.253  | 8260.768  | AF071170  | 3824.141  | 2539.27   | U16752    | 722.733   | 826.11    |
| NM_020387 | 17210.805 | 12625.983 | AF075075  | 439.82    | 514.777   | M30134    | 408.702   | 517.104   |
| NM_00724E | 1207.008  | 1165.832  | AK025259  | 1962.478  | 1732.509  | NM_00088C | 636.359   | 1651.831  |
| AK026248  | 1544.109  | 1587.635  | NM_005453 | 262.492   | 436.367   | NM_00203E | 3671.885  | 3923.597  |
| NM_00457E | 2838.798  | 2687.329  | NM_018304 | 4623.147  | 4282.355  | NM_003747 | 1263.682  | 2263.592  |
| NM_000647 | 905.205   | 634.113   | AK023264  | 761.734   | 224.253   | NM_002827 | 3874.339  | 2876.384  |
| AB046793  | 266.315   | 197.585   | AK024457  | 3008.448  | 2248.115  | NM_00194E | 985.946   | 902.265   |
| NM_017604 | 748.264   | 595.431   | AL389977  | 398.648   | 571.322   | BF035425  | 34399.07  | 31964.559 |
| NM_01773E | 3867.011  | 7563.617  | AK026894  | 1206.078  | 817.538   | NM_00160E | 591.089   | 1148.625  |
| NM_016557 | 569.545   | 735.276   | AK026372  | 727.259   | 409.232   | NM_00015E | 46349.258 | 54946.98  |
| NM_000623 | 2918.884  | 3517.471  | NM_01418E | 3657.735  | 3626.844  | NM_01463E | 1300.023  | 1785.863  |
| AF161348  | 2039.187  | 1698.52   | AF056442  | 717.422   | 427.723   | AF099740  | 642.886   | 987.824   |
| NM_018467 | 5888.138  | 8528.418  | AK024752  | 37398.324 | 32847.41  | NM_006117 | 4860.794  | 5568.368  |
| NM_00606E | 763.142   | 652.821   | BG117194  | 1172.416  | 789.965   | NM_00222E | 1599.724  | 1643.335  |
| U16752    | 535.31    | 424.161   | AF131859  | 4167.441  | 3630.672  | NM_01541E | 12515.466 | 12967.032 |
| M30134    | 276.371   | 177.512   | AK023632  | 299.331   | 687.656   | NM_004897 | 701.008   | 1030.611  |
| NM_00088C | 213.515   | 208.485   | AF086118  | 5069.802  | 5655.735  | NM_00255E | 1342.923  | 1898.571  |
| NM_00203E | 3492.056  | 3553.994  | NM_01413E | 1165.985  | 1256.948  | NM_00030E | 1568.873  | 1654.5    |
| NM_00572E | 13413.097 | 13397.854 | AK025044  | 555.448   | 737.078   | NM_00452E | 23705.168 | 25759.021 |
| NM_01549E | 1253.805  | 1560.578  | AF230317  | 625.688   | 554.229   | AK026381  | 9277.687  | 9878.805  |
| NM_003747 | 1446.729  | 1569.93   | AK023806  | 2214.811  | 2199.591  | NM_00245C | 45926.195 | 10161.47  |
| NM_002827 | 4025.415  | 8124.205  | AF088068  | 323.282   | 789.829   | NM_00168E | 489.397   | 707.332   |
| NM_00194E | 2105.854  | 2613.78   | Y16696    | 14195.176 | 13760.343 | NM_00070E | 363.214   | 692.733   |
| BF035425  | 7571.044  | 5875.364  | AK026094  | 2236.916  | 1945.616  | NM_145904 | 19990.613 | 14588.188 |
| NM_00160E | 279.195   | 414.172   | AF161344  | 4545.607  | 4330.126  | AF150735  | 2778.994  | 2724.614  |
| NM_00015E | 36032.73  | 27630.951 | NM_001207 | 63250.887 | 52770.316 | NM_01818E | 865.902   | 980.18    |
| NM_01463E | 1556.409  | 1826.286  | AF075045  | 1171.871  | 1121.732  | NM_01238E | 1394.562  | 1215.653  |
| AF099740  | 663.72    | 783.981   | AK022199  | 1030.511  | 631.073   | BF038366  | 468.181   | 566.794   |
| NM_006117 | 6160.107  | 6118.376  | NM_006211 | 552.43    | 289.358   | NM_00245E | 7190.866  | 7189.334  |
| NM_00222E | 2033.699  | 1510.367  | NM_003524 | 7802.183  | 4966.966  | NM_012304 | 355.726   | 589.325   |
| NM_00622E | 300.279   | 297.589   | AK021438  | 1432.692  | 1530.224  | NM_01644C | 9773.949  | 14418.148 |
| NM_01541E | 13153.715 | 9639.115  | S39891    | 720.476   | 394.225   | NM_007194 | 1477.703  | 1344.194  |
| NM_004897 | 990.157   | 2205.738  | AK021624  | 1084.074  | 1288.208  | NM_000314 | 5010.441  | 4982.084  |
| NM_00255E | 1571.237  | 1980.653  | AF278605  | 8668.563  | 8626.791  | S74620    | 422.305   | 868.11    |
| AF225418  | 376.912   | 827.278   | NM_006497 | 7522.554  | 7421.239  | AF305239  | 1101.129  | 1026.335  |
| NM_00030E | 1237.802  | 924.671   | AL133599  | 862.794   | 910.948   | AL137264  | 6934.82   | 4979.743  |
| NM_00452E | 22983.381 | 19079.959 | NM_01647E | 1666.946  | 1823.275  | NM_00222E | 1048.94   | 901.959   |
| NM_018394 | 108.815   | 126.548   | AF086064  | 815.781   | 677.5     | X84370    | 3629.806  | 3333.163  |
| AK026381  | 7530.443  | 6680.439  | AK023042  | 4523.334  | 4721.501  | NM_00403E | 868.733   | 1161.297  |
| NM_00245C | 40496.988 | 8719.127  | AF086501  | 494.414   | 1726.596  | NM_00050E | 349.807   | 298.623   |
| NM_00168E | 727.984   | 886.317   | AK026429  | 1066.75   | 1266.141  | NM_006287 | 423.087   | 605.954   |
| AF004711  | 126.007   | 119.738   | NM_01655C | 3322.808  | 3251.98   | NM_00011E | 315.793   | 344.556   |
| NM_00070E | 601.662   | 542.551   | AK024813  | 4764.345  | 5098.142  | NM_00091E | 5909.9    | 9715.961  |
| NM_004231 | 40689.938 | 37841.68  | AJ227909  | 20819.414 | 16057.937 | BG325046  | 1360.697  | 1462.501  |
| NM_145904 | 36277.617 | 41888.18  | CY3Cy5    | 8192.007  | 1074.959  | AI351740  | 2488.648  | 2822.099  |

|           |           |           |           |           |           |           |           |           |
|-----------|-----------|-----------|-----------|-----------|-----------|-----------|-----------|-----------|
| NM_003034 | 156.001   | 110.993   | BG534366  | 1164.286  | 3766.095  | AA444051  | 885.616   | 801.393   |
| NM_013334 | 2998.116  | 2694.106  | BG698522  | 10001.659 | 14224.804 | NM_007164 | 2070.648  | 1605.895  |
| AF150735  | 2492.531  | 2984.359  | AA152346  | 902.212   | 1048.041  | BE783826  | 21299.029 | 22513.994 |
| NM_018183 | 907.467   | 922.033   | L15189    | 3319.875  | 3838.532  | X04827    | 1177.588  | 1288.158  |
| NM_012382 | 1604.824  | 1387.953  | AB023420  | 12978.22  | 13872.49  | H07088    | 977.189   | 1073.109  |
| BF038366  | 687.469   | 653.919   | AF022912  | 3129.258  | 3399.068  | AI004656  | 1403.964  | 1728.024  |
| NM_002452 | 7498.255  | 8069.85   | AA477428  | 11823.766 | 16941.154 | BC020596  | 1913.028  | 2131.844  |
| NM_012304 | 392.347   | 382.212   | AA156342  | 1763.83   | 1968.886  | AF116606  | 41288.934 | 52887.449 |
| NM_016440 | 9997.777  | 12058.231 | R45594    | 15414.324 | 15410.28  | X98922    | 1504.094  | 2067.13   |
| NM_007194 | 1760.875  | 1653.811  | H46425    | 2406.847  | 3081.816  | AK098435  | 2302.095  | 2218.854  |
| NM_000314 | 5509.213  | 4888.298  | AI355949  | 605.86    | 621.684   | AK092872  | 2670.528  | 2447.253  |
| AB002369  | 1165.895  | 1266.637  | AA278152  | 7525.223  | 7055.522  | AF230496  | 427.487   | 511.672   |
| S74620    | 520.737   | 397.836   | H75530    | 2894.583  | 2786.617  | M16801    | 379.324   | 656.841   |
| AF305239  | 1119.643  | 1004.276  | NM_004176 | 5717.974  | 5000.687  | M30134    | 299.363   | 270.766   |
| AL137264  | 3887.221  | 4572.356  | NM_004548 | 20579.066 | 16393.816 | NM_002038 | 1920.497  | 1555.212  |
| NM_002226 | 1654.291  | 2051.246  | SR5       | 3919.459  | 4755.815  | NM_005729 | 9043.38   | 7834.079  |
| X84370    | 4076.884  | 3239.394  | SR7       | 6142.166  | 49066.219 | NM_015493 | 1062.403  | 1222.569  |
| NM_004039 | 1122.365  | 1308.862  | SR9       | 24631.158 | 5807.463  | AF141901  | 587.178   | 706.536   |
| NM_000508 | 245.382   | 311.56    | CY3Cy5    | 9131.456  | 1780.257  | NM_007008 | 902.137   | 1002.177  |
| AB014558  | 944.41    | 1027.588  | NM_001315 | 8779.694  | 11085.08  | AL109708  | 378.219   | 383.483   |
| NM_006287 | 423.328   | 319.669   | AF286095  | 1722.139  | 2362.098  | L29143    | 525.814   | 420.19    |
| NM_000118 | 462.073   | 587.177   | NM_000878 | 1109.115  | 1218.399  | AF234532  | 1941.791  | 1179.472  |
| NM_000913 | 7202.256  | 7216.075  | S66407    | 1555.699  | 1833.03   | NM_002418 | 516.511   | 736.714   |
| NM_001298 | 476.006   | 455.213   | NM_016523 | 610.264   | 862.791   | NM_004485 | 729.75    | 800.615   |
| BG325046  | 962.596   | 1163.57   | NM_004258 | 45025.914 | 42087.168 | NM_013296 | 4703.809  | 4449.67   |
| AI351740  | 2361.441  | 2919.525  | NM_001981 | 3725.942  | 4124.615  | AL117478  | 1091.729  | 1198.003  |
| AA444051  | 881.588   | 794.14    | NM_014654 | 932.514   | 1105.533  | NM_005307 | 1268.433  | 1714.693  |
| NM_007164 | 2312.32   | 2041.092  | NM_001585 | 45744.203 | 47987.488 | NM_005958 | 1537.652  | 1970.879  |
| BE783826  | 13250.36  | 10494.068 | AK026108  | 6556.367  | 7950.931  | NM_013436 | 521.162   | 828.265   |
| X04827    | 1482.074  | 1237.248  | NM_006379 | 3390.598  | 3499.984  | AF225426  | 793.779   | 1067.651  |
| H07088    | 1223.724  | 1057.032  | BF571428  | 2421.084  | 2412.455  | NM_005208 | 6676.601  | 7126.357  |
| AI004656  | 1644.857  | 2061.704  | AB037723  | 4557.478  | 3923.872  | NM_000421 | 390.057   | 342.607   |
| BC020596  | 1593.757  | 2361.023  | NM_006246 | 3335.339  | 3365.221  | AK025687  | 11466.882 | 9035.16   |
| AF116606  | 48697.039 | 56098.645 | U58096    | 23914.67  | 19877.92  | AF218941  | 913.165   | 856.4     |
| X98922    | 1933.639  | 2546.985  | NM_016929 | 3286.282  | 2806.737  | NM_000705 | 282.696   | 305.821   |
| AK098435  | 2519.004  | 3000.662  | NM_013943 | 988.57    | 915.488   | NM_004231 | 34647.238 | 24944.24  |
| AK092872  | 3543.963  | 4709.347  | NM_001639 | 4676.994  | 5131.402  | AK023107  | 4324.102  | 4980.753  |
| AF230496  | 491.928   | 489.373   | AF182404  | 2305.521  | 2096.464  | NM_006854 | 10397.803 | 11334.419 |
| M16801    | 639.848   | 530.235   | NM_000804 | 748.991   | 854.274   | NM_004580 | 5202.74   | 3632.989  |
| M30134    | 309.4     | 209.139   | NM_006555 | 2385.359  | 2961.074  | NM_020387 | 17597.258 | 11605.099 |
| NM_000880 | 202.056   | 142.778   | NM_014521 | 1203.645  | 1581.795  | NM_007246 | 1037.655  | 737.909   |
| NM_002038 | 2154.759  | 1438.387  | NM_002445 | 1348.906  | 1652.157  | AK026248  | 1193.392  | 1131.743  |
| NM_005729 | 11436.173 | 9597.435  | NM_017809 | 835.575   | 990.119   | NM_004578 | 2089.219  | 1819.203  |
| NM_015493 | 1250.126  | 1457.784  | AK023202  | 2020.771  | 2423.838  | NM_000647 | 785.417   | 850.793   |
| NM_003747 | 1345.116  | 1314.29   | D63877    | 4545.27   | 5954.286  | NM_017604 | 632.815   | 996.964   |
| AB037744  | 2916.442  | 2401.391  | AF131760  | 1301.804  | 1473.801  | NM_017738 | 4402.985  | 5437.531  |
| AF141901  | 720.339   | 844.341   | NM_018698 | 1814.921  | 2161.05   | AF161348  | 2142.074  | 1850.256  |
| AL109708  | 806.448   | 907.482   | NM_006461 | 1140.445  | 1314.2    | NM_018467 | 7766.157  | 7056.639  |
| AF234532  | 1777.952  | 1299.549  | NM_018201 | 3351.491  | 5000.28   | NM_006068 | 1036.887  | 743.97    |
| NM_002418 | 597.17    | 655.782   | NM_014438 | 1051.433  | 1010.918  | NM_002704 | 308.137   | 204.384   |
| NM_004485 | 879.135   | 776.292   | NM_014880 | 3589.734  | 3464.166  | U16752    | 826.458   | 611.949   |
| NM_012419 | 172.889   | 159.111   | NM_003764 | 3990.625  | 2709.351  | NM_016440 | 9007.18   | 8755.465  |
| NM_013296 | 5705.558  | 6265.159  | NM_004829 | 566.825   | 856.766   | NM_007194 | 1252.794  | 898.573   |

|           |           |           |           |           |           |           |           |           |
|-----------|-----------|-----------|-----------|-----------|-----------|-----------|-----------|-----------|
| AL117478  | 1276.025  | 1303.489  | NM_006793 | 29793.852 | 31715.453 | NM_000314 | 4033.297  | 2247.444  |
| NM_005307 | 658.738   | 541.152   | NM_001538 | 3944.031  | 3627.071  | AB002369  | 697.433   | 633.83    |
| NM_005958 | 1417.032  | 1969.107  | X97261    | 62910.469 | 19997.256 | S74620    | 481.972   | 362.297   |
| NM_013438 | 748.583   | 910.879   | D87666    | 65501.809 | 66943.547 | AF305239  | 993.462   | 956.347   |
| AF225426  | 807.765   | 914.178   | AF149304  | 850.592   | 734.839   | NM_002827 | 4879.412  | 6297.532  |
| NM_005208 | 4141.14   | 4504.962  | NM_012095 | 9001.009  | 8358.896  | NM_001948 | 1274.168  | 1518.507  |
| NM_000421 | 532.619   | 713.972   | X73079    | 31367.756 | 34515.777 | BF035425  | 34366.305 | 33798.539 |
| AK025687  | 8758.654  | 10145.817 | NM_019091 | 1016.447  | 1303.851  | NM_000158 | 45005.473 | 30902.428 |
| AF218941  | 865.568   | 1128.352  | L07518    | 593.182   | 742.689   | NM_014638 | 1250.226  | 1127.427  |
| NM_004978 | 227.523   | 206.873   | AF264781  | 1963.108  | 3077.718  | AF099740  | 789.468   | 534.754   |
| AF004711  | 221.011   | 222.939   | AK022823  | 433.816   | 723.457   | NM_006117 | 4643.347  | 3671.732  |
| NM_000705 | 598.977   | 653.522   | NM_002456 | 981.185   | 930.812   | NM_002225 | 1733.125  | 1602.407  |
| NM_004231 | 37759.809 | 29802.867 | AK024215  | 12585.982 | 16580.107 | NM_006228 | 253.105   | 236.495   |
| NM_002243 | 189.472   | 165.947   | AB044661  | 4030.349  | 4796.026  | NM_015415 | 13461.654 | 10267.766 |
| NM_016577 | 362.983   | 250.135   | NM_000606 | 7931.089  | 7986.083  | NM_000308 | 1069.997  | 1323.75   |
| AK023107  | 5301.807  | 4420.401  | NM_016124 | 8822.947  | 9274.643  | NM_004528 | 23523.031 | 20615.479 |
| NM_006854 | 11056.314 | 10654.374 | NM_019079 | 600.816   | 815.047   | AK026381  | 3904.553  | 2543.578  |
| NM_004580 | 8916.205  | 11547.723 | U53530    | 2484.464  | 2461.16   | NM_002450 | 42532.313 | 5558.372  |
| NM_020387 | 20153.553 | 45028.012 | NM_006598 | 2163.097  | 3867.919  | NM_001688 | 553.419   | 525.759   |
| NM_007248 | 1407.274  | 1097.1    | NM_015948 | 5314.752  | 5114.239  | AB011106  | 534.328   | 369.768   |
| AK026248  | 1529.971  | 1538.299  | NM_003054 | 2298.711  | 2146.879  | D26362    | 2156.718  | 1330.47   |
| NM_004578 | 2948.19   | 2829.592  | NM_003042 | 573.996   | 391.566   | NM_013452 | 1570.079  | 1167.005  |
| NM_000647 | 702.125   | 376.574   | NM_002219 | 17335.832 | 16830.145 | AY009402  | 1682.883  | 2048.703  |
| AB046793  | 179.667   | 475.644   | NM_002826 | 6158.731  | 5374.311  | NM_018451 | 1288.241  | 1265.298  |
| NM_017604 | 844.789   | 1161.644  | AF159141  | 4064.102  | 3778.143  | NM_002584 | 2770.156  | 2226.181  |
| NM_017738 | 4542.409  | 4294.732  | NM_002420 | 576.241   | 820.93    | NM_013334 | 3027.962  | 1996.425  |
| NM_016557 | 592.044   | 606.106   | NM_016458 | 23317.797 | 35491.418 | NM_018183 | 1525.633  | 2308.572  |
| NM_000623 | 3454.045  | 4541.626  | AK022233  | 3431.617  | 4311.285  | NM_012382 | 1722.414  | 1827.125  |
| NM_018301 | 99.434    | 413.701   | AL137713  | 419.025   | 514.663   | BF038366  | 990.547   | 812.634   |
| AF161348  | 2836.744  | 3925.784  | AK026410  | 8007.818  | 12563.316 | NM_002452 | 7612.876  | 5335.921  |
| NM_018467 | 6997.175  | 10850.972 | NM_014637 | 3306.485  | 4036.365  | NM_012304 | 403.805   | 307.752   |
| NM_006068 | 891.379   | 1024.415  | NM_013379 | 16737.08  | 20592.912 | AF245505  | 590.886   | 513.228   |
| NM_002704 | 332.733   | 216.546   | AF113208  | 5348.198  | 6870.893  | AB037776  | 467.509   | 266.478   |
| U16752    | 581.514   | 569.684   | NM_006153 | 4716.412  | 5605.677  | AF196976  | 2554.436  | 1260.593  |
| NM_016440 | 9658.305  | 6459.177  | NM_012164 | 1576.36   | 2132.785  | AL050379  | 559.965   | 398.588   |
| NM_007194 | 1844.75   | 1310.222  | AK026010  | 1014.501  | 1345.871  | NM_003161 | 743.003   | 605.658   |
| NM_000314 | 5721.36   | 3438.656  | NM_004721 | 883.032   | 1342.127  | NM_014498 | 441.382   | 886.155   |
| AB002369  | 1512.708  | 1437.816  | AB011156  | 1479.298  | 1560.397  | NM_016215 | 8145.749  | 9290.886  |
| S74620    | 380.381   | 360.649   | NM_018079 | 1231.921  | 1285.558  | NM_001501 | 1334.973  | 898.806   |
| AF305239  | 1243.982  | 896.081   | NM_004760 | 4328.279  | 4140.44   | NM_006178 | 11591.03  | 7188.404  |
| NM_002827 | 2972.034  | 1931.065  | NM_006752 | 8481.688  | 9059.671  | AL137459  | 481.331   | 554.658   |
| NM_001948 | 1690.697  | 1511.934  | NM_004428 | 397.028   | 597.122   | AB037812  | 250.551   | 301.377   |
| BF035425  | 8253.047  | 8935.288  | NM_006809 | 4390.662  | 5830.463  | AB007932  | 982.797   | 639.963   |
| NM_001608 | 499.332   | 845.119   | NM_006942 | 558.129   | 708.073   | AF219257  | 14065.199 | 9709.466  |
| NM_000158 | 38661.328 | 44766.832 | NM_018199 | 361.017   | 739.303   | NM_003978 | 783.502   | 692.044   |
| NM_014638 | 1732.782  | 1961.225  | NM_013943 | 1185.704  | 1565.193  | NM_002561 | 2284.973  | 1869.489  |
| AF099740  | 704.397   | 842.188   | NM_001639 | 4902.09   | 5491.95   | NM_006103 | 15876.738 | 16694.977 |
| NM_006117 | 6416.64   | 6623.181  | H39560    | 583.776   | 727.852   | NM_006208 | 533.484   | 922.836   |
| NM_002225 | 1985.011  | 1406.465  | BG534366  | 1055.425  | 1595.239  | NM_000805 | 1083.63   | 1324.792  |
| NM_006228 | 370.826   | 528.107   | BG698522  | 8834.639  | 14155.82  | AL359933  | 6836.676  | 7030.737  |
| NM_015415 | 15058.516 | 17601.645 | AA152346  | 934.593   | 1992.178  | NM_001302 | 500.872   | 445.062   |
| NM_004897 | 856.975   | 990.767   | L15189    | 3393.445  | 4377.384  | M17783    | 3146.87   | 2436.236  |
| NM_002555 | 2023.747  | 2522.537  | AB023420  | 13440.053 | 15780.608 | NM_018590 | 3958.633  | 3520.027  |

|           |           |           |           |           |           |           |           |           |
|-----------|-----------|-----------|-----------|-----------|-----------|-----------|-----------|-----------|
| AF225418  | 454.215   | 975.74    | AF022912  | 3609.739  | 4744.603  | NM_00317E | 1109.311  | 932.711   |
| NM_00030E | 1605.709  | 2317.575  | H46425    | 2293.806  | 2296.646  | NM_012437 | 4896.499  | 4700.833  |
| NM_00452E | 29128.023 | 32776.23  | AI355949  | 810.734   | 821.607   | AF090944  | 260.686   | 152.428   |
| AK026381  | 7289.029  | 8332.236  | AA278152  | 7480.394  | 8647.399  | NM_002607 | 447.174   | 231.739   |
| NM_00245C | 39115.016 | 9659.416  | H75530    | 2642.225  | 3275.066  | AF116626  | 1986.905  | 1928.252  |
| NM_00168E | 817.824   | 1113.928  | NM_00417E | 6108.32   | 6052.156  | NM_00176C | 18164.77  | 17008.057 |
| NM_01472E | 449.447   | 313.25    | NM_00454E | 22860.396 | 19752.084 | NM_002527 | 801.862   | 1031.363  |
| AB011106  | 1062.871  | 682.756   | AK000554  | 2869.255  | 2845.8    | NM_00706E | 20080.318 | 14630.013 |
| D26362    | 3783.976  | 2591.148  | NM_00647E | 4225.051  | 4379.526  | AF149785  | 1828.235  | 935.372   |
| NM_01345E | 1096.342  | 819.849   | NM_00153E | 5336.768  | 4221.209  | NM_01206E | 7738.403  | 4000.642  |
| AL133073  | 306.931   | 333.948   | X97261    | 59363.195 | 18365.018 | NM_004064 | 2792.484  | 1694.649  |
| AY009402  | 1391.337  | 1303.997  | NM_00146E | 394.097   | 498.888   | NM_00125E | 1319.881  | 955.543   |
| NM_018451 | 1168.858  | 414.74    | NM_00541C | 415.984   | 432.163   | NM_014704 | 2259.156  | 1390.076  |
| NM_01244E | 564.132   | 453.393   | D87666    | 58911.766 | 61815.813 | NM_02020E | 421.361   | 385.848   |
| NM_002584 | 4939.893  | 5876.498  | NM_00131E | 9837.979  | 17431.938 | NM_001227 | 705.142   | 662.3     |
| NM_013334 | 3071.027  | 2219.03   | AF286095  | 1964.492  | 3936.648  | NM_001191 | 2166.711  | 2674.677  |
| AF150735  | 3002.669  | 2884.451  | NM_00087E | 1153.617  | 1139.863  | U15174    | 863.226   | 1193.918  |
| NM_01818E | 1336.562  | 1950.99   | S66407    | 1648.854  | 2384.333  | NM_01334E | 908.406   | 1096.435  |
| NM_01238E | 1808.857  | 1877.876  | NM_01652E | 658.897   | 955.043   | NM_014344 | 411.508   | 377.352   |
| BF038366  | 783.084   | 604.877   | NM_00158E | 47814.746 | 59378.859 | AB040917  | 407.586   | 427.947   |
| NM_00245E | 7761.447  | 8948.565  | AK026108  | 6564.593  | 8439.347  | AL110261  | 2471.758  | 1665.461  |
| NM_012304 | 402.778   | 639.32    | NM_00637E | 3264.759  | 3664.188  | NM_00593E | 432.431   | 313.361   |
| AF245505  | 581.277   | 436.114   | BF571428  | 2513.277  | 2761.922  | NM_00427E | 4025.839  | 3449.647  |
| AB037776  | 565.827   | 361.823   | AB037723  | 5128.309  | 4577.321  | NM_00190E | 1735.474  | 1599.496  |
| AF196976  | 3156.416  | 2122.424  | NM_00624E | 3105.709  | 3117.804  | NM_00028E | 3933.523  | 3508.361  |
| AL050379  | 1009.167  | 529.365   | NM_00431E | 557.824   | 561.998   | NM_005911 | 12535.965 | 7897.979  |
| NM_003161 | 1199.519  | 1242.977  | U58096    | 24260.654 | 22787.217 | AV702690  | 701.549   | 413.582   |
| NM_01449E | 462.155   | 350.218   | NM_01692E | 6661.365  | 6408.243  | AL117452  | 1365.285  | 791.29    |
| NM_01621E | 11150.123 | 8686.236  | NM_01232E | 932.404   | 1139.848  | NM_01223C | 422.072   | 355.837   |
| AK026919  | 235.337   | 259.186   | NM_01594E | 5364.426  | 4358.326  | NM_01403E | 4438.321  | 2427.359  |
| NM_001501 | 2667.587  | 2505.742  | NM_003054 | 2544.12   | 2312.963  | NM_002061 | 2613.065  | 2064.328  |
| NM_00617E | 13856.166 | 13924.441 | NM_00304E | 485.956   | 568.667   | AF169974  | 1344.463  | 958.038   |
| AL137459  | 646.584   | 532.147   | NM_00479C | 319.826   | 596.119   | NM_00452E | 851.593   | 615.37    |
| AB037812  | 275.607   | 192.079   | NM_00221E | 16500.852 | 18277.213 | NM_00573E | 1317.837  | 1335.186  |
| AB007932  | 800.234   | 728.073   | AF182404  | 2418.123  | 4059.648  | NM_01813E | 1815.238  | 2530.759  |
| AF219257  | 10374.971 | 8180.919  | NM_000804 | 682.793   | 1829.75   | NM_01961E | 2296.717  | 2215.853  |
| NM_00397E | 796.121   | 634.494   | NM_00655E | 2504.262  | 2938.093  | AF183411  | 1604.917  | 1473.753  |
| NM_002561 | 1980.992  | 1868.261  | NM_014521 | 1572.792  | 2480.869  | BF244591  | 818.873   | 782.683   |
| NM_00610E | 19468.307 | 19450.918 | NM_00244E | 1090.547  | 1734.849  | NM_00588E | 4692.978  | 3663.982  |
| NM_00080E | 371.546   | 280.983   | NM_01780E | 729.464   | 1377.061  | U63785    | 1383.011  | 1073.997  |
| AL359933  | 8596.418  | 9100.352  | NM_006461 | 1302.134  | 1225.791  | NM_00596E | 1638.763  | 1357.04   |
| NM_00130E | 544.669   | 411.782   | NM_018201 | 3447.149  | 3782.862  | NM_01331C | 2188.471  | 762.409   |
| M17783    | 4260.591  | 4792.718  | NM_01443E | 1105.136  | 1108.668  | BC004958  | 777.122   | 482.8     |
| NM_01859C | 5091.017  | 5152.559  | NM_01488C | 3550.787  | 3962.252  | NM_00576E | 4565.7    | 2552.141  |
| NM_00317E | 1199.735  | 1081.027  | NM_003764 | 3927.994  | 2865.715  | NM_00647E | 235.932   | 149.953   |
| NM_012437 | 5870.058  | 6512.694  | NM_00482E | 845.136   | 897.648   | NM_01464E | 1542.955  | 1200.576  |
| AF090944  | 253.293   | 118.371   | NM_00679E | 31505.619 | 31771.102 | NM_00565E | 1009.487  | 880.724   |
| NM_002607 | 793.789   | 513.973   | NM_01807E | 1304.013  | 1066.685  | NM_01455E | 870.039   | 954.757   |
| NM_01818E | 154.282   | 124.411   | NM_00476C | 3830.03   | 3446.309  | NM_00344C | 1020.123  | 787.665   |
| AF116712  | 237.645   | 152.961   | NM_00675E | 8365.397  | 7494.539  | NM_00469E | 5509.26   | 3454.76   |
| AF116626  | 2628.588  | 3352.891  | NM_00680E | 4967.833  | 5092.099  | U41387    | 13685.851 | 7369.034  |
| NM_00176C | 24330.502 | 21206.77  | AF149304  | 984.321   | 1062.5    | NM_00451E | 4022.746  | 2594.023  |
| NM_002527 | 1064.952  | 595.777   | NM_01209E | 9220.854  | 11557.737 | NM_00651E | 493.469   | 403.826   |

|           |           |           |           |           |           |           |           |           |
|-----------|-----------|-----------|-----------|-----------|-----------|-----------|-----------|-----------|
| NM_00589C | 958.172   | 699.09    | NM_01643E | 346.816   | 568.144   | NM_00368E | 11245.426 | 7203.915  |
| NM_00706E | 30115.424 | 24240.053 | X73079    | 35215.941 | 45105.609 | NM_00248E | 411.492   | 396.045   |
| AF149785  | 2165.462  | 2108.482  | NM_019091 | 1396.099  | 1406.89   | NM_00629E | 5655.013  | 4951.197  |
| NM_01206E | 9643.506  | 6650.297  | L07518    | 537.395   | 722.537   | NM_00154C | 1822.073  | 1395.681  |
| NM_004064 | 3960.911  | 2982.213  | AF264781  | 2063.832  | 2870.174  | NM_012111 | 3814.765  | 2749.233  |
| NM_00125E | 2043.207  | 1619.994  | NM_00245E | 935.119   | 636.005   | NM_00447C | 6600.415  | 4210.109  |
| NM_014704 | 1800.601  | 1381.251  | AK024215  | 12552.278 | 16252.41  | NM_00141E | 3957.637  | 2157.357  |
| NM_02020E | 854.506   | 641.575   | AB044661  | 4466.006  | 4541.765  | NM_00375E | 23053.268 | 10074.647 |
| NM_001227 | 633.961   | 981.972   | NM_00060E | 10789.756 | 10619.969 | AL049680  | 2206.617  | 1620.322  |
| NM_001191 | 2196.165  | 2112.734  | NM_016124 | 8426.035  | 8115.883  | AL133660  | 487.645   | 363.655   |
| U15174    | 694.474   | 1023.023  | NM_019079 | 683.831   | 706.798   | AK001595  | 787.479   | 444.751   |
| NM_013342 | 1085.244  | 1504.943  | U53530    | 2386.148  | 2084.214  | NM_00371E | 2913.544  | 1691.273  |
| NM_014344 | 861.057   | 781.964   | NM_00659E | 1571.096  | 1609.53   | M94065    | 782.864   | 460.14    |
| AB040917  | 576.693   | 612.969   | NM_00417E | 5081.245  | 4991.798  | BF036874  | 811.672   | 603.889   |
| AL110261  | 4206.692  | 3633.158  | NM_00454E | 21390.033 | 24179.1   | BE888487  | 230.198   | 308.653   |
| AA203539  | 314.353   | 180.723   | AK000554  | 3663.553  | 3492.837  | AF182419  | 911.785   | 661.125   |
| AK021786  | 435.825   | 430.207   | NM_006472 | 4769.666  | 7243.787  | NM_00429E | 251.935   | 464.461   |
| NM_005932 | 949.621   | 651.96    | NM_00282E | 6231.595  | 6625.277  | NM_00701E | 979.194   | 791.194   |
| M26663    | 223.361   | 259.46    | AF159141  | 4224.251  | 5130.766  | NM_00270E | 2270.973  | 1672.374  |
| AF241254  | 207.938   | 275.711   | NM_00242C | 467.493   | 837.863   | NM_00537E | 8200.665  | 3590.708  |
| NM_00427E | 5943.263  | 6123.381  | NM_01645E | 27785.816 | 29564.064 | NM_00598E | 2728.906  | 2395.39   |
| NM_004851 | 486.445   | 386.199   | AK022233  | 3368.233  | 3820.351  | NM_01590E | 2282.699  | 1623.689  |
| NM_00190E | 1776.941  | 1253.951  | AK026410  | 6922.936  | 7124.367  | AK023759  | 1078.074  | 660.999   |
| NM_00028E | 3519.521  | 2737.308  | NM_014637 | 3315.035  | 3254.41   | L25270    | 7320.303  | 6143.116  |
| NM_005911 | 12328.587 | 10842.969 | NM_01337E | 18235.271 | 20168.082 | AB033111  | 529.542   | 432.796   |
| AV702690  | 957.074   | 1084.883  | NM_020232 | 747.945   | 3994.453  | AJ276316  | 692.493   | 406.525   |
| AL117452  | 1973.937  | 1549.572  | AF113208  | 5545.98   | 8760.732  | AF229246  | 2783.537  | 1705.125  |
| NM_01223C | 811.155   | 663.857   | NM_00615E | 5326.318  | 5561.62   | S64709    | 2020.43   | 1072.218  |
| NM_01403E | 5708.018  | 3949.412  | NM_012164 | 1521.129  | 1489.546  | NM_01848E | 520.328   | 334.526   |
| NM_002061 | 3060.193  | 2542.894  | AK026010  | 862.536   | 1154.221  | X56465    | 437.824   | 363.054   |
| AF169974  | 1389.672  | 1553.232  | NM_004721 | 482.95    | 550.955   | NM_003071 | 2912.611  | 1803.635  |
| NM_004522 | 676.435   | 927.552   | AB011156  | 1095.827  | 1301.341  | AK021494  | 789.679   | 392.133   |
| NM_00573E | 1817.309  | 6073.493  | NM_00624E | 2910.345  | 2569.38   | AF075023  | 588.823   | 256.515   |
| NM_01813E | 1726.55   | 2918.829  | NM_00431E | 430.259   | 487.908   | AL360160  | 12949.271 | 8183.568  |
| NM_01961E | 2870.459  | 3532.73   | U58096    | 23480.053 | 24083.199 | AK001092  | 24118.766 | 17084.617 |
| AF183411  | 2431.841  | 4768.624  | NM_01692E | 5859.387  | 5959.359  | NM_014144 | 785.44    | 487.606   |
| BF244591  | 1121.713  | 974.558   | NM_01232E | 1031.469  | 1391.959  | AF147345  | 454.007   | 281.544   |
| NM_00588E | 6153.755  | 6510.398  | NM_006942 | 616.711   | 941.685   | AF147373  | 1750.26   | 872.549   |
| U63785    | 940.588   | 1178.787  | NM_01819E | 485.066   | 586.237   | AF086253  | 763.618   | 493.131   |
| NM_00596E | 1140.405  | 1312.133  | NM_01394E | 1242.699  | 1297.936  | AF086303  | 376.087   | 256.063   |
| NM_00315E | 1107.285  | 1144.046  | NM_00163E | 4987.012  | 5200.603  | AF086434  | 638.074   | 671.962   |
| NM_00310E | 261.89    | 167.215   | H39560    | 496.342   | 565.166   | AK022063  | 1704.786  | 1449.974  |
| NM_01331C | 3462.108  | 1872.494  | BG534366  | 1100.063  | 1312.286  | AF086345  | 1367.854  | 955.898   |
| BC004958  | 1469.006  | 2027.424  | BG698522  | 8369.248  | 8957.874  | AF086400  | 708.114   | 709.59    |
| NM_005762 | 8730.397  | 11438.682 | AA152346  | 951.785   | 745.362   | AF086464  | 697.58    | 848.323   |
| NM_00647E | 722.456   | 1422.504  | L15189    | 3513.438  | 3206.051  | AL049278  | 1582.833  | 1342.141  |
| NM_01464E | 2201.948  | 3530.355  | AB023420  | 13350.368 | 12200.926 | NM_00506C | 223.815   | 292.946   |
| NM_00565E | 1624.479  | 1726.447  | BI822179  | 495.767   | 632.109   | AL035369  | 1119.083  | 1501.024  |
| NM_01455E | 726.995   | 602.933   | AF022912  | 3149.945  | 2968.368  | AF075094  | 1298.32   | 1200.634  |
| NM_00344C | 1697.792  | 1738.405  | AA477428  | 13120.307 | 25749.98  | AF075097  | 1131.311  | 1342.392  |
| NM_00469E | 10538.134 | 10035.113 | AA156342  | 1740.601  | 3686.119  | AK022801  | 240.859   | 257.565   |
| U41387    | 15334.927 | 8329.391  | R45594    | 15365.396 | 16445.523 | AL133075  | 4566.517  | 4123.69   |
| NM_00451E | 5075.156  | 3538.407  | H46425    | 2875.313  | 2648.666  | AL137630  | 1762.697  | 1243.116  |

|           |           |           |           |           |           |           |           |           |
|-----------|-----------|-----------|-----------|-----------|-----------|-----------|-----------|-----------|
| NM_006513 | 1203.356  | 988.645   | AI355949  | 451.329   | 707.815   | AK055236  | 277.504   | 165.502   |
| NM_003685 | 14209.661 | 15666.052 | AA278152  | 7171.673  | 6640.229  | AL137277  | 3652.418  | 2064.112  |
| NM_002486 | 551.035   | 956.125   | H75530    | 2440.813  | 2370.061  | AL137447  | 369.208   | 377.409   |
| NM_006295 | 8297.834  | 9709.027  | NM_004829 | 985.257   | 920.22    | BC023609  | 549.041   | 410.348   |
| NM_001540 | 2362.883  | 2552.735  | NM_006793 | 30548.549 | 28894.549 | AK025100  | 1274.876  | 867.113   |
| NM_012111 | 6138.528  | 5873.951  | NM_001538 | 5809.153  | 6048.82   | AF086395  | 700.048   | 430.717   |
| NM_004470 | 9362.951  | 8795.948  | X97261    | 58597.363 | 18864.289 | AF086049  | 926.954   | 601.044   |
| NM_001418 | 5785.753  | 5800.234  | NM_001468 | 386.631   | 633.685   | AF114263  | 490.137   | 613.541   |
| NM_003756 | 32898.418 | 37818.266 | D87666    | 57053.313 | 61118.102 | AK026142  | 2950.635  | 1959.114  |
| AL049680  | 3219.26   | 3784.71   | NM_001315 | 8778.579  | 8866.332  | AF161369  | 702.877   | 370.437   |
| AL133660  | 527.185   | 783.604   | AF286095  | 1591.629  | 1162.074  | AK027176  | 998.08    | 483.855   |
| AK001595  | 1115.968  | 673.785   | NM_000878 | 1044.454  | 693.758   | AF073328  | 298.119   | 203.537   |
| NM_018015 | 419.621   | 220.906   | S66407    | 1836.752  | 1753.632  | Y12019    | 2120.012  | 1921.308  |
| NM_003715 | 6475.719  | 10093.314 | NM_016523 | 501.789   | 500.635   | AF232217  | 452.568   | 345.252   |
| M94065    | 1791.487  | 4589.593  | NM_004258 | 49912.129 | 55776.664 | AK021898  | 852.921   | 456.613   |
| BF036874  | 1245.152  | 2813.271  | NM_001981 | 4140.32   | 5280.992  | AK022024  | 1803.942  | 854.821   |
| BE888487  | 350.238   | 975.95    | NM_014654 | 1020.325  | 1272.102  | AK022301  | 946.94    | 321.23    |
| AF182419  | 915.389   | 669.467   | NM_001585 | 49870.84  | 48720.285 | AK021948  | 906.13    | 740.588   |
| NM_004293 | 245.632   | 497.089   | AK026108  | 9475.104  | 9160.472  | AK022341  | 461.432   | 365.722   |
| NM_004450 | 373.042   | 412.569   | NM_006379 | 3364.819  | 3202.985  | AK026861  | 293.76    | 284.779   |
| NM_007016 | 1273.638  | 1325.546  | BF571428  | 3257.697  | 3596.298  | AK021642  | 1840.354  | 1303.374  |
| NM_002703 | 2888.418  | 2054.719  | AB037723  | 5721.591  | 4871.211  | AK022455  | 417.604   | 236.749   |
| NM_005375 | 10818.046 | 6354.719  | NM_000606 | 9825.481  | 9877.953  | AK021987  | 835.878   | 782.655   |
| NM_005985 | 1937.926  | 1290.516  | NM_016124 | 7033.21   | 7679.451  | AK026905  | 1187.11   | 928.869   |
| NM_015906 | 2793.867  | 3120.425  | NM_019079 | 604.225   | 552.5     | AK026704  | 492.495   | 466.53    |
| AK023759  | 975.727   | 1094.741  | U53530    | 2169.43   | 2139.866  | NM_006638 | 1686.004  | 1091.694  |
| L25270    | 8340.85   | 7939.196  | NM_006598 | 1436.922  | 1394.55   | X14675    | 764.214   | 263.671   |
| AB033111  | 801.503   | 707.423   | NM_015948 | 5201.531  | 4203.05   | AF071170  | 2300.846  | 1039.528  |
| AJ276316  | 1037.866  | 909.686   | NM_003054 | 2785.565  | 2912.836  | AF075075  | 214.219   | 103.358   |
| AF229246  | 7550.571  | 5779.905  | NM_002219 | 16410.492 | 16304.395 | AK025259  | 795.437   | 606.841   |
| S64709    | 3526.303  | 3607.636  | AF182404  | 2542.565  | 2721.42   | NM_018304 | 2782.537  | 1427.222  |
| NM_018488 | 809.432   | 739.587   | NM_000804 | 744.444   | 552.269   | AK023264  | 325.031   | 193.747   |
| X56465    | 373.6     | 423.487   | NM_006555 | 2404.135  | 1845.549  | AK024457  | 1653.888  | 1006.725  |
| NM_003071 | 4829.819  | 5959.668  | NM_014521 | 1478.177  | 1232.821  | AK026894  | 1250.997  | 998.395   |
| AK021494  | 1246.896  | 987.535   | NM_017809 | 1032.15   | 965.394   | AK026372  | 2490.97   | 2309.922  |
| AK022117  | 280.142   | 202.731   | AK023202  | 2011.24   | 2125.983  | NM_014186 | 2118.074  | 1094.075  |
| AF075023  | 415.914   | 587.328   | D63877    | 4795.053  | 4728.437  | AF056442  | 294.691   | 177.6     |
| AL360160  | 9513.065  | 18592.625 | AF131760  | 1589.907  | 1299.017  | AK024752  | 19082.613 | 9497.981  |
| AB040926  | 194.004   | 159.961   | NM_018698 | 1693.08   | 1802.409  | BG117194  | 503.672   | 301.19    |
| AK001092  | 15765.292 | 11056.125 | NM_006461 | 1268.457  | 871.153   | AF131859  | 2014.355  | 2523.136  |
| AK023427  | 314.811   | 148.317   | NM_018201 | 3271.302  | 3031.788  | AF086118  | 2576.158  | 1606.685  |
| NM_014144 | 1265.868  | 1200.905  | NM_014438 | 1302.817  | 1201.342  | NM_014138 | 445.659   | 320.58    |
| AF147345  | 872.247   | 707.445   | NM_014880 | 3692.095  | 3857.648  | AF230317  | 614.733   | 713.416   |
| AF147373  | 1619.742  | 1186.391  | NM_006153 | 4571.359  | 5026.664  | AK023806  | 1099.066  | 778.052   |
| AK026209  | 273.711   | 186.881   | NM_012164 | 1482.483  | 2317.424  | Y16696    | 12391.526 | 7031.928  |
| AF086253  | 980.48    | 469.597   | AK026010  | 1092.297  | 1299.797  | AK026094  | 953.476   | 636.305   |
| AF086303  | 603.609   | 537.511   | NM_004721 | 345.867   | 694.418   | AF161344  | 2942.838  | 1672.428  |
| AF086434  | 937.375   | 1119.304  | AB011156  | 1311.066  | 1426.126  | AF086027  | 572.021   | 447.707   |
| AK022063  | 1497.737  | 1352.263  | NM_018079 | 1243.796  | 1240.318  | NM_001207 | 48068.434 | 28988.035 |
| AF086345  | 2098.25   | 1751.829  | NM_004760 | 3555.165  | 3309.442  | AK023655  | 377.645   | 246.278   |
| AF086464  | 595.695   | 551.992   | NM_006752 | 8179.125  | 8434.283  | AF075045  | 214.947   | 327.084   |
| AL049278  | 1588.152  | 2001.074  | NM_004428 | 427.731   | 598.163   | AK022199  | 382.87    | 160.38    |
| AL117519  | 248.246   | 267.846   | NM_006809 | 5083.848  | 4873.108  | NM_006211 | 238.369   | 141.324   |

|           |          |          |           |           |           |           |           |           |
|-----------|----------|----------|-----------|-----------|-----------|-----------|-----------|-----------|
| NM_01331E | 392.646  | 782.012  | AF149304  | 875.553   | 655.591   | NM_003524 | 3960.591  | 1195.328  |
| AK025063  | 142.648  | 106.193  | NM_012095 | 9064.493  | 9075.024  | AK021438  | 588.891   | 349.735   |
| AF075108  | 161.083  | 152.172  | X73079    | 33264.777 | 30669.24  | S39891    | 295.804   | 174.34    |
| NM_00506C | 571.756  | 788.068  | NM_019091 | 1299.962  | 743.51    | AK021624  | 1052.009  | 515.303   |
| AF085935  | 2822.235 | 8860.793 | L07518    | 514.681   | 377.156   | AF278605  | 5160.696  | 2910.612  |
| AF075097  | 1673.339 | 2984.933 | AF264781  | 1872.096  | 1806.354  | NM_006497 | 3593.846  | 1895.103  |
| AK022801  | 420.442  | 267.686  | NM_002456 | 1094.638  | 764.025   | AL133599  | 527.722   | 294.445   |
| AL133075  | 4222.209 | 3797.615 | AK024215  | 12473.531 | 13332.385 | NM_016472 | 886.112   | 479.051   |
| AL137692  | 177.17   | 649.839  | AB044661  | 3627.768  | 3528.565  | AK023042  | 2316.181  | 1447.84   |
| AL137630  | 2211.72  | 2134.922 | NM_015376 | 2045.803  | 2246.175  | AK026429  | 468.405   | 438.74    |
| AK055236  | 418.01   | 338.55   | NM_001176 | 1157.49   | 1179.619  | NM_01655C | 1576.787  | 877.155   |
| AL137277  | 3474.394 | 2848.923 | NM_013341 | 656.448   | 648.315   | AK024813  | 2374.611  | 1530.694  |
| AL137447  | 713.832  | 507.689  | NM_016536 | 429.273   | 735.976   | AJ227909  | 8827.274  | 4911.169  |
| AL157467  | 290.377  | 262.056  | NM_004066 | 593.979   | 317.749   | AK021880  | 430.927   | 245.312   |
| BC023609  | 1694.88  | 2769.479 | NM_004941 | 4334.199  | 3606.511  | CY3Cy5    | 3227.088  | 586.387   |
| AK025100  | 2042.524 | 2358.158 | AF151831  | 4468.248  | 4375.148  | BG534366  | 427.149   | 597.917   |
| AF086395  | 910.428  | 763.665  | AB011121  | 1237.803  | 1075.511  | BG698522  | 4507.943  | 4522.105  |
| AF086049  | 840.76   | 975.227  | AF083255  | 8983.285  | 11483.297 | AA152346  | 366.703   | 347.068   |
| AF088020  | 192.426  | 139.402  | AK022605  | 1026.823  | 1565.331  | L15189    | 991.897   | 1370.799  |
| AF114263  | 627.885  | 975.229  | AK000554  | 3771.12   | 4741.101  | AB023420  | 5103.909  | 4599.233  |
| AF086073  | 409.035  | 600.527  | NM_006472 | 4721.186  | 5784.203  | AF022912  | 997.302   | 1141.005  |
| AK026142  | 4387.469 | 6108.759 | NM_002826 | 6417.873  | 6753.722  | AA477428  | 4089.29   | 3091.528  |
| AF161369  | 889.913  | 900.461  | AF159141  | 3600.594  | 2691.457  | AA156342  | 713.29    | 612.358   |
| AK027176  | 1239.199 | 974.509  | NM_00242C | 584.512   | 523.378   | R45594    | 5458.877  | 5393.578  |
| AF073328  | 355.563  | 407.378  | NM_01645E | 25737.742 | 24602.182 | H46425    | 1192.251  | 1041.295  |
| AF211968  | 743.553  | 3508.032 | AK022233  | 3823.823  | 5423.725  | AI355949  | 266.297   | 177.268   |
| Y12019    | 2702.758 | 6146.903 | AK026410  | 7489.228  | 6849.095  | AA278152  | 2737.207  | 2409.778  |
| AF085224  | 293.665  | 715.49   | NM_014637 | 2835.098  | 2842.579  | H75530    | 873.091   | 932.377   |
| AF147418  | 200.957  | 102.037  | NM_013379 | 16760.371 | 15869.255 | NM_00417E | 2219.441  | 2008.219  |
| AL137326  | 662.205  | 996.319  | AF113208  | 5249.984  | 4875.955  | NM_00454E | 7314.718  | 7160.257  |
| AK021898  | 912.269  | 945.941  | AF019382  | 1014.542  | 746.61    | SR5       | 1781.476  | 2564.104  |
| AK022024  | 2062.899 | 2868.343 | BC012757  | 1809.685  | 1877.978  | SR7       | 2438.904  | 23528.42  |
| AK022301  | 1184.885 | 1115.552 | NM_004062 | 2101.009  | 2060.247  | SR9       | 9764.771  | 2034.959  |
| AK021948  | 784.336  | 713.002  | NM_005883 | 760.962   | 1318.695  | CY3Cy5    | 1728.429  | 452.811   |
| AK022054  | 368.348  | 423.704  | NM_004449 | 1732.908  | 2238.233  | NM_00131E | 3306.994  | 4506.467  |
| AK022191  | 168      | 132.275  | NM_014591 | 3621.707  | 4124.979  | AF286095  | 630.228   | 678.318   |
| AK022341  | 516.055  | 711.329  | NM_014592 | 1572.423  | 1887.466  | NM_00087E | 400.838   | 489.301   |
| AK026861  | 238.946  | 177.025  | NM_001945 | 2526.512  | 3479.009  | S66407    | 718.474   | 942.359   |
| AK021642  | 2536.671 | 2650.209 | NM_020039 | 2304.909  | 3681.089  | NM_016523 | 214.07    | 263.171   |
| AK022455  | 508.169  | 416.976  | NM_006653 | 2172.157  | 4302.489  | NM_00425E | 25161.777 | 20182.689 |
| AK021987  | 614.538  | 505.913  | NM_014442 | 3721.639  | 3752.519  | NM_001981 | 1334.023  | 1254.365  |
| AK026905  | 687.856  | 714.212  | AB002313  | 1961.335  | 1960.797  | NM_014654 | 407.043   | 423.726   |
| AK023449  | 366.193  | 406.903  | AB011167  | 1937.082  | 1608.646  | NM_00158E | 22756.039 | 22906.852 |
| AK026704  | 799.142  | 1373.478 | NM_005409 | 920.901   | 400.817   | AK026108  | 3468.789  | 3476.017  |
| NM_000134 | 292.592  | 304.444  | NM_00020E | 3074.869  | 2308.39   | NM_00637E | 1107.997  | 1488.684  |
| NM_00663E | 2166.029 | 1690.259 | NM_00218E | 36387.012 | 25848.229 | BF571428  | 1365.045  | 1072.838  |
| X14675    | 895.41   | 744.784  | AK027119  | 11072.111 | 8900.063  | AB037723  | 2924.476  | 2091.725  |
| AF071170  | 3278.755 | 3817.728 | AB037727  | 17269.533 | 17011.539 | NM_00624E | 1093.355  | 1071.138  |
| AF161364  | 682.542  | 803.335  | NM_005426 | 4520.081  | 4759.371  | NM_00431E | 213.655   | 218.686   |
| AK025259  | 1740.739 | 1259.375 | NM_004763 | 661.432   | 641.257   | U58096    | 9055.36   | 8029.025  |
| NM_005453 | 213.033  | 280.726  | NM_014063 | 6861.184  | 7251.567  | NM_013943 | 558.342   | 583.055   |
| NM_018304 | 4018.755 | 5153.563 | D86964    | 4851.441  | 4634.298  | NM_00163E | 1999.793  | 2592.536  |
| AK023264  | 438.84   | 332.782  | AL049801  | 1793.555  | 1502.955  | AF182404  | 1256.646  | 2633.006  |



|           |           |           |           |           |           |           |           |           |
|-----------|-----------|-----------|-----------|-----------|-----------|-----------|-----------|-----------|
| AK024457  | 1471.504  | 1593.932  | NM_016395 | 5985.619  | 5329.102  | NM_000804 | 285.939   | 428.755   |
| AK026894  | 911.509   | 1560.175  | NM_003152 | 1002.382  | 831.333   | NM_006555 | 917.4     | 969.679   |
| AK026372  | 617.669   | 665.904   | NM_014727 | 4159.197  | 3055.782  | NM_014521 | 502.677   | 509.213   |
| AL109684  | 294.778   | 315.842   | BE885010  | 651.133   | 425.481   | NM_002445 | 537.971   | 682.529   |
| NM_014186 | 2451.373  | 2228.359  | NM_006342 | 1623.537  | 1794.052  | NM_017805 | 314.437   | 481.797   |
| AF056442  | 471.455   | 353.334   | NM_016396 | 4433.635  | 5095.448  | AK023202  | 721.013   | 1033.639  |
| AK024752  | 31166.436 | 35012.828 | NM_005689 | 1139.264  | 1257.182  | D63877    | 1395.295  | 1432.66   |
| BG117194  | 1070.999  | 962.115   | NM_005552 | 20569.918 | 20093.969 | AF131760  | 468.172   | 597.144   |
| AF131859  | 3667.28   | 3867.626  | NM_006717 | 2044.671  | 1648.901  | NM_018695 | 701.42    | 483.246   |
| AF086118  | 3518.089  | 3033.274  | AL109786  | 1409.061  | 1439.045  | NM_006461 | 465.814   | 412.26    |
| NM_014135 | 974.578   | 866.66    | AK026479  | 5149.395  | 6628.449  | NM_018201 | 1334.689  | 1346.565  |
| AK025044  | 407.78    | 323.404   | AK022860  | 5358.954  | 7992.486  | NM_014435 | 481.04    | 456.521   |
| AK023690  | 438.66    | 291.062   | X60188    | 21569.664 | 22686.586 | NM_014880 | 1296.421  | 806.284   |
| U48697    | 259.484   | 192.23    | NM_005977 | 3051.43   | 2277.302  | NM_003764 | 1428.588  | 1154.375  |
| AK023806  | 1296.763  | 1270.871  | NM_002747 | 552.872   | 222.337   | NM_004825 | 388.242   | 501.746   |
| AF088068  | 397.527   | 833.263   | NM_006265 | 8275.123  | 4177.948  | NM_006793 | 11199.998 | 12872.535 |
| Y16696    | 10842.159 | 17504.609 | NM_006059 | 1748.032  | 1177.898  | NM_001535 | 2218.539  | 2198.781  |
| AK026094  | 1190.784  | 1443.622  | NM_000347 | 4372.399  | 3759.201  | X97261    | 29657.008 | 9599.66   |
| AF161344  | 3577.231  | 3451.642  | M13452    | 5718.654  | 7331.292  | NM_001465 | 221.56    | 106.69    |
| AF022793  | 311.655   | 215.994   | AF082075  | 330.195   | 909.062   | NM_005410 | 177.805   | 117.856   |
| AF086027  | 705.422   | 850.983   | NM_016114 | 2457.211  | 2299.953  | D87666    | 33171.082 | 30626.807 |
| NM_001207 | 45149.484 | 70131.211 | AY007114  | 1651.201  | 1438.335  | NM_002921 | 166.774   | 209.964   |
| AK023655  | 266.61    | 387.518   | AB000895  | 819.54    | 743.861   | AF149304  | 417.354   | 994.008   |
| AF075045  | 456.543   | 1035.095  | X80031    | 508.555   | 419.862   | NM_012095 | 3334.025  | 6239.084  |
| AK022199  | 561.177   | 272.334   | AK022178  | 999.646   | 891.38    | NM_016435 | 205.195   | 145.528   |
| NM_006211 | 345.877   | 224.802   | L00635    | 1049.327  | 1398.59   | X73079    | 11564.988 | 13768.599 |
| NM_003524 | 7184.089  | 4161.266  | NM_015601 | 1345.668  | 1615.755  | NM_019091 | 456.23    | 699.059   |
| AK021438  | 1007.876  | 1013.253  | NM_001780 | 30160.162 | 27922.313 | L07518    | 220.185   | 158.36    |
| S39891    | 506.171   | 375.224   | AJ277442  | 923.384   | 1062.114  | AF264781  | 725.658   | 532.529   |
| R17536    | 278.326   | 146.061   | NM_004569 | 3166.746  | 5362.311  | NM_002455 | 273.777   | 158.1     |
| AF278605  | 6039.236  | 4562.956  | AF089088  | 1323.354  | 1627.14   | AK024215  | 4332.353  | 4620.982  |
| NM_006497 | 5564.564  | 5852.579  | L07557    | 1897.76   | 1994.66   | AB044661  | 1164.316  | 1082.133  |
| AK022329  | 210.992   | 395.152   | NM_002796 | 57444.641 | 60927.648 | NM_000605 | 3198.077  | 2319.911  |
| AL133599  | 1750.945  | 1770.462  | D78514    | 4071.865  | 4107.458  | NM_016124 | 2378.886  | 1515.426  |
| AK022380  | 310.926   | 206.274   | AK021665  | 412.403   | 364.402   | NM_019075 | 281.324   | 149.238   |
| NM_016472 | 1010.244  | 912.379   | NM_013366 | 736.815   | 553.565   | U53530    | 843.528   | 653.719   |
| AF086064  | 385.325   | 425.296   | NM_002787 | 23918.512 | 16061.724 | NM_006595 | 702.803   | 972.836   |
| AK023042  | 3376.12   | 3649.815  | U95006    | 7003.709  | 5422.931  | NM_000111 | 374.811   | 13.329    |
| AF086501  | 196.091   | 169.082   | NM_003347 | 7618.06   | 5408.592  | NM_015945 | 2116.152  | 2344.759  |
| AK026429  | 412.317   | 469.616   | AF273051  | 864.166   | 590.799   | NM_003054 | 1137.203  | 1265.026  |
| NM_016550 | 2316.594  | 2887.274  | NM_014516 | 4032.639  | 3036.057  | NM_003042 | 169.145   | 326.714   |
| AK024813  | 3521.598  | 3629.577  | AK021868  | 585.51    | 814.01    | NM_002215 | 6042.623  | 6330.271  |
| AJ227909  | 11955.412 | 14353.89  | AK000643  | 59076.895 | 60601.996 | NM_002825 | 2683.634  | 4749.994  |
| AK021880  | 666.63    | 524.962   | NM_018421 | 4673.521  | 5418.143  | AF159141  | 1532.234  | 1617.234  |
| CY3Cy5    | 5428.6    | 599.077   | AB014574  | 44681.461 | 46875.945 | NM_002420 | 301.229   | 196.487   |
| BG534366  | 526.801   | 454.728   | NM_020127 | 1470.619  | 1153.357  | NM_016455 | 9610.272  | 8210.055  |
| BG698522  | 5146.582  | 2977.845  | NM_015623 | 11238.535 | 10185.672 | AK022233  | 1126.023  | 1118.258  |
| AA152346  | 404.787   | 279.137   | AB045116  | 1134.15   | 837.005   | AK026410  | 3494.055  | 2631.034  |
| L15189    | 954.872   | 712.181   | L49054    | 1069.23   | 1002.778  | NM_014637 | 1154.495  | 1133.622  |
| AB023420  | 6009.869  | 4946.722  | NM_001675 | 1113.751  | 950.162   | NM_013375 | 6969.008  | 7487.38   |
| AF022912  | 1274.536  | 878.717   | NM_003422 | 2530.709  | 2375.537  | AF113208  | 1713.352  | 1483.45   |
| AA477428  | 6944.928  | 6367.504  | NM_001451 | 532.049   | 510.684   | NM_006153 | 1608.259  | 1565.369  |
| AA156342  | 1088.319  | 1506.464  | NM_014779 | 1183.012  | 1105.125  | NM_012164 | 495.504   | 524.975   |

|           |           |           |           |           |           |           |           |           |
|-----------|-----------|-----------|-----------|-----------|-----------|-----------|-----------|-----------|
| R45594    | 10684.493 | 23955.553 | NM_002943 | 3454.282  | 3321.103  | AK026010  | 305.501   | 290.961   |
| AI143386  | 270.906   | 718.884   | AL133649  | 1297.294  | 1521.653  | NM_004721 | 219.334   | 216.016   |
| H46425    | 1474.043  | 1197.4    | AB018303  | 551.633   | 457.855   | AB011156  | 515.662   | 668.615   |
| AI355949  | 587.989   | 509.315   | NM_006454 | 4057.581  | 3809.721  | NM_018079 | 524.325   | 689.488   |
| AA278152  | 7320.499  | 4012.37   | NM_015846 | 2961.986  | 2229.868  | NM_004760 | 1359.92   | 1413.204  |
| H75530    | 2282.243  | 1819.986  | NM_015972 | 8324.819  | 6826.933  | NM_006752 | 3190.48   | 2797.026  |
| NM_004176 | 5642.579  | 3342.754  | NM_016132 | 2133.438  | 1274.636  | NM_006809 | 1763.766  | 1843.339  |
| NM_004548 | 17156.686 | 9522.486  | NM_018006 | 1609.826  | 1599.464  | NM_006942 | 139.525   | 623.528   |
| SR5       | 4047.47   | 2305.685  | NM_016090 | 2252.079  | 1769.037  | NM_018199 | 184.806   | 451.824   |
| SR7       | 6003.582  | 29480.512 | NM_001013 | 54632.004 | 57352.141 | NM_013943 | 506.92    | 622.442   |
| SR9       | 27243.059 | 2964.502  | AK024040  | 5912.133  | 6670.167  | NM_001639 | 1753.817  | 2194.949  |
| CY3Cy5    | 5768.242  | 823.933   | NM_005061 | 5047.5    | 4641.84   | BG534366  | 411.584   | 559.473   |
| NM_001315 | 4793.442  | 3155.504  | NM_000997 | 59348.516 | 59318.133 | BG698522  | 5007.67   | 4906.375  |
| AF286095  | 1057.924  | 579.759   | AF182417  | 50458.754 | 41168.691 | AA152346  | 415.35    | 414.935   |
| NM_000878 | 537.492   | 425.578   | AL137354  | 21075.93  | 15795.216 | L15189    | 1007.363  | 1133.131  |
| S66407    | 794.416   | 588.674   | NM_001023 | 56838.828 | 55921.707 | AB023420  | 5250.821  | 3562.201  |
| NM_004258 | 42556.578 | 35999.277 | AK021571  | 10546.006 | 6860.821  | AF022912  | 1146.418  | 936.511   |
| NM_001981 | 1704.873  | 1566.78   | AF052149  | 1924.378  | 1624.173  | AA477428  | 4206.629  | 3914.303  |
| NM_014654 | 794.556   | 984.643   | AK025586  | 670.866   | 460.142   | AA156342  | 619.465   | 376.357   |
| NM_001585 | 34731.789 | 37349.289 | AL137512  | 1184.912  | 785.419   | R45594    | 5682.461  | 4054.083  |
| AK026108  | 4925      | 9443.006  | NM_005036 | 796.156   | 766.125   | H46425    | 1390.932  | 943.334   |
| NM_006379 | 2743.843  | 5537.855  | NM_002541 | 1816.244  | 2135.779  | AI355949  | 258.59    | 346.981   |
| BF571428  | 2125.64   | 2265.595  | NM_000056 | 3645.794  | 3826.606  | AA278152  | 2887.425  | 2453.817  |
| AB037723  | 2965.448  | 1427.552  | NM_016311 | 9183.884  | 6479.033  | H75530    | 1002.892  | 1102.39   |
| NM_006246 | 2693.262  | 1449.253  | NM_001867 | 52641.008 | 52875.059 | NM_004176 | 2701.517  | 2998.015  |
| NM_004316 | 497.122   | 182.289   | NM_002300 | 57390.063 | 59034.555 | NM_004548 | 7720.789  | 6539.18   |
| U58096    | 23831.475 | 15306.04  | NM_000290 | 3107.665  | 2436.819  | AK000554  | 1372.501  | 1203.755  |
| NM_012323 | 866.193   | 664.544   | NM_016538 | 6618.153  | 4037.654  | NM_006472 | 1475.182  | 1831.079  |
| NM_006942 | 442.59    | 332.633   | AK023275  | 9024.012  | 4895.06   | NM_001538 | 3107.288  | 5604.396  |
| NM_013943 | 1275.201  | 824.929   | AJ223352  | 6850.253  | 3130.319  | X97261    | 34566.367 | 15762.44  |
| NM_001639 | 5116.408  | 3456.577  | NM_012238 | 2700.475  | 1837.488  | NM_001468 | 198.46    | 260.283   |
| H39560    | 496.508   | 362.626   | NM_016539 | 11277.011 | 4313.012  | D87666    | 31068.344 | 27880.422 |
| AF182404  | 2322.501  | 2057.569  | NM_006807 | 9098.418  | 8818.044  | NM_001315 | 3665.437  | 3806.133  |
| NM_000804 | 620.291   | 638.665   | L16464    | 702.306   | 464.79    | AF286095  | 761.604   | 891.091   |
| NM_006555 | 2140.983  | 1379.178  | NM_006532 | 3728.747  | 3169.599  | NM_000878 | 403.104   | 470.366   |
| NM_014521 | 764.545   | 617.999   | U07132    | 4703.726  | 3469.859  | S66407    | 645.264   | 654.025   |
| NM_002445 | 1087.633  | 797.088   | NM_003436 | 884.259   | 941.694   | NM_016523 | 226.723   | 289.778   |
| D63877    | 4050.596  | 4853.758  | AL035301  | 1436.105  | 1127.467  | NM_004258 | 23426.012 | 17613.939 |
| AF131760  | 1331.581  | 1285.468  | NM_017687 | 3881.827  | 2924.463  | NM_001981 | 1184.579  | 995.427   |
| NM_018698 | 1882.795  | 1683.635  | NM_017975 | 1578.718  | 1102.829  | NM_014654 | 436.527   | 595.531   |
| NM_006461 | 1333.022  | 1131.25   | AK025036  | 858.85    | 1089.294  | NM_001585 | 22986.518 | 17709.164 |
| NM_018201 | 4123.383  | 10657.965 | AK024843  | 7458.313  | 6957.505  | AK026108  | 3685.665  | 2859.384  |
| NM_014438 | 1180.828  | 2872.279  | AF074994  | 704.743   | 809.459   | NM_006379 | 1180.736  | 1006.744  |
| NM_014880 | 2752.12   | 2422.822  | NM_017670 | 4750.692  | 6033.505  | BF571428  | 1800.216  | 1355.51   |
| NM_003764 | 3218.769  | 1973.499  | AF286598  | 930.573   | 2051.674  | AB037723  | 3493.356  | 2607.797  |
| NM_004829 | 723.53    | 565.441   | AK021468  | 1020.934  | 1132.661  | NM_006246 | 1249.927  | 1393.251  |
| NM_006793 | 30228.865 | 23339.834 | BC033020  | 1439.704  | 1578.54   | NM_004316 | 276.191   | 330.912   |
| NM_001538 | 3081.561  | 1948.452  | NM_004366 | 5811.025  | 4321.855  | U58096    | 10459.124 | 12157.533 |
| X97261    | 65740.563 | 14968.309 | AK026168  | 1876.553  | 1558.602  | NM_016929 | 2949.516  | 2658.959  |
| NM_001468 | 509.257   | 407.165   | AJ296152  | 14369.076 | 10118.497 | NM_012323 | 599.534   | 662.554   |
| D87666    | 56907.879 | 34357.848 | AK001067  | 2284.747  | 1825.555  | NM_000111 | 152.254   | 422.964   |
| AF149304  | 697.686   | 545.294   | AK027088  | 7844.299  | 4642.909  | NM_015948 | 2429.557  | 4017.355  |
| NM_012095 | 8512.876  | 7170.642  | AB037721  | 7513.436  | 5250.575  | NM_003054 | 1019.677  | 1050.607  |

|           |           |           |           |           |           |           |           |           |
|-----------|-----------|-----------|-----------|-----------|-----------|-----------|-----------|-----------|
| NM_01643E | 494.453   | 351.764   | AK027120  | 10374.113 | 7470.774  | NM_00304E | 185.851   | 245.991   |
| X73079    | 28744.75  | 19766.809 | AB029001  | 1784.954  | 1307.322  | NM_00221E | 6645.588  | 7958.115  |
| NM_019091 | 975.65    | 609.727   | AB006624  | 3423.854  | 2582.257  | AF182404  | 1136.404  | 1745.977  |
| L07518    | 365.368   | 892.847   | AL109717  | 658.281   | 717.816   | NM_000804 | 330.093   | 389.571   |
| AF264781  | 1940.017  | 2212.897  | AK025473  | 1251.948  | 1025.78   | NM_00655E | 945.5     | 988.847   |
| AK022823  | 439.076   | 395.605   | AF146693  | 825.147   | 621.083   | NM_014521 | 452.304   | 330.504   |
| NM_00245E | 1066.416  | 2375.169  | AF271070  | 14650.849 | 12080.355 | NM_00244E | 481.72    | 477.326   |
| AK024215  | 12571.439 | 29530.982 | NM_014903 | 2470.757  | 1834.206  | NM_01780E | 374.52    | 209.948   |
| AB044661  | 3111.71   | 2688.21   | AK055959  | 815.424   | 786.63    | AK023202  | 753.825   | 601.165   |
| NM_00060E | 6894.803  | 4964.339  | AF052141  | 740.55    | 584.185   | D63877    | 1393.978  | 1178.359  |
| NM_016124 | 4851.493  | 5490.875  | AK021705  | 5265.537  | 3917.971  | AF131760  | 511.35    | 594.899   |
| NM_01907E | 388.42    | 463.14    | NM_016141 | 11218.546 | 7763.027  | NM_01869E | 557.228   | 324.251   |
| U53530    | 1643.865  | 1259.409  | AL109702  | 1781.503  | 1567.428  | NM_006461 | 389.196   | 333.289   |
| NM_00659E | 1115.422  | 1083.976  | AK025624  | 15581.128 | 12675.084 | NM_018201 | 1447.979  | 1302.692  |
| NM_01594E | 4461.651  | 2904.442  | AL110125  | 5205.636  | 4927.401  | NM_01443E | 565.174   | 598.857   |
| NM_003054 | 2347.865  | 1787.714  | AK022764  | 695.808   | 916.24    | NM_01488E | 1776.526  | 1449.736  |
| NM_00304E | 530.099   | 470.594   | AK002118  | 416.178   | 881.037   | NM_003764 | 1466.253  | 1059.478  |
| NM_00221E | 16669.459 | 11036.481 | X89744    | 461.609   | 328.016   | NM_00482E | 497.75    | 472.614   |
| NM_00282E | 4631.78   | 3052.771  | AJ011600  | 1449.642  | 1225.246  | NM_00679E | 12105.183 | 12302.585 |
| AF159141  | 2044.533  | 1551.733  | AJ002785  | 852.063   | 739.376   | NM_01807E | 387.373   | 1123.008  |
| NM_00242E | 386.737   | 809.403   | Z70716    | 693.288   | 327.594   | NM_00476E | 1326.661  | 2369.144  |
| NM_01645E | 15042.061 | 17566.973 | AL049251  | 687.003   | 496.246   | NM_00675E | 3056.608  | 3244.843  |
| AK022233  | 1459.549  | 1600.328  | Z83945    | 776.846   | 534.109   | NM_00442E | 184.302   | 171.444   |
| AL137713  | 348.105   | 338.904   | L32606    | 752.447   | 506.211   | NM_00680E | 1683.78   | 2397.649  |
| AK026410  | 3701.523  | 3242.491  | L05148    | 535.092   | 368.447   | AF149304  | 380.857   | 581.699   |
| NM_014637 | 1664.193  | 2635.904  | AK091125  | 908.75    | 741.567   | NM_01209E | 4038.348  | 7972.396  |
| NM_01337E | 17833.443 | 37812.422 | M93056    | 9264.677  | 6484.895  | NM_01643E | 210.28    | 112.601   |
| AF113208  | 3714.435  | 3930.05   | D16474    | 4535.048  | 3151.604  | X73079    | 12507.305 | 11169.543 |
| NM_00615E | 3874.24   | 2978.078  | AL080072  | 730.604   | 653.061   | NM_019091 | 321.741   | 398.512   |
| NM_012164 | 1222.026  | 1183.997  | AL049280  | 1833.608  | 1137.383  | AF264781  | 568.66    | 524.869   |
| AK026010  | 871.388   | 1060.676  | AK025212  | 8072.395  | 6636.777  | NM_00245E | 226.737   | 144.171   |
| NM_004721 | 343.556   | 552.575   | AB021925  | 590.264   | 500.978   | AK024215  | 4230.761  | 3228.441  |
| AB011156  | 841.137   | 923.466   | AL157503  | 3883.443  | 3222.766  | AB044661  | 1274.824  | 1168.438  |
| NM_01807E | 1059.234  | 783.905   | AK000053  | 287.725   | 385.561   | NM_00060E | 5421.31   | 3823.854  |
| NM_00476E | 2790.221  | 1818.088  | AK000786  | 1571.865  | 1009.486  | NM_016124 | 2714.565  | 2398.741  |
| NM_00675E | 8209.191  | 5053.475  | AK000935  | 774.41    | 321.51    | NM_01907E | 320.529   | 370.757   |
| NM_00442E | 394.874   | 257.54    | AK021458  | 1970.079  | 1242.151  | U53530    | 898.886   | 817.232   |
| NM_00680E | 4591.798  | 3362.678  | NM_017674 | 3766.52   | 2741.919  | NM_00659E | 723.29    | 855.554   |
| NM_01394E | 960.504   | 998.788   | AK000966  | 682.066   | 670.362   | NM_00417E | 2760.039  | 5208.806  |
| NM_00163E | 4339.591  | 3056.679  | AK024525  | 3832.506  | 3108.223  | NM_00454E | 8091.653  | 14478.012 |
| H39560    | 303.108   | 330.962   | AK024909  | 367.427   | 538.752   | AK000554  | 1069.247  | 1233.693  |
| BG534366  | 731.82    | 1053.621  | AK024544  | 1078.29   | 910.279   | NM_00647E | 1576.687  | 1860.001  |
| BG698522  | 7510.376  | 7860.93   | AK025097  | 431.758   | 424.039   | NM_00282E | 2528.599  | 2919.563  |
| AA152346  | 904.633   | 940.078   | AK001880  | 3208.263  | 2461.932  | AF159141  | 1209.08   | 757.974   |
| L15189    | 2934.403  | 2758.574  | AF156166  | 4302.889  | 2913.553  | NM_00242E | 264.618   | 478.01    |
| AB023420  | 11406.938 | 11141.934 | NM_01437E | 36714.402 | 24641.689 | NM_01645E | 9911.459  | 7894.816  |
| BI822179  | 350.936   | 535.263   | NM_01420E | 29999.264 | 22045.361 | AK022233  | 1112.543  | 952.126   |
| AF022912  | 3334.629  | 5166.341  | NM_001651 | 4985.296  | 5026.658  | AL137713  | 166.016   | 314.744   |
| AA477428  | 10614.18  | 22190.949 | L32786    | 2828.662  | 2574.815  | AK026410  | 3362.345  | 2324.008  |
| AA156342  | 1946.511  | 2817.02   | AL355720  | 3248.824  | 4668.972  | NM_014637 | 938.063   | 676.574   |
| R45594    | 14953.147 | 10848.905 | AK002023  | 2035.138  | 1947.183  | NM_01337E | 6703.647  | 4492.578  |
| H46425    | 2054.099  | 1730.001  | AF150156  | 793.466   | 1279.583  | AF113208  | 2548.265  | 2329.318  |
| AI355949  | 579.982   | 1310.829  | NM_016464 | 1065.069  | 1432.359  | NM_00615E | 2315.613  | 1791.906  |

|           |           |           |           |           |           |           |           |           |
|-----------|-----------|-----------|-----------|-----------|-----------|-----------|-----------|-----------|
| AA278152  | 7896.75   | 8794.803  | L40402    | 1396.789  | 1098.791  | NM_012164 | 525.904   | 505.054   |
| H75530    | 2447.07   | 3097.294  | AK022422  | 949.82    | 676.3     | AK026010  | 439.56    | 639.816   |
| NM_004176 | 5756.024  | 4953.202  | AK023485  | 1042.313  | 577.772   | NM_004721 | 239.253   | 147.772   |
| NM_004548 | 18037.703 | 10364.422 | AK022474  | 22317.516 | 15201.319 | AB011156  | 488.838   | 710.676   |
| AK000554  | 2652.888  | 2424.677  | AK022392  | 2112.666  | 1773.519  | NM_006246 | 1289.15   | 2541.013  |
| NM_006472 | 4614.963  | 3022.985  | AK025949  | 2032.646  | 1333.027  | NM_004316 | 301.507   | 609.413   |
| NM_001538 | 3304.654  | 2820.514  | Y10259    | 1729.269  | 1054.316  | NM_014446 | 122.926   | 192.955   |
| X97261    | 61848.277 | 15299.482 | AK021725  | 2108.802  | 1574.459  | U58096    | 9229.772  | 10618.244 |
| D87666    | 58333.762 | 41360.855 | NM_002408 | 3586.263  | 3566.026  | NM_016928 | 2218.514  | 2562.295  |
| NM_002921 | 281.583   | 320.323   | AK024282  | 1679.528  | 1626.786  | NM_012323 | 473.927   | 714.323   |
| NM_001315 | 8128.179  | 7383.19   | AF085838  | 2039.506  | 2079.577  | NM_006942 | 193.193   | 148.431   |
| AF286095  | 1245.034  | 1179.474  | NM_018277 | 1436.972  | 1691.506  | NM_018196 | 219.497   | 97.653    |
| NM_000878 | 860.088   | 622.705   | AF014455  | 706.892   | 608.976   | NM_013943 | 591.422   | 686.386   |
| S66407    | 1560.623  | 1475.843  | AF086335  | 2213.885  | 1982.104  | NM_001638 | 1638.46   | 1575.78   |
| NM_016523 | 528.72    | 518.06    | AB011118  | 16503.289 | 11862.388 | BG534366  | 386.201   | 386.617   |
| NM_018727 | 471.411   | 1382.952  | AK021476  | 1660.354  | 1002.272  | BG698522  | 4057.634  | 2785.633  |
| NM_004258 | 49587.469 | 67631.805 | NM_018630 | 2502.712  | 1389.906  | AA152346  | 315.846   | 152.908   |
| NM_001981 | 3245.74   | 5871.976  | AF086175  | 754.406   | 733.702   | L15189    | 953.436   | 818.308   |
| NM_014654 | 1099.494  | 760.43    | AK002196  | 580.278   | 432.59    | AB023420  | 4752.759  | 3465.323  |
| NM_001588 | 41406.051 | 32233.516 | NM_004576 | 948.001   | 828.148   | AF022912  | 1162.853  | 780.198   |
| AK026108  | 5728.997  | 5564.163  | AF040097  | 913.143   | 671.253   | AA477428  | 4153.78   | 3443.487  |
| AB037723  | 4382.111  | 4900.4    | NM_020436 | 444.306   | 253.042   | AA156342  | 645.824   | 669.888   |
| NM_006246 | 2022.135  | 1904.58   | AK024182  | 1578.022  | 2093.729  | R45594    | 6052.988  | 4749.229  |
| NM_004316 | 293.754   | 435.758   | NM_006913 | 11013.679 | 9869.43   | H46425    | 1598.191  | 1530.156  |
| U58096    | 22355.01  | 12841.969 | NM_000499 | 7258.804  | 3826.298  | AI355949  | 294.974   | 515.245   |
| NM_016928 | 4327.208  | 4473.406  | AL049955  | 15674.286 | 10766.626 | AA278152  | 3009.301  | 2843.165  |
| NM_012323 | 1172.339  | 1057.807  | AF155654  | 6951.612  | 6093.1    | H75530    | 1036.389  | 1703.723  |
| NM_015948 | 3944.758  | 2679.232  | AK000028  | 2459.403  | 1841.363  | NM_003764 | 1901.968  | 2379.894  |
| NM_003054 | 2306.74   | 1936.899  | NM_013320 | 51581.074 | 47881.887 | NM_004828 | 434.448   | 581.69    |
| NM_003042 | 247.578   | 632.712   | AJ245902  | 470.27    | 289.843   | NM_006793 | 11053.812 | 12091.776 |
| NM_002219 | 15380.935 | 9330.792  | AL050039  | 677.753   | 890.163   | NM_001538 | 2346.689  | 1813.764  |
| AF182404  | 2553.764  | 2299.487  | AF087987  | 697.429   | 735.294   | X97261    | 31973.342 | 6527.65   |
| NM_000804 | 624.908   | 520.715   | H09474    | 1466.694  | 996.356   | NM_001468 | 241.695   | 152.308   |
| NM_006558 | 2357.293  | 1460.009  | AB002368  | 8587.213  | 5506.04   | D87666    | 27628.064 | 15722.344 |
| NM_014521 | 935.742   | 925.262   | AL360263  | 47882.156 | 28311.283 | NM_001315 | 3505.516  | 2422.947  |
| NM_002448 | 1315.338  | 1517.009  | Z36780    | 2047.054  | 1950.865  | AF286095  | 612.4     | 444.237   |
| NM_017808 | 1629.47   | 3588.07   | AK022403  | 1803.758  | 1504.793  | NM_000878 | 380.17    | 417.38    |
| AK023202  | 2257.475  | 4735.884  | AK022955  | 4685.618  | 4098.22   | S66407    | 808.276   | 3022.425  |
| D63877    | 5076.216  | 10210.986 | AK021760  | 473.026   | 661.224   | NM_004258 | 24316.648 | 15373.186 |
| AF131760  | 1565.527  | 2114.115  | BC035855  | 2517.152  | 1567.247  | NM_001981 | 1550.037  | 1083.963  |
| NM_018698 | 1636.091  | 1366.276  | AL137408  | 9948.34   | 7701.578  | NM_014654 | 421.16    | 216.457   |
| NM_006461 | 1358.637  | 1322.87   | AF054995  | 1319.393  | 896.768   | NM_001588 | 25819.715 | 21410.396 |
| NM_018201 | 3749.879  | 5396.12   | AL080176  | 2169.133  | 1497.268  | AK026108  | 3667.142  | 3412.313  |
| NM_014880 | 2484.889  | 3210.473  | AK023627  | 1195.385  | 1224.681  | NM_006379 | 1286.016  | 1464.159  |
| NM_003764 | 3076.438  | 2448.953  | CY3Cy5    | 5512.319  | 1082.495  | BF571428  | 1579.156  | 1353.24   |
| NM_004828 | 461.421   | 760.056   | BI759406  | 4511.92   | 4606.754  | AB037723  | 3006.244  | 2160.934  |
| NM_006793 | 33636.063 | 37907.461 | R76099    | 641.044   | 923.554   | NM_000606 | 6211.635  | 9493.866  |
| NM_018079 | 1224.975  | 894.371   | S74445    | 918.028   | 1073.163  | NM_016124 | 2945.812  | 4231.808  |
| NM_004760 | 3082.991  | 2059.933  | BI763360  | 1654.649  | 1943.317  | NM_019079 | 249.985   | 303.763   |
| NM_006752 | 7697.313  | 6371.81   | D25538    | 1296.388  | 1232.524  | U53530    | 903.251   | 905.486   |
| NM_004428 | 402.864   | 595.483   | NM_000360 | 5982.087  | 5393.346  | NM_006598 | 682.377   | 797.662   |
| NM_006808 | 3897.04   | 2918.665  | D49950    | 6012.859  | 4088.029  | NM_015948 | 1981.732  | 1603.981  |
| AF149304  | 743.898   | 581.988   | NM_001849 | 1229.85   | 1672.045  | NM_003054 | 1120.015  | 878.027   |

|           |           |           |           |           |           |           |           |          |
|-----------|-----------|-----------|-----------|-----------|-----------|-----------|-----------|----------|
| NM_01209E | 8335.153  | 5715.442  | X03635    | 2991.286  | 3918.73   | NM_00304E | 204.259   | 112.232  |
| NM_01643E | 428.812   | 421.309   | AF353674  | 6185.624  | 14042.117 | NM_00479C | 219.681   | 63.225   |
| X73079    | 31880.736 | 27361.84  | BC002645  | 4715.832  | 10437.156 | NM_00221E | 5806.689  | 3350.891 |
| NM_019091 | 1240.981  | 1220.891  | NM_021138 | 4588.556  | 9709.934  | AF182404  | 976.586   | 927.535  |
| L07518    | 506.954   | 1180.456  | BC002792  | 1042.728  | 2895.38   | NM_000804 | 355.031   | 591.184  |
| AF264781  | 1708.057  | 3299.957  | NM_02100E | 2887.022  | 6549.432  | NM_00655E | 905.991   | 663.033  |
| NM_01614E | 87.804    | 606.745   | SB        | 543.132   | 1642.215  | NM_014521 | 520.408   | 594.487  |
| AK022823  | 378.37    | 490.92    | SR6       | 2440.313  | 8411.253  | NM_00244E | 449.89    | 273.232  |
| NM_00245E | 732.345   | 677.807   | SR8       | 9535.637  | 65702.68  | NM_01780E | 373.623   | 229.778  |
| AK024215  | 10797.459 | 14372.133 | SR10      | 32696.922 | 31642.867 | AK023202  | 790.765   | 457.77   |
| AB044661  | 3123.998  | 3564.031  | CY3Cy5    | 6140.28   | 862.309   | D63877    | 1570.579  | 1504.082 |
| NM_00060E | 7611.078  | 5474.965  | X07203    | 521.947   | 705.668   | AF131760  | 699.661   | 544.581  |
| NM_016124 | 5430.263  | 4053.508  | NM_003834 | 2392.608  | 3023.366  | NM_01869E | 700.939   | 657.901  |
| U53530    | 1631.085  | 1473.171  | NM_00595E | 2621.7    | 3145.669  | NM_018201 | 1557.307  | 1792.211 |
| NM_00659E | 1171.049  | 1408.605  | NM_003381 | 995.102   | 1255.562  | NM_01443E | 577.368   | 310.489  |
| NM_00417E | 6056.229  | 5472.086  | NM_00575E | 805.116   | 847.033   | NM_01488C | 1586.667  | 1651.99  |
| NM_00454E | 17473.676 | 12491.037 | NM_00370E | 15227.683 | 11929.688 | NM_00615E | 2519.906  | 3488.037 |
| AK000554  | 2349.74   | 1879.779  | NM_00036E | 558.718   | 1074.02   | NM_012164 | 624.543   | 1022.291 |
| NM_00647E | 3420.928  | 2238.154  | NM_016351 | 759.688   | 1127.747  | AK026010  | 354.702   | 454.493  |
| NM_00282E | 5310.247  | 3088.363  | NM_00440E | 890.636   | 1437.713  | NM_004721 | 171.108   | 272.018  |
| AF159141  | 2389.747  | 1791.28   | NM_005667 | 1942.35   | 5578.396  | AB011156  | 396.421   | 723.819  |
| NM_00242C | 412.387   | 437.522   | NM_00630E | 792.165   | 2201.055  | NM_01807E | 438.759   | 370.772  |
| NM_01645E | 20297.918 | 22788.943 | NM_00006C | 866.15    | 3096.144  | NM_00476C | 1106.264  | 799.594  |
| AK022233  | 2933.441  | 4464.237  | NM_00958E | 928.183   | 3662.991  | NM_00675E | 3142.337  | 2542.484 |
| AK026410  | 6014.433  | 6203.745  | L09080    | 2554.986  | 5922.365  | NM_00680E | 1592.707  | 1441.565 |
| NM_014637 | 2328.546  | 2625.658  | NM_004467 | 722.648   | 2568.752  | AF149304  | 441.872   | 342.672  |
| NM_01337E | 16967.674 | 11189.65  | NM_00562E | 1059.556  | 2257.732  | NM_01209E | 2832.485  | 2120.135 |
| AF113208  | 4131.972  | 4223.77   | AF091033  | 657.793   | 769.516   | NM_01643E | 235.61    | 97.023   |
| NM_00615E | 3857.111  | 2989.963  | NM_001122 | 6537.637  | 7174.857  | X73079    | 12134.24  | 9604.499 |
| NM_012164 | 1036.534  | 904.866   | NM_004591 | 1263.082  | 1796.697  | NM_019091 | 398.973   | 368.837  |
| AK026010  | 1423.884  | 1831.735  | AL133027  | 635.167   | 1059.143  | L07518    | 313.4     | 178.567  |
| NM_004721 | 627.931   | 1181.223  | AB037732  | 1445.377  | 1922.051  | AF264781  | 615.645   | 421.05   |
| AB011156  | 880.764   | 1005.341  | NM_001837 | 433.662   | 421.642   | AB002293  | 23.474    | 132.779  |
| NM_00624E | 2506.717  | 1985.722  | NM_00183E | 62205.273 | 70167.906 | NM_00245E | 278.254   | 264.884  |
| NM_00431E | 388.085   | 393.597   | BC016029  | 409.29    | 439.758   | AK024215  | 5012.634  | 6387.58  |
| U58096    | 23335.539 | 18126.527 | M27487    | 397.337   | 590.663   | AB044661  | 1554.224  | 2161.909 |
| NM_01692E | 3729.775  | 3499.018  | NM_002981 | 6375.916  | 12896.272 | NM_01537E | 746.7     | 1395.982 |
| NM_01232E | 787.954   | 724.829   | NM_001244 | 1253.198  | 3420.055  | NM_00117E | 482.09    | 940.785  |
| NM_00694E | 405.31    | 363.767   | NM_01227E | 693.465   | 1837.449  | NM_013341 | 282.856   | 386.027  |
| NM_01819E | 408.948   | 474.466   | NM_006137 | 639.559   | 2058      | NM_01653E | 237.822   | 86.138   |
| NM_01394E | 1159.758  | 840.912   | AL117468  | 2936.918  | 7531.334  | NM_00406E | 223.516   | 239.632  |
| NM_00163E | 5803.003  | 4774.679  | NM_00538E | 2901.219  | 2776.874  | NM_004941 | 1518.12   | 1109.522 |
| H39560    | 565.202   | 713.496   | AK027086  | 4046.519  | 9530.474  | AF151831  | 1419.563  | 918.402  |
| BG534366  | 975.212   | 1112.698  | AF073770  | 1201.018  | 1508.823  | AB011121  | 393.474   | 208.337  |
| BG698522  | 7485.362  | 6842.161  | AL359401  | 5340.59   | 6547.604  | AF083255  | 2469.75   | 1800.314 |
| AA152346  | 776.545   | 1091.102  | NM_01221E | 1898.572  | 2276.889  | AK022605  | 438.144   | 324.236  |
| L15189    | 3165.979  | 5771.433  | NM_01657E | 2241.047  | 2617.336  | AK000554  | 1083.457  | 815.771  |
| AB023420  | 11877.971 | 14568.712 | NM_00130E | 5070.29   | 4804.122  | NM_00647E | 1607.172  | 1155.667 |
| BI822179  | 482.979   | 329.512   | M21304    | 849.238   | 1080.222  | NM_00282E | 2074.822  | 1521.023 |
| AF022912  | 2599.77   | 2060.963  | NM_00197E | 512.733   | 334.254   | AF159141  | 1255.017  | 1067.627 |
| AA477428  | 11332.428 | 11191.776 | AB040896  | 1707.952  | 1709.502  | NM_01645E | 11860.188 | 9515.878 |
| AA156342  | 1648.891  | 1614.925  | NM_001107 | 1697.795  | 1472.62   | AK022233  | 880.776   | 812.862  |
| R45594    | 14646.608 | 12417.105 | AF084645  | 474.371   | 664.372   | AL137713  | 157.816   | 213.857  |

|           |           |           |           |           |           |           |           |           |
|-----------|-----------|-----------|-----------|-----------|-----------|-----------|-----------|-----------|
| H46425    | 1821.981  | 2147.369  | AF151851  | 4447.847  | 3280.45   | AK026410  | 4314.766  | 5718.742  |
| AI355949  | 575.804   | 750.969   | NM_002234 | 1234      | 3570.667  | NM_014637 | 1334.413  | 2238.424  |
| AA278152  | 6893.962  | 5769.804  | NM_000701 | 2722.778  | 6257.696  | NM_013379 | 8625.878  | 17238.613 |
| H75530    | 1956.876  | 2148.454  | AB022696  | 3424.138  | 7371.76   | AF113208  | 2805.808  | 2954.428  |
| NM_003764 | 3308.612  | 1928.12   | NM_002233 | 72.668    | 1712.673  | AF019382  | 496.229   | 641.301   |
| NM_004829 | 551.505   | 682.129   | NM_001656 | 1359.202  | 1780.79   | BC012757  | 666.947   | 1280.572  |
| NM_006793 | 27495.047 | 15000.329 | Z70705    | 1053.223  | 858.657   | M96686    | 190.039   | 162.427   |
| NM_001538 | 3350.632  | 1835.288  | NM_002611 | 968.096   | 1208.79   | NM_004062 | 716.267   | 635.515   |
| X97261    | 65852.008 | 12358.641 | NM_017417 | 366.726   | 481.969   | NM_005883 | 385.295   | 266.387   |
| NM_001468 | 497.646   | 327.67    | AL133602  | 644.305   | 701.404   | NM_004449 | 650.917   | 455.95    |
| NM_005410 | 404.858   | 145.495   | AF037219  | 2541.491  | 2029.059  | NM_014591 | 1096.685  | 825.414   |
| D87666    | 55856.699 | 45184.848 | AK026075  | 466.108   | 412.225   | NM_014592 | 641.045   | 407.933   |
| NM_001315 | 8493.056  | 6441.766  | NM_000251 | 3149.219  | 2799.93   | NM_001945 | 837.433   | 801.903   |
| AF286095  | 1397.532  | 3046.57   | NM_006038 | 1664.8    | 1596.785  | NM_020039 | 708.719   | 321.593   |
| NM_000878 | 809.973   | 1256.847  | NM_000252 | 3922.66   | 8853.715  | NM_006653 | 490.382   | 311.01    |
| S66407    | 1349.642  | 1956.998  | NM_017917 | 4243.76   | 7938.248  | NM_014442 | 1104.177  | 572.504   |
| NM_018727 | 356.362   | 251.426   | NM_004092 | 7875.417  | 9398.786  | AB002313  | 595.306   | 259.838   |
| NM_004258 | 53981.504 | 53079.973 | X15624    | 1845.103  | 2570.634  | AB011167  | 489.276   | 364.667   |
| NM_001981 | 2505.045  | 2477.029  | NM_004467 | 426.842   | 776.645   | NM_005409 | 350.658   | 368.5     |
| NM_014654 | 877.069   | 702.964   | NM_005622 | 754.816   | 1018.411  | NM_000208 | 965.348   | 1028.028  |
| NM_001585 | 36051.383 | 28076.24  | NM_018058 | 4719.845  | 5044.919  | NM_002188 | 11055.187 | 10497.994 |
| AK026108  | 5495.568  | 4661.164  | NM_004548 | 5960.49   | 6898.977  | AK027119  | 5817.684  | 7229.178  |
| NM_006379 | 2593.027  | 3009.378  | X69079    | 17188.982 | 14476.751 | AB037727  | 16400.354 | 20698.867 |
| BF571428  | 1975.883  | 1310.894  | BI759406  | 4490.313  | 3645.71   | NM_005426 | 2223.172  | 4572.186  |
| AB037723  | 3773.901  | 2558.537  | R76099    | 626.59    | 586.119   | NM_004763 | 270.273   | 448.739   |
| NM_000606 | 8478.911  | 5020.683  | S74445    | 785.954   | 613.178   | NM_014063 | 3835.571  | 6270.567  |
| NM_016124 | 6369.328  | 4700.479  | BI763360  | 1271.323  | 1230.493  | D86964    | 1988.584  | 3655.439  |
| NM_019079 | 697.668   | 555.27    | D25538    | 1352.421  | 1586      | AL049801  | 846.49    | 1450.96   |
| U53530    | 1967.009  | 2095.509  | NM_000360 | 6711.181  | 5444.973  | NM_016395 | 2834.016  | 3879.612  |
| NM_006598 | 1257.835  | 1086.366  | D49950    | 6299.403  | 4073.833  | NM_003152 | 425.661   | 876.41    |
| NM_000111 | 364.379   | 135.605   | NM_001849 | 1064.042  | 1234.513  | NM_014727 | 1572.263  | 3154.231  |
| NM_015948 | 3979.326  | 2334.093  | X03635    | 2656.225  | 2741.235  | BE885010  | 218.916   | 308.403   |
| NM_003054 | 2510.787  | 1642.164  | NM_001523 | 440.96    | 355.649   | NM_006342 | 604.572   | 480.622   |
| NM_003042 | 545.277   | 355.267   | NM_017423 | 818.292   | 1004.956  | NM_016396 | 1548.379  | 1500.597  |
| NM_004790 | 484.498   | 571.545   | NM_019613 | 2162.384  | 2928.294  | NM_005689 | 348.565   | 385.48    |
| NM_002219 | 18402.113 | 13103.25  | NM_005382 | 2078.209  | 1072.294  | AF086546  | 147.402   | 162.854   |
| AF182404  | 2608.313  | 2638.97   | AK027086  | 2673.938  | 3829.311  | NM_005552 | 9334.406  | 7234.714  |
| NM_000804 | 1222.853  | 2771.814  | AB032997  | 754.934   | 1185.643  | NM_006717 | 641.33    | 735.19    |
| NM_006555 | 3090.124  | 4067.176  | AL096857  | 1723.58   | 2186.472  | AL109786  | 421.911   | 389.06    |
| NM_014521 | 1143.205  | 1382.967  | AB040104  | 267.209   | 354.722   | AK026479  | 1634.199  | 878.905   |
| NM_002445 | 1264.295  | 1172.458  | NM_003834 | 2256.614  | 2222.257  | AK022860  | 1804.955  | 1048.411  |
| NM_017809 | 893.302   | 940.331   | NM_005959 | 2846.264  | 2686.076  | X60188    | 7093.772  | 3937.969  |
| AK023202  | 1953.731  | 2854.94   | NM_003381 | 1419.874  | 1150.631  | NM_005977 | 1021.13   | 396.861   |
| D63877    | 3691.299  | 3755.607  | NM_005756 | 830.027   | 892.358   | NM_006265 | 2926.355  | 1585.715  |
| AF131760  | 1298.973  | 997.827   | NM_003702 | 16577.506 | 12884.343 | NM_003126 | 261.721   | 583.797   |
| NM_018698 | 1536.994  | 1509.839  | NM_000369 | 702.323   | 1052.503  | NM_006059 | 859.708   | 1430.382  |
| NM_006461 | 830.459   | 703.766   | NM_004405 | 1005.517  | 745.614   | NM_000347 | 3575.318  | 5914.142  |
| NM_018201 | 2707.69   | 2588.645  | NM_001988 | 6048.357  | 4745.444  | M13452    | 2563.101  | 4287.113  |
| NM_014438 | 835.905   | 650.752   | NM_006060 | 1708.063  | 2476.092  | NM_016114 | 861.653   | 758.571   |
| NM_014880 | 2828.743  | 1897.888  | NM_005667 | 2024.073  | 3871.515  | AY007114  | 516.55    | 632.046   |
| NM_006153 | 4224.527  | 3391.65   | NM_006308 | 1003.737  | 1196.244  | AF086604  | 238.396   | 148.313   |
| NM_012164 | 1389.401  | 1057.446  | NM_000060 | 951.558   | 1302.476  | AB000895  | 391.724   | 218.671   |
| AK026010  | 750.702   | 745.995   | NM_009589 | 1374.296  | 2705.595  | X80031    | 248.649   | 151.375   |

|           |           |           |           |           |           |           |           |           |
|-----------|-----------|-----------|-----------|-----------|-----------|-----------|-----------|-----------|
| NM_004721 | 486.729   | 272.742   | L09080    | 2000.267  | 2210.044  | AK022178  | 457.904   | 564.992   |
| AB011156  | 943.149   | 632.597   | NM_007326 | 4741.512  | 4027.529  | NM_006011 | 250.069   | 250.437   |
| NM_018079 | 1375.772  | 898.735   | NM_001886 | 4908.987  | 5582.562  | L00635    | 327.948   | 160.737   |
| NM_004760 | 2968.563  | 1986.695  | AF137372  | 3633.335  | 4621.612  | NM_015601 | 482.679   | 400.498   |
| NM_006752 | 8403.456  | 5348.116  | AF220417  | 1130.897  | 1783.026  | NM_001780 | 9542.857  | 6716.951  |
| NM_004428 | 441.545   | 272.921   | D83782    | 3985.47   | 4272.15   | AJ277442  | 287.21    | 163.639   |
| NM_006809 | 4567.074  | 4612.81   | NM_002078 | 2147.093  | 1996.181  | NM_004569 | 874.777   | 860.532   |
| AF149304  | 819.289   | 1344.148  | NM_000287 | 3144.574  | 3818.838  | AF089088  | 368.713   | 314.78    |
| NM_012095 | 9224.309  | 21237.326 | NM_001656 | 1235.439  | 1814.227  | L07557    | 660.29    | 242.725   |
| NM_016438 | 715.065   | 1663.205  | AF091033  | 400.632   | 379.082   | D78514    | 1353.812  | 826.333   |
| X73079    | 30980.15  | 36165.68  | NM_001122 | 5933.917  | 4995.72   | NM_013366 | 164.115   | 206.947   |
| NM_019091 | 975.801   | 1301.605  | NM_004591 | 1172.958  | 1138.623  | NM_002787 | 7309.868  | 3908.731  |
| L07518    | 558.805   | 606.538   | AL133027  | 720.134   | 818.202   | U95006    | 2576.898  | 2284.765  |
| AF264781  | 1897.815  | 1856.44   | AB037732  | 1571.904  | 1569.679  | NM_003347 | 3201.738  | 3054.287  |
| NM_002456 | 741.009   | 610.054   | NM_001837 | 464.284   | 759.039   | AF273051  | 368.736   | 363.281   |
| AK024215  | 10621.947 | 8886.345  | NM_001839 | 58963.164 | 67127.141 | NM_014516 | 2742.968  | 4567.834  |
| AB044661  | 3237.14   | 2355.178  | BC016029  | 529.208   | 473.983   | AK021868  | 254.414   | 177.702   |
| NM_015376 | 1883.113  | 1358.862  | M27487    | 478.7     | 603.786   | AK000643  | 37720.531 | 79555.969 |
| NM_001176 | 1117.758  | 773.015   | NM_002286 | 49418.723 | 36795.992 | NM_018421 | 1729.146  | 1394.836  |
| NM_013341 | 759.852   | 548.306   | NM_002164 | 623.374   | 690.228   | AB014574  | 18855.76  | 14033.335 |
| NM_016536 | 389.728   | 373.851   | NM_003811 | 5819.579  | 6053.324  | NM_020127 | 977.039   | 1814.096  |
| NM_004066 | 638.838   | 525.47    | NM_002981 | 5689.264  | 5320.238  | NM_015623 | 3934.543  | 2613.461  |
| NM_004941 | 3038.513  | 1408.304  | NM_001244 | 1064.54   | 1281.913  | AB045116  | 572.788   | 480.638   |
| AF151831  | 3121.492  | 2187.869  | NM_012275 | 527.003   | 673.118   | L49054    | 364.311   | 356.437   |
| AB011121  | 917.888   | 655.505   | NM_006137 | 373.045   | 399.006   | NM_003422 | 989.815   | 1434.137  |
| AF083255  | 8556.167  | 6392.86   | NM_016139 | 37046.523 | 20950.986 | NM_001451 | 261.228   | 112.885   |
| AK022605  | 1302.315  | 1217.794  | AL117468  | 1892.911  | 1434.563  | NM_014779 | 469.222   | 647.333   |
| AK000554  | 2793.985  | 2640.758  | NM_004090 | 5516.239  | 6525.793  | NM_002943 | 1086.795  | 947.665   |
| NM_006472 | 4745.767  | 4919.101  | NM_014634 | 8709.645  | 7193.946  | AL133649  | 402.868   | 303.95    |
| NM_002826 | 6571.957  | 13696.979 | NM_001919 | 13559.672 | 13200.694 | NM_015846 | 1035.704  | 711.578   |
| AF159141  | 3538.009  | 3767.357  | BC031485  | 2153.633  | 2488.221  | NM_015972 | 3037.445  | 2685.949  |
| NM_002420 | 524.424   | 618.053   | NM_004092 | 6520.2    | 6509.202  | NM_016132 | 781.321   | 957.378   |
| NM_016458 | 27938     | 26845.381 | X15624    | 1629.923  | 2175.609  | NM_018006 | 556.803   | 746.266   |
| AK022233  | 3170.078  | 3974.255  | AF073770  | 1366.864  | 1453.578  | NM_016090 | 598.352   | 314.259   |
| AL137713  | 572.712   | 453.745   | AL359401  | 5260.958  | 5000.49   | NM_001013 | 23739.67  | 19737.684 |
| AK026410  | 7382.688  | 6081.021  | NM_012213 | 1763.549  | 1710.553  | AK024040  | 1738.394  | 1180.858  |
| NM_014637 | 2514.121  | 3642.134  | NM_016573 | 2203.323  | 2171.28   | NM_005061 | 1638.579  | 1017.961  |
| NM_013379 | 18429.525 | 21196.152 | NM_001303 | 4904.955  | 3655.953  | AL137354  | 7082.143  | 3635.57   |
| AF113208  | 3918.466  | 2763.173  | M21304    | 736.321   | 538.413   | NM_001023 | 32007.178 | 61209.824 |
| AF019382  | 938.007   | 664.659   | NM_001979 | 611.46    | 602.026   | AK021571  | 3801.001  | 3611.14   |
| BC012757  | 1939.151  | 1607.671  | AB040896  | 2007.753  | 1805.073  | AF052149  | 599.862   | 1043.736  |
| M96686    | 575.589   | 447.165   | NM_001107 | 2127.022  | 1892.667  | AK025586  | 230.466   | 206.604   |
| NM_004062 | 1613.135  | 1458.372  | AF084645  | 370.843   | 593.918   | AL137512  | 283.568   | 369.58    |
| NM_005883 | 1019.883  | 1006.465  | AF151851  | 4157.284  | 3111.228  | NM_005036 | 248.748   | 252.669   |
| NM_004449 | 1470.481  | 956.062   | NM_005176 | 390.745   | 653.386   | NM_002541 | 500.45    | 251.378   |
| NM_014591 | 2809.851  | 2171.727  | NM_003636 | 3566.823  | 3458.44   | NM_000056 | 1128.865  | 422.146   |
| NM_014592 | 1600.168  | 1076.053  | NM_002234 | 937.48    | 1034.249  | NM_016311 | 2456.886  | 1111.846  |
| NM_001945 | 2026.9    | 1857.017  | NM_000701 | 1619.932  | 1770.759  | NM_001867 | 23066.617 | 13501.49  |
| NM_020039 | 1766.15   | 1337.861  | AB022696  | 2290.574  | 1762.408  | NM_002300 | 33009.746 | 44559.648 |
| NM_006653 | 1695.952  | 1763.226  | NM_021005 | 2073.12   | 2693.45   | NM_000290 | 1056.329  | 872.454   |
| NM_014442 | 2368.119  | 2010.184  | SB        | 457.445   | 487.729   | NM_016538 | 2001.865  | 1647.845  |
| AB002313  | 1976.227  | 2169.03   | NM_001523 | 383.613   | 414.721   | AK023275  | 3932.096  | 4659.885  |
| AB011167  | 1980.795  | 5283.55   | NM_017423 | 887.447   | 1120.143  | AJ223352  | 2947.938  | 3842.55   |

|           |           |           |           |           |           |           |          |          |
|-----------|-----------|-----------|-----------|-----------|-----------|-----------|----------|----------|
| NM_005409 | 1345.52   | 1841.138  | Z70705    | 994.07    | 575.379   | NM_012239 | 1013.237 | 1136.26  |
| NM_000209 | 3098.948  | 3906.113  | NM_002611 | 766.294   | 1105.482  | NM_016539 | 3536.999 | 1795.759 |
| NM_002189 | 34966.523 | 35397.004 | NM_017417 | 375.949   | 349.774   | NM_006807 | 2685.336 | 1348.65  |
| AK027119  | 12200.027 | 12429.026 | AL133602  | 742.392   | 632.779   | NM_000329 | 177.168  | 291.755  |
| AB037727  | 28267.232 | 32378.545 | AF037219  | 3058.91   | 2131.636  | L16464    | 239.774  | 400.742  |
| NM_005429 | 4557.845  | 6207.772  | NM_000251 | 2919.389  | 2491.879  | NM_006539 | 1582.436 | 1340.449 |
| NM_004769 | 552.961   | 1093.052  | NM_006039 | 1243.598  | 1555.765  | U07132    | 1659.346 | 1092.252 |
| NM_014069 | 7539.854  | 6657.896  | AB011133  | 2162.24   | 1992.384  | NM_003439 | 264.274  | 203.801  |
| D86964    | 5292.747  | 9692.034  | NM_017579 | 25646.408 | 18547.764 | NM_017979 | 471.379  | 273.585  |
| AL049801  | 2066.341  | 2746.354  | NM_018444 | 1704.767  | 2876.573  | AK025036  | 319.362  | 219.692  |
| NM_016399 | 5083.67   | 3209.299  | NM_000259 | 3011.973  | 4116.089  | AK024843  | 2473.584 | 2310.846 |
| NM_003159 | 870.56    | 715.468   | NM_006947 | 10408.174 | 8142.02   | NM_017679 | 1312.596 | 768.452  |
| NM_014727 | 2938.359  | 2350.16   | NM_017917 | 2422.411  | 2508.305  | AK021468  | 331.038  | 72.672   |
| BE885010  | 484.589   | 392.791   | NM_000069 | 733.127   | 1058.416  | BC033020  | 347.344  | 299.811  |
| NM_006349 | 1571.909  | 1429.051  | NM_009589 | 695.976   | 1321.303  | NM_004369 | 2401.948 | 1580.434 |
| NM_016399 | 4574.963  | 5315.442  | L09080    | 2768.231  | 3252.482  | AK026168  | 635.103  | 540.168  |
| NM_005689 | 1030.589  | 1760.117  | NM_007329 | 4971.051  | 4003.901  | AJ296152  | 5431.208 | 6980.376 |
| AF086546  | 433.426   | 243.268   | NM_001889 | 4706.857  | 5022.631  | AK001067  | 742.205  | 1970.029 |
| NM_005559 | 13891.101 | 7052.489  | NM_005629 | 603.817   | 590.875   | AK027088  | 3715.588 | 6967.899 |
| NM_006717 | 1953.425  | 1380.226  | NM_018059 | 4653.749  | 4149.322  | AB037721  | 2813.849 | 5142.648 |
| AL109786  | 1532.642  | 1313.104  | NM_004549 | 5747.034  | 4952.522  | AK027120  | 4948.774 | 7487.491 |
| AK026479  | 5886.573  | 6286.174  | X69079    | 17414.426 | 12241.144 | AB029001  | 654.912  | 403.537  |
| AK022860  | 6163.161  | 12945.074 | BI759406  | 4469.037  | 2687.116  | AB006624  | 1352.913 | 887.95   |
| X60188    | 22365.654 | 25077.369 | R76099    | 682.768   | 732.774   | AL109717  | 330.395  | 307.507  |
| NM_005977 | 2915.968  | 2977.392  | S74445    | 894.698   | 822.444   | AK025473  | 472.222  | 495.032  |
| NM_002747 | 476.498   | 944.52    | BI763360  | 1142.468  | 1127.981  | AF146693  | 295.979  | 250.297  |
| NM_006269 | 8951.554  | 12986.98  | D25538    | 1292.58   | 1419.895  | AF271070  | 4860.18  | 3978.022 |
| NM_003129 | 1218.482  | 1442.888  | NM_000369 | 6558.53   | 5788.725  | NM_014909 | 812.841  | 640.302  |
| NM_006059 | 1685.53   | 2776.247  | D49950    | 6349.98   | 4402.979  | AK055959  | 259.99   | 173.865  |
| AL080144  | 137.345   | 712.04    | NM_001849 | 1365.293  | 1566.273  | AL109702  | 482.332  | 318.926  |
| NM_000347 | 2638.552  | 3001.092  | X03635    | 2637.602  | 2624.992  | AK025624  | 5245.786 | 3272.078 |
| M13452    | 5572.999  | 8830.054  | X03348    | 2712.207  | 3976.459  | AK026684  | 279.789  | 240.524  |
| AF082075  | 830.153   | 2624.032  | AF353674  | 5829.632  | 7479.594  | AL110125  | 1561.753 | 1121.881 |
| NM_016114 | 2027.414  | 1858.028  | BC002645  | 2923.906  | 2389.927  | X89744    | 277.101  | 33.277   |
| AY007114  | 1434.013  | 1345.408  | NM_021138 | 2152.125  | 1967.222  | AJ011600  | 716.503  | 1538.828 |
| AF086604  | 346.746   | 595.766   | BC002792  | 689.571   | 847.8     | AJ002785  | 459.84   | 772.519  |
| AB000895  | 809.875   | 400.011   | NM_002981 | 5028.472  | 5361.964  | Z70716    | 274.734  | 228.722  |
| AK022178  | 757.95    | 632.995   | NM_001244 | 1188.011  | 2022.016  | AL049251  | 192.93   | 219.408  |
| NM_006011 | 421.252   | 371.196   | NM_012279 | 466.348   | 903.143   | Z83945    | 319.666  | 161.679  |
| L00635    | 832.884   | 809.105   | NM_006137 | 557.768   | 642.077   | L32606    | 235.901  | 154.053  |
| NM_015601 | 1734.836  | 1894.248  | NM_016139 | 35047.582 | 29373.145 | L05148    | 233.796  | 130.771  |
| NM_001789 | 34099.59  | 55567.398 | AL117468  | 2224.288  | 2555.554  | AK091125  | 267.296  | 243.965  |
| AJ277442  | 699.961   | 556.627   | NM_019619 | 1904.436  | 1799.045  | D16904    | 269.704  | 74.305   |
| NM_004569 | 2609.53   | 2009.178  | NM_005389 | 1829.657  | 696.66    | M93056    | 2716.509 | 1508.036 |
| AF089088  | 848.981   | 809.256   | AK027086  | 2397.08   | 2989.52   | D16474    | 2143.085 | 1509.025 |
| L07557    | 1964.99   | 1881.447  | AB032997  | 800.875   | 782.553   | AL080072  | 327.646  | 171.48   |
| D78514    | 5166.22   | 8684.49   | AL096857  | 2184.54   | 1759.34   | AL049280  | 737.883  | 1863.4   |
| AK021665  | 497.583   | 535.094   | X07203    | 285.142   | 154.143   | AK025212  | 2965.981 | 7434.36  |
| NM_013369 | 709.831   | 865.064   | NM_003834 | 2194.752  | 1870.225  | AB021925  | 211.551  | 98.395   |
| NM_002787 | 23877.27  | 29231.629 | NM_005959 | 2660.511  | 2193.452  | AL157503  | 1314.789 | 817.973  |
| U95006    | 8601.555  | 15843.512 | NM_003381 | 1189.113  | 937.246   | AK000053  | 381.616  | 695.558  |
| NM_003347 | 9361.021  | 15373.35  | NM_005759 | 819.1     | 501.481   | AK000786  | 792.282  | 1686.21  |
| AF273051  | 1416.933  | 3177.097  | NM_003709 | 15259.995 | 8657.914  | AK000935  | 241.435  | 214.086  |



|           |           |           |           |           |           |           |           |           |
|-----------|-----------|-----------|-----------|-----------|-----------|-----------|-----------|-----------|
| NM_014516 | 3950.812  | 6000.679  | NM_000369 | 643.197   | 611.091   | AK021458  | 910.116   | 922.345   |
| AK021868  | 731.846   | 1420.938  | NM_004405 | 898.647   | 1931.831  | NM_017674 | 867.975   | 1169.351  |
| AK000643  | 47406.125 | 62058.316 | NM_001988 | 4148.47   | 3111.591  | AK000966  | 234.348   | 149.983   |
| NM_018421 | 4955.974  | 6370.99   | NM_006060 | 1454.504  | 1334.033  | AK024525  | 1021.359  | 635.418   |
| AB014574  | 39642.625 | 31338.383 | NM_005667 | 1466.167  | 1346.415  | AK024909  | 309.517   | 38.636    |
| NM_020127 | 1353.132  | 1227.198  | NM_006308 | 555.959   | 362.191   | AK024544  | 464.473   | 364.607   |
| NM_015623 | 11857.217 | 15030.769 | NM_002234 | 902.057   | 1125.146  | AK001880  | 1702.154  | 4741.701  |
| AB045116  | 946.935   | 560.523   | NM_000701 | 1841.083  | 2576.493  | AF156166  | 1578.255  | 2499.335  |
| L49054    | 1163.779  | 550.589   | AB022696  | 3917.946  | 3950.5    | NM_014373 | 11161.488 | 6530.185  |
| NM_001675 | 1224.695  | 1317.755  | AF137372  | 2841.027  | 2671.551  | NM_014206 | 9497.017  | 5344.324  |
| NM_003422 | 2759.619  | 3175.659  | AF220417  | 1009.896  | 1090.839  | NM_001651 | 1396.954  | 1215.736  |
| NM_001451 | 696.591   | 506.897   | D83782    | 3141.562  | 3046.978  | L32786    | 731.583   | 400.843   |
| NM_014779 | 1272.106  | 1027.939  | NM_002078 | 2096.802  | 1649.869  | U03239    | 203.142   | 94.33     |
| NM_002943 | 2299.324  | 1451.734  | NM_000287 | 3097.46   | 2807.89   | AL355720  | 1120.401  | 367.24    |
| AL133649  | 1112.144  | 615.227   | NM_001656 | 1177.213  | 1309.049  | AK002023  | 846.534   | 339.283   |
| AB018303  | 448.333   | 487.628   | AF091033  | 365.267   | 374.006   | AF150156  | 215.556   | 100.703   |
| NM_015972 | 9329.611  | 10038.103 | NM_001122 | 5824.08   | 4053.78   | NM_016464 | 315.556   | 296.692   |
| NM_016132 | 1897.172  | 3956.148  | NM_004591 | 1244.683  | 934.162   | L40402    | 910.973   | 2042.563  |
| NM_018006 | 2889.061  | 4752.745  | AL133027  | 790.055   | 608.226   | AF086216  | 162.126   | 124.633   |
| NM_016090 | 2944.596  | 5522.299  | AB037732  | 1538.478  | 1041.92   | AK022422  | 225.934   | 155.475   |
| NM_001013 | 49513.93  | 69554.586 | NM_001837 | 376.963   | 297.58    | AK023485  | 381.423   | 378.466   |
| AK024040  | 6023.704  | 11451.551 | NM_001839 | 60183.184 | 61463.164 | AK022474  | 5826.701  | 2331.001  |
| NM_005061 | 4969.466  | 6641.299  | M27487    | 318.219   | 252.798   | AK022392  | 913.43    | 1138.682  |
| NM_000997 | 47362.234 | 59980.723 | NM_002286 | 49668.699 | 23260.182 | AL117451  | 255.051   | 69.414    |
| AF182417  | 48658.906 | 45850.5   | NM_002164 | 423.383   | 410.001   | AK025949  | 660.916   | 1137.439  |
| AL137354  | 24605.959 | 36991.418 | NM_003811 | 3712.647  | 2740.897  | Y10259    | 645.154   | 1187.348  |
| NM_001023 | 52380.688 | 62827.891 | AB011133  | 1811.733  | 2775.434  | AK021725  | 597.688   | 479.65    |
| AK021571  | 9635.734  | 6104.898  | NM_017572 | 24869.877 | 24373.723 | NM_002408 | 1465.621  | 1323.241  |
| AF052149  | 1815.247  | 1855.011  | NM_018444 | 1837.962  | 2122.31   | AK024282  | 469.447   | 343.826   |
| AK025586  | 666.704   | 441.562   | NM_000252 | 2607.061  | 2629.686  | AF085838  | 526.863   | 361.414   |
| AL137512  | 848.311   | 1102.718  | NM_006947 | 10278.009 | 9448.182  | NM_018277 | 311.192   | 163.728   |
| NM_005036 | 923.926   | 873.883   | NM_017917 | 2420.865  | 2312.515  | AF014455  | 344.269   | 45.27     |
| NM_002541 | 1766.318  | 1085.492  | NM_004090 | 5240.179  | 4841.216  | AF086335  | 685.718   | 473.495   |
| NM_000056 | 3871.974  | 3116.318  | NM_014634 | 8765.849  | 5700.661  | AB011118  | 6002.093  | 13844.087 |
| NM_016311 | 10109.82  | 8798.282  | NM_001919 | 10723.09  | 7988.627  | S66666    | 250.553   | 584.463   |
| NM_001867 | 51136.422 | 60092.395 | BC031485  | 2270.434  | 1824.958  | AK021476  | 452.993   | 560.926   |
| NM_000290 | 2458.132  | 3034.537  | NM_004092 | 6266.242  | 5321.891  | NM_018630 | 908.264   | 1187.69   |
| NM_016538 | 6156.007  | 4747.356  | X15624    | 1576.716  | 1554.842  | AF086175  | 332.207   | 386.994   |
| AK023275  | 10204.75  | 5495.616  | AF073770  | 1255.04   | 910.159   | NM_004576 | 194.367   | 216.463   |
| AJ223352  | 9884.915  | 10983.699 | AL359401  | 4353.747  | 3190.845  | AF040097  | 257.721   | 226.163   |
| NM_012238 | 3436.894  | 6639.731  | NM_012213 | 1762.996  | 1325.14   | NM_020436 | 190.143   | 131.74    |
| NM_016539 | 13997.077 | 10424.422 | NM_016573 | 2174.477  | 1683.958  | AK024182  | 532.471   | 185.398   |
| NM_006807 | 10056.691 | 22243.363 | NM_001303 | 4376.157  | 2807.837  | NM_006913 | 3293.527  | 2255.311  |
| NM_000326 | 371.129   | 575.777   | M21304    | 780.844   | 373.238   | NM_000499 | 1591.424  | 523.635   |
| L16464    | 813.296   | 1310.621  | NM_001979 | 486.908   | 319.59    | AL049955  | 5994.05   | 6742.495  |
| NM_006532 | 2985.573  | 2111.323  | AB040896  | 1936.849  | 1402.504  | AF155654  | 2404.772  | 2557.301  |
| U07132    | 4548.111  | 3528.61   | NM_001107 | 1582.585  | 1147.221  | AF088044  | 405.997   | 24.707    |
| NM_003436 | 634.132   | 866.382   | AF084645  | 354.997   | 371.838   | AK000028  | 793.51    | 1071.296  |
| AB034691  | 420.122   | 246.999   | AF151851  | 4113.12   | 2616.081  | NM_013320 | 19069.225 | 13272.101 |
| AL035301  | 1330.306  | 1225.1    | NM_003636 | 3176.198  | 2323.588  | AF087987  | 287.664   | 166.716   |
| NM_017687 | 4204.546  | 4469.783  | AF040723  | 8918.136  | 8587.999  | Z36840    | 219.506   | 90.805    |
| NM_017975 | 1526.357  | 1153.901  | NM_015527 | 2495.718  | 3394.433  | AK021723  | 256.989   | 502.754   |
| AK025036  | 958.811   | 1081.772  | X89675    | 1100.851  | 1678.693  | H09474    | 421.255   | 474.225   |

|           |           |           |           |           |           |           |           |           |
|-----------|-----------|-----------|-----------|-----------|-----------|-----------|-----------|-----------|
| AK024843  | 7053.272  | 6212.912  | NM_012189 | 460.481   | 508.755   | AB002368  | 3119.332  | 2632.055  |
| AF074994  | 540.851   | 697.238   | NM_005798 | 8422.266  | 7973.397  | AL360263  | 23219.521 | 29729.412 |
| NM_01767C | 4797.314  | 3083.351  | NM_004216 | 2089.723  | 2277.585  | Z36780    | 874.526   | 1704.918  |
| AF286598  | 552.898   | 484.393   | NM_016289 | 17618.717 | 14329.601 | AK022403  | 632.365   | 289.29    |
| AK021468  | 729.306   | 876.144   | NM_001464 | 390.531   | 429.328   | AK022955  | 1274.067  | 546.03    |
| BC033020  | 1122.265  | 2138.858  | NM_002051 | 1432.515  | 1353.051  | AK021760  | 175.522   | 322.425   |
| NM_00436E | 5855.835  | 7125.526  | NM_017423 | 877.145   | 627.205   | BC035855  | 570.696   | 163.831   |
| AK026168  | 1988.434  | 1909.829  | Z70705    | 804.695   | 451.105   | AL137408  | 2907.307  | 801.556   |
| AJ296152  | 13087.417 | 9849.292  | NM_002611 | 689.891   | 421.178   | AF054995  | 387.391   | 190.712   |
| AK001067  | 1868.245  | 1483.321  | NM_017417 | 483.096   | 336.025   | AL080176  | 660.723   | 145.858   |
| AK027088  | 7577.242  | 12467.292 | AL133602  | 924.041   | 549.115   | AK023627  | 262.353   | 196.027   |
| AB037721  | 6433.963  | 10225.697 | AF037219  | 2718.887  | 1568.16   | CY3Cy5    | 1278.892  | 452.289   |
| AK027120  | 12408.711 | 20211.506 | AK026075  | 586.977   | 479.497   | BI759406  | 1822.113  | 2313.116  |
| AB029001  | 2062.59   | 4241.717  | NM_000251 | 2604.823  | 1576.517  | R76099    | 331.376   | 386.848   |
| AB006624  | 4446.79   | 7534.989  | NM_006038 | 1840.737  | 1116.169  | S74445    | 357.702   | 368.505   |
| AL109717  | 1041.884  | 1705.971  | U87223    | 1589.291  | 2052.831  | BI763360  | 564.22    | 492.486   |
| AK025473  | 1500.58   | 2027.106  | NM_000093 | 535.05    | 842.682   | D25538    | 540.405   | 609.397   |
| AF146693  | 598.607   | 519.425   | NM_001779 | 2642.082  | 3364.569  | NM_00036C | 2546.719  | 3079.905  |
| AF271070  | 14343.652 | 11708.423 | AB033059  | 489.055   | 810.033   | D49950    | 1979.822  | 2445.993  |
| NM_014903 | 1979.2    | 1514.722  | NM_016484 | 1559.279  | 1775.394  | NM_00184E | 367.801   | 511.807   |
| AK055959  | 622.108   | 571.145   | AK026114  | 384.521   | 338.186   | X03635    | 1243.237  | 1456.946  |
| AF052141  | 518.219   | 526.799   | NM_014452 | 853.839   | 731.26    | X03348    | 906.653   | 1203.757  |
| AK021705  | 5208.131  | 8711.9    | NM_014683 | 407.665   | 418.951   | AF353674  | 1644.135  | 2041.742  |
| NM_016141 | 8683.895  | 9314.398  | AK021536  | 4197.777  | 3169.725  | BC002645  | 1255.888  | 1070.242  |
| AL109702  | 1333.752  | 1256.265  | NM_00260C | 1584.79   | 1076.828  | NM_021138 | 944.367   | 794.959   |
| AK025624  | 14857.899 | 12179.664 | NM_00364E | 14171.62  | 6444.75   | BC002792  | 419.539   | 370.089   |
| AK026684  | 687.577   | 418.723   | NM_006663 | 411.326   | 395.962   | NM_02100E | 862.44    | 1093.085  |
| AL110125  | 2118.004  | 1827.658  | NM_006092 | 474.463   | 384.147   | SB        | 127.815   | 92.533    |
| AK022764  | 517.569   | 428.125   | NM_012424 | 532.039   | 351.699   | SR2       | 23315.844 | 14527.485 |
| AJ243673  | 954.714   | 1110.37   | NM_00244E | 480.256   | 454.414   | SR4       | 4997.36   | 4411.343  |
| X89744    | 427.241   | 637.274   | NM_000863 | 609.021   | 590.59    | SR6       | 695.106   | 621.969   |
| AJ011600  | 907.141   | 742.126   | NM_006651 | 1911.485  | 1119.739  | SR8       | 2681.002  | 7299.215  |
| AJ002785  | 716.299   | 418.282   | NM_00533E | 8754.918  | 4036.947  | SR10      | 9086.912  | 2898.259  |
| Z70716    | 677.954   | 1089.521  | NM_001419 | 5734.155  | 2732.661  | CY3Cy5    | 955.728   | 356.999   |
| AL049251  | 1468.477  | 1728.298  | AF119817  | 14115.248 | 5536.984  | X07203    | 221.272   | 389.599   |
| Z83945    | 911.824   | 1404.354  | NM_00132E | 18768.578 | 17138.924 | AB040104  | 206.175   | 151.105   |
| L32606    | 865.409   | 1579.124  | NM_005749 | 3430.048  | 3510.638  | NM_003834 | 1212.276  | 1390.111  |
| L05148    | 647.998   | 799.509   | NM_00423C | 3497.257  | 3948.612  | NM_00595E | 1132.797  | 1291.956  |
| AK091125  | 949.674   | 1521.711  | NM_014503 | 451.237   | 711.271   | NM_003381 | 498.451   | 516.874   |
| D16904    | 583.018   | 235.313   | NM_014659 | 957.658   | 935.589   | NM_00575E | 368.242   | 312.704   |
| M93056    | 8475.438  | 4998.866  | NM_004399 | 2627.562  | 1698.661  | NM_003702 | 5533.928  | 6065.016  |
| D16474    | 2895.847  | 1804.653  | NM_006337 | 2937.873  | 2256.864  | NM_00036E | 315.282   | 329.796   |
| AL080072  | 751.023   | 850.208   | NM_004507 | 2274.192  | 1666.335  | NM_016351 | 332.952   | 554.254   |
| AL049280  | 825.827   | 1534.161  | NM_00271C | 15633.852 | 9178.365  | NM_00440E | 347.745   | 432.473   |
| AK025212  | 8075.942  | 9120.338  | NM_01406C | 2236.855  | 2325.758  | NM_00606C | 670.692   | 588.791   |
| AK023424  | 780.649   | 379.197   | NM_004749 | 6644.019  | 4540.656  | NM_005667 | 612.409   | 602.914   |
| AB021925  | 706.556   | 498.871   | BQ446064  | 859.337   | 655.962   | NM_00630E | 405.904   | 284.07    |
| AL157503  | 2841.693  | 2559.087  | AF274571  | 772.739   | 527.906   | NM_00006C | 294.094   | 244.617   |
| AK000053  | 344.7     | 463.21    | NM_005449 | 452.059   | 230.994   | NM_00958E | 336.708   | 349.582   |
| AK000786  | 1195.619  | 662.537   | NM_003879 | 2868.923  | 1932.164  | L09080    | 1235.348  | 1050.417  |
| AK000935  | 510.324   | 177.726   | NM_016052 | 3964.144  | 2109.963  | NM_00732E | 2241.688  | 1258.378  |
| AK021458  | 2867.846  | 3962.188  | NM_00671E | 1331.324  | 433.097   | AK023080  | 155.645   | 160.019   |
| NM_017674 | 3376.084  | 5425.759  | NM_005427 | 583.483   | 589.592   | NM_00188E | 2044.32   | 1591.593  |

|            |           |           |           |           |           |           |           |           |
|------------|-----------|-----------|-----------|-----------|-----------|-----------|-----------|-----------|
| AK000811   | 558.604   | 1083.475  | NM_016312 | 456.074   | 309.892   | NM_004467 | 241.452   | 103.618   |
| AK000966   | 806.267   | 1042.286  | NM_001776 | 1009.934  | 548.853   | NM_005622 | 343.5     | 263.055   |
| AK024525   | 3682.785  | 4830.85   | NM_001903 | 8262.355  | 4666.081  | NM_018058 | 1741.992  | 1338.376  |
| AK024607   | 271.68    | 1374.35   | NM_001874 | 3126.732  | 3817.382  | NM_004548 | 2097.883  | 2088.006  |
| AK024909   | 419.796   | 570.884   | NM_005857 | 12759.76  | 14230.217 | X69079    | 7287.141  | 5193.97   |
| AK024544   | 1023.288  | 1451.659  | NM_002429 | 553.168   | 650       | AF091033  | 316.856   | 362.752   |
| AK025097   | 427.438   | 691.03    | AK027037  | 1574.198  | 1224.86   | NM_001122 | 2372.702  | 3520.599  |
| AK001880   | 3153.428  | 3230.047  | NM_003875 | 9346.929  | 4370.771  | NM_004591 | 598.355   | 720.876   |
| AF156166   | 2643.039  | 2030.533  | AF191687  | 1450.448  | 980.236   | NM_006274 | 172.74    | 205.976   |
| NM_014373  | 31654.184 | 27729.086 | NM_000274 | 6505.271  | 3091.924  | AL133027  | 340.32    | 361.636   |
| NM_014206  | 33174.477 | 19450.115 | NM_000170 | 923.286   | 656.046   | AB037732  | 722.146   | 946.365   |
| NM_001651  | 3391.375  | 2538.043  | NM_000281 | 5173.505  | 2817.601  | NM_005767 | 159.733   | 178.224   |
| L32786     | 1819.442  | 2513.933  | AK001295  | 3117.085  | 1914.583  | NM_001837 | 185.021   | 140.607   |
| AL355720   | 3383.096  | 2619.199  | NM_006031 | 1407.564  | 1002.114  | NM_001838 | 39340.133 | 66672.125 |
| AK002023   | 1392.967  | 985.121   | NM_002715 | 4406.448  | 2288.352  | BC016029  | 186.811   | 165.662   |
| AF150156   | 517.95    | 392.628   | NM_001020 | 58253.746 | 56104.973 | M27487    | 249.876   | 248.285   |
| NM_016464  | 737.973   | 663.141   | AB020660  | 2085.26   | 1907.507  | NM_002286 | 23831.789 | 16440.313 |
| L40402     | 1009.276  | 882.106   | NM_006659 | 13371.319 | 5126.763  | NM_002164 | 276.981   | 251.514   |
| unknown (S | 495.289   | 897.722   | NM_018051 | 1023.428  | 489.949   | NM_003811 | 2334.377  | 2548.883  |
| AF086216   | 227.548   | 482.807   | NM_015371 | 2335.582  | 1303.102  | NM_002981 | 2221.713  | 2171.215  |
| AK022422   | 734.722   | 667.373   | AB040915  | 783.87    | 479.502   | NM_001244 | 610.867   | 558.744   |
| AK023485   | 1418.647  | 968.844   | NM_006481 | 1860.608  | 2345.717  | NM_012275 | 239.498   | 471.159   |
| AK022474   | 16656.174 | 14514.353 | AB011115  | 429.965   | 963.76    | NM_006137 | 230.11    | 264.057   |
| AK022392   | 1738.889  | 4494.958  | NM_003910 | 13475.05  | 15747.488 | NM_016138 | 11512.152 | 8623.247  |
| AL117451   | 1001.856  | 2063.692  | AB007913  | 826.842   | 1207.715  | AL117468  | 1059.26   | 723.09    |
| AK025949   | 1574.779  | 1281.038  | NM_006696 | 2678.167  | 2211.948  | NM_019613 | 801.868   | 566.982   |
| Y10259     | 1646.128  | 1426.256  | NM_004599 | 8395.742  | 6019.224  | NM_005382 | 753.067   | 309.096   |
| AK021725   | 1917.572  | 1492.599  | NM_006037 | 7882.637  | 5720.926  | AK027086  | 986.26    | 955.247   |
| NM_002408  | 4422.528  | 2976.343  | NM_015871 | 2994.182  | 2527.335  | AB032997  | 762.243   | 1338.162  |
| AK024282   | 1972.803  | 2871.535  | NM_019037 | 4364.211  | 2357.88   | AL096857  | 978.976   | 648.847   |
| AF085838   | 2134.322  | 2012.957  | NM_015891 | 2645.785  | 1269.359  | AB002351  | 191.466   | 128.173   |
| NM_018277  | 1102.091  | 647.121   | AB037778  | 584.109   | 391.778   | AF073770  | 483.944   | 709.168   |
| AF014455   | 597.355   | 712.918   | NM_005066 | 29158.09  | 11682.134 | AL359401  | 1960.444  | 3184.833  |
| AF086335   | 1684.677  | 889.458   | NM_003089 | 3667.424  | 1565.33   | NM_012213 | 760.977   | 1261.025  |
| AB011118   | 14417.437 | 7365.539  | NM_003753 | 17034.049 | 6080.192  | NM_016573 | 1048.737  | 1275.804  |
| S66666     | 455.863   | 277.982   | NM_017590 | 1326.199  | 900.062   | NM_001303 | 2118.406  | 1982.353  |
| AK021476   | 1033.276  | 436.328   | AB011145  | 5128.684  | 2543.138  | M21304    | 435.406   | 374.408   |
| NM_018630  | 3110.56   | 4362.685  | NM_003750 | 25294.715 | 7590.793  | NM_001979 | 258.259   | 266.029   |
| AF086175   | 1132.494  | 1785.636  | M92422    | 1311.288  | 619.707   | AB040896  | 708.63    | 810.917   |
| NM_004576  | 3594.671  | 4797.165  | NM_017868 | 1633.213  | 713.266   | NM_001107 | 658.241   | 689.658   |
| AF040097   | 1040.526  | 2568.133  | AK021888  | 971.717   | 1375.136  | AF084645  | 171.83    | 215.073   |
| NM_020436  | 281.177   | 752.195   | AK022848  | 2894.262  | 3791.88   | AF151851  | 1869.035  | 1570.004  |
| AK024182   | 1568.559  | 1443.78   | NM_018159 | 10558.456 | 8619.608  | NM_005176 | 179.133   | 161.449   |
| NM_006913  | 10209.783 | 7519.142  | NM_000819 | 3668.057  | 2976.825  | NM_003636 | 1178.909  | 1121.454  |
| NM_018565  | 724.78    | 1684.625  | NM_002513 | 2252.988  | 1740.825  | NM_002234 | 535.283   | 535.864   |
| NM_000499  | 7060.557  | 10448.032 | NM_017424 | 459.951   | 383.1     | NM_000701 | 687.998   | 686.551   |
| AL049955   | 15447.749 | 9938.985  | NM_001522 | 5369.426  | 3259.899  | AB022696  | 1624.701  | 1411.01   |
| AF155654   | 5590.768  | 4136.935  | NM_000883 | 1533.553  | 1039.928  | AF137372  | 1187.077  | 995.145   |
| AF088044   | 364.129   | 234.481   | AF254086  | 1336.043  | 1003.66   | AF220417  | 364.947   | 463.459   |
| AK000028   | 2322.369  | 1952.111  | AL390142  | 1324.786  | 702.072   | D83782    | 1576.438  | 1024.061  |
| NM_013320  | 50854.719 | 36107.668 | NM_006565 | 1646.19   | 683.08    | NM_002078 | 836.004   | 666.083   |
| AJ245902   | 567.472   | 380.153   | AB007930  | 9957.913  | 4275.534  | NM_000287 | 1230.457  | 798.077   |
| AF009316   | 328.772   | 471.055   | AJ005273  | 1739.78   | 1098.957  | NM_001656 | 518.043   | 369.877   |

|           |           |           |           |           |           |           |          |          |
|-----------|-----------|-----------|-----------|-----------|-----------|-----------|----------|----------|
| AF087987  | 802.403   | 318.612   | AK021892  | 1872.12   | 868.247   | Z70705    | 461.816  | 485.942  |
| Z36840    | 499.386   | 371.595   | NM_003437 | 1224.289  | 861.027   | NM_002611 | 478.402  | 897.852  |
| H09474    | 945.738   | 451.281   | NM_018337 | 3714.262  | 1476.787  | NM_017417 | 234.337  | 251.189  |
| AB002368  | 7942.053  | 4188.967  | AA193295  | 16793.295 | 6357.548  | AL133602  | 432.367  | 334.193  |
| AL360263  | 49415.137 | 62960.305 | NM_018045 | 2255.361  | 1111.002  | AF037219  | 789.618  | 926.388  |
| Z36780    | 1941.273  | 3981.517  | NM_014803 | 1618.437  | 1789.134  | AK026075  | 212.954  | 201.151  |
| AK022403  | 1719.479  | 4335.534  | AK024956  | 405.185   | 434.558   | NM_000251 | 1026.112 | 813.042  |
| AK022955  | 7290.21   | 10604.425 | AF147386  | 1322.703  | 1888.326  | AF118071  | 116.413  | 209.308  |
| AK021760  | 560.55    | 733.138   | AF273052  | 9061.842  | 8053.161  | NM_006038 | 870.534  | 794.298  |
| BC035855  | 1443.573  | 831.789   | NM_017943 | 4282.234  | 3256.732  | AB011133  | 695.553  | 749.669  |
| AL137408  | 9073.239  | 4889.489  | AK025682  | 564.639   | 433.674   | NM_017572 | 9489.576 | 9235.57  |
| AF054995  | 1170.577  | 786.154   | NM_016478 | 4249.237  | 2919.769  | NM_018444 | 622.182  | 548.61   |
| AL080176  | 3658.081  | 4142.897  | AL389986  | 2740.717  | 1812.642  | NM_000252 | 985.257  | 739      |
| AK023627  | 1396.813  | 2861.133  | AF142409  | 1455.176  | 809.796   | NM_006947 | 3374.235 | 2375.519 |
| CY3Cy5    | 4955.925  | 745.035   | AF088052  | 761.618   | 469.335   | NM_017917 | 1069.636 | 661.541  |
| BI759406  | 5642.147  | 5612.085  | AF086342  | 373.116   | 326.947   | NM_004090 | 2124.108 | 1648.175 |
| R76099    | 915.38    | 717.731   | AF086387  | 473.916   | 289.045   | NM_014634 | 3059.132 | 1722.406 |
| S74445    | 1109.023  | 967.862   | AF086443  | 366.686   | 305.312   | NM_001919 | 4287.857 | 3487.317 |
| BI763360  | 1128.289  | 1103.88   | AL389941  | 530.312   | 334.756   | BC031485  | 853.826  | 747.687  |
| D25538    | 1870.656  | 1787.444  | AB037756  | 1487.965  | 827.868   | NM_004092 | 2256.17  | 2001.55  |
| NM_000360 | 6631.287  | 6794.237  | AK001853  | 2345.014  | 1122.126  | X15624    | 785.698  | 680.07   |
| D49950    | 5926.421  | 4237.474  | AK025071  | 456.828   | 254.238   | NM_004467 | 345.548  | 289.227  |
| NM_001849 | 1463.254  | 1667.294  | AF075082  | 390.952   | 537.374   | NM_005622 | 337.724  | 644.544  |
| X03635    | 3060.056  | 3223.873  | NM_015370 | 1399.749  | 2276.843  | NM_018058 | 1908.894 | 2533.134 |
| AF353674  | 4836.109  | 5453.483  | AF085917  | 653.023   | 1095.929  | NM_004548 | 2488.25  | 3522.237 |
| BC002645  | 3316.696  | 3446.284  | AF085989  | 702.725   | 1265.064  | X69079    | 9448.677 | 8924.423 |
| NM_021138 | 3547.554  | 2790.354  | AL360139  | 49038.129 | 40822.715 | BI759406  | 2018.972 | 2143.87  |
| BC002792  | 1097.619  | 804.73    | AF075110  | 1655.051  | 2017.215  | R76099    | 251.535  | 323.978  |
| NM_021005 | 2350.229  | 1920.261  | AL137323  | 661.024   | 733.605   | S74445    | 424.687  | 412.831  |
| SR2       | 53580.898 | 47616.039 | AL137494  | 3556.755  | 2638.442  | BI763360  | 670.475  | 665.239  |
| SR4       | 15821.737 | 13510.198 | AL162037  | 5284.113  | 2961.376  | D25538    | 495.989  | 403.191  |
| SR6       | 2018.084  | 1498.671  | AL390150  | 1295.015  | 672.768   | NM_000360 | 2692.133 | 2858.041 |
| SR8       | 7950.388  | 16852.734 | AF086063  | 294.669   | 224.146   | D49950    | 2079.934 | 2019.021 |
| SR10      | 26387.545 | 7190.722  | AF086098  | 500.75    | 292.327   | NM_001849 | 439.971  | 706.901  |
| CY3Cy5    | 4056.317  | 512.91    | AF086076  | 563.293   | 380.313   | X03635    | 1234.063 | 1061.053 |
| X07203    | 366.086   | 322.892   | AL833393  | 1305.041  | 516.259   | X03348    | 992.209  | 1076.369 |
| AB040104  | 495.653   | 407.998   | AF088005  | 678.245   | 275.296   | AF353674  | 1844.39  | 1805.388 |
| NM_003834 | 2428.433  | 2064.022  | AF086096  | 4311.247  | 1857.624  | BC002645  | 1397.924 | 1233.533 |
| NM_005959 | 3061.589  | 2158.505  | AL390132  | 328.679   | 290.286   | NM_021138 | 1027.782 | 705.941  |
| NM_003381 | 1240.02   | 1260.621  | NM_017933 | 2089.023  | 1109.059  | BC002792  | 377.152  | 402.318  |
| NM_005756 | 977.179   | 1017.603  | NM_017819 | 6271.369  | 2724.17   | NM_021005 | 886.913  | 661.089  |
| NM_003702 | 13375.72  | 11198.429 | AK024653  | 13079.045 | 12611.419 | SB        | 129.433  | 67.275   |
| NM_000369 | 2033.208  | 1508.948  | AF103907  | 813.142   | 1242.605  | NM_001523 | 307.049  | 280.319  |
| NM_016351 | 711.727   | 594.613   | AF094508  | 771.528   | 1438.112  | NM_017423 | 477.77   | 369.089  |
| NM_004405 | 1063.614  | 947.843   | AF161351  | 1654.65   | 3108.275  | NM_019613 | 900.833  | 1061.675 |
| NM_006060 | 1959.838  | 1603.129  | AF257098  | 488.1     | 383.948   | NM_005382 | 786.355  | 456.541  |
| NM_005667 | 1735.24   | 2243.326  | AF111782  | 1146.019  | 1258.061  | AK027086  | 1121.105 | 1584.928 |
| NM_006308 | 733.084   | 785.154   | AF151530  | 401.947   | 407.397   | AB032997  | 373.287  | 494.702  |
| NM_000060 | 904.407   | 962.276   | AK022093  | 2187.413  | 1729.909  | AL096857  | 925.391  | 1005.188 |
| NM_009589 | 1071.437  | 956.998   | AK022005  | 392.733   | 367.891   | AB002351  | 160.15   | 204.245  |
| L09080    | 2181.635  | 2047.241  | AK022137  | 455.95    | 396.996   | AB040104  | 198.216  | 143.003  |
| NM_007326 | 4495.09   | 3250.79   | AK022272  | 694.319   | 398.408   | NM_003834 | 1253.317 | 1465.993 |
| AK023080  | 3443.657  | 3704.322  | AK027155  | 1846.089  | 858.179   | NM_005959 | 1039.938 | 1069.189 |

|           |           |           |           |           |           |           |           |           |
|-----------|-----------|-----------|-----------|-----------|-----------|-----------|-----------|-----------|
| NM_001886 | 5398.107  | 5733.87   | AF221846  | 371.687   | 191.717   | NM_003381 | 496.796   | 557.071   |
| NM_004467 | 451.202   | 378.286   | AK027219  | 294.499   | 205.029   | NM_005756 | 386.631   | 368.603   |
| NM_005622 | 909.301   | 1167.478  | AK024528  | 4210.535  | 2102.718  | NM_003702 | 5995.527  | 6359.846  |
| NM_018058 | 4793.298  | 4266.815  | AK000016  | 1155.894  | 1755.011  | NM_000366 | 325.399   | 207.656   |
| NM_004548 | 5984.708  | 4805.545  | AK023367  | 1310.924  | 1982.907  | NM_004405 | 462.445   | 587.549   |
| X69079    | 24416.605 | 17822.283 | AL080209  | 1724.545  | 1954.634  | NM_001988 | 2460.437  | 1774.566  |
| AF091033  | 611.306   | 649.786   | NM_016255 | 1915.444  | 1761.496  | NM_006060 | 803.684   | 621.041   |
| NM_001122 | 5696.199  | 6200.168  | NM_014318 | 1255.686  | 1162.879  | NM_005667 | 624.777   | 564.417   |
| NM_004591 | 1209.94   | 974.422   | AK056674  | 558.647   | 382.364   | NM_006308 | 380.126   | 220.488   |
| NM_006274 | 376.786   | 321.739   | AK022042  | 537.131   | 212.152   | NM_000060 | 379.632   | 394.256   |
| AL133027  | 730.132   | 589.969   | AL117588  | 390.561   | 294.383   | NM_009588 | 349.522   | 395.793   |
| AB037732  | 1501.98   | 1864.867  | BE895529  | 2087.851  | 2891.183  | L09080    | 1385.805  | 945.281   |
| NM_005767 | 542.734   | 553.658   | AK000964  | 469.635   | 868.411   | NM_007326 | 2346.409  | 1304.655  |
| NM_001837 | 525.428   | 404.315   | AL117536  | 610.805   | 804.955   | NM_001886 | 2200.184  | 2162.624  |
| NM_001839 | 63500.277 | 70971.492 | NM_017751 | 2954.666  | 3293.3    | AF137372  | 1484.422  | 2147.697  |
| BC016029  | 674.35    | 688.767   | NM_003771 | 836.618   | 959.662   | AF220417  | 520.789   | 978.975   |
| M27487    | 496.181   | 485.644   | NM_017860 | 3090.553  | 3792.885  | D83782    | 1766.892  | 2003.83   |
| NM_002286 | 53699.113 | 57613.242 | X91195    | 39120.035 | 34344.215 | NM_002078 | 1012.633  | 1061.413  |
| NM_002164 | 819.07    | 581.277   | AF086190  | 519.38    | 315.238   | NM_000287 | 1322.605  | 1923.793  |
| NM_003811 | 4134.537  | 4346.752  | AL050035  | 1329.508  | 834.155   | NM_001656 | 485.981   | 773.314   |
| NM_002981 | 4276.077  | 4245.422  | AK024449  | 1831.432  | 1801.434  | AF091033  | 151.778   | 117.98    |
| NM_001244 | 2083.95   | 1759.227  | AF279780  | 36528.047 | 15647.271 | NM_001122 | 2550.868  | 3061.022  |
| NM_012275 | 549.523   | 666.11    | AK022510  | 574.784   | 439.376   | NM_004591 | 501.499   | 544.049   |
| NM_006137 | 771.408   | 1089.125  | AJ131609  | 1183.916  | 570.372   | AL133027  | 442.471   | 457.269   |
| NM_016139 | 40034.504 | 37040.34  | BC019280  | 2290.165  | 1197.573  | AB037732  | 649.644   | 884.527   |
| AL117468  | 2907.702  | 2665.071  | AF086498  | 403.822   | 330.674   | NM_005767 | 220.834   | 88.644    |
| NM_019613 | 2351.621  | 2219.135  | AK000687  | 421.594   | 218.231   | NM_001837 | 253.334   | 130.292   |
| NM_005382 | 2455.446  | 608.068   | AF079567  | 405.634   | 276.836   | NM_001839 | 43285.84  | 64012.781 |
| AK027086  | 3328.704  | 3262.969  | AK022177  | 657.985   | 999.753   | BC016029  | 219.828   | 211.671   |
| AB032997  | 1105.203  | 960.038   | AK023852  | 463.956   | 503.632   | M27487    | 233.375   | 299.491   |
| AL096857  | 2470.677  | 1864.85   | AF086466  | 1044.739  | 1233.317  | NM_002286 | 28971.916 | 19967.748 |
| AB002351  | 470.04    | 330.876   | AB007962  | 11760.867 | 10723.821 | NM_002164 | 289.25    | 213.588   |
| AF073770  | 1368.369  | 1282.998  | AF005081  | 761.873   | 871.728   | NM_003811 | 2496.038  | 2687.135  |
| AL359401  | 5624.803  | 6150.394  | AK026438  | 690.317   | 554.138   | NM_002981 | 2405.658  | 2289.302  |
| NM_012213 | 2099.107  | 1856.059  | AK021546  | 584.231   | 567.319   | NM_001244 | 571.505   | 327.392   |
| NM_016573 | 2903.563  | 2361.644  | AL050186  | 10395.445 | 7084.626  | NM_012275 | 255.52    | 170.521   |
| NM_001303 | 5238.03   | 4240.453  | AK021918  | 2545.602  | 2439.223  | NM_006137 | 243.275   | 182.989   |
| M21304    | 1104.639  | 819.959   | AK021669  | 2346.856  | 1773.913  | NM_016139 | 12248.341 | 8242.739  |
| NM_001979 | 676.32    | 1231.454  | AL080113  | 34606.547 | 17580.26  | AL117468  | 1089.495  | 885.845   |
| AB040896  | 2079.157  | 2730.125  | AL050083  | 1063.688  | 556.526   | NM_004090 | 2656.879  | 4182.098  |
| NM_001107 | 2085.656  | 1630.354  | AK022766  | 423.821   | 282.005   | NM_014634 | 2601.144  | 2832.432  |
| AF084645  | 593.974   | 501.37    | AL049422  | 4262.418  | 2876.447  | NM_001919 | 5278.016  | 6806.288  |
| AF151851  | 5072.654  | 4052.424  | AL133089  | 431.24    | 339.973   | BC031485  | 984.481   | 1401.705  |
| NM_005176 | 533.052   | 441.801   | AK023526  | 2296.584  | 1856.735  | NM_004092 | 1204.229  | 2156.237  |
| NM_003636 | 4031.929  | 3773.968  | BE266129  | 818.306   | 412.763   | X15624    | 817.925   | 1303.838  |
| NM_002234 | 1128.61   | 998.06    | AK025602  | 5104.466  | 2567.584  | AL359401  | 2030.589  | 2785.758  |
| NM_000701 | 2232.57   | 2136.926  | AK026309  | 1705.369  | 967.055   | NM_012213 | 734.317   | 1021.216  |
| AB022696  | 4575.434  | 3960.852  | AL137486  | 2527.456  | 1168.928  | NM_016573 | 1209.669  | 1433.998  |
| NM_014379 | 371.521   | 784.253   | AL110162  | 600.16    | 438.024   | NM_001303 | 2621.512  | 3038.129  |
| AF137372  | 3498.54   | 3561.948  | AK022681  | 11107.183 | 6527.601  | M21304    | 377.425   | 242.669   |
| AF220417  | 1017.217  | 1154.352  | CY3Cy5    | 9016.661  | 1183.403  | NM_001979 | 284.991   | 402.629   |
| D83782    | 4120.366  | 3254.735  | Y18483    | 1108.477  | 1867.098  | AB040896  | 735.658   | 662.051   |
| NM_002078 | 2364.418  | 2146.174  | AI565117  | 64837.633 | 65650.531 | NM_001107 | 694.279   | 1008.616  |

|           |           |           |           |           |           |           |          |          |
|-----------|-----------|-----------|-----------|-----------|-----------|-----------|----------|----------|
| NM_000287 | 3436.98   | 2755.296  | AI299075  | 3567.778  | 4100.063  | AF084645  | 165.933  | 214.466  |
| NM_001656 | 1339.201  | 1552.559  | M59979    | 700.496   | 668.897   | AF151851  | 1947.852 | 1625.381 |
| Z70705    | 965.631   | 695.188   | AB011098  | 1337.129  | 1217.857  | NM_005176 | 158.152  | 101.567  |
| NM_002611 | 1313.443  | 894.381   | AA609759  | 1148.851  | 1046.6    | NM_003636 | 1349.164 | 965.607  |
| NM_017417 | 746.2     | 535.874   | AA029418  | 5490.198  | 5285.655  | NM_002234 | 605.672  | 511.51   |
| AL133602  | 1117.034  | 932.849   | L20815    | 4333.429  | 4557.175  | NM_000701 | 675.992  | 739.03   |
| AF037219  | 3144.637  | 3112.66   | AI364483  | 16839.99  | 15576.854 | AB022696  | 1574.682 | 1162.446 |
| AK026075  | 795.35    | 493.912   | AA456001  | 11715.588 | 13231.899 | NM_002233 | 107.056  | 153.468  |
| NM_000251 | 3006.025  | 2014.491  | AA176581  | 703.967   | 703.509   | NM_014379 | 166.466  | 86.275   |
| NM_006038 | 2114.545  | 1897.883  | BI818232  | 673.999   | 996.245   | NM_021005 | 1063.067 | 1505.868 |
| AB011133  | 2358.799  | 2153.001  | AA451686  | 5150.362  | 5802.737  | SB        | 169.175  | 240.952  |
| NM_017572 | 26394.4   | 21348.18  | AA934644  | 816.19    | 666.015   | NM_001523 | 320.729  | 574.694  |
| NM_018444 | 1961.003  | 1608.497  | NM_003822 | 1421.454  | 1024.733  | NM_017423 | 631.945  | 1468.813 |
| NM_000252 | 2768.3    | 2619.003  | NM_004412 | 3075.712  | 3179.833  | NM_002611 | 534.369  | 892.273  |
| NM_006947 | 9616.063  | 10916.325 | SR5       | 3677.362  | 4483.207  | NM_017417 | 283.816  | 572.448  |
| NM_017917 | 3047.02   | 3675.383  | SR7       | 5256.812  | 35398.465 | AL133602  | 494.924  | 891.593  |
| NM_004090 | 6319.188  | 6290.458  | SR9       | 21630.877 | 3267.127  | AF037219  | 865.054  | 792.056  |
| NM_014634 | 10166.932 | 7415.937  | CY3Cy5    | 4489.261  | 539.788   | AK026075  | 219.229  | 276.965  |
| NM_001919 | 13256.407 | 11837.308 | NM_019555 | 530.664   | 897.064   | NM_000251 | 1069.974 | 892.899  |
| BC031485  | 2532.193  | 2508.362  | NM_012096 | 7548.158  | 10063.631 | AF118071  | 108.167  | 195.091  |
| NM_004092 | 7123.312  | 6451.941  | NM_003905 | 12606.944 | 14445.483 | NM_006038 | 938.888  | 721.013  |
| X15624    | 2251.505  | 2366.976  | L12052    | 2329.64   | 2367.95   | AB011133  | 749.297  | 761.903  |
| NM_004467 | 513.049   | 820.735   | AB028976  | 6634.927  | 6231.103  | NM_017572 | 9200.337 | 7715.603 |
| NM_005622 | 839.43    | 1062.774  | AK026337  | 1032.689  | 999.622   | NM_018444 | 754.16   | 642.204  |
| NM_018058 | 4711.651  | 3467.283  | NM_015869 | 2094.273  | 2182.858  | NM_000252 | 901.71   | 802.557  |
| NM_004548 | 6495.804  | 6491.641  | AB031038  | 349.578   | 773.528   | NM_006947 | 3418.897 | 2276.596 |
| X69079    | 23779.762 | 15187.099 | NM_004626 | 1430.864  | 1453.667  | NM_017917 | 977.655  | 727.71   |
| BI759406  | 5797.169  | 4613.851  | NM_001899 | 635.965   | 597.574   | NM_000060 | 414.511  | 674.017  |
| R76099    | 994.993   | 1156.988  | NM_004305 | 32587.441 | 30950.33  | NM_009589 | 321.066  | 1019.55  |
| S74445    | 1343.408  | 1123.564  | NM_006089 | 1546.775  | 1771.911  | L09080    | 1590.502 | 2111.027 |
| BI763360  | 1570.017  | 1380.975  | NM_005992 | 1943.816  | 2195.975  | NM_007326 | 2173.957 | 2822.785 |
| D25538    | 1565.633  | 1485.365  | NM_003144 | 53472.328 | 58325.613 | NM_001886 | 1486.617 | 1939.454 |
| NM_000360 | 6857.114  | 6555.905  | NM_000908 | 872.812   | 601.323   | NM_005622 | 254.285  | 295.313  |
| D49950    | 6418.303  | 4808.826  | AB011102  | 4724.713  | 4664.359  | NM_018058 | 1911.082 | 2384.79  |
| NM_001849 | 1343.372  | 1623.235  | D63480    | 2168.034  | 1713.699  | NM_004548 | 2097.032 | 2878.788 |
| X03635    | 3818.2    | 3450.579  | NM_002969 | 2655.167  | 2534.447  | X69079    | 8484.482 | 8110.921 |
| X03348    | 2622.46   | 3317.541  | NM_006475 | 856.643   | 564.432   | BI759406  | 1810.136 | 1654.353 |
| AF353674  | 5004.699  | 4915.863  | NM_004620 | 1181.948  | 767.165   | R76099    | 284.075  | 286.651  |
| BC002645  | 3439.761  | 3019.681  | AF087940  | 3468.849  | 2780.057  | S74445    | 414.033  | 375.467  |
| NM_021138 | 3853.231  | 3603.067  | AJ277587  | 2359.966  | 1248.304  | BI763360  | 708.697  | 786.877  |
| BC002792  | 1178.176  | 1228.072  | D87432    | 3627.331  | 1954.166  | D25538    | 509.001  | 476.928  |
| NM_021005 | 2744.347  | 2531.383  | AK023749  | 805.393   | 968.353   | NM_000360 | 2557.944 | 2020.138 |
| SB        | 375.842   | 336.957   | NM_002337 | 4087.772  | 4339.522  | D49950    | 2145.371 | 1642.188 |
| NM_001523 | 723.466   | 666.29    | NM_013245 | 1954.012  | 1738.593  | NM_001849 | 416.753  | 507.963  |
| NM_017423 | 1169.229  | 991.657   | NM_006423 | 3625.95   | 4523.949  | X03635    | 1179.396 | 1092.186 |
| AK027086  | 3365.122  | 3417.289  | NM_004766 | 3472.388  | 3286.41   | X03348    | 971.717  | 990.662  |
| AB032997  | 1231.958  | 929.964   | NM_005819 | 7890.728  | 7918.695  | AF353674  | 1669.254 | 1617.057 |
| AL096857  | 2425.023  | 1989.759  | AK025520  | 3030.546  | 1947.868  | BC002645  | 1317.679 | 922.482  |
| AB002351  | 351.962   | 295.345   | NM_004892 | 8511.896  | 7932.719  | NM_021138 | 963.673  | 1302.677 |
| X07203    | 483.409   | 435.481   | NM_014597 | 11768.494 | 11189.791 | BC002792  | 381.679  | 274.572  |
| AB040104  | 478.904   | 369.238   | NM_017896 | 8859.615  | 7956.59   | NM_002981 | 2097.322 | 2679.615 |
| NM_003834 | 3137.122  | 3017.109  | AB002374  | 3802.411  | 3003.952  | NM_001244 | 495.176  | 786.445  |
| NM_005959 | 3713.038  | 3021.237  | U17327    | 1642.872  | 1233.626  | NM_012275 | 306.261  | 452.305  |

|           |           |           |           |           |           |           |           |           |
|-----------|-----------|-----------|-----------|-----------|-----------|-----------|-----------|-----------|
| NM_003381 | 1368.189  | 1488.318  | M87790    | 17301.529 | 14942.233 | NM_006137 | 300.014   | 347.394   |
| NM_005756 | 1097.206  | 828.915   | NM_001768 | 2174.35   | 1780.645  | NM_016139 | 12818.25  | 14351.523 |
| NM_003702 | 17163.48  | 16478.402 | NM_000029 | 7247.366  | 5704.02   | AL117468  | 469.566   | 390.043   |
| NM_000369 | 781.932   | 710.923   | NM_000715 | 806.267   | 591.203   | NM_019613 | 224.557   | 173.538   |
| NM_004405 | 1417.561  | 1352.04   | AF035802  | 5353.903  | 4827.207  | NM_005382 | 719.045   | 209.845   |
| NM_001988 | 6580.842  | 6332.559  | Y08145    | 645.615   | 443.499   | AK027086  | 875.781   | 777.383   |
| NM_006060 | 2289.887  | 1616.717  | NM_013328 | 28546.982 | 31985.068 | AB032997  | 300.384   | 265.135   |
| NM_005667 | 1826.949  | 2313.259  | NM_000790 | 417.51    | 589.796   | AL096857  | 946.709   | 1117.482  |
| NM_006308 | 803.646   | 853.504   | NM_002660 | 2063.402  | 2045.718  | AB002351  | 160.956   | 188.188   |
| NM_000060 | 942.266   | 1024.436  | NM_015900 | 526.287   | 540.265   | X07203    | 207.983   | 124.64    |
| NM_009589 | 944.46    | 1151.639  | NM_003706 | 951.947   | 1103.456  | AB040104  | 194.879   | 278.814   |
| L09080    | 2455.935  | 2416.572  | NM_005218 | 8927.48   | 7252.357  | NM_003834 | 1354.741  | 1485.708  |
| NM_007326 | 6946.605  | 6258.897  | AL122071  | 529.279   | 615.866   | NM_005959 | 1204.49   | 1029.639  |
| AK023080  | 544.165   | 518.379   | AB033054  | 10906.334 | 11317.798 | NM_003381 | 375.908   | 341.215   |
| NM_001886 | 6095.399  | 6853.11   | NM_016122 | 1160.775  | 1041.09   | NM_005756 | 301.306   | 289.051   |
| AF137372  | 3345.704  | 4435.494  | AF153330  | 1163.373  | 1137.771  | NM_003702 | 5631.711  | 4307.267  |
| AF220417  | 1300.335  | 1727.676  | NM_001652 | 857.016   | 732.683   | NM_000369 | 231.518   | 311.125   |
| D83782    | 4226.468  | 3190.216  | D87446    | 5361.313  | 6455.487  | NM_004405 | 462.637   | 360.674   |
| NM_002078 | 2611.662  | 1987.41   | BF540935  | 2172.492  | 2128.206  | NM_001988 | 2449.274  | 1462.613  |
| NM_000287 | 3736.933  | 3349.577  | NM_004466 | 530.509   | 353.469   | NM_006060 | 713.535   | 652.256   |
| NM_001656 | 1383.768  | 1400.458  | NM_007081 | 2631.309  | 2478.121  | NM_005667 | 598.405   | 525.976   |
| AF091033  | 691.231   | 683.352   | AB032964  | 2979.027  | 2638.485  | NM_006308 | 274.157   | 194.418   |
| NM_001122 | 6534.034  | 7681.655  | BE733605  | 2570.79   | 2188.549  | NM_002234 | 917.982   | 1434.363  |
| NM_004591 | 1751.824  | 1901.858  | NM_003334 | 13672.022 | 10741.794 | NM_003471 | 192.544   | 173.366   |
| NM_006274 | 455.79    | 682.091   | NM_002693 | 2138.236  | 1993.621  | NM_000701 | 834.163   | 1506.042  |
| AL133027  | 840.376   | 982.451   | NM_003671 | 977.748   | 964.691   | AB022696  | 1848.431  | 2978.875  |
| AB037732  | 1913.577  | 2045.019  | AK026000  | 1886.19   | 1862.698  | NM_002233 | 131.696   | 175.503   |
| NM_005767 | 529.839   | 597.988   | NM_017833 | 1698.106  | 1741.693  | NM_014379 | 264.973   | 545.386   |
| NM_001837 | 581.727   | 746.099   | NM_006675 | 3659.227  | 4330.118  | AF137372  | 779.733   | 425.939   |
| NM_001839 | 51888.609 | 63844.945 | NM_003022 | 12283.45  | 12804.826 | AF220417  | 385.891   | 348.917   |
| BC016029  | 655.506   | 648.928   | NM_004873 | 2641.337  | 2334.204  | D83782    | 921.072   | 1248.609  |
| M27487    | 618.006   | 543.987   | NM_019842 | 1330.035  | 1046.153  | NM_002078 | 876.071   | 808.246   |
| NM_002286 | 53354.645 | 57249.016 | NM_002317 | 1448.319  | 2073.386  | NM_000287 | 1297.634  | 1556      |
| NM_002164 | 834.488   | 1022.237  | NM_000320 | 4416.247  | 4372.466  | NM_001656 | 494.37    | 461.067   |
| NM_003811 | 4523.873  | 5779.39   | NM_003136 | 4395.356  | 1888.799  | AF091033  | 256.816   | 229.614   |
| NM_002981 | 4620.719  | 6183.526  | NM_006475 | 330.215   | 668.937   | NM_001122 | 2442.945  | 2444.725  |
| NM_001244 | 2141.988  | 2242.703  | NM_004620 | 1196.999  | 1604.335  | NM_004591 | 778.055   | 1032.508  |
| NM_012275 | 585.806   | 815.571   | AF087940  | 3261.802  | 4188.95   | NM_006274 | 141.762   | 102.432   |
| NM_006137 | 716.004   | 903.581   | AJ277587  | 2440.222  | 3373.13   | AL133027  | 343.94    | 423.741   |
| NM_016139 | 43665.512 | 48790.582 | D87432    | 4728.237  | 4636.804  | AB037732  | 596.31    | 558.773   |
| AL117468  | 2723.894  | 2956.974  | Y18483    | 547.93    | 676.964   | NM_005767 | 179.272   | 182.836   |
| NM_004090 | 7062.367  | 10184.429 | AI565117  | 63078.094 | 61678.938 | NM_001837 | 196.96    | 258.142   |
| NM_014634 | 9309.839  | 10476.866 | AI299075  | 3589.232  | 3249.991  | NM_001839 | 43294.141 | 45556.488 |
| NM_001919 | 13471.691 | 12447.361 | M59979    | 522.906   | 638.889   | BC016029  | 209.811   | 245.385   |
| BC031485  | 2508.331  | 2689.87   | AB011098  | 1341.325  | 1380.332  | M27487    | 249.772   | 189.69    |
| NM_004092 | 7357.381  | 7379.076  | AA609759  | 1213.394  | 906.165   | NM_002286 | 26674.27  | 15765.938 |
| X15624    | 2526.409  | 3023.665  | AA029418  | 5644.203  | 4458.316  | NM_002164 | 223.704   | 176.165   |
| AF073770  | 1673.12   | 3105.55   | L20815    | 4012.082  | 3660.108  | NM_003811 | 1910.383  | 1788.79   |
| AL359401  | 5453.185  | 7815.724  | AI364483  | 14490.986 | 16586.221 | AB011133  | 965.701   | 1506.711  |
| NM_012213 | 2312.384  | 3046.861  | AA456001  | 10550.711 | 16710.908 | NM_017572 | 10549.744 | 12631.815 |
| NM_016573 | 3428.977  | 5133.234  | BI818232  | 475.197   | 604.543   | NM_018444 | 640.303   | 803.63    |
| NM_001303 | 6215.015  | 7875.258  | AA451686  | 3830.508  | 3458.214  | NM_000252 | 1128.388  | 1302.199  |
| M21304    | 1116.693  | 1085.367  | NM_004412 | 2723.042  | 2452.885  | NM_006947 | 3210.83   | 4514.326  |

|           |           |           |           |           |           |           |          |           |
|-----------|-----------|-----------|-----------|-----------|-----------|-----------|----------|-----------|
| NM_001979 | 599.53    | 584.211   | NM_002050 | 2260.509  | 926.568   | NM_017917 | 944.795  | 1222.4    |
| AB040896  | 2511.005  | 3091.127  | NM_007097 | 7595.694  | 3477.385  | NM_004090 | 2279.087 | 2708.315  |
| NM_001107 | 2011.698  | 2271.055  | NM_000029 | 10812.244 | 13604.023 | NM_014634 | 2200.809 | 2196.864  |
| AF084645  | 695.18    | 870.678   | NM_000715 | 1031.08   | 1030.486  | NM_001919 | 3784.51  | 4871.379  |
| AB049758  | 180.863   | 179.806   | AF035802  | 4475.518  | 4843.509  | BC031485  | 810.551  | 882.122   |
| AF151851  | 5410.931  | 4919.001  | Y08145    | 682.191   | 727.102   | NM_004092 | 2360.556 | 3189.396  |
| NM_005176 | 482.756   | 482.441   | M26123    | 1099.867  | 787.085   | X15624    | 698.787  | 1021.929  |
| NM_003636 | 4005.245  | 4042.799  | NM_001838 | 678.035   | 595.263   | AF073770  | 588.267  | 610.499   |
| NM_002234 | 1225.377  | 1349.269  | NM_019555 | 581.228   | 522.961   | AL359401  | 1815.804 | 2289.085  |
| NM_000701 | 2338.316  | 3220.966  | NM_012096 | 6749.999  | 5859.502  | NM_012213 | 726.099  | 1038.617  |
| AB022696  | 5172.885  | 7508.837  | NM_003905 | 13702.732 | 11604.862 | NM_016573 | 1216.255 | 1417.337  |
| NM_002233 | 400.021   | 1205.2    | L12052    | 2199.042  | 1840.934  | NM_001303 | 2501.689 | 2084.798  |
| NM_021005 | 2312.212  | 2876.401  | AB028976  | 5502.905  | 5534.524  | M21304    | 589.488  | 330.465   |
| SB        | 621.536   | 744.75    | AK026337  | 796.689   | 721.48    | NM_001979 | 270.686  | 282.303   |
| NM_017423 | 1122.592  | 1180.959  | NM_015869 | 1956.522  | 1680.86   | AB040896  | 643.265  | 797.854   |
| Z70705    | 1157.657  | 1399.242  | AB031038  | 524.593   | 1182.72   | NM_001107 | 675.052  | 633.192   |
| NM_002611 | 1238.449  | 1365.368  | NM_004626 | 1667.114  | 2386.869  | AF084645  | 196.231  | 371.182   |
| NM_017417 | 1086.273  | 1081.905  | NM_001899 | 868.302   | 1010.668  | AF151851  | 1714.877 | 1336.686  |
| AL133602  | 1094.199  | 1284.727  | NM_004305 | 29833.779 | 29754.213 | NM_005176 | 166.954  | 170.02    |
| AF037219  | 3249.334  | 3210.665  | NM_006089 | 1625.389  | 1518.454  | NM_003636 | 1213.43  | 1228.682  |
| AK026075  | 826.561   | 724.06    | AF072506  | 601.39    | 524.567   | AF040723  | 6999.018 | 12677.147 |
| NM_000251 | 3363.613  | 2813.86   | NM_005992 | 2002.425  | 1604.476  | NM_015527 | 1297.193 | 2577.297  |
| AF118071  | 206.562   | 203.146   | NM_003144 | 56101.527 | 57067.07  | X89675    | 695.685  | 1332.265  |
| NM_006038 | 2171.716  | 2034.51   | NM_000908 | 1218.552  | 1240.547  | NM_018068 | 188.03   | 178.758   |
| AB011133  | 1434.896  | 1451.485  | AB011102  | 4303.302  | 3416.496  | NM_012188 | 254.679  | 517.747   |
| NM_017572 | 28050.395 | 27878.025 | D63480    | 1821.607  | 1014.152  | NM_005798 | 3043.585 | 4333.84   |
| NM_018444 | 2065.198  | 2343.417  | NM_002969 | 2169.926  | 960.156   | NM_004216 | 768.448  | 943.057   |
| NM_000252 | 3330.548  | 3258.302  | AK023749  | 824.612   | 766.103   | NM_016288 | 6512.21  | 8524.672  |
| NM_006947 | 9961.024  | 12548.37  | NM_002337 | 3429.045  | 2313.992  | NM_001464 | 290.339  | 493.737   |
| NM_017917 | 2765.783  | 2879.527  | NM_013245 | 2443.183  | 1504.26   | NM_002051 | 614.301  | 754.355   |
| NM_000060 | 966.941   | 2433.341  | NM_006423 | 3138.593  | 3703.066  | NM_001523 | 273.892  | 262.802   |
| NM_009588 | 923.083   | 1743.191  | NM_004766 | 2723.428  | 2322.657  | NM_017423 | 323.947  | 359.89    |
| L09080    | 1640.81   | 1615.94   | NM_005819 | 6735.652  | 6420.579  | Z70705    | 362.05   | 399.059   |
| NM_007326 | 5029.393  | 3769.356  | AK025520  | 3328.574  | 2415.425  | NM_002611 | 426.577  | 246.862   |
| NM_001886 | 6251.199  | 6167.102  | NM_004892 | 8046.941  | 10268.382 | NM_017829 | 79.747   | 101.591   |
| NM_004467 | 478.802   | 405.104   | NM_014597 | 12545.944 | 12295.592 | NM_017417 | 262.979  | 213.265   |
| NM_005622 | 884.538   | 997.862   | NM_017896 | 9282.297  | 7393.244  | AL133602  | 450.704  | 333.53    |
| NM_018058 | 5089.211  | 5118.271  | AB002374  | 4199.37   | 3267.347  | AF037219  | 892.544  | 679.273   |
| NM_004548 | 6270.091  | 7331.234  | U17327    | 1822.733  | 1284.235  | AK026075  | 237.002  | 239.325   |
| X69079    | 18050.877 | 18247.146 | M87790    | 19376.627 | 9134.1    | NM_000251 | 1285.262 | 756.547   |
| BI759406  | 5818.216  | 6848.621  | NM_001768 | 1892.543  | 979.142   | AF118071  | 134.943  | 353.781   |
| R76099    | 956.529   | 957.877   | NM_002951 | 14843.723 | 17245.566 | NM_006038 | 779.61   | 692.81    |
| S74445    | 1009.945  | 955.827   | NM_002317 | 1161.537  | 1207.074  | NM_002485 | 116.909  | 135.813   |
| BI763360  | 1833.776  | 1883.866  | NM_000320 | 4513.495  | 4778.084  | U87223    | 1309.357 | 2345.182  |
| D25538    | 1727.77   | 1876.246  | NM_017921 | 352.203   | 310.271   | NM_000093 | 361.504  | 1157.186  |
| NM_000360 | 7348.575  | 7452.603  | NM_003136 | 5591.471  | 5011.947  | NM_001779 | 1526.877 | 3808.933  |
| D49950    | 6428.76   | 6173.936  | NM_013328 | 28954.125 | 27805.992 | AB033059  | 317.027  | 914.607   |
| NM_001849 | 1662.016  | 1694.682  | NM_000790 | 516.596   | 481.89    | NM_016484 | 665.197  | 1384.112  |
| X03635    | 4328.193  | 5176.563  | NM_002660 | 1992.606  | 1844.574  | AK026114  | 212.167  | 149.185   |
| X03348    | 2750.944  | 3244.444  | NM_015900 | 1046.859  | 1064.964  | NM_014452 | 355.101  | 273.73    |
| AF353674  | 5582.137  | 5883.676  | NM_003706 | 949.446   | 916.992   | NM_014683 | 221.07   | 201.615   |
| BC002645  | 3515.603  | 3711.323  | NM_005218 | 9731.576  | 8397.665  | AK021536  | 1614.254 | 1644.885  |
| NM_021138 | 3487.563  | 3058.2    | AL122071  | 946.634   | 712.851   | U31285    | 124.434  | 151.55    |



|           |           |           |           |           |           |           |           |           |
|-----------|-----------|-----------|-----------|-----------|-----------|-----------|-----------|-----------|
| BC002792  | 1202.194  | 1124.928  | AB033054  | 11947.707 | 8780.464  | NM_00260C | 764.798   | 601.608   |
| NM_002981 | 3528.295  | 5280.605  | NM_016122 | 1055.816  | 684.371   | NM_00364E | 5704.727  | 5415.604  |
| NM_001244 | 1749.581  | 2223.102  | AF153330  | 1098.022  | 547.329   | NM_00666E | 199.119   | 192.192   |
| NM_01227E | 693.812   | 1110.521  | NM_001652 | 703.655   | 197.982   | NM_00393E | 167.974   | 117.542   |
| NM_006137 | 557.144   | 477.757   | NM_003822 | 1634.713  | 1553.713  | NM_012424 | 296.533   | 197.793   |
| NM_01613E | 41632.074 | 31139.957 | NM_004412 | 2929.918  | 3949.176  | NM_00244E | 377.716   | 250.892   |
| AL117468  | 3267.976  | 3175.74   | NM_00205C | 2015.587  | 1932.677  | NM_00086E | 346.31    | 180.597   |
| NM_01961E | 2694.811  | 2971.739  | NM_007097 | 9678.819  | 9269.063  | NM_006651 | 1076.458  | 785.013   |
| NM_00538E | 2462.448  | 1120.156  | D87446    | 5763.499  | 6737.923  | NM_00533E | 3647.397  | 2755.539  |
| AK027086  | 3816.975  | 3883.087  | BF540935  | 2112.063  | 1695.76   | NM_00141E | 2409.112  | 1691.875  |
| AB032997  | 1215.858  | 1272.553  | NM_00446E | 1449.001  | 1435.829  | AF119817  | 5471.153  | 3837.034  |
| AL096857  | 3128.501  | 3868.414  | NM_007081 | 2650.967  | 2627.132  | AL035306  | 536.493   | 616.159   |
| AB002351  | 525.698   | 547.539   | NM_00037E | 343.992   | 84.608    | NM_00132E | 10185.403 | 8211.951  |
| X07203    | 664.086   | 737.215   | AB032964  | 2679.884  | 2563.021  | NM_00574E | 1380.512  | 1461.602  |
| AB040104  | 389.012   | 275.325   | BE733605  | 2531.497  | 2282.167  | NM_00423C | 2273.637  | 3652.571  |
| NM_003834 | 3387.531  | 3656.799  | NM_003334 | 15530.286 | 13629.196 | AK024372  | 237.632   | 640.027   |
| NM_00595E | 4141.925  | 4480.942  | NM_00269E | 2268.414  | 2315.312  | NM_01450E | 369.772   | 819.764   |
| NM_003381 | 1408.422  | 1440.136  | NM_003671 | 960.163   | 917.92    | NM_01465E | 365.814   | 490.444   |
| NM_00575E | 1175.317  | 1193.808  | AK026000  | 2480.795  | 1961.084  | NM_00439E | 1014.661  | 1070.292  |
| NM_00370E | 17958.33  | 19211.275 | NM_01783E | 2029.254  | 2126.511  | NM_006337 | 1216.023  | 1235.49   |
| NM_00036E | 786.994   | 1027.654  | NM_00667E | 3850.153  | 2932.801  | NM_004507 | 959.416   | 877.985   |
| NM_00440E | 1067.08   | 1087.875  | NM_00302E | 13380.26  | 7839.373  | NM_00271C | 5746.71   | 4586.497  |
| NM_00198E | 6115.726  | 5147.975  | NM_00487E | 3389.606  | 1826.271  | NM_01406C | 1145.304  | 1340.898  |
| NM_00606C | 1932.337  | 1892.635  | NM_01984E | 1657.362  | 896.626   | NM_00474E | 2734.36   | 2648.079  |
| NM_005667 | 1705.976  | 2335.651  | NM_00599E | 2263.662  | 2788.524  | BQ446064  | 352.304   | 350.897   |
| NM_00630E | 772.603   | 672.526   | NM_003144 | 61858.727 | 57244.055 | AF302502  | 239.584   | 153.441   |
| NM_002234 | 1116.832  | 995.857   | NM_00090E | 943.65    | 1254.307  | AF274571  | 353.854   | 258.089   |
| NM_000701 | 2043.941  | 2668.87   | AB011102  | 5737.017  | 6068.839  | NM_00544E | 176.892   | 261.52    |
| AB022696  | 4603.358  | 4336.422  | D63480    | 1402.7    | 1364.412  | NM_00387E | 1222.991  | 998.217   |
| NM_01437E | 269.435   | 178.195   | NM_00296E | 2497.917  | 2795.492  | NM_01605E | 1971.179  | 1325.488  |
| AF137372  | 3381.554  | 4228.813  | NM_00647E | 744.785   | 1055.507  | NM_00671E | 575.02    | 438.438   |
| AF220417  | 1353.507  | 1977.718  | NM_00462C | 1113.469  | 1110.861  | NM_005427 | 274.855   | 261.959   |
| D83782    | 4575.101  | 4038.406  | AF087940  | 3492.16   | 3710.52   | NM_01631E | 228.391   | 196.787   |
| NM_00207E | 2189.765  | 2212.083  | AJ277587  | 2682.362  | 3230.685  | AF234887  | 145.753   | 117.798   |
| NM_000287 | 4039.082  | 4713.42   | D87432    | 4323.49   | 4667.196  | NM_00177E | 575.403   | 463.913   |
| NM_00165E | 1398.877  | 2066.676  | Y18483    | 785.068   | 629.789   | NM_00179E | 138.469   | 204.397   |
| AF091033  | 522.395   | 525.165   | AI565117  | 61826.223 | 58741.613 | NM_00190E | 3002.129  | 2414.66   |
| NM_001122 | 5839.989  | 7003.796  | U28015    | 540.707   | 424.998   | NM_001874 | 1376.475  | 1156.994  |
| NM_004591 | 1636.471  | 1789.053  | AI299075  | 3298.95   | 3186.357  | NM_00186E | 128.439   | 133.379   |
| NM_006274 | 556.042   | 645.82    | M59979    | 600.345   | 560.054   | X69637    | 114.893   | 145.73    |
| AL133027  | 990.35    | 1120.583  | AB011098  | 1489.623  | 1330.845  | NM_005857 | 6350.81   | 15012.007 |
| AB037732  | 1774.653  | 2202.041  | AA609759  | 1222.357  | 964.836   | NM_00242E | 250.565   | 301.823   |
| NM_005767 | 594.168   | 678.865   | AA029418  | 5496.163  | 4494.775  | AK027037  | 580.496   | 609.27    |
| NM_001837 | 555.41    | 1104.338  | L20815    | 4267.326  | 3349.656  | NM_00387E | 3387.936  | 2682.833  |
| NM_00183E | 59863.391 | 74475.844 | AI364483  | 17439.535 | 11980.996 | AF191687  | 563.691   | 371.051   |
| BC016029  | 641.903   | 496.372   | AA456001  | 11333.335 | 7794.636  | NM_00304E | 169.464   | 209.387   |
| M27487    | 641.272   | 653.812   | AA176581  | 1526.641  | 965.458   | NM_000274 | 2634.304  | 1941.924  |
| NM_00228E | 54003.215 | 58269.406 | AA451686  | 4791.235  | 2677.822  | NM_00017C | 552.501   | 603.143   |
| NM_002164 | 720.568   | 966.416   | AA934644  | 535.492   | 422.074   | NM_000281 | 2244.877  | 2349.363  |
| NM_003811 | 3922.117  | 4180.625  | M87790    | 15569.08  | 13326.858 | AK001295  | 1437.823  | 1244.643  |
| AB011133  | 1938.986  | 2015.65   | NM_00176E | 2249.335  | 2027.63   | NM_006031 | 692.084   | 686.437   |
| NM_01757E | 24611.016 | 22361.277 | NM_00002E | 9484.384  | 8793.703  | NM_00271E | 1964.314  | 1735.791  |
| NM_018444 | 1636.052  | 2037.989  | NM_00071E | 980.89    | 965.198   | NM_00102C | 37760.246 | 47616.785 |

|           |           |           |           |           |           |           |           |          |
|-----------|-----------|-----------|-----------|-----------|-----------|-----------|-----------|----------|
| NM_000252 | 2976.183  | 3603.684  | AF035802  | 5093.02   | 4386.024  | AB020660  | 836.063   | 746.594  |
| NM_006947 | 10612.34  | 12127.701 | Y08145    | 605.255   | 437.589   | NM_006659 | 7621.591  | 5211.028 |
| NM_017917 | 3061.634  | 3644.188  | M26123    | 889.549   | 922.649   | NM_018051 | 600.902   | 474.645  |
| NM_004090 | 7546.55   | 12174.326 | NM_001838 | 574.769   | 642.182   | NM_015371 | 1147.039  | 723.239  |
| NM_014634 | 10572.089 | 16469.813 | NM_012096 | 7249.817  | 6255.137  | AB040915  | 368.842   | 416.463  |
| NM_001919 | 13630.333 | 12609.843 | NM_003905 | 13321.587 | 13764.677 | AF147791  | 184.794   | 128.229  |
| BC031485  | 2942.502  | 3062.278  | L12052    | 2016.823  | 2058.83   | NM_006481 | 1008.591  | 1760.748 |
| NM_004092 | 3890.118  | 3916.116  | AB028976  | 5873.623  | 6492.192  | AB011115  | 264.292   | 330.822  |
| X15624    | 2141.024  | 2740.386  | AK026337  | 720.751   | 738.555   | NM_003910 | 5536.054  | 8675.065 |
| AF073770  | 1621.8    | 1976.912  | NM_015869 | 2149.907  | 1620.451  | AB007913  | 584.315   | 655.63   |
| AL359401  | 5811.53   | 7218.182  | NM_004626 | 1367.127  | 718.604   | NM_006696 | 832.683   | 758.644  |
| NM_012213 | 2244.928  | 2281.679  | NM_001899 | 561.715   | 330.74    | NM_004599 | 3112.79   | 3212.222 |
| NM_016573 | 3466.645  | 3908.426  | NM_004305 | 29476.955 | 18840.434 | NM_006037 | 2893.166  | 2947.75  |
| NM_001303 | 5154.272  | 5720.295  | NM_006089 | 1625.36   | 1325.551  | NM_015871 | 1742.755  | 1784.211 |
| M21304    | 1157.785  | 909.374   | AF072506  | 601.435   | 279.183   | AB032962  | 159.58    | 295.475  |
| NM_001979 | 653.543   | 971.009   | AB033054  | 13520.66  | 14846.816 | NM_019037 | 1872.73   | 1776.279 |
| AB040896  | 2232.163  | 3605.779  | NM_016122 | 1131.576  | 1198.533  | NM_015891 | 1041.159  | 711.368  |
| NM_001107 | 2014.311  | 2769.73   | AF153330  | 1193.494  | 1244.871  | NM_006802 | 231.689   | 317.646  |
| AF084645  | 593.431   | 817.725   | NM_001652 | 673.164   | 667.661   | AB037778  | 300.251   | 307.15   |
| AF151851  | 5624      | 5925.972  | NM_017613 | 232.383   | 206.327   | NM_005066 | 11492.838 | 9724.393 |
| NM_005176 | 394.891   | 564.717   | M81768    | 399.847   | 561.161   | NM_003089 | 1607.293  | 1298.719 |
| NM_003636 | 4073.966  | 4191.463  | J05200    | 265.927   | 267.803   | NM_003753 | 6319.034  | 4422.288 |
| AF040723  | 7762.109  | 6221.079  | AK023749  | 655.212   | 469.842   | NM_006223 | 199.353   | 119.371  |
| NM_015527 | 2560.25   | 2769.914  | NM_002337 | 3462.447  | 3648.727  | NM_017590 | 577.249   | 426.422  |
| X89675    | 1222.409  | 1643.252  | NM_013245 | 2559.777  | 1980.441  | AB011145  | 1907.588  | 1470.94  |
| NM_012189 | 419.627   | 474.281   | NM_006423 | 3328.849  | 4201.765  | NM_003750 | 11208.21  | 8198.73  |
| NM_005798 | 8633.651  | 10680.315 | NM_004766 | 3150.827  | 3043.623  | M92422    | 630.006   | 702.032  |
| NM_004216 | 2969.567  | 4308.449  | NM_005819 | 6834.567  | 6097.679  | NM_017868 | 757.27    | 527.016  |
| NM_016289 | 19517.191 | 21456.945 | AK025520  | 2859.293  | 1669.844  | AK021888  | 468.645   | 633.95   |
| NM_001464 | 529.922   | 637.517   | NM_004892 | 7159.511  | 5734.594  | AK022848  | 857.291   | 1089.359 |
| NM_002051 | 1629.011  | 1207.388  | NM_014597 | 10774.38  | 6105.244  | AL049957  | 188.791   | 187.735  |
| NM_001523 | 621.15    | 658.991   | NM_017896 | 8070.107  | 4145.841  | NM_005847 | 101.351   | 95.333   |
| NM_017423 | 1192.624  | 1250.57   | AB002374  | 3760.208  | 2056.856  | NM_018159 | 4931.252  | 4646.711 |
| Z70705    | 1224.209  | 1313.87   | U17327    | 1943.027  | 761.456   | NM_000819 | 1475.916  | 1331.971 |
| NM_002611 | 896.478   | 1258.547  | NM_017833 | 1716.964  | 2313.308  | NM_002513 | 836.063   | 901.507  |
| NM_017417 | 943.321   | 808.339   | NM_006675 | 4562.672  | 5211.632  | NM_017424 | 226.296   | 239.068  |
| AL133602  | 1341.825  | 1169.628  | NM_003022 | 16905.746 | 17679.025 | NM_001522 | 1938.462  | 2098.447 |
| AF037219  | 3303.577  | 4931.365  | NM_004873 | 3005.325  | 3088.635  | NM_000883 | 704.943   | 571.419  |
| AK026075  | 748.978   | 1170.725  | NM_019842 | 1588.055  | 1516.645  | AF254086  | 616.958   | 658.02   |
| NM_000251 | 3280.101  | 4195.383  | NM_002951 | 7387.188  | 5911.475  | AL390142  | 485.268   | 410.596  |
| AF118071  | 200.083   | 228.438   | NM_002317 | 1336.317  | 1166.463  | NM_006565 | 565.718   | 609.536  |
| NM_006038 | 1474.906  | 1650.884  | NM_000320 | 5019.282  | 4716.772  | AB007930  | 3665.727  | 3321.786 |
| U87223    | 2218.579  | 1606.653  | NM_003136 | 4669.288  | 4363.56   | X76978    | 165.179   | 149.927  |
| NM_000093 | 416.031   | 754.043   | NM_013328 | 27679.666 | 27152.201 | AJ005273  | 781.259   | 566.019  |
| NM_001779 | 3707.159  | 7324.564  | NM_000790 | 770.455   | 1397.147  | AK021892  | 707.677   | 479.866  |
| AB033059  | 968.828   | 2434.673  | NM_002660 | 2062.722  | 1867.114  | NM_017637 | 113.354   | 181.696  |
| NM_016484 | 2395.133  | 3047.524  | NM_015900 | 665.29    | 585.74    | NM_003121 | 179.365   | 103.1    |
| AK026114  | 500.058   | 345.282   | NM_003706 | 1148.066  | 1482.291  | NM_003437 | 591.827   | 603.066  |
| NM_014452 | 1035.25   | 1178.79   | NM_005218 | 8294.441  | 4518.333  | NM_018337 | 2087.132  | 1346.669 |
| NM_014683 | 447.871   | 547.367   | AL122071  | 729.072   | 423.269   | AA193295  | 6282.24   | 4915.558 |
| AK021536  | 5746.214  | 4117.624  | NM_014913 | 13217.276 | 16517.182 | NM_018045 | 915.6     | 567.175  |
| AF079529  | 188.706   | 160.813   | NM_005864 | 7579.366  | 12811.696 | NM_014803 | 536.308   | 309.418  |
| NM_002600 | 2164.323  | 2430.277  | NM_012341 | 4631.017  | 5163.796  | AK024956  | 267.539   | 206.778  |

|          |           |           |          |           |           |          |           |           |
|----------|-----------|-----------|----------|-----------|-----------|----------|-----------|-----------|
| NM_00364 | 19204.799 | 23490.377 | NM_00325 | 21984.791 | 23780.533 | AF147386 | 536.311   | 487.547   |
| NM_00666 | 1181.083  | 2320.275  | D87450   | 3372.739  | 2866.62   | AF086500 | 88.243    | 131.892   |
| NM_00609 | 811.284   | 1076.451  | NM_01779 | 9695.733  | 9613.264  | AF273052 | 4152.058  | 8429.791  |
| NM_00393 | 530.996   | 898.666   | AK021919 | 1207.031  | 1094.881  | NM_01794 | 1573.199  | 1328.823  |
| NM_01242 | 1008.053  | 1102.363  | AF000562 | 2584.257  | 2973.951  | AF147383 | 168.318   | 176.615   |
| NM_00244 | 1036.507  | 1179.742  | AK025713 | 2201.241  | 1751.418  | AK025682 | 301.725   | 349.682   |
| NM_00086 | 1221.625  | 4420.853  | NM_01810 | 542.586   | 508.253   | NM_01647 | 2558.852  | 2924.362  |
| NM_00665 | 2640.303  | 5256.545  | NM_00205 | 2299.955  | 2146.832  | AL389986 | 1175.213  | 1355.051  |
| NM_00533 | 11521.297 | 14972.223 | NM_00709 | 9069.853  | 10606.103 | AF142409 | 565.878   | 394.254   |
| NM_00141 | 6954.306  | 6285.887  | D87446   | 4912.467  | 6190.113  | AF088052 | 367.694   | 328.865   |
| AF119817 | 16165.976 | 14761.466 | BF540935 | 1985.136  | 1811.802  | AF086342 | 222.317   | 303.39    |
| AL035306 | 1742.437  | 1461.045  | NM_00446 | 599.726   | 623.701   | AF086451 | 136.996   | 163.103   |
| NM_00132 | 17348.4   | 11773.805 | NM_00708 | 2230.265  | 2248.108  | AF086310 | 149.203   | 120.83    |
| NM_00574 | 3341.617  | 4726.07   | AB032964 | 2983.704  | 2727.099  | AF086387 | 226.817   | 226.99    |
| NM_00423 | 5192.501  | 11575.984 | BE733605 | 2692.547  | 2455.55   | AF086443 | 151.363   | 258.195   |
| AK024372 | 423.231   | 953.182   | NM_00333 | 18057.795 | 13922.574 | AL389941 | 350.78    | 334.136   |
| NM_01450 | 934.216   | 1442.587  | NM_00269 | 2383.091  | 1763.704  | AB037756 | 693.594   | 645.577   |
| NM_01465 | 1302.278  | 1350.164  | NM_00367 | 875.841   | 748.268   | AK001853 | 937.287   | 695.735   |
| NM_00439 | 3633.385  | 2892.397  | AK026000 | 2107.108  | 1434.948  | AK025071 | 233.359   | 218.795   |
| NM_00633 | 3869.058  | 2696.825  | NM_00581 | 1750.74   | 1948.864  | AF075082 | 185.571   | 230.615   |
| NM_00450 | 3176.68   | 2029.557  | NM_01627 | 944.824   | 716.085   | NM_01537 | 487.879   | 427.175   |
| NM_00271 | 18346.729 | 11095.539 | NM_00021 | 17179.359 | 20363.799 | AF085917 | 291.718   | 230.948   |
| NM_01406 | 2975.328  | 3089.931  | AB037830 | 1746.26   | 1959.132  | AF085989 | 254.346   | 466.338   |
| NM_00474 | 7671.385  | 7860.186  | NM_01568 | 2696.157  | 2721.757  | AL360139 | 35046.254 | 36634.582 |
| BQ446064 | 1139.645  | 1173.343  | NM_00435 | 28058.627 | 26320.186 | AF075110 | 636.947   | 840.06    |
| AF302502 | 316.302   | 651.276   | X03324   | 3418.104  | 3761.948  | AL137323 | 288.181   | 323.639   |
| AF274571 | 1533.029  | 1939.476  | AF130988 | 707.111   | 721.61    | AL137494 | 1508.28   | 1263.448  |
| NM_00544 | 797.164   | 1041.941  | NM_01493 | 980.869   | 885.651   | AL162037 | 2242.315  | 2243.945  |
| NM_00387 | 4191.958  | 5664.749  | NM_01538 | 712.271   | 572.055   | AL390150 | 526.286   | 445.095   |
| U69263   | 266.106   | 100.341   | NM_00369 | 2328.258  | 2388.063  | AL137575 | 144.66    | 166.225   |
| NM_01605 | 6330.52   | 6704.43   | NM_00087 | 4067.093  | 3410.992  | NM_00276 | 241.76    | 243.513   |
| NM_00671 | 2175.872  | 4371.156  | NM_01421 | 3505.344  | 3690.776  | AF086063 | 210.842   | 235.31    |
| NM_00542 | 1177.781  | 3148.402  | NM_00275 | 2499.165  | 2088.304  | AF086098 | 334.206   | 248.733   |
| NM_01631 | 775.577   | 1836.945  | NM_01328 | 1212.207  | 973.341   | AF086076 | 256.659   | 201.442   |
| AF234887 | 396.525   | 668.12    | Y11306   | 1159.859  | 928.347   | AL833393 | 450.246   | 403.801   |
| NM_00177 | 1608.292  | 1560.153  | NM_01611 | 686.231   | 517.393   | AF088005 | 375.616   | 324.389   |
| NM_00190 | 8994.363  | 9080.234  | X85106   | 979.734   | 714.5     | AF086096 | 2028.834  | 1494.629  |
| NM_00187 | 3454.473  | 4148.516  | NM_00393 | 2149.046  | 1936.626  | AL390132 | 233.278   | 182.075   |
| NM_00186 | 224.599   | 280.855   | NM_00436 | 1039.124  | 577.81    | NM_01793 | 1212.355  | 597.433   |
| NM_00585 | 13875.677 | 21977.518 | NM_00668 | 449.871   | 361.404   | NM_01781 | 2742.703  | 1662.073  |
| NM_00242 | 892.274   | 797.497   | NM_01247 | 34808.707 | 25474.896 | AK024653 | 5817.971  | 3161.213  |
| NM_00042 | 229.59    | 160.698   | AF250226 | 8974.279  | 5519.811  | AF103907 | 493.508   | 516.084   |
| AK027037 | 1815.474  | 1653.656  | NM_00321 | 27707.58  | 17094.855 | AF094508 | 189.585   | 174.175   |
| NM_00387 | 9758.838  | 6748.892  | AL157475 | 4344.632  | 5507.529  | AF161351 | 635.724   | 656.979   |
| AF191687 | 1868.175  | 1630.574  | NM_00606 | 17905.83  | 18838.104 | AF257098 | 188.758   | 164.326   |
| NM_00304 | 419.072   | 432.205   | NM_00653 | 3599.544  | 3989.951  | NM_01413 | 190.57    | 111.324   |
| NM_00027 | 8033.759  | 7853.237  | NM_01760 | 1902.608  | 2325.842  | AF111782 | 577.788   | 425.78    |
| NM_00017 | 961.9     | 1091.513  | AF110265 | 9372.591  | 8902.224  | AF151530 | 220.599   | 240.641   |
| NM_00028 | 6507.935  | 7416.394  | AF272371 | 54957.848 | 51012.48  | AK000877 | 117.263   | 100.276   |
| AK001295 | 4439.678  | 5124.845  | AK021848 | 1231.523  | 1233.032  | AK021991 | 176.361   | 85.266    |
| NM_00603 | 2422.854  | 3253.03   | NM_00370 | 1461.22   | 1734.351  | AK022093 | 944.068   | 1187.397  |
| NM_00271 | 6697.1    | 11562.463 | AF084362 | 598.157   | 324.503   | AK022232 | 133.818   | 208.192   |
| NM_00102 | 50226.988 | 77854.281 | NM_00155 | 4237.493  | 4270.259  | AK022376 | 150.242   | 133.347   |

|           |           |           |           |           |           |           |           |           |
|-----------|-----------|-----------|-----------|-----------|-----------|-----------|-----------|-----------|
| AB020660  | 2995.991  | 6060.515  | NM_014173 | 10879.538 | 11661.008 | AK022005  | 255.141   | 380.915   |
| NM_006659 | 18524.488 | 22995.344 | NM_001731 | 13238.973 | 13089.331 | AK022137  | 213.388   | 199.57    |
| NM_018051 | 1665.344  | 2172.641  | AL137506  | 687.164   | 904.697   | AK022272  | 314.849   | 315.907   |
| NM_015371 | 3728.478  | 3042.843  | AK022961  | 2702.12   | 2523.393  | AK027155  | 882.993   | 496.645   |
| AB040915  | 1181.92   | 899.201   | NM_007375 | 5856.371  | 5641.561  | AF221846  | 194.573   | 126.049   |
| AF147791  | 539.002   | 822.562   | NM_014371 | 3215.34   | 3598.626  | AK027219  | 161.92    | 192.703   |
| NM_006481 | 1546.929  | 2061.242  | AF290512  | 5877.882  | 5369.966  | AK024528  | 2833.677  | 1731.6    |
| AB011115  | 592.114   | 411.036   | NM_006716 | 5223.927  | 4012.854  | AL049311  | 114.675   | 141.421   |
| NM_003910 | 14124.784 | 16821.766 | AB002323  | 2125.093  | 1924.837  | AK000016  | 371.76    | 155.927   |
| AB007913  | 1125.612  | 975.919   | AK022241  | 4131      | 3735.947  | AK023367  | 462.498   | 503.83    |
| NM_006696 | 3311.025  | 2799.161  | AK022587  | 6052.083  | 5710.735  | AL080209  | 696.148   | 969.73    |
| NM_004599 | 9894.197  | 8289.719  | NM_005506 | 1489.396  | 773.738   | AL137431  | 148.95    | 145.986   |
| NM_006037 | 8710.844  | 7217.558  | AL137404  | 55980.961 | 40126.332 | NM_016255 | 636.092   | 614.054   |
| NM_015871 | 4235.003  | 3214.672  | NM_020185 | 1156.871  | 1413.109  | NM_014318 | 471.828   | 625.215   |
| AB032962  | 393.845   | 385.712   | NM_002832 | 38506.707 | 49051.641 | AK021962  | 100.316   | 168.353   |
| NM_019037 | 6016.721  | 4869.691  | NM_017732 | 6169.02   | 8290.645  | AK056674  | 300.426   | 270.07    |
| NM_015891 | 3015.752  | 2582.34   | NM_002851 | 1986.395  | 2033.192  | AK022856  | 161.112   | 130.074   |
| NM_006802 | 665.414   | 468.258   | NM_002071 | 697.827   | 674.043   | AK022042  | 225.856   | 350.463   |
| AB037778  | 823.029   | 658.227   | NM_005339 | 12672.613 | 10911.567 | AL117588  | 235.832   | 381.75    |
| NM_005066 | 35735.758 | 26961.811 | NM_001906 | 3253.31   | 3243.425  | AK021569  | 123.672   | 70.654    |
| NM_003089 | 5562.003  | 4745.244  | NM_004142 | 695.164   | 427.084   | NM_017708 | 206.303   | 142.067   |
| NM_003753 | 22791.012 | 22228.141 | AF108138  | 1303.135  | 1112.605  | BE895529  | 750.111   | 400.897   |
| NM_006223 | 734.268   | 1085.615  | NM_004347 | 364.418   | 347.396   | AF056453  | 113       | 132.277   |
| NM_017590 | 2345.283  | 3712.418  | BF340302  | 2468.298  | 1891.168  | AK000964  | 223.883   | 225.705   |
| AB011145  | 6745.881  | 8855.953  | AK024210  | 1273.626  | 1236.567  | AL117536  | 244.737   | 215.598   |
| NM_003750 | 34370.195 | 27073.748 | NM_002276 | 4061.222  | 3704.667  | NM_017751 | 1513.586  | 2468.471  |
| M92422    | 2258.61   | 1628.31   | AL133087  | 1695.378  | 1286.909  | NM_003771 | 460.748   | 347.35    |
| NM_017868 | 2420.197  | 1830.657  | NM_018010 | 1166.893  | 992.452   | NM_017860 | 1644.285  | 1838.078  |
| AK021888  | 1018.818  | 1214.565  | NM_002274 | 8924.512  | 13082.558 | X91195    | 15926.476 | 14272.231 |
| AK022848  | 2946.01   | 2665.91   | AL080200  | 824.224   | 456.966   | AF086190  | 187.395   | 153.989   |
| AL049957  | 344.167   | 267.008   | BF337874  | 3154.341  | 2402.188  | AL050035  | 517.071   | 433.35    |
| NM_018159 | 13183.292 | 9856.683  | NM_003475 | 13107.089 | 10154.909 | AK024449  | 937.135   | 1288.846  |
| NM_000819 | 4361.301  | 3500.581  | NM_000243 | 4785.634  | 2895.568  | AL357201  | 158.767   | 137.333   |
| NM_002513 | 2488.39   | 1847.358  | NM_004383 | 12311.284 | 7556.267  | AF279780  | 19194.008 | 13426.689 |
| NM_017424 | 894.749   | 1334.892  | NM_012256 | 7519.27   | 8215.396  | AK022510  | 425.824   | 371.945   |
| NM_001522 | 6187.021  | 5884.164  | NM_006006 | 1212.108  | 1277.125  | AK023878  | 211.977   | 162.041   |
| NM_000883 | 2499.144  | 2539.328  | NM_016325 | 1493.229  | 1778.016  | AK021851  | 173.902   | 147.162   |
| AF254086  | 2213.524  | 1983.574  | NM_001604 | 1508.869  | 1323.09   | AJ131609  | 534.64    | 463.492   |
| AL390142  | 1588.11   | 1480.56   | NM_017656 | 2413.734  | 2457.438  | BC019280  | 1066.304  | 700.623   |
| NM_006565 | 2347.368  | 2048.229  | X16282    | 7672.239  | 7086.748  | AF086498  | 206.905   | 179.325   |
| AB007930  | 11624.081 | 9441.215  | AK022519  | 465.648   | 660.308   | L77565    | 110.909   | 117.738   |
| X76978    | 312.638   | 250.724   | S75264    | 9657.093  | 9028.863  | AF079567  | 240.398   | 183.406   |
| AJ005273  | 2188.157  | 2160.919  | AF027513  | 1593.387  | 1535.879  | AK022177  | 367.149   | 731.869   |
| AK021892  | 2244.235  | 2289.389  | NM_001379 | 2343.073  | 1914.603  | AK023852  | 146.719   | 51.137    |
| NM_017637 | 294.794   | 400.213   | NM_018664 | 2676.592  | 3156.322  | AF086466  | 414.393   | 269.05    |
| NM_003121 | 349.747   | 272.317   | BC006428  | 3809.562  | 3775.375  | AB007962  | 3848.31   | 2124.779  |
| NM_003437 | 1915.348  | 1885.436  | NM_005034 | 1067.324  | 952.292   | AF005081  | 312.336   | 227.702   |
| NM_018337 | 4888.376  | 4458.695  | NM_003926 | 7530.591  | 9223.054  | AK026438  | 284.737   | 208.196   |
| AA193295  | 20073.27  | 15599.884 | AF085356  | 800.526   | 617.862   | AK021546  | 228.424   | 225.138   |
| NM_018045 | 3056.682  | 2345.85   | NM_016047 | 37955.625 | 38359.969 | AL050186  | 3641.594  | 3036.146  |
| NM_014803 | 1806.448  | 1946.811  | NM_001499 | 9490.952  | 11566.992 | AK021918  | 941.64    | 953.398   |
| AK024956  | 344.661   | 335.493   | BF030165  | 15547.702 | 15152.789 | AK021669  | 1195.945  | 834.249   |
| AF147386  | 1482.29   | 1035.313  | NM_016732 | 15429.993 | 10737.795 | AL080113  | 13695.773 | 10153.934 |

|           |           |           |           |           |           |           |           |           |
|-----------|-----------|-----------|-----------|-----------|-----------|-----------|-----------|-----------|
| AF273052  | 9867.033  | 6974.693  | NM_014763 | 16118.234 | 8875.373  | AL050083  | 435.567   | 493.56    |
| NM_017943 | 5327.962  | 4692.592  | AK026261  | 462.392   | 430.207   | AK022766  | 183.102   | 210.298   |
| AF147383  | 353.552   | 412.928   | AF086534  | 710.952   | 788.553   | AL049422  | 1867.62   | 1573.069  |
| AK025682  | 1128.125  | 834.354   | AF070617  | 1753.532  | 2429.598  | AL133089  | 172.5     | 141.711   |
| NM_013352 | 244.742   | 227.5     | NM_014918 | 11659.713 | 13391.401 | AK023526  | 1006.119  | 1092.353  |
| NM_016478 | 5006.651  | 4347.837  | NM_003654 | 530.15    | 308.131   | BE266129  | 283.653   | 187.69    |
| AL389986  | 3444.081  | 3312.368  | NM_000152 | 6130.178  | 6616.066  | X66227    | 130.21    | 143.441   |
| AF142409  | 1867.216  | 2862.887  | D17222    | 4358.923  | 4890.699  | AK025602  | 2005.281  | 1785.002  |
| AF086279  | 356.996   | 308.151   | NM_000154 | 2076.299  | 1897.477  | AK026309  | 790.691   | 663.307   |
| AF088052  | 1264.387  | 872.75    | NM_003549 | 588.847   | 1046.444  | AL137486  | 1486.721  | 1048.173  |
| AF086342  | 521.316   | 397.568   | NM_000671 | 2211.606  | 3235.045  | AL110162  | 215.786   | 353.793   |
| AF086387  | 872.28    | 1874.643  | NM_006297 | 12531.43  | 12992.245 | AF119880  | 125.13    | 332.375   |
| AF086443  | 789.568   | 701.592   | X85325    | 52749.586 | 49806.984 | AK022681  | 4055.164  | 3944.754  |
| AL389941  | 828.805   | 768.966   | AF318366  | 7568.823  | 7166.215  | CY3Cy5    | 1978.418  | 378.036   |
| AB037756  | 2149.671  | 2110.927  | AF182423  | 1556.766  | 1519.601  | Y18483    | 260.665   | 317.214   |
| AK001853  | 2991.614  | 2368.779  | D26018    | 3270.133  | 2748.815  | AI565117  | 43860.66  | 58572.563 |
| AK025071  | 836.266   | 949.75    | AB037863  | 869.555   | 762.711   | AI299075  | 1759.577  | 2034.89   |
| AF075082  | 395.429   | 462.457   | BC000363  | 848.146   | 749.244   | M59979    | 235.943   | 145.405   |
| NM_01537C | 1348.317  | 1671.816  | NM_007237 | 986.019   | 635.027   | AB011098  | 576.147   | 627.327   |
| AF085917  | 999.192   | 914.135   | NM_004608 | 960.076   | 563.99    | AA609759  | 448.094   | 425.737   |
| AF085989  | 824.253   | 774.551   | NM_018257 | 5193.072  | 3866.362  | AA029418  | 2586.859  | 2166.367  |
| AL360139  | 66262.016 | 58375.574 | NM_005919 | 1593.594  | 1060.541  | L20815    | 1791.303  | 2042.362  |
| AF075110  | 2104.155  | 2313.111  | AF085931  | 589.531   | 454.223   | AI364483  | 7591.887  | 14028.539 |
| AK022157  | 205.167   | 230.597   | AK022211  | 200.182   | 439.905   | AA456001  | 4014.481  | 4371.118  |
| AL137323  | 821.529   | 724.4     | AF086112  | 722.201   | 810.981   | BI818232  | 207.564   | 50.683    |
| AL137494  | 3761.026  | 3385.639  | AL137254  | 1584.151  | 2242.821  | AA451686  | 1745.849  | 2375.256  |
| AL162037  | 5685.169  | 4891.921  | AK026359  | 624.28    | 812.143   | AA934644  | 212.845   | 210.919   |
| AL390150  | 1748.956  | 1344.318  | AF085884  | 2073.151  | 2772.02   | NM_003822 | 509.16    | 638.925   |
| AL137359  | 392.746   | 598.924   | S81522    | 4622.335  | 5618.819  | NM_004412 | 1331.591  | 1642.294  |
| AL137575  | 486.881   | 602.571   | S94541    | 1531.277  | 2297.223  | SR5       | 1662.522  | 1664.677  |
| NM_002761 | 641.247   | 391.01    | L36587    | 16049.742 | 16022.332 | SR7       | 2179.31   | 17100.471 |
| AF086098  | 795.923   | 611.41    | AK024228  | 1356.312  | 1665.37   | SR9       | 8534.972  | 1896.405  |
| AF086076  | 1189.54   | 2873.833  | NM_016647 | 1246.375  | 1182.038  | CY3Cy5    | 2367.871  | 427.732   |
| AL833393  | 1972.03   | 3085.181  | AK024695  | 1580.756  | 1418.576  | NM_019555 | 307.595   | 307.892   |
| AF088005  | 1244.869  | 1127.508  | AF038174  | 1803.295  | 1533.948  | NM_012096 | 2920.327  | 3110.765  |
| AF086096  | 5703.044  | 4178.133  | NM_013243 | 750.896   | 618.91    | NM_003905 | 5390.938  | 6386.41   |
| AL390132  | 564.25    | 591.531   | AF070632  | 681.467   | 565.06    | L12052    | 863.996   | 1664.637  |
| NM_017933 | 2857.052  | 2170.401  | AF161359  | 1475.859  | 1080.762  | AB028976  | 2396.395  | 3234.529  |
| NM_017819 | 7945.848  | 5838.566  | AL359338  | 1830.231  | 1236.893  | AK026337  | 358.219   | 355.053   |
| AK024653  | 13039.594 | 12765.797 | AK023623  | 2518.457  | 1735.631  | NM_015866 | 934.354   | 895.115   |
| AF103907  | 1091.661  | 977.941   | AK026202  | 362.204   | 698.849   | AB031038  | 168.809   | 234.752   |
| AF094508  | 382.464   | 427.961   | AK021523  | 458.413   | 717.369   | NM_004626 | 514.418   | 530.899   |
| AF161351  | 1805.542  | 1548.543  | AK021539  | 4621.896  | 7613.585  | NM_001896 | 234.854   | 191.924   |
| AF257098  | 468.573   | 333.44    | AK021819  | 1183.606  | 1789.485  | NM_004305 | 16370.154 | 15472.888 |
| AF111782  | 1153.343  | 699.251   | AK026738  | 1321      | 1511.882  | NM_006086 | 632.02    | 738.165   |
| AF151530  | 585.024   | 391.986   | AK025011  | 834.922   | 943.29    | AF072506  | 255.206   | 266.962   |
| AK021991  | 390.062   | 410.541   | AL157491  | 706.107   | 1077.891  | NM_005992 | 766.179   | 1042.643  |
| AK022093  | 2859.774  | 2181.839  | NM_005266 | 1630.615  | 1856.038  | NM_003144 | 30582.834 | 27334.438 |
| AK022232  | 305.99    | 235.545   | AF087965  | 675.97    | 781.147   | NM_000906 | 547.821   | 668.398   |
| AK022376  | 433.898   | 543.234   | AF085998  | 1591.431  | 2317.407  | AB011102  | 1944.386  | 2103.166  |
| AK022005  | 738.791   | 487.372   | AB030240  | 476.283   | 540.124   | NM_002966 | 1005.461  | 1110.01   |
| AK022137  | 618.819   | 500.737   | AK024681  | 783.155   | 1340.051  | NM_00462C | 475.714   | 419.287   |
| AK022272  | 737.326   | 603.464   | AF085990  | 886.452   | 860.764   | AF087940  | 1656.167  | 2169.683  |

|           |           |           |           |           |           |           |           |          |
|-----------|-----------|-----------|-----------|-----------|-----------|-----------|-----------|----------|
| AK027155  | 2574.739  | 2038.574  | NM_014907 | 11065.913 | 14337.032 | AJ277587  | 1039.257  | 1714.38  |
| AF221846  | 463.741   | 683.828   | AB007977  | 8482.519  | 10228.945 | D87432    | 1500.575  | 1929.891 |
| AF264626  | 396.516   | 414.376   | NM_014221 | 1756.491  | 1974.043  | AK023749  | 355.554   | 786.637  |
| AK027219  | 445.977   | 466.089   | U58663    | 420.6     | 484.987   | NM_002337 | 1442.352  | 2454.376 |
| AK024528  | 8796.981  | 7530.795  | U84515    | 1252.822  | 1214.878  | NM_013245 | 923.436   | 918.445  |
| AK000016  | 820.328   | 764.141   | U92021    | 1907.673  | 4194.456  | NM_006423 | 1537.256  | 2263.021 |
| AK023367  | 1669.537  | 1583.929  | AF086143  | 7216.384  | 5216.49   | NM_004766 | 1520.278  | 1310.971 |
| AL080209  | 1993.69   | 1739.434  | AK022239  | 745.612   | 901.086   | NM_005819 | 3980.052  | 4220.537 |
| AL137431  | 209.795   | 228.893   | AK022364  | 694.555   | 1011.591  | AK025520  | 1149.898  | 875.797  |
| NM_016255 | 2195.693  | 1688.343  | AK024674  | 763.347   | 1058.943  | NM_004892 | 3037.159  | 3100.15  |
| NM_014315 | 1798.706  | 1333.539  | AK024244  | 3735.105  | 5920.521  | NM_014597 | 4871.077  | 3758.728 |
| AK056674  | 979.898   | 1126.026  | AK023812  | 589.086   | 1221.713  | NM_017896 | 3474.854  | 2981.104 |
| AK022042  | 721.716   | 563.452   | AL390084  | 1501.183  | 2083.752  | AB002374  | 1556.727  | 1787.428 |
| AL117588  | 423.375   | 570.775   | AK023565  | 648.734   | 897.19    | U17327    | 660.75    | 539.147  |
| NM_017705 | 356.739   | 336.942   | AK021479  | 1115.953  | 1403.713  | M87790    | 7807.613  | 7043.027 |
| BE895529  | 1906.554  | 1848.082  | NM_003835 | 1857.672  | 3086.929  | NM_001765 | 897.297   | 711.281  |
| AK000964  | 714.736   | 695.921   | AK000245  | 2169.223  | 3054.119  | NM_000025 | 2970.473  | 2334.713 |
| AL117536  | 619.682   | 549.959   | AF118072  | 502.986   | 1217.449  | NM_000715 | 234.95    | 213.29   |
| NM_017751 | 3979.939  | 3183.101  | AK023724  | 465.164   | 769.34    | AF035802  | 1551.324  | 1595.255 |
| NM_003771 | 1432.569  | 959.174   | AK024112  | 531.139   | 949.915   | Y08145    | 176.378   | 297.029  |
| NM_017860 | 5414.373  | 4604.884  | AF085900  | 15565.951 | 21504.467 | M26123    | 340.202   | 340.178  |
| X91195    | 40854.48  | 34599.832 | AK026195  | 822.009   | 1604.057  | NM_013325 | 10010.695 | 8914.271 |
| AF086190  | 452.633   | 436.949   | AK022420  | 1578.279  | 2553.185  | NM_000790 | 227.946   | 351.661  |
| AL050035  | 1372.206  | 970.972   | AK023254  | 1136.069  | 1317.495  | NM_002660 | 933.138   | 1255.43  |
| AK024449  | 2644.354  | 3410.448  | AK023945  | 6962.348  | 11324.729 | NM_015900 | 205.602   | 221.565  |
| AL357201  | 324.91    | 295       | AK022446  | 676.599   | 763.523   | NM_003706 | 395.486   | 514.166  |
| AF279780  | 35165.82  | 24853.275 | AK023352  | 715.532   | 1882.896  | AF182218  | 141.896   | 58.168   |
| AK022510  | 1045.609  | 755.101   | AK023773  | 1000.043  | 1202.814  | NM_005215 | 3574.866  | 4363.031 |
| L37717    | 307.756   | 463.522   | AK024123  | 561.112   | 507.617   | AL122071  | 212.916   | 166.593  |
| AJ131609  | 1856.024  | 1639.18   | AF116709  | 1169.185  | 1656.185  | AB033054  | 4496.884  | 6509.459 |
| BC019280  | 3308.716  | 3004.082  | AK025533  | 1040.506  | 1399.424  | NM_016122 | 373.433   | 603.236  |
| AF086498  | 673.049   | 538.684   | AK021911  | 7031.551  | 10044.841 | AF153330  | 385.502   | 427.728  |
| AK000687  | 604.316   | 476.18    | D17225    | 1059.095  | 1160.815  | NM_014742 | 48.962    | 1576.702 |
| AF079567  | 770.945   | 675.485   | AF147430  | 2344.74   | 3276.709  | NM_004770 | 151.747   | 111.45   |
| AK022177  | 827.079   | 921.611   | AK021857  | 22806.133 | 30335.545 | M81768    | 111.147   | 76.948   |
| AK023852  | 405.692   | 364.493   | AK022257  | 1603.676  | 2327.983  | NM_001037 | 81.881    | 30.77    |
| AF086466  | 1181.367  | 1151.45   | BE887356  | 32850.949 | 41489.828 | D87446    | 2138.308  | 1866.81  |
| AB007962  | 12960.776 | 9787.621  | X84369    | 657.031   | 1082.617  | BF540935  | 1594.122  | 1532.033 |
| AF005081  | 1128.385  | 766.671   | AK023329  | 3763.057  | 6551.02   | NM_004466 | 278.543   | 416.997  |
| AK026438  | 785.452   | 834.292   | AF116686  | 846.272   | 1606.358  | NM_007081 | 1005.521  | 1404.155 |
| AK021546  | 794.831   | 771.487   | AK000477  | 1665.932  | 2476.997  | AB032964  | 932.247   | 1179.81  |
| AL050186  | 11632.499 | 9972.515  | AK021773  | 2575.676  | 3307.648  | BE733605  | 1231.405  | 1132.898 |
| AK021918  | 3339.319  | 3059.081  | AK027074  | 3444.012  | 5639.417  | NM_003334 | 5450.856  | 5370.877 |
| AF069137  | 244.323   | 122.779   | AL365456  | 837.773   | 1150.97   | NM_002693 | 873.721   | 779.555  |
| AK021669  | 3069.982  | 2428.017  | NM_018035 | 1051.573  | 1141.513  | NM_003671 | 362.092   | 396.585  |
| AL080113  | 38791.82  | 25771.936 | U84522    | 2216.187  | 2809.527  | AK026000  | 892.754   | 1438.225 |
| AL050083  | 1454.165  | 1182.301  | AK021694  | 2656.917  | 3542.93   | NM_017833 | 606.665   | 1774.589 |
| AK022766  | 682.126   | 516.401   | AF086013  | 1077.713  | 1050.497  | NM_006675 | 2157.782  | 6454.906 |
| AL049422  | 5901.206  | 5416.874  | U84505    | 2629.514  | 3222.874  | NM_003022 | 5651.304  | 7984.54  |
| AL133089  | 456.815   | 279.385   | X81005    | 1315.446  | 1350.808  | NM_004873 | 1307.601  | 1351.227 |
| AK023526  | 3215.474  | 2650.536  | AL049265  | 1327.947  | 1751.937  | NM_019842 | 444.928   | 557.905  |
| AF075038  | 246.271   | 239.909   | AK022225  | 312.97    | 728.287   | NM_002951 | 4740.508  | 5447.146 |
| BE266129  | 980.969   | 584.304   | NM_012352 | 629.907   | 1046.695  | NM_002317 | 378.779   | 320.647  |

|           |           |           |            |           |           |           |           |           |
|-----------|-----------|-----------|------------|-----------|-----------|-----------|-----------|-----------|
| X66227    | 256.479   | 151.554   | AL137635   | 959.839   | 995.503   | NM_00032C | 1632.424  | 1926.13   |
| AK025602  | 6005.948  | 6030.03   | AL049430   | 2083.167  | 3981.656  | NM_00313C | 1939.023  | 2321.537  |
| AK026309  | 2263.769  | 1708.961  | AK021461   | 759.95    | 1425.724  | NM_00647E | 199.37    | 339.811   |
| AL137486  | 3974.328  | 3312.468  | AB015349   | 780.371   | 840.069   | NM_00462C | 477.48    | 666.977   |
| AL110162  | 814.989   | 1253.182  | AL079274   | 12867.02  | 16896.289 | AF087940  | 2217.675  | 2873.402  |
| AF119880  | 332.845   | 521.193   | S46403     | 890.008   | 1394.874  | AJ277587  | 1150.595  | 1531.889  |
| AK022681  | 13006.848 | 14829.379 | AL137398   | 2421.936  | 3655.907  | D87432    | 1773.099  | 2293.743  |
| CY3Cy5    | 1662.193  | 447.893   | Z83941     | 1246.418  | 1477.243  | Y18483    | 270.486   | 239.708   |
| Y18483    | 303.761   | 165.588   | Y12021     | 1286.52   | 2036.237  | AI565117  | 43588.973 | 49567.887 |
| AI299075  | 2114.018  | 2010.56   | BC016172   | 991.912   | 2101.484  | AI299075  | 1466.916  | 1566.205  |
| M59979    | 343.859   | 363.258   | AF127771   | 1008.838  | 1829.721  | M59979    | 301.486   | 466.222   |
| AB011098  | 1079.213  | 1324.265  | NM_01330C  | 17282.689 | 22008.9   | AB011098  | 527.805   | 584.95    |
| AA609759  | 753.088   | 779.832   | AK026039   | 5728.6    | 8176.579  | AA609759  | 386.555   | 342.606   |
| AA029418  | 2842.184  | 2167.458  | AF108756   | 12910.127 | 14414.819 | AA029418  | 1952.639  | 2074.438  |
| L20815    | 2566.198  | 2853.364  | NM_00407E  | 3018.109  | 3668.792  | L20815    | 1542.667  | 2518.46   |
| AI364483  | 4752.104  | 4423.194  | NM_001887  | 2807.927  | 2879.043  | AI364483  | 8038.7    | 16373.677 |
| AA456001  | 6150.259  | 6331.253  | NM_006533  | 2138.02   | 2358.495  | AA456001  | 3846.304  | 6839.294  |
| AA176581  | 296.284   | 117.324   | AK026747   | 3551.418  | 4331.162  | BI818232  | 283.265   | 229.935   |
| AA451686  | 3779.559  | 4664.169  | AL110150   | 3978.456  | 4402.098  | AA451686  | 1805.848  | 1912.211  |
| NM_003822 | 804.461   | 890.757   | NM_00199E  | 4670.496  | 4193.049  | AA934644  | 176.639   | 163.129   |
| NM_004412 | 2261.739  | 3075.978  | X87825     | 2472.649  | 2483.551  | NM_003822 | 526.782   | 465.163   |
| SR9       | 18170.559 | 4249.687  | AK001285   | 18203.574 | 23041.342 | NM_004412 | 1279.734  | 1316.298  |
| CY3Cy5    | 2687.866  | 690.322   | D17215     | 3805.288  | 4248.321  | NM_00205C | 999.858   | 1192.233  |
| NM_01955E | 247.586   | 145.525   | BE781513   | 955.947   | 929.897   | NM_007097 | 3512.666  | 4611.81   |
| NM_01209E | 3898.071  | 1853.17   | NM_015714  | 16761.582 | 17710.969 | NM_00002E | 3460.199  | 2706.21   |
| L12052    | 1462.8    | 687.402   | AK075564   | 1150.274  | 1192.116  | NM_00071E | 342.466   | 340.544   |
| AB028976  | 2864.121  | 2376.347  | AK026219   | 881.963   | 704.437   | AF035802  | 2465.809  | 2596.825  |
| AK026337  | 327.417   | 363.089   | D28446     | 1128.105  | 1148.605  | Y08145    | 332.257   | 277.299   |
| NM_01586E | 1253.45   | 1222.68   | AK024756   | 1262.551  | 1684.027  | M26123    | 410.277   | 414.835   |
| AB031038  | 361.732   | 2271.861  | NM_017911  | 1296.632  | 1650.644  | NM_00183E | 289.84    | 181.131   |
| NM_00462E | 868.305   | 1146.171  | AJ224168   | 2757.756  | 3141.098  | NM_01955E | 262.918   | 391.512   |
| NM_00189E | 342.17    | 388.68    | S69873     | 677.47    | 616.814   | NM_01209E | 2933.615  | 2958.931  |
| NM_00430E | 15057.284 | 15050.428 | AF147325   | 69738.531 | 64733.266 | NM_00390E | 5358.103  | 4820.257  |
| NM_00608E | 1168.943  | 1517.91   | NM_01442E  | 527.94    | 500.517   | L12052    | 940.352   | 807.099   |
| AF072506  | 495.25    | 318.216   | NM_018497  | 382.418   | 833.555   | AB028976  | 2212.959  | 1812.336  |
| NM_005992 | 1682.357  | 2203.245  | AK023584   | 444.289   | 804.979   | AK026337  | 407.049   | 452.838   |
| NM_003144 | 44252.188 | 41051.066 | NM_003774  | 873.091   | 856.258   | NM_01586E | 815.081   | 813.454   |
| NM_00090E | 688.405   | 705.989   | D87466     | 6994.229  | 7917.561  | NM_00462E | 517.31    | 874.616   |
| AB011102  | 3419.337  | 4382.049  | CY3Cy5     | 2331.893  | 269.561   | NM_00189E | 245.029   | 367.134   |
| D63480    | 1800.8    | 2398.081  | AA608568   | 4701.411  | 3088.423  | NM_00430E | 7848.234  | 8541.927  |
| NM_00296E | 1679.65   | 2151.269  | BG831301   | 27695.271 | 32332.99  | NM_00608E | 630.838   | 908.116   |
| NM_00647E | 310.491   | 377.109   | M14764     | 1619.59   | 1562.777  | AF072506  | 246.083   | 258.134   |
| NM_00462C | 680.629   | 802.954   | AA478647   | 2811.894  | 2801.367  | NM_005992 | 751.486   | 740.031   |
| AF087940  | 1997.222  | 2554.916  | M35999     | 952.008   | 910.918   | NM_003144 | 27753.561 | 19993.055 |
| AJ277587  | 1853.036  | 1974.727  | AW058501   | 1156.99   | 2674.307  | NM_00090E | 370.794   | 434.09    |
| D87432    | 2634.227  | 3046.844  | ID 2623896 | 4867.121  | 5144.571  | AB011102  | 1889.421  | 2080.404  |
| AK023749  | 295.226   | 275.253   | ID 2602214 | 2631.276  | 3098.815  | D63480    | 820.946   | 1004.687  |
| NM_002337 | 2028.627  | 1212.811  | AI928195   | 2081.49   | 4021.581  | NM_00296E | 1022.798  | 1106.342  |
| NM_01324E | 1574.592  | 557.43    | AA482489   | 641.723   | 1128.077  | M81768    | 144.546   | 155.029   |
| NM_00642E | 2295.895  | 2223.104  | AA458922   | 8669.142  | 10298.881 | AK023749  | 286.127   | 302.565   |
| NM_00476E | 2567.151  | 1882.306  | NM_14565E  | 2913.494  | 2941.414  | NM_002337 | 1532.077  | 1425.316  |
| NM_00581E | 3775.88   | 3252.493  | NM_021957  | 563.425   | 677.363   | NM_01324E | 805.174   | 608.412   |
| AK025520  | 2345.455  | 1028.18   | SR2        | 65154.887 | 64266.195 | NM_00642E | 1436.292  | 1419.247  |

|           |           |           |           |           |           |           |           |           |
|-----------|-----------|-----------|-----------|-----------|-----------|-----------|-----------|-----------|
| NM_004892 | 5752.233  | 5801.452  | SR4       | 17091.367 | 24512.855 | NM_004766 | 1106.727  | 697.148   |
| NM_014597 | 8176.401  | 8644.71   | SR6       | 2636.549  | 2945.307  | NM_005819 | 4224.179  | 4216.468  |
| NM_017896 | 6328.564  | 6228.76   | SR8       | 7441.029  | 24885.045 | AK024722  | 122.54    | 89.689    |
| AB002374  | 2704.539  | 2531.239  | SR10      | 27933.943 | 8520.333  | AK025520  | 1247.322  | 1026.879  |
| U17327    | 1390.845  | 1597.572  | CY3Cy5    | 2984.22   | 413.912   | NM_004892 | 3281.357  | 4396.114  |
| M87790    | 12736.233 | 14005.778 | NM_017729 | 1693.764  | 1277.095  | NM_014597 | 5163.33   | 5111.815  |
| NM_001768 | 1314.93   | 1720.377  | NM_005259 | 2992.77   | 1769.341  | NM_017896 | 3711.966  | 3098.052  |
| NM_000029 | 5522.376  | 6629.265  | NM_002840 | 1921.558  | 2065.545  | AB002374  | 1661.47   | 1246.91   |
| NM_000715 | 463.995   | 709.134   | NM_006174 | 840.555   | 977.547   | U17327    | 686.638   | 463.587   |
| AF035802  | 2349.615  | 3007.559  | NM_015850 | 2232.088  | 2718.825  | M87790    | 7634.125  | 6109.965  |
| Y08145    | 302.667   | 365.493   | NM_004864 | 1325.784  | 1231.258  | NM_001768 | 966.971   | 938.788   |
| M26123    | 538.889   | 860.094   | NM_002838 | 3745.123  | 3975.709  | NM_002951 | 5202.111  | 5580.239  |
| NM_001838 | 430.904   | 642.028   | AK027377  | 673.459   | 646.591   | NM_002317 | 550.302   | 609.703   |
| NM_013328 | 16144.893 | 8661.244  | NM_014686 | 54577.055 | 49782.145 | NM_000320 | 2054.597  | 2204.046  |
| NM_002660 | 1036.611  | 791.596   | BF528358  | 1130.257  | 1166.449  | NM_003136 | 2247.433  | 3695.346  |
| NM_015900 | 326.533   | 272.598   | NM_016339 | 534.521   | 824.434   | NM_013328 | 10583.338 | 11305.538 |
| NM_003706 | 614.352   | 914.247   | NM_002487 | 525.432   | 986.437   | NM_000790 | 210.05    | 152.422   |
| NM_005218 | 6653.059  | 6715.806  | NM_013340 | 794.573   | 1103.338  | NM_002660 | 798.185   | 1108.748  |
| AB033054  | 8138.115  | 9286.044  | NM_005462 | 847.764   | 1483.909  | NM_015900 | 255.446   | 178.197   |
| NM_016122 | 638.964   | 862.603   | NM_012319 | 2093.978  | 2761.663  | NM_003706 | 353.83    | 447.334   |
| AF153330  | 709.863   | 752.661   | AK026235  | 1020.97   | 1374.02   | NM_005218 | 3202.61   | 3120.92   |
| NM_001652 | 409.074   | 521.835   | NM_006510 | 10990.338 | 10183.441 | AL122071  | 274.916   | 225.019   |
| NM_004770 | 266.858   | 949.741   | NM_003141 | 2140.436  | 1888.207  | AB033054  | 4146.471  | 4070.858  |
| D87446    | 3087.195  | 1978.25   | NM_020245 | 4574.374  | 4247.206  | NM_016122 | 336.462   | 262.351   |
| BF540935  | 362.873   | 328.222   | NM_007175 | 1892.148  | 1501.371  | AF153330  | 429.607   | 550.079   |
| NM_004466 | 240.3     | 299.552   | AB046381  | 625.683   | 705.437   | NM_003822 | 551.727   | 561.238   |
| NM_007081 | 1799.708  | 2040.965  | AJ011497  | 2725.886  | 2002.633  | NM_004412 | 1398.67   | 1510.028  |
| AB032964  | 1915.076  | 2247.567  | NM_003018 | 677.572   | 521.46    | NM_002050 | 1244.904  | 2051.708  |
| BE733605  | 1511.266  | 1514.15   | NM_000336 | 852.395   | 776.917   | NM_007097 | 3041.024  | 3637.052  |
| NM_003334 | 7481.109  | 7783.994  | AF215923  | 1789.188  | 893.192   | D87446    | 2001.005  | 2323.375  |
| NM_002693 | 1789.985  | 2363.752  | U66621    | 5152.414  | 3200.904  | BF540935  | 1205.612  | 1140.583  |
| NM_003671 | 828.582   | 923.949   | NM_005720 | 16201.481 | 10705.242 | NM_004466 | 235.253   | 232.553   |
| AK026000  | 1820.183  | 2461.598  | AB040936  | 457.853   | 756.087   | NM_007081 | 869.838   | 858.801   |
| NM_017833 | 617.678   | 780.546   | AB023161  | 595.402   | 724.692   | AB032964  | 919.22    | 825.515   |
| NM_006675 | 3210.861  | 3202.735  | U61736    | 821.334   | 704.412   | BE733605  | 1288.388  | 1107.544  |
| NM_003022 | 10918.979 | 10777.43  | AJ132086  | 1581.962  | 1403.386  | NM_003334 | 5924.49   | 8137.626  |
| NM_004873 | 2855.443  | 3972.526  | U92816    | 4800.361  | 4731.895  | NM_002693 | 1003.984  | 1195.516  |
| NM_019842 | 1193.045  | 2757.976  | BC011987  | 20627.658 | 24526.354 | NM_003671 | 407.35    | 405.907   |
| NM_002951 | 16308.752 | 43726.594 | NM_004106 | 27922.084 | 29645.461 | AK026000  | 877.917   | 849.235   |
| NM_002317 | 766.408   | 1769.091  | NM_003485 | 3113.383  | 3170.949  | NM_017833 | 496.598   | 799.73    |
| NM_000320 | 3239.39   | 5049.638  | NM_005038 | 3732.609  | 4429.899  | NM_006675 | 1692.533  | 1556.388  |
| NM_017921 | 268       | 254.336   | L03418    | 9693.448  | 11890.15  | NM_003022 | 5198.901  | 4146.067  |
| NM_003136 | 3284.341  | 4015.24   | M95923    | 811.901   | 931.732   | NM_004873 | 1215.514  | 959.262   |
| NM_006475 | 265.091   | 205.455   | NM_002415 | 56901.367 | 59214.121 | NM_019842 | 526.313   | 524.909   |
| NM_004620 | 552.736   | 562.636   | NM_006332 | 1087.262  | 930.042   | NM_005992 | 752.519   | 1010.904  |
| AF087940  | 1569.333  | 1051.048  | NM_000916 | 4213.183  | 3390.584  | NM_003144 | 32542.455 | 29782.264 |
| AJ277587  | 1370.555  | 920.275   | NM_018663 | 4316.133  | 3419.006  | NM_000908 | 447.489   | 574.447   |
| D87432    | 2484.902  | 1657.852  | NM_145904 | 17353.064 | 11917.747 | AB011102  | 2382.856  | 3485.399  |
| Y18483    | 338.189   | 329.138   | NM_006796 | 6877.273  | 5965.793  | D63480    | 983.09    | 1044.226  |
| AI565117  | 49461.781 | 65360.422 | NM_000706 | 963.668   | 725.394   | NM_002966 | 1261.363  | 1862.201  |
| U28015    | 255.417   | 86.362    | NM_015941 | 1554.635  | 1124.361  | NM_006475 | 188.873   | 143.01    |
| AI299075  | 2102.494  | 2210.64   | NM_003655 | 7812.322  | 6643.26   | NM_004620 | 490.33    | 512.3     |
| M59979    | 399.292   | 491.562   | AK025111  | 649.082   | 371.066   | AF087940  | 2044.388  | 2198.139  |



|           |           |           |           |           |           |           |           |           |
|-----------|-----------|-----------|-----------|-----------|-----------|-----------|-----------|-----------|
| AB011098  | 1041.171  | 1581.528  | NM_001732 | 893.027   | 484.338   | AJ277587  | 1059.975  | 1423.278  |
| AA609759  | 668.837   | 706.472   | NM_018690 | 4319.148  | 2472.693  | D87432    | 1538.233  | 1585.509  |
| AA029418  | 3111.425  | 2706.243  | NM_000860 | 938.829   | 669.13    | Y18483    | 256.691   | 240.892   |
| L20815    | 2476.59   | 2840.853  | AB037798  | 2512.88   | 2271.979  | AI565117  | 42056.313 | 48111.906 |
| AI364483  | 4562.263  | 5336.829  | NM_000780 | 653.134   | 447.828   | AI299075  | 1276.566  | 1073.61   |
| AA456001  | 4897.353  | 5210.807  | AF272663  | 3090.839  | 3166.947  | M59979    | 216.181   | 202.446   |
| BI818232  | 265.535   | 479.579   | NM_012190 | 1257.564  | 1042.896  | AB011098  | 464.217   | 749.609   |
| AA451686  | 3974.574  | 5044.858  | AB033015  | 348.867   | 687.031   | AA609759  | 357.334   | 340.786   |
| AA934644  | 359.908   | 579.918   | AF277719  | 1386.706  | 1495.388  | AA029418  | 2027.175  | 1401.91   |
| NM_003822 | 660.261   | 1032.146  | NM_000791 | 2414.306  | 2597.573  | L20815    | 1391.92   | 1167.105  |
| NM_004412 | 2486.458  | 4049.952  | NM_003681 | 2593.838  | 2880.149  | AI364483  | 5904.154  | 4530.8    |
| NM_002050 | 1802.104  | 1837.321  | NM_004800 | 13494.363 | 15449.623 | AA456001  | 3337.664  | 2141.902  |
| NM_007097 | 6756.647  | 7722.712  | AB037738  | 533.398   | 544.926   | AA176581  | 197.337   | 440.937   |
| NM_000029 | 4670.472  | 3530.469  | S82769    | 296.004   | 715.082   | AA451686  | 1756.556  | 1219.829  |
| NM_000715 | 341.426   | 186.113   | NM_004677 | 556.213   | 743.58    | AA934644  | 159.317   | 97.46     |
| AF035802  | 1453.092  | 706.03    | NM_014954 | 9966.891  | 10107.692 | M87790    | 8918.706  | 9335.282  |
| M26123    | 623.262   | 384.418   | NM_000807 | 426.076   | 472.483   | NM_001768 | 1005.799  | 1264.038  |
| NM_001838 | 322.876   | 223.587   | NM_014909 | 3172.382  | 2293.151  | NM_000029 | 3771.207  | 3373.863  |
| NM_019555 | 435.567   | 1409.036  | X91148    | 649.845   | 537.317   | NM_000715 | 418.858   | 372.933   |
| NM_012096 | 4512.734  | 3849.753  | NM_015700 | 7870.774  | 5647.847  | AF035802  | 2290.924  | 2331.442  |
| NM_003905 | 9550.571  | 8496.478  | NM_019087 | 2921.425  | 2135.967  | Y08145    | 278.843   | 416.199   |
| L12052    | 1835.424  | 2725.308  | NM_016322 | 673.299   | 491.038   | M26123    | 346.599   | 239.777   |
| AB028976  | 3112.92   | 8791.466  | NM_005072 | 1390.429  | 835.988   | NM_001838 | 195.161   | 203.545   |
| AK026337  | 384.006   | 314.58    | AF308802  | 1268.566  | 571.985   | NM_019555 | 202.948   | 225.323   |
| NM_015868 | 1420.203  | 1661.127  | S76984    | 12185.937 | 6902.743  | NM_012096 | 2758.137  | 1946.4    |
| AB031038  | 314.363   | 284.484   | NM_014495 | 54631.809 | 51608.887 | NM_003905 | 5113.281  | 3754.818  |
| NM_004626 | 825.254   | 998.783   | NM_014081 | 652.632   | 726.842   | L12052    | 733.34    | 917.372   |
| NM_001898 | 323.751   | 523.576   | NM_005651 | 726.272   | 743.095   | AB028976  | 1536.704  | 1215.038  |
| NM_004305 | 15155.229 | 18324.756 | NM_005418 | 668.669   | 711.147   | AK026337  | 341.752   | 202.374   |
| NM_006088 | 986.489   | 1568.813  | NM_007195 | 1803.012  | 1633.648  | NM_015868 | 811.545   | 568.231   |
| AF072506  | 427.704   | 391.683   | AK023337  | 1558.678  | 1697.897  | AB031038  | 173.332   | 115.659   |
| NM_005992 | 1834.198  | 2870.667  | NM_013275 | 8654.799  | 9238.736  | NM_004626 | 459.211   | 499.931   |
| NM_003144 | 44678.313 | 51718.758 | AB037842  | 948.515   | 777.587   | NM_001898 | 206.518   | 303.438   |
| NM_000908 | 795.159   | 1740.259  | NM_019011 | 2788.993  | 2470.148  | NM_004305 | 13848.411 | 11816.984 |
| AB011102  | 3409.914  | 4493.913  | AF459094  | 5663.335  | 4932.623  | NM_006088 | 663.805   | 693.753   |
| D63480    | 1663.45   | 2356.502  | NM_003157 | 1569.586  | 1621.315  | AB033054  | 4673.048  | 4895.861  |
| NM_002968 | 1550.807  | 1883.111  | NM_004938 | 1942.049  | 1724.288  | NM_016122 | 318.441   | 271.019   |
| NM_004770 | 181.196   | 236.064   | NM_014326 | 797.274   | 752.454   | AF153330  | 455.142   | 338.231   |
| AK023749  | 362.389   | 331.019   | NM_004448 | 934.066   | 873.14    | NM_001652 | 287.042   | 330.08    |
| NM_002337 | 2599.45   | 2751.298  | NM_015981 | 1802.526  | 1827.369  | NM_004770 | 117.326   | 100.752   |
| NM_013245 | 1865.601  | 2033.741  | NM_000455 | 4082.223  | 3722.739  | AK023749  | 298.163   | 158.973   |
| NM_006423 | 2896.035  | 4595.39   | NM_014791 | 6295.893  | 6351.552  | NM_002337 | 1270.283  | 967.358   |
| NM_004766 | 2854.89   | 3105.166  | NM_003318 | 1581.266  | 1133.13   | NM_013245 | 827.947   | 587.268   |
| NM_005819 | 3917.688  | 4215.92   | NM_004362 | 3592.813  | 2890.983  | NM_006423 | 1344.08   | 1286.156  |
| AK025520  | 2500.335  | 1864.237  | NM_000182 | 18869.186 | 15898.044 | NM_004766 | 1316.563  | 785.1     |
| NM_004892 | 5789.508  | 6777.144  | AK023384  | 1336.352  | 1201.696  | NM_005819 | 3419.268  | 2333.804  |
| NM_014597 | 7621.285  | 7090.79   | NM_016026 | 6508.12   | 4127.247  | AK025520  | 1128.48   | 404.128   |
| NM_017896 | 6341.643  | 6497.668  | AB046381  | 733.46    | 441.761   | NM_004892 | 3034.55   | 2284.942  |
| AB002374  | 2964.87   | 2750.757  | AJ011497  | 1592.869  | 809.499   | NM_014597 | 5270.577  | 4010.566  |
| U17327    | 1174.836  | 1524.08   | NM_003018 | 669.017   | 419.688   | NM_017896 | 3568.861  | 2368.702  |
| M87790    | 11320.065 | 12437.832 | NM_000336 | 480.762   | 652.161   | AB002374  | 1529.984  | 1103.775  |
| NM_001768 | 931.835   | 866.765   | W61100    | 13029.322 | 15851.752 | U17327    | 639.435   | 465.844   |
| NM_002951 | 9404.211  | 11771.832 | AA608568  | 4713.401  | 3709.049  | NM_017833 | 822.941   | 882.234   |

|           |           |           |            |           |           |           |           |           |
|-----------|-----------|-----------|------------|-----------|-----------|-----------|-----------|-----------|
| NM_002317 | 467.782   | 363.197   | BG831301   | 8691.6    | 8386.437  | NM_006675 | 1827.677  | 2159.075  |
| NM_000320 | 2435.451  | 1466.316  | M14764     | 1148.124  | 891.328   | NM_003022 | 5416.001  | 5061.758  |
| NM_017921 | 229.767   | 201.48    | AA478647   | 2724.856  | 2591.973  | NM_013306 | 83.999    | 248.319   |
| NM_003136 | 3266.087  | 2273.851  | AW058501   | 845.719   | 913.063   | NM_004873 | 1441.843  | 1924.389  |
| NM_013328 | 17879.498 | 12720.228 | M81379     | 554.872   | 707.132   | NM_019842 | 792.575   | 965.94    |
| NM_002660 | 1359.865  | 1668.172  | ID 2623896 | 5292.96   | 5013.366  | NM_002951 | 6376.699  | 7779.868  |
| NM_015900 | 290.166   | 343.143   | ID 2602214 | 2340.612  | 1927.525  | NM_002317 | 527.134   | 716.251   |
| NM_003706 | 686.854   | 715.174   | ID 2071279 | 5582.495  | 4114.204  | NM_000320 | 1650.941  | 1907.955  |
| NM_005218 | 6316.817  | 7227.479  | L10709     | 3216.953  | 3669.538  | NM_003136 | 2362.956  | 4321.911  |
| AL122071  | 326.361   | 404.404   | N35489     | 987.622   | 1222.232  | NM_013328 | 12664.256 | 17589.283 |
| AB033054  | 7735.103  | 8973.979  | AI928195   | 1843.516  | 1626.726  | NM_000790 | 211.521   | 246.79    |
| NM_016122 | 595.088   | 656.958   | AA482489   | 417.724   | 462.399   | NM_002660 | 749.291   | 500.33    |
| AF153330  | 634.197   | 992.651   | AA458922   | 8142.245  | 7457.6    | NM_015900 | 207.097   | 300.22    |
| NM_001652 | 700.023   | 1346.165  | NM_145659  | 3077.657  | 4157.109  | NM_003706 | 434.827   | 430.123   |
| NM_003822 | 556.59    | 781.793   | NM_021957  | 1510.312  | 1729.276  | NM_005218 | 3144.756  | 2338.408  |
| NM_004412 | 1671.228  | 1685.626  | NM_001719  | 6909.523  | 4706.898  | AL122071  | 243.181   | 179.601   |
| NM_002050 | 1449.423  | 906.504   | AL080062   | 1932.806  | 1024.219  | NM_014913 | 4723.566  | 4457.925  |
| NM_007097 | 6155.256  | 3824.665  | NM_145904  | 13313.965 | 7075.455  | NM_005864 | 3335.04   | 4364.259  |
| D87446    | 3337.592  | 2134.253  | NM_006796  | 5456.573  | 3735.816  | NM_012341 | 1681.04   | 1503.042  |
| BF540935  | 524.697   | 416.379   | NM_000706  | 1032.687  | 728.43    | NM_003256 | 8500.362  | 8487.489  |
| NM_007081 | 1991.079  | 1878.094  | NM_015941  | 1451.177  | 1467.677  | D87450    | 1132.26   | 1346.024  |
| NM_000373 | 103.799   | 152.019   | NM_003655  | 4777.468  | 4217.307  | NM_017797 | 3822.716  | 5027.207  |
| AB032964  | 2079.477  | 2772.522  | NM_014837  | 1525.533  | 1374.356  | AK021919  | 414.125   | 485.518   |
| BE733605  | 1657.579  | 1832.639  | NM_017729  | 1255.647  | 1218.703  | AF000562  | 1140.118  | 1375.281  |
| NM_003334 | 7876.289  | 8639.856  | NM_005259  | 1133.8    | 1049.165  | AK025713  | 941.8     | 964.211   |
| NM_002693 | 1655.625  | 1951.947  | NM_002840  | 1506.795  | 1352.485  | NM_018100 | 367.929   | 319.576   |
| NM_003671 | 747.533   | 1010.99   | NM_006174  | 1737.968  | 1962.553  | NM_002050 | 1093.486  | 786.867   |
| AK026000  | 1843.635  | 2264.473  | NM_015850  | 1127.962  | 1759.383  | NM_007097 | 3539.573  | 3592.625  |
| NM_017833 | 608.106   | 791.065   | NM_004864  | 1268.095  | 1789.93   | D87446    | 1892.266  | 2095.043  |
| NM_006675 | 3164.408  | 4277.346  | NM_002838  | 4376.344  | 6568.25   | BF540935  | 968.924   | 560.644   |
| NM_003022 | 11314.614 | 13526.737 | NM_014686  | 38562.82  | 34009.246 | NM_004466 | 210.728   | 128.65    |
| NM_004873 | 2898.926  | 3187.531  | BF528358   | 847.287   | 715.959   | NM_007081 | 872.909   | 569.072   |
| NM_019842 | 972.961   | 1365.852  | NM_016339  | 397.859   | 513.215   | AB032964  | 957.085   | 778.691   |
| NM_005992 | 1597.916  | 1851.764  | NM_002487  | 820.597   | 910.229   | BE733605  | 1537.978  | 911.565   |
| NM_003144 | 37956.66  | 20912.133 | NM_005462  | 958.105   | 554.701   | NM_003334 | 4860.576  | 4148.984  |
| NM_000908 | 499.549   | 312.452   | NM_012319  | 1840.7    | 1716.297  | NM_002693 | 837.162   | 657.61    |
| AB011102  | 2956.86   | 2008.596  | AK026235   | 860.336   | 1088.264  | NM_003671 | 495.424   | 535.527   |
| D63480    | 1558.206  | 916.828   | NM_006510  | 10302.604 | 9720.717  | AK026000  | 1108.853  | 1154.229  |
| NM_002969 | 1461.277  | 1013.285  | NM_003141  | 1889.862  | 1667.385  | NM_005814 | 753.341   | 642.445   |
| NM_004620 | 537.7     | 473.316   | NM_020245  | 4750.492  | 4501.324  | NM_000211 | 6364.403  | 6574.466  |
| AF087940  | 2002.571  | 2183.674  | NM_007175  | 1519.958  | 1523.282  | AB037830  | 695.198   | 648.957   |
| AJ277587  | 1845.039  | 2015.166  | NM_015700  | 6947.777  | 4138.798  | NM_015685 | 1520.829  | 1699.471  |
| D87432    | 3051.375  | 3410.892  | NM_019087  | 2069.818  | 1459.078  | NM_004357 | 10278.663 | 11199.592 |
| Y18483    | 432.459   | 541.425   | NM_016322  | 438.438   | 1098.191  | X03324    | 1389.184  | 1734.956  |
| AI565117  | 47914.844 | 73392.383 | NM_004277  | 805.668   | 819.234   | AF130988  | 299.426   | 211.565   |
| U28015    | 309.897   | 231.377   | NM_005072  | 992.184   | 959.938   | NM_014934 | 396.373   | 400.023   |
| AI299075  | 2171.621  | 2618.591  | AF215923   | 1874.536  | 1907.436  | NM_015385 | 262.028   | 173.281   |
| M59979    | 333.19    | 329.728   | U66621     | 2373.923  | 2554.359  | NM_003690 | 1121.354  | 1010.385  |
| AB011098  | 819.023   | 1139.341  | NM_005720  | 13746.972 | 10561.992 | NM_000876 | 2030.507  | 1501.317  |
| AA609759  | 650.287   | 799.401   | AB023161   | 607.471   | 517.105   | NM_014214 | 1300.928  | 1069.199  |
| AA029418  | 2947.495  | 3092.89   | AJ132086   | 1112.108  | 1278.999  | NM_005232 | 143.775   | 140.472   |
| L20815    | 2355.335  | 3305.104  | U92816     | 3787.071  | 2669.834  | NM_002752 | 807.022   | 655.851   |
| AI364483  | 5073.557  | 5009.638  | BC011987   | 20998.166 | 19948.598 | NM_013281 | 343.828   | 205.847   |

|           |           |           |           |           |           |           |           |           |
|-----------|-----------|-----------|-----------|-----------|-----------|-----------|-----------|-----------|
| AA456001  | 7145.103  | 7832.166  | NM_004106 | 27710.494 | 27595.518 | Y11306    | 416.485   | 242.485   |
| BI818232  | 187.505   | 366.798   | NM_003485 | 2568.813  | 2185.177  | NM_016112 | 197.171   | 314.986   |
| AA451686  | 3690.898  | 5476.383  | NM_005038 | 3471.638  | 3968.644  | X85106    | 269.418   | 138.442   |
| AA934644  | 284.73    | 297.812   | L03418    | 10391.146 | 8794.231  | NM_003931 | 636.642   | 352.831   |
| M87790    | 9373.864  | 4994.785  | M95923    | 1309.296  | 1112.823  | NM_012479 | 12832.455 | 8472.857  |
| NM_001768 | 1060.52   | 768.491   | NM_002415 | 65889.508 | 56559.453 | AF250226  | 3710.733  | 2616.026  |
| NM_000029 | 5057.254  | 3658.376  | NM_006332 | 1588.429  | 1924.379  | NM_003217 | 9744.253  | 8225.124  |
| NM_000715 | 368.265   | 251.549   | NM_000916 | 3528.739  | 3461.908  | AL157475  | 1465.726  | 1327.377  |
| AF035802  | 1754.95   | 1590.946  | NM_018663 | 4692.758  | 6732.914  | NM_006069 | 7323.665  | 6587.189  |
| Y08145    | 246.512   | 259.123   | NM_014791 | 5583.175  | 3466.749  | NM_006534 | 1510.924  | 1436.338  |
| M26123    | 803.345   | 557.188   | NM_003318 | 1684.276  | 678.276   | NM_017601 | 634.645   | 673.792   |
| NM_001838 | 386.549   | 339.587   | NM_004362 | 1480.027  | 1080.412  | AF110265  | 3728.375  | 3803.714  |
| NM_019555 | 315.702   | 222.58    | NM_000182 | 17336.457 | 30704.49  | AF272371  | 40148.73  | 56767.602 |
| NM_012096 | 4907.85   | 5397.831  | AK023384  | 1302.298  | 1764.261  | AK021848  | 609.321   | 705.446   |
| NM_003905 | 9997.062  | 10208.297 | NM_016026 | 5666.266  | 5709.584  | NM_003704 | 711.682   | 894.045   |
| L12052    | 1815.876  | 2294.003  | AK025111  | 549.876   | 457.712   | AK023140  | 457.701   | 395.412   |
| AB028976  | 2126.281  | 2284.224  | NM_001732 | 675.204   | 590.358   | AF084362  | 266.914   | 287.855   |
| AK026337  | 288.167   | 331.211   | NM_018690 | 5083.312  | 4309.1    | NM_001553 | 1703.812  | 1451.161  |
| NM_015869 | 1402.902  | 1722.61   | NM_000860 | 633.859   | 738.129   | NM_014173 | 4101.752  | 4276.853  |
| AB031038  | 368.131   | 477.748   | AB037798  | 2651.654  | 2747.896  | NM_001731 | 4292.152  | 3458.251  |
| NM_004626 | 888.187   | 1189.283  | NM_000780 | 673.059   | 487.189   | AL137506  | 293.329   | 199.916   |
| NM_001899 | 348.01    | 457.057   | AF272663  | 2928.531  | 2249.703  | AK022961  | 980.733   | 848.467   |
| NM_004305 | 14406.545 | 16727.545 | NM_012190 | 980.363   | 893.049   | NM_007375 | 2042.676  | 1381.178  |
| NM_006089 | 921.115   | 1332.435  | AF277719  | 1561.09   | 1444.087  | NM_014371 | 1076.361  | 591.563   |
| AF072506  | 382.101   | 435.986   | NM_000791 | 2291.414  | 2186.035  | AF290512  | 1647.088  | 1304.416  |
| AB033054  | 7281.041  | 5513.74   | NM_003681 | 3595.529  | 2636.456  | NM_006716 | 1966.914  | 1266.478  |
| NM_016122 | 463.548   | 321.088   | NM_004800 | 13147.081 | 12413.537 | AB002323  | 623.665   | 521.012   |
| AF153330  | 504.951   | 311.339   | AB037738  | 1052.798  | 1232.809  | AK022241  | 1590.457  | 1286.054  |
| NM_001652 | 284.862   | 216.577   | NM_014954 | 19987.563 | 16087.992 | AK022587  | 2291.847  | 2089.885  |
| M81768    | 268.576   | 100.455   | NM_014909 | 2949.615  | 2569.74   | NM_005506 | 359.039   | 224.01    |
| AK023749  | 397.676   | 435.065   | NM_145659 | 1733.835  | 1104.88   | AL137404  | 28922.891 | 22705.551 |
| NM_002337 | 2778.258  | 2990.629  | NM_001719 | 3829.655  | 4044.531  | NM_020185 | 281.542   | 283.82    |
| NM_013245 | 1793.306  | 1565.957  | AL080062  | 1456.487  | 1522.534  | NM_002832 | 15569.118 | 12419.933 |
| NM_006423 | 2458.797  | 2903.892  | AF308802  | 918.091   | 826.22    | NM_017732 | 2696.198  | 2969.82   |
| NM_004766 | 2677.155  | 2455.891  | S76984    | 14235.326 | 14052.541 | NM_002851 | 726.094   | 1075.23   |
| NM_005819 | 3224.709  | 4252.657  | NM_014495 | 55585.879 | 50731.809 | NM_002071 | 248.456   | 218.393   |
| AK024722  | 174.253   | 241.844   | NM_014081 | 642.226   | 577.202   | NM_005339 | 7871.236  | 5505.085  |
| AK025520  | 2269.212  | 1590.067  | NM_005651 | 934.044   | 698.209   | NM_001906 | 1594.159  | 1445.831  |
| NM_004892 | 6455.214  | 8340.933  | NM_007195 | 2063.341  | 2213.952  | NM_004142 | 256.53    | 343.578   |
| NM_014597 | 8427.895  | 10663.3   | AK023337  | 1651.411  | 1370.689  | AF108138  | 479.912   | 316.639   |
| NM_017896 | 6297.588  | 6281.338  | NM_013275 | 7985.769  | 7316.33   | NM_004347 | 145.593   | 160.338   |
| AB002374  | 2667.322  | 2705.727  | AB037842  | 661.414   | 719.204   | BF340302  | 1147.771  | 585.116   |
| U17327    | 1070.821  | 1245.951  | NM_019011 | 2558.722  | 2345.666  | AK024210  | 346.15    | 284.169   |
| NM_017833 | 463.999   | 382.576   | AF459094  | 5835.321  | 5615.603  | NM_002276 | 1088.229  | 884.014   |
| NM_006675 | 2091.831  | 1519.209  | NM_003157 | 2145.844  | 2035.02   | AL133087  | 482.102   | 297.831   |
| NM_003022 | 9518.559  | 5452.984  | NM_004938 | 1898.592  | 1644.039  | NM_018010 | 245.678   | 322.963   |
| NM_004873 | 2310.286  | 1135.31   | NM_014326 | 896.287   | 637.687   | NM_002274 | 2052.709  | 1467.861  |
| NM_019842 | 895.676   | 690.328   | NM_004448 | 600.798   | 529.097   | BF337874  | 840.26    | 593.297   |
| NM_002951 | 10040.8   | 9480.926  | NM_015981 | 1261.592  | 910.562   | NM_003475 | 4505.54   | 3342.691  |
| NM_002317 | 623.76    | 521.693   | NM_000455 | 4224.559  | 2990.963  | NM_000243 | 1583.137  | 1233.702  |
| NM_000320 | 2983.439  | 2283.164  | NM_012319 | 1789.244  | 1187.875  | NM_004383 | 4411.637  | 5598.368  |
| NM_017921 | 267.495   | 184.941   | AK026235  | 796.382   | 698.834   | NM_012256 | 5826.163  | 4490.369  |
| NM_003136 | 3349.012  | 3225.993  | NM_006510 | 7914.299  | 5956.036  | NM_006006 | 441.413   | 396.201   |

|           |           |           |            |           |           |           |           |           |
|-----------|-----------|-----------|------------|-----------|-----------|-----------|-----------|-----------|
| NM_01332E | 20050.102 | 20123.582 | NM_003141  | 1061.122  | 1650.062  | NM_01632E | 528.415   | 628.742   |
| NM_00079C | 295.034   | 356.645   | NM_02024E  | 3606.15   | 4308.276  | NM_001604 | 372.877   | 599.307   |
| NM_00266C | 1338.09   | 1417.323  | NM_00717E  | 1100.403  | 1312.826  | NM_01765E | 862.226   | 835.848   |
| NM_01590C | 374.746   | 424.753   | AB046381   | 513.308   | 663.614   | X16282    | 2591.016  | 2422.143  |
| NM_00370E | 861.414   | 1429.528  | AJ011497   | 1348.986  | 1140.125  | NM_01441E | 674.052   | 701.056   |
| AF182218  | 248.219   | 192.365   | NM_00301E  | 862.3     | 877.607   | S75264    | 3661.356  | 3155.552  |
| NM_00521E | 6370.764  | 7688.787  | M14764     | 899.598   | 1040.22   | AF027513  | 521.625   | 553.873   |
| AL122071  | 549.759   | 903.971   | AA478647   | 2706.622  | 2724.753  | NM_00137E | 836.303   | 621.324   |
| NM_01491E | 7793.414  | 4858.168  | AW058501   | 923.724   | 576.635   | NM_018664 | 1008.646  | 834.794   |
| NM_005864 | 4639.042  | 2183.466  | M81379     | 391.714   | 344.841   | BC006428  | 1203.556  | 865.697   |
| NM_012341 | 2463.695  | 1388.734  | ID 2623896 | 3628.098  | 3185.018  | NM_005034 | 238.988   | 206.049   |
| NM_00325E | 10685.087 | 5117.644  | ID 2602214 | 3294.048  | 2611.469  | NM_00392E | 1849.8    | 1060.62   |
| D87450    | 1995.261  | 1095.92   | ID 2071279 | 6128.604  | 4815.81   | AF085356  | 240.269   | 232.561   |
| NM_017797 | 5464.89   | 3457.365  | L10709     | 3759.601  | 3107.582  | NM_016047 | 12526.977 | 7728.221  |
| AK021919  | 662.409   | 514.74    | N35489     | 1018.469  | 1026.116  | NM_00149E | 3002.133  | 2018.487  |
| AF000562  | 1244.428  | 1113.248  | AI928195   | 1440.3    | 1119.62   | BF030165  | 4424.281  | 5851.27   |
| AK025713  | 1388.124  | 1293.7    | AA482489   | 421.273   | 291.037   | NM_01673E | 4605.933  | 3028.14   |
| NM_01810C | 422.188   | 276.026   | AA458922   | 7498.24   | 4983.475  | NM_01476E | 4697.225  | 3717.688  |
| NM_00205C | 1631.617  | 1734.439  | M95923     | 1114.676  | 706.65    | AF070617  | 506.499   | 641.701   |
| NM_007097 | 6873.483  | 6326.89   | NM_00241E  | 58929.363 | 53703.398 | NM_01491E | 4495.866  | 4012.457  |
| D87446    | 3653.738  | 4276.437  | NM_00633E  | 1020.719  | 924.268   | NM_003654 | 107.796   | 219.282   |
| BF540935  | 516.06    | 298.811   | NM_00200C  | 335.051   | 720.953   | NM_00015E | 2431.571  | 3470.273  |
| NM_00446E | 239.451   | 227.037   | NM_00091E  | 1202.769  | 1560.099  | D17222    | 9055.204  | 10015.808 |
| NM_007081 | 1590.212  | 1896.955  | NM_01866E  | 4013.406  | 5749.353  | NM_000154 | 858.813   | 1028.892  |
| AB032964  | 1803.113  | 2503.097  | NM_145904  | 15056.612 | 14376.713 | NM_00354E | 137.164   | 126.54    |
| BE733605  | 1654.503  | 2121.892  | NM_00679E  | 5947.522  | 7333.154  | NM_000671 | 586.842   | 406.724   |
| NM_003334 | 9740.309  | 12313.725 | NM_00070E  | 1015.711  | 1043.764  | NM_006297 | 3900.116  | 3349.32   |
| NM_00269E | 1822.137  | 2747.534  | NM_015941  | 1497.741  | 3379.422  | X85325    | 19471.438 | 10375.951 |
| NM_003671 | 763.502   | 1192.242  | NM_01772E  | 1098.204  | 1738.438  | AF318366  | 2463.892  | 2052.85   |
| AK026000  | 1773.528  | 1989.512  | NM_00525E  | 1062.016  | 794.208   | AF182423  | 578.893   | 305.962   |
| NM_005814 | 419.599   | 169.855   | NM_00284C  | 1821.63   | 1593.729  | D26018    | 924.672   | 800.162   |
| NM_01627E | 251.894   | 435.916   | NM_006174  | 848.566   | 896.504   | AB037863  | 311.479   | 250.056   |
| NM_000211 | 11336.972 | 5631.258  | NM_01585C  | 5445.526  | 5353.016  | BC000363  | 365.633   | 737.916   |
| AB037830  | 797.933   | 334.761   | NM_004864  | 1283.135  | 1071.777  | NM_007237 | 290.372   | 220.756   |
| NM_01568E | 718.525   | 343.505   | NM_00283E  | 3518.19   | 3103.134  | NM_00460E | 193.236   | 247.981   |
| NM_004357 | 10989.063 | 6269.201  | NM_01468E  | 58706.672 | 49062.105 | NM_018257 | 1567.337  | 1062.19   |
| X03324    | 2106.108  | 1471.54   | BF528358   | 801.487   | 769.256   | NM_00591E | 375.948   | 255.237   |
| NM_014934 | 752.576   | 553.713   | NM_01633E  | 519.277   | 563.983   | AF085931  | 130.036   | 111.328   |
| NM_01538E | 304.5     | 221.275   | NM_002487  | 806.933   | 1341.045  | AF086112  | 282.767   | 282.542   |
| NM_00369C | 2205.075  | 2493.05   | NM_01334C  | 664.815   | 824.443   | AL137254  | 724.528   | 665.054   |
| NM_00087E | 2919.987  | 2470.964  | NM_00546E  | 761.929   | 552.961   | AF085884  | 871.908   | 872.963   |
| NM_014214 | 2487.519  | 2742.379  | NM_014954  | 15886.965 | 15051.264 | S81522    | 1334.288  | 1255.472  |
| NM_00523E | 276.038   | 205.783   | NM_000807  | 468.098   | 500.328   | S94541    | 561.068   | 417.826   |
| NM_00275E | 1786.214  | 2107.718  | NM_01490E  | 1548.188  | 1430.83   | L36587    | 5388.868  | 4766.877  |
| NM_013281 | 552.293   | 416.812   | X91148     | 841.813   | 816.167   | AK024228  | 552.778   | 510.756   |
| Y11306    | 792.87    | 976.415   | NM_01570C  | 7653.888  | 7057.806  | NM_016647 | 487.858   | 379.895   |
| NM_016112 | 451.755   | 458.55    | NM_019087  | 1141.705  | 1343.003  | AK024695  | 631.365   | 508.856   |
| X85106    | 343.736   | 314.352   | NM_00507E  | 857.712   | 885.632   | AF038174  | 676.185   | 515.55    |
| NM_003931 | 1436.413  | 1860.839  | AF215923   | 2214.658  | 2630.482  | NM_01324E | 506.006   | 538.741   |
| NM_006681 | 239.192   | 251.223   | NM_00572C  | 17351.779 | 23194.914 | AF070632  | 715.057   | 1843.476  |
| NM_01247E | 25541.615 | 26060.592 | AB040936   | 751       | 986.542   | AF161359  | 485.593   | 350.7     |
| AF250226  | 5745.338  | 6147.867  | AJ132086   | 1360.046  | 1229.299  | AL365520  | 390.378   | 219.462   |
| NM_003217 | 19527.051 | 17037.482 | U92816     | 9709.861  | 7141.386  | AL359338  | 471.649   | 298.711   |

|           |           |           |           |           |           |           |           |           |
|-----------|-----------|-----------|-----------|-----------|-----------|-----------|-----------|-----------|
| AL157475  | 2435.767  | 1112.339  | BC011987  | 20879.211 | 18879.889 | AK023623  | 710.928   | 445.572   |
| NM_006069 | 4221.563  | 2070.667  | NM_004106 | 30040.637 | 22869.191 | AK021539  | 2088.72   | 2052.853  |
| NM_006534 | 1636.648  | 920.218   | NM_003485 | 3490.262  | 2941.919  | AK021819  | 432.412   | 764.878   |
| NM_017601 | 1315.413  | 490.072   | NM_005038 | 3197.694  | 2178.958  | AK026738  | 433.056   | 331.238   |
| AF110265  | 5689.773  | 2753.749  | L03418    | 11060.911 | 5697.722  | AK025011  | 279.761   | 292.465   |
| AF272371  | 39225.527 | 29644.219 | NM_003157 | 2005.289  | 1421.474  | AL157491  | 350.863   | 264.591   |
| AK021848  | 821.062   | 672.889   | NM_004448 | 854.227   | 956.962   | NM_005266 | 948.662   | 1133.976  |
| NM_003704 | 1005.03   | 730.813   | NM_015981 | 1533.879  | 1845.39   | AF087965  | 232.41    | 158.946   |
| AK023140  | 530.642   | 629.627   | NM_000455 | 4024.17   | 3753.302  | AF085998  | 691.83    | 667.478   |
| AF084362  | 202.397   | 255.662   | NM_014791 | 5621.207  | 5234.6    | AK024681  | 339.601   | 246.512   |
| NM_001553 | 2235.21   | 2114.622  | NM_003318 | 2285.012  | 1616.386  | AF085990  | 224.007   | 133.118   |
| NM_014173 | 8429.61   | 7632.188  | NM_004362 | 2508.548  | 2258.119  | NM_014907 | 5138.234  | 3883.093  |
| NM_001731 | 8884.853  | 11567.118 | AK023384  | 1523.894  | 2120.107  | AB007977  | 2122.569  | 1092.988  |
| AL137506  | 546.123   | 731.205   | NM_016026 | 6918.856  | 9499.37   | NM_014221 | 711.284   | 463.62    |
| AK022961  | 1971.274  | 2080.888  | NM_018690 | 7337.969  | 9129.235  | U84515    | 511.013   | 454.323   |
| NM_007375 | 4775.245  | 4714.643  | NM_000860 | 1386.238  | 1127.177  | Y11180    | 333.338   | 182.248   |
| NM_014371 | 2753.921  | 2911.452  | AB037798  | 2441.816  | 2402.785  | AF086143  | 1787.318  | 1100.054  |
| AF290512  | 2456.716  | 2609.928  | NM_000780 | 549.786   | 453.238   | AK022239  | 193.798   | 138.802   |
| NM_006716 | 3913.244  | 3992.422  | AF272663  | 10275.854 | 8097.652  | AK022364  | 219.101   | 193.242   |
| AB002323  | 1504.185  | 1363.096  | NM_012190 | 1425.969  | 1113.918  | AK024674  | 345.123   | 349.037   |
| AK022241  | 2832.352  | 2827.443  | AF277719  | 1412.346  | 1060.173  | AK024244  | 1640.807  | 1181.37   |
| AK022587  | 4738.702  | 5827.001  | NM_000791 | 2486.846  | 1855.745  | AK023812  | 436.771   | 204.65    |
| NM_005512 | 196.579   | 942.932   | NM_003681 | 2870.696  | 1733.954  | AL390084  | 555.038   | 580.624   |
| NM_005506 | 913.307   | 1161.109  | NM_004800 | 13678.623 | 8990.911  | AK023565  | 301.77    | 369.424   |
| AL137404  | 40870.012 | 37243.926 | NM_004952 | 1501.524  | 1199.677  | AK021479  | 474.029   | 622.833   |
| NM_020185 | 586.922   | 387.116   | AB037730  | 3651.435  | 3933.401  | NM_003835 | 759.738   | 933.882   |
| NM_002832 | 21530.527 | 9788.024  | NM_001357 | 8038.286  | 7222.815  | AK000245  | 545.003   | 499.228   |
| NM_017732 | 3978.905  | 2128.48   | NM_003893 | 1809.74   | 1757.367  | AK023724  | 192.321   | 126.023   |
| NM_002851 | 890.531   | 395.779   | AB037816  | 2126.459  | 1584.525  | AK024112  | 187.981   | 181.616   |
| NM_005339 | 7180.309  | 4702.087  | NM_014380 | 393.731   | 492.068   | AF085900  | 4727.901  | 3131.65   |
| NM_001906 | 2238.666  | 2105.743  | NM_014265 | 699.116   | 1985.538  | AK026195  | 245.11    | 125.713   |
| NM_004142 | 242.696   | 262.977   | NM_001719 | 6906.11   | 10459.415 | AK022420  | 518.032   | 422.414   |
| AF108138  | 759.649   | 991.598   | AL080062  | 2225.358  | 2927.953  | AK023254  | 238.62    | 213.529   |
| NM_004347 | 273.037   | 241.098   | AF308802  | 1612.774  | 1969.859  | AK023748  | 193.489   | 338.444   |
| BF340302  | 898.329   | 582.866   | S76984    | 15690.234 | 20491.598 | AK023945  | 4359.276  | 6211.067  |
| AK024210  | 693.304   | 851.129   | NM_014495 | 55179.77  | 59889.953 | AK022446  | 283.42    | 215.541   |
| NM_002276 | 1372.284  | 1318.238  | NM_014081 | 711.65    | 1012.559  | AK023352  | 158.041   | 115.051   |
| AL133087  | 908.317   | 951.055   | NM_005651 | 1046.034  | 767.937   | AK023773  | 381.943   | 238.089   |
| NM_018010 | 620.822   | 693.473   | NM_007195 | 2172.552  | 1894.592  | AK024123  | 198.588   | 54.23     |
| NM_002274 | 3067.451  | 3613.381  | AK023337  | 5901.88   | 7931.041  | AF116709  | 518.931   | 558.132   |
| AL080200  | 625.14    | 960.298   | NM_013275 | 15729.969 | 13338.194 | AK025533  | 483.059   | 574.819   |
| BF337874  | 1137.333  | 1493.93   | NM_019011 | 2422.612  | 2309.568  | AK026499  | 114.902   | 44.187    |
| NM_003475 | 4853.415  | 5734.593  | AF459094  | 6678.608  | 4013.01   | AK021911  | 2523.606  | 3073.876  |
| NM_000243 | 2048.175  | 2171.376  | NM_002544 | 2550.99   | 1613.599  | D17225    | 262.567   | 352.957   |
| NM_004383 | 8657.378  | 9410.531  | AB011542  | 732.678   | 881.674   | AF147430  | 839.263   | 1050.152  |
| NM_012256 | 1992.55   | 783.695   | NM_001853 | 3512.13   | 2764.609  | AK025766  | 3718.646  | 3513.671  |
| NM_006006 | 609.32    | 419.561   | U41737    | 485.509   | 939.788   | U35875    | 6102.287  | 5761.924  |
| NM_016325 | 672.951   | 259.043   | NM_005799 | 828.369   | 843.086   | AK021857  | 7015.043  | 5716.695  |
| NM_001604 | 503.693   | 200.644   | X99661    | 848.518   | 1213.926  | AK022257  | 868.095   | 624.847   |
| NM_017656 | 1278.945  | 571.205   | NM_005927 | 2334.266  | 2060.384  | BE887356  | 18639.031 | 12532.554 |
| X16282    | 4074.582  | 1992.93   | AB028983  | 1787.293  | 1430.735  | X84369    | 347.746   | 370.913   |
| AK022519  | 334.367   | 274.781   | AB037800  | 1251.947  | 1079.696  | AK023329  | 1181.29   | 1443.301  |
| NM_014415 | 972.468   | 531.975   | AK026377  | 387.099   | 831.279   | AF116686  | 8.923     | 1743.658  |

|           |           |           |           |           |           |           |           |           |
|-----------|-----------|-----------|-----------|-----------|-----------|-----------|-----------|-----------|
| S75264    | 4381.489  | 3630.883  | NM_006747 | 1212.729  | 1457.143  | AK025181  | 238.33    | 302.798   |
| AF027513  | 938.855   | 740.005   | NM_007086 | 1530.551  | 2531.714  | AK021773  | 583.108   | 562.871   |
| NM_001379 | 1728.474  | 1352.251  | NM_003870 | 9922.077  | 14495.759 | AK027074  | 1140.478  | 1092.712  |
| NM_018664 | 2134.51   | 2118.682  | AK024507  | 1059.922  | 1302.477  | AL365456  | 311.728   | 371.329   |
| BC006428  | 2914.345  | 2824.804  | NM_001243 | 3382.622  | 3990.961  | NM_018038 | 247.459   | 383.812   |
| NM_005034 | 777.529   | 733.719   | AK025997  | 3298.492  | 3231.9    | AK025048  | 175.105   | 248.234   |
| NM_003926 | 3874.973  | 3704.1    | NM_014887 | 5584.387  | 3533.192  | U84522    | 747.64    | 978.934   |
| AF085356  | 422.397   | 415.335   | NM_002590 | 1551.45   | 722.872   | AK021694  | 828.694   | 1155.416  |
| NM_016047 | 24929.48  | 21637.592 | NM_018556 | 6702.728  | 4645.709  | AF086013  | 291.423   | 334       |
| NM_001499 | 5725.157  | 6007.592  | NM_005824 | 928.234   | 555.247   | U84505    | 1281.245  | 1355.468  |
| BF030165  | 10174.367 | 12902.508 | AF052211  | 3354.168  | 2184.505  | X81005    | 507.916   | 559.001   |
| NM_016732 | 10855.108 | 12355.163 | NM_005600 | 2586.785  | 3393.52   | AL049265  | 593.821   | 534.875   |
| NM_014763 | 9007.127  | 9053.478  | NM_005967 | 4459.106  | 7156.217  | NM_012352 | 221.772   | 241.914   |
| AF086534  | 372.024   | 338.086   | AB014566  | 960.885   | 776.897   | AL137635  | 274.816   | 258.26    |
| AF070617  | 764.102   | 505.284   | NM_015678 | 643.161   | 581.544   | AL049430  | 880.392   | 1025.715  |
| NM_014918 | 4689.929  | 1710.807  | NM_014223 | 3170.088  | 3135.148  | AK021461  | 300.798   | 274.662   |
| NM_000152 | 3131.753  | 2014.021  | NM_016194 | 2304.621  | 1829.819  | AB015349  | 260.602   | 189.049   |
| D17222    | 17405.008 | 10785.029 | NM_000562 | 3128.335  | 4626.891  | AL079274  | 3330.369  | 2915.314  |
| NM_000154 | 1563.946  | 1244.795  | NM_020353 | 1153.886  | 1399.956  | AL137398  | 549.995   | 640.344   |
| NM_003549 | 433.445   | 243.303   | NM_019011 | 11056.926 | 8955.166  | Y12021    | 380.791   | 545.745   |
| NM_000671 | 1511.526  | 1659.007  | NM_004879 | 14775.37  | 12831.333 | AF127771  | 445.057   | 472.603   |
| NM_006297 | 5750.814  | 5152.802  | AB020694  | 2816.685  | 2157.303  | NM_013300 | 5130.093  | 5997.836  |
| X85325    | 29190.42  | 21601.055 | NM_016071 | 3605.846  | 2891.021  | AK026039  | 2004.18   | 2288.513  |
| AF318366  | 5090.477  | 5628.542  | AL050131  | 778.472   | 526.813   | AF108756  | 5087.985  | 5452.189  |
| AF182423  | 985.272   | 1022.202  | NM_004475 | 8105.21   | 4353.282  | AF086394  | 140.395   | 106.868   |
| D26018    | 1990.061  | 2001.31   | NM_001627 | 9057.471  | 6229.001  | NM_004075 | 1022.137  | 1689.776  |
| AK023029  | 188.052   | 145.002   | NM_001226 | 1512.803  | 744.967   | NM_001887 | 1133.919  | 1259.626  |
| NM_017643 | 200.577   | 116.63    | NM_001336 | 754.759   | 449.046   | NM_006533 | 999.354   | 1194.21   |
| AB037863  | 281.855   | 352.103   | AB050716  | 948.813   | 653.432   | AK026747  | 1633.272  | 1727.966  |
| BC000363  | 413.758   | 499.058   | X77690    | 1274.914  | 1371.661  | AL110150  | 2521.469  | 3020.521  |
| NM_007237 | 778.478   | 822.023   | NM_002422 | 766.859   | 1151.998  | NM_001998 | 2176.179  | 2017.182  |
| NM_004608 | 441       | 470.079   | NM_006690 | 2340.253  | 2919.248  | X87825    | 1427.522  | 1365.699  |
| NM_018257 | 2357.171  | 2410.14   | NM_006156 | 474.341   | 337.571   | NM_000914 | 191.27    | 117.876   |
| NM_005919 | 708.057   | 643.864   | NM_003348 | 3697.547  | 7018.09   | AK001285  | 8072.804  | 9040.962  |
| AF086112  | 351.658   | 224.09    | AB033029  | 886.214   | 1306.682  | D17215    | 1778.275  | 1747.586  |
| AL137254  | 615.634   | 303.278   | NM_006002 | 906.226   | 230.581   | BE781513  | 351.695   | 351.489   |
| AK026359  | 331.778   | 223.263   | AL137663  | 3560.928  | 4699.681  | NM_015714 | 6243      | 5259.071  |
| AF085884  | 998.206   | 544.741   | AB006198  | 8358.374  | 8429.571  | AK075564  | 423.218   | 702.929   |
| S81522    | 2916.298  | 2026.701  | U72518    | 2907.731  | 2736.642  | AK026219  | 342.443   | 324.211   |
| S94541    | 914.697   | 971.183   | AF264765  | 749.043   | 753.192   | D28446    | 387.801   | 349.962   |
| L36587    | 9945.001  | 9105.656  | NM_015322 | 5261.628  | 3656.278  | AK024756  | 498.987   | 341.78    |
| AK024228  | 740.118   | 921.991   | NM_016607 | 3805.808  | 3019.355  | NM_017911 | 611.923   | 526.885   |
| NM_016647 | 1008.802  | 1018.783  | NM_003275 | 1291.932  | 830.855   | AJ224168  | 1193.96   | 1350.844  |
| AK024695  | 970.312   | 1536.796  | NM_000268 | 22931.967 | 13324.292 | AF147325  | 40685.848 | 47006.414 |
| AF038174  | 1001.147  | 1198.862  | M30493    | 19862.451 | 12810.937 | NM_014428 | 241.15    | 233.421   |
| AF070632  | 542.119   | 926.18    | AJ008160  | 620.349   | 367.1     | AK023584  | 209.671   | 77.466    |
| AF161359  | 1041.362  | 1322.529  | NM_004343 | 51039.789 | 26768.779 | NM_003774 | 360.19    | 187.284   |
| AL365520  | 579.081   | 927.921   | X52355    | 5079.687  | 2977.936  | D87466    | 2870.922  | 2320.894  |
| AL359338  | 975.669   | 1051.088  | NM_006963 | 10673.354 | 6584.512  | CY3Cy5    | 1272.938  | 306.543   |
| AK023623  | 887.455   | 685.401   | NM_000307 | 646.781   | 571.541   | AA608568  | 1770.229  | 1256.225  |
| AK026202  | 251.473   | 152.563   | U66561    | 5177.409  | 5077.78   | BG831301  | 18310.514 | 14029.448 |
| AK021539  | 1779.994  | 669.314   | NM_000306 | 2760.297  | 2275.323  | M14764    | 214.583   | 176.642   |
| AK021819  | 477.447   | 355.146   | NM_002200 | 2524.225  | 3271.158  | AA478647  | 1557.97   | 2143.134  |

|           |          |          |           |           |           |            |           |           |
|-----------|----------|----------|-----------|-----------|-----------|------------|-----------|-----------|
| AK026738  | 347.602  | 193.499  | AF017433  | 1617.82   | 1888.512  | M35999     | 469.471   | 373.921   |
| AK025011  | 229.376  | 149.363  | AF130111  | 1986.208  | 2491.31   | AW058501   | 401.558   | 938.481   |
| AL157491  | 260.08   | 262.101  | NM_016307 | 3437.307  | 2872.825  | M81379     | 259.082   | 212.735   |
| NM_005266 | 694.028  | 541.058  | AB028449  | 3131.652  | 2423.784  | ID 2623896 | 1723.965  | 1848.803  |
| AF087965  | 247.697  | 186.315  | NM_004697 | 2238.242  | 2783.42   | ID 2602214 | 1200.336  | 793.054   |
| AF085998  | 880.508  | 1124.677 | U94384    | 593.032   | 603.875   | ID 2071279 | 2151.696  | 1602.852  |
| AK024681  | 494.03   | 406.125  | AF131776  | 3825.615  | 6623.151  | L10709     | 1672.87   | 1325.719  |
| AF085990  | 253.102  | 278.766  | NM_020528 | 5470.894  | 8035.935  | N35489     | 438.471   | 392.627   |
| NM_014907 | 6157.153 | 6820.384 | NM_007040 | 27617.318 | 36912.43  | AI928195   | 560.988   | 487.903   |
| AB007977  | 2002.471 | 2246.353 | NM_014483 | 12135.049 | 16188.074 | AA482489   | 188.434   | 346.167   |
| NM_014221 | 1166.505 | 1044.259 | AK024249  | 2859.651  | 3918.533  | AA458922   | 3265.715  | 3164.519  |
| U58663    | 317.625  | 327.01   | AF239156  | 10369.896 | 10086.212 | NM_145655  | 1078.252  | 840.755   |
| U84515    | 591.699  | 476.942  | NM_020390 | 1768.656  | 1383.561  | SR2        | 34979.973 | 20935.201 |
| U92021    | 369.43   | 515.352  | NM_003321 | 21526.682 | 14246.8   | SR4        | 8327.027  | 6880.241  |
| AF086143  | 3534.735 | 3473.93  | U18937    | 13848.195 | 9682.711  | SR6        | 956.305   | 890.319   |
| AK022364  | 218.65   | 323.545  | U01925    | 1578.005  | 853.856   | SR8        | 4062.703  | 10066.983 |
| AK024674  | 346.198  | 275.648  | AJ420488  | 65426.316 | 58135.801 | SR10       | 14257.621 | 3132.122  |
| AK024244  | 960.971  | 489.278  | AF268872  | 2084.382  | 1550.148  | CY3Cy5     | 944.724   | 203.382   |
| AK023812  | 332.756  | 171.349  | AK022180  | 30567.096 | 18967.715 | NM_017725  | 559.445   | 569.058   |
| AL390084  | 444.897  | 343.441  | AK001384  | 1042.271  | 662.816   | NM_005255  | 1244.906  | 846.464   |
| AK023565  | 271.176  | 169.051  | AK025437  | 3698.433  | 2253.921  | NM_002840  | 731.53    | 599.402   |
| AK021479  | 458.906  | 491.112  | AK074164  | 927.686   | 1011.731  | NM_006174  | 258.612   | 206.078   |
| NM_003835 | 486.65   | 643.172  | NM_004168 | 10968.981 | 13195.658 | NM_015850  | 1690.3    | 1625.15   |
| AK000245  | 631.996  | 495.176  | AF161353  | 8030.289  | 7554.239  | NM_004864  | 457.063   | 431.034   |
| AF118072  | 300.042  | 140.845  | NM_000764 | 2519.44   | 2566.113  | NM_002835  | 1039.631  | 869.483   |
| AK024112  | 205.294  | 96.364   | D42047    | 2420.569  | 2497.208  | NM_014685  | 34652.684 | 22198.637 |
| AF085900  | 4473.941 | 4348.708 | AB009282  | 13051.6   | 11547.479 | BF528358   | 379.37    | 398.108   |
| AK022420  | 917.822  | 1183.29  | NM_005004 | 47482.852 | 48545.969 | NM_002487  | 353.158   | 276.083   |
| AK023254  | 500.242  | 443.8    | NM_003670 | 7762.25   | 10372.47  | NM_013340  | 322.846   | 231.965   |
| AK023945  | 5542.163 | 8069.14  | NM_014639 | 3767.46   | 4140.973  | NM_005462  | 388.4     | 316.388   |
| AK022446  | 621.062  | 1175.499 | NM_006392 | 4228.46   | 4900.002  | NM_012315  | 870.64    | 1097.487  |
| AK023352  | 375.785  | 541.064  | NM_014717 | 1705.777  | 1884.884  | AK026235   | 315.279   | 363.368   |
| AK023773  | 505.137  | 408.233  | NM_017922 | 2566.775  | 2799.847  | NM_006510  | 4525.473  | 4057.607  |
| AF116709  | 211.539  | 201.955  | NM_002823 | 61546.418 | 60277.855 | NM_003141  | 1045.878  | 886.515   |
| AK025533  | 627.813  | 704.202  | NM_017916 | 17537.459 | 14496.327 | NM_020245  | 2097.45   | 1833.667  |
| AK021911  | 2965.781 | 1744.613 | NM_001805 | 9791.772  | 7400.369  | NM_007175  | 738.515   | 709.601   |
| D17225    | 439.431  | 372.116  | AK022360  | 2216.565  | 1631.325  | AJ011497   | 1027.35   | 830.229   |
| AF147430  | 1306.554 | 753.402  | AK095694  | 2180.497  | 1641.943  | NM_003015  | 275.423   | 224.558   |
| AK025766  | 5586.563 | 3447.151 | X52341    | 60455.109 | 50416.988 | NM_000335  | 430.901   | 479.858   |
| U35875    | 4169.94  | 2783.091 | NM_003082 | 7127.495  | 5407.746  | W61100     | 32566.236 | 28166.316 |
| AK021857  | 8816.732 | 6752.826 | AL133632  | 3054.969  | 2035.932  | AF215923   | 933.246   | 1612.932  |
| AK022257  | 916.247  | 893.741  | AK024551  | 920.473   | 532.278   | U66621     | 2354.722  | 3299.366  |
| BE887356  | 10206.94 | 7358.677 | AL833249  | 4189.258  | 2817.163  | NM_005720  | 8498.973  | 5937.315  |
| X84369    | 520.897  | 673.234  | NM_018374 | 3270.677  | 2364.596  | AB040936   | 208.579   | 128.154   |
| AK023329  | 2530.432 | 3107.691 | AF131852  | 333.377   | 610.27    | U61736     | 216.902   | 296.757   |
| AK021773  | 1207.011 | 1532.34  | AK021894  | 2240.971  | 2829.82   | AJ132086   | 618.732   | 901.938   |
| AK027074  | 2617.599 | 2919.363 | NM_020424 | 2049.596  | 2229.253  | U92816     | 3098.105  | 3214.832  |
| AL365456  | 568.216  | 1012.993 | AF438313  | 2267.416  | 2969.656  | BC011987   | 8820.985  | 9794.946  |
| NM_018035 | 334.669  | 375.762  | NM_017815 | 481.672   | 570.55    | NM_004105  | 12948.577 | 13993.508 |
| U84522    | 1038.077 | 703.677  | AF147341  | 518.72    | 623.315   | NM_003485  | 1440.398  | 1621.764  |
| AK021694  | 1662.435 | 718.456  | AB033009  | 19722.17  | 15879.882 | NM_005035  | 1347.513  | 916.304   |
| AF086013  | 468.132  | 224.154  | AL137761  | 491.115   | 602.885   | L03418     | 4444.052  | 2413.553  |
| U84505    | 1237.2   | 550.301  | AK022086  | 519.183   | 892.94    | M95923     | 490.649   | 312.247   |

|            |           |           |           |           |           |           |           |           |
|------------|-----------|-----------|-----------|-----------|-----------|-----------|-----------|-----------|
| X81005     | 609.835   | 304.458   | AF147320  | 2797.606  | 3042.868  | NM_002415 | 47961.152 | 42829.457 |
| AL049265   | 793.997   | 640.472   | AK027024  | 951.018   | 742.132   | NM_006332 | 398.441   | 353.347   |
| NM_012352  | 169.956   | 194.065   | AK022339  | 969.937   | 954.573   | NM_000916 | 1307.857  | 1117.379  |
| AL137635   | 297.733   | 333.764   | AK022138  | 1787.768  | 2034.07   | NM_018663 | 1661.954  | 1339.667  |
| AL049430   | 1001.858  | 1205.324  | AF086191  | 4365.31   | 3658.174  | NM_145904 | 7874.037  | 5466.007  |
| AK021461   | 361.576   | 405.449   | AF143880  | 907.055   | 1172.437  | NM_006796 | 2694.126  | 2708.653  |
| AB015349   | 477.023   | 323.883   | NM_017638 | 5288.718  | 5018.754  | NM_000706 | 498.175   | 646.548   |
| AL079274   | 3986.589  | 5027.455  | AL050013  | 790.091   | 727.86    | NM_015941 | 707.022   | 528.679   |
| S46403     | 421.627   | 332.992   | AL133052  | 2635.157  | 3404.344  | NM_003655 | 3030.191  | 2238.3    |
| AL137398   | 1044.47   | 1054.964  | AB037824  | 2295.182  | 2321.531  | NM_014837 | 1050.857  | 854.035   |
| Y12021     | 449.393   | 670.893   | AF361494  | 2762.473  | 1199.954  | AK025111  | 698.837   | 2851.472  |
| AF127771   | 563.101   | 655.693   | AK022810  | 1491.756  | 1223.832  | NM_001732 | 451.895   | 788.477   |
| Z83949     | 565.297   | 1762.408  | AF147408  | 1587.826  | 1940.163  | NM_018690 | 2399.536  | 1807.135  |
| NM_013300  | 9108.082  | 12738.812 | AK027222  | 7148.181  | 8260.708  | NM_000860 | 893.363   | 1174.014  |
| AK026039   | 3245.661  | 4731.948  | AF085868  | 386.804   | 594.499   | AB037798  | 1086.98   | 836.273   |
| AF108756   | 7139.607  | 8312.862  | AK054767  | 868.03    | 626.33    | NM_000780 | 350.934   | 392.666   |
| AF086394   | 282.574   | 578.895   | AL080086  | 544.135   | 718.407   | AF272663  | 2556.906  | 2268.505  |
| NM_004075  | 896.11    | 426.896   | AL049301  | 955.656   | 919.303   | NM_012190 | 447.559   | 432.605   |
| NM_001887  | 2123.119  | 1007.89   | AL050042  | 3189.447  | 2621.293  | AF277719  | 508.638   | 577.79    |
| NM_006533  | 760.626   | 419.741   | AL117570  | 689.384   | 466.004   | NM_000791 | 1470.088  | 1548.139  |
| AK026747   | 2502.414  | 1083.289  | NM_018469 | 2335.927  | 1997.539  | NM_003681 | 1354.786  | 1165.469  |
| AL110150   | 984.422   | 497.721   | NM_014867 | 10374.799 | 7680.394  | NM_004800 | 4859.428  | 3741.94   |
| NM_001998  | 1718.632  | 804.993   | AL359932  | 936.927   | 700.939   | NM_014954 | 9662.87   | 7796.28   |
| X87825     | 1176.358  | 710.197   | AB037850  | 2833.164  | 2998.783  | NM_014905 | 1223.375  | 1433.155  |
| AK001285   | 10577.063 | 8006.014  | AK002197  | 2193.009  | 2142.656  | X91148    | 261.414   | 306.562   |
| D17215     | 2093.482  | 1499.318  | AF087996  | 4145.318  | 4072.684  | NM_015700 | 3261.528  | 2557.407  |
| BE781513   | 436.987   | 411.251   | AK021710  | 3659.54   | 3437.786  | NM_019087 | 1381.959  | 1213.347  |
| NM_015714  | 7269.582  | 5592.296  | NM_007017 | 1223.069  | 1104.129  | NM_016322 | 326.241   | 297.79    |
| AK075564   | 550.443   | 556.868   | AL137446  | 2490.688  | 1811.772  | NM_005072 | 324.818   | 240.845   |
| AK026219   | 387.428   | 416.912   | AB025286  | 1789.757  | 1534.417  | AF308802  | 887.4     | 1515.962  |
| D28446     | 449.281   | 418.685   | AF009286  | 1044.729  | 954.265   | S76984    | 5431.771  | 6057.119  |
| AK024756   | 1004.162  | 1240.417  | AB032364  | 806.623   | 854.92    | NM_014495 | 47378.887 | 54148.637 |
| NM_017911  | 1085.871  | 1020.669  | AF009295  | 795.523   | 969.054   | NM_014081 | 309.141   | 175.447   |
| AJ224168   | 2154.524  | 2408.984  | NM_005029 | 2209.653  | 1873.304  | NM_005651 | 347.278   | 294.857   |
| S69873     | 470.16    | 641.199   | AF056447  | 2004.408  | 2152.856  | NM_007195 | 1333.098  | 1089.881  |
| AF147325   | 45051.047 | 70983.531 | AK001010  | 1439.242  | 1517.946  | AK023337  | 1099.788  | 1061.407  |
| NM_014428  | 303.239   | 397.491   | NM_018076 | 1282.25   | 1346.011  | NM_013275 | 4638.771  | 3939.707  |
| NM_018497  | 261.395   | 801.026   | AK021442  | 2078.752  | 1789.234  | NM_019011 | 937.745   | 980.985   |
| AK023584   | 301.334   | 473.289   | AK001076  | 1441.215  | 1362.997  | AF459094  | 2150.983  | 1977.071  |
| NM_003774  | 658.881   | 437.668   | AK001820  | 852.052   | 1021.068  | NM_003157 | 980.003   | 1128.354  |
| D87466     | 3224.798  | 3611.555  | AK021482  | 8347.401  | 7679.554  | NM_004938 | 706.07    | 818.438   |
| CY3Cy5     | 1334.124  | 241.57    | AK021730  | 681.824   | 493.714   | NM_014326 | 361.336   | 267.323   |
| AA608568   | 3010.488  | 1607.67   | AK025317  | 13140.578 | 8958.561  | NM_004448 | 224.425   | 212.121   |
| BG831301   | 16897.02  | 11218.712 | AK025177  | 1228.282  | 824.206   | NM_015981 | 498.396   | 458.893   |
| M14764     | 420.799   | 283.178   | AK025552  | 735.363   | 1190.971  | NM_000455 | 1539.867  | 1533.621  |
| AA478647   | 2623.367  | 2031.515  | AK026725  | 2928.123  | 1952.725  | NM_014791 | 2419.59   | 2145.104  |
| M35999     | 323.02    | 354.568   | AJ008118  | 60623.016 | 58573.809 | NM_003318 | 825.925   | 586.638   |
| M81379     | 294.357   | 254.394   | NM_005523 | 2081.966  | 3134.885  | NM_004362 | 1509.219  | 1260.261  |
| ID 2623896 | 3281.429  | 3450.727  | AL109674  | 567.209   | 775.698   | NM_000182 | 8220.927  | 5614.537  |
| ID 2602214 | 2069.255  | 1610.266  | AK024512  | 4143.416  | 6475.393  | AK023384  | 622.229   | 531.158   |
| ID 2071279 | 3812.873  | 2501.226  | NM_018062 | 1411.934  | 1771.093  | NM_016026 | 2858.918  | 2033.766  |
| L10709     | 2690.013  | 1924.662  | NM_007128 | 8836.675  | 9805.003  | AB046381  | 272.399   | 254.429   |
| N35489     | 808.541   | 695.679   | NM_007160 | 713.108   | 1282.842  | AJ011497  | 867.432   | 902.393   |



|           |           |           |           |           |           |            |           |           |
|-----------|-----------|-----------|-----------|-----------|-----------|------------|-----------|-----------|
| AI928195  | 764.667   | 809.77    | NM_018627 | 769.35    | 984.36    | NM_00301E  | 723.917   | 835.249   |
| AA482489  | 308.735   | 291.419   | NM_015377 | 734.665   | 909.107   | NM_00033E  | 346.091   | 388.99    |
| AA458922  | 6751.329  | 6767.838  | AL137531  | 1386.945  | 1282.74   | W61100     | 30493.643 | 28157.973 |
| NM_14565E | 1652.249  | 1554.472  | AK022210  | 505.53    | 386.258   | AA608568   | 1883.522  | 1356.616  |
| NM_021957 | 395.369   | 343.212   | AL080085  | 4703.015  | 4396.891  | BG831301   | 18650.482 | 16622.072 |
| SR2       | 50514.938 | 44047.871 | AF086519  | 1081.915  | 1588.574  | M14764     | 1632.447  | 2173.459  |
| SR4       | 14189.799 | 11801.038 | L08435    | 325.557   | 1051.178  | AA478647   | 1848.689  | 2001.792  |
| SR6       | 1890.543  | 1727.128  | AF055012  | 4910.446  | 6438.029  | M35999     | 355.089   | 375.994   |
| SR8       | 7083.205  | 23650.102 | AK022307  | 3379.403  | 5738.49   | AW058501   | 481.9     | 772.937   |
| SR10      | 25974.121 | 9354.218  | U00950    | 235.362   | 1202.466  | M81379     | 387.7     | 1128.952  |
| CY3Cy5    | 2394.704  | 416.824   | NM_005172 | 1921.703  | 2884.997  | ID 2623896 | 1672.861  | 1641.993  |
| NM_01772E | 992.188   | 612.398   | AK025192  | 6535.329  | 9028.763  | ID 2602214 | 1189.069  | 950.768   |
| NM_00525E | 1043.456  | 437.285   | NM_012403 | 3497.56   | 4564.571  | ID 2071279 | 2444.951  | 1922.53   |
| NM_00284C | 1417.901  | 812.942   | AK022611  | 7024.225  | 8618.129  | L10709     | 1678.778  | 1493.656  |
| NM_006174 | 333.352   | 263.069   | NM_00615E | 10673.368 | 11895.465 | N35489     | 582.838   | 686.123   |
| NM_01585C | 1995.399  | 1359.602  | NM_00634E | 2322.828  | 2228.615  | AI928195   | 533.412   | 315.52    |
| NM_004864 | 939.507   | 517.896   | AK025240  | 5471.249  | 6099.298  | AA458922   | 3499.137  | 3173.651  |
| NM_00283E | 2614.213  | 1895.687  | NM_017633 | 15590.712 | 16347.345 | NM_14565E  | 1198.638  | 834.314   |
| AK027377  | 242.876   | 109.189   | AF086186  | 27134.773 | 29187.047 | NM_021957  | 413.174   | 755.589   |
| NM_01468E | 53034.801 | 40038.133 | NM_017802 | 5201.088  | 8108.636  | NM_00171E  | 2793.027  | 2212.665  |
| BF528358  | 722.163   | 746.096   | AF155194  | 1053.944  | 1673.658  | AL080062   | 773.595   | 613.672   |
| NM_002487 | 305.613   | 689.612   | AK023667  | 1122.239  | 1199.952  | NM_145904  | 7016.585  | 5459.658  |
| NM_005462 | 513.111   | 463.886   | AJ008137  | 13824.562 | 11940.244 | NM_00679E  | 2504.973  | 2629.454  |
| NM_01231E | 1682.867  | 1609.427  | AF085841  | 794.822   | 572.79    | NM_00070E  | 445.591   | 393.087   |
| AK026235  | 749.779   | 674.26    | U92026    | 1063.323  | 1953.109  | NM_015941  | 696.585   | 662.324   |
| NM_00651C | 8462.846  | 7810.416  | AF086234  | 44544.965 | 55606.848 | NM_00365E  | 2702.742  | 2039.154  |
| NM_003141 | 1179.316  | 1328.873  | AK023680  | 6198.237  | 8680.276  | NM_014837  | 1060.258  | 874.312   |
| NM_02024E | 3546.937  | 3622.004  | AF009324  | 2878.677  | 4875.036  | NM_01772E  | 534.903   | 454.054   |
| NM_00717E | 1390.055  | 1592.663  | AF019226  | 2769.999  | 3705.981  | NM_00525E  | 1330.693  | 894.017   |
| AB046381  | 432.734   | 320.88    | AK022112  | 781.017   | 1240.429  | NM_00284C  | 726.547   | 717.536   |
| AJ011497  | 1707.982  | 1818.589  | AL137480  | 12699.51  | 16903.674 | NM_006174  | 272.354   | 364.22    |
| NM_00301E | 507.405   | 505.938   | AK022182  | 1413.287  | 2293.186  | NM_01585C  | 2207.764  | 3666.779  |
| NM_00033E | 997.218   | 1532.128  | D16473    | 2833.632  | 4717.104  | NM_004864  | 495.062   | 588.808   |
| W61100    | 30654.635 | 39535.516 | AB028968  | 1819.976  | 2611.762  | NM_00283E  | 1255.268  | 1081.033  |
| AF215923  | 1515.29   | 1156.95   | AK001202  | 634.797   | 1161.129  | NM_01468E  | 37333.27  | 29714.582 |
| U66621    | 3501.617  | 3309.948  | AF195764  | 51442.723 | 53966.512 | BF528358   | 302.534   | 525.356   |
| NM_00572C | 14398.768 | 7745.266  | AF055029  | 1477.616  | 2166.337  | NM_002487  | 370.824   | 462.705   |
| AB040936  | 302.272   | 228.269   | S82164    | 1698.531  | 2759.958  | NM_01334C  | 304.12    | 313.449   |
| AJ132086  | 1126.16   | 951.66    | AK024394  | 1637.833  | 2077.837  | NM_005462  | 446.776   | 361.015   |
| U92816    | 5809.597  | 5163.415  | AF147374  | 2272.456  | 3150.042  | NM_01231E  | 747.123   | 628.081   |
| BC011987  | 15062.874 | 14371.265 | AF130091  | 861.141   | 863.822   | AK026235   | 386.674   | 296.045   |
| NM_00410E | 22628.459 | 23518.652 | L43338    | 18848.178 | 24378.568 | NM_00651C  | 4119.638  | 4011.067  |
| NM_00348E | 1893.38   | 1697.645  | AJ227866  | 23177.375 | 32330.619 | NM_003141  | 764.188   | 738.111   |
| NM_00503E | 2329.418  | 1950.971  | AF458223  | 7362.395  | 11875.206 | NM_02024E  | 2040.777  | 1686.163  |
| L03418    | 8159.924  | 5575.156  | AK026822  | 488.836   | 706.997   | NM_00717E  | 668.629   | 605.938   |
| M95923    | 414.254   | 483.6     | AK022838  | 9908.752  | 9662.02   | X91148     | 219.86    | 275.823   |
| NM_00241E | 54627.305 | 59146.449 | NM_00350E | 747.438   | 825.854   | NM_01570C  | 3078.559  | 2579.207  |
| NM_006332 | 827.651   | 822.248   | CY3Cy5    | 8608.865  | 1241.678  | NM_019087  | 1109.892  | 911.74    |
| NM_00091E | 2332.572  | 1675.571  | AA700390  | 6415.26   | 6686.162  | NM_016322  | 339.231   | 201.095   |
| NM_018663 | 3474.75   | 3360.528  | Y18474    | 727.358   | 858.788   | NM_005072  | 325.546   | 241.363   |
| NM_145904 | 13793.219 | 13427.197 | AA436163  | 1238.177  | 1774.765  | AF215923   | 780.684   | 660.078   |
| NM_00679E | 5556.715  | 8500.08   | BI907981  | 1336.985  | 2150.503  | U66621     | 2052.192  | 2055.22   |
| NM_00070E | 958.904   | 1980.618  | BI603841  | 3994.981  | 5293.665  | NM_00572C  | 9598.497  | 8026.356  |

|           |           |           |           |           |           |           |           |           |
|-----------|-----------|-----------|-----------|-----------|-----------|-----------|-----------|-----------|
| NM_015941 | 1621.883  | 2234.161  | BG696638  | 9600.643  | 7878.738  | AB040936  | 185.546   | 243.843   |
| NM_003655 | 6715.525  | 9002.969  | M19888    | 3254.646  | 2447.087  | U61736    | 783.728   | 2095.938  |
| NM_014837 | 1793.131  | 2054.892  | Y08136    | 1065.391  | 924.482   | AJ132086  | 608.997   | 785.518   |
| AK025111  | 433.362   | 341.384   | AA156863  | 6057.344  | 5470.299  | U92816    | 3357.119  | 3417.813  |
| NM_001732 | 547.103   | 313.037   | BI915199  | 2483.878  | 2123.775  | BC011987  | 9205.855  | 8614.34   |
| NM_018690 | 3860.138  | 2166.715  | R82957    | 59694.141 | 59694.473 | NM_004100 | 13143.144 | 10101.763 |
| NM_000860 | 541.145   | 494.872   | BI830442  | 966.782   | 659.873   | NM_003485 | 1509.307  | 1506.136  |
| AB037798  | 1525.694  | 1211.693  | AA398951  | 5995.6    | 4718.332  | NM_005035 | 1437.356  | 1243.862  |
| AF272663  | 2308.477  | 1433.28   | AI218732  | 2156.592  | 1971.655  | L03418    | 4261.187  | 2795.28   |
| NM_012190 | 894.007   | 564.316   | NM_004102 | 5411.569  | 4017.395  | M95923    | 499.479   | 349.599   |
| NM_000791 | 1927.76   | 1797.957  | NM_004544 | 5948.572  | 5337.003  | NM_002415 | 47869.914 | 38836.508 |
| NM_003681 | 2753.089  | 2184.387  | SR5       | 3834.176  | 4775.718  | NM_006332 | 578.763   | 695.85    |
| NM_004800 | 9446.863  | 7885.692  | SR7       | 5982.957  | 44967.992 | NM_000910 | 1316.433  | 941.074   |
| AB037738  | 372.094   | 336.897   | SR9       | 22082.563 | 3719.812  | NM_018663 | 1838.876  | 1191.166  |
| S82769    | 231.829   | 282.295   | CY3Cy5    | 7557.269  | 1252.585  | NM_014791 | 2511.645  | 2913.654  |
| NM_014954 | 7693.667  | 8606.304  | NM_018049 | 6711.02   | 5385.651  | NM_003318 | 752.178   | 523.508   |
| NM_000807 | 354.791   | 420.802   | AJ133439  | 794.008   | 871.516   | NM_004362 | 1448.488  | 1264.854  |
| NM_014900 | 1633.057  | 2277.664  | NM_014395 | 660.29    | 592.8     | NM_000182 | 7484.713  | 5915.273  |
| X91148    | 418.198   | 585.31    | NM_001561 | 779.084   | 658.907   | AK023384  | 482.701   | 497.058   |
| NM_015700 | 6337.941  | 7554.844  | NM_005160 | 1961.724  | 1946.507  | NM_016020 | 2089.917  | 1664.137  |
| NM_019087 | 2860.974  | 3616.199  | NM_000590 | 396.899   | 438.9     | AK025111  | 290.98    | 161.214   |
| NM_016322 | 520.609   | 795.535   | X78817    | 19658.254 | 24750.707 | NM_001732 | 543.955   | 398.099   |
| NM_005072 | 700.798   | 916.528   | AB023135  | 575.24    | 793.843   | NM_018690 | 2642.787  | 2293.468  |
| AF308802  | 838.642   | 471.59    | AY009401  | 1052.293  | 1055.865  | AF272663  | 2651.295  | 2644.31   |
| S76984    | 10626.223 | 6354.1    | AF294628  | 734.958   | 542.307   | NM_012190 | 522.16    | 393.86    |
| NM_014495 | 54226.152 | 37884.27  | AK026960  | 501.581   | 373.924   | AB033015  | 220.076   | 262.235   |
| NM_014081 | 527.636   | 423.153   | NM_001991 | 781.089   | 714.382   | AF277719  | 570.006   | 488.504   |
| NM_005651 | 583.51    | 366.8     | NM_000193 | 1445.124  | 1593.589  | NM_000791 | 1036.108  | 1045.701  |
| NM_005418 | 193.843   | 235.057   | BC014586  | 719.844   | 667.531   | NM_003681 | 1355.433  | 1696.576  |
| NM_007195 | 1273.489  | 983.878   | NM_002448 | 1825.333  | 2349.089  | NM_004800 | 5210.196  | 4833.771  |
| AK023337  | 1996.436  | 1912.55   | AF053952  | 9396.8    | 10900.708 | AB037738  | 199.279   | 116.749   |
| NM_013275 | 9516.952  | 13552.089 | NM_014044 | 5015.903  | 3662.169  | NM_014954 | 7436.467  | 6678.572  |
| AB037842  | 517.518   | 376.379   | NM_000900 | 1929.993  | 2472.298  | NM_000807 | 205.175   | 149.923   |
| NM_019011 | 1959.227  | 1916.742  | AK023684  | 4916.522  | 4926.274  | NM_014900 | 1241.864  | 1112.017  |
| AF459094  | 3920.071  | 3461.07   | NM_000232 | 956.707   | 1017.898  | NM_145650 | 1033.09   | 1066.25   |
| NM_003157 | 1243.197  | 1262.211  | NM_015057 | 1702.056  | 965.8     | NM_021957 | 277.525   | 277.301   |
| NM_004930 | 1403.529  | 1428.131  | AF303398  | 8346.983  | 8228.727  | NM_001710 | 2217.337  | 1559.355  |
| NM_014320 | 398.711   | 441.065   | NM_014810 | 3580.226  | 3344.75   | AL080062  | 571.842   | 588.537   |
| NM_004440 | 373.988   | 225.034   | NM_004730 | 2032.311  | 2400.737  | S76984    | 5624.72   | 3702.725  |
| NM_015981 | 546.469   | 616.349   | NM_007357 | 4349.633  | 5244.251  | NM_014495 | 51242.008 | 60007.449 |
| NM_000455 | 3312.179  | 3868.719  | NM_003763 | 5036.378  | 5695.992  | NM_014081 | 483.497   | 621.114   |
| NM_014791 | 4659.272  | 5352.981  | AK023448  | 2162.107  | 1626.625  | NM_005651 | 506.792   | 955.294   |
| NM_003310 | 1319.446  | 1447.638  | Y18213    | 3270.942  | 2749.519  | AK023699  | 952.876   | 1401.863  |
| NM_004362 | 2272.117  | 3566.992  | NM_003283 | 3717.575  | 2616.137  | NM_007195 | 633.655   | 799.041   |
| NM_000182 | 14189.822 | 19132.535 | AF249898  | 7453.13   | 4065.287  | AK023337  | 1618.558  | 1694.296  |
| AK023384  | 1240.066  | 1694.352  | M69181    | 6921.804  | 4871.182  | NM_013275 | 5114.375  | 4777.328  |
| NM_016020 | 6486.956  | 17612.18  | AK027224  | 392.769   | 370.918   | AB037842  | 273.499   | 296.894   |
| AB046381  | 682.964   | 429.972   | L09078    | 440.3     | 405.042   | NM_019011 | 984.38    | 1002.703  |
| AJ011497  | 1453.544  | 1143.842  | NM_002652 | 721.365   | 736.783   | AF459094  | 2193.516  | 2326.655  |
| NM_003010 | 537.812   | 535.428   | NM_001311 | 2859.656  | 1846.581  | NM_003157 | 1503.04   | 3035.182  |
| NM_000330 | 646.733   | 429.915   | NM_017790 | 6090.498  | 5843.867  | NM_004930 | 1120.196  | 2154.194  |
| W61100    | 18155.189 | 16118.514 | NM_000354 | 364.542   | 320.727   | NM_014320 | 317.497   | 269.298   |
| AA608568  | 3356.327  | 2461.193  | NM_012410 | 2705.485  | 2108.359  | NM_004440 | 266.824   | 123.811   |

|            |           |           |           |           |           |            |           |           |
|------------|-----------|-----------|-----------|-----------|-----------|------------|-----------|-----------|
| BG831301   | 12430.52  | 8447.313  | NM_001111 | 7679.282  | 5135.937  | NM_015981  | 455.873   | 386.34    |
| M14764     | 374.374   | 475.396   | NM_004152 | 411.187   | 356.432   | NM_000455  | 1983.203  | 1664.365  |
| AA478647   | 2649.9    | 3096.466  | NM_005028 | 2034.866  | 2543.791  | NM_012319  | 659.852   | 634.684   |
| M35999     | 417.228   | 475.896   | NM_001611 | 948.897   | 803.522   | AK026235   | 468.895   | 500.284   |
| AW058501   | 278.865   | 201.489   | M59979    | 363.784   | 461.005   | NM_006510  | 4037.62   | 2631.992  |
| M81379     | 346.455   | 515.021   | AB018310  | 2363.418  | 2768.345  | NM_003141  | 980.102   | 806.204   |
| ID 2623896 | 2833.347  | 2659.397  | NM_015379 | 18967.109 | 27780.717 | NM_020245  | 1890.228  | 1251.503  |
| ID 2602214 | 1902.128  | 1576.549  | NM_004878 | 437.93    | 517.384   | NM_007175  | 546.321   | 458.22    |
| ID 2071279 | 3700.015  | 2998.298  | AF144638  | 61083.258 | 58040.516 | AB046381   | 294.617   | 208.503   |
| L10709     | 2855.916  | 2925.11   | NM_005502 | 482.802   | 146.17    | AJ011497   | 805.757   | 634.945   |
| N35489     | 908.54    | 929.636   | NM_000742 | 847.848   | 702.057   | NM_003018  | 245.889   | 425.435   |
| AI928195   | 1035.425  | 1198.114  | NM_002355 | 9453.235  | 7224.397  | NM_000336  | 276.558   | 545.394   |
| AA482489   | 248.832   | 302.943   | AK026608  | 1048.917  | 814.155   | W61100     | 29824.889 | 48188.699 |
| AA458922   | 7539.951  | 8821.645  | AB046836  | 1222.498  | 1104.587  | AA608568   | 2092.919  | 3313.823  |
| NM_145659  | 1792.01   | 2028.54   | AJ224166  | 1470.114  | 1475.166  | BG831301   | 18154.047 | 19916.721 |
| NM_021957  | 505.106   | 1185.186  | AK026098  | 2777.603  | 4607.56   | M14764     | 279.489   | 332.728   |
| NM_001719  | 3945.48   | 6350.268  | NM_012381 | 1936.24   | 1924.935  | AA478647   | 2134.944  | 2694.495  |
| AL080062   | 1605.453  | 2689.863  | M20702    | 549.037   | 598.821   | M35999     | 339.038   | 488.388   |
| NM_145904  | 12986.381 | 7365.961  | NM_006397 | 13441.017 | 15548.538 | AW058501   | 204.278   | 295.168   |
| NM_006796  | 5073.415  | 3683.415  | D83776    | 2118.458  | 2268.465  | M81379     | 203.287   | 264.951   |
| NM_015941  | 1149.641  | 955.214   | NM_004088 | 3375.464  | 2726.578  | ID 2623896 | 1428.525  | 1465.602  |
| NM_003655  | 5208.629  | 3249.325  | NM_002180 | 1125.693  | 1083.86   | ID 2602214 | 1233.843  | 1185.34   |
| NM_014837  | 1533.176  | 1270.786  | NM_000138 | 2466.762  | 2291.11   | ID 2071279 | 2721.151  | 3958.518  |
| NM_017729  | 1142.846  | 1197.032  | NM_018163 | 1608.593  | 986.646   | L10709     | 1841.39   | 2817.342  |
| NM_005259  | 1365.722  | 1391.036  | AK026362  | 3430.072  | 2867.016  | N35489     | 398.07    | 440.096   |
| NM_002840  | 1750.412  | 1592.842  | NM_004968 | 3602.723  | 2790.508  | AI928195   | 423.546   | 529.459   |
| NM_006174  | 409.988   | 517.358   | NM_005908 | 2063.254  | 1714.835  | AA458922   | 3514.626  | 2751.042  |
| NM_015850  | 1397.388  | 1295.94   | NM_004785 | 3449.482  | 3083.501  | M95923     | 402.333   | 267.561   |
| NM_004864  | 821.057   | 724.733   | NM_002428 | 2095.159  | 1787.757  | NM_002415  | 44042.234 | 26263.193 |
| NM_002838  | 2495.007  | 2215.674  | NM_014674 | 5556.862  | 4415.257  | NM_006332  | 451.879   | 264.084   |
| AK027377   | 190.993   | 203.467   | NM_018271 | 1385.32   | 1271.864  | NM_000916  | 1314.528  | 1034.592  |
| NM_014686  | 42795.809 | 34631.074 | NM_000547 | 442.201   | 368.062   | NM_018663  | 1397.534  | 1027.64   |
| BF528358   | 686.299   | 696.909   | NM_014652 | 2106.363  | 1801.104  | NM_145904  | 6548.355  | 3616.258  |
| NM_002487  | 304.267   | 218.234   | AL133020  | 6434.833  | 5360.253  | NM_006796  | 2614.94   | 1805.01   |
| NM_013340  | 382.538   | 612.791   | NM_014044 | 3593.544  | 3266.788  | NM_000706  | 541.632   | 413.868   |
| NM_005462  | 773.243   | 840.668   | NM_000900 | 2094.384  | 2525.721  | NM_015941  | 632.69    | 1170.025  |
| NM_012319  | 1786.726  | 2344.612  | AK023684  | 4747.013  | 5098.064  | NM_003655  | 3155.321  | 4378.72   |
| AK026235   | 760.62    | 1590.324  | NM_000232 | 1053.128  | 1266.439  | NM_014837  | 840.416   | 1233.061  |
| NM_006510  | 10411.378 | 27301.857 | J05070    | 311.182   | 671.037   | NM_017729  | 557.813   | 800.116   |
| NM_003141  | 1432.761  | 2756.186  | U76368    | 762.266   | 981.38    | NM_005259  | 1269.289  | 1517.598  |
| NM_020245  | 3378.561  | 5505.237  | AA700390  | 6320.641  | 8015.597  | NM_002840  | 972.728   | 1386.477  |
| NM_007175  | 1367.536  | 2042.005  | Y18474    | 689.524   | 1217.926  | NM_015850  | 2336.759  | 3698.991  |
| X91148     | 414.529   | 404.813   | AA436163  | 1517.478  | 2025.076  | NM_004864  | 548.746   | 408.516   |
| NM_015700  | 5302.878  | 3398.65   | BI907981  | 1297.602  | 1707.489  | NM_002838  | 1107.423  | 1007.631  |
| NM_019087  | 2083.324  | 1418.234  | BI603841  | 4199.108  | 4251.136  | NM_014686  | 27119.865 | 21604.148 |
| NM_005072  | 633.339   | 350.336   | BG696638  | 9136.99   | 7813.78   | BF528358   | 383.293   | 501.077   |
| AF215923   | 1669.505  | 1146.15   | M19888    | 2871.573  | 2334.801  | NM_016339  | 233.709   | 226.722   |
| U66621     | 3484.431  | 3635.357  | Y08136    | 1030.471  | 794.935   | NM_002487  | 303.216   | 252.026   |
| NM_005720  | 16342.375 | 13627.166 | AA156863  | 5093.398  | 3484.256  | NM_013340  | 237.153   | 251.144   |
| AB040936   | 384.266   | 506.479   | BI915199  | 2106.104  | 1854.168  | NM_005462  | 420.007   | 375.65    |
| AB023161   | 203.852   | 228.824   | R82957    | 61310.586 | 55730.23  | NM_004677  | 150.677   | 121.303   |
| U61736     | 423.908   | 418.193   | BI830442  | 947.872   | 742.32    | NM_014954  | 9799.424  | 5604.26   |
| AJ132086   | 1028.79   | 1136.293  | AA398951  | 5952.036  | 4017.552  | NM_014909  | 1284.803  | 1171.045  |

|           |           |           |           |           |           |           |           |           |
|-----------|-----------|-----------|-----------|-----------|-----------|-----------|-----------|-----------|
| U92816    | 5580.962  | 4801.708  | AI218732  | 2255.139  | 2238.156  | X91148    | 248.972   | 146.068   |
| BC011987  | 14169.282 | 14044.371 | NM_004102 | 5070.759  | 4332.037  | NM_01570C | 2768.779  | 2167.954  |
| NM_00410E | 23321.291 | 22656.82  | NM_004544 | 5739.723  | 4796.143  | NM_019087 | 1296.31   | 1370.088  |
| NM_00348E | 2430.344  | 3756.844  | NM_016204 | 750.368   | 496.894   | NM_01632Z | 288.109   | 444.149   |
| NM_00503E | 2779.948  | 2612.328  | NM_002652 | 683.496   | 659.16    | NM_00507Z | 452.659   | 812.33    |
| L03418    | 9408.642  | 7766.529  | NM_001311 | 3230.095  | 2075.427  | AF215923  | 835.501   | 1259.417  |
| M95923    | 686.899   | 704.981   | NM_01779E | 6089.317  | 5336.673  | U66621    | 2341.009  | 3089.427  |
| NM_00241E | 50986.094 | 66304.125 | NM_000354 | 317.784   | 368.666   | NM_00572C | 10610.81  | 13910.179 |
| NM_00633Z | 1213.841  | 1801.752  | NM_01241C | 2808.199  | 3508.627  | AB040936  | 309.04    | 285.386   |
| NM_00091E | 3222.925  | 3139.917  | NM_001111 | 7347.835  | 8201.162  | U61736    | 308.141   | 256.358   |
| NM_01866Z | 3694.856  | 4232.064  | NM_01804E | 7787.612  | 13455.897 | AJ132086  | 672.253   | 796.658   |
| NM_014791 | 4074.377  | 2685.519  | AJ133439  | 712.108   | 922.293   | U92816    | 2490.231  | 2149.696  |
| NM_00331E | 1221.274  | 577.674   | NM_01439E | 632.93    | 913.662   | BC011987  | 9652.974  | 9517.83   |
| NM_00436Z | 1445.907  | 1010.669  | NM_001561 | 1125.828  | 1178.753  | NM_00410E | 13064.613 | 11928.315 |
| NM_00018Z | 14668.729 | 9715.128  | NM_00516C | 2112.991  | 1791.654  | NM_00348E | 1498.032  | 1690.607  |
| AK023384  | 848.017   | 664.803   | X78817    | 24739.234 | 20290.439 | NM_00503E | 1581.743  | 1528.38   |
| NM_01602E | 4770.982  | 4147.454  | AB023135  | 875.56    | 808.433   | L03418    | 4746.924  | 3367.089  |
| AK025111  | 524.434   | 452.345   | AY009401  | 1323.234  | 1043.903  | NM_003157 | 979.597   | 906.054   |
| NM_00173Z | 699.873   | 776.002   | AF294628  | 711.485   | 602.719   | NM_00493E | 761.638   | 868.917   |
| NM_01869C | 4316.271  | 4524.249  | AK026960  | 487.124   | 364.357   | NM_01432E | 322.009   | 285.287   |
| NM_00086C | 848.565   | 737.971   | NM_001991 | 1200.934  | 850.316   | NM_00444E | 262.178   | 114.417   |
| AB037798  | 1886.006  | 2021.023  | NM_00019Z | 1982.272  | 1953.136  | NM_015981 | 895.44    | 517.673   |
| NM_00078C | 485.125   | 593.012   | BC014586  | 751.936   | 632.105   | NM_00045E | 1869.462  | 3404.617  |
| AF272663  | 4108.912  | 3473.288  | NM_00244E | 1711.159  | 1484.819  | NM_014791 | 2310.796  | 2050.783  |
| NM_01219C | 1022.232  | 835.907   | AF053952  | 19881.271 | 16039.816 | NM_00331E | 828.933   | 425.182   |
| AF277719  | 911.609   | 1428.272  | BF184738  | 703.243   | 570.076   | NM_00436Z | 1410.879  | 1198.384  |
| NM_000791 | 2061.431  | 2716.02   | NM_015057 | 1474.128  | 1103.255  | NM_00018Z | 8587.067  | 7859.139  |
| NM_003681 | 3007.371  | 3287.113  | AF303398  | 6319.169  | 5524.43   | AK023384  | 622.297   | 846.637   |
| NM_00480C | 10315.064 | 11491.44  | NM_01481C | 2975.402  | 2090.36   | NM_01602E | 2727.114  | 3945.045  |
| AB037738  | 267.887   | 313.424   | NM_00473E | 1919.888  | 1663.371  | NM_00086C | 674.743   | 806.316   |
| S82769    | 221.823   | 358.253   | NM_007357 | 4150.255  | 3334.995  | AB037798  | 1054.736  | 1766.976  |
| NM_004677 | 227.682   | 340.707   | NM_00376Z | 4601.955  | 4667.436  | NM_00078C | 222.128   | 207.429   |
| NM_014954 | 9587.185  | 11928.535 | AK023448  | 2287.292  | 1907.177  | AF272663  | 3165.238  | 2990.399  |
| NM_000807 | 322.816   | 357.032   | Y18213    | 2970.301  | 2134.928  | NM_01219C | 506.432   | 441.762   |
| NM_01490E | 1973.958  | 2319.515  | NM_00328Z | 4401.318  | 3862.925  | AF277719  | 492.674   | 664.839   |
| NM_14565E | 1426.662  | 1124.201  | AF249898  | 8409.353  | 6474.028  | NM_000791 | 1124.178  | 1079.668  |
| NM_021957 | 332.843   | 480.23    | M69181    | 8449.859  | 7547.716  | NM_003681 | 1818.776  | 3185.992  |
| NM_00171E | 3404.942  | 2478.911  | NM_00242E | 1963.884  | 1621.204  | NM_00480C | 6263.649  | 9965.431  |
| AL080062  | 1076.842  | 769.463   | NM_014674 | 5427.136  | 3621.608  | AB037738  | 203.236   | 148.649   |
| AF308802  | 728.447   | 497.753   | NM_018271 | 1409.208  | 1100.172  | NM_00495Z | 989.881   | 918.906   |
| S76984    | 10435.528 | 8876.248  | NM_000547 | 375.887   | 177.295   | NM_020414 | 919.499   | 527.697   |
| NM_01449E | 50816.012 | 60282.305 | NM_01465Z | 2179.138  | 2520.945  | AB037730  | 1413.932  | 1197.596  |
| NM_014081 | 420.812   | 437.65    | AL133020  | 6703.915  | 7165.227  | AF147429  | 164.711   | 128.168   |
| NM_005651 | 603.467   | 670.403   | NM_00415Z | 353.315   | 858.713   | NM_001357 | 2998.591  | 2287.857  |
| NM_00719E | 1273.4    | 1018.418  | BU565263  | 57581.883 | 58097.977 | NM_00389Z | 626.424   | 502.289   |
| AK023337  | 1997.653  | 1933.901  | NM_00502E | 2061.651  | 2307.171  | AB037816  | 674.652   | 703.962   |
| NM_01327E | 9597.679  | 11712.233 | NM_001611 | 919.805   | 593.654   | NM_01426E | 179.92    | 254.027   |
| AB037842  | 505.788   | 408.035   | AB018310  | 2296.664  | 2349.916  | NM_00171E | 2927.749  | 2723.857  |
| U92074    | 392.551   | 298.998   | NM_01537E | 17425.332 | 16999.232 | AL080062  | 782.501   | 1068.79   |
| NM_019011 | 1894.069  | 2184.079  | NM_00487E | 699.981   | 886.355   | NM_005651 | 496.085   | 944.446   |
| AF459094  | 4394.949  | 4736.347  | AF144638  | 58298.121 | 56038.785 | NM_00719E | 659.133   | 538.938   |
| NM_003157 | 1261.768  | 1580.308  | BF028822  | 509.773   | 383.398   | AK023337  | 1601.452  | 1360.584  |
| NM_00493E | 1633.576  | 1681.327  | NM_00074Z | 1014.995  | 1119.212  | NM_01327E | 6087.629  | 5367.485  |

|            |           |           |           |           |           |           |          |           |
|------------|-----------|-----------|-----------|-----------|-----------|-----------|----------|-----------|
| NM_014326  | 515.993   | 419.654   | NM_002355 | 9904.958  | 8745.647  | AB037842  | 224.651  | 280.707   |
| NM_015981  | 778.149   | 800.084   | AK026608  | 1384.795  | 1044.513  | U92074    | 212.398  | 300.062   |
| NM_000455  | 3225.126  | 3236.104  | NM_004102 | 4784.917  | 3600.881  | NM_019011 | 1450.955 | 2194.344  |
| NM_012319  | 1040.656  | 1042.357  | NM_004544 | 5831.11   | 4263.66   | AF459094  | 2290.317 | 2940.112  |
| AK026235   | 634.253   | 454.798   | NM_016204 | 915.284   | 1289.763  | NM_002544 | 845.325  | 933.038   |
| NM_006510  | 6605.412  | 5045.128  | AB046836  | 1387.127  | 1832.798  | AB011542  | 345.219  | 318.894   |
| NM_003141  | 1260.262  | 2061.303  | NM_017816 | 5800.882  | 5440.073  | NM_001853 | 1088.767 | 609.272   |
| NM_020245  | 3077.406  | 2561.948  | AJ224166  | 1464.82   | 1387.461  | U41737    | 267.205  | 232.611   |
| NM_007175  | 1281.16   | 973.886   | AK026098  | 2688.608  | 2357.344  | NM_005799 | 321.606  | 238.281   |
| AB046381   | 380.714   | 220.446   | NM_012381 | 1771.097  | 1591.951  | X99661    | 350.267  | 319.039   |
| AJ011497   | 1717.317  | 1561.108  | M20702    | 426.963   | 324.833   | NM_005927 | 971.705  | 639.222   |
| NM_003018  | 556.901   | 913.981   | NM_006397 | 11429.354 | 10406.602 | AB028983  | 494.993  | 372.535   |
| NM_000336  | 602.159   | 595.274   | D83776    | 1989.648  | 2404.08   | AB037800  | 364.265  | 327.558   |
| W61100     | 22979.787 | 22765.232 | NM_004088 | 3154.135  | 2903.882  | AK026377  | 196.061  | 362.74    |
| AA608568   | 3872.459  | 3971.266  | NM_002180 | 1581.662  | 1971.367  | NM_018660 | 2244.795 | 2220.747  |
| BG831301   | 20351.16  | 19198.826 | NM_000138 | 2594.638  | 2547.07   | NM_003394 | 1557.001 | 1963.587  |
| M14764     | 562.238   | 462.734   | NM_018163 | 1767.124  | 2357.175  | NM_007086 | 797.814  | 2723.11   |
| AA478647   | 2601.608  | 2818.532  | AK026362  | 3550.22   | 4069.042  | AK025997  | 730.539  | 753.741   |
| M35999     | 381.075   | 660.856   | NM_004968 | 3395.967  | 3072.943  | NM_005546 | 262.989  | 165.479   |
| AW058501   | 307.536   | 285.739   | NM_005908 | 2080.945  | 2002.483  | NM_014887 | 2187.976 | 1952.552  |
| M81379     | 288.354   | 343.017   | NM_004785 | 4144.876  | 3893.704  | NM_002590 | 534.701  | 449.979   |
| ID 2623896 | 3437.702  | 3603.178  | AK024079  | 464.761   | 380.506   | NM_018556 | 2397.168 | 1819.65   |
| ID 2602214 | 3267.744  | 5086.349  | NM_000193 | 2402.13   | 2141.594  | NM_005824 | 419.382  | 191.02    |
| ID 2071279 | 4412.161  | 4251.349  | BC014586  | 668.928   | 759.453   | AF052211  | 1426.208 | 817.902   |
| L10709     | 3159.427  | 3205.374  | NM_002448 | 1349.127  | 1300.578  | NM_005235 | 197.008  | 102.552   |
| N35489     | 863.381   | 1059.907  | AF053952  | 33328.578 | 29591.096 | NM_005600 | 986.544  | 615.866   |
| AI928195   | 1016.905  | 944.293   | BF184738  | 644.107   | 1239.218  | NM_005967 | 1312.717 | 879.52    |
| AA458922   | 7514.159  | 6522.831  | NM_014044 | 4016.742  | 6697.424  | AB014566  | 463.363  | 284.707   |
| M95923     | 984.792   | 829.654   | NM_000900 | 2603.344  | 4481.756  | NM_014223 | 815.401  | 934.053   |
| NM_002415  | 52710.859 | 62004.586 | AK023684  | 4293.711  | 5568.339  | NM_016194 | 825.218  | 596.099   |
| NM_006332  | 667.987   | 660.304   | NM_000232 | 1246.113  | 1361.264  | AL050385  | 623.125  | 585.665   |
| NM_000916  | 2373.797  | 1829.294  | AA700390  | 5040.411  | 4664.025  | NM_007027 | 1246.71  | 1638.715  |
| NM_018663  | 2843.414  | 2068.571  | Y18474    | 760.762   | 837.119   | NM_000633 | 8507.538 | 16373.787 |
| NM_145904  | 13111.382 | 7554.543  | AA436163  | 974.697   | 1014.382  | NM_019011 | 3053.17  | 2058.042  |
| NM_006796  | 5553.504  | 7113.866  | BI907981  | 1242.063  | 1264.18   | NM_004879 | 5061.392 | 4178.433  |
| NM_000706  | 627.911   | 761.225   | BI603841  | 3582.95   | 3143.566  | AB020694  | 936.374  | 486.487   |
| NM_015941  | 1546.873  | 1619.248  | BG696638  | 8187.561  | 6877.208  | NM_016071 | 1574.982 | 1528.871  |
| NM_003655  | 6006.023  | 5410.834  | M19888    | 3009.661  | 2095.503  | AL050131  | 508.656  | 570.798   |
| NM_014837  | 1704.498  | 1661.023  | Y08136    | 1076.303  | 977.526   | NM_004475 | 2751.055 | 2127.173  |
| NM_017729  | 1370.626  | 1923.29   | AA156863  | 5268.806  | 5022.273  | NM_001627 | 3206.053 | 2758.384  |
| NM_005259  | 1747.404  | 1465.113  | BI915199  | 2266.043  | 2792.367  | NM_001226 | 560.347  | 407.292   |
| NM_002840  | 1783.818  | 1444.302  | R82957    | 61074.055 | 58162.285 | NM_001336 | 295.343  | 234.013   |
| NM_006174  | 318.127   | 403.797   | BI830442  | 932.996   | 803.133   | AB050716  | 336.555  | 192.52    |
| NM_015850  | 1521.167  | 1504.565  | AA398951  | 5586.835  | 3862.497  | X77690    | 548.022  | 374.718   |
| NM_004864  | 1236.067  | 1308.914  | AI218732  | 2314.901  | 2169.023  | NM_006536 | 194.008  | 125.648   |
| NM_002838  | 2682.757  | 2615.474  | AF249898  | 8892.326  | 7105.021  | NM_006690 | 557.997  | 306.428   |
| AK027377   | 256.579   | 290.599   | M69181    | 8702.27   | 6394.538  | AF218022  | 800.946  | 1004.115  |
| NM_014686  | 49043.879 | 43650.582 | L09078    | 549.916   | 859.484   | NM_003348 | 931.421  | 1152.779  |
| BF528358   | 681.948   | 702.074   | NM_002652 | 701.11    | 1220.218  | AB033029  | 244.627  | 365.702   |
| NM_016339  | 268.773   | 284.951   | NM_001311 | 4128.535  | 5224.482  | AB006198  | 3077.101 | 2226.528  |
| NM_013340  | 378.069   | 280.439   | NM_017798 | 6034.237  | 9115.244  | U72518    | 899.426  | 562.738   |
| NM_005462  | 688.06    | 509.381   | NM_012410 | 2556.296  | 2782.885  | AF264765  | 230.641  | 173.374   |
| NM_014954  | 5942.674  | 4450.62   | NM_001111 | 7587.282  | 7536.585  | NM_015322 | 1648.667 | 962.409   |

|           |           |           |           |           |           |           |           |           |
|-----------|-----------|-----------|-----------|-----------|-----------|-----------|-----------|-----------|
| NM_000807 | 339.628   | 165.728   | NM_018049 | 5845.125  | 5545.557  | NM_016607 | 1724.316  | 2341.343  |
| NM_014909 | 1530.243  | 1132.016  | AJ133439  | 561.958   | 596.354   | NM_003275 | 596.738   | 850.398   |
| X91148    | 675.043   | 478.092   | NM_014395 | 481.319   | 292.556   | NM_000268 | 6653.044  | 4293.015  |
| NM_015700 | 6233.685  | 7384.368  | NM_001561 | 827.785   | 863.355   | M30493    | 7883.618  | 5348.509  |
| NM_019087 | 2203.791  | 2882.782  | NM_005160 | 1712.91   | 1478.969  | NM_004343 | 19991.967 | 7294.52   |
| NM_016322 | 557.154   | 595.266   | NM_000596 | 412.967   | 906.526   | X52355    | 1748.094  | 917.981   |
| NM_004277 | 242.54    | 376.523   | X78817    | 21005.748 | 17597.385 | NM_006963 | 3637.152  | 2372.886  |
| NM_005072 | 747.736   | 591.717   | AB023135  | 780.449   | 675.079   | NM_000307 | 200.919   | 187.423   |
| AF215923  | 1614.303  | 1511.035  | AY009401  | 1183.739  | 1333.123  | U66561    | 1915.186  | 1157.848  |
| U66621    | 4244.629  | 5179.316  | AK026960  | 629.078   | 958.844   | NM_000306 | 833.958   | 488.392   |
| NM_005720 | 18556.805 | 16591.6   | NM_001991 | 906.185   | 1165.666  | NM_002200 | 983.515   | 858.797   |
| AB040936  | 374.837   | 373.952   | NM_000742 | 846.317   | 977.285   | AF017433  | 478.194   | 371.859   |
| U61736    | 466.394   | 292.874   | NM_002355 | 9402.411  | 11095.473 | AF130111  | 826.788   | 600.846   |
| AJ132086  | 1114.917  | 1142.579  | AK026608  | 1293.094  | 2021.758  | NM_016307 | 571.622   | 466.616   |
| U92816    | 6737.236  | 6806.852  | NM_005070 | 220.758   | 1008.452  | AB028449  | 1030.532  | 817.51    |
| BC011987  | 17144.301 | 18382.898 | NM_015057 | 1221.649  | 1024.556  | AF131776  | 1064.19   | 1151.842  |
| NM_004106 | 24419.977 | 25038.467 | AF303398  | 6105.857  | 4822.798  | NM_020528 | 2124.087  | 3367.473  |
| NM_003485 | 2839.865  | 3352.087  | NM_014810 | 2558.553  | 1593.299  | NM_007040 | 8939.319  | 10213.406 |
| NM_005038 | 2916.13   | 3309.662  | NM_004738 | 1860.168  | 1498.43   | NM_014483 | 4931.478  | 6270.095  |
| L03418    | 8954.627  | 6538.594  | NM_007357 | 3768.099  | 3742.05   | AK024249  | 537.819   | 443.293   |
| NM_003157 | 1386.862  | 1550.232  | NM_003763 | 4331.025  | 4949.519  | AF239156  | 3092.42   | 2194.752  |
| NM_004938 | 1422.299  | 1809.444  | AK023448  | 2039.469  | 1266.701  | NM_020390 | 797.735   | 477.817   |
| NM_014326 | 390.785   | 264.856   | Y18213    | 2696.465  | 1947.934  | NM_003321 | 6675.41   | 3371.954  |
| NM_004448 | 352.573   | 211.182   | NM_003283 | 3103.087  | 2891.881  | U18937    | 5699.36   | 4780.568  |
| NM_015981 | 676.781   | 726.086   | NM_018163 | 1865.969  | 1624.238  | U01925    | 466.016   | 401.073   |
| NM_000455 | 3118.891  | 2701.989  | AK026362  | 3810.33   | 3864.237  | AJ420488  | 53944.629 | 74258.234 |
| NM_014791 | 4192.262  | 3256.642  | NM_004968 | 3456.798  | 3451.219  | AF268872  | 830.121   | 663.804   |
| NM_003318 | 1560.701  | 1405.587  | NM_005908 | 2240.409  | 3637.066  | AK022180  | 6668.281  | 3715.193  |
| NM_004362 | 1924.638  | 3044.07   | NM_004785 | 4261.831  | 8267.42   | AK001384  | 375.89    | 305.368   |
| NM_000182 | 17527.682 | 16834.537 | AK024079  | 463.341   | 624.476   | AK025437  | 966.233   | 827.402   |
| AK023384  | 933.983   | 1106.331  | NM_002428 | 2098.827  | 4024.881  | AK074164  | 420.775   | 318.416   |
| NM_016026 | 5073.553  | 5873.075  | NM_014674 | 6146.423  | 8304.309  | NM_004168 | 4739.803  | 4229.933  |
| AK025111  | 527.2     | 667.351   | NM_018271 | 1358.367  | 1572.981  | AF161353  | 4101.948  | 3524.695  |
| NM_001732 | 922.009   | 1017.727  | NM_000547 | 496.91    | 820.847   | NM_000764 | 614.402   | 516.556   |
| NM_018690 | 5044.196  | 5007.724  | NM_014652 | 2019.35   | 2837.567  | NM_004146 | 7284.983  | 5168.778  |
| NM_000860 | 661.772   | 770.34    | AL133020  | 6913.266  | 10656.234 | NM_003002 | 4536.286  | 3634.388  |
| AB037798  | 2130.798  | 2559.441  | NM_004152 | 415.068   | 375.099   | D42047    | 609.39    | 733.353   |
| NM_000780 | 532.283   | 429.947   | NM_001611 | 587.615   | 544.588   | AB009282  | 4155.606  | 2979.719  |
| AF272663  | 3139.112  | 3229.759  | M59979    | 415.26    | 382.42    | NM_014639 | 1589.713  | 2255.787  |
| NM_012190 | 1113.459  | 1448.776  | AB018310  | 2381.07   | 2506.935  | NM_006392 | 1437.023  | 1810.281  |
| AF277719  | 967.58    | 1311.945  | NM_020133 | 521.39    | 503.722   | NM_014717 | 538.782   | 678.844   |
| NM_000791 | 2342.481  | 2422.461  | NM_015379 | 20285.68  | 26268.889 | NM_017922 | 709.875   | 765.698   |
| NM_003681 | 3497.753  | 3214.218  | NM_004878 | 1197.682  | 1302.739  | NM_002823 | 45656.41  | 48470.473 |
| NM_004800 | 10946.091 | 10062.86  | AF144638  | 62483.918 | 58631.844 | NM_017916 | 5530.844  | 3768.268  |
| NM_004952 | 1283.156  | 1811.976  | NM_001777 | 11663.396 | 11929.176 | NM_001805 | 2525.634  | 1182.167  |
| NM_020414 | 1370.766  | 883.599   | U79457    | 6681.076  | 7284.638  | AK022360  | 880.993   | 734.98    |
| AB037730  | 2701.264  | 1827.597  | AB037832  | 557.714   | 923.536   | AK095694  | 615.668   | 501.163   |
| AF147429  | 248.863   | 140.766   | AB046786  | 1503.895  | 1805.493  | X52341    | 23617.541 | 12834.518 |
| NM_001357 | 6148.122  | 4529.369  | NM_016620 | 18028.678 | 19601.168 | NM_003082 | 2631.922  | 1761.296  |
| NM_003893 | 1356.659  | 1054.263  | NM_018890 | 30304.32  | 39750.711 | AL133632  | 1300.151  | 729.921   |
| AB037816  | 1513.442  | 1906.599  | NM_016204 | 1038.859  | 1724.736  | AL833249  | 1318.196  | 1276.265  |
| NM_014380 | 539.535   | 338.795   | AB046836  | 1097.669  | 1342.723  | NM_018374 | 1236.691  | 905.918   |
| NM_014265 | 278.387   | 456.455   | NM_017816 | 5421.233  | 5645.365  | AF131852  | 253.365   | 318.259   |

|           |           |           |           |           |           |           |           |           |
|-----------|-----------|-----------|-----------|-----------|-----------|-----------|-----------|-----------|
| NM_001719 | 3582.368  | 3737.763  | AJ224166  | 1565.135  | 1849.666  | AK021894  | 1105.047  | 918.643   |
| AL080062  | 1483.069  | 1715.005  | AK026098  | 3134.081  | 4227.025  | NM_020424 | 845.262   | 623.88    |
| AF308802  | 965.309   | 858.381   | NM_012381 | 2282.023  | 1943.985  | AF147341  | 867.693   | 943.442   |
| S76984    | 11948.646 | 12290.105 | M20702    | 549.778   | 684.235   | AB033009  | 6159.033  | 5005.41   |
| NM_014495 | 48307.848 | 60528.883 | NM_006397 | 14728.053 | 11791.866 | AL137761  | 153.23    | 250.591   |
| NM_014081 | 625.082   | 489.627   | D83776    | 1930.566  | 1624.536  | AK022086  | 425.831   | 532.888   |
| NM_005651 | 715.653   | 691.206   | NM_004088 | 3128.559  | 2756.41   | AF147320  | 818.859   | 797.438   |
| NM_007195 | 1370.54   | 1451.246  | NM_002180 | 993.024   | 1272.367  | AK027024  | 483.98    | 431.257   |
| AK023337  | 2539.143  | 3079.743  | NM_000138 | 2167.708  | 2221.372  | AK022339  | 352.061   | 414.55    |
| NM_013275 | 11135.159 | 12022.63  | AB011541  | 2357.159  | 2992.243  | AK022138  | 625.627   | 717.708   |
| AB037842  | 707.197   | 667.828   | BC032460  | 8263.566  | 12987.309 | AF086191  | 1040.9    | 807.152   |
| U92074    | 470.182   | 299.839   | AK024404  | 1941.324  | 4286.985  | AF143880  | 196.611   | 153.734   |
| NM_019011 | 2247.122  | 2523.729  | NM_005166 | 431.478   | 1031.875  | NM_017638 | 2079.275  | 1951.837  |
| AF459094  | 5035.362  | 5030.409  | NM_000213 | 13990.211 | 13158.658 | AL133052  | 845.952   | 907.263   |
| NM_002544 | 742.193   | 1072.497  | BE906107  | 15001.826 | 14357.357 | AB037824  | 944.454   | 840.903   |
| AB011542  | 1680.474  | 5579.325  | NM_015516 | 3175.231  | 3740.545  | AF361494  | 952.262   | 463.197   |
| NM_001853 | 2350.729  | 1773.848  | AB033065  | 1252.198  | 1162.649  | AK022810  | 528.061   | 447.759   |
| U41737    | 202.036   | 192.585   | NM_005211 | 681.198   | 703.407   | AK023122  | 335.435   | 489.124   |
| NM_005798 | 527.169   | 269.713   | NM_004857 | 5438.484  | 5593.643  | AF147408  | 604.34    | 513.734   |
| X99661    | 959.068   | 1131.688  | NM_012108 | 668.052   | 841.277   | AK027222  | 1989.146  | 1499.373  |
| NM_005927 | 1588.893  | 1376.534  | NM_003253 | 1452.792  | 1817.689  | AF085868  | 167.704   | 165.424   |
| AB028983  | 1047.153  | 668.629   | NM_013285 | 4449.375  | 3619.311  | AK054767  | 272.989   | 313.004   |
| AB037800  | 946.523   | 870.415   | NM_002872 | 13644.34  | 11601.993 | AL117486  | 178.685   | 72.562    |
| AK026377  | 401.43    | 696.328   | NM_000490 | 784.512   | 826.178   | AL050042  | 948.066   | 1042.235  |
| NM_018660 | 4687.475  | 4753.93   | NM_004839 | 1004.031  | 1066.123  | NM_018468 | 784.623   | 517.965   |
| NM_003394 | 2660.029  | 1977.464  | NM_012193 | 1703.409  | 1581.728  | NM_014867 | 3834.505  | 2835.956  |
| NM_006747 | 750.937   | 849.523   | NM_003405 | 9138.896  | 8842.763  | AB037850  | 990.936   | 933.521   |
| NM_007086 | 1141.604  | 981.486   | NM_004720 | 4283.068  | 3351.954  | AK002197  | 822.514   | 550.834   |
| NM_003870 | 6703.146  | 6301.153  | NM_001057 | 1031.158  | 1068.541  | AF087996  | 1485.404  | 886.384   |
| AK024507  | 458.92    | 516.115   | NM_005561 | 6123.744  | 8024.616  | AK021710  | 1561.189  | 1470.002  |
| NM_001243 | 3215.912  | 3628.713  | AF272381  | 5780.946  | 6232.493  | NM_007017 | 972.321   | 746.755   |
| AK025997  | 2065.95   | 2084.035  | NM_004524 | 2647.288  | 3921.7    | AL137446  | 770.862   | 686.505   |
| NM_005546 | 402.209   | 444.465   | BE894943  | 1026.688  | 1813.587  | AB025286  | 593.574   | 679.028   |
| NM_000298 | 287.186   | 298.061   | NM_016422 | 1636.694  | 1948.191  | AF009286  | 312.299   | 238.842   |
| S51112    | 310.197   | 375.988   | NM_017878 | 3470.36   | 3193.24   | AF056437  | 347.77    | 363.008   |
| NM_014887 | 4361.938  | 4940.42   | NM_004494 | 62553.039 | 60779.07  | AB032364  | 258.304   | 249.863   |
| NM_002590 | 1042.347  | 1193.629  | AL049687  | 969.213   | 646.293   | NM_005028 | 1085.72   | 1437.171  |
| NM_018556 | 4842.713  | 6139.435  | NM_005643 | 11388.678 | 12673.429 | AF056447  | 792.745   | 2263.487  |
| NM_005824 | 575.084   | 728.785   | NM_003592 | 3354.524  | 7486.033  | AK001010  | 674.865   | 1062.431  |
| AF052211  | 2436.024  | 4869.372  | NM_014953 | 2877.614  | 3727.672  | NM_018076 | 310.818   | 351.53    |
| NM_005600 | 1786.691  | 936.474   | AF179995  | 585.062   | 1031.301  | AK021442  | 466.893   | 419.674   |
| NM_005967 | 1971.254  | 1394.824  | NM_016195 | 5520.9    | 1900.264  | AK001076  | 652.693   | 962.995   |
| NM_013315 | 217.947   | 452.372   | NM_004523 | 987.202   | 705.006   | AK001820  | 692.795   | 519.294   |
| AB014566  | 697.79    | 501.645   | NM_004404 | 5274.203  | 5701.884  | AK021482  | 2204.142  | 1813.535  |
| NM_015678 | 325.277   | 379.896   | NM_002960 | 3669.33   | 3893.674  | AK021730  | 271.999   | 322.97    |
| AK025950  | 207.346   | 171.326   | NM_006790 | 931.137   | 833.34    | AK025126  | 246.014   | 177.393   |
| NM_014223 | 2272.671  | 2325.888  | AL117522  | 8995.174  | 6568.825  | AK025317  | 2725.57   | 1366.027  |
| NM_016194 | 1914.758  | 1644.77   | NM_006572 | 6688.922  | 8907.488  | AK026119  | 191.588   | 45.7      |
| AL050385  | 792.286   | 662.542   | NM_003781 | 1060.555  | 1239.304  | AK025177  | 477.567   | 295.643   |
| NM_007027 | 2657.833  | 2041.512  | NM_001304 | 733.685   | 499.451   | AK025552  | 402.309   | 260.123   |
| NM_000633 | 9812.342  | 7581.349  | NM_003130 | 781.722   | 482.165   | AK026284  | 227.513   | 226.437   |
| AB037855  | 1197.556  | 1168.116  | NM_004716 | 19668.33  | 15154.173 | AK026725  | 880.863   | 605.891   |
| AK024524  | 6970.012  | 6241.337  | D29810    | 3297.609  | 3843.25   | AJ008118  | 44143.309 | 32471.574 |

|           |           |           |           |           |           |           |           |           |
|-----------|-----------|-----------|-----------|-----------|-----------|-----------|-----------|-----------|
| NM_000562 | 1740.867  | 1589.541  | NM_014821 | 135.084   | 1523.763  | NM_005523 | 793.985   | 570.341   |
| NM_019011 | 5966.021  | 5050.785  | NM_000128 | 1876.641  | 2481.695  | AK024512  | 1309.923  | 1074.827  |
| NM_004879 | 12257.079 | 14804.215 | AB002384  | 1821.22   | 1644.806  | AK023454  | 776.868   | 1051.598  |
| AB020694  | 2142.921  | 2473.969  | NM_018437 | 1051.596  | 1021.625  | L23207    | 579.634   | 596.191   |
| NM_016071 | 3039.395  | 3381.753  | NM_000422 | 647.517   | 463.62    | NM_018062 | 461.869   | 619.832   |
| AL050131  | 408.998   | 390.402   | AK023164  | 1628.025  | 2078.767  | NM_007128 | 3913.112  | 3602.876  |
| NM_004475 | 6695.213  | 8843.972  | NM_005379 | 1620.027  | 2340.038  | NM_007160 | 232.167   | 146.876   |
| NM_001627 | 8111.165  | 11548.075 | AK027121  | 3439.01   | 6881.961  | NM_018627 | 213.756   | 251.396   |
| NM_001226 | 1230.979  | 1319.428  | NM_017433 | 3126.063  | 3537.062  | AL157458  | 216.14    | 117.365   |
| NM_001336 | 497.871   | 537.852   | AL117661  | 2194.87   | 2545.706  | NM_015377 | 275.915   | 254.783   |
| AB050716  | 720.579   | 332.447   | X64643    | 2029.35   | 1622.956  | AL137531  | 1049.844  | 1365.622  |
| X77690    | 715.688   | 484.464   | NM_005380 | 8880.387  | 6979.669  | AK022210  | 889.96    | 1201.854  |
| NM_006536 | 297.539   | 169.224   | NM_005269 | 965.34    | 1377.377  | AL080085  | 2377.097  | 5039.665  |
| NM_002422 | 400.181   | 288.986   | D70835    | 56847.973 | 56701.836 | AK022106  | 323.129   | 605.052   |
| NM_006690 | 770.063   | 774.097   | NM_002697 | 2526.946  | 2945.007  | AF086519  | 352.128   | 290.83    |
| NM_006156 | 270.287   | 290.515   | NM_001518 | 6941.994  | 6796.63   | AF055012  | 1323.391  | 1387.029  |
| AF218022  | 1674.195  | 1613.874  | NM_003412 | 15789.314 | 15451.185 | AK022307  | 1330.403  | 1243.249  |
| NM_003348 | 2206.278  | 2220.444  | NM_018336 | 1012.488  | 1199.558  | NM_005172 | 541.827   | 707.435   |
| AB033029  | 340.338   | 236.1     | AK022668  | 5399.258  | 4513.055  | AK025192  | 2289.646  | 2258.423  |
| AL137663  | 175.227   | 119.868   | AW975132  | 2933.3    | 2810.975  | NM_012403 | 521.465   | 650.177   |
| AB006198  | 7315.279  | 6848.892  | NM_006051 | 3280.263  | 2872.458  | AK022611  | 2730.941  | 3591.628  |
| U72518    | 1818.505  | 2525.415  | NM_018427 | 2044.786  | 1640.064  | NM_006158 | 2668.606  | 3408.131  |
| NM_015322 | 4608.551  | 5024.811  | AB037814  | 619.372   | 567.579   | NM_006346 | 973.715   | 1337.59   |
| NM_016607 | 2637.964  | 2671.858  | NM_014663 | 10859.534 | 8510.898  | AK025240  | 2133.354  | 3131.117  |
| NM_003275 | 948.423   | 1593.719  | AF007217  | 1383.948  | 765.167   | NM_005377 | 542.695   | 853.087   |
| NM_000268 | 13688.878 | 29851.699 | AB037753  | 4262.324  | 4642.831  | NM_017633 | 7264.834  | 13900.427 |
| M30493    | 21152.238 | 29282.762 | NM_004674 | 2405.898  | 1909.376  | AF086186  | 6068.718  | 10953.346 |
| AJ008160  | 468.723   | 767.197   | AB037801  | 6527.542  | 4592.925  | NM_017802 | 2403.294  | 4865.83   |
| NM_004343 | 42752.426 | 32096.361 | AL080159  | 10472.783 | 7399.571  | AF155194  | 300.535   | 658.896   |
| X52355    | 2743.05   | 4273      | NM_017823 | 49588.574 | 42649.473 | AK023667  | 917.371   | 2076.053  |
| NM_006963 | 7042.773  | 3491.604  | U55185    | 1204.838  | 1452.828  | AJ008137  | 3272.831  | 6464.991  |
| NM_000307 | 263.065   | 187.826   | U30828    | 10352.103 | 10063.094 | AF085841  | 460.116   | 676.888   |
| U66561    | 3402.915  | 1879.076  | AF085886  | 60107.039 | 55061.07  | U92026    | 321.949   | 236.01    |
| NM_000306 | 1739.408  | 1389.688  | AK023828  | 3891.636  | 3032.056  | AF086234  | 16302.537 | 10718.213 |
| NM_002200 | 2115.946  | 1381.736  | AK022664  | 923.347   | 1264.895  | AK023680  | 2103.042  | 1784.56   |
| AF017433  | 1043.884  | 939.56    | AL080223  | 2291.565  | 2943.431  | AF009324  | 1276.23   | 1216.185  |
| AF130111  | 2082.06   | 1402.314  | AK001630  | 924.592   | 1213.609  | AF019226  | 915.048   | 1336.184  |
| NM_016307 | 1178.922  | 977.173   | NM_014612 | 14398.337 | 13635.681 | AL137480  | 5524.668  | 8209.608  |
| AB028449  | 1727.017  | 1374.293  | AF079098  | 865.807   | 890.212   | AK022182  | 541.958   | 1012.332  |
| NM_004697 | 1614.407  | 1590.186  | AK021815  | 1088.787  | 1150.325  | D16473    | 1470.27   | 2910.332  |
| U94384    | 201.803   | 181.148   | NM_001543 | 641.654   | 739.188   | AB028968  | 664.145   | 1601.417  |
| AF131776  | 2193.422  | 1895.007  | NM_016641 | 3937.527  | 3954.79   | AK001202  | 398.852   | 717.396   |
| NM_020528 | 4057.09   | 3566.856  | AB018010  | 915.168   | 631.736   | AF195764  | 33822.543 | 56635.039 |
| NM_007040 | 20230.623 | 15531.979 | NM_014610 | 12051.081 | 10013.208 | AF055029  | 600.478   | 1570.806  |
| NM_014483 | 9689.511  | 8962.324  | NM_000689 | 826.297   | 559.761   | S82164    | 552.282   | 1249.488  |
| AK024249  | 1223.963  | 1638.091  | NM_006621 | 4853.81   | 5882.699  | AK024394  | 734.281   | 1950.283  |
| AF239156  | 6774.719  | 7107.246  | BF347398  | 3491.639  | 4108.448  | AF147374  | 835.456   | 2145.265  |
| NM_020390 | 1505.281  | 1596.098  | AK026762  | 1744.637  | 1891.067  | AF130091  | 296.827   | 784.222   |
| NM_003321 | 16310.211 | 17864.096 | NM_004412 | 498.714   | 460.673   | L43338    | 3383.432  | 7096.123  |
| U18937    | 12693.088 | 15509.359 | L48516    | 1659.474  | 1231.148  | AJ227866  | 6251.614  | 11460.197 |
| U01925    | 923.347   | 1280.263  | NM_016648 | 4616.792  | 3713.506  | AF458223  | 3594.484  | 7390.705  |
| AJ420488  | 49435.504 | 69297.328 | AF083930  | 1999.2    | 1822.385  | AK022838  | 4779.462  | 7023.433  |
| AF268872  | 1823.836  | 2445.397  | NM_003426 | 721.866   | 622.356   | NM_003505 | 306.723   | 458.701   |



|           |           |           |           |           |           |           |           |           |
|-----------|-----------|-----------|-----------|-----------|-----------|-----------|-----------|-----------|
| AK022180  | 24964.387 | 22580.336 | AK027159  | 1009.891  | 1000.032  | CY3Cy5    | 3452.359  | 518.779   |
| AK001384  | 611.975   | 655.175   | AK025360  | 494.864   | 552.864   | AA700390  | 2539.436  | 1298.494  |
| AK025437  | 1956.975  | 1862.375  | AF075112  | 786.866   | 819.455   | AA436163  | 518.619   | 286.468   |
| AK074164  | 640.988   | 401.8     | AK001796  | 718.353   | 465.475   | BI907981  | 363.946   | 275.688   |
| NM_00416E | 8667.337  | 4751.026  | AF086152  | 8270.847  | 6159.014  | BI603841  | 1950.776  | 909.094   |
| AF161353  | 5846.028  | 3949.972  | U78519    | 1565.878  | 1042.754  | BG696638  | 3505.718  | 1578.6    |
| NM_000764 | 601.778   | 517.721   | AK026872  | 1650.621  | 1330.387  | M19888    | 1595.59   | 2149.288  |
| NM_00414E | 14983.697 | 12246.781 | AL157505  | 671.152   | 571.92    | Y08136    | 893.988   | 1901.826  |
| NM_003002 | 9722.001  | 7675.734  | NM_00719C | 5556.277  | 4540.522  | AA156863  | 3783.045  | 8118.968  |
| D42047    | 1709.659  | 2055.123  | AF043897  | 1395.977  | 2195.753  | BI915199  | 1171.396  | 764.912   |
| AB009282  | 8264.054  | 6695.503  | U79246    | 2132.721  | 2162.828  | R82957    | 47165.863 | 21794.258 |
| NM_005004 | 37525.629 | 32373.348 | AF052140  | 661.77    | 622.263   | BI830442  | 411.618   | 235.396   |
| NM_00367C | 5949.976  | 6136.112  | NM_01883E | 772.894   | 438.227   | AA398951  | 2782.345  | 1577.674  |
| NM_01463E | 2350.83   | 1610.317  | AF007147  | 739.553   | 814.794   | AI218732  | 928.595   | 480.552   |
| NM_006392 | 4005.393  | 2705.329  | AF052127  | 2843.371  | 2925.864  | NM_004102 | 1408.862  | 469.443   |
| NM_014717 | 1066.191  | 846.514   | AF052150  | 693.883   | 600.279   | NM_004544 | 2111.875  | 472.677   |
| NM_017922 | 1930.649  | 1527.72   | AF086481  | 581.542   | 531.71    | SR5       | 1742.944  | 990.374   |
| NM_002823 | 53974.359 | 67907.172 | AL355689  | 1312.438  | 1737.107  | SR7       | 2364.893  | 6144.783  |
| NM_01791E | 12816.254 | 12922.871 | AK024885  | 1500.205  | 2202.094  | SR9       | 7832.581  | 618.154   |
| NM_00180E | 4479.176  | 6186.486  | AK022441  | 998.448   | 770.426   | CY3Cy5    | 1939.696  | 447.328   |
| AK022360  | 1760.861  | 2196.58   | AK026208  | 2385.096  | 1890.995  | NM_01804E | 3116.974  | 1909.291  |
| AK095694  | 1366.832  | 2054.683  | NM_016947 | 61285.891 | 50024.367 | NM_001561 | 383.627   | 294.366   |
| X52341    | 49580.926 | 50644.781 | AY007136  | 654.632   | 507.255   | NM_00516C | 847.866   | 245.914   |
| NM_003082 | 5889.427  | 6950.075  | AL359940  | 3659.617  | 2415.02   | X78817    | 10894.81  | 4552.026  |
| AL133632  | 2427.955  | 3069.995  | NM_01828E | 1452.235  | 958.464   | AB023135  | 481.199   | 202.823   |
| AK024551  | 429.75    | 931.723   | AF085961  | 510       | 505.163   | AY009401  | 997.21    | 1847.012  |
| AL833249  | 2409.247  | 2153.614  | AK024925  | 13040.513 | 9096.328  | AF294628  | 641.61    | 1269.933  |
| NM_018374 | 2159.83   | 957.978   | AL049460  | 5675.469  | 4773.061  | NM_001991 | 331.706   | 182.353   |
| AK021894  | 1428.68   | 1210.523  | AK022396  | 1211.275  | 1524.912  | NM_000193 | 1005.657  | 421.01    |
| NM_020424 | 1832.354  | 1811.092  | AF075113  | 623.326   | 628.453   | NM_00244E | 381.616   | 194.128   |
| AF438313  | 1745.061  | 1746.153  | AF086037  | 413.355   | 461.642   | AF053952  | 5383.371  | 1420.663  |
| NM_01781E | 250.913   | 183.785   | AK022892  | 6749.226  | 4284.179  | NM_003213 | 4105.15   | 1318.443  |
| AF147341  | 288.041   | 199.867   | Z36807    | 21787.744 | 13473.766 | NM_014044 | 1196.769  | 371.926   |
| AB033009  | 12699.61  | 10306.852 | U20896    | 444.59    | 401.882   | NM_00090C | 910.515   | 309.164   |
| AL137761  | 301.098   | 220.536   | U52836    | 658.922   | 591.07    | AK023684  | 1622.845  | 466.082   |
| AK022086  | 546.378   | 436.909   | NM_01793E | 1628.78   | 1543.348  | NM_015057 | 885.259   | 527.023   |
| AF147320  | 1327.703  | 1231.033  | AK021837  | 1843.665  | 1513.122  | AF303398  | 3575.833  | 1498.899  |
| AK027024  | 623.627   | 624.587   | AK002088  | 13757.232 | 10000.856 | NM_01481C | 1240.831  | 188.102   |
| AK022339  | 827.331   | 653.704   | X98206    | 473.821   | 342.953   | NM_00473E | 1116.559  | 555.497   |
| AK022138  | 1217.194  | 1495.194  | AK022193  | 380.6     | 251.709   | NM_007357 | 1978.761  | 963.783   |
| AF086191  | 2669.507  | 2695.03   | AK000106  | 1648.484  | 959.026   | NM_003763 | 2593.32   | 4290.555  |
| AF143880  | 526.132   | 1156.55   | AK022370  | 1692.203  | 932.108   | AK023448  | 1213.355  | 1246.475  |
| AK024567  | 189.671   | 599.072   | AK026765  | 937.897   | 420.935   | Y18213    | 1499.291  | 624.23    |
| NM_01763E | 5440.15   | 14135.01  | AL117530  | 655.109   | 253.121   | NM_003283 | 1685.594  | 673.334   |
| AL133052  | 1884.126  | 2575.763  | AK025016  | 473.07    | 288.431   | AF249898  | 3377.839  | 862.431   |
| AB037824  | 2136.19   | 2368.629  | AL080191  | 2604.674  | 1711.275  | M69181    | 2804.83   | 577.115   |
| AF361494  | 1787.656  | 1211.579  | AK021639  | 12780.584 | 9314.12   | L09078    | 225.379   | 160.878   |
| AK022810  | 940.704   | 1243.303  | AK023189  | 745.391   | 671.269   | NM_001311 | 620.023   | 252.665   |
| X92110    | 302.33    | 258.205   | AK023872  | 502.67    | 660.864   | NM_01779E | 2440.344  | 905.338   |
| AF147408  | 966.517   | 750.065   | AF306347  | 453.962   | 552.512   | NM_01241C | 915.635   | 162.076   |
| AK027222  | 2480.784  | 2104.78   | AK023464  | 406.872   | 479.137   | NM_001111 | 2675.271  | 1072.614  |
| AF085868  | 583.999   | 1006.186  | AK023829  | 983.376   | 1836.411  | BU565263  | 58013.629 | 59466.219 |
| AF075049  | 158.977   | 446.203   | AK024157  | 1117.884  | 2093.479  | NM_00502E | 959.69    | 608.146   |

|           |           |           |           |           |           |           |           |           |
|-----------|-----------|-----------|-----------|-----------|-----------|-----------|-----------|-----------|
| AK054767  | 471.583   | 556.867   | AK022963  | 474.707   | 435.975   | AB018310  | 1184.611  | 946.667   |
| AL080086  | 312.574   | 125.432   | AK023563  | 365.333   | 383.121   | NM_015379 | 8352.545  | 4562.873  |
| AL049301  | 557.78    | 588.319   | AK023905  | 2384.941  | 1919.871  | AF144638  | 8135.951  | 3037.919  |
| AL050042  | 1757.433  | 1658.05   | AK024231  | 2383.671  | 2351.016  | NM_002355 | 3096.54   | 624.616   |
| AL080195  | 275.506   | 412.602   | NM_016940 | 1782.401  | 1621.534  | AK026608  | 537.823   | 139.723   |
| AL117570  | 391.198   | 439.214   | AK025757  | 1594.212  | 1157.566  | AB046836  | 424.215   | 254.295   |
| NM_018469 | 1616.61   | 2417.491  | Y16713    | 723.386   | 361.792   | NM_017816 | 2297.209  | 1274.769  |
| NM_014867 | 10949.521 | 13119.231 | L07394    | 6353.134  | 3523.368  | AK026098  | 1179.546  | 713.278   |
| AL359932  | 600.217   | 961.714   | AK056133  | 851.275   | 672.3     | NM_012381 | 1146.503  | 1120.01   |
| AB037850  | 1929.011  | 2698.395  | NM_017845 | 4019.893  | 3276.5    | NM_006397 | 3106.339  | 1415.099  |
| AK002197  | 1499.624  | 1684.859  | AK026006  | 931.631   | 595.987   | D83776    | 1365.105  | 776.728   |
| AF087996  | 1168.557  | 1260.549  | NM_019089 | 8724.648  | 4728.749  | NM_004088 | 1239.395  | 555.642   |
| AK021710  | 3181.744  | 3206.791  | AL122072  | 2551.857  | 2092.558  | NM_002180 | 393.276   | 266.832   |
| BC033114  | 417.997   | 397.688   | AK026221  | 558.169   | 561.738   | NM_000138 | 1227.916  | 656.058   |
| AL137446  | 711.927   | 498.677   | Y13870    | 906.79    | 1178.794  | NM_018163 | 542.708   | 166.162   |
| AB025286  | 629.536   | 355.587   | AK026403  | 1282.969  | 1530.268  | AK026362  | 1412.57   | 562.878   |
| AF009286  | 553.801   | 408.997   | AF086361  | 560.448   | 777.672   | NM_004968 | 1337.239  | 303.607   |
| AF056437  | 763.881   | 834.979   | AK022980  | 741.928   | 656.4     | NM_005908 | 809.46    | 252.16    |
| AF009295  | 383.252   | 207.057   | AL359058  | 1283.501  | 1570.604  | NM_004785 | 1637.636  | 723.138   |
| NM_005029 | 1469.796  | 2219.721  | AK026237  | 1850.07   | 2490.481  | NM_002428 | 776.876   | 526.817   |
| AF056447  | 1430.711  | 2234.741  | AK023687  | 605.166   | 531.857   | NM_014674 | 2359.365  | 857.297   |
| AK001010  | 711.815   | 897.946   | NM_017632 | 1626.086  | 1820.857  | NM_018271 | 342.472   | 204.399   |
| NM_018076 | 867.87    | 722.547   | AK026655  | 1374.173  | 915.53    | NM_014652 | 629.248   | 264.224   |
| AK021442  | 1067.493  | 1228.712  | AL390128  | 1462.659  | 982.263   | AL133020  | 2680.874  | 1324.968  |
| AK021686  | 262.316   | 441.162   | AL157429  | 4129.362  | 4183.901  | NM_014044 | 1716.869  | 1180.125  |
| AK001076  | 1244.388  | 1347.648  | NM_012071 | 28163.389 | 25591.102 | NM_000900 | 1302.104  | 912.549   |
| AK001820  | 357.289   | 426.81    | AF055018  | 4537.611  | 3961.36   | AA700390  | 2698.057  | 2646.485  |
| AK021482  | 3795.118  | 3318.905  | AF070599  | 995.114   | 795.315   | Y18474    | 551.83    | 1349.28   |
| AK021730  | 440.594   | 592.216   | NM_005450 | 2032.986  | 1580.944  | AA436163  | 756.359   | 1362.622  |
| AK025126  | 306.502   | 209.925   | AK023600  | 808.23    | 760.951   | BI603841  | 629.179   | 359.969   |
| AK025317  | 7386.795  | 6988.081  | NM_005210 | 452.202   | 712.394   | BG696638  | 4253.393  | 1693.382  |
| AK026119  | 225.285   | 255.517   | NM_005525 | 1573.412  | 1261.185  | M19888    | 1385.559  | 399.562   |
| AK026725  | 1157.15   | 1350.012  | NM_005285 | 2092.547  | 1744.544  | Y08136    | 507.927   | 264.018   |
| AJ008118  | 58425.48  | 45567.758 | AK001918  | 935.258   | 998.527   | AA156863  | 2430.657  | 804.039   |
| NM_005523 | 1639.52   | 1392.025  | NM_018635 | 23024.225 | 24186.246 | BI915199  | 993.719   | 390.582   |
| AK024512  | 2490.86   | 1867.787  | AF086048  | 3399.729  | 4271.205  | R82957    | 49092.984 | 27745.758 |
| AK023454  | 1494.572  | 1626.096  | L15616    | 3976.15   | 6255.126  | BI830442  | 394.601   | 343.941   |
| L23207    | 1096.199  | 1272.279  | AB019565  | 8089.235  | 7761.071  | AA398951  | 2882.261  | 1874.982  |
| NM_018062 | 1253.622  | 1588.726  | D16914    | 58390.652 | 58229.051 | AI218732  | 1096.951  | 727.097   |
| NM_007128 | 5404.709  | 6974.082  | NM_000283 | 1676.622  | 3679.895  | NM_004102 | 2225.619  | 1091.085  |
| NM_007160 | 604.812   | 845.848   | AK024092  | 1286.552  | 1306.468  | NM_004544 | 2533.785  | 1509.452  |
| AB002442  | 259.956   | 335.111   | AK002044  | 4792.971  | 3510.303  | NM_018890 | 12123.143 | 5768.272  |
| NM_018627 | 545.03    | 532.733   | AK022206  | 465.164   | 379.115   | NM_001311 | 1242.781  | 634.325   |
| NM_015377 | 492.493   | 644.071   | U90904    | 5550.185  | 5003.952  | NM_017798 | 3220.173  | 2170.769  |
| AL137531  | 1005.484  | 1228.97   | AF088053  | 2465.738  | 2001.402  | NM_012410 | 1318.467  | 567.658   |
| AK022210  | 295.789   | 217.687   | AL133662  | 511.351   | 298.489   | NM_001111 | 3454.93   | 1992.575  |
| AL080085  | 3741.594  | 4521.197  | NM_002565 | 496.046   | 121.393   | NM_018049 | 3193.568  | 2839.154  |
| AK022106  | 306.925   | 153.9     | U90903    | 1062.967  | 1153.984  | AJ133439  | 399.266   | 568.348   |
| AF086519  | 364.867   | 528.554   | AF278760  | 1130.121  | 710.714   | NM_014395 | 575.239   | 932.774   |
| AF055012  | 2295.137  | 1138.273  | X58061    | 402.722   | 490.469   | NM_005160 | 1062.191  | 532.084   |
| AK022307  | 1741.079  | 1296.272  | AB032954  | 1420.319  | 1312.667  | X78817    | 7338.807  | 2827.126  |
| AF132201  | 296.402   | 418.923   | NM_006003 | 20190.123 | 19047.713 | AB023135  | 736.446   | 560.642   |
| U00950    | 1250.068  | 3610.197  | AL110197  | 3121.493  | 4173.564  | AY009401  | 634.009   | 511.018   |

|           |           |           |            |           |           |           |           |           |
|-----------|-----------|-----------|------------|-----------|-----------|-----------|-----------|-----------|
| AF085997  | 342.557   | 380.382   | AF085995   | 1134.891  | 865.769   | AF294628  | 306.727   | 277.412   |
| NM_005172 | 1112.423  | 1882.683  | CY3Cy5     | 2635.979  | 457.487   | NM_001991 | 408.222   | 247.001   |
| AK025192  | 3042.188  | 4989.926  | AA029300   | 3279.257  | 4663.135  | NM_000193 | 771.333   | 306.686   |
| NM_012403 | 2297.586  | 1956.546  | BG708842   | 39265.34  | 45609.012 | BC014586  | 269.231   | 252.086   |
| AK022611  | 5604.241  | 6648.726  | M19723     | 49607.781 | 70950.836 | NM_002448 | 585.213   | 439.895   |
| NM_006158 | 6091.369  | 4520.35   | X06256     | 5174.449  | 5523.974  | AF053952  | 5424.038  | 3292.118  |
| NM_006346 | 1391.042  | 1353.42   | AA709271   | 814.674   | 984.657   | NM_003213 | 5577.356  | 2621.396  |
| AK025240  | 3781.465  | 3140.991  | M34057     | 1278.429  | 1189.761  | BF184738  | 345.35    | 368.162   |
| NM_017633 | 11391.281 | 12845.551 | ID 1984668 | 1260.765  | 1370.726  | AF303398  | 2399.929  | 1237.185  |
| AF086186  | 8339.391  | 9582.583  | ID 1832579 | 1189.445  | 962.31    | NM_014810 | 1696.705  | 394.72    |
| NM_017802 | 3665.052  | 4093.687  | H-430185 M | 1447.422  | 1181.867  | NM_004738 | 1005.987  | 332.367   |
| AF155194  | 216.332   | 412.451   | D16583     | 4595.397  | 2345.172  | NM_007357 | 2173.66   | 2254.042  |
| AK023667  | 872.179   | 941.778   | H44051     | 682.482   | 500.116   | NM_003763 | 2356.47   | 2431.477  |
| AJ008137  | 7135.363  | 7500.677  | AA481547   | 1923.293  | 1357.42   | AF249898  | 3967.21   | 2190.955  |
| AF085841  | 544.17    | 447.124   | AA831880   | 715.736   | 684.627   | M69181    | 2329.292  | 1365.422  |
| U92026    | 335.728   | 248.835   | T64880     | 952.112   | 747.477   | NM_002428 | 1040.7    | 803.017   |
| AF086234  | 26491.48  | 15145.946 | NM_020967  | 1467.757  | 874.782   | NM_014674 | 2610.538  | 1500.905  |
| AK023680  | 3265.671  | 2169.594  | NM_001071  | 9103.771  | 4867.572  | NM_018271 | 475.842   | 242.097   |
| AF009324  | 2176.346  | 3001.274  | SR2        | 43221.184 | 29411.514 | NM_014652 | 1055.486  | 469.821   |
| AF019226  | 2346.967  | 5578.687  | SR4        | 10585.75  | 7704.742  | AL133020  | 3353.188  | 2052.171  |
| AL137480  | 10745.843 | 16176.991 | SR6        | 1483.693  | 1076.056  | NM_001611 | 477.919   | 413.606   |
| AK022182  | 455.703   | 890.615   | SR8        | 5690.484  | 12722.177 | AB018310  | 1016.037  | 699.58    |
| D16473    | 2462.328  | 4520.146  | SR10       | 19152.277 | 4915.179  | NM_020133 | 530.001   | 584.424   |
| AB028968  | 1207.034  | 1285.82   | CY3Cy5     | 1753.878  | 286.896   | NM_004878 | 223.149   | 517.521   |
| AK001202  | 467.95    | 276.113   | NM_005027  | 2470.789  | 5275.18   | AF144638  | 43340.867 | 55105.492 |
| AF195764  | 38579.273 | 39871.895 | NM_004612  | 1594.984  | 3272.747  | NM_000742 | 295.325   | 179.786   |
| AF055029  | 932.489   | 859.157   | NM_005608  | 1916.783  | 2733.467  | NM_002355 | 4166.634  | 2378.317  |
| S82164    | 632.169   | 506.855   | NM_001106  | 1018.744  | 1294.913  | AK026608  | 467.474   | 304.194   |
| AK024394  | 1150.776  | 932.543   | NM_015583  | 968.622   | 1236.996  | NM_004102 | 2281.551  | 1490.834  |
| AF147374  | 1358.085  | 1879.193  | NM_018490  | 2641.926  | 3058.629  | NM_004544 | 2848.477  | 1678.958  |
| AF130091  | 325.669   | 272.022   | NM_004778  | 396.392   | 424.277   | NM_018890 | 13660.162 | 4796.717  |
| L43338    | 5373.275  | 5221.177  | NM_006245  | 3231.171  | 2834.355  | NM_016204 | 357.698   | 225.639   |
| AJ227866  | 6946.59   | 7423.264  | NM_005103  | 2218.006  | 2655.885  | AJ224166  | 891.725   | 1401.291  |
| AF458223  | 6150.508  | 6258.358  | NM_004822  | 799.278   | 702.094   | AK026098  | 1447.197  | 658.924   |
| AK026822  | 466.472   | 394.049   | AK022349   | 557.39    | 339.177   | M20702    | 426.731   | 1015.568  |
| AK022838  | 4572.642  | 7786.464  | NM_004973  | 2175.811  | 1480.467  | D83776    | 1080.719  | 2736.24   |
| CY3Cy5    | 9078.806  | 1168.686  | NM_007245  | 2673.178  | 1976.177  | NM_004088 | 2162.633  | 4066.245  |
| AA700390  | 6597.924  | 12186.04  | NM_001890  | 840.537   | 598.561   | NM_002180 | 923.999   | 1530.868  |
| Y18474    | 724.068   | 625.122   | NM_001286  | 1412.188  | 1043.128  | NM_000138 | 1685.645  | 4141.603  |
| AA436163  | 1382.208  | 950.707   | NM_014648  | 346.656   | 133.832   | NM_018163 | 969.44    | 1604.322  |
| BI907981  | 1001.085  | 801.701   | NM_005073  | 594.335   | 419.028   | NM_005908 | 716.534   | 319.235   |
| BI603841  | 2303.217  | 1375.732  | NM_000951  | 1640.339  | 927.485   | NM_004785 | 1762.434  | 1352.627  |
| BG696638  | 8399.088  | 4285.386  | X52599     | 618.974   | 586.122   | NM_000193 | 983.625   | 908.009   |
| M19888    | 3046.049  | 1481.187  | AK000158   | 3251.433  | 4662.432  | BC014586  | 330.878   | 293.86    |
| Y08136    | 1097.512  | 679.411   | NM_005769  | 2097.573  | 3364.973  | NM_002448 | 640.699   | 303.569   |
| AA156863  | 5521.665  | 3318.429  | AK024500   | 8437.667  | 11881.384 | AF053952  | 7502.101  | 2761.599  |
| BI915199  | 2336.092  | 1470.077  | NM_002564  | 9110.587  | 12208.39  | NM_003213 | 6296.609  | 2677.808  |
| R82957    | 58145.156 | 45530.348 | NM_000963  | 4488.779  | 6603.375  | BF184738  | 321.164   | 215.658   |
| BI830442  | 720.241   | 1123.18   | NM_013308  | 5681.226  | 6849.323  | NM_014044 | 1960.631  | 1045.264  |
| AA398951  | 7772.349  | 9246.115  | AF027302   | 2706.846  | 2622.654  | NM_000900 | 1204.485  | 1876.791  |
| NM_004544 | 7053.769  | 10799.314 | NM_002852  | 2727.556  | 2311.102  | NM_000232 | 649.895   | 919.075   |
| SR5       | 4444.692  | 2875.926  | NM_001817  | 3036.809  | 2296.168  | AA700390  | 3012.324  | 2362.003  |
| SR7       | 6029.104  | 29789.227 | AF063611   | 1129.946  | 997.511   | AA436163  | 752.216   | 1555.062  |

|           |           |           |           |           |           |           |           |           |
|-----------|-----------|-----------|-----------|-----------|-----------|-----------|-----------|-----------|
| SR9       | 25369.74  | 3499.565  | NM_006039 | 1890.731  | 1531.373  | BI907981  | 703.101   | 1581.865  |
| CY3Cy5    | 11218.1   | 1508.506  | NM_002089 | 551.077   | 499.473   | BI603841  | 1561.042  | 2921.505  |
| NM_018049 | 7210.357  | 5581.787  | NM_014656 | 3770.9    | 2915.677  | BG696638  | 5773.023  | 7810.372  |
| NM_014395 | 654.427   | 403.598   | NM_002076 | 2536.774  | 1633.598  | M19888    | 1858.433  | 3306.725  |
| NM_005160 | 2364.209  | 1352.529  | X05299    | 3673.598  | 2258.17   | Y08136    | 595.533   | 1107.423  |
| NM_000596 | 294.85    | 362.171   | BM468475  | 992.429   | 663.568   | AA156863  | 3069.921  | 4943.114  |
| X78817    | 20683.752 | 10916.646 | NM_000318 | 2259.057  | 1187.708  | BI915199  | 1231.407  | 1810.848  |
| AB023135  | 512.128   | 503.381   | NM_002060 | 5064.052  | 3106.946  | AA398951  | 2401.383  | 911.379   |
| AY009401  | 1339.638  | 916.323   | AK001230  | 1606      | 1130.363  | AI218732  | 972.899   | 714.548   |
| AF294628  | 673.854   | 309.25    | NM_014680 | 5019.879  | 2771.214  | AF249898  | 2113.987  | 1574.987  |
| AK026960  | 399.609   | 279.191   | NM_006224 | 38176.848 | 48724.891 | M69181    | 2525.606  | 880.161   |
| NM_001991 | 930.551   | 629.328   | AL137300  | 7717.302  | 8830.199  | NM_001311 | 1157.88   | 546.604   |
| NM_000193 | 2075.939  | 2814.506  | NM_000229 | 2446.66   | 3435.441  | NM_017798 | 3253.7    | 3865.188  |
| AF053952  | 24614.029 | 27976.73  | NM_006995 | 24808.932 | 36079.672 | NM_012410 | 1355.291  | 470.458   |
| BF184738  | 760.354   | 771.144   | NM_003129 | 12981.64  | 21738.592 | NM_001111 | 3434.378  | 1627.207  |
| NM_014044 | 4263.247  | 2380.801  | NM_001956 | 2280.73   | 2901.106  | AJ133439  | 393.487   | 948.331   |
| NM_000900 | 2268.987  | 1817.685  | AB033064  | 1534.034  | 2046.848  | NM_014395 | 326.537   | 853.896   |
| AK023684  | 4943.492  | 4342.992  | AK022317  | 3090.444  | 3826.671  | NM_001561 | 432.305   | 755.68    |
| NM_000232 | 770.975   | 739.562   | NM_003124 | 2603.33   | 2658.245  | NM_005160 | 1340.856  | 1607.499  |
| AF303398  | 5806.471  | 5051.58   | NM_004531 | 895.975   | 870.491   | X78817    | 16625.889 | 23334.74  |
| NM_014810 | 3109.497  | 1802.563  | AL133581  | 825.863   | 634.641   | AB023135  | 404.935   | 716.89    |
| NM_004738 | 1991.364  | 1214.592  | NM_002558 | 3584.623  | 3860.812  | AY009401  | 654.209   | 1344.469  |
| NM_007357 | 5073.853  | 2982.078  | NM_005031 | 2527.239  | 2847.114  | AF294628  | 395.246   | 478.384   |
| NM_003763 | 5602.186  | 3108.565  | AB040920  | 473.363   | 539.257   | NM_001991 | 531.723   | 248.47    |
| AK023448  | 2527.348  | 1212.612  | NM_000720 | 406.165   | 315.387   | NM_000742 | 398.628   | 213.672   |
| Y18213    | 3175.888  | 2315.391  | NM_004842 | 885.53    | 595.827   | NM_002355 | 3981.16   | 1257.717  |
| NM_003283 | 3959.92   | 2526.118  | AK024639  | 3430.162  | 2055.199  | AK026608  | 504.465   | 341.558   |
| AF249898  | 9532.587  | 9507.989  | AB007915  | 650.129   | 510.086   | NM_015057 | 940.633   | 1453.434  |
| M69181    | 7879.203  | 9216.553  | AB033070  | 626.181   | 475.475   | AF303398  | 3840.723  | 5886.629  |
| AK027224  | 544.985   | 1804.561  | NM_018229 | 1066.528  | 711.447   | NM_014810 | 2180.911  | 3040.15   |
| L09078    | 385.406   | 826.936   | NM_006325 | 4459.268  | 3137.318  | NM_004738 | 1144.765  | 1916.02   |
| NM_002652 | 732.787   | 578.486   | AY009127  | 7889.294  | 5675.595  | NM_007357 | 2796.799  | 5242.543  |
| NM_001311 | 3123.481  | 1727.998  | NM_014869 | 1449.42   | 1184.638  | NM_003763 | 3296.593  | 5534.016  |
| NM_017798 | 6905.917  | 5210.571  | NM_006708 | 20287.816 | 22897.045 | AK023448  | 1149.871  | 654.349   |
| NM_012410 | 3054.793  | 2206.847  | AB037835  | 1557.11   | 1944.478  | Y18213    | 1722.962  | 1659.073  |
| NM_001111 | 8582.442  | 5977.07   | NM_016228 | 337.394   | 624.499   | NM_003283 | 1390.807  | 397.159   |
| NM_005028 | 2571.609  | 4150.616  | NM_000157 | 2526.703  | 3385.002  | NM_018163 | 781.327   | 581.47    |
| NM_001611 | 670.22    | 760.066   | NM_000712 | 6735.485  | 12154.009 | AK026362  | 1581.387  | 1084.595  |
| M59979    | 326.552   | 176.136   | NM_018088 | 868.305   | 1359.88   | NM_004968 | 1827.237  | 668.873   |
| AB018310  | 2107.716  | 1339.884  | NM_014846 | 2353.87   | 2080.474  | NM_005908 | 847.379   | 273.269   |
| NM_015379 | 18158.936 | 10501.227 | AB011164  | 2063.241  | 1513.863  | NM_004785 | 2070.72   | 549.179   |
| NM_004878 | 597.826   | 601.701   | M24750    | 1198.072  | 1163.373  | NM_002428 | 1128.121  | 585.333   |
| AF144638  | 49770.609 | 50135.34  | NM_005965 | 973.347   | 1540.922  | NM_014652 | 1183.085  | 484.865   |
| NM_005502 | 441.466   | 616.25    | NM_002740 | 2281.218  | 2313.071  | AL133020  | 3554.455  | 1922.167  |
| NM_000742 | 1025.936  | 2632.861  | AL117482  | 1729.465  | 1272.754  | BU565263  | 48897.227 | 73434.617 |
| AK026608  | 1638.493  | 2470.045  | NM_006549 | 18742.205 | 11461.107 | NM_005028 | 1315.637  | 3397.709  |
| AB046836  | 1122.422  | 1441.845  | AB018324  | 7579.008  | 5630.325  | NM_001611 | 436.551   | 971.653   |
| AJ224166  | 2046.761  | 4546.646  | NM_005627 | 2765.97   | 2582.626  | AB018310  | 1159.691  | 2252.266  |
| AK026098  | 2710.518  | 2091.438  | M64497    | 2452.4    | 1769.009  | NM_015379 | 13103.44  | 18878.76  |
| NM_012381 | 1970.579  | 1187.742  | NM_007274 | 5524.782  | 3423.524  | AF144638  | 46769.863 | 42638.117 |
| M20702    | 509.565   | 427.328   | NM_003356 | 3590.899  | 2382.18   | NM_001777 | 5992.684  | 4022.359  |
| NM_006397 | 11316.642 | 5186.863  | NM_014648 | 372.044   | 504.215   | U79457    | 3270.063  | 2032.448  |
| D83776    | 2086.421  | 1335.886  | NM_019604 | 366.374   | 417.689   | NM_014347 | 3183.747  | 636.705   |

|           |           |           |            |           |           |           |           |           |
|-----------|-----------|-----------|------------|-----------|-----------|-----------|-----------|-----------|
| NM_00408E | 3589.628  | 3420.108  | NM_005073  | 640.422   | 848.888   | NM_00129E | 7152.991  | 2421.119  |
| NM_00218C | 1469.34   | 2783.541  | NM_000951  | 1806.995  | 3079.002  | NM_004344 | 5017.914  | 2544.702  |
| NM_00013E | 2758.875  | 3007.338  | X52599     | 604.583   | 1029.754  | AB046786  | 820.359   | 2747.63   |
| NM_018163 | 1925.456  | 2266.562  | AA029300   | 3354.76   | 5983.492  | NM_01662C | 10238.671 | 5905.192  |
| AK026362  | 3908.232  | 6106.874  | BG708842   | 39651.41  | 58101.777 | NM_01889C | 14715.288 | 6349.844  |
| NM_00496E | 3822.863  | 6998.308  | M19723     | 48115.891 | 69307.969 | NM_016204 | 862.149   | 1115.301  |
| NM_00590E | 2766.57   | 4357.555  | X06256     | 5421.096  | 5794.992  | AB046836  | 617.699   | 1115.403  |
| AK024079  | 446.859   | 593.62    | AA709271   | 737.37    | 937.299   | NM_01781E | 3701.771  | 7212.931  |
| NM_00242E | 2101.911  | 1670.184  | M34057     | 1003.482  | 785.139   | AJ224166  | 916.845   | 1460.098  |
| NM_014674 | 6085.111  | 3645.777  | ID 1984668 | 1292.727  | 1065.276  | AK026098  | 1678.353  | 3278.184  |
| NM_018271 | 1035.891  | 789.674   | ID 1832579 | 1088.312  | 770.496   | NM_012381 | 1239.899  | 1594.152  |
| NM_014652 | 2428.82   | 1869.875  | H-430185 M | 1394.447  | 1266.379  | M20702    | 397.303   | 766.724   |
| AL133020  | 6839.029  | 5091.708  | D16583     | 2887.954  | 1862.425  | NM_006397 | 7104.501  | 9495.347  |
| NM_014044 | 4428.188  | 3524.542  | H44051     | 610.914   | 518.608   | D83776    | 1055.734  | 1667.043  |
| NM_00090C | 2210.418  | 3271.633  | AA481547   | 1656.646  | 1188.177  | NM_00408E | 1785.819  | 2473.551  |
| AK023684  | 5250.158  | 6840.946  | AA831880   | 741.212   | 358.583   | NM_00218C | 947.566   | 1133.39   |
| NM_000232 | 926.602   | 1249.923  | NM_020967  | 1208.044  | 1001.185  | AB011541  | 864.756   | 696.436   |
| J05070    | 448.642   | 1125.713  | NM_001071  | 8397.015  | 4461.936  | BC032460  | 2767.266  | 859.864   |
| AA700390  | 5729.698  | 4257.15   | AB028990   | 596.387   | 221.855   | NM_014071 | 1006.827  | 268.293   |
| Y18474    | 643.47    | 706.526   | X05299     | 3962.506  | 4317.838  | AK024404  | 782.966   | 298.184   |
| AA436163  | 1224.67   | 1063.842  | BM468475   | 924.712   | 1278.784  | NM_00632E | 528.648   | 438.577   |
| BI907981  | 865.513   | 821.164   | NM_00031E  | 2352.979  | 3455.291  | BE906107  | 6624.481  | 3285.006  |
| BI603841  | 3569.206  | 2257.847  | NM_00206C  | 6556.126  | 8368.35   | NM_01551E | 1836.911  | 3611.514  |
| BG696638  | 9697.767  | 9258.278  | AK001230   | 1656.213  | 2490.508  | AB033065  | 707.916   | 1494.147  |
| M19888    | 3594.172  | 3935.318  | NM_01468C  | 6148.288  | 7637.124  | NM_004857 | 3457.326  | 4993.494  |
| Y08136    | 1499.627  | 2192.398  | NM_005027  | 2214.011  | 3318.644  | NM_01210E | 358.812   | 726.813   |
| AA156863  | 6524.879  | 8145.725  | NM_004612  | 1373.815  | 2130.803  | NM_003253 | 502.79    | 573.322   |
| BI915199  | 3141.536  | 4662.641  | NM_00560E  | 2065.603  | 2508.403  | NM_01328E | 3099.671  | 4289.133  |
| AA398951  | 7848.341  | 7724.47   | NM_015583  | 816.928   | 930.632   | NM_002872 | 12711.39  | 18107.068 |
| AI218732  | 2513.8    | 3371.43   | NM_01849C  | 2172.229  | 1738.415  | NM_00049C | 396.402   | 622.504   |
| NM_004102 | 3776.419  | 3050.146  | NM_00624E  | 3211.047  | 2850.724  | NM_00483E | 531.707   | 792.175   |
| NM_004544 | 6848.768  | 4983.165  | NM_005103  | 2169.505  | 2292.809  | NM_012193 | 865.28    | 1112.747  |
| NM_016204 | 663.598   | 596.149   | NM_004822  | 725.258   | 639.137   | NM_00340E | 4932.146  | 5017.208  |
| NM_002652 | 760.516   | 577.879   | AK022349   | 488.082   | 295.43    | NM_00472C | 3101.997  | 3047.351  |
| NM_001311 | 3168.997  | 2180.196  | NM_00575C  | 487.356   | 328.698   | NM_001057 | 728.076   | 809.544   |
| NM_01779E | 6931.048  | 8617.341  | NM_004973  | 2045.896  | 1293.134  | NM_005561 | 2233.883  | 1587.4    |
| NM_01241C | 3094.073  | 4629.9    | NM_00724E  | 2434.973  | 1793.463  | AF272381  | 1570.292  | 1022.214  |
| NM_001111 | 7683.077  | 5184.767  | NM_00189C  | 816.182   | 369.682   | NM_004524 | 1024.568  | 271.711   |
| NM_01804E | 7836.306  | 5489.504  | NM_00128E  | 1603.531  | 1017.121  | NM_00631E | 1108.885  | 253.667   |
| AJ133439  | 577.12    | 350.893   | AB007915   | 696.142   | 1293.289  | NM_018401 | 485.753   | 226.655   |
| NM_01439E | 642.83    | 366.367   | AB033070   | 587.214   | 765.251   | NM_005163 | 1371.546  | 726.779   |
| NM_001561 | 498.56    | 398.816   | NM_018229  | 1135.137  | 1587.478  | NM_007273 | 16762.809 | 6562.313  |
| NM_00516C | 2214.943  | 841.001   | NM_00632E  | 4761.558  | 6690.626  | NM_016422 | 880.418   | 669.321   |
| X78817    | 21349.51  | 19463.576 | AY009127   | 8436.221  | 12582.623 | NM_01787E | 1860.271  | 4044.893  |
| AB023135  | 757.43    | 1522.816  | NM_01486E  | 1620.528  | 2733.822  | NM_005643 | 6879.063  | 9856.173  |
| AY009401  | 1461.506  | 2287.643  | AK000158   | 3088.787  | 3758.109  | NM_003592 | 1258.318  | 2449.359  |
| NM_001991 | 1151.909  | 1471.367  | NM_00576E  | 2141.716  | 3255.44   | NM_014953 | 1573.79   | 2066.187  |
| NM_000193 | 1336.359  | 1357.912  | Z83799     | 556.464   | 2325.237  | AF179995  | 444.383   | 909.032   |
| BC014586  | 695.789   | 512.695   | AK024500   | 6920.572  | 7264.677  | NM_01619E | 4162.115  | 2811.977  |
| NM_00244E | 1478.753  | 1052.86   | NM_002564  | 7725.953  | 6562.96   | NM_004523 | 717.965   | 972.535   |
| AF053952  | 12015.182 | 10982.247 | NM_000963  | 4689.227  | 6031.611  | NM_004404 | 4633.342  | 6494.29   |
| BF184738  | 1013.53   | 1585.954  | NM_01330E  | 4973.179  | 5203.415  | NM_00296C | 1298.718  | 1825.914  |
| NM_015057 | 1558.065  | 722.569   | AF027302   | 2712.806  | 2087.979  | NM_00679C | 469.032   | 414.696   |

|           |           |           |           |           |           |           |           |           |
|-----------|-----------|-----------|-----------|-----------|-----------|-----------|-----------|-----------|
| AF303398  | 7308.231  | 5403.326  | NM_002852 | 2867.295  | 2162.125  | AL117522  | 2838.415  | 1617.604  |
| NM_014810 | 3382.068  | 1932.885  | NM_001817 | 3001.826  | 2479.625  | NM_006572 | 2558.012  | 1637.26   |
| NM_004738 | 2445.541  | 2830.587  | AF063611  | 1058.261  | 1167.759  | NM_019061 | 1029.935  | 441.402   |
| NM_007357 | 5104.7    | 6573.59   | NM_006039 | 1666.737  | 1309.95   | AB033007  | 1767.797  | 474.521   |
| NM_003763 | 5775.053  | 6725.852  | NM_002089 | 673.199   | 454.748   | NM_003781 | 414.947   | 213.649   |
| AB011137  | 614.409   | 4456.92   | NM_014656 | 4051.408  | 2645.406  | NM_004716 | 7609.102  | 9433.014  |
| Y18213    | 3532.744  | 3681.805  | NM_002076 | 2490.91   | 1570.405  | D29810    | 2251.592  | 3687.693  |
| NM_003283 | 4048.475  | 4377.717  | Z25431    | 3529.25   | 6534.51   | NM_000128 | 788.176   | 1296.391  |
| AF249898  | 9453.94   | 6330.772  | NM_005627 | 3049.264  | 6303.491  | AB002384  | 844.695   | 1061.259  |
| M69181    | 8329.862  | 5260.508  | M64497    | 2613.452  | 4155.161  | NM_018437 | 384.091   | 490.841   |
| AK027224  | 585.707   | 509.65    | NM_007274 | 5844.075  | 6848.703  | AK023164  | 715.564   | 1258.394  |
| L09078    | 715.602   | 1369.123  | NM_003356 | 3906.873  | 5275.663  | NM_005379 | 602.534   | 739.94    |
| NM_002428 | 2335.133  | 2167.183  | AF238315  | 672.606   | 1541.396  | AK027121  | 1491.053  | 2237.019  |
| NM_014674 | 7413.617  | 10403.545 | NM_006224 | 32878.352 | 37647.289 | NM_017433 | 738.613   | 833.464   |
| NM_018271 | 1463.909  | 2387.38   | AL137300  | 7576.658  | 7410.337  | AL117661  | 1058.784  | 1006.037  |
| NM_000547 | 572.503   | 614.66    | NM_000229 | 2264.503  | 2884.581  | X64643    | 657.572   | 806.617   |
| NM_014652 | 2570.663  | 2226.585  | NM_006995 | 23567.646 | 26271.191 | NM_005380 | 3948.246  | 2785.749  |
| AL133020  | 7062.114  | 7548.076  | NM_003129 | 11948.371 | 14317.346 | D70835    | 29116.555 | 6665.908  |
| BU565263  | 65098.242 | 62288.762 | NM_001956 | 1731.627  | 1829.563  | NM_002697 | 1064.747  | 275.496   |
| NM_005028 | 2410.578  | 1730.722  | AB033064  | 1144.031  | 1342.839  | NM_001518 | 2932.265  | 1152.844  |
| NM_001611 | 755.254   | 575.578   | AK022317  | 2525.011  | 2495.707  | NM_003412 | 4406.526  | 1363.406  |
| AB018310  | 2373.316  | 2416.664  | NM_018396 | 7542.189  | 9253.745  | NM_018336 | 288.654   | 152.153   |
| NM_020133 | 354.201   | 238.903   | NM_003124 | 2584.893  | 2402.375  | AK022668  | 1795.213  | 1630.585  |
| NM_015379 | 21165.725 | 19085.521 | NM_006886 | 52113.402 | 45523.055 | AW975132  | 1293.205  | 1326.299  |
| BF028822  | 420.175   | 1161.144  | NM_004531 | 796.006   | 1118.598  | NM_006051 | 1465.527  | 3182.898  |
| NM_005502 | 596.761   | 1050.918  | AL133581  | 818.199   | 793.925   | NM_018427 | 1231.196  | 2489.848  |
| NM_000742 | 739.803   | 885.635   | NM_002558 | 3610.999  | 5432.15   | NM_014663 | 6610.641  | 9550.063  |
| NM_002355 | 10928.954 | 9055.768  | NM_005031 | 2635.827  | 2377.495  | AF007217  | 1127.304  | 1254.717  |
| AK026608  | 1385.819  | 1161.978  | AB040920  | 546.001   | 564.435   | AB037753  | 2649.789  | 4559.414  |
| NM_004102 | 3965.485  | 3878.539  | NM_000720 | 330.462   | 345.569   | NM_004674 | 1344.656  | 2191.068  |
| NM_004544 | 7131.931  | 7457.908  | NM_004842 | 1072.928  | 724.275   | AB037801  | 4354.32   | 4725.796  |
| NM_018890 | 30928.115 | 20950.299 | AK024639  | 3528.869  | 1864.317  | AL080159  | 5817.75   | 6593.92   |
| NM_016204 | 789.597   | 1182.156  | NM_015720 | 4079.028  | 2712.848  | NM_017823 | 35676.707 | 31796.441 |
| AB046836  | 736.014   | 729.535   | NM_020967 | 1225.172  | 2313.492  | U55185    | 847.043   | 1507.688  |
| NM_017816 | 5670.638  | 3573.498  | NM_001071 | 9427.854  | 10303.621 | U30828    | 6926.867  | 7452.903  |
| AJ224166  | 1664.266  | 864.135   | AB028990  | 511.882   | 916.379   | AF085886  | 53036.504 | 44889.441 |
| AK026098  | 2430.786  | 1769.737  | AK002089  | 233.097   | 723.701   | AK023828  | 1169.363  | 770.659   |
| NM_012381 | 2012.387  | 1294.535  | NM_006708 | 22570.121 | 23719.959 | AL080223  | 928.609   | 741.882   |
| M20702    | 569.624   | 475.041   | AB037835  | 1333.604  | 1776.245  | AK001630  | 353.248   | 226.886   |
| NM_006397 | 14055.828 | 10791.21  | NM_016228 | 419.267   | 389.686   | NM_014612 | 3291.227  | 1474.35   |
| D83776    | 2332.767  | 2656.636  | NM_000157 | 2573.275  | 2821.233  | AF079098  | 355.19    | 203.435   |
| NM_000138 | 3229.113  | 4912.396  | NM_000712 | 6613.383  | 7436.662  | AK021815  | 390.761   | 273.346   |
| NM_018163 | 1655.003  | 1535.553  | NM_018088 | 939.504   | 844.099   | NM_001543 | 425.881   | 640.117   |
| AK026362  | 4067.973  | 3678.606  | NM_007205 | 586.499   | 420.951   | NM_016641 | 2325.458  | 4611.699  |
| NM_004968 | 4028.283  | 3804.515  | AK023035  | 1104.636  | 1068.468  | AB018010  | 637.904   | 1053.527  |
| NM_005908 | 2416.432  | 1908.011  | NM_014846 | 2502.032  | 2307.826  | NM_014610 | 6821.199  | 11134.29  |
| NM_004785 | 4139.196  | 3574.898  | AB011164  | 2405.137  | 1943.86   | NM_000688 | 539.325   | 1090.226  |
| AK024079  | 346.781   | 407.318   | M24750    | 1001.186  | 764.802   | NM_006621 | 2873.698  | 4796.766  |
| NM_000193 | 1949.693  | 2176.655  | NM_005965 | 912.096   | 811.207   | BF347398  | 948.813   | 1709.78   |
| BC014586  | 657.638   | 989.365   | NM_002740 | 2410.984  | 1805.223  | AK026762  | 843.319   | 1574.058  |
| NM_002448 | 1225.022  | 1498.683  | AL117482  | 1463.038  | 881.213   | NM_004412 | 325.092   | 403.908   |
| AF053952  | 23838.455 | 20360.467 | NM_006549 | 22941.84  | 15277.81  | L48516    | 962.805   | 1396.492  |
| NM_003213 | 13146.006 | 11199.412 | AB018324  | 6915.219  | 4782.022  | NM_016648 | 2868.322  | 3744.039  |

|           |           |           |            |           |           |           |           |           |
|-----------|-----------|-----------|------------|-----------|-----------|-----------|-----------|-----------|
| BF184738  | 874.916   | 2055.633  | NM_002742  | 33829.84  | 22552.908 | AF083930  | 1219.387  | 2245.384  |
| NM_014044 | 4542.386  | 5087.415  | NM_005750  | 440.089   | 484.518   | NM_003426 | 463.086   | 389.67    |
| NM_000900 | 2318.032  | 2004.399  | NM_004973  | 2161.843  | 2687.69   | AK027159  | 488.303   | 509.018   |
| AK023684  | 4351.332  | 3874.34   | AF101051   | 656.684   | 879.844   | AF075112  | 348.789   | 265.497   |
| NM_000232 | 1023.882  | 598.155   | NM_007245  | 3006.16   | 3798.367  | AK001796  | 291.325   | 256.371   |
| J05070    | 278.931   | 169.973   | NM_001890  | 918.716   | 1392.13   | AF086152  | 1729.545  | 1077.033  |
| AA700390  | 5989.869  | 3506.639  | NM_001286  | 1563.711  | 2493.067  | U78519    | 832.257   | 962.372   |
| Y18474    | 569.679   | 467.751   | NM_014648  | 422.149   | 471.891   | AK026872  | 737.11    | 1191.835  |
| AA436163  | 1477.965  | 1367.545  | NM_019604  | 319.104   | 483.673   | AL157505  | 366.023   | 684.122   |
| BI907981  | 1192.257  | 1307.214  | NM_005073  | 617.485   | 879.966   | NM_007190 | 1042.8    | 2248.038  |
| BI603841  | 4902.645  | 5274.717  | NM_000951  | 1475.86   | 1908.414  | AF043897  | 693.568   | 1196.014  |
| Y08136    | 1747.225  | 2266.175  | X52599     | 799.548   | 851.091   | U79246    | 1116.798  | 1935.786  |
| AA156863  | 6027.493  | 6538.484  | AA029300   | 3332.918  | 3478.577  | AF052140  | 460.747   | 359.909   |
| BI915199  | 2664.01   | 2481.758  | BG708842   | 25784.982 | 22097.736 | AF007147  | 474.953   | 650.268   |
| R82957    | 55366.637 | 59295.617 | M19723     | 48064.852 | 59819.023 | AF052127  | 1209.202  | 1747.218  |
| BI830442  | 648.762   | 742.62    | AA709271   | 988.303   | 1192.521  | AK024885  | 804.687   | 875.309   |
| AA398951  | 7262.218  | 4015.109  | M34057     | 1114.68   | 1101.231  | AK026208  | 1412.919  | 1665.869  |
| AI218732  | 2480.692  | 2074.868  | ID 1984668 | 1382.688  | 1267.888  | NM_016947 | 50658.371 | 62032.773 |
| AF249898  | 9669.346  | 7765.291  | ID 1832579 | 1138.875  | 912.055   | AY007136  | 502.382   | 602.843   |
| M69181    | 7991.065  | 6054.665  | H-430185 M | 1294.737  | 843.966   | AK026759  | 237.875   | 734.356   |
| AK027224  | 410.531   | 262.819   | D16583     | 4762.98   | 2294.386  | AL359940  | 1856.296  | 3425.769  |
| NM_002652 | 797.571   | 996.791   | H44051     | 660.495   | 383.502   | NM_018286 | 631.057   | 1519.776  |
| NM_001311 | 3311.362  | 1912.602  | AA481547   | 2061.331  | 1795.506  | AK024925  | 4950.984  | 6636.053  |
| NM_017798 | 6511.333  | 4361.083  | AA831880   | 708.481   | 732.682   | AL049460  | 2542.171  | 4134.504  |
| NM_012410 | 3256.999  | 2002.155  | T64880     | 1063.789  | 805.587   | AK022396  | 616.982   | 1065.228  |
| NM_001111 | 8325.018  | 4942.612  | NM_006039  | 1691.506  | 2010.857  | AF075113  | 402.844   | 676.696   |
| NM_018049 | 7270.233  | 3879.954  | NM_002089  | 748.992   | 914.465   | AF086037  | 297.699   | 279.021   |
| AJ133439  | 562.783   | 380.454   | NM_014656  | 3435.168  | 3984.959  | AK022892  | 2633.47   | 2469.825  |
| NM_014395 | 544.772   | 434.883   | NM_002076  | 2815.756  | 3654.011  | Z36807    | 7336.931  | 5581.711  |
| NM_001561 | 553.129   | 613.519   | X05299     | 3786.264  | 3654.459  | NM_017935 | 1285.3    | 1532.277  |
| NM_005160 | 2619.274  | 2830.388  | BM468475   | 948.629   | 1111.889  | AK021837  | 755.672   | 560.072   |
| AB023135  | 821.29    | 1417.841  | NM_000318  | 2350.153  | 2983.572  | AK002088  | 4571.325  | 6082.346  |
| AY009401  | 1787.531  | 2065.387  | NM_002060  | 5689.811  | 6228.358  | AK000106  | 1030.205  | 1554.867  |
| AF294628  | 613.05    | 566.669   | AK001230   | 1631.588  | 2052.044  | AK022370  | 1107.728  | 1562.045  |
| AK026960  | 375.31    | 232.805   | NM_014680  | 5355.252  | 4528.306  | AK026765  | 447.223   | 662.615   |
| NM_001991 | 916.016   | 600.472   | NM_005027  | 2188.091  | 2095.788  | AL117530  | 404.191   | 581.37    |
| NM_005502 | 591.068   | 507.038   | NM_004612  | 1481.876  | 1565.176  | AL080191  | 1093.961  | 1428.168  |
| NM_000742 | 1064.283  | 1583.127  | NM_005608  | 1700.836  | 1677.891  | AK021639  | 8121.053  | 11855.787 |
| NM_002355 | 12417.073 | 17685.551 | NM_001106  | 1215.388  | 1358.092  | AK023189  | 452.837   | 758.186   |
| AK026608  | 1377.326  | 1588.591  | NM_015583  | 823.659   | 1127.834  | AK024157  | 265.746   | 542.68    |
| NM_015057 | 1543.5    | 1493.287  | NM_018490  | 2310.133  | 2241.071  | AK023905  | 654.783   | 662.75    |
| NM_004738 | 2673.973  | 3138.235  | NM_004778  | 289.766   | 305.862   | AK024231  | 1178.988  | 1218.408  |
| NM_007357 | 5130.399  | 6182.647  | NM_006245  | 3338.573  | 2683.93   | NM_016940 | 1079.522  | 2128.653  |
| NM_003763 | 6863.702  | 10446.655 | NM_005103  | 2128.302  | 1797.21   | AK025757  | 1027.457  | 1770.845  |
| AK023448  | 2385.799  | 1497.008  | NM_004822  | 912.496   | 827.778   | Y16713    | 470.506   | 465.833   |
| Y18213    | 3073.186  | 1884.123  | AK022349   | 608.242   | 630.161   | L07394    | 2594.978  | 3047.831  |
| NM_003283 | 3877.865  | 2426.55   | NM_005031  | 2603.771  | 3426.815  | AK056133  | 616.368   | 906.925   |
| NM_018163 | 2180.382  | 2355.467  | AB040920   | 458.431   | 708.643   | NM_017845 | 2100.163  | 3291.937  |
| AK026362  | 4172.125  | 4187.131  | NM_000720  | 416.122   | 533.405   | AF130080  | 564.556   | 1211.067  |
| NM_004968 | 4305.039  | 4353.309  | NM_004842  | 978.998   | 1153.79   | AK026006  | 514.995   | 909.616   |
| NM_005908 | 2586.723  | 3454.823  | AK024639   | 3560.239  | 3840.451  | NM_019085 | 4565.19   | 5580.084  |
| NM_004785 | 4533.045  | 5203.202  | NM_015720  | 5501.974  | 6712.25   | AL122072  | 1239.598  | 2081.979  |
| NM_002428 | 2536.37   | 2581.875  | AB007915   | 673.745   | 850.212   | AK026221  | 416.956   | 613.644   |

|           |           |           |           |           |           |            |           |           |
|-----------|-----------|-----------|-----------|-----------|-----------|------------|-----------|-----------|
| NM_014674 | 6853.801  | 5165.877  | AB033070  | 710.477   | 1043.456  | Y13870     | 459.139   | 765.01    |
| NM_018271 | 1216.806  | 1028.357  | NM_018229 | 1335.887  | 1714.743  | AK026403   | 812.107   | 1325.965  |
| NM_000547 | 443.81    | 295.303   | NM_006325 | 4863.296  | 4864.146  | AL359058   | 731.224   | 1059.825  |
| NM_014652 | 2487.862  | 1437.544  | AY009127  | 8462.587  | 12092.584 | AK026237   | 1061.335  | 1091.611  |
| AL133020  | 7065.924  | 3789.504  | NM_014869 | 1538.053  | 1701.255  | NM_017632  | 812.507   | 981.085   |
| NM_004152 | 417.393   | 562.931   | AK000158  | 2959.434  | 3035.449  | AK026655   | 630.771   | 631.445   |
| BU565263  | 61396.406 | 64994.289 | NM_005769 | 2083.104  | 2664.977  | NM_005279  | 662.34    | 301.51    |
| NM_005028 | 2528.77   | 3333.917  | AK024500  | 7850.326  | 8015.943  | AF129926   | 1185.88   | 2338.791  |
| M59979    | 467.75    | 586.72    | NM_002564 | 8715.843  | 7867.609  | AK025822   | 1087.72   | 1926.708  |
| AB018310  | 2687.24   | 3474.002  | NM_001884 | 313.795   | 105.537   | AL360140   | 426.214   | 533.829   |
| NM_015379 | 22992.986 | 25807.363 | NM_000963 | 4948.331  | 6021.434  | AF201937   | 17304.303 | 20429.865 |
| NM_004878 | 450.033   | 502.962   | NM_013308 | 4560.216  | 4655.692  | AL390128   | 698.258   | 1038.476  |
| AF144638  | 57671.188 | 46657.551 | AF027302  | 2760.748  | 2152.98   | AL157429   | 2124.826  | 3604.626  |
| NM_001777 | 15376.671 | 27822.885 | NM_002852 | 2979.023  | 2667.408  | NM_012071  | 21226.541 | 28620.57  |
| U79457    | 8311.325  | 9545.843  | NM_001817 | 3185.686  | 2038.692  | AF055018   | 2049.41   | 3347.494  |
| AB037832  | 499.374   | 702.306   | AF063611  | 1197.655  | 1336.652  | AF070599   | 693.364   | 1322.192  |
| NM_014347 | 9930.646  | 11879.693 | NM_005965 | 850.79    | 948.604   | NM_005450  | 938.958   | 1695.11   |
| NM_001296 | 17274.809 | 18173.168 | NM_002740 | 2216.924  | 2786.786  | AK023600   | 426.805   | 546.795   |
| NM_004344 | 12446.583 | 20614.668 | AL117482  | 1652.16   | 2374.374  | NM_005528  | 979.259   | 1400.825  |
| AF085972  | 405.905   | 406.408   | NM_006549 | 28612.291 | 28375.33  | NM_005288  | 1032.997  | 1228.596  |
| NM_000757 | 508.382   | 493.087   | AB018324  | 7832.049  | 10702.105 | AK001918   | 504.855   | 832.072   |
| AB046786  | 1302.147  | 908.037   | NM_002742 | 47609.613 | 62927.527 | NM_018638  | 10453.063 | 10156.604 |
| NM_016620 | 15761.226 | 9876.611  | Z25431    | 3659.798  | 5350.582  | AF086048   | 1445.504  | 2629.749  |
| NM_018890 | 29326.752 | 15139.54  | NM_005627 | 3181.136  | 5868.146  | L15616     | 2366.056  | 4138.071  |
| NM_016204 | 558.005   | 369.255   | M64497    | 2411.912  | 3325.587  | AB019565   | 6204.151  | 6412.793  |
| AB046836  | 1040.289  | 779.212   | NM_007274 | 6005.676  | 5672.317  | D16914     | 44676.895 | 63767.266 |
| NM_017816 | 6093.326  | 7442.896  | NM_003356 | 5427.729  | 5796.802  | NM_000833  | 825.837   | 1016.331  |
| AK026098  | 2742.619  | 3869.771  | AF238315  | 381.203   | 500.627   | NM_000283  | 746.648   | 922.821   |
| NM_012381 | 1847.592  | 2132.643  | NM_006224 | 35487.754 | 26084.951 | NM_012460  | 1682.574  | 2975.037  |
| M20702    | 655.997   | 566.811   | AL137300  | 7686.069  | 6115.283  | NM_012118  | 1395.587  | 2427.322  |
| NM_006397 | 14854.396 | 10481.719 | NM_000229 | 2466.681  | 3013.313  | AK024092   | 768.333   | 1515.861  |
| D83776    | 1991.944  | 2000.498  | NM_006995 | 24613.33  | 26536.854 | AK002044   | 3598.983  | 5248.537  |
| NM_004088 | 3774.011  | 2872.764  | NM_003129 | 12225.626 | 12129.692 | AK022206   | 372.335   | 600.685   |
| NM_002180 | 1477.305  | 1855.224  | NM_001956 | 1864.124  | 2334.627  | U90904     | 3910.802  | 8275.714  |
| NM_000138 | 2739.473  | 2617.561  | AB033064  | 1627.66   | 1911.663  | AF088053   | 1766.108  | 3247.48   |
| AB011541  | 2788.301  | 2753.195  | AK022317  | 2820.992  | 3400.202  | AL133662   | 345.812   | 415.444   |
| BC032460  | 9951.801  | 15519.457 | NM_018396 | 7372.343  | 7151.03   | U90903     | 594.096   | 1285.778  |
| NM_014071 | 2863.198  | 6633.493  | NM_003124 | 1968.538  | 1911.186  | AF278760   | 407.165   | 443.458   |
| AK024404  | 2328.602  | 2920.968  | NM_006886 | 54330.043 | 39080.254 | AB032954   | 641.381   | 503.082   |
| NM_006329 | 1213.548  | 1659.269  | NM_004531 | 989.085   | 928.697   | NM_006003  | 13533.184 | 14497.447 |
| NM_005166 | 691.433   | 495.319   | NM_002558 | 3771.428  | 4123.574  | AL110197   | 2202.021  | 3185.948  |
| NM_000213 | 8431.268  | 6313.214  | NM_003586 | 653.573   | 852.891   | AF085995   | 666.557   | 804.16    |
| BE906107  | 14903.316 | 8349.916  | NM_000922 | 1409.581  | 2196.754  | CY3Cy5     | 497.15    | 213.324   |
| NM_015516 | 2989.506  | 1884.795  | NM_013232 | 6138.878  | 6268.549  | AA029300   | 1128.963  | 1210.266  |
| AB033065  | 1308.034  | 599.527   | NM_017993 | 1182.129  | 1756.153  | BG708842   | 11132.495 | 6904.234  |
| NM_005211 | 510.615   | 347.519   | NM_000362 | 6075.894  | 6988.621  | M19723     | 24725.477 | 23648.979 |
| NM_004857 | 5418.86   | 5909.915  | NM_014429 | 1646.116  | 1616.128  | X06256     | 1858.983  | 1355.062  |
| NM_012108 | 1046.946  | 1646.063  | AK000770  | 1514.898  | 1867.488  | AA709271   | 339.809   | 364.28    |
| NM_000490 | 788.513   | 1088.564  | NM_002370 | 9501.601  | 10611.704 | M34057     | 546.072   | 387.387   |
| NM_004839 | 766.517   | 579.76    | NM_015670 | 1683.298  | 2493.552  | ID 1984668 | 525.776   | 671.32    |
| NM_012193 | 1787.565  | 1347.862  | NM_014709 | 900.171   | 1070.178  | ID 1832579 | 535.741   | 435.548   |
| NM_003405 | 9911.477  | 5659.224  | AB028990  | 683.303   | 789.553   | H-430185 N | 599.948   | 921.749   |
| NM_004720 | 5528.401  | 2809.894  | NM_006708 | 22871.314 | 17723.523 | D16583     | 1717.184  | 1273.583  |



|           |           |           |           |           |           |           |           |           |
|-----------|-----------|-----------|-----------|-----------|-----------|-----------|-----------|-----------|
| NM_001057 | 1215.188  | 1045.488  | AB037835  | 1548.072  | 2029.949  | H44051    | 301.354   | 374.663   |
| NM_005561 | 6115.532  | 5532.115  | NM_016228 | 505.29    | 916.497   | AA481547  | 773       | 869.003   |
| AF272381  | 5414.154  | 4851.81   | NM_000157 | 2924.94   | 3382.082  | AA831880  | 301.889   | 493.328   |
| NM_004524 | 3421.783  | 4068.911  | NM_000712 | 6782.479  | 6005.456  | T64880    | 356.705   | 686.008   |
| NM_006315 | 3758.578  | 5494.49   | NM_018088 | 1037.241  | 630.099   | NM_020967 | 492.854   | 744.317   |
| NM_018401 | 2148.105  | 2367.27   | BC013695  | 13427.14  | 10964.97  | NM_001071 | 3586.693  | 4237.592  |
| NM_005163 | 3946.793  | 3161.455  | NM_007205 | 448.742   | 459.462   | SR2       | 19205.115 | 23273.609 |
| NM_007273 | 39163.824 | 31464.445 | AK023035  | 1376.028  | 1015.748  | SR4       | 4500.53   | 5403.194  |
| BE894943  | 646.608   | 428.458   | NM_014846 | 2585.017  | 2072.249  | SR6       | 735.993   | 1237.465  |
| NM_016422 | 2146.259  | 1693.069  | AB011164  | 2320.58   | 1686.219  | SR8       | 2604.726  | 10908.154 |
| NM_017878 | 2721.569  | 2032.034  | M24750    | 1086.496  | 1516.968  | SR10      | 8124.665  | 4514.571  |
| NM_004494 | 60728.563 | 56813.824 | AB046776  | 832.14    | 1327.849  | CY3Cy5    | 738.577   | 255.46    |
| AL049687  | 1013.122  | 576.701   | AF217289  | 213.575   | 297.685   | NM_005027 | 785.14    | 656.284   |
| NM_005643 | 12885.265 | 9441.392  | NM_002687 | 8871.496  | 8543.144  | NM_004612 | 498.555   | 650.472   |
| AF179995  | 1326.03   | 3321.362  | NM_000627 | 1278.263  | 1500.892  | NM_005608 | 637.437   | 779.028   |
| NM_004523 | 1246.975  | 1287.754  | NM_000038 | 620.228   | 572.214   | NM_001106 | 405.31    | 349.282   |
| NM_004404 | 5253.575  | 3686.927  | NM_000825 | 435.783   | 652.063   | NM_015583 | 328.444   | 281.487   |
| NM_002960 | 3021.336  | 2132.335  | NM_001963 | 473.505   | 1129.848  | NM_018490 | 943.443   | 835.471   |
| AB046788  | 385.257   | 332.496   | NM_004334 | 1604.632  | 1776.513  | NM_004778 | 136.394   | 163.407   |
| NM_006790 | 875.193   | 446.102   | NM_003886 | 3023.227  | 3385.395  | NM_006245 | 1367.451  | 2075.63   |
| AL117522  | 11248.822 | 6507.359  | NM_005843 | 1242.232  | 1322.641  | NM_005103 | 1040.257  | 1787.937  |
| NM_006572 | 7224.637  | 6216.387  | NM_003854 | 500.395   | 680.814   | NM_004822 | 354.809   | 466.297   |
| NM_004784 | 367.207   | 677.177   | NM_001252 | 11614.976 | 10573.212 | AK022349  | 285.498   | 120.126   |
| NM_019061 | 3252.389  | 3473.911  | AF053712  | 915.674   | 840.195   | NM_005750 | 172.458   | 294.621   |
| AB033007  | 3697.405  | 2785.69   | NM_003947 | 884.253   | 841.881   | NM_004973 | 862.925   | 1211.655  |
| NM_003781 | 1388.455  | 993.834   | NM_002821 | 13781.782 | 16123.325 | NM_007245 | 1083.248  | 1252.351  |
| NM_003130 | 898.139   | 890.465   | M96652    | 8060.067  | 7188.805  | NM_001890 | 442.884   | 352.412   |
| NM_004716 | 16693.838 | 8735.797  | L41690    | 1946.611  | 1778.956  | NM_001286 | 620.631   | 778.697   |
| D29810    | 4266.084  | 3723.079  | NM_018059 | 487.772   | 459.915   | NM_014648 | 173.702   | 154.262   |
| AB002384  | 1988.557  | 3538.015  | NM_000939 | 46009.285 | 36392.691 | NM_019604 | 162.727   | 144.478   |
| NM_018437 | 1812.218  | 3631.877  | NM_005183 | 337.985   | 342.06    | NM_005073 | 203.469   | 345.577   |
| NM_000422 | 2948.532  | 5470.781  | NM_006514 | 1860.15   | 1856.141  | NM_000951 | 557.454   | 418.798   |
| AK023164  | 1469.4    | 2374.181  | AF065164  | 4294.922  | 2301.459  | X52599    | 292.538   | 181.507   |
| NM_005379 | 928.952   | 717.008   | AB028991  | 2088.473  | 2319.368  | AK000158  | 1265.35   | 1484.539  |
| AK027121  | 2954.367  | 1647.547  | AF263547  | 2667.821  | 3400.984  | NM_005769 | 784.765   | 677.669   |
| NM_017433 | 1565.737  | 1184.891  | AJ008143  | 6441.924  | 6083.759  | AK024500  | 2664.01   | 3342.094  |
| AL117661  | 2254.667  | 1498.596  | NM_007144 | 837.852   | 995.115   | NM_002564 | 3432.756  | 3166.486  |
| X64643    | 2248.821  | 1030.745  | NM_005093 | 384.448   | 599.12    | NM_000963 | 1982.991  | 2654.758  |
| NM_005380 | 11373.306 | 7976.568  | NM_004424 | 3562.938  | 3231.642  | NM_013308 | 1849.209  | 3192.741  |
| D70835    | 56188.223 | 39181.996 | AL133117  | 1773.659  | 2142.98   | AF027302  | 1042.601  | 1121.056  |
| NM_002697 | 3506.055  | 2587.11   | AB033040  | 514.467   | 1341.997  | NM_002852 | 1170.41   | 1675.397  |
| NM_001518 | 8961.448  | 6934.893  | AF070586  | 3324.305  | 5945.647  | NM_001817 | 1201.53   | 1165.864  |
| NM_003412 | 9876.184  | 7641.098  | NM_014412 | 1069.948  | 1089.613  | AF063611  | 495.854   | 682.132   |
| NM_018336 | 1104.884  | 1200.57   | NM_013303 | 1800.646  | 1355.852  | NM_006039 | 716.88    | 797.274   |
| AK022668  | 4627.696  | 2870.953  | NM_012227 | 2841.924  | 3681.742  | NM_002089 | 329.787   | 433.372   |
| AW975132  | 2014.002  | 1448.064  | NM_006101 | 855.992   | 544.121   | M28983    | 191.801   | 124.267   |
| NM_006051 | 2932.593  | 1783.128  | NM_001237 | 3161.488  | 2381.005  | NM_014656 | 1385.055  | 1654.108  |
| NM_018427 | 2088.893  | 1423.906  | NM_002507 | 1316.79   | 1384.629  | NM_002076 | 1169.406  | 1180.597  |
| AB037814  | 803.436   | 468.382   | NM_015962 | 1367.998  | 1236.332  | X05299    | 1346.126  | 1362.125  |
| NM_014663 | 13061.859 | 7194.651  | NM_016145 | 452.615   | 596.213   | BM468475  | 483.7     | 595.079   |
| AF007217  | 2266.612  | 1835.749  | NM_016078 | 3400.47   | 2540.547  | NM_000318 | 1015.95   | 842.808   |
| NM_004674 | 3574.229  | 6946.001  | NM_003798 | 406.908   | 232.421   | NM_002060 | 2204.133  | 1990.357  |
| NM_017823 | 53117.801 | 57371.973 | NM_004401 | 1319.383  | 722.514   | AK001230  | 704.794   | 518.443   |

|           |           |           |           |           |           |           |           |           |
|-----------|-----------|-----------|-----------|-----------|-----------|-----------|-----------|-----------|
| U55185    | 748.34    | 505.081   | NM_001849 | 3618.632  | 1949.185  | NM_01468C | 2021.676  | 1872.073  |
| U30828    | 12928.313 | 8660.045  | AF255910  | 513.76    | 294.686   | NM_006224 | 12473.927 | 9404.68   |
| AF085886  | 63065.871 | 53145.828 | NM_016146 | 2206.578  | 1301.736  | AL137300  | 1962.722  | 1789.42   |
| AK023828  | 4825.48   | 3019.717  | AK024343  | 1289.618  | 1897.072  | NM_000229 | 725.778   | 658.909   |
| AK022664  | 803.061   | 695.003   | NM_001936 | 381.255   | 362.373   | NM_006995 | 7867.895  | 7869.979  |
| AL080223  | 3427.553  | 2085.055  | NM_002569 | 655.002   | 991.341   | NM_003129 | 3568.969  | 4589.224  |
| AK001630  | 1252.505  | 1741.059  | D42084    | 1704.961  | 1680.841  | NM_001956 | 850.809   | 840.408   |
| NM_014612 | 12062.126 | 9733.206  | NM_001734 | 340.982   | 473.288   | AB033064  | 582.227   | 546.659   |
| AF079098  | 1090.081  | 876.292   | NM_014693 | 559.365   | 657.897   | AK022317  | 1216.967  | 1130.088  |
| AK021815  | 1575.394  | 1603.8    | AB007896  | 689.444   | 639.05    | NM_003124 | 1215.699  | 1617.868  |
| NM_001543 | 816.816   | 814.87    | AB007916  | 5787.457  | 5957.257  | NM_004531 | 417.64    | 432.46    |
| NM_016641 | 4240.125  | 3396.15   | AF049140  | 1176.401  | 867.172   | AL133581  | 366.393   | 508.403   |
| AB018010  | 1173.73   | 695.34    | AL136794  | 957.386   | 541.881   | NM_002558 | 1379.324  | 1736.825  |
| NM_01461C | 14296.391 | 9758.015  | BC035601  | 32395.834 | 36207.531 | NM_005031 | 960.839   | 1275.05   |
| NM_000689 | 794.688   | 615.18    | NM_001458 | 963.103   | 822.721   | AB040920  | 295.922   | 301.707   |
| NM_006621 | 5620.563  | 4672.954  | NM_020388 | 5217.931  | 4056.817  | NM_00072C | 186.21    | 227.837   |
| BF347398  | 2378.492  | 2706.573  | NM_004202 | 31757.592 | 19436.75  | NM_004842 | 484.759   | 521.043   |
| AK026762  | 1868.67   | 2345.246  | AB046829  | 445.224   | 439.934   | AK024639  | 1449.883  | 980.521   |
| NM_004412 | 1055.478  | 1844.883  | NM_016445 | 415.204   | 276.011   | NM_01572C | 2210.185  | 2095.309  |
| NM_016648 | 5384.752  | 5822.743  | NM_003379 | 17487.318 | 8867.677  | AB007915  | 282.417   | 275.513   |
| AF083930  | 2110.419  | 1529.407  | NM_004521 | 5901.534  | 3196.539  | AB033070  | 305.693   | 352.182   |
| NM_005986 | 461.764   | 603.553   | AF229162  | 1548.186  | 886.722   | NM_018229 | 444.169   | 333.47    |
| NM_003426 | 917.844   | 650.722   | U02309    | 31667.004 | 16641.721 | NM_006325 | 1812.773  | 1636.743  |
| NM_014862 | 563.473   | 423.927   | NM_005257 | 12324.024 | 10242.937 | AY009127  | 3239.957  | 3674.664  |
| AK027159  | 1290.508  | 1059.335  | AF011573  | 4808.765  | 4145.39   | NM_014869 | 592.271   | 580.746   |
| AK025360  | 574.798   | 576.044   | NM_002145 | 1482.764  | 1553.21   | NM_006708 | 6311.439  | 5764.265  |
| AF075112  | 540.429   | 541.557   | NM_003923 | 386.166   | 431.29    | AB037835  | 467.661   | 293.886   |
| AK001796  | 893.17    | 723.774   | NM_004831 | 529.583   | 680.003   | NM_000157 | 856.043   | 1067.477  |
| AF086152  | 5371.772  | 3430.052  | NM_014213 | 2437.928  | 2379.24   | NM_000712 | 2585.48   | 2182.356  |
| U78519    | 1524.035  | 1672.35   | NM_000168 | 2522.909  | 2612.469  | NM_018088 | 363.03    | 128.285   |
| AK026872  | 1410.681  | 1247.413  | AF294629  | 2405.455  | 2746.156  | NM_014846 | 1345.845  | 1707.515  |
| NM_00719C | 5725.271  | 5157.702  | NM_000545 | 5608.357  | 7674.493  | AB011164  | 1327.113  | 1438.915  |
| AF043897  | 1604.055  | 2483.234  | NM_002136 | 44378.066 | 43231.824 | M24750    | 459.325   | 435.669   |
| AF007147  | 1103.431  | 1643.716  | AK025571  | 744.911   | 721.043   | NM_005965 | 610.253   | 883.268   |
| AF052127  | 3096.452  | 3471.552  | NM_014463 | 22758.32  | 15225.499 | NM_00274C | 937.369   | 1302.657  |
| AK024261  | 437.645   | 327.051   | NM_00552C | 14804.39  | 11908.552 | AL117482  | 717.396   | 906.955   |
| AF052150  | 505.341   | 303.742   | AK023265  | 1011.669  | 660.717   | NM_002742 | 22551.4   | 26939.457 |
| AF086481  | 560.497   | 664.202   | NM_018723 | 329.408   | 504.521   | Z25431    | 1309.726  | 1559.115  |
| AK021982  | 495.456   | 416.49    | AB029009  | 2314.2    | 1871.966  | NM_005627 | 1250.855  | 1849.537  |
| AL355689  | 586.208   | 485.225   | AF112207  | 1729.517  | 1364.409  | M64497    | 871.718   | 882.653   |
| AK024885  | 1875.405  | 1825.474  | AJ420488  | 50406.711 | 71349.32  | NM_007274 | 2031.707  | 1686.228  |
| AK022441  | 1100.471  | 1162.194  | NM_005594 | 14328.332 | 7193.132  | NM_003356 | 1777.935  | 1636.981  |
| AK026208  | 3053.493  | 2372.78   | NM_004461 | 49443.438 | 38894.488 | AF238315  | 256.186   | 199.854   |
| NM_016947 | 72818.172 | 64907.594 | NM_018473 | 4367.452  | 2005.732  | NM_014648 | 229.865   | 93.68     |
| AY007136  | 802.668   | 754.713   | BF106121  | 776.692   | 453.36    | NM_005073 | 215.537   | 161.324   |
| AK026759  | 323.362   | 375.911   | AK023719  | 4029.885  | 5866.912  | NM_000951 | 581.493   | 612.616   |
| AL359940  | 3979.737  | 2923.01   | AK025590  | 1289.197  | 1716.998  | X52599    | 268.015   | 348.01    |
| NM_018286 | 1542.206  | 2609.723  | AY007149  | 2596.056  | 3219.923  | AA029300  | 1099.604  | 908.32    |
| AF085961  | 572.944   | 495.66    | M12078    | 717.551   | 769.366   | BG708842  | 13456.972 | 9654.476  |
| AK024925  | 11784.177 | 9375.577  | NM_00455C | 9240.367  | 8973.305  | M19723    | 26052.818 | 27147.623 |
| AL049460  | 4824.303  | 4430.501  | NM_000785 | 920.234   | 1170.337  | X06256    | 1813.79   | 1774.192  |
| AK022396  | 956.577   | 1484.25   | NM_004110 | 3837.54   | 3330.217  | AA709271  | 341.504   | 470.371   |
| AK022892  | 6656.093  | 8036.471  | NM_013387 | 29480.857 | 31670.223 | M34057    | 494.052   | 408.266   |

|           |           |           |           |           |          |            |          |          |
|-----------|-----------|-----------|-----------|-----------|----------|------------|----------|----------|
| U50536    | 483.687   | 692.537   | NM_005262 | 4342.308  | 4379.756 | ID 1984668 | 529.891  | 872.564  |
| Z36807    | 25333.336 | 20598.096 | NM_005757 | 403.255   | 357.499  | ID 1832579 | 437.344  | 451.48   |
| U20896    | 547.346   | 429.056   | NM_020128 | 557.944   | 701.806  | H-430185 N | 646.706  | 438.87   |
| U52836    | 526.553   | 350.465   | NM_005068 | 1765.638  | 1544.998 | D16583     | 1494.874 | 1241.383 |
| NM_017936 | 2456.272  | 3235.961  | NM_018223 | 4593.138  | 3884.928 | H44051     | 349.046  | 281.647  |
| AK021837  | 2069.851  | 2688.837  | NM_006693 | 12012.438 | 9085.354 | AA481547   | 849.387  | 976.888  |
| AK002088  | 8731.774  | 5885.85   | NM_001722 | 1460.502  | 998.505  | AA831880   | 295.956  | 447.115  |
| X98206    | 460.839   | 559.649   | AB046802  | 1733.033  | 1248.045 | T64880     | 483.368  | 446.981  |
| AK022193  | 480.497   | 608.279   | NM_003297 | 838.224   | 511.818  | NM_020967  | 463.51   | 646.185  |
| AK022370  | 1873.98   | 1584.451  | X74861    | 279.214   | 162.006  | NM_001071  | 3683.609 | 3547.854 |
| AK026765  | 1046.502  | 825.189   | NM_006940 | 405.392   | 301.245  | AB028990   | 255.695  | 230.197  |
| AL117530  | 866.244   | 681.045   | NM_018269 | 9163.525  | 5092.938 | X05299     | 1143.538 | 1075.086 |
| AL080191  | 2253.167  | 1821.032  | AK024633  | 2422.678  | 1286.074 | BM468475   | 363.625  | 587.937  |
| AK021639  | 15105.132 | 11974.661 | NM_001453 | 7074.591  | 4550.051 | NM_000318  | 747.44   | 880.941  |
| AK023189  | 655.313   | 912.344   | NM_012075 | 960.192   | 1248.489 | NM_002060  | 1785.685 | 1844.34  |
| AF306347  | 390.494   | 1187.338  | AB004851  | 603.566   | 767.119  | AK001230   | 613.431  | 627.168  |
| AK022619  | 401.35    | 797.103   | NM_013381 | 357.992   | 553.926  | NM_014680  | 1935.22  | 1537.008 |
| AK023464  | 1358.839  | 1283.806  | AK023911  | 1870.841  | 2020.953 | NM_005027  | 791.398  | 660.569  |
| AK024157  | 523.391   | 640.014   | NM_001283 | 1359.304  | 2052.815 | NM_004612  | 569.301  | 469.232  |
| AK023905  | 1674.7    | 2835.557  | D87470    | 841.5     | 1242.056 | NM_005608  | 751.201  | 853.019  |
| AK024231  | 3007.1    | 4482.34   | AF147307  | 4000.893  | 4167.666 | NM_001106  | 442.737  | 313.438  |
| NM_016940 | 2059.744  | 1838.566  | AK001829  | 1164.703  | 1306.581 | NM_015583  | 392.982  | 348.529  |
| AK025757  | 1705.446  | 1246.675  | NM_016525 | 2385.255  | 2812.046 | NM_018490  | 939.56   | 968.246  |
| Y16713    | 765.989   | 674.394   | AK024931  | 6955.049  | 4654.03  | NM_006245  | 1210.556 | 1060.692 |
| L07394    | 6991.001  | 5182.356  | AL109715  | 514.596   | 471.826  | NM_005103  | 984.528  | 1538.158 |
| AK056133  | 1110.307  | 955.203   | AF086181  | 399.623   | 223.17   | NM_004822  | 371.267  | 658.878  |
| NM_017845 | 4661.794  | 5487.462  | D86985    | 390.655   | 430.346  | AK022349   | 256.955  | 447.533  |
| AF130080  | 1189.761  | 1145.331  | AK022258  | 589.386   | 373.762  | NM_005750  | 232.671  | 215.401  |
| AK026006  | 1110.608  | 1288.462  | AF131799  | 638.947   | 405.552  | NM_004973  | 866.27   | 831.767  |
| NM_019086 | 7768      | 5905.236  | AK000455  | 716.967   | 219.664  | NM_007245  | 1088.627 | 1256.965 |
| AF147440  | 392.396   | 646.928   | NM_005230 | 585.366   | 412.872  | NM_001890  | 432.421  | 434.648  |
| AL122072  | 2392.53   | 2756.626  | AL365407  | 1858.677  | 1843.531 | NM_001286  | 619.973  | 427.838  |
| AK026221  | 947.924   | 2070.394  | AK000840  | 2073.186  | 2606.835 | AB007915   | 274.357  | 307.882  |
| AL359058  | 1459.192  | 1338.776  | AL162073  | 723.509   | 881.689  | AB033070   | 245.825  | 287.54   |
| AK026237  | 2289.876  | 4492.384  | AL390160  | 417.534   | 487.44   | NM_018226  | 413.908  | 319.492  |
| AK023687  | 491.647   | 845.259   | AJ006835  | 2836.407  | 2850.842 | NM_006325  | 1468.83  | 1602.396 |
| NM_017632 | 1400.85   | 863.206   | AF075057  | 151.182   | 297.598  | AY009127   | 2640.79  | 3293.528 |
| AK026655  | 1172.769  | 827.171   | AL110138  | 487.671   | 622.985  | NM_014866  | 594.423  | 524.894  |
| S41522    | 391.416   | 241.551   | AL122039  | 641.372   | 630.089  | AK000158   | 1418.178 | 1294.94  |
| NM_005276 | 392.193   | 478.937   | AF070577  | 4443.63   | 3547.134 | NM_005766  | 764.381  | 750.528  |
| AF129926  | 2147.115  | 1951.49   | AL157484  | 4493.252  | 2805.253 | AK024500   | 3401.218 | 3620.317 |
| AK025822  | 2275.64   | 2580.765  | AK024850  | 1056.391  | 632.14   | NM_002564  | 3582.12  | 4021.569 |
| AL360140  | 799.499   | 748.849   | Y09836    | 2496.009  | 1283.839 | NM_000963  | 1807.234 | 2581.165 |
| AF201937  | 26630.049 | 22614.465 | AL137597  | 6984.323  | 4094.07  | NM_013308  | 1840.561 | 2508.727 |
| AL390128  | 1327.482  | 1541.958  | AF086044  | 582.957   | 391.629  | AF027302   | 1135.751 | 1594.814 |
| AL157429  | 3910.698  | 5405.144  | NM_014926 | 520.499   | 136.293  | NM_002852  | 1435.217 | 2104.932 |
| NM_012071 | 37060.156 | 47302.609 | AF131790  | 262.064   | 342.625  | NM_001817  | 1223.86  | 1323.384 |
| AF070599  | 1254.644  | 1692.561  | AJ011378  | 459.656   | 963.766  | AF063611   | 676.295  | 892.325  |
| NM_005210 | 938.509   | 1122.788  | AF009266  | 618.666   | 924.993  | NM_006036  | 717.1    | 668.591  |
| NM_005525 | 2021.56   | 2520.567  | AF009310  | 887.815   | 669.888  | NM_002086  | 364.728  | 312.467  |
| NM_005285 | 1961.951  | 1296.612  | AF060168  | 761.044   | 855.53   | NM_004590  | 183.325  | 79.634   |
| AK001918  | 870.174   | 923.482   | AF009275  | 498.588   | 606.663  | M28983     | 210.265  | 194.889  |
| NM_018635 | 23023.859 | 16907.604 | AF056426  | 779.151   | 776.175  | NM_014656  | 1391.408 | 1114.33  |

|            |           |           |           |           |           |           |           |           |
|------------|-----------|-----------|-----------|-----------|-----------|-----------|-----------|-----------|
| AF086048   | 1440.017  | 1263.392  | AF064850  | 949.871   | 2246.075  | NM_002076 | 1124.835  | 1105.752  |
| L15616     | 3787.489  | 5522.255  | AK001096  | 887.132   | 1394.799  | Z25431    | 1236.798  | 1273.454  |
| AB019565   | 10872.511 | 16479.332 | NM_018329 | 624.708   | 844.284   | NM_005627 | 1059.434  | 1128.656  |
| D16914     | 69993.883 | 65626.438 | AK021565  | 610.696   | 508.45    | M64497    | 718.703   | 631.647   |
| AA084879   | 901.531   | 1047.927  | AK021778  | 328.499   | 243.296   | NM_007274 | 1442.407  | 1150.211  |
| NM_000833  | 2586.862  | 2724.476  | AK001150  | 2832.148  | 2089.084  | NM_003356 | 1302.351  | 999.393   |
| NM_000283  | 2576.151  | 2268.471  | AK002123  | 365.939   | 225.864   | NM_006224 | 12816.491 | 9621.649  |
| NM_012460  | 3398.834  | 3279.646  | AK021633  | 1016.043  | 644.765   | AL137300  | 2265.556  | 1768.903  |
| NM_012118  | 3528.831  | 3018.51   | AK025659  | 693.152   | 427.961   | NM_000229 | 923.111   | 1078.755  |
| AK001133   | 449.897   | 364.556   | AK026788  | 565.192   | 350.71    | NM_006995 | 9063.309  | 11513.055 |
| AK024092   | 1479.114  | 1411.844  | AK026824  | 514.342   | 337.075   | NM_003129 | 4179.41   | 5446.18   |
| AK026285   | 367.304   | 528.539   | AJ008130  | 10171.531 | 16252.782 | NM_001956 | 615.544   | 802.795   |
| AK022226   | 351.606   | 324.512   | AF086502  | 1123.764  | 1333.942  | AB033064  | 588.079   | 723.816   |
| AK022206   | 524.992   | 559.047   | L39924    | 1134.186  | 1807.601  | AK022317  | 1196.036  | 1228.03   |
| U90904     | 8739.213  | 10759.156 | U52054    | 2822.981  | 3783.349  | NM_018396 | 2606.638  | 3084.717  |
| AF088053   | 3250.03   | 4082.253  | AK023325  | 1109.775  | 1256.937  | NM_003124 | 1007.859  | 1102.65   |
| AL133662   | 569.081   | 511.632   | NM_017985 | 1053.177  | 1251.464  | NM_006886 | 21498.297 | 29024.863 |
| U90903     | 1194.344  | 1688.457  | AK025866  | 2256.479  | 2752.693  | NM_004531 | 383.93    | 572.276   |
| AF278760   | 991.965   | 697.315   | AF088058  | 1531.797  | 1982.54   | AL133581  | 359.083   | 592.358   |
| X58061     | 578.927   | 928.069   | NM_000513 | 642.446   | 1095.378  | NM_002558 | 1459.122  | 1981.769  |
| AB032954   | 1161.739  | 1403.016  | Y11165    | 1072.152  | 1094.423  | NM_005031 | 910.772   | 1263.501  |
| NM_006003  | 22624.498 | 22386.078 | BC028422  | 504.198   | 379.449   | AB040920  | 257.455   | 612.697   |
| AL110197   | 1376.572  | 2154.56   | AK022219  | 286.666   | 424.166   | NM_004842 | 437.172   | 470.439   |
| AF085995   | 2032.78   | 3323.96   | AK024413  | 554.431   | 970.1     | AK024639  | 1510.366  | 1311.974  |
| CY3Cy5     | 3561.744  | 440.586   | AK022247  | 735.762   | 715.884   | NM_015720 | 1936.487  | 1492.893  |
| AA029300   | 4820.103  | 4200.541  | AK001453  | 1976.323  | 2384.446  | NM_020967 | 410.935   | 319.489   |
| BG708842   | 46253.047 | 35708.535 | AB007972  | 1606.014  | 1877.452  | NM_001071 | 2530.906  | 1546.379  |
| M19723     | 57196.051 | 61064.305 | AL390144  | 2545.091  | 2877.597  | AB028990  | 178.963   | 253.072   |
| X06256     | 7198.732  | 6258.771  | AK024017  | 1056.701  | 1239.63   | NM_006708 | 7313.905  | 5616.813  |
| AA709271   | 1381.553  | 2892.412  | X56196    | 455.42    | 1089.78   | AB037835  | 595.336   | 420.12    |
| M34057     | 1751.264  | 1525.332  | D17220    | 3085.664  | 3387.992  | NM_000157 | 1080.519  | 911.331   |
| ID 1984668 | 2338.578  | 1454.205  | D28363    | 38059.93  | 31582.297 | NM_000712 | 2943.52   | 2983.017  |
| ID 1832579 | 1610.114  | 1297.543  | AB011171  | 1071.229  | 1286.303  | NM_018088 | 365.659   | 437.503   |
| H-430185 N | 2134.859  | 1405.425  | AF090099  | 258.483   | 114.007   | NM_007205 | 181.374   | 311.454   |
| D16583     | 6740.975  | 3286.331  | AK023606  | 265.362   | 361.908   | AK023035  | 570.638   | 730.736   |
| H44051     | 789.449   | 603.574   | NM_005322 | 2111.014  | 2633.411  | NM_014846 | 1069.482  | 1329.371  |
| AA481547   | 3136.458  | 2107.875  | AK024465  | 1277.032  | 1212.358  | AB011164  | 997.867   | 1049.296  |
| AA831880   | 945.924   | 866.113   | AF075119  | 492.523   | 365.437   | M24750    | 533.357   | 608.294   |
| T64880     | 1434.61   | 1019.599  | AK021478  | 1033.123  | 788.364   | NM_005965 | 470.528   | 478.668   |
| NM_020967  | 2066.53   | 1478.894  | AF131782  | 1033.959  | 596.051   | NM_002740 | 1010.28   | 1769.292  |
| NM_001071  | 13927.701 | 9069.827  | NM_014210 | 3855.226  | 2597.945  | AL117482  | 683.855   | 613.962   |
| SR2        | 53568.715 | 59289.246 | AK021603  | 790.849   | 527.932   | NM_006546 | 8965.306  | 8529.007  |
| SR4        | 19830.066 | 16348.277 | AL110136  | 1315.878  | 612.261   | AB018324  | 3095.099  | 3261.047  |
| SR6        | 2926.156  | 1865.399  | AK002203  | 320.558   | 391.136   | NM_002742 | 19435.725 | 19795.896 |
| SR8        | 9229.557  | 20332.748 | AK026469  | 1981.66   | 2407.562  | NM_005750 | 226.867   | 91.246    |
| SR10       | 30984.803 | 7643.991  | D16935    | 3156.027  | 3998.289  | NM_004973 | 664.485   | 484.389   |
| CY3Cy5     | 3211.201  | 308.711   | AK027019  | 763.044   | 950.385   | NM_007245 | 839.272   | 750.67    |
| NM_005027  | 4116.296  | 6770.861  | U92019    | 362.874   | 209.358   | NM_001890 | 287.157   | 351.013   |
| NM_004612  | 2142.442  | 1925.492  | U52835    | 2126.738  | 1591.907  | NM_001286 | 453.904   | 340.469   |
| NM_005608  | 2295.123  | 2208.869  | NM_000756 | 2342.98   | 2710.142  | NM_005073 | 268.895   | 121.542   |
| NM_012294  | 420.164   | 346.446   | AK022148  | 509.792   | 535.189   | NM_000951 | 478.595   | 488.49    |
| NM_001106  | 1608.113  | 1551.275  | Z36811    | 48854.625 | 55273.816 | X52599    | 332.195   | 243.385   |
| NM_015583  | 1554.027  | 1549.987  | K03200    | 3701.338  | 3541.173  | AA029300  | 1305.6    | 1400.67   |

|           |           |           |           |           |           |            |           |           |
|-----------|-----------|-----------|-----------|-----------|-----------|------------|-----------|-----------|
| NM_01849C | 3982.37   | 4148.502  | U17629    | 1899.791  | 2069.831  | BG708842   | 14570.742 | 16700.502 |
| NM_00624E | 4627.325  | 3593.739  | NM_02042E | 1096.742  | 1257.352  | M19723     | 23966.502 | 24608.051 |
| NM_00510E | 3822.207  | 4344.159  | U79265    | 3002.185  | 1961.9    | AA709271   | 368.459   | 628.488   |
| NM_00482E | 1469.426  | 1313.475  | AK022868  | 3400.229  | 2747.931  | M34057     | 584.851   | 523.689   |
| AK022349  | 870.346   | 615.391   | NM_00353C | 398.135   | 377.941   | ID 1984668 | 556.754   | 525.759   |
| NM_00575C | 564.495   | 376.914   | AJ227871  | 605.638   | 618.991   | ID 1832579 | 440.981   | 444.267   |
| NM_00497E | 3271.505  | 2036.946  | AK025344  | 1803.699  | 1088.208  | H-430185 N | 641.951   | 740.321   |
| NM_00724E | 4426.835  | 3159.816  | D28589    | 7729.813  | 4123.609  | D16583     | 1662.1    | 1353.994  |
| NM_00189C | 1359.269  | 1730.532  | AF301223  | 447.513   | 455.954   | H44051     | 335.287   | 425.749   |
| NM_00128E | 2568.128  | 2639.071  | NM_017867 | 3931.186  | 2254.253  | AA481547   | 806.114   | 801.327   |
| NM_01464E | 520.716   | 348.017   | U92820    | 8912.088  | 4941.72   | AA831880   | 339.427   | 420.043   |
| NM_019604 | 440.569   | 407.965   | NM_017937 | 1273.886  | 739.462   | T64880     | 341.931   | 275.474   |
| NM_00507E | 930.488   | 784.01    | AL360266  | 1308.286  | 803.468   | NM_00603E  | 680.847   | 576.888   |
| NM_000951 | 2586.125  | 2053.037  | AL160132  | 9331.16   | 5440.055  | NM_00208E  | 251.292   | 296.844   |
| X52599    | 1789.776  | 748.464   | NM_019557 | 2291.501  | 1840.386  | NM_01465E  | 661.134   | 664.83    |
| AK000158  | 5098.72   | 5364.042  | CY3Cy5    | 7811.652  | 967.057   | NM_00207E  | 891.947   | 336.235   |
| NM_00576E | 2779.224  | 2557.209  | AA150828  | 1980.493  | 2491.558  | X05299     | 1183.842  | 845.428   |
| AK024500  | 11661.09  | 10172.83  | H90764    | 490.81    | 744.245   | BM468475   | 438.784   | 414.134   |
| NM_002564 | 12768.897 | 14154.58  | AI859208  | 659.453   | 1081.46   | NM_00031E  | 892.67    | 739.836   |
| NM_00096E | 7500.901  | 7557.589  | H64379    | 7619.827  | 6519.586  | NM_00206C  | 2107.577  | 1732.442  |
| NM_01330E | 9251.454  | 8088.375  | BE208258  | 49110.453 | 58577.586 | AK001230   | 686.053   | 883.69    |
| AF027302  | 3845.323  | 3064.41   | T72202    | 769.816   | 1254.052  | NM_01468C  | 1954.885  | 1781.806  |
| NM_00285E | 4299.315  | 3962.884  | BI831922  | 2586.597  | 3816.414  | NM_005027  | 982.154   | 995.4     |
| NM_001817 | 4728.966  | 3295.03   | M69238    | 4120.742  | 5953.937  | NM_00461E  | 562.935   | 606.08    |
| AF063611  | 1750.255  | 1565.615  | BE294756  | 486.967   | 734.27    | NM_00560E  | 776.917   | 966.762   |
| NM_00603E | 2637.405  | 2185.783  | NM_00107E | 337.088   | 487.991   | NM_00110E  | 439.777   | 681.528   |
| NM_00208E | 890.463   | 778.265   | NM_002711 | 681.845   | 886.425   | NM_01558E  | 390.626   | 370.401   |
| M28983    | 343.296   | 558.289   | SR7       | 4927.535  | 53535.574 | NM_01849C  | 860.291   | 958.737   |
| NM_01465E | 8167.166  | 7586.146  | SR9       | 20927.941 | 6858.609  | NM_00624E  | 1188.959  | 1168.027  |
| NM_00207E | 4215.048  | 5292.108  | CY3Cy5    | 7317.62   | 658.916   | NM_00435E  | 139.687   | 223.135   |
| X05299    | 6399.881  | 7713.108  | NM_00156C | 4688.917  | 6320.097  | NM_00510E  | 1042.577  | 1444.316  |
| BM468475  | 1326.576  | 1701.596  | NM_00178E | 9335.313  | 11421.444 | NM_00482E  | 327.597   | 401.129   |
| NM_00031E | 3561.206  | 3501.797  | J03171    | 2140.871  | 2592.964  | AK022349   | 261.645   | 213.456   |
| NM_00206C | 8009.828  | 7376.535  | NM_00585E | 648.469   | 637.629   | NM_005031  | 903.935   | 701.348   |
| AK001230  | 2708.522  | 2937.267  | NM_00432E | 18431.242 | 23184.463 | AB040920   | 252.467   | 145.303   |
| NM_01468C | 9348.335  | 8119.528  | NM_00531E | 1100.96   | 1957.125  | NM_00072C  | 184.526   | 109.242   |
| NM_006224 | 47443.402 | 36132.813 | NM_001711 | 536.567   | 710.793   | NM_00484E  | 300.039   | 235.122   |
| AL137300  | 10529.356 | 7855.74   | NM_00421C | 13613.32  | 16430.521 | AK024639   | 1087.777  | 838.347   |
| NM_00022E | 2982.145  | 2672.95   | NM_02014C | 2151.114  | 3145.303  | NM_01572C  | 1709.718  | 1184.907  |
| NM_00699E | 35267.238 | 32692.459 | NM_00250C | 1497.355  | 2048.329  | AB007915   | 271.326   | 187.268   |
| NM_00312E | 16443.035 | 18074.861 | AK026232  | 3069.74   | 4882.253  | AB033070   | 326.709   | 358.641   |
| NM_00195E | 3434.59   | 3762.453  | NM_01489E | 6911.727  | 9003.945  | NM_01822E  | 423.61    | 325.401   |
| AB033064  | 1391.182  | 1614.285  | NM_000231 | 2587.155  | 2994.206  | NM_00632E  | 1905.066  | 1873.429  |
| AK022317  | 3108.501  | 3188.244  | L07517    | 1281.329  | 1666.799  | AY009127   | 3252.427  | 3964.964  |
| NM_01839E | 10102.207 | 8842.721  | AK022451  | 1441.653  | 2186.741  | NM_01486E  | 624.61    | 593.436   |
| NM_003124 | 3488.063  | 2574.038  | NM_01435E | 67147.156 | 69035.234 | AK000158   | 1418.536  | 1556.718  |
| NM_004531 | 1441.395  | 1334.494  | BM918441  | 3309.273  | 2978.499  | NM_00576E  | 839.562   | 1178.812  |
| AL133581  | 1473.98   | 1024.427  | NM_00104E | 9327.763  | 10883.771 | AK024500   | 3326.131  | 4253.655  |
| NM_00255E | 6284.667  | 5250.649  | NM_005697 | 5794.877  | 7071.146  | NM_002564  | 3907.389  | 4004.404  |
| NM_005031 | 4017.801  | 5047.043  | NM_00309E | 4782.497  | 6048.566  | NM_001884  | 277.436   | 29        |
| AB040920  | 789.744   | 1031.185  | NM_004781 | 1498.67   | 1949.808  | Z83806     | 131.422   | 206.553   |
| NM_00072C | 734.91    | 686.235   | NM_01830E | 2015.853  | 2420.273  | NM_00096E  | 1975.699  | 2453.116  |
| NM_00484E | 1918.575  | 2896.11   | NM_01475E | 1962.065  | 2502.133  | NM_01330E  | 2048.042  | 2375.041  |

|            |           |           |           |           |           |           |           |           |
|------------|-----------|-----------|-----------|-----------|-----------|-----------|-----------|-----------|
| AK024639   | 6689.611  | 6504.705  | NM_005124 | 1831.794  | 2418.154  | AF027302  | 1115.109  | 1312.687  |
| AB007915   | 1345.542  | 2722.22   | AK000947  | 3510.565  | 5780.333  | NM_002852 | 1635.761  | 2157.607  |
| AB033070   | 1046.815  | 1713.592  | L08240    | 643.593   | 943.079   | NM_001817 | 1362.927  | 1428.48   |
| NM_018229  | 2054.004  | 2209.725  | NM_017952 | 1276.635  | 1618.25   | AF063611  | 677.993   | 527.667   |
| NM_006325  | 7119.914  | 8489.238  | NM_006389 | 4801.661  | 7890.429  | NM_005965 | 530.916   | 262.532   |
| NM_014869  | 2278.525  | 2736.32   | NM_000163 | 939.557   | 1305.023  | NM_002740 | 863.08    | 320.781   |
| NM_006708  | 28241.975 | 20605.691 | NM_005755 | 892.257   | 887.385   | AL117482  | 573.33    | 346.672   |
| AB037835   | 2362.826  | 2062.306  | NM_003329 | 56789.535 | 61506.52  | NM_006549 | 7379.568  | 3882.671  |
| NM_016228  | 513.171   | 497.547   | NM_003299 | 58060.672 | 56492.801 | AB018324  | 2769.77   | 2705.862  |
| NM_000157  | 3293.228  | 2857.161  | NM_014330 | 11047.622 | 11277.162 | NM_002742 | 19635.645 | 13167.305 |
| NM_000712  | 11579.744 | 9878.147  | NM_007214 | 13322.198 | 14018.185 | Z25431    | 1313.249  | 973.483   |
| NM_018088  | 1237.615  | 1350.893  | NM_000311 | 2543.995  | 3391.065  | NM_005627 | 1121.393  | 1201.274  |
| BC013695   | 21609.295 | 17284.512 | NM_017909 | 3293.443  | 3686.067  | M64497    | 842.532   | 898.481   |
| NM_014846  | 4191.291  | 3561.142  | NM_006335 | 11380.71  | 14619.737 | NM_007274 | 1666.609  | 1515.355  |
| AB011164   | 4048.018  | 3149.804  | NM_000786 | 18512.369 | 18296.512 | NM_003356 | 2012.02   | 1836.002  |
| M24750     | 1880.162  | 1703.627  | AL133561  | 3048.865  | 3488.28   | NM_006224 | 16322.368 | 16299.974 |
| NM_005965  | 1920.679  | 2813.706  | NM_017731 | 448.553   | 1046.032  | AL137300  | 2085.293  | 2070.726  |
| NM_002740  | 3774.708  | 4326.606  | AB040891  | 2777.652  | 3932.738  | NM_000229 | 1050.055  | 1191.74   |
| AL117482   | 2951.548  | 2199.519  | AB037780  | 701.058   | 1201.59   | NM_006995 | 9358.256  | 12926.716 |
| NM_006549  | 38837.246 | 44926.734 | NM_005845 | 10941.579 | 12196.421 | NM_003129 | 4230.295  | 6040.614  |
| AB018324   | 10918.498 | 13974.212 | NM_016209 | 6574.689  | 8117.741  | NM_001956 | 994.652   | 1101.481  |
| Z25431     | 6365.453  | 12143.288 | AK075415  | 610.587   | 525.297   | AB033064  | 602.165   | 649.834   |
| NM_005627  | 5412.659  | 8805.493  | NM_018964 | 2812.411  | 2798.74   | AK022317  | 1500.567  | 1591.674  |
| M64497     | 4079.607  | 5503.143  | NM_000080 | 1333.845  | 1615.518  | NM_018396 | 2927.861  | 3085.289  |
| NM_007274  | 9499.853  | 17382.152 | NM_001829 | 796.797   | 845.465   | NM_003124 | 1494.426  | 1669.943  |
| AF238315   | 703.594   | 883.353   | AF283645  | 1851.724  | 2077.706  | NM_006886 | 22048.975 | 20640.729 |
| NM_014648  | 469.971   | 347.251   | NM_016575 | 1198.397  | 1386.993  | NM_004531 | 491.259   | 645.753   |
| NM_019604  | 310.371   | 408.956   | NM_003897 | 2202.815  | 2629.802  | AL133581  | 370.814   | 323.63    |
| NM_005073  | 780.341   | 974.517   | NM_014165 | 7857.563  | 8675.414  | NM_002558 | 1405.693  | 1194.823  |
| NM_000951  | 2398.02   | 1918.935  | AL442085  | 3837.964  | 3904.859  | NM_003586 | 403.721   | 139.388   |
| X52599     | 577.76    | 572.455   | NM_013313 | 2521.558  | 3455.639  | NM_000922 | 543.68    | 230.673   |
| AA029300   | 5388.018  | 5030.773  | NM_014736 | 5215.373  | 5594.016  | NM_013232 | 1724.446  | 969.82    |
| BG708842   | 51708.18  | 60694.684 | AK023886  | 1682.366  | 2357.226  | NM_017993 | 369.695   | 261.762   |
| M19723     | 54102.273 | 65025.676 | NM_002553 | 1231.304  | 1661.49   | NM_000362 | 2107.791  | 1851.913  |
| X06256     | 7281.426  | 7255.887  | AJ404615  | 2317.218  | 2558.659  | NM_014429 | 609.454   | 225.298   |
| AA709271   | 1414.697  | 1724.236  | NM_016053 | 11916.321 | 13328.747 | AK000770  | 402.275   | 308.023   |
| M34057     | 1929.765  | 1768.82   | AB007869  | 2623.11   | 2584.882  | NM_002370 | 3040.022  | 2584.013  |
| ID 1984668 | 2059.539  | 1765.578  | AB046844  | 557.114   | 840.893   | NM_015670 | 501.525   | 364.158   |
| ID 1832579 | 1858.133  | 1961.456  | NM_000302 | 1891.599  | 1718.67   | NM_014709 | 354.176   | 315.906   |
| H-430185 N | 2486.469  | 2275.646  | NM_013235 | 22708.201 | 22311.848 | AB028990  | 219.12    | 256.701   |
| D16583     | 6734.034  | 4931.917  | NM_016015 | 3792.69   | 3565.855  | AK002089  | 110.451   | 163.377   |
| H44051     | 832.075   | 828.489   | AK022900  | 1243.555  | 890.597   | NM_006708 | 7436.6    | 7341.503  |
| AA481547   | 3340.548  | 3793.435  | NM_001125 | 479.506   | 537.972   | AB037835  | 576.59    | 629.124   |
| AA831880   | 1227.955  | 1384.364  | AB023216  | 892.767   | 976.448   | NM_000157 | 1045.635  | 1117.537  |
| T64880     | 1565.194  | 2246.857  | NM_002266 | 27801.146 | 24202.711 | NM_000712 | 3030.61   | 2686.001  |
| NM_020967  | 2224.306  | 2900.088  | NM_014400 | 7169.897  | 6537.787  | NM_018088 | 371.855   | 435.516   |
| NM_001071  | 14578.703 | 15748.537 | AL157492  | 990.177   | 1033.71   | BC013695  | 5460.959  | 5473.591  |
| AB028990   | 1173.243  | 1364.092  | AL353957  | 2889.1    | 2039.994  | NM_007205 | 247.931   | 143.127   |
| X05299     | 5688.69   | 4744.933  | NM_000231 | 2129.442  | 2641.426  | AK023035  | 596.61    | 617.677   |
| BM468475   | 1342.981  | 1450.956  | L07517    | 1966.961  | 2840.19   | NM_014846 | 454.588   | 578.553   |
| NM_000318  | 3418.644  | 3613.079  | AK022451  | 2089.198  | 2497.038  | AB011164  | 965.573   | 900.343   |
| NM_002060  | 7749.528  | 7279.421  | AA150828  | 1936.987  | 2078.382  | M24750    | 501.166   | 489.925   |
| AK001230   | 2375.195  | 2266.091  | AI859208  | 534.257   | 534.593   | AB046776  | 247.599   | 216.849   |

|           |           |           |           |           |           |           |          |           |
|-----------|-----------|-----------|-----------|-----------|-----------|-----------|----------|-----------|
| NM_01468C | 8266.082  | 8454.627  | H64379    | 8497.987  | 8340.519  | NM_002687 | 2657.784 | 1520.383  |
| NM_005027 | 4074.451  | 5036.394  | T72202    | 1161.139  | 1769.408  | NM_000627 | 401.951  | 350.083   |
| NM_004612 | 2308.296  | 2395.45   | BI831922  | 2501.054  | 2969.544  | NM_00003E | 293.55   | 576.069   |
| NM_00560E | 3088.555  | 3066.961  | M69238    | 3519.779  | 4200.493  | NM_00082E | 230.457  | 145.143   |
| NM_001106 | 1650.576  | 1348.852  | AA664180  | 948.373   | 876.774   | NM_004334 | 463.925  | 640.865   |
| NM_01558E | 1531.474  | 1317.633  | NM_002711 | 962.311   | 1336.317  | NM_00388E | 1147.194 | 1007.33   |
| NM_01849C | 3922.635  | 3489.219  | AK026092  | 2636.795  | 1782.516  | NM_00584E | 430.066  | 593.051   |
| NM_00624E | 4724.758  | 4209.969  | AK001175  | 2045.222  | 1258.861  | NM_003854 | 177.273  | 589.58    |
| NM_00435E | 297.192   | 270.098   | NM_00332E | 58610.949 | 60741.793 | NM_00125E | 4298.098 | 4190.767  |
| NM_00510E | 3979.472  | 6133.845  | NM_00329E | 57422.414 | 59574.211 | AF053712  | 406.477  | 386.808   |
| NM_00482E | 1402.631  | 1516.995  | NM_007034 | 538.028   | 546.095   | NM_003947 | 282.416  | 334.52    |
| AK022349  | 785.292   | 984.678   | NM_00156C | 4741.792  | 5549.246  | NM_002821 | 4401.521 | 3980.698  |
| NM_00575C | 683.978   | 627.719   | NM_00178E | 7710.14   | 6078.803  | M96652    | 3801.028 | 4071.275  |
| NM_00497E | 3745.418  | 3956.441  | J03171    | 1758.716  | 1869.949  | L41690    | 691.705  | 731.205   |
| NM_00724E | 5001.542  | 4904.132  | NM_00585E | 592.336   | 868.743   | NM_01805E | 223.655  | 350.369   |
| NM_00189C | 1646.089  | 1551.95   | NM_00531E | 1147.51   | 1351.658  | NM_00093E | 17974    | 17432.311 |
| NM_00128E | 2690.401  | 2354.568  | NM_001711 | 835.052   | 995.889   | NM_006514 | 624.924  | 871.275   |
| AB007915  | 851.477   | 703.598   | NM_00421C | 12170.483 | 11810.778 | AF065164  | 1500.562 | 1273.551  |
| AB033070  | 1125.858  | 1166.385  | NM_02014C | 2027.815  | 2334.004  | AB028991  | 802.882  | 544.471   |
| NM_01822E | 2104.01   | 2188.717  | NM_00196E | 482.597   | 458.566   | AF263547  | 799.658  | 408.494   |
| NM_00632E | 6451.379  | 7254.365  | NM_00250C | 1411.58   | 2007.404  | AJ008143  | 1693.673 | 1099.884  |
| AY009127  | 14474.766 | 21159.627 | AK026232  | 2586.252  | 2532.864  | NM_007144 | 247.138  | 625.968   |
| NM_01486E | 2470.618  | 3006.805  | NM_01489E | 7774.192  | 7931.345  | NM_00509E | 168.31   | 198.7     |
| NM_00392E | 300.313   | 177.441   | AK023827  | 3956.547  | 2886.527  | NM_004424 | 1240.433 | 441.792   |
| AK000158  | 5141.009  | 4442.43   | NM_001117 | 778.325   | 409.263   | AL133117  | 756.18   | 432.13    |
| NM_00576E | 2849.318  | 2820.205  | NM_00182E | 719.312   | 625.866   | AB033040  | 239.105  | 32.73     |
| AK024500  | 12265.924 | 9520.557  | AF283645  | 1798.316  | 1928.083  | AF070586  | 1201.861 | 992.257   |
| NM_002564 | 12510.885 | 9130.625  | NM_01657E | 2151.572  | 2378.964  | NM_01441E | 431.589  | 548.81    |
| NM_00096E | 7833.198  | 8857.831  | NM_00104E | 9836.34   | 11361.029 | NM_01330E | 615.358  | 368.622   |
| NM_01330E | 8899.205  | 11342.458 | NM_005697 | 5238.256  | 5179.779  | NM_012227 | 1123.704 | 1104.941  |
| AF027302  | 4302.282  | 4734.091  | NM_00309E | 4321.665  | 4414.292  | NM_006101 | 331.474  | 453.426   |
| NM_00285E | 5177.383  | 6483.887  | NM_004781 | 1279.965  | 1400.441  | NM_001237 | 1105.663 | 914.809   |
| NM_001817 | 5541.559  | 6020.871  | NM_01830E | 1638.379  | 1568.947  | NM_002507 | 631.126  | 495.286   |
| AF063611  | 2236.921  | 3133.619  | NM_01475E | 1761.049  | 1612.371  | NM_01596E | 430.293  | 531.694   |
| NM_00603E | 3209.36   | 3904.679  | NM_005124 | 1804.029  | 1866.539  | NM_01614E | 207.023  | 354.181   |
| NM_00208E | 976.445   | 978.995   | AK000947  | 3616.508  | 4555.865  | NM_01607E | 1477.918 | 1908.871  |
| NM_01465E | 7256.73   | 6589.963  | L08240    | 645.364   | 555.806   | NM_00379E | 190.004  | 153.958   |
| NM_00207E | 4384.876  | 3789.162  | NM_00294C | 1596.861  | 2285.833  | NM_004401 | 516.029  | 278.278   |
| Z25431    | 5709.583  | 6260.688  | NM_016081 | 12100.918 | 12275.433 | NM_00184E | 2611.629 | 2163.409  |
| NM_005627 | 5471.516  | 7963.236  | NM_00638E | 4937.936  | 4426.486  | AF255910  | 424.168  | 290.465   |
| M64497    | 3930.332  | 6653.852  | M30818    | 595.534   | 586.087   | NM_01614E | 963.67   | 733.883   |
| NM_007274 | 7764.26   | 9688.424  | NM_00016E | 874.945   | 689.115   | AK024343  | 398.624  | 318.587   |
| NM_00335E | 3747.143  | 4584.764  | NM_00575E | 1082.306  | 692.9     | NM_00256E | 247.113  | 133.311   |
| AF238315  | 729.247   | 934.896   | AB023216  | 1063.814  | 1389.22   | D42084    | 802.072  | 777.337   |
| NM_006224 | 56173.324 | 56247.816 | NM_00226E | 27052.035 | 29203.85  | NM_001734 | 198.585  | 385.022   |
| AL137300  | 11133.629 | 8091.961  | NM_01440C | 7449.672  | 7819.167  | NM_01469E | 277.893  | 122.744   |
| NM_00022E | 2979.118  | 2304.301  | AL157492  | 914.637   | 1089.741  | AB007896  | 416.649  | 306.371   |
| NM_00699E | 32009.311 | 22552.465 | AL353957  | 2948.304  | 3086.005  | AB007916  | 2207.17  | 1827.661  |
| NM_00312E | 16680.199 | 15355.283 | NM_007214 | 13437.571 | 13532.384 | NM_002874 | 235.75   | 187.112   |
| NM_00195E | 3865.001  | 2993.497  | NM_000311 | 2354.637  | 2500.209  | AF049140  | 440.042  | 271.451   |
| AB033064  | 1640.221  | 1564.978  | NM_01790E | 3386.209  | 2874.872  | AL136794  | 321.226  | 327.817   |
| AK022317  | 3738.238  | 3796.302  | NM_00633E | 11358.966 | 12831.005 | BC035601  | 9829.1   | 9840.266  |
| NM_01839E | 10222.804 | 11951.789 | NM_00078E | 17256.934 | 16007.785 | NM_00145E | 416.977  | 356.23    |

|            |           |           |           |           |           |           |           |           |
|------------|-----------|-----------|-----------|-----------|-----------|-----------|-----------|-----------|
| NM_003124  | 4405.29   | 5224.606  | AL133561  | 2912.041  | 2592.249  | NM_02038E | 1858.676  | 1542.565  |
| NM_004531  | 1587.041  | 2456.206  | NM_017731 | 514.667   | 269.006   | NM_004202 | 12564.308 | 11546.5   |
| AL133581   | 1433.513  | 1487.01   | AB040891  | 2365.598  | 3037.379  | AB046829  | 277.806   | 226.027   |
| NM_00255E  | 7206.382  | 11679.749 | AB037780  | 827.765   | 697.782   | NM_01644E | 195.007   | 276.818   |
| NM_005031  | 4474.991  | 6606.498  | NM_00584E | 11576.591 | 11596.794 | NM_00337E | 7592.636  | 6686.116  |
| AB040920   | 871.324   | 1192.382  | NM_01620E | 7661.334  | 10630.988 | NM_004521 | 2274.393  | 1495.758  |
| NM_00072C  | 710.439   | 657.761   | AK075415  | 435.046   | 344.261   | AF229162  | 634.228   | 559.756   |
| NM_00484E  | 1612.323  | 1704.107  | NM_018964 | 3308.607  | 3035.533  | U02309    | 14801.633 | 10741.573 |
| AK024639   | 6598.767  | 4563.57   | NM_00008C | 1785.047  | 1329.084  | NM_005257 | 4963.786  | 1820.769  |
| NM_01572C  | 9626.75   | 7570.34   | NM_002711 | 677.786   | 996.36    | AF011573  | 1546.459  | 678.037   |
| NM_020967  | 2020.356  | 2178.865  | AK026092  | 2341.412  | 2147.123  | NM_00214E | 545.968   | 413.496   |
| NM_001071  | 13622.445 | 15878.796 | AK001175  | 2252.345  | 2367.963  | NM_00392E | 197.191   | 353.186   |
| AB028990   | 1222.149  | 1589.39   | NM_003897 | 2199.344  | 2071.789  | NM_004831 | 307.201   | 401.314   |
| AK002089   | 438.249   | 489.674   | NM_01416E | 7467.642  | 7999.352  | NM_01421E | 1227.527  | 1361.349  |
| NM_00670E  | 29275.971 | 21253.736 | AL442085  | 3649.043  | 3275.286  | NM_00016E | 778.025   | 731.661   |
| AB037835   | 2155.927  | 1431.839  | NM_01331E | 1942.924  | 2138.842  | AF294629  | 833.354   | 472.995   |
| NM_01622E  | 491.925   | 393.573   | NM_01473E | 5261.794  | 6057.438  | NM_00054E | 1141.985  | 1004.616  |
| NM_000157  | 3865.588  | 2726.692  | AK023886  | 1518.48   | 1444.615  | NM_00213E | 15418.875 | 14340.705 |
| NM_00071E  | 10801.994 | 7675.747  | NM_00255E | 1229.157  | 1403.935  | AK025571  | 281.717   | 514.427   |
| NM_01808E  | 1362.04   | 994.728   | AJ404615  | 2728.09   | 2516.82   | NM_00494C | 138.974   | 155.907   |
| NM_01484E  | 4670.348  | 5973.222  | NM_01605E | 11846.484 | 11039.773 | NM_01446E | 8133.008  | 11488.379 |
| AB011164   | 4544.844  | 4740.806  | AB007869  | 3324.295  | 2709.525  | NM_00552C | 5507.953  | 5490.504  |
| M24750     | 2410.466  | 5505.598  | AB046844  | 683.025   | 974.189   | AK023265  | 378.202   | 441.182   |
| NM_00596E  | 1584.747  | 3467.908  | NM_00030E | 1780.021  | 1699.904  | NM_01872E | 236.121   | 268.448   |
| NM_00274C  | 3950.939  | 5629.902  | NM_01323E | 25855.516 | 21659.311 | AB029009  | 971.741   | 1075.958  |
| AL117482   | 2846.169  | 2976.86   | NM_01601E | 3813.527  | 3550.936  | AF112207  | 712.217   | 585.181   |
| NM_00654E  | 38854.465 | 32738.811 | AK022900  | 1457.441  | 698.422   | AJ420488  | 29083.443 | 69837.477 |
| AB018324   | 11026.053 | 10761.747 | NM_00250C | 1467.052  | 2163.447  | NM_005594 | 5533.055  | 5405.554  |
| NM_00274E  | 64984.965 | 63193.945 | AK026232  | 2621.284  | 3378.469  | NM_004461 | 24972.17  | 30222.629 |
| NM_00575C  | 639.862   | 683.638   | NM_01489E | 7900.524  | 9280.298  | NM_01847E | 1832.897  | 1504.34   |
| NM_00497E  | 5246.475  | 7113.276  | AK023827  | 2702.148  | 2963.58   | BF106121  | 361.525   | 296.536   |
| AF101051   | 1464.466  | 4111.475  | NM_000231 | 3030.636  | 3742.263  | AK022590  | 941.658   | 429.442   |
| NM_00724E  | 5006.513  | 9086.579  | L07517    | 1141.083  | 1550.336  | AK023719  | 1350.861  | 1181.8    |
| NM_00189C  | 1825.007  | 4030.727  | AK022451  | 2020.976  | 2074.218  | AF035317  | 169.6     | 111.721   |
| NM_00128E  | 2973.783  | 5335.803  | NM_01435E | 61566.934 | 61294.93  | AK025590  | 407.059   | 398.381   |
| NM_01464E  | 620.828   | 711.981   | BM918441  | 2904.045  | 3768.646  | AY007149  | 1024.105  | 1034.705  |
| NM_019604  | 404.914   | 330.958   | AA150828  | 1538.96   | 1413.617  | M12078    | 244.123   | 518.115   |
| NM_00507E  | 874.736   | 612.853   | H90764    | 470.602   | 816.477   | NM_00455C | 4030.011  | 3315.74   |
| NM_000951  | 2668.608  | 1713.234  | AI859208  | 455.352   | 779.899   | NM_00078E | 406.208   | 321.899   |
| X52599     | 976.288   | 895.324   | H64379    | 8414.589  | 7164.381  | NM_00411C | 1465.797  | 1486.869  |
| AA029300   | 4567.75   | 3879.101  | BE208258  | 45627.395 | 43322.539 | NM_013387 | 10197.012 | 8984.452  |
| AA709271   | 1318.712  | 1927.742  | T72202    | 939.173   | 1001.805  | NM_00526E | 1489.073  | 1349.581  |
| M34057     | 1847.66   | 1741.603  | BI831922  | 2602.919  | 2551.477  | NM_01648E | 408.349   | 18.858    |
| ID 1984668 | 2166.153  | 2516.472  | M69238    | 3786.586  | 3852.51   | NM_02012E | 212.172   | 293.345   |
| ID 1832579 | 1940.884  | 2573.629  | AA664180  | 1041.936  | 789.166   | NM_00506E | 811.921   | 844.564   |
| H-430185 N | 2420.557  | 2430.409  | NM_016081 | 12688.653 | 23623.766 | NM_01822E | 1900.67   | 1792.85   |
| D16583     | 7086.319  | 5293.005  | NM_00638E | 4950.961  | 6845.693  | NM_00669E | 4855.814  | 5706.931  |
| H44051     | 818.649   | 811.722   | M30818    | 657.264   | 784.062   | NM_00172E | 573.84    | 739.447   |
| AA481547   | 3169.876  | 2943.009  | NM_00016E | 871.555   | 1115.492  | AB046802  | 670.097   | 505.372   |
| AA831880   | 1076.25   | 1085.809  | NM_00575E | 1250.042  | 1107.792  | NM_003297 | 347.369   | 423.624   |
| T64880     | 1687.6    | 1457.827  | NM_00332E | 61033.668 | 62321.852 | NM_00694C | 235.407   | 202.708   |
| NM_00603E  | 2824.99   | 4475.463  | NM_00329E | 59333.77  | 58326.289 | NM_01826E | 4104.915  | 3441.884  |
| NM_00208E  | 1124.675  | 1954.338  | NM_01433C | 20817.678 | 17512.563 | AK024633  | 1001.047  | 1015.662  |



|           |           |           |           |           |           |           |          |          |
|-----------|-----------|-----------|-----------|-----------|-----------|-----------|----------|----------|
| NM_00459C | 952.697   | 1433.204  | NM_007034 | 532.194   | 662.796   | NM_001453 | 2955.817 | 2181.773 |
| NM_01465E | 7547.241  | 15438.273 | NM_00156C | 4214.167  | 4089.923  | NM_01207E | 391.223  | 623.69   |
| NM_00207E | 4205.211  | 6454.597  | NM_001783 | 9729.801  | 10676.872 | AB004851  | 300.238  | 217.414  |
| X05299    | 5457.893  | 6492.153  | J03171    | 1957.921  | 2422.948  | NM_013381 | 225.145  | 165.054  |
| BM468475  | 1298.201  | 1208.771  | NM_00585E | 859.321   | 1129.762  | AK023911  | 648.47   | 681.685  |
| NM_00031E | 3265.163  | 2396.386  | NM_004323 | 18050.4   | 18826.529 | AL110237  | 216.646  | 147.433  |
| NM_00206C | 6998.82   | 4460.081  | NM_005312 | 1305.765  | 1482.195  | D87470    | 350.43   | 617.736  |
| AK001230  | 2561.421  | 1795.149  | NM_001711 | 956.931   | 886.759   | AF147307  | 1682.48  | 1269.316 |
| NM_01468C | 9224.515  | 7756.518  | NM_00421C | 13129.617 | 10845.582 | AK001829  | 454.565  | 560.52   |
| NM_005027 | 3758.983  | 5416.645  | NM_02014C | 2031.185  | 2497.004  | NM_01652E | 930.527  | 680.103  |
| NM_004612 | 2199.669  | 3214.452  | AK075415  | 424.733   | 651.879   | AK024931  | 2835.931 | 2200.677 |
| NM_00560E | 2906.837  | 2942.198  | AK025616  | 502.683   | 521.603   | AL109715  | 253.664  | 182.861  |
| NM_012294 | 200.74    | 571.778   | NM_018964 | 3477.415  | 3683.232  | AF086181  | 303.788  | 36.559   |
| NM_001106 | 1852.983  | 2182.938  | NM_00008C | 1467.771  | 1361.126  | D86985    | 239.885  | 119.472  |
| NM_015583 | 1602.582  | 1376.695  | NM_001829 | 845.058   | 880.864   | AK022258  | 275.616  | 337.56   |
| NM_01849C | 4167.706  | 3730.976  | AF283645  | 1797.485  | 1416.832  | AF088043  | 154.45   | 379.885  |
| NM_00624E | 5239.531  | 4583.107  | NM_01657E | 2245.365  | 2881.843  | AF131799  | 314.552  | 245.694  |
| NM_005103 | 3807.398  | 4755.017  | NM_00104E | 9877.984  | 11921.878 | AK000455  | 326.575  | 190.661  |
| NM_004822 | 1656.119  | 1965.876  | NM_005697 | 5962.321  | 6394.771  | NM_00523C | 314.961  | 229.993  |
| AK022349  | 1031.931  | 838.028   | NM_003099 | 3991.316  | 4322.406  | AL365407  | 603.41   | 525.215  |
| NM_005031 | 4802.971  | 6239.2    | NM_004781 | 1312.923  | 1397.334  | AK000840  | 867.856  | 538.282  |
| AB040920  | 1372.025  | 2187.848  | NM_018303 | 1684.734  | 1743.875  | AL162073  | 343.658  | 81.024   |
| NM_00072C | 520.603   | 1160.228  | NM_01475E | 2180.51   | 2015.606  | AL390160  | 213.591  | 266.088  |
| NM_004842 | 1492.066  | 2381.983  | NM_005124 | 1911.419  | 1779.011  | AJ006835  | 1157.098 | 532.659  |
| AK024639  | 6643.147  | 8405.222  | AK000947  | 3647.334  | 4108.178  | AL110138  | 173.207  | 337.304  |
| NM_01572C | 8784.854  | 10286.274 | L08240    | 794.214   | 683.475   | AL049445  | 235.18   | 23.617   |
| AB007915  | 1062.908  | 1198.844  | NM_00294C | 1606.316  | 1586.538  | AL050153  | 145.15   | 119.355  |
| AB033070  | 1099.674  | 1050.961  | AB046844  | 522.082   | 721.607   | AF070577  | 1444.116 | 1253.616 |
| NM_01822E | 1574.004  | 1419.354  | NM_000302 | 2015.521  | 2478.062  | AL157484  | 2090.795 | 2155.599 |
| NM_00632E | 6917.863  | 5885.595  | NM_01323E | 26127.639 | 25843.584 | AK024850  | 376.574  | 534.915  |
| AY009127  | 12823.981 | 17687.758 | NM_01601E | 4319.132  | 5140.825  | Y09836    | 997.646  | 683.156  |
| NM_01486E | 2202.799  | 2370.064  | NM_02012C | 2095.142  | 1973.23   | AL137597  | 2784.548 | 2768.131 |
| AK000158  | 5665.438  | 4888.226  | AK022900  | 1349.379  | 1309.891  | AF086044  | 325.011  | 379.302  |
| NM_00576E | 2807.784  | 3393.153  | AB023216  | 1181.101  | 1235.178  | NM_01492E | 228.799  | 292.807  |
| AK024500  | 13811.143 | 17895.063 | NM_00226E | 26781.02  | 22116.564 | AF131790  | 248.612  | 116.444  |
| NM_002564 | 12155.659 | 9099.105  | NM_01440C | 7488.41   | 6375.946  | AJ011378  | 353.813  | 71.259   |
| NM_000963 | 8353.522  | 9586.198  | AL157492  | 718.271   | 434.482   | AF009266  | 266.234  | 134.516  |
| NM_01330E | 9067.875  | 9670.408  | AL353957  | 2710.318  | 2811.972  | AF009310  | 239.462  | 169.1    |
| AF027302  | 4334.484  | 4293.352  | NM_007214 | 11623.571 | 12367.274 | AF054991  | 308.639  | 199.983  |
| NM_002852 | 4902.741  | 5034.629  | NM_000311 | 2421.484  | 3709.74   | AF060168  | 403.773  | 209.954  |
| NM_001817 | 5480.316  | 5780.744  | NM_017909 | 3118.508  | 3281.498  | AF009275  | 261.48   | 147.845  |
| AF063611  | 2581.089  | 3458.63   | NM_00633E | 10704.469 | 10482.188 | AF015251  | 202.566  | 268.65   |
| NM_00596E | 1397.341  | 1549.698  | NM_00078E | 15011.955 | 11469.454 | AF056426  | 225.469  | 221.958  |
| NM_00274C | 3657.023  | 4535.083  | AL133561  | 2841.635  | 2503.355  | AK001096  | 181.447  | 76.254   |
| AL117482  | 2590.345  | 3628.384  | NM_017731 | 442.607   | 424.463   | NM_01832E | 287.96   | 271.844  |
| NM_00654E | 37731.867 | 37525.336 | AB040891  | 2317.18   | 2318.852  | AK021565  | 222.99   | 216.484  |
| AB018324  | 11857.844 | 14801.329 | AB037780  | 1078.558  | 802.707   | AK021778  | 192.316  | 112.439  |
| NM_002742 | 51970.734 | 56759.914 | NM_00584E | 11895.899 | 11212.305 | AK001150  | 929.561  | 734.46   |
| Z25431    | 6141.773  | 6923.197  | NM_016209 | 7478.879  | 6619.224  | AK002123  | 182.482  | 281.024  |
| NM_005627 | 5248.311  | 5720.369  | AK002114  | 1684.813  | 2031.79   | AK021633  | 379.112  | 762.975  |
| M64497    | 3260.24   | 3235.059  | AL390184  | 813.306   | 1070.78   | AK025659  | 372.997  | 289.602  |
| NM_007274 | 7672.142  | 7279.466  | AK026318  | 1043.444  | 897.749   | AK026788  | 303.368  | 223.297  |
| NM_00335E | 4941.454  | 5254.995  | AF291673  | 911.678   | 1136.667  | AK026824  | 202.208  | 208.085  |

|           |           |           |           |           |           |           |           |           |
|-----------|-----------|-----------|-----------|-----------|-----------|-----------|-----------|-----------|
| NM_006224 | 55914.457 | 51096.828 | NM_004365 | 8479.587  | 7477.554  | AJ008130  | 4373.299  | 2951.001  |
| AL137300  | 4689.076  | 3927.729  | NM_016355 | 2760.372  | 2726.405  | AF086502  | 413.247   | 281.087   |
| NM_000229 | 3539.833  | 4078.738  | AJ296290  | 1904.746  | 1641.542  | L39924    | 418.798   | 567.104   |
| NM_006995 | 37483.668 | 56466.863 | AK026092  | 2256.865  | 2380.436  | U52054    | 1165.259  | 2637.342  |
| NM_003129 | 19783.643 | 35985.902 | AK001175  | 2312.796  | 2971.773  | AK023325  | 433.756   | 346.657   |
| NM_001956 | 4066.118  | 3394.986  | NM_003897 | 1847.422  | 2198.339  | NM_017985 | 385.625   | 178.561   |
| AB033064  | 1855.277  | 1688.244  | NM_014165 | 7388.917  | 7580.725  | AK025866  | 859.322   | 956.417   |
| AK022317  | 4087.292  | 3294.512  | AL442085  | 4430.128  | 5792.608  | AF088058  | 465.332   | 366.377   |
| NM_018396 | 10473.773 | 9404.376  | NM_013313 | 2271.994  | 2439.486  | NM_000513 | 427.983   | 443.451   |
| NM_003124 | 4511.095  | 3959.399  | NM_014736 | 5665.327  | 5750.044  | Y11165    | 407.547   | 402.176   |
| NM_006886 | 58728.574 | 62675.672 | AK023886  | 1575.254  | 1472.159  | BC028422  | 322.815   | 246.911   |
| NM_004531 | 1390.967  | 1407.87   | NM_002553 | 1326.41   | 1320.494  | AK022219  | 185.934   | 128.563   |
| AL133581  | 1292.33   | 1720.671  | AJ404615  | 2969.481  | 2061.886  | NM_013244 | 236.184   | 71.143    |
| NM_002558 | 6906.794  | 8718.152  | NM_016053 | 13573.227 | 11195.174 | NM_003545 | 159.728   | 204.214   |
| NM_003586 | 1529.816  | 1718.664  | AB007869  | 4026.846  | 3187.488  | AK024413  | 288.69    | 132.087   |
| NM_000922 | 2901.29   | 3582.422  | M64108    | 2186.821  | 2050.485  | AK022247  | 222.188   | 250.675   |
| NM_013232 | 8585.247  | 7841.028  | NM_014767 | 535.218   | 376.364   | AK001453  | 769.411   | 1087.528  |
| NM_017993 | 1872.064  | 2408.271  | Y17867    | 1871.491  | 1989.925  | AB007972  | 659.06    | 462.242   |
| NM_000362 | 10713.848 | 8871.347  | M92642    | 638.229   | 1059.529  | AL390144  | 1054.845  | 640.278   |
| NM_014429 | 2546.833  | 1763.863  | NM_018071 | 2340.043  | 2131.28   | AK024017  | 467.735   | 319.202   |
| AK000770  | 2005.176  | 1719.794  | NM_004333 | 3562.462  | 4261.467  | X56196    | 275.159   | 396.618   |
| NM_002370 | 14001.968 | 12314.631 | M31520    | 66182.75  | 72279.414 | D17220    | 1436.384  | 1608.973  |
| NM_015670 | 2093.011  | 2037.772  | NM_002020 | 6486.96   | 6283.125  | D28363    | 14096.614 | 12052.806 |
| NM_014709 | 1433.668  | 1086.435  | AK024423  | 2026.152  | 2018.717  | AB011171  | 450.833   | 693.989   |
| AB028990  | 1067.175  | 882.239   | NM_005043 | 15853.725 | 14806.156 | AK023606  | 168.3     | 78.22     |
| AK002089  | 424.952   | 554.326   | NM_005979 | 7268.908  | 7049.121  | AF189251  | 158.428   | 139.003   |
| NM_006708 | 28860.699 | 24799.465 | NM_006282 | 3391.276  | 4004.189  | NM_005322 | 848.263   | 985.713   |
| AB037835  | 1937.354  | 2061.522  | NM_015920 | 18206.969 | 19694.223 | AK024465  | 445.059   | 674.12    |
| NM_016228 | 671.611   | 944.285   | AB011113  | 1921.369  | 1934.037  | AF075119  | 203.699   | 202.61    |
| NM_000157 | 4188.181  | 5311.813  | NM_004115 | 1175.955  | 1000.978  | AK021478  | 543.388   | 421.003   |
| NM_000712 | 10488.461 | 6742.683  | NM_018287 | 1252.655  | 1042.229  | AF131782  | 504.844   | 467.957   |
| NM_018088 | 1312.173  | 981.424   | NM_001955 | 3134      | 2495.124  | NM_014210 | 1554.935  | 1749.149  |
| BC013695  | 21795.168 | 18151.734 | AF016004  | 2506.487  | 3255.94   | AK021603  | 479.994   | 372.22    |
| NM_007205 | 583.45    | 399.752   | NM_003567 | 6610.426  | 4871.633  | AL110136  | 471.997   | 378.121   |
| AK023035  | 2296.79   | 2173.51   | NM_007315 | 4047.805  | 1641.871  | AK026469  | 631.5     | 622.039   |
| NM_014846 | 2988.665  | 2686.65   | L20686    | 3514.75   | 2622.934  | D16935    | 1263.483  | 1288.657  |
| AB011164  | 3870.768  | 3830.16   | NM_000304 | 707.5     | 324.169   | AK027019  | 363.417   | 229.602   |
| M24750    | 2082.701  | 2298.476  | AK023362  | 588.91    | 379.42    | U92019    | 218.147   | 271.885   |
| AB046776  | 799.436   | 850.349   | S72604    | 20302.891 | 26878.596 | U52835    | 653.708   | 254.403   |
| NM_002687 | 12529.381 | 10599.652 | NM_017984 | 855.409   | 921.851   | NM_000756 | 754.712   | 454.889   |
| NM_000627 | 1681.798  | 1170.716  | NM_002675 | 1347.32   | 1714.166  | AK022148  | 240.182   | 112.945   |
| NM_000038 | 1421.892  | 909.098   | NM_012432 | 19571.541 | 18589.459 | Z36811    | 22666.764 | 19419.744 |
| NM_000825 | 566.342   | 428.813   | NM_005007 | 9066.797  | 10194.755 | K03200    | 2123.486  | 1732.945  |
| NM_004334 | 1485.144  | 1206.771  | AK024996  | 2967.989  | 2846.667  | U17629    | 1039.164  | 1031.331  |
| NM_003886 | 4104.928  | 3771.287  | NM_001258 | 599.043   | 253.633   | NM_020428 | 455.253   | 390.768   |
| NM_005843 | 1837.529  | 1929.45   | NM_012290 | 3468.905  | 3310.698  | U79265    | 795.812   | 607.811   |
| NM_003854 | 966.881   | 742.719   | NM_002431 | 4149.623  | 2614.719  | AK022868  | 1254.366  | 856.57    |
| NM_017980 | 753.988   | 670.104   | NM_001827 | 21968.199 | 22380.902 | NM_003530 | 257.553   | 100.045   |
| NM_001252 | 17786.275 | 16363.461 | NM_020466 | 3781.834  | 3137.086  | AJ227871  | 245.638   | 262.234   |
| AF053712  | 1179.059  | 997.325   | AL079280  | 584.831   | 210.425   | AK025344  | 658.248   | 558.178   |
| NM_003947 | 1195.934  | 1250.648  | NM_002853 | 4198.255  | 4231.494  | D28589    | 3225.243  | 3249.23   |
| NM_002821 | 21047.357 | 23017.59  | NM_003174 | 945.126   | 760.069   | AF301223  | 183.217   | 260.88    |
| M96652    | 12212.846 | 8751.378  | NM_012307 | 12349.541 | 9543.141  | NM_017867 | 1618.509  | 1268.207  |

|           |           |           |           |           |           |           |           |           |
|-----------|-----------|-----------|-----------|-----------|-----------|-----------|-----------|-----------|
| L41690    | 2984.431  | 2388.848  | NM_002540 | 1001.83   | 981.688   | U92820    | 2619.174  | 2386.862  |
| NM_018059 | 1098.078  | 662.574   | NM_006371 | 3123.717  | 2691.361  | NM_017937 | 556.356   | 424.776   |
| NM_000939 | 53081.367 | 47686.367 | NM_018834 | 1126.016  | 849.104   | AL360266  | 510.153   | 449.648   |
| NM_006514 | 2688.153  | 2313.363  | AK026882  | 1464.783  | 1068.414  | AL160132  | 6384.099  | 5773.553  |
| AF065164  | 5857.379  | 4767.906  | NM_004574 | 890.778   | 927.062   | NM_019557 | 969.054   | 964.111   |
| AB028991  | 3534.676  | 3147.488  | NM_004848 | 1823.518  | 1351.132  | CY3Cy5    | 3030.422  | 380.882   |
| AF263547  | 3777.688  | 2768.743  | NM_014813 | 399.587   | 471.972   | AA150828  | 1031.476  | 1140.926  |
| AJ008143  | 9594.292  | 6949.974  | AF014459  | 3893.451  | 4161.456  | H90764    | 307.287   | 274.548   |
| NM_007144 | 1308.804  | 935.458   | AK024601  | 3930.213  | 4316.692  | AI859208  | 362.654   | 409.781   |
| NM_005093 | 596.429   | 422.722   | S68069    | 3740.03   | 4260.332  | H64379    | 4437.104  | 3492.291  |
| NM_004424 | 5880.651  | 3852.122  | AB011095  | 1156.484  | 1198.329  | BE208258  | 28695.975 | 20196.139 |
| AL133117  | 3421.132  | 2563.807  | NM_001503 | 798.255   | 981.762   | T72202    | 493.479   | 417.286   |
| AF070586  | 3416.439  | 3313.601  | NM_006302 | 2304.597  | 2796.785  | BI831922  | 1373.017  | 1396.109  |
| NM_014412 | 2016.245  | 2896.686  | AJ224875  | 3011.54   | 3170.083  | BE294756  | 276.479   | 632.344   |
| NM_013303 | 3230.63   | 2232.969  | NM_002149 | 8062.104  | 7264.47   | NM_002711 | 465.237   | 1167.957  |
| NM_012227 | 6239.979  | 6299.135  | AF043324  | 1916.233  | 1909.619  | SR5       | 2575.115  | 5887.324  |
| NM_006101 | 1615.321  | 1201.301  | AK024172  | 834.067   | 1013.067  | SR7       | 3542.901  | 52858.664 |
| NM_001237 | 4808.81   | 3888.554  | NM_014814 | 5111.301  | 3675.753  | SR9       | 13553.426 | 5005.417  |
| NM_002507 | 2455.575  | 2310.91   | NM_002797 | 11974.921 | 12448.343 | CY3Cy5    | 6518.865  | 735.285   |
| NM_015962 | 2152.676  | 1749.698  | AK024318  | 970.364   | 686.161   | NM_001560 | 2401.012  | 2376.877  |
| NM_016145 | 926.643   | 938.797   | NM_016129 | 3225.532  | 3009.555  | NM_001783 | 7758.92   | 6724.757  |
| NM_016078 | 6334.092  | 4183.686  | NM_002809 | 5442.271  | 5492.853  | J03171    | 1177.551  | 1201.07   |
| NM_003798 | 797.908   | 376.19    | NM_017912 | 17296.34  | 15894.052 | NM_005856 | 498.683   | 417.721   |
| NM_004401 | 2016.713  | 1153.247  | NM_000423 | 5007.18   | 4876.192  | NM_004323 | 9952.893  | 9239.114  |
| NM_001849 | 5563.391  | 3761.124  | AB046838  | 2549.426  | 2063.042  | NM_005312 | 772.027   | 899.988   |
| AF255910  | 1168.17   | 1135.72   | AK026339  | 921.055   | 863.531   | NM_001711 | 791.487   | 1327.84   |
| NM_016146 | 4225.474  | 4268.324  | X98411    | 5427.159  | 3898.917  | NM_020140 | 2080.063  | 4970.663  |
| AK024343  | 1482.524  | 1322.328  | AF116658  | 3649.516  | 2596.732  | NM_002500 | 808.672   | 1507.754  |
| NM_002569 | 965.277   | 841.768   | NM_014865 | 8990.12   | 7844.526  | AK026232  | 1531.035  | 2572.484  |
| D42084    | 4229.711  | 3731.844  | AB032977  | 6372.342  | 5729.358  | NM_014892 | 3953.112  | 7143.613  |
| NM_001734 | 585.063   | 679.06    | AK001725  | 817.732   | 603.365   | NM_000231 | 1603.13   | 3210.382  |
| NM_014693 | 1151.239  | 654.109   | NM_003036 | 2316.326  | 2251.388  | L07517    | 615.684   | 1194.921  |
| AB007896  | 1647.246  | 1181.401  | NM_020529 | 3405.513  | 6917.374  | AK022451  | 1563.206  | 2692.057  |
| AB007916  | 12592.866 | 21437.389 | NM_020395 | 2254.292  | 1944.925  | NM_014359 | 58494.629 | 70919.742 |
| NM_002874 | 1193.04   | 839.898   | NM_003425 | 1676.075  | 1651.917  | BM918441  | 1181.753  | 2711.15   |
| AF049140  | 1920.158  | 1662.875  | NM_013388 | 7170.066  | 7187.881  | NM_001045 | 7221.392  | 7685.16   |
| AL136794  | 1624.335  | 1352.161  | AF038951  | 12529.906 | 7397.798  | NM_005697 | 3765.529  | 7552.374  |
| BC035601  | 45721.727 | 35569.559 | NM_006492 | 1600.458  | 1368.326  | NM_003099 | 3065.561  | 6705.533  |
| NM_001458 | 1461.092  | 1181.173  | AK021811  | 1095.957  | 918.431   | NM_004781 | 870.369   | 1908.935  |
| NM_020388 | 8267.517  | 6178.58   | NM_003428 | 2418.01   | 2196.044  | NM_016315 | 376.169   | 718.192   |
| NM_004202 | 48392.016 | 33927.879 | AF055030  | 1533.546  | 1565.339  | NM_018303 | 1325.694  | 3116.493  |
| AB046829  | 1025.655  | 807.139   | AK000589  | 1682.131  | 947.288   | NM_014758 | 2070.856  | 4639.604  |
| NM_016445 | 584.94    | 345.933   | X53281    | 7823.985  | 6779.486  | AL133047  | 288.741   | 735.673   |
| NM_003379 | 33185.648 | 22061.602 | BC012782  | 920.84    | 889.166   | NM_005124 | 1344.093  | 2662.999  |
| NM_004521 | 9547.049  | 7628.116  | AF132026  | 51676.512 | 47696.754 | L08240    | 529.268   | 759.757   |
| AF229162  | 2877.046  | 2696.999  | AL050353  | 1715.939  | 1687.016  | NM_017952 | 906.689   | 1868.459  |
| U02309    | 53397.402 | 48516.258 | AB037788  | 8661.935  | 13551.138 | NM_006389 | 2947.977  | 4449.119  |
| NM_005257 | 20477.311 | 12647.546 | NM_004587 | 4759.994  | 3173.936  | M30818    | 264.378   | 613.497   |
| AF011573  | 7226.707  | 4165.485  | NM_000975 | 59136.43  | 61181.004 | NM_000163 | 488.177   | 788.656   |
| NM_002145 | 2880.266  | 2197.887  | AF147412  | 19817.035 | 13675.613 | NM_005755 | 571.712   | 806.408   |
| NM_003923 | 760.773   | 589.639   | AK024570  | 10434.455 | 8980.47   | NM_003329 | 47721.66  | 49469.973 |
| NM_004831 | 1450.367  | 1245.328  | AF161401  | 6088.757  | 4925.285  | NM_003299 | 49165.188 | 44690.609 |
| NM_014213 | 5608.048  | 3386.18   | NM_000990 | 12645.801 | 9284.561  | NM_014330 | 11267.667 | 14979.472 |

|           |           |           |           |           |           |           |           |           |
|-----------|-----------|-----------|-----------|-----------|-----------|-----------|-----------|-----------|
| NM_00016E | 4361.256  | 4947.595  | NM_01474C | 3990.356  | 2933.864  | NM_007034 | 313.258   | 499.322   |
| AF294629  | 3574.162  | 3167.472  | NM_01595E | 8368.05   | 9585.131  | NM_007214 | 10556.022 | 17971.076 |
| NM_00054E | 8737.219  | 6464.022  | AF075008  | 2933.903  | 2652.514  | NM_000311 | 1726.51   | 3910.868  |
| NM_00213E | 54045.262 | 45502.754 | NM_006504 | 4979.678  | 5660.474  | NM_01790E | 1908.754  | 3992.626  |
| AK025571  | 1215.759  | 1093.426  | AF070538  | 497.579   | 801.393   | NM_00633E | 7590.177  | 16965.27  |
| NM_00494C | 437.465   | 352.767   | AL137430  | 674.416   | 862.823   | NM_00078E | 11423.704 | 16673.561 |
| NM_01446E | 37260.223 | 57719.703 | NM_00069E | 5218.295  | 4967.609  | AL133561  | 1786.252  | 3488.016  |
| NM_00552C | 26305.07  | 26463.438 | NM_00248E | 17445.047 | 16371.552 | NM_017731 | 264.657   | 645.319   |
| AK023265  | 1735.204  | 1792.856  | NM_00400E | 9213.099  | 8777.483  | AB040891  | 1745.915  | 4279.912  |
| NM_01872E | 705.431   | 795.51    | NM_00018E | 1033.962  | 778.231   | AB037780  | 568.43    | 1095.361  |
| AB029009  | 3935.867  | 3249.2    | BF244401  | 4112.767  | 2856.008  | NM_00584E | 8046.911  | 11854.564 |
| AF112207  | 3044.482  | 2858.719  | NM_00471E | 26709.975 | 20716.832 | NM_01620E | 4455.517  | 7044.271  |
| AJ420488  | 61877.207 | 68177.266 | AL359585  | 3020.112  | 2085.794  | AK075415  | 402.548   | 499.199   |
| NM_005594 | 17958.875 | 10864.909 | AB046850  | 3506.462  | 3976.334  | AK025616  | 256.337   | 363.523   |
| NM_004461 | 60023.531 | 64740.207 | NM_014801 | 2478.618  | 2224.889  | NM_018964 | 2047.945  | 2900.713  |
| NM_01847E | 7401.512  | 5000.93   | NM_00364E | 6507.343  | 5153.305  | NM_00008C | 973.279   | 1703.319  |
| BF106121  | 1100.448  | 1313.985  | AB027013  | 2040.355  | 1758.32   | NM_00182E | 569.239   | 768.527   |
| AK022590  | 3267.66   | 2829.091  | BC032686  | 617.4     | 420.133   | NM_00725E | 264.112   | 362.912   |
| AK023719  | 6383.333  | 5596.398  | BF185480  | 2610.428  | 1915.33   | AF283645  | 1009.364  | 1661.244  |
| AK025590  | 1953.593  | 1765.699  | NM_00212E | 17047.564 | 11364.643 | NM_01657E | 1216.358  | 1837.492  |
| AY007149  | 4468.008  | 4322.761  | NM_003074 | 3252.693  | 1603.852  | NM_003897 | 1270.176  | 2697.501  |
| M12078    | 1102.804  | 993.202   | AL360195  | 1573.365  | 1126.585  | NM_01416E | 4528.311  | 7880.92   |
| NM_00455C | 17643.688 | 13961.427 | U14383    | 735.303   | 531.696   | AL442085  | 2436.691  | 3941.712  |
| NM_00078E | 1805.363  | 1440.242  | NM_01781C | 1131.102  | 916.616   | NM_01331E | 1745.05   | 3223.81   |
| NM_00411C | 5874.146  | 3996.856  | NM_003181 | 58217.613 | 56215.922 | NM_01473E | 4066.121  | 8185.573  |
| NM_013387 | 43612.398 | 33590.133 | NM_004451 | 1811.529  | 2002.97   | AK023886  | 874.143   | 1602.078  |
| NM_00526E | 7396.615  | 6279.297  | NM_004364 | 48887.883 | 33883.469 | NM_00255E | 727.763   | 1484.068  |
| NM_005757 | 673.093   | 368.773   | AK023505  | 2027.119  | 1987.55   | AJ404615  | 1781.584  | 2893.288  |
| NM_01648E | 695.507   | 760.533   | AB037851  | 4469.874  | 3628.683  | NM_01605E | 8757.812  | 13589.421 |
| NM_02012E | 1069.267  | 1054.368  | AL050389  | 2740.177  | 2161.388  | AB007869  | 2309.262  | 3622.649  |
| NM_00506E | 3942.553  | 4206.387  | AK024684  | 1971.317  | 1902.359  | AB046844  | 291.167   | 483.548   |
| NM_01822E | 8172.184  | 8537.711  | NM_01494E | 8241.504  | 8276.822  | NM_00030E | 1054.866  | 1698.575  |
| NM_00669E | 21693.881 | 24930.283 | AK001546  | 2640.608  | 2379.571  | NM_01323E | 18588.053 | 22343.42  |
| NM_00172E | 2500.749  | 3116.395  | NM_006537 | 5751.585  | 5847.44   | NM_01601E | 2305.422  | 3712.521  |
| AB046802  | 2455.406  | 1766.987  | AF007155  | 6890.035  | 6908.934  | AK022900  | 923.403   | 1283.66   |
| NM_003297 | 1453.941  | 1068.612  | AK023055  | 773.907   | 291.644   | AB023216  | 510.97    | 1101.662  |
| X74861    | 450.12    | 601.226   | AL049282  | 5481.516  | 4418.674  | NM_00226E | 20863.072 | 24679.266 |
| NM_00694C | 622.373   | 347.326   | AK021443  | 1693.546  | 1341.919  | NM_01440C | 4661.217  | 7309.122  |
| NM_01826E | 15952.011 | 15125.843 | AF070569  | 592.661   | 405.595   | AL157492  | 447.183   | 961.605   |
| AK024633  | 4411.115  | 8114.853  | NM_02023E | 2036.718  | 1819.636  | AL353957  | 1519.755  | 2875.68   |
| NM_00145E | 11995.842 | 11593.202 | AF143873  | 412.379   | 824.919   | NM_000231 | 1782.046  | 3382.789  |
| NM_01207E | 1614.231  | 1234.786  | AL355732  | 1395.744  | 1208.23   | L07517    | 777.224   | 1834.303  |
| AB004851  | 1184.142  | 1023.969  | NM_01796E | 2278.478  | 2154.089  | AK022451  | 2741.298  | 5057.932  |
| NM_013381 | 659.754   | 768.575   | AF143327  | 1133.563  | 908.173   | BM918441  | 1823.006  | 3770.393  |
| AK023911  | 1938.955  | 1763.768  | AL049990  | 787.592   | 974.293   | AA150828  | 1076.799  | 2350.19   |
| NM_00128E | 3333.46   | 3766.903  | AF131843  | 1101.731  | 812.508   | H90764    | 367.832   | 516.744   |
| AL110237  | 711.927   | 736.077   | AK026653  | 841.648   | 674.183   | AI859208  | 465.439   | 1533.085  |
| D87470    | 1386.283  | 1667.196  | NM_020231 | 1583.02   | 1082.032  | H64379    | 6946.157  | 11278.745 |
| AF147307  | 7274.753  | 6271.402  | AL133118  | 2289.773  | 2477.657  | T72202    | 643.195   | 1286.412  |
| AK001829  | 2123.946  | 2037.725  | AK023571  | 1161.274  | 1381.018  | BI831922  | 1835.053  | 3037.454  |
| NM_01652E | 3807.316  | 3434.643  | NM_00170E | 3158.205  | 3078.906  | M69238    | 2650.972  | 4532.577  |
| AK024931  | 12722.008 | 10597.366 | AK026657  | 737.264   | 816.181   | AA664180  | 670.554   | 1057.593  |
| AL109715  | 761.583   | 791.988   | AL833558  | 524.962   | 439.048   | NM_00107E | 425.035   | 467.031   |

|           |           |           |           |           |           |           |           |           |
|-----------|-----------|-----------|-----------|-----------|-----------|-----------|-----------|-----------|
| AF086181  | 598.601   | 894.294   | NM_018050 | 327.411   | 720.459   | NM_002711 | 490       | 1813.737  |
| AK021540  | 718.529   | 2192.554  | AF087991  | 10041.081 | 8870.474  | AK026092  | 1155.592  | 1663.37   |
| D86985    | 1354.007  | 2188.167  | AJ227884  | 1178.423  | 1115.097  | AK001175  | 1019.045  | 1551.961  |
| AK022258  | 765.707   | 708.861   | X64986    | 978.034   | 911.897   | NM_003325 | 51572.578 | 62306.133 |
| AF088043  | 503.29    | 649.816   | L38282    | 3768.48   | 4033.221  | NM_003295 | 52066.016 | 64457.84  |
| AF131799  | 947.201   | 1261.868  | NM_018056 | 2054.132  | 1564.283  | NM_007034 | 560.363   | 1112.977  |
| AK000455  | 1099.937  | 1296.379  | NM_019008 | 2158.744  | 1420.768  | NM_005261 | 358.822   | 856.888   |
| NM_005230 | 1101.029  | 1232.033  | M20838    | 853.047   | 668.542   | NM_001560 | 2579.153  | 5791.267  |
| AL365407  | 2563.372  | 2321.98   | AK022738  | 641.467   | 341.011   | NM_001783 | 6876.281  | 9231.342  |
| AK000840  | 2350.089  | 2090.336  | AK024252  | 544.744   | 474.866   | J03171    | 1147.854  | 2086.01   |
| AL162073  | 1006.937  | 1172.089  | AK002095  | 709.832   | 528.946   | NM_005855 | 536.922   | 778.341   |
| AL390160  | 1511.913  | 3019.742  | AK000821  | 2949.265  | 2305.823  | NM_002310 | 421.706   | 772.906   |
| AJ006835  | 6640.273  | 9058.933  | AK024526  | 8582.963  | 5900.909  | NM_005312 | 707.828   | 1290.191  |
| AL110138  | 789.384   | 692.952   | AK000848  | 604.378   | 459.345   | NM_001711 | 607.539   | 1193.473  |
| AL050153  | 547.549   | 519.213   | AK023307  | 540.111   | 307.946   | NM_004210 | 10088.32  | 11484.893 |
| AL122039  | 873.506   | 1417.438  | NM_017618 | 1880.822  | 1403.975  | NM_020140 | 1647.384  | 2788.556  |
| AF070577  | 6126.678  | 7497.851  | AK024315  | 5362.293  | 4634.138  | NM_001962 | 342.637   | 594.206   |
| AL157484  | 7074.232  | 8794.536  | AK024862  | 625.839   | 334.263   | NM_002500 | 805.099   | 1093.112  |
| AK024850  | 1550.642  | 2079.198  | AK024945  | 2037.053  | 1365.425  | AK026232  | 1278.03   | 1333.128  |
| Y09836    | 4315.484  | 4200.716  | AK024579  | 4734.371  | 3291.201  | NM_014892 | 3233.192  | 2934.163  |
| AL137597  | 12444.509 | 13295.198 | S75708    | 8248.41   | 7397.267  | AK023827  | 1212.132  | 1040.849  |
| AK022144  | 547.324   | 1447.428  | U79291    | 7605.097  | 7354.09   | NM_000335 | 289.788   | 395.917   |
| AF086044  | 1121.626  | 1364.988  | D17172    | 6105.238  | 7847.111  | NM_016575 | 1781.4    | 1694.747  |
| NM_014920 | 668.285   | 799.174   | AJ227859  | 892.759   | 851.861   | NM_018557 | 193.264   | 182.75    |
| AF131790  | 630.942   | 739.986   | NM_018544 | 622.736   | 717.463   | NM_001045 | 6781.487  | 6377.26   |
| AJ011378  | 946.667   | 928.929   | AK022670  | 483.556   | 334.426   | NM_005697 | 3150.27   | 2762.809  |
| AF009266  | 1018.234  | 1593.01   | L10141    | 954.314   | 587.303   | NM_003095 | 2511.798  | 2225.735  |
| AF009310  | 815.586   | 847.862   | AB020699  | 4591.201  | 4243.948  | NM_004781 | 731.149   | 573.732   |
| AF060168  | 1688.582  | 2235.955  | AF086269  | 1028.389  | 845.763   | NM_018303 | 1014.588  | 869.728   |
| AF009275  | 885.064   | 854.986   | U90437    | 2129.637  | 1612.741  | NM_014758 | 1568.454  | 1365.648  |
| AF015251  | 703.182   | 1209.973  | AK000842  | 8777.661  | 6994.015  | NM_005124 | 1099.534  | 1057.958  |
| AF056426  | 1250.301  | 1527.622  | AK023386  | 6305.413  | 4360.349  | AK000947  | 2344.559  | 2210.43   |
| AF064850  | 568.296   | 849.942   | NM_007053 | 17852.885 | 11721.009 | L08240    | 417.523   | 333.7     |
| AK001096  | 502.835   | 494.274   | AK022153  | 1021.486  | 755.826   | NM_002940 | 808.979   | 1020.44   |
| NM_018320 | 1203.587  | 1417.22   | AK022789  | 932.428   | 732.808   | NM_016081 | 4809.524  | 6249.582  |
| AK021565  | 1122.755  | 1367.842  | AK023756  | 737.288   | 457.734   | NM_006385 | 2588.601  | 4140.439  |
| AK021778  | 522.541   | 531.009   | NM_001126 | 6579.248  | 5686.501  | M30818    | 252.088   | 318.078   |
| AK001150  | 3496.284  | 3783.028  | AK023673  | 2245.406  | 1964.639  | NM_000163 | 349.016   | 342.542   |
| AK002123  | 488.685   | 783.433   | NM_018252 | 1572.341  | 1509.572  | NM_005755 | 533.577   | 391.641   |
| AK021633  | 1270.808  | 1483.57   | NM_018000 | 48582.098 | 43112.695 | AB023216  | 487.136   | 426.875   |
| AK025659  | 1495.104  | 1375.034  | AF124366  | 14047.451 | 12786.38  | NM_002265 | 16800.43  | 12216.981 |
| AK026788  | 868.38    | 1170.232  | AF130112  | 665.915   | 808.885   | NM_014400 | 4351.477  | 3063.058  |
| AK026824  | 769.883   | 922.541   | NM_000551 | 3335.163  | 2427.819  | AL157492  | 558.573   | 509.017   |
| AJ008130  | 17041.68  | 14102.837 | AL365518  | 2176.366  | 1603.877  | AL353957  | 1651.526  | 1477.591  |
| NM_003665 | 301.524   | 1993.641  | AF086257  | 3292.028  | 2440.146  | NM_007214 | 7153.179  | 5748.308  |
| AF086502  | 1896.205  | 3303.822  | U00928    | 575.336   | 404.138   | NM_000311 | 1401.319  | 1495.212  |
| L39924    | 2002.069  | 2186.158  | NM_019056 | 2476.318  | 1878.004  | NM_017905 | 1569.034  | 1565.833  |
| U52054    | 4638.297  | 5732.052  | AF279783  | 3245.297  | 3785.81   | NM_006335 | 6532.658  | 7029.069  |
| AK023325  | 2219.528  | 2092.655  | AF182422  | 6579.61   | 7302.34   | NM_000785 | 8346.955  | 5635.493  |
| NM_017985 | 1460.542  | 1741.766  | NM_016943 | 644.65    | 557.156   | AL133561  | 1487.186  | 1348.681  |
| AK025866  | 4707.581  | 10113.369 | AF070602  | 1118.97   | 1003.936  | AB040891  | 1255.9    | 1507.114  |
| AF088058  | 2455.189  | 3934.228  | BE393290  | 1274.347  | 1344.772  | AB037780  | 426.462   | 480.99    |
| NM_000513 | 1754.188  | 2359.193  | NM_017622 | 1317.979  | 921.98    | NM_005845 | 7317.093  | 7356.027  |

|           |           |           |           |           |           |           |           |           |
|-----------|-----------|-----------|-----------|-----------|-----------|-----------|-----------|-----------|
| Y11165    | 2193.297  | 3461.34   | AF133331  | 2445.313  | 1828.914  | NM_016209 | 3927.043  | 4543.887  |
| BC028422  | 1652.029  | 2865.042  | AK022289  | 1277.847  | 770.942   | AK075415  | 432.208   | 548.616   |
| AK022219  | 561.709   | 586.797   | AF161403  | 8552.792  | 5673.663  | NM_018964 | 1598.955  | 1772.784  |
| AK024192  | 333.14    | 947.324   | NM_020183 | 1654.925  | 1936.102  | NM_000080 | 837.54    | 1008.766  |
| AK024413  | 442.084   | 853.12    | NM_018029 | 702.982   | 840.311   | NM_002711 | 409.857   | 449.486   |
| AL137752  | 357.065   | 826.08    | AL389954  | 1052.777  | 881.664   | AK026092  | 1627.637  | 1546.512  |
| AK022247  | 814.53    | 944.773   | NM_019852 | 2512.538  | 2392.469  | AK001175  | 1115.794  | 1086.65   |
| AK001453  | 2785.914  | 2487.347  | NM_006118 | 5455.062  | 4620.018  | NM_003897 | 1144.963  | 1297.106  |
| AB007972  | 3029.443  | 3110.566  | AK026225  | 22461.912 | 23694.471 | NM_014165 | 4094.331  | 4301.564  |
| AL390144  | 4469.938  | 3579.971  | AL050032  | 3191.751  | 2666.343  | AL442085  | 2171.138  | 1702.435  |
| AK024017  | 2406.517  | 2689.176  | AF009304  | 746.581   | 532.84    | NM_013313 | 1560.442  | 2028.213  |
| X56196    | 851.094   | 1410.658  | AF086177  | 8024.132  | 7392.409  | NM_014736 | 3564.747  | 2472.899  |
| D17220    | 6791.876  | 8802.377  | NM_018949 | 1106.094  | 1230.508  | AK023886  | 734.117   | 671.401   |
| D28363    | 46610.215 | 53835.25  | AK021593  | 553.735   | 336.344   | NM_002553 | 667.314   | 460.108   |
| AB011171  | 2106.235  | 2615.286  | D17187    | 1757.834  | 1277.593  | AJ404615  | 1406.859  | 1195.161  |
| AF090099  | 400.321   | 628.047   | AJ243672  | 877.349   | 761.101   | NM_016053 | 6856.556  | 5999.667  |
| AK023606  | 679.171   | 626.778   | AL122087  | 795.161   | 476.361   | AB007869  | 1694.599  | 1693.019  |
| NM_005322 | 3746.53   | 3336.992  | D17169    | 32417.348 | 22869.414 | AB046844  | 252.527   | 332.03    |
| AK024465  | 2017.576  | 1993.82   | NM_017924 | 4782.772  | 5653.94   | NM_000302 | 1430.436  | 3052.202  |
| AF075119  | 924.704   | 739.633   | S81578    | 1021.963  | 1010.48   | NM_013235 | 14608.279 | 11375.529 |
| AK021478  | 2622.3    | 2832.065  | NM_017546 | 4320.391  | 3522.588  | NM_016015 | 1921.56   | 1732.976  |
| AF131782  | 1936.982  | 1922.863  | AF086210  | 683.783   | 502.889   | NM_001962 | 512.499   | 620.888   |
| NM_014210 | 6162.517  | 7328.728  | AL137400  | 733.263   | 675.822   | NM_002500 | 1131.896  | 1482.271  |
| AK021603  | 1367.738  | 1404.465  | AF007142  | 2256.764  | 1760.174  | AK026232  | 1418.339  | 1745.067  |
| AL110136  | 2200.429  | 1887.372  | AF119853  | 4719.739  | 2414.711  | NM_014892 | 4106.334  | 4752.268  |
| AF075095  | 244.88    | 313.891   | CY3Cy5    | 5399.092  | 460.836   | AK023827  | 1917.45   | 2179.434  |
| AK026469  | 2615.266  | 2789.58   | AI248827  | 1286.505  | 1173.798  | NM_001117 | 351.224   | 381.078   |
| D16935    | 6022.192  | 7034.08   | R45026    | 1865.387  | 1901.769  | NM_000231 | 1255.68   | 1538.184  |
| AK027019  | 1394.03   | 1329.351  | BI768063  | 808.292   | 939.207   | L07517    | 641.936   | 852.908   |
| U92019    | 596.673   | 478.585   | BG386057  | 379.726   | 755.556   | AK022451  | 2147.312  | 2230.138  |
| U52835    | 4075.866  | 2565.354  | AI970239  | 2064.786  | 3018.773  | NM_014355 | 59616.648 | 65772.023 |
| NM_000756 | 4229.752  | 3335.944  | AA496452  | 4633.315  | 6938.166  | BM918441  | 1249.399  | 1417.849  |
| AK022148  | 711.007   | 556.016   | X67594    | 3972.983  | 6509.434  | AA150828  | 911.066   | 804.9     |
| Z36811    | 54251.563 | 60496.301 | AF363393  | 858.937   | 1231.129  | H90764    | 285.219   | 273.597   |
| K03200    | 7492.818  | 8993.4    | BC008837  | 540.548   | 1043.719  | AI859208  | 322.433   | 312.631   |
| U17629    | 3579.198  | 4260.792  | NM_015869 | 1217.37   | 1928.883  | H64379    | 4088      | 2624.32   |
| NM_020428 | 2538.609  | 2852.017  | NM_001631 | 656.737   | 985.689   | BE208258  | 26638.98  | 18080.17  |
| U79265    | 5348.716  | 4316.018  | AB000734  | 3805.555  | 5980.328  | T72202    | 509.716   | 573.613   |
| AK022868  | 5955.035  | 4826.542  | NM_000862 | 523.505   | 812.364   | BI831922  | 1396.646  | 1839.926  |
| NM_003530 | 706.265   | 665.457   | X87838    | 5535.128  | 9556.301  | M69238    | 2179.49   | 3539.012  |
| AJ227871  | 908.997   | 792.918   | NM_033199 | 848.409   | 1073.669  | AA664180  | 460.844   | 284.57    |
| AK025344  | 3078.618  | 3611.066  | NM_015001 | 1667.539  | 2338.869  | NM_016081 | 7166.905  | 7012.442  |
| D28589    | 16137.574 | 15349.174 | SR8       | 8825.438  | 49451.441 | NM_006389 | 2253.755  | 2376.599  |
| AF301223  | 807.286   | 855.226   | SR10      | 32425.814 | 21915.412 | M30818    | 281.329   | 485.058   |
| NM_017867 | 6932.522  | 5236.564  | CY3Cy5    | 9486.873  | 867.414   | NM_000163 | 500.053   | 567.241   |
| U92820    | 16351.203 | 15420.289 | X00094    | 943.371   | 1042.921  | NM_005755 | 513.559   | 557.25    |
| NM_017937 | 2445.985  | 2686.45   | NM_003775 | 1112.574  | 1415.151  | NM_003329 | 43692.199 | 32615.416 |
| AL360266  | 2519.536  | 2209.115  | NM_002082 | 8597.942  | 8269.451  | NM_003299 | 37042.16  | 27224.846 |
| AL160132  | 20397.301 | 21062.402 | AF155657  | 12182.022 | 14969.532 | NM_014330 | 18066.682 | 16692.01  |
| NM_019557 | 4440.326  | 5563.578  | NM_006056 | 2936.409  | 4119.312  | NM_007034 | 353.269   | 399.767   |
| CY3Cy5    | 1843.848  | 1134.546  | AF045229  | 9659.887  | 15016.568 | NM_001560 | 2011.556  | 1447.244  |
| AA150828  | 774.752   | 422.531   | NM_001840 | 6904.853  | 11840.662 | NM_001783 | 6395.803  | 4735.081  |
| AI859208  | 510.291   | 279.64    | AK025099  | 2679.858  | 4261.891  | J03171    | 981.92    | 928.167   |

|           |           |           |           |           |           |           |           |           |
|-----------|-----------|-----------|-----------|-----------|-----------|-----------|-----------|-----------|
| H64379    | 4981.252  | 3149.753  | NM_016099 | 26616.391 | 32342.766 | NM_005856 | 335.294   | 177.258   |
| BE208258  | 26845.006 | 17484.99  | NM_000228 | 1641.717  | 2832.637  | NM_004323 | 10167.297 | 7004.209  |
| T72202    | 939.344   | 755.549   | NM_000830 | 1150.866  | 1997.505  | NM_005312 | 582.116   | 540.296   |
| BI831922  | 2135.288  | 2484.031  | AF148950  | 498.405   | 962.395   | NM_001711 | 525.121   | 661.965   |
| M69238    | 2895.322  | 3813.623  | NM_001155 | 7970.498  | 9887.95   | NM_004210 | 8988.901  | 10806.09  |
| AA599158  | 9077.314  | 10109.788 | M62896    | 20926.469 | 26229.645 | NM_020140 | 1253.877  | 1669.396  |
| BE294756  | 286.602   | 203.667   | NM_017736 | 4059.638  | 4927.474  | AK075415  | 394.461   | 351.076   |
| NM_002711 | 580.873   | 960.802   | NM_000313 | 869.087   | 866.898   | NM_018964 | 2060.073  | 1715.178  |
| SR1       | 52987.82  | 82045.414 | AA641953  | 2368.734  | 3666.573  | NM_000080 | 986.594   | 1306.725  |
| SR3       | 33385.078 | 29970.67  | AL137764  | 28325.221 | 36865.953 | NM_001829 | 458.683   | 297.505   |
| SR5       | 2650.483  | 3984.313  | NM_001660 | 20222.768 | 22087.268 | NM_007256 | 220.161   | 247.426   |
| CY3Cy5    | 2864.86   | 647.818   | NM_000710 | 441.921   | 353.808   | AF283645  | 1061.949  | 865.877   |
| NM_005261 | 154.791   | 306.108   | NM_000752 | 1394.69   | 1344.221  | NM_016575 | 1648.176  | 1616.281  |
| NM_001560 | 2822.461  | 2414.848  | NM_002018 | 4756.3    | 4939.015  | NM_001045 | 6585.572  | 4636.301  |
| NM_001783 | 3094.163  | 1951.446  | NM_002377 | 885.696   | 1375.333  | NM_005697 | 2815.765  | 1798.067  |
| J03171    | 1150.15   | 619.164   | NM_006018 | 707.608   | 1151.373  | NM_003099 | 2179.738  | 1410.375  |
| NM_005856 | 363.951   | 57.907    | AF161383  | 3913.996  | 7833.153  | NM_004781 | 589.515   | 346.013   |
| NM_004323 | 8751.413  | 5906.178  | NM_000410 | 13191.608 | 16353.866 | NM_018303 | 805.39    | 574.249   |
| NM_005312 | 782.149   | 700.082   | AF224266  | 2196.635  | 2045.293  | NM_014758 | 1413.636  | 1224.276  |
| NM_001711 | 608.622   | 605.466   | U72882    | 15223.459 | 18945.762 | NM_005124 | 1058.595  | 1111.513  |
| NM_004210 | 10000.86  | 11284.264 | NM_014337 | 8238.787  | 9087.646  | AK000947  | 1994.462  | 1638.865  |
| NM_020140 | 1558.031  | 2324.96   | NM_014387 | 2414.938  | 3679.675  | NM_002940 | 816.348   | 688.155   |
| NM_002500 | 315.063   | 486.4     | NM_003641 | 5959.708  | 8049.032  | AB046844  | 328.348   | 372.822   |
| AK026232  | 1853.998  | 2073.017  | NM_012463 | 1783.455  | 1849.432  | NM_000302 | 1013.487  | 1038.174  |
| NM_014892 | 4776.611  | 5781.714  | L29140    | 27505.707 | 31771.934 | NM_013235 | 14211.87  | 10862.345 |
| AK023827  | 1471.392  | 2315.436  | AK026448  | 1475.297  | 1628.821  | NM_016015 | 1950.223  | 1850.317  |
| NM_001117 | 603.047   | 679.555   | AK057418  | 7730.977  | 7362.917  | NM_020120 | 1042.001  | 903.034   |
| NM_000231 | 2039.634  | 3328.164  | L37199    | 955.248   | 846.957   | AK022900  | 731.543   | 524.547   |
| L07517    | 823.247   | 1219.95   | AL110218  | 1531.57   | 1476.516  | AB023216  | 406.812   | 521.191   |
| AK022451  | 903.073   | 1494.906  | AB023201  | 5808.887  | 4986.157  | NM_002266 | 17453.471 | 14173.587 |
| BM918441  | 2335.364  | 4320.021  | NM_000072 | 1716.773  | 1667.759  | NM_014400 | 4351.31   | 3989.416  |
| NM_018557 | 300.509   | 198.739   | NM_000697 | 1643.74   | 1409.57   | AL157492  | 499.608   | 456.936   |
| NM_001045 | 2447.481  | 3036.691  | NM_000017 | 4422.257  | 3779.773  | AL353957  | 1543.108  | 1544.27   |
| NM_005697 | 3449.874  | 2328.901  | NM_000237 | 1898.774  | 1854.607  | NM_007214 | 6459.299  | 4728.851  |
| NM_003099 | 2780.101  | 1754.853  | NM_018346 | 3831.993  | 3507.265  | NM_000311 | 1132.34   | 927.016   |
| NM_004781 | 964.045   | 669.434   | AL122054  | 2935.343  | 2800.059  | NM_017909 | 1398.667  | 1081.34   |
| NM_018303 | 1114.007  | 545.627   | AB011182  | 4235.98   | 5242.18   | NM_006335 | 5484.684  | 3736.958  |
| NM_014758 | 787.22    | 567.533   | AB023151  | 530.582   | 936.141   | NM_000786 | 7952.871  | 3486.176  |
| NM_005124 | 1245.374  | 1270.615  | NM_000140 | 8156.911  | 15379.912 | AL133561  | 1365.475  | 1169.106  |
| AK000947  | 2602.975  | 3148.213  | NM_005125 | 4385.031  | 5742.654  | AB040891  | 1106.868  | 1051.382  |
| L08240    | 475.49    | 424.101   | NM_020038 | 962.747   | 732.771   | AB037780  | 373.778   | 219.061   |
| NM_017952 | 1035.202  | 1037.4    | NM_016246 | 1917.528  | 2128.179  | NM_005845 | 6168.041  | 4950.911  |
| NM_016081 | 5969.599  | 7680.89   | NM_015926 | 10504.714 | 10496.136 | NM_016209 | 3292.943  | 2538.627  |
| NM_006389 | 4042.973  | 5170.858  | X03757    | 4123.516  | 4139.541  | AK002114  | 1046.167  | 1554.127  |
| M30818    | 357.618   | 556.183   | NM_005136 | 772.667   | 789.848   | AL390184  | 510.347   | 220.684   |
| NM_000163 | 407.894   | 789.145   | AK094513  | 475.19    | 538.286   | NM_018699 | 629.279   | 574.551   |
| NM_005755 | 678.939   | 911.499   | NM_001183 | 11619.126 | 12017.384 | AK026318  | 381.165   | 316.604   |
| U70981    | 211.675   | 307.842   | NM_000890 | 1736.325  | 2458.726  | AF291673  | 498.84    | 536.59    |
| NM_014330 | 7810.5    | 10449.104 | NM_004976 | 13369.343 | 12645.919 | NM_004365 | 4614.817  | 3859.724  |
| NM_007214 | 8433.139  | 6071.322  | AK021597  | 11474.032 | 13364.407 | NM_016355 | 1218.147  | 1108.823  |
| NM_000311 | 1674.633  | 1212.539  | NM_005737 | 19175.869 | 19689.199 | AJ296290  | 826.266   | 727.82    |
| NM_017909 | 2419.879  | 1769.608  | NM_006803 | 920.682   | 876.367   | AK026092  | 1348.378  | 1215.409  |
| NM_006335 | 6307.706  | 4121.308  | NM_002533 | 2079.541  | 1468.14   | AK001175  | 948.599   | 840.182   |

|           |           |           |           |           |           |           |           |           |
|-----------|-----------|-----------|-----------|-----------|-----------|-----------|-----------|-----------|
| NM_000786 | 12467.303 | 5147.489  | AF235022  | 815.544   | 608.236   | NM_003897 | 907.121   | 972.077   |
| NM_002519 | 193.036   | 221.083   | BE799167  | 172.677   | 75.676    | NM_014165 | 3852.509  | 2812.133  |
| AL133561  | 1930.257  | 1632.716  | AF182814  | 2844.135  | 2594.292  | AL442085  | 1364.103  | 938.658   |
| NM_017731 | 283.576   | 364.813   | NM_005329 | 747.991   | 748.216   | NM_013313 | 1949.645  | 4314.5    |
| AB040891  | 1730.18   | 1918.984  | NM_000107 | 1043.144  | 1089.117  | NM_014736 | 3426.289  | 4146.388  |
| AB037780  | 518.535   | 536.408   | AL157445  | 1101.195  | 1256.55   | AK023886  | 822.7     | 718.303   |
| NM_005845 | 7541.942  | 8384.467  | NM_001517 | 10757.934 | 13372.534 | NM_002553 | 668.741   | 461.748   |
| NM_016209 | 5038.634  | 6271.307  | NM_005053 | 3190.956  | 3103.005  | AJ404615  | 1227.071  | 834.551   |
| AK075415  | 411.143   | 689.144   | D86974    | 2989.096  | 2835.189  | NM_016053 | 5843.724  | 3687.051  |
| AK025616  | 315.803   | 275.026   | NM_018283 | 1992.67   | 1630.314  | AB007869  | 1045.219  | 756.787   |
| NM_018964 | 1991.227  | 2303.411  | NM_001983 | 4954.525  | 5300.729  | M64108    | 1154.464  | 793.104   |
| NM_000080 | 870.992   | 1466.317  | NM_004993 | 548.468   | 515.916   | NM_014767 | 241.143   | 322.636   |
| NM_001829 | 755.383   | 667.432   | Y12337    | 2221.388  | 1843.623  | Y17867    | 1339.446  | 1113.542  |
| NM_000339 | 227.327   | 550.114   | M29551    | 13859.391 | 14291.18  | M92642    | 496.147   | 510.769   |
| AF283645  | 1341.344  | 2358.859  | AB023148  | 275.469   | 533.376   | NM_018071 | 1205.089  | 1193.679  |
| NM_016575 | 1171.107  | 2451.829  | NM_002929 | 1384.967  | 1614.947  | NM_004333 | 1953.999  | 1983.362  |
| NM_003897 | 1462.778  | 1186.068  | BC028375  | 1034.002  | 928.893   | M31520    | 53962.375 | 63157.508 |
| NM_014165 | 4605.479  | 2423.207  | AB026436  | 1814.942  | 1527.812  | NM_002020 | 4633.076  | 3986.473  |
| AL442085  | 1695.901  | 748.749   | NM_016029 | 5293.465  | 4869.848  | AL050137  | 222.105   | 274.581   |
| J03250    | 171.523   | 266.547   | AK024562  | 1505.873  | 1072.295  | AK024423  | 1179.693  | 1245.667  |
| NM_013313 | 1508.977  | 1237.319  | NM_014066 | 1670.938  | 1456.396  | NM_005043 | 9212.474  | 6976.019  |
| NM_014736 | 4156.018  | 2809.471  | NM_004573 | 1600.899  | 1220.402  | NM_005979 | 4159.499  | 3622.205  |
| AK023886  | 1016.972  | 1204.224  | NM_000313 | 653.854   | 530.776   | NM_006282 | 1772.868  | 1654.666  |
| NM_002553 | 1290.458  | 1428.808  | NM_001498 | 59472.547 | 55285.863 | NM_015920 | 8640.617  | 6664.333  |
| AJ404615  | 2367.667  | 2372.417  | AF263523  | 2006.466  | 1911.709  | AB011113  | 1037.127  | 1081.818  |
| NM_016053 | 8406.456  | 8962.131  | L08441    | 14536.541 | 12070.534 | NM_004115 | 683.475   | 545.045   |
| AB007869  | 1319.235  | 1263.4    | AA641953  | 2141.899  | 1907.806  | NM_018287 | 654.31    | 511.785   |
| AB046844  | 479.548   | 656.607   | AI248827  | 1102.162  | 950.929   | NM_001955 | 1745.763  | 1746.255  |
| NM_000302 | 1918.069  | 2161.836  | R45026    | 1875.576  | 1965.954  | AF016004  | 981.814   | 1396.816  |
| NM_013235 | 16895.963 | 17721.834 | BI768063  | 951.936   | 1801.367  | NM_003567 | 1702.379  | 949.303   |
| NM_016015 | 2825.687  | 3920.188  | BG386057  | 705.504   | 720.822   | NM_007315 | 2151.509  | 652.281   |
| NM_001125 | 435.823   | 526.256   | AI970239  | 2283.875  | 2541.759  | L20686    | 1101.147  | 543.625   |
| AB023216  | 954.606   | 1197.46   | AA496452  | 4444.755  | 4353.12   | NM_000304 | 218.981   | 291.546   |
| NM_002266 | 18093.73  | 22103.447 | X67594    | 3982.803  | 4011.436  | S72604    | 7879.396  | 5084.383  |
| NM_014400 | 5229.88   | 8153.068  | BC008837  | 577.589   | 616.285   | NM_017984 | 226.927   | 190.767   |
| AL157492  | 718.542   | 1200.948  | NM_015869 | 1283.589  | 1248.558  | NM_002675 | 1089.287  | 1106.139  |
| AL353957  | 2210.934  | 4746.256  | NM_001631 | 737.929   | 751.457   | NM_012432 | 17289.916 | 13404.705 |
| NM_000231 | 1949.262  | 1721.187  | AB000734  | 4864.639  | 3998.477  | NM_005007 | 6123.832  | 5975.499  |
| L07517    | 819.082   | 1123.306  | NM_005987 | 59892.617 | 63201.055 | AK024996  | 1392.078  | 1180.509  |
| AK022451  | 782.884   | 1142.677  | X87838    | 5817.483  | 8374.059  | NM_004417 | 194.238   | 179.455   |
| BM918441  | 1382.191  | 811.656   | NM_033199 | 1106.547  | 1598.897  | NM_012290 | 1988.558  | 1918.32   |
| AA878880  | 597.612   | 358.642   | NM_015001 | 1838.443  | 1732.252  | NM_002431 | 1889.917  | 1344.553  |
| AA150828  | 962.719   | 814.672   | NM_000169 | 5552.156  | 6590.583  | NM_001827 | 12120.715 | 10409.649 |
| H90764    | 236.427   | 209.864   | AK057418  | 7619.474  | 4979.712  | NM_020466 | 1982.922  | 1405.921  |
| AI859208  | 540.816   | 392.178   | L37199    | 1093.451  | 1211.634  | NM_002853 | 1875.844  | 1478.983  |
| H64379    | 4877.541  | 4330.204  | NM_007260 | 1735.327  | 1561.183  | NM_003174 | 329.273   | 254.257   |
| T72202    | 848.969   | 778.892   | AF148646  | 5939.954  | 4470.274  | NM_012307 | 6547.021  | 3499.858  |
| BI831922  | 1892.797  | 2018.271  | AL110218  | 1599.831  | 1327.839  | NM_002540 | 338.822   | 255.14    |
| M69238    | 2776.531  | 3544.032  | AB023201  | 4817.299  | 4060.241  | NM_006371 | 1357.85   | 1050.358  |
| AA664180  | 586.83    | 502.741   | X00094    | 823.871   | 811.347   | NM_018834 | 507.672   | 382.448   |
| NM_002711 | 566.951   | 948.981   | NM_003775 | 1371.532  | 1446.694  | AK026882  | 558.862   | 464.219   |
| AK026092  | 1602.726  | 2424.03   | NM_002082 | 10941.998 | 10509.492 | NM_004574 | 415.866   | 228.2     |
| AK001175  | 1666.64   | 2251.006  | NM_002922 | 226.927   | 213.571   | NM_004848 | 910.002   | 679.239   |



|           |           |           |           |           |           |           |           |           |
|-----------|-----------|-----------|-----------|-----------|-----------|-----------|-----------|-----------|
| NM_003329 | 39946.832 | 22224.436 | AF155657  | 14728.905 | 15778.938 | AF014459  | 825.619   | 711.491   |
| NM_003299 | 34078.762 | 19777.791 | NM_006056 | 3312.115  | 3852.031  | AK024601  | 1944.813  | 1593.627  |
| NM_007034 | 341.47    | 138.384   | AF045229  | 10650.025 | 10930.403 | S68069    | 1992.09   | 1720.539  |
| NM_001560 | 2665.552  | 1607.021  | NM_001840 | 8297.496  | 8861.866  | AB011095  | 939.347   | 701.235   |
| NM_001783 | 3165.847  | 2195.82   | AK025099  | 2568.784  | 2650.413  | NM_001503 | 481.421   | 392.759   |
| J03171    | 1107.527  | 884.024   | NM_016099 | 27133.441 | 24498.463 | NM_006302 | 1005.724  | 981.472   |
| NM_005856 | 383.727   | 251.34    | NM_000394 | 428.006   | 692.26    | AJ224875  | 1492.8    | 1096.316  |
| NM_005312 | 896.519   | 1483.9    | NM_000228 | 1632.566  | 1353.951  | NM_002149 | 3405.135  | 2958.202  |
| NM_001711 | 623.494   | 717.297   | NM_000830 | 1016.145  | 1141.096  | AF043324  | 1779.441  | 1611.26   |
| NM_004210 | 9457.31   | 11351.68  | AF148950  | 756.683   | 685.518   | AK024172  | 475.038   | 414.449   |
| NM_020140 | 1677.641  | 2700.004  | NM_001155 | 8063.061  | 7318.401  | NM_014814 | 2376.605  | 1785.015  |
| NM_001962 | 239.346   | 372.91    | M62896    | 23366.441 | 20388.256 | NM_002797 | 5674.405  | 5120.784  |
| NM_002500 | 1488.074  | 2192.958  | NM_017736 | 3396.701  | 2685.44   | AK024318  | 506.236   | 414.733   |
| AK026232  | 1536.325  | 2186.057  | AK021597  | 11626.75  | 9694.659  | NM_016129 | 1383.248  | 1105.217  |
| NM_014892 | 4342.302  | 5895.396  | NM_005737 | 18611.35  | 15438.395 | NM_002809 | 2770.252  | 2500.76   |
| AK023827  | 1344.122  | 2156.853  | NM_006803 | 1037.588  | 598.09    | NM_017912 | 11117.496 | 8941.181  |
| NM_001117 | 480.404   | 692.664   | NM_002533 | 1809.546  | 1300.083  | NM_000423 | 3147.427  | 2219.252  |
| NM_001829 | 567.093   | 286.832   | AF235022  | 607.094   | 555.793   | AB046838  | 1126.48   | 761.113   |
| AF283645  | 1228.776  | 856.466   | AL137764  | 28199.986 | 24968.438 | AK026339  | 415.596   | 304.873   |
| NM_016575 | 879.578   | 466.302   | NM_001660 | 16857.979 | 21252.043 | X98411    | 2735.821  | 2049.705  |
| NM_018557 | 288.223   | 403.74    | NM_000710 | 501.143   | 532.727   | AF116658  | 2092.666  | 1328.228  |
| NM_001045 | 2701.727  | 1714.248  | NM_000752 | 1533.739  | 1416.313  | NM_014865 | 3094.719  | 1462.077  |
| NM_005697 | 3134.79   | 2097.276  | AB040945  | 825.999   | 566.325   | AB032977  | 2347.802  | 1480.124  |
| NM_003099 | 2770.823  | 2347.639  | NM_002377 | 1076.635  | 1195.687  | NM_003036 | 1035.35   | 554.846   |
| NM_004781 | 995.104   | 827.644   | NM_006018 | 561.596   | 638.4     | NM_020529 | 1160.843  | 666.69    |
| NM_018303 | 1087.736  | 1161.402  | AF161383  | 3529.802  | 4111.05   | NM_020395 | 952.845   | 735.321   |
| NM_014758 | 921.333   | 1076.534  | NM_000410 | 12957.231 | 12406.522 | NM_003425 | 673.225   | 786.556   |
| AL133047  | 215.573   | 244.06    | AF224266  | 2719.926  | 2312.612  | NM_013388 | 3497.519  | 3035.994  |
| NM_005124 | 1314.465  | 1466.913  | U72882    | 17005.508 | 14473.202 | AF038951  | 6065.021  | 2951.371  |
| AK000947  | 2470.115  | 4175.883  | NM_014337 | 7978.488  | 6896.235  | NM_006492 | 761.757   | 566.526   |
| L08240    | 556.316   | 644.345   | NM_014387 | 2301.586  | 2094.66   | AK021811  | 475.371   | 679.337   |
| NM_002940 | 1375.637  | 2009.787  | NM_003641 | 5174.69   | 4258.893  | NM_003428 | 1469.386  | 1094.52   |
| NM_016081 | 7108.228  | 10926.523 | NM_012463 | 1724.731  | 1150.826  | AF055030  | 865.829   | 739.11    |
| NM_006389 | 4206.124  | 6579.999  | L29140    | 26547.512 | 18023.283 | AK000589  | 967.576   | 705.43    |
| M30818    | 553.03    | 855.154   | AK026448  | 1675.408  | 1098.656  | X53281    | 5564.768  | 5063.77   |
| NM_000163 | 398.898   | 653.749   | AB026436  | 1687.157  | 1044.164  | BC012782  | 585.672   | 450.342   |
| NM_005755 | 794.49    | 1286.667  | NM_016029 | 4493.655  | 3145.111  | AF132026  | 29244.176 | 18046.875 |
| NM_001125 | 356.302   | 83.938    | AK024562  | 1296.536  | 893.319   | AL050353  | 796.724   | 367.322   |
| AB023216  | 784.094   | 611.755   | NM_014066 | 1557.701  | 1300.56   | AB037788  | 4003.169  | 2197.971  |
| NM_002266 | 15528.006 | 11920.533 | NM_004573 | 1205.307  | 1004.774  | NM_004587 | 2697.467  | 1241.711  |
| NM_014400 | 4590.794  | 3232.919  | NM_000072 | 1602.493  | 1613.903  | NM_000975 | 58001.871 | 65914.406 |
| AL157492  | 592.911   | 413.074   | NM_000697 | 1472.368  | 1539.854  | AF147412  | 4667.403  | 2649.634  |
| AL353957  | 1952.52   | 1186.491  | NM_000017 | 4598.102  | 4342.605  | AK024570  | 6370.927  | 3172.815  |
| NM_007214 | 7863.394  | 4687.531  | NM_000237 | 1804.201  | 1521.239  | AF161401  | 2890.955  | 1733.582  |
| NM_000311 | 1457.167  | 1235.635  | NM_018346 | 3851.504  | 4104.151  | NM_000990 | 5757.076  | 2755.238  |
| NM_017909 | 2022.718  | 1531.25   | AB011182  | 5499.107  | 5659.508  | NM_014740 | 1323.203  | 680.504   |
| NM_006335 | 5215.039  | 4458.452  | AB023151  | 729.001   | 452.152   | NM_015956 | 3110.188  | 1692.595  |
| NM_000786 | 12603.608 | 8538.762  | NM_000140 | 8289.055  | 8951.592  | AF075008  | 1015.091  | 870.582   |
| AL133561  | 2185.142  | 1811.018  | NM_005125 | 4153.805  | 4687.979  | NM_006504 | 2592.471  | 2292.45   |
| NM_017731 | 366.459   | 239.724   | NM_020038 | 966.856   | 894.963   | AF070538  | 333.107   | 274.545   |
| AB040891  | 1747.046  | 2226.781  | NM_016246 | 2136.357  | 1628.872  | AL137430  | 415.177   | 321.988   |
| AB037780  | 590.136   | 1398.201  | NM_015926 | 10455.319 | 8642.722  | NM_000696 | 2636.792  | 1980.022  |
| NM_005845 | 7688.896  | 12040.232 | X03757    | 4684.025  | 4258.078  | NM_002488 | 7581.678  | 5840.523  |

|           |           |           |           |           |           |           |           |           |
|-----------|-----------|-----------|-----------|-----------|-----------|-----------|-----------|-----------|
| NM_016209 | 5196.548  | 8380.556  | NM_005136 | 702.633   | 683.953   | NM_004003 | 4820.294  | 2911.255  |
| AK075415  | 450.877   | 666.785   | AK094513  | 389.038   | 381.551   | NM_000188 | 467.529   | 419.263   |
| AK025616  | 328.572   | 411.514   | NM_001183 | 13864.275 | 13966.075 | BF244401  | 2109.145  | 1534.052  |
| NM_018964 | 2102.831  | 3021.514  | NM_000890 | 1565.827  | 1551.831  | NM_004718 | 15566.299 | 11290.536 |
| NM_004733 | 203.253   | 921.449   | NM_004976 | 11570.549 | 8510.309  | AL359585  | 1389.085  | 1139.488  |
| NM_000080 | 1045.41   | 1646.605  | NM_033199 | 558.865   | 467.349   | AB046850  | 1301.958  | 1028.68   |
| NM_002711 | 493.221   | 431.471   | NM_015001 | 1554.453  | 1039.161  | NM_014801 | 1506.609  | 1170.324  |
| AK026092  | 1118.995  | 728.128   | NM_000169 | 4515.001  | 3503.947  | NM_003642 | 2033.116  | 1131.283  |
| AK001175  | 1324.843  | 644.584   | AF182814  | 3024.16   | 2059.912  | AB027013  | 1501.782  | 807.275   |
| NM_003897 | 1434.393  | 1438.082  | NM_005329 | 1212.239  | 1137.653  | BC032686  | 239       | 103.483   |
| NM_014165 | 4489.892  | 3945.574  | NM_000107 | 1518      | 2243.166  | BF185480  | 1785.772  | 1132.458  |
| AL442085  | 1927.745  | 1291.495  | AL157445  | 1283.421  | 1874.232  | NM_002128 | 8179.061  | 4222.336  |
| J03250    | 199.341   | 173.96    | NM_001517 | 11023.294 | 11775.574 | NM_003074 | 1673.367  | 832.966   |
| NM_013313 | 1734.753  | 2013.716  | NM_005053 | 3735.015  | 3124.825  | AL360195  | 680.048   | 747.665   |
| NM_014736 | 4606.812  | 5285.687  | D86974    | 3280.494  | 2986.494  | U14383    | 204.512   | 170.062   |
| AK023886  | 1055.506  | 1230.29   | NM_018283 | 1718.272  | 1273.061  | NM_017810 | 454.193   | 313.256   |
| NM_002553 | 979.962   | 1208.15   | NM_001983 | 4608.154  | 4015.472  | NM_003181 | 39367.586 | 16870.574 |
| AJ404615  | 2221.175  | 2679.318  | NM_003384 | 5629.776  | 5647.446  | NM_004451 | 753.903   | 432.108   |
| NM_016053 | 8978.603  | 11606.268 | Y12337    | 2087.061  | 1720.579  | NM_004364 | 22159.408 | 9584.802  |
| AB007869  | 1501.211  | 1569.086  | M29551    | 14234.138 | 12898.293 | AK023505  | 1311.338  | 1053.2    |
| AB046844  | 491.852   | 550.12    | AB023148  | 1017.877  | 1419.175  | AB037851  | 2764.637  | 2015.904  |
| NM_000302 | 1691.577  | 2170.37   | NM_002929 | 1322.827  | 1097.756  | AL050389  | 1320.712  | 991.981   |
| NM_013235 | 19860.473 | 23131.023 | BC028375  | 950.699   | 601.222   | AK024684  | 880.593   | 598.662   |
| NM_016015 | 2638.03   | 3253.121  | AF148950  | 416.862   | 343.855   | NM_014945 | 4718.625  | 4133.048  |
| NM_002500 | 322.603   | 174.321   | NM_001155 | 7671.346  | 6083.835  | AK001546  | 1114.851  | 1143.227  |
| AK026232  | 1551.394  | 1111.986  | M62896    | 18601.088 | 12833.627 | NM_006537 | 2640.046  | 2635.846  |
| NM_014892 | 3948.024  | 2883.987  | NM_017736 | 3188.854  | 2252.659  | AF007155  | 4587.533  | 4170.236  |
| AK023827  | 1243.266  | 724.945   | NM_000313 | 831.849   | 788.867   | AK023055  | 257.784   | 231.546   |
| NM_000231 | 1801.633  | 1297.716  | NM_001498 | 58795.293 | 52835.203 | AL049282  | 3026.025  | 2152.838  |
| L07517    | 844.781   | 385.353   | AF263523  | 1077.314  | 1005.864  | AK021443  | 957.486   | 583.356   |
| AK022451  | 722.794   | 566.573   | L08441    | 12944.679 | 11612.592 | AF070569  | 232.972   | 256.372   |
| BM918441  | 1569.839  | 1706.738  | AA641953  | 2693.001  | 2672.378  | NM_020233 | 888.311   | 615.159   |
| AA878880  | 208.075   | 159.277   | AI248827  | 1649.802  | 1758.082  | AF143873  | 314.835   | 218.073   |
| AA150828  | 955.433   | 1101.038  | R45026    | 2005.76   | 3563.5    | AL355732  | 837.984   | 590.645   |
| H90764    | 299.14    | 235.566   | BI768063  | 1141.103  | 2518.564  | NM_017966 | 1044.15   | 740.966   |
| AI859208  | 454.665   | 544.087   | BG386057  | 1076.103  | 1711.096  | AF143327  | 610.895   | 399.961   |
| H64379    | 4744.809  | 4683.242  | AI970239  | 2533.663  | 2474.723  | AL049991  | 168.786   | 123.344   |
| T72202    | 833.618   | 1303.419  | AA496452  | 4123.513  | 3960.522  | AL049990  | 319.493   | 219.625   |
| BI831922  | 1979.482  | 2534.104  | X67594    | 3805.082  | 3416.98   | AF131843  | 433.987   | 316.884   |
| M69238    | 2988.456  | 4338.796  | BC008837  | 390.366   | 652.389   | AK026653  | 319.07    | 268.338   |
| AA664180  | 545.944   | 858.125   | NM_015869 | 1583.533  | 1794.312  | NM_020231 | 441.569   | 287.971   |
| NM_016081 | 5141.845  | 5225.5    | NM_001631 | 427.724   | 493.79    | AL133118  | 1268.493  | 974.288   |
| NM_006389 | 4004.702  | 3341.966  | AB000734  | 4149.86   | 3420.221  | AK023571  | 1878.297  | 1795.865  |
| M30818    | 295.961   | 288.085   | NM_005987 | 60266.047 | 61366.059 | NM_001702 | 2151.495  | 1905.072  |
| NM_005755 | 613.196   | 317.287   | X87838    | 5012.656  | 4827.834  | AK026657  | 309.004   | 316.118   |
| NM_003329 | 38401.559 | 20329.547 | NM_014387 | 2145.833  | 2059.646  | AF087991  | 5093.061  | 4068.436  |
| NM_003299 | 19704.602 | 11147.542 | NM_003641 | 4587.449  | 2947.117  | Y12839    | 258.86    | 353.003   |
| NM_007034 | 461.019   | 315.358   | NM_012463 | 1496.46   | 1073.724  | X64979    | 215.352   | 396.352   |
| NM_001560 | 2517.803  | 2914.006  | L29140    | 23284.26  | 16910.24  | AJ001876  | 384.375   | 308.626   |
| NM_001783 | 3476.73   | 3407.508  | AK026448  | 1610.811  | 1430.675  | AJ227884  | 571.534   | 555.133   |
| J03171    | 1395.352  | 1281.609  | AK057418  | 8138.506  | 7075.762  | X64986    | 657.154   | 495.587   |
| NM_005312 | 1002.096  | 1503.255  | L37199    | 987.922   | 1478.405  | L38282    | 2043.976  | 1489.543  |
| NM_001711 | 567.496   | 808.35    | NM_007260 | 2081.435  | 2182.338  | NM_018056 | 832.896   | 607.614   |

|           |           |           |           |           |           |           |           |           |
|-----------|-----------|-----------|-----------|-----------|-----------|-----------|-----------|-----------|
| NM_00421C | 9999.091  | 16028.627 | AF148646  | 6228.774  | 5998.625  | NM_01900E | 769.361   | 336.522   |
| NM_02014C | 1840.807  | 4049.498  | AL110218  | 1625.59   | 1790.396  | M20838    | 278.277   | 282.427   |
| AK075415  | 262.879   | 260.727   | AB023201  | 6184.565  | 8724.073  | AK022738  | 207.44    | 142.412   |
| AK025616  | 294.457   | 204.684   | AF155657  | 13880.311 | 14326.973 | AK002095  | 481.934   | 415.497   |
| NM_018964 | 1601.19   | 1020.778  | NM_00605E | 4163      | 3555.051  | AK000821  | 1640.71   | 1580.69   |
| NM_00008C | 770.727   | 480.187   | AF045229  | 9426.398  | 8940.692  | AK024526  | 5301.369  | 4097.196  |
| NM_00182E | 503.923   | 347.504   | NM_00184C | 7430.972  | 7222.149  | AK000848  | 231.906   | 207.548   |
| AF283645  | 1196.017  | 1462.561  | AK025099  | 2714.078  | 3076.573  | AK023307  | 332.469   | 398.801   |
| NM_01657E | 1074.641  | 899.233   | NM_01609E | 27821.648 | 29743.301 | NM_01761E | 1096.077  | 624.559   |
| NM_018557 | 280.534   | 360.298   | NM_000394 | 324.478   | 735.411   | AK024315  | 2866.75   | 1831.271  |
| NM_00104E | 3052.937  | 2932.401  | NM_00022E | 1571.383  | 1549.51   | AK024945  | 716.354   | 423.907   |
| NM_005697 | 3357.236  | 3722.267  | NM_00513E | 590.825   | 557.463   | AK024579  | 1754.723  | 880.868   |
| NM_00309E | 2894.932  | 3013.578  | AK094513  | 462.328   | 380.887   | S75708    | 4407.627  | 2615.475  |
| NM_004781 | 979.447   | 1138.706  | NM_001183 | 12478.734 | 12165.287 | U79291    | 3430.728  | 2289.518  |
| NM_01631E | 254.879   | 236.557   | NM_00089C | 1791      | 2104.068  | D17172    | 3169.038  | 2907.149  |
| NM_01830E | 1198.5    | 1438.844  | NM_00497E | 11279.795 | 10066.274 | AJ227859  | 399.389   | 321.785   |
| NM_01475E | 1000.242  | 1571.019  | AK021597  | 11097.955 | 12039.648 | NM_018544 | 370.583   | 415.542   |
| AL133047  | 280.611   | 425.645   | NM_005737 | 19360.916 | 16563.76  | AK022670  | 257.471   | 133.229   |
| NM_005124 | 1448.22   | 2116.994  | NM_000014 | 750.261   | 902.237   | L10141    | 343.422   | 295.328   |
| AK000947  | 3005.849  | 5618.661  | NM_00680E | 1370.554  | 1917.545  | AB020699  | 2789.239  | 2111.35   |
| L08240    | 542.421   | 571.323   | NM_00253E | 2256.051  | 2458.48   | AF086269  | 657.68    | 794.123   |
| NM_00294C | 1116.991  | 1884.709  | AF235022  | 998.661   | 1013.419  | U90437    | 1243.094  | 1260.116  |
| AB046844  | 371.352   | 337.573   | NM_00075E | 1914.487  | 1492.868  | AK000842  | 6078.981  | 4887.463  |
| NM_00030E | 1405.99   | 722.999   | AB040945  | 984.15    | 767.809   | AK023386  | 3170.022  | 1547.136  |
| NM_01323E | 13859.094 | 7901.495  | NM_00201E | 7091.14   | 5673.874  | NM_00705E | 11283.97  | 7357.683  |
| NM_01601E | 2650.505  | 2053.489  | NM_002377 | 1120.06   | 1020.191  | AK022153  | 325.343   | 197.208   |
| NM_02012C | 1341.003  | 569.662   | NM_00601E | 542.291   | 448.779   | AK022789  | 311.696   | 270.442   |
| AK022900  | 734.769   | 357.279   | AF161383  | 3555.535  | 4585.854  | NM_00112E | 2967.278  | 1871.978  |
| AB023216  | 807.976   | 581.195   | NM_00041C | 11356.473 | 12242.165 | AK023673  | 862.665   | 625.251   |
| NM_00226E | 15363.135 | 11810.699 | U72882    | 13914.063 | 16605.068 | NM_01825E | 556.271   | 490.808   |
| NM_01440C | 4657.417  | 4002.374  | NM_014337 | 5403.398  | 5809.068  | NM_01800C | 30490.635 | 18027.717 |
| AL157492  | 639.867   | 590.088   | NM_003384 | 4897.418  | 3243.449  | AF164963  | 485.002   | 278.693   |
| AL353957  | 2047.328  | 1924.32   | Y12337    | 2119.458  | 1415.314  | AF124366  | 8797.627  | 6605.673  |
| NM_007214 | 8072.263  | 7818.629  | M29551    | 12450.934 | 8161.455  | AF130112  | 432.324   | 420.243   |
| NM_000311 | 1737.302  | 1899.496  | AB023148  | 542.315   | 556.501   | NM_000551 | 1289.696  | 1348.134  |
| NM_01790E | 2371.039  | 1951.264  | NM_00292E | 1154.29   | 1524.406  | AL365518  | 1093.537  | 988.471   |
| NM_00633E | 7194.96   | 8013.735  | BC028375  | 1078.807  | 1444.939  | AF086257  | 1581.182  | 1212.862  |
| NM_00078E | 13081.467 | 11210.348 | AB026436  | 2156.622  | 2122.049  | AC119751  | 450.688   | 423.476   |
| AL133561  | 2070.95   | 2268.311  | NM_01602E | 5338.663  | 4618.068  | U00928    | 269.371   | 225.625   |
| NM_017731 | 401.869   | 365.273   | AK024562  | 1818.578  | 2661.791  | NM_01905E | 1271.213  | 1011.18   |
| AB040891  | 1733.255  | 3107.735  | NM_01406E | 1868.215  | 2325.551  | AF279783  | 1677.59   | 1239.258  |
| AB037780  | 574.635   | 881.811   | NM_00457E | 1673.673  | 1900.849  | AF182422  | 3272.917  | 1757.573  |
| NM_00584E | 6212.349  | 9009.177  | NM_00007E | 2041.841  | 2404.628  | AF070602  | 490.133   | 289.601   |
| NM_01620E | 5048.646  | 8319.222  | NM_000697 | 2222.191  | 2087.448  | BE393290  | 1178.047  | 1022.019  |
| AK002114  | 927.312   | 465.375   | NM_000017 | 6246.72   | 5393.404  | NM_01762E | 816.772   | 616.34    |
| AL390184  | 418.819   | 272.406   | NM_000237 | 1943.626  | 1872.989  | AF133331  | 899.702   | 387.994   |
| NM_01869E | 384.027   | 211.308   | NM_01834E | 3937.016  | 3398.357  | AK022289  | 425.838   | 285.394   |
| AK026318  | 676.998   | 354.87    | AL122054  | 3544.006  | 2741.066  | AF161403  | 3110.865  | 2089.927  |
| AF291673  | 887.82    | 840.488   | AB011182  | 5261.055  | 4818.408  | NM_02018E | 1123.034  | 1208.516  |
| NM_00436E | 3801.339  | 1774.593  | AB023151  | 622.282   | 884.512   | NM_01802E | 278.404   | 225.409   |
| NM_01635E | 1825.161  | 1339.135  | NM_00014C | 9729.053  | 9472.809  | AL389954  | 332.201   | 270.08    |
| AJ296290  | 1272.401  | 1040.083  | NM_00512E | 4797.769  | 5133.067  | NM_01985E | 1103.597  | 1139.126  |
| AK026092  | 1172.313  | 1179.037  | NM_02003E | 1360.329  | 1731.595  | NM_00611E | 2345.748  | 1718.027  |

|           |           |           |           |           |           |           |           |           |
|-----------|-----------|-----------|-----------|-----------|-----------|-----------|-----------|-----------|
| AK001175  | 1556.045  | 1305.295  | NM_015926 | 7525.746  | 9379.962  | AK026225  | 11042.13  | 10307.874 |
| NM_003897 | 1705.752  | 1692.455  | X03757    | 1322.913  | 1547.826  | AL050032  | 3353.401  | 2798.307  |
| NM_014165 | 4406.614  | 5075.184  | NM_002902 | 5777.899  | 4902.512  | AF009304  | 273.671   | 161.574   |
| AL442085  | 2384.138  | 2706.892  | NM_020248 | 13312.549 | 8806.065  | AF086177  | 4242.311  | 3418.235  |
| J03250    | 225.937   | 181.141   | X89670    | 665.328   | 554.3     | NM_018945 | 1420.351  | 1698.127  |
| NM_013313 | 1621.92   | 2478.513  | NM_001726 | 526.589   | 951.654   | AK021593  | 313.73    | 258.876   |
| NM_014736 | 5095.128  | 6556.655  | NM_004053 | 5553.021  | 7820.741  | D17187    | 951.241   | 625.448   |
| AK023886  | 1048.859  | 1701.607  | NM_014420 | 753.702   | 1609.67   | AJ243672  | 502.33    | 270.331   |
| NM_002553 | 1108.453  | 1669.811  | NM_001489 | 2165.699  | 3358.063  | AL122087  | 309.932   | 179.836   |
| AJ404615  | 2470.093  | 3029.726  | M20259    | 413.061   | 753.811   | D17169    | 16335.601 | 9432.834  |
| NM_016053 | 6983.898  | 8283.287  | NM_020374 | 2497.108  | 2602.383  | NM_017924 | 2582.36   | 1910.601  |
| AB007869  | 1721.042  | 2000.117  | NM_014922 | 1583.347  | 1399.979  | S81578    | 646.327   | 913.513   |
| M64108    | 716.614   | 631.547   | NM_000169 | 6677.662  | 6381.856  | NM_017546 | 1908.786  | 1956.075  |
| Y17867    | 629.899   | 434.424   | AF182814  | 3094.193  | 2513.992  | AF007142  | 628.542   | 455.601   |
| NM_018071 | 1288.486  | 819.302   | AK026147  | 249.965   | 296.722   | AF119853  | 1639.639  | 1065.16   |
| NM_004333 | 2745.006  | 1758.61   | NM_005329 | 793.49    | 910.957   | CY3Cy5    | 5416.368  | 656.894   |
| M31520    | 43807.688 | 72038.664 | NM_000107 | 1460.328  | 1511.064  | AI248827  | 740.506   | 1160.743  |
| NM_002020 | 1872.781  | 1483.634  | AL157445  | 1341.213  | 1480.272  | R45026    | 949.96    | 1358.534  |
| AL050137  | 252.226   | 191.684   | NM_001517 | 15477.178 | 15401.572 | BI768063  | 491.524   | 783.6     |
| AK024423  | 1371.165  | 922.406   | NM_005053 | 3920.993  | 4195.691  | AI970239  | 1102.956  | 1545.629  |
| NM_005043 | 7300.205  | 5577.254  | D86974    | 3475.905  | 3962.468  | AA496452  | 2627.164  | 3950.863  |
| NM_005979 | 3435.792  | 3059.982  | NM_001983 | 4150.64   | 5346.625  | X67594    | 2136.347  | 2921.25   |
| NM_006282 | 2423.4    | 2241.007  | NM_004993 | 640.618   | 747.898   | BC008837  | 255.209   | 479.132   |
| NM_000826 | 148.01    | 174.067   | NM_001793 | 12660.055 | 7511.039  | NM_015865 | 948.092   | 2427.13   |
| NM_015920 | 12001.96  | 13163.978 | NM_001943 | 3040.772  | 1833.419  | AB000734  | 1181.885  | 1730.11   |
| AB011113  | 1176.712  | 1262.088  | NM_004927 | 4209.211  | 2075.545  | NM_005987 | 51660.813 | 70499.039 |
| NM_004115 | 894.213   | 936.893   | AB040928  | 218.542   | 720.943   | X87838    | 3453.411  | 5496.481  |
| NM_018287 | 930.051   | 1417.029  | NM_001459 | 984.968   | 1378.096  | NM_033195 | 407.775   | 571.724   |
| NM_001955 | 1695.538  | 2123.655  | NM_015513 | 6493.78   | 10554.549 | NM_015001 | 794.262   | 1683.828  |
| AF016004  | 1323.322  | 3134.902  | NM_006219 | 9085.846  | 11368.506 | SR2       | 46641.109 | 55335.992 |
| NM_003567 | 2908.909  | 3639.302  | NM_004443 | 4018.659  | 3432.311  | SR4       | 9892.898  | 15368.876 |
| NM_007315 | 3007.155  | 2113.896  | NM_001932 | 606.176   | 725.442   | SR6       | 1431.813  | 2310.865  |
| L20686    | 1745.244  | 2217.649  | NM_017412 | 546.23    | 493.968   | SR8       | 4786.206  | 24554.049 |
| S72604    | 6764.229  | 3181.806  | NM_005544 | 376.208   | 606.86    | SR10      | 18640.543 | 9870.125  |
| NM_017984 | 485.196   | 523.478   | NM_002964 | 21078.68  | 20749.066 | CY3Cy5    | 4949.745  | 650.663   |
| NM_002460 | 177.677   | 454.98    | AF311862  | 52668.66  | 53369.883 | X00094    | 732.08    | 818.79    |
| NM_002675 | 809.116   | 786.871   | NM_003215 | 638.622   | 704.659   | NM_003775 | 556.096   | 838.452   |
| NM_012432 | 9848.307  | 4520.1    | NM_016447 | 1046.338  | 1125.536  | NM_002082 | 4770.243  | 4556.794  |
| NM_005007 | 5051.485  | 3278.887  | NM_015626 | 3825.008  | 4229.887  | AF155657  | 7446.52   | 9404.702  |
| AK024996  | 1975.588  | 1061.098  | NM_004899 | 4644.638  | 5080.718  | NM_006056 | 1871.62   | 2359.619  |
| NM_001258 | 392.717   | 319.255   | AB006628  | 9097.536  | 8118.508  | AF045229  | 5201.173  | 6485.061  |
| NM_004417 | 338.291   | 268.362   | AF272036  | 6515.294  | 7062.76   | NM_001840 | 5007.7    | 6397.014  |
| NM_012290 | 2508.139  | 1596.658  | AF231023  | 1129.622  | 1473.099  | AK025099  | 1283.765  | 2130.239  |
| NM_002431 | 2480.108  | 1322.799  | NM_005148 | 2181.09   | 2601.63   | NM_016095 | 12090.843 | 16513.549 |
| NM_001827 | 14704.312 | 11070.715 | NM_004746 | 923.767   | 916.887   | NM_000228 | 524.548   | 980.294   |
| NM_020466 | 2226.209  | 1368.432  | AF146019  | 4702.796  | 5838.461  | AF148950  | 250.998   | 597.732   |
| AL079280  | 260.477   | 397.741   | Z36782    | 7794.257  | 8205.66   | NM_001155 | 5187.98   | 7879.3    |
| NM_002853 | 3097.255  | 3358.227  | M70435    | 855.137   | 1000.613  | M62896    | 6226.443  | 10635.392 |
| NM_003174 | 718.93    | 633.704   | NM_003490 | 5333.188  | 5680.855  | NM_017736 | 2111.315  | 3734.024  |
| NM_012307 | 6181.912  | 5894.46   | AF090942  | 632.447   | 462.271   | NM_000313 | 529.758   | 916.032   |
| NM_002540 | 903.338   | 1079.016  | AF508940  | 3814.109  | 2247.518  | NM_001498 | 52171.469 | 65432.664 |
| NM_006371 | 2491.368  | 2600.846  | NM_005429 | 3827.274  | 3030.015  | AF263523  | 1235.828  | 2460.829  |
| NM_018834 | 855.617   | 1266.098  | NM_020237 | 746.902   | 875.707   | L08441    | 12666.878 | 18858.061 |

|           |           |           |           |           |           |           |           |           |
|-----------|-----------|-----------|-----------|-----------|-----------|-----------|-----------|-----------|
| AK026882  | 613.716   | 805.244   | AF130051  | 555.088   | 560.82    | AA641953  | 1784.383  | 3364.51   |
| NM_004574 | 500.036   | 562.402   | M25753    | 10166.773 | 7720.677  | AL137764  | 15207.894 | 16112.118 |
| NM_004848 | 1618.149  | 2550.036  | NM_003883 | 1868.966  | 1624.856  | NM_001660 | 11425.576 | 14044.36  |
| NM_001944 | 474.389   | 615.352   | NM_014929 | 2891.854  | 2528.713  | NM_000710 | 308.126   | 438.683   |
| NM_014813 | 448.529   | 596.695   | NM_004203 | 8300.07   | 6597.697  | NM_000752 | 801.461   | 961.918   |
| AF014459  | 1709.083  | 2349.646  | NM_001951 | 2018.628  | 3413.279  | AB040945  | 831.889   | 858.021   |
| AK024601  | 2121.734  | 1100.219  | NM_002391 | 1283.973  | 1002.069  | NM_002018 | 2398.193  | 2762.71   |
| S68069    | 3344.548  | 11076.884 | NM_007066 | 3454.949  | 2774.432  | NM_002377 | 662.307   | 1421.492  |
| AB011095  | 419.766   | 561.087   | NM_003674 | 26743.129 | 23224.119 | NM_006018 | 313.575   | 504.34    |
| NM_001503 | 485.05    | 816.871   | NM_001197 | 4190.691  | 4143.117  | AF161383  | 1968.279  | 2563.052  |
| NM_006302 | 1731.855  | 1006.172  | NM_006682 | 880.713   | 1208.343  | NM_000410 | 9595.83   | 16722.281 |
| AJ224875  | 1760.879  | 1094.357  | NM_006410 | 2099.728  | 2779.374  | AF224266  | 929.502   | 1626.182  |
| NM_002149 | 5647.251  | 3072.126  | NM_014977 | 28806.326 | 27181.227 | U72882    | 7545.561  | 10940.917 |
| AF043324  | 2321.065  | 1108.551  | AK026325  | 2351.132  | 4104.28   | NM_014337 | 3103.636  | 4647.505  |
| AK024172  | 485.174   | 309.437   | U83857    | 901.574   | 1148.658  | NM_007161 | 32727.727 | 53831.316 |
| NM_014814 | 3341.036  | 2332.039  | NM_001230 | 1965.88   | 1894.816  | NM_014387 | 1537.628  | 3038.862  |
| NM_002797 | 7298.301  | 5431.372  | AK025662  | 2314.741  | 1592.579  | NM_003641 | 2342.644  | 3962.516  |
| AK024318  | 807.643   | 616.637   | NM_000201 | 515.247   | 694.073   | NM_012463 | 1058.601  | 2171.586  |
| NM_016129 | 1771.076  | 1954.053  | AB011539  | 1748.084  | 1821.287  | L29140    | 12936.102 | 21805.979 |
| NM_002809 | 4352.679  | 4816.982  | U37028    | 1871.188  | 2058.366  | AK026448  | 817.849   | 1574.615  |
| NM_017912 | 6899.887  | 5827.732  | AB014597  | 2797.773  | 3929.09   | AK057418  | 4435.58   | 8559.343  |
| NM_000423 | 4062.717  | 4029.743  | S81361    | 289.256   | 315.461   | L37199    | 619.834   | 1359.806  |
| AB046838  | 1748.783  | 1737.175  | AK024313  | 5570.704  | 3432.876  | NM_007260 | 1134.389  | 2705.246  |
| AK026339  | 658.633   | 914.182   | NM_003891 | 3339.646  | 2603.555  | AF148646  | 3508.08   | 5798.159  |
| X98411    | 3857.143  | 5372.036  | NM_002022 | 1227.217  | 1569.296  | AL110218  | 1002.552  | 1641.097  |
| AF116658  | 2981.477  | 3707.731  | NM_015524 | 2490.59   | 2773.332  | AB023201  | 4159.864  | 8167.602  |
| NM_014865 | 4411.811  | 7206.516  | NM_001673 | 8326.914  | 7560.442  | NM_000072 | 909.995   | 1427.89   |
| AB032977  | 3627.602  | 5201.535  | AK023167  | 501.133   | 844.567   | NM_000697 | 773.217   | 1156.139  |
| AK001725  | 640.469   | 920.967   | NM_016510 | 1910.97   | 1561.152  | NM_000017 | 2475.235  | 3198.823  |
| NM_003036 | 1248.938  | 1211.93   | NM_014270 | 1733.295  | 2244.55   | NM_000237 | 1062.899  | 1697.604  |
| NM_020529 | 2151.266  | 3017.683  | NM_000071 | 5928.482  | 6184.861  | NM_018346 | 2253.045  | 2571.287  |
| NM_020395 | 1181.021  | 716.918   | NM_006843 | 2547.323  | 2321.882  | AL122054  | 1960.527  | 2742.441  |
| NM_003425 | 1383.398  | 1412.74   | NM_006915 | 1861.305  | 2122.344  | AB011182  | 3380.906  | 4093.865  |
| NM_013388 | 4533.125  | 3367.999  | NM_006035 | 2396.248  | 2404.38   | AB023151  | 341.718   | 587.258   |
| AF038951  | 7805.744  | 3125.443  | NM_006086 | 10190.901 | 13063.699 | NM_000140 | 3772.964  | 5754.538  |
| NM_006492 | 740.437   | 528.777   | NM_004520 | 7476.805  | 8414.829  | NM_005125 | 2226.909  | 3631.159  |
| AK021811  | 509.479   | 482.963   | AK027118  | 3723.184  | 4021.994  | NM_020038 | 481.133   | 774.509   |
| NM_003428 | 892.69    | 716.227   | AK022882  | 10856.017 | 9393.771  | NM_016246 | 722.266   | 1409.897  |
| AF055030  | 1071.114  | 609.86    | NM_006105 | 2269.372  | 2149.76   | NM_015926 | 4195.781  | 6732.186  |
| AK000589  | 1140.629  | 627.514   | NM_005981 | 1538.284  | 1337.348  | X03757    | 1297.978  | 2288.052  |
| X53281    | 3649.255  | 2418.459  | NM_000474 | 5671.059  | 4324.555  | NM_018658 | 3980.734  | 6232.663  |
| BC012782  | 926.468   | 806.777   | NM_016264 | 967.526   | 608.79    | NM_005136 | 400.635   | 956.411   |
| AF132026  | 36952.117 | 25231.426 | NM_006079 | 34147.141 | 17639.92  | AK094513  | 437.611   | 814.42    |
| AL050353  | 1396.205  | 1247.146  | AB037837  | 1070.352  | 679.542   | NM_001183 | 11592.011 | 20746.041 |
| AB037788  | 7677.266  | 8467.758  | NM_014595 | 7045.102  | 3820.22   | NM_000890 | 815.865   | 1560.335  |
| NM_004587 | 3619.909  | 3110.021  | NM_014789 | 1156.995  | 758.561   | NM_004976 | 8936.343  | 13101.263 |
| NM_000975 | 43597.16  | 71843.492 | AB046784  | 1676.397  | 1149.566  | AK021597  | 7488.967  | 11937.954 |
| AF147412  | 7744.335  | 8587.591  | X52402    | 3875.45   | 3493.023  | NM_005737 | 10308.527 | 10676.196 |
| AK024570  | 10957.484 | 13108.6   | AL133663  | 1347.974  | 729.435   | NM_000014 | 414.247   | 438.624   |
| AF161401  | 4664.593  | 5944.771  | NM_004992 | 2236.908  | 3970.498  | NM_006803 | 358.849   | 519.947   |
| NM_000990 | 10721.582 | 12690.762 | NM_014462 | 2284.505  | 3765.441  | NM_002533 | 1029.399  | 766.523   |
| NM_014740 | 2976.644  | 2590.337  | NM_014156 | 53407.023 | 47571.93  | AF235022  | 441.448   | 382.046   |
| NM_015956 | 6220.312  | 7274.579  | NM_003137 | 7480.11   | 8258.873  | AF182814  | 1879.607  | 2491.01   |

|           |           |           |           |           |           |           |           |           |
|-----------|-----------|-----------|-----------|-----------|-----------|-----------|-----------|-----------|
| AF075008  | 1414.569  | 978.667   | NM_006938 | 32927.816 | 28262.652 | NM_005328 | 594.36    | 1002.479  |
| NM_006504 | 3216.093  | 3547.839  | NM_004515 | 647.543   | 926.721   | NM_000107 | 760.704   | 1324.554  |
| AL137430  | 449.261   | 496.951   | AF265228  | 1498.447  | 1697.749  | AL157445  | 742.075   | 1427.172  |
| NM_000696 | 3326.514  | 2216.317  | NM_003757 | 20555.434 | 18858.047 | NM_001517 | 4103.057  | 5914.914  |
| NM_002488 | 11752.541 | 6203.162  | AK025561  | 2901.128  | 3128.311  | NM_005053 | 1277.725  | 2058.952  |
| NM_004003 | 3799.583  | 2048.785  | NM_018602 | 20135.391 | 16603.502 | D86974    | 1531.026  | 2078.215  |
| NM_000188 | 760.569   | 368.314   | NM_004096 | 5782.912  | 5421.304  | NM_018283 | 821.738   | 1622.272  |
| BF244401  | 1523.77   | 1119.946  | NM_017629 | 5436.188  | 5395.792  | NM_001983 | 2457.662  | 4306.571  |
| NM_004718 | 18204.84  | 10340.765 | AL049681  | 1919.129  | 1857.041  | M29551    | 6604.666  | 5457.13   |
| AL359585  | 2231.533  | 1604.796  | NM_006584 | 716.483   | 731.84    | NM_002928 | 839.321   | 746.927   |
| AB046850  | 2383.769  | 1879.411  | AF052181  | 1041.311  | 819.633   | BC028375  | 418.294   | 277.801   |
| NM_014801 | 1053.284  | 854.197   | AL050074  | 4238.282  | 2735.565  | AB026436  | 856.013   | 702.72    |
| NM_003642 | 4308.227  | 3316.371  | AK026436  | 627.133   | 477.256   | NM_016028 | 2806.187  | 1616.68   |
| AB027013  | 552.641   | 443.826   | NM_018061 | 1812.979  | 815.768   | AK024562  | 587.943   | 412.466   |
| BC032686  | 398.032   | 282.932   | AK023059  | 670.847   | 366.364   | NM_014066 | 830.031   | 539.963   |
| BF185480  | 1862.595  | 1831.235  | NM_003551 | 1879.144  | 1053.075  | NM_004573 | 604.609   | 430.898   |
| NM_002128 | 14774.092 | 12601.345 | AF305210  | 373.151   | 287.971   | NM_000313 | 505.679   | 995.416   |
| NM_007105 | 308.603   | 435.804   | AK021900  | 4196.209  | 2831.629  | NM_001498 | 48832.113 | 39880.844 |
| NM_003074 | 2843.331  | 1681.356  | NM_002764 | 8825.931  | 14937.953 | AF263523  | 1040.974  | 1395.616  |
| AL360195  | 612.198   | 891.37    | NM_019857 | 1342.945  | 2755.228  | L08441    | 10441.074 | 8187.908  |
| U14383    | 717.19    | 849.731   | NM_015455 | 23518.6   | 19459.084 | AA641953  | 1503.127  | 925.207   |
| NM_017810 | 732.145   | 1090.661  | AF024702  | 921.089   | 945.321   | AI248827  | 788.493   | 653.066   |
| NM_003181 | 41268.809 | 48292.363 | NM_001964 | 1524.716  | 2250.499  | R45026    | 1133.671  | 833.567   |
| NM_004451 | 1662.275  | 2409.333  | NM_005962 | 12823.995 | 13574.289 | BI768063  | 621.064   | 436.974   |
| NM_004364 | 33480.742 | 33426.977 | X74864    | 1058.994  | 1258.984  | BG386057  | 508.647   | 502.813   |
| AK023505  | 935.185   | 777.925   | NM_016170 | 9048.982  | 9377.792  | AI970239  | 1063.351  | 843.461   |
| AB037851  | 2184.418  | 1760.754  | NM_006166 | 1649.16   | 1287.321  | AA496452  | 2330.93   | 1681.002  |
| AL050389  | 1167.187  | 753.277   | S72620    | 39291.148 | 31232.322 | X67594    | 2059.889  | 1418.972  |
| AK025855  | 220.916   | 142.53    | NM_016831 | 393.553   | 489.052   | NM_005987 | 57263.691 | 69959.82  |
| AK024684  | 1032.828  | 637.395   | NM_005263 | 21658.572 | 21080.512 | X87838    | 2672.154  | 2034.872  |
| NM_014945 | 4536.221  | 2824.704  | AB033022  | 5749.397  | 5305.562  | NM_033198 | 262.447   | 233.638   |
| AK001546  | 1651.664  | 1181.35   | AF147397  | 639.386   | 441.703   | NM_015001 | 908.943   | 740.038   |
| NM_006537 | 3698.879  | 2171.232  | AK027158  | 716.215   | 432.65    | NM_000168 | 2118.977  | 1034.529  |
| AF007155  | 3908.283  | 2615.133  | AK002187  | 246.458   | 162.824   | AK057418  | 3621.928  | 2325.599  |
| AK023055  | 463.72    | 245.021   | AF085836  | 5128.318  | 2476.342  | L37199    | 412.757   | 492.329   |
| AL049282  | 3921.261  | 3051.065  | AL049449  | 401.567   | 270.039   | NM_007260 | 813.222   | 792.407   |
| AK021443  | 971.107   | 687.912   | AL359654  | 626.248   | 338.674   | AF148646  | 2884.727  | 1894.479  |
| AF070569  | 408.271   | 619.086   | AK024224  | 1466.464  | 960.476   | AL110218  | 730.815   | 474.846   |
| NM_020233 | 1015.063  | 1080.363  | NM_015362 | 5467.476  | 7993.122  | AB023201  | 3021.515  | 1971.667  |
| AF143873  | 363.483   | 403.973   | AF147344  | 910.501   | 1865.802  | X00094    | 408.498   | 362.332   |
| AL355732  | 632.349   | 869.81    | AF147371  | 923.5     | 1235.268  | NM_003775 | 427.538   | 373.544   |
| NM_017968 | 1788.306  | 2523.853  | NM_018982 | 2329.263  | 2013.868  | NM_002082 | 3670.629  | 2494.644  |
| AF143327  | 699.637   | 832.461   | AF086254  | 3548.026  | 2789.622  | AF155657  | 6487.178  | 4814.337  |
| AL137535  | 267.741   | 233.213   | AF086294  | 386.281   | 142.48    | NM_006058 | 1795.345  | 2135.118  |
| AL049991  | 405.034   | 530.84    | AF086324  | 494.367   | 668.464   | AF045229  | 4800.146  | 4271.611  |
| AL049990  | 673.59    | 897.872   | AF086261  | 1100.823  | 1432.041  | NM_001840 | 4343.057  | 4137.162  |
| AF131843  | 1029.137  | 975.504   | AF086367  | 2010.265  | 1958.149  | NM_016098 | 11493.372 | 11440.489 |
| AK026653  | 673.043   | 650.602   | AF086437  | 1095.192  | 883.702   | NM_000228 | 617.504   | 480.287   |
| NM_020231 | 1094.264  | 1737.017  | AK025088  | 4017.125  | 3825.227  | NM_000830 | 485.573   | 563.975   |
| AL133118  | 634.871   | 682.646   | U79295    | 872.506   | 1106.464  | NM_005208 | 268.858   | 210.001   |
| AK023571  | 277.636   | 375.41    | AK002107  | 753.534   | 836.542   | NM_001155 | 3823.022  | 2610.837  |
| AF052148  | 251.935   | 412.533   | NM_003596 | 3222.937  | 2885.942  | M62896    | 4266.246  | 2575.21   |
| AF131783  | 213.939   | 203.673   | NM_018838 | 3361.016  | 2027.773  | NM_017738 | 1721.22   | 1330.649  |

|           |           |           |            |           |           |           |           |           |
|-----------|-----------|-----------|------------|-----------|-----------|-----------|-----------|-----------|
| NM_001702 | 1493.446  | 1320.016  | AK021454   | 1149.294  | 524.285   | AK021597  | 6049.046  | 4958.68   |
| AK026657  | 450.455   | 209.523   | AK022069   | 1263.286  | 484.549   | NM_005737 | 10177.752 | 7166.303  |
| AL833558  | 405.752   | 128.313   | AL137457   | 896.714   | 476.838   | NM_006803 | 327.851   | 326.951   |
| NM_01805C | 402.099   | 123.368   | AF085944   | 1064.578  | 441.706   | NM_002533 | 796.248   | 604.007   |
| AF087991  | 4707.913  | 3191.226  | AL133038   | 783.029   | 353.266   | AF235022  | 364.764   | 242.906   |
| Y12839    | 328.283   | 134.204   | AL137414   | 1284.141  | 1230.508  | AL137764  | 13530.041 | 7948.071  |
| AJ001876  | 259.381   | 185.933   | AL137624   | 874.699   | 1076.711  | NM_00166C | 10215.578 | 6541.835  |
| AJ227884  | 599.388   | 746.016   | AL359574   | 849.687   | 982.57    | NM_000752 | 485.596   | 568.405   |
| X75693    | 229.753   | 248.73    | AL133569   | 1069.278  | 785.056   | NM_00201E | 2595.299  | 1844.745  |
| Y10510    | 272.64    | 125.052   | AL137435   | 483.722   | 388.263   | NM_002377 | 467.844   | 462.107   |
| L38282    | 1613.506  | 1740.155  | AL157463   | 505.775   | 465.313   | NM_00601E | 305.378   | 538.598   |
| NM_01805E | 1742.278  | 1979.686  | AL359604   | 645.973   | 546.946   | AF161383  | 1567.303  | 2045.674  |
| Y16185    | 243.705   | 378.072   | AK027189   | 962.177   | 835.565   | NM_00041C | 9121.854  | 10376.883 |
| NM_01900E | 1485.221  | 1494.18   | AF088014   | 1550.353  | 1418.287  | AF224266  | 636.605   | 459.354   |
| M20838    | 626.016   | 1047.188  | AL109719   | 887.67    | 1105.047  | U72882    | 5869.167  | 3631.282  |
| AK022738  | 358.94    | 380.242   | AF086093   | 1004.171  | 1213.536  | NM_014337 | 4505.525  | 3309.43   |
| Y11918    | 235.994   | 710.541   | U92022     | 1089.403  | 825.136   | NM_007161 | 23987.191 | 13909.96  |
| AK024252  | 356.357   | 369.152   | NM_00365C  | 11384.913 | 10876.545 | NM_014387 | 882.319   | 717.487   |
| AK002095  | 243.564   | 178.364   | AK022119   | 2978.682  | 2350.815  | NM_003641 | 1126.054  | 835.662   |
| AK000821  | 1394.077  | 1119.868  | AL157488   | 542.178   | 777.06    | NM_012463 | 522.389   | 270.603   |
| AK024526  | 3695.497  | 2766.353  | NM_016644  | 1647.803  | 1999.145  | L29140    | 6951.544  | 3607.257  |
| AK000848  | 343.256   | 249.397   | AF085842   | 560.274   | 550.741   | AK026448  | 547.002   | 445.799   |
| AK023307  | 349.783   | 170.85    | AK026750   | 860.224   | 1084.141  | AB026436  | 946.547   | 630.312   |
| NM_01761E | 791.5     | 670.26    | AF072164   | 1349.148  | 779.508   | NM_01602E | 2342.542  | 1828.965  |
| NM_01784E | 173.991   | 254.098   | NM_01861C  | 386.016   | 286.475   | AK024562  | 595.327   | 433.664   |
| AK024315  | 3424.978  | 4282.305  | AF083122   | 232.486   | 185.576   | NM_01406E | 933.507   | 638.208   |
| AK024862  | 842.121   | 1288.729  | AF147317   | 602.068   | 305.597   | NM_004573 | 623.924   | 606.334   |
| AK024945  | 669.469   | 733.367   | AF232216   | 566.071   | 382.097   | NM_000072 | 907.329   | 616.04    |
| AK024411  | 1683.079  | 2977.319  | NM_017773  | 1823.375  | 1710.748  | NM_000697 | 595.85    | 512.788   |
| AK024579  | 2250.743  | 2371.292  | AK021885   | 460.68    | 837.032   | NM_000017 | 2240.089  | 1918.218  |
| AK024877  | 216.32    | 253.299   | AK022018   | 327.821   | 240.741   | NM_000237 | 926.599   | 865.347   |
| S75708    | 2767.033  | 2064.339  | AK022161   | 597.861   | 422.227   | NM_01834E | 1988.996  | 1590.236  |
| U79291    | 4569.439  | 3464.607  | AK021940   | 588.211   | 435.288   | AL122054  | 1554.659  | 1385.222  |
| D17172    | 3859.605  | 2699.975  | AK022189   | 1939.933  | 1665.848  | AB011182  | 2761.914  | 1854.56   |
| AF161370  | 236.125   | 106.782   | AK026856   | 676.049   | 1092.172  | NM_00014C | 3004.456  | 3706.709  |
| AJ227859  | 548.996   | 333.97    | AL162033   | 1776.162  | 2046.874  | NM_00512E | 1767.697  | 2180.592  |
| NM_018544 | 264.432   | 196.717   | AL162010   | 375.3     | 347.914   | NM_02003E | 336.219   | 455.784   |
| AK022670  | 278.216   | 253.844   | NM_005001  | 8757.733  | 5538.523  | NM_01624E | 507.396   | 315.503   |
| L10141    | 275.624   | 124.591   | AK024175   | 3639.454  | 2503.201  | NM_01592E | 2827.914  | 1724.428  |
| AB020699  | 2736.393  | 1711.417  | NM_00051C  | 663.298   | 383.813   | X03757    | 736.726   | 433.673   |
| AF086269  | 597.803   | 463.314   | NM_017787  | 2082.496  | 1593.11   | NM_01865E | 1789.113  | 1250.563  |
| U90437    | 1480.031  | 1113.271  | NM_02031E  | 2973.723  | 3181.254  | NM_001183 | 8055.284  | 4607.683  |
| AK000842  | 7421.282  | 10692.035 | unknown (S | 1015.705  | 886.307   | NM_00497E | 7047.683  | 5433.484  |
| AK023386  | 2905.288  | 4064.76   | unknown (S | 522.593   | 836.386   | NM_015001 | 821.728   | 757.019   |
| NM_007053 | 16644.889 | 20939.553 | AK001910   | 1097.566  | 1017.245  | NM_00016E | 1876.962  | 1029.481  |
| AK022153  | 289.612   | 245.674   | AK023892   | 352.976   | 392.335   | AF182814  | 1639.291  | 923.597   |
| AK022789  | 424.405   | 172.68    | AF124368   | 1041.585  | 859.968   | NM_00532E | 320.13    | 240.055   |
| AK023756  | 488.689   | 521.074   | AF265210   | 8128.167  | 6707.547  | NM_000107 | 520.083   | 446.067   |
| NM_001126 | 3934.27   | 2576.366  | AK024241   | 713.644   | 657.451   | AL157445  | 537.048   | 1089.073  |
| AK023673  | 1051.744  | 842.934   | AK025061   | 1225.649  | 1030.253  | NM_005053 | 1442.974  | 2777.371  |
| NM_018252 | 1275.978  | 1122.723  | AF088067   | 5157.418  | 2856.527  | NM_001983 | 2188.366  | 1527.708  |
| NM_01800C | 17364.125 | 11087.866 | AF056441   | 1433.716  | 749.393   | NM_004993 | 1790.831  | 748.56    |
| AF124366  | 7930.715  | 5096.273  | AK024389   | 4728.803  | 1900.055  | NM_003384 | 2062.866  | 973.255   |

|           |           |           |           |           |           |           |           |           |
|-----------|-----------|-----------|-----------|-----------|-----------|-----------|-----------|-----------|
| AF130112  | 334.594   | 222.572   | AK026793  | 1814.323  | 832.508   | Y12337    | 237.179   | 161.014   |
| NM_000551 | 1994.089  | 1122.863  | NM_001672 | 667.723   | 582.263   | M29551    | 3401.31   | 2574.229  |
| AL365518  | 1496.991  | 918.784   | AJ276253  | 15541.134 | 9926.719  | NM_002925 | 1129.095  | 787.276   |
| AF086257  | 2176.685  | 1324.837  | AF147314  | 1255.856  | 1606.061  | BC028375  | 468.993   | 328.536   |
| AF075056  | 284.061   | 292.749   | NM_018980 | 2448.524  | 1741.259  | NM_005205 | 312.077   | 502.864   |
| AC119751  | 387.417   | 352.98    | AF086201  | 733.523   | 552.157   | NM_001155 | 3771.367  | 2178.625  |
| U00928    | 379.763   | 314.185   | U48696    | 270.001   | 154.366   | M62896    | 7292.807  | 4484.976  |
| NM_019056 | 1772.204  | 1732.853  | AF230316  | 3828.358  | 2264.207  | NM_017736 | 1715.622  | 1120.964  |
| AF279783  | 2275.847  | 2016.628  | L32136    | 433.136   | 1233.864  | NM_000313 | 437.043   | 373.233   |
| AF182422  | 4390.525  | 3969.255  | NM_004488 | 941.183   | 1033.264  | NM_001498 | 43302.949 | 32186.873 |
| NM_016943 | 249.38    | 214.738   | AK024515  | 3165.606  | 3052.834  | AF263523  | 6744.466  | 6347.051  |
| AF070602  | 448.542   | 786.995   | AF085862  | 4797.856  | 4691.266  | L08441    | 7087.626  | 7196.26   |
| BE393290  | 660.982   | 976.752   | NM_017998 | 1783.27   | 1900.943  | AA641953  | 1127.899  | 633.89    |
| NM_017622 | 877.246   | 1139.101  | AL049271  | 24398.436 | 24293.873 | AI248827  | 554.807   | 488.5     |
| AF133331  | 1918.469  | 2300.773  | AK023079  | 30516.377 | 29659.314 | R45026    | 686.706   | 759.839   |
| AK022289  | 1040.771  | 1117.498  | NM_019609 | 1900.443  | 1682.818  | AA496452  | 2493.527  | 5056.812  |
| L34408    | 288.129   | 330.04    | AK026198  | 3197.852  | 2745.852  | X67594    | 1403.284  | 1078.415  |
| AF161403  | 2502.209  | 2392.672  | AF183570  | 669.754   | 388.95    | NM_015865 | 323.624   | 213.086   |
| NM_020183 | 1164.443  | 1069.14   | NM_005497 | 11408.005 | 4760.811  | AB000734  | 586.168   | 486.724   |
| NM_018025 | 429.134   | 259.144   | AK024048  | 1844.007  | 1032.314  | NM_005987 | 47499.648 | 22081.666 |
| AL389954  | 755.413   | 449.301   | AB033093  | 1141.295  | 389.66    | X87838    | 2457.532  | 1507.85   |
| NM_019852 | 2055.327  | 1408.421  | NM_005912 | 650.193   | 602.889   | NM_014387 | 1104.605  | 677.747   |
| NM_006118 | 3377.964  | 1985.729  | NM_005909 | 27013.572 | 11856.038 | NM_003641 | 1823.842  | 972.089   |
| AK026225  | 15660.27  | 12745.15  | AK021879  | 454.692   | 381.832   | NM_012463 | 650.02    | 437.739   |
| AL050032  | 718.023   | 504.43    | AK055991  | 644.405   | 726.935   | L29140    | 12548.123 | 7128.33   |
| AF009304  | 507.224   | 322.295   | AF113697  | 618.48    | 699.831   | AK026448  | 898.73    | 895.414   |
| AF086177  | 5998.622  | 3726.91   | AK022326  | 705.461   | 718.399   | AK057418  | 3673.126  | 2933.563  |
| NM_018945 | 434.062   | 161.748   | AF085991  | 580.751   | 549.975   | L37199    | 393.747   | 381.486   |
| AK021593  | 278.443   | 221.958   | NM_005683 | 835.498   | 990.469   | NM_007260 | 2101.591  | 2403.287  |
| D17187    | 1486.585  | 1109.567  | NM_020427 | 5677.123  | 7119.362  | AF148646  | 2651.391  | 1691.417  |
| AJ243672  | 583.939   | 543.186   | AF085920  | 1222.472  | 1054.459  | AL110218  | 590.236   | 357.885   |
| AL122087  | 585.959   | 672.275   | AK023173  | 10730.025 | 8179.917  | AB023201  | 2844.829  | 2275.952  |
| D17169    | 20452.271 | 15303.592 | AK025225  | 401.61    | 440.566   | X00094    | 572.268   | 840.209   |
| NM_017924 | 3529.17   | 3863.615  | U79275    | 3559.812  | 3754.427  | NM_003775 | 402.077   | 754.734   |
| S81578    | 562.412   | 682.037   | AJ227908  | 1071.546  | 1139.075  | NM_002082 | 4315.021  | 7641.502  |
| NM_017546 | 2845.719  | 3342.25   | AF007193  | 1822.956  | 1653.12   | NM_002922 | 424.666   | 785.438   |
| AF086210  | 237.239   | 305.825   | BC028589  | 2171.901  | 1751.639  | NM_006056 | 1350.763  | 1326.609  |
| AL137400  | 289.206   | 275.221   | CY3Cy5    | 13603.977 | 949.363   | AF045229  | 4174.405  | 2525.803  |
| NM_006511 | 317.989   | 368.908   | M65134    | 1306.773  | 2337.524  | NM_001840 | 3889.424  | 2192.28   |
| AF007142  | 1088.735  | 1938.308  | BG539651  | 14582.841 | 20837.422 | AK025099  | 674.285   | 441.739   |
| AF119853  | 2367.914  | 2131.505  | N52646    | 25021.787 | 37649.441 | NM_016095 | 4714.913  | 2949.205  |
| AF279782  | 257.548   | 319.514   | BG748827  | 9289.788  | 5874.517  | NM_000830 | 473.642   | 367.643   |
| CY3Cy5    | 2251.24   | 241.283   | AA952897  | 2043.855  | 1731.292  | NM_005136 | 281.978   | 194.451   |
| AI248827  | 804.75    | 701.082   | BG760342  | 3329.052  | 3244.691  | NM_001183 | 8374.326  | 6351.983  |
| R45026    | 1257.254  | 856.123   | AA703141  | 653.425   | 637.228   | NM_000890 | 480.305   | 285.616   |
| BI768063  | 603.87    | 559.698   | AI122630  | 9097.105  | 8958.938  | NM_004976 | 7556.722  | 12779.854 |
| BG386057  | 396.217   | 454.197   | NM_002103 | 30346.229 | 23480.92  | AK021597  | 6154.944  | 7468.391  |
| AI970239  | 1631.109  | 2060.517  | NM_003379 | 10650.121 | 6142.095  | NM_005737 | 8370.774  | 7576.032  |
| AA496452  | 5222.424  | 8562.373  | SR1       | 65112.023 | 66966.266 | NM_006803 | 259.814   | 288.612   |
| X67594    | 3227.435  | 5027.52   | SR3       | 48084.355 | 56186.82  | NM_002533 | 861.675   | 524.924   |
| AF363393  | 392.621   | 673.163   | SR5       | 4408.376  | 4015.135  | AF235022  | 533.909   | 418.029   |
| BC008837  | 514.741   | 806.693   | SR7       | 4648.741  | 32902.184 | AL137764  | 13575.108 | 8788.683  |
| NM_015865 | 1297.674  | 2007.014  | SR9       | 20799.053 | 3191.685  | NM_001660 | 10072.108 | 10064.783 |



|           |           |           |           |           |           |           |           |           |
|-----------|-----------|-----------|-----------|-----------|-----------|-----------|-----------|-----------|
| AB000734  | 1955.381  | 1563.299  | CY3Cy5    | 5444.051  | 522.143   | NM_000752 | 714.758   | 984.196   |
| NM_005987 | 58785.953 | 63456.285 | NM_001728 | 21208.318 | 34460.891 | NM_002018 | 1782.67   | 1077.423  |
| X87838    | 5739.1    | 5702.23   | NM_005565 | 14496.947 | 23895.012 | NM_002377 | 363.22    | 428.471   |
| NM_033198 | 498.489   | 868.841   | NM_003824 | 6203.388  | 11115.837 | AF161383  | 1486.393  | 968.746   |
| NM_015001 | 1844.565  | 3146.291  | NM_001386 | 1586.409  | 1782.234  | NM_000410 | 7191.861  | 4474.941  |
| SR6       | 2277.342  | 2297.857  | NM_001163 | 1466.605  | 1375.684  | U72882    | 2133.982  | 992.661   |
| SR8       | 8296.35   | 24833.117 | NM_005878 | 2402.11   | 1732.155  | NM_014337 | 4029.283  | 2013.14   |
| SR10      | 28866.15  | 9740.233  | AF308602  | 2218.347  | 2238.484  | NM_003384 | 2545.352  | 1319.847  |
| CY3Cy5    | 3998.812  | 553.638   | AB011089  | 1535.419  | 1201.756  | Y12337    | 602.32    | 385.457   |
| X00094    | 617.961   | 194.688   | AF007192  | 759.677   | 549.076   | M29551    | 3442.986  | 2274.442  |
| NM_003775 | 687.585   | 423.534   | NM_001276 | 13050.382 | 10504.224 | NM_002928 | 801.851   | 741.76    |
| NM_002082 | 4016.435  | 2775.898  | NM_016157 | 639.609   | 396.394   | BC028375  | 1269.197  | 3391.741  |
| NM_002922 | 403.247   | 440.807   | NM_014915 | 34303.227 | 20612.432 | AB026436  | 1334.268  | 2899.707  |
| AF155657  | 11991.314 | 9171.143  | NM_012286 | 2361.675  | 1645.746  | NM_016028 | 2823.771  | 3115.545  |
| NM_006056 | 2446.879  | 1990.717  | NM_002195 | 3772.748  | 1984.928  | AK024562  | 650.439   | 600.963   |
| AF045229  | 9850.233  | 10290.411 | D84294    | 2970.133  | 2008.25   | NM_014066 | 744.224   | 479.898   |
| NM_001840 | 8747.276  | 10805.586 | M31659    | 1057.699  | 863.625   | NM_004573 | 710.847   | 443.222   |
| AK025099  | 2168.938  | 2825.826  | AF052155  | 8843.179  | 14656.536 | NM_000072 | 828.184   | 480.342   |
| NM_016098 | 15538.882 | 17435.297 | NM_005085 | 2514.444  | 4698.888  | NM_000697 | 586.887   | 419.902   |
| NM_000394 | 554.375   | 706.609   | AK025966  | 2733.923  | 1802.582  | NM_000017 | 2201.318  | 1905.284  |
| NM_000228 | 1937.395  | 1692.274  | NM_018725 | 942.685   | 1213.512  | NM_000237 | 31544.395 | 13245.142 |
| NM_000830 | 1117.856  | 1176.163  | NM_003081 | 15617.966 | 12455.369 | AL122054  | 1711.817  | 1264.891  |
| AF148950  | 353.427   | 299.139   | NM_016495 | 1800.274  | 1343.44   | AB011182  | 2556.535  | 1152.358  |
| NM_001155 | 8018.158  | 7882.631  | D50402    | 31542.244 | 19189.982 | NM_000140 | 1196.949  | 810.017   |
| M62896    | 11173.115 | 11250.873 | M73547    | 6652.625  | 4272.111  | NM_005125 | 966.246   | 554.206   |
| NM_017736 | 3414.68   | 3635.805  | NM_003687 | 941.605   | 729.305   | NM_016246 | 555.425   | 385.888   |
| NM_000390 | 365.771   | 321.993   | NM_004134 | 4286.779  | 2645.211  | NM_015926 | 1644.882  | 1047.012  |
| NM_000313 | 889.888   | 916.295   | NM_005955 | 3241.895  | 2283.722  | X03757    | 396.485   | 323.025   |
| NM_001498 | 55908.777 | 65590.039 | NM_004048 | 646.115   | 642.674   | NM_002902 | 2881.35   | 2032.158  |
| AF263523  | 2047.94   | 3065.368  | NM_001179 | 589.276   | 138.532   | NM_020248 | 5203.193  | 2490.896  |
| AL137764  | 13821.647 | 6610.796  | AL137705  | 3818.587  | 3775.348  | X89670    | 543.924   | 1463.633  |
| NM_001660 | 6288.819  | 3626.785  | U41898    | 505.668   | 410.555   | NM_004053 | 2252.835  | 2013.317  |
| NM_000710 | 1704.672  | 1428.561  | NM_014848 | 453.42    | 489.175   | NM_014420 | 475.913   | 1934.758  |
| NM_000752 | 1273.771  | 1081.972  | BF217766  | 1111.694  | 549.623   | NM_001488 | 875.373   | 1958.989  |
| AB040945  | 788.218   | 517.389   | NM_000184 | 2108.134  | 1516.521  | NM_020374 | 929.88    | 1391.017  |
| NM_002018 | 3483.494  | 2129.315  | NM_016180 | 723.602   | 310.499   | NM_014922 | 232.427   | 166.244   |
| NM_002377 | 929.869   | 830.107   | NM_000112 | 594.367   | 296.287   | NM_000168 | 2202.514  | 1059.766  |
| NM_006018 | 540.88    | 402.515   | NM_005827 | 5179.924  | 2867.289  | AF182814  | 1636.129  | 980.051   |
| AF161383  | 3553.809  | 4325.32   | NM_003053 | 3613.697  | 2733.218  | NM_005328 | 566.799   | 478.846   |
| NM_000410 | 12425.929 | 15394.909 | NM_003044 | 1850.766  | 1009.898  | NM_000107 | 515.426   | 494.533   |
| AF224266  | 1479.634  | 1642.708  | NM_006672 | 6892.937  | 3924.941  | NM_001517 | 1333.231  | 952.161   |
| U72882    | 7692.314  | 8438.559  | AB007875  | 961.406   | 660.917   | NM_005053 | 682.045   | 567.646   |
| NM_014337 | 6607.604  | 7105.894  | NM_018261 | 1677.628  | 1292.941  | D86974    | 1426.135  | 843.147   |
| NM_007161 | 43484.848 | 41032.055 | D50911    | 12993.46  | 8300.324  | NM_018283 | 437.215   | 280.418   |
| NM_014387 | 2168.328  | 1812.416  | AB011104  | 1644.761  | 1343.549  | NM_001983 | 2113.862  | 1117.344  |
| NM_003641 | 4278.311  | 3609.109  | AK024069  | 8390.611  | 5529.527  | NM_001793 | 3338.886  | 1577.191  |
| NM_012463 | 1398.475  | 1375.386  | NM_004582 | 11221.855 | 7831.708  | NM_001943 | 1265.16   | 590.023   |
| L29140    | 20940.125 | 17293.225 | NM_015640 | 13385.577 | 9018.85   | NM_004927 | 1883.328  | 1501.575  |
| AK026448  | 1318.72   | 1155.759  | AF233450  | 737.065   | 520.54    | NM_015513 | 3150.967  | 4188.29   |
| AK057418  | 5972.069  | 6036.927  | NM_016233 | 1456.462  | 965.982   | NM_006218 | 5570.687  | 6702.455  |
| L37199    | 943.174   | 970.929   | NM_000821 | 13962.624 | 7182.18   | NM_004443 | 1657.478  | 2121.96   |
| NM_007260 | 1769.328  | 2478.206  | NM_020121 | 722.287   | 507.368   | NM_001932 | 506.756   | 1034.367  |
| AF148646  | 5517.167  | 6295.144  | NM_003145 | 43588.75  | 24742.133 | NM_002964 | 7551.308  | 3979.239  |

|           |           |           |           |           |           |           |           |          |
|-----------|-----------|-----------|-----------|-----------|-----------|-----------|-----------|----------|
| AL110218  | 1620.224  | 1953.075  | NM_001632 | 1506.141  | 747.098   | AF311862  | 26127.639 | 13405.26 |
| AB023201  | 6643.979  | 9279.667  | NM_012264 | 1131.76   | 521.405   | NM_003215 | 211.288   | 439.112  |
| NM_000072 | 426.207   | 356.508   | AF311312  | 2194.051  | 1549.107  | NM_016447 | 468.833   | 281.473  |
| NM_000697 | 690.062   | 334.04    | NM_014915 | 30187.217 | 19285.033 | NM_015626 | 1805.262  | 1329.096 |
| NM_000017 | 2642.431  | 1487.844  | NM_012286 | 2542.676  | 1986.11   | NM_004895 | 2160.732  | 1293.941 |
| NM_000237 | 1154.846  | 837.244   | NM_002195 | 4605.972  | 3040.443  | AB006628  | 1890.995  | 1358.716 |
| NM_018346 | 2860.217  | 1506.641  | AW160671  | 54123     | 47625.484 | AF272036  | 3055.871  | 1736.158 |
| AL122054  | 2920.272  | 1538.369  | BI870529  | 7342.482  | 7152.418  | AF231023  | 408.1     | 292.893  |
| AB011182  | 4286.637  | 2235.769  | AA702698  | 1135.752  | 1294.723  | NM_005146 | 1100.901  | 736.053  |
| AB023151  | 317.457   | 281.202   | AI681514  | 1024.536  | 1056.104  | NM_004746 | 314.329   | 357.195  |
| NM_000140 | 4415.437  | 4797.87   | NM_001300 | 1928.161  | 1640.419  | AF146019  | 1919.358  | 904.739  |
| NM_005125 | 4015.28   | 6246.459  | BG748827  | 10043.085 | 8859.941  | Z36782    | 2907.606  | 1049.729 |
| NM_020038 | 439.156   | 397.576   | AA952897  | 1953.138  | 1593.818  | NM_003490 | 1331.152  | 526.061  |
| NM_016246 | 1201.683  | 1273.821  | BG760342  | 3183.761  | 2817.17   | AF508940  | 2092.031  | 1957.494 |
| NM_015926 | 6253.424  | 6762.834  | AA703141  | 580.932   | 566.773   | NM_005425 | 2396.695  | 2217.577 |
| X03757    | 2748.953  | 2950.558  | AI122630  | 7863.744  | 4341.356  | NM_020237 | 267.366   | 246.905  |
| NM_018658 | 4061.051  | 3897.018  | NM_002103 | 26927.33  | 14245.604 | AF130051  | 441.363   | 1331.41  |
| NM_005136 | 455.07    | 344.036   | NM_003379 | 10414.994 | 5491.375  | M25753    | 5371.488  | 5086.406 |
| AK094513  | 505.601   | 338.817   | NM_006589 | 4586.337  | 3260.258  | NM_003883 | 801.162   | 932.189  |
| NM_001183 | 16735.859 | 16594.012 | NM_004134 | 4383.337  | 2857.164  | NM_014925 | 1224.863  | 1876.51  |
| NM_000890 | 699.518   | 569.708   | NM_005955 | 3391.492  | 2400.942  | NM_004203 | 2825.166  | 1755.988 |
| NM_004976 | 11873.754 | 12384.575 | NM_004048 | 605.389   | 533.386   | NM_001951 | 700.578   | 422.912  |
| AK021597  | 13850.228 | 14533.588 | NM_001728 | 18394.146 | 14053.973 | NM_002391 | 380.303   | 289.49   |
| NM_005737 | 15562.297 | 16318.019 | NM_005565 | 12512.216 | 8180.825  | NM_007066 | 1220.258  | 635.04   |
| NM_000014 | 642.909   | 700.272   | NM_003824 | 5549.732  | 4839.147  | NM_003674 | 9909.699  | 5682.42  |
| NM_006803 | 805.564   | 929.111   | NM_000686 | 1829.528  | 1587.731  | NM_001197 | 2791.795  | 1360.891 |
| NM_002533 | 1966.986  | 2394.221  | NM_012452 | 6359.677  | 5765.876  | NM_006682 | 401.774   | 234.85   |
| AF235022  | 1055.05   | 1307.259  | AF229166  | 871.791   | 815.713   | NM_006410 | 755.992   | 756.961  |
| AF182814  | 2033.721  | 887.844   | NM_005137 | 3170.58   | 2323.378  | NM_014977 | 13507.413 | 5825.369 |
| NM_005329 | 488.217   | 262.845   | NM_006764 | 2714.485  | 2111.457  | AK026325  | 1118.876  | 1003.393 |
| NM_000107 | 915.763   | 412.562   | NM_001386 | 1883.397  | 2653.817  | U83857    | 360.091   | 260.854  |
| AL157445  | 564.049   | 348.614   | NM_001163 | 2048.187  | 1630.252  | NM_001230 | 734.448   | 740.664  |
| NM_001517 | 6028.89   | 4558.938  | NM_005878 | 2330.156  | 2091.176  | AK025662  | 744.147   | 275.235  |
| NM_005053 | 1836.365  | 1450.286  | AF308602  | 1465.788  | 840.031   | NM_000201 | 1205.334  | 1407.812 |
| D86974    | 2418.347  | 1703.884  | AB011089  | 447.145   | 397.501   | AB011539  | 209.612   | 173.666  |
| NM_018283 | 1855.308  | 1579.544  | AF007192  | 1111.536  | 695.449   | U37028    | 244.568   | 151.531  |
| NM_001983 | 5112.893  | 7204.565  | NM_001276 | 10774.412 | 9279.609  | AB014597  | 1137.746  | 616.951  |
| NM_004993 | 618.477   | 1091.508  | NM_016157 | 1121.912  | 931.499   | AK024313  | 2607.553  | 3518.441 |
| NM_003384 | 4297.38   | 3484.972  | NM_000112 | 690.442   | 587.647   | NM_003891 | 1349.944  | 1665.908 |
| Y12337    | 1016.677  | 871.084   | NM_005827 | 6052.594  | 3386.45   | NM_002022 | 485.411   | 1217.123 |
| M29551    | 11160.999 | 9205.944  | NM_003053 | 4260.09   | 3771.227  | NM_015524 | 1336.425  | 1156.21  |
| AB023148  | 461.151   | 379.274   | NM_003044 | 1931.346  | 1583.746  | NM_001673 | 3628.997  | 1556.011 |
| NM_002929 | 1276.858  | 1276.228  | NM_006672 | 10533.641 | 10347.639 | NM_016510 | 845.077   | 494.416  |
| BC028375  | 891.74    | 853.432   | M31659    | 1132.478  | 947.444   | NM_014270 | 583.495   | 433.822  |
| AB026436  | 1585.33   | 1821.385  | NM_003056 | 7844.315  | 8405.708  | NM_000071 | 3120.252  | 2228.783 |
| NM_016029 | 4738.438  | 5621.942  | NM_016226 | 9657.733  | 7433.974  | NM_006843 | 1269.005  | 789.362  |
| AK024562  | 1239.245  | 1421.429  | AK024311  | 740.507   | 942.976   | NM_004321 | 818.5     | 602.173  |
| NM_014066 | 1678.395  | 1953.35   | AF052155  | 7462.76   | 5177.809  | AF311212  | 3338.516  | 1619.151 |
| NM_004573 | 1814.71   | 1787.6    | NM_005085 | 2739.898  | 3561.402  | NM_006915 | 1088.458  | 670.462  |
| NM_000313 | 1052.805  | 814.413   | AF060902  | 2268.132  | 2134.028  | NM_006035 | 976.518   | 841.443  |
| NM_001498 | 51832.289 | 35132.707 | AF121858  | 7561.361  | 6882.706  | NM_006086 | 1240.541  | 766.04   |
| AF263523  | 1753.808  | 1389.349  | NM_013437 | 947.64    | 872.536   | NM_004520 | 3173.336  | 1392.12  |
| L08441    | 16058.199 | 7395.993  | AK025966  | 3023.656  | 2372.243  | AK027118  | 1900.365  | 904.399  |

|           |           |           |           |           |           |           |           |           |
|-----------|-----------|-----------|-----------|-----------|-----------|-----------|-----------|-----------|
| AA641953  | 1971.544  | 1295.894  | NM_014440 | 576.821   | 1248.222  | AK022882  | 7154.89   | 1736.313  |
| AI248827  | 1092.56   | 808.43    | NM_018725 | 573.887   | 385.163   | NM_006105 | 563.904   | 320.478   |
| R45026    | 1248.631  | 799.388   | NM_003081 | 8675.907  | 5292.503  | NM_005981 | 484.673   | 272.351   |
| BI768063  | 702.53    | 339.778   | NM_016495 | 1492.232  | 1089.283  | NM_000474 | 2915.914  | 1357.55   |
| BG386057  | 381.268   | 371.729   | D50402    | 6244.551  | 3939.887  | NM_006079 | 18815.402 | 17206.889 |
| AI970239  | 1698.893  | 1707.947  | M73547    | 6479.267  | 5531.071  | AB046784  | 720.283   | 1090.814  |
| AA496452  | 4659.825  | 4938.083  | NM_003687 | 1679.183  | 1108.933  | X52402    | 1445.565  | 2021.413  |
| X67594    | 3698.056  | 4134.323  | NM_003145 | 44564.832 | 31664.035 | AL133663  | 572.225   | 979.858   |
| BC008837  | 495.634   | 611.503   | NM_001632 | 1649.244  | 1371.952  | NM_004992 | 876.422   | 736.384   |
| NM_015869 | 940.619   | 972.102   | NM_012264 | 1395.093  | 1389.74   | NM_014462 | 997.652   | 603.698   |
| NM_001631 | 580.429   | 446.301   | AF311312  | 2214.841  | 2642.542  | NM_014156 | 30636.541 | 16709.57  |
| AB000734  | 2122.879  | 1563.972  | NM_001179 | 305.733   | 962.027   | NM_003137 | 4465.449  | 2693.967  |
| NM_000862 | 159.187   | 324.282   | NM_005313 | 48744.965 | 47239.117 | NM_006938 | 16659.449 | 9403.13   |
| NM_005987 | 56261.238 | 65620.148 | NM_017765 | 19138.17  | 15053.676 | NM_004515 | 181.076   | 173.587   |
| X87838    | 5941.497  | 5979.225  | NM_000428 | 669.695   | 841.184   | NM_020158 | 1536.461  | 1429.84   |
| NM_033199 | 504.143   | 474.656   | AB040967  | 10269.805 | 9854.824  | AF176085  | 1697.526  | 1287.448  |
| NM_015001 | 1775.793  | 2425.44   | NM_003578 | 1183.32   | 1133.306  | NM_006985 | 3260.668  | 1478.871  |
| NM_000169 | 5587.576  | 6609.317  | NM_014721 | 1931.43   | 1706.137  | AF265228  | 508.357   | 284.82    |
| NM_000699 | 316.572   | 163.033   | AK026352  | 1034.969  | 2406.084  | NM_003757 | 10543.464 | 5054.903  |
| AK057418  | 3581.156  | 2537.568  | AL137705  | 2749.538  | 3586.71   | AK025561  | 1154.744  | 753.533   |
| L37199    | 910.295   | 687.021   | AF169257  | 516.236   | 400.85    | NM_018602 | 2650.865  | 1588.862  |
| NM_007260 | 1259.234  | 723.944   | BF217766  | 801.912   | 876.893   | NM_004096 | 1920.8    | 1073.297  |
| AF148646  | 4257.91   | 2532.077  | NM_000184 | 2313.02   | 1268.469  | NM_017629 | 2360.546  | 914.295   |
| AL110218  | 1164.161  | 575.54    | NM_016180 | 645.925   | 405.071   | AL049681  | 581.788   | 279.799   |
| AB023201  | 4419.619  | 3247.184  | NM_002103 | 34117.805 | 23673.844 | AF052181  | 323.315   | 274.543   |
| X00094    | 526.422   | 269.8     | NM_003379 | 10945.352 | 7447.052  | AL050074  | 900.084   | 434.142   |
| NM_003775 | 669.81    | 397.741   | NM_006589 | 6320.541  | 9395.795  | AK026436  | 301.865   | 309.218   |
| NM_002082 | 4692.229  | 3623.773  | AB007875  | 1353.297  | 1857.563  | AK021900  | 2999.857  | 4499.341  |
| NM_002922 | 237.542   | 154.171   | NM_018261 | 980.5     | 1060.068  | NM_002764 | 3599.362  | 2456.196  |
| AF155657  | 13183.548 | 10802.84  | AL050288  | 33264.93  | 34494.594 | NM_019857 | 436.03    | 365.067   |
| NM_006056 | 3173.68   | 3406.723  | NM_005040 | 3508.032  | 3633.819  | NM_015455 | 15652.313 | 14114.215 |
| AF045229  | 9223.69   | 12382.134 | NM_016391 | 13322.999 | 10397.818 | AF024702  | 1760.391  | 1677.627  |
| NM_001840 | 8525.112  | 9134.857  | AF075033  | 4273.538  | 3602.318  | NM_001964 | 981.711   | 1191.137  |
| AK025099  | 2433.689  | 1932.614  | D50911    | 13182.468 | 9403.82   | NM_005962 | 6310.213  | 5294.206  |
| NM_016099 | 16135.685 | 12078.501 | AB011104  | 1109.844  | 610.485   | X74864    | 1057.479  | 903.158   |
| NM_000228 | 1557.805  | 1395.841  | AK024069  | 8610.052  | 5112.519  | AK026804  | 530.773   | 351.556   |
| NM_000830 | 1229.876  | 1342.03   | NM_004582 | 10909.058 | 6990.852  | NM_016170 | 2748.895  | 1283.727  |
| NM_005209 | 476.821   | 736.867   | NM_015640 | 12100.82  | 8856.07   | NM_006166 | 618.41    | 277.173   |
| AF148950  | 392.33    | 435.263   | AF233450  | 783.949   | 816.907   | S72620    | 13022.487 | 6057.755  |
| NM_001155 | 8856.688  | 15607.069 | NM_016233 | 1373.805  | 893.77    | NM_005263 | 8114.739  | 3550.527  |
| M62896    | 9716.386  | 11395.308 | NM_000821 | 17709.045 | 14873.474 | AB033022  | 3087.123  | 2002.883  |
| NM_017736 | 3262.56   | 4181.919  | AF308602  | 2285.596  | 1582.732  | AF147397  | 244.513   | 200.51    |
| NM_000390 | 385.461   | 442.289   | AB011089  | 1376.338  | 1058.623  | AK027158  | 233.115   | 156.303   |
| AK021597  | 9879.874  | 6713.57   | AF007192  | 1075.887  | 1304.516  | AL359654  | 323.495   | 498.896   |
| NM_005737 | 8911.165  | 5218.776  | NM_001276 | 12185.469 | 19900.898 | AK024224  | 842.988   | 1366.442  |
| NM_006803 | 784.463   | 518.974   | NM_016157 | 1276.049  | 2033.38   | NM_015362 | 2470.362  | 2380.678  |
| NM_002533 | 1564.634  | 753.763   | NM_014915 | 30658.344 | 39316.324 | AF147344  | 431.209   | 516.253   |
| AF235022  | 753.205   | 335.727   | NM_012286 | 2254.685  | 2803.992  | AF147371  | 635.865   | 706.617   |
| AL137764  | 22155.176 | 10736.017 | NM_002195 | 4830.822  | 4878.163  | NM_018982 | 1292.948  | 1961.643  |
| NM_001660 | 17265.365 | 10206.519 | D84294    | 4548.66   | 5931.698  | AF086254  | 2316.506  | 3444.663  |
| NM_000710 | 375.648   | 369.15    | X59770    | 384.967   | 871.549   | AF086324  | 320.8     | 365.218   |
| NM_000752 | 1323.651  | 1185.746  | K02765    | 3228.066  | 3261.569  | AK022150  | 468.508   | 309.456   |
| AB040945  | 771.494   | 499.104   | M65134    | 1311.611  | 1475.434  | AF086261  | 508.213   | 308.088   |

|           |           |           |           |           |           |           |           |           |
|-----------|-----------|-----------|-----------|-----------|-----------|-----------|-----------|-----------|
| NM_00201E | 4108.225  | 4016.234  | BG539651  | 12004.832 | 11916.563 | AF086367  | 868.729   | 573.766   |
| NM_002377 | 1164.421  | 2475.795  | N52646    | 24419.031 | 19308.766 | AF086437  | 294.358   | 231.849   |
| NM_00601E | 560.783   | 647.154   | AW160671  | 56199.184 | 49861.574 | AK025088  | 1378.098  | 861.832   |
| AF161383  | 3485.552  | 3440.673  | BI870529  | 7830.142  | 8207.537  | U79295    | 344.331   | 368.581   |
| NM_00041C | 11841.778 | 12420.152 | AA702698  | 1001.44   | 1048.687  | NM_00359E | 764.339   | 425.507   |
| AF224266  | 1198.102  | 1301.469  | AI681514  | 736.969   | 889.33    | NM_01883E | 1552.112  | 924.302   |
| U72882    | 7280.834  | 6491.518  | NM_00130C | 1357.211  | 1239.714  | AK021454  | 554.875   | 799.371   |
| NM_014337 | 7270.235  | 10051.949 | BG748827  | 7523.709  | 7988.718  | AF085944  | 580.523   | 1312.004  |
| NM_014387 | 2264.435  | 2927.668  | AA952897  | 1095.297  | 1082.92   | AL133038  | 540.718   | 1336.224  |
| NM_003641 | 4852.697  | 5787.716  | BG760342  | 2201.39   | 2609.953  | AL137414  | 787.003   | 753.573   |
| NM_01246E | 1513.377  | 1662.61   | AA703141  | 802.344   | 947.975   | AL359574  | 745.029   | 816.858   |
| L29140    | 23418.701 | 22292.762 | AI122630  | 8513.551  | 6070.796  | AL133569  | 1066.242  | 1224.314  |
| AK026448  | 1321.567  | 1389.441  | NM_003081 | 5371.874  | 4526.599  | AK027189  | 491.421   | 1010.833  |
| AB026436  | 1058.478  | 691.02    | NM_01649E | 1342.902  | 1206.526  | AF088014  | 594.888   | 294.535   |
| NM_01602E | 3989.159  | 3172.261  | D50402    | 7464.064  | 6213.007  | AL109719  | 479.257   | 162.99    |
| AK024562  | 1118.39   | 666.531   | M73547    | 7103.303  | 7720.339  | U92022    | 394.605   | 360.263   |
| NM_01406E | 1522.86   | 1047.96   | NM_003687 | 1845.708  | 2487.378  | NM_00365C | 4462.95   | 2110.816  |
| NM_00457E | 1376.845  | 809.525   | NM_004134 | 4478.02   | 5523.613  | AK022119  | 681.018   | 557.752   |
| NM_00007E | 1654.713  | 975.462   | NM_00595E | 4792.817  | 5744.163  | NM_016644 | 320.291   | 161.432   |
| NM_000697 | 1276.542  | 824.396   | NM_00404E | 674.643   | 917.208   | AF072164  | 631.215   | 742.204   |
| NM_000017 | 3035.602  | 1803.128  | NM_01242E | 3975.065  | 6193.784  | AF083122  | 543.367   | 1926.24   |
| NM_000237 | 1409.807  | 1458.529  | NM_00172E | 18178.949 | 20883.762 | AF147317  | 889.947   | 4081.501  |
| NM_01834E | 3044.303  | 2771.509  | NM_00556E | 13381.941 | 12794.053 | AK022161  | 259.055   | 343.959   |
| AL122054  | 2941.952  | 3296.575  | NM_003824 | 5471.311  | 5715.345  | AK022189  | 423.37    | 984.216   |
| AB011182  | 5103.247  | 5527.879  | NM_00068E | 1713.167  | 1323.438  | AK026856  | 356.233   | 443.738   |
| AB023151  | 437.984   | 958.937   | NM_01245E | 1907.325  | 2155.607  | AL162033  | 399.751   | 280.305   |
| NM_00014C | 4733.108  | 4128.604  | AF229166  | 484.058   | 931.112   | NM_005001 | 4332.01   | 2288.428  |
| NM_00512E | 3133.735  | 2468.364  | NM_005137 | 1166.636  | 2084.554  | AK024175  | 1705.218  | 785.133   |
| NM_02003E | 523.892   | 372.978   | NM_006764 | 1099.548  | 1311.574  | NM_00051C | 269.586   | 444.59    |
| NM_01624E | 1032.251  | 1029.65   | NM_00138E | 1248.474  | 1715.454  | NM_02031E | 2668.699  | 1637.925  |
| NM_01592E | 6067.5    | 5135.495  | NM_00116E | 1493.615  | 1146.648  | AK001910  | 233.825   | 152.764   |
| X03757    | 3026.724  | 2899.918  | NM_00587E | 2415.871  | 1750.293  | AF265210  | 2862.397  | 1684.431  |
| NM_00513E | 513.972   | 594.095   | NM_02034E | 384.434   | 581.296   | AK024241  | 223.561   | 178.018   |
| AK094513  | 490.001   | 416.698   | AF169257  | 476.593   | 337.835   | AK025061  | 548.633   | 460.147   |
| NM_00118E | 18824.422 | 25496.479 | NM_01484E | 714.728   | 499.397   | AF088067  | 1628.026  | 906.267   |
| NM_00089C | 773.425   | 983.003   | BF217766  | 717.647   | 905.732   | AF056441  | 1003.827  | 1521.161  |
| NM_00497E | 12001.478 | 14384.222 | NM_000184 | 2368.709  | 2273.861  | AK024389  | 2388.203  | 2762.235  |
| NM_03319E | 300.947   | 298.65    | NM_01618C | 663.105   | 501.322   | AF147314  | 1567.392  | 902.574   |
| NM_015001 | 689.269   | 662.46    | NM_000112 | 930.039   | 825.43    | NM_01898C | 1402.317  | 865.62    |
| NM_00016E | 4763.212  | 3397.773  | NM_005827 | 7088.225  | 6975.767  | AF086201  | 968.289   | 839.971   |
| NM_00069E | 228.134   | 144.924   | NM_00305E | 5910.608  | 6736.804  | AK024515  | 1513.065  | 1997.836  |
| AF182814  | 3058.816  | 1685.941  | NM_003044 | 2391.632  | 2601.552  | AF085862  | 2336.766  | 2750.646  |
| AK026147  | 224.965   | 229.199   | NM_00667E | 10810.065 | 11297.548 | NM_01799E | 470.881   | 433.096   |
| NM_00532E | 619.529   | 487.071   | NM_00033E | 170.27    | 1122.74   | AL049271  | 11982.352 | 6993.478  |
| NM_000107 | 1109.102  | 1172.915  | NM_01622E | 10184.941 | 15298.543 | AK023079  | 14798.017 | 7037.413  |
| AL157445  | 657.527   | 1156.056  | AK024311  | 928.36    | 1244.694  | NM_01960E | 627.115   | 420.709   |
| NM_001517 | 7329.364  | 5690.856  | AF052155  | 7759.587  | 6223.708  | AK026198  | 852.468   | 497.747   |
| NM_00505E | 2064.88   | 1544.805  | NM_00508E | 2513.709  | 1935.421  | NM_005497 | 3116.968  | 1785.704  |
| D86974    | 2084.698  | 1407.037  | AF060902  | 1013.086  | 1136.837  | AK024048  | 951.157   | 1095.881  |
| NM_01828E | 1625.115  | 1294.562  | AF121858  | 2985.682  | 2952.854  | AB033093  | 580.96    | 473.864   |
| NM_00198E | 4995.74   | 5481.767  | NM_013437 | 846.698   | 1216.481  | NM_00591E | 364.104   | 511.397   |
| NM_00499E | 630.833   | 795.517   | AK025966  | 2482.019  | 1763.51   | NM_00590E | 11535.09  | 10206.958 |
| NM_003384 | 5041.677  | 7470.207  | NM_01872E | 906.859   | 553.367   | AK055991  | 331.199   | 227.322   |

|           |           |           |           |           |           |           |           |           |
|-----------|-----------|-----------|-----------|-----------|-----------|-----------|-----------|-----------|
| Y12337    | 1420.183  | 1752.079  | AK024069  | 9053.315  | 6761.559  | AF113697  | 193.67    | 129.585   |
| M29551    | 12282.048 | 18585.18  | NM_004582 | 11975.919 | 9015.769  | AK022326  | 290.783   | 185.492   |
| AB023148  | 448.806   | 608.893   | NM_015640 | 15125.558 | 11059.848 | NM_020427 | 6107.997  | 9025.364  |
| NM_002929 | 1274.809  | 1788.73   | AF233450  | 760.866   | 689.824   | AF085920  | 281.748   | 257.344   |
| BC028375  | 835.894   | 913.9     | NM_016233 | 1218.771  | 1744.068  | AK023173  | 4027.536  | 3242.873  |
| AF148950  | 671.202   | 1605.549  | NM_000821 | 19450.617 | 16057.522 | AK025225  | 742.638   | 584.335   |
| NM_001155 | 5853.598  | 4958.103  | NM_020121 | 876.628   | 696.271   | U79275    | 1318.037  | 922.383   |
| M62896    | 9450.46   | 7966.845  | NM_003145 | 47176.648 | 55252.336 | AJ227908  | 274.152   | 334.879   |
| NM_017736 | 2953.57   | 2530.145  | NM_001632 | 1911.603  | 2094.16   | AF007193  | 311.946   | 380.75    |
| NM_000390 | 359.697   | 460.749   | NM_012264 | 1534.867  | 1690.962  | BC028589  | 981.967   | 590.946   |
| NM_000313 | 644.358   | 461.192   | AF311312  | 2672.091  | 4208.933  | CY3Cy5    | 6735.512  | 967.864   |
| NM_001495 | 50799.594 | 31751.164 | NM_017765 | 19988.309 | 29736.828 | K02765    | 626.855   | 1419.971  |
| AF263523  | 2127.817  | 1669.462  | NM_000428 | 806.34    | 1088.028  | M65134    | 522.833   | 1245.232  |
| L08441    | 19295.137 | 12338.596 | AB040967  | 9842.566  | 9702.093  | BG539651  | 6279.963  | 6794.475  |
| AA641953  | 2406.307  | 1989.406  | NM_003578 | 1273.813  | 1146.452  | AW160671  | 42094.09  | 61979.973 |
| AI248827  | 1225.84   | 1547.725  | NM_014721 | 1388.338  | 1883.155  | BI870529  | 5008.131  | 8625.67   |
| R45026    | 1699.194  | 1811.648  | AK026352  | 521.725   | 1375.192  | AA702698  | 761.666   | 1352.053  |
| BI768063  | 793.356   | 1085.394  | AL137705  | 3537.815  | 3163.761  | AI681514  | 341.04    | 828.633   |
| BG386057  | 483.107   | 389.409   | U41898    | 736.802   | 527.961   | NM_001300 | 972.078   | 1828.398  |
| AI970239  | 1828.84   | 1810.904  | NM_007262 | 19726.734 | 15774.594 | BG748827  | 5728.867  | 8200.053  |
| AA496452  | 4403.778  | 4622.396  | NM_014783 | 6919.527  | 3854.223  | AA952897  | 1028.897  | 1511.37   |
| X67594    | 3702.754  | 3817.435  | NM_014053 | 2707.036  | 2363.5    | BG760342  | 1568.446  | 2917.535  |
| BC008837  | 410.08    | 509.358   | NM_004939 | 3785.028  | 4409.793  | AA703141  | 404.788   | 616.1     |
| NM_015869 | 891.508   | 1416.604  | NM_001425 | 14415.523 | 14080.675 | AA195244  | 148.143   | 574.15    |
| NM_001631 | 515.923   | 663.765   | NM_015710 | 712.587   | 501.026   | AI122630  | 4979.86   | 8227.44   |
| AB000734  | 1919.781  | 2666.916  | NM_014158 | 5829.328  | 4496.947  | NM_002103 | 10223.061 | 12372.193 |
| NM_000862 | 348.67    | 677.348   | AK021591  | 1439.625  | 1866.051  | NM_003379 | 6236.884  | 8832.389  |
| NM_005987 | 56884.797 | 65798.938 | NM_014675 | 1361.072  | 1247.227  | SR5       | 2691.725  | 4698.263  |
| X87838    | 6290.602  | 7925.467  | NM_006589 | 5676.167  | 8782.226  | SR7       | 4144.739  | 43882.008 |
| NM_014387 | 1979.207  | 5141.325  | AB007875  | 1509.856  | 3567.913  | SR9       | 18470.645 | 5241.98   |
| NM_003641 | 3162.087  | 2664.439  | NM_014796 | 566.153   | 566.36    | CY3Cy5    | 3925.284  | 577.567   |
| NM_012463 | 1182.949  | 1041.161  | AL050288  | 25058.887 | 27929.023 | NM_012428 | 2025.595  | 4265.264  |
| L29140    | 18845.459 | 16259.691 | NM_005040 | 5057.332  | 6680.813  | NM_013269 | 286.498   | 635.257   |
| AK026448  | 1210.504  | 1219.531  | NM_016391 | 10394.922 | 11852.38  | NM_001728 | 14076.86  | 21318.059 |
| AK057418  | 5111.744  | 5065.448  | AF075033  | 4440.061  | 5468.33   | NM_005565 | 7662.285  | 8917.408  |
| L37199    | 727.722   | 366.435   | D50911    | 13419.81  | 11564.319 | NM_012452 | 1532.592  | 3287.015  |
| NM_007260 | 1610.159  | 1371.541  | AB011104  | 1985.778  | 1357.003  | AF229166  | 308.998   | 658.93    |
| AF148646  | 5098.54   | 3872.551  | NM_003248 | 1345.216  | 1148.962  | NM_005137 | 1405.75   | 2236.653  |
| AL110218  | 1323.512  | 1147.491  | NM_000552 | 3848.693  | 3996.873  | NM_006764 | 1465.037  | 2709.726  |
| AB023201  | 5370.43   | 6187.142  | NM_003809 | 465.864   | 979.434   | NM_001386 | 475.766   | 806.519   |
| X00094    | 651.048   | 695.862   | AK000860  | 4872.625  | 5951.977  | NM_001163 | 900.948   | 1465.09   |
| NM_003775 | 927.876   | 920.901   | NM_014961 | 834.022   | 911.834   | NM_005878 | 860.79    | 1538.667  |
| NM_002082 | 5461.934  | 4602.604  | NM_020145 | 1984.909  | 1700.937  | AF308602  | 1238.204  | 2431.498  |
| NM_002922 | 357.616   | 423.919   | AK021529  | 3252.101  | 3601.568  | AB011089  | 477.688   | 753.03    |
| AF155657  | 12505.272 | 12389.139 | AB037845  | 3736.304  | 3786.099  | AF007192  | 426.794   | 582.088   |
| NM_006056 | 3132.499  | 2903.01   | AL137579  | 14181.228 | 23627.523 | NM_001276 | 8544.174  | 13228.255 |
| AF045229  | 9219.747  | 8977.281  | NM_012383 | 8844.125  | 15577.205 | NM_016157 | 360.205   | 501.319   |
| NM_001840 | 8325.368  | 9128.483  | AJ271684  | 1404.009  | 1894.761  | NM_014915 | 29602.627 | 36133.801 |
| AK025099  | 2262.898  | 3053.765  | AF255342  | 7455.814  | 7370.911  | NM_012286 | 1181.263  | 1661.559  |
| NM_016099 | 16516.799 | 19365.842 | NM_003300 | 8512.374  | 8715.966  | NM_002195 | 2204.997  | 2789.065  |
| NM_000394 | 326.674   | 256.046   | AK026682  | 2330.272  | 2392.139  | D84294    | 2525.533  | 4307.182  |
| NM_000228 | 1652.463  | 1804.224  | NM_004655 | 2404.304  | 3047.495  | X59770    | 194.432   | 244.031   |
| NM_000830 | 1027.909  | 1191.131  | NM_003942 | 2178.13   | 3414.475  | M31659    | 747.843   | 1728.972  |

|           |           |           |           |           |           |           |           |           |
|-----------|-----------|-----------|-----------|-----------|-----------|-----------|-----------|-----------|
| NM_005136 | 454.595   | 561.3     | NM_006471 | 25191.676 | 27695.146 | NM_003056 | 4693.092  | 10208.481 |
| AK094513  | 356.987   | 353.327   | NM_004165 | 5482.473  | 4295.889  | NM_016226 | 5918.463  | 12036.376 |
| NM_001183 | 15766.01  | 20241.141 | NM_000368 | 1090.801  | 1642.381  | AK024311  | 584.124   | 1589.095  |
| NM_005737 | 11871.59  | 7716.281  | NM_016586 | 963.605   | 573.081   | AF052155  | 4175.344  | 6948.981  |
| NM_000014 | 491.387   | 244.053   | NM_004140 | 394.101   | 1178.009  | NM_005085 | 921.065   | 1517.498  |
| NM_006803 | 645.414   | 395.941   | NM_002866 | 2799.036  | 3082.877  | AF060902  | 939.786   | 1454.138  |
| NM_002533 | 1648.966  | 1230.149  | NM_003860 | 1163.196  | 1315.091  | AF121858  | 2378.95   | 4951.126  |
| AF235022  | 1004.562  | 741.905   | NM_005414 | 821.78    | 869.33    | NM_013437 | 558.141   | 1010.456  |
| AL137764  | 27596.471 | 29759.775 | NM_004468 | 5917.133  | 5927.174  | AK025966  | 1374.654  | 2050.707  |
| NM_001660 | 20764.311 | 27339.957 | NM_016031 | 15660.414 | 14888.934 | NM_018725 | 389.13    | 787.384   |
| NM_000710 | 457.099   | 434.027   | NM_004804 | 1355.888  | 1537.201  | NM_003081 | 9385.394  | 12008.848 |
| NM_000752 | 1389.796  | 1030.63   | M92439    | 15911.089 | 20302.613 | NM_016495 | 1049.945  | 1650.075  |
| AB040945  | 806.036   | 530.445   | AL117665  | 3757.357  | 4336.571  | D50402    | 6852.327  | 7213.777  |
| NM_002018 | 3795.128  | 3476.865  | AF263541  | 1878.789  | 2643.062  | M73547    | 4012.876  | 5170.704  |
| NM_002377 | 1096.929  | 1643.332  | NM_001262 | 10133.229 | 13757.787 | NM_003687 | 614.813   | 1250.335  |
| NM_006018 | 605.577   | 1225.057  | BE873030  | 3531.749  | 4400.009  | NM_004134 | 2883.432  | 4517.876  |
| AF161383  | 3542.712  | 5131.443  | NM_002440 | 839.825   | 889.865   | NM_005955 | 1476.711  | 2189.965  |
| NM_000410 | 12722.092 | 19935.385 | NM_003625 | 1107.974  | 1183.877  | NM_004048 | 461.201   | 656.373   |
| AF224266  | 1178.023  | 1390.969  | BC006990  | 4794.523  | 4896.987  | NM_001179 | 262.948   | 198.039   |
| U72882    | 5803.742  | 6091.483  | NM_019114 | 1659.008  | 2285.861  | NM_005313 | 26810.766 | 21765.508 |
| NM_014337 | 6901.535  | 8147.295  | M33552    | 7849.686  | 9199.102  | NM_017765 | 5198.125  | 4543.285  |
| NM_003384 | 4028.329  | 4177.604  | AJ252060  | 1845.903  | 2306.818  | NM_000428 | 311.779   | 584.383   |
| Y12337    | 870.235   | 1191.391  | NM_006403 | 4419.694  | 4572.671  | AB040967  | 6039.137  | 5089.281  |
| M29551    | 8097.975  | 15676.868 | NM_018977 | 596.945   | 907.681   | NM_014721 | 1238.924  | 1116.805  |
| AB023148  | 526.447   | 526.15    | AJ001402  | 1941.333  | 1013.938  | AK026352  | 465.966   | 1855.055  |
| NM_002928 | 1702.646  | 3726.848  | NM_004540 | 807.727   | 465.463   | AL137705  | 1848.102  | 2577.961  |
| AB026436  | 1851.264  | 3295.639  | NM_000235 | 2981.812  | 3509.253  | U41898    | 198.706   | 360.454   |
| NM_016028 | 4614.443  | 3629.678  | NM_015879 | 1029.53   | 1242.476  | AF169257  | 254.357   | 637.313   |
| AK024562  | 1189.842  | 925.87    | AF068236  | 17224.504 | 19092.697 | NM_014848 | 345.744   | 720.728   |
| NM_014066 | 1763.264  | 1498.388  | L25628    | 2211.016  | 3477.613  | NM_000184 | 1200.264  | 1364.933  |
| NM_004573 | 1499.481  | 1562.856  | M37033    | 1710.812  | 2163.217  | NM_016180 | 384.57    | 876.819   |
| NM_000072 | 1784.922  | 1828.308  | NM_007171 | 2348.347  | 2429.417  | NM_000112 | 391.221   | 826.509   |
| NM_000697 | 1599.617  | 1919.156  | NM_004278 | 1181.235  | 1022.485  | NM_005827 | 3025.042  | 4351.95   |
| NM_000017 | 3383.385  | 2779.791  | NM_005632 | 1570.849  | 2640.08   | NM_003053 | 1596.445  | 2585.111  |
| NM_000237 | 1501.215  | 1647.25   | AK021499  | 1454.459  | 2021.094  | NM_003044 | 629.7     | 650.79    |
| NM_018346 | 3281.065  | 3479.955  | AK000336  | 2936.717  | 4661.44   | NM_006672 | 2787.539  | 2547.702  |
| AL122054  | 3085.299  | 3298.034  | NM_002795 | 17441.201 | 21343.82  | NM_000338 | 498.661   | 127.787   |
| AB011182  | 5126.764  | 5125.877  | NM_006292 | 3980.36   | 4922.552  | AB007875  | 366.019   | 235.371   |
| AB023151  | 417.73    | 501.828   | AB007948  | 1736.944  | 2287.904  | NM_018261 | 412.346   | 499.99    |
| NM_000140 | 5041.314  | 6361.667  | AB033066  | 2089.772  | 1370.099  | NM_005040 | 2427.932  | 3426.431  |
| NM_005125 | 4401.068  | 8055.256  | AF126028  | 2465.449  | 2366.021  | M80783    | 362.111   | 934.153   |
| NM_020038 | 572.934   | 689.026   | NM_007019 | 3835.654  | 3284.179  | AF075033  | 2287.269  | 4856.093  |
| NM_016246 | 916.458   | 1091.813  | NM_007075 | 689.035   | 754.787   | D50911    | 7759.391  | 11244.814 |
| NM_015926 | 4133.424  | 4288.778  | NM_017640 | 1092.284  | 1982.131  | AB011104  | 843.653   | 1543.945  |
| X03757    | 1272.753  | 1583.058  | NM_017721 | 1956.051  | 2431.182  | AK024069  | 4669.972  | 6604.532  |
| NM_002902 | 5675.586  | 4941.947  | NM_019088 | 6300.372  | 7846.959  | NM_004582 | 6788.924  | 10365.368 |
| NM_020248 | 7239.011  | 4702.702  | AB002373  | 1705.876  | 2093.151  | NM_015640 | 8874.077  | 14145.692 |
| X89670    | 675.462   | 747.094   | NM_016350 | 26270.307 | 27019.354 | AF233450  | 500.373   | 825.915   |
| NM_001726 | 221.95    | 319.615   | AK024167  | 3244.59   | 3582.173  | NM_016233 | 548.282   | 813.155   |
| NM_004053 | 4254.253  | 7180.137  | AK025308  | 589.831   | 386.222   | NM_000821 | 5849.178  | 8070.731  |
| NM_014420 | 429.128   | 705.053   | NM_005026 | 3860.213  | 2271.897  | NM_020121 | 379.707   | 714.135   |
| NM_001488 | 1896.593  | 2398.417  | AF213356  | 3342.796  | 3268.692  | NM_003145 | 28532.41  | 33173.219 |
| M20259    | 306.698   | 242       | BC035716  | 2040.662  | 2919.63   | NM_001632 | 991.845   | 1029.021  |

|           |           |           |           |           |           |           |           |           |
|-----------|-----------|-----------|-----------|-----------|-----------|-----------|-----------|-----------|
| NM_020374 | 1747.992  | 1778.042  | NM_018014 | 963.007   | 777.672   | NM_012264 | 557.721   | 331.857   |
| NM_014922 | 986.621   | 575.12    | NM_002359 | 15808.846 | 13047.27  | AF311312  | 1071.875  | 677.12    |
| NM_000169 | 4954.485  | 3716.376  | AF230809  | 3783.495  | 2328.399  | NM_014915 | 21616.951 | 11185.584 |
| NM_000699 | 308.328   | 142.356   | NM_017894 | 25740.77  | 17678.955 | NM_012286 | 1120.437  | 913.719   |
| BE799167  | 308.891   | 431.321   | NM_006509 | 1728.61   | 1799.813  | NM_002195 | 1712.361  | 1444.899  |
| AF182814  | 3466.914  | 2507.786  | AK025447  | 1449.834  | 2440.536  | D84294    | 2004.715  | 2608.593  |
| NM_005329 | 930.24    | 660.137   | NM_002624 | 40393.543 | 46341.734 | K02765    | 772.485   | 1229.883  |
| NM_000107 | 1247.544  | 1140.14   | AF006199  | 1453.966  | 1997.406  | N52646    | 8390.697  | 8845.857  |
| AL157445  | 1143.199  | 1169.419  | NM_004554 | 6662.301  | 6854.572  | AW160671  | 37336.512 | 23126.883 |
| NM_001517 | 9015.538  | 9149.117  | NM_018119 | 2229.233  | 2047.683  | BI870529  | 4185.556  | 7947.958  |
| NM_005053 | 2130.244  | 2742.087  | NM_014576 | 466.441   | 647.15    | AA702698  | 780.43    | 1803.735  |
| D86974    | 2114.036  | 2530.585  | AL162035  | 2664.653  | 2277.677  | AI681514  | 477.296   | 1046.951  |
| NM_018283 | 1580.216  | 1684.969  | NM_006692 | 1750.105  | 1177.362  | NM_00130C | 973.93    | 2401.865  |
| NM_001983 | 5046.964  | 6167.252  | NM_003084 | 2537.795  | 2220.375  | BG748827  | 5479.965  | 9211.766  |
| NM_004993 | 585.003   | 818.587   | NM_002582 | 6394.649  | 5432.446  | AA952897  | 921.403   | 2111.335  |
| NM_001793 | 8645.942  | 5541.825  | NM_001009 | 54402.582 | 56885.898 | BG760342  | 1432.02   | 2939.314  |
| NM_001943 | 2242.229  | 1179.06   | NM_001011 | 59446.367 | 56608.398 | AA703141  | 399.04    | 587.241   |
| NM_004927 | 3504.541  | 4081.255  | D17289    | 15582.745 | 15976.689 | AI122630  | 4804.883  | 7753.359  |
| AB040928  | 322.551   | 338.701   | NM_002949 | 18556.033 | 8224.617  | NM_002103 | 11502.103 | 14160.471 |
| NM_001459 | 640.756   | 915.617   | NM_014230 | 7774.215  | 4037.975  | NM_003379 | 6659.585  | 9111.919  |
| NM_015513 | 3550.042  | 5301.38   | NM_017748 | 4836.345  | 4823.176  | NM_006589 | 2467.709  | 2033.218  |
| NM_006219 | 9815.004  | 13180.616 | NM_014901 | 7026.226  | 6674.337  | NM_004134 | 1847.253  | 1427.133  |
| NM_004443 | 2037.828  | 1310.874  | AK000005  | 6117.38   | 6835.256  | NM_005955 | 1315.588  | 904.233   |
| NM_001932 | 631.286   | 397.546   | AF086790  | 2065.55   | 1544.837  | NM_012428 | 1857.524  | 2773.28   |
| NM_017412 | 332.254   | 251.698   | NM_000108 | 12239.878 | 8998.916  | NM_001728 | 11233.828 | 11976.807 |
| NM_005544 | 282.274   | 141.863   | NM_018128 | 2617.688  | 2386.46   | NM_005565 | 6577.118  | 5513.168  |
| NM_002964 | 10798.978 | 8808.932  | NM_016931 | 9331.224  | 9965.448  | NM_003824 | 2435.632  | 3370.787  |
| AF311862  | 32515.027 | 23361.469 | NM_004373 | 26768.533 | 24826.773 | NM_000686 | 524.066   | 448.632   |
| NM_003215 | 525.262   | 670.916   | NM_005566 | 55350.586 | 53664.559 | NM_006764 | 1803.875  | 4832.877  |
| NM_016447 | 886.911   | 704.915   | NM_000162 | 3161.826  | 2748.51   | NM_001386 | 404.224   | 915.348   |
| NM_015626 | 3779.353  | 3413.127  | AK027067  | 389.09    | 791.136   | NM_001163 | 832.777   | 1571.409  |
| NM_004899 | 4148.362  | 3671.628  | NM_016287 | 6393.712  | 4928.711  | NM_005878 | 1007.972  | 1733.003  |
| AB006628  | 4739.869  | 4274.447  | AK021661  | 449.362   | 415.08    | AF308602  | 1089.125  | 1846.9    |
| AF272036  | 6324.471  | 5210.805  | NM_003864 | 4673.299  | 3536.923  | AB011089  | 523.201   | 769.074   |
| AF231023  | 1289.198  | 1655.528  | NM_006824 | 15606.233 | 12896.619 | AF007192  | 699.896   | 590.619   |
| NM_005148 | 2255.753  | 2917.663  | NM_002107 | 977.039   | 758.84    | NM_001276 | 5035.129  | 2038.038  |
| NM_004746 | 929.019   | 1048.36   | NM_002694 | 8945.208  | 10448.79  | NM_016157 | 190.299   | 132.259   |
| AF146019  | 5195.067  | 6565.978  | NM_004454 | 1848.402  | 2352.722  | NM_000112 | 314.304   | 471.985   |
| Z36782    | 7912.249  | 8821.052  | NM_012482 | 3779.138  | 6258.459  | NM_005827 | 2313.783  | 1677.572  |
| M70435    | 391.93    | 549.564   | AF217227  | 2341.619  | 4081.417  | NM_003053 | 1413.475  | 1769.323  |
| NM_00349C | 3933.639  | 3925.775  | AK024141  | 3347.185  | 2171.645  | NM_003044 | 856.496   | 3034.384  |
| AF210651  | 526.754   | 334.347   | U13706    | 704.117   | 609.876   | NM_006672 | 3820.588  | 7885.56   |
| AF090942  | 423.852   | 407.837   | NM_002813 | 13330.771 | 15294.973 | M31659    | 544.731   | 967.899   |
| AF508940  | 2377.617  | 2387.055  | AL049450  | 3551.038  | 4661.745  | NM_003056 | 3983.644  | 6057.658  |
| NM_005429 | 4416.925  | 4669.162  | AK023481  | 555.598   | 738.295   | NM_016226 | 5232.65   | 5817.07   |
| NM_020237 | 925.826   | 845.127   | AK022011  | 588.52    | 218.965   | AK024311  | 360.687   | 554.597   |
| NM_014929 | 2362.101  | 1889.723  | NM_005086 | 25046.098 | 20954.344 | AF052155  | 4365.479  | 5427.472  |
| NM_004203 | 4842.72   | 2896.457  | NM_007238 | 1452.008  | 1298.475  | NM_005085 | 707.825   | 672.128   |
| NM_001951 | 2031.34   | 1429.477  | NM_017606 | 5022.893  | 4446.261  | AF060902  | 593.413   | 380.489   |
| NM_002391 | 880.786   | 521.229   | AK024644  | 6011.213  | 5923.855  | AF121858  | 2084.686  | 1301.479  |
| NM_007066 | 2899.043  | 1801.718  | AB019573  | 765.293   | 728.194   | NM_01444C | 383.428   | 603.768   |
| NM_003674 | 12320.33  | 10860.008 | U68494    | 4010.468  | 1241.915  | NM_018725 | 483.273   | 1190.319  |
| NM_001197 | 5307.302  | 3600.329  | AF064254  | 977.236   | 899.256   | NM_003081 | 8450.716  | 9580.518  |

|           |           |           |           |           |           |           |           |           |
|-----------|-----------|-----------|-----------|-----------|-----------|-----------|-----------|-----------|
| NM_006682 | 874.681   | 680.427   | AL137360  | 6095.682  | 5550.212  | M73547    | 2767.329  | 774.172   |
| NM_00641C | 1703.914  | 1680.832  | AF143331  | 428.62    | 447.803   | NM_003687 | 343.49    | 184.266   |
| NM_014977 | 17842.02  | 13447.488 | AK000819  | 617.909   | 402.17    | NM_020121 | 241.667   | 418.481   |
| AK026325  | 2652.472  | 2596.441  | AF201941  | 1807.543  | 1229.732  | NM_003145 | 22924.865 | 26959.42  |
| U83857    | 755.617   | 882.959   | AF143878  | 293.371   | 893.876   | NM_001632 | 928.022   | 1645.721  |
| NM_00123C | 1341.356  | 1590.949  | AF026941  | 1513.698  | 1830.741  | NM_005313 | 28978.936 | 42487.75  |
| AK025662  | 2151.945  | 2088.098  | NM_00707C | 4260.925  | 6842.509  | NM_017765 | 4571.171  | 4652.421  |
| NM_000201 | 350.074   | 553.016   | AL133019  | 4602.898  | 6643.379  | AB040967  | 5964.497  | 5457.011  |
| AB011539  | 637.678   | 545.14    | NM_014895 | 999.253   | 648.38    | NM_014721 | 824.777   | 739.319   |
| U37028    | 508.876   | 716.974   | NM_017654 | 1395.42   | 2375.54   | AK026352  | 310.264   | 591.279   |
| AB014597  | 2380.765  | 3003.102  | L77561    | 448.592   | 351.972   | NM_014845 | 231.268   | 229.28    |
| S81361    | 788.148   | 990.856   | AL109696  | 2521.411  | 1947.566  | BF217766  | 237.401   | 228.695   |
| NM_015524 | 2505.735  | 2356.968  | AK022190  | 1557.95   | 1122.611  | NM_000184 | 586.896   | 341.407   |
| NM_001673 | 8949.875  | 4951.764  | AJ011593  | 1617.212  | 1318.473  | NM_002103 | 6340.898  | 4466.681  |
| AK023167  | 508.18    | 371.223   | X89743    | 527.247   | 565.679   | NM_003375 | 4197.781  | 2313.068  |
| NM_01651C | 2257.538  | 1702.638  | AJ002784  | 447.815   | 507.922   | NM_006585 | 3054.936  | 7682.708  |
| NM_01427C | 1140.091  | 1057.844  | U17621    | 588.284   | 431.579   | NM_018261 | 599.077   | 1086.307  |
| NM_000071 | 6837.055  | 5623.493  | AL049239  | 2868.837  | 2409.033  | AL050288  | 14671.39  | 8876.678  |
| NM_006843 | 2434.782  | 1810.804  | NM_013285 | 1411.155  | 1202.003  | NM_00504C | 2355.931  | 1453.6    |
| NM_004321 | 1586.114  | 1245.906  | M60721    | 9966.728  | 8659.88   | NM_016391 | 5067.875  | 2521.936  |
| AF311212  | 6761.187  | 5876.336  | L39061    | 3007.626  | 2341.946  | AF075033  | 1955.725  | 907.152   |
| NM_006915 | 2073.712  | 2155.951  | AF071508  | 2113.064  | 2055.907  | D50911    | 6075.038  | 3039.564  |
| NM_006035 | 2277.428  | 2366.482  | L07265    | 17251.596 | 18934.541 | AB011104  | 664.532   | 298.382   |
| NM_006085 | 5649.88   | 5925.983  | L19369    | 331.124   | 1132.438  | AK024069  | 4220.866  | 3652.022  |
| NM_00452C | 7345.213  | 8269.788  | D16472    | 5756.998  | 7847.19   | NM_004582 | 4856.063  | 3476.347  |
| AK027118  | 3331.59   | 5635.011  | AL157459  | 2059.355  | 3555.077  | NM_01564C | 5064.143  | 2849.202  |
| AK022882  | 16034.431 | 15985.691 | AB020654  | 614.407   | 119.648   | AF233450  | 241.92    | 106.828   |
| NM_006105 | 1996.661  | 2869.636  | AL353954  | 681.82    | 665.035   | NM_016233 | 225.222   | 180.3     |
| NM_005981 | 1686.159  | 2058.309  | NM_01763C | 2538.386  | 1701.797  | NM_000821 | 3648.211  | 2032.616  |
| NM_000474 | 5448.509  | 3494.481  | AK000778  | 1469.077  | 1221.786  | AF308602  | 656.485   | 461.987   |
| NM_016264 | 292.532   | 275.45    | AL133573  | 5611.752  | 3163.769  | AB011089  | 357.835   | 403.929   |
| NM_006075 | 27134.023 | 17682.795 | NM_017955 | 467.39    | 263.848   | NM_016157 | 464.7     | 1247.604  |
| AB037837  | 1104.404  | 1554.096  | AK000958  | 614.96    | 620.612   | NM_014915 | 27204.941 | 43484.453 |
| NM_014785 | 1311.456  | 2995.253  | AK024523  | 675.708   | 481.106   | NM_012285 | 1071.614  | 1940.473  |
| AB046784  | 1556.637  | 3221.303  | AK024600  | 2572.202  | 2387.201  | NM_002195 | 1756.134  | 1861.498  |
| NM_004992 | 1665.418  | 1402.595  | AK024543  | 1342.018  | 1479.19   | D84294    | 2144.696  | 1952.823  |
| NM_014462 | 1730.954  | 1221.14   | AK024624  | 12265.442 | 12628.404 | K02765    | 779.446   | 794.121   |
| NM_014155 | 46875.895 | 27809.135 | AK025090  | 705.902   | 337.927   | M65134    | 448.919   | 531.283   |
| NM_003137 | 7277.456  | 5929.412  | NM_018605 | 1291.948  | 1463.104  | BG539651  | 4477.035  | 2564.13   |
| NM_006935 | 29095.586 | 16409.295 | AF086473  | 391.798   | 930.559   | N52646    | 6784.413  | 2548.91   |
| NM_004515 | 609.356   | 657.624   | D87682    | 1815.693  | 1825.251  | AW160671  | 33166.574 | 12254.966 |
| NM_020155 | 3219.353  | 2735.31   | AF321617  | 3976.618  | 3710.756  | BI870529  | 3312.747  | 2914.265  |
| AF176085  | 3255.477  | 2958.402  | AF223389  | 962.364   | 587.946   | AA702698  | 399.478   | 379.189   |
| NM_006985 | 7159.232  | 5503.859  | NM_000682 | 499.253   | 395.471   | AI681514  | 190.414   | 153.882   |
| AF265228  | 1415.146  | 1388.404  | AF086208  | 1724.349  | 1991.813  | NM_00130C | 586.646   | 293.975   |
| NM_003757 | 27474.037 | 30629.482 | AK023335  | 4125.448  | 5832.776  | BG748827  | 3790.508  | 924.588   |
| AK025561  | 2900.625  | 2897.924  | AK023187  | 1498.537  | 1920.289  | AA952897  | 599.355   | 270.114   |
| NM_018602 | 13746.448 | 15593.706 | AK022231  | 910.224   | 1072.61   | BG760342  | 966.704   | 666.799   |
| NM_004095 | 6976.842  | 13878.462 | NM_019033 | 1040.119  | 823.577   | AI122630  | 3117.22   | 2760.414  |
| NM_017625 | 5414.552  | 7302.965  | AL133101  | 959.644   | 814.862   | NM_003081 | 3057.866  | 2514.9    |
| AL049681  | 1720.457  | 2170.634  | AK024602  | 14424.04  | 16066.075 | NM_003687 | 757.842   | 1978.831  |
| NM_006584 | 741.646   | 975.22    | NM_000485 | 8990.942  | 8504.078  | NM_004134 | 2585.247  | 4374.872  |
| AF052181  | 1122.733  | 1004.429  | AK025503  | 1722.536  | 1264.134  | NM_005955 | 1547.74   | 2011.568  |



|           |           |           |           |           |           |           |           |           |
|-----------|-----------|-----------|-----------|-----------|-----------|-----------|-----------|-----------|
| AL050074  | 2323.53   | 1627.721  | AF130073  | 1870.167  | 1179.846  | NM_00404E | 349.842   | 379.304   |
| NM_018061 | 2173.008  | 2686.262  | AK024225  | 13503.463 | 7076.89   | NM_006017 | 350.235   | 839.358   |
| AK021900  | 4565.521  | 2990.966  | AF086334  | 927.888   | 595.833   | NM_01242E | 1804.951  | 2183.01   |
| NM_002764 | 6459.775  | 4352.824  | AF075035  | 20580.414 | 14738.215 | NM_01326E | 268.197   | 267.954   |
| NM_019857 | 1470.027  | 1357.688  | AL110180  | 2925.985  | 2385.879  | NM_00172E | 9511.423  | 3853.127  |
| NM_01545E | 20622.93  | 15362.011 | BC024924  | 5952.525  | 4233.829  | NM_00556E | 5153.297  | 1623.268  |
| AF024702  | 3390.784  | 2545.348  | NM_01790E | 6217.229  | 4303.698  | NM_003824 | 1702.041  | 994.802   |
| NM_001964 | 1434.974  | 2504.581  | AL110286  | 4022.746  | 3269.698  | NM_00068E | 235.482   | 164.373   |
| NM_005962 | 11786.474 | 9419.626  | AF086374  | 1422.182  | 1915.98   | NM_012452 | 841.207   | 452.678   |
| X74864    | 1842.238  | 1614.072  | AL162066  | 6459.478  | 7024.635  | AF229166  | 265.532   | 202.279   |
| AK026804  | 1279.47   | 1302.232  | NM_01609E | 13335.434 | 15776.062 | NM_005137 | 723.656   | 259.514   |
| NM_01617C | 5801.825  | 5114.756  | U79290    | 1752.874  | 2490.317  | NM_006764 | 760.254   | 241.976   |
| NM_002114 | 432.576   | 385.856   | AK022121  | 502.024   | 925.634   | NM_00138E | 216.6     | 70.512    |
| NM_00616E | 1466.45   | 1436.147  | X98114    | 830.146   | 1123.86   | NM_001163 | 547.428   | 523.909   |
| S72620    | 39252.492 | 37124.777 | AK024197  | 516.075   | 1031.922  | NM_00587E | 370.177   | 146.986   |
| NM_005263 | 20773.422 | 21952.666 | NM_01404C | 4675.915  | 4486.196  | NM_01618C | 294.463   | 741.575   |
| AB033022  | 5544.249  | 6230.654  | AK000799  | 4019.917  | 3106.472  | NM_000112 | 275.094   | 532.465   |
| AF147397  | 834.112   | 1464.062  | NM_015582 | 18192.135 | 17872.256 | NM_005827 | 2637.901  | 2711.871  |
| AK027158  | 715.065   | 488.568   | AK027091  | 1817.7    | 1155.894  | NM_003053 | 1837.229  | 1969.351  |
| AK002187  | 460.608   | 1113.384  | NM_00152E | 2198.154  | 1579.786  | NM_003044 | 577.462   | 681.097   |
| AF085836  | 2248.934  | 2724.589  | U31738    | 1253.703  | 751.434   | NM_006672 | 3124.62   | 2378.187  |
| AL049449  | 422.495   | 565.587   | AF179890  | 2822.167  | 1980.925  | NM_00033E | 111.259   | 849.923   |
| AL359654  | 379.074   | 390.341   | AK023536  | 4582.874  | 2584.308  | M31659    | 417.001   | 455.654   |
| AK024224  | 1209.159  | 1283.529  | AK026561  | 1677.594  | 1589.164  | NM_00305E | 3412.035  | 2642.72   |
| NM_015362 | 4334.692  | 3612.474  | AK021568  | 4265.443  | 3493.697  | NM_01622E | 3983.367  | 2656.837  |
| AF147344  | 520.516   | 413.493   | Z36838    | 890.432   | 498.212   | AK024311  | 344.805   | 379.907   |
| AF147371  | 869.284   | 927.132   | AF088054  | 528.375   | 118.568   | AF052155  | 2682.052  | 766.075   |
| AK023745  | 215.242   | 221.35    | AK023881  | 2792.951  | 1974.558  | NM_00508E | 454.001   | 349.914   |
| NM_018982 | 2181.163  | 2052.71   | AK027114  | 57542.258 | 54768.074 | AF060902  | 449.815   | 191.194   |
| AF086254  | 3764.76   | 4902.055  | NM_01629E | 2374.292  | 1665.991  | AF121858  | 1632.768  | 1092.489  |
| AF086294  | 336.889   | 250.199   | AK002146  | 1002.426  | 1016.394  | NM_013437 | 355.41    | 424.248   |
| AF086324  | 561.754   | 652.159   | NM_00315E | 1311.699  | 1750.562  | AK025966  | 613.893   | 445.229   |
| AF086261  | 770.54    | 904.173   | AK023494  | 592.966   | 1789.814  | NM_01872E | 228.955   | 414.335   |
| AF086367  | 2132.514  | 2290.83   | AF086256  | 1284.384  | 2326.092  | AK024069  | 2855.776  | 1271.504  |
| AF086437  | 689.052   | 884.313   | NM_015492 | 4087.368  | 6002.047  | NM_004582 | 3936.071  | 2008.628  |
| AK025088  | 3050.752  | 5479.659  | NM_006933 | 772.146   | 902.491   | NM_01564C | 7680.819  | 12447.716 |
| U79295    | 872.243   | 1232.679  | AF132204  | 884.662   | 793.682   | NM_020121 | 363.279   | 630.518   |
| AK002107  | 629.749   | 894.936   | AK022874  | 3282.285  | 1827.441  | NM_00314E | 23261.344 | 16889.967 |
| NM_00359E | 1141.144  | 2066.333  | CY3Cy5    | 3688.31   | 613.583   | NM_001632 | 895.923   | 833.256   |
| NM_01883E | 2549.912  | 1615.249  |           | 223.385   | 2361.486  | NM_012264 | 494.961   | 535.918   |
| AF075083  | 224.405   | 76.06     | BI912037  | 1752.468  | 4038.143  | AF311312  | 1057.85   | 685.26    |
| AK021454  | 988.948   | 737.605   | AA454646  | 2696.338  | 3648.139  | NM_001179 | 323.352   | 247.366   |
| AK022069  | 1085.953  | 751.71    | U18087    | 36089.93  | 36577.992 | NM_005313 | 25727.869 | 21900.965 |
| AL137457  | 285.623   | 260.208   | U66349    | 624.89    | 1032.346  | NM_01776E | 3845.375  | 1974.216  |
| AF075092  | 506.019   | 343.831   | AA057156  | 1174.182  | 1790.257  | NM_00042E | 262.076   | 101.606   |
| AF085913  | 276.627   | 172.782   | U19487    | 1658.742  | 2177.969  | AB040967  | 3840.945  | 1101.075  |
| AF085944  | 1017.132  | 675.295   | AF166327  | 12640.276 | 12167.854 | NM_014721 | 658.961   | 364.304   |
| AL133038  | 725.055   | 724.28    | AF260739  | 1488.229  | 1187.406  | AK026352  | 251.196   | 227.747   |
| AL137414  | 1549.721  | 1291.872  | AF531423  | 2086.004  | 2080.74   | AL137705  | 1309.487  | 833.698   |
| AL137624  | 168.25    | 180.275   | X76555    | 722.795   | 730.467   | NM_007262 | 8356.79   | 5151.538  |
| AL359574  | 1439.582  | 1248.054  | NM_005432 | 1770.966  | 1215.875  | NM_014783 | 2921.566  | 2305.485  |
| AL133569  | 2302.387  | 1715.871  | L10386    | 3696.893  | 3547.59   | NM_014053 | 1491.665  | 1888.057  |
| AL137435  | 327.517   | 351.323   | AF061812  | 3974.623  | 2882.102  | NM_002571 | 564.412   | 600.069   |

|           |           |           |           |           |           |           |           |          |
|-----------|-----------|-----------|-----------|-----------|-----------|-----------|-----------|----------|
| AL157463  | 341.778   | 479.373   | AL136756  | 1236.418  | 1284.529  | NM_00493C | 1930.353  | 1933.945 |
| AL359604  | 402.319   | 487.39    | NM_012469 | 4368.007  | 3063.579  | NM_00142E | 9316.253  | 9815.986 |
| AK027189  | 1213.328  | 1065.22   | NM_13426C | 9129.679  | 6350.743  | NM_01571C | 225.071   | 146.822  |
| AF088014  | 1426.146  | 1323.255  | SR2       | 43485.918 | 30161.479 | NM_01415E | 2800.332  | 1749.373 |
| AL109719  | 974.3     | 631.032   | SR4       | 10983.395 | 8910.796  | AK021591  | 602.844   | 375.818  |
| U92022    | 1035.249  | 1124.275  | SR6       | 1989.445  | 1878.114  | NM_01467E | 385.531   | 196.618  |
| NM_00365C | 11865.186 | 13103.145 | SR8       | 5123.032  | 13441.244 | NM_00658E | 2609.363  | 2081.423 |
| AK022119  | 952.129   | 1356.995  | SR10      | 18768.529 | 5168.903  | AB007875  | 341.412   | 359.268  |
| AL157488  | 375.926   | 547.136   | CY3Cy5    | 2784.779  | 986.332   | NM_018261 | 724.226   | 874.124  |
| NM_016644 | 1115.452  | 1538.313  | AL080157  | 803.383   | 1222.653  | AL050288  | 10175.981 | 2607.331 |
| AF085842  | 565.111   | 1520.951  | NM_00510C | 234.469   | 560.514   | NM_00504C | 2019.069  | 403.419  |
| AK026750  | 723.331   | 325.778   | NM_00530E | 1031.472  | 1601.633  | NM_016391 | 4316.064  | 1861.994 |
| AF072164  | 1271.413  | 1944.668  | NM_000911 | 400.61    | 782.107   | AF075033  | 1776.088  | 1152.21  |
| NM_01861C | 410.902   | 514.777   | NM_007227 | 543.573   | 591.223   | D50911    | 4864.118  | 2004.369 |
| AF147317  | 512.67    | 413.873   | NM_007023 | 542.983   | 916.286   | AB011104  | 684.732   | 646.931  |
| AF232216  | 365.403   | 580.04    | NM_005873 | 9706.122  | 10148.533 | NM_00324E | 441.047   | 283.895  |
| NM_017773 | 1496.682  | 1802.423  | NM_004624 | 1447.385  | 2594.106  | NM_00107E | 513.549   | 1154.389 |
| AK021885  | 444.723   | 486.877   | NM_00386E | 778.639   | 641.735   | NM_000552 | 3192.663  | 3910.878 |
| AK022018  | 362.075   | 221.77    | AB015330  | 4598.202  | 4421.68   | NM_00380E | 622.415   | 696.423  |
| AK022161  | 445.438   | 518.126   | L09071    | 408.402   | 444.702   | AK000860  | 2029.552  | 1806.69  |
| AK022296  | 393.856   | 389.426   | BC036375  | 12599.056 | 6841.344  | NM_014961 | 435.921   | 315.075  |
| AK021940  | 921.725   | 1303.564  | NM_006363 | 4785.755  | 6530.105  | NM_02014E | 609.88    | 668.023  |
| AK022052  | 357.72    | 508.203   | NM_02041E | 725.391   | 1055.39   | AK021529  | 1149.336  | 1400.289 |
| AK022189  | 621.722   | 681.145   | NM_01487E | 255.503   | 103.517   | AB037845  | 2017.659  | 2030.104 |
| AK022338  | 573.277   | 591.593   | AL049667  | 3766.303  | 4739.603  | NM_00598C | 1489.526  | 641.838  |
| AK026856  | 758.307   | 943.092   | NM_000334 | 1259.985  | 1789.681  | NM_01619C | 12797.215 | 5150.781 |
| AL162033  | 956.06    | 861.693   | NM_02040C | 584.97    | 1034.117  | AL137579  | 2352.335  | 1776.891 |
| AL162010  | 266.045   | 256.983   | NM_001504 | 1430.044  | 1336.799  | NM_012383 | 3034.887  | 2408.684 |
| NM_005001 | 8615.426  | 4448.313  | D50926    | 2346.768  | 2822.387  | AJ271684  | 324.844   | 234.552  |
| AK024175  | 3163.096  | 1974.097  | BF205683  | 1007.884  | 951.999   | AF255342  | 1118.06   | 669.876  |
| NM_00051C | 659.838   | 1056.546  | M17017    | 768.125   | 661.381   | NM_00330C | 991.876   | 369.902  |
| NM_017787 | 2407.327  | 7915.731  | NM_00299C | 760.257   | 1017.616  | AK026682  | 400.083   | 139.355  |
| NM_02031E | 4151.907  | 3385.919  | NM_002432 | 10088.206 | 9003.135  | NM_01772C | 23792.889 | 5328.848 |
| AK001910  | 907.929   | 861.847   | NM_01242C | 203.611   | 425.811   | NM_00465E | 725.324   | 304.107  |
| AK023892  | 526.029   | 468.228   | AB033037  | 644.264   | 532.485   | NM_003942 | 932.388   | 518.043  |
| AF124368  | 273.979   | 437.601   | L40400    | 2355.143  | 1834.152  | NM_006471 | 8116.393  | 1892.923 |
| AF265210  | 7272.643  | 8268.396  | AK025688  | 1185.32   | 877.962   | NM_00416E | 2167.517  | 462.766  |
| AK024241  | 568.214   | 612.403   | Z36819    | 18279.928 | 11270.995 | NM_01658E | 335.478   | 431.638  |
| AK025061  | 694.33    | 898.921   | NM_001195 | 247.194   | 177.355   | NM_00286E | 717.846   | 775.727  |
| AF088067  | 3444.799  | 2213.012  | NM_01444E | 1042.457  | 767.184   | NM_00386C | 256.651   | 428.11   |
| AF056441  | 1045.916  | 725.028   | NM_00431E | 5073.914  | 9682.915  | NM_005414 | 1114.863  | 1144.383 |
| Y10509    | 394.607   | 485.097   | NM_02016E | 3158.407  | 3568.48   | NM_00446E | 1596.542  | 1526.746 |
| AK024389  | 3139.39   | 2483.995  | AK023860  | 1435.672  | 2564.113  | NM_016031 | 7688.298  | 5252.319 |
| AK026793  | 1698.888  | 3503.473  | NM_000031 | 2505.651  | 3766.25   | NM_004804 | 899.895   | 599.411  |
| AJ276253  | 22219.189 | 27458.1   | NM_01628E | 5010.046  | 5570.736  | M92439    | 5670.032  | 3725.852 |
| AF147314  | 1051.071  | 1389.273  | NM_001567 | 2635.572  | 3846.2    | AL117665  | 1613.978  | 875.015  |
| NM_01898C | 2086.723  | 1791.85   | NM_00490E | 10534.558 | 9901.353  | AF263541  | 659.332   | 448.83   |
| AF086201  | 1199.48   | 1324.367  | AF217971  | 1088.145  | 1311.317  | NM_001262 | 4460.616  | 4691.5   |
| AK024712  | 345.053   | 336.211   | NM_00192E | 755.377   | 778.179   | BE873030  | 791.894   | 887.309  |
| U48696    | 547.608   | 806.05    | AF245517  | 780.251   | 702.84    | NM_00244C | 361.262   | 516.418  |
| AF230316  | 5856.024  | 5624.938  | NM_004982 | 550.644   | 533.267   | NM_00362E | 327.037   | 601.296  |
| K00629    | 227.75    | 339.876   | NM_001694 | 49498.695 | 31249.414 | BC006990  | 1704.911  | 456.7    |
| AK024515  | 1497.368  | 1580.239  | NM_000217 | 168.895   | 438.103   | NM_002277 | 422.482   | 242.643  |

|           |           |           |           |           |           |           |           |           |
|-----------|-----------|-----------|-----------|-----------|-----------|-----------|-----------|-----------|
| AF085862  | 4615.032  | 4391.667  | AK026180  | 616.488   | 428.53    | NM_019114 | 705.605   | 270.393   |
| NM_01799E | 1298.073  | 1482.498  | NM_01336E | 1946.337  | 1276.942  | M33552    | 2491.356  | 893.683   |
| AL049271  | 20729.975 | 23397.941 | NM_005817 | 8363.955  | 5839.342  | AJ252060  | 610.61    | 221.807   |
| AK023079  | 35587.254 | 55069.52  | NM_00391E | 5236.916  | 2712.549  | NM_00640E | 1819.919  | 459.947   |
| NM_01960E | 1503.741  | 2206.594  | NM_00287C | 12986.273 | 8111.599  | NM_018977 | 204.097   | 163.438   |
| AK026198  | 753.128   | 768.076   | NM_00147E | 28812.205 | 27649.494 | AJ001402  | 251.458   | 149.676   |
| AF183570  | 469.217   | 284.229   | NM_00261E | 256.787   | 395.837   | NM_00454C | 266.357   | 356.147   |
| NM_005497 | 3755.84   | 2912.156  | AF135422  | 2080.605  | 2696.926  | NM_00023E | 1334.273  | 688.356   |
| AK024048  | 1859.168  | 1868.744  | NM_00447E | 11380.183 | 12085.916 | L25628    | 403.774   | 508.457   |
| AB033093  | 1346.853  | 596.782   | AF070587  | 1120.993  | 1073.151  | M37033    | 736.959   | 557.775   |
| NM_00591E | 1063.229  | 624.419   | BE250526  | 577.266   | 562.536   | NM_007171 | 1290.463  | 811.463   |
| NM_00590E | 20987.723 | 12296.224 | NM_01681E | 1813.905  | 1980.879  | NM_00427E | 429.874   | 240.68    |
| AK001948  | 287.952   | 254.117   | NM_01222E | 2106.343  | 2201.448  | NM_00563E | 439.432   | 416.66    |
| AL355717  | 230.089   | 195.484   | NM_00500E | 806.211   | 935.545   | AK021499  | 378.587   | 174.559   |
| AK055991  | 744.267   | 1203.721  | NM_00659E | 2733.68   | 2733.475  | AK000336  | 1457.672  | 659.306   |
| AF113697  | 537.509   | 629.364   | AK023214  | 5296.126  | 5541.052  | NM_00279E | 7776.333  | 4035.836  |
| AK022326  | 581.868   | 458.839   | NM_00146E | 8000.613  | 6193.425  | NM_00629E | 1668.023  | 851.791   |
| AF085991  | 803.086   | 648.105   | NM_00360C | 4308.556  | 3320.578  | AB007948  | 859.496   | 980.967   |
| NM_00568E | 1065.333  | 743.13    | NM_01749C | 2219.826  | 1781.494  | AB033066  | 1063.455  | 777.991   |
| NM_020427 | 8934.032  | 6676.809  | NM_00271E | 1195.765  | 952.37    | AF126028  | 1021.637  | 625.673   |
| AF085920  | 665.139   | 782.024   | AK026727  | 1342.834  | 949.984   | NM_00701E | 1110.234  | 659.197   |
| AK023173  | 5496.094  | 5326.211  | NM_00283C | 446.387   | 245.625   | NM_01764C | 296.104   | 199.088   |
| AK025225  | 368.351   | 379.088   | NM_006247 | 3167.951  | 2215.453  | NM_017721 | 748.828   | 310.713   |
| U79275    | 2217.448  | 2653.655  | AB032983  | 434.921   | 243.761   | NM_01908E | 2331.08   | 807.637   |
| AJ227908  | 751.21    | 942.003   | NM_018281 | 6880.681  | 4113.566  | AB002373  | 509.574   | 176.386   |
| AF007193  | 1013.012  | 1123.899  | NM_004457 | 3489.112  | 1796.671  | NM_01635C | 2296.065  | 480.755   |
| AK022367  | 647.589   | 1062.921  | NM_01404E | 1533.789  | 902.271   | AK024167  | 1151.971  | 350.178   |
| BC028589  | 2468.733  | 3353.525  | BC036375  | 15339.744 | 20369.078 | NM_00502E | 1304.296  | 895.204   |
| CY3Cy5    | 7326.084  | 1127.885  | BI912037  | 1226.673  | 1761.008  | AF213356  | 1019.351  | 753.583   |
| K02765    | 2168.664  | 3024.412  | AA454646  | 2289.257  | 3057.409  | BC035716  | 435.883   | 175.675   |
| M65134    | 1439.849  | 3248.338  | U18087    | 41246.738 | 34755.75  | AF230809  | 811.186   | 479.334   |
| BG539651  | 12634.862 | 25568.607 | U66349    | 716.966   | 703.276   | NM_01789A | 4365.351  | 2731.595  |
| N52646    | 15175.489 | 20629.166 | AA057156  | 992.445   | 1320.638  | NM_00650E | 577.242   | 384.974   |
| AW160671  | 53657.316 | 62703.59  | U19487    | 2003.059  | 1901.393  | AK025447  | 523.335   | 419.917   |
| BI870529  | 8874.399  | 12539.613 | AF166327  | 14997.396 | 14307.325 | NM_00262A | 10444.738 | 5256.511  |
| AA702698  | 1292.653  | 1184.493  | AF260739  | 1043.91   | 670.738   | AF006199  | 554.052   | 341.681   |
| AI681514  | 963.334   | 733.276   | AF531423  | 2381.952  | 2218.754  | NM_00455A | 1352.224  | 816.088   |
| NM_00130C | 1906.558  | 1943.914  | X76555    | 709.509   | 514.158   | NM_01811E | 756.571   | 510.132   |
| BG748827  | 12185.501 | 11381.938 | NM_00543E | 2023.285  | 1425.451  | NM_01457E | 194.468   | 123.957   |
| AA952897  | 2025.025  | 2044.234  | L10386    | 3908.702  | 3064.732  | AL162035  | 1107.028  | 590.436   |
| BG760342  | 3808.199  | 3628.204  | AF061812  | 4309.854  | 2917.862  | NM_00669E | 366.116   | 235.74    |
| AA703141  | 711.427   | 665.856   | AL136756  | 1239.942  | 1129.577  | NM_00308A | 989.953   | 441.683   |
| AA195244  | 288.836   | 366.125   | NM_01246E | 4043.723  | 2588.723  | NM_00258E | 1641.526  | 1126.49   |
| AI122630  | 9212.68   | 7732.959  | NM_13426C | 8659.016  | 4436.939  | NM_00100E | 39586.82  | 18312.551 |
| NM_00210E | 31886.059 | 23742.402 | AK025688  | 1617.791  | 2725.777  | D17289    | 4745.896  | 1577.86   |
| NM_00337E | 12225.244 | 10084.579 | Z36819    | 24088.105 | 45937.867 | NM_00294E | 7378.708  | 2974.851  |
| SR1       | 58006.379 | 60653.047 | NM_01444E | 1378.576  | 2028.085  | NM_01423C | 2490.83   | 1881.275  |
| SR3       | 47429.117 | 36041.445 | AL080157  | 791.255   | 1119.48   | NM_01774E | 2020.604  | 1833.396  |
| SR5       | 4799.264  | 6371.108  | NM_00530E | 1041.747  | 1637.671  | AK025374  | 642.486   | 638.526   |
| CY3Cy5    | 10941.184 | 1674.473  | NM_000911 | 293.378   | 296.761   | NM_014901 | 2682.695  | 1986.48   |
| NM_01242E | 3717.987  | 4992.282  | NM_007227 | 613.189   | 749.272   | AK000005  | 2615.038  | 2276.757  |
| NM_01326E | 638.345   | 674.985   | NM_00702E | 861.787   | 811.199   | AF086790  | 362.114   | 320.466   |
| NM_00172E | 22914.119 | 35949.711 | NM_00587E | 9876.991  | 8559.281  | NM_00010E | 4894.209  | 2353.845  |

|           |           |           |           |           |           |           |           |           |
|-----------|-----------|-----------|-----------|-----------|-----------|-----------|-----------|-----------|
| NM_00556E | 14073.462 | 22013.137 | NM_004624 | 1847.922  | 2084.41   | NM_01812E | 1013.504  | 438.984   |
| NM_003824 | 4901.093  | 10684.73  | NM_00386E | 992.981   | 1066.474  | NM_016931 | 1990.745  | 960.887   |
| NM_00068E | 1576.84   | 3075.196  | AB015330  | 5208.581  | 5139.104  | NM_00437E | 13909.766 | 6423.703  |
| NM_01245E | 5439.875  | 6364.342  | NM_00145E | 3757.767  | 2998.179  | NM_00556E | 39873.008 | 16912.713 |
| AF229166  | 698.23    | 716.218   | L09071    | 392.011   | 349.279   | NM_00016E | 587.389   | 396.248   |
| NM_005137 | 3020.447  | 2810.357  | AK026180  | 606.834   | 943.883   | NM_016287 | 2119.893  | 846.609   |
| NM_006764 | 2605.969  | 2808.003  | NM_01336E | 2028.317  | 4302.161  | NM_003864 | 884.477   | 279.202   |
| NM_00138E | 1366.933  | 1684.542  | NM_005817 | 8912.156  | 21094.994 | NM_006824 | 5014.022  | 3727.33   |
| NM_00116E | 1336.272  | 1272.888  | NM_00391E | 5551.236  | 9046.989  | NM_002107 | 385.338   | 453.208   |
| NM_00587E | 1749.344  | 1797.136  | NM_00287E | 11762.777 | 15566.034 | NM_002694 | 3046.5    | 1103.264  |
| AF308602  | 2102.143  | 1858.561  | NM_00636E | 5190.531  | 6128.224  | NM_004454 | 533.549   | 151.524   |
| AB011089  | 1269.864  | 802.981   | NM_02041E | 779.864   | 1362.946  | NM_01248E | 866.069   | 412.784   |
| AF007192  | 951.323   | 564.129   | AL049667  | 2293.87   | 2487.749  | AF217227  | 869.18    | 693.515   |
| NM_00127E | 14600.118 | 12226.176 | NM_000334 | 1289.453  | 1985.407  | AK024141  | 900.423   | 735.119   |
| NM_016157 | 612.884   | 579.534   | NM_02040E | 705.723   | 674.105   | NM_00281E | 2215.18   | 1470.351  |
| NM_01491E | 45667.996 | 44518.238 | NM_001504 | 1137.021  | 915.528   | AK022745  | 1303.674  | 849.598   |
| NM_00219E | 4356.494  | 7599.707  | D50926    | 2712.761  | 2107.327  | AL049450  | 1496.148  | 917.109   |
| D84294    | 5084.702  | 9502.504  | BF205683  | 1137.042  | 1001.585  | AK023481  | 559.615   | 957.776   |
| M31659    | 1626.446  | 1727.4    | NM_00154E | 340.072   | 284.67    | NM_00508E | 8703.134  | 4245.374  |
| NM_00305E | 6668.906  | 9476.254  | NM_00075E | 8187.812  | 5971.889  | NM_00723E | 628.207   | 292.863   |
| NM_01622E | 10782.854 | 13431.354 | M17017    | 706.834   | 560.797   | NM_01760E | 2093.57   | 1445.606  |
| AK024311  | 912.241   | 1494.672  | NM_00299E | 830.536   | 713.503   | AK024644  | 2722.803  | 1544.395  |
| AF052155  | 8283.991  | 11345.444 | NM_00243E | 9642.551  | 6375.198  | AB019573  | 254.379   | 227.555   |
| NM_00508E | 1857.758  | 2524.428  | AB033037  | 643.669   | 303.99    | U68494    | 1609.106  | 359.839   |
| AF060902  | 1882.419  | 3463.116  | L40400    | 2214.46   | 1420.968  | AF064254  | 401.397   | 293.092   |
| AF121858  | 5122.472  | 5836.964  | NM_006247 | 3165.509  | 5471.739  | AL137360  | 2113.206  | 2441.449  |
| NM_013437 | 1149.991  | 1104.969  | AB032983  | 614.208   | 1582.754  | AF201941  | 627.998   | 336.477   |
| NM_017681 | 429.965   | 379.739   | NM_018281 | 7598.194  | 13292.574 | AF026941  | 389.822   | 214.131   |
| X57655    | 416.694   | 278.627   | NM_004457 | 4041.419  | 6562.87   | NM_00707E | 1546.872  | 909.593   |
| AK025966  | 2367.422  | 1948.132  | NM_01404E | 1517.399  | 2814.587  | AL133019  | 1493.979  | 1060.602  |
| NM_01444E | 354.967   | 322.33    | NM_00539E | 411.003   | 713.984   | NM_01489E | 316.193   | 348.92    |
| NM_01872E | 685.798   | 1064.787  | NM_00431E | 5154.632  | 10619.354 | AK024883  | 1701.529  | 996.733   |
| NM_003081 | 12895.66  | 7813.229  | NM_02016E | 3117.673  | 6695.935  | AF217989  | 429.51    | 427.177   |
| NM_01649E | 1940.073  | 1333.1    | AK023860  | 1137.264  | 1315.185  | NM_017654 | 405.05    | 379.36    |
| D50402    | 21490.07  | 12612.793 | NM_000031 | 1100.059  | 1285.518  | AL109696  | 631.247   | 511.365   |
| M73547    | 7852.916  | 4855.998  | NM_00208E | 29055.152 | 21706.146 | AK022190  | 292.171   | 108.384   |
| NM_003687 | 974.237   | 618.468   | NM_01628E | 5074.969  | 4267.182  | AJ011593  | 685.981   | 357.345   |
| NM_004134 | 5168.417  | 4119.571  | NM_001567 | 2490.017  | 2505.915  | AJ227907  | 189.759   | 839.325   |
| NM_00595E | 3081.356  | 3947.588  | NM_00490E | 11133.411 | 8552.979  | NM_00217E | 468.307   | 1329.997  |
| NM_00404E | 855.808   | 1674.51   | AF217971  | 1748.953  | 1410.869  | U17621    | 286.348   | 238.488   |
| BE548044  | 429.833   | 690.169   | NM_00192E | 712.32    | 699.158   | AL049239  | 615.083   | 825.279   |
| AF028832  | 330.067   | 531.815   | AF245517  | 537.593   | 762.633   | NM_01328E | 404.876   | 204.365   |
| NM_001179 | 470.117   | 672.844   | NM_00498E | 554.298   | 503.279   | M60721    | 3641.974  | 1342.847  |
| NM_00531E | 47026.082 | 48037.066 | NM_001694 | 43204.809 | 25364.367 | L39061    | 772.018   | 298.815   |
| NM_01776E | 10462.664 | 12537.546 | AF286370  | 307.777   | 338.624   | AF071508  | 465.195   | 416.667   |
| NM_00042E | 1013.874  | 1344.121  | NM_000217 | 305.858   | 282.453   | L07265    | 2986.303  | 1783.383  |
| AB040967  | 13175.643 | 14485.766 | NM_01246E | 5227.087  | 8875.993  | D16472    | 356.042   | 296.041   |
| NM_014721 | 1979.945  | 3821.674  | NM_13426E | 4066.468  | 6466.029  | AF085823  | 195.385   | 170.903   |
| AK026352  | 544.273   | 698.619   | NM_00147E | 32222.842 | 51476.633 | AL157459  | 564.158   | 381.956   |
| AL137705  | 3569.523  | 3020.431  | NM_00261E | 1216.894  | 2793.278  | AL353954  | 262.45    | 275.029   |
| NM_02034E | 425.431   | 220.762   | AF135422  | 2813.573  | 4273.969  | NM_01763E | 958.722   | 832.742   |
| AF169257  | 398.883   | 350.621   | NM_00447E | 10343.147 | 8721.961  | AK000778  | 556.077   | 528.768   |
| NM_01484E | 496.573   | 231.02    | NM_00261E | 710.291   | 461.504   | AK000932  | 446.608   | 974.727   |

|           |           |           |           |           |           |           |           |           |
|-----------|-----------|-----------|-----------|-----------|-----------|-----------|-----------|-----------|
| BF217766  | 940.34    | 518.545   | AF070587  | 1096.807  | 953.444   | AL133573  | 1638.699  | 1051.141  |
| NM_000184 | 1892.3    | 1230.293  | BE250526  | 514.228   | 326.531   | AK024523  | 211.553   | 86.304    |
| NM_016180 | 680.242   | 408.492   | NM_016819 | 1742.167  | 1267.97   | AK024600  | 278.864   | 150.584   |
| NM_000112 | 711.093   | 558.147   | NM_012222 | 2238.27   | 1897.818  | AK024624  | 1989.476  | 890.471   |
| NM_005827 | 6069.531  | 6396.968  | NM_005002 | 1278.599  | 1098.359  | D87682    | 432.948   | 263.173   |
| NM_003053 | 3401.787  | 5370.675  | NM_006596 | 2760.174  | 2047.599  | AF321617  | 1374.53   | 779.514   |
| NM_003044 | 775.701   | 1182.734  | AK023214  | 4830.541  | 2904.809  | unknown ( | 342.32    | 388.779   |
| NM_006672 | 5274.753  | 6647.588  | NM_001469 | 4981.285  | 3795.959  | AF086208  | 466.583   | 264.394   |
| AB007875  | 1207.264  | 1075.407  | NM_003600 | 3041.976  | 1962.427  | AK023335  | 1028.687  | 317.632   |
| NM_001147 | 235.233   | 487.122   | NM_017490 | 2187.18   | 1298.394  | AK023187  | 239.255   | 110.107   |
| AL050288  | 37692.52  | 49479.719 | NM_002718 | 1065.492  | 606.246   | NM_019033 | 777.911   | 284.951   |
| NM_005040 | 5332.051  | 5618.551  | AK026727  | 1208.766  | 657.436   | AK024602  | 6074.976  | 4735.937  |
| NM_016391 | 11702.951 | 10456.733 | NM_002830 | 414.269   | 433.572   | NM_000485 | 3977.049  | 3016.642  |
| AF075033  | 4583.377  | 3191.962  | L09071    | 584.099   | 1223.728  | NM_018542 | 185.067   | 176.415   |
| D50911    | 13977.47  | 9221.594  | NM_003322 | 428.254   | 993.822   | AK025503  | 675.508   | 449.69    |
| AB011104  | 1831.835  | 1741.032  | BC036375  | 15894.059 | 27077.965 | AF130073  | 636.446   | 652.025   |
| AK024069  | 8565.185  | 4879.795  | BI912037  | 1050.489  | 1395.495  | AK024225  | 6090.375  | 3247.388  |
| NM_004582 | 10812.377 | 6272.799  | AA454646  | 2620.435  | 2578.122  | AF075035  | 3449.421  | 2319.769  |
| NM_015640 | 13882.222 | 8847.858  | U18087    | 32796.672 | 20560.943 | AL110180  | 1283.043  | 824.945   |
| AF233450  | 799.875   | 650.171   | U66349    | 712.821   | 589.083   | U00949    | 447.829   | 2056.968  |
| NM_016233 | 1418.877  | 693.333   | AA057156  | 1116.586  | 826.209   | BC024924  | 2866.97   | 3337.094  |
| NM_000821 | 13781.897 | 8905.34   | U19487    | 1693.334  | 1257.798  | NM_017906 | 2400.154  | 1747.033  |
| NM_020121 | 695.088   | 462.04    | AF166327  | 14205.439 | 9891.393  | AL110286  | 878.608   | 381.93    |
| NM_003145 | 43860.75  | 40581.426 | AF260739  | 890.262   | 714.711   | AF086374  | 233.737   | 130.131   |
| NM_001632 | 1683.522  | 2016.367  | AF531423  | 2240.426  | 1482.098  | AL162066  | 1868.969  | 466.024   |
| NM_012264 | 1284.449  | 1446.814  | X76555    | 482.281   | 401.504   | NM_016096 | 4024.85   | 1170.982  |
| AF311312  | 2498.53   | 2813.672  | NM_005432 | 1758.906  | 1076.306  | U79290    | 417.269   | 301.431   |
| NM_014915 | 45507.824 | 38472.48  | L10386    | 3903.541  | 2360.456  | NM_014040 | 2011.729  | 2002.958  |
| NM_012286 | 1908.946  | 2037.228  | AF061812  | 3204.83   | 1789.912  | AK000799  | 1573.998  | 1077.647  |
| K02765    | 1952.177  | 2245.282  | AL136756  | 1186.724  | 794.784   | NM_015582 | 6290.102  | 4715.993  |
| M65134    | 1435.666  | 1612.679  | NM_002990 | 1111.998  | 3390.003  | AK027091  | 701.667   | 594.731   |
| BG539651  | 10311.322 | 8733.359  | NM_002432 | 11839.822 | 25332.693 | NM_001526 | 504.166   | 387.148   |
| N52646    | 17972.072 | 13441.305 | NM_012420 | 179.18    | 1072.839  | U31738    | 535.975   | 340.697   |
| AW160671  | 51746.699 | 44179.574 | AB033037  | 621.11    | 1050.447  | AF179890  | 1309.564  | 1005.658  |
| BI870529  | 8291.702  | 8854.245  | L40400    | 2671.769  | 3763.335  | AK023536  | 2474.057  | 1170.691  |
| AA702698  | 1152.701  | 1133.815  | AK025688  | 1203.477  | 2028.196  | AK026561  | 317.512   | 303.051   |
| AI681514  | 921.953   | 930.205   | Z36819    | 20733.646 | 27010.672 | AK021568  | 1587.507  | 732.162   |
| NM_001300 | 1895.443  | 1998.801  | NM_001195 | 249.192   | 138.227   | AF088054  | 229.9     | 93.082    |
| BG748827  | 10617.049 | 6965.347  | NM_014448 | 2172.728  | 1938.03   | AK023881  | 696.819   | 462.517   |
| AA952897  | 2153.395  | 1402.244  | AL080157  | 794.27    | 581.416   | AK027114  | 28596.166 | 25704.609 |
| BG760342  | 3299.303  | 2313.247  | NM_005308 | 989.184   | 997.656   | NM_016298 | 591.862   | 599.107   |
| AA703141  | 705.837   | 271.776   | NM_000911 | 332.887   | 258.771   | AK002146  | 246.749   | 161.063   |
| AI122630  | 9051.511  | 8202.279  | NM_007227 | 554.843   | 653.445   | NM_003159 | 260.271   | 96.156    |
| NM_002103 | 29412.887 | 21195.346 | NM_007023 | 723.028   | 663.568   | AF086256  | 362.898   | 214.77    |
| NM_003379 | 11912.085 | 8271.952  | NM_005873 | 9386.045  | 6266.64   | NM_015492 | 960.837   | 390.114   |
| NM_006589 | 6123.363  | 5150.767  | NM_004624 | 1711.115  | 1726.007  | AF132204  | 386.693   | 222.805   |
| NM_004134 | 3887.188  | 3958.287  | NM_003865 | 785.779   | 782.308   | AK022874  | 1558.832  | 420.544   |
| NM_005955 | 2930.937  | 3729.962  | AB015330  | 3246.561  | 2135.335  | CY3Cy5    | 838.608   | 349.159   |
| BE548044  | 285.845   | 572.469   | NM_001455 | 3687.891  | 3016.011  | BI912037  | 393.4     | 298.821   |
| NM_012428 | 4306.239  | 4500.104  | NM_004982 | 880.587   | 1911.38   | AA454646  | 741.291   | 566.016   |
| NM_013269 | 596.866   | 537.431   | NM_001694 | 53939.473 | 68000.047 | U18087    | 8480.021  | 3677.663  |
| NM_001728 | 22452.199 | 20212.453 | AF286370  | 534.101   | 830.261   | U66349    | 307.408   | 189.303   |
| NM_005565 | 12430.492 | 11032.695 | NM_000217 | 404.405   | 558.515   | AA057156  | 432.676   | 302.468   |

|           |           |           |           |           |           |           |          |          |
|-----------|-----------|-----------|-----------|-----------|-----------|-----------|----------|----------|
| NM_003824 | 5126.861  | 4537.879  | AK026180  | 595.115   | 1040.36   | U19487    | 681.48   | 471.879  |
| NM_000686 | 1313.033  | 1168.932  | NM_013365 | 2077.853  | 2987.327  | AF166327  | 5616.31  | 6071.724 |
| NM_012452 | 5603.758  | 4288.254  | NM_005817 | 7558.835  | 8981.689  | AF260739  | 351.272  | 274.65   |
| AF229166  | 502.097   | 739.248   | NM_003916 | 4239.755  | 3836.951  | AF531423  | 847.928  | 878.226  |
| NM_005137 | 1939.969  | 1295.772  | NM_002870 | 27184.188 | 22177.176 | X76555    | 267.121  | 213.338  |
| NM_006764 | 2369.279  | 1749.925  | NM_006363 | 4604.6    | 3978.481  | NM_005432 | 663.505  | 475.922  |
| NM_001386 | 1324.819  | 1171.523  | NM_020415 | 639.598   | 445.965   | L10386    | 1385.026 | 1295.144 |
| NM_001163 | 1429.955  | 884.895   | AL049667  | 3635.925  | 2569.624  | AF061812  | 1198.034 | 1050.87  |
| NM_005878 | 1542.078  | 1083.588  | NM_000334 | 1062.858  | 853.315   | AL136756  | 476.746  | 325.719  |
| AF308602  | 1970.687  | 1611.027  | NM_020400 | 692.005   | 379.88    | NM_012466 | 1546.008 | 1572.807 |
| AB011089  | 1428.493  | 995.326   | NM_001504 | 1073.354  | 920.194   | NM_134260 | 4283.255 | 3924.474 |
| AF007192  | 914.736   | 728.205   | D50926    | 2493.715  | 2041.882  | SR8       | 2316.718 | 6814.936 |
| NM_001276 | 14545.218 | 11979.171 | BF205683  | 882.599   | 793.794   | SR10      | 7644.358 | 2814.127 |
| NM_016157 | 840.29    | 618.869   | NM_001548 | 343.197   | 428.38    | CY3Cy5    | 854.88   | 493.343  |
| NM_000112 | 714.372   | 487.999   | NM_000758 | 8083.794  | 5248.671  | AL080157  | 269.062  | 273.219  |
| NM_005827 | 5527.044  | 4672.811  | M17017    | 698.274   | 715.442   | NM_005308 | 316.78   | 406.928  |
| NM_003044 | 604.979   | 814.666   | NM_002718 | 1634.289  | 2599.736  | NM_007227 | 233.838  | 189.592  |
| NM_006672 | 6318.465  | 6238.756  | AK026727  | 2279.845  | 3295.027  | NM_007023 | 313.727  | 156.395  |
| NM_000338 | 357.163   | 123.499   | NM_002830 | 462.739   | 643.059   | NM_014461 | 193.341  | 126.204  |
| M31659    | 1235.08   | 1712.529  | NM_006247 | 3382.407  | 4145.2    | NM_003865 | 354.183  | 248.586  |
| NM_003056 | 8306.375  | 11063.699 | AB032983  | 578.789   | 765.306   | AB015330  | 978.597  | 844.613  |
| NM_016226 | 9637.942  | 10729.479 | NM_018281 | 7982.496  | 10897.18  | NM_001455 | 1242.523 | 1068.465 |
| AK024311  | 922.544   | 1095.207  | NM_004457 | 3163.33   | 2572.587  | L09071    | 195.3    | 172.86   |
| AF052155  | 8672.396  | 5692.286  | NM_014049 | 1492.517  | 1678.722  | BC036375  | 4782.444 | 4181.004 |
| NM_005085 | 1557.449  | 1349.52   | NM_005396 | 363.127   | 254.816   | NM_006363 | 1563.577 | 2021.014 |
| AF060902  | 1508.395  | 1186.785  | NM_004315 | 5860.077  | 7314.261  | NM_020415 | 271.551  | 184.804  |
| AF121858  | 3799.775  | 2917.441  | NM_020166 | 3283.231  | 2747.751  | AL049667  | 1162.428 | 1722.39  |
| NM_013437 | 1425.704  | 1110.982  | AK023860  | 1247.291  | 1140.203  | NM_000334 | 467.889  | 201.008  |
| AK025966  | 2424.03   | 1376.461  | NM_000031 | 2790.036  | 2393.305  | NM_020400 | 252.397  | 187.647  |
| NM_018725 | 749.715   | 661.999   | NM_002085 | 18926.988 | 13420.582 | NM_001504 | 362.521  | 198.898  |
| NM_003081 | 20828.068 | 12313.285 | NM_016286 | 5473.556  | 4130.745  | D50926    | 829.856  | 604.698  |
| NM_016495 | 1899.02   | 1295.88   | NM_001567 | 2514.258  | 2280.382  | BF205683  | 528.808  | 555.082  |
| D50402    | 25689.768 | 17908.354 | NM_004905 | 11442.719 | 9142.651  | NM_001548 | 137.747  | 258.882  |
| M73547    | 8339.023  | 4948.789  | AF217971  | 1545.761  | 1115.222  | NM_000758 | 3069.848 | 2873.082 |
| NM_003687 | 1336.962  | 1328.833  | NM_001925 | 756.932   | 738.239   | M17017    | 327.094  | 376.965  |
| NM_020121 | 796.62    | 626.803   | AF245517  | 882.753   | 613.171   | NM_002990 | 370.131  | 494.993  |
| NM_001632 | 1734.581  | 2023.448  | NM_020396 | 638.671   | 1417.312  | NM_002432 | 3823.285 | 6954.594 |
| NM_012264 | 1251.568  | 1221.723  | AF029900  | 2184.362  | 3774.802  | AB033037  | 300.075  | 443.456  |
| AF311312  | 2468.033  | 2566.76   | NM_003325 | 3792.812  | 5134.224  | L40400    | 892.362  | 1042.614 |
| NM_001179 | 590.033   | 734.018   | NM_016178 | 2545.042  | 3381.865  | AK025688  | 450.192  | 646.554  |
| NM_000428 | 935.782   | 1122.813  | AK022639  | 1288.704  | 1601.446  | Z36819    | 6573.362 | 6437.494 |
| AB040967  | 11508.25  | 8994.95   | D31766    | 1473.787  | 2228.053  | NM_014448 | 478.008  | 512.682  |
| NM_014721 | 1801.96   | 1456.603  | NM_001478 | 27688.346 | 18364.977 | NM_004315 | 1700.705 | 2413.009 |
| AK026352  | 755.921   | 613.973   | AF135422  | 2585.218  | 1986.545  | NM_020166 | 988.888  | 1317.237 |
| AL137705  | 4086.677  | 2763.111  | NM_004479 | 14401.682 | 10009.08  | AK023860  | 507.824  | 381.66   |
| U41898    | 502.375   | 227.64    | NM_002610 | 719.401   | 475.273   | NM_000031 | 781.7    | 1072.899 |
| AF169257  | 576.45    | 357.101   | AF070587  | 1262.086  | 1069.733  | NM_002085 | 7951.329 | 4252.04  |
| NM_014848 | 612.705   | 370.81    | BE250526  | 521.905   | 398.208   | NM_016286 | 1926.536 | 1389.679 |
| BF217766  | 822.66    | 532.765   | NM_016819 | 1800.963  | 1431.716  | NM_001567 | 843.178  | 591.673  |
| NM_000184 | 2119.094  | 1494.332  | NM_012222 | 2314.939  | 1339.837  | NM_004905 | 3530.515 | 3737.701 |
| NM_016180 | 744.088   | 654.687   | NM_005002 | 1257.368  | 749.198   | AF217971  | 551.626  | 351.361  |
| NM_002103 | 30046.42  | 23606.861 | NM_006596 | 2892.264  | 1972.659  | NM_001925 | 303.005  | 500.121  |
| NM_003379 | 12161.169 | 9297.549  | AK023214  | 4916.205  | 2770.912  | AF245517  | 326.61   | 276.662  |

|           |           |           |           |           |           |           |          |          |
|-----------|-----------|-----------|-----------|-----------|-----------|-----------|----------|----------|
| NM_00658E | 5931.895  | 5592.472  | NM_001469 | 7875.854  | 5375.57   | NM_00498Z | 235.458  | 167.066  |
| AB007875  | 1159.046  | 947.231   | AK022689  | 2977.33   | 5648.998  | AF286370  | 176.357  | 156.289  |
| AL050288  | 34752.078 | 23914.16  | NM_016227 | 783.288   | 1375.106  | AK026180  | 223.031  | 386.979  |
| NM_00504C | 5443.186  | 3560.448  | NM_00419E | 16782.611 | 19187.871 | NM_01336E | 838.125  | 646.932  |
| NM_016391 | 13195.534 | 9487.65   | NM_00470E | 1610.913  | 2316.502  | NM_005817 | 2991.713 | 2630.962 |
| M80783    | 492.678   | 74.86     | NM_02019C | 10118.835 | 12235.757 | NM_00391E | 1831.011 | 1199.379 |
| AF075033  | 4556.155  | 2661.761  | AK024003  | 555.371   | 511.441   | NM_00287C | 6481.801 | 5457.754 |
| D50911    | 13303.999 | 7276.996  | NM_014357 | 1762.55   | 1526.886  | NM_00147E | 6142.789 | 5748.366 |
| AB011104  | 1629.199  | 1620.724  | NM_004067 | 496.373   | 600.14    | AF135422  | 649.117  | 847.24   |
| AK024069  | 8584.857  | 4809.874  | NM_000121 | 5322.836  | 4638.015  | NM_00447E | 2704.554 | 3658.443 |
| NM_00458Z | 10893.404 | 6602.23   | NM_002091 | 5445.095  | 4387.533  | NM_00261C | 301.116  | 76.182   |
| NM_01564C | 14866.822 | 10616.29  | AB033092  | 2284.448  | 2011.607  | AF070587  | 497.033  | 258.642  |
| AF233450  | 1055.336  | 721.43    | NM_00302Z | 824.975   | 850.016   | BE250526  | 221.658  | 415.755  |
| NM_01623Z | 1506.17   | 775.38    | BC035030  | 1951.816  | 1532.653  | NM_01681E | 577.957  | 332.621  |
| NM_000821 | 15407.452 | 12157.115 | NM_00534C | 16174.937 | 11934.047 | NM_01222Z | 715.826  | 323.618  |
| AF308602  | 2521.104  | 2712.074  | NM_016201 | 827.127   | 583.976   | NM_00500Z | 527.226  | 297.066  |
| AB011089  | 1339.233  | 1039.637  | NM_000864 | 2488.715  | 1768.185  | NM_00659E | 1054.296 | 1722.822 |
| AF007192  | 957.787   | 944.754   | NM_017977 | 1331.033  | 978.659   | AK023214  | 1535.498 | 1533.916 |
| NM_00127E | 14565.916 | 15193.412 | AF147727  | 1409.693  | 903.031   | NM_00146E | 2413.535 | 3381.773 |
| NM_016157 | 755.085   | 644.183   | NM_006751 | 2602.343  | 1823.727  | NM_00360C | 1241.563 | 948.047  |
| NM_01491E | 44917.434 | 29311.307 | AB037834  | 9294.619  | 3059.771  | NM_01749C | 685.607  | 832.568  |
| NM_01228E | 2337.264  | 2235.922  | NM_00356E | 984.297   | 478.495   | AK026727  | 594.865  | 631.844  |
| NM_00219E | 4798.985  | 4187.974  | AF202635  | 1200.683  | 2775.177  | NM_00283C | 194.175  | 142.586  |
| D84294    | 4436.104  | 3159.579  | NM_01412E | 399.101   | 790.308   | NM_006247 | 1136.309 | 1322.325 |
| K02765    | 3770.762  | 2515.887  | NM_017904 | 479.72    | 711.798   | AB032983  | 268.554  | 502.296  |
| M65134    | 1095.474  | 978.567   | NM_013367 | 3439.713  | 4293.575  | NM_018281 | 2518.141 | 2449.566 |
| BG539651  | 10540.043 | 6637.998  | NM_000321 | 3967.769  | 4330.798  | NM_004457 | 1471.538 | 1272.809 |
| N52646    | 18664.766 | 11435.694 | NM_006341 | 6717.603  | 5512.672  | NM_01404E | 545.942  | 859.104  |
| AW160671  | 52937.809 | 39239.285 | NM_00170E | 1697.096  | 1280.969  | NM_00539E | 147.103  | 124.963  |
| BI870529  | 8322.775  | 7263.69   | NM_006191 | 3319.927  | 3552.92   | BC036375  | 4209.334 | 4289.965 |
| AA702698  | 1096.853  | 976.264   | NM_00180C | 964.435   | 812.584   | BI912037  | 401.798  | 145.58   |
| AI681514  | 1001.131  | 802.098   | NM_00433E | 2759.745  | 1819.989  | AA454646  | 841.245  | 445.383  |
| NM_00130C | 1937.511  | 1149.481  | NM_01594E | 1285.489  | 1111.206  | U18087    | 8226.186 | 4905.216 |
| BG748827  | 10515.827 | 7491.416  | NM_01397E | 1161.062  | 1087.806  | U66349    | 313.459  | 294.883  |
| AA952897  | 1729.34   | 1399.287  | NM_00379C | 1963.89   | 1480.827  | AA057156  | 449.891  | 334.014  |
| BG760342  | 3250.582  | 2595.402  | NM_000494 | 1446.149  | 1257.375  | U19487    | 701.946  | 1073.732 |
| AA703141  | 812.434   | 688.871   | NM_01602Z | 607.714   | 547.986   | AF166327  | 5536.404 | 5502.537 |
| AI122630  | 9188.142  | 8538.682  | NM_00372Z | 7316.901  | 5358.777  | AF260739  | 325.803  | 233.658  |
| NM_003081 | 17518.549 | 14072.375 | NM_01443C | 299.991   | 310.709   | AF531423  | 1009.584 | 645.058  |
| NM_01649E | 1811.699  | 1725.554  | NM_00049E | 824.35    | 408.617   | X76555    | 239.677  | 185.215  |
| D50402    | 26641.477 | 22516.75  | AF085883  | 798.142   | 698.719   | NM_00543Z | 685.886  | 868.022  |
| M73547    | 7744.177  | 7810.283  | NM_016571 | 1317.177  | 778.194   | L10386    | 1298.995 | 1227.549 |
| NM_003687 | 1100.148  | 1127.275  | NM_01644E | 1607.619  | 752.822   | AF061812  | 1385.625 | 1069.296 |
| NM_004134 | 4627.816  | 3924.284  | NM_00251E | 811.449   | 1558.687  | AL136756  | 564.129  | 481.115  |
| NM_00595E | 2806.417  | 2357.912  | NM_00187C | 675.569   | 1479.58   | NM_01246E | 1558.659 | 1232.549 |
| NM_00404E | 905.666   | 671.635   | AJ271216  | 859.343   | 1100.465  | NM_13426C | 4299.216 | 4620.913 |
| NM_01242E | 3642.253  | 2479.95   | U23028    | 2819.853  | 3523.24   | AK025688  | 428.468  | 344.111  |
| NM_01326E | 589.522   | 456.307   | NM_000817 | 3964.898  | 4220.611  | Z36819    | 5695.093 | 6549.409 |
| NM_00172E | 20203.182 | 18777.709 | AF113132  | 10783.209 | 8710.477  | NM_01444E | 464.18   | 389.178  |
| NM_00556E | 12657.315 | 10713.503 | NM_006571 | 3874.942  | 3597.041  | AL080157  | 314.411  | 159.211  |
| NM_003824 | 5382.2    | 4867.189  | NM_00187E | 312.614   | 350.509   | NM_00530E | 441.256  | 275.095  |
| NM_00068E | 1623.817  | 1285.744  | AK022680  | 813.154   | 703.073   | NM_000911 | 218.786  | 140.036  |
| NM_01245Z | 7023.539  | 5273.029  | NM_01894E | 6017.156  | 4761.332  | NM_007227 | 255.304  | 256.441  |

|           |           |           |           |           |           |           |           |           |
|-----------|-----------|-----------|-----------|-----------|-----------|-----------|-----------|-----------|
| AF229166  | 794.249   | 667.241   | NM_016359 | 4006.699  | 2458.228  | NM_007023 | 332.342   | 468.269   |
| NM_005137 | 2992.317  | 1860.901  | NM_004156 | 3502.99   | 2049.137  | NM_005873 | 3176.844  | 2346.049  |
| NM_006764 | 2309.82   | 1728.479  | AK000561  | 735.488   | 684.335   | NM_004624 | 596.179   | 583.803   |
| NM_001386 | 1250.361  | 927.585   | AB051449  | 9007.165  | 6058.11   | NM_003865 | 349.092   | 660.307   |
| NM_001163 | 1391.585  | 1175.795  | BC009187  | 7159.805  | 4151.736  | AB015330  | 1143.531  | 1427.477  |
| NM_005878 | 1637.603  | 1252.132  | AL133617  | 841.043   | 453.585   | NM_001455 | 1398.652  | 1830.558  |
| AF169257  | 398.214   | 516.601   | NM_016485 | 3607.166  | 1875.175  | L09071    | 181.745   | 244.901   |
| NM_014848 | 656.553   | 556.305   | NM_002615 | 9781.303  | 6431.916  | NM_003322 | 204.116   | 278.931   |
| BF217766  | 892.937   | 970.727   | AF090894  | 399.273   | 395.335   | AK026180  | 216.131   | 271.448   |
| NM_000184 | 2198.876  | 2900.468  | AK000049  | 647.326   | 1055.162  | NM_013365 | 671.32    | 761.41    |
| NM_016180 | 691.867   | 682.901   | NM_016357 | 2763.673  | 4245.526  | NM_005817 | 2646.209  | 2815.516  |
| NM_000112 | 787.594   | 690.461   | NM_014500 | 9304.555  | 13494.839 | NM_003916 | 1658.521  | 2576.038  |
| NM_005827 | 5501.245  | 4205.166  | AK023792  | 551.334   | 1723.824  | NM_002870 | 6533.162  | 5471.341  |
| NM_003053 | 3575.918  | 3739.925  | NM_020149 | 2816.124  | 7419.675  | NM_006363 | 1831.729  | 1175.081  |
| NM_003044 | 826.22    | 856.747   | NM_006237 | 914.253   | 1407.05   | NM_020415 | 281.701   | 385.587   |
| NM_006672 | 7809.612  | 6614.355  | NM_001271 | 4825.454  | 4682.88   | AL049667  | 1292.932  | 1313.454  |
| M31659    | 1363.584  | 949.455   | NM_003683 | 1567.231  | 1986.21   | NM_000334 | 363.383   | 396.224   |
| NM_003056 | 8529.867  | 8201.262  | AF039019  | 3353.235  | 4534.699  | NM_020400 | 248.145   | 187.222   |
| NM_016226 | 10332.412 | 11751.516 | NM_012255 | 5913.351  | 6321.307  | NM_001504 | 361.657   | 542.288   |
| AK024311  | 1190.374  | 1068.499  | NM_018196 | 1387.476  | 1420.719  | D50926    | 848.554   | 977.94    |
| AF052155  | 8026.184  | 7421.328  | NM_004818 | 2783.352  | 2465.248  | BF205683  | 418.158   | 522.325   |
| NM_005085 | 1428.511  | 1515.06   | J04205    | 7391.9    | 4207.803  | NM_000758 | 3957.092  | 5152.444  |
| AF060902  | 1710.436  | 1552.609  | D38491    | 4034.953  | 1909.954  | M17017    | 359.162   | 390.564   |
| AF121858  | 4628.719  | 4013.92   | AK026835  | 1892.437  | 1414.727  | NM_002990 | 405.704   | 403.622   |
| NM_013437 | 1139.835  | 1119.515  | NM_002819 | 11765.57  | 8319.01   | NM_002432 | 3680.071  | 4026.745  |
| AK025966  | 2328.147  | 1496.546  | NM_013264 | 3348.189  | 2260.562  | AB033037  | 318.788   | 219.8     |
| NM_018725 | 754.415   | 716.04    | NM_003315 | 8758.304  | 5060.958  | L40400    | 895.653   | 681.125   |
| AK024069  | 8560.05   | 7458.183  | NM_005570 | 6957.69   | 3134.472  | NM_006247 | 1112.866  | 1321.699  |
| NM_004582 | 11124.821 | 11459.321 | NM_000086 | 2784.957  | 2077.291  | NM_018281 | 2148.589  | 2493.587  |
| NM_015640 | 15012.54  | 20682.07  | NM_003752 | 2348.313  | 1274.923  | NM_004457 | 1267.21   | 1150.386  |
| AF233450  | 1006.259  | 1388.116  | NM_003932 | 7672.448  | 4621.92   | NM_014046 | 543.653   | 791.205   |
| NM_016233 | 1474.006  | 2524.884  | NM_016491 | 9850.551  | 5693.189  | NM_004315 | 1745.929  | 1211.738  |
| NM_000821 | 13589.385 | 17731.561 | NM_006429 | 13859.974 | 6650.027  | NM_020166 | 1178.011  | 753.446   |
| NM_020121 | 797.243   | 710.908   | NM_003307 | 4441.763  | 7912.853  | AK023860  | 536.769   | 367.42    |
| NM_003145 | 41541.238 | 35578.035 | AF070565  | 1117.806  | 1625.042  | NM_000031 | 813.421   | 630.582   |
| NM_001632 | 1779.45   | 2010.356  | AK021644  | 1507.251  | 1805.802  | NM_002085 | 6317.501  | 7324.387  |
| NM_012264 | 1443.637  | 1359.13   | NM_016599 | 350.345   | 1173.494  | NM_016286 | 1873.737  | 2822.739  |
| AF311312  | 2471.835  | 2426.876  | NM_015944 | 529.264   | 1221.079  | NM_001567 | 880.097   | 1376.869  |
| NM_001179 | 489.732   | 371.907   | NM_002064 | 809.743   | 1973.255  | NM_004905 | 3654.089  | 4965.479  |
| NM_005313 | 47301.02  | 44625.23  | NM_015523 | 3517.879  | 5935.01   | AF217971  | 498.434   | 592.988   |
| NM_017765 | 12422.796 | 16741.561 | NM_015960 | 5165.565  | 6221.485  | NM_001925 | 287.225   | 353.092   |
| AB040967  | 13034.896 | 20392.135 | NM_006085 | 2136.251  | 3966.886  | AF245517  | 389.557   | 199.91    |
| NM_003578 | 274.361   | 304.666   | NM_000907 | 4606.548  | 6994.129  | NM_004982 | 248.342   | 218.567   |
| NM_014721 | 1930.676  | 1876.91   | AF254085  | 2392.106  | 1985.217  | NM_001694 | 19169.734 | 15392.542 |
| AK026352  | 626.052   | 935.061   | NM_001987 | 1382.005  | 1284.152  | AF286370  | 263.958   | 82.592    |
| AL137705  | 3824.071  | 2851.021  | AF244088  | 1847.713  | 1358.744  | NM_000217 | 292.68    | 50.796    |
| U41898    | 495.066   | 324.371   | NM_007136 | 810.824   | 615.179   | NM_012466 | 1259.933  | 1501.217  |
| NM_007262 | 20992.059 | 28885.994 | AK025434  | 997.167   | 748.755   | NM_134260 | 3148.836  | 3901.486  |
| NM_014783 | 7708.857  | 8185.824  | AJ251845  | 410.615   | 209.679   |           | 34.963    | 108.084   |
| NM_014053 | 3006.634  | 3719.134  | AK000435  | 992.084   | 747.059   | AF261758  | 188.658   | 53.139    |
| NM_002571 | 981.508   | 1165.031  | AK000569  | 2332.917  | 1408.068  | NM_001478 | 6674.135  | 5874.455  |
| NM_004939 | 4567.902  | 6009.188  | NM_006049 | 1091.302  | 690.061   | AF135422  | 610.454   | 427.119   |
| NM_001425 | 22401.684 | 26838.355 | NM_017661 | 1428.47   | 737.662   | AB029396  | 3.934     | 11947.62  |



|           |           |           |           |           |           |           |          |           |
|-----------|-----------|-----------|-----------|-----------|-----------|-----------|----------|-----------|
| NM_01571C | 557.709   | 738.188   | BC016698  | 5429.409  | 3111.307  | NM_004479 | 3334.801 | 2539.337  |
| NM_01415E | 5477.527  | 4718.935  | AK027185  | 978.843   | 1384.135  | NM_00261C | 289.769  | 320.144   |
| AK021591  | 1663.961  | 1915.387  | AK025576  | 1117.02   | 1241.65   | AF070587  | 490.828  | 253.428   |
| NM_01467E | 1352.152  | 1326.361  | AF147385  | 661.833   | 939.318   | BE250526  | 224.151  | 448.954   |
| NM_00658E | 6436.111  | 8082.736  | AL442086  | 2577.062  | 4184.745  | NM_01681E | 632.045  | 633.075   |
| AB007875  | 1230.174  | 1114.638  | AK026784  | 235.954   | 622.416   | NM_01222Z | 652.777  | 697.322   |
| NM_018261 | 1179.47   | 1025.852  | BC034819  | 2475.733  | 4005.767  | NM_00500Z | 550.405  | 621.058   |
| AL050288  | 35854.012 | 34471.934 | AF147313  | 5184.455  | 8203.901  | NM_00659E | 1032.316 | 1180.462  |
| NM_00504C | 6086.82   | 5319.574  | AF147382  | 18154.652 | 22316.098 | AK023214  | 1521.896 | 1215.48   |
| NM_016391 | 12945.536 | 11997.344 | AK001957  | 3151.963  | 6714.229  | NM_00146E | 2356.934 | 2533.47   |
| M80783    | 473.131   | 494.644   | AK000850  | 853.737   | 2211.85   | NM_00360C | 1346.266 | 1000.426  |
| AF075033  | 4988.641  | 3602.075  | AK021833  | 1587.017  | 3300.978  | NM_01749C | 836.411  | 558.483   |
| D50911    | 14292.424 | 8139.281  | AF143867  | 968.388   | 1046.979  | NM_00271E | 439.417  | 458.873   |
| AB011104  | 2008.467  | 2312.394  | AK025889  | 3611.829  | 3436.769  | AK026727  | 611.872  | 477.894   |
| NM_00324E | 1323.841  | 1296.408  | NM_01471E | 1134.823  | 1355.226  | L09071    | 181.762  | 223.671   |
| NM_00107E | 767.488   | 922.127   | AF086448  | 1909.883  | 1304.514  | NM_00332Z | 223.971  | 268.002   |
| NM_00055Z | 6791.959  | 11033.186 | AF086386  | 1073.416  | 886.341   | BC036375  | 4743.825 | 3738.457  |
| NM_00380E | 508.947   | 776.119   | AF086457  | 1202.717  | 554.491   | BI912037  | 352.128  | 415.366   |
| AK000860  | 6380.127  | 6215.005  | AK025469  | 901.687   | 628.88    | AA454646  | 992.44   | 753.628   |
| NM_014961 | 1014.068  | 1360.519  | NM_02023E | 5658.939  | 4446.806  | U18087    | 7830.637 | 6815.47   |
| NM_02014E | 1351.147  | 1241.141  | AF070581  | 610.407   | 371.522   | U66349    | 305.416  | 264.976   |
| AK021529  | 2461.946  | 2408.494  | AK024187  | 487.783   | 328.593   | AA057156  | 379.004  | 302.531   |
| AB037845  | 4620.377  | 5061.682  | AF075079  | 423.226   | 387.594   | U19487    | 701.426  | 607.462   |
| NM_00598C | 4616.419  | 3935.441  | AK022479  | 585.929   | 505.6     | AF166327  | 5729.234 | 5307.639  |
| NM_01619C | 45125.742 | 55364.219 | AK023572  | 428.996   | 629.393   | AF260739  | 359.802  | 320.198   |
| AL137579  | 7823.882  | 8337.871  | AF086004  | 7197.63   | 8183.053  | AF531423  | 888.647  | 1121.156  |
| NM_01238E | 7929.191  | 8753.844  | AF147433  | 274.313   | 788.069   | X76555    | 268.485  | 633.626   |
| AJ271684  | 1210.088  | 1836.613  | AF086006  | 331.044   | 789.466   | NM_00543Z | 700.054  | 545.346   |
| AF255342  | 5952.2    | 10653.019 | AL137318  | 998.754   | 1791.3    | L10386    | 1336.332 | 1341.578  |
| AK026682  | 2238.362  | 3285.834  | AL137482  | 585.758   | 1064.938  | AF061812  | 1251.826 | 1121.97   |
| NM_00465E | 3282.598  | 3505.696  | AL162011  | 11144.561 | 14433.54  | AL136756  | 491.132  | 600.763   |
| NM_00394Z | 2811.655  | 3201.088  | AL390177  | 455.163   | 530.906   | NM_00299C | 295.655  | 327.404   |
| NM_006471 | 25065.438 | 19875.314 | AL137678  | 432.589   | 235.741   | NM_00243Z | 3204.202 | 4354.713  |
| NM_00416E | 5063.037  | 2119.742  | AK056111  | 570.004   | 515.399   | NM_01242C | 107.113  | 405.72    |
| NM_00036E | 817.673   | 705.826   | AL162055  | 226.635   | 453.84    | AB033037  | 417.017  | 1619.813  |
| NM_01658E | 1068.879  | 842.927   | Y13807    | 1158.206  | 710.203   | L40400    | 802.738  | 500.115   |
| NM_00286E | 1832.536  | 1651.773  | AK023038  | 509.592   | 253.259   | AK025688  | 460.227  | 713.936   |
| NM_00386C | 725.669   | 1111.243  | AK026206  | 859.195   | 506.173   | Z36819    | 6788.146 | 7944.146  |
| NM_005414 | 975.063   | 960.94    | AF086074  | 1016.74   | 751.758   | NM_00119E | 191.382  | 96.074    |
| NM_00446E | 6142.107  | 7490.147  | AK023964  | 1459.51   | 1173.82   | NM_01444E | 458.252  | 343.09    |
| NM_016031 | 16773.471 | 24572.014 | AF086084  | 907.087   | 443.215   | AL080157  | 332.149  | 283.434   |
| NM_004804 | 1691.103  | 1698.884  | AL050184  | 619.817   | 404.693   | NM_00530E | 370.167  | 903.235   |
| M92439    | 13088.287 | 14013.529 | AF085853  | 368.622   | 210.471   | NM_000911 | 187.859  | 162.184   |
| AL117665  | 4484.264  | 5754.068  | AK027112  | 3042.964  | 2601.014  | NM_007227 | 197.534  | 237.086   |
| AF263541  | 2144.572  | 3077.253  | AL049314  | 1554.346  | 1670.907  | NM_00702Z | 306.543  | 366.074   |
| AK027169  | 491.713   | 864.795   | AF093016  | 7805.02   | 8658.682  | NM_00587Z | 3174.056 | 3453.999  |
| NM_00126Z | 10218.525 | 14413.926 | AF161345  | 1233.086  | 1508.685  | NM_004624 | 610.621  | 675.282   |
| BE873030  | 1433.282  | 1673.627  | -         | 472.384   | 655.122   | NM_00386E | 364.756  | 284.427   |
| NM_00244C | 876.478   | 1459.226  | AF090925  | 521.175   | 618.718   | AB015330  | 1208.587 | 1083.77   |
| NM_00362E | 821.338   | 1383.661  | NM_01416E | 3359.749  | 4904.898  | NM_00145E | 1356.263 | 1203.526  |
| BC006990  | 5289.216  | 5886.573  | AK021659  | 435.819   | 631.958   | NM_00498Z | 200.995  | 411.312   |
| NM_019114 | 2202.526  | 1816.461  | NM_014137 | 313.337   | 623.862   | NM_001694 | 17714.68 | 30482.736 |
| M33552    | 4296.813  | 3027.605  | AK021974  | 1054.113  | 1060.556  | AF286370  | 144.729  | 328.411   |

|           |           |           |           |           |           |           |          |          |
|-----------|-----------|-----------|-----------|-----------|-----------|-----------|----------|----------|
| AJ252060  | 2135.862  | 1365.585  | AK022068  | 788.049   | 642.529   | AK026180  | 243.833  | 187.95   |
| NM_006403 | 5464.722  | 4390.964  | AK022229  | 751.792   | 704.178   | NM_013365 | 725.666  | 746.054  |
| NM_018977 | 607.865   | 454.598   | AK022362  | 1640.986  | 1350.36   | NM_005817 | 3164.151 | 5032.468 |
| AJ001402  | 1120.386  | 625.376   | AK022004  | 2817.277  | 2224.817  | NM_003916 | 1961.002 | 1713.878 |
| NM_004540 | 850.836   | 828.4     | AK022390  | 691.818   | 516.881   | NM_002870 | 6813.396 | 8802.376 |
| NM_000235 | 3271.222  | 3405.342  | AK027134  | 1027.323  | 594.619   | NM_006363 | 1825.616 | 1724.083 |
| AF068236  | 13057.453 | 13924.101 | AK024168  | 608.531   | 347.359   | NM_020415 | 285.973  | 162.937  |
| L25628    | 3005.738  | 3477.448  | AF264622  | 756.094   | 638.889   | NM_014879 | 151.663  | 355.113  |
| M37033    | 2142.53   | 3428.313  | AK022255  | 1537.957  | 1031.661  | AL049667  | 1291.637 | 1186.646 |
| NM_007171 | 3322.83   | 3491.76   | AF161360  | 826.312   | 1105.582  | NM_000334 | 419.154  | 586.462  |
| NM_004278 | 1178.864  | 1443.068  | AK021720  | 1072.075  | 1289.895  | NM_020400 | 273.364  | 242.442  |
| NM_005632 | 1314.719  | 1563.637  | NM_016497 | 14918.442 | 13982.752 | NM_001504 | 400.951  | 264.591  |
| AK021499  | 1389.352  | 1809.412  | AK000617  | 485.96    | 403.437   | D50926    | 836.202  | 1073.563 |
| AK000336  | 3707.168  | 4892.255  | AF009261  | 498.241   | 747.257   | BF205683  | 506.348  | 466.063  |
| NM_002795 | 19871.078 | 30248.621 | AB037792  | 1009.863  | 680.791   | NM_001548 | 190.14   | 146.325  |
| NM_006292 | 4746.216  | 8162.157  | AK022480  | 432.419   | 338.233   | NM_000758 | 3961.062 | 3866.719 |
| AB007948  | 1810.519  | 2728.969  | AK024158  | 555.647   | 270.916   | M17017    | 317.377  | 427.139  |
| AB033066  | 2019.265  | 1781.84   | AL080082  | 2431.989  | 1169.609  | NM_003600 | 835.501  | 682.791  |
| AF126028  | 2823.64   | 3802.281  | AK021623  | 1448.154  | 958.992   | NM_017490 | 640.689  | 902.864  |
| NM_007019 | 3855.003  | 4888.147  | U79242    | 642.349   | 1140.623  | NM_002718 | 417.045  | 894.346  |
| NM_007075 | 835.508   | 1087.273  | AF119901  | 1989.184  | 2274.573  | AK026727  | 578.424  | 1381.181 |
| NM_017640 | 1003.27   | 1178.559  | AK001936  | 1633.809  | 3044.234  | NM_002830 | 164.218  | 237.926  |
| NM_017721 | 2065.571  | 1684.308  | NM_003770 | 33925.699 | 32318.256 | NM_006247 | 1293.933 | 1880.274 |
| NM_019088 | 6795.937  | 4096.052  | AK001395  | 4779.862  | 5370.363  | AB032983  | 230.721  | 311.158  |
| AB002373  | 1844.035  | 1431.141  | S57803    | 2570.596  | 2713.306  | NM_018281 | 2641.278 | 3265.539 |
| NM_016350 | 20322.008 | 14399.168 | AF131822  | 784.227   | 862.314   | NM_004457 | 1529.723 | 2157.313 |
| AK024167  | 3620.595  | 2256.915  | AK023131  | 1144.78   | 927.904   | NM_014045 | 587.675  | 589.499  |
| AK025308  | 671.437   | 377.078   | AF085865  | 3209.081  | 2320.119  | NM_005396 | 160.768  | 136.549  |
| NM_005026 | 4143.919  | 3076.844  | AK025521  | 1842.216  | 1521.767  | NM_004315 | 1979.193 | 1952.579 |
| AF213356  | 3007.754  | 3257.134  | NM_001053 | 48402.004 | 33954.969 | NM_020166 | 1345.419 | 1204.427 |
| BC035716  | 1398.764  | 1571.499  | Z70694    | 2001.102  | 1709.029  | AK023860  | 645.776  | 627.835  |
| NM_018014 | 701.289   | 891.852   | L77602    | 503.902   | 297.274   | NM_000031 | 945.829  | 938.727  |
| NM_002359 | 11739.243 | 14796.638 | NM_015421 | 4534.641  | 2911.519  | NM_002085 | 5648.556 | 7092.902 |
| AF230809  | 1340.149  | 1695.132  | AF086081  | 3317.428  | 2009.533  | NM_016286 | 1776.854 | 1648.404 |
| NM_017894 | 8585.196  | 8746.64   | NM_018634 | 446.862   | 221.773   | NM_001567 | 874.931  | 1125.999 |
| NM_006509 | 1693.08   | 2005.417  | L23867    | 386.224   | 354.92    | NM_004905 | 3949.411 | 6701.368 |
| AK025447  | 1615.196  | 1618.436  | AB020968  | 845.986   | 662.596   | AF217971  | 606.143  | 496.797  |
| NM_002624 | 29699.227 | 27884.949 | AL138690  | 1161.609  | 1554.259  | NM_001925 | 327.57   | 315.179  |
| AF006199  | 1710.746  | 2141.413  | AF074989  | 1000.101  | 1554.454  | AF245517  | 317.477  | 391.414  |
| NM_004554 | 4700.303  | 5977.812  | AK001107  | 915.214   | 918.453   | X78926    | 4446.39  | 2822.609 |
| NM_018119 | 2747.674  | 4328.789  | AF147393  | 317.249   | 341.939   | AJ278110  | 278.267  | 238.196  |
| NM_014576 | 720.988   | 1078.855  | AL137339  | 322.636   | 359.182   | NM_014237 | 489.425  | 622.718  |
| AL162035  | 3475.17   | 5086.444  | AL080112  | 1634.864  | 1243.674  | NM_020396 | 179.751  | 197.7    |
| NM_006692 | 1166.119  | 1763.826  | AK022299  | 545.481   | 218.68    | AF029900  | 621.419  | 1626.157 |
| NM_003084 | 3019.438  | 3471.137  | AL137325  | 295.741   | 319.535   | NM_003325 | 1077.474 | 1241.201 |
| NM_002582 | 6061.54   | 6301.708  | AF147361  | 1197.627  | 1131.044  | NM_016178 | 917.942  | 1057.382 |
| NM_001009 | 54216.797 | 65168.602 | AL133086  | 732.682   | 554.013   | AK022639  | 356.464  | 297.256  |
| NM_001026 | 51747.598 | 59265.84  | NM_012151 | 37747.332 | 35248.824 | D31766    | 547.753  | 369.219  |
| NM_001011 | 59929.574 | 48495.625 | AF087994  | 1225.025  | 995.259   | NM_001478 | 7608.449 | 6203.844 |
| AB061315  | 640.639   | 393.749   | AJ227912  | 447.618   | 343.523   | NM_002612 | 136.114  | 315.33   |
| D17289    | 15497.262 | 7706.188  | NM_018195 | 1516.064  | 1596.738  | AF135422  | 713.921  | 845.551  |
| NM_002949 | 19576.984 | 10213.282 | AK025532  | 3238.96   | 2080.808  | NM_004479 | 3974.114 | 3123.033 |
| NM_014230 | 9040.438  | 7323.065  | NM_003522 | 471.566   | 178.859   | NM_002610 | 250.769  | 182.834  |

|           |           |           |           |           |           |           |           |           |
|-----------|-----------|-----------|-----------|-----------|-----------|-----------|-----------|-----------|
| NM_01774E | 3788.737  | 5474.94   | BF217847  | 912.13    | 698.798   | AF070587  | 555.88    | 498.762   |
| AK025374  | 1389.706  | 1922.63   | NM_005320 | 1476.238  | 750.331   | BE250526  | 269.772   | 172.95    |
| NM_014901 | 7122.037  | 10083.252 | CY3Cy5    | 5367.875  | 735.978   | NM_01681E | 635.662   | 686.748   |
| AK000005  | 8128.519  | 12673.917 | BI830936  | 795.161   | 833.114   | NM_01222E | 729.578   | 531.831   |
| AF086790  | 843.641   | 1342.232  | U79292    | 5711.696  | 6860.949  | NM_00500E | 569.659   | 353.949   |
| U28480    | 373.253   | 537.856   | BI830753  | 814.641   | 874.925   | NM_00659E | 1078.277  | 1023.855  |
| NM_00010E | 13056.703 | 16386.434 | X68314    | 781.653   | 814.977   | AK023214  | 1569.917  | 1089.056  |
| NM_01812E | 2661.771  | 2474.052  | X71973    | 35581.098 | 33810.543 | NM_00146E | 2128.053  | 2223.492  |
| NM_016931 | 8394.818  | 7048.391  | T49651    | 3768.843  | 4917.547  | BC036368  | 126.399   | 258.787   |
| NM_00437E | 39071.48  | 38403.996 | N51014    | 2209.533  | 2156.605  | NM_001851 | 318.847   | 489.536   |
| NM_00556E | 52399.867 | 61030.543 | BE392471  | 12292.679 | 10011.781 | S67789    | 295.031   | 839.447   |
| NM_00016E | 2362.05   | 3409.041  | AI802950  | 1457.318  | 1207.99   | AK022689  | 1033.346  | 2510.648  |
| AK027067  | 890.266   | 1526.621  | AA682423  | 507.201   | 312.318   | NM_01622E | 222.245   | 1163.41   |
| NM_01628E | 6389.739  | 11206.097 | AL043686  | 4320.327  | 3701.78   | NM_00419E | 2400.985  | 2342.826  |
| AK021661  | 740.344   | 1104.808  | AA490172  | 982.523   | 1034.363  | NM_00470E | 677.394   | 629.135   |
| NM_00386E | 4667.459  | 4328.507  | AA775212  | 2922.301  | 2773.126  | NM_02019C | 2523.351  | 2261.521  |
| NM_00682E | 16554.637 | 15009.57  | NM_00094E | 1439.937  | 1527.799  | NM_01435E | 424.599   | 412.412   |
| NM_00210E | 1182.605  | 692.65    | NM_00257E | 22789.873 | 21236.596 | NM_00406E | 210.544   | 144.702   |
| NM_00269E | 8486.51   | 5460.293  | SR5       | 3221.291  | 3982.17   | NM_000121 | 1220.218  | 1268.749  |
| NM_00445E | 2133.088  | 1227.779  | SR7       | 4075.948  | 35830.172 | NM_002091 | 886.17    | 671.518   |
| NM_00096E | 551.266   | 275.231   | SR9       | 17343.932 | 3368.359  | AB033092  | 1470.091  | 1578.51   |
| NM_01248E | 3366.55   | 2058.724  | CY3Cy5    | 3578.279  | 395.366   | M89957    | 316.615   | 14.876    |
| AF217227  | 2303.028  | 1501.593  | NM_003371 | 9355.407  | 10147.261 | NM_00302E | 293.564   | 397.501   |
| AK024141  | 3353.569  | 1937.137  | AK023114  | 3268.687  | 3705.673  | BC035030  | 764.19    | 516.187   |
| U13706    | 516.51    | 223.227   | NM_00367E | 3455.37   | 3831.659  | NM_00534C | 5357.394  | 5516.987  |
| NM_00281E | 4679.925  | 7904.755  | NM_012301 | 739.883   | 636.611   | NM_016201 | 197.751   | 204.845   |
| NM_00119E | 484.284   | 1089.221  | NM_01441E | 3092.846  | 2770.77   | NM_00086E | 951.613   | 1417.76   |
| AL049450  | 3935.441  | 6779.467  | NM_01493E | 2446.383  | 2402.755  | NM_01797E | 445.337   | 717.378   |
| AK023481  | 490.357   | 932.824   | AF049460  | 533.262   | 421.707   | AF147727  | 462.444   | 370.151   |
| AK022011  | 384.97    | 699.379   | AK026066  | 1082.472  | 1041.997  | NM_006751 | 921.664   | 1026.679  |
| NM_00508E | 17745.088 | 33028.094 | NM_00524E | 3311.66   | 3297.19   | AB037834  | 4386.268  | 1346.873  |
| NM_00723E | 2353.877  | 2286.819  | AF054589  | 474.393   | 619.204   | NM_00356E | 391.163   | 327.668   |
| AL049340  | 373.475   | 547.182   | NM_00527C | 1010.535  | 1102.053  | NM_01405E | 4183.857  | 6034.278  |
| NM_01760E | 6328.737  | 6742.639  | NM_01481E | 1495.066  | 1557.024  | NM_00277E | 17427.291 | 25472.762 |
| AK024644  | 8055.599  | 9832.191  | NM_007221 | 3955.66   | 4168.687  | AF202635  | 503.67    | 1045.157  |
| AB019573  | 913.066   | 1201.632  | X54163    | 17874.594 | 17729.264 | NM_01412E | 206.3     | 438.298   |
| U68494    | 5348.728  | 3035.642  | AK025395  | 805.017   | 604.112   | NM_01790E | 163.478   | 143.702   |
| AF064254  | 1146.975  | 2399.852  | NM_00038E | 1115.592  | 941.399   | NM_01336E | 1342.858  | 1326.101  |
| AK021524  | 340.438   | 495.748   | X58377    | 714.854   | 597.693   | AL137550  | 106.918   | 112.139   |
| AL137360  | 6565.098  | 9829.769  | NM_00246E | 529.213   | 748.354   | NM_000321 | 1367.117  | 998.549   |
| AF143331  | 381.526   | 541.616   | NM_01466E | 1055.846  | 1192.12   | NM_006341 | 2390.716  | 2219.18   |
| AK000819  | 518.778   | 421.885   | NM_00472E | 1639.818  | 2120.642  | NM_00170E | 601.762   | 284.911   |
| AF201941  | 2179.697  | 1735.22   | NM_01442E | 1077.055  | 1009.169  | NM_006191 | 1217.207  | 1387.884  |
| AF026941  | 1240.014  | 708.884   | NM_01213E | 1773.517  | 2185.256  | NM_00180C | 378.168   | 245.852   |
| NM_00707C | 4048.672  | 2580.005  | NM_01795E | 670.174   | 579.932   | NM_00433E | 1034.258  | 1008.198  |
| AL133019  | 4067.674  | 3005.002  | NM_00661E | 1589.816  | 2024.21   | NM_01594E | 433.273   | 446.247   |
| NM_01489E | 1227.759  | 1248.54   | NM_016451 | 2074.456  | 1612.851  | NM_01397E | 454.746   | 534.685   |
| AK024883  | 4432.08   | 7166.203  | NM_007351 | 15522.667 | 11095.268 | NM_00379C | 668.142   | 515.362   |
| AF086215  | 150.652   | 936.459   | AK026266  | 8355.584  | 6153.413  | NM_00049E | 595.629   | 383.252   |
| AK000776  | 108.881   | 599.241   | NM_00712E | 4260.057  | 3449.718  | NM_01602E | 261.04    | 262.982   |
| L77561    | 370.984   | 381.924   | NM_00317E | 2675.985  | 2351.934  | NM_00372E | 1405.134  | 1360.631  |
| AL109696  | 1446.319  | 2280.712  | NM_00072E | 1370.125  | 1100.987  | NM_01443C | 153.585   | 401.091   |
| AK022190  | 642.052   | 438.547   | AL096751  | 4056.897  | 3194.034  | NM_00049E | 282.582   | 372.024   |

|           |           |           |           |           |           |           |          |          |
|-----------|-----------|-----------|-----------|-----------|-----------|-----------|----------|----------|
| AJ011593  | 1308.096  | 1549.213  | NM_000364 | 759.494   | 894.285   | AF085883  | 384.21   | 257.946  |
| AJ227907  | 589.984   | 321.377   | AF026920  | 3406.061  | 3447.645  | NM_016571 | 410.956  | 454.142  |
| X89743    | 695.154   | 758.988   | NM_004931 | 3591.41   | 2862.647  | NM_016446 | 598.883  | 476.452  |
| AJ002784  | 644.522   | 1213.405  | NM_000607 | 21679.758 | 20939.49  | NM_002516 | 225.819  | 272.953  |
| U17621    | 750.91    | 1303.479  | AF090409  | 266.775   | 352.782   | NM_001870 | 153.493  | 135.525  |
| AL049239  | 2639.758  | 3356.202  | NM_002575 | 4708.596  | 4131.762  | AJ271216  | 312.785  | 385.354  |
| NM_013286 | 1598.733  | 2029.649  | NM_004244 | 3636.108  | 2238.207  | U23028    | 976.247  | 1075.964 |
| M60721    | 11931.725 | 11715.524 | AK001500  | 1621.162  | 1423.957  | NM_000817 | 1119.266 | 724.971  |
| L39061    | 3100.452  | 1866.494  | NM_006774 | 532.869   | 687.526   | AF113132  | 3406.373 | 3095.584 |
| AF071508  | 1394.462  | 937.834   | NM_020129 | 899.011   | 1044.669  | NM_006571 | 1437.266 | 1436.464 |
| L07265    | 9940.104  | 5410.891  | Y16521    | 2131.906  | 2444.555  | AK022680  | 348.252  | 171.339  |
| L19369    | 534.033   | 261.304   | AL050371  | 2578.235  | 2706.385  | NM_018946 | 2121.184 | 2191.145 |
| D16472    | 2133.091  | 1865.505  | NM_002651 | 5789.202  | 5399.288  | NM_016356 | 1318.543 | 662.557  |
| AL157459  | 2381.637  | 3743.182  | NM_002413 | 6846.946  | 4996.927  | NM_004156 | 1255.65  | 1450.754 |
| AB020654  | 670.598   | 548.39    | NM_017577 | 388.397   | 255.278   | AK000561  | 293.576  | 575.569  |
| AL353954  | 736.688   | 762.484   | NM_001757 | 2517.383  | 2530.424  | AB051449  | 2071.933 | 2375.769 |
| NM_017630 | 3015.447  | 2452.713  | NM_001647 | 2939.829  | 2597.966  | BC009187  | 2507.222 | 2199.701 |
| AK000778  | 1069.458  | 1269.097  | NM_018156 | 1203.288  | 1620.869  | AL133617  | 317.464  | 270.493  |
| AK000932  | 469.417   | 605.194   | NM_016301 | 6202.881  | 5497.792  | NM_016485 | 1422.126 | 1357.623 |
| AL133573  | 6034.912  | 7541.376  | AK021975  | 662.87    | 847.567   | NM_002615 | 3385.478 | 3276.43  |
| AK000115  | 360.49    | 307.937   | AB032952  | 20275.988 | 16726.82  | AF090894  | 190.302  | 292.511  |
| NM_017956 | 530.075   | 864.476   | NM_002522 | 10111.458 | 10049.329 | NM_016357 | 723.829  | 823.444  |
| AK000958  | 617.601   | 684.482   | NM_018607 | 359.249   | 345.612   | NM_014500 | 2043.506 | 2105.88  |
| AK024523  | 699.989   | 1135.573  | NM_002976 | 2404.205  | 1600.397  | AK023792  | 212.919  | 678.258  |
| AK024600  | 970.424   | 1483.907  | AB040879  | 1470.635  | 2591.081  | NM_020146 | 788.194  | 923.738  |
| AK024543  | 1129.991  | 658.323   | AL049935  | 3230.455  | 2380.891  | NM_006237 | 275.948  | 360.096  |
| AK024624  | 8871.062  | 6143.752  | AB033043  | 3860.45   | 4825.2    | NM_001271 | 1726.043 | 1374.382 |
| AK025090  | 1026.255  | 905.334   | NM_014999 | 1851.188  | 1910.618  | NM_003683 | 532.185  | 266.053  |
| NM_014152 | 466.965   | 698.398   | AK025220  | 1601.482  | 1698.366  | AF039019  | 1228.015 | 1640.095 |
| AF086473  | 687.854   | 1213.699  | NM_016306 | 14433.201 | 13160.425 | NM_012256 | 1773.576 | 1214.581 |
| D87682    | 1562.351  | 2857.532  | D42046    | 2671.983  | 3083.07   | NM_018196 | 484.825  | 488.334  |
| AF321617  | 2668.768  | 4653.293  | NM_001033 | 2564.371  | 2389.956  | NM_004816 | 849.753  | 783.716  |
| AF223389  | 470.096   | 498.029   | NM_004526 | 12122.282 | 10600.06  | J04205    | 2265.598 | 2288.978 |
| NM_006950 | 203.821   | 410.329   | NM_002526 | 6719.784  | 4878.846  | D38491    | 1149.904 | 505.045  |
| NM_000682 | 578.019   | 494.308   | NM_020135 | 2006.758  | 2069.627  | AK026835  | 675.399  | 619.2    |
| AF086208  | 1325.41   | 1067.96   | NM_018516 | 3165.379  | 2814.451  | NM_002816 | 3667.214 | 3441.796 |
| AK023335  | 3365.413  | 2941.598  | AK023149  | 1494.744  | 952.884   | NM_013264 | 1192.732 | 1635.917 |
| AK023187  | 886.693   | 629.488   | AK023168  | 2023.954  | 1830.278  | NM_003315 | 3025.507 | 3324.492 |
| AK022231  | 432.719   | 199.418   | NM_006646 | 528.776   | 392.452   | NM_005570 | 2334.79  | 1766.473 |
| NM_019033 | 671.222   | 431.383   | NM_004742 | 793.021   | 552.823   | NM_000086 | 807.771  | 943.65   |
| AL133101  | 1061.065  | 805.222   | NM_014753 | 2062.344  | 1795.838  | NM_003752 | 879.349  | 901.399  |
| AF143875  | 444.342   | 695.859   | NM_006585 | 27961.834 | 25842.297 | NM_003932 | 2867.135 | 2660.447 |
| AK024602  | 2985.57   | 4965.468  | NM_014331 | 2871.463  | 2596.877  | NM_016491 | 3256.868 | 2766.694 |
| NM_018507 | 458.133   | 1002.811  | NM_006795 | 9985.793  | 15333.067 | NM_006426 | 4954.131 | 4791.589 |
| NM_000485 | 10399.413 | 20215.496 | AF070568  | 1587.199  | 1689.063  | NM_003307 | 1416.137 | 1680.495 |
| NM_018542 | 246.539   | 519.689   | NM_000277 | 368.783   | 378.291   | AK021644  | 431.078  | 433.967  |
| AK025503  | 752.947   | 799.583   | NM_000240 | 3254.704  | 2696.305  | NM_016596 | 220.022  | 283.787  |
| AF130073  | 967.086   | 1186.574  | AK055733  | 12584.498 | 11033.331 | NM_002064 | 249.258  | 335.01   |
| AK024225  | 12655.543 | 11837.488 | AF298880  | 8269.063  | 6415.972  | NM_015523 | 1116.227 | 936.334  |
| AF086334  | 929.918   | 880.972   | AK025395  | 853.661   | 1359.624  | NM_015960 | 1594.459 | 767.392  |
| AL137602  | 462.439   | 251.382   | NM_000386 | 1097.431  | 1368.521  | NM_006085 | 595.573  | 628.284  |
| NM_003696 | 418.715   | 286.102   | X58377    | 658.725   | 542.908   | NM_000907 | 1379.604 | 1005.329 |
| AF075035  | 3237.582  | 2491.464  | NM_002469 | 751.386   | 833.932   | AF254085  | 787.898  | 676.718  |

|           |           |           |           |           |           |           |          |          |
|-----------|-----------|-----------|-----------|-----------|-----------|-----------|----------|----------|
| AL110180  | 2895.123  | 2338.618  | BI830936  | 834.536   | 898.837   | NM_001987 | 514.342  | 499.725  |
| U00949    | 525.267   | 639.702   | U79292    | 6094.296  | 6556.124  | AF244088  | 447.754  | 390.148  |
| BC024924  | 7154.227  | 13024.589 | BI830753  | 629.226   | 770.802   | NM_007136 | 293.198  | 261.945  |
| NM_017906 | 7665.673  | 14796.912 | X68314    | 734.932   | 547.43    | AK025434  | 299.556  | 248.144  |
| AL110286  | 3925.411  | 7581.058  | X71973    | 29299.52  | 18843.955 | AJ251845  | 215.412  | 183.209  |
| AF086374  | 1004.368  | 1527.825  | T49651    | 3528.012  | 3928.28   | AK000435  | 299.099  | 374.417  |
| AL162066  | 8925.052  | 10424.876 | N51014    | 2330.947  | 1990.563  | AK000569  | 489.92   | 435.091  |
| NM_016096 | 13283.592 | 11755.743 | BE392471  | 12540.021 | 11333.794 | NM_006046 | 390.77   | 371.642  |
| U79290    | 1472.779  | 1143.273  | AI802950  | 1582.828  | 1376.178  | NM_017661 | 527.085  | 320.519  |
| NM_014040 | 4565.205  | 7781.452  | AI741278  | 377.109   | 537.074   | BC016698  | 1974.112 | 1605.248 |
| AK000799  | 4471.387  | 7026.244  | AA682423  | 406.903   | 426.409   | NM_007374 | 231.605  | 50.644   |
| NM_015582 | 15978.406 | 25922.35  | AL043686  | 4000.39   | 3380.899  | AK027185  | 347.617  | 742.641  |
| AK027091  | 1923.642  | 2626.553  | AA490172  | 839.851   | 692.714   | AK025576  | 308.141  | 405.602  |
| NM_001526 | 565.047   | 933.443   | AA775212  | 2793.367  | 2532.016  | AF147385  | 275.082  | 117.656  |
| U31738    | 1597.423  | 1090.569  | NM_000945 | 1323.319  | 1467.471  | AL442086  | 800.052  | 699.775  |
| AF179890  | 3376.604  | 3577.462  | NM_002574 | 22464.51  | 20134.574 | BC034819  | 544.64   | 419.691  |
| AK023536  | 3381.474  | 3423.784  | AB011174  | 1236.684  | 987.842   | AF147313  | 1425.936 | 1827.88  |
| AK026561  | 412.039   | 298.134   | NM_000607 | 21293.73  | 20344.508 | AF147382  | 4217.204 | 3509.139 |
| AK021568  | 3825.017  | 3467.803  | AB011099  | 369.757   | 220.107   | AK001957  | 903.77   | 764.791  |
| Z36838    | 501.22    | 573.084   | AF090409  | 245.404   | 388.258   | AK000850  | 226.559  | 222.984  |
| AF088054  | 539.337   | 371.678   | NM_002575 | 5648.368  | 5462.258  | AK021833  | 463.483  | 405.816  |
| AK023881  | 2553.498  | 2593.33   | NM_004244 | 3931.563  | 4022.44   | AF143867  | 320.806  | 401.168  |
| AK027114  | 49618.258 | 61356.801 | NM_003371 | 8925.11   | 8558.126  | AK025889  | 1104.012 | 1173.501 |
| NM_016296 | 1937.727  | 2699.528  | AK023114  | 3014.301  | 3092.433  | NM_014715 | 316.877  | 316.962  |
| AK002146  | 814.754   | 1519.804  | NM_003678 | 3483.846  | 3157.975  | AF086448  | 633.932  | 725.46   |
| NM_003156 | 1109.012  | 934.141   | NM_012301 | 716.746   | 499.493   | AF086386  | 390.574  | 394.877  |
| AF086256  | 1038.415  | 849.982   | NM_005631 | 399.061   | 392.175   | AF086413  | 163.232  | 212.798  |
| NM_015492 | 3823.363  | 2611.281  | NM_014419 | 3411.856  | 3415.463  | AF086457  | 461.978  | 475.172  |
| NM_006933 | 666.624   | 474.041   | NM_014938 | 2238.83   | 2505.306  | AK025469  | 345.518  | 374.034  |
| AF132204  | 1076.642  | 1096.694  | AF049460  | 410.837   | 500.76    | NM_020236 | 2625.684 | 2843.657 |
| AK022874  | 2963.63   | 3120.849  | AK026066  | 1182.236  | 967.866   | AF070581  | 302.193  | 281.303  |
| CY3Cy5    | 10042.313 | 1639.666  | NM_005244 | 3634.525  | 3327.351  | AK024187  | 287.427  | 323.113  |
| BI912037  | 1255.497  | 1320.27   | AF054589  | 366.996   | 222.433   | AK022479  | 200.462  | 160.865  |
| AA454646  | 3837.301  | 4762.189  | NM_005270 | 761.021   | 740.442   | AK023572  | 147.643  | 269.446  |
| U18087    | 39162.234 | 35513.281 | NM_014815 | 1178.489  | 1012.012  | AF086004  | 1352.114 | 1253.799 |
| U66349    | 1234.246  | 2140.292  | NM_005443 | 494.217   | 359.883   | AF147433  | 215.994  | 124.492  |
| AA057156  | 1799.592  | 3005.64   | NM_007221 | 4491.909  | 3261.497  | AF086006  | 153.529  | 110.44   |
| U19487    | 2850.85   | 4432.913  | X54163    | 16905.021 | 12438.865 | AL137318  | 369.728  | 183.126  |
| AF166327  | 17007.002 | 20617.371 | NM_018607 | 339.18    | 217.073   | AL137482  | 212.453  | 285.544  |
| AF260739  | 1105.426  | 1423.167  | NM_002978 | 2466.984  | 2206.211  | AL162011  | 3940.661 | 3051.839 |
| AF531423  | 2573.967  | 4048.567  | NM_014668 | 1065.661  | 1060.06   | AL390177  | 277.522  | 124.775  |
| X76555    | 1171.634  | 3251.332  | NM_004722 | 1828.604  | 1794.66   | AL137678  | 217.368  | 108.347  |
| NM_005432 | 2963.865  | 3537.465  | NM_014425 | 996.115   | 824.848   | AK056111  | 275.438  | 328.497  |
| L10386    | 6428.392  | 6655.071  | NM_012133 | 1669.405  | 1544.379  | AL162055  | 204.023  | 130.088  |
| AF061812  | 7677.543  | 7903.522  | NM_017954 | 592.533   | 462.043   | Y13807    | 462.443  | 521.567  |
| AL136756  | 1978.925  | 2531.606  | NM_006612 | 1468.291  | 1205.782  | AK023038  | 216.977  | 272.675  |
| NM_012466 | 9116.521  | 15884.973 | NM_016451 | 1810.021  | 1617.398  | AK026206  | 277.057  | 273.467  |
| NM_134260 | 17350.566 | 31712.555 | NM_007351 | 14605.195 | 12370.868 | AF086074  | 281.244  | 198.61   |
| SR2       | 56731.898 | 57233.309 | AK026266  | 8797.793  | 7628.489  | AK023964  | 524.271  | 612.63   |
| SR4       | 19709.463 | 18298.982 | NM_007124 | 8671.153  | 7846.46   | AF086084  | 370.483  | 544.466  |
| SR6       | 2880.37   | 2630.56   | NM_003176 | 2574.643  | 2034.295  | AL050184  | 261.014  | 429.105  |
| SR8       | 9971.467  | 23125.002 | NM_000723 | 1392.239  | 859.689   | AF085853  | 193.445  | 273.998  |
| SR10      | 32830.891 | 9266.626  | AL096751  | 4190.209  | 2772.813  | AK027112  | 902.067  | 927.698  |

|           |           |           |           |           |           |           |          |          |
|-----------|-----------|-----------|-----------|-----------|-----------|-----------|----------|----------|
| CY3Cy5    | 5935.828  | 859.026   | NM_000364 | 770.073   | 597.6     | AL049314  | 557.952  | 605.876  |
| AL080157  | 980.092   | 1139.144  | AF026920  | 3273.19   | 2174.366  | AF093016  | 1998.763 | 1664.758 |
| NM_00510C | 218.192   | 287.241   | NM_004931 | 3631.936  | 1543.177  | AF161345  | 342.583  | 405.777  |
| NM_00530E | 1290.919  | 1353.449  | NM_00679E | 8621.913  | 10963.925 | -         | 187.017  | 107.441  |
| NM_000911 | 643.343   | 934.271   | AF070568  | 1758.411  | 1702.966  | AF090925  | 286.977  | 468.094  |
| NM_007227 | 1054.2    | 1474.499  | NM_00024C | 3244.721  | 3328.58   | NM_01416E | 729.822  | 307.312  |
| NM_00702E | 1405.049  | 2592.056  | AK055733  | 14234.022 | 15654.551 | AK021974  | 416.631  | 286.954  |
| NM_014461 | 530.389   | 554.32    | AF298880  | 9880.188  | 10448.427 | AK022068  | 316.375  | 380.476  |
| NM_00386E | 1269.728  | 1777.6    | AK001500  | 1251.389  | 951.873   | AK022229  | 356.566  | 448.132  |
| AB015330  | 6581.048  | 7321.985  | NM_006774 | 602.519   | 538.175   | AK022362  | 839.687  | 707.848  |
| NM_00145E | 5919.323  | 7810.769  | NM_02012E | 786.677   | 836.537   | AK022004  | 972.175  | 808.067  |
| NM_00188E | 167.004   | 83.123    | Y16521    | 2179.277  | 1977.383  | AK022136  | 317.629  | 41.397   |
| L09071    | 965.245   | 1298.756  | AL050371  | 2430.394  | 2586.764  | AK022390  | 286.07   | 311.241  |
| NM_00332E | 868.604   | 1288.887  | NM_002651 | 5128.212  | 4449.788  | AK027134  | 309.01   | 596.895  |
| NM_00356E | 41.905    | 706.056   | NM_00241E | 7834.027  | 6510.912  | AK024168  | 158.765  | 198.697  |
| BC036375  | 19489.127 | 16122.884 | NM_001757 | 1834.01   | 2093.389  | AF264622  | 263.205  | 71.583   |
| NM_00636E | 6261.243  | 6737.223  | NM_001647 | 2811.131  | 2701.446  | AK027203  | 142.64   | 151.764  |
| NM_02041E | 981.873   | 1036.99   | NM_01815E | 1230.354  | 965.889   | AK021793  | 600.73   | 431.785  |
| NM_01487E | 323.263   | 440.04    | NM_016301 | 6851.789  | 5179.322  | AK022255  | 580.822  | 283.412  |
| AL049667  | 6090.003  | 5573.879  | AK021975  | 637.285   | 524.61    | AF161360  | 256.215  | 216.252  |
| NM_000334 | 1741.218  | 1904.321  | AB032952  | 18982.566 | 14140.965 | AK021720  | 256.446  | 196.231  |
| NM_02040C | 912.255   | 1326.899  | NM_00252E | 9644.44   | 7352.541  | NM_016497 | 4070.215 | 2886.115 |
| D50926    | 3461.124  | 4985.858  | NM_00094E | 1875.789  | 2137.861  | AK000617  | 108      | 249.143  |
| BF205683  | 1965.093  | 1859.948  | NM_002574 | 27579.686 | 28868.953 | AF009261  | 209.781  | 153.41   |
| NM_00156E | 323.332   | 498.315   | AB011174  | 1306.701  | 1143.99   | AB037792  | 489.356  | 537.211  |
| NM_00154E | 560.633   | 477.363   | AB040879  | 1503.298  | 1737.453  | AK022480  | 193.619  | 138.601  |
| NM_00075E | 13673.226 | 14315.149 | AL049935  | 3291.37   | 2624.815  | AK024158  | 255.875  | 78.024   |
| M17017    | 1029.574  | 1239.765  | AB033043  | 3833.083  | 4129.964  | AL080082  | 710.965  | 420.644  |
| NM_00299C | 1584.805  | 1459.085  | NM_01499E | 1912.914  | 1483.513  | AK021623  | 587.718  | 588.033  |
| NM_00243E | 15608.568 | 17605.508 | AK025220  | 1744.949  | 1298.417  | AK023733  | 119.258  | 199.875  |
| NM_01242C | 207.904   | 270.308   | NM_01630E | 13178.869 | 9908.17   | AF119901  | 586.403  | 664.281  |
| AB033037  | 1189.47   | 1692.802  | D42046    | 2436.025  | 1999.768  | AK001936  | 606.708  | 510.725  |
| L40400    | 3515.969  | 3934.801  | NM_00103E | 2556.996  | 1980.873  | NM_00377C | 6322.404 | 5108.623 |
| AK025688  | 1768.33   | 2316.364  | NM_00452E | 11814.8   | 11234.494 | AK001395  | 1552.076 | 1038.532 |
| Z36819    | 28932.621 | 30767.75  | NM_00252E | 9394.273  | 7748.286  | S57803    | 808.666  | 1100.216 |
| NM_00119E | 499.951   | 407.383   | NM_02013E | 2194.42   | 1902.042  | AF131822  | 285.394  | 169.806  |
| NM_01444E | 2359.867  | 3254.075  | NM_01851E | 2687.561  | 2696.24   | AK023131  | 380.899  | 476.431  |
| NM_00431E | 8221.085  | 12688.773 | AK023149  | 1309.975  | 1030.032  | AF085865  | 1587.065 | 2101.631 |
| NM_02016E | 4152.642  | 4346.716  | AK023168  | 1920.657  | 1610.351  | X78261    | 178.981  | 277.775  |
| S56138    | 285.161   | 177.282   | NM_00664E | 680.879   | 441.781   | AK025521  | 621.161  | 722.415  |
| AK023860  | 1441.475  | 1394.12   | NM_00474E | 942.369   | 523.841   | NM_00105E | 9193.89  | 7994.156 |
| NM_000031 | 3596.621  | 3465.394  | NM_01475E | 2205.869  | 1335.506  | Z70694    | 576.543  | 783.967  |
| NM_00208E | 40673.805 | 36004.715 | NM_00658E | 29029.219 | 18687.459 | NM_015421 | 1825.211 | 1188.828 |
| AK026061  | 373.208   | 235.886   | NM_014331 | 2695.571  | 1735.929  | AF086081  | 1244.332 | 1182.878 |
| NM_01628E | 8485.83   | 9828.541  | AF054589  | 415.018   | 442.759   | NM_018634 | 183.174  | 104.549  |
| NM_001567 | 4218.206  | 4680.003  | NM_00527C | 1290.431  | 1764.504  | NM_018111 | 262.762  | 79.078   |
| NM_00490E | 16676.631 | 17399.252 | NM_01481E | 1225.673  | 1785.226  | AB020968  | 419.545  | 400.743  |
| AF217971  | 2043.495  | 1637.584  | NM_00544E | 522.1     | 528.64    | AL138690  | 360.062  | 161.375  |
| NM_00192E | 1366.288  | 1175.436  | NM_007221 | 4850.17   | 5107.578  | AK000394  | 167.301  | 94.524   |
| AF245517  | 1113.751  | 974.813   | X54163    | 22070.33  | 21759.342 | NM_013941 | 300.758  | 326.333  |
| NM_00498E | 991.247   | 1058.231  | AK025395  | 1085.493  | 1186.708  | AF074989  | 379.368  | 168.634  |
| AF286370  | 570.105   | 536.389   | NM_00038E | 1199.064  | 1454.029  | AK001107  | 249.558  | 99.162   |
| NM_000217 | 413.288   | 655.464   | X58377    | 666.826   | 527.307   | AF147393  | 194.25   | 161.358  |

|           |           |           |           |           |           |           |           |           |
|-----------|-----------|-----------|-----------|-----------|-----------|-----------|-----------|-----------|
| AK026180  | 778.51    | 1196.051  | NM_002469 | 700.213   | 820.42    | AL080112  | 709.888   | 832.342   |
| NM_013365 | 3240.678  | 3779.623  | BI830936  | 761.495   | 668.203   | AK022299  | 243.291   | 201.562   |
| NM_005817 | 13572.473 | 16005.212 | U79292    | 7126.614  | 6125.912  | AL137325  | 175.342   | 195.713   |
| NM_003916 | 8758.116  | 9640.229  | BI830753  | 743.175   | 608.25    | AF147361  | 385.205   | 251.035   |
| NM_002870 | 37318.902 | 41224.051 | X68314    | 922.394   | 912.614   | AL133086  | 255.023   | 327.652   |
| NM_001478 | 40746.781 | 58724.141 | X71973    | 34172.797 | 24801.762 | NM_012151 | 12623.047 | 14749.251 |
| NM_002612 | 324.324   | 651.99    | T49651    | 3332.099  | 3474.563  | AF087994  | 458.872   | 690.092   |
| AF135422  | 2939.528  | 2611.352  | N51014    | 2530.873  | 2506.458  | AJ227912  | 222.637   | 311.766   |
| NM_004479 | 13201.596 | 10719.906 | BE392471  | 12676.373 | 9511.003  | NM_018195 | 621.834   | 664.035   |
| NM_002610 | 1070.011  | 1151.47   | AI802950  | 1708.724  | 1296.248  | AK025532  | 628.918   | 673.171   |
| AF070587  | 1855.318  | 1411.612  | AI741278  | 370.226   | 270.114   | AK021789  | 140.532   | 167.683   |
| BE250526  | 820.401   | 684.845   | AA682423  | 498.528   | 425.572   | NM_003522 | 229.667   | 218.206   |
| NM_016819 | 2574.79   | 2356.883  | AL043686  | 4347.26   | 3152.385  | BF217847  | 290.867   | 312.445   |
| NM_012222 | 2665.652  | 2393.511  | AA490172  | 957.878   | 466.122   | NM_005320 | 664.674   | 647.664   |
| NM_005002 | 1963.88   | 1818.193  | AA775212  | 3162.61   | 1634.407  | CY3Cy5    | 1533.588  | 253.628   |
| NM_006596 | 4062.566  | 3439.818  | NM_000723 | 1738.618  | 1476.012  | BI830936  | 473.814   | 532.242   |
| AK023214  | 7163.629  | 5321.92   | AL096751  | 5037.404  | 4604.6    | U79292    | 7910.306  | 8798.658  |
| NM_001469 | 12427.484 | 9432.532  | NM_000364 | 921.406   | 827.086   | AA947915  | 276.794   | 250.986   |
| NM_003600 | 6205.586  | 4729.593  | AF026920  | 3548.141  | 3537.81   | BI830753  | 504.246   | 660.25    |
| NM_017490 | 3582.651  | 2598.217  | NM_004931 | 5317.096  | 4175.68   | X68314    | 527.439   | 447.309   |
| AK026727  | 2276.321  | 2014.305  | NM_000607 | 23353.375 | 20536.287 | X71973    | 17876.711 | 22804.826 |
| NM_002830 | 470.751   | 611.572   | AB011099  | 305.497   | 482.712   | T49651    | 1912.468  | 2448.041  |
| NM_006247 | 5076.663  | 5119.055  | AF090409  | 311.111   | 465.528   | N51014    | 1207.505  | 1265.307  |
| NM_018281 | 11028.622 | 12851.429 | NM_002575 | 5897.2    | 4950.861  | BE392471  | 16406.09  | 30202.215 |
| NM_004457 | 5427.115  | 5994.58   | NM_004244 | 3548.077  | 2786.56   | AI802950  | 1215.545  | 1012.446  |
| NM_014049 | 2841.409  | 3492.257  | NM_003371 | 11411.019 | 10069.675 | AI741278  | 242.274   | 313.187   |
| NM_005396 | 584.043   | 633.55    | AK023114  | 3205.065  | 3884.04   | AA682423  | 364.98    | 230.216   |
| BC036375  | 19349.004 | 21792.219 | NM_003678 | 3733.489  | 4421.686  | AL043686  | 2357.07   | 2124.277  |
| BI912037  | 1430.78   | 1198.405  | NM_012301 | 869.1     | 729.256   | AA490172  | 532.237   | 376.18    |
| AA454646  | 4305.14   | 4219.345  | NM_005631 | 1340.656  | 1736.914  | AA775212  | 1608.386  | 1211.336  |
| U18087    | 48815.059 | 37471.164 | NM_014419 | 3818.821  | 2794.859  | NM_000945 | 710.61    | 707.939   |
| U66349    | 1163.739  | 844.883   | NM_014938 | 3026.308  | 2481.089  | NM_002574 | 11147.973 | 8560.115  |
| AA057156  | 1775.343  | 1444.261  | AF049460  | 454.262   | 345.474   | SR5       | 2005.137  | 2686.485  |
| U19487    | 2905.025  | 2054.98   | AK026066  | 1110.61   | 799.355   | SR7       | 2690.423  | 25652.986 |
| AF166327  | 15980.382 | 10931.005 | NM_005244 | 4629.725  | 2964.801  | SR9       | 10335.449 | 1991.148  |
| AF260739  | 1544.464  | 900.428   | NM_018158 | 1669.094  | 2108.331  |           | 23.312    | 157.523   |
| AF531423  | 2521.504  | 2061.336  | NM_016301 | 8272.563  | 9314.984  | CY3Cy5    | 2286.16   | 311.258   |
| X76555    | 910.55    | 907.863   | AK021975  | 767.788   | 587.188   | NM_003371 | 10007.307 | 9538.451  |
| NM_005432 | 2734.4    | 1743.343  | AB032952  | 22191.625 | 23522.781 | NM_001164 | 203.528   | 103.42    |
| L10386    | 5798.246  | 4405.188  | NM_002522 | 9751.018  | 10675.844 | AK023114  | 1666.178  | 1858.084  |
| AF061812  | 7527.948  | 6282.978  | NM_018607 | 340.054   | 362.596   | NM_003678 | 1683.508  | 1707.429  |
| AL136756  | 2298.534  | 2403.143  | NM_002978 | 3391.932  | 2217.405  | NM_014271 | 125.61    | 89.156    |
| NM_012469 | 8035.068  | 8113.729  | S83549    | 274.914   | 200.073   | NM_012301 | 540.369   | 383.701   |
| NM_134260 | 15427.96  | 19815.674 | NM_014668 | 1000.716  | 902.526   | NM_000680 | 194.705   | 177.788   |
| AK025688  | 1308.777  | 1954.278  | NM_004722 | 2164.763  | 2740.051  | NM_005631 | 199.587   | 162.031   |
| NM_001195 | 457.54    | 364.682   | NM_014425 | 1266.088  | 1384.7    | NM_014419 | 2856.061  | 3379.288  |
| NM_014448 | 2180.5    | 2426.897  | NM_012133 | 2026.561  | 2164.365  | NM_014938 | 1398.104  | 1400.264  |
| AL080157  | 1360.331  | 1384.27   | NM_017954 | 755.482   | 578.447   | AF049460  | 332.461   | 574.534   |
| NM_005308 | 1574.281  | 1179.746  | NM_006612 | 1799.812  | 1727.815  | NM_000441 | 179.663   | 84.702    |
| NM_000911 | 455.731   | 315.128   | NM_016451 | 2041.257  | 1974.089  | AK026066  | 661.604   | 764.65    |
| NM_007227 | 836.647   | 720.283   | NM_007351 | 15379.712 | 8936.144  | NM_005244 | 3269.273  | 3137.217  |
| NM_007023 | 1079.088  | 791.421   | AK026266  | 8585.532  | 4318.154  | NM_005270 | 532.1     | 620.927   |
| NM_014461 | 417.044   | 508.309   | NM_007124 | 3860.285  | 1945.691  | NM_014815 | 692.225   | 699.899   |

|           |           |           |           |           |           |           |           |           |
|-----------|-----------|-----------|-----------|-----------|-----------|-----------|-----------|-----------|
| NM_003865 | 1493.645  | 1267.306  | NM_003176 | 2919.44   | 1242.859  | NM_005443 | 216.559   | 150.156   |
| AB015330  | 7784.504  | 4991.115  | AK023168  | 2446.34   | 2482.188  | NM_007221 | 2921.228  | 2440.771  |
| NM_001455 | 4566.788  | 3462.195  | NM_006646 | 804.926   | 717.541   | X54163    | 10738.563 | 11260.446 |
| L09071    | 807.77    | 1128.191  | NM_004742 | 1166.302  | 858.817   | AK025395  | 333.199   | 416.245   |
| NM_003322 | 684.556   | 890.625   | NM_014753 | 2954.907  | 2560.316  | NM_000388 | 511.548   | 544.849   |
| AK026180  | 597.255   | 816.81    | NM_006585 | 34724.09  | 32321.32  | NM_002465 | 280.681   | 300.981   |
| NM_005817 | 11305.712 | 14590.842 | NM_014331 | 3298.949  | 3819.262  | NM_014668 | 975.239   | 949.034   |
| NM_003916 | 7768.435  | 7022.573  | NM_006795 | 9872.258  | 10971.668 | NM_004722 | 1177.58   | 913.243   |
| NM_002870 | 43183.02  | 34405.387 | AF070568  | 1799.745  | 2192.109  | NM_014425 | 600.947   | 421.252   |
| NM_006363 | 6456.354  | 5774.789  | NM_000277 | 351.236   | 249.467   | NM_012133 | 764.624   | 1231.681  |
| NM_020415 | 1053.479  | 944.703   | NM_000240 | 3687.942  | 3345.791  | NM_006612 | 1011.122  | 1249.308  |
| NM_014879 | 285.821   | 301.867   | AK055733  | 15073.957 | 15250.742 | NM_016451 | 748.186   | 612.777   |
| AL049667  | 5869.501  | 4094.573  | AF298880  | 10035.786 | 11120.472 | NM_007351 | 9190.493  | 7351.114  |
| NM_000334 | 2035.392  | 1279.967  | AK001500  | 1825.107  | 1140.535  | AK026266  | 4920.979  | 4104.397  |
| NM_020400 | 948.288   | 627.854   | NM_020129 | 836.03    | 961.202   | NM_007124 | 2221.072  | 2035.202  |
| NM_001504 | 1646.003  | 867.216   | Y16521    | 2850.491  | 2882.893  | NM_003176 | 1346.48   | 1410.619  |
| D50926    | 3413.703  | 2553.089  | NM_003167 | 424.723   | 347.838   | NM_000723 | 668.224   | 501.457   |
| BF205683  | 2027.061  | 1301.23   | AL050371  | 2688.943  | 2797.937  | AL096751  | 2300.133  | 1294.885  |
| NM_001565 | 292.449   | 318.241   | NM_002651 | 6243.359  | 4074.411  | NM_000364 | 417.725   | 243.024   |
| NM_001548 | 436.908   | 267.264   | NM_002413 | 9292.199  | 5025.381  | AF026920  | 2038.595  | 1651.729  |
| NM_000758 | 13993.443 | 10119.37  | NM_017577 | 440.9     | 237.472   | NM_004931 | 2977.466  | 1830.763  |
| M17017    | 1186.119  | 1186.251  | NM_001757 | 2527.511  | 1529.48   | NM_000607 | 9419.675  | 7992.108  |
| NM_002990 | 1558.054  | 1416.9    | NM_001647 | 4376.378  | 2365.065  | AB011099  | 151.691   | 162.427   |
| NM_002432 | 13743.499 | 14167.425 | NM_003768 | 4350.874  | 3323.684  | AF090409  | 208.218   | 155.14    |
| AB033037  | 1324.463  | 1929.284  | NM_018393 | 946.468   | 803.434   | NM_002575 | 2642.767  | 2440.738  |
| L40400    | 3492.474  | 3274.326  | BF032535  | 3369.894  | 2755.592  | NM_004244 | 2183.961  | 1993.237  |
| NM_006247 | 5158.572  | 8192.138  | NM_018332 | 2533.83   | 1804.191  | AK001500  | 773.493   | 1019.506  |
| AB032983  | 1054.577  | 1713.258  | NM_005096 | 11339.437 | 9842.937  | NM_006774 | 277.885   | 284.316   |
| NM_018281 | 10571.171 | 22260.113 | NM_006760 | 1025.312  | 1022.368  | NM_020129 | 475.667   | 709.735   |
| NM_004457 | 5757.131  | 8119.611  | NM_012289 | 6280.445  | 6220.474  | Y16521    | 1240.776  | 1114.069  |
| NM_014049 | 2471.676  | 3139.152  | AB037775  | 1156.314  | 1120.569  | NM_003167 | 178.587   | 201.484   |
| NM_005396 | 525.257   | 561.317   | L27560    | 1667.349  | 1293.181  | AL050371  | 1507.304  | 1919.195  |
| NM_004315 | 7199.673  | 7888.398  | AB011174  | 1722.769  | 1538.693  | NM_002651 | 2687.9    | 2481.651  |
| NM_020166 | 4295.816  | 3594.311  | AB043635  | 394.488   | 255.354   | NM_002413 | 3987.009  | 3753.465  |
| S56138    | 324.038   | 242.277   | AB040879  | 1527.668  | 1681.426  | NM_017577 | 210.002   | 317.616   |
| AK023860  | 1494.902  | 1406.717  | AL049935  | 3647.402  | 2908.137  | NM_001757 | 1409.515  | 1495.839  |
| NM_000031 | 3205.197  | 2383.918  | AB033043  | 4531.561  | 5573.798  | NM_001647 | 834.633   | 1071.181  |
| NM_002085 | 40743     | 24071.838 | NM_014999 | 2013.203  | 1814.401  | NM_018158 | 620.859   | 506.233   |
| AK026061  | 460.088   | 392.543   | AK025220  | 1940.98   | 1914.643  | NM_016301 | 3376.35   | 3528.452  |
| NM_016286 | 7709.728  | 5872.426  | NM_016308 | 13365.317 | 11935.23  | AK021975  | 308.682   | 253.013   |
| NM_001567 | 3886.025  | 3285.385  | D42046    | 2797.8    | 2716.443  | AB032952  | 10788.54  | 9735.649  |
| NM_004905 | 15896.367 | 11530.698 | NM_001033 | 2869.201  | 1684.678  | NM_002522 | 9287.146  | 10205.533 |
| AF217971  | 2420.887  | 1402.9    | NM_004526 | 11895.381 | 7972.719  | NM_018607 | 164.7     | 114.524   |
| NM_001925 | 995.05    | 930.155   | NM_002526 | 11195.97  | 5380.638  | NM_002978 | 1115.965  | 949.108   |
| AF245517  | 1184.32   | 898.023   | NM_020135 | 2134.069  | 1095.244  | AB040879  | 728.942   | 576.54    |
| AF286370  | 519.48    | 498.87    | NM_018518 | 3491.26   | 2000.638  | AL049935  | 1724.208  | 1284.82   |
| NM_000217 | 588.257   | 810.796   | AK023149  | 1753.779  | 1649.161  | AB033043  | 2999.528  | 3533.666  |
| NM_012469 | 7080.492  | 11366.845 | NM_006438 | 1312.401  | 1888.862  | NM_014999 | 996.826   | 898.243   |
| NM_134260 | 12626.817 | 24645.701 | NM_001845 | 1246.02   | 1125.21   | AK025220  | 789.794   | 601.35    |
| NM_001478 | 42305.117 | 31366.852 | AK024697  | 1311.416  | 881.74    | NM_016308 | 6208.896  | 5197.219  |
| NM_002612 | 278.91    | 170.983   | NM_006460 | 1894.505  | 1527.738  | D42046    | 1569.352  | 1452.128  |
| AF135422  | 2981.157  | 2159.315  | L34156    | 570.027   | 291.337   | NM_001033 | 1408.936  | 1032.193  |
| NM_004479 | 16598.379 | 10551.146 | NM_003749 | 17620.742 | 15687.805 | NM_004526 | 6047.604  | 6135.042  |



|           |           |           |           |           |           |           |           |           |
|-----------|-----------|-----------|-----------|-----------|-----------|-----------|-----------|-----------|
| NM_00261C | 897.589   | 478.763   | NM_003557 | 2325.305  | 1929.596  | NM_00252E | 4559.761  | 4582.603  |
| AF070587  | 1669.639  | 1043.971  | NM_001257 | 12383.66  | 8636.007  | NM_02013E | 1290.454  | 1311.394  |
| BE250526  | 566.003   | 489.91    | D85245    | 6727.881  | 5094.088  | NM_01851E | 1862.832  | 2042.69   |
| NM_01681E | 2326.614  | 1920.118  | NM_000943 | 1650.504  | 1037.735  | AK023149  | 621.045   | 738.225   |
| NM_01222Z | 2880.26   | 2447.414  | NM_00465E | 2372.674  | 1792.502  | AK023168  | 1238.258  | 1284.682  |
| NM_00500Z | 1869.487  | 1431.556  | NM_00125C | 6231.219  | 3556.284  | NM_00664E | 360.689   | 301.531   |
| NM_00659E | 4276.016  | 3041.157  | AF298812  | 1969.086  | 1490.479  | NM_00474Z | 587.698   | 404.626   |
| AK023214  | 7322.08   | 5089.821  | NM_00496E | 1878.403  | 1579.968  | NM_01475Z | 1376.708  | 855.24    |
| NM_00146E | 12178.152 | 10352.033 | AJ249900  | 801.846   | 499.563   | NM_00658E | 15440.615 | 16536.693 |
| NM_00360C | 6211.652  | 5429.375  | AK022581  | 4886.392  | 4851.715  | NM_014331 | 1680.444  | 1816.311  |
| NM_01749C | 3988.489  | 3308.971  | NM_018054 | 2390.926  | 2461.792  | NM_00679E | 3863.529  | 4943.434  |
| NM_00271E | 1899.704  | 2037.94   | NM_00618E | 1006.783  | 671.126   | AF070568  | 750.365   | 578.391   |
| AK026727  | 2787.869  | 2959.034  | NM_00095E | 6327.811  | 4478.087  | NM_00024C | 1343.683  | 1197.282  |
| NM_00283C | 585.996   | 690.161   | NM_001401 | 1015.914  | 603.1     | AK055733  | 6256.153  | 7138.29   |
| L09071    | 736.035   | 1138.954  | NM_013271 | 14425.868 | 7162.406  | AF298880  | 4365.969  | 4858.791  |
| NM_00332Z | 763.589   | 822.648   | NM_004157 | 7051.236  | 4217.93   | AK025395  | 421.305   | 370.867   |
| BC036375  | 17837.273 | 15815.916 | NM_000684 | 1967.673  | 3616.563  | NM_00038E | 632.684   | 686.356   |
| BI912037  | 1339.574  | 1205.741  | NM_00083Z | 293.104   | 799.137   | X58377    | 355.596   | 471.572   |
| AA454646  | 3676.238  | 2942.293  | NM_015913 | 15255.847 | 27406.453 | NM_00246E | 344.582   | 332.604   |
| U18087    | 44610.184 | 33532.59  | NM_005157 | 6730.108  | 11101.063 | AI673575  | 153.108   | 120.621   |
| U66349    | 1061.667  | 1076.863  | NM_007354 | 1249.006  | 1664.557  | BI830936  | 380.292   | 361.167   |
| AA057156  | 1791.289  | 1197.004  | U67037    | 1948.999  | 2975.068  | U79292    | 7289.546  | 7347.318  |
| U19487    | 2563.168  | 2214.686  | NM_00496C | 17244.957 | 17443.746 | AA947915  | 190.54    | 226.476   |
| AF166327  | 15997.241 | 13487.429 | AF272370  | 6258.36   | 7342.085  | BI830753  | 468.785   | 580.438   |
| AF260739  | 1476.573  | 1234.356  | AF130050  | 4881.35   | 7064.391  | X68314    | 648.392   | 724.699   |
| AF531423  | 2309.964  | 2394.854  | AF119898  | 687.512   | 854.013   | X71973    | 15726.668 | 14186.027 |
| X76555    | 993.554   | 1020.014  | AK023045  | 875.183   | 1154.539  | T49651    | 1845.481  | 2548.082  |
| NM_00543Z | 2900.408  | 2692.844  | NM_012197 | 3265.054  | 5554.622  | N51014    | 1345.548  | 1486.297  |
| L10386    | 6678.964  | 8097.918  | AK024016  | 3164.877  | 3757.43   | BE392471  | 6845.306  | 6619.441  |
| AF061812  | 8069.234  | 8766.76   | NM_003581 | 6727.551  | 6909.091  | AI802950  | 1118.615  | 831.157   |
| AL136756  | 2173.956  | 2921.297  | NM_00288E | 413.852   | 253.676   | AI741278  | 231.902   | 277.702   |
| NM_00299C | 1245.124  | 1744.793  | NM_012407 | 1040.767  | 688.298   | AA682423  | 357.354   | 279.758   |
| NM_00243Z | 13938.735 | 15387.831 | NM_00718E | 2011.579  | 1150.114  | AL043686  | 2517.735  | 2187.935  |
| NM_01242C | 228.671   | 307.091   | NM_007044 | 2926.977  | 2359.578  | AA490172  | 513.038   | 507.405   |
| AB033037  | 710.764   | 919.493   | AF294326  | 6395.443  | 4321.077  | AA775212  | 1723.693  | 1386.158  |
| L40400    | 3268.634  | 4139.177  | NM_01467E | 2066.643  | 1703.778  | NM_00094E | 667.946   | 944.476   |
| NM_001195 | 671.188   | 393.353   | NM_012317 | 59539.898 | 57861.355 | NM_002574 | 11605.702 | 9206.642  |
| NM_01444E | 2473.963  | 1966.177  | NM_01785Z | 2675.608  | 1715.761  | AB011174  | 650.158   | 953.173   |
| AL080157  | 1163.152  | 1022.293  | NM_016097 | 10370.902 | 6174.295  | AB043635  | 199.84    | 120.62    |
| NM_00530E | 1731.601  | 2190.205  | AB035301  | 494.926   | 383.598   | NM_000607 | 11031.721 | 8753.953  |
| NM_000911 | 586.323   | 444.527   | AF286113  | 777.318   | 1005.618  | AB011099  | 189.938   | 191.366   |
| NM_007227 | 864.404   | 1091.596  | AB046800  | 4827.566  | 7435.501  | NM_00257E | 3387.015  | 3193.573  |
| NM_00702Z | 1170.168  | 1450.863  | NM_00216Z | 3775.836  | 6998.48   | NM_004244 | 2152.491  | 1726.144  |
| NM_00587Z | 12944.731 | 11962.189 | NM_01545E | 5181.474  | 9345.932  | NM_003371 | 11600.825 | 12023.955 |
| NM_004624 | 2562.094  | 3069.756  | D13540    | 6788.872  | 11294.268 | NM_001164 | 142.191   | 176.502   |
| NM_014461 | 482.502   | 559.395   | NM_01657C | 10948.297 | 17853.381 | AK023114  | 1723.128  | 2069.228  |
| NM_00386E | 1485.794  | 1524.106  | AF209198  | 2048.873  | 3783.144  | NM_00367E | 1745.996  | 2107.047  |
| AB015330  | 7815.687  | 7484.703  | L09247    | 637.873   | 1023.729  | NM_012301 | 618.882   | 531.097   |
| NM_00145E | 5069.124  | 6088.842  | NM_00693E | 24769.834 | 39335.434 | NM_00068C | 154.589   | 72.93     |
| NM_00238E | 451.946   | 309.825   | NM_001327 | 10357.673 | 18339.105 | NM_005631 | 201.413   | 169.999   |
| NM_00498Z | 919.266   | 956.849   | AF321182  | 498.903   | 561.422   | NM_01441E | 2550.731  | 2091.081  |
| NM_001694 | 54082.543 | 58658.234 | AY040878  | 347.962   | 524.689   | NM_01493E | 1305.497  | 1311.969  |
| AF286370  | 476.764   | 324.288   | AB037722  | 751.752   | 803.787   | AF049460  | 247.422   | 258.495   |

|           |           |           |           |           |           |           |           |           |
|-----------|-----------|-----------|-----------|-----------|-----------|-----------|-----------|-----------|
| NM_000217 | 332.178   | 546.779   | NM_003652 | 878.714   | 1052.089  | NM_000441 | 125.827   | 100.092   |
| NM_013365 | 3144.191  | 2654.474  | NM_000063 | 1503.358  | 2120.479  | AK026066  | 596.151   | 625.025   |
| NM_005817 | 11125.494 | 10720.676 | NM_018389 | 1290.297  | 1247.591  | NM_005244 | 3601.138  | 3043.832  |
| NM_003916 | 6445.764  | 5433.926  | AB033026  | 1702.247  | 2080.348  | AF054589  | 174.192   | 259.601   |
| NM_002870 | 37210.977 | 28556.387 | NM_014716 | 2775.461  | 3462.025  | NM_005270 | 536.117   | 514.605   |
| NM_006363 | 6546.464  | 7796.423  | AB002354  | 511.52    | 791.118   | NM_014815 | 600.707   | 651.139   |
| NM_020415 | 1126.994  | 1647.936  | NM_002278 | 431.248   | 938.017   | NM_005443 | 198.69    | 257.604   |
| NM_014879 | 248.316   | 432.897   | AK023845  | 2775.82   | 3086.067  | NM_007221 | 2185.471  | 2344.365  |
| AL049667  | 6001.254  | 5806.306  | NM_002638 | 4247.863  | 5222.849  | X54163    | 11203.946 | 14746.771 |
| NM_000334 | 1886.742  | 1794.389  | NM_016487 | 1082.526  | 1605.009  | NM_018607 | 146.888   | 201.599   |
| NM_020400 | 936.665   | 1060.932  | NM_005808 | 8280.104  | 15457.975 | NM_002978 | 2192.991  | 1624.577  |
| NM_001504 | 1938.266  | 1983.442  | AF269249  | 857.723   | 1606.462  | S83549    | 213.479   | 161.063   |
| D50926    | 3629.268  | 5522.369  | X51417    | 575.686   | 923.332   | NM_014668 | 1066.885  | 1134.891  |
| BF205683  | 1991.489  | 2008.244  | D31763    | 4109.52   | 4661.209  | NM_004722 | 1270.525  | 1636.519  |
| NM_001548 | 597.288   | 470.736   | NM_018169 | 4204.199  | 8320.717  | NM_014425 | 561.286   | 463.733   |
| NM_000758 | 13884.579 | 18617.715 | NM_004506 | 2569.239  | 4233.206  | NM_012133 | 795.835   | 1055.783  |
| M17017    | 996.975   | 1856.874  | S74529    | 47932.578 | 54679.34  | NM_017954 | 380.845   | 424.318   |
| NM_003600 | 5966.347  | 4405.417  | NM_020227 | 502.844   | 660.178   | NM_013385 | 238.745   | 206.397   |
| NM_017490 | 3708.846  | 3018.617  | NM_005933 | 535.246   | 832.414   | NM_006612 | 1035.808  | 1304.962  |
| NM_002718 | 1930.696  | 1723.308  | NM_001421 | 493.168   | 1163.433  | NM_016451 | 899.74    | 749.137   |
| AK026727  | 2157.684  | 2516.353  | U97060    | 389.687   | 871.96    | NM_007351 | 8414.898  | 6678.773  |
| NM_002830 | 418.424   | 431.772   | M73837    | 1287.732  | 2148.83   | AK026266  | 4773.608  | 4041.001  |
| NM_006247 | 4801.37   | 7110.414  | NM_004229 | 597.058   | 702.911   | NM_007124 | 2136.842  | 1345.134  |
| AB032983  | 566.232   | 453.167   | NM_005839 | 6666.105  | 7809.118  | NM_003176 | 1788.427  | 1756.362  |
| NM_018281 | 10183.913 | 10087.388 | AK023379  | 1401.685  | 1596.857  | NM_000723 | 688.804   | 1395.64   |
| NM_004457 | 4967.271  | 4018.821  | AK021904  | 10108.819 | 10108.349 | AL096751  | 2418.913  | 2450.579  |
| NM_014049 | 2358.492  | 2446.164  | -         | 1502.103  | 1347.028  | NM_000364 | 425.463   | 561.923   |
| NM_005396 | 433.513   | 498.555   | NM_018292 | 611.096   | 1203.091  | AF026920  | 1677.778  | 1965.59   |
| NM_004315 | 7100.518  | 9322.249  | AK022294  | 1664.461  | 2937.952  | NM_004931 | 2640.153  | 3020.942  |
| NM_020166 | 4710.127  | 6661.559  | AF086507  | 1357.869  | 2309.055  | NM_006795 | 5674.055  | 4815.581  |
| S56138    | 1048.382  | 2176.109  | U79289    | 2071.929  | 3455.505  | AF070568  | 756.439   | 739.879   |
| AK023860  | 1898.738  | 2810.131  | NM_014028 | 3591.103  | 6708.886  | NM_000277 | 197.066   | 243.715   |
| NM_000031 | 3714.116  | 3939.172  | NM_000402 | 1825.859  | 3653.059  | NM_000240 | 2110.07   | 1752.272  |
| NM_002085 | 43325.035 | 36374.945 | NM_000690 | 9530.14   | 15299.888 | AK055733  | 6698.883  | 7682.514  |
| AK026061  | 510.723   | 602.765   | NM_000155 | 6003.096  | 8880.752  | AF298880  | 4998.858  | 5302.513  |
| NM_016286 | 8079.868  | 7528.807  | AK024489  | 430.977   | 790.377   | AK001500  | 844.404   | 620.05    |
| NM_001567 | 3819.621  | 4309.673  | NM_000181 | 10563.635 | 17700.107 | NM_006774 | 295.943   | 271.204   |
| NM_004905 | 16671.898 | 16708.934 | NM_014121 | 1235.392  | 1803.54   | NM_020129 | 528.248   | 1034.939  |
| AF217971  | 2135.031  | 2495.101  | NM_006730 | 2369.146  | 4632.659  | Y16521    | 1504.222  | 1600.854  |
| NM_001925 | 1183.316  | 1608.016  | NM_005644 | 3606.202  | 6079.047  | NM_003167 | 174.974   | 135.236   |
| AF245517  | 1039.621  | 1336.583  | NM_018442 | 3973.989  | 6078.8    | AL050371  | 1441.185  | 1823.82   |
| NM_004137 | 42.874    | 1026.092  | AF182416  | 4395.716  | 6822.63   | NM_002651 | 2864.979  | 2785.139  |
| X78926    | 16404.98  | 5103.848  | NM_005999 | 15416.479 | 19926.088 | NM_002413 | 4000.008  | 3303.342  |
| AJ278110  | 972.824   | 860.806   | NM_006015 | 1162.055  | 1470.685  | NM_017577 | 257.056   | 393.316   |
| NM_014237 | 4537.417  | 3817.571  | NM_004634 | 2340.97   | 2976.335  | NM_001757 | 1350.838  | 1191.258  |
| NM_020396 | 456.576   | 526.6     | NM_002017 | 6056.635  | 5965.656  | NM_001647 | 2446.934  | 2823.482  |
| AF029900  | 2276.445  | 2588.04   | NM_017523 | 10227.738 | 10461.677 | NM_018158 | 693.464   | 740.867   |
| NM_003325 | 3517.553  | 4367.442  | NM_002382 | 19998.922 | 20572.352 | NM_016301 | 3462.664  | 2684.482  |
| NM_016178 | 3242.014  | 4668.406  | NM_002158 | 997.238   | 1360.68   | AK021975  | 350.551   | 561.947   |
| AK022639  | 1106.926  | 1129.238  | U13223    | 7379.714  | 12999.034 | AB032952  | 10880.006 | 11332.472 |
| D31766    | 1935.547  | 2293.455  | NM_016270 | 3006.243  | 6209.201  | NM_002522 | 9428.955  | 12881.137 |
| NM_006547 | 458.035   | 425.23    | AK001357  | 1478.137  | 1260.191  | NM_000945 | 783.775   | 791.957   |
| NM_016383 | 120.933   | 231.307   | NM_015721 | 2470.903  | 2674.48   | NM_002574 | 12529.315 | 13125.771 |

|           |           |           |           |           |           |           |           |           |
|-----------|-----------|-----------|-----------|-----------|-----------|-----------|-----------|-----------|
| NM_00147E | 40297.48  | 36145.18  | AF086298  | 1344.994  | 1187.445  | AB011174  | 958.834   | 961.816   |
| NM_002612 | 509.707   | 461.92    | AK027238  | 961.763   | 1017.07   | AB043635  | 245.428   | 143.877   |
| AF135422  | 4171.478  | 5239.969  | AK000032  | 514.949   | 701.52    | AB040879  | 815.917   | 777.134   |
| NM_00447E | 17801.746 | 15927.411 | AK025758  | 948.101   | 877.246   | AL049935  | 1872.866  | 1369.087  |
| NM_00261C | 1122.837  | 688.094   | AL360201  | 1072.114  | 1606.151  | AB033043  | 3472.063  | 4244.71   |
| AF070587  | 1817.984  | 1663.88   | S94540    | 26897.246 | 33773.879 | NM_01499E | 1103.706  | 957.867   |
| BE250526  | 909.327   | 676.167   | U79297    | 920.571   | 1510.207  | AK025220  | 771.21    | 712.725   |
| NM_01681E | 2656.983  | 2671.69   | AK002164  | 999.901   | 1612.115  | NM_01630E | 6174.098  | 6570.726  |
| NM_01222E | 2849.365  | 3031.257  | AK026924  | 5472.829  | 7210.079  | D42046    | 1457.319  | 1247.383  |
| NM_00500E | 2077.121  | 3310.419  | AL122047  | 8559.157  | 11785.426 | NM_00103E | 1226.182  | 1112.726  |
| NM_00659E | 4632.899  | 6644.077  | AF052091  | 1495.418  | 1745.428  | NM_00452E | 6034.964  | 6186.531  |
| NM_00146E | 13586.816 | 21021.617 | AK024447  | 59201.777 | 55155.387 | NM_00252E | 4749.107  | 3805.893  |
| BC036368  | 354.764   | 221.569   | AF052145  | 1320.573  | 1339.846  | NM_02013E | 1154.596  | 1081.599  |
| NM_001851 | 2223.67   | 2146.839  | AF086458  | 1886.615  | 2488.037  | NM_01851E | 1657.618  | 1453.653  |
| S67789    | 856.326   | 700.947   | AF086548  | 2245.622  | 3038.985  | AK023149  | 889.766   | 557.47    |
| AK022689  | 3109.701  | 2961.133  | AK024350  | 1249.879  | 2076.697  | AK023168  | 1161.676  | 1273.82   |
| NM_016227 | 555.005   | 598.179   | AK023717  | 1695.917  | 2864.917  | NM_00664E | 428.543   | 215.933   |
| NM_00419E | 9710.407  | 9308.716  | AK023727  | 1089.807  | 960.225   | NM_00474E | 623.867   | 725.465   |
| NM_00470E | 1503.705  | 1879.225  | AK025271  | 891.181   | 747.422   | NM_01475E | 1202.079  | 973.207   |
| NM_02019C | 10697.505 | 12352.46  | AF086204  | 3811.066  | 3449.819  | NM_00658E | 15480.813 | 17327.74  |
| AK024003  | 563.5     | 625.535   | NM_007021 | 934.942   | 626.339   | NM_014331 | 1510.999  | 1697.214  |
| NM_014357 | 2311.836  | 2200.809  | AK026283  | 355.62    | 564.631   | AF054589  | 209.502   | 199.634   |
| NM_004067 | 927.032   | 727.006   | NM_01767E | 354.059   | 236.047   | NM_00527C | 494.848   | 574.148   |
| NM_000121 | 8164.715  | 8301.441  | AK021570  | 984.88    | 871.41    | NM_01481E | 748.647   | 613.601   |
| NM_002091 | 5195.795  | 5207.592  | AL360204  | 629.257   | 620.968   | NM_00544E | 299       | 332.816   |
| AB033092  | 3977.526  | 4539.875  | AK000103  | 1259.422  | 848.52    | NM_007221 | 2495.58   | 2501.98   |
| M89957    | 540.572   | 466.445   | AK026294  | 426.391   | 262.107   | X54163    | 12305.168 | 12430.229 |
| NM_00302E | 1414.622  | 1822.199  | AF085959  | 827.515   | 576.003   | AK025395  | 423.454   | 452.754   |
| BC035030  | 2541.691  | 2217.037  | AF075107  | 668.28    | 840.048   | NM_00038E | 594.058   | 715.386   |
| NM_00534C | 23641.854 | 21133.125 | AK023104  | 1040.932  | 2048.623  | X58377    | 375.057   | 410.686   |
| NM_016201 | 1237.886  | 1237.647  | Y11177    | 1019.844  | 1265.777  | NM_00246E | 332.797   | 486.6     |
| NM_000864 | 3631.943  | 4514.194  | AK021691  | 14143.669 | 21069.365 | AI673575  | 175.656   | 68.428    |
| NM_017977 | 2215.998  | 2584.142  | AK023595  | 581.335   | 893.658   | BI830936  | 432.583   | 553.556   |
| AF147727  | 2142.354  | 3175.521  | AK022037  | 398.948   | 429.289   | U79292    | 7472.992  | 8267.302  |
| NM_006751 | 4028.462  | 6079.663  | AK000141  | 3432.743  | 3951.192  | AA947915  | 217.927   | 240.306   |
| NM_00356E | 1288.912  | 2593.81   | AL137758  | 1901.942  | 2077.059  | BI830753  | 421.678   | 395.576   |
| NM_01405E | 21170.561 | 16249.286 | AK025786  | 774.227   | 992.125   | X68314    | 670.987   | 663.467   |
| NM_002777 | 54305.625 | 54541.473 | AK024188  | 1141.292  | 1198.243  | X71973    | 15712.031 | 14880.569 |
| AF202635  | 1759.281  | 1729.375  | AK024379  | 557.475   | 473.466   | T49651    | 2048.661  | 2396.296  |
| NM_01412E | 686.428   | 765.07    | AK026820  | 639.414   | 559.328   | N51014    | 1387.031  | 1045.84   |
| NM_017904 | 579.47    | 1031.424  | AK001716  | 1764.005  | 1340.794  | BE392471  | 6585.434  | 5959.355  |
| NM_013367 | 4538.755  | 5572.338  | AK026821  | 889.478   | 746.275   | AI802950  | 963.96    | 821.589   |
| AL137550  | 624.482   | 1261.131  | AK026280  | 8273.566  | 6025.324  | AA682423  | 376.577   | 531.466   |
| NM_000321 | 3804.396  | 4256.436  | AF113017  | 3948.508  | 3715.164  | AL043686  | 2239.369  | 2298.546  |
| NM_006341 | 9179.008  | 7856.077  | AL080232  | 3840.969  | 4128.084  | AA490172  | 454.572   | 526.506   |
| NM_00170E | 2613.851  | 1826.844  | AK001120  | 3641.984  | 4334.653  | AA775212  | 1610.363  | 1689.301  |
| NM_006191 | 4729.67   | 4881.337  | AK023224  | 1993.337  | 2416.955  | NM_00072E | 630.821   | 444.04    |
| NM_00180C | 1424.456  | 1104.861  | AK023731  | 2636.808  | 2998.697  | AL096751  | 3140.238  | 2733.071  |
| NM_00433E | 4837.147  | 4204.551  | AK023929  | 258.295   | 554.557   | NM_000364 | 517.731   | 317.631   |
| NM_01594E | 2034.137  | 2285.089  | AK022442  | 1086.256  | 1684.619  | AF026920  | 3110.379  | 3163.129  |
| NM_01397E | 1834.223  | 2420.479  | AK023336  | 974.826   | 1322.335  | NM_004931 | 2406.396  | 2071.514  |
| NM_00379C | 2374.691  | 2276.345  | AK023771  | 445.396   | 847.392   | NM_000607 | 13495.178 | 12782.885 |
| NM_000494 | 1988.378  | 2000.435  | AK024099  | 243.458   | 529.065   | AB011099  | 219.087   | 292.68    |

|           |           |           |           |           |           |           |           |           |
|-----------|-----------|-----------|-----------|-----------|-----------|-----------|-----------|-----------|
| NM_016023 | 825.299   | 1172.527  | AK026873  | 2117.012  | 2825.931  | AF090409  | 211.365   | 152.237   |
| NM_003722 | 12942.164 | 13363.137 | AK026394  | 2454.604  | 3057.069  | NM_002575 | 3610.784  | 3733.473  |
| NM_014430 | 640.008   | 599.423   | NM_005448 | 896.903   | 1080.652  | NM_004244 | 2291.646  | 2116.858  |
| NM_000495 | 1191.854  | 1283.806  | AK025943  | 14812.147 | 14215.472 | NM_003371 | 11599.317 | 13615.438 |
| AF085883  | 1459.406  | 2249.393  | BG106479  | 773.637   | 827.372   | NM_001164 | 196.069   | 222.373   |
| NM_016571 | 2203.981  | 2796.327  | AF130069  | 11683.486 | 11384.119 | AK023114  | 1647.435  | 1738.695  |
| NM_016446 | 2945.181  | 4392.528  | AL109669  | 1435.307  | 1369.705  | NM_003678 | 1601.323  | 2261.432  |
| NM_002516 | 1207.599  | 676.107   | AB037766  | 1313.982  | 1051.398  | NM_012301 | 610.435   | 624.238   |
| NM_001870 | 341.91    | 417.752   | AK026995  | 379.104   | 448.198   | NM_005631 | 610.663   | 1106.453  |
| AJ271216  | 849.619   | 801.086   | BF842915  | 616.369   | 390.739   | NM_014419 | 2321.552  | 2552.64   |
| U23028    | 3623.582  | 3645.494  | X82545    | 2687.116  | 2028.817  | NM_014938 | 1371.175  | 1351.169  |
| NM_000817 | 5848.68   | 4840.402  | AK024632  | 2819.108  | 2650.482  | AF049460  | 288.725   | 179.233   |
| AF113132  | 12876.551 | 8730.754  | NM_018474 | 5566.05   | 3851.913  | AK026066  | 629.025   | 624.385   |
| NM_006571 | 5259.737  | 4862.456  | AK024937  | 1174.165  | 1380.629  | NM_005244 | 2879.39   | 3067.755  |
| NM_001875 | 476.595   | 418.217   | D17178    | 997.824   | 1366.982  | NM_018158 | 790.424   | 820.817   |
| AK022680  | 1329.297  | 1304.851  | AK022094  | 2854.433  | 4244.723  | NM_016301 | 3666.018  | 3280.576  |
| NM_018946 | 9021.542  | 8975.378  | AK026695  | 964.494   | 1430.958  | AK021975  | 346.968   | 267.018   |
| NM_016359 | 6447.232  | 5368.729  | AK022220  | 491.868   | 677.316   | AB032952  | 14847.905 | 12203.34  |
| NM_004156 | 4759.106  | 6414.845  | U84520    | 2081.153  | 2512.625  | NM_002522 | 15920.504 | 15840.012 |
| AK000561  | 1386.893  | 1865.073  | AL133616  | 5285.206  | 5714.831  | NM_018607 | 277.678   | 322.729   |
| AB051449  | 15908.344 | 16356.095 | AK026382  | 2176.134  | 2341.049  | NM_002978 | 2419.713  | 2506.243  |
| BC009187  | 8716.236  | 11091.45  | AK091169  | 1868.313  | 2438.264  | S83549    | 192.511   | 168.694   |
| AL133617  | 1109.502  | 1170.621  | NM_014745 | 33427.629 | 33483.961 | NM_014668 | 1056.937  | 1017.212  |
| NM_016485 | 5693.222  | 6109.972  | AF086026  | 7104.521  | 7200.125  | NM_004722 | 1309.745  | 1498.293  |
| AF090894  | 748.703   | 713.452   | AL133011  | 463.467   | 290.113   | NM_014425 | 537.07    | 791.261   |
| AK000049  | 281.884   | 172.698   | NM_016300 | 627.286   | 561.895   | NM_012133 | 888.524   | 1410.749  |
| NM_006167 | 405.183   | 339.831   | NM_015607 | 17441.277 | 14122.161 | NM_017954 | 265.744   | 303.387   |
| NM_016357 | 3105.482  | 3140.718  | AK026955  | 1575.123  | 1351.735  | NM_006612 | 1007.642  | 1311.934  |
| NM_014500 | 8541.558  | 6568.118  | AL110202  | 14575.412 | 11686.459 | NM_016451 | 935.746   | 859.412   |
| AK023792  | 397.049   | 257.953   | AK021980  | 896.843   | 901.259   | NM_007351 | 8975.151  | 7916.449  |
| NM_020149 | 1915.704  | 2252.394  | S46402    | 1055.163  | 612.783   | AK026266  | 4527.511  | 3709.505  |
| NM_006237 | 926.925   | 787.55    | AF075048  | 557.181   | 341.766   | NM_007124 | 2170.684  | 1806.936  |
| NM_001271 | 5312.34   | 4532.494  | Z83940    | 741.683   | 829.037   | NM_003176 | 1431.625  | 1459.324  |
| NM_003683 | 1992.48   | 1996.609  | NM_005800 | 1108.966  | 614.401   | AK023168  | 1031.335  | 950.452   |
| AF039019  | 3881.265  | 4436.493  | AF019617  | 6246.83   | 4674.78   | NM_006646 | 461.382   | 405.532   |
| NM_012255 | 7367.163  | 6719.549  | AL137305  | 6411.314  | 7230.027  | NM_004742 | 1147.961  | 665.646   |
| NM_018196 | 1782.71   | 1798.855  | NM_005290 | 653.743   | 707.643   | NM_014753 | 1281.102  | 864.469   |
| NM_004818 | 3334.736  | 3268.385  | AK025802  | 734.876   | 952.606   | NM_006585 | 16362.801 | 17324.48  |
| J04205    | 10472.574 | 8017.377  | AF085973  | 487.846   | 824.397   | NM_014331 | 1676.193  | 1803.981  |
| D38491    | 5673.311  | 2758.808  | NM_018013 | 3101.88   | 5168.561  | NM_006795 | 7261.465  | 7780.785  |
| AK026835  | 2830.947  | 2353.194  | AK022517  | 1412.035  | 1138.014  | AF070568  | 891.147   | 1104.904  |
| NM_002819 | 18764.383 | 18210.918 | NM_000329 | 16977.406 | 15135.191 | NM_000277 | 224.62    | 249.43    |
| NM_013264 | 5199.052  | 6620.926  | NM_001182 | 4823.229  | 5010.631  | NM_000240 | 2329.144  | 2419.007  |
| NM_003315 | 13105.078 | 12896.536 | NM_000333 | 1848.949  | 1632.367  | AK055733  | 6596.724  | 8220.936  |
| NM_005570 | 11178.762 | 11921.556 | NM_000172 | 3087.646  | 3329.052  | AF298880  | 5151.29   | 5873.584  |
| NM_000086 | 3956.804  | 4225.976  | NM_002297 | 2600.261  | 2800.844  | AK001500  | 833.778   | 1154.996  |
| NM_003752 | 3969.428  | 3480.822  | AB040968  | 8488.222  | 7596.145  | NM_006774 | 364.911   | 364.419   |
| NM_003932 | 12992.525 | 11726.299 | U17615    | 1744.747  | 1510.276  | NM_020129 | 439.205   | 567.324   |
| NM_016491 | 16014.548 | 10900.589 | NM_005303 | 3451.326  | 3335.996  | Y16521    | 1758.079  | 2744.21   |
| NM_006429 | 23068.635 | 21238.148 | NM_016126 | 10162.496 | 8079.769  | AL050371  | 1842.027  | 2121.526  |
| NM_003307 | 6560.875  | 5453.985  | U84119    | 921.823   | 823.402   | NM_002651 | 2730.917  | 2593.627  |
| AF070565  | 720.411   | 718.579   | NM_003608 | 1210.437  | 1661.495  | NM_002413 | 4202.814  | 3815.048  |
| AK021644  | 1886.547  | 1647.282  | AF302079  | 13373.937 | 11615.189 | NM_017577 | 250.484   | 181.647   |

|           |           |           |             |           |           |           |          |          |
|-----------|-----------|-----------|-------------|-----------|-----------|-----------|----------|----------|
| NM_01659E | 464.506   | 339.862   | NM_00255C   | 689.318   | 497.807   | NM_001757 | 1241.648 | 1494.156 |
| NM_015944 | 732.79    | 548.592   | NM_000692   | 1525.594  | 1064.693  | NM_001647 | 2121.767 | 2186.941 |
| NM_002064 | 823.067   | 889.137   | AF086062    | 1572.937  | 3070.794  | NM_00622E | 299.786  | 227.612  |
| NM_015523 | 3376.728  | 2944.089  | L47668      | 20661.369 | 17404.82  | NM_00376E | 1973.893 | 1512.528 |
| NM_01596C | 5474.149  | 4216.644  | NM_01792C   | 3467.03   | 5368.511  | NM_01839E | 576.506  | 419.305  |
| NM_00608E | 2217.973  | 2157.735  | AK025345    | 717.476   | 1565.743  | BF032535  | 2133.809 | 2091.656 |
| NM_000907 | 5158.762  | 5621.097  | D25274      | 6758.334  | 10701.281 | NM_01833E | 1127.578 | 828.029  |
| AF254085  | 2441.109  | 2275.046  | CY3Cy5      | 1745.186  | 463.464   | NM_00509E | 5364.927 | 4852.483 |
| AK023541  | 227.079   | 292.433   | D50373      | 863.733   | 325.118   | NM_00676C | 475.764  | 401.088  |
| NM_001987 | 1786.868  | 1197.791  | AA488757    | 6974.565  | 4352.993  | NM_01228E | 2722.72  | 2453.663 |
| AF244088  | 2490.479  | 2155.385  | AI394286    | 2181.017  | 1199.066  | AB037775  | 684.127  | 864.18   |
| NM_00713E | 1163.189  | 1285.091  | H07071      | 1467.958  | 924.009   | L27560    | 1218.915 | 1164.459 |
| AK025434  | 1604.836  | 1733.214  | M25322      | 2791.905  | 1490.075  | AB011174  | 971.918  | 1090.672 |
| AJ251845  | 880.406   | 742.851   | H-L 27586 I | 1202.632  | 1180.334  | AB043635  | 190.477  | 244.898  |
| AK000435  | 1762.493  | 1273.652  | ID 214180   | 462.908   | 362.821   | AB040879  | 993.862  | 1362.046 |
| AK000569  | 3077.004  | 2310.637  | ID 1867426  | 3270.239  | 2980.2    | AL049935  | 1733.051 | 1661.308 |
| NM_00604E | 1988.433  | 1378.749  | BE735403    | 2482.297  | 2073.318  | AB033043  | 3463.71  | 5071.302 |
| NM_017661 | 1917.463  | 1375.641  | NM_02255E   | 3642.378  | 2095.752  | NM_01499E | 1162.777 | 1031.087 |
| BC016698  | 7648.384  | 4538.104  | NM_01438E   | 9430.488  | 7927.813  | AK025220  | 922.756  | 952.353  |
| NM_007374 | 319.803   | 409.134   | SR2         | 43850.094 | 63648.184 | NM_01630E | 6938.499 | 6546.756 |
| AK027185  | 1305.492  | 1030.461  | SR4         | 13148.223 | 17222.77  | D42046    | 1891.156 | 1806.279 |
| AK025576  | 1245.416  | 1019.577  | SR6         | 1847.821  | 2873.698  | NM_00103E | 1431.753 | 892.497  |
| AF147385  | 629.227   | 506.723   | SR8         | 6433.013  | 30493.977 | NM_00452E | 6830.97  | 6897.442 |
| AL442086  | 3700.271  | 2838.016  | SR10        | 26444.885 | 12946.401 | NM_00252E | 5878.816 | 5951.119 |
| BC034819  | 2906.487  | 2785.974  | CY3Cy5      | 3119.198  | 339.26    | NM_02013E | 1199.154 | 1169.432 |
| AF147313  | 6755.313  | 4760.389  | NM_005811   | 4616.341  | 2168.5    | NM_01851E | 1783.458 | 2057.241 |
| AF147382  | 17807.041 | 16387.143 | NM_005764   | 973.665   | 270.953   | AK023149  | 801.148  | 715.906  |
| AK001957  | 3593.178  | 3414.67   | NM_01636E   | 2098.373  | 1187.247  | NM_00643E | 931.461  | 660.591  |
| AK000850  | 911.09    | 892.467   | NM_004214   | 4317.339  | 2204.007  | NM_00184E | 507.114  | 391.559  |
| AK021833  | 1710.772  | 1937.211  | NM_00432E   | 7523.624  | 3732.404  | NM_00459E | 203.57   | 136.307  |
| AF143867  | 1318.859  | 1212.513  | NM_00283E   | 2732.418  | 1235.776  | AK024697  | 623.662  | 589.008  |
| AK025889  | 3808.007  | 3526.659  | NM_020167   | 1508.294  | 709.692   | NM_00646C | 839.285  | 951.86   |
| NM_01471E | 1578.157  | 1405.766  | AL049963    | 7956.378  | 4778.037  | L34156    | 291.664  | 267.714  |
| AF086272  | 263.911   | 107.099   | NM_01605E   | 13647.142 | 8698.857  | NM_00374E | 8258.651 | 7693.169 |
| AF086448  | 2277.289  | 2717.978  | NM_01400E   | 2156.881  | 1149.811  | NM_003557 | 1530.963 | 1313.21  |
| AB019391  | 549.069   | 276.221   | NM_00463E   | 1086.301  | 683.993   | NM_001257 | 8869.688 | 7975.232 |
| AF086386  | 1384.417  | 1292.609  | NM_00397E   | 3361.855  | 2250.785  | NM_00179E | 242.799  | 268.409  |
| AF086413  | 469.356   | 504.674   | NM_01768E   | 1265.547  | 963.732   | D85245    | 4042.963 | 3789.848 |
| AF086457  | 1568.222  | 1254.433  | AK025612    | 5687.052  | 3984.027  | NM_00094E | 892      | 736.926  |
| AK025469  | 1271.857  | 1295.602  | NM_01226E   | 4111.468  | 3903.767  | NM_00465E | 1739.204 | 2068.765 |
| NM_02023E | 10535.229 | 8961.905  | NM_01220E   | 770.461   | 717.702   | NM_00125C | 3535.554 | 3076.549 |
| AF070581  | 1154.816  | 1056.11   | NM_00329E   | 301.951   | 539.661   | AF298812  | 1078.415 | 886.766  |
| AK024187  | 1053.927  | 1215.883  | NM_00473E   | 3341.965  | 4639.425  | NM_00496E | 899.656  | 1122.035 |
| AF075079  | 428.64    | 224.175   | NM_003827   | 3897.53   | 2505.013  | AJ249900  | 260.981  | 282.593  |
| AK022479  | 578.661   | 514.318   | NM_00458E   | 754.016   | 398.467   | AK022581  | 2685.525 | 2688.749 |
| AK023572  | 475.497   | 539.92    | AF228710    | 14187.3   | 6857.443  | NM_018054 | 1052.477 | 1245.004 |
| AF086004  | 6517.616  | 5669.529  | AY007131    | 24260.439 | 12919.103 | NM_00618E | 906.784  | 891.102  |
| AF147433  | 414.04    | 435.075   | U61735      | 2756.752  | 1250.26   | NM_00095E | 3363.97  | 3143.713 |
| AF085978  | 329.4     | 337.098   | NM_001144   | 1684.986  | 1144.872  | NM_001401 | 529.23   | 439.559  |
| AF086006  | 393.279   | 462.908   | AK023766    | 4431.997  | 3092.011  | NM_013271 | 8247.548 | 6563.199 |
| AL137318  | 1133.276  | 1227.947  | NM_001897   | 1377.547  | 1402.557  | NM_004157 | 3034.501 | 2654.907 |
| AL137482  | 574.568   | 765.542   | NM_00385E   | 1062.108  | 1045.883  | NM_000684 | 881.889  | 800.467  |
| AL162011  | 13249.885 | 16776.934 | AB033109    | 1427.278  | 1726.907  | NM_01591E | 4709.886 | 3932.333 |

|           |           |           |           |           |           |           |           |           |
|-----------|-----------|-----------|-----------|-----------|-----------|-----------|-----------|-----------|
| AL390177  | 751.099   | 551.01    | NM_002053 | 10767.921 | 10200.662 | NM_005157 | 2716.488  | 2219.531  |
| AL137678  | 354.008   | 245.65    | NM_006889 | 1005.862  | 745.745   | NM_007354 | 583.104   | 348.085   |
| AK056111  | 638.139   | 522.848   | NM_014589 | 1497.428  | 948.517   | U67037    | 1000.958  | 808.293   |
| AL162055  | 261.34    | 260.712   | NM_000759 | 1329.312  | 1109.018  | NM_00496C | 7670.605  | 6794.506  |
| Y13807    | 1059.835  | 828.41    | AK023334  | 1453.355  | 918.305   | AF272370  | 3940.795  | 4204.417  |
| AK022053  | 456.199   | 392.299   | NM_002563 | 9475.958  | 7257.467  | AF130050  | 1913.362  | 1833.418  |
| AK023038  | 803.731   | 743.776   | NM_002437 | 1589.076  | 1797.991  | AK023045  | 216.394   | 202.31    |
| AK026206  | 1614.247  | 1508.958  | D79991    | 1283.986  | 1601.316  | NM_012197 | 2014.318  | 1895.534  |
| AF086074  | 1390.103  | 958.542   | AK022425  | 635.984   | 592.707   | AK024016  | 1498.356  | 1745.996  |
| AK023964  | 2194.135  | 1875.243  | NM_000054 | 9127.296  | 10131.889 | NM_003581 | 3594.666  | 4027.29   |
| AF086084  | 1090.829  | 893.905   | NM_014713 | 4954.26   | 7631.644  | NM_00288E | 203.767   | 219.588   |
| AK000156  | 402.73    | 305.866   | NM_006033 | 1640.85   | 1190.312  | NM_012407 | 527.137   | 597.564   |
| AL050184  | 714.337   | 746.586   | NM_004837 | 5040.108  | 2565.869  | NM_00718E | 1228.955  | 992.519   |
| AF085853  | 733.965   | 797.195   | NM_00037C | 1412.496  | 614.768   | NM_007044 | 1146.546  | 1275.529  |
| AK027112  | 3925.119  | 3953.844  | BE865893  | 1764.351  | 805.302   | AF294326  | 2853.173  | 2946.3    |
| AL049314  | 1494.695  | 1862.601  | NM_003123 | 44577.883 | 22166.457 | NM_01467E | 936.976   | 1311.997  |
| AF093016  | 9040.328  | 8596.015  | AY005822  | 2976.519  | 1206.186  | NM_012317 | 45847.598 | 68193.547 |
| AF161345  | 1784.088  | 2152.652  | NM_018129 | 22982.76  | 12175.433 | NM_017853 | 1261.286  | 1124.387  |
| -         | 582.184   | 684.036   | AF289022  | 1326.978  | 867.279   | NM_016097 | 5025.393  | 5149.385  |
| AF090925  | 401.536   | 520.632   | AB002326  | 522.347   | 140.965   | AB046800  | 2414.073  | 2337.838  |
| NM_014163 | 2435.719  | 2250.171  | M17252    | 308.193   | 554.056   | NM_002162 | 1681.631  | 1911.402  |
| AK021659  | 346.036   | 426.737   | NM_016025 | 2913.841  | 3975.014  | NM_01545E | 2124.42   | 1728.179  |
| AK021974  | 1236.638  | 1493.926  | NM_013319 | 1514.752  | 2620.227  | D13540    | 2870.518  | 2431.747  |
| AK022068  | 752.223   | 1072.506  | NM_00074E | 1014.572  | 1857.831  | NM_01657C | 4065.994  | 3213.366  |
| AK022229  | 755.588   | 734.867   | NM_000722 | 666.919   | 1378.792  | AF209198  | 789.466   | 549.907   |
| AK022362  | 2133.514  | 1670.573  | NM_014211 | 508.096   | 427.75    | L09247    | 330.65    | 274.746   |
| AK022004  | 2924.773  | 2114.671  | NM_000814 | 1546.221  | 2439.021  | M69012    | 35924.344 | 32674.213 |
| AK022390  | 946.877   | 907.135   | NM_000453 | 1965.678  | 2356.606  | NM_016347 | 184.055   | 186.516   |
| AK027134  | 1155.695  | 974.376   | J03077    | 10971.769 | 13969.293 | NM_00693E | 8680.633  | 6917.154  |
| AK024168  | 1375.14   | 1007.493  | J03048    | 20160.525 | 10978.109 | NM_001327 | 4501.547  | 4650.679  |
| AF222857  | 482.323   | 615.89    | NM_000317 | 5635.8    | 2382.61   | AF321182  | 165.433   | 267.101   |
| AF264622  | 662.15    | 499.403   | NM_01837E | 4434.957  | 1885.714  | AB037722  | 176.987   | 185.977   |
| AK027203  | 479.646   | 338.544   | NM_01743E | 1722.184  | 872.855   | NM_003652 | 262.287   | 252.251   |
| AK021793  | 2856.032  | 1778.369  | U59209    | 1440.774  | 708.555   | NM_000063 | 706.71    | 652.023   |
| AK022255  | 2389.201  | 1656.446  | NM_020195 | 1760.031  | 864.905   | NM_01838E | 391.55    | 436.507   |
| AK023730  | 472.514   | 683.547   | AK023824  | 3692.006  | 4963.016  | AB033026  | 629.021   | 535.17    |
| AF161360  | 1263.468  | 1494.527  | AL133069  | 2714.725  | 3253.935  | AF104914  | 9273.311  | 9742.566  |
| AK021720  | 1623.79   | 1600.342  | AL117574  | 452.471   | 408.752   | NM_01471E | 1855.01   | 1929.465  |
| NM_016497 | 18559.623 | 17519.611 | AK026055  | 4284.128  | 3806.282  | AK023845  | 1273.038  | 949.691   |
| AK000617  | 452.843   | 369.254   | AK024126  | 649.646   | 823.283   | NM_00263E | 2476.067  | 2599.233  |
| AF009261  | 663.935   | 727.006   | NM_00151E | 4116.019  | 5461.592  | NM_016487 | 524.597   | 393.418   |
| AF086264  | 389.217   | 298.389   | NM_000061 | 3821.928  | 2183.311  | NM_00580E | 4410.787  | 4390.466  |
| AB037792  | 1961.047  | 1965.693  | AB046859  | 10940.494 | 4904.59   | NM_006401 | 15262.715 | 17874.502 |
| AK022480  | 483.461   | 299.744   | NM_005109 | 5080.679  | 3499.229  | AF269249  | 298.199   | 112.102   |
| AK024158  | 642.031   | 560.852   | AK023573  | 2773.879  | 3846.193  | X51417    | 210.962   | 92.04     |
| AL080082  | 3020.753  | 1962.146  | NM_00273C | 2747.188  | 3584.067  | D31763    | 1625.238  | 908.994   |
| AK021623  | 2401.904  | 1862.97   | NM_00482E | 2764.403  | 4221.8    | NM_01816E | 1649.731  | 1785.665  |
| AK023733  | 416.216   | 441.397   | AB011540  | 18295.633 | 32560.271 | AK021452  | 4040.083  | 3446.849  |
| U79242    | 425.523   | 803.169   | NM_00473E | 2390.075  | 1690.501  | NM_00450E | 851.118   | 861.437   |
| AF119901  | 2514.259  | 2515.475  | NM_006895 | 603.381   | 203.478   | S74529    | 24270.357 | 20689.049 |
| AK001936  | 2513.715  | 2548.502  | NM_006459 | 6198.317  | 2852.385  | NM_020227 | 281.619   | 397.326   |
| NM_00377C | 26576.365 | 22068.902 | D50373    | 772.738   | 832.378   | NM_005933 | 286.171   | 153.212   |
| AK001395  | 6744.476  | 7360.812  | AA488757  | 9235.352  | 8286.589  | NM_001421 | 424.657   | 381.758   |

|           |           |           |             |           |           |           |           |           |
|-----------|-----------|-----------|-------------|-----------|-----------|-----------|-----------|-----------|
| S57803    | 3676.058  | 4122.553  | AI394286    | 1783.864  | 834.802   | M73837    | 580.397   | 545.016   |
| AF131822  | 961.144   | 968.754   | H07071      | 1813.438  | 880.81    | U69127    | 11889.534 | 11069.567 |
| AK023131  | 1483.942  | 1430.591  | M25322      | 3036.975  | 1235.184  | NM_00583C | 3374.255  | 2315.794  |
| U61096    | 398.677   | 308.169   | H-L 27586 I | 1051.922  | 969.819   | AK023379  | 760.522   | 893.636   |
| AF085865  | 3304.537  | 3451.537  | ID 214180   | 654.04    | 424.214   | NM_00607E | 215.591   | 214.188   |
| X78261    | 354.42    | 363.812   | ID 1867426  | 4359.075  | 5476.715  | AK021904  | 4154.238  | 3995.494  |
| AK025521  | 1816.142  | 2123.302  | W99328      | 916.782   | 426.388   | -         | 517.263   | 614.205   |
| NM_001053 | 52019.656 | 53072.746 | AI434176    | 697.429   | 84.871    | NM_018292 | 273.69    | 352.001   |
| Z70694    | 3752.036  | 3415.555  | H08563      | 883.206   | 343.614   | AL049705  | 2915.365  | 3123.758  |
| L77602    | 457.994   | 376.126   | BE735403    | 2421.413  | 1896.453  | AK022294  | 1094.064  | 836.802   |
| NM_015421 | 6221.667  | 5363.197  | NM_022552   | 4157.316  | 3814.125  | AF086507  | 568.205   | 492.051   |
| AF086081  | 5114.784  | 4289.73   | NM_014389   | 10099.824 | 13764.675 | U79289    | 836.109   | 686.827   |
| NM_018634 | 612.136   | 794.471   | AF116659    | 1940.601  | 3188.048  | NM_01402E | 1245.949  | 1119.339  |
| NM_018111 | 714.828   | 557.374   | D79991      | 1302.011  | 566.05    | NM_000402 | 576.062   | 539.336   |
| L23867    | 567.099   | 654.455   | AK022425    | 622.424   | 142.924   | NM_004273 | 211.798   | 250.155   |
| AB020968  | 1369.349  | 1234.342  | NM_000054   | 3458.13   | 1345.901  | NM_00069C | 3533.67   | 4006.094  |
| AL138690  | 1183.636  | 1247.728  | NM_014713   | 3451.631  | 1253.708  | NM_00015E | 2746.574  | 2765.623  |
| NM_013941 | 1245.657  | 1214.156  | NM_001812   | 1368.396  | 1003.068  | AK024489  | 194.891   | 205.326   |
| AF074989  | 1405.94   | 1550.833  | NM_01478E   | 949.816   | 335.416   | NM_000181 | 3783.563  | 3480.81   |
| AK001107  | 637.195   | 927.589   | NM_005811   | 4404.818  | 2071.846  | NM_014121 | 417.284   | 480.663   |
| AF147393  | 768.05    | 631.385   | NM_005764   | 1048.495  | 274.409   | NM_00673C | 964.763   | 1036.988  |
| AL137339  | 373.247   | 386.365   | NM_016362   | 1702.665  | 635.798   | NM_005644 | 1164.653  | 1026.785  |
| AL080112  | 2318.451  | 2515.76   | NM_004214   | 3945.178  | 1434.765  | NM_018442 | 1847.276  | 1809.531  |
| AK022299  | 652.232   | 427.907   | NM_004329   | 6858.98   | 2202.551  | AF182416  | 2153.891  | 1701.826  |
| AL137325  | 590.465   | 387.328   | NM_002836   | 2756.02   | 1269.383  | NM_00599C | 6547.993  | 5536.959  |
| AF147361  | 1623.802  | 1139.946  | NM_020167   | 1451.92   | 792.188   | NM_00601E | 496.115   | 508.472   |
| AL133086  | 829.804   | 750.395   | AL049963    | 7044.128  | 3907.981  | NM_004634 | 1002.118  | 1135.857  |
| NM_012151 | 41131.516 | 43531.379 | NM_01605E   | 13633.154 | 8751.28   | NM_002017 | 2742.677  | 3429.848  |
| AF087994  | 1385.524  | 1326.236  | NM_01400E   | 2573.268  | 2999.22   | NM_017523 | 4173.888  | 3912.033  |
| AJ227912  | 889.461   | 833.23    | NM_004636   | 1097.544  | 805.415   | NM_002382 | 9514.58   | 8870.256  |
| NM_01819E | 2115.617  | 2216.573  | AK022603    | 825.82    | 419.978   | NM_00215E | 335.985   | 290.053   |
| AK025532  | 3203.276  | 3046.823  | NM_004896   | 6194.408  | 3727.251  | U13223    | 4110.347  | 3948.625  |
| AK021789  | 545.29    | 973.408   | NM_013372   | 296.926   | 620.182   | NM_01627C | 1061.824  | 1131.857  |
| AF086383  | 286.241   | 311.744   | NM_003976   | 3612.101  | 4689.454  | AK001357  | 910.933   | 501.215   |
| NM_003522 | 998.289   | 1142.066  | NM_01768E   | 1639.238  | 1643.23   | NM_015721 | 1247.406  | 1052.021  |
| BF217847  | 1999.494  | 1937.52   | AK025612    | 6223.272  | 8418.002  | AF086298  | 562.766   | 414.428   |
| NM_00532C | 2566.396  | 1566.708  | NM_01226E   | 4056.295  | 5101.196  | AK027238  | 529.516   | 452.853   |
| CY3Cy5    | 2327.473  | 476.566   | NM_012203   | 816.665   | 1966.639  | AK000032  | 312.09    | 234.471   |
| BI830936  | 358.537   | 375.55    | J03077      | 9012.457  | 4993.149  | AK025758  | 227.624   | 229.721   |
| U79292    | 1504.056  | 891.37    | J03048      | 16785.434 | 2897.11   | AL360201  | 288.507   | 257.175   |
| BI830753  | 449.292   | 439.978   | NM_00286E   | 2503.813  | 1434.29   | S94540    | 17825.324 | 17168.576 |
| X68314    | 308.305   | 153.263   | AK024100    | 2184.984  | 1213.223  | U79297    | 313.295   | 173.786   |
| X71973    | 28434.805 | 10468.05  | NM_00513E   | 1127.623  | 414.872   | AK002164  | 322.403   | 285.111   |
| T49651    | 2268.071  | 1760.193  | NM_003827   | 3580.219  | 1837.67   | AF052122  | 3641.271  | 4362.536  |
| N51014    | 1626.147  | 1047.706  | NM_004583   | 652.587   | 170.012   | NM_00131C | 859.153   | 903.235   |
| BE392471  | 10878.527 | 5164.481  | NM_001103   | 537.68    | 100.829   | AK026924  | 4097.014  | 4097.542  |
| AI802950  | 1017.553  | 728.33    | AF228710    | 14690.046 | 4219.186  | AL122047  | 4012.199  | 4836.292  |
| AA682423  | 250.029   | 299.72    | AY007131    | 24379.236 | 10683.455 | AF052091  | 875.693   | 851.64    |
| AL043686  | 2240.7    | 1728.934  | U61735      | 2544.075  | 1031.131  | AK024447  | 37437.629 | 31018.73  |
| AA490172  | 526.711   | 424.565   | NM_001144   | 1672.564  | 685.18    | AF052145  | 600.165   | 852.185   |
| AA775212  | 2444.469  | 2025.243  | AK023766    | 3423.242  | 1531.285  | AF086458  | 922.835   | 967.76    |
| NM_00094E | 1166.158  | 1009.581  | NM_001897   | 1065.194  | 1156.601  | AF086548  | 1443.592  | 1940.236  |
| NM_002574 | 20410.25  | 16219.307 | NM_003853   | 1145.547  | 816.984   | AK024350  | 533.518   | 540.589   |

|           |           |           |           |           |           |           |          |          |
|-----------|-----------|-----------|-----------|-----------|-----------|-----------|----------|----------|
| SR5       | 3013.952  | 3807.221  | AB033109  | 1823.156  | 2266.962  | AK023717  | 860.501  | 801.418  |
| SR7       | 4672.953  | 33564.41  | NM_002053 | 7947.868  | 5774.417  | AK023727  | 495.476  | 459.105  |
| SR9       | 20125.975 | 4077.459  | NM_006889 | 1105.805  | 861.431   | AK025271  | 376.132  | 653.301  |
| CY3Cy5    | 2932.338  | 621.835   | NM_002438 | 1485.199  | 1607.147  | AF086204  | 2597.464 | 1884.192 |
| NM_003371 | 2243.415  | 1690.811  | NM_014589 | 2278.817  | 2449.094  | NM_007021 | 617.46   | 550.451  |
| AK023114  | 2209.638  | 1617.839  | NM_000759 | 1889.226  | 2527.962  | AK026283  | 196.513  | 150.924  |
| NM_003678 | 2780.473  | 1814.447  | AK023334  | 1661.724  | 2162.063  | AK022076  | 257.113  | 142.558  |
| NM_005631 | 347.062   | 170.098   | NM_002563 | 10234.301 | 12400.505 | AK023065  | 193.571  | 203.506  |
| NM_014419 | 1176.139  | 569.475   | NM_002437 | 1395.409  | 1874.292  | NM_017678 | 212.832  | 257.2    |
| NM_014938 | 1801.161  | 928.555   | AK023573  | 2616.398  | 1398.607  | AK021570  | 339.898  | 426.253  |
| AF049460  | 284.521   | 200.795   | NM_002730 | 2604.355  | 864.606   | AL360204  | 276.786  | 182.351  |
| AK026066  | 821.633   | 700.24    | NM_004828 | 2483.967  | 1113.241  | AK000103  | 775.256  | 709.293  |
| NM_005244 | 1225.407  | 876.945   | AB011540  | 15225.914 | 4649.516  | AK026294  | 188.565  | 160.93   |
| AF054589  | 303.502   | 380.113   | NM_000040 | 5447.801  | 2600.48   | AF085959  | 389.576  | 517.922  |
| NM_005270 | 871.882   | 1206.752  | NM_004631 | 2683.141  | 1142.943  | AF075107  | 306.875  | 397.563  |
| NM_014815 | 1255.407  | 1322.526  | NM_006033 | 3265.55   | 1642.281  | AK023104  | 434.949  | 286.11   |
| NM_005443 | 336.267   | 419.187   | NM_004837 | 4159.168  | 2068.895  | AK022181  | 244      | 292.514  |
| NM_007221 | 3577.416  | 3882.401  | NM_000370 | 1259.917  | 616.899   | AK026923  | 1004.835 | 1010.173 |
| X54163    | 16911.498 | 16634.184 | BE865893  | 2240.022  | 962.037   | Y11177    | 440.231  | 502.513  |
| AK025395  | 685.177   | 986.198   | NM_003123 | 47858.059 | 24226.068 | U61091    | 162.188  | 224.827  |
| NM_000388 | 1101.333  | 1374.357  | AY005822  | 3576.959  | 1793.393  | AK021691  | 6587.687 | 7233.245 |
| X58377    | 460.48    | 628.144   | NM_018129 | 22002.113 | 9778.773  | AK023595  | 244.222  | 295.414  |
| NM_002469 | 497.068   | 734.841   | AF289022  | 1496.5    | 572.571   | AK022037  | 281.5    | 200.585  |
| AI673575  | 330.342   | 491.762   | NM_016025 | 1811.775  | 799.965   | AK000141  | 1970.174 | 2214.829 |
| NM_014668 | 352.124   | 261.271   | NM_013319 | 1245.164  | 754.519   | AL137758  | 973.815  | 922.264  |
| NM_004722 | 1119.215  | 520.704   | NM_000746 | 964.775   | 667.882   | AK023865  | 177.127  | 165.463  |
| NM_014425 | 806.354   | 487.862   | NM_000722 | 874.194   | 339.787   | AK025786  | 588.235  | 609.622  |
| NM_012133 | 1510.357  | 879.443   | NM_006030 | 1119.646  | 1211.224  | AK024188  | 651.865  | 542.836  |
| NM_017954 | 227.646   | 387.854   | NM_020410 | 5371.098  | 5203.864  | AK024379  | 280.677  | 172.155  |
| NM_006612 | 1040.671  | 743.217   | AF000143  | 12614.854 | 13052.256 | AK026820  | 368.771  | 360.077  |
| NM_016451 | 1391.715  | 1110.36   | NM_014211 | 527.195   | 735.231   | AK001716  | 1841.007 | 1718.677 |
| NM_007351 | 10371.55  | 4514.121  | NM_000814 | 1322.311  | 1470.27   | AF113683  | 193.335  | 284.365  |
| AK026266  | 5513.408  | 2846.143  | NM_000453 | 2120.658  | 2869.457  | AK026821  | 773.274  | 757.35   |
| NM_007124 | 3242.172  | 1564.347  | NM_022552 | 4074.017  | 1765.435  | AK026280  | 7557.967 | 7192.539 |
| NM_003176 | 2253.776  | 1445.299  | NM_014389 | 7321.249  | 2971.88   | AF113017  | 3292.252 | 3748.028 |
| NM_000723 | 1208.665  | 998.234   | AF116659  | 1995.854  | 859.819   | AL080232  | 3636.784 | 3920.589 |
| AL096751  | 2436.948  | 1735.847  | NM_000317 | 8698.457  | 4424.595  | AK001120  | 2674.459 | 3036.416 |
| NM_000364 | 543.528   | 467.946   | NM_017438 | 1357.097  | 1105.847  | AK022416  | 321.8    | 404.216  |
| AF026920  | 1844.972  | 1810.411  | U59209    | 1424.428  | 1044.813  | AK023224  | 1035.974 | 1320.684 |
| NM_004931 | 3945.911  | 3428.096  | NM_020195 | 2059.278  | 1152.349  | AK023731  | 826.112  | 755.653  |
| NM_000607 | 14545.325 | 12490.811 | AK023824  | 2589.531  | 1227.098  | AK023929  | 163.968  | 183.192  |
| AF090409  | 257.445   | 248.131   | AL133069  | 2207.181  | 905.627   | AK022442  | 489.424  | 595.83   |
| NM_002575 | 4118.692  | 4031.952  | AL117574  | 631.524   | 57.985    | AK023336  | 431.039  | 424.764  |
| NM_004244 | 2112.356  | 2407.468  | AK026055  | 3380.248  | 1387.777  | AK026873  | 1157.677 | 1514.322 |
| AK001500  | 832.749   | 472.675   | AK024126  | 1063.776  | 685.742   | AK026394  | 1144.196 | 1300.347 |
| NM_006774 | 391.199   | 259.183   | NM_001516 | 3738.395  | 1418.018  | NM_005448 | 478.131  | 404.929  |
| NM_002714 | 187.257   | 78.634    | NM_002744 | 4147.052  | 2866.825  | AK025943  | 7055.124 | 6694.065 |
| NM_020129 | 484.751   | 485.867   | NM_015917 | 6781.045  | 5509.395  | BG106479  | 407.729  | 308.085  |
| Y16521    | 1234.404  | 633.803   | NM_020397 | 709.976   | 733.672   | AF130069  | 9190.578 | 7473.333 |
| AL050371  | 1692.494  | 1108.593  | NM_000061 | 5362.317  | 5553.241  | AL109669  | 603.372  | 717.118  |
| NM_002651 | 4241.434  | 1837.802  | AB046859  | 9898.832  | 9287.192  | AB037766  | 997.031  | 776.275  |
| NM_002413 | 5142.57   | 2506.204  | NM_005109 | 4751.154  | 5479.094  | AK026995  | 196.84   | 147.949  |
| NM_017577 | 275.32    | 241.637   | NM_003976 | 2945.036  | 1534.422  | AL133091  | 527.174  | 293.608  |



|           |           |           |             |           |           |           |           |          |
|-----------|-----------|-----------|-------------|-----------|-----------|-----------|-----------|----------|
| NM_001757 | 1834.427  | 1439.796  | NM_017688   | 1395.157  | 573.209   | BF842915  | 401.353   | 227.644  |
| NM_001647 | 1626.36   | 957.752   | AK025612    | 4833.631  | 2404.103  | AF086212  | 310.414   | 214.463  |
| NM_018158 | 961.808   | 753.167   | D50373      | 993.502   | 1352.675  | X82545    | 1541.624  | 1444.658 |
| NM_016301 | 4601.996  | 3054.528  | AA488757    | 8109.887  | 5225.955  | AK024632  | 2105.311  | 2526.948 |
| AK021975  | 422.262   | 297.017   | AI394286    | 1901.069  | 796.414   | NM_018474 | 2887.788  | 3267.389 |
| AB032952  | 11907.583 | 8955.854  | H07071      | 1854.124  | 985.084   | AK024937  | 615.729   | 768.66   |
| NM_002522 | 4144.028  | 3922.891  | M25322      | 2988.971  | 1025.947  | D17178    | 430.092   | 534.688  |
| NM_018607 | 300.488   | 283.232   | H-L 27586 I | 1289.016  | 716.398   | AK022094  | 1251.554  | 1418.945 |
| NM_002978 | 1436.053  | 1144.093  | ID 214180   | 752.341   | 115.922   | AK026695  | 562.908   | 600.201  |
| AB040879  | 1195.115  | 609.752   | ID 1867426  | 5821.848  | 4042.77   | U84520    | 2115.171  | 2664.932 |
| AL049935  | 3000.129  | 1626.541  | ID 396450   | 331.645   | 450.138   | Z11853    | 221.094   | 315.723  |
| AB033043  | 1841.017  | 1204.11   | W99328      | 952.119   | 1145.795  | AL133616  | 2627.989  | 2739.352 |
| NM_014998 | 1608.044  | 883.021   | AI434176    | 595.789   | 495.577   | AK026382  | 1094.406  | 957.342  |
| AK025220  | 1212.197  | 592.24    | H08563      | 848.428   | 947.607   | AK091169  | 1172.15   | 1244.219 |
| NM_016308 | 10001.308 | 5006.037  | BE735403    | 1666.438  | 2233.381  | NM_014745 | 23833.947 | 23390.34 |
| D42046    | 1800.066  | 676.895   | NM_002438   | 1560.907  | 813.916   | AF086026  | 3810.931  | 4110.414 |
| NM_001033 | 2087.279  | 1033.869  | NM_002563   | 9581.049  | 19119.525 | AL133011  | 423.466   | 416.464  |
| NM_004528 | 9818.078  | 4645.677  | NM_002437   | 1726.251  | 3119.803  | NM_016308 | 266.176   | 299.738  |
| NM_002528 | 3170.993  | 1476.569  | D79991      | 2024.562  | 3520.216  | NM_015607 | 8688.196  | 8713.18  |
| NM_020135 | 1802.403  | 1302.013  | AK022425    | 749.378   | 1587.553  | AK026955  | 821.048   | 963.558  |
| NM_018518 | 1952.813  | 1290.18   | NM_000054   | 8495.833  | 13251.854 | AL110202  | 7840.495  | 7248.064 |
| AK023149  | 1121.523  | 667.458   | NM_014713   | 4757.044  | 7041.993  | AK021980  | 433.248   | 511.717  |
| AK023168  | 1478.139  | 997.158   | NM_005811   | 5303.153  | 3678.675  | S46402    | 445.53    | 483.406  |
| NM_006648 | 307.2     | 211.355   | NM_005764   | 1172.368  | 476.562   | AF075048  | 353.798   | 268.306  |
| NM_004742 | 290.844   | 220.129   | NM_016362   | 2265.502  | 1147.614  | Z83940    | 458.921   | 635.906  |
| NM_014753 | 1762      | 1086.772  | NM_004214   | 4517.277  | 1961.413  | NM_005808 | 663.831   | 902.543  |
| NM_006585 | 23539.857 | 17559.326 | NM_004329   | 6487.194  | 2530.149  | AF019617  | 4431.054  | 5718.205 |
| NM_014331 | 2905.328  | 3091.763  | NM_002836   | 2611.37   | 1171.728  | AL137305  | 3042.167  | 4037.348 |
| NM_006795 | 5492.806  | 4981.379  | NM_020167   | 1638.694  | 905.768   | NM_005298 | 270.92    | 292.473  |
| AF070568  | 1659.861  | 2174.242  | AL049963    | 7227.969  | 5133.294  | AK025802  | 333.71    | 477.223  |
| NM_000277 | 319.316   | 277.068   | NM_016058   | 15057.889 | 12544.836 | AF085973  | 338.819   | 750.972  |
| NM_000248 | 2112.744  | 2147.534  | NM_014005   | 3142.034  | 3105.829  | NM_018013 | 1193.027  | 1731.716 |
| AK055733  | 13231.367 | 12861.497 | NM_004636   | 1479.676  | 2115.177  | AK022517  | 714.671   | 486.78   |
| AF298880  | 5679.984  | 5916.792  | AK022603    | 611.198   | 715.76    | NM_000328 | 9203.986  | 9326.445 |
| AK025395  | 538.767   | 314.588   | NM_004896   | 7734.83   | 6586.76   | NM_001182 | 5668.527  | 5191.062 |
| NM_000388 | 885.65    | 577.089   | NM_014211   | 384.662   | 1082.581  | NM_000333 | 1188.098  | 1332.813 |
| X58377    | 346.366   | 365.736   | NM_000814   | 1450.312  | 2967.511  | NM_000172 | 1995.891  | 1724.777 |
| NM_002468 | 398.98    | 383.748   | NM_000453   | 1746.459  | 2874.342  | NM_002297 | 2913.146  | 3076.102 |
| BI830936  | 560.609   | 465.142   | J03077      | 10952.545 | 20826.205 | AB040968  | 5803.126  | 6036.834 |
| U79292    | 1985.924  | 1382.939  | J03048      | 20986.154 | 18123.225 | X85323    | 430.42    | 525.536  |
| BI830753  | 604.054   | 492.112   | AL157469    | 450.674   | 1072.62   | AK000802  | 150.83    | 168.578  |
| X68314    | 284.235   | 166.486   | NM_002868   | 3704.996  | 6701.677  | U17615    | 1299.292  | 1069.576 |
| X71973    | 27341.941 | 11714.953 | AK024100    | 3184.002  | 5189.813  | NM_005303 | 3291.469  | 4055.088 |
| T49651    | 2594.188  | 2080.542  | AF228710    | 11279.78  | 4854.124  | NM_016128 | 5666.612  | 5192.761 |
| N51014    | 1810.926  | 1161.865  | AY007131    | 17331.701 | 10407.932 | U84119    | 638.204   | 558.227  |
| BE392471  | 10995.945 | 5824.658  | U61735      | 2348.633  | 1011.458  | NM_003608 | 671.885   | 935.844  |
| AI802950  | 937.899   | 510.135   | NM_001144   | 1667.83   | 1002.084  | AF302079  | 7322.464  | 7780.418 |
| AL043686  | 2294.447  | 1837.592  | AK023766    | 4659.229  | 2875.601  | AJ224167  | 272.983   | 434.049  |
| AA490172  | 459.871   | 465.831   | NM_001897   | 1431.782  | 1855.374  | NM_002558 | 445.83    | 551.26   |
| AA775212  | 2477.514  | 2230.911  | NM_003853   | 1503.231  | 1901.801  | NM_000692 | 921.993   | 1231.884 |
| NM_000945 | 1023.035  | 1510.374  | AB033109    | 1839.373  | 2052.414  | AF086062  | 791.963   | 1138.604 |
| NM_002574 | 21578.971 | 19033.998 | NM_002053   | 16034.791 | 16244.946 | AF000268  | 147.875   | 223.43   |
| AB011174  | 1031.297  | 1621.354  | NM_006889   | 1453.499  | 1910.403  | L47668    | 11850.235 | 15102.32 |

|           |           |           |           |           |           |             |           |           |
|-----------|-----------|-----------|-----------|-----------|-----------|-------------|-----------|-----------|
| AB043635  | 402.89    | 1382.441  | NM_002744 | 4461.141  | 7616.049  | NM_01792C   | 1123.9    | 2088.589  |
| NM_000607 | 10647.461 | 5164.79   | NM_015917 | 7298.622  | 12311.715 | AK025345    | 433.836   | 789.145   |
| AB011099  | 239.147   | 130.672   | NM_020397 | 580.882   | 1471.259  | D25274      | 3152.176  | 4890.831  |
| AF090409  | 193.206   | 444.343   | NM_000061 | 4907.88   | 8241.19   | CY3Cy5      | 891.03    | 273.652   |
| NM_002575 | 3916.166  | 2181.997  | AB046859  | 13382.291 | 20639.182 | D50373      | 280.77    | 256.564   |
| NM_004244 | 3130.35   | 2072.868  | NM_005109 | 4903.592  | 9443.421  | AA488757    | 2600.833  | 3177.141  |
| NM_003371 | 2848.385  | 2053.017  | AK023573  | 3399.78   | 6795.188  | AA205399    | 151.167   | 124.413   |
| AK023114  | 2221.611  | 1342.245  | NM_002730 | 3658.306  | 6442.349  | AI394286    | 1235.365  | 1212.044  |
| NM_003678 | 2580.417  | 1940.223  | NM_004828 | 3555.013  | 5871.369  | H07071      | 343.382   | 703.487   |
| NM_005631 | 297.668   | 170.47    | AB011540  | 18141.289 | 27524.416 | M25322      | 1410.972  | 1705.868  |
| NM_014419 | 1228.465  | 551.832   | NM_000040 | 7700.163  | 14588.313 | AA436187    | 279.055   | 94.45     |
| NM_014938 | 1789.745  | 1107.392  | NM_004631 | 2589.749  | 4651.417  | H-L 27586 I | 673.819   | 857.567   |
| AF049460  | 336.135   | 228.052   | NM_004837 | 2373.422  | 2648.618  | ID 214180   | 794.598   | 458.785   |
| AK026066  | 967.314   | 719.276   | NM_000370 | 1204.708  | 607.543   | ID 1867426  | 1380.866  | 933.532   |
| NM_005244 | 1112.416  | 1090.686  | BE865893  | 1291.656  | 507.764   | W99328      | 575.645   | 577.354   |
| AF054589  | 363.941   | 260.579   | NM_003123 | 24712.389 | 11684.646 | AI434176    | 440.24    | 420.807   |
| NM_005270 | 917.26    | 922.347   | AY005822  | 3319.908  | 1731.77   | H08563      | 424.314   | 447.979   |
| NM_014815 | 1082.47   | 1264.877  | NM_018129 | 26742.479 | 11023.717 | BE735403    | 866.488   | 1335.849  |
| NM_005443 | 387.945   | 388.912   | AF289022  | 1312.283  | 420.651   | NM_022552   | 1671.69   | 1576.113  |
| NM_007221 | 3464.858  | 3564.991  | M17252    | 685.267   | 321.155   | NM_014388   | 3093.155  | 3223.641  |
| X54163    | 14840.712 | 15719.034 | NM_016025 | 2459.929  | 2052.608  | SR2         | 27862.982 | 35126.477 |
| NM_018607 | 338.898   | 219.089   | NM_013319 | 1473.859  | 1754.933  | SR4         | 5797.142  | 6815.119  |
| NM_002978 | 910.488   | 768.276   | NM_000746 | 1053.573  | 1273.893  | SR6         | 895.025   | 924.584   |
| NM_014668 | 546.678   | 310.369   | NM_000722 | 911.055   | 1153.754  | SR8         | 3238.458  | 10642.049 |
| NM_004722 | 1166.059  | 783.384   | NM_016116 | 238.695   | 781.106   | SR10        | 11073.609 | 4270.72   |
| NM_014425 | 610.053   | 467.881   | NM_000929 | 319.079   | 1111.932  | CY3Cy5      | 864.633   | 183.404   |
| NM_012133 | 1410.81   | 722.605   | NM_018655 | 1116.339  | 2265.818  | NM_005811   | 1628.016  | 1892.081  |
| NM_017954 | 254.929   | 329.3     | NM_005663 | 1125.887  | 2289.661  | NM_005764   | 392.539   | 342.619   |
| NM_006612 | 1090.727  | 696.078   | X89960    | 1160.916  | 2164.952  | NM_016362   | 478.371   | 582.634   |
| NM_016451 | 1592.603  | 776.235   | NM_006550 | 410.969   | 967.363   | NM_004214   | 2041.593  | 2228.006  |
| NM_007351 | 10388.851 | 4896.573  | NM_005773 | 1207.815  | 2657.977  | NM_004328   | 2441.763  | 2338.813  |
| AK026266  | 6027.219  | 3617.446  | NM_017644 | 3856.481  | 6618.666  | NM_002838   | 1286.335  | 1310.272  |
| NM_007124 | 3362.781  | 2081.69   | AB032971  | 466.84    | 598.77    | NM_020167   | 738.844   | 865.745   |
| NM_003176 | 2459.398  | 1922.559  | NM_002482 | 1375.298  | 2118.834  | AL049963    | 3858.807  | 4145.798  |
| NM_000723 | 1325.512  | 972.924   | NM_001718 | 442.027   | 824.092   | NM_016058   | 6963.821  | 4795.821  |
| AL096751  | 2974.133  | 2341.092  | AF116659  | 2457.596  | 4228.031  | NM_004898   | 3034.808  | 3092.937  |
| NM_000364 | 677.951   | 647.309   | NM_000317 | 11118.123 | 13513.734 | NM_013372   | 839.145   | 1824.91   |
| AF026920  | 1940.882  | 2191.243  | NM_018376 | 2916.458  | 2722.828  | AK025612    | 2359.922  | 3062.505  |
| NM_004931 | 3388.586  | 3066.377  | NM_017438 | 1570.829  | 719.591   | NM_012268   | 1702.677  | 3393.262  |
| NM_006795 | 4334.315  | 2439.159  | U59209    | 1417.582  | 459.905   | NM_012203   | 423.334   | 985.162   |
| AF070568  | 1412.295  | 1003.489  | NM_020195 | 1996.299  | 1000.485  | NM_004738   | 1531.964  | 1974.053  |
| NM_000277 | 244.853   | 178.724   | AK023824  | 2341.739  | 1021.346  | NM_006458   | 2848.966  | 3871.894  |
| NM_000240 | 1566.986  | 1196.246  | AL133069  | 2712.628  | 2342.241  | NM_003827   | 1836.077  | 1805.754  |
| AK055733  | 11831.789 | 7299.649  | AL117574  | 605.065   | 901.391   | NM_004583   | 395.948   | 215.343   |
| AF298880  | 6652.966  | 4258.389  | AK026055  | 4890.847  | 5376.454  | NM_001103   | 192.656   | 358.641   |
| AK001500  | 625.336   | 398.183   | AK024126  | 925.323   | 1224.227  | AF228710    | 5731.497  | 9235.496  |
| NM_006774 | 416.482   | 228.88    | NM_001516 | 4284.048  | 4042.591  | NM_018398   | 209.278   | 306.784   |
| NM_020128 | 522.876   | 320.158   | NM_019086 | 2440.759  | 3906.551  | AY007131    | 8752.699  | 12142.813 |
| Y16521    | 1261.514  | 975.693   | NM_006670 | 2239.823  | 3888.931  | U61735      | 1978.939  | 2088.414  |
| AL050371  | 1800.79   | 782.567   | NM_012425 | 4416.621  | 7720.761  | NM_001144   | 1077.815  | 1334.404  |
| NM_002651 | 4382.006  | 2106.141  | NM_005816 | 245.988   | 685.639   | AK023766    | 2413.831  | 2790.157  |
| NM_002413 | 5377.251  | 2334.438  | NM_002750 | 4279.077  | 5674.479  | NM_001897   | 764.405   | 915.259   |
| NM_017577 | 256.063   | 178.41    | NM_000081 | 2250.988  | 3935.643  | NM_003853   | 935.535   | 532.301   |

|           |           |           |           |           |           |           |          |           |
|-----------|-----------|-----------|-----------|-----------|-----------|-----------|----------|-----------|
| NM_001757 | 1875.261  | 1412.9    | AK024134  | 4889.744  | 8648.727  | NM_006888 | 870.777  | 879.615   |
| NM_001647 | 1802.173  | 1591.477  | NM_003014 | 981.027   | 1955.451  | NM_002438 | 925.674  | 969.449   |
| NM_018158 | 1008.195  | 915.501   | NM_018558 | 679.209   | 1647.529  | NM_014588 | 1258.234 | 1525.591  |
| NM_016301 | 4922.724  | 3862.103  | NM_001974 | 1828.224  | 3917.528  | NM_000758 | 905.849  | 2018.14   |
| AK021975  | 520.048   | 564.227   | NM_013957 | 1272.429  | 2443.172  | AK023334  | 840.728  | 1170.351  |
| AB032952  | 12955.187 | 11147.574 | NM_002468 | 2922.606  | 6517.07   | NM_002568 | 4954.072 | 7098.609  |
| NM_002522 | 4289.817  | 4956.396  | NM_003028 | 1480.967  | 2118.686  | NM_002437 | 732.698  | 1190.803  |
| NM_000948 | 1159.128  | 1026.348  | NM_016541 | 1501.99   | 1224.581  | D79991    | 732.274  | 1121.908  |
| NM_002574 | 20610.689 | 9454.643  | NM_018548 | 3992.963  | 1969.289  | AK022425  | 184.478  | 248.244   |
| AB011174  | 1049.964  | 560.892   | NM_013401 | 792.675   | 348.236   | NM_000054 | 799.674  | 1021.821  |
| AB043635  | 256.625   | 207.171   | NM_018238 | 1983.837  | 1194.278  | NM_014713 | 1767.204 | 1766.67   |
| AB040879  | 1194.235  | 715.344   | NM_006858 | 5610.876  | 3144.479  | NM_001812 | 727.204  | 838.286   |
| AL049935  | 2435.231  | 1098.903  | NM_001405 | 5467.264  | 2552.321  | NM_014788 | 347.913  | 436.494   |
| AB033043  | 1924.536  | 1185.571  | NM_003880 | 779.82    | 336.469   | NM_006033 | 1394.075 | 1384.124  |
| NM_014998 | 1425.268  | 461.31    | AF131778  | 1460.092  | 1441.3    | NM_004837 | 2208.267 | 1808.411  |
| AK025220  | 1125.196  | 916.49    | NM_001562 | 7250.396  | 7249.544  | NM_000370 | 1219.266 | 4234      |
| NM_016308 | 8907.733  | 4300.874  | NM_013278 | 1063.552  | 1171.571  | BE865893  | 1196.75  | 3048.412  |
| D42046    | 1920.651  | 1225.188  | NM_003487 | 2196.224  | 2853.933  | NM_003123 | 17090.75 | 21917.686 |
| NM_001033 | 2143.734  | 687.594   | NM_006887 | 10902.651 | 17640.012 | AY005822  | 1625.425 | 1462.324  |
| NM_004528 | 9581.229  | 4185.895  | NM_006477 | 1852.931  | 2925.469  | NM_018128 | 8273.059 | 8434.259  |
| NM_002528 | 3135.69   | 1471.308  | NM_002880 | 5000.7    | 8751.657  | AF289022  | 753.584  | 828.453   |
| NM_020138 | 1775.678  | 1546.178  | NM_000678 | 8320.302  | 11544.102 | NM_016028 | 1014.66  | 384.221   |
| NM_018518 | 2398.311  | 1760.859  | NM_001066 | 2729.864  | 5317.107  | NM_013318 | 521.329  | 380.133   |
| AK023149  | 1146.319  | 1263.25   | NM_004657 | 2476.724  | 4372.657  | NM_000748 | 528.677  | 426.787   |
| AK023168  | 1399.786  | 1650.87   | NM_006291 | 2954.797  | 5764.756  | NM_000722 | 407.365  | 410.97    |
| NM_006648 | 312.21    | 372.796   | NM_018170 | 4574.996  | 7353.666  | NM_006030 | 466.006  | 458.333   |
| NM_004742 | 358.084   | 333.766   | NM_003867 | 803.193   | 1943.331  | NM_020410 | 2120.283 | 2726.346  |
| NM_014753 | 2104.494  | 1572.932  | AK022588  | 87.08     | 375.446   | AF000143  | 4616.979 | 6262.991  |
| NM_006588 | 24569.898 | 18810.482 | AL162062  | 536.665   | 1072.238  | NM_014211 | 287.157  | 328.615   |
| NM_014331 | 2609.914  | 3203.807  | NM_003173 | 4622.928  | 5496.411  | NM_000814 | 553.934  | 488.318   |
| AF054589  | 364.759   | 319.336   | NM_005030 | 3438.104  | 4126.34   | NM_000453 | 1031.705 | 1411.931  |
| NM_005270 | 1020.105  | 810.508   | NM_017584 | 2649.731  | 2577.418  | J03077    | 3742.092 | 6461.625  |
| NM_014818 | 1278.351  | 939.794   | NM_020359 | 2378.826  | 1340.937  | J03048    | 6636.7   | 1914.051  |
| NM_005443 | 361.774   | 198.824   | AB014541  | 8602.208  | 3233.885  | NM_002868 | 1342.045 | 1769.708  |
| NM_007221 | 3925.317  | 2472.452  | NM_002583 | 2327.392  | 1104.101  | AK024100  | 1026.323 | 963.78    |
| X54163    | 16816.303 | 11658.132 | NM_006570 | 8364.438  | 4540.325  | NM_005138 | 416.593  | 520.907   |
| AK025395  | 756.498   | 477.142   | NM_020348 | 936.191   | 842.104   | NM_000317 | 2321.105 | 1939.063  |
| NM_000388 | 1033.275  | 778.809   | NM_006034 | 10931.488 | 3924.351  | NM_018378 | 1838.762 | 1532.173  |
| X58377    | 363.018   | 339.749   | NM_005201 | 10486.772 | 8321.967  | NM_017618 | 590.953  | 1858.526  |
| NM_002468 | 484.795   | 229.712   | X56807    | 2432.792  | 2107.332  | NM_017438 | 826.384  | 1875.925  |
| BI830936  | 447.477   | 376.09    | NM_000092 | 839.453   | 533.251   | U59209    | 748.185  | 908.548   |
| U79292    | 2455.856  | 1456.955  | AF174600  | 3979.831  | 5721.368  | NM_020198 | 1038.219 | 867.045   |
| AA947915  | 210.139   | 159.511   | AK001003  | 2365.201  | 3805.108  | AK023824  | 1447.348 | 1090.771  |
| BI830753  | 570.537   | 223.187   | NM_002800 | 16015.845 | 30791.248 | AL133069  | 1226.9   | 1578.232  |
| X68314    | 334.489   | 193.497   | NM_018384 | 8109.41   | 11922.741 | AL117574  | 248.112  | 101.366   |
| X71973    | 27190.156 | 11605.352 | AF282617  | 1037.898  | 2200.704  | AK026055  | 1912.123 | 1532.411  |
| T49651    | 2355.162  | 1992.369  | AF157323  | 2229.259  | 4798.848  | AK024126  | 452.688  | 338.576   |
| N51014    | 2012.947  | 1844.803  | NM_006028 | 523.003   | 1424.51   | NM_001518 | 1704.879 | 1011.195  |
| BE392471  | 12630.701 | 10813.935 | NM_005877 | 8788.11   | 13850.711 | NM_002744 | 1651.029 | 1286.56   |
| AI802950  | 1206.087  | 1287.295  | NM_003338 | 1803.692  | 2578.383  | NM_015917 | 2726.585 | 2727.952  |
| AI741278  | 307.666   | 494.061   | NM_013396 | 912.571   | 1110.993  | NM_020397 | 337.2    | 259.733   |
| AA682423  | 369.858   | 476.886   | NM_017752 | 953.231   | 454.201   | NM_000061 | 2105.092 | 2435.014  |
| AL043686  | 3126.166  | 3082.957  | D26069    | 5574.113  | 2618.417  | AB046859  | 2785.459 | 2907.388  |

|           |           |           |           |           |           |             |          |          |
|-----------|-----------|-----------|-----------|-----------|-----------|-------------|----------|----------|
| AA490172  | 509.28    | 766.533   | BF107577  | 9393.203  | 4587.091  | NM_00510E   | 1394.727 | 1928.82  |
| AA775212  | 2465.529  | 2994.936  | NM_005837 | 5005.408  | 3184.095  | NM_00482E   | 1222.055 | 1641.266 |
| NM_000723 | 1466.507  | 1261.683  | NM_01662E | 4019.435  | 1615.37   | AB011540    | 1240.992 | 1074.584 |
| AL096751  | 2901.182  | 2100.355  | NM_017493 | 1070.609  | 380.237   | NM_00004C   | 739.405  | 1032.134 |
| NM_000364 | 627.813   | 398.043   | NM_00613E | 4797.131  | 3667.837  | NM_004631   | 1425.799 | 1979.193 |
| AF026920  | 2096.778  | 1573.665  | AF237772  | 14376.141 | 12666.119 | NM_00329E   | 209.226  | 180.759  |
| NM_004931 | 4289.945  | 2648.507  | AK025934  | 1172.096  | 1166.949  | NM_00473E   | 1522.945 | 1567.489 |
| NM_000607 | 15737.725 | 9573.006  | AJ008154  | 1033.015  | 1147.78   | NM_00689E   | 296.635  | 550.529  |
| AB011099  | 303.61    | 248.237   | NM_00685E | 3631.854  | 5919.266  | NM_00645E   | 3386.832 | 4654.049 |
| NM_00257E | 4068.292  | 2041.324  | X52350    | 49549.027 | 67699.563 | D50373      | 315.509  | 307.649  |
| NM_004244 | 3295.742  | 1831.141  | NM_002147 | 494.07    | 704.872   | AA488757    | 2946.035 | 2060.729 |
| NM_003371 | 2742.525  | 1339.083  | NM_006177 | 1280.011  | 2445.514  | AI394286    | 1361.606 | 863.024  |
| AK023114  | 2464.691  | 1895.344  | AL137286  | 4358.41   | 8311.124  | H07071      | 508.579  | 563.28   |
| NM_00367E | 2675.404  | 1852.682  | NM_01635E | 7988.182  | 12737.503 | M25322      | 1697.606 | 1181.35  |
| NM_014271 | 266.308   | 74.849    | NM_01627E | 8073.586  | 14781.041 | H-L 27586 I | 656.359  | 617.974  |
| NM_012301 | 216.593   | 151.874   | NM_02041E | 2351.229  | 5281.68   | ID 214180   | 258.942  | 278.295  |
| NM_005631 | 338.141   | 337.153   | NM_013293 | 1989.24   | 2591.457  | ID 1867426  | 2715.47  | 2272.525 |
| NM_01441E | 1345.46   | 1567.802  | AF315592  | 4811.307  | 5835.202  | W99328      | 541.382  | 687.657  |
| NM_01493E | 2191.323  | 2580.789  | AF095844  | 1033.585  | 1528.378  | AI434176    | 429.353  | 482.803  |
| AF049460  | 593.408   | 497.071   | NM_015833 | 1135.977  | 1092.938  | H08563      | 219.165  | 98.015   |
| AK026066  | 1088.067  | 1507.073  | NM_00098E | 49444.293 | 60949     | NM_01438E   | 1536.677 | 1846.286 |
| NM_005244 | 1511.419  | 2568.042  | AK026760  | 15055.776 | 7154.604  | NM_00171E   | 234.287  | 232.658  |
| NM_01815E | 1347.924  | 3405.886  | NM_014772 | 1910.482  | 1088.591  | AF116659    | 319.317  | 611.385  |
| NM_016301 | 6366.37   | 8328.957  | AK025248  | 1254.629  | 632.228   | D79991      | 618.768  | 640.973  |
| AK021975  | 502.142   | 1016.22   | NM_00453E | 12800.264 | 5926.835  | AK022425    | 310.143  | 290.519  |
| AB032952  | 12364.889 | 11451.823 | NM_00642E | 9326.098  | 7088.088  | NM_000054   | 2030.845 | 2373.873 |
| NM_002522 | 3826.936  | 4897.288  | NM_00428C | 10500.774 | 7985.299  | NM_014713   | 1890.499 | 1997.864 |
| AB032970  | 357.439   | 14.553    | AF110399  | 1047.193  | 1277.212  | NM_001812   | 718.641  | 694.513  |
| NM_018607 | 423.541   | 355.433   | AK027094  | 1433.082  | 2006.31   | NM_01478E   | 420.604  | 333.571  |
| NM_00297E | 1523.183  | 514.721   | AL359596  | 1078.824  | 2079.98   | NM_005811   | 2059.992 | 1517.323 |
| NM_01466E | 667.193   | 448.039   | U79249    | 669.44    | 1583.941  | NM_005764   | 409.955  | 456.743  |
| NM_004722 | 1263.681  | 740.526   | AK022114  | 862.822   | 1664.996  | NM_016362   | 594.876  | 432.088  |
| NM_01442E | 836.726   | 630.672   | BF217864  | 7713.135  | 12252.464 | NM_004214   | 1996.127 | 1402.843 |
| NM_012133 | 1669.082  | 883.595   | NM_005917 | 26342.467 | 47093.832 | NM_00432E   | 2700.49  | 1610.828 |
| NM_017954 | 404.485   | 284.159   | NM_007052 | 506.093   | 724.884   | NM_00283E   | 1324.155 | 1124.869 |
| NM_006612 | 1231.825  | 883.762   | BC017044  | 551.263   | 1261.01   | NM_020167   | 690.177  | 542.941  |
| NM_016451 | 1914.425  | 2430.458  | AV758498  | 1168.647  | 2474.331  | AL049963    | 3482.189 | 3417.917 |
| NM_007351 | 12067.967 | 10587.475 | NM_02019E | 1350.639  | 2015.387  | NM_01605E   | 6315.431 | 6356.476 |
| AK026266  | 7257.807  | 6089.457  | NM_018657 | 802.701   | 674.136   | NM_01400E   | 1091.217 | 1118.509 |
| NM_007124 | 3925.62   | 3849.476  | L40410    | 3652.583  | 1781.667  | NM_00463E   | 755.252  | 1066.796 |
| NM_00317E | 2928.035  | 3205.979  | NM_00705E | 1046.656  | 412.79    | AK022603    | 225.957  | 221.178  |
| AK023168  | 2139.788  | 4333.13   | NM_016652 | 599.806   | 298.224   | NM_00397E   | 1006.163 | 1113.394 |
| NM_00664E | 640.873   | 1301.991  | NM_01631C | 4462.576  | 1900.573  | NM_01768E   | 410.033  | 527.083  |
| NM_00679E | 7484.4    | 10118.748 | BC006560  | 923.087   | 188.897   | AK025612    | 1295.948 | 1383.721 |
| AF070568  | 1802.39   | 2485.706  | NM_00629E | 735.369   | 493.048   | NM_01226E   | 609.002  | 684.636  |
| NM_000277 | 321.279   | 460.812   | AF060938  | 26385.828 | 23641.074 | NM_012203   | 418.397  | 366.672  |
| NM_00024C | 2443.983  | 2139.925  | NM_001973 | 2545.954  | 2356.643  | J03077      | 4405.689 | 6035.643 |
| AK055733  | 15746.351 | 15030.882 | NM_01446E | 4232.71   | 5209.559  | J03048      | 8499.263 | 2903.053 |
| AF298880  | 8133.54   | 7949.942  | AL050015  | 1639.964  | 3323.27   | AL157469    | 194.116  | 298.612  |
| AK001500  | 862.811   | 738.992   | AY007117  | 2453.772  | 4340.809  | NM_00286E   | 1613.494 | 2232.969 |
| NM_006774 | 514.914   | 323.084   | AF039698  | 2284.407  | 4294.583  | AK024100    | 1162.642 | 1282.458 |
| NM_002714 | 332.153   | 52.028    | AL109679  | 383.041   | 819.115   | NM_00513E   | 484.256  | 419.761  |
| NM_02012E | 765.899   | 1101.704  | AB046828  | 3229.573  | 4241.412  | NM_003827   | 1857.787 | 1707.038 |

|           |           |           |           |           |           |           |           |           |
|-----------|-----------|-----------|-----------|-----------|-----------|-----------|-----------|-----------|
| Y16521    | 1854.341  | 1877.976  | AF144487  | 771.944   | 2096.416  | NM_004583 | 298.109   | 321.246   |
| AL050371  | 2200.118  | 2343.988  | AL137532  | 2372.166  | 3370.631  | NM_001103 | 219.637   | 208.753   |
| NM_002651 | 5829.641  | 5594.889  | AK025419  | 1981.183  | 3653.58   | AF228710  | 6824.14   | 4584.327  |
| NM_002413 | 7716.415  | 7481.86   | NM_017413 | 561.473   | 949.644   | NM_018393 | 211.565   | 264.321   |
| NM_017577 | 363.932   | 406.143   | NM_013259 | 7909.63   | 11458.791 | AY007131  | 9961.602  | 8530.655  |
| NM_001757 | 2249.015  | 2596.887  | NM_018375 | 4862.1    | 9234.921  | U61735    | 1876.356  | 1751.537  |
| NM_001647 | 2211.834  | 3106.795  | NM_004913 | 684.308   | 711.333   | NM_001144 | 998.549   | 819.938   |
| NM_006228 | 763.347   | 1506.724  | AK026838  | 1583.932  | 2775.769  | AK023766  | 2280.468  | 2165.408  |
| NM_003768 | 4694.746  | 7966.915  | AK023371  | 1947.031  | 1591.053  | NM_001897 | 735.878   | 1483.994  |
| NM_018393 | 781.839   | 1632.641  | AK025015  | 1643.06   | 975.852   | NM_003853 | 631.85    | 1073.834  |
| BF032535  | 1304.727  | 3141.788  | AF086187  | 1403.696  | 992.792   | AB033109  | 1078.691  | 1200.573  |
| NM_005093 | 14349.501 | 20869.729 | AF305836  | 33872.188 | 22589.002 | NM_002053 | 2870.153  | 3149.557  |
| NM_006760 | 871.894   | 1950.373  | AL035295  | 1253.398  | 811.95    | NM_006883 | 561.599   | 596.485   |
| NM_012283 | 7216.459  | 12362.895 | NM_018302 | 2810.438  | 2333.59   | NM_002433 | 715.349   | 624.69    |
| AB037775  | 959.374   | 1579.055  | AK027252  | 3089.982  | 2567.047  | NM_014583 | 371.042   | 441.279   |
| L27560    | 1263.675  | 1823.677  | AF165527  | 3009.594  | 2645.271  | NM_000753 | 336.687   | 421.301   |
| AB011174  | 1490.054  | 2234.819  | NM_014092 | 832.867   | 970.423   | AK023334  | 553.461   | 442.468   |
| AB040879  | 1456.175  | 1803.263  | AL110133  | 6918.701  | 10612.661 | NM_002563 | 4855.263  | 5998.203  |
| AK000007  | 317.987   | 40.799    | AL050053  | 278.568   | 902.519   | NM_002437 | 534.82    | 712.539   |
| AL049935  | 3615.878  | 2952.775  | AK000529  | 2018.109  | 3485.645  | AK023573  | 1128.145  | 1424.74   |
| AB033043  | 3199.932  | 3954.056  | AK027243  | 1197.213  | 1966.792  | NM_002730 | 1278.987  | 994.271   |
| NM_014993 | 2108.346  | 2111.018  | AF147415  | 844.924   | 1914.544  | NM_004823 | 1213.711  | 1448.878  |
| AK025220  | 1679.904  | 1684.381  | AL049273  | 471.156   | 753.624   | AB011540  | 6979.797  | 6817.254  |
| NM_016303 | 12785.282 | 11249.72  | AK098474  | 677.689   | 1179.14   | NM_000040 | 2695.125  | 2717.531  |
| D42046    | 2614.265  | 2689.039  | AL117475  | 1999.644  | 4270.098  | NM_004631 | 1504.174  | 1339.516  |
| NM_001033 | 2946.587  | 2630.018  | AL049300  | 245.357   | 431.748   | NM_006033 | 1704.292  | 1568.996  |
| NM_004523 | 13847.163 | 12115.801 | NM_003887 | 1210.481  | 619.119   | NM_004837 | 2195.556  | 1976.984  |
| NM_002523 | 5917.011  | 5064.948  | NM_004267 | 6442.819  | 3210.618  | NM_000370 | 844.817   | 727.498   |
| NM_020133 | 2456.527  | 2804.287  | AK026687  | 1394.188  | 1017.248  | BE865893  | 1406.84   | 763.122   |
| NM_018513 | 3072.753  | 3089.72   | AL117444  | 629.526   | 661.018   | NM_003123 | 24332.307 | 17090.803 |
| AK023149  | 1562.065  | 1551.193  | NM_017994 | 6625.596  | 5927.282  | AY005822  | 1389.935  | 1051.889  |
| NM_006433 | 714.094   | 1516.424  | AK021693  | 2076.023  | 1760.417  | NM_018123 | 13724.038 | 10950.996 |
| NM_001843 | 1147.02   | 2282.697  | AB023177  | 5335.05   | 5700.166  | AF289022  | 729.687   | 619.287   |
| NM_004593 | 253.219   | 266.861   | Y11609    | 2300.594  | 4094.489  | AB002326  | 154.192   | 209.563   |
| AK024697  | 1537.113  | 2510.484  | AJ278482  | 478.892   | 521.476   | M17252    | 182.456   | 668.509   |
| NM_006460 | 2076.994  | 4820.771  | NM_012122 | 6839.928  | 9819.282  | NM_016023 | 1424.206  | 5090.07   |
| L34156    | 595.055   | 872.949   | AF009285  | 9887.55   | 11987.502 | NM_013313 | 653.144   | 805.949   |
| NM_003743 | 18346.945 | 29362.914 | NM_012125 | 3477.913  | 4280.094  | NM_000722 | 468.093   | 517.173   |
| NM_003557 | 1721.683  | 2548.609  | AB032363  | 393.907   | 900.31    | NM_006030 | 357.173   | 258.354   |
| NM_001257 | 6750.864  | 8836.357  | AF009294  | 2939.997  | 4390.589  | NM_020410 | 1950.759  | 2238.022  |
| D85245    | 5725.017  | 8829.318  | NM_001524 | 740.924   | 1317.274  | AF000143  | 1558.406  | 1634.843  |
| NM_000943 | 2161.689  | 3400.713  | AK000998  | 1211.674  | 2086.924  | NM_014211 | 286.573   | 192.361   |
| NM_004653 | 2026.24   | 3618.955  | AK001225  | 390.272   | 1211.815  | NM_000814 | 342.993   | 410.03    |
| NM_001250 | 5735.642  | 8377.442  | AK021435  | 502.02    | 735.043   | NM_000453 | 979.944   | 1060.05   |
| AF298812  | 1346.73   | 1992.694  | AK025112  | 862.69    | 269.403   | NM_022552 | 1786.722  | 1428.379  |
| NM_004963 | 2137.261  | 3486.747  | AK025173  | 3700.258  | 3064.528  | NM_014383 | 3468.189  | 2860.631  |
| AJ249900  | 640.984   | 820.69    | AK025430  | 674.297   | 606.103   | AF116659  | 769.764   | 548.75    |
| AK022581  | 5301.469  | 7207.185  | AK026722  | 506.288   | 690.219   | NM_000317 | 3236.132  | 2099.003  |
| NM_018054 | 3214.171  | 5572.167  | AF117338  | 3190.5    | 4427.649  | NM_018373 | 2030.163  | 1364.568  |
| NM_006183 | 678.449   | 1108.86   | AK025567  | 2238.92   | 3874.419  | NM_017613 | 290.823   | 231.679   |
| NM_001401 | 1174.183  | 2658.198  | U56857    | 3079.294  | 3799.144  | NM_017433 | 940.98    | 894.7     |
| NM_013271 | 6287.591  | 8819.36   | L43349    | 435.323   | 708.391   | U59209    | 771.612   | 607.117   |
| NM_004157 | 6522.652  | 9031.676  | BE905682  | 368.168   | 1115.998  | NM_020193 | 994.241   | 568.058   |

|           |           |           |           |           |           |            |          |          |
|-----------|-----------|-----------|-----------|-----------|-----------|------------|----------|----------|
| NM_000684 | 1654.565  | 3036.412  | AF086421  | 1743.128  | 2984.711  | AK023824   | 1837.864 | 1396.083 |
| NM_015913 | 14125.684 | 30822.656 | AK001612  | 766.423   | 2468.027  | AL133069   | 1300.776 | 1456.819 |
| NM_005157 | 6082.186  | 12619.063 | AF161522  | 1753.817  | 3118.722  | AL117574   | 211.245  | 348.89   |
| NM_007354 | 466.096   | 797.394   | AF086028  | 6127.965  | 13472.158 | AK026055   | 2079.372 | 2134.577 |
| U67037    | 901.344   | 2642.9    | U46119    | 216.916   | 876.781   | NM_001516  | 1897.06  | 1883.564 |
| NM_004960 | 19160.758 | 27057.734 | AK023489  | 820.697   | 699.112   | NM_002744  | 823.994  | 874.622  |
| AF272370  | 4029.201  | 7651.79   | AK021561  | 2874.574  | 2964.727  | NM_015917  | 2469.798 | 2433.826 |
| AF130050  | 5542.345  | 9420.203  | AK025222  | 777.902   | 690.153   | NM_020397  | 391.637  | 374.728  |
| AF119898  | 396.969   | 827.156   | NM_003531 | 1267.042  | 2164.606  | NM_000061  | 2026.051 | 2301.847 |
| AK023045  | 486.801   | 628.013   | NM_017799 | 1024.749  | 1804.585  | AB046859   | 1403.969 | 1361.406 |
| NM_012197 | 2370.906  | 4451.932  | NM_003510 | 674.857   | 705.583   | NM_005109  | 1309.441 | 1753.149 |
| AK024016  | 2970.453  | 5673.258  | NM_003538 | 386.984   | 767.496   | NM_013372  | 175.247  | 654.153  |
| NM_003581 | 6414.011  | 10834.74  | AL137403  | 1357.255  | 2175.695  | NM_003976  | 1484.204 | 1739.308 |
| NM_002888 | 551.811   | 968.473   | AL049348  | 624.433   | 1242.104  | NM_017688  | 553.605  | 327.677  |
| NM_012407 | 1200.912  | 2691.363  | NM_018534 | 645.551   | 1444.433  | AK025612   | 3218.125 | 3019.589 |
| AF302505  | 567.791   | 1195.245  | AB037847  | 1315.153  | 2667.219  | NM_012268  | 2647.116 | 2566.368 |
| NM_007186 | 1353.912  | 2056.74   | NM_005170 | 1772.738  | 2859.828  | NM_012203  | 313.423  | 376.932  |
| NM_007044 | 3602.592  | 6317.081  | S96437    | 1277.919  | 2529.184  | NM_004736  | 1441.836 | 1807.735 |
| AF294326  | 6523.333  | 10221.279 | NM_015176 | 1100.815  | 2107.75   | NM_006895  | 258.401  | 213.022  |
| NM_014678 | 1932.316  | 4293.798  | AL080186  | 458.294   | 229.363   | NM_006459  | 3802.729 | 2879.151 |
| NM_012317 | 49415.117 | 65640.5   | NM_005306 | 35172.68  | 29409.896 | D50373     | 343.279  | 289.81   |
| NM_016097 | 11618.911 | 18649.117 | NM_001646 | 7460.221  | 6489.005  | AA488757   | 4199.494 | 3695.505 |
| AB035301  | 346.352   | 822.907   | AL137327  | 635.207   | 669.361   | AI394286   | 1218.443 | 1090.127 |
| AF286113  | 230.245   | 378.65    | AF358454  | 1993.67   | 2335.516  | H07071     | 989.555  | 1209.991 |
| AB046800  | 2496.275  | 5806.412  | AL137634  | 675.706   | 537.739   | M25322     | 1986.23  | 1964.953 |
| NM_002162 | 3914.993  | 8303.377  | AK024863  | 3651.889  | 3471.636  | ID 1867426 | 776.786  | 869.879  |
| NM_015458 | 3287.133  | 3212.451  | AJ008135  | 45053.699 | 47275.086 | ID 396450  | 304.901  | 209.402  |
| D13540    | 5293.748  | 3916.805  | AK026908  | 3929.756  | 4029.579  | W99328     | 600.026  | 674.654  |
| NM_016570 | 8177.656  | 6179.638  | AL050068  | 471.823   | 1470.937  | AI434176   | 297.1    | 298.244  |
| AF209198  | 1642.927  | 1183.898  | U92025    | 480.921   | 651.191   | H08563     | 224.532  | 313.614  |
| L09247    | 423.581   | 504.389   | AB046766  | 547.33    | 1261.837  | BE735403   | 382.911  | 523.83   |
| M69012    | 19405.896 | 12922.554 | AF009323  | 840.227   | 2032.067  | NM_002438  | 850.064  | 1137.448 |
| NM_016347 | 402.85    | 41.82     | Z25437    | 445.367   | 1119.751  | NM_014589  | 742.073  | 647.223  |
| NM_006936 | 16605.385 | 16892.059 | AK001526  | 3027.205  | 6101.633  | NM_000759  | 550.232  | 617.976  |
| NM_001327 | 6417.607  | 6564.436  | NM_000519 | 443.811   | 1717.399  | AK023334   | 714.652  | 654.622  |
| AF321182  | 321.731   | 536.645   | AF086183  | 788.684   | 2202.777  | NM_002563  | 5128.281 | 5774.504 |
| AB037722  | 225.113   | 290.047   | AK000525  | 946.45    | 2004.778  | NM_002437  | 888.684  | 742.048  |
| NM_003652 | 562.86    | 784.628   | AL137434  | 1078.302  | 2699.843  | D79991     | 644.05   | 550.054  |
| NM_000063 | 484.518   | 908.754   | AL080216  | 1187.925  | 1132.13   | AK022425   | 275.202  | 164.057  |
| NM_018389 | 755.188   | 1390.118  | AF038188  | 5206.795  | 3076.188  | NM_000054  | 3933.329 | 3266.892 |
| AB033026  | 902.061   | 1258.984  | AJ227888  | 420.998   | 763.818   | NM_014713  | 2039.157 | 1767.31  |
| AF104914  | 17531.549 | 17814.422 | AJ227864  | 795.985   | 521.085   | NM_001812  | 688.551  | 487.098  |
| NM_014716 | 1726.105  | 2490.388  | AF157562  | 3946.102  | 3959.938  | NM_014785  | 415.415  | 401.613  |
| AB002354  | 467.911   | 385.633   | AK021958  | 5512.684  | 5685.532  | NM_005811  | 2422.789 | 1506.648 |
| AK023845  | 2332.717  | 4200.774  | M31164    | 963.694   | 1224.725  | NM_005764  | 495.779  | 355.986  |
| NM_002638 | 2054.259  | 3304.919  | AF113674  | 8148.41   | 8692.605  | NM_016362  | 1076.032 | 1184.757 |
| NM_016487 | 705.733   | 1728.881  | NM_003511 | 480.738   | 1200.657  | NM_004214  | 2035.602 | 2271.752 |
| NM_005808 | 6972.04   | 16413.404 | CY3Cy5    | 7842.627  | 1019.962  | NM_004329  | 3926.672 | 7678.597 |
| AF269249  | 607.381   | 314.706   | H97792    | 2994.059  | 2823.948  | NM_002836  | 1528.55  | 2329.396 |
| X51417    | 315.734   | 172.293   | L33404    | 1370.72   | 1347.844  | NM_020167  | 903.732  | 985.649  |
| D31763    | 2475.978  | 901.489   | M13509    | 2540.916  | 2539.296  | AL049963   | 3289.164 | 3550.716 |
| NM_018169 | 2625.997  | 1190.287  | X04076    | 7612.017  | 5263.979  | NM_016058  | 6600.749 | 5857.051 |
| AK021452  | 7577.328  | 5044.578  | AA485362  | 2460.037  | 1675.568  | NM_014005  | 294.01   | 458.356  |

|           |           |           |           |           |           |           |           |           |
|-----------|-----------|-----------|-----------|-----------|-----------|-----------|-----------|-----------|
| NM_004506 | 1977.71   | 1556.697  | AJ222801  | 3235.146  | 1750.232  | NM_004636 | 212.542   | 125.733   |
| S74529    | 29551.561 | 15099.957 | W72207    | 47903.84  | 24557.65  | NM_004896 | 2925.558  | 2985.694  |
| NM_005933 | 416.602   | 318.68    | BI772354  | 2382.737  | 1579.5    | NM_00603C | 482.846   | 716.52    |
| NM_005596 | 285.66    | 139.482   | AA733033  | 1308.596  | 1324.346  | NM_02041C | 2499.183  | 3760.528  |
| NM_001421 | 1162.932  | 998.211   | AA583574  | 1644.329  | 1380.614  | AF000143  | 4181.775  | 4450.928  |
| U97060    | 289.734   | 142.677   | AI690184  | 45278.008 | 35531.027 | NM_014211 | 268.711   | 196.524   |
| M73837    | 1006.95   | 1213.801  | AA927490  | 2589.553  | 2464.344  | NM_000814 | 816.393   | 842.586   |
| NM_004226 | 331.789   | 75.731    | NM_001824 | 59992.438 | 67060.781 | NM_000453 | 1069.853  | 1160.736  |
| U69127    | 27072.4   | 17695.773 | NM_002964 | 1725.745  | 1910.721  | J03077    | 4316.971  | 5164.934  |
| NM_005836 | 5397.641  | 3379.443  | SR9       | 17334.088 | 5011.313  | J03048    | 8489.782  | 2970.918  |
| AK023379  | 1098.849  | 1514.725  | CY3Cy5    | 8337.563  | 1670.569  | NM_002866 | 1466.949  | 1787.946  |
| AK021904  | 11803.221 | 10643.566 | NM_017818 | 1978.625  | 2127.085  | AK024100  | 1432.494  | 1356.846  |
| -         | 1555.376  | 1966.789  | NM_020433 | 550.677   | 646.714   | NM_005135 | 515.76    | 589.606   |
| NM_018292 | 686.424   | 1121.972  | NM_001767 | 760.564   | 695.917   | NM_003827 | 2050.381  | 1884.612  |
| AK022294  | 535.422   | 293.451   | AF028823  | 4540.318  | 4490.929  | NM_004583 | 397.41    | 558.812   |
| AF086507  | 519.448   | 324.428   | NM_004295 | 23907.742 | 15861.058 | NM_001103 | 325.345   | 194.792   |
| U79289    | 605.936   | 539.05    | NM_002087 | 4152.388  | 2616.207  | AF228710  | 7599.483  | 6750.372  |
| NM_014028 | 1747.769  | 573.461   | NM_014585 | 853.861   | 648.564   | NM_018396 | 356.073   | 180.902   |
| NM_000402 | 1236.39   | 1072.578  | AF200815  | 838.293   | 780.675   | AY007131  | 13136.796 | 15524.281 |
| NM_00069C | 6825.589  | 4022.484  | NM_014564 | 329.465   | 781.898   | U61735    | 1921.433  | 2064.713  |
| NM_000155 | 2786.405  | 1570.414  | NM_013441 | 1996.063  | 1444.359  | NM_001144 | 886.606   | 926.588   |
| AK024489  | 475.553   | 460.13    | NM_014421 | 1297.872  | 2105.735  | AK023766  | 2414.95   | 2488.74   |
| NM_000181 | 7231.307  | 5864.745  | AB033028  | 637.63    | 715.561   | NM_001897 | 616.325   | 960.441   |
| NM_014121 | 664.617   | 870.008   | NM_012465 | 488.302   | 297.897   | NM_003853 | 292.734   | 526.674   |
| NM_00673C | 1647.139  | 2010.818  | M60499    | 2842.831  | 2767.856  | AB033109  | 1064.539  | 957.511   |
| NM_005644 | 2207.51   | 1877.115  | NM_003833 | 17980.465 | 23527.25  | NM_002053 | 2986.197  | 3249.135  |
| NM_018442 | 3042.538  | 3341.289  | AK000868  | 3826.658  | 4525.434  | NM_006886 | 564.922   | 673.959   |
| AF182416  | 4083.007  | 2612.043  | NM_001233 | 2573.997  | 3779.501  | NM_002744 | 1726.014  | 2159.936  |
| NM_005996 | 13126.143 | 7244.858  | NM_001234 | 2801.461  | 3554.218  | NM_015917 | 2590.496  | 4891.437  |
| NM_006015 | 705.972   | 329.457   | BF679789  | 3505.959  | 3903.685  | NM_020397 | 326.115   | 433.473   |
| NM_004634 | 1879.787  | 1131.671  | AB007859  | 655.919   | 886.117   | NM_000061 | 2022.609  | 2561.904  |
| NM_002017 | 4894.464  | 2983.638  | NM_006754 | 406.86    | 559.043   | AB046859  | 5068.594  | 4310.157  |
| NM_017523 | 8640.205  | 5293.868  | NM_001127 | 3335.994  | 3547.306  | NM_005106 | 1936.415  | 1882.229  |
| NM_002382 | 8197.028  | 5795.395  | NM_01243C | 1978.169  | 1495.607  | AK023573  | 1333.821  | 1258.891  |
| NM_002156 | 663.919   | 622.035   | NM_003917 | 17444.51  | 11404.705 | NM_00273C | 1350.76   | 957.524   |
| U13223    | 7112.157  | 7723.743  | NM_007077 | 1421.234  | 1061.412  | NM_004828 | 1607.024  | 1451.753  |
| NM_01627C | 2899.088  | 3113.045  | NM_002956 | 1505.61   | 1602.627  | AB011540  | 7913.263  | 5633.416  |
| AK001357  | 489.587   | 150.866   | AB018739  | 1102.413  | 848.224   | NM_00004C | 3185.405  | 3498.734  |
| NM_015721 | 1499.153  | 737.289   | NM_00675C | 17621.783 | 12701.043 | NM_004631 | 1600.878  | 1397.638  |
| AF086298  | 557.526   | 250.275   | NM_020164 | 4772.654  | 3136.571  | NM_006033 | 2141.669  | 2018.289  |
| AK027238  | 523.402   | 214.057   | AK023521  | 4847.526  | 3831.591  | NM_004837 | 2300.896  | 1625.685  |
| AK000032  | 293.527   | 185.733   | NM_014267 | 13824.57  | 12676.786 | NM_00037C | 845.146   | 739.239   |
| AK025758  | 728.948   | 452.98    | NM_001481 | 859.969   | 632.156   | BE865893  | 1704.812  | 1039.468  |
| AL360201  | 253.514   | 311.827   | U30872    | 1654.77   | 1651.919  | NM_003123 | 26525.168 | 20081.561 |
| S81294    | 266.403   | 60.866    | AF111783  | 5271.933  | 8653.793  | AY005822  | 1748.753  | 1532.761  |
| S94540    | 5685.975  | 11724.029 | NM_020469 | 3369.429  | 2128.71   | NM_018126 | 15994.383 | 13354     |
| U79297    | 656.538   | 1268.595  | NM_002289 | 884.434   | 681.294   | AF289022  | 985.819   | 809.807   |
| AK002164  | 629.777   | 681.301   | AK026408  | 1944.424  | 1922.602  | AB002326  | 421.142   | 605.511   |
| AF052122  | 3354.601  | 3733.92   | NM_005025 | 1165.67   | 1277.077  | M17252    | 192.279   | 92.581    |
| NM_00131C | 1398.71   | 1426.27   | NM_006307 | 662.935   | 830.816   | NM_016025 | 966.642   | 758.865   |
| AK026924  | 3076.056  | 1877.677  | M74782    | 2469.408  | 1860.981  | NM_013316 | 575.371   | 661.959   |
| AL122047  | 4737.979  | 2409.07   | AY026461  | 2840.004  | 3592.427  | NM_000746 | 481.139   | 644.045   |
| AF052091  | 600.333   | 335.506   | AK025708  | 2415.645  | 2629.128  | NM_000722 | 269.141   | 462.537   |

|           |           |           |           |           |           |           |          |          |
|-----------|-----------|-----------|-----------|-----------|-----------|-----------|----------|----------|
| AK024447  | 34564.566 | 11115.986 | NM_000405 | 1242.397  | 779.514   | NM_01865E | 641.279  | 595.322  |
| AF052145  | 811.604   | 556.71    | NM_005564 | 48295.066 | 39094.223 | NM_00566E | 548.075  | 749.096  |
| AF086458  | 1369.966  | 1181.89   | NM_00450E | 1887.57   | 1832.33   | X89960    | 435.644  | 611.997  |
| AF086548  | 1325.622  | 1540.217  | NM_00640E | 14152.558 | 13149.966 | NM_00655C | 207.545  | 249.168  |
| AK024350  | 856.295   | 2350.396  | NM_000324 | 450.539   | 266.52    | NM_00577E | 530.253  | 309.912  |
| AK023717  | 1219.498  | 2628.878  | AL137619  | 2038.028  | 1775.366  | NM_017644 | 1581.693 | 1197.285 |
| AK023727  | 489.545   | 267.739   | NM_00430C | 4114.938  | 3468.568  | NM_00248E | 701.261  | 386.614  |
| AK025271  | 527.767   | 296.302   | AK001913  | 3601.147  | 4683.911  | NM_00171E | 280.11   | 107.234  |
| AF086204  | 1445.751  | 277.838   | NM_017737 | 822.442   | 1133.697  | AF116659  | 898.068  | 615.85   |
| NM_007021 | 654.735   | 619.922   | NM_00429E | 991.819   | 1482.176  | NM_000317 | 4275.547 | 2732.195 |
| AK026283  | 277.688   | 295.934   | NM_015484 | 3896.516  | 3356.862  | NM_01837E | 2072.198 | 1320.169 |
| AK022076  | 357.36    | 583.646   | NM_01804E | 1812.128  | 1420.446  | NM_01761E | 236.659  | 123.033  |
| AK023065  | 245.143   | 633.081   | NM_01331E | 2051.373  | 1209.773  | NM_01743E | 839.314  | 489.217  |
| NM_01767E | 238.153   | 528.375   | M20701    | 7604.986  | 4388.364  | U59209    | 719.562  | 425.826  |
| AK021570  | 278.996   | 291.585   | NM_00291E | 1531.989  | 1573.761  | NM_02019E | 1135.496 | 1052.372 |
| AL360204  | 434.231   | 983.48    | NM_013284 | 2944.059  | 2725.481  | AK023824  | 1749.061 | 1302.117 |
| AK000103  | 761.099   | 1811.237  | NM_00673E | 2404.113  | 2052.946  | AL133069  | 1220.642 | 1044.533 |
| AK026294  | 300.022   | 661.705   | NM_013274 | 4275.823  | 4236.421  | AL117574  | 421.883  | 549.597  |
| AF085959  | 777.861   | 2250.567  | AL050187  | 2459.883  | 2461.791  | AK026055  | 2491.379 | 3901.149 |
| AF075107  | 332.567   | 1090.04   | NM_012387 | 11272.948 | 9253.401  | AK024126  | 633.18   | 880.876  |
| AK023104  | 679.045   | 1113.346  | NM_01473E | 1290.613  | 837.132   | NM_00151E | 1819.857 | 1605.831 |
| AK022181  | 211.83    | 98.314    | NM_00425E | 11881.554 | 10001.608 | NM_01908E | 899.068  | 1501.553 |
| AK026923  | 1111.142  | 720.878   | AF172929  | 4900.886  | 4407.889  | NM_00667C | 1015.027 | 1470.727 |
| Y11177    | 660.345   | 434.893   | NM_00639E | 13469.697 | 11686.115 | NM_01242E | 2015.933 | 2399.245 |
| U61091    | 285.779   | 522.014   | AK025655  | 1856.385  | 1488.348  | NM_00275C | 2005.96  | 2778.916 |
| AK022037  | 216.19    | 161.018   | NM_00136E | 416.462   | 278.835   | NM_000081 | 1028.11  | 1444.043 |
| AK000141  | 1626.283  | 691.161   | NM_00405E | 714.97    | 1666.607  | AK024134  | 2088.299 | 1424.566 |
| AL137758  | 1291.054  | 1763.36   | AK000868  | 4009.522  | 6308.852  | NM_003014 | 443.082  | 295.153  |
| AK023865  | 232.623   | 402.752   | NM_00123E | 3472.132  | 5631.403  | NM_01855E | 344.063  | 241.762  |
| AK025786  | 845.645   | 1944.896  | NM_001234 | 4954.466  | 10499.806 | NM_001974 | 899.198  | 996.435  |
| AK024188  | 586.418   | 846.403   | BF679789  | 5329.157  | 9894.173  | NM_013957 | 638.521  | 660.195  |
| AK024379  | 609.015   | 1662.861  | H97792    | 2636.559  | 2764.138  | NM_00246E | 1035.565 | 1101.844 |
| AK026820  | 445.027   | 562.651   | L33404    | 1289.522  | 1056.415  | NM_00302E | 599.205  | 490.973  |
| AK001716  | 740.832   | 951.188   | M13509    | 2913.038  | 1921.837  | NM_00156E | 319.846  | 338.032  |
| AK026821  | 509.694   | 903.575   | X04076    | 7636.998  | 5664.645  | NM_016541 | 816.839  | 445.405  |
| AK026280  | 1144.258  | 2262.365  | AA485362  | 2316.283  | 1925.216  | NM_01854E | 1690.881 | 1248.389 |
| AF113017  | 1228.818  | 1506.021  | AJ222801  | 3723.291  | 3650.926  | NM_013401 | 478.571  | 332.162  |
| AL080232  | 1290.753  | 700.826   | W72207    | 48892.992 | 63627.391 | NM_01823E | 1223.5   | 577.474  |
| AK001120  | 1225.114  | 1197.167  | BI772354  | 2533.219  | 2765.325  | NM_00685E | 2957.341 | 2287.291 |
| AF264629  | 292.024   | 300.491   | AA733033  | 1400.95   | 1395.965  | NM_00140E | 2460.52  | 1866.856 |
| AK022416  | 410.693   | 363.619   | AA583574  | 1574.32   | 1489.61   | NM_00388C | 438.666  | 390.204  |
| AK023224  | 1318.025  | 848.972   | AI690184  | 49982.184 | 41849.246 | NM_00546E | 173.453  | 200.226  |
| AK023731  | 750.011   | 486.156   | AA927490  | 2417.786  | 2315.731  | AF131778  | 688.02   | 684.338  |
| AK022442  | 903.16    | 1147.236  | NM_001824 | 56214.723 | 66005.398 | NM_00156E | 2995.323 | 3670.301 |
| AK023336  | 628.429   | 1593.37   | NM_002964 | 1783.18   | 1524.083  | NM_01327E | 344.68   | 358.488  |
| AK026873  | 1567.444  | 1048.771  | NM_00505E | 10493.212 | 11648.567 | NM_003487 | 1141.817 | 1019.962 |
| AK026394  | 1605.31   | 345.687   | NM_00228E | 921.069   | 1466.381  | NM_006887 | 4138.689 | 5342.814 |
| NM_00544E | 776.813   | 479.965   | AK026408  | 1785.773  | 2606.367  | NM_006477 | 929.235  | 1287.702 |
| AB000464  | 248.728   | 313.176   | NM_00502E | 1319.787  | 1573.232  | NM_00288C | 1947.928 | 2405.726 |
| AK025943  | 16449.961 | 31702.441 | NM_006307 | 590.005   | 771.568   | NM_00067E | 3280.575 | 4421.147 |
| BG106479  | 674.438   | 1244.208  | M74782    | 2566.943  | 1984.952  | NM_00106E | 1131.064 | 1178.653 |
| AF130069  | 6515.452  | 6293.545  | NM_01781E | 1890.129  | 1599.676  | NM_004657 | 812.158  | 768.326  |
| AL109669  | 1393.317  | 2931.557  | NM_02043E | 485.318   | 488.308   | NM_006291 | 1269.911 | 1090.906 |



|           |           |           |           |           |           |           |           |           |
|-----------|-----------|-----------|-----------|-----------|-----------|-----------|-----------|-----------|
| AB037766  | 784.214   | 829.546   | AF028823  | 4146.456  | 3194.524  | NM_01817C | 1802.42   | 1153.421  |
| AK026995  | 322.255   | 84.026    | NM_004295 | 26884.82  | 26814.248 | NM_003867 | 543.977   | 561.978   |
| AL133091  | 405.374   | 348.334   | NM_002087 | 4505.718  | 5251.532  | NM_003173 | 2159.029  | 1779.75   |
| BF842915  | 534.413   | 1099.724  | NM_014585 | 1154.635  | 1035.135  | NM_00503C | 1557.529  | 977.803   |
| AF086212  | 388.392   | 848.695   | AF200815  | 1237.609  | 1219.611  | NM_017584 | 1266.556  | 826.449   |
| X82545    | 1335.547  | 1790.045  | NM_013441 | 1955.506  | 1630.899  | NM_020355 | 1393.888  | 850.327   |
| AK024632  | 1624.356  | 1597.514  | NM_014421 | 801.237   | 640.147   | AB014541  | 3872.554  | 2052.792  |
| NM_018474 | 3150.109  | 2023.741  | NM_01768C | 596.767   | 422.456   | NM_002583 | 1262.419  | 909.806   |
| AK024937  | 813.964   | 1397.985  | NM_012465 | 699.674   | 528.252   | NM_00657C | 4448.661  | 2940.156  |
| D17178    | 784.019   | 1614.871  | M60499    | 2907.81   | 2712.765  | NM_006034 | 4863.262  | 3106.64   |
| AK022094  | 1599.215  | 2270.885  | NM_001614 | 60170     | 71466.586 | AB040943  | 290.51    | 209.065   |
| AK026695  | 1059.578  | 1722.566  | NM_000366 | 703.075   | 702.928   | NM_005201 | 808.123   | 553.721   |
| AK022220  | 556.565   | 1415.08   | NM_00430C | 4616.5    | 4129.596  | X56807    | 1217.078  | 1124.241  |
| AL137539  | 514.126   | 1799.48   | AB007859  | 595.384   | 734.953   | NM_000092 | 443.653   | 412.999   |
| U84520    | 667.391   | 279.899   | NM_001127 | 2608.643  | 3331.868  | AF174600  | 1910.75   | 2062.657  |
| Z11853    | 279.823   | 63.486    | NM_01243C | 2221.207  | 2527.897  | AK001003  | 1041.425  | 1087.062  |
| AL133616  | 5225.121  | 9875.25   | NM_003917 | 17776.814 | 20029.025 | NM_00280C | 7660.527  | 12303.01  |
| AK023391  | 158.941   | 344.43    | NM_007077 | 1686.154  | 2323.048  | NM_018384 | 3939.28   | 4451.15   |
| AK026382  | 1719.521  | 2829.588  | NM_002956 | 1488.357  | 1719.623  | AF282617  | 557.182   | 360.478   |
| AK091169  | 2112.612  | 3886.989  | AB018739  | 985.472   | 1184.94   | AF157323  | 985.892   | 670.2     |
| NM_014745 | 18029.311 | 27289.941 | NM_00675C | 19826.408 | 18030.178 | NM_006025 | 241.586   | 309.818   |
| AF086026  | 2704.82   | 2686.792  | NM_020164 | 5008.102  | 3368.273  | NM_005877 | 3719.492  | 3610.46   |
| NM_01630C | 483.694   | 390.612   | AK023521  | 4639.561  | 3223.54   | NM_003335 | 1049.1    | 2701.164  |
| NM_015607 | 12787.06  | 15011.25  | NM_014267 | 13224.138 | 8988.86   | NM_013396 | 508.309   | 439.024   |
| AK026955  | 1427.825  | 3823.654  | NM_001481 | 874.366   | 437.084   | NM_017752 | 493.655   | 312.817   |
| AL110202  | 14327.645 | 17744.246 | U30872    | 1561.859  | 1246.828  | D26069    | 3033.321  | 2517.833  |
| AK021980  | 705.616   | 898.982   | AF111783  | 397.218   | 228.402   | BF107577  | 5405.179  | 4772.889  |
| S46402    | 860.433   | 1155.023  | NM_020469 | 3288.444  | 2327.895  | NM_005837 | 2685.822  | 1811.43   |
| AF075048  | 310.578   | 455.446   | NM_002639 | 1368.826  | 1017.638  | NM_016625 | 2155.449  | 1141.572  |
| Z83940    | 736.959   | 649.353   | NM_006395 | 14901.213 | 14763.489 | NM_017493 | 491.97    | 314.266   |
| NM_00580C | 1052.302  | 1053.305  | AK025655  | 1753.419  | 1836.503  | NM_006136 | 2068.331  | 1575.154  |
| AF019617  | 3133.311  | 4150.376  | NM_001362 | 795.315   | 835.571   | AF237772  | 5592.604  | 4621.871  |
| AL137305  | 6876.994  | 13707.652 | NM_004056 | 500.473   | 263.686   | AK025934  | 687.634   | 542.637   |
| NM_00529C | 503.812   | 1914.666  | NM_001056 | 777.352   | 671.33    | NM_006856 | 1690.964  | 2088.672  |
| AK025802  | 584.874   | 1263.76   | AY026461  | 3131.359  | 3147.374  | X52350    | 32558.418 | 39436.402 |
| AF085973  | 356.098   | 784.005   | AK025708  | 2171.283  | 2261.27   | AF071554  | 554.697   | 738.939   |
| NM_018013 | 2168.639  | 3706.496  | NM_000405 | 1190.537  | 1283.597  | NM_002147 | 238.952   | 190.337   |
| AK022517  | 883.55    | 740.717   | NM_005564 | 47111.359 | 55469.246 | U90919    | 984.879   | 963.793   |
| NM_000329 | 11365.871 | 4351.563  | NM_004505 | 2622.422  | 2820.22   | NM_006177 | 459.865   | 445.352   |
| NM_001182 | 1295.417  | 569.595   | NM_006405 | 15211.024 | 13329.357 | AL137286  | 1780.232  | 1116.148  |
| AF143328  | 196.622   | 597.473   | NM_006749 | 970.372   | 1034.282  | NM_016355 | 3028.944  | 2407.174  |
| NM_000333 | 1593.877  | 1619.426  | NM_004694 | 346.626   | 600.399   | NM_016275 | 3168.648  | 2159.696  |
| NM_000172 | 1541.341  | 2043.984  | NM_000324 | 639.543   | 473.883   | NM_020415 | 785.128   | 585.582   |
| NM_002297 | 3550.436  | 7644.899  | AL137619  | 2003.808  | 1916.988  | NM_013293 | 898.725   | 781.054   |
| AB040968  | 4721.193  | 9130.156  | NM_001824 | 55495.727 | 64065.484 | AF315592  | 1967.156  | 1369.153  |
| X85323    | 343.529   | 331.451   | NM_002964 | 1909.784  | 2181.775  | AF095844  | 461.198   | 337.894   |
| AK000802  | 287.321   | 63.135    | NM_005052 | 13631.546 | 11102.712 | NM_015833 | 528.339   | 298.261   |
| NM_005303 | 1092.914  | 1152.869  | AF319476  | 684.272   | 648.872   | NM_000986 | 35319.258 | 58574.066 |
| NM_016126 | 9455.828  | 10863.844 | AK001913  | 3994.107  | 5621.847  | AK026760  | 8449.211  | 5584.972  |
| U84119    | 794.914   | 1416.872  | NM_017737 | 470.6     | 391.466   | NM_014772 | 1074.915  | 527.181   |
| NM_003605 | 1266.55   | 1372.468  | NM_004292 | 1075.193  | 1106.521  | AK025248  | 524.885   | 309.067   |
| M21499    | 169.829   | 464.085   | NM_013284 | 2731.27   | 3644.855  | NM_004535 | 5239.896  | 3599.721  |
| AF302079  | 10110.092 | 6626.34   | NM_006739 | 2807.723  | 2249.365  | NM_006425 | 3196.112  | 2535.931  |

|            |           |           |           |           |           |           |           |           |
|------------|-----------|-----------|-----------|-----------|-----------|-----------|-----------|-----------|
| AJ224167   | 330.417   | 193.451   | NM_013274 | 3869.556  | 3107.493  | AL359596  | 362.664   | 419.715   |
| NM_00255C  | 432.579   | 245.587   | AL050187  | 2763.67   | 2389.36   | U79249    | 367.757   | 371.184   |
| NM_000692  | 1528.308  | 2391.072  | NM_012387 | 11227.939 | 7258.164  | AK022114  | 338.139   | 609.146   |
| AF086062   | 1778.239  | 5070.453  | NM_014735 | 1334.89   | 1046.289  | AL133585  | 521.412   | 891.65    |
| AF000268   | 418.346   | 984.437   | NM_004252 | 13442.316 | 13437.435 | NM_002631 | 4138.345  | 3640.654  |
| L47668     | 13160.384 | 23461.066 | AF172929  | 4875.363  | 3423.54   | BF217864  | 2759.996  | 1996.419  |
| NM_01792C  | 1603.642  | 3049.356  | NM_012465 | 508.89    | 829.809   | NM_005917 | 9500.171  | 5610.631  |
| AK025345   | 531.763   | 988.532   | M60499    | 3019.162  | 3081.735  | BC017044  | 253.016   | 108.535   |
| D25274     | 5629.336  | 7379.622  | NM_000366 | 507.134   | 442.333   | AV758498  | 410.211   | 276.474   |
| CY3Cy5     | 1515.456  | 194.246   | NM_003833 | 18509.949 | 19901.488 | NM_020196 | 640.688   | 537.27    |
| D50373     | 756.124   | 793.557   | AK000868  | 4136.795  | 3318.27   | NM_018657 | 373.863   | 246.596   |
| AA488757   | 4252.951  | 3640.087  | NM_001233 | 3273.648  | 5102.837  | L40410    | 1758.215  | 1038.226  |
| AI394286   | 2698.161  | 1478.683  | NM_001234 | 4578.926  | 7097.512  | NM_007055 | 447.916   | 431.607   |
| H07071     | 1357.652  | 847.778   | BF679789  | 5454.476  | 7029.81   | NM_016652 | 337.918   | 274.342   |
| M25322     | 2637.704  | 2242.977  | X04076    | 9999.082  | 17664.854 | NM_01631C | 1922.125  | 1011.973  |
| AA436187   | 412.433   | 460.043   | AA485362  | 2825.063  | 3111.517  | BC006560  | 348.605   | 299.305   |
| ID 1867426 | 3247.929  | 2843.596  | AJ222801  | 4120.82   | 4775.754  | NM_006296 | 267.555   | 118.558   |
| ID 396450  | 451.491   | 429.698   | W72207    | 51258.039 | 42311.238 | AF060938  | 4361.103  | 2990.358  |
| W99328     | 1136.936  | 920.857   | BI772354  | 2482.634  | 2070.8    | NM_001973 | 580.113   | 381.264   |
| AI434176   | 603.322   | 556.526   | AA733033  | 1393.033  | 1025.794  | AL050015  | 609.811   | 555.831   |
| H08563     | 359.88    | 365.068   | AA583574  | 1834.317  | 1172.372  | AY007117  | 1071.755  | 1073.528  |
| BE735403   | 1814.48   | 1555.844  | AI690184  | 49780.156 | 31604.404 | AF039698  | 975.323   | 1678.535  |
| NM_022552  | 4264.328  | 2878.305  | AA927490  | 2758.131  | 1703.769  | AL109679  | 223.176   | 241.609   |
| NM_014386  | 8262.173  | 6375.88   | NM_001481 | 969.901   | 787.613   | AB046828  | 1518.079  | 1338.352  |
| SR2        | 56394.504 | 46043.156 | U30872    | 1406.403  | 1291.16   | AF144487  | 307.655   | 246.26    |
| SR4        | 18691.506 | 14899.155 | NM_002639 | 1223.1    | 1001.994  | AL137532  | 984.714   | 851.314   |
| SR6        | 2525.967  | 2417.09   | NM_014734 | 2371.37   | 1994.996  | AK025419  | 763.647   | 408.918   |
| SR8        | 9350.259  | 23232.498 | NM_002289 | 822.778   | 585.767   | NM_017413 | 217.981   | 98.456    |
| SR10       | 36406.539 | 18478.396 | AK026408  | 1810.582  | 1908.703  | NM_013256 | 2593.254  | 1446.532  |
| CY3Cy5     | 3383.385  | 426.429   | NM_005025 | 1096.919  | 1207.237  | NM_018375 | 1555.629  | 837.803   |
| NM_005811  | 3727.164  | 2389.83   | NM_006307 | 491.7     | 539.656   | NM_004913 | 247.571   | 272.707   |
| NM_005764  | 939.141   | 440.242   | NM_001767 | 607.639   | 1008.911  | AK026838  | 725.537   | 569.103   |
| NM_016362  | 944.898   | 727.245   | NM_004295 | 29374.26  | 30263.568 | AK022443  | 397.427   | 229.663   |
| NM_004214  | 4192.161  | 2884.64   | NM_002087 | 4544.766  | 4003.443  | AK023371  | 878.256   | 633.468   |
| NM_004329  | 5182.793  | 2544.745  | NM_014585 | 821.017   | 495.861   | AK025015  | 764.578   | 573.858   |
| NM_002836  | 3425.997  | 4324.291  | AF200815  | 1045.182  | 696.114   | AF086187  | 832.005   | 796.513   |
| NM_020167  | 1258.077  | 1502.943  | NM_013441 | 2305.532  | 1243.505  | AF305836  | 21008.375 | 16232.286 |
| NM_014005  | 1741.385  | 1469.874  | NM_006749 | 1175.859  | 1172.162  | AL109784  | 212.401   | 242.285   |
| NM_004636  | 1333.479  | 885.722   | NM_000324 | 650.067   | 736.847   | AL035295  | 854.133   | 966.926   |
| AK022603   | 665.305   | 448.671   | AL137619  | 2648.908  | 2600.976  | NM_018302 | 1346.072  | 990.758   |
| NM_004896  | 6714.442  | 5631.625  | NM_003615 | 286.727   | 347.368   | AK027252  | 708.47    | 607.449   |
| NM_003976  | 3687.554  | 3743.958  | NM_00430C | 4435.332  | 4041.806  | AF165527  | 649.65    | 567.118   |
| NM_017686  | 1374.653  | 1214.27   | NM_001127 | 3341.891  | 4727.507  | NM_014092 | 510.577   | 383.206   |
| AK025612   | 3867.182  | 3129.713  | NM_01243C | 2258.26   | 2647.181  | AL110133  | 2064.105  | 2657.978  |
| NM_012266  | 2124.183  | 2211.565  | NM_003917 | 19345.787 | 17869.51  | AL050053  | 198.109   | 269.643   |
| NM_012203  | 842.804   | 776.489   | NM_007077 | 1903.508  | 2070.354  | AK000529  | 757.059   | 741.703   |
| NM_003296  | 577.688   | 576.524   | NM_002956 | 1469.056  | 1011.726  | AK027243  | 518.696   | 758.087   |
| NM_004736  | 3404.615  | 4399.332  | AB018739  | 1039.594  | 752.413   | AF147415  | 395.173   | 211.653   |
| NM_006895  | 751.449   | 690.168   | NM_00675C | 19333.336 | 11269.229 | AL049273  | 201.885   | 201.583   |
| NM_006456  | 8801.592  | 8152.609  | NM_020164 | 4839.373  | 1976.04   | AL049984  | 403.275   | 583.723   |
| NM_003827  | 3169.819  | 2307.87   | AL050187  | 2802.671  | 2834.955  | AK098474  | 298.201   | 275.593   |
| NM_004583  | 810.591   | 442.307   | NM_012387 | 9613.777  | 10683.061 | AL117475  | 631.942   | 447.326   |
| NM_001103  | 390.662   | 278.959   | NM_014735 | 1199.468  | 2259.058  | NM_017535 | 1668.696  | 965.186   |

|           |           |           |           |           |           |           |           |           |
|-----------|-----------|-----------|-----------|-----------|-----------|-----------|-----------|-----------|
| AF228710  | 11326.165 | 7192.485  | NM_004252 | 14127.528 | 15759.106 | L23852    | 296.475   | 299.01    |
| NM_01839E | 576.44    | 573.487   | AF172929  | 4344.818  | 3612.128  | NM_003887 | 592.734   | 564.457   |
| AY007131  | 22799.621 | 14249.857 | NM_00639E | 12611.735 | 11870.35  | NM_004267 | 2751.28   | 1747.28   |
| U61735    | 3654.083  | 2380.605  | AK025655  | 1391.797  | 1495.086  | AK026687  | 820.619   | 663.052   |
| NM_001144 | 2378.359  | 2837      | NM_001362 | 518.499   | 420.24    | AL117444  | 236.948   | 138.568   |
| AK023766  | 6821.266  | 9618.77   | AK025708  | 2474.351  | 3079.666  | NM_017994 | 2454.243  | 2166.706  |
| NM_001897 | 2354.203  | 5089.747  | NM_00040E | 1223.809  | 1500.077  | AK021693  | 745.357   | 792.902   |
| NM_00385E | 1249.488  | 1884.03   | NM_005564 | 51735.277 | 50770.035 | AB023177  | 2550.985  | 3205.147  |
| AB033109  | 2191.787  | 2299.659  | NM_00450E | 2601.641  | 1614.332  | Y11609    | 548.196   | 681.095   |
| NM_00205E | 11030.437 | 8510.125  | NM_00239C | 1350.335  | 1607.055  | NM_01212E | 3008.372  | 3518.741  |
| NM_00688E | 1409.779  | 1063.992  | NM_00614E | 938.426   | 620.505   | AF009285  | 3072.187  | 2836.088  |
| NM_00243E | 1273.273  | 1273.511  | NM_01491C | 7904.168  | 8141.511  | NM_01212E | 1607.895  | 1128.902  |
| NM_01458E | 1156.859  | 987.971   | AK001064  | 3043.972  | 2841.323  | AB032363  | 207.3     | 114.058   |
| NM_00075E | 1805.938  | 2164.191  | AB029031  | 3828.692  | 3363.971  | AF009294  | 779.41    | 645.513   |
| AK023334  | 1851.331  | 1186.263  | NM_001294 | 3020.151  | 2967.36   | NM_001524 | 383.363   | 234.257   |
| NM_00256E | 9608.386  | 8347.588  | NM_014241 | 4475.886  | 4960.282  | AK000998  | 448.381   | 277.173   |
| NM_002437 | 1676.245  | 1476.355  | AF302786  | 2499.66   | 2420.941  | AK001225  | 209.98    | 151.789   |
| D79991    | 2004.647  | 1572.913  | AL122083  | 2629.936  | 2654.913  | AK021684  | 1085.75   | 1008.62   |
| AK022425  | 660.47    | 429.603   | NM_00505E | 12244.295 | 10253.012 | AK001060  | 334.362   | 129.318   |
| NM_000054 | 6080.178  | 5281.322  | AF319476  | 738.693   | 1278.835  | AK021480  | 188.537   | 291.37    |
| NM_01471E | 4421.979  | 3823.765  | AK001913  | 3379.386  | 4096.161  | AK025112  | 512.822   | 353.202   |
| NM_00181E | 1768.983  | 1725.09   | NM_00429E | 1084.787  | 1268.963  | AK025297  | 109.09    | 736.535   |
| NM_01478E | 1123.302  | 1135.604  | NM_015484 | 4684.698  | 5035.256  | AK026079  | 283.352   | 414.439   |
| NM_00603E | 1671.638  | 1152.778  | NM_01804E | 2149.627  | 3582.444  | AK025173  | 1327.974  | 1229.068  |
| NM_004837 | 5132.201  | 3436.552  | NM_01331E | 2335.309  | 1926.159  | AK025430  | 341.953   | 237.907   |
| NM_00037C | 1617.293  | 1266.483  | M20701    | 11797.331 | 8463.316  | AK026722  | 312.019   | 354.301   |
| BE865893  | 2016.771  | 1289.39   | NM_00291E | 1692.377  | 1350.684  | AF117338  | 1246.662  | 1536.896  |
| NM_00312E | 43012.539 | 26242.072 | NM_013284 | 2911.097  | 2097.476  | AK025567  | 1222.116  | 1470.485  |
| AY005822  | 3778.806  | 2635.248  | NM_00673E | 2858.197  | 1318.702  | NM_01910E | 140.061   | 185.376   |
| NM_01812E | 8875.027  | 4499.794  | AK024955  | 17071.875 | 16683.014 | U56857    | 1721.752  | 1744.423  |
| AF289022  | 1885.303  | 2948.956  | NM_01658C | 1213.984  | 1014.486  | AF086421  | 759.077   | 483.224   |
| AB002326  | 498.407   | 698.805   | AF169693  | 1091.758  | 1206.665  | AK001612  | 524.137   | 369.083   |
| NM_01602E | 3053.787  | 5491.805  | L23206    | 4274.824  | 3597.813  | AF161522  | 980.214   | 702.628   |
| NM_01331E | 1787.406  | 1739.994  | NM_01219E | 2794.969  | 2418.016  | AF086028  | 2886.263  | 2421.267  |
| NM_00074E | 1214.959  | 1091.935  | NM_00629E | 2215.895  | 2266.125  | AK025365  | 443.069   | 463.136   |
| NM_00072E | 847.897   | 612.712   | NM_00722E | 3681.048  | 3577.463  | AK023489  | 269.958   | 257.665   |
| NM_00603C | 1184.825  | 1345.833  | AB011105  | 2108.617  | 2150.063  | AK021561  | 1214.85   | 1017.063  |
| NM_02041C | 5463.509  | 4819.61   | NM_00221E | 510.559   | 549.087   | AL050145  | 180.099   | 229.779   |
| AF000143  | 10492.09  | 9104.494  | NM_01897C | 492.09    | 560.83    | AK025222  | 267.485   | 401.198   |
| NM_014211 | 638.567   | 289.589   | NM_004814 | 4603.847  | 4234.924  | NM_003531 | 551.18    | 1014.907  |
| NM_000814 | 915.314   | 777.573   | D86976    | 15009.506 | 20204.076 | NM_01779E | 474.537   | 878.667   |
| NM_00045E | 2269.309  | 2201.251  | AF307080  | 1356.317  | 2813.878  | NM_00351C | 368.178   | 951.775   |
| J03077    | 12319.701 | 11259.075 | NM_004057 | 986.268   | 1414.485  | NM_00353E | 265.565   | 630.195   |
| J03048    | 25731.518 | 7807.217  | K03175    | 881.653   | 850.924   | AL137403  | 727.998   | 739.629   |
| AL157469  | 600.528   | 523.232   | NM_00301E | 807.252   | 875.406   | S96437    | 549.992   | 896.888   |
| NM_00286E | 4040.47   | 4651.813  | NM_00649E | 16474.828 | 20709.379 | NM_01517E | 524.396   | 214.759   |
| AK024100  | 3119.319  | 3033.643  | NM_00082E | 530.576   | 340.287   | AL353939  | 330.093   | 333.861   |
| NM_00513E | 1326.957  | 1274.397  | NM_00482E | 1068.467  | 750.61    | AL117573  | 1196.784  | 508.084   |
| NM_000317 | 3620.092  | 2118.535  | NM_013314 | 418.949   | 182.655   | AL080186  | 206.582   | 183.871   |
| NM_01837E | 4849.505  | 2828.656  | BE904126  | 20136.936 | 19940.641 | NM_00530E | 26026.148 | 17550.225 |
| NM_01761E | 371.83    | 361.637   | AF272380  | 24171.512 | 19135.715 | NM_00164E | 4478.307  | 2839.037  |
| NM_01743E | 3062.54   | 2109.169  | NM_004431 | 8124.539  | 7746.026  | AL137327  | 408.873   | 643.664   |
| U59209    | 2062.872  | 1221.172  | NM_00201E | 1661.996  | 1478.748  | AF358454  | 982.882   | 806.814   |

|             |          |          |           |           |           |           |           |           |
|-------------|----------|----------|-----------|-----------|-----------|-----------|-----------|-----------|
| NM_020195   | 2388.934 | 1508.235 | NM_002070 | 43070.414 | 39014.586 | AK026090  | 609.883   | 542.931   |
| AK023824    | 2412.387 | 3955.963 | AF227969  | 1710.822  | 2163.251  | AF070637  | 214.048   | 333.014   |
| AL133069    | 3510.358 | 6725.405 | AF116657  | 514.327   | 783.346   | AL137634  | 355.46    | 471.815   |
| AL117574    | 791.389  | 1189.713 | NM_003944 | 23756.045 | 18605.568 | AK024863  | 1347.737  | 1606.136  |
| AK026055    | 6313.169 | 5499.409 | NM_016120 | 47809.148 | 35757.797 | AK026908  | 1527.945  | 1969.408  |
| AK024126    | 1388.409 | 1253.707 | NM_002893 | 1194.219  | 1107.595  | D17110    | 187.664   | 294.045   |
| NM_001516   | 4427.278 | 2964.681 | NM_002393 | 4680      | 3689.375  | AL050068  | 244.271   | 321.867   |
| NM_002744   | 2094.068 | 2288.842 | NM_002669 | 3763.478  | 3762.75   | AB046766  | 362.145   | 420.754   |
| NM_015917   | 6722.555 | 5560.265 | AB014600  | 1829.199  | 1982.647  | AL137434  | 464.061   | 801.698   |
| NM_020397   | 796.437  | 670.972  | NM_018312 | 1404.331  | 1377.712  | Z36795    | 756.459   | 667.927   |
| NM_000061   | 6236.443 | 4497.958 | X98259    | 983.502   | 1342.268  | AL080216  | 560.28    | 339.905   |
| AB046859    | 8139.616 | 5822.141 | U05255    | 618.836   | 662.196   | AF038188  | 3734.534  | 2644.083  |
| NM_005109   | 4126.93  | 3567.825 | X98260    | 7191.056  | 4425.131  | D17046    | 664.352   | 502.312   |
| AK023573    | 3182.452 | 3067.203 | NM_007217 | 5734.073  | 5549.262  | NM_017645 | 2262.296  | 1306.192  |
| NM_002730   | 3562.59  | 2814.554 | NM_014777 | 5780.974  | 5012.826  | AF157562  | 1845.161  | 2469.109  |
| NM_004828   | 3576.925 | 3537.545 | NM_001102 | 8128.275  | 5809.709  | AK021958  | 3077.6    | 3245.957  |
| AB011540    | 8401.649 | 7119.991 | NM_003803 | 1560.585  | 2725.292  | AF113674  | 3431.685  | 8400.038  |
| NM_000040   | 4773.997 | 4686.702 | NM_002818 | 49544.148 | 37088.984 | NM_003511 | 245.891   | 1231.606  |
| NM_004631   | 3863.581 | 4814.792 | AK021608  | 2239.164  | 2428.828  | H97792    | 1170.539  | 4225.145  |
| NM_003296   | 471.039  | 395.531  | NM_004297 | 673.507   | 644.28    | L33404    | 421.608   | 482.048   |
| NM_004736   | 2741.872 | 2499.857 | NM_006044 | 6760.849  | 6879.711  | M13509    | 868.396   | 1314.931  |
| NM_006895   | 510.497  | 529.129  | AK025498  | 1398.835  | 1273.221  | X04076    | 3513.332  | 5280.76   |
| NM_006459   | 7722.845 | 6112.549 | NM_001395 | 7675.664  | 9373.299  | W95082    | 284.835   | 334.409   |
| D50373      | 693.847  | 744.282  | NM_002068 | 4366.87   | 3959.781  | AA485362  | 815.418   | 787.512   |
| AA488757    | 3086.964 | 1905.06  | NM_013338 | 2882.209  | 2977.178  | AJ222801  | 1128.614  | 952.884   |
| AA205399    | 246.396  | 281.739  | NM_014671 | 3292.316  | 2858.921  | W72207    | 19192.086 | 13487.145 |
| AI394286    | 2622.911 | 3497.945 | NM_001814 | 7736.279  | 6324.349  | BI772354  | 998.383   | 1152.393  |
| H07071      | 1659.994 | 2511.531 | NM_018439 | 1211.804  | 1100.723  | AA583574  | 658.523   | 864.196   |
| M25322      | 2488.186 | 3474.067 | NM_005656 | 917.157   | 981.79    | AI690184  | 9607.799  | 9899.377  |
| AA436187    | 357.042  | 317.342  | NM_006012 | 4157.513  | 4265.686  | AA927490  | 833.953   | 540.678   |
| H-L 27586 I | 1621.031 | 1584.868 | NM_002151 | 1130.867  | 1471.596  | NM_001824 | 23128.352 | 13581.87  |
| ID 214180   | 802.498  | 677.435  | NM_014889 | 1445.602  | 1364.132  | NM_002964 | 659.491   | 411.841   |
| ID 1867426  | 3930.883 | 4728.546 | AF173935  | 819.47    | 756.883   | SR5       | 1492.176  | 1053.37   |
| ID 396450   | 480.061  | 529.853  | AK025322  | 5831.506  | 5184.982  | SR7       | 2223.1    | 6814.344  |
| W99328      | 1094.339 | 1122.305 | NM_017887 | 3939.73   | 3159.874  | SR9       | 7936.995  | 646.633   |
| AI434176    | 565.102  | 589.904  | NM_000526 | 1703.951  | 1560.065  | CY3Cy5    | 1523.794  | 382.595   |
| H08563      | 433.758  | 460.601  | AF007152  | 1826.718  | 1456.793  | NM_001767 | 194.243   | 439.298   |
| BE735403    | 2097.74  | 1565.215 | NM_017575 | 407.065   | 607.445   | AF028823  | 1290.454  | 1659.539  |
| NM_022552   | 4517.096 | 2953.705 | AL122100  | 477.105   | 298.632   | NM_004295 | 4422.237  | 4647.917  |
| NM_014389   | 8925.672 | 7600.439 | NM_005310 | 1718.416  | 1350.657  | NM_002087 | 1810.439  | 1669.514  |
|             | 41.355   | 560.205  | NM_014423 | 6804.645  | 6552.8    | NM_014585 | 454.168   | 775.353   |
| NM_001718   | 468.794  | 421.374  | NM_018083 | 1108.022  | 1151.365  | AF200815  | 353.331   | 512.744   |
| AF116659    | 846.759  | 855.777  | AL110188  | 4864.196  | 3524.374  | NM_014564 | 212.929   | 278.614   |
| D79991      | 1512.012 | 685.617  | D70834    | 26332.348 | 19181.803 | NM_013441 | 395.343   | 436.723   |
| AK022425    | 548.311  | 397.808  | NM_000970 | 55156.711 | 64242.051 | NM_014421 | 334.653   | 267.394   |
| NM_000054   | 3740.534 | 2883.836 | NM_033288 | 731.297   | 596.414   | NM_017680 | 307.388   | 44.364    |
| NM_014713   | 4360.747 | 3645.034 | AK000102  | 1189.373  | 1346.5    | M60499    | 986.757   | 673.978   |
| NM_001812   | 1754.413 | 1217.489 | AB040916  | 1833.904  | 2329.281  | NM_003833 | 5465.534  | 3918.705  |
| NM_014785   | 630.679  | 547.719  | NM_005587 | 1261.681  | 857.776   | AK000868  | 1423.713  | 519.244   |
| NM_005811   | 4392.406 | 4147.422 | AF038362  | 1809.027  | 1049.524  | NM_001233 | 1456.302  | 1162.275  |
| NM_005764   | 852.462  | 906.973  | NM_005195 | 11093.397 | 7868.536  | NM_001234 | 1257.781  | 875.632   |
| NM_016362   | 2151.446 | 3888.92  | NM_005481 | 568.672   | 490.909   | BF679789  | 1110.685  | 948.935   |
| NM_004214   | 5453.845 | 6077.478 | NM_004715 | 3454.641  | 2648.932  | NM_000085 | 188.626   | 250.836   |

|           |           |           |           |           |           |           |          |           |
|-----------|-----------|-----------|-----------|-----------|-----------|-----------|----------|-----------|
| NM_00432E | 6892.132  | 5427.116  | L40392    | 2568.671  | 1833.531  | AB007859  | 270.262  | 774.897   |
| NM_00283E | 3226.517  | 2604.514  | BF541482  | 453.324   | 415.411   | NM_001127 | 1280.716 | 1779.737  |
| NM_020167 | 1192.756  | 848.351   | NM_001007 | 51757.605 | 61939.953 | NM_01243C | 797.844  | 1215.801  |
| AL049963  | 8374.577  | 12422.41  | NM_003017 | 6689.995  | 4496.635  | NM_003917 | 3513.269 | 4292.058  |
| NM_01605E | 17674.604 | 14965.561 | NM_02036E | 3078.923  | 2811.401  | NM_007077 | 447.462  | 427.93    |
| NM_01400E | 1783.584  | 1504.255  | NM_020141 | 3542.021  | 3308.768  | NM_00295E | 686.203  | 703.168   |
| NM_00463E | 1249.997  | 1000.302  | NM_006482 | 441.04    | 441.431   | AB018739  | 399.114  | 336.176   |
| AK022603  | 416.517   | 323.608   | NM_003779 | 527.398   | 617.138   | NM_00675C | 6526.245 | 4341.707  |
| NM_00489E | 7630.091  | 6116.487  | NM_00363E | 769.979   | 657.427   | NM_020164 | 2028.884 | 1087.012  |
| NM_00397E | 3902.338  | 3427.839  | NM_000662 | 1901.457  | 1691.42   | AK023521  | 1960.299 | 1810.693  |
| NM_01768E | 1426.779  | 1380.835  | NM_000292 | 1551.853  | 1097.728  | NM_014267 | 4442.535 | 2970.929  |
| AK025612  | 4029.175  | 3688.077  | NM_00368E | 45283.258 | 43821.672 | U30872    | 490.919  | 364.752   |
| NM_01226E | 2432.401  | 2403.863  | NM_016173 | 982.419   | 960.076   | AF111783  | 380.086  | 400.499   |
| NM_012203 | 781.855   | 832.703   | NM_00287E | 3181.835  | 2530.526  | NM_02046E | 1109.873 | 729.002   |
| J03077    | 10519.156 | 6946.759  | NM_004427 | 2942.738  | 2308.993  | NM_014734 | 771.603  | 521.8     |
| J03048    | 20421.402 | 3873.674  | U90549    | 3468.82   | 2741.785  | NM_00228E | 298.828  | 247.343   |
| AL157469  | 382.402   | 303.992   | NM_01324C | 8344.793  | 6644.142  | AK026408  | 734.655  | 423.937   |
| NM_00286E | 3851.362  | 5265.77   | NM_015874 | 21375.992 | 15398.417 | NM_00502E | 462.015  | 297.758   |
| AK024100  | 2988.874  | 2829.538  | NM_00496E | 46189.301 | 29988.314 | NM_006307 | 341.923  | 216.586   |
| NM_00513E | 1178.306  | 1394.639  | AF312393  | 43774.355 | 28174.074 | M74782    | 895.712  | 475.663   |
| NM_003827 | 5152.819  | 4446.59   | AF272898  | 6998.982  | 4400.875  | NM_00105E | 496.24   | 557.433   |
| NM_001103 | 399.866   | 390.504   | AB037817  | 574.441   | 390.801   | AY026461  | 1428.945 | 1956.164  |
| AF228710  | 13933.925 | 10066.354 | AB032951  | 5928.084  | 3794.897  | AK025708  | 988.014  | 1243.365  |
| NM_01839E | 552.86    | 481.051   | NM_003417 | 906.26    | 902.073   | NM_00040E | 430.226  | 586.897   |
| AY007131  | 29273.014 | 33354.395 | NM_00514E | 6684.913  | 4923.604  | NM_005564 | 12943.28 | 8984.344  |
| U61735    | 4080.858  | 4247.919  | AK024073  | 837.063   | 2296.231  | NM_00450E | 635.691  | 1005.27   |
| NM_001144 | 2370.519  | 2137.583  | NM_005887 | 3680.041  | 3946.367  | NM_00640E | 2387.938 | 1915.033  |
| AK023766  | 7169.056  | 7451.156  | AL110232  | 852.796   | 1033.059  | NM_00674E | 299.066  | 302.91    |
| NM_001897 | 1585.322  | 2063.189  | AK026103  | 1676.482  | 2158.743  | NM_004694 | 131.874  | 323.276   |
| NM_003853 | 1274.82   | 1263.108  | NM_016353 | 6983.86   | 5689.172  | AL137619  | 577.821  | 769.513   |
| AB033109  | 2409.256  | 2737.804  | AK022567  | 1461.672  | 1045.608  | NM_00430C | 1304.528 | 717.718   |
| NM_002053 | 10728.313 | 9021.328  | AK023450  | 819.855   | 809.484   | AF319476  | 304.634  | 316.572   |
| NM_00688E | 1371.011  | 1316.535  | AL080280  | 2071.886  | 1792.054  | AK001913  | 1411.852 | 1492.824  |
| NM_00243E | 1393.364  | 1137.019  | AB028947  | 1686.668  | 1560.244  | NM_004292 | 502.137  | 558.522   |
| NM_01458E | 1249.521  | 1139.823  | AF035314  | 1168.66   | 1101.184  | NM_015484 | 1602.705 | 3124.75   |
| NM_00075E | 1420.235  | 1144.374  | NM_01803E | 836.721   | 596.473   | NM_01804E | 832.648  | 1529.7    |
| AK023334  | 1602.699  | 1436.751  | AF052087  | 800.804   | 827.017   | NM_01331E | 683.749  | 468.232   |
| NM_002563 | 12515.507 | 15560.054 | AF007143  | 1674.903  | 1348.612  | M20701    | 1884.066 | 1334.105  |
| NM_002437 | 1510.304  | 1519.474  | AF147417  | 699.976   | 615.808   | NM_002912 | 376.208  | 169.815   |
| AK023573  | 2889.38   | 1819.571  | AK023656  | 836.611   | 824.533   | NM_013284 | 912.077  | 1024.713  |
| NM_00273C | 2919.261  | 1496.917  | AF086511  | 3097.621  | 2481.282  | NM_00673E | 849.682  | 496.495   |
| NM_00482E | 3738.776  | 4145.292  | AK022989  | 2844.18   | 2734.514  | NM_013274 | 1295.121 | 720.288   |
| AB011540  | 12257.569 | 13012.52  | AK001604  | 4882.191  | 4653.201  | AL050187  | 929.151  | 635.682   |
| NM_00004C | 4437.714  | 7243.034  | AK021619  | 449.465   | 600.599   | NM_012387 | 3272.78  | 1577.547  |
| NM_004631 | 3854.053  | 4034.8    | AK025872  | 396.517   | 329.808   | NM_01473E | 349.16   | 224.54    |
| NM_006033 | 1669.145  | 1349.256  | AF131762  | 11259.923 | 9779.732  | NM_004252 | 3674.95  | 1787.051  |
| NM_004837 | 5616.316  | 3960.713  | AY007089  | 4971.494  | 4937.134  | AF172929  | 1638.028 | 910.142   |
| NM_00037C | 1604.43   | 1023.149  | AK021816  | 3307.018  | 3160.254  | NM_00639E | 4311.878 | 2133.658  |
| BE865893  | 2205.132  | 1278.945  | D43770    | 5806.585  | 4614.678  | AK025655  | 655.499  | 299.305   |
| NM_003123 | 48733.59  | 31210.85  | AF085960  | 420.422   | 471.103   | NM_003833 | 6892.193 | 10476.483 |
| AY005822  | 4080.467  | 3665.785  | NM_014254 | 2029.254  | 1987.497  | AK000868  | 1683.932 | 1910.494  |
| NM_01812E | 13175.817 | 11168.397 | AF086036  | 520.895   | 349.44    | NM_001233 | 1472.37  | 2174.033  |
| AF289022  | 1766.938  | 1737.824  | U09197    | 1869.341  | 1857.712  | NM_001234 | 1586.628 | 2730.779  |

|             |           |           |           |           |           |           |           |           |
|-------------|-----------|-----------|-----------|-----------|-----------|-----------|-----------|-----------|
| AB002326    | 302.826   | 355.141   | U50529    | 630.865   | 623.174   | BF679789  | 1607.904  | 2076.053  |
| NM_016025   | 3018.85   | 2290.269  | Z36800    | 1053.85   | 1029.215  | H97792    | 1063.679  | 1276.176  |
| NM_013319   | 1589.87   | 1497.387  | U15553    | 5159.162  | 3786.158  | L33404    | 344.612   | 302.132   |
| NM_000746   | 1217.875  | 1035.141  | Z36829    | 1008.446  | 1044.527  | M13509    | 824.897   | 687.433   |
| NM_000722   | 886.394   | 599.098   | AK024734  | 3604.57   | 3940.139  | X04076    | 5120.879  | 8507.953  |
| NM_006030   | 1143.974  | 1483.41   | NM_017741 | 887.003   | 768.615   | W95082    | 183.297   | 244.492   |
| NM_020410   | 5775.622  | 5085.401  | AK000144  | 950.588   | 976.715   | AA485362  | 806.77    | 539.78    |
| AF000143    | 12687.808 | 10269.689 | AK022275  | 598.094   | 561.572   | AJ222801  | 1182.983  | 788.061   |
| NM_000814   | 924.757   | 707.576   | AK000942  | 859.377   | 1092.415  | W72207    | 17157.65  | 10013.643 |
| NM_000453   | 2261.075  | 1949.337  | AL117533  | 1208.439  | 1159.47   | BI772354  | 770.548   | 401.346   |
| NM_022552   | 4358.695  | 2620.243  | AK026036  | 699.865   | 684.335   | AA733033  | 359.616   | 248.522   |
| NM_014389   | 6513.7    | 3783.111  | AK023422  | 1129.816  | 1015.404  | AA583574  | 562.057   | 259.967   |
| NM_001718   | 467.513   | 880.319   | AK022796  | 944.646   | 793.744   | AI690184  | 9106.08   | 4719.594  |
| AF116659    | 1865.512  | 2112.431  | AK095193  | 776.268   | 649.53    | AA927490  | 901.338   | 630.746   |
| NM_000317   | 5632.824  | 3781.4    | AK025081  | 711.44    | 518.313   | NM_001824 | 28729.342 | 15823.286 |
| NM_018376   | 4788.098  | 2567.953  | AL122088  | 1284.509  | 1056.551  | NM_002964 | 542.816   | 451.744   |
| NM_017615   | 390.673   | 232.491   | AL137518  | 1081.112  | 1204.355  | NM_005052 | 3043.545  | 1368.3    |
| NM_017438   | 2418.883  | 1706.669  | AK023437  | 1845.44   | 1578.298  | NM_014734 | 936.339   | 913.108   |
| U59209      | 2047.133  | 1208.5    | AK024147  | 591.67    | 1141.898  | NM_002289 | 334.996   | 324.193   |
| NM_020195   | 2566.625  | 2786.417  | AK022897  | 1880.19   | 3397.789  | AK026408  | 645.408   | 1108.119  |
| BC002753    | 268.136   | 521.48    | AK023556  | 340.053   | 1302.706  | NM_005025 | 408.655   | 510.202   |
| AK023824    | 2655.207  | 2519.485  | AK023898  | 6477.977  | 5787.385  | NM_006307 | 294.003   | 268.775   |
| AL133069    | 3412.956  | 5465.622  | NM_019040 | 4802.709  | 4841.615  | M74782    | 958.124   | 958.675   |
| AL117574    | 702.233   | 589.824   | NM_005978 | 983.205   | 888.994   | NM_017818 | 841.065   | 960.6     |
| AK026055    | 5745.074  | 5851.225  | Y16711    | 747.191   | 534.372   | NM_020433 | 257.37    | 229.117   |
| AK024126    | 1550.924  | 1282.553  | AJ272179  | 2603.503  | 2822.999  | NM_001767 | 225.388   | 191.798   |
| NM_001516   | 4808.181  | 3483.343  | AJ007015  | 941.539   | 764.445   | AF028823  | 1232.359  | 974.742   |
| NM_002744   | 2855.286  | 1993.252  | AL049317  | 796.515   | 968.226   | NM_004970 | 126.419   | 785.905   |
| NM_015917   | 7014.035  | 5605.572  | AL050090  | 875.855   | 923.632   | NM_004295 | 4799.199  | 3790.912  |
| NM_020397   | 891.167   | 693.954   | AF086309  | 794.813   | 873.567   | NM_002087 | 1717.073  | 1145.124  |
| NM_000061   | 6762.146  | 5071.912  | AF238870  | 878.55    | 754.724   | NM_014585 | 386.847   | 211.931   |
| AB046859    | 10181.748 | 7064.062  | AK026279  | 3032.814  | 2326.733  | AF200815  | 232.466   | 100.167   |
| NM_005109   | 4626.05   | 3773.843  | AF130094  | 5790.907  | 4388.22   | NM_013441 | 557.655   | 275.928   |
| NM_013372   | 273.064   | 172.211   | AK026673  | 1236.653  | 810.353   | NM_014421 | 298.365   | 195.506   |
| NM_003976   | 3131.615  | 1923.816  | NM_005452 | 2890.149  | 2412.719  | M60499    | 986.715   | 691.979   |
| NM_017688   | 1432.912  | 1590.805  | AF170935  | 14470.708 | 13831.405 | NM_004300 | 1616.384  | 1679.866  |
| AK025612    | 4258.739  | 5176.605  | AK025218  | 598.634   | 503.271   | NM_000085 | 406.484   | 36.474    |
| NM_012268   | 2139.916  | 3643.174  | AJ227899  | 1639.108  | 2144.505  | AB007859  | 269.277   | 424.831   |
| NM_012203   | 954.886   | 1177.891  | AL359607  | 938.13    | 1264.751  | NM_001127 | 1005.428  | 1294.78   |
| NM_004736   | 2876.271  | 2561.547  | AF161371  | 7650.051  | 9517.076  | NM_012430 | 734.746   | 698.784   |
| NM_006895   | 558.965   | 931.763   | AK022464  | 1210.038  | 971.75    | NM_003917 | 3287.346  | 2477.376  |
| NM_006459   | 7705.934  | 6276.351  | AF086230  | 1451.953  | 1826.158  | NM_007077 | 345.711   | 319.847   |
| AA488757    | 5581.646  | 6695.009  | AK023408  | 2364.4    | 3471.656  | NM_002956 | 553.224   | 313.698   |
| AA205399    | 323.429   | 206.445   | U84509    | 2082.341  | 2622.483  | AB018739  | 309.105   | 352.875   |
| AI394286    | 2644.382  | 2222.223  | AK002036  | 5086.517  | 4657.31   | NM_006750 | 5964.625  | 2748.467  |
| H07071      | 4731.018  | 5312.201  | AK025775  | 4052.76   | 3658.694  | NM_020164 | 1510.159  | 454.173   |
| M25322      | 4042.218  | 4102.109  | AF043469  | 821.348   | 1209.048  | AK023521  | 1244.295  | 569.428   |
| AA436187    | 964.691   | 1202.999  | AL109671  | 605.745   | 488.712   | NM_014267 | 4195.29   | 2418.641  |
| H-L 27586 I | 2288.782  | 2211.662  | AK022008  | 3209.573  | 2453.454  | NM_001481 | 277.106   | 224.813   |
| ID 214180   | 822.858   | 879.789   | NM_018186 | 1095.333  | 902.639   | U30872    | 384.195   | 362.879   |
| ID 1867426  | 5011.71   | 3786.015  | AL080188  | 2581.308  | 2238.231  | NM_002639 | 420.948   | 176.737   |
| ID 396450   | 575.005   | 749.769   | T99941    | 4137.197  | 3563.922  | AK025655  | 815.768   | 1933.108  |
| W99328      | 1245.343  | 1246.918  | AF113678  | 1615.281  | 1827.621  | NM_001362 | 277.561   | 266.996   |

|           |           |           |            |           |           |           |           |           |
|-----------|-----------|-----------|------------|-----------|-----------|-----------|-----------|-----------|
| AI434176  | 586.455   | 525.294   | AL137313   | 53532.898 | 58247.266 | NM_00405E | 268.183   | 353.843   |
| H08563    | 534.228   | 500.828   | Z83951     | 356.39    | 335.12    | NM_00105E | 606.631   | 1010.697  |
| BE735403  | 2099.467  | 1659.263  | AB002363   | 7171.445  | 6910.384  | AY026461  | 1323.131  | 1149.791  |
| NM_00243E | 1265.363  | 928.09    | NM_005284  | 3353.513  | 4001.474  | AK025708  | 797.641   | 986.74    |
| NM_01458E | 676.212   | 567.321   | AF086351   | 2316.517  | 3054.212  | NM_00040E | 513.931   | 1081.314  |
| NM_00075E | 1313.244  | 1256.697  | D83199     | 22499.66  | 25513.584 | NM_005564 | 12772.256 | 7515.779  |
| AK023334  | 1805.295  | 1985.657  | Y16708     | 1130.97   | 1768.089  | NM_00450E | 509.274   | 242.227   |
| NM_00256E | 10786.748 | 15075.062 | AL157453   | 4504.669  | 8596.921  | NM_00640E | 3037.972  | 1658.285  |
| NM_002437 | 1715.817  | 1591.729  | NM_01909E  | 3864.078  | 5036.79   | NM_00674E | 429.791   | 143.091   |
| D79991    | 1832.347  | 1891.654  | AK022212   | 26370.396 | 23708.033 | AL137619  | 529.898   | 373.221   |
| AK022425  | 594.521   | 435.177   | X64974     | 1513.734  | 1621.563  | NM_002964 | 852.15    | 1678.513  |
| NM_000054 | 5362.548  | 3900.305  | NM_000834  | 2623.698  | 2725.663  | NM_00505E | 4592.852  | 5193.711  |
| NM_01471E | 4216.654  | 2906.658  | NM_00648E  | 32330.688 | 29412.852 | AF319476  | 335.274   | 693.939   |
| NM_005811 | 4852.853  | 5871.926  | NM_01245E  | 1003.469  | 1144.896  | AK001913  | 1472.703  | 1294.386  |
| NM_005764 | 821.045   | 859.022   | NM_01236C  | 343.882   | 470.721   | NM_017737 | 259.482   | 189.749   |
| NM_01636E | 1322.586  | 1391.56   | AL137268   | 2110.032  | 1907.895  | NM_00429E | 421.958   | 893.692   |
| NM_004214 | 6526.554  | 9234.002  | AK022398   | 921.081   | 971.519   | NM_015484 | 1461.329  | 2263.917  |
| NM_00432E | 11627.033 | 11596.524 | AK024109   | 2729.513  | 4568.552  | NM_01804E | 709.579   | 1129.526  |
| NM_00283E | 4138.298  | 4259.67   | AF088048   | 1175.479  | 1712.046  | NM_01331E | 508.128   | 561.242   |
| NM_020167 | 1545.415  | 1326.884  | AK001143   | 2626.998  | 1872.873  | M20701    | 1812.299  | 1171.951  |
| AL049963  | 9113.298  | 8143.279  | AK001701   | 3304.128  | 2306.88   | NM_00291E | 271.146   | 499.911   |
| NM_01605E | 19217.145 | 15839.902 | AB007978   | 593.648   | 542.24    | NM_013284 | 790.431   | 603.032   |
| NM_01400E | 2337.055  | 2152.468  | AF217970   | 1444.219  | 1627.998  | NM_00673E | 765.899   | 353.932   |
| NM_00463E | 1612.246  | 1908.52   | AF086297   | 1619.026  | 2110.772  | NM_013274 | 1275.464  | 965.459   |
| AK022603  | 842.848   | 924.471   | AK025455   | 1490.188  | 1314.004  | AL050187  | 934.778   | 670.199   |
| NM_00489E | 7761.266  | 6561.008  | AK026799   | 12264.092 | 10857.948 | NM_012387 | 3869.067  | 2096.166  |
| NM_00603C | 1460.364  | 1123.241  | NM_01486C  | 851.508   | 1023.455  | NM_01473E | 360.8     | 180.278   |
| NM_02041C | 5565.667  | 3777.274  | AK022549   | 1023.009  | 1550.132  | NM_00425E | 4053.458  | 2590.789  |
| AF000143  | 10590.526 | 8423.129  | NM_018157  | 750.77    | 909.092   | AF172929  | 1802.817  | 809.217   |
| NM_000814 | 955.278   | 885.266   | Z70714     | 3610.823  | 3755.531  | NM_01246E | 253.154   | 211.904   |
| NM_00045E | 2187.354  | 2033.541  | AK021640   | 13225.465 | 17856.076 | M60499    | 1273.455  | 2116.479  |
| J03077    | 10614.678 | 8284.735  | NM_01656E  | 50691.383 | 57848.184 | NM_001614 | 39074.055 | 94624.305 |
| J03048    | 28414.775 | 16536.279 | CY3Cy5     | 4170.818  | 1567.177  | NM_00036E | 456.353   | 402.183   |
| AL157469  | 508.216   | 671.359   | BF310427   | 2496.784  | 3331.931  | NM_00383E | 7632.767  | 12626.71  |
| NM_00286E | 4340.7    | 4018.259  | N94424     | 1076.115  | 1273.932  | AK000868  | 1663.46   | 1653.605  |
| AK024100  | 2791.84   | 2355.082  | AA045192   | 2131.107  | 2812.688  | NM_00123E | 1797.627  | 1875.952  |
| NM_00513E | 1432.03   | 2182.223  | AI521645   | 275.019   | 452.049   | NM_001234 | 1511.208  | 1605.963  |
| NM_003827 | 6147.078  | 7772.639  | M92642     | 1562.53   | 2493.254  | BF679789  | 1732.287  | 2116.524  |
| NM_00458E | 999.248   | 1382.589  | H-U 44385  | 12083.445 | 11032.749 | H97792    | 1036.718  | 1020.686  |
| NM_001103 | 475.624   | 466.922   | ID 1654970 | 5723.566  | 4946.117  | L33404    | 295.401   | 434.314   |
| AF228710  | 17753.342 | 16318.311 | ID 2531132 | 5438.586  | 4758.811  | M13509    | 688.95    | 759.625   |
| NM_01839E | 837.664   | 720.141   | ID 4365538 | 419       | 304.237   | X04076    | 2955.189  | 2383.22   |
| AY007131  | 32022.545 | 30514.584 | AA485665   | 430.366   | 367.077   | AA485362  | 727.781   | 390.682   |
| U61735    | 4954.414  | 5001.044  | BF125928   | 9776.256  | 9621.996  | AJ222801  | 1019.203  | 528.052   |
| NM_001144 | 3092.221  | 3604.76   | BG571026   | 1831.116  | 1765.518  | W72207    | 16371.156 | 8903.039  |
| AK023766  | 6933.132  | 6236.958  | AA489017   | 2929.487  | 2356.156  | BI772354  | 887.49    | 590.315   |
| NM_001897 | 2094.763  | 2206.241  | NM_01224E  | 15117.227 | 10930.825 | AA733033  | 495.681   | 340.03    |
| NM_00385E | 1283.236  | 1349.687  | NM_13326E  | 1537.82   | 956.109   | AA583574  | 567.799   | 530.954   |
| AB033109  | 2723.322  | 2898.099  | SR2        | 38889.297 | 34088.547 | AI690184  | 12633.877 | 7289.632  |
| NM_00205E | 15357.33  | 12288.126 | SR4        | 10514.187 | 9282.336  | AA927490  | 831.106   | 603.673   |
| NM_00688E | 1663.969  | 1580.296  | SR6        | 1456.07   | 1199.71   | NM_001481 | 348.922   | 260.008   |
| NM_002744 | 2315.55   | 1988.818  | SR8        | 5028.813  | 12297.319 | U30872    | 726.618   | 809.998   |
| NM_015917 | 7306.689  | 5387.831  | SR10       | 17688.811 | 4572.952  | AF111783  | 264.372   | 280.95    |

|           |           |           |           |           |           |           |           |           |
|-----------|-----------|-----------|-----------|-----------|-----------|-----------|-----------|-----------|
| NM_020397 | 766.034   | 648.279   | CY3Cy5    | 1593.673  | 273.432   | NM_020465 | 1565.648  | 1819.866  |
| NM_000061 | 6644.153  | 7002.561  | NM_017450 | 2426.979  | 2613.574  | NM_002635 | 729.433   | 738.211   |
| AB046859  | 11788.038 | 17678.559 | NM_002023 | 660.483   | 1045.072  | NM_014734 | 1005.083  | 1343.589  |
| NM_005105 | 4285.936  | 5222.279  | NM_002835 | 579.401   | 691.921   | NM_002285 | 469.503   | 349.124   |
| AK023573  | 3366.622  | 2697.049  | AF190500  | 805.702   | 1146.429  | AK026408  | 744.374   | 1666.997  |
| NM_002730 | 3571.317  | 3664.397  | NM_001616 | 412.454   | 505.686   | NM_005025 | 384.752   | 385.608   |
| NM_004825 | 4177.485  | 3912.792  | NM_005904 | 547.35    | 792.409   | NM_006307 | 255.547   | 727.478   |
| AB011540  | 9781.576  | 6526.391  | NM_005273 | 10288.455 | 10862.245 | M74782    | 912.867   | 867.338   |
| NM_000040 | 3945.232  | 3516.411  | NM_006576 | 1138.698  | 1060.832  | NM_017815 | 767.008   | 789.619   |
| NM_004631 | 4239.011  | 4448.173  | NM_018645 | 695.684   | 835.971   | NM_020433 | 301.674   | 126.159   |
| NM_006033 | 2409.507  | 2798.219  | AB035266  | 2736.605  | 2468.531  | AF028823  | 1039.461  | 1007.418  |
| NM_004837 | 6041.265  | 6534.212  | NM_003744 | 1450.467  | 1216.797  | NM_004295 | 5043.756  | 3318.054  |
| NM_000370 | 1792.035  | 1606.04   | NM_006375 | 1097.824  | 925.149   | NM_002087 | 1458.648  | 1240.72   |
| BE865893  | 2470.926  | 1501.835  | NM_018132 | 2289.666  | 2159.403  | NM_014585 | 267.835   | 207.681   |
| NM_003123 | 51937.172 | 43421.422 | NM_018207 | 613.579   | 658.584   | AF200815  | 328.183   | 269.229   |
| AY005822  | 5135.166  | 4231.898  | NM_000345 | 11362.813 | 6990.436  | NM_013441 | 387.837   | 237.125   |
| NM_018125 | 14996.813 | 11974.937 | AB029021  | 8061.336  | 5578.25   | NM_014421 | 353.481   | 194.597   |
| AF289022  | 1978.331  | 2084.205  | NM_002101 | 15732.572 | 9238.1    | NM_006745 | 391.332   | 543.341   |
| AB002326  | 334.584   | 255.063   | NM_005423 | 494.01    | 363.862   | NM_000324 | 297.13    | 342.502   |
| M17252    | 262.915   | 291.523   | Z36789    | 1131.557  | 619.637   | AL137619  | 1008.445  | 1360.021  |
| NM_016025 | 3370.456  | 2683.47   | J02874    | 2432.341  | 2186.358  | NM_004300 | 1808.584  | 1904.177  |
| NM_013315 | 1953.177  | 1678.367  | AF070525  | 4196.979  | 4810.913  | AB007859  | 278.253   | 258.675   |
| NM_000745 | 1282.301  | 1655.401  | NM_001177 | 4049.635  | 4322.782  | NM_001127 | 1040.422  | 1063.334  |
| NM_000722 | 1085.483  | 834.199   | NM_014447 | 1142.078  | 1476.823  | NM_012430 | 688.178   | 677.265   |
| NM_016116 | 590.192   | 387.887   | NM_002355 | 758.174   | 925.953   | NM_003917 | 4489.547  | 3250.855  |
| NM_000925 | 339.566   | 214.167   | NM_006691 | 966.978   | 1345.871  | NM_007077 | 580.616   | 757.167   |
| NM_018655 | 1442.702  | 1700.007  | NM_001505 | 431.607   | 1206.901  | NM_002955 | 502.528   | 593.685   |
| NM_005663 | 2161.411  | 2154.626  | NM_003710 | 1124.026  | 1753.746  | AB018739  | 456.243   | 458.198   |
| NM_005773 | 1404.951  | 1251.742  | Z83805    | 357.99    | 276.191   | NM_006750 | 7155.488  | 4488.873  |
| NM_017644 | 4970.944  | 4394.541  | NM_004665 | 1479.415  | 1970.454  | NM_020164 | 1881.995  | 905.382   |
| NM_002482 | 2033.194  | 1162.674  | NM_003614 | 1206.506  | 1178.354  | AK023521  | 1731.089  | 920.023   |
| NM_001715 | 308.736   | 235.068   | NM_014257 | 5472.119  | 4096.326  | NM_014267 | 4645.096  | 2590.894  |
| AF116659  | 2704.134  | 1961.508  | NM_001140 | 424.383   | 523.815   | AL050187  | 1363.766  | 1796.386  |
| NM_000317 | 7767.476  | 6251.899  | NM_016055 | 225.834   | 202.266   | NM_012387 | 4884.548  | 5304.874  |
| NM_018375 | 5679.62   | 4930.182  | NM_004843 | 1398.763  | 1296.476  | NM_014735 | 514.283   | 621.022   |
| NM_017615 | 453.767   | 414.28    | AK022845  | 651.74    | 694.534   | NM_004252 | 5741.754  | 8150.148  |
| NM_017435 | 2830.138  | 2372.12   | NM_003004 | 361.598   | 483.729   | AF172929  | 2585.623  | 3317.792  |
| U59209    | 2627.106  | 2025.521  | S77835    | 291.749   | 219.095   | NM_006395 | 6568.196  | 8282.734  |
| NM_020195 | 2851.027  | 2213.437  | NM_002985 | 5174.034  | 4543.159  | AK025655  | 802.916   | 980.192   |
| BC002753  | 181.283   | 138.981   | AB018347  | 4234.156  | 3372.662  | NM_001362 | 302.304   | 244.436   |
| AK023824  | 3299.08   | 2569.12   | NM_003284 | 1242.941  | 590.343   | NM_004055 | 298.834   | 270.618   |
| AL133069  | 3967.67   | 3158.109  | NM_018152 | 633.518   | 338.649   | NM_001055 | 480.044   | 648.294   |
| AL117574  | 836.759   | 736.144   | NM_000315 | 957.311   | 693.509   | AY026461  | 686.758   | 632.412   |
| AK026055  | 7396.047  | 6578.473  | NM_003257 | 250.686   | 228.864   | AK025708  | 745.686   | 525.759   |
| AK024126  | 1616.551  | 1532.102  | NM_012461 | 1644.991  | 1248.706  | NM_000405 | 365.563   | 231.544   |
| NM_001515 | 5162.999  | 4019.026  | AK001379  | 727.869   | 330.037   | NM_005564 | 17764.791 | 10005.464 |
| NM_019085 | 2309.538  | 2436.283  | NM_007072 | 1387.625  | 1837.097  | NM_004505 | 791.148   | 560.255   |
| NM_006670 | 3618.943  | 3758.813  | NM_012320 | 3019.648  | 2932.546  | NM_006405 | 3549.128  | 1928.057  |
| NM_012425 | 6025.511  | 5611.881  | NM_018205 | 1810.633  | 2194.256  | NM_002390 | 730.52    | 1197.646  |
| NM_005815 | 786.933   | 1081.537  | NM_015925 | 4516.512  | 5638.677  | NM_014910 | 2745.156  | 3622.091  |
| NM_000081 | 3030.064  | 2357.567  | U90653    | 3607.95   | 7644.269  | AK001064  | 1820.055  | 1816.828  |
| NM_003025 | 2325.059  | 2676.734  | NM_000195 | 721.372   | 4231.929  | AB029031  | 2236.826  | 2441.741  |
| NM_001565 | 1107.089  | 1166.522  | NM_018335 | 1526.367  | 1951.571  | NM_001294 | 1585.092  | 1806.011  |



|           |           |           |            |           |           |           |           |           |
|-----------|-----------|-----------|------------|-----------|-----------|-----------|-----------|-----------|
| NM_016541 | 1518.337  | 1774.563  | NM_006745  | 21771.459 | 25834.354 | NM_014241 | 2145.184  | 2555.426  |
| NM_01854E | 5912.336  | 7537.067  | NM_000275  | 515.113   | 572.962   | AF302786  | 1170.656  | 1425.156  |
| NM_013401 | 1308.163  | 1454.822  | AK000037   | 942.168   | 886.087   | AL122083  | 1131.031  | 1351.434  |
| AB046770  | 156.971   | 585.325   | NM_014760  | 1501.861  | 1387.515  | NM_005052 | 4242.41   | 4524.186  |
| NM_01823E | 3385.933  | 2912.737  | NM_01839E  | 891.982   | 888.295   | BF038439  | 312.039   | 584.585   |
| NM_00685E | 6734.186  | 6059.103  | NM_002560  | 10536.483 | 7176.487  | AF319476  | 318.635   | 325.208   |
| NM_00140E | 4858.295  | 4724.113  | NM_014404  | 1065.799  | 937.919   | AK001913  | 1482.427  | 1424.903  |
| NM_003880 | 709.306   | 870.597   | NM_018713  | 475.49    | 555.164   | NM_004292 | 369.574   | 277.381   |
| AF131778  | 1347.137  | 1441.543  | NM_015947  | 3124.768  | 2550.66   | NM_015484 | 1263.553  | 1055.004  |
| NM_001562 | 8064.416  | 7326.583  | NM_002042  | 32485.592 | 24368.602 | NM_01804E | 776.635   | 423.379   |
| NM_01327E | 1020.369  | 930.755   | AJ006268   | 598.09    | 343.915   | NM_01331E | 912.816   | 545.349   |
| NM_003487 | 3118.779  | 2142.965  | M74089     | 1900.433  | 1169.893  | M20701    | 2755.014  | 2015.078  |
| NM_006887 | 15572.489 | 15357.036 | AF190864   | 3446.779  | 2359.897  | NM_002912 | 387.805   | 360.188   |
| NM_006477 | 2038.949  | 2173.46   | NM_002779  | 3106.807  | 2243.357  | NM_013284 | 1076.48   | 637.361   |
| NM_002880 | 6178.841  | 7094.977  | L40397     | 8750.86   | 7139.072  | NM_00673E | 750.437   | 509.439   |
| NM_00106E | 4665.94   | 6204.815  | AA098879   | 663.081   | 585.722   | NM_013274 | 1654.335  | 1122.847  |
| NM_004657 | 1387.141  | 1892.16   | NM_000025  | 8873.641  | 8076.66   | AK024955  | 2209.69   | 2665.72   |
| NM_006291 | 5060.689  | 8092.503  | D38521     | 2258.758  | 2727.723  | NM_016580 | 269.045   | 254.898   |
| NM_003867 | 777.964   | 1701.325  | NM_000454  | 62.071    | 1654.731  | AF169693  | 463.112   | 413.246   |
| NM_003173 | 6497.812  | 6356.477  | NM_000403  | 2876.23   | 4259.155  | L23206    | 1927.899  | 1957.318  |
| NM_005030 | 5820.391  | 5802.656  | NM_018127  | 7578.314  | 19376.393 | NM_012192 | 1402.502  | 3215.496  |
| NM_017584 | 3109.82   | 3638.005  | AB020677   | 6092.969  | 7512.027  | NM_006293 | 1228.67   | 1613.965  |
| NM_02035E | 3958.09   | 5046.676  | AB033097   | 1470.584  | 1404.14   | NM_00722E | 1440.482  | 1281.645  |
| AB014541  | 9291.898  | 10420.957 | NM_000135  | 1102.8    | 1676.105  | AB011105  | 837.921   | 848.422   |
| NM_002583 | 4717.57   | 6726.273  | AJ223948   | 2840.135  | 3184.69   | NM_002213 | 262.961   | 237.737   |
| NM_006570 | 15171.716 | 19005.875 | NM_01621E  | 798.239   | 729.688   | NM_004814 | 2046.111  | 3066.136  |
| NM_02034E | 962.383   | 1135.911  | AK022947   | 1516.046  | 1440.007  | D86976    | 7404.659  | 7209.667  |
| NM_006034 | 11182.938 | 13041.779 | AL050029   | 1494.55   | 1190.772  | AF307080  | 635.701   | 599.677   |
| NM_016640 | 234.221   | 425.913   | AL049966   | 301.6     | 203.342   | NM_004057 | 792.931   | 691.021   |
| AB040943  | 565.383   | 716.173   | NM_005204  | 2023.068  | 1834.467  | NM_018971 | 215.253   | 134.43    |
| NM_005201 | 11952.283 | 13340.792 | NM_016203  | 511.059   | 439.863   | K03175    | 250.905   | 216.655   |
| X56807    | 2803.002  | 3043.051  | NM_002759  | 3035.437  | 2399.189  | NM_00301E | 330.56    | 298.921   |
| NM_000092 | 1015.438  | 1219.71   | NM_007271  | 1195.475  | 1113.211  | NM_00649E | 4727.833  | 3656.004  |
| AF174600  | 6335.468  | 8285.986  | NM_006255  | 2295.964  | 2129.252  | NM_00082E | 241.34    | 375.468   |
| AK001003  | 3136.348  | 3426.938  | BE392143   | 2305.942  | 2013.509  | NM_00482E | 322.211   | 276.372   |
| NM_002800 | 19583.586 | 26911.105 | NM_005813  | 1734.388  | 1327.693  | NM_002072 | 381.004   | 300.423   |
| NM_018384 | 8513.976  | 9328.149  | AB037718   | 2793.428  | 2334.926  | NM_003182 | 233.306   | 137.76    |
| AF282617  | 1683.114  | 1785.919  | AL389994   | 759.795   | 694.994   | BE904126  | 2576.901  | 3395.592  |
| AF157323  | 3380.998  | 5873.413  | NM_003909  | 3058.343  | 1863.723  | AF272380  | 2787.566  | 2480.182  |
| NM_00602E | 1138.938  | 1490.864  | NM_003659  | 2938.807  | 2176.213  | NM_004431 | 2114.585  | 2401.29   |
| NM_00333E | 2448.605  | 3934.081  | AB029021   | 7809.5    | 8122.331  | NM_002012 | 672.703   | 834.279   |
| NM_01339E | 1802.947  | 3381.625  | NM_002101  | 18190.012 | 18644.738 | NM_002070 | 17993.957 | 20495.43  |
| NM_017752 | 1084.191  | 1362.636  | NM_005423  | 440.834   | 834.531   | AF227969  | 825.822   | 1436.137  |
| D26069    | 8878.338  | 10076.354 | Z36789     | 1020.499  | 1478.781  | AF116657  | 336.152   | 553.27    |
| BF107577  | 13376.566 | 13730.282 | J02874     | 3284.351  | 5447.682  | NM_004102 | 239.988   | 222.189   |
| NM_005837 | 9895.459  | 11736.568 | BF310427   | 2072.646  | 2696.016  | NM_003944 | 7929.762  | 9215.218  |
| NM_01662E | 6158.963  | 5874.868  | H45617     | 748.589   | 994.505   | NM_016120 | 16464.791 | 19056.098 |
| NM_017493 | 1378.181  | 1750.122  | M92642     | 1817.134  | 4148.925  | NM_002893 | 715.357   | 740.597   |
| NM_00613E | 5571.29   | 7339.929  | AA464532   | 305.294   | 175.663   | NM_002393 | 1987.811  | 1611.14   |
| AF237772  | 20582.695 | 27139.74  | H-U 44385  | 11032.138 | 7724.561  | NM_00266E | 1553.46   | 1505.432  |
| AK025934  | 1356.268  | 2030.238  | ID 1654970 | 4338.906  | 3568.757  | AB014600  | 653.864   | 546.335   |
| AJ008154  | 1947.884  | 2058.122  | ID 2531132 | 4861.631  | 4241.856  | NM_018312 | 555.451   | 467.196   |
| NM_00685E | 4216.756  | 3679.842  | ID 4365538 | 407.794   | 408.783   | X98259    | 253.159   | 238.157   |

|           |           |           |           |           |           |           |           |           |
|-----------|-----------|-----------|-----------|-----------|-----------|-----------|-----------|-----------|
| X52350    | 52623.438 | 52751.203 | AA485665  | 413.177   | 430.947   | X98260    | 2175.659  | 1237.352  |
| AF071554  | 1183.986  | 1266.35   | BF125928  | 9067      | 8094.757  | NM_007217 | 1879.055  | 1372.267  |
| NM_002147 | 345.862   | 391.263   | BG571026  | 1414.905  | 1156.725  | NM_014777 | 1992.762  | 1213.215  |
| U90919    | 2801      | 3208.51   | AA489017  | 2477.073  | 2051.977  | NM_001102 | 2771.38   | 1950.141  |
| NM_006177 | 992.536   | 1169.322  | NM_012245 | 13750.323 | 8561.708  | NM_003803 | 473.46    | 233.268   |
| AL137286  | 6547.011  | 10003.501 | NM_133263 | 1407.808  | 944.844   | NM_002818 | 19503.23  | 13177.564 |
| NM_016358 | 7065.051  | 9024.851  | NM_003284 | 1195.835  | 1202.355  | NM_001937 | 1081.852  | 643.316   |
| NM_016275 | 12826.761 | 18128.596 | NM_018152 | 916.487   | 1290.548  | AK024778  | 440.742   | 187.662   |
| NM_020418 | 2141.966  | 2921.581  | NM_000319 | 1169.386  | 1957.297  | AK021608  | 791.338   | 1219.924  |
| NM_013293 | 2815.162  | 4253.141  | NM_003257 | 291.912   | 721.625   | NM_004297 | 248.704   | 426.594   |
| AF315592  | 6795.631  | 9094.078  | NM_012461 | 2181.063  | 4988.935  | NM_006044 | 2658.536  | 3366.399  |
| AF095844  | 1743.637  | 2350.726  | AK001379  | 869.547   | 1099.507  | AK025498  | 562.364   | 590.311   |
| NM_015833 | 1766.641  | 1890.656  | NM_002023 | 518.065   | 591.359   | NM_001395 | 3441.092  | 4000.142  |
| AK026760  | 21243.932 | 23174.684 | NM_002839 | 527.694   | 441.825   | NM_002068 | 2401.205  | 2809.861  |
| NM_005617 | 337.883   | 300.973   | AF190500  | 812.961   | 1016.427  | NM_013338 | 1421.079  | 1597.708  |
| NM_014772 | 3467.112  | 5356.775  | NM_001616 | 274.096   | 590.742   | NM_014671 | 2075.558  | 1984.256  |
| AK025248  | 2105.602  | 2512.043  | NM_005904 | 653.965   | 639.619   | NM_001814 | 3944.747  | 5171.233  |
| NM_004538 | 18576.766 | 23553.342 | NM_005273 | 9325.099  | 7878.513  | NM_018438 | 486.725   | 549.677   |
| NM_006428 | 12272.894 | 15407.17  | NM_000524 | 231.446   | 204.472   | NM_005658 | 514.137   | 499.168   |
| NM_004280 | 15064.14  | 18208.023 | NM_006576 | 850.604   | 883.218   | NM_006012 | 1505.85   | 1501.859  |
| AF110399  | 1871.125  | 2908.693  | NM_018645 | 640.397   | 642.739   | NM_002151 | 416.171   | 515.979   |
| AK027094  | 3208.781  | 4832.02   | AB035266  | 3375.528  | 2645.329  | NM_014888 | 488.54    | 399.625   |
| AL359596  | 807.753   | 431.235   | NM_003744 | 1647.362  | 1175.989  | AF173935  | 260.289   | 267.065   |
| U79249    | 1111.136  | 739.162   | NM_006378 | 1206.435  | 859.892   | AK025322  | 1470.666  | 909.465   |
| AK022114  | 1143.419  | 778.481   | NM_018132 | 2253.307  | 1950.351  | NM_017887 | 1365.651  | 1197.56   |
| AL133585  | 1175.852  | 1011.985  | NM_018207 | 630.688   | 334.82    | NM_000528 | 346.846   | 231.942   |
| NM_002631 | 13288.355 | 9598.516  | NM_000345 | 11338.322 | 7095.966  | AF007152  | 651.93    | 530.396   |
| NM_000775 | 486.771   | 293.481   | NM_001862 | 43488.852 | 28148.354 | NM_005310 | 353.934   | 217.923   |
| AB032981  | 413.125   | 270.657   | NM_006531 | 849.688   | 534.631   | NM_014423 | 2577.338  | 1569.711  |
| NM_007052 | 875.943   | 1861.344  | AF190864  | 3811.933  | 4434.186  | NM_018083 | 517.139   | 739.367   |
| BC017044  | 677.874   | 1462.968  | NM_002779 | 4184.309  | 5961.739  | AL110188  | 1063.774  | 1252.988  |
| AV758498  | 2415.425  | 3532.479  | L40397    | 9680.404  | 17205.805 | D70834    | 8419.174  | 7456.258  |
| NM_020198 | 3374.869  | 4446.707  | NM_020198 | 6108.397  | 10936.746 | NM_000970 | 34489.887 | 62245.199 |
| AK024113  | 403.963   | 612.271   | AA098879  | 454.561   | 944.799   | NM_033288 | 314.841   | 431.702   |
| NM_018657 | 1974.285  | 2837.129  | AF070525  | 4096.52   | 5661.406  | AK000102  | 545.398   | 597.524   |
| NM_016310 | 6463.342  | 7015.881  | NM_001177 | 3863.142  | 5128.481  | AB040916  | 773.044   | 691.399   |
| AK021562  | 824.096   | 967.949   | NM_014447 | 1236.06   | 1477.77   | NM_005587 | 475.9     | 406.437   |
| BC006560  | 892.625   | 932.499   | NM_002356 | 511.554   | 592.884   | AF038362  | 873.939   | 629.242   |
| NM_006298 | 941.17    | 1023.205  | NM_006691 | 877.726   | 1163.657  | NM_005195 | 5714.337  | 5486.53   |
| AF060938  | 33494.121 | 35128.57  | NM_001505 | 322.384   | 244.766   | NM_005481 | 339.263   | 308.26    |
| NM_001973 | 2970.031  | 4104.559  | NM_003710 | 1028.618  | 1048.864  | NM_004715 | 1123.496  | 1177.041  |
| NM_014468 | 6188.337  | 7599.993  | Z83805    | 297.24    | 315.16    | L40392    | 678.042   | 753.956   |
| AL050015  | 1693.872  | 1667.982  | NM_004666 | 1390.286  | 1938.894  | NM_001007 | 33698.391 | 35251.418 |
| AY007117  | 3363.754  | 3270.687  | NM_003614 | 818.454   | 955.157   | NM_003017 | 2257.877  | 1414.826  |
| AF039698  | 2439.146  | 3001.558  | NM_014257 | 4906.191  | 3732.87   | NM_020366 | 1119.581  | 602.468   |
| AL109679  | 337.39    | 287.585   | NM_001140 | 430.955   | 404.214   | NM_020141 | 1353.538  | 1810.487  |
| AB046828  | 3259.931  | 2691.864  | NM_004843 | 1492.765  | 1142.131  | NM_006482 | 281.011   | 364.289   |
| AF144487  | 846.563   | 1006.023  | AK022845  | 631.805   | 544.824   | NM_003779 | 292.117   | 204.936   |
| AL137532  | 2184.015  | 1894.067  | S77835    | 290.046   | 189.317   | NM_003635 | 459.424   | 520.951   |
| AK025419  | 3137.963  | 3193.648  | NM_002985 | 5171.746  | 3319.583  | NM_000662 | 701.317   | 1044.842  |
| NM_013258 | 5029.282  | 7285.53   | AB018347  | 3401.29   | 2419.948  | NM_000292 | 509.9     | 599.074   |
| NM_018375 | 2591.393  | 3972.267  | AB033073  | 2344.319  | 1328.314  | NM_003688 | 15260.555 | 14274.271 |
| NM_004913 | 1138.765  | 1890.595  | NM_005813 | 1612.563  | 1645.028  | NM_016173 | 411.75    | 496.947   |

|           |          |          |           |           |           |           |          |           |
|-----------|----------|----------|-----------|-----------|-----------|-----------|----------|-----------|
| AK026838  | 2111.433 | 2649.913 | AB037718  | 3298.89   | 4230.767  | NM_002875 | 1234.995 | 1000.435  |
| AL137383  | 329.559  | 337.381  | AL389994  | 1001.72   | 1607.375  | NM_004427 | 1228.991 | 1135.702  |
| AL035295  | 735.998  | 520.964  | NM_003909 | 3620.933  | 5378.192  | U90549    | 1233.214 | 1102.598  |
| NM_018302 | 2893.823 | 2424.949 | NM_001277 | 6821.36   | 11804.268 | NM_013240 | 2668.129 | 1688.662  |
| AK027252  | 2346.253 | 1823.34  | NM_003659 | 3770.065  | 5247.793  | NM_015874 | 6915.236 | 3892.437  |
| AF165527  | 2836.825 | 1967.223 | NM_007072 | 1341.997  | 2259.163  | NM_004965 | 16669.4  | 12030.609 |
| NM_014092 | 1307.875 | 1060.896 | NM_012320 | 2864.281  | 4602.375  | AF312393  | 9545.9   | 7481.525  |
| AL110133  | 4938.126 | 4640.935 | NM_018208 | 1836.122  | 2252.77   | AF272898  | 1811.183 | 1391.487  |
| AL050053  | 299.936  | 276.904  | NM_015929 | 4715.458  | 4412.54   | AB032951  | 1613.76  | 954.199   |
| AK000529  | 2187.815 | 1689.515 | U90653    | 3381.281  | 3322.371  | NM_003417 | 314.554  | 202.197   |
| AK027243  | 1289.712 | 1263.468 | NM_000196 | 419.53    | 496.998   | NM_005149 | 1730.008 | 902.715   |
| AL109783  | 296.587  | 855.157  | NM_018339 | 1422.986  | 1162.26   | AK022223  | 385.814  | 434.773   |
| AF147415  | 1209.333 | 1725.665 | NM_006745 | 21420.416 | 20276.207 | NM_005887 | 1503.009 | 2049.845  |
| AL049273  | 533.892  | 592.451  | NM_000275 | 497.092   | 643.677   | AL110232  | 301.04   | 190.879   |
| L23852    | 404.666  | 555.37   | AK000037  | 861.254   | 554.351   | AK026103  | 869.366  | 1078.119  |
| NM_003887 | 1384.362 | 2131.924 | NM_014760 | 1327.946  | 1082.434  | NM_016353 | 4079.059 | 5260.254  |
| NM_004267 | 5793.043 | 9563.821 | NM_018398 | 806.817   | 867.895   | AK022567  | 647.901  | 533.572   |
| AL357212  | 358.49   | 364.418  | NM_002560 | 12581.362 | 8210.738  | S77357    | 260.202  | 208.187   |
| AK026687  | 2237.951 | 2225.576 | NM_014404 | 465.468   | 275.41    | AK023450  | 402.18   | 392.671   |
| AL117444  | 588.891  | 490.53   | NM_018713 | 474.209   | 431.979   | AL080280  | 1008.166 | 1122.411  |
| NM_017994 | 6321.376 | 5944.223 | NM_015947 | 2780.76   | 1993.042  | AB028947  | 553.095  | 525.999   |
| AK021693  | 2337.333 | 1692.074 | NM_002042 | 29530.881 | 20865.951 | AF035314  | 359.989  | 430.109   |
| AB023177  | 6187.395 | 4252.043 | AJ006268  | 486.935   | 477.331   | NM_018036 | 387.13   | 266.426   |
| Y11609    | 1436.522 | 1608.574 | NM_012245 | 12357.301 | 8756.911  | AF052087  | 368.674  | 281.119   |
| NM_012122 | 6835.195 | 6455.568 | NM_133263 | 1611.515  | 1370.596  | AF007143  | 358.65   | 389.454   |
| AF009285  | 7992.033 | 7833.771 | NM_000025 | 8102.954  | 8100.622  | AK023656  | 339.222  | 421.31    |
| NM_012125 | 3366.314 | 4102.272 | D38521    | 2415.773  | 2811.172  | AF086511  | 420.807  | 259.729   |
| AF056435  | 238.162  | 361.408  | NM_000403 | 3460.397  | 2679.92   | AK022989  | 620.116  | 319.07    |
| AB032363  | 497.809  | 866.935  | NM_018127 | 6522.253  | 5735.088  | AK001604  | 1254.827 | 666.897   |
| AF009294  | 2949.55  | 2813.046 | AB020677  | 6559.774  | 4495.374  | AK021619  | 345.079  | 857.963   |
| NM_001524 | 1079.981 | 1142.497 | AB033097  | 1297.987  | 1110.717  | AK022347  | 281.228  | 292.803   |
| AF056445  | 310.146  | 430.013  | NM_000135 | 1157.524  | 851.871   | AK025872  | 220.241  | 461.333   |
| AK000998  | 936.047  | 1179.005 | AJ223948  | 2604.689  | 2328.695  | AF131762  | 5458.796 | 10972.324 |
| AK001225  | 418.35   | 679.663  | NM_016218 | 773.767   | 500.493   | AY007089  | 2363.255 | 4927.428  |
| AK001819  | 477.371  | 706.309  | AK022947  | 1678.152  | 1213.503  | AK021816  | 2072.223 | 2856.389  |
| AK021480  | 609.746  | 1038.518 | AL050029  | 1736.882  | 1318.129  | D43770    | 3043.15  | 3524.78   |
| AK021726  | 502.657  | 737.449  | AL049966  | 329.838   | 325.253   | AF085960  | 226.75   | 308.44    |
| AK025112  | 1553.14  | 2182.599 | NM_005204 | 1966.607  | 1228.749  | AK021519  | 381.554  | 423.736   |
| AK025297  | 570.809  | 781.464  | NM_016203 | 492.813   | 405.629   | NM_014254 | 676.601  | 739.77    |
| AK026079  | 527.79   | 352.077  | NM_002759 | 2787.01   | 1800.888  | U09197    | 524.911  | 282.84    |
| AK026675  | 280.169  | 195.346  | NM_007271 | 1302.348  | 957.24    | U15553    | 996.471  | 801.604   |
| AK025173  | 3035.344 | 2328.758 | NM_006255 | 2689.354  | 2120.273  | Z36829    | 299.273  | 202.054   |
| AK025430  | 365.161  | 290.844  | BE392143  | 2197.29   | 1757.359  | AK024734  | 1310.482 | 927.009   |
| AK026722  | 353.793  | 269.301  | NM_018132 | 2600.383  | 2786.801  | AK000144  | 406.119  | 639.934   |
| AF117338  | 1493.207 | 2481.605 | NM_018207 | 797.917   | 1092.755  | AK022275  | 636.776  | 997.789   |
| AK025567  | 2435.503 | 2900.019 | NM_000345 | 13449.248 | 12311.905 | NM_016349 | 228.619  | 321.379   |
| NM_019102 | 442.007  | 401.189  | NM_001862 | 47754.336 | 61125.074 | AL117533  | 477.378  | 734.423   |
| U56857    | 2586.688 | 2246.674 | NM_006531 | 1522.354  | 2126.141  | AK026036  | 351.586  | 462.329   |
| L43349    | 546.917  | 450.587  | AB029021  | 10531.323 | 13661.005 | AK023422  | 415.467  | 489.79    |
| BE905682  | 407.119  | 758.781  | NM_002101 | 18195.748 | 19201.447 | AK022796  | 401.974  | 608.594   |
| Z70695    | 265.313  | 381.043  | NM_005423 | 465.319   | 603.348   | AK095193  | 256.894  | 330.842   |
| AF086421  | 2149.902 | 1835.136 | Z36789    | 1022.098  | 998.704   | AK025081  | 218.852  | 284.2     |
| AK001612  | 1486.932 | 2223.234 | J02874    | 3666.555  | 4156.219  | AL122088  | 486.407  | 365.828   |

|            |           |           |            |           |           |           |           |           |
|------------|-----------|-----------|------------|-----------|-----------|-----------|-----------|-----------|
| AF161522   | 2760.137  | 2908.061  | BF310427   | 1944.306  | 2153.282  | AL137518  | 352.131   | 351.259   |
| AF086028   | 2474.487  | 2890.379  | N94424     | 734.563   | 653.202   | AK022556  | 211.393   | 176.273   |
| U46119     | 289.634   | 531.468   | AA045192   | 1599.752  | 1403.748  | AK023437  | 478.623   | 416.908   |
| unknown (€ | 717.243   | 1055.894  | AI521645   | 335.88    | 268.457   | AK024147  | 309.075   | 59.129    |
| unknown (€ | 868.179   | 927.097   | M92642     | 957.508   | 1121.398  | AK022897  | 548.512   | 453.892   |
| unknown (€ | 312.893   | 243.084   | H-U 44385  | 11510.013 | 8407.383  | AK023898  | 1787.555  | 1451.801  |
| unknown (€ | 185.433   | 754.754   | ID 1654970 | 5599.36   | 4763.223  | NM_019040 | 1709.106  | 3207.983  |
| AK025365   | 978.921   | 1200.91   | ID 2531132 | 4856.823  | 3177.617  | NM_005978 | 403.316   | 2588.934  |
| AK023489   | 655.029   | 908.484   | ID 4365538 | 462.903   | 278.637   | Y16711    | 499.149   | 1491.069  |
| AK021561   | 2054.307  | 1988.757  | AA485665   | 400.358   | 298.018   | AJ272179  | 1340.908  | 2573.224  |
| AK025222   | 730.719   | 529.611   | BF125928   | 9639.979  | 6932.615  | AJ007015  | 546.127   | 648.955   |
| NM_003531  | 1538.318  | 1883.875  | BG571026   | 1668.416  | 979.193   | AL049317  | 569.447   | 774.492   |
| L08434     | 244.315   | 217.041   | AA489017   | 2687.649  | 1621.198  | AL050090  | 557.594   | 1031.659  |
| NM_017799  | 1164.284  | 1345.765  | S77835     | 365.175   | 551.493   | AF086309  | 385.724   | 433.775   |
| NM_003510  | 618.383   | 546.446   | NM_002985  | 6041.872  | 6114.973  | AF238870  | 395.383   | 377.138   |
| AL137403   | 1327.511  | 1617.756  | AB018347   | 4485.287  | 5303.785  | AK026279  | 1455.521  | 1919.451  |
| AL049348   | 549.518   | 619.42    | AB033073   | 4031.482  | 6328.399  | AF130094  | 2876.473  | 3477.964  |
| NM_018534  | 1205.266  | 2074.358  | NM_003284  | 1800.306  | 2240.12   | AK026673  | 526.692   | 521.48    |
| AB037847   | 3661.209  | 3145.958  | NM_018152  | 978.432   | 1830.435  | NM_005452 | 1272.948  | 1305.3    |
| NM_005170  | 2846.412  | 4051.404  | NM_000319  | 1490.013  | 3004.413  | AF170935  | 5148.362  | 5568.023  |
| S96437     | 1146.54   | 1230.755  | NM_003257  | 296.594   | 468.028   | AJ227899  | 500.608   | 377.917   |
| NM_015176  | 1747.696  | 3105.802  | NM_012461  | 1938.075  | 2297.441  | AL359607  | 278.365   | 376.295   |
| AL353939   | 981.163   | 1380.863  | AK001379   | 1011.951  | 696.258   | AF161371  | 2819.487  | 3333.077  |
| AL117573   | 3562.103  | 4586.75   | NM_017450  | 2280.763  | 2297.456  | AK022464  | 369.269   | 172.539   |
| AL080186   | 471.121   | 709.76    | NM_002023  | 516.357   | 701.259   | AF086230  | 432.136   | 402.624   |
| NM_005306  | 20858.578 | 14523.622 | NM_002839  | 439.975   | 412.584   | AK023408  | 740.662   | 692.588   |
| NM_001646  | 6130.449  | 4951.188  | AF190500   | 734.419   | 678.795   | U84509    | 571.228   | 1233.196  |
| AL137327   | 893.037   | 1143.578  | NM_005904  | 680.702   | 429.949   | AK002036  | 2108.147  | 4372.964  |
| AF358454   | 2619.433  | 3660.913  | NM_005273  | 10136.488 | 8248.721  | U84512    | 234.964   | 590.614   |
| AK026090   | 1335.735  | 2160.757  | NM_006576  | 980.316   | 674.474   | AK025775  | 1937.24   | 4262.44   |
| AF070637   | 514.973   | 722.581   | NM_018645  | 640.296   | 640.623   | AB046791  | 337.146   | 403.277   |
| AL137634   | 999.266   | 1725.256  | AB035266   | 2661.629  | 2163.15   | AF043469  | 484.492   | 679.876   |
| AK024863   | 4101.487  | 5205.771  | NM_003744  | 1711.627  | 1267.199  | AL109671  | 392.368   | 993.082   |
| AJ008135   | 39070.879 | 41287.234 | NM_006378  | 880.665   | 532.128   | NM_012375 | 263.127   | 265.58    |
| AK026908   | 3337.824  | 2627.708  | NM_014404  | 1196.514  | 3747.081  | AK022008  | 1170.232  | 1415.875  |
| AL050068   | 517.573   | 785.326   | NM_002042  | 39745.711 | 42403.246 | NM_018186 | 635.723   | 987.796   |
| U92025     | 458.044   | 490.732   | AB028944   | 513.239   | 520.221   | AL080188  | 903.874   | 1044.956  |
| AB046766   | 937.127   | 1085.142  | AJ006268   | 703.557   | 1032.828  | T99941    | 1934.731  | 2413.405  |
| AF009323   | 1309.254  | 941.621   | AF190864   | 4005.389  | 4901.816  | AF113678  | 510.469   | 366.966   |
| U52829     | 807.96    | 1171.285  | NM_002779  | 4421.382  | 5036.858  | AL137313  | 26962.436 | 29536.973 |
| Z25437     | 1786.874  | 2036.296  | L40397     | 9878.64   | 11741.014 | AB002363  | 2379.893  | 2374.612  |
| AK001526   | 2698.136  | 3515.223  | NM_020198  | 5887.734  | 5295.435  | NM_005284 | 773.784   | 670.3     |
| AF086183   | 614.251   | 566.292   | AA098879   | 518.394   | 555.901   | AF086351  | 763.934   | 790.241   |
| AK000525   | 1089.257  | 1090.743  | NM_001177  | 3572.561  | 2867.324  | D83199    | 8594.425  | 12261.348 |
| AL137434   | 831.244   | 1118.72   | NM_014447  | 1389.744  | 1289.518  | AK025957  | 273.71    | 212.531   |
| Z36795     | 2052.644  | 2535.926  | NM_002356  | 557.667   | 479.901   | Y16708    | 379.982   | 190.869   |
| AL080216   | 1738.681  | 2962.517  | NM_006691  | 948.809   | 791.707   | AL157453  | 1234.776  | 1067.009  |
| AF038188   | 5316.401  | 3909.304  | NM_001505  | 349.296   | 370.655   | NM_019096 | 2300.012  | 3901.049  |
| AJ227888   | 868.701   | 1041.8    | NM_003710  | 1098.926  | 1007.66   | AK022212  | 6571.071  | 16992.84  |
| D17046     | 803.153   | 639.786   | Z83805     | 300.729   | 353.686   | X64974    | 1306.395  | 3101.529  |
| NM_017645  | 3041.707  | 4190.538  | NM_004666  | 1374.795  | 1250.465  | NM_000834 | 1830.383  | 2846.881  |
| AJ227864   | 705.674   | 765.954   | NM_003614  | 1080.093  | 952.793   | NM_006485 | 12320.542 | 18225.701 |
| AF157562   | 5377.733  | 9884.644  | NM_014257  | 4554.766  | 2833.371  | NM_012456 | 480.007   | 746.2     |

|           |           |           |           |           |           |            |           |           |
|-----------|-----------|-----------|-----------|-----------|-----------|------------|-----------|-----------|
| AK021958  | 11759.359 | 11865.11  | NM_001140 | 442.066   | 368.035   | AL137268   | 1108.123  | 1252.782  |
| M31164    | 1874.858  | 1800.264  | NM_004843 | 1287.512  | 829.773   | AK022398   | 374.091   | 295.341   |
| AF113674  | 8956.364  | 8677.19   | NM_007271 | 1283.824  | 1811.197  | AK024109   | 1145.001  | 1407.572  |
| NM_003511 | 891.002   | 1040.59   | NM_006255 | 2646.343  | 3372.93   | AF088048   | 253.427   | 277.618   |
| CY3Cy5    | 10038.604 | 1750.71   | BE392143  | 3134.051  | 4276.354  | AK001143   | 1148      | 1010.712  |
| H97792    | 2657.481  | 2465.249  | NM_005813 | 2161.764  | 2389.801  | AK001701   | 1185.924  | 990.87    |
| L33404    | 625.43    | 523.511   | AB037718  | 3844.25   | 5100.5    | AB007978   | 276.768   | 110.01    |
| M13509    | 673.909   | 562.226   | AL389994  | 798.432   | 1523.422  | AF217970   | 442.229   | 418.186   |
| X04076    | 8520.246  | 6440.699  | NM_003909 | 3580.555  | 4340.25   | AF086297   | 437.302   | 501.234   |
| W95082    | 439.355   | 449.365   | NM_001277 | 5903.719  | 6319.212  | AK025455   | 599.537   | 667.111   |
| AA485362  | 1488.822  | 931.594   | NM_003659 | 3656.549  | 3188.855  | AK026799   | 2691.161  | 2078.287  |
| AJ222801  | 1461.285  | 1195.3    | NM_012320 | 3126.458  | 2216.84   | NM_014860  | 246.286   | 353.981   |
| W72207    | 46727.332 | 35130.719 | NM_018208 | 2142.307  | 1971.775  | AK022549   | 281.735   | 203.588   |
| BI772354  | 2785.483  | 2313.355  | U90653    | 3233.687  | 2843.156  | NM_018157  | 458.392   | 895.913   |
| AA733033  | 1676.804  | 1356.856  | NM_000196 | 381.077   | 444.885   | Z70714     | 1435.052  | 1149.76   |
| AA583574  | 1971.72   | 1597.675  | NM_018339 | 1473.733  | 1401.711  | AK021640   | 3747.518  | 2654.903  |
| AI690184  | 55598.215 | 66536.289 | NM_006745 | 19664.98  | 14641.606 | NM_016565  | 20082.521 | 18542.535 |
| T48692    | 570.896   | 609.686   | NM_000275 | 691.12    | 375.794   | CY3Cy5     | 724.912   | 306.068   |
| AA927490  | 3684.033  | 5491.343  | NM_018398 | 667.201   | 533.138   | N94424     | 218.132   | 304.889   |
| NM_001824 | 57000.289 | 68065.07  | NM_002560 | 9781.271  | 4969.221  | AA045192   | 345.267   | 520.161   |
| NM_002964 | 1979.525  | 2473.442  | NM_005574 | 18817.523 | 19888.553 | AI521645   | 152.048   | 110.627   |
| SR5       | 4553.007  | 3362.809  | NM_017895 | 7259.306  | 7487.122  | M92642     | 264.436   | 175.785   |
| SR7       | 6777.444  | 34289.145 | NM_004610 | 1626.863  | 1945.237  | H-U 44385  | 3554.754  | 3097.695  |
| SR9       | 26972.949 | 4232.797  | NM_001612 | 1399.053  | 1938.755  | ID 1654970 | 1625.326  | 1550.946  |
| CY3Cy5    | 8632.546  | 1106.891  | AK027002  | 1131.878  | 1268.845  | ID 2531132 | 1860.121  | 2391.966  |
| NM_017818 | 2436.5    | 1682.01   | AB025254  | 3726.177  | 6693.828  | ID 4365538 | 224.274   | 115.535   |
| NM_020433 | 507.083   | 393.208   | NM_004081 | 889.375   | 2177.743  | AA485665   | 156.357   | 178.166   |
| NM_001767 | 685.34    | 892.468   | NM_000025 | 8260.379  | 5290.868  | BF125928   | 3357.483  | 3380.406  |
| AF028823  | 2928.858  | 3134.268  | D38521    | 2310.315  | 1851.576  | BG571026   | 712.619   | 636.672   |
| NM_004970 | 174.295   | 102.922   | NM_000403 | 3110.507  | 2456.453  | AA489017   | 1081.843  | 782.957   |
| NM_004295 | 3476.93   | 2581.062  | NM_018127 | 6421.538  | 4985.275  | NM_012245  | 3946.022  | 3434.051  |
| NM_002087 | 5070.165  | 4064.885  | AB020677  | 6815.696  | 4148.752  | NM_133263  | 605.567   | 340.627   |
| NM_014585 | 845.048   | 835.416   | AB033097  | 1778.563  | 1400.528  | SR6        | 603.028   | 656.107   |
| AF200815  | 804.47    | 652.349   | NM_000135 | 1154.518  | 574.343   | SR10       | 7161.346  | 2374.544  |
| NM_014564 | 414.457   | 454.657   | AJ223948  | 2422.823  | 1880.198  | CY3Cy5     | 796.849   | 275.006   |
| NM_013441 | 1923.835  | 1393.872  | NM_016218 | 604.074   | 410.458   | NM_017450  | 856.434   | 1547.053  |
| NM_014421 | 1036.456  | 1214.548  | AK022947  | 1479.503  | 1056.937  | AF190500   | 225.352   | 153.52    |
| AB033028  | 406.494   | 425.95    | AL050029  | 1768.561  | 945.87    | NM_005904  | 255.859   | 148.198   |
| NM_017680 | 456.741   | 583.611   | AL049966  | 354.679   | 86.697    | NM_005273  | 2957.175  | 2258.923  |
| NM_012465 | 776.869   | 653.146   | NM_018641 | 3641.563  | 3596.867  | NM_000524  | 169.369   | 154.462   |
| M60499    | 4423.688  | 5938.952  | NM_002221 | 2176.353  | 2509.613  | NM_006576  | 303.518   | 350.041   |
| NM_003833 | 23211.957 | 20079.104 | NM_002371 | 366.686   | 696.009   | NM_018645  | 331.757   | 172.917   |
| AK000868  | 4070.507  | 3119.359  | NM_002562 | 370.65    | 625.401   | AB035266   | 710.779   | 998.112   |
| NM_001233 | 4745.497  | 4442.644  | AK024502  | 5616.773  | 15243.114 | NM_003744  | 608.896   | 500.287   |
| NM_001234 | 4226.759  | 4503.885  | NM_001124 | 933.752   | 4366.849  | NM_006378  | 377.201   | 311.394   |
| BF679789  | 3404.67   | 3851.057  | NM_004586 | 1200.921  | 1688.411  | NM_018132  | 898.949   | 761.915   |
| NM_014382 | 210.87    | 174.103   | NM_004844 | 3996.525  | 4581.269  | NM_018207  | 255.37    | 322.405   |
| NM_000085 | 279.362   | 247.521   | NM_013447 | 1042.001  | 1196.237  | NM_000345  | 2501.524  | 1755.525  |
| AB007859  | 858.172   | 689.834   | NM_000051 | 2028.795  | 1469.105  | NM_006531  | 377.271   | 263.883   |
| NM_006754 | 620.338   | 820.56    | NM_004180 | 3778.637  | 3017.195  | AB029021   | 1856.829  | 1662.68   |
| NM_001127 | 3933.566  | 6359.604  | NM_004786 | 21995.768 | 19888.9   | NM_005423  | 155.285   | 392.045   |
| NM_012430 | 2636.16   | 2559.287  | AF302109  | 2647.024  | 2844.236  | Z36789     | 400.964   | 532.081   |
| NM_003917 | 2080.946  | 1557.99   | AL117485  | 4364.257  | 3208.62   | J02874     | 733.333   | 937.712   |

|           |           |           |           |           |           |           |          |          |
|-----------|-----------|-----------|-----------|-----------|-----------|-----------|----------|----------|
| NM_007077 | 674.053   | 681.991   | NM_003505 | 429.022   | 184.653   | AF070525  | 1373.67  | 1560.497 |
| NM_002956 | 1189.189  | 1026.714  | NM_007191 | 854.126   | 689.002   | NM_014447 | 512.3    | 1506.729 |
| AB018739  | 1451.389  | 1339.694  | AL109667  | 671.142   | 551.365   | NM_002356 | 216.66   | 226.424  |
| NM_006750 | 14416.18  | 12109.563 | NM_000840 | 619.772   | 379.361   | NM_006691 | 236.273  | 326.915  |
| NM_020164 | 5260.492  | 3833.42   | NM_001343 | 2990.354  | 3280.011  | NM_001505 | 160.828  | 156.674  |
| AK023521  | 4589.556  | 2990.735  | NM_007275 | 9335.605  | 9252.036  | NM_003710 | 357.94   | 196.343  |
| NM_014267 | 16240.005 | 15286.545 | NM_019025 | 15997.74  | 18945.916 | Z83805    | 184.908  | 78.156   |
| NM_001481 | 1189.355  | 1145.428  | NM_018461 | 4563.431  | 5846.205  | NM_004666 | 530.129  | 668.479  |
| U30872    | 1870.119  | 2033.156  | AF235023  | 2154.001  | 3674.3    | NM_003614 | 204.284  | 171.437  |
| AF111783  | 763.096   | 390.435   | NM_006910 | 3692.585  | 6348.264  | NM_014257 | 908.791  | 522.534  |
| NM_020469 | 4827.116  | 5601.384  | AF162667  | 1683.791  | 1485.531  | NM_004843 | 549.313  | 874.121  |
| NM_014734 | 2741.049  | 1593.337  | AB046847  | 1830.94   | 1364.436  | AK022845  | 247.777  | 146.84   |
| NM_002289 | 1294.453  | 784.791   | NM_000447 | 1479.238  | 1334.478  | NM_003004 | 164.397  | 192.002  |
| AK026408  | 2101.267  | 2183.244  | NM_006354 | 4576.909  | 3636.905  | S77835    | 231.231  | 266.42   |
| NM_005025 | 1141.986  | 1138.711  | AF303378  | 5113.639  | 4640.98   | NM_002985 | 2021.107 | 1469.66  |
| NM_006307 | 635.808   | 663.813   | NM_016037 | 4719.5    | 3780.291  | AB018347  | 994.638  | 1010.605 |
| M74782    | 2982.74   | 3140.574  | NM_000043 | 388.9     | 475.795   | NM_003284 | 379.272  | 416.686  |
| NM_001056 | 1756.933  | 1799.927  | NM_015965 | 407.65    | 319.576   | NM_018152 | 276.202  | 253.195  |
| AY026461  | 3116.613  | 3089.555  | NM_000417 | 2235.455  | 1499.88   | NM_000319 | 449.534  | 394.369  |
| AK025708  | 2379.409  | 2397.437  | NM_020356 | 797.989   | 482.802   | NM_012461 | 689.087  | 1067.527 |
| NM_000405 | 640.29    | 634.522   | NM_018235 | 23645.496 | 23741.633 | AK001379  | 357.88   | 290.948  |
| NM_005564 | 19222.826 | 16932.504 | NM_012104 | 7565.336  | 8427.667  | NM_007072 | 437.959  | 537.923  |
| NM_004508 | 1345.759  | 1113.76   | NM_006144 | 635.69    | 870.721   | NM_015929 | 1608.14  | 2191.448 |
| NM_006405 | 3855.046  | 4073.166  | AL136549  | 1567.027  | 1821.096  | U90653    | 1049.806 | 964.105  |
| AJ245946  | 497.362   | 577.22    | NM_012168 | 778.004   | 1047.37   | NM_000196 | 163.454  | 226.34   |
| NM_006749 | 1060.685  | 1120.594  | NM_007038 | 1789.867  | 2235.972  | NM_018339 | 525.152  | 662.949  |
| NM_004694 | 426.246   | 639.866   | AF311324  | 2242.378  | 2995.196  | NM_006745 | 6165.428 | 4661.27  |
| NM_000324 | 846.589   | 466.675   | AF124433  | 535.212   | 790.82    | NM_000275 | 202.264  | 226.636  |
| NM_012206 | 442.102   | 502.909   | NM_001461 | 748.582   | 657.227   | AK000037  | 266.663  | 315.704  |
| AL137619  | 2111.311  | 2309.947  | AF061556  | 772.312   | 831.251   | NM_014760 | 522.168  | 814.112  |
| NM_003615 | 540.214   | 250.401   | AL162049  | 989.645   | 680.757   | NM_018398 | 379.118  | 552.153  |
| NM_004300 | 5007.081  | 3750.92   | AF036144  | 393.66    | 315.084   | NM_002560 | 3236.45  | 3063.53  |
| NM_000052 | 410.764   | 304.861   | NM_005032 | 501.844   | 842.505   | NM_014404 | 355.485  | 296.16   |
| AF319476  | 907.209   | 846.695   | NM_004160 | 2210.675  | 1894.49   | NM_018713 | 157.881  | 237.069  |
| NM_005538 | 424.077   | 264.995   | AL109677  | 689.701   | 606.449   | NM_015947 | 948.242  | 1078.516 |
| AK001913  | 4468.668  | 3434.117  | NM_003941 | 21014.514 | 14681.152 | NM_002042 | 5694.716 | 6410.61  |
| NM_017737 | 676.017   | 410.873   | AF177909  | 924.562   | 1032.913  | AB028944  | 230.911  | 213.75   |
| NM_004292 | 1079.96   | 943.549   | NM_002664 | 5449.015  | 3325.904  | AJ006268  | 319.991  | 347.545  |
| NM_015484 | 3319.109  | 4163.039  | AB018271  | 2101.752  | 1611.566  | M74089    | 709.828  | 570.546  |
| NM_018046 | 2186.527  | 2361.567  | AL137665  | 2334.984  | 1384.483  | AF190864  | 1429.399 | 1158.865 |
| NM_013316 | 893.507   | 1064.449  | NM_016434 | 1171.042  | 1008.022  | NM_002779 | 1054.024 | 954.758  |
| M20701    | 859.883   | 742.476   | NM_005634 | 2392.971  | 2464.494  | L40397    | 2677.899 | 2652.902 |
| NM_002912 | 1188.443  | 1098.738  | NM_017757 | 3919.666  | 4406.136  | NM_020198 | 1631.507 | 1291.613 |
| NM_013284 | 2721.188  | 2486.552  | NM_002146 | 14414.608 | 15127.458 | AA098879  | 185.054  | 326.373  |
| NM_006739 | 1632.703  | 1320.239  | AB007892  | 3853.142  | 4700.635  | NM_000025 | 1703.659 | 1765.63  |
| NM_013274 | 4189.658  | 4467.479  | AB037748  | 728.568   | 1269.053  | D38521    | 877.216  | 1604.697 |
| AL050187  | 3591.818  | 3438.159  | AB002306  | 1387.249  | 2303.076  | NM_000403 | 574.129  | 568.584  |
| NM_012387 | 13926.57  | 11840.155 | NM_001300 | 1417.525  | 1851.089  | NM_018127 | 2009.229 | 1418.366 |
| NM_014735 | 1333.739  | 851.903   | NM_012472 | 461.796   | 581.32    | AB020677  | 1646.487 | 1304.046 |
| NM_004252 | 12880.74  | 10301.184 | NM_018187 | 6909.788  | 11813.829 | AB033097  | 428.58   | 291.363  |
| AF172929  | 5831.287  | 5220.054  | NM_003016 | 14969.327 | 12516.364 | NM_000135 | 316.902  | 193.966  |
| NM_006398 | 12860.16  | 11988.773 | NM_005463 | 8278.142  | 6632.985  | AJ223948  | 755.74   | 722.654  |
| L11285    | 571.807   | 569.917   | NM_001325 | 1682.354  | 1516.724  | NM_016218 | 261.495  | 206.78   |

|           |           |           |           |           |           |            |          |          |
|-----------|-----------|-----------|-----------|-----------|-----------|------------|----------|----------|
| AK025655  | 2457.09   | 2489.117  | NM_018282 | 12075.479 | 7139.713  | AK022947   | 519.603  | 504.587  |
| NM_004056 | 589.776   | 379.586   | BC019932  | 2154.392  | 1552.642  | AL050029   | 598.723  | 379.995  |
| NM_003833 | 18934.527 | 19957.75  | AF114818  | 2021.151  | 1880.394  | AL049966   | 179.927  | 99.255   |
| AK000868  | 4247.735  | 2863.859  | AK025106  | 1376.146  | 1340.322  | NM_005204  | 773.469  | 659.183  |
| NM_001233 | 4749.509  | 4677.873  | NM_020144 | 2018.516  | 1604.309  | NM_016203  | 229.578  | 220.106  |
| NM_001234 | 3360.095  | 3840.308  | NM_003908 | 39650.543 | 30376.588 | NM_002755  | 1358.215 | 940.251  |
| BF679789  | 2274.585  | 2823.631  | BE893142  | 1461.493  | 1219.891  | NM_007271  | 502.927  | 622.062  |
| H97792    | 2540.96   | 4910.742  | NM_003103 | 3276.923  | 1851.798  | NM_006255  | 1006.562 | 783.861  |
| L33404    | 555.669   | 678.46    | NM_015340 | 3497.389  | 2506.947  | BE392143   | 992.459  | 1056.4   |
| M13509    | 766.931   | 791.792   | NM_006451 | 2283.337  | 1341.476  | NM_005813  | 586.382  | 592.575  |
| X04076    | 8821.91   | 9555.969  | NM_002094 | 1297.833  | 818.333   | AB037718   | 1049.127 | 1092.562 |
| W95082    | 616.884   | 692.313   | NM_002937 | 407.868   | 289.642   | AL389994   | 315.338  | 316.154  |
| AA485362  | 1480.571  | 1881.222  | AL137476  | 4795.52   | 5248.584  | NM_003905  | 2092.317 | 2163.047 |
| AJ222801  | 1614.385  | 1475.642  | AF052174  | 1595.831  | 2190.767  | NM_001277  | 1694.379 | 1884.742 |
| W72207    | 50829.031 | 46636.004 | AF070590  | 956.69    | 1042.637  | NM_003655  | 1179.825 | 808.77   |
| BI772354  | 2871.549  | 3613.768  | NM_000761 | 30199.99  | 47161.727 | AB029021   | 1587.197 | 1546.846 |
| AA733033  | 1345.681  | 1335.651  | NM_020142 | 2509.533  | 4528.045  | NM_002101  | 5805.033 | 7163.414 |
| AA583574  | 1954.829  | 1737.295  | NM_000774 | 1940.302  | 3017.795  | NM_005423  | 245.032  | 757.971  |
| AI690184  | 52200.465 | 42838.457 | NM_017781 | 30405.754 | 25020.467 | Z36789     | 422.479  | 560.322  |
| AA927490  | 3289.801  | 2852.28   | NM_006004 | 45158.25  | 55621.035 | J02874     | 627.077  | 609.841  |
| NM_001824 | 34729.125 | 32616.953 | NM_004894 | 11758.688 | 12078.49  | BF310427   | 590.747  | 572.887  |
| NM_002964 | 2571.008  | 3811.162  | AB028960  | 517.694   | 403.744   | N94424     | 198.322  | 99.425   |
| BF038439  | 450.077   | 394.596   | NM_005648 | 16013.002 | 9622.567  | AA045192   | 346.499  | 233.909  |
| NM_014734 | 2973.101  | 2536.788  | NM_006943 | 11057.771 | 9422.439  | AI521645   | 158.795  | 75.518   |
| NM_002285 | 1003.159  | 743.182   | NM_006741 | 4024.969  | 3367.133  | H45617     | 157.686  | 79.192   |
| AK026408  | 1904.859  | 1643.546  | NM_014166 | 3343.304  | 2780.459  | M92642     | 249.464  | 210.585  |
| NM_005025 | 1155.697  | 1142.906  | AL117606  | 4666.151  | 3442.107  | H-U 44385  | 3590.709 | 3028.317 |
| NM_006307 | 685.221   | 470.045   | NM_012330 | 1440.462  | 870.258   | ID 1654970 | 1759.768 | 1650.56  |
| M74782    | 3162.622  | 4136.752  | AF294278  | 1264.863  | 954.365   | ID 2531132 | 1923.637 | 1970.035 |
| NM_017818 | 2307.725  | 2928.294  | NM_018211 | 1107.64   | 861.52    | ID 4365538 | 142.931  | 319.496  |
| NM_020433 | 463.295   | 514.745   | NM_014520 | 2299.413  | 1459.57   | AA485665   | 245.265  | 491.217  |
| NM_001767 | 748.078   | 824.829   | NM_002616 | 899.949   | 682.494   | BF125928   | 3417.486 | 4446.252 |
| AF028823  | 3061.14   | 3670.269  | AK025712  | 7576.791  | 3634.705  | BG571026   | 647.02   | 546.471  |
| NM_004295 | 2957.745  | 2844.923  | AF052497  | 187.525   | 768.573   | AA489017   | 988.597  | 713.926  |
| NM_001714 | 413.083   | 409.949   | AK026375  | 1632.873  | 1850.286  | NM_012245  | 4165.233 | 3125.237 |
| NM_014585 | 943.811   | 877.054   | U85992    | 768.247   | 872.411   | NM_133263  | 615.182  | 883.127  |
| AF200815  | 1012.928  | 865.169   | AL110152  | 597.965   | 907.742   | NM_003284  | 402.286  | 330.746  |
| NM_013441 | 1939.119  | 980.337   | AL117565  | 4311.788  | 11027.135 | NM_018152  | 301.378  | 212.408  |
| NM_014421 | 1088.621  | 939.796   | AF147305  | 316.964   | 622.147   | NM_000315  | 596.646  | 1361.571 |
| AB033028  | 718.188   | 532.368   | AK022109  | 1067.871  | 1117.378  | NM_003257  | 200.66   | 673.315  |
| NM_017680 | 627.007   | 771.642   | AK022103  | 597.864   | 530.265   | NM_012461  | 713.837  | 689.175  |
| NM_012465 | 824.636   | 1177.129  | AK022111  | 490.233   | 251.598   | NM_002835  | 153.582  | 138.137  |
| NM_003615 | 373.089   | 263.511   | AF143882  | 565.997   | 464.362   | AF190500   | 207.344  | 194.147  |
| NM_004300 | 5649.563  | 3941.63   | U00953    | 590.437   | 714.368   | NM_001616  | 167.035  | 232.943  |
| NM_000085 | 348.59    | 258.394   | AF086176  | 750.645   | 852.846   | NM_005904  | 267.581  | 153.795  |
| AB007859  | 736.84    | 794.284   | NM_017742 | 621.078   | 446.26    | NM_005273  | 3077.544 | 3451.253 |
| NM_006754 | 506.58    | 495.167   | NM_005108 | 1167.257  | 936.479   | NM_006576  | 381.675  | 509.057  |
| NM_001127 | 3316.171  | 3692.536  | AK022292  | 1864.956  | 1354.036  | NM_018645  | 271.977  | 623.921  |
| NM_012430 | 2354.337  | 2448.317  | AB051436  | 1724.67   | 1115.839  | AB035266   | 593.451  | 712.338  |
| NM_002956 | 1242.923  | 1791.168  | AK026482  | 7504.567  | 4717.729  | NM_003744  | 601.164  | 447.166  |
| AB018739  | 1443.516  | 1481.599  | AL137473  | 1291.722  | 862.531   | NM_006378  | 386.812  | 247.185  |
| NM_006750 | 17432.316 | 12701.093 | AJ001873  | 5538.427  | 3003.988  | NM_018132  | 896.628  | 640.043  |
| NM_020164 | 5391.007  | 2643.833  | AB026054  | 493.938   | 708.542   | NM_018207  | 287.955  | 203.376  |

|           |           |           |           |          |           |           |           |           |
|-----------|-----------|-----------|-----------|----------|-----------|-----------|-----------|-----------|
| AK023521  | 4925.271  | 2768.905  | AK022604  | 736.492  | 902.969   | NM_00034E | 2735.323  | 2071.086  |
| NM_014267 | 15385.925 | 8738.474  | U66048    | 1034.916 | 1468.782  | NM_00186E | 17735.916 | 15226.618 |
| NM_001481 | 1459.789  | 826.822   | AL080095  | 442.622  | 436.314   | NM_006531 | 343.156   | 221.808   |
| U30872    | 1929.897  | 1574.543  | AK023401  | 1747.143 | 2688.923  | M74089    | 671.176   | 583.837   |
| AF111783  | 880.416   | 630.199   | AK001865  | 791.04   | 1191.279  | AF190864  | 1397.496  | 1749.888  |
| NM_00025E | 715.155   | 563.79    | AK024035  | 8432.556 | 12969.262 | NM_00277E | 1141.489  | 1822.87   |
| NM_00263E | 1771.302  | 1577.639  | AL049331  | 240.472  | 433.66    | L40397    | 2431.942  | 3757.313  |
| NM_00639E | 12388.641 | 9126.231  | AL050079  | 942.007  | 1522.797  | NM_02019E | 1386.454  | 1688.931  |
| AK025655  | 2679.037  | 2250.649  | AL080233  | 1472.432 | 1545.928  | NM_014447 | 510.508   | 388.85    |
| NM_00405E | 710.756   | 306.427   | AL117663  | 1302.717 | 1266.581  | NM_00235E | 200.099   | 450.96    |
| NM_00105E | 1776.908  | 1983.69   | NM_01429E | 2071.061 | 1964.011  | NM_006691 | 359.938   | 548.84    |
| AY026461  | 3156.747  | 3558.104  | AK024432  | 1431.415 | 1315.267  | NM_00150E | 189.863   | 174.916   |
| AK025708  | 2607.092  | 2646.688  | AL137513  | 830.1    | 495.187   | NM_00371C | 399.78    | 303.439   |
| NM_00040E | 691.557   | 553.254   | AF088001  | 395.309  | 542.433   | Z83805    | 157.869   | 156.771   |
| NM_00556E | 53760.539 | 38504.242 | NM_018067 | 1805.485 | 1684.078  | NM_00466E | 708.497   | 1205.871  |
| NM_00450E | 2498.282  | 1358.916  | NM_01895E | 5692.176 | 3414.399  | NM_00361E | 341.054   | 327.938   |
| NM_00640E | 10858.967 | 6032.167  | NM_014787 | 1106.741 | 900.661   | NM_014257 | 1040.259  | 1112.54   |
| AJ245946  | 460.026   | 287.129   | AL122109  | 1114.786 | 930.098   | NM_00114C | 241.623   | 487.435   |
| NM_00674E | 1001.679  | 810.396   | AF074988  | 955.018  | 536.287   | NM_01605E | 110.369   | 154.095   |
| NM_00469E | 664.926   | 556.945   | AK024946  | 1131.783 | 625.791   | NM_00484E | 583.9     | 517.577   |
| NM_00032E | 665.417   | 897.542   | AK001432  | 1434.746 | 2291.913  | AK022845  | 229.322   | 236.661   |
| NM_01220E | 304.827   | 704.951   | AL133568  | 2684.193 | 3838.626  | NM_00300E | 236.949   | 193.281   |
| AL137619  | 2272.831  | 2007.267  | AF009265  | 1126.285 | 1971.769  | S77835    | 197.008   | 134.23    |
| NM_00182E | 42222.629 | 34124.504 | AF009309  | 1488.206 | 1988.889  | NM_00298E | 1936.312  | 1491.384  |
| NM_00296E | 2083.726  | 1873.438  | NM_00236C | 1301.969 | 2181.379  | AB018347  | 1031.483  | 1073.691  |
| NM_00505E | 9989.624  | 7742.76   | AF00927E  | 316.498  | 592.821   | AB033073  | 930.861   | 914.393   |
| AF319476  | 1058.155  | 1200.856  | AF009322  | 880.995  | 1954.849  | NM_00581E | 635.748   | 505.349   |
| NM_00553E | 369.806   | 94.743    | AF056425  | 1156.201 | 1732.871  | AB037718  | 1135.269  | 1159.974  |
| AK001913  | 4726.35   | 4877.065  | AF090893  | 422.202  | 605.556   | AL38999E  | 378.06    | 375.07    |
| NM_017737 | 687.826   | 484.822   | NM_01803E | 6919.64  | 4748.375  | NM_00390E | 1526.116  | 1250.849  |
| NM_00429E | 963.445   | 1104.538  | AK001945  | 470.135  | 547.638   | NM_001277 | 1572.386  | 1879.388  |
| NM_01548E | 3609.266  | 3673.007  | AK021541  | 250.236  | 231.346   | NM_00365E | 1296.211  | 1549.808  |
| NM_01804E | 2206.355  | 2406.166  | AK021766  | 261.052  | 208.179   | NM_00707E | 550.82    | 876.617   |
| NM_01331E | 1171.039  | 1166.999  | AK021630  | 623.791  | 610.61    | NM_01232C | 759.477   | 801.1     |
| M20701    | 2715.134  | 2666.44   | AK021831  | 697.901  | 769.894   | NM_01820E | 814.471   | 584.28    |
| NM_00291E | 1276.568  | 1198.927  | AK025650  | 2213.701 | 1808.041  | NM_01592E | 1955.99   | 3575.856  |
| NM_01328E | 3157.143  | 2646.587  | AK026401  | 736.637  | 343.077   | U90653    | 1252.234  | 1210.762  |
| NM_00673E | 1216.453  | 662.54    | AK026773  | 1142.764 | 921.656   | NM_00019E | 154.048   | 416.256   |
| NM_01327E | 5249.751  | 2900.761  | AK025893  | 280.791  | 258.801   | NM_01833E | 547.052   | 848.76    |
| AL050187  | 3207.688  | 1621.195  | AF086158  | 2022.148 | 3276.003  | NM_00674E | 7784.268  | 8940.123  |
| NM_012387 | 14047.906 | 10289.271 | AF086050  | 1779.55  | 2880.481  | NM_00027E | 256.499   | 365.521   |
| NM_01473E | 1766.3    | 1420.983  | AF147375  | 835.116  | 1082.764  | AK000037  | 316.546   | 232.906   |
| NM_00425E | 14932.501 | 15301.438 | X51524    | 7097.722 | 8984.788  | NM_01476C | 475.612   | 421.539   |
| AF172929  | 6483.172  | 6357.338  | AK025759  | 2546.355 | 3531.468  | NM_01839E | 337.478   | 437.096   |
| NM_01246E | 561.109   | 539.22    | AJ238556  | 522.667  | 649.2     | NM_00256C | 3243.168  | 3747.478  |
| M60499    | 4647.063  | 4772.767  | AK021516  | 1893.832 | 2630.354  | NM_01440E | 454.767   | 260.408   |
| NM_00383E | 18520.736 | 23969.871 | Z70699    | 526.535  | 480.631   | NM_01871E | 212.895   | 420.562   |
| AK000868  | 3983.672  | 3413.7    | NM_00689E | 974.846  | 958.681   | NM_015947 | 1091.5    | 895.367   |
| NM_00123E | 5074.976  | 6325.442  | AK023429  | 385.526  | 374.831   | NM_00204E | 6448.646  | 4892.949  |
| NM_00123E | 3753.857  | 5164.486  | AK022276  | 615.733  | 484.861   | AB028944  | 211.93    | 189.373   |
| BF679789  | 2207.962  | 2261.862  | AL133653  | 314.197  | 231.053   | AJ006268  | 246.325   | 203.253   |
| H97792    | 2407.711  | 2817.381  | AK02377E  | 306.955  | 296.916   | NM_01224E | 3885.758  | 3263.218  |
| M13509    | 780.927   | 1021.698  | AL049377  | 584.812  | 325.546   | NM_13326E | 563.387   | 359.035   |



|           |           |           |           |           |           |            |          |           |
|-----------|-----------|-----------|-----------|-----------|-----------|------------|----------|-----------|
| X04076    | 8750.209  | 11361.69  | NM_003544 | 31693.785 | 40900.098 | NM_000025  | 1514.9   | 1286.409  |
| AA485362  | 2620.731  | 1802.944  | U17640    | 634.515   | 1003.138  | D38521     | 830.931  | 712.549   |
| AJ222801  | 3061.611  | 2300.275  | AK001187  | 1264.819  | 1693.245  | NM_000403  | 897.356  | 893.397   |
| W72207    | 49056.656 | 25678.541 | NM_003529 | 14922.73  | 20563.02  | NM_018127  | 2190.048 | 2140.166  |
| AA733033  | 1585.322  | 840.216   | AF056436  | 1350.723  | 1858.213  | AB020677   | 2018.758 | 1757.034  |
| AA583574  | 1923.39   | 1312.308  | AB023191  | 874.841   | 1682.567  | AB033097   | 415.862  | 488.625   |
| AI690184  | 44560.211 | 48616.551 | AK027212  | 5342.676  | 6293.267  | NM_000135  | 372.732  | 336.702   |
| AA927490  | 3840.431  | 3772.163  | X56197    | 560.7     | 807.389   | AJ223948   | 1115.847 | 1132.474  |
| NM_001481 | 1215.29   | 1486.155  | NM_005199 | 3641.992  | 4217.47   | NM_016218  | 403.508  | 265.827   |
| U30872    | 1800.469  | 1999.853  | U90905    | 1023.754  | 1108.557  | AK022947   | 529.567  | 786.441   |
| AF111783  | 554.804   | 592.221   | AF161422  | 1022.207  | 994.909   | AL050029   | 622.012  | 548.657   |
| NM_002639 | 1925.367  | 3547.471  | AL137384  | 789.768   | 325.082   | AL049966   | 167.605  | 126.493   |
| NM_014734 | 3149.12   | 4181.577  | NM_020153 | 353.527   | 322.709   | NM_005204  | 815.504  | 554.982   |
| NM_002289 | 1201.273  | 919.818   | NM_005321 | 4292.901  | 4072.209  | NM_016203  | 210.152  | 204.696   |
| AK026408  | 1702.574  | 1872.733  | AF073520  | 675.669   | 711.405   | NM_002759  | 1300.274 | 752.468   |
| NM_005025 | 1030.458  | 1287.588  | AF143885  | 238.72    | 204.93    | NM_007271  | 483.122  | 389.27    |
| NM_006307 | 596.103   | 744.86    | NM_014015 | 5069.707  | 3950.982  | NM_006255  | 848.529  | 626.724   |
| M74782    | 2457.76   | 2473.582  | AK026839  | 203.095   | 197.167   | BE392143   | 863.309  | 929.533   |
| NM_017818 | 2285.828  | 2777.516  | AK024973  | 383.333   | 360.983   | NM_018132  | 819.15   | 777.867   |
| NM_001767 | 663.764   | 608.675   | AJ008123  | 2353.752  | 1662.586  | NM_018207  | 226.882  | 306.891   |
| AF028823  | 4413.148  | 4019.76   | AJ008156  | 698.455   | 691.677   | NM_000345  | 2245.199 | 2482.03   |
| NM_004295 | 13352.984 | 11123.845 | AF147321  | 308.793   | 99.868    | NM_001862  | 19202.92 | 26070.133 |
| NM_002087 | 5688.981  | 3773.76   | AF161437  | 2911.718  | 1589.536  | NM_006531  | 334.601  | 547.734   |
| AB023154  | 269.008   | 241.198   | AK001039  | 2454.171  | 3313.87   | AB029021   | 1739.492 | 1475.463  |
| NM_014585 | 950.577   | 930.98    | AK026465  | 935.838   | 1642.991  | NM_002101  | 5557.435 | 5097.829  |
| AF200815  | 1126.122  | 703.362   | AK024321  | 407.064   | 641.747   | NM_005423  | 220.677  | 150.269   |
| NM_014564 | 716.376   | 1070.781  | U52834    | 462.405   | 552.753   | Z36789     | 376.426  | 369.895   |
| NM_013441 | 2351.908  | 1541.486  | AJ227898  | 336.194   | 426.965   | J02874     | 851.221  | 985.782   |
| NM_014421 | 1068.713  | 990.626   | M34428    | 219.576   | 270.979   | BF310427   | 564.086  | 665.602   |
| NM_006749 | 961.074   | 1446.778  | NM_003532 | 697.668   | 1094.427  | N94424     | 248.384  | 209.702   |
| NM_004694 | 469.359   | 1003.117  | NM_017869 | 4448.731  | 3759.345  | AA045192   | 556.03   | 444.296   |
| NM_000324 | 375.939   | 458.529   | AF075100  | 468.962   | 318.085   | AI521645   | 81.842   | 298.395   |
| NM_012206 | 228.628   | 580.178   | AF203447  | 4448.403  | 3100.942  | H45617     | 111.816  | 111.785   |
| AL137619  | 922.049   | 1409.788  | NM_018502 | 790.357   | 887.571   | M92642     | 310.402  | 365.93    |
| NM_003615 | 526.73    | 665.045   | AL080066  | 6451.89   | 5682.866  | H-U 44385  | 3993.177 | 3001.403  |
| NM_004300 | 5774.08   | 6423.734  | AJ227870  | 878.208   | 1614.762  | ID 1654970 | 1764.43  | 1825.962  |
| NM_000052 | 450.93    | 409.515   | AL137620  | 460.081   | 519.734   | ID 2531132 | 1845.367 | 1721.191  |
| NM_000085 | 285.24    | 633.929   | NM_005294 | 1017.583  | 904.565   | ID 4365538 | 177.83   | 154.286   |
| AB007859  | 1048.43   | 1084.381  | AF085826  | 532.171   | 392.488   | AA485665   | 217.611  | 94.558    |
| NM_006754 | 503.504   | 456.937   | AK024362  | 488.304   | 435.17    | BF125928   | 3574.163 | 3447.109  |
| NM_001127 | 3840.916  | 3419.735  | AF118068  | 1636.992  | 1249.645  | BG571026   | 684.856  | 452.782   |
| NM_012430 | 2573.415  | 2185.332  | NM_004164 | 302.596   | 248.879   | AA489017   | 1097.609 | 462.169   |
| NM_003917 | 10986.783 | 6282.793  | NM_019018 | 3745.609  | 3258.197  | AK022845   | 312.548  | 205.201   |
| NM_007077 | 1373.589  | 880.271   | M87931    | 403.219   | 378.469   | NM_003004  | 199.749  | 160.679   |
| NM_002956 | 1448.13   | 864.456   | CY3Cy5    | 6314.435  | 675.185   | S77835     | 233.516  | 70.977    |
| AB018739  | 1160.826  | 973.414   | L35594    | 815.358   | 709.627   | NM_002985  | 1701.473 | 1812.592  |
| NM_006750 | 17573.426 | 12150.334 | BE790116  | 6598.896  | 5168.299  | AB018347   | 1054.118 | 1713.533  |
| NM_020164 | 6124.239  | 3915.501  | AI922341  | 3873.487  | 3157.717  | AB033073   | 860.476  | 1231.888  |
| AK023521  | 5531.638  | 4073.623  | AA410517  | 1044.226  | 879.255   | NM_003284  | 386.996  | 418.644   |
| NM_014267 | 16594.242 | 14620.09  | M12824    | 3569.284  | 2501.449  | NM_018152  | 265.145  | 249.326   |
| AL050187  | 3726.887  | 5318.183  | W60100    | 1140.532  | 831.747   | NM_000319  | 495.391  | 436.954   |
| NM_012387 | 12115.797 | 16644.662 | M24898    | 666.867   | 506.378   | NM_003257  | 184.158  | 184.401   |
| NM_014735 | 952.239   | 1713.609  | U72508    | 1215.204  | 927.733   | NM_012461  | 736.792  | 771.86    |

|           |           |           |           |           |           |           |          |          |
|-----------|-----------|-----------|-----------|-----------|-----------|-----------|----------|----------|
| NM_004252 | 12145.665 | 18049.604 | AA457153  | 3635.896  | 3277.104  | AK001379  | 372.531  | 286.791  |
| AF172929  | 6445.2    | 8249.826  | AA283122  | 4580.799  | 3075.448  | NM_01745C | 736.619  | 534.009  |
| NM_00639E | 14664.197 | 17227.018 | AA868504  | 2831.216  | 2323.868  | NM_002023 | 197.361  | 177.226  |
| AK025655  | 1815.481  | 2767.775  | AA877845  | 6656.593  | 5295.6    | NM_00283C | 232.378  | 365.643  |
| NM_00405E | 605.746   | 866.739   | AA664241  | 47121.152 | 39255.938 | AF190500  | 225.934  | 237.856  |
| NM_00105E | 1465.181  | 1736.016  | AI016456  | 832.059   | 657.849   | NM_00161E | 148.47   | 168.272  |
| AY026461  | 3431.725  | 3496.11   | NM_00058E | 23180.424 | 11970.174 | NM_005904 | 292.967  | 218.569  |
| AK025708  | 2812.056  | 2441.276  | SR1       | 63882.617 | 66583.234 | NM_005273 | 3205.729 | 3215.408 |
| NM_00040E | 989.386   | 587.483   | SR7       | 4762.434  | 54404.676 | NM_00657E | 343.872  | 490.892  |
| NM_005564 | 47065.332 | 30842.674 | SR9       | 21459.711 | 4772.799  | NM_01864E | 267.214  | 254.763  |
| NM_00450E | 2558.452  | 2159.954  | CY3Cy5    | 11918.368 | 1463.162  | AB035266  | 728.422  | 473.815  |
| NM_00640E | 11505.964 | 10252.675 | NM_00581C | 7654.565  | 6938.193  | NM_003744 | 547.381  | 464.658  |
| AJ245946  | 789.511   | 649.776   | M28170    | 5889.568  | 4611.439  | NM_00637E | 412.396  | 274.24   |
| NM_00239C | 2197.22   | 3567.298  | NM_00155E | 715.612   | 189.927   | NM_014404 | 301.301  | 372.209  |
| NM_01491C | 3268.633  | 4688.185  | AK026223  | 3412      | 3186.196  | NM_018713 | 177.827  | 193.284  |
| AK001064  | 3857.479  | 6047.703  | NM_000874 | 1576.864  | 1076.208  | NM_015947 | 1002.216 | 1332.13  |
| AB029031  | 6830.872  | 7913.43   | NM_005854 | 1727.154  | 1564.644  | NM_002042 | 6092.564 | 6709.521 |
| NM_001294 | 4464.738  | 5861.496  | AB007863  | 26673.543 | 19826.561 | AB028944  | 272.314  | 540.161  |
| NM_014241 | 5546.846  | 7375.531  | AK024456  | 3218.065  | 2978.368  | AJ006268  | 281.869  | 506.257  |
| AF302786  | 2890.801  | 3951.716  | NM_01778E | 1025.554  | 760.606   | M74089    | 675.361  | 803.448  |
| AL122083  | 1961.802  | 2584.252  | D31887    | 3762.146  | 2947.054  | AF190864  | 1418.626 | 2093.409 |
| NM_005052 | 9737.081  | 11512.484 | NM_002313 | 1206.921  | 911.823   | NM_00277E | 1189.322 | 1537.519 |
| BF038439  | 389.452   | 481.507   | NM_00445E | 1364.529  | 1079.176  | L40397    | 2807.821 | 3417.821 |
| AF319476  | 811.166   | 776.157   | NM_005503 | 2531.997  | 2716.903  | NM_02019E | 1860.143 | 1797.844 |
| AK001913  | 4767.408  | 4474.572  | NM_001502 | 2041.073  | 1799.264  | AA098879  | 156.932  | 165.116  |
| NM_017737 | 758.743   | 555.487   | NM_005721 | 1592.241  | 851.627   | AF070525  | 1538.981 | 1967.346 |
| NM_004292 | 1515.205  | 1442.882  | AF176012  | 3333.044  | 2222.652  | NM_001177 | 1422.338 | 1745.716 |
| NM_015484 | 4514.73   | 2857.777  | BE743838  | 5952.062  | 8095.207  | NM_014447 | 550.322  | 487.971  |
| NM_01804E | 2576.472  | 1801.628  | AF273046  | 4048.162  | 3828.19   | NM_00235E | 209.699  | 360.388  |
| NM_01331E | 2147.907  | 1145.838  | NM_001081 | 2196.512  | 2036.558  | NM_006691 | 449.147  | 400.629  |
| M20701    | 7051.817  | 2762.008  | NM_002483 | 2305.717  | 1893.391  | NM_00150E | 247.267  | 141.72   |
| NM_002912 | 1205.727  | 758.446   | BF002026  | 2088.416  | 2126.731  | NM_00371C | 422.664  | 309.832  |
| NM_013284 | 3269.582  | 2295.567  | NM_004171 | 1725.107  | 1665.16   | Z83805    | 222.5    | 279.65   |
| NM_00673E | 3498.737  | 3063.108  | NM_014037 | 5661.316  | 5125.572  | NM_00466E | 686.004  | 1555.981 |
| NM_013274 | 5869.504  | 4856.68   | NM_00486E | 16236.456 | 13772.652 | NM_003614 | 385.834  | 661.87   |
| AL157500  | 528.193   | 669.052   | NM_01868E | 2265.27   | 1848.726  | NM_014257 | 1480.307 | 1092.539 |
| AK024955  | 8999.727  | 11576.259 | AK056652  | 4164.991  | 3815.259  | NM_00114C | 215.554  | 122.34   |
| NM_01658C | 698.361   | 750.396   | AL137438  | 1498.661  | 1266.003  | NM_004843 | 553.867  | 474.209  |
| AF169693  | 493.538   | 1063.473  | NM_017957 | 3132.609  | 2574.991  | NM_005204 | 785.555  | 687.52   |
| L23206    | 2045.255  | 1995.073  | NM_003024 | 1752.569  | 1645.266  | NM_016203 | 213.618  | 470.918  |
| NM_012192 | 3192.467  | 3834.741  | NM_01324E | 2717.821  | 2318.158  | NM_00275E | 1073.495 | 889.242  |
| NM_006293 | 2871.384  | 3215.619  | NM_000034 | 65115.137 | 75287.625 | NM_007271 | 415.088  | 354.902  |
| NM_00722E | 3518.658  | 3503.163  | AK022230  | 3665.596  | 2823.94   | NM_00625E | 990.038  | 1511.173 |
| AB011105  | 1344.493  | 1401.11   | AK022147  | 6631.873  | 4885.206  | BE392143  | 1118.014 | 1662.833 |
| NM_002213 | 403.653   | 552.323   | L25664    | 2534.076  | 2334.55   | NM_005813 | 723.056  | 588.922  |
| NM_01897C | 690.095   | 679.583   | NM_01494C | 4056.574  | 2702.191  | AB037718  | 1304.783 | 1493.62  |
| NM_004814 | 5598.243  | 5969.686  | NM_005783 | 931.607   | 570.966   | AL389994  | 376.37   | 417.908  |
| D86976    | 24666.816 | 15933.479 | NM_00690C | 2125.605  | 1240.51   | NM_00390E | 1896.069 | 1547.168 |
| AF307080  | 2427.147  | 1896.887  | NM_01635E | 5886.993  | 4787.192  | NM_001277 | 1955.21  | 2514.547 |
| NM_004057 | 2507.854  | 2080.908  | NM_00640E | 5227.662  | 4433.409  | NM_00365E | 1339.334 | 864.438  |
| NM_018971 | 651.851   | 577.022   | AF216292  | 33333.492 | 40917.234 | NM_007072 | 657.125  | 897.953  |
| K03175    | 1054.766  | 1711.208  | NM_000952 | 1061.924  | 1411.246  | NM_01232C | 966.437  | 1095.341 |
| NM_00301E | 1013.149  | 552.507   | NM_005894 | 932.292   | 1152.034  | NM_01820E | 1028.008 | 829.627  |

|           |           |           |           |           |           |           |          |           |
|-----------|-----------|-----------|-----------|-----------|-----------|-----------|----------|-----------|
| NM_006496 | 15851.897 | 9428.207  | NM_014584 | 2692.781  | 3762.841  | NM_015925 | 2048.93  | 2161.315  |
| NM_000828 | 614.014   | 420.24    | M30627    | 692.955   | 775.384   | U90653    | 1320.233 | 1117.043  |
| NM_004826 | 895.942   | 373.387   | NM_016649 | 4223.268  | 3827.004  | NM_018335 | 511.251  | 313.257   |
| NM_013314 | 723.41    | 991.94    | AK090536  | 17070.611 | 14298.314 | NM_006745 | 7771.359 | 8199.387  |
| NM_002072 | 1431.962  | 1241.079  | D63477    | 1178.163  | 1087.42   | NM_000275 | 254.344  | 258.489   |
| NM_003182 | 716.335   | 743.989   | NM_020243 | 21294.514 | 18505.232 | AK000037  | 329.985  | 262.407   |
| BE904126  | 15716.238 | 14953.654 | NM_014051 | 3209.12   | 3338.584  | NM_014760 | 477.339  | 421.02    |
| AF272380  | 19215.82  | 18416.561 | AK025398  | 11659.015 | 11709.844 | NM_018395 | 334.551  | 215.547   |
| NM_004431 | 3378.816  | 4295.361  | AB037750  | 3621.845  | 2690.333  | NM_002560 | 3303.446 | 2949.154  |
| NM_002012 | 1918.449  | 1945.881  | AK023056  | 1032.712  | 777.361   | NM_000787 | 269.007  | 160.632   |
| NM_002070 | 38167.277 | 38260.352 | NM_001120 | 38165.066 | 33961.852 | U57962    | 1108.211 | 773.199   |
| AF227969  | 2115.839  | 2249.843  | NM_017885 | 1807.445  | 1635.862  | NM_016175 | 1648.84  | 1300.638  |
| AF116657  | 527.854   | 726.3     | NM_004915 | 1988.347  | 1643.541  | NM_005574 | 4866.465 | 4786.285  |
| NM_004102 | 527.184   | 334.585   | AK022207  | 1180.802  | 1000.17   | NM_017895 | 2184.257 | 2515.026  |
| NM_003944 | 13680.43  | 12102.708 | AV708752  | 3957.677  | 4669.801  | NM_004610 | 395.151  | 496.382   |
| NM_016120 | 30026.896 | 26744.023 | AF119885  | 2913.475  | 2077.995  | NM_001612 | 471.877  | 449.396   |
| NM_002893 | 1686.515  | 1746.912  | NM_004996 | 2036.161  | 1034.737  | AK027002  | 415.096  | 755.452   |
| NM_002393 | 3514.933  | 2614.951  | NM_005971 | 2205.464  | 1749.241  | AB025254  | 1069.99  | 1367.507  |
| NM_002665 | 4643.727  | 2853.271  | NM_017435 | 7638.747  | 882.762   | NM_004081 | 364.562  | 331.864   |
| AB014600  | 3412.029  | 1858.307  | NM_013386 | 4917.629  | 6314.133  | NM_000025 | 2180.909 | 1833.814  |
| NM_018312 | 2477.344  | 2181.798  | NM_006517 | 2202.798  | 3123.457  | D38521    | 835.479  | 475.507   |
| X98259    | 832.784   | 510.603   | AK026680  | 7034.606  | 6308.369  | NM_000403 | 1009.329 | 880.454   |
| X98260    | 7803.857  | 3666.331  | NM_012436 | 60718.762 | 62392.684 | NM_018127 | 2318.156 | 1855.99   |
| NM_007217 | 6659.368  | 4154.661  | AK001299  | 25095.396 | 22008.611 | AB020677  | 2093.191 | 1905.086  |
| NM_014777 | 3093.661  | 1747.68   | AB014559  | 11874.189 | 10347.105 | AB033097  | 508.295  | 404.815   |
| NM_001102 | 7392.938  | 4408.145  | NM_016489 | 5100.484  | 4738.271  | NM_000135 | 428.057  | 393.992   |
| NM_003803 | 322.03    | 232.774   | NM_005033 | 4258.04   | 3097.554  | AJ223948  | 1030.4   | 975.44    |
| NM_002815 | 52653.703 | 61857.496 | NM_015932 | 56084.094 | 60097.211 | NM_016215 | 286.428  | 517.294   |
| NM_001937 | 5659.446  | 5052.677  | NM_017949 | 563.045   | 521.99    | AK022947  | 661.94   | 497.177   |
| AK024778  | 1710.796  | 1442.227  | AK022169  | 1005.255  | 952.016   | AL050029  | 680.163  | 383.115   |
| AK021608  | 4249.952  | 5348.664  | AF015592  | 1952.592  | 1505.522  | NM_004063 | 174.36   | 171.692   |
| NM_004297 | 998.136   | 1363.99   | AK026795  | 2253.381  | 1711.447  | AB040976  | 818.721  | 730.466   |
| NM_006044 | 8131.721  | 10788.636 | NM_016399 | 2758.888  | 2873.665  | NM_018641 | 1156.098 | 794.397   |
| AK025498  | 1622.206  | 2268.654  | NM_016617 | 7419.274  | 5798.653  | NM_002221 | 431.8    | 1067.131  |
| NM_001395 | 4864.543  | 4961.235  | NM_002027 | 8262.146  | 6914.388  | NM_002371 | 155.856  | 152.881   |
| NM_002065 | 7005.688  | 7433.773  | AL162078  | 2658.246  | 2513.622  | NM_002562 | 129.276  | 187.195   |
| NM_013335 | 5022.056  | 3780.665  | NM_013382 | 12297.396 | 10294.879 | AK024502  | 1641.221 | 2954.406  |
| NM_014671 | 4734.067  | 3623.447  | AB002314  | 1217.599  | 1051.266  | NM_001124 | 249.307  | 241.925   |
| NM_001814 | 12778.605 | 8377.521  | NM_014043 | 2532.713  | 1901.669  | NM_004585 | 493.535  | 325.917   |
| NM_018435 | 2100.272  | 881.471   | AB011114  | 44232.238 | 30990.916 | NM_004844 | 1370.182 | 1556.026  |
| NM_005655 | 1472.004  | 604.305   | D11466    | 16443.75  | 12809.547 | NM_013447 | 521.557  | 405.782   |
| NM_006012 | 5936.969  | 3501.431  | NM_014055 | 12771.988 | 16803.697 | NM_000051 | 625.905  | 839.416   |
| NM_002151 | 1210.329  | 914.235   | D31885    | 20072.217 | 28890.117 | NM_005705 | 148.293  | 191.605   |
| NM_014885 | 2003.652  | 1119.054  | BE743838  | 5877.114  | 5514.548  | NM_004180 | 1513.083 | 891.128   |
| AF173935  | 1030.974  | 666.092   | AF273046  | 7877.523  | 5953.016  | NM_004785 | 8694.275 | 10678.777 |
| AK025322  | 6182.348  | 4053.797  | NM_001081 | 2826.708  | 2891.439  | AF302109  | 961.06   | 1629.01   |
| NM_017887 | 6070.018  | 4326.657  | NM_002483 | 2194.508  | 2377.636  | AL117485  | 1390.021 | 1134.955  |
| NM_000525 | 1064.316  | 571.681   | BF002026  | 988.351   | 1188.97   | NM_003505 | 242.924  | 218.774   |
| AF007152  | 3276.216  | 1970.53   | L35594    | 950.376   | 1146.393  | NM_007191 | 368.518  | 244.108   |
| NM_017575 | 889.779   | 563.419   | BE790116  | 6146.068  | 6556.39   | AL109667  | 213.118  | 337.734   |
| NM_005310 | 1778.196  | 876.755   | AI922341  | 2930.062  | 2723.429  | NM_000840 | 281.261  | 248.326   |
| NM_014423 | 8283.359  | 6651.558  | M12824    | 2403.113  | 2141.8    | NM_004475 | 155.062  | 164.453   |
| NM_018083 | 2059.112  | 2779.745  | W60100    | 1180.381  | 1054.032  | AF205437  | 241.24   | 277.898   |

|           |           |           |           |           |           |           |          |          |
|-----------|-----------|-----------|-----------|-----------|-----------|-----------|----------|----------|
| AL110188  | 9685.264  | 11709.809 | M24898    | 821.018   | 629.503   | AF034102  | 2087.306 | 1706.474 |
| D70834    | 37100.367 | 40069.438 | U72508    | 1088.71   | 1314.833  | AJ008142  | 2883.97  | 2307.599 |
| NM_00097C | 61610.73  | 73057.102 | AA457153  | 3545.46   | 3631.978  | AL035289  | 110.701  | 261.592  |
| NM_03328E | 1137.497  | 1534.979  | AA283122  | 4512.996  | 3938.058  | NM_001343 | 907.202  | 1243.85  |
| NM_00326E | 325.312   | 503.646   | AA868504  | 3115.402  | 3391.669  | NM_00727E | 2124.749 | 2380.834 |
| AK000102  | 1518.685  | 1875.22   | AA877845  | 7027.008  | 6907.497  | NM_01902E | 3008.203 | 4718.657 |
| AB040916  | 2350.077  | 1948.253  | AA664241  | 54121.43  | 42819.777 | NM_018461 | 1012.528 | 1043.286 |
| NM_005587 | 1385.894  | 528.409   | AI016456  | 1683.548  | 1295.885  | AF235023  | 763.365  | 805.185  |
| AF038362  | 3638.603  | 1465.192  | NM_00058E | 25060.734 | 21445.971 | NM_00691C | 1081.625 | 1112.391 |
| NM_00519E | 29211.123 | 17941.893 | AK026281  | 1389.377  | 1876.905  | AF162667  | 648.953  | 616.398  |
| NM_005481 | 1358.924  | 1091.732  | U23862    | 1364.374  | 2360.716  | AB046847  | 556.917  | 366.249  |
| NM_00471E | 4642.929  | 3600.812  | NM_00640E | 7396.979  | 9086.766  | NM_000447 | 522.713  | 435.957  |
| L40392    | 4279.438  | 5294.723  | AF216292  | 36159.113 | 37274.34  | NM_006354 | 1684.197 | 1579.659 |
| NM_02036E | 4308.155  | 2414.338  | NM_000952 | 1148.031  | 1118.705  | AF303378  | 1638.982 | 1296.756 |
| AF086497  | 474.006   | 677.229   | NM_005894 | 894.327   | 1180.55   | NM_016037 | 1662.688 | 979.762  |
| NM_020141 | 6038.938  | 8206.187  | NM_014584 | 3517.014  | 3544.306  | NM_000043 | 162.694  | 205.226  |
| NM_006482 | 889.711   | 1776.115  | M30627    | 843.144   | 590.754   | NM_01614C | 116.78   | 174.481  |
| NM_00377E | 812.572   | 970.917   | NM_00581C | 4563.313  | 5053.226  | NM_01596E | 166.704  | 100.311  |
| NM_00363E | 1323.372  | 1455.263  | M28170    | 5562.359  | 4464.706  | NM_000417 | 869.575  | 592.539  |
| NM_000662 | 2977.51   | 3253.548  | NM_00155E | 694.871   | 378.624   | NM_02035E | 289.47   | 392.069  |
| NM_000292 | 2442.067  | 2225.324  | AK026223  | 3368.444  | 2910.909  | AF152527  | 167.844  | 63.681   |
| NM_00368E | 54267.039 | 50908.715 | NM_000874 | 1387.673  | 1211.624  | NM_01823E | 5746.558 | 5109.199 |
| NM_016173 | 1700.508  | 1867.785  | NM_005854 | 1833.655  | 1949.48   | NM_002424 | 131.378  | 234.156  |
| NM_00287E | 5256.085  | 5457.563  | AB007863  | 30794.85  | 24984.588 | NM_012104 | 1794.618 | 1553.949 |
| NM_004427 | 6427.396  | 7337.603  | AK024456  | 3970.447  | 3922.038  | NM_006144 | 126.736  | 125.945  |
| U90549    | 5826.796  | 9291.218  | NM_01778E | 1109.526  | 1322.665  | AL136549  | 211.544  | 207.915  |
| NM_01324C | 12570.364 | 16651.898 | D31887    | 4117.248  | 5744.121  | NM_01216E | 203.865  | 544.258  |
| NM_015874 | 29729.629 | 33490.969 | NM_002313 | 1357.329  | 1391.254  | NM_00703E | 409.13   | 597.221  |
| NM_00496E | 51037.063 | 61546.262 | NM_00445E | 1510.647  | 1761.03   | AF311324  | 697.67   | 669.454  |
| AF312393  | 41765.559 | 47711.293 | NM_005503 | 2683.783  | 3327.292  | AF124433  | 271.223  | 196.646  |
| AF272898  | 5826.398  | 7639.708  | NM_001502 | 1057.04   | 1671.93   | AK001647  | 194.094  | 217.732  |
| AB032951  | 6638.794  | 7014.251  | NM_005721 | 1149.857  | 1243.238  | NM_001461 | 239.093  | 170.244  |
| AK024073  | 1089.535  | 512.967   | AF284223  | 23407.627 | 32620.785 | AF061556  | 254.637  | 208.598  |
| AK022223  | 933.837   | 945.024   | AF176012  | 3669.891  | 3882.603  | AL162049  | 391.855  | 541.446  |
| NM_005887 | 5242.223  | 6720.01   | NM_005971 | 3369.833  | 3489.804  | NM_005032 | 286.531  | 134.775  |
| AK024921  | 988.455   | 1360.688  | NM_01743E | 5309.394  | 973.13    | NM_00416C | 963.99   | 1088.588 |
| AL110232  | 553.475   | 1120.66   | NM_01338E | 5011.344  | 5610.996  | AL109677  | 313.254  | 423.725  |
| AK026103  | 3362.662  | 4593.767  | NM_006517 | 2195.955  | 2473.246  | NM_003941 | 6688.572 | 5152.007 |
| NM_01635E | 10848.095 | 11396.744 | NM_004171 | 1773.075  | 1733.252  | AF177909  | 264.34   | 297.779  |
| AK022567  | 2640.402  | 2788.525  | NM_014037 | 5311.282  | 5670.688  | NM_002664 | 2109.05  | 1988.641 |
| S77357    | 1046.626  | 1247.068  | NM_00486E | 15101.837 | 15540.551 | AB018271  | 776.275  | 555.613  |
| AK023450  | 2190.416  | 2290.033  | NM_01868E | 2143.589  | 2305.209  | AL137665  | 830.398  | 540.287  |
| AL080280  | 3159.774  | 4437.113  | AK056652  | 4028.874  | 3876.966  | NM_016434 | 398.459  | 252.666  |
| AB028947  | 1491.283  | 1622.956  | NM_01583E | 686.382   | 261.591   | NM_005634 | 710.731  | 458.818  |
| AF035314  | 1656.946  | 2225.956  | AL137438  | 1642.165  | 1468      | NM_017757 | 1125.563 | 1124.443 |
| NM_01803E | 1369.213  | 2067.483  | NM_017957 | 3993.788  | 3776.257  | NM_00214E | 2414.604 | 1765.736 |
| AF052087  | 1421.919  | 2275.379  | NM_003024 | 2356.365  | 2495.744  | AB007892  | 234.379  | 453.458  |
| AF007143  | 1670.312  | 2484.067  | NM_01324E | 2492.901  | 3134.848  | AB037748  | 195.306  | 397.535  |
| AF147417  | 823.524   | 1118.008  | NM_000034 | 65110.949 | 71498.43  | AB002306  | 437.217  | 370.043  |
| AK023656  | 1460.26   | 1929.361  | AK022230  | 4341.555  | 4040.649  | NM_00130C | 465.682  | 536.636  |
| AF086511  | 1546.003  | 1959.655  | AK022147  | 7130.136  | 6572.403  | NM_018187 | 2232.691 | 2826.503 |
| AK022989  | 1966.728  | 1852.398  | L25664    | 3606.225  | 4389.943  | NM_00301E | 4817.989 | 4910.995 |
| AK021619  | 988.922   | 626.965   | NM_01494C | 3802.578  | 4977.12   | NM_00546E | 1947.018 | 1309.045 |

|           |           |           |           |           |           |           |           |           |
|-----------|-----------|-----------|-----------|-----------|-----------|-----------|-----------|-----------|
| AK022347  | 570.285   | 406.571   | NM_005783 | 731.163   | 1199.948  | NM_001325 | 656.375   | 595.54    |
| AK025872  | 619.289   | 864.062   | AK000851  | 856.042   | 680.707   | NM_018282 | 3293.092  | 2162.656  |
| AF131762  | 17570.441 | 21625.512 | NM_006900 | 833.778   | 962.977   | BC019932  | 694.916   | 714.341   |
| AY007089  | 9741.085  | 14042.452 | AJ289111  | 5095.51   | 5574.826  | AF114818  | 579.81    | 451.973   |
| AK021816  | 5485.025  | 5924.538  | NM_016356 | 1401.452  | 794.336   | AK025106  | 494.336   | 1344.615  |
| D43770    | 8181.303  | 8211.145  | NM_014043 | 3701.308  | 5130.206  | NM_020144 | 607.858   | 696.127   |
| AF085960  | 1006.011  | 1140.658  | NM_014622 | 1111.414  | 1204.164  | NM_003908 | 16853.436 | 15017.82  |
| AF087976  | 548.012   | 765.206   | AB011114  | 51309.496 | 50930.301 | BE893142  | 542.982   | 348.19    |
| AK021519  | 1567.58   | 1835.625  | D11466    | 19860.1   | 20368.137 | NM_003103 | 1506.514  | 902.314   |
| NM_014254 | 2875.805  | 4173.699  | NM_014056 | 11560.781 | 12244.425 | NM_015340 | 1480.82   | 1859.564  |
| AF086036  | 604.921   | 1016.83   | D31885    | 18879.211 | 20881.199 | NM_006451 | 927.554   | 690.582   |
| AF086010  | 574.195   | 591.969   | NM_016649 | 4496.435  | 4357.605  | NM_002094 | 442.481   | 341.275   |
| U09197    | 2387.849  | 3164.917  | AK090536  | 15831.389 | 15612.099 | NM_002937 | 192.792   | 154.777   |
| U50529    | 937.742   | 1719.524  | D63477    | 1277.469  | 1183.951  | AL137476  | 1087.316  | 953.621   |
| U66050    | 677.589   | 621.596   | NM_020243 | 19531.145 | 19767.871 | AF052174  | 471.151   | 859.589   |
| Z36800    | 520.017   | 1085.347  | NM_014051 | 3140.066  | 3166.527  | AF070590  | 288.622   | 186.404   |
| U15553    | 4237.202  | 5004.223  | AK025398  | 11531.033 | 12643.088 | NM_000761 | 5896.462  | 4836.494  |
| U52831    | 569.929   | 1333.936  | AB037750  | 3358.162  | 3008.913  | NM_020142 | 534.59    | 570.288   |
| Z36829    | 944.375   | 1306.642  | AK023056  | 1035.498  | 1095.452  | NM_000774 | 573.952   | 484.243   |
| AK024734  | 4135.508  | 5467.396  | NM_001120 | 39332.504 | 36402.875 | NM_017781 | 9171.508  | 9752.69   |
| NM_017741 | 1155.018  | 1194.606  | NM_017888 | 1803.39   | 2532.761  | NM_006004 | 21316.273 | 19768.176 |
| AK000144  | 1253.387  | 889.403   | NM_004915 | 1854.067  | 2899.619  | NM_004894 | 3884.75   | 3211.584  |
| AK022275  | 809.21    | 757.448   | AK022207  | 799.255   | 1479.508  | AB028960  | 223.727   | 215.767   |
| AK000942  | 781.527   | 910.921   | AV708752  | 4512.188  | 5471.343  | NM_005648 | 5671.294  | 4884.898  |
| AK026036  | 1075.817  | 884.352   | AF119885  | 3118.108  | 4050.047  | NM_006943 | 3771.887  | 2844.169  |
| AK023422  | 1225.416  | 1111.51   | NM_004996 | 1231.519  | 1214.498  | NM_006741 | 1317.784  | 999.454   |
| AK022796  | 1518.316  | 2206.658  | NM_000710 | 374.556   | 592.199   | NM_014166 | 1368.965  | 775.339   |
| AF090910  | 699.196   | 990.088   | AK026281  | 787.556   | 1642.434  | AL117606  | 1732.549  | 2069.559  |
| AK095193  | 1427.263  | 1294.433  | AK026680  | 7743.34   | 10613.058 | NM_012330 | 515.025   | 566.314   |
| AK025081  | 1595.643  | 1103.057  | AK001299  | 24614.98  | 32313.117 | AF294278  | 439.551   | 299.239   |
| AL122088  | 1248.928  | 1497.668  | AB014559  | 13662.376 | 16943.002 | NM_018211 | 442.895   | 230.577   |
| AF116633  | 277.538   | 650.971   | NM_016489 | 6063.608  | 6588.249  | NM_014520 | 736.928   | 808.941   |
| AF119912  | 841.508   | 1064.837  | NM_005033 | 4334.176  | 4715.402  | NM_002616 | 439.526   | 402.374   |
| AL137518  | 1335.281  | 1508.386  | NM_015932 | 61566.59  | 65218.879 | AK025712  | 2735.613  | 2859.459  |
| AK022556  | 488.053   | 979.623   | NM_017949 | 631.743   | 810.588   | AK026375  | 447.167   | 335.166   |
| AK023437  | 2110.955  | 2658.793  | AK022169  | 1210.088  | 1310.771  | U85992    | 162.9     | 362.541   |
| AK023822  | 435.74    | 496.925   | AF015592  | 1903.582  | 2387.379  | AL110152  | 159.587   | 280.845   |
| AK024147  | 727.745   | 1329.664  | AK026795  | 2186.615  | 2260.351  | AF131745  | 173.458   | 92.142    |
| AK022897  | 1626.766  | 2419.961  | NM_016617 | 6420.298  | 7749.502  | AL117565  | 701.02    | 450.673   |
| AK023556  | 489.461   | 422.466   | NM_002027 | 5733.242  | 4623.33   | AF147305  | 213.938   | 194.16    |
| AK023898  | 6688.729  | 8475.888  | AL162078  | 1220.145  | 1166.492  | AK022109  | 362.321   | 338.359   |
| NM_019040 | 5819.819  | 4247.335  | NM_000919 | 262.501   | 1343.217  | AK022103  | 196.167   | 180.212   |
| NM_005978 | 1446.382  | 1805.509  | NM_013382 | 4547.044  | 5935.073  | NM_007030 | 215.849   | 147.364   |
| Y16711    | 1486.441  | 1863.138  | AB002314  | 583.504   | 835.333   | AK022111  | 213.012   | 102.163   |
| AJ272179  | 4617.996  | 7060.489  | NM_001502 | 3449.287  | 4587.475  | AK021527  | 204.232   | 116.463   |
| AJ007015  | 1498.539  | 1631.965  | NM_005721 | 1771.339  | 1964.385  | AF143882  | 251.725   | 232.313   |
| AL049317  | 1781.571  | 1928.564  | AF284223  | 28214.32  | 48728.82  | U00953    | 253.172   | 197.908   |
| AF086309  | 1020.69   | 620.116   | AF176012  | 4509.551  | 7293.345  | AF086176  | 253.818   | 212.656   |
| AF238870  | 966.603   | 715.063   | BE743838  | 5484.542  | 8410.254  | NM_017742 | 315.776   | 513.583   |
| AK026279  | 4731.907  | 4507.447  | NM_001081 | 2234.512  | 3365.42   | NM_005108 | 361.535   | 405.9     |
| AF130094  | 9409.062  | 9340.471  | NM_002483 | 1690.201  | 2231.094  | AK022292  | 687.211   | 682.917   |
| AK026673  | 2302.899  | 2254.846  | BF002026  | 808.86    | 1245.893  | AB051436  | 788.307   | 844.658   |
| NM_005452 | 5373.491  | 6444.564  | L35594    | 1002.339  | 1255.395  | AK026482  | 1540.991  | 1568.154  |

|           |           |           |           |           |           |           |          |          |
|-----------|-----------|-----------|-----------|-----------|-----------|-----------|----------|----------|
| AF170935  | 19607.053 | 25566.768 | BE790116  | 7490.689  | 11509.328 | AL137473  | 501.971  | 774.099  |
| AK025218  | 1133.283  | 1401.341  | AI922341  | 4841.627  | 6792.29   | AJ001873  | 1381.49  | 876.408  |
| AJ227899  | 1481.618  | 1950.328  | AA410517  | 779.433   | 1039.042  | AK022604  | 267.421  | 334.302  |
| AL359607  | 1001.24   | 1389.262  | M12824    | 3014.125  | 4396.647  | AK023401  | 283.147  | 204.798  |
| AF161371  | 11528.37  | 15280.137 | W60100    | 1746.055  | 2341.576  | AK001865  | 202.924  | 309.048  |
| AK022464  | 1177.089  | 1780.726  | U72508    | 1434.874  | 1748.589  | AK024035  | 2254.183 | 2399.803 |
| AF086230  | 1157.348  | 1307.678  | AA457153  | 3735.398  | 3948.028  | AL050079  | 299.085  | 314.377  |
| AK023408  | 3621.878  | 4744.035  | AA283122  | 3111.575  | 4126.066  | AL080233  | 408.059  | 857.747  |
| U84509    | 2163.248  | 2042.252  | AA868504  | 2178.018  | 3365.245  | AL049361  | 125.283  | 174.405  |
| AL110201  | 337.755   | 363.707   | AA877845  | 4310.702  | 6129.747  | AL050132  | 156.842  | 188.272  |
| AK002036  | 6987.168  | 8261.808  | AA664241  | 23045.531 | 28539.75  | AL117663  | 521.712  | 466.831  |
| U84512    | 712.443   | 479.821   | AI016456  | 1398.409  | 1446.565  | NM_014293 | 634.748  | 648.228  |
| AK025775  | 6109.385  | 7641.038  | NM_014940 | 3794.755  | 3178.991  | AK024432  | 528.892  | 611.388  |
| AB046791  | 1131.043  | 1272.368  | NM_005783 | 934.664   | 1068.231  | AL137513  | 367.32   | 270      |
| AF043469  | 1854.679  | 1848.36   | NM_006900 | 2895.836  | 3199.845  | NM_018067 | 723.781  | 695.018  |
| AL109671  | 1171.187  | 1237.121  | AJ289111  | 6787.71   | 7229.647  | NM_018950 | 1805.7   | 1814.218 |
| NM_012375 | 476.233   | 302.25    | NM_016350 | 8104.955  | 9293.928  | NM_014787 | 509.483  | 411.544  |
| AK022008  | 3904.023  | 3601.427  | NM_006400 | 6929.698  | 8521.3    | AL122109  | 388.282  | 386.351  |
| NM_018180 | 2765.579  | 2431.036  | AF216292  | 35095.98  | 42657.191 | AF074988  | 499.876  | 441.561  |
| AJ132194  | 209.442   | 1015.943  | NM_000952 | 1677.096  | 1737.101  | AK024946  | 452.691  | 323.553  |
| AF113678  | 2241.689  | 2616.982  | NM_005894 | 1501.995  | 1796.908  | AK001432  | 402.818  | 824.918  |
| AL137313  | 50500.727 | 64436.152 | NM_014584 | 3345.667  | 4627.845  | AL133568  | 933.689  | 1066.662 |
| Z83951    | 550.666   | 1156.166  | NM_001555 | 757.283   | 1078.16   | AF009265  | 177.341  | 217.598  |
| AL833529  | 441.134   | 784.07    | AK026223  | 3998.733  | 6424.839  | AF009309  | 274.528  | 380.915  |
| AB002363  | 10045.497 | 14672.751 | NM_000874 | 1378.907  | 1424.121  | NM_002360 | 242.236  | 220.484  |
| NM_005284 | 2278.838  | 2858.108  | AB007863  | 29702.236 | 32632.602 | AF009322  | 158.358  | 151.54   |
| AF086351  | 3894.643  | 5041.919  | AK024456  | 2656.241  | 3178.036  | AF056425  | 238.951  | 227.481  |
| D83199    | 26068.521 | 32029.377 | NM_017780 | 1161.316  | 1562.391  | AF090893  | 155.128  | 164.687  |
| AK025957  | 787.036   | 940.003   | D31887    | 3661.815  | 4599.399  | NM_018033 | 1663.351 | 1181.067 |
| Y16708    | 1558.237  | 1594.723  | NM_002313 | 689.073   | 1075.677  | AK001945  | 178.898  | 338.396  |
| AL157453  | 4640.009  | 5227.327  | NM_004915 | 1617.087  | 1985.869  | AK021630  | 189.147  | 221.309  |
| NM_019090 | 6661.606  | 5737.685  | AV708752  | 4497.83   | 4081.109  | AK021831  | 364.421  | 348.38   |
| AK022212  | 28844.766 | 26107.365 | AF119885  | 3252.709  | 3395.378  | AK025650  | 877.238  | 672.484  |
| X64974    | 2798.519  | 2904.199  | NM_000750 | 1166.427  | 910.452   | AK026401  | 339.651  | 301.258  |
| NM_000834 | 5124.818  | 5167.903  | NM_004990 | 2656.842  | 2637.013  | AK026773  | 366.467  | 420.245  |
| NM_006480 | 23122.156 | 22149.461 | NM_005971 | 3113.062  | 3195.526  | AK025893  | 192.447  | 43.325   |
| NM_012450 | 1839.517  | 2111.029  | NM_017435 | 8694.56   | 1524.113  | AF086158  | 676.846  | 939.496  |
| AL137268  | 3049.735  | 2475.166  | NM_013380 | 4842.322  | 5136.606  | AF086050  | 248.123  | 231.858  |
| AK001130  | 516.739   | 312.874   | NM_006517 | 1811.906  | 2359.231  | AF147375  | 250.118  | 218.041  |
| AK022398  | 654.734   | 909.785   | NM_017957 | 3392.136  | 3842.134  | X51524    | 1359.939 | 1163.378 |
| AK024109  | 2494.015  | 2167.539  | NM_003024 | 2002.371  | 2190.104  | AK025759  | 631.348  | 859.127  |
| AF088048  | 1042.175  | 1091.439  | NM_013240 | 2452.756  | 2918.442  | AJ238556  | 153.711  | 175.213  |
| AK001143  | 3868.181  | 2567.471  | NM_000034 | 64469.063 | 68257.633 | AK021516  | 370.501  | 204.499  |
| AK001701  | 4908.396  | 3609.796  | AK022230  | 2636.348  | 3149.115  | Z70699    | 187.504  | 128.5    |
| AK025455  | 2345.093  | 3503.15   | AK022147  | 5730.656  | 5721.667  | NM_006890 | 328.415  | 220.755  |
| AK026799  | 12571.411 | 16660.686 | L25664    | 1209.629  | 682.706   | AK023429  | 162.663  | 119.963  |
| NM_014860 | 1204.889  | 1622.734  | NM_002027 | 7094.549  | 7872.279  | AK022276  | 240.188  | 189.835  |
| AK022549  | 1705.189  | 1518.283  | AL162078  | 2712.251  | 2834.265  | AK026881  | 135.954  | 71.924   |
| NM_018157 | 1396.199  | 1420.003  | NM_000910 | 645.376   | 549.568   | AL133653  | 168.713  | 182.356  |
| Z70714    | 4628.358  | 6533.053  | NM_013382 | 14177.903 | 15074.101 | AK023774  | 167.189  | 153.7    |
| AK021640  | 11629.515 | 13150.856 | AB002314  | 1109.341  | 1006.251  | AL049377  | 233.202  | 181.255  |
| NM_016560 | 48579.238 | 58991.266 | NM_014043 | 2892.333  | 3048.885  | NM_003544 | 7737.092 | 8745.65  |
| CY3Cy5    | 5049.243  | 442.241   | NM_014622 | 1006.702  | 1099.249  | U17640    | 166.613  | 308.327  |

|            |           |           |           |           |           |           |           |           |
|------------|-----------|-----------|-----------|-----------|-----------|-----------|-----------|-----------|
| BF310427   | 3264.108  | 2868.042  | AB011114  | 49547.16  | 54054.086 | AK001187  | 299.898   | 488.679   |
| N94424     | 704.202   | 758.722   | D11466    | 20352.725 | 21203.701 | NM_003526 | 2981.813  | 3343.343  |
| AA045192   | 2614.345  | 2270.815  | NM_014056 | 13838.736 | 13755.648 | AF056436  | 378.856   | 349.992   |
| AI521645   | 416.407   | 283.226   | D31885    | 19703.637 | 20728.742 | AB023191  | 235.655   | 210.627   |
| M92642     | 1504.339  | 1657.776  | NM_016649 | 3964.899  | 3820.8    | AK027212  | 1662.846  | 2210.417  |
| H-U 44385  | 17404.332 | 15975.961 | AK090536  | 17317.025 | 16353.775 | X56197    | 201.771   | 240.754   |
| ID 1654970 | 7921.639  | 8261.414  | D63477    | 1184.773  | 1067.78   | NM_005196 | 526.113   | 650.645   |
| ID 2531132 | 7915.4    | 7821.052  | NM_020243 | 19667.24  | 19394.859 | U90905    | 287.806   | 254.535   |
| ID 4365538 | 407.888   | 408.635   | NM_014051 | 3321.418  | 4007.778  | AF161422  | 397.884   | 447.543   |
| AA485665   | 596.177   | 549.515   | AK025398  | 8677.527  | 10056.143 | AL137384  | 369.825   | 643.147   |
| BF125928   | 15052.778 | 16465.646 | NM_003150 | 2674.79   | 2673.265  | AF070619  | 379.098   | 289.125   |
| BG571026   | 2347.795  | 2141.896  | NM_014784 | 3311.643  | 3157.519  | NM_020153 | 180.963   | 162.964   |
| AA489017   | 3694.68   | 2495.113  | AK026383  | 5451.385  | 5544.045  | NM_005321 | 1172.933  | 1432.245  |
| NM_012245  | 21364.596 | 16744.342 | AK023821  | 815.665   | 1072.071  | AF073520  | 244.567   | 176.883   |
| NM_133263  | 2295.632  | 1437.48   | AB014594  | 3831.339  | 4158.284  | NM_014015 | 2131.639  | 1751.62   |
| SR6        | 2394.319  | 2129.313  | M94547    | 1442.84   | 1902.84   | Z34278    | 164.459   | 67.361    |
| SR8        | 8082.347  | 23814.539 | NM_005087 | 15679.419 | 14834.272 | AK024973  | 172.115   | 290.998   |
| SR10       | 29962.852 | 11393.199 | NM_012098 | 1537.975  | 1710.687  | AJ008123  | 937.162   | 1274.071  |
|            | 1574.044  | 1314.197  | NM_018095 | 1726.752  | 1913.884  | AJ008156  | 295.105   | 360.272   |
| CY3Cy5     | 5019.169  | 540.291   | AB023164  | 3098.856  | 2795.077  | AF147321  | 181.739   | 172.37    |
| NM_017450  | 3773.099  | 4003.767  | AK026281  | 807.126   | 827.013   | AF161437  | 1237.91   | 1172.924  |
| NM_002023  | 976.961   | 1217.455  | AK026680  | 7538.802  | 7349.882  | AK001039  | 638.634   | 511.646   |
| NM_002839  | 802.343   | 704.41    | NM_012436 | 56392.832 | 61733.977 | AK026465  | 270.179   | 262.388   |
| AF190500   | 1133.231  | 1113.554  | AK001299  | 32322.518 | 30843.137 | U52834    | 127.033   | 187.861   |
| NM_001616  | 527.704   | 517.647   | AB014559  | 16420.973 | 15723.161 | AJ227898  | 120.007   | 234.216   |
| NM_005904  | 1218.504  | 1327.014  | NM_016489 | 5485.705  | 5594.105  | NM_017866 | 1463.571  | 1182.93   |
| NM_005273  | 15610.423 | 15492.851 | NM_005033 | 3919.892  | 3391.815  | AF075100  | 205.662   | 270.719   |
| NM_000524  | 495.344   | 615.501   | NM_015932 | 55941.535 | 61738.188 | AF203447  | 1483.332  | 1759.636  |
| NM_006576  | 1658.832  | 1962.258  | AK022169  | 1176.488  | 1424.28   | NM_018502 | 327.048   | 363.936   |
| NM_018645  | 1400.776  | 1505.216  | AF015592  | 1834.883  | 2019.478  | AL080066  | 2357.684  | 2178.377  |
| NM_014682  | 1203.341  | 1640.675  | AK026795  | 1764.269  | 1868.006  | AJ227870  | 486.145   | 411.954   |
| AB035266   | 3623.262  | 4072.123  | NM_016399 | 2397.379  | 2652.239  | AL137620  | 162.393   | 315.176   |
| NM_003744  | 2583.558  | 1780.263  | NM_016617 | 7122.57   | 7361.499  | NM_005294 | 440.414   | 449.556   |
| NM_006378  | 1893.489  | 1499.075  | NM_002338 | 1696.521  | 1794.498  | AF085826  | 315.012   | 413.933   |
| NM_018132  | 3742.825  | 2494.097  | AL117666  | 744.202   | 662.32    | AK024362  | 221.4     | 186.388   |
| NM_018207  | 889.528   | 736.438   | Y17865    | 1689.267  | 1471.925  | AF118068  | 809.966   | 625.269   |
| NM_000345  | 17292.813 | 11903.23  | NM_005825 | 16514.012 | 14489.566 | NM_004164 | 276.882   | 482.462   |
| NM_006531  | 1741.771  | 2083.169  | NM_002756 | 3107.848  | 2782.486  | NM_019018 | 1808.248  | 2052.496  |
| AB029021   | 12642.339 | 10282.05  | U79299    | 613.802   | 746.375   | M87931    | 206.597   | 139.357   |
| NM_002101  | 25351.52  | 23594.521 | AJ000414  | 1172.729  | 1132.298  | CY3Cy5    | 3445.386  | 344.639   |
| NM_005423  | 568.213   | 703.207   | AK025674  | 9482.586  | 8772.911  | L35594    | 750.645   | 454.558   |
| Z36789     | 2036.385  | 3339.883  | AF007194  | 5755.691  | 4838.712  | BE790116  | 5104.2    | 3680.852  |
| J02874     | 4224.357  | 5237.804  | NM_019069 | 1816.615  | 1976.676  | AI922341  | 3291.672  | 2680.755  |
| NM_001177  | 5903.512  | 7041.122  | NM_004761 | 4236.401  | 4748.441  | AA410517  | 521.159   | 459.258   |
| NM_014447  | 2368.197  | 2399.847  | Z25424    | 2365.745  | 2221.711  | M12824    | 1929.79   | 1495.367  |
| NM_002356  | 1106.267  | 1162.04   | U79458    | 7744.897  | 7812.958  | W60100    | 824.551   | 644.231   |
| NM_006691  | 1370.865  | 1572.056  | NM_014920 | 882.857   | 689.628   | M24898    | 591.997   | 512.855   |
| NM_001505  | 711.176   | 730.178   | NM_002961 | 57776.668 | 60494.617 | U72508    | 1093.882  | 999.971   |
| NM_003710  | 1566.874  | 1913.852  | NM_018298 | 1307.969  | 1785.467  | AA457153  | 2481.974  | 2302.17   |
| Z83805     | 530.618   | 587.927   | NM_000676 | 4753.458  | 4744.185  | AA283122  | 4345.124  | 3462.975  |
| NM_004666  | 2348.228  | 2533.608  | AF064770  | 478.205   | 480.654   | AA868504  | 1767.183  | 1549.394  |
| NM_003614  | 1540.492  | 1565.346  | NM_004127 | 58616.066 | 59646.516 | AA877845  | 4711.332  | 4989.293  |
| NM_014257  | 8060.769  | 6486.071  | NM_013324 | 5715.639  | 4651.396  | AA664241  | 48595.145 | 44301.844 |

|           |           |           |           |           |           |           |           |           |
|-----------|-----------|-----------|-----------|-----------|-----------|-----------|-----------|-----------|
| NM_001140 | 603.225   | 965.96    | AL133022  | 696.713   | 653.333   | AI016456  | 875.869   | 796.984   |
| NM_016059 | 424.695   | 211.156   | NM_003953 | 888.057   | 1109.277  | NM_000588 | 17323.896 | 19396.73  |
| NM_004843 | 2254.209  | 1889.484  | NM_006301 | 767.059   | 922.6     | SR3       | 33077.074 | 33056.586 |
| AK022845  | 1043.583  | 958.666   | AF222694  | 542.18    | 689.916   | SR5       | 2743.358  | 4429.713  |
| NM_003004 | 474.024   | 601.263   | AL049925  | 1406.928  | 1825.832  | SR7       | 3339.834  | 40457.926 |
| S77835    | 420.057   | 312.988   | NM_012219 | 3906.157  | 3500.563  | SR9       | 12869.433 | 3108.995  |
| NM_002985 | 7038.671  | 4981.466  | X72887    | 2164.861  | 1725.221  | CY3Cy5    | 5999.228  | 1162.58   |
| AB018347  | 4786.747  | 3522.252  | NM_004529 | 1073.122  | 899.269   | NM_005810 | 7639.021  | 6508.045  |
| NM_003284 | 1713.792  | 1305.108  | NM_000127 | 1180.922  | 1006.706  | M28170    | 6835.185  | 4267.221  |
| NM_018152 | 1063.373  | 993.944   | Y10483    | 8502.407  | 7546.22   | NM_001555 | 452.556   | 331.612   |
| NM_000319 | 1616.981  | 1501.418  | NM_006784 | 1721.361  | 1593.465  | AK026223  | 2630.142  | 2440.757  |
| NM_012461 | 3045.77   | 3140.576  | NM_017876 | 2628.37   | 1888.792  | NM_000874 | 1078.591  | 927.415   |
| AK001379  | 1556.255  | 1364.956  | NM_001087 | 50243.758 | 48806.504 | NM_005854 | 1029.18   | 1079.407  |
| NM_007072 | 1972.264  | 1664.124  | NM_001826 | 763.298   | 546.746   | AB007863  | 28496.145 | 20775.482 |
| NM_012320 | 4151.772  | 4130.461  | AK025352  | 749.122   | 735.354   | AK024456  | 2942.199  | 2861.085  |
| NM_018208 | 2718.138  | 2915.954  | NM_003721 | 10035.359 | 10149.656 | NM_017788 | 784.504   | 835.73    |
| NM_015929 | 6188.031  | 6624.769  | NM_004724 | 1419.184  | 1425.045  | D31887    | 2655.491  | 2303.172  |
| U90653    | 3988.052  | 4135.008  | NM_001431 | 9221.023  | 9061.157  | NM_002313 | 983.623   | 1187.301  |
| NM_000196 | 702.656   | 801.848   | AK022666  | 1116.811  | 960.994   | NM_004459 | 752.665   | 725.248   |
| NM_018339 | 2298.437  | 2446.801  | NM_000381 | 1046.575  | 731.451   | NM_005503 | 1514.847  | 1685.449  |
| NM_006745 | 25996.361 | 25699.566 | NM_000427 | 1517.501  | 1598.954  | NM_001502 | 1301.673  | 1299.233  |
| NM_000275 | 1007.239  | 1090.083  | NM_006946 | 788.694   | 719.659   | NM_005721 | 665.384   | 1007.093  |
| AK000037  | 1178.546  | 980.206   | NM_000174 | 51060.344 | 49577.273 | AF284223  | 14817.012 | 22126.578 |
| NM_014760 | 2331.893  | 2139.701  | NM_002508 | 3349.493  | 2969.125  | BE743838  | 3126.18   | 3921.681  |
| NM_018398 | 1308.904  | 1204.059  | NM_014343 | 3148.952  | 3435.705  | AF273046  | 2679.471  | 2737.874  |
| NM_002560 | 20160.588 | 16112.107 | D25303    | 1022.33   | 991.184   | NM_001081 | 1444.554  | 1534.364  |
| NM_014404 | 1437.145  | 1215.496  | AB043007  | 29770.309 | 31273.229 | NM_002483 | 1106.721  | 1621.603  |
| NM_018713 | 575.409   | 684.675   | NM_004861 | 1621.608  | 1750.969  | BF002026  | 306.54    | 440.338   |
| NM_015947 | 3947.463  | 2856.672  | AF022913  | 3174.829  | 2621.999  | NM_004171 | 1484.803  | 1144.038  |
| NM_002042 | 21761.684 | 16047.893 | NM_000028 | 1277.655  | 1144.573  | NM_014037 | 5698.738  | 5369.288  |
| AB028944  | 833.75    | 618.813   | NM_001382 | 7310.202  | 5210.703  | NM_004866 | 9915.035  | 8784.057  |
| AJ006268  | 1470.926  | 2125.809  | M93718    | 4400.405  | 4150.874  | NM_018688 | 1648.419  | 1474.104  |
| AF190864  | 5451.158  | 4499.091  | NM_005386 | 1772.399  | 1704.313  | AK056652  | 2843.769  | 2857.971  |
| NM_002779 | 4834.115  | 4568.978  | AK023807  | 7177.427  | 5500.812  | AL137438  | 1008.855  | 1032.12   |
| L40397    | 10016.289 | 9292.867  | NM_018188 | 7620.091  | 6422.158  | NM_017957 | 3189.808  | 2834.314  |
| NM_020198 | 5122.528  | 4416.33   | AK024273  | 1558.249  | 1352.481  | NM_003024 | 1540.482  | 1558.524  |
| AA098879  | 685.706   | 680.845   | X59417    | 19173.547 | 17217.584 | NM_013248 | 1758.737  | 1587.224  |
| NM_000025 | 11075.82  | 8076.509  | NM_005659 | 34758.492 | 34972.117 | NM_000034 | 59424.469 | 71855.016 |
| D38521    | 3490.451  | 3310.606  | D28476    | 7275.082  | 6349.234  | AK022230  | 2957.369  | 2727.028  |
| NM_000403 | 3874.22   | 3394.391  | NM_016263 | 1927.377  | 1848.254  | AK022147  | 5203.791  | 5745.439  |
| NM_018127 | 10396.386 | 12975.511 | NM_003335 | 11727.072 | 13246.035 | L25664    | 1992.57   | 2259.995  |
| AB020677  | 9224.331  | 9874.287  | AB002376  | 3294.985  | 3210.537  | NM_014940 | 2366.318  | 2301.059  |
| AB033097  | 2588.56   | 2094.771  | NM_018249 | 630.159   | 685.662   | NM_005783 | 475.132   | 465.595   |
| NM_000135 | 1647.792  | 1786.594  | NM_005558 | 2308.151  | 2083.07   | AK000851  | 452.885   | 543.905   |
| AJ223948  | 4236.375  | 4084.642  | NM_016631 | 1815.844  | 1657.151  | NM_006900 | 959.876   | 1115.323  |
| NM_016218 | 1206.37   | 1257.642  | AB015617  | 19891.979 | 18702.576 | AJ289111  | 3814.851  | 5409.067  |
| AK022947  | 2636.236  | 2078.31   | AK022730  | 2056.45   | 2035.921  | NM_016356 | 684.479   | 1135.478  |
| AL050029  | 2542.321  | 2142.598  | NM_002256 | 10396.523 | 10976.368 | NM_006406 | 3403.747  | 3928.781  |
| AL049966  | 515.771   | 448.678   | AF064839  | 18538.268 | 17615.746 | AF216292  | 20098.055 | 22117.877 |
| NM_005204 | 2485.819  | 2292.23   | NM_005439 | 6449.685  | 6377.342  | NM_000952 | 466.479   | 503.464   |
| NM_016203 | 1057.075  | 1669.172  | AB037810  | 1003.326  | 1101.316  | NM_005894 | 421.747   | 383.908   |
| NM_002759 | 4546.111  | 3375.709  | NM_006593 | 815.831   | 503.882   | NM_014584 | 1785.986  | 2255.734  |
| NM_007271 | 1575.046  | 1106.39   | NM_000376 | 5182.937  | 4449.666  | M30627    | 475.034   | 431.362   |



|            |           |           |           |           |           |           |           |           |
|------------|-----------|-----------|-----------|-----------|-----------|-----------|-----------|-----------|
| NM_006255  | 3825.807  | 2948.253  | NM_000475 | 3855.141  | 3074.047  | NM_016645 | 2662.651  | 2133.325  |
| BE392143   | 3849.691  | 4303.459  | M61872    | 15736.966 | 9720.95   | AK090536  | 10008.807 | 8474.431  |
| NM_005813  | 2361.096  | 1738.887  | NM_016153 | 627.603   | 455.589   | D63477    | 562.491   | 525.658   |
| AB037718   | 4983.963  | 4246.213  | AK027089  | 2104.471  | 1945.285  | NM_014051 | 2067.521  | 2535.801  |
| AL389994   | 1261.069  | 1163.781  | X59845    | 508.823   | 756.658   | AK025398  | 6765.828  | 7983.438  |
| NM_003905  | 4369.083  | 3346.428  | NM_006284 | 6250.456  | 5725.87   | AB037750  | 2141.331  | 1912.255  |
| NM_001277  | 7753.423  | 6989.759  | U18909    | 1530.211  | 1575.535  | AK023056  | 829.7     | 791.494   |
| NM_003655  | 4999.369  | 3965.849  | NM_003485 | 3151.21   | 2602.695  | NM_001120 | 26926.977 | 24316.537 |
| AB029021   | 13811.29  | 12564.355 | NM_016585 | 10004.777 | 8015.374  | NM_017885 | 1484.715  | 1399.614  |
| NM_002101  | 27568.08  | 24663.205 | NM_003597 | 1964.292  | 1719.11   | NM_004915 | 2029.705  | 2020.166  |
| NM_005423  | 620.974   | 433.033   | NM_002565 | 45039.941 | 39941.273 | AK022207  | 1119.767  | 1237.929  |
| Z36789     | 1622.601  | 1358.343  | NM_006561 | 3726.974  | 3562.816  | AV708752  | 3142.485  | 4355.672  |
| J02874     | 4674.038  | 4584.209  | NM_017521 | 902.095   | 877.383   | AF119885  | 2277.187  | 3315.833  |
| BF310427   | 3318.474  | 3147.604  | AK025200  | 5935.772  | 5318.342  | NM_004995 | 2312.309  | 3363.402  |
| AI521645   | 527.824   | 474.32    | NM_001383 | 5905.67   | 6079.377  | NM_005971 | 1636.491  | 2294.58   |
| M92642     | 1827.303  | 1788.886  | NM_001025 | 53521.082 | 58794.992 | NM_017435 | 7035.739  | 1931.678  |
| H-U 44385  | 16776.398 | 12927.167 | NM_005005 | 26359.027 | 23743.395 | NM_013385 | 3008.268  | 5519.858  |
| ID 1654970 | 9368.088  | 8270.504  | NM_016304 | 32843.504 | 29082.281 | NM_006517 | 1282.453  | 2318.59   |
| ID 2531132 | 8288.076  | 8098.495  | NM_006013 | 40958.199 | 35049.16  | AK026680  | 4273.395  | 3968.952  |
| ID 4365538 | 724.452   | 743.495   | NM_014045 | 12561.667 | 12530.473 | AB014559  | 11278.778 | 14111.307 |
| AA485665   | 574.486   | 505.741   | L34071    | 8119.189  | 7871.607  | NM_016485 | 4121.647  | 4901.614  |
| BF125928   | 15194.585 | 13209.422 | AK025201  | 5894.985  | 5851.725  | NM_005033 | 3117.243  | 3527.328  |
| BG571026   | 2136.436  | 2165.967  | AK022995  | 1656.791  | 1367.14   | NM_015932 | 53153.156 | 63837.898 |
| AA489017   | 4357.107  | 4412.651  | NM_006065 | 9423.367  | 7001.183  | NM_017945 | 527.947   | 873.696   |
| NM_012245  | 22752.549 | 19464.859 | AV718258  | 608.434   | 405.182   | AK022169  | 977.511   | 1498.437  |
| NM_133263  | 2145.214  | 1698.446  | NM_005165 | 2651.723  | 2195.229  | AF015592  | 1730.27   | 1889.052  |
| NM_003284  | 1900.723  | 2083.948  | NM_005135 | 35814.504 | 27344.688 | AK026795  | 1526.761  | 2540.377  |
| NM_018152  | 1258.323  | 1108.44   | NM_002115 | 38898.336 | 33053.074 | NM_016395 | 2085.792  | 3251.833  |
| NM_000315  | 2049.44   | 1935.888  | AK023162  | 2294.99   | 2145.687  | NM_016617 | 5129.822  | 8891.845  |
| NM_003257  | 415.477   | 353.372   | NM_006395 | 2623.97   | 2376.437  | NM_002027 | 5774.509  | 8972.301  |
| NM_012461  | 2817.212  | 3055.65   | NM_018645 | 1822.74   | 1468.388  | AL162078  | 1486.205  | 2275.473  |
| AK001379   | 1443.595  | 1282.594  | NM_013445 | 2915.946  | 2392.077  | NM_013382 | 2981.162  | 4236.721  |
| NM_001615  | 537.254   | 457.24    | NM_004537 | 956.515   | 834.378   | AB002314  | 367.528   | 1140.112  |
| NM_005904  | 1041.703  | 1084.193  | NM_020225 | 2133.468  | 2435.461  | NM_014043 | 1940.094  | 3335.807  |
| NM_005273  | 15124.273 | 13701.847 | NM_017865 | 3898.109  | 4660.222  | NM_014622 | 479.749   | 909.592   |
| NM_000524  | 405.457   | 529.561   | NM_003427 | 2202.62   | 2148.313  | AB011114  | 34156.227 | 52248.59  |
| NM_006575  | 1405.195  | 1577.447  | NM_005920 | 4895.521  | 4573.135  | D31885    | 7024.654  | 11069.599 |
| NM_018645  | 1159.917  | 1565.581  | Y09321    | 890.68    | 769.952   | BE743838  | 3984.031  | 5427.746  |
| NM_014682  | 177.982   | 195.351   | AK001499  | 3697.997  | 3024.774  | NM_001081 | 2157.555  | 2906.236  |
| AB035266   | 3394.72   | 3325.204  | AK023568  | 994.593   | 873.297   | NM_002483 | 2414.431  | 3726.021  |
| NM_003744  | 2355.607  | 2140.043  | AK021728  | 799.511   | 375.077   | BF002026  | 1001.839  | 1726.393  |
| NM_006375  | 2608.592  | 4235.389  | AK026852  | 1823.126  | 1457.919  | L35594    | 954.263   | 1214.296  |
| NM_018132  | 3753.819  | 3505.429  | AK021629  | 813.69    | 877.423   | BE790116  | 5888.354  | 8055.615  |
| NM_018207  | 1006.174  | 1017.92   | AL110257  | 46747.406 | 36532.949 | AI922341  | 4231.539  | 5799.894  |
| NM_000345  | 14986.495 | 11015.467 | AB013384  | 1592.989  | 1670.484  | AA410517  | 701.956   | 1217.104  |
| NM_001862  | 55381.184 | 58752.59  | AK024824  | 1217.728  | 1352.619  | M12824    | 2332.596  | 3093.538  |
| NM_006531  | 1471.221  | 1234.377  | AK024270  | 1929.529  | 1915.382  | W60100    | 884.174   | 1462.979  |
| AF190864   | 5723.25   | 5225.426  | AK025569  | 3933.222  | 3762.719  | M24898    | 897.014   | 980.23    |
| NM_002775  | 6112.417  | 6093.207  | AK023060  | 1817.451  | 1557.349  | U72508    | 1100.236  | 1806.668  |
| L40397     | 12037.228 | 12007.823 | NM_014870 | 1346.294  | 1199.604  | AA457153  | 2887.348  | 4217.353  |
| NM_020195  | 6372.094  | 5681.674  | AK021917  | 1428.067  | 1536.615  | AA283122  | 2451.154  | 3286.917  |
| NM_001177  | 5784.984  | 6871.841  | AF052146  | 42845.633 | 36635.465 | AA868504  | 1596.879  | 2353.965  |
| NM_014447  | 2099.773  | 2329.333  | NM_004870 | 2820.491  | 2626.728  | AA877845  | 4705.46   | 6241.125  |

|           |           |           |           |           |           |           |           |           |
|-----------|-----------|-----------|-----------|-----------|-----------|-----------|-----------|-----------|
| NM_002356 | 910.998   | 1273.029  | AF143872  | 20201.506 | 20686.227 | AA664241  | 11061.501 | 13160.499 |
| NM_006691 | 1720.697  | 1724.346  | AK025686  | 781.665   | 434.004   | AI016456  | 491.318   | 936.648   |
| NM_001505 | 926.785   | 694.47    | AF143326  | 2805.518  | 2955.897  | NM_000588 | 24140.449 | 29425.195 |
| NM_003710 | 1488.81   | 1778.996  | AL049229  | 3795.858  | 6913.762  | NM_000710 | 665.092   | 733.791   |
| Z83805    | 627.555   | 634.905   | NM_018306 | 34432.156 | 46572.984 | AK026281  | 296.79    | 199.43    |
| NM_004666 | 2328.9    | 3131.736  | AK026146  | 4868.667  | 5573.077  | NM_006406 | 4328.54   | 7386.157  |
| NM_003614 | 2102.369  | 3189.762  | AK023152  | 3274.018  | 3102.722  | AF216292  | 27421.191 | 35180.121 |
| NM_014257 | 8031.625  | 9038.233  | AK000155  | 2497.082  | 2319.72   | NM_000952 | 1284.299  | 2124.78   |
| NM_001140 | 867.147   | 1008.339  | AL389937  | 4675.749  | 3840.508  | NM_005894 | 1211.569  | 1609.528  |
| NM_016059 | 304.206   | 588.295   | AK022628  | 49210.496 | 49245.938 | NM_014584 | 2785.911  | 4608.396  |
| NM_004843 | 2731.835  | 3274.869  | AK021737  | 5447.727  | 5126.524  | M30627    | 939.281   | 1069.333  |
| AK022845  | 998.04    | 1058.73   | AK026295  | 7811.18   | 6539.951  | NM_005810 | 9001.392  | 12755.661 |
| NM_003004 | 701.617   | 582.615   | AK022346  | 608.508   | 644.862   | M28170    | 7534.331  | 8975.187  |
| S77835    | 532.895   | 283.826   | AK025007  | 2269.331  | 1983.273  | NM_001555 | 729.03    | 1097.291  |
| NM_002985 | 7042.389  | 5268.743  | NM_016486 | 7727.103  | 7108.061  | AK026223  | 2804.854  | 3666.414  |
| AB018347  | 5737.146  | 4777.589  | AL117601  | 781.448   | 730.072   | NM_000874 | 866.988   | 891.245   |
| AB033073  | 3858.197  | 4420.269  | AK026490  | 33031.742 | 30006.871 | NM_005854 | 1271.16   | 1614.342  |
| NM_005813 | 3476.505  | 4112.188  | AJ227861  | 2897.325  | 2300.57   | AB007863  | 22716.881 | 21327.074 |
| AB037718  | 5282.978  | 5526.596  | AJ001020  | 1063.269  | 938.098   | AK024456  | 2585.681  | 3240.948  |
| AL389994  | 1230.561  | 1551.141  | AJ001875  | 3466.598  | 2805.681  | NM_017789 | 570.228   | 838.447   |
| NM_003909 | 5019.474  | 6297.902  | L13433    | 2068.829  | 4133.193  | D31887    | 2442.414  | 2981.927  |
| NM_001277 | 7654.465  | 8758.631  | NM_007220 | 848.178   | 1360.646  | NM_002313 | 1162.231  | 1508.342  |
| NM_003659 | 5372.136  | 5279.74   | NM_017777 | 1644.151  | 1449.814  | NM_004459 | 844.227   | 972.468   |
| NM_007072 | 1884.702  | 2223.76   | AK021989  | 999.098   | 903.191   | NM_005503 | 1352.896  | 2231.015  |
| NM_012320 | 4365.706  | 4203.056  | AK023407  | 761.335   | 583.758   | NM_001502 | 710.052   | 1151.369  |
| NM_018208 | 3052.973  | 3504.777  | AK022298  | 2428.519  | 2017.244  | NM_005721 | 659.522   | 1074.997  |
| NM_015929 | 6520.654  | 6981.182  | AJ277441  | 26553.838 | 24652.996 | AF284223  | 14969.646 | 23183.531 |
| U90653    | 4017.249  | 4067.507  | NM_006057 | 1194.585  | 966.62    | AF176012  | 2333.812  | 3020.469  |
| NM_000196 | 731.537   | 930.814   | AK024242  | 10564.662 | 10895.896 | NM_005971 | 2539.969  | 3023.821  |
| NM_018339 | 2344.714  | 2646.119  | AK024559  | 489.809   | 739.115   | NM_017435 | 5832.305  | 876.805   |
| NM_006745 | 29604.705 | 34595.973 | AK024851  | 1794.718  | 2698.612  | NM_013386 | 3197.675  | 3941.732  |
| NM_000275 | 1262.983  | 1818.97   | AK024943  | 1002.693  | 1695.338  | NM_006517 | 1447.002  | 1679.973  |
| AK000037  | 1276.583  | 1476.117  | AK024995  | 457.106   | 921.028   | NM_004171 | 1988.071  | 1938.209  |
| NM_014760 | 2190.678  | 3156.736  | AL359943  | 35962.969 | 30216.207 | NM_014037 | 6090.681  | 6327.779  |
| NM_014404 | 1197.193  | 1153.395  | NM_000534 | 4656.505  | 3743.734  | NM_004866 | 10645.067 | 11974.854 |
| NM_018713 | 445.897   | 450.38    | L10140    | 1506.772  | 917.432   | NM_018688 | 1543.622  | 1633.236  |
| NM_015947 | 3987.281  | 3898.554  | AL133447  | 1427.115  | 1366.363  | AK056652  | 2655.004  | 3047.751  |
| NM_002042 | 6412.188  | 5899.715  | AB037853  | 18515.547 | 18090.455 | AL137438  | 973.876   | 1172.358  |
| AB028944  | 713.658   | 854.765   | AK056222  | 1883.22   | 1669.477  | NM_017957 | 2760.534  | 2845.647  |
| AJ006268  | 1160.023  | 1346.685  | AK002028  | 24657.795 | 28960.879 | NM_003024 | 1261.881  | 1914.106  |
| NM_012245 | 25409.629 | 24145.563 | AL050127  | 2351.999  | 2886.414  | NM_013248 | 1714.57   | 2443.817  |
| NM_133263 | 2388.702  | 1860.156  | AK024805  | 10032.337 | 9556.073  | NM_000034 | 59414.98  | 71514.781 |
| NM_000025 | 10939.189 | 8893.183  | AK001423  | 1169.917  | 1491.794  | AK022230  | 1063.873  | 1885.335  |
| D38521    | 3660.566  | 3284.205  | AL133574  | 1379.102  | 1301.295  | AK022147  | 2589.377  | 3391.033  |
| NM_000403 | 4167.723  | 3774.799  | AF147339  | 23801.592 | 20769.137 | L25664    | 869.986   | 1309.028  |
| NM_018127 | 9797.653  | 9281.722  | AL390181  | 25008.232 | 21434.334 | NM_014940 | 2817.806  | 3487.52   |
| AB020677  | 9812.16   | 7311.173  | NM_017914 | 23184.994 | 20872.516 | NM_005783 | 568.915   | 794.988   |
| AB033097  | 2776.577  | 2405.555  | S83374    | 2078.36   | 1623.843  | AK000851  | 413.835   | 392.289   |
| NM_000135 | 2115.601  | 2512.87   | AK025784  | 18060.93  | 18099.02  | NM_006900 | 493.635   | 784.857   |
| AJ223948  | 4274.395  | 4968.979  | U07199    | 2831.452  | 2828.538  | AJ289111  | 4569.608  | 6476.924  |
| NM_016218 | 1486.251  | 2298.06   | AK023713  | 1068.675  | 1022.147  | NM_016356 | 723.933   | 1224.832  |
| AK022947  | 3601.74   | 5018.32   | X81445    | 1122.171  | 1179.586  | NM_014043 | 1800.889  | 1939.979  |
| AL050029  | 3850.857  | 6485.851  | U95091    | 995.607   | 1264.097  | NM_014622 | 604.589   | 771.614   |

|            |           |           |           |           |           |           |           |           |
|------------|-----------|-----------|-----------|-----------|-----------|-----------|-----------|-----------|
| AL049966   | 506.602   | 383.616   | NM_017900 | 26370.063 | 23693.285 | AB011114  | 35545.598 | 32636.904 |
| NM_005204  | 2791.573  | 2214.794  | S50182    | 1847.323  | 1767.626  | D11466    | 13403.584 | 13174.925 |
| NM_016203  | 717.902   | 707.877   | AL360145  | 1573.689  | 1434.641  | NM_014056 | 9289.458  | 9092.57   |
| NM_002759  | 4442.976  | 3271.121  | Y12016    | 1190.53   | 894.558   | D31885    | 15335.997 | 14566.282 |
| NM_007271  | 1847.296  | 1966.774  | NM_001178 | 836.441   | 1008.993  | NM_016649 | 2860.597  | 2534.947  |
| NM_018132  | 3994.655  | 4015.18   | NM_000704 | 1599.329  | 1873.618  | AK090536  | 10585.341 | 9940.13   |
| NM_018207  | 1007.636  | 1125.3    | NM_015987 | 1359.562  | 1156.257  | D63477    | 624.921   | 595.493   |
| NM_000345  | 15255.923 | 14089.891 | NM_019605 | 2415.177  | 2089.08   | NM_020243 | 13206.962 | 11906.745 |
| NM_001862  | 55947.734 | 61869.383 | NM_015369 | 794.489   | 690.846   | NM_014051 | 2059.231  | 2128.201  |
| NM_006531  | 1984.426  | 1873.276  | Z49090    | 6282.855  | 5407.626  | AK025398  | 6583.843  | 7912.89   |
| AB029021   | 14714.071 | 13322.474 | AK025467  | 4534.474  | 4068.857  | AB037750  | 2015.12   | 2300.935  |
| NM_002101  | 27910.164 | 24713.535 | AK026593  | 3721.927  | 3647.097  | AK023056  | 484.335   | 477.694   |
| NM_005423  | 757.324   | 848.055   | L37700    | 1179.987  | 794.274   | NM_001120 | 25250.824 | 29406.123 |
| Z36789     | 1762.056  | 1750.039  | NM_017665 | 3151.16   | 3374.149  | NM_017888 | 1232.543  | 1706.427  |
| J02874     | 4520.859  | 5665.379  | AK024819  | 997.179   | 574.06    | AK022207  | 696.36    | 858.435   |
| BF310427   | 3344.804  | 3229.844  | AF052106  | 3669.673  | 3570.999  | AV708752  | 3874.824  | 5137.976  |
| N94424     | 792.517   | 802.932   | AK000441  | 474.489   | 557.427   | AF119885  | 2309.906  | 2588.559  |
| AA045192   | 3215.741  | 2388.75   | AK022391  | 1603.764  | 1407.634  | NM_004996 | 1857.194  | 2553.983  |
| H45617     | 368.936   | 596.594   | NM_016125 | 2546.788  | 2888.426  | NM_000588 | 23693.045 | 19072.859 |
| M92642     | 2278.654  | 3316.435  | CY3Cy5    | 12319.868 | 977.123   | AK026281  | 448.187   | 391.056   |
| H-U 44385  | 17770.914 | 23908.451 | R72122    | 3406.435  | 4791.631  | AK026680  | 4850.112  | 3794.524  |
| ID 1654970 | 8632.729  | 8237.602  | Z35309    | 2995.18   | 4295.228  | AK001299  | 20841.215 | 16115.367 |
| ID 2531132 | 8040.712  | 7141.631  | X04571    | 995.122   | 865.617   | AB014559  | 11571.161 | 10437.555 |
| ID 4365538 | 424.32    | 349.019   | AA700005  | 3448.885  | 4858.202  | NM_016489 | 3539.662  | 3171.043  |
| AA485665   | 469.425   | 404.512   | AA292025  | 1177.148  | 995.665   | NM_005033 | 2862.312  | 2237.851  |
| BF125928   | 15511.701 | 15984.964 | AK056843  | 4924.573  | 3165.184  | NM_015932 | 51154.715 | 46250.16  |
| BG571026   | 3492.808  | 5957.581  | U49928    | 20456.936 | 13164.212 | NM_017949 | 481.949   | 546.404   |
| AK022845   | 1095.439  | 939.231   | AK096645  | 16696.166 | 12637.485 | AK022169  | 371.442   | 454.349   |
| NM_003004  | 712.31    | 611.411   | AK092859  | 2070.223  | 1574.118  | AF015592  | 1267.353  | 1271.246  |
| S77835     | 433.042   | 656.229   | NM_019884 | 4426.48   | 2563.489  | AK026795  | 1260.738  | 1375.859  |
| NM_002985  | 8389.774  | 10954.014 | SR2       | 54112.242 | 52639.797 | NM_016399 | 1863.29   | 2283.437  |
| AB018347   | 5806.488  | 5669.916  | SR4       | 17984.484 | 17464.627 | NM_016617 | 4715.413  | 5851.444  |
| AB033073   | 4162.709  | 4821.633  | SR6       | 2509.161  | 2178.577  | NM_002027 | 5425.008  | 7016.664  |
| NM_003284  | 1843.667  | 1957.563  | SR8       | 7902.326  | 27622.607 | AL162078  | 532.242   | 928.863   |
| NM_018152  | 1437.986  | 1365.099  | SR10      | 28540.293 | 10085.98  | NM_000919 | 450.984   | 483.178   |
| NM_000319  | 2359.698  | 2379.372  | CY3Cy5    | 4433.294  | 342.821   | NM_013382 | 1551.624  | 2068.885  |
| NM_003257  | 509.076   | 858.553   | NM_005291 | 20167.439 | 24068.727 | AB002314  | 270.723   | 653.878   |
| NM_012461  | 3199.089  | 4079.422  | AF253316  | 659.347   | 1043.194  | NM_005503 | 1661.266  | 1425.214  |
| AK001379   | 1513.131  | 1459.339  | NM_005855 | 876.76    | 599.485   | NM_001502 | 2181.635  | 1900.188  |
| NM_017450  | 3988.787  | 4107.06   | NM_005388 | 3566.795  | 2384.592  | NM_005721 | 697.312   | 613.346   |
| NM_002023  | 983.639   | 1136.619  | NM_007232 | 27106.881 | 16508.168 | AF284223  | 15310.408 | 15403.591 |
| NM_002839  | 1007.827  | 920.586   | NM_003027 | 1594.866  | 1264.42   | AF176012  | 2684.511  | 2260.305  |
| AF190500   | 1082.056  | 1184.914  | NM_002717 | 4223.319  | 2048.692  | BE743838  | 3407.533  | 2606.353  |
| NM_001616  | 502.818   | 666.973   | NM_003025 | 15324.419 | 7082.863  | NM_001081 | 1996.498  | 1559.61   |
| NM_005904  | 1286.372  | 1599.422  | U52051    | 886.446   | 501.676   | NM_002483 | 1960.023  | 2152.874  |
| NM_005273  | 15450.597 | 21290.117 | NM_020179 | 4926.701  | 3055.682  | BF002026  | 828.002   | 742.031   |
| NM_000524  | 577.431   | 563.242   | NM_004306 | 51772.801 | 38167.168 | L35594    | 683.353   | 651.495   |
| NM_006576  | 1821.186  | 1476.58   | NM_001153 | 780.496   | 959.748   | BE790116  | 5270.882  | 4729.724  |
| NM_018645  | 1290.564  | 890.089   | NM_006786 | 2796.599  | 2001.897  | AI922341  | 2773.62   | 2511.33   |
| AB035266   | 3158.687  | 2719.262  | NM_006205 | 2190.1    | 2446.61   | S57283    | 393.998   | 283.212   |
| NM_003744  | 2673.176  | 2321.54   | NM_004034 | 5092.027  | 3887.309  | M12824    | 541.698   | 539.921   |
| NM_006378  | 1724.109  | 1855.285  | NM_000130 | 6912.456  | 6127.555  | AA457153  | 2474.625  | 3698.753  |
| NM_014404  | 1443.896  | 1626.042  | AF193756  | 1121.299  | 1362.288  | AA283122  | 1552.045  | 2117.419  |

|           |           |           |           |           |           |           |           |           |
|-----------|-----------|-----------|-----------|-----------|-----------|-----------|-----------|-----------|
| NM_018713 | 675.521   | 795.876   | AI492087  | 17307.072 | 16190.282 | AA868504  | 1391.239  | 1657.813  |
| NM_015947 | 5018.357  | 5557.784  | NM_016568 | 1229.72   | 759.872   | AA877845  | 4642.751  | 7149.042  |
| NM_002042 | 20132.727 | 21828.881 | NM_002987 | 746.828   | 539.186   | AA664241  | 6612.776  | 8612.362  |
| AB028944  | 788.297   | 1035.182  | AB033102  | 9942.068  | 7236.903  | NM_014940 | 2855.003  | 1568.341  |
| AJ006268  | 1173.805  | 1450.945  | NM_014774 | 4058.314  | 3270.073  | NM_005783 | 497.953   | 412.506   |
| AF190864  | 6096.089  | 6442.561  | NM_014143 | 7706.843  | 6193.375  | AK000851  | 228.662   | 244.426   |
| NM_002779 | 6708.015  | 6901.789  | M55646    | 14428.678 | 10356.834 | NM_006900 | 2568.207  | 1912.93   |
| L40397    | 14092.933 | 20257.926 | NM_006112 | 25684.498 | 17203.229 | AJ289111  | 5177.513  | 3654.436  |
| NM_020198 | 7817.384  | 12671.558 | M12807    | 1624.692  | 1021.315  | NM_016356 | 8419.936  | 6142.453  |
| NM_001177 | 5733.322  | 6700.712  | NM_001765 | 1814.142  | 1455.968  | NM_006406 | 3414.792  | 3146.162  |
| NM_014447 | 2180.723  | 2326.7    | NM_003361 | 2788.835  | 2706.313  | AF216292  | 22007.158 | 15927.968 |
| NM_002356 | 1047.504  | 1038.645  | NM_012099 | 3589.157  | 2999.747  | NM_000952 | 1020.534  | 844.196   |
| NM_006691 | 1715.959  | 1836.688  | NM_018684 | 12924.864 | 11324.92  | NM_005894 | 827.177   | 713.094   |
| NM_001505 | 748.814   | 936.559   | NM_017983 | 1358.19   | 1276.006  | NM_014584 | 1891.724  | 1487.967  |
| NM_003710 | 1776.878  | 2637.577  | AF116909  | 2160.967  | 2088.469  | M30627    | 422.686   | 260.078   |
| Z83805    | 1048.623  | 1186.539  | BE906724  | 1946.257  | 1688.31   | NM_005810 | 6473.906  | 5472.938  |
| NM_004666 | 2343.354  | 3022.26   | NM_002283 | 10994.128 | 9244.264  | M28170    | 4654.117  | 3115.46   |
| NM_003614 | 1404.455  | 1108.832  | AJ276095  | 17657.885 | 16510.773 | NM_001555 | 430.592   | 543.023   |
| NM_014257 | 7565.946  | 5759.255  | NM_004819 | 4077.094  | 3304.025  | AK026223  | 1381.004  | 1927.264  |
| NM_001140 | 598.657   | 719.022   | NM_007184 | 2855.749  | 2647.801  | NM_000874 | 930.091   | 1406.058  |
| NM_016059 | 371.762   | 344.289   | AF231916  | 2943.422  | 2104.188  | NM_005854 | 788.913   | 1596.986  |
| NM_004843 | 2250.945  | 2494.821  | NM_003501 | 4041.799  | 3484.617  | AB007863  | 1150.436  | 1393.304  |
| NM_005204 | 3008.112  | 2493.587  | AK022654  | 22610.844 | 18168.709 | AK024456  | 2419.535  | 3400.126  |
| NM_016203 | 1039.652  | 978.481   | BC002905  | 5517.058  | 5134.089  | NM_017789 | 353.558   | 455.842   |
| NM_002759 | 4891.405  | 4305.031  | NM_018091 | 7017.52   | 6126.761  | D31887    | 2305.194  | 2889.55   |
| NM_007271 | 1998.016  | 1940.936  | NM_001108 | 3462.791  | 2987.613  | NM_002313 | 1058.444  | 1558.995  |
| NM_006255 | 4775.484  | 6118.261  | NM_001637 | 1026.366  | 489.6     | NM_004459 | 623.235   | 641.998   |
| BE392143  | 4094.67   | 5668.869  | NM_016630 | 8761.592  | 6553.271  | NM_004915 | 2690.653  | 1764.941  |
| NM_005813 | 3045.894  | 3226.572  | NM_014291 | 7109.817  | 4685.514  | AK022207  | 1149.765  | 932.599   |
| AB037718  | 5958.239  | 8863.537  | NM_014631 | 879.556   | 733.593   | AV708752  | 3359.546  | 2239.291  |
| AL389994  | 1309.574  | 1941.319  | NM_001089 | 4896.245  | 3640.327  | AF119885  | 2503.278  | 1733.584  |
| NM_003909 | 5108.995  | 6823.068  | NM_000120 | 4299.971  | 3739.222  | NM_000750 | 816.671   | 453.676   |
| NM_001277 | 8265.801  | 10342.758 | AF172327  | 26433.52  | 21497.572 | NM_004996 | 2241.92   | 1659.533  |
| NM_003659 | 5447.38   | 6342.807  | NM_001676 | 4018.582  | 2584.922  | NM_005971 | 1985.12   | 1744.381  |
| NM_012320 | 4884.189  | 4263.341  | NM_001679 | 15613.651 | 11893.845 | NM_017435 | 5119.713  | 564.137   |
| NM_018208 | 3387.044  | 2829.714  | NM_004046 | 62289.574 | 62373.332 | NM_013386 | 3190.412  | 2646.631  |
| U90653    | 4167.37   | 4590.744  | NM_004983 | 1255.799  | 1055.131  | NM_006517 | 1366.822  | 1178.207  |
| NM_000196 | 671.748   | 1026.079  | U09384    | 640.718   | 577.162   | NM_004171 | 1386.388  | 1319.757  |
| NM_018339 | 253.097   | 384.336   | NM_006860 | 6840.937  | 6523.526  | NM_014037 | 4182.767  | 3942.086  |
| NM_006745 | 24984.355 | 22155.785 | NM_004794 | 11559.758 | 10865.063 | NM_004866 | 8808.385  | 10143.859 |
| NM_000275 | 876.479   | 642.346   | NM_004283 | 2183.243  | 1843.986  | NM_018688 | 1275.108  | 1542.363  |
| NM_018398 | 1342.056  | 1321.782  | NM_004163 | 24191.77  | 21832.811 | AK056652  | 2242.445  | 3055.862  |
| NM_002560 | 20966.494 | 16933.039 | AK026308  | 1719.849  | 1402.611  | AL137438  | 753.609   | 1206.455  |
| NM_000787 | 1122.406  | 997.692   | NM_013337 | 1618.046  | 1559.64   | NM_017957 | 271.434   | 527.952   |
| U57962    | 4799.211  | 4468.664  | NM_006899 | 4051.461  | 3507.909  | NM_003024 | 1358.206  | 2024.616  |
| NM_016176 | 8980.594  | 10742.142 | NM_012200 | 2549.551  | 1880.543  | NM_013248 | 1741.493  | 2242.815  |
| NM_005574 | 22300.502 | 25487.029 | NM_001724 | 1309.892  | 1276.657  | NM_000034 | 54265.344 | 72626.5   |
| NM_017895 | 9669.909  | 12418.186 | NM_000150 | 2061.849  | 1662.358  | AK022230  | 1084.544  | 1525.832  |
| NM_004610 | 1294.996  | 1324.608  | AB023152  | 994.641   | 573.117   | AK022147  | 2241.814  | 2980.059  |
| NM_001612 | 2594.807  | 3737.255  | NM_006212 | 1449.467  | 930.52    | L25664    | 469.919   | 783.675   |
| AK027002  | 1833.622  | 2579.553  | AK022872  | 3696.077  | 3168.423  | NM_002027 | 4879.727  | 2641.128  |
| AB025254  | 6011.638  | 8674.568  | AK024272  | 5911.002  | 3959.448  | AL162078  | 2590.659  | 1741.15   |
| NM_004081 | 1646.787  | 2581.803  | NM_016381 | 1853.26   | 1338.64   | NM_000919 | 235.915   | 283.98    |

|           |           |           |           |           |           |           |           |           |
|-----------|-----------|-----------|-----------|-----------|-----------|-----------|-----------|-----------|
| AB032990  | 157.047   | 170.86    | AL591715  | 839.148   | 743.904   | NM_013382 | 9777.918  | 6703.696  |
| NM_000025 | 13221.094 | 10123.99  | NM_007254 | 1418.386  | 1282.193  | AB002314  | 787.617   | 628.594   |
| D38521    | 3733.475  | 3051.774  | NM_018042 | 6680.966  | 7585.724  | NM_014043 | 1494.085  | 1322.606  |
| NM_000403 | 4428.807  | 3850.574  | BE741525  | 1505.304  | 1626.735  | NM_014622 | 742.577   | 315.275   |
| NM_018127 | 9472.664  | 11443.813 | BF030555  | 29319.451 | 25214.428 | AB011114  | 34256.184 | 24985.502 |
| AB020677  | 10295.167 | 15693.977 | NM_012433 | 6736.883  | 4356.075  | D11466    | 13016.05  | 11089.737 |
| AB033097  | 2220.93   | 1659.039  | NM_005605 | 2664.777  | 2380.391  | NM_014056 | 8458.742  | 6957.904  |
| NM_000135 | 1999.519  | 1244.293  | NM_002576 | 1591.765  | 1501.617  | D31885    | 14183.218 | 13212.203 |
| AJ223948  | 3396.519  | 2429.6    | NM_003582 | 2404.892  | 2169.716  | NM_016645 | 2362.808  | 1918.559  |
| NM_016218 | 1089.437  | 686.099   | AF057354  | 634.271   | 530.948   | AK090536  | 9234.438  | 7932.018  |
| AK022947  | 2689.682  | 1291.65   | AF169351  | 9098.344  | 8179.327  | D63477    | 505.895   | 516.015   |
| AL050029  | 2872.291  | 2161.979  | M14200    | 52519.391 | 56489.762 | NM_020243 | 12345.741 | 14877.537 |
| AL049966  | 568.479   | 595.459   | NM_000282 | 3795.893  | 3715.617  | NM_014051 | 2054.312  | 2584.031  |
| NM_004063 | 486.214   | 720.867   | NM_000532 | 12914.864 | 12868.038 | AK025398  | 6020.596  | 9741.651  |
| AB040976  | 5342.489  | 4466.445  | NM_016341 | 1118.222  | 1007.106  | AB037750  | 2091.417  | 2484.73   |
| NM_018641 | 6091.45   | 4530.605  | NM_004034 | 4715.493  | 3471.21   | AK023056  | 659.78    | 865.787   |
| U49089    | 403.464   | 326.535   | NM_000130 | 6172.245  | 5485.487  | NM_001120 | 21868.617 | 25909.93  |
| NM_002221 | 2410.391  | 2237.015  | AF193756  | 1130.572  | 1353.047  | NM_017888 | 1011.982  | 1481.249  |
| NM_002371 | 507.232   | 683.548   | AI492087  | 18631.121 | 19380.531 | NM_003150 | 1347.777  | 678.681   |
| NM_002562 | 445.287   | 663.317   | R72122    | 2840.12   | 2091.42   | NM_014784 | 2330.788  | 1327.775  |
| AK024502  | 7543.803  | 13454.1   | Z35309    | 2755.393  | 1937.233  | AK026383  | 3524.027  | 2125.185  |
| NM_001124 | 1531.908  | 3344.578  | X04571    | 822.396   | 533.014   | AK023821  | 300.822   | 236.655   |
| NM_004586 | 2421.879  | 2669.931  | AA700005  | 2218.101  | 2048.554  | AB014594  | 2270.231  | 1391.647  |
| NM_004844 | 5732.099  | 7193.727  | AA292025  | 1257.488  | 1057.887  | M94547    | 957.907   | 634.934   |
| NM_013447 | 2250.094  | 1973.613  | AA437226  | 1495.415  | 1256.766  | NM_005087 | 9364.703  | 6490.378  |
| NM_000051 | 3355.531  | 2837.615  | R36143    | 1668.673  | 1539.671  | NM_012098 | 2022.009  | 1206.13   |
| NM_005709 | 523.007   | 456.441   | XM_056359 | 1012.235  | 874.609   | NM_018095 | 929.628   | 830.99    |
| NM_004180 | 6104.691  | 3927.229  | D10353/NM | 12191.158 | 10092.682 | AB023164  | 2220.438  | 1650.174  |
| NM_004786 | 33891.117 | 28951.639 | M15042    | 5322.551  | 4621.06   | AK026281  | 419.472   | 416.243   |
| AF302109  | 4761.938  | 4351.645  | AK056843  | 5672.075  | 5402.979  | AK026680  | 4318.199  | 2869.66   |
| AL117485  | 7549.875  | 5261.086  | U49928    | 24783.75  | 21383.348 | NM_012436 | 50526.828 | 54394.801 |
| NM_003505 | 641.531   | 574.265   | AK096645  | 18064.988 | 18344.643 | AK001299  | 4410.932  | 3915.778  |
| NM_007191 | 1284.928  | 932.273   | AK092859  | 1660.281  | 1856.063  | AB014559  | 3187.898  | 3581.304  |
| AL109667  | 1109.783  | 604.947   | NM_018291 | 4554.886  | 3822.28   | NM_016488 | 2738.723  | 3001.902  |
| NM_000840 | 727.29    | 453.2     | NM_005530 | 2084.7    | 1553.395  | NM_005033 | 2328.782  | 2802.989  |
| NM_001094 | 398.789   | 236.21    | BE906724  | 1781.838  | 1891.12   | NM_015932 | 47662.777 | 62656.961 |
| NM_004476 | 585.893   | 318.766   | NM_002283 | 9108.174  | 9709.85   | NM_017945 | 379.488   | 604.845   |
| NM_003155 | 293.282   | 143.394   | AJ276095  | 16431.664 | 16940.428 | AK022169  | 401.63    | 738.146   |
| AF205437  | 909.996   | 880.713   | NM_004819 | 3343.777  | 2919.668  | AF015592  | 1228.566  | 1416.128  |
| AF034102  | 10273.843 | 8635.897  | NM_007184 | 2975.014  | 2459.968  | AK026795  | 1293.308  | 1631.916  |
| AJ008142  | 14080.674 | 10805.646 | NM_005291 | 18736.982 | 15012.571 | NM_016395 | 1598.757  | 2104.786  |
| NM_001343 | 4901.57   | 4717.155  | AF253316  | 595.593   | 645.978   | NM_016617 | 4213.655  | 5197.038  |
| NM_007275 | 11147.737 | 11083.724 | NM_005855 | 510.845   | 481.774   | NM_002338 | 1397.059  | 613.949   |
| NM_019025 | 23005.047 | 23293.15  | NM_002923 | 1200.842  | 1020.017  | AL117666  | 501.611   | 181.739   |
| NM_018461 | 6587.485  | 7997.961  | NM_006794 | 1752.69   | 1513.856  | Y17865    | 2068.087  | 1122.988  |
| AF235023  | 3514.674  | 4634.168  | NM_018653 | 4031.264  | 3760.962  | NM_005825 | 10117.301 | 5789.143  |
| NM_006910 | 5186.752  | 7393.032  | NM_005388 | 3948.833  | 3908.35   | NM_002756 | 1547.988  | 995.653   |
| AF162667  | 3478.373  | 3871.945  | NM_007232 | 35583.344 | 35780.18  | U79299    | 364.81    | 382.417   |
| AB046847  | 2961.023  | 2181.686  | NM_003027 | 1115.803  | 1255.284  | AJ000414  | 677.249   | 428.653   |
| NM_000447 | 3025.882  | 2202.434  | NM_016257 | 588.866   | 460.607   | AK025674  | 8149.167  | 5808.834  |
| NM_006354 | 9239.213  | 7964.748  | NM_002717 | 5250.409  | 4527.903  | AF007194  | 5206.186  | 3529.911  |
| AF303378  | 8705.797  | 7434.427  | NM_014486 | 277.755   | 797.789   | NM_019065 | 1208.97   | 810       |
| NM_016037 | 7317.852  | 5360.194  | NM_003025 | 19246     | 18294.113 | NM_004761 | 2506.373  | 2190.545  |

|           |           |           |           |           |           |           |           |           |
|-----------|-----------|-----------|-----------|-----------|-----------|-----------|-----------|-----------|
| NM_000043 | 490.785   | 572.006   | NM_001153 | 866.864   | 1060.058  | Z25424    | 1341.944  | 931.005   |
| NM_016140 | 402.563   | 590.721   | NM_006786 | 2717.84   | 2754.997  | U79458    | 3361.915  | 3000.003  |
| NM_015965 | 718.76    | 504.13    | NM_006205 | 1231.084  | 1502.377  | NM_014920 | 365.029   | 357.129   |
| NM_000417 | 3457.67   | 2385.106  | NM_004794 | 10353.685 | 11960.225 | NM_002961 | 34032.711 | 35830.355 |
| NM_020356 | 693.908   | 435.543   | NM_004283 | 2538.948  | 3175.213  | NM_018296 | 598.348   | 827.982   |
| AF152527  | 250.003   | 192.706   | NM_004163 | 19365.73  | 19985.766 | NM_000676 | 777.607   | 1138.109  |
| NM_018235 | 28596.951 | 21078.857 | NM_013337 | 1770.727  | 1467.982  | NM_004127 | 11205.247 | 14574.481 |
| NM_002424 | 418.925   | 398.995   | NM_004193 | 2189.504  | 2171.143  | NM_013324 | 3551.677  | 4104.909  |
| NM_012104 | 11896.903 | 9105.438  | NM_002803 | 9884.249  | 7952.907  | AL133022  | 342.577   | 894.934   |
| NM_006144 | 795.784   | 500.032   | NM_005508 | 2282.037  | 2168.388  | NM_003953 | 459.388   | 803.152   |
| AL136549  | 1555.764  | 1301.713  | NM_006788 | 1173.865  | 1592.664  | AL049925  | 1153.811  | 730.984   |
| NM_012166 | 1120.415  | 1016.469  | AK025039  | 724.705   | 980.023   | NM_012219 | 2251.32   | 1187.57   |
| NM_002216 | 642.165   | 576.886   | NM_016568 | 1375.295  | 1708.296  | X72887    | 1138.754  | 577.397   |
| NM_007038 | 2322.408  | 3460.863  | NM_002987 | 495.936   | 711.867   | NM_004529 | 607.765   | 402.682   |
| AF124433  | 1308.46   | 2157.596  | AB033102  | 14968.333 | 13412.51  | NM_000127 | 847.457   | 558.397   |
| AK001647  | 686.693   | 828.789   | NM_014774 | 3428.819  | 3812.906  | Y10483    | 5803.206  | 3751.541  |
| NM_001461 | 1182.062  | 951.809   | NM_014143 | 8897.246  | 8690.224  | NM_006784 | 1061.063  | 593.987   |
| AF061556  | 1064.516  | 1023.385  | M55646    | 17383.582 | 16848.02  | NM_017876 | 1584.239  | 991.413   |
| AL162049  | 2132.466  | 2118.301  | NM_006112 | 30258.502 | 30912.184 | NM_001087 | 45553.184 | 35308.484 |
| AF036144  | 804.299   | 869.397   | NM_000879 | 537.483   | 780.111   | NM_001826 | 408.003   | 209.308   |
| NM_001823 | 222.956   | 180.431   | M12807    | 2085.596  | 1932.493  | AK025352  | 355.597   | 263.926   |
| NM_005032 | 1010.758  | 932.661   | NM_001765 | 2272.013  | 2103.969  | NM_003721 | 5020.731  | 4697.266  |
| NM_004160 | 3774.529  | 3204.091  | NM_012099 | 3631.012  | 3914.626  | NM_004724 | 773.546   | 816.946   |
| AL109677  | 1142.571  | 861.869   | NM_018684 | 14526.61  | 14735.782 | NM_001431 | 4774.3    | 5165.054  |
| NM_003941 | 29946.439 | 20019.061 | NM_017983 | 1257.563  | 992.113   | NM_000427 | 781.722   | 1237.356  |
| AF177909  | 1240.564  | 906.856   | AF169351  | 8885.696  | 8844.568  | NM_014924 | 318.057   | 536.48    |
| NM_002664 | 8593.362  | 4363.867  | M14200    | 55481.688 | 58457.016 | NM_000174 | 7380.402  | 9434.207  |
| AB018271  | 3652.128  | 2336.108  | NM_000282 | 3482.618  | 3833.197  | NM_002506 | 1817.144  | 2132.858  |
| AL137665  | 2971.889  | 1763.733  | NM_000532 | 11819.789 | 12810.709 | NM_014343 | 2233.146  | 3134.19   |
| NM_016434 | 1911.93   | 1571.568  | NM_016341 | 1069.318  | 1193.576  | D25303    | 580.419   | 680.322   |
| NM_005634 | 3540.885  | 2966.188  | AF231916  | 3359.888  | 3064.431  | AB043007  | 15520.957 | 7986.613  |
| NM_017757 | 5285.133  | 4187.195  | NM_003501 | 4882.014  | 4541.226  | NM_004861 | 982.281   | 624.164   |
| NM_002146 | 19491.928 | 14248.538 | AK022654  | 34636.438 | 37971.648 | AF022913  | 1203.719  | 636.65    |
| AB007892  | 2016.176  | 1694.544  | BC002905  | 6017.948  | 6056.286  | NM_000026 | 808.574   | 467.102   |
| AB037748  | 1691.562  | 1964.075  | NM_018091 | 7439.532  | 7473.597  | NM_001382 | 4209.992  | 2129.352  |
| AB002306  | 2955.133  | 3454.023  | NM_001108 | 3715.104  | 4598.717  | M93718    | 2845.563  | 1976.406  |
| NM_001300 | 1941.835  | 1908.751  | NM_001637 | 992.363   | 911.598   | NM_005386 | 1650.972  | 1070.579  |
| NM_012472 | 881.672   | 1528.937  | NM_016630 | 7683.948  | 7405.319  | AK023807  | 4670.027  | 3184.858  |
| NM_003016 | 26916.729 | 31191.156 | NM_014291 | 6478.431  | 5389.283  | NM_018186 | 7160.659  | 5145.464  |
| NM_005463 | 13951.06  | 16438.959 | NM_014631 | 703.383   | 652.745   | AK024273  | 1328.68   | 839.971   |
| NM_001325 | 2769.652  | 2642.04   | NM_001089 | 5232.046  | 4378.438  | X59417    | 10109.856 | 7930.499  |
| NM_018282 | 18034.994 | 15086.841 | NM_000120 | 5261.995  | 5562.063  | NM_005659 | 39161.195 | 26798.742 |
| BC019932  | 4094.662  | 3064.524  | AF172327  | 33151.191 | 36122.918 | D28476    | 4382.303  | 3693.884  |
| AF114818  | 3014.799  | 2812.188  | NM_001676 | 4934.499  | 5052.035  | NM_016263 | 1047.127  | 1124.037  |
| AK025106  | 2586.238  | 2380.078  | NM_001679 | 17520.627 | 15561.99  | NM_003335 | 2222.662  | 2418.51   |
| NM_020144 | 3247.313  | 3036.18   | NM_004046 | 64647.414 | 63088.18  | AB002376  | 2019.46   | 2531.581  |
| NM_003906 | 49872.961 | 57484.441 | NM_004983 | 1193.099  | 1177.39   | NM_018249 | 388.47    | 419.217   |
| BE893142  | 2427.06   | 1570.684  | U09384    | 597.634   | 591.915   | NM_005556 | 805.528   | 1180.069  |
| NM_003103 | 5405.333  | 4081.635  | NM_018291 | 6962.314  | 7433.669  | NM_016631 | 712.628   | 1004.919  |
| NM_015340 | 6530.201  | 4117.081  | NM_005530 | 2594.998  | 3141.809  | AB015617  | 2485.579  | 3236.628  |
| NM_006451 | 4065.601  | 2898.274  | NM_006899 | 4830.709  | 5250.436  | AK022730  | 1504.002  | 1910.536  |
| NM_002094 | 2222.052  | 1520.145  | NM_012200 | 2807.042  | 2647.557  | NM_002256 | 6925.329  | 10603.836 |
| NM_002937 | 780.717   | 830.648   | NM_001724 | 1743.494  | 1834.915  | AF064839  | 12424.873 | 14388.937 |

|           |           |           |           |           |           |           |           |           |
|-----------|-----------|-----------|-----------|-----------|-----------|-----------|-----------|-----------|
| AL137476  | 5382.404  | 4887.892  | NM_000150 | 2650.493  | 2178.682  | NM_005439 | 3299.856  | 4379.151  |
| AF052174  | 2175.186  | 1661.542  | AB023152  | 983.363   | 895.541   | NM_006593 | 402.086   | 287.908   |
| AF070590  | 1257.877  | 1291.992  | NM_006212 | 1788.859  | 1839.472  | NM_000376 | 4470.116  | 2246.921  |
| NM_004709 | 320.008   | 416.441   | AK022872  | 3868.454  | 3359.083  | NM_000475 | 2529.659  | 1242.577  |
| NM_000761 | 37642.168 | 40268.051 | AK024272  | 5543.421  | 4203.188  | M61872    | 9778.959  | 3794.189  |
| NM_020142 | 3169.482  | 4522.211  | NM_016381 | 1998.019  | 2349.585  | AK027089  | 1266.293  | 733.82    |
| NM_000774 | 3081.875  | 4288.25   | AL591715  | 1102.611  | 901.839   | X59845    | 463.628   | 289.282   |
| NM_017781 | 35503.059 | 38158.793 | NM_018042 | 8569.514  | 8245.056  | NM_006284 | 3723.184  | 2341.549  |
| NM_006004 | 51348.484 | 57269.188 | BE741525  | 1452.78   | 1284.606  | U18909    | 1087.728  | 764.4     |
| NM_004894 | 20373.906 | 21366.533 | BF030555  | 33268.773 | 28823.492 | NM_003489 | 1970.196  | 1264.925  |
| AB028960  | 951.851   | 1107.366  | NM_012433 | 8119.604  | 5419.901  | NM_016589 | 5858.504  | 3782.162  |
| NM_005648 | 25545.5   | 24619.066 | NM_005605 | 2935.846  | 2617.023  | NM_003597 | 1266.447  | 776.033   |
| AK000689  | 400.789   | 538.025   | NM_002576 | 1788.71   | 2113.615  | NM_002568 | 24254.117 | 17926.035 |
| NM_006943 | 17604.006 | 17013.563 | NM_003582 | 1854.42   | 1713.5    | NM_006561 | 2089.058  | 1904.881  |
| NM_006741 | 7101.979  | 7871.834  | NM_020179 | 4987.854  | 4944.818  | NM_017521 | 486.895   | 565.427   |
| NM_014166 | 6623.662  | 7184.445  | NM_001153 | 787.484   | 1007.662  | AK025200  | 2889.813  | 3041.735  |
| AL117606  | 8136.909  | 13080.588 | NM_006786 | 2204.657  | 2050.37   | NM_001383 | 3330.418  | 4156.268  |
| NM_012330 | 2104.218  | 2233.614  | NM_006205 | 1581.645  | 1703.983  | NM_001029 | 37435.758 | 36610.203 |
| AF294278  | 1723.95   | 1855.608  | NM_004034 | 4800.06   | 5000.569  | NM_005008 | 15711.001 | 20844.887 |
| NM_018211 | 1530.863  | 1082.04   | NM_000130 | 6313.351  | 6870.179  | NM_016304 | 20929.379 | 26497.301 |
| NM_014520 | 3480.531  | 3338.678  | AF193756  | 979.155   | 1017.095  | NM_006013 | 27740.176 | 28958.127 |
| AL117508  | 316.279   | 415.753   | AI492087  | 21707.766 | 24185.205 | NM_014046 | 7897.636  | 9778.413  |
| NM_002616 | 2039.47   | 3748.3    | R72122    | 3018.286  | 2887.103  | L34071    | 5239.603  | 10487.6   |
| AK025712  | 14791.361 | 12393.343 | Z35309    | 3244.712  | 2572.016  | AK025201  | 3031.585  | 1681.578  |
| AK026375  | 2481.239  | 1361.796  | X04571    | 989.216   | 495.407   | AK021927  | 292.192   | 242.362   |
| U85992    | 927.791   | 1124.516  | AA700005  | 2392.581  | 2659.93   | AK022995  | 1138.714  | 553.335   |
| AL110152  | 736.355   | 530.718   | AA292025  | 1090.831  | 1328.006  | NM_006066 | 5775.57   | 3627.408  |
| NM_004795 | 367.049   | 439.011   | AA437226  | 1536.477  | 1589.705  | AV718258  | 287.067   | 202.827   |
| AF131745  | 768.127   | 1381.511  | R36143    | 1876.138  | 1780.414  | NM_005165 | 1207.508  | 724.638   |
| AL117565  | 4123.742  | 5293.838  | XM_056359 | 1285.516  | 993.239   | NM_005138 | 18684.934 | 12287.415 |
| AF147305  | 717.702   | 821.302   | D10353/NM | 15924.475 | 14688.403 | NM_002115 | 34321.957 | 20732.717 |
| AK022109  | 1291.919  | 1480.158  | M15042    | 5575.903  | 5059.399  | AK023162  | 1353.703  | 1222.292  |
| AK022103  | 780.648   | 664.699   | AK056843  | 7965.473  | 6915.572  | NM_006396 | 1519.789  | 1330.099  |
| NM_007030 | 815.193   | 656.505   | U49928    | 23709.367 | 24405.93  | NM_018649 | 851.5     | 999.729   |
| AK022111  | 877.512   | 489.938   | AK096645  | 16265.596 | 17012.455 | NM_018263 | 257.945   | 479.297   |
| AK021527  | 554.138   | 599.593   | AK092859  | 1421.95   | 1159.298  | NM_013449 | 1025.835  | 1204.003  |
| AF143882  | 857.479   | 1198.132  | NM_001765 | 2673.635  | 2558.029  | NM_004537 | 341.755   | 673.775   |
| U00953    | 991.861   | 889.393   | NM_012099 | 3701.218  | 4543.015  | NM_020226 | 1067.175  | 1343.382  |
| AF086176  | 858.899   | 1556.142  | NM_018684 | 14352.416 | 17735.793 | NM_017865 | 2182.564  | 2550.771  |
| AF086232  | 578.666   | 1553.142  | NM_017983 | 1709.966  | 2097.087  | NM_003427 | 728.725   | 1015.077  |
| NM_017742 | 1359.932  | 2980.426  | AF116909  | 2445.81   | 2802.348  | NM_005920 | 2700.254  | 2797.929  |
| NM_005108 | 1884.348  | 2321.719  | BE906724  | 2113.777  | 1879.927  | Y09321    | 606.513   | 621.125   |
| AK022292  | 3172.801  | 4275.472  | NM_002283 | 11800.709 | 12101.848 | AK001499  | 1826.675  | 769.627   |
| AK024173  | 357.775   | 509.737   | AJ276095  | 19027.057 | 19343.988 | AK023568  | 586.103   | 401.042   |
| AB051436  | 2690.755  | 2894.997  | NM_004819 | 3883.034  | 3394.276  | AK021728  | 304.493   | 196.903   |
| AK026482  | 9509.903  | 9730.811  | NM_007184 | 3382.198  | 3791.574  | AK026852  | 1005.041  | 499.356   |
| AL137473  | 2790.144  | 3048.753  | NM_005291 | 20989.795 | 17361.197 | AK021629  | 358.849   | 338.424   |
| AJ001873  | 8984.726  | 7828.398  | NM_005855 | 581.291   | 653.166   | AL110257  | 26715.613 | 16826.502 |
| AB026054  | 1523.448  | 1479.325  | NM_002923 | 1223.883  | 957.078   | AB013384  | 1076.267  | 968.842   |
| AK022604  | 1064.517  | 406.364   | NM_006794 | 1863.42   | 1821.196  | AK024824  | 1353.502  | 820.549   |
| U66048    | 1203.499  | 802.3     | NM_018653 | 4720.691  | 5359.897  | AK024270  | 1242.087  | 1073.348  |
| AL080095  | 452.45    | 157.977   | NM_005388 | 5482.251  | 5692.161  | AK025569  | 2641.024  | 1926.835  |
| AK023401  | 1848.52   | 1761.86   | NM_007232 | 42644.832 | 43801.707 | AK023060  | 1236.604  | 1103.613  |

|           |           |           |           |           |           |           |           |           |
|-----------|-----------|-----------|-----------|-----------|-----------|-----------|-----------|-----------|
| AK001865  | 867.461   | 1392.448  | NM_003027 | 1095.577  | 880.324   | NM_01487C | 744.528   | 677.119   |
| AK024035  | 11047.192 | 13859.234 | NM_016257 | 739.282   | 660.262   | AK021917  | 1172.075  | 1151.565  |
| AL049331  | 377.755   | 622.996   | NM_002717 | 5806.16   | 5966.826  | AF052146  | 22082.818 | 18068.137 |
| AL050079  | 1647.287  | 1584.933  | NM_012114 | 563.385   | 530.884   | NM_00487C | 1684.628  | 1997.428  |
| AL080233  | 2203.027  | 1996.278  | NM_003025 | 18890.455 | 16796.744 | AF143872  | 2681.096  | 2814.485  |
| AL117591  | 339.039   | 522.424   | NM_001679 | 17571.289 | 21497.855 | AF143326  | 525.799   | 610.446   |
| AL049361  | 601.453   | 721.68    | NM_004046 | 59811.848 | 65765.07  | AL049229  | 2242.922  | 2235.406  |
| AL050132  | 559.614   | 635.469   | NM_004983 | 1474.98   | 2026.872  | NM_01830E | 16579.66  | 20938.951 |
| AL117663  | 1349.262  | 1631      | U09384    | 875.794   | 833.892   | AK026146  | 1459.165  | 1992.084  |
| NM_014293 | 2463.149  | 3493.076  | NM_00686C | 8300.214  | 12114.775 | AK023152  | 1816.054  | 2030.983  |
| AK024432  | 2973.553  | 3733.956  | NM_004794 | 14743.689 | 18301.85  | AK000155  | 1738.939  | 1815.226  |
| AL137513  | 1633.488  | 2634.344  | NM_004283 | 2667.141  | 2990.765  | AL389937  | 1961.857  | 1598.763  |
| NM_018067 | 4012.944  | 6933.88   | NM_004163 | 27212.59  | 31527.328 | AK022628  | 26586.32  | 13650.684 |
| AL122109  | 1490.771  | 1658.354  | AK026308  | 2117.524  | 2021.151  | AK021737  | 3368.373  | 1929.239  |
| AF074988  | 1610.833  | 1585.818  | NM_013337 | 2133.554  | 2348.044  | AL357454  | 748.407   | 506.685   |
| AK024946  | 1772.344  | 1604.777  | NM_004193 | 2138.714  | 1982.461  | AK026295  | 4128.021  | 2283.27   |
| AK001432  | 2425.771  | 4339.953  | NM_002803 | 9449.545  | 6821.34   | AK022346  | 273.246   | 301.493   |
| AL133568  | 5834.193  | 9028.87   | NM_00550E | 1914.023  | 2233.971  | AK025007  | 1482.801  | 808.993   |
| AF009265  | 1473.816  | 773.605   | NM_018485 | 558.003   | 1115.371  | NM_01648E | 4750.249  | 2900.631  |
| AF009309  | 906.675   | 627.079   | NM_00678E | 957.23    | 1031.991  | AL117601  | 515.873   | 455.513   |
| AF054830  | 207.528   | 558.832   | NM_01656E | 1115.358  | 1142.973  | AK026490  | 17489.471 | 12464.413 |
| NM_00236C | 1568.642  | 1661.024  | AB033102  | 16940.107 | 16728.896 | AJ227861  | 1843.016  | 1230.394  |
| AF009274  | 527.917   | 485.864   | NM_014774 | 4167.602  | 5789.469  | AJ001020  | 685.801   | 612.34    |
| AF009322  | 680.433   | 772.995   | NM_014143 | 8765.876  | 10124.18  | AJ001875  | 2268.653  | 1650.686  |
| AF056425  | 1401.345  | 1137.286  | M55646    | 21634.148 | 21058.557 | X64985    | 421.518   | 619.343   |
| AF090893  | 667.784   | 743.728   | NM_006112 | 29591.145 | 31397.443 | L13433    | 1046.425  | 898.861   |
| NM_018033 | 8817.698  | 5991.099  | NM_00257E | 1324.688  | 1769.512  | NM_00722C | 447.494   | 410.195   |
| AK001945  | 759.299   | 801.312   | NM_003582 | 1977.662  | 2749.589  | NM_017777 | 822.949   | 841.302   |
| AK021541  | 966.801   | 879.948   | AF057354  | 819.363   | 992.239   | AK021989  | 712.229   | 553.377   |
| AK021766  | 564.966   | 360.253   | AF169351  | 12139.235 | 15243.436 | AK023407  | 669.86    | 934.874   |
| AK002109  | 170.304   | 405.189   | M14200    | 62482.563 | 59328.609 | AK022298  | 1697.042  | 1274.579  |
| AK021630  | 916.368   | 1560.313  | NM_000282 | 4440.872  | 5618.714  | AJ277441  | 17064.982 | 13327.119 |
| AK021831  | 1458.643  | 2314.401  | NM_000532 | 13961.519 | 17194.35  | NM_006057 | 1091.258  | 998.597   |
| AK025650  | 4483.155  | 5658.35   | NM_016341 | 1023.21   | 1283.463  | AK024242  | 6713.965  | 7672.256  |
| AK026401  | 1555.955  | 1907.213  | AF231916  | 4021.37   | 3809.961  | AK024851  | 668.266   | 804.098   |
| AK026773  | 2081.401  | 2700.373  | NM_003501 | 4873.319  | 5639.17   | AK024943  | 723.896   | 682.142   |
| AK025893  | 361.579   | 649.566   | AK022654  | 39860.023 | 44482.168 | AK024995  | 420.469   | 515.595   |
| AK026823  | 227.642   | 61.401    | BC002905  | 6162.588  | 6966.002  | AL359943  | 21957.736 | 14413.851 |
| U73530    | 485.631   | 577.334   | NM_018091 | 6675.331  | 7690.098  | NM_000534 | 3071.629  | 1536.111  |
| AF086158  | 4503.349  | 9107.905  | NM_001108 | 4317.941  | 5051.802  | L10140    | 875.559   | 520.989   |
| AF086050  | 3468.956  | 4610.267  | NM_001637 | 1193.803  | 1314.843  | AL133447  | 669.665   | 459.84    |
| AF147375  | 1046.114  | 380.419   | NM_01663C | 9665.685  | 10168.242 | AB037853  | 12546.262 | 8759.941  |
| X51524    | 6528.439  | 4489.593  | NM_014291 | 7217.852  | 6235.811  | D28450    | 25307.674 | 16849.322 |
| AK025759  | 3671.757  | 3742.442  | NM_014631 | 849.338   | 877.096   | AK056222  | 1251.024  | 1014.782  |
| AK024105  | 362.121   | 628.793   | NM_00108E | 5996.974  | 5422.06   | AK002028  | 16598.252 | 15449.964 |
| AJ238556  | 706.31    | 650.259   | NM_00012C | 5064.162  | 6274.198  | AL050127  | 1507.183  | 1180.15   |
| AK021516  | 1899.374  | 1839.331  | AF172327  | 31703.025 | 31097.639 | AK024805  | 6552.97   | 5175.048  |
| Z70699    | 1064.847  | 986.97    | NM_00167E | 5451.431  | 4880.29   | AK001423  | 832.287   | 754.124   |
| AL049919  | 358.217   | 455.75    | AB018338  | 17353.912 | 14857.325 | AK024090  | 18829.176 | 9712.422  |
| NM_00689E | 945.388   | 863.301   | NM_004923 | 1570.452  | 1461.021  | AL133574  | 2241.283  | 1013.902  |
| AK023429  | 743.279   | 1204.928  | NM_003971 | 2063.829  | 1311.995  | AF131754  | 191.432   | 164.701   |
| AK022276  | 890.202   | 1060.922  | AK026973  | 969.415   | 1126.763  | AK021936  | 873.476   | 528.126   |
| AK026881  | 223.692   | 628.863   | NM_005822 | 1622.337  | 1562.257  | AF147339  | 19367.219 | 11115.175 |



|           |           |           |           |           |           |           |           |           |
|-----------|-----------|-----------|-----------|-----------|-----------|-----------|-----------|-----------|
| AL133653  | 459.11    | 326.076   | NM_006899 | 3985.491  | 4867.147  | AL390181  | 14174.149 | 9245.565  |
| AK023774  | 569.267   | 515.913   | NM_012200 | 3058.406  | 3552.736  | NM_017914 | 16288.003 | 11024.716 |
| AL049377  | 2000.58   | 1402.668  | NM_001724 | 1659.124  | 2813.298  | AK024953  | 2502.401  | 2127.92   |
| NM_003544 | 54542.781 | 61404.355 | NM_000150 | 3196.264  | 4584.647  | AK024276  | 3387.755  | 2324.013  |
| U17640    | 860.556   | 1349.929  | AB023152  | 860.235   | 1117.267  | S83374    | 1493.33   | 957.694   |
| AK001187  | 2429.402  | 3058.59   | NM_006212 | 1773.498  | 2346.531  | AK025784  | 11032.671 | 9482.548  |
| NM_003529 | 24093.951 | 38358.633 | AK022872  | 4501.952  | 5802.245  | U07199    | 1447.88   | 1666.292  |
| AF056436  | 2007.814  | 1489.845  | AK024272  | 5600.218  | 8291.251  | AK023713  | 612.544   | 758.801   |
| AB023191  | 1085.289  | 962.691   | NM_016381 | 2279.905  | 3014.359  | X81445    | 575.139   | 642.13    |
| AK027212  | 8648.583  | 7756.4    | AL591715  | 1391.412  | 1380.403  | U95091    | 527.777   | 514.261   |
| X56197    | 817.722   | 949.918   | NM_018042 | 8674.979  | 7397.515  | NM_017900 | 17127.906 | 14746.831 |
| NM_005199 | 3897.715  | 3832.649  | NM_014944 | 7501.006  | 6403.336  | S50182    | 1159.348  | 1228.288  |
| U90905    | 1742.588  | 1704.598  | NM_001942 | 374.651   | 447.794   | AL360145  | 1030.63   | 913.049   |
| AF161422  | 2121.683  | 1858.69   | AF200348  | 1996.805  | 1820.321  | Y12016    | 683.942   | 579.803   |
| AL137384  | 1202.528  | 415.938   | Y11710    | 890.433   | 980.986   | NM_001178 | 397.26    | 331.98    |
| AF070619  | 1214.12   | 1193.085  | J03756    | 612.371   | 724.298   | AK023696  | 3124.688  | 1627.812  |
| NM_020153 | 573.011   | 335.426   | NM_002650 | 2230.294  | 2659.322  | NM_000704 | 893.072   | 611.739   |
| NM_005321 | 7374.136  | 4480.393  | AK024071  | 1466.472  | 2578.485  | NM_015987 | 615.047   | 294.98    |
| AF073520  | 1186.34   | 1090.806  | AB002319  | 2692.235  | 2892.472  | NM_019605 | 1319.698  | 891.748   |
| AF143885  | 441.868   | 389.469   | AF039942  | 3765.502  | 4069.999  | NM_015369 | 364.762   | 324.66    |
| NM_014015 | 6956.387  | 5855.191  | NM_004421 | 2334.454  | 2357.569  | Z49090    | 6194.942  | 3966.624  |
| Z34278    | 428.526   | 312.02    | NM_018654 | 1446.41   | 2031.849  | AK021592  | 5168.857  | 3006.127  |
| AK024973  | 645.224   | 899.052   | AB046863  | 7698.464  | 10278.297 | AK025467  | 2485.478  | 2116.964  |
| AJ008123  | 3852.438  | 3776.078  | M62403    | 12346.825 | 13882.846 | AK026593  | 2321.066  | 1786.817  |
| AJ008156  | 1052.237  | 799.364   | NM_017883 | 4880.958  | 5689.079  | L37700    | 824.388   | 770.389   |
| AF147321  | 425.954   | 496.221   | AK025131  | 2769.449  | 3564.772  | NM_017665 | 1796.001  | 2061.09   |
| AF161437  | 5667.953  | 8423.17   | NM_000754 | 26738.996 | 31007.314 | AB007976  | 407.337   | 306.889   |
| AK001039  | 3365.477  | 5647.631  | NM_014619 | 1441.964  | 1836.604  | AK024819  | 685.759   | 434.31    |
| AK026465  | 1666.033  | 3024.292  | NM_005629 | 18116.41  | 21778.971 | AF052106  | 2628.538  | 1941.109  |
| AK024321  | 666.404   | 770.889   | J04621    | 2818.693  | 3544.046  | AK022391  | 1312.87   | 1367.348  |
| AK001582  | 904.198   | 1008.71   | NM_000718 | 2491.934  | 3032      | NM_016125 | 1222.777  | 731.728   |
| U92018    | 913.176   | 889.094   | NM_000161 | 5894.609  | 8637.159  | CY3Cy5    | 4949.222  | 759.727   |
| U52834    | 780.581   | 464.574   | NM_002634 | 9866.647  | 9245.081  | R72122    | 1189.628  | 1512.027  |
| AJ227898  | 484.63    | 415.252   | NM_017749 | 2363.003  | 2754.07   | X04571    | 504.806   | 542.557   |
| AF130053  | 364.416   | 323.251   | NM_001972 | 58177.477 | 56392.953 | AA700005  | 1575.37   | 2781.011  |
| M34428    | 325.942   | 226.535   | AK024455  | 1102.754  | 2964.266  | AA292025  | 789.18    | 1370.706  |
| NM_003532 | 717.447   | 1109.172  | NM_004702 | 892.293   | 854.872   | AA437226  | 1025.425  | 1769.261  |
| NM_017869 | 8294.154  | 7622.075  | NM_007109 | 1931.117  | 2196.366  | R36143    | 836.865   | 1552.064  |
| AF075100  | 869.665   | 544.046   | AK023404  | 6860.28   | 7527.984  | XM_056359 | 628.988   | 1080.461  |
| AF203447  | 7966.38   | 4308.752  | NM_013239 | 1274.324  | 1056.023  | D10353/NM | 5753.689  | 8696.278  |
| NM_018502 | 1195.468  | 699.96    | NM_001789 | 2097.109  | 1869.88   | AK056843  | 2757.681  | 1269.243  |
| AL080066  | 8866.417  | 5594.676  | NM_016004 | 3716.211  | 3744.632  | U49928    | 11773.783 | 4861.208  |
| AJ227870  | 1962.72   | 1917.705  | NM_002655 | 1412.447  | 1408.715  | AK096645  | 9335.853  | 4173.874  |
| AL137620  | 681.04    | 623.75    | AB028955  | 11391.794 | 10972.206 | AK092859  | 876.27    | 382.342   |
| NM_005294 | 1936.448  | 1360.033  | U66879    | 9039.793  | 9618.631  | NM_019884 | 2602.836  | 1658.813  |
| AK026879  | 343.448   | 333.762   | NM_016022 | 12491.287 | 15597.389 | SR2       | 36659.863 | 19994.504 |
| AF085826  | 1528.647  | 1129.672  | NM_004874 | 2347.897  | 2449.61   | SR4       | 8887.45   | 4943.873  |
| AK024362  | 1279.364  | 1002.436  | NM_014204 | 2076.636  | 2004.109  | SR6       | 1375.848  | 1195.918  |
| AF118068  | 4270.064  | 3082.115  | NM_018509 | 11836.352 | 14239.239 | CY3Cy5    | 7093.327  | 1384.761  |
| NM_004164 | 924.85    | 683.667   | NM_004086 | 1103.062  | 1310.47   | NM_005291 | 1839.819  | 2064.093  |
| NM_019018 | 5685.976  | 5040.809  | AL050199  | 762.213   | 1023.309  | AF253316  | 700.925   | 490.45    |
| M87931    | 825.95    | 983.752   | NM_001748 | 4779.91   | 6384.055  | NM_002923 | 678.614   | 1130.645  |
| CY3Cy5    | 2429.541  | 403.727   | NM_007352 | 609.991   | 677.684   | NM_006794 | 580.393   | 562.357   |

|           |           |           |           |           |           |           |           |           |
|-----------|-----------|-----------|-----------|-----------|-----------|-----------|-----------|-----------|
| BE790116  | 6441.955  | 8254.971  | AF176706  | 2462.896  | 2841.146  | NM_018653 | 2788.564  | 4708.947  |
| AI922341  | 2316.76   | 1916.377  | NM_014484 | 1140.776  | 1182.254  | NM_005388 | 1580.557  | 2099.319  |
| M12824    | 1135.043  | 568.954   | NM_001086 | 1808.761  | 3542.553  | NM_007232 | 10233.108 | 15217.895 |
| W60100    | 1138.469  | 1687.915  | NM_014670 | 4978.605  | 5769.583  | NM_003027 | 787.931   | 912.112   |
| M24898    | 553.506   | 388.289   | NM_019048 | 5592.993  | 7018.759  | NM_016257 | 257.413   | 583.501   |
| U72508    | 608.295   | 513.18    | NM_001040 | 1668.371  | 1725.727  | NM_003025 | 8275.397  | 4379.078  |
| AA457153  | 4020.709  | 6668.047  | AF279698  | 3546.423  | 3478.372  | U52051    | 569.199   | 483.169   |
| AA283122  | 2443.656  | 2989.839  | NM_019849 | 2613.182  | 2099.606  | NM_020179 | 1584.948  | 711.966   |
| AA868504  | 3208.515  | 2794.365  | NM_000049 | 510.885   | 857.054   | NM_004306 | 33985.551 | 18838.107 |
| AA877845  | 8288.011  | 11344.866 | AB032996  | 30108.92  | 28269.311 | NM_001153 | 453.488   | 294.83    |
| AA664241  | 13291.25  | 7126.005  | AB040881  | 3195.274  | 3037.311  | NM_006786 | 1359.44   | 688.837   |
| AI016456  | 403.944   | 238.463   | AY007121  | 1387.092  | 1365.029  | NM_006205 | 718.14    | 537.304   |
| NM_000588 | 29965.465 | 26703.664 | NM_003372 | 8425.368  | 9139.222  | NM_004034 | 2711.5    | 2331.34   |
| NM_000710 | 734.514   | 1361.165  | NM_007317 | 4270.195  | 4488.679  | NM_004193 | 1033.78   | 1745.634  |
| SR5       | 4548.428  | 3820.729  | AK021466  | 2448.265  | 2650.37   | NM_002803 | 5608.058  | 7750.063  |
| SR7       | 5310.915  | 38228.484 | NM_006443 | 31162.992 | 35639.25  | NM_005508 | 1159.679  | 1904.582  |
| SR9       | 25626.631 | 5280.888  | NM_001559 | 1286.616  | 1144.537  | NM_006788 | 441.377   | 778.49    |
| CY3Cy5    | 6717.079  | 900.699   | NM_002938 | 5897.074  | 6547.134  | AK025039  | 291.804   | 492.608   |
| NM_005810 | 2835.056  | 1637.453  | AK023652  | 6858.986  | 8008.192  | NM_016568 | 494.25    | 672.93    |
| M28170    | 1602.618  | 2806.344  | NM_003070 | 6335.894  | 7093.433  | AB033102  | 2994.706  | 3636.83   |
| NM_001555 | 455.839   | 937.838   | AL122101  | 3021.898  | 4044.873  | NM_014774 | 2442.771  | 4862.033  |
| AK026223  | 4238.256  | 6174.874  | NM_004780 | 2711.931  | 3131.168  | NM_014143 | 5878.649  | 9506.038  |
| NM_000874 | 1527.168  | 2949.754  | NM_016216 | 4902.928  | 4508.711  | NM_006112 | 16107.561 | 8146.292  |
| NM_005854 | 1123.734  | 1254.093  | AK001649  | 1048.705  | 668.476   | M12807    | 903.49    | 395.399   |
| AB007863  | 14405.968 | 20053.92  | NM_016638 | 11292.607 | 9505.491  | NM_001765 | 791.227   | 410.972   |
| AK024456  | 3942.315  | 8700.261  | AB018274  | 9048.404  | 8623.348  | NM_003361 | 1595.936  | 786.465   |
| NM_017789 | 949.996   | 1553.285  | NM_005871 | 5784.909  | 4255.663  | NM_012099 | 1811.559  | 1028.532  |
| D31887    | 4178.703  | 6174.358  | NM_007042 | 2447.557  | 2238.512  | NM_018684 | 9384.183  | 6920.88   |
| NM_002313 | 1304.697  | 1296.96   | NM_016333 | 8258.321  | 7450.016  | NM_017983 | 707.237   | 538.462   |
| NM_004459 | 1558.894  | 1289.81   | BE875028  | 2443.424  | 2210.393  | AF116909  | 1016.85   | 667.415   |
| NM_005503 | 2202.759  | 1359.345  | AK000511  | 3769.171  | 3872.754  | BE906724  | 995.609   | 893.526   |
| NM_001502 | 1229.681  | 914.558   | AF121255  | 3111.16   | 5495.084  | NM_002283 | 5072.909  | 7298.803  |
| NM_005721 | 825.166   | 808.006   | NM_017946 | 1519.314  | 1256.453  | AJ276095  | 6922.745  | 8586.72   |
| AF284223  | 18318.342 | 15768.534 | NM_004953 | 6025.697  | 5929.546  | NM_004819 | 1881.798  | 2723.956  |
| BE743838  | 4566.605  | 3785.098  | AL049682  | 1440.306  | 1265.304  | AF231916  | 904.629   | 1255.033  |
| AF273046  | 4335.231  | 2736.755  | NM_005528 | 5853.023  | 5469.652  | NM_003501 | 1527.969  | 2449.421  |
| NM_001081 | 3005.974  | 2818.301  | AK022842  | 704.828   | 853.894   | AK022654  | 3588.706  | 3979.647  |
| NM_002483 | 1897.413  | 3078.606  | NM_007006 | 21227.084 | 30342.092 | BC002905  | 1896.139  | 1987.357  |
| BF002026  | 858.317   | 2375.648  | NM_005793 | 5257.388  | 5637.582  | NM_018091 | 3952.59   | 4952.584  |
| NM_004171 | 484.356   | 904.82    | NM_004901 | 1011.663  | 521.784   | NM_001108 | 1928.987  | 3415.177  |
| NM_014037 | 1770.856  | 1483.865  | U77088    | 1558.207  | 1731.909  | NM_016630 | 4577.918  | 6805.702  |
| NM_004866 | 13571.057 | 15847.077 | NM_006721 | 20694.602 | 23068.727 | NM_014291 | 2113.244  | 2897.479  |
| NM_018688 | 2450.507  | 1629.232  | NM_016282 | 4444.175  | 4675.032  | NM_014631 | 619.552   | 895.168   |
| AK056652  | 4425.916  | 4238.588  | NM_002765 | 2468.979  | 2520.791  | NM_001089 | 1626.337  | 2786.09   |
| NM_015839 | 358.077   | 741.93    | NM_001905 | 6721.469  | 5803.745  | NM_001676 | 2156.809  | 1356.099  |
| AL137438  | 1772.602  | 3438.636  | AF292100  | 2552.416  | 2615.163  | NM_001679 | 8342.038  | 4782.556  |
| NM_017957 | 1465.736  | 1053.985  | NM_003434 | 39609.309 | 36744.344 | NM_004046 | 52349.465 | 71649.734 |
| NM_003024 | 2163.335  | 2682.687  | NM_018181 | 726.79    | 367.575   | NM_004983 | 797.262   | 622.586   |
| NM_013248 | 4074.49   | 7078.305  | NM_005654 | 1130.693  | 867.461   | U09384    | 425.415   | 392.514   |
| NM_000034 | 63169.332 | 73008.891 | AF024698  | 63167.34  | 58061.09  | NM_006860 | 3431.016  | 2475.601  |
| AK022230  | 4272.239  | 5744.678  | BE904617  | 13169.616 | 14922.603 | NM_004794 | 6052.952  | 4757.762  |
| AK022147  | 4091.641  | 3206.382  | AK024495  | 1057.517  | 1242.148  | NM_004283 | 1126.627  | 1362.108  |
| L25664    | 1823.49   | 2805.082  | AF024694  | 2842.705  | 3662.334  | NM_004163 | 5423.094  | 6505.771  |

|           |           |           |           |           |           |           |           |           |
|-----------|-----------|-----------|-----------|-----------|-----------|-----------|-----------|-----------|
| NM_01494C | 3415.502  | 1856.839  | AK001758  | 6438.461  | 5470.916  | AK026308  | 667.242   | 940.626   |
| NM_005783 | 551.272   | 529.54    | U90842    | 832.862   | 677.397   | NM_006895 | 2317.537  | 2987.848  |
| AK000851  | 480.272   | 451.641   | AK025076  | 624.043   | 569.445   | NM_01220C | 1339.599  | 1845.429  |
| NM_00690C | 990.006   | 945.72    | AF086325  | 2320.627  | 2148.655  | NM_001724 | 913.988   | 1253.117  |
| AJ289111  | 4922.609  | 4521.726  | NM_00492E | 788.835   | 1001.006  | NM_006212 | 464.479   | 762.058   |
| NM_01635E | 1996.418  | 1895.727  | AF147401  | 1622.213  | 1557.499  | AK022872  | 1943.888  | 2741.131  |
| NM_00640E | 7125.517  | 6559.353  | AJ001904  | 374.292   | 494.245   | AK024272  | 2275.098  | 3326.716  |
| AF216292  | 26396.848 | 19335.299 | AF075022  | 1303.846  | 1338.938  | NM_016381 | 844.201   | 1747.999  |
| NM_000952 | 486.151   | 567.279   | AF075060  | 2256.149  | 2167.635  | NM_01636C | 210.556   | 392.252   |
| NM_005894 | 690.725   | 895.85    | AB002438  | 763.56    | 644.664   | AL591715  | 526.301   | 1053.698  |
| NM_014584 | 3597.96   | 4910.917  | AF147436  | 627.948   | 876.215   | NM_018042 | 2025.117  | 1446.438  |
| M30627    | 776.411   | 1254.602  | AK021441  | 833.805   | 842.777   | BE741525  | 649.177   | 505.53    |
| NM_01664E | 3325.645  | 2187.334  | AK026018  | 1487.388  | 1502.37   | BF030555  | 18680.41  | 15977.802 |
| AK090536  | 14407.042 | 8444.322  | AF085846  | 3103.328  | 3071.002  | NM_012433 | 4336.333  | 1954.539  |
| D63477    | 1261.43   | 962.164   | AK023901  | 8949.417  | 7758.986  | NM_005605 | 1536.083  | 1419.315  |
| NM_020243 | 16147.802 | 9448.285  | AL109705  | 1070.441  | 910.634   | NM_00257E | 680.841   | 771.965   |
| NM_014051 | 3393.087  | 2186.909  | AF088057  | 4269.052  | 3544.862  | NM_003582 | 1075.219  | 999.125   |
| AK025398  | 10350.7   | 7737.146  | AB024518  | 820.104   | 245.291   | AF169351  | 5627.604  | 3391.322  |
| AB037750  | 3514.568  | 2551.815  | AF086255  | 15945.05  | 14922.653 | M14200    | 31072.115 | 30969.463 |
| AK023056  | 625.941   | 393.396   | AK022660  | 776.616   | 719.491   | NM_000282 | 1923.993  | 2195.786  |
| NM_001120 | 32129.232 | 21658.799 | AF088051  | 2291.323  | 2007.076  | NM_016341 | 713.465   | 1123.416  |
| NM_01788E | 1562.948  | 1170.366  | AK023883  | 624.669   | 926.378   | NM_004034 | 2300.821  | 2406.319  |
| NM_00491E | 612.523   | 390.537   | AF086260  | 680.942   | 1225.862  | NM_00013C | 645.342   | 502.225   |
| AK022207  | 1113.962  | 1044.787  | AF086366  | 837.69    | 612.807   | R72122    | 1400.182  | 2119.412  |
| AV708752  | 5075.832  | 9671.589  | AF086360  | 4576.848  | 4427.112  | Z35309    | 839.897   | 940.404   |
| AF119885  | 3089.255  | 3158.8    | AF087993  | 3147.482  | 3592.166  | X04571    | 344.309   | 527.775   |
| NM_00075C | 674.763   | 651.956   | AF035282  | 1160.933  | 1349.061  | AA700005  | 1601.208  | 2462.508  |
| NM_00499E | 2805.039  | 3110.434  | AK021966  | 5153.222  | 5707.675  | AA292025  | 681.506   | 906.669   |
| NM_01743E | 10388.707 | 1314.885  | AB018292  | 8795.824  | 8585.771  | AA437226  | 799.656   | 1624.439  |
| NM_01338E | 4396.043  | 6561.885  | AF085971  | 958.306   | 1323.608  | R36143    | 805.397   | 1764.88   |
| NM_006517 | 1687.871  | 3406.028  | AF147302  | 1413.086  | 1756.682  | D10353/NM | 6427.472  | 3784.014  |
| AK026680  | 5312.724  | 6035.665  | AF085929  | 1838.335  | 2214.041  | M15042    | 3138.61   | 2401.949  |
| NM_01243E | 40704.227 | 32308.93  | AK001126  | 2739.152  | 2519.415  | AK056843  | 3201.847  | 2430.65   |
| AK001299  | 10037.68  | 8665.549  | AF085976  | 2324.703  | 2577.455  | U49928    | 15095.931 | 12068.296 |
| AB014559  | 6307.654  | 10336.015 | AF075104  | 8635.494  | 7773.618  | AK096645  | 11175.64  | 10075.74  |
| NM_01648E | 4283.579  | 2846.095  | AK021724  | 525.406   | 349.049   | AK092859  | 804.519   | 939.86    |
| NM_005033 | 3459.975  | 1900.387  | AL133025  | 515.651   | 838.479   | NM_019884 | 2426.094  | 2082.171  |
| NM_015932 | 63204.41  | 61165.734 | AL137402  | 12135.78  | 10819.164 |           | 305.87    | 81.021    |
| NM_01794E | 576.006   | 265.917   | AL137617  | 2958.988  | 2512.997  | NM_018291 | 3696.653  | 5200.688  |
| AK022169  | 772.925   | 814.5     | AL359568  | 22702.971 | 18558.705 | NM_00553C | 1868.317  | 2733.65   |
| AF015592  | 2260.517  | 2940.046  | AL133564  | 7806.989  | 7115.513  | AF116909  | 888.94    | 1230.069  |
| AK026795  | 1754.042  | 1208.999  | AL137428  | 1100.132  | 1220.969  | BE906724  | 412.334   | 685.218   |
| NM_01639E | 2682.245  | 3060.597  | AL157462  | 1292.065  | 1425.418  | NM_002283 | 531.558   | 763.876   |
| NM_016617 | 6280.62   | 2882.137  | AL359602  | 5700.89   | 5329.793  | AJ276095  | 6312.552  | 8134.39   |
| NM_002027 | 6120.964  | 2924.44   | NM_01819C | 29623.273 | 34322.191 | NM_007184 | 1590.915  | 2741.872  |
| AL162078  | 1468.839  | 1108.039  | AF086054  | 404.153   | 889.081   | NM_005291 | 1270.328  | 2058.298  |
| NM_00091E | 547.331   | 536.897   | AK026794  | 430.042   | 863.317   | NM_00585E | 335.992   | 635.762   |
| NM_013382 | 7570.571  | 6871.922  | AK022259  | 60504.195 | 54448.867 | NM_002923 | 631.878   | 1076.538  |
| AB002314  | 681.726   | 1104.285  | NM_014123 | 947.791   | 1498.924  | NM_006794 | 610.457   | 746.529   |
| NM_012247 | 252.832   | 1340.445  | AK022461  | 1267.191  | 1121.206  | NM_018653 | 2550.27   | 5152.774  |
| NM_014622 | 764.408   | 739.044   | NM_01601C | 3100.343  | 2989.16   | NM_007232 | 18194.084 | 13900.76  |
| AB011114  | 42782.836 | 32595.744 | AK023783  | 773.355   | 1090.95   | NM_003027 | 710.158   | 658.679   |
| D11466    | 19650.994 | 27686.219 | AL358312  | 811.105   | 1116.921  | NM_016257 | 363.609   | 338.665   |

|           |           |           |           |           |           |           |           |           |
|-----------|-----------|-----------|-----------|-----------|-----------|-----------|-----------|-----------|
| NM_014056 | 13119.258 | 21829.713 | AF174394  | 4063.976  | 3693.056  | NM_002717 | 2668.795  | 2242.163  |
| D31885    | 14816.238 | 18279.959 | AF083121  | 640.941   | 554.551   | NM_014486 | 333.776   | 455.386   |
| BE743838  | 5798.195  | 4974.43   | AF230315  | 749.203   | 555.869   | NM_003025 | 12045.366 | 16841.168 |
| AF273046  | 3516.19   | 1672.449  | AK021876  | 8984.75   | 7803.199  | U52051    | 537.963   | 652.468   |
| NM_001081 | 2831.87   | 1222.509  | AK022017  | 1037.492  | 794.42    | NM_020179 | 2311.608  | 2451.696  |
| NM_002483 | 2380.92   | 4583.292  | AK022160  | 3976.085  | 4322.855  | NM_004306 | 40487.566 | 53225.137 |
| BF002026  | 955.596   | 1890.622  | AK022295  | 1164.96   | 1402.623  | NM_001153 | 1100.488  | 1384.908  |
| L35594    | 336.67    | 400.695   | AK021935  | 1409.205  | 1458.266  | NM_006786 | 1833.709  | 2185.457  |
| BE790116  | 6616.797  | 7941.808  | AK022187  | 6027.525  | 6908.112  | NM_006205 | 1082.495  | 1179.546  |
| AI922341  | 2669.209  | 3597.531  | AK022337  | 1860.432  | 2729.725  | NM_006860 | 1788.191  | 2279.219  |
| AA410517  | 265.647   | 744.047   | AK026847  | 769.463   | 1101.773  | NM_004794 | 5410.445  | 8152.706  |
| M12824    | 1647.071  | 2741.693  | AK023048  | 1099.71   | 978.522   | NM_004283 | 724.289   | 1252.721  |
| W60100    | 750.861   | 227.993   | AL359560  | 667.218   | 781.994   | NM_004163 | 1225.748  | 1505.068  |
| M24898    | 374.394   | 312.146   | AK026891  | 2668.314  | 2906.293  | NM_013337 | 1321.712  | 2629.52   |
| U72508    | 460.437   | 406.41    | AK024595  | 840.587   | 1995.418  | NM_004193 | 855.114   | 1024.411  |
| AA457153  | 3380.168  | 2007.405  | AL137562  | 2933.942  | 2968.939  | NM_002803 | 4735.176  | 6555.76   |
| AA283122  | 2324.767  | 1911.925  | M90355    | 54994.281 | 53461.281 | NM_005508 | 894.195   | 1013.988  |
| AA868504  | 3273.522  | 3836.386  | AK026373  | 9090.41   | 8567.019  | NM_006788 | 583.479   | 1434.448  |
| AA877845  | 8721.15   | 13749.26  | AK021581  | 1780.209  | 1693.209  | AB033102  | 11186.017 | 16309.831 |
| AA664241  | 21061.322 | 23560.352 | unknown ( | 653.374   | 839.597   | NM_014774 | 2534.269  | 3954.817  |
| AI016456  | 617.934   | 1514.812  | AK021744  | 1070.664  | 1167.125  | NM_014143 | 6640.328  | 10479.74  |
| AK026281  | 534.166   | 882.589   | AK022308  | 749.874   | 660.224   | M55646    | 11869.552 | 16171.372 |
| NM_006406 | 7567.329  | 5591.859  | AL133640  | 2631.166  | 2278.796  | NM_006112 | 21650.898 | 28481.477 |
| AF216292  | 24965.313 | 12838.65  | AJ012502  | 7862.086  | 9477.886  | M12807    | 1267.342  | 1379.334  |
| NM_000952 | 413.467   | 418.281   | AK021722  | 1913.768  | 1795.093  | NM_001765 | 1425.141  | 1802.046  |
| NM_005894 | 791.043   | 1409.477  | NM_000681 | 364.555   | 628.677   | NM_003361 | 2284.13   | 2621.592  |
| NM_014584 | 3755.206  | 3522.729  | AF147445  | 2008.667  | 1998.678  | NM_012096 | 3207.408  | 3879.18   |
| M30627    | 432.492   | 631.815   | Y10508    | 15679.088 | 13485.753 | NM_018684 | 11237.513 | 16628.303 |
| NM_005810 | 4182.662  | 6279.155  | NM_005182 | 49329.645 | 41912.223 | NM_017983 | 1037.145  | 1117.547  |
| M28170    | 2636.491  | 4193.938  | D17074    | 873.159   | 926.351   | AF169351  | 3209.392  | 3401.283  |
| AK026223  | 4236.813  | 6315.481  | AF039944  | 11335.992 | 9614.502  | M14200    | 35803.898 | 41344.398 |
| NM_000874 | 1038.838  | 364.621   | AJ276252  | 482.435   | 813.589   | NM_000282 | 2010.467  | 2399.358  |
| NM_005854 | 1063.055  | 577.161   | AK021716  | 7013.892  | 6329.261  | AF231916  | 769.03    | 1186.413  |
| AB007863  | 10191.394 | 4453.389  | AK025035  | 8968.894  | 8150.48   | NM_003501 | 1693.862  | 3170.121  |
| AK024456  | 2761.107  | 1924.071  | AK002085  | 4347.827  | 5040.14   | AK022654  | 3387.023  | 4510.745  |
| NM_017789 | 1008.26   | 962.302   | AF086200  | 510.329   | 512.265   | BC002905  | 2836.537  | 2828.699  |
| D31887    | 3451.535  | 4305.228  | AL133618  | 3006.558  | 3087.423  | NM_018091 | 5130.176  | 5631.91   |
| NM_006180 | 404.906   | 776.062   | AJ131610  | 4483.339  | 4547.169  | NM_014291 | 5069.557  | 5454.694  |
| NM_002313 | 1801.423  | 3613.92   | S50207    | 502.327   | 375.513   | NM_014631 | 604.942   | 714.307   |
| NM_004459 | 1416.74   | 1680.64   | AF119872  | 5931.516  | 5461.683  | NM_001089 | 3390.416  | 4270.878  |
| NM_001502 | 1494.489  | 1985.332  | X99687    | 696.22    | 691.534   | NM_000120 | 3596.336  | 6091.063  |
| NM_005721 | 1046.68   | 990.152   | AK024185  | 1840.21   | 1412.555  | AF172327  | 21067.248 | 31804.67  |
| AF284223  | 20849.031 | 26059.896 | NM_015417 | 408.111   | 558.924   | NM_001676 | 4438.377  | 5247.141  |
| AF176012  | 3614.499  | 4618.534  | AK026101  | 5591.354  | 6539.735  | NM_000220 | 252.985   | 474.181   |
| NM_005971 | 3049.091  | 3695.04   | AK022194  | 12745.368 | 13205.114 | NM_004519 | 475.511   | 429.884   |
| NM_017435 | 12082.986 | 1608.427  | AF085963  | 1476.197  | 1485.451  | NM_001679 | 10959.298 | 13809.07  |
| NM_013386 | 5210.939  | 7182.833  | AK021436  | 1342.68   | 1369.813  | NM_004046 | 50062.59  | 73715.375 |
| NM_006517 | 1822.031  | 2582.694  | U58664    | 1019.679  | 889.834   | NM_004983 | 1190.731  | 1547.402  |
| NM_004171 | 599.322   | 661.247   | AL137569  | 3200.767  | 3451.739  | U09384    | 503.541   | 813.02    |
| NM_014037 | 1972.212  | 2347.212  | AK021920  | 2906.921  | 2224.269  | NM_019884 | 2519.31   | 3069.862  |
| NM_004866 | 11325.348 | 7139.794  | AL049415  | 1474.111  | 1131.13   | NM_018291 | 1535.416  | 1532.855  |
| NM_018688 | 1977.452  | 1981.613  | AK022375  | 999.405   | 890.077   | NM_012200 | 1625.362  | 3525.89   |
| AK056652  | 3860.302  | 4054.714  | NM_003378 | 52841.383 | 50526.723 | NM_001724 | 1240.735  | 1562.025  |

|           |           |           |           |           |           |           |           |           |
|-----------|-----------|-----------|-----------|-----------|-----------|-----------|-----------|-----------|
| AL137438  | 1329.181  | 716.993   | AL110194  | 10645.9   | 13752.692 | NM_00015C | 313.517   | 650.601   |
| NM_017957 | 1775.904  | 1392.614  | AF138860  | 704.374   | 692.439   | AK024272  | 3564.895  | 4852.139  |
| NM_003024 | 1941.614  | 1551.366  | NM_013301 | 1283.694  | 1302.596  | NM_016381 | 1466.42   | 2352.615  |
| NM_013248 | 2681.053  | 2332.722  | NM_017673 | 1110.954  | 705.219   | AL591715  | 651.235   | 683.609   |
| NM_000034 | 62663.871 | 68568.953 | AB046857  | 1104.915  | 1282.447  | NM_018042 | 4393.573  | 3842.166  |
| AK022230  | 3218.294  | 5690.223  | AK024408  | 9798.65   | 10329.244 | BE741525  | 726.117   | 634.205   |
| AK022147  | 5477.111  | 10773.071 | AF086307  | 11108.635 | 11740.724 | BF030555  | 21525.266 | 19135.449 |
| L25664    | 1866.935  | 2401.582  | L19364    | 2033.142  | 2126.195  | NM_012433 | 4480.9    | 2824.623  |
| NM_01494C | 3746.339  | 3309.643  | NM_00539C | 1943.587  | 2306.14   | NM_005605 | 1557.413  | 1786.536  |
| NM_005783 | 836.21    | 943.773   | CY3Cy5    | 5707.913  | 481.466   | NM_003582 | 1350.993  | 2925.024  |
| AK000851  | 438.427   | 528.525   | L07738    | 1500.447  | 929.406   | NM_020179 | 720.779   | 898.286   |
| NM_00690C | 1155.519  | 1369.811  | Z48054    | 1094.178  | 985.793   | NM_004306 | 18249.711 | 24801.559 |
| AJ289111  | 5545.004  | 7604.412  | H90415    | 2435.072  | 1888.656  | NM_001153 | 363.989   | 631.602   |
| NM_016356 | 2893.281  | 3304.483  | AA676470  | 15639.678 | 11542.371 | NM_006786 | 1351.071  | 1365.534  |
| NM_014043 | 3053.443  | 2507.526  | M38258    | 555.068   | 330.018   | X04571    | 265.62    | 405.806   |
| NM_014622 | 937.209   | 1370.948  | AA457155  | 22319.918 | 11315.292 | AA700005  | 1587.636  | 2113.484  |
| AB011114  | 38199.414 | 21686.85  | BM014365  | 709.432   | 517.083   | AA292025  | 790.677   | 667.92    |
| D11466    | 22872.768 | 28414.377 | H91842    | 545.483   | 373.236   | AA437226  | 1140.399  | 846.378   |
| NM_014056 | 12876.224 | 12110.247 | U78045    | 2904.819  | 2473.35   | R36143    | 1111.584  | 954.122   |
| D31885    | 11720.816 | 11133.219 | AA878561  | 52242.563 | 55369.629 | XM_056359 | 629.042   | 529.976   |
| NM_016649 | 3650.519  | 3300.997  | BF688309  | 800.24    | 557.298   | D10353/NM | 7866.896  | 5579.023  |
| AK090536  | 13473.213 | 8649.216  | AI538525  | 3353.687  | 2215.669  | M15042    | 3250.366  | 2396.487  |
| D63477    | 1134.647  | 1076.047  | NM_000941 | 2111.885  | 1284.624  | AK056843  | 3572.001  | 3164.285  |
| NM_020243 | 19584.004 | 28264.158 | SR1       | 58838.871 | 58360     | U49928    | 14405.546 | 14844.144 |
| NM_014051 | 2855.051  | 2429.525  | SR3       | 52393.703 | 58015.98  | M12807    | 807.786   | 1047.892  |
| AK025398  | 9883.464  | 9238.247  | SR5       | 3925.26   | 6179.966  | NM_001765 | 156.412   | 544.783   |
| AB037750  | 3047.408  | 1732.956  | SR7       | 5577.602  | 48499.465 | NM_003361 | 294.333   | 352.162   |
| AK023056  | 787.867   | 1230.754  | U62858    | 4760.656  | 3483.462  | NM_012099 | 725.147   | 748.378   |
| NM_001120 | 20685.752 | 25976.537 | AF035121  | 336.914   | 365.169   | NM_018684 | 7418.456  | 8338.524  |
| NM_017888 | 1886.245  | 2425.096  | NM_014432 | 2208.472  | 1486.354  | NM_017983 | 700.476   | 766.196   |
| NM_004915 | 1181.163  | 1306.785  | NM_001558 | 1049.895  | 668.281   | NM_007184 | 2221.66   | 2973.304  |
| AK022207  | 1115.843  | 1439.479  | NM_006953 | 1088.78   | 1168.69   | NM_005291 | 10459.72  | 6773.977  |
| AV708752  | 4510.483  | 4675.519  | NM_00253C | 830.009   | 1256.239  | AF253316  | 300.538   | 256.901   |
| AF119885  | 3460.467  | 4560.164  | U96173    | 1918.796  | 1248.175  | NM_005855 | 482.91    | 747.448   |
| NM_00075C | 923.378   | 1033.146  | NM_018941 | 1224.143  | 526.354   | NM_002923 | 678.057   | 510.654   |
| NM_004996 | 3814.182  | 6022.836  | BE730585  | 632.143   | 433.24    | NM_006794 | 969.162   | 803.447   |
| NM_00071C | 310.358   | 878.442   | NM_00198C | 1003.739  | 980.84    | NM_018653 | 2560.363  | 2363.3    |
| AK026281  | 405.132   | 686.542   | NM_005954 | 1380.001  | 1084.039  | NM_005388 | 2611.567  | 2612.557  |
| AK026680  | 4034.92   | 2198.611  | NM_001321 | 3650.43   | 3037.42   | NM_007232 | 21555.143 | 16019.144 |
| NM_012436 | 37548.211 | 34030.832 | AB018264  | 4672.802  | 3107.107  | NM_003027 | 538.436   | 344.043   |
| AK001299  | 13128.315 | 12132.697 | U92544    | 4227.12   | 4877.624  | NM_016257 | 671.224   | 476.396   |
| AB014559  | 6144.546  | 3874.52   | NM_019644 | 891.541   | 1085.822  | NM_002717 | 3381.372  | 4545.447  |
| NM_016489 | 4775.692  | 6593.826  | NM_006791 | 2988.338  | 3303.993  | NM_012114 | 442.237   | 507.398   |
| NM_005033 | 4222.298  | 6578.338  | AJ278348  | 15149.864 | 16275.91  | NM_014486 | 487.095   | 534.912   |
| NM_015932 | 57349.293 | 53452.52  | AK023106  | 1843.711  | 1330.511  | NM_001679 | 5141.781  | 6319.665  |
| NM_017949 | 578.878   | 494.855   | NM_01673C | 41991.676 | 37032.047 | NM_004046 | 49038.527 | 72163.172 |
| AK022169  | 799.107   | 710.579   | AL035297  | 1582.392  | 1359.754  | U09384    | 280.573   | 368.891   |
| AF015592  | 1681.132  | 1356.863  | NM_004408 | 3174.264  | 2900.318  | NM_00686C | 1538.8    | 1506.565  |
| AK026795  | 1794.462  | 1992.483  | AJ131244  | 1329.285  | 1132.158  | NM_004794 | 5515.905  | 7190.484  |
| NM_016399 | 2560.669  | 2827.845  | NM_002532 | 5131.704  | 4126.71   | NM_004283 | 899.939   | 1512.6    |
| NM_016617 | 6793.338  | 5135.924  | NM_012388 | 4033.685  | 3737.365  | NM_004163 | 3123.535  | 4516.245  |
| NM_002027 | 7045.412  | 8110.474  | NM_016651 | 563.082   | 481.721   | AK026308  | 1212.985  | 1301.151  |
| AL162078  | 1806.327  | 2081.315  | NM_001671 | 395.839   | 372.617   | NM_013337 | 1277.778  | 937.526   |

|           |           |           |           |           |           |           |           |           |
|-----------|-----------|-----------|-----------|-----------|-----------|-----------|-----------|-----------|
| NM_000919 | 516.425   | 561.232   | NM_019843 | 2719.643  | 1822.08   | NM_004193 | 1462.536  | 910.121   |
| NM_013382 | 8137.553  | 12666.188 | NM_016192 | 4871.75   | 3347.284  | NM_002803 | 5180.25   | 3496.601  |
| AB002314  | 1043.979  | 2277.929  | BE878426  | 52271.949 | 47982.852 | NM_005508 | 1405.216  | 1678.924  |
| NM_001502 | 1539.991  | 1405.674  | NM_001745 | 9036.526  | 7205.14   | NM_006788 | 461.522   | 508.044   |
| NM_005721 | 906.07    | 1691.054  | NM_003825 | 7550.479  | 6746.673  | NM_016568 | 718.896   | 469.997   |
| AF284223  | 18868.445 | 14330.755 | AK025006  | 16905.822 | 13810.658 | AB033102  | 9878.982  | 7831.779  |
| AF176012  | 3586.082  | 2904.577  | AF218014  | 12497.838 | 9261.79   | NM_014774 | 2135.378  | 1766.816  |
| BE743838  | 4677.479  | 3003.527  | NM_006678 | 4186.257  | 3018.764  | NM_014143 | 5517.215  | 4644.411  |
| AF273046  | 4190.234  | 4283.917  | AY007729  | 31924.32  | 29361.123 | M55646    | 8824.646  | 7633.748  |
| NM_001081 | 3398.022  | 3667.832  | NM_014424 | 944.969   | 862.889   | NM_006112 | 17984.168 | 16800.377 |
| NM_002483 | 1781.58   | 3193.883  | AF159092  | 1442.702  | 1563.201  | BE741525  | 740.841   | 1104.25   |
| BF002026  | 658.702   | 578.364   | BC007318  | 2019.256  | 2625.048  | BF030555  | 1395.945  | 1665.052  |
| L35594    | 492.572   | 1071.144  | M36693    | 3520.067  | 4611.911  | NM_012433 | 4177.225  | 3213.112  |
| BE790116  | 7742.55   | 15495.512 | NM_005898 | 14846.49  | 12078.955 | NM_005605 | 846.74    | 1091.72   |
| AI922341  | 2656.726  | 2748.198  | NM_002889 | 42117.664 | 33075.27  | NM_002576 | 723.797   | 985.137   |
| M12824    | 1312.401  | 1170.373  | AF078866  | 2124.509  | 1973.613  | NM_003582 | 705.54    | 664.958   |
| W60100    | 1046.115  | 952.52    | BF311880  | 2602.885  | 2322.771  | AF169351  | 4926.515  | 5264.354  |
| M24898    | 482.089   | 635.891   | NM_016075 | 1068.974  | 660.559   | M14200    | 33849.789 | 27856.52  |
| U72508    | 651.142   | 790.443   | NM_001360 | 9381.496  | 5504.676  | NM_000282 | 1934.395  | 1796.153  |
| AA457153  | 3956.676  | 3289.798  | AK026656  | 5317.194  | 2851.271  | NM_000532 | 6825.594  | 8451.062  |
| AA283122  | 2959.526  | 2742.445  | AJ276207  | 6172.451  | 4400.321  | NM_016341 | 874.673   | 609.765   |
| AA868504  | 3065.918  | 3586.229  | AB011131  | 8511.346  | 5951.34   | AF231916  | 2338.966  | 1416.167  |
| AA877845  | 9991.273  | 18600.102 | NM_000751 | 8769.217  | 7568.798  | NM_003501 | 2363.552  | 1618.143  |
| AA664241  | 28086.246 | 40502.969 | NM_014849 | 3344.874  | 2368.096  | AK022654  | 22007.803 | 22186.098 |
| AI016456  | 647.118   | 1264.445  | NM_001042 | 8380.189  | 5216.695  | BC002905  | 4144.109  | 3093.763  |
| NM_014940 | 4648.117  | 3519.22   | NM_012229 | 5230.552  | 12204.191 | NM_018091 | 4783.163  | 4113.07   |
| NM_005783 | 633.19    | 1145.913  | NM_005071 | 888.321   | 1121.682  | NM_001108 | 2092.282  | 1504.503  |
| AK000851  | 582.525   | 467.773   | AB023147  | 13942.815 | 17747.367 | NM_001637 | 574.257   | 365.756   |
| NM_006900 | 731.821   | 998.437   | NM_016615 | 15084.129 | 11616.798 | NM_016630 | 4508.306  | 3022.479  |
| AJ289111  | 5323.495  | 5919.45   | NM_005630 | 2576.268  | 2700.477  | NM_014291 | 3385.108  | 2276.205  |
| NM_016356 | 1404.494  | 2089.922  | NM_012201 | 2101.774  | 2082.499  | NM_014631 | 493.167   | 575.543   |
| NM_006406 | 8446.52   | 13360.431 | AB046774  | 607.805   | 741.475   | NM_001088 | 3003.544  | 1932.913  |
| AF216292  | 26820.885 | 21965.174 | AK022385  | 13951.067 | 14211.498 | NM_000120 | 2737.369  | 1768.772  |
| NM_005894 | 763.406   | 929.926   | NM_002775 | 1565.484  | 1798.066  | AF172327  | 17576.18  | 12154.646 |
| NM_014584 | 3598.937  | 3269.046  | AK024584  | 3760.84   | 2598.022  | NM_001676 | 3494.999  | 2258.63   |
| M30627    | 722.197   | 1125.496  | NM_003504 | 6577.318  | 6654.435  | AB018338  | 941.47    | 1020.108  |
| NM_005810 | 3593.339  | 4581.613  | NM_013298 | 5044.284  | 5323.621  | D80010    | 151.94    | 583.003   |
| M28170    | 2051.594  | 2080.134  | NM_007267 | 2269.308  | 2463.63   | NM_004923 | 984.758   | 1103.391  |
| AK026223  | 3628.427  | 3879.326  | AK022830  | 522.023   | 345.007   | NM_003971 | 1305.828  | 1067.011  |
| NM_000874 | 1259.326  | 1309.336  | Z36816    | 1401.296  | 853.837   | AK026973  | 277.649   | 420.911   |
| NM_005854 | 1291.913  | 1757.864  | NM_005865 | 3296.462  | 1861.511  | U81002    | 1935.437  | 2250.617  |
| AB007863  | 14177.14  | 10307.787 | NM_006413 | 5188.174  | 3651.303  | NM_016298 | 3727.095  | 4770.734  |
| AK024456  | 3296.912  | 3419.471  | NM_017684 | 1000.769  | 687.482   | NM_014185 | 2775.668  | 3548.979  |
| NM_017788 | 885.608   | 1201.774  | AK025542  | 1885.418  | 1672.986  | L38517    | 2655.927  | 3273.799  |
| D31887    | 3539.242  | 4050.816  | AF207547  | 920.589   | 760.538   | NM_018291 | 3153.049  | 2815.66   |
| NM_002313 | 1675.479  | 3436.4    | NM_002768 | 5220.415  | 4911.696  | NM_005530 | 1515.721  | 935.765   |
| NM_004458 | 1438.773  | 1940.48   | NM_003691 | 2661.996  | 1987.526  | NM_006898 | 2109.77   | 1092.955  |
| NM_004915 | 707.918   | 364.617   | NM_002950 | 24157.16  | 17366.688 | NM_012200 | 1344.407  | 620.449   |
| AK022207  | 1219.602  | 1344.945  | NM_002318 | 2183.823  | 2686.313  | NM_001724 | 840.342   | 906.258   |
| AV708752  | 4357.199  | 2763.263  | NM_001433 | 1969.27   | 2927.359  | NM_000150 | 1821.267  | 1267.086  |
| AF119885  | 3689.865  | 5251.871  | NM_003134 | 50059.27  | 51500.906 | AB023152  | 549.189   | 479.994   |
| NM_000750 | 457.679   | 466.503   | NM_004314 | 3874.094  | 4321.696  | NM_006212 | 915.185   | 459.462   |
| NM_004996 | 2804.717  | 3453.938  | NM_018247 | 8962.807  | 7214.861  | AK022872  | 2305.911  | 1216.117  |

|           |           |           |           |           |           |           |           |           |
|-----------|-----------|-----------|-----------|-----------|-----------|-----------|-----------|-----------|
| NM_005971 | 2764.223  | 3512.421  | NM_017979 | 7301.716  | 7130.617  | AK024272  | 2917.951  | 1400.715  |
| NM_017435 | 10280.99  | 1215.268  | NM_019644 | 1032.365  | 1389.61   | NM_016381 | 1125.921  | 578.405   |
| NM_018018 | 228.297   | 342.289   | NM_006791 | 2248.457  | 3068.181  | AL591715  | 523.052   | 349.163   |
| NM_013386 | 4504.297  | 5421.612  | AJ278348  | 11831.107 | 16455.203 | NM_018042 | 5242.79   | 4758.863  |
| NM_006424 | 374.878   | 850.3     | NM_015872 | 290.407   | 675.802   | NM_014944 | 837.02    | 844.831   |
| NM_006517 | 1879.468  | 3699.498  | AI285199  | 3203.586  | 4033.996  | AF200348  | 296.044   | 427.175   |
| NM_004171 | 624.971   | 1033.364  | BI906283  | 1141.67   | 2648.704  | Y11710    | 293.333   | 272.823   |
| NM_014037 | 2394.044  | 2585.99   | AA757170  | 289.182   | 893.81    | NM_002650 | 1071.213  | 1159.306  |
| NM_004866 | 12579.063 | 17111.822 | L07738    | 1247.198  | 933.772   | NM_003260 | 6042.422  | 7474.947  |
| NM_018688 | 2017.831  | 2451.858  | Z48054    | 803.564   | 782.374   | AK024071  | 1022.602  | 1181.29   |
| AK056652  | 3567.388  | 4091.666  | H90415    | 3175.706  | 2260.714  | AF056490  | 878.796   | 933.673   |
| NM_015839 | 254.441   | 524.023   | AA676470  | 17538.969 | 13153.211 | NM_005539 | 1486.713  | 2023.154  |
| AL137438  | 1458.271  | 1507.514  | M38258    | 607.522   | 350.585   | BF341504  | 669.954   | 664.799   |
| NM_017957 | 1890.071  | 1915.723  | AA457155  | 18032.426 | 14239.474 | NM_005541 | 5086.756  | 4143.356  |
| NM_003024 | 1938.967  | 2003.843  | H91842    | 750.478   | 502.391   | AB002319  | 1201.357  | 903.242   |
| NM_013248 | 3062.396  | 3328.19   | U78045    | 3562.275  | 3059.618  | AF039942  | 1734.238  | 1411.719  |
| NM_000034 | 64568.09  | 73332.906 | AA878561  | 59091.488 | 56634.156 | NM_004421 | 1523.171  | 996.67    |
| AK022230  | 2417.265  | 2924.604  | BF688309  | 815.004   | 608.706   | NM_018654 | 597.866   | 738.289   |
| AK022147  | 5235.044  | 7032.833  | AI538525  | 3760.6    | 5295.076  | AB046863  | 4917.822  | 3925.357  |
| L25664    | 2393.916  | 3198.231  | NM_000623 | 726.038   | 1207.868  | M62403    | 7064.555  | 3045.801  |
| NM_002027 | 7631.465  | 5483.109  | AF222980  | 3349.906  | 2472.798  | NM_017883 | 2522.522  | 1399.325  |
| AL162078  | 1677.078  | 1926.961  | AK026758  | 2930.07   | 3321.216  | AK025131  | 1363.408  | 785.609   |
| NM_000919 | 684.128   | 791.601   | AF159092  | 1136.385  | 1244.5    | NM_000754 | 10912.986 | 6389.262  |
| NM_013382 | 6107.041  | 3342.409  | BC007318  | 1891.698  | 1673.184  | NM_014619 | 758.828   | 442.612   |
| AB002314  | 700.5     | 708.297   | M36693    | 1996.799  | 1839.465  | NM_005629 | 7961.542  | 4645.895  |
| NM_014043 | 2538.185  | 2195.275  | NM_016292 | 10241.633 | 10670.351 | J04621    | 1135.268  | 716.983   |
| NM_014622 | 1007.558  | 1363.102  | NM_002601 | 3021.5    | 4351.115  | NM_000718 | 1252.288  | 1024.866  |
| AB011114  | 39724.707 | 29536.424 | U62858    | 4726.749  | 5224.207  | NM_000161 | 2856.296  | 1916.086  |
| D11466    | 19868.404 | 19996.18  | AF035121  | 782.965   | 371.273   | NM_002634 | 3791.451  | 4683.467  |
| NM_014056 | 11156.423 | 8128.01   | NM_014432 | 2406.52   | 2102.407  | NM_017749 | 1224.487  | 1193.614  |
| D31885    | 14426.792 | 23240.955 | NM_001558 | 1090.63   | 933.82    | NM_001972 | 42540.867 | 38687.703 |
| NM_016649 | 3630.812  | 4397.295  | NM_006953 | 1224.286  | 1883.969  | NM_002006 | 8558.077  | 6834.272  |
| AK090536  | 13338.729 | 13878.155 | NM_002530 | 429.135   | 471.268   | NM_007111 | 2987.291  | 2770.834  |
| D63477    | 1335.206  | 1691.532  | U96173    | 2391.129  | 1754.521  | NM_004702 | 368.237   | 229.883   |
| NM_014051 | 3350.794  | 6078.68   | NM_018941 | 1846.942  | 1073.197  | NM_007109 | 1053.767  | 1054.879  |
| AK025398  | 10733.491 | 13961.545 | BE730585  | 482.568   | 719.085   | AK023404  | 4897.585  | 4067.127  |
| AB037750  | 3230.363  | 4056.388  | NM_001980 | 1069.478  | 848.412   | NM_013239 | 280.236   | 324.016   |
| AK023056  | 821.521   | 697.342   | NM_005954 | 1339.984  | 1753.816  | NM_001789 | 937.994   | 569.369   |
| NM_001120 | 36624.699 | 36272.461 | NM_001321 | 6618.496  | 8026.875  | NM_016004 | 2424.799  | 1978.521  |
| NM_017888 | 1882.524  | 2574.103  | AB018264  | 5186.979  | 5400.022  | AB028955  | 6847.349  | 6184.86   |
| NM_003150 | 3319.727  | 2607.318  | NM_006911 | 906.649   | 878.161   | U66879    | 4984.286  | 2291.999  |
| NM_014784 | 2379.418  | 1802.253  | U92544    | 5575.001  | 5447.138  | NM_016022 | 6097.728  | 4132.01   |
| AK026383  | 4566.141  | 4640.02   | NM_012229 | 4647.613  | 4555.956  | NM_004874 | 1126.077  | 580.428   |
| AK023821  | 487.294   | 425.399   | NM_005071 | 965.215   | 935.065   | NM_014204 | 1129.067  | 541.049   |
| AB014594  | 2401.988  | 3295.868  | AB023147  | 12604.541 | 14007.454 | S70385    | 10618.553 | 5104.58   |
| M94547    | 1255.198  | 1820.054  | NM_016615 | 12391.029 | 9842.797  | M34671    | 266.067   | 288.393   |
| NM_005087 | 11661.789 | 10655.803 | NM_005630 | 2083.649  | 1895.972  | NM_018509 | 5218.674  | 3832.909  |
| NM_012098 | 548.09    | 613.738   | AK023106  | 2218.948  | 2213.456  | NM_004086 | 531.663   | 274.51    |
| NM_018095 | 1533.316  | 1328.506  | NM_016730 | 49678.668 | 42094.184 | AL050199  | 469.132   | 517.532   |
| AB023164  | 2686.699  | 2719.703  | AL035297  | 2306.395  | 4006.002  | NM_001748 | 2314.887  | 1682.256  |
| AK026281  | 355.436   | 200.3     | NM_004408 | 4072.836  | 4989.018  | NM_001109 | 268.269   | 204.582   |
| U23862    | 459.197   | 608.106   | AJ131244  | 1475.622  | 1120.678  | AF176706  | 912.769   | 631.643   |
| AK026680  | 4150.671  | 4421.11   | NM_002532 | 5547.915  | 5127.627  | NM_014484 | 544.659   | 708.292   |

|           |           |           |           |           |           |           |           |           |
|-----------|-----------|-----------|-----------|-----------|-----------|-----------|-----------|-----------|
| NM_012436 | 41826.586 | 37395.891 | NM_012388 | 4612.745  | 4272.791  | NM_001086 | 787.345   | 874.709   |
| AB014559  | 7557.986  | 14784.373 | NM_016651 | 540.785   | 551.57    | NM_014670 | 2300.74   | 3202.752  |
| NM_016489 | 4225.966  | 5543.176  | NM_019843 | 3225.262  | 2920.957  | NM_019048 | 2788.67   | 3783.256  |
| NM_005033 | 3906.369  | 4325.042  | NM_016192 | 6615.687  | 5702.302  | NM_001040 | 856.558   | 1014.358  |
| NM_015932 | 56888.477 | 60153.398 | BE878426  | 51043.426 | 50526.461 | AF279698  | 2076.122  | 2989.5    |
| NM_017949 | 718.84    | 857.074   | NM_001745 | 9647.564  | 11922.617 | NM_019849 | 1363.649  | 2065.757  |
| AK022169  | 852.625   | 838.167   | NM_003825 | 8724.344  | 11176.262 | AB032996  | 15919.14  | 11414.845 |
| AF015592  | 1573.538  | 1410.299  | AK025006  | 17021.174 | 22384.609 | AB040881  | 1960.566  | 1332.389  |
| AK026795  | 1975.929  | 2114.515  | AF218014  | 12886.24  | 14330.933 | AY007121  | 559.986   | 266.985   |
| NM_016399 | 2745.684  | 3523.847  | NM_006678 | 4731.35   | 3985.943  | NM_003372 | 4271.502  | 2223.927  |
| NM_016617 | 7293.842  | 12745.562 | AY007729  | 31596.209 | 20685.148 | NM_007317 | 2241.838  | 1267.465  |
| AL117666  | 505.118   | 576.246   | NM_001433 | 480.985   | 622.454   | AB037826  | 18938.563 | 10355.787 |
| NM_005825 | 12152.476 | 7073.009  | NM_003134 | 52585.359 | 50790.824 | AK021466  | 1373.487  | 552.642   |
| NM_002756 | 2731.585  | 2469.518  | NM_004314 | 3540.989  | 3497.824  | Z36796    | 51886.051 | 62052.004 |
| U79299    | 980.786   | 1198.411  | NM_018247 | 8714.646  | 10053.143 | NM_006443 | 14869.476 | 10560.598 |
| AJ000414  | 1276.455  | 1668.477  | NM_017979 | 6265.466  | 6772.454  | NM_001559 | 403.622   | 374.605   |
| AK025674  | 4831.102  | 5258.317  | NM_005898 | 15562.175 | 13740.585 | NM_004959 | 421.37    | 317.094   |
| AF007194  | 3429.046  | 2949.829  | NM_002889 | 50213.82  | 39528.078 | AK026022  | 13256.533 | 9292.429  |
| NM_019069 | 1277.387  | 619.253   | AF078866  | 2416.068  | 2334.061  | NM_003199 | 1326.22   | 1099.608  |
| NM_004761 | 4803.492  | 2933.779  | BF311880  | 4277.403  | 3050.704  | NM_002938 | 1681.033  | 1698.637  |
| Z25424    | 1960.222  | 1529.674  | NM_000078 | 451.795   | 294.149   | AK023652  | 2973.02   | 2731.792  |
| U79458    | 7171.033  | 7099.152  | NM_016075 | 767.453   | 439.343   | AF099032  | 441.494   | 263.149   |
| NM_014920 | 565.794   | 829.726   | NM_001360 | 12374.457 | 9442.604  | NM_003070 | 3293.864  | 5381.367  |
| NM_002961 | 55776.242 | 63155.004 | AK026656  | 6701.31   | 5801.22   | AL122101  | 1555.905  | 1579.321  |
| NM_018298 | 1186.7    | 2273.639  | AJ276207  | 8116.769  | 7423.574  | NM_004780 | 1250.581  | 1257.96   |
| NM_000676 | 2402.699  | 3583.601  | AB011131  | 8995.546  | 7729.188  | NM_016216 | 2071.65   | 1454.915  |
| AF064770  | 460.917   | 686.631   | NM_000751 | 10159.087 | 9282.655  | AK001649  | 408.625   | 269.521   |
| NM_005766 | 520.639   | 606.621   | NM_014849 | 3720.963  | 3599.854  | NM_016638 | 5097.296  | 4665.917  |
| AL117612  | 245.854   | 188.129   | NM_001042 | 9126.551  | 7038.424  | AB018274  | 4871.323  | 8421.041  |
| NM_004127 | 57065.504 | 54938.035 | NM_000623 | 717.531   | 757.233   | NM_005871 | 3874.274  | 2869.408  |
| NM_013324 | 7166.3    | 7940.536  | NM_000941 | 2289.917  | 2310.356  | NM_007042 | 1204.311  | 964.758   |
| AL133022  | 782.151   | 1255.472  | AF222980  | 2223.044  | 2052.242  | NM_016333 | 5325.387  | 2674.405  |
| NM_003953 | 906.41    | 1552.091  | AK026758  | 1860.565  | 1473.242  | BE875028  | 1327.424  | 581.707   |
| NM_006301 | 484.323   | 764.992   | NM_012201 | 2129.584  | 1570.393  | AK000511  | 1729.53   | 604.263   |
| AF222694  | 616.128   | 623.128   | AB046774  | 709.405   | 496.595   | AF121255  | 1932.073  | 1510.532  |
| AL049925  | 1376.951  | 1270.272  | AK022385  | 22189.924 | 13643.992 | NM_005494 | 1620.467  | 795.628   |
| NM_012219 | 2699.6    | 1995.681  | NM_002775 | 1597.537  | 818.491   | NM_017946 | 655.551   | 327.605   |
| X72887    | 841.918   | 565.557   | AK024584  | 4471.871  | 1281.272  | NM_004953 | 2540.372  | 1415.688  |
| NM_004529 | 651.802   | 455.992   | NM_003504 | 6031.633  | 2828.356  | NM_012199 | 990.589   | 698.858   |
| NM_000127 | 461.621   | 294.495   | NM_013298 | 3748.255  | 1904.134  | AL049682  | 648.067   | 381.628   |
| Y10483    | 5559.377  | 2427.155  | NM_007267 | 2419.878  | 1507.712  | NM_005528 | 2905.646  | 1800.954  |
| NM_006784 | 1436.818  | 1288.187  | AK022830  | 693.473   | 676.496   | NM_007006 | 12915.326 | 13354.087 |
| NM_017876 | 2293.311  | 1650.822  | Z36816    | 1596.227  | 1271.949  | AL137346  | 1129.889  | 979.224   |
| NM_001087 | 20742.18  | 18127.117 | NM_005865 | 4650.51   | 3211.065  | NM_017756 | 13235.465 | 8499.647  |
| NM_001826 | 518.644   | 178.425   | NM_006413 | 5866.765  | 5038.137  | NM_005793 | 2533.663  | 1409.332  |
| AK025352  | 760.033   | 431.995   | NM_017684 | 1657.342  | 1068.668  | NM_004901 | 463.191   | 297.251   |
| NM_003721 | 8755.795  | 6880.246  | AK025542  | 2913.575  | 2547.606  | U77088    | 1091.676  | 1289.187  |
| NM_004724 | 1334.444  | 1409.206  | AF207547  | 1397.574  | 1196.806  | NM_006721 | 11938.652 | 20613.26  |
| NM_001431 | 8468.011  | 11944.734 | NM_002768 | 5672.558  | 5596.525  | NM_016282 | 1815.684  | 1627.118  |
| AK022666  | 253.597   | 869.071   | NM_003691 | 2830.359  | 2264.695  | NM_002765 | 1492.281  | 865.508   |
| NM_000381 | 582.626   | 1267.517  | NM_002950 | 24075.652 | 15196.121 | NM_001905 | 2369.121  | 1315.568  |
| NM_000427 | 1570.929  | 1995.985  | NM_002318 | 3360.882  | 2047.264  | AF292100  | 1555.088  | 1160.069  |
| NM_014924 | 712.359   | 1023.197  | NM_005954 | 1600.675  | 1798.694  | NM_003434 | 20649.006 | 17999.688 |



|           |           |           |           |           |           |           |           |           |
|-----------|-----------|-----------|-----------|-----------|-----------|-----------|-----------|-----------|
| NM_00694E | 809.965   | 1114.569  | NM_001321 | 4725.354  | 4539.484  | NM_005654 | 645.653   | 1153.964  |
| NM_000174 | 33501.125 | 32920.559 | AB018264  | 5041.713  | 5153.371  | AF024698  | 46021.902 | 41574.41  |
| NM_00250E | 3773.937  | 5546.098  | NM_006911 | 793.152   | 798.425   | BE904617  | 8108.805  | 8031.906  |
| NM_01434E | 4494.45   | 7599.083  | U92544    | 3620.575  | 3334.866  | AK024495  | 508.999   | 193.063   |
| D25303    | 1644.148  | 3631.774  | NM_019644 | 831.666   | 660.521   | AF024694  | 1725.034  | 1039.975  |
| AB043007  | 23626.775 | 15021.365 | NM_006791 | 2344.054  | 1287.439  | AF091081  | 3399.574  | 1655.325  |
| NM_004861 | 660.303   | 234.912   | AJ278348  | 11621.981 | 9520.51   | AK001758  | 2966.933  | 1441.873  |
| NM_016161 | 377.713   | 409.85    | AI285199  | 2422.963  | 1745.965  | U90842    | 260.25    | 200.038   |
| AF022913  | 3001.803  | 2890.583  | L07738    | 1464.315  | 587.862   | AF086325  | 1377.646  | 724.37    |
| NM_00002E | 1116.532  | 606.985   | Z48054    | 730.383   | 421.377   | AF147401  | 915.901   | 609.447   |
| NM_00138E | 4120.051  | 3401.263  | H90415    | 2991.849  | 1738.41   | AF075022  | 815.217   | 425.943   |
| M93718    | 4015.833  | 3899.891  | AA676470  | 19708.154 | 14342.392 | AF075060  | 1216.984  | 826.348   |
| NM_00538E | 799.701   | 696.976   | M38258    | 538.879   | 563.525   | AB002438  | 538.894   | 273.627   |
| AK023807  | 6156.665  | 3719.974  | AA457155  | 33725.484 | 27544.029 | AK021441  | 799.813   | 1024.21   |
| NM_01818E | 4858.124  | 3758.095  | BM014365  | 1038.459  | 1039.712  | AK026018  | 741.854   | 624.559   |
| AK024273  | 917.865   | 788.871   | H91842    | 710.882   | 759.479   | AF085846  | 1536.565  | 1873.988  |
| X59417    | 14126.591 | 3561.009  | U78045    | 4437.288  | 2993.199  | AK023901  | 4894.077  | 4402.324  |
| NM_00565E | 14963.866 | 6245.949  | AA878561  | 60286.551 | 54965.379 | AL109705  | 502.425   | 416.998   |
| D28476    | 6326.115  | 3833.216  | BF688309  | 967.338   | 542.557   | AF147392  | 252.859   | 286.228   |
| NM_01626E | 1567.257  | 1225.899  | AI538525  | 4134.866  | 3253.963  | AF088057  | 1978.761  | 2337.13   |
| NM_00333E | 5489.422  | 3702.68   | NM_00382E | 8865.14   | 11725.316 | AB024518  | 512.177   | 776.364   |
| AB002376  | 3065.492  | 3139.663  | AK025006  | 16202.034 | 18571.975 | AF086255  | 4642.264  | 4285.728  |
| NM_01824E | 492.711   | 962.186   | AF218014  | 16087.474 | 18240.121 | AK022660  | 529.009   | 752.518   |
| NM_00555E | 1777.957  | 2934.952  | NM_00667E | 4122.015  | 3915.899  | AF088051  | 989.622   | 907.323   |
| NM_016631 | 1501.599  | 3606.725  | AY007729  | 27832.184 | 22232.271 | AF086366  | 331.401   | 248.229   |
| AK022730  | 3174.331  | 4037.184  | NM_014424 | 539.891   | 480.647   | AF086360  | 2987.374  | 1688.656  |
| AF064839  | 19634.299 | 34485.137 | AF159092  | 1247.606  | 963.948   | AF087993  | 1704.827  | 1747.986  |
| AB037810  | 395.651   | 721.417   | BC007318  | 2200.758  | 2350.719  | AF035282  | 963.644   | 1287.217  |
| NM_00037E | 2524.328  | 2299.672  | M36693    | 2857.884  | 4461.357  | AK021966  | 2854.926  | 2262.842  |
| NM_00047E | 2892.187  | 1589.008  | NM_01629E | 12748.043 | 17503.164 | AB018292  | 4470.82   | 4501.942  |
| M61872    | 11030.728 | 3295.58   | NM_002601 | 2744.912  | 2137.547  | AF085971  | 505.634   | 322.437   |
| AK027089  | 2020.655  | 942.597   | U62858    | 5457.635  | 6963.325  | AF147302  | 719.523   | 585.396   |
| X59845    | 335.208   | 152.757   | AF035121  | 451.196   | 436.542   | AF085929  | 1819.01   | 2328.128  |
| NM_006284 | 5667.223  | 2634.593  | NM_01443E | 2359.372  | 1889.956  | AK001126  | 1328.344  | 1143.519  |
| U18909    | 1275.163  | 752.983   | NM_00155E | 1251.236  | 1166.18   | AF085976  | 1111.274  | 755.77    |
| NM_00348E | 2249.229  | 1541.156  | NM_00695E | 1305.671  | 1575.919  | AF075104  | 3754.628  | 3083.45   |
| NM_01658E | 8216.122  | 5531.814  | NM_00253E | 1143.334  | 1153.991  | AL133025  | 375.56    | 618.287   |
| NM_003597 | 1287.076  | 386.106   | U96173    | 2718.342  | 2277.685  | AL137402  | 7054.047  | 6909.802  |
| NM_00256E | 36707.625 | 11760.939 | NM_018941 | 1938.131  | 1272.82   | AL137617  | 1460.134  | 1156.855  |
| NM_006561 | 3355.409  | 1512.145  | BE730585  | 604.959   | 428.415   | AL359568  | 14633.813 | 14578.495 |
| NM_017521 | 684.035   | 486.94    | NM_00198E | 1667.99   | 1210.303  | AL133564  | 3240.707  | 2894.504  |
| AK022973  | 140.803   | 300.175   | NM_00074E | 598.016   | 656.049   | AL137428  | 610.994   | 711.006   |
| NM_00674E | 397.933   | 419.906   | NM_000751 | 10296.267 | 13147.686 | AL157462  | 907.469   | 1118.237  |
| AK025200  | 5740.156  | 8338.353  | NM_01484E | 4442.612  | 4301.401  | AL359602  | 2654.068  | 2323.445  |
| L34071    | 10522.261 | 16762.43  | NM_00104E | 8057.813  | 6979.401  | NM_01819E | 16648.326 | 14991.821 |
| AK025201  | 5728.474  | 4694.637  | NM_01222E | 5979.66   | 3752.853  | AK022259  | 37212.438 | 25225.582 |
| AK022995  | 1338.057  | 493.512   | NM_01673E | 50711.922 | 49912.711 | AK022461  | 678.802   | 682.113   |
| NM_00606E | 5270.549  | 1376.714  | AL035297  | 1319.265  | 1174.329  | NM_01601E | 1775.126  | 2209.091  |
| NM_00516E | 2104.183  | 909.254   | NM_00440E | 4468.104  | 2764.515  | AF070647  | 8991.633  | 5830.721  |
| NM_00513E | 18247.207 | 8072.639  | AJ131244  | 1568.026  | 1073.333  | AF116649  | 411.129   | 223.32    |
| NM_00211E | 11641.942 | 4775.178  | NM_00253E | 6408.46   | 6696.833  | AF174394  | 1794.028  | 996.571   |
| AK023162  | 2199.964  | 631.237   | NM_01238E | 5472.184  | 5313.846  | AK025924  | 328.208   | 341.226   |
| NM_00639E | 2373.15   | 1130.733  | NM_016651 | 690.995   | 671.686   | AK021876  | 6962.022  | 9056.313  |

|           |           |           |           |           |           |           |           |           |
|-----------|-----------|-----------|-----------|-----------|-----------|-----------|-----------|-----------|
| NM_01864E | 1092.277  | 563.007   | NM_001671 | 663.381   | 621.047   | AK022017  | 717.732   | 851.813   |
| NM_01826E | 374.524   | 384.663   | NM_01984E | 3876.405  | 3573.993  | AK022295  | 635.235   | 831.695   |
| NM_01344E | 1916.418  | 1887.601  | NM_01619E | 6595.454  | 6289.726  | AK021935  | 814.241   | 725.331   |
| NM_004537 | 648.378   | 809.598   | BE878426  | 47559.051 | 46997.184 | AK022187  | 3611.844  | 4387.483  |
| AL390134  | 469.582   | 845.225   | NM_00174E | 10421.189 | 8263.701  | AK022337  | 1217.746  | 1229.115  |
| NM_02022E | 1216.868  | 1558.859  | AK025542  | 3760.789  | 3559.51   | AK026847  | 574.415   | 825.529   |
| NM_01786E | 4829.471  | 5747.747  | AF207547  | 1194.955  | 1107.226  | AK023048  | 843.306   | 666.217   |
| NM_003427 | 1933.526  | 3269.227  | NM_00276E | 7840.679  | 10554.687 | AL359560  | 374.175   | 234.972   |
| Y09321    | 1149.825  | 2220.671  | NM_003691 | 2664.116  | 3419.538  | AK026891  | 1342.05   | 1070.169  |
| AK001499  | 2474.712  | 902.321   | NM_00295C | 21986.4   | 20654.219 | AK024595  | 238.006   | 495.663   |
| AK023568  | 478.961   | 240.651   | NM_003134 | 52901.926 | 54634.598 | AL137562  | 1442.198  | 766.777   |
| AK026852  | 855.77    | 314.327   | NM_004314 | 3344.083  | 4987.171  | M90355    | 39528.453 | 20603.689 |
| AK021629  | 522.944   | 232.02    | NM_018247 | 5983.019  | 7980.235  | AK022495  | 928.045   | 641.321   |
| AL110257  | 25906.975 | 6756.338  | NM_01797E | 4826.152  | 6471.539  | AK021632  | 439.167   | 573.248   |
| AB013384  | 1121.698  | 603.141   | BF311880  | 5185.074  | 4284.849  | AK026373  | 5604.938  | 5035.699  |
| AK024824  | 324.485   | 203.335   | NM_01607E | 1109.051  | 879.609   | AF009277  | 217.052   | 181.025   |
| AK024270  | 1581.132  | 725.604   | NM_00136C | 13896.713 | 11135.703 | AK021581  | 790.596   | 331.742   |
| AK025569  | 2642.6    | 1516.085  | AK026656  | 8682.42   | 6786.295  | AK021744  | 513.306   | 322.498   |
| AK023060  | 1108.639  | 755.343   | AJ276207  | 9277.327  | 8211.091  | NM_01843C | 2228.544  | 1840.069  |
| NM_01487C | 1139.995  | 502.501   | AB011131  | 10479.938 | 6317.658  | AL110200  | 640.814   | 341.268   |
| AK021917  | 393.258   | 312.203   | AF164794  | 6503.342  | 7515.746  | AL133640  | 1709.862  | 1938.232  |
| AF052146  | 14771.844 | 6957.041  | AB020656  | 673.697   | 1064.869  | AJ012502  | 4062.233  | 2695.946  |
| NM_00487C | 2295.372  | 1277.048  | AK023648  | 3794.582  | 5449.054  | AK021722  | 987.989   | 1358.117  |
| AF143872  | 6760.139  | 4453.311  | NM_00041E | 1670.063  | 1270.698  | AF147445  | 1189.037  | 1549.728  |
| AK025686  | 331.447   | 370.046   | NM_004991 | 857.627   | 1468.051  | Y10508    | 9953.821  | 5556.36   |
| AF143326  | 1338.991  | 1401.186  | AF222980  | 2947.813  | 4567.638  | NM_00518E | 26223.764 | 12495.495 |
| AL049229  | 3891.247  | 3854.556  | AK026758  | 2827.425  | 5161.125  | D17074    | 517.258   | 421.436   |
| NM_01830E | 18593.789 | 20990.152 | NM_012201 | 1975.134  | 2331.596  | AF039944  | 5895.606  | 3451.2    |
| AK026146  | 2969.562  | 3430.71   | AK024584  | 5288.914  | 2685.911  | AJ276252  | 384.191   | 303.797   |
| AL389937  | 2989.248  | 5604.12   | NM_003504 | 7360.598  | 5563.115  | AK021716  | 3466.222  | 1956.731  |
| AK022628  | 29416.965 | 8241.338  | NM_01329E | 4450.663  | 4059.635  | AK025035  | 4160.434  | 2175.764  |
| AK021737  | 3304.562  | 945.433   | NM_007267 | 2993.655  | 2449.441  | AK002085  | 1705.978  | 1059.345  |
| AK026295  | 5505.309  | 1539.089  | AK022830  | 682.093   | 744.512   | AL133618  | 2591.792  | 2448.313  |
| AK022346  | 370.696   | 246.905   | Z36816    | 2088.407  | 1318.958  | AF230314  | 484.34    | 371.758   |
| AK025007  | 1467.843  | 596.751   | NM_00586E | 5321.164  | 4351.901  | AK001086  | 456.175   | 561.174   |
| NM_01648E | 5179.094  | 1792.286  | NM_00641E | 5311.995  | 3856.745  | AJ131610  | 2964.906  | 2904.682  |
| AK026490  | 17923.18  | 6528.403  | NM_017684 | 1507.663  | 665.458   | S50207    | 360.046   | 539.828   |
| AJ227861  | 1127.729  | 329.209   | AL049689  | 1348.157  | 1327.321  | AF119872  | 4868.083  | 8063.123  |
| AJ001020  | 287.245   | 122.213   | NM_00021E | 1417.574  | 1277.458  | AK023255  | 14984.521 | 12760.541 |
| AJ001875  | 1522.709  | 482.09    | NM_00220E | 2459.621  | 2926.158  | NM_00262E | 14638.835 | 12486.406 |
| L13433    | 1290.307  | 1490.505  | AF135960  | 2415.495  | 1960.671  | AK024185  | 586.015   | 491.184   |
| NM_00722C | 848.726   | 880.062   | NM_006871 | 1020.912  | 1334.732  | AK026101  | 2492.631  | 1268.592  |
| AK021989  | 546.778   | 418.947   | NM_019074 | 3578.586  | 4677.934  | AK022194  | 6570.653  | 7884.359  |
| AK022298  | 1418.76   | 514.214   | NM_018494 | 54746.125 | 57194.613 | AF085963  | 755.573   | 444.031   |
| AJ277441  | 11096.951 | 3359.547  | AK000006  | 768.286   | 1534.905  | AK021436  | 916.564   | 411.423   |
| NM_006057 | 306.001   | 130.028   | NM_001115 | 2225.026  | 2582.046  | U58664    | 623.147   | 333.603   |
| AK024242  | 8955.138  | 9556.42   | NM_014921 | 1107.532  | 1608.295  | AL137569  | 2234.767  | 1219.305  |
| AK024559  | 709.096   | 1741.052  | NM_016581 | 53429.289 | 56143.477 | AK021920  | 1480.821  | 565.144   |
| AK024851  | 504.2     | 516.41    | NM_01325E | 1693.382  | 2661.954  | AL049415  | 519.976   | 194.634   |
| AK024943  | 584.226   | 785.357   | J05046    | 24357.834 | 29383.305 | NM_00337E | 20165.268 | 12156.051 |
| AL359943  | 22747.611 | 7808.178  | NM_01231E | 1805.014  | 1531.588  | AL110194  | 4714.271  | 1792.267  |
| NM_000534 | 4393.854  | 1858.581  | NM_002751 | 6158.741  | 6258.043  | AF138860  | 275.958   | 126.451   |
| L10140    | 892.6     | 293.44    | NM_004291 | 2010.44   | 1639.454  | NM_006687 | 729.448   | 489.301   |

|            |           |           |           |           |           |           |           |           |
|------------|-----------|-----------|-----------|-----------|-----------|-----------|-----------|-----------|
| AL133447   | 826.831   | 478.532   | NM_003816 | 4359.514  | 3606.352  | NM_013301 | 519.817   | 538.779   |
| AB037853   | 7482.258  | 2437.723  | AK022635  | 533.843   | 265.268   | NM_017673 | 308.208   | 204.722   |
| D28450     | 26910.635 | 8180.933  | NM_004912 | 4066.958  | 3951.767  | AB046857  | 589.509   | 685.688   |
| AK056222   | 809.496   | 329.686   | U79304    | 15789.508 | 11168.936 | AK024408  | 5184.835  | 3557.197  |
| unknown (S | 17.782    | 586.074   | NM_016267 | 7282.119  | 6487.652  | AJ227905  | 218.107   | 350.019   |
| AK002028   | 22727.008 | 22178.328 | NM_004671 | 4384.271  | 2991.508  | AF086307  | 4948.061  | 4685.467  |
| AL050127   | 1407.697  | 1794.838  | NM_005180 | 17097.096 | 22713.592 | L19364    | 1121.782  | 1524.912  |
| AK024805   | 11608.988 | 16842.043 | NM_006526 | 4115.324  | 5946.868  | NM_005390 | 1212.153  | 1211.022  |
| AK024090   | 23182.492 | 5243.43   | NM_012145 | 15985.785 | 21167.771 | CY3Cy5    | 6583.97   | 2398.675  |
| AL133574   | 433.798   | 298.46    | AF305779  | 1610.932  | 2249.848  | BI906283  | 154.838   | 1006.342  |
| AF131754   | 279.477   | 115.347   | AF225416  | 7819.432  | 10615.987 | AA757170  | 713.505   | 937.613   |
| AF147339   | 7808.952  | 3355.38   | NM_016231 | 1885.788  | 2286.941  | L07738    | 897.25    | 750.549   |
| AL390181   | 18148.258 | 9454.549  | NM_002093 | 5447.806  | 8767.694  | Z48054    | 518.19    | 421.525   |
| NM_017914  | 10633.652 | 5349.792  | AB042555  | 9085.825  | 14243.854 | H90415    | 1670.956  | 1132.841  |
| NM_006350  | 337.303   | 288.532   | NM_001729 | 611.229   | 676.855   | AA676470  | 9632.142  | 6320.828  |
| AK024953   | 3023.823  | 1409.029  | NM_017763 | 1560.407  | 2111.11   | M38258    | 286.195   | 337.148   |
| AK024276   | 1135.247  | 557.718   | NM_012216 | 1505.111  | 2294.714  | AA457155  | 17946.713 | 12041.062 |
| S83374     | 670.242   | 273.682   | NM_005338 | 725.342   | 635.214   | BM014365  | 426.997   | 375.296   |
| AK025784   | 12998.08  | 5878.662  | X73502    | 5591.13   | 5204.279  | H91842    | 275.538   | 235.664   |
| U07199     | 2688.065  | 1217.228  | NM_020445 | 55264.496 | 52368.539 | U78045    | 1465.031  | 1168.966  |
| AK023713   | 949.387   | 633.576   | NM_016376 | 8698.855  | 7674.15   | AA878561  | 50019.813 | 49019.516 |
| X81445     | 725.391   | 825.799   | AB046848  | 6991.532  | 5851.89   | BF688309  | 293.594   | 245.806   |
| U95091     | 872.856   | 1122.682  | AL133057  | 6267.693  | 5056.501  | AI538525  | 1529.309  | 1218.402  |
| NM_017900  | 23766.664 | 19486.979 | U04845    | 8331.695  | 5926.65   | NM_000623 | 457.637   | 448.942   |
| S50182     | 2603.344  | 3482.867  | NM_018103 | 8066.403  | 7406.54   | NM_000941 | 1010.505  | 676.049   |
| AL360145   | 1063.35   | 1356.228  | AK026302  | 7704.417  | 10285.283 | SR1       | 59473.141 | 57721.645 |
| Y12016     | 1131.44   | 1140.961  | NM_012214 | 2668.321  | 3699.901  | SR3       | 26931.541 | 13279.705 |
| NM_001178  | 441.229   | 192.793   | AF049656  | 27865.496 | 36179.281 | SR5       | 2118.577  | 1506.708  |
| AK023696   | 3959.736  | 836.53    | NM_000312 | 2697.907  | 2850.504  | SR7       | 2963.69   | 18402.582 |
| NM_000704  | 1186.961  | 523.165   | NM_016598 | 5296.037  | 6990.573  | SR9       | 10160.697 | 1305.276  |
| NM_015987  | 1388.201  | 493.386   | BE874867  | 48732.184 | 53709.066 | CY3Cy5    | 1741.689  | 190.426   |
| NM_019605  | 2560.522  | 1683.239  | AL136719  | 2514.65   | 3630.075  | U62858    | 2167.72   | 4102.124  |
| NM_015369  | 549.385   | 406.254   | NM_014109 | 6513.447  | 10848.391 | NM_000877 | 426.098   | 444.616   |
| Z49090     | 1392.61   | 490.317   | NM_012160 | 2147.672  | 3201.198  | AF035121  | 669.085   | 932.332   |
| AK021592   | 2025.443  | 537.077   | NM_006357 | 55535.176 | 57997.598 | NM_014432 | 1376.619  | 1709.826  |
| AK025467   | 2889.563  | 1199.667  | NM_014248 | 39903.27  | 47782.566 | NM_001558 | 501.324   | 416.804   |
| AK026593   | 3175.793  | 1457.514  | AK027070  | 959.034   | 1397.328  | NM_006953 | 667.322   | 734.263   |
| L37700     | 408.182   | 252.39    | NM_006249 | 3836.596  | 4828.664  | NM_002530 | 374.872   | 263.049   |
| NM_017665  | 2820.34   | 1653.947  | NM_018318 | 1153.798  | 1258.366  | U96173    | 1372.825  | 966.043   |
| AB007976   | 509.117   | 369.751   | AB020640  | 2288.39   | 2563.016  | NM_018941 | 860.861   | 585.776   |
| AF052106   | 3519.855  | 4006.074  | D29954    | 17045.732 | 14202.387 | BE730585  | 290.649   | 318.641   |
| AK000441   | 383.444   | 619.927   | AF007131  | 2033.131  | 1733.822  | NM_001980 | 562.1     | 643.62    |
| AK022391   | 2851.163  | 3165.156  | NM_006839 | 1696.938  | 1459      | NM_005954 | 574.176   | 574.064   |
| CY3Cy5     | 7586.68   | 437.455   | NM_000223 | 867.883   | 703.571   | NM_001321 | 1739.386  | 1357.215  |
| R72122     | 2978.532  | 2637.07   | NM_005851 | 1253.56   | 774.823   | AB018264  | 2179.644  | 1187.345  |
| Z35309     | 2511.143  | 1719.798  | AF119256  | 1810.183  | 1174.22   | NM_006911 | 374.818   | 224.81    |
| X04571     | 728.147   | 648.398   | X74497    | 2223.388  | 1796.879  | U92544    | 1614.774  | 1001.88   |
| AA700005   | 2950.366  | 3271.87   | NM_012210 | 1689.764  | 1267.794  | NM_006791 | 1287.091  | 993.273   |
| AA292025   | 1820.893  | 1902.602  | U10072    | 3031.921  | 2324.992  | AJ278348  | 7013.603  | 4232.481  |
| AA437226   | 1758.663  | 1809.43   | AF222749  | 20248.029 | 23860.16  | NM_015872 | 240.165   | 133.501   |
| R36143     | 1912.446  | 1506.551  | NM_003410 | 3861.656  | 3782.491  | AI285199  | 801.346   | 441.083   |
| XM_056359  | 1105.834  | 1096.395  | NM_002229 | 1285.987  | 1539.213  | AK023106  | 937.784   | 1449.636  |
| D10353/NM  | 9408.477  | 9274.708  | S69027    | 5282.4    | 7534.364  | NM_016730 | 21469.43  | 20093.729 |

|           |           |           |           |           |           |           |           |           |
|-----------|-----------|-----------|-----------|-----------|-----------|-----------|-----------|-----------|
| M15042    | 6787.655  | 6461.395  | NM_012119 | 5341.766  | 9501.249  | AL035297  | 777.617   | 542.003   |
| AK056843  | 4052.481  | 4432.625  | X99631    | 15199.271 | 22534.09  | NM_004408 | 2141.108  | 4887.021  |
| U49928    | 22034.803 | 20740.82  | NM_001730 | 2825.073  | 3891.043  | AJ131244  | 917.624   | 1063.908  |
| AK096645  | 17820     | 16090.467 | AK026290  | 441.576   | 923.885   | NM_002532 | 3131.545  | 3861.957  |
| AK092859  | 1603.77   | 1488.777  | AB014589  | 2495.992  | 4192.122  | NM_012388 | 3087.743  | 4104.131  |
| NM_019884 | 5128.553  | 4534.1    | AF248649  | 759.522   | 1004.228  | NM_016651 | 464.464   | 315.352   |
| SR6       | 3324.967  | 4671.024  | NM_000991 | 51630.789 | 58045.488 | NM_001671 | 232.99    | 233.203   |
| SR8       | 10981.107 | 44965.719 | NM_016034 | 13986.532 | 20487.766 | NM_019843 | 1754.693  | 1460.71   |
| SR10      | 33630.75  | 12763.235 | X69150    | 49425.648 | 51088.137 | NM_016192 | 2644.716  | 1898.446  |
| CY3Cy5    | 7336.48   | 747.996   | NM_001025 | 55883.738 | 61269.809 | BE878426  | 51470.094 | 43499.836 |
| NM_005291 | 9792.634  | 7245.87   | NM_016067 | 52715.27  | 43687.426 | NM_001745 | 3927.528  | 3162.556  |
| NM_005855 | 876.457   | 637.759   | NM_018285 | 14715.307 | 12145.218 | NM_003825 | 3320.323  | 3041.718  |
| NM_002923 | 1236.531  | 1486.251  | AK022393  | 11566.837 | 8242.52   | AK025006  | 6933.318  | 4421.613  |
| NM_006794 | 1519.135  | 1765.152  | AK026654  | 907.771   | 1013.131  | AF218014  | 4160.265  | 2970.358  |
| NM_018653 | 5861.166  | 6711.708  | AB020643  | 478.27    | 282.333   | NM_006678 | 1668.115  | 1135.146  |
| NM_005388 | 3990.601  | 4127.945  | AK025245  | 1010.14   | 1237.279  | AY007729  | 12049.07  | 6213.192  |
| NM_007232 | 30984.5   | 29896.316 | AK025496  | 5694.651  | 5652.186  | NM_014424 | 370.722   | 187.68    |
| NM_003027 | 887.482   | 743.544   | NM_005205 | 55282.359 | 49478.629 | AF159092  | 551.874   | 302.187   |
| NM_016257 | 334.715   | 652.326   | NM_016138 | 2207.017  | 2559.645  | BC007318  | 989.489   | 485.433   |
| NM_002717 | 6073.849  | 5591.387  | Z36833    | 51068.074 | 52994.375 | M36693    | 1170.896  | 466.136   |
| NM_012114 | 616.255   | 696.934   | NM_014355 | 2138.539  | 2834.203  | NM_016292 | 5522.974  | 2445.245  |
| NM_014486 | 767.332   | 1025.522  | M21191    | 43561.695 | 53248.293 | NM_002601 | 1293.509  | 615.801   |
| NM_003025 | 20392.234 | 19482.885 | AF072810  | 1590.931  | 1721.567  | NM_000078 | 571.555   | 495.431   |
| U52051    | 526.387   | 690.318   | NM_003528 | 3012.498  | 2607.962  | NM_016075 | 519.116   | 522.982   |
| NM_020179 | 7467.557  | 7222.988  | NM_017769 | 687.233   | 815.54    | NM_001360 | 5774.618  | 4954.489  |
| NM_001153 | 1101.138  | 1276.507  | D85131    | 11534.02  | 10916.213 | AK026656  | 3332.499  | 2362.833  |
| NM_006786 | 2964.95   | 2558.475  | D30612    | 3834.668  | 3296.038  | AJ276207  | 3966.839  | 3523.441  |
| NM_006205 | 2015.806  | 2969.862  | NM_002163 | 17020.242 | 13459.359 | AB011131  | 3604.859  | 1839.61   |
| NM_004034 | 5522.261  | 6555.254  | U52097    | 14282.899 | 9431.854  | NM_000751 | 3366.12   | 2491.273  |
| NM_000130 | 3895.859  | 3881.047  | NM_003416 | 2986.879  | 2759.317  | NM_014849 | 1370.622  | 913.745   |
| AF193756  | 1125.549  | 1166.531  | AL079289  | 604.488   | 573.504   | NM_001042 | 3450.079  | 2250.667  |
| NM_004183 | 677.415   | 780.517   | NM_018484 | 1130.035  | 1514.97   | NM_012229 | 2193.633  | 1299.455  |
| AI492087  | 21342.592 | 22296.807 | NM_017594 | 1181.175  | 1508.726  | AB023147  | 6241.586  | 4838.793  |
| NM_004193 | 3877.648  | 4517.437  | AK027237  | 845.204   | 767.872   | NM_016615 | 5908.33   | 3220.819  |
| NM_002803 | 8930.137  | 7469.014  | AL133090  | 24383.904 | 31893.699 | NM_005630 | 1161.189  | 872.667   |
| NM_005508 | 2746.169  | 2699.472  | AF085867  | 4154.8    | 6675.735  | NM_012201 | 1355.531  | 2456.171  |
| NM_006788 | 1677.277  | 1780.592  | AK026158  | 1396.519  | 2626.699  | AB046774  | 398.767   | 1290.342  |
| NM_016568 | 1831.327  | 2006.123  | AF086510  | 3171.258  | 4773.438  | NM_002775 | 927.854   | 939.424   |
| AB033102  | 12400.011 | 12664.714 | Z36779    | 2991.516  | 5063.415  | AK024584  | 2081.007  | 1879.229  |
| NM_014774 | 4817.071  | 4726.319  | NM_002816 | 2436.549  | 4051.932  | NM_003504 | 2903.67   | 1988.056  |
| NM_014143 | 10275.608 | 12949.938 | AK026735  | 4106.608  | 3018.733  | NM_013298 | 2324.549  | 2836.651  |
| M55646    | 12985.625 | 11704.581 | AL110104  | 25189.932 | 23580.77  | NM_007267 | 1546.331  | 1221.725  |
| NM_006112 | 30509.674 | 34254.676 | AF240633  | 1357.627  | 1080.708  | Z36816    | 950.769   | 916.909   |
| M12807    | 2148.228  | 1950.781  | AK027056  | 7848.863  | 5513.241  | NM_005865 | 1967.186  | 1328.329  |
| NM_001765 | 1485.143  | 1048.047  | AK024294  | 2288.489  | 1649.864  | NM_006413 | 2946.829  | 2472.185  |
| NM_003361 | 2794.757  | 2975.855  | AL110126  | 2457.256  | 2049.787  | NM_017684 | 568.447   | 392.664   |
| NM_018684 | 11180.189 | 12525.001 | AF052172  | 22226.979 | 14835.029 | AK025542  | 957.416   | 721.103   |
| NM_017983 | 1936.328  | 1925.343  | AB014573  | 4628.24   | 3561.484  | AF207547  | 277.944   | 189.571   |
| AF116909  | 2969.968  | 3973.224  | AK025418  | 541.096   | 671.778   | NM_002768 | 2185.417  | 2975.196  |
| BE906724  | 2272.657  | 2574.531  | AK091109  | 24563.764 | 25597.842 | NM_003691 | 1211.366  | 901.862   |
| NM_002283 | 9396.208  | 9772.989  | NM_014967 | 3067.271  | 3320.969  | NM_002950 | 10236.09  | 6872.771  |
| AJ276095  | 20037.811 | 23460.396 | AK022915  | 3913.729  | 4292.704  | NM_002318 | 1353.863  | 757.241   |
| NM_004819 | 4532.741  | 4401.179  | AJ011409  | 11356.557 | 17736.262 | NM_003134 | 39248.266 | 23766.371 |

|           |           |           |           |           |           |           |           |           |
|-----------|-----------|-----------|-----------|-----------|-----------|-----------|-----------|-----------|
| NM_007184 | 4601.24   | 4467.021  | AJ227906  | 1450.882  | 2049.69   | NM_004314 | 1932.131  | 1207.987  |
| AF231916  | 1493.001  | 1675.18   | AJ011598  | 620.03    | 676.562   | NM_018247 | 3415.791  | 2588.384  |
| NM_003501 | 3327.94   | 2913.615  | L10404    | 757.763   | 743.521   | NM_017979 | 1831.301  | 1109.137  |
| AK022654  | 28232.57  | 26281.779 | AF283776  | 9093.416  | 10553.806 | NM_019644 | 658.09    | 886.242   |
| BC002905  | 6688.708  | 8574.917  | L10123    | 21146.771 | 17803.027 | NM_006791 | 1672.566  | 3959.866  |
| NM_018091 | 6883.609  | 9497.288  | D16877    | 3304.932  | 3443.264  | AJ278348  | 8438.097  | 16358.41  |
| NM_001108 | 3920.904  | 5668.464  | AL109781  | 3634.439  | 2374.585  | NM_015872 | 366.487   | 845.679   |
| NM_001637 | 1040.039  | 1794.096  | AK021712  | 479.789   | 395.216   | BI906283  | 1034.19   | 2283.158  |
| NM_016630 | 8340.343  | 9714.72   | AK021895  | 4462.472  | 3730.109  | L07738    | 1029.042  | 679.807   |
| NM_014291 | 7540.308  | 5991.941  | AK000952  | 5393.385  | 5057.929  | Z48054    | 582.68    | 494.328   |
| NM_014631 | 790.735   | 851.677   | AK024520  | 2771.967  | 3025.564  | H90415    | 2911.26   | 2439.667  |
| NM_001089 | 3746.029  | 3047.203  | AK024592  | 4939.768  | 3298.911  | AA676470  | 9363.637  | 6955.88   |
| NM_000120 | 5195.211  | 4836.419  | AK024904  | 1960.252  | 1622.564  | M38258    | 300.474   | 454.882   |
| AF172327  | 32221.932 | 33343.523 | AK025030  | 1342.354  | 1225.479  | AA457155  | 16629.043 | 9231.491  |
| NM_001676 | 4048.931  | 4275.528  | AK024542  | 2609.347  | 2236.589  | BM014365  | 446.784   | 303.211   |
| NM_001679 | 17700.996 | 15991.509 | AK025064  | 560.39    | 775.034   | H91842    | 326.818   | 219.133   |
| U09384    | 878.593   | 795.164   | AB050477  | 2527.606  | 2307.346  | U78045    | 1344.878  | 1173.341  |
| NM_006860 | 7576.107  | 7367.469  | AF086202  | 9232.55   | 9287.782  | AA878561  | 52033.152 | 50680.434 |
| NM_004794 | 12401.494 | 12622.245 | AK023270  | 2689.883  | 3123.992  | BF688309  | 332.937   | 375.2     |
| NM_004283 | 2621.076  | 2761.063  | AF085979  | 27503.818 | 22393.393 | AI538525  | 1975.408  | 1248.931  |
| NM_004163 | 17639.922 | 19349.748 | AK023112  | 2030.291  | 2086.724  | NM_000623 | 263.706   | 185.36    |
| AK026308  | 1569.02   | 1916.878  | NM_017806 | 23957.42  | 21056.66  | NM_000941 | 1249.31   | 955.864   |
| NM_013337 | 2203.38   | 2535.527  | AK001937  | 48468.273 | 44800.828 | AF222980  | 1294.673  | 1058.629  |
| NM_006899 | 5613.549  | 5592.709  | AL365517  | 1088.508  | 1266.884  | AK026758  | 842.84    | 556.924   |
| NM_012200 | 3055.37   | 2450.484  | AK021988  | 5457.798  | 6543.108  | AF159092  | 892.55    | 1890.427  |
| NM_001724 | 1929.293  | 1393.75   | U17628    | 1817.358  | 2294.184  | BC007318  | 1311.585  | 2575.746  |
| NM_000150 | 2503.242  | 2331.401  | AF119867  | 4513.176  | 3852.795  | M36693    | 1567.775  | 2530.152  |
| AB023152  | 1161.538  | 1708.633  | AL357205  | 9709.31   | 11730.101 | U62858    | 3358.583  | 6918.167  |
| NM_006212 | 1289.344  | 1591.512  | AF124819  | 385.374   | 490.798   | AF035121  | 416.514   | 425.564   |
| AK022872  | 5469.981  | 7792.882  | D17091    | 615.867   | 735.536   | NM_014432 | 1164.006  | 1207.082  |
| AK024272  | 6823.453  | 8203.242  | AL133074  | 1173.776  | 1174.196  | NM_001558 | 471.794   | 390.235   |
| NM_016381 | 2702.189  | 2731.423  | AF086318  | 8660.86   | 9189.921  | NM_006953 | 979.795   | 811.577   |
| AL591715  | 749.086   | 798.19    | AF088012  | 1765.892  | 1703.578  | NM_002530 | 235.446   | 339.887   |
| NM_018042 | 2655.036  | 2568.512  | NM_018121 | 1384.716  | 897.168   | U96173    | 1205.397  | 925.306   |
| BE741525  | 1554.825  | 1249.405  | AK026708  | 3808.902  | 3634.958  | NM_018941 | 481.529   | 436.577   |
| BF030555  | 27291.367 | 22111.463 | NM_017903 | 7997.875  | 7038.961  | BE730585  | 629.438   | 781.286   |
| NM_012433 | 7427.166  | 4741.502  | NM_018074 | 1326.352  | 1379.073  | NM_001980 | 547.774   | 389.228   |
| NM_002576 | 1580.823  | 1561.794  | NM_000909 | 2348.552  | 1642.753  | NM_006159 | 544.722   | 770.775   |
| NM_003582 | 2282.163  | 2475.071  | NM_019013 | 1439.593  | 2585.742  | NM_005954 | 704.163   | 684.307   |
| AF057354  | 771.561   | 575.374   | NM_006783 | 780.815   | 1259.246  | NM_012471 | 466.7     | 642.501   |
| AF169351  | 10353.893 | 9066.272  | L09268    | 735.036   | 815.585   | NM_001321 | 1845.487  | 1568.47   |
| M14200    | 58040.191 | 60967.285 | NM_020186 | 6770.359  | 5845.213  | AB018264  | 2284.087  | 1484.73   |
| NM_000282 | 3888.628  | 3596.545  | AF090947  | 2395.741  | 2042.205  | NM_006911 | 369.223   | 383.5     |
| NM_000532 | 15436.293 | 19808.746 | AJ272196  | 6489.388  | 7442.845  | U92544    | 1683.351  | 1091.098  |
| NM_016341 | 1487.434  | 1891.878  | AF116662  | 621.049   | 560.654   | NM_012229 | 2420.198  | 3491.618  |
| NM_004034 | 4912.767  | 6361.656  | X58162    | 7541.496  | 8584.479  | NM_005071 | 643.014   | 1002.457  |
| NM_000130 | 3778.183  | 3674.315  | CY3Cy5    | 5032.03   | 609.774   | AB023147  | 9478.114  | 16002.169 |
| AF193756  | 793.685   | 827.898   | L35251    | 2525.45   | 3240.19   | NM_016615 | 6568.643  | 11263.968 |
| AI492087  | 22775.998 | 32791.914 | BE910395  | 1317.622  | 1832.982  | AK023106  | 922.488   | 758.686   |
| R72122    | 3933.592  | 4281.204  | N46828    | 1977.139  | 2230.256  | NM_016730 | 33504.176 | 30741.783 |
| Z35309    | 2807.599  | 3397.557  | BI908302  | 17461.912 | 19880.898 | AL035297  | 961.103   | 934.454   |
| X04571    | 904.268   | 946.654   | AA460969  | 2158.003  | 4181.218  | NM_004408 | 2630.124  | 2558.888  |
| AA700005  | 3164.639  | 4094.559  | BG695859  | 704.205   | 938.8     | AJ131244  | 827.923   | 719.23    |

|           |           |           |           |           |           |           |           |           |
|-----------|-----------|-----------|-----------|-----------|-----------|-----------|-----------|-----------|
| AA292025  | 1538.171  | 1851.837  | M85079    | 4511.244  | 4185.938  | NM_002532 | 2990.684  | 2404.106  |
| AA437226  | 1626.165  | 2060.693  | AA457671  | 9766.155  | 8025.946  | NM_012388 | 2625.908  | 2074.512  |
| R36143    | 1709.148  | 2521.785  | X07437    | 4064.197  | 2753.33   | NM_016651 | 350.407   | 510.001   |
| XM_056359 | 1180.576  | 1324.23   | NM_000641 | 1847.941  | 1078.435  | NM_001671 | 229.274   | 383.705   |
| D10353/NM | 10351.071 | 8599.854  | AE006466  | 2437.867  | 1522.513  | NM_019843 | 1464.955  | 1335.661  |
| M15042    | 7169.03   | 5956.169  | BC008737  | 43153.73  | 33892.727 | NM_016192 | 2707.549  | 2233.615  |
| AK056843  | 5342.771  | 4810.342  | BC011655  | 2289.786  | 2293.814  | BE878426  | 47498.711 | 45021.043 |
| U49928    | 25405.959 | 22194.539 | BC002396  | 3053.612  | 2519.578  | NM_001745 | 4913.412  | 5057.431  |
| AK096645  | 20345.602 | 18941.869 | NM_022095 | 863.727   | 734.477   | NM_003825 | 3741.569  | 3590.195  |
| AK092859  | 1850.685  | 2089.685  | SR2       | 43767.891 | 36329.98  | AK025006  | 8656.546  | 11714.029 |
| NM_019884 | 5961.014  | 6019.974  | SR4       | 10843.399 | 7308.137  | AF218014  | 6336.286  | 5317.683  |
| NM_018291 | 5372.434  | 6983.645  | SR6       | 1718.19   | 1138.178  | NM_006678 | 1845.7    | 1498.26   |
| NM_005530 | 3317.004  | 4902.329  | SR8       | 6018.404  | 11601.895 | AY007729  | 13781.164 | 7941.816  |
| AF116909  | 2854.759  | 2845.674  | SR10      | 19060.965 | 4504.131  | NM_001433 | 333.02    | 885.237   |
| BE906724  | 1934.532  | 1872.33   | CY3Cy5    | 2382.095  | 258.121   | NM_003134 | 42352.805 | 56155.445 |
| NM_002283 | 7835.697  | 6927.002  | NM_020370 | 1029.69   | 1247.987  | NM_004314 | 2351.496  | 5077.632  |
| AJ276095  | 17636.508 | 17548.607 | NM_004767 | 702.411   | 1073.247  | NM_005898 | 8852.438  | 5367.336  |
| NM_004819 | 4339.221  | 3884.47   | BF310159  | 6425.534  | 7438.753  | NM_002888 | 33399.234 | 31947.547 |
| NM_007184 | 4252.884  | 4825.93   | NM_000316 | 42.456    | 3147.932  | AF078866  | 1234.59   | 1655.352  |
| NM_005291 | 12626.787 | 12917.286 | NM_018986 | 1364.363  | 1593.308  | BF311880  | 3163.525  | 2216.072  |
| AF253316  | 787.59    | 823.93    | U27655    | 3221.365  | 2704.559  | NM_000078 | 307.954   | 409.404   |
| NM_005855 | 1201.499  | 842.147   | NM_003360 | 1023.428  | 928.578   | NM_016075 | 330.838   | 224.538   |
| NM_002923 | 1176.374  | 1561.77   | Z21965    | 27388.752 | 18949.961 | NM_001360 | 5343.826  | 3838.701  |
| NM_006794 | 1517.368  | 1871.122  | NM_012427 | 837.128   | 523.988   | AK026656  | 3083.23   | 2342.091  |
| NM_018653 | 7859.342  | 10615.863 | AF131857  | 7236.712  | 4533.882  | AJ276207  | 4512.825  | 4013.3    |
| NM_005388 | 4091.552  | 5037.693  | NM_000852 | 7951.437  | 4144.14   | AB011131  | 4496.181  | 3556.201  |
| NM_007232 | 34543.77  | 27794.02  | NM_000399 | 666.777   | 563.457   | NM_000751 | 3820.468  | 6227.973  |
| NM_003027 | 831.884   | 824.683   | AW797282  | 504.167   | 320.676   | NM_014848 | 2194.095  | 3641.267  |
| NM_016257 | 644.058   | 644.574   | NM_002402 | 2649.864  | 1585.17   | NM_001042 | 4560.101  | 3723.809  |
| NM_002717 | 6204.774  | 7441.691  | L09070    | 722.415   | 613.549   | NM_000623 | 468.834   | 1248.444  |
| NM_014486 | 568.803   | 510.357   | NM_000062 | 5143.25   | 3600.605  | NM_000941 | 1434.846  | 3295.143  |
| NM_003025 | 23013.197 | 23383.094 | NM_009590 | 2251.021  | 1551.155  | AK026758  | 1160      | 831.353   |
| U52051    | 695.811   | 691.061   | AL133037  | 683.698   | 249.828   | NM_012201 | 1591.916  | 2545.221  |
| NM_020179 | 9247.729  | 7669.619  | NM_020350 | 3931.134  | 1865.511  | AB046774  | 349.666   | 554.06    |
| NM_004306 | 53922.18  | 49587.824 | NM_000350 | 1110.521  | 553.228   | AK022385  | 16522.199 | 12903.019 |
| NM_001153 | 1148.841  | 1087.239  | X91103    | 6830.936  | 3890.703  | NM_002775 | 872.102   | 669.307   |
| NM_006786 | 3327.341  | 3210.592  | AL117235  | 799.206   | 1082.399  | AK024584  | 2224.052  | 1047.625  |
| NM_006205 | 2563.683  | 3003.576  | NM_014822 | 6020.178  | 7681.541  | NM_003504 | 3438.804  | 1954.913  |
| NM_006860 | 6634.485  | 6269.177  | NM_005296 | 3325.782  | 4451.816  | NM_013298 | 2158.724  | 1473.347  |
| NM_004794 | 11484.254 | 12842.405 | NM_001337 | 602.721   | 748.314   | NM_007267 | 1306.916  | 1040.002  |
| NM_004283 | 2446.099  | 3129.702  | NM_003611 | 6583.003  | 7084.292  | AK022830  | 232.825   | 266.012   |
| NM_004163 | 16390.18  | 15154.068 | AB014538  | 2045.123  | 2609.26   | Z36816    | 976.09    | 1103.7    |
| AK026308  | 1590.43   | 1303.186  | NM_004154 | 330.033   | 370.288   | NM_005865 | 2488.483  | 1561.742  |
| NM_013337 | 2260.525  | 2511.689  | NM_006209 | 750.14    | 606.174   | NM_006413 | 2985.09   | 3240.413  |
| NM_004193 | 2834.905  | 3242.778  | AK025118  | 4854.461  | 4580.075  | NM_017684 | 435.978   | 390.07    |
| NM_002803 | 10093.583 | 13926.748 | NM_000727 | 1600.961  | 1008.52   | AK025542  | 1527.905  | 1198.707  |
| NM_005508 | 2744.435  | 3924.253  | NM_002621 | 361.753   | 233.797   | AF207547  | 490.548   | 332.67    |
| NM_006788 | 1530.947  | 1767.933  | NM_005385 | 5163.521  | 3070.257  | NM_002768 | 2527.459  | 2695.5    |
| AK025039  | 591.653   | 964.938   | NM_018985 | 2505.126  | 1317.929  | NM_003691 | 1585.408  | 1611.915  |
| NM_016568 | 1248.04   | 1355.605  | NM_006074 | 19661.834 | 12159.722 | NM_002950 | 12890.922 | 10495.86  |
| NM_002987 | 411.353   | 524.184   | AF208232  | 2959.035  | 2446.84   | NM_002318 | 1683.108  | 1062.885  |
| AB033102  | 12213.589 | 11537.563 | NM_002988 | 2564.796  | 2252.012  | NM_005954 | 786.4     | 2478.622  |
| NM_014774 | 4957.18   | 6305.701  | NM_004186 | 1043.99   | 858.367   | NM_012471 | 294.508   | 552.777   |

|           |           |           |           |           |           |           |           |           |
|-----------|-----------|-----------|-----------|-----------|-----------|-----------|-----------|-----------|
| NM_014143 | 10801.277 | 15132.524 | NM_016258 | 2603.904  | 2438.179  | NM_006911 | 750.723   | 643.658   |
| M55646    | 14939.497 | 14509.367 | AF203032  | 3684.244  | 2383.527  | U92544    | 2618.821  | 2980.951  |
| NM_006112 | 31342.395 | 34117.047 | AB014542  | 13376.058 | 7501.944  | NM_006791 | 1456.616  | 1923.962  |
| M12807    | 2206.415  | 2320.452  | NM_014640 | 567.384   | 244.022   | AJ278348  | 8044.904  | 10679.585 |
| NM_001765 | 1556.265  | 1403.831  | Y10518    | 38849.176 | 25328.055 | AI285199  | 1374.453  | 888.434   |
| NM_003361 | 3537.262  | 3178.061  | AF155135  | 5396.504  | 3029.733  | L07738    | 752.515   | 313.703   |
| NM_012095 | 3225.295  | 3144.628  | NM_014790 | 1212.029  | 717.828   | Z48054    | 524.931   | 490.262   |
| NM_018684 | 11887.306 | 12771.592 | NM_003571 | 6158.435  | 3403.791  | H90415    | 1547.268  | 1028.369  |
| NM_017983 | 1841.024  | 2351.752  | AF084560  | 4983.356  | 6880.691  | AA676470  | 10736.521 | 6511.246  |
| AF057354  | 737.423   | 613.502   | NM_015715 | 2618.366  | 3265.392  | M38258    | 355.177   | 368.547   |
| AF169351  | 7494.434  | 6575.261  | NM_000032 | 3018.812  | 3431.37   | AA457155  | 24401.109 | 15287.716 |
| M14200    | 56944.648 | 51617.961 | NM_002083 | 1315.558  | 1350.127  | BM014365  | 470.192   | 440.309   |
| NM_000282 | 3468.694  | 2955.352  | NM_002035 | 3256.766  | 3166.351  | H91842    | 355.025   | 458.857   |
| NM_000532 | 13558.472 | 12354.235 | NM_014900 | 703.02    | 676.584   | U78045    | 1668.151  | 1357.275  |
| NM_016341 | 1327.862  | 1562.199  | BF342908  | 803.233   | 846.877   | AA878561  | 48648.578 | 55366.656 |
| AF231916  | 2203.466  | 1881.741  | AF118073  | 427.415   | 475.371   | BF688309  | 588.061   | 262.217   |
| NM_003501 | 4593.304  | 6419.494  | AK023510  | 2542.734  | 1664.404  | AI538525  | 1785.405  | 1439.472  |
| AK022654  | 34570.25  | 44678.238 | NM_004345 | 1159.663  | 733.804   | AF218014  | 7103.163  | 5156.785  |
| BC002905  | 6676.515  | 7279.978  | NM_000702 | 21529.623 | 14633.64  | NM_006678 | 2063.183  | 1239.287  |
| NM_018091 | 8025.614  | 8532.215  | X71490    | 7892.703  | 5750.696  | AY007729  | 17399.082 | 14458.523 |
| NM_001108 | 4297.789  | 4349.494  | AF257081  | 1474.901  | 1476.316  | NM_014424 | 365.157   | 668.399   |
| NM_001637 | 924.557   | 881.836   | NM_001688 | 36041.453 | 22655.207 | AF159092  | 1473.397  | 3318.758  |
| NM_016630 | 8452.833  | 8266.133  | NM_003631 | 399.553   | 257.13    | BC007318  | 1078.581  | 1223.787  |
| NM_014291 | 7720.845  | 6528.562  | NM_000219 | 592.189   | 380.775   | M36693    | 1530.876  | 1348.078  |
| NM_014631 | 1208.902  | 1082.324  | NM_002232 | 744.162   | 505.825   | NM_016292 | 6671.953  | 5384.576  |
| NM_001085 | 5082.381  | 4481.559  | NM_016106 | 2813.123  | 1585.085  | NM_002601 | 1486      | 1233.684  |
| NM_000120 | 5679.58   | 5302.508  | NM_014570 | 2738.898  | 1557.763  | U62858    | 2823.952  | 2272.344  |
| AF172327  | 32897.469 | 34512.984 | NM_014747 | 3821.952  | 2226.004  | NM_014432 | 1027.216  | 936.273   |
| NM_001676 | 4347.66   | 4922.67   | Y19240    | 2840.765  | 1926.032  | NM_001558 | 463.788   | 378.542   |
| NM_000220 | 419.453   | 581.615   | AF091029  | 5351.12   | 3139.223  | NM_006953 | 879.751   | 568.982   |
| NM_001679 | 19849.078 | 17179.471 | X97074    | 9833.053  | 4039.057  | NM_002530 | 261.679   | 197.034   |
| NM_004046 | 66051.43  | 70065.703 | NM_002625 | 474.591   | 915.4     | U96173    | 1281.538  | 1137.095  |
| NM_004983 | 1053.259  | 789.434   | NM_004135 | 4357.08   | 5378.317  | NM_018941 | 664.413   | 375.29    |
| U09384    | 1203.259  | 882.234   | NM_000203 | 651.196   | 520.858   | BE730585  | 499.522   | 334.872   |
| NM_019884 | 5354.706  | 4605.821  | NM_013443 | 1546.634  | 1895.732  | NM_001980 | 777.807   | 570.286   |
| NM_018291 | 5073.303  | 4120.131  | NM_000925 | 7360.528  | 7456.187  | NM_000751 | 4799.8    | 3588.102  |
| NM_005530 | 3076.175  | 2691.875  | NM_000465 | 1417.962  | 1413.947  | NM_014845 | 1579.749  | 1041.494  |
| NM_006895 | 6065.515  | 4978.773  | NM_000123 | 2713.259  | 3001.552  | NM_001042 | 3861.954  | 1884.771  |
| NM_012200 | 3221.373  | 2870.781  | BE858979  | 911.481   | 451.157   | NM_012225 | 2662.377  | 2694.896  |
| NM_001724 | 1959.528  | 2019.933  | NM_000122 | 1838.078  | 788.099   | NM_005071 | 542.856   | 493.585   |
| NM_000150 | 1839.694  | 1374.469  | NM_006712 | 49927.406 | 62575.363 | AB023147  | 7020.7    | 8331.587  |
| AB023152  | 1354.782  | 1456.365  | NM_006240 | 1284.713  | 744.097   | NM_016615 | 9363.739  | 7593.518  |
| NM_006212 | 1659.652  | 1310.325  | NM_007026 | 1940.498  | 1700.951  | NM_005630 | 1276.835  | 1113.73   |
| AK022872  | 4800.223  | 3918.342  | M37712    | 6983.952  | 3867.817  | AK023106  | 2501.697  | 2194.121  |
| AK024272  | 6495.427  | 5505.584  | NM_002648 | 609.877   | 377.44    | NM_016730 | 26437.385 | 16647.703 |
| NM_016381 | 2717.716  | 2051.37   | AF070670  | 3432.895  | 1521.644  | AL035297  | 649.826   | 355.663   |
| AL591715  | 640.137   | 686.905   | NM_016156 | 2646.338  | 1953.365  | NM_004408 | 2354.89   | 2195.155  |
| NM_007254 | 293.434   | 263.448   | NM_016528 | 1183.155  | 819.682   | AJ131244  | 692.132   | 509.046   |
| NM_018042 | 3338.484  | 3671.271  | NM_015974 | 1822.141  | 881.31    | NM_002532 | 2583.675  | 2085.186  |
| BE741525  | 1440.105  | 2067.112  | NM_014384 | 1175.633  | 786.609   | NM_012388 | 2348.816  | 1896.654  |
| BF030555  | 33317.406 | 31231.428 | NM_002573 | 2125.289  | 1057.704  | NM_001671 | 301.526   | 190.022   |
| NM_012433 | 8008.526  | 5069.979  | AL133037  | 660.847   | 965.319   | NM_019843 | 1921.081  | 1658.433  |
| NM_005605 | 2397.833  | 2045.989  | NM_020350 | 4806.643  | 5354.44   | NM_016192 | 3666.255  | 2907.389  |

|           |           |           |           |           |           |           |           |           |
|-----------|-----------|-----------|-----------|-----------|-----------|-----------|-----------|-----------|
| NM_002576 | 1942.758  | 1705.93   | NM_000350 | 1413.131  | 1803.642  | BE878426  | 47514.207 | 54989.613 |
| NM_003582 | 2362.257  | 2209.219  | X91103    | 8174.988  | 9663.447  | NM_001745 | 4792.698  | 3985.192  |
| U52051    | 565.63    | 707.184   | AA419164  | 3590.648  | 4731.392  | AK025542  | 1570.796  | 1028.238  |
| NM_020179 | 4969.264  | 3785.091  | L35251    | 2683.402  | 3451.535  | AF207547  | 510.245   | 281.565   |
| NM_004306 | 50299.266 | 43736.684 | BE910395  | 1023.365  | 1148.787  | NM_002766 | 2420.901  | 1774.504  |
| NM_001153 | 1313.629  | 1836.151  | N46828    | 2509.652  | 2360.837  | NM_003691 | 1403.618  | 1250.237  |
| NM_006786 | 2801.503  | 2213.036  | BI908302  | 16098.936 | 14802.626 | NM_002950 | 13223.326 | 11532.264 |
| NM_006205 | 2410.7    | 2251.565  | AA460969  | 2008.117  | 1491.373  | NM_002318 | 1947.406  | 1925.525  |
| NM_004034 | 5469.019  | 4561.415  | BG695859  | 719.204   | 752.603   | NM_001433 | 268.595   | 357.684   |
| NM_000130 | 5707.454  | 5152.481  | M85079    | 3351.511  | 3265.497  | NM_003134 | 39786.359 | 36314.402 |
| AF193756  | 1081.943  | 983.533   | AA457671  | 9919.46   | 7180.299  | NM_004314 | 2364.851  | 2726.536  |
| AI492087  | 21799.91  | 28561.553 | X07437    | 3411.377  | 2515.154  | NM_018247 | 3974.042  | 4198.228  |
| R72122    | 3700.406  | 3474.543  | NM_000641 | 1808.268  | 1308.561  | NM_017979 | 3342.907  | 3221.668  |
| Z35309    | 2904.469  | 2453.259  | AE006466  | 2899.397  | 2222.085  | NM_005896 | 9114.924  | 6996.466  |
| X04571    | 730.286   | 720.852   | BC011655  | 2527.27   | 2090.592  | NM_002888 | 28894.125 | 17174.533 |
| AA700005  | 3026.049  | 3198.923  | BC002396  | 3478.172  | 2653.207  | AF078866  | 1057.543  | 793.941   |
| AA292025  | 1597.505  | 1696.002  | NM_022095 | 902.62    | 548.339   | BF311880  | 2401.496  | 1990.537  |
| AA437226  | 1767.171  | 1653.531  | AF112219  | 14073.263 | 6174.9    | NM_000078 | 209.82    | 176.538   |
| R36143    | 1894.923  | 1900.187  | NM_014640 | 554.338   | 461.691   | NM_016075 | 735.784   | 617.67    |
| XM_056359 | 1002.426  | 1192.396  | Y10518    | 49195.098 | 63092.305 | NM_001360 | 6523.368  | 4519.609  |
| D10353/NM | 11436.794 | 10149.872 | AF155135  | 6500.08   | 6883.976  | AK026656  | 4498.806  | 3461.88   |
| M15042    | 7210.37   | 8850.821  | NM_014790 | 1314.749  | 1289.714  | AJ276207  | 5127.242  | 4391.335  |
| AK056843  | 5146.649  | 4589.054  | NM_003571 | 6717.203  | 7165.962  | AB011131  | 4536.979  | 3404.736  |
| U49928    | 28683.434 | 25493.123 | AB032965  | 34922.98  | 37665.504 | AF164794  | 3171.695  | 1985.186  |
| AK096645  | 22347.031 | 20310.178 | NM_020370 | 565.762   | 482.141   | AB020656  | 348.283   | 256.381   |
| AK092859  | 2256.812  | 1677.984  | NM_004767 | 792.959   | 622.402   | AK023648  | 2242.983  | 1835.999  |
| M12807    | 2495.483  | 2639.132  | BF310159  | 6836.587  | 5477.943  | AF077033  | 1596.147  | 1387.388  |
| NM_001765 | 947.497   | 657.348   | NM_000316 | 309.912   | 393.768   | NM_004991 | 584.891   | 829.354   |
| NM_003361 | 2747.93   | 1984.316  | NM_018986 | 1219.476  | 1093.383  | AF222980  | 1271.947  | 1575.205  |
| NM_012099 | 3086.055  | 2662.393  | AB044934  | 571.779   | 542.741   | AK026758  | 1436.046  | 1415.703  |
| NM_018684 | 10186.968 | 8496.292  | U27655    | 2348.672  | 1695.6    | NM_012201 | 1152.054  | 1165.847  |
| NM_017983 | 1676.719  | 1320.311  | NM_003360 | 1085.844  | 898.483   | AK022385  | 14491.956 | 11773.925 |
| AF116909  | 3109.868  | 2183.505  | Z21965    | 25038.943 | 19021.734 | NM_002775 | 932.928   | 781.119   |
| BE906724  | 2359.736  | 1907.754  | NM_012427 | 778.477   | 824.431   | AK024584  | 2222.044  | 1427.287  |
| NM_002283 | 8998.963  | 7373.538  | NM_000852 | 8981.947  | 5386.907  | NM_003504 | 3696.652  | 2759.026  |
| AJ276095  | 18517.326 | 18366.604 | NM_000399 | 654.171   | 541.11    | NM_013296 | 2478.776  | 1969.138  |
| NM_004819 | 4014.118  | 4390.095  | AW797282  | 484.996   | 383.456   | NM_007267 | 1637.973  | 1858.195  |
| NM_007184 | 4200.81   | 3910.413  | NM_002402 | 2708.359  | 1330.496  | NM_005865 | 3310.205  | 2558.531  |
| NM_005291 | 16888.475 | 14206.179 | L09070    | 588.709   | 432.853   | NM_006413 | 3089.372  | 2214.158  |
| AF253316  | 351.217   | 538.908   | NM_000062 | 5127.833  | 3297.26   | NM_017684 | 423.327   | 238.296   |
| NM_005855 | 728.948   | 588.52    | NM_009590 | 2569.659  | 1368.881  | AL049689  | 425.43    | 272.801   |
| NM_002923 | 1152.071  | 1142.367  | NM_016106 | 3100.546  | 3409.847  | NM_000216 | 559.926   | 630.366   |
| NM_006794 | 1826.153  | 1432.996  | NM_014570 | 3034.854  | 2890.248  | AF135960  | 1113.819  | 863.002   |
| NM_018653 | 6345.708  | 6048.345  | NM_014747 | 4352.549  | 4437.166  | NM_014216 | 10413.358 | 10280.649 |
| NM_005386 | 3866.128  | 3680.826  | Y19240    | 3855.189  | 4342.504  | NM_001115 | 1056.695  | 1060.269  |
| NM_007232 | 29783.611 | 29108.777 | AF091029  | 6068.131  | 6243.484  | NM_014921 | 612.356   | 519.814   |
| NM_003027 | 1085.653  | 1500.415  | X97074    | 18888.223 | 15575.304 | NM_016581 | 34658.348 | 29917.123 |
| NM_016257 | 911.905   | 1067.939  | AL117235  | 903.037   | 893.53    | NM_013255 | 801.932   | 657.159   |
| NM_002717 | 5808.185  | 6284.043  | NM_014822 | 5239.941  | 4243.295  | NM_007183 | 507.357   | 423.857   |
| NM_012114 | 1964.844  | 2100.634  | NM_005296 | 2930.594  | 3143.873  | AJ238243  | 4915.49   | 3833.057  |
| NM_003025 | 22512.035 | 25639.521 | NM_001337 | 579.46    | 692.92    | J05046    | 7476.847  | 4869.543  |
| NM_001679 | 16432.051 | 10721.66  | NM_003611 | 6148.423  | 4996.659  | NM_012318 | 838.905   | 638.718   |
| NM_004046 | 61358.574 | 61547.836 | AB014538  | 2105.475  | 1580.874  | NM_002751 | 2485.9    | 1888.042  |



|           |           |           |           |           |           |           |           |           |
|-----------|-----------|-----------|-----------|-----------|-----------|-----------|-----------|-----------|
| NM_004983 | 726.02    | 703.403   | NM_004154 | 511.404   | 266.722   | NM_004291 | 845.478   | 449.222   |
| U09384    | 724.934   | 580.605   | NM_006209 | 714.296   | 597.312   | NM_003816 | 2371.041  | 1941.98   |
| NM_006860 | 6536.944  | 4504.388  | AK025118  | 4273.255  | 3583.173  | AK022635  | 321.427   | 85.579    |
| NM_004794 | 10517.313 | 10299.45  | NM_000727 | 1453.19   | 1242.884  | NM_004912 | 2159.21   | 1585.712  |
| NM_004283 | 2736.487  | 2754.651  | NM_002621 | 650.958   | 551.364   | U79304    | 7793.678  | 5613.806  |
| NM_004163 | 20344.855 | 19252.922 | NM_005385 | 5572.175  | 4570.751  | NM_016267 | 2390.63   | 1926.028  |
| AK026308  | 1680.386  | 1367.815  | NM_018985 | 2534.4    | 1836.504  | NM_004671 | 2165.235  | 1669.131  |
| NM_013337 | 2204.847  | 2937.351  | NM_006074 | 21725.479 | 15197.454 | NM_005180 | 6489.872  | 8795.301  |
| NM_004193 | 2963.839  | 2727.276  | AF208232  | 3039.851  | 2208.785  | NM_006526 | 1387.105  | 1694.051  |
| NM_002803 | 8464.954  | 7152.207  | NM_002988 | 3149.918  | 2191.477  | U35622    | 763.321   | 810.441   |
| NM_005508 | 2512.398  | 2716.817  | NM_004186 | 1205.719  | 531.367   | NM_007045 | 1045.935  | 893.179   |
| NM_006788 | 1166.089  | 1047.554  | NM_016258 | 2536.234  | 1688.801  | NM_002093 | 2209.667  | 2012.464  |
| NM_016568 | 1305.768  | 1475.112  | AF203032  | 3915.02   | 2132.173  | AB042555  | 4214.746  | 3803.786  |
| AB033102  | 9332.295  | 12037.246 | AB014542  | 12723.409 | 4937.34   | NM_001729 | 246.151   | 300.365   |
| NM_014774 | 5350.294  | 8554.34   | AF070670  | 4975.896  | 4114.314  | NM_017763 | 633.347   | 566.913   |
| NM_014143 | 10396.767 | 12625.658 | NM_016156 | 2742.745  | 3175.261  | NM_013975 | 1108.171  | 1003.116  |
| M55646    | 17237.805 | 15913.997 | NM_016528 | 1215.547  | 1894.515  | NM_003843 | 3224.236  | 2508.765  |
| NM_006112 | 31575.811 | 34887.656 | NM_015974 | 1941.238  | 2059.841  | NM_012216 | 693.326   | 652.102   |
| BE741525  | 1513.26   | 1583.401  | NM_014384 | 1233.573  | 1315.274  | NM_005338 | 388.986   | 495.825   |
| BF030555  | 17050.678 | 9774.588  | NM_002573 | 2340.873  | 2527.293  | X73502    | 2672.586  | 2508.513  |
| NM_012433 | 6747.587  | 3265.872  | AF133424  | 2127.176  | 2099.308  | NM_020445 | 44428.059 | 40938.613 |
| NM_005605 | 1786.116  | 1844.559  | NM_005003 | 18544.902 | 14531.487 | NM_016376 | 5002.311  | 3850.906  |
| NM_002576 | 1870.195  | 1406.906  | AF084560  | 3848.645  | 3765.113  | AB046848  | 3239.501  | 2613.769  |
| NM_003582 | 2018.986  | 1670.521  | NM_015715 | 2514.149  | 2153.012  | NM_018103 | 3213.013  | 3503.779  |
| AF057354  | 707.889   | 377.242   | NM_000032 | 2837.384  | 2647.61   | AK026302  | 3876.156  | 2898.817  |
| AF169351  | 9264.936  | 8144.319  | NM_002083 | 1033.552  | 654.165   | NM_012214 | 1077.469  | 1816.987  |
| M14200    | 55780.723 | 54478.789 | NM_002035 | 2608.475  | 2045.291  | AF049656  | 11157.668 | 12679.621 |
| NM_000282 | 3900.91   | 3618.11   | NM_014900 | 585.644   | 548.717   | NM_000312 | 1283.274  | 1429.301  |
| NM_000532 | 13384.659 | 11840.017 | BF342908  | 984.791   | 911.063   | NM_003963 | 586.601   | 752.685   |
| NM_016341 | 1578.349  | 1666.481  | AF118073  | 408.468   | 438.806   | AC009729  | 205.96    | 422.085   |
| AF231916  | 1758.334  | 1675.6    | AK023510  | 2478.064  | 1970.24   | NM_016598 | 2905.355  | 3292.017  |
| NM_003501 | 4025.682  | 3296.581  | NM_004345 | 1223.682  | 1160.31   | NM_014109 | 3009.272  | 2844.416  |
| AK022654  | 34310.16  | 33523.48  | NM_000702 | 25673.219 | 19922.094 | NM_012160 | 987.948   | 698.493   |
| BC002905  | 6944.335  | 6248.134  | X71490    | 8989.175  | 7444.912  | NM_006357 | 42906.07  | 29167.523 |
| NM_018091 | 8307.293  | 8789.785  | AF257081  | 1493.186  | 1363.364  | NM_014248 | 24716.611 | 15284.905 |
| NM_001108 | 4383.952  | 5128.607  | NM_001688 | 33959.438 | 18601.256 | AK027070  | 513.495   | 551.523   |
| NM_001637 | 1152.369  | 1208.87   | NM_000219 | 512.689   | 166.043   | AF129533  | 212.896   | 201.279   |
| NM_016630 | 8555.569  | 10031.4   | NM_002232 | 555.98    | 278.217   | NM_003341 | 3384.632  | 2714.281  |
| NM_014291 | 7036.376  | 7331.444  | NM_022095 | 857.899   | 1031.512  | NM_017785 | 465.035   | 491.451   |
| NM_014631 | 885.308   | 1220.946  | AF112219  | 14464.275 | 13297.601 | NM_006249 | 1593.694  | 1235.417  |
| NM_001089 | 5314.825  | 4542.956  | NM_000521 | 354.338   | 145.565   | NM_018318 | 419.687   | 553.743   |
| NM_000120 | 6214.808  | 6042.201  | NM_004135 | 4117.399  | 3272.11   | AB020640  | 1358.4    | 1406.812  |
| AF172327  | 34130.926 | 35199.387 | NM_000203 | 535.693   | 444.338   | D29954    | 8647.517  | 5690.375  |
| NM_001676 | 3731.383  | 3817.695  | NM_013443 | 1669.574  | 1141.326  | AF007131  | 1221.344  | 1227.296  |
| AB018338  | 11776.757 | 11088.917 | NM_000925 | 6147.965  | 4396.039  | AF119256  | 695.046   | 501.176   |
| D80010    | 488.923   | 427.079   | NM_000465 | 1994.611  | 1346.621  | X74497    | 875.088   | 876.458   |
| NM_004923 | 1900.36   | 1239.88   | NM_000123 | 2905.994  | 2776.313  | NM_012210 | 398.71    | 487.704   |
| NM_003971 | 2156.077  | 1222.765  | AL137501  | 573.982   | 433.125   | U10072    | 1124.508  | 1921.26   |
| AK026973  | 917.081   | 1162.899  | BE858979  | 830.086   | 902.258   | NM_003410 | 3180.247  | 6041.948  |
| NM_005822 | 877.089   | 648.219   | NM_000122 | 2269.086  | 1442.022  | NM_007146 | 1204.643  | 1403.446  |
| U81002    | 4300.487  | 4071.649  | NM_006712 | 50915.105 | 61709.578 | NM_002229 | 697.927   | 737.294   |
| NM_016299 | 6211.643  | 4960.962  | NM_006240 | 1371.848  | 802.955   | S69027    | 2691.448  | 3781.432  |
| NM_014185 | 4846.203  | 4254.558  | NM_007026 | 2710.098  | 2033.685  | X99631    | 7426.529  | 6742.894  |

|           |           |           |           |           |           |           |           |           |
|-----------|-----------|-----------|-----------|-----------|-----------|-----------|-----------|-----------|
| L38517    | 3497.734  | 2832.515  | M37712    | 6769.448  | 3406.22   | NM_00173C | 1256.436  | 1277.277  |
| NM_018291 | 5296.279  | 5298.275  | NM_00264E | 626.851   | 330.939   | AK026290  | 296.608   | 442.266   |
| NM_00553C | 3096.196  | 3050.789  | AW797282  | 562.825   | 349.356   | AB014589  | 941.741   | 808.961   |
| NM_00689E | 5892.21   | 4692.909  | NM_002402 | 2638.245  | 2261.567  | AF248649  | 317.953   | 350.096   |
| NM_01220C | 3081.301  | 2377.282  | L09070    | 634.976   | 688.966   | U37146    | 15041.896 | 13725.431 |
| NM_001724 | 1895.103  | 1605.418  | NM_000062 | 4741.325  | 5646.7    | NM_01208E | 1175.18   | 827.62    |
| NM_00015C | 1699.016  | 2087.048  | NM_017877 | 372.498   | 525.598   | NM_000991 | 46491.746 | 60319.148 |
| AB023152  | 1910.033  | 2003.944  | NM_00959C | 2833.589  | 3371.18   | NM_016034 | 10300.81  | 8184.978  |
| NM_006212 | 1404.301  | 1703.209  | AL133037  | 843.559   | 849.046   | X69150    | 49584.199 | 61831.203 |
| AK022872  | 5068.932  | 7045.317  | NM_02035C | 4094.092  | 3770.663  | NM_00102E | 52808.508 | 66389.305 |
| AK024272  | 6433.185  | 8571.137  | NM_00035C | 1249.9    | 1139.497  | NM_01828E | 7564.414  | 7523.944  |
| NM_016381 | 2811.672  | 3103.654  | X91103    | 7511.891  | 6293.436  | AK022393  | 5953.495  | 4605.638  |
| AL591715  | 752.883   | 733.124   | AA419164  | 3601.723  | 3860.063  | AK026654  | 619.622   | 1039.957  |
| NM_018042 | 3494.06   | 3598.159  | L35251    | 2022.696  | 2117.812  | AB020643  | 438.409   | 740.783   |
| NM_014944 | 5034.872  | 4048.859  | BE910395  | 1154.257  | 1016.724  | NM_00520E | 49142.66  | 64048.531 |
| AF200348  | 1854.217  | 1292.613  | N46828    | 2466.671  | 2027.728  | NM_00196E | 967.865   | 1194.308  |
| Y11710    | 469.057   | 589.264   | BI908302  | 16709.537 | 15408.008 | NM_01613E | 1049.252  | 1217.275  |
| NM_00265C | 2751.695  | 2411.996  | AA460969  | 2307.521  | 2559.174  | Z36833    | 35729.703 | 26472.742 |
| NM_00326C | 8558.575  | 6597.48   | BG695859  | 740.23    | 808.176   | NM_01435E | 1047.878  | 1408.551  |
| AK024071  | 2655.879  | 2881.075  | M85079    | 4273.189  | 3463.547  | AF072810  | 378.613   | 390.736   |
| AF056490  | 2701.099  | 2773.154  | AA457671  | 10663.523 | 8208.488  | AF174482  | 4126.111  | 3523.824  |
| NM_00553E | 3800.049  | 3898.72   | X07437    | 5406.011  | 4111.41   | NM_00352E | 1269.143  | 1008.164  |
| NM_005541 | 13198.1   | 11553.278 | NM_000641 | 2000.576  | 1184.62   | NM_01776E | 400.569   | 325.084   |
| AB002319  | 2540.198  | 2218.509  | AE006466  | 2575.188  | 1949.964  | D85131    | 5795.406  | 4262.434  |
| AF039942  | 4053.564  | 3405.606  | BC002396  | 2927.002  | 1996.63   | NM_00216E | 8708.763  | 7667.404  |
| NM_004421 | 2501.139  | 2057.855  | AF208232  | 3810.635  | 3891.972  | U52097    | 632.213   | 544.303   |
| NM_018654 | 2128.223  | 2780.393  | NM_00298E | 4075.732  | 4091.724  | NM_00341E | 1566.363  | 1923.129  |
| AB046863  | 7220.629  | 8318.262  | NM_00418E | 1329.318  | 1205.734  | NM_018484 | 460.073   | 598.813   |
| M62403    | 12722.057 | 15838.81  | NM_01625E | 2737.844  | 3301.945  | NM_017594 | 865.241   | 1416.655  |
| NM_01788E | 6788.679  | 7403.143  | AF203032  | 4050.635  | 3888.061  | AK027237  | 635.796   | 1521.613  |
| AK025131  | 3317.638  | 4647.698  | AB014542  | 15250.916 | 13419.486 | AK027104  | 1046.208  | 1377.277  |
| NM_000754 | 28329.426 | 39298.172 | NM_01464C | 544.716   | 559.107   | AL133090  | 11221.921 | 12462.638 |
| NM_01461E | 1378.403  | 1841.635  | Y10518    | 43806.844 | 46265.809 | AF085867  | 1849.03   | 2239.04   |
| NM_00562E | 14407.527 | 16063.101 | AF155135  | 6374.007  | 5969.147  | Z36779    | 1872.198  | 2706.552  |
| J04621    | 3119.22   | 3541.327  | NM_01479C | 1329.623  | 1318.403  | NM_017822 | 2943.802  | 2674.521  |
| NM_00071E | 2981.778  | 3159.299  | NM_003571 | 7214.877  | 6423.922  | AK026844  | 1538.184  | 1322.11   |
| NM_000161 | 5463.483  | 6291.035  | AB032965  | 40368.859 | 34244.832 | AK026735  | 2132.627  | 1355.964  |
| NM_002634 | 11700.31  | 9108.021  | NM_02037C | 606.803   | 304.373   | AL110104  | 13219.365 | 10524.003 |
| NM_01774E | 2583.782  | 2240.794  | NM_004767 | 619.991   | 786.077   | AF240633  | 638.768   | 672.069   |
| BQ893560  | 339.944   | 545.529   | BF310159  | 7164.72   | 6327.383  | AK027056  | 3751.118  | 2140.167  |
| NM_001972 | 60005.977 | 53146.504 | NM_01898E | 1337.329  | 1237.389  | AF052172  | 5052.366  | 4103.109  |
| NM_00144E | 423.073   | 361.595   | AB044934  | 895.008   | 722.717   | AB014573  | 747.063   | 750.819   |
| AK024455  | 641.221   | 711.105   | U27655    | 3292.109  | 2400.664  | AK091109  | 13521.476 | 10421.796 |
| NM_00200E | 16085.144 | 16291.01  | NM_00336C | 1203.485  | 927.799   | NM_014967 | 1439.465  | 1875.492  |
| NM_007111 | 6098.429  | 5198.646  | Z21965    | 31710.502 | 21645.436 | AK022915  | 1862.952  | 2689.22   |
| NM_00204E | 1111.66   | 673.765   | NM_012427 | 696.041   | 479.818   | AK021736  | 427.558   | 872.62    |
| NM_004702 | 985.795   | 951.326   | AF131857  | 6985.254  | 4509.704  | AJ011598  | 300.897   | 322.49    |
| NM_00710E | 2634.38   | 2076.419  | NM_000852 | 8409.856  | 4457.708  | AJ001906  | 308.425   | 138.332   |
| AK023404  | 3442.354  | 2699.087  | NM_00039E | 601.102   | 248.406   | U17633    | 589.651   | 552.751   |
| NM_01323E | 918.525   | 893.481   | AF257081  | 1491.563  | 1869.858  | AL049231  | 911.716   | 701.488   |
| NM_00178E | 2308.063  | 1459.465  | NM_00168E | 41999.305 | 36767.438 | Z83939    | 795.168   | 472.628   |
| NM_016004 | 5387.976  | 6121.386  | NM_003631 | 277.791   | 625.095   | L10404    | 451.728   | 306.103   |
| NM_00265E | 1341.397  | 2061.844  | NM_00021E | 729.716   | 807.698   | AF283776  | 4232.211  | 4103.581  |

|           |           |           |           |           |           |           |           |           |
|-----------|-----------|-----------|-----------|-----------|-----------|-----------|-----------|-----------|
| AB028955  | 10899.755 | 13535.171 | NM_002232 | 708.954   | 1020.975  | L10123    | 10425.68  | 7843.157  |
| U66879    | 9974.891  | 12277.465 | NM_016106 | 3644.563  | 3992.401  | AK021895  | 1320.318  | 1278.842  |
| NM_016022 | 17027.248 | 23057.617 | NM_014570 | 3126.849  | 3158.466  | AK000036  | 1659.03   | 2284.736  |
| NM_004874 | 2945.347  | 3706.273  | NM_014747 | 4550.083  | 4919.997  | AK000769  | 523.679   | 758.216   |
| NM_014204 | 2567.34   | 3511.454  | Y19240    | 3564.354  | 3444.809  | AK000924  | 661.894   | 534.244   |
| NM_001941 | 324.778   | 446.906   | AF091029  | 7304.254  | 7206.622  | AK022252  | 1692.684  | 1903.764  |
| NM_018509 | 11422.26  | 12209.188 | X97074    | 19510.848 | 16146.477 | AK000114  | 1475.918  | 1274.296  |
| NM_004086 | 1118.119  | 1369.839  | AL117235  | 724.58    | 991.714   | AK000952  | 3404.515  | 2384.579  |
| AL050199  | 993.678   | 446.086   | NM_014822 | 4972      | 3762.309  | AK024520  | 2057.837  | 1642.925  |
| NM_001748 | 6736.007  | 4299.066  | NM_005296 | 3320.371  | 3374.579  | AK024592  | 2752.072  | 1756.363  |
| NM_007352 | 760.23    | 475.315   | NM_001337 | 556.99    | 681.908   | AK024904  | 1247.239  | 884.419   |
| AF176706  | 3453.923  | 4922.881  | NM_003611 | 6729.382  | 6251.608  | AB050477  | 1856.567  | 2525.895  |
| NM_014484 | 1158.96   | 1362.17   | AB014538  | 1947.28   | 2160.047  | AK025716  | 677.898   | 903.283   |
| AF163762  | 485.581   | 778.854   | NM_006209 | 871.613   | 585.838   | AF086202  | 5511.803  | 4408.243  |
| NM_001086 | 1548.348  | 1838.915  | AK025118  | 4168.815  | 3071.284  | NM_017806 | 7286.572  | 9883.404  |
| NM_014670 | 2158.573  | 3109.702  | NM_000727 | 1546.086  | 870.601   | AK023447  | 741.21    | 738.661   |
| NM_019048 | 6317.889  | 6761.852  | NM_002621 | 510.273   | 263.665   | AK001937  | 17819.916 | 20673.357 |
| NM_001040 | 1755.16   | 1666.411  | NM_005385 | 5101.258  | 3022.453  | AL365517  | 779.548   | 1186.971  |
| AF279698  | 3164.283  | 2645.042  | NM_018985 | 2414.825  | 1558.91   | AB007961  | 1203.885  | 1370.342  |
| NM_019849 | 2078.663  | 1789.555  | NM_006074 | 18374.4   | 8872.833  | NM_005547 | 1184.38   | 1911.545  |
| NM_000049 | 669.829   | 956.967   | NM_006712 | 52692.496 | 66588.492 | AF119862  | 4154.559  | 4415.434  |
| AB032996  | 30324.25  | 33714.008 | NM_006240 | 2111.045  | 2336.786  | U17628    | 923.613   | 491.981   |
| AB040881  | 4162.78   | 5329.901  | NM_007026 | 2956.098  | 3013.472  | AF119867  | 2217.671  | 1723.163  |
| AY007121  | 2050.337  | 2520.481  | M37712    | 8610.455  | 7506.713  | AL357205  | 7077.654  | 7826.985  |
| NM_003372 | 10631.354 | 12720.332 | NM_002648 | 947.615   | 775.721   | AF124819  | 347.913   | 233.726   |
| NM_003980 | 525.264   | 269.17    | AF070670  | 5481.232  | 5596.077  | D17091    | 867.116   | 726.719   |
| NM_007317 | 5152.471  | 5538.444  | NM_016156 | 3152.391  | 4275.604  | AL133074  | 501.461   | 394.992   |
| AK021466  | 2737.218  | 3290.104  | NM_016528 | 1210.72   | 1976.483  | AK021765  | 460.901   | 617.891   |
| NM_006443 | 29400.58  | 30730.322 | NM_015974 | 1892.203  | 2538.451  | AK026708  | 1512.823  | 1675.48   |
| NM_001559 | 529.268   | 266.84    | NM_014384 | 1294.818  | 1970.037  | NM_017903 | 3255.054  | 3380.731  |
| NM_004959 | 1218.447  | 1145.619  | NM_002573 | 2367.062  | 2676.588  | NM_018074 | 1206.476  | 1290.156  |
| AK026022  | 26175.879 | 24383.455 | AF133424  | 2424.706  | 2407.657  | NM_000909 | 2208.606  | 2281.671  |
| NM_003199 | 2752.68   | 1999.612  | NM_005003 | 20594.291 | 18162.629 | NM_019013 | 591.909   | 675.625   |
| NM_002938 | 4199.839  | 3795.93   | AF084560  | 5066.701  | 5577.393  | L37711    | 445.213   | 447.128   |
| AK023652  | 5189.933  | 7452.433  | NM_015715 | 2858.832  | 2845.763  | S70313    | 5557.664  | 6460.446  |
| AF099032  | 1055.774  | 1822.205  | NM_000032 | 3458.131  | 3658.281  | AK021607  | 928.374   | 554.696   |
| AK001649  | 1238.891  | 774.238   | NM_002083 | 1422.315  | 1402.732  | L09268    | 426.752   | 592.557   |
| NM_016638 | 12489.944 | 9651.592  | NM_002035 | 3424.734  | 3245.079  | NM_020186 | 3371.003  | 2365.216  |
| AB018274  | 11674.034 | 10165.602 | NM_014900 | 660.158   | 449.076   | AF090947  | 1576.295  | 1058.632  |
| NM_005871 | 7686.421  | 5860.519  | BF342908  | 712.93    | 474.712   | CY3Cy5    | 1432.661  | 237.951   |
| NM_007042 | 3859.859  | 3774.158  | AF118073  | 413.405   | 306.555   | L35251    | 848.692   | 729.307   |
| NM_016333 | 12359.026 | 10419.112 | AK023510  | 2129.481  | 1395.668  | BE910395  | 448.471   | 408.867   |
| BE875028  | 2869.198  | 3119.573  | NM_004345 | 1234.021  | 1197.292  | N46828    | 642.765   | 441.314   |
| AK000511  | 4383.333  | 4513.146  | NM_000702 | 22928.838 | 15786.765 | BI908302  | 5716.374  | 4197.346  |
| AF121255  | 4266.567  | 6294.056  | X71490    | 7790.518  | 5457.053  | AA460969  | 790.696   | 465.988   |
| NM_005494 | 4074.213  | 4283.978  | NM_014273 | 10720.143 | 9485.617  | BG695859  | 332.757   | 225.847   |
| NM_017946 | 1655.051  | 1555.437  | AF039442  | 1143.687  | 1125.02   | M85079    | 1202.911  | 864.522   |
| NM_004953 | 8459.225  | 9465.861  | NM_004680 | 950.605   | 807.935   | AA457671  | 3623.146  | 2299.744  |
| AL049682  | 1836.751  | 1794.271  | NM_005671 | 3961.951  | 5666.216  | X07437    | 1498.896  | 1051.993  |
| NM_005528 | 6686.303  | 5765.757  | NM_017409 | 520.263   | 828.65    | NM_000641 | 744.22    | 374.165   |
| AK022842  | 621.789   | 550.909   | AF112219  | 15639.458 | 18215.066 | AE006466  | 985.503   | 539.066   |
| NM_007006 | 25469.984 | 23442.574 | NM_004135 | 4258.881  | 4836.389  | BC008737  | 17204.295 | 13945.521 |
| AL137346  | 2664.13   | 3557.579  | NM_000203 | 527.118   | 860.028   | BC011655  | 1073.62   | 654.713   |

|           |           |           |           |           |           |           |           |           |
|-----------|-----------|-----------|-----------|-----------|-----------|-----------|-----------|-----------|
| NM_017756 | 13651.794 | 11397.741 | NM_013443 | 2129.324  | 2056.78   | BC002396  | 1292.919  | 856.598   |
| NM_005793 | 8172.24   | 8316.441  | NM_000925 | 7115.844  | 7067.57   | NM_022095 | 456.752   | 304.286   |
| NM_004901 | 872.832   | 933.437   | NM_000465 | 2040.296  | 1647.056  | SR6       | 929.695   | 808.75    |
| NM_006721 | 27390.332 | 29488.854 | NM_000123 | 2693.278  | 2571.52   | SR8       | 3094.591  | 6168.383  |
| NM_016282 | 3558.875  | 3852.999  | AL137501  | 486.609   | 406.585   | SR10      | 10197.203 | 2203.632  |
| NM_001905 | 9216.097  | 7752.573  | BE858979  | 734.322   | 477.771   | CY3Cy5    | 1151.505  | 234.224   |
| AF292100  | 3411.511  | 2822.364  | NM_000122 | 1154.662  | 631.499   | NM_004767 | 375.306   | 524.897   |
| NM_003434 | 44506.609 | 42152.754 | U87223    | 1538.159  | 1250.128  | BF310159  | 2471.361  | 2025.241  |
| NM_018181 | 651.96    | 521.969   | X91348    | 18614.734 | 15729.095 | NM_018986 | 593.302   | 485.23    |
| NM_005654 | 993.743   | 1186.116  | Z36505    | 1772.984  | 1967.008  | AB044934  | 272.949   | 321.008   |
| AF024698  | 60196.953 | 61774.207 | NM_001854 | 1780.645  | 2217.682  | U27655    | 1141.371  | 880.696   |
| BE904617  | 13652.946 | 12671.778 | NM_017913 | 1348.464  | 1609.211  | NM_00336C | 522.618   | 381.711   |
| AK024495  | 1499.874  | 1162.104  | NM_003647 | 765.115   | 954.756   | Z21965    | 8244.868  | 5052.484  |
| AF024694  | 3374.421  | 2819.905  | NM_001699 | 25237.34  | 32342.119 | NM_012427 | 338.644   | 231.558   |
| AF091081  | 6635.506  | 6359.099  | AB006589  | 305.843   | 126.649   | AF131857  | 2948.102  | 2501.737  |
| AK001758  | 7701.037  | 5810.073  | NM_018351 | 520.198   | 487.42    | NM_000852 | 3630.322  | 2256.431  |
| U90842    | 712.826   | 536.99    | AK023019  | 264.325   | 444.505   | NM_000395 | 251.267   | 229.255   |
| AK025076  | 589.515   | 873.159   | NM_147171 | 5141.967  | 7812.986  | NM_002402 | 1177.301  | 756.632   |
| AF086325  | 2034.239  | 1954.491  | AF238083  | 7658.243  | 8679.736  | L09070    | 312.855   | 147.369   |
| NM_004928 | 812.517   | 919.302   | NM_002962 | 364.727   | 591.075   | NM_000062 | 2081.601  | 1549.336  |
| AF147401  | 1713.549  | 1497.401  | NM_016388 | 1470.102  | 1453.753  | NM_00959C | 1209.077  | 891.256   |
| AF075022  | 1268.82   | 1102.584  | AB046783  | 811.14    | 905.311   | AL133037  | 406.492   | 440.745   |
| AF075060  | 1937.559  | 1911.908  | NM_000845 | 818.787   | 588.293   | NM_02035C | 2125.09   | 1152.979  |
| AF085846  | 4733.913  | 6671.874  | NM_004604 | 50086.816 | 49780.789 | NM_00035C | 497.742   | 269.747   |
| AL109705  | 1298.647  | 1388.002  | NM_014965 | 3047.694  | 2137.522  | X91103    | 2566.487  | 2128.362  |
| AF147392  | 546.17    | 1006.313  | NM_004882 | 14977.088 | 8503.957  | AA419164  | 1754.332  | 1481.622  |
| AF088057  | 3645.013  | 3556.47   | AL390148  | 6819.716  | 4145.813  | AL117235  | 402.936   | 533.099   |
| AF086255  | 12388.522 | 11785.264 | AK024055  | 1091.789  | 418.394   | NM_014822 | 1495.037  | 1292.357  |
| AK022660  | 875.307   | 759.141   | U10485    | 489.671   | 938.412   | NM_005296 | 1168.897  | 1340.818  |
| AF088051  | 1473.194  | 1412.049  | AK025326  | 7030.397  | 6214.862  | NM_003611 | 2255.445  | 1708.934  |
| AK023883  | 673.617   | 677.969   | NM_013376 | 724.51    | 1153.644  | AB014538  | 817.157   | 693.452   |
| AF086260  | 441.667   | 246.809   | NM_017964 | 2460.575  | 3049.45   | NM_006205 | 345.95    | 392.768   |
| AF086366  | 775.898   | 815.634   | NM_016272 | 474.019   | 955.621   | AK025118  | 1627.282  | 1299.904  |
| AF086360  | 4445.443  | 3010.835  | NM_016238 | 4291.16   | 6365.364  | NM_000727 | 728.605   | 443.891   |
| AF087993  | 3741.877  | 3515.046  | NM_001758 | 4299.601  | 8971.67   | NM_005385 | 2122.731  | 1190.128  |
| AF035282  | 1648.393  | 2111.454  | BE546276  | 1128.735  | 1456.299  | NM_018985 | 1107.086  | 652.377   |
| AK021966  | 5624.499  | 5906.351  | NM_004725 | 6414.899  | 6247.244  | NM_006074 | 10031.017 | 6803.37   |
| AB018292  | 7829.299  | 7513.812  | NM_015997 | 4670.163  | 6074.583  | AF208232  | 1148.232  | 782.601   |
| AF085971  | 779.72    | 1110.925  | NM_001167 | 7485.2    | 10572.687 | NM_002988 | 1302.411  | 1057.573  |
| AF147302  | 1361.046  | 1421.122  | NM_012115 | 3460.911  | 4401.901  | NM_004186 | 488.772   | 311.44    |
| AF085929  | 2099.578  | 1733.846  | NM_004933 | 22359.852 | 24564.158 | NM_016258 | 1380.879  | 824.627   |
| AK001126  | 2148.484  | 2422.979  | M96577    | 6772.824  | 6987.772  | AF203032  | 1893.201  | 1201.198  |
| AF085976  | 3472.404  | 2864.131  | NM_013258 | 22565.158 | 22474.396 | AB014542  | 4999.565  | 3351.346  |
| AF075104  | 6897.033  | 6158.624  | NM_003842 | 1091.326  | 1200.903  | NM_01464C | 275.399   | 104.076   |
| AK021724  | 615.476   | 514.888   | NM_016184 | 1183.541  | 1072.105  | Y10518    | 16716.207 | 13442.155 |
| AL133025  | 654.315   | 1127.219  | L11238    | 6702.012  | 4237.081  | AF155135  | 2547.427  | 1763.87   |
| AL137402  | 15485.429 | 21068.119 | NM_012205 | 4848.078  | 3279.147  | NM_01479C | 615.906   | 376.744   |
| AL137617  | 2627.97   | 2219.529  | K02046    | 1717.27   | 1066.199  | NM_003571 | 2691.217  | 2248.45   |
| AL359568  | 29601.242 | 25991.316 | AL110151  | 1314.277  | 1499.127  | AB032965  | 12366.314 | 8968.629  |
| AL133564  | 5131.721  | 4101.446  | AK024841  | 1815.169  | 2281.302  | AF133424  | 898.79    | 750.343   |
| AL137428  | 1613.953  | 1537.504  | NM_004995 | 2656.813  | 4100.264  | NM_005003 | 5492.296  | 5061.871  |
| AL157462  | 1792.119  | 1696.486  | NM_001190 | 2867.054  | 3622.938  | AF084560  | 1423.114  | 1321.2    |
| AL359602  | 5242.198  | 4843.838  | NM_005271 | 6612.231  | 11801.922 | NM_015715 | 946.589   | 726.982   |

|           |           |           |           |           |           |           |           |           |
|-----------|-----------|-----------|-----------|-----------|-----------|-----------|-----------|-----------|
| NM_01819C | 32386.906 | 30798.785 | NM_012244 | 2383.643  | 4273.889  | NM_000032 | 999.174   | 953.45    |
| AF086054  | 617.228   | 763.412   | NM_004341 | 1235.414  | 2044.545  | NM_002083 | 383.676   | 241.77    |
| AF086089  | 444.216   | 542.255   | AB082521  | 6818.075  | 8353.303  | NM_002035 | 1030.496  | 967.377   |
| AK022259  | 56778.289 | 57456.438 | AK026806  | 177.561   | 667.494   | NM_01490C | 335.329   | 122.939   |
| AK022461  | 1405.548  | 1968.311  | AL050182  | 1004.984  | 2241.305  | BF342908  | 410.372   | 150.567   |
| NM_01601C | 3415.465  | 4371.876  | NM_02004C | 762.182   | 1087.419  | AK023510  | 962.873   | 753.237   |
| AF070647  | 17904.6   | 17482.016 | NM_002374 | 1485.883  | 1476.573  | NM_004345 | 551.485   | 552.092   |
| AF116649  | 542.99    | 655.09    | AK026940  | 2275.822  | 1933.99   | NM_000702 | 9928.658  | 8084.022  |
| AF174394  | 2704.127  | 2295.718  | AF155117  | 3276.084  | 2538.212  | X71490    | 3130.414  | 2702.929  |
| AF144054  | 713.281   | 634.488   | AB014527  | 797.952   | 541.785   | AF257081  | 721.73    | 542.016   |
| AK021876  | 5806.797  | 6035.282  | NM_004411 | 1015.93   | 805.089   | NM_001685 | 14358.811 | 7748.854  |
| AK022017  | 1072.207  | 962.902   | NM_015935 | 4786.986  | 3152.68   | NM_003631 | 190.619   | 193.345   |
| AK022160  | 3822.616  | 3214.211  | NM_00074C | 527.571   | 426.581   | NM_000215 | 360.016   | 132.473   |
| AK022295  | 729.101   | 863.555   | AK025985  | 3767.307  | 12491.225 | NM_002232 | 423.227   | 122.228   |
| AK021935  | 1384.188  | 1029.067  | NM_013255 | 1723.732  | 2419.967  | NM_016105 | 1169.93   | 858.121   |
| AK022187  | 5044.961  | 4973.781  | NM_004143 | 1349.553  | 1533.915  | NM_01457C | 1418.295  | 1113.521  |
| AK022337  | 1448.817  | 1717.536  | X66087    | 842.914   | 671.698   | NM_014747 | 2017.543  | 1694.425  |
| AK026847  | 845.341   | 871.789   | NM_016325 | 5760.314  | 6751.475  | Y19240    | 1602.032  | 1293.897  |
| AK023048  | 802.217   | 932.819   | NM_017544 | 16158.426 | 21220.082 | AF091029  | 1739.497  | 1070.989  |
| AL359560  | 520.999   | 709.657   | NM_003153 | 948.647   | 1427.216  | X97074    | 4832.522  | 2828.011  |
| AK026891  | 2324.63   | 1979.781  | NM_016285 | 1432.814  | 2489.419  | NM_002625 | 133.269   | 215.457   |
| AK024595  | 683.105   | 1044.926  | NM_014707 | 501.315   | 848.91    | NM_004135 | 1569.055  | 1541.321  |
| M90355    | 61966.898 | 53302.184 | AF025771  | 1692.456  | 2491.421  | NM_013443 | 673.756   | 623.711   |
| AK022495  | 2200.646  | 1593.765  | NM_018215 | 820.047   | 1151.58   | NM_000925 | 2477.871  | 1892.374  |
| AK021632  | 745.985   | 734.122   | NM_007187 | 9005.688  | 10813.479 | NM_000465 | 553.937   | 499.329   |
| AK026373  | 14302.13  | 12070.817 | NM_001825 | 463.387   | 364.239   | NM_000123 | 1065.745  | 1056.791  |
| AF009277  | 448.943   | 298.727   | NM_007279 | 3042.472  | 4335.816  | AL137501  | 256.348   | 155.561   |
| AK021581  | 3235.198  | 2669.458  | BE390833  | 18666.045 | 19045.738 | BE858979  | 403.239   | 519.102   |
| AK021744  | 846.181   | 786.3     | NM_00473C | 11093.009 | 10317.239 | NM_000122 | 693.714   | 428.796   |
| NM_01843C | 5257.661  | 3677.113  | NM_000801 | 3225.003  | 2329.48   | NM_006712 | 34567.945 | 28393.156 |
| AL110200  | 1185.925  | 805.198   | NM_006115 | 21918.215 | 15782.968 | NM_00624C | 540.551   | 248.341   |
| AK022308  | 747.072   | 712.046   | NM_005801 | 2636.843  | 1718.057  | NM_007025 | 1005.939  | 696.854   |
| AL133640  | 3018.978  | 3211.919  | NM_018195 | 1829.714  | 981.852   | M37712    | 3170.662  | 1938.845  |
| AK021722  | 2358.809  | 2086.733  | NM_001535 | 13689.137 | 9586.153  | NM_002645 | 343.021   | 167.969   |
| NM_000681 | 247.382   | 398.661   | AK027232  | 3168.832  | 3909.954  | AF070670  | 1277.891  | 614.56    |
| AF147445  | 1729.097  | 1663.52   | NM_012204 | 814.88    | 957.608   | NM_016155 | 1433.638  | 1317.399  |
| Y10508    | 10972.649 | 8757.055  | AK091117  | 787.381   | 671.227   | NM_016525 | 578.996   | 519.355   |
| AF039944  | 15803.34  | 19790.127 | NM_003613 | 827.888   | 1065.207  | NM_015974 | 871.81    | 411.852   |
| AJ276252  | 670.345   | 673.036   | NM_000022 | 4250.748  | 6910.681  | NM_014384 | 592.411   | 448.239   |
| AK021716  | 6886.344  | 5486.636  | NM_016575 | 3233.733  | 5661.622  | NM_002573 | 1151.165  | 525.175   |
| AK025035  | 10233.056 | 11087.417 | NM_004213 | 1531.011  | 2686.278  | AL133037  | 385.517   | 419.105   |
| AK002085  | 5293.146  | 5719.546  | NM_001925 | 48611.91  | 59528.523 | NM_02035C | 1647.594  | 1413.916  |
| AF086200  | 651.671   | 523.443   | NM_000905 | 1406.397  | 1850.37   | NM_00035C | 562.145   | 485.241   |
| AL133618  | 2262.762  | 1776.353  | AK022648  | 980.03    | 1147.466  | X91103    | 3175.035  | 5148.562  |
| AF230314  | 628.13    | 380.224   | AK022976  | 1029.217  | 2100.062  | AA419164  | 1868.425  | 4452.075  |
| AK001086  | 965.733   | 1098.541  | NM_006874 | 3910.044  | 4672.708  | L35251    | 1036.301  | 1261.86   |
| AJ131610  | 6036.591  | 7753.325  | AB046777  | 5010.081  | 5277.307  | BE910395  | 652.139   | 485.454   |
| AF119872  | 9559.593  | 10133.144 | AJ251844  | 5364.605  | 4973.188  | N46828    | 983.619   | 656.348   |
| AK023255  | 32809.199 | 30182.574 | D16815    | 806.301   | 511.379   | BI908302  | 6050.072  | 4912.337  |
| NM_002622 | 32572.141 | 30082.307 | NM_00188C | 3001.745  | 2155.421  | AA460969  | 1036.444  | 754.786   |
| AK024185  | 1429.033  | 1137.814  | AB028943  | 2104.958  | 1253.825  | BG695859  | 415.843   | 426.615   |
| AK026101  | 5171.062  | 5692.633  | NM_006194 | 674.669   | 291.587   | M85079    | 1668.302  | 1458.27   |
| AF085963  | 1282.923  | 1159.66   | AK001603  | 4418.964  | 2489.534  | AA457671  | 4103.01   | 3204.765  |

|           |           |           |           |           |           |           |           |           |
|-----------|-----------|-----------|-----------|-----------|-----------|-----------|-----------|-----------|
| AK021436  | 802.785   | 583.239   | U71601    | 1818.657  | 710.333   | X07437    | 2040.194  | 1475.863  |
| U58664    | 1171.817  | 995.962   | AF042838  | 3392.873  | 3612.316  | NM_000641 | 829.29    | 827.543   |
| AL137569  | 3001.336  | 3578.67   | AL137511  | 563.88    | 871.017   | AE006466  | 1181.454  | 665.941   |
| AK021920  | 3144.315  | 3057.317  | X91221    | 490.875   | 690.614   | BC011655  | 1124.981  | 867.268   |
| AL049415  | 1494.994  | 1670.474  | AF075062  | 5855.027  | 8541.035  | BC002396  | 1420.915  | 1171.858  |
| AK022375  | 1072.558  | 1003.968  | NM_004188 | 1011.917  | 1766.324  | NM_022095 | 482.354   | 300.441   |
| NM_003375 | 42002.648 | 37546.367 | AF147381  | 4032.761  | 7507.661  | AF112219  | 6543.506  | 5810.921  |
| AL110194  | 13194.992 | 10400.492 | AB002452  | 439.256   | 936.806   | NM_014640 | 216.981   | 292.351   |
| NM_014106 | 1276.215  | 713.366   | AK027101  | 21928.434 | 27883.207 | Y10518    | 17755.584 | 19195.141 |
| NM_006687 | 1355.029  | 1521.846  | AF010236  | 439.9     | 878.502   | AF155135  | 2268.542  | 2665.522  |
| NM_013301 | 1496.574  | 2097.914  | AK024358  | 757.689   | 1404.18   | NM_014790 | 607.329   | 539.133   |
| NM_017673 | 872.96    | 1097.278  | NM_014840 | 800.531   | 1469.194  | NM_003571 | 3172.44   | 3236.54   |
| AB046857  | 2036.787  | 2652.566  | AF088075  | 897.881   | 1367.848  | AB032965  | 15401.62  | 16259.122 |
| AK024408  | 8854.011  | 6428.369  | AK026376  | 1368.305  | 1960.129  | NM_020370 | 374.83    | 313.026   |
| AJ227905  | 495.801   | 592.589   | AF088061  | 3308.242  | 4131.567  | BF310159  | 2461.948  | 1716.369  |
| AF086307  | 10870.593 | 10929.416 | AF086425  | 557.646   | 879.235   | NM_018986 | 527.742   | 378.558   |
| L19364    | 1931.367  | 2083.358  | AF086286  | 2089.329  | 2532.422  | AB044934  | 287.029   | 216.561   |
| NM_005390 | 1788.253  | 1635.499  | AF086376  | 1566.841  | 1066.123  | U27655    | 1166.076  | 965.698   |
| CY3Cy5    | 8743.381  | 1310.428  | AF086410  | 582.656   | 503.78    | NM_003360 | 608.074   | 416.503   |
| L07738    | 1469.782  | 1065.816  | AF086455  | 372.844   | 198.498   | Z21965    | 11865.054 | 8871.712  |
| Z48054    | 1477.072  | 1115.925  | AK022997  | 4926.274  | 3284.711  | NM_000852 | 3474.68   | 2220.191  |
| H90415    | 3751.556  | 2587.266  | NM_017617 | 2858.194  | 2327.269  | NM_000396 | 324.178   | 222.667   |
| AA676470  | 16794.924 | 18691.459 | AF131830  | 1193.333  | 676.254   | AW797282  | 256.922   | 130.106   |
| M38258    | 704.179   | 1047.489  | NM_014811 | 1012.558  | 607.69    | NM_002402 | 1000.821  | 714.839   |
| AA457155  | 18175.262 | 19122.361 | AF147426  | 967.809   | 1245.768  | L09070    | 388.645   | 156.564   |
| BM014365  | 1606.676  | 1656.37   | BC019667  | 16304.037 | 18333.684 | NM_000062 | 2233.756  | 1774.098  |
| H91842    | 1049.517  | 1181.304  | AK026026  | 11373.787 | 12993.472 | NM_009590 | 1346.294  | 1103.245  |
| U78045    | 3290.967  | 3362.776  | AF085941  | 8514.602  | 12557.812 | NM_016106 | 1375.328  | 1512.766  |
| AA878561  | 55599.637 | 59123.563 | Z69892    | 2085.446  | 3548.416  | NM_014570 | 1043.43   | 857.205   |
| BF688309  | 645.021   | 974.781   | AF085977  | 475.318   | 1255.667  | NM_014747 | 1762.712  | 2085.191  |
| AI538525  | 5542.082  | 6126.126  | AK023590  | 477.847   | 940.9     | Y19240    | 1609.847  | 2147.375  |
| NM_000623 | 882.076   | 836.68    | AF087961  | 568.094   | 1014.59   | AF091029  | 2433.583  | 2813.191  |
| NM_000941 | 2947.891  | 3069.918  | AL137309  | 1279.582  | 2207.204  | X97074    | 7824.246  | 7338.103  |
| SR9       | 34024.031 | 10786.233 | AL137475  | 893.406   | 1396.457  | AL117235  | 456.625   | 420.532   |
| CY3Cy5    | 10337.802 | 971.171   | AL161956  | 2867      | 3832.747  | NM_014822 | 2411.714  | 2134.229  |
| U62858    | 6124.01   | 4288.18   | AL390176  | 2116.211  | 2852.944  | NM_005296 | 1260.229  | 1221.796  |
| AF035121  | 822.812   | 600.773   | AL137356  | 1488.696  | 1543.993  | NM_001337 | 183.677   | 212.34    |
| NM_014432 | 3230.149  | 2790.999  | AL137547  | 835.903   | 904.044   | NM_003611 | 2267.903  | 2106.959  |
| NM_001558 | 1085.031  | 1417.865  | AK021994  | 1664.985  | 1898.407  | AB014538  | 938.41    | 945.286   |
| NM_006953 | 1754.392  | 2337.013  | Z70763    | 504.261   | 698.71    | NM_006209 | 400.417   | 289.388   |
| NM_002530 | 459.276   | 506.542   | AK023802  | 8046.253  | 9193.253  | AK025118  | 1790.627  | 1559.28   |
| U96173    | 2532.988  | 2346.314  | AF086103  | 745.638   | 645.285   | NM_000727 | 998.475   | 626.076   |
| NM_018941 | 1564.113  | 1204.108  | AL080135  | 443.501   | 287.994   | NM_002621 | 256.121   | 86.839    |
| NM_020241 | 476.225   | 298.15    | AK023158  | 931.449   | 586.844   | NM_005385 | 2069.178  | 1417.741  |
| BE730585  | 736.238   | 561.915   | AK000580  | 389.598   | 232.286   | NM_018985 | 1177.789  | 849.214   |
| NM_001980 | 1436.793  | 1056.612  | AF085852  | 2110.024  | 996.063   | NM_006074 | 11051.893 | 8550.903  |
| NM_005954 | 2200.143  | 2209.762  | AK023952  | 1182.007  | 1064.971  | AF208232  | 1323.899  | 1298.975  |
| NM_012471 | 502.536   | 857.74    | AK000787  | 955.539   | 1207.445  | NM_002988 | 1525.035  | 1101.402  |
| NM_001321 | 4123.269  | 4343.486  | AF090885  | 8887.91   | 11421.259 | NM_004186 | 584.767   | 482.881   |
| AB018264  | 5842.909  | 5249.007  | AF161342  | 562.842   | 724.402   | NM_016258 | 1360.859  | 1194.888  |
| NM_006911 | 1103.62   | 1063.526  | NM_016646 | 591.639   | 860.72    | AF203032  | 1856.765  | 1500.778  |
| U92544    | 2341.642  | 2148.015  | NM_014082 | 1228.461  | 2132.183  | AB014542  | 5316.554  | 3493.727  |
| NM_019644 | 836.279   | 667.965   | AF100636  | 615.313   | 1593.197  | AF070670  | 1404.292  | 1522.713  |

|           |           |           |           |           |           |           |           |           |
|-----------|-----------|-----------|-----------|-----------|-----------|-----------|-----------|-----------|
| NM_006791 | 4601.05   | 5787.804  | AF161366  | 526.993   | 762.097   | NM_016156 | 1469.057  | 1725.907  |
| AJ278348  | 15964.39  | 16982.1   | AK022197  | 2340.834  | 3801.477  | NM_016528 | 652.535   | 839.073   |
| AK023106  | 2089.375  | 1830.926  | AF090940  | 229.006   | 862.995   | NM_015974 | 902.598   | 928.074   |
| NM_016730 | 29574.514 | 19851.607 | AK021970  | 480.34    | 534.534   | NM_014384 | 568.762   | 548.495   |
| AL035297  | 2103.281  | 1112.265  | AK022066  | 52669.891 | 63680.773 | NM_002573 | 1040.789  | 1005.574  |
| NM_004408 | 4698.232  | 3444.454  | AK022224  | 1787.059  | 1658.695  | AF133424  | 1112.933  | 965.418   |
| AJ131244  | 2340.432  | 1696.185  | AK022359  | 806.912   | 1157.447  | NM_005003 | 7331.368  | 6748.387  |
| NM_002532 | 7332.231  | 7208.642  | AK022000  | 1702.519  | 2242.303  | AF084560  | 1716.615  | 1381.479  |
| NM_012388 | 6028.957  | 5755.203  | AK022129  | 2682.922  | 3614.505  | NM_015715 | 1107.156  | 980.382   |
| NM_016651 | 645.255   | 568.014   | AK022263  | 7743.234  | 10081.472 | NM_000032 | 1427.901  | 1109.619  |
| NM_019843 | 3717.083  | 3304.72   | AK022384  | 924.835   | 879.028   | NM_002083 | 558.962   | 395.419   |
| NM_016192 | 8211.073  | 6831.076  | AK027097  | 669.975   | 813.452   | NM_002035 | 1336.227  | 1144.947  |
| BE878426  | 51508.414 | 50629.676 | AK024613  | 666.48    | 684.687   | NM_014900 | 387.454   | 112.729   |
| NM_001745 | 13137.995 | 14052.034 | AL117437  | 359.325   | 473.718   | BF342908  | 360.312   | 340.056   |
| NM_003825 | 9086.71   | 12403.291 | AK027198  | 1668.764  | 1198.465  | AF118073  | 253.025   | 183.289   |
| AK025006  | 19451.334 | 23400.121 | AK000257  | 732.467   | 905.277   | AK023510  | 1076.588  | 763.536   |
| AF218014  | 11138.311 | 10995.698 | NM_006160 | 7534.415  | 7753.009  | NM_004345 | 626.59    | 445.81    |
| NM_006678 | 3825.961  | 3445.333  | NM_000529 | 985.301   | 1380.375  | NM_000702 | 10844.122 | 9066.901  |
| AY007729  | 26547.418 | 21142.84  | AL110159  | 605.944   | 747.568   | X71490    | 4063.258  | 3978.102  |
| NM_014424 | 879.926   | 819.202   | AF009259  | 574.39    | 855.096   | AF257081  | 708.277   | 688.774   |
| AF159092  | 1252.742  | 1124.596  | AF009260  | 961.851   | 1704.972  | NM_001688 | 15391.471 | 12713.951 |
| BC007318  | 2677.456  | 2858.851  | NM_017902 | 1540.934  | 2099.28   | NM_000219 | 329.278   | 578.961   |
| M36693    | 3248.927  | 2777.196  | AK021981  | 363.808   | 271.926   | NM_002232 | 342.436   | 264.145   |
| NM_016292 | 15175.798 | 14392.684 | AL359567  | 1419.937  | 1253.432  | NM_022095 | 473.74    | 566.91    |
| NM_002601 | 4105.185  | 3976.38   | NM_017726 | 1994.239  | 1691.23   | AF112219  | 6535.126  | 6013.281  |
| NM_005898 | 18803.27  | 13284.601 | AK026716  | 493.528   | 359.663   | NM_002625 | 197.697   | 128.564   |
| NM_002888 | 35407.461 | 23107.393 | AL049325  | 9917.209  | 4941.859  | NM_004135 | 1588.604  | 1305.638  |
| AF078866  | 3259.058  | 2455.766  | AK024154  | 8328.864  | 10367.63  | NM_000203 | 264.149   | 118.888   |
| BF311880  | 1778.523  | 1131.145  | AF086341  | 1000.198  | 1045.873  | NM_013443 | 689.569   | 439.122   |
| NM_016075 | 1495.155  | 911.772   | AK026672  | 1460.326  | 1649.455  | NM_000925 | 2883.372  | 2803.591  |
| NM_001360 | 15428.673 | 12225.923 | S83282    | 50678.965 | 59415.324 | NM_000465 | 689.79    | 585.307   |
| AK026656  | 4751.56   | 3582.373  | AK024164  | 19820.373 | 25970.395 | NM_000123 | 1342.441  | 1677.771  |
| AJ276207  | 8992.076  | 8318.206  | AF052130  | 4486.499  | 7210.59   | AL137501  | 373.621   | 256.65    |
| AB011131  | 11477.139 | 10282.433 | AF130090  | 10874.318 | 15696.483 | BE858979  | 537.707   | 373.056   |
| NM_000749 | 765.624   | 619.436   | AL096727  | 1252.147  | 2585.21   | NM_000122 | 3113.546  | 2377.534  |
| NM_000751 | 10371.134 | 13790.118 | AL080110  | 1891.061  | 4473.023  | NM_006712 | 37892.867 | 45704.574 |
| NM_014849 | 3456.545  | 3369.482  | AK024076  | 1602.849  | 3455.196  | NM_006240 | 704.002   | 601.974   |
| NM_001042 | 8918.18   | 7632.156  | M87940    | 3154.534  | 5044.288  | NM_007026 | 1088.669  | 734.298   |
| NM_020041 | 594.245   | 718.215   | L77588    | 1267.1    | 1416.101  | M37712    | 3133.206  | 2048.87   |
| NM_012229 | 6326.86   | 4669.217  | AF086304  | 10892.861 | 12276.785 | NM_002648 | 592.055   | 877.249   |
| NM_005071 | 949.887   | 949.481   | U61094    | 1566.233  | 1944.753  | AW797282  | 220.064   | 288.969   |
| AB023147  | 16740.137 | 21179.322 | AB032976  | 1226.111  | 1742.352  | NM_002402 | 1277.681  | 1268.88   |
| NM_016615 | 19405.582 | 16334.041 | AF301222  | 8652.447  | 17692.682 | L09070    | 490.213   | 603.688   |
| NM_005630 | 3510.586  | 3958.299  | AF215981  | 7246.521  | 5878.867  | NM_000062 | 2173.128  | 3115.737  |
| NM_012201 | 3371.553  | 2331.218  | NM_000732 | 14154.345 | 10087.863 | NM_017877 | 263.684   | 291.615   |
| AB046774  | 753.72    | 639.231   | AF130044  | 1223.768  | 815.698   | NM_009590 | 1253.987  | 1422.797  |
| AK022385  | 18295.256 | 14353.946 | AF087980  | 430.906   | 244.149   | AL133037  | 687.552   | 635.97    |
| NM_002775 | 2190.602  | 1352.558  | NM_013939 | 612.597   | 636.586   | NM_020350 | 1838.459  | 1468.362  |
| AK024584  | 6279.384  | 2810.524  | AB038651  | 2064.677  | 2569.408  | NM_000350 | 571.399   | 596.72    |
| NM_003504 | 8509.063  | 5642.888  | AL359603  | 1156.649  | 1578.989  | X91103    | 3542.924  | 2967.413  |
| NM_013298 | 5125.295  | 5174.514  | X84838    | 492.796   | 587.199   | AA419164  | 1567.507  | 1625.792  |
| NM_007267 | 3800.391  | 3910.347  | NM_013940 | 792.624   | 1291.368  | L35251    | 1140.164  | 1030.712  |
| AK022830  | 781.726   | 439.851   | AL117643  | 1066.141  | 1234.258  | BE910395  | 739.613   | 767.132   |

|           |           |           |           |           |           |           |           |           |
|-----------|-----------|-----------|-----------|-----------|-----------|-----------|-----------|-----------|
| Z36816    | 2669.685  | 1861.051  | AF075063  | 1283.257  | 2610.347  | N46828    | 1276.731  | 1174.284  |
| NM_005865 | 4633.248  | 3276.718  | AF069135  | 4777.942  | 8788.493  | BI908302  | 7392.993  | 7897.929  |
| NM_006413 | 7458.08   | 5385.864  | AK026524  | 1218.276  | 2594.064  | AA460969  | 915.654   | 712.808   |
| NM_017684 | 1803.278  | 1531.491  | AB011157  | 3454.458  | 5421.348  | BG695859  | 427.34    | 419.071   |
| AK025542  | 2450.652  | 2491.926  | U17632    | 1632.557  | 2508.153  | M85079    | 1740.708  | 1937.694  |
| AF207547  | 1109.887  | 1160.283  | AK026764  | 2720.454  | 3319.308  | AA457671  | 4437.887  | 4116.921  |
| NM_002768 | 4475.038  | 3921.562  | AF113700  | 2197.64   | 3297.147  | X07437    | 2369.154  | 1772.902  |
| NM_003691 | 4497.42   | 3237.335  | NM_017835 | 9014.586  | 10494.956 | NM_000641 | 1011.655  | 668.371   |
| NM_002950 | 30230.625 | 23248.391 | NM_018347 | 2528.658  | 2947.898  | AE006466  | 1356.33   | 1003.607  |
| NM_002318 | 2808.018  | 1859.318  | AK024986  | 1098.452  | 877.303   | BC008737  | 20407.285 | 17538.938 |
| AK022278  | 338.5     | 88.683    | AK026730  | 569.166   | 652.893   | BC011655  | 1175.717  | 1123.891  |
| NM_003134 | 46252.43  | 50014.246 | AK024739  | 1012.406  | 899.386   | BC002396  | 1489.135  | 1178.562  |
| NM_004314 | 4630.129  | 5746.746  | AK098681  | 1171.721  | 1121.537  | AF208232  | 1649.177  | 2426.255  |
| NM_018247 | 10606.551 | 11192.833 | AK026772  | 1525.752  | 827.706   | NM_002988 | 1951.32   | 2422.741  |
| NM_017979 | 7986.719  | 7745.906  | NM_014260 | 11066.97  | 7693.592  | NM_004188 | 603.209   | 687.957   |
| NM_019644 | 822.058   | 619.579   | AK026458  | 469.079   | 364.35    | NM_016258 | 1189.027  | 1339.521  |
| NM_006791 | 4190.934  | 3821.611  | AK022266  | 356.377   | 235.969   | AF203032  | 1772.537  | 2108.629  |
| AJ278348  | 14674.205 | 13499.763 | CY3Cy5    | 8944.598  | 785.913   | AB014542  | 5607.432  | 5380.527  |
| NM_015872 | 554.657   | 682.615   | M23254    | 9056.903  | 7977.582  | NM_014640 | 461.673   | 395.64    |
| AI285199  | 1938.819  | 1521.758  | BE618539  | 1034.136  | 1273.942  | Y10518    | 23312.682 | 24156.121 |
| L07738    | 2412.43   | 2425.93   | R28062    | 4141.798  | 3192.37   | AF155135  | 2609.132  | 2450.946  |
| Z48054    | 1639.709  | 1917.627  | U38545    | 825.896   | 697.696   | NM_014790 | 658.513   | 558.177   |
| H90415    | 3661.847  | 2929.141  | AI627464  | 3189.863  | 3740.388  | NM_003571 | 4164.646  | 4148.51   |
| AA676470  | 17448     | 14547.254 | BI756258  | 2701.798  | 2192.611  | AB032965  | 19682.76  | 19126.344 |
| M38258    | 822.165   | 592.076   | AI342225  | 67982.227 | 73011.695 | NM_020370 | 332.222   | 142.885   |
| AA457155  | 20601.547 | 18248.531 | AF110020  | 884.678   | 1030.471  | NM_004767 | 403.328   | 440.188   |
| BM014365  | 1516.369  | 1774.697  | AA608557  | 7721.674  | 7086.093  | BF310159  | 3175.585  | 2331.821  |
| H91842    | 861.283   | 1241.299  | AL050095  | 8992.885  | 5389.082  | NM_018988 | 583.983   | 728.097   |
| U78045    | 3554.484  | 3522.036  | U03272    | 1774.591  | 1752.731  | AB044934  | 237.707   | 275.571   |
| AA878561  | 56554.348 | 61530.07  | NM_000498 | 757.681   | 617.003   | U27655    | 1208.425  | 1107.577  |
| BF688309  | 833.795   | 908.954   | NM_000664 | 2245.577  | 2319.899  | NM_003360 | 674.498   | 429.484   |
| AI538525  | 4795.072  | 4298.144  | SR1       | 67997.516 | 69163.422 | Z21965    | 14069.784 | 11117.625 |
| NM_000623 | 742.423   | 724.841   | SR7       | 4989.413  | 46520.664 | NM_012427 | 380.179   | 306.365   |
| NM_000941 | 3065.914  | 2855.339  | SR9       | 20513.811 | 4301.668  | AF131857  | 3570.66   | 3159.048  |
| AF222980  | 3876.377  | 3636.449  | CY3Cy5    | 10333.055 | 1203.984  | NM_000852 | 4041.428  | 2563.905  |
| AK026758  | 1729.224  | 1647.567  | NM_014808 | 1817.622  | 2140.016  | NM_000398 | 320.883   | 252.732   |
| NM_014424 | 797.597   | 782.185   | AB006627  | 2645.859  | 2634.387  | AF257081  | 1075.895  | 1580.576  |
| AF159092  | 863.173   | 814.084   | NM_000416 | 3789.529  | 3401.707  | NM_001688 | 16675.541 | 18971.658 |
| BC007318  | 2477.087  | 2670.35   | NM_003382 | 893.868   | 808.511   | NM_000218 | 262.184   | 193.692   |
| M36693    | 2798.639  | 3115.387  | NM_002965 | 6057.912  | 7055.877  | NM_002232 | 254.896   | 287.221   |
| NM_016292 | 11730.324 | 10019.016 | AB007883  | 5426.166  | 3601.998  | NM_016108 | 1368.082  | 1426.256  |
| NM_002601 | 3434.179  | 2478.986  | AK093780  | 9465.92   | 7960.338  | NM_014570 | 1421.75   | 1102.554  |
| U62858    | 6483.051  | 6054.528  | NM_007037 | 31675.295 | 29197.414 | NM_014747 | 1966.812  | 1891.703  |
| NM_014432 | 3335.986  | 3444.644  | NM_001649 | 1238.262  | 1283.999  | Y19240    | 1641.586  | 2199.552  |
| NM_001558 | 1217.175  | 1081.072  | NM_005492 | 3995.294  | 3491.854  | AF091029  | 3180.484  | 2990.622  |
| NM_006953 | 1964.848  | 1994.818  | AF038196  | 3930.04   | 3991.626  | X97074    | 9507.441  | 9006.757  |
| NM_002530 | 487.364   | 648.676   | NM_004859 | 12754.196 | 12122.661 | AL117235  | 413.469   | 444.688   |
| U96173    | 2887.278  | 2993.975  | NM_016352 | 1816.042  | 1617.051  | NM_014822 | 2333.506  | 2195.412  |
| NM_018941 | 1604.424  | 1608.541  | NM_005014 | 1110.738  | 914.864   | NM_005298 | 1626.425  | 1562.466  |
| BE730585  | 714.249   | 809.415   | NM_006944 | 766.11    | 618.015   | NM_001337 | 218.458   | 265.211   |
| NM_001980 | 1105.134  | 1010.802  | NM_004407 | 487.002   | 698.189   | NM_003611 | 2477.93   | 2864.82   |
| NM_006158 | 231.315   | 260.618   | NM_001202 | 1073.584  | 1150.804  | AB014538  | 934.51    | 1033.666  |
| NM_005954 | 2115.817  | 1579.633  | AB037804  | 1240.732  | 1174.355  | NM_004154 | 245.121   | 56.06     |



|           |           |           |           |           |           |           |           |           |
|-----------|-----------|-----------|-----------|-----------|-----------|-----------|-----------|-----------|
| NM_012471 | 572.589   | 573.53    | U34249    | 1352.203  | 1483.679  | NM_006209 | 413.976   | 289.798   |
| NM_001321 | 4949.407  | 4455.598  | NM_003289 | 48352.098 | 51543.91  | AK025118  | 2003.364  | 2044.019  |
| AB018264  | 6627.146  | 4616.406  | AI200114  | 2005.059  | 1817.742  | NM_000727 | 1084.542  | 599.048   |
| NM_006911 | 1269.45   | 579.652   | NM_006323 | 9922.504  | 8893.674  | NM_002621 | 240.498   | 102.198   |
| U92544    | 2499.448  | 2139.309  | NM_016466 | 1660.31   | 1717.264  | NM_005385 | 2659.801  | 1817.438  |
| NM_012229 | 5858.896  | 5977.232  | NM_001493 | 6469.244  | 5780.627  | NM_018985 | 1197.279  | 869.471   |
| NM_005071 | 1171.833  | 1367.631  | NM_014841 | 1003.039  | 849.379   | NM_006074 | 11099.975 | 8354.202  |
| AB023147  | 17367.697 | 25503.379 | NM_014426 | 5259.499  | 4855.616  | NM_006712 | 39173.027 | 75693.297 |
| NM_016615 | 13848.841 | 12596.771 | NM_006816 | 44269.086 | 37370.016 | NM_006240 | 756.727   | 940.921   |
| NM_005630 | 2362.008  | 2528.804  | NM_000258 | 23308.955 | 17494.539 | NM_007026 | 1092.75   | 1249.25   |
| AK023106  | 2246.023  | 2302.867  | AB033055  | 8678.222  | 8050.918  | M37712    | 3075.594  | 2670.193  |
| AL035297  | 2057.876  | 2950.3    | AF311287  | 6608.987  | 5545.341  | NM_002648 | 397.799   | 363.796   |
| NM_004408 | 4941.598  | 6701.348  | NM_003098 | 1260.29   | 1032.821  | AF070670  | 2392.619  | 2168.845  |
| AJ131244  | 1864.818  | 2703.785  | NM_014781 | 3610.911  | 3333.515  | NM_016156 | 1438.464  | 1787.849  |
| NM_002532 | 8181.687  | 8499.858  | BU629989  | 1078.399  | 1002.02   | NM_016528 | 667.508   | 666.758   |
| NM_012388 | 6154.052  | 6117.531  | X87896    | 1635.265  | 1244.089  | NM_015974 | 937.721   | 1234.411  |
| NM_001671 | 684.383   | 840.529   | M88310    | 2447.417  | 1942.237  | NM_014384 | 549.621   | 684.942   |
| NM_019843 | 4118.34   | 4737.407  | NM_000042 | 2143.506  | 1951.324  | NM_002573 | 1441.348  | 1799.718  |
| NM_016192 | 7843.629  | 7651.974  | AF035787  | 738.92    | 609.841   | AF133424  | 1139.78   | 1188.04   |
| BE878426  | 43845.965 | 44791.426 | NM_005024 | 3956.338  | 3708.944  | NM_005003 | 8797.871  | 8953.345  |
| NM_001745 | 12482.215 | 11772.139 | NM_003403 | 1014.378  | 1013.301  | AF084560  | 2016.254  | 2100.812  |
| NM_003825 | 9135.61   | 9431.674  | NM_016335 | 1256.217  | 1377.873  | NM_015715 | 1123.554  | 1283.595  |
| AK025006  | 18979.035 | 16321.038 | NM_003165 | 3610.532  | 3537.318  | NM_000032 | 1564.018  | 1664.106  |
| AF218014  | 13248.765 | 12079.015 | NM_003906 | 15470.821 | 14185.295 | NM_002083 | 551.9     | 484.54    |
| NM_006678 | 4554.678  | 3375.931  | AL359590  | 29813.928 | 31149.592 | NM_002035 | 1411.781  | 1342.877  |
| AY007729  | 31041.248 | 21219.318 | NM_002861 | 8651.34   | 7823.487  | NM_014900 | 354.437   | 431.662   |
| NM_001433 | 664.686   | 750.03    | NM_003080 | 5072.051  | 4372.35   | BF342908  | 505.904   | 282.505   |
| NM_003134 | 48242.043 | 48458.883 | NM_002645 | 2330.543  | 1978.912  | AK023510  | 1097.499  | 845.388   |
| NM_004314 | 4744.686  | 5178.492  | AB033027  | 2524.915  | 2446.632  | NM_004345 | 711.445   | 521.046   |
| NM_018247 | 9754.612  | 8408.991  | AK021805  | 9736.252  | 8701.22   | NM_000702 | 11155.056 | 9386.629  |
| NM_017979 | 7176.033  | 9134.646  | AB014550  | 2497.43   | 1905.034  | X71490    | 3761.975  | 3559.32   |
| NM_002889 | 43955.805 | 46704.113 | AF320294  | 3262.775  | 2531.718  | NM_014273 | 4855.383  | 5964.36   |
| AF078866  | 4153.59   | 6980.738  | AF320293  | 672.092   | 420.508   | AF039442  | 762.487   | 1054.927  |
| BF311880  | 2866.725  | 4499.736  | AF161436  | 4104.582  | 3840.368  | NM_004680 | 425.974   | 550.061   |
| NM_000078 | 716.873   | 678.951   | NM_020402 | 2694.878  | 2460.084  | NM_005671 | 1290.611  | 1848.17   |
| NM_016075 | 1666.855  | 1612.364  | NM_004299 | 3142.634  | 3056.889  | NM_017409 | 243.333   | 308.094   |
| NM_001360 | 16744.324 | 16914.113 | NM_001171 | 1414.426  | 1546.312  | NM_019625 | 1682.903  | 2031.45   |
| AK026656  | 5808.584  | 4572.573  | NM_002250 | 5733.291  | 4415.06   | NM_006729 | 1161.18   | 1394.834  |
| AJ276207  | 9270.255  | 8120.15   | NM_006478 | 633.442   | 733.021   | NM_006071 | 322.907   | 352.826   |
| AB011131  | 11684.296 | 8877.776  | AF132734  | 14631.271 | 13913.547 | NM_012236 | 2320.325  | 2293.87   |
| NM_000749 | 297.121   | 471.617   | NM_018379 | 2706.451  | 2668.323  | AF112219  | 6247.468  | 5253.539  |
| NM_000751 | 7879.494  | 6858.691  | NM_016403 | 15349.34  | 13522.7   | NM_002625 | 200.843   | 236.788   |
| NM_014849 | 3575.985  | 3057.404  | NM_015603 | 1382.332  | 1193.363  | NM_004135 | 1775.819  | 1506.954  |
| NM_001042 | 8819.024  | 8150.114  | NM_001921 | 7238.83   | 5990.456  | NM_000203 | 259.873   | 199.589   |
| NM_020041 | 831.524   | 758.943   | NM_006230 | 7924.29   | 6977.676  | NM_013443 | 760.058   | 556.046   |
| NM_000623 | 633.995   | 709.353   | NM_014699 | 8296.215  | 6640.147  | NM_000925 | 2613.22   | 2148.406  |
| NM_000941 | 2726.215  | 2428.446  | NM_013400 | 9422.466  | 8331.224  | NM_000465 | 818.603   | 587.77    |
| AF222980  | 2862.146  | 2286.798  | AK026257  | 3174.945  | 2113.647  | NM_000123 | 1352.267  | 1295.636  |
| AK026758  | 1282.513  | 1226.224  | AK023836  | 6369.511  | 6033.659  | AL137501  | 262.25    | 307.452   |
| AB046774  | 1041.726  | 1121.875  | NM_018109 | 2873.986  | 2330.32   | BE858979  | 581.481   | 444.998   |
| AK022385  | 23041.404 | 32539.387 | AJ299442  | 5105.98   | 5585.072  | NM_000122 | 838.365   | 500.402   |
| NM_002775 | 2388.415  | 2758.538  | AB040897  | 483.183   | 266.989   | U87223    | 399.78    | 756.156   |
| AK024584  | 7129.697  | 4580.164  | NM_000129 | 1509.772  | 1347.333  | X91348    | 1866.644  | 3322.194  |

|           |           |           |           |           |           |           |           |           |
|-----------|-----------|-----------|-----------|-----------|-----------|-----------|-----------|-----------|
| NM_003504 | 9102.799  | 7762.934  | NM_003762 | 5702.83   | 6240.26   | Z36505    | 807.86    | 1039.5    |
| NM_01329E | 5610.468  | 6975.521  | NM_01844E | 4191.137  | 4599.693  | NM_001854 | 977.565   | 1086.718  |
| NM_007267 | 4616.122  | 4559.056  | NM_000187 | 733.88    | 866.838   | NM_017913 | 448.503   | 429.699   |
| AK022830  | 779.089   | 903.618   | NM_01446E | 1556.618  | 1259.64   | NM_00275E | 2307.364  | 2308.63   |
| Z36816    | 2626.469  | 2194.966  | D87292    | 7411.956  | 7010.065  | AK024799  | 12344.734 | 11524.998 |
| NM_00586E | 5464.437  | 4318.285  | NM_00549E | 2538.317  | 2183.359  | NM_000924 | 1549.72   | 2399.415  |
| NM_006413 | 6939.749  | 6696.423  | NM_001202 | 1298.718  | 1959.894  | NM_00333C | 1622.846  | 1682.401  |
| NM_017684 | 1964.467  | 1669.468  | AB037804  | 1303.923  | 1645.614  | NM_00169E | 2298.024  | 2664.612  |
| AK025542  | 2218.025  | 1830.486  | U34249    | 1339.23   | 1844.139  | NM_018351 | 253.36    | 188.758   |
| AF207547  | 984.474   | 782.803   | NM_00328E | 51791.84  | 55211.586 | NM_147171 | 1566.636  | 1004.653  |
| NM_00276E | 4617.41   | 3540.945  | AI200114  | 1091.678  | 1056.178  | AF238083  | 2779.543  | 2408.403  |
| NM_003691 | 3709.696  | 3521.021  | M74220    | 755.507   | 654.161   | NM_01638E | 670.495   | 621.381   |
| NM_00295C | 30590.299 | 33372.965 | M23254    | 9029.194  | 7647.453  | AB046783  | 383.324   | 130.161   |
| NM_00231E | 3465.741  | 3450.16   | BE618539  | 1726.252  | 1700.591  | NM_00084E | 462.876   | 382.944   |
| NM_005954 | 2078.979  | 1807.838  | R28062    | 3989.862  | 3801.828  | NM_004604 | 32374.383 | 35556.125 |
| NM_012471 | 465.052   | 619.608   | U38545    | 838.473   | 716.126   | NM_01496E | 1696.353  | 1217.873  |
| NM_001321 | 3694.092  | 2892.161  | AI627464  | 3239.144  | 3737.507  | NM_00488E | 6647.279  | 5165.47   |
| AB018264  | 6019.33   | 4575.729  | BI756258  | 2758.325  | 2419.865  | AL390148  | 3359.536  | 2101.557  |
| NM_006911 | 1377.641  | 1175.486  | AF110020  | 947.085   | 705.248   | AK024055  | 666.983   | 500.758   |
| U92544    | 1774.341  | 1811.382  | AA608557  | 7204.089  | 7605.652  | U10485    | 250.069   | 247.766   |
| AJ278348  | 16496.586 | 22301.02  | AL050095  | 9072.992  | 6307.764  | AK025326  | 398.411   | 615.573   |
| NM_01587E | 804.146   | 1125.364  | U03272    | 2208.764  | 2197.803  | NM_01337E | 228.156   | 365.459   |
| AI285199  | 2277.636  | 2363.248  | NM_00049E | 758.696   | 559.813   | NM_017964 | 1049.816  | 1367.249  |
| AA757170  | 568.822   | 360.753   | NM_000664 | 2118.964  | 2141.618  | NM_01642E | 398.496   | 601.64    |
| L07738    | 2176.538  | 2170.753  | AF075085  | 47561.176 | 41725.719 | NM_00408E | 4015.188  | 4002.113  |
| Z48054    | 1470.912  | 1730.357  | NM_00589E | 3727.913  | 3952.724  | NM_01603E | 1518.219  | 1675.572  |
| H90415    | 3645.902  | 2848.554  | NM_00004E | 2338.325  | 2721.112  | NM_001184 | 613.224   | 592.654   |
| AA676470  | 17879.609 | 13693.202 | AF035787  | 676.887   | 547.734   | NM_01553C | 2282.541  | 2475.448  |
| M38258    | 940.531   | 631.993   | NM_005024 | 3654.88   | 3048.974  | NM_01623E | 1558.432  | 1664.813  |
| AA457155  | 18774.973 | 18939.473 | NM_00340E | 1582.605  | 1640.387  | NM_00175E | 1283.073  | 1396.742  |
| BM014365  | 1181.042  | 971.755   | NM_01480E | 1726.815  | 2002.153  | NM_00472E | 2597.451  | 2438.713  |
| H91842    | 641.616   | 792.188   | AB006627  | 3716.122  | 4079.233  | NM_015997 | 1813.004  | 3266.972  |
| U78045    | 3932.631  | 3120.138  | NM_00041E | 3137.892  | 3178.838  | NM_001167 | 2558.802  | 2217.571  |
| AA878561  | 52366.887 | 59077.137 | NM_00338E | 773.293   | 862.017   | NM_01211E | 1268.593  | 1006.789  |
| BF688309  | 1257.053  | 1495.091  | NM_00296E | 5725.395  | 6755.998  | NM_00493E | 6767.396  | 7175.043  |
| AI538525  | 5228.814  | 6222.378  | AB007883  | 4974.006  | 3889.291  | M96577    | 2676.005  | 2250.162  |
| NM_00382E | 9884.893  | 15239.621 | AK093780  | 8515.159  | 8052.884  | NM_01325E | 11065.963 | 11914.577 |
| AK025006  | 19717.611 | 20045.25  | AY009397  | 67463.5   | 72241.531 | NM_00384E | 568.578   | 601.918   |
| AF218014  | 11143.054 | 9140.194  | NM_007037 | 33117.727 | 30382.004 | NM_016184 | 619.759   | 619.258   |
| NM_00667E | 3195.993  | 2443.534  | NM_00164E | 942.976   | 1095.641  | L11238    | 2874.243  | 2178.643  |
| AY007729  | 29829.521 | 22822.939 | NM_00549E | 3618.147  | 3696.548  | AK025684  | 323.355   | 263.242   |
| NM_014424 | 869.104   | 436.926   | AF038196  | 3898.116  | 4503.008  | NM_01220E | 2240.526  | 1428.479  |
| BC007318  | 2959.51   | 3364.966  | NM_00485E | 12308.352 | 12353.527 | K02046    | 750.583   | 531.451   |
| M36693    | 2905.558  | 4008.845  | NM_01635E | 2068.187  | 1769.579  | AL110151  | 1080.811  | 1657.116  |
| NM_01629E | 13144.363 | 14360.584 | NM_005014 | 877.062   | 1062.55   | AK024841  | 669.663   | 1045.759  |
| NM_002601 | 3934.621  | 3996.927  | NM_006944 | 858.977   | 831.096   | NM_00499E | 1087.64   | 1588.42   |
| U62858    | 7187.013  | 6237.129  | NM_004407 | 771.611   | 1022.148  | NM_00038E | 1551.22   | 1831.97   |
| AF035121  | 945.896   | 944.692   | NM_00007C | 3702.501  | 4103.636  | NM_007231 | 363.289   | 261.246   |
| NM_01443E | 2934.8    | 3247.542  | NM_00225C | 5669.532  | 7844.198  | NM_00119C | 827.949   | 729.881   |
| NM_00155E | 1168.606  | 1177.681  | NM_00632E | 9814.919  | 9201.018  | NM_005271 | 2469.251  | 2863.416  |
| NM_00695E | 1948.512  | 2191.108  | NM_01646E | 1770.848  | 1260.923  | NM_015654 | 2507.851  | 3320.296  |
| NM_00253C | 903.844   | 832.441   | NM_00149E | 5833.159  | 4684.674  | NM_012244 | 799.998   | 808.638   |
| U96173    | 2870.254  | 2595.818  | NM_014841 | 875.111   | 942.627   | NM_004341 | 560.483   | 774.156   |

|           |           |           |           |           |           |           |           |           |
|-----------|-----------|-----------|-----------|-----------|-----------|-----------|-----------|-----------|
| NM_018941 | 1854.548  | 1593.95   | NM_014426 | 4698.503  | 3779.845  | AL050182  | 511.952   | 368.28    |
| NM_020241 | 454.532   | 344.166   | NM_006816 | 43826.816 | 41041.902 | NM_020040 | 359.294   | 376.032   |
| BE730585  | 671.196   | 603.367   | AK026518  | 55800.102 | 56155.605 | NM_002374 | 1013.806  | 1139.844  |
| NM_001980 | 1277.773  | 1079.119  | NM_000258 | 21921.836 | 16748.279 | AK026940  | 769.331   | 593.931   |
| NM_006159 | 232.533   | 235.973   | AB033055  | 8714.102  | 7424.205  | AF155117  | 1524.243  | 1310.767  |
| NM_000751 | 9583.18   | 11570.294 | AF311287  | 6351.542  | 6086.952  | AB014527  | 366.775   | 512.725   |
| NM_014849 | 4746.51   | 3936.186  | NM_003098 | 1528.684  | 1406.722  | NM_004411 | 623.043   | 519.659   |
| NM_001042 | 9614.33   | 8535.254  | NM_014781 | 3132.545  | 3403.577  | NM_015938 | 2727.456  | 2317.965  |
| NM_020041 | 594.634   | 897.135   | BU629989  | 1324.13   | 1148.008  | NM_000740 | 328.046   | 201.158   |
| NM_012229 | 5594.395  | 5237.104  | X87896    | 1570.023  | 1299.511  | NM_017843 | 215.287   | 191.193   |
| NM_005071 | 967.607   | 1282.595  | M88310    | 1994.6    | 1849.022  | AK025985  | 1335.229  | 6363.28   |
| AB023147  | 16881.896 | 21261.535 | NM_018446 | 5147.241  | 5532.604  | NM_013256 | 659.438   | 707.808   |
| NM_016615 | 16096.426 | 19442.795 | NM_000187 | 940.566   | 953.525   | NM_004143 | 530.427   | 503.707   |
| NM_005630 | 3126.424  | 3532.165  | NM_014465 | 1874.261  | 2313.636  | X66087    | 246.981   | 198.5     |
| AK023106  | 2395.609  | 2190.129  | D87292    | 7690.875  | 9157.801  | NM_016328 | 1571.161  | 2636.127  |
| NM_016730 | 32289.41  | 33987.141 | NM_005498 | 2046.006  | 2494.276  | NM_017544 | 6600.976  | 8394.16   |
| AL035297  | 2127.862  | 2155.906  | NM_016335 | 1486.853  | 1640.626  | NM_003153 | 470.578   | 328.077   |
| NM_004408 | 4224.957  | 4691.596  | NM_003165 | 4756.418  | 4750.1    | NM_016285 | 491.563   | 711.631   |
| AJ131244  | 2473.119  | 2262.124  | NM_003906 | 23653.232 | 17830.363 | AF025771  | 859.394   | 676.158   |
| NM_002532 | 7947.444  | 7670.075  | AL359590  | 29865.779 | 27612.186 | NM_018215 | 404.443   | 391.824   |
| NM_012388 | 6944.926  | 7055.643  | NM_002861 | 7831.73   | 7274.888  | AB033110  | 181.868   | 204.175   |
| NM_016651 | 1243.383  | 1368.541  | NM_003080 | 5220.771  | 4237.912  | NM_005083 | 1165.105  | 830.824   |
| NM_001671 | 559.716   | 557.536   | NM_002645 | 1901.793  | 1896.723  | NM_007187 | 3470.153  | 3873.661  |
| NM_019843 | 3761.128  | 4308.033  | AB033027  | 3156.027  | 2876.323  | NM_001828 | 320.936   | 319.09    |
| NM_016192 | 9172.792  | 8285.609  | AK021805  | 9864.792  | 9160.493  | NM_003096 | 2179.898  | 1621.046  |
| BE878426  | 46660.824 | 48966.313 | AB014550  | 2353.675  | 2311.257  | NM_007279 | 1365.793  | 1236.79   |
| NM_001745 | 12842.723 | 12824.144 | AF320294  | 2938.694  | 3122.208  | BE390833  | 7785.515  | 6635.321  |
| AK025542  | 2849.063  | 2687.804  | AF320293  | 734.214   | 642.377   | NM_004730 | 4507.637  | 5196.126  |
| AF207547  | 1077.75   | 1020.771  | AF161436  | 3839.576  | 4228.707  | NM_000801 | 1327.06   | 1240.841  |
| NM_002768 | 4251.989  | 5018.571  | NM_020402 | 2838.637  | 2957.381  | NM_006115 | 9130.593  | 7901.952  |
| NM_003691 | 3509.885  | 3650.339  | NM_004299 | 2857.437  | 2624.873  | NM_005801 | 1224.418  | 1041.978  |
| NM_002950 | 26262.334 | 29271.707 | NM_001171 | 1695.684  | 1461.056  | NM_018198 | 945.961   | 608.303   |
| NM_002318 | 3028.583  | 3739.065  | NM_000498 | 806.601   | 1033.401  | NM_001539 | 7093.738  | 7620.99   |
| NM_001433 | 666.277   | 656.066   | NM_000664 | 2726.449  | 3096.359  | NM_012267 | 213.369   | 225.085   |
| NM_003134 | 55066.906 | 50647.52  | AF075085  | 52051.703 | 53137.242 | AK027232  | 374.779   | 833.846   |
| NM_004314 | 4916.164  | 6348.041  | NM_005892 | 3547.842  | 5388.316  | NM_012204 | 373.867   | 381.672   |
| NM_018247 | 9340.038  | 12603.393 | NM_006478 | 693.547   | 1118.818  | NM_003613 | 366.535   | 518.792   |
| NM_017979 | 6528.793  | 7514.548  | AF132734  | 14343.226 | 14557.421 | NM_004213 | 489.363   | 698.103   |
| NM_005898 | 17366.84  | 18191.283 | NM_018379 | 2983.907  | 2566.969  | NM_001929 | 10727.462 | 11688.699 |
| NM_002889 | 50002.758 | 44892.285 | NM_016403 | 17470.361 | 14440.426 | NM_000906 | 526.664   | 476.733   |
| AF078866  | 3504.906  | 4011.851  | NM_015603 | 1210.118  | 1155.827  | NM_000480 | 987.338   | 1024.578  |
| BF311880  | 1454.821  | 1216.064  | AK021788  | 551.402   | 572.897   | AF254084  | 8805.096  | 11089.275 |
| NM_016075 | 1553.271  | 1466.655  | NM_001921 | 6499.813  | 5638.238  | AK022648  | 365.07    | 700.979   |
| NM_001360 | 17552.412 | 15433.046 | NM_006230 | 7057.121  | 5821.577  | AK022976  | 545.342   | 1107.541  |
| AK026656  | 7775.476  | 6468.802  | NM_014699 | 8686.737  | 7280.164  | AB048791  | 1438.685  | 2490.298  |
| AJ276207  | 9300.303  | 9555.905  | NM_013400 | 9541.744  | 8489.188  | NM_006874 | 1573.497  | 991.553   |
| AB011131  | 12568.84  | 12683.304 | AK026257  | 2942.607  | 2352.606  | AB046777  | 1867.246  | 1793.503  |
| AF164794  | 7935.025  | 9588.266  | AK023836  | 7447.985  | 6833.35   | AJ251844  | 2361.019  | 1679.494  |
| AB020656  | 988.916   | 1061.169  | NM_018109 | 2562.175  | 2060.735  | D16815    | 436.388   | 241.248   |
| AK023648  | 3729.237  | 4265.252  | AJ299442  | 5604.169  | 6509.28   | NM_001880 | 1132.808  | 878.2     |
| NM_000412 | 1805.757  | 2266.346  | AB040897  | 525.031   | 484.586   | AB028943  | 1318.367  | 1056.172  |
| AF077033  | 4230.728  | 5962.726  | NM_000129 | 1177.997  | 1143.799  | NM_006194 | 438.606   | 315.038   |
| NM_004991 | 1055.283  | 1128.298  | NM_003762 | 3670.928  | 3667.346  | AK001603  | 2656.414  | 2155.059  |

|           |           |           |           |           |           |           |          |           |
|-----------|-----------|-----------|-----------|-----------|-----------|-----------|----------|-----------|
| AF222980  | 3702.273  | 4899.09   | NM_004859 | 11758.74  | 12535.698 | U71601    | 928.856  | 519.697   |
| AK026758  | 1571.268  | 1868.099  | NM_016352 | 1565.514  | 1500.939  | AF042838  | 1508.522 | 2170.068  |
| NM_012201 | 3328.051  | 3432.611  | NM_005014 | 1014.748  | 1074.761  | AL137511  | 368.583  | 553.916   |
| AB046774  | 831.562   | 1359.543  | NM_006944 | 732.759   | 935.235   | X91221    | 260.65   | 177.459   |
| AK022385  | 18637.912 | 20184.613 | NM_004407 | 863.596   | 909.356   | AF075031  | 240.849  | 206.048   |
| NM_003504 | 9134.139  | 7513.1    | NM_000070 | 4045.413  | 4344.684  | AF075062  | 1508.703 | 1864.221  |
| NM_013298 | 5115.824  | 6653.482  | NM_001202 | 1377.338  | 1552.011  | AB002452  | 259.405  | 634.777   |
| NM_007267 | 4304.004  | 3483.945  | AB037804  | 1500.224  | 1937.061  | AK027101  | 3795.504 | 8605.567  |
| AK022830  | 692.205   | 704.085   | U34249    | 1986.43   | 2007.821  | AF010236  | 208.789  | 332.115   |
| Z36816    | 2797.424  | 2602.472  | NM_003289 | 54556.766 | 56426.387 | AK024358  | 179.648  | 403.547   |
| NM_005865 | 6534.03   | 4173.729  | AI200114  | 1912.869  | 1708.26   | NM_014840 | 289.425  | 598.033   |
| NM_006413 | 7275.747  | 6641.304  | M23254    | 8012.224  | 6354.569  | D17085    | 406.822  | 742.324   |
| NM_017684 | 1958.311  | 2118.802  | BE618539  | 1319.115  | 1207.28   | AF088075  | 569.249  | 909.73    |
| AL049689  | 1023.868  | 1405.915  | R28062    | 3580.66   | 3764.207  | AK026376  | 569.683  | 970.674   |
| NM_000216 | 804.118   | 924.385   | U38545    | 544.233   | 608.092   | AF088061  | 1608.516 | 2847.544  |
| NM_002203 | 513.891   | 637.19    | AI627464  | 2810.643  | 3173.488  | AF086286  | 946.003  | 868.038   |
| AF135960  | 1251.662  | 1854.071  | BI756258  | 2800.666  | 2403.391  | AF086376  | 670.917  | 437.718   |
| NM_014216 | 13080.803 | 17219.896 | AI342225  | 62442.762 | 64316.863 | AF086410  | 225.489  | 276.235   |
| NM_003010 | 1919.019  | 3096.961  | AA634103  | 67848.445 | 64320.879 | AF086455  | 217.009  | 126.567   |
| NM_006871 | 1171.034  | 1910.371  | J04599    | 1268.447  | 1118.839  | AK022997  | 2240.539 | 1992.469  |
| NM_019074 | 3697.566  | 3988.405  | AF110020  | 741.523   | 963.748   | NM_017617 | 1416.61  | 1288.264  |
| NM_018494 | 47734.117 | 45182.141 | AA608557  | 6874.544  | 7043.009  | AF131830  | 634.483  | 526.696   |
| AK000006  | 981.275   | 1392.095  | AL050095  | 9171.127  | 6507.861  | NM_014811 | 522.009  | 292.91    |
| NM_001115 | 1584.657  | 2334.692  | U03272    | 2030.021  | 1900.885  | AF147426  | 409.391  | 578.062   |
| NM_014921 | 1466.353  | 1869.469  | NM_003098 | 1209.278  | 1479.382  | BC019667  | 843.011  | 1584.696  |
| NM_016581 | 51318.836 | 54211.418 | NM_014781 | 3580.108  | 3629.716  | AK026026  | 701.575  | 996.488   |
| NM_013255 | 1956.247  | 2447.56   | BU629989  | 973.376   | 1217.53   | AF085941  | 3155.691 | 5085.151  |
| NM_007183 | 1098.488  | 1234.863  | X87896    | 1738.103  | 1654.224  | Z69892    | 772.83   | 1425.34   |
| AJ238243  | 9874.198  | 11179.436 | M88310    | 2307.826  | 2351.096  | AL137475  | 451.311  | 724.599   |
| J05046    | 19608.516 | 20116.16  | NM_000042 | 2537.085  | 2686.281  | AL161956  | 1357.813 | 2664.291  |
| NM_012318 | 2380.44   | 2370.427  | AF035787  | 1044.317  | 920.193   | AL390176  | 838.049  | 1545.14   |
| NM_002751 | 4868.321  | 4841.83   | NM_005024 | 4129.388  | 3208.826  | AL137356  | 676.959  | 1133.704  |
| NM_004291 | 921.713   | 1239.191  | NM_003403 | 1441.16   | 1254.155  | AL137547  | 583.807  | 1136.27   |
| NM_003816 | 5063.916  | 4639.902  | NM_014808 | 1393.735  | 1485.721  | AK021994  | 562.673  | 957.216   |
| AK022635  | 649.507   | 415.407   | AB006627  | 3307.838  | 2609.985  | Z70763    | 467.051  | 991.007   |
| NM_004912 | 5094.363  | 4166.136  | NM_000416 | 2770.218  | 3351.302  | AK023802  | 3830.149 | 5721.628  |
| U79304    | 15003.534 | 10720.071 | NM_003382 | 1127.298  | 860.333   | AF086103  | 412.036  | 487.518   |
| NM_016267 | 5128.534  | 4616.455  | NM_002965 | 5158.369  | 5904.757  | AL080135  | 213.215  | 249.495   |
| NM_004671 | 5333.944  | 7246.35   | AB007883  | 6087.02   | 4802.087  | AK023158  | 367.21   | 255.733   |
| NM_007015 | 350.678   | 585.568   | AK093780  | 8923.949  | 9293.999  | AK000580  | 257.005  | 126.101   |
| NM_005180 | 16349.152 | 16699.713 | NM_001649 | 1746.571  | 2197.24   | AF085852  | 1006.849 | 1025.495  |
| NM_006526 | 4973.52   | 4692.958  | NM_005492 | 3028.328  | 3353.063  | AK023952  | 602.142  | 1192.769  |
| U35622    | 1750.331  | 1520.129  | AF038196  | 3546.032  | 3952.574  | AF090885  | 3778.993 | 6023.943  |
| NM_007045 | 2435.958  | 2921.262  | AF320294  | 2334.717  | 2422.745  | AF161342  | 221.466  | 368.684   |
| NM_003627 | 6510.317  | 8472.19   | AF161436  | 3844.281  | 3961.124  | NM_014082 | 488.727  | 1130.207  |
| NM_012145 | 22341.887 | 30801.354 | NM_020402 | 2016.077  | 2652.463  | AK021970  | 401.505  | 519.591   |
| AF305779  | 2167.112  | 2166.413  | NM_004299 | 3684.407  | 3257.104  | AK022066  | 28985.57 | 49885.246 |
| AF225416  | 10328.053 | 12052.844 | NM_001171 | 1527.888  | 1696.241  | AK022224  | 667.896  | 1333.712  |
| NM_016231 | 2421.276  | 3653.673  | NM_002250 | 6527.448  | 7427.467  | AK022359  | 552.489  | 924.404   |
| NM_002093 | 5635.837  | 7995.389  | S81591    | 669.127   | 674.215   | AK022000  | 522.501  | 1056.715  |
| AB042555  | 6167.219  | 8535.362  | NM_006323 | 8285.525  | 7751.694  | AK022129  | 1128.368 | 1986.448  |
| NM_001729 | 530.984   | 2430.513  | NM_016466 | 1843.75   | 1811.784  | AK022263  | 3219.743 | 5132.611  |
| NM_017763 | 2255.179  | 3548.412  | NM_001493 | 6711.483  | 6375.73   | AK022384  | 469.9    | 428.288   |

|           |           |           |           |           |           |            |          |           |
|-----------|-----------|-----------|-----------|-----------|-----------|------------|----------|-----------|
| NM_013975 | 2752.237  | 3483.198  | NM_014841 | 879.002   | 959.143   | AK027097   | 282.507  | 243.551   |
| NM_003843 | 5962.626  | 6977.243  | NM_014426 | 4841.691  | 4839.233  | AK024613   | 246.055  | 148.476   |
| NM_012216 | 1957.082  | 2231.506  | NM_000258 | 20619.436 | 19227.068 | AL117437   | 256.576  | 301.339   |
| NM_005338 | 883.031   | 1272.113  | AB033055  | 7326.906  | 7180.213  | AK027198   | 861.997  | 878.316   |
| X73502    | 6041.223  | 7306.661  | AF311287  | 5935.63   | 7117.813  | AL162077   | 169.032  | 143.67    |
| NM_020445 | 52923.336 | 52599.746 | AJ299442  | 5416.646  | 6967.586  | AK000257   | 241.989  | 461.994   |
| NM_016376 | 9609.051  | 8176.734  | NM_000129 | 997.678   | 1142.253  | AF009259   | 295.45   | 545.27    |
| AB046848  | 5695.343  | 4390.603  | NM_003762 | 6547.587  | 7175.367  | AF009260   | 572.562  | 568.026   |
| AL133057  | 7383.219  | 6932.101  | NM_018446 | 5249.995  | 6829.459  | AF009280   | 401.013  | 738.893   |
| U04845    | 9351.244  | 9610.894  | NM_014465 | 2039.781  | 2071.731  | NM_003079  | 660.976  | 1281.786  |
| NM_018103 | 9218.16   | 9408.999  | D87292    | 7237.801  | 8234.848  | NM_017902  | 761.019  | 1764.748  |
| AK026302  | 9579.665  | 9793.885  | NM_005498 | 2804.095  | 3249.382  | unknown (S | 270.729  | 237.023   |
| NM_012214 | 2786.975  | 1879.153  | NM_016335 | 2248.255  | 2174.796  | unknown (S | 200.456  | 343.492   |
| AF049656  | 20151.416 | 15301.261 | NM_003165 | 5384.659  | 4998.798  | AL359567   | 732.315  | 894.513   |
| NM_000312 | 2061.93   | 1983.282  | NM_003906 | 27471.115 | 23783.984 | NM_017726  | 1284.918 | 1427.87   |
| NM_003963 | 911.145   | 1154.887  | AL359590  | 33093.426 | 34231.824 | AK026716   | 302.28   | 219.723   |
| AC009729  | 1073.014  | 1489.316  | NM_002861 | 8983.531  | 10295.066 | AL049325   | 5026.232 | 5363.265  |
| NM_016598 | 7872.003  | 10287.659 | NM_003080 | 6144.663  | 6187.24   | AK026672   | 528.52   | 1253.85   |
| BE874867  | 32329.156 | 28428.598 | NM_013268 | 449.294   | 791.445   | AL080110   | 924.174  | 990.048   |
| AL136719  | 2605.308  | 3276.155  | NM_002645 | 2104.125  | 2435.942  | NM_020425  | 510.301  | 433.671   |
| NM_014109 | 8434.883  | 10424.38  | AB033027  | 2851.419  | 3421.651  | AK024076   | 677.553  | 709.125   |
| NM_012160 | 2183.588  | 3303.676  | AK021805  | 8985.611  | 9565.086  | M87940     | 1077.527 | 1097.761  |
| NM_006357 | 58873.836 | 58269.199 | AB014550  | 2372.098  | 3245.118  | L77588     | 724.898  | 941.2     |
| NM_014248 | 47471.715 | 48192.035 | NM_006826 | 15443.228 | 16773.25  | AF086304   | 5210.38  | 6437.069  |
| AK027070  | 1925.784  | 1881.735  | AB007973  | 7105.857  | 8655.702  | U61094     | 642.321  | 580.416   |
| AF129533  | 547.545   | 781.724   | NM_002999 | 685.655   | 723.434   | AB032976   | 747.294  | 1324.433  |
| NM_003341 | 7132.053  | 7965.491  | M96843    | 7557.763  | 8548.962  | AF301222   | 4631.369 | 6824.227  |
| NM_017785 | 1298.903  | 1372.464  | NM_017791 | 1462.578  | 1719.808  | AF215981   | 4407.23  | 4932.813  |
| NM_006249 | 4127.762  | 4012.104  | NM_005882 | 8077.731  | 9675.471  | NM_000732  | 7233.412 | 10428.678 |
| NM_018318 | 1320.899  | 1325.368  | BC012304  | 6562.817  | 7906.809  | AF130044   | 627.545  | 709.056   |
| AB020640  | 2162.079  | 2706.806  | AB046815  | 3653.442  | 4011.362  | AF116709   | 314.975  | 49.796    |
| D29954    | 21062.912 | 16412.17  | AF075085  | 51659.02  | 50806.238 | AF087980   | 318.232  | 362.928   |
| AF007131  | 1784.653  | 1415.589  | NM_005892 | 4863.737  | 5178.221  | AL117643   | 595.861  | 1233.719  |
| NM_006839 | 2098.486  | 1548.059  | NM_006478 | 809.443   | 684.166   | AF075063   | 619.403  | 341.247   |
| NM_000223 | 621.9     | 548.132   | AF132734  | 15748.999 | 15112.643 | AF069135   | 1662.793 | 1874.954  |
| NM_005851 | 1388.432  | 1242.739  | NM_018379 | 2333.705  | 2436.139  | AK026524   | 558.36   | 541.423   |
| AF119256  | 1126.003  | 1085.071  | NM_016403 | 17367.568 | 16137.682 | AB011157   | 1704.934 | 2071.993  |
| X74497    | 1374.214  | 934.119   | NM_015603 | 1691.775  | 1648.437  | U17632     | 845.086  | 700.084   |
| NM_012210 | 998.362   | 1146.295  | AK021788  | 669.458   | 669.861   | AK026764   | 966.327  | 1140.781  |
| U10072    | 3541.824  | 2353.013  | NM_001921 | 6050.198  | 6336.296  | AF113700   | 1340.1   | 2004.049  |
| AF222749  | 18168.797 | 15863.738 | NM_006230 | 7639.389  | 7588.74   | NM_017835  | 3882.809 | 5958.944  |
| NM_003410 | 3561.433  | 3123.881  | NM_014699 | 11384.564 | 10836.936 | NM_018347  | 1129.397 | 1518.466  |
| NM_007146 | 3338.586  | 4141.77   | NM_013400 | 11978.197 | 15593.554 | AF086223   | 280.528  | 192.842   |
| NM_002229 | 1317.462  | 2301.518  | AK026257  | 3141.708  | 3113.77   | AK024986   | 375.194  | 395.109   |
| S69027    | 5245.344  | 5169.007  | AK023836  | 7236.012  | 8386.026  | AK026730   | 317.326  | 288.474   |
| NM_012119 | 5773.525  | 7048.849  | NM_018109 | 3094.807  | 3165.279  | AK024739   | 594.774  | 628.256   |
| X99631    | 15680.722 | 15793.872 | NM_005076 | 7495.053  | 9072.616  | AK098681   | 636.991  | 670.413   |
| NM_001730 | 2983.869  | 3048.992  | AF253321  | 944.462   | 1363.244  | AK026772   | 683.59   | 845.347   |
| AK026290  | 563.73    | 437.384   | U80735    | 2718.901  | 3584.086  | NM_014260  | 5732.771 | 8021.743  |
| AB014589  | 2393.854  | 3306.228  | NM_017850 | 1534.825  | 2046.622  | AK026458   | 515.326  | 389.125   |
| AF248649  | 941.156   | 1181.464  | NM_016522 | 728.702   | 1014.982  | AK022266   | 268.439  | 351.188   |
| U37146    | 21815.129 | 19462.441 | NM_002224 | 1631.245  | 2047.462  | CY3Cy5     | 2931.685 | 366.345   |
| NM_012086 | 3165.993  | 2984.699  | X07979    | 33543.016 | 34640.715 | M23254     | 4049.906 | 2964.379  |

|           |           |           |           |           |           |           |           |           |
|-----------|-----------|-----------|-----------|-----------|-----------|-----------|-----------|-----------|
| AB040431  | 520.862   | 960.81    | NM_000082 | 965.329   | 1165.221  | BE618539  | 1501.18   | 1296.801  |
| NM_000991 | 54140.023 | 60566.352 | L13857    | 2299.319  | 2369.838  | R28062    | 2392.586  | 1944.665  |
| NM_016034 | 21471.766 | 21738.107 | NM_018098 | 5088.502  | 5551.402  | U38545    | 437.919   | 478.18    |
| X69150    | 52108.645 | 54361.613 | AF286164  | 644.824   | 928.471   | AI627464  | 2591.59   | 2888.244  |
| NM_001025 | 60566.703 | 60381.27  | AF146277  | 4825.938  | 4848.438  | BI756258  | 2184.575  | 2303.562  |
| NM_016067 | 50777.035 | 47025.473 | NM_002559 | 683.732   | 535.798   | J04599    | 772.766   | 703.235   |
| NM_018285 | 18030.822 | 15389.039 | AF055033  | 24631.83  | 22511.443 | AF110020  | 801.359   | 734.917   |
| AK022393  | 15517.13  | 20464.045 | NM_017700 | 1418.987  | 1554.092  | AA608557  | 4187.588  | 4192.679  |
| AK026654  | 1161.293  | 937.826   | M37191    | 8273.549  | 9111.996  | AL050095  | 6899.332  | 4567.472  |
| AB020643  | 354.507   | 273.221   | NM_003020 | 1209.027  | 1086.084  | U03272    | 1247.684  | 1443.454  |
| AK025245  | 956.089   | 1031.562  | NM_003404 | 48818.047 | 50257.809 | NM_000495 | 404.601   | 544.841   |
| AK025496  | 5824.978  | 5496.371  | NM_001114 | 1891.661  | 2196.145  | NM_000664 | 1212.675  | 1133.161  |
| NM_005205 | 60856.59  | 50263.465 | X82240    | 1958.483  | 2225.083  | SR5       | 2774.452  | 3264.508  |
| NM_001966 | 1457.43   | 1314.555  | NM_013995 | 17049.674 | 18655.359 | SR7       | 3329.724  | 28266.236 |
| NM_016135 | 2868.161  | 3318.138  | NM_004455 | 639.257   | 724.561   | SR9       | 14538.116 | 2927.75   |
| Z36833    | 59127.883 | 51977.246 | NM_006010 | 19172.391 | 28223.357 | CY3Cy5    | 3843.654  | 351.189   |
| NM_014355 | 2235.867  | 2813.123  | K03191    | 2920.269  | 3306.309  | NM_014805 | 974.386   | 910.348   |
| M21191    | 48784.117 | 49643.09  | NM_005079 | 12410.405 | 19072.453 | AB006627  | 2504.764  | 1590.453  |
| AF072810  | 2403.67   | 2688.857  | NM_005192 | 14394.919 | 19679.994 | NM_000415 | 1375.999  | 1235.812  |
| L19778    | 1025.763  | 1030.007  | NM_004585 | 637.783   | 1064.745  | NM_003382 | 473.521   | 535.312   |
| AF174482  | 11205.622 | 10440.374 | NM_015032 | 5983.188  | 6475.896  | NM_002965 | 3484.334  | 3132.007  |
| NM_003525 | 1542.97   | 1360.267  | AK022956  | 3507.341  | 5417.94   | AB007883  | 3954.266  | 2690.899  |
| NM_017765 | 1261.653  | 1379.192  | AK023121  | 1278.661  | 1662.964  | NM_007037 | 25815.574 | 18969.439 |
| D85131    | 19361.459 | 16887.584 | NM_014104 | 47791.055 | 52059.066 | NM_001645 | 771.12    | 946.381   |
| D30612    | 4480.789  | 4165.121  | NM_002392 | 1101.231  | 1185.009  | NM_005492 | 1512.087  | 1455.84   |
| NM_002163 | 20349.102 | 17810.605 | NM_002749 | 57016.492 | 56079.813 | AF038196  | 2174.439  | 2224.049  |
| U52097    | 17220.85  | 15463.765 | NM_018216 | 5193.44   | 5364.368  | NM_004855 | 8944.442  | 8904.003  |
| NM_003415 | 3548.741  | 4752.3    | NM_003390 | 1075.884  | 1167.855  | NM_016352 | 1259.875  | 1206.139  |
| AL079289  | 418.908   | 294.948   | AL137747  | 3039.903  | 3538.44   | NM_005014 | 527.198   | 500.522   |
| NM_018484 | 671.703   | 460.902   | NM_014755 | 6911.625  | 8687.889  | NM_006944 | 501.974   | 423.764   |
| NM_017594 | 1817.238  | 1557.453  | AF077188  | 18746.395 | 19127.324 | NM_004407 | 667.32    | 530.88    |
| AK027237  | 1107.333  | 826.622   | NM_012446 | 2593.602  | 2811.767  | NM_000070 | 3286.867  | 3349.194  |
| AK027104  | 1610.691  | 1661.803  | NM_018335 | 1384.199  | 1157.392  | NM_001202 | 695.675   | 745.247   |
| AL133090  | 22395.146 | 23171.012 | NM_018685 | 28494.037 | 30526.992 | AB037804  | 723.073   | 982.111   |
| AF085867  | 4670.208  | 6057.209  | NM_006984 | 3362.191  | 3678.36   | U34249    | 1017.767  | 972.9     |
| AK026158  | 1873.847  | 2193.479  | AF231919  | 1325.173  | 1737.542  | NM_003285 | 34849.105 | 27835.689 |
| AF086510  | 6727.512  | 6880.414  | NM_018214 | 695.262   | 737.844   | AI200114  | 1186.868  | 967.255   |
| Z36779    | 4300.981  | 4723.015  | AL133644  | 9260.462  | 9308.732  | NM_006323 | 5266.794  | 3342.833  |
| NM_018422 | 753.354   | 602.396   | NM_002706 | 4331.228  | 3703.915  | NM_016465 | 1157.994  | 817.09    |
| NM_002815 | 2763.714  | 3486.421  | NM_004199 | 852.468   | 549.547   | NM_001493 | 3852.242  | 2569.995  |
| NM_017513 | 678.72    | 726.881   | NM_019023 | 49713.055 | 45899.125 | NM_014841 | 638.657   | 519.77    |
| AK025288  | 579.175   | 662.421   | NM_004420 | 1306.269  | 1181.203  | NM_014425 | 2741.172  | 2379.343  |
| NM_017822 | 7694.475  | 8733.708  | NM_005499 | 21536.506 | 24423.656 | NM_006815 | 38651.066 | 26490.965 |
| AK026844  | 2999.476  | 3156.424  | NM_015387 | 4931.146  | 5550.083  | AK026518  | 43709.379 | 27006.711 |
| AK026735  | 3178.349  | 3262.559  | NM_001733 | 10228.169 | 8250.777  | NM_000255 | 14553.093 | 10610.736 |
| AL110104  | 18833.158 | 20169.035 | NM_005065 | 992.372   | 954.059   | AB033055  | 5700.552  | 4734.079  |
| AF240633  | 1039.167  | 1362.327  | NM_017825 | 8852.076  | 10918.428 | AF311287  | 4486.298  | 3718.708  |
| AK027056  | 8753.907  | 7163.064  | NM_014035 | 4045.016  | 4978.622  | NM_003095 | 802.005   | 865.564   |
| AK024294  | 3228.313  | 3116.326  | NM_020122 | 15968.223 | 20369.002 | NM_014781 | 1894.531  | 1942.967  |
| AL110126  | 3692.835  | 3488.702  | NM_013432 | 28951     | 36619.348 | BU629989  | 459.873   | 588.502   |
| AF052172  | 14707.528 | 13253.053 | AB020716  | 1031.063  | 1461.723  | X87896    | 960.239   | 936.993   |
| AB014573  | 4615.064  | 4444.766  | NM_002295 | 56690.125 | 55234.863 | M88310    | 1541.598  | 1313.068  |
| AK025418  | 954.088   | 1677.24   | AK027130  | 855.922   | 923.125   | NM_000042 | 1426.931  | 1316.278  |

|            |           |           |           |           |           |           |           |           |
|------------|-----------|-----------|-----------|-----------|-----------|-----------|-----------|-----------|
| AK091109   | 26231.434 | 21731.305 | NM_005479 | 18476.428 | 25131.096 | AF035787  | 378.221   | 413.076   |
| AF032897   | 401.32    | 681.187   | NM_005730 | 58044.762 | 55200.098 | NM_005024 | 1865.373  | 1654.99   |
| NM_014967  | 3429.204  | 2628.978  | NM_005392 | 1408.234  | 1078.56   | NM_003403 | 744.898   | 409.214   |
| AK022915   | 3635.885  | 3508.227  | AL133572  | 5798.98   | 5564.127  | NM_016335 | 873.187   | 662.839   |
| AK021736   | 412.128   | 440.434   | AK022500  | 2085.059  | 2076.53   | NM_003165 | 2620.22   | 1871.899  |
| AF131834   | 1278.66   | 1195.068  | BC021298  | 970.795   | 799.222   | NM_003906 | 12388.347 | 7902.217  |
| AK025851   | 1649.319  | 1481.324  | U52096    | 7419.106  | 6882.151  | AL359590  | 18681.65  | 14611.358 |
| AJ011409   | 10788.431 | 12701.601 | AB013897  | 1531.118  | 1857.101  | NM_002861 | 4112.366  | 3535.918  |
| AJ227906   | 1268.168  | 1229.677  | NM_005526 | 30268.324 | 36727.191 | NM_003080 | 3541.766  | 2591.978  |
| V00541     | 409.262   | 440.224   | AK001669  | 2574.675  | 2197.028  | NM_013265 | 328.268   | 498.796   |
| AJ011598   | 508.598   | 737.504   | NM_006195 | 9215.115  | 10415.161 | NM_002645 | 1350.917  | 1406.464  |
| AJ001906   | 745.805   | 852.949   | NM_006190 | 10374.308 | 11408.351 | AB033027  | 1631.833  | 1570.51   |
| U17633     | 839.494   | 951.837   | NM_006365 | 2469.569  | 2532.004  | AK021805  | 6194.628  | 6327.453  |
| AL049231   | 328.644   | 740.866   | NM_004133 | 960.778   | 972.875   | AB014550  | 1409.992  | 1568.989  |
| L10404     | 1074.842  | 1046.733  | NM_001615 | 8038.518  | 8186.727  | AF320294  | 1998.33   | 1787.503  |
| AF283776   | 10434.425 | 13791.975 | BC000401  | 9256.739  | 10696.782 | AF320293  | 532.296   | 723.47    |
| L10123     | 18801.045 | 22126.398 | NM_006425 | 5547.991  | 6788.755  | AF161436  | 2308.337  | 3170.408  |
| AF071507   | 407.165   | 648.617   | BF344046  | 2901.899  | 3648.337  | NM_020402 | 1391.71   | 1670.996  |
| D16877     | 2181.379  | 2555.799  | AF432218  | 10209.422 | 13432.325 | NM_004295 | 1904.446  | 2118.398  |
| L19363     | 520.906   | 684.591   | NM_004286 | 5250.54   | 8739.869  | NM_001171 | 1009.999  | 907.047   |
| AL109781   | 5023.482  | 5685.094  | AK025082  | 998.133   | 906.824   | NM_002250 | 2709.186  | 2712.346  |
| AK021895   | 1828.92   | 1401.599  | AF086535  | 855.316   | 825.24    | S81591    | 346.267   | 214.442   |
| AK024563   | 459.311   | 489.182   | AB040901  | 1659.132  | 1628.648  | NM_006475 | 395.694   | 209.852   |
| AK000036   | 3202.881  | 4356.968  | AL137406  | 3228.103  | 3650.594  | AF132734  | 6480.616  | 4051.644  |
| AK000924   | 810.798   | 630.688   | NM_012253 | 4587.496  | 4654.271  | NM_018375 | 1312.054  | 844.602   |
| AK022252   | 1274.129  | 1567.013  | NM_006876 | 1908.961  | 1950.857  | NM_016403 | 10069.279 | 6461.032  |
| AK000114   | 3401.521  | 3828.205  | NM_000293 | 1833.199  | 1857.554  | NM_015603 | 808.472   | 488.54    |
| AK000952   | 3496.861  | 4858.743  | AF153821  | 2054.899  | 1935.493  | NM_001921 | 3650.934  | 3004.739  |
| AK024520   | 3675.646  | 4991.56   | NM_013370 | 1710.916  | 1635.896  | NM_006230 | 3908.49   | 3179.806  |
| AK024592   | 4701.28   | 5166.84   | NM_001374 | 832.699   | 529.035   | NM_014695 | 5747.927  | 4405.815  |
| AK024904   | 2093.626  | 2772.799  | NM_003310 | 4017.591  | 4345.116  | NM_013400 | 5187.071  | 4488.183  |
| AK025030   | 1454.516  | 1393.988  | AK024461  | 2519.954  | 2743.894  | AK026257  | 1402.077  | 933.43    |
| AK024542   | 2187.479  | 2371.905  | AK025485  | 777.629   | 829.201   | AK023836  | 3694.15   | 3335.864  |
| AK024915   | 699.68    | 632.261   | NM_017635 | 1870.861  | 1600.226  | NM_018105 | 1517.917  | 1581.433  |
| AB050477   | 3054.307  | 2659.266  | X62534    | 1188.516  | 1166.938  | AJ299442  | 3254.951  | 3611.843  |
| AK000152   | 1987.921  | 1741.102  | AF027147  | 27034.781 | 26181.873 | AB040897  | 332.429   | 480.523   |
| AK024300   | 892.21    | 1020.552  | M62399    | 2548.677  | 2847.242  | NM_000125 | 829.879   | 772.039   |
| L09092     | 682.36    | 555.579   | NM_002357 | 714.229   | 745.61    | NM_003762 | 3148.977  | 2886.396  |
| NM_012132  | 979.722   | 1062.497  | U71600    | 2116.708  | 2412.865  | NM_018445 | 2078.469  | 1971.901  |
| NM_012125  | 1871.219  | 2149.724  | NM_004472 | 1066.981  | 1198.53   | NM_000187 | 449.463   | 352.796   |
| AK024881   | 472.432   | 474.282   | AB037862  | 4224.256  | 5553.801  | NM_014465 | 851.023   | 717.19    |
| AK025716   | 1269.302  | 1177.004  | AF085924  | 784.901   | 332.501   | D87292    | 3434.108  | 2657.934  |
| unknown (S | 233.341   | 334.348   | AK023887  | 751.646   | 809.181   | NM_005495 | 1092.692  | 554.946   |
| AF086202   | 9320.842  | 11672.146 | AF088022  | 9315.857  | 7804.747  | NM_001202 | 591.704   | 371.185   |
| AK022352   | 455.921   | 525.428   | AK026537  | 1846.69   | 1906.958  | AB037804  | 747.906   | 515.368   |
| AK023270   | 2046.44   | 1912.62   | NM_015485 | 3384.077  | 3075.01   | U34249    | 1186.326  | 925.177   |
| AF085979   | 27071.18  | 33094.789 | AF147411  | 401.737   | 559.197   | NM_003285 | 42297.605 | 29891.773 |
| AK023112   | 2337.009  | 2832.28   | NM_002666 | 4483.054  | 4191.987  | AI200114  | 1939.274  | 1429.07   |
| NM_017805  | 24551.111 | 30210.41  | AF202145  | 2306.779  | 2813.03   | M23254    | 4072.518  | 3371.407  |
| L04552     | 265.601   | 266.645   | AK026155  | 2641.242  | 2288.667  | BE618539  | 1387.097  | 1298.893  |
| AK001937   | 44654.773 | 40548.91  | NM_018052 | 29477.5   | 27380.275 | R28062    | 2395.089  | 2169.478  |
| AL365517   | 1203.377  | 1003.459  | AF143322  | 655.419   | 651.62    | U38545    | 367.616   | 428.071   |
| AK021988   | 9642.001  | 8951.122  | AK022386  | 4217.407  | 3967.106  | AI627464  | 1819.03   | 2154.015  |

|           |           |           |           |           |           |           |           |           |
|-----------|-----------|-----------|-----------|-----------|-----------|-----------|-----------|-----------|
| AF086494  | 14466.846 | 14702.373 | NM_002767 | 5635.296  | 5248.495  | BI756258  | 1747.555  | 1495.513  |
| BI769977  | 968.198   | 1152.125  | AF131846  | 15459.358 | 15998.685 | J04599    | 810.602   | 757.821   |
| AL137567  | 877.108   | 662.988   | AF088069  | 2794.852  | 2022.897  | AF110020  | 597.011   | 912.405   |
| AK024913  | 3778.459  | 4333.371  | AF086551  | 943.569   | 1614.521  | AA608557  | 4275.763  | 4922.459  |
| AB007961  | 2043.386  | 2066.143  | NM_013393 | 5143.037  | 6803.709  | AL050095  | 7940.549  | 4932.824  |
| NM_005547 | 1020.321  | 1063.106  | AK025072  | 2298.104  | 1754.29   | U03272    | 1310.385  | 1141.809  |
| S81973    | 299.832   | 245.145   | AK022410  | 764.176   | 649.928   | NM_00049E | 444.322   | 487.52    |
| AF119862  | 9771.168  | 8362.096  | L10378    | 12920.119 | 11557.943 | NM_000664 | 1272.878  | 991.409   |
| U17628    | 2063.383  | 2220.15   | AK022179  | 1068.333  | 634.49    | AF075085  | 28083.373 | 18496.805 |
| AF119867  | 3133.43   | 2855.332  | AJ227860  | 1009.91   | 1091.203  | NM_005892 | 2775.104  | 1569.5    |
| AL357205  | 16830.98  | 20307.77  | AL157448  | 989.865   | 846.845   | D16856    | 329.838   | 181.339   |
| AF124819  | 563.675   | 882.733   | AF026942  | 1753.424  | 1431.362  | NM_000042 | 1551.489  | 1076.881  |
| D17091    | 1514.328  | 1913.777  | AJ276429  | 1471.552  | 1229.313  | AF035787  | 381.989   | 265.913   |
| AL133074  | 1436.84   | 1840.795  | AL117657  | 1443.54   | 1317.243  | NM_005024 | 1905.582  | 1569.413  |
| AF086318  | 5931.547  | 6845.92   | AK021590  | 2555.304  | 2653.199  | NM_003403 | 661.959   | 556.201   |
| AF088012  | 1951.209  | 1805.659  | AB002441  | 705.528   | 510.946   | NM_01480E | 1112.468  | 1135.608  |
| NM_018121 | 1686.739  | 2298.786  | AK023998  | 1668.456  | 1325.377  | AB006627  | 2692.065  | 2279.397  |
| AK026708  | 2600.032  | 2493.521  | AK021643  | 1367.421  | 1609.832  | NM_00041E | 1681.511  | 2047.893  |
| NM_017903 | 9161.837  | 7977.364  | U84507    | 728.672   | 886.385   | NM_003382 | 466.195   | 522.582   |
| NM_018074 | 1759.111  | 1725.792  | AK000872  | 1691.632  | 1547.497  | NM_00296E | 3482.505  | 3421.034  |
| NM_00090E | 2390.12   | 1970.248  | AK027147  | 7435.937  | 8362.127  | AB007883  | 4140.308  | 3003.519  |
| U31737    | 639.887   | 745.889   | AK022415  | 17833.271 | 14929.544 | AK093780  | 5511.09   | 4903.026  |
| AK024828  | 1993.261  | 2085.104  | AL137368  | 783.947   | 1058.714  | AY009397  | 56313.598 | 68974.914 |
| AF009315  | 1819.087  | 1802.41   | AK021932  | 1292.43   | 1019.998  | NM_007037 | 27780.746 | 22694.533 |
| NM_019013 | 1813.341  | 1820.706  | AK026787  | 4077.925  | 3711.415  | NM_00164E | 725.554   | 1038.691  |
| NM_006783 | 605.774   | 540.648   | AK023542  | 1293.079  | 1246.58   | NM_005492 | 1471.575  | 1366.659  |
| L37711    | 644.092   | 720.129   | AK000203  | 1381.365  | 998.785   | AF038196  | 2199.27   | 2620.922  |
| S70313    | 9827.018  | 8287.646  | AK021845  | 2981.88   | 2805.327  | NM_00485E | 10363.771 | 9541.523  |
| AK021607  | 1236.464  | 1012.793  | NM_018592 | 1594.894  | 1777.585  | NM_016352 | 1352.348  | 1172.744  |
| L09268    | 752.417   | 476.463   | NM_018503 | 16760.854 | 16782.611 | NM_005014 | 589.866   | 558.917   |
| NM_02018E | 8498.092  | 7361.081  | NM_01644E | 9545.436  | 9428.555  | NM_006944 | 501.78    | 420.285   |
| AF090947  | 1338.775  | 939.518   | AL049670  | 5046.953  | 3845.198  | NM_004407 | 551.912   | 309.991   |
| AJ272196  | 6910.603  | 8652.175  | NM_018512 | 11207.702 | 10334.821 | NM_00007C | 3326.196  | 2123.411  |
| X58162    | 3682.814  | 4213.171  | AK022412  | 2385.707  | 2265.064  | NM_00225C | 3202.456  | 1687.302  |
| AK022825  | 566.778   | 636.923   | AK023073  | 7139.922  | 6661.176  | NM_006323 | 5047.729  | 4692.458  |
| CY3Cy5    | 9317.776  | 675.57    | AK023697  | 3881.026  | 4665.779  | NM_01646E | 1237.475  | 962.895   |
|           | 543.25    | 665.432   | AK023922  | 1013.095  | 1252.799  | NM_001493 | 4024.369  | 3645.835  |
| L35251    | 4298.665  | 6667.563  | AK022438  | 1363.525  | 1304.967  | NM_014841 | 678.271   | 799.927   |
| BE910395  | 1993.438  | 2400.643  | AK023764  | 895.157   | 987.538   | NM_01442E | 2788.252  | 2592.283  |
| N46828    | 2933.178  | 3327.059  | AK024082  | 1346.382  | 1214.004  | NM_00681E | 37484.406 | 29890.227 |
| BI908302  | 26356.811 | 28307.076 | Z27405    | 15506.853 | 10495.83  | AK026518  | 45495.887 | 35452.324 |
| AA460969  | 2894.161  | 2364.685  | NM_014617 | 33898.703 | 28028.822 | NM_00025E | 16030.459 | 12436.478 |
| BG695859  | 1322.381  | 1694.824  | AK074682  | 4505.895  | 3699.029  | AB033055  | 6092.523  | 4879.003  |
| M85079    | 6130.629  | 5534.779  | AK024513  | 650.095   | 612.887   | AF311287  | 4896.287  | 3485.458  |
| AA457671  | 16731.783 | 24595.4   | BC036692  | 1001.207  | 869.498   | NM_00309E | 814.104   | 677.853   |
| X07437    | 7435.855  | 5248.024  | AJ009640  | 3212.084  | 3697.956  | NM_014781 | 2043.686  | 1755.315  |
| NM_000641 | 2475.308  | 2045.026  | Y11163    | 767.302   | 549.413   | BU629989  | 679.85    | 312.869   |
| AE006466  | 2623.174  | 1650.96   | AF035308  | 9735.18   | 8705.549  | X87896    | 1001.451  | 682.193   |
| BC008737  | 53458.508 | 24875.494 | NM_014054 | 3617.743  | 3424.641  | M88310    | 1283.335  | 793.493   |
| BC011655  | 3501.366  | 1732.004  | AK021840  | 33627.008 | 32142.326 | NM_01844E | 2141.901  | 1781.858  |
| BC002396  | 4349.488  | 3072.11   | AK022228  | 2049.321  | 2340.765  | NM_000187 | 425.852   | 268.526   |
| NM_02209E | 1073.683  | 878.542   | AK022031  | 523.428   | 737.698   | NM_01446E | 1194.346  | 803.762   |
| SR2       | 55698.012 | 34168.383 | AF086480  | 2552.402  | 2862.031  | D87292    | 3415.096  | 3252.574  |



|           |           |           |             |           |           |           |           |           |
|-----------|-----------|-----------|-------------|-----------|-----------|-----------|-----------|-----------|
| SR4       | 18452.352 | 7894.086  | AK000806    | 43510.668 | 34727.094 | NM_00549E | 1545.338  | 1318.562  |
| SR6       | 2716.228  | 1277.376  | NM_016471   | 2510.225  | 2685.506  | NM_01633E | 1368.205  | 1418.064  |
| SR8       | 9191.622  | 14290.932 | NM_005364   | 5622.979  | 5735.682  | NM_00316E | 3525.022  | 3032.153  |
| SR10      | 30974.988 | 3819.995  | AK023482    | 2846.251  | 2935.091  | NM_00390E | 13014.354 | 9120.093  |
| CY3Cy5    | 4471.243  | 286.878   | AK022798    | 496.14    | 540.837   | AL359590  | 20936.895 | 18771.066 |
| NM_02037C | 1133.743  | 1181.474  | AL157423    | 794.951   | 503.714   | NM_002861 | 4664.837  | 5140.876  |
| NM_004767 | 1178.253  | 1530.011  | AK023176    | 978.758   | 809.521   | NM_00308C | 4210.808  | 3776.754  |
| BF310159  | 8379.836  | 8916.429  | AL161991    | 16000.646 | 18256.852 | NM_00404Z | 486.669   | 512.858   |
| NM_00031E | 791.838   | 955.909   | D17032      | 14881.577 | 13356.666 | NM_00264E | 851.318   | 630.894   |
| NM_01898E | 2463.419  | 3145.971  | AL137292    | 643.053   | 330.899   | AB033027  | 2049.964  | 2039.341  |
| AB044934  | 873.753   | 859.865   | NM_017941   | 2387.746  | 1790.869  | AK021805  | 7086.37   | 6741.114  |
| U27655    | 4474.673  | 3541.65   | D28384      | 69337.852 | 62725.602 | AB014550  | 1502.932  | 1402.363  |
| NM_00336C | 1465.075  | 1099.889  | AF118079    | 31512.803 | 31938.326 | AF320294  | 1966.24   | 1950.068  |
| Z21965    | 35850.602 | 22060.523 | AF277572    | 887.398   | 1157.304  | AF320293  | 539.602   | 662.846   |
| NM_012427 | 951.219   | 741.455   | AL365413    | 4196.008  | 4034.682  | AF161436  | 2808.774  | 3126.821  |
| AF131857  | 8346.309  | 3743.177  | NM_00525E   | 13056.562 | 12753.887 | NM_02040Z | 1736.267  | 1473.307  |
| NM_00085Z | 7947.14   | 4078.298  | NM_00044C   | 3924.493  | 2975.831  | NM_00429E | 2799.72   | 2704.142  |
| NM_00039E | 820.072   | 537.312   | NM_001297   | 2947.658  | 2237.967  | NM_001171 | 1147.893  | 1622.501  |
| AW797282  | 475.957   | 275.66    | NM_00440Z   | 4907.519  | 3752.491  | NM_00049E | 414.518   | 282.295   |
| NM_00240Z | 3519.188  | 2128.633  | X64993      | 800.75    | 745.622   | NM_000664 | 1311.235  | 973.064   |
| L09070    | 1011.633  | 1098.351  | NM_004434   | 7904.177  | 8640.088  | AF075085  | 31997.521 | 21375.623 |
| NM_00006Z | 10537.385 | 11989.753 | NM_01623C   | 2232.71   | 2512.827  | NM_00589Z | 2894.353  | 2133.837  |
| NM_017877 | 708.525   | 637.965   | NM_00108Z   | 1003.303  | 746.763   | AF132734  | 7151.768  | 5914.018  |
| NM_00959C | 3168.191  | 3301.494  | AK023966    | 5043.273  | 4379.598  | NM_01837E | 1377.983  | 1079.265  |
| AL133037  | 948.077   | 805.203   | AK025702    | 2523.048  | 1640.296  | NM_01640Z | 12214.726 | 9236.857  |
| NM_02035C | 5853.226  | 2149.988  | AK022038    | 1170.8    | 947.526   | NM_01560Z | 823.5     | 494.462   |
| NM_00035C | 792.571   | 297.681   | AK025119    | 792.69    | 693.508   | AK021788  | 346.767   | 442.11    |
| X91103    | 8341.523  | 3881.594  | AJ224170    | 757.158   | 396.586   | NM_001921 | 3419.319  | 3425.893  |
| AA419164  | 4506.038  | 3066.239  | AF085866    | 3338.02   | 2974.546  | NM_00623C | 3740.762  | 3293.776  |
| AL117235  | 1846.817  | 1666.937  | CY3Cy5      | 5111.355  | 425.555   | NM_01469E | 6305.671  | 5290.31   |
| NM_003611 | 11283.672 | 9727.704  | AA397813    | 14674.831 | 18254.402 | NM_01340C | 5704.21   | 5927.806  |
| AB014538  | 3151.044  | 2791.586  | W47350      | 1187.182  | 1532.797  | AK026257  | 1868.97   | 1819.168  |
| NM_004154 | 837.842   | 686.114   | AI160964    | 377.292   | 711.589   | AK023836  | 4411.162  | 4536.44   |
| NM_00620E | 1133.942  | 722.752   | W68291      | 16253.518 | 17112.941 | NM_01810E | 1874.491  | 1599.973  |
| AK025118  | 6434.033  | 3869.137  | N64384      | 2176.272  | 1849.649  | AJ299442  | 3294.171  | 3967.947  |
| NM_000727 | 2418.521  | 1493.996  | H-X 53655 I | 2484.643  | 1606.206  | NM_00012E | 1415.742  | 1591.759  |
| NM_002621 | 495.276   | 365.666   | H-U 05770 I | 6178.28   | 6942.111  | NM_00376Z | 3245.583  | 4605.246  |
| NM_00538E | 7536.084  | 3834.791  | H-M 65199   | 8121.577  | 7777.659  | NM_00485E | 10532.178 | 6730.532  |
| NM_01898E | 3664.707  | 1846.461  | H-M 32315   | 4054.83   | 4353.502  | NM_01635Z | 1411.621  | 1095.231  |
| NM_006074 | 29877.635 | 17038.928 | H-V00536M   | 2596.1    | 3210.896  | NM_005014 | 534.474   | 461.338   |
| AF208232  | 3167.714  | 3005.307  | H-D85429M   | 4079.83   | 4340.618  | NM_006944 | 408.456   | 850.75    |
| NM_00298E | 5086.745  | 4464.41   | BF439832    | 2041.319  | 3311.842  | NM_004407 | 738.751   | 627.711   |
| NM_00418E | 2090.458  | 1472.424  | BG819162    | 1885.093  | 1899.9    | NM_00007C | 4590.275  | 3709.257  |
| NM_01625E | 4492.034  | 3784.295  | NM_01753Z   | 4056.631  | 4306.622  | NM_00120Z | 842.63    | 681.821   |
| AF203032  | 5129.633  | 4374.055  | SR6         | 1983.831  | 2338.889  | AB037804  | 826.363   | 969.441   |
| AB014542  | 24608.475 | 25474.088 | SR8         | 6358.28   | 23984.342 | U34249    | 1548.277  | 1375.972  |
| NM_01464C | 1691.27   | 1633.45   | SR10        | 23118.705 | 8815.021  | NM_00328E | 44922.25  | 36875.145 |
| AB032965  | 37289.215 | 21541.549 | CY3Cy5      | 4411.089  | 338.306   | AI200114  | 2248.47   | 1855.74   |
| AF133424  | 2775.622  | 2655.444  | NM_004447   | 5835.536  | 5626.9    | M23254    | 4198.648  | 4800.718  |
| NM_00500Z | 36298.93  | 32647.594 | NM_001204   | 890.973   | 610.872   | BE618539  | 1628.237  | 1624.377  |
| AF084560  | 5199.884  | 5975.744  | BF131321    | 1518.402  | 983.977   | R28062    | 2343.23   | 2110.029  |
| NM_01571E | 4174.682  | 5613.972  | NM_01654C   | 754.961   | 1407.201  | U38545    | 489.412   | 431.839   |
| NM_00003Z | 4885.906  | 5269.426  | NM_012116   | 1662.283  | 1832.866  | AI627464  | 1815.783  | 2143.753  |

|           |           |           |           |           |           |           |           |          |
|-----------|-----------|-----------|-----------|-----------|-----------|-----------|-----------|----------|
| NM_002083 | 1502.613  | 1542.176  | NM_000020 | 4409.795  | 3878.824  | BI756258  | 1817.475  | 1956.565 |
| NM_002035 | 4935.506  | 4592.587  | NM_000956 | 1084.945  | 853.484   | J04599    | 800.327   | 654.385  |
| NM_014900 | 1222.691  | 688.165   | NM_002442 | 3458.84   | 2883.702  | AF110020  | 744.838   | 591.464  |
| BF342908  | 1341.839  | 1026.169  | AB033091  | 7552.188  | 6668.918  | AA707922  | 929.111   | 548.024  |
| AF118073  | 643.534   | 707.781   | NM_004557 | 8486.16   | 8620.318  | AA608557  | 4361.976  | 6543.1   |
| AK023510  | 3308.554  | 2181.677  | NM_014757 | 3004.617  | 2477.821  | AL050095  | 7905.83   | 6808.471 |
| NM_004345 | 1898.606  | 1174.359  | NM_017893 | 475.315   | 617.397   | U03272    | 1235.117  | 1431.397 |
| NM_000702 | 28903.953 | 20269.84  | NM_001584 | 2545.262  | 2167.101  | NM_003095 | 751.587   | 788.757  |
| X71490    | 12836.727 | 10806.037 | NM_012259 | 47395.102 | 47551.832 | NM_014781 | 2118.626  | 1672.917 |
| AF257081  | 2440.679  | 2414.601  | AF272357  | 2506.061  | 2591.422  | BU629989  | 713.502   | 344.267  |
| NM_001685 | 55210.063 | 40124.242 | AB020705  | 1427.897  | 1566.718  | X87896    | 1127.506  | 763.024  |
| NM_003631 | 528.211   | 548.098   | NM_002980 | 1838.955  | 1640.278  | M88310    | 1914.427  | 1292.887 |
| NM_000219 | 1358.062  | 1399.563  | NM_015886 | 1700.339  | 1699.149  | NM_000042 | 1752.036  | 1630.886 |
| NM_002232 | 1166.515  | 1563.523  | NM_007102 | 64442.586 | 57836.027 | AF035787  | 423.444   | 372.89   |
| NM_016106 | 4440.936  | 6529.59   | BG491613  | 10319.823 | 8586.811  | AF090405  | 246.069   | 241.256  |
| NM_014570 | 4821.036  | 6466.459  | AB006423  | 1785.434  | 1535.339  | NM_005024 | 2113.945  | 1778.907 |
| NM_014747 | 6940.857  | 6894.896  | NM_005719 | 63913.477 | 62080.113 | NM_003403 | 1029.236  | 968.224  |
| Y19240    | 5284.886  | 7343.821  | NM_002725 | 1175.294  | 1112.145  | AB006627  | 3205.506  | 2963.621 |
| AF091029  | 9668.446  | 14820.292 | NM_000445 | 641.883   | 753.969   | NM_000416 | 1636.415  | 1794.44  |
| X97074    | 16331.803 | 19618.658 | NM_001705 | 23603.721 | 25416.906 | NM_003382 | 595.566   | 832.501  |
| NM_002625 | 570.52    | 1015.814  | NM_017735 | 3122.163  | 2766.677  | NM_002965 | 3555.848  | 4756.989 |
| NM_004135 | 8229.453  | 9185.862  | AB033044  | 6142.25   | 4412.623  | AB007883  | 4465.453  | 3389.102 |
| NM_000203 | 901.993   | 877.15    | AB014564  | 1326.822  | 1331.497  | AK093780  | 4850.489  | 5354.736 |
| NM_013443 | 3004.624  | 3789.855  | NM_020230 | 2838.473  | 2382.003  | NM_001645 | 901.496   | 1525.986 |
| NM_000925 | 11791.722 | 12918.768 | NM_006762 | 55139.738 | 55121.461 | NM_005492 | 1710.655  | 2279.866 |
| NM_000465 | 2587.18   | 3240.91   | NM_006352 | 1815.003  | 1536.214  | AF038196  | 2346.115  | 2986.378 |
| NM_000123 | 4681.718  | 4069.693  | NM_005094 | 2494.883  | 2373.922  | AF320294  | 2271.065  | 1767.102 |
| AL137501  | 896.701   | 671.153   | NM_002335 | 646.304   | 856.592   | AF320293  | 379.613   | 521.526  |
| BE858979  | 1354.164  | 794.326   | BE382905  | 810.86    | 738.304   | AF161436  | 3185.177  | 3063.731 |
| NM_000122 | 3280.152  | 2383.717  | NM_002152 | 8988.355  | 9236.276  | NM_020402 | 2036.427  | 1837.052 |
| NM_006712 | 57063.691 | 64626.289 | NM_001701 | 434.607   | 610.654   | NM_004295 | 2058.306  | 1838.292 |
| NM_006240 | 1784.349  | 1585.963  | AK022558  | 4603.588  | 4392.218  | NM_001171 | 979.687   | 953.276  |
| NM_007026 | 3765.708  | 5349.969  | NM_007177 | 9256.336  | 9559.231  | NM_002250 | 3200.863  | 3075.283 |
| M37712    | 12168.036 | 11583.246 | NM_000809 | 823.922   | 560.351   | S81591    | 227.684   | 142.857  |
| NM_002645 | 1281.707  | 1720.776  | AK023915  | 4776.107  | 4195.522  | NM_006323 | 5451.235  | 5561.937 |
| AF070670  | 7679.017  | 10259.682 | AB051453  | 2094.444  | 1986.076  | NM_016466 | 1578.876  | 1924.623 |
| NM_016156 | 4670.899  | 6678.92   | AK026842  | 728.9     | 617.355   | NM_001493 | 4308.255  | 4539.46  |
| NM_016525 | 2215.156  | 2927.788  | NM_002395 | 3253.378  | 3745.686  | NM_014841 | 736.809   | 575.583  |
| NM_015974 | 3336.609  | 4055.005  | NM_016271 | 4597.828  | 4343.578  | NM_014426 | 3456.664  | 4643.423 |
| NM_014384 | 1629.825  | 2535.659  | NM_016619 | 4307.542  | 4375.401  | NM_000255 | 15964.248 | 19479.93 |
| NM_002573 | 4176.931  | 4244.434  | NM_014481 | 1363.863  | 1443.393  | AB033055  | 5878.511  | 7176.25  |
| AL133037  | 1264.083  | 1369.733  | U22172    | 2442.639  | 2373.95   | AF311287  | 4134.475  | 4532.119 |
| NM_020350 | 7719.45   | 6272.176  | AB032960  | 1440.573  | 1522.063  | AJ299442  | 3436.195  | 3425.071 |
| NM_000350 | 2092.627  | 2497.553  | NM_014264 | 6838.261  | 5762.951  | AB040897  | 435.312   | 438.831  |
| BE910395  | 1897.377  | 2292.213  | AF020089  | 2556.258  | 2211.687  | NM_000125 | 805.545   | 755.296  |
| N46828    | 3262.962  | 3908.152  | NM_006257 | 3226.818  | 2944.696  | NM_003762 | 3293.436  | 2813.146 |
| BI908302  | 29343.283 | 25526.066 | NM_016281 | 10168.582 | 8083.663  | NM_018446 | 2473.369  | 2451.895 |
| M85079    | 6920.764  | 7001.396  | NM_004734 | 17418.977 | 17575.367 | NM_000187 | 703.565   | 769.526  |
| AA457671  | 15770.701 | 14485.821 | AK024793  | 1990.618  | 2090.551  | NM_014465 | 1470.743  | 1186.829 |
| X07437    | 9810.003  | 7567.947  | AF208291  | 1941.017  | 2063.132  | D87292    | 3658.844  | 3881.679 |
| NM_000641 | 2951.677  | 3084.946  | NM_015886 | 1505.887  | 1626.825  | NM_005495 | 1849.602  | 1863.204 |
| AE006466  | 4996.249  | 4583.395  | NM_020355 | 450.252   | 563.069   | NM_016335 | 1811.225  | 2150.936 |
| BC011655  | 5812.3    | 8055.734  | BG491613  | 7328.005  | 8196.614  | NM_003165 | 3602.78   | 3513.461 |

|           |           |           |             |           |           |           |           |           |
|-----------|-----------|-----------|-------------|-----------|-----------|-----------|-----------|-----------|
| BC002396  | 6234.772  | 7985.943  | AA397813    | 23880.65  | 36328.258 | NM_00390E | 7433.081  | 7616.655  |
| NM_02209E | 1530.239  | 2116.341  | W47350      | 1908.716  | 2148.308  | AL359590  | 24366.697 | 22515.867 |
| AF112219  | 23950.27  | 35136.727 | W68291      | 17402.465 | 16177.947 | NM_002861 | 4946.14   | 5818.14   |
| NM_000521 | 334.082   | 355.822   | N64384      | 2338.725  | 1964.046  | NM_00308C | 4278.885  | 4079.84   |
| NM_01464C | 927.708   | 969.468   | H-X 53655 I | 2265.136  | 1940.1    | NM_00404Z | 872.505   | 1022.31   |
| Y10518    | 59852.477 | 59924.188 | H-U 05770 I | 6289.843  | 7127.338  | NM_01326E | 435.054   | 357.824   |
| AF155135  | 10090.87  | 9869.18   | H-M 65199   | 10238.703 | 10881.044 | NM_00264E | 1312.345  | 1597.857  |
| NM_01479C | 1941.719  | 2807.471  | H-M 32315   | 4342.233  | 5684.589  | AB033027  | 1687.737  | 2002.903  |
| NM_02037C | 1018.832  | 1013.675  | H-V00536M   | 2583.248  | 2786.452  | AK021805  | 6543.733  | 8533.659  |
| NM_004767 | 1205.108  | 1785.142  | H-D85429M   | 4353.86   | 4214.816  | AB014550  | 1299.676  | 1673.344  |
| BF310159  | 9357.975  | 8606.998  | BF439832    | 2373.401  | 2721.683  | NM_00682E | 5958.061  | 3517.993  |
| AB044934  | 1260.589  | 1429.061  | BG819162    | 1695.467  | 2064.622  | AB007973  | 3601.732  | 2911.863  |
| U27655    | 5445.813  | 4508.923  | NM_01753Z   | 3986.659  | 4656.792  | NM_00299E | 727.577   | 443.518   |
| NM_00579E | 458.398   | 386.178   | M38449      | 7535.678  | 5824.158  | M96843    | 7448.121  | 5826.466  |
| NM_00336C | 1673.368  | 2008.874  | AB033044    | 4813.597  | 4407.838  | NM_017791 | 1495.955  | 1552.393  |
| Z21965    | 49792.52  | 53321.262 | AB014564    | 1014.881  | 939.264   | NM_00588Z | 3884.057  | 3868.245  |
| NM_012427 | 930.413   | 1060.586  | NM_02023C   | 2239.944  | 2340.452  | BC012304  | 3269.999  | 3447.979  |
| NM_00085Z | 17526.637 | 19480.938 | NM_00635Z   | 1504.106  | 1734.898  | AB046815  | 2300.277  | 2109.977  |
| NM_00039E | 1030.337  | 1037.236  | NM_01643C   | 777.48    | 1212.555  | AF075085  | 31195.289 | 25708.902 |
| AW797282  | 1020.534  | 1158.199  | NM_004447   | 5243.182  | 5147.841  | NM_00589Z | 3691.847  | 3557.168  |
| NM_00240Z | 4744.873  | 5501.272  | NM_001204   | 1433.673  | 1246.598  | NM_00647E | 662.374   | 613.027   |
| L09070    | 1096.166  | 1368.698  | BF131321    | 1339.707  | 1296.409  | AF132734  | 4221.793  | 4601.735  |
| NM_00006Z | 10438.723 | 14079.483 | NM_012116   | 2020.662  | 1567.442  | NM_01837E | 1512.299  | 1497.997  |
| NM_017877 | 696.911   | 1324.931  | NM_00002C   | 6071.791  | 5992.287  | NM_01640Z | 14805.966 | 15914.871 |
| NM_00959C | 4627.804  | 5828.009  | NM_00095E   | 1084.238  | 995.787   | NM_01560Z | 1117.101  | 1012.883  |
| NM_01610E | 4502.247  | 3685.02   | NM_00244Z   | 2875.212  | 3004.514  | AK021788  | 574.689   | 310.96    |
| NM_01457C | 4641.275  | 3465.583  | AB033091    | 7681.83   | 10205.711 | NM_001921 | 3786.133  | 4526.773  |
| NM_014747 | 7596.24   | 6101.736  | NM_004557   | 9717.595  | 9060.042  | NM_00623C | 5122.716  | 7846.3    |
| Y19240    | 5163.069  | 4652.794  | NM_014757   | 3321.553  | 3089.147  | NM_01469E | 8316.419  | 9849.767  |
| AF091029  | 8245.521  | 6560.741  | NM_01789Z   | 676.646   | 613.199   | NM_01340C | 6033.109  | 7950.721  |
| X97074    | 19001.379 | 11923.579 | NM_001584   | 2922.035  | 2857.04   | AK026257  | 1661.49   | 2189.619  |
| AL117235  | 1378.626  | 1088.803  | NM_01225E   | 37237.207 | 38797.336 | AK023836  | 3823.584  | 5748.65   |
| NM_01482Z | 7709.937  | 6824.927  | AF272357    | 2805.036  | 3073.387  | NM_01810E | 1502.108  | 1859.646  |
| NM_00529E | 5121.971  | 5322.621  | NM_01637Z   | 53149.875 | 44576.445 | NM_00507E | 9156.473  | 5277.686  |
| NM_001337 | 1366.001  | 1168.35   | AB020705    | 1364.639  | 1454.187  | AF253321  | 1581.016  | 1260.355  |
| NM_003611 | 11857.587 | 10078.237 | NM_00298C   | 2342.697  | 2063.153  | U80735    | 1302.568  | 1213.869  |
| AB014538  | 3789.949  | 4184.39   | NM_00571E   | 64956.41  | 58839.441 | NM_01785C | 1001.552  | 782.318   |
| NM_004154 | 803.247   | 1416.194  | NM_00272E   | 1360.909  | 937.822   | NM_01652Z | 1013.971  | 930.263   |
| NM_00620E | 1315.948  | 1799.831  | NM_00045C   | 805.514   | 536.163   | X07979    | 28914.965 | 19749.664 |
| AK025118  | 7393.369  | 8296.846  | NM_00044E   | 635.212   | 891.582   | L13857    | 1631.437  | 959.827   |
| NM_000727 | 3121.084  | 2490.833  | NM_00451Z   | 7468.334  | 6172.646  | NM_01809E | 3428.336  | 3186.134  |
| NM_002621 | 992.461   | 1118.954  | NM_00170E   | 25817.74  | 22277.91  | AF286164  | 465.879   | 467.95    |
| NM_00538E | 9919.545  | 10258.189 | NM_01773E   | 3361.715  | 2586.983  | AF146277  | 3560.868  | 4054.035  |
| NM_01898E | 5081.317  | 5223.569  | AF208291    | 1708.304  | 1752.978  | AF055033  | 20380.803 | 16360.11  |
| NM_006074 | 34247.703 | 30209.725 | NM_005094   | 2126.891  | 1916.16   | NM_01770C | 1068.836  | 1481.479  |
| AF208232  | 4005.056  | 5642.152  | NM_00233E   | 701.579   | 575.668   | M37191    | 7366.762  | 10546.915 |
| NM_00298E | 6324.726  | 7597.151  | BE382905    | 749.225   | 792.469   | NM_00524Z | 457.258   | 325.491   |
| NM_00418E | 1894.79   | 2457.853  | AK022558    | 3680.627  | 3781.78   | NM_00302C | 652.61    | 881.667   |
| NM_01625E | 4795.081  | 5728.492  | NM_00080E   | 554.819   | 490.17    | NM_003404 | 26439.203 | 31230.67  |
| AF203032  | 6224.965  | 7873.105  | NM_01753Z   | 4313.969  | 3622.467  | NM_001114 | 970.783   | 1417.775  |
| AB014542  | 25988.744 | 25838.32  | M38449      | 6610.464  | 6026.84   | X82240    | 999.171   | 809.181   |
| AF070670  | 8024.697  | 5157.012  | AK023915    | 4858.019  | 3730.414  | NM_01399E | 7347.246  | 5619.065  |
| NM_01615E | 4227.329  | 3843.195  | AB051453    | 3340.398  | 2698.791  | NM_00445E | 409.849   | 245.494   |

|           |           |           |             |           |           |           |           |           |
|-----------|-----------|-----------|-------------|-----------|-----------|-----------|-----------|-----------|
| NM_01652E | 1937.171  | 1841.249  | AK026842    | 920.042   | 545.311   | NM_00601C | 7407.677  | 6204.772  |
| NM_015974 | 2899.27   | 1758.499  | NM_00239E   | 3613.901  | 3794.055  | K03191    | 1860.739  | 1495.836  |
| NM_014384 | 1745.176  | 1279.479  | NM_014963   | 2197.559  | 3346.803  | NM_00507E | 4951.122  | 4671.621  |
| NM_002573 | 3936.562  | 2544.141  | NM_00425E   | 996.516   | 912.42    | NM_005192 | 9107.615  | 8816.057  |
| AF133424  | 2636.041  | 1829.689  | NM_016271   | 5513.332  | 3932.359  | NM_00458E | 449.885   | 467.021   |
| NM_005003 | 31634.135 | 19475.436 | NM_01661E   | 4551.58   | 4058.552  | NM_015032 | 3252.141  | 2343.094  |
| AF084560  | 5149.814  | 3337.525  | NM_014481   | 1304.771  | 1158.196  | AK022956  | 1564.535  | 1691.46   |
| NM_01571E | 3291.836  | 2479.562  | U22172      | 2816.676  | 2549.83   | AK023121  | 691.589   | 702.877   |
| NM_000032 | 4537.696  | 3200.948  | AF020089    | 2251.156  | 2255.565  | NM_014104 | 34083.355 | 27006.729 |
| NM_002083 | 1644.1    | 1133.755  | NM_006257   | 2816.566  | 2732.603  | NM_002392 | 583.852   | 597.668   |
| NM_00203E | 5030.316  | 4147.209  | NM_016281   | 11802.593 | 8658.421  | NM_00274E | 44961.941 | 46894.508 |
| NM_01490C | 1495.646  | 1461.189  | NM_004734   | 22590.324 | 18371.021 | NM_01821E | 2575.868  | 2614.497  |
| BF342908  | 1351.397  | 1874.23   | AK024793    | 1798.851  | 1413.088  | NM_00339C | 792.543   | 868.347   |
| AF118073  | 1124.062  | 897.004   | NM_01225E   | 44229.832 | 41748.438 | AL137747  | 2108.04   | 2109.996  |
| AK023510  | 4590.336  | 5437.455  | AF272357    | 2970.644  | 2357.69   | NM_01475E | 4369.499  | 6847.303  |
| NM_00434E | 2177.383  | 2719.766  | NM_016372   | 53301.742 | 47255.078 | AF077188  | 11672.223 | 15763.272 |
| NM_000702 | 35901.098 | 43386.523 | AB020705    | 1220.578  | 1597.026  | NM_01244E | 1433.509  | 1763.846  |
| X71490    | 14551.146 | 17734.25  | NM_00298C   | 2060.699  | 1988.383  | NM_01833E | 924.239   | 755.017   |
| AF257081  | 2537.487  | 2823.604  | BG491613    | 9237.98   | 8462.701  | NM_01868E | 18131.768 | 19503.262 |
| NM_00652E | 221.937   | 170.716   | AA397813    | 26809.275 | 31961.406 | NM_006984 | 2330.209  | 2739.31   |
| NM_00168E | 56731.395 | 67573.828 | W47350      | 1490.393  | 940.366   | AF231919  | 624.977   | 1020.341  |
| NM_003631 | 444.145   | 939.623   | W68291      | 15589.582 | 13240.615 | AL133644  | 10218.897 | 6592.416  |
| NM_00021E | 823.521   | 1043.566  | N64384      | 2909.915  | 2107.902  | NM_00270E | 2025.255  | 1454.056  |
| NM_002232 | 1026.382  | 1029.559  | H-X 53655 I | 2239.747  | 2267.637  | NM_019023 | 49771.977 | 56418.414 |
| NM_02209E | 1415.306  | 2168.741  | H-M 32315   | 3044.971  | 3226.227  | NM_00442C | 537.856   | 489.447   |
| AF112219  | 19701.26  | 15531.146 | H-V00536M   | 1689.021  | 1198.829  | NM_00297C | 496.403   | 313.741   |
| NM_00262E | 518.838   | 454.789   | H-D85429M   | 4424.895  | 4191.521  | NM_00549E | 11309.041 | 9338.144  |
| NM_00413E | 7451.439  | 5858.308  | BF439832    | 2366.006  | 2209.906  | NM_015387 | 2292.545  | 2668.336  |
| NM_000203 | 634.097   | 563.161   | BG819162    | 2729.833  | 2026.554  | NM_001733 | 6675.275  | 2448.843  |
| NM_013443 | 2650.362  | 2124.123  | NM_00272E   | 1199.107  | 858.299   | NM_00506E | 375.625   | 332.414   |
| NM_00092E | 9155.417  | 4948.457  | NM_00045C   | 635.125   | 427.5     | NM_01782E | 7551.035  | 10952.136 |
| NM_00046E | 2538.709  | 1302.701  | NM_00044E   | 1032.768  | 892.38    | NM_01403E | 2669.253  | 3410.198  |
| AF116685  | 972.722   | 689.495   | NM_01773E   | 1441.065  | 1645.687  | NM_020122 | 8556.374  | 12624.157 |
| NM_000123 | 4022.043  | 3003.465  | NM_01643C   | 937.889   | 1505.663  | NM_013432 | 14454.636 | 15277.741 |
| AL137501  | 1147.248  | 1256.714  | NM_004447   | 5027.424  | 5441.549  | AB020716  | 388.628   | 650.567   |
| BE858979  | 1663.104  | 1848.062  | NM_001204   | 1541.326  | 1178.354  | NM_00229E | 26848.197 | 29913.414 |
| NM_000122 | 11870.876 | 13415.605 | BF131321    | 1406.344  | 1210.276  | AK027130  | 375.578   | 569.695   |
| NM_006712 | 62751.316 | 72143.148 | NM_012116   | 2133.614  | 1655.07   | NM_00547E | 8875.243  | 11825.907 |
| NM_00624C | 2163.802  | 2053.43   | NM_00002C   | 6623.892  | 5683.176  | NM_00573C | 45652.965 | 39578.469 |
| NM_00702E | 3580.632  | 5261.479  | NM_00095E   | 1366.691  | 1465.829  | NM_005392 | 680.669   | 318.524   |
| M37712    | 11644.839 | 11320.365 | NM_002442   | 3322.701  | 3443.244  | AL133572  | 2518.969  | 1840.534  |
| NM_00264E | 1160.374  | 1520.723  | AB033091    | 6483.788  | 5941.087  | AK022500  | 1539.407  | 1230.166  |
| AW797282  | 751.245   | 1191.833  | NM_004557   | 6104.467  | 5079.622  | BC021298  | 510.987   | 375.895   |
| NM_002402 | 4153.162  | 4771.019  | NM_014757   | 2750.723  | 2276.355  | U52096    | 3762.446  | 2717.138  |
| L09070    | 1048.86   | 1359.68   | NM_017893   | 976.75    | 908.729   | AB013897  | 846.844   | 727.488   |
| NM_000062 | 9374.01   | 9431.561  | NM_001584   | 3165.356  | 2871.997  | NM_00552E | 19382.982 | 19492.701 |
| NM_017877 | 2189.417  | 2297.257  | NM_00080E   | 566.217   | 718.092   | AK001669  | 1813.789  | 1389.51   |
| AL133037  | 1053.073  | 1024.122  | NM_00571E   | 59556.48  | 57933.367 | NM_00619E | 3910.795  | 4451.97   |
| NM_02035C | 7088.411  | 6767.921  | NM_014264   | 6361.926  | 6851.348  | NM_00619C | 5842.667  | 6223.07   |
| NM_00035C | 2173.361  | 3092.088  | AF020089    | 2726.835  | 2536.522  | NM_00636E | 1308.509  | 1240.578  |
| AA419164  | 5764.501  | 7155.701  | NM_006257   | 3460.911  | 3369.673  | NM_004133 | 740.151   | 1086.913  |
| L35251    | 3628.461  | 3598.124  | NM_016281   | 11289.12  | 10697.928 | NM_00161E | 6144.334  | 9487.744  |
| BE910395  | 1772.108  | 1051.809  | NM_004734   | 21354.068 | 24614.551 | BC000401  | 5066.728  | 6648.694  |

|           |           |           |           |           |           |           |           |           |
|-----------|-----------|-----------|-----------|-----------|-----------|-----------|-----------|-----------|
| N46828    | 2680.643  | 1918.97   | AK024793  | 1972.692  | 1975.049  | NM_006425 | 3201.145  | 3793.895  |
| BI908302  | 25327.402 | 19114.031 | BE382905  | 1070.835  | 829.292   | BF344046  | 1706.952  | 2467.649  |
| AA460969  | 2599.049  | 1202.546  | AK022558  | 3135.216  | 2462.472  | AF432218  | 5026.495  | 6584.443  |
| BG695859  | 2080.795  | 1952.597  | AK026842  | 751.034   | 527.328   | NM_004286 | 2265.31   | 3460.626  |
| M85079    | 8015.426  | 10145.197 | NM_002395 | 1834.476  | 1472.238  | AK025082  | 1234.145  | 1031.315  |
| AA457671  | 18526.934 | 27004.559 | NM_004259 | 1184.051  | 882.843   | AF086535  | 424.259   | 315.936   |
| X07437    | 10972.986 | 12498.321 | NM_016271 | 4794.109  | 3794.829  | AB040901  | 717.451   | 586.815   |
| NM_000641 | 3424.72   | 5311.295  | NM_016619 | 3338.733  | 3310.365  | AL137406  | 1490.971  | 1301.736  |
| AE006466  | 4667.945  | 5469.356  | NM_014481 | 853.817   | 592.021   | NM_012253 | 2937.447  | 2262.286  |
| BC011655  | 5064.461  | 7065.188  | U22172    | 3001.089  | 2960.068  | NM_006876 | 934.841   | 774.933   |
| BC002396  | 5711.219  | 7441.3    | AB032960  | 1849.067  | 1910.502  | NM_000293 | 898.588   | 716.921   |
| AF208232  | 4081.863  | 5851.788  | NM_017675 | 1316.615  | 1076.304  | AF153821  | 1600.899  | 1358.578  |
| NM_002988 | 4953.549  | 5020.977  | NM_015991 | 1021.145  | 832.986   | NM_013370 | 1164.216  | 1107.202  |
| NM_004186 | 1681.464  | 1770.072  | NM_012417 | 1091.002  | 2756.38   | NM_001374 | 694.422   | 603.82    |
| NM_016258 | 4430.474  | 3756.5    | BF246606  | 695.078   | 664.309   | NM_003310 | 2193.183  | 2793.354  |
| AF203032  | 5473.385  | 4888.416  | NM_002342 | 2696.291  | 2710.225  | AK024461  | 1533.144  | 2421.045  |
| AB014542  | 25524.541 | 20171.561 | NM_002184 | 1223.092  | 1099.414  | NM_017635 | 1067.89   | 1094.56   |
| NM_014640 | 1071.051  | 1087.256  | NM_014883 | 1722.562  | 1901.674  | X62534    | 709.624   | 1129.108  |
| AB032965  | 55269.223 | 59954.156 | NM_000230 | 737.297   | 1523.59   | AF027147  | 14452.824 | 15439.549 |
| NM_020370 | 832.067   | 885.071   | NM_003657 | 1253.414  | 1242.267  | M62399    | 1473.649  | 1879.806  |
| NM_004767 | 1041.686  | 956.547   | AL049296  | 5018.419  | 4339.524  | NM_002357 | 477.526   | 723.884   |
| BF310159  | 7790.882  | 6551.743  | NM_014471 | 41130.574 | 33760.23  | U71600    | 1169.156  | 1541.653  |
| NM_000316 | 538.06    | 420.111   | NM_004397 | 2549.437  | 2526.934  | NM_004472 | 774.863   | 1278.595  |
| NM_018986 | 2130.854  | 2349.418  | NM_018579 | 3341.01   | 2978.653  | AB037862  | 2337.588  | 3232.812  |
| AB044934  | 1589.218  | 2083.292  | NM_006201 | 2913.7    | 2961.459  | AK023887  | 696.424   | 560.982   |
| U27655    | 5605.076  | 7230.607  | NM_007110 | 2253.105  | 1819.487  | AF088022  | 7743.322  | 6582.347  |
| NM_003360 | 2163.311  | 3237.409  | U50383    | 8704.886  | 7781.004  | AK026537  | 762.645   | 741.85    |
| Z21965    | 51971.879 | 58954.355 | AK025085  | 5189.178  | 5113.611  | NM_015485 | 1795.175  | 1636.482  |
| NM_012427 | 919.67    | 1239.054  | NM_006290 | 1232.067  | 1172.617  | AF147411  | 794.559   | 813.943   |
| NM_000852 | 18381.189 | 21536.461 | AF118124  | 29329.713 | 40510.746 | NM_002666 | 3310.9    | 4536.277  |
| NM_000396 | 1282.886  | 1535.641  | NM_004849 | 8451.452  | 7908.489  | AF202145  | 1435.309  | 1781.246  |
| AF257081  | 2244.668  | 3025.073  | AL137527  | 5899.232  | 5607.546  | AK026155  | 1191.96   | 1898.382  |
| NM_001688 | 54292.961 | 45400.027 | J04974    | 13109.524 | 10724.771 | NM_018052 | 26589.213 | 24875.902 |
| NM_003631 | 460.059   | 427.714   | NM_007058 | 7073.594  | 8268.749  | AF143322  | 347.508   | 522.455   |
| NM_000219 | 793.076   | 707.141   | NM_000396 | 1486.491  | 1716.745  | AK022386  | 3110.121  | 4075.877  |
| NM_002232 | 958.363   | 1006.756  | NM_001528 | 2621.435  | 2769.54   | NM_002767 | 2741.67   | 3523.394  |
| NM_016106 | 5192.821  | 6598.578  | NM_007014 | 2686.503  | 2507.636  | AF131846  | 9957.417  | 10268.563 |
| NM_014747 | 6942.242  | 7457.174  | AL096740  | 1343.006  | 1182.406  | AF088069  | 1432.435  | 1821.054  |
| Y19240    | 5614.454  | 8131.308  | AK023968  | 1553.767  | 1882.082  | AF086551  | 606.608   | 776.902   |
| X97074    | 23940.541 | 25743.08  | NM_004652 | 1126.13   | 1292.466  | NM_013393 | 3165.442  | 4300.15   |
| AL117235  | 1207.017  | 1239.628  | NM_006102 | 1147.638  | 964.25    | AK025072  | 1170.083  | 849.141   |
| NM_014822 | 7688.564  | 7211.258  | AK025425  | 22447.271 | 18205.162 | AK022410  | 785.597   | 515.073   |
| NM_005296 | 5073.635  | 4694.593  | NM_001747 | 9986.455  | 10472.507 | L10378    | 5897.201  | 4288.059  |
| NM_001337 | 614.497   | 711.693   | NM_001148 | 11337.48  | 9514.935  | AK022179  | 625.661   | 398.985   |
| NM_003611 | 8003.765  | 5633.891  | AF242522  | 4097.515  | 3845.309  | AJ227860  | 742.989   | 663.405   |
| AB014538  | 2713.294  | 2265.131  | NM_004024 | 5098.306  | 5670.669  | AL157448  | 563.782   | 595.707   |
| NM_004154 | 1417.161  | 1313.096  | X52345    | 24369.957 | 23624.98  | AF026942  | 1103.468  | 906.298   |
| NM_006209 | 1786.02   | 2896.903  | NM_006965 | 7575.409  | 7952.73   | AJ276429  | 1376.425  | 989.645   |
| AK025118  | 8421.083  | 11666.057 | S67970    | 1358.686  | 1633.343  | AL117657  | 675.756   | 738.167   |
| NM_000727 | 3225.933  | 3022.218  | AF221520  | 5404.535  | 6966.121  | AK023589  | 563.958   | 456.998   |
| NM_002621 | 749.871   | 979.559   | NM_005360 | 1594.62   | 1662.359  | AK021590  | 2067.011  | 2706.755  |
| NM_018985 | 5157.688  | 5340.686  | NM_004349 | 3914.986  | 4275.458  | AB002441  | 610.233   | 777.129   |
| NM_006074 | 36093.809 | 38804.809 | NM_002092 | 6326.122  | 6344.865  | AK023998  | 863.971   | 946.683   |

|           |           |           |           |           |           |           |           |           |
|-----------|-----------|-----------|-----------|-----------|-----------|-----------|-----------|-----------|
| NM_006712 | 66569.086 | 67655.625 | NM_018077 | 2099.198  | 1800.88   | AK021643  | 939.443   | 1487.435  |
| NM_006240 | 2157.283  | 1751      | NM_016839 | 23853.59  | 26036.139 | Z11802    | 235.308   | 413.175   |
| NM_007026 | 3184.177  | 2952.024  | NM_005968 | 61621.934 | 57675.137 | U84507    | 513.144   | 499.647   |
| M37712    | 10971.573 | 7734.109  | AK021416  | 1556.034  | 1234.047  | AK000872  | 953.647   | 1385.459  |
| NM_002648 | 1143.028  | 806.009   | NM_018471 | 12722.26  | 13808.491 | AK027147  | 6163.505  | 7898.54   |
| AF070670  | 4807.799  | 6161.387  | NM_003819 | 24308.463 | 22664.309 | AK022415  | 20180.213 | 10780.413 |
| NM_016528 | 2068.473  | 3106.811  | NM_016183 | 3301.022  | 3060.386  | AL137368  | 456.943   | 292.836   |
| NM_015974 | 3312.679  | 4426.296  | NM_004872 | 5390.608  | 5456.223  | AK021932  | 865.446   | 628.463   |
| NM_014384 | 1995.345  | 2376.353  | NM_001958 | 54751.977 | 47130.262 | AK026787  | 4951.07   | 3752.477  |
| NM_002573 | 4861.938  | 6505.936  | NM_015904 | 5841.238  | 5176.515  | AK023542  | 1020.401  | 1186.664  |
| AF133424  | 2882.637  | 3035.211  | NM_018122 | 2632.016  | 2053.158  | AK000203  | 758.862   | 681.212   |
| NM_005003 | 31147.238 | 27368.041 | AF035318  | 1585.579  | 1448.933  | AK021845  | 5240.958  | 5770.567  |
| AF084560  | 5256.11   | 4203.084  | NM_015456 | 5257.111  | 5137.035  | AK022434  | 584.213   | 661.352   |
| NM_015715 | 3258.116  | 2506.188  | AK025056  | 2348.955  | 2867.861  | NM_018592 | 1463.952  | 2011.57   |
| NM_000032 | 4779.436  | 3456.808  | NM_012088 | 15550.952 | 18547.078 | NM_018503 | 22712.416 | 25574.191 |
| NM_002083 | 1103.34   | 1000.55   | NM_017947 | 838.852   | 1223.223  | NM_016449 | 10713.591 | 15421.767 |
| NM_002035 | 5270.005  | 5063.145  | NM_002494 | 9268.962  | 11264.884 | AL049670  | 3137.23   | 3854.368  |
| NM_014900 | 1439.901  | 3032.328  | M58510    | 7912.068  | 8791.776  | NM_018512 | 9849.239  | 9943.424  |
| BF342908  | 1487.965  | 1960.017  | NM_000782 | 1323.42   | 1276.386  | AK022412  | 1571.866  | 2325.7    |
| AF118073  | 777.782   | 998.219   | BE396003  | 1665.028  | 1416.399  | AK023073  | 6800.652  | 8144.424  |
| AK023510  | 3877.55   | 4938.327  | AK023300  | 2007.923  | 2454.307  | AK023922  | 631.713   | 624.681   |
| NM_004345 | 1911.298  | 2188.494  | NM_018082 | 3162.518  | 3270.188  | AK022438  | 1034.066  | 1180.17   |
| NM_000702 | 36923.547 | 46934.863 | NM_003904 | 4750.71   | 4675.174  | AK023764  | 813.385   | 1030.761  |
| X71490    | 13554.631 | 17605.992 | NM_006234 | 18048.566 | 19156.447 | AK024082  | 681.069   | 872.358   |
| NM_014273 | 13858.702 | 13721.741 | AB028987  | 6400.426  | 5512.938  | Z27405    | 18059.1   | 9211.919  |
| AF039442  | 1240.799  | 1525.859  | NM_003594 | 1226.663  | 845.737   | AK023412  | 1145.838  | 976.85    |
| NM_004680 | 1269.567  | 922.881   | NM_005521 | 2373.391  | 2499.591  | NM_014617 | 17931.678 | 15925.466 |
| AF104260  | 542.839   | 603.174   | AF164438  | 5862.821  | 6611.398  | AK074682  | 2739.011  | 2642.01   |
| NM_005671 | 5113.225  | 4856.442  | AK022284  | 771.053   | 903.827   | X74605    | 694.843   | 959.668   |
| NM_019625 | 3495.812  | 4767.68   | AK025844  | 1771.566  | 1198.667  | AK024513  | 779.83    | 1115.324  |
| NM_006071 | 1213.773  | 1655.415  | AL137727  | 1981.852  | 1815.021  | BC036692  | 965.998   | 1778.621  |
| NM_012236 | 14974.317 | 18765.76  | L17327    | 625.269   | 653.839   | AJ009640  | 2764.27   | 4394.046  |
| AF112219  | 21984.457 | 26765.998 | AF074986  | 1021.285  | 1073.575  | Y11163    | 423.409   | 724.72    |
| NM_000521 | 622.111   | 582.06    | AL049240  | 2997.285  | 3700.47   | AF147340  | 555.786   | 631.533   |
| NM_004135 | 7051.059  | 5026.512  | U80773    | 1855.998  | 2145.688  | AF035308  | 5568.154  | 6235.388  |
| NM_013443 | 2838.378  | 2152.222  | AK021745  | 1812.325  | 2254.125  | NM_014054 | 1794.216  | 2435.191  |
| NM_000925 | 9525.438  | 7040.092  | L38937    | 4733.337  | 4422.316  | AK021840  | 19258.076 | 19690.703 |
| NM_000465 | 2587.13   | 1833.909  | AK024327  | 1073.563  | 1000.079  | AK022228  | 944.585   | 1410.842  |
| NM_000123 | 4355.098  | 4976.506  | AK021700  | 666.839   | 732.259   | AF086480  | 1885.599  | 2253.994  |
| AL137501  | 816.567   | 1225.372  | AK024395  | 563.365   | 561.995   | AK022122  | 337.826   | 648.648   |
| BE858979  | 1304.858  | 1578.652  | AK000801  | 2305.175  | 2762.713  | AK000806  | 42807.293 | 42182.676 |
| NM_000122 | 3144.452  | 3028.533  | D85433    | 3333.07   | 3223.905  | NM_016471 | 1937.645  | 1888.702  |
| U87223    | 1520.074  | 1370.414  | AF086184  | 9316.092  | 8255.459  | Z11852    | 400.807   | 392.91    |
| X91348    | 24486.016 | 17962.395 | NM_018275 | 4449.416  | 4494.609  | NM_001145 | 492.303   | 698.238   |
| Z36505    | 1874.67   | 1376.046  | AL049266  | 2146.803  | 2202.41   | NM_005364 | 7773.417  | 11690.282 |
| NM_001854 | 1352.841  | 1122.837  | AK021560  | 469.919   | 515.515   | AK023482  | 2899.229  | 3706.852  |
| NM_002755 | 5778.284  | 5467.813  | AF088045  | 1161.81   | 1142.809  | AK022798  | 430.98    | 819.047   |
| AK024799  | 18078.813 | 19369.443 | AF007149  | 984.557   | 738.154   | AL157423  | 465.391   | 651.889   |
| NM_000924 | 5940.49   | 11379.816 | AK001469  | 901.416   | 983.432   | AK023115  | 287.246   | 425.844   |
| NM_003647 | 1932.104  | 1618.023  | AK021627  | 1400.948  | 1175.172  | AK023176  | 630.517   | 975.581   |
| NM_001699 | 29112.801 | 35987.445 | AF085859  | 3030.835  | 2433.842  | AL161991  | 8295.4    | 14696.488 |
| NM_018351 | 789.934   | 871.574   | AJ420504  | 1430.722  | 2232.282  | D17032    | 6607.042  | 8038.543  |
| NM_147171 | 3659.339  | 2204.36   | AK026307  | 2011.921  | 2636.254  | AL137292  | 393.274   | 520.813   |

|           |           |           |           |           |           |           |           |           |
|-----------|-----------|-----------|-----------|-----------|-----------|-----------|-----------|-----------|
| AF238083  | 5089.631  | 3651.77   | AF075047  | 495.529   | 275.96    | NM_017941 | 1424.934  | 1896.312  |
| NM_002962 | 486.049   | 483.217   | AL049260  | 1029.954  | 1033.777  | AF301016  | 332.623   | 509.048   |
| NM_016388 | 2149.679  | 1724.272  | AL049975  | 1903.342  | 1590.106  | BE900527  | 892.299   | 1548.677  |
| NM_014965 | 5301.314  | 5405.525  | AL080067  | 1000.245  | 983.203   | D28384    | 43118.039 | 49989.887 |
| NM_004882 | 19529.754 | 22608.354 | AL117464  | 2752.851  | 2256.157  | AF118079  | 14124.052 | 16710.744 |
| AL390148  | 9815.041  | 10641.936 | AL080160  | 764.083   | 910.342   | AF277572  | 509.324   | 595.966   |
| AK024055  | 2133.203  | 3143.421  | AL157477  | 3453.541  | 3837.862  | AL365413  | 2255.862  | 2932.784  |
| U10485    | 886.396   | 709.782   | AK022083  | 307.25    | 947.978   | NM_005258 | 6782.458  | 7634.035  |
| AK025326  | 9357.59   | 5887.136  | AB002318  | 1979.214  | 1600.753  | NM_000440 | 2521.527  | 3886.363  |
| NM_013376 | 1019.833  | 867.209   | AL357535  | 3008.671  | 2936.251  | NM_001297 | 2015.541  | 2912.536  |
| NM_017964 | 3109.36   | 2471.779  | AL049951  | 869.224   | 835.703   | NM_004403 | 2883.492  | 4227.148  |
| NM_016272 | 914.914   | 615.393   | AK024963  | 496.377   | 572.733   | X64993    | 694.875   | 920.847   |
| NM_016428 | 1171.645  | 1046.676  | AK023725  | 757.259   | 631.297   | NM_004434 | 6388.776  | 7928.703  |
| NM_004083 | 14475.377 | 13802.995 | AK022936  | 2400.427  | 2424.998  | NM_006265 | 625.095   | 962.98    |
| NM_016038 | 11405.674 | 10978.212 | AK024385  | 2466.379  | 2563.309  | NM_016230 | 1424.141  | 2328.888  |
| NM_001184 | 2508.444  | 3510.239  | AF049615  | 1622.619  | 2448.233  | NM_001083 | 935.197   | 1389.622  |
| NM_015530 | 9831.28   | 13409.814 | NM_014358 | 17009.826 | 17447.662 | AK023966  | 3147.162  | 4320.618  |
| NM_016238 | 6245.11   | 7960.097  | AF009282  | 4611.792  | 5231.433  | AK025702  | 1119.764  | 1744.298  |
| NM_001758 | 5297.402  | 5889.56   | AF024704  | 6713.273  | 6678.048  | NM_018958 | 737.222   | 1142.627  |
| BE546276  | 1083.68   | 873.297   | AF056431  | 1316.99   | 1161.893  | NM_002367 | 379.154   | 262.74    |
| NM_004725 | 10073.64  | 7787.902  | NM_016412 | 1638.326  | 1410.214  | AK022038  | 709.361   | 681.341   |
| NM_015997 | 5311.175  | 5417.304  | AF009293  | 1451.063  | 1377.45   | AK025119  | 395.29    | 676.4     |
| NM_001167 | 7581.857  | 6464.924  | NM_004158 | 65713.391 | 59502.816 | AJ224170  | 485.211   | 295.949   |
| NM_012115 | 4506.076  | 3710.979  | AF056444  | 7760.156  | 6635.741  | AF085866  | 2248.271  | 3133.517  |
| NM_004933 | 35646.922 | 28102.514 | AK000989  | 865.683   | 665.435   | CY3Cy5    | 1123.15   | 215.459   |
| M96577    | 9709.446  | 6530.747  | AK002210  | 1270.981  | 1057.039  | AA397813  | 13661.809 | 8785.479  |
| NM_013258 | 30847.746 | 22309.734 | AK021677  | 825.462   | 1035.823  | W47350    | 698.19    | 340.345   |
| L11238    | 10081.875 | 12200.937 | AK001057  | 839.001   | 930.498   | W68291    | 8189.846  | 5509.482  |
| AK025684  | 978.189   | 1575.834  | AK021471  | 803.774   | 788.719   | N64384    | 1211.95   | 654.46    |
| NM_012205 | 6653.627  | 7934.108  | AK021709  | 642.064   | 417.34    | H-X 53655 | 924.113   | 587.461   |
| K02046    | 3023.408  | 3982.518  | AK025109  | 2440.759  | 2445.049  | H-U 05770 | 2721.642  | 2294.41   |
| AL110151  | 2007.881  | 1508.525  | AK026057  | 2522.721  | 2430.412  | H-M 65199 | 4406.548  | 3022.888  |
| AK024841  | 2365.42   | 2140.837  | AK026713  | 549.452   | 433.074   | H-M 32315 | 1502.747  | 1131.809  |
| NM_004995 | 1863.925  | 1681.474  | AJ008147  | 25784.793 | 28585.637 | H-V00536M | 1029.433  | 584.444   |
| AK023320  | 535.865   | 436.263   | AK024369  | 4359.685  | 4489.443  | H-D85429M | 1816.96   | 1116.998  |
| NM_000386 | 5374.967  | 4952.045  | L43345    | 1106.673  | 1110.278  | BF439832  | 855.572   | 551.619   |
| NM_007231 | 633.904   | 553.824   | AF180297  | 4762.948  | 4566.714  | BG819162  | 766.941   | 425.456   |
| NM_001190 | 3700.41   | 3403.868  | AK023245  | 6539.788  | 6400.012  | NM_017532 | 2208.083  | 2411.208  |
| NM_005271 | 9704.128  | 9715.506  | AF147303  | 1121.949  | 821.777   | SR2       | 37585.27  | 26564.275 |
| NM_015654 | 7740.377  | 8128.15   | S56365    | 61578.629 | 60953.371 | SR4       | 11130.51  | 19195.594 |
| NM_012244 | 2587.073  | 2536.784  | AK023607  | 666.29    | 657.156   | SR6       | 1840.917  | 1592.065  |
| NM_004341 | 1908.127  | 2181.714  | AL049997  | 6085.224  | 5100.659  | SR8       | 5295.563  | 15736.642 |
| AB082521  | 8667.295  | 8708.171  | AK024118  | 865.33    | 770.654   | NM_004447 | 2337.812  | 1341.075  |
| AK026806  | 374.526   | 621.616   | X89657    | 496.811   | 1222.43   | NM_001204 | 503.681   | 272.629   |
| AL050182  | 1313.495  | 1054.279  | NM_017847 | 2919.805  | 2858.798  | BF131321  | 518.769   | 268.705   |
| NM_020040 | 1303.637  | 1083.292  | AL049675  | 2042.328  | 2420.072  | NM_012116 | 877.831   | 552.673   |
| NM_002374 | 2397.414  | 1896.97   | AL050151  | 917.731   | 1301.818  | NM_000020 | 2262.857  | 1093.426  |
| AK026940  | 2952.444  | 2508.985  | NM_003537 | 24779.574 | 22221.209 | NM_000956 | 342.392   | 208.889   |
| AF155117  | 4413.479  | 3275.829  | AF056419  | 23701.326 | 23856.531 | NM_002442 | 1516.086  | 782.8     |
| NM_015938 | 12838.455 | 14833.321 | AF074983  | 1260.134  | 1396.854  | AB033091  | 3485.764  | 2685.852  |
| NM_000740 | 891.824   | 1460.517  | AK021862  | 590.409   | 726.677   | NM_004557 | 4013.929  | 2708.665  |
| NM_017843 | 841.628   | 939.336   | AK024177  | 2355.178  | 1977.582  | NM_014757 | 1281.882  | 767.552   |
| AK025985  | 2723.4    | 5199.676  | AK024827  | 10152.333 | 8991.524  | NM_001584 | 950.23    | 622.89    |

|           |           |           |           |           |           |           |           |           |
|-----------|-----------|-----------|-----------|-----------|-----------|-----------|-----------|-----------|
| NM_013256 | 2166.402  | 1692.516  | AK021952  | 1288.134  | 744.842   | NM_012256 | 22268.674 | 12039.104 |
| NM_004143 | 1703.027  | 1148.926  | K01564    | 974.661   | 1074.85   | AF272357  | 1317.149  | 862.58    |
| X66087    | 813.024   | 586.47    | AB023175  | 861.884   | 893.088   | NM_016372 | 30037.014 | 18731.441 |
| NM_016328 | 6942.55   | 5511.885  | AL359563  | 552.93    | 717.029   | AB020705  | 757.426   | 846.191   |
| NM_017544 | 19850.771 | 16726.422 | NM_005304 | 572.73    | 713.957   | NM_002980 | 1154.884  | 1144.244  |
| NM_003153 | 1121.465  | 1064.937  | NM_014477 | 1543.95   | 1433.683  | NM_015886 | 729.963   | 871.164   |
| NM_016285 | 1475.405  | 1507.072  | AF086478  | 1950.651  | 1877.906  | NM_004251 | 3549.512  | 2021.875  |
| AF025771  | 2536.939  | 2570.145  | AF086022  | 1517.101  | 1711.648  | BF337921  | 876.488   | 461.958   |
| NM_018215 | 1012.228  | 1248.935  | AK021514  | 46020.004 | 44009.75  | U53532    | 793.569   | 674.427   |
| AB033110  | 944.997   | 1002.012  | AJ008134  | 3072.161  | 3303.561  | NM_001740 | 1629.331  | 988.273   |
| NM_005083 | 20082.41  | 14528.017 | L33808    | 21780.285 | 21732.652 | NM_012484 | 1811.759  | 1096.61   |
| NM_007187 | 12910.203 | 9703.951  | D31886    | 2689.566  | 2342.354  | AL096732  | 707.876   | 527.223   |
| NM_018983 | 11591.452 | 12146.829 | U92024    | 1075.158  | 1286.936  | AB006423  | 600.888   | 298.982   |
| NM_003096 | 9569.531  | 7655.816  | AK023330  | 2942.892  | 2103.482  | NM_005719 | 43095.082 | 25493.412 |
| NM_007279 | 4942.294  | 4467.116  | AF075071  | 3071.735  | 2220.637  | NM_003462 | 13765.227 | 7940.537  |
| BE390833  | 26412.627 | 21130.107 | AF001892  | 622.216   | 1308.812  | NM_006093 | 2312.02   | 2306.847  |
| NM_004730 | 16224.947 | 11930.969 | X93500    | 1758.663  | 1522.993  | NM_000139 | 850.892   | 819.815   |
| NM_000801 | 4652.317  | 3921.376  | U79271    | 1049.068  | 678.91    | NM_006664 | 3744.481  | 2911.973  |
| NM_006115 | 33987.121 | 25188.203 | AK024609  | 4311.518  | 3351.443  | NM_002728 | 434.223   | 380.391   |
| NM_001539 | 21523.236 | 33245.434 | NM_018120 | 5441.313  | 5188.065  | NM_004513 | 3152.132  | 2179.646  |
| NM_012267 | 472.823   | 706.813   | AK026874  | 3427.242  | 3246.018  | NM_001708 | 14335.649 | 14479.097 |
| AK027232  | 2882.022  | 2360.771  | AK024178  | 678.776   | 444.547   | NM_017735 | 1508.893  | 1564.663  |
| NM_012204 | 881.643   | 964.085   | D17217    | 1182.749  | 1343.871  | AB033044  | 3444.441  | 4117.276  |
| AK091117  | 891.52    | 593.243   | AF088033  | 2494.929  | 2081.702  | AB014564  | 586.098   | 910.908   |
| NM_003613 | 1368.465  | 875.888   | NM_020422 | 1671.598  | 1453.658  | NM_020230 | 1751.879  | 2126.923  |
| NM_000022 | 6009.829  | 5166.297  | AY007156  | 1452.941  | 1442.389  | NM_003742 | 1718.637  | 1117.797  |
| NM_016576 | 4780.152  | 4001.328  | AK023979  | 3294.408  | 3881.766  | NM_005094 | 996.44    | 601.261   |
| NM_004213 | 1992.952  | 1828.151  | CY3Cy5    | 15197.538 | 2055.771  | BE382905  | 786.748   | 661.076   |
| NM_001929 | 57929.293 | 45678.211 | U13738    | 1009.962  | 1183.578  | NM_002152 | 4776.383  | 4585.094  |
| NM_000906 | 2373.336  | 2475.494  | AF068236  | 57328.172 | 60068.09  | AK022558  | 2064.695  | 1336.37   |
| NM_000480 | 3621.347  | 3919.865  | H94487    | 1562.185  | 1562.71   | NM_006476 | 20505.822 | 12592.829 |
| AF254084  | 27631.688 | 22074.967 | BG681747  | 35892.086 | 37230.336 | AK023787  | 1146.368  | 624.365   |
| AK022648  | 1061.178  | 924.619   | H63077    | 3276.297  | 4162.241  | NM_002133 | 657.718   | 733.193   |
| AK022976  | 1548.404  | 1545.374  | AA437291  | 461.403   | 899.61    | NM_015697 | 1796.358  | 2040.974  |
| AB048791  | 4566.502  | 3465.702  | X04503    | 4148.515  | 3393.452  | NM_032943 | 1155.012  | 1012.747  |
| NM_003107 | 1214.462  | 945.225   | D45917    | 2709.677  | 2706.245  | NM_007177 | 5629.928  | 4561.627  |
| NM_006874 | 5003.508  | 4057.343  | X52001    | 4821.511  | 4978.164  | NM_000809 | 265.631   | 291.785   |
| AB046777  | 6597.168  | 6313.375  | BI823872  | 9673.863  | 9411.441  | AL359592  | 449.354   | 342.429   |
| AJ251844  | 3210.429  | 3146.683  | AA430552  | 5054.994  | 5230.721  | NM_006078 | 3887.292  | 3353.927  |
| D16815    | 1301.798  | 1045.073  | X66142    | 1994.964  | 1528.229  | NM_001091 | 643.15    | 583.714   |
| NM_001880 | 3456.719  | 3071.938  | NM_005913 | 931.634   | 892.562   | AK023915  | 1989.968  | 1443.499  |
| AB028943  | 3181.304  | 2055.244  | R45054    | 5716.231  | 5445.392  | AB051453  | 1608.62   | 1438.778  |
| AF042838  | 4914.174  | 3792.558  | NM_000620 | 813.438   | 1023.288  | NM_002395 | 1537.269  | 1186.434  |
| AL137511  | 729.852   | 726.652   | SR5       | 4591.566  | 6377.514  | AB023203  | 837.812   | 969.725   |
| X91221    | 281.557   | 393.57    | CY3Cy5    | 16752.158 | 2945.195  | NM_014963 | 1246.467  | 971.252   |
| AF075031  | 443.715   | 309.451   | AF312769  | 1128.645  | 1106.516  | NM_004259 | 506.755   | 350.053   |
| AF075062  | 7252.144  | 5712.867  | AB020668  | 2282.865  | 2157.597  | NM_016271 | 2058.072  | 1365.083  |
| NM_004188 | 1139.733  | 780.962   | NM_006203 | 22601.805 | 21424.707 | NM_016619 | 2162.695  | 2340.632  |
| AF147381  | 4610.363  | 4972.336  | NM_013261 | 555.49    | 403.738   | NM_014481 | 503.425   | 627.896   |
| AB002452  | 721.921   | 703.18    | AF309553  | 6352.508  | 6089.813  | U22172    | 1294.413  | 952.333   |
| AK027101  | 27073.313 | 22419.172 | NM_003605 | 4851.789  | 5011.026  | AB032960  | 627.219   | 623.72    |
| AF010236  | 652.541   | 813.324   | NM_006139 | 961.407   | 1343.04   | NM_014264 | 3057.433  | 2622.552  |
| NM_014840 | 1204.538  | 743.682   | NM_005586 | 5591.574  | 6053.302  | AF020089  | 1143.955  | 1076.777  |



|           |           |           |           |           |           |           |           |           |
|-----------|-----------|-----------|-----------|-----------|-----------|-----------|-----------|-----------|
| D17085    | 425.89    | 363.626   | NM_012242 | 3998.195  | 2949.349  | NM_006257 | 1529.9    | 1252.898  |
| AF088075  | 1102.403  | 1002.974  | NM_006896 | 1441.422  | 1303.68   | NM_016281 | 4968.423  | 3799.944  |
| AK026376  | 1748.077  | 1613.621  | NM_001130 | 58112.211 | 58940.289 | NM_004734 | 8181.189  | 9969.333  |
| AF088061  | 4819.74   | 4759.5    | NM_002975 | 28111.156 | 30721.695 | AK024793  | 1125.113  | 1817.791  |
| AF086425  | 374.209   | 718.532   | AK023511  | 6006.199  | 6283.799  | AF208291  | 840.247   | 1037.507  |
| AF086286  | 3530.984  | 4202.297  | NM_002725 | 1614.484  | 1468.305  | L10284    | 51521.742 | 50588.82  |
| AF086376  | 2061.202  | 2091.699  | NM_014375 | 17662.893 | 17235.854 | NM_000276 | 1188.253  | 954.528   |
| AF086410  | 732.247   | 1120.091  | NM_017812 | 15888.117 | 19613.197 | NM_000019 | 49996.199 | 58780.371 |
| AF086455  | 275.999   | 271.247   | J03260    | 3859.093  | 4529.914  | NM_015886 | 749.113   | 609.017   |
| AK022997  | 6728.086  | 4802.024  | AB014514  | 4887.432  | 4643.059  | NM_004262 | 353.898   | 482.769   |
| NM_017617 | 3717.865  | 2405.556  | NM_002865 | 5065.667  | 5493.226  | BG491613  | 4735.932  | 6977.942  |
| AF131830  | 1862.512  | 2044.648  | NM_003566 | 2596.471  | 1797.401  | AA397813  | 14392.381 | 14601.42  |
| NM_014811 | 1523.982  | 1897.154  | NM_013292 | 5890.114  | 5352.375  | W47350    | 1015.784  | 833.49    |
| AF147426  | 1084.679  | 960.279   | NM_002387 | 3866.838  | 2793.176  | W68291    | 9102.101  | 11845.618 |
| BC019667  | 19714.389 | 15793.794 | NM_000069 | 2000.229  | 1674.272  | N64384    | 1200.963  | 1776.992  |
| AK026026  | 15085.447 | 10497.753 | AB023217  | 1124.158  | 907.403   | H-X 53655 | 1095.383  | 908.871   |
| AF085941  | 9912.114  | 7877.695  | L08902    | 1165.42   | 765.06    | H-U 05770 | 2967.079  | 3262.984  |
| Z69892    | 2562.515  | 2499.011  | J02639    | 2791.978  | 2860.673  | H-M 65199 | 5446.263  | 5610.757  |
| AK023590  | 539.726   | 768.019   | NM_007263 | 18938.264 | 19005.543 | H-M 32315 | 2015.803  | 2472.414  |
| AF087961  | 936.315   | 755.806   | AF206020  | 3013.451  | 3667.855  | H-V00536M | 1507.868  | 1736.624  |
| AL137309  | 1793.315  | 2021.445  | NM_014410 | 3124.186  | 2539.43   | H-D85429M | 2225.509  | 2634.977  |
| AL137475  | 1238.6    | 1259.022  | AF305835  | 898.477   | 890       | BF439832  | 1384.798  | 1814.345  |
| AL161956  | 4349.394  | 4594.355  | NM_002150 | 6789.38   | 5304.193  | BG819162  | 844.541   | 937.563   |
| AL390176  | 2754.99   | 3174.193  | NM_004595 | 6643.644  | 5884.242  | NM_017532 | 2102.498  | 3058.554  |
| AL137356  | 1115.507  | 1072.561  | NM_020178 | 769.176   | 773.286   | M38449    | 3324.066  | 3163.927  |
| AL137547  | 1298.376  | 1001.666  | NM_002264 | 1365.578  | 1266.311  | AB033044  | 3123.039  | 3557.163  |
| AK021994  | 1479.609  | 1708.844  | NM_014754 | 14788.216 | 18120.143 | AB014564  | 629.841   | 1003.164  |
| Z70763    | 648.867   | 777.006   | D49387    | 1984.134  | 1803.151  | NM_020230 | 1455.197  | 2128.797  |
| AK023802  | 9039.456  | 9077.818  | AF050146  | 4959.307  | 4570.963  | NM_006352 | 812.942   | 1229.294  |
| AF088013  | 641.565   | 1055.132  | NM_000116 | 4306.125  | 4769.123  | NM_016430 | 399.364   | 1066.005  |
| AF086103  | 993.857   | 917.732   | NM_006698 | 8155.807  | 8631.41   | NM_004447 | 3176.158  | 3146.369  |
| AL080135  | 766.573   | 870.863   | NM_006804 | 11763.303 | 9706.619  | NM_001204 | 818.848   | 900.837   |
| AK023158  | 1350.206  | 1253.2    | NM_015969 | 7478.023  | 7693.025  | BF131321  | 679.609   | 827.667   |
| AK000580  | 480.279   | 310.138   | AL353933  | 543.311   | 474.528   | NM_012116 | 1148.258  | 1430.955  |
| AF085852  | 3643.261  | 2444.217  | NM_003051 | 4402.365  | 3684.38   | NM_000020 | 2991.976  | 3502.715  |
| AK023952  | 1383.731  | 1331.384  | NM_001133 | 365.639   | 748.073   | NM_000956 | 427.876   | 493.001   |
| AK000787  | 1211.753  | 827.089   | NM_145342 | 6459.491  | 5774.091  | NM_002442 | 1667.754  | 1793.605  |
| AF090885  | 10404.222 | 8819.402  | AJ278917  | 20410.377 | 18637.336 | AB033091  | 4503.096  | 4614.924  |
| AF161342  | 617.666   | 556.19    | AK025641  | 43368.777 | 40773.746 | NM_004557 | 4505.864  | 3661.479  |
| NM_016646 | 652.535   | 631.138   | AK025886  | 2798.181  | 2620.223  | NM_014757 | 1602.583  | 1444.212  |
| NM_014082 | 884.366   | 983.322   | NM_003058 | 955.007   | 691.113   | NM_017893 | 335.337   | 385.115   |
| AF100636  | 771.144   | 652.718   | NM_001720 | 10394.946 | 8841.349  | NM_001584 | 1358.173  | 1627.998  |
| AF161366  | 785.371   | 855.063   | NM_018390 | 2160.979  | 2063.163  | NM_012259 | 28135.119 | 22470.998 |
| AK022197  | 2310.571  | 2424.469  | AB037724  | 8212.85   | 6870.976  | AF272357  | 1788.341  | 1342.103  |
| AF090940  | 441.329   | 669.815   | AK025086  | 1851.447  | 1559.336  | AB020705  | 877.817   | 962.781   |
| AK021970  | 732.742   | 1176.467  | AK026151  | 11358.655 | 11400.364 | NM_002980 | 1199.275  | 1023.955  |
| AK022066  | 58535.457 | 61773.898 | NM_014140 | 2806.212  | 2649.86   | NM_016274 | 1034.337  | 1123.968  |
| AK022224  | 1760.426  | 1523.343  | NM_002916 | 2474.466  | 1958.999  | NM_014946 | 478.712   | 383.219   |
| AK022359  | 879.237   | 1102.563  | M20700    | 3057.78   | 3594.776  | NM_014251 | 1244.472  | 1250.089  |
| AK022000  | 990.287   | 1003.213  | NM_001034 | 6719.667  | 6668.578  | AK022750  | 2664.583  | 2554.532  |
| AK022129  | 2376.405  | 1789.382  | NM_002689 | 1812.148  | 1767.362  | NM_004251 | 4202.775  | 4410.43   |
| AK022263  | 8910.854  | 10195.751 | NM_017686 | 1739.871  | 1861.703  | BF337921  | 1258.3    | 1240.554  |
| AK022384  | 1250.366  | 1604.532  | AL096734  | 766.008   | 704.145   | U53532    | 1639.641  | 1713.355  |

|           |           |           |           |           |           |           |           |           |
|-----------|-----------|-----------|-----------|-----------|-----------|-----------|-----------|-----------|
| AK027097  | 676.381   | 1226.316  | AK000800  | 3045.297  | 3094.285  | NM_001740 | 2352.638  | 1786.85   |
| AK024613  | 684.9     | 986.889   | NM_018154 | 2903.645  | 2591.813  | NM_012484 | 2366.296  | 1747.433  |
| AK027198  | 2856.859  | 2773.443  | BC006287  | 5358.513  | 4970.529  | AL096732  | 883.713   | 876.789   |
| AK000257  | 1387.865  | 1153.117  | AB023198  | 7632.076  | 6154.365  | AB006423  | 978.916   | 913.705   |
| NM_006160 | 6133.952  | 4174.152  | AF304163  | 14818.957 | 15910.842 | NM_005710 | 48768.211 | 46817.168 |
| NM_000520 | 648.883   | 787.041   | NM_005231 | 7374.863  | 6692.992  | NM_003462 | 18315.037 | 17436.252 |
| AL110159  | 704.655   | 526.632   | AF064729  | 1743.474  | 1482.421  | NM_006090 | 2523.805  | 2644.475  |
| AF009259  | 781.683   | 843.249   | NM_005412 | 25067.801 | 22353.732 | NM_000130 | 1099.141  | 1070.258  |
| AF009260  | 1325.793  | 1218.355  | NM_012113 | 3146.056  | 3057.544  | NM_006664 | 4876.141  | 6146.41   |
| NM_003070 | 2691.792  | 3768.188  | NM_002720 | 1940.988  | 1877.406  | NM_002410 | 405.525   | 353.611   |
| NM_017902 | 2285.645  | 2822.62   | NM_014370 | 20838.236 | 21256.555 | NM_002720 | 1004.032  | 971.95    |
| AK021981  | 1616.144  | 2056.246  | NM_017812 | 15694.294 | 15462.061 | NM_000450 | 511.694   | 477.695   |
| AL359567  | 1695.814  | 2301.877  | AF204173  | 1301.379  | 1220.654  | NM_004510 | 4256.225  | 5680.633  |
| NM_017720 | 2826.727  | 3285.152  | J03260    | 3495.183  | 3549.32   | NM_001700 | 16847.277 | 21371.943 |
| AK021977  | 329.022   | 118.271   | U13738    | 1016.059  | 1055.087  | NM_017730 | 2046.8    | 2493.159  |
| AK026716  | 709.41    | 898.566   | AF068236  | 55113.977 | 57293.738 | AF208291  | 1097.144  | 1437.043  |
| AL049325  | 18878.334 | 15202.592 | H94487    | 2242.481  | 2231.786  | L10284    | 52344.855 | 64236.883 |
| AK024154  | 9543.201  | 7304.526  | BG681747  | 33561.031 | 33329.371 | NM_000270 | 1077.562  | 1181.055  |
| AF086341  | 1413.838  | 1208.204  | H63077    | 3013.505  | 3422.24   | NM_000010 | 40176.309 | 47509.629 |
| AK026672  | 1924.721  | 1763.481  | AA679352  | 22110.43  | 20916.121 | AK023701  | 925.672   | 967.402   |
| S83282    | 55602.816 | 57311.824 | AA437291  | 603.189   | 426.894   | NM_003740 | 2653.545  | 3142.134  |
| AK024164  | 16795.725 | 18702.863 | X04503    | 6449.694  | 5809.526  | NM_005094 | 1764.74   | 1894.884  |
| AF052130  | 5984.493  | 6308.685  | D45917    | 2703.07   | 2858.612  | NM_002330 | 473.137   | 377.805   |
| AF130090  | 14963.527 | 14466.44  | X52001    | 4525.691  | 4597.069  | BE382905  | 551.88    | 478.254   |
| AL096727  | 1488.889  | 1629.783  | BI823872  | 9619.593  | 8665.902  | NM_002150 | 5760.104  | 6210.753  |
| AL080110  | 2222.84   | 2258.189  | AA430552  | 5325.665  | 5095.788  | AK022558  | 2918.816  | 2969.889  |
| NM_020420 | 1804.53   | 2080.854  | X66142    | 1913.77   | 1587.29   | NM_006470 | 30569.23  | 34203.598 |
| AK024076  | 2399.639  | 3270.203  | NM_005910 | 652.262   | 504.158   | AK023787  | 1714.624  | 1882.669  |
| M87940    | 4273.502  | 5528.568  | R45054    | 5451.411  | 4933.893  | NM_002130 | 971.851   | 1275.388  |
| L77588    | 2022.735  | 1646.997  | NM_000620 | 765.394   | 929.769   | NM_015697 | 2115.254  | 2432.962  |
| AF086304  | 15926.678 | 15396.606 | NM_000900 | 8212.229  | 7293.639  | NM_032940 | 1456.831  | 2035.366  |
| U61094    | 1856.224  | 1974.964  | AL117398  | 5943.268  | 5662.116  | NM_007177 | 5375.963  | 6823.89   |
| AB032976  | 2306.208  | 2815.92   | AY007158  | 59544.582 | 59941     | NM_006070 | 5566.641  | 8469.732  |
| AF301222  | 11513.204 | 12597.188 | M58050    | 6960.328  | 6608.508  | NM_017530 | 2247.421  | 3088.406  |
| AF215981  | 7693.295  | 7758.959  | NM_007260 | 17336.268 | 18545.982 | M38449    | 3715.324  | 4285.052  |
| NM_000730 | 21568.043 | 26837.924 | NM_014410 | 2625.606  | 2774.935  | AK025495  | 958.728   | 1150.579  |
| AF130044  | 1184.398  | 1573.367  | AF305835  | 699.527   | 777.576   | NM_001091 | 1130.932  | 1110.353  |
| AF087980  | 869.639   | 1048.557  | AF312769  | 1137.326  | 1090.355  | AK023915  | 3177.741  | 3378.743  |
| NM_013930 | 800.219   | 682.816   | AB020668  | 2420.342  | 3019.5    | AB051453  | 1890.057  | 2282.295  |
| AB038651  | 2883.735  | 2739.559  | NM_006200 | 22640.961 | 21234.623 | AK026842  | 763.013   | 766.668   |
| AL359603  | 1649.79   | 1714.57   | NM_013261 | 896.378   | 547.899   | NM_002390 | 2163.181  | 2501.683  |
| X84838    | 571.522   | 1064.999  | AF309553  | 5758.047  | 5234.091  | AB023203  | 1247.192  | 1548.689  |
| NM_013940 | 1064.847  | 1312.328  | NM_003600 | 4538.49   | 4472.733  | NM_014960 | 1987.715  | 2063.564  |
| AL117643  | 1179.527  | 1670.289  | NM_000100 | 29508.133 | 31797.59  | NM_004250 | 689.937   | 782.292   |
| AF075063  | 1601.691  | 1491.834  | NM_001900 | 62498.152 | 62529.09  | NM_016271 | 2521.624  | 2045.644  |
| AF069135  | 4910.729  | 4496.942  | NM_003990 | 4079.569  | 3872.674  | NM_016610 | 2136.02   | 1876.748  |
| AK026524  | 1928.584  | 2123.464  | NM_018961 | 1453.689  | 1483.176  | NM_014481 | 574.636   | 610.459   |
| AB011157  | 6237.646  | 7540.097  | NM_005580 | 5514.814  | 5408.34   | U22172    | 1537.73   | 1320.753  |
| U17632    | 2312.412  | 2005.112  | NM_012240 | 3714.363  | 2586.881  | AB032960  | 681.529   | 895.462   |
| AK026764  | 3503.785  | 4270.989  | NM_006890 | 1476.043  | 1353.02   | NM_014264 | 3112.294  | 3403.685  |
| AF113700  | 3563.446  | 3988.347  | NM_001130 | 60839.094 | 58475.141 | AF020089  | 1584.773  | 1321.783  |
| NM_017830 | 11438.776 | 9866.379  | NM_002970 | 27773.711 | 27775.83  | AK024793  | 904.925   | 813.634   |
| NM_018347 | 2479.816  | 3624.191  | AK023511  | 5562.339  | 5750.871  | NM_012250 | 33345.773 | 27790.699 |

|           |           |           |           |           |           |           |           |           |
|-----------|-----------|-----------|-----------|-----------|-----------|-----------|-----------|-----------|
| AK024986  | 1251.365  | 1433.598  | NM_014556 | 2772.747  | 2778.516  | AF272357  | 2004.068  | 3352.098  |
| AK026730  | 1095.365  | 799.342   | NM_003058 | 865.619   | 760.716   | NM_016372 | 33999.93  | 31155.338 |
| AK024739  | 1633.935  | 2095.501  | AB014514  | 4956.529  | 5064.666  | AB020705  | 584.898   | 1063.185  |
| AK098681  | 1348.58   | 1544.991  | NM_002865 | 4517.14   | 4617.351  | NM_002980 | 1079.27   | 1464.955  |
| AK026772  | 2637.385  | 3472.139  | NM_003566 | 2050.984  | 1404.284  | NM_015886 | 1101.057  | 1303.831  |
| NM_014260 | 17388.281 | 22076.592 | NM_007159 | 25729.486 | 23348.021 | NM_020358 | 320.887   | 479.83    |
| AK026458  | 860.523   | 997.269   | NM_003731 | 14772.009 | 11929.404 | NM_004262 | 332.448   | 262.194   |
| AK022266  | 533.632   | 569.693   | NM_005446 | 7236.786  | 6238.033  | NM_007102 | 48051.148 | 55446.188 |
| CY3Cy5    | 1245.746  | 350.393   | NM_013292 | 6484.065  | 5515.803  | BG491613  | 5072.103  | 4922.733  |
| M23254    | 5781.249  | 1528.73   | NM_002387 | 4043.979  | 4565.722  | AA397813  | 16141.376 | 14890.475 |
| BE618539  | 494.421   | 296.162   | NM_000069 | 2114.485  | 2706.728  | W47350    | 894.135   | 765.443   |
| R28062    | 3325.053  | 1546.892  | AB023217  | 1029.901  | 1004.497  | W68291    | 7938.68   | 7424.138  |
| U38545    | 760.79    | 701.794   | L08902    | 1038.091  | 791.007   | N64384    | 1364.386  | 1315.988  |
| AI627464  | 2954.43   | 1632.374  | J02639    | 4372.513  | 4569.734  | H-X 53655 | 1048.297  | 1230.28   |
| BI756258  | 1210.175  | 526.17    | NM_005231 | 7218.133  | 6660.296  | H-U 05770 | 2560.223  | 4171.543  |
| AI342225  | 52510.176 | 27241.854 | AF064729  | 1387.306  | 1052.28   | H-M 65199 | 4460.706  | 5465.203  |
| AA634103  | 60563.969 | 36551.691 | NM_012113 | 3438.42   | 3508.965  | H-M 32315 | 1864.815  | 2710      |
| J04599    | 352.673   | 230.984   | NM_002150 | 6281.109  | 5710.732  | H-V00536M | 1176.072  | 1678.429  |
| AA608557  | 5643.55   | 2437.529  | NM_004595 | 5569.692  | 5897.318  | BG819162  | 1368.631  | 1331.099  |
| AL050095  | 2911.075  | 1009.474  | NM_020178 | 878.354   | 1212.411  | NM_002728 | 766.044   | 699.31    |
| U03272    | 1819.119  | 1240.898  | NM_002264 | 1779.682  | 2303.606  | NM_000450 | 329.792   | 594.008   |
| NM_000498 | 662.68    | 604.597   | NM_014754 | 14753.643 | 19226.906 | NM_000448 | 357.527   | 691.286   |
| NM_000664 | 1996.836  | 2898.747  | D49387    | 1541.213  | 1560.894  | NM_004513 | 3325.232  | 3903.879  |
| SR7       | 5366.382  | 53715.188 | AF050146  | 5368.692  | 4920.062  | NM_001708 | 14090.373 | 16484.68  |
| SR9       | 25402.793 | 7131.274  | NM_000116 | 4241.005  | 4172.88   | NM_017735 | 1747.816  | 2149.957  |
| CY3Cy5    | 10366.099 | 1132.344  | NM_006698 | 7834.024  | 8436.726  | AB033044  | 3979.095  | 4372.329  |
| NM_014808 | 848.983   | 419.004   | NM_006804 | 13848.78  | 12690.043 | AB014564  | 977.603   | 908.88    |
| AB006627  | 408.577   | 250.931   | NM_015969 | 7436.723  | 8136.736  | NM_020230 | 1953.668  | 1997.388  |
| NM_000416 | 2252.684  | 581.268   | NM_003051 | 4811.506  | 4758.65   | NM_006762 | 40882.703 | 43267.77  |
| NM_003382 | 552.041   | 360.22    | NM_145342 | 7042.733  | 8952.661  | NM_006352 | 915.199   | 1296.521  |
| NM_002965 | 5392.042  | 2663.037  | AJ278917  | 16821.635 | 18454.131 | NM_016430 | 571.999   | 875.246   |
| AB007883  | 1923.279  | 701.397   | AK025641  | 31138.877 | 31673.57  | NM_004447 | 2890.646  | 2685.379  |
| NM_006391 | 450.345   | 248.389   | NM_000620 | 923.396   | 839.388   | NM_001204 | 925.54    | 760.292   |
| AK093780  | 6122.44   | 2034.119  | NM_000905 | 7234.043  | 6457.594  | BF131321  | 683.992   | 879.603   |
| AY009397  | 45171.313 | 12740.879 | AL117398  | 6492.122  | 7854.896  | NM_012116 | 776.822   | 791.216   |
| NM_007037 | 10345.853 | 2669.459  | AY007158  | 56824.699 | 55557.297 | NM_000020 | 3138.853  | 3140.348  |
| NM_001649 | 608.581   | 462.449   | NM_001720 | 10608.426 | 10266.482 | NM_000956 | 551.255   | 1214.494  |
| NM_005492 | 2452.169  | 885.29    | NM_018390 | 2410.385  | 3091.07   | NM_002442 | 1478.878  | 2007.955  |
| AF038196  | 3243.988  | 1289.365  | AB037724  | 8486.98   | 9885.843  | AB033091  | 3619.609  | 5266.252  |
| NM_004859 | 4996.403  | 2357.649  | AK025086  | 2150.297  | 2422.794  | NM_004557 | 3096.199  | 3220.733  |
| NM_016352 | 719.33    | 576.973   | AK026151  | 11828.595 | 13216.745 | NM_014757 | 1394.912  | 1687.125  |
| NM_005014 | 935.353   | 1064.3    | NM_014140 | 2544.347  | 2716.603  | NM_001584 | 1674.348  | 1694.021  |
| NM_006944 | 542.851   | 1124.448  | NM_002916 | 2290.307  | 1909.394  | NM_000809 | 303.799   | 612.208   |
| NM_004407 | 1080.988  | 1793.804  | M20700    | 3666.995  | 3544.303  | AB018258  | 343.31    | 436.101   |
| NM_000070 | 2359.799  | 3994.903  | NM_001034 | 6650.758  | 6175.799  | AL359592  | 811.18    | 852.969   |
| NM_001202 | 1345.715  | 1689.159  | NM_002689 | 2177.45   | 2637.09   | NM_006078 | 4770.29   | 7968.289  |
| AB037804  | 1271.414  | 1650.301  | NM_017686 | 1856.09   | 2077.528  | NM_000824 | 380.992   | 1025.774  |
| U34249    | 1442.272  | 1857.715  | AL096734  | 867.685   | 1088.531  | NM_005953 | 51267.867 | 26360.061 |
| NM_003289 | 47273.313 | 57086.988 | AK000800  | 3304.434  | 3588.565  | NM_016274 | 1159.605  | 1451.733  |
| AI200114  | 468.456   | 1023.003  | NM_018154 | 2844.613  | 2623.784  | NM_014946 | 363.436   | 404.877   |
| NM_006323 | 6084.787  | 1327.251  | NM_005358 | 480.884   | 606.946   | NM_014251 | 1361.98   | 1502.982  |
| NM_016466 | 881.659   | 591.797   | BC006287  | 5146.559  | 6138.059  | AK022750  | 2664.325  | 2749.067  |
| NM_001493 | 4013.042  | 1065.206  | AB023198  | 6392.603  | 6399.873  | NM_004251 | 2871.497  | 2709.46   |

|           |           |           |           |           |           |           |           |           |
|-----------|-----------|-----------|-----------|-----------|-----------|-----------|-----------|-----------|
| NM_014841 | 977.085   | 709.39    | AF304163  | 13873.512 | 15605.759 | BF337921  | 1184.382  | 1053.997  |
| NM_014426 | 4420.22   | 2357.497  | NM_006896 | 1457.16   | 1191.348  | U53532    | 976.12    | 1312.969  |
| NM_006816 | 18953.055 | 6235.768  | NM_001130 | 62976.074 | 58334.926 | NM_001740 | 2116.404  | 1913.385  |
| AK026518  | 27969.414 | 7383.099  | AK023511  | 5815.404  | 5812.642  | NM_012484 | 943.282   | 879.57    |
| NM_000256 | 10636.173 | 2265.997  | NM_014556 | 3310.929  | 3114.324  | AL096732  | 847.068   | 941.802   |
| AB033055  | 4840.751  | 1377.479  | NM_001615 | 68087.094 | 66290.156 | AB006423  | 894.795   | 1259.844  |
| AF311287  | 3629.055  | 888.316   | NM_002725 | 1638.134  | 1387.182  | NM_005719 | 45560.723 | 48436.586 |
| NM_003096 | 993.681   | 611.372   | NM_014375 | 22060.732 | 23474.783 | NM_003462 | 17181.766 | 16332.111 |
| NM_014781 | 2973.315  | 2306.98   | NM_017812 | 15993.813 | 15397.445 | NM_006093 | 1123.927  | 1638.856  |
| BU629989  | 1073.562  | 1178.758  | AF204173  | 1654.751  | 2246.713  | NM_000139 | 769.219   | 1101.755  |
| X87896    | 1624.402  | 2601.488  | J03260    | 3411.675  | 4046.012  | NM_006664 | 5192.217  | 5447.137  |
| M88310    | 3094.434  | 5616.045  | U13738    | 1089.159  | 1478.67   | NM_014264 | 3890.835  | 3898.413  |
| NM_000042 | 2514.783  | 3431.617  | AF068236  | 62409.695 | 56848.523 | AF020089  | 1427.688  | 1654.706  |
| AF035787  | 568.809   | 562.049   | H94487    | 1852.744  | 1841.024  | NM_006257 | 1979.658  | 1888.54   |
| AF090405  | 232.313   | 619.938   | BG681747  | 32944.672 | 32753.953 | NM_016281 | 5642.686  | 7435.586  |
| NM_005024 | 3633.308  | 3669.962  | H63077    | 2910.008  | 3302.413  | NM_004734 | 11471.845 | 15579.643 |
| NM_003403 | 1251.373  | 1693.485  | AA679352  | 23992.801 | 30701.604 | AK024793  | 1268.344  | 1983.296  |
| NM_016335 | 328.554   | 365.327   | AA437291  | 1078.778  | 977.773   | AF208291  | 962.045   | 1171.303  |
| NM_003165 | 1943.285  | 557.912   | X04503    | 5567.288  | 6304.241  | NM_000276 | 1019.27   | 1293.38   |
| NM_003906 | 3936.675  | 909.976   | D45917    | 2886.316  | 3712.16   | NM_000019 | 35411.453 | 42430.332 |
| AL359590  | 20427.572 | 8654.274  | X52001    | 5388.205  | 6117.843  | AK023701  | 938.46    | 881.791   |
| NM_002861 | 6639.688  | 2983.491  | BI823872  | 10950.565 | 10343.464 | NM_003742 | 1725.649  | 1323.695  |
| NM_003080 | 2508.228  | 1079.323  | AA430552  | 5765.637  | 6254.964  | NM_005094 | 1567.179  | 1562.807  |
| NM_004042 | 204.343   | 189.424   | X66142    | 2087.516  | 2241.793  | NM_002335 | 228.763   | 123.524   |
| NM_013266 | 420.192   | 351.132   | NM_005913 | 724.69    | 1003.051  | BE382905  | 391.942   | 544.355   |
| NM_002645 | 1318.935  | 521.858   | R45054    | 4660.89   | 4917.326  | NM_002152 | 4316.745  | 4278.509  |
| AB033027  | 1366.005  | 431.843   | NM_002387 | 3936.884  | 3148.686  | NM_001701 | 257.988   | 440.063   |
| AK021805  | 3258.483  | 1169.422  | NM_000069 | 2128.855  | 1878.367  | AK022558  | 2612.978  | 4183.803  |
| AB014550  | 1109.445  | 335.907   | AB023217  | 1205.16   | 1000.795  | AK023787  | 1625.962  | 1630.177  |
| AF320294  | 903.942   | 416.158   | L08902    | 1289.573  | 1005.768  | NM_002133 | 1055.903  | 1726.958  |
| AF161436  | 2991.49   | 2479.743  | J02639    | 3619.4    | 3288.254  | NM_015697 | 1525.193  | 1513.789  |
| NM_020402 | 1524.008  | 1714.004  | M58050    | 7259.007  | 7653.42   | NM_032943 | 1418.397  | 1459.594  |
| NM_004296 | 3214.832  | 4687.825  | NM_007263 | 20009.17  | 19143.688 | NM_007177 | 8020.826  | 7414.407  |
| NM_001171 | 1447.18   | 2099.418  | AF206020  | 2988.115  | 3376.45   | NM_000737 | 1655.824  | 1902.977  |
| NM_002250 | 5480.248  | 7162.621  | NM_014410 | 3463.959  | 3037.688  | NM_000839 | 10801.065 | 11646.602 |
| S81591    | 1060.317  | 1087.729  | AF305835  | 1196.799  | 1606.226  | AK024102  | 9018.489  | 11146.79  |
| AF132734  | 9219.174  | 1718.383  | AF312769  | 1292.88   | 1259.22   | AL079273  | 2432.814  | 3456.687  |
| NM_018379 | 1794.839  | 390.639   | AB020668  | 2520.813  | 2909.3    | AK026129  | 1374.128  | 1548.683  |
| NM_016403 | 8596.679  | 1869.164  | NM_006203 | 25225.014 | 25949.213 | NM_001743 | 24394.789 | 28224.449 |
| NM_015603 | 1057.987  | 537.092   | NM_013261 | 1006.729  | 1266.516  | AK024200  | 1136.801  | 1306.406  |
| NM_001921 | 5443.75   | 3808.58   | NM_003556 | 2120.325  | 2828.301  | NM_003713 | 4426.915  | 3775.33   |
| NM_006230 | 7160.026  | 3616.775  | AF309553  | 6020.023  | 8161.104  | M38449    | 3243.098  | 2812.751  |
| NM_014696 | 2260.062  | 725.692   | NM_003605 | 5278.79   | 5112.721  | AK025495  | 537.542   | 779.992   |
| NM_013400 | 6283.716  | 1834.109  | NM_006139 | 646.055   | 936.377   | NM_001091 | 1068.318  | 788.575   |
| AK026257  | 1837.407  | 458.135   | NM_000100 | 30853.752 | 40792.566 | AK023915  | 2846.966  | 2368.863  |
| AK023836  | 3358.401  | 1021.174  | NM_001900 | 63734.363 | 60968.422 | AB051453  | 1600.209  | 1340.604  |
| NM_018106 | 2304.383  | 601.626   | NM_003993 | 4624.052  | 4952.057  | AK026842  | 366.251   | 356.025   |
| AJ299442  | 3495.236  | 2081.286  | NM_005586 | 5522.583  | 7271.917  | NM_002395 | 1833.01   | 2521.334  |
| AB040897  | 387.482   | 361.101   | NM_012242 | 3883.651  | 3419.21   | AB023203  | 804.705   | 1216.754  |
| NM_000129 | 1006.881  | 1139.887  | NM_003051 | 4920.754  | 4973.388  | NM_004259 | 563.461   | 778.801   |
| NM_003762 | 7388.469  | 12755.264 | NM_145342 | 4422.239  | 3522.974  | NM_016271 | 2753.806  | 1507.169  |
| NM_018446 | 5250.157  | 8309.231  | AJ278917  | 19714.813 | 18659.814 | NM_016619 | 2046.164  | 1724.509  |
| NM_000187 | 908.044   | 1332.908  | AF016495  | 1651.472  | 2657.529  | NM_014481 | 339.834   | 394.046   |

|           |           |           |           |           |           |           |           |           |
|-----------|-----------|-----------|-----------|-----------|-----------|-----------|-----------|-----------|
| NM_014465 | 2272.355  | 3515.405  | AK025641  | 29248.188 | 29554.748 | U22172    | 1646.256  | 1205.61   |
| D87292    | 6937.407  | 8596.408  | NM_001038 | 747.844   | 437.277   | AB032960  | 826.275   | 678.188   |
| NM_005495 | 1843.146  | 2970.179  | AK025886  | 2554.919  | 2291.576  | NM_017675 | 698.355   | 944.651   |
| NM_001202 | 628.351   | 204.155   | NM_003058 | 1528.048  | 1861.196  | NM_015991 | 463.295   | 519.333   |
| AB037804  | 808.042   | 316.684   | AB014514  | 4441.907  | 5150.435  | NM_005562 | 524.559   | 596.152   |
| U34249    | 706.495   | 219.821   | NM_002865 | 5265.468  | 7602.917  | NM_002350 | 1327.112  | 1394.428  |
| NM_003285 | 29929.941 | 15773.227 | NM_003566 | 2246.005  | 1676.214  | NM_002342 | 1817.215  | 3348.304  |
| AI200114  | 448.951   | 441.712   | NM_005446 | 6964.923  | 10461.361 | D13631    | 875.482   | 1269.926  |
| M74220    | 670.784   | 652.295   | NM_013292 | 6508.553  | 8581.144  | NM_003712 | 2263.208  | 1995.475  |
| M23254    | 8643.648  | 6709.755  | AK000800  | 2789.872  | 2616.226  | NM_002184 | 617.901   | 569.265   |
| BE618539  | 544.885   | 600.243   | NM_018154 | 2473.19   | 1657.461  | NM_014883 | 999.15    | 1016.605  |
| R28062    | 3286.89   | 1281.683  | BC006287  | 3383.051  | 3399.329  | NM_017805 | 2775.733  | 2172.363  |
| U38545    | 481.73    | 259.807   | AB023198  | 6080.98   | 5685.819  | M86841    | 518.809   | 530.098   |
| AI627464  | 2433.087  | 803.701   | AF304163  | 13053.427 | 15084.758 | U56387    | 558.076   | 647.176   |
| BI756258  | 1139.024  | 407.282   | NM_005231 | 6848.562  | 7392.24   | NM_003657 | 691.962   | 696.91    |
| AI342225  | 52817.391 | 26854.266 | AF064729  | 1992.886  | 2146.91   | AL049296  | 2563.499  | 3023.642  |
| AA634103  | 60818.023 | 54168.836 | NM_005412 | 20972.09  | 19383.209 | NM_014471 | 24492.432 | 22371.563 |
| J04599    | 621.856   | 376.996   | NM_012113 | 2952.596  | 2424.392  | NM_004397 | 1397.244  | 1691.161  |
| AA608557  | 7540.594  | 8418.988  | NM_002150 | 7705.762  | 7583.706  | NM_003185 | 241.281   | 741.128   |
| AL050095  | 3842.072  | 3949.49   | NM_004595 | 6504.705  | 7538.6    | NM_020235 | 1208.622  | 1055.249  |
| U03272    | 1887.33   | 2120.407  | NM_020178 | 605.546   | 1033.531  | D49356    | 374.098   | 588.699   |
| NM_000495 | 583.114   | 818.046   | NM_002264 | 1432.475  | 1384.033  | AJ250475  | 2136.708  | 3135.92   |
| NM_000664 | 2023.356  | 3229.266  | NM_014754 | 15672.174 | 19822.355 | NM_018575 | 1305.723  | 930.719   |
| AF075085  | 42554.676 | 50354.168 | D49387    | 2112.905  | 1969.298  | NM_006201 | 1338.693  | 543.727   |
| NM_005892 | 2134.458  | 2638.594  | AF050146  | 5282.712  | 5047.672  | NM_007110 | 908.337   | 425.192   |
| NM_000042 | 1816.413  | 373.124   | NM_000116 | 5078.379  | 4745.136  | NM_001255 | 4538.29   | 2524.981  |
| NM_005024 | 3728.406  | 5337.587  | NM_006695 | 8584.704  | 9756.352  | U50383    | 4080.471  | 2959.252  |
| NM_003403 | 1755.73   | 2056.972  | NM_006804 | 17230.234 | 22276.861 | AK025085  | 2887.219  | 3035.578  |
| NM_014805 | 2270.202  | 3274.954  | NM_015969 | 7550.881  | 10239.594 | NM_016317 | 502.772   | 1026.909  |
| AB006627  | 1228.339  | 1202.37   | AL353933  | 688.923   | 624.861   | NM_006290 | 642.727   | 396.789   |
| NM_000415 | 2327.587  | 1361.607  | NM_000679 | 2089.17   | 1827.274  | AK022290  | 774.4     | 660.01    |
| NM_003382 | 475.813   | 333.861   | AF218006  | 53628.43  | 48114.203 | NM_003680 | 27516.578 | 20675.025 |
| NM_002965 | 4090.798  | 1519.737  | AK026935  | 15020.982 | 13247.843 | AF118124  | 14406.528 | 9993.557  |
| AB007883  | 1455.434  | 315.116   | NM_020162 | 4172.257  | 4714.818  | NM_004845 | 3542.72   | 2735.341  |
| AK093780  | 6289.478  | 3071.822  | AK027124  | 40542.809 | 42277.816 | AL137527  | 2662.835  | 1792.686  |
| AY009397  | 47450.145 | 27765.449 | M31212    | 44965.871 | 55355.633 | J04974    | 7867.605  | 5267.181  |
| NM_007037 | 15324.205 | 11585.847 | NM_001720 | 10171.821 | 10589.568 | NM_007055 | 3004.365  | 2806.885  |
| NM_001645 | 900.388   | 1215.957  | NM_018390 | 2567.693  | 2823.137  | NM_000395 | 501.255   | 921.678   |
| NM_005492 | 3796.211  | 5939.458  | AB037724  | 5390.382  | 5678.463  | NM_001525 | 1598.018  | 1757.062  |
| AF038196  | 4075.077  | 5873.372  | AK025086  | 2058.145  | 2316.005  | NM_007014 | 1529.073  | 1761.345  |
| NM_004855 | 7738.813  | 8428.784  | AK026151  | 13108.791 | 14459.536 | AL096740  | 696.009   | 654.803   |
| NM_016352 | 1265.245  | 1522.152  | NM_014140 | 3011.819  | 3135.829  | AF191545  | 436.244   | 492.738   |
| NM_005014 | 921.684   | 1295.758  | NM_002915 | 2375.272  | 2354.36   | NM_014554 | 1220.106  | 929.5     |
| NM_006944 | 521.101   | 1149.291  | M20700    | 3580.059  | 3389.597  | AL137484  | 766.791   | 969.561   |
| NM_004407 | 884.326   | 1329.237  | NM_001034 | 7464.575  | 6417.871  | AK023968  | 1036.318  | 706.513   |
| NM_000070 | 2613.149  | 3357.731  | NM_002685 | 2198.58   | 2141.735  | NM_004652 | 405.927   | 447.243   |
| NM_002250 | 4150.911  | 890.747   | NM_017685 | 1841.982  | 2317.077  | NM_006102 | 242.151   | 198.825   |
| S81591    | 528.334   | 231.695   | AL096734  | 614.469   | 871.71    | AK025425  | 12778.805 | 7523.017  |
| AL021682  | 648.349   | 455.714   | AK024462  | 18467.732 | 15969.518 | AK025974  | 15591.745 | 9761.25   |
| NM_003304 | 713.206   | 630.159   | NM_005711 | 655.357   | 1135.743  | NM_005781 | 3150.881  | 2417.719  |
| NM_016465 | 1083.864  | 489.919   | NM_019601 | 620.674   | 638.194   | BC036740  | 7842.362  | 5523.493  |
| NM_001493 | 3531.306  | 693.403   | NM_002205 | 1547.22   | 1382.48   | NM_001747 | 6310.541  | 4870.111  |
| NM_014841 | 590.436   | 343.669   | NM_007074 | 918.61    | 755.621   | NM_001148 | 6289.639  | 3025.519  |

|           |           |           |           |           |           |           |           |           |
|-----------|-----------|-----------|-----------|-----------|-----------|-----------|-----------|-----------|
| NM_01442E | 4079.996  | 1908.898  | NM_00223C | 1136.72   | 1211.838  | AF242522  | 2518.266  | 1497.017  |
| NM_00681E | 20377.275 | 13094.329 | NM_00381E | 3857.339  | 3807.162  | AJ008152  | 2007.773  | 1828.444  |
| AK026518  | 41893.438 | 31489.563 | U17989    | 1113.909  | 1203.355  | NM_004024 | 2971.721  | 2862.929  |
| NM_00025E | 15670.247 | 14152.387 | AL137595  | 774.725   | 852.69    | X52345    | 11143.437 | 10109.513 |
| AB033055  | 8016.126  | 8035.477  | NM_01802E | 1217.827  | 1352.167  | NM_00696E | 3736.394  | 3989.001  |
| AF311287  | 5147.553  | 5791.534  | AF249267  | 61339.445 | 52042.141 | AF027142  | 44310.813 | 48221.934 |
| NM_00309E | 1500.559  | 2152.229  | NM_004113 | 1348.905  | 1464.755  | S67970    | 543.244   | 682.35    |
| NM_014781 | 3618.655  | 5842.428  | X84939    | 5783.681  | 5852.702  | AF221520  | 3191.674  | 4103.307  |
| BU629989  | 1284.874  | 1467.488  | NM_01832C | 12787.59  | 11881.711 | NM_006941 | 24006.293 | 25945.67  |
| X87896    | 1559.465  | 2158.085  | NM_00206E | 3040.018  | 3066.521  | AB037852  | 657.145   | 596.895   |
| M88310    | 2829.356  | 4084.518  | M65066    | 13727.593 | 12649.962 | NM_00536C | 1162.026  | 781.998   |
| NM_01844E | 4782.57   | 2394.195  | NM_016951 | 3232.951  | 3171.537  | NM_00434E | 1357.507  | 857.148   |
| NM_000187 | 1237.637  | 1332.27   | NM_013251 | 1627.88   | 1740.123  | NM_00209E | 4135.137  | 3119.231  |
| NM_01446E | 2314.541  | 4337.52   | NM_00609E | 2428.88   | 2338.546  | NM_018077 | 524.242   | 373.853   |
| D87292    | 8818.251  | 14441.498 | AF272379  | 2466.156  | 2539.2    | NM_01683E | 11748.191 | 5889.124  |
| NM_00549E | 1879.271  | 3441.786  | NM_01232E | 1244.084  | 1330.249  | NM_00596E | 46691.699 | 43611.199 |
| NM_01633E | 787.022   | 902.718   | NM_00308E | 29028.758 | 27196.234 | AK021416  | 1501.102  | 1268.596  |
| NM_00316E | 2848.329  | 2953.15   | NM_016084 | 10666.54  | 10994.387 | NM_018471 | 5619.752  | 4201.34   |
| NM_00390E | 5210.423  | 1453.852  | AF095289  | 10037.407 | 10466.131 | NM_00381E | 12575.231 | 13369.374 |
| AL359590  | 19244.951 | 5447.076  | NM_005537 | 4231.679  | 4267.919  | NM_00656C | 1217.981  | 924.312   |
| NM_002861 | 4836.424  | 1453.632  | NM_01900E | 2864.331  | 2469.238  | NM_01618E | 1793.607  | 1250.584  |
| NM_00308C | 2498.417  | 503.09    | NM_01593E | 5395.163  | 5054.71   | NM_00487E | 3624.241  | 2505.188  |
| NM_01326E | 331.528   | 208.995   | AF182412  | 1208.396  | 1205.222  | NM_00195E | 37803.559 | 28898.238 |
| NM_00264E | 1849.785  | 1195.779  | AK027200  | 2010.546  | 1816.034  | NM_004757 | 1287.577  | 1168.992  |
| AB033027  | 2016.404  | 2301.633  | S78372    | 542.588   | 1009.627  | NM_015904 | 2423.901  | 1330.324  |
| AK021805  | 4636.353  | 5462.536  | U03106    | 6219.842  | 7368.427  | NM_00196C | 11993.117 | 6870.24   |
| AB014550  | 1583.062  | 1714.596  | NM_00007E | 14019.859 | 13658.445 | NM_01812E | 2133.468  | 1766.683  |
| AF320294  | 1869.422  | 2146.027  | NM_00684E | 16426.246 | 15081.238 | AF035318  | 860.123   | 805.274   |
| AF320293  | 360.406   | 593.406   | NM_01488E | 652.148   | 927.411   | NM_01545E | 2987.555  | 3316.771  |
| AF161436  | 3624.118  | 4840.688  | NM_00494E | 4952.409  | 4354.204  | AK025056  | 1054.004  | 1127.186  |
| NM_02040E | 1589.211  | 2586.765  | NM_02024E | 2675.853  | 1969.273  | AF140710  | 2763.931  | 3198.601  |
| NM_00429E | 3875.044  | 6177.919  | NM_00178E | 11555.363 | 9196.528  | NM_01208E | 9719.218  | 11079.18  |
| NM_001171 | 1236.817  | 1725.378  | NM_01768E | 744.694   | 704.681   | NM_017947 | 654.348   | 993.018   |
| NM_00049E | 424.96    | 292.591   | NM_00220E | 2817.861  | 2258.723  | NM_002494 | 4720.878  | 4029.7    |
| NM_000664 | 3248.185  | 3758.14   | NM_002291 | 556.832   | 661.211   | M58510    | 4422.542  | 3728.984  |
| AF075085  | 47886.609 | 51843.762 | AL137477  | 6591.039  | 6035.743  | NM_00078E | 524.159   | 301.932   |
| NM_00589E | 1764.95   | 2473.824  | AK024961  | 6187.681  | 6439.322  | BE396003  | 606.607   | 523.921   |
| NM_00647E | 553.059   | 877.431   | NM_01606E | 3790.834  | 4141.466  | AK023300  | 787.998   | 905.956   |
| AF132734  | 15600.326 | 21690.531 | NM_01425E | 2353.211  | 2525.296  | NM_01808E | 916.353   | 470.994   |
| NM_01837E | 2586.488  | 2189.638  | NM_015967 | 2996.481  | 3158.268  | NM_003904 | 2416.735  | 1519.959  |
| NM_01640E | 12443.906 | 13620.904 | NM_012237 | 1003.95   | 1496.501  | NM_006234 | 9059.421  | 8578.223  |
| NM_01560E | 662.389   | 310.371   | NM_00359E | 1208.265  | 1129.189  | AB028987  | 2184.27   | 1371.387  |
| NM_001921 | 3854.587  | 1192.322  | NM_00240E | 1433.44   | 1465.706  | NM_003594 | 511.203   | 356.026   |
| NM_00623C | 6408.072  | 2424.933  | NM_004994 | 16566.797 | 14588.603 | NM_005521 | 1106.34   | 1000.711  |
| NM_01469E | 2977.787  | 1414.548  | NM_00661C | 12361.451 | 11973.197 | AF164438  | 4816.256  | 3473.852  |
| NM_01340C | 8306.199  | 5314.644  | NM_01762E | 545.657   | 855.078   | AK022284  | 706.032   | 662.368   |
| AK026257  | 2329.973  | 2091.492  | NM_003791 | 5699.528  | 5153.864  | AB040893  | 614.549   | 397.885   |
| AK023836  | 5396.976  | 5582.101  | NM_018017 | 4884.489  | 4630.7    | AK025844  | 788.403   | 444.75    |
| NM_01810E | 2961.757  | 4636.085  | AK001296  | 8881.148  | 7789.641  | AL137727  | 741.842   | 942.143   |
| AJ299442  | 5292.524  | 6515.87   | AK000173  | 867.945   | 1010.891  | L17327    | 185.868   | 322.633   |
| AB040897  | 372.643   | 875.292   | NM_01836E | 3098.957  | 2740.977  | AF074986  | 658.513   | 607.145   |
| NM_00012E | 1055.635  | 1700.258  | NM_00658E | 18605.348 | 15448.531 | AL049240  | 1516.406  | 1707.626  |
| NM_00376E | 6941.716  | 9737.42   | AJ272180  | 2060.508  | 1916.969  | U80773    | 1141.487  | 1591.238  |

|           |           |           |           |           |           |           |           |           |
|-----------|-----------|-----------|-----------|-----------|-----------|-----------|-----------|-----------|
| NM_004859 | 6560.852  | 4173.51   | AK025709  | 1281.676  | 1243.491  | AK021745  | 973.633   | 728.796   |
| NM_016352 | 806.255   | 1292.057  | NM_019016 | 13445.299 | 10963.862 | L38937    | 2542.386  | 2680.74   |
| NM_005014 | 1207.67   | 1868.184  | NM_012261 | 9786.381  | 7958.794  | AK024327  | 502.543   | 372.909   |
| NM_006944 | 658.055   | 1165.301  | NM_015556 | 3407.433  | 3821.01   | AK000801  | 2145.729  | 2781.631  |
| NM_004407 | 948.096   | 1494.29   | NM_018416 | 1370.787  | 1262.158  | D85433    | 2119.925  | 1699.407  |
| NM_000070 | 2451.461  | 4048.103  | NM_004606 | 6315.972  | 6691.467  | AF086184  | 5687.258  | 3821.236  |
| NM_001202 | 1323.385  | 1921.534  | AK022643  | 1355.957  | 2783.319  | NM_018275 | 1899.622  | 1170.424  |
| AB037804  | 1466.487  | 1942.645  | AB046808  | 2742.82   | 3244.411  | AK021560  | 510.462   | 666.183   |
| U34249    | 1375.281  | 1341.483  | AK026265  | 2717.078  | 2957.546  | AF007149  | 301.208   | 240.566   |
| NM_003289 | 44763.063 | 51436.844 | AK027179  | 657.113   | 642.805   | AK001469  | 460.93    | 409.931   |
| AI200114  | 547.637   | 317.918   | NM_006466 | 1516.602  | 1773.878  | AK021627  | 777.722   | 899.238   |
| M23254    | 6341.835  | 2433.832  | NM_005681 | 1896.277  | 1760.52   | AF085859  | 1919.786  | 1417.698  |
| BE618539  | 432.828   | 340.588   | NM_015156 | 4296.661  | 4342.245  | AK026307  | 1596.731  | 2083.392  |
| R28062    | 3174.219  | 1785.228  | NM_012384 | 3427.919  | 3762.475  | AL049260  | 815.773   | 634.565   |
| U38545    | 547.065   | 514.197   | NM_004653 | 2446.992  | 2639.817  | AL049975  | 721.932   | 601.759   |
| AI627464  | 2645.146  | 3203.514  | AF233453  | 5425.303  | 4871.505  | AL080067  | 392.798   | 244.467   |
| BI756258  | 1563.112  | 2092.309  | D87454    | 10685.384 | 9756.168  | AL117464  | 1714.002  | 2329      |
| AF110020  | 445.149   | 643.713   | NM_007020 | 2705.011  | 2044.4    | AL080160  | 1169.611  | 1092.123  |
| AA608557  | 7320.136  | 10250.348 | NM_000713 | 8875.423  | 7671.63   | AL157477  | 1495.986  | 1125.074  |
| AL050095  | 4838.525  | 5873.4    | NM_016055 | 4389.295  | 4097.928  | AB002318  | 884.562   | 616.647   |
| U03272    | 1856.954  | 2617.977  | NM_013291 | 7483.669  | 8550.521  | AL357535  | 1114.134  | 1085.009  |
| NM_003098 | 1267.987  | 1596.884  | NM_002936 | 8687.894  | 11192.154 | AL049951  | 589.683   | 545.845   |
| NM_014781 | 4244.468  | 5055.046  | NM_014161 | 2922.182  | 2765.115  | AK024963  | 610.21    | 657.953   |
| BU629989  | 1246.837  | 1293.22   | BF312817  | 5152.901  | 6452.357  | AK023725  | 295.418   | 178.009   |
| M88310    | 3275.322  | 5451.88   | AF086491  | 3410.771  | 3420.411  | AK022936  | 793.873   | 318.604   |
| D16856    | 383.929   | 846.356   | NM_014856 | 1352.024  | 1135.088  | AK024385  | 916.738   | 710.794   |
| NM_000042 | 3000.042  | 4279.266  | NM_003492 | 1330.99   | 1149.781  | NM_017709 | 456.023   | 472.19    |
| AF035787  | 352.074   | 200.333   | NM_003780 | 34995     | 39790.898 | AF049615  | 362.504   | 450.461   |
| NM_003403 | 701.649   | 483.945   | NM_002711 | 1179.576  | 1704.629  | NM_014358 | 9444.74   | 10404.683 |
| NM_014808 | 966.984   | 664.869   | NM_000199 | 13986.435 | 13807.602 | AF009282  | 3316.785  | 3607.242  |
| AB006627  | 833.527   | 605.588   | NM_003778 | 64724.059 | 58588.324 | AF024704  | 4609.447  | 5083.932  |
| NM_000416 | 2167.291  | 1237.211  | NM_001041 | 538.347   | 877.547   | AF056431  | 842.496   | 1183.417  |
| NM_003382 | 721.094   | 680.934   | AK023263  | 2019.168  | 2308.773  | NM_016412 | 780.757   | 779.8     |
| NM_002965 | 5673.726  | 6648.543  | NM_004622 | 2148.71   | 2924.516  | AF009293  | 1021.787  | 1544.629  |
| AB007883  | 2732.378  | 2564.904  | AK021445  | 1435.742  | 1416.765  | NM_004158 | 47918.016 | 61053.73  |
| NM_003839 | 455.622   | 873.524   | NM_017934 | 8957.523  | 8070.692  | AF056444  | 3251.357  | 2462.827  |
| AK093780  | 8255.025  | 10082.959 | NM_014168 | 52815.664 | 48292.07  | AK000989  | 1116.098  | 1226.629  |
| AY009397  | 52782.445 | 65672.875 | AF211971  | 4890.711  | 3951.428  | AK002210  | 1581.686  | 1213.255  |
| NM_001649 | 1061.745  | 1755.557  | NM_002931 | 2606.206  | 2193.921  | AK021677  | 501.872   | 634.456   |
| NM_005492 | 4318.781  | 5842.739  | NM_013448 | 55646.496 | 49799.039 | AK001057  | 494.546   | 565.945   |
| AF038196  | 4257.201  | 5304.092  | X65232    | 37703.32  | 34092.625 | AK021471  | 664.085   | 1147.801  |
| AF320294  | 1912.013  | 3154.004  | U12767    | 965.16    | 1127.592  | AK021709  | 869.025   | 1168.074  |
| AF320293  | 313.468   | 704.216   | M33782    | 1524.854  | 1700.135  | AK025109  | 1009.478  | 859.49    |
| AF161436  | 3883.1    | 4513.525  | NM_002196 | 1008.686  | 1174.036  | AK025295  | 707.648   | 575.542   |
| NM_020402 | 1765.469  | 2432.526  | NM_017755 | 4899.968  | 5228.771  | AK026057  | 956.391   | 751.816   |
| NM_004299 | 4143.938  | 5902.873  | NM_015696 | 4237.87   | 4173.592  | AJ008117  | 6854.205  | 6648.938  |
| NM_001171 | 1619.094  | 2354.581  | AK022551  | 1564.814  | 1744.225  | AJ008147  | 18225.484 | 17517.592 |
| NM_002250 | 6202.849  | 6978.174  | AF085968  | 3226.488  | 2213.076  | AK024369  | 1185.148  | 1058.517  |
| S81591    | 1072.816  | 1541.514  | AK023665  | 1991.482  | 3132.149  | L43345    | 478.349   | 825.618   |
| NM_006323 | 7919.053  | 4261.805  | AB011136  | 1706.335  | 2002.463  | AF180297  | 3019.667  | 3345.796  |
| NM_016466 | 1365.299  | 859.685   | AF085898  | 5236.499  | 5088.248  | AK023245  | 4344.04   | 4719.313  |
| NM_001493 | 4985.852  | 3996.594  | AL442094  | 841.572   | 1069.588  | AF147303  | 1278.872  | 1301.113  |
| NM_003716 | 426.486   | 633.646   | AL161960  | 4447.271  | 6247.661  | S56365    | 48100.434 | 59973.816 |

|           |           |           |           |           |           |           |           |           |
|-----------|-----------|-----------|-----------|-----------|-----------|-----------|-----------|-----------|
| NM_014841 | 1351.956  | 2551.075  | AL049964  | 2653.376  | 3117.004  | AK023607  | 666.752   | 718.987   |
| NM_014426 | 5517.301  | 5279.514  | AF038184  | 858.937   | 1452.583  | AL049997  | 2570.901  | 2199.375  |
| NM_000258 | 17146.623 | 23005.688 | AK023269  | 2619.043  | 2746.515  | AK024509  | 827.532   | 650.654   |
| AB033055  | 8511.094  | 11819.507 | AF070564  | 5510.812  | 4546.79   | NM_017847 | 1586.935  | 2008.009  |
| AF311287  | 5416.253  | 8545.826  | AK021439  | 26220.494 | 23280.543 | AL049675  | 1085.325  | 1362.762  |
| AJ299442  | 6207.225  | 7074.352  | AF052099  | 2450.32   | 2405.119  | AL050151  | 384.905   | 555.538   |
| AB040897  | 390.183   | 620.528   | AL110111  | 4941.007  | 3344.969  | NM_003537 | 12550.704 | 16435.586 |
| NM_000129 | 997.848   | 1312.782  | AF070543  | 1841.235  | 1785.86   | AF056419  | 17910.908 | 20898.988 |
| NM_003762 | 7941.886  | 11112.921 | AF086509  | 527.905   | 692.02    | AF074983  | 1113.618  | 1243.471  |
| NM_018446 | 6802.858  | 8096.842  | NM_014778 | 2617.333  | 2582.725  | AK021862  | 497.383   | 358.157   |
| NM_000187 | 1020.989  | 1551.595  | AK001171  | 7423.915  | 6829.267  | AK024177  | 1304.091  | 1718.066  |
| NM_014465 | 1983.444  | 1584.559  | AK026273  | 11763.19  | 10911.748 | AK024827  | 4715.751  | 4329.409  |
| D87292    | 7678.159  | 7350.834  | NM_020250 | 15439.071 | 16687.771 | AK021952  | 1159.984  | 871.262   |
| NM_005498 | 1372.749  | 385.306   | AF055007  | 1802.91   | 2563.012  | K01564    | 1109.773  | 1399.494  |
| NM_016335 | 538.463   | 259.635   | NM_012337 | 1230.623  | 1459.166  | AB023175  | 885.568   | 1462.95   |
| NM_003165 | 3191.865  | 2459.656  | AL389879  | 8057.102  | 7596.745  | AL359563  | 337.584   | 420.741   |
| NM_003906 | 8413.354  | 4080.235  | AK021542  | 1030.158  | 1201.546  | NM_005304 | 546.866   | 521.405   |
| AL359590  | 28669.438 | 23510.877 | AK022869  | 2686.344  | 2694.033  | NM_014477 | 531.254   | 683.807   |
| NM_002861 | 8336.135  | 9244.199  | NM_016111 | 9535.385  | 9020.71   | L40521    | 864.836   | 1654.55   |
| NM_003080 | 3710.099  | 3954.013  | AF085958  | 60267.941 | 54073.445 | AF086478  | 538.332   | 681.161   |
| NM_004042 | 453.807   | 485.398   | AF086021  | 2941.163  | 2634.763  | AF086022  | 893.126   | 848.631   |
| NM_013268 | 439.218   | 989.273   | AL117655  | 612.449   | 618.628   | AK021514  | 27166.006 | 20112.846 |
| NM_002645 | 1860.798  | 2607.986  | AK024472  | 1047.167  | 887.973   | AJ008134  | 2141.467  | 1771.702  |
| AB033027  | 2662.096  | 4378.295  | AF087981  | 813.421   | 513.362   | L33808    | 3151.981  | 3771.654  |
| AK021805  | 5739.054  | 8686.66   | NM_017976 | 5182.913  | 5455.526  | D31886    | 1355.427  | 2105.172  |
| AB014550  | 1968.819  | 3076.076  | U06700    | 2076.921  | 1967.341  | U92024    | 396.701   | 340.028   |
| NM_006826 | 17947.941 | 22197.67  | U63828    | 2709.132  | 2488.165  | AK023330  | 1780.57   | 1833.598  |
| AB007973  | 6731.687  | 7495.304  | Z36794    | 1901.564  | 2094.356  | AF075071  | 1748.767  | 1665.354  |
| NM_002998 | 571.808   | 1028.596  | Z36828    | 6096.262  | 6656.597  | AL080213  | 456.686   | 623.353   |
| M96843    | 7839.052  | 9383.767  | AF086121  | 9033.044  | 7911.713  | AF147428  | 654.555   | 584.377   |
| NM_017791 | 1284.073  | 1716.515  | AF086140  | 734.667   | 593.167   | AF001892  | 357.475   | 311.196   |
| NM_005882 | 9529.036  | 12264.345 | AK026915  | 1677.295  | 1261.553  | AF075003  | 381.053   | 630.365   |
| BC012304  | 8564.78   | 8620.745  | AL110259  | 1051.848  | 823.503   | X93500    | 1197.249  | 887.019   |
| AB046815  | 3938.273  | 4911.675  | AB033100  | 9771.935  | 9814.563  | U79271    | 924.407   | 889.155   |
| AF075085  | 44425.84  | 43773.477 | AL390138  | 3362.382  | 3260.122  | NM_019888 | 529.867   | 502.31    |
| NM_005892 | 1478.606  | 501.808   | AL137290  | 9307.829  | 9011.577  | AK024609  | 3523.881  | 2975.374  |
| NM_006478 | 432.925   | 187.176   | AK022095  | 1275.242  | 854.275   | NM_018120 | 4151.949  | 3789.486  |
| AF132734  | 11943.932 | 4963.26   | NM_014124 | 33980.469 | 26601.402 | AK026874  | 1769.437  | 1696.587  |
| NM_018379 | 1508.927  | 905.777   | AF119888  | 679.187   | 791.831   | D17217    | 397.741   | 577.305   |
| NM_016403 | 10496.999 | 5761.167  | AK001551  | 1780.628  | 1589.58   | AF088033  | 1241.831  | 1070.3    |
| NM_015603 | 1502.81   | 852.59    | AK001825  | 1722.58   | 1865.839  | AY007156  | 740.321   | 685.754   |
| NM_001921 | 5483.85   | 6374.7    | AK024714  | 1822.326  | 2065.379  | AF086408  | 19082.986 | 16457.992 |
| NM_006230 | 8678.612  | 9519.26   | AK022363  | 1802.286  | 2198.795  | AK023979  | 1292.266  | 1119.126  |
| NM_014698 | 5116.33   | 5242.951  | AK022485  | 1119.812  | 985.834   | CY3Cy5    | 11304.966 | 1617.806  |
| NM_013400 | 5376.754  | 5923.168  | AK023395  | 5367.31   | 7039.607  | U13738    | 1357.224  | 1408.811  |
| AK026257  | 3003.02   | 4796.844  | AK023818  | 13411.492 | 11632.544 | BG681747  | 21913.359 | 17485.557 |
| AK023836  | 6090.449  | 6965.122  | AK024139  | 662.162   | 1017.252  | H63077    | 2357.769  | 2133.764  |
| NM_018108 | 3508.265  | 4292.125  | AK024206  | 6564.209  | 5201.3    | AA679352  | 13640.12  | 11061.715 |
| NM_005076 | 3908.499  | 4459.035  | NM_006262 | 3106.033  | 2619.358  | AA437291  | 497.748   | 617.789   |
| NM_000090 | 428.846   | 512.089   | AK026598  | 2977.252  | 2376.423  | X04503    | 4596.276  | 5781.567  |
| AF253321  | 974.196   | 1008.791  | AK023602  | 727.715   | 628.73    | D45917    | 1780.195  | 2083.33   |
| U80735    | 2569.484  | 2706.776  | NM_018097 | 20809.273 | 20079.811 | X52001    | 3464.159  | 4387.485  |
| NM_017850 | 1198.067  | 1272.421  | AF130043  | 825.706   | 801.123   | BI823872  | 6194.885  | 8989.128  |



|           |           |           |           |           |           |           |           |           |
|-----------|-----------|-----------|-----------|-----------|-----------|-----------|-----------|-----------|
| NM_016522 | 653.267   | 982.247   | Y11167    | 767.746   | 596.525   | AA430552  | 1565.168  | 2059.067  |
| NM_002224 | 1593.958  | 1867.236  | AK026813  | 1053.886  | 1191.31   | X66142    | 1062.443  | 936.222   |
| X07979    | 26678.068 | 25656.648 | AK027225  | 1325.997  | 1696.946  | NM_005913 | 434.152   | 310.989   |
| NM_003874 | 469.153   | 548.189   | AK023083  | 1717.887  | 1642.349  | R45054    | 3757.541  | 2143.444  |
| NM_000082 | 1106.477  | 1215.965  | AF130093  | 1553.486  | 1689.535  | NM_000620 | 398.395   | 430.186   |
| L13857    | 1293.856  | 396.351   | AF116622  | 603.936   | 991.855   | NM_000905 | 5311.181  | 3201.975  |
| NM_018095 | 2329.024  | 773.756   | NM_005325 | 966.446   | 1009.729  | SR5       | 3069.386  | 2087.762  |
| AF286164  | 383.343   | 331.8     | AF217967  | 1504.489  | 1722.589  | SR7       | 4107.306  | 25355.238 |
| AF146277  | 3063.221  | 1656.609  | NM_018150 | 8138.738  | 8371.614  | SR9       | 15975.14  | 2069.928  |
| NM_002555 | 451.639   | 530.648   | NM_017915 | 816.968   | 923.065   | CY3Cy5    | 7920.261  | 747.61    |
| AF055033  | 6682.624  | 6374.714  | NM_017855 | 38892.238 | 45190.035 | AF312769  | 1266.599  | 1210.714  |
| NM_017700 | 1289.403  | 1467.008  | AB007954  | 3281.723  | 3278.27   | AB020668  | 1722.731  | 2157.279  |
| J04422    | 693.608   | 1136.809  | AK026494  | 6466.582  | 7191.181  | AF309553  | 3305.712  | 1703.837  |
| NM_005242 | 439.958   | 847.497   | AK022067  | 1002.754  | 1058.807  | NM_003605 | 2575.082  | 1470.729  |
| NM_003020 | 1679.377  | 1989.064  | AK023508  | 1250.168  | 1231.723  | NM_000100 | 17221.338 | 13410.562 |
| NM_003404 | 39047.332 | 45703.156 | AK025840  | 1386.276  | 1675.017  | NM_003993 | 2350.427  | 2522.286  |
| NM_001114 | 1897.214  | 2640.2    | BC024009  | 3744.613  | 3228.872  | NM_018961 | 763.9     | 1056.84   |
| X82240    | 2508.69   | 3320.543  | AF128543  | 9263.659  | 8172.818  | NM_005585 | 2859.637  | 2591.8    |
| NM_013995 | 20222.365 | 22292.904 | NM_004185 | 1945.901  | 2088.395  | NM_012242 | 2980.645  | 1823.962  |
| NM_004455 | 498.288   | 613.789   | U84510    | 8434.073  | 7089.619  | NM_006895 | 829.311   | 499.601   |
| NM_006010 | 15642.774 | 17698.416 | S83198    | 16184.885 | 17019.004 | NM_001130 | 53524.43  | 33868.875 |
| K03191    | 2825.138  | 2581.571  | AF052119  | 14020.076 | 12949.442 | NM_002975 | 15406.411 | 11703.333 |
| NM_005075 | 11285.835 | 11120.136 | X94290    | 1720.47   | 1502.568  | AK023511  | 3759.949  | 3165.376  |
| NM_005192 | 16588.873 | 18992.518 | AK026685  | 26523.059 | 22722.023 | NM_002725 | 1178.566  | 665.415   |
| NM_004585 | 358.19    | 321.029   | AF090927  | 23473.959 | 26993.078 | NM_014375 | 10498.23  | 7180.375  |
| NM_015032 | 5889.136  | 4765.39   | AL137642  | 1352.405  | 1588.414  | NM_017812 | 9839.29   | 7745.375  |
| AK022956  | 3189.94   | 3166.808  | AL133619  | 1918.382  | 1762.519  | AF204173  | 732.116   | 533.266   |
| AK023121  | 1546.563  | 1578.736  | AL157496  | 565.281   | 588.719   | J03260    | 2113.859  | 1947.27   |
| NM_014104 | 17881.18  | 4418.258  | AK025902  | 4018.964  | 4102.865  | NM_005485 | 344.068   | 994.756   |
| NM_002392 | 612.381   | 331.221   | AL353949  | 519.858   | 1037.135  | NM_002865 | 2638.426  | 1527.408  |
| NM_002745 | 28693.311 | 14695.664 | NM_005181 | 3772.61   | 3893.017  | NM_003731 | 8359.813  | 6361.927  |
| NM_018215 | 3000.104  | 1974.608  | AF026945  | 767.028   | 814.168   | NM_005445 | 4684.608  | 3349.153  |
| NM_003390 | 1209.869  | 555.035   | AF143676  | 4051.767  | 4034.84   | NM_013292 | 3731.986  | 2308.796  |
| AL137747  | 2222.641  | 1415.454  | U66044    | 8240.955  | 9641.629  | NM_002387 | 2378.315  | 1307.72   |
| NM_014755 | 5851.279  | 5561.65   | NM_005247 | 53442.754 | 46124.168 | NM_000065 | 1214.157  | 796.236   |
| AF077188  | 10526.648 | 11423.913 | NM_005283 | 2207.412  | 1764.116  | AB023217  | 602.592   | 585.308   |
| NM_018335 | 821.261   | 1204.848  | AL122089  | 1914.342  | 2057.779  | L08902    | 577.497   | 567.827   |
| NM_006984 | 1151.626  | 1335.431  | AA203665  | 7127.275  | 6888.316  | J02639    | 2644.77   | 2674.666  |
| AF231919  | 1417.279  | 1753.324  | U95646    | 1666.694  | 1326.728  | M58050    | 4660.954  | 4947.691  |
| NM_018214 | 473.415   | 616.977   | Y16705    | 1842.866  | 1491.234  | NM_007263 | 11595.498 | 9158.991  |
| Y11718    | 322.207   | 683.555   | AF279775  | 3772.331  | 3526.024  | AF206020  | 2237.347  | 1170.457  |
| AL133644  | 3779.639  | 3895.918  | NM_001821 | 3138.234  | 2554.502  | NM_014410 | 1559.943  | 840.309   |
| NM_002705 | 4214.112  | 5158.562  | NM_005647 | 1179.47   | 718.976   | NM_014754 | 8585.595  | 5549.157  |
| NM_004195 | 740.346   | 812.224   | X64978    | 6364.38   | 5659.806  | AF050146  | 3041.144  | 4126.637  |
| NM_019023 | 46071.957 | 44594.441 | NM_000912 | 28360.859 | 31121.141 | NM_000115 | 2271.687  | 3270.754  |
| NM_004420 | 1231.426  | 1560.604  | NM_002345 | 2051.637  | 2090.472  | NM_006695 | 4533.763  | 8589.534  |
| NM_002970 | 746.417   | 897.485   | U57971    | 2038.198  | 2117.736  | NM_015965 | 4226.771  | 2430.859  |
| NM_005495 | 25328.361 | 26043.678 | X89673    | 1128.603  | 1121.044  | NM_003051 | 2825.319  | 2086.802  |
| NM_015387 | 3018.821  | 1602.827  | AK024593  | 2377.249  | 2115.467  | NM_145342 | 4580.136  | 2648.848  |
| NM_001733 | 2347.321  | 1454.986  | Z83934    | 907.274   | 913.719   | AJ278917  | 9348.428  | 7212.458  |
| NM_005065 | 600.625   | 484.343   | NM_018355 | 3089.432  | 2640.98   | AF016495  | 1576.208  | 1526.401  |
| NM_017825 | 9868.339  | 6983.34   | AK022020  | 3061.529  | 2816.239  | AK025886  | 1074.181  | 676.112   |
| NM_014035 | 2122.743  | 2281.86   | U17634    | 749.899   | 658.835   | NM_003055 | 406.717   | 326.322   |

|           |           |           |             |           |           |           |           |           |
|-----------|-----------|-----------|-------------|-----------|-----------|-----------|-----------|-----------|
| NM_020122 | 11615.232 | 13338.507 | AK000263    | 7186.456  | 6919.649  | NM_00172C | 5979.863  | 4510.676  |
| NM_00229E | 51804.414 | 66214.242 | Y13895      | 841.075   | 1046.693  | NM_01839C | 1173.845  | 1172.984  |
| AK027130  | 823.813   | 1524.61   | NM_017447   | 1153.657  | 1151.638  | AB037724  | 4263.31   | 2227.712  |
| NM_00547E | 14801.567 | 20374.689 | AL049452    | 942.552   | 909.791   | AK025086  | 1052.613  | 811.599   |
| NM_00573C | 14468.794 | 19483.928 | NM_016622   | 1990.372  | 2123.85   | NM_01414C | 2095.726  | 2897.11   |
| NM_005392 | 1878.52   | 1724.035  | AK026976    | 1078.214  | 1127.214  | NM_00291E | 1830.782  | 2116.083  |
| AL133572  | 6099.785  | 6099.777  | AF070559    | 1595.699  | 1049.73   | M20700    | 1965.21   | 2813.892  |
| AK022500  | 1706.841  | 1990.089  | D42043      | 6553.73   | 5475.227  | NM_001034 | 4552.264  | 5505.241  |
| AB013897  | 1577.075  | 2131.48   | CY3Cy5      | 3853.512  | 338.701   | NM_00268E | 1077.163  | 1572.762  |
| NM_00552E | 33419.219 | 33504.848 | Z11694      | 14496.827 | 14618.914 | AK000800  | 2063.258  | 1315.236  |
| AK001669  | 2208.61   | 1682.863  | BF983177    | 2780.147  | 2629.915  | NM_018154 | 1738.851  | 1393.647  |
| NM_00619E | 8118.469  | 4721.619  | Z26317      | 4058.453  | 3729.055  | BC006287  | 3440.007  | 2533.379  |
| NM_00619C | 10186.205 | 11398.921 | X16983      | 23193.08  | 27472.809 | AB023198  | 4459.345  | 5246.097  |
| NM_00636E | 1723.389  | 505.793   | H-Y 00711 I | 67584.961 | 75013.594 | NM_005231 | 4600.212  | 3749.397  |
| NM_00161E | 5483.826  | 3606.116  | H-X 16707 I | 5552.682  | 5032.29   | AF064729  | 1202.859  | 720.083   |
| BC000401  | 8475.32   | 9962.28   | AL038354    | 66311.008 | 68810.547 | NM_005412 | 12925.693 | 9587.533  |
| NM_00642E | 4627.964  | 7740.418  | R14607      | 3963.431  | 3776.368  | NM_012113 | 2129.259  | 1368.445  |
| BF344046  | 1942.902  | 2219.486  | W84867      | 815.575   | 1124.617  | NM_00272E | 891.212   | 753.868   |
| AF432218  | 10972.703 | 16937.717 | SR6         | 2420.461  | 1969.377  | NM_01437E | 8123.247  | 7683.015  |
| NM_00428E | 6334.026  | 8687.855  | SR8         | 8057.272  | 18134.242 | NM_017812 | 10057.461 | 9329.886  |
| AK025082  | 812.493   | 1019.331  | SR10        | 27649.482 | 5671.8    | AF204173  | 699.984   | 554.517   |
| AF086535  | 964.795   | 798.189   | CY3Cy5      | 1810.605  | 126.497   | J03260    | 2074.281  | 1779.569  |
| AB040901  | 1489.163  | 1255.484  | NM_001284   | 48633.266 | 63900.902 | AF068236  | 45356.512 | 45264.805 |
| AL137406  | 3335.006  | 3915.263  | NM_00284E   | 451.802   | 694.562   | H94487    | 1735.554  | 2145.135  |
| NM_012253 | 4616.063  | 4212.68   | U31099      | 856.639   | 799.931   | BG681747  | 22587.873 | 27649.967 |
| NM_00687E | 1732.535  | 1306.87   | NM_001105   | 3140.687  | 3180.066  | H63077    | 1893.375  | 2642.892  |
| NM_000293 | 2716.383  | 2610.586  | NM_00558E   | 1118.131  | 1242.619  | AA679352  | 14581.118 | 19136.318 |
| AF153821  | 1035.798  | 360.144   | NM_00207E   | 4927.249  | 6139.088  | AA437291  | 696.697   | 1077.983  |
| NM_01337C | 811.337   | 480.264   | Y08756      | 32904.168 | 46616.402 | X04503    | 4069.624  | 6099.574  |
| NM_00331C | 3378.362  | 2033.449  | NM_005563   | 7661.655  | 11590.495 | D45917    | 2548.458  | 3167.065  |
| AK024461  | 2140.692  | 1447.347  | AY007090    | 1448.957  | 1510.126  | X52001    | 3280.637  | 1658.212  |
| AK025485  | 629.507   | 641.413   | NM_005102   | 3998.443  | 4022.55   | BI823872  | 5502.777  | 3374.682  |
| NM_01763E | 1989.473  | 2486.505  | NM_00451E   | 924.318   | 926.432   | AA430552  | 3324.636  | 1916.89   |
| X62534    | 1369.724  | 1753.035  | NM_006501   | 974.139   | 765.957   | X66142    | 982.625   | 795.659   |
| AF027147  | 18007.188 | 19076.016 | NM_00271E   | 6139.881  | 6082.338  | NM_005913 | 532.23    | 399.763   |
| M62399    | 2796.85   | 3648.824  | AB035356    | 818.069   | 868.764   | R45054    | 4234.326  | 3720.345  |
| NM_002357 | 971.322   | 1129.263  | NM_005603   | 35885.344 | 18328.801 | NM_00090E | 5020.815  | 3382.761  |
| U71600    | 1586.826  | 2736.521  | NM_001061   | 1267.746  | 399.101   | AL117398  | 3697.668  | 2435.369  |
| NM_004472 | 1420.888  | 1509.472  | AI075338    | 932.474   | 305.161   | AY007158  | 55288.785 | 53078.66  |
| AB037862  | 5639.387  | 5838.846  | NM_006834   | 4778.582  | 4825.449  | M58050    | 4077.854  | 2736.899  |
| AF085924  | 806.682   | 791.099   | AB011100    | 2916.594  | 2627.079  | NM_007263 | 10048.597 | 7661.922  |
| AK023887  | 678.96    | 877.633   | U61741      | 1668.421  | 1712.359  | AF206020  | 2235.394  | 1345.752  |
| AF088022  | 9115.882  | 8227.239  | NM_012402   | 4360.49   | 4985.143  | NM_01441C | 2498.26   | 2785.52   |
| AK026537  | 2203.591  | 2755.435  | M76676      | 3826.751  | 3962.761  | AF305835  | 425.332   | 728.836   |
| NM_01548E | 3556.654  | 3839.194  | NM_003857   | 1477.734  | 1589.558  | AF312769  | 845.089   | 1002.803  |
| AF085992  | 415.217   | 735.212   | AL137690    | 782.864   | 903.98    | AB020668  | 1868.006  | 2243.344  |
| NM_00266E | 4509.764  | 3509.138  | Z83804      | 3682.191  | 4084.002  | NM_006203 | 16360.25  | 13580.789 |
| AF202145  | 1955.446  | 1600.125  | NM_00438E   | 2927.182  | 3609.404  | NM_013261 | 682.323   | 375.882   |
| AK026155  | 2135.841  | 1892.767  | U67784      | 1293.808  | 1740.585  | AF309553  | 3495.278  | 4330.66   |
| NM_018052 | 19035.234 | 19714.664 | NM_00736E   | 2408.857  | 2347.067  | NM_00360E | 2675.864  | 3348.385  |
| AF143322  | 480.802   | 919.491   | NM_000592   | 877.012   | 847.999   | NM_00190C | 58525.047 | 61915.973 |
| AK022386  | 3123.695  | 4495.881  | NM_016584   | 21531.385 | 19452.279 | NM_003993 | 2381.527  | 1365.244  |
| NM_002767 | 5858.228  | 6980.922  | NM_00181E   | 3434.326  | 2894.896  | NM_018961 | 762.265   | 767.841   |

|           |           |           |           |           |           |           |           |           |
|-----------|-----------|-----------|-----------|-----------|-----------|-----------|-----------|-----------|
| AF131846  | 7776.285  | 7407.715  | NM_000064 | 12473.45  | 10673.098 | NM_005586 | 2769.223  | 2988.359  |
| AF088069  | 2726.448  | 3380.342  | NM_003264 | 4886.305  | 4246.395  | NM_012242 | 2064.821  | 1644.721  |
| AF086551  | 891.113   | 1517.089  | NM_006725 | 4759.729  | 4308.847  | NM_006896 | 890.616   | 725.8     |
| AF263545  | 593.222   | 858.873   | NM_016608 | 1207.138  | 1015.303  | NM_001130 | 50270.492 | 37980.773 |
| NM_013393 | 5234.786  | 6018.495  | NM_004817 | 1234.729  | 568.515   | NM_002975 | 18221.525 | 25435.748 |
| AK025072  | 2289.89   | 2334.567  | NM_018975 | 12541.832 | 6291.43   | AK023511  | 4148.188  | 4870.98   |
| AK022410  | 806.191   | 897.455   | AB023215  | 10862.16  | 5230.441  | NM_014556 | 1948.354  | 1294.611  |
| L10378    | 12404.299 | 15075.473 | NM_018073 | 1392.194  | 1288.527  | NM_001615 | 61301.117 | 64535.207 |
| AK022179  | 938.456   | 1132.448  | AL137529  | 2209.454  | 1984.426  | AK025886  | 1576.461  | 1612.332  |
| AJ227860  | 1516.333  | 1601.997  | NM_012332 | 2558.08   | 2777.227  | AB014514  | 2580.263  | 3424.545  |
| AL157448  | 1194.687  | 1381.774  | AK026648  | 1309.984  | 1407.67   | NM_002865 | 2816.754  | 3657.198  |
| AF026942  | 872.638   | 739.02    | NM_000497 | 1977.224  | 2162.926  | NM_003566 | 1444.05   | 1517.699  |
| AJ276429  | 792.973   | 529.839   | NM_017421 | 1589.459  | 1511.999  | NM_007156 | 16209.896 | 9760.063  |
| AL117657  | 1743.987  | 1279.74   | AK025977  | 19427.916 | 20408.385 | NM_003731 | 7176.336  | 6053.244  |
| AK023589  | 614.8     | 298.121   | AK023130  | 7949.062  | 9921.818  | NM_005446 | 3779.186  | 3140.191  |
| AK021590  | 1499.926  | 687.637   | NM_000273 | 1432.101  | 1344.734  | NM_013292 | 3949.018  | 5293.063  |
| AB002441  | 454.232   | 326.586   | NM_002899 | 14358.706 | 13079.649 | NM_002387 | 2900.222  | 2894.277  |
| AK023998  | 1483.329  | 794.667   | NM_000486 | 2104.836  | 1844.177  | NM_000066 | 1258.676  | 1204.246  |
| AK021643  | 685.753   | 691.412   | BE876237  | 1758.159  | 1579.986  | AB023217  | 873.498   | 503.666   |
| Z11802    | 420.094   | 504.215   | NM_005397 | 1112.137  | 1298.792  | L08902    | 685.11    | 464.705   |
| U54734    | 493.381   | 799.662   | NM_000806 | 12473.02  | 11116.7   | J02639    | 2379.232  | 1791.696  |
| U84507    | 855.403   | 1243.139  | NM_006320 | 1939.699  | 1696.197  | NM_005231 | 4741.185  | 4878.99   |
| X65706    | 414.537   | 578.091   | AB014511  | 5220.589  | 4841.494  | AF064729  | 548.103   | 686.719   |
| AK000872  | 2220.75   | 3813.402  | NM_014252 | 5677.312  | 4501.365  | NM_005412 | 14251.945 | 13941.046 |
| AK027147  | 4791.987  | 5368.121  | NM_001662 | 8702.367  | 6559.139  | NM_012113 | 2831.093  | 2151.076  |
| AK026084  | 328.923   | 397.883   | NM_016131 | 8447.215  | 5142.091  | NM_002150 | 4566.508  | 4356.101  |
| AK022415  | 10708.835 | 7894.045  | NM_006822 | 1574.02   | 1057.822  | NM_004595 | 4294.003  | 4633.698  |
| AL137368  | 1180.94   | 1249.337  | NM_012142 | 9496.995  | 5785.606  | NM_020178 | 495.829   | 647.252   |
| AK021932  | 1198.289  | 1433.367  | NM_016429 | 1720.663  | 1039.888  | NM_002264 | 582.526   | 1248.113  |
| AK026787  | 2347.144  | 3272.291  | NM_014580 | 1115.433  | 1094.444  | NM_014754 | 9317.298  | 14623.945 |
| AK023542  | 1502.492  | 2092.599  | AB028998  | 1018.261  | 1132.303  | D49387    | 1404.395  | 1870.909  |
| AK000203  | 1426.066  | 1832.646  | NM_000153 | 1178.681  | 1207.635  | AF050146  | 3747.987  | 5050.689  |
| AK021845  | 1772.6    | 1084.797  | NM_002033 | 6815.851  | 8870.789  | NM_006804 | 7639.509  | 7231.688  |
| NM_018592 | 1075.991  | 322.009   | AK091794  | 625.267   | 594.029   | NM_015966 | 4323.317  | 4690.401  |
| NM_018503 | 7146.975  | 2711.955  | NM_004111 | 4232.243  | 4711.913  | NM_003051 | 2924.973  | 2704.251  |
| NM_016449 | 5980.259  | 3316.432  | AF085966  | 5171.515  | 4498.613  | NM_145342 | 3799.437  | 3696.066  |
| AL049670  | 4466.767  | 2355.819  | NM_005316 | 2118.455  | 1875.276  | AJ278917  | 13014.118 | 10530.937 |
| NM_018512 | 3502.243  | 2721.259  | NM_016316 | 3731.464  | 4361.704  | AK025641  | 27055.516 | 24092.479 |
| AK022412  | 2919.095  | 4124.956  | NM_003369 | 11474.272 | 10462.441 | NM_000620 | 604.476   | 577.912   |
| AK023073  | 2229.362  | 2693.977  | NM_000057 | 3116.925  | 2886.634  | NM_000905 | 5099.402  | 3310.409  |
| AK023697  | 500.114   | 767.109   | NM_018343 | 4606.22   | 4113.095  | NM_001720 | 6969.004  | 6617.767  |
| AK023922  | 985.606   | 1155.635  | AK095793  | 1960.728  | 1862.898  | NM_018390 | 1132.159  | 1620.13   |
| AK022438  | 1755.064  | 1811.592  | NM_003177 | 4490.438  | 3876.689  | AB037724  | 5284.335  | 8103.862  |
| AK023764  | 1346.501  | 1615.203  | NM_017719 | 1346.244  | 1107.626  | AK025086  | 1772.266  | 2213.621  |
| AK024082  | 964.505   | 1259.167  | AF064078  | 1509.16   | 1960.353  | AK026151  | 7591.625  | 9750.505  |
| NM_003948 | 413.078   | 672.32    | AL049688  | 1811.843  | 1520.477  | NM_014140 | 1541.435  | 2259.703  |
| Z27405    | 9091.004  | 6564.314  | NM_002737 | 2524.549  | 2156.342  | NM_002916 | 1528.738  | 2472.7    |
| AK023412  | 1881.316  | 2273.688  | Z25427    | 2782.536  | 2002.59   | NM_001034 | 4413.741  | 4463.886  |
| NM_014617 | 33847.195 | 35475.152 | NM_004672 | 8901.826  | 7027.033  | NM_002686 | 1407.968  | 1396.653  |
| AK074682  | 5768.423  | 6633.451  | NM_001353 | 3315.548  | 2089.877  | NM_017686 | 1018.634  | 1236.29   |
| X74605    | 840.92    | 1152.075  | NM_006214 | 3544.555  | 2064.553  | AL096734  | 398.973   | 356.889   |
| AK024513  | 973.924   | 1164.076  | AJ010228  | 6856.115  | 3696.953  | AK000800  | 2089.033  | 1631.605  |
| BC036692  | 816.168   | 692.914   | NM_005198 | 3592.854  | 2190.806  | NM_018154 | 1825.203  | 1493.818  |

|           |           |           |             |           |           |           |           |           |
|-----------|-----------|-----------|-------------|-----------|-----------|-----------|-----------|-----------|
| AJ009640  | 5940.478  | 5322.66   | NM_001061   | 1413.874  | 1792.264  | NM_00535E | 347.828   | 314.941   |
| Y11163    | 600.569   | 331.877   | AI075338    | 1631.791  | 2000.013  | BC006287  | 3062.921  | 2403.323  |
| AF086391  | 338.528   | 331.487   | Z11694      | 12136.696 | 12100.768 | AB023198  | 4244.771  | 3655.433  |
| AF147340  | 528.938   | 697.26    | BF983177    | 2249.397  | 1890.978  | AF304163  | 8349.351  | 7799.561  |
| AF035308  | 3983.499  | 3698.659  | Z26317      | 4059.88   | 3679.383  | NM_00689E | 842.233   | 717.331   |
| NM_014054 | 3830.732  | 5118.812  | X16983      | 27118.281 | 25379.521 | NM_001130 | 50352.18  | 42117.109 |
| AK021840  | 31638.441 | 40301.234 | BG679991    | 1738.387  | 1386.588  | NM_00297E | 16803.842 | 19410.641 |
| AK022228  | 2085.846  | 3016.367  | H-Y 00097 I | 3898.328  | 4521.642  | AK023511  | 3780.52   | 3528.997  |
| AK022031  | 644.019   | 914.255   | H-M 59964   | 2046.628  | 2457.792  | NM_01455E | 1751.65   | 1612.612  |
| AF086480  | 1661.641  | 2339.108  | H-X 16707 I | 4613.863  | 5699.537  | NM_00272E | 1307.185  | 1234.151  |
| AK022122  | 520.834   | 902.342   | R14607      | 3849.079  | 3660.042  | AF204173  | 1104.039  | 1488.368  |
| AK000806  | 24759.43  | 20858.109 | W84867      | 904.05    | 734.144   | J03260    | 2621.166  | 3456.832  |
| NM_016471 | 2820.605  | 2896.212  | NM_02197E   | 5602.173  | 4295.825  | U13738    | 882.288   | 1117.222  |
| Z11852    | 585.584   | 781.016   | NM_00571E   | 15789.36  | 7386.158  | H63077    | 1838.909  | 2564.987  |
| NM_001145 | 510.307   | 501.333   | NM_00285E   | 6638.781  | 8208.44   | AA679352  | 12873.298 | 19196.512 |
| NM_005364 | 6476.295  | 5408.538  | NM_004817   | 1673.962  | 1930.379  | X04503    | 3943.498  | 3901.816  |
| AK023482  | 4186.68   | 4882.033  | NM_01897E   | 13268.763 | 18847.441 | D45917    | 2074.165  | 2603.129  |
| AK022798  | 544.911   | 1015.666  | NM_001284   | 44392.605 | 54786.813 | X52001    | 3692.469  | 3287.031  |
| AL157423  | 511.513   | 329.612   | NM_00324E   | 11436.007 | 9826.097  | BI823872  | 6529.776  | 5129.656  |
| AK023115  | 396.327   | 287.225   | NM_00284E   | 496.783   | 803.331   | AA430552  | 3555.172  | 3169.473  |
| AK023176  | 1151.988  | 897.758   | NM_00558E   | 1866.877  | 1320.343  | X66142    | 1486.638  | 887.134   |
| AL161991  | 16136.475 | 12896.034 | NM_00207E   | 1546.773  | 1862.313  | NM_00591E | 963.017   | 1097.67   |
| D17032    | 16609.072 | 14884.196 | Y08756      | 5762.377  | 6643.032  | R45054    | 4042.289  | 3851.153  |
| AL137292  | 731.579   | 799.456   | NM_00643E   | 1136.157  | 1412.039  | NM_002387 | 2390.528  | 1500.237  |
| NM_017941 | 1495.568  | 1805.605  | NM_00451E   | 1157.987  | 1195.558  | NM_00006E | 1197.355  | 951.948   |
| AF301016  | 734.712   | 1011.118  | NM_006501   | 695.274   | 870.375   | AB023217  | 527.059   | 478.713   |
| BE900527  | 1598.943  | 2943.388  | NM_00271E   | 5231.698  | 4693.624  | L08902    | 861.154   | 542.189   |
| D28384    | 54346.242 | 69310.727 | AB035356    | 1054.349  | 1035.157  | NM_01441C | 1957.695  | 2602.397  |
| Z83947    | 512.414   | 680.264   | AV752086    | 1552.345  | 1197.827  | AF305835  | 754.113   | 1112.108  |
| AF118079  | 28239.316 | 36162.938 | NM_01610E   | 9373.6    | 6299.58   | NM_00620E | 19587.859 | 20888.676 |
| AF277572  | 849.297   | 1018.442  | NM_00437E   | 2742.105  | 1603.383  | NM_013261 | 717.985   | 1585.774  |
| AL365413  | 3698.95   | 4154.501  | NM_01425E   | 5037.674  | 5784.75   | NM_00355E | 454.623   | 671.204   |
| NM_00525E | 9171.785  | 9109.565  | NM_00166E   | 8361.884  | 9524.81   | NM_00360E | 2303.749  | 2290.76   |
| NM_00044C | 5191.449  | 5381.906  | NM_016131   | 9024.558  | 10326.89  | NM_00010C | 18238.189 | 16511.738 |
| NM_001297 | 3045.75   | 2831.638  | NM_00682E   | 1942.785  | 2404.102  | NM_00190C | 56751.367 | 65509.051 |
| NM_00440E | 8678.468  | 8897.15   | NM_01214E   | 10331.955 | 12886.487 | NM_00399E | 2582.061  | 2100.054  |
| X64993    | 1254.752  | 1460.722  | NM_01642E   | 1843.161  | 2404.312  | NM_018961 | 953.156   | 842.765   |
| NM_004434 | 11200.202 | 11150.568 | NM_006834   | 4218.218  | 5100.003  | NM_00558E | 3767.73   | 3574.209  |
| NM_00626E | 576.089   | 1220.857  | AB011100    | 2311.317  | 2642.364  | NM_01224E | 2352.144  | 1604.858  |
| NM_01623C | 2471.447  | 3496.885  | U61741      | 1582.652  | 1579.338  | NM_003051 | 2758.53   | 2028.355  |
| NM_00108E | 835.552   | 1254.004  | NM_01240E   | 3552.466  | 3766.312  | NM_14534E | 3585.152  | 2961.975  |
| AK023966  | 3694.296  | 2487.944  | M76676      | 3571.119  | 4118.279  | AJ278917  | 13474.509 | 11158.554 |
| AK025702  | 3143.864  | 2873.252  | AL137690    | 1100.779  | 1264.795  | AK025641  | 22282.617 | 20987.693 |
| NM_01895E | 492.047   | 292.006   | Z83804      | 3942.829  | 4676.101  | AB014514  | 3558.278  | 6249.833  |
| NM_002367 | 527.112   | 307.525   | NM_00736E   | 2454.968  | 2930.458  | NM_00356E | 1363.189  | 975.661   |
| AK022038  | 763.283   | 694.671   | NM_00059E   | 1314.145  | 1112.817  | NM_00715E | 19251.043 | 13950.509 |
| AK025119  | 1116.141  | 906.907   | NM_016584   | 20440.531 | 20516.285 | NM_003731 | 10244.449 | 7756.889  |
| NM_00636E | 479.484   | 880.125   | NM_00181E   | 3633.578  | 3691.615  | NM_00544E | 6044.833  | 4330.792  |
| AJ224170  | 1253.787  | 1904.674  | NM_000064   | 9708.123  | 7454.545  | NM_01329E | 4207.446  | 3902.341  |
| AL137389  | 253.812   | 409.596   | NM_003264   | 4248.458  | 3766.534  | AK000800  | 1695.357  | 1190.555  |
| AF085866  | 2895.723  | 3897.123  | NM_00672E   | 3416.087  | 2509.535  | NM_018154 | 1561.536  | 924.276   |
| CY3Cy5    | 9059.98   | 676.618   | NM_00332E   | 1631.416  | 950.092   | BC006287  | 3380.205  | 3017.125  |
| AA397813  | 26097.582 | 32026.631 | NM_00456E   | 38636.598 | 23156.379 | AB023198  | 4614.845  | 3345.563  |

|             |           |           |             |           |           |           |           |           |
|-------------|-----------|-----------|-------------|-----------|-----------|-----------|-----------|-----------|
| W47350      | 1043.925  | 1586.874  | NM_000202   | 1776.875  | 1012.959  | AF304163  | 9150.729  | 8984.061  |
| AF097935    | 685.535   | 1226.175  | Z25427      | 2566.691  | 2811.906  | NM_005231 | 4819.385  | 4136.119  |
| W68291      | 23798.893 | 25484.336 | NM_004672   | 8718.261  | 9032.051  | AF064729  | 1372.254  | 1594.717  |
| N64384      | 2046.643  | 2053.098  | NM_001353   | 4206.002  | 4785.511  | NM_005412 | 13656.628 | 20766.137 |
| H-X 53655 I | 1863.453  | 1352.948  | NM_006214   | 4003.177  | 4973.104  | NM_012113 | 2706.66   | 3498.048  |
| H-U 05770 I | 6652.63   | 6805.969  | AJ010228    | 8602.222  | 9273.039  | NM_002150 | 4771.687  | 8457.427  |
| H-M 65199   | 10859.717 | 13261.322 | NM_005198   | 4148.253  | 4204.782  | NM_004595 | 4127.932  | 7382.598  |
| H-M 32315   | 4742.486  | 7202.15   | NM_018073   | 1855.992  | 1712.708  | NM_020178 | 736.341   | 941.065   |
| H-V00536M   | 3338.154  | 4394.931  | AL137529    | 1909.44   | 1726.873  | NM_002264 | 951.131   | 1869.872  |
| H-D85429M   | 4990.854  | 5375.511  | NM_012332   | 2269.981  | 2074.648  | D49387    | 1396.873  | 1925.538  |
| BF439832    | 2611.558  | 4212.125  | AK026648    | 1031.075  | 1048.325  | AF050146  | 3463.14   | 4148.21   |
| BG819162    | 1380.275  | 1632.844  | NM_000497   | 1577.216  | 1851.85   | NM_000116 | 2757.239  | 3015.82   |
| NM_017532   | 3337.374  | 4685.171  | NM_017421   | 1413.218  | 1898.461  | NM_006698 | 4916.394  | 6510.067  |
| SR6         | 2981.605  | 2619.807  | AK025977    | 10159.903 | 13180.187 | NM_006804 | 9742.241  | 7807.886  |
| SR8         | 9764.841  | 27840.344 | NM_002899   | 12666.439 | 12363.175 | NM_015968 | 4664.751  | 4361.292  |
| SR10        | 34786.449 | 11807.414 | NM_000486   | 1892.498  | 2328.531  | NM_004517 | 2032.292  | 1144.391  |
| CY3Cy5      | 4928.504  | 342.366   | BE876237    | 1921.597  | 1917.121  | AI017418  | 453.548   | 320.612   |
| NM_004447   | 8060.011  | 9476.729  | NM_005397   | 1187.734  | 993.974   | NM_000679 | 1724.141  | 986.525   |
| NM_001204   | 1407.996  | 1444.482  | NM_000806   | 8577.801  | 6727.474  | AF218006  | 45226.957 | 31164.197 |
| BF131321    | 1043.503  | 902.599   | NM_006320   | 2346.682  | 1189.681  | AK026935  | 11088.184 | 7331.89   |
| NM_012116   | 3064.518  | 2830.946  | AB014511    | 5092.982  | 3117.864  | NM_020162 | 3163.052  | 3314.574  |
| NM_000020   | 2973.375  | 3239.551  | NM_021976   | 5677.617  | 5716.42   | AK027124  | 30949.594 | 26438.205 |
| NM_000956   | 1165.714  | 955.709   | NM_005718   | 15980.79  | 16683.086 | M31212    | 29876.58  | 26830.336 |
| NM_002442   | 3373.915  | 3320.463  | NM_018264   | 2689.714  | 3014.33   | AL117398  | 3587.068  | 2870.9    |
| AB033091    | 6647.653  | 6358.894  | NM_014580   | 1089.382  | 1184.979  | AY007158  | 50255.672 | 56521.547 |
| NM_004557   | 8187.044  | 7319.907  | AB028998    | 841.685   | 985.672   | NM_001720 | 7494.096  | 7989.49   |
| NM_014757   | 2822.093  | 3036.626  | NM_000153   | 878.906   | 832.064   | NM_018390 | 1591.496  | 1689.771  |
| NM_017893   | 590.736   | 573.313   | NM_002033   | 5575.02   | 7648.407  | AB037724  | 6000.247  | 9180.656  |
| NM_002980   | 2464.995  | 2656.003  | AK091794    | 730.937   | 574.501   | NM_014140 | 1477.505  | 2488.633  |
| NM_015886   | 1784.39   | 2064.997  | NM_016316   | 3988.188  | 5323.67   | NM_002916 | 1396.165  | 1551.559  |
| NM_020358   | 481.015   | 731.412   | NM_003369   | 12070.21  | 12991.59  | M20700    | 2150.363  | 2400.52   |
| NM_004262   | 1013.592  | 1260.115  | NM_000057   | 3394.034  | 3048.055  | NM_001034 | 4529.477  | 3556.666  |
| BG491613    | 9971.908  | 10378.43  | NM_018343   | 4953.407  | 4721.511  | NM_002688 | 1261.795  | 1114.301  |
| NM_005719   | 64842.629 | 67379.758 | AK095793    | 1956.639  | 1700.017  | NM_017686 | 1015.668  | 1134.369  |
| NM_002728   | 913.264   | 899.912   | NM_003177   | 4249.26   | 3948.2    | AL096734  | 559.103   | 860.632   |
| NM_000450   | 1280.051  | 1020.06   | NM_017719   | 1419.711  | 906.049   | NM_016645 | 1936.638  | 1110.949  |
| NM_017735   | 3026.699  | 3644.347  | AF064078    | 1254.318  | 929.955   | L14723    | 6364.692  | 3260.246  |
| AB033044    | 4588.087  | 4526.579  | AL049688    | 1669.395  | 1139.559  | AK024462  | 12532.784 | 6792.389  |
| AB014564    | 2186.566  | 2938.728  | NM_002737   | 2229.127  | 1213.774  | NM_019601 | 373.205   | 221.692   |
| NM_020230   | 4153.272  | 5877.828  | NM_002719   | 5570.286  | 6290.2    | NM_002206 | 1116.59   | 864.02    |
| NM_006762   | 50225.695 | 61915.129 | AV752086    | 1616.046  | 2008.57   | NM_007074 | 940.14    | 1020.282  |
| NM_016430   | 952.571   | 2056.33   | NM_016102   | 11699.143 | 16870.318 | NM_002230 | 1043.087  | 1105.431  |
| NM_002335   | 874.269   | 838.577   | NM_004376   | 2185.885  | 2800.853  | NM_003815 | 3067.576  | 3462.54   |
| BE382905    | 959.829   | 1138.107  | NM_000272   | 1354.441  | 2147.708  | NM_001430 | 1306.995  | 1279.863  |
| NM_001701   | 762.975   | 1072.712  | NM_001061   | 848.291   | 867.487   | AB010098  | 622.302   | 804.728   |
| AK022558    | 5851.542  | 6621.711  | AI075338    | 1245.042  | 1365.604  | U17989    | 777.798   | 564.132   |
| NM_000809   | 656.78    | 434.332   | Z11694      | 8684.924  | 10682.657 | AL137595  | 571.952   | 652.861   |
| AK026842    | 830.816   | 815.734   | BF983177    | 1920.806  | 2249.615  | NM_018028 | 684.916   | 833.049   |
| NM_002395   | 4724.56   | 5040.124  | X56160      | 4784.853  | 5998.86   | AF249267  | 46808.004 | 43999.871 |
| NM_004259   | 1387.668  | 1406.312  | BG679991    | 1353.157  | 1604.102  | NM_004113 | 470.939   | 618.146   |
| NM_016271   | 4028.422  | 5735.674  | H-Y 00097 I | 5491.09   | 5543.338  | X84939    | 3920.009  | 5269.782  |
| NM_016619   | 5138.326  | 7168.15   | H-M 59964   | 2376.658  | 2580.761  | NM_018320 | 7624.694  | 10358.337 |
| NM_014481   | 2058.144  | 2574.623  | H-X 16707 I | 4397.561  | 4571.326  | NM_002068 | 1813.303  | 2055.536  |

|           |           |           |           |           |           |           |           |           |
|-----------|-----------|-----------|-----------|-----------|-----------|-----------|-----------|-----------|
| U22172    | 1843.917  | 1638.834  | AL038354  | 56562.941 | 50220.293 | NM_01605E | 11169.289 | 8537.146  |
| AB032960  | 1627.407  | 1314.302  | R14607    | 3623.679  | 2388.984  | M65066    | 8196.891  | 9120.514  |
| NM_014264 | 6864.752  | 5581.316  | W84867    | 776.911   | 292.539   | NM_016951 | 2109.497  | 2518.473  |
| AF020089  | 2082.69   | 1821.957  | NM_000064 | 10126.945 | 9342.939  | NM_013251 | 695.13    | 922.366   |
| NM_006257 | 4408.849  | 5110.374  | NM_003264 | 4404.123  | 5211.754  | NM_00609E | 1897.354  | 1211.161  |
| NM_016281 | 8589.238  | 8409.807  | NM_00672E | 5037.159  | 6261.184  | AF272379  | 1507.628  | 837.763   |
| NM_004734 | 16534.039 | 22462.219 | NM_00332E | 1831.873  | 1984.164  | NM_01232E | 517.592   | 582.871   |
| AK024793  | 1492.951  | 1720.632  | NM_00456E | 37251.348 | 41260.164 | NM_00308E | 15061.84  | 9958.698  |
| AF208291  | 969.342   | 1198.803  | NM_00020E | 1959.346  | 2628.041  | NM_016084 | 6994.237  | 4515.773  |
| NM_004877 | 42805.008 | 46116.289 | NM_00549E | 15704.854 | 17114.188 | AF095289  | 5725.098  | 4303.522  |
| NM_00001E | 906.95    | 2264.106  | NM_00285E | 5739.632  | 6225.507  | NM_005537 | 2694.074  | 2431.475  |
| NM_01588E | 1749.138  | 1658.208  | NM_004817 | 1114.873  | 859.363   | NM_01900E | 2187.606  | 2404.833  |
| NM_02035E | 523.374   | 409.851   | NM_01897E | 12084.979 | 12911.82  | NM_01593E | 4145.438  | 3462.321  |
| NM_00426E | 760.431   | 844.571   | NM_001284 | 38731.98  | 51567.531 | AF182412  | 568.203   | 276.816   |
| BG491613  | 8412.892  | 7123.697  | NM_00324E | 9157.445  | 10080.803 | AK027200  | 1090.304  | 934.823   |
| AA397813  | 29322.766 | 26082.912 | U31099    | 1181.24   | 1203.219  | S78372    | 192.194   | 187.291   |
| W47350    | 779.823   | 955.072   | NM_00110E | 3743.771  | 3926.101  | U03106    | 3764.173  | 5105.466  |
| N64384    | 2243.538  | 1936.165  | NM_00558E | 1421.056  | 1477.872  | NM_00007E | 8575.093  | 8191.178  |
| H-X 53655 | 1756.353  | 1436.855  | NM_00207E | 4922.012  | 5076.48   | NM_00684E | 12882.201 | 13046.083 |
| H-U 05770 | 6690.913  | 6732.806  | Y08756    | 27192.52  | 28007.617 | M73239    | 649.219   | 625.11    |
| H-M 65199 | 11812.254 | 12470.647 | AY007090  | 730.625   | 939.206   | NM_00494E | 3122.185  | 3516.666  |
| H-M 32315 | 5278.473  | 5765.534  | NM_00643E | 741.107   | 566.098   | NM_02024E | 1324.482  | 1928.031  |
| H-V00536M | 2709.264  | 3085.046  | NM_00510E | 4156.227  | 3121.207  | NM_00178E | 8168.99   | 9268.045  |
| H-D85429M | 4386.93   | 5243.293  | NM_00451E | 930.866   | 993.023   | NM_00717E | 48996.832 | 48531.844 |
| BF439832  | 2424.464  | 3530.516  | NM_006501 | 650.222   | 250.994   | NM_01768E | 349.573   | 414.25    |
| BG819162  | 1188.807  | 1108.865  | NM_005397 | 1439.765  | 2099.068  | NM_00220E | 2557.843  | 2487.297  |
| NM_01753E | 2460.598  | 2667.004  | NM_00080E | 9715.834  | 11077.652 | NM_002291 | 523.886   | 742.557   |
| M38449    | 7112.875  | 10236.64  | NM_00632E | 2006.297  | 1966.372  | AL137477  | 3621.522  | 3649.172  |
| AB033044  | 4200.626  | 4302.001  | AB014511  | 5454.387  | 6016.614  | AF284580  | 616.731   | 535.745   |
| AB014564  | 1561.713  | 1038.888  | NM_01425E | 4740.931  | 5222.905  | AK024961  | 3590.017  | 2263.871  |
| NM_02023E | 2995.69   | 2324.414  | NM_00166E | 7141.708  | 7431.185  | NM_01606E | 1855.074  | 1371.389  |
| NM_00635E | 2221.369  | 2277.823  | NM_016131 | 8004.061  | 8001.152  | NM_01425E | 1386.987  | 1128.508  |
| NM_01643E | 894.109   | 1176.462  | NM_00682E | 1376.676  | 1957.253  | NM_015967 | 1740.757  | 1049.444  |
| NM_004447 | 7042.17   | 6683.298  | NM_01214E | 8063.828  | 8216.634  | NM_00359E | 1001.025  | 879.193   |
| NM_001204 | 1128.934  | 1111.484  | NM_01642E | 1772.708  | 1880.819  | NM_00240E | 629.333   | 312.982   |
| BF131321  | 899.552   | 867.375   | NM_006834 | 4524.464  | 4796.742  | NM_004994 | 9986.104  | 5395.967  |
| NM_00002E | 3711.474  | 3511.987  | AB011100  | 3020.351  | 2903.279  | NM_00661E | 9435.44   | 6425.538  |
| NM_00095E | 1009.014  | 1162.39   | U61741    | 1913.55   | 1737.275  | NM_00042E | 824.273   | 959.987   |
| NM_00244E | 3504.414  | 3695.25   | NM_01240E | 4672.601  | 4634.453  | NM_003791 | 3352.997  | 3277.621  |
| AB033091  | 6318.171  | 6997.962  | M76676    | 3758.444  | 4275.506  | NM_018017 | 2974.603  | 2843.798  |
| NM_004557 | 5725.833  | 5826.992  | NM_003857 | 1725.154  | 1907.406  | AK001296  | 6602.661  | 6131.883  |
| NM_014757 | 2242.411  | 2395.733  | AL137690  | 893.874   | 1102.385  | AK000173  | 325.394   | 371.725   |
| NM_01789E | 490.031   | 373.024   | Z83804    | 4362.203  | 5967.587  | NM_01836E | 2254.766  | 2408.264  |
| NM_001584 | 2074.25   | 2358.521  | NM_00438E | 3079.621  | 3319.872  | NM_00658E | 16686.006 | 17468.365 |
| NM_01225E | 29305.867 | 30336.652 | U67784    | 1463.509  | 1362.707  | AJ272180  | 1109.856  | 1022.521  |
| AF272357  | 2683.881  | 2956.825  | NM_00736E | 2384.717  | 1569.059  | AK025709  | 922.943   | 886.48    |
| NM_01637E | 34178.945 | 34315.461 | NM_00059E | 976.597   | 825.924   | NM_01901E | 12762.26  | 9984.246  |
| AB020705  | 1264.741  | 1770.44   | NM_016584 | 19861.178 | 16922.164 | NM_012261 | 6522.441  | 5476.402  |
| NM_01433E | 379.264   | 426.66    | NM_00181E | 3691.474  | 3676.976  | NM_01555E | 2494.357  | 2354.606  |
| NM_00298E | 1715.385  | 2508.757  | AK095793  | 1950.322  | 2141.715  | NM_01841E | 862.514   | 646.358   |
| NM_00571E | 57897.875 | 60645.176 | NM_003177 | 4780.151  | 4876.207  | NM_00460E | 3735.578  | 3307.455  |
| NM_00272E | 831.254   | 742.578   | NM_01771E | 1191.486  | 1290.51   | D70833    | 58856.691 | 62254.352 |
| NM_00045E | 630.456   | 718.299   | AF064078  | 1164.279  | 1700.232  | NM_016621 | 971.42    | 757.466   |

|           |           |           |           |           |           |           |           |           |
|-----------|-----------|-----------|-----------|-----------|-----------|-----------|-----------|-----------|
| NM_00044E | 408.574   | 369.347   | AL049688  | 1484.444  | 1963.037  | AB046808  | 1067.936  | 1118.047  |
| NM_004513 | 5610.333  | 4672.477  | NM_002737 | 2692.756  | 2365.589  | AK026265  | 1954.608  | 1693.487  |
| NM_00170E | 26770.111 | 32933.918 | Z25427    | 2186.885  | 2516.383  | AK027179  | 747.154   | 1013.061  |
| NM_01773E | 2542.745  | 3281.686  | NM_004672 | 8257.821  | 8317.897  | NM_00646E | 819.554   | 765.935   |
| AF208291  | 1344.303  | 922.515   | NM_001353 | 3298.399  | 3379.149  | NM_005681 | 1092.841  | 922.461   |
| NM_004877 | 40950.836 | 33427.758 | NM_006214 | 2655.013  | 2748.208  | NM_01515E | 3044.669  | 4488.237  |
| BE382905  | 836.632   | 1117.573  | AJ010228  | 5728.519  | 5477.873  | NM_012384 | 2291.378  | 3235.03   |
| NM_001701 | 582.348   | 538.106   | NM_00519E | 3277.172  | 3589.497  | NM_004653 | 1660.227  | 2081.701  |
| AK022558  | 5395.13   | 5943.346  | AK021426  | 283.339   | 908.476   | AF233453  | 3292.308  | 3870.448  |
| NM_00080E | 535.275   | 552.674   | NM_018073 | 1692.551  | 1635.904  | D87454    | 6489.031  | 7594.447  |
| NM_017532 | 3153.646  | 2807.37   | AL137529  | 2471.467  | 2426.919  | NM_00702C | 1661.25   | 1837.964  |
| AK026842  | 984.966   | 903.312   | NM_012332 | 2366.642  | 2470.283  | NM_000713 | 5809.724  | 5858.702  |
| NM_00239E | 4642.601  | 5528.352  | AK026648  | 1373.94   | 1480.539  | NM_01605E | 3748.582  | 4655.801  |
| NM_00425E | 1081.402  | 1019.176  | NM_000497 | 2366.657  | 2326.388  | NM_013291 | 5375.122  | 5581.218  |
| NM_016271 | 4350.083  | 4790.554  | NM_017421 | 1771.5    | 2517.276  | NM_00293E | 6423.458  | 6290.918  |
| NM_01661E | 5167.312  | 6725.507  | AK025977  | 25283.939 | 33064.875 | NM_014161 | 1975.509  | 1925.387  |
| NM_014481 | 1636.54   | 2237.104  | AK023130  | 9118.232  | 10968.863 | BF312817  | 4161.164  | 4216.228  |
| U22172    | 1554.998  | 1496.782  | NM_000273 | 1172.668  | 1239.699  | AF086491  | 2009.045  | 1449.481  |
| AB032960  | 1227.732  | 1277.013  | NM_00289E | 11921.435 | 9453.544  | NM_01485E | 571.152   | 521.455   |
| NM_014264 | 5809.828  | 5441.802  | NM_00048E | 2198.642  | 1528.092  | NM_003492 | 896.333   | 535.259   |
| AF020089  | 1408.944  | 1417.685  | BE876237  | 1694.929  | 1571.708  | NM_00378C | 16514.699 | 12085.154 |
| NM_006257 | 4225.53   | 3880.571  | NM_01475C | 2411.563  | 2472.056  | NM_00019E | 7214.139  | 8445.311  |
| NM_016281 | 8088.992  | 6580.047  | NM_015912 | 1020.362  | 1468.354  | NM_017711 | 977.326   | 1100.176  |
| NM_004734 | 18267.307 | 18431.355 | NM_00046C | 2077.089  | 2358.023  | NM_00377E | 55705.652 | 58898.293 |
| AK024793  | 1703.031  | 1582.733  | AB002339  | 2081.064  | 2399.817  | NM_000693 | 414.6     | 230.972   |
| NM_01225E | 34420.586 | 32496.264 | NM_005104 | 13049.172 | 12773.063 | AK023263  | 1323.369  | 1451.868  |
| AF272357  | 2738.719  | 2216.652  | NM_00688E | 23730.445 | 25021.361 | NM_004622 | 1053.513  | 1778.94   |
| NM_016372 | 43469.652 | 34732.809 | AL137423  | 3592.627  | 3697.464  | NM_017934 | 5482.547  | 6697.502  |
| AB020705  | 1476.752  | 1476.82   | AB018322  | 1501.463  | 1644.448  | NM_01416E | 38073.969 | 34752.313 |
| NM_00298C | 2118.49   | 2205.27   | NM_00706E | 12142.618 | 10441.425 | AF211971  | 3303.131  | 5015.473  |
| NM_01588E | 1883.088  | 2191.19   | NM_00571E | 12741.306 | 14477.767 | NM_002931 | 1354.087  | 1609.451  |
| NM_004262 | 1093.042  | 1180.898  | NM_018264 | 2600.077  | 3689.152  | NM_01344E | 41672.09  | 39265.957 |
| BG491613  | 8940.708  | 9873.01   | NM_01458C | 1342.282  | 1554.128  | X65232    | 19200.814 | 19143.309 |
| AA397813  | 29063.107 | 32813.195 | AB028998  | 1175.583  | 1577.384  | U12767    | 372.443   | 487.779   |
| W47350    | 874.038   | 761.663   | NM_000153 | 1201.163  | 1583.342  | U17630    | 919.706   | 1177.489  |
| W68291    | 22378.293 | 23180.111 | NM_002033 | 7200.723  | 7713.739  | M33782    | 817.074   | 836.999   |
| N64384    | 1686.254  | 1982.987  | AK091794  | 573.857   | 805.085   | NM_00219E | 564.168   | 596.928   |
| H-X 53655 | 1540.454  | 1351.619  | NM_004111 | 5224.911  | 7459.345  | NM_01775E | 3509.515  | 4525      |
| H-U 05770 | 6359.528  | 6051.764  | AF085966  | 5654.297  | 5530.7    | NM_01569E | 2330.695  | 1284.333  |
| H-M 65199 | 8687.316  | 7861.732  | NM_00531E | 2328.972  | 2000.695  | AK022551  | 865.359   | 575.661   |
| H-M 32315 | 4379.508  | 4244.539  | NM_01631E | 3977.58   | 3472.219  | AF085968  | 1046.019  | 625.762   |
| H-V00536M | 2455.752  | 2469.674  | NM_00336E | 11004.581 | 7431.395  | AK023665  | 457.435   | 301.085   |
| H-D85429M | 4539.39   | 4482.667  | NM_000057 | 3211.472  | 2401.919  | AB011136  | 1119.598  | 800.39    |
| BF439832  | 2548.293  | 2847.085  | NM_018343 | 4605.843  | 3769.53   | AF085898  | 3041.306  | 3684.799  |
| BG819162  | 1230.574  | 1699.153  | X15880    | 51488.813 | 55268.352 | AK021552  | 1558.27   | 1644.143  |
| NM_00272E | 1040.197  | 1388.664  | AL137461  | 2971.023  | 3794.478  | AL442094  | 722.586   | 814.067   |
| NM_00045C | 802.329   | 635.322   | AF114264  | 6106.647  | 6784.832  | AK023269  | 1768.771  | 2294.104  |
| NM_00044E | 627.378   | 978.747   | NM_00554E | 420.364   | 851.87    | AF070564  | 4293.056  | 6047.689  |
| NM_004513 | 5470.264  | 3997.658  | NM_018972 | 2074.6    | 2373.408  | AK021439  | 16804.09  | 18174.01  |
| NM_00170E | 26256.572 | 27895.496 | AB037828  | 688.315   | 707.495   | AF052099  | 2013.677  | 1766.442  |
| NM_01773E | 3022.006  | 3304.084  | AB023210  | 924.993   | 808.922   | AL110111  | 3292.933  | 2650.079  |
| AB033044  | 4371.883  | 3926.573  | AB037786  | 2899.624  | 2339.796  | AF070543  | 1075.869  | 1205.734  |
| AB014564  | 1608.738  | 1829.938  | NM_00364E | 6358.993  | 6503.046  | AF086509  | 333.6     | 903.448   |

|           |           |           |           |           |           |           |           |           |
|-----------|-----------|-----------|-----------|-----------|-----------|-----------|-----------|-----------|
| NM_02023C | 3869.453  | 4217.413  | AB037735  | 695.36    | 806.322   | NM_01477E | 2156.36   | 2334.798  |
| NM_006352 | 2684.992  | 3294.085  | AK002177  | 5662.85   | 4965.6    | AK001171  | 11999.797 | 13910.252 |
| NM_01643C | 1129.672  | 1815.483  | AK024429  | 2109.856  | 2951.909  | AK026273  | 7888.204  | 3654.515  |
| NM_004447 | 7676.879  | 9031.411  | AB000509  | 1127.133  | 1396.561  | NM_02025C | 8299.969  | 5680.342  |
| NM_001204 | 1227.072  | 997.654   | AB018314  | 2347.034  | 2706.397  | AF055007  | 1332.537  | 691.919   |
| BF131321  | 971.492   | 808.711   | NM_00437E | 1555.895  | 1319.71   | NM_012337 | 757.969   | 565.18    |
| NM_012116 | 1529.93   | 1550.261  | AJ238899  | 1227.12   | 1355.966  | AL389879  | 7249.139  | 3983.268  |
| NM_00002C | 2165.645  | 1946.923  | NM_018037 | 1384.588  | 1541.123  | AK022869  | 1249.846  | 944.346   |
| NM_00095E | 1030.423  | 846.608   | NM_001110 | 4771.53   | 3771.419  | NM_016111 | 6245.692  | 6671.311  |
| NM_002442 | 3189.37   | 3218.283  | NM_003222 | 714.67    | 1065.024  | AF086021  | 2609.602  | 5331.104  |
| AB033091  | 5702.599  | 4795.957  | NM_000841 | 7626.176  | 4885.781  | U06700    | 1107.055  | 1168.722  |
| NM_004557 | 4738.012  | 3691.213  | NM_001245 | 2655.974  | 1656.029  | U63828    | 1868.819  | 1749.079  |
| NM_014757 | 2125.212  | 2011.802  | NM_003672 | 27011.531 | 25580.828 | Z36794    | 848.212   | 1079.772  |
| NM_001584 | 2069.218  | 2667.701  | NM_002574 | 48667.27  | 49966.434 | Z36828    | 5385.858  | 8761.006  |
| NM_00080E | 759.461   | 613.823   | AJ008139  | 6854.023  | 8334.274  | AF086121  | 7718.062  | 12623.79  |
| NM_014264 | 6929.843  | 8832.95   | NM_00432E | 2960.169  | 2736.475  | AF086140  | 950.92    | 1200.384  |
| AF020089  | 1584.753  | 1188.626  | NM_000882 | 625.99    | 1021.942  | AK026915  | 494.488   | 213.25    |
| NM_006257 | 4318.651  | 3599.014  | NM_004577 | 3491.464  | 3451.001  | AL110259  | 434.302   | 474.339   |
| NM_016281 | 8697.715  | 5624.884  | NM_015507 | 596.372   | 330.549   | AB033100  | 7126.303  | 6324.442  |
| NM_004734 | 20999.861 | 17408.086 | AF007157  | 30650.74  | 39424.363 | AL390138  | 2373.823  | 2421.371  |
| AK024793  | 1947.157  | 1751.744  | D38553    | 2997.703  | 2581.857  | AL137290  | 3419.06   | 3482.418  |
| AF208291  | 1473.611  | 1414.666  | NM_00617C | 2886.812  | 2695.589  | AK024180  | 440.184   | 542.783   |
| NM_001701 | 736.914   | 992.835   | NM_01429E | 14674.878 | 18855.047 | AK001551  | 1452.423  | 1248.562  |
| AK022558  | 5269.874  | 6345.402  | AK001581  | 1780.139  | 1375.682  | AK001825  | 994.769   | 1402.804  |
| NM_003713 | 1087.158  | 1609.45   | NM_005862 | 2224.691  | 1760.83   | AK024714  | 744.513   | 799.039   |
| NM_00425E | 1277.138  | 1050.399  | NM_00054E | 6496.129  | 7485.2    | AK022363  | 1159.885  | 1167.058  |
| NM_016271 | 4316.778  | 4088.017  | AB002297  | 2886.81   | 4084.083  | AK022485  | 850.134   | 874.291   |
| AB032960  | 1406.982  | 1800.994  | NM_00502C | 30988.629 | 30698.5   | AK023395  | 4366.28   | 4483.775  |
| NM_01767E | 933.603   | 434.375   | NM_014077 | 4362.593  | 4501.325  | AK023818  | 7203.867  | 5924.663  |
| NM_015991 | 574.28    | 505.253   | NM_018412 | 2049.156  | 2155.587  | AK024139  | 452.138   | 743       |
| BF246606  | 552.365   | 805.599   | NM_01232E | 3464.764  | 3198.504  | AK023522  | 559.891   | 1295.155  |
| NM_002342 | 4613.888  | 5115.635  | M14087    | 35830.867 | 30994.178 | AK024206  | 4449.244  | 6179.329  |
| NM_002184 | 929.629   | 1036.146  | AJ272324  | 1572.556  | 813.988   | NM_006262 | 1574.977  | 1848.662  |
| NM_014883 | 2005.053  | 2255.088  | NM_00088E | 6307.586  | 3773.444  | AK026598  | 2130.166  | 1166.671  |
| NM_003657 | 1215.073  | 1013.056  | M59040    | 3654.701  | 1584.367  | AK023602  | 559.569   | 611.935   |
| AL049296  | 6242.155  | 4415.75   | NM_017582 | 17418.342 | 18860.242 | NM_018097 | 12729.099 | 11196.534 |
| NM_014471 | 27400.252 | 19872.479 | NM_01523E | 1223.516  | 1036.511  | AF130043  | 353.313   | 333.061   |
| NM_004397 | 1742.234  | 1587.024  | AK026962  | 2945.619  | 2836.33   | AK026813  | 903.439   | 725.783   |
| NM_02023E | 2416.356  | 2014.58   | X04366    | 2583.175  | 2820.704  | AF116622  | 561.864   | 490.316   |
| D49356    | 1175.931  | 1744.803  | NM_00050E | 52330.258 | 45100.27  | NM_00532E | 630.035   | 635.649   |
| NM_01857E | 4072.551  | 4318.234  | NM_00066E | 4280.151  | 5210.214  | AF217967  | 723.687   | 872.48    |
| NM_006201 | 3496.989  | 3326.554  | NM_003481 | 1904.96   | 2046.25   | NM_01815C | 5906.846  | 5336.648  |
| NM_007110 | 1668.084  | 1706.853  | AB046814  | 1678.512  | 1344.586  | NM_01791E | 365.844   | 525.674   |
| U50383    | 7014.636  | 6906.574  | NM_017664 | 4571.138  | 4663.607  | NM_01785E | 25755.223 | 25673.41  |
| AK025085  | 7585.008  | 9752.905  | AK025523  | 1287.698  | 1477.878  | AB007954  | 1392.962  | 1596.007  |
| NM_00629C | 2024.371  | 2282.896  | NM_00705E | 3321.229  | 3046.834  | AK026494  | 3520.821  | 4681.441  |
| AF118124  | 29616.438 | 33998.012 | NM_00687C | 4523.181  | 5404.828  | AK025840  | 1896.852  | 2818.175  |
| NM_00484E | 6267.359  | 6522.602  | NM_00735E | 5515.305  | 4600.132  | BC024009  | 1416.782  | 1329.746  |
| AL137527  | 7013.776  | 7955.126  | L13283    | 868.731   | 692.748   | AF128543  | 5080.967  | 3843.217  |
| AK026068  | 588.676   | 978.939   | NM_013327 | 2947.176  | 2023.775  | U84510    | 5088.714  | 4228.639  |
| AK024186  | 408.086   | 534.634   | AF303888  | 5141.688  | 3456.537  | S83198    | 7316.378  | 6392.751  |
| J04974    | 7806.791  | 7819.114  | NM_000077 | 1036.609  | 729.656   | AF052119  | 12422.12  | 15076.931 |
| NM_00705E | 5693.406  | 5360.934  | NM_007084 | 1519.066  | 2239.057  | AK026685  | 14238.944 | 11545.675 |



|           |           |           |           |           |           |             |           |           |
|-----------|-----------|-----------|-----------|-----------|-----------|-------------|-----------|-----------|
| NM_000396 | 1402.637  | 1288.182  | M97191    | 22945.568 | 21758.578 | AF090927    | 18143.65  | 17606.791 |
| NM_001528 | 1789.038  | 1656.68   | AK023015  | 1949.774  | 1736.246  | AL137642    | 1242.723  | 1117.043  |
| NM_007014 | 2873.446  | 2466.251  | NM_003457 | 15552.605 | 14964.068 | AL133619    | 1873.987  | 1701.448  |
| AL096740  | 1227.52   | 1107.932  | NM_012391 | 2787.976  | 3249.919  | AK025902    | 3157.643  | 3098.239  |
| NM_014554 | 3150.131  | 2684.775  | NM_005254 | 2449.348  | 2572.271  | NM_005181   | 4561.723  | 4467.669  |
| AL137484  | 1266.032  | 1214.217  | NM_005611 | 1097.405  | 1296.062  | AF026945    | 452.2     | 468.172   |
| AK023968  | 1515.395  | 1501.504  | AF141655  | 1856.119  | 1009.34   | AF143676    | 2486.52   | 2762.731  |
| NM_004652 | 1337.292  | 1298.931  | NM_007345 | 1137.571  | 917.401   | U66044      | 5472.489  | 5489.903  |
| NM_006102 | 1115.076  | 1312.794  | NM_004830 | 821.918   | 753.37    | NM_005247   | 40675.379 | 35464.672 |
| AK025425  | 22807.449 | 22864.873 | AF132362  | 59377.156 | 60148.328 | NM_005283   | 1301.169  | 1530.387  |
| AK025974  | 13066.898 | 11759.488 | NM_007007 | 7327.215  | 7200.333  | AL122089    | 1162.94   | 1108.831  |
| NM_001747 | 20890.871 | 25781.756 | NM_006386 | 2004.749  | 1664.515  | AA203665    | 3784.605  | 3575.231  |
| NM_001148 | 22144.164 | 23798.252 | NM_006559 | 15895.691 | 13773.724 | U95646      | 2140.727  | 2383.556  |
| AF242522  | 4929.602  | 5874.13   | NM_004501 | 52716.891 | 48545.988 | Y16705      | 1286.443  | 1428.835  |
| NM_004024 | 2499.277  | 2357.082  | NM_004966 | 15141.858 | 12545.134 | AF279775    | 4085.013  | 3583.112  |
| X52345    | 18908.383 | 12143.023 | NM_006700 | 2123.52   | 1924.612  | NM_001821   | 1825.395  | 1930.443  |
| NM_006965 | 8396.152  | 6533.682  | NM_006445 | 14148.646 | 18687     | NM_005647   | 499.22    | 431.782   |
| AF027142  | 57716.813 | 53336.559 | NM_012109 | 12147.962 | 11924.183 | X64978      | 3438.356  | 3243.959  |
| S67970    | 1273.277  | 1362.392  | AF019633  | 2199.844  | 1745.72   | NM_002345   | 962.724   | 638.327   |
| AF221520  | 7073.374  | 6840.134  | AB002361  | 7849.626  | 5928.236  | U57971      | 945.965   | 1029.719  |
| NM_006941 | 36545.32  | 29515.461 | NM_018060 | 5686.838  | 3669.311  | X89673      | 957.696   | 780.576   |
| AB037852  | 975.105   | 988.553   | NM_014239 | 3755.446  | 2452.84   | Z83934      | 790.683   | 572.778   |
| NM_004349 | 3137.603  | 3194.371  | NM_017662 | 5472.502  | 3413.772  | NM_018355   | 1660.048  | 1156.853  |
| NM_002092 | 7834.319  | 8982.046  | U88837    | 1805.247  | 997.41    | AK022020    | 1713.876  | 1368.213  |
| NM_018077 | 2146.69   | 2254.349  | NM_017446 | 14595.455 | 8257.46   | AK000263    | 5380.071  | 4291.812  |
| NM_016839 | 8236.092  | 7983.733  | AK001478  | 5107.166  | 5183.646  | Y13895      | 439.618   | 307.644   |
| NM_005968 | 45002.395 | 45765.273 | AK025697  | 2646.364  | 2420.55   | NM_017447   | 802.134   | 632.391   |
| AK021416  | 1138.085  | 1309.216  | AK021734  | 913.615   | 1288.696  | AL049452    | 767.83    | 856.478   |
| NM_018471 | 14481.856 | 14377.015 | D00265    | 29120.963 | 25954.369 | NM_016622   | 1593.832  | 1842.918  |
| NM_003819 | 34062.102 | 28246.086 | NM_004552 | 29253.258 | 16280.188 | AK026976    | 785.209   | 1617.771  |
| NM_006560 | 3483.007  | 2424.049  | NM_000143 | 2674.484  | 2503.605  | AF070559    | 2918.511  | 2752.9    |
| NM_016183 | 3396.793  | 2411.844  | NM_006294 | 47901.887 | 48129.102 | D42043      | 6157.658  | 8576.612  |
| NM_004872 | 7731.135  | 6162.285  | AL137294  | 1958.161  | 2576.194  | CY3Cy5      | 1976.801  | 387.413   |
| NM_001958 | 30966.953 | 21948.879 | NM_003743 | 1088.772  | 755.435   | Z11694      | 4824.064  | 6308.859  |
| NM_001960 | 55954.262 | 62740.723 | AB037797  | 756.569   | 467.703   | BF983177    | 1101.585  | 1007.204  |
| NM_018122 | 5452.629  | 6116.882  | NM_001520 | 1216.897  | 1362.386  | Z26317      | 1807.753  | 1843.646  |
| AF035318  | 2024.741  | 1610.256  | NM_017870 | 1915.783  | 2237.242  | X16983      | 11129.811 | 10604.042 |
| NM_015456 | 6441.751  | 4070.458  | AL133633  | 1152.817  | 1016.828  | X56160      | 1768.544  | 1359.668  |
| AK025056  | 3014.505  | 2277.713  | NM_012252 | 1429.254  | 1283.937  | BG679991    | 745.217   | 687.272   |
| AF140710  | 4223.941  | 2459.63   | AK026817  | 1727.266  | 1213.626  | H-Y 00097 I | 2091.406  | 1491.578  |
| NM_012088 | 16453.117 | 11478.998 | AL157442  | 26214.129 | 17157.893 | H-M 59964   | 1037.831  | 986.978   |
| NM_017947 | 891.735   | 1331.376  | AB011148  | 2506.687  | 1295.159  | H-Y 00711 I | 57290.375 | 65226.719 |
| NM_002494 | 6135.846  | 5959.651  | AL389938  | 35619.43  | 21511.176 | H-X 16707 I | 1833.89   | 1553.28   |
| M58510    | 4373.514  | 5472.899  | NM_001949 | 38590.645 | 22722.857 | H-U76456M   | 241.961   | 229.93    |
| NM_000782 | 562.882   | 768.077   | NM_003507 | 592.756   | 224.202   | AL038354    | 36539.727 | 21653.879 |
| BE396003  | 1515.514  | 1523.411  | AK026591  | 582.524   | 656.399   | R14607      | 1594.831  | 1127.606  |
| AK023300  | 930.281   | 946.144   | AK001889  | 1597.607  | 1711.994  | W84867      | 321.294   | 126.468   |
| NM_018082 | 1686.343  | 1506.264  | AK025726  | 1686.715  | 1803.074  | NM_021976   | 2576.222  | 1974.576  |
| NM_003904 | 5454.522  | 4653.55   | AJ227869  | 1200.709  | 1115.872  | SR2         | 39656.992 | 21737.008 |
| NM_006234 | 17235.152 | 18280.146 | AL117613  | 8266.169  | 8270.316  | SR4         | 9460.397  | 6168.863  |
| AB028987  | 6009.074  | 4811.97   | AL137753  | 3205.844  | 2613.585  | SR6         | 1433.351  | 1079.474  |
| NM_003594 | 2049.889  | 1713.785  | AL110262  | 14091.872 | 14312.285 | SR8         | 4967.746  | 12317.333 |
| NM_005521 | 3452.032  | 3184.364  | AK025627  | 22079.674 | 28166.188 | SR10        | 17299.582 | 4114.252  |

|           |           |           |           |           |           |           |           |           |
|-----------|-----------|-----------|-----------|-----------|-----------|-----------|-----------|-----------|
| AL137727  | 1966.186  | 1712.043  | AF216077  | 3832.847  | 3604.042  | CY3Cy5    | 951.635   | 131.294   |
| L17327    | 679.511   | 399.217   | AF086238  | 773.123   | 956.094   | NM_001284 | 25935.572 | 18752.758 |
| AF074986  | 1042.871  | 741.001   | AK021612  | 13971.799 | 13661.193 | NM_002849 | 373.705   | 335.337   |
| AF075004  | 454.292   | 198.873   | AF147342  | 822.506   | 565.837   | U31099    | 423.068   | 537.559   |
| AL049240  | 2315.344  | 1685.036  | AF088031  | 815.337   | 434.497   | NM_001105 | 2172.638  | 1665.976  |
| U80773    | 1807.138  | 1484.043  | AK002025  | 35546.254 | 24743.957 | NM_005585 | 587.76    | 348.944   |
| AK021745  | 1317.208  | 1439.157  | AK026299  | 1663.843  | 931.054   | NM_002075 | 2157.327  | 1651.976  |
| L38937    | 3669.967  | 3973.568  | NM_017794 | 1463.972  | 1003.808  | Y08756    | 11450.813 | 7912.833  |
| U90907    | 797.874   | 994.38    | AK025170  | 3817.832  | 2719.511  | NM_005563 | 3839.918  | 2825.925  |
| AK024327  | 2100.96   | 2154.365  | AB033031  | 1498.249  | 1359.36   | AY007090  | 337.389   | 262.284   |
| AK021700  | 479.083   | 587.549   | AF085872  | 6220.688  | 5916.249  | NM_006439 | 339.173   | 192.927   |
| AK024395  | 642.921   | 729.25    | AK022342  | 1481.459  | 1769.949  | NM_005102 | 1804.725  | 1420.619  |
| AK000801  | 3152.834  | 3672.551  | AF147420  | 1485.288  | 2384.031  | NM_004518 | 403.138   | 174.148   |
| D85433    | 3577.822  | 3278.03   | AL049312  | 2013.326  | 2089.677  | NM_006501 | 385.436   | 262.057   |
| AF086184  | 7655.77   | 7345.958  | AL050072  | 2804.794  | 3947.073  | NM_002719 | 2307.986  | 1768.079  |
| NM_018275 | 3222.182  | 2643.368  | AL117590  | 727.616   | 211.957   | AV752086  | 679.84    | 608.054   |
| AL049266  | 2764.64   | 2495.458  | AL049357  | 4090.647  | 3816.941  | NM_016102 | 3875.418  | 3307.699  |
| AK021560  | 891.854   | 1840.185  | AL110223  | 402.367   | 842.43    | NM_004376 | 1127.71   | 784.785   |
| AF088045  | 879.103   | 573.594   | AL117659  | 755.392   | 967.845   | NM_005603 | 30607.496 | 15543.992 |
| AF007149  | 1346.671  | 1222.573  | AK027180  | 8253.609  | 9145.13   | NM_001061 | 648.819   | 521.222   |
| AK021627  | 1448.386  | 1103.589  | AK026802  | 834.792   | 1014.43   | AI075338  | 680.075   | 377.331   |
| NM_019596 | 513.482   | 463.587   | NM_004544 | 10665.94  | 9782.019  | NM_006834 | 2545.426  | 3998.222  |
| AF085859  | 3593.322  | 2275.819  | AL133080  | 2722.176  | 2577.316  | AB011100  | 1464.69   | 1286.872  |
| AJ420504  | 419.341   | 270.013   | NM_017792 | 2000.867  | 1683.705  | U61741    | 543.699   | 508.427   |
| AK026307  | 635.762   | 370.886   | AK025213  | 3419.92   | 2633.466  | NM_012402 | 2020.805  | 2306.324  |
| AL049260  | 715.293   | 362.189   | NM_014949 | 2381.547  | 1882.385  | M76676    | 1710.615  | 1471.708  |
| AL049975  | 1069.14   | 1280.71   | AL080221  | 2253.531  | 1346.659  | NM_003857 | 647.742   | 734.762   |
| AL080067  | 518.677   | 541.241   | AL137370  | 632.461   | 1039.351  | AL137690  | 364.458   | 326.751   |
| AL117464  | 2846.651  | 2937.68   | AF009262  | 2833.155  | 3105.292  | Z83804    | 1418.824  | 1325.908  |
| AL049291  | 329.332   | 334.331   | AK024346  | 1669.47   | 1223.323  | NM_004386 | 1678.013  | 1442.057  |
| AL080160  | 486.338   | 388.596   | AF009320  | 250.798   | 1246.417  | U67784    | 826.095   | 611.79    |
| L23849    | 469.535   | 494.525   | AF056422  | 582.524   | 1585.27   | NM_007366 | 947.091   | 762.357   |
| AL157477  | 3485.498  | 3616.874  | AK001919  | 906.984   | 781.761   | NM_000592 | 384.198   | 459.781   |
| AK022083  | 403.211   | 414.655   | AK021535  | 862.86    | 777.13    | NM_016584 | 6463.807  | 4921.668  |
| AB002318  | 2251.607  | 1181.092  | AK021753  | 5651.668  | 3594.618  | NM_001815 | 1147.727  | 854.363   |
| AL357535  | 2296.958  | 1854.716  | AK001139  | 2792.383  | 2449.985  | NM_000064 | 4066.703  | 2818.972  |
| AL049951  | 2335.456  | 1858.77   | AK002090  | 1145.865  | 1452.441  | NM_003264 | 2384.09   | 1487.453  |
| AK024963  | 1522.16   | 1264.514  | AK021618  | 877.566   | 1600.423  | NM_006725 | 1475.849  | 1083.61   |
| AK023725  | 1043.242  | 1498.382  | AK021822  | 948.378   | 998.118   | NM_003326 | 717.072   | 541.814   |
| AK022936  | 3335.567  | 2929.29   | AK025246  | 5520.125  | 4437.838  | NM_004568 | 20743.24  | 14410.914 |
| AK024385  | 2301.445  | 2082.639  | AK025847  | 3706.169  | 2480.104  | NM_000202 | 748.068   | 560.571   |
| NM_017709 | 846.656   | 703.175   | AK026442  | 725.532   | 310.369   | NM_005496 | 7436.993  | 3668.016  |
| AF049615  | 1171.119  | 860.154   | AK026816  | 699.476   | 401.259   | NM_016608 | 630.898   | 503.211   |
| NM_014358 | 18834.621 | 15741.978 | NM_014174 | 2776.799  | 3082.394  | NM_004817 | 728.559   | 385.306   |
| AF009282  | 4259.534  | 3144.059  | AF147337  | 2003.458  | 1876.087  | NM_018975 | 6103.456  | 4494.526  |
| AF024704  | 6271.555  | 4525.262  | AK026981  | 2171.002  | 2014.927  | AB023215  | 6554.541  | 3711.514  |
| AF056431  | 1667.956  | 1419.059  | AL359558  | 473.859   | 1335.903  | NM_018073 | 845.2     | 835.401   |
| NM_016412 | 829.38    | 773.8     | NM_001417 | 33683.367 | 40078.277 | AL137529  | 993.462   | 928.786   |
| AF009293  | 1618.121  | 2514.87   | AK022236  | 3435.871  | 2739.84   | NM_012332 | 1153.964  | 745.562   |
| NM_004158 | 56979.742 | 54813.977 | AK000073  | 674.164   | 851.559   | AK026648  | 891.628   | 697.284   |
| AF056444  | 3397.194  | 3939.001  | AK000618  | 1025.674  | 923.843   | NM_000497 | 912.084   | 884.165   |
| AK000989  | 1588.847  | 1940.934  | AK024773  | 881.053   | 611.85    | NM_017421 | 716.794   | 493.242   |
| AK002210  | 2366.426  | 2699.574  | AL390180  | 1317.107  | 1047.809  | AK025977  | 7523.188  | 6426.636  |

|           |           |           |           |           |           |            |           |           |
|-----------|-----------|-----------|-----------|-----------|-----------|------------|-----------|-----------|
| AK021677  | 1164.063  | 839.754   | X60484    | 1132.215  | 1088.326  | AK023130   | 3404.576  | 4205.698  |
| AK001057  | 981.144   | 1112.948  | AF055019  | 1185.462  | 1299.158  | NM_000273  | 457.77    | 290.611   |
| AK001808  | 592.044   | 894.318   | NM_003525 | 7226.042  | 5087.838  | NM_002895  | 4618.018  | 3772.666  |
| AK021471  | 871.579   | 945.801   | AF056432  | 1909.16   | 2013.474  | NM_000486  | 713.859   | 780.601   |
| AK021709  | 677.106   | 756.409   | X56199    | 1479.848  | 2388.211  | BE876237   | 859.097   | 630.479   |
| AK025109  | 2353.971  | 2375.11   | AL162006  | 1652.077  | 1487.869  | AB017913   | 504.142   | 628.383   |
| AK026057  | 3247.539  | 2129.223  | NM_017971 | 35298.109 | 37771.875 | NM_005397  | 456.103   | 399.29    |
| AK026267  | 390.804   | 512.736   | AF090097  | 3134.764  | 2506.149  | NM_000806  | 3783.04   | 2772.513  |
| AJ008117  | 11037.834 | 10147.417 | AF116620  | 11988.483 | 10008.977 | NM_006320  | 783.833   | 559.018   |
| AJ008147  | 22142.275 | 18909.74  | AF293335  | 36954.484 | 30150.826 | AB014511   | 2236.74   | 1896.128  |
| AK024369  | 2043.881  | 1714.435  | AL080065  | 623.405   | 1197.936  | NM_014252  | 2438.648  | 1847.363  |
| L43345    | 1213.103  | 1015.948  | AK024431  | 5996.913  | 5803.546  | NM_001662  | 4018.259  | 3606.058  |
| AF180297  | 3660.551  | 2771.934  | AF116635  | 626.962   | 871.273   | NM_016131  | 4572.074  | 3271.688  |
| AK023245  | 9993.315  | 9822.083  | X96644    | 3706.079  | 4694.159  | NM_006822  | 895.314   | 722.773   |
| AF086224  | 804.625   | 919.205   | Z34281    | 19248.311 | 15551.468 | NM_012142  | 4615.382  | 3041.438  |
| AF186017  | 683.248   | 610.512   | NM_018678 | 54712.836 | 45799.129 | NM_016425  | 993.975   | 712.671   |
| AK023607  | 1408.604  | 1362.077  | AJ008122  | 36744.926 | 30273.68  | NM_014580  | 575.815   | 805.049   |
| AL049997  | 7641.647  | 6379.098  | AK022667  | 15901.264 | 13959.854 | NM_000153  | 346.19    | 396.422   |
| AK024118  | 974.041   | 968.846   | AK026667  | 1073.592  | 769.472   | NM_002033  | 1451.224  | 1381.163  |
| AL110258  | 358.284   | 302.009   | AF113211  | 2087.221  | 1867.103  | AK091794   | 700.983   | 752.578   |
| X89657    | 463.177   | 529.81    | AL117568  | 880.838   | 1504.752  | NM_004111  | 2254.285  | 2119.951  |
| AK024509  | 1398.822  | 1086.5    | NM_000843 | 436.904   | 912.687   | AF085966   | 2325.229  | 1360.521  |
| AL050185  | 508.889   | 326.974   | S71805    | 1330.489  | 1078.047  | NM_005316  | 1051.091  | 724.198   |
| NM_017847 | 3084.94   | 3036.415  | U21072    | 2013.302  | 2327.325  | NM_003365  | 3916.861  | 3537.128  |
| AL049675  | 1519.962  | 1523.504  | AK024377  | 860.875   | 1305.228  | NM_000057  | 1238.492  | 1037.931  |
| AL050151  | 1534.85   | 1596.973  | AB032527  | 1735.222  | 2100.726  | NM_018343  | 2322.339  | 1463.818  |
| NM_003537 | 11464.427 | 10491.538 | AK023557  | 1171.739  | 978.196   | AK095793   | 645.836   | 605.63    |
| AF056419  | 14478.174 | 12596.947 | AK027107  | 1140.939  | 1272.833  | NM_003177  | 1911.999  | 1657.829  |
| AF074983  | 1785.888  | 1870.211  | AB040887  | 3616.232  | 3462.458  | NM_017715  | 573.771   | 402.474   |
| AK021862  | 842.889   | 797.009   | AK025196  | 4075.116  | 3582.883  | AF064078   | 531.619   | 500.087   |
| AK024177  | 2173.843  | 2432.54   | AK024800  | 869.146   | 770.586   | AL049688   | 750.583   | 751.65    |
| AF090102  | 432.97    | 428.355   | AK000401  | 1924.561  | 1269.809  | NM_002737  | 1050.348  | 713.938   |
| K01564    | 2433.502  | 2417.078  | AF305068  | 1508.011  | 1157.496  | Z25427     | 1156.905  | 897.671   |
| AB023175  | 1348.112  | 1134.769  | D17231    | 31986.01  | 24996.83  | NM_004672  | 3897.323  | 3741.579  |
| AL359563  | 907.129   | 820.258   | AF531295  | 2084.077  | 1408.723  | NM_001353  | 2001.169  | 1516.1    |
| NM_014477 | 900.413   | 779.522   | CY3Cy5    | 7414.111  | 866.134   | NM_006214  | 1807.228  | 1299.53   |
| AL109791  | 385.86    | 675.189   | BF974315  | 6281.11   | 5351.511  | AJ010228   | 3755.491  | 1879.98   |
| AF086478  | 2648.274  | 2163.569  | T74985    | 750.394   | 740.066   | NM_005195  | 2063.163  | 1977.861  |
| AF086022  | 1267.784  | 1392.322  | AI652705  | 2202.578  | 1944.496  | NM_006845  | 63264.762 | 71239.422 |
| AK021514  | 44967.711 | 45969.594 | AA569974  | 7408.34   | 8508.401  | NM_005603  | 23261.693 | 16676.695 |
| AJ008134  | 1912.325  | 1890.218  | AA923615  | 1272.531  | 1568.696  | NM_001061  | 681.737   | 833.903   |
| S71486    | 1586.902  | 1579.181  | AA446028  | 2182.554  | 2449.463  | AI075338   | 598.498   | 610.266   |
| L33808    | 16197.318 | 12363.466 | M80583    | 1429.513  | 2072.843  | Z11694     | 3895.886  | 3994.761  |
| D31886    | 2764.246  | 2733.022  | AW009565  | 4977.969  | 5985.71   | BF983177   | 859.009   | 713.271   |
| U92024    | 520.718   | 705.238   | X07767    | 3660.873  | 4365.946  | Z26317     | 1396.452  | 1003.693  |
| AK023330  | 2917.157  | 2046.669  | X65293    | 2687.779  | 2730.781  | X56160     | 1496.066  | 1572.438  |
| AF075071  | 1784.288  | 1577.19   | AF252284  | 3680.458  | 3581.253  | BG679991   | 699.307   | 508.216   |
| AF001892  | 993.418   | 963.896   | BU727558  | 2694.854  | 2510.407  | H-Y 000971 | 2091.062  | 1708.366  |
| X93500    | 2385.663  | 2437.142  | SR1       | 65354.156 | 69338.797 | H-M 59964  | 1123.376  | 1013.177  |
| U79271    | 1850.307  | 2408.346  | SR3       | 45456.688 | 52074.621 | H-X 167071 | 2116.766  | 1744.146  |
| NM_019885 | 832.049   | 920.997   | SR5       | 3877.353  | 5768.246  | AL038354   | 40119.777 | 26724.033 |
| AK024609  | 6273.002  | 5734.334  | SR7       | 4828.871  | 45457.977 | R14607     | 1726.719  | 1503.754  |
| AK023660  | 696.773   | 652.702   | SR9       | 15498.491 | 4480.428  | W84867     | 305.819   | 298.034   |

|           |           |           |           |           |           |           |           |           |
|-----------|-----------|-----------|-----------|-----------|-----------|-----------|-----------|-----------|
| NM_018120 | 6201.222  | 4635.676  | CY3Cy5    | 10650.076 | 1508.474  | NM_021976 | 2702.642  | 1851.301  |
| AK027209  | 451.068   | 596.881   | M33197    | 65423.668 | 68268.617 | NM_005718 | 6402.634  | 3428.653  |
| AK026874  | 3791.24   | 3307.662  | NM_007264 | 5332.99   | 5022.819  | NM_016608 | 774.632   | 1261.972  |
| AK024178  | 762.431   | 691.578   | NM_016511 | 5480.614  | 4446.591  | NM_002858 | 3628.873  | 3604.014  |
| D17217    | 1231.192  | 1639.795  | NM_003559 | 922.885   | 1107.605  | NM_004817 | 837.878   | 750.207   |
| AF088033  | 1667.23   | 1439.129  | M55337    | 730.241   | 623.593   | NM_018975 | 5707.664  | 6409.134  |
| NM_020422 | 2104.844  | 2094.292  | NM_016533 | 32050.139 | 34973.242 | NM_001284 | 24093.322 | 19020.527 |
| AY007156  | 1915.806  | 1872.324  | NM_014751 | 3766.97   | 4048.759  | NM_003242 | 3001.607  | 2342.85   |
| AF086408  | 39689.863 | 37255.207 | NM_002347 | 27968.162 | 25699.014 | NM_001105 | 1310.478  | 454.62    |
| AK023979  | 1782.734  | 1598.42   | AB046807  | 1358.639  | 1478.447  | NM_005585 | 598.431   | 504.095   |
| CY3Cy5    | 16499.186 | 1776.521  | NM_003508 | 658.655   | 560.388   | NM_002075 | 1649.26   | 1542.781  |
| U13738    | 1399.324  | 1451.919  | NM_014623 | 6820.451  | 7739.983  | Y08756    | 8830.153  | 7562.246  |
| AF068236  | 48780.414 | 51857.867 | M30629    | 6573.238  | 7113.701  | AY007090  | 400.917   | 304.49    |
| H94487    | 1114.142  | 1231.701  | BE539299  | 1154.641  | 1238.978  | NM_006439 | 390.955   | 285.718   |
| BG681747  | 34309.262 | 44971.973 | AF193873  | 6467.67   | 6119.885  | NM_005102 | 1977.688  | 1608.29   |
| H63077    | 2792.405  | 3981.768  | NM_002628 | 3394.111  | 3570.574  | NM_004518 | 552.294   | 400.757   |
| AA679352  | 26321.693 | 34431.461 | M23575    | 1343.825  | 1812.422  | NM_006501 | 327.846   | 242.997   |
| AA437291  | 699.275   | 944.792   | AA190729  | 2256.778  | 2590.759  | NM_002719 | 2817.7    | 2283.522  |
| X04503    | 2919.059  | 4203.805  | NM_004170 | 926.267   | 894.125   | AB035356  | 355.192   | 147.757   |
| D45917    | 2578.714  | 3444.925  | M33197    | 61338.055 | 64390.953 | AV752086  | 881.254   | 645.802   |
| X52001    | 4442.064  | 5184.721  | NM_003665 | 493.455   | 347.735   | NM_016102 | 5789.929  | 4082.204  |
| BI823872  | 15156.836 | 17218.266 | AF220217  | 1428.778  | 1545.383  | NM_004376 | 1126.858  | 651.261   |
| AA430552  | 3796.092  | 4009.146  | NM_013323 | 4980.558  | 5220.951  | NM_014252 | 2881.105  | 2877.324  |
| X66142    | 2841.762  | 2845.687  | NM_014937 | 522.96    | 605.162   | NM_001662 | 4056.81   | 4421.97   |
| NM_005913 | 570.216   | 662.437   | M33197    | 4690.791  | 4760.725  | NM_016131 | 4252.948  | 4395.678  |
| R45054    | 7559.219  | 7045.183  | NM_000853 | 1958.724  | 2087.077  | NM_006822 | 1488.096  | 1808.515  |
| NM_000620 | 1024.84   | 1144.663  | AF016903  | 27562.367 | 27226.611 | NM_012142 | 4245.275  | 5429.715  |
| NM_000905 | 10116.408 | 8120.043  | NM_015675 | 8994.594  | 8552.826  | NM_016429 | 1286.999  | 1292.51   |
| SR5       | 5518.464  | 6236.109  | AK022267  | 997.051   | 863.702   | NM_006834 | 2125.054  | 1940.823  |
| SR9       | 33194.637 | 9574.527  | M33197    | 63957.27  | 65037.625 | AB011100  | 1264.249  | 938.014   |
| CY3Cy5    | 20586.818 | 2329.608  | U90878    | 3363.658  | 3607.652  | U61741    | 739.886   | 454.471   |
| AF312769  | 866.072   | 803.156   | NM_006597 | 42337.207 | 36708.855 | NM_012402 | 1574.687  | 1633.714  |
| AB020668  | 1442.131  | 1571.228  | NM_012483 | 25910.35  | 24607.49  | NM_003857 | 1019.657  | 769.074   |
| NM_006203 | 16284.606 | 18840.986 | NM_003498 | 4574.591  | 4179.866  | AL137690  | 1326.018  | 997.444   |
| NM_013261 | 748.623   | 632.723   | AB023420  | 14869.32  | 17980.652 | Z83804    | 1651.556  | 1548.428  |
| AF309553  | 7985.384  | 9537.724  | NM_007342 | 4965.033  | 4015.567  | NM_004386 | 1571.666  | 1249.814  |
| NM_003605 | 6332.317  | 6177.355  | NM_005672 | 552.647   | 410.138   | U67784    | 660.091   | 786.381   |
| NM_006139 | 758.46    | 457.492   | D25217    | 14489.034 | 12544.063 | NM_007366 | 1422.792  | 1126.815  |
| NM_003993 | 5507.176  | 6354.666  | NM_006351 | 6617.378  | 4936.112  | NM_000592 | 441.095   | 460.204   |
| NM_018961 | 1788.286  | 2160.478  | M33197    | 61133.305 | 47308.703 | NM_016584 | 9454.807  | 8352.708  |
| NM_005586 | 6631.571  | 8225.605  | NM_004683 | 1781.882  | 1301.772  | NM_001815 | 1400.251  | 1116.505  |
| NM_012242 | 5285.664  | 4450.822  | AK025263  | 450.402   | 382.256   | NM_000064 | 4896.898  | 3569.47   |
| NM_006896 | 1588.319  | 1581.338  | M33197    | 64329.234 | 62313.258 | NM_003264 | 2180.257  | 1500.177  |
| NM_001130 | 56357.094 | 56654.426 | NM_001467 | 1502.333  | 1580.424  | NM_006725 | 2233.63   | 1609.228  |
| NM_002975 | 42338.484 | 39921.547 | NM_018066 | 24632.791 | 26093.928 | NM_003326 | 846.578   | 398.699   |
| AK023511  | 6372.488  | 6159.263  | NM_006931 | 4442.675  | 4322.491  | NM_004568 | 19528.775 | 8851.479  |
| NM_002725 | 1321.016  | 900.901   | NM_020344 | 5241.635  | 4879.726  | NM_000202 | 699.524   | 318.316   |
| NM_017812 | 17479.348 | 18940.926 | AF119868  | 1084.285  | 1142.813  | Z25427    | 1144.333  | 1073.591  |
| AF204173  | 1600.022  | 2007.449  | NM_005050 | 3457.875  | 2969.776  | NM_004672 | 4274.57   | 4942.721  |
| J03260    | 3541.59   | 4017.315  | M33197    | 63213.641 | 60482.164 | NM_001353 | 1583.402  | 1721.462  |
| AB014514  | 4556.782  | 5152.238  | NM_018976 | 10755.354 | 11303.96  | NM_006214 | 1731.795  | 1933.753  |
| NM_002865 | 5599.588  | 5825.218  | NM_003355 | 7057.229  | 7645.096  | AJ010228  | 2327.996  | 3902.733  |
| NM_003566 | 2558.559  | 1767.222  | NM_005074 | 1797.547  | 2371.655  | NM_005196 | 1467.481  | 1950.418  |

|           |           |           |           |           |           |             |           |           |
|-----------|-----------|-----------|-----------|-----------|-----------|-------------|-----------|-----------|
| NM_003731 | 15835.962 | 17624.27  | NM_013272 | 1411.213  | 1860.058  | NM_018073   | 749.102   | 556.462   |
| NM_005446 | 7691.234  | 9942.446  | NM_004558 | 847.971   | 707.128   | AL137529    | 1141.925  | 864.324   |
| NM_013292 | 7201.135  | 9627.36   | AL079296  | 582.203   | 628.284   | NM_012332   | 1032.937  | 828.586   |
| NM_002387 | 5438.182  | 5667.38   | NM_014770 | 735.991   | 645.323   | AK026648    | 1253.595  | 1179.343  |
| NM_000069 | 1778.513  | 1937.155  | AB037737  | 1117.458  | 848.177   | NM_000497   | 2125.976  | 2166.177  |
| AB023217  | 1431.338  | 1542.288  | M33197    | 61306.418 | 64024.574 | NM_017421   | 1555.453  | 1413.265  |
| L08902    | 1115.537  | 1030.542  | AK023103  | 2113.179  | 2222.948  | AK025977    | 7651.409  | 7900.159  |
| J02639    | 4077.797  | 3995.375  | NM_017858 | 2871.185  | 2167.533  | AK023130    | 3663.069  | 3765.179  |
| NM_007263 | 30928.4   | 26304.188 | NM_019059 | 56956.055 | 63705.266 | NM_000273   | 718.359   | 496.898   |
| AF206020  | 2421.779  | 2504.529  | D80008    | 1388.778  | 1387.849  | NM_002899   | 5704.526  | 5827.123  |
| NM_014410 | 2313.025  | 2153.157  | AK001069  | 31056.342 | 29660.123 | NM_000486   | 1051.799  | 1355.621  |
| AF305835  | 802.823   | 865.381   | M33197    | 61621.535 | 63761.172 | BE876237    | 966.967   | 1246.775  |
| NM_002150 | 3363.005  | 3413.605  | NM_000935 | 1529.187  | 1293.594  | NM_005397   | 774.273   | 692.656   |
| NM_004595 | 7192.901  | 6616.773  | NM_000359 | 15642.165 | 13769.764 | NM_000806   | 4374.084  | 3004.011  |
| NM_020178 | 1202.103  | 1216.751  | NM_006395 | 6159.807  | 6706.142  | NM_006320   | 662.703   | 225.705   |
| NM_002264 | 1767.173  | 1722.98   | NM_014306 | 5665.936  | 5603.381  | AB014511    | 2153.892  | 1050.146  |
| NM_014754 | 17771.75  | 18509.295 | NM_001084 | 5487.459  | 5610.48   | NM_021976   | 2586.475  | 3046.779  |
| D49387    | 1246.2    | 1155.041  | NM_015983 | 4184.608  | 4016.782  | NM_005718   | 7808.294  | 9794.972  |
| AF050146  | 4729.672  | 3604.44   | NM_018622 | 5404.369  | 5802.893  | NM_018264   | 1164.303  | 912.234   |
| NM_000116 | 5088.76   | 4208.881  | M33197    | 64525.539 | 63424.586 | NM_014580   | 556.246   | 497.42    |
| NM_006698 | 8561.834  | 8503.387  | NM_005867 | 6801.545  | 7815.349  | AB028998    | 515.499   | 361.835   |
| NM_006804 | 12890.018 | 13999.284 | AK026031  | 16711.582 | 19830.4   | NM_000153   | 472.812   | 432.004   |
| NM_015969 | 7100.863  | 9755.354  | NM_016468 | 6153.438  | 7558.126  | NM_002033   | 2594.079  | 3018.609  |
| AL353933  | 775.689   | 1048.512  | BE539299  | 903.256   | 734.332   | NM_004111   | 1640.028  | 1626.968  |
| NM_003051 | 3068.632  | 4340.361  | AF193873  | 1346.703  | 1032.077  | AF085966    | 2291.956  | 2066.647  |
| NM_001133 | 607.644   | 643.118   | NM_002628 | 871.12    | 689.35    | NM_005316   | 1003.973  | 785.824   |
| NM_145342 | 5581.984  | 7259.078  | AA190729  | 2462.452  | 1661.431  | NM_016316   | 1627.23   | 1762.289  |
| AJ278917  | 14987.974 | 16838.09  | BF974315  | 6051.105  | 5462.168  | NM_003369   | 4066.971  | 4665.707  |
| AK025886  | 2121.236  | 1887.554  | T74985    | 670.525   | 883.746   | NM_000057   | 1272.542  | 1029.845  |
| NM_003058 | 1088.448  | 991.678   | AI652705  | 3329.378  | 2639.251  | NM_018343   | 2673.51   | 2032.782  |
| NM_001720 | 11224.769 | 11123.259 | AA569974  | 7079.739  | 7759.537  | AK095793    | 833.067   | 858.135   |
| NM_018390 | 3128.051  | 3740.867  | AA923615  | 1176.511  | 1554.692  | NM_003177   | 2117.445  | 1613.577  |
| AB037724  | 6905.542  | 6604.561  | AA446028  | 2327.698  | 2583.29   | NM_017719   | 602.782   | 330.694   |
| AK025086  | 1290.645  | 1409.824  | M80583    | 1580.749  | 2487.046  | AF064078    | 478.401   | 372.948   |
| AK026151  | 5792.76   | 5762.072  | AW009565  | 5813.495  | 6804.656  | AL049688    | 727.87    | 392.044   |
| NM_014140 | 2855.004  | 3686.573  | X07767    | 3510.972  | 3941.066  | NM_002737   | 999.814   | 372.597   |
| NM_002916 | 2815.268  | 2388.184  | AF252284  | 4471.148  | 4941.714  | NM_002719   | 3107.509  | 4706.86   |
| M20700    | 3661.352  | 3299.435  | BU727558  | 2874.696  | 3321.387  | AB035356    | 351.694   | 633.108   |
| NM_001034 | 8753.156  | 7245.766  | AL050139  | 4210.107  | 5846.586  | AV752086    | 951.616   | 1113.798  |
| NM_002689 | 2683.965  | 2946.414  | U90878    | 2887.39   | 1866.208  | NM_016102   | 5478.11   | 8514.135  |
| NM_017686 | 2354.654  | 2792.946  | NM_006597 | 46680.836 | 34693.414 | NM_004376   | 1106.246  | 1524.963  |
| AL096734  | 864.23    | 1072.77   | NM_012483 | 2157.457  | 1790.39   | NM_001061   | 446.604   | 311.741   |
| AK000800  | 3652.422  | 4397.745  | NM_003498 | 2293.071  | 1741.604  | AI075338    | 534.334   | 337.384   |
| NM_018154 | 3639.802  | 4298.582  | AB023420  | 9855.563  | 7946.123  | BG744154    | 25958.604 | 24275.848 |
| BC006287  | 6451.981  | 9548.75   | M33197    | 65355.512 | 75996.117 | Z11694      | 2317.651  | 2368.596  |
| AB023198  | 9617.424  | 13231.555 | NM_007264 | 8974.365  | 8072.317  | BF983177    | 677.72    | 502.092   |
| NM_005231 | 7732.991  | 7090.38   | NM_016511 | 13776.586 | 11949.156 | Z26317      | 1239.306  | 1151.622  |
| AF064729  | 2298.318  | 1858.039  | NM_003559 | 1357.711  | 1405.956  | X16983      | 10408.233 | 9054.099  |
| NM_005412 | 31329.879 | 26726.346 | M55337    | 604.689   | 873.841   | X56160      | 1916.079  | 1868.821  |
| NM_012113 | 3263.566  | 3036.496  | M33197    | 69127.969 | 65000.539 | BG679991    | 667.881   | 603.675   |
| NM_002725 | 958.55    | 1046.781  | NM_013229 | 2016.983  | 1802.227  | H-Y 00097 I | 2426.954  | 2411.958  |
| NM_014375 | 9530.378  | 10957.337 | NM_016533 | 54800.566 | 58225.715 | H-M 59964   | 1294.192  | 1330.796  |
| NM_017812 | 13909.283 | 17115.055 | NM_014751 | 8939.166  | 9235.752  | H-Y 00711 I | 53631.359 | 64339.34  |

|           |           |           |           |           |           |             |           |           |
|-----------|-----------|-----------|-----------|-----------|-----------|-------------|-----------|-----------|
| AF204173  | 1343.047  | 1624.226  | NM_002347 | 34237.086 | 33412.699 | H-X 16707 I | 2470.523  | 2016.665  |
| J03260    | 1746.062  | 1841.62   | AB046807  | 1698.356  | 1718.001  | AL038354    | 36899.945 | 20515.912 |
| U13738    | 1309.698  | 1421.077  | M33197    | 63234.855 | 64903.406 | R14607      | 1067.426  | 417.837   |
| AF068236  | 40605.027 | 39513.496 | NM_014623 | 6320.322  | 10887.454 | W84867      | 231.083   | 152.149   |
| H94487    | 1405.842  | 1261.001  | M30629    | 5689.896  | 6321.358  | NM_000064   | 5202.591  | 5910.502  |
| BG681747  | 32381.104 | 31136.133 | M33197    | 60144.379 | 62908.016 | NM_003264   | 2109.375  | 2107.462  |
| H63077    | 3007.749  | 3261.188  | NM_018976 | 12980.925 | 10761.981 | NM_006725   | 2535.106  | 2283.6    |
| AA679352  | 26070.396 | 28861.42  | NM_003355 | 7858.704  | 6561.459  | NM_003326   | 784.452   | 998.009   |
| AA437291  | 625.429   | 787.97    | NM_005074 | 559.182   | 556.99    | NM_004566   | 20609.438 | 23051.754 |
| X04503    | 4627.314  | 4563.312  | NM_013272 | 946.202   | 768.473   | NM_000202   | 768.992   | 1212.474  |
| D45917    | 3001.331  | 4113.784  | NM_004170 | 1113.63   | 1069.172  | NM_005496   | 7966.664  | 5526.369  |
| X52001    | 4802.94   | 6179.097  | NM_018057 | 937.747   | 829.672   | NM_002856   | 3370.519  | 2966.125  |
| BI823872  | 14122.202 | 18225.346 | M33197    | 65243.758 | 65596.617 | NM_004817   | 526.776   | 469.207   |
| X66142    | 2508.765  | 3146.386  | NM_015717 | 1394.164  | 1350.965  | NM_018975   | 5896.155  | 5781.981  |
| NM_005913 | 587.037   | 1160.157  | NM_015925 | 775.684   | 678.058   | AB023215    | 5977.491  | 5263.583  |
| R45054    | 7530.538  | 8540.968  | NM_003665 | 863.107   | 772.077   | NM_001284   | 23370.357 | 20305.088 |
| NM_000620 | 1148.673  | 1125.389  | AF220217  | 1179.974  | 1722.053  | NM_003242   | 2123.146  | 1788.689  |
| AL117398  | 6322.33   | 5074.04   | NM_013323 | 7417.782  | 8117.127  | NM_002846   | 157.232   | 163.907   |
| AY007158  | 67630     | 77047.602 | NM_017426 | 2659.073  | 3334.397  | U31099      | 449.454   | 595.225   |
| M58050    | 7410.242  | 8646.613  | M33197    | 5193.869  | 4980.582  | NM_001105   | 2659.067  | 1959.285  |
| NM_007263 | 27415.91  | 28421.377 | NM_000853 | 3937.024  | 4534.955  | NM_005585   | 605.686   | 589.258   |
| AF206020  | 1472.873  | 2001.383  | AF016903  | 36413.77  | 35509.73  | NM_002075   | 2053.443  | 2229.204  |
| NM_014410 | 1440.414  | 1164.584  | NM_015675 | 10310.2   | 10702.643 | Y08756      | 12291.57  | 12048.587 |
| AF305835  | 957.96    | 921.343   | NM_016040 | 2189.79   | 2236.646  | NM_005563   | 3708.523  | 3560.209  |
| AF312769  | 613.29    | 679.17    | M33197    | 71808.383 | 64768.34  | AY007090    | 443.745   | 347.12    |
| AB020668  | 1337.359  | 1312.36   | AF031136  | 63251.965 | 63458.809 | NM_006436   | 391.943   | 230.861   |
| NM_006203 | 16625.875 | 15142.478 | NM_015983 | 1984.555  | 1037.695  | NM_005102   | 1874.704  | 2033.009  |
| NM_013261 | 582.209   | 553.114   | NM_018622 | 6856.639  | 4388.784  | NM_004516   | 502.783   | 244.553   |
| NM_003556 | 495.357   | 484.637   | M33197    | 62336.664 | 61634.672 | NM_006501   | 244.994   | 142.387   |
| AF309553  | 7851.143  | 7969.128  | NM_005867 | 7764.459  | 6432.353  | NM_005397   | 490.305   | 642.931   |
| NM_003605 | 6726.155  | 7306.488  | AK026031  | 9979.257  | 7521.799  | NM_000806   | 4715.935  | 5030.855  |
| NM_003993 | 4641.611  | 6526.761  | NM_016466 | 6405.01   | 5463.132  | NM_006320   | 941.6     | 1077.269  |
| NM_018961 | 1555.556  | 2002.172  | NM_007342 | 5278.103  | 5004.468  | AB014511    | 2600.127  | 4119.171  |
| NM_005586 | 6378.038  | 8087.383  | NM_005672 | 748.859   | 738.708   | NM_014252   | 2438.668  | 2832.719  |
| NM_012242 | 5459.851  | 5336.247  | D25217    | 16608.967 | 14318.113 | NM_001662   | 4340.312  | 4120.465  |
| NM_006896 | 1432.117  | 1473.57   | NM_006351 | 7279.603  | 6244.354  | NM_016131   | 4673.465  | 3743.762  |
| NM_002975 | 38448.953 | 40800.418 | M33197    | 62567.211 | 63208.102 | NM_006822   | 860.82    | 786.228   |
| AK023511  | 6417.869  | 8077.875  | NM_004683 | 9858.464  | 9006.168  | NM_012142   | 4585.302  | 5130.486  |
| NM_014556 | 3874.859  | 3408.802  | M33197    | 60703.039 | 63419.355 | NM_016426   | 871.623   | 734.617   |
| AK025886  | 1529.16   | 2160.217  | NM_001467 | 2298.591  | 2150.062  | NM_006834   | 2081.303  | 1953.099  |
| NM_003056 | 1096.37   | 886.403   | NM_018066 | 31944.041 | 37613.188 | AB011100    | 1096.754  | 1246.719  |
| AB014514  | 4442.685  | 4371.589  | NM_006931 | 5697.822  | 6343.704  | U61741      | 868.822   | 889.04    |
| NM_002865 | 4784.44   | 5744.58   | NM_020344 | 4607.27   | 5599.056  | NM_012402   | 1759.835  | 1943.936  |
| NM_003566 | 2739.813  | 1802.376  | NM_005050 | 3153.726  | 3242.25   | M76676      | 1853.21   | 1600.109  |
| NM_004246 | 622.36    | 791.135   | AF252284  | 3452.316  | 2197.426  | NM_003857   | 660.161   | 754.83    |
| AK026315  | 494.915   | 575.836   | BU727558  | 839.724   | 747.12    | AL137690    | 633.849   | 559       |
| NM_007156 | 29697.736 | 33267.59  | M33197    | 12474.929 | 9055.779  | Z83804      | 1864.912  | 1988.569  |
| NM_003731 | 14264.766 | 17730.234 | AL050139  | 4115.928  | 3686.173  | NM_004386   | 1740.522  | 1773.702  |
| NM_005446 | 6628.673  | 7800.875  | NM_004556 | 2056.195  | 2021.267  | U67784      | 854.014   | 877.033   |
| NM_013292 | 6464.381  | 6956.588  | AL079296  | 886.255   | 681.665   | NM_007366   | 1325.638  | 883.116   |
| NM_002387 | 5190.388  | 5443.819  | NM_014770 | 2002.914  | 2375.063  | NM_000592   | 388.026   | 386.405   |
| NM_000066 | 1564.604  | 1769.941  | AB037737  | 1075.115  | 1158.056  | NM_016584   | 8186.844  | 3356.226  |
| AB023217  | 1383.752  | 1582.136  | M33197    | 62994.113 | 64635.457 | NM_001815   | 1288.424  | 585.519   |

|           |           |           |           |           |           |           |           |           |
|-----------|-----------|-----------|-----------|-----------|-----------|-----------|-----------|-----------|
| L08902    | 1226.087  | 1095.125  | AK023103  | 2303.051  | 2454.094  | AK095793  | 915.24    | 1563.802  |
| NM_005231 | 7584.401  | 8671.241  | NM_017858 | 2605.312  | 3319.819  | NM_003177 | 2379.491  | 3857.006  |
| AF064729  | 8939.773  | 9949.193  | NM_019059 | 64045.066 | 66754.398 | NM_017719 | 636.749   | 572.51    |
| NM_005412 | 28432.922 | 29985.66  | D80008    | 1581.74   | 1417.795  | AF064078  | 673.713   | 818.261   |
| NM_012113 | 2760.166  | 3269.244  | X56789    | 1436.322  | 1451.585  | AL049688  | 1400.883  | 3181.564  |
| NM_002150 | 4692.314  | 4762.446  | AK001069  | 58481.133 | 53923.633 | NM_002737 | 1617.615  | 1837.274  |
| NM_004595 | 7516.903  | 8441.228  | M33197    | 62686.406 | 62893.703 | Z25427    | 1199.479  | 1423.509  |
| NM_020178 | 1200.706  | 1356.809  | NM_000935 | 1878.948  | 1772.066  | NM_004672 | 4156.676  | 3810.005  |
| NM_002264 | 1695.063  | 1762.336  | NM_000359 | 20007.51  | 25303.762 | NM_001353 | 1661.327  | 1351.831  |
| NM_014754 | 17188.018 | 16398.393 | NM_006395 | 5600.774  | 6480.958  | NM_006214 | 1590.691  | 1539.06   |
| D49387    | 1682.376  | 1520.405  | NM_014306 | 5682.058  | 6293.207  | AJ010228  | 3999.55   | 3559.625  |
| AF050146  | 5166.063  | 5064.329  | NM_001084 | 5703.455  | 7263.914  | NM_005198 | 1895.426  | 2156.088  |
| NM_000116 | 5013.868  | 4951.971  | M33197    | 65434.086 | 66144.617 | NM_018073 | 629.166   | 736.15    |
| NM_006698 | 8321.056  | 9817.911  | NM_014623 | 8454.835  | 7545.261  | AL137529  | 1516.119  | 1741.508  |
| NM_006804 | 13171.778 | 15552.561 | NM_007244 | 7403.001  | 5371.445  | NM_012332 | 994.509   | 932.173   |
| NM_015969 | 6803.797  | 9024.609  | M30629    | 3365.244  | 3265.787  | NM_000497 | 908.566   | 1064.431  |
| AL353933  | 850.936   | 1061.984  | BE539299  | 1041.996  | 888.824   | NM_017421 | 619.561   | 591.684   |
| NM_003051 | 3012.443  | 3231.803  | AF193873  | 2806.777  | 2219.902  | AK025977  | 10853.009 | 10723.111 |
| NM_145342 | 4968.415  | 4402.247  | NM_002628 | 1570.264  | 1549.226  | AK023130  | 3974.038  | 3892.346  |
| AJ278917  | 15750.045 | 13973.189 | M23575    | 587.712   | 629.788   | NM_000273 | 833.086   | 692.729   |
| NM_000620 | 847.897   | 845.293   | AA190729  | 2648.444  | 2437.209  | NM_002895 | 5710.901  | 3860.464  |
| AL117398  | 6307.242  | 6519.229  | BF974315  | 7041.736  | 6978.717  | NM_000486 | 987.83    | 538.252   |
| AY007158  | 54002.797 | 53110.656 | T74985    | 818.346   | 969.536   | BE876237  | 905.493   | 448.752   |
| NM_001720 | 9838.813  | 10560.529 | AI652705  | 4570.573  | 4334.064  | NM_000838 | 344.052   | 537.462   |
| NM_018390 | 3153.511  | 4133.946  | AA973397  | 883.693   | 1307.083  | NM_014750 | 1256.368  | 2576.275  |
| AB037724  | 7139.521  | 6784.571  | AA569974  | 7407.308  | 8124.708  | NM_015912 | 967.489   | 1396.609  |
| AK025086  | 1509.935  | 1531.106  | AA923615  | 748.475   | 939.935   | NM_000460 | 1091.566  | 1312.073  |
| AK026151  | 8100.558  | 6466.145  | AA446028  | 2406.861  | 2473.124  | AB002339  | 1154.319  | 1425.607  |
| NM_014140 | 2826.383  | 3044.224  | M80583    | 1701.83   | 2259.46   | NM_005104 | 6182.738  | 6242.847  |
| NM_002916 | 2993.505  | 2120.398  | AW009565  | 5747.83   | 7587.341  | NM_006888 | 11090.202 | 11843.259 |
| M20700    | 3649.463  | 3745.31   | AW451878  | 275.481   | 1038.737  | AL137423  | 1982.879  | 1763.152  |
| NM_001034 | 8622.841  | 7346.568  | AI570478  | 2573.085  | 5021.132  | AB018322  | 797.147   | 783.331   |
| NM_002689 | 2720.79   | 2611.305  | X07767    | 3003.479  | 3476.752  | NM_007068 | 10110.763 | 7971.635  |
| NM_017686 | 2050.373  | 2612.491  | X65293    | 527.036   | 481.628   | NM_005718 | 6859.541  | 5705.349  |
| AL096734  | 971.396   | 1058.954  | AF016903  | 13554.917 | 11019.282 | NM_018264 | 1153.626  | 1083.393  |
| AK000800  | 3257.855  | 3042.446  | NM_015675 | 5785.405  | 4235.617  | NM_014580 | 508.933   | 681.226   |
| NM_018154 | 3856.079  | 3014.411  | AK022267  | 760.943   | 588.286   | AB028998  | 664.075   | 406.227   |
| NM_005358 | 483.077   | 639.152   | NM_016040 | 3141.581  | 2222.791  | AK025389  | 742.897   | 656.673   |
| BC006287  | 5626.317  | 6349.505  | M33197    | 60881.188 | 62793.406 | NM_000153 | 743.524   | 526.556   |
| AB023198  | 10041.727 | 7539.857  | AF031136  | 43896.395 | 38313.652 | NM_002033 | 1391.643  | 1593.446  |
| NM_006896 | 980.223   | 954.922   | U90878    | 3859.495  | 3597.161  | NM_004111 | 2379.571  | 2503.332  |
| NM_002975 | 34157.77  | 31414.213 | NM_006597 | 49073.535 | 38639.68  | AF085966  | 2546.506  | 2089.002  |
| AK023511  | 5226.796  | 6372.427  | NM_012483 | 11224.929 | 10811.95  | NM_005316 | 1165.181  | 649.85    |
| NM_014556 | 2203.94   | 2002.093  | NM_003498 | 3247.236  | 2978.922  | NM_016316 | 1961.065  | 1844.313  |
| NM_002725 | 1228.5    | 1476.908  | AB023420  | 11610.82  | 12364.287 | NM_003369 | 5146.527  | 2811.493  |
| NM_014375 | 6145.74   | 6024.06   | NM_016511 | 29940.664 | 27291.535 | NM_000057 | 1176.844  | 459.775   |
| NM_017812 | 14206.509 | 14475.909 | NM_003559 | 2577.515  | 2537.425  | NM_018343 | 2101.802  | 874.122   |
| AF204173  | 1370.687  | 1482.503  | M55337    | 1506.079  | 1352.824  | AF114264  | 3535.967  | 5104.755  |
| J03260    | 2680.51   | 2454.057  | M33197    | 69620.398 | 64919.148 | NM_018972 | 1037.554  | 1339.969  |
| U13738    | 1315.447  | 924.471   | NM_013229 | 2155.73   | 2366.404  | AB037828  | 265.698   | 296.832   |
| AF068236  | 52471.918 | 54217.391 | NM_016533 | 56448.152 | 57184.52  | AB023210  | 485.867   | 344.668   |
| H94487    | 1838.906  | 1617.811  | NM_014751 | 6258.438  | 6088.444  | AB037786  | 1644.9    | 1146.179  |
| BG681747  | 33450.766 | 34453.082 | NM_002347 | 24688.514 | 23238.332 | NM_003648 | 4009.293  | 3854.917  |

|           |           |           |           |           |           |           |           |           |
|-----------|-----------|-----------|-----------|-----------|-----------|-----------|-----------|-----------|
| H63077    | 2849.59   | 3510.61   | AB046807  | 1182.686  | 1576.551  | AB037735  | 302.885   | 376.055   |
| AA679352  | 26163.143 | 26655.344 | NM_018066 | 13213.951 | 11605.927 | AK002177  | 3080.624  | 2605.052  |
| AA437291  | 600.642   | 484.424   | NM_006931 | 2629.941  | 2274.878  | AK024429  | 908.591   | 1017.289  |
| X04503    | 4892.964  | 4503.118  | NM_020344 | 4430.334  | 3687.783  | NM_003496 | 48420.25  | 52544.602 |
| D45917    | 2468.282  | 2900.292  | AF119868  | 887.245   | 642.595   | AB000509  | 736.123   | 989.34    |
| X52001    | 3748.152  | 4964.603  | NM_005050 | 2695.396  | 2015.193  | AB018314  | 906.914   | 1004.285  |
| BI823872  | 13576.611 | 13240.678 | M33197    | 60891.688 | 61778.531 | NM_004378 | 816.674   | 776.582   |
| AA430552  | 4258.16   | 4116.228  | NM_018976 | 12608.159 | 11136.333 | AJ238899  | 661.245   | 663.399   |
| X66142    | 2887.518  | 2556.028  | NM_003355 | 8025.584  | 7209.72   | NM_018037 | 586.826   | 457.729   |
| NM_005913 | 857.867   | 692.368   | NM_005074 | 1076.598  | 1431.382  | NM_001110 | 2462.774  | 1855.76   |
| R45054    | 7384.098  | 6988.539  | NM_013272 | 1256.32   | 1199.825  | NM_003222 | 405.673   | 290.956   |
| NM_002387 | 4665.925  | 4718.115  | NM_018057 | 1149.617  | 1093.242  | NM_000841 | 3931.118  | 2216.193  |
| NM_000069 | 1504.642  | 1518.883  | M33197    | 63786.707 | 65255.625 | NM_001245 | 1040.743  | 507.884   |
| AB023217  | 1309.164  | 1528.481  | NM_015717 | 2700.7    | 2919.701  | AJ008139  | 2966.285  | 3719.617  |
| L08902    | 870.655   | 855.354   | NM_015925 | 1423.253  | 1341.807  | NM_004326 | 1635.156  | 1685.707  |
| M58050    | 6525.18   | 5270.331  | NM_003665 | 1420.022  | 1372.675  | NM_000882 | 263.609   | 268.672   |
| NM_007263 | 23000.656 | 20267.496 | AF220217  | 1183.858  | 1425.658  | NM_004577 | 1641.076  | 1596.539  |
| AF206020  | 2177.395  | 1771.865  | NM_013323 | 16744.295 | 16657.484 | NM_015507 | 506.286   | 791.246   |
| NM_014410 | 1804.009  | 2529.382  | NM_017426 | 2815.365  | 4963.476  | AF007157  | 17187.811 | 13441.268 |
| AF305835  | 740.609   | 813.965   | M33197    | 5295.283  | 6091.412  | D38553    | 1579.627  | 1309.801  |
| AF312769  | 925.868   | 734.587   | NM_000853 | 2655.265  | 3036.351  | NM_006170 | 1781.528  | 1347.152  |
| AB020668  | 2038.949  | 1946.986  | M33197    | 61231.648 | 60891.219 | NM_014296 | 7366.657  | 5564.247  |
| NM_006203 | 24401.443 | 23252.264 | NM_000935 | 1410.451  | 1010.888  | AK001581  | 745.345   | 499.39    |
| NM_013261 | 695.441   | 637.274   | NM_000359 | 6690.087  | 5339.668  | NM_005862 | 1397.787  | 924.74    |
| AF309553  | 8070.413  | 7319.951  | NM_006395 | 7159.62   | 5235.411  | NM_000548 | 2208.85   | 2351.502  |
| NM_003605 | 6673.575  | 6282.634  | NM_014306 | 6481.877  | 4942.272  | AK022541  | 7421.139  | 7406.559  |
| NM_000100 | 21800.926 | 25396.443 | NM_001084 | 5159.935  | 4251.584  | AB002297  | 1817.195  | 2252.591  |
| NM_001900 | 67275.602 | 65663.516 | NM_015983 | 2168.659  | 1699.419  | NM_005020 | 11559.908 | 10873.646 |
| NM_003993 | 3060.673  | 3313.466  | NM_018622 | 6408.178  | 4971.427  | NM_014077 | 1765.441  | 2026.828  |
| NM_018961 | 1733.2    | 2089.806  | M33197    | 62050.926 | 62644.117 | NM_018412 | 700.455   | 917.488   |
| NM_005586 | 6257.871  | 6626.084  | NM_005867 | 8137.736  | 7713.932  | NM_012325 | 1744.879  | 1982.639  |
| NM_012242 | 4551.826  | 4138.506  | AK026031  | 10058.753 | 10303.846 | M14087    | 15349.72  | 10517.488 |
| NM_003051 | 1781.528  | 2214.471  | NM_016468 | 6607.211  | 6497.054  | AJ272324  | 514.889   | 423.046   |
| NM_145342 | 3546.28   | 3625.929  | NM_007342 | 5418.391  | 5546.251  | NM_000885 | 3259.94   | 1756.743  |
| AJ278917  | 4814.976  | 4330.05   | NM_005672 | 777.56    | 1182.74   | M59040    | 1327.372  | 544.586   |
| AK025641  | 18461.438 | 16049.551 | D25217    | 16766.016 | 18003.162 | NM_017582 | 9306.848  | 19550.012 |
| NM_001038 | 18526.361 | 11105.658 | NM_006351 | 6804.989  | 7239.459  | AK026962  | 1693.519  | 2700.397  |
| AB040457  | 450.396   | 253.426   | M33197    | 62144.672 | 59712.949 | X04366    | 1309.12   | 1413.192  |
| AK025886  | 1713.608  | 1601.569  | NM_004683 | 21280.824 | 16688.205 | NM_000505 | 34916.227 | 28844.258 |
| NM_003058 | 908.691   | 1005.545  | AK025263  | 656.989   | 1385.595  | NM_000666 | 2091.966  | 1902.23   |
| AB014514  | 4788.05   | 4931.652  | M33197    | 63237.051 | 64205.496 | NM_003481 | 1003.495  | 928.362   |
| NM_002865 | 5052.739  | 5525.87   | NM_004688 | 14885.39  | 9796.293  | AB046814  | 414.173   | 355.373   |
| NM_003566 | 2642.986  | 1758.841  | AB037725  | 1169.123  | 953.745   | NM_017664 | 2014.695  | 2406.499  |
| NM_004249 | 799.976   | 837.825   | M33197    | 59165.738 | 53619.531 | AK025523  | 263.642   | 358.596   |
| NM_007159 | 29621.709 | 34900.516 | NM_004860 | 3656.688  | 3083.156  | NM_007059 | 1547.969  | 1887.094  |
| NM_003731 | 15561.616 | 17715.574 | AF217190  | 6037.051  | 4064.626  | NM_006870 | 2303.389  | 2381.706  |
| NM_005446 | 8034.49   | 8990.272  | AB028981  | 29797.844 | 22900.613 | NM_007359 | 2855.814  | 2284.261  |
| NM_013292 | 7417.546  | 8044.961  | NM_006800 | 2720.801  | 2126.125  | L13283    | 483.831   | 340.399   |
| AK000800  | 3498.048  | 3888.625  | NM_002729 | 7761.919  | 7217.634  | NM_013327 | 1546.104  | 1129.561  |
| NM_018154 | 3230.083  | 3063.81   | M33197    | 14042.972 | 12180.07  | AF303888  | 2426.862  | 1392.443  |
| BC006287  | 5812.644  | 6740.494  | AL050139  | 4219.446  | 4543.009  | NM_000077 | 426.308   | 285.829   |
| AB023198  | 9499.467  | 10855.25  | NM_002593 | 1276.322  | 1519.449  | AF176646  | 288.561   | 48.119    |
| AF304163  | 19607.115 | 21606.316 | NM_004558 | 3929.349  | 4362.978  | NM_007084 | 946.44    | 1565.179  |



|           |           |           |           |           |           |           |           |           |
|-----------|-----------|-----------|-----------|-----------|-----------|-----------|-----------|-----------|
| NM_005231 | 6482.399  | 5717.575  | AL079296  | 1376.082  | 1163.721  | M97191    | 16563.217 | 21824.57  |
| AF064729  | 1529.366  | 1268.092  | NM_014770 | 4732.62   | 4795.826  | AK023015  | 913.408   | 1287.061  |
| NM_005412 | 28882.232 | 26558.342 | AB037737  | 1086.418  | 1219.312  | NM_003457 | 7504.583  | 9928.714  |
| NM_012113 | 3276.761  | 4090.477  | M33197    | 62248.844 | 61535.453 | NM_012391 | 1330.552  | 1378.333  |
| NM_002150 | 6232.806  | 5503.242  | AK023103  | 2613.611  | 2815.98   | NM_005254 | 1094.224  | 1375.463  |
| NM_004595 | 7719.083  | 7184.131  | NM_017858 | 2875.112  | 3139.447  | NM_005611 | 567.583   | 691.065   |
| NM_020178 | 1229.061  | 2086.37   | NM_019059 | 61148.684 | 62404.398 | AF141655  | 619.873   | 757.071   |
| NM_002264 | 1876.066  | 2010.036  | NM_013347 | 531.7     | 1684.992  | NM_007345 | 403.172   | 476.301   |
| NM_014754 | 19436.875 | 21439.662 | D80008    | 1587.244  | 2638.149  | NM_004830 | 527.695   | 495.337   |
| D49387    | 1647.304  | 1527.191  | X56789    | 1737.974  | 3065.995  | AF132362  | 48441.816 | 60388.113 |
| AF050146  | 5215.813  | 4392.79   | NM_004132 | 2685.877  | 1951.765  | NM_007007 | 3704.719  | 4923.064  |
| NM_000116 | 4134.047  | 3957.404  | NM_014844 | 2461.783  | 1598.895  | NM_006386 | 920.716   | 916.267   |
| NM_006698 | 8938.129  | 9755.627  | M33197    | 59795.133 | 60210.715 | NM_006555 | 9305.752  | 8701.091  |
| NM_006804 | 15971.744 | 16469.035 | NM_018492 | 3427.401  | 3091.215  | NM_004501 | 28202.654 | 20731.209 |
| NM_015969 | 6767.329  | 7617.647  | NM_001346 | 1346.601  | 1113.867  | NM_004966 | 7039.161  | 7531.82   |
| AL353933  | 951.251   | 873.041   | NM_003149 | 690.628   | 704.855   | NM_006700 | 963.083   | 1224.814  |
| NM_004517 | 5506.994  | 7124.357  | NM_003377 | 10058.988 | 8973.438  | NM_006445 | 6363.14   | 7087.521  |
| AI017418  | 891.628   | 1096.638  | NM_002220 | 2758.755  | 2210.965  | NM_012109 | 6824.9    | 6236.976  |
| NM_000679 | 951.885   | 1193.702  | AB033034  | 1983.298  | 2165.655  | AF019633  | 955.257   | 843.162   |
| AF218006  | 37645.023 | 40924.512 | D38169    | 2687.531  | 2539.02   | AB002361  | 3899.522  | 3149.741  |
| AK026935  | 7769.045  | 8942.534  | M33197    | 61668.73  | 65004.227 | NM_018060 | 2470.964  | 1879.151  |
| NM_004752 | 104.219   | 565.415   | NM_018171 | 743.579   | 928.29    | NM_014239 | 1415.511  | 1183.516  |
| NM_020162 | 5990.205  | 6588.207  | NM_002447 | 12909.236 | 14701.727 | NM_017662 | 2596.468  | 1833.401  |
| AK027124  | 32371.678 | 33551.406 | NM_014145 | 13521.271 | 13874.695 | U88837    | 452.495   | 324.803   |
| AB037813  | 649.317   | 442.292   | NM_014141 | 7687.544  | 7636.522  | NM_017446 | 5516.043  | 3594.311  |
| AY007158  | 59586.5   | 58964.582 | NM_002223 | 2807.995  | 2967.752  | AK001478  | 4268.18   | 6626.928  |
| NM_001720 | 12437.494 | 12546.313 | NM_005490 | 14313.808 | 22763.029 | AK025697  | 2198.791  | 2852.993  |
| NM_018390 | 4091.988  | 3964.813  | NM_003151 | 2163.793  | 3679.661  | AK021734  | 788.059   | 1492.692  |
| AB037724  | 9011.526  | 8876.499  | NM_005601 | 4516.364  | 8169.934  | AF075028  | 359.049   | 394.317   |
| AK025086  | 2048.978  | 2401.401  | NM_016151 | 17326.102 | 27226.66  | BF245026  | 329.271   | 800.349   |
| AK026151  | 8994.109  | 8390.644  | NM_004324 | 1313.959  | 978.423   | D00265    | 18809.582 | 22400.471 |
| NM_014140 | 3395.56   | 3854.5    | NM_005614 | 12232.873 | 9940.454  | NM_004552 | 18330.309 | 17086.953 |
| NM_002916 | 3216.228  | 2243.519  | AK026270  | 1909.192  | 1292.486  | NM_000143 | 1810.973  | 2499.108  |
| M20700    | 3781.347  | 3865.487  | NM_004556 | 3098.73   | 2949.175  | NM_006294 | 38418.883 | 27894.102 |
| NM_001034 | 8711.042  | 7908.622  | D90075    | 7844.3    | 7105.418  | AL137294  | 864.157   | 942.007   |
| AL096734  | 843.327   | 1222.86   | M33197    | 59556.789 | 61243.164 | NM_003743 | 633.407   | 656.318   |
| NM_016645 | 3593.673  | 3630.108  | AK023827  | 2092.248  | 1718.197  | AB037797  | 294.876   | 137.482   |
| L14723    | 6373.805  | 5944.063  | AK021702  | 2095.082  | 1637.177  | NM_001520 | 537.296   | 688.919   |
| AK024462  | 7690.075  | 7434.983  | NM_003885 | 1938.769  | 2046.627  | NM_017870 | 840.866   | 990.151   |
| NM_019601 | 885.783   | 873.264   | NM_016448 | 4521.347  | 5790.051  | AL133633  | 642.949   | 667.075   |
| NM_002206 | 1889.406  | 2027.5    | NM_003936 | 1597.997  | 1537.598  | NM_012252 | 586.025   | 818.213   |
| NM_007074 | 712.805   | 619.554   | M33197    | 61472.473 | 63065.742 | AK026817  | 1047.683  | 913.428   |
| NM_006614 | 249.923   | 709.359   | NM_002688 | 2634.135  | 2385.199  | AL157442  | 15127.891 | 12654.365 |
| NM_002230 | 1134.259  | 1455.899  | NM_004415 | 4076.116  | 4832.884  | AB011148  | 1195.279  | 847.463   |
| NM_003815 | 3361.709  | 3250.672  | NM_007278 | 15784.177 | 16303.858 | AL389938  | 14186.061 | 13206.382 |
| NM_001430 | 2509.551  | 3382.366  | NM_004723 | 13927.08  | 22620.598 | NM_001949 | 15519.092 | 14887.138 |
| AB010098  | 1134.39   | 1031.74   | M33197    | 45775.348 | 51178.887 | NM_003507 | 476.059   | 920.407   |
| U17989    | 1095.974  | 1437.809  | AB018299  | 47112.473 | 52352.746 | AK026591  | 433.703   | 752.375   |
| U62325    | 587.238   | 723.224   | NM_005245 | 6116.629  | 8869.618  | AK001889  | 1698.683  | 3032.459  |
| AL137595  | 966.743   | 1420.049  | M33197    | 62578.559 | 57745.133 | AK025726  | 1361.808  | 2451.217  |
| NM_018028 | 1581.834  | 1869.718  | NM_016219 | 9040.402  | 7310.942  | AJ227869  | 1333.111  | 2296.301  |
| AF249267  | 53162.297 | 52055.145 | NM_004751 | 710.426   | 812.585   | AF075011  | 423.101   | 665.95    |
| NM_004113 | 1104.062  | 1357.357  | AK025605  | 3725.475  | 3124.159  | AK026189  | 282.765   | 366.079   |

|           |           |           |           |           |           |           |           |           |
|-----------|-----------|-----------|-----------|-----------|-----------|-----------|-----------|-----------|
| X84939    | 7324.185  | 7832.028  | NM_003783 | 592.808   | 884.756   | AL117613  | 4067.094  | 4899.245  |
| NM_018320 | 12967.911 | 9930.538  | NM_007000 | 3649.783  | 2808.52   | AL137753  | 2096.98   | 2725.452  |
| NM_002069 | 3773.29   | 3536.616  | M23161    | 7643.913  | 6588.209  | AK021785  | 358.193   | 244.882   |
| NM_016951 | 4992.686  | 5563.716  | NM_003197 | 5587.486  | 5601.01   | AL110262  | 5648.382  | 6375.329  |
| NM_013251 | 1210.12   | 1222.975  | AF176705  | 2533.468  | 2457.166  | AK025627  | 10491.638 | 12477.591 |
| NM_006099 | 3963.532  | 4879.764  | D29012    | 7820.983  | 10001.911 | U00945    | 270.524   | 473.317   |
| AF272379  | 3655.615  | 3746.074  | NM_017414 | 2830.429  | 3088.898  | AF216077  | 2324.955  | 2485.283  |
| NM_012326 | 1300.537  | 1461.215  | NM_012179 | 25668.939 | 27773.434 | AF086238  | 484.285   | 448.434   |
| NM_003085 | 13699.505 | 12828.901 | NM_002793 | 5345.798  | 6646.156  | AK021612  | 9514.463  | 10318.607 |
| NM_016084 | 17775.104 | 18616.682 | NM_004788 | 1963.301  | 2149.431  | AF147342  | 300.765   | 331.66    |
| AF095289  | 11852.214 | 13486.617 | M33197    | 62729.727 | 60471.387 | AF088031  | 342.97    | 365.71    |
| NM_005537 | 5796.658  | 5959.393  | AL442083  | 3164.142  | 3188.86   | AF086240  | 357.255   | 442.585   |
| NM_019003 | 3476.296  | 3179.24   | D63487    | 5549.923  | 5835.624  | AK002025  | 21892.508 | 19066.521 |
| NM_015935 | 3165.326  | 2821.533  | AK097791  | 7847.375  | 8678.474  | AK026299  | 696.108   | 958.408   |
| AF182412  | 1250.566  | 1341.424  | NM_020367 | 619.632   | 913.353   | NM_017794 | 610.66    | 885.837   |
| AK027200  | 1881.353  | 1743.725  | AK022705  | 2575.106  | 5405.868  | AK025170  | 868.9     | 1092.94   |
| S78372    | 434.368   | 526.427   | NM_016404 | 6656.669  | 13956.816 | AB033031  | 970.584   | 1776.748  |
| U03106    | 8360.898  | 8409.009  | L03426    | 2153.597  | 3153.748  | AK025249  | 422.42    | 1213.793  |
| NM_000075 | 18039.645 | 12871.811 | M33197    | 61154.852 | 62078.625 | AF085872  | 5743.114  | 11601.605 |
| NM_006845 | 11116.72  | 10712.817 | NM_020163 | 2272.281  | 3157.414  | AK022538  | 5256.842  | 10022.48  |
| NM_014885 | 917.034   | 1063.411  | NM_006608 | 3792.748  | 2866.889  | AL360257  | 438.501   | 712.714   |
| M73239    | 942.237   | 854.8     | NM_000457 | 997.414   | 698.589   | AK022342  | 698.988   | 736.704   |
| NM_004945 | 7045.587  | 6359.171  | M34356    | 3205.512  | 3293.977  | AF147420  | 704.639   | 958.986   |
| NM_020242 | 3043.723  | 2565.898  | AJ133115  | 4886.427  | 4342.154  | AL049312  | 1052.303  | 1420.241  |
| NM_001785 | 14255.284 | 11581.623 | X51630    | 9543.081  | 8638.242  | AL050072  | 2437.709  | 4075.418  |
| NM_007175 | 56873.453 | 53207.121 | NM_005056 | 2251.457  | 2176.086  | AL117590  | 456.443   | 848.04    |
| NM_002209 | 3736.822  | 2773.363  | NM_001965 | 719.569   | 548.139   | AL049357  | 2383.198  | 2531.734  |
| NM_002291 | 679.609   | 593.373   | AF208502  | 14752.55  | 9510.354  | AL110223  | 313.367   | 281.685   |
| AL137477  | 9053.881  | 7919.782  | M33197    | 59725.547 | 57704.414 | AK027180  | 3641.209  | 4150.245  |
| AF284580  | 922.86    | 948.936   | AF264750  | 18280.012 | 17067.615 | AK026802  | 196.168   | 391.478   |
| AK024961  | 11112.725 | 11310.288 | NM_006980 | 4929.697  | 6225.278  | NM_004544 | 5492.038  | 5979.597  |
| NM_016068 | 5714.761  | 6038.364  | AK023904  | 3632.35   | 2859.454  | AF086041  | 431.077   | 425.885   |
| NM_014256 | 997.87    | 1136.156  | NM_017956 | 6119.32   | 5595.646  | Y15167    | 477.507   | 648.904   |
| NM_015967 | 4186.838  | 3400.586  | NM_017826 | 516.974   | 669.05    | AL133080  | 1176.692  | 1400.48   |
| NM_012237 | 881.233   | 496.948   | NM_016496 | 2398.07   | 2026.915  | NM_017792 | 1422.825  | 1513.241  |
| NM_003595 | 1156.146  | 1303.997  | NM_014309 | 4782.853  | 4825.116  | AK025213  | 1512.952  | 2886.213  |
| NM_002409 | 971.846   | 1598.952  | M33197    | 54208.063 | 54776.977 | NM_014949 | 937.57    | 1123.369  |
| NM_004994 | 14885.368 | 15893.472 | NM_004094 | 2636.583  | 2963.246  | AL080221  | 821.465   | 877.153   |
| NM_006610 | 11824.965 | 10362.091 | NM_020236 | 3086.406  | 3873.795  | AL137370  | 504.516   | 929.948   |
| NM_003791 | 7027.141  | 6882.801  | AK027059  | 7029.516  | 14241.584 | AF009262  | 4042.499  | 9163.643  |
| NM_018017 | 5615.547  | 6112.065  | AF151109  | 17102.104 | 32196.041 | AF009306  | 282.72    | 679.899   |
| AK001296  | 9073.985  | 10084.571 | NM_015414 | 64760.785 | 67864.297 | AF050198  | 639.822   | 927.315   |
| AK000173  | 1092.091  | 1021.335  | L34070    | 8897.396  | 11939.992 | AK024346  | 1380.943  | 1849.124  |
| NM_018365 | 4868.499  | 4259      | AF038182  | 1335.457  | 1130.008  | AF056422  | 525.107   | 909.67    |
| NM_006586 | 18961.74  | 14419.248 | NM_016475 | 3899.262  | 3523.141  | AF090892  | 546.924   | 680.879   |
| AJ272180  | 3173.942  | 2709.239  | AF086472  | 491.136   | 407.692   | AK001089  | 318.307   | 726.955   |
| AK025709  | 1785.509  | 1815.053  | NM_001865 | 61705.93  | 59131.734 | AK001919  | 610.188   | 816.804   |
| NM_019016 | 13005.266 | 10170.201 | NM_006441 | 5097.188  | 4409.278  | AK021535  | 629.39    | 797.488   |
| NM_012261 | 14906.97  | 11300.482 | NM_001918 | 2394.436  | 1983.038  | AK021753  | 2700.824  | 2578.966  |
| NM_015556 | 6431.475  | 5799.6    | NM_018245 | 7214.284  | 7109.282  | AK001139  | 1461.883  | 1656.729  |
| NM_018416 | 2360.101  | 2765.975  | M33197    | 56391.109 | 55949.582 | AK002090  | 580.319   | 794.98    |
| NM_004606 | 8537.463  | 7774.238  | AF252390  | 804.962   | 978.946   | AK021618  | 262.809   | 265.438   |
| D70833    | 64748.355 | 54580.176 | NM_012117 | 8806.258  | 5998.042  | AK021822  | 587.819   | 651.667   |

|           |           |           |           |           |           |           |           |           |
|-----------|-----------|-----------|-----------|-----------|-----------|-----------|-----------|-----------|
| NM_016621 | 2040.42   | 1283.887  | D17130    | 65336.109 | 67915.266 | AK026763  | 373.645   | 842.528   |
| AB046808  | 2759.895  | 2819.656  | X76302    | 6574.361  | 6382.103  | AK025246  | 3905.325  | 6250.502  |
| AK026265  | 3452.011  | 3865.159  | AK026276  | 959.073   | 864.347   | AK025847  | 806.081   | 1168.91   |
| NM_006466 | 1412.895  | 989.186   | M33197    | 65244.727 | 70831.398 | AK026442  | 413.516   | 632.201   |
| NM_005681 | 2167.434  | 1488.087  | X52354    | 2390.113  | 4508.033  | NM_014174 | 2640.405  | 4822.748  |
| NM_015156 | 5939.183  | 5336.584  | NM_005413 | 1516.647  | 2329.164  | AF147337  | 1118.672  | 1829.673  |
| NM_012384 | 4154.851  | 3503.905  | NM_002315 | 2469.62   | 2799.863  | AK025203  | 37414.289 | 44713.539 |
| NM_004653 | 4697.698  | 4375.094  | AK024191  | 1273.993  | 1821.943  | AK026981  | 1763.918  | 2780.954  |
| AF233453  | 7146.572  | 7897.248  | D83781    | 1702.914  | 1500.291  | NM_006394 | 294.592   | 208.359   |
| D87454    | 15745.231 | 18239.361 | AF075013  | 421.677   | 478.749   | AK023819  | 402.865   | 527.977   |
| NM_007020 | 7244.187  | 6065.446  | AL832699  | 4283.753  | 3909.344  | AL133656  | 1013.254  | 1259.713  |
| NM_000713 | 11097.109 | 8351.727  | NM_012191 | 1484.948  | 1335.933  | AL050037  | 5184.83   | 8663.987  |
| NM_016055 | 3512.883  | 3095.09   | M33197    | 65341.051 | 66445.711 | NM_001417 | 19682.094 | 23674.17  |
| NM_013291 | 13628.927 | 10709.666 | AK000757  | 691.127   | 807.595   | AK022236  | 1812.624  | 3696.048  |
| NM_002936 | 14241.935 | 12374.108 | AL359577  | 1406.952  | 1288.211  | AK000073  | 463.781   | 718.966   |
| NM_014161 | 5216.066  | 5153.909  | NM_018139 | 1991.721  | 1890.983  | AK000618  | 491.019   | 886.662   |
| BF312817  | 5443.835  | 5683.405  | NM_014805 | 4241.139  | 4029.178  | AK024773  | 266.004   | 321.904   |
| AF086491  | 1879.546  | 1479.168  | AF052120  | 2370.449  | 2681.845  | AL390180  | 278.717   | 423.668   |
| NM_014856 | 1745.594  | 1259.133  | NM_014871 | 3828.006  | 4786.206  | X60484    | 692.064   | 940.695   |
| NM_003492 | 830.002   | 602.544   | AK026754  | 1563.726  | 1114.744  | AF055019  | 741.932   | 1321.875  |
| NM_003780 | 21536.566 | 17047.594 | M33197    | 65362.762 | 64882.664 | NM_003525 | 5036.092  | 5625.186  |
| NM_000199 | 9999.032  | 9449.182  | AL137552  | 1703.492  | 1649.105  | AK000229  | 537.425   | 835.936   |
| NM_003778 | 56544.293 | 55218.574 | AK025794  | 3581.452  | 3711.771  | AF056432  | 1318.116  | 2382.547  |
| AK023263  | 3572.418  | 3351.725  | AK024522  | 2005.011  | 2410.292  | AK001987  | 16538.148 | 23671.578 |
| NM_004622 | 2377.778  | 3118.092  | NM_007198 | 5466.094  | 10261.405 | NM_013332 | 946.735   | 1646.47   |
| AK021445  | 1580.833  | 1229.436  | M33197    | 65342.273 | 69940.641 | X56199    | 1906.996  | 3166.391  |
| NM_017934 | 8779.688  | 9087.017  | AK023220  | 584.332   | 745.924   | NM_005193 | 1399.612  | 2510.261  |
| NM_014166 | 42057.102 | 42455.074 | AK024566  | 910.406   | 974.235   | AL162006  | 646.777   | 1280.978  |
| AF211971  | 9065.621  | 7285.875  | AK025683  | 582.575   | 572.63    | NM_017971 | 22219.795 | 30718.443 |
| NM_002931 | 3634.236  | 3044.449  | M33197    | 64140.5   | 70916.336 | AF090097  | 1386.415  | 2186.52   |
| NM_013448 | 44256.316 | 39699.191 | AK024981  | 16846.035 | 19547.354 | AF054998  | 258.902   | 482.108   |
| X65232    | 40135.07  | 32378.264 | AK027246  | 1410.154  | 1551.337  | AF116620  | 6625.639  | 10308.997 |
| U12767    | 758.669   | 908.82    | U80766    | 4827.548  | 5371.327  | AF293335  | 37067.168 | 36449.68  |
| U17630    | 1449.412  | 1401.712  | AK001638  | 1551.456  | 1409.293  | AL080065  | 248.697   | 452.319   |
| M33782    | 1725.946  | 1493.691  | AF161386  | 9946.819  | 8387.259  | AK024431  | 2920.313  | 3744.268  |
| NM_002196 | 1094.323  | 992.587   | AL365369  | 3583.017  | 3987.716  | AF116635  | 310.968   | 292.173   |
| NM_017755 | 7109.943  | 7228.159  | AK025454  | 4337.074  | 4291.428  | X96644    | 2684.564  | 3886.528  |
| NM_015696 | 4738.558  | 3511.399  | M33197    | 62991.297 | 62641.91  | Z34281    | 10170.579 | 13322.902 |
| AK022551  | 1965.97   | 1687.444  | X05826    | 7434.465  | 6556.41   | NM_018678 | 42404.477 | 45261.629 |
| AF085968  | 2319.096  | 1560.745  | Y11608    | 787.415   | 587.374   | AJ008122  | 20405.539 | 21684.719 |
| AK023665  | 628.168   | 605.422   | AJ001872  | 3974.548  | 3425.225  | AK022667  | 7214.258  | 9245.058  |
| AB011136  | 1852.609  | 2078.787  | M33197    | 63124.246 | 62408.77  | AK026667  | 295.289   | 343.665   |
| AF085898  | 5784.92   | 5107.966  | NM_005598 | 1647.274  | 2517.182  | AF113211  | 1040.708  | 1571.362  |
| AL442094  | 882.172   | 536.375   | Y10515    | 1407.773  | 2504.714  | AL117568  | 677.941   | 1708.155  |
| AL161960  | 6338.063  | 7897.888  | M87942    | 870.851   | 1175.08   | NM_000843 | 371.624   | 750.917   |
| AK026327  | 64.191    | 2242.728  | AK023636  | 10473.589 | 14163.245 | S71805    | 511.701   | 865.751   |
| AL049964  | 3692.236  | 4691.167  | D25272    | 3827.915  | 5394.794  | NM_018391 | 1038.843  | 1878.118  |
| AF038184  | 699.127   | 365.86    | M33197    | 65306.996 | 66115.352 | U90917    | 632.213   | 694.454   |
| AK023269  | 3981.479  | 4570.323  | NM_020168 | 1632.971  | 2511.145  | AK022140  | 1420.694  | 1731.727  |
| AF070564  | 4696.534  | 4500.852  | AK025931  | 62218.293 | 61436.258 | AK023372  | 17143.371 | 17193.359 |
| AK021439  | 14469.859 | 12329.786 | M33197    | 1499.213  | 1647.06   | U21072    | 1236.068  | 1575.058  |
| AF052099  | 2917.976  | 3356.348  | AK021972  | 2148.896  | 2428.951  | AK024377  | 504.051   | 465.149   |
| AL110111  | 5524.355  | 4428.527  | M33197    | 62309.113 | 61824.711 | AK027107  | 576.512   | 596.854   |

|           |           |           |            |           |           |           |           |           |
|-----------|-----------|-----------|------------|-----------|-----------|-----------|-----------|-----------|
| AF070543  | 2255.68   | 2223.348  | AK001083   | 1823.54   | 1619.819  | AB040887  | 1929.051  | 4295.33   |
| AF086509  | 678.236   | 738.809   | AK000185   | 2029.001  | 1547.475  | AK025196  | 1987.545  | 3374.02   |
| NM_014778 | 3254.217  | 3045.793  | NM_017962  | 803.763   | 994.111   | AJ227879  | 339.329   | 556.788   |
| AK001171  | 12519.194 | 12567.331 | AK000865   | 1138.47   | 1116.093  | AK024800  | 299.187   | 466.938   |
| AK026273  | 4026.388  | 3292.477  | M33197     | 69849.703 | 64394.313 | AK000401  | 1057.376  | 1184.407  |
| NM_020250 | 9961.092  | 9042.937  | AK024779   | 1527.815  | 1651.929  | D17231    | 16764.75  | 20187.436 |
| AF055007  | 2596.648  | 2240.172  | AK024940   | 634.087   | 492.245   | AF531295  | 381.906   | 539.909   |
| NM_012337 | 1013.535  | 1030.477  | AK024406   | 822.819   | 1536.01   | CY3Cy5    | 4197.722  | 359.963   |
| AL389879  | 3588.932  | 3154.007  | AK024568   | 12870.085 | 14567.624 | BF974315  | 3379.332  | 2487.449  |
| AK022869  | 2297.576  | 1836.594  | NM_018381  | 562.833   | 655.64    | T74985    | 454.768   | 429.707   |
| NM_016111 | 8434.589  | 7069.969  | M33197     | 61962.215 | 63663.105 | AI652705  | 3045.135  | 2380.568  |
| AF085958  | 58504.316 | 52351.191 | AK026277   | 7372.303  | 7547.136  | AA973397  | 715.231   | 733.123   |
| AF086021  | 4557.666  | 3562.104  | U10509     | 2140.178  | 2000.24   | AA569974  | 3731.379  | 3648.004  |
| AF085982  | 748.999   | 305.131   | NM_007165  | 42877.539 | 42363.84  | AA923615  | 579.793   | 719.576   |
| AL117655  | 983.541   | 676.059   | NM_014018  | 3590.256  | 4970.724  | AA446028  | 1383.36   | 1362.917  |
| AK024472  | 1444.372  | 1268.369  | AF085956   | 1687.772  | 2010.012  | M80583    | 1068.048  | 1172.03   |
| AF087981  | 684.371   | 875.129   | NM_019116  | 1203.473  | 1863.149  | AW009565  | 2946.423  | 3906.545  |
| NM_017978 | 3477.275  | 3659.771  | AF147318   | 2101.842  | 2504.923  | X07767    | 1998.291  | 2859.755  |
| U06700    | 1627.8    | 1105.291  | unknown (S | 1529.969  | 1938.71   | AF252284  | 2473.316  | 3447.032  |
| U63828    | 3038.05   | 2635.621  | M33197     | 59078.594 | 60021.414 | BU727558  | 1502.375  | 1632.133  |
| Z36794    | 1324.15   | 1180.726  | AL137556   | 1492.768  | 1400.137  | SR1       | 55196.418 | 70528.602 |
| Z36828    | 8773.057  | 7761.261  | NM_014696  | 8826.883  | 9008.805  | SR3       | 32615.281 | 34658.684 |
| AF086121  | 12928.388 | 13090.737 | AL359055   | 1731.984  | 1634.104  | SR5       | 2439.857  | 3320.468  |
| AF086140  | 1442.523  | 1254.625  | NM_014908  | 1757.991  | 2231.48   | SR7       | 3187.322  | 38624.945 |
| AK026915  | 1093.738  | 833.014   | AF086125   | 2163.856  | 2241.312  | SR9       | 12715.588 | 3451.484  |
| AL110259  | 918.513   | 752.618   | AK023547   | 1377.248  | 1285.596  | CY3Cy5    | 4576.871  | 823.801   |
| AB033100  | 9294.76   | 8884.138  | U67847     | 1707.685  | 1619.898  | M33197    | 63962.324 | 49899.223 |
| AL390138  | 2882.374  | 2460.896  | AL137321   | 6147.086  | 5827.9    | NM_007264 | 10734.006 | 6372.162  |
| AL137290  | 9595.785  | 8407.811  | M33197     | 71529.781 | 65202.609 | NM_002262 | 387.395   | 392.605   |
| AK021606  | 978.748   | 800.853   | AK024207   | 3742.541  | 2802.818  | NM_016511 | 18052.439 | 11069.334 |
| NM_014124 | 33487.969 | 22120.924 | AK021843   | 1061.564  | 1000.26   | NM_003558 | 1258.636  | 905.54    |
| AF119888  | 955.454   | 435.702   | AF075025   | 4607.557  | 4563.446  | M55337    | 927.282   | 715.47    |
| AK001551  | 1606.088  | 1085.916  | AF116623   | 640.182   | 606.851   | M33197    | 61219.52  | 52736.637 |
| AK001825  | 1932.068  | 1357.869  | AF088008   | 2033.692  | 2194.124  | NM_013228 | 1078.224  | 825.27    |
| AK024714  | 776.827   | 841.37    | AK023528   | 1937.969  | 1764.771  | NM_016533 | 48099.328 | 32279.26  |
| AK022363  | 1126.846  | 852.563   | AK023043   | 778.279   | 893.705   | NM_014751 | 8215.954  | 6719.396  |
| AK022485  | 762.591   | 712.003   | M33197     | 65344.668 | 64876.43  | NM_002347 | 24821.768 | 16573.395 |
| AK023395  | 1615.031  | 1705.424  | AF147349   | 6856.466  | 8999.759  | AB046807  | 776.148   | 620.476   |
| AK023818  | 7096.566  | 6661.617  | AL050346   | 18988.918 | 25559.658 | NM_018178 | 553.619   | 669.299   |
| AK024139  | 501.86    | 528.016   | AK001520   | 7767.464  | 10351.541 | NM_014623 | 3475.053  | 6075.621  |
| AK023522  | 326.362   | 409.5     | AK021731   | 599.963   | 647.449   | NM_007244 | 9983.696  | 15455.91  |
| AK023895  | 1905.145  | 1799.428  | D90070     | 5633.407  | 7861.194  | M30629    | 3164.114  | 4032.196  |
| AK024206  | 6145.433  | 5040.359  | Y12235     | 933.592   | 1242.894  | BE539299  | 475.863   | 540.908   |
| NM_006262 | 2166.67   | 2022.976  | M33197     | 52619.09  | 47632.23  | AF193873  | 4732.375  | 5318.123  |
| AK026598  | 3288.19   | 2819.222  | AF086179   | 1035.831  | 846.51    | NM_002628 | 1334.152  | 2027.3    |
| AK023602  | 592.808   | 746.898   | AK025807   | 1677.934  | 1375.191  | M23575    | 856.259   | 1119.524  |
| NM_018097 | 24317.541 | 22873.666 | M33197     | 60868.098 | 57041.332 | AA190729  | 1271.543  | 1646.375  |
| AF130043  | 970.746   | 1092.939  | AK025266   | 4179.018  | 4010.252  | NM_004170 | 1228.236  | 725.611   |
| Y11167    | 1103.16   | 1158.24   | AK001843   | 4824.589  | 4230.375  | NM_018057 | 1422.881  | 967.792   |
| AK026813  | 700.764   | 776.055   | AK000548   | 42731.953 | 38821.195 | M33197    | 51831.488 | 57412.301 |
| AK027225  | 1138.213  | 889.537   | NM_003920  | 12130.184 | 9060.729  | NM_015717 | 1767.405  | 1486.163  |
| AK023083  | 3950.256  | 3286.913  | NM_004787  | 17231.492 | 14696.908 | NM_015925 | 1204.983  | 878.555   |
| AF130093  | 716.13    | 677.124   | AF087984   | 5262.976  | 4511.722  | NM_003665 | 710.417   | 564.961   |

|           |           |           |           |           |           |           |           |           |
|-----------|-----------|-----------|-----------|-----------|-----------|-----------|-----------|-----------|
| AF116622  | 1023.878  | 929.585   | M33197    | 61161.82  | 61350.629 | AF220217  | 544.278   | 573.054   |
| NM_00532E | 1246.68   | 1219.219  | AK022273  | 3893.47   | 3343.36   | NM_01332E | 10762.864 | 9016.953  |
| AF217967  | 1332.845  | 1609.496  | NM_01588E | 933.429   | 1014.286  | NM_01742E | 1179.424  | 1314.817  |
| NM_01815C | 8434.951  | 6462.555  | AK027161  | 884.499   | 773.262   | M33197    | 1957.258  | 1617.598  |
| NM_01791E | 1261.914  | 967.664   | AK024271  | 1520.976  | 1444.726  | NM_00085E | 2264.198  | 2358.766  |
| NM_01785E | 39514.742 | 37301.789 | AK021650  | 7065.916  | 5176.783  | AF016903  | 26359.982 | 19589.352 |
| AB007954  | 3137.028  | 3262.455  | AL050210  | 3990.196  | 4233.499  | NM_01567E | 4927.876  | 4007.178  |
| AK026494  | 3342.766  | 3596.311  | L37699    | 2238.729  | 2276.755  | AK022267  | 595.48    | 529.022   |
| AK023508  | 1812.715  | 1962.407  | M33197    | 63187.723 | 62691.113 | M33197    | 52317.805 | 71643.703 |
| AK025840  | 3746.136  | 3510.299  | AL050173  | 2332.309  | 2071.586  | AF031136  | 52063.082 | 69483.016 |
| BC024009  | 2157.159  | 1956.363  | D80002    | 2358.814  | 2595.45   | U90878    | 1441.45   | 2531.156  |
| AF128543  | 5029.532  | 4642.485  | U17637    | 11517.747 | 12889.996 | NM_006597 | 27934.477 | 30304.256 |
| NM_00418E | 2123.022  | 2296.073  | AF207831  | 1787.707  | 2496.872  | NM_01248E | 10292.542 | 14058.997 |
| U84510    | 7825.761  | 6339.156  | NM_00354E | 787.424   | 890.527   | NM_00349E | 2243.573  | 2365.66   |
| S83198    | 13555.303 | 12803.827 | M33197    | 61347.988 | 55259.668 | AB023420  | 9388.987  | 16756.516 |
| AF052119  | 20097.883 | 21306.426 | NM_01827E | 4436.681  | 3937.186  | NM_00734E | 2753.869  | 2059.669  |
| X94290    | 2052.541  | 2566.921  | CY3Cy5    | 9264.074  | 1006.541  | NM_00567E | 334.795   | 301.238   |
| AK026685  | 19031.105 | 18577.635 | R19938    | 7059.51   | 5748.897  | D25217    | 7189.613  | 6045.506  |
| AF090927  | 31600.146 | 27887.02  | N94487    | 12259.503 | 9805.412  | NM_006351 | 3365.276  | 3011.44   |
| AL137642  | 2300.775  | 2343.086  | AI886795  | 4585.297  | 4027.437  | M33197    | 51799.035 | 36323.836 |
| AL133619  | 3093.312  | 2559.064  | D10495    | 5254.401  | 5027.228  | NM_00010E | 319.801   | 217.452   |
| AL157496  | 647.517   | 524.805   | BF344679  | 2562.464  | 2941.294  | NM_00468E | 10808.476 | 9344.193  |
| AK025902  | 4152.274  | 4720.099  | BG743223  | 857.882   | 548.755   | AK023226  | 197.938   | 175.136   |
| AL353949  | 718.107   | 755.841   | M36634    | 1636.088  | 1247.16   | AK025263  | 274.963   | 291.83    |
| NM_005181 | 4613.091  | 4180.196  | M14156    | 7828.841  | 5930.677  | M33197    | 52556.711 | 48999.824 |
| AF026945  | 879.63    | 1033.48   | U87939    | 1861.565  | 1527.699  | NM_001467 | 1173.181  | 1106.387  |
| AF143676  | 4886.167  | 3833.709  | U86961    | 1120.787  | 1428.062  | NM_01806E | 23142.488 | 23759.895 |
| U66044    | 5393.089  | 4676.231  | AK094237  | 4279.426  | 3849.719  | NM_006931 | 2924.165  | 3061.542  |
| NM_005247 | 41096.324 | 30399.604 | L07592    | 2789.358  | 2390.227  | AF119868  | 381.52    | 571.871   |
| NM_00528E | 1959.14   | 1678.744  | NM_006981 | 923.66    | 711.753   | NM_00505C | 1950.595  | 2569.063  |
| AL122089  | 2437.008  | 2200.679  | SR2       | 44696.906 | 57287.547 | M33197    | 52144.504 | 69265.359 |
| AA203665  | 3304.709  | 2819.259  | SR4       | 10562.261 | 11439.976 | NM_005074 | 1359.795  | 1398.447  |
| U95646    | 3911.72   | 4322.537  | SR6       | 1276.242  | 1409.399  | NM_01327E | 918.703   | 1427.274  |
| Y16705    | 1938.759  | 1442.425  | SR8       | 4698.85   | 18132.068 | NM_00455E | 3006.043  | 2747.62   |
| AF279775  | 3834.114  | 3642.751  | SR10      | 19929.604 | 7818.756  | AL079296  | 643.774   | 444.485   |
| NM_001821 | 4426.76   | 3582.118  | CY3Cy5    | 9951.259  | 871.851   | NM_01477C | 2875.742  | 2165.101  |
| NM_005647 | 1377.841  | 1141.994  | NM_00736E | 1350.284  | 1060.096  | AB037737  | 478.712   | 685.886   |
| X64978    | 6588.398  | 5459.568  | NM_01477E | 2515.953  | 1992.783  | M33197    | 57545.293 | 60685.316 |
| NM_00091E | 18605.699 | 15767.206 | NM_00648C | 25095.822 | 25386.678 | AK023103  | 1188.25   | 1416.503  |
| NM_00234E | 1087.874  | 1219.336  | NM_00722E | 35538.402 | 37470.477 | NM_01785E | 1352.617  | 1134.848  |
| U57971    | 1868.642  | 1973.675  | NM_00014E | 1582.211  | 1717.055  | NM_01905E | 37723.363 | 33006.883 |
| X89673    | 1384.404  | 1545.387  | AF030107  | 1961.409  | 1417.313  | D80008    | 670.867   | 718.869   |
| AK024593  | 1776.093  | 1923.613  | NM_000871 | 1899.514  | 2023.797  | X56789    | 645.024   | 576.397   |
| Z83934    | 853.719   | 1282.189  | M33197    | 64211.832 | 58768.555 | AK001069  | 36918.641 | 27342.295 |
| NM_01835E | 3747.658  | 3877.836  | NM_01896E | 1936.997  | 2037.014  | M33197    | 58466.074 | 61464.223 |
| AK022020  | 4236.724  | 3392.91   | AF086924  | 64461.891 | 63540.848 | NM_00093E | 944.044   | 1017.868  |
| AF147399  | 713.899   | 419.382   | NM_000264 | 591.28    | 516.675   | NM_00639E | 3609.523  | 4710.25   |
| U17634    | 468.156   | 579.321   | AB058740  | 10787.286 | 9280.72   | NM_01430E | 2771.756  | 3035.422  |
| AK000263  | 8809.468  | 8648.693  | NM_00338E | 876.53    | 714.964   | NM_001084 | 3182.08   | 4196.027  |
| Y13895    | 1019.706  | 1154.532  | NM_00439E | 892.103   | 441.46    | NM_01598E | 1752.055  | 2378.369  |
| NM_017447 | 1705.079  | 1745.637  | M33197    | 67009.484 | 63314.094 | NM_01862E | 3231.134  | 4628.042  |
| AL049452  | 1661.906  | 1436.964  | NM_001154 | 4783.276  | 2912.544  | M33197    | 53285.672 | 68543.359 |
| NM_01662E | 2979.687  | 2966.278  | NM_00181E | 1730.895  | 1341.518  | NM_005867 | 4259.848  | 8296.828  |

|             |           |           |           |           |           |           |           |           |
|-------------|-----------|-----------|-----------|-----------|-----------|-----------|-----------|-----------|
| AK026976    | 1452.036  | 1873.46   | NM_001993 | 683.447   | 510.958   | AK026031  | 14633.674 | 20853.348 |
| AF070559    | 7196.342  | 6965.608  | NM_015725 | 7672.487  | 7946.539  | NM_016468 | 3876.413  | 3500.447  |
| D42043      | 5435.749  | 5351.031  | R61452    | 1176.808  | 944.124   | BE539299  | 499.635   | 365.322   |
| CY3Cy5      | 4884.657  | 299.134   | M33197    | 62610.914 | 63249.305 | AF193873  | 5096.443  | 2860.958  |
| BG744154    | 69057.508 | 65340.629 | NM_001716 | 1204.661  | 698.147   | NM_002628 | 2211.061  | 1621.552  |
| Z11694      | 19277.26  | 15901.28  | NM_006073 | 584.12    | 689.541   | M23575    | 890.066   | 782.711   |
| BF983177    | 1904.931  | 1485.813  | NM_006564 | 8064.221  | 6362.774  | AA190729  | 1335.365  | 950.142   |
| Z26317      | 4395.825  | 3765.015  | NM_004802 | 2021.423  | 1996.124  | BF974315  | 3589.634  | 2690.693  |
| X16983      | 14659.367 | 13709.153 | M33197    | 61246.367 | 61351.613 | T74985    | 522.878   | 602.476   |
| X56160      | 4458.745  | 4048.032  | NM_002983 | 1036.213  | 1028.54   | AI652705  | 3417.073  | 2991.454  |
| BG679991    | 1154.628  | 1016.248  | NM_000074 | 10487.382 | 9011.29   | AA973397  | 721.839   | 827.615   |
| H-Y 00097 I | 5872.226  | 5844.609  | BF434335  | 23128.34  | 18731.682 | AA569974  | 3958.081  | 4830.02   |
| H-M 59964   | 2988.966  | 3408.036  | NM_002993 | 1846.52   | 1192.603  | AA923615  | 503.302   | 738.1     |
| H-Y 00711 I | 65218.391 | 65309.996 | AK026946  | 1267.287  | 1186.674  | AA446028  | 1384.265  | 1479.021  |
| H-X 16707 I | 4116.152  | 3954.96   | M33197    | 61543.555 | 60804.648 | M80583    | 907.89    | 1079.626  |
| AL038354    | 64890.727 | 68885.656 | NM_003192 | 3524.544  | 2268.299  | AW009565  | 2789.721  | 3073.344  |
| R14607      | 2608.644  | 2608.128  | NM_018449 | 2222.628  | 1721.81   | H18633    | 708.925   | 649.57    |
| W84867      | 570.309   | 1152.851  | AF086129  | 761.553   | 454.7     | X07767    | 2271.901  | 4380.949  |
| NM_021976   | 7771.146  | 8140.021  | D79994    | 624.608   | 657.817   | X65293    | 723.812   | 980.097   |
| SR2         | 62397.098 | 62337.297 | NM_014458 | 2990.703  | 2718.519  | AF252284  | 2581.3    | 4185.949  |
| SR4         | 23590.047 | 25269.527 | AF235049  | 2555.382  | 2213.846  | BU727558  | 2039.85   | 2492.261  |
| SR6         | 3548.965  | 3518.069  | NM_001995 | 2016.244  | 2292.133  | M33197    | 8872.049  | 10726.616 |
| SR8         | 11332.424 | 33624.199 | NM_000183 | 7590.381  | 6138.854  | AL050139  | 2934.676  | 3619.972  |
| SR10        | 38061.098 | 13269.837 | AY004175  | 1788.544  | 1266.134  | U90878    | 1521.258  | 873.249   |
| CY3Cy5      | 4444.374  | 286.578   | M33197    | 60359.699 | 60754.219 | NM_006597 | 23466.096 | 13670.829 |
| NM_001284   | 53483.129 | 45787.953 | NM_012327 | 5090.939  | 4081.443  | NM_012483 | 15253.34  | 11926.874 |
| NM_003242   | 14520.26  | 11024.284 | NM_000904 | 1098.134  | 971.158   | NM_003498 | 2639.512  | 1995.022  |
| U31099      | 727.295   | 933.012   | NM_016048 | 1057.069  | 895.253   | AB023420  | 9091.751  | 6945.891  |
| NM_001105   | 2489.204  | 1869.011  | NM_000375 | 8707.255  | 7921.029  | M33197    | 58243.09  | 64778.18  |
| NM_005585   | 1355.119  | 1298.584  | NM_000265 | 4806.643  | 5645.06   | NM_007264 | 12154.363 | 11249.49  |
| NM_002075   | 3678.854  | 3732.743  | NM_018849 | 7735.849  | 6471.516  | NM_002262 | 483.99    | 351.13    |
| Y08756      | 16358.474 | 18183.371 | M33197    | 60884.746 | 57326.27  | NM_016511 | 18859.605 | 16373.352 |
| NM_005563   | 10194.521 | 8647.277  | AF279890  | 3203.608  | 2888.478  | NM_003558 | 1393.891  | 1524.919  |
| AY007090    | 862.155   | 854.129   | NM_002236 | 1761.551  | 1340.248  | M55337    | 926.331   | 880.544   |
| NM_005102   | 5334.012  | 6365.422  | NM_012069 | 4654.784  | 3925.712  | M33197    | 57330.512 | 59896.914 |
| NM_004518   | 1049.761  | 1070.982  | NM_001689 | 42085.188 | 38085.559 | NM_013228 | 1094.511  | 933.57    |
| NM_002719   | 6395.085  | 8074.734  | NM_016601 | 951.263   | 613.229   | NM_016533 | 47830.414 | 39865.844 |
| AB035356    | 616.219   | 997.052   | NM_017905 | 8762.821  | 6232.001  | NM_014751 | 8909.041  | 14397.086 |
| AV752086    | 1894.15   | 2338.91   | M33197    | 65071.598 | 59616.063 | NM_002347 | 28564.396 | 37443.734 |
| NM_016102   | 10774.415 | 15292.575 | NM_006815 | 14380.005 | 9315.271  | AB046807  | 1175.442  | 2339.848  |
| NM_004376   | 4124.677  | 5168.925  | NM_001663 | 3002.081  | 2045.31   | NM_018176 | 509.715   | 866.478   |
| NM_000272   | 545.882   | 548.342   | NM_004218 | 4033.79   | 3387.489  | M33197    | 54016.602 | 68521.938 |
| NM_006061   | 842.288   | 1268.811  | NM_016530 | 999.234   | 706.401   | NM_014623 | 3589.099  | 5720.289  |
| NM_001061   | 1178.943  | 1190.511  | NM_014804 | 925.557   | 587.293   | NM_007244 | 11334.183 | 13028.414 |
| AI075338    | 646.588   | 687.328   | L40520    | 5073.101  | 4956.756  | M30629    | 3994.733  | 4315.255  |
| NM_006834   | 6051.893  | 5453.154  | NM_002633 | 8908.22   | 7220.238  | M33197    | 51105.941 | 39047.637 |
| AB011100    | 2773.824  | 2233.471  | M33197    | 56929.387 | 59676.664 | NM_018976 | 5596.358  | 4322.821  |
| U61741      | 1255.891  | 1161.072  | NM_002878 | 3456.441  | 2500.267  | NM_003355 | 3913.458  | 2921.852  |
| NM_012402   | 4571.619  | 3745.141  | NM_017723 | 4200.735  | 3384.021  | NM_005074 | 1329.311  | 1242.068  |
| M76676      | 4261.621  | 3716.747  | AK022922  | 2827.703  | 1686.434  | NM_013272 | 820.176   | 689.169   |
| NM_003857   | 2289.522  | 1900.299  | NM_006462 | 6497.552  | 5160.348  | NM_004170 | 2165.506  | 1824.973  |
| AL137690    | 793.391   | 626.271   | AK024750  | 5277.49   | 3345.033  | NM_018057 | 1664.945  | 1573.653  |
| Z83804      | 4254.361  | 3191.82   | NM_000400 | 26226.748 | 23947.986 | M33197    | 56241.832 | 67763.453 |

|           |           |           |           |           |           |           |           |           |
|-----------|-----------|-----------|-----------|-----------|-----------|-----------|-----------|-----------|
| NM_004386 | 3730.577  | 3879.89   | M33197    | 54690.563 | 58078.906 | NM_015717 | 1738.059  | 1839.98   |
| U67784    | 824.608   | 880.458   | NM_002613 | 3533.923  | 2477.668  | NM_015925 | 1414.921  | 1272.16   |
| NM_007366 | 2467.339  | 3095.942  | NM_004419 | 3735.177  | 2775.792  | NM_003665 | 671.474   | 989.483   |
| NM_000592 | 1348.646  | 1495.117  | U47635    | 2426.644  | 1672.42   | AF220217  | 629.241   | 652.647   |
| NM_016584 | 16979.635 | 18557.07  | NM_018650 | 824.706   | 652.601   | NM_013323 | 11542.278 | 12282.311 |
| NM_001815 | 3036.23   | 2884.971  | AK026945  | 13767.404 | 9924.148  | NM_017426 | 1295.901  | 1520.672  |
| NM_000064 | 12087.252 | 11394.097 | NM_002828 | 859.223   | 586.353   | M33197    | 2229      | 1914.256  |
| NM_003264 | 5389.232  | 6239.161  | NM_014369 | 1106.57   | 805.318   | NM_000853 | 2274.14   | 2467.524  |
| NM_006725 | 3537.847  | 4193.105  | M33197    | 57518.418 | 58522.695 | NM_000846 | 789.018   | 1707.351  |
| NM_003326 | 1832.58   | 2549.299  | NM_001398 | 14250.415 | 9663.657  | AF016903  | 24185.191 | 31348.932 |
| NM_004566 | 43758.313 | 53819.195 | AB050049  | 2850.098  | 2098.46   | NM_015675 | 3830.808  | 5162.192  |
| NM_000202 | 2158.104  | 2578.388  | J05125    | 642.45    | 489.323   | NM_016040 | 1673.323  | 1845.243  |
| NM_016608 | 1392.548  | 1590.725  | NM_001993 | 1000.029  | 674.886   | M33197    | 52337.602 | 54000.813 |
| NM_004817 | 1411.071  | 1925.047  | BF575833  | 814.065   | 817.64    | AF031136  | 52072.746 | 65830.906 |
| NM_018975 | 15185.824 | 19470.662 | NM_015725 | 12659.622 | 10032.941 | NM_015983 | 1802.21   | 928.362   |
| AB023215  | 15661.976 | 15798.201 | R61452    | 1722.339  | 1474.497  | NM_018622 | 2805.14   | 1609.055  |
| NM_018073 | 1244.76   | 1106.229  | R19938    | 6083.445  | 5158.267  | M33197    | 56612.574 | 41425.672 |
| AL137529  | 2291.249  | 1667.611  | N94487    | 14308.235 | 15866.482 | NM_005867 | 5161.485  | 3787.451  |
| NM_012332 | 2746.377  | 2012.397  | AI886795  | 4079.465  | 3781.485  | AK026031  | 15237.577 | 12082.129 |
| AK026648  | 1613.981  | 1161.321  | D10495    | 4937.87   | 4376.791  | NM_016468 | 4229.384  | 3291.564  |
| NM_000497 | 2040.371  | 1736.049  | BF344679  | 2581.615  | 2530.862  | NM_007342 | 3359.947  | 3548.315  |
| NM_017421 | 1940.331  | 1345.39   | BG743223  | 810.484   | 495.852   | NM_005672 | 539.748   | 425.319   |
| AK025977  | 16811.268 | 16120.417 | M36634    | 1378.117  | 1009.641  | D25217    | 7869.487  | 6953.069  |
| AK023130  | 10641.572 | 8878.904  | M14156    | 9440.64   | 6866.468  | NM_006351 | 3898.781  | 3248.136  |
| NM_000273 | 890.161   | 792.413   | U87939    | 1709.425  | 1574.756  | M33197    | 51624.363 | 42535.473 |
| NM_002899 | 14135.99  | 13109.751 | U86961    | 1242.221  | 895.163   | NM_004683 | 10297.376 | 8666.228  |
| NM_000486 | 1670.237  | 1931.02   | AK094237  | 3633.075  | 2429.441  | M33197    | 54046.07  | 46678.277 |
| BE876237  | 1813.998  | 2050.312  | L07592    | 1561.136  | 981.634   | NM_001467 | 1605.7    | 2317.106  |
| NM_005397 | 1366.307  | 1716.771  | NM_006981 | 471.624   | 427.354   | NM_018066 | 27792.695 | 32632.199 |
| NM_000806 | 13081.116 | 12654.908 | M33197    | 69359.531 | 63273.078 | NM_006931 | 3278.155  | 4431.479  |
| NM_006320 | 3130.009  | 4034.394  | AK027244  | 1096.504  | 1043.677  | NM_020344 | 3535.868  | 3918.73   |
| AB014511  | 7015.761  | 8440.711  | NM_018449 | 5671.526  | 5669.945  | AF119868  | 502.568   | 727.096   |
| NM_006822 | 2292.625  | 2028.522  | AF086129  | 1478.894  | 1093.948  | NM_005050 | 1488.882  | 2080.957  |
| NM_012142 | 11663.49  | 14138.642 | D79994    | 1413.056  | 1167.474  | AJ133127  | 391.214   | 228.079   |
| NM_016429 | 3123.704  | 3848.47   | NM_014458 | 4825.736  | 3934.151  | AF252284  | 2317.022  | 1268.058  |
| NM_018264 | 3015.912  | 2407.451  | AF235049  | 5132.764  | 4711.371  | BU727558  | 1797.876  | 1248.662  |
| NM_014580 | 947.211   | 716.106   | M33197    | 58686.898 | 62109.258 | M33197    | 7545.455  | 5240.153  |
| AB028998  | 1542.549  | 1212.728  | NM_007369 | 1356.059  | 1429.285  | AL050139  | 2989.66   | 2468.934  |
| NM_000153 | 1252.581  | 1055.704  | NM_014776 | 2719.11   | 2030.173  | NM_002593 | 646.693   | 730.687   |
| NM_002033 | 7435.039  | 6409.176  | NM_006480 | 36154.031 | 32450.113 | NM_004558 | 4212.457  | 3688.109  |
| AK091794  | 612.045   | 554.094   | NM_007223 | 43682.227 | 43166.242 | AL079296  | 787.017   | 685.792   |
| NM_004111 | 4903.571  | 4938.478  | NM_000145 | 1188.974  | 1116.254  | NM_014770 | 3671.351  | 3080.992  |
| AF085966  | 5323.773  | 5985.211  | AF030107  | 1761.857  | 1079.53   | AB037737  | 502.484   | 549.46    |
| NM_005316 | 2626.069  | 2625.318  | NM_000871 | 1592.857  | 1576.74   | M33197    | 59482.891 | 65658.297 |
| NM_016316 | 4245.015  | 4557.776  | M33197    | 62697.656 | 61633.695 | AK023103  | 1332.432  | 1177.7    |
| NM_003369 | 12783.278 | 12500.791 | NM_018968 | 1297.593  | 1288.954  | NM_017858 | 1295.967  | 1288.52   |
| NM_000057 | 4308.733  | 3478.146  | AF086924  | 60990.285 | 60041.516 | NM_019059 | 39687.195 | 39445.715 |
| NM_018343 | 5234.14   | 5894.759  | NM_000264 | 843.519   | 723.037   | D80008    | 640.47    | 569.748   |
| AK095793  | 2026.805  | 2356.479  | AB058740  | 8280.4    | 7451.332  | X56789    | 817.385   | 835.321   |
| NM_003177 | 4913.103  | 6021.535  | M33197    | 62330.32  | 60095.266 | AK001069  | 37704.016 | 27619.223 |
| NM_017719 | 1301.956  | 1392.777  | NM_001154 | 3337.258  | 2057.815  | M33197    | 54270.359 | 65891.992 |
| AF064078  | 1518.429  | 1912.962  | NM_001819 | 1774.807  | 1313.053  | NM_000935 | 1031.947  | 1590.371  |
| AL049688  | 1731.011  | 2080.23   | M33197    | 59220.016 | 60327.707 | NM_000359 | 11674.595 | 14588.449 |

|             |           |           |           |           |           |           |           |           |
|-------------|-----------|-----------|-----------|-----------|-----------|-----------|-----------|-----------|
| NM_002737   | 2209.382  | 1967.094  | NM_006815 | 26504.781 | 35713.223 | NM_006395 | 3788.979  | 5527.883  |
| Z25427      | 3335.835  | 3360.602  | NM_001663 | 5326.657  | 4689.632  | NM_014306 | 2740.144  | 2641.516  |
| NM_006214   | 4828.337  | 5958.864  | NM_004218 | 7339.68   | 5831.668  | NM_001084 | 2742.408  | 2281.027  |
| AJ010228    | 9688.226  | 9402.539  | NM_016530 | 1219.982  | 1000.898  | M33197    | 57953.445 | 48013.426 |
| NM_005195   | 5071.211  | 5337.856  | NM_014804 | 1365.002  | 1080.485  | NM_014623 | 3477.478  | 3741.695  |
| NM_006845   | 74976.297 | 65284.895 | NM_012455 | 5485.645  | 4764.148  | NM_007244 | 12459.5   | 9328.305  |
| NM_005603   | 42729.102 | 33273.23  | NM_002806 | 10705.438 | 10144.252 | M30629    | 4354.094  | 3745.783  |
| NM_001061   | 1139.055  | 1137.164  | M33197    | 65480.961 | 65274.582 | BE539299  | 625.383   | 556.412   |
| AI075338    | 964.823   | 751.096   | NM_001716 | 1533.669  | 1252.032  | AF193873  | 5768.481  | 4234.359  |
| Z11694      | 19109.168 | 16988.326 | NM_002030 | 562.106   | 512.693   | NM_002625 | 2412.406  | 2287.491  |
| BF983177    | 2440.346  | 2154.833  | NM_006073 | 872.766   | 683.87    | M23575    | 946.928   | 1165.582  |
| Z26317      | 4651.602  | 4982.46   | NM_006564 | 4576.425  | 3411.629  | AA190729  | 1268.073  | 1219.466  |
| X16983      | 18216.119 | 18404.004 | NM_004802 | 2071.587  | 2650.756  | BF974315  | 3768.261  | 3405.71   |
| X56160      | 4329.991  | 3953.225  | M33197    | 64044.641 | 61384.695 | T74985    | 407.416   | 430.516   |
| BG679991    | 1051.54   | 1206.957  | NM_002983 | 690.021   | 642.158   | AI652705  | 3257.313  | 2808.887  |
| H-Y 00097 I | 6292.363  | 6004.793  | NM_000074 | 4820.722  | 3480.66   | AA973397  | 764.891   | 990.567   |
| H-M 59964   | 3128.623  | 3758.534  | BF434335  | 15515.731 | 9992.888  | AA569974  | 3960.388  | 4333.375  |
| H-X 16707 I | 4446.764  | 5249.127  | NM_002993 | 1014.203  | 931.371   | AA923615  | 570.075   | 669.043   |
| R14607      | 2627.564  | 3253.623  | AK026946  | 858.981   | 659.291   | AA446028  | 1401.135  | 1380.835  |
| W84867      | 480.631   | 485.85    | M33197    | 61273.145 | 57595.574 | M80583    | 933.567   | 1172.023  |
| NM_021975   | 7733.304  | 9588.649  | NM_003192 | 5313.025  | 5874.975  | AW009565  | 2760.742  | 2741.976  |
| NM_005715   | 21988.092 | 23902.6   | NM_002825 | 1987.673  | 2377.974  | X07767    | 1923.442  | 1806.376  |
| NM_005495   | 19543.488 | 12780.806 | NM_001395 | 26439.861 | 21856.418 | AF016903  | 27596.764 | 19395.293 |
| NM_002855   | 8673.279  | 7433.799  | AB050049  | 5401.377  | 4983.424  | NM_015675 | 5582.089  | 4041.663  |
| NM_004817   | 1449.717  | 1361.776  | J05125    | 772.329   | 730.797   | AK022267  | 518.719   | 406.963   |
| NM_018975   | 15094.546 | 17433.238 | NM_001995 | 2350.569  | 2039.879  | NM_016040 | 1582.972  | 1061.391  |
| NM_001284   | 53049.59  | 51485.43  | NM_000183 | 15383.457 | 13998.948 | U90878    | 1650.255  | 1734.939  |
| NM_003242   | 14499.959 | 14036.122 | AY004175  | 2595.902  | 2142.448  | NM_006597 | 26060.523 | 17044.615 |
| NM_002845   | 666.991   | 790.203   | M33197    | 61489.078 | 58603.797 | NM_012483 | 17176.143 | 16376.736 |
| U31099      | 927.019   | 996.992   | NM_012327 | 5511.583  | 5137.604  | NM_003495 | 2651.062  | 2538.7    |
| NM_001105   | 3066.453  | 2301.619  | NM_000904 | 1023.914  | 1058.139  | AB023420  | 7782.854  | 7763.838  |
| NM_005585   | 1609.893  | 1524.98   | NM_016045 | 1133.344  | 1089.941  | M33197    | 56502.977 | 64668.469 |
| NM_002075   | 4158.303  | 3723.164  | NM_000375 | 8531.14   | 7984.898  | NM_007264 | 12602.579 | 10673.624 |
| Y08756      | 17327.443 | 19244.766 | NM_000265 | 2756.383  | 3026.11   | NM_002262 | 379.641   | 435.227   |
| AY007090    | 784.447   | 1041.606  | NM_018845 | 6074.461  | 5175.518  | NM_016511 | 18676.982 | 16361.476 |
| NM_006435   | 544.449   | 814.155   | M33197    | 55651.336 | 54913.18  | NM_003555 | 1327.94   | 1363.748  |
| NM_004515   | 1016.613  | 889.982   | AF279890  | 2508.305  | 1480.052  | M55337    | 1030.393  | 1197.14   |
| NM_006501   | 492.542   | 552.727   | NM_002236 | 1473.015  | 1101.998  | M33197    | 56311.957 | 63828.609 |
| NM_002715   | 6048.587  | 6201.907  | NM_012065 | 1873.335  | 1803.35   | NM_013225 | 1084.57   | 909.425   |
| AB035356    | 663.661   | 644.642   | NM_001685 | 29735.982 | 25969.715 | NM_016533 | 47397.723 | 40187.656 |
| AV752086    | 2008.744  | 2283.412  | NM_016601 | 933.711   | 724.776   | NM_014751 | 7228.676  | 6811.244  |
| NM_016102   | 9334.717  | 12415.247 | NM_017905 | 10714.043 | 9199.588  | NM_002347 | 23352.596 | 20832.723 |
| NM_004375   | 3432.278  | 4034.741  | NM_006981 | 1843.274  | 1726.817  | AB046807  | 831.376   | 716.245   |
| NM_014252   | 6856.573  | 7375.231  | M33197    | 58314.258 | 56802.871 | NM_018065 | 24510.879 | 18225.605 |
| NM_001662   | 11785.491 | 12864.839 | AK027244  | 2611.665  | 2080.541  | NM_006931 | 3136.687  | 2403.089  |
| NM_016131   | 10299.811 | 9762.334  | L40520    | 5172.715  | 4094.511  | NM_020344 | 3739.662  | 3276.201  |
| NM_006822   | 2075.572  | 2094.743  | NM_002633 | 9862.688  | 12202.667 | AF119868  | 402.089   | 484.641   |
| NM_012142   | 12717.769 | 14813.067 | U11036    | 608.82    | 627.745   | NM_005050 | 1740.475  | 1158.795  |
| NM_016425   | 2798.751  | 3466.318  | NM_002875 | 3768.099  | 2929.283  | AJ133127  | 246.582   | 211.646   |
| NM_006834   | 5738.085  | 5987.256  | NM_017723 | 4000.253  | 3394.918  | M33197    | 51483.355 | 58201.516 |
| AB011100    | 2887      | 3549.611  | AK022922  | 1478.764  | 991.602   | NM_018975 | 6442.551  | 6140.542  |
| U61741      | 1930.668  | 1999.537  | NM_006462 | 4138.368  | 3320.035  | NM_003355 | 4238.137  | 3764.018  |
| NM_012402   | 5377.315  | 5033.398  | AK024750  | 3466.518  | 2255.421  | NM_005074 | 1229.332  | 1596.856  |



|           |           |           |           |           |           |           |           |           |
|-----------|-----------|-----------|-----------|-----------|-----------|-----------|-----------|-----------|
| M76676    | 4401.685  | 3845.107  | NM_000400 | 17434.404 | 16061.711 | NM_013272 | 847.014   | 1150.888  |
| NM_003857 | 2824.827  | 2273.423  | M33197    | 60796.934 | 59420.375 | NM_004170 | 2077.508  | 2054.354  |
| AL137690  | 1202.76   | 1477.407  | NM_002613 | 1475.556  | 973.107   | NM_018057 | 1675.376  | 1737.61   |
| Z83804    | 4907.463  | 5916.328  | NM_004419 | 1554.623  | 1551.167  | M33197    | 55546.031 | 64049.512 |
| NM_004386 | 4102.478  | 4839.191  | U47635    | 1362.077  | 985.931   | NM_015717 | 1646.216  | 2113.24   |
| U67784    | 1355.168  | 1611.027  | NM_018650 | 842.329   | 808.987   | NM_015925 | 1068.315  | 1106.805  |
| NM_007366 | 3284.581  | 3401.926  | AK026945  | 24769.477 | 24599.92  | NM_003665 | 833.081   | 710.554   |
| NM_000592 | 1352.534  | 1891.094  | NM_001888 | 917.838   | 831.295   | AF220217  | 709.375   | 885.087   |
| NM_016584 | 20363.135 | 24649.053 | NM_001154 | 8781.844  | 7856.438  | NM_013323 | 11072.449 | 11954.594 |
| NM_001815 | 3617.574  | 3861.089  | NM_001819 | 2586.186  | 1980.934  | NM_014937 | 440.51    | 950.018   |
| NM_000064 | 12980.092 | 13437.636 | NM_016938 | 557.696   | 686.262   | NM_017426 | 1167.431  | 1330.839  |
| NM_003264 | 4904.63   | 5307.1    | NM_001993 | 1247.488  | 1167.367  | M33197    | 2348.28   | 2331.291  |
| NM_006725 | 3315.168  | 3387.522  | BF575833  | 695.044   | 719.429   | NM_000853 | 2079.614  | 2270.288  |
| NM_003326 | 1418.237  | 1728.337  | NM_015725 | 14160.561 | 11739.691 | M33197    | 55151.535 | 47604.324 |
| NM_004568 | 41581.375 | 50209.418 | R61452    | 1484.797  | 2009.726  | NM_000935 | 883.306   | 598.064   |
| NM_000202 | 1930.938  | 1800.538  | R19938    | 6220.145  | 5194.783  | NM_000355 | 10755.711 | 6959.331  |
| Z25427    | 3203.692  | 3202.096  | AI886795  | 1875.009  | 1574.315  | NM_006395 | 3655.688  | 2406.046  |
| NM_004672 | 11622.908 | 10827.992 | D10495    | 3514.956  | 4502.238  | NM_014306 | 2932.768  | 2183.611  |
| NM_001353 | 4690.175  | 4454.925  | BF344679  | 1915.031  | 1850.566  | NM_001084 | 3494.248  | 2620.315  |
| NM_006214 | 4754.898  | 4040.866  | M36634    | 1138.266  | 908.949   | NM_015983 | 2429.042  | 1712.003  |
| AJ010228  | 10789.912 | 11448.299 | M14156    | 6121.396  | 4816.238  | NM_018622 | 3203.582  | 2688.579  |
| NM_005198 | 4643.405  | 4661.479  | U87939    | 778.896   | 620.352   | M33197    | 55286.113 | 57920.719 |
| NM_018073 | 1434.851  | 1610.795  | AK094237  | 2407.394  | 2617.681  | NM_005867 | 5155.889  | 4746.37   |
| AL137529  | 3069.583  | 3410.553  | L07592    | 2213.964  | 2712.904  | AK026031  | 16443.771 | 19843.891 |
| NM_012332 | 3232.078  | 2919.778  | M57627    | 1127.868  | 1122.215  | NM_016468 | 4393.184  | 4327.201  |
| AK026648  | 1563.463  | 1490.609  | AK026946  | 2291.365  | 2830.374  | NM_007342 | 3064.829  | 3532.262  |
| NM_000497 | 2119.329  | 2322.544  | M33197    | 59617.785 | 61091.141 | NM_005672 | 727.533   | 731.443   |
| NM_017421 | 2191.398  | 2251.182  | NM_003192 | 7953.474  | 7665.756  | D25217    | 7541.857  | 7823.966  |
| AK025977  | 19497.363 | 19740.221 | NM_018449 | 5461.189  | 5178.306  | NM_006351 | 3928.873  | 3679.724  |
| AK023130  | 11062.956 | 15203.38  | AF086129  | 1647.068  | 1402.344  | M33197    | 51749.805 | 41002.824 |
| NM_000273 | 1049.621  | 1004.873  | D79994    | 1653.085  | 1564.84   | NM_004683 | 10836.208 | 9170.503  |
| NM_002895 | 13299.712 | 14206.741 | NM_014458 | 6427.347  | 5165.595  | AK025263  | 220.659   | 227.766   |
| NM_000486 | 2085.684  | 2926.7    | AF235049  | 4354.229  | 4410.208  | M33197    | 51040.43  | 42559.48  |
| BE876237  | 1740.855  | 2319.364  | M33197    | 62574.777 | 61875.004 | NM_001467 | 1130.25   | 1267.601  |
| NM_005397 | 1446.508  | 1548.756  | NM_007369 | 1135.679  | 1255.274  | NM_004688 | 5674.444  | 3551.906  |
| NM_000806 | 13432.399 | 14343.957 | NM_014776 | 1196.795  | 1506.642  | AB037725  | 466.934   | 422.053   |
| NM_006320 | 2640.896  | 2763.963  | NM_006480 | 16533.664 | 20063.311 | M33197    | 40573.551 | 23818.246 |
| AB014511  | 7020.873  | 6072.31   | NM_007223 | 17820.541 | 19196.779 | NM_004860 | 2218.66   | 1633.762  |
| NM_021976 | 7232.747  | 7322.163  | NM_000145 | 1062.257  | 1126.37   | AF217190  | 2527.879  | 1878.308  |
| NM_005718 | 22166.1   | 22762.305 | AF030107  | 885.09    | 772.626   | AB028981  | 37929.176 | 25743.576 |
| NM_018264 | 3911.776  | 4981.88   | NM_000871 | 725.645   | 654.698   | NM_006800 | 2897.452  | 3427.905  |
| NM_014580 | 1149.982  | 1576.619  | M33197    | 64420.031 | 61330.477 | NM_002476 | 814.751   | 936.485   |
| AB028998  | 1358.363  | 1845.725  | NM_000264 | 771.166   | 524.613   | NM_002725 | 4363.966  | 5047.658  |
| NM_000153 | 1387.751  | 1083.097  | AB058740  | 10433.73  | 10079.383 | M33197    | 7325.479  | 8151.981  |
| NM_002033 | 5973.222  | 6033.414  | NM_002236 | 3413.064  | 2838.326  | AL050139  | 3161.701  | 3264.101  |
| AK091794  | 1078.166  | 825.82    | NM_001689 | 56676.66  | 57916.43  | NM_002593 | 647.311   | 735.41    |
| NM_004111 | 5701.119  | 6309.804  | NM_016601 | 1409.215  | 1474.8    | NM_004558 | 4475.011  | 4399.385  |
| AF085966  | 5553.16   | 6003.757  | NM_017905 | 16036.411 | 15280.985 | AL079296  | 698.797   | 608.297   |
| NM_005316 | 2760.531  | 2909.19   | M33197    | 56189.758 | 58206.094 | NM_014770 | 3834.839  | 3489.907  |
| NM_016316 | 4677.602  | 5109.998  | NM_006815 | 27254.799 | 23878.83  | AB037737  | 370.342   | 607.672   |
| NM_003369 | 13097.172 | 15618.013 | NM_001663 | 5230.512  | 4148.527  | M33197    | 56339.035 | 65810.648 |
| NM_000057 | 3515.933  | 4226.049  | NM_004218 | 6671.467  | 5421.629  | AK023103  | 1203.352  | 1520.733  |
| NM_018343 | 5263.661  | 5631.938  | NM_016530 | 1133.87   | 1207.583  | NM_017858 | 1418.675  | 1657.781  |

|             |           |           |           |           |           |           |           |           |
|-------------|-----------|-----------|-----------|-----------|-----------|-----------|-----------|-----------|
| AK095793    | 1516.557  | 2137.511  | NM_014804 | 1211.781  | 952.481   | NM_019055 | 41227.813 | 44644.426 |
| NM_003177   | 5059.307  | 5610.332  | NM_012455 | 3410.967  | 3328.771  | D80008    | 772.215   | 596.851   |
| NM_017719   | 1188.483  | 1182.678  | NM_002806 | 7228.728  | 9938.468  | X56789    | 842.913   | 839.668   |
| AF064078    | 1207.612  | 1881.401  | M33197    | 63539.879 | 62189.363 | AK001069  | 35518.18  | 30683.715 |
| AL049688    | 1925.066  | 2122.9    | NM_001716 | 530.594   | 777.908   | NM_004132 | 3064.246  | 2065.627  |
| NM_002737   | 1964.205  | 1670.119  | NM_006564 | 4949.699  | 4926.239  | NM_014844 | 1540.43   | 982.666   |
| NM_002719   | 5591.131  | 5736.761  | NM_004802 | 1066.694  | 2000.002  | M33197    | 46187.949 | 32922.797 |
| AV752086    | 2181.92   | 1913.728  | NM_002983 | 847.176   | 1418.996  | NM_018492 | 1440.459  | 1057.194  |
| NM_016102   | 10959.577 | 11270.228 | NM_000074 | 8233.524  | 8359.989  | NM_001346 | 2284.86   | 1999.825  |
| NM_004376   | 3496.624  | 3441.45   | U47635    | 3261.788  | 3571.806  | NM_003146 | 1047.333  | 1139.262  |
| NM_000272   | 852.003   | 1043.029  | NM_018650 | 2463.284  | 2261.742  | NM_003377 | 4514.389  | 4856      |
| NM_006061   | 710.581   | 924.982   | AK026945  | 33252.027 | 40128.629 | NM_002220 | 4011.818  | 4601.01   |
| NM_001061   | 1233.644  | 1085.321  | NM_002828 | 2399.431  | 2325.88   | AB033034  | 1125.578  | 1306.376  |
| AI075338    | 994.559   | 718.1     | NM_014369 | 2510.035  | 2809.304  | D38169    | 3875.195  | 3526.089  |
| Z11694      | 18582.668 | 19483.17  | M33197    | 62394.719 | 61671.879 | M33197    | 49229.516 | 56832.176 |
| BF983177    | 2064.219  | 2203.67   | NM_001398 | 23027.908 | 25143.184 | NM_018171 | 446.079   | 423.905   |
| Z26317      | 4579.44   | 5060.105  | AB050049  | 4974.969  | 5178.938  | NM_002447 | 6585.695  | 7241.901  |
| X16983      | 18873.422 | 20497.719 | J05125    | 622.486   | 714.589   | NM_014145 | 6541.784  | 7720.104  |
| X56160      | 4296.65   | 4535.088  | NM_005164 | 537.757   | 855.495   | NM_014141 | 4089.187  | 4821.101  |
| BG679991    | 1156.032  | 1552.276  | NM_001995 | 2491.323  | 2692.801  | NM_002223 | 1780.459  | 1829.511  |
| H-Y 00097 I | 5757.574  | 6773.208  | NM_000183 | 8311.974  | 12774.271 | M33197    | 49515.879 | 62488.742 |
| H-M 59964   | 2915.258  | 3239.537  | AY004175  | 1138.601  | 1290.861  | NM_005490 | 5705.556  | 6656.688  |
| H-X 16707 I | 3929.765  | 4737.338  | M33197    | 63498.137 | 62904.809 | NM_003151 | 1738.361  | 2731.839  |
| H-U76456M   | 305.736   | 757.064   | NM_012327 | 2955.349  | 4560.152  | NM_006811 | 3899.273  | 4826.447  |
| AL038354    | 57418.641 | 64457.352 | NM_000904 | 1153.211  | 1379.463  | NM_005601 | 2217.284  | 1760.451  |
| R14607      | 2940.879  | 2734.984  | NM_016048 | 2004.109  | 2251.588  | NM_016151 | 7921.842  | 6726.985  |
| W84867      | 692.121   | 680.955   | NM_000375 | 7517.764  | 9955.127  | NM_004324 | 388.838   | 272.805   |
| NM_000064   | 13133.515 | 14395.303 | NM_000265 | 3481.133  | 5544.36   | NM_005614 | 4770.812  | 3228.883  |
| NM_003264   | 5353.856  | 6396.571  | NM_018849 | 5895.455  | 7192.254  | AK026270  | 600.429   | 428.31    |
| NM_006725   | 3469.254  | 3463.793  | M33197    | 57671.512 | 58340.609 | NM_004556 | 1422.945  | 990.287   |
| NM_003326   | 2295.067  | 2306.181  | M33197    | 61699.781 | 63756.09  | D90075    | 3833.954  | 2683.498  |
| NM_004566   | 41085.324 | 31743.451 | NM_016824 | 1296.248  | 1290.823  | M33197    | 39690.586 | 38407.688 |
| NM_000202   | 2173.987  | 1659.083  | NM_003031 | 3954.345  | 6505.053  | NM_014857 | 533.876   | 576.089   |
| NM_005496   | 20678.568 | 15747.887 | NM_003008 | 1693.725  | 2566.601  | AK023827  | 3284.388  | 3814.93   |
| NM_002858   | 9688.07   | 9951.094  | M33197    | 60247.945 | 60445.637 | AK021702  | 1265.352  | 1286.659  |
| NM_004817   | 1944.851  | 1862.904  | AK027244  | 1759.446  | 2099.814  | NM_003885 | 1233.996  | 1629.431  |
| NM_018975   | 15915.248 | 17677.84  | L40520    | 3668.932  | 5210.451  | NM_016448 | 2463.093  | 2427.742  |
| NM_001284   | 51268.836 | 54509.531 | NM_006680 | 2868.612  | 3308.246  | NM_003936 | 973.529   | 912.699   |
| NM_003242   | 14802.645 | 16558.574 | NM_002633 | 7588.101  | 9785.186  | M33197    | 45871.078 | 57777.426 |
| NM_002849   | 693.573   | 316.179   | U11036    | 1015.295  | 1458.681  | NM_002688 | 1150.302  | 1281.088  |
| U31099      | 1114.012  | 887.366   | M33197    | 58409.66  | 60850.191 | NM_004415 | 2265.345  | 2797.199  |
| NM_001105   | 2983.49   | 2515.584  | NM_002878 | 4461.345  | 5041.514  | NM_014262 | 641.49    | 692.271   |
| NM_005585   | 1404.486  | 1639.582  | NM_017723 | 3004.085  | 2909.398  | NM_007278 | 7650.981  | 7977.043  |
| NM_002075   | 3960.086  | 4184.545  | AK022922  | 1914.5    | 1884.152  | NM_005219 | 6943.28   | 7172.901  |
| Y08756      | 18083.422 | 19344.781 | NM_006462 | 5625.594  | 8259.505  | NM_004723 | 6215.735  | 5124.619  |
| AY007090    | 1124.619  | 906.814   | AK024750  | 3613.266  | 3727.724  | M33197    | 43455.254 | 47241.109 |
| NM_006439   | 567.615   | 581.038   | NM_000400 | 20151.084 | 17008.318 | NM_018413 | 2569.072  | 2807.723  |
| NM_005102   | 4941.898  | 5083.564  | NM_015885 | 5339.272  | 5479.076  | AB018299  | 33645.344 | 26740.451 |
| NM_004518   | 1017.656  | 758.932   | NM_015889 | 59850.945 | 64849.027 | NM_005245 | 4361.712  | 4237.875  |
| NM_006501   | 558.427   | 442.258   | NM_000212 | 617.105   | 938.046   | M33197    | 49101.898 | 30473.48  |
| NM_005397   | 1405.842  | 1587.08   | M33197    | 60230.957 | 63016.773 | NM_016219 | 6786.549  | 4509.73   |
| NM_000806   | 16635.697 | 15301.979 | NM_004276 | 2660.632  | 3620.592  | NM_004751 | 534.078   | 487.978   |
| NM_006320   | 3036.203  | 2531.615  | NM_002332 | 11230.854 | 17630.734 | AK025605  | 1742.241  | 1321.369  |

|           |           |           |           |           |           |           |           |           |
|-----------|-----------|-----------|-----------|-----------|-----------|-----------|-----------|-----------|
| AB014511  | 6401.203  | 4900.432  | NM_002859 | 1708.484  | 2828.146  | NM_003783 | 366.874   | 391.3     |
| NM_014252 | 6369.876  | 6500.204  | NM_005246 | 1463.757  | 2036.794  | NM_007000 | 1490.513  | 1755.237  |
| NM_001662 | 12698.059 | 12225.877 | NM_017651 | 618.905   | 1177.469  | M23161    | 2888.929  | 3440.153  |
| NM_016131 | 11011.7   | 10639.457 | AL137662  | 580.732   | 840.756   | NM_006100 | 417.279   | 474.956   |
| NM_006822 | 2319.616  | 2347.617  | AK000354  | 4934.506  | 5802.433  | NM_003197 | 2707.302  | 4304.792  |
| NM_012142 | 11447.838 | 11449.157 | NM_014882 | 459.502   | 800.606   | AF176705  | 1596.203  | 1679.92   |
| NM_016429 | 2718.372  | 3411.909  | NM_000836 | 1137.431  | 1474.843  | D29012    | 4644.666  | 4730.628  |
| NM_006834 | 5498.898  | 5240.354  | M33197    | 59584.316 | 57958.652 | NM_017414 | 497.996   | 355.934   |
| AB011100  | 2926.407  | 3449.116  | AK024474  | 2585.827  | 2906.499  | NM_012179 | 13475.05  | 9526.585  |
| U61741    | 2065.532  | 1662.966  | NM_017901 | 1355.469  | 1776.376  | NM_002793 | 2782.308  | 2195.307  |
| NM_012402 | 5006.158  | 4964.181  | NM_004272 | 1883.883  | 1429.909  | NM_004788 | 788.574   | 636.697   |
| M76676    | 4253.198  | 3856.796  | NM_017589 | 941.179   | 1000.352  | M33197    | 51814.398 | 46103.969 |
| NM_003857 | 2810.14   | 2462.157  | AK023582  | 1014.512  | 1120.865  | AL442083  | 1946.625  | 1651.135  |
| AL137690  | 1053.215  | 1168.55   | NM_000358 | 2602.108  | 3028.232  | D63487    | 2965.938  | 2155.511  |
| Z83804    | 5590.777  | 5385.482  | NM_001930 | 8370.185  | 10667.844 | AK097791  | 4097.338  | 3343.986  |
| NM_004386 | 4055.383  | 3778.248  | AK025270  | 1029.714  | 1082.343  | NM_020367 | 976.395   | 1160.189  |
| U67784    | 1347.482  | 1546.883  | NM_001564 | 2270.016  | 2315.574  | AK022705  | 1530.82   | 1393.717  |
| NM_007366 | 2988.047  | 2733.436  | M33197    | 52425.961 | 58113.465 | NM_016404 | 1608.009  | 1408.159  |
| NM_000592 | 1482.565  | 1834.84   | AF263537  | 18700.801 | 29613.234 | L03426    | 1369.313  | 1371.814  |
| NM_016584 | 19737.102 | 18930.49  | NM_015895 | 4930.431  | 7276.931  | M33197    | 46998.145 | 44887.895 |
| NM_001815 | 3148.38   | 2849.039  | AL050050  | 634.111   | 1245.819  | NM_020163 | 1243.768  | 1699.036  |
| AK095793  | 1627.106  | 1990.743  | NM_004690 | 1157.853  | 1375.16   | NM_006608 | 2004.464  | 1565.01   |
| NM_003177 | 5946.203  | 5167.994  | M33197    | 61935.895 | 58543.586 | NM_000457 | 348.85    | 391.004   |
| NM_017719 | 1408.713  | 1144.779  | NM_013374 | 18884.818 | 24565.029 | M34356    | 1176.599  | 980.114   |
| AF064078  | 1369.906  | 1123.179  | NM_003252 | 5350.745  | 6888.378  | AJ133115  | 2057.631  | 2518.222  |
| AL049688  | 1769.438  | 1816.082  | NM_001228 | 918.594   | 1048.567  | X51630    | 4517.092  | 3779.643  |
| NM_002737 | 1991.669  | 1575.371  | AK026607  | 573.015   | 537.642   | NM_005056 | 1026.226  | 1007.692  |
| Z25427    | 3536.179  | 4008.321  | NM_016561 | 7324.549  | 8587.859  | AF208502  | 6385.406  | 5531.564  |
| NM_004672 | 11653.839 | 13160.196 | NM_001225 | 1073.337  | 962.05    | M33197    | 44593.313 | 34072.773 |
| NM_001353 | 4790.003  | 4801.269  | NM_014245 | 12233.551 | 13951.773 | AF264750  | 8831.891  | 6075.417  |
| NM_006214 | 5018.955  | 5160.534  | M33197    | 60219.574 | 59180.219 | NM_006980 | 695.909   | 417.986   |
| AJ010228  | 10512.873 | 10301.219 | AL110226  | 61276.496 | 60259.898 | AK023904  | 2003.843  | 1098.266  |
| NM_005198 | 5222.368  | 4700.785  | M33197    | 1902.314  | 1619.387  | NM_017956 | 5440.688  | 2975.505  |
| AK021426  | 857.862   | 673.449   | NM_000308 | 2855.721  | 3932.339  | NM_016496 | 1238.098  | 981.23    |
| NM_018073 | 1372.658  | 1964.668  | X69636    | 1598.34   | 1844.398  | NM_014309 | 2401.781  | 1789.541  |
| AL137529  | 3222.396  | 3373.627  | M33197    | 63107.156 | 63013.559 | M33197    | 29511.947 | 20241.799 |
| NM_012332 | 3385.73   | 3532.418  | NM_004173 | 4135.573  | 5019.753  | NM_004094 | 1260.436  | 989.323   |
| AK026648  | 1630.128  | 2094.161  | NM_013974 | 2709.137  | 3640.995  | NM_020236 | 1317.769  | 1607.691  |
| NM_000497 | 2272.734  | 2726.824  | NM_017547 | 1273.31   | 1806.808  | AK027059  | 3555.645  | 3506      |
| NM_017421 | 1752.044  | 1939.035  | NM_003983 | 3978.546  | 4334.315  | AF151109  | 6878.759  | 8361.655  |
| AK025977  | 18976.006 | 16899.707 | AK023708  | 902.31    | 1382.717  | NM_015414 | 54604.578 | 69209.594 |
| AK023130  | 11059.579 | 11354.001 | NM_002108 | 960.794   | 1363.171  | L34070    | 3545.884  | 5901.603  |
| NM_000273 | 844.536   | 1206.224  | M33197    | 63054.48  | 61401.762 | AF038182  | 615.107   | 421.629   |
| NM_002899 | 12741.839 | 12366.737 | NM_018464 | 12333.753 | 16334.379 | NM_016475 | 1565.595  | 1159.828  |
| NM_000486 | 1918.32   | 1697.502  | D43948    | 1068.106  | 920.35    | M33197    | 269.921   | 448.37    |
| BE876237  | 2210.95   | 2367.668  | NM_012310 | 3547.917  | 3851.625  | NM_001865 | 37993.02  | 23792.275 |
| NM_000838 | 442.186   | 558.978   | BF382116  | 3236.723  | 3458.056  | NM_006441 | 2031.841  | 1891.5    |
| NM_014750 | 2565.104  | 2798.475  | NM_003193 | 3071.998  | 3497.7    | NM_001918 | 1037.864  | 616.481   |
| NM_015912 | 1250.26   | 1186.222  | AK055825  | 63500.285 | 59723.762 | NM_018245 | 4268.452  | 3212.598  |
| NM_000460 | 3083.231  | 2751.04   | M33197    | 53994.34  | 55533.578 | M33197    | 45846.113 | 27082.512 |
| AB002339  | 3030.147  | 2562.599  | AF113216  | 655.244   | 575.176   | AF252390  | 581.153   | 480.965   |
| NM_005104 | 15933.671 | 15193.691 | NM_005197 | 6654.156  | 6191.759  | NM_012117 | 4943.347  | 2487.266  |
| NM_006888 | 26819.32  | 34842.371 | AL137421  | 60205.941 | 57806.895 | D17130    | 50855.363 | 55385.629 |

|           |           |           |           |           |           |           |           |           |
|-----------|-----------|-----------|-----------|-----------|-----------|-----------|-----------|-----------|
| AL137423  | 5264.955  | 5996.306  | M33197    | 61655.125 | 57676.441 | X76302    | 3184.896  | 2281.396  |
| AB018322  | 2412.136  | 2544.861  | NM_007241 | 517.142   | 1038.114  | AK026276  | 601.518   | 657.782   |
| NM_007068 | 10809.252 | 9425.521  | NM_000124 | 843.956   | 874.835   | M33197    | 52642.137 | 58071.949 |
| NM_005718 | 20798.084 | 23547.338 | NM_017996 | 2722.759  | 3749.463  | X52354    | 909.393   | 1048.664  |
| NM_018264 | 3829.547  | 3813      | NM_014517 | 1168.315  | 1862.436  | NM_005413 | 874.237   | 1022.838  |
| NM_014580 | 1238.271  | 1451.759  | NM_005466 | 820.053   | 1074.397  | NM_002315 | 1239.032  | 1436.132  |
| AB028998  | 1950.032  | 1994.256  | NM_004269 | 676.311   | 1250.566  | AK024191  | 686.672   | 991.722   |
| AK025389  | 492.089   | 592.075   | M33197    | 61674.395 | 62319.063 | D83781    | 398.273   | 263.671   |
| NM_000153 | 1588.018  | 2291.224  | D31765    | 903.948   | 1027.156  | AL832699  | 1830.975  | 2609.246  |
| NM_002033 | 7795.063  | 8831.907  | NM_006107 | 6822.616  | 7435.808  | M33197    | 44279.594 | 49675.168 |
| AK091794  | 530.299   | 1182.093  | NM_004175 | 1077.291  | 1034.322  | AK000757  | 484.747   | 629.076   |
| NM_004111 | 5501.763  | 4975.247  | AF288288  | 13696.536 | 14365.789 | AL359577  | 877.969   | 1191.772  |
| AF085966  | 6073.26   | 5490.423  | NM_017646 | 4742.268  | 5391.227  | NM_018139 | 883.468   | 1338.007  |
| NM_005316 | 2523.748  | 3192.232  | AL050368  | 838.758   | 1584.023  | NM_014805 | 2156.657  | 3249.1    |
| NM_016316 | 4448.795  | 4504.644  | NM_003092 | 7653.407  | 9404.144  | AF052120  | 1492.148  | 2247.679  |
| NM_003369 | 12642.569 | 11787.549 | M33197    | 60527.504 | 59146.234 | NM_014871 | 1127.808  | 1961.671  |
| NM_000057 | 3824.366  | 3121.89   | NM_005861 | 654.887   | 659.053   | AK026754  | 419.394   | 472.849   |
| NM_018343 | 6186.393  | 5551.498  | NM_018848 | 478.989   | 923.792   | M33197    | 48850.535 | 62481.563 |
| X15880    | 59146.73  | 58035.367 | NM_003760 | 773.419   | 762.126   | AL137552  | 1737.67   | 2230.885  |
| AL137461  | 3865.278  | 4629.649  | AK025998  | 762.615   | 894.982   | AK025794  | 1515.037  | 3023.937  |
| AF114264  | 2350.737  | 1928.019  | AL080080  | 2111.785  | 1838.998  | AK024522  | 599.7     | 891.538   |
| NM_017514 | 582.674   | 664.413   | NM_018482 | 1981.723  | 1878.662  | NM_007198 | 2888.864  | 3562.388  |
| AB018261  | 519.176   | 498.623   | NM_017880 | 1434.891  | 1803.758  | NM_014958 | 472.028   | 413.745   |
| NM_018972 | 2517.697  | 3155.503  | AF090945  | 4026.824  | 4239.757  | M33197    | 49217.59  | 60682.363 |
| AB037828  | 649.382   | 639.625   | M33197    | 61154.117 | 65049.32  | AK023220  | 485.328   | 592.926   |
| AB023210  | 1733.716  | 1334.009  | NM_001161 | 3695.386  | 5137.938  | AK024566  | 528.802   | 498.942   |
| AB037786  | 3033.104  | 2635.267  | NM_004044 | 6037.764  | 7687.406  | M33197    | 52844.957 | 64292.613 |
| NM_003648 | 10505.067 | 10450.807 | NM_000221 | 7423.667  | 9405.21   | AK024981  | 9707.872  | 14270.642 |
| AB037735  | 1247.61   | 1297.128  | H75678    | 841.893   | 1251.806  | AK027246  | 620.734   | 915.413   |
| AK002177  | 5593.793  | 5413.216  | NM_006452 | 2740.535  | 3772.989  | U80766    | 2671.718  | 3313.526  |
| AK024429  | 2229.43   | 2371.928  | AB002359  | 1199.757  | 1970.375  | AK001638  | 521.251   | 799.982   |
| NM_003496 | 56022.07  | 54730.957 | M33197    | 4237.931  | 4994.821  | AF161386  | 3939.014  | 6557.034  |
| AB000509  | 1898.603  | 1763.576  | AB007864  | 530.302   | 632.051   | AL365369  | 1618.958  | 2997.04   |
| AB018314  | 2246.455  | 2613.425  | NM_002198 | 1614.641  | 2356.153  | AK025454  | 863.008   | 1266.262  |
| NM_004378 | 1472.467  | 1739.994  | AF024693  | 487.012   | 631.549   | M33197    | 45783.473 | 49090.684 |
| AJ238899  | 1730.912  | 1771.246  | AK025905  | 1211.581  | 1011.395  | X05826    | 3538.807  | 5461.35   |
| NM_018037 | 1499.509  | 1237.474  | M33197    | 16035.183 | 15894.574 | Y11608    | 590.959   | 654.093   |
| NM_001110 | 6470.98   | 5780.499  | NM_014169 | 1159.957  | 1124.793  | AJ001872  | 3065.558  | 2407.804  |
| NM_003222 | 1134.93   | 1418.521  | NM_004964 | 7738.258  | 9913.725  | M33197    | 53438.465 | 49006.785 |
| NM_000841 | 8128.397  | 6372.712  | AL117497  | 1678.329  | 1907.787  | L33811    | 364.579   | 373.191   |
| NM_000735 | 284.814   | 488.132   | AF075016  | 806.451   | 855.377   | NM_005598 | 957.182   | 705.309   |
| NM_001245 | 3290.722  | 3801.138  | M33197    | 60185.902 | 60641.938 | Y10515    | 427.844   | 376.457   |
| NM_003672 | 34774.027 | 31238.885 | AF147360  | 517.621   | 867.442   | M87942    | 475.923   | 304.732   |
| NM_002574 | 41835.891 | 44303.801 | AL137269  | 3278.714  | 4058.348  | AK023636  | 4717.287  | 3577.267  |
| AJ008139  | 7329.819  | 5960.79   | AK021983  | 1234.819  | 1871.715  | D25272    | 1993.923  | 1473.508  |
| NM_004326 | 2969.646  | 2735.159  | Y11681    | 4562.012  | 6070.828  | M33197    | 49011.598 | 38927.691 |
| NM_000882 | 642.264   | 567.718   | AL110135  | 10460.225 | 14023.996 | NM_020168 | 650.01    | 475.558   |
| NM_004577 | 4730.428  | 3890.257  | NM_006993 | 7710.6    | 9326.938  | AB037771  | 426.048   | 602.203   |
| NM_015507 | 585.731   | 591.297   | M33197    | 60865.16  | 58744.754 | AK025931  | 52910.727 | 63751.34  |
| AF007157  | 25926.975 | 22722.553 | AF086429  | 805.734   | 570.469   | M33197    | 796.082   | 700.246   |
| D38553    | 4747.939  | 4527.98   | M33197    | 50558.984 | 51740.82  | AK021972  | 1206.208  | 1308.756  |
| NM_006170 | 4150.93   | 3529.675  | M33197    | 61647.859 | 63579.688 | M33197    | 53128.266 | 52144.422 |
| NM_014298 | 20590.064 | 17459.549 | AF085969  | 555.91    | 634.894   | AK001083  | 937.263   | 924.387   |

|           |           |           |           |           |           |            |           |           |
|-----------|-----------|-----------|-----------|-----------|-----------|------------|-----------|-----------|
| AK001581  | 2848.484  | 2396.876  | AF144233  | 3268.851  | 2782.585  | AK000185   | 1063.927  | 603.344   |
| NM_005862 | 3037.805  | 3299.411  | AF085975  | 905.443   | 1521.591  | NM_017962  | 492.039   | 265.472   |
| NM_000548 | 6029.486  | 6146.988  | AF075103  | 512.298   | 637.991   | NM_017834  | 502.084   | 387.305   |
| AK022541  | 16248.436 | 18149.209 | M33197    | 60906.031 | 60355.867 | AK000865   | 797.674   | 534.18    |
| AB002297  | 4896.824  | 5626.813  | AL137390  | 1122.622  | 1561.037  | M33197     | 51766.445 | 41324.805 |
| NM_005020 | 34547.797 | 35949.875 | AL137611  | 4529.073  | 5670.655  | AK024558   | 343.51    | 470.156   |
| NM_014077 | 6088.027  | 6396.218  | AL359566  | 20703.678 | 23196.85  | AK024779   | 760.426   | 618.041   |
| NM_018412 | 2451.331  | 2823.943  | AL137427  | 1090.815  | 1122.654  | AK024940   | 383.375   | 318.651   |
| NM_012328 | 5236.145  | 5225.64   | AL157460  | 2117.497  | 2078.818  | AK024406   | 594.517   | 645.794   |
| M14087    | 44610.156 | 45904.949 | AK022035  | 1657.43   | 1134.036  | AK024568   | 7953.227  | 6395.883  |
| AJ272324  | 2389.528  | 1978.981  | M33197    | 60848.848 | 56785.188 | AK024873   | 708.761   | 691.621   |
| NM_000885 | 5775.345  | 4830.179  | NM_004337 | 1026.966  | 1038.439  | M33197     | 52244.238 | 53113.73  |
| M59040    | 3845.824  | 3400.333  | AK022141  | 1013.016  | 895.139   | AK026277   | 3322.214  | 4213.734  |
| NM_017582 | 18957.258 | 19698.049 | AK023942  | 35816.152 | 37498.387 | U10509     | 825.925   | 1245.373  |
| NM_015238 | 1477.844  | 1291.185  | M33197    | 58776.113 | 52823.09  | NM_007165  | 20713.898 | 26634.109 |
| AK026962  | 3971.496  | 3302.556  | AK022046  | 517.24    | 1062.783  | NM_014018  | 1657.026  | 2267.357  |
| X04366    | 4062.237  | 3843.504  | AK027207  | 879.538   | 878.578   | AF085956   | 850.698   | 404.879   |
| NM_000505 | 46060.684 | 37068.152 | AJ227892  | 2624.199  | 3264.203  | NM_019116  | 497.105   | 483.864   |
| NM_018656 | 456.196   | 451.088   | M33197    | 59797.449 | 58192.719 | AF147318   | 1143.112  | 717.393   |
| NM_000666 | 5880.167  | 6597.57   | AK022013  | 692.04    | 755.336   | unknown (S | 392.627   | 257.341   |
| NM_003481 | 2743.102  | 1974.308  | AK022155  | 2628.247  | 2754.249  | M33197     | 48492.563 | 52603.207 |
| AB046814  | 1937.067  | 2029.52   | AK022288  | 565.305   | 635.3     | AL137556   | 1066.887  | 884.805   |
| NM_017778 | 683.366   | 723.327   | M33197    | 61312.543 | 59019.043 | NM_014696  | 7369.861  | 7439.002  |
| NM_017664 | 4897.587  | 5996.521  | AK021589  | 799.669   | 785.487   | AL359055   | 787.414   | 521.942   |
| AK025523  | 537.27    | 1064.95   | D17152    | 7783.737  | 9154.515  | NM_014908  | 1232.96   | 1477.816  |
| NM_007058 | 4206.17   | 4516.395  | AK024464  | 10662.613 | 9290.939  | AF086125   | 1753.696  | 1018.487  |
| NM_006870 | 5557.633  | 6573.345  | M33197    | 764.601   | 858.206   | AL079279   | 291.634   | 337.326   |
| NM_007358 | 6637.831  | 5932.227  | AK025423  | 1228.976  | 1715.919  | AK023547   | 515.854   | 301.803   |
| L13283    | 1131.032  | 1006.262  | M33197    | 58815.871 | 57724.211 | U67847     | 945.493   | 1191.693  |
| NM_013327 | 4349.509  | 4404.481  | AL049846  | 588.544   | 642.441   | AL137321   | 2819.466  | 4471.589  |
| AF303888  | 6073.574  | 6187.575  | AK021682  | 11164.06  | 13321.243 | M33197     | 51075.203 | 55028.844 |
| NM_000077 | 1299.563  | 1270.522  | AJ012500  | 2345.968  | 1411.486  | AK024207   | 1599.353  | 2100.975  |
| NM_007084 | 1485.999  | 1182.47   | BC035058  | 939.437   | 759.653   | AK021843   | 610.511   | 610.082   |
| M97191    | 27140.5   | 24701.842 | X57566    | 2542.026  | 2761.354  | AF075025   | 2168.23   | 1931.768  |
| AK023015  | 2115.921  | 2081.761  | M33197    | 63086.359 | 59782.793 | AF116623   | 431.288   | 413.431   |
| NM_003457 | 13898.084 | 11023.626 | NM_018616 | 4322.252  | 5429.021  | AF088008   | 1073.162  | 1067.941  |
| NM_012391 | 3329.792  | 2689.257  | AK023809  | 1139.658  | 1520.879  | AK023528   | 836.599   | 553.268   |
| NM_005254 | 4063.029  | 3875.727  | M87943    | 60425.594 | 63823.898 | M33197     | 49123.305 | 49300.789 |
| NM_005611 | 2094.897  | 1690.945  | AL360137  | 1020.737  | 1122.616  | AF147349   | 3124.622  | 3592.049  |
| AF141655  | 1372.25   | 1274.08   | U28131    | 52159.875 | 54467.758 | AL050346   | 13787.012 | 18347.869 |
| NM_007345 | 1364.709  | 1314.203  | AY007106  | 5141.621  | 5651.238  | AK001520   | 3704.637  | 4586.758  |
| NM_004830 | 1070.854  | 943.881   | M33197    | 62632.648 | 59268.789 | AK021731   | 309.009   | 561.229   |
| NM_007007 | 11513.708 | 10468.216 | NM_006088 | 35297.371 | 42649.395 | D90070     | 3192.177  | 3294.635  |
| NM_006386 | 2559.848  | 1772.522  | NM_018265 | 980.287   | 1319.239  | M33197     | 32295.092 | 22499.705 |
| NM_006558 | 21248.352 | 20129.721 | AF130086  | 626.785   | 547.086   | AF086179   | 674.293   | 759.445   |
| NM_004501 | 49958.605 | 49952.895 | AK023858  | 2541.49   | 2579.492  | AK025807   | 978.61    | 1085.053  |
| NM_004966 | 16832.768 | 17836.121 | M33197    | 57994.07  | 53109.785 | M33197     | 50918.094 | 47773.219 |
| NM_006700 | 2688.869  | 3624.358  | AF250920  | 2143.757  | 2619.302  | AK025266   | 1941.71   | 1698.748  |
| NM_006445 | 15616.565 | 18293.33  | NM_017733 | 1737.3    | 1864.961  | AK001843   | 2096.487  | 1827.089  |
| NM_012108 | 14856.512 | 15166.317 | NM_014042 | 2492.352  | 2965.635  | AK000548   | 19312.246 | 20290.961 |
| AF019633  | 2590.721  | 2443.332  | M33197    | 61468.645 | 54586.508 | NM_003920  | 7799.496  | 11262.527 |
| AB002361  | 8088.258  | 7466.924  | AF317550  | 747.319   | 395.554   | NM_004787  | 10819.957 | 16256.857 |
| NM_018060 | 6491.564  | 6940.656  | M33197    | 61633.848 | 58203.988 | AF087984   | 2497.188  | 4051.077  |

|           |           |           |           |           |           |           |           |           |
|-----------|-----------|-----------|-----------|-----------|-----------|-----------|-----------|-----------|
| NM_014239 | 5472.001  | 5606.07   | AL049263  | 360.948   | 1180.395  | AF009302  | 415.361   | 318.812   |
| NM_017662 | 6535.01   | 7815.213  | AK022372  | 2185.34   | 3100.205  | M33197    | 50277.074 | 47574.93  |
| U88837    | 2126.928  | 2382.694  | AJ227863  | 918.791   | 801.76    | AK022273  | 1948.861  | 1781.297  |
| NM_017446 | 18388.295 | 20997.248 | NM_015916 | 920.944   | 814.456   | NM_015882 | 654.485   | 673.323   |
| AK001478  | 10364.21  | 8812.623  | AL137380  | 854.325   | 1274.504  | AK027161  | 407.177   | 478.929   |
| AK025697  | 4837.207  | 4150.544  | M33197    | 60917.34  | 60112.102 | AK024271  | 629.227   | 729.753   |
| AK021734  | 1010.163  | 1096.41   | AL137658  | 12175.784 | 13086.696 | AK021650  | 5141.803  | 4584.063  |
| BF245026  | 739.631   | 481.741   | D16888    | 2439.513  | 3569.973  | AL050210  | 1681.924  | 1629.599  |
| D00265    | 38587.469 | 34435.277 | AF068298  | 1378.631  | 1424.988  | L37699    | 1647.962  | 1521.631  |
| NM_000779 | 494.29    | 315.175   | Z70770    | 1296.151  | 1134.347  | M33197    | 51941.105 | 59729.902 |
| NM_004552 | 38196.84  | 33328.926 | AJ227900  | 2799.848  | 2731.966  | AL050173  | 1343.603  | 1308.747  |
| NM_000143 | 4042.646  | 3740.256  | AK023242  | 526.226   | 739.616   | D80002    | 1216.521  | 1252.025  |
| AL137294  | 2616.123  | 2450.359  | M33197    | 59519.199 | 60078.941 | U17637    | 4882.678  | 5271.973  |
| NM_003743 | 1548.757  | 1480.65   | CY3Cy5    | 11857.136 | 1282.432  | AF207831  | 786.808   | 730.371   |
| AB037797  | 651.733   | 762.105   | Y10802    | 1363.197  | 1867.755  | AK023174  | 1203.349  | 1295.843  |
| NM_001520 | 1844.425  | 2088.406  | BI762229  | 3112.344  | 3846.009  | NM_003546 | 1460.632  | 1305.908  |
| NM_017870 | 1631.816  | 1750.994  | BG618320  | 6104.992  | 5963.516  | M33197    | 39594.543 | 32585.143 |
| AL133633  | 1951.359  | 1733.682  | Y00787    | 2175.036  | 2148.259  | NM_018272 | 2118.335  | 2374.29   |
| NM_012252 | 1901.348  | 1931.363  | NM_007276 | 3763.266  | 3142.044  | CY3Cy5    | 3545.829  | 349.555   |
| AK026817  | 2089.631  | 2199.97   | N34462    | 6071.733  | 5904.438  | R19938    | 4605.25   | 5075.736  |
| AL157442  | 32272.357 | 34187.238 | AI658778  | 2538.496  | 2683.542  | N94487    | 8820.674  | 7167.002  |
| AB011148  | 3044.363  | 3526.536  | L19067    | 2951.669  | 3370.047  | AI886795  | 2425.524  | 3193.331  |
| AL389938  | 26886.482 | 28292.436 | Z48482    | 1329.869  | 1240.418  | D10495    | 3106.978  | 3351.133  |
| NM_001949 | 50571.75  | 61372.059 | W60413    | 1494.118  | 1318.984  | BF344679  | 1542.64   | 1721.91   |
| NM_003507 | 1586.573  | 1610.376  | BI823365  | 1315.8    | 1044.827  | M36634    | 729.773   | 588.12    |
| AK026591  | 1154.708  | 1036.101  | X06318    | 6428.685  | 6671.288  | M14156    | 4403.393  | 4182.723  |
| AK001889  | 3896.048  | 4234.257  | AL834159  | 4069.47   | 3921.202  | U87939    | 1128.315  | 1070.419  |
| AK025726  | 2225.181  | 2155.031  | NM_000164 | 34003.184 | 33468.605 | U86961    | 1201.242  | 1220.588  |
| AJ227869  | 3621.546  | 3028.571  | SR7       | 2466.858  | 28563.752 | AK094237  | 606.082   | 531.856   |
| AK026189  | 542.421   | 796.762   | SR9       | 8347.901  | 1371.241  | L07592    | 793.73    | 920.386   |
| AK026790  | 424.402   | 629.932   | CY3Cy5    | 9826.165  | 1122.792  | SR2       | 32314.5   | 27186.367 |
| AL117613  | 11997.796 | 9009.615  | NM_003682 | 816.142   | 513.912   | SR4       | 8149.454  | 7278.586  |
| AL137753  | 4735.111  | 4372.802  | NM_000207 | 968.955   | 1092.914  | SR6       | 965.493   | 854.303   |
| AK021785  | 784.181   | 793.068   | NM_001782 | 942.813   | 860.825   | SR8       | 4446.511  | 14099.821 |
| AL110262  | 11507.705 | 10123.131 | NM_002754 | 1084.889  | 944.114   | SR10      | 15759.906 | 6331.302  |
| AK025627  | 13204.729 | 12361.517 | NM_000797 | 2966.49   | 2854.329  | CY3Cy5    | 6244.161  | 640.83    |
| U00945    | 559.421   | 995.13    | NM_014927 | 756.647   | 681.276   | M33197    | 56907.34  | 63804.555 |
| AF216077  | 2635.76   | 2162      | NM_016293 | 9527.504  | 9980.113  | NM_007369 | 738.786   | 688.674   |
| AF086238  | 431.256   | 304.242   | AF217525  | 2512.506  | 2373.31   | NM_014776 | 1835.811  | 2037.563  |
| AK021612  | 12043.419 | 11245.464 | AL080148  | 11551.527 | 13705.859 | NM_006480 | 25717.252 | 18026.998 |
| AF147342  | 476.413   | 475.963   | NM_006731 | 1032.864  | 876.729   | NM_007223 | 13704.988 | 12361.125 |
| AF088031  | 604.492   | 211.591   | NM_018487 | 613.867   | 665.168   | NM_000145 | 791.112   | 841.059   |
| AK002025  | 37283.707 | 40046.344 | NM_020134 | 1604.723  | 1536.055  | AF030107  | 919.338   | 800.477   |
| AK026299  | 2079.473  | 2162.674  | NM_014061 | 878.154   | 723.898   | NM_000871 | 1183.974  | 1272.264  |
| NM_017794 | 1801.986  | 1801.267  | BC034395  | 1100.953  | 867.843   | AF086924  | 47802.043 | 43721.797 |
| AK025170  | 2072.492  | 2576.128  | NM_002479 | 619.237   | 550.027   | NM_000264 | 617.876   | 507.029   |
| AB033031  | 2719.34   | 2927.156  | NM_000348 | 9866.983  | 8746.235  | AB058740  | 4469.746  | 4159.615  |
| AF085872  | 8367.645  | 7343.935  | NM_004950 | 3137.149  | 2193.981  | NM_003385 | 591.381   | 608.326   |
| AK022538  | 11237.711 | 10979.946 | NM_000724 | 1844.09   | 1543.87   | NM_001886 | 547.05    | 816.634   |
| AL360257  | 1074.19   | 874.599   | NM_002557 | 3653.789  | 2463.853  | NM_004392 | 819.707   | 623.822   |
| AK022342  | 1426.144  | 1337.034  | NM_004477 | 581.607   | 722.911   | NM_001819 | 1406.126  | 697.996   |
| AF147420  | 1603.177  | 1438.509  | BE728156  | 970.19    | 1146.008  | NM_001993 | 758.817   | 594.129   |
| AL049312  | 1977.901  | 1890.785  | NM_005662 | 20448.951 | 23346.68  | NM_015725 | 7454.461  | 10192.972 |

|           |           |           |           |           |           |           |           |           |
|-----------|-----------|-----------|-----------|-----------|-----------|-----------|-----------|-----------|
| AL050072  | 3289.048  | 2559.083  | NM_003060 | 512.92    | 473.49    | R61452    | 939.044   | 1165.484  |
| AL117590  | 818.284   | 894.607   | AK021489  | 19427.4   | 21131.217 | NM_012455 | 3419.834  | 3079.207  |
| AL049357  | 5700.798  | 4326.153  | NM_003895 | 952.321   | 817.336   | NM_002806 | 5243.877  | 4164.945  |
| AL050129  | 675.391   | 665.134   | NM_004317 | 4157.534  | 4469.23   | M33197    | 52548.078 | 56795.906 |
| AL110223  | 751.985   | 897.057   | NM_014645 | 1900.093  | 1455.016  | NM_001716 | 796.985   | 812.565   |
| AK027180  | 9765.083  | 10417.351 | NM_014708 | 2574.671  | 2080.68   | NM_006564 | 3944.591  | 4919.163  |
| NM_004544 | 12224.337 | 11788.867 | NM_003693 | 1136.58   | 1068.376  | NM_000074 | 6277.676  | 5525.244  |
| AF086041  | 482.697   | 530.06    | NM_000356 | 17345.67  | 14501.635 | BF434335  | 12483.785 | 12359.679 |
| AL133080  | 3330.991  | 3009.773  | NM_018134 | 26953.104 | 29714.529 | M57627    | 791.712   | 887.716   |
| NM_017792 | 2380.881  | 2490.483  | NM_013247 | 3103.324  | 3212.408  | M33197    | 50603.379 | 48209.094 |
| AK025213  | 4665.809  | 4518.244  | NM_006770 | 2555.735  | 2138.972  | NM_003192 | 2797.508  | 2941.779  |
| NM_014945 | 3747.839  | 3790.633  | BE394704  | 883.183   | 796.718   | NM_018445 | 1723.727  | 2607.889  |
| AL080221  | 2927.069  | 2960.212  | NM_004703 | 1887.434  | 1698.635  | AF086129  | 923.819   | 1013.889  |
| AL137370  | 1095.243  | 1166.129  | NM_001512 | 980.758   | 774.158   | D79994    | 925.945   | 1610.602  |
| AF009262  | 8976.479  | 8343.607  | NM_014706 | 2062.417  | 1948.525  | NM_014455 | 1441.223  | 1591.167  |
| AF009306  | 722.47    | 635.989   | AK023172  | 426.29    | 525.601   | AF235049  | 1522.15   | 2461.29   |
| AF050198  | 1395.488  | 1557.013  | AJ001348  | 875.612   | 514.602   | NM_005164 | 574.408   | 669.402   |
| AK024346  | 4007.723  | 3676.162  | NM_014007 | 765.391   | 436.93    | NM_001995 | 1137.408  | 1139.642  |
| AF009273  | 556.864   | 660.342   | AB033006  | 2085.575  | 1456.274  | NM_000183 | 7559.76   | 8507.27   |
| AF009320  | 535.255   | 466.457   | AF020314  | 6542.25   | 5419.036  | AY004175  | 956.616   | 1284.599  |
| AF056422  | 1493.908  | 1614.909  | NM_016332 | 8538.262  | 6635.146  | M33197    | 53103.109 | 62576.945 |
| AF090892  | 769.463   | 1218.142  | AK023936  | 390.985   | 312.483   | NM_012327 | 2021.156  | 2068.721  |
| AK001089  | 643.578   | 477.2     | NM_006457 | 784.548   | 883.18    | NM_000904 | 639.49    | 570.86    |
| AK001919  | 1625.043  | 1650.967  | AF000381  | 2452.295  | 1995.302  | NM_016045 | 896.621   | 849.936   |
| AK021535  | 1406.424  | 1520.007  | NM_018075 | 720.16    | 543.965   | NM_000375 | 5114.15   | 5067.324  |
| AK021753  | 4434.199  | 3175.534  | NM_012105 | 1096.504  | 856.579   | NM_000265 | 2836.964  | 4059.86   |
| AK001139  | 2445.424  | 2232.865  | S82470    | 2702.995  | 2646.497  | NM_018845 | 3708.413  | 3330.763  |
| AK002090  | 1547.327  | 1833.375  | AB020695  | 835.086   | 680.263   | M33197    | 47155.504 | 38388.359 |
| AK021618  | 372.66    | 468.267   | AB028982  | 1204.52   | 773.225   | AF279890  | 1738.441  | 1564.282  |
| AK021822  | 794.177   | 856.722   | NM_002004 | 2201.478  | 1868.062  | NM_001685 | 28031.133 | 36679.082 |
| AK025246  | 6255.719  | 5621.108  | NM_005121 | 743.753   | 365.201   | NM_017905 | 5246.77   | 4942.304  |
| AK025847  | 2932.126  | 2425.737  | NM_001643 | 19073.783 | 16867.529 | M33197    | 52915.281 | 61472.328 |
| AK026442  | 734.028   | 655.31    | NM_020221 | 891.217   | 854.889   | NM_006815 | 7676.83   | 7507.258  |
| AK026816  | 613.141   | 599.102   | NM_000747 | 1894.345  | 1824.112  | NM_001663 | 772.405   | 1131.184  |
| AK000944  | 506.987   | 747.399   | NM_005415 | 2153.042  | 1798.621  | NM_004215 | 955.45    | 1341.247  |
| NM_014174 | 6831.721  | 5441.006  | AJ275973  | 6760.537  | 5295.634  | NM_016530 | 806.037   | 673.999   |
| AF147337  | 4393.237  | 3005.501  | NM_006493 | 1040.849  | 826.193   | NM_014804 | 443.249   | 592.008   |
| AK025203  | 53917.211 | 50648.121 | U76362    | 2025.914  | 1397.018  | L40520    | 2470.866  | 2156.76   |
| AK026981  | 4369.348  | 3712.803  | NM_014225 | 802.618   | 231.581   | NM_002633 | 4805.772  | 4091.4    |
| NM_006394 | 411.999   | 360.885   | AL832292  | 2140.75   | 1648.487  | U11036    | 530.087   | 405.5     |
| AK023819  | 984.191   | 814.226   | NM_003045 | 6267.927  | 5054.959  | M33197    | 51310.246 | 53045.633 |
| AL133656  | 1533.804  | 1366.425  | NM_002615 | 1693.63   | 1325.369  | NM_002875 | 2224.293  | 1737.459  |
| AL050037  | 12160.044 | 9580.188  | L27479    | 695.495   | 478.744   | NM_017723 | 2478.663  | 1927.38   |
| NM_001417 | 37827.5   | 28125.418 | NM_002193 | 1109.645  | 899.542   | AK022922  | 868.105   | 740.136   |
| AK022236  | 3176.581  | 3666.831  | NM_001385 | 6185.575  | 5090.847  | NM_006462 | 2850.126  | 2643.125  |
| AK000073  | 662.817   | 681.278   | X76770    | 4033.884  | 3565.33   | AK024750  | 1402.004  | 1011.137  |
| AK000618  | 672.147   | 749.105   | AB037808  | 1900.234  | 2422.873  | NM_000400 | 6949.02   | 6424.353  |
| AK024773  | 800.32    | 713.271   | NM_016035 | 2675.301  | 1872.694  | NM_004415 | 1553.267  | 1949.004  |
| AL390180  | 843.238   | 786.358   | Z36821    | 2823.113  | 2288.195  | U47635    | 1139.57   | 1501.534  |
| X60484    | 1019.423  | 1355      | AF289485  | 2406.986  | 1986.934  | NM_018650 | 652.224   | 747.732   |
| AF055019  | 2221.216  | 1997.532  | AK024794  | 1649.363  | 1739.943  | AK026945  | 7836.105  | 12851.832 |
| NM_003525 | 13968.35  | 8300.483  | NM_019853 | 5850.954  | 6003.669  | NM_002825 | 675.472   | 797.759   |
| AK000229  | 917.708   | 989.785   | NM_017992 | 5255.393  | 5715.573  | NM_014365 | 707.895   | 847.833   |

|           |           |           |           |           |           |           |           |           |
|-----------|-----------|-----------|-----------|-----------|-----------|-----------|-----------|-----------|
| AF056432  | 2969.209  | 2624.815  | NM_005400 | 611.895   | 299.718   | M33197    | 53039.125 | 62345.949 |
| AK001987  | 41260.895 | 35946.059 | AK023061  | 362.996   | 270.27    | NM_00139E | 4140.639  | 4391.792  |
| NM_013332 | 2454.159  | 3187.84   | NM_00725E | 1347.802  | 873.373   | AB050049  | 658.008   | 777.067   |
| X56199    | 1814.515  | 2115.48   | NM_00366E | 2469.832  | 1619.284  | NM_00199E | 635.568   | 707.148   |
| NM_00519E | 2392.235  | 2132.176  | NM_013384 | 39492.684 | 32488.166 | NM_01572E | 7664.438  | 9698.57   |
| AL162006  | 1298.51   | 1409.669  | NM_018241 | 1603.223  | 1284.171  | R61452    | 1147.627  | 1079.721  |
| NM_017971 | 24350.873 | 19379.988 | NM_005834 | 2036.142  | 1456.664  | R19938    | 4212.001  | 3856.393  |
| AF090097  | 2984.636  | 2761.631  | NM_000724 | 1433.453  | 1276.847  | N94487    | 6911.002  | 7052.075  |
| AF116620  | 15064.187 | 14190.105 | NM_002557 | 4379.538  | 3720.265  | AI886795  | 2166.621  | 2305.809  |
| AF293335  | 27003.514 | 24705.512 | Y10802    | 257.704   | 494.804   | D10495    | 3049.097  | 3181.72   |
| AK024431  | 6775.664  | 5573.526  | BI762229  | 2325.256  | 2500.054  | BF344679  | 1786.203  | 1615.801  |
| AF116635  | 840.18    | 684.611   | M28983    | 1196.64   | 887.649   | BG743223  | 468.03    | 369.727   |
| X96644    | 6436.263  | 6543.775  | Y00787    | 1148.798  | 1433.032  | M36634    | 300.788   | 359.713   |
| Z34281    | 16774.674 | 16717.902 | N34462    | 1695.033  | 1767.675  | M14156    | 5128.533  | 4422.626  |
| NM_01867E | 38946.27  | 36019.508 | AI658778  | 1990.198  | 2041.676  | U87939    | 655.052   | 808.46    |
| AJ008122  | 27383.924 | 25651.152 | L19067    | 2074.378  | 2263.836  | NM_005191 | 524.473   | 686.606   |
| AK022667  | 16985.713 | 15976.122 | Z48482    | 794.897   | 662.544   | AK094237  | 1032.556  | 1090.333  |
| AK026667  | 1144.608  | 1084.048  | W60413    | 771.892   | 745.901   | L07592    | 430.299   | 827.636   |
| AF113211  | 1412.865  | 1718.218  | BI823365  | 1066.861  | 783.314   | M33197    | 50620.246 | 50220.914 |
| AL117568  | 2467.916  | 2089.125  | X06318    | 3665.989  | 3300.465  | AK027244  | 748.8     | 1462.1    |
| NM_00084E | 467.183   | 348.94    | AL834159  | 2214.798  | 2095.59   | NM_01844E | 2687.164  | 3671.488  |
| S71805    | 1715.327  | 1296.424  | NM_000164 | 13040.111 | 11290.6   | AF086129  | 975.492   | 980.113   |
| NM_018391 | 2305.47   | 2910.625  | NM_016217 | 6986.769  | 5804.448  | D79994    | 576.76    | 1196.852  |
| U90917    | 863.11    | 1014.399  | AK025971  | 4285.321  | 3342.292  | NM_01445E | 4638.564  | 4592.006  |
| AK022140  | 2662.581  | 2242.57   | AB033006  | 1792.883  | 1765.969  | AF235049  | 3015.411  | 3449.024  |
| AK023372  | 33025.359 | 24097.705 | AF020314  | 1933.474  | 2444.777  | M33197    | 50925.48  | 64324.359 |
| AF086527  | 685.065   | 506.041   | NM_01633E | 4654.762  | 4231.504  | NM_00736E | 564.69    | 463.259   |
| U21072    | 3079.756  | 3049.425  | AK023936  | 408.046   | 555.149   | NM_01477E | 1310.187  | 1280.109  |
| AK024377  | 920.593   | 866.177   | NM_006457 | 752.313   | 1084.346  | NM_00648C | 18279.604 | 17278.15  |
| AK023557  | 1276.027  | 1156.554  | NM_00368E | 492.342   | 647.171   | NM_00722E | 29035.453 | 22577.594 |
| AK027107  | 912.663   | 1095.675  | NM_00178E | 675.664   | 810.564   | NM_00014E | 728.597   | 846.505   |
| AB040887  | 5899.046  | 4912.643  | NM_002754 | 801.314   | 1078.176  | AF030107  | 1010.392  | 738.554   |
| AK025196  | 2237.259  | 2135.154  | NM_01629E | 3724.896  | 4209.393  | NM_000871 | 583.979   | 376.534   |
| AJ227879  | 790.417   | 802.445   | AL080148  | 3968.199  | 3723.601  | NM_01896E | 1027.408  | 1613.385  |
| AK024800  | 1394.656  | 1233.155  | NM_006731 | 661.289   | 463.974   | AB058740  | 684.015   | 542.657   |
| AK000401  | 2336.213  | 2084.17   | NM_020134 | 789.57    | 618.688   | M33197    | 49629.289 | 49186.059 |
| AF305068  | 1460.896  | 1230.156  | NM_014061 | 604.885   | 426.916   | NM_001154 | 1024.956  | 1079.482  |
| D17231    | 36361.113 | 35793.582 | BC034395  | 653.37    | 524.364   | NM_00181E | 1016.858  | 915.373   |
| AF531295  | 1660.812  | 1302.359  | NM_00034E | 6497.763  | 4641.804  | NM_01693E | 449.547   | 650.502   |
| CY3Cy5    | 7653.674  | 834.411   | NM_00505E | 1101.684  | 925.637   | M33197    | 52320.309 | 63635.543 |
| BF974315  | 9056.941  | 9362.515  | NM_00495C | 2886.563  | 2157.545  | NM_00681E | 15885.95  | 12511.995 |
| T74985    | 1016.651  | 1534.975  | U76362    | 1612.263  | 2087.224  | NM_00166E | 2346.925  | 1950.527  |
| AI652705  | 3183.964  | 2683.052  | NM_01422E | 519.621   | 636.764   | NM_00421E | 3912.487  | 4172.103  |
| AA973397  | 703.859   | 497.128   | AL832292  | 2161.919  | 2045.213  | NM_01653C | 849.862   | 829.28    |
| AA569974  | 9194.328  | 10757.871 | NM_00304E | 5113.882  | 5060.382  | NM_014804 | 849.967   | 1060.863  |
| AA923615  | 497.827   | 530.326   | NM_00306C | 281.113   | 484.19    | NM_01245E | 2493.068  | 2723.322  |
| AA446028  | 2534.787  | 1603.818  | AK021489  | 21495.439 | 26105.953 | NM_00280E | 4707.533  | 5130.812  |
| M80583    | 1094.926  | 723.977   | NM_00452E | 530.085   | 675.667   | M33197    | 55301.668 | 58839.813 |
| AW009565  | 5032.297  | 3384.167  | NM_00389E | 1426.153  | 1568.051  | NM_00171E | 782.033   | 998.323   |
| H18633    | 460.597   | 633.45    | NM_01470E | 1155.982  | 1276.594  | NM_00203C | 450.273   | 1078.76   |
| X07767    | 3483.696  | 3815.688  | NM_00369E | 871.074   | 666.817   | NM_00607E | 355.201   | 312.841   |
| X65293    | 417.194   | 951.263   | NM_00035E | 9714.708  | 8363.016  | NM_006564 | 3238.787  | 2866.497  |
| AF252284  | 2864.679  | 3278.47   | NM_018134 | 10678.443 | 9995.021  | NM_00480E | 922.343   | 1001.269  |



|           |           |           |           |           |           |           |           |           |
|-----------|-----------|-----------|-----------|-----------|-----------|-----------|-----------|-----------|
| BU727558  | 1370.691  | 1520.892  | NM_013247 | 1430.308  | 1701.921  | NM_002983 | 455.655   | 601.455   |
| SR5       | 3691.712  | 4479.323  | NM_006770 | 1202.013  | 1248.598  | NM_000074 | 968.608   | 676.935   |
| SR7       | 4915.808  | 52397.484 | BE394704  | 618.81    | 342.937   | BF434335  | 11645.992 | 9715.635  |
| SR9       | 19801.822 | 6121.149  | NM_004703 | 1173.365  | 960.209   | NM_002993 | 645.238   | 566.843   |
| CY3Cy5    | 11093.287 | 1244.922  | NM_001512 | 556.345   | 366.186   | M33197    | 49241.074 | 59024.063 |
| M33197    | 67659.328 | 65623.914 | NM_014706 | 2759.839  | 2609.339  | NM_003192 | 1476.435  | 1974.03   |
| NM_007264 | 8478.354  | 8044.123  | AK023172  | 476.752   | 348.96    | NM_002828 | 1067.323  | 935.526   |
| NM_016511 | 13915.116 | 10291.556 | AJ001348  | 804.745   | 766.045   | NM_014368 | 1218.457  | 732.046   |
| NM_003558 | 2101.72   | 2268.761  | NM_007255 | 1298.788  | 1735.026  | M33197    | 55793.09  | 59400.535 |
| M55337    | 770.813   | 917.459   | NM_003668 | 3380.13   | 3735.138  | NM_001398 | 13901.823 | 11884.891 |
| M33197    | 70915.43  | 30686.525 | NM_013384 | 36117.223 | 33325.02  | AB050049  | 2757.677  | 2708.313  |
| NM_013228 | 1668.068  | 622.864   | NM_001187 | 671.896   | 197.467   | J05125    | 418.861   | 663.65    |
| NM_016533 | 44885.73  | 26669.115 | NM_018241 | 1610.756  | 1387.323  | NM_001995 | 775.845   | 1080.406  |
| NM_014751 | 2710.088  | 2234.953  | NM_005834 | 2982.575  | 3019.718  | NM_000183 | 7401.533  | 7450.398  |
| NM_002347 | 24271.59  | 19505.357 | NM_018075 | 490.952   | 725.246   | AY004175  | 1187.634  | 1295.654  |
| AB046807  | 1406.037  | 1123.925  | NM_012105 | 964.353   | 1250.482  | M33197    | 55777.25  | 60734.109 |
| NM_003508 | 618.53    | 563.587   | S82470    | 2251.873  | 2293.676  | NM_012327 | 1879.683  | 1815.124  |
| NM_014623 | 6801.542  | 7607.857  | NM_000434 | 846.02    | 889.242   | NM_000904 | 960.479   | 1048.602  |
| NM_007244 | 11193.336 | 10787.875 | AB028982  | 2202.155  | 1973.736  | NM_016048 | 1065.02   | 795.67    |
| M30629    | 4380.431  | 4941.779  | NM_002004 | 3868.436  | 2534.351  | NM_000375 | 3460.313  | 4273.853  |
| BE539299  | 970.918   | 746.606   | NM_005121 | 667.946   | 221.286   | NM_000265 | 1802.105  | 2543.252  |
| AF193873  | 2413.933  | 2687.406  | NM_001643 | 9857.902  | 6547.243  | NM_018848 | 3020.43   | 3292.681  |
| NM_002628 | 1186.165  | 1863.419  | NM_020221 | 794.326   | 333.284   | M33197    | 30341.283 | 23759.346 |
| M23575    | 744.581   | 725.049   | NM_000747 | 1239.001  | 1048.321  | AF279890  | 936.968   | 897.106   |
| AA190729  | 2144.173  | 2834.28   | NM_005415 | 2069.665  | 1605.071  | NM_002238 | 1448.932  | 1267.951  |
| NM_004170 | 780.099   | 976.016   | AL137708  | 567.566   | 455.735   | NM_012068 | 1494.666  | 1141.03   |
| M33197    | 61257.309 | 62262.094 | AJ275973  | 15672.066 | 14345.359 | NM_001688 | 10896.53  | 12090.704 |
| NM_015717 | 1342.519  | 1204.298  | AL834159  | 2636.712  | 2440.414  | NM_016601 | 618.594   | 460.264   |
| NM_015925 | 807.772   | 956.172   | NM_000164 | 17895.273 | 16682.027 | NM_017905 | 4472.181  | 3564.991  |
| NM_003665 | 1211.843  | 873.106   | NM_016217 | 6866.527  | 6472.822  | NM_006981 | 1056.027  | 736.434   |
| AF220217  | 1804.422  | 2629      | AK025971  | 4143.446  | 4261.452  | M33197    | 55814.629 | 54688.824 |
| NM_013323 | 9100.849  | 7356.064  | NM_002618 | 2107.829  | 2355.824  | AK027244  | 1262.876  | 1175.183  |
| NM_014937 | 941.309   | 915.437   | L27479    | 661.646   | 496.691   | L40520    | 2224.006  | 1937.83   |
| NM_017428 | 2753.767  | 1449.628  | NM_001388 | 6628.557  | 5804.18   | NM_002633 | 5831.861  | 5102.811  |
| M33197    | 2979.861  | 1393.55   | X76770    | 3936.493  | 3419.086  | M33197    | 50875.762 | 34974.629 |
| NM_000853 | 2104.926  | 1341.039  | AB037808  | 1185.497  | 1092.375  | NM_002878 | 1576.226  | 1804.439  |
| AF016903  | 14822.843 | 10519.268 | NM_016038 | 2698.039  | 2405.578  | NM_017723 | 1849.797  | 2119.779  |
| NM_015675 | 6179.243  | 5087.846  | AF090911  | 914.74    | 981.47    | AK022922  | 1074.499  | 1037.159  |
| AK022267  | 748.78    | 998.258   | Z36821    | 5149.819  | 4891.472  | NM_006462 | 2601.358  | 2042.945  |
| M33197    | 59798.074 | 65544.156 | AF289485  | 2067.205  | 1536.955  | AK024750  | 1188.576  | 771.372   |
| AF031136  | 42643.441 | 45284.734 | AF130092  | 1270.91   | 885.737   | NM_000400 | 9694.771  | 8464.253  |
| U90878    | 5390.159  | 6038.268  | NM_016095 | 1567.619  | 1161.632  | M33197    | 50635.473 | 47092.098 |
| NM_006597 | 38464.152 | 39046.391 | AK024794  | 801.889   | 870.152   | NM_002613 | 1348.163  | 905.785   |
| NM_012483 | 14291.677 | 14760.145 | NM_019853 | 4812.453  | 3925.018  | NM_004418 | 1273.671  | 1347.587  |
| NM_003498 | 4174.864  | 5050.312  | NM_017992 | 5371.474  | 5405.168  | NM_018650 | 401.028   | 596.175   |
| AB023420  | 11304.153 | 14213.87  | NM_005400 | 498.724   | 334.178   | AK026945  | 10036.535 | 13126.086 |
| NM_007342 | 6604.735  | 5791.018  | BF851643  | 388.301   | 317.265   | NM_001888 | 548.93    | 353.372   |
| NM_005672 | 752.18    | 947.212   | AK023061  | 442.644   | 661.841   | NM_004392 | 766.17    | 613.841   |
| D25217    | 21251.605 | 19752.398 | NM_014061 | 751.344   | 611.599   | M33197    | 57662.637 | 63427.586 |
| NM_006351 | 7934.603  | 5956.07   | BC034395  | 873.833   | 876.711   | NM_001154 | 4288.238  | 4074.905  |
| M33197    | 63944.016 | 66135.75  | NM_002479 | 527.997   | 416.08    | NM_001818 | 1382.46   | 1308.315  |
| NM_004683 | 12015.399 | 10455.693 | NM_000348 | 2465.212  | 2347.452  | NM_016938 | 522.599   | 513.815   |
| AK025263  | 513.727   | 278.785   | NM_005059 | 774.372   | 1265.029  | NM_001993 | 623.186   | 668.891   |

|           |           |           |           |           |           |           |           |           |
|-----------|-----------|-----------|-----------|-----------|-----------|-----------|-----------|-----------|
| M33197    | 63688.066 | 45717.813 | NM_004950 | 3290.346  | 2976.567  | BF575833  | 416.148   | 584.147   |
| NM_001467 | 2031.163  | 1661.857  | NM_000724 | 2762.634  | 2603.457  | NM_015725 | 3971.321  | 4986.474  |
| NM_018066 | 16839.18  | 15152.586 | NM_004477 | 524.367   | 581.729   | R61452    | 727.121   | 894.664   |
| NM_006931 | 2877.729  | 2799.604  | BE728156  | 379.457   | 499.591   | R19938    | 3643.048  | 4964.464  |
| NM_020344 | 4872.406  | 5548.722  | BI762229  | 1297.107  | 1287.344  | N94487    | 6472.995  | 5679.214  |
| AF119868  | 1118.597  | 1567.284  | BG618320  | 5347.385  | 4558.77   | AI886795  | 1056.349  | 1783.642  |
| NM_005050 | 2611.313  | 3001.586  | Y00787    | 1122.628  | 1073.118  | D10495    | 1883.531  | 2185.609  |
| M33197    | 57762.25  | 64447.215 | NM_007276 | 1545.364  | 1305.734  | BF344679  | 1240.543  | 1568.489  |
| NM_018976 | 10775.37  | 13192.252 | N34462    | 2685.745  | 2577.467  | M36634    | 569.987   | 425.493   |
| NM_003355 | 7319.161  | 8851.532  | AI658778  | 1745.394  | 1740.715  | M14156    | 2765.653  | 2217.838  |
| NM_005074 | 1108.355  | 1737.779  | L19067    | 2145.739  | 2128.708  | U87939    | 605.294   | 448.461   |
| NM_013272 | 930.281   | 1274.823  | Z48482    | 824.786   | 664.99    | U86961    | 616.503   | 647.768   |
| NM_004555 | 2470.075  | 1995.591  | W60413    | 810.824   | 630.726   | AK094237  | 849.407   | 1332.612  |
| AL079296  | 1018.273  | 934.414   | BI823365  | 1034.391  | 683.354   | L07592    | 695.009   | 839.778   |
| NM_014770 | 1078.371  | 826.586   | X06318    | 3952.274  | 3913.676  | BF434335  | 30218.172 | 23642.574 |
| AB037737  | 1302.009  | 2347.94   | NM_004703 | 1360.211  | 1395.564  | NM_002993 | 1078.069  | 1040.592  |
| M33197    | 63667.371 | 68030.391 | NM_001512 | 806.436   | 850.31    | AK026946  | 1384.814  | 2303.963  |
| AK023103  | 2739.165  | 2809.409  | NM_014706 | 4017.026  | 4547.81   | M33197    | 49716.313 | 57677.512 |
| NM_017855 | 3135.331  | 2512.583  | AK023172  | 264.905   | 483.593   | NM_003192 | 3976.629  | 4564.17   |
| NM_019055 | 53154.797 | 24441.531 | AF139768  | 341.251   | 454.802   | NM_018445 | 2529.12   | 2458.768  |
| NM_013347 | 415.733   | 260.782   | AJ001348  | 824.538   | 973.935   | AF086129  | 937.275   | 909.277   |
| D80008    | 1529.395  | 818.919   | NM_014007 | 1249.634  | 1239.175  | D79994    | 685.786   | 754.551   |
| X56789    | 940.56    | 496.644   | NM_000207 | 623.335   | 662.023   | NM_014455 | 3140.048  | 3036.141  |
| AK001069  | 28956.244 | 18524.217 | NM_006314 | 5308.523  | 5188.661  | L10333    | 1301.072  | 3630.799  |
| M33197    | 58121.117 | 62741.254 | NM_001782 | 602.671   | 629.777   | AF235049  | 2190.646  | 2253.787  |
| NM_000935 | 1256.083  | 1190.437  | NM_000797 | 2139.388  | 1793.752  | M33197    | 49593.027 | 61709.563 |
| NM_000355 | 9186.479  | 11139.084 | NM_014927 | 194.964   | 363.966   | NM_007365 | 422.358   | 861.639   |
| NM_006395 | 5314.112  | 7871.304  | NM_016293 | 6907.83   | 7331.204  | NM_014776 | 1227.923  | 1293.458  |
| NM_014306 | 5438.648  | 7040.129  | AF217525  | 472.416   | 264.821   | NM_006480 | 13240.071 | 13784.114 |
| NM_001084 | 5513.501  | 7952.09   | AL080148  | 7971.956  | 7160.822  | NM_007223 | 24546.748 | 22355.148 |
| NM_015983 | 2567.558  | 3071.123  | NM_006731 | 588.558   | 694.918   | NM_000145 | 668.572   | 639.169   |
| NM_018622 | 5315.325  | 6916.532  | NM_018487 | 522.185   | 334.608   | AF030107  | 791.669   | 698.813   |
| M33197    | 63821.773 | 67400.219 | NM_020134 | 1170.253  | 1145.609  | M33197    | 49418.875 | 43927.98  |
| NM_005867 | 8020.884  | 9937.975  | NM_020221 | 904.249   | 966.497   | NM_018965 | 860.123   | 1021.61   |
| AK026031  | 7597.954  | 9785.077  | NM_000747 | 1590.134  | 1707.351  | AF086924  | 33801.367 | 33857.301 |
| NM_016465 | 5544.617  | 6527.544  | NM_005415 | 2511.108  | 2846.102  | AB058740  | 3073.023  | 2442.248  |
| BE539299  | 1212.821  | 1750.785  | AL137708  | 391.177   | 133.936   | AF279890  | 3382.397  | 3573.312  |
| AF193873  | 2558.888  | 2364.264  | AJ275973  | 15940.699 | 16427.449 | NM_002236 | 1398.459  | 1222.345  |
| NM_002625 | 1363.036  | 1229.444  | NM_006493 | 1866.842  | 2161.78   | NM_012065 | 3780.538  | 3725.07   |
| M23575    | 589.751   | 794.406   | NM_014225 | 835.172   | 1051.052  | NM_001685 | 32940.754 | 27694.836 |
| AA190729  | 2943.841  | 2834.753  | NM_003895 | 546.99    | 690.898   | NM_016601 | 1131.755  | 1161.726  |
| BF974315  | 9064.608  | 8354.378  | NM_004317 | 3390.272  | 3695.389  | NM_017905 | 9845.245  | 8804.697  |
| T74985    | 901.373   | 1203.122  | NM_014645 | 1360.071  | 1292.293  | M33197    | 49413.672 | 57633.895 |
| AI652705  | 2904.11   | 1229.795  | NM_014705 | 1842.264  | 1618.211  | NM_006815 | 14867.191 | 14128.865 |
| AA973397  | 523.075   | 328.902   | NM_003693 | 958.498   | 943.904   | NM_001663 | 2042.805  | 2068.664  |
| AA569974  | 6426.94   | 4181.221  | NM_000356 | 12301.312 | 11233.82  | NM_004215 | 4019.881  | 5097.762  |
| AA446028  | 2396.119  | 1899.734  | NM_018134 | 16067.992 | 14670.746 | NM_016530 | 926.168   | 1232.549  |
| M80583    | 1345.058  | 1374.371  | NM_013247 | 2358.918  | 2469.514  | NM_014804 | 574.6     | 437.5     |
| AW009565  | 5581.828  | 5374.022  | NM_006770 | 1452.842  | 1371.115  | NM_012455 | 3657.001  | 4074.511  |
| AW451878  | 589.92    | 817.056   | BE394704  | 542.881   | 615.71    | NM_002806 | 3694.503  | 3549.596  |
| AI570478  | 661.806   | 397.095   | AK024794  | 1112.375  | 1419.473  | M33197    | 48102.02  | 49753.781 |
| H18633    | 856.858   | 592.61    | NM_019853 | 5035.852  | 6757.835  | NM_001716 | 685.432   | 721.654   |
| X07767    | 3450.144  | 4251.271  | NM_017992 | 4980.711  | 6536.277  | NM_006564 | 2018.493  | 1880.678  |

|           |           |           |           |           |           |           |           |           |
|-----------|-----------|-----------|-----------|-----------|-----------|-----------|-----------|-----------|
| AF252284  | 2731.951  | 3377.691  | NM_005400 | 332.772   | 472.975   | NM_004802 | 709.311   | 570.978   |
| BU727558  | 1084.524  | 1533.634  | AK023061  | 583.908   | 610.256   | M33197    | 47495.457 | 56429.242 |
| M33197    | 9608.131  | 11137.741 | NM_007255 | 1621.521  | 1803.517  | NM_000074 | 3359.162  | 2586.209  |
| AL050139  | 3682.93   | 4444.174  | NM_003668 | 6445.643  | 7148.244  | M33197    | 55331.703 | 54455.008 |
| U90878    | 5369.585  | 5512.291  | NM_013384 | 56757.488 | 49346.141 | NM_002613 | 2533.422  | 2102.844  |
| NM_006597 | 51009.141 | 39991.789 | NM_001187 | 864.374   | 892.9     | NM_004419 | 2956.493  | 2882.334  |
| NM_012483 | 11448.93  | 12034.174 | NM_012105 | 839.483   | 843.681   | U47635    | 1507.194  | 1580.256  |
| NM_003498 | 4540.383  | 4776.246  | NM_000197 | 238.648   | 395.917   | NM_018650 | 1771.346  | 1608.791  |
| AB023420  | 13936.38  | 16118.949 | S82470    | 2068.73   | 1927.422  | AK026945  | 18004.713 | 17131.26  |
| M33197    | 64038.188 | 67345.648 | AB028982  | 1232.313  | 1000.831  | NM_002828 | 1342.543  | 868.961   |
| NM_007264 | 9011.591  | 8300.711  | NM_002004 | 2942.944  | 2374.287  | NM_014369 | 1146.646  | 590.441   |
| NM_016511 | 13978.163 | 5565.686  | NM_001643 | 15700.228 | 13420.663 | M33197    | 55359.793 | 52247.215 |
| NM_003559 | 1637.547  | 863.929   | NM_019096 | 3065.12   | 2523.218  | NM_001398 | 9001.239  | 5061.918  |
| M55337    | 606.09    | 430.449   | NM_014725 | 2260.085  | 2696.469  | AB050049  | 1670.089  | 1388.706  |
| M33197    | 60072.598 | 63981.453 | NM_006892 | 1860.877  | 2171.239  | NM_001995 | 697.288   | 676.88    |
| NM_013229 | 1652.438  | 1818.985  | NM_019117 | 494.476   | 582.811   | NM_000183 | 5776.513  | 7244.618  |
| NM_016533 | 42459.652 | 41754.906 | NM_017658 | 4234.297  | 4091.62   | AY004175  | 608.272   | 810.932   |
| NM_014751 | 2473.438  | 3267.618  | NM_018679 | 7740.541  | 6884.021  | M33197    | 50807.695 | 50870.652 |
| NM_002347 | 23429.219 | 26721.988 | NM_016643 | 749.186   | 827.829   | NM_012327 | 1324.781  | 1387.108  |
| AB046807  | 1253.889  | 1325.354  | NM_006779 | 3047.72   | 2820.476  | NM_016048 | 586.874   | 548.155   |
| NM_018176 | 506.637   | 597.877   | NM_016217 | 6514.824  | 6609.242  | NM_000375 | 2640.993  | 2167.12   |
| NM_003508 | 373.822   | 713.991   | NM_002193 | 1098.909  | 725.249   | NM_000265 | 1382.974  | 1698.75   |
| M33197    | 60596.57  | 67799.063 | NM_001388 | 5201.944  | 4191.542  | NM_018849 | 2236.029  | 2813.202  |
| NM_014623 | 6751.179  | 8814.417  | X76770    | 2870.075  | 2346.211  | M33197    | 40446.199 | 34240.301 |
| NM_007244 | 6701.237  | 7958.979  | AB037808  | 1096.603  | 855.923   | AF015910  | 34517.816 | 22758.379 |
| M30629    | 3600.058  | 4113.441  | NM_016038 | 2606.767  | 2991.513  | BC009993  | 1378.719  | 710.741   |
| M33197    | 57478.207 | 60833.676 | Z36821    | 2736.958  | 2536.346  | M33197    | 50186.531 | 39292.578 |
| NM_018976 | 13663.272 | 12916.312 | AF289485  | 1780.4    | 1803.49   | NM_016824 | 735.714   | 462.666   |
| NM_003355 | 10322.967 | 10022.026 | AF130092  | 1107.44   | 889.478   | NM_003031 | 1955.765  | 1379.182  |
| NM_005074 | 1114.624  | 1432.801  | NM_016095 | 2567.853  | 1969.555  | NM_007170 | 528.103   | 337.177   |
| NM_013272 | 1309.291  | 1135.893  | AF300612  | 40753.176 | 40384.641 | NM_003008 | 928.592   | 549.044   |
| NM_004170 | 1012.992  | 624.144   | AB014557  | 1199.533  | 1209.447  | M33197    | 31367.873 | 25847.121 |
| NM_018057 | 1463.585  | 1133.633  | NM_005578 | 3358.931  | 2209.272  | L40520    | 1299.76   | 1047.433  |
| M33197    | 66722.219 | 42940.461 | NM_003653 | 3058.258  | 3124.834  | NM_002633 | 3777.87   | 3686.379  |
| NM_015717 | 1115.211  | 661.748   | NM_018457 | 18842.979 | 22607.186 | M33197    | 43512.242 | 42049.082 |
| NM_015925 | 780.476   | 420.256   | NM_002953 | 9159.662  | 11115.588 | NM_002878 | 1646.504  | 1909.965  |
| NM_003665 | 1102.437  | 963.89    | NM_002187 | 1028.453  | 931.375   | NM_017723 | 1247.69   | 1274.932  |
| AF220217  | 1533.56   | 1115.58   | NM_014246 | 4730.485  | 5693.332  | AK022922  | 648.627   | 722.043   |
| NM_013323 | 11711.021 | 8096.499  | NM_014859 | 879.785   | 968.34    | NM_006462 | 2045.525  | 2209.481  |
| NM_014937 | 580.258   | 568.068   | AF311912  | 733.111   | 777.134   | AK024750  | 1369.878  | 1236.269  |
| NM_017426 | 3083.049  | 4363.563  | NM_001116 | 925.639   | 715.057   | NM_000400 | 9206.996  | 10098.277 |
| M33197    | 4336.438  | 4823.268  | BC035395  | 5865.64   | 5556.026  | NM_015885 | 1810.517  | 1154.281  |
| NM_000853 | 2074.726  | 2978.658  | NM_001703 | 9217.923  | 8009.507  | NM_015889 | 39831.828 | 23188.658 |
| AF016903  | 15143.585 | 16257.616 | NM_020126 | 2878.24   | 3059.011  | M33197    | 46185.137 | 30570.869 |
| NM_015675 | 5228.862  | 5013.688  | NM_013982 | 4553.673  | 4195.316  | NM_004276 | 1266.403  | 820.792   |
| AK022267  | 870.142   | 1175.578  | NM_005049 | 1453.691  | 1398.183  | NM_002332 | 5230.849  | 2903.733  |
| NM_016040 | 3351.512  | 3616.016  | NM_003882 | 666.678   | 733.425   | NM_002859 | 1079.248  | 931.047   |
| M33197    | 64621.746 | 75796.742 | NM_004630 | 5965.324  | 6131.715  | NM_005246 | 1946.35   | 1486.443  |
| AF031136  | 37936.383 | 42704.551 | AK023001  | 2869.165  | 3177.916  | AF161339  | 2037.879  | 1782.076  |
| NM_015983 | 2082.726  | 1902.904  | NM_014826 | 5783.797  | 6870.82   | M33197    | 50187.703 | 40592.285 |
| NM_018622 | 7312.665  | 6511.545  | AF201947  | 444.319   | 638.866   | AK000354  | 1354.541  | 1592.329  |
| M33197    | 60264.063 | 63304.758 | U01147    | 1796.052  | 1774.52   | M33197    | 47312.195 | 50909.535 |
| NM_005867 | 9900.406  | 9458.159  | NM_004040 | 3868.247  | 3255.148  | AK024474  | 1127.57   | 1464.08   |

|           |           |           |           |           |           |           |           |           |
|-----------|-----------|-----------|-----------|-----------|-----------|-----------|-----------|-----------|
| AK026031  | 10125.412 | 10141.283 | NM_006116 | 916.986   | 892.717   | NM_017901 | 606.22    | 789.556   |
| NM_01646E | 6403.094  | 6362.932  | NM_00545E | 904.109   | 964.772   | NM_00427E | 503.575   | 728.176   |
| NM_00734E | 6929.886  | 8091.872  | NM_003587 | 15973.16  | 15110.523 | NM_00035E | 1147.107  | 1014.044  |
| NM_00567E | 1143.143  | 1291.975  | X90978    | 667.526   | 587.258   | NM_00193C | 4120.92   | 3231.654  |
| D25217    | 16001.512 | 5838.023  | BF219403  | 19230.332 | 19726.494 | AK025270  | 553.084   | 346.362   |
| NM_006351 | 6347.943  | 2945.719  | NM_016119 | 835.692   | 1114.937  | NM_001564 | 1813.462  | 1570.89   |
| M33197    | 56639.738 | 31651.643 | AK075450  | 1293.454  | 1601.786  | M33197    | 47651.73  | 33899.984 |
| NM_00468E | 12962.36  | 8400.082  | AF178983  | 4391.803  | 6197.035  | AF263537  | 14349.331 | 12335.188 |
| M33197    | 58638.883 | 62306.41  | NM_001324 | 3906.589  | 4999.045  | NM_01589E | 2902.143  | 3877.988  |
| NM_001467 | 2199.119  | 2718.662  | AB037795  | 1761.448  | 2815.86   | M33197    | 48356.703 | 51016.375 |
| NM_01806E | 11867.992 | 15293.333 | D43949    | 2797.604  | 2875.327  | NM_013374 | 10954.816 | 13447.208 |
| NM_006931 | 2493.121  | 3050.113  | AK022975  | 674.233   | 1005.617  | NM_00325E | 2581.011  | 2713.818  |
| NM_020344 | 4440.249  | 5410.989  | NM_015344 | 1813.504  | 2635.889  | NM_016561 | 2991.974  | 3188.956  |
| AF119868  | 1159.514  | 1779.027  | NM_00428E | 648.845   | 935.274   | NM_00122E | 682.06    | 708.117   |
| NM_00505C | 2672.883  | 3451.894  | AL122055  | 4768.783  | 5758.866  | NM_01424E | 6535.041  | 7163.447  |
| AF252284  | 3730.715  | 3695.233  | NM_00513E | 13868.98  | 13964.479 | M33197    | 44133.469 | 55221.98  |
| BU727558  | 1071.376  | 1261.466  | X07695    | 322.997   | 671.78    | AL110226  | 48089.242 | 64805.531 |
| M33197    | 12440.955 | 14351.405 | D87458    | 1020.975  | 856.092   | M33197    | 727.696   | 589.389   |
| AL050139  | 4410.175  | 4130.936  | AK021750  | 1619.043  | 1796.533  | NM_004921 | 582.582   | 501.834   |
| NM_00455E | 2680.334  | 1975.956  | NM_00362E | 954.145   | 1049.406  | L09097    | 848.576   | 918.927   |
| AL079296  | 739.972   | 528.186   | AK023594  | 2976.945  | 3044.794  | AK024809  | 351.623   | 377.469   |
| NM_01477C | 1132.139  | 659.412   | AB032989  | 318.507   | 458.018   | NM_00030E | 1859.728  | 2671.002  |
| AB037737  | 826.648   | 725.557   | AB010099  | 7033.056  | 6412.197  | X69636    | 2154.596  | 1899.805  |
| M33197    | 60602.84  | 62902.754 | AB039920  | 2468.863  | 2414.639  | M33197    | 51692.117 | 50347.758 |
| AK023103  | 2443.177  | 2568.45   | AB046782  | 1321.782  | 2012.127  | NM_00417E | 9219.403  | 9767.546  |
| NM_01785E | 2688.217  | 2821.909  | NM_00419C | 11091.13  | 12957.636 | NM_013974 | 1352.087  | 1469.135  |
| NM_01905E | 55452.816 | 64828.645 | NM_01427E | 3181.032  | 3489.53   | NM_017547 | 678.942   | 429.412   |
| NM_013347 | 588.422   | 542.933   | NM_00040E | 2997.35   | 3100.994  | NM_00398E | 1801.208  | 1537.31   |
| D80008    | 1494.47   | 1623.445  | AF208005  | 753.937   | 779.624   | AK023708  | 646.329   | 506.985   |
| X56789    | 744.755   | 1010.565  | NM_002231 | 5960.132  | 6390.431  | NM_00210E | 678.929   | 685.731   |
| AK001069  | 22976.68  | 24807.875 | NM_020474 | 11254.281 | 11757.765 | M33197    | 42786.164 | 39343.559 |
| M33197    | 63337.133 | 70509.852 | NM_00264E | 1968.038  | 2847.148  | NM_018464 | 4933.56   | 4851.137  |
| NM_00093E | 1288.849  | 1634.037  | NM_017807 | 2395.618  | 2910.264  | D43948    | 528.027   | 446.723   |
| NM_00035E | 6052.938  | 7198.171  | NM_01474E | 622.515   | 701.712   | NM_01231C | 990.486   | 1084.849  |
| NM_00639E | 5403.344  | 7111.962  | NM_00046E | 4474.17   | 4940.905  | BF382116  | 3164.08   | 3030.952  |
| NM_01430E | 4743.793  | 6276.232  | NM_00333E | 4900.91   | 7148.563  | NM_00319E | 3643.828  | 3826.176  |
| NM_001084 | 5127.709  | 6440.841  | NM_00580E | 7467.124  | 7848.326  | AK055825  | 48735.434 | 64065.438 |
| NM_00350E | 696.909   | 704.684   | NM_004181 | 638.441   | 355.956   | M33197    | 46028.285 | 58325.957 |
| M33197    | 62236.066 | 65485.77  | NM_00390C | 6905.733  | 6642.984  | NM_005197 | 3278.099  | 3418.67   |
| NM_01462E | 9136.416  | 8722.021  | NM_003337 | 1555.131  | 1449.505  | AL137421  | 33547.5   | 28847.834 |
| NM_007244 | 8929.813  | 7664.551  | AF298152  | 2433.32   | 1602.882  | M33197    | 50554.383 | 56196.641 |
| M30629    | 5100.383  | 4793.646  | AF117233  | 2186.204  | 2157.489  | NM_007241 | 536.997   | 739.36    |
| BE539299  | 1316.792  | 1222.452  | NM_01584E | 452.86    | 486.69    | NM_000124 | 756.613   | 413.328   |
| AF193873  | 2330.74   | 1191.705  | NM_01601E | 2033.927  | 2478.694  | NM_01799E | 1896.031  | 1198.079  |
| NM_00262E | 1155.84   | 708.295   | M94362    | 7311.552  | 6716.238  | NM_014517 | 1108.052  | 606.691   |
| M23575    | 418.27    | 351.628   | AK024707  | 830.668   | 1082.664  | NM_00546E | 635.003   | 150.007   |
| AA190729  | 2395.35   | 1611.615  | NM_01425E | 759.13    | 710.272   | NM_00426E | 755.7     | 414.709   |
| BF974315  | 6534.042  | 4951.613  | AK022909  | 728.807   | 822.512   | NM_00340E | 837.959   | 527.14    |
| T74985    | 801.882   | 613.391   | NM_00653C | 3011.192  | 3163.122  | M33197    | 25292.693 | 17228.51  |
| AI652705  | 3227.394  | 2893.829  | AB033024  | 1643.815  | 1565.4    | D31765    | 763.056   | 711.184   |
| AA973397  | 610.133   | 984.106   | NM_01894E | 1896.45   | 2433.62   | NM_006107 | 2580.325  | 2298.829  |
| AA569974  | 6139.07   | 7583.65   | NM_005531 | 590.247   | 474.465   | NM_00417E | 497.917   | 637.403   |
| AA446028  | 1969.749  | 2479.474  | NM_004387 | 434.243   | 297.35    | AF288288  | 6911.612  | 6878.951  |

|           |           |           |           |           |           |           |           |           |
|-----------|-----------|-----------|-----------|-----------|-----------|-----------|-----------|-----------|
| M80583    | 1251.676  | 1829.711  | AF217226  | 3340.475  | 4436.948  | NM_01764E | 1719.914  | 1478.964  |
| AW009565  | 4871.262  | 6855.342  | NM_00576C | 8593.179  | 7923.834  | AL050368  | 492.852   | 417.135   |
| H18633    | 268.158   | 394.903   | NM_007265 | 2303.099  | 2698.253  | NM_00309Z | 3361.447  | 3002.629  |
| X07767    | 3233.836  | 4607.957  | AK023639  | 3870.036  | 4093.066  | M33197    | 43281.844 | 39863.922 |
| X65293    | 387.55    | 517.762   | AL137700  | 371.174   | 650.609   | NM_005861 | 804.824   | 810.334   |
| AF016903  | 13192.3   | 9983.303  | NM_004904 | 756.119   | 822.051   | NM_01884E | 954.597   | 1223.406  |
| NM_01567E | 5764.632  | 5555.988  | NM_003083 | 1623.947  | 1732.352  | NM_00376C | 2470.324  | 2327.842  |
| AK022267  | 999.578   | 1679.266  | NM_006789 | 3767.546  | 3622.318  | AB037759  | 456.558   | 409.497   |
| NM_01604C | 4402.905  | 4051.903  | NM_000982 | 3010.005  | 3321.302  | AK025998  | 1008.903  | 1024.383  |
| M33197    | 59109.227 | 65205.07  | NM_016093 | 60972.789 | 50569.875 | AL080080  | 1764.089  | 1645.656  |
| AF031136  | 43727.492 | 32199.563 | NM_012423 | 49975.957 | 43940.66  | NM_01848Z | 960.672   | 472.696   |
| U90878    | 5152.153  | 3676.009  | AK026367  | 10667.32  | 9239.215  | NM_01788C | 807.212   | 606.58    |
| NM_006597 | 34003.434 | 8142.252  | AK026491  | 4998.592  | 4369.347  | AF090945  | 1973.035  | 984.099   |
| NM_012483 | 9225.274  | 5269.074  | NM_001015 | 64715.117 | 54476.781 | M33197    | 45986.074 | 26168.018 |
| NM_00349E | 3911.618  | 2168.163  | AL110170  | 39787.117 | 42018.027 | NM_001161 | 2626.322  | 1497.823  |
| AB023420  | 11146.143 | 7552.636  | AK021747  | 512.87    | 349.341   | NM_00404A | 3808.405  | 2049.369  |
| NM_016511 | 13723.447 | 13488.534 | AK025640  | 4297.255  | 4684.745  | NM_000221 | 14537.933 | 7325.839  |
| NM_00355E | 1494.466  | 2067.657  | NM_019101 | 682.821   | 915.069   | H75678    | 512.72    | 260.844   |
| NM_00218E | 418.99    | 665.789   | NM_00092C | 1368.711  | 1717.698  | NM_00645Z | 3316.394  | 1561.055  |
| M55337    | 858.93    | 844.147   | NM_02037E | 1017.693  | 1249.749  | AB002359  | 1543.173  | 759.261   |
| M33197    | 59532.164 | 65948.516 | NM_016049 | 5928.702  | 6922.964  | M33197    | 1692.735  | 1708.629  |
| NM_01322E | 1305.229  | 2083.298  | NM_013311 | 5667.202  | 6069.548  | NM_00219E | 650.269   | 805.933   |
| NM_01653Z | 47514.012 | 51843.531 | NM_000291 | 54545.355 | 51644.152 | AK025905  | 563.817   | 384.746   |
| NM_014751 | 2651.863  | 3306.7    | NM_018081 | 2487.244  | 2552.589  | BE958072  | 466.872   | 470.084   |
| NM_002347 | 22907.367 | 27184.668 | NM_014649 | 2858.569  | 3680.344  | M33197    | 28901.938 | 32096.852 |
| AB046807  | 1070.98   | 1369.173  | AL117488  | 1699.653  | 1814.647  | NM_01448C | 769.353   | 718.923   |
| NM_01806E | 15386.653 | 15718.182 | NM_01224C | 1490.894  | 1345.153  | NM_01416E | 1582.673  | 1409.564  |
| NM_006931 | 2890.528  | 2863.861  | NM_01900E | 2370.166  | 2885.492  | NM_00496A | 4092.305  | 5446.377  |
| NM_02034A | 5546.538  | 5369.054  | NM_004739 | 4317.033  | 4330.712  | AL117497  | 1015.84   | 513       |
| AF119868  | 1089.664  | 866.096   | AV752216  | 654.045   | 608.132   | AF075016  | 535.864   | 267.51    |
| NM_00505C | 3745.922  | 3249.824  | NM_005341 | 567.333   | 736.514   | AF147437  | 1123.33   | 581.282   |
| M33197    | 56394.363 | 64637.367 | AF181999  | 867.863   | 787.705   | M33197    | 48068.641 | 34055.785 |
| NM_01897E | 11149.843 | 5508.75   | NM_00193A | 1889.352  | 2118.814  | AL137269  | 1248.725  | 795.65    |
| NM_00335E | 8142.655  | 4786.628  | AB011090  | 1253.504  | 1106.181  | AK021983  | 899.86    | 571.324   |
| NM_00507A | 714.992   | 694.406   | NM_000209 | 581.933   | 867.246   | Y11681    | 2193.658  | 1217.709  |
| NM_01327Z | 1010.387  | 784.46    | NM_01868Z | 2616.826  | 2643.601  | AL110135  | 6384.682  | 2718.836  |
| NM_00417C | 656.191   | 608.569   | NM_00654E | 9986.288  | 9748.371  | NM_00699Z | 4310.836  | 4476.47   |
| NM_018057 | 948.143   | 776.854   | NM_01653A | 590.991   | 666.726   | M33197    | 45263.988 | 42840.227 |
| M33197    | 58169.113 | 63005.344 | AB021923  | 615.81    | 551.591   | AF086429  | 755.813   | 648.212   |
| NM_015717 | 860.474   | 1522.159  | AK024240  | 675.158   | 889.662   | M33197    | 38687.449 | 49647.949 |
| NM_01592E | 884.583   | 1442.812  | NM_01645E | 31516.365 | 37702.309 | AK026512  | 1481.408  | 860.528   |
| NM_00366E | 961.567   | 1358.45   | AK022677  | 1625.847  | 2300.27   | M33197    | 50885.219 | 40296.84  |
| AF220217  | 1429.501  | 2090.785  | AF035288  | 385.555   | 459.442   | AF144233  | 2171.739  | 1498.681  |
| NM_01332Z | 8397.445  | 8806.991  | AL137645  | 7120.32   | 6911.36   | AF085975  | 1474.343  | 1780.752  |
| NM_014937 | 481.55    | 727.133   | AK026141  | 1082.991  | 927.258   | M33197    | 41717.848 | 33623.629 |
| NM_01742E | 2754.958  | 3075.878  | AK02289A  | 1618.844  | 1726.489  | AL137390  | 1036.662  | 1353.1    |
| M33197    | 3973.154  | 4987.482  | AF217993  | 4259.076  | 4665.975  | AL137611  | 1057.083  | 1043.393  |
| NM_00085Z | 2285.425  | 2731.662  | AF131823  | 615.771   | 784.199   | AL359566  | 9208.228  | 8060.342  |
| M33197    | 58631.648 | 63684.086 | AK02632A  | 6369.156  | 6966.499  | AL137427  | 1812.522  | 1364.05   |
| NM_00093E | 1616.168  | 1646.421  | AK025253  | 727.369   | 1017.255  | AL157460  | 1364.488  | 1570.767  |
| NM_00035E | 5486.788  | 5465.916  | AF131777  | 225.38    | 497.747   | M33197    | 40079.375 | 35671.254 |
| NM_00639E | 7937.186  | 9324.261  | AK02500A  | 2037.707  | 2116.416  | AK026718  | 521.52    | 861.705   |
| NM_01430E | 7960.932  | 9092.409  | AL136818  | 967.613   | 1094.927  | AK022141  | 607.459   | 563.29    |

|           |           |           |           |           |           |            |           |           |
|-----------|-----------|-----------|-----------|-----------|-----------|------------|-----------|-----------|
| NM_001084 | 6535.65   | 6729.277  | AF146798  | 1229.592  | 1346.122  | AK023942   | 18765.119 | 20044.395 |
| NM_015983 | 2737.826  | 2515.254  | AK022049  | 439.19    | 419.268   | M33197     | 45520.305 | 45516.477 |
| NM_018622 | 4932.436  | 1577.686  | AF086517  | 3225.677  | 3643.729  | NM_020351  | 884.84    | 1446.026  |
| M33197    | 69389.305 | 50124.449 | AK025740  | 6076.335  | 6371.607  | AK027207   | 1581.644  | 2366.498  |
| NM_005867 | 8534.375  | 5891.477  | AK000311  | 1338.778  | 1568.554  | AJ227892   | 1581.544  | 2026.345  |
| AK026031  | 7817.792  | 5125.096  | AK025346  | 42201.773 | 50417.32  | M33197     | 28649.273 | 21557.77  |
| NM_016468 | 5673.393  | 3836.367  | AK022583  | 2371.049  | 3385.434  | AK022013   | 557.722   | 521.003   |
| NM_007342 | 5587.747  | 4846.361  | AL137534  | 60546.949 | 46741.137 | AK022155   | 3571.572  | 4196.606  |
| NM_005672 | 940.858   | 835.94    | AF052121  | 830.162   | 617.551   | AK022288   | 1113.59   | 1699.642  |
| D25217    | 16962.869 | 15570.912 | AL359062  | 1212.625  | 1316.939  | AK021916   | 1071.364  | 627.527   |
| NM_006351 | 4665.869  | 4869.189  | AK026869  | 995.438   | 1077.727  | AK024201   | 1527.724  | 1145.092  |
| M33197    | 58463.969 | 64131.188 | AK022192  | 480.414   | 669.551   | AK022174   | 768.133   | 509.063   |
| NM_004683 | 8876.795  | 8800.384  | NM_019099 | 35600.543 | 40706.938 | M33197     | 42364.656 | 52851.785 |
| AK025263  | 433.268   | 922.842   | Y12020    | 10661.248 | 9847.538  | AK023891   | 1226.842  | 399.942   |
| M33197    | 57884.32  | 63429.527 | AJ001905  | 727.544   | 446.74    | AK026878   | 1486.207  | 835.096   |
| NM_001467 | 2356.504  | 3195.156  | U17635    | 1342.433  | 1333.294  | AK021589   | 560.135   | 649.248   |
| NM_004688 | 14350.933 | 14861.548 | AL049930  | 558.255   | 775.927   | D17152     | 4006.24   | 4792.222  |
| AB037725  | 1499.927  | 1905.763  | Z83946    | 664.322   | 724.835   | AK024464   | 5923.995  | 7122.838  |
| M33197    | 53562.566 | 55216.02  | D55638    | 690.151   | 590.902   | AK023638   | 406.131   | 834.465   |
| NM_017718 | 597.603   | 681.516   | L23870    | 776.575   | 809.486   | M33197     | 474.227   | 640.451   |
| NM_004860 | 3325.234  | 3779.169  | D55644    | 546.857   | 593.317   | AK025423   | 639.876   | 1103.286  |
| AF217190  | 7115.178  | 6383.069  | Z97017    | 447.884   | 587.151   | unknown (S | 1223.248  | 854.051   |
| AB028981  | 20988.168 | 6127.826  | D16951    | 564.052   | 588.914   | unknown (S | 1379.5    | 472.666   |
| NM_006800 | 2156.704  | 896.302   | L19362    | 610.393   | 562.801   | M33197     | 42237.102 | 38001.375 |
| NM_002729 | 6792.052  | 4553.029  | L33807    | 1141.536  | 1435.527  | AK021682   | 7934.351  | 6711.679  |
| M33197    | 11153.354 | 5959.082  | AB007975  | 504.189   | 581.405   | AJ012500   | 928.671   | 1312.501  |
| AL050139  | 3760.501  | 2898.545  | AK021821  | 572.216   | 521.483   | U00944     | 437.979   | 486.412   |
| NM_004558 | 2570.962  | 2158.105  | AK000772  | 661.262   | 1686.212  | BC035058   | 868.462   | 1419.844  |
| AL079296  | 882.167   | 942.458   | AL049328  | 792.449   | 949.272   | X57566     | 1279.407  | 1050.034  |
| NM_014770 | 1269.83   | 1077.521  | NM_017932 | 633.009   | 358.458   | M33197     | 44021.16  | 41610.352 |
| AB037737  | 975.172   | 1585.385  | AK000910  | 1540.844  | 1483.313  | NM_018616  | 1088.56   | 1191.294  |
| M33197    | 57805.125 | 66078.633 | AF252280  | 6294.477  | 5764.145  | AK023809   | 523.742   | 548.008   |
| AK023103  | 2426.105  | 2952.201  | AK000107  | 414.932   | 420.012   | M87943     | 55823.59  | 60104.859 |
| NM_017858 | 2613.126  | 3275.099  | AK000951  | 632.687   | 783.775   | AL360137   | 407.044   | 454.538   |
| NM_019058 | 54723.496 | 61794.047 | AK024518  | 10229.596 | 11451.309 | U28131     | 29904.795 | 24763.715 |
| NM_013347 | 454.547   | 839.082   | AK024586  | 553.366   | 582.863   | AY007106   | 1467.236  | 1347.687  |
| D80008    | 1581.622  | 1899.676  | AK025017  | 2300.944  | 2258.091  | M33197     | 47108.922 | 51222.82  |
| X56789    | 1133.516  | 1509.173  | AK024534  | 636.044   | 678.151   | AF048848   | 462.878   | 752.081   |
| AK001069  | 39467.707 | 41337.016 | AK024914  | 3173.034  | 3491.971  | AL049299   | 491.973   | 811.659   |
| NM_004132 | 1292.685  | 1628.317  | BC030949  | 1443.296  | 2160.207  | NM_006088  | 24908.729 | 32613.197 |
| NM_014844 | 2286.465  | 2335.89   | AF116615  | 1360.761  | 1222.673  | AK023858   | 1279.088  | 1245.816  |
| M33197    | 56025.438 | 57737.586 | U17636    | 40645.016 | 37452.727 | M33197     | 33624.191 | 34397.262 |
| NM_018492 | 4438.788  | 5866.416  | NM_018546 | 2328.159  | 2200.289  | AF250920   | 988.993   | 889.975   |
| NM_001346 | 705.811   | 256.772   | U52699    | 10486.778 | 10200.348 | NM_014042  | 1035.53   | 998.833   |
| NM_003149 | 480.633   | 266.536   | S71613    | 757.877   | 736.495   | M33197     | 49967.133 | 46166.004 |
| NM_003377 | 8515.553  | 5702.885  | AJ011910  | 8145.629  | 7394.007  | AF317550   | 402.087   | 402.789   |
| NM_002220 | 1687.052  | 1010.098  | AK024378  | 637.463   | 819.223   | NM_003543  | 316.179   | 383.844   |
| AB033034  | 1818.101  | 1088.476  | NM_014026 | 2772.892  | 2694.744  | M33197     | 39969.586 | 51764.836 |
| D38169    | 1963.758  | 1447.931  | D61703    | 8984.093  | 7151.755  | AK022372   | 729.87    | 1112.937  |
| M33197    | 56021.418 | 59176.23  | AF086198  | 11621.068 | 13294.854 | AJ227863   | 424.447   | 682.839   |
| NM_018171 | 564.21    | 705.309   | AL137382  | 39977.113 | 40501.422 | NM_015916  | 770.582   | 1060.825  |
| NM_002447 | 10180.392 | 12418.649 | AK024599  | 4614.829  | 5431.987  | M33197     | 47382.438 | 43387.164 |
| NM_014145 | 11528.745 | 16697.838 | NM_018012 | 341.23    | 466.311   | AL137658   | 5432.824  | 5822.017  |

|           |           |           |           |           |           |           |           |           |
|-----------|-----------|-----------|-----------|-----------|-----------|-----------|-----------|-----------|
| NM_014141 | 1580.249  | 2307.381  | NM_014450 | 572.699   | 703.895   | D16888    | 975.97    | 1046.419  |
| NM_002223 | 1330.139  | 2060.729  | NM_017991 | 634.377   | 614.823   | AF068298  | 1109.557  | 1341.665  |
| NM_005490 | 7428.661  | 10303.728 | L37198    | 1800.433  | 2056.537  | Z70770    | 1092.192  | 1277.731  |
| NM_003151 | 3758.271  | 4840.525  | U67822    | 644.786   | 771.848   | AJ227900  | 821.315   | 641.893   |
| NM_006811 | 5565.189  | 6569.575  | AK025431  | 826.393   | 652.898   | M33197    | 45659.695 | 51551.039 |
| NM_005601 | 3693.412  | 4125.905  | AK023662  | 484.005   | 618.663   | CY3Cy5    | 7658.334  | 752.359   |
| NM_016151 | 10985.364 | 13425.127 | AF086274  | 21162.971 | 18932.58  | BI762229  | 1489.861  | 1286.095  |
| NM_004324 | 1252.484  | 1416.989  | AK023682  | 889.989   | 841.502   | BG618320  | 7479.569  | 5038.497  |
| NM_005614 | 13734.504 | 15619.157 | AK024024  | 1395.978  | 1291.629  | Y00787    | 1537.355  | 1073.503  |
| AK026270  | 2041.692  | 1595.287  | AF000991  | 494.464   | 505.01    | NM_007276 | 1708.933  | 1411.735  |
| NM_004556 | 3063.17   | 3370.831  | AK000685  | 11999.088 | 14037.218 | N34462    | 3319.626  | 3052.451  |
| D90075    | 10320.406 | 13807.405 | D28381    | 9719.694  | 9770.432  | AI658778  | 1104.026  | 1194.328  |
| M33197    | 53786.488 | 22389.336 | BE706519  | 762.262   | 761.433   | L19067    | 1485.776  | 1602.979  |
| AK023827  | 1345.983  | 855.089   | AF130064  | 21144.5   | 20539.869 | Z48482    | 697.26    | 651.127   |
| AK021702  | 1711.119  | 1120.829  | D16988    | 38297.234 | 37028.922 | W60413    | 1253.195  | 1250.145  |
| NM_003885 | 2060.815  | 1285.382  | AK001959  | 2663.25   | 3343.977  | BI823365  | 1658.08   | 1501.88   |
| NM_016448 | 4436.323  | 2945.938  | U36217    | 1194.726  | 1130.323  | X06318    | 4332.773  | 6089.724  |
| NM_003936 | 1647.396  | 1428.866  | AL389880  | 952.939   | 1171.588  | AL834159  | 3003.813  | 4292.226  |
| M33197    | 53761.063 | 61323.348 | AL157452  | 1218.964  | 1516.778  | NM_000164 | 22987     | 20010.236 |
| NM_002688 | 2826.86   | 3393.905  | AK024155  | 17700.832 | 17331.271 | SR9       | 15285.201 | 2942.884  |
| NM_020369 | 709.429   | 1163.288  | AL359334  | 8791.632  | 11585.746 | CY3Cy5    | 6946.433  | 770.375   |
| NM_004415 | 1869.572  | 2682.406  | AK027095  | 686.133   | 866.785   | NM_002531 | 1144.335  | 1040.283  |
| NM_007278 | 14897.873 | 20908.684 | AF062097  | 531.654   | 607.833   | NM_006314 | 1619.011  | 1056.106  |
| NM_004723 | 14915.59  | 18505.85  | D17093    | 14435.368 | 21616.85  | NM_002754 | 381.321   | 118.896   |
| M33197    | 59062.285 | 64986.531 | AK022784  | 754.779   | 496.617   | NM_000797 | 3472.923  | 2406.577  |
| NM_005245 | 9056.696  | 12311.527 | AL117521  | 2023.597  | 2044.354  | NM_016293 | 5439.163  | 5027.191  |
| M33197    | 60406.723 | 59773.77  | AK021913  | 3429.545  | 3366.189  | NM_018487 | 486.372   | 690.816   |
| NM_016219 | 7610.384  | 7800.321  | AL137489  | 6671.081  | 6800.522  | NM_020134 | 1607.915  | 2221.293  |
| NM_004751 | 867.882   | 1110.495  | AF009311  | 3140.328  | 2975.89   | NM_014061 | 901.768   | 1009.111  |
| AK025605  | 4023.978  | 3291.728  | S73397    | 810.563   | 829.68    | BC034395  | 1469.451  | 1853.4    |
| NM_003783 | 893.859   | 695.889   | AK024433  | 1780.987  | 1824.137  | NM_002479 | 367.473   | 387.771   |
| NM_007000 | 3804.913  | 3913.509  | U82321    | 473.231   | 812.88    | NM_000348 | 7163.355  | 6352.77   |
| M23161    | 7128.888  | 2632.89   | AK023856  | 644.289   | 595.721   | NM_004950 | 3219.775  | 3234.59   |
| NM_006100 | 407.433   | 214.046   | AL050376  | 500.338   | 478.129   | NM_000724 | 2192.208  | 2371.327  |
| NM_003197 | 6258.938  | 3839.205  | AL359652  | 681.336   | 528.422   | NM_002557 | 7323.06   | 6966.048  |
| AF176705  | 3738.638  | 2091.833  | AK022423  | 856.727   | 700.474   | NM_005662 | 8230.96   | 8139.929  |
| D29012    | 9158.262  | 6532.948  | AF088021  | 1600.971  | 1458.166  | AK021489  | 3178.454  | 2626.484  |
| NM_017414 | 1109.156  | 754.244   | BF509267  | 1976.057  | 2182.057  | NM_004317 | 1961.965  | 1675.246  |
| NM_012179 | 22274.229 | 19317.66  | NM_002455 | 4224.856  | 4929.408  | NM_014645 | 655.781   | 415.207   |
| NM_002793 | 5581.639  | 5341.637  | NM_002959 | 14893.272 | 15326.556 | NM_014708 | 1241.067  | 831.488   |
| NM_004788 | 2076.217  | 2598.095  | AK000899  | 6989.842  | 6541.753  | NM_004703 | 1323.482  | 1267.805  |
| M33197    | 54581.035 | 61847.957 | CY3Cy5    | 9002.085  | 667.08    | NM_001512 | 869.145   | 699.477   |
| AL442083  | 3393.051  | 4373.737  | AW300857  | 30002.635 | 26868.449 | NM_014706 | 3424.96   | 5296.497  |
| D63487    | 6188.708  | 8460.257  | H85962    | 28124.844 | 27022.295 | AK023172  | 359.208   | 649.513   |
| AK097791  | 4051.659  | 5473.537  | X66945    | 1527.682  | 1629.087  | AJ001348  | 688.405   | 884.075   |
| NM_020367 | 483.915   | 679.263   | X12830    | 6059.413  | 6411.939  | NM_014007 | 947.51    | 1178.158  |
| AK022705  | 2711.018  | 3453.731  | U00482    | 1842.856  | 2063.918  | AB033006  | 2132.019  | 2808.438  |
| NM_016404 | 5048.743  | 6188.319  | K01904    | 21205.189 | 20521.201 | AF020314  | 8288.895  | 9492.201  |
| L03426    | 1980.317  | 2881.778  | BE538886  | 1887.673  | 1840.977  | NM_016332 | 7613.58   | 8072.236  |
| M33197    | 64106.547 | 68055.992 | NM_002228 | 933.93    | 722.162   | AK023936  | 441.431   | 570.672   |
| NM_020163 | 2101.881  | 2821.503  | M57650    | 11242.241 | 9102.473  | NM_006457 | 553.255   | 862.141   |
| NM_006608 | 2441.581  | 3480.176  | BC023978  | 877.139   | 1011.631  | AF000381  | 1597.436  | 1670.615  |
| NM_000457 | 625.078   | 934.396   | M21302    | 5052.698  | 4625.704  | NM_000197 | 232.367   | 253.306   |

|           |           |           |           |           |           |           |           |           |
|-----------|-----------|-----------|-----------|-----------|-----------|-----------|-----------|-----------|
| M34356    | 3295.019  | 3263.901  | SR6       | 2608.674  | 2390.024  | S82470    | 884.877   | 620.168   |
| AJ133115  | 5836.96   | 8005.01   | SR8       | 8306.269  | 26068.842 | NM_000747 | 1659.456  | 1383.102  |
| X51630    | 8120.79   | 3513.541  | SR10      | 27566.297 | 10132.25  | NM_005415 | 2382.189  | 1795.039  |
| NM_005056 | 1690.846  | 920.413   | CY3Cy5    | 7214.721  | 497.278   | AJ275973  | 13422.124 | 15243.914 |
| NM_001965 | 422.419   | 306.559   | NM_001525 | 17439.48  | 16393.482 | NM_006493 | 1292.59   | 1729.329  |
| AF208502  | 13888.565 | 5595.355  | NM_006055 | 4104.665  | 4497.863  | U76362    | 3348.439  | 4408.711  |
| M33197    | 55869.316 | 42963.648 | NM_004296 | 1033.001  | 1230.098  | AF040248  | 956.135   | 1374.507  |
| AF264750  | 14413.794 | 9670.729  | NM_005048 | 723.023   | 781.553   | NM_014228 | 490.043   | 753.06    |
| NM_006980 | 1197.352  | 1099.661  | NM_001060 | 3205.414  | 3509.308  | AL832292  | 2483.273  | 2363.569  |
| AK023904  | 2191.995  | 1543.784  | NM_018841 | 1001.469  | 887.637   | NM_003045 | 5163.339  | 5933.663  |
| NM_017956 | 2831.027  | 2638.802  | NM_005226 | 489.009   | 692.152   | NM_002193 | 291.602   | 165.897   |
| NM_016496 | 1699.583  | 2384.061  | AL133105  | 3117.035  | 3686.947  | NM_001388 | 2149.006  | 1411.182  |
| NM_014309 | 5672.925  | 7931.132  | AK022859  | 1558.945  | 1602.342  | X76770    | 834.371   | 544.328   |
| M33197    | 49831.617 | 60759.855 | NM_000214 | 1053.061  | 1047.88   | AB037808  | 894.431   | 2282.597  |
| NM_004094 | 2058.462  | 2949.304  | NM_014864 | 6484.576  | 6257.983  | NM_016038 | 925.728   | 440.532   |
| NM_020236 | 2684.255  | 3406.042  | NM_003728 | 14469.685 | 14192.171 | NM_019853 | 4347.651  | 3636.32   |
| AK027059  | 9069.019  | 11286.528 | NM_014352 | 6751.59   | 6968.97   | NM_017992 | 4053.186  | 3695.754  |
| AF151109  | 15976.405 | 20378.545 | NM_012282 | 1083.696  | 823.915   | BF851643  | 306.104   | 285.198   |
| NM_015414 | 64893.629 | 77744.758 | NM_003323 | 12813.873 | 14216.554 | AK023061  | 452.727   | 456.133   |
| L34070    | 9973.844  | 14021.558 | NM_018668 | 3858.029  | 3869.343  | NM_013384 | 42133.133 | 50110.363 |
| AF038182  | 1230.213  | 1102.259  | NM_004227 | 1463.687  | 1827.057  | NM_001187 | 544.319   | 767.678   |
| NM_016475 | 4125.628  | 4933.953  | NM_005282 | 1728.378  | 1614.553  | NM_018241 | 1237.793  | 1491.224  |
| AF086472  | 774.534   | 868.599   | NM_001736 | 624.695   | 703.129   | NM_005834 | 2985.71   | 4844.792  |
| NM_001865 | 53584.527 | 23948.256 | AB028949  | 966.398   | 795.286   | NM_000724 | 822.087   | 679.5     |
| NM_006441 | 4110.655  | 2149.629  | AL137580  | 641.763   | 390.248   | NM_002557 | 3738.849  | 1655.198  |
| NM_001918 | 2194.07   | 1410.164  | NM_004101 | 796.059   | 885.039   | BI762229  | 1293.858  | 1178.702  |
| NM_018245 | 2141.683  | 1526.516  | NM_002995 | 38032.387 | 36227.289 | L19067    | 2066.144  | 2073.123  |
| M33197    | 61285.816 | 48092.945 | AB033114  | 403.921   | 825.552   | Z48482    | 1074.75   | 1207.954  |
| NM_012117 | 7530.83   | 3901.869  | NM_015978 | 2324.034  | 3000.212  | W60413    | 1180.425  | 1483.409  |
| D17130    | 57789.977 | 64592.188 | NM_003810 | 2390.663  | 2279.615  | BI823365  | 1428.102  | 1466.045  |
| X76302    | 5290.384  | 6275.411  | NM_004908 | 950.236   | 1050.386  | X06318    | 4610.923  | 4800.099  |
| AK026276  | 872.92    | 1247.146  | M14584    | 859.714   | 681.477   | AL834159  | 3152.427  | 3353.614  |
| M33197    | 61951.926 | 67735.344 | NM_018360 | 2850.897  | 2360.338  | NM_016217 | 8939.336  | 8831.373  |
| X52354    | 2517.15   | 3389.814  | NM_020228 | 4212.593  | 3552.887  | AK025971  | 3807.343  | 3790.664  |
| NM_005413 | 1134.134  | 1497.028  | AK024685  | 1518.532  | 1299.15   | NM_014007 | 454.061   | 344.084   |
| NM_002315 | 1837.048  | 2433.957  | NM_003676 | 9287.62   | 10549.949 | AB033006  | 1258.912  | 810.319   |
| AK024191  | 1437.251  | 2180.669  | AF113007  | 825.366   | 1199.471  | AF020314  | 4393.893  | 2864.17   |
| AV693985  | 566.887   | 1042.23   | NM_000688 | 3202.753  | 2689.502  | NM_016332 | 3841.496  | 2419.404  |
| D83781    | 1331.13   | 1458.256  | U39573    | 981.934   | 835.452   | AK023936  | 273.923   | 211.906   |
| AF085825  | 489.833   | 669.744   | D82061    | 1793.428  | 1410.411  | NM_006457 | 382.529   | 868.489   |
| AL832699  | 4051.705  | 5161.303  | AJ293009  | 1483.432  | 1157.108  | NM_000207 | 1264.094  | 1171.433  |
| NM_012191 | 1091.584  | 277.328   | NM_000374 | 2483.115  | 1782.504  | NM_002531 | 1261.334  | 1128.401  |
| M33197    | 57860.082 | 35371.078 | NM_000502 | 11072.739 | 9282.656  | NM_006314 | 5120.006  | 4008.01   |
| AK000757  | 522.015   | 364.469   | NM_001359 | 19924.869 | 23542.924 | NM_016293 | 7173.379  | 8344.428  |
| AL359577  | 1261.525  | 813.294   | NM_003224 | 1601.48   | 1480.326  | AL080148  | 7789.769  | 8042.854  |
| NM_018139 | 1844.359  | 1102.602  | NM_001658 | 63109.773 | 58246.918 | NM_006731 | 646.493   | 484.599   |
| NM_014805 | 3448.456  | 2021.381  | NM_006827 | 18198.004 | 18612.479 | NM_018487 | 696.711   | 911.651   |
| AF052120  | 2353.191  | 1563.084  | NM_001483 | 1275.55   | 1055.95   | NM_020134 | 1477.147  | 1314.552  |
| NM_014871 | 3002.299  | 2181.503  | NM_018973 | 7822.824  | 7356.823  | NM_014061 | 1057.841  | 944.779   |
| AK026754  | 674.219   | 623.946   | NM_002591 | 13491.711 | 11335.076 | BC034395  | 1517.58   | 1242.96   |
| M33197    | 57458.781 | 58381.309 | NM_020216 | 2812.756  | 2010.239  | NM_000348 | 8075.679  | 7567.837  |
| AL137552  | 726.866   | 835.077   | AK021860  | 1735.831  | 1246.096  | NM_005059 | 455.663   | 519.199   |
| AK025794  | 3034.875  | 3719.972  | NM_005057 | 1181.897  | 1352.055  | NM_004950 | 2771.856  | 2538.438  |



|            |           |           |           |           |           |           |           |           |
|------------|-----------|-----------|-----------|-----------|-----------|-----------|-----------|-----------|
| AF131835   | 373.109   | 703.981   | NM_001394 | 10864.288 | 12991.357 | NM_006493 | 1014.84   | 858.448   |
| AK024522   | 803.532   | 1122.817  | NM_018441 | 10346.906 | 9745.188  | U76362    | 1983.136  | 1655.84   |
| NM_00719E  | 5616.865  | 6551.613  | NM_00077E | 13386.252 | 13461.678 | AF040248  | 339.478   | 401.658   |
| NM_01495E  | 667.928   | 572.659   | NM_001609 | 1461.939  | 1616.19   | NM_01422E | 326.387   | 599.474   |
| M33197     | 57334.043 | 62195.781 | BE733234  | 843.697   | 780.804   | AL832292  | 1599.307  | 1473.362  |
| AK023220   | 770.966   | 957.523   | NM_012282 | 507.996   | 560.099   | NM_00304E | 1702.963  | 1429.987  |
| AK024566   | 808.356   | 935.23    | NM_003323 | 5795.979  | 5513.839  | NM_005662 | 7403.034  | 6688.396  |
| AK025683   | 499.175   | 591.904   | BG685310  | 930.666   | 800.124   | AK021489  | 4266.579  | 4607.069  |
| M33197     | 67242.867 | 65850.18  | AW300857  | 25870.182 | 24123.332 | NM_004317 | 2072.653  | 1912.619  |
| AK024981   | 14132.653 | 14714.767 | H85962    | 26719.738 | 27978.471 | NM_01464E | 1003.543  | 992.904   |
| AK027246   | 1147.949  | 1899.685  | BG742446  | 1106.013  | 1037.062  | NM_01470E | 1853.546  | 1730.216  |
| U80766     | 3482.15   | 3803.902  | AA864554  | 2245.323  | 2144.122  | NM_003693 | 887.046   | 885.777   |
| AK001638   | 823.532   | 563.37    | X66945    | 1170.394  | 1077.332  | NM_00035E | 17436.285 | 16351.131 |
| AF161386   | 6842.202  | 3234.172  | AI160703  | 578.646   | 944.07    | NM_018134 | 14443.042 | 13296.668 |
| AL365369   | 3239.689  | 1971.817  | X12830    | 8910.891  | 9912.801  | NM_013247 | 2175.904  | 2162.503  |
| AK025454   | 1872.028  | 934.718   | U00482    | 2631.73   | 3212.955  | NM_00677C | 1753.489  | 1909.591  |
| M33197     | 59449.348 | 39502.691 | Z80998    | 858.78    | 1323.675  | BE394704  | 412.334   | 723.032   |
| X05826     | 5510.038  | 3781.769  | K01904    | 22853.563 | 20968.545 | NM_004703 | 1489.651  | 1522.891  |
| AJ001872   | 949.209   | 800.655   | BE538886  | 1701.422  | 2069.943  | NM_001512 | 908.796   | 730.796   |
| M33197     | 57800.504 | 63782.27  | NM_00222E | 1016.031  | 970.724   | NM_01470E | 3434.827  | 3507.29   |
| L77559     | 262.799   | 916.914   | M57650    | 12588.166 | 11986.634 | AK023172  | 447.618   | 340.884   |
| NM_00559E  | 1093.524  | 1164.263  | BC023978  | 1008.501  | 799.327   | AJ001348  | 730.886   | 597.105   |
| Y10515     | 541.81    | 542.822   | M21302    | 4534.612  | 5180.516  | NM_00725E | 1326.686  | 1244.13   |
| M87942     | 701.704   | 624.457   | NM_01634E | 6058.107  | 7336.44   | NM_00366E | 2757.495  | 2269.273  |
| AK023636   | 9874.277  | 9902.633  | AK024865  | 972.519   | 968.061   | NM_013384 | 24665.51  | 26195.824 |
| D25272     | 2575.544  | 3570.794  | NM_00721C | 667.963   | 749.676   | NM_001187 | 234.66    | 209.429   |
| M33197     | 64629.828 | 73667.742 | NM_01836C | 1320.768  | 1503.714  | NM_018241 | 490.76    | 489.583   |
| NM_02016E  | 1592.97   | 2172.05   | AL365415  | 773.769   | 631.534   | NM_005834 | 748.454   | 429.81    |
| AK025931   | 14415.777 | 16470.184 | L29147    | 29405.934 | 31831.557 | AF000381  | 916.027   | 574.348   |
| M33197     | 2131.162  | 1494.449  | NM_00152E | 16064.115 | 16523.996 | S82470    | 1131.068  | 1267.531  |
| M33197     | 59153.023 | 51266.242 | NM_00605E | 3257.542  | 3076.783  | AB028982  | 1800.986  | 2846.205  |
| AK001083   | 1316.033  | 976.723   | NM_00429E | 673.897   | 646.257   | NM_002004 | 3223.931  | 3339.848  |
| AK000185   | 1317.949  | 979.701   | NM_00504E | 499.453   | 307.057   | NM_005121 | 665.041   | 865.96    |
| NM_017962  | 342.565   | 363.56    | NM_005972 | 856.808   | 869.851   | NM_001643 | 12941.156 | 11631.638 |
| NM_017834  | 657.066   | 1141.739  | NM_00106C | 3288.506  | 3396.496  | NM_020221 | 834.136   | 1023.989  |
| AK000865   | 857.071   | 1584.26   | NM_018841 | 1506.508  | 1469.039  | NM_000747 | 1607.427  | 1312.003  |
| M33197     | 57054.895 | 65045.539 | NM_00522E | 618.564   | 740.379   | NM_00541E | 2378.115  | 1634.696  |
| AK024779   | 940.488   | 1063.762  | AL133105  | 3215.908  | 3796.639  | AJ275973  | 14017.922 | 12664.255 |
| AK024940   | 478.925   | 450.888   | AK022859  | 1788.966  | 2111.904  | AL834159  | 1768.971  | 1767.013  |
| AK024406   | 760.923   | 1190.911  | NM_000214 | 1147.646  | 1062.488  | NM_000164 | 15594.305 | 11995.644 |
| AK024568   | 7862.673  | 7692.767  | NM_00372E | 15881.896 | 17078.596 | NM_016217 | 3804.586  | 2938.668  |
| NM_018381  | 673.258   | 1109.525  | NM_014352 | 9526.591  | 10609.281 | AK025971  | 1103.986  | 984.514   |
| M33197     | 59482.16  | 32824.469 | NM_012481 | 4380.31   | 4825.68   | AB037808  | 804.654   | 888.261   |
| AK026277   | 5891.076  | 3315.987  | L09102    | 28018.529 | 26537.691 | NM_01603E | 2141.608  | 1988.59   |
| U10509     | 1284.064  | 950.019   | U68488    | 1578.562  | 1573.6    | Z36821    | 5738.541  | 6382.034  |
| NM_00716E  | 15916.823 | 9142.229  | NM_00067E | 610.549   | 456.603   | AF289485  | 2041.531  | 2545.206  |
| NM_01401E  | 2688.502  | 2167.023  | NM_016247 | 6603.434  | 6853.701  | AF130092  | 1808.341  | 2475.05   |
| AF085956   | 1927.255  | 1515.694  | NM_003224 | 765.622   | 695.715   | NM_01609E | 2382.416  | 2501.271  |
| NM_01911E  | 899.277   | 721.925   | NM_006827 | 12908.128 | 11947.741 | AK024794  | 904.681   | 1042.666  |
| AF147318   | 834.437   | 688.7     | AK021761  | 4772.58   | 4057.264  | NM_019853 | 4285.976  | 3430.104  |
| unknown (S | 701.352   | 711.523   | AK024536  | 1648.629  | 1441.893  | NM_017992 | 4364.457  | 3737.666  |
| M33197     | 57321.586 | 65812.57  | NM_01866E | 4468.073  | 4834.545  | NM_00540C | 319.891   | 207.717   |
| AL137556   | 1135.315  | 1981.616  | NM_004227 | 961.671   | 911.337   | BF851643  | 255.456   | 302.266   |

|           |           |           |           |           |           |           |           |           |
|-----------|-----------|-----------|-----------|-----------|-----------|-----------|-----------|-----------|
| NM_01469E | 7849.6    | 9477.029  | NM_005282 | 1459.143  | 1214.011  | AK023061  | 351.873   | 278.909   |
| AL359055  | 1543.941  | 2094.867  | AB028949  | 1480.647  | 1722.58   | BC034395  | 747.1     | 379.432   |
| NM_01490E | 2011.381  | 3092.237  | AL137580  | 903.772   | 1021.454  | NM_00034E | 1367.128  | 1347.455  |
| AK023547  | 1200.517  | 590.955   | NM_004101 | 1293.817  | 1855.009  | NM_00495C | 400.218   | 375.164   |
| U67847    | 850.398   | 342.286   | NM_00299E | 56780.039 | 51467.215 | NM_000724 | 533.125   | 498.287   |
| AL137321  | 3500.161  | 1958.83   | AB033114  | 544.614   | 565.163   | AI417775  | 626.389   | 926.422   |
| M33197    | 58567.984 | 39369.617 | NM_00381C | 3303.207  | 3886.797  | BI762229  | 1982.648  | 2635.42   |
| AK024207  | 2516.505  | 1239.99   | NM_00490E | 550.158   | 809.655   | BG618320  | 7655.444  | 9124.124  |
| AK021843  | 942.953   | 688.958   | NM_014443 | 4174.886  | 3795.365  | Y00787    | 1815.475  | 1992.843  |
| AF075025  | 4325.175  | 3287.49   | NM_005212 | 5816.784  | 5017.204  | NM_00727E | 2625.704  | 2409.748  |
| AF088008  | 1717.138  | 1483.943  | M14584    | 971.228   | 615.588   | N34462    | 3954.612  | 4500.731  |
| AK023528  | 1152.229  | 935.072   | NM_006419 | 2018.832  | 1696.151  | AI658778  | 1748.878  | 2395.342  |
| AK023043  | 584.597   | 570.07    | AF035035  | 356.816   | 846.34    | L19067    | 1868.72   | 2202.956  |
| M33197    | 53729.797 | 60517.586 | AB020676  | 1029.017  | 992.257   | Z48482    | 777.223   | 908.129   |
| AF147349  | 6634.507  | 8266.402  | AK024715  | 1438.239  | 1077.911  | W60413    | 1429.721  | 1778.726  |
| AL050346  | 10798.853 | 12177.708 | BF306955  | 1091.708  | 979.422   | BI823365  | 1733.878  | 1674.6    |
| AK001520  | 7677.216  | 9254.136  | NM_001394 | 6669.781  | 6932.027  | X06318    | 4367.039  | 4390.783  |
| AK021731  | 537.719   | 999.676   | NM_00077E | 6582.623  | 6669.791  | NM_01470E | 527.317   | 414.373   |
| D90070    | 5172.761  | 5835.701  | BE733234  | 532.356   | 374.896   | NM_003682 | 676.907   | 900.244   |
| Y12235    | 454.437   | 517.348   | NM_02022E | 5269.565  | 3860.185  | NM_000207 | 449.383   | 628.044   |
| M33197    | 51079.379 | 61384.758 | AK024685  | 1967.863  | 1828.099  | NM_002531 | 2000.73   | 2191.376  |
| AF086179  | 1302.104  | 1749.167  | NM_00367E | 10724.135 | 11787.038 | NM_006314 | 5356.791  | 6235.537  |
| AK025807  | 2426.628  | 2937.173  | AF113007  | 834.4     | 937.986   | NM_001782 | 586.278   | 697.021   |
| AK022478  | 396.225   | 1058.861  | NM_00068E | 4858.59   | 4928.246  | NM_002754 | 518.102   | 555.724   |
| M33197    | 66143.258 | 40906.488 | U39573    | 1706.84   | 1562.497  | NM_000797 | 3282.707  | 3692.603  |
| AK025266  | 3727.458  | 1739.186  | D82061    | 3324.064  | 3680.087  | NM_016293 | 7237.421  | 8645.298  |
| AK001843  | 4589.292  | 2132.512  | AJ293009  | 3074.406  | 4098.409  | AF217525  | 271.413   | 328.322   |
| AK000548  | 36006.539 | 16144.091 | NM_000374 | 3911.463  | 3986.548  | AL080148  | 9324.685  | 10276.555 |
| NM_00392C | 4438.633  | 2030.802  | BF088089  | 582.246   | 956.481   | NM_006731 | 607.47    | 566.601   |
| NM_004787 | 4132.516  | 2643.096  | NM_001359 | 29562.096 | 39360.723 | NM_018487 | 648.718   | 794.864   |
| AF087984  | 4715.132  | 3210.948  | NM_00169E | 14723.655 | 17065.521 | NM_020134 | 1312.382  | 1888.753  |
| AF009302  | 387.116   | 312.751   | NM_00497E | 12924.963 | 6858.567  | NM_000747 | 861.641   | 295.082   |
| M33197    | 61957.508 | 50279.758 | NM_00224E | 821.122   | 681.446   | NM_00541E | 434.787   | 251.101   |
| AK022273  | 1405.976  | 892.521   | D87445    | 9960.936  | 10192.797 | AJ275973  | 3945.546  | 3658.085  |
| AK027161  | 443.241   | 418.49    | NM_00023E | 6756.816  | 5565.18   | U76362    | 736.952   | 685.853   |
| AK024271  | 1373.285  | 854.821   | NM_002247 | 1177.978  | 935.564   | AF040248  | 314.918   | 304.949   |
| AK021650  | 2874.703  | 1104.922  | NM_00498C | 22139.959 | 18571.887 | AL832292  | 1509.396  | 1420.53   |
| AL050210  | 1907.285  | 1979.367  | NM_01634E | 2018.394  | 1909.867  | AK021489  | 13979.296 | 19415.568 |
| L37699    | 1752.3    | 2084.659  | AK024865  | 526.449   | 385.848   | NM_00389E | 550.132   | 550.564   |
| M33197    | 58129.633 | 63268.016 | NM_00721C | 484.669   | 373.007   | NM_004317 | 2712.028  | 2909.424  |
| AL050173  | 1966.285  | 2241.285  | NM_001483 | 1790.157  | 1624.526  | NM_01464E | 1505.431  | 1766.167  |
| D80002    | 2009.696  | 2284.032  | NM_018973 | 11914.133 | 9928.058  | NM_01470E | 2127.146  | 2112.14   |
| U17637    | 3772.14   | 4605.695  | NM_002591 | 24175.59  | 27792.359 | NM_003693 | 904.27    | 957.412   |
| AF207831  | 1323.92   | 1466.597  | NM_02021E | 7239.129  | 6324.841  | NM_00035E | 14382.327 | 14544.146 |
| AK023174  | 350.74    | 742.062   | AK021860  | 2476.38   | 3008.339  | NM_018134 | 17452.047 | 14669.734 |
| NM_00354E | 1132.518  | 1245.289  | AK000119  | 638.078   | 790.765   | NM_013247 | 1997.563  | 1834.786  |
| M33197    | 54424.23  | 60068.031 | AB046816  | 1771.665  | 2010.668  | NM_00677C | 1803.617  | 1603.183  |
| NM_018272 | 4067.901  | 5349.525  | AL137266  | 4045.47   | 4541.458  | BE394704  | 1180.61   | 1627.028  |
| CY3Cy5    | 10011.134 | 726.136   | NM_016457 | 1243.116  | 1374.474  | AK024794  | 212.298   | 340.386   |
| R19938    | 4504.848  | 5267.846  | NM_005057 | 1249.55   | 1272.337  | NM_019853 | 988.928   | 823.915   |
| N94487    | 6993.673  | 7145.749  | AF143321  | 1187.703  | 892.089   | NM_00725E | 365.154   | 402.582   |
| AI886795  | 4921.062  | 5575.929  | AB046842  | 1653.266  | 1451.47   | NM_00366E | 2616      | 2395.875  |
| D10495    | 6339.339  | 7837.187  | NM_00485C | 2508.641  | 2185.789  | NM_013384 | 18991.496 | 16048.338 |

|           |           |           |           |           |           |           |           |           |
|-----------|-----------|-----------|-----------|-----------|-----------|-----------|-----------|-----------|
| BF344679  | 3005.353  | 3529.466  | NM_002822 | 3893.675  | 4050.407  | NM_001187 | 328.621   | 235.049   |
| BG743223  | 389.171   | 521.619   | NM_014352 | 3471.178  | 3231.325  | NM_018241 | 660.975   | 645.285   |
| M36634    | 1088.953  | 1334.286  | NM_012481 | 1561.135  | 1467.019  | NM_005834 | 1954.917  | 2562.533  |
| M14156    | 5749.437  | 5788.212  | L09102    | 18002.994 | 17882.762 | AF000381  | 2848.863  | 3029.619  |
| U87939    | 1821.276  | 2017.062  | U68488    | 430.201   | 739.568   | NM_018075 | 410.921   | 402.32    |
| U86961    | 1201.839  | 1510.85   | NM_016247 | 4086.326  | 4750.427  | NM_012105 | 872.517   | 903.288   |
| AK094237  | 4535.829  | 4699.314  | NM_012282 | 760.461   | 968.837   | S82470    | 1864.196  | 1954.667  |
| L07592    | 3837.617  | 4418.049  | NM_003323 | 7088.158  | 6385.811  | AB020695  | 331.394   | 643.395   |
| NM_006981 | 1834.839  | 2773.789  | BG685310  | 1356.123  | 1344.368  | AB028982  | 1488.687  | 1578.662  |
| SR2       | 55319.734 | 57879.848 | AW300857  | 43364.617 | 43509.258 | NM_002004 | 3088.865  | 2517.477  |
| SR4       | 18102.998 | 20179.945 | H85962    | 38929.387 | 40189.805 | NM_005121 | 409.635   | 400.301   |
| SR6       | 2661.999  | 3063.133  | BG742446  | 1470.865  | 1865.426  | NM_001643 | 10841.701 | 11511.411 |
| SR8       | 9027.013  | 30752.188 | AA864554  | 6716.38   | 8331.155  | NM_019096 | 1187.936  | 1040.093  |
| SR10      | 30704.875 | 12877.092 | X66945    | 3439.48   | 3402.497  | NM_014725 | 1219.959  | 626.552   |
| CY3Cy5    | 7675.917  | 539.913   | AI160703  | 802.449   | 1311.712  | NM_017655 | 1340.3    | 1212.583  |
| M33197    | 61000.383 | 59765.473 | X12830    | 10962.628 | 15816.22  | NM_018679 | 715.328   | 597.758   |
| NM_007369 | 787.765   | 575.832   | U00482    | 2977.879  | 3963.236  | NM_006779 | 1775.583  | 1466.471  |
| NM_014776 | 1891.132  | 1735.593  | Z80998    | 1124.162  | 1772.797  | NM_016217 | 4575.039  | 3364.148  |
| NM_006480 | 8837.549  | 8426.856  | K01904    | 20215.357 | 21350.332 | AK025971  | 3421.023  | 3854.844  |
| NM_007223 | 30693.416 | 29065.203 | BE538886  | 1895.397  | 1582.932  | NM_002618 | 1824.968  | 1580.72   |
| NM_000145 | 1706.859  | 2544.218  | NM_002228 | 1087.273  | 876.649   | L27479    | 372.495   | 361.454   |
| AF030107  | 1797.37   | 1841.434  | M57650    | 12684.293 | 11368.882 | NM_002193 | 657.019   | 918.265   |
| NM_000871 | 1868.317  | 1544.811  | BC023978  | 1154.65   | 908.274   | NM_001388 | 4174.376  | 3837.63   |
| M33197    | 61867.906 | 60165.816 | M21302    | 4506.69   | 4457.799  | X76770    | 2988.831  | 2489.843  |
| NM_018968 | 915.116   | 1003.657  | NM_005212 | 2683.308  | 2649.733  | AB037808  | 1032.057  | 1092.376  |
| AF086924  | 58091.777 | 58645.695 | NM_006419 | 892.378   | 757.319   | NM_005915 | 854.005   | 1065.98   |
| NM_000264 | 1073.34   | 1262.104  | AB020676  | 484.348   | 455.248   | NM_016038 | 2252.823  | 2560.227  |
| AB058740  | 12448.558 | 10773.008 | AK024715  | 321.376   | 612.079   | Z36821    | 7746.641  | 7405.251  |
| NM_003385 | 705.995   | 769.441   | U90942    | 63356.844 | 60793.324 | AF289485  | 2165.661  | 2210.839  |
| NM_001888 | 1058.764  | 1176.352  | NM_014942 | 610.164   | 776.977   | AF130092  | 1526.193  | 1268.956  |
| NM_004392 | 1238.862  | 1374.588  | NM_018360 | 1662.983  | 1783.055  | NM_016095 | 2336.706  | 1752.946  |
| NM_001154 | 9930.762  | 10175.888 | AL365415  | 883.249   | 606.552   | AF300612  | 35081.617 | 34842.859 |
| NM_001819 | 2196.867  | 2163.745  | L29147    | 37991.957 | 47695.078 | NM_005578 | 358.384   | 192.813   |
| NM_016938 | 613.555   | 597.848   | NM_001525 | 18672.918 | 18628.881 | NM_003653 | 711.751   | 443.591   |
| NM_001993 | 750.443   | 597.02    | NM_006055 | 5335.284  | 4869.484  | NM_018457 | 5002.991  | 3781.537  |
| BF575833  | 595.782   | 618.459   | NM_004296 | 1252.758  | 1661.379  | NM_002187 | 204.892   | 257.332   |
| NM_015725 | 14545.414 | 16623.529 | NM_005972 | 769.876   | 829.228   | NM_014246 | 2115.661  | 1850.752  |
| R61452    | 2175.485  | 2586.968  | NM_001060 | 3666.743  | 5106.049  | NM_014859 | 280.605   | 441.027   |
| NM_012455 | 3657.901  | 4223.18   | NM_018841 | 1359.435  | 2006.421  | NM_001116 | 319.556   | 403.109   |
| NM_002806 | 9341.252  | 12107.905 | NM_005226 | 941.871   | 699.144   | BC035395  | 3275.057  | 3551.739  |
| M33197    | 65330.273 | 62446.645 | AL133105  | 4030.999  | 4798.044  | NM_001703 | 5151.266  | 5313.552  |
| NM_001716 | 597.253   | 894.684   | AK022859  | 2016.324  | 2077.615  | NM_020126 | 2553.674  | 2813.296  |
| NM_006073 | 633.292   | 627.61    | NM_000214 | 963.182   | 933.28    | NM_013982 | 3733.84   | 4064.542  |
| NM_004951 | 409.324   | 532.781   | NM_004975 | 4540.057  | 2172.538  | NM_005049 | 1014.596  | 1073.313  |
| NM_006564 | 7316.928  | 8368.315  | D87445    | 3099.582  | 3306.96   | NM_003882 | 497.271   | 524.108   |
| NM_004802 | 1897.245  | 2251.185  | NM_000238 | 2096.063  | 1949.862  | NM_004630 | 3893.686  | 3799.368  |
| M33197    | 59248.23  | 63558.434 | NM_004980 | 11428.72  | 12061.647 | AK023001  | 2969.492  | 2737.419  |
| NM_002983 | 1062.148  | 1389.85   | AB011094  | 6960.545  | 5806.509  | NM_014826 | 4067.214  | 3582.818  |
| NM_000074 | 10344.173 | 9085.184  | NM_003224 | 1641.778  | 1635.874  | U01147    | 1386.218  | 1136.84   |
| BF434335  | 29553.027 | 28263.982 | NM_001658 | 64406.063 | 57819.645 | NM_004040 | 5200.832  | 3794.527  |
| M57627    | 2080.32   | 253.547   | NM_006827 | 15015.003 | 13605.2   | NM_006116 | 1826.97   | 1184.4    |
| NM_002993 | 2950.164  | 2444.46   | AK021761  | 5336.187  | 4005.434  | NM_005456 | 1508.815  | 1397.922  |
| M33197    | 55506.559 | 61236.254 | AK024536  | 2238.727  | 2396.775  | AK075450  | 387.952   | 212.197   |

|           |           |           |           |           |           |           |           |           |
|-----------|-----------|-----------|-----------|-----------|-----------|-----------|-----------|-----------|
| NM_003192 | 8808.4    | 8158.277  | NM_018668 | 6544.627  | 6247.787  | AF178983  | 502.867   | 386.799   |
| NM_018449 | 5825.17   | 5598.996  | NM_004227 | 1015.376  | 877.149   | AB037795  | 515.895   | 685.461   |
| AF086129  | 1536.467  | 1395.389  | NM_005282 | 2743.114  | 3012.516  | D43949    | 983.307   | 500.786   |
| D79994    | 1428.187  | 1801.353  | NM_001736 | 1082.89   | 895.898   | NM_015344 | 1234.14   | 1021.127  |
| NM_014458 | 4948.87   | 5503.246  | AB028949  | 1759.123  | 2124.255  | NM_004288 | 487.45    | 648.891   |
| AF235049  | 4669.476  | 5475.258  | AL137580  | 1079.674  | 1008.502  | AL122055  | 4596.72   | 4841.528  |
| NM_005164 | 728.506   | 983.665   | NM_004101 | 997.299   | 1272.626  | NM_005132 | 11698.807 | 11730.706 |
| NM_001995 | 2345.28   | 2343.596  | NM_002995 | 51662.633 | 51327.422 | X07695    | 308.814   | 210.623   |
| NM_000183 | 13536.981 | 14891.249 | AB033114  | 710.78    | 648.725   | D87458    | 701.163   | 485.877   |
| AY004175  | 2295.143  | 2362.821  | NM_015978 | 2773.947  | 2727.248  | AK021750  | 2110.616  | 1957.871  |
| M33197    | 62393.07  | 61053.449 | NM_003810 | 2858.968  | 2301.87   | NM_003626 | 1095.482  | 1348.559  |
| NM_012327 | 4123.125  | 4964.149  | NM_016457 | 616.568   | 835.055   | AK023594  | 3429.469  | 2737.638  |
| NM_000904 | 1499.096  | 1516.639  | NM_004850 | 587.661   | 589.296   | AB032989  | 294.27    | 376.032   |
| NM_016048 | 2237.695  | 1977.508  | NM_002822 | 1720.191  | 2206.999  | AB010099  | 7611.744  | 6730.007  |
| NM_000375 | 9034.038  | 9877.034  | BF306955  | 815.506   | 758.173   | AB039920  | 3988.227  | 3388.85   |
| NM_000265 | 5683.311  | 9206.649  | NM_001394 | 8165.75   | 8864.865  | AB046782  | 1718.715  | 1311.948  |
| NM_018849 | 8055.177  | 9612.585  | NM_018441 | 4702.695  | 4147.335  | NM_014275 | 761.179   | 328.692   |
| M33197    | 57203.617 | 61162.973 | NM_000778 | 7272.493  | 6882.181  | NM_002231 | 1342.322  | 847.589   |
| AF279890  | 3513.573  | 3670.874  | NM_001609 | 889.742   | 680.221   | NM_020474 | 1368.147  | 956.34    |
| NM_002236 | 2841.052  | 2521.698  | BE733234  | 424.543   | 640.604   | NM_002643 | 490.32    | 548.147   |
| NM_012069 | 2269.697  | 2271.156  | NM_020228 | 5348.449  | 5132.659  | NM_017807 | 651.772   | 533.069   |
| NM_001689 | 54064.801 | 56818.195 | AK024685  | 2462.382  | 3284.151  | NM_000462 | 2183.366  | 2195.267  |
| NM_016601 | 1239.321  | 1249.258  | NM_003676 | 13639.637 | 18958.801 | NM_003336 | 2838.865  | 2742.755  |
| NM_017905 | 11931.623 | 11817.738 | AF113007  | 1606.113  | 1669.175  | NM_005805 | 7637.552  | 6663.401  |
| M33197    | 61230.66  | 62964.746 | NM_000688 | 4899.107  | 4201.313  | NM_003900 | 4523.14   | 4478.371  |
| NM_006815 | 30785.596 | 27020.418 | U39573    | 1104.76   | 988.87    | NM_003337 | 1411.536  | 1491.945  |
| NM_001663 | 6030.943  | 5712.388  | D82061    | 2808.478  | 2582.093  | AF298152  | 2319.562  | 1687.906  |
| NM_004218 | 7941.178  | 7548.435  | AJ293009  | 2812.722  | 2676.978  | AF117233  | 1743.497  | 1815.506  |
| NM_016530 | 1508.849  | 1613.02   | NM_000374 | 3744.977  | 4860.157  | NM_015848 | 351.92    | 358.485   |
| NM_014804 | 1909.674  | 1744.274  | NM_000502 | 15371.716 | 18777.885 | NM_001723 | 1405.158  | 1191.21   |
| L40520    | 5120.633  | 4383.717  | NM_001359 | 21937.967 | 23922.184 | NM_016018 | 1922.845  | 1868.63   |
| NM_002633 | 8792.736  | 7442.998  | AF190900  | 1895.534  | 2101.329  | M94362    | 8992.573  | 8925.479  |
| U11036    | 1240.241  | 1662.714  | NM_020404 | 4837.168  | 4148.106  | AK024707  | 837.028   | 904.438   |
| M33197    | 58886.383 | 58436.91  | BE972401  | 2788.052  | 2046.084  | NM_014255 | 1193.034  | 1344.448  |
| NM_002878 | 3708.707  | 4279.52   | AB007922  | 526.615   | 624.051   | AK022909  | 1071.351  | 1033.106  |
| NM_017723 | 5529.861  | 5979.455  | NM_015982 | 1463.432  | 1641.201  | NM_006530 | 3956.465  | 4470.433  |
| AK022922  | 3185.646  | 3391.493  | NM_003746 | 16672.518 | 13663.768 | NM_018942 | 550.419   | 481.502   |
| NM_006462 | 9110.646  | 10239.701 | NM_002910 | 33821.898 | 30236.969 | AF217226  | 988.264   | 500.546   |
| AK024750  | 5056.058  | 5438.24   | AC096970  | 30064.211 | 32514.846 | NM_005760 | 3710.186  | 2356.843  |
| NM_000400 | 21716.736 | 23314.898 | AK024865  | 465.606   | 429.626   | NM_007265 | 873.924   | 787.329   |
| M33197    | 56701.688 | 61993.434 | NM_001483 | 2132.935  | 3046.714  | AK023639  | 1741.776  | 1544.195  |
| NM_002613 | 3702.497  | 3607.039  | NM_018973 | 15512.184 | 14694.609 | AL137700  | 349.314   | 570.226   |
| NM_004419 | 4036.101  | 4325.766  | NM_002591 | 18128.289 | 18456.625 | NM_004904 | 323.302   | 707.37    |
| U47635    | 3621.127  | 3956.402  | AL049334  | 732.206   | 923.992   | NM_003083 | 1942.528  | 1991.626  |
| NM_018650 | 2055.932  | 2124.877  | NM_020216 | 6946.089  | 7352.121  | NM_006789 | 2587.046  | 2255.393  |
| AK026945  | 43487.695 | 36032.48  | AK021860  | 2675.697  | 2698.436  | NM_000982 | 2135.577  | 2111.9    |
| NM_002828 | 1642.664  | 1224.549  | AK000119  | 645.369   | 993.223   | NM_012423 | 43595.863 | 52323.887 |
| NM_014369 | 3581.068  | 2655.419  | AL137266  | 3124.295  | 3488.271  | AK026367  | 15860.348 | 14746.437 |
| M33197    | 58040.285 | 62005.844 | NM_014288 | 2029.049  | 1893.1    | AK026491  | 10155.362 | 9064.463  |
| NM_001398 | 29688.785 | 28298.195 | NM_017703 | 3011.254  | 3543.09   | NM_001015 | 53409.5   | 63232.527 |
| AB050049  | 7378.404  | 7280.637  | NM_015320 | 865.224   | 741.642   | AL110170  | 43066.73  | 36639.215 |
| J05125    | 1063.916  | 1033.208  | NM_004055 | 1004.094  | 800.927   | AK025640  | 1418.465  | 1108.375  |
| NM_001993 | 580.261   | 397.154   | NM_014726 | 5389.188  | 5868.903  | NM_000920 | 350.163   | 408.755   |

|           |           |           |           |           |           |           |           |           |
|-----------|-----------|-----------|-----------|-----------|-----------|-----------|-----------|-----------|
| NM_01572E | 11032.013 | 12508.595 | AJ297349  | 2120.463  | 2106.838  | NM_02037E | 490.18    | 556.104   |
| R61452    | 2186.282  | 2075.214  | NM_00582E | 4285.424  | 3463.292  | NM_01604E | 2504.559  | 1785.827  |
| R19938    | 5174.956  | 5684.657  | NM_00161E | 2736.32   | 2371.26   | NM_013311 | 1863.187  | 1701.227  |
| N94487    | 12256.471 | 13498.842 | NM_00659E | 2630.768  | 2911.729  | NM_000291 | 30567.881 | 29378.359 |
| AI886795  | 4995.621  | 6119.876  | NM_00446E | 1106.943  | 1108.254  | NM_018081 | 1142.611  | 1117.383  |
| D10495    | 7133.139  | 8057.383  | U43586    | 860.18    | 1574.313  | NM_01464E | 1622.218  | 2446.528  |
| BF344679  | 3333.176  | 3796.653  | NM_006271 | 8307.838  | 11459.71  | AL117488  | 1064.469  | 1409.769  |
| BG743223  | 540.08    | 475.687   | NM_018647 | 913.731   | 1241.897  | NM_01224E | 796.605   | 834.774   |
| M36634    | 1234.063  | 1332.331  | NM_00302E | 780.188   | 865.087   | NM_01900E | 2712.648  | 2274.848  |
| M14156    | 6910.438  | 7106.626  | NM_000721 | 44774.5   | 46998.672 | NM_00473E | 5392.691  | 4297.465  |
| U87939    | 1779.242  | 1887.849  | NM_00393E | 2321.329  | 2873.257  | NM_005341 | 1214.704  | 1247.597  |
| U86961    | 1492.513  | 1467.805  | NM_01864E | 640.56    | 1049.676  | AF181999  | 876.127   | 801.68    |
| NM_005191 | 447.68    | 653.218   | NM_00509E | 5472.631  | 6345.313  | NM_001934 | 2468.172  | 1867.047  |
| AK094237  | 5339.645  | 5139.094  | NM_00005E | 685.107   | 905.244   | AB011090  | 1175.969  | 1032.211  |
| L07592    | 3881.678  | 3511.932  | NM_019057 | 1989.003  | 1577.156  | NM_01868E | 3673.079  | 4041.355  |
| NM_006981 | 2030.842  | 1607.887  | NM_002677 | 756.75    | 555.957   | AL355722  | 558.979   | 677.548   |
| M33197    | 59198.613 | 59710.965 | NM_01620E | 1007.339  | 858.807   | NM_00654E | 2476.241  | 1760.947  |
| AK027244  | 3538.374  | 3423.857  | NM_00575E | 642.582   | 574.13    | NM_01645E | 9333.275  | 7897.829  |
| NM_01844E | 4518.818  | 4944.125  | AF149724  | 656.933   | 464.328   | AK022677  | 527.032   | 444.473   |
| AF086129  | 1301.97   | 1403.887  | NM_006367 | 49302.895 | 56489.109 | AL137645  | 7836.701  | 8062.543  |
| D79994    | 1752.019  | 1890      | NM_00673E | 24443.848 | 24987.318 | AK026141  | 562.719   | 656.753   |
| NM_01445E | 3812.52   | 4383.887  | NM_004354 | 938.815   | 604.11    | AK022894  | 847.37    | 849.721   |
| AF235049  | 4800.399  | 5189.681  | NM_004661 | 1593.609  | 1177.784  | AF217993  | 2658.472  | 1999.182  |
| M33197    | 58602.91  | 62750.531 | NM_00161E | 1793.904  | 1748.874  | AK026324  | 5079.764  | 4354.922  |
| NM_00736E | 1167.949  | 1137.456  | NM_001241 | 1048.795  | 1219.617  | AK025253  | 423.375   | 556.439   |
| NM_01477E | 2582.955  | 2511.56   | AF217504  | 1905.262  | 2054.422  | AF131777  | 500.934   | 749.194   |
| NM_00648E | 31693.926 | 31321.818 | AK027102  | 5721.996  | 6099.767  | AK025004  | 2578.37   | 2642.946  |
| NM_00722E | 48959.281 | 44075.34  | AL109714  | 789.937   | 866.602   | AL136818  | 807.609   | 997.216   |
| NM_00014E | 1881.723  | 2097.718  | NM_00463E | 3880.614  | 4774.539  | AF146798  | 3228.144  | 3341.903  |
| AF030107  | 1797.264  | 2185.233  | NM_01791E | 2877.228  | 3025.136  | AF086517  | 4312.109  | 3989.188  |
| NM_000871 | 1859.481  | 1817.095  | NM_01445E | 4562.563  | 5359.024  | AK025346  | 18055.537 | 11015.504 |
| M33197    | 59392.145 | 60844.895 | NM_00474E | 2999.291  | 3126.834  | AL137534  | 28860.438 | 19299.131 |
| NM_01896E | 1062.498  | 1134.362  | NM_00380E | 1994.558  | 2192.318  | NM_01909E | 11641.451 | 9994.651  |
| AF086924  | 59255.719 | 60364.371 | NM_01988E | 4428.463  | 4425.058  | Y12020    | 8822.372  | 7826.558  |
| NM_000264 | 1077.734  | 1077.573  | NM_00327E | 56700.43  | 52942.262 | AJ001905  | 601.217   | 572.489   |
| AB058740  | 14182.606 | 12695.657 | NM_00042E | 1047.489  | 1480.27   | U17635    | 812.744   | 974.921   |
| NM_00188E | 457.721   | 471.237   | M29540    | 771.348   | 835.685   | Z83946    | 345.41    | 237.061   |
| NM_00439E | 1158.836  | 1013.295  | NM_01662E | 2999.965  | 3176.742  | D55638    | 282.382   | 525.547   |
| NM_001154 | 10055.199 | 9655.209  | NM_001334 | 4779.25   | 4192.435  | L23870    | 361.402   | 585.15    |
| NM_00181E | 2423.466  | 1752.313  | NM_004771 | 948.806   | 850.628   | L19362    | 505.986   | 350.089   |
| NM_01693E | 726.126   | 807.865   | AL365514  | 677.525   | 783.574   | AK000910  | 1198.215  | 935.161   |
| M33197    | 59218.836 | 60565.473 | NM_01829E | 722.443   | 596.339   | AF252280  | 4266.613  | 2656.387  |
| NM_00681E | 27638.168 | 27486.664 | NM_002104 | 443.977   | 877.139   | AK000107  | 276.935   | 203.576   |
| NM_00166E | 5873.112  | 6077.306  | NM_005504 | 3901.621  | 3437.082  | AK000951  | 405.9     | 348.342   |
| NM_00421E | 7084.655  | 7259.182  | AF234654  | 1075.262  | 1060.686  | AK024518  | 4776.186  | 5477.646  |
| NM_01653E | 1589.383  | 1835.821  | NM_00011E | 3351.017  | 2821.078  | AK024586  | 355.247   | 548.246   |
| NM_014804 | 1567.302  | 2298.723  | NM_01600E | 26838.23  | 28447.131 | AK025017  | 1669.887  | 1483.811  |
| NM_01245E | 4507.24   | 5035.195  | NM_01454E | 811.95    | 718.095   | AK024914  | 1640.12   | 2168.559  |
| NM_00280E | 10038.219 | 10994.152 | NM_01783E | 7524.85   | 7542.996  | AK025055  | 1389.75   | 1967.747  |
| M33197    | 61646.652 | 60586.742 | NM_00171E | 2587.632  | 2192.828  | BC030949  | 860.593   | 732.229   |
| NM_00171E | 1079.241  | 1078.392  | NM_015367 | 6625.166  | 6796.15   | U17636    | 11490.771 | 7614.654  |
| NM_00607E | 678.417   | 564.356   | NM_01449E | 5766.608  | 5328.058  | NM_01854E | 313.77    | 406.565   |
| NM_004951 | 608.417   | 778.665   | NM_00237E | 16517.412 | 14439.402 | U52699    | 3171.353  | 2338.729  |

|           |           |           |           |           |           |           |           |           |
|-----------|-----------|-----------|-----------|-----------|-----------|-----------|-----------|-----------|
| NM_006564 | 8838.227  | 9083.826  | NM_000988 | 62741.207 | 61118.379 | S71613    | 698.676   | 1187.781  |
| NM_004802 | 1739.975  | 1803.637  | AF055016  | 4754.342  | 4222.795  | AJ011910  | 2910.641  | 2132.214  |
| M33197    | 59543.238 | 63418.867 | NM_007234 | 11651.41  | 11453.442 | AK024378  | 371.044   | 524.75    |
| NM_002983 | 1186.839  | 1313.045  | Y16704    | 64379     | 64181.68  | NM_014026 | 1583.01   | 1967.018  |
| NM_000074 | 10993.927 | 9084.942  | NM_014567 | 6820.218  | 6362.817  | D61703    | 6463.38   | 4999.671  |
| BF434335  | 32431.33  | 25464.414 | NM_017842 | 2589.432  | 2250.496  | AF086198  | 2624.129  | 2633.955  |
| AK026946  | 2863.888  | 3123.612  | AB037809  | 987.39    | 830.752   | AL137382  | 31863.42  | 24054.645 |
| M33197    | 53459.793 | 60269.5   | AB011129  | 569.657   | 629.57    | AK024599  | 2511.925  | 2438.595  |
| NM_003192 | 9215.063  | 9888.455  | NM_014391 | 3603.452  | 3142.054  | L37198    | 526.678   | 358.615   |
| NM_002828 | 2212.578  | 2116.406  | NM_004270 | 720.64    | 557.186   | AF086274  | 4346.602  | 3684.782  |
| NM_014369 | 3037.101  | 3137.811  | NM_001537 | 866.872   | 892.526   | AK000685  | 4283.984  | 4592.852  |
| M33197    | 59922.711 | 60247.926 | U80743    | 672.201   | 808.487   | D28381    | 5921.508  | 5753.216  |
| NM_001398 | 26456.996 | 25614.727 | NM_001352 | 1973.652  | 2036.889  | BE706519  | 485.316   | 371.546   |
| AB050049  | 6406.265  | 6912.588  | D15050    | 567.678   | 407.897   | AF130064  | 12607.342 | 11438.303 |
| J05125    | 720.381   | 1012.632  | NM_006527 | 4042.432  | 4162.088  | U17624    | 342.539   | 398.573   |
| NM_005164 | 518.15    | 648.902   | NM_006627 | 2014.458  | 2132.783  | D16988    | 26417.629 | 20531.459 |
| NM_001995 | 2579.667  | 2647.533  | NM_007363 | 19765.578 | 18848.307 | AK001959  | 1885.191  | 2014.431  |
| NM_000183 | 15246.183 | 17349.432 | NM_003093 | 44892.246 | 45905.117 | U36217    | 368.889   | 422.511   |
| AY004175  | 3165.938  | 3080.62   | U05589    | 1058.183  | 931.509   | AL389880  | 450.738   | 470.716   |
| M33197    | 60696     | 60617.84  | NM_014473 | 12067.375 | 12543.61  | AL157452  | 865.405   | 948.182   |
| NM_012327 | 5226.61   | 6272.101  | NM_003095 | 61734.688 | 60323.477 | AK024155  | 10466.095 | 8982.383  |
| NM_000904 | 1442.412  | 1667.559  | NM_016389 | 1987.404  | 1627.378  | AL359334  | 5069.319  | 5125.312  |
| NM_016048 | 1925.885  | 1936.396  | NM_002295 | 60675.066 | 58038.711 | AK027095  | 792.32    | 695.507   |
| NM_000375 | 8472.353  | 9100.827  | NM_003133 | 23703.939 | 20880.727 | AF062097  | 658.621   | 701.947   |
| NM_000265 | 5231.998  | 8200.229  | NM_001762 | 2165.543  | 1373.626  | D17093    | 6353.92   | 5483.493  |
| NM_018849 | 9247.755  | 9604.54   | NM_016306 | 16317.356 | 14865.174 | AL117521  | 275.526   | 167.05    |
| M33197    | 55946.02  | 57794.953 | NM_003755 | 1067.775  | 1143.145  | AK021913  | 1229.338  | 1240.015  |
| AF279890  | 4277.738  | 3559.69   | NM_013238 | 6947.618  | 5371.715  | AL137489  | 1031.673  | 893.588   |
| NM_002236 | 3078.238  | 2808.183  | BE258640  | 18294.07  | 14380.324 | AF009311  | 749.641   | 557.52    |
| NM_012069 | 2721.757  | 2910.673  | NM_003314 | 7492.202  | 5404.357  | AK024433  | 495.186   | 337.253   |
| NM_001689 | 51689.547 | 53433.516 | AL355730  | 557.308   | 704.915   | U82321    | 316.481   | 355.686   |
| NM_016601 | 1455.023  | 1328.338  | U79273    | 1042.758  | 1113.895  | AL359652  | 391.143   | 391.033   |
| NM_017905 | 12312.154 | 13847.742 | AK022050  | 2758.81   | 2359.165  | AF088021  | 1609.083  | 1314.934  |
| NM_006981 | 1518.236  | 2038.47   | NM_002512 | 55355.918 | 55004.113 | BF509267  | 1163.211  | 1319.271  |
| M33197    | 60919.93  | 57934.727 | AL365411  | 1705.157  | 1602.983  | NM_002455 | 2220.104  | 2084.262  |
| AK027244  | 3457.09   | 3877.41   | NM_016066 | 2492.149  | 2849.72   | NM_002959 | 8530.217  | 7920.048  |
| L40520    | 6803.944  | 5224.962  | AK024677  | 755.316   | 783.784   | AK000899  | 5252.219  | 3889.939  |
| NM_002633 | 9518.117  | 9305.407  | NM_000036 | 1070.49   | 1001.622  | CY3Cy5    | 6324.484  | 650.808   |
| U11036    | 844.267   | 810.312   | AF254082  | 19297.617 | 16308.646 | AW300857  | 22751.891 | 19083.275 |
| NM_002878 | 4940.39   | 3919.651  | AF205718  | 7776.414  | 6319.923  | H85962    | 23814.207 | 24224.088 |
| NM_017723 | 5459.269  | 4867.266  | NM_003420 | 751.852   | 992.674   | BG742446  | 795.376   | 986.456   |
| AK022922  | 3185.907  | 2888.535  | AY004252  | 1150.42   | 874.194   | AA864554  | 3750.544  | 4033.674  |
| NM_006462 | 9641.614  | 9645      | NM_006261 | 2570.347  | 1655.322  | X66945    | 1994.183  | 1816.386  |
| AK024750  | 4034.253  | 3998.462  | AK027045  | 785.942   | 500.312   | AI160703  | 475.217   | 572.995   |
| NM_000400 | 22592.498 | 24908.947 | AF169796  | 1385.679  | 1291.81   | X12830    | 6099.191  | 5905.265  |
| M33197    | 54963.941 | 62988.867 | AK001814  | 1659.629  | 1547.56   | U00482    | 1610.296  | 1511.618  |
| NM_002613 | 3623.366  | 3286.254  | NM_007222 | 2401.203  | 2406.244  | Z80998    | 342.313   | 502.558   |
| NM_004419 | 3504.479  | 3614.496  | NM_003435 | 2505.806  | 2094.828  | K01904    | 11687.178 | 11078.793 |
| U47635    | 3671.02   | 3627.462  | NM_016291 | 4320.76   | 3059.127  | BE538886  | 1159.416  | 1010.055  |
| NM_018650 | 2264.741  | 2556.412  | NM_005937 | 60464.816 | 46797.09  | NM_002228 | 599.792   | 511.511   |
| AK026945  | 44704.902 | 44201.277 | AK023259  | 1906.976  | 1265.695  | M57650    | 11077.3   | 12392.258 |
| NM_001888 | 518.189   | 617.272   | AK001503  | 963.158   | 1275.094  | BC023978  | 1017.345  | 1617.46   |
| NM_004392 | 973.443   | 852.341   | AK022880  | 1853.646  | 1501.765  | M21302    | 3494.69   | 4960.455  |

|           |           |           |           |           |           |           |           |           |
|-----------|-----------|-----------|-----------|-----------|-----------|-----------|-----------|-----------|
| M33197    | 61822.625 | 58325.547 | NM_003601 | 7588.975  | 8487.97   | NM_016346 | 3375.648  | 4317.074  |
| NM_001154 | 9496.284  | 9470.405  | AK001228  | 3637.071  | 4536.926  | SR2       | 44919.055 | 46123.691 |
| NM_001819 | 2114.159  | 2268.599  | AK026778  | 1204.923  | 1478.061  | SR4       | 10506.347 | 11242.923 |
| NM_016938 | 806.491   | 731.466   | AF074987  | 1755.216  | 1669.775  | SR6       | 1493.196  | 1579.709  |
| NM_001993 | 868.299   | 599.186   | AK001058  | 25457.49  | 23016.68  | SR8       | 5147.237  | 17109.463 |
| BF575833  | 691.189   | 617.98    | AK026239  | 1607.85   | 1401.666  | SR10      | 16518.145 | 7302.862  |
| NM_015725 | 13345.194 | 15734.223 | AF086283  | 694.455   | 680.92    | CY3Cy5    | 5033.771  | 470.711   |
| R61452    | 1947.666  | 2578.467  | AF088047  | 590.579   | 396.74    | NM_001525 | 12329.892 | 14362.196 |
| R19938    | 5611.601  | 5532.843  | AF086281  | 1114.274  | 1227.179  | NM_006055 | 2425.679  | 2446.035  |
| AI886795  | 5705.269  | 4931.513  | AF086372  | 523       | 312.714   | NM_004296 | 754.299   | 854.688   |
| D10495    | 6892.691  | 7002.135  | AF086393  | 1099.262  | 1052.771  | NM_005972 | 520.151   | 530.433   |
| BF344679  | 3111.647  | 3414.191  | AF086453  | 684.463   | 767.4     | NM_001060 | 2119.774  | 1714.516  |
| BG743223  | 641.92    | 437.786   | AF070621  | 5935.701  | 5336.613  | NM_018841 | 664.384   | 547.884   |
| M36634    | 1152.759  | 1310.61   | NM_020240 | 1990.132  | 2017.995  | NM_005226 | 385.568   | 363.281   |
| M14156    | 7223.801  | 7391.478  | AK023678  | 6418.905  | 4018.347  | AL133105  | 2188.733  | 2041.401  |
| U87939    | 1779.431  | 2096.71   | AF052090  | 4285.837  | 3427.018  | AK022859  | 901.942   | 954.761   |
| U86961    | 1717.842  | 1763.583  | AK023718  | 1619.436  | 2149.193  | NM_000214 | 575.605   | 562.399   |
| NM_005191 | 484.382   | 602.073   | AF075089  | 1904.466  | 2055.776  | NM_014864 | 3786.914  | 4184.719  |
| AK094237  | 4418.042  | 5082.836  | AF086007  | 62488.227 | 57677.938 | NM_003728 | 13140.65  | 14187.921 |
| AK056794  | 460.112   | 574.014   | AK000803  | 1705.615  | 1915.063  | NM_014352 | 6447.484  | 8147.516  |
| L07592    | 4013.084  | 4203.982  | AK022374  | 410.94    | 612.111   | NM_012481 | 2345.813  | 3028.716  |
| BF434335  | 35458.34  | 34003.914 | AF085926  | 9903.202  | 10457.944 | NM_016247 | 4647.729  | 5058.369  |
| M57627    | 489.335   | 650.68    | AF085948  | 675.948   | 509.116   | NM_012282 | 636.181   | 409.904   |
| NM_002993 | 2697.553  | 2691.96   | AL137307  | 2738.159  | 3397.532  | NM_006710 | 348.947   | 561.657   |
| AK026946  | 2560.35   | 2552.74   | AL137468  | 4215.292  | 4778.27   | NM_003323 | 6727.18   | 7185.77   |
| M33197    | 57636.801 | 54866.848 | AL162007  | 15558.959 | 13955.609 | BG685310  | 975.86    | 1031.073  |
| NM_003192 | 8425.997  | 7133.765  | AL390137  | 12030.744 | 9709.517  | NM_018668 | 3493.147  | 6942.991  |
| NM_018449 | 5696.014  | 5932.812  | AL137340  | 661.782   | 422.785   | NM_004227 | 536.873   | 661.719   |
| AF086129  | 1776.312  | 1489.162  | AL162045  | 983.835   | 802.601   | NM_005282 | 1591.783  | 1778.42   |
| D79994    | 1736.354  | 1758.05   | AK022437  | 14315.677 | 12040.503 | NM_001736 | 412.657   | 593.165   |
| NM_014458 | 4779.479  | 5457.81   | AB042410  | 586.463   | 660.769   | AB028949  | 1011.787  | 741.88    |
| AF235049  | 4971.73   | 5311.532  | AF086102  | 2610.99   | 1919.289  | AL137580  | 347.003   | 299.224   |
| M33197    | 59465.203 | 62247.297 | AF116682  | 19327.594 | 18008.461 | NM_004101 | 504.085   | 588.604   |
| NM_007369 | 1353.234  | 1122.751  | AL137259  | 3141.12   | 2734.183  | NM_002995 | 27960.096 | 20357.139 |
| NM_014776 | 2756.771  | 2300.429  | AL122107  | 5178.842  | 3412.962  | AB033114  | 258.576   | 177.79    |
| NM_006480 | 32941.035 | 28195.066 | AF075021  | 991.287   | 1192.237  | NM_015978 | 1870.723  | 1440.004  |
| NM_007223 | 45088.773 | 39367.031 | AK025140  | 10739.013 | 9389.732  | NM_003810 | 1716.456  | 1209.676  |
| NM_000145 | 1920.465  | 2520.087  | AK023394  | 1072.52   | 1160.94   | NM_014443 | 2731.6    | 1897.712  |
| AF030107  | 1886.922  | 1890.527  | AF090093  | 8732.685  | 8895.863  | NM_005212 | 3445.886  | 3078.597  |
| NM_000871 | 1733.454  | 1862.691  | AF161340  | 2117.351  | 2078.957  | M14584    | 601.006   | 388.047   |
| M33197    | 58807.734 | 58741.48  | AF242771  | 1005.515  | 872.935   | NM_006419 | 1241.607  | 1076.975  |
| NM_018968 | 1318.714  | 1505.29   | NM_018562 | 4568.168  | 4713.546  | AB020676  | 814.378   | 826.84    |
| NM_000264 | 1011.907  | 1050.722  | AF098666  | 797.133   | 867.62    | AK024715  | 763.957   | 1065.342  |
| AB058740  | 14302.156 | 12566.346 | AK021969  | 777.863   | 689.499   | U90942    | 44949.25  | 40196.992 |
| NM_003385 | 555.878   | 659.435   | AK022065  | 543.721   | 517.173   | NM_014942 | 414.089   | 346.825   |
| AF279890  | 2971.952  | 3521.407  | AK022221  | 3783.259  | 3412.797  | NM_018360 | 2026.279  | 1329.135  |
| NM_002236 | 2306.36   | 2076.234  | AK022356  | 1387.157  | 1123.572  | AL365415  | 473.363   | 546.271   |
| NM_012069 | 2469.328  | 2279.039  | AK021998  | 3454.371  | 2417.073  | L29147    | 2125.31   | 1497.682  |
| NM_001689 | 54093.324 | 44156.43  | AK022126  | 2121.391  | 1730.884  | NM_020228 | 4240.811  | 5227.799  |
| NM_016601 | 1439.05   | 1254.209  | AK022256  | 981.973   | 970.968   | AK024685  | 1336.425  | 1610.551  |
| NM_017905 | 11801.377 | 11176.223 | AK022383  | 2133.259  | 1580.593  | NM_003676 | 8301.254  | 8812.545  |
| M33197    | 62345.078 | 62234.992 | AK027041  | 2865.091  | 2381.488  | AF113007  | 716.737   | 798.215   |
| NM_006815 | 30643.029 | 31774.238 | AK024332  | 591.134   | 617.746   | NM_000688 | 2925.541  | 2190.273  |

|           |           |           |           |           |           |           |           |           |
|-----------|-----------|-----------|-----------|-----------|-----------|-----------|-----------|-----------|
| NM_001663 | 6142.721  | 7323.091  | NM_005355 | 27836.381 | 23455.377 | U39573    | 904.218   | 883.363   |
| NM_004218 | 7549.992  | 7588.931  | AK000937  | 862.295   | 592.23    | D82061    | 1493.921  | 1622.767  |
| NM_016530 | 1502.599  | 1632.406  | AF035306  | 1167.251  | 1126.568  | AJ293009  | 1261.372  | 1236.06   |
| NM_014804 | 1912.929  | 1871.579  | NM_003954 | 607.028   | 968.548   | NM_000374 | 1653.173  | 1470.295  |
| NM_012455 | 4713.504  | 4437.06   | NM_016348 | 728.578   | 1074.414  | NM_000502 | 7393.252  | 6630.871  |
| NM_002806 | 10191.653 | 10302.056 | AK023877  | 576.666   | 466.798   | NM_001355 | 15744.501 | 17297.646 |
| M33197    | 61471.844 | 64523.996 | AK024213  | 22773.404 | 20961.729 | NM_001696 | 7473.931  | 8235.912  |
| NM_001716 | 1150.357  | 1345.038  | AK025093  | 704.435   | 1175.842  | NM_004975 | 10493.227 | 5305.389  |
| NM_002030 | 512.829   | 423.046   | AK022184  | 2857.644  | 2977.243  | D87445    | 5424.209  | 5691.271  |
| NM_006073 | 510.726   | 484.081   | AB007959  | 1124.163  | 1259.13   | NM_000238 | 2868.158  | 2714.496  |
| NM_004951 | 558.818   | 685.001   | AK024360  | 523.101   | 436.097   | NM_002247 | 711.902   | 519.952   |
| NM_006564 | 8264.567  | 8766.85   | AK024153  | 794.313   | 910.205   | NM_004980 | 14714.471 | 14126.799 |
| NM_004802 | 2014.098  | 2171.657  | Y10516    | 1818.093  | 2278.016  | AB011094  | 8154.85   | 7895.878  |
| NM_002983 | 969.922   | 1367.694  | AF015039  | 1889.758  | 2221.823  | NM_003224 | 893.197   | 584.423   |
| NM_000074 | 8801.673  | 7475.819  | U50528    | 552.776   | 607.233   | NM_001658 | 54830.273 | 64590.047 |
| M33197    | 57924.91  | 59150.57  | AB020632  | 1096.5    | 1364.113  | NM_006827 | 9978.268  | 9359.913  |
| NM_002613 | 3486.305  | 2877.394  | NM_018614 | 25671.262 | 25949.443 | AK021761  | 3220.546  | 3244.687  |
| NM_004419 | 3902.329  | 3040.554  | AL117549  | 888.506   | 810.263   | AK024536  | 401.517   | 319.192   |
| U47635    | 3516.624  | 2527.547  | NM_005222 | 2747.208  | 1824.387  | NM_001483 | 1811.752  | 1870.114  |
| NM_018650 | 2338.992  | 2395.243  | BC024308  | 5538.532  | 4356.276  | NM_018973 | 7036.419  | 5817.3    |
| AK026945  | 39920.891 | 33774.109 | NM_000538 | 1437.604  | 1222.053  | NM_002591 | 10355.938 | 7006.538  |
| NM_002828 | 2782.908  | 2568.675  | AK001838  | 64380.418 | 56955.555 | NM_020216 | 3524.13   | 3074.181  |
| NM_014369 | 3871.736  | 3732.159  | NM_018295 | 798.951   | 746.425   | AK021860  | 914.653   | 904.756   |
| M33197    | 59526.52  | 57755.371 | AF086262  | 3061.16   | 2905.343  | AB046816  | 637.123   | 789.733   |
| NM_001398 | 29688.195 | 26953.352 | AF086292  | 7349.392  | 6544.146  | AL137266  | 1954.797  | 2350.049  |
| AB050049  | 6865.13   | 6286.917  | AK023769  | 521.042   | 720.345   | NM_016457 | 596.373   | 811.913   |
| J05125    | 799.698   | 807.037   | AK024342  | 16806.529 | 16843.688 | NM_005057 | 722.132   | 700.098   |
| NM_005164 | 440.142   | 606.208   | AL137712  | 5252.572  | 4513.542  | AF143321  | 671.337   | 639.93    |
| NM_001995 | 2437.898  | 2256.404  | AK021673  | 16432.621 | 16274.042 | AB046842  | 1372.663  | 1419.777  |
| NM_000183 | 13671.768 | 14146.901 | AB014543  | 2244.202  | 1907.251  | NM_004850 | 1286.653  | 1424.505  |
| AY004175  | 3066.67   | 2804.585  | NM_018445 | 7259.647  | 5532.428  | NM_002822 | 2239.045  | 2488.391  |
| M33197    | 60832.086 | 58984.266 | AK022743  | 7481.946  | 6419.754  | BF306955  | 846.836   | 747.919   |
| NM_012327 | 5240.7    | 4908.253  | NM_013938 | 6634.159  | 6549.718  | NM_001394 | 5443.79   | 3450.657  |
| NM_000904 | 1437.341  | 1604.58   | NM_013986 | 41071.52  | 43303.625 | NM_018441 | 6451.479  | 4100.713  |
| NM_016048 | 1954.601  | 1939.491  | U55055    | 826.926   | 1260.268  | NM_000778 | 7198.511  | 8490.443  |
| NM_000375 | 9235.576  | 9386.551  | AB018319  | 821.642   | 609.087   | NM_001609 | 660.834   | 565.143   |
| NM_000265 | 5892.787  | 8235.996  | AK001101  | 1390.91   | 1005.581  | BE733234  | 542.316   | 638.059   |
| NM_018849 | 8201.839  | 8210.446  | BM973473  | 585.187   | 634.413   | NM_012282 | 523.997   | 688.531   |
| M33197    | 55099.238 | 55540.934 | AK021637  | 914.755   | 529.686   | NM_006710 | 317.547   | 398.603   |
| AF015910  | 23833.539 | 21644.613 | U17631    | 1255.431  | 940.208   | NM_003323 | 7089.478  | 7523.001  |
| BC009993  | 2708.97   | 2238.47   | AK000774  | 460.931   | 452.265   | BG685310  | 1167.037  | 1003.727  |
| M33197    | 62367.176 | 59043.723 | AK024046  | 2281.093  | 2003.522  | AW300857  | 21774.758 | 16535.639 |
| NM_016824 | 1107.297  | 683.734   | NM_017931 | 3020.223  | 2612.768  | H85962    | 24355.686 | 20599.244 |
| NM_003031 | 4251.199  | 3618.592  | AK022793  | 842.27    | 602.743   | BG742446  | 1019.925  | 1005.982  |
| NM_007170 | 934.789   | 725.252   | AJ227910  | 1224.936  | 1100.22   | AA864554  | 4002.311  | 5123.447  |
| NM_003008 | 3061.813  | 3140.331  | AF001893  | 898.725   | 526.921   | X66945    | 2123.123  | 2324.491  |
| M33197    | 53053.715 | 55541.273 | X04236    | 16770.18  | 16255.02  | AI160703  | 557.734   | 667.062   |
| AK027244  | 3565.27   | 3558.228  | D16875    | 2278.786  | 2579.208  | K01904    | 12047.622 | 11040.175 |
| L40520    | 7085.06   | 5663.836  | AK027171  | 1089.349  | 1375.527  | BE538886  | 917.764   | 1007.43   |
| NM_002633 | 10171.13  | 7539.215  | AK021945  | 3882.487  | 3282.384  | NM_002228 | 624.849   | 503.934   |
| M33197    | 53926.238 | 57281.133 | L23545    | 1418.502  | 1537.689  | M57650    | 10462.274 | 15534.217 |
| NM_002878 | 5186.306  | 4856.282  | CY3Cy5    | 11154.819 | 1239.075  | BC023978  | 617.108   | 783.392   |
| NM_017723 | 5973.697  | 5129.943  | U13022    | 1477.57   | 992.688   | M21302    | 3597.122  | 3376.949  |



|           |           |           |           |           |           |           |           |           |
|-----------|-----------|-----------|-----------|-----------|-----------|-----------|-----------|-----------|
| AK022922  | 3255.7    | 3099.483  | R23251    | 29979.365 | 24525.428 | NM_01634E | 2410.209  | 1801.205  |
| NM_006462 | 8084.543  | 7865.483  | BG763477  | 1770.224  | 988.84    | AK024865  | 475.342   | 493.272   |
| AK024750  | 1978.112  | 1290.394  | AA702640  | 3187.992  | 2945.08   | U90942    | 49296.461 | 50288.805 |
| NM_00040C | 10532.775 | 8146.738  | T68583    | 6480.875  | 4979.682  | NM_014942 | 610.194   | 1257.479  |
| NM_01588E | 4912.988  | 4199.12   | AA481944  | 57858.695 | 51416.996 | NM_01836C | 1513.302  | 1496.398  |
| AK027157  | 448.987   | 277.394   | X14390    | 2123.815  | 1119.839  | AL365415  | 613.695   | 566.422   |
| NM_01588E | 58976.633 | 56265.434 | AF038440  | 1125.453  | 895.692   | L29147    | 21629.693 | 17457.777 |
| M33197    | 65753.68  | 58745.402 | M31158    | 1528.044  | 1268.336  | NM_00152E | 12528.684 | 10628.673 |
| NM_00427E | 3360.249  | 2933.673  | H00742    | 2686.876  | 2365.496  | NM_00605E | 3300.382  | 2782.298  |
| NM_002332 | 11177.44  | 10970.501 | D42108    | 3515.578  | 3139.066  | NM_00429E | 720.097   | 969.184   |
| NM_00285E | 2521.028  | 2738.741  | BG700922  | 1415.68   | 1204.16   | NM_00504E | 514.366   | 759.465   |
| NM_00524E | 2736.849  | 3581.973  | AI366068  | 25512.908 | 36571.203 | NM_005972 | 642.663   | 1078.622  |
| NM_017651 | 913.628   | 1077.532  | N57553    | 802.395   | 1093.68   | AL133105  | 2245.06   | 2507.776  |
| AF161339  | 5369.782  | 4899.556  | AF080158  | 2606.428  | 2641.571  | AK022859  | 1084.086  | 1264.892  |
| M33197    | 56044.672 | 60775.516 | BM664556  | 2120.307  | 2210.428  | NM_014464 | 837.524   | 871.199   |
| AL137662  | 541.502   | 596.946   | SR7       | 4028.641  | 47040.285 | NM_000214 | 744.719   | 822.378   |
| AK000354  | 7465.105  | 8124.528  | SR9       | 19821.9   | 5856.483  | NM_014864 | 3853.747  | 3517.095  |
| AL161984  | 744.504   | 639.847   | CY3Cy5    | 18659.902 | 2276.04   | NM_00372E | 13102.038 | 13344.083 |
| NM_00395C | 364.634   | 432.545   | M33197    | 68010.5   | 75823.992 | NM_014352 | 6492.002  | 5469.765  |
| NM_014882 | 568.357   | 465.821   | NM_007024 | 9290.898  | 7940.58   | NM_012481 | 1431.936  | 970.804   |
| NM_00083E | 2144.466  | 1933.386  | NM_013231 | 4113.839  | 2659.324  | U68488    | 816.499   | 987.819   |
| M33197    | 58423.91  | 60333.281 | NM_01210E | 5369.617  | 3816.597  | NM_00067E | 391.578   | 423.419   |
| NM_00151C | 720.562   | 504.591   | NM_006254 | 7790.132  | 5739.478  | NM_016247 | 4516.053  | 3729.251  |
| AK024474  | 4567.189  | 4935.069  | X95425    | 3555.511  | 2357.614  | AB011094  | 7598.553  | 8618.169  |
| NM_017901 | 2009.417  | 1828.771  | NM_004422 | 2465.919  | 1714.928  | NM_003224 | 779.435   | 768.271   |
| NM_004272 | 2517.309  | 2077.53   | NM_016562 | 1386.917  | 834.119   | NM_006827 | 10067.268 | 9728.675  |
| NM_01758E | 1224.225  | 940.975   | NM_00489E | 14912.527 | 14067.21  | AK021761  | 4007.079  | 3531.995  |
| AK023582  | 1164.019  | 981.572   | U59748    | 3487.906  | 3860.767  | AK024536  | 1601.323  | 1076.168  |
| NM_00035E | 3180.205  | 3012.82   | L32537    | 1049.287  | 1252.622  | NM_01866E | 3915.671  | 3153.739  |
| NM_00193C | 10237.533 | 8366.454  | NM_014303 | 27064.277 | 41491.234 | NM_004227 | 535.568   | 506.894   |
| AK025270  | 1126.982  | 1696.04   | M95610    | 24357.65  | 27810.824 | NM_005282 | 1849.124  | 1598.786  |
| NM_001564 | 2893.021  | 2438.873  | NM_003118 | 6016.988  | 6557.248  | NM_00173E | 501.833   | 812.794   |
| M33197    | 60621.668 | 61361.148 | L02922    | 20480.955 | 22670.52  | AB028949  | 1091.532  | 1250.112  |
| AF263537  | 36144.414 | 39683.82  | NM_001797 | 2859.495  | 3145.478  | NM_00299E | 38363.344 | 32989.09  |
| NM_01589E | 6103.079  | 6724.636  | NM_003154 | 2732.048  | 2944.981  | AB033114  | 707.98    | 762.197   |
| NM_00018E | 1240.181  | 1263.48   | NM_00423E | 1424.228  | 1625.568  | NM_01597E | 3475.164  | 5169.459  |
| AL050050  | 842.705   | 464.861   | AK023459  | 2780.78   | 3083.015  | NM_00381C | 1918.068  | 1617.878  |
| NM_00469C | 1811.985  | 1038.409  | BI762154  | 789.183   | 1012.102  | NM_00490E | 236.325   | 381.854   |
| M33197    | 58727.219 | 58969.336 | NM_01213E | 8546.253  | 5819.093  | NM_014442 | 2751.692  | 1974.236  |
| NM_013374 | 23615.533 | 21340.904 | AF121856  | 4387.564  | 2762.47   | NM_005212 | 3074.077  | 2621.123  |
| NM_003252 | 8469.35   | 7851.296  | NM_006421 | 4186.92   | 3163.668  | M14584    | 457.634   | 273.307   |
| NM_00122E | 1638.996  | 1557.19   | NM_017457 | 23680.609 | 20042.779 | AB020676  | 643.188   | 390.455   |
| AK026607  | 1047.646  | 829.859   | NM_00376E | 10973.854 | 8186.023  | AK024715  | 581.136   | 518.539   |
| NM_016561 | 21132.668 | 20477.629 | NM_00586E | 1001.709  | 738.661   | BF306955  | 1028.141  | 1152.506  |
| NM_00122E | 4596.634  | 3525.209  | M33197    | 31151.41  | 27092.75  | NM_001394 | 5605.551  | 4992.128  |
| NM_01424E | 22213.152 | 19721.287 | NM_018202 | 21004.176 | 18222.023 | NM_00077E | 6949.038  | 6808.771  |
| M33197    | 57896.18  | 61286.141 | AB023197  | 6908.56   | 6207.638  | NM_00160E | 684.378   | 537.39    |
| AL110226  | 58657.973 | 61388.543 | NM_022173 | 9231.346  | 10092.445 | BE733234  | 437.93    | 657.375   |
| AB046822  | 867.477   | 804.891   | AB040970  | 5833.775  | 7870.225  | NM_02022E | 4740.701  | 3398.604  |
| M33197    | 1856.506  | 2784.697  | NM_01833C | 4840.847  | 5025.27   | AK024685  | 1274.394  | 959.583   |
| AK024809  | 735.786   | 776.786   | AB023222  | 1428.198  | 2176.776  | NM_00367E | 8402.118  | 8414.739  |
| NM_00030E | 5205.353  | 5098.303  | M33197    | 68120.492 | 71206.469 | AF113007  | 906.629   | 979.593   |
| X69636    | 4677.652  | 3937.161  | U50342    | 3254.213  | 3841.54   | NM_00068E | 3392.813  | 2688.192  |

|           |           |           |           |           |           |           |           |           |
|-----------|-----------|-----------|-----------|-----------|-----------|-----------|-----------|-----------|
| M33197    | 54247.129 | 54151.742 | NM_000295 | 960.133   | 1115.689  | U39573    | 1068.31   | 1122.886  |
| NM_004173 | 18726.717 | 18681.945 | AF103795  | 1484.658  | 1983.623  | D82061    | 1870.715  | 1908.517  |
| NM_013974 | 6409.636  | 6554.106  | NM_006215 | 864.113   | 1318.129  | AJ293009  | 1339.418  | 1395.045  |
| NM_017547 | 2613.089  | 2845.815  | U80018    | 932.107   | 715.335   | NM_000374 | 2597.437  | 2816.051  |
| NM_003983 | 5248.866  | 4724.212  | NM_000717 | 2523.132  | 1355.35   | NM_000502 | 10666.872 | 12772.091 |
| AK023708  | 1422.417  | 1031.886  | M33197    | 68249.508 | 67083.75  | NM_001355 | 15755.201 | 17607.715 |
| NM_002108 | 2343.746  | 1831.698  | NM_004845 | 2856.123  | 1674.46   | NM_001696 | 8022.071  | 9208.376  |
| M33197    | 59216.242 | 56648.563 | NM_007107 | 14810.7   | 10541.145 | NM_004975 | 7446.925  | 4218.225  |
| NM_018464 | 18851.105 | 15895.827 | NM_000047 | 17834.049 | 12101.318 | NM_002245 | 209.114   | 176.596   |
| D43948    | 2365.821  | 1597.64   | M68874    | 2551.583  | 2318.663  | D87445    | 5330.013  | 3571.832  |
| NM_012310 | 7585.255  | 5874.475  | NM_006319 | 3958.025  | 3298.202  | NM_000238 | 3636.051  | 3221.241  |
| BE410824  | 723.262   | 496.854   | NM_018226 | 6196.396  | 5302.019  | NM_002247 | 663.156   | 516.073   |
| BF382116  | 11385.566 | 9108.906  | NM_004605 | 1182.469  | 943.786   | NM_004980 | 13770.018 | 11778.002 |
| NM_003193 | 9121.491  | 8103.108  | Z36813    | 6283.885  | 6802.865  | NM_016346 | 2665.801  | 2841.006  |
| AK055825  | 65613.109 | 69151.25  | NM_006660 | 7528.332  | 7861.561  | AK024865  | 328.238   | 321.068   |
| M33197    | 59279.719 | 59685.09  | NM_004727 | 837.611   | 818.699   | NM_007210 | 298.349   | 314.821   |
| AF113216  | 933.42    | 852.604   | M33197    | 18475.646 | 21830.246 | NM_001483 | 916.804   | 711.72    |
| NM_005197 | 8104.261  | 9267.448  | NM_004045 | 9298.761  | 11373.774 | NM_018973 | 7249.679  | 6042.035  |
| AL137421  | 53453.918 | 50902.523 | NM_001891 | 4009.755  | 4544.494  | NM_002591 | 13235.232 | 11718.159 |
| M33197    | 65540.844 | 66788.008 | NM_001440 | 30024.264 | 22250.836 | NM_020216 | 4121.275  | 4235.853  |
| NM_007241 | 785.921   | 1032.721  | NM_001201 | 751.874   | 674.861   | AK021860  | 1636.523  | 1980.06   |
| NM_000124 | 1270.816  | 1584.243  | NM_016618 | 4124.521  | 2105.826  | NM_016457 | 684.624   | 843.363   |
| NM_017996 | 3675.014  | 4100.401  | AB014568  | 27866.879 | 17847.102 | NM_005057 | 784.085   | 683.699   |
| NM_014517 | 2953.64   | 2992.625  | NM_012249 | 6548.811  | 4155.586  | AF143321  | 710.552   | 509.575   |
| NM_005466 | 1310.304  | 1165.553  | AK022546  | 7070.014  | 4914.86   | AB046842  | 980.472   | 622.051   |
| NM_004269 | 1552.381  | 1772.597  | NM_014067 | 8855.244  | 5800.05   | NM_004850 | 1286.048  | 1211.459  |
| NM_003409 | 595.866   | 397.596   | NM_002914 | 4609.722  | 3470.96   | NM_002822 | 2127.413  | 1516.287  |
| M33197    | 62997.02  | 59098.281 | NM_020385 | 2748.83   | 2179.877  | NM_014352 | 6316.439  | 6963.974  |
| D31765    | 1232.689  | 1412.452  | NM_014877 | 769.396   | 836.916   | NM_012481 | 2426.947  | 2146.646  |
| NM_006107 | 10599.248 | 6860.794  | NM_006541 | 1306.308  | 1330.918  | L09102    | 32342.131 | 30791.707 |
| NM_004175 | 2020.832  | 1783.167  | M33197    | 68323.867 | 84644.383 | U68488    | 1015.26   | 1225.769  |
| AF288288  | 25849.932 | 22315.229 | NM_005705 | 7377.196  | 8638.386  | NM_000675 | 353.547   | 497.185   |
| NM_017646 | 5827.552  | 5228.65   | NM_004328 | 2289.516  | 2278.435  | NM_016247 | 3797.175  | 3068.074  |
| AL050368  | 1533.886  | 1441.464  | NM_004581 | 4147.447  | 4386.596  | NM_012282 | 455.033   | 387.038   |
| NM_003092 | 10957.173 | 9144.355  | NM_006817 | 25226.303 | 26650.959 | NM_006710 | 393.23    | 397.812   |
| M33197    | 58097.91  | 59695.316 | NM_015921 | 42197.715 | 51395.371 | NM_003323 | 7126.845  | 5615.395  |
| NM_005861 | 1897.772  | 1488.952  | AB040900  | 15884.17  | 20082.965 | BG685310  | 1254.324  | 974.499   |
| NM_018848 | 3251.211  | 2599.582  | NM_001080 | 778.278   | 986.665   | AW300857  | 22185.182 | 18158.93  |
| NM_003760 | 3566.749  | 3028.177  | NM_001482 | 1293.003  | 1336.886  | H85962    | 28210.662 | 24030.959 |
| AB037759  | 1302.037  | 766.274   | NM_001797 | 2560.145  | 1874.729  | BG742446  | 1251.547  | 1001.648  |
| AK025998  | 4460.063  | 3447.509  | NM_003154 | 3653.733  | 2751.651  | AA864554  | 3748.646  | 4247.46   |
| AL080080  | 8799.791  | 6031.517  | NM_004235 | 1645.963  | 1071.289  | X66945    | 2515.296  | 2729.252  |
| NM_018482 | 2509.283  | 2655.665  | AK023459  | 4053.972  | 2880.301  | AI160703  | 576.799   | 801.141   |
| NM_017880 | 1701.463  | 2685.196  | U13022    | 1916.612  | 1249.651  | X12830    | 5912.695  | 9989.153  |
| AF090945  | 5002.461  | 4602.954  | R23251    | 29136.361 | 23921.51  | K01904    | 11466.45  | 12962.825 |
| M33197    | 59958.828 | 58069.105 | BG763477  | 1078.775  | 1040.903  | BE538886  | 1007.312  | 797.041   |
| NM_001161 | 6575.153  | 6034.075  | AA702640  | 3284.711  | 2733.649  | NM_002228 | 450.002   | 327.235   |
| NM_004044 | 7814.795  | 8263.815  | T68583    | 6245.463  | 5384.586  | M57650    | 10996.749 | 7594.729  |
| NM_000221 | 22597.268 | 22148.953 | X14390    | 1381.643  | 1589.394  | BC023978  | 613.08    | 459.896   |
| H75678    | 2003.558  | 1734.296  | AF038440  | 1421.107  | 1888.525  | M21302    | 3277.916  | 2742.26   |
| NM_006452 | 9109.193  | 8849.867  | M31158    | 1904.153  | 1821.709  | NM_005212 | 3009.559  | 2512.158  |
| AB002359  | 3823.146  | 3328.412  | BG700922  | 1262.738  | 1081.354  | M14584    | 538.432   | 592.911   |
| M33197    | 4419.911  | 4408.342  | AI366068  | 25513.768 | 30739.785 | NM_006419 | 1315.245  | 1122.628  |

|           |           |           |           |           |           |           |           |           |
|-----------|-----------|-----------|-----------|-----------|-----------|-----------|-----------|-----------|
| AB007864  | 1369.325  | 1188.182  | N57553    | 868.032   | 1077.927  | AF035035  | 338.544   | 338.385   |
| NM_00219E | 3134.515  | 2755.164  | AF080158  | 2519.536  | 2645.336  | AB020676  | 592.24    | 600.229   |
| AF024693  | 896.091   | 724.901   | BM664556  | 2109.634  | 2367.301  | NM_014942 | 390.512   | 215.646   |
| AK025905  | 2217      | 1581.561  | NM_016545 | 1810.496  | 1728.273  | NM_01836C | 2010.462  | 1631.199  |
| AL121733  | 1275.255  | 1215.777  | NM_00029E | 1661.298  | 945.638   | AL365415  | 554.693   | 520.177   |
| BE958072  | 961.666   | 607.237   | AF026932  | 796.118   | 748.823   | L29147    | 23628.99  | 20221.285 |
| M33197    | 47464.328 | 35620.422 | AF103795  | 1731.514  | 931.182   | NM_00152E | 13686.989 | 11753.778 |
| NM_017532 | 486.805   | 535.965   | NM_00621E | 1150.008  | 697.766   | NM_00605E | 3761.315  | 3442.493  |
| NM_01448C | 2724.424  | 2486.124  | M33197    | 68271.438 | 83737.594 | NM_00429E | 923.178   | 870.783   |
| NM_00593E | 761.93    | 565.948   | NM_007024 | 9143.051  | 6424.174  | NM_00504E | 616.097   | 700.049   |
| NM_01416E | 5655.723  | 4787.411  | NM_013231 | 4339.291  | 2931.729  | NM_005972 | 740.96    | 749.068   |
| NM_004964 | 12224.452 | 10993.119 | NM_01210E | 4984.327  | 3772.9    | NM_00106C | 2037.009  | 3034.91   |
| AL117497  | 1328.906  | 1164.134  | X95425    | 3457.968  | 3503.373  | NM_00522E | 535.326   | 714.728   |
| AF075016  | 824.891   | 789.691   | NM_004422 | 2999.043  | 3127.684  | AL133105  | 2183.873  | 2608.712  |
| AF147437  | 2195.025  | 1812.516  | NM_016562 | 1225.854  | 1191.637  | AK022859  | 1213.804  | 1211.134  |
| M33197    | 54253.246 | 57386.336 | NM_00489E | 14769.983 | 12450.73  | NM_000214 | 633.081   | 539.319   |
| AF147360  | 1007.255  | 1225.788  | U59748    | 3344.314  | 3738.501  | NM_014864 | 3792.013  | 2343.221  |
| AL137269  | 5137.294  | 5735.855  | L32537    | 1149.752  | 929.495   | NM_00372E | 11479.463 | 10890.974 |
| AK021983  | 2233.869  | 2083.407  | NM_014303 | 23937.705 | 25542.834 | NM_00497E | 12519.866 | 10637     |
| Y11681    | 8475.836  | 9743.881  | M33197    | 67943.43  | 65682.773 | NM_00224E | 303.463   | 260.439   |
| AL110135  | 21791.16  | 17436.631 | M95610    | 26784.555 | 24828.229 | D87445    | 4744.12   | 6026.942  |
| NM_006993 | 9001.098  | 8085.272  | L02922    | 20655.834 | 23838.295 | NM_00023E | 3102.408  | 2213.206  |
| NM_00233E | 821.016   | 747.849   | M33197    | 21989.785 | 14373.704 | NM_002247 | 622.068   | 559.588   |
| M33197    | 57924.422 | 59421.316 | NM_00404E | 12904.742 | 9170.877  | NM_00498C | 12478.184 | 10628.054 |
| AF086429  | 553.268   | 513.581   | NM_001891 | 3551.134  | 2587.899  | NM_003224 | 827.44    | 764.088   |
| AF086439  | 952.877   | 732.008   | NM_01213E | 9001.896  | 6524.845  | NM_00165E | 55283.695 | 64122.898 |
| M33197    | 57147.008 | 58178.852 | AF121856  | 3961.524  | 2955.451  | NM_006827 | 10354.054 | 8016.816  |
| AF038171  | 715.031   | 424.702   | NM_006421 | 4129.942  | 3916.572  | AK021761  | 5143.6    | 4177.693  |
| AF052160  | 824.98    | 709.157   | NM_017457 | 24340.25  | 31631.766 | AK024536  | 1181.052  | 1145.667  |
| AK026512  | 1981.738  | 1650.167  | NM_00376E | 10841.482 | 10917.723 | NM_01866E | 4942.724  | 3824.345  |
| M33197    | 68324.969 | 64162.949 | NM_00586E | 846.868   | 1014.785  | NM_004227 | 757.845   | 587.129   |
| AF144233  | 3495.998  | 3548.976  | M33197    | 65887.5   | 61577.754 | NM_005282 | 2298.545  | 1905.531  |
| AF085975  | 2309.648  | 2170.539  | NM_018202 | 19404.551 | 17338.191 | NM_00173E | 821.681   | 1050.476  |
| AF075103  | 568.727   | 759.845   | AB023197  | 5834.572  | 4751.448  | AB028949  | 1382.772  | 1839.309  |
| M33197    | 59267.984 | 55895.055 | NM_022173 | 8781.375  | 8429.917  | AL137580  | 462.966   | 427.655   |
| AL137390  | 1658.683  | 2204.698  | AB040970  | 4834.576  | 4858.829  | NM_004101 | 714.301   | 828.668   |
| AL137611  | 5950.347  | 7196.257  | NM_01833C | 4424.099  | 4445.686  | NM_00299E | 43904.426 | 40215.379 |
| AL359566  | 28405.906 | 29442.668 | AB023222  | 1414.284  | 1268.576  | AB033114  | 638.304   | 979.816   |
| AL137427  | 2796.077  | 2707.076  | AB033088  | 1275.796  | 1139.621  | NM_01597E | 2502.622  | 2655.202  |
| AL157460  | 5063.436  | 3724.818  | M33197    | 68016.195 | 66685.867 | NM_00381C | 2057.168  | 1282.944  |
| AL359595  | 592.944   | 609.34    | U50342    | 2478.844  | 2884.985  | NM_00490E | 378.895   | 317.243   |
| M33197    | 58113.258 | 58715.215 | NM_015921 | 52256.828 | 45152.238 | NM_016171 | 51637.664 | 66040.828 |
| AK026718  | 1524.609  | 1638.496  | AB040900  | 19640.717 | 16018.22  | NM_014443 | 3361.036  | 2691.963  |
| AK022035  | 6556.334  | 6301.938  | NM_00108C | 1174.94   | 581.104   | NM_016457 | 587.578   | 605.711   |
| M33197    | 60462.223 | 63423.578 | NM_001482 | 1828.377  | 1090.268  | NM_005057 | 603.21    | 664.231   |
| NM_004337 | 1983.431  | 1979.133  | U80018    | 1189.709  | 841.011   | AF143321  | 523.594   | 450.073   |
| AK022141  | 1380.925  | 1494.89   | NM_000717 | 2762.496  | 1610.998  | AB046842  | 1055.577  | 755.592   |
| AK023942  | 31190.963 | 29544.523 | M33197    | 68136.531 | 67695.953 | NM_00485C | 1073.442  | 1124.702  |
| M33197    | 60080.172 | 55510.461 | NM_00484E | 3167.918  | 2712.587  | NM_002822 | 2112.78   | 1910.583  |
| AK027207  | 1812.418  | 2178.52   | NM_007107 | 15036.375 | 17486.998 | BF306955  | 1219.609  | 852.619   |
| AF083120  | 593.928   | 817.195   | NM_000047 | 18840.83  | 17777.535 | NM_001394 | 5529.632  | 3683.484  |
| AJ227892  | 6444.506  | 7549.328  | M68874    | 2582.438  | 3017.28   | NM_018441 | 6588.796  | 4635.477  |
| M33197    | 55997.156 | 57693.41  | NM_00631E | 4505.683  | 4675.33   | NM_00077E | 7369.948  | 6486.661  |

|           |           |           |           |           |           |           |           |           |
|-----------|-----------|-----------|-----------|-----------|-----------|-----------|-----------|-----------|
| AK022013  | 1407.67   | 2267.84   | NM_018226 | 5240.589  | 6122.087  | NM_001605 | 662.568   | 630.165   |
| AK022155  | 2880.049  | 3164.011  | NM_004605 | 1008.299  | 1029.772  | BE733234  | 471.868   | 543.334   |
| AK022288  | 1295.068  | 1892.682  | Z36813    | 6599.284  | 6121.554  | NM_020228 | 5959.315  | 4309.51   |
| AK021916  | 900.469   | 1199.226  | NM_006660 | 6989.367  | 8353.075  | AK024685  | 1860.034  | 1649.698  |
| AK024201  | 1776.25   | 1401.845  | NM_004727 | 1058.116  | 1388.404  | NM_003676 | 8982.567  | 9835.342  |
| M33197    | 60892.758 | 60641.566 | AF080158  | 3136.383  | 2152.532  | AF113007  | 1030.998  | 1111.932  |
| AK023891  | 327.483   | 284.201   | BM664556  | 2199.058  | 1634.65   | NM_000688 | 3340.766  | 4130.654  |
| AK026878  | 511.275   | 560.148   | M33197    | 68919.656 | 62390.344 | U39573    | 1099.707  | 1496.043  |
| AK000777  | 962.978   | 982.384   | NM_016545 | 2566.147  | 1573.147  | D82061    | 2138.965  | 2473.95   |
| AK021589  | 1678.645  | 1648.633  | NM_001440 | 29465.326 | 21062.664 | AJ293009  | 2006.972  | 2105.215  |
| D17152    | 8453.062  | 10460.766 | NM_001201 | 1199.12   | 436.996   | NM_000374 | 2902.558  | 2399.119  |
| AK024464  | 12122.206 | 12532.635 | NM_016618 | 4956.344  | 2542.451  | NM_000502 | 8436.724  | 8818.926  |
| AK023638  | 792.544   | 814.833   | AB014568  | 32163.932 | 21858.658 | NM_001355 | 17171.777 | 14717.796 |
| M33197    | 1006.727  | 1142.196  | NM_012249 | 7908.726  | 6162.093  | NM_005175 | 22814.135 | 17532.787 |
| AK025423  | 3065.471  | 3567.687  | AK022546  | 7727.846  | 9523.508  | NM_001696 | 8394.079  | 10182.214 |
| M33197    | 56940.996 | 59201.871 | NM_014067 | 10264.603 | 10350.426 | AF190900  | 2576.069  | 2298.219  |
| AL049846  | 1137.481  | 1156.815  | NM_020385 | 2307.866  | 1931.639  | NM_020404 | 15980.548 | 12517.628 |
| AK024161  | 1277.149  | 1319.991  | NM_014877 | 769.361   | 856.768   | BE972401  | 5457.697  | 3436.778  |
| AK021682  | 14828.689 | 17049.57  | NM_006541 | 1199.823  | 978.506   | NM_017425 | 713.056   | 476.208   |
| AJ012500  | 1829.645  | 1773.627  | M33197    | 68059.5   | 69886.492 | AB007922  | 377.104   | 300.278   |
| U00944    | 1513.003  | 1648.266  | NM_005705 | 7173.022  | 8508.806  | NM_015982 | 1341.046  | 1030.249  |
| BC035058  | 1519.132  | 1835.043  | NM_004328 | 2423.715  | 2081.812  | NM_003746 | 13101.887 | 9567.774  |
| X57566    | 4980.176  | 5033.562  | NM_004581 | 4517.574  | 4836.064  | NM_002910 | 29729.137 | 17806.357 |
| M33197    | 64445.531 | 60574.148 | NM_006817 | 21979.961 | 25820.85  | AC096970  | 21562.982 | 16623.523 |
| NM_018616 | 6489.879  | 9166.785  | M33197    | 67909.742 | 64710.664 | AK024865  | 341.408   | 359.037   |
| AK023809  | 2663.584  | 3163.266  | M95610    | 29996.025 | 23353.736 | NM_007210 | 269.857   | 215.316   |
| M87943    | 57043.32  | 58022.457 | NM_003118 | 8481.281  | 5110.099  | NM_001483 | 1375.462  | 1100.064  |
| AL360137  | 1789.203  | 2007.48   | L02922    | 27448.01  | 21300.984 | NM_018973 | 8800.444  | 10137.443 |
| U28131    | 60440.613 | 58206.43  | NM_001797 | 3050.618  | 2219.16   | NM_002591 | 16816.135 | 20604.164 |
| AY007106  | 10606.36  | 9246.628  | NM_003154 | 3305.28   | 2380.391  | NM_020216 | 4278.885  | 4510.287  |
| M33197    | 58910.336 | 54908.52  | NM_004235 | 2045.976  | 1140.881  | AK021860  | 1047.631  | 1062.884  |
| NM_006088 | 39778.34  | 37271.988 | AK023459  | 3738.538  | 2976.122  | AK000119  | 281.899   | 324.176   |
| NM_018265 | 1463.909  | 1405.602  | BI762154  | 974.659   | 924.834   | AB046816  | 786.458   | 751.553   |
| AF130086  | 1770.844  | 1527.378  | U13022    | 2120.957  | 1701.182  | AL137266  | 2847.112  | 3449.617  |
| AK023858  | 4451.775  | 3963.928  | R23251    | 26773.334 | 28419.207 | U95031    | 383.515   | 434.533   |
| M33197    | 56121.59  | 59026.66  | BG763477  | 1282.891  | 1824.013  | NM_014288 | 3112.979  | 2388.845  |
| AF250920  | 5164.954  | 4782.384  | AA702640  | 3099.099  | 3260.489  | AF035300  | 636.956   | 796.421   |
| NM_017733 | 2492.342  | 3018.641  | X14390    | 1175.218  | 1739.962  | NM_017703 | 4472.665  | 4240.01   |
| NM_014042 | 3351.714  | 4202.918  | AF038440  | 969.116   | 1225.7    | NM_015320 | 1257.45   | 1119.109  |
| M33197    | 63373.824 | 58872.203 | M31158    | 1678.714  | 1483.171  | NM_004055 | 1353.667  | 1356.062  |
| AF317550  | 823.184   | 870.138   | H00742    | 2946.57   | 3337.979  | NM_014726 | 7501.839  | 7766.066  |
| NM_003543 | 459.747   | 516.373   | D42108    | 3780.682  | 4424.093  | NM_000926 | 1549.678  | 2646.186  |
| AK025416  | 723.403   | 803.814   | BG700922  | 1167.342  | 1122.9    | AJ297349  | 948.809   | 973.43    |
| AK022165  | 475.068   | 636.099   | AI366068  | 21862.486 | 28030.094 | NM_005828 | 1572.748  | 1226.519  |
| M33197    | 60374.996 | 55662.797 | N57553    | 810.827   | 1143.93   | NM_001619 | 1297.819  | 803.876   |
| AL049263  | 994.722   | 647.112   | AB040970  | 6268.511  | 3990.591  | NM_006595 | 1673.198  | 1313.633  |
| AK022372  | 3186.863  | 3751.473  | NM_018330 | 5492.048  | 4100.771  | NM_005936 | 907.991   | 971.377   |
| AJ227863  | 1805.399  | 1462.816  | AB023222  | 1718.539  | 1098.909  | U43586    | 1073.816  | 1787.546  |
| NM_015916 | 1520.605  | 1070.788  | AB033088  | 1701.775  | 816.553   | NM_006271 | 5314.778  | 6408.378  |
| AL137380  | 2719.031  | 3124.099  | M33197    | 68172.242 | 67524.727 | NM_018647 | 435.91    | 359.336   |
| M33197    | 53988.141 | 59209.316 | U50342    | 3910.471  | 2509.62   | NM_003026 | 293.007   | 363.32    |
| AL137658  | 14246.764 | 13367.404 | NM_000295 | 1516.082  | 979.881   | NM_003933 | 1248.974  | 1478.654  |
| D16888    | 4320.554  | 4538.332  | AF103795  | 1693.809  | 1202.454  | NM_018640 | 318.844   | 395.261   |

|           |           |           |           |           |           |           |           |           |
|-----------|-----------|-----------|-----------|-----------|-----------|-----------|-----------|-----------|
| U79277    | 456.364   | 435.885   | NM_006215 | 1203.202  | 872.142   | NM_005095 | 2648.704  | 2047.014  |
| AF068298  | 2966.2    | 2770.862  | NM_013231 | 4438.004  | 4143.163  | NM_003163 | 13365.765 | 16277.529 |
| Z70770    | 1408.873  | 1198.629  | NM_012106 | 4885.746  | 5082.058  | NM_019057 | 2398.164  | 2054.57   |
| AJ227900  | 4573.49   | 4865.997  | X95425    | 3797.827  | 3783.765  | NM_002677 | 695.869   | 895.611   |
| AK023242  | 1361.173  | 1374.244  | NM_004422 | 2664.735  | 2402.645  | NM_016205 | 1296.806  | 922.375   |
| M33197    | 59369.137 | 61859.293 | NM_016562 | 1402.581  | 1166.628  | NM_005755 | 506.221   | 560.316   |
| CY3Cy5    | 10225.213 | 846.217   | M33197    | 67877.859 | 65124.297 | AF149724  | 803.932   | 809.064   |
| Y10802    | 296.746   | 484.308   | AY009399  | 13467.978 | 17162.904 | BC020745  | 509.455   | 421.832   |
| BI762229  | 3794.291  | 4109.295  | NM_004895 | 13303.805 | 12612.346 | NM_006367 | 39940.957 | 31430.574 |
| BG618320  | 4662.504  | 4236.747  | U59748    | 2870.829  | 3611.198  | NM_001241 | 623.206   | 553.049   |
| Y00787    | 2365.645  | 2579.018  | L32537    | 858.281   | 942.505   | AF217504  | 969.934   | 676.68    |
| NM_007276 | 4306.146  | 3643.562  | NM_014303 | 16230.825 | 23393.631 | AK027102  | 3011.385  | 2457.321  |
| N34462    | 10091.682 | 9041.684  | NM_006660 | 8492.624  | 6791.596  | AL109714  | 720.516   | 954.734   |
| AI658778  | 3519.894  | 4538.069  | NM_004727 | 916.584   | 718.703   | NM_004632 | 3014.723  | 2767.618  |
| L19067    | 3780.317  | 4235.794  | M33197    | 22094.164 | 15759.402 | NM_017919 | 2835.853  | 2301.265  |
| Z48482    | 1915.771  | 1871.082  | NM_004045 | 12284.698 | 8305.75   | NM_014456 | 2793.782  | 2329.335  |
| W60413    | 2003.071  | 2444.75   | NM_001891 | 4736.232  | 3246.537  | NM_004740 | 2930.034  | 2347.098  |
| BI823365  | 2608.079  | 3063.703  | NM_012139 | 9144.268  | 8529.553  | NM_019886 | 2555.449  | 2582.904  |
| X06318    | 8366.538  | 10102.604 | AF121856  | 3602.386  | 3566.805  | NM_003278 | 39305.289 | 29680.043 |
| AL834159  | 5581.906  | 6565.004  | NM_006421 | 3706.127  | 3721.944  | NM_000426 | 847.653   | 840.793   |
| NM_000164 | 22531.207 | 21134.141 | NM_017457 | 20363.313 | 20788.055 | AK021957  | 40676.289 | 40534.508 |
| SR5       | 5368.691  | 5450.736  | NM_003765 | 10932.535 | 10723.572 | NM_016623 | 3547.06   | 4290.115  |
| SR7       | 7147.803  | 50572.625 | NM_005868 | 827.001   | 991.121   | NM_001334 | 5728.017  | 5599.43   |
| SR9       | 31989.426 | 8668.709  | M33197    | 64073.035 | 62700.375 | NM_004771 | 1698.358  | 3057.781  |
| CY3Cy5    | 12327.399 | 1516.932  | NM_018202 | 13240.056 | 14906.134 | AL365514  | 491.821   | 477.398   |
| NM_003682 | 892.034   | 986.472   | AB023197  | 5248.048  | 7257.356  | NM_018295 | 844.58    | 696.936   |
| NM_000207 | 754.642   | 820.321   | NM_022173 | 3460.853  | 4910.39   | NM_017832 | 4926.8    | 4433.621  |
| NM_002531 | 3736.763  | 2914.875  | M33197    | 68136.945 | 68757.523 | NM_001713 | 2127.554  | 1945.964  |
| NM_006314 | 8684.719  | 8045.96   | NM_005705 | 7764.78   | 6886.29   | NM_015367 | 4101.22   | 4546.285  |
| NM_001782 | 943.659   | 878.359   | NM_004328 | 3049.476  | 2266.252  | NM_014498 | 4161.932  | 2786.292  |
| NM_002754 | 767.331   | 840.384   | NM_004581 | 5714.81   | 3794.005  | NM_002375 | 12187.855 | 10503.541 |
| NM_000797 | 2237.313  | 2386.954  | NM_006817 | 28514.512 | 20275.391 | NM_000988 | 56290.723 | 66248.961 |
| NM_014927 | 372.53    | 619.842   | NM_015921 | 50575.367 | 39334.289 | NM_001813 | 1290.697  | 911.006   |
| NM_016293 | 11788.853 | 11287.635 | AB040900  | 20786.379 | 16216.576 | AF055016  | 3205.697  | 2396.912  |
| AF217525  | 535.733   | 194.166   | NM_001080 | 1194.749  | 834.033   | NM_007234 | 5864.537  | 4832.962  |
| AL080148  | 11842.912 | 12135.156 | NM_001482 | 1993.694  | 1349.152  | Y16704    | 58232.887 | 67577.555 |
| NM_006731 | 1353.489  | 1483.178  | U80018    | 1111.91   | 1034.467  | NM_014567 | 2693.346  | 3109.37   |
| NM_018487 | 524.94    | 408.039   | NM_000717 | 2878.402  | 2253.523  | NM_017842 | 1233.657  | 1402.081  |
| NM_020134 | 2250.423  | 2103.917  | M33197    | 65346.383 | 63816.621 | AB037809  | 916.155   | 997.51    |
| NM_014061 | 2365.051  | 3121.46   | NM_004845 | 3374.895  | 4195.079  | NM_004270 | 979.905   | 1007.73   |
| BC034395  | 1166.712  | 1276.191  | NM_007107 | 12668.707 | 13783.954 | NM_001537 | 1628.488  | 2033.318  |
| NM_002479 | 1129.826  | 1331.162  | NM_000047 | 17885.012 | 17677.068 | U80743    | 825.962   | 887.475   |
| NM_000348 | 15083.023 | 15133.399 | M68874    | 2623.053  | 3953.834  | NM_014473 | 6355.278  | 4807.675  |
| NM_005059 | 847.165   | 1100.255  | NM_006319 | 4212.065  | 5361.985  | NM_003095 | 51919.328 | 58741.461 |
| NM_000724 | 3672.902  | 3829.432  | NM_018226 | 5055.585  | 7758.713  | NM_016385 | 1192.23   | 777.448   |
| NM_002557 | 5551.726  | 6130.405  | NM_004605 | 1053.472  | 1391.392  | NM_002295 | 52314.004 | 45831.797 |
| NM_004477 | 744.046   | 589.897   | Z36813    | 4554.397  | 5887.309  | NM_003133 | 11625.623 | 7050.072  |
| BE728156  | 432.005   | 844.314   | AB018327  | 2805.02   | 1866.835  | NM_001762 | 5521.869  | 3577.366  |
| NM_005662 | 29237.709 | 28354.018 | AF303889  | 1409.687  | 944.685   | NM_016306 | 10199.441 | 6633.031  |
| NM_003060 | 437.078   | 546.594   | M33197    | 64637.793 | 62973.336 | NM_003755 | 542.507   | 813.599   |
| AK021489  | 27284.547 | 25081.904 | AK022649  | 6030.46   | 3804.901  | NM_013238 | 4010.799  | 4194.475  |
| NM_004525 | 3434.966  | 3304.818  | NM_016507 | 6137.742  | 4212.245  | BE258640  | 9064.586  | 9422.13   |
| NM_003895 | 804.5     | 853.605   | NM_002024 | 8438.963  | 5237.676  | NM_003314 | 3661.49   | 4147.065  |

|           |           |           |           |           |           |           |           |           |
|-----------|-----------|-----------|-----------|-----------|-----------|-----------|-----------|-----------|
| NM_004317 | 5848.823  | 5945.875  | NM_002743 | 10463.093 | 7342.326  | NM_002512 | 27784.156 | 24634.938 |
| NM_014645 | 1632.767  | 1678.652  | AF173358  | 16008.89  | 11771.25  | AL365411  | 1297.931  | 1495.917  |
| NM_014705 | 4224.943  | 3375.753  | NM_016366 | 3754.356  | 3209.381  | AY004252  | 449.832   | 541.316   |
| NM_003693 | 1591.578  | 1275.356  | M33197    | 68212.555 | 65407.992 | NM_006261 | 2227.156  | 1548.332  |
| NM_000356 | 20508.164 | 17686.291 | NM_016545 | 2417.722  | 1937.529  | AK027045  | 602.226   | 471.098   |
| NM_018134 | 45451.469 | 36624.5   | NM_001440 | 29742.857 | 27038.043 | AF169796  | 1436.416  | 1048.919  |
| NM_013247 | 4110.601  | 4273.247  | NM_001201 | 1090.493  | 875.555   | AK001814  | 2913.936  | 2493.93   |
| NM_006770 | 4206.27   | 4039.861  | NM_016615 | 5669.586  | 6869.081  | NM_007222 | 1242.761  | 1473.963  |
| BE394704  | 857.143   | 1357.234  | AB014568  | 33077.879 | 32852.527 | NM_003435 | 1619.583  | 1964.591  |
| NM_004703 | 3143.97   | 3512.842  | NM_012249 | 9150.016  | 9980.118  | NM_016291 | 2745.7    | 2462.562  |
| NM_001512 | 1052.134  | 1304.921  | AK022546  | 7182.835  | 7881.043  | NM_005937 | 37208.832 | 33440.172 |
| NM_014706 | 5932.958  | 7987.984  | NM_014067 | 11906.675 | 14179.062 | AK023259  | 2428.314  | 1415.749  |
| AK023172  | 793.93    | 1096.507  | NM_002914 | 5061.666  | 6698.13   | AK022880  | 1801.786  | 1654.716  |
| AF139768  | 600.739   | 601.497   | NM_020385 | 2550.74   | 2907.377  | NM_003601 | 5009.539  | 6188.77   |
| AJ001348  | 1014.018  | 829.204   | NM_006541 | 1067.531  | 1344.124  | AF088047  | 290.546   | 403.118   |
| NM_014007 | 1652.786  | 1785.111  | NM_018179 | 1632.642  | 766.066   | AF086281  | 766.244   | 668.397   |
| AB033006  | 3723.671  | 3862.566  | NM_006197 | 10261.283 | 3649.248  | AF086372  | 187.013   | 188.964   |
| AF020314  | 15103.834 | 17217.285 | NM_014181 | 1093.625  | 596.59    | AF086393  | 1132.046  | 1088.053  |
| NM_016332 | 13539.207 | 14683.954 | M29273    | 3135.492  | 1705.423  | AF086453  | 526.423   | 1045.483  |
| AK023936  | 535.151   | 729.786   | M33197    | 65625.313 | 60577.383 | AF070621  | 3862.076  | 3972.07   |
| NM_006457 | 1038.151  | 1819.61   | NM_004854 | 6281.542  | 3973.085  | NM_020240 | 1224.897  | 1556.312  |
| AF000381  | 6418.311  | 5273.768  | AJ245418  | 14376.61  | 9745.622  | AK023678  | 5004.363  | 3854.59   |
| NM_018075 | 748.582   | 554.236   | NM_006377 | 5839.062  | 4041.803  | AF052090  | 2903.092  | 2798.667  |
| NM_012105 | 864.334   | 866.777   | AK026427  | 1458.112  | 886.839   | AK023718  | 1516.63   | 1781.078  |
| S82470    | 3282.048  | 2836.76   | NM_002436 | 5786.483  | 3957.688  | AF075089  | 2463.234  | 2448.019  |
| AB028982  | 2088.248  | 1732.24   | NM_018362 | 4680.891  | 3805.373  | AF241255  | 569.645   | 739.808   |
| NM_002004 | 6599.368  | 5998.187  | M33197    | 68212.047 | 66765.078 | AF086007  | 53128.266 | 62399.59  |
| NM_005121 | 901.169   | 729.901   | NM_004755 | 1127.021  | 1099.251  | AK000803  | 1506.846  | 1578.256  |
| NM_001643 | 23803.887 | 22015.367 | NM_002186 | 3820.589  | 3763.431  | AK022374  | 526.354   | 655.347   |
| AK021818  | 178.218   | 366.658   | NM_006182 | 1606.673  | 1448.833  | AF085926  | 8597.236  | 8189.907  |
| NM_020221 | 1739.325  | 1943.844  | AL137543  | 4848.277  | 4343.712  | AL137307  | 1819.166  | 2004.775  |
| NM_000747 | 2108.779  | 2044.738  | NM_004444 | 12261.797 | 12399.63  | AL162045  | 597.646   | 590.63    |
| NM_005415 | 4396.177  | 4494.708  | M33197    | 1952.995  | 1958.93   | AK022437  | 9078.21   | 6723.932  |
| AL137708  | 806.974   | 615.099   | NM_001957 | 2580.48   | 3311.249  | AB042410  | 397.823   | 200.506   |
| AJ275973  | 21217.611 | 26114.135 | AK024533  | 23353.342 | 26332.459 | AF086102  | 2465.531  | 1179.144  |
| NM_006493 | 2426.806  | 3050.144  | NM_002736 | 14051.056 | 16887.467 | AF116682  | 11894.688 | 16156.959 |
| U76362    | 2300.393  | 2621.844  | NM_004246 | 3901.61   | 4306.899  | AL137259  | 1929.439  | 2197.392  |
| AF040248  | 1410.23   | 1376.213  | NM_002285 | 4420.62   | 3231.972  | AF086079  | 320.742   | 210.51    |
| NM_014225 | 1142.337  | 1277.792  | NM_006694 | 27114.439 | 21547.684 | AL122107  | 3784.95   | 3915.296  |
| AL832292  | 3956.911  | 3812.559  | NM_005207 | 2291.302  | 1893.277  | AF075021  | 543.481   | 719.053   |
| NM_003045 | 6879.265  | 7388.766  | NM_014467 | 965.022   | 303.623   | AK025140  | 6067.114  | 7145.858  |
| NM_002615 | 2282.551  | 1914.171  | NM_003087 | 5614.857  | 3635.009  | AK023394  | 880.656   | 1176.913  |
| L27479    | 621.1     | 711.635   | NM_001630 | 7064.259  | 5794.856  | AF090093  | 6168.838  | 6829.188  |
| NM_002193 | 1310.223  | 1035.168  | M33197    | 68052.797 | 64635.188 | AF161340  | 3568.145  | 3745.664  |
| NM_001385 | 8469.293  | 7182.729  | NM_002031 | 915.885   | 606.388   | AF242771  | 777.68    | 600.914   |
| X76770    | 5062.908  | 4380.281  | AF305081  | 3662.031  | 2589.457  | NM_018562 | 5511.042  | 5636.477  |
| AB037808  | 1816.371  | 1506.055  | NM_004712 | 10541.568 | 8918.218  | AF098666  | 766.518   | 635.563   |
| NM_005915 | 308.067   | 206.994   | AF118078  | 3036.331  | 2255.45   | AF161365  | 295.391   | 243.231   |
| NM_016035 | 4667.913  | 3689.02   | AL157428  | 942.367   | 719.358   | AK021969  | 453.699   | 541.503   |
| Z36821    | 6001.796  | 4885.009  | M33197    | 68135.047 | 66873.719 | AK022065  | 605.532   | 723.974   |
| AF289485  | 4295.646  | 4185.717  | NM_005855 | 3508.821  | 3085.628  | AK022221  | 3242.381  | 2763.218  |
| AF130092  | 1555.713  | 1304.456  | AK025163  | 2276.739  | 2359.104  | AK022356  | 598.949   | 677.138   |
| NM_016095 | 4361.18   | 4050.361  | NM_014931 | 5108.451  | 6719.183  | AK021998  | 2088.954  | 932.379   |

|           |           |           |           |           |           |           |           |           |
|-----------|-----------|-----------|-----------|-----------|-----------|-----------|-----------|-----------|
| AK024794  | 1851.407  | 1821.271  | NM_014487 | 3370.923  | 3553.306  | AK022126  | 1575.634  | 1356.451  |
| NM_019853 | 7364.021  | 7730.528  | NM_018070 | 4349.564  | 4392.551  | AK022256  | 616.848   | 484.695   |
| NM_017992 | 9437.787  | 10272.261 | NM_002484 | 5544.098  | 4465.417  | AK022383  | 899.799   | 395.872   |
| NM_005400 | 609.53    | 477.795   | M33197    | 68007.906 | 64835.645 | AK027041  | 1166.685  | 911.912   |
| BF851643  | 636.354   | 631.37    | NM_018240 | 68125.945 | 69416.367 | AK022064  | 337.601   | 367.188   |
| AK023061  | 902.433   | 725.25    | AK025941  | 2300.519  | 2239.378  | AK024332  | 298.875   | 323.322   |
| NM_007255 | 2708.839  | 2443.281  | M33197    | 64825.422 | 61147.824 | NM_005355 | 16734.363 | 17025.711 |
| NM_003665 | 8434.488  | 9537.39   | NM_015914 | 2344.384  | 1878.569  | AK000937  | 542.942   | 658.447   |
| NM_013384 | 58085.27  | 56356.898 | AF059531  | 14104.186 | 8468.338  | AF035306  | 639.441   | 687.119   |
| NM_001187 | 1517.604  | 1121.793  | NM_002707 | 10995.906 | 8016.338  | NM_003954 | 540.209   | 637.449   |
| NM_018241 | 2169.177  | 2272.47   | AF029777  | 1567.595  | 1197.443  | NM_016345 | 500.594   | 486.264   |
| NM_005834 | 5940.786  | 6741.518  | NM_003352 | 1562.112  | 1059.297  | AK024213  | 16107.043 | 15501.102 |
| NM_000724 | 2963.014  | 2702.808  | AK026884  | 15691.876 | 12818.079 | AK025093  | 515.31    | 546.611   |
| NM_002557 | 4182.397  | 3950.836  | S82198    | 2867.705  | 2307.636  | AK022184  | 2318.205  | 2531.575  |
| NM_004477 | 429.809   | 237.112   | NM_002594 | 5202.496  | 4551.476  | AB007959  | 717.982   | 763.94    |
| BE728156  | 585.279   | 287.09    | NM_001159 | 1518.21   | 1518.026  | Y10516    | 598.084   | 534.62    |
| BI762229  | 3631.985  | 3187.533  | NM_031407 | 4506.035  | 4485.96   | AF015039  | 1821.234  | 1400.843  |
| BG618320  | 6340.252  | 4640.93   | M33197    | 58936.539 | 59784.07  | U50528    | 851.661   | 710.547   |
| Y00787    | 2887.555  | 2856.602  | D86982    | 858.864   | 1161.769  | AB020632  | 993.557   | 855.013   |
| NM_007275 | 4263.04   | 3520.839  | NM_005619 | 3015.754  | 4369.557  | NM_018614 | 16229.204 | 10968.651 |
| N34462    | 9572.502  | 11288.412 | D87440    | 2629.172  | 2584.802  | NM_005222 | 1167.678  | 589.718   |
| AI658778  | 3734.3    | 4253.304  | AK000332  | 19167.838 | 19477.863 | BC024308  | 1992.188  | 925.723   |
| L19067    | 3623.367  | 4353.043  | AL080156  | 1374.19   | 1464.278  | AK001838  | 52611.168 | 51437.539 |
| Z48482    | 1723.633  | 1503.004  | M33197    | 59685.016 | 58365.203 | NM_018295 | 1282.302  | 1519.383  |
| W60413    | 1785.258  | 1618.033  | NM_006735 | 981.521   | 1084.053  | AF086262  | 1106.679  | 643.358   |
| BI823365  | 2597.318  | 2244.324  | NM_002895 | 1969.712  | 1560.662  | AF086292  | 4507.523  | 1917.772  |
| X06318    | 7760.173  | 8124.524  | NM_013351 | 34148.98  | 22950.063 | AK023769  | 557.623   | 494.673   |
| AL834159  | 5625.704  | 6352      | NM_012340 | 8030.469  | 5683.001  | AK024342  | 12640.284 | 9719.32   |
| NM_016217 | 10933.827 | 10408.009 | NM_006022 | 1544.061  | 1000.342  | AL137712  | 6123.31   | 4968.382  |
| AK025971  | 6690.66   | 6988.362  | AK025110  | 2597.25   | 1960.665  | AL137606  | 429.775   | 576.478   |
| NM_014007 | 1466.366  | 1241.272  | X52339    | 57307.695 | 43109.984 | AK021673  | 11718.548 | 14259.011 |
| AB033006  | 2742.824  | 2159.21   | M33197    | 62558.625 | 58485.582 | AB014543  | 1177.887  | 1116.038  |
| AF020314  | 13300.952 | 10874.677 | AB046830  | 3438.601  | 3251.739  | NM_018445 | 3950.892  | 3603.346  |
| NM_016332 | 11029.167 | 8877.592  | NM_007122 | 2793.732  | 3218.807  | AK022743  | 3396.854  | 3270.29   |
| AK023936  | 587.675   | 487.692   | NM_001485 | 1342.814  | 458.499   | NM_014627 | 1192.573  | 1234.613  |
| NM_006457 | 1234.094  | 1278.489  | NM_016202 | 10815.539 | 8990.593  | NM_013935 | 5100.366  | 5209.155  |
| NM_003682 | 776.372   | 661.333   | NM_012475 | 1217.624  | 2135.729  | NM_013985 | 41608.074 | 31577.793 |
| NM_006314 | 10259.508 | 8268.744  | M33197    | 54169.18  | 60321.781 | AB018319  | 1084.471  | 519.858   |
| NM_001782 | 1091.325  | 1013.214  | NM_006275 | 4325.161  | 7376.191  | AK001101  | 797.734   | 322.033   |
| NM_002754 | 942.678   | 981.056   | NM_003407 | 4517.366  | 8858.698  | BM973473  | 283.624   | 199.217   |
| NM_000797 | 2101.206  | 2283.549  | NM_007209 | 62035.074 | 62218.973 | AK021637  | 282.268   | 229.472   |
| NM_014927 | 454.326   | 566.152   | NM_003729 | 6965.599  | 5912.597  | U17631    | 584.155   | 397.258   |
| NM_016293 | 14628.709 | 16139.319 | L05096    | 9586.918  | 8438.44   | AL137723  | 787.578   | 495.263   |
| AL080148  | 10933.512 | 12568.112 | BC015899  | 6488.975  | 7831.018  | AK024046  | 1607.253  | 1266.603  |
| NM_006731 | 1370.169  | 1274.674  | NM_017985 | 10886.173 | 7484.506  | NM_017931 | 2096.948  | 1828.478  |
| NM_018487 | 622.523   | 546.712   | AK023629  | 791.071   | 484.641   | AK022793  | 746.71    | 706.689   |
| NM_020134 | 2296.456  | 2184.29   | AK024846  | 2390.959  | 1734.036  | AJ227910  | 748.856   | 811.224   |
| NM_014061 | 2618.609  | 3140.609  | AK001451  | 5072.797  | 3666.361  | AF001893  | 1072.612  | 811.753   |
| NM_002475 | 1296.869  | 1388.751  | M33197    | 56155.602 | 36857     | X04236    | 10574.934 | 8285.327  |
| NM_000345 | 18223.551 | 20472.721 | NM_007180 | 1586.071  | 1110.612  | D16875    | 1253.43   | 1750.133  |
| NM_005055 | 968.057   | 1046.994  | NM_005609 | 949.574   | 643.639   | AK027171  | 791.097   | 827.634   |
| NM_004950 | 4710.106  | 4875.485  | NM_005475 | 8810.531  | 5973.322  | AK021945  | 2161.813  | 1907.954  |
| NM_006493 | 2189.942  | 2046.035  | NM_005660 | 3230.043  | 2303.038  | L23545    | 963.016   | 801.234   |

|           |           |           |           |           |           |           |           |           |
|-----------|-----------|-----------|-----------|-----------|-----------|-----------|-----------|-----------|
| U76362    | 1500.29   | 1462.848  | AK023902  | 1637.464  | 1247.027  | CY3Cy5    | 5433.621  | 609.676   |
| AF040248  | 826.06    | 946.041   | NM_005223 | 920.671   | 1363.882  | U13022    | 1024.408  | 675.594   |
| NM_01422E | 694.013   | 563.645   | AB011173  | 5470.311  | 9481.617  | R23251    | 12263.93  | 11324.344 |
| AL832292  | 3993.823  | 3517.097  | AB023195  | 1316      | 2171.383  | BG763477  | 544.193   | 628.252   |
| NM_00304E | 6139.884  | 6270.895  | U43431    | 2971.005  | 4994.757  | AA702640  | 1850.787  | 2063.689  |
| NM_00566E | 27101.391 | 29044.166 | AB006622  | 2481.213  | 5400.603  | T68583    | 4165.355  | 4086.857  |
| NM_00306C | 520.824   | 559.51    | M33197    | 64195.582 | 67004.453 | AA481944  | 47877.57  | 35495.09  |
| AK021489  | 24697.43  | 25679.707 | AK097041  | 5657.063  | 10352.439 | X14390    | 611.194   | 611.088   |
| NM_00452E | 549.341   | 569.859   | AF068744  | 39742.148 | 51464.172 | AF038440  | 762.64    | 690.952   |
| NM_00389E | 900.448   | 946.378   | AK000762  | 2202.147  | 2678.244  | M31158    | 785.631   | 679.8     |
| NM_004317 | 6045.808  | 6502.211  | NM_004571 | 782.59    | 751.303   | H00742    | 1862.206  | 2453.123  |
| NM_01464E | 2403.961  | 2488.908  | AJ345030  | 2624.762  | 1995.953  | D42108    | 2371.662  | 2491.68   |
| NM_01470E | 6207.322  | 5888.9    | AK023472  | 15762.942 | 10938.389 | BG700922  | 663.996   | 767.158   |
| NM_00369E | 2029.147  | 1960.629  | AL109729  | 1047.667  | 523.854   | AI366068  | 12370.233 | 14740.19  |
| NM_00035E | 24102.355 | 26597.217 | AF007146  | 839.575   | 655.523   | N57553    | 525.715   | 709.175   |
| NM_018134 | 46637.59  | 43708.117 | M33197    | 65785.5   | 60099.621 | AF080158  | 1799.823  | 2121.329  |
| NM_013247 | 4897.189  | 5707.961  | S79912    | 32977.273 | 25170.889 | BM664556  | 1511.9    | 1872.577  |
| NM_00677C | 4395.256  | 4060.353  | AK026892  | 2571.614  | 3545.167  | SR3       | 29380.059 | 22649.176 |
| BE394704  | 1053.897  | 1172.231  | S83275    | 27154.252 | 43365.34  | SR5       | 2692.046  | 3100.261  |
| NM_00470E | 3481.108  | 4306.548  | AL117427  | 6462.683  | 10770.404 | SR7       | 3032.375  | 29072.176 |
| NM_00151E | 1483.825  | 1944.495  | M33197    | 65203.043 | 61300.297 | SR9       | 13162.945 | 2662.083  |
| NM_01470E | 6467.152  | 8093.029  | AF052118  | 12759.058 | 22116.725 | CY3Cy5    | 6980.828  | 1459.937  |
| AK023172  | 858.023   | 876.039   | AK025166  | 6760.905  | 13453.362 | M33197    | 39711.277 | 34524.508 |
| AJ001348  | 945.961   | 1108.442  | AL359586  | 1551.635  | 2954.419  | NM_007024 | 3987.904  | 3126.962  |
| NM_00725E | 1987.552  | 1556.546  | AF147421  | 776.499   | 1490.218  | NM_013231 | 2849.956  | 2218.322  |
| NM_00366E | 7155.409  | 6823.207  | AF035290  | 1828.903  | 3492.438  | NM_01210E | 2343.563  | 1698.361  |
| NM_013384 | 54285.805 | 50654.902 | AK023216  | 1385.625  | 2873.656  | NM_006254 | 3247.091  | 2567.404  |
| NM_001187 | 937.21    | 591.223   | M33197    | 61438.992 | 61124.797 | X95425    | 2752.458  | 2603.57   |
| NM_018241 | 2049.659  | 2192.886  | AF086547  | 1160.797  | 2264.289  | NM_00442E | 1604.259  | 1170.674  |
| NM_005834 | 5925.555  | 6018.028  | AK023288  | 1448.785  | 2045.7    | NM_01656E | 762.997   | 597.523   |
| AF000381  | 6796.067  | 6556.188  | M33197    | 66973.688 | 61184.762 | M33197    | 62918.586 | 55993.371 |
| NM_01807E | 713.909   | 812.121   | AK022428  | 1523.996  | 1016.431  | AY009399  | 7233.036  | 6902.548  |
| NM_01210E | 996.132   | 1293.488  | AK000788  | 981.759   | 908.869   | NM_00489E | 9633.178  | 8339.559  |
| S82470    | 3393.785  | 3099.415  | AK023457  | 2595.246  | 1716.764  | U59748    | 2587.408  | 3948.762  |
| AB028982  | 3945.766  | 4368.888  | AK025089  | 6324.561  | 4513.188  | L32537    | 394.398   | 399.659   |
| NM_002004 | 8511.257  | 11002.022 | AK021431  | 1131.372  | 783.858   | NM_01430E | 14244.736 | 12085.242 |
| NM_005121 | 949.564   | 961.003   | M33197    | 64603.496 | 60666.742 | M33197    | 66848.641 | 64597.719 |
| NM_00164E | 24357.6   | 26417.975 | AF085996  | 3914.158  | 6509.403  | M95610    | 17021.492 | 16482.377 |
| NM_020221 | 1851.778  | 2538.646  | AK001279  | 2311.048  | 3592.433  | L02922    | 12751.021 | 12410.81  |
| NM_000747 | 2364.669  | 2614.652  | AF086407  | 636.916   | 1056.396  | NM_001797 | 1608.352  | 1871.637  |
| NM_00541E | 4423.744  | 4725.06   | AF085949  | 857.044   | 1519.394  | NM_003154 | 1585.49   | 1544.839  |
| AL137708  | 843.76    | 772.308   | AK001567  | 1732.808  | 2823.071  | NM_00423E | 660.231   | 631.089   |
| AJ275973  | 23788.398 | 28298.496 | M33197    | 58920.73  | 60290.629 | AK023459  | 1640.854  | 1714.984  |
| AL834159  | 3805.521  | 4050.584  | U52839    | 3532.225  | 5940.711  | BI762154  | 406.129   | 490.088   |
| NM_000164 | 16575.389 | 13371.525 | X78262    | 606.104   | 1627.872  | NM_01213E | 6507.776  | 3772.792  |
| NM_016217 | 7197.862  | 5808.175  | U42379    | 318.048   | 1695.604  | AF121856  | 1825.715  | 1293.771  |
| AK025971  | 6220.047  | 6027.308  | U58667    | 2239.982  | 5654.155  | NM_006421 | 1921.599  | 1642.706  |
| NM_00261E | 2452.964  | 2500.155  | M33197    | 58372.598 | 57871.832 | NM_017457 | 11116.694 | 8305.28   |
| L27479    | 685.74    | 852.473   | AK026984  | 15967.755 | 25295.715 | NM_00376E | 5237.183  | 3608.672  |
| NM_00219E | 3616.429  | 3357.836  | AK022088  | 1209.89   | 715.126   | NM_00586E | 456.384   | 415.354   |
| NM_00138E | 12185.77  | 11043.636 | NM_013391 | 1201.185  | 749.775   | M33197    | 45437.59  | 31024.75  |
| X76770    | 5303.927  | 4366.229  | M33197    | 63573.965 | 59626.09  | NM_01820E | 11549.472 | 9226.562  |
| AB037808  | 1713.277  | 1800.217  | AL157466  | 2980.801  | 2001.748  | AB023197  | 3290.978  | 2484.047  |



|           |           |           |           |           |           |           |           |           |
|-----------|-----------|-----------|-----------|-----------|-----------|-----------|-----------|-----------|
| NM_01603E | 5456.55   | 6373.152  | AL389981  | 1010.644  | 407.775   | NM_02217E | 5583.752  | 4659.978  |
| AF090911  | 173.125   | 521.209   | AK024336  | 1660.703  | 1362.633  | AB040970  | 2751.414  | 2110.257  |
| Z36821    | 7700.301  | 7886.803  | AK023862  | 922.501   | 1246.226  | NM_01833C | 2492.724  | 1932.461  |
| AF289485  | 5155.324  | 6211.174  | NM_018621 | 1781.657  | 3255.495  | AB023222  | 927.8     | 551.974   |
| AF130092  | 1741.709  | 1874.483  | AK022016  | 1709.403  | 3380.209  | AB033088  | 984.45    | 654.131   |
| NM_01609E | 4793.32   | 5074.864  | AK021628  | 2068.46   | 2705.817  | M33197    | 53140.441 | 38909.715 |
| AK024794  | 1589.108  | 1834.192  | M33197    | 62199.105 | 63476.027 | U50342    | 2229.643  | 1668.567  |
| NM_01985E | 7866.773  | 7381.678  | NM_01860E | 807.576   | 1495.924  | NM_00029E | 784.199   | 420.894   |
| NM_01799E | 8729.805  | 10264.176 | AK022118  | 1907.235  | 4299.637  | AF103795  | 836.056   | 806.965   |
| NM_00540C | 947.941   | 680.891   | AK026453  | 7562.223  | 15824.612 | NM_00621E | 576.716   | 455.781   |
| BF851643  | 609.114   | 428.484   | AK025673  | 1585.476  | 2901.203  | U80018    | 806.033   | 855.412   |
| AK023061  | 659.115   | 1064.602  | AF116678  | 418.179   | 1173.844  | NM_000717 | 1477.114  | 756.69    |
| NM_014061 | 1275.8    | 1250.437  | BF476109  | 209.052   | 856.326   | M33197    | 59867.184 | 55159.398 |
| BC034395  | 1029.737  | 960.816   | M33197    | 64209.902 | 60052.438 | NM_00484E | 2137.446  | 1442.76   |
| NM_00247E | 510.018   | 348.625   | AK023635  | 520.387   | 788.922   | NM_007107 | 6331.755  | 4141.547  |
| NM_00034E | 8987.513  | 7606.436  | AK023912  | 340.676   | 1893.037  | NM_000047 | 10876.297 | 7225.866  |
| NM_00505E | 914.49    | 1043.529  | AK022431  | 1377.158  | 3907.979  | M68874    | 1219.717  | 1108.013  |
| NM_00495C | 4425.039  | 3365.921  | AK023305  | 60199.32  | 56972.754 | NM_00631E | 2220.201  | 2373.531  |
| NM_000724 | 3205.988  | 3184.092  | AK023763  | 4151.652  | 6798.02   | NM_01822E | 2431.279  | 1815.729  |
| NM_00055E | 182.977   | 472.182   | AK023967  | 558.599   | 886.415   | NM_00460E | 414.397   | 239.43    |
| NM_002557 | 5657.78   | 4365.86   | AK022729  | 1967.341  | 1435.4    | Z36813    | 2811.527  | 2525.221  |
| NM_004477 | 298.119   | 477.411   | NM_00616E | 12868.79  | 10007.498 | NM_00666C | 3473.604  | 4397.507  |
| Y10802    | 460.424   | 350.656   | AL050374  | 2797.31   | 2385.542  | NM_00148E | 497.959   | 562.26    |
| AI417775  | 283.615   | 543.171   | M33197    | 62701.262 | 63166.16  | NM_004727 | 954.238   | 770.254   |
| BI762229  | 4015.014  | 4404.037  | M28639    | 4743.127  | 8639.062  | NM_00668E | 36139.516 | 23456.461 |
| BG618320  | 7950.161  | 6357.188  | AL122073  | 13188.396 | 30297.293 | M33197    | 7016.458  | 4267.841  |
| Y00787    | 3651.69   | 4187.837  | AF116655  | 3726.612  | 8306.725  | NM_00404E | 4384.507  | 4526.697  |
| NM_00727E | 4993.188  | 4962.172  | AJ243222  | 1437.905  | 3022.547  | NM_001891 | 1776.95   | 1286.878  |
| N34462    | 10900.206 | 12724.994 | AK026132  | 3574.271  | 6717.267  | NM_00144C | 15667.498 | 11261.612 |
| AI658778  | 3990.928  | 4745.892  | Y11162    | 977.258   | 2397.508  | NM_001201 | 605.689   | 477.66    |
| L19067    | 3982.875  | 4243.352  | M33197    | 62697.512 | 60558.367 | NM_01661E | 2105.813  | 914.219   |
| Z48482    | 1866.32   | 2063.261  | AF070584  | 1617.317  | 3927.685  | AB014568  | 18066.006 | 10643.152 |
| W60413    | 1957.516  | 2000.378  | AF165185  | 482.938   | 858.508   | NM_01224E | 4325.238  | 2689.505  |
| BI823365  | 2262.623  | 2243.258  | AF075006  | 750.417   | 1235.003  | AK022546  | 4599.73   | 3050.211  |
| X06318    | 7357.442  | 9353.453  | M33197    | 60493.449 | 59451.184 | NM_014067 | 5271.132  | 3812.744  |
| NM_00470E | 2179.977  | 1996.862  | AK000903  | 29397.303 | 49784.309 | NM_002914 | 2325.708  | 1605.336  |
| NM_00151E | 777.087   | 644.282   | AK023938  | 1389.032  | 2119.402  | NM_02038E | 1496.156  | 1749.89   |
| NM_01470E | 5308.081  | 5053.471  | AK026896  | 752.658   | 788.98    | NM_006541 | 722.534   | 820.729   |
| AK023172  | 703.601   | 691.978   | AL110169  | 1052.048  | 1796.835  | M33197    | 53215.945 | 67794.563 |
| AF139768  | 546.64    | 386.022   | L13743    | 3771.5    | 2601.071  | NM_00570E | 4208.355  | 5744.068  |
| AJ001348  | 747.651   | 580.845   | U84519    | 1574.996  | 1033.64   | NM_00432E | 1385.414  | 1637.44   |
| NM_014007 | 1316.633  | 1399.912  | Z11849    | 5547.95   | 5050.026  | NM_004581 | 1770.877  | 1321.024  |
| AB033006  | 5841.533  | 4037.208  | AJ002788  | 4306.964  | 6562.513  | NM_006817 | 9748.37   | 7248.594  |
| AF020314  | 13477.83  | 12702.012 | X58060    | 822.895   | 1155.761  | NM_00710E | 3999.643  | 2648.79   |
| NM_01633E | 12970.973 | 9803.389  | U84527    | 597.548   | 1242.19   | NM_015921 | 18314.92  | 11508.71  |
| AK023936  | 530.828   | 449.473   | M33197    | 64810.633 | 64931.754 | AB040900  | 7190.001  | 9806.794  |
| NM_006457 | 1049.464  | 1198.318  | AF052103  | 3025.144  | 6792.245  | NM_00148E | 662.551   | 498.976   |
| NM_00368E | 915.079   | 797.04    | AF075050  | 733.097   | 1133.138  | NM_001797 | 2400.068  | 1903.789  |
| NM_000207 | 1222.105  | 1229.817  | AK024842  | 1370.548  | 2655.765  | NM_003154 | 2123.524  | 1477.08   |
| NM_002531 | 4914.058  | 4110.561  | NM_01838E | 1937.25   | 3312.972  | NM_00423E | 1177.675  | 893.564   |
| NM_006314 | 12019.058 | 10454.997 | M33197    | 64852.266 | 63013.113 | AK023459  | 1666.779  | 1145.949  |
| NM_00178E | 1411.266  | 1355.881  | D17203    | 50132.617 | 57155.879 | BI762154  | 674.016   | 471.222   |
| NM_002754 | 1092.714  | 938.663   | NM_00649E | 5764.113  | 10770.615 | U13022    | 1185.085  | 594.781   |

|           |           |           |             |           |           |           |           |           |
|-----------|-----------|-----------|-------------|-----------|-----------|-----------|-----------|-----------|
| NM_000797 | 2889.111  | 2935.546  | NM_005288   | 1230.506  | 2315.085  | R23251    | 11162.291 | 9618.683  |
| NM_014927 | 410.229   | 421.658   | AK022101    | 1795.875  | 2801.9    | BG763477  | 659.468   | 492.424   |
| NM_016293 | 18365.557 | 20597.666 | NM_003251   | 4035.434  | 6157.707  | AA702640  | 1871.785  | 1426.775  |
| AL080148  | 13847.421 | 15044.041 | AF086203    | 834.243   | 1329.555  | T68583    | 5130.005  | 7891.311  |
| NM_006731 | 1305.589  | 1344.411  | AB046772    | 1278.351  | 2516.915  | X14390    | 607.871   | 765.658   |
| NM_018487 | 707.898   | 753.855   | AL442080    | 1060.416  | 1990.824  | AF038440  | 752.829   | 850.786   |
| NM_020134 | 2536.441  | 2422.71   | AY007143    | 14764.683 | 25340.113 | M31158    | 679.53    | 398.89    |
| NM_020221 | 865.555   | 807.474   | L15557      | 1348.31   | 2137.867  | H00742    | 1420.439  | 1052.974  |
| NM_000747 | 1085.708  | 946.084   | M33197      | 65628.367 | 62193.258 | D42108    | 2078.922  | 1319.158  |
| NM_005415 | 3946.258  | 3480.124  | NM_001563   | 9812.364  | 10329.35  | BG700922  | 687.23    | 422.7     |
| AL137708  | 498.39    | 554.505   | NM_000266   | 1102.863  | 1837.809  | AI366068  | 11079.845 | 10743.689 |
| AJ275973  | 18728.066 | 17870.557 | X89666      | 4521.788  | 6350.429  | N57553    | 397.615   | 379.584   |
| NM_014228 | 1447.904  | 1286.872  | NM_017429   | 510.379   | 982.145   | AF080158  | 1378.205  | 1638.005  |
| AL832292  | 4948.551  | 4412.758  | NM_003104   | 9149.983  | 18259.105 | BM664556  | 1133.042  | 1345.718  |
| NM_003045 | 7160.088  | 5335.266  | NM_014581   | 2890.849  | 5497.208  | NM_016545 | 1100.803  | 1962.276  |
| NM_005662 | 28497.563 | 25983.381 | NM_000898   | 1166.41   | 1802.905  | NM_000295 | 750.382   | 474.939   |
| NM_003060 | 709.651   | 608.238   | M33197      | 64952.996 | 64787.824 | AF026932  | 495.457   | 404.097   |
| AK021489  | 28116.945 | 29335.473 | AK024448    | 4220.868  | 7444.244  | AF103795  | 1303.254  | 944.283   |
| NM_004525 | 750.736   | 792.492   | NM_014406   | 2933.772  | 5760.602  | NM_006215 | 742.186   | 491.566   |
| NM_003895 | 1123.904  | 1539.913  | Z11801      | 1811.527  | 3432.344  | M33197    | 61546.656 | 46261.438 |
| NM_004317 | 6570.794  | 6613.351  | AK027253    | 759.104   | 1457.915  | NM_007024 | 3835.652  | 2869.698  |
| NM_014645 | 2647.546  | 2361.191  | S68954      | 55909.203 | 19234.092 | NM_013231 | 3783.747  | 7307.81   |
| NM_014708 | 5447.728  | 5567.684  | S81335      | 3570.069  | 5260.581  | NM_012106 | 2085.47   | 1665.292  |
| NM_003693 | 2580.703  | 2705.043  | AF052109    | 7922.029  | 4106.826  | X95425    | 2649.726  | 1795.462  |
| NM_000356 | 30346.109 | 29420.248 | M33197      | 49521.902 | 60064.746 | NM_004422 | 1660.677  | 1065.573  |
| NM_018134 | 48745.406 | 51325.688 | AK024405    | 587.141   | 936.091   | NM_016562 | 834.33    | 660.149   |
| NM_013247 | 4408.86   | 5251.886  | NM_003353   | 33564.301 | 52493.867 | M33197    | 53274.859 | 39624.848 |
| NM_006770 | 5859.502  | 5860.316  | X82127      | 39448.215 | 56813.25  | AY009399  | 5998.62   | 4390.277  |
| BE394704  | 932.243   | 1494.507  | AL122044    | 3188.55   | 5341.998  | NM_004895 | 8689.855  | 5826.703  |
| AK024794  | 1412.468  | 1174.441  | NM_005752   | 1995.712  | 3634.923  | U59748    | 1505.916  | 1228.276  |
| NM_019853 | 7197.172  | 5654.834  | M33197      | 61831.555 | 66669.508 | L32537    | 435.89    | 299.165   |
| NM_017992 | 8781.69   | 7568.289  | CY3Cy5      | 9191.313  | 620.206   | NM_014303 | 11456.486 | 10759.434 |
| NM_005400 | 721.018   | 291.515   | AA115473    | 1824.507  | 1513.722  | NM_014863 | 366.249   | 501.821   |
| BF851643  | 358.833   | 359.887   | AA872397    | 2908.813  | 2411.598  | M33197    | 61389.285 | 57667.266 |
| NM_007255 | 2010.615  | 3068.967  | AA709414    | 2425.696  | 1641.715  | M95610    | 14372.952 | 13089.855 |
| NM_003668 | 6398.015  | 12081.307 | D12676      | 1336.503  | 1339.559  | L02922    | 12073.049 | 12455.536 |
| NM_018241 | 2250.097  | 2791.734  | BC012593    | 979.124   | 813.903   | M33197    | 13150.024 | 9755.641  |
| NM_005834 | 6094.928  | 7053.935  | NM_000939   | 41271.707 | 45368.48  | NM_004045 | 5448.803  | 3341.7    |
| AF000381  | 8732.863  | 7969.163  | NM_004295   | 24472.48  | 30277.738 | NM_001891 | 2366.47   | 1753.689  |
| NM_018075 | 758.73    | 882.145   | H-X 02812 I | 2884.719  | 3106.457  | NM_012135 | 5876.009  | 4242.184  |
| NM_012105 | 1302.663  | 1634.09   | U75898      | 4616.955  | 5003.139  | AF121856  | 1647.734  | 1139.907  |
| S82470    | 3168.661  | 3513.003  | M29039      | 945.597   | 1281.946  | NM_006421 | 1729.063  | 1468.066  |
| AB028982  | 3979.602  | 4118.269  | M59815      | 667.264   | 742.291   | NM_017457 | 10900.105 | 8201.603  |
| NM_002004 | 7639.253  | 8865.873  | M33210      | 977.223   | 1494.501  | NM_003765 | 4821.577  | 3979.882  |
| NM_005121 | 1094.388  | 807.441   | NM_006917   | 1131.623  | 1279.889  | M33197    | 38920.277 | 23386.043 |
| NM_001643 | 26118.391 | 26210.65  | SR2         | 40430.891 | 62247.445 | NM_018202 | 9667.467  | 6800.106  |
| NM_019096 | 6050.269  | 4361.373  | SR4         | 10189.32  | 16741.955 | AB023197  | 2987.844  | 2042.099  |
| NM_014725 | 2363.988  | 1938.355  | SR6         | 1720.276  | 2779.386  | NM_022173 | 5637.539  | 4458.635  |
| NM_006892 | 2678.546  | 2233.07   | SR8         | 5789.863  | 28511.922 | AB040970  | 2449.486  | 1981.908  |
| NM_019117 | 865.771   | 606.76    | SR10        | 20217.17  | 10647.075 | NM_018330 | 2448.774  | 1777.544  |
| NM_017658 | 3436.335  | 4987.7    | CY3Cy5      | 7696.409  | 503.125   | AB023222  | 983.301   | 1148.279  |
| NM_018679 | 6437.993  | 9675.506  | M33197      | 64568.383 | 62968.852 | AB033088  | 1056.205  | 702.792   |
| NM_016643 | 612.212   | 929.419   | NM_001203   | 2212.346  | 2252.375  | M33197    | 52046.586 | 44960.055 |

|           |           |           |           |           |           |           |           |           |
|-----------|-----------|-----------|-----------|-----------|-----------|-----------|-----------|-----------|
| NM_00258C | 494.247   | 709.001   | NM_00479C | 8738.162  | 5855.113  | U50342    | 1932.095  | 1883.176  |
| NM_016217 | 13551.54  | 15825.592 | NM_014047 | 9162.335  | 8823.482  | NM_015921 | 25878.965 | 22034.824 |
| AK025971  | 7414.839  | 7071.995  | AK022901  | 847.094   | 724.084   | AB040900  | 10488.081 | 8403.365  |
| NM_00261E | 3144.752  | 3262.267  | M33197    | 65728.203 | 60422.859 | NM_00108C | 548.903   | 393.927   |
| L27479    | 940.115   | 909.479   | AF037332  | 3335.813  | 2709.511  | NM_00148E | 1020.952  | 594.408   |
| NM_00219E | 4647.545  | 3734.454  | NM_014571 | 677.869   | 570.037   | U80018    | 800.131   | 643.057   |
| NM_00138E | 15272.507 | 12939.943 | NM_00605E | 826.777   | 1383.907  | NM_000717 | 1491.439  | 645.168   |
| X76770    | 5093.063  | 5282.414  | AB040912  | 3319.099  | 4203.045  | M33197    | 54748.07  | 58745.535 |
| AB037808  | 1874.863  | 1591.326  | NM_003871 | 1072.811  | 1123.869  | NM_00484E | 2173.189  | 2173.324  |
| NM_01603E | 5112.457  | 5123.099  | NM_00624E | 3308.671  | 3672.496  | NM_007107 | 6260.331  | 5978.521  |
| AF090911  | 378.261   | 444.414   | NM_00103E | 759.797   | 799.969   | NM_000047 | 12677.747 | 12531.168 |
| Z36821    | 7810.463  | 7882.912  | NM_006387 | 3210.189  | 4219.596  | M68874    | 1190.312  | 1437.879  |
| AF289485  | 4773.446  | 4490.985  | NM_00564E | 1646.452  | 1818.346  | NM_00631E | 2122.95   | 2528.772  |
| AF130092  | 2062.127  | 1819.099  | NM_00663E | 2174.502  | 2125.818  | NM_01822E | 2400.271  | 2427.067  |
| NM_01609E | 5028.545  | 4426.814  | NM_00169E | 638.908   | 784.229   | NM_00460E | 492.252   | 337.808   |
| AF300612  | 50821.77  | 48627.055 | BI767871  | 3145.946  | 2767.875  | Z36813    | 3486.454  | 3908.775  |
| AB014557  | 751.561   | 449.001   | AK022817  | 1521.706  | 1406.838  | NM_00666C | 3273.753  | 3536.478  |
| NM_00557E | 6966.9    | 3353.156  | NM_018034 | 3730.715  | 3481.808  | NM_004727 | 432.249   | 385.898   |
| NM_00295E | 9381.259  | 18158.061 | M33197    | 65236.688 | 64972.32  | NM_00055E | 470.354   | 453.397   |
| NM_002187 | 1086.114  | 1698.35   | AB037831  | 1634.097  | 1389.633  | NM_00668E | 30819.162 | 29148.176 |
| AF311912  | 711.399   | 1107.078  | NM_01210E | 9991.989  | 8878.018  | AF080158  | 1780.223  | 1945.216  |
| NM_001116 | 1331.734  | 1590.341  | AL122077  | 3995.757  | 3234.527  | BM664556  | 1829.775  | 1361.732  |
| BC035395  | 8197.619  | 10266.097 | NM_01463E | 798.363   | 1015.117  | NM_01654E | 909.337   | 416.295   |
| NM_00170E | 11031.127 | 12407.628 | NM_00642E | 1285.912  | 1105.117  | NM_00144C | 14454.879 | 8399.483  |
| NM_02012E | 6853.589  | 6154.098  | BE789195  | 668.566   | 513.048   | NM_001201 | 622.73    | 204.266   |
| NM_01398E | 8857.391  | 8704.417  | NM_01694E | 2226.375  | 2182.209  | NM_01661E | 1734.225  | 868.575   |
| NM_00504E | 2530.781  | 2360.095  | M33197    | 57834.242 | 59908.883 | AB014568  | 17887.576 | 11924.983 |
| NM_00388E | 1121.878  | 1032.75   | NM_00725E | 2595.665  | 2412.665  | NM_01224E | 4628.57   | 3902.666  |
| NM_00463C | 9579.071  | 9615.852  | NM_01840E | 736.078   | 464.553   | AK022546  | 5131.1    | 6929.409  |
| AK023001  | 7357.757  | 8472.991  | NM_01800E | 1411.61   | 1286.718  | NM_014067 | 5597.812  | 7886.243  |
| NM_01482E | 8543.813  | 9246.668  | AK075081  | 1709.51   | 1660.78   | NM_002914 | 2977.114  | 3893.138  |
| AF201947  | 680.831   | 1053.122  | NM_00089E | 5515.408  | 6913.643  | NM_02038E | 1445.547  | 1424.061  |
| U01147    | 4128.56   | 4051.807  | NM_00382C | 36622.008 | 48152.238 | NM_006541 | 927.721   | 1135.28   |
| NM_00404C | 9919.514  | 8937.234  | M33197    | 65250.137 | 66414.742 | M33197    | 50542.609 | 48617.566 |
| NM_00611E | 3198.245  | 3389.88   | NM_01651E | 5538.607  | 6642.056  | NM_00570E | 3141.878  | 3576.224  |
| NM_00545E | 2393.945  | 2348.071  | NM_00618E | 10033.271 | 11395.639 | NM_00432E | 1019.658  | 1198.035  |
| NM_003587 | 9717.46   | 6493.447  | NM_01480C | 868.156   | 955.144   | NM_004581 | 2248.783  | 2237.455  |
| X90978    | 1327.82   | 716.688   | NM_001557 | 956.666   | 1020.457  | NM_006817 | 11468.202 | 12160.492 |
| BF219403  | 14188.44  | 10450.539 | AF147311  | 1973.252  | 1925.184  | NM_00710E | 4636.822  | 6724.526  |
| NM_01611E | 1964.733  | 1316.771  | NM_002131 | 29613.57  | 32111.033 | M33197    | 68129.117 | 56091.324 |
| AB037795  | 2707.092  | 4823.743  | NM_017927 | 2116.474  | 1960.983  | M95610    | 20804.322 | 15756.341 |
| AK022975  | 1299.554  | 1921.844  | NM_020151 | 9816.672  | 9368.224  | L02922    | 15021.355 | 9550.188  |
| NM_015344 | 3438.563  | 3892.437  | NM_005891 | 33121.238 | 34858.297 | NM_001797 | 2331.612  | 1609.625  |
| NM_00428E | 1727.542  | 2091.339  | NM_00164E | 2720.392  | 2328.553  | NM_003154 | 1709.099  | 1096.771  |
| AL122055  | 11378.689 | 13374.294 | NM_00395E | 1499.71   | 1376.393  | NM_00423E | 1166.586  | 1234.305  |
| NM_00513E | 29436.123 | 26615.971 | M33197    | 60484.871 | 57004.434 | AK023459  | 1709.122  | 1346.1    |
| X07695    | 1032.34   | 648.769   | NM_00350C | 2979.269  | 3502.83   | BI762154  | 785       | 929.071   |
| D87458    | 1432.962  | 1446.868  | NM_014317 | 2219.28   | 2172.113  | U13022    | 1272.974  | 1186.408  |
| AK021750  | 3126.396  | 3580.108  | L09234    | 6663.969  | 5486.451  | R23251    | 13138.209 | 21443.875 |
| NM_00362E | 1910.905  | 2165.005  | NM_00005E | 1449.149  | 993.243   | BG763477  | 795.479   | 999.444   |
| NM_00693E | 390.811   | 443.778   | AK026740  | 724.691   | 449.174   | AA702640  | 1868.361  | 2604.585  |
| AK023594  | 5979.051  | 6858.786  | NM_017881 | 4075.588  | 2937.65   | T68583    | 3721.255  | 5735.02   |
| AB032989  | 640.553   | 688.115   | M33197    | 62824.504 | 59628.707 | X14390    | 649.492   | 1172.464  |

|           |           |           |             |           |           |           |           |           |
|-----------|-----------|-----------|-------------|-----------|-----------|-----------|-----------|-----------|
| AB010099  | 19845.654 | 20705.436 | NM_017634   | 3428.623  | 3371.486  | AF038440  | 723.955   | 1034.777  |
| AB039920  | 9866.42   | 10958.149 | NM_000813   | 961.135   | 966.431   | M31158    | 738.629   | 899.472   |
| AB046782  | 3878.369  | 4628.927  | NM_018896   | 1545.712  | 1560.75   | H00742    | 1118.388  | 1425.725  |
| NM_004190 | 13529.941 | 10865.403 | AJ300465    | 2086.536  | 1844.948  | D42108    | 1435.995  | 1550.884  |
| NM_014275 | 4522.775  | 3275.748  | X86400      | 1369.423  | 1809.373  | BG700922  | 731.698   | 394.823   |
| NM_000409 | 3057.216  | 1917.407  | NM_000810   | 1601.863  | 2036.01   | AI366068  | 9992.853  | 11734.983 |
| AF208005  | 1180.822  | 892.276   | AF069307    | 2457.219  | 2843.945  | N57553    | 722.761   | 886.61    |
| NM_002231 | 9014.025  | 6304.096  | M33197      | 61136.32  | 57055.973 | AB040970  | 3633.481  | 2100.302  |
| NM_003336 | 8463.82   | 10546.266 | U92978      | 2163.596  | 2313.685  | NM_018330 | 2969.269  | 2041.084  |
| NM_005805 | 14083.424 | 14310.803 | NM_014488   | 597.655   | 741.661   | AB023222  | 1089.868  | 860.565   |
| NM_004181 | 788.511   | 815.902   | NM_013389   | 3851.739  | 3774.656  | AB033088  | 903.737   | 637.301   |
| NM_003900 | 11583.395 | 10943.473 | AB014567    | 657.09    | 803.542   | M33197    | 52621.82  | 32127.107 |
| NM_003337 | 3502.585  | 3368.239  | NM_005326   | 6332.433  | 6081.31   | U50342    | 2699.292  | 1350.8    |
| AF298152  | 4534.908  | 3172.131  | AB035130    | 1169.102  | 1550.068  | NM_000295 | 933.255   | 389.641   |
| AF117233  | 3756.878  | 4556.272  | NM_003359   | 937.698   | 1382.935  | NM_000716 | 603.978   | 45.301    |
| NM_015848 | 1423.786  | 1159.205  | M33197      | 46367.855 | 53053.063 | AF026932  | 463.818   | 459.396   |
| NM_001723 | 2082.776  | 2034.421  | AF119917    | 890.52    | 1239.425  | AF103795  | 1201.193  | 958.67    |
| NM_016018 | 2700.632  | 3001.662  | NM_017915   | 921.071   | 776.079   | NM_006215 | 934.656   | 1051.903  |
| M94362    | 18486.164 | 16765.08  | AL050097    | 642.606   | 607.162   | M33197    | 55636.391 | 64687.746 |
| AK024707  | 1904.21   | 2112.338  | NM_003579   | 1526.55   | 974.794   | NM_007024 | 4048.906  | 5369.444  |
| NM_014255 | 3088.869  | 3227.321  | AL049283    | 1583.342  | 1244.818  | NM_013231 | 2644.08   | 3046.298  |
| AK022909  | 2332.027  | 2703.304  | M33197      | 50641.184 | 51967.738 | NM_012106 | 2196.908  | 2677.158  |
| NM_006530 | 6513.89   | 6679.786  | NM_002401   | 25564.379 | 22046.963 | X95425    | 2581.707  | 3640.045  |
| AB033024  | 2357.669  | 1377.731  | NM_001274   | 1679.566  | 1621.929  | NM_004422 | 1404.553  | 1972.399  |
| NM_018942 | 2816.402  | 2011.961  | NM_003913   | 430.891   | 594.365   | NM_016562 | 581.325   | 860.506   |
| NM_005531 | 432.719   | 382.482   | NM_002227   | 2234.617  | 1717.172  | M33197    | 41880.68  | 45597.406 |
| NM_006977 | 553.043   | 371.703   | NM_007199   | 1716.866  | 1991.146  | AY009399  | 5625.205  | 7529.273  |
| AF217226  | 5288.488  | 3328.072  | AB002301    | 410.783   | 1005.682  | NM_004895 | 5282.605  | 5020.648  |
| NM_007265 | 3484.163  | 3102.029  | AB014530    | 2496.105  | 2544.294  | U59748    | 1088.201  | 896.697   |
| AK023639  | 5619.357  | 6009.321  | M33197      | 53290.473 | 56296.949 | NM_014303 | 7503.177  | 7823.318  |
| AL137700  | 1261.498  | 1074.824  | NM_005989   | 2261.539  | 2159.48   | NM_006660 | 3638.592  | 3214.748  |
| NM_004904 | 1018.135  | 1133.407  | AB014607    | 3861.864  | 3043.059  | NM_001486 | 373.882   | 174.982   |
| NM_003083 | 3202.826  | 2998.179  | AF134401    | 1557.151  | 1563.183  | NM_004727 | 596.11    | 540.212   |
| NM_006789 | 6803.748  | 6748.222  | NM_006387   | 3549.329  | 3953.749  | NM_000559 | 560.438   | 398.051   |
| NM_000982 | 6621.701  | 8531.353  | NM_005646   | 3254.95   | 3338.824  | NM_006685 | 37882.559 | 24523.938 |
| NM_012423 | 64815.566 | 66766.336 | NM_006639   | 2994.73   | 3683.367  | M33197    | 10983.044 | 7042.314  |
| AK026367  | 37825.508 | 40107.301 | NM_001692   | 1553.323  | 2304.211  | NM_004045 | 5124.383  | 4523.787  |
| AK026491  | 23223.705 | 24714.123 | BI767871    | 2771.343  | 3013.505  | NM_001891 | 2423.483  | 2923.345  |
| AK021747  | 805.687   | 779.615   | AA418907    | 722.921   | 597.862   | NM_012139 | 6224.92   | 6828.028  |
| AK025640  | 7163.474  | 5917.492  | M65291      | 561.357   | 1380.972  | AF121856  | 1988.829  | 1929.361  |
| AF131772  | 461.878   | 298.746   | AA115473    | 3014.842  | 3273.931  | NM_006421 | 1583.693  | 1903.958  |
| AL137685  | 482.217   | 480.245   | AA872397    | 7343.594  | 8949.409  | NM_017457 | 11955.244 | 19178.32  |
| NM_019101 | 1093.722  | 816.414   | AA709414    | 3689.99   | 2633.806  | NM_003765 | 4935.396  | 5489.213  |
| NM_000920 | 1804.387  | 1586.399  | D12676      | 3366.538  | 2610.394  | M33197    | 38294.406 | 47702.777 |
| NM_020375 | 1455.423  | 1038.282  | BC012593    | 976.807   | 778.506   | NM_018202 | 7842.132  | 9214.489  |
| NM_016049 | 8164.793  | 6920.739  | NM_000939   | 46863.594 | 40338.34  | AB023197  | 1939.197  | 2778.413  |
| NM_013311 | 8593.759  | 8711.082  | NM_004295   | 23329.295 | 20228.629 | NM_022173 | 2387.064  | 2169.786  |
| NM_000291 | 52980.977 | 51700.559 | H-X 02812 I | 2923.439  | 2637.738  | M33197    | 51782.008 | 67380.664 |
| NM_018081 | 3710.355  | 3451.22   | U75898      | 5749.938  | 4625.585  | NM_005705 | 4549.037  | 4668.093  |
| NM_014649 | 3625.291  | 4268.022  | M29039      | 759.301   | 553.642   | NM_004328 | 1406.431  | 1051.604  |
| AL117488  | 1830.217  | 1711.831  | M59815      | 875.331   | 798.261   | NM_004581 | 3078.072  | 2409.935  |
| NM_012240 | 1899.078  | 2123.498  | NM_006917   | 863.711   | 683.141   | NM_006817 | 13020.272 | 11643.608 |
| NM_019005 | 4769.148  | 5372.267  | M33197      | 1025.428  | 773.733   | NM_007108 | 5242.393  | 4378.561  |

|           |           |           |           |           |           |           |           |           |
|-----------|-----------|-----------|-----------|-----------|-----------|-----------|-----------|-----------|
| NM_004739 | 9704.176  | 10126.862 | AB011146  | 2002.847  | 1884.971  | NM_015921 | 23319.424 | 19758.797 |
| AV752216  | 1632.882  | 1713.019  | NM_006185 | 6732.093  | 6514.264  | AB040900  | 10566.06  | 9225.136  |
| NM_005341 | 1918.592  | 2061.459  | NM_014800 | 1225.771  | 1274.278  | NM_001080 | 682.275   | 984.01    |
| AF181999  | 1551.229  | 1693.936  | NM_001557 | 1524.637  | 1547.762  | NM_001482 | 1030.731  | 1624.25   |
| NM_001934 | 5183.597  | 4599.271  | AF147311  | 3573.69   | 4450.465  | U80018    | 706.96    | 1020.305  |
| AB011090  | 2931.485  | 3035.694  | NM_002131 | 39402.059 | 56943.023 | NM_000717 | 1594.082  | 2099.632  |
| NM_000209 | 1446.581  | 1741.021  | NM_017927 | 1292.672  | 1683.897  | M33197    | 50190.676 | 60231.016 |
| NM_018682 | 6926.484  | 7061.836  | M33197    | 66329.609 | 72086.906 | NM_004845 | 2077.9    | 2106.912  |
| AL355722  | 393.211   | 327.052   | NM_001203 | 2421.755  | 3424.698  | NM_007107 | 6998.244  | 8834.453  |
| NM_006545 | 7832.243  | 6788.941  | NM_006733 | 676.217   | 555.912   | NM_000047 | 10436.132 | 10575.449 |
| NM_016534 | 2002.906  | 1689.995  | NM_014047 | 18413.844 | 14000.467 | M68874    | 1127.092  | 1478.458  |
| AB021923  | 636.845   | 454.504   | AK022901  | 2718.25   | 1899.363  | NM_006319 | 1194.131  | 3042.897  |
| AK024240  | 745.175   | 988.523   | M33197    | 62506.055 | 62457.879 | NM_018226 | 969.102   | 1400.32   |
| NM_016456 | 34875.883 | 32096.033 | AF037332  | 4211.849  | 3621.723  | Z36813    | 873.601   | 596.713   |
| AK022677  | 3621.746  | 3255.814  | NM_006052 | 879.549   | 529.206   | AB018327  | 1157.345  | 964.977   |
| AF035288  | 417.454   | 480.772   | AB040912  | 3532.643  | 3071.361  | AF303889  | 771.388   | 663.251   |
| AL137645  | 5114.716  | 4363.958  | NM_003871 | 1575.652  | 898.78    | M33197    | 54915.305 | 58343.711 |
| AK026141  | 1756.555  | 1625.388  | NM_006243 | 1944.084  | 1175.365  | AK022649  | 3490.905  | 2953.476  |
| AK022894  | 3552.362  | 3298.457  | M33197    | 63312.875 | 62587.652 | NM_016507 | 3669.755  | 3123.254  |
| AF217993  | 8960.818  | 9884.986  | AJ011129  | 3106.853  | 3442.096  | NM_002024 | 5767.833  | 4723.361  |
| AF131823  | 1039.349  | 941.776   | NM_001039 | 738.632   | 809.525   | NM_002743 | 4467.22   | 4292.071  |
| AK026324  | 8321.302  | 7930.338  | M33197    | 62149.781 | 64980.918 | AF173358  | 9215.552  | 11799.104 |
| AK021971  | 332.501   | 774.615   | U92978    | 1691.522  | 1912.597  | NM_016366 | 2906.069  | 4096.003  |
| AK025253  | 1067.088  | 1412.494  | NM_005738 | 453.861   | 516.261   | M33197    | 51550.867 | 53706.355 |
| AK025004  | 3830.427  | 3953.466  | NM_014488 | 1160.485  | 1801.55   | NM_016545 | 1480.103  | 1934.972  |
| AL136818  | 1535.393  | 1703.731  | NM_013389 | 3746.498  | 6370.896  | NM_001440 | 14345.061 | 20147.48  |
| AF146798  | 1916.494  | 2024.86   | AB014567  | 717.485   | 1151.028  | NM_001201 | 680.762   | 885.11    |
| AK022049  | 479.914   | 491.129   | AK022817  | 1936.715  | 2619.991  | NM_016618 | 1822.992  | 2181.247  |
| AF086517  | 6574.391  | 5926.074  | NM_018034 | 6593.32   | 8753.37   | AB014568  | 15725.46  | 17503.533 |
| AK025740  | 14942.802 | 15577.448 | AB037831  | 2071.55   | 2559.772  | NM_012249 | 3499.764  | 4944.437  |
| AK000311  | 3549.149  | 3745.514  | NM_012103 | 14124.942 | 16730.848 | AK022546  | 4286.537  | 5189.363  |
| AK025346  | 56688.41  | 50444.102 | AL122077  | 12428.822 | 15031.524 | NM_014067 | 2937.664  | 4713.097  |
| AK022583  | 4253.624  | 4256.581  | NM_014632 | 1217.553  | 1074.575  | NM_002914 | 1525.406  | 2070.198  |
| AL137534  | 53459.285 | 50143.531 | NM_006422 | 1515.505  | 1750.36   | NM_020385 | 996.952   | 817.188   |
| AF052121  | 1629.892  | 1198.918  | NM_016946 | 2391.268  | 2680.907  | NM_006541 | 476.987   | 514.661   |
| AL359062  | 1726.59   | 1595.238  | M33197    | 63432.414 | 61624.66  | NM_018179 | 742.296   | 509.947   |
| AK026869  | 1206.494  | 1040.58   | NM_007259 | 2871.943  | 2478.594  | NM_006197 | 4531.129  | 2762.015  |
| NM_019099 | 50356.625 | 44325.063 | NM_018402 | 795.757   | 546.028   | NM_014181 | 634.4     | 560.171   |
| Y12020    | 11850.261 | 9248.264  | NM_018009 | 1097.813  | 1031.072  | M29273    | 1555.798  | 987.851   |
| AJ011597  | 419.27    | 239.002   | AK075081  | 1956.361  | 1551.851  | M33197    | 56045.879 | 50847.809 |
| AJ001905  | 986.349   | 1022.555  | NM_000895 | 5968.414  | 4128.184  | NM_004854 | 3445.28   | 2542.372  |
| U17635    | 2349.874  | 2440.683  | NM_003820 | 31646.742 | 22958.105 | AJ245418  | 6785.238  | 5629.192  |
| AL049930  | 1026.044  | 865.22    | NM_015915 | 3369.478  | 2163.158  | NM_006377 | 3252.384  | 4834.055  |
| Z83946    | 472.466   | 580.607   | M33197    | 65819.742 | 60683.418 | AK026427  | 819.401   | 983.283   |
| D55638    | 617.541   | 543.796   | NM_016518 | 6057.673  | 5336.318  | AF244129  | 563.911   | 872.927   |
| L23870    | 1045.864  | 1046.515  | AB002301  | 700.092   | 902.414   | NM_002436 | 3253.755  | 3537.091  |
| D55644    | 585.848   | 761.932   | AB014530  | 3309.995  | 4475.608  | NM_018362 | 2729.281  | 3032.821  |
| D16951    | 1086.494  | 1181.395  | M33197    | 59317.121 | 59224.359 | M33197    | 51381.398 | 57837.066 |
| L19362    | 1265.193  | 1119.179  | NM_005989 | 2425.182  | 3106.425  | NM_004755 | 743.997   | 766.642   |
| L33807    | 2182.83   | 2913.179  | AB014607  | 1447.691  | 1723.831  | NM_002186 | 1933.399  | 2285.766  |
| U80774    | 302.972   | 581.461   | AF134401  | 1391.113  | 2156.916  | NM_006182 | 713.968   | 685.505   |
| AB007975  | 938.804   | 1055.563  | NM_020151 | 10225.621 | 14381.219 | AL137543  | 2021.362  | 2345.09   |
| AK021821  | 659.749   | 749.74    | NM_003956 | 2047.528  | 2590.265  | NM_004444 | 5971.78   | 6769.491  |

|           |           |           |             |           |           |           |           |           |
|-----------|-----------|-----------|-------------|-----------|-----------|-----------|-----------|-----------|
| AL049328  | 1338.889  | 1475.29   | M33197      | 61381.82  | 57451.32  | M33197    | 546.802   | 672.435   |
| AK000030  | 1096.813  | 984.35    | NM_003500   | 3854.908  | 4489.309  | NM_001957 | 1171.249  | 1350.1    |
| NM_017932 | 942.546   | 943.265   | NM_014317   | 2423.339  | 3109.406  | AK024533  | 9976.099  | 10831.828 |
| AK000910  | 4121.04   | 4129.947  | L09234      | 7264.72   | 8182.011  | NM_002736 | 8085.262  | 10253.311 |
| AF252280  | 12236.612 | 11611.065 | NM_000059   | 1243.504  | 929.236   | NM_004246 | 969.824   | 1538.167  |
| AK000107  | 1323.063  | 1284.182  | AK026740    | 815.808   | 731.978   | NM_002285 | 2497.92   | 2470.532  |
| AK000951  | 523.581   | 1023.018  | NM_017881   | 5353.069  | 3788.316  | NM_006694 | 12503.898 | 13406.054 |
| AK024518  | 12051.741 | 13740.262 | M33197      | 61980.121 | 59655.191 | NM_005207 | 948.938   | 927.299   |
| AK024586  | 432.11    | 494.872   | NM_017634   | 2796.644  | 2853.187  | NM_014467 | 522.878   | 440.376   |
| AK025017  | 3369.525  | 2840.837  | NM_000813   | 612.001   | 574.452   | NM_003087 | 2935.146  | 2846.882  |
| AK024534  | 777.553   | 656.559   | NM_018896   | 1423.774  | 890.162   | NM_001630 | 3740.358  | 3804.2    |
| AK024616  | 442.106   | 536.211   | AJ300465    | 1678.583  | 896.039   | M33197    | 52614.055 | 68555.023 |
| AK024914  | 4578.258  | 4780.318  | X86400      | 1317.479  | 893.284   | NM_002031 | 552.425   | 610.456   |
| BC030949  | 4518.76   | 4530.311  | NM_000810   | 1708.39   | 1369.831  | AF305081  | 2076.769  | 2203.188  |
| AF116615  | 1758.035  | 1329.566  | AF069307    | 2255.628  | 1983.161  | NM_004712 | 6841.554  | 8171.145  |
| U17636    | 48685.586 | 43285.727 | M33197      | 976.485   | 1341.004  | AF118078  | 3231.956  | 4908.738  |
| NM_018546 | 2563.15   | 2719.187  | AB011146    | 2061.116  | 3011.141  | NM_020166 | 296.965   | 523.142   |
| U52699    | 13119.241 | 12812.003 | NM_007286   | 517.302   | 740.029   | AL157428  | 634.648   | 407.791   |
| S71613    | 751.664   | 1013.025  | NM_014069   | 1448.549  | 1441.626  | M33197    | 48934.637 | 45645.59  |
| AJ011910  | 14228.218 | 12311.166 | AB035130    | 1571.831  | 1225.326  | BE904175  | 360.102   | 409.401   |
| AK024378  | 904.051   | 926.343   | NM_003359   | 2316.262  | 2482.405  | NM_005858 | 1443.589  | 2000.139  |
| NM_014026 | 4012.672  | 3495.142  | M33197      | 49045.531 | 51002.238 | AK025163  | 1085.936  | 1178.818  |
| D61703    | 12026.762 | 10806.769 | AF119917    | 388.649   | 445.865   | NM_014931 | 1882.85   | 2266.033  |
| AF086198  | 14241.855 | 13970.803 | NM_017915   | 890.948   | 841.817   | NM_014487 | 1442.371  | 1432.551  |
| AL137382  | 49526.453 | 45926.602 | AL050097    | 776.718   | 751.37    | NM_018070 | 1554.671  | 1906.116  |
| AK024599  | 8333.525  | 9172.191  | NM_003579   | 1260.167  | 906.116   | NM_002484 | 1979.043  | 2322.057  |
| AK024928  | 295.65    | 532.866   | AL049283    | 1435.953  | 1043.881  | M33197    | 50154.895 | 55271.031 |
| NM_014450 | 1170.587  | 1173.57   | M33197      | 51963.609 | 54035.66  | NM_018240 | 40082.422 | 51527.535 |
| NM_017991 | 764.876   | 834.926   | NM_002401   | 17050.674 | 13451.511 | AK025941  | 977.431   | 1800.759  |
| L37198    | 2232.87   | 2075.912  | NM_001274   | 1420.757  | 1034.55   | M33197    | 51756.07  | 54606.211 |
| U67822    | 682.86    | 598.435   | NM_003913   | 577.335   | 504.351   | NM_015914 | 961.613   | 1003.483  |
| AK025431  | 1254.078  | 1442.027  | NM_002227   | 2363.959  | 1309.429  | AF059531  | 5823.909  | 6121.357  |
| AK023662  | 888.311   | 1046.541  | NM_007199   | 1474.366  | 1354.736  | NM_002707 | 4868.976  | 6905.804  |
| AF086274  | 28724.078 | 29344.512 | NM_006243   | 1264.573  | 1951.043  | AF029777  | 941.455   | 946.349   |
| AK023682  | 1188.777  | 1604.759  | AJ011129    | 2857.277  | 3515.833  | NM_003352 | 786.106   | 643.566   |
| AK024024  | 2000.932  | 1893.534  | NM_001039   | 747.5     | 1133.901  | AK026884  | 8561.548  | 10446.729 |
| AF000991  | 602.887   | 748.452   | NM_006387   | 3948.564  | 5790.773  | S82198    | 1449.268  | 1968.091  |
| AK000685  | 21023.412 | 17739.129 | NM_005646   | 2818.211  | 3918.512  | NM_002594 | 2349.084  | 2070.34   |
| D28381    | 16031.352 | 13583.815 | NM_006639   | 4503.844  | 5226.773  | NM_001159 | 901.999   | 1053.685  |
| BE706519  | 735.221   | 872.954   | NM_001692   | 1092.589  | 1064.847  | NM_031407 | 1776.9    | 2030.385  |
| AF130064  | 30496.59  | 30875.77  | BI767871    | 3733.909  | 3212.096  | M33197    | 51072.656 | 58467.965 |
| U17624    | 1026.919  | 1303.862  | AA418907    | 1200.914  | 1295.171  | AK000410  | 49858.109 | 50355.766 |
| AK025184  | 525.597   | 785.243   | M65291      | 546.802   | 465.177   | NM_020193 | 734.382   | 584.423   |
| D16988    | 46082.895 | 42630.816 | AA115473    | 2813.029  | 2513.2    | NM_005619 | 1143.52   | 1271.733  |
| AK001959  | 5180.44   | 6494.867  | AA872397    | 6059.096  | 6180.046  | D87440    | 941.454   | 1017.647  |
| U36217    | 2006.729  | 1573.646  | M24283      | 759.876   | 784.557   | AK000332  | 7214.53   | 8692.928  |
| AL389880  | 1710.865  | 1441.265  | AA709414    | 3610.916  | 3107.837  | AL080156  | 575.91    | 535.872   |
| AL157452  | 2761.613  | 2990.974  | D12676      | 2431.672  | 2006.733  | M33197    | 48264.855 | 62006.977 |
| AK024155  | 25792.459 | 22054.428 | BC012593    | 857.498   | 943.207   | NM_006738 | 424.528   | 794.144   |
| AL359334  | 22410.455 | 20593.066 | NM_000939   | 34294.371 | 34828.582 | NM_016260 | 324.569   | 505.859   |
| AK027095  | 1461.51   | 1847.406  | NM_004295   | 16447.484 | 12725.045 | NM_002895 | 1294.538  | 1560.64   |
| AF062097  | 1623.854  | 1835.348  | H-X 02812 I | 2334.337  | 1607.544  | NM_013351 | 14458.907 | 16497.984 |
| NM_019847 | 686.432   | 691.267   | U75898      | 2771.524  | 2012.71   | NM_012340 | 4538.98   | 4232.244  |

|           |           |           |           |           |           |           |           |           |
|-----------|-----------|-----------|-----------|-----------|-----------|-----------|-----------|-----------|
| D17093    | 19555.479 | 19822.684 | M29039    | 959.18    | 736.761   | NM_006022 | 982.552   | 627.878   |
| AK022784  | 440.541   | 876.546   | M59815    | 827.372   | 678.434   | AK025110  | 989.4     | 1005.449  |
| AL117521  | 3028.258  | 2369.202  | NM_000895 | 5528.831  | 6664.455  | X52339    | 33451.59  | 23750.865 |
| NM_000731 | 461.284   | 415.969   | NM_015915 | 3181.838  | 3115.889  | M33197    | 47211.109 | 49408.43  |
| AK021913  | 3513.746  | 3271.885  | M33197    | 61160.438 | 63960.055 | AB046830  | 1686.434  | 1859.451  |
| AL137489  | 9603.988  | 8461.515  | NM_016518 | 5956.675  | 8036.873  | NM_007122 | 1596.613  | 1737.938  |
| AF009311  | 2150.426  | 2007.536  | NM_006185 | 17213.912 | 25374.703 | NM_001488 | 661.118   | 436.963   |
| S73397    | 1028.092  | 959.435   | NM_014800 | 1300.892  | 1997.055  | NM_016202 | 5333.182  | 4518.333  |
| AK023939  | 484.214   | 142.096   | NM_001557 | 1224.141  | 1542.325  | NM_012476 | 699.129   | 567.277   |
| AK024433  | 2920.19   | 2385.615  | AF147311  | 3838.634  | 3829.19   | NM_016604 | 744.992   | 823.186   |
| U82321    | 932.093   | 965.364   | NM_002131 | 47863.219 | 47118.027 | M33197    | 46759.98  | 49304.129 |
| AK023856  | 797.852   | 640.397   | NM_017927 | 3001.876  | 2384.135  | NM_006276 | 1778.271  | 2464.09   |
| AL050376  | 1309.64   | 1104.731  | M33197    | 63732.859 | 61003.879 | NM_003407 | 1602.558  | 2074.918  |
| AL359652  | 2086.175  | 1915.595  | NM_001203 | 2192.98   | 2019.172  | NM_007209 | 46466.402 | 52085.238 |
| AK022423  | 2265.676  | 1767.291  | NM_004799 | 19811.818 | 18591.91  | NM_003729 | 2211.971  | 2494.808  |
| AF088021  | 5057.02   | 4876.124  | NM_006733 | 694.872   | 751.332   | L05096    | 4140.413  | 5065.882  |
| BF509267  | 7460.986  | 7072.586  | NM_014047 | 12706.074 | 13545.109 | BC015899  | 2306.047  | 3315.727  |
| NM_002455 | 6864.248  | 6162.146  | AK022901  | 1323.017  | 732.192   | NM_017986 | 7189.832  | 8062.166  |
| NM_002959 | 18636.1   | 17540.529 | M33197    | 63499.09  | 60521.355 | AK023629  | 510.636   | 758.123   |
| AB046773  | 453.906   | 249.729   | AF037332  | 2204.841  | 2038.756  | AK024846  | 1164.807  | 1377.521  |
| AK000899  | 14211.396 | 15119.222 | NM_006052 | 745.063   | 761.274   | AK001451  | 2307.461  | 2623.623  |
| AK023377  | 571.133   | 297.461   | AB040912  | 3672.928  | 2812.757  | M33197    | 32261.695 | 29975.232 |
| CY3Cy5    | 11186.271 | 961.572   | NM_003871 | 991.115   | 803.119   | NM_007180 | 910.666   | 981.257   |
| AW300857  | 34922.23  | 33854.621 | NM_018896 | 952.355   | 857.705   | NM_005609 | 543.85    | 260.576   |
| H85962    | 31089.34  | 28481.363 | AJ300465  | 1269.301  | 1238.42   | NM_005476 | 3497.494  | 3821.561  |
| BG742446  | 1833.645  | 1732.637  | X86400    | 1255.31   | 1472.282  | NM_005660 | 1841.223  | 1912.505  |
| AA864554  | 8175.659  | 8414.201  | NM_000810 | 1182.276  | 1508.186  | AK023902  | 810.901   | 1098.888  |
| X66945    | 3096.596  | 3274.775  | AF069307  | 1975.917  | 2912.95   | AB011173  | 2351.906  | 2716.376  |
| AI160703  | 784.175   | 987.088   | M33197    | 59530.602 | 66521.852 | AB023195  | 622.058   | 547.023   |
| X12830    | 12375.563 | 13023.938 | U92978    | 2765.397  | 3730.023  | U43431    | 1249.115  | 1137.866  |
| U00482    | 2697.829  | 2864.912  | NM_014488 | 1230.318  | 1126.717  | AB006622  | 877.747   | 1130.04   |
| Z80998    | 697.725   | 1046.082  | NM_013389 | 5745.746  | 5030.073  | M33197    | 45658.207 | 45656.324 |
| K01904    | 26391.229 | 26588.951 | AB014567  | 686.357   | 821.558   | AK097041  | 945.923   | 1568.995  |
| BE538886  | 2006.139  | 2614.789  | AK022817  | 1899.999  | 1552.768  | AF068744  | 3811.133  | 5741.48   |
| NM_002228 | 1586.791  | 1623.01   | NM_018034 | 5025.63   | 4834.702  | AK000762  | 1162.399  | 1485.54   |
| M57650    | 12157.936 | 12300.88  | M33197    | 62126.859 | 63140.547 | NM_004571 | 383.539   | 675.648   |
| BC023978  | 1107.029  | 1033.029  | AB037831  | 1471.89   | 1572.122  | AJ345030  | 1322.856  | 1593.824  |
| M21302    | 3053.682  | 3414.356  | NM_012103 | 12153.877 | 13188.037 | AK023631  | 318.629   | 224.106   |
| NM_016346 | 5504.153  | 6338.342  | AL122077  | 9417.141  | 8901.425  | AK023472  | 8595.783  | 8251.01   |
| SR2       | 63820.648 | 66212.789 | NM_014632 | 1102.713  | 1085.471  | AK021796  | 501.414   | 538.972   |
| SR4       | 22729.104 | 24437.104 | NM_006422 | 1175.978  | 1436.746  | AL109729  | 537.518   | 558.674   |
| SR10      | 35309.203 | 12231.466 | BE789195  | 1271.452  | 1689.777  | AF007146  | 529.552   | 736.028   |
| CY3Cy5    | 13060.218 | 942.744   | NM_016946 | 1800.549  | 2000.978  | M33197    | 48010.23  | 35196.402 |
| NM_001525 | 24400.785 | 26108.467 | M33197    | 62644.086 | 62728.723 | S79912    | 25703.947 | 20052.162 |
| NM_006055 | 7062.031  | 7425.788  | NM_007259 | 2435.923  | 1898.291  | AK026892  | 1398.775  | 1533.673  |
| NM_004296 | 1182.737  | 1060.634  | NM_018402 | 685.563   | 487.421   | S83275    | 16427.59  | 15396.091 |
| NM_005972 | 1343.472  | 1119.027  | NM_018009 | 786.06    | 546.255   | AL117427  | 4567.594  | 4317.138  |
| NM_001060 | 5041.413  | 5400.267  | M33197    | 50791.332 | 55345.75  | M33197    | 47801.875 | 48774.656 |
| NM_018841 | 1611.283  | 1799.341  | NM_002401 | 20266.361 | 24800.451 | AF052118  | 6877.023  | 7486.204  |
| NM_005226 | 690.301   | 697.239   | NM_001274 | 1090.789  | 1210.682  | AK025166  | 3266.239  | 3561.578  |
| AL133105  | 2855.335  | 2974.073  | NM_002227 | 1977.346  | 2317.472  | AL359586  | 729.931   | 756.896   |
| AK022859  | 1611.673  | 1861.972  | NM_007199 | 1324.444  | 2004.692  | AF147421  | 425.097   | 416.343   |
| NM_000214 | 604.216   | 699.998   | AB002301  | 558.509   | 982.792   | AF035290  | 1066.67   | 1388.047  |

|           |           |           |           |           |           |           |           |           |
|-----------|-----------|-----------|-----------|-----------|-----------|-----------|-----------|-----------|
| NM_014864 | 8541.461  | 8864.884  | AB014530  | 5897.717  | 6657.424  | AK023216  | 447.098   | 654.554   |
| NM_003728 | 13260.622 | 11693.072 | M33197    | 60194.617 | 59685.566 | M33197    | 44870.297 | 55224.57  |
| NM_014352 | 7220.951  | 8590.479  | NM_005989 | 4294.508  | 3589.57   | M33197    | 50571.832 | 58650.656 |
| NM_012481 | 2819.319  | 3062.377  | AB014607  | 3961.511  | 3440.859  | AK022428  | 628.332   | 695.754   |
| L09102    | 27355.426 | 26869.004 | AF134401  | 1743.834  | 1936.043  | AK000788  | 719.28    | 716.017   |
| U68488    | 1888.122  | 2315.08   | NM_020151 | 9910.448  | 9809.953  | AK023457  | 1055.501  | 1312.275  |
| NM_000675 | 671.59    | 578.897   | NM_005891 | 27357.734 | 34619.063 | AK025089  | 3031.192  | 3846.381  |
| NM_016247 | 5321.004  | 5405.78   | NM_001645 | 1775.938  | 1862.895  | AK027206  | 312.34    | 367.807   |
| NM_012282 | 1213.647  | 1311.267  | NM_003956 | 1820.214  | 1673.482  | AK023298  | 354.438   | 216.544   |
| NM_006710 | 687.447   | 828.944   | M33197    | 58309.883 | 60993.715 | AK021431  | 567.246   | 577.038   |
| NM_003323 | 13772.745 | 15128.678 | NM_003500 | 3081.346  | 2849.118  | M33197    | 48489.91  | 60353.777 |
| BG685310  | 2403.895  | 3005.055  | NM_014317 | 2200.302  | 2438.642  | AF085996  | 1821.965  | 2553.762  |
| NM_018668 | 8807.369  | 9365.244  | L09234    | 6701.9    | 7850.534  | AK001279  | 1229.318  | 1211.716  |
| NM_004227 | 1453.792  | 1340.893  | NM_000059 | 1182.288  | 1336.633  | AF086407  | 556.608   | 607.562   |
| NM_005282 | 3126.818  | 3280.472  | AK026740  | 477.05    | 734.486   | AF085949  | 465.701   | 384.299   |
| NM_001736 | 1109.125  | 1441.965  | NM_017881 | 3220.774  | 3475.428  | AK001567  | 763.394   | 971.42    |
| AB028949  | 2198.22   | 2215.384  | M33197    | 62554.387 | 61767.945 | M33197    | 32082.742 | 30382.045 |
| AL137580  | 1244.736  | 1116.861  | NM_017634 | 2844.518  | 1916.454  | U52839    | 1254.664  | 1315.411  |
| NM_004101 | 947.17    | 1261.583  | NM_000300 | 2137.275  | 2078.422  | M33197    | 36321.781 | 44030.953 |
| NM_002995 | 57999.43  | 56107.234 | M33197    | 59332.207 | 60502.035 | AK026984  | 8091.987  | 14607.054 |
| AB033114  | 518.758   | 527.744   | AV756917  | 1830.454  | 2177.356  | AK022088  | 530.734   | 433.195   |
| NM_015978 | 2659.963  | 2884.911  | NM_018380 | 8277.345  | 10435.453 | NM_013391 | 563.736   | 394.971   |
| NM_003810 | 3139.441  | 3072.515  | NM_012070 | 1933.944  | 2758.816  | M33197    | 47849.531 | 49985.031 |
| NM_004908 | 612.231   | 700.153   | NM_019038 | 1064.296  | 1360.074  | AL157466  | 1656.49   | 1942.416  |
| NM_005212 | 5692.132  | 4982.695  | AF183423  | 3243.18   | 2828.917  | AL389981  | 490.644   | 497.101   |
| NM_006419 | 2319.494  | 2115.386  | M33197    | 1166.439  | 1040.212  | AK024336  | 1038.108  | 1084.384  |
| AB020676  | 1158.644  | 1267.382  | AB011146  | 2245.259  | 2053.655  | AK023862  | 531.215   | 382.416   |
| AK024715  | 1200.904  | 1288.753  | NM_005326 | 8358      | 8473.135  | NM_018621 | 848.415   | 922.255   |
| U90942    | 65298.418 | 66864     | AB035130  | 1282.734  | 967.703   | AK022016  | 902.052   | 1076.826  |
| NM_014942 | 642.959   | 687.158   | NM_003359 | 1660.926  | 1298.657  | AK021628  | 1015.586  | 944.26    |
| NM_018360 | 3151.384  | 3124.42   | M33197    | 48965.422 | 46483.488 | M33197    | 46341.691 | 48750.551 |
| AK022489  | 1417.472  | 1082.887  | NM_017915 | 672.671   | 1065.566  | NM_018603 | 587.322   | 805.901   |
| AL365415  | 1222.531  | 1337.482  | NM_003579 | 1226.609  | 1112.878  | AK022118  | 1075.255  | 1146.303  |
| L29147    | 34072.313 | 34816.16  | AL049283  | 917.92    | 656.94    | AK026453  | 4206.638  | 5249.15   |
| NM_020228 | 3525.5    | 3038.959  | AF005258  | 1001.428  | 990.525   | AK025673  | 1083.61   | 1159.34   |
| AK024685  | 2017.872  | 2175.182  | NM_000887 | 905.842   | 967.55    | AF116678  | 612.011   | 573.174   |
| NM_003676 | 16932.404 | 16705.277 | M33197    | 62255.91  | 61567.598 | M33197    | 41877.523 | 38256.008 |
| AF113007  | 2056.837  | 2100.45   | X99659    | 11260.836 | 14108.135 | AK022431  | 297.504   | 633.728   |
| NM_000688 | 7406.588  | 6846.552  | NM_015416 | 2652.42   | 3113.838  | AK023305  | 7447.46   | 10700.269 |
| U39573    | 1627.861  | 1732.73   | NM_002731 | 749.856   | 793.06    | AK022729  | 1297.857  | 1447.408  |
| D82061    | 2347.791  | 2484.666  | NM_003899 | 3385.467  | 3141.643  | NM_006168 | 8533.425  | 10246.022 |
| AJ293009  | 2524.611  | 3079.58   | X99662    | 6098.143  | 5329.738  | AL050374  | 2103.377  | 2239.73   |
| NM_000374 | 3541.255  | 3349.827  | NM_003473 | 34233.316 | 32543.883 | M33197    | 49559.859 | 52259.418 |
| NM_000502 | 9308.617  | 9572.91   | NM_014325 | 1707.911  | 1471.804  | M28639    | 2325.003  | 2006.13   |
| BF088089  | 533.712   | 592.088   | M33197    | 57495.871 | 58546.563 | AL122073  | 6409.232  | 5144.458  |
| NM_001359 | 20391.102 | 23189.305 | NM_006016 | 46041.836 | 50294.34  | AF116655  | 1819.443  | 1739.793  |
| NM_005175 | 41736.258 | 45181.18  | NM_001242 | 1760.307  | 1484.486  | AJ243222  | 951.815   | 912.926   |
| NM_001696 | 14714.274 | 14443.965 | NM_014891 | 8047.896  | 6277.545  | AK026132  | 1690.198  | 1865.711  |
| NM_004975 | 4108.099  | 2608.212  | NM_013392 | 4962.564  | 3841.89   | Y11162    | 736.342   | 584.823   |
| NM_002245 | 495.017   | 427.104   | M33197    | 60356.023 | 56810.176 | M33197    | 46783.773 | 41700.242 |
| D87445    | 10380.439 | 12806.203 | NM_003458 | 642.1     | 472.681   | AF070584  | 946.219   | 893.501   |
| NM_000238 | 5588.827  | 5107.062  | AF052692  | 938.53    | 785.76    | AF075006  | 604.114   | 459.856   |
| NM_002247 | 1365.004  | 1371.271  | NM_002354 | 1215.994  | 1648.711  | M33197    | 39728.195 | 38121.219 |



|           |           |           |           |           |           |           |           |           |
|-----------|-----------|-----------|-----------|-----------|-----------|-----------|-----------|-----------|
| NM_00498C | 18866.396 | 14610.04  | NM_000179 | 704.209   | 786.843   | AK000903  | 13314.163 | 19779.225 |
| AB011094  | 15049.583 | 15908.076 | AF062739  | 1684.224  | 1921.827  | AK023938  | 450.409   | 714.097   |
| NM_003224 | 1869.429  | 1924.042  | NM_006602 | 2001.211  | 2069.287  | AL110169  | 343.165   | 717.62    |
| NM_006827 | 19655.385 | 19201.963 | M33197    | 56334.723 | 61505.477 | L13743    | 1840.451  | 1938.201  |
| AK021761  | 7931.309  | 7745.181  | AL079314  | 4529.784  | 6697.908  | U84519    | 1162.684  | 1028.106  |
| AK024536  | 1240.897  | 1239.75   | NM_001260 | 1185.737  | 1245.993  | Z11849    | 3452.063  | 3899.762  |
| NM_001483 | 3989.51   | 3740.596  | NM_001950 | 1977.32   | 2241.654  | AJ002788  | 1954.053  | 2253.663  |
| NM_018973 | 18808.262 | 16278.808 | AK026364  | 1354.862  | 1387.067  | M33197    | 54951.453 | 56811.961 |
| NM_002591 | 12557.206 | 11786.686 | NM_018117 | 813.622   | 944.059   | AF052103  | 1865      | 2001.772  |
| NM_020216 | 7780.917  | 8381.76   | NM_006999 | 926.308   | 679.107   | AF075050  | 446.197   | 510.096   |
| AK021860  | 2277.212  | 2178.504  | M33197    | 60690.469 | 57183.836 | AK024842  | 657.253   | 649.768   |
| AB046816  | 1453.422  | 1236.679  | NM_004331 | 4625.154  | 4621.573  | NM_018382 | 852.743   | 569.76    |
| AL137266  | 4805.333  | 4436.444  | NM_015703 | 7805.346  | 6785.873  | BC022303  | 374.124   | 859.059   |
| NM_016457 | 1398.906  | 1302.453  | AB018337  | 1354.402  | 1071.005  | M33197    | 49753.316 | 46720.676 |
| NM_005057 | 1789.635  | 1829.374  | AK025273  | 2112.202  | 1388.926  | D17203    | 26105.699 | 25692.613 |
| AF143321  | 918.387   | 687.201   | M33197    | 57067.531 | 51852.688 | NM_006495 | 2730.055  | 3414.436  |
| AB046842  | 1495.804  | 2059.907  | NM_002205 | 635.439   | 514.097   | NM_005288 | 635.726   | 734.356   |
| NM_004850 | 2654.749  | 2569.068  | M33197    | 60342.086 | 58148.645 | AK022101  | 524.992   | 814.203   |
| NM_002822 | 3992.848  | 5121.099  | NM_001836 | 469.548   | 606.616   | NM_003251 | 304.299   | 628.186   |
| BF306955  | 1875.133  | 1752.494  | NM_001911 | 30137.984 | 24221.506 | M33197    | 48671.426 | 64059.371 |
| NM_001394 | 16417.574 | 16094.765 | NM_000537 | 363       | 715.325   | AL442080  | 343.724   | 960.419   |
| NM_000778 | 17020.314 | 17369.371 | NM_006503 | 786.51    | 808.595   | AY007143  | 1310.923  | 2624.38   |
| NM_001609 | 1669.615  | 1497.531  | M33197    | 1109.691  | 1081.174  | L15557    | 598.436   | 963.13    |
| BE733234  | 979.694   | 1063.7    | AB020698  | 905.371   | 838.238   | M33197    | 55037.551 | 63305.262 |
| NM_012282 | 1040.2    | 979.326   | U68382    | 2360.974  | 2313.404  | NM_001563 | 5818.531  | 6197.162  |
| NM_006710 | 539.29    | 583.532   | NM_003969 | 1859.011  | 1729.007  | NM_000266 | 699.995   | 817.683   |
| NM_003323 | 14281.902 | 12042.647 | NM_004651 | 1681.428  | 2082.938  | X89666    | 2090.594  | 2069.719  |
| BG685310  | 2460.392  | 2373.326  | M33197    | 60734.59  | 56336.152 | NM_017429 | 438.086   | 370.977   |
| H85962    | 42260.832 | 39027.797 | NM_017569 | 4129.336  | 3217.006  | NM_003104 | 3937.569  | 4304.35   |
| BG742446  | 2243.623  | 2078.728  | NM_002906 | 1342.879  | 1315.297  | NM_014581 | 1713.37   | 1643.989  |
| AA864554  | 8306.928  | 10221.132 | AK024480  | 1747.409  | 1611.72   | NM_000898 | 764.926   | 919.011   |
| X66945    | 3216.148  | 3706.825  | Y13871    | 8971.203  | 6659.777  | M33197    | 51166.102 | 62408.105 |
| AI160703  | 821.511   | 819.187   | AL137725  | 3907.179  | 2408.146  | AK024448  | 2087.292  | 2199.216  |
| X12830    | 10945.282 | 11130.209 | M33197    | 54433.629 | 51530.93  | NM_014406 | 1629.951  | 1513.692  |
| U00482    | 2537.954  | 2518.359  | AJ008151  | 8923.443  | 6956.002  | Z11801    | 909.184   | 896.933   |
| Z80998    | 1022.385  | 968.661   | AK024149  | 1261.823  | 1509.435  | AK027253  | 372.666   | 323.272   |
| K01904    | 25044.887 | 24115.879 | AK023094  | 600.982   | 416.588   | S68954    | 31453.975 | 4779.755  |
| BE538886  | 1651.121  | 1989.715  | M33197    | 50722.121 | 48742.359 | S81335    | 1746.349  | 1687      |
| NM_002228 | 1410.152  | 1125.513  | NM_004091 | 2359.734  | 2270.971  | AF052109  | 4249.155  | 1356.913  |
| M57650    | 10650.752 | 11256.744 | X74070    | 60100.055 | 58372.477 | M33197    | 28573.105 | 27059.434 |
| BC023978  | 1047.417  | 928.521   | AF027219  | 971.008   | 1195.386  | NM_003353 | 8596.965  | 12962.666 |
| M21302    | 2955.515  | 3371.657  | NM_006333 | 2434.754  | 1848.81   | X82127    | 6770.191  | 8230.233  |
| NM_016346 | 5413.29   | 6125.664  | M33197    | 60499.273 | 57381.742 | AL122044  | 488.758   | 744.09    |
| AK024865  | 1061.846  | 1058.503  | NM_002898 | 6319.344  | 4869.886  | NM_018296 | 509.009   | 775.173   |
| NM_007210 | 614.518   | 673.178   | AK022749  | 6407.366  | 5912.279  | M33197    | 50656.418 | 67286.453 |
| NM_014942 | 880.95    | 795.356   | BF031409  | 5851.959  | 5079.055  | CY3Cy5    | 4147.52   | 486.891   |
| NM_018360 | 3150.782  | 2541.661  | NM_007043 | 1346.104  | 1470.703  | AA418907  | 875.247   | 1004.76   |
| AL365415  | 1275.452  | 1027.753  | BE378791  | 559.315   | 775.153   | M65291    | 347.534   | 512.907   |
| NM_001525 | 26092.977 | 23649.619 | U94388    | 1151.338  | 1528.011  | AA115473  | 1635.258  | 1808.63   |
| NM_006055 | 6717.844  | 6018.405  | NM_012322 | 2861.08   | 2763.897  | AA872397  | 3736.564  | 4568.798  |
| NM_004296 | 1407.337  | 1584.51   | M33197    | 57814.238 | 53991.789 | AA709414  | 1432.103  | 2512.546  |
| NM_005048 | 1150.995  | 1058.899  | NM_004889 | 36726.762 | 36252.016 | D12676    | 1379.286  | 1479.379  |
| NM_005972 | 1204.036  | 1180.964  | AK025314  | 1374.411  | 1244.073  | BC012593  | 402.433   | 407.775   |

|           |           |           |           |           |           |             |           |           |
|-----------|-----------|-----------|-----------|-----------|-----------|-------------|-----------|-----------|
| NM_00106C | 4609.669  | 5080.648  | NM_002109 | 1935.415  | 1442.971  | NM_00429E   | 9843.283  | 10512.321 |
| NM_018841 | 1555.446  | 1530.422  | NM_000984 | 63205.914 | 57468.203 | H-X 02812 I | 1437.47   | 2012.187  |
| NM_00522E | 700.138   | 708.761   | NM_002453 | 2300.888  | 1690.965  | U75898      | 1896.532  | 1790.16   |
| AL133105  | 2674.189  | 3023.695  | AK000780  | 23689.705 | 19613.813 | M29039      | 537.594   | 694.752   |
| AK022859  | 1696.71   | 1504.134  | AK023027  | 2878.689  | 2124.515  | NM_006917   | 869.641   | 961.499   |
| NM_014864 | 7488.134  | 7901.915  | AB002348  | 25941.342 | 25782.531 | SR2         | 28750.617 | 27438.053 |
| NM_00372E | 11385.643 | 10193.726 | M33197    | 30413.961 | 37220.137 | SR4         | 5504.464  | 5181.325  |
| NM_014352 | 8224.545  | 9139.01   | AK026043  | 2151.715  | 3115.751  | SR6         | 1151.735  | 1508.225  |
| NM_012481 | 3067.203  | 3142.386  | NM_00500E | 3318.653  | 4758.689  | SR8         | 3179.72   | 11649.517 |
| L09102    | 25988.346 | 27451.645 | AK027033  | 1002.173  | 970.738   | SR10        | 10882.151 | 4183.404  |
| U68488    | 1756.093  | 2073.148  | NM_00010E | 1584.531  | 1576.653  | CY3Cy5      | 4191.636  | 512.458   |
| NM_016247 | 5212.395  | 4583.294  | NM_00300C | 9183.049  | 7170.36   | M33197      | 56066.957 | 62380.094 |
| NM_003224 | 1855.526  | 1746.128  | NM_00249E | 16461.15  | 12328.051 | NM_001203   | 1694.003  | 2696.906  |
| NM_006827 | 21414.77  | 19836.295 | M33197    | 56951.879 | 52247.5   | NM_00479E   | 12927.802 | 11130.521 |
| AK021761  | 9689.812  | 8388.31   | NM_016284 | 1915.753  | 1897.507  | NM_006733   | 411.52    | 340.726   |
| AK024536  | 1791.851  | 1683.156  | NM_014593 | 2909.308  | 3449.659  | NM_014047   | 6796.159  | 8519.596  |
| NM_01866E | 8546.691  | 7732.678  | NM_006833 | 7505.194  | 11332.023 | AK022901    | 1129.249  | 2077.741  |
| NM_004227 | 1246.88   | 1083.414  | NM_012257 | 1040.814  | 941.175   | NM_006052   | 891.004   | 1313.729  |
| NM_005282 | 2905.009  | 3259.627  | U37690    | 17148.465 | 14648.279 | AB040912    | 883.222   | 1017.745  |
| NM_00173E | 1086.552  | 1258.781  | AB029012  | 20645.092 | 14655.659 | NM_003871   | 1046.823  | 816.644   |
| AB028949  | 2415.476  | 2117.688  | M33197    | 63649.039 | 58121.574 | NM_006243   | 645.606   | 654.922   |
| AL137580  | 1143.159  | 999.07    | AF060936  | 3587.159  | 2494.029  | AJ011129    | 2419.117  | 2491.877  |
| NM_004101 | 1027.791  | 1041.649  | AL050088  | 3513.008  | 3611.868  | AF282874    | 495.576   | 695.668   |
| NM_00299E | 51329.703 | 48889.137 | AK024939  | 2407.087  | 2439.698  | NM_00103E   | 622.447   | 743.035   |
| NM_01597E | 2499.588  | 2387.295  | AK001561  | 2826.068  | 2783.342  | NM_006387   | 1187.17   | 874.491   |
| NM_00381C | 2935.706  | 2738.044  | AB007880  | 1705.753  | 1746.979  | NM_00564E   | 1169.955  | 1139.673  |
| NM_00490E | 605.605   | 639.028   | AK024950  | 1196.205  | 1466.07   | NM_00663E   | 1744.556  | 1630.802  |
| NM_014443 | 4358.152  | 2552.484  | M33197    | 59593.996 | 61423.582 | NM_001692   | 545.633   | 730.185   |
| NM_005212 | 5924.216  | 5612.521  | NM_01414E | 8456.635  | 9707.979  | BI767871    | 2169.313  | 2017.898  |
| M14584    | 777.309   | 487.822   | NM_018843 | 4203.207  | 4228.729  | AK022817    | 1140.097  | 1213.764  |
| NM_00641E | 2415.47   | 2164.381  | AF086225  | 1306.716  | 1547.1    | NM_018034   | 3213.222  | 2812.963  |
| AB020676  | 1057.239  | 1039.116  | NM_005844 | 4103.926  | 3343.616  | M33197      | 50242.66  | 46744.164 |
| AK024715  | 1108.79   | 994.467   | AK024941  | 3152.073  | 2309.274  | AB037831    | 1311.072  | 1217.405  |
| BF306955  | 2290.704  | 2012.651  | AF056434  | 2334.337  | 1944.134  | NM_012103   | 9099.405  | 13291.215 |
| NM_001394 | 16201.167 | 16186.656 | M33197    | 25991.465 | 21611.525 | AL122077    | 6508.044  | 8347.825  |
| NM_00077E | 16943.387 | 17637.771 | M33197    | 57951.566 | 59627.238 | NM_014632   | 513.659   | 742.376   |
| NM_00160E | 1960.34   | 1590.321  | NM_01812E | 1017.932  | 858.072   | NM_006422   | 441.063   | 794.876   |
| BE733234  | 840.24    | 899.216   | AK024506  | 2305.174  | 2876.534  | NM_00725E   | 248.174   | 350.114   |
| NM_02022E | 3820.483  | 3728.678  | AF086326  | 2257.057  | 3442.488  | NM_018402   | 950.422   | 1340.334  |
| AK024685  | 2556.154  | 2334.91   | M33197    | 60686.926 | 58894.75  | NM_01800E   | 545.054   | 1070.207  |
| NM_00367E | 16274.516 | 18169.604 | AL080057  | 575.523   | 503.01    | AK075081    | 956.733   | 1757.971  |
| AF113007  | 2086.998  | 2300.252  | AK025948  | 963.842   | 1117.343  | NM_00089E   | 1476.055  | 2465.024  |
| NM_00068E | 7303.135  | 7072.033  | AL353948  | 7243.351  | 5830.368  | NM_00382C   | 13200.269 | 17253.572 |
| U39573    | 1762.442  | 1713.461  | M33197    | 21879.072 | 19022.111 | M33197      | 48522.477 | 54462.25  |
| D82061    | 2736.037  | 2738.433  | AK025869  | 764.166   | 1004.484  | NM_01651E   | 2875.895  | 2231.859  |
| AJ293009  | 2925.269  | 3094.041  | AK023961  | 758.374   | 1246.179  | NM_00618E   | 5816.855  | 4160.808  |
| NM_000374 | 3392.778  | 3341.328  | M33197    | 53160.043 | 51380.875 | NM_01480C   | 523.696   | 350.857   |
| NM_000502 | 8385.459  | 8812.504  | AF056430  | 738.389   | 755.936   | NM_001557   | 746.977   | 593.569   |
| BF088089  | 518.305   | 396.36    | NM_01490E | 866.915   | 1661.333  | AF147311    | 1867.062  | 1611.462  |
| NM_00135E | 21509.25  | 22910.867 | M33197    | 59805.074 | 53872.516 | NM_002131   | 20557.967 | 20219.021 |
| NM_00169E | 13137.654 | 13328.135 | NM_01805E | 2601.996  | 2360.359  | NM_017927   | 1842.977  | 1455.656  |
| NM_00497E | 5079.155  | 2609.466  | AK002199  | 1127.156  | 803.372   | NM_020151   | 7219.213  | 10455.688 |
| D87445    | 11920.944 | 12176.071 | AK021662  | 833.97    | 1152.307  | NM_005891   | 17401.361 | 14041.018 |

|           |           |           |           |           |           |             |           |           |
|-----------|-----------|-----------|-----------|-----------|-----------|-------------|-----------|-----------|
| NM_00023E | 6095.942  | 4765.612  | AK021706  | 1255.835  | 1342.807  | NM_00164E   | 1540.476  | 2392.855  |
| NM_002247 | 1178.999  | 1072.512  | M33197    | 61178.727 | 50358.695 | NM_00395E   | 1146.37   | 1064.216  |
| NM_00498C | 9488.666  | 7715.048  | AK026259  | 19253.428 | 14404.002 | M33197      | 50375.207 | 60210.758 |
| NM_01634E | 5984.465  | 5889.696  | AJ008115  | 11096.05  | 10523.767 | NM_00350C   | 1798.295  | 1964.058  |
| AK024865  | 1109.415  | 1290.223  | AF083125  | 697.601   | 789.075   | NM_014317   | 1076.931  | 1691.7    |
| NM_00721C | 581.731   | 769.549   | M33197    | 56773.508 | 53562.379 | L09234      | 1169.934  | 938.602   |
| NM_00148E | 3602.473  | 3723.281  | AK022970  | 721.977   | 967.636   | NM_017881   | 1317.171  | 814.779   |
| NM_01897E | 19948.92  | 21367.068 | AK026212  | 1105.326  | 1199.073  | M33197      | 47824.824 | 48279.434 |
| NM_002591 | 14077.751 | 15634.462 | AF086222  | 523.375   | 870.86    | NM_017634   | 1464.163  | 1377.181  |
| NM_02021E | 8509.141  | 9651.452  | AF086415  | 4278.793  | 4852.216  | NM_00081E   | 370.547   | 278.425   |
| AK021860  | 2209.042  | 2002.016  | M33197    | 56408.543 | 53016.719 | NM_01889E   | 800.022   | 621.066   |
| AB046816  | 1459.194  | 1401.757  | NM_00422E | 2185.872  | 3868.454  | AJ300465    | 886.724   | 729.099   |
| AL137266  | 4833.571  | 5062.893  | NM_00643E | 6827.179  | 8632.66   | NM_00081C   | 862.37    | 453.539   |
| NM_016457 | 1494.493  | 1484.648  | AF025441  | 1119.446  | 970.349   | AF069307    | 970.641   | 646.089   |
| NM_005057 | 1715.256  | 1629.858  | U62823    | 4833.314  | 5574.645  | M33197      | 46600.602 | 45835.059 |
| AF143321  | 771.444   | 796.116   | NM_00353E | 29529.775 | 32777.891 | U92978      | 1402.223  | 891.772   |
| AB046842  | 1626.259  | 1853.043  | AK026768  | 2219.2    | 2415.016  | NM_00573E   | 371.172   | 359.386   |
| NM_00485C | 1946.174  | 2431.79   | M33197    | 64938.063 | 65213.906 | NM_01448E   | 407.61    | 316.882   |
| NM_00282E | 3719.948  | 3961.542  | AK000852  | 16078.877 | 20150.715 | NM_01338E   | 2481.456  | 1772.612  |
| NM_01435E | 9891.338  | 9618.808  | AF251188  | 2145.571  | 2184.157  | AB014567    | 280.63    | 198.201   |
| NM_012481 | 3363.81   | 2868.99   | AK026418  | 3012.046  | 2586.347  | NM_00532E   | 6038.946  | 5814.876  |
| L09102    | 38194.086 | 34089.449 | AF086194  | 33169.301 | 31710.295 | NM_01406E   | 542.007   | 410.499   |
| U68488    | 2142.822  | 2373.622  | AK026811  | 2246.823  | 2321.221  | AB035130    | 624.188   | 358.631   |
| NM_00067E | 682.084   | 799.818   | AL049973  | 550.118   | 607.551   | NM_00335E   | 572.829   | 491.182   |
| NM_016247 | 6491.611  | 6092.73   | M33197    | 60854.953 | 54862.234 | M33197      | 18239.488 | 11837.986 |
| NM_01228E | 1267.205  | 1262.169  | AK023633  | 1489.305  | 1544.495  | NM_00357E   | 457.337   | 393.163   |
| NM_00671C | 832.018   | 857.325   | NM_00617E | 1321.444  | 1423.923  | AL049283    | 715.614   | 345.205   |
| NM_00332E | 14622.03  | 13849.423 | M33197    | 45457.113 | 46969.293 | M33197      | 44473.043 | 37019.426 |
| BG685310  | 2224.085  | 3081.902  | AJ008132  | 3012.216  | 5410.855  | NM_002401   | 14941.765 | 12164.617 |
| AW300857  | 36660.559 | 37578.18  | M33197    | 58287.973 | 56279.926 | NM_001274   | 536.442   | 569.015   |
| H85962    | 44890.172 | 45602.203 | U12129    | 2535.171  | 3159.535  | NM_002227   | 451.084   | 274.583   |
| BG742446  | 2010.632  | 2207.945  | S81242    | 53985.242 | 55879.113 | NM_00719E   | 698.175   | 442.621   |
| AA864554  | 7891.601  | 9844.493  | AF230801  | 1674.916  | 1527.784  | AB014530    | 2004.439  | 1327.822  |
| X66945    | 3178.604  | 3545.388  | AF075072  | 1323.753  | 1208.927  | NM_00598E   | 1238.201  | 888.791   |
| AI160703  | 652.069   | 1042.155  | M33197    | 56024.957 | 57546.875 | AB014607    | 2385.59   | 1393.664  |
| X12830    | 10798.92  | 11904.399 | NM_00250E | 1380.265  | 1189.513  | AF134401    | 852.141   | 712.454   |
| U00482    | 2224.52   | 2606.55   | U38442    | 1402.356  | 2055.915  | NM_006387   | 2932.953  | 2550.038  |
| Z80998    | 805.712   | 1126.441  | AF110136  | 946.751   | 1001.912  | NM_00564E   | 1697.541  | 1657.115  |
| K01904    | 24103.926 | 24092.381 | AK026706  | 1454.087  | 1491.341  | NM_00663E   | 2333.009  | 2105.615  |
| BE538886  | 2020.496  | 2117.62   | AB007936  | 29992.553 | 37702.426 | NM_00169E   | 393.789   | 286.097   |
| NM_00222E | 1131.377  | 1071.396  | D28391    | 21845.455 | 24808.178 | BI767871    | 1437.016  | 686.125   |
| M57650    | 1759.995  | 1861.294  | M33197    | 45287.625 | 50643.863 | AA418907    | 634.719   | 624.083   |
| BC023978  | 455.52    | 723.012   | AJ227896  | 6452.145  | 5177.778  | M65291      | 336.01    | 158.681   |
| M21302    | 729.774   | 870.412   | L32841    | 2995.603  | 2543.285  | AA115473    | 1774.6    | 1245.901  |
| NM_00521E | 7146.07   | 5921.146  | CY3Cy5    | 8860.332  | 932.505   | AA872397    | 2093.801  | 1411.547  |
| NM_00641E | 2415.464  | 2053.111  | AI298534  | 948.318   | 876.832   | M24283      | 220.355   | 253.024   |
| AF035035  | 745.997   | 744.913   | R71691    | 158.506   | 409.298   | AA709414    | 1334.926  | 917.075   |
| AB020676  | 1289.824  | 1220.692  | AW167715  | 299.912   | 489.715   | D12676      | 1005.647  | 715.713   |
| AK024715  | 1423.087  | 1414.032  | AA424735  | 1287.217  | 1103.217  | BC012593    | 520.831   | 393.976   |
| NM_01494E | 698.594   | 502.802   | U78294    | 636.312   | 969.688   | NM_00093E   | 14107.234 | 11450.168 |
| NM_01836C | 3277.959  | 3206.858  | AA171613  | 655.208   | 695.544   | NM_00429E   | 10667.346 | 7761.535  |
| AL365415  | 915.498   | 1185.397  | BI760394  | 1080.047  | 1057.633  | H-X 02812 I | 628.94    | 472.701   |
| L29147    | 44144.574 | 45047.996 | AA555216  | 494.718   | 461.261   | U75898      | 2515.079  | 1979.531  |

|           |           |           |           |           |           |           |           |           |
|-----------|-----------|-----------|-----------|-----------|-----------|-----------|-----------|-----------|
| NM_00152E | 24255.869 | 26103.096 | U09117    | 9273.319  | 8961.925  | M29039    | 506.965   | 568.22    |
| NM_00605E | 6617.659  | 6944.357  | M21054    | 447.787   | 500.393   | NM_006917 | 816.042   | 855.609   |
| NM_00429E | 1513.671  | 1685.781  | M18468    | 1047.984  | 1342.66   |           | 324.378   | 469.969   |
| NM_00504E | 1101.745  | 1116.391  | H66070    | 6813.079  | 6300.923  | AB011146  | 925.451   | 593.798   |
| NM_00597E | 1050.231  | 1449.077  | AA164741  | 887.728   | 709.614   | NM_00618E | 11768.767 | 10362.04  |
| NM_00106C | 4390.44   | 5087.506  | AI189375  | 568.866   | 454.955   | NM_01480C | 987.146   | 758.329   |
| NM_018841 | 1799.329  | 1733.182  | AI978885  | 1528.958  | 1208.188  | NM_001557 | 585.187   | 651.379   |
| NM_00522E | 796.482   | 606.065   | AK054960  | 7615.173  | 6666.858  | AF147311  | 627.015   | 668.518   |
| AL133105  | 3000.822  | 3129.071  | L15344    | 1104.393  | 1026.484  | NM_002131 | 12646.996 | 10181.746 |
| AK022859  | 1327.004  | 1485.1    | SR5       | 2842.58   | 4408.873  | NM_017927 | 1537.58   | 1184.582  |
| NM_00372E | 2405.442  | 1994.85   | SR7       | 3393.407  | 40960.426 | M33197    | 52006.168 | 44572.918 |
| NM_00497E | 4595.657  | 3112.358  | SR9       | 15842.153 | 3966.875  | NM_00120E | 1722.547  | 1498.704  |
| D87445    | 12630.394 | 12982.496 | NM_01458E | 3176.934  | 3368.99   | NM_00479E | 8437.425  | 5266.398  |
| NM_00023E | 7787.771  | 5873.687  | NM_01436E | 8439.267  | 7856.782  | NM_00673E | 479.936   | 433.916   |
| NM_002247 | 1580.393  | 1518.361  | NM_00092E | 484.104   | 455.271   | NM_014047 | 2749.223  | 2363.689  |
| NM_00498C | 22191.615 | 19610.406 | NM_00645E | 660.682   | 777.91    | AK022901  | 711.554   | 771.204   |
| NM_003224 | 1973.973  | 1856.948  | NM_01809E | 546.057   | 526.415   | M33197    | 49253.332 | 49751.16  |
| NM_00165E | 61437.242 | 61389.066 | AL390078  | 828.37    | 769.179   | AF037332  | 1180.302  | 1100.566  |
| NM_006827 | 19404.83  | 19105.25  | NM_00403E | 1131.501  | 1110.187  | AB040912  | 734.081   | 558.046   |
| AK021761  | 8929.385  | 8461.197  | NM_01598E | 492.738   | 452.558   | NM_003871 | 536.93    | 469.349   |
| AK024536  | 1492.191  | 1822.928  | NM_00654E | 315.839   | 383.682   | NM_00624E | 1519.255  | 1414.523  |
| NM_01866E | 8860.404  | 8876.294  | NM_01495E | 1108.517  | 945.344   | M33197    | 47786.871 | 44724.445 |
| NM_004227 | 1432.586  | 1248.352  | NM_00399E | 3032.877  | 2712.906  | AJ011129  | 1402.235  | 806.081   |
| NM_00528E | 3509.675  | 3052.922  | AF279265  | 1929.806  | 2291.76   | M33197    | 49255.875 | 51877.043 |
| NM_00173E | 1438.271  | 1432.024  | NM_00521E | 43771.297 | 29762.488 | U92978    | 1807.32   | 1581.625  |
| AB028949  | 2214.273  | 2752.016  | AB040914  | 499.332   | 606.841   | NM_01338E | 1652.93   | 1478.536  |
| AL137580  | 1333.464  | 1056.327  | NM_002997 | 2192.938  | 2202.168  | AB014567  | 492.946   | 445.053   |
| NM_004101 | 1211.973  | 1091.822  | NM_00237E | 6467.962  | 5067.506  | AK022817  | 1019.107  | 735.804   |
| NM_00299E | 53019.234 | 47829.09  | AB007929  | 5303.282  | 4831.942  | NM_018034 | 2523.749  | 2306.86   |
| NM_01597E | 1224.88   | 1396.885  | NM_00457E | 2582.586  | 2695.598  | M33197    | 51371.102 | 58751.613 |
| NM_00381C | 972.73    | 998.504   | AA203126  | 2293.476  | 2681.225  | AB037831  | 793.4     | 1025.302  |
| NM_016457 | 1646.735  | 1640.585  | L12347    | 4156.765  | 3826.835  | NM_01210E | 2571.744  | 2680.938  |
| NM_005057 | 1637.631  | 1510.816  | NM_00162E | 4206.026  | 3737.567  | AL122077  | 2753.142  | 1729.756  |
| AF143321  | 1268.722  | 1094.384  | Z36788    | 1099.125  | 1021.728  | NM_00642E | 825.522   | 609.285   |
| AB046842  | 2723.228  | 2264.057  | NM_00485E | 3769.91   | 3471.94   | NM_01694E | 1011.971  | 966.624   |
| NM_00485C | 2833.918  | 2634.907  | NM_001494 | 3480.195  | 2980.757  | M33197    | 44689.102 | 48148.695 |
| NM_00282E | 4423.446  | 4792.675  | NM_00420E | 1188.762  | 1142.443  | NM_00725E | 770.262   | 589.604   |
| BF306955  | 1968.721  | 1890.137  | NM_00460E | 4900.95   | 4904.509  | AK075081  | 894.073   | 886.093   |
| NM_001394 | 16990.424 | 16569.215 | AK022849  | 765.492   | 527.873   | NM_00089E | 2775.249  | 2774.261  |
| NM_018441 | 10159.294 | 9000.998  | AF040964  | 2116.757  | 2508.131  | NM_00382C | 17105.518 | 13160.722 |
| NM_00077E | 17687.055 | 19455.332 | NM_00193E | 1595.051  | 1541.342  | NM_01591E | 2438.64   | 2059.686  |
| NM_00160E | 1891.841  | 1765.99   | NM_00327E | 6676.647  | 8184.638  | M33197    | 48574.871 | 44965.648 |
| BE733234  | 927.525   | 1135.17   | AB014599  | 1401.193  | 1232.82   | NM_01651E | 2521.46   | 2542.411  |
| NM_02022E | 4598.73   | 3864.186  | NM_00439E | 519.032   | 171.215   | AB002301  | 459.126   | 303.189   |
| AK024685  | 2952.739  | 2443.96   | AB018345  | 445.738   | 191.866   | AB014530  | 2727.984  | 2392.632  |
| NM_00367E | 17783.381 | 15609.246 | NM_00583E | 469.483   | 145.448   | M33197    | 42476.066 | 35462.465 |
| AF113007  | 2077.147  | 1959.319  | AW407841  | 802.879   | 763.49    | NM_00598E | 880.843   | 467.263   |
| NM_00068E | 7512.685  | 7288.332  | U15197    | 396.62    | 220.818   | AB014607  | 2180.958  | 1408.593  |
| U39573    | 1482.54   | 1732.728  | NM_00187E | 2544.549  | 2452.883  | AF134401  | 898.015   | 897.381   |
| D82061    | 2161.745  | 2089.985  | AF264014  | 5778.268  | 7230.285  | NM_020151 | 4655.371  | 4501.119  |
| AJ293009  | 1624.759  | 1793.398  | L09098    | 437.413   | 195.184   | NM_005891 | 7926.327  | 6924.67   |
| NM_000374 | 2918.094  | 3014.313  | NM_001831 | 848.085   | 495.304   | NM_00395E | 380.29    | 392.902   |
| NM_00050E | 2058.678  | 2312.035  | NM_000137 | 3543.806  | 3990.006  | M33197    | 33996.566 | 26209.145 |

|           |           |           |           |           |           |             |           |           |
|-----------|-----------|-----------|-----------|-----------|-----------|-------------|-----------|-----------|
| NM_00135E | 13203.238 | 12877.834 | NM_01210Z | 1439.678  | 1306.436  | NM_014317   | 400.962   | 503.352   |
| NM_00517E | 40480.035 | 41408.039 | NM_005017 | 10679.765 | 9869.371  | L09234      | 1057.895  | 792.448   |
| NM_00169E | 12114.544 | 12408.543 | AF163572  | 8151.436  | 7775.022  | NM_00005E   | 500.61    | 258.431   |
| AF190900  | 6711.602  | 5782.622  | NM_000897 | 3467.952  | 3612.738  | AK026740    | 454.591   | 351.531   |
| NM_020404 | 18382.857 | 14745.393 | NM_000487 | 398.829   | 879.509   | NM_017881   | 1631.96   | 1448.131  |
| BE972401  | 12918.316 | 11240.499 | NM_006411 | 13342.636 | 13665.896 | M33197      | 47073.289 | 52386.082 |
| U56725    | 657.97    | 652.049   | NM_01418Z | 1511.8    | 1644.699  | NM_017634   | 865.899   | 907.428   |
| NM_01742E | 1760.691  | 1662.495  | NM_00049Z | 2611.088  | 3181.844  | NM_00081Z   | 332.358   | 361.888   |
| AB007922  | 1271.022  | 1053.594  | NM_01208E | 594.371   | 351.178   | NM_01889E   | 659.538   | 694.959   |
| NM_01598Z | 2414.982  | 2048.201  | NM_001170 | 1889.38   | 2027.228  | AJ300465    | 897.339   | 700.148   |
| NM_00374E | 36936.227 | 34666.242 | AL137716  | 598.716   | 288.659   | X86400      | 542.469   | 533.673   |
| NM_00291C | 38355.438 | 33678.445 | NM_00469E | 624.632   | 621.038   | NM_00081C   | 1271.012  | 948.889   |
| AC096970  | 29593.891 | 30089.889 | NM_01434Z | 966.225   | 1141.782  | AF069307    | 1196.593  | 1093.581  |
| AK024865  | 1274.397  | 1230.372  | Z50169    | 531.904   | 372.881   | NM_006917   | 892.534   | 954.934   |
| NM_00721C | 819.85    | 564.078   | AB043997  | 777.579   | 520.749   | AB011146    | 783.766   | 714.548   |
| NM_00148Z | 4062.741  | 3879.851  | NM_00177Z | 403.624   | 393.437   | NM_00532E   | 5414.021  | 4493.103  |
| NM_01897Z | 19474.209 | 18668.092 | Z70704    | 899.143   | 794.643   | AB035130    | 444.434   | 350.735   |
| NM_002591 | 11126.745 | 11474.384 | NM_000557 | 1913.166  | 2177.949  | M33197      | 6842.52   | 3916.953  |
| NM_02021E | 6711.091  | 7769.159  | NM_00323E | 361.281   | 353.324   | NM_00357E   | 480.572   | 464.797   |
| AK021860  | 699.623   | 808.541   | NM_00137E | 2906.041  | 2980.669  | M33197      | 27094.896 | 17346.018 |
| AB046816  | 1190.221  | 1283.681  | NM_00231Z | 962.182   | 888.935   | NM_002401   | 11031.049 | 8154.02   |
| AL137266  | 4239.273  | 4215.873  | M20699    | 772.359   | 711.885   | NM_001274   | 415.964   | 219.782   |
| U95031    | 699.851   | 734.143   | NM_004774 | 2545.64   | 2394.393  | NM_002227   | 1270.669  | 616.936   |
| NM_01428E | 7406.754  | 6988.921  | NM_016937 | 1250.655  | 1143.128  | NM_00719E   | 865.835   | 929.952   |
| AF035300  | 1307.126  | 1527.342  | NM_00269C | 1329.387  | 975.409   | NM_00624Z   | 2179.142  | 2457.209  |
| NM_01770Z | 10213.271 | 10719.479 | NM_01232E | 2778.157  | 3371.413  | M33197      | 50009.922 | 40408.98  |
| NM_01532C | 2813.094  | 2272.018  | NM_01650E | 1114.059  | 984.442   | AJ011129    | 1345.863  | 1056.378  |
| NM_00405E | 2446.685  | 1582.987  | NM_00645E | 4634.294  | 4265.297  | NM_00103E   | 286.873   | 272.227   |
| NM_01472E | 17118.754 | 17502.678 | AK026062  | 11187.908 | 13443.736 | NM_006387   | 1797.154  | 1608.575  |
| AJ297349  | 6017.419  | 6984.316  | AF047002  | 12730.466 | 15289.854 | NM_00564E   | 2185.72   | 1603.723  |
| NM_00582E | 9237.143  | 10428.062 | AL050082  | 1304.712  | 1547.559  | NM_00663E   | 2195.063  | 2284.628  |
| NM_00161E | 2514.029  | 2544.689  | NM_00662Z | 33902.648 | 33194.359 | BI767871    | 582.344   | 279.897   |
| NM_00659E | 3069.218  | 2456.711  | NM_01658E | 956.803   | 1096.189  | AA418907    | 317.005   | 264.442   |
| NM_00446Z | 899.472   | 796.668   | NM_00313E | 4596.337  | 3935.12   | AA115473    | 892.943   | 722.671   |
| NM_00593E | 586.704   | 568.931   | L12347    | 4610.81   | 3889.656  | AA872397    | 3369.331  | 2547.106  |
| U43586    | 1022.492  | 1269.93   | NM_00162Z | 3150.611  | 3214.625  | AA709414    | 1654.263  | 1104.141  |
| NM_006271 | 10458.394 | 10408.184 | Z36788    | 1168.3    | 1525.486  | D12676      | 1369.768  | 765.521   |
| NM_00302E | 566.692   | 643.191   | U20536    | 825.492   | 1080.148  | BC012593    | 531.809   | 438.783   |
| NM_000721 | 46296.309 | 50477.164 | AI298534  | 631.155   | 673.858   | NM_00093E   | 11422.782 | 8910.778  |
| NM_00393Z | 772.278   | 1121.715  | AW167715  | 574.376   | 705.165   | NM_00429E   | 6298.959  | 4879.792  |
| NM_01864C | 436.833   | 980.068   | AA424735  | 821.686   | 1035.689  | H-X 02812 I | 718.023   | 712.71    |
| NM_00509E | 4563.95   | 5044.468  | U78294    | 509.75    | 598.469   | U75898      | 2276.568  | 1882.955  |
| NM_00316Z | 831.089   | 702.524   | BI760394  | 489.067   | 364.557   | M29039      | 599.464   | 569.698   |
| NM_019057 | 5141.357  | 4730.648  | AA555216  | 245.35    | 537.821   | M59815      | 353.619   | 377.309   |
| NM_002677 | 1628.85   | 1233.459  | U09117    | 5612.653  | 6093.164  | M33210      | 4838.048  | 9530.886  |
| NM_01620E | 4068.453  | 3632.069  | M21054    | 316.996   | 402.596   | AK075081    | 1280.786  | 997.789   |
| NM_00575E | 2281.181  | 2227.671  | M18468    | 927.625   | 545.285   | NM_00089E   | 3540.863  | 2953.181  |
| AF149724  | 2603.6    | 2871.655  | H66070    | 7066.552  | 6291.35   | NM_00382C   | 15054.529 | 11000.602 |
| BC020745  | 1484.482  | 1304.395  | AA164741  | 2475.312  | 2659.595  | NM_01591E   | 1562.618  | 1343.819  |
| NM_006367 | 59774.262 | 63735.445 | AI189375  | 569.439   | 531.295   | M33197      | 47387.75  | 39144.609 |
| NM_00673Z | 39736.613 | 34452.047 | AI978885  | 1867.457  | 2029.005  | NM_01651E   | 3460.304  | 3274.872  |
| NM_004354 | 2653.201  | 2543.948  | NM_00166E | 10224.306 | 10021.923 | NM_00618E   | 6791.84   | 6449.71   |
| NM_004661 | 3752.233  | 3893.412  | NM_00187E | 1862.702  | 1889.144  | NM_01480C   | 443.284   | 497.668   |

|           |           |           |           |           |           |           |           |           |
|-----------|-----------|-----------|-----------|-----------|-----------|-----------|-----------|-----------|
| NM_002009 | 803.06    | 1090.673  | AF264014  | 5389.973  | 6510.718  | NM_002131 | 6982.422  | 4886.223  |
| NM_001610 | 3011.012  | 2909.422  | L09098    | 394.719   | 360.661   | NM_017927 | 607.141   | 326.144   |
| NM_001241 | 2175.826  | 2060.866  | NM_001831 | 655.203   | 472.597   | M33197    | 34395.195 | 22877.016 |
| AF217504  | 3046.417  | 3208.983  | NM_014586 | 2454.187  | 2410.016  | NM_001203 | 1120.227  | 891.681   |
| AK027102  | 8833.407  | 7558.189  | NM_014366 | 2686.131  | 2360.914  | NM_004799 | 7527.872  | 6288.246  |
| AL109714  | 886.114   | 999.429   | NM_000923 | 204.381   | 425.276   | NM_006733 | 364.224   | 326.067   |
| NM_004632 | 4927.584  | 4821.661  | NM_018096 | 321.121   | 638.078   | NM_014047 | 4422.863  | 3825.005  |
| NM_017919 | 4127.357  | 3458.595  | NM_004036 | 760.744   | 888.633   | AK022901  | 560.036   | 436.459   |
| NM_014456 | 5921.845  | 5965.419  | NM_015986 | 585.825   | 868.593   | M33197    | 37268.258 | 35018.164 |
| NM_004740 | 5870.265  | 5695.769  | NM_006546 | 733.064   | 668.29    | NM_006052 | 323.903   | 346.895   |
| NM_003805 | 2636.083  | 2532.507  | NM_014959 | 830.75    | 1098.716  | AB040912  | 842.674   | 953.994   |
| NM_019886 | 2255.661  | 2723.818  | NM_003992 | 2437.874  | 2118.241  | NM_003871 | 912.902   | 1201.336  |
| NM_003278 | 13923.646 | 15851.654 | AF279265  | 1773.548  | 2261.538  | NM_000813 | 334.771   | 409.398   |
| NM_000426 | 531.698   | 511.866   | NM_005213 | 48311.453 | 42839.434 | NM_018896 | 597.094   | 493.172   |
| AK021957  | 53581.73  | 56646.176 | NM_002379 | 10470.741 | 11379.405 | AJ300465  | 612.222   | 526.5     |
| NM_016623 | 7644.956  | 6875.574  | AB007929  | 6123.677  | 7378.364  | X86400    | 562.936   | 260.355   |
| NM_001334 | 11633.761 | 10880.01  | NM_004579 | 2549.386  | 3074.018  | NM_000810 | 772.659   | 423.948   |
| NM_004771 | 3840.137  | 4498.379  | AA203126  | 2286.617  | 2924.432  | AF069307  | 1158.299  | 1261.166  |
| AL365514  | 2313.771  | 2008.203  | Z50169    | 660.659   | 501.898   | M33197    | 47101.02  | 52626.938 |
| NM_018299 | 2060.316  | 1659.802  | AB043997  | 739.583   | 755.718   | U92978    | 1004.581  | 679.164   |
| NM_002104 | 1623.788  | 1479.884  | NM_004853 | 798.697   | 949.617   | NM_013389 | 1778.88   | 1669.259  |
| NM_005504 | 8258.518  | 7259.71   | NM_001494 | 1149.858  | 1541.06   | AB014567  | 636.129   | 731.902   |
| AF234654  | 2359.353  | 2387.858  | NM_004206 | 470.37    | 603.815   | AK022817  | 605.635   | 503.711   |
| NM_000110 | 6397.519  | 6951.487  | NM_004603 | 7270.363  | 8097.105  | NM_018034 | 2273.96   | 1862.363  |
| NM_016002 | 33360.008 | 33293.859 | AK022849  | 982.659   | 1038.411  | M33197    | 48332.383 | 61651.227 |
| NM_014549 | 1156.7    | 1428.911  | AF040964  | 2662.811  | 2294.027  | AB037831  | 800.181   | 1034.099  |
| NM_017832 | 12739.999 | 14741.881 | NM_001939 | 2786.187  | 3149.298  | NM_012103 | 4176.33   | 4058.435  |
| NM_001713 | 2941.246  | 2740.473  | NM_003279 | 4791.017  | 5419.178  | AL122077  | 4386.804  | 4226.481  |
| NM_015367 | 7605.57   | 8405.196  | AB014599  | 2808.854  | 3165.21   | NM_014632 | 455.922   | 466.948   |
| NM_014498 | 5940.778  | 4548.082  | NM_004393 | 866.955   | 753.27    | NM_006422 | 298.777   | 645.418   |
| NM_002375 | 12590.324 | 11548.671 | AB018345  | 566.708   | 622.305   | NM_016946 | 188.247   | 181.101   |
| NM_000988 | 64876.719 | 68853.805 | NM_005832 | 416.26    | 465.917   | M33197    | 46051.008 | 43595.992 |
| NM_001813 | 3745.631  | 3722.399  | AW407841  | 1529.515  | 1813.917  | NM_007259 | 620.399   | 627.872   |
| AF055016  | 4213.594  | 4477.692  | NM_016588 | 318.972   | 644.79    | NM_018402 | 240.473   | 578.965   |
| NM_007234 | 11126.871 | 12953.088 | NM_003135 | 3118.787  | 3687.338  | NM_018009 | 740.328   | 884.715   |
| Y16704    | 65445     | 71460.461 | NM_000137 | 2596.493  | 3514.168  | M33197    | 42749.988 | 38101.523 |
| NM_014567 | 2180.55   | 2167.809  | NM_012102 | 1014.314  | 1064.083  | NM_002401 | 7466.155  | 4605.017  |
| NM_017842 | 2566.283  | 2632.81   | NM_005017 | 8046.717  | 8974.72   | NM_001274 | 484.36    | 401.675   |
| AB037809  | 1891.073  | 1734.617  | AF163572  | 3331.513  | 3294.922  | NM_002227 | 979.607   | 869.253   |
| AB011129  | 1583.2    | 1459.255  | NM_000897 | 2611.185  | 3271.985  | NM_007199 | 925.987   | 1307.862  |
| NM_014391 | 6293.715  | 5974.916  | NM_006411 | 11187.2   | 11216.448 | AB014530  | 1449.03   | 1093.917  |
| NM_004270 | 2711.161  | 2171.859  | NM_014182 | 1117.697  | 1426.054  | M33197    | 28118.18  | 30769.191 |
| NM_012082 | 642.857   | 594.597   | AB040884  | 439.036   | 389.62    | NM_005989 | 1316.215  | 1515.742  |
| NM_001537 | 4019.136  | 4266.391  | NM_000492 | 6091.982  | 7007.36   | AB014607  | 2331.831  | 2644.909  |
| U80743    | 2113.88   | 2130.194  | NM_012089 | 624.806   | 681.327   | AF134401  | 773.236   | 928.968   |
| NM_001352 | 5533.721  | 4892.521  | NM_001170 | 2772.699  | 2978.819  | NM_020151 | 3341.457  | 3782.158  |
| D15050    | 1294.908  | 976.825   | AL137716  | 681.07    | 638.263   | NM_005891 | 11554.413 | 11401.513 |
| NM_006527 | 6418.508  | 6056.49   | NM_004696 | 597.2     | 555.088   | NM_001645 | 673.352   | 726.453   |
| NM_006627 | 3502.843  | 3824.656  | NM_014342 | 1303.665  | 1389.075  | M33197    | 44083.441 | 43501.402 |
| NM_007363 | 32967.523 | 30510.521 | AK054960  | 8297.183  | 7336.758  | NM_003500 | 1438.539  | 1448.058  |
| NM_003093 | 52198.82  | 53439.977 | L15344    | 1411.077  | 1499.185  | NM_014317 | 684.732   | 910.29    |
| U05589    | 1271.412  | 1617.874  | NM_001665 | 6868.356  | 5558.182  | L09234    | 1614.989  | 1525.373  |
| NM_014473 | 12387.897 | 14342.207 | Z70704    | 622.3     | 689.14    | NM_000059 | 316.176   | 240.325   |

|           |           |           |           |           |           |           |           |           |
|-----------|-----------|-----------|-----------|-----------|-----------|-----------|-----------|-----------|
| NM_00309E | 57070.344 | 60678.086 | NM_014363 | 464.466   | 566.825   | NM_017881 | 549.824   | 360.559   |
| NM_01638E | 2417.222  | 2405.812  | NM_000557 | 2610.804  | 2898.671  | M33197    | 44496.973 | 60387.16  |
| NM_00229E | 65383.957 | 67948.414 | NM_00137E | 2161.286  | 2655.516  | NM_017634 | 2345.574  | 2416.895  |
| NM_00313E | 30127.186 | 30836.631 | NM_00231E | 1321.527  | 1023.004  | NM_01774E | 511.912   | 547.722   |
| NM_00176E | 16124.364 | 14949.509 | M20699    | 248.986   | 181.945   | NM_00030C | 1044.264  | 937.697   |
| NM_01630E | 20149.301 | 22630.42  | NM_004774 | 2743.077  | 2551.691  | M33197    | 42904.113 | 44920.762 |
| NM_01323E | 7705.645  | 7757.58   | NM_016937 | 1367.513  | 1291.144  | AV756917  | 1360.025  | 1674.878  |
| BE258640  | 21787.652 | 24929.541 | NM_00269C | 2056.076  | 2036.908  | NM_01838C | 2612.259  | 4535.949  |
| NM_003314 | 9554.097  | 9865.017  | NM_01232E | 3319.934  | 4694.99   | AK001442  | 865.623   | 1286.286  |
| AL355730  | 968.692   | 923.32    | NM_007341 | 891.854   | 943.523   | NM_01207C | 1359.223  | 2668.889  |
| U79273    | 2279.809  | 2069.311  | NM_01650E | 1387.11   | 1484.05   | NM_01903E | 411.306   | 404.89    |
| AK022050  | 6060.583  | 5606.967  | NM_00645E | 5922.707  | 5911.807  | AF183423  | 388.184   | 664.368   |
| NM_00251E | 62192.578 | 60973.793 | AK026062  | 14257.378 | 17002.018 | NM_001351 | 926.428   | 1175.672  |
| NM_00124E | 818.526   | 697.291   | AF047002  | 16481.201 | 17452.35  | M33197    | 740.343   | 754.119   |
| AL365411  | 5276.283  | 4941.296  | AB040914  | 673.711   | 410.823   | AB011146  | 654.138   | 815.651   |
| M24470    | 640.669   | 527.085   | NM_002997 | 3796.864  | 3945.746  | NM_00532E | 2282.38   | 1919.545  |
| NM_01606E | 4668.246  | 4406.286  | NM_00237E | 7279.952  | 6550.683  | NM_00335E | 331.303   | 372.7     |
| NM_00124E | 1421.954  | 1612.446  | AB007929  | 5082.177  | 4042.89   | M33197    | 18007.531 | 18838.023 |
| AK024677  | 1362.013  | 1705.009  | NM_00457E | 1982.048  | 1720.235  | NM_00357E | 415.005   | 374.274   |
| NM_00003E | 1914.135  | 1845.328  | AA203126  | 1855.503  | 1254      | AL049283  | 836.042   | 693.98    |
| AF254082  | 27041.832 | 24933.014 | L12347    | 2664.841  | 1739.717  | NM_01541E | 1323.097  | 2520.066  |
| AF205718  | 8366.94   | 7803.44   | NM_00162E | 2251.026  | 1363.743  | NM_00389E | 1220.375  | 2014.232  |
| NM_00342C | 932.595   | 1009.83   | NM_018477 | 1515.578  | 1171.215  | X99662    | 2076.694  | 2643.643  |
| AY004252  | 1151.253  | 991.453   | U20536    | 686.337   | 476.994   | NM_00347E | 16556.77  | 16000.169 |
| NM_006261 | 3480.906  | 3299.537  | AI298534  | 646.715   | 460.21    | NM_01432E | 573.585   | 534.062   |
| AK027045  | 1341.596  | 1701.651  | AW167715  | 927.063   | 843.023   | M33197    | 44194.641 | 40542.438 |
| AF169796  | 2461.346  | 2175.709  | BI760394  | 936.219   | 948.121   | NM_00601E | 18166.709 | 18187.154 |
| AK026157  | 694.737   | 561.727   | AA555216  | 273.773   | 198.971   | NM_00124E | 625.732   | 539.599   |
| AK001814  | 5999.351  | 6359.756  | U09117    | 5699.571  | 8030.51   | NM_014891 | 2681.499  | 2717.867  |
| NM_00722E | 2867.759  | 3124.846  | M21054    | 336.351   | 450.518   | NM_01339E | 2595.098  | 2035.102  |
| NM_00343E | 2550.455  | 2774.163  | M18468    | 1211.863  | 1086.211  | M33197    | 43768.934 | 36196.457 |
| NM_016291 | 4255.225  | 3878.121  | H66070    | 10969.457 | 11773.98  | NM_00282C | 253.441   | 224.194   |
| NM_005937 | 32790.625 | 37854.273 | AA164741  | 2997.863  | 3113.09   | NM_002354 | 437.704   | 387.981   |
| AK023259  | 7175.609  | 4343.484  | AI189375  | 444.413   | 803.249   | NM_00660E | 1117.092  | 1684.752  |
| AK001503  | 2686.375  | 2296.184  | AI978885  | 3088.695  | 3457.968  | M33197    | 35202.875 | 48643.34  |
| AK022880  | 3819.005  | 3457.947  | AB014599  | 2804.297  | 1906.389  | AL079314  | 2544.733  | 4652.897  |
| NM_003601 | 16250.772 | 16899.969 | NM_00439E | 489.253   | 393.079   | NM_00126C | 534.847   | 816.662   |
| AK001228  | 6103.259  | 7987.183  | NM_00583E | 598.014   | 123.767   | NM_00195C | 1027.493  | 1291.888  |
| AK026778  | 2360.905  | 2410.229  | AW407841  | 1377.741  | 856.53    | AK026364  | 1005.21   | 1001.443  |
| AF074987  | 4300.108  | 4324.513  | NM_00187E | 945.817   | 714.601   | M33197    | 42452.898 | 44322.594 |
| AK001058  | 27987.234 | 24684.619 | AF264014  | 3581.562  | 2893.487  | NM_004331 | 1922.517  | 2225.916  |
| AK026239  | 2371.619  | 2161.93   | NM_001831 | 749.272   | 420.58    | NM_01570E | 3246.259  | 2703.306  |
| AF086283  | 953.35    | 1099.333  | NM_00092E | 487.595   | 427.496   | AB018337  | 475.47    | 449.032   |
| AF088047  | 761.088   | 733.788   | NM_00645E | 698.429   | 648.508   | AK025273  | 906.654   | 852.031   |
| AF086281  | 1545.968  | 1634.037  | NM_00403E | 932.693   | 967.849   | M33197    | 31669.135 | 26973.193 |
| AF086372  | 427.241   | 434.031   | NM_01598E | 319.463   | 676.375   | NM_00220E | 1778.438  | 1435.069  |
| AF086393  | 1957.598  | 2172.704  | NM_00654E | 507.576   | 652.805   | M33197    | 45865.742 | 40255.555 |
| AF086453  | 889.219   | 992.592   | NM_01495E | 877.436   | 1593.468  | NM_001911 | 16496.574 | 10557.173 |
| AF070621  | 8587.97   | 9361.116  | NM_00399E | 2726.939  | 3661.223  | NM_00650E | 677.262   | 1316.631  |
| NM_02024C | 2616.734  | 3686.317  | AF279265  | 2416.93   | 3164.564  | M33197    | 331.075   | 346.547   |
| AK023678  | 7933.599  | 7669.711  | NM_00521E | 51430.703 | 46876.691 | AB020698  | 489.592   | 745.494   |
| AF052090  | 4009.69   | 4060.886  | NM_001170 | 1985.433  | 1517.819  | U68382    | 339.514   | 437.112   |
| AK023718  | 4755.421  | 5291.105  | NM_00469E | 574.689   | 97.348    | NM_00396E | 618.841   | 488.663   |

|           |           |           |           |           |           |           |           |           |
|-----------|-----------|-----------|-----------|-----------|-----------|-----------|-----------|-----------|
| AF075089  | 4820.731  | 4087.233  | NM_014342 | 496.092   | 547.857   | NM_004651 | 557.467   | 689.792   |
| AF241255  | 967.024   | 821.154   | Z50169    | 391.637   | 213.077   | M33197    | 37792.902 | 31507.406 |
| AF086007  | 62522.129 | 58963.301 | AB043997  | 1071.636  | 466.768   | NM_017565 | 1849.785  | 1276.241  |
| AK000803  | 3892.979  | 3860.315  | NM_004853 | 3254.902  | 3411.659  | NM_002906 | 465.33    | 345.369   |
| AK022374  | 1636.174  | 1479.926  | NM_001494 | 9487.698  | 9820.085  | AK024480  | 531.594   | 372.735   |
| AF085926  | 32772.094 | 29874.113 | NM_004603 | 7300.883  | 8565.838  | Y13871    | 3080.895  | 2347.473  |
| AF085948  | 791.673   | 838.445   | AK022849  | 1573.074  | 1730.153  | AL137725  | 791.471   | 588.119   |
| AL137307  | 4211.718  | 4817.02   | AF040964  | 3432.914  | 3891.883  | M33197    | 15311.744 | 12667.984 |
| AL137468  | 10182.052 | 11308.01  | NM_001939 | 3285.077  | 4387.184  | AJ008151  | 4581.757  | 4649.978  |
| AL162007  | 38317.02  | 40437.105 | NM_003279 | 8793.594  | 9966.198  | M33197    | 34734.906 | 27461.785 |
| AL390137  | 34033.16  | 27202.162 | NM_012328 | 1650.643  | 1386.789  | X74070    | 45307.309 | 60683.574 |
| AL137340  | 893.81    | 1000.784  | NM_016508 | 577.807   | 419.103   | NM_006333 | 921.012   | 1079.919  |
| AL137542  | 859.386   | 727.618   | NM_006456 | 1730.921  | 491.048   | M33197    | 36769.199 | 36280.047 |
| AL162045  | 1654.667  | 1646.061  | AK026062  | 2827.49   | 1949.974  | NM_002898 | 1634.211  | 1334.28   |
| X92185    | 485.632   | 828.454   | AF047002  | 3294.275  | 1707.6    | AK022749  | 1606.85   | 1489.799  |
| AK022437  | 16437.988 | 14961.403 | AL050082  | 959.622   | 636.461   | BF031409  | 1909.297  | 1688.189  |
| AB042410  | 885.543   | 746       | NM_006623 | 30308.656 | 23651.494 | NM_007043 | 534.369   | 571.317   |
| AF086102  | 1390.768  | 1431.646  | NM_003135 | 3443.19   | 1958.876  | U94388    | 341.49    | 373.737   |
| AF116682  | 19545.061 | 20282.377 | NM_000137 | 2793.423  | 1616.171  | NM_012322 | 952.801   | 927.562   |
| AL137259  | 2405.392  | 2375.365  | NM_012102 | 3460.984  | 3192.19   | M33197    | 32803.223 | 25158.748 |
| AL122107  | 4083.015  | 4205.008  | NM_005017 | 11508.391 | 11248.833 | NM_004888 | 14860.99  | 12037.241 |
| AF075021  | 1060.369  | 998.1     | NM_000897 | 2522.344  | 3207.951  | NM_002108 | 520.469   | 497.971   |
| AK025140  | 12926.858 | 13393.842 | NM_000487 | 609.839   | 566.578   | NM_000984 | 45337.789 | 48148.688 |
| AK023394  | 2871.42   | 2888.264  | NM_006411 | 14777.802 | 9712.016  | NM_002453 | 501.048   | 389.14    |
| AF090093  | 16737.396 | 18042.172 | NM_014182 | 1635.847  | 1314.472  | AK000780  | 1464.629  | 1535.379  |
| AF161340  | 5300.332  | 5195.714  | AB040884  | 582.431   | 367.067   | AK026721  | 617.3     | 508.8     |
| AF242771  | 1605.753  | 1498.752  | NM_000492 | 8765.375  | 7760.404  | AB002348  | 5088.296  | 3632.563  |
| NM_018562 | 12016.433 | 12452.99  | NM_012089 | 862.331   | 878.455   | M33197    | 15399.654 | 13083.063 |
| AF098666  | 1217.081  | 1277.348  | AJ272057  | 2536.723  | 2157.728  | AK026043  | 886.808   | 546.216   |
| AF161365  | 841.612   | 576.277   | AK024216  | 4712.758  | 3885.793  | NM_005006 | 1182.205  | 1534.452  |
| AF290544  | 726.567   | 606.19    | Y16752    | 1514.053  | 834.939   | NM_000106 | 779.615   | 672.258   |
| AK021969  | 2251.073  | 2692.169  | NM_020156 | 654.968   | 48.862    | NM_003000 | 3807.756  | 4717.897  |
| AK022065  | 3481.691  | 3625.691  | AF355402  | 1147.017  | 932.19    | NM_002495 | 6772.64   | 6367.995  |
| AK022221  | 6021.072  | 4588.227  | AK000407  | 2140.512  | 1876.724  | M33197    | 39615.637 | 36399.73  |
| AK022356  | 1799.142  | 1524.923  | NM_001773 | 1025.523  | 824.679   | NM_016284 | 627.508   | 656.446   |
| AK021998  | 4041.695  | 4018.677  | Z70704    | 842.935   | 849.672   | NM_014593 | 842.685   | 859.328   |
| AK022126  | 3450.984  | 4073.358  | NM_014363 | 1076.478  | 676.82    | NM_006833 | 2992.503  | 4923.989  |
| AK022256  | 1117.749  | 1057.527  | NM_001375 | 2483.268  | 2144.701  | NM_012257 | 526.243   | 902.909   |
| AK022383  | 1773.77   | 1603.045  | NM_002312 | 1425.683  | 674.172   | U37690    | 7043.476  | 11096.851 |
| AK027041  | 2989.793  | 2751.691  | M20699    | 879.209   | 484.157   | NM_005120 | 442.672   | 660.337   |
| AK022064  | 421.602   | 609.778   | NM_004774 | 4416.128  | 3424.414  | AB029012  | 6707.604  | 4409.524  |
| AK024332  | 492.836   | 897.692   | NM_016937 | 2450.5    | 2169.449  | M33197    | 43423.695 | 31622.365 |
| NM_005355 | 23871.203 | 24996.824 | NM_002690 | 2343.087  | 1672.398  | NM_006295 | 321.837   | 472.171   |
| AK027195  | 446.567   | 652.044   | NM_018239 | 480.42    | 116.616   | AF060936  | 919.125   | 556.459   |
| AK000937  | 891.75    | 943.975   | U88892    | 431.936   | 276.101   | AK024939  | 829.964   | 761.949   |
| AF035306  | 3342.365  | 2770.871  | NM_005725 | 676.418   | 41.548    | AK001561  | 659.482   | 589.155   |
| AK091662  | 1045.438  | 1161.79   | NM_012211 | 409.026   | 219.331   | AF074998  | 604.879   | 474.715   |
| NM_003954 | 1246.15   | 1302.835  | AK026737  | 576.074   | 536.268   | AB007880  | 1094.37   | 1464.319  |
| NM_016348 | 1692.488  | 1986.885  | NM_006289 | 1074.727  | 1003.361  | M33197    | 45500.672 | 47952.512 |
| AK022003  | 1020.651  | 1231.181  | NM_015677 | 1212.608  | 858.19    | NM_014146 | 1593.638  | 1722.931  |
| AK023877  | 1190.605  | 1277.316  | NM_001772 | 9036.474  | 4632.202  | AF147356  | 326.328   | 598.376   |
| AK024213  | 27541.93  | 28629.027 | L05500    | 6707.314  | 4785.605  | NM_018843 | 2053.624  | 2564.998  |
| AK025093  | 806.771   | 487.904   | NM_012306 | 7884.826  | 5764.002  | M33197    | 43952.043 | 54863.48  |



|           |           |           |           |          |          |            |           |           |
|-----------|-----------|-----------|-----------|----------|----------|------------|-----------|-----------|
| AK022184  | 1440.286  | 1615.019  | AF222903  | 3251.739 | 2561.22  | AL109782   | 2221.875  | 2522.724  |
| AB007959  | 860.878   | 1009.102  | NM_006226 | 3381.289 | 2900.862 | AF086225   | 493.148   | 595.462   |
| AK026002  | 611.447   | 567.711   | L10374    | 9487.19  | 6419.312 | NM_005844  | 3613.135  | 4740.4    |
| AK024153  | 1879.989  | 1722.971  | AB016902  | 783.878  | 529.167  | AK024941   | 1165.715  | 1254.355  |
| Y10516    | 4701.311  | 5147.16   | AF272378  | 7740.441 | 7253.468 | AF056434   | 732.966   | 664.301   |
| AF056451  | 1542.692  | 1518.36   | NM_000249 | 452.042  | 371.542  | M33197     | 4048      | 4994.19   |
| AF015039  | 6425.109  | 6267.837  | NM_005860 | 1192.052 | 983.738  | M33197     | 36144.668 | 37499.113 |
| U50528    | 1714.495  | 1927.27   | AF095288  | 1021.274 | 1252.378 | AK024506   | 654.742   | 517.079   |
| AB020632  | 2631.448  | 2938.749  | AK026271  | 375.231  | 516.4    | AF086326   | 778.476   | 814.785   |
| NM_018614 | 44740.391 | 48658.215 | NM_001799 | 377.533  | 487.858  | AL080057   | 331.692   | 542.394   |
| AL117549  | 2093.395  | 3202.607  | NM_005610 | 515.43   | 216.108  | AL117528   | 579.242   | 731.507   |
| NM_005222 | 5503.396  | 6413.947  | NM_004924 | 8789.75  | 7205.43  | M33197     | 41863.859 | 51274.637 |
| BC024308  | 12992.764 | 14639.313 | NM_006505 | 639.005  | 348.985  | AK025948   | 429.788   | 611.212   |
| NM_000538 | 4512.908  | 5015.918  | AB033050  | 1775.538 | 1706.232 | AK000674   | 168.118   | 419.956   |
| AK001838  | 60270.414 | 60384.406 | NM_004356 | 8078.223 | 6682.3   | AL353948   | 2690.569  | 2869.742  |
| NM_018295 | 1951.033  | 2274.61   | NM_001855 | 584.941  | 300.249  | M33197     | 3515.667  | 5183.74   |
| AF070574  | 877.156   | 1190.016  | BC015022  | 3360.226 | 2811.352 | M33197     | 18786.445 | 16272.69  |
| AF086262  | 4650.183  | 6047.19   | NM_006697 | 247.009  | 551.68   | AF056430   | 967.386   | 917.296   |
| AF086292  | 5085.364  | 5233.833  | NM_002406 | 4491.066 | 3964.889 | M33197     | 23140.25  | 27214.068 |
| AK023769  | 683.656   | 538.836   | NM_001935 | 1572.348 | 1418.718 | NM_018055  | 707.599   | 895.274   |
| AK024342  | 15331.202 | 13726.921 | NM_003291 | 314.698  | 759.286  | AK002199   | 463.09    | 546.648   |
| AL137712  | 7254.725  | 6931.918  | AK022950  | 459.092  | 279.531  | AK021469   | 950.207   | 1343.05   |
| AL137606  | 479.9     | 578.089   | NM_019044 | 3894.16  | 2923.471 | AK021706   | 842.134   | 1260.619  |
| AK021673  | 17873.873 | 19651.479 | AF174601  | 1262.496 | 941.148  | M33197     | 35388.742 | 44217.57  |
| AB014543  | 1595.768  | 1652.922  | AF279865  | 545.493  | 355.811  | AK026259   | 2270.1    | 2014.295  |
| NM_018445 | 7871.861  | 7174.842  | NM_014700 | 645.146  | 481.854  | AJ008115   | 2192.875  | 2177.371  |
| AK022743  | 4673.103  | 3822.85   | NM_014714 | 372.224  | 288.33   | AF083125   | 196.396   | 137.68    |
| NM_014627 | 2351.763  | 1889.879  | NM_005687 | 2235.911 | 1740.226 | M33197     | 39957.355 | 36962.977 |
| NM_013938 | 19781.135 | 16057.237 | NM_005983 | 3138.658 | 2535.042 | AF086415   | 875.516   | 775.648   |
| NM_013986 | 68885.289 | 64748.18  | NM_017652 | 597.663  | 356.228  | unknown (S | 231.279   | 234.553   |
| U55055    | 1560.44   | 2055.062  | X59268    | 166.508  | 438.667  | M33197     | 12176.957 | 14922.53  |
| AB018319  | 2670.218  | 2783.368  | D70832    | 2531.096 | 1635.401 | NM_006432  | 2667.756  | 2602.941  |
| AK001101  | 4746.775  | 5005.381  | AK026980  | 174.18   | 378.402  | NM_003535  | 6091.27   | 8011.583  |
| BM973473  | 2446.367  | 3342.268  | AF024708  | 1492.069 | 1703.522 | AK026768   | 683.354   | 858.448   |
| AK021637  | 2047.831  | 2107.842  | NM_006467 | 368.963  | 308.831  | M33197     | 42157.715 | 39197.828 |
| AK021658  | 1257.634  | 872.043   | AB033019  | 1014.602 | 925.585  | AK000852   | 5266.895  | 5398.763  |
| U17631    | 3328.571  | 2779.816  | NM_001452 | 427.145  | 532.736  | AF251188   | 398.06    | 335.202   |
| AL137723  | 4324.835  | 4901.51   | NM_014764 | 3794.165 | 4871.402 | AK026418   | 770.79    | 995.24    |
| AK000774  | 648.128   | 680.033   | NM_018078 | 1173.994 | 1173.254 | AF086194   | 6939.221  | 7243.681  |
| AK024046  | 3049.75   | 3201.327  | NM_016013 | 433.311  | 240.088  | AK026811   | 697.328   | 781.567   |
| NM_017931 | 4007.31   | 4293.056  | NM_016050 | 326.295  | 441.535  | M33197     | 19090.266 | 22573.303 |
| AK022793  | 1368.388  | 1400.637  | NM_007080 | 7957.715 | 6437.848 | M84507     | 554.009   | 742.546   |
| AJ227910  | 1549.925  | 1463.6    | AK026912  | 4177.945 | 3638.808 | NM_006175  | 403.754   | 689.588   |
| AF001893  | 1834.968  | 1986.674  | AK023531  | 5463.346 | 4613.742 | M33197     | 11633.845 | 12446.599 |
| X04236    | 20929.391 | 17835.469 | AK024298  | 140.214  | 324.627  | M33197     | 38887.227 | 38722.34  |
| D16875    | 2054.529  | 2263.46   | AK026742  | 91.923   | 212.397  | S81242     | 13763.61  | 16671.848 |
| AK027171  | 1330.789  | 1292.725  | AK025074  | 282.666  | 418.003  | AF230801   | 364.441   | 265.037   |
| AK021945  | 3723.211  | 4203.798  | NM_006242 | 232.37   | 556.654  | AF075072   | 748.202   | 1197.237  |
| L23545    | 1529.246  | 1419.334  | AF282887  | 287.5    | 452.608  | M33197     | 43137.191 | 33717.547 |
| CY3Cy5    | 3611.151  | 579.264   | AF067972  | 424.555  | 595.876  | NM_002505  | 1565.513  | 2125.041  |
| U13022    | 829.477   | 368.57    | D87076    | 142.25   | 408.081  | AK026706   | 758.676   | 1024.944  |
| R23251    | 20618.816 | 13251.656 | NM_014149 | 415.498  | 578.084  | AB007936   | 4178.649  | 7191.763  |
| BG763477  | 1289.353  | 1150.938  | AB020635  | 354.561  | 292.505  | D28391     | 3061.065  | 2573.588  |

|           |           |           |           |           |           |           |           |           |
|-----------|-----------|-----------|-----------|-----------|-----------|-----------|-----------|-----------|
| AA702640  | 2386.468  | 1961.482  | NM_006515 | 117.842   | 413.553   | M33197    | 13208.144 | 12773.256 |
| T68583    | 2571.853  | 1959.012  | NM_005224 | 667.142   | 971.454   | AJ227896  | 1747.481  | 2053.877  |
| AA481944  | 12027.305 | 7693.925  | NM_012144 | 2649.418  | 3095.019  | L32841    | 401.836   | 631.497   |
| X14390    | 1006.154  | 1039.159  | X65231    | 37278.277 | 42962.703 | M33197    | 5638.845  | 7077.656  |
| AF038440  | 483.295   | 490.63    | NM_002908 | 828.961   | 986.148   | CY3Cy5    | 4338.915  | 607.134   |
| M31158    | 1098.865  | 900.947   | AF205632  | 1138.737  | 1885.084  | AI298534  | 298.063   | 380.393   |
| H00742    | 1217.152  | 1267.219  | NM_005378 | 13183.007 | 16173.299 | AA424735  | 430.192   | 350.56    |
| D42108    | 1164.275  | 1116.136  | NM_002397 | 2931.289  | 4315.411  | BI760394  | 409.235   | 670.387   |
| BG700922  | 1066.166  | 989.111   | AF000672  | 532.263   | 709.47    | U09117    | 4190.537  | 4122.849  |
| AI366068  | 18585.361 | 25072.141 | AK002195  | 228.262   | 521.415   | M18468    | 176.003   | 250.428   |
| N57553    | 868.744   | 1342.934  | AK022850  | 484.112   | 643.346   | H66070    | 2638.325  | 3473.015  |
| AF080158  | 2357.18   | 4112.912  | NM_016490 | 411.346   | 299.834   | AA164741  | 1091.738  | 1354.774  |
| BM664556  | 1947.934  | 3478.716  | S66168    | 707.007   | 855.022   | AI189375  | 391.942   | 413.387   |
| SR5       | 3987.281  | 5184.607  | NM_003851 | 1843.635  | 3655.514  | AI978885  | 1371.051  | 1145.331  |
| SR7       | 5086.307  | 54473.563 | AF070536  | 929.057   | 1056.475  | AK054960  | 6332.564  | 4961.417  |
| SR9       | 24052.904 | 7391.313  | AK022297  | 508.197   | 604.589   | L15344    | 751.967   | 746.557   |
| CY3Cy5    | 14380.378 | 1751.991  | U79300    | 410.721   | 402.608   | SR1       | 51520.363 | 72212.297 |
| M33197    | 78903.188 | 54792.406 | AK025151  | 4136.017  | 5349.136  | SR3       | 21654.514 | 20574.102 |
| NM_007024 | 2440.44   | 1556.416  | AK025550  | 1907.939  | 3086.042  | SR5       | 1530.09   | 2090.395  |
| NM_013231 | 851.231   | 667.554   | AF088076  | 8268.146  | 11794.692 | SR7       | 2787.945  | 25386.887 |
| NM_012106 | 3773.823  | 2532.635  | AF086543  | 1454.56   | 1689.967  | SR9       | 9645.622  | 1907.097  |
| NM_006254 | 7737.764  | 5428.246  | AB046797  | 678.818   | 1040.356  | CY3Cy5    | 5225.098  | 764.726   |
| X95425    | 661.277   | 487.389   | AK025156  | 299.545   | 546.974   | NM_014586 | 1467.258  | 1494.54   |
| NM_004422 | 1156.303  | 866.052   | AK022116  | 379.903   | 583.841   | NM_014366 | 3646.131  | 3591.351  |
| M33197    | 65314.859 | 65728.336 | AK026207  | 602.807   | 738.068   | NM_006453 | 269.05    | 369.551   |
| AY009399  | 13296.676 | 12066.412 | AF075106  | 264.809   | 328.7     | AL390078  | 274.159   | 269.634   |
| NM_004895 | 6245.675  | 5581.212  | AK023339  | 310.284   | 417.842   | NM_004036 | 337.52    | 365.717   |
| U59748    | 889.701   | 786.618   | AF086008  | 402.098   | 362.811   | NM_006546 | 151.932   | 183.297   |
| L32537    | 652.746   | 605.4     | AF086029  | 286.731   | 125.816   | NM_014956 | 515.276   | 722.971   |
| NM_014303 | 8163.957  | 9043.956  | U52050    | 542.267   | 392.408   | NM_003992 | 848.925   | 820.291   |
| M95610    | 22884.105 | 28757.205 | U73799    | 772.684   | 1070      | AF279265  | 426.197   | 462.358   |
| NM_003118 | 6853.021  | 7991.329  | Z36826    | 585.387   | 2202.728  | NM_005213 | 29991.766 | 24995.09  |
| L02922    | 27427.705 | 29043.502 | AK021668  | 12386.974 | 14093.097 | AB040914  | 573.612   | 579.797   |
| NM_001797 | 2049.739  | 2591.359  | AF086148  | 10009.6   | 10811.134 | NM_002997 | 2586.501  | 2617.473  |
| NM_003154 | 1980.073  | 2779.008  | AJ245433  | 1308.45   | 1482.579  | NM_002379 | 6110.579  | 6009.589  |
| NM_004235 | 1012.168  | 1467.487  | AK021942  | 2393.524  | 2272.991  | AB007929  | 4182.985  | 5098.233  |
| AK023459  | 2719.251  | 3741.656  | NM_014127 | 317.237   | 577.949   | NM_004579 | 1619.331  | 1804.062  |
| BI762154  | 644.88    | 970.046   | AF090902  | 593.016   | 416.464   | AA203126  | 1350.103  | 1793.997  |
| NM_012139 | 2910.869  | 1859.786  | AF119887  | 3519.117  | 3245.551  | L12347    | 3493.888  | 3349.296  |
| AF121856  | 3090.284  | 1821.984  | NM_018578 | 399.065   | 324.258   | NM_001622 | 2412.043  | 2812.202  |
| NM_006421 | 2565.165  | 2040.388  | NM_018543 | 332.109   | 549.49    | Z36788    | 1095.464  | 1078.928  |
| NM_017457 | 19173.221 | 13267.813 | AK024438  | 986.801   | 955.75    | NM_018477 | 1857.902  | 1455.127  |
| NM_003765 | 4856.041  | 3464.661  | AK022803  | 992.718   | 1425.498  | U20536    | 420.858   | 355.499   |
| M33197    | 52205.551 | 38307.445 | AK023517  | 999.107   | 1284.794  | NM_004853 | 1902.924  | 1634.541  |
| NM_018202 | 14742.038 | 12660.561 | AK023869  | 2400.741  | 3181.816  | NM_001494 | 4677.668  | 4519.604  |
| AB023197  | 5028.266  | 3934.117  | NM_017728 | 521.856   | 61.757    | NM_004603 | 1328.864  | 1347.175  |
| NM_022173 | 5948.848  | 5331.88   | NM_006189 | 428.878   | 182.435   | AK022849  | 570.299   | 554.898   |
| AB040970  | 6027.158  | 5790.956  | AJ272177  | 263.293   | 392.019   | AF040964  | 1551.135  | 1351.822  |
| NM_018330 | 4380.279  | 4647.238  | AK026402  | 2058.021  | 2103.617  | NM_001939 | 590.668   | 679.272   |
| AB023222  | 1600.192  | 2168.33   | AK024618  | 728.721   | 1005.586  | NM_003279 | 3623.063  | 2346.198  |
| M33197    | 61464.984 | 69267.438 | AL049969  | 418.475   | 410.33    | AB014599  | 1804.763  | 1570.019  |
| U50342    | 3759.962  | 3843.221  | NM_005220 | 464.353   | 122.32    | NM_004393 | 361.84    | 321.887   |
| NM_000295 | 1093.214  | 1280.013  | NM_015373 | 142.755   | 364.966   | NM_005832 | 223.751   | 281.636   |

|           |           |           |           |           |           |           |          |          |
|-----------|-----------|-----------|-----------|-----------|-----------|-----------|----------|----------|
| AF026932  | 505.773   | 650.258   | AK026366  | 23105.936 | 25162.846 | AW407841  | 595.974  | 391.663  |
| AF103795  | 1194.588  | 1722.207  | AK024229  | 7356.25   | 6674.885  | NM_001879 | 1199.081 | 1098.973 |
| NM_006215 | 932.888   | 1227.697  | AK021467  | 2442.064  | 2384.232  | AF264014  | 3574.677 | 3664.578 |
| U80018    | 457.664   | 479.664   | NM_020371 | 1524.013  | 2124.57   | L09098    | 838.074  | 364.986  |
| NM_000717 | 1945.477  | 861.215   | AK022498  | 601.436   | 498.092   | NM_001831 | 777.284  | 471.487  |
| M33197    | 74089.773 | 62321.223 | U84506    | 394.192   | 271.988   | NM_000137 | 1614.334 | 868.484  |
| NM_004845 | 895.339   | 719.614   | U21556    | 19643.756 | 13511.21  | NM_012102 | 1907.388 | 1369.345 |
| NM_007107 | 12069.607 | 7924.648  | AB002344  | 407.373   | 331.383   | NM_005017 | 5731.518 | 4324.48  |
| NM_000047 | 1395.78   | 875.973   | NM_006829 | 1828.65   | 1806.242  | AF163572  | 2925.006 | 2093.884 |
| M68874    | 2001.986  | 2282.593  | NM_017669 | 8462.006  | 9128.036  | NM_000897 | 808.475  | 541.05   |
| NM_006319 | 4248.212  | 3808.382  | AF147379  | 33182.566 | 35620.18  | NM_006411 | 1898.248 | 1118.014 |
| NM_018226 | 6223.194  | 5064.667  | AK023760  | 3147.7    | 3800.59   | AB040884  | 407.817  | 349.374  |
| NM_004605 | 1060.387  | 1058.072  | X98415    | 59463.672 | 53550.828 | NM_000492 | 3567.417 | 3447.482 |
| Z36813    | 4311.281  | 4708.005  | AK024205  | 1213.367  | 1494.759  | NM_001170 | 1275.577 | 812.588  |
| NM_006660 | 5871.321  | 9439.622  | AF086034  | 1910.128  | 2282.126  | AL137716  | 290.917  | 203.521  |
| NM_004727 | 716.599   | 952.289   | AK000745  | 1829.93   | 2701.164  | NM_004696 | 582.445  | 448.949  |
| M33197    | 15889.093 | 14887.291 | Z83935    | 630.331   | 114.956   | NM_014342 | 549.459  | 529.288  |
| NM_004045 | 10832.723 | 12552.647 | AF093744  | 503.372   | 367.01    | Z50169    | 380.85   | 257.861  |
| NM_001891 | 2239.052  | 3242.027  | NM_020524 | 775.607   | 1025.668  | NM_000452 | 721.163  | 195.313  |
| NM_001440 | 20745.238 | 12388.7   | NM_001999 | 566.191   | 374.712   | NM_003057 | 297.767  | 122.207  |
| NM_016618 | 3391.953  | 1569.339  | NM_002602 | 6652.33   | 8176.06   | AB043997  | 436.879  | 334.115  |
| AB014568  | 8366.479  | 4628.873  | NM_016239 | 687.8     | 663.104   | NM_001773 | 388.764  | 360.59   |
| NM_012249 | 2191.884  | 1578.552  | NM_003383 | 2806.765  | 3455.322  | Z70704    | 411.933  | 393.545  |
| AK022546  | 1790.396  | 1432.194  | D17271    | 6829.204  | 7958.504  | NM_014363 | 408.519  | 186.421  |
| NM_014067 | 1801.377  | 1393.219  | X91648    | 1598.539  | 1741.899  | NM_000557 | 1780.941 | 1219.948 |
| NM_002914 | 3573.774  | 2696.233  | AK026658  | 441.613   | 702.801   | NM_003239 | 498.714  | 364.969  |
| NM_020385 | 1334.583  | 1212.897  | AF282264  | 6859.552  | 8434.354  | NM_002312 | 379.995  | 204.949  |
| NM_014877 | 769.465   | 806.58    | Z70717    | 323.769   | 443.35    | M20699    | 165.45   | 182.37   |
| NM_006541 | 1299.076  | 1744.145  | X69110    | 110.267   | 245.681   | NM_004774 | 1127.918 | 648.693  |
| M33197    | 59237.727 | 69854.313 | NM_017660 | 850.563   | 642.777   | NM_016937 | 1009.725 | 686.304  |
| NM_005705 | 4234.655  | 5824.24   | AB011151  | 3555.526  | 2774.532  | NM_002690 | 1535.476 | 1406.794 |
| NM_004328 | 2098.594  | 2605.186  | U92995    | 1054.838  | 1082.066  | NM_012328 | 2273.35  | 2256.074 |
| NM_004581 | 4022.964  | 5479.911  | AL133017  | 878.513   | 1034.941  | NM_007341 | 435.826  | 384.761  |
| NM_006817 | 25584.873 | 28603.592 | CY3Cy5    | 5132.471  | 375.505   | NM_016508 | 694.667  | 475.545  |
| NM_015921 | 46175.707 | 44199.859 | X00588    | 1287.907  | 1107.011  | NM_006456 | 2790.326 | 2158.947 |
| AB040900  | 12636.846 | 16226.474 | AI359037  | 387.551   | 605.467   | AK026062  | 4917.632 | 4537.342 |
| NM_001080 | 1109.119  | 1886.661  | BI754285  | 499.981   | 454.969   | AF047002  | 3947.78  | 2955.096 |
| NM_001482 | 1539.783  | 2440.817  | X15998    | 3958.416  | 3824.365  | AL050082  | 324.689  | 93.435   |
| NM_001797 | 899.26    | 746.531   | NM_001883 | 2384.245  | 2324.771  | NM_006623 | 10104.85 | 6222.804 |
| NM_003154 | 981.823   | 478.331   | NM_004628 | 834.196   | 921.942   | NM_016588 | 332.393  | 163.578  |
| AK023459  | 2583.894  | 1952.555  | H-M 69043 | 1328.075  | 1118.077  | NM_003135 | 602.149  | 438.616  |
| U13022    | 903.204   | 622.853   | AF077374  | 664.058   | 544.083   | L12347    | 1854.88  | 1710.453 |
| R23251    | 18849.756 | 15738.842 | X59065    | 863.673   | 694.936   | NM_001622 | 1623.738 | 1624.766 |
| BG763477  | 1126.82   | 1067.383  | M59828    | 7323.511  | 6717.08   | Z36788    | 506.546  | 641.881  |
| AA702640  | 2371.262  | 2271.445  | NM_016134 | 1802.151  | 1727.584  | NM_018477 | 1065.136 | 728.208  |
| T68583    | 2701.894  | 2700.948  | SR2       | 46860.43  | 57329.113 | U20536    | 474.121  | 391.105  |
| AA481944  | 17535.445 | 13872.417 | SR4       | 14070.003 | 17814.463 | AI298534  | 633.383  | 267.078  |
| X14390    | 942.273   | 1228.102  | SR6       | 1791.869  | 2188.892  | AW167715  | 589.917  | 461.309  |
| AF038440  | 523.363   | 506.97    | SR8       | 6637.751  | 26449.189 | AA424735  | 1117.202 | 1053.475 |
| M31158    | 1161.931  | 1371.783  | SR10      | 23109.195 | 9402.722  | U78294    | 698.504  | 477.796  |
| H00742    | 1468.031  | 2578.252  | CY3Cy5    | 4111.964  | 317.064   | BI760394  | 838.846  | 451.902  |
| D42108    | 1499.179  | 2377.135  | NM_000612 | 4104.841  | 5196.3    | AA555216  | 230.969  | 186.077  |
| BG700922  | 925.89    | 1251.886  | NM_004257 | 16344.956 | 19369.006 | U09117    | 7288.718 | 4781.731 |

|           |           |           |           |           |           |           |           |           |
|-----------|-----------|-----------|-----------|-----------|-----------|-----------|-----------|-----------|
| AI366068  | 18672.215 | 26779.244 | NM_002844 | 261.531   | 367.793   | M21054    | 316.103   | 360.281   |
| N57553    | 774.128   | 1330.981  | NM_000683 | 639.708   | 894.258   | M18468    | 696.395   | 492.357   |
| AF080158  | 2525.632  | 3424.548  | NM_005901 | 2548.266  | 2902.775  | H66070    | 5658.428  | 4976.559  |
| BM664556  | 2209.079  | 3447.831  | NM_004248 | 1048.515  | 956.349   | AI978885  | 789.221   | 455.737   |
| NM_016545 | 1996.3    | 2877.951  | NM_001313 | 637.959   | 549.627   | L15344    | 613.905   | 143.293   |
| NM_000295 | 927.526   | 594.262   | NM_004796 | 558.161   | 424.301   |           | 254.876   | 229.219   |
| AF026932  | 1163.659  | 1315.694  | NM_000435 | 3389.152  | 2627.672  | NM_001665 | 1966.769  | 1713.975  |
| AF103795  | 523.565   | 471.713   | NM_001842 | 29687.209 | 27609.852 | NM_001875 | 813.974   | 664.928   |
| NM_006215 | 572.875   | 516.539   | AB017169  | 648.697   | 574.058   | AF264014  | 3623.505  | 2669.12   |
| M33197    | 50551.75  | 43107.734 | AL080170  | 1732.959  | 1811.165  | L09098    | 226.843   | 187.427   |
| NM_007024 | 2679.968  | 2227.441  | AB039903  | 4561.84   | 4362.636  | NM_001831 | 464.525   | 360.077   |
| NM_013231 | 1417.578  | 1134.738  | NM_000542 | 14872.831 | 13943.257 | NM_014586 | 2064.67   | 1380.945  |
| NM_012106 | 3564.203  | 3362.354  | NM_014625 | 453.903   | 882.95    | NM_014366 | 5833.333  | 4077.263  |
| NM_006254 | 6961.313  | 6527.376  | NM_006851 | 707.656   | 579.47    | NM_006453 | 439.073   | 370.011   |
| X95425    | 886.816   | 889.625   | AK001560  | 1513.515  | 1456.349  | NM_018096 | 594.023   | 450.915   |
| NM_004422 | 1427.435  | 1508.002  | AB001328  | 1279.503  | 1531.21   | AL390078  | 839.785   | 701.203   |
| NM_016562 | 542.616   | 743.991   | NM_000948 | 850.987   | 617.456   | NM_004036 | 900.62    | 699.658   |
| M33197    | 57790.363 | 68266.891 | H99588    | 3930.865  | 3343.214  | NM_006546 | 671.304   | 592.883   |
| AY009399  | 13228.3   | 19999.256 | AK022600  | 2570.808  | 3825.626  | NM_014955 | 1041.797  | 1087.234  |
| NM_004895 | 8814.823  | 9411.738  | AK023142  | 1080.657  | 1327.097  | NM_003992 | 1536.663  | 1476.224  |
| U59748    | 1732.894  | 2285.674  | U61740    | 12073.709 | 16327.984 | AF279265  | 1312.812  | 1096.67   |
| L32537    | 905.126   | 1349.42   | NM_006409 | 46240.148 | 50732.164 | NM_005213 | 18298.666 | 9428.286  |
| NM_014303 | 13129.529 | 17586.109 | AB049054  | 1494.155  | 1995.93   | AA203126  | 1352.744  | 1610.806  |
| L02922    | 25317.67  | 31720.4   | AF027205  | 9348.596  | 6779.974  | Z50169    | 214.322   | 310.948   |
| M33197    | 13345.077 | 5788.707  | AF075012  | 705.553   | 725.654   | AB043997  | 920.839   | 768.274   |
| NM_004045 | 10506.72  | 5734.907  | NM_001570 | 610.893   | 457.39    | NM_004853 | 3221.772  | 2461.264  |
| NM_001891 | 762.918   | 387.526   | NM_015658 | 312.245   | 260.002   | NM_001494 | 8176.888  | 6907.291  |
| NM_012139 | 3023.628  | 2832.85   | NM_000589 | 1354.552  | 1176.618  | NM_004206 | 778.622   | 927.887   |
| AF121856  | 3222.162  | 2492.656  | NM_016546 | 7765.629  | 8116.691  | NM_004603 | 7311.253  | 9363.746  |
| NM_006421 | 2597.372  | 2717.362  | AF309653  | 9858.487  | 8488.041  | AK022849  | 1082.572  | 705.449   |
| NM_017457 | 20250.025 | 21547.57  | NM_002620 | 20122.199 | 16757.936 | AF040964  | 2083.863  | 1580.41   |
| NM_003765 | 6210.916  | 8213.646  | S79267    | 681.222   | 784.724   | AK023527  | 186.818   | 165.832   |
| NM_005868 | 1019.512  | 1282.444  | NM_001816 | 1243.714  | 1156.093  | NM_001939 | 1245.204  | 590.321   |
| NM_018202 | 17030.662 | 17872.322 | NM_003784 | 34123.492 | 31169.545 | NM_003275 | 3639.759  | 2111.842  |
| AB023197  | 5391.976  | 6590.94   | NM_000195 | 28684.623 | 26565.127 | AB014599  | 693.935   | 553.653   |
| NM_022173 | 7808.732  | 10391.929 | NM_005445 | 11004.378 | 6844.158  | NM_004393 | 169.769   | 105.216   |
| AB040970  | 5911.686  | 7367.725  | NM_014899 | 2224.009  | 2333.597  | U15197    | 166.039   | 158.918   |
| NM_018330 | 5429.463  | 6646.441  | NM_003630 | 5058.813  | 5680.755  | AL050082  | 817.868   | 748.242   |
| AB033088  | 1786.638  | 2210.999  | NM_000046 | 3574.394  | 3893.113  | NM_006623 | 23096.582 | 18541.943 |
| U50342    | 3119.082  | 4729.024  | NM_003219 | 1866.015  | 2212.597  | NM_016588 | 1068.829  | 698.454   |
| NM_015921 | 41235.102 | 23667.266 | NM_006709 | 3864.533  | 3551.792  | NM_003135 | 3167.887  | 2347.106  |
| AB040900  | 19740.725 | 12371.189 | NM_004910 | 1551.188  | 1376.959  | NM_000137 | 2898.97   | 2550.462  |
| NM_001080 | 1075.304  | 646.753   | AB013452  | 243.236   | 741.62    | NM_012102 | 2855.951  | 2153.719  |
| NM_001482 | 1231.938  | 994.279   | M93107    | 3020.523  | 4281.575  | NM_005017 | 11532.019 | 11404.149 |
| U80018    | 679.726   | 543.331   | BC001479  | 5897.391  | 6931.938  | AF163572  | 5707.298  | 5272.346  |
| NM_000717 | 2139.084  | 1660.178  | NM_002461 | 11184.234 | 13893.057 | NM_000897 | 2335.717  | 1807.233  |
| M33197    | 64370.934 | 68850.766 | NM_005771 | 5414.571  | 6014.461  | NM_000487 | 659.52    | 814.546   |
| NM_004845 | 1234.219  | 1338.752  | AB032986  | 9350.038  | 10220.393 | NM_006411 | 11203.425 | 11254.305 |
| NM_007107 | 13010.786 | 13191.386 | NM_017528 | 7620.966  | 6403.544  | NM_014182 | 996.609   | 938.196   |
| NM_000047 | 3298.84   | 4181.374  | NM_016032 | 4745.354  | 3874.972  | AB040884  | 278.624   | 321.06    |
| M68874    | 2204.02   | 3924.443  | NM_014324 | 47469.043 | 47428.535 | NM_000492 | 3049.288  | 2893.997  |
| NM_006319 | 4904.881  | 7345.172  | NM_001687 | 11956.406 | 10955.182 | NM_001170 | 668.16    | 695.739   |
| NM_004605 | 1082.3    | 1666.554  | AK026374  | 1191.6    | 1107.125  | AK054960  | 7955.787  | 5226.09   |

|           |           |           |           |           |           |           |          |          |
|-----------|-----------|-----------|-----------|-----------|-----------|-----------|----------|----------|
| Z36813    | 5662.479  | 9510.662  | NM_001169 | 829.847   | 641.54    | L15344    | 1453.352 | 943.264  |
| NM_00666C | 6572.557  | 10440.053 | AK024648  | 3217.409  | 2593.051  | NM_00166E | 5605.121 | 5073.02  |
| NM_004727 | 588.013   | 1235.605  | NM_000719 | 525.216   | 281.271   | Z70704    | 648.192  | 401.821  |
| NM_00055E | 719.998   | 797.678   | NM_003459 | 5476.429  | 5202.01   | NM_01436E | 636.377  | 522.687  |
| AF080158  | 2215.843  | 1540.847  | AB032526  | 333.366   | 247.99    | NM_000557 | 2460.572 | 1632.137 |
| BM664556  | 1880.245  | 1435.976  | NM_000171 | 1884.968  | 1589.666  | NM_00137E | 1772.575 | 1378.435 |
| NM_01654E | 2128.658  | 1360.171  | AL354615  | 869.135   | 619.121   | NM_00231E | 986.316  | 541.317  |
| NM_00144C | 22510.213 | 16221.723 | NM_01334E | 44340.84  | 40069.215 | M20699    | 662.74   | 647.298  |
| NM_01661E | 3617.657  | 1910.666  | NM_00370E | 3315.06   | 3154.483  | NM_004774 | 3413.003 | 3717.334 |
| AB014568  | 10346.068 | 6933.15   | NM_006861 | 1549.27   | 1785.646  | NM_016937 | 1649.051 | 1881.837 |
| NM_01224E | 3183.894  | 3142.652  | NM_00582E | 2445.749  | 2067.771  | NM_00269C | 380.368  | 321.786  |
| AK022546  | 3343.219  | 4385.365  | NM_00046E | 1087.739  | 1049.567  | NM_01232E | 650.424  | 540.302  |
| NM_014067 | 5318.286  | 6729.591  | NM_01590E | 9955.344  | 9976.463  | NM_00645E | 2260.314 | 1712.124 |
| NM_002914 | 3929.443  | 4852.018  | NM_00089E | 358.319   | 518.051   | AK026062  | 2557.9   | 1939.687 |
| NM_02038E | 1892.858  | 2323.764  | AB040672  | 4927.893  | 4517.562  | AF047002  | 4393.996 | 2745.891 |
| NM_014877 | 661.618   | 1352.513  | NM_00219E | 3199.148  | 4044.452  | AB040914  | 509.971  | 636.004  |
| NM_006541 | 1309.65   | 2089.335  | NM_005491 | 2973.064  | 4577.028  | NM_002997 | 2877.265 | 1983.179 |
| M33197    | 60249.211 | 72648.289 | NM_00386E | 1741.561  | 2141.972  | AB007929  | 5346.543 | 4256.059 |
| NM_00570E | 5701.291  | 7335.325  | X63417    | 1833.866  | 2486.853  | NM_00457E | 1905.041 | 1429.021 |
| NM_00432E | 2545.616  | 3442.101  | S94539    | 13258.164 | 11780.733 | AA203126  | 2155.905 | 2022.53  |
| NM_004581 | 3813.341  | 5343.489  | NM_00640E | 679.851   | 658.508   | L12347    | 3184.61  | 2337.989 |
| NM_006817 | 23910.58  | 30919.301 | NM_00578E | 1850.461  | 1311.18   | NM_00162E | 2474.402 | 2107.988 |
| M95610    | 10001.559 | 7403.374  | NM_01824E | 1452.806  | 1207.931  | Z36788    | 871.915  | 1081.506 |
| NM_001797 | 1011.74   | 900.942   | AK001695  | 5924.687  | 5243.499  | NM_018477 | 1805.68  | 1517.839 |
| NM_003154 | 909.827   | 565.936   | NM_01788E | 2497.407  | 2905.864  | U20536    | 439.844  | 476.747  |
| NM_00423E | 534.915   | 523.661   | NM_00625E | 2360.364  | 1821.884  | AI298534  | 662.256  | 305.202  |
| AK023459  | 2601.028  | 2337.933  | NM_014397 | 3866.96   | 3213.626  | R71691    | 180.073  | 108.456  |
| U13022    | 1798.372  | 2302.183  | AB023182  | 1022.61   | 819.933   | AW167715  | 874.401  | 905.09   |
| R23251    | 20771.32  | 23054.029 | NM_003607 | 1220.176  | 992.022   | AA424735  | 1697.514 | 1655.883 |
| BG763477  | 983.921   | 1774.452  | NM_00657E | 1380.232  | 1495.943  | U78294    | 805.402  | 964.292  |
| AA702640  | 2986.545  | 4554.06   | NM_013254 | 2159.72   | 2530.471  | AA171613  | 502.825  | 362.142  |
| T68583    | 4770.534  | 5599.303  | NM_000437 | 9531.902  | 11184.653 | BI760394  | 1021.581 | 794.854  |
| X14390    | 1033.535  | 1723.868  | AB046819  | 4085.072  | 4158.032  | AA555216  | 276.235  | 268.186  |
| AF038440  | 772.447   | 1196.651  | NM_00609C | 3160.683  | 3909.23   | U09117    | 7261.975 | 6405.491 |
| M31158    | 1367.169  | 2139.217  | NM_00290C | 8405.634  | 7258.971  | H66070    | 1474.668 | 1575.422 |
| H00742    | 2417.503  | 3372.539  | AK001560  | 587.92    | 661.701   | AA164741  | 359.839  | 413.73   |
| D42108    | 1778.024  | 2515.788  | AB001328  | 717.307   | 936.052   | AI189375  | 291.412  | 343.334  |
| BG700922  | 1213.198  | 1720.173  | NM_00094E | 328.973   | 665.717   | AI978885  | 837.289  | 864.978  |
| AI366068  | 18136.979 | 28325.48  | X00588    | 1144.421  | 1582.12   | AB014599  | 2371.924 | 2428.015 |
| N57553    | 752.567   | 1197.071  | AI359037  | 2381.688  | 2201.49   | AW407841  | 1112.37  | 866.776  |
| AB040970  | 4726.309  | 2896.963  | X15998    | 4514.562  | 3248.51   | U15197    | 303.112  | 342.178  |
| NM_01833C | 4351.978  | 2600.785  | M76482    | 342.724   | 323.724   | NM_00187E | 1335.352 | 937.393  |
| AB033088  | 1071.105  | 741.779   | NM_00188E | 3508.536  | 2891.724  | AF264014  | 5170.787 | 5282.099 |
| NM_00029E | 915.093   | 578.827   | NM_00462E | 1391.184  | 1265.87   | L09098    | 332.381  | 343.352  |
| AF103795  | 823.417   | 662.809   | H-M 69043 | 2995.173  | 3651.629  | NM_00415E | 172.602  | 228.627  |
| NM_00621E | 539.693   | 542.239   | AF077374  | 1886.233  | 1246.604  | NM_001831 | 723.695  | 591.807  |
| NM_013231 | 2980.224  | 3682.671  | X59065    | 824.843   | 822.502   | NM_01458E | 2646.397 | 2210.197 |
| NM_01210E | 3968.265  | 5816.851  | M59828    | 2881.817  | 3100.363  | NM_01436E | 7104.501 | 5678.985 |
| X95425    | 1891.092  | 2372.441  | NM_016134 | 1714.781  | 1345.54   | NM_00092E | 449.388  | 287.369  |
| NM_00442E | 1831.022  | 2563.192  | AJ010482  | 2381.964  | 2219.1    | NM_00645E | 637.052  | 721.896  |
| NM_01656E | 1006.459  | 1337.047  | NM_00544E | 8651.194  | 6024.615  | NM_01809E | 516.812  | 760.778  |
| M33197    | 57163.711 | 69019.18  | NM_01489E | 1096.732  | 1451.927  | AL390078  | 882.877  | 716.81   |
| AY009399  | 12669.171 | 18072.598 | NM_00363C | 3315.556  | 4268.268  | NM_00403E | 802.064  | 736.727  |

|           |           |           |           |           |           |           |           |           |
|-----------|-----------|-----------|-----------|-----------|-----------|-----------|-----------|-----------|
| NM_00489E | 7582.892  | 9292.607  | NM_000612 | 4769.473  | 6158.103  | NM_01598E | 327.032   | 387.439   |
| U59748    | 1416.109  | 2198.267  | NM_004257 | 11389.72  | 10906.97  | NM_00654E | 440.491   | 476.904   |
| L32537    | 915.065   | 982.627   | NM_000683 | 701.795   | 558.113   | NM_01495E | 173.753   | 173.584   |
| NM_00666C | 5803.808  | 4515.991  | NM_003629 | 1439.302  | 1293.345  | NM_00399Z | 306.74    | 339.986   |
| NM_004727 | 416.504   | 474.416   | NM_005901 | 3171.004  | 2889.496  | AF279265  | 314.947   | 405.134   |
| NM_00668E | 9167.941  | 6618.998  | NM_00424E | 1783.908  | 1814.626  | NM_00521E | 5667.38   | 3531.462  |
| M33197    | 14565.741 | 10489.64  | NM_00131E | 885.496   | 643.975   | NM_00117C | 1300.372  | 1342.656  |
| NM_00404E | 11050.672 | 7733.003  | NM_00479E | 895.282   | 1032.867  | AL137716  | 460.125   | 509.029   |
| NM_001891 | 776.408   | 765.116   | NM_00043E | 5641.66   | 5054.13   | NM_00469E | 473.219   | 473.483   |
| NM_01213E | 4940.59   | 5106.197  | NM_00184Z | 30484.539 | 28032.451 | NM_01434Z | 876.903   | 1303.423  |
| AF121856  | 3246.22   | 4331.63   | AB017169  | 657.859   | 873.306   | Z50169    | 417.905   | 509.583   |
| NM_006421 | 3277.179  | 4888.756  | AL080170  | 1902.628  | 1888.261  | AB043997  | 904.846   | 1080.208  |
| NM_017457 | 21816.775 | 32751.643 | AB039903  | 4917.941  | 4368.742  | NM_00485E | 3295.446  | 3739.165  |
| NM_00376E | 9787.781  | 13181.622 | NM_00054Z | 13227.582 | 10628.693 | NM_00149A | 8300.265  | 11942.524 |
| NM_00586E | 942.527   | 1236.243  | NM_01462E | 570.97    | 168.407   | NM_017707 | 435.872   | 399.346   |
| M33197    | 50652.559 | 61772.395 | NM_00370E | 2110.213  | 2620.426  | NM_00420E | 845.012   | 972.657   |
| NM_01820Z | 14682.933 | 19713.029 | NM_006861 | 1093.298  | 1586.806  | NM_00460E | 4768.979  | 5287.755  |
| AB023197  | 5091.682  | 5903.155  | NM_00582E | 1160.036  | 1577.167  | AK022849  | 1080.862  | 980.397   |
| M33197    | 65203.863 | 54950.836 | NM_00046E | 343.42    | 422.319   | AF040964  | 1071.183  | 1188.576  |
| NM_00570E | 3512.82   | 2361.929  | NM_01590E | 7057.743  | 10489.948 | NM_00193E | 643.734   | 661.642   |
| NM_00432E | 2457.923  | 1860.578  | AK022600  | 1114.732  | 1918.284  | NM_00327E | 3380.585  | 2843.696  |
| NM_004581 | 3008.914  | 2390.636  | AK023142  | 980.748   | 823.757   | NM_01232E | 2265.524  | 2493.607  |
| NM_006817 | 25407.867 | 19492.359 | U61740    | 13786.518 | 11750.508 | NM_007341 | 381.378   | 392.202   |
| NM_00710E | 14438.199 | 11506.91  | NM_00640E | 44973.797 | 47445.652 | NM_01650E | 607.419   | 650.74    |
| NM_015921 | 42664.949 | 28252.01  | AB049054  | 2556.52   | 2364.631  | NM_00645E | 4664.978  | 4048.24   |
| AB040900  | 19657.922 | 14531.489 | NM_015071 | 731.497   | 842.932   | AK026062  | 5106.651  | 6543.504  |
| NM_00108C | 1239.037  | 849.71    | NM_013227 | 1446.148  | 1445.818  | AF047002  | 9479.677  | 12816.409 |
| NM_00148Z | 1376.952  | 1168.219  | Z83803    | 780.06    | 756.075   | NM_01658E | 1184.335  | 1046.921  |
| U80018    | 929.309   | 801.961   | AF027205  | 19318.482 | 16163.655 | NM_00313E | 3137.972  | 3761.178  |
| NM_000717 | 2317.406  | 2319.731  | AF075012  | 1741.319  | 1586.978  | NM_01210Z | 2667.331  | 3342.155  |
| M33197    | 59990.148 | 71951.297 | NM_00157C | 1087.6    | 1045.687  | NM_005017 | 12305.665 | 14311.309 |
| NM_00484E | 1688.181  | 2451.558  | NM_01565E | 672.674   | 650.337   | AF163572  | 6348.841  | 6649.779  |
| NM_007107 | 12496.783 | 15121.165 | NM_00058E | 3042.978  | 2827.386  | NM_000897 | 2852.15   | 3725.003  |
| NM_000047 | 7270.629  | 8333.092  | NM_01654E | 17297.131 | 17153.857 | NM_000487 | 745.723   | 486.805   |
| M68874    | 2153.428  | 3190.169  | AF309653  | 8658.07   | 7263.811  | NM_006411 | 11936.844 | 11600.472 |
| NM_00631E | 4735.015  | 5371.261  | NM_00262C | 15834.619 | 14436.479 | NM_01418Z | 880.305   | 1250.12   |
| NM_01822E | 6588.802  | 10586.896 | S79267    | 810.112   | 498.637   | AB040884  | 524.326   | 430.159   |
| NM_00460E | 1240.211  | 1442.814  | NM_00181E | 1085.705  | 904.241   | NM_00049Z | 2963.568  | 2885.969  |
| Z36813    | 5755.776  | 7087.273  | NM_00378A | 35668.129 | 31107.963 | AJ272057  | 3609.231  | 3805.564  |
| AB018327  | 1910.568  | 1227.9    | NM_00019E | 23932.652 | 18353.543 | AK024216  | 7836.563  | 7880.81   |
| AF303889  | 524.677   | 402.07    | NM_00657E | 1265.188  | 1067.717  | Y16752    | 2434.606  | 2271.88   |
| M33197    | 63462.836 | 49921.723 | NM_01325A | 1387.643  | 1647.342  | NM_02015E | 616.716   | 628.132   |
| AK022649  | 4480.278  | 3313.852  | NM_000437 | 7237.69   | 8045.679  | AK000407  | 1829.629  | 2247.644  |
| NM_016507 | 2478.118  | 1743.412  | AB046819  | 3346.944  | 3698.192  | AK026164  | 833.812   | 1391.501  |
| NM_002024 | 3519.355  | 2261.198  | NM_00290C | 3815.786  | 4350.505  | Z70704    | 822.415   | 1154.105  |
| NM_00274Z | 10458.529 | 7870.66   | NM_00491C | 766.858   | 904.558   | NM_01436E | 674.188   | 703.585   |
| AF173358  | 5673.927  | 4989.489  | AB013452  | 296.485   | 307.553   | NM_000557 | 2555.364  | 3033.366  |
| NM_01636E | 1238.467  | 1233.101  | M93107    | 3000.365  | 2370.461  | NM_00137E | 2405.615  | 2575.089  |
| M33197    | 59370.945 | 61067.625 | BC001479  | 4273.534  | 4059.176  | NM_00231Z | 998.424   | 962.465   |
| NM_01654E | 2202.773  | 1937.354  | NM_002461 | 13712.919 | 14309.997 | NM_00347E | 324.639   | 192.254   |
| NM_00144C | 23018.746 | 19351.721 | NM_005771 | 6733.007  | 7178.053  | NM_00269C | 1161.306  | 1309.282  |
| NM_001201 | 629.942   | 691.181   | AB032986  | 25792.031 | 29363.559 | NM_01823E | 464.08    | 532.672   |
| NM_01661E | 3999.458  | 2916.263  | NM_01752E | 28997.559 | 31314.211 | U88892    | 413.011   | 341.759   |

|           |           |           |           |           |           |           |           |           |
|-----------|-----------|-----------|-----------|-----------|-----------|-----------|-----------|-----------|
| AB014568  | 19806.25  | 20030.604 | NM_016032 | 9811.158  | 12769.798 | NM_012211 | 531.044   | 609.915   |
| NM_012249 | 6335.879  | 6408.849  | NM_014324 | 49274.734 | 46155.844 | AB040877  | 1175.862  | 1009.908  |
| AK022546  | 4536.424  | 5056.117  | NM_001687 | 18838.207 | 20611.896 | AB040927  | 321.968   | 273.396   |
| NM_014067 | 6986.391  | 8164.18   | AK026374  | 1961.354  | 2396.4    | AK026737  | 1542.228  | 1096.867  |
| NM_002914 | 4136.159  | 4289.542  | NM_001169 | 1715.209  | 1833.249  | NM_000210 | 372.836   | 522.871   |
| NM_020385 | 1813.582  | 1656.447  | AK024648  | 10901.881 | 16016.652 | AF251025  | 355.259   | 611.125   |
| NM_014877 | 836.071   | 1161.444  | NM_000719 | 712.638   | 903.907   | NM_015677 | 1680.041  | 2777.759  |
| NM_006541 | 1093.685  | 1541.219  | NM_003459 | 4280.453  | 4639.51   | NM_001772 | 7375.012  | 7978.97   |
| NM_018179 | 1142.291  | 557.938   | NM_000171 | 1137.908  | 966.313   | AB011087  | 986.366   | 1231.632  |
| NM_006197 | 8194.729  | 2135.686  | NM_013349 | 36732.215 | 28596.545 | AF161341  | 3114.897  | 2439.782  |
| M29273    | 677.003   | 429.312   | NM_016134 | 1054.911  | 1320.639  | AJ249902  | 531.376   | 625.975   |
| M33197    | 67404.516 | 58847.648 | NM_000896 | 397.217   | 643.719   | NM_004384 | 1724.382  | 1864.987  |
| NM_004854 | 1561.639  | 1393.208  | AB040672  | 3329.601  | 2668.658  | L05500    | 4864.519  | 5263.273  |
| AJ245418  | 3315.083  | 2887.261  | NM_002192 | 2045.167  | 1470.102  | NM_012306 | 6767.872  | 8377.093  |
| NM_006377 | 3295.164  | 2743.516  | NM_005491 | 3565.178  | 3608.454  | AF222903  | 1813.443  | 2024.559  |
| NM_002436 | 2575.6    | 2370.092  | NM_003869 | 1767.263  | 1662.223  | NM_006226 | 1967.395  | 2443.397  |
| NM_018362 | 3463.621  | 3062.078  | X63417    | 5506.5    | 6563.215  | L10374    | 7593.551  | 7237.753  |
| M33197    | 38751.516 | 36923.656 | S94539    | 24219.891 | 24668.414 | AB016902  | 1064.944  | 807.148   |
| NM_004755 | 1325.413  | 1359.016  | NM_006402 | 1432.622  | 1612.028  | AF272378  | 40337.34  | 32838.152 |
| NM_002186 | 2448.161  | 2536.467  | NM_005785 | 2788.39   | 2928.466  | NM_000249 | 1408.313  | 1995.745  |
| NM_006182 | 758.9     | 965.11    | NM_018248 | 2459.413  | 2080.24   | NM_005860 | 3190.971  | 2850.508  |
| AL137543  | 4776.697  | 5439.948  | AK001695  | 8948.155  | 12072.268 | AF095288  | 5784.528  | 5766.715  |
| NM_004444 | 6721.88   | 6827.636  | NM_017886 | 4051.737  | 4843.754  | AK025116  | 398.077   | 293.01    |
| M33197    | 1006.285  | 1121.415  | NM_006252 | 1766.78   | 1474.69   | AK026271  | 3446.381  | 2600.927  |
| NM_001957 | 2472.967  | 3326.974  | NM_001721 | 452.699   | 150.718   | NM_001799 | 3237.566  | 2802.703  |
| AK024533  | 9143.613  | 9937.686  | NM_014397 | 5901.389  | 5173.623  | NM_003478 | 1967.367  | 2724.121  |
| NM_002736 | 19207.303 | 18840.992 | AB023182  | 1549.21   | 1795.158  | NM_016237 | 3376.183  | 4021.861  |
| NM_004246 | 3385.053  | 3546.425  | NM_003607 | 1177.536  | 1002.161  | NM_004924 | 5229.325  | 5177.686  |
| NM_002285 | 3101.106  | 1830.488  | AB017169  | 515.922   | 703.702   | NM_001796 | 1104.335  | 1186.561  |
| NM_006694 | 24485.012 | 15198.738 | AL080170  | 779.682   | 727.065   | NM_001211 | 1687.288  | 1616.145  |
| NM_005207 | 2350.654  | 1472.687  | AB039903  | 3264.719  | 3757.561  | NM_006505 | 662.506   | 535.647   |
| NM_014467 | 412.734   | 393.049   | NM_000542 | 9921.372  | 11203.66  | AB033050  | 1458.843  | 1563.973  |
| NM_003087 | 1305.225  | 1193.388  | AK001560  | 791.396   | 1069.53   | NM_004356 | 4243.693  | 4717.835  |
| NM_001630 | 2214.235  | 1621      | AB001328  | 770.061   | 1088.205  | BC015022  | 1918.184  | 2655.478  |
| M33197    | 55008.602 | 59276.672 | H99588    | 761.547   | 743.493   | NM_006697 | 2500.175  | 2488.342  |
| NM_002031 | 647.284   | 718.566   | X00588    | 1687.96   | 1771.675  | M19182    | 500.689   | 641.724   |
| AF305081  | 3499.156  | 2728.788  | AI359037  | 4171.029  | 5091.772  | AK025707  | 592.076   | 603.566   |
| NM_004712 | 9251.596  | 8416.4    | J04513    | 414.302   | 499.325   | NM_002406 | 47125.98  | 47409.477 |
| AF118078  | 2008.841  | 1692.218  | X15998    | 5018.992  | 4840.554  | U87169    | 1084.554  | 999.71    |
| NM_020169 | 431.968   | 496.872   | M76482    | 545.884   | 602.565   | NM_002073 | 502.525   | 622.574   |
| AL157428  | 834.836   | 789.561   | NM_001883 | 2992.629  | 2450.312  | NM_006043 | 331.225   | 457.947   |
| M33197    | 55951.262 | 61134.711 | NM_004628 | 1776.805  | 1544.615  | AF117222  | 500.917   | 714.219   |
| BE904175  | 363.062   | 414.288   | L31785    | 579.499   | 776.256   | NM_001935 | 13398.347 | 12185.071 |
| NM_005855 | 3068.984  | 3033.407  | H-M 69043 | 1952.372  | 2048.652  | S75755    | 1140.369  | 1329.063  |
| AK025163  | 1589.933  | 1529.976  | AF077374  | 1343.582  | 1320.069  | AB014576  | 6056.451  | 7009.496  |
| NM_014931 | 4855.683  | 4796.65   | X59065    | 726.982   | 504.896   | AK000145  | 244.297   | 227.822   |
| NM_014487 | 2866.157  | 2359.137  | M59828    | 4324.254  | 5827.691  | AF174601  | 1134.018  | 1287.533  |
| NM_018070 | 3547.478  | 3314.507  | AF309653  | 9580.938  | 9120.045  | AF279865  | 291.491   | 275.556   |
| NM_002484 | 3679.357  | 3513.199  | NM_002620 | 10653.396 | 11309.465 | NM_014700 | 369.207   | 344.671   |
| M33197    | 49142.953 | 56435.434 | S79267    | 427.649   | 562.434   | NM_014714 | 254.571   | 258.845   |
| NM_018240 | 53342.445 | 65304.102 | NM_001816 | 705.293   | 923.523   | NM_005687 | 2639.323  | 3139.171  |
| AL162052  | 646.76    | 843.847   | NM_003784 | 27056.117 | 28433.4   | NM_005983 | 1782.921  | 2221.091  |
| AK025941  | 3801.968  | 4259.929  | NM_000195 | 16674.076 | 14449.055 | NM_017652 | 2419.74   | 2140.823  |

|           |           |           |           |           |           |           |           |           |
|-----------|-----------|-----------|-----------|-----------|-----------|-----------|-----------|-----------|
| M33197    | 63086.547 | 43683.914 | NM_005445 | 6416.76   | 3383.655  | X59268    | 1486.075  | 1936.48   |
| NM_015914 | 1853.167  | 1164.797  | NM_014899 | 1260.391  | 1632.189  | D70832    | 22659.014 | 20912.887 |
| AF059531  | 4277.442  | 2544.246  | NM_003630 | 3062.837  | 3886.335  | NM_001425 | 2271.519  | 2216.971  |
| NM_002707 | 10712.294 | 7807.509  | NM_000046 | 1635.028  | 1381.434  | M61870    | 358.651   | 167.084   |
| AF029777  | 969.386   | 688.175   | NM_003219 | 527.48    | 461.3     | AK026980  | 607.952   | 512.868   |
| NM_003352 | 1277.465  | 1089.578  | NM_006709 | 2518.034  | 1847.392  | AJ277915  | 607.568   | 688.53    |
| AK026884  | 9405.037  | 6753.791  | NM_000612 | 3838.088  | 3883.605  | NM_020368 | 847.867   | 844.514   |
| S82198    | 1610.214  | 1321.951  | NM_004257 | 20441.178 | 22388.188 | AF024708  | 9056.492  | 10623.196 |
| NM_002594 | 3435.805  | 2704.312  | NM_002844 | 213.06    | 352.145   | NM_006467 | 1304.256  | 1881.502  |
| NM_001159 | 517.6     | 652.007   | NM_000683 | 1447.181  | 2095.218  | AB033019  | 2361.412  | 3132.443  |
| NM_031407 | 3518.053  | 4181.51   | NM_003629 | 1629.82   | 1691.706  | NM_001452 | 435.448   | 646.908   |
| M33197    | 55663.738 | 62359.41  | NM_005901 | 3351.503  | 2805.589  | NM_006162 | 357.873   | 392.079   |
| NM_020193 | 1044.86   | 1012.92   | NM_004248 | 1835.463  | 1977.068  | NM_016050 | 194.787   | 352.387   |
| NM_005619 | 2792.659  | 3319.769  | NM_000959 | 389.333   | 426.173   | NM_007080 | 5157.681  | 5193.646  |
| D87440    | 2724.945  | 3113.515  | NM_001313 | 853.553   | 1070.046  | AK026912  | 3034.04   | 3550.917  |
| AK000332  | 9628.7    | 10116.941 | NM_004796 | 938.408   | 988.238   | AK023531  | 3937.896  | 4443.994  |
| AL080156  | 1418.558  | 999.029   | NM_000435 | 6804.515  | 5810.805  | AK024298  | 160.633   | 343.134   |
| M33197    | 52937.563 | 64866.434 | NM_001842 | 30827.785 | 29915.275 | AB011128  | 2479.368  | 2935.716  |
| NM_006738 | 1486.535  | 1705.887  | NM_000719 | 389.129   | 565.078   | AK025074  | 1727.595  | 2674.766  |
| NM_002895 | 909.958   | 759.097   | NM_003459 | 3441.759  | 5143.174  | NM_000303 | 826.784   | 1276.673  |
| NM_013351 | 15080.099 | 10740.877 | AB032526  | 639.681   | 608.268   | NM_006242 | 461.475   | 791.866   |
| NM_012340 | 2537.47   | 2091.763  | AL354615  | 1053.78   | 969.776   | AF282887  | 247.804   | 421.387   |
| NM_006022 | 687.312   | 727.796   | NM_013349 | 23541.764 | 25384.305 | X78712    | 323.282   | 364.956   |
| AK025110  | 2217.079  | 1708.286  | NM_003705 | 1311.323  | 996.742   | NM_001497 | 625.671   | 747.003   |
| X52339    | 44909.637 | 25601.111 | NM_006861 | 636.381   | 742.969   | NM_004130 | 1112.006  | 1489.232  |
| M33197    | 54756.473 | 55319.93  | NM_005829 | 922.093   | 894.844   | NM_006348 | 227.858   | 155.188   |
| AB046830  | 4021.47   | 4041.327  | NM_000466 | 926.746   | 837.052   | NM_004958 | 224.216   | 161.825   |
| NM_007122 | 2006.297  | 2482.759  | NM_015908 | 6269.316  | 7853.504  | D87076    | 878.925   | 930.699   |
| NM_001488 | 864.383   | 683.785   | AK022600  | 1766.297  | 1988.511  | NM_014148 | 1259.3    | 1055.524  |
| NM_016202 | 7782.268  | 6251.921  | AK023142  | 1111.896  | 1019.912  | AB020635  | 599.643   | 646.965   |
| NM_012476 | 895.87    | 731.732   | U61740    | 14869.861 | 14293.717 | NM_006515 | 524.638   | 442.382   |
| M33197    | 56051.984 | 65658.305 | NM_006409 | 48560.809 | 44586.488 | NM_012144 | 1864.824  | 2164.624  |
| NM_006276 | 4348.377  | 6038.354  | AB049054  | 4119.046  | 3349.688  | X65231    | 27080.625 | 25582.357 |
| NM_003407 | 4291.326  | 6741.232  | NM_015071 | 1103.291  | 1262.719  | NM_002908 | 699.903   | 951.011   |
| NM_007209 | 54542.918 | 68148.68  | NM_013227 | 1682.055  | 2382.129  | AF205632  | 927.351   | 1198.481  |
| NM_003729 | 8426.428  | 7690.477  | Z83803    | 564.503   | 821.545   | NM_005378 | 9661.123  | 8294.292  |
| L05096    | 12454.764 | 12822.178 | AF027205  | 14587.702 | 18293.139 | NM_002397 | 2330.255  | 1385.992  |
| BC015899  | 4907.687  | 6713.707  | NM_001570 | 1555.033  | 1313.43   | AF000672  | 390.806   | 393.007   |
| NM_017986 | 1654.616  | 1447.974  | NM_017886 | 2020.153  | 1630.119  | AK002195  | 426.22    | 677.5     |
| AK024846  | 1965.606  | 1325.281  | NM_006252 | 1531.229  | 1005.383  | AF086128  | 322.531   | 356.298   |
| AK001451  | 4135.259  | 3104.653  | NM_001721 | 487.888   | 492.806   | AK022850  | 692.972   | 925.214   |
| M33197    | 45538.359 | 27810.539 | NM_014397 | 2858.751  | 3550.724  | NM_016490 | 1434.366  | 1036.412  |
| NM_007180 | 1167.96   | 834.274   | AB023182  | 953.961   | 970.326   | AL137498  | 922.942   | 1107.801  |
| NM_005609 | 549.017   | 487.661   | NM_003607 | 861.216   | 872.744   | AK024289  | 660.085   | 501.495   |
| NM_005476 | 6304.434  | 4928.008  | NM_013254 | 1459.443  | 1283.544  | NM_003851 | 11320.419 | 12250.076 |
| NM_005660 | 2522.855  | 2328.895  | NM_000437 | 3830.016  | 3234.661  | AK024150  | 763.454   | 779.66    |
| AK023902  | 2003.015  | 1480.784  | AB046819  | 4332.252  | 4098.138  | U79300    | 1218.139  | 1154.481  |
| NM_005223 | 468.879   | 776.116   | NM_006090 | 721.586   | 948.669   | AK025151  | 4220.724  | 5291.765  |
| AB011173  | 5403.982  | 4946.729  | NM_002900 | 2879.666  | 2792.819  | AK025550  | 1736.798  | 2286.29   |
| AB023195  | 1628.85   | 1840      | NM_004910 | 1458.849  | 1098.535  | AF088076  | 9218.467  | 12271.862 |
| U43431    | 2704.962  | 2761.319  | M93107    | 6121.647  | 4349.738  | AF086543  | 723.518   | 1081.699  |
| AB006622  | 1592.592  | 2622.957  | BC001479  | 8622.094  | 7344.675  | AB046797  | 672.672   | 814.339   |
| M33197    | 57713.93  | 67686.203 | NM_002461 | 24249.211 | 26894.801 | AK002098  | 840.094   | 695.401   |



|           |           |           |           |           |           |           |           |           |
|-----------|-----------|-----------|-----------|-----------|-----------|-----------|-----------|-----------|
| AK097041  | 3971.164  | 4063.005  | NM_005771 | 9199.677  | 10680.366 | AK025156  | 7319.002  | 9775.574  |
| AF068744  | 28650.238 | 27203.543 | AB032986  | 26899.043 | 26603.91  | AF026526  | 555.868   | 520.802   |
| AK000762  | 2178.269  | 2660.818  | NM_017528 | 26305.764 | 27259.615 | AK026207  | 2046.708  | 2083.188  |
| NM_004571 | 1097.964  | 1459.535  | NM_016032 | 8752.58   | 9681.538  | NM_020181 | 354.186   | 302.057   |
| AJ345030  | 1640.96   | 1120.118  | AK026374  | 2411.017  | 2564.49   | AK024984  | 8138.59   | 8469.15   |
| AK023472  | 6924.161  | 4840.838  | NM_001169 | 2146.143  | 2091.009  | AF085955  | 617.589   | 495.931   |
| AL109729  | 691.699   | 592.573   | AK024648  | 12135.454 | 9885.21   | AF075106  | 1097.873  | 1086.281  |
| AF007146  | 500.993   | 520.615   | NM_000795 | 518.452   | 791.452   | AK023339  | 877.947   | 675.449   |
| M33197    | 56105.188 | 52558.926 | AB037761  | 9776.786  | 9784.677  | AF086008  | 1421.234  | 1515.852  |
| S79912    | 5593.329  | 4477.818  | NM_014008 | 35370.453 | 28008.895 | AF087970  | 498.04    | 662.946   |
| AL110283  | 826.699   | 465.591   | NM_014731 | 5961.621  | 5088.107  | AF086029  | 289.034   | 466.657   |
| AK026892  | 2152.988  | 2019.51   | AF035191  | 2922.429  | 2009.88   | AF075115  | 441.84    | 543.893   |
| S83275    | 11461.467 | 11919.664 | NM_004058 | 1159.26   | 961.762   | U05597    | 621.023   | 522.938   |
| AL117427  | 3913.784  | 4710.852  | NM_004527 | 712.526   | 635.054   | U50524    | 401.339   | 509.404   |
| M33197    | 55579.777 | 60105.684 | NM_012062 | 3212.393  | 2737.292  | U63332    | 275.092   | 488.228   |
| AF052118  | 11440.945 | 11998.248 | AK026717  | 546.498   | 364.083   | U52050    | 196.449   | 301.125   |
| AK025166  | 4948.416  | 4516.741  | AJ010482  | 1238.08   | 991.928   | U73799    | 473.556   | 540.166   |
| AL359586  | 1833.274  | 2579.158  | NM_000896 | 787.579   | 851.277   | AK021668  | 12666.046 | 14491.303 |
| AF147421  | 650.204   | 847.263   | AB040672  | 7909.29   | 9118.051  | AF086148  | 8616.68   | 7531.553  |
| AF035290  | 1642.75   | 3042.064  | NM_002192 | 3886.072  | 5094.379  | AK021942  | 1595.35   | 1827.074  |
| AK023216  | 1636.889  | 2336.486  | NM_005491 | 4896.335  | 4341.538  | AF090902  | 1144.284  | 1088.221  |
| M33197    | 54489.949 | 63173.246 | NM_003869 | 5177.026  | 6506.483  | AF119887  | 3456.585  | 3422.74   |
| AK023288  | 1299.55   | 1482.086  | X63417    | 7141.876  | 8116.895  | AK091038  | 307.612   | 579.169   |
| AK022198  | 647.923   | 1068.247  | S94539    | 24210.246 | 24947.826 | AK024193  | 699.564   | 1026.688  |
| M33197    | 69045.039 | 49886.516 | NM_006402 | 1297.924  | 1262.015  | NM_018578 | 362.699   | 440.796   |
| AK022428  | 1105.338  | 736.846   | NM_005785 | 3397.415  | 2914.521  | AK024438  | 3850.118  | 4503.636  |
| AK000788  | 408.825   | 408.405   | NM_018248 | 2703.744  | 2320.531  | AF161337  | 467.544   | 589.277   |
| AK023457  | 1693.521  | 1454.386  | AK001695  | 10707.457 | 8809.233  | AK022482  | 336.584   | 338.317   |
| AK025089  | 4642.061  | 3764.444  | AB040898  | 1462.052  | 1662.222  | AK023811  | 151.528   | 238.627   |
| AK021431  | 1339.078  | 1256.766  | AB031547  | 1895.36   | 1339.843  | AK024135  | 518.969   | 620.817   |
| M33197    | 58210.148 | 58490.336 | NM_003970 | 837.851   | 632.722   | AK022803  | 1206.004  | 1574.985  |
| AF085996  | 1874.61   | 1110.333  | AK022496  | 880.203   | 636.566   | AK023517  | 749.429   | 996.698   |
| AK001279  | 1909.521  | 1755.48   | NM_002883 | 1371.305  | 1409.51   | AK023869  | 1804.289  | 2415.78   |
| AF086407  | 540.532   | 735.272   | NM_016150 | 504.057   | 449.875   | NM_017728 | 444.521   | 415.017   |
| AF085949  | 450.662   | 552.085   | NM_004312 | 25948.709 | 26626.721 | AJ272177  | 694.069   | 866.167   |
| AK001567  | 1700.848  | 1511.716  | NM_001347 | 4620.02   | 6609.004  | Z36850    | 206.534   | 108.946   |
| M33197    | 47071.129 | 40999.148 | AK024549  | 16314.645 | 19602.234 | AK024618  | 683.99    | 609.574   |
| U52839    | 2173.978  | 3711.109  | NM_006338 | 9890.856  | 11873.388 | AL049969  | 254.751   | 267.071   |
| X78262    | 356.447   | 941.528   | NM_007164 | 8053.439  | 8019.743  | NM_005220 | 314.23    | 181.834   |
| M33197    | 50791.75  | 50417.457 | NM_000261 | 741.15    | 694.868   | AK000208  | 354.394   | 468.974   |
| AK026984  | 17165.578 | 19257.832 | NM_002606 | 3104.474  | 2991.505  | AK024229  | 10486.487 | 12105.679 |
| M33197    | 67544.07  | 47719.09  | NM_002570 | 1290.158  | 1133.717  | AK021467  | 3475.656  | 4146.365  |
| AL157466  | 2496.645  | 1832.063  | NM_003183 | 1253.917  | 1167.727  | NM_020371 | 1667.109  | 2033.779  |
| AK024336  | 1209.915  | 1006.125  | NM_019851 | 1594.439  | 1675.284  | AK022498  | 745.157   | 846.459   |
| AK023862  | 496.021   | 348.785   | NM_003238 | 1969.875  | 1951.649  | U84506    | 457.505   | 314.868   |
| NM_018621 | 1284.636  | 1084.635  | NM_018367 | 425.832   | 432.174   | AB002344  | 859.838   | 1144.633  |
| AK022016  | 1125.177  | 790.362   | NM_001363 | 7982.815  | 7973.135  | NM_017668 | 3137.562  | 3661.613  |
| AK021628  | 771.897   | 628.029   | NM_014096 | 5820.212  | 6641.734  | AF147379  | 17006.928 | 16644.77  |
| M33197    | 55166.727 | 49499.848 | NM_005706 | 1715.611  | 1695.817  | AK023760  | 2322.482  | 2275.901  |
| AK022118  | 1101.325  | 953.814   | NM_001261 | 1749.686  | 1608.942  | X98415    | 25561.035 | 20098.836 |
| AK026453  | 5525.154  | 3877.574  | NM_007219 | 1157.741  | 1261.049  | AK024205  | 1318.053  | 1289.137  |
| AK025673  | 595.211   | 633.841   | AK026854  | 2194.037  | 2078      | AL390170  | 387.002   | 452.885   |
| M33197    | 51380.164 | 63475.031 | NM_004906 | 534.26    | 448.864   | AK022887  | 324.714   | 717.282   |

|           |           |           |           |           |           |           |           |           |
|-----------|-----------|-----------|-----------|-----------|-----------|-----------|-----------|-----------|
| AK022431  | 826.616   | 859.116   | NM_012447 | 2930.019  | 2805.229  | AK000745  | 9282.362  | 8207.004  |
| AK023305  | 29816.564 | 25600.176 | NM_006366 | 2691.92   | 2218.587  | NM_005295 | 465.97    | 486.096   |
| AK023763  | 1728.106  | 2408.671  | AK027013  | 28713.92  | 36489.414 | Z83935    | 418.032   | 455.02    |
| AK022729  | 1274.376  | 968.475   | NM_001344 | 32436.074 | 51141.309 | AF093744  | 983.198   | 1117.828  |
| NM_006165 | 3958.631  | 2648.569  | NM_018294 | 3092.715  | 2886.666  | NM_018687 | 9596.471  | 10016.278 |
| AL050374  | 1375.75   | 1164.348  | AL389934  | 4210.366  | 3619.443  | M57417    | 14331.477 | 12763.322 |
| M33197    | 58674.359 | 52944.957 | NM_004330 | 4573.347  | 4528.263  | NM_020524 | 2402.905  | 2808.188  |
| M28639    | 4134.24   | 3356.314  | AF151802  | 6603.591  | 6116.812  | NM_003383 | 608.286   | 715.781   |
| AL122073  | 14873.482 | 11121.468 | AB006746  | 1086.072  | 1094.249  | D17271    | 2923.286  | 2985.823  |
| AF116655  | 3782.375  | 3668.505  | NM_006495 | 3003.766  | 2355.16   | X91648    | 600.721   | 655.365   |
| AJ243222  | 804.848   | 596.557   | AB023233  | 1298.122  | 1250.436  | AK026658  | 446.38    | 388.857   |
| AK026132  | 3392.932  | 2685.224  | AL133071  | 304.877   | 652.669   | AF086322  | 380.691   | 613.457   |
| Y11162    | 786.802   | 634.691   | NM_004369 | 1654.456  | 1369.261  | Z70717    | 553.769   | 550.394   |
| M33197    | 56848.434 | 56692.676 | NM_004370 | 404.785   | 657.143   | X79308    | 619.046   | 570.684   |
| AF070584  | 1574.312  | 1502.365  | NM_018130 | 3286.764  | 2959.16   | AF086476  | 617.496   | 603.956   |
| AF075006  | 766.28    | 804.412   | NM_016155 | 1093.903  | 1531.76   | U92995    | 1273.36   | 1149.517  |
| M33197    | 52243.32  | 58704.867 | NM_001224 | 1814.368  | 1301.487  | NM_007105 | 671.468   | 852.537   |
| AK000903  | 28636.234 | 28595.766 | NM_017811 | 1714.781  | 1756.994  | AL137555  | 156.708   | 163.176   |
| AK023938  | 1376.978  | 1345.769  | NM_001569 | 865.053   | 767.559   | CY3Cy5    | 2934.633  | 367.283   |
| AK026896  | 475.015   | 513.945   | AK023284  | 1324.878  | 1439.382  | AI359037  | 413.029   | 174.763   |
| AL110169  | 1069.832  | 1078.001  | NM_005101 | 443.367   | 346.663   | X15998    | 2816.114  | 1364.554  |
| L13743    | 1424.303  | 575.537   | AF130060  | 16620.436 | 23301.211 | M76482    | 561.608   | 626.867   |
| Z11849    | 4395.119  | 3124.674  | NM_007057 | 13223.944 | 8195.114  | X17519    | 231.474   | 208.62    |
| AJ002788  | 3466.106  | 2590.305  | NM_000177 | 6939.221  | 8132.357  | NM_001883 | 2023.622  | 1040.334  |
| M33197    | 72890.531 | 64801.816 | NM_003387 | 7909.895  | 8357.71   | NM_004625 | 710.331   | 554.351   |
| AF075050  | 524.381   | 465.231   | U60665    | 789.589   | 598.035   | H-M 69043 | 1581.349  | 1656.558  |
| AK024842  | 1022.284  | 866.202   | NM_005507 | 40326.004 | 36017.559 | AF077374  | 680.916   | 681.926   |
| NM_018382 | 1625.471  | 1135.665  | AL080133  | 5027.331  | 3813.51   | U43901    | 590.725   | 364.471   |
| M33197    | 56857.203 | 66690.797 | AY014403  | 959.815   | 774.207   | X59065    | 810.373   | 670.888   |
| D17203    | 50674.355 | 43750.367 | NM_006912 | 4626.603  | 3453.317  | M59828    | 4157.444  | 3125.348  |
| NM_006495 | 5145.375  | 5506.724  | X12534    | 2220.527  | 2156.573  | NM_016134 | 754.601   | 907.463   |
| NM_005285 | 572.531   | 680.343   | NM_018951 | 4531.883  | 4007.03   | SR2       | 31719.195 | 30278.229 |
| AK022101  | 1385.772  | 1382.169  | NM_014323 | 607.134   | 542.118   | SR4       | 9035.626  | 8905.048  |
| NM_003251 | 3118.215  | 2761.112  | AB002324  | 741.706   | 291.41    | SR6       | 1496.276  | 1314.664  |
| AF086203  | 373.438   | 463.377   | AK026231  | 797.763   | 732.924   | SR8       | 4461.937  | 17202.59  |
| AB046772  | 1006.919  | 1270.968  | NM_002140 | 5551.049  | 4535.204  | SR10      | 16052.413 | 7026.003  |
| M33197    | 52728.156 | 62795.391 | NM_020143 | 605.744   | 333.424   | CY3Cy5    | 2982.53   | 296.185   |
| AL442080  | 832.925   | 1107.892  | NM_012469 | 707.916   | 632.813   | NM_000612 | 499.289   | 486.452   |
| AY007143  | 5646.422  | 4625.187  | NM_005131 | 1624.617  | 1981.027  | NM_004257 | 3672.774  | 3166.016  |
| L15557    | 1627.103  | 1052.842  | NM_007056 | 2009.201  | 2656.091  | NM_000683 | 356.419   | 332.17    |
| M33197    | 73778.313 | 51123.664 | AF083383  | 2556.248  | 3509.498  | NM_003625 | 498.55    | 370.157   |
| NM_001563 | 6772.95   | 4760.074  | NM_006925 | 4033.68   | 4597.508  | NM_005901 | 833.599   | 638.057   |
| NM_000265 | 724.752   | 350.477   | NM_004890 | 44667.098 | 47698.297 | NM_004245 | 845.016   | 612.4     |
| X89666    | 2554.21   | 2377.546  | AK023181  | 2435.864  | 1594.569  | NM_001313 | 558.255   | 498.204   |
| NM_003104 | 7530.021  | 5268.986  | NM_004294 | 1015.092  | 634.457   | NM_004795 | 779.174   | 838.479   |
| NM_000895 | 1327.931  | 966.026   | NM_005051 | 21767.785 | 21266.658 | NM_000435 | 2384.35   | 2011.538  |
| M33197    | 61744.348 | 52896.297 | NM_001965 | 18115.635 | 15964.516 | NM_001842 | 33413.496 | 25647.797 |
| AK024448  | 3683.237  | 2312.094  | D17259    | 52605.188 | 51237.703 | AB017169  | 545.247   | 434.747   |
| NM_014405 | 2333.045  | 1804.535  | AB002366  | 315.388   | 285.524   | AL080170  | 1537.067  | 724.925   |
| Z11801    | 1082.194  | 1082.86   | AF264627  | 41105.379 | 32651.5   | AB039903  | 2697.588  | 2780.15   |
| S68954    | 45100.406 | 11942.843 | AL133053  | 578.245   | 1122.702  | NM_000542 | 7862.986  | 7603.022  |
| S81335    | 2161.236  | 1808.144  | NM_018142 | 4271.329  | 3987.862  | NM_006851 | 590.562   | 495.12    |
| AF052109  | 9187.479  | 1849.122  | NM_017653 | 543.849   | 757.577   | AK001560  | 802.812   | 890.82    |

|             |           |           |           |           |           |           |           |           |
|-------------|-----------|-----------|-----------|-----------|-----------|-----------|-----------|-----------|
| M33197      | 40627.879 | 28881.441 | AL109695  | 7848.998  | 5658.632  | AB001328  | 1177.923  | 1126.896  |
| AK024405    | 465.019   | 351.434   | NM_002168 | 1141.915  | 1114.903  | NM_000948 | 348.577   | 213.289   |
| NM_003353   | 36280.227 | 31116.012 | NM_004453 | 439.497   | 420.746   | H99588    | 2918.685  | 2463.654  |
| X82127      | 20671.227 | 18709.4   | NM_016229 | 1789.229  | 710.307   | AK022600  | 485.393   | 379.341   |
| AL122044    | 2666.897  | 2245.855  | NM_018244 | 763.733   | 522.924   | U61740    | 1738.526  | 1259.036  |
| NM_018296   | 1359.272  | 1018.482  | NM_002492 | 15553.657 | 14834.977 | NM_006405 | 44388.129 | 42660.293 |
| NM_005752   | 981.002   | 862.674   | NM_005642 | 2794.537  | 2468.491  | AB049054  | 299.518   | 244.989   |
| M33197      | 50871.82  | 58093.891 | NM_018105 | 1255.227  | 1399.713  | NM_015071 | 277.23    | 312.747   |
| CY3Cy5      | 8884.577  | 758.69    | AK023452  | 5158.82   | 5870.398  | AF027205  | 4270.368  | 3211.832  |
| AA418907    | 1166.285  | 1854.739  | AF155065  | 457.653   | 595.104   | AF075012  | 923.867   | 972.668   |
| M65291      | 446.08    | 728.037   | NM_000332 | 1408.137  | 969.515   | NM_001570 | 780.72    | 685.077   |
| AA115473    | 4268.648  | 5129.826  | AK022215  | 2721.092  | 1967.847  | NM_015658 | 381.862   | 729.838   |
| AA872397    | 11119.957 | 14206.827 | U90305    | 485.29    | 403.028   | NM_000585 | 1851.18   | 1844.328  |
| M24283      | 544.468   | 736.229   | NM_001527 | 12816.793 | 12066.565 | NM_016546 | 11691.639 | 11857.322 |
| AA709414    | 4628.499  | 5512.634  | AK025269  | 6803.593  | 7096.628  | AF309653  | 5340.904  | 3784.79   |
| D12676      | 3476.771  | 3802.583  | NM_001438 | 549.135   | 476.987   | NM_002620 | 15483.566 | 11295.229 |
| BC012593    | 1527.107  | 1727.917  | AB040971  | 1476.844  | 875.967   | S79267    | 832.457   | 549.782   |
| NM_000935   | 48557.492 | 44878.457 | NM_006562 | 2851.981  | 1685.781  | NM_001816 | 655.536   | 456.004   |
| NM_004295   | 16409.91  | 17931.281 | AK024254  | 391.553   | 774.518   | NM_003784 | 19659.836 | 17416.955 |
| H-X 02812 I | 3328.401  | 4309.033  | NM_018456 | 3978.672  | 4967.396  | NM_000195 | 12906.771 | 10994.531 |
| U75898      | 3092.361  | 3354.433  | NM_019021 | 514.263   | 650.08    | NM_005445 | 6894.209  | 5249.723  |
| M29039      | 1117.573  | 1448.387  | AK002183  | 330.989   | 281.886   | NM_014895 | 1353.456  | 1325.226  |
| M59815      | 710.998   | 1101.729  | NM_018996 | 640.357   | 505.561   | NM_003630 | 3135.872  | 3845.152  |
| NM_006917   | 448.916   | 465.247   | AL137304  | 1020.483  | 888.535   | NM_000046 | 2627.578  | 3768.228  |
| SR2         | 53338.645 | 55537.723 | AK026883  | 1875.788  | 2577.051  | NM_003215 | 1395.447  | 1237.473  |
| SR4         | 15042.657 | 16368.887 | NM_014350 | 8916.132  | 9039.013  | NM_006705 | 2802.599  | 2631.679  |
| SR6         | 2100.837  | 2655.285  | U00925    | 4735.064  | 5064.074  | NM_004910 | 755.029   | 656.582   |
| SR8         | 6058.678  | 22943.309 | AL390185  | 1671.305  | 1649.081  | M93107    | 860.537   | 686.906   |
| SR10        | 24613.422 | 10454.409 | AF086235  | 4715.261  | 5058.689  | BC001479  | 544.154   | 401.114   |
| CY3Cy5      | 7881.213  | 760.693   | AF143886  | 1572.184  | 1760.036  | NM_002461 | 2831.023  | 2448.782  |
| M33197      | 63543.07  | 67364.992 | AK025975  | 1538.606  | 1127.025  | NM_005771 | 897.451   | 842.658   |
| NM_001203   | 3192.687  | 3978.461  | AK025583  | 25099.674 | 26283.283 | AB032986  | 8490.365  | 6826.338  |
| NM_004795   | 20510.363 | 18709.951 | NM_014664 | 1079.535  | 1161.656  | NM_017528 | 11377.949 | 11420.822 |
| NM_006733   | 893.757   | 1059.775  | AL109788  | 652.572   | 783.826   | NM_016032 | 2552.032  | 1972.864  |
| NM_014047   | 16034.84  | 19651.719 | NM_014952 | 36990.832 | 22027.66  | NM_014324 | 46490.98  | 57385.164 |
| AK022901    | 2080.786  | 2225.816  | AL137566  | 521.461   | 606.034   | NM_001687 | 10795.004 | 14482.114 |
| M33197      | 63525.656 | 67412.258 | AF087962  | 819.506   | 640.578   | AK026374  | 1652.486  | 2071.944  |
| AF037332    | 4952.822  | 6311.79   | AL050197  | 670.892   | 442.358   | NM_001169 | 1420.061  | 1648.948  |
| NM_014571   | 751.318   | 768.179   | AF085870  | 3625.946  | 2935.79   | AK024648  | 6492.747  | 8039.107  |
| NM_006052   | 1213.111  | 1451.208  | AL117580  | 5160.919  | 3602.77   | NM_003455 | 5114.167  | 4075.798  |
| AB040912    | 4429.96   | 4982.099  | AL110190  | 3492.017  | 3265.16   | NM_000171 | 1701.106  | 1011.791  |
| NM_006243   | 3848.22   | 4468.582  | AL117656  | 567.322   | 683.529   | AL354615  | 692.466   | 464.512   |
| AJ011129    | 2682.927  | 2796.484  | AJ001893  | 1104.086  | 1390.795  | NM_013345 | 23733.688 | 21931.688 |
| NM_001035   | 633.571   | 837.326   | NM_014815 | 7659.902  | 7704.715  | NM_003705 | 2288.65   | 2001.699  |
| NM_006387   | 3603.435  | 4049.953  | AF086040  | 1777.281  | 941.916   | NM_006861 | 774.307   | 736.413   |
| NM_005646   | 3140.555  | 3286.548  | AB032988  | 1109.945  | 765.315   | NM_005825 | 1851.13   | 2280.685  |
| NM_006635   | 3399.986  | 4123.195  | AK023559  | 4657.395  | 3139.382  | NM_000466 | 947.046   | 1013.735  |
| NM_001692   | 817.232   | 1241.237  | AB037859  | 55975.211 | 50833.195 | NM_015908 | 7393.215  | 10529.724 |
| BI767871    | 2329.619  | 2566.057  | AL049233  | 1280.356  | 1263.71   | NM_000896 | 291.757   | 215.163   |
| AK022817    | 2034.765  | 2415.638  | NM_017696 | 2493.679  | 2261.375  | AB040672  | 1417.492  | 1044.477  |
| NM_018034   | 7174.63   | 7616.521  | AL050166  | 3808.002  | 3515.321  | NM_002192 | 739.202   | 791.93    |
| M33197      | 61875.445 | 60932.125 | AK026705  | 895.334   | 1319.943  | NM_005491 | 1242.861  | 768.674   |
| AB037831    | 1854.23   | 2079.424  | NM_003602 | 582.507   | 714.141   | NM_003865 | 2115.259  | 2121.905  |

|           |           |           |           |           |           |           |           |           |
|-----------|-----------|-----------|-----------|-----------|-----------|-----------|-----------|-----------|
| NM_012103 | 17537.605 | 18029.854 | AF009258  | 14565.184 | 18823.99  | X63417    | 976.459   | 780.025   |
| AL122077  | 13193.034 | 13337.57  | AF009305  | 807.602   | 1062.603  | S94539    | 6998.534  | 5168.826  |
| NM_014632 | 1464.577  | 1879.232  | AF009270  | 248.659   | 305.203   | NM_006402 | 663.572   | 570.355   |
| NM_006422 | 1734.279  | 2493.472  | AF056421  | 560.158   | 430.045   | NM_005785 | 2076.198  | 1753.912  |
| BE789195  | 562.326   | 582.451   | AK001085  | 805.788   | 782.111   | NM_018248 | 2108.48   | 1790.9    |
| NM_016946 | 3249.718  | 3574.344  | AK001906  | 829.812   | 720.401   | NM_006252 | 1326.277  | 1260.761  |
| M33197    | 59117.16  | 61311.887 | AK021528  | 456.707   | 369.678   | NM_001721 | 462.995   | 318.044   |
| NM_007259 | 3630.664  | 3813.759  | AK021746  | 1661.036  | 1742.727  | NM_014397 | 3242.292  | 3553.595  |
| NM_018402 | 966.169   | 718.006   | AK001136  | 964.294   | 915.89    | AB023182  | 1267.661  | 809.763   |
| NM_018009 | 742.64    | 704.702   | AK002066  | 308.849   | 425.806   | NM_003607 | 696.097   | 575.446   |
| AK075081  | 2428.278  | 2564.006  | AK021617  | 411.349   | 531.427   | NM_006575 | 1151.623  | 945.339   |
| NM_000895 | 6097.074  | 6972.532  | AK021810  | 795.69    | 960.919   | NM_013254 | 1606.92   | 1810.435  |
| NM_003820 | 22347.992 | 22710.906 | AK025190  | 280.269   | 789.523   | NM_000437 | 7956.488  | 10651.714 |
| M33197    | 53919.379 | 62905.07  | AK026743  | 360.175   | 301.307   | AB046819  | 5234.571  | 4984.823  |
| NM_016518 | 6745.969  | 6514.299  | AK025214  | 599.555   | 795.32    | NM_006090 | 2708.454  | 3270.184  |
| NM_006185 | 11503.893 | 11291.488 | AK025846  | 526.429   | 814.677   | NM_002900 | 6708.197  | 8103.556  |
| NM_014800 | 1276.136  | 1183.428  | AK026805  | 2555.367  | 2593.108  | NM_006851 | 158.588   | 201.938   |
| NM_001557 | 909.34    | 963.216   | U00959    | 764.187   | 681.947   | AK001560  | 573.743   | 536.422   |
| AF147311  | 3996.303  | 4619.149  | NM_014578 | 1477.83   | 1303.848  | AB001328  | 824.357   | 725.93    |
| NM_002131 | 48777.406 | 47949.703 | AF147306  | 530.52    | 401.836   | BI754285  | 573.447   | 364.318   |
| NM_017927 | 1438.043  | 1625.529  | NM_012183 | 1438.719  | 1194.208  | X15998    | 4916.705  | 2964.143  |
| NM_020151 | 12760.049 | 14029.678 | AK026785  | 588.715   | 420.234   | M76482    | 406.262   | 266.727   |
| NM_005891 | 40655.988 | 41679.578 | NM_018225 | 13185.952 | 11098.152 | NM_001883 | 2144.469  | 957.694   |
| NM_001645 | 2598.153  | 3084.757  | AK025534  | 1234.177  | 1134.731  | H-M 69043 | 1926.439  | 1705.536  |
| NM_003956 | 2650.545  | 3374.853  | AF091526  | 541.009   | 800.553   | AF077374  | 863.675   | 645.978   |
| M33197    | 58925.223 | 59618.945 | AK022170  | 557.936   | 334.142   | U43901    | 460.838   | 283.927   |
| NM_003500 | 4771.545  | 4973.815  | NM_003523 | 2277.283  | 2031.006  | M59828    | 4706.502  | 4651.423  |
| NM_014317 | 2966.288  | 3831.769  | NM_016503 | 857.107   | 906.749   | NM_016134 | 1115.604  | 828.246   |
| L09234    | 10757.771 | 11535.109 | AK056351  | 2530.881  | 2639.402  | AJ010482  | 1511.168  | 1912.59   |
| NM_000059 | 1832.422  | 2012.972  | NM_014690 | 1027.995  | 1082.897  | NM_005445 | 3900.496  | 2657.488  |
| AK026740  | 1198.592  | 1465.292  | NM_017698 | 1824.019  | 2327.512  | NM_014899 | 770.627   | 788.166   |
| NM_017881 | 4627.839  | 4505.762  | AF086490  | 391.71    | 429.446   | NM_003630 | 1320.297  | 1134.662  |
| M33197    | 54633.066 | 62028.703 | AF131738  | 15779.477 | 14233.012 | NM_000046 | 1445.649  | 1714.04   |
| NM_017634 | 3691.428  | 3730.792  | AK021666  | 490.9     | 471.688   | NM_003219 | 348.034   | 279.144   |
| NM_000813 | 786.394   | 833.916   | AK024825  | 1113.334  | 1327.145  | NM_000612 | 724.841   | 389.504   |
| NM_018896 | 1803.431  | 1747.447  | AF086317  | 3350.249  | 4677.401  | NM_004257 | 4248.41   | 2963.891  |
| AJ300465  | 1394.839  | 1180.853  | U16850    | 1889.816  | 2123.692  | NM_000683 | 1115.744  | 855.428   |
| X86400    | 1938.763  | 2111.916  | AL390178  | 1489.911  | 1858.297  | NM_003629 | 1974.349  | 1057.028  |
| NM_000810 | 1204.978  | 1208.134  | NM_005383 | 463.07    | 758.689   | NM_005901 | 3738.966  | 2817.382  |
| AF069307  | 2950.258  | 3295.344  | Z36806    | 1223.064  | 1523.745  | NM_004248 | 2558.605  | 1778.232  |
| M33197    | 53208.277 | 60947.508 | NM_018618 | 835.763   | 828.153   | NM_001313 | 834.387   | 588.357   |
| U92978    | 1656.581  | 1909      | AJ008121  | 15714.502 | 15029.45  | NM_019066 | 238.453   | 61.749    |
| NM_005738 | 552.913   | 593.722   | AK023739  | 1149.835  | 1120.692  | NM_002362 | 339.143   | 312.111   |
| NM_014488 | 1071.493  | 1308.714  | NM_005830 | 5422.537  | 5012.45   | NM_004796 | 636.486   | 469.374   |
| NM_013389 | 4355.911  | 4090.729  | NM_001507 | 198.676   | 643.904   | NM_000435 | 4162.666  | 3234.472  |
| AB014567  | 783.742   | 942.99    | Z70762    | 419.363   | 835.134   | NM_001842 | 30589.656 | 24236.1   |
| NM_005326 | 12351.363 | 13602.51  | BF037206  | 502.507   | 544.857   | NM_007281 | 406.179   | 419.608   |
| NM_007286 | 486.754   | 428.386   | AK023642  | 668.647   | 345.388   | AB017169  | 622.394   | 680.031   |
| NM_014069 | 1404.685  | 1474.415  | U52827    | 489.494   | 355.117   | AL080170  | 1665.47   | 1230.128  |
| AB035130  | 1215.907  | 2648.256  | AL049466  | 6066.262  | 8541.022  | AB039903  | 2861.827  | 3277.05   |
| NM_003359 | 2643.798  | 2457.508  | AB037802  | 1978.706  | 2071.291  | NM_000542 | 9294.696  | 9485.733  |
| M33197    | 48863.801 | 51093.762 | U17623    | 957.855   | 1127.872  | NM_005829 | 1046.086  | 835.749   |
| AF119917  | 935.825   | 768.164   | AL137450  | 5237.742  | 6823.243  | NM_000466 | 746.346   | 673.849   |

|             |           |           |           |           |           |           |           |           |
|-------------|-----------|-----------|-----------|-----------|-----------|-----------|-----------|-----------|
| AK021834    | 711.295   | 885.818   | AK023058  | 1886.893  | 2385.297  | AK023142  | 494.358   | 575.903   |
| NM_017915   | 1118.38   | 966.487   | AJ227878  | 730.492   | 279.344   | U61740    | 6805.27   | 7041.288  |
| AL050097    | 594.807   | 638.522   | NM_012064 | 4527.681  | 3767.051  | NM_006405 | 45508.875 | 58872.133 |
| NM_003579   | 1746.047  | 1639.008  | AK001460  | 790.109   | 753.299   | AB049054  | 2133.342  | 1657.995  |
| AL049283    | 2006.03   | 2007.984  | AK092508  | 2615.453  | 2354.302  | NM_015071 | 835.524   | 827.182   |
| M33197      | 51998.766 | 58700.129 | AK027111  | 44724.539 | 44999.391 | AF027205  | 12001.078 | 8661.999  |
| NM_002401   | 33739.535 | 30118.805 | NM_003515 | 638.37    | 662.809   | AF075012  | 1247.975  | 1047.334  |
| NM_001274   | 2136.51   | 1998.647  |           |           |           | NM_001570 | 910.578   | 1018.424  |
| NM_003913   | 846.494   | 790.207   |           |           |           | NM_015655 | 462.084   | 429.733   |
| NM_002227   | 2067.294  | 1836.66   |           |           |           | NM_000585 | 2648.441  | 1716.788  |
| NM_007195   | 1898.508  | 2023.436  |           |           |           | NM_016545 | 12558.5   | 12510.373 |
| AB002301    | 631.238   | 697.613   |           |           |           | AF309653  | 6190.092  | 5055.509  |
| AB014530    | 5607.496  | 5183.16   |           |           |           | NM_002620 | 13753.197 | 14292.765 |
| M33197      | 56776.531 | 60859.844 |           |           |           | S79267    | 812.06    | 972.751   |
| NM_005985   | 2767.534  | 2379.336  |           |           |           | NM_001815 | 654.148   | 840.231   |
| AB014607    | 3465.878  | 3006.694  |           |           |           | NM_003784 | 26283.422 | 24385.439 |
| AF134401    | 1966.406  | 2177.598  |           |           |           | NM_000195 | 18266.488 | 15490.593 |
| NM_006387   | 4868.01   | 6168.638  |           |           |           | NM_006575 | 391.267   | 207.459   |
| NM_005645   | 4661.156  | 4889.604  |           |           |           | NM_013254 | 888.998   | 574.794   |
| NM_006635   | 3695.014  | 4194.952  |           |           |           | AB013452  | 466.822   | 554.718   |
| NM_001692   | 1076.931  | 1287.701  |           |           |           | M93107    | 3019.09   | 4668.387  |
| BI767871    | 2962.954  | 2821.018  |           |           |           | BC001479  | 3546.141  | 4264.691  |
| AA418907    | 1401.153  | 1515.984  |           |           |           | NM_002461 | 16053.798 | 16481.887 |
| M65291      | 563.544   | 390.613   |           |           |           | NM_005771 | 5376.706  | 5656.035  |
| AA115473    | 3836.025  | 4034.703  |           |           |           | NM_017525 | 29234.805 | 23874.713 |
| AA872397    | 8447.191  | 9419.732  |           |           |           | NM_016032 | 6624.659  | 5634.309  |
| AA709414    | 3701.683  | 4153.662  |           |           |           | NM_014324 | 39924.859 | 51036.855 |
| D12676      | 2364.155  | 2375.789  |           |           |           | NM_001687 | 9697.08   | 10671.502 |
| BC012593    | 973.72    | 1061.808  |           |           |           | AK026374  | 1472.604  | 1398.397  |
| NM_000935   | 44800.375 | 38443.289 |           |           |           | NM_001165 | 1170.184  | 1082.389  |
| NM_004295   | 23942.158 | 22845.684 |           |           |           | AK024648  | 6052.074  | 4117.741  |
| H-X 02812 I | 3837.425  | 3832.472  |           |           |           | NM_003455 | 3587.789  | 3197.617  |
| U75898      | 4114.388  | 4290.065  |           |           |           | NM_000171 | 1061.398  | 1452.24   |
| M29039      | 1247.459  | 1228.262  |           |           |           | AL354615  | 884.387   | 863.687   |
| M59815      | 908.108   | 848.671   |           |           |           | NM_013345 | 28791.844 | 25052.846 |
| NM_006917   | 600.334   | 421.803   |           |           |           | NM_016134 | 655.661   | 601.291   |
| M33197      | 970.017   | 1423.942  |           |           |           | NM_000895 | 519.324   | 594.118   |
| AB011146    | 1477.612  | 2036.999  |           |           |           | AB040672  | 4314.062  | 4664.417  |
| NM_006185   | 16251.989 | 18016.969 |           |           |           | NM_002192 | 1922.198  | 2968.613  |
| NM_014800   | 1507.925  | 1679.936  |           |           |           | NM_005491 | 1725.911  | 2511.872  |
| NM_001557   | 1236.669  | 1274.077  |           |           |           | NM_003865 | 3770.263  | 6462.907  |
| AF147311    | 4727      | 4304.432  |           |           |           | S94539    | 20904.635 | 19169.285 |
| NM_002131   | 47613.508 | 43207.766 |           |           |           | NM_006402 | 947.827   | 618       |
| NM_017927   | 2287.936  | 2259.302  |           |           |           | NM_005785 | 1990.916  | 1545.083  |
| M33197      | 61755.805 | 64563.664 |           |           |           | NM_018245 | 2675.884  | 3183.868  |
| NM_001203   | 2940.158  | 3691.297  |           |           |           | AK001695  | 3462.338  | 2088.143  |
| NM_004795   | 18690.398 | 16090.476 |           |           |           | NM_017885 | 2405.685  | 1545.912  |
| NM_006733   | 931.098   | 895.497   |           |           |           | NM_006252 | 1385.059  | 1011.265  |
| NM_014047   | 13876.338 | 14290.571 |           |           |           | NM_001721 | 439.594   | 287.986   |
| AK022901    | 1053.911  | 875.332   |           |           |           | NM_014397 | 3223.729  | 3005.605  |
| M33197      | 60705.223 | 64222.82  |           |           |           | AB023182  | 912.052   | 901.266   |
| AF037332    | 4480.04   | 4946.807  |           |           |           | NM_003607 | 737.661   | 983.091   |
| NM_014571   | 635.419   | 595.163   |           |           |           | AB017169  | 285.67    | 359.923   |

|           |           |           |
|-----------|-----------|-----------|
| NM_006052 | 1231.937  | 1135.763  |
| AB040912  | 3213.11   | 3535.547  |
| NM_003871 | 564.603   | 393.293   |
| NM_006243 | 4108.282  | 4377.847  |
| AJ011129  | 2878.048  | 2640.318  |
| NM_001039 | 598.988   | 933.716   |
| M33197    | 56139.031 | 59229.594 |
| U92978    | 3155.108  | 2706.785  |
| NM_005738 | 511.921   | 371.536   |
| NM_014488 | 1560.539  | 1363.474  |
| NM_013389 | 5549.805  | 5378.25   |
| AB014567  | 877.274   | 896.779   |
| AK022817  | 1752.333  | 1733.467  |
| NM_018034 | 6594.381  | 7663.464  |
| M33197    | 58876.211 | 61876.34  |
| AB037831  | 1800.388  | 2019.051  |
| NM_012103 | 17233.211 | 21625.43  |
| AL122077  | 14280.661 | 15593.143 |
| NM_014632 | 859.371   | 813.808   |
| NM_006422 | 996.716   | 1357.849  |
| BE789195  | 491.545   | 709.147   |
| NM_016946 | 3189.497  | 3486.069  |
| M33197    | 53388.66  | 64719     |
| NM_007259 | 3333.049  | 3945.523  |
| NM_018402 | 894.942   | 902.262   |
| NM_018009 | 1204.74   | 927.9     |
| AK075081  | 3018.214  | 2818.954  |
| NM_000895 | 6039.362  | 6463.976  |
| NM_015915 | 5015.807  | 4634.879  |
| M33197    | 54406.375 | 65808.188 |
| NM_016518 | 5729.113  | 7442.736  |
| AB002301  | 929.808   | 854.435   |
| AB014530  | 8474.453  | 7484.541  |
| M33197    | 53925.332 | 59910.008 |
| NM_005989 | 3766.016  | 3103.275  |
| AB014607  | 5678.395  | 4648.434  |
| AF134401  | 2227.161  | 2600.587  |
| NM_020151 | 10720.589 | 12192.971 |
| NM_005891 | 37470.176 | 37477.996 |
| NM_001645 | 2238.678  | 2653.939  |
| NM_003956 | 2353.521  | 2964.509  |
| M33197    | 55157.758 | 59812.281 |
| NM_003500 | 4349.655  | 4821.723  |
| NM_014317 | 2369.717  | 2814.024  |
| L09234    | 7741.395  | 8058.182  |
| NM_000059 | 1219.363  | 1120.967  |
| AK026740  | 919.084   | 819.388   |
| NM_017881 | 2675.231  | 2633.251  |
| M33197    | 57986.441 | 63788.531 |
| NM_017634 | 4121.433  | 4534.937  |
| NM_000813 | 862.261   | 515.638   |
| NM_018896 | 1497.098  | 1159.891  |
| AJ300465  | 1134.234  | 902.251   |

|           |           |           |
|-----------|-----------|-----------|
| AL080170  | 684.581   | 842.812   |
| NM_000542 | 1598.567  | 1183.422  |
| NM_014625 | 151.244   | 234.958   |
| NM_006851 | 199.911   | 263.808   |
| H99588    | 2108.665  | 3593.173  |
| X00588    | 1661.655  | 1729.045  |
| AI359037  | 3273.075  | 3733.858  |
| J04513    | 559.576   | 419.278   |
| BI754285  | 939.779   | 657.329   |
| X15998    | 5049.716  | 3017.33   |
| NM_001883 | 2846.076  | 2102.502  |
| NM_004628 | 1270.174  | 1951.349  |
| L31785    | 586.277   | 368.254   |
| H-M 69043 | 1673.935  | 1043.271  |
| AF077374  | 1060.625  | 725.267   |
| U43901    | 473.67    | 447.96    |
| X59065    | 568.498   | 570.662   |
| M59828    | 4077.208  | 3817.362  |
| AF309653  | 1073.055  | 1032.104  |
| NM_002620 | 5083.42   | 5095.928  |
| S79267    | 289.785   | 360.409   |
| NM_003784 | 5323.497  | 5554.613  |
| NM_000195 | 11532.221 | 14968.317 |
| NM_005445 | 6219.751  | 7538.52   |
| NM_003219 | 1393.249  | 2685.917  |
| NM_006709 | 2362.752  | 2954.436  |
| NM_000612 | 3244.29   | 2875.742  |
| NM_004257 | 12600.182 | 11005.572 |
| NM_000683 | 1165.146  | 673.93    |
| NM_003629 | 1996.757  | 1078.315  |
| NM_005901 | 3574.81   | 1946.157  |
| NM_004248 | 1249.579  | 1146.264  |
| NM_000959 | 422.763   | 704.882   |
| NM_001313 | 886.923   | 1004.103  |
| NM_004796 | 631.198   | 459.95    |
| NM_000435 | 3461.534  | 2473.135  |
| NM_001842 | 27292.57  | 17946.734 |
| NM_003459 | 2221.26   | 2010.505  |
| AL354615  | 296.043   | 257.399   |
| NM_013349 | 15025.684 | 24184.871 |
| NM_003705 | 1236.665  | 2190.384  |
| NM_006861 | 831.83    | 1543.655  |
| NM_005829 | 762.975   | 1673.431  |
| NM_000466 | 884.756   | 1657.668  |
| NM_015908 | 6030.729  | 8597.325  |
| AK022600  | 3197.865  | 2922.162  |
| AK023142  | 1251.025  | 1191.495  |
| U61740    | 10798.872 | 8533.441  |
| NM_006409 | 43036.477 | 48678.652 |
| AB049054  | 2569.332  | 1524.059  |
| NM_015071 | 950.127   | 590.011   |
| NM_013227 | 1671.974  | 828.458   |
| Z83803    | 668.958   | 744.44    |

|             |           |           |
|-------------|-----------|-----------|
| X86400      | 1758.696  | 2097.714  |
| NM_00081C   | 1092.186  | 1147.402  |
| AF069307    | 2598.193  | 3358.824  |
| NM_006917   | 961.398   | 571.727   |
| M33197      | 889.581   | 1226.784  |
| AB011146    | 2057.872  | 2557.684  |
| NM_00532E   | 9461.26   | 11180.675 |
| NM_01406E   | 1090.495  | 898.086   |
| AB035130    | 1424.49   | 1153.075  |
| NM_00335E   | 2130.846  | 2090.784  |
| M33197      | 39778.746 | 37760.305 |
| AF119917    | 466.256   | 516.324   |
| NM_01791E   | 1010.155  | 1111.476  |
| AK021513    | 542.775   | 747.727   |
| NM_00357E   | 2253.506  | 1801.604  |
| AL049283    | 2253.93   | 1845.591  |
| M33197      | 50149.918 | 53871.656 |
| NM_002401   | 22732.225 | 20528.441 |
| NM_001274   | 1838.33   | 1581.363  |
| NM_00391E   | 689.623   | 751.674   |
| NM_002227   | 2326.803  | 1988.773  |
| NM_00719E   | 1987.857  | 2581.724  |
| NM_00624E   | 4306.286  | 4332.854  |
| M33197      | 60206.785 | 62259.762 |
| AJ011129    | 3537.388  | 2717.322  |
| NM_00103E   | 859.479   | 1042.265  |
| NM_006387   | 3930.174  | 4594.985  |
| NM_00564E   | 3972.542  | 4004.993  |
| NM_00663E   | 3990.661  | 4274.247  |
| NM_00169E   | 1005.677  | 1270.917  |
| BI767871    | 2316.707  | 2562.258  |
| AA418907    | 767.836   | 819.132   |
| AA115473    | 2908.904  | 2838.096  |
| AA872397    | 5473.135  | 4835.271  |
| AA709414    | 3556.957  | 3393.453  |
| D12676      | 2669.426  | 2490.158  |
| BC012593    | 1266.79   | 1212.768  |
| NM_00093E   | 38786.984 | 34062.875 |
| NM_00429E   | 12936.241 | 12156.082 |
| H-X 02812 I | 2751.605  | 2500.114  |
| U75898      | 2803.583  | 2321.055  |
| M29039      | 935.874   | 1078.886  |
| M59815      | 671.856   | 685.16    |
| AK075081    | 3181.256  | 2956.549  |
| NM_00089E   | 6707.067  | 6144.602  |
| NM_00382C   | 34155.77  | 26002.268 |
| NM_01591E   | 6569.431  | 4734.079  |
| M33197      | 62376.793 | 58271.078 |
| NM_01651E   | 7328.604  | 7558.776  |
| NM_00618E   | 16355.503 | 17390.822 |
| NM_01480C   | 1255.447  | 1490.151  |
| NM_001557   | 970.754   | 1179.642  |
| AF147311    | 4304.43   | 4916.241  |

|           |           |           |
|-----------|-----------|-----------|
| AF027205  | 11500.666 | 9935.575  |
| AF075012  | 1489.591  | 1561.18   |
| NM_00157C | 964.812   | 751.204   |
| NM_01565E | 337.732   | 420.169   |
| NM_00058E | 2239.19   | 1245.838  |
| NM_01654E | 12637.546 | 8318.378  |
| NM_01788E | 1611.792  | 1664.482  |
| NM_014397 | 606.124   | 758.319   |
| AB023182  | 417.885   | 298.521   |
| NM_003607 | 477.523   | 683.304   |
| NM_00657E | 711.592   | 1277.947  |
| NM_013254 | 1609.987  | 2389.415  |
| NM_000437 | 5289.8    | 10962.749 |
| AB046819  | 4203.785  | 6444.016  |
| NM_00609C | 2427.77   | 3334.922  |
| NM_00290C | 6787.159  | 7262.914  |
| NM_00491C | 997.578   | 884.84    |
| AB013452  | 459.446   | 357.149   |
| M93107    | 3118.124  | 3441.026  |
| BC001479  | 6186.073  | 6057.826  |
| NM_002461 | 16033.949 | 11474.962 |
| NM_005771 | 4306.321  | 3119.761  |
| AB032986  | 19548.025 | 14374.774 |
| NM_01752E | 21092.414 | 12753.57  |
| NM_01603E | 5776.693  | 4343.046  |
| NM_014324 | 39286.059 | 52155.664 |
| NM_001687 | 12111.534 | 15421.271 |
| AK026374  | 1834.014  | 2048.742  |
| NM_00116E | 1537.188  | 1009.827  |
| AK024648  | 6480.954  | 4709.377  |
| AB037761  | 1438.241  | 2324.567  |
| NM_01400E | 15586.355 | 22375.551 |
| NM_014731 | 2451.477  | 4255.437  |
| AF035191  | 5314.758  | 8055.39   |
| NM_00405E | 904.403   | 1616.307  |
| NM_004527 | 885.211   | 1356.375  |
| NM_01206E | 4671.818  | 6748.649  |
| AK026717  | 481.098   | 275.388   |
| AJ010482  | 1281.037  | 1205.951  |
| NM_00089E | 541.188   | 776.053   |
| AB040672  | 2813.448  | 2359.623  |
| NM_00219E | 3063.23   | 3706.724  |
| NM_005491 | 3147.779  | 1988.762  |
| NM_00386E | 5590.433  | 4160.989  |
| X63417    | 4417.092  | 3813.99   |
| S94539    | 17067.018 | 11092.306 |
| NM_00640E | 1019.756  | 832.272   |
| NM_00578E | 2206.799  | 1947.674  |
| NM_01824E | 1823.467  | 1381.432  |
| AK001695  | 5698.59   | 3870.446  |
| AB040898  | 636.755   | 876.778   |
| AB031547  | 664.199   | 720.04    |
| NM_00397C | 297.565   | 913.175   |

|           |           |           |
|-----------|-----------|-----------|
| NM_002131 | 48718.145 | 47929.379 |
| NM_017927 | 1544.606  | 1413.262  |
| M33197    | 57162.527 | 59985.77  |
| NM_001203 | 2558.775  | 2351.015  |
| NM_004799 | 12529.142 | 9173.978  |
| NM_006733 | 836.522   | 1041.172  |
| NM_014047 | 12390.194 | 12713.437 |
| AK022901  | 1660.916  | 1460.7    |
| M33197    | 58256.375 | 57761.238 |
| AF037332  | 3938.995  | 2856.789  |
| NM_014571 | 617.403   | 459.642   |
| NM_006052 | 1224.271  | 1196.148  |
| AB040912  | 6553.795  | 6678.968  |
| NM_003871 | 536.868   | 438.471   |
| NM_000813 | 924.932   | 1243.609  |
| NM_018896 | 2220.577  | 1985.87   |
| AJ300465  | 1658.883  | 1426.287  |
| X86400    | 2244.824  | 2131.266  |
| NM_000810 | 1320.297  | 1184.512  |
| AF069307  | 3071.481  | 3220.121  |
| M33197    | 54388.285 | 58322.879 |
| U92978    | 2595.336  | 2906.122  |
| NM_005738 | 479.96    | 706.749   |
| NM_014488 | 1185.575  | 1477.37   |
| NM_013389 | 4435.812  | 5091.045  |
| AB014567  | 605.408   | 663.123   |
| AK022817  | 1344.035  | 1230.939  |
| NM_018034 | 5655.337  | 4395.351  |
| M33197    | 52997.824 | 61391.289 |
| AB037831  | 1358.047  | 1620.385  |
| NM_012103 | 13935.682 | 15030.67  |
| AL122077  | 11220.668 | 10731.043 |
| NM_014632 | 1354.771  | 905.948   |
| NM_006422 | 1463.962  | 1201.974  |
| BE789195  | 599.16    | 858.288   |
| NM_016946 | 2676.896  | 2433.075  |
| M33197    | 55290.941 | 62216.656 |
| NM_007259 | 3582.557  | 3311.304  |
| NM_018402 | 703.782   | 676.695   |
| NM_018009 | 820.944   | 772.572   |
| M33197    | 49747.48  | 53317.238 |
| NM_002401 | 30453.912 | 25444.141 |
| NM_001274 | 2117.325  | 1807.448  |
| NM_003913 | 826.151   | 554.962   |
| NM_002227 | 2949.028  | 2314.562  |
| NM_007199 | 1705.158  | 1975.281  |
| AB014530  | 6662.491  | 6989.593  |
| M33197    | 53436.59  | 56773.852 |
| NM_005989 | 3834.128  | 3606.339  |
| AB014607  | 4208.56   | 3590.66   |
| AF134401  | 1812.145  | 2080.532  |
| NM_020151 | 8789.158  | 7814.08   |
| NM_005891 | 30957.014 | 28645.85  |

|           |           |           |
|-----------|-----------|-----------|
| AK022496  | 497.879   | 778.023   |
| AB042636  | 386.779   | 499.283   |
| AB033035  | 474.34    | 666.428   |
| NM_002883 | 1520.953  | 2161.321  |
| NM_019012 | 297.547   | 300.559   |
| NM_016150 | 1994.466  | 1805.184  |
| U57058    | 532.133   | 524.404   |
| AL137452  | 946.846   | 1108.195  |
| NM_004312 | 36077.871 | 28552.453 |
| NM_001347 | 3374.128  | 4575.001  |
| AK024549  | 16470.471 | 17255.516 |
| NM_006338 | 11314.92  | 9943.399  |
| NM_007164 | 6898.878  | 5312.473  |
| NM_000261 | 692.658   | 663.076   |
| NM_002606 | 2333.084  | 1474.671  |
| NM_002570 | 844.363   | 567.062   |
| NM_003183 | 980.541   | 850.372   |
| NM_003585 | 572.997   | 573.921   |
| NM_019851 | 1312.84   | 1383.873  |
| NM_003238 | 1449.112  | 1112.968  |
| NM_001363 | 822.622   | 1264.401  |
| NM_014096 | 827.179   | 1791.176  |
| NM_005706 | 2098.119  | 3325.381  |
| NM_001261 | 1262.353  | 1713.773  |
| NM_001977 | 189.046   | 597.526   |
| NM_007219 | 5128.739  | 6013.606  |
| AK026854  | 1827.366  | 1601.639  |
| NM_001269 | 2341.063  | 2381.675  |
| NM_002506 | 426.46    | 630.757   |
| NM_004906 | 1303.883  | 943.051   |
| NM_012447 | 5381.883  | 7435.697  |
| NM_006366 | 6807.163  | 6088.86   |
| AK027013  | 18150.48  | 20791.59  |
| NM_001344 | 15642.287 | 20683.479 |
| NM_018294 | 1892.95   | 2082.444  |
| AL389934  | 3377.006  | 2908.591  |
| NM_004330 | 3415.84   | 3325.768  |
| AF151802  | 5127.865  | 4945.085  |
| AB006746  | 697.529   | 455.232   |
| NM_006498 | 2624.402  | 1781.735  |
| AB023233  | 1067.863  | 686.711   |
| NM_004369 | 1300.073  | 1044.162  |
| NM_004370 | 378.212   | 216.515   |
| NM_018130 | 1892.688  | 1929.077  |
| AB006630  | 1290.902  | 1172.326  |
| NM_016155 | 706.285   | 1149.399  |
| NM_001224 | 3350.024  | 4049.571  |
| NM_017811 | 3052.628  | 3480.05   |
| NM_001569 | 1034.058  | 975.891   |
| AK023284  | 937.004   | 1139.788  |
| NM_005101 | 1839.099  | 1793.299  |
| AF130060  | 28490.605 | 25833.953 |
| NM_007057 | 10023.428 | 8749.667  |



|           |           |           |
|-----------|-----------|-----------|
| NM_00164E | 2169.402  | 2213.233  |
| NM_00395E | 2361.62   | 2695.883  |
| M33197    | 53541.656 | 57810.977 |
| NM_00350C | 4148.765  | 4559.111  |
| NM_014317 | 2584.768  | 2787.254  |
| L09234    | 7640.513  | 7334.539  |
| NM_00005E | 1445.555  | 929.159   |
| AK026740  | 906.73    | 710.201   |
| NM_017881 | 3077.105  | 2545.454  |
| M33197    | 54173.668 | 63803.211 |
| NM_017634 | 3872.704  | 4126.822  |
| NM_017743 | 1577.718  | 1654.206  |
| NM_00030C | 3128.277  | 2995.664  |
| M33197    | 59241.145 | 60662.348 |
| AV756917  | 4634.6    | 4332.223  |
| NM_01838C | 9897.523  | 9822.724  |
| AK001442  | 1171.431  | 1207.129  |
| NM_01207C | 1856.822  | 2577.305  |
| NM_01903E | 1122.635  | 1011.564  |
| AF183423  | 3842.571  | 3772.696  |
| M33197    | 919.819   | 1043.074  |
| AB011146  | 2003.827  | 1853.348  |
| NM_00532E | 10978.673 | 9476.89   |
| NM_00728E | 408.522   | 570.477   |
| NM_01406E | 1216.945  | 1161.854  |
| AB035130  | 1805.047  | 1292.747  |
| NM_00335E | 1917.763  | 1750.711  |
| M33197    | 42279.461 | 39515.191 |
| AF119917  | 756.115   | 748.288   |
| NM_01791E | 1216.27   | 754.18    |
| AL050097  | 482.493   | 891.213   |
| NM_00357E | 1847.039  | 1494.968  |
| AL049283  | 1962.223  | 2199.416  |
| NM_002214 | 907.496   | 803.974   |
| AF005258  | 711.832   | 575.49    |
| NM_000887 | 1271.99   | 1719.269  |
| M33197    | 69572.664 | 64292.945 |
| X99659    | 40551.574 | 33360.184 |
| NM_01541E | 4212.242  | 3499.301  |
| NM_002731 | 604.593   | 551.385   |
| NM_00389E | 2168.042  | 2314.925  |
| X99662    | 3448.545  | 4006.39   |
| NM_00347E | 24959.752 | 25431.262 |
| NM_01432E | 2292.25   | 2302.647  |
| M33197    | 52405.238 | 51042.109 |
| NM_00601E | 43069.664 | 36953.598 |
| NM_001242 | 1852.966  | 1813.69   |
| NM_001882 | 312.16    | 519.626   |
| NM_014891 | 6806.272  | 7144.912  |
| NM_013392 | 5753.701  | 4954.237  |
| M33197    | 53647.367 | 53758.715 |
| NM_00323E | 686.995   | 522.052   |
| AF052692  | 1042.467  | 969.861   |

|           |           |           |
|-----------|-----------|-----------|
| NM_000177 | 5289.412  | 5505.212  |
| NM_003387 | 6366.659  | 5916.662  |
| U60665    | 920.159   | 937.702   |
| NM_005507 | 40859.793 | 31023.939 |
| AL080133  | 5343.692  | 6215.925  |
| AY014403  | 1055.842  | 707.608   |
| NM_006912 | 3555.782  | 2452.154  |
| X12534    | 1222.818  | 832.345   |
| NM_018951 | 3298.525  | 4870.66   |
| NM_01432E | 3118.448  | 4294.839  |
| NM_00320E | 1126.276  | 916.215   |
| AB002324  | 1429.626  | 1342.643  |
| NM_005131 | 747.71    | 848.269   |
| NM_00705E | 874.38    | 596.121   |
| AF083383  | 1665.75   | 1609.326  |
| NM_00692E | 2076.511  | 1721.859  |
| NM_00489C | 38975.605 | 43845.074 |
| AK023181  | 1885.536  | 1644.763  |
| NM_004294 | 1124.392  | 991.722   |
| NM_005051 | 11886.788 | 9550.971  |
| NM_00196E | 11009.52  | 7311.354  |
| D17259    | 45701.398 | 61446.371 |
| AF264627  | 27186.746 | 14875.948 |
| NM_018142 | 2336.123  | 2264.4    |
| NM_01765E | 760.068   | 816.905   |
| AL109695  | 4305.418  | 3713.058  |
| NM_00216E | 1065.29   | 1301.968  |
| NM_00445E | 423.955   | 600.344   |
| NM_005642 | 1965.039  | 1870.669  |
| NM_01810E | 728.022   | 660.949   |
| AK023452  | 2333.17   | 1822.745  |
| NM_000332 | 845.125   | 998.425   |
| AK022215  | 1431.372  | 1169.114  |
| NM_001527 | 8175.713  | 5450.549  |
| AK025269  | 5420.666  | 3776.919  |
| NM_00143E | 279.869   | 311.682   |
| AB040971  | 1054.65   | 880.024   |
| NM_006562 | 3181.956  | 2694.971  |
| NM_01845E | 2371.524  | 2174.805  |
| NM_019021 | 388.039   | 482.666   |
| AK002183  | 443.928   | 442.458   |
| NM_01899E | 474.071   | 594.673   |
| AK026883  | 1247.638  | 1143.87   |
| NM_01435C | 6188.675  | 8429.164  |
| U00925    | 3115.233  | 2717.354  |
| AL390185  | 1235.91   | 935.629   |
| AF086235  | 3836.25   | 2521.478  |
| AF143886  | 908.006   | 789.981   |
| AK025975  | 1325.912  | 970.823   |
| AK025583  | 17695.682 | 13515.958 |
| NM_014664 | 936.8     | 850.673   |
| AL109788  | 512.754   | 455.288   |
| NM_014952 | 45815.66  | 43463.238 |

|           |           |           |
|-----------|-----------|-----------|
| NM_00522E | 1239.567  | 1175.004  |
| NM_002354 | 1660.296  | 1681.271  |
| NM_000179 | 2014.586  | 1028.022  |
| AF062739  | 2019.841  | 2262.735  |
| NM_006602 | 2613.461  | 2431.789  |
| M33197    | 52097.848 | 54366.262 |
| AL079314  | 6535.513  | 7211.151  |
| NM_001260 | 1551.826  | 1642.56   |
| NM_001950 | 4019.446  | 3969.49   |
| AK026364  | 1673.769  | 1648.678  |
| NM_018117 | 1242.1    | 1024.27   |
| NM_006999 | 420.49    | 411.188   |
| NM_006289 | 394.674   | 326.048   |
| M33197    | 52988.488 | 55078.957 |
| NM_004331 | 4906.276  | 4861.179  |
| NM_015999 | 513.42    | 385.998   |
| NM_015703 | 5534.04   | 4658.314  |
| AB018337  | 1666.751  | 1672.894  |
| NM_014489 | 685.25    | 440.484   |
| AK025273  | 3557.319  | 2841.047  |
| M33197    | 50346.289 | 53559.207 |
| NM_002205 | 3950.536  | 3471.02   |
| M33197    | 58394.074 | 53294.551 |
| NM_001839 | 725.562   | 624.845   |
| NM_001911 | 44466.633 | 28194.461 |
| NM_000537 | 486.247   | 539.409   |
| NM_006503 | 1160.824  | 1065.795  |
| M33197    | 1358.433  | 1415.439  |
| AB020698  | 1382.367  | 1695.353  |
| U68382    | 3094.824  | 3474.363  |
| NM_003969 | 2610.308  | 2361.276  |
| NM_004651 | 2337.443  | 1945.504  |
| NM_003363 | 744.378   | 711.48    |
| M33197    | 56289.266 | 49230.66  |
| NM_017569 | 3632.031  | 2900.486  |
| NM_002909 | 2143.901  | 1520.914  |
| AK024480  | 1148.9    | 900.15    |
| Y13871    | 12036.288 | 10814.666 |
| AL137725  | 10435.035 | 8715.897  |
| AJ008151  | 14774.195 | 12807.594 |
| AK024149  | 889.503   | 1336.859  |
| AK023094  | 429.713   | 253.097   |
| M33197    | 55210.898 | 56130.582 |
| NM_004091 | 3814.932  | 3216.365  |
| X74070    | 55652.453 | 59097.688 |
| AF027219  | 1554.75   | 1512.941  |
| NM_006333 | 3892.15   | 4509.486  |
| M33197    | 54006.582 | 56671.484 |
| NM_002899 | 5766.836  | 5160.538  |
| AK022749  | 4075.343  | 3383.811  |
| BF031409  | 5675.777  | 5215.293  |
| NM_007043 | 1744.202  | 1825.266  |
| BE378791  | 789.382   | 758.362   |

|           |           |           |
|-----------|-----------|-----------|
| AF087962  | 1350.534  | 1410.735  |
| AL050197  | 979.195   | 1244.564  |
| AL110190  | 2711.893  | 3556.27   |
| AJ001893  | 832.492   | 580.406   |
| NM_014819 | 5031.75   | 4409.909  |
| NM_017609 | 237.97    | 149.023   |
| AF086040  | 696.865   | 726.737   |
| AB032988  | 669.011   | 669.365   |
| AK023559  | 4421.105  | 2904.916  |
| AB037859  | 43597.188 | 53400.293 |
| AL049233  | 1368.282  | 887.353   |
| NM_017699 | 2311.974  | 1440.198  |
| AL050166  | 2201.756  | 1577.37   |
| NM_003602 | 634.767   | 709.22    |
| AF009258  | 9811.478  | 12195.437 |
| AF009305  | 357.003   | 481.857   |
| NM_006193 | 279.597   | 309.888   |
| AK021746  | 933.145   | 887.021   |
| AK001136  | 711.895   | 603.331   |
| AK021617  | 291.99    | 189.332   |
| AK021810  | 680.838   | 605.843   |
| AK026743  | 338.3     | 159.358   |
| AK025214  | 380.423   | 270.648   |
| AK025846  | 700.148   | 680.681   |
| AK026805  | 1898.673  | 1774.258  |
| AL389983  | 1187.063  | 948.812   |
| AJ008159  | 151.767   | 467.302   |
| AK000995  | 640.19    | 708.65    |
| NM_014579 | 4911.069  | 4811.504  |
| AF147306  | 274.437   | 275.881   |
| AF086267  | 262.947   | 557.115   |
| NM_012183 | 1262.885  | 1159.821  |
| AK026785  | 434.738   | 744.981   |
| AK001938  | 250.625   | 540.546   |
| NM_018225 | 7245.5    | 6484.817  |
| AK025534  | 522.991   | 463.981   |
| AF091526  | 443.81    | 402.162   |
| X79986    | 542.81    | 416.435   |
| NM_003523 | 3076.222  | 2808.099  |
| NM_016503 | 591.819   | 702.568   |
| AK056351  | 3036.365  | 2667.515  |
| NM_014690 | 1901.404  | 2418.089  |
| NM_017699 | 1111.734  | 1756.143  |
| AF086490  | 337.062   | 537.616   |
| AF131738  | 17250     | 17379.275 |
| AK021666  | 2157.144  | 2214.002  |
| AK024081  | 220.798   | 270.1     |
| AK024825  | 1805.252  | 1656.178  |
| AF086317  | 2899.258  | 3196.935  |
| U16850    | 2619.258  | 4493.163  |
| AL390178  | 345.81    | 472.727   |
| NM_005383 | 198.104   | 336.309   |
| Z36806    | 602.107   | 534.831   |

|           |           |           |
|-----------|-----------|-----------|
| U94388    | 1077.759  | 1124.58   |
| NM_012322 | 3888.475  | 4063.201  |
| M33197    | 52792.43  | 55185.828 |
| NM_004889 | 35477.977 | 33951.746 |
| AK025314  | 1919.792  | 1519.543  |
| NM_002109 | 4069.971  | 3437.747  |
| NM_000984 | 62535.461 | 65547.367 |
| NM_002453 | 8158.439  | 7165.711  |
| AK026721  | 2036.577  | 2146.049  |
| AK023027  | 1715.461  | 1598.883  |
| AK025598  | 655.965   | 725.837   |
| AB002348  | 40314.27  | 29738.68  |
| M33197    | 31169.078 | 27264.727 |
| AK026043  | 3851.032  | 4632.745  |
| NM_005006 | 5974.27   | 6741.515  |
| AK027033  | 3700.611  | 3746.608  |
| NM_000106 | 1413.747  | 1325.662  |
| NM_003000 | 10080.201 | 11645.438 |
| NM_002495 | 17825.637 | 14361.205 |
| M33197    | 57877.504 | 52173.109 |
| NM_016284 | 3727.722  | 3059.38   |
| NM_014593 | 3158.664  | 3673.112  |
| NM_006833 | 8112.276  | 9241.759  |
| NM_012257 | 1284.015  | 1183.821  |
| U37690    | 15160.974 | 15924.319 |
| NM_005120 | 1190.565  | 1148.228  |
| AB029012  | 17444.184 | 13200.466 |
| M33197    | 56709.086 | 57454.527 |
| AJ010278  | 671.845   | 298.922   |
| NM_006299 | 1954.279  | 1740.65   |
| AF060936  | 5293.58   | 4342.385  |
| NM_018167 | 832.748   | 740.99    |
| AL050088  | 1482.984  | 1224.002  |
| AK024939  | 3170.414  | 2996.088  |
| AK001561  | 2630.961  | 1804.625  |
| AB007880  | 2724.569  | 2457.798  |
| AK024950  | 822.316   | 794.546   |
| M33197    | 57982.48  | 58014.773 |
| NM_014146 | 13907.962 | 14073.884 |
| AF147356  | 573.185   | 622.154   |
| NM_018843 | 6302.154  | 6432.158  |
| M33197    | 54674.371 | 56946.758 |
| AL109782  | 6062.834  | 6122.212  |
| AF086225  | 820.311   | 1001.109  |
| NM_005844 | 3573.969  | 3055.451  |
| AK024941  | 5150.658  | 5250.485  |
| AF056434  | 490.506   | 596.493   |
| M33197    | 40364.645 | 35803.664 |
| AK025489  | 1618.744  | 1531.945  |
| AL390152  | 1720.916  | 1502.289  |
| M33197    | 71059.805 | 63950.617 |
| NM_018126 | 1587.359  | 1623.367  |
| AK024506  | 3224.034  | 2736.734  |

|           |           |           |
|-----------|-----------|-----------|
| AJ008121  | 7293.646  | 7807.399  |
| AJ008153  | 828.734   | 888.802   |
| NM_005830 | 2893.491  | 2949.901  |
| AL389876  | 875.152   | 1010.927  |
| AK022120  | 493.105   | 389.945   |
| Z70762    | 391.032   | 455.358   |
| BF037206  | 1372.488  | 1492.299  |
| AK021474  | 9034.613  | 9662.063  |
| AK023642  | 732.841   | 774.754   |
| AW511510  | 288.21    | 715.279   |
| U52827    | 613.25    | 647.264   |
| AL049466  | 5589.501  | 7300.609  |
| AB037802  | 947.433   | 1000.052  |
| U17623    | 561.933   | 766.164   |
| AL137450  | 2771.644  | 3496.978  |
| AK023058  | 1332.669  | 1210.283  |
| NM_012064 | 3365.705  | 2984.66   |
| AK001460  | 503.181   | 512.798   |
| AK092508  | 1801.838  | 1811.021  |
| AK027111  | 29032.477 | 27952.768 |
| NM_003518 | 202.83    | 587.178   |

|           |           |           |
|-----------|-----------|-----------|
| NM_014179 | 635.947   | 693.158   |
| AF086326  | 4197.371  | 5873.417  |
| M33197    | 57851.352 | 57420.281 |
| AL080057  | 1038.847  | 1299.366  |
| M33197    | 55035.504 | 53106.863 |
| AK025948  | 1280.002  | 1731.811  |
| AJ238555  | 405.815   | 389.273   |
| AL353948  | 9770.564  | 9192.398  |
| AL122043  | 946.804   | 1034.108  |
| M33197    | 51579.043 | 50578.129 |
| AK025869  | 4212.933  | 3729.038  |
| M33197    | 52990.777 | 43806.848 |
| AF056430  | 1369.609  | 1405.654  |
| NM_014906 | 1128.906  | 1145.909  |
| AF009291  | 1734.077  | 1827.194  |
| M33197    | 56676.574 | 56558.223 |
| NM_018055 | 2143.492  | 1896.764  |
| AK002199  | 871.476   | 722.022   |
| AK021662  | 768.866   | 916.353   |
| AK001038  | 423.814   | 582.012   |
| AK001802  | 518.656   | 532.852   |
| AK021469  | 1425.098  | 1495.919  |
| AK021706  | 1812.565  | 1303.242  |
| M33197    | 51096.496 | 53098.758 |
| AK025161  | 350.68    | 331.816   |
| AK026259  | 15611.15  | 13444.147 |
| AJ008115  | 19572.355 | 13686.067 |
| AF083125  | 1016.474  | 1225.873  |
| M33197    | 59101.684 | 57634.477 |
| AK022970  | 1127.252  | 1113.026  |
| AK026212  | 1206.728  | 1193.001  |
| AF086222  | 556.676   | 657.92    |
| AF086415  | 4350.907  | 3725.833  |
| M33197    | 51742.703 | 46886.816 |
| AK024470  | 1860.539  | 1591.086  |
| NM_017935 | 1031.678  | 980.062   |
| NM_004226 | 1346.572  | 1271.692  |
| AK023400  | 634.421   | 451.77    |
| NM_006432 | 11405.109 | 8861.217  |
| AF025441  | 1829.41   | 2132.385  |
| U62823    | 3606.438  | 3444.859  |
| NM_003535 | 24001.012 | 21418.596 |
| AK026768  | 2624.171  | 2591.04   |
| M33197    | 66275.148 | 64535.711 |
| AK000852  | 20258.389 | 18875.08  |
| AF251188  | 5132.119  | 5026.666  |
| AK026418  | 7924.985  | 6493.629  |
| AF086194  | 47255.797 | 38581.277 |
| AK026811  | 2407.762  | 2487.715  |
| M33197    | 55467.527 | 53401.055 |
| AK023633  | 2106.642  | 1881.102  |
| NM_006179 | 1398.479  | 617.512   |
| AL360165  | 2000.912  | 1667.054  |

|           |           |           |
|-----------|-----------|-----------|
| M33197    | 49310.633 | 45833.621 |
| AJ008132  | 4035.48   | 3552.346  |
| NM_005281 | 2571.468  | 2080.834  |
| NM_005549 | 1887.496  | 1301.801  |
| M33197    | 68122.398 | 55802.883 |
| U12129    | 5475.211  | 4740.442  |
| S81242    | 53054.969 | 50030.918 |
| AF230801  | 1208.545  | 995.679   |
| M33197    | 61008.586 | 59210.211 |
| NM_002509 | 5559.554  | 5506.456  |
| U38442    | 3204.167  | 3637.21   |
| AF110136  | 1167.541  | 982.219   |
| AK026706  | 3519.819  | 2284.772  |
| AB007936  | 30963.877 | 21197.977 |
| D28391    | 25432.732 | 18766.811 |
| M33197    | 43101.09  | 34155.648 |
| AK026859  | 592.601   | 610.024   |
| D86961    | 496.11    | 652.77    |
| AJ227896  | 4124.303  | 3097.639  |
| L32841    | 5879.212  | 5554.514  |
| M33197    | 49384.176 | 44769.727 |
| AF131770  | 1500.678  | 1525.415  |
| CY3Cy5    | 9354.821  | 1030.088  |
| AW167715  | 689.772   | 1016.437  |
| AA424735  | 1151.101  | 1377.161  |
| U78294    | 454.328   | 542.818   |
| AA171613  | 327.146   | 307.013   |
| BI760394  | 1234.019  | 1160.551  |
| AA555216  | 623.776   | 483.794   |
| U09117    | 12467.606 | 14091.007 |
| M21054    | 683.323   | 700.661   |
| M18468    | 1271.324  | 1443.712  |
| H66070    | 12112.283 | 11724.616 |
| AA164741  | 3426.147  | 3552.493  |
| AI189375  | 1226.808  | 1446.207  |
| AI978885  | 4164.187  | 4002.861  |
| AK054960  | 14349.677 | 15890.581 |
| L15344    | 3633.207  | 3966.337  |
| SR5       | 4659.9    | 4763.055  |
| SR7       | 5578.827  | 46627.23  |
| SR9       | 25746.32  | 7159.099  |
| CY3Cy5    | 7859.477  | 599.753   |
| NM_014589 | 3715.696  | 4008.316  |
| NM_014369 | 7617.492  | 8060.171  |
| NM_000923 | 469.496   | 615.872   |
| NM_006453 | 867.909   | 1126.224  |
| NM_018099 | 742.202   | 783.267   |
| AL390078  | 442.152   | 593.542   |
| NM_004039 | 1150.167  | 1338.193  |
| NM_015989 | 856.464   | 821.172   |
| NM_006549 | 829.67    | 931.197   |
| NM_014959 | 1977.234  | 2189.824  |
| NM_003992 | 3462.355  | 3982.81   |

|           |           |           |
|-----------|-----------|-----------|
| AF279265  | 3797.412  | 4583.903  |
| NM_005213 | 44493.328 | 41214.996 |
| AB040914  | 1314.158  | 1405.39   |
| NM_002997 | 7337.951  | 8200.792  |
| NM_002379 | 13194.037 | 14129.482 |
| AB007929  | 10187.289 | 12057.714 |
| NM_004579 | 5283.405  | 5884.917  |
| AA203126  | 4297.819  | 5494.224  |
| L12347    | 5724.928  | 6079.097  |
| NM_001622 | 5546.776  | 5732.446  |
| Z36788    | 2275.363  | 2419.892  |
| NM_018477 | 3532.958  | 4373.218  |
| U20536    | 1643.909  | 1678.863  |
| NM_004853 | 4404.164  | 4104.681  |
| NM_001494 | 13411.481 | 14280.365 |
| NM_017707 | 384.714   | 427.378   |
| NM_004206 | 1290.726  | 1491.13   |
| NM_004603 | 9071.472  | 9471.22   |
| AK022849  | 1916.392  | 2314.142  |
| AF040964  | 3948.796  | 5003.243  |
| NM_001939 | 4817.565  | 4891.16   |
| NM_003279 | 7766.928  | 7671.234  |
| AB014599  | 4902.995  | 4574.134  |
| NM_004393 | 1093.066  | 1167.291  |
| AB018345  | 588.085   | 738.031   |
| NM_005832 | 791.073   | 663.156   |
| AW407841  | 2246.333  | 2088.193  |
| U15197    | 585.468   | 510.048   |
| NM_001879 | 4686.278  | 5153.62   |
| AF264014  | 10455.905 | 13718.279 |
| L09098    | 721.982   | 1043.694  |
| NM_004155 | 540.811   | 788.693   |
| NM_001831 | 1451.129  | 1721.162  |
| NM_000137 | 5496.776  | 6477.103  |
| NM_012102 | 3533.235  | 3952.761  |
| NM_005017 | 13098.792 | 14173.437 |
| AF163572  | 6944.739  | 7554.912  |
| NM_000897 | 3746.765  | 3785.076  |
| NM_000487 | 758.392   | 558.706   |
| NM_006411 | 15928.203 | 15522.946 |
| NM_014182 | 2365.858  | 2669.529  |
| AB040884  | 512.836   | 654.874   |
| NM_000492 | 10150.887 | 11660.073 |
| NM_012089 | 1433.529  | 1595.667  |
| NM_001170 | 3002.597  | 2448.51   |
| AL137716  | 1062.061  | 898.81    |
| NM_004696 | 1233.685  | 1156.906  |
| NM_014342 | 1698.059  | 1873.773  |
| Z50169    | 828.391   | 647.761   |
| AB043997  | 1518.402  | 1873.386  |
| AF097645  | 264.347   | 579.327   |
| Z70704    | 750.714   | 853.865   |
| NM_014363 | 1478.644  | 1245.789  |

|           |           |           |
|-----------|-----------|-----------|
| NM_000557 | 2786.138  | 2929.15   |
| NM_001375 | 4037.885  | 3837.578  |
| NM_002312 | 1267.27   | 1180.699  |
| M20699    | 1351.841  | 1351.544  |
| NM_004774 | 5090.808  | 5070.359  |
| NM_016937 | 3324.672  | 3070.833  |
| NM_002690 | 3047.202  | 2731.91   |
| NM_012328 | 4106.27   | 4850.08   |
| NM_007341 | 1072.823  | 1114.145  |
| NM_016508 | 1243.302  | 1544.935  |
| NM_006456 | 7303.425  | 7098.732  |
| AK026062  | 17053.793 | 17828.672 |
| AF047002  | 18487.59  | 18838.506 |
| AL050082  | 2060.832  | 2589.823  |
| NM_006623 | 45092.973 | 52507.711 |
| NM_016588 | 1763.422  | 2087.394  |
| NM_003135 | 7304.196  | 7683.33   |
| L12347    | 1622.157  | 1394.088  |
| NM_001622 | 2511.397  | 2473.65   |
| Z36788    | 915.002   | 850.538   |
| NM_018477 | 2557.333  | 3042.837  |
| U20536    | 1109.392  | 1402.304  |
| AI298534  | 551.892   | 369.838   |
| AW167715  | 747.469   | 711.688   |
| AA424735  | 1583.177  | 1406.527  |
| U78294    | 623.772   | 652.349   |
| AA171613  | 353.597   | 423.311   |
| BI760394  | 2246.891  | 2369.854  |
| AA555216  | 555.427   | 595.063   |
| U09117    | 16581.307 | 15129.006 |
| M21054    | 500.224   | 818.365   |
| M18468    | 1641.083  | 1611.903  |
| H66070    | 16060.355 | 16827.879 |
| AA164741  | 3285.689  | 3160.987  |
| AI189375  | 1426.779  | 1443.173  |
| AI978885  | 3766.808  | 3651.072  |
| AK054960  | 13909.083 | 12440.794 |
| L15344    | 3376.246  | 3047.612  |
| NM_014470 | 428.678   | 292.706   |
| NM_001665 | 11630.625 | 13051.263 |
| NM_001879 | 1232.241  | 1105.637  |
| AF264014  | 5874.46   | 5968.968  |
| L09098    | 612.576   | 704.189   |
| NM_001831 | 802.587   | 899.073   |
| NM_014586 | 4070.123  | 4370.997  |
| NM_014366 | 8238.037  | 8324.194  |
| NM_000923 | 557.658   | 642.572   |
| NM_006453 | 935.346   | 1020.793  |
| NM_018096 | 793.63    | 849.488   |
| AL390078  | 909.868   | 1018.866  |
| NM_004036 | 2630.121  | 2526.756  |
| NM_015986 | 1032.828  | 1025.197  |
| NM_006546 | 999.306   | 900.724   |

|           |           |           |
|-----------|-----------|-----------|
| NM_01495  | 2341.343  | 2338.008  |
| NM_00399  | 4519.071  | 4209.9    |
| AF279265  | 3694.57   | 3989.835  |
| NM_00521  | 45268.461 | 39074.625 |
| AB040914  | 1562.61   | 1172.83   |
| NM_002997 | 7334.338  | 8002.239  |
| NM_00237  | 12960.501 | 15828.709 |
| AB007929  | 9361.038  | 12079.614 |
| NM_00457  | 6077.407  | 6339.12   |
| AA203126  | 4406.312  | 5034.576  |
| Z50169    | 362.227   | 415.97    |
| AB043997  | 1084.305  | 926.547   |
| NM_00485  | 4304.086  | 4877.654  |
| NM_001494 | 14424.419 | 14747.033 |
| NM_00420  | 1590.483  | 1756.033  |
| NM_00460  | 12149.455 | 13191.988 |
| AK022849  | 2097.769  | 2179.497  |
| AF040964  | 4388.237  | 4968.208  |
| NM_00193  | 4715.272  | 3888.906  |
| NM_00327  | 10274.116 | 7407.224  |
| AB014599  | 3742.139  | 3574.811  |
| NM_00439  | 1348.234  | 1316.215  |
| AB018345  | 755.076   | 1208.282  |
| NM_00583  | 829.15    | 745.774   |
| AW407841  | 2161.071  | 2612.844  |
| U15197    | 747.241   | 610.521   |
| AL050082  | 1398.295  | 1487.451  |
| NM_00662  | 34571.43  | 27362.641 |
| NM_01658  | 1344.118  | 1144.855  |
| NM_00313  | 6426.95   | 6443.298  |
| NM_000137 | 6034.007  | 6667.105  |
| NM_01210  | 4560.693  | 4679.754  |
| NM_005017 | 19801.715 | 18561.906 |
| AF163572  | 13039.806 | 12176.289 |
| NM_000897 | 5433.25   | 5564.279  |
| NM_000487 | 765.08    | 942.115   |
| NM_006411 | 18066.459 | 18696.387 |
| NM_01418  | 2080.499  | 2184.855  |
| AB040884  | 465.682   | 474.898   |
| NM_001170 | 3845.45   | 3215.48   |
| AL137716  | 1079.434  | 858.512   |
| NM_00469  | 1900.204  | 1759.347  |
| NM_01434  | 1550.911  | 1746.745  |
| AK054960  | 9094.887  | 8598.491  |
| L15344    | 2293.997  | 2277.744  |
| NM_00166  | 9559.16   | 9263.187  |
| NM_00177  | 545.837   | 671.269   |
| Z70704    | 1028.131  | 907.991   |
| NM_01436  | 1630.76   | 1496.265  |
| NM_000557 | 4465.661  | 4388.223  |
| NM_00323  | 347.946   | 465.245   |
| NM_00137  | 4459.756  | 4314.363  |
| NM_00231  | 1607.769  | 1180.036  |



|           |           |           |
|-----------|-----------|-----------|
| M20699    | 1578.363  | 1694.327  |
| NM_004774 | 5685.423  | 4733.288  |
| NM_016937 | 3481.947  | 3308.929  |
| NM_012328 | 3467.631  | 3208.159  |
| NM_007341 | 1627.317  | 1513.794  |
| NM_016508 | 1393.239  | 1198.843  |
| NM_006456 | 12256.623 | 11008.902 |
| AK026062  | 17766.002 | 18417.594 |
| AF047002  | 20190.393 | 19846.213 |
| AB040914  | 803.557   | 499.259   |
| NM_002997 | 3371.446  | 3233.415  |
| NM_002379 | 8994.149  | 8973.449  |
| AB007929  | 5861.141  | 6645.207  |
| NM_004579 | 3959.249  | 3287.398  |
| AA203126  | 3426.894  | 3380.854  |
| L12347    | 3095.832  | 2823.336  |
| NM_001622 | 3050.117  | 2556.481  |
| Z36788    | 1382.304  | 1186.097  |
| NM_018477 | 2994.275  | 3063.503  |
| U20536    | 1347.138  | 1448.955  |
| AI298534  | 1096.738  | 815.893   |
| R71691    | 225.873   | 380.929   |
| AW167715  | 870.022   | 1166.069  |
| AA424735  | 1493.115  | 1382.09   |
| U78294    | 957.599   | 749.13    |
| AA171613  | 355.344   | 299.229   |
| BI760394  | 2449.043  | 1987.075  |
| AA555216  | 730.239   | 533.185   |
| U09117    | 22069.633 | 19813.1   |
| M21054    | 721.246   | 802.371   |
| M18468    | 1392.866  | 1095.752  |
| H66070    | 17203.574 | 17638.219 |
| AA164741  | 3562.91   | 3028.691  |
| AI189375  | 1382.81   | 1264.599  |
| AI978885  | 5066.123  | 4273.616  |
| AB014599  | 3894.25   | 3508.794  |
| NM_004393 | 738.164   | 457.911   |
| AB018345  | 500.1     | 364.468   |
| NM_005832 | 533.441   | 425.134   |
| AW407841  | 1642.563  | 1615.993  |
| U15197    | 486.16    | 706.746   |
| NM_001879 | 1776.191  | 1458.947  |
| AF264014  | 7725.819  | 7917.016  |
| L09098    | 570.262   | 689.468   |
| NM_004155 | 380.834   | 323.668   |
| NM_001831 | 1179.616  | 1068.325  |
| NM_014586 | 4613.598  | 4089.798  |
| NM_014366 | 8174.696  | 7739.017  |
| NM_000923 | 837.811   | 681.766   |
| NM_006453 | 889.444   | 865.444   |
| NM_018096 | 696.208   | 806.761   |
| AL390078  | 879.346   | 467.9     |
| NM_004036 | 3292.459  | 2234.136  |

|           |           |           |
|-----------|-----------|-----------|
| NM_015986 | 754.084   | 718.517   |
| NM_006546 | 1087.048  | 1202.116  |
| NM_014959 | 1982.468  | 1671.596  |
| NM_003992 | 3830.89   | 3947.074  |
| AF279265  | 3290.474  | 3070.117  |
| NM_005213 | 45877.406 | 35929.766 |
| NM_001170 | 2246.512  | 2043.059  |
| AL137716  | 769.188   | 822.155   |
| NM_004696 | 807.093   | 979.945   |
| NM_014342 | 1798.406  | 1572.682  |
| Z50169    | 419.294   | 335.022   |
| NM_000726 | 329.25    | 350.689   |
| AB043997  | 1106.973  | 1212.701  |
| NM_004853 | 3277.935  | 2946.811  |
| NM_001494 | 14052.447 | 14004.885 |
| NM_017707 | 659.432   | 743.99    |
| NM_004206 | 1379.099  | 1399.553  |
| NM_004603 | 12354.983 | 11337.311 |
| AK022849  | 1978.989  | 1915.653  |
| AF040964  | 3952.149  | 4592.095  |
| AK023527  | 569.257   | 547.674   |
| NM_001939 | 4935.287  | 4199.702  |
| NM_003279 | 13696.613 | 11394.539 |
| NM_012328 | 3888.54   | 3275.395  |
| NM_007341 | 757.096   | 1024.676  |
| NM_016508 | 1130.081  | 1198.197  |
| NM_006456 | 4827.043  | 3942.812  |
| AK026062  | 16005.854 | 14593.122 |
| AF047002  | 18008.182 | 16421.488 |
| AL050082  | 1717.554  | 1664.366  |
| NM_006623 | 39449.27  | 32744.666 |
| NM_016588 | 1491.844  | 1406.294  |
| NM_003135 | 6260.964  | 5799.574  |
| NM_000137 | 6466.76   | 7099.602  |
| NM_012102 | 5959.282  | 5985.254  |
| NM_005017 | 9199.83   | 9137.715  |
| AF163572  | 13126.877 | 10696.378 |
| NM_000897 | 5592.889  | 5379.794  |
| NM_000487 | 866.84    | 787.409   |
| NM_014182 | 2383.474  | 2539.799  |
| AB040884  | 1531.777  | 1068.056  |
| NM_000492 | 11325.254 | 10654.804 |
| NM_012089 | 1605.503  | 1323.365  |
| AJ272057  | 8862.684  | 8582.251  |
| NM_004402 | 779.403   | 467.581   |
| AK024216  | 14463.121 | 13784.753 |
| Y16752    | 7223.806  | 5917.08   |
| NM_014694 | 700.31    | 674.634   |
| NM_020156 | 1246.835  | 1156.062  |
| NM_014830 | 1776.651  | 1842.619  |
| AF355402  | 2720.469  | 3115.127  |
| AK000407  | 4600.583  | 4671.231  |
| AK026164  | 395.76    | 408.78    |

|           |           |           |
|-----------|-----------|-----------|
| NM_01447C | 191.09    | 694.295   |
| NM_00166E | 8271.541  | 8637.928  |
| AF097645  | 529.19    | 751.852   |
| NM_00177E | 971.86    | 892.017   |
| Z70704    | 1516.492  | 1378.382  |
| NM_01436E | 1792.503  | 1590.937  |
| NM_000557 | 5282.899  | 4906.739  |
| NM_00137E | 3850.077  | 2755.82   |
| NM_00231E | 2150.333  | 1464.309  |
| NM_004774 | 5762.539  | 4876.082  |
| NM_016937 | 3262.25   | 2815.292  |
| NM_00347E | 707.47    | 1159.804  |
| NM_00269C | 3055.828  | 2509.656  |
| AB033086  | 432.527   | 145.65    |
| NM_01823E | 1166.23   | 1092.92   |
| U88892    | 1212.206  | 727.761   |
| AK023755  | 479.22    | 461.691   |
| NM_00572E | 531.602   | 416.165   |
| NM_012211 | 834.274   | 459.413   |
| AB040877  | 2576.949  | 2144.753  |
| AB040927  | 758.141   | 674.879   |
| AK026737  | 2033.822  | 1714.544  |
| NM_00628E | 2686.225  | 2929.209  |
| NM_019067 | 3316.553  | 3432.596  |
| AF251025  | 763.696   | 704.763   |
| NM_015677 | 3078.175  | 2939.141  |
| NM_00177E | 12226.946 | 9639.508  |
| AL162032  | 59.459    | 497.303   |
| AB011087  | 1725.682  | 1593.688  |
| AF161341  | 9430.145  | 6396.697  |
| AJ249902  | 1505.617  | 1531.694  |
| NM_004384 | 1996.477  | 1893.54   |
| NM_01230E | 13954.52  | 12268.818 |
| AF222903  | 4002.026  | 3509.713  |
| NM_00622E | 3466.853  | 3192.172  |
| L10374    | 14833.711 | 12583.716 |
| M84605    | 432.51    | 83.101    |
| AB016902  | 1590.805  | 1052.724  |
| AF272378  | 43580.527 | 41734.672 |
| NM_00024E | 4242.143  | 4010.089  |
| NM_01431C | 568.584   | 674.432   |
| NM_00586C | 4059.319  | 3161.109  |
| AF095288  | 7650.098  | 8328.447  |
| AK025116  | 456.282   | 363.566   |
| AK026271  | 5191.117  | 7184.756  |
| NM_00347E | 3089.208  | 3517.313  |
| BE275227  | 357.641   | 576.445   |
| NM_016237 | 7351.645  | 6600.414  |
| NM_004924 | 11254.773 | 10662.771 |
| NM_00179E | 1998.491  | 1571.719  |
| NM_001211 | 3379      | 2072.807  |
| NM_00650E | 1087.767  | 900.032   |
| AB033050  | 2613.383  | 2554.248  |

|           |           |           |
|-----------|-----------|-----------|
| NM_004356 | 11607.353 | 9693.983  |
| NM_001855 | 268.495   | 588.277   |
| BC015022  | 4035.121  | 3918.675  |
| NM_006697 | 3807.271  | 4071.741  |
| M19182    | 1049.531  | 992.914   |
| AK025707  | 964.779   | 878.546   |
| NM_002406 | 49885.234 | 51195.859 |
| U87169    | 1811.888  | 1829.911  |
| NM_002073 | 976.348   | 954.793   |
| NM_006043 | 813.367   | 399.583   |
| AF117222  | 614.675   | 498.338   |
| NM_001935 | 21921.922 | 28541.877 |
| S75755    | 1509.445  | 1286.119  |
| AF176518  | 837.648   | 524.326   |
| AB014576  | 12394.359 | 10310.829 |
| NM_019044 | 5703.37   | 4477.364  |
| AK000145  | 957.562   | 1154.961  |
| AF174601  | 2826.461  | 2932.567  |
| AF279865  | 967.237   | 652.497   |
| NM_014700 | 855.541   | 806.489   |
| NM_014714 | 443.14    | 502.945   |
| NM_005687 | 2095.096  | 1590.546  |
| NM_005983 | 4045.797  | 3661.24   |
| NM_017652 | 5039.849  | 4695.527  |
| X59268    | 2804.169  | 3077.206  |
| D70832    | 39648.707 | 33426.934 |
| NM_001429 | 7032.64   | 6115.133  |
| M61870    | 1885.113  | 1276.922  |
| AB032967  | 73.644    | 561.004   |
| AK026980  | 927.736   | 1362.777  |
| AJ277915  | 415.255   | 370.682   |
| NM_020368 | 1985.931  | 2157.359  |
| AB033019  | 4730.662  | 4521.95   |
| NM_001452 | 1048.151  | 695.071   |
| NM_006162 | 974.379   | 760.631   |
| NM_014764 | 9529.672  | 8950.563  |
| NM_018078 | 1638.313  | 1517.735  |
| NM_016013 | 676.437   | 671.296   |
| AK021960  | 451.07    | 399.996   |
| NM_007080 | 11371.485 | 11240.953 |
| AK026912  | 6485.951  | 6367.176  |
| AK023531  | 6901.46   | 5806.97   |
| AB011128  | 4717.477  | 4172.042  |
| AK025074  | 3613.065  | 4323.267  |
| NM_000303 | 2864.292  | 3067.825  |
| NM_006242 | 811.329   | 945.102   |
| AF282887  | 666.331   | 485.028   |
| X78712    | 790.906   | 1095.641  |
| NM_001497 | 2077.613  | 2613.756  |
| D87076    | 2531.276  | 2845.656  |
| NM_014149 | 3373.579  | 3424.575  |
| AB020635  | 1929.223  | 1616.421  |
| NM_006515 | 1239.855  | 948.762   |

|           |           |           |
|-----------|-----------|-----------|
| NM_005224 | 1986.68   | 1615.827  |
| NM_012144 | 6611.226  | 6193.934  |
| X65231    | 46371.355 | 56431.77  |
| NM_00290E | 1704.623  | 1887.879  |
| AF205632  | 2908.323  | 2392.38   |
| NM_00537E | 26255.615 | 23415.771 |
| NM_002397 | 2491.377  | 2119.16   |
| AF000672  | 876.855   | 813.002   |
| AK002195  | 978.006   | 1181.908  |
| AF086128  | 599.832   | 483.272   |
| AK026099  | 422.926   | 68.726    |
| AK023831  | 321.543   | 340.883   |
| AK022850  | 1435.057  | 2042.591  |
| NM_01649C | 1968.454  | 2864.431  |
| AF038193  | 602.078   | 741.473   |
| AK001942  | 425.83    | 152.097   |
| NM_003851 | 12241.069 | 15146.569 |
| U79244    | 411.776   | 673.94    |
| AK024150  | 1875.076  | 2141.423  |
| AF070536  | 2404      | 2027.045  |
| AK022297  | 1075.203  | 1136.9    |
| U79300    | 1187.541  | 1181.513  |
| AK025151  | 11854.285 | 11152.015 |
| AK025550  | 4997.506  | 4992.557  |
| AF088076  | 6224.479  | 6595.187  |
| AF086543  | 2417.995  | 2229.289  |
| AB046797  | 1244.805  | 1237.302  |
| AK002098  | 1535.491  | 1694.724  |
| AK025156  | 10292.818 | 9393.17   |
| AK022116  | 2311.957  | 1553.39   |
| AF026526  | 881.893   | 803.036   |
| AK026207  | 5935.024  | 6130.85   |
| AK024984  | 9180.13   | 11703.029 |
| AK000276  | 560.771   | 575.159   |
| AL110236  | 729.372   | 941.166   |
| AF085955  | 508.094   | 694.884   |
| AF075106  | 3378.363  | 4063.807  |
| AK023339  | 1578.061  | 1628.545  |
| AF086008  | 1282.938  | 1629.895  |
| AF087970  | 459.565   | 756.949   |
| AF086029  | 980.682   | 1082.583  |
| U05597    | 743.887   | 800.819   |
| U50524    | 431.919   | 454.123   |
| U63332    | 436.637   | 458.974   |
| U52050    | 680.3     | 606.06    |
| U73799    | 1325.734  | 1159.29   |
| NM_01836E | 466.924   | 176.874   |
| AJ245433  | 3820.172  | 2850.219  |
| AK021942  | 18035.801 | 15066.261 |
| NM_014127 | 1249.037  | 960.695   |
| AL360187  | 896.539   | 725.846   |
| AK021878  | 847.282   | 477.509   |
| AK021817  | 1494.908  | 1376.93   |

|           |           |           |
|-----------|-----------|-----------|
| AL080103  | 668.742   | 737.115   |
| AK023217  | 870.532   | 1361.975  |
| AK021883  | 766.773   | 904.812   |
| AF090902  | 2889.417  | 3408.699  |
| AF119887  | 8551.828  | 9086.123  |
| AK091038  | 657.276   | 607.952   |
| AK024193  | 1358.277  | 1632.149  |
| NM_018543 | 427.11    | 301.939   |
| AK024438  | 11685.793 | 13328.211 |
| AF161337  | 413.267   | 543.785   |
| AK022482  | 1391.075  | 1267.866  |
| AK023811  | 756.771   | 523.673   |
| AK022803  | 1027.716  | 1043.937  |
| AK023517  | 1082.555  | 934.732   |
| AK024195  | 17.941    | 1077.481  |
| NM_017728 | 994.44    | 930.008   |
| U80772    | 494.332   | 701.982   |
| NM_006189 | 716.843   | 772.671   |
| AJ272177  | 591.902   | 557.423   |
| AK026402  | 11451.461 | 11065.621 |
| AF111846  | 841.399   | 873.839   |
| M11948    | 53780.078 | 66028.867 |
| Z36850    | 273.559   | 283.219   |
| AK024618  | 1049.038  | 1048.511  |
| AL049969  | 1071.844  | 1624.844  |
| NM_005220 | 1826.432  | 1627.691  |
| NM_018619 | 522.727   | 692.816   |
| AK000208  | 341.691   | 364.265   |
| AK000470  | 303.284   | 439.448   |
| AK026366  | 41689.172 | 40901.727 |
| AK024229  | 19789.939 | 17820.287 |
| AK021467  | 3698.283  | 3336.212  |
| NM_020371 | 2392.782  | 2287.91   |
| AK022498  | 2597.168  | 2476.704  |
| U84506    | 797.236   | 585.511   |
| U21556    | 50943.168 | 48470.527 |
| AB002444  | 519.01    | 381.242   |
| AB002344  | 1889.469  | 1645.657  |
| AF147379  | 38134.91  | 36608.563 |
| AK023760  | 1858.161  | 1923.808  |
| AF086034  | 11519.895 | 14754.504 |
| AK000174  | 1302.034  | 1751.162  |
| AF130071  | 900.073   | 1052.974  |
| AL390170  | 643.297   | 503.954   |
| AK022887  | 944.535   | 1025.544  |
| AK000745  | 16001.538 | 17006.512 |
| NM_015901 | 1439.246  | 1384.976  |
| Z83935    | 1334.971  | 999.992   |
| AF093744  | 2037.65   | 2203.957  |
| NM_018687 | 21840.223 | 19906.975 |
| M57417    | 30068.627 | 24998.195 |
| NM_020524 | 2424.635  | 2365.306  |
| NM_001999 | 1311.806  | 1301.453  |

|           |           |           |
|-----------|-----------|-----------|
| X64977    | 485.291   | 443.703   |
| NM_002602 | 4103.686  | 3183.696  |
| NM_016239 | 505.444   | 294.953   |
| NM_003383 | 2442.488  | 2508.825  |
| D17271    | 6776.665  | 6604.015  |
| X91648    | 1231.499  | 1348.443  |
| AF282264  | 12486.311 | 13697.892 |
| AF086322  | 1644.856  | 1605.858  |
| Z70717    | 1765.171  | 1219.343  |
| AK024736  | 935.127   | 855.378   |
| X79308    | 2222.686  | 1813.82   |
| AF086476  | 667.177   | 663.697   |
| NM_017660 | 5061.589  | 5299.222  |
| AB011151  | 8722.229  | 7516.998  |
| U92995    | 2986.651  | 2687.385  |
| Z70769    | 920.76    | 1018.401  |
| NM_007106 | 2257.594  | 2241.556  |
| AL137555  | 2217.479  | 2208.632  |
| AL133017  | 2110.456  | 1737.456  |
| CY3Cy5    | 5240.806  | 434.572   |
| X00588    | 2434.227  | 2582.684  |
| AI359037  | 6469.118  | 8085.413  |
| BI754285  | 1295.026  | 2154.441  |
| X15998    | 9173.624  | 10683.704 |
| M76482    | 639.191   | 858.819   |
| NM_001883 | 4708.883  | 5328.099  |
| NM_004628 | 2459.528  | 2409.479  |
| L31785    | 926.592   | 1110.711  |
| H-M 69043 | 3359.592  | 4304.176  |
| AF077374  | 2225.545  | 2814.991  |
| U43901    | 720.118   | 967.305   |
| X59065    | 1027.34   | 846.39    |
| M59828    | 7640.214  | 7884.603  |
| NM_016134 | 1834.554  | 2332.5    |
| SR2       | 50817.309 | 55606.105 |
| SR4       | 17962.684 | 19731.902 |
| SR6       | 2351.135  | 2426.835  |
| SR8       | 7547.159  | 25217.986 |
| SR10      | 26328.068 | 10758.797 |
| CY3Cy5    | 4793.056  | 446.416   |
| NM_000612 | 6733.058  | 8529.552  |
| NM_004257 | 27627.48  | 33625.313 |
| NM_000683 | 4798.759  | 4925.227  |
| NM_003629 | 3346.152  | 3960.727  |
| NM_005901 | 6734.677  | 7968.146  |
| NM_004248 | 2000.316  | 2655.587  |
| NM_000959 | 370.582   | 758.539   |
| NM_001313 | 1189.331  | 1183.624  |
| NM_002362 | 509.061   | 450.368   |
| NM_004796 | 1298.972  | 1403.532  |
| NM_000435 | 12676.202 | 13453.758 |
| NM_001842 | 46695.672 | 50610.703 |
| NM_007281 | 610.485   | 607.665   |

|           |           |           |
|-----------|-----------|-----------|
| AB017169  | 1143.578  | 1298.182  |
| AL080170  | 2604.413  | 3277.129  |
| AB039903  | 5406.65   | 6614.116  |
| NM_000542 | 11987.231 | 14129.604 |
| NM_014625 | 478.226   | 530.198   |
| NM_006851 | 939.702   | 894.341   |
| AK001560  | 1429.524  | 1733.014  |
| AB001328  | 759.699   | 1062.745  |
| NM_000945 | 488.738   | 917.404   |
| H99588    | 3261.426  | 3066.633  |
| AK022600  | 4002.888  | 4517.009  |
| AK023142  | 2269.987  | 2076.718  |
| U61740    | 17850.199 | 22808.564 |
| NM_006405 | 45649.57  | 51576.777 |
| AB049054  | 5661.195  | 6531.397  |
| NM_015071 | 1678.734  | 1938.826  |
| NM_013227 | 2532.258  | 3205.039  |
| Z83803    | 1231.926  | 1585.837  |
| AF027205  | 25200.908 | 22340.697 |
| AF075012  | 1934.44   | 2634.85   |
| NM_001570 | 1912.51   | 2422.501  |
| NM_015655 | 751.935   | 1169.453  |
| NM_000585 | 3498.199  | 3960.004  |
| NM_016545 | 22892.811 | 26618.805 |
| AF309653  | 13315.753 | 13459.635 |
| NM_002620 | 24576.467 | 25979.188 |
| S79267    | 1625.89   | 1580.224  |
| NM_001815 | 1374.586  | 1547.079  |
| NM_003784 | 36519.148 | 41859.418 |
| NM_000195 | 21638.434 | 24077.836 |
| NM_005445 | 9653.54   | 7602.732  |
| NM_014895 | 2352.645  | 2637.273  |
| NM_003630 | 4684.663  | 6227.701  |
| NM_000045 | 3962.71   | 4568.704  |
| NM_003215 | 1908.5    | 1925.841  |
| NM_006705 | 5161.349  | 3684.891  |
| NM_004910 | 1875.691  | 2588.99   |
| AB013452  | 792.092   | 1151.669  |
| M93107    | 8193.617  | 10428.42  |
| BC001479  | 14681.476 | 14966.946 |
| NM_002461 | 27037.691 | 27713.273 |
| NM_005771 | 11719.926 | 14041.543 |
| AB032986  | 36730.805 | 38555.039 |
| NM_017525 | 32609.631 | 34423.984 |
| NM_016032 | 11936.891 | 12016.342 |
| NM_014324 | 47702.422 | 54033.816 |
| NM_001687 | 22700.992 | 23031.639 |
| AK026374  | 3309.631  | 2686.571  |
| NM_001169 | 1684.132  | 2014.19   |
| AK024648  | 11823.47  | 12298.453 |
| NM_000715 | 735.435   | 948.76    |
| NM_003455 | 7773.533  | 6939.248  |
| AB032526  | 290.19    | 379.255   |



|           |           |           |
|-----------|-----------|-----------|
| NM_000171 | 1405.252  | 1246.615  |
| AL354615  | 1311.445  | 1278.633  |
| NM_013349 | 37594.203 | 37502.93  |
| NM_003705 | 3095.785  | 3328.403  |
| NM_006861 | 1626.232  | 2163.093  |
| NM_005829 | 2607.678  | 2812.408  |
| NM_000466 | 1260.075  | 1512.701  |
| NM_015908 | 11851.635 | 11344.984 |
| NM_000896 | 1089.674  | 1809.274  |
| AB040672  | 10002.798 | 9900.259  |
| NM_002192 | 6192.17   | 6024.546  |
| NM_005491 | 6256.634  | 6267.436  |
| NM_003869 | 5081.254  | 4920.075  |
| X63417    | 7485.828  | 9811.691  |
| S94539    | 27456.898 | 25160.396 |
| NM_006402 | 1976.843  | 1851.164  |
| NM_005785 | 3788.085  | 3596.409  |
| NM_018248 | 3649.023  | 3558.032  |
| AK001695  | 10202.134 | 10074.133 |
| NM_017886 | 5629.23   | 5726.495  |
| NM_006252 | 3048.457  | 2806.378  |
| NM_001721 | 966.981   | 940.976   |
| NM_014397 | 6202.903  | 6393.198  |
| AB023182  | 1281      | 1341.413  |
| NM_003607 | 1185.855  | 1185.093  |
| NM_006575 | 1367.049  | 1488.591  |
| NM_013254 | 2631.165  | 2815.957  |
| NM_000437 | 13592.462 | 14473.799 |
| AB046819  | 7049.421  | 7656.535  |
| NM_006090 | 4387.298  | 5228.325  |
| NM_002900 | 8934.783  | 7704.309  |
| NM_006851 | 751.036   | 803.658   |
| AK001560  | 2173.615  | 2055.127  |
| AB001328  | 992.611   | 1161.229  |
| NM_000948 | 376.752   | 673.285   |
| H99588    | 3899.462  | 4307.752  |
| X00588    | 2211.943  | 2525.818  |
| AI359037  | 6135.408  | 6487.342  |
| J04513    | 630.981   | 608.076   |
| BI754285  | 1631.273  | 1219.095  |
| X15998    | 9904.283  | 8632.894  |
| M76482    | 692.779   | 663.422   |
| NM_001883 | 4977.124  | 4990.826  |
| H-M 69043 | 3330.604  | 4173.748  |
| AF077374  | 2481.01   | 2036.763  |
| U43901    | 707.883   | 947.12    |
| X59065    | 630.815   | 1065.645  |
| M59828    | 5527.05   | 5710.199  |
| NM_016134 | 1647.639  | 2014.366  |
| AJ010482  | 3019.098  | 3457.605  |
| NM_005445 | 11477.2   | 7510.51   |
| NM_014899 | 4589.857  | 4889.674  |
| NM_003630 | 5868.467  | 7016.103  |

|           |           |           |
|-----------|-----------|-----------|
| NM_00004E | 4305.818  | 4860.891  |
| NM_00321E | 2501.174  | 2138.511  |
| NM_00670E | 5009.575  | 4576.922  |
| NM_00061E | 8141.87   | 8739.712  |
| NM_00425E | 27070.094 | 26986.385 |
| NM_00068E | 4033.873  | 3862.066  |
| NM_00362E | 3285.021  | 2973.113  |
| NM_00590E | 6333.464  | 6097.471  |
| NM_00424E | 1843.048  | 2008.95   |
| NM_00479E | 1208.858  | 1350.694  |
| NM_00043E | 11609.525 | 11465.912 |
| NM_00184E | 33577.93  | 31501.133 |
| AB017169  | 552.537   | 565.201   |
| AL080170  | 2063.659  | 2694.401  |
| AB039903  | 5795.938  | 5539.11   |
| NM_00054E | 11774.979 | 12725.751 |
| NM_00370E | 3604.611  | 3558.526  |
| NM_00686E | 1766.32   | 2082.481  |
| NM_00582E | 2950.662  | 3044.452  |
| NM_00046E | 1286.285  | 1433.657  |
| NM_01590E | 11484.842 | 11895.243 |
| AK022600  | 2415.496  | 2706.163  |
| AK023142  | 1769.427  | 1597.469  |
| U61740    | 20771.662 | 21550.17  |
| NM_00640E | 48642.773 | 51898.586 |
| AB049054  | 5499.968  | 5706.661  |
| NM_015071 | 1434.298  | 1598.348  |
| NM_01322E | 2281.751  | 2348.99   |
| Z83803    | 1206.613  | 1629.701  |
| AF027205  | 23596.49  | 20828.682 |
| AF075012  | 2262.607  | 2566.94   |
| NM_00157E | 1819.697  | 2280.687  |
| NM_01565E | 696.054   | 830.569   |
| NM_00058E | 4090.423  | 4234.884  |
| NM_01654E | 21502.141 | 22430.521 |
| AF309653  | 11683.109 | 10395.611 |
| NM_00262E | 17284.852 | 17176     |
| S79267    | 1177.253  | 1164.724  |
| NM_00181E | 1312.925  | 1077.491  |
| NM_00378E | 33520.84  | 31710.367 |
| NM_00019E | 15975.47  | 13694.208 |
| NM_00657E | 2058.302  | 1577.676  |
| NM_01325E | 3209.505  | 3356.151  |
| NM_00043E | 12832.438 | 14165.149 |
| AB046819  | 7358.351  | 7643.08   |
| NM_00609E | 5315.674  | 5740.048  |
| NM_00290E | 9378.85   | 8308.134  |
| NM_00491E | 1993.618  | 2449.633  |
| AB013452  | 702.901   | 1010.495  |
| M93107    | 8140.147  | 9399.611  |
| BC001479  | 13635.566 | 12622.801 |
| NM_00246E | 25415.689 | 27037.992 |
| NM_00577E | 10773.599 | 12202.78  |

|           |           |           |
|-----------|-----------|-----------|
| AB032986  | 34729.359 | 34134.41  |
| NM_01752E | 32614.006 | 31496.061 |
| NM_01603Z | 10470.499 | 11899.303 |
| NM_01432A | 44101.055 | 48531.129 |
| NM_001687 | 20580.488 | 27076.502 |
| AK026374  | 2741.075  | 3193.44   |
| NM_001169 | 1794.177  | 1964.217  |
| AK024648  | 10521.092 | 11327.66  |
| NM_00071E | 762.319   | 798.83    |
| NM_00345E | 3566.911  | 3653.229  |
| NM_000171 | 1052.53   | 1025.167  |
| AL354615  | 1354.898  | 1248.922  |
| NM_01334E | 37319.488 | 28676.643 |
| NM_01613A | 2108.68   | 2060.001  |
| AJ010482  | 2825.652  | 2903.627  |
| NM_00089E | 1003.321  | 1263.073  |
| AB040672  | 6700.179  | 6222.714  |
| NM_00219Z | 7203.039  | 6399.643  |
| NM_005491 | 7226.894  | 6646.001  |
| NM_00386E | 5800.305  | 5929.614  |
| X63417    | 7499.658  | 9476.191  |
| S94539    | 25552.014 | 23850.049 |
| NM_00640Z | 2416.416  | 2425.977  |
| NM_00578E | 3896.009  | 3426.61   |
| NM_01824E | 3139.255  | 3169.553  |
| AK001695  | 6467.667  | 6769.353  |
| NM_01788E | 4643.219  | 4141.104  |
| NM_00625Z | 2142.417  | 2249.573  |
| NM_001721 | 654.704   | 885.184   |
| NM_014397 | 6144.62   | 7263.311  |
| AB023182  | 1037.801  | 1316.878  |
| NM_003607 | 1311.484  | 1033.113  |
| AB017169  | 1077.93   | 1180.473  |
| AL080170  | 2488.939  | 2591.7    |
| AB039903  | 5880.372  | 5955.088  |
| NM_00054Z | 16572.766 | 13902.918 |
| NM_01462E | 402.8     | 429.13    |
| NM_006851 | 646.564   | 768.876   |
| AK001560  | 1903.079  | 1679.988  |
| AB001328  | 1168.333  | 961.513   |
| NM_00094E | 487.777   | 755.896   |
| H99588    | 2866.29   | 3132.156  |
| X00588    | 750.759   | 831.95    |
| AI359037  | 2926.515  | 2546.314  |
| BI754285  | 783.08    | 781.383   |
| X15998    | 1563.656  | 1450.675  |
| NM_00188Z | 3581.152  | 3582.248  |
| NM_00462E | 2038.057  | 1851.228  |
| L31785    | 1052.746  | 793.165   |
| H-M 69043 | 2904.604  | 3742.784  |
| U43901    | 729.147   | 1348.716  |
| M59828    | 4022.091  | 3855.06   |
| AF309653  | 11510.433 | 9693.282  |

|           |           |           |
|-----------|-----------|-----------|
| NM_002620 | 21134.236 | 18199.809 |
| S79267    | 2032.657  | 1974.173  |
| NM_001816 | 1304.303  | 1302.913  |
| NM_003784 | 34347.273 | 29143.945 |
| NM_000195 | 25383.961 | 19749.08  |
| NM_005445 | 10062.869 | 6106.411  |
| NM_014895 | 3339.556  | 3149.821  |
| NM_003630 | 4696.681  | 4929.24   |
| NM_000046 | 2629.559  | 2994.671  |
| NM_003219 | 1590.648  | 1442.225  |
| NM_006709 | 4398.974  | 3900.199  |
| NM_000612 | 6177.52   | 6508.524  |
| NM_004257 | 20690.529 | 20166.512 |
| NM_002844 | 206.519   | 388.225   |
| NM_000683 | 739.145   | 1070.439  |
| NM_003629 | 1703.051  | 1471.054  |
| NM_005901 | 4939.603  | 5057.343  |
| NM_004248 | 612.418   | 640.878   |
| NM_000959 | 352.12    | 244.455   |
| NM_001313 | 693.614   | 840.229   |
| NM_004796 | 980.954   | 1205.179  |
| NM_000435 | 5783.274  | 4824.26   |
| NM_001842 | 33153.805 | 23778.855 |
| NM_003459 | 6673.271  | 6133.604  |
| NM_000171 | 1679.8    | 1452.812  |
| AL354615  | 1244.976  | 983.207   |
| NM_013349 | 36220.98  | 27670.605 |
| NM_003705 | 2465.045  | 2190.989  |
| NM_006861 | 1586.741  | 1845.779  |
| NM_005829 | 2925.513  | 2349.954  |
| NM_000466 | 1128.69   | 940.595   |
| NM_015908 | 10446.381 | 11243.528 |
| AK022600  | 936.28    | 730.785   |
| AK023142  | 1131.799  | 952.227   |
| U61740    | 10445.896 | 10216.955 |
| NM_006409 | 42891.574 | 47073.793 |
| AB049054  | 2659.951  | 2959.12   |
| NM_015071 | 851.144   | 942.091   |
| NM_013227 | 1835.685  | 1700.464  |
| Z83803    | 215.007   | 570.538   |
| AF027205  | 17091.9   | 14149.624 |
| AF075012  | 2262.539  | 2028.798  |
| NM_001570 | 1584.846  | 1519.939  |
| NM_015658 | 840.844   | 604.317   |
| NM_000589 | 4474.315  | 3376.839  |
| NM_016546 | 23727.607 | 16977.418 |
| NM_017886 | 4499.818  | 3412.8    |
| NM_006252 | 2280.603  | 2397.382  |
| NM_001721 | 805.645   | 725.455   |
| NM_014397 | 5243.446  | 5787.487  |
| AB023182  | 1161.926  | 896.714   |
| NM_003607 | 1221.151  | 1019.073  |
| NM_006575 | 1353.527  | 994.298   |

|           |           |           |
|-----------|-----------|-----------|
| NM_013254 | 2665.135  | 2508.789  |
| NM_000437 | 10132.548 | 10238.272 |
| AB046819  | 6009.408  | 5997.638  |
| NM_006090 | 5317.661  | 5053.373  |
| NM_002900 | 5065.617  | 4665.939  |
| NM_004910 | 1487.359  | 1649.859  |
| AB013452  | 414.14    | 444.107   |
| M93107    | 6037.021  | 7107.394  |
| BC001479  | 7102.712  | 7148.991  |
| NM_002461 | 18028.797 | 19272.322 |
| NM_005771 | 9937.368  | 12208.57  |
| AB032986  | 26557.984 | 26489.219 |
| NM_017528 | 20518.238 | 20536.557 |
| NM_016032 | 4381.69   | 4544.141  |
| NM_014324 | 43655.488 | 50092.496 |
| NM_001687 | 21132.818 | 22771.041 |
| AK026374  | 2644.476  | 2403.287  |
| NM_001169 | 2117.754  | 1959.423  |
| AK024648  | 10961.059 | 7990.496  |
| AB037761  | 11923.13  | 11260.482 |
| NM_014008 | 44134.129 | 36302.418 |
| NM_014731 | 7528.026  | 6897.014  |
| AF035191  | 8942.02   | 6281.907  |
| NM_004058 | 1152.702  | 1072.907  |
| NM_004527 | 781.517   | 679.689   |
| NM_012062 | 7896.531  | 8199.83   |
| AK026717  | 425.787   | 362.551   |
| AJ010482  | 3195.861  | 3234.628  |
| NM_000896 | 728.2     | 803.908   |
| AB040672  | 1218.391  | 1124.901  |
| NM_002192 | 1716.816  | 1597.744  |
| NM_005491 | 4698.751  | 4338.653  |
| NM_003869 | 1859.655  | 1863.682  |
| X63417    | 7219.918  | 8087.44   |
| S94539    | 8327.709  | 8198.706  |
| NM_006402 | 1912.489  | 1774.645  |
| NM_005788 | 4258.2    | 3423.362  |
| NM_018248 | 3171.342  | 2477.281  |
| AK001695  | 9528.95   | 8747.114  |
| AB040898  | 2180.561  | 1585.208  |
| AB031547  | 2340.002  | 2039.017  |
| NM_003970 | 1021.878  | 1161.99   |
| AK022496  | 1776.134  | 1490.44   |
| AB033035  | 529.15    | 443.082   |
| NM_002883 | 2689.11   | 2336.518  |
| NM_000141 | 526.197   | 405.872   |
| NM_016150 | 776.984   | 898.823   |
| U57058    | 832.341   | 810.561   |
| AL137452  | 1915.63   | 2108.248  |
| NM_004312 | 12336.958 | 11257.812 |
| NM_001347 | 5213.643  | 5640.543  |
| AK024549  | 5054.745  | 5336.096  |
| NM_006338 | 1429.947  | 1403.982  |

|           |           |           |
|-----------|-----------|-----------|
| NM_007164 | 2745.716  | 2504.582  |
| NM_000261 | 1532.337  | 2244.067  |
| NM_002606 | 4262.295  | 5083.195  |
| NM_002570 | 1647.098  | 2066.138  |
| NM_003183 | 1882.669  | 2143.597  |
| NM_003585 | 648.525   | 839.337   |
| NM_019851 | 2095.28   | 1689.271  |
| NM_003238 | 2420.585  | 1917.133  |
| NM_001363 | 8776.113  | 8569.894  |
| NM_014096 | 11211.962 | 11546.807 |
| NM_005706 | 4179.961  | 3878.566  |
| NM_001261 | 2428.69   | 1906.304  |
| NM_001977 | 1039.754  | 749.931   |
| NM_007219 | 8594.979  | 7461.94   |
| AK026854  | 3647.94   | 3478.194  |
| NM_001269 | 2202.283  | 2117.476  |
| NM_004906 | 2985.229  | 2638.069  |
| NM_012447 | 4262.255  | 3558.971  |
| NM_006366 | 3787.018  | 3723.052  |
| AK027013  | 47490.098 | 47551.703 |
| NM_001344 | 28740.307 | 36043.012 |
| NM_018294 | 2280.905  | 2239.526  |
| AL389934  | 1547.291  | 1255.933  |
| NM_004330 | 6283.229  | 6422.845  |
| AF151802  | 5149.586  | 4868.333  |
| AB006746  | 735.89    | 952.645   |
| NM_006498 | 1092.089  | 1433.299  |
| AB023233  | 1462.214  | 1167.885  |
| NM_004369 | 1694.815  | 1534.316  |
| NM_004370 | 504.317   | 582.572   |
| NM_018130 | 5225.531  | 3786.155  |
| AF085878  | 1133.428  | 575.482   |
| AB006630  | 3692.213  | 2125.073  |
| NM_016155 | 2241.735  | 1767.731  |
| NM_001224 | 4871.798  | 4733.663  |
| NM_017811 | 6742.992  | 5997.867  |
| NM_001569 | 3062.608  | 2997.531  |
| AK023284  | 2949.176  | 3097.377  |
| AF106069  | 207.895   | 653.201   |
| NM_005101 | 3927.86   | 3991.427  |
| NM_004205 | 458.378   | 379.351   |
| AF130060  | 4668.306  | 4206.713  |
| NM_007057 | 10669.776 | 9806.397  |
| NM_000177 | 13074.689 | 13748.701 |
| NM_003387 | 6373.755  | 6698.552  |
| U60665    | 1996.601  | 2212.79   |
| NM_005507 | 41239.313 | 39684.18  |
| AL080133  | 2895.432  | 2988.257  |
| AY014403  | 1582.376  | 1193.17   |
| NM_006912 | 6442.932  | 6387.73   |
| X12534    | 2727.835  | 2839.479  |
| NM_018951 | 6435.884  | 6739.638  |
| NM_014323 | 7767.521  | 7415.992  |

|           |           |           |
|-----------|-----------|-----------|
| NM_00320E | 4389.686  | 4022.53   |
| AB002324  | 2735.956  | 2577.529  |
| NM_00216E | 353.985   | 303.419   |
| AK026231  | 1111.516  | 1493.271  |
| NM_00214C | 12561.779 | 10421.179 |
| NM_02014E | 2146.105  | 1981.621  |
| NM_01246E | 4310.157  | 3836.299  |
| NM_005131 | 2354.72   | 2408.732  |
| NM_00705E | 2359.477  | 2484.539  |
| AF083383  | 2818.184  | 3116.46   |
| NM_00692E | 4878.74   | 4639.76   |
| NM_00489C | 21274.67  | 18146.227 |
| AK023181  | 3130.417  | 3332.26   |
| NM_004294 | 1724.753  | 1695.583  |
| NM_005051 | 20997.561 | 22376.682 |
| NM_00196E | 17203.516 | 19024.375 |
| D17259    | 47776.281 | 57068.449 |
| AB002366  | 361.7     | 629.791   |
| AF264627  | 44781.574 | 42037.105 |
| AL133053  | 1290.559  | 1298.931  |
| NM_01814E | 6915.939  | 6169.466  |
| NM_01765E | 3919.6    | 4379.351  |
| AL109695  | 8198.675  | 7713.025  |
| NM_00216E | 2793.596  | 2854.5    |
| NM_00445E | 1505.145  | 1505.071  |
| NM_01622E | 2163.19   | 2339.695  |
| NM_018244 | 1883.532  | 2149.227  |
| NM_00249E | 24323.453 | 21834.662 |
| AB046855  | 618.408   | 479.428   |
| NM_00564E | 4676.365  | 4404.223  |
| NM_01810E | 2205.589  | 1861.115  |
| AK023452  | 5700.067  | 5664.273  |
| NM_00033E | 1740.035  | 1922.712  |
| AK022215  | 3672.562  | 4568.612  |
| U90305    | 372.245   | 378.248   |
| NM_001527 | 15914.167 | 15213.356 |
| AK025269  | 3922.849  | 4488.642  |
| NM_00143E | 556.04    | 496.357   |
| AB040971  | 1387.867  | 1339.814  |
| NM_00656E | 5569.66   | 4838.427  |
| AK024254  | 1260.941  | 1040.535  |
| NM_01845E | 6462.319  | 6146.318  |
| NM_019021 | 1468.087  | 1308.295  |
| AK002183  | 977.927   | 1186.794  |
| NM_01899E | 1666.486  | 1638.096  |
| AL137304  | 2074.485  | 1973.075  |
| AL049274  | 433.995   | 597.804   |
| NM_01827E | 690.083   | 609.625   |
| AK026883  | 808.028   | 1111.419  |
| NM_01435C | 9371.75   | 8732.202  |
| U00925    | 6734.11   | 7409.201  |
| AL390185  | 475.75    | 492.957   |
| AF086235  | 6355.155  | 6521.927  |

|           |           |           |
|-----------|-----------|-----------|
| AF143886  | 785.806   | 858.006   |
| AK025975  | 470.465   | 445.667   |
| AK025583  | 29618.566 | 28627.18  |
| NM_014664 | 2316.102  | 2077.415  |
| AL109788  | 805.617   | 807.362   |
| NM_014952 | 36420.48  | 27414.391 |
| AB037765  | 695.712   | 638.93    |
| AK025068  | 762.348   | 630.111   |
| AK026720  | 545.777   | 456.949   |
| AL137566  | 1073.703  | 972.702   |
| AF087962  | 3344.419  | 2603.247  |
| AL050197  | 2535.296  | 2332.558  |
| AF085870  | 786.812   | 1055.193  |
| AL117580  | 731.115   | 761.291   |
| AL110190  | 564.438   | 540.854   |
| AJ001893  | 1256.247  | 1807.061  |
| NM_014819 | 9598.994  | 9331.02   |
| AF086040  | 1331.985  | 1338.041  |
| AB032988  | 1737.99   | 1760.896  |
| AK023559  | 2183.436  | 1617.346  |
| AB037859  | 39234.328 | 39090.18  |
| AL049233  | 1463.365  | 986.452   |
| NM_017696 | 2219.914  | 2052.169  |
| AL050166  | 3682.698  | 3399.459  |
| AK026705  | 1628.443  | 1311.873  |
| NM_003602 | 1379.414  | 930.659   |
| AF009258  | 11302.293 | 10813.168 |
| AF009305  | 1464.478  | 1550.804  |
| AF009318  | 763.685   | 641.964   |
| AF090889  | 830.882   | 772.028   |
| AK001085  | 404.792   | 424.529   |
| AK001906  | 584.684   | 316.074   |
| AK021528  | 1140.721  | 1411.081  |
| AK021746  | 778.452   | 754.978   |
| AK001136  | 1268.17   | 1641.525  |
| AK021617  | 567.53    | 668.756   |
| AK021810  | 506.897   | 502.339   |
| AK025846  | 940.214   | 845.281   |
| AK026805  | 3070.996  | 2766.851  |
| AL389983  | 6939.494  | 5747.064  |
| AJ008159  | 773.022   | 596.271   |
| AK000995  | 533.02    | 658.433   |
| U00959    | 2122.151  | 2030.015  |
| NM_014578 | 9564.83   | 8250.116  |
| AF147306  | 2021.406  | 1518.125  |
| AF086267  | 1040.912  | 1261.384  |
| X74606    | 711.497   | 921.874   |
| NM_012183 | 358.328   | 628.465   |
| AK026785  | 1227.158  | 1439.356  |
| NM_018225 | 12715.378 | 13256.58  |
| AK025534  | 817.51    | 586.961   |
| AF091526  | 705.475   | 647.805   |
| M60749    | 3084.476  | 2965.348  |



|           |           |           |
|-----------|-----------|-----------|
| NM_003523 | 8317.93   | 6212.602  |
| X01448    | 551.294   | 858.313   |
| NM_016503 | 4641.723  | 3931.3    |
| AK056351  | 21716.057 | 20908.141 |
| NM_01469C | 5743.458  | 6281.129  |
| NM_01769E | 5465.875  | 6285.554  |
| AF086490  | 1309.581  | 1218.537  |
| AF131738  | 26957.539 | 25041.682 |
| AK021666  | 1610.698  | 1529.019  |
| AK024825  | 3285.799  | 3454.03   |
| AF086317  | 7820.643  | 9446.094  |
| U16850    | 4502.025  | 4481.167  |
| AL390178  | 622.042   | 521.716   |
| Z36806    | 1334.31   | 1341.691  |
| NM_01861E | 826.627   | 854.149   |
| AJ008121  | 16930.385 | 15537.766 |
| AJ008153  | 1646.547  | 1716.473  |
| AK023739  | 1652.784  | 1131.002  |
| NM_00583C | 6329.049  | 3608.742  |
| NM_001507 | 1501.827  | 1290.121  |
| X92108    | 1006.769  | 692.039   |
| AL389876  | 804.786   | 580.011   |
| AK022120  | 752.257   | 514.19    |
| Z70762    | 1792.839  | 2055.338  |
| D17099    | 456.568   | 520.624   |
| BF037206  | 982.85    | 1064.98   |
| AK021474  | 4390.041  | 4663.531  |
| AK023642  | 2511.035  | 1803.142  |
| AW511510  | 373.236   | 411.922   |
| U52827    | 288.898   | 536.043   |
| AL049466  | 11542.295 | 11793.375 |
| AB037802  | 1789.027  | 1938.624  |
| AL137450  | 6716.009  | 5550.409  |
| NM_012064 | 2054.339  | 1545.989  |
| AK001460  | 953.667   | 672.301   |
| AK092508  | 3762.776  | 2787.774  |
| AK027111  | 48431.047 | 35773.633 |
| NM_00351E | 611.79    | 606.677   |

| ID        | Replicate 1       |                     | ID        | Replicate 2       |                     | ID        | Replicate 3       |                     |
|-----------|-------------------|---------------------|-----------|-------------------|---------------------|-----------|-------------------|---------------------|
|           | control<br>AMPCH1 | 50uM zinc<br>AMPCH2 |           | control<br>AMPCH1 | 50uM zinc<br>AMPCH2 |           | control<br>AMPCH1 | 50uM zinc<br>AMPCH2 |
| CY3Cy5    | 10007.753         | 327.652             | CY3Cy5    | 5597.957          | 176.956             | CY3Cy5    | 23860.385         | 3696.188            |
| NM_000041 | 33515.992         | 46753.848           | NM_000041 | 28132.617         | 27365.85            | NM_000041 | 1407.931          | 1676.973            |
| W69211    | 760.345           | 1357.196            | W69211    | 322.962           | 493.985             | AA449931  | 355.96            | 552.135             |
| AA449931  | 4118.711          | 6988.391            | AA449931  | 2322.177          | 2138.189            | AA877347  | 435.957           | 287.043             |
| AA877347  | 9141.624          | 12790.463           | AA877347  | 7919.178          | 7156.63             | S57235    | 940.963           | 1051.065            |
| S57235    | 7189.752          | 6771.268            | S57235    | 5567.017          | 5214.171            | AI376272  | 1117.397          | 990.661             |
| AI376272  | 2547.365          | 2348.359            | AI376272  | 1562.318          | 1740.857            | BF242229  | 899.534           | 1191.986            |
| BF242229  | 3158.228          | 2845.514            | BF242229  | 2637.023          | 3071.791            | X75756    | 2131.012          | 2344.154            |
| X75756    | 27870.684         | 32316.16            | X75756    | 11817.981         | 14496.1             | AI754623  | 532.276           | 600.505             |
| AI754623  | 2842.073          | 3647.636            | AI754623  | 1763.078          | 2060.222            | AA401326  | 537.211           | 735.936             |
| AA401326  | 7094.305          | 8389.202            | AA401326  | 5438.891          | 5434.337            | AA504482  | 265.679           | 378.853             |
| AA504482  | 6833.039          | 7751.824            | AA504482  | 2514.693          | 2845.185            | NM_006003 | 355.567           | 248.715             |
| BI602175  | 1056.762          | 1181.32             | NM_006003 | 7977.291          | 6504.352            | NM_006555 | 1111.693          | 1000.527            |
| NM_006003 | 20739.902         | 28214.588           | NM_006555 | 619.038           | 771.988             | SR1       | 16936.727         | 19517.539           |
| NM_006555 | 2366.495          | 2220.156            | SR5       | 958.424           | 891.258             | SR3       | 528.823           | 489.541             |
| SR7       | 7847.756          | 41175.813           | SR7       | 1865.181          | 20272.93            | SR5       | 247.839           | 171.667             |
| SR9       | 26874.752         | 5826.425            | SR9       | 6303.234          | 900.052             | SR7       | 480.024           | 4863.565            |
| CY3Cy5    | 2888.177          | 124.074             | CY3Cy5    | 7170.245          | 312.313             | CY3Cy5    | 24048.328         | 1809.108            |
| NM_006869 | 34067.391         | 47488.754           | NM_006869 | 29705.102         | 32679.307           | NM_006869 | 1774.251          | 2562.177            |
| NM_015364 | 619.58            | 1054.384            | NM_006611 | 403.376           | 455.328             | NM_004963 | 239.576           | 392.127             |
| NM_006611 | 577.199           | 697.172             | NM_004963 | 1582.967          | 1332.548            | NM_005535 | 1722.449          | 1869.737            |
| NM_004963 | 1722.742          | 2318.093            | NM_001181 | 734.181           | 602.117             | AB037857  | 303.924           | 605.68              |
| NM_005535 | 13550.944         | 12809.471           | NM_005535 | 8322.185          | 7430.698            | AF218021  | 598.592           | 486.074             |
| AB037857  | 1177.802          | 1065.596            | AB037857  | 1150.274          | 994.013             | NM_013262 | 633.497           | 590.636             |
| AF218021  | 1253.796          | 1134.131            | AF218021  | 1305.74           | 1437.685            | NM_007185 | 492.089           | 720.357             |
| NM_013262 | 8550.239          | 9140.605            | NM_013262 | 10555.972         | 17078.623           | NM_003357 | 1164.228          | 1345.92             |
| NM_007185 | 7278.974          | 9480.159            | NM_007185 | 5880.968          | 8101.279            | AK023261  | 2019.248          | 2246.124            |
| NM_003357 | 8444.512          | 8231.312            | NM_003357 | 7088.064          | 7269.695            | NM_012278 | 329.908           | 295.925             |
| AF195420  | 716.619           | 787.534             | AK023261  | 2274.066          | 2174.528            | NM_016100 | 135.776           | 126.932             |
| AK023261  | 5502.969          | 6255.616            | NM_012278 | 812.339           | 711.519             | NM_001550 | 1816.622          | 1877.137            |
| NM_005097 | 741.991           | 1130.363            | NM_014057 | 732.353           | 868.617             | NM_018677 | 321.952           | 609.673             |
| NM_012278 | 1411.188          | 1562.105            | NM_001550 | 4302.917          | 3373.363            | NM_016582 | 359.812           | 508.029             |
| NM_014057 | 1500.474          | 1442.441            | AK026849  | 2103.408          | 2447.415            | NM_014229 | 336.354           | 314.735             |
| NM_001550 | 15314.212         | 13390.233           | NM_002785 | 585.969           | 452.677             | NM_013265 | 1652.982          | 1350.934            |
| AK026849  | 5968.173          | 5568.661            | NM_016582 | 6463.929          | 4909.142            | NM_014964 | 340.28            | 232.175             |
| NM_018677 | 862.605           | 724.492             | NM_014229 | 1375.798          | 1214.647            | NM_014016 | 2444.205          | 2376.652            |
| NM_002785 | 1276.745          | 882.324             | NM_013265 | 9677.638          | 10166.985           | NM_013433 | 766.802           | 879.957             |
| NM_016582 | 6250.207          | 9329.301            | NM_014964 | 1526.571          | 1724.139            | NM_003794 | 1128.447          | 1319.036            |
| NM_014229 | 2020.25           | 3152.978            | NM_014016 | 15158.217         | 16117.353           | NM_019892 | 1401.069          | 1186.94             |
| NM_013265 | 11565.709         | 17227.367           | NM_013433 | 1951.601          | 1745.554            | NM_016169 | 1271.466          | 1367.924            |
| NM_014016 | 16206.961         | 12827.073           | NM_003794 | 6392.044          | 5666.528            | BF307652  | 203.321           | 238.725             |
| NM_013433 | 1580.021          | 1082.883            | NM_019892 | 7140.58           | 7243.209            | AF116574  | 178.888           | 258.03              |
| NM_003794 | 6847.644          | 6689.537            | NM_016169 | 4217.794          | 5540.029            | NM_005869 | 561.321           | 533.685             |
| NM_019892 | 9009.516          | 8867.644            | NM_004533 | 886.261           | 1137.797            | NM_018676 | 252.531           | 307.347             |
| NM_016169 | 4291.683          | 5092.536            | BF307652  | 944.624           | 1144.686            | NM_006280 | 18908.055         | 17868.539           |
| BF307652  | 1820.931          | 2185.522            | NM_017772 | 2756.796          | 3168                | NM_002066 | 277.775           | 355.424             |
| NM_017772 | 2729.293          | 3481.177            | AF116574  | 882.132           | 1026.893            | NM_007355 | 52951.879         | 44565.289           |
| AF116574  | 1386.905          | 1225.537            | NM_005529 | 923.712           | 991.398             | NM_006096 | 3664.908          | 3498.553            |
| NM_005529 | 1871.861          | 2060.56             | NM_005869 | 2698.307          | 3142.012            | NM_012288 | 266.198           | 372.915             |

|           |           |           |           |           |           |           |          |           |
|-----------|-----------|-----------|-----------|-----------|-----------|-----------|----------|-----------|
| NM_00586E | 5025.656  | 5002.467  | AF105067  | 931.576   | 1184.828  | NM_005264 | 136.657  | 171.874   |
| AF105067  | 1306.365  | 1460.211  | NM_01867E | 1040.642  | 1361.743  | NM_000714 | 6390.285 | 3826.837  |
| NM_01867E | 950.91    | 1237.454  | NM_00628C | 54503.535 | 61387.809 | AK025626  | 124.204  | 312.711   |
| NM_006014 | 1234.069  | 873.643   | NM_00735E | 61194.465 | 58295.09  | NM_00255E | 1568.817 | 1509.507  |
| NM_00628C | 59249.207 | 58112.008 | NM_00609E | 3060.186  | 3169.117  | AL122079  | 135.12   | 70.827    |
| NM_001771 | 311.966   | 798.392   | NM_01228E | 4288.98   | 4170.875  | NM_01808E | 925.788  | 654.87    |
| NM_00206E | 766.943   | 758.355   | NM_005264 | 2424.08   | 1799.588  | L21934    | 447.957  | 434.407   |
| NM_00735E | 72434.195 | 61585.891 | NM_02037E | 1579.542  | 1856.238  | AL117442  | 722.462  | 774.062   |
| NM_00609E | 3537.008  | 4403.093  | NM_00255E | 2959.261  | 3047.748  | NM_001214 | 733.672  | 770.507   |
| NM_01228E | 4330.37   | 4016.103  | NM_01808E | 2478.56   | 2669.422  | U16851    | 3101.047 | 2890.07   |
| NM_005264 | 2317.962  | 2247.588  | L21934    | 1292.107  | 1168.484  | NM_02030E | 391.376  | 457.704   |
| NM_02037E | 1385.063  | 1221.789  | AL117442  | 4936.047  | 5214.189  | NM_00644E | 114.78   | 145.047   |
| NM_000714 | 66182.016 | 46157     | NM_00469E | 420.782   | 566.751   | NM_000341 | 257.028  | 390.52    |
| NM_00255E | 2655.338  | 2657.803  | AF299075  | 404.569   | 650.251   | NM_01245C | 694.884  | 751.755   |
| NM_01808E | 2553.123  | 3433.994  | NM_00718E | 1277.825  | 1742.267  | NM_007071 | 1139.099 | 1100.532  |
| L21934    | 1160.7    | 1300.24   | NM_001214 | 2763.664  | 5181.97   | NM_00496E | 69.482   | 76.512    |
| AL117442  | 7136.532  | 8018.229  | AK022409  | 344.155   | 336.186   | NM_01213E | 168.765  | 142.079   |
| NM_00469E | 791.315   | 918.072   | U16851    | 2620.511  | 2817.743  | M37190    | 89.152   | 153.967   |
| AF299075  | 1166.237  | 1461.322  | NM_014341 | 931.674   | 1250.925  | NM_00681E | 1152.792 | 972.364   |
| NM_00718E | 2032.02   | 2011.38   | NM_02030E | 1010.875  | 1211.773  | AK024434  | 1133.314 | 1218.167  |
| NM_001214 | 6708.712  | 6909.379  | NM_000341 | 543.292   | 536.212   | NM_00238E | 3350.851 | 3759.196  |
| AK022409  | 745.536   | 838.961   | AK023533  | 702.932   | 732.755   | NM_01606E | 2608.29  | 2786.649  |
| U16851    | 6912.602  | 5559.164  | NM_01245C | 663.03    | 918.406   | NM_01761E | 1207.229 | 1042.747  |
| NM_014341 | 5046.979  | 4926.503  | NM_007071 | 3870.395  | 5103.929  | NM_01323E | 3617.029 | 3331.617  |
| NM_02030E | 2098.925  | 1768.919  | NM_01213E | 478.988   | 431.2     | NM_017841 | 765.478  | 677.678   |
| NM_000341 | 951.665   | 774.351   | AK024434  | 7397.695  | 8408.103  | NM_001254 | 774.195  | 908.373   |
| AK023533  | 849.241   | 955.623   | NM_00238E | 7492.152  | 7304.221  | NM_02041E | 2201.484 | 2559.631  |
| NM_01245C | 1440.119  | 1658.51   | NM_01606E | 27199.232 | 33499.059 | NM_00303E | 826.509  | 781.429   |
| NM_007071 | 4946.76   | 6521.887  | NM_01761E | 2071.495  | 2155.604  | NM_01745E | 747.115  | 626.597   |
| NM_00681E | 13312.064 | 7464.479  | NM_01323E | 8141.325  | 8783.337  | AF038564  | 1710.399 | 1485.895  |
| AK024434  | 8049.825  | 6516.938  | NM_017841 | 4085.25   | 4345.629  | NM_01765E | 448.112  | 491.344   |
| NM_00238E | 7018.133  | 7699.04   | NM_001254 | 2006.776  | 2548.87   | NM_006904 | 3973.828 | 4288.224  |
| NM_01606E | 34482.035 | 39548.223 | NM_02041E | 10332.948 | 10954.958 | NM_004217 | 3655.585 | 3384.787  |
| NM_01761E | 2264.641  | 2505.353  | NM_00303E | 4288.749  | 4777.823  | NM_006347 | 15008.64 | 17841.762 |
| NM_01323E | 9535.321  | 9646.927  | NM_01745E | 3896.534  | 4498.833  | NM_02040E | 379.69   | 440.616   |
| NM_017841 | 4307.793  | 5206.37   | AF038564  | 3378.716  | 3010.895  | NM_01468E | 1716.905 | 1441.17   |
| NM_001254 | 2987.484  | 4133.883  | AB033768  | 1800.495  | 1335.398  | NM_00155C | 680.089  | 783.524   |
| NM_02041E | 17904.129 | 26782.418 | NM_01765E | 1358.711  | 1372.073  | AK026849  | 132.323  | 174.849   |
| NM_00303E | 8224.559  | 10240.39  | NM_006904 | 3504.37   | 4608.458  | NM_018677 | 414.72   | 491.698   |
| NM_01745E | 13685.421 | 12765.026 | NM_004217 | 3227.883  | 3973.623  | NM_00278E | 465.64   | 466.548   |
| AF038564  | 4781.834  | 4256.777  | NM_006347 | 20094.383 | 27771.543 | NM_000041 | 1711.596 | 1961.641  |
| AB033768  | 1424.757  | 1056.251  | NM_02040E | 1383.811  | 1674.616  | W69211    | 262.964  | 264.788   |
| NM_01765E | 3148.22   | 3011.451  | NM_01468E | 19940.471 | 29384.234 | AA449931  | 977.786  | 959.036   |
| NM_006904 | 5300.141  | 5846.202  | NM_00155C | 14166.34  | 10589.595 | AA877347  | 885.274  | 1097.39   |
| NM_004217 | 6341.451  | 6587.851  | AK026849  | 9213.41   | 8165.797  | S57235    | 1086.269 | 1032.192  |
| NM_006347 | 25507.822 | 31402.176 | NM_018677 | 1169.429  | 853.738   | AI376272  | 575.055  | 859.406   |
| NM_02040E | 1986.432  | 1820.235  | NM_00278E | 987.255   | 779.051   | BF242229  | 1238.874 | 1052.757  |
| NM_01468E | 24682.795 | 27773.441 | NM_000041 | 29400.939 | 29571.822 | X75756    | 5048.464 | 4716.793  |
| NM_00155C | 11726.921 | 6304.669  | W69211    | 620.396   | 644.198   | AI754623  | 1013.288 | 1271.971  |
| AK026849  | 5181.247  | 3746.83   | AA449931  | 4326.113  | 4132.626  | AA401326  | 1623.548 | 1700.06   |
| NM_00278E | 968.899   | 839.201   | AA877347  | 6567.108  | 5885.413  | AA504482  | 1169.41  | 1010.894  |
| NM_000041 | 28613.063 | 31604.887 | S57235    | 5205.979  | 4753.531  | NM_00600E | 626.087  | 548.866   |
| W69211    | 674.819   | 802.929   | AI376272  | 1854.645  | 1705.945  | NM_00655E | 1450.141 | 1456.303  |

|           |           |           |           |           |           |           |           |           |
|-----------|-----------|-----------|-----------|-----------|-----------|-----------|-----------|-----------|
| AA449931  | 3736.687  | 3949.858  | BF242229  | 2260.793  | 2720.329  | NM_016516 | 516.287   | 408.81    |
| AA877347  | 8124.745  | 8452.591  | X75756    | 10596.172 | 12829.799 | AF263538  | 608.406   | 356.55    |
| S57235    | 7168.217  | 6896.12   | AI754623  | 760.992   | 936.763   | NM_006280 | 2233.46   | 2427.235  |
| AI376272  | 2455.433  | 2698.7    | AA401326  | 3972.226  | 4676.548  | NM_002066 | 229.976   | 210.693   |
| BF242229  | 3201.832  | 3482.115  | AA504482  | 2831.781  | 2641.174  | NM_007355 | 40436.977 | 43323.855 |
| X75756    | 29982.561 | 39124.52  | NM_006003 | 15678.068 | 13831.693 | NM_006096 | 2520.755  | 2552.377  |
| AI754623  | 2932.41   | 3165.375  | NM_016516 | 3455.007  | 5892.076  | NM_006866 | 5450.766  | 4708.384  |
| AA401326  | 7763.589  | 9467.044  | AF263538  | 768.731   | 710.348   | NM_015364 | 75.348    | 94.491    |
| AA504482  | 7474.142  | 5931.612  | NM_006280 | 62795.605 | 53705.301 | NM_004963 | 681.977   | 509.558   |
| BI602175  | 958.561   | 876.516   | NM_001771 | 504.832   | 517.858   | NM_005535 | 1951.612  | 1766.256  |
| NM_006003 | 21111.563 | 20657.943 | NM_007355 | 67006.984 | 59015.766 | AB037857  | 410.982   | 505.067   |
| NM_006555 | 1989.077  | 2197.362  | NM_006096 | 4632.648  | 4145.122  | AF218021  | 512.929   | 613.881   |
| NM_016516 | 3439.998  | 4216.117  | NM_006866 | 41129.328 | 48797.574 | NM_013262 | 2033.32   | 1896.728  |
| AF263538  | 901.003   | 1314.278  | NM_015364 | 391.201   | 656.576   | NM_007185 | 1770.504  | 1805.214  |
| NM_006280 | 50050.535 | 43436.281 | NM_006611 | 350.986   | 359.181   | NM_003221 | 497.321   | 308.75    |
| NM_002155 | 910.709   | 836.231   | NM_004963 | 1477.246  | 1475.068  | NM_003357 | 3478.68   | 3836.467  |
| NM_002066 | 789.927   | 826.721   | NM_001181 | 460.151   | 565.85    | AF195420  | 212.053   | 280.751   |
| NM_007355 | 65498.113 | 53047.91  | NM_005535 | 9230.23   | 9448.37   | AK023261  | 3325.113  | 3781.421  |
| NM_006096 | 4377.788  | 4223.003  | AB037857  | 635.328   | 1030.654  | NM_005097 | 356.515   | 566.229   |
| NM_006866 | 28356.652 | 36706.926 | NM_005012 | 102.88    | 232.879   | NM_012278 | 503.991   | 556.642   |
| NM_006611 | 586.756   | 459.739   | AF218021  | 989.492   | 1099.007  | NM_014057 | 237.035   | 347.127   |
| NM_004963 | 1806.498  | 1826.184  | NM_013262 | 6765.966  | 8759.296  | NM_020309 | 249.924   | 248.679   |
| NM_001181 | 888.257   | 902.602   | NM_007185 | 2724.193  | 3468.894  | NM_012450 | 424.087   | 304.533   |
| NM_005535 | 13161.301 | 14790.623 | NM_003357 | 3157.111  | 4005.25   | NM_007071 | 952.475   | 650.203   |
| AB037857  | 1542.665  | 1173.384  | AK023261  | 2391.778  | 2249.815  | NM_016582 | 1305.02   | 1022.737  |
| AF218021  | 1343.599  | 1712.066  | NM_005097 | 323.47    | 400.234   | NM_014229 | 239.842   | 253.052   |
| NM_013262 | 10202.675 | 11309.345 | NM_012278 | 772.873   | 949.814   | NM_013265 | 766.38    | 647.703   |
| NM_007185 | 9698.15   | 11187.528 | NM_016100 | 2741.036  | 2651.915  | NM_014016 | 4662.74   | 4801.332  |
| NM_003221 | 686.6     | 800.29    | NM_014057 | 947.671   | 1335.596  | NM_013433 | 834.841   | 775.639   |
| NM_003357 | 9028.951  | 8255.306  | NM_020309 | 2218.502  | 1966.614  | NM_003794 | 2073.101  | 2471.155  |
| AF195420  | 463.557   | 659.275   | NM_000341 | 1080.331  | 995.921   | NM_019892 | 997.894   | 1031.842  |
| AK023261  | 5533.316  | 5013.215  | AK023533  | 897.172   | 908.927   | NM_016169 | 1681.502  | 1998.314  |
| NM_005097 | 560.298   | 980.854   | NM_012450 | 1033.903  | 973.717   | BF307652  | 651.89    | 827.263   |
| NM_012278 | 1056.637  | 1103.218  | NM_007071 | 5952.313  | 5258.52   | NM_017772 | 520.337   | 507.232   |
| NM_016100 | 764.087   | 981.231   | NM_016582 | 5028.299  | 5258.894  | AF116574  | 442.687   | 318.101   |
| NM_014057 | 1541.733  | 1995.786  | NM_014229 | 1415.994  | 1543.552  | NM_005529 | 596.244   | 483.865   |
| NM_020309 | 1618.338  | 1698.458  | NM_013265 | 9927.121  | 9978.252  | NM_005866 | 1338.934  | 1291.029  |
| NM_000341 | 915.364   | 897.733   | NM_014964 | 1446.052  | 1496.268  | AF105067  | 295.218   | 285.669   |
| AK023533  | 835.277   | 1039.993  | NM_014016 | 14280.478 | 15468.184 | NM_018676 | 508.106   | 482.519   |
| NM_012450 | 1533.192  | 1588.584  | NM_013433 | 1811.3    | 2448.334  | NM_012072 | 96.626    | 186.317   |
| NM_007071 | 4943.435  | 5200.242  | NM_003794 | 5005.792  | 5225.954  | NM_006014 | 155.055   | 531.197   |
| NM_016582 | 5210.928  | 5066.059  | NM_019892 | 3280.106  | 4077.016  | NM_006904 | 904.488   | 1206.61   |
| NM_014229 | 1713.192  | 1697.769  | BF307652  | 593.438   | 938.079   | NM_004217 | 1172.235  | 1514.704  |
| NM_013265 | 10896.655 | 11794.068 | NM_017772 | 586.284   | 855.34    | NM_006347 | 3086.745  | 3627.199  |
| NM_014964 | 1873.623  | 2161.531  | AF116574  | 634.748   | 563.252   | NM_020406 | 224.533   | 168.165   |
| NM_014016 | 17913.732 | 18117.318 | NM_005866 | 3688.792  | 4345.016  | NM_014685 | 160.947   | 226.68    |
| NM_013433 | 2395.664  | 2361.982  | AF105067  | 1094.224  | 1361.329  | NM_012288 | 505.812   | 687.249   |
| NM_003794 | 7756.74   | 7505.165  | NM_018676 | 1088.871  | 1572.538  | NM_005264 | 317.276   | 258.901   |
| NM_019892 | 9447.54   | 10516.911 | NM_006014 | 1134.474  | 1786.594  | NM_020373 | 233.861   | 135.327   |
| NM_016169 | 6516.581  | 9186.71   | NM_006904 | 6382.434  | 6261.563  | NM_000714 | 3221.286  | 4617.191  |
| NM_004533 | 453.798   | 511.46    | NM_004217 | 5552.267  | 5146.537  | NM_002556 | 1552.273  | 1854.772  |
| BF307652  | 2046.281  | 2115.271  | NM_006347 | 23759.752 | 28748.582 | NM_018089 | 679.501   | 791.527   |
| NM_017772 | 3231.69   | 4426.689  | NM_020406 | 1247.675  | 1122.119  | L21934    | 830.199   | 680.381   |

|           |           |           |           |           |           |           |          |          |
|-----------|-----------|-----------|-----------|-----------|-----------|-----------|----------|----------|
| AF116574  | 1450.292  | 1378.712  | NM_014685 | 23034.926 | 21550.656 | AL117442  | 2007.885 | 1932.829 |
| NM_005529 | 1572.52   | 1975.813  | NM_012288 | 3335.109  | 3435.455  | AF299075  | 341.42   | 303.149  |
| NM_005869 | 4337.633  | 4508.528  | NM_005264 | 2161.892  | 1947.925  | NM_007188 | 492.117  | 573.188  |
| AF105067  | 1136.276  | 1070.097  | NM_020373 | 1365.789  | 1359.917  | NM_001214 | 1410.124 | 1541.492 |
| NM_018676 | 1361.152  | 2031.734  | NM_002556 | 2265.178  | 2649.674  | AK022409  | 151.354  | 243.708  |
| NM_012072 | 422.7     | 641.871   | NM_018089 | 2224.07   | 2815.058  | U16851    | 4495.45  | 4886.551 |
| NM_006014 | 1813.082  | 2311      | AL117442  | 2034.496  | 2622.345  | NM_014341 | 999.957  | 988.811  |
| NM_006904 | 3970.619  | 3492.471  | AF299075  | 590.992   | 606.245   | NM_006003 | 454.677  | 315.036  |
| NM_004217 | 6064.538  | 6142.985  | NM_000340 | 409.54    | 512.357   | NM_006555 | 717.989  | 771.474  |
| NM_006347 | 24076.5   | 26112.102 | NM_007188 | 1607.427  | 2064.478  | NM_016516 | 244.425  | 217.68   |
| NM_020406 | 2255.271  | 2268.958  | NM_001214 | 2154.548  | 2834.824  | AF263538  | 216.076  | 305.25   |
| NM_014685 | 24093.367 | 26729.072 | AK022409  | 517.935   | 745.305   | NM_006812 | 570.943  | 504.859  |
| NM_012288 | 4793.813  | 4893.881  | U16851    | 9623.883  | 11949.17  | AK024434  | 1005.144 | 1163.283 |
| NM_005264 | 2360.687  | 2702.685  | NM_014341 | 5965.497  | 7825.107  | NM_002388 | 4496.08  | 5399.16  |
| NM_020373 | 1348.335  | 1427.92   | NM_006003 | 22820.338 | 17324.621 | NM_016069 | 2817.999 | 2977.409 |
| NM_000714 | 72000.281 | 62961.582 | NM_006555 | 1891.696  | 1743.802  | NM_017612 | 1297.741 | 1626.93  |
| NM_002556 | 2815.265  | 3043.98   | NM_016516 | 2800.734  | 2671.156  | NM_013236 | 6096.27  | 6729.172 |
| NM_018089 | 3776.469  | 3775.183  | AF263538  | 677.527   | 719.788   | NM_017841 | 1114.869 | 1244.528 |
| L21934    | 1759.301  | 1966.056  | AK024434  | 9369.439  | 10109.469 | NM_001254 | 1523.439 | 1665.992 |
| AL117442  | 7330.619  | 6505.734  | NM_002388 | 6478.837  | 7759.324  | NM_020412 | 2925.326 | 3258.836 |
| AF299075  | 1284.127  | 1092.088  | NM_016069 | 20828.02  | 25946.225 | NM_003032 | 2298.306 | 2224.28  |
| NM_000340 | 460.424   | 783.127   | NM_017612 | 1296.226  | 1681.029  | NM_017453 | 1719.365 | 1551.582 |
| NM_007188 | 1518.498  | 1784.455  | NM_013236 | 7163.292  | 8415.125  | AF038564  | 2595.704 | 2526.61  |
| NM_001214 | 5070.535  | 5577.367  | NM_017841 | 3387.053  | 3509.826  | AB033768  | 386.951  | 530.344  |
| AK022409  | 790.9     | 896.974   | NM_001254 | 2158.566  | 2714.643  | NM_017659 | 1217.097 | 1200.752 |
| U16851    | 7375.962  | 9164.309  | NM_020412 | 10158.167 | 11113.94  | AK023261  | 2418.151 | 2763.787 |
| NM_014341 | 6696.73   | 8228.926  | NM_003032 | 5234.555  | 6760.71   | NM_005097 | 243.143  | 333.077  |
| NM_006003 | 17270.232 | 12388.03  | NM_017453 | 9542.419  | 8837.768  | NM_001550 | 2797.885 | 2715.008 |
| NM_006555 | 1910.236  | 1800.625  | AF038564  | 3185.065  | 3570.582  | NM_018677 | 363.01   | 510.78   |
| NM_016516 | 3418.851  | 3150.332  | AB033768  | 3617.843  | 5263.222  | NM_002785 | 499.069  | 320.016  |
| AF263538  | 957.288   | 1136.502  | NM_017659 | 2716.248  | 3498.495  | NM_000041 | 2877.151 | 3264.068 |
| NM_006812 | 15976.312 | 18232.969 | AK023261  | 5158.034  | 4072.573  | W69211    | 218.995  | 370.708  |
| AK024434  | 9331.83   | 10551.745 | NM_005097 | 448.255   | 504.895   | AA449931  | 502.084  | 485.872  |
| NM_002388 | 8066.816  | 8811.952  | NM_012278 | 681.663   | 886.97    | AA877347  | 1151.532 | 1339.632 |
| NM_016069 | 36417.656 | 45781.473 | NM_016100 | 644.186   | 697.821   | S57235    | 1835.03  | 2342.055 |
| NM_017612 | 2590.344  | 3073.984  | NM_014057 | 618.338   | 628.808   | AI376272  | 1357.689 | 1356.443 |
| NM_013236 | 8889.078  | 7645.338  | NM_001550 | 10190.305 | 8021.722  | BF242229  | 1236.405 | 1490.916 |
| NM_017841 | 4670.595  | 4150.488  | AK026849  | 7648.591  | 6978.825  | X75756    | 4091.083 | 5111.449 |
| NM_001254 | 3272.928  | 3511.665  | NM_018677 | 1007.619  | 607.263   | AI754623  | 1995.806 | 1999.608 |
| NM_020412 | 15541.192 | 15870.944 | NM_002785 | 709.668   | 932.657   | AA401326  | 1747.841 | 2336.322 |
| NM_003032 | 7854.568  | 7891.087  | NM_000041 | 27192.586 | 36737.801 | AA504482  | 1995.803 | 2151.865 |
| NM_017453 | 13370.646 | 12666.688 | W69211    | 467.812   | 759.083   | BI602175  | 157.73   | 402.023  |
| AF038564  | 5358.026  | 5864.973  | AA449931  | 2435.532  | 2691.113  | NM_005869 | 298.472  | 456.03   |
| AB033768  | 2328.127  | 2228.958  | AA877347  | 6665.154  | 7875.908  | AF105067  | 189.021  | 183.637  |
| NM_017659 | 3128.996  | 4336.975  | BF242229  | 1915.474  | 2756.76   | NM_018676 | 532.134  | 372.442  |
| AK023261  | 4471.898  | 3337.724  | X75756    | 15023.662 | 16877.188 | NM_012072 | 278.149  | 116.553  |
| NM_012278 | 939.019   | 1063.502  | AI754623  | 2773.052  | 2964.165  | NM_006280 | 8625.912 | 8367.35  |
| NM_016100 | 729.128   | 786.998   | AA401326  | 4193.737  | 5382.453  | NM_002155 | 113.116  | 210.955  |
| NM_014057 | 1253.873  | 1385.165  | AA504482  | 5916.355  | 7934.386  | NM_007355 | 62526.93 | 46175.84 |
| NM_001550 | 15843.625 | 15192.733 | NM_005529 | 1687.34   | 1373.605  | NM_006096 | 2642.105 | 3031     |
| AK026849  | 7033.872  | 7566.53   | NM_005869 | 3812.928  | 3442.161  | NM_006869 | 3211.69  | 3700.599 |
| NM_018677 | 1196.316  | 911.088   | AF105067  | 907.211   | 994.314   | NM_004963 | 588.372  | 583.754  |
| NM_002785 | 1066.418  | 1074.634  | NM_018676 | 916.715   | 937.728   | NM_001181 | 89.472   | 206.55   |

|           |           |           |           |           |           |           |          |          |
|-----------|-----------|-----------|-----------|-----------|-----------|-----------|----------|----------|
| NM_000041 | 30524.521 | 38403.023 | NM_006014 | 1502.071  | 1163.689  | NM_00553E | 3030.757 | 3496.744 |
| W69211    | 752.061   | 1215.14   | NM_00628C | 54680.41  | 51324.957 | AB037857  | 538.358  | 543.349  |
| AA449931  | 4479.25   | 5440.134  | NM_00215E | 595.177   | 369.996   | NM_005012 | 106.658  | 215.805  |
| AA877347  | 9352.507  | 10063.758 | NM_00206E | 734.106   | 956.917   | AF218021  | 532.962  | 937.175  |
| R54049    | 462.166   | 582.002   | NM_00609E | 4501.583  | 4844.777  | NM_01326E | 3348.937 | 4225.005 |
| S57235    | 7262.19   | 6582.168  | NM_00686E | 24835.037 | 31581.404 | NM_00718E | 2202.891 | 2631.146 |
| AI376272  | 2716.662  | 2614.663  | NM_00496C | 1528.936  | 1747.679  | NM_003221 | 212.508  | 543.259  |
| BF242229  | 3289.74   | 3263.655  | NM_005012 | 335.418   | 491.479   | NM_003357 | 4900.727 | 4927.105 |
| X75756    | 24419.34  | 27970.727 | AF218021  | 955.404   | 1184.972  | NM_00718E | 389.018  | 418.856  |
| AI754623  | 2679.408  | 2981.569  | NM_01326E | 4487.077  | 5042.202  | NM_001214 | 1184.859 | 1231.729 |
| AA401326  | 6639.626  | 6761.379  | NM_00718E | 4783.359  | 5184.033  | U16851    | 2662.708 | 2313.329 |
| N55461    | 503.423   | 799.526   | NM_003221 | 479.467   | 523.311   | NM_014341 | 633.676  | 618.345  |
| AA504482  | 8853.453  | 10277.513 | NM_003357 | 7921.21   | 9688.879  | NM_02030E | 484.911  | 567.825  |
| BI602175  | 671.708   | 1003.327  | AF195420  | 480.974   | 515.635   | NM_00644E | 115.714  | 129.248  |
| NM_00552E | 1213.019  | 1127.346  | NM_00718E | 1520.634  | 1379.735  | NM_000341 | 372.153  | 209.42   |
| NM_00586E | 3443.463  | 3141.431  | NM_001214 | 3268.566  | 3305.892  | NM_01245C | 544.412  | 693.484  |
| AF105067  | 1262.015  | 1317.485  | AK022409  | 564.675   | 560.414   | NM_007071 | 731.862  | 637.106  |
| NM_01867E | 978.139   | 1380.056  | U16851    | 7489.145  | 6410.855  | NM_01658E | 923.712  | 994.413  |
| NM_006014 | 1705.439  | 1545.197  | NM_014341 | 6366.09   | 5104.609  | NM_01422E | 364.255  | 281.994  |
| NM_00628C | 58590.5   | 51940.32  | NM_02030E | 1517.664  | 1519.114  | NM_01326E | 1051.988 | 1145.505 |
| NM_00215E | 515.457   | 645.509   | NM_000341 | 868.74    | 789.406   | NM_014964 | 360.439  | 454.886  |
| NM_00206E | 961.736   | 1011.86   | AK023533  | 774.128   | 888.362   | NM_01401E | 6814.018 | 8125.962 |
| NM_00735E | 68639.555 | 61018.406 | NM_007071 | 4589.095  | 5802.194  | NM_01343E | 1597.725 | 1581.918 |
| NM_00609E | 4762.334  | 4241.366  | NM_01658E | 3724.428  | 3786.012  | NM_003794 | 4298.648 | 4625.563 |
| NM_00686E | 30441.705 | 39202.688 | NM_01422E | 1193.577  | 1191.944  | NM_01989E | 2636.218 | 2531.737 |
| NM_006611 | 663.633   | 702.211   | NM_01326E | 9890.708  | 10738.016 | NM_01616E | 2042.459 | 2750.052 |
| NM_00496E | 2361.776  | 3260.841  | NM_014964 | 1021.258  | 997.562   | BF307652  | 833.372  | 862.129  |
| NM_001181 | 803.699   | 962.073   | NM_003794 | 6052.997  | 7883.015  | NM_01777E | 1618.951 | 1599.057 |
| NM_00553E | 14645.226 | 12106.294 | NM_01989E | 2823.236  | 2935.629  | NM_02041E | 1976.565 | 2597.763 |
| AB037857  | 1353.863  | 1120.358  | NM_01616E | 2340.857  | 2890.422  | NM_00303E | 1988.063 | 1847.453 |
| AF218021  | 1382.357  | 1465.986  | BF307652  | 658.201   | 1065.361  | NM_01745E | 1955.919 | 1482.795 |
| NM_01326E | 8908.672  | 9276.691  | NM_01777E | 2765.108  | 3270.142  | AF038564  | 1930.408 | 1574.6   |
| NM_00718E | 9073.7    | 9921.084  | NM_02041E | 11310.588 | 8732.592  | AB033768  | 117.277  | 128.242  |
| NM_003221 | 933.458   | 959.141   | NM_00303E | 7237.096  | 6062.36   | NM_01765E | 504.118  | 631.279  |
| NM_003357 | 11032.622 | 13298.669 | NM_01745E | 12116.686 | 9009.969  | NM_006904 | 3391.595 | 3699.153 |
| AF195420  | 614.543   | 1266.691  | AF038564  | 5256.687  | 4059.231  | NM_004217 | 2454.681 | 2564.929 |
| NM_00718E | 1307.195  | 1116.177  | AB033768  | 2195.04   | 1414.876  | NM_006347 | 7647.572 | 9798.914 |
| NM_001214 | 4385.634  | 4433.423  | NM_01765E | 2504.273  | 1851.186  | NM_02040E | 636.761  | 534.452  |
| AK022409  | 815.359   | 857.823   | NM_006904 | 5292.267  | 5301.791  | NM_01468E | 411.683  | 747.201  |
| U16851    | 6852.915  | 6103.502  | NM_004217 | 4974.937  | 4535.773  | NM_01228E | 1584.538 | 1570.424 |
| NM_014341 | 5818.594  | 5381.575  | NM_006347 | 21526.576 | 23353.107 | NM_005264 | 273.675  | 250.576  |
| NM_02030E | 1570.031  | 1849.5    | NM_02040E | 1179.031  | 1306.808  | NM_000714 | 9422.021 | 9849.019 |
| NM_000341 | 940.627   | 927.327   | NM_01468E | 19642     | 18261.471 | NM_00255E | 2346.937 | 2226.906 |
| AK023533  | 779.271   | 930.633   | NM_01228E | 4477.401  | 4474.272  | NM_01808E | 1757.142 | 2252.071 |
| NM_01245C | 1450.449  | 1642.283  | NM_005264 | 2055.181  | 1925.318  | L21934    | 892.142  | 1340.205 |
| NM_007071 | 4973.366  | 5268.116  | NM_02037E | 2328.143  | 2315.083  | AB018317  | 1016.52  | 2983.403 |
| NM_01658E | 5980.276  | 6587.605  | NM_00255E | 1275.22   | 1924.818  | AL117442  | 4123.951 | 4152.075 |
| NM_01422E | 935.474   | 815.516   | NM_01808E | 2233.181  | 3123.67   | NM_00469E | 481.724  | 454.623  |
| NM_01326E | 11721.391 | 13945.912 | L21934    | 1077.891  | 1324.854  | AK026663  | 705.615  | 604.657  |
| NM_014964 | 2088.115  | 2783.819  | AL117442  | 6615.689  | 7227.24   | NM_001174 | 1068.269 | 646.18   |
| NM_01401E | 18853.092 | 19828.33  | NM_00469E | 891.334   | 886.495   | U69645    | 2013.166 | 1942.76  |
| NM_01343E | 2408.496  | 2189.083  | AF299075  | 1036.517  | 1042.383  | NM_01908E | 3350.064 | 3204.091 |
| NM_003794 | 6990.782  | 6576.492  | AK026663  | 1075.079  | 711.054   | NM_001424 | 761.473  | 543.037  |

|           |           |           |           |           |           |           |           |           |
|-----------|-----------|-----------|-----------|-----------|-----------|-----------|-----------|-----------|
| NM_019892 | 9386.694  | 9005.463  | NM_001174 | 1727.039  | 1204.233  | AB040950  | 893.566   | 803.421   |
| NM_016169 | 4492.719  | 5165.535  | U69645    | 5155.614  | 5463.342  | NM_014003 | 1789.699  | 1837.203  |
| BF307652  | 2826.631  | 4105.807  | NM_019082 | 5182.434  | 4475.296  | NM_001356 | 643.12    | 513.978   |
| NM_017772 | 3359.03   | 4460.788  | NM_001424 | 1543.76   | 1383.186  | AB002282  | 41230.406 | 43781.391 |
| AF116574  | 1221.435  | 1990.656  | AB040950  | 1631.546  | 1280.895  | AB037805  | 3096.815  | 3356.117  |
| NM_020412 | 13642.011 | 8820.703  | NM_014003 | 3385.016  | 2750.207  | NM_016516 | 330.462   | 293.742   |
| NM_003032 | 7777.595  | 6472.321  | NM_001356 | 830.904   | 899.732   | AF263538  | 299.303   | 278.651   |
| NM_017453 | 12391.405 | 8717.006  | AB002282  | 57235.477 | 54047.609 | M37190    | 143.199   | 201.551   |
| AF038564  | 4243.31   | 4130.298  | AB037805  | 6045.545  | 5331.968  | NM_006812 | 1827.872  | 1759.64   |
| AB033768  | 1114.103  | 1681.616  | NM_016516 | 2375.947  | 2435.836  | AK024434  | 2410.464  | 2518.295  |
| NM_017659 | 2685.072  | 2434.726  | AF263538  | 878.653   | 548.816   | NM_002388 | 6978.474  | 7339.635  |
| NM_006904 | 5959.802  | 5733.754  | AK024434  | 8077.645  | 7846.998  | NM_016069 | 11896.398 | 15090.677 |
| NM_004217 | 7126.613  | 6944.956  | NM_002388 | 6174.241  | 7350.065  | NM_017612 | 1826.479  | 2219      |
| NM_020406 | 2484.958  | 2777.655  | NM_016069 | 45990.469 | 55826.152 | NM_013357 | 1153.607  | 1428.485  |
| NM_014685 | 25082.813 | 25285.695 | NM_017612 | 2117.312  | 2767.205  | NM_013236 | 9749.318  | 10289.378 |
| NM_012288 | 5224.79   | 5170.448  | NM_013236 | 10243.616 | 11072.454 | NM_017841 | 4106.691  | 3822.152  |
| NM_005264 | 2570.744  | 2871.625  | NM_017841 | 4677.309  | 4910.854  | NM_001254 | 2316.38   | 2394.89   |
| NM_020373 | 1785.301  | 2768.192  | NM_001254 | 3532.552  | 3777.782  | NM_004389 | 299.093   | 386.283   |
| NM_000714 | 72510.742 | 62473.934 | NM_004389 | 945.161   | 615.443   | AF278532  | 170.057   | 129.391   |
| NM_002556 | 2270.076  | 1749.843  | NM_005928 | 777.174   | 536.411   | NM_003952 | 574.646   | 575.506   |
| NM_018089 | 2469.926  | 3436.702  | NM_003952 | 1828.511  | 1492.09   | NM_005424 | 571.56    | 481.465   |
| L21934    | 1399.792  | 1719.012  | NM_005424 | 1172.842  | 670.425   | NM_005975 | 186.324   | 153.475   |
| AL117442  | 9110.903  | 12431.004 | NM_005975 | 5011.016  | 3968.758  | AY007220  | 2483.81   | 3677.728  |
| NM_004695 | 1364.837  | 1452.012  | AY007220  | 5855.764  | 5118.264  | NM_004438 | 634.028   | 946.414   |
| AF299075  | 1390.08   | 1786.681  | NM_004438 | 2358.906  | 2071.97   | X89399    | 1046.451  | 1409.721  |
| AK026663  | 1805.836  | 1287.275  | X89399    | 1358.542  | 1250.359  | NM_003808 | 410.791   | 392.399   |
| NM_001174 | 1557.654  | 1187.155  | NM_003808 | 1076.446  | 994.55    | AK023666  | 402.315   | 766.765   |
| U69645    | 6374.413  | 5731.29   | AK023666  | 1332.837  | 1387.068  | NM_005399 | 1392.938  | 1217.131  |
| NM_019082 | 5616.295  | 4869.705  | NM_005399 | 1979.298  | 1499.301  | NM_006573 | 414.435   | 506.581   |
| NM_001424 | 1723.881  | 1800.886  | NM_006573 | 1218.66   | 1047.359  | NM_005118 | 200.662   | 239.191   |
| AB040950  | 1894.637  | 1585.233  | NM_015185 | 1866.295  | 1417.105  | NM_015185 | 612.948   | 676.077   |
| NM_014003 | 3827.794  | 3958.658  | NM_005374 | 314.398   | 509.425   | AF011757  | 236.748   | 390.136   |
| NM_001356 | 1298.557  | 1440.472  | NM_003632 | 1904.739  | 1779.051  | NM_003632 | 1103.958  | 1257.721  |
| AB037805  | 9975.042  | 9876.97   | NM_002194 | 2464.76   | 2530.08   | NM_002194 | 2363.944  | 2311.402  |
| NM_016516 | 3290.583  | 3815.394  | NM_000530 | 828.76    | 781.852   | NM_000530 | 352.518   | 407.599   |
| AF263538  | 978.923   | 990.396   | AB028989  | 616.668   | 666.976   | AB028989  | 147.326   | 357.696   |
| NM_012135 | 711.586   | 718.452   | NM_016166 | 15824.068 | 15274.735 | NM_016166 | 5416.907  | 6100.024  |
| NM_006812 | 17582.145 | 18526.924 | NM_002086 | 21707.875 | 20802.934 | NM_002086 | 15662.569 | 18690.789 |
| AK024434  | 10532.694 | 8919.47   | NM_016248 | 1128.383  | 1100.026  | NM_016248 | 894.715   | 666.315   |
| NM_002388 | 6763.392  | 7463.887  | NM_005489 | 11612.957 | 10821.915 | NM_005489 | 4739.016  | 4519.06   |
| NM_016069 | 37821.984 | 47658.758 | NM_020482 | 2132.282  | 1869.516  | NM_020482 | 470.19    | 420.8     |
| NM_017612 | 2437.715  | 2342.771  | NM_005417 | 459.093   | 494.719   | NM_004464 | 177.137   | 110.24    |
| NM_013236 | 11111.809 | 14979.896 | NM_002649 | 3648.116  | 2860.054  | NM_002399 | 516.452   | 323.897   |
| NM_017841 | 4541.177  | 5454.174  | AK025329  | 10097.083 | 8930.404  | NM_005417 | 521.691   | 562.83    |
| NM_001254 | 3621.042  | 4851.846  | NM_001259 | 666.27    | 434.928   | NM_002649 | 2927.55   | 3344.614  |
| NM_004389 | 1191.8    | 744.193   | AL137679  | 1973.884  | 1677.92   | AK025329  | 802.374   | 1210.305  |
| NM_003952 | 1727.827  | 1272.545  | NM_001786 | 5745.915  | 6228.396  | NM_001259 | 346.697   | 370.986   |
| NM_005424 | 1682.032  | 1483.864  | AK025026  | 1820.759  | 1985.062  | AL137679  | 400.288   | 534.837   |
| NM_005975 | 4474.009  | 3947.405  | AK023052  | 992.7     | 865.625   | NM_001786 | 3335.405  | 4361.007  |
| AY007220  | 14287.929 | 13355.32  | NM_006455 | 46921.855 | 43479.395 | AB040965  | 446.551   | 268.138   |
| NM_004438 | 2739.995  | 3711.824  | NM_018460 | 5286.306  | 5153.995  | AK023052  | 428.221   | 797.671   |
| X89399    | 2673.452  | 2298.536  | NM_002705 | 5305.473  | 4593.411  | AB018350  | 280.321   | 352.8     |
| NM_003808 | 1255.165  | 1208.306  | NM_005591 | 10342.194 | 10447.42  | NM_006455 | 14953.218 | 19317.227 |

|           |           |           |           |           |           |           |           |           |
|-----------|-----------|-----------|-----------|-----------|-----------|-----------|-----------|-----------|
| AK023666  | 1403.229  | 1378.093  | NM_002373 | 720.994   | 930.483   | NM_01846C | 5479.891  | 6009.316  |
| NM_00539E | 1636.72   | 1799.976  | NM_017734 | 492.552   | 439.298   | NM_00270E | 2572.52   | 2573.426  |
| NM_006573 | 1563.721  | 1457.01   | AK024251  | 1841.709  | 1411.945  | NM_005591 | 4079.025  | 3715.677  |
| NM_005118 | 679.507   | 819.105   | NM_00254E | 2027.725  | 1802.594  | NM_002373 | 534.772   | 385.103   |
| NM_01518E | 2829.685  | 2363.78   | NM_00668E | 60400.492 | 54279.605 | NM_00312E | 813.343   | 652.522   |
| AF011757  | 605.703   | 739.277   | NM_005411 | 8651.928  | 8357.899  | NM_017734 | 106.735   | 170.369   |
| NM_003632 | 2664.462  | 2816.658  | NM_00485E | 3294.798  | 2590.702  | AK024251  | 709.04    | 667.608   |
| NM_002194 | 3758.627  | 4076.093  | NM_006952 | 834.571   | 536.371   | NM_00254E | 907.714   | 752.236   |
| NM_00053C | 1175.405  | 1202.083  | NM_00480E | 761.101   | 568.276   | NM_00668E | 39556.938 | 38647.133 |
| AB028989  | 1174.107  | 1178.5    | NM_004617 | 973.75    | 855.667   | NM_005411 | 2393.406  | 2289.786  |
| NM_01616E | 14414.288 | 16911.957 | NM_00566E | 2889.946  | 2920.556  | NM_00485E | 2025.039  | 2093.869  |
| NM_00208E | 21089.441 | 27653.578 | NM_00674E | 403.672   | 416.56    | NM_00505E | 90.838    | 112.595   |
| NM_01624E | 1289.001  | 1596.641  | NM_012177 | 3285.74   | 3066.868  | NM_00480E | 469.135   | 395.73    |
| NM_00548E | 13354.912 | 16547.152 | NM_00666E | 15535.1   | 16078.498 | NM_004617 | 253.868   | 483.648   |
| NM_020482 | 2269.501  | 1994.69   | NM_002807 | 5445.604  | 4211.323  | NM_00566E | 2455.582  | 2565.254  |
| NM_005417 | 825.832   | 693.609   | NM_00279E | 44108.371 | 39902.176 | NM_00674E | 185.721   | 194.447   |
| NM_00264E | 4183.488  | 3592.195  | NM_00279C | 33590.809 | 35570.188 | NM_012177 | 2543.393  | 3422.973  |
| AK025329  | 8865.567  | 7141.607  | NM_01838E | 3632.365  | 3475.326  | NM_00666E | 4365.972  | 4317.373  |
| NM_00125E | 778.194   | 724.927   | BF217579  | 10066.785 | 9304.559  | NM_002807 | 3587.125  | 3285.04   |
| AL137679  | 1926.501  | 1973.522  | NM_00433E | 3427.751  | 2851.431  | NM_00279E | 10649.133 | 11914.63  |
| NM_00178E | 6293.735  | 7426.769  | AF040965  | 5445.82   | 4800.421  | NM_00279C | 6548.642  | 6514.782  |
| AB040965  | 579.518   | 936.017   | AB037840  | 5581.296  | 4284.593  | NM_01838E | 3463.542  | 3875.328  |
| AK025026  | 2051.903  | 2432.442  | NM_007011 | 5671.426  | 5870.585  | BF217579  | 4630.585  | 4347.738  |
| AK023052  | 1911.93   | 1969.307  | Y10210    | 3942.314  | 3800.777  | NM_00433E | 2470.006  | 2102.424  |
| AB018350  | 789.605   | 783.416   | AB020689  | 3385.319  | 3457.156  | AF040965  | 4749.372  | 4650.98   |
| NM_00645E | 61311.066 | 54214.129 | AK023916  | 1045.7    | 1113.306  | AB037840  | 2343.709  | 1834.172  |
| NM_01846C | 4612.769  | 3748.61   | NM_003203 | 4232.855  | 4034.268  | NM_007011 | 6890.875  | 7123.409  |
| NM_00270E | 8530.156  | 7771.279  | NM_002514 | 224.129   | 512.83    | Y10210    | 3249.552  | 2888.196  |
| NM_005591 | 7978.402  | 7499.752  | AF177238  | 2117.256  | 1064.135  | AB020689  | 1532.926  | 1443.606  |
| NM_002373 | 786.227   | 1026.809  | NM_01240E | 8244.801  | 6469.624  | AK023916  | 987.652   | 590.259   |
| NM_00312E | 503.03    | 1509.207  | NM_014947 | 13738.328 | 12800.49  | NM_003203 | 4225.825  | 4005.054  |
| NM_017734 | 1290.449  | 1320.107  | AB033112  | 2448.932  | 2168.432  | AF177238  | 1498.38   | 890.935   |
| AK024251  | 2538.206  | 2458.823  | NM_005674 | 730.399   | 867.913   | AB021641  | 348.459   | 307.175   |
| NM_00254E | 2399.985  | 2908.569  | AK023243  | 1601.742  | 1387.659  | NM_01240E | 4451.354  | 4255.948  |
| NM_00668E | 62242.152 | 56968.902 | NM_01440E | 1788.489  | 2178.94   | NM_014947 | 7756.051  | 8076.24   |
| NM_005411 | 9461.265  | 10037.931 | NM_001422 | 1720.916  | 1581.888  | AB033112  | 1698.149  | 1597.461  |
| NM_00485E | 4170.444  | 3435.099  | AK022358  | 1198.206  | 1163.288  | NM_005674 | 445.491   | 609.109   |
| NM_00480E | 1131.211  | 661.94    | NM_000977 | 22574.121 | 23080.828 | AK023243  | 424.586   | 319.519   |
| NM_004617 | 1434.812  | 847.694   | NM_01420E | 37204.527 | 42587.047 | NM_01440E | 1124.145  | 1460.359  |
| NM_00566E | 3530.364  | 2478.555  | NM_018141 | 16569.418 | 17136.691 | BE791857  | 519.475   | 469.649   |
| NM_00674E | 675.003   | 366.185   | NM_016504 | 35136.547 | 38622.918 | NM_006867 | 131.741   | 196.186   |
| NM_012177 | 3815.368  | 3256.213  | U25752    | 55687.551 | 51607.598 | NM_001422 | 1727.078  | 1632.454  |
| NM_00666E | 29163.785 | 31033.561 | X96646    | 43810.691 | 46169.473 | AK022358  | 1097.969  | 660.235   |
| NM_002807 | 7877.525  | 6731.652  | AB032991  | 7341.672  | 4963.424  | NM_000977 | 7217.135  | 6046.075  |
| NM_00279E | 57188.988 | 50406.758 | AK026985  | 2719.709  | 2476.265  | NM_01420E | 10656.01  | 10578.683 |
| NM_00279C | 35834.277 | 38270.156 | AK000855  | 1188.514  | 1025.884  | NM_018141 | 12175.714 | 11363.788 |
| NM_01838E | 4913.999  | 4561.281  | NM_00410E | 2543.446  | 2720.783  | BE790474  | 116.428   | 112.369   |
| NM_01494E | 574.752   | 681.863   | NM_00319E | 6701.729  | 8479.075  | NM_016504 | 23910.178 | 25855.527 |
| BF217579  | 16452.57  | 15660.41  | AF220415  | 686.482   | 546.153   | U25752    | 67009.664 | 41902.586 |
| NM_00433E | 4542.922  | 3839.417  | NM_005174 | 65143.668 | 50100.461 | X96646    | 13232.374 | 12778.966 |
| AF040965  | 15049.364 | 13813.515 | NM_00036E | 2853.85   | 3321.796  | AB032991  | 1951.867  | 2204.779  |
| AB037840  | 6779.533  | 7096.512  | AF110322  | 971.548   | 944.658   | AK026985  | 3148.746  | 2997.69   |
| NM_007011 | 9033.957  | 10056.589 | NM_01345C | 1557.695  | 1710.05   | AK000855  | 964.829   | 843.655   |



|           |           |           |           |           |           |           |           |           |
|-----------|-----------|-----------|-----------|-----------|-----------|-----------|-----------|-----------|
| Y10210    | 5441.685  | 7239.522  | NM_004538 | 1325.673  | 1298.801  | NM_004109 | 1425.098  | 1396.696  |
| AB020689  | 2772.519  | 3554.054  | NM_003077 | 1787.635  | 1750.733  | NM_003198 | 3158.905  | 2867.88   |
| AK023916  | 993.634   | 1217.515  | NM_002105 | 1453.546  | 1655.482  | NM_005174 | 17768.254 | 17578.859 |
| NM_003203 | 5876.301  | 8426.156  | NM_018489 | 2755.972  | 2136.398  | NM_000365 | 1785.371  | 1627.121  |
| NM_002514 | 1046.241  | 1477.655  | L13203    | 4804.459  | 4093.047  | AF110322  | 1129.611  | 1187.04   |
| AF177238  | 2312.197  | 1755.623  | NM_018040 | 2081.854  | 1542.276  | NM_013450 | 1851.008  | 1908.304  |
| AL096747  | 1101.066  | 872.715   | AB042646  | 4184.085  | 3611.033  | NM_004538 | 234.042   | 310.557   |
| AB021641  | 500.346   | 550.546   | NM_003431 | 2991.518  | 2505.684  | NM_003077 | 2050.667  | 1603.978  |
| NM_012406 | 10975.781 | 8424.818  | M29581    | 3577.835  | 3159.557  | NM_002105 | 1015.784  | 1036.074  |
| NM_014947 | 19808.783 | 13396.523 | AL359622  | 339.266   | 339.008   | NM_018489 | 1315.043  | 959.558   |
| AB033112  | 2102.814  | 1358.01   | AL050204  | 2216.895  | 1622.272  | L13203    | 1744.432  | 1565.494  |
| NM_005674 | 867.107   | 888.428   | AF085999  | 859.748   | 624.723   | NM_018040 | 1497.146  | 1294.418  |
| AK023243  | 1532.01   | 1202.869  | AK025316  | 2176.701  | 1949.591  | AB042646  | 3750.241  | 2720.792  |
| NM_014409 | 1944.449  | 1391.918  | AK026357  | 1744.334  | 1821.813  | NM_003431 | 3185.29   | 2628.007  |
| BE791857  | 722.724   | 643.067   | NM_018323 | 3696.532  | 3788.522  | M29581    | 2788.679  | 2163.273  |
| NM_001422 | 2348.073  | 1936.691  | NM_014235 | 3322.694  | 3280.978  | AL050204  | 568.546   | 670.624   |
| AK022358  | 1311.17   | 1423.504  | AK026922  | 4279.206  | 3702.189  | AF085999  | 232.903   | 152.982   |
| NM_000977 | 21205.693 | 20734.229 | NM_014353 | 812.046   | 760.785   | AK025316  | 2059.938  | 2606.72   |
| NM_014205 | 35714.426 | 40865.887 | AF070541  | 503.545   | 620.136   | AK026357  | 2220.866  | 2057.938  |
| NM_018141 | 19026.109 | 20857.848 | AK022006  | 12917.525 | 19519.527 | NM_018323 | 2665.107  | 2525.67   |
| NM_016504 | 38204.559 | 50031.941 | AF070552  | 16096.382 | 21581.186 | NM_014235 | 1551.924  | 1337.592  |
| U25752    | 61400.176 | 60179.152 | NM_004271 | 5848.042  | 5807.556  | AK026922  | 3064.9    | 3159.412  |
| X96646    | 37615.117 | 46912.684 | AK022282  | 1358.425  | 762.869   | AK022645  | 340.849   | 414.214   |
| AB032991  | 4773.167  | 3364.248  | NM_018266 | 5250.207  | 5473.875  | AF070541  | 271.69    | 338.66    |
| AK026985  | 4290.141  | 3233.573  | NM_004867 | 871.538   | 693.14    | AK022006  | 10619.83  | 11462.45  |
| AK000855  | 1643.119  | 1203.305  | AL050021  | 11459.242 | 10753.875 | AF070552  | 12105.865 | 15222.058 |
| NM_004109 | 2662.84   | 1942.446  | AB002448  | 1052.266  | 893.155   | NM_004271 | 2382.602  | 2834.09   |
| NM_003198 | 6867.449  | 4368.91   | NM_003838 | 2202.378  | 2056.086  | AF129928  | 353.446   | 371.501   |
| AF220415  | 558.249   | 562.858   | AK023089  | 4006.385  | 2780.388  | AK022282  | 777.193   | 783.573   |
| NM_005174 | 66147.516 | 50392.195 | AK026059  | 28807.162 | 25364.102 | NM_018266 | 4312.657  | 4043.803  |
| NM_000365 | 3226.543  | 2307.241  | AK026942  | 2293.522  | 1712.461  | NM_004867 | 1121.203  | 742.112   |
| AF110322  | 1175.358  | 1226.098  | AK025814  | 4043.864  | 2423.667  | AL050021  | 10810.586 | 9410.449  |
| NM_013450 | 5556.856  | 4882.105  | AK000655  | 4916.419  | 4996.51   | AB002448  | 959.079   | 522.971   |
| NM_004538 | 1580.174  | 1589.525  | NM_017936 | 2961.709  | 2108.912  | NM_003838 | 2394.445  | 1881.533  |
| NM_003077 | 1786.904  | 1124.887  | D63134    | 751.319   | 1006.211  | AK023089  | 2387.505  | 2033.637  |
| NM_002105 | 1706.259  | 1392.046  | Y12018    | 52234.102 | 49382.949 | AK026059  | 18952.361 | 20145.68  |
| NM_018489 | 2362.515  | 2166.058  | Y10513    | 2217.842  | 1858.196  | AK026942  | 1744.097  | 1665.113  |
| L13203    | 7743.969  | 8661.982  | M21536    | 1147.305  | 1137.443  | AK025814  | 1619.767  | 1453.992  |
| NM_018040 | 2146.025  | 2348.305  | NM_014029 | 61169.906 | 51782.844 | AK000655  | 2742.358  | 2564.748  |
| AB042646  | 10328.717 | 11270.268 | Z83937    | 979.416   | 710.901   | AL117611  | 737.859   | 503.182   |
| NM_003431 | 4477.425  | 4677.119  | L08443    | 1147.275  | 828.339   | AF131841  | 60.093    | 115.192   |
| M29581    | 3020.602  | 3049.642  | L38936    | 951.972   | 404.93    | NM_017936 | 2228.177  | 1686.363  |
| AL359622  | 357.972   | 509.963   | D55643    | 2167.41   | 1915.776  | D63134    | 1390.019  | 1019.455  |
| AL050204  | 3038.405  | 2693.742  | AK025818  | 10821.799 | 8661.138  | Y12018    | 33617.422 | 33594.613 |
| AF085999  | 752.741   | 446.575   | AK023185  | 3912.232  | 2123.759  | X64990    | 90.936    | 146.281   |
| AK025316  | 2801.769  | 2341.973  | AK022183  | 506.743   | 418.289   | Y10513    | 1263.536  | 1001.345  |
| AK026357  | 3265.589  | 2627.372  | AK026345  | 761.432   | 603.604   | M21536    | 379.111   | 416.41    |
| NM_018323 | 4069.15   | 3304.896  | AB007971  | 434.343   | 462.864   | NM_014029 | 47717.238 | 38118.887 |
| NM_014235 | 6013.533  | 4006.05   | NM_018278 | 1277.869  | 2430.554  | Z83937    | 687.675   | 550.35    |
| AK026922  | 4558.242  | 3649.9    | AK026328  | 1328.955  | 2353.386  | L08443    | 1133.004  | 1013.782  |
| NM_014353 | 676.923   | 469.509   | AK000864  | 1363.867  | 1176.713  | L38936    | 681.534   | 414.482   |
| AF070541  | 714.457   | 437.291   | AK022414  | 579.745   | 618.933   | D55643    | 1654.308  | 1048.72   |
| AK022006  | 34160.348 | 31689.895 | NM_017624 | 6872.85   | 5687.181  | AK025818  | 9531.448  | 7381.496  |

|           |           |           |           |           |           |           |           |           |
|-----------|-----------|-----------|-----------|-----------|-----------|-----------|-----------|-----------|
| AF070552  | 19280.189 | 19603.229 | NM_017928 | 440.749   | 499.315   | AK023185  | 2412.265  | 1539.229  |
| NM_004271 | 9142.968  | 8857.658  | AK000907  | 3688.15   | 3721.42   | NM_018168 | 172.092   | 153.097   |
| AF129928  | 881.582   | 889.189   | AK024390  | 927.786   | 1296.602  | AK026345  | 344.356   | 381.449   |
| AK022282  | 996.151   | 1130.22   | AK024517  | 3108.278  | 2425.35   | AB007971  | 250.74    | 246.831   |
| NM_018266 | 5063.059  | 6111.444  | AK024585  | 1216.878  | 907.294   | NM_018278 | 862.033   | 965.076   |
| NM_004867 | 888.974   | 847.064   | AK024887  | 4291.33   | 2982.308  | AK026328  | 275.988   | 258.001   |
| AL050021  | 11271.729 | 11766.371 | AK025005  | 496.643   | 493.183   | NM_017624 | 5672.381  | 5026.585  |
| AB002448  | 326.671   | 763.31    | AK095587  | 7010.56   | 5277.197  | AK000907  | 2081.042  | 1939.753  |
| NM_003838 | 2837.115  | 3493.96   | AF086043  | 666.482   | 1024.879  | AK024390  | 306.859   | 542.916   |
| AK023089  | 5211.027  | 3762.117  | AK000038  | 1052.326  | 1077.07   | AK024868  | 209.825   | 205.881   |
| AK026059  | 65645.57  | 50197.629 | BC010084  | 694.962   | 660.855   | AK024517  | 1756.738  | 1560.789  |
| AK026942  | 2799.651  | 2243.978  | U10513    | 1292.222  | 1216.7    | AK024585  | 691.399   | 360.896   |
| AK025814  | 4614.783  | 3674.679  | L10151    | 914.842   | 882.226   | AK024887  | 2767.514  | 1949.287  |
| AK000655  | 7698.11   | 6306.174  | AK022203  | 749.777   | 834.108   | AF086151  | 314.098   | 103.477   |
| AL117611  | 712.468   | 725.009   | BC032236  | 1201.717  | 1127.409  | AK095587  | 1685.87   | 2181.732  |
| NM_017938 | 4210.531  | 3467.101  | AK023037  | 811.159   | 887.721   | AF086043  | 287.892   | 268.396   |
| Y10209    | 577.404   | 631.886   | AF086195  | 1169.762  | 1051.062  | AK000038  | 739.18    | 1084.751  |
| D63134    | 1532.679  | 1127.93   | AK021963  | 588.506   | 738.311   | BC010084  | 339.35    | 428.522   |
| Y12018    | 63673.215 | 46487.75  | AK002209  | 462.6     | 308.487   | U10513    | 516.581   | 597.444   |
| Y10513    | 2678.162  | 2680      | NM_017854 | 43478.508 | 36505.594 | L10151    | 386.032   | 383.432   |
| M21536    | 1389.808  | 1565.529  | NM_014354 | 1436.163  | 1409.786  | AK022203  | 202.446   | 272.63    |
| NM_014028 | 62843.492 | 55407.906 | AL137548  | 4186.99   | 3461.382  | BC032236  | 238.162   | 201.72    |
| Z83937    | 1345.639  | 1545.438  | AK095051  | 976.574   | 508.8     | AK023037  | 471.658   | 654.892   |
| L08443    | 1449.934  | 1610.899  | AK024929  | 2532.29   | 2671.932  | S71611    | 382.265   | 279.938   |
| D55643    | 1423.073  | 1588.033  | NM_017779 | 621.905   | 524.634   | AK055950  | 649.171   | 406.48    |
| AK025818  | 11451.388 | 11158.949 | D17232    | 6192.838  | 5919.681  | AL050122  | 775.839   | 762.855   |
| AK023185  | 3977.926  | 3262.211  | NM_005260 | 1468.75   | 1699.27   | AK024209  | 161.548   | 313.277   |
| AK022183  | 629.057   | 513.016   | AF085880  | 6236.854  | 4568.273  | AK000839  | 3277.048  | 2305.868  |
| AK026345  | 3150.078  | 2928.863  | AF000990  | 1103.826  | 644.744   | AK002209  | 317.082   | 186.862   |
| AB007971  | 559.763   | 703.971   | NM_016094 | 4715.662  | 4252.343  | NM_017854 | 20823.609 | 24736.354 |
| NM_018278 | 3975.375  | 3334.917  | AK025003  | 2347.839  | 2041.532  | NM_014354 | 575.772   | 813.423   |
| AK000417  | 555.979   | 488.159   | AK023601  | 1223.334  | 985.661   | AL137548  | 3330.534  | 2999.239  |
| AK000864  | 4343.037  | 3013.974  | NM_001427 | 2548.905  | 2031.648  | AK024929  | 2302.379  | 1941.695  |
| NM_017624 | 8778.501  | 8616.124  | NM_016175 | 1205.276  | 1031.066  | NM_017779 | 596.775   | 310.463   |
| NM_017928 | 589.281   | 640.955   | AF133334  | 9148.282  | 14380.414 | D17232    | 700.076   | 1058.974  |
| AK000907  | 3142.75   | 4367.396  | AK026498  | 1774.082  | 1735.687  | NM_005260 | 715.678   | 755.129   |
| AK024390  | 1935.35   | 2093.307  | NM_003894 | 1821.441  | 997.16    | AF085880  | 4202.769  | 4298.618  |
| AK024517  | 2919.835  | 2785.258  | NM_006373 | 15539.559 | 10756.764 | AK025003  | 1147.648  | 1241.636  |
| AK024585  | 684.518   | 740.333   | AK001007  | 3659.652  | 3013.409  | NM_001427 | 1053.8    | 872.919   |
| AK024887  | 5236.426  | 5448.865  | NM_014485 | 770.291   | 593.807   | NM_016175 | 767.818   | 699.294   |
| AK095587  | 10227.016 | 7617.618  | AF116655  | 10948.91  | 7097.521  | M15639    | 3019.042  | 2148.427  |
| AF086043  | 1070.597  | 891.133   | AF086134  | 869.312   | 705.66    | AF130084  | 1263.045  | 1172.789  |
| AK000038  | 1359.415  | 1423.042  | AF009308  | 38270.055 | 37563.801 | AF133334  | 3961.968  | 3438.644  |
| BC010084  | 1132.997  | 1064.582  | AB032969  | 31767.438 | 32652.211 | NM_016290 | 2612.452  | 1925.614  |
| U10513    | 1442.193  | 1263.994  | Y11610    | 1616.978  | 1107.075  | AK026498  | 296.777   | 567.831   |
| L10151    | 1098.36   | 790.867   | AF085940  | 1631.116  | 857.284   | NM_003894 | 1183.9    | 1203.424  |
| AK022203  | 724.682   | 775.671   | L37695    | 1430.207  | 1334.497  | NM_006373 | 11121.587 | 12301.123 |
| AK023037  | 1046.034  | 1017.974  | NM_004627 | 4137.142  | 3259.797  | AK001007  | 2856.891  | 2506.671  |
| AL050122  | 1006.488  | 1230.778  | AL050217  | 9010.957  | 8281.223  | NM_014485 | 474.262   | 137.114   |
| AK000839  | 6317.287  | 6443.719  | L37704    | 1134.885  | 1399.177  | AF116655  | 4973.766  | 3664.961  |
| AF086195  | 776.174   | 939.087   | NM_005162 | 3150.404  | 3621.004  | AF086134  | 289.996   | 179.877   |
| AK021963  | 688.289   | 711.58    | AB007968  | 2697.492  | 2374.809  | AF009308  | 11422.791 | 9419.088  |
| AK002209  | 826.97    | 676.406   | S81580    | 508.958   | 524.315   | AB032969  | 18469.215 | 19121.771 |

|           |           |           |           |           |           |           |           |           |
|-----------|-----------|-----------|-----------|-----------|-----------|-----------|-----------|-----------|
| NM_017854 | 57542.07  | 43497.719 | U50277    | 2046.251  | 3350.257  | Y11610    | 319.86    | 328.959   |
| NM_014354 | 2277.289  | 1608.466  | CY3Cy5    | 5016.78   | 139.553   | AF085940  | 319.138   | 262.446   |
| AL137548  | 6030.842  | 4534.338  | AI889961  | 3609.765  | 3625.107  | L37695    | 354.536   | 341.251   |
| AK095051  | 832.547   | 628.331   | AI360116  | 3567.874  | 3016.384  | NM_004627 | 2541.816  | 2624.259  |
| AK024929  | 3854.811  | 3372.856  | AI572835  | 1435.753  | 1594.465  | AK026523  | 743.408   | 628.55    |
| D17232    | 4259.285  | 5232.077  | R20392    | 6587.828  | 5320.779  | AL050217  | 2871.479  | 2514.719  |
| NM_00526C | 2758.138  | 2183.571  | AA486367  | 5641.691  | 3860.671  | L37704    | 604.204   | 242.562   |
| AF085880  | 6561.716  | 5396.284  | AL136131  | 17727.77  | 14798.659 | NM_005162 | 1419.302  | 1095.979  |
| AF000990  | 772.88    | 764.002   | NM_033357 | 1372.814  | 1563.958  | AB007968  | 1007.956  | 950.361   |
| NM_016094 | 3894.637  | 3832.428  | NM_003263 | 629.879   | 513.743   | AL117544  | 462.406   | 403.387   |
| AK025003  | 2488.456  | 2113.881  | U59911    | 3225.01   | 3401.672  | NM_005664 | 18160.816 | 18284.084 |
| NM_001427 | 2142.808  | 2110.169  | SR2       | 29967.146 | 33197.473 | NM_00627C | 21810.84  | 20753.486 |
| NM_016175 | 993.191   | 1144.592  | SR4       | 20675.398 | 18950.707 | U50277    | 662.619   | 324.166   |
| M15639    | 5264.84   | 5828.724  | SR6       | 2884.437  | 2579.009  | Z48633    | 3395.84   | 2623.445  |
| AF130084  | 3625.224  | 4305.958  | SR8       | 11162.053 | 33507.406 | M62627    | 14071.615 | 11702.946 |
| AF133334  | 7216.245  | 8140.643  | SR10      | 40324.844 | 14617.632 | NM_00668E | 4572.897  | 3405.961  |
| NM_01629C | 3299.63   | 3395.446  | CY3Cy5    | 7002.877  | 189.528   | CY3Cy5    | 15758.802 | 701.401   |
| AK026498  | 1087.257  | 1252.372  | NM_000865 | 1487.973  | 1452.915  | AI889961  | 1099.955  | 1255.088  |
| NM_003894 | 2252.948  | 1231.836  | NM_000867 | 1001.35   | 977.037   | AI360116  | 804.167   | 943.412   |
| NM_006373 | 21718.732 | 17207.951 | AF076642  | 1238.901  | 1465.575  | NM_013983 | 165.749   | 183.908   |
| AK001007  | 3470.356  | 2597.309  | NM_00238E | 2880.616  | 2724.852  | R20392    | 1396.738  | 1713.717  |
| AF116655  | 8677.128  | 6162.434  | NM_005314 | 1242.297  | 1414.565  | AA486367  | 3210.599  | 3620.709  |
| AF009308  | 25833.02  | 21420.797 | NM_004885 | 1265.313  | 1108.55   | N56684    | 323.934   | 464.802   |
| AB032969  | 26325.549 | 24440.439 | NM_005145 | 1140.002  | 1159.54   | M55153    | 350.286   | 255.586   |
| Y11610    | 952.53    | 990.71    | NM_012152 | 5720.629  | 5222.721  | AK097322  | 59.566    | 218.941   |
| L37695    | 997.11    | 654.454   | AK024093  | 1971.288  | 2295.128  | AL136131  | 3332.069  | 3585.024  |
| NM_004627 | 3378.338  | 2800.159  | NM_00194C | 1834.004  | 1627.904  | NM_033357 | 1420.264  | 1489.406  |
| AK026523  | 1955.663  | 1188.005  | U83115    | 3030.369  | 3396.45   | AF335109  | 332.986   | 331.835   |
| AL050217  | 10899.477 | 10539.582 | NM_001264 | 4629.105  | 3992.247  | U59911    | 4796.566  | 5542.158  |
| L37704    | 612.528   | 744.781   | NM_013364 | 9703.804  | 9725.806  | SB        | 58.302    | 330.099   |
| NM_005162 | 2151.733  | 1991.331  | NM_01436E | 947.037   | 998.819   | NM_002054 | 220.904   | 380.974   |
| AB007968  | 1278.103  | 1436.69   | NM_00085C | 2996.799  | 2720.398  | SR2       | 44318.59  | 48717.305 |
| AL117544  | 538.4     | 668.627   | NM_00467E | 563.799   | 556.367   | SR4       | 7199.415  | 7227.725  |
| NM_005664 | 30927.447 | 38032.621 | NM_001994 | 1430.765  | 1816.659  | SR6       | 682.297   | 631.819   |
| NM_00627C | 43579.668 | 47330.031 | J00129    | 14175.752 | 15577.147 | SR8       | 4994.98   | 16950.391 |
| U50277    | 970.507   | 1030.913  | NM_00332C | 3736.645  | 3636.815  | SR10      | 19046.188 | 6578.615  |
| Z48633    | 3179.827  | 3331.634  | L10146    | 4711.504  | 5665.519  | CY3Cy5    | 16001.562 | 571.29    |
| M62627    | 17841.287 | 19624.477 | NM_000685 | 4111.105  | 3833.338  | NM_000865 | 361.297   | 375.788   |
| NM_00668E | 6031.01   | 6131.855  | AK025657  | 13799.7   | 15614.227 | AF076642  | 144.282   | 259.922   |
| CY3Cy5    | 3579.574  | 111.046   | AF142063  | 873.251   | 626.599   | NM_00238E | 415.368   | 644.938   |
| AI889961  | 4503.817  | 4658.528  | W42849    | 2272.521  | 2519.907  | NM_005314 | 292.263   | 403.084   |
| AI360116  | 3383.829  | 3157.383  | AK022790  | 43843.289 | 40166.992 | NM_004885 | 480.726   | 510.091   |
| NM_013983 | 824.898   | 913.349   | NM_004311 | 4829.443  | 4744.476  | NM_005145 | 307.187   | 425.253   |
| AI572835  | 3306.176  | 3573.239  | NM_005624 | 1684.502  | 1970.179  | NM_012152 | 1900.078  | 2404.654  |
| R20392    | 9607.231  | 9618.382  | NM_002302 | 885.555   | 1963.839  | AK024093  | 595.458   | 624.552   |
| AA486367  | 7724.087  | 5450.049  | AF263462  | 1893.328  | 1771.594  | NM_00194C | 1560.196  | 1441.162  |
| N56684    | 1335.028  | 1218.102  | AV697672  | 576.449   | 386.443   | U83115    | 703.779   | 848.258   |
| M55153    | 842.6     | 997.863   | NM_000942 | 55999.703 | 52103.805 | NM_001264 | 2074.776  | 2433.028  |
| AF414120  | 348.878   | 605.026   | NM_002982 | 673.966   | 497.452   | NM_013364 | 1806.748  | 1816.856  |
| NM_033357 | 2711.788  | 2718.716  | AK056773  | 4501.633  | 4674.965  | NM_01436E | 143.605   | 302.811   |
| AF335109  | 1651.572  | 1859.937  | NM_002182 | 4447.023  | 3779.874  | NM_00085C | 3330.696  | 3137.777  |
| NM_003263 | 589.324   | 650.996   | NM_01647C | 2731.468  | 3159.497  | NM_00467E | 242.884   | 426.067   |
| U59911    | 6480.823  | 7172.274  | AL365408  | 21869.424 | 27313.865 | NM_007193 | 200.346   | 295.956   |

|           |           |           |           |           |           |           |           |           |
|-----------|-----------|-----------|-----------|-----------|-----------|-----------|-----------|-----------|
| NM_002054 | 1553.478  | 1846.323  | AK026204  | 6924.932  | 7081.495  | NM_001994 | 3673.656  | 3455.239  |
| SR6       | 3113.201  | 2856.723  | NM_014635 | 3398.267  | 2755.879  | NM_00332C | 2566.539  | 2512.219  |
| SR8       | 10561.308 | 26973.748 | NM_004145 | 8622.986  | 8949.531  | L10146    | 3883.565  | 5284.678  |
| SR10      | 31621.148 | 9667.876  | AK023196  | 1201.379  | 1625.019  | NM_000685 | 3276.561  | 3759.951  |
| CY3Cy5    | 5504.868  | 126.29    | NM_018728 | 3071.225  | 3202.853  | AK025657  | 14634.025 | 16437.23  |
| NM_000865 | 1910.165  | 2439.224  | AK024014  | 1501.405  | 1677.249  | AF142063  | 322.825   | 397.765   |
| NM_000867 | 1004.031  | 1005.759  | NM_016234 | 2757.133  | 2885.792  | W42849    | 1589.532  | 2151.291  |
| AF076642  | 1972.137  | 2156.229  | NM_001876 | 4286.133  | 4718.995  | AK022790  | 4347.231  | 4665.315  |
| NM_002386 | 4295.855  | 4383.465  | NM_016144 | 6924.214  | 7106.303  | NM_004311 | 581.818   | 850.128   |
| NM_005314 | 1983.6    | 2115.928  | AL133099  | 8769.083  | 7726.423  | NM_005624 | 351.673   | 511.064   |
| NM_004885 | 2203.419  | 2051.608  | NM_016082 | 2068.912  | 1880.605  | AB020672  | 345.566   | 178.099   |
| NM_005145 | 1535.357  | 1846.893  | NM_000433 | 1401.087  | 1138.869  | NM_00148C | 228.095   | 239.624   |
| NM_012152 | 8464.828  | 9738.857  | NM_00019C | 4171.262  | 4663.794  | AF263462  | 477.832   | 474.553   |
| AK024093  | 3083.747  | 2926.05   | X15667    | 3788.84   | 3645.079  | NM_000942 | 40845.363 | 40503.938 |
| NM_00194C | 3760.034  | 4900.987  | NM_017512 | 1197.59   | 1450.065  | NM_002982 | 343.248   | 403.917   |
| NM_013364 | 17113.238 | 19547.484 | NM_018661 | 590.879   | 579.273   | AK056773  | 6122.243  | 6461.418  |
| NM_014368 | 1129.675  | 1263.312  | NM_001678 | 275.734   | 563.051   | NM_002182 | 5519.701  | 5516.882  |
| NM_00085C | 3522.436  | 3859.394  | AK023078  | 5308.898  | 4966.629  | NM_01647C | 2488.641  | 2857.065  |
| NM_004676 | 1162.121  | 1348.794  | NM_002239 | 37590.992 | 40546.629 | AK026204  | 4928.161  | 4604.609  |
| NM_007193 | 358.256   | 496.057   | NM_002249 | 24011.414 | 29396.391 | NM_014635 | 2086.156  | 1695.002  |
| NM_001994 | 4686.608  | 4909.417  | NM_015684 | 2790.781  | 2952.15   | NM_004145 | 5394.131  | 6013.467  |
| J00129    | 14886.618 | 15709.933 | NM_003945 | 23969.449 | 28264.311 | AK023196  | 1253.619  | 1222.999  |
| NM_00332C | 3160.118  | 3084.224  | NM_004981 | 6799.543  | 7350.198  | NM_018728 | 3243.794  | 3324.927  |
| L10146    | 4646.428  | 4550.964  | AK096507  | 1753.547  | 1967.545  | AK024014  | 1040.731  | 1336.786  |
| NM_000685 | 3980.409  | 3978.912  | NM_016524 | 2602.03   | 2702.066  | NM_016234 | 3978.228  | 4395.037  |
| AK025657  | 15128.929 | 16320.253 | NM_007126 | 42399.859 | 48493.074 | NM_001876 | 1985.969  | 2016.038  |
| AF142063  | 457.514   | 547.36    | AL137631  | 7931.888  | 8534.253  | NM_016144 | 1479.459  | 1595.656  |
| W42849    | 2386.87   | 2317.354  | NM_016057 | 15535.676 | 18584.104 | AL133099  | 311.986   | 451.44    |
| AK022790  | 58746.023 | 48602.336 | NM_014677 | 944.924   | 930.802   | NM_016082 | 1251.063  | 1131.311  |
| NM_004311 | 8095.27   | 9523.705  | NM_006855 | 1093.755  | 976.931   | NM_000433 | 1314.223  | 1475.5    |
| NM_005624 | 2502.97   | 2887.057  | NM_015599 | 1645.625  | 1524.004  | NM_00019C | 3875.258  | 3541.428  |
| NM_002302 | 938.977   | 1010.541  | NM_018696 | 5221.825  | 5495.279  | X15667    | 1624.434  | 1738.253  |
| AB020672  | 293.202   | 641.441   | NM_000136 | 9242.688  | 7918.671  | NM_017512 | 1078.705  | 1361.582  |
| AK026958  | 528.673   | 596.829   | AL157456  | 867.107   | 883.696   | NM_018661 | 560.375   | 385.152   |
| NM_000579 | 946.487   | 761.815   | AL162056  | 678.882   | 845.596   | NM_001678 | 409.882   | 273.897   |
| NM_00148C | 469.939   | 528.514   | NM_00038C | 3696.443  | 3190.517  | AK023078  | 932.562   | 1220.641  |
| AF263462  | 1963.937  | 2602.067  | NM_004628 | 1440.248  | 1206.753  | NM_002239 | 21369.176 | 23097.014 |
| AB040962  | 711.584   | 931.166   | NM_014876 | 1601.184  | 1770.843  | NM_002249 | 16247.521 | 18390.168 |
| NM_000639 | 479.793   | 499.124   | NM_005406 | 5886.978  | 6134.547  | NM_015684 | 3052.671  | 3210.285  |
| AV697672  | 791.554   | 849.643   | NM_003328 | 2064.155  | 2372.478  | NM_003945 | 24741.746 | 26622     |
| NM_000942 | 56905.059 | 48651.285 | X93921    | 7036.175  | 7073.767  | NM_004981 | 3621.444  | 4018.534  |
| NM_002982 | 1449.067  | 1618.436  | AF073482  | 6537.378  | 6102.2    | AK096507  | 1173.563  | 739.548   |
| NM_00219C | 569.362   | 1166.479  | NM_00599C | 6785.162  | 6151.003  | NM_016524 | 1843.239  | 1666.608  |
| AK056773  | 8191.504  | 8695.559  | NM_016276 | 23158.068 | 24920.436 | NM_007126 | 27304.076 | 30757.227 |
| NM_002182 | 13903.584 | 17674.723 | NM_017762 | 4913.557  | 4867.227  | AL137631  | 7604.417  | 7218.575  |
| NM_01647C | 4441.642  | 4784.632  | NM_001863 | 65037.754 | 53774.852 | NM_016057 | 15435.731 | 15084.128 |
| AL365408  | 28015.188 | 37383.566 | NM_000921 | 9337.581  | 10054.176 | NM_014677 | 534.994   | 565.64    |
| AK026204  | 8888.21   | 7872.745  | NM_000098 | 3515.378  | 3491.056  | NM_006855 | 818.17    | 1074.377  |
| NM_014635 | 3254.695  | 2739.492  | NM_000016 | 16369.228 | 18345.35  | NM_015599 | 534.763   | 944.189   |
| NM_004145 | 10284.742 | 11344.369 | AK026913  | 4271.428  | 4299.834  | NM_018696 | 3054.779  | 3053.184  |
| AK023196  | 1335.455  | 1428.256  | L10146    | 2348.322  | 3201.563  | NM_000136 | 6190.354  | 6719.536  |
| NM_018728 | 3785.875  | 3373.115  | NM_000685 | 3529.143  | 4015.429  | AL157456  | 765.117   | 595.669   |
| AK024014  | 2454.118  | 2715.616  | AK025657  | 13359.173 | 14305.291 | AL162056  | 606.451   | 605.058   |

|           |           |           |           |           |           |           |           |           |
|-----------|-----------|-----------|-----------|-----------|-----------|-----------|-----------|-----------|
| NM_016234 | 9865.426  | 9954.289  | AF142063  | 666.284   | 643.053   | NM_00038C | 2689.446  | 3229.03   |
| NM_00187E | 5566.193  | 5449.683  | W42849    | 1605.08   | 1626.665  | NM_00462E | 1045.673  | 1002.86   |
| NM_016144 | 10455.855 | 10278.579 | AI889961  | 1375.459  | 1219.425  | AF085734  | 321.109   | 210.166   |
| AL133099  | 18016.623 | 16942.826 | AI360116  | 2202.154  | 2027.448  | NM_01487E | 1806.326  | 1813.075  |
| NM_016082 | 2385.002  | 2403.789  | NM_013983 | 942.15    | 618.203   | NM_00540E | 4247.412  | 3953.543  |
| NM_000433 | 2787.427  | 3214.585  | AI572835  | 2060.637  | 2004.34   | NM_00332E | 1447.927  | 985.641   |
| NM_00019C | 5924.746  | 5907.729  | R20392    | 7870.459  | 6415.891  | X93921    | 7856.922  | 7547.434  |
| X15667    | 12403.813 | 11906.189 | AA486367  | 3829.378  | 2506.381  | AF073482  | 1173.253  | 1137.64   |
| NM_017512 | 1964.572  | 2515.73   | N56684    | 1229.94   | 1092.637  | NM_00599C | 5166.478  | 4795.792  |
| NM_018661 | 1238.569  | 1010.72   | M55153    | 891.735   | 750.805   | NM_01627E | 21166.672 | 22702.516 |
| NM_00167E | 712.248   | 1058.804  | AF414120  | 401.388   | 633.496   | NM_017762 | 3323.724  | 3273.518  |
| AK023078  | 6042.118  | 6354.843  | AK097322  | 587.759   | 648.169   | NM_001863 | 48508.25  | 44147.605 |
| NM_00223E | 45643.637 | 45941.129 | NM_002054 | 869.23    | 1546.526  | NM_000921 | 7944.411  | 7994.201  |
| NM_00224E | 36573.504 | 45683.867 | AK026204  | 5657.011  | 5815.537  | NM_00009E | 3637.584  | 3435.698  |
| NM_015684 | 3608.156  | 4083.83   | NM_014635 | 2985.481  | 2491.494  | NM_00001E | 13726.343 | 15929.674 |
| NM_00394E | 29714.527 | 36522.219 | NM_004145 | 7429.664  | 7285.757  | AK026913  | 4739.188  | 4097.891  |
| NM_004981 | 10395.489 | 12369.811 | AK023196  | 1065.719  | 1300.99   | L10146    | 2843.025  | 3919.696  |
| AK096507  | 2081.177  | 2174.314  | NM_01872E | 3777.413  | 3376.2    | NM_00068E | 1799.212  | 1858.601  |
| NM_016524 | 3916.101  | 3726.456  | AK024014  | 1245.665  | 1403.834  | AK025657  | 11785.577 | 15382.926 |
| NM_00712E | 48440.969 | 52367.629 | NM_00086E | 1483.912  | 1407.889  | AF142063  | 289.052   | 672.184   |
| AL137631  | 11882.157 | 11739.965 | NM_000867 | 835.843   | 579.473   | W42849    | 1503.93   | 1879.183  |
| NM_016057 | 16526.529 | 17583.934 | AF076642  | 1510.93   | 1389.261  | AI889961  | 2314.433  | 2962.719  |
| NM_014677 | 1456.483  | 1461.299  | NM_00238E | 2955.29   | 3079.606  | AI360116  | 2036.065  | 1827.818  |
| NM_00685E | 1304.099  | 1363.543  | NM_005314 | 1516.056  | 1326.777  | NM_013983 | 369.473   | 393.7     |
| NM_00627E | 481.236   | 632.302   | NM_00488E | 2494.665  | 2589.228  | AI572835  | 1010.273  | 1359.19   |
| NM_01559E | 3270.658  | 2321.946  | NM_00514E | 1403.854  | 1378.297  | R20392    | 5208.49   | 4984.558  |
| AB037902  | 678.324   | 434.715   | NM_012152 | 9651.996  | 10955.729 | AA486367  | 4470.682  | 4756.038  |
| AL157456  | 1734.696  | 1718.279  | AK024093  | 3924.471  | 5035.699  | N56684    | 886.39    | 953.348   |
| AL162056  | 1074.485  | 1154.233  | NM_00085C | 4048.842  | 3745.823  | M55153    | 401.439   | 536.631   |
| NM_00038C | 8463.086  | 7927.517  | NM_00467E | 805.472   | 1060.871  | AL136131  | 10939.032 | 9767.096  |
| NM_00462E | 2277.105  | 1980.838  | NM_001994 | 4260.293  | 4853.509  | NM_033357 | 1484.755  | 1913.852  |
| NM_01487E | 2052.424  | 2050.707  | J00129    | 14721.314 | 14123.997 | AF335109  | 1160.277  | 972.902   |
| NM_00540E | 5532.162  | 5430.84   | NM_00332C | 3587.503  | 3479.457  | U59911    | 5402.911  | 5992.037  |
| NM_00332E | 4291.861  | 4475.536  | NM_016524 | 2092.677  | 2741.535  | AK026204  | 3203.936  | 3474.364  |
| X93921    | 9541.115  | 9670.315  | NM_00712E | 30995.354 | 36021.063 | NM_01463E | 1209.8    | 1290.332  |
| AF073482  | 5133.393  | 5408.041  | AL137631  | 7668.556  | 7232.309  | NM_00414E | 4019.896  | 4730.567  |
| NM_00599C | 6666.702  | 6832.091  | NM_016057 | 10306.423 | 10219.808 | AK023196  | 786.778   | 1272.947  |
| NM_01627E | 38175.32  | 42457.695 | NM_014677 | 634.73    | 1044.897  | NM_01872E | 3302.893  | 3777.229  |
| NM_017762 | 4614.08   | 4886.749  | NM_00685E | 852.782   | 1017.835  | AK024014  | 849.171   | 1325.036  |
| NM_001863 | 69103.523 | 52842.191 | AK022790  | 53178.793 | 44603.559 | NM_00086E | 893.287   | 1062.409  |
| NM_000921 | 9337.871  | 9392.238  | NM_004311 | 5507.197  | 4238.257  | NM_000867 | 256.406   | 282.158   |
| NM_00009E | 3750.339  | 3872.786  | NM_005624 | 1683.624  | 1675.697  | AF076642  | 1528.744  | 1420.378  |
| NM_00001E | 18377.93  | 20290.328 | NM_002302 | 966.06    | 786.76    | NM_00238E | 2110.727  | 1855.956  |
| AK026913  | 5538.699  | 4837.527  | AB020672  | 681.601   | 701.253   | NM_005314 | 1612.747  | 1409.007  |
| L10146    | 4486.271  | 5720.312  | AK026958  | 572.675   | 822.486   | NM_00488E | 2299.208  | 1939.547  |
| NM_00068E | 5946.428  | 5434.217  | NM_00057E | 806.852   | 878.305   | NM_00514E | 812.761   | 1228.197  |
| AK025657  | 15160.771 | 16214.597 | NM_00148C | 407.171   | 582.99    | NM_012152 | 4794.795  | 4598.537  |
| AF142063  | 963.382   | 577.515   | AF263462  | 2566.512  | 2731.514  | AK024093  | 1380.566  | 1138.241  |
| NM_013983 | 944.392   | 1189.244  | NM_002982 | 617.459   | 611.628   | NM_00194C | 2554.508  | 2136.126  |
| AI572835  | 4824.054  | 5292.653  | NM_00219C | 213.077   | 1468.285  | U83115    | 2056.493  | 2102.311  |
| R20392    | 10325.442 | 9050.767  | AK056773  | 8125.732  | 9398.396  | NM_001264 | 4045.359  | 4082.71   |
| AA486367  | 8015.43   | 5743.489  | NM_002182 | 4482.955  | 5127.304  | NM_013364 | 3760.01   | 4105.748  |
| N56684    | 1483.742  | 1564.075  | NM_01647C | 2677.283  | 3517.533  | NM_01436E | 440.543   | 550.311   |

|           |           |           |           |           |           |           |           |           |
|-----------|-----------|-----------|-----------|-----------|-----------|-----------|-----------|-----------|
| M55153    | 1043.373  | 1100.593  | AL365408  | 18927.828 | 21091.252 | NM_00085C | 3066.351  | 3954.369  |
| AF414120  | 481.294   | 426.252   | NM_017762 | 3956.318  | 4624.208  | NM_00467E | 357.642   | 531.049   |
| AK097322  | 337.385   | 694.81    | NM_001863 | 65418.164 | 51056.609 | NM_007193 | 183.639   | 274.36    |
| AL136131  | 31720.313 | 42731.191 | NM_000921 | 8534.54   | 9351.597  | NM_001994 | 3794.281  | 3835.954  |
| NM_033357 | 2680.599  | 2999.022  | NM_00009E | 2542.126  | 2478.834  | J00129    | 12095.421 | 11983.292 |
| AF335109  | 1907.526  | 2085.731  | NM_00001E | 11640.362 | 13621.293 | NM_00332C | 2169.927  | 2049.667  |
| NM_003263 | 719.502   | 854.615   | AK026913  | 4621.497  | 4887.397  | NM_016524 | 1592.535  | 1007.006  |
| U59911    | 6142.271  | 6041.532  | NM_016234 | 6926.781  | 6593.406  | NM_00712E | 18433.732 | 23954.998 |
| NM_002054 | 1537.43   | 1280.509  | NM_00187E | 4656.154  | 4504.262  | AL137631  | 7111.021  | 7161.188  |
| NM_004482 | 504.742   | 584.325   | NM_016144 | 9103.963  | 7762.919  | NM_016057 | 14053.861 | 15055.178 |
| AK026204  | 8446.71   | 8561.719  | AL133099  | 19067.191 | 16391.428 | NM_014677 | 435.437   | 521.28    |
| NM_01463E | 4343.271  | 3366.212  | NM_016082 | 2773.095  | 2945.024  | NM_00685E | 856.956   | 865.707   |
| NM_00414E | 12107.812 | 13694.951 | NM_000433 | 2813.29   | 2955.075  | AK022790  | 30537.391 | 27697.947 |
| AK023196  | 1474.982  | 1711.897  | NM_00019C | 6057.87   | 7428.131  | NM_004311 | 3740.153  | 3595.951  |
| NM_01872E | 7040.97   | 6328.175  | NM_002239 | 42258.191 | 45477.488 | NM_005624 | 1720.662  | 1580.284  |
| NM_000867 | 1063.819  | 1245.573  | NM_002249 | 25905.08  | 32747.387 | NM_002302 | 639.924   | 509.19    |
| AF076642  | 1809.822  | 2294.016  | NM_015684 | 3435.869  | 3908.27   | AK026958  | 317.409   | 233.16    |
| NM_00238E | 3652.896  | 4126.866  | NM_00394E | 21631.744 | 26652.797 | NM_00057E | 808.382   | 340.96    |
| NM_005314 | 2127.522  | 2000.466  | NM_004981 | 3994.098  | 4033.101  | AF263462  | 1623.436  | 1211.753  |
| NM_00488E | 2160.496  | 2205.969  | AK096507  | 1454.265  | 1814.561  | AB040962  | 468.132   | 324.701   |
| NM_00514E | 1234.723  | 1448.71   | NM_002054 | 1269.311  | 1313.166  | NM_000942 | 49810.75  | 43951.41  |
| NM_012152 | 11081.696 | 10482.727 | NM_004482 | 783.656   | 834.484   | NM_002982 | 620.489   | 570.007   |
| AK024093  | 2884.164  | 3281.923  | NM_01559E | 1647.682  | 1012.308  | AK056773  | 6052.706  | 6702.612  |
| NM_00194C | 3857.98   | 3921.045  | NM_01869E | 12779.72  | 11558.326 | NM_002182 | 5521.703  | 6164.977  |
| U83115    | 3700      | 4419.834  | NM_00013E | 16734.209 | 16680.848 | NM_01647C | 2089.549  | 2298.963  |
| NM_001264 | 7933.025  | 8262.172  | AL157456  | 1133.143  | 1004.816  | AL365408  | 14455.711 | 15504.611 |
| NM_013364 | 20498.398 | 24354.166 | AL162056  | 1249.085  | 1479.962  | NM_00009E | 2707.954  | 3200.944  |
| NM_01436E | 1388.499  | 1315.867  | NM_00540E | 4831.64   | 6302.855  | NM_00001E | 11862.274 | 13316.637 |
| NM_00085C | 4761.452  | 4210.433  | NM_00332E | 3364.74   | 4567.967  | AK026913  | 3297.358  | 3541.56   |
| NM_00467E | 1019.49   | 1376.183  | X93921    | 7732.481  | 7555.921  | NM_016234 | 8561.47   | 7883.964  |
| NM_007193 | 365.741   | 481.018   | AF073482  | 4731.677  | 4814.423  | NM_00187E | 4401.798  | 3525.287  |
| NM_001994 | 5594.825  | 5561.219  | NM_00599C | 4662.519  | 3624.555  | NM_016144 | 8338.205  | 7062.209  |
| J00129    | 15813.218 | 14582.428 | NM_01627E | 19549.074 | 20818.4   | AL133099  | 8433.332  | 7119.385  |
| NM_00332C | 3176.679  | 2845.145  | NM_00085C | 3683.593  | 3644.714  | NM_016082 | 2124.632  | 2144.936  |
| NM_016524 | 3769.131  | 3318.779  | NM_00467E | 1275.534  | 1239.497  | NM_000433 | 2022.738  | 2535.127  |
| NM_00712E | 40086.332 | 46312.957 | NM_001994 | 3909.193  | 4066.207  | NM_00019C | 5104.466  | 4792.648  |
| AL137631  | 13383.878 | 14190.2   | J00129    | 12092.688 | 11536.362 | X15667    | 3932.086  | 3561.362  |
| NM_00685E | 3185.616  | 3046.457  | NM_00332C | 3313.514  | 3148.611  | NM_017512 | 1698.932  | 1831.5    |
| AK022790  | 55464.469 | 47269.188 | L10146    | 4704.709  | 4499.965  | NM_00167E | 348.986   | 328.255   |
| NM_004311 | 7945.967  | 7038.441  | NM_00068E | 3556.816  | 3424.777  | AK023078  | 2643.359  | 2341.795  |
| NM_005624 | 3284.444  | 3334.611  | AK025657  | 14674.738 | 12883.494 | NM_00223E | 30324.125 | 34414.164 |
| NM_002302 | 936.746   | 955.842   | W42849    | 2745.239  | 2132.314  | NM_00224E | 22686.936 | 28797.4   |
| AB020672  | 469.342   | 563.448   | AI889961  | 4462.219  | 4180.493  | NM_015684 | 3665.827  | 2769.298  |
| AK026958  | 305.377   | 448.631   | AI360116  | 3900.576  | 3860.229  | NM_00394E | 20810.906 | 23332.467 |
| NM_00057E | 714.987   | 552.778   | NM_013983 | 612.858   | 753.987   | NM_004981 | 3974.992  | 4527.644  |
| AF263462  | 2395.019  | 2364.074  | AI572835  | 3241.275  | 3629.29   | AK096507  | 1231.425  | 1377.189  |
| AB040962  | 1029.507  | 876.986   | AK097322  | 942.057   | 1592.068  | NM_000352 | 120.538   | 151.127   |
| NM_00063E | 240.109   | 603.636   | AL136131  | 27583.672 | 38628.859 | NM_01559E | 1713.724  | 1569.618  |
| AV697672  | 810.244   | 541.854   | NM_033357 | 1724.203  | 2047.309  | AB037902  | 244.775   | 213.401   |
| NM_000942 | 48094.895 | 41139.598 | AF335109  | 1471.804  | 1571.409  | NM_01869E | 7893.808  | 7084.302  |
| NM_002982 | 635.284   | 673.833   | NM_003263 | 267.104   | 330.679   | NM_00013E | 9150.058  | 9435.213  |
| NM_00219C | 317.72    | 357.317   | U59911    | 6419.453  | 7053.455  | AL157456  | 777.879   | 637.351   |
| AK056773  | 7655.965  | 7820.915  | AK056773  | 8485.588  | 8870.911  | AL162056  | 898.972   | 853.293   |

|           |           |           |           |           |           |           |           |           |
|-----------|-----------|-----------|-----------|-----------|-----------|-----------|-----------|-----------|
| NM_002182 | 15913.038 | 15116.966 | NM_002182 | 10426.072 | 12798.761 | NM_00038C | 4374.353  | 4261.255  |
| NM_01647C | 2963.448  | 3294.36   | NM_01647C | 3233.508  | 3389.74   | NM_00462E | 1167.715  | 1129.564  |
| AL365408  | 26413.422 | 32132.395 | AL365408  | 21606.135 | 19765.641 | AF085734  | 437.452   | 207.174   |
| NM_017762 | 4761.542  | 4712.24   | AK026204  | 7205.31   | 6112.145  | NM_01487E | 2119.571  | 3016.505  |
| NM_001863 | 69845.156 | 51186.789 | NM_014635 | 3487.601  | 2536.186  | NM_00540E | 4334.205  | 5116.892  |
| NM_000921 | 9999.464  | 11184.017 | NM_004145 | 9237.744  | 8016.574  | NM_00332E | 1187.13   | 901.532   |
| NM_00001E | 15994.267 | 19171.002 | AK023196  | 1379.88   | 1391.58   | X93921    | 7314.603  | 7716.043  |
| AK026913  | 5285.358  | 6115      | NM_01872E | 4515.686  | 3629.799  | AF073482  | 1707.228  | 1834.412  |
| NM_016234 | 11975.462 | 11470.915 | AK024014  | 2675.159  | 2564.585  | NM_00599C | 5576.899  | 4914.113  |
| NM_00187E | 6385.627  | 6404.833  | NM_000865 | 1951.142  | 1777.085  | NM_01627E | 23565.922 | 22914.09  |
| NM_016144 | 8671.568  | 8446.19   | NM_000867 | 1280.341  | 1070.262  | NM_00085C | 2705.573  | 2762.742  |
| AL133099  | 17959.289 | 16505.604 | AF076642  | 2336.411  | 2495.814  | NM_00467E | 404.127   | 622.404   |
| NM_016082 | 2618.494  | 3147.297  | NM_00238E | 3929.981  | 3829.075  | NM_007193 | 133.21    | 230.934   |
| NM_000433 | 2116.138  | 2683.474  | AK024093  | 3679.696  | 5068.154  | NM_001994 | 3906.06   | 3748.414  |
| NM_00019C | 6398.343  | 7074.242  | NM_00194C | 3505.627  | 4008.306  | J00129    | 11635.544 | 11497.718 |
| X15667    | 10235.195 | 9634.724  | U83115    | 4406.852  | 5100.113  | NM_00332C | 2547.624  | 2299.238  |
| NM_017512 | 1725.506  | 2000.591  | NM_001264 | 6375.831  | 6904.927  | L10146    | 4538.998  | 4484.78   |
| NM_018661 | 924.812   | 865.507   | NM_013364 | 9813.679  | 10588.611 | NM_00068E | 4145.584  | 3823.513  |
| NM_00167E | 379.922   | 841.608   | NM_01436E | 1279.276  | 1087.867  | AK025657  | 14598.452 | 14765.721 |
| AK023078  | 3500.509  | 3504.789  | NM_002239 | 44173.867 | 44782.582 | AF142063  | 541.5     | 530.387   |
| NM_00223E | 48389.805 | 46497.371 | NM_002249 | 33738.547 | 39812.656 | W42849    | 2068.365  | 2016.828  |
| NM_00224E | 38639.215 | 44745.695 | NM_015684 | 3402.983  | 3692.175  | AI889961  | 2692.591  | 3395.032  |
| NM_015684 | 3466.925  | 3803.722  | NM_003945 | 25383.086 | 30102.441 | AI360116  | 3031.929  | 2748.611  |
| NM_003945 | 26914.186 | 30472.338 | NM_004981 | 6404.806  | 7140.843  | NM_013983 | 288.402   | 344.385   |
| NM_004981 | 10397.234 | 10694.853 | AK096507  | 1548.965  | 1755.674  | AI572835  | 1907.197  | 1878.675  |
| AK096507  | 1371.441  | 1828.334  | NM_016524 | 2343.937  | 2266.635  | R20392    | 5280.583  | 5054.103  |
| NM_002054 | 1633.126  | 1528.46   | NM_00712E | 27375.865 | 31686.645 | AA486367  | 5423.331  | 4856.287  |
| NM_004482 | 1525.326  | 1556.592  | AL137631  | 6083.631  | 5392.951  | N56684    | 805.525   | 1012.822  |
| NM_01559E | 1787.827  | 1421.217  | NM_016057 | 15175.066 | 15530.478 | M55153    | 335.992   | 441.51    |
| NM_01869E | 11092.547 | 11585.464 | NM_014677 | 939.85    | 791.67    | AF414120  | 197.664   | 403.443   |
| NM_00013E | 15668.944 | 17407.625 | NM_006855 | 919.028   | 1287.983  | AL136131  | 10825.004 | 9883.413  |
| AL157456  | 1049      | 1360.659  | AK022790  | 56611.805 | 51698.848 | NM_033357 | 1963.836  | 1812.816  |
| AL162056  | 1221.247  | 1378.599  | NM_004311 | 6549.698  | 5654.559  | AF335109  | 428.019   | 743.616   |
| NM_00038C | 6500.408  | 8222.711  | NM_005624 | 2371.607  | 2034.773  | U59911    | 6090.345  | 6661.428  |
| NM_00462E | 2096.53   | 2282.971  | NM_002302 | 899.8     | 669.224   | NM_002982 | 1950.915  | 2611.413  |
| NM_01487E | 2068.712  | 1839.601  | AF263462  | 2445.7    | 2861.436  | AK056773  | 5038.558  | 5854.946  |
| NM_00540E | 5977.131  | 5799.744  | AV697672  | 483.808   | 635.442   | NM_002182 | 5357.807  | 6640.047  |
| NM_00332E | 4403.85   | 4235.295  | NM_000942 | 55675.805 | 53623.234 | NM_01647C | 2131.224  | 2341.596  |
| X93921    | 10358.96  | 8737.2    | NM_00540E | 6549.921  | 7203.085  | AL365408  | 15388.029 | 16952.336 |
| AF073482  | 4771.23   | 4365.083  | NM_00332E | 5243.76   | 5572.1    | AK026204  | 5573.89   | 4830.096  |
| NM_00599C | 5481.053  | 5012.807  | X93921    | 9052.772  | 8890.313  | NM_01463E | 2861.248  | 2287.323  |
| NM_01627E | 35345.883 | 42478.52  | AF073482  | 6454.664  | 7451.015  | NM_00414E | 5898.677  | 5643.971  |
| NM_00085C | 3984.219  | 4942.744  | NM_00599C | 6832.158  | 6949.904  | AK023196  | 1340.872  | 1175.943  |
| NM_00467E | 1257.36   | 1448.553  | NM_01627E | 30331.664 | 34694.41  | NM_01872E | 3882.791  | 3345.523  |
| NM_007193 | 343.821   | 616.553   | NM_017762 | 5084.567  | 4284.367  | AK024014  | 1654.018  | 1811.842  |
| L10146    | 4503.268  | 4829.438  | NM_001863 | 64207.777 | 49412.66  | NM_000865 | 864.545   | 973.612   |
| NM_00068E | 5204.947  | 5503.639  | NM_000921 | 10836.263 | 11431.804 | AF076642  | 1301.521  | 1171.953  |
| AK025657  | 15021.578 | 16977.936 | NM_00009E | 3379.951  | 3034.078  | NM_00238E | 2297.607  | 1760.282  |
| AF142063  | 324.183   | 502.447   | NM_00001E | 16869.139 | 15773.304 | NM_005314 | 1262.831  | 1588.587  |
| W42849    | 1471.564  | 1559.975  | AK026913  | 4757.446  | 4555.896  | NM_00488E | 2431.456  | 2766.401  |
| AI889961  | 3391.743  | 3827.523  | NM_016234 | 11184.72  | 10595.918 | NM_00514E | 1204.693  | 916.04    |
| AI360116  | 3521.048  | 3885.937  | NM_00187E | 4955.509  | 5100.639  | NM_012152 | 6481.433  | 7442.032  |
| NM_013983 | 901.986   | 901.597   | NM_016144 | 9208.14   | 8989.917  | AK024093  | 1069.112  | 1216.837  |

|           |           |           |           |           |           |           |           |           |
|-----------|-----------|-----------|-----------|-----------|-----------|-----------|-----------|-----------|
| AI572835  | 3738.912  | 4856.294  | AL133099  | 19836.652 | 18145.889 | NM_00194C | 2551.646  | 2606.559  |
| R20392    | 11377.866 | 12712.416 | NM_016082 | 2421.01   | 2645.055  | U83115    | 1615.438  | 1452.944  |
| AA486367  | 9026.944  | 6459.647  | NM_000433 | 2905.398  | 3629.857  | NM_001264 | 3976.055  | 4461.346  |
| N56684    | 1460.839  | 1148.949  | NM_00019C | 5860.812  | 6399.654  | NM_013364 | 3274.676  | 3733.281  |
| M55153    | 1152.703  | 1222.295  | X15667    | 9682.008  | 11571.305 | NM_01436E | 547.73    | 432.586   |
| AF414120  | 571.917   | 516.249   | NM_017512 | 1646.514  | 2616.372  | NM_00223C | 23524.457 | 30225.701 |
| AK097322  | 473.121   | 591.468   | NM_018661 | 446.8     | 1183.182  | NM_00224C | 20214.41  | 27575.846 |
| AL136131  | 30111.574 | 40700.418 | AK023078  | 5139.466  | 5201.655  | NM_015684 | 2994.5    | 2859.337  |
| NM_033357 | 2351.362  | 2331.496  | NM_014737 | 5080.757  | 4806.086  | NM_00394E | 21760.51  | 25417.682 |
| AF335109  | 1633.68   | 1691.813  | NM_00348E | 5332.042  | 6045.679  | NM_004981 | 4514.32   | 4738.564  |
| NM_003263 | 665.343   | 630.229   | NM_001454 | 59961.676 | 47690.102 | AK096507  | 1702.024  | 1525.699  |
| U59911    | 6408.203  | 7922.991  | NM_00655E | 1020.128  | 1312.674  | NM_016524 | 2806.955  | 2685.162  |
| NM_002982 | 2539.445  | 1835.378  | Z22780    | 887.251   | 974.728   | NM_00712C | 32919.754 | 31981.074 |
| AK056773  | 10440.831 | 12146.257 | NM_005797 | 1493.695  | 2099.902  | AL137631  | 9007.784  | 8379.177  |
| AL365408  | 28383.713 | 36903.289 | NM_004824 | 2832.437  | 3176.62   | NM_016057 | 14890.924 | 15337.287 |
| AK026204  | 9329.602  | 8871.877  | M17733    | 61776.07  | 49220.809 | NM_014677 | 1009.221  | 858.788   |
| NM_01463E | 4368.149  | 3053.578  | U83191    | 643.725   | 797.466   | NM_00685E | 1128.157  | 1001.194  |
| NM_00414E | 11428.314 | 12042.333 | NM_013952 | 6759.606  | 6633.503  | AK022790  | 26041.266 | 23335.252 |
| AK023196  | 992.855   | 1288.749  | NM_01559E | 2120.265  | 1874.794  | NM_004311 | 2099.771  | 2215.09   |
| NM_01872E | 3139.714  | 2433.993  | AB037902  | 294.036   | 1232.23   | NM_005624 | 691.548   | 879.825   |
| AK024014  | 2917.076  | 3588.517  | NM_01869E | 12586.602 | 14083.507 | NM_002302 | 310.023   | 360.621   |
| NM_00086E | 1977.491  | 1814.584  | NM_00013E | 20045.832 | 20718.471 | AB020672  | 366.441   | 253.812   |
| NM_000867 | 1226.645  | 951.645   | AL157456  | 1278.206  | 1186.073  | NM_00057E | 609.664   | 537.705   |
| AF076642  | 1941.98   | 2581.031  | AL162056  | 1294.271  | 1303.404  | AF263462  | 1646.417  | 1447.031  |
| NM_00238E | 4804.213  | 5166.548  | NM_00038C | 6569.632  | 5860.232  | AB040962  | 530.302   | 514.424   |
| NM_005314 | 2049.292  | 2207.646  | NM_00462E | 2230.463  | 3229.752  | NM_00063E | 203.49    | 199.065   |
| NM_00488E | 2336.825  | 2204.893  | NM_01487E | 2203.646  | 2143.899  | AV697672  | 401.303   | 275.973   |
| NM_00514E | 1363.827  | 1316.479  | AB032958  | 1001.32   | 1081.885  | NM_000942 | 56799.668 | 43748.641 |
| NM_012152 | 13952.207 | 14614.817 | AK024427  | 4651.306  | 4649.7    | NM_00540E | 4068.102  | 4285.822  |
| AK024093  | 4434.708  | 6132.786  | NM_00300E | 1439.015  | 1750.308  | NM_00332E | 1125.532  | 1210.632  |
| NM_00194C | 3697.734  | 4062.438  | NM_000493 | 566.448   | 748.709   | X93921    | 7257.021  | 7369.777  |
| U83115    | 3924.235  | 4185.723  | AF272035  | 3448.356  | 4759.995  | AF073482  | 2568.822  | 2050.376  |
| NM_001264 | 6389.026  | 6463.371  | AY009133  | 862.945   | 1503.467  | NM_00599C | 6241.645  | 5171.723  |
| NM_013364 | 20035.361 | 20950.459 | NM_00096E | 501.979   | 541.599   | NM_01627E | 22987.283 | 24902.324 |
| NM_01436E | 1431.924  | 1462.166  | NM_013403 | 3749.826  | 3551.065  | NM_017762 | 4746.233  | 4470.847  |
| NM_004981 | 9989.049  | 11747.833 | NM_004123 | 581.192   | 567.022   | NM_001863 | 56454.402 | 39854.934 |
| AK096507  | 1784.348  | 1762.019  | AB020671  | 566.586   | 543.839   | NM_000921 | 8842.731  | 8877.805  |
| NM_016524 | 3661.595  | 3214.44   | NM_01825E | 5489.18   | 5321.712  | NM_00009E | 3240.799  | 3011.674  |
| NM_00712E | 49415.016 | 47068.734 | NM_016232 | 648.239   | 956.21    | NM_00001E | 15423.605 | 15550.43  |
| AL137631  | 8126.367  | 8660.213  | AF178930  | 1573.096  | 2719.183  | AK026913  | 4330.613  | 3880.876  |
| NM_016057 | 14179.415 | 17646.107 | M74161    | 2711.537  | 2842.722  | NM_016234 | 6272.117  | 5528.621  |
| NM_014677 | 1269.745  | 1504.759  | NM_016542 | 7028.898  | 8273.332  | NM_00187E | 3427.288  | 3118.702  |
| NM_00685E | 1358.774  | 1593.239  | NM_000484 | 2850.877  | 2512.397  | NM_016144 | 4940.768  | 5084.914  |
| AK022790  | 59769.434 | 49974.715 | S40369    | 17533.354 | 16733.479 | AL133099  | 4478.685  | 4005.296  |
| NM_004311 | 8838.926  | 8962.056  | NM_015831 | 5522.87   | 6010.178  | NM_016082 | 1573.84   | 1563.894  |
| NM_005624 | 2682.01   | 2604.421  | AK023154  | 4570.047  | 5173.22   | NM_000433 | 2013.329  | 2391.235  |
| AB020672  | 490.582   | 340.87    | NM_012451 | 2150.801  | 2408.323  | NM_00019C | 5178.315  | 5065.95   |
| AK026958  | 584.752   | 465.575   | NM_00251C | 1084.934  | 1207.869  | X15667    | 4545.037  | 4100.185  |
| NM_00057E | 864.847   | 599.837   | NM_006624 | 6086.501  | 6311.727  | NM_017512 | 1657.005  | 1889.319  |
| NM_00148C | 412.983   | 534.401   | AF130079  | 796.7     | 1153.373  | NM_018661 | 573.834   | 744.741   |
| AF263462  | 2834.79   | 2824.691  | NM_017667 | 1614.98   | 3546.068  | NM_00167E | 172.798   | 336.475   |
| AB040962  | 834.921   | 721.698   | AK002211  | 3654.043  | 3583.569  | AK023078  | 2583.328  | 2299.932  |
| AV697672  | 656.767   | 557.874   | NM_012127 | 8186.577  | 7911.391  | NM_014737 | 3371.642  | 3102.171  |



|           |           |           |           |           |           |           |           |           |
|-----------|-----------|-----------|-----------|-----------|-----------|-----------|-----------|-----------|
| NM_000942 | 58868.203 | 53225.488 | NM_014454 | 1889.176  | 1577.348  | NM_00348E | 2975.586  | 2872.064  |
| NM_01627E | 46287.578 | 46092.297 | NM_01748E | 2208.521  | 1787.006  | NM_001454 | 59973.367 | 42599.941 |
| NM_017762 | 6072.473  | 7031.914  | NM_002824 | 16336.491 | 12755.417 | NM_00655E | 879.146   | 751.284   |
| NM_001863 | 62685.039 | 45563.633 | NM_00683E | 25919.039 | 28597.029 | Z22780    | 607.667   | 628.294   |
| NM_000921 | 8474.002  | 9879.847  | NM_006023 | 13737.82  | 13714.525 | NM_005797 | 867.482   | 816.341   |
| NM_00009E | 2537.465  | 3417.313  | NM_014673 | 3676.576  | 4565.559  | NM_004824 | 2158.543  | 1805.708  |
| NM_00001E | 12029.374 | 16945.447 | AB002330  | 3814.388  | 3559.219  | M17733    | 59923.367 | 44596.965 |
| AK026913  | 4682.165  | 5588.208  | AL137509  | 18396.479 | 20937.488 | U83191    | 899.038   | 620.193   |
| NM_016234 | 11681.487 | 11466.743 | NM_00653E | 3790.39   | 3558.319  | NM_013952 | 4024.558  | 4117.445  |
| NM_00187E | 5865.61   | 7580.096  | NM_019887 | 7153.6    | 8049.295  | NM_01559E | 1489.273  | 1184.273  |
| NM_016144 | 11177.842 | 10790.041 | NM_00405C | 9224.013  | 9104.217  | AB037902  | 106.676   | 107.616   |
| AL133099  | 20073.008 | 18386.607 | NM_006024 | 20768.1   | 25651.064 | NM_01869E | 5985.686  | 6074.697  |
| NM_016082 | 2516.318  | 2395.289  | NM_020191 | 3438.858  | 3287.968  | NM_00013E | 9145.251  | 8893.119  |
| NM_000433 | 2493.68   | 2489.209  | NM_017434 | 2292.032  | 2140.396  | AL157456  | 804.919   | 722.566   |
| NM_00019C | 7644.784  | 7144.815  | AJ275213  | 580.127   | 553.733   | AL162056  | 972.423   | 611.156   |
| X15667    | 13610.965 | 11697.243 | NM_004793 | 12101.712 | 13205.09  | NM_00038C | 4670.641  | 4146.304  |
| NM_017512 | 2868.348  | 3274.576  | NM_00439C | 1730.713  | 2180.431  | NM_00462E | 1472.761  | 1443.466  |
| NM_018661 | 892.492   | 1068.189  | NM_015907 | 1411.65   | 1803.568  | AF085734  | 302.376   | 127.191   |
| NM_00167E | 500.986   | 940.158   | NM_001912 | 2148.495  | 1982.431  | NM_01487E | 2161.709  | 2265.213  |
| AK023078  | 6474.646  | 6468.386  | NM_013267 | 2099.065  | 1915.107  | AB032958  | 762.665   | 555.18    |
| NM_014737 | 5382.839  | 5231.51   | NM_002454 | 3579.11   | 3546.497  | AK024427  | 2027.51   | 2526.363  |
| NM_00348E | 4475.176  | 4442.001  | NM_001917 | 4026.84   | 3308.603  | NM_00300E | 718.946   | 560.686   |
| NM_00655E | 1567.993  | 1967.916  | NM_00595E | 24766.791 | 22806.969 | NM_000493 | 349.993   | 395.257   |
| NM_005797 | 1115.389  | 1609.733  | NM_003043 | 5769.887  | 6451.524  | AF272035  | 2412.562  | 2244.07   |
| NM_004824 | 2325.259  | 2174.727  | D87077    | 5003.369  | 7054.198  | AY009133  | 742.394   | 687.426   |
| M17733    | 65790.016 | 58781.836 | NM_01430E | 310.966   | 638.437   | NM_00096E | 270.63    | 271.937   |
| U83191    | 559.739   | 619.448   | L07033    | 1573.998  | 1768.679  | NM_013403 | 3102.87   | 2588.307  |
| NM_013952 | 5591.766  | 6003.591  | AK000142  | 791.211   | 472.971   | AB020671  | 544.42    | 298.611   |
| NM_004482 | 552.016   | 589.409   | NM_005993 | 6354.136  | 6966.01   | NM_00020E | 168.599   | 266.294   |
| NM_000352 | 264.571   | 443.71    | AK026341  | 1755.46   | 1938.988  | NM_01825E | 4207.79   | 4346.124  |
| NM_01559E | 2515.54   | 1828.386  | NM_018943 | 4556.617  | 4287.42   | NM_016232 | 293.571   | 346.413   |
| AB037902  | 497.3     | 439.697   | AJ292757  | 700.089   | 728.024   | AF178930  | 532.665   | 445.699   |
| NM_01869E | 16315.168 | 14224.146 | U01922    | 596.143   | 541.175   | M74161    | 1684.571  | 1740.346  |
| NM_00013E | 20363.299 | 18325.404 | NM_00399E | 1735.646  | 2121.727  | NM_016542 | 5334.662  | 5783.315  |
| AL157456  | 1226.057  | 1306.482  | NM_003433 | 9379.957  | 7443.113  | NM_000484 | 1660.571  | 1632.347  |
| AL162056  | 1071.07   | 1236.344  | NM_005221 | 4494.497  | 3556.501  | NM_00385E | 191.975   | 184.207   |
| NM_00038C | 11088.981 | 10390.659 | NM_001952 | 14958.085 | 17452.23  | S40369    | 6018.195  | 5991.8    |
| NM_00462E | 2450.794  | 2636.569  | NM_003223 | 17495.693 | 14412.089 | NM_015831 | 3777.481  | 4445.137  |
| NM_01487E | 2702.256  | 3227.783  | NM_006713 | 61948.988 | 46360.445 | AK023154  | 2801.165  | 2635.984  |
| AB032958  | 1775.75   | 1942.589  | NM_020201 | 3299.219  | 2861.427  | Z36820    | 1249.558  | 1370.336  |
| AK024427  | 3881.903  | 3454.674  | AK023530  | 679.998   | 679.72    | NM_003967 | 2791.27   | 2748.413  |
| NM_00300E | 2814.28   | 2966.615  | NM_01601E | 9110.892  | 10318.518 | NM_012451 | 2100.795  | 2183.986  |
| NM_000493 | 424.839   | 525.677   | NM_01224E | 7505.158  | 7729.644  | NM_00251C | 507.516   | 651.447   |
| AF272035  | 3101.787  | 3060.973  | NM_001533 | 13922.408 | 13435.649 | NM_02038E | 1142.56   | 1411.239  |
| AY009133  | 924.269   | 1024.452  | NM_00692E | 10162.821 | 8607.329  | NM_006624 | 2306.339  | 2958.938  |
| NM_00096E | 457.064   | 582.85    | NM_003977 | 18974.061 | 18049.734 | AF130079  | 200.083   | 215.26    |
| NM_013403 | 3734.331  | 3940.232  | NM_00599E | 28559.986 | 37622.438 | NM_017667 | 735.635   | 538.858   |
| NM_004123 | 461.447   | 474.996   | U28424    | 2407.393  | 2062.775  | AK002211  | 1302.145  | 1103.101  |
| AB020671  | 439.991   | 430.735   | BF541372  | 2068.733  | 2185.039  | NM_012127 | 3211.576  | 3252.093  |
| NM_00020E | 797.461   | 762.881   | AF092137  | 4759.251  | 3598.954  | NM_014454 | 1455.685  | 1154.772  |
| NM_01825E | 6705.926  | 8145.155  | NM_004623 | 1367.178  | 1330.576  | NM_01748E | 933.604   | 1158.132  |
| NM_016232 | 747.646   | 973.746   | NM_016551 | 4017.745  | 3507.691  | NM_002824 | 11178.459 | 9527.8    |
| AF178930  | 985.322   | 881.368   | AK024631  | 2963.851  | 2603.96   | NM_00683E | 18610.023 | 18808.656 |

|           |           |           |           |           |           |           |           |           |
|-----------|-----------|-----------|-----------|-----------|-----------|-----------|-----------|-----------|
| M74161    | 1844.957  | 2085.585  | AF087977  | 1195.674  | 1384.144  | NM_006023 | 7938.196  | 7762.056  |
| NM_016542 | 5281.745  | 5079.203  | AL050028  | 4593.084  | 4472.496  | NM_014673 | 2959.042  | 3102.822  |
| NM_000484 | 2287.197  | 2226.108  | BE732255  | 6407.723  | 5584.773  | AB002330  | 2228.735  | 2233.858  |
| NM_003855 | 848.109   | 525.043   | NM_004955 | 1619.206  | 1293.67   | AL137509  | 10947.424 | 10420.159 |
| S40369    | 21258.049 | 22577.084 | NM_003364 | 1474.59   | 1553.067  | NM_006538 | 2500.58   | 2214.263  |
| NM_015831 | 7100.919  | 7119.976  | NM_017803 | 1476.657  | 935.223   | NM_019887 | 4949.513  | 4534.199  |
| AK023154  | 4214.985  | 4057.49   | NM_005994 | 9740.291  | 14091.791 | NM_004050 | 4007.71   | 3852.704  |
| Z36820    | 2375.818  | 2761.193  | AB027508  | 4825.489  | 4043.124  | NM_006024 | 9016.675  | 8979.09   |
| NM_003967 | 5226.783  | 5417.301  | NM_016331 | 1765.717  | 2064.858  | NM_020191 | 2135.04   | 1788.754  |
| NM_012451 | 3000.218  | 3897.98   | NM_014360 | 16790.795 | 15151.975 | NM_017434 | 1053.001  | 736.833   |
| NM_002510 | 1147.74   | 1030.172  | AB033053  | 903.048   | 915.397   | NM_020182 | 679.655   | 389.796   |
| NM_006624 | 4423.073  | 4112.552  | NM_007358 | 4870.271  | 5423.03   | AL137669  | 1215.189  | 997.327   |
| NM_007069 | 158.272   | 163.986   | NM_001571 | 3260.671  | 2632.763  | AJ275213  | 309.857   | 299.849   |
| AF130079  | 823.946   | 424.171   | AF126749  | 781.5     | 547.761   | NM_004793 | 5071.082  | 5194.608  |
| NM_017667 | 507.223   | 717.812   | NM_018108 | 1637.246  | 1448.179  | NM_004390 | 1384.642  | 1303.041  |
| AK002211  | 2904.991  | 2925.947  | NM_003450 | 1096.291  | 650.827   | NM_014263 | 3222.473  | 3587.517  |
| NM_012127 | 6297.103  | 6842.819  | AK021577  | 1608.527  | 1145.135  | NM_020361 | 863.475   | 727.635   |
| NM_014454 | 1531.843  | 1220.967  | AF147390  | 494.477   | 514.165   | NM_015907 | 774.578   | 805.336   |
| NM_017489 | 2532.674  | 2344.221  | AF085879  | 1062.387  | 852.937   | NM_001912 | 1604.841  | 1488.917  |
| NM_002824 | 18057.518 | 19027.734 | AF075019  | 2109.274  | 1831.84   | NM_013267 | 847.366   | 1042.046  |
| NM_006835 | 26284.689 | 32582.994 | AF147388  | 645.389   | 910.596   | NM_002454 | 2840.872  | 2690.241  |
| NM_006023 | 16171.625 | 17085.043 | AK021498  | 3823.438  | 3357.836  | NM_001917 | 496.822   | 543.785   |
| NM_014673 | 4166.639  | 4619.543  | AF085874  | 4857.784  | 4570.525  | NM_005956 | 13435.125 | 13645.74  |
| AB002330  | 2651.407  | 2594.753  | AK026959  | 3583.859  | 2522.013  | NM_003043 | 2527.325  | 1928.922  |
| AL137509  | 15740.744 | 13635.13  | NM_019556 | 1680.675  | 1506.614  | D87077    | 1497.964  | 1740.781  |
| NM_006538 | 3529.428  | 2812.434  | NM_004753 | 2589.269  | 2111.574  | L07033    | 1096.412  | 1367.227  |
| NM_019887 | 7893.276  | 6624.354  | NM_015462 | 2675.792  | 2636.246  | AK000142  | 395.237   | 331.111   |
| NM_004050 | 16264.984 | 16106.165 | AF147377  | 1785.115  | 3688.814  | NM_005993 | 1607.063  | 1890.336  |
| NM_006024 | 21430.195 | 23211.424 | AK026700  | 839.437   | 443.304   | AK026341  | 666.463   | 840.565   |
| NM_020191 | 4394.437  | 3486.434  | AF086242  | 1139.501  | 748.313   | NM_018943 | 2079.103  | 1991.422  |
| NM_017434 | 5274.951  | 5182.967  | AF086370  | 1038.395  | 587.874   | AJ292757  | 885.774   | 640.923   |
| NM_020182 | 1335.837  | 1620.759  | AF086332  | 9967.591  | 8222.692  | U01922    | 249.603   | 301.42    |
| AL137669  | 3958.435  | 4619.714  | AJ404614  | 385.792   | 833.211   | NM_003999 | 751.164   | 641.37    |
| AJ275213  | 878.208   | 838.856   | AF086347  | 4425.932  | 4106.042  | NM_004469 | 134.843   | 245.641   |
| NM_004793 | 10256.513 | 9870.657  | AF086388  | 860.953   | 909.093   | NM_003433 | 4462.216  | 4448.707  |
| NM_004390 | 1560.06   | 1706.401  | AF086444  | 641.406   | 654.618   | NM_005221 | 2587.462  | 2571.473  |
| NM_014263 | 4793.99   | 3790.943  | AK001043  | 2861.97   | 1901.66   | NM_005870 | 470.258   | 556.702   |
| NM_020361 | 998.378   | 865.706   | AK024535  | 5892.122  | 4182.547  | NM_018561 | 1947.621  | 1978.964  |
| NM_015907 | 1083.954  | 840.63    | AL359608  | 1481.061  | 1468.528  | NM_001270 | 2597.04   | 2322.974  |
| NM_001912 | 2637.807  | 2598.204  | NM_016498 | 23358.607 | 21260.379 | NM_001952 | 4645.173  | 4129.875  |
| NM_013267 | 3318.288  | 3340.756  | AF088025  | 773.122   | 747.687   | NM_003223 | 4251.006  | 4017.651  |
| NM_002454 | 4125.126  | 4542.652  | AF085934  | 1285.233  | 1992.379  | NM_006713 | 45814.395 | 40715.637 |
| NM_001917 | 4179.51   | 4384.652  | AF147423  | 794.95    | 781.831   | NM_020201 | 1368.408  | 1543.763  |
| NM_005956 | 31237.484 | 31034.137 | AF075088  | 1021.845  | 848.021   | AK023530  | 577.297   | 344.114   |
| NM_003043 | 7067.679  | 7148.211  | AK023971  | 23305.186 | 21944.555 | NM_016019 | 5482.832  | 4920.557  |
| D87077    | 2117.395  | 1664.096  | AK024738  | 1759.028  | 1111.704  | NM_012245 | 6051.96   | 4495.09   |
| NM_014308 | 736.613   | 583.651   | AL133103  | 1141.149  | 879.616   | NM_001533 | 10400.43  | 10289.516 |
| L07033    | 1908.975  | 1918.235  | BC015321  | 1170.573  | 870.385   | NM_006929 | 3657.429  | 3381.371  |
| AK023934  | 268.909   | 469.917   | AL137293  | 1907.075  | 1481.081  | NM_003977 | 8968.647  | 8197.797  |
| AK000142  | 1146.002  | 874.017   | AL137458  | 1439.312  | 1401.117  | NM_005998 | 21132.969 | 25504.186 |
| NM_005993 | 6696.679  | 6826.588  | AL157490  | 18111.832 | 17963.26  | U28424    | 2194.979  | 2586.158  |
| AK026341  | 1694.911  | 1705.728  | AL390167  | 4046.442  | 3638.677  | BF541372  | 1226.415  | 1658.041  |
| NM_018943 | 4879.635  | 4905.286  | AK023657  | 1595.877  | 1237.818  | AF092137  | 916.844   | 923.309   |

|           |           |           |           |           |           |           |          |          |
|-----------|-----------|-----------|-----------|-----------|-----------|-----------|----------|----------|
| AJ292757  | 458.657   | 526.463   | AF086068  | 2159.011  | 1706.635  | NM_004623 | 1510.096 | 1320.566 |
| U01922    | 973.07    | 1040.18   | AF075018  | 882.07    | 876.827   | NM_016551 | 2826.111 | 2526.271 |
| NM_003999 | 1318.669  | 1496.945  | AK021838  | 15590.37  | 15156.404 | AK024631  | 1714.818 | 1807.589 |
| NM_003433 | 8309.798  | 7774.731  | AK021990  | 654.768   | 565.549   | AK026949  | 596.416  | 649.123  |
| NM_005221 | 3886.005  | 3762.481  | AK022168  | 1304.052  | 1147.635  | NM_004957 | 2304.678 | 2072.869 |
| NM_005870 | 944.616   | 1025.432  | AK022327  | 783.537   | 655.257   | AL050028  | 2366.286 | 1924.21  |
| NM_018561 | 1885.708  | 1822.652  | AK022201  | 21130.102 | 2824.117  | BE732255  | 4054.945 | 3180.781 |
| NM_001270 | 2822.545  | 2398.316  | AK022353  | 2452.629  | 2149.394  | NM_004955 | 1378.104 | 1499.986 |
| NM_001952 | 8030.934  | 7681.821  | AK026868  | 972.565   | 1097.34   | NM_003364 | 186.344  | 221.655  |
| NM_003223 | 6432.796  | 6861.095  | AK022245  | 1292.125  | 318.173   | NM_017803 | 1049.34  | 970.333  |
| NM_006713 | 57580.508 | 46212.969 | AK022200  | 4541.633  | 3795.275  | NM_005994 | 2098.739 | 2319.935 |
| NM_020201 | 4593.879  | 4636.071  | AK023396  | 2327.07   | 1847.04   | AB027508  | 1219.066 | 1269.061 |
| U81557    | 358.389   | 514.901   | AF264625  | 1380.519  | 1278.999  | NM_016331 | 679.421  | 1379.713 |
| AK023530  | 1247.938  | 861.232   | NM_018101 | 3096.347  | 3573.079  | NM_014360 | 4810.482 | 5327.272 |
| NM_016019 | 10012.342 | 7493.822  | AF293366  | 899.64    | 1139.474  | AB033053  | 507.378  | 689.583  |
| NM_012245 | 9076.529  | 7305.433  | AF052107  | 17283.436 | 14738.518 | NM_007355 | 3980.088 | 3966.301 |
| AK022591  | 3313.108  | 3352.56   | AK001022  | 6226.253  | 7249.992  | NM_001571 | 1614.73  | 1582.664 |
| NM_001533 | 18431.107 | 16363.531 | AL049351  | 5056.537  | 5019.712  | AF126749  | 241.685  | 289.067  |
| NM_006929 | 16616.701 | 15120.733 | AK021826  | 4272.188  | 3116.02   | NM_018105 | 1621.043 | 1402.246 |
| NM_003977 | 30035.984 | 32317.217 | AK024541  | 3556.537  | 2320.536  | NM_003450 | 422.142  | 581.638  |
| NM_005995 | 31800.107 | 37880.281 | AK025341  | 2534.1    | 1423.798  | AK021577  | 1360.647 | 1400.29  |
| U28424    | 3340.216  | 3127.958  | AK024138  | 5397.39   | 6904.407  | AF147390  | 144.683  | 157.487  |
| BF541372  | 4960.955  | 4365.566  | Y10505    | 2440.528  | 2793.084  | AF075019  | 462.08   | 577.579  |
| AF092137  | 6895.279  | 6294.205  | NM_005615 | 3039.663  | 2973.234  | AK021498  | 1894.152 | 2118.63  |
| NM_004623 | 1902.269  | 1809.512  | AK025311  | 535.661   | 1111.734  | AF085874  | 1557.027 | 1142.507 |
| NM_016551 | 2772.215  | 2720.545  | AF166125  | 3164.701  | 2791      | AK026959  | 1098.46  | 1338.323 |
| AK024631  | 1514.979  | 1577.861  | AF225425  | 1875.475  | 1299.415  | NM_019556 | 845.664  | 762.115  |
| AF087977  | 972.089   | 972.094   | AF064848  | 13770.115 | 15906.391 | NM_004753 | 2426.886 | 2493.437 |
| AK026949  | 661.255   | 638.478   | U61089    | 3796.31   | 4474.573  | NM_015462 | 2393.634 | 2518.013 |
| NM_004957 | 3495.833  | 3335.393  | AK001036  | 4525.015  | 5627.187  | AF147377  | 211.879  | 711.112  |
| AL050028  | 3884.351  | 3978.677  | AK024858  | 12652.291 | 13958.002 | AK026700  | 563.42   | 603.698  |
| NM_000371 | 1038.448  | 1192.961  | Y16697    | 852.781   | 780.412   | AF086332  | 4501.833 | 5224.147 |
| BE732255  | 5715.236  | 6174.345  | NM_001049 | 4927.152  | 3807.358  | AJ404614  | 339.042  | 426.268  |
| NM_004955 | 1550.153  | 2272.45   | AK024554  | 1388.69   | 1205.72   | AF086347  | 2008.998 | 2152.259 |
| NM_003364 | 1645.083  | 1919.414  | AF068294  | 1640.367  | 1837.218  | AF086444  | 302.232  | 400.024  |
| NM_017803 | 4807.233  | 4272.508  | AK025909  | 3759.487  | 2895.218  | AK001043  | 2642.672 | 2593.81  |
| NM_015863 | 213.64    | 269.306   | AK026138  | 2093.736  | 1831.939  | AK024535  | 3249.448 | 4298.442 |
| NM_005994 | 7048.826  | 6727.697  | Z70706    | 1597.216  | 1046.573  | AL359608  | 654.265  | 531.094  |
| AB027508  | 4244.163  | 3754.383  | NM_000549 | 1065.68   | 735.79    | NM_016495 | 9045.656 | 9487.084 |
| NM_016331 | 1733.758  | 1391.621  | AK021434  | 15156.981 | 15506.102 | AF088025  | 477.6    | 340.188  |
| NM_014360 | 26273.615 | 23235.59  | NM_016479 | 12357.805 | 12600.691 | AF085934  | 833.79   | 663.068  |
| NM_018952 | 579.702   | 568.303   | AK000933  | 16945.604 | 20288.59  | AF075088  | 393.403  | 540.163  |
| AB033053  | 1087.822  | 1169.039  | Y10205    | 2092.265  | 1873.494  | AK023971  | 8281.457 | 7928.808 |
| NM_007355 | 6028.863  | 5827.306  | NM_014626 | 3101.548  | 2822.291  | AK024738  | 1089.525 | 937.699  |
| NM_001571 | 3964.788  | 3704.853  | AL080092  | 6394.087  | 4734.47   | BC015321  | 261.531  | 265.58   |
| AF126749  | 436.081   | 543.161   | AL137279  | 2739.039  | 2519.564  | AL157450  | 795.907  | 452.951  |
| NM_018105 | 2320.891  | 2685.018  | AK023981  | 2298.295  | 2336.604  | AL359594  | 533.839  | 514.23   |
| NM_003405 | 1693.772  | 1414.866  | AK021874  | 6655.838  | 5537.927  | AL137293  | 893.961  | 1061.12  |
| NM_003450 | 1676.282  | 1599.568  | AF086384  | 60776.051 | 49827.414 | AL137458  | 282.774  | 185.794  |
| AK021577  | 2383.242  | 2883.045  | M77818    | 14971.697 | 12090.708 | AL157490  | 3271.701 | 3125.681 |
| AF147390  | 693.446   | 473.98    | AF009267  | 2315.594  | 1642.979  | AL390167  | 461.959  | 575.352  |
| AF085879  | 1568.287  | 1806.752  | AK027129  | 3430.928  | 2288.966  | AK023657  | 1630.086 | 1391.751 |
| AF075019  | 1877.787  | 1901.981  | L19367    | 1975.005  | 1215.93   | AF075018  | 192.463  | 299.969  |

|           |           |           |           |           |           |           |          |          |
|-----------|-----------|-----------|-----------|-----------|-----------|-----------|----------|----------|
| AF147388  | 711.951   | 524.632   | NM_015698 | 3024.632  | 2193.486  | AK024239  | 279.047  | 361.525  |
| AK021498  | 2272.369  | 2166.527  | CY3Cy5    | 11613.313 | 382.735   | AK021838  | 5419.955 | 5507.065 |
| AF085874  | 4502.085  | 4333.768  | BG696293  | 3540.401  | 4152.72   | AF083118  | 790.627  | 587.836  |
| AF147346  | 665.937   | 852.719   | BG113873  | 767.259   | 840.031   | AF211977  | 212.768  | 230.537  |
| AK026959  | 3006.021  | 2915.196  | BC013135  | 10243.118 | 12114.277 | AF089811  | 180.312  | 193.617  |
| NM_019556 | 1917.019  | 1543.078  | AA281652  | 5476.356  | 6216.269  | AK021909  | 506.675  | 182.87   |
| NM_004753 | 4958.788  | 4623.458  | U31905    | 1279.461  | 1414.154  | AK022168  | 628.565  | 347.332  |
| NM_015462 | 5847.134  | 5063.675  | X52479    | 1925.581  | 2176.223  | AK022353  | 725.46   | 1157.134 |
| AF147377  | 971.388   | 871.218   | AW408832  | 5021.881  | 5925.664  | AK026868  | 172.102  | 264.552  |
| AK026700  | 1368.108  | 1206.836  | AA486364  | 4312.911  | 4560.134  | AK022200  | 2049.869 | 2131.467 |
| AK000127  | 709.582   | 229.104   | M15476    | 16991.164 | 17346.803 | AK023396  | 232.802  | 222.065  |
| AF086242  | 1100.728  | 427.835   | U57456    | 2138.741  | 2349.273  | NM_018101 | 2612.623 | 2182.696 |
| AF086370  | 755.35    | 815.958   | N70057    | 48560.582 | 48819.254 | AF293366  | 281.158  | 257.403  |
| AF086332  | 17341.191 | 14400.143 | NM_006497 | 6939.009  | 6866.5    | BF526704  | 966.085  | 726.045  |
| AF086432  | 470.058   | 367.397   | NM_006892 | 1511.842  | 1411.191  | AJ491695  | 2826.332 | 2091.459 |
| AJ404614  | 940.868   | 985.496   | SR5       | 5933.105  | 5177.772  | AF052107  | 4333.378 | 3213.347 |
| AF086347  | 8765.607  | 8773.366  | SR7       | 8207.681  | 38008.238 | AK001022  | 1844.564 | 1561.438 |
| AF086388  | 1884.812  | 1861.329  | SR9       | 30163.771 | 5636.162  | AL049351  | 1508.171 | 1825.487 |
| AF086444  | 1683.359  | 1373.7    | CY3Cy5    | 10028.387 | 439.797   | AL137508  | 148.69   | 252.1    |
| AK001043  | 4974.705  | 4557.394  | AF254067  | 1341.207  | 1141.856  | AK021826  | 1959.919 | 2128.979 |
| AK024535  | 7280.714  | 6726.11   | NM_016363 | 2052.213  | 1702.641  | AK024541  | 153.646  | 113.353  |
| AL359608  | 1774.208  | 1657.885  | AY009090  | 575.664   | 853.966   | AK024138  | 2315.715 | 1903.211 |
| NM_016498 | 26929.961 | 28143.461 | NM_005592 | 315.055   | 306.264   | Y10505    | 1087.806 | 621.417  |
| AF088025  | 982.525   | 782.507   | U81380    | 802.62    | 734.367   | U00946    | 1224.898 | 608.551  |
| AK024286  | 2536.507  | 2485.052  | NM_002303 | 338.704   | 631.99    | NM_005615 | 1115.891 | 842.609  |
| AF075098  | 40.342    | 198.416   | NM_016509 | 605.654   | 716.078   | AF070642  | 3335.159 | 2398.417 |
| AF085934  | 1408.734  | 1291.347  | NM_012296 | 12564.205 | 15087.984 | AK027125  | 1991.96  | 1634.717 |
| AF075088  | 925.011   | 1207.136  | AF041038  | 1547.896  | 1814.161  | D16918    | 776.085  | 489.821  |
| AK023971  | 18998.586 | 17539.092 | NM_004536 | 1635.714  | 1719.119  | D16467    | 1436.175 | 1296.821 |
| AK024738  | 1431.459  | 1422.636  | NM_014672 | 1898.645  | 2671.693  | AF090932  | 362.82   | 561.738  |
| AL133103  | 1451.863  | 1367.65   | AB058719  | 524.771   | 710.912   | AF166125  | 1795.043 | 1843.096 |
| BC015321  | 1511.694  | 1271.343  | AK025935  | 594.153   | 720.684   | AF225425  | 1035.708 | 877.03   |
| AL157450  | 859.956   | 751.696   | AB032953  | 510.234   | 854.149   | AF064848  | 5911.464 | 6840.674 |
| AL359594  | 2166.336  | 2203.786  | NM_016441 | 2011.849  | 2316.349  | U61089    | 2442.521 | 2988.778 |
| AL137293  | 3115.857  | 2073.668  | NM_004625 | 5016.23   | 4329.08   | AK001036  | 2162.367 | 2269.121 |
| AL137458  | 1509.279  | 1075.324  | NM_007179 | 4949.151  | 5272.334  | AK024858  | 4051.506 | 4300.167 |
| AL157490  | 13701.822 | 9458.88   | NM_001306 | 1273.504  | 1359.425  | Y16697    | 212.865  | 306.164  |
| AL390167  | 4657.907  | 3733.409  | AB046861  | 1066.558  | 1105.731  | NM_001045 | 3180.092 | 3239.827 |
| AK023657  | 1633.844  | 1855.575  | NM_005940 | 298.312   | 428.129   | AK024554  | 826.277  | 830.722  |
| NM_014332 | 870.983   | 687.605   | AF061034  | 8643.814  | 8189.756  | AF068294  | 1139.062 | 1222.978 |
| AF086068  | 1874.179  | 1816.926  | X03655    | 960.102   | 854.186   | AK025909  | 1831.44  | 1538.768 |
| AK026322  | 289.235   | 351.356   | NM_005833 | 3117.667  | 2946.038  | AK026138  | 1460.826 | 1572.243 |
| AF086059  | 975.37    | 949.2     | NM_003100 | 5430.859  | 5574.416  | AK021434  | 5108.761 | 3783.351 |
| AF086091  | 742.43    | 868.539   | NM_013322 | 6220.009  | 6927.929  | NM_016475 | 4551.273 | 3053.976 |
| AF075018  | 925.472   | 1029.547  | AB020627  | 2184.008  | 2111.633  | AK000933  | 3197.742 | 2013.09  |
| AK021838  | 16685.963 | 14196.387 | NM_005387 | 5364.24   | 6522.453  | NM_014626 | 966.666  | 552.328  |
| AK021990  | 795.654   | 627.826   | AL137938  | 25176.244 | 29635.713 | AK025277  | 533.781  | 198.433  |
| AF083118  | 1456.217  | 1229.434  | AF228704  | 2458.093  | 2887.204  | NM_018352 | 771.437  | 205.363  |
| AF211977  | 306.868   | 278.548   | AK022746  | 2644.828  | 2736.354  | AK026880  | 1705.199 | 1181.401 |
| AF089811  | 690.311   | 650.818   | NM_006568 | 4424.552  | 4506.471  | AL080092  | 2148.418 | 2106.383 |
| AF147444  | 765.013   | 882.991   | NM_004847 | 7819.305  | 8117.739  | AL137279  | 487.473  | 558.563  |
| NM_016566 | 607.851   | 587.61    | NM_002255 | 1120.122  | 1302.187  | AK023981  | 1107.924 | 1329.958 |
| AK021909  | 1444.482  | 1267.31   | AF151889  | 12214.444 | 12952.353 | AK025037  | 612.97   | 522.892  |

|           |           |           |           |           |           |           |           |           |
|-----------|-----------|-----------|-----------|-----------|-----------|-----------|-----------|-----------|
| AK022043  | 796.634   | 553.496   | BC034483  | 1849.299  | 1859.524  | AK021874  | 2105.214  | 1707.639  |
| AK022168  | 2086.412  | 2282.469  | NM_003620 | 3252.644  | 3338.348  | AF009267  | 1087.273  | 1049.244  |
| AK022327  | 691.618   | 931.214   | NM_013289 | 815.562   | 490.321   | AK027129  | 1824.18   | 1957.1    |
| AK021959  | 598.951   | 392.344   | AA586375  | 855.055   | 820.32    | NM_01569E | 1536.903  | 1228.68   |
| AK022061  | 353.019   | 248.907   | BE910339  | 20048.361 | 19204.168 | CY3Cy5    | 30219.117 | 2140.183  |
| AK022201  | 887.583   | 790.729   | U89715    | 767.784   | 728.299   | BG696293  | 3069.937  | 3478.518  |
| AK022353  | 4246.563  | 4186.667  | NM_005227 | 1527.181  | 1459.728  | BG113873  | 368.692   | 688.224   |
| AK026868  | 830.429   | 1001.629  | NM_000286 | 17046.332 | 9531.777  | BC013135  | 6744.429  | 7195.563  |
| AK022245  | 584.439   | 567.571   | NM_016454 | 14386.337 | 16168.992 | AI625002  | 649.589   | 627.752   |
| AK022200  | 7637.603  | 7756.898  | NM_003469 | 2630.726  | 2974.066  | AA281652  | 4732.9    | 4980.517  |
| AK026967  | 118.611   | 330.288   | NM_016433 | 323.151   | 437.022   | U31905    | 698.801   | 1054.758  |
| AK024604  | 85.955    | 217.99    | NM_000859 | 3677.796  | 4999.4    | X52479    | 1000.76   | 1434.5    |
| AK023396  | 740.952   | 719.959   | NM_005480 | 1717.673  | 1849.431  | AW408832  | 1586.177  | 1342.297  |
| AF264625  | 768.126   | 802.838   | AB034694  | 612.505   | 600.835   | AA486364  | 807.398   | 1147.786  |
| NM_018101 | 3305.831  | 2658.272  | NM_003273 | 3288.908  | 3448.449  | M15476    | 8067.58   | 9106.481  |
| AF293366  | 1306.97   | 1040.065  | AK026404  | 1865.716  | 2340.892  | U57456    | 1466.729  | 1760.224  |
| BF526704  | 1280.679  | 934.331   | NM_01794E | 8281.919  | 9447.53   | N70057    | 17868.777 | 18047.219 |
| AJ491695  | 4274.371  | 3581.16   | NM_000392 | 1676.967  | 2067.316  | NM_006497 | 2484.898  | 2825.252  |
| AF052107  | 11252.979 | 9912.363  | AF208536  | 1162.691  | 1576.841  | NM_006892 | 1506.04   | 2186.729  |
| AK022430  | 1278.872  | 1047.024  | AB037848  | 936.845   | 1239.7    | SR9       | 11596.661 | 2519.048  |
| AK001022  | 5348.404  | 6154.891  | AF082657  | 2475.406  | 2820.327  | CY3Cy5    | 31665.301 | 1827.713  |
| AL049351  | 9206.021  | 9871.147  | NM_006744 | 1138.846  | 1341.019  | AF254067  | 781.903   | 1102.825  |
| AL137508  | 640.967   | 787.546   | AF297659  | 559.375   | 744.935   | NM_016363 | 1624.012  | 1385.55   |
| AK021826  | 4572.219  | 4540.464  | NM_018231 | 2137.829  | 2272.978  | AY009090  | 615.153   | 774.335   |
| AK024541  | 1018.745  | 956.377   | NM_007163 | 338.319   | 407.897   | U81380    | 260.074   | 623.355   |
| AK025341  | 758.903   | 720.236   | NM_000583 | 4154.816  | 4104.918  | NM_016509 | 576.365   | 514.989   |
| AK024138  | 3848.549  | 3037.149  | NM_014914 | 2998.257  | 2923.646  | NM_01229E | 5418.195  | 5711.35   |
| Y10505    | 3021.925  | 2011.085  | NM_004484 | 4818.122  | 5407.544  | AF041038  | 696.101   | 1035.7    |
| U00946    | 4445.103  | 3664.139  | NM_018289 | 1541.73   | 2072.659  | NM_00453E | 1214.881  | 1169.665  |
| NM_00561E | 2682.452  | 2450.584  | AB018260  | 2465.125  | 2870.113  | NM_014672 | 1932.151  | 1885.085  |
| Z34290    | 1134.865  | 1458.219  | NM_01476E | 2760.327  | 3163.09   | AB058719  | 662.248   | 725.031   |
| AF070642  | 9111.794  | 8183.676  | NM_016627 | 5124.565  | 6287.083  | AK025935  | 485.744   | 659.607   |
| AK027125  | 2736.283  | 3027.433  | NM_016121 | 3324.32   | 5023.383  | AB032953  | 607.093   | 915.421   |
| AK025311  | 677.295   | 585.551   | NM_014769 | 2933.803  | 2735.208  | NM_016441 | 1144.368  | 1482.903  |
| D16918    | 1675.008  | 1297.265  | NM_006349 | 23952.803 | 35193.977 | NM_006334 | 609.203   | 797.777   |
| D16467    | 1658.526  | 1484.735  | AK026264  | 10541.313 | 11939.518 | NM_00462E | 3313.576  | 3584.336  |
| AF090932  | 528.262   | 555.93    | AF222927  | 786.74    | 1150.168  | NM_007179 | 4078.099  | 4344.853  |
| AF166125  | 2485.8    | 2357.245  | NM_01434E | 2481.161  | 3529.25   | NM_00130E | 1458.374  | 1506.175  |
| AF225425  | 2140.317  | 1792.274  | NM_018217 | 11396.17  | 11850.481 | AB046861  | 1061.835  | 1002.216  |
| AF064848  | 12825.326 | 11744.435 | AF241831  | 1863.389  | 1874.32   | AF061034  | 6143.624  | 6435.366  |
| U61089    | 4242.837  | 3798.57   | NM_003033 | 2722.064  | 2628.684  | X03655    | 639.027   | 1040.006  |
| AK001036  | 3452.666  | 3165.845  | U96113    | 1138.857  | 1072.963  | NM_005833 | 2891.43   | 3162.562  |
| AK024858  | 12364.543 | 12522.992 | NM_002733 | 1291.192  | 1409.519  | NM_00310C | 3883.557  | 3987.995  |
| Y16697    | 774.266   | 708.096   | M31008    | 1087.315  | 738.208   | NM_013322 | 4189.089  | 4491.69   |
| NM_00104E | 6806.583  | 6796.599  | NM_00628E | 1000.518  | 844.538   | AB020627  | 785.173   | 1447.181  |
| AK024554  | 1462.757  | 1307.128  | NM_016224 | 4914.458  | 4919.102  | NM_005387 | 5078.175  | 5467.343  |
| AF068294  | 2648.131  | 3070.107  | AB046861  | 1132.193  | 1080.764  | AL137938  | 14895.964 | 18341.465 |
| AK025909  | 2981.877  | 3000.411  | NM_00594C | 600.615   | 530.296   | AF228704  | 1832.627  | 2421.768  |
| AK026138  | 2262.916  | 2090.311  | AF061034  | 9089.325  | 11321.007 | AK022746  | 1701.586  | 1831.677  |
| AK021434  | 10323.469 | 7791.813  | X03655    | 817.745   | 991.621   | NM_00656E | 1945.875  | 2292.069  |
| NM_01647E | 5748.869  | 5285.087  | BG696293  | 3932.918  | 5460.08   | NM_00644C | 1978.999  | 2448.856  |
| AK000933  | 9830.788  | 8404.524  | AA777410  | 947.935   | 1302.557  | NM_004847 | 4117.627  | 4581.912  |
| Y10205    | 737.874   | 688.374   | BC013135  | 9263.211  | 13157.174 | NM_00225E | 906.569   | 701.05    |

|           |           |           |           |           |           |           |           |           |
|-----------|-----------|-----------|-----------|-----------|-----------|-----------|-----------|-----------|
| NM_014626 | 1568.115  | 1139.779  | AI625002  | 968.514   | 1120.853  | BC034483  | 1965.927  | 1939.763  |
| AK025277  | 1479.351  | 1282.681  | AA281652  | 5178.092  | 5961.032  | NM_00362C | 2525.21   | 2578.671  |
| AF086095  | 1024.964  | 1301.714  | U31905    | 1825.328  | 1884.237  | AA586375  | 799.184   | 880.22    |
| NM_018352 | 1520.17   | 1273.859  | X52479    | 2344.578  | 2244.567  | BE910339  | 16133.976 | 15943.609 |
| AK026880  | 2873.903  | 2912.96   | AW408832  | 5197.554  | 4960.671  | U89715    | 1191.33   | 705.958   |
| AF086061  | 845.303   | 640.735   | AA486364  | 5614.964  | 6002.983  | NM_005227 | 1766.918  | 1846.126  |
| AL080092  | 3966.377  | 2582.751  | M15476    | 19769.734 | 22233.137 | NM_000286 | 8245.913  | 6655.958  |
| AF075069  | 370.254   | 391.647   | U57456    | 2788.104  | 3257.751  | NM_016454 | 13809.959 | 17619.291 |
| AL137279  | 2138.239  | 1623.248  | N70057    | 54533.031 | 52863.215 | NM_003466 | 1415.638  | 1618.927  |
| AK023981  | 2122.659  | 1769.726  | NM_006497 | 7908.751  | 7020.415  | NM_000856 | 4528.667  | 4955.757  |
| AK025037  | 961.114   | 760.402   | NM_006892 | 1929.239  | 2058.287  | NM_00548C | 590.739   | 654.993   |
| AK021874  | 8762.485  | 7347.818  | AK000124  | 1987.706  | 1662.874  | AB034694  | 849.101   | 690.624   |
| M77818    | 24096.201 | 24986.465 | NM_00448C | 1960.664  | 1758.763  | NM_003273 | 3232.235  | 2747.034  |
| AF009267  | 2883.419  | 2841.338  | BC034483  | 2634.621  | 2627.98   | AK026404  | 1845.778  | 1523.802  |
| AK027129  | 3689.112  | 3002.098  | NM_00362C | 3700.083  | 4060.547  | NM_017946 | 1919.677  | 2423.847  |
| L19367    | 357.149   | 372.818   | NM_013289 | 691.527   | 623.448   | NM_000392 | 535.195   | 852.485   |
| NM_015696 | 2971.133  | 2043.938  | AA586375  | 973.032   | 1116.75   | AB037848  | 710.035   | 601.597   |
| CY3Cy5    | 9978.506  | 265.054   | BE910339  | 22999.057 | 35855.879 | AF082657  | 2236.017  | 2078.492  |
| BG696293  | 4518.47   | 4592.165  | U89715    | 728.938   | 1173.469  | NM_006744 | 662.799   | 636.81    |
| BG113873  | 1271.347  | 1325.682  | AF254067  | 1292.483  | 1736.426  | AF297659  | 575.843   | 597.333   |
| BC013135  | 27300.797 | 34901.254 | NM_016363 | 1894.128  | 2236.277  | NM_018231 | 2283.387  | 2241.117  |
| AI625002  | 1139.78   | 1113.044  | AY009090  | 2269.614  | 2879.38   | NM_000583 | 3470.259  | 3575.974  |
| AA281652  | 6122.85   | 5667.233  | NM_005592 | 254.081   | 768.471   | NM_014914 | 3362.254  | 3206.74   |
| U31905    | 2173.912  | 1996.822  | U81380    | 459.911   | 701.934   | NM_004484 | 5078.226  | 5783.104  |
| X52479    | 2523.501  | 2605.965  | NM_002303 | 588.582   | 1257.377  | NM_018286 | 1960.781  | 1763.373  |
| BC013200  | 900.753   | 457.977   | NM_016509 | 872.018   | 1103.107  | AB018260  | 1456.345  | 1571.234  |
| AW408832  | 8133.739  | 8727.109  | AF041038  | 1533.089  | 2221.669  | NM_014766 | 1901.966  | 1962.002  |
| AA486364  | 7611.268  | 8390.621  | NM_004536 | 1651.024  | 1695.512  | NM_016627 | 4402.488  | 5372.298  |
| M15476    | 37601.086 | 45036.117 | NM_014672 | 1722.81   | 1947.996  | NM_016121 | 3064.068  | 3144.059  |
| U57456    | 3939.776  | 4467.601  | AB058719  | 1541.673  | 1354.23   | NM_014766 | 2204.976  | 2514.89   |
| NM_006497 | 13813.631 | 18064.982 | AK025935  | 1055.09   | 1444.387  | NM_006346 | 12862.122 | 15280.818 |
| NM_006892 | 2257.511  | 3049.619  | AB032953  | 882.382   | 976.897   | AK026264  | 8429.743  | 9559.897  |
| SR5       | 8791.517  | 8763.098  | NM_016441 | 1624.804  | 2006.554  | AF222927  | 785.263   | 733.021   |
| SR7       | 10495.909 | 46201.266 | NM_006334 | 1191.257  | 1326.099  | NM_014346 | 3397.459  | 3743.09   |
| SR9       | 37382.477 | 8168.574  | NM_003474 | 1052.779  | 795.423   | NM_018217 | 3244.583  | 3012.103  |
| CY3Cy5    | 8033.896  | 257.435   | NM_004625 | 5259.644  | 4300.114  | AF241831  | 1041.726  | 1057.827  |
| AF254067  | 2523.74   | 2579.279  | NM_007179 | 6924.532  | 6090.256  | NM_003033 | 1968.187  | 2309.685  |
| NM_016363 | 2259.128  | 2164.006  | NM_001306 | 1861.632  | 1630.483  | U96113    | 1128.225  | 1198.022  |
| AY009090  | 862.645   | 1176.778  | AF297659  | 644.382   | 706.765   | NM_002733 | 1882.137  | 1104.474  |
| NM_005592 | 799.804   | 338.879   | NM_018231 | 2561.178  | 2586.584  | M31008    | 920.472   | 595.533   |
| U81380    | 1050.583  | 965.218   | NM_000583 | 4166.692  | 5097.13   | NM_016224 | 4433.411  | 3650.521  |
| NM_002303 | 812.368   | 829.729   | NM_005833 | 3035.253  | 3645.084  | AB046861  | 1123.127  | 798.288   |
| NM_016509 | 863.866   | 1319.396  | NM_00310C | 6683.237  | 7181.356  | NM_00594C | 460.661   | 412.627   |
| AF041038  | 3308.556  | 3242.182  | NM_013322 | 6723.109  | 7479.85   | AF061034  | 6804.452  | 7385.621  |
| NM_004536 | 2948.258  | 2880.215  | AB020627  | 1594.261  | 1971.126  | X03655    | 711.775   | 644.826   |
| NM_014672 | 3013.602  | 2915.418  | NM_005387 | 5834.414  | 5987.724  | BG696293  | 2604.897  | 2744.783  |
| AB058719  | 1580.676  | 1476.218  | AF228704  | 3480.094  | 4548.995  | BG113873  | 309.234   | 496.309   |
| AK025935  | 1350.363  | 1578.37   | AK022746  | 3449.23   | 3519.058  | BC013135  | 7662.337  | 9442.667  |
| AB032953  | 989.332   | 1294.716  | NM_006566 | 4962.767  | 5560.065  | AI625002  | 575.672   | 695.483   |
| NM_016441 | 1693.476  | 2009.307  | NM_00644C | 4478.356  | 3968.283  | AA281652  | 5402.823  | 5539.857  |
| NM_004625 | 7669.873  | 8269.144  | NM_004847 | 7697.33   | 7479.807  | U31905    | 1144.271  | 1149.985  |
| NM_001306 | 2603.92   | 3194.961  | NM_002255 | 1647.122  | 1314.619  | X52479    | 1466.196  | 1507.007  |
| AB046861  | 1661.926  | 1767.031  | AF151889  | 13978.06  | 13474.616 | AW408832  | 2130.568  | 2171.308  |

|           |           |           |           |           |           |           |           |           |
|-----------|-----------|-----------|-----------|-----------|-----------|-----------|-----------|-----------|
| AB028173  | 277.533   | 545.461   | U96113    | 1067.964  | 974.582   | AA486364  | 1985.361  | 1885.293  |
| NM_00594C | 642.292   | 818.873   | NM_002733 | 1090.285  | 1557.572  | M15476    | 10245.094 | 10610.748 |
| AF061034  | 13241.667 | 15268.739 | M31008    | 1065.264  | 946.885   | U57456    | 1864.643  | 1887.779  |
| X03655    | 1414.499  | 1464.085  | NM_00628E | 811.65    | 952.784   | N70057    | 18500.607 | 17749.357 |
| NM_005833 | 3418.774  | 3353.87   | NM_016224 | 5566.935  | 6181.055  | NM_006497 | 3020.114  | 3184.727  |
| NM_00310C | 5950.612  | 5779.117  | NM_005227 | 2737.544  | 3106.291  | NM_006892 | 1800.129  | 1869.04   |
| NM_005387 | 3512.427  | 3946.028  | NM_00028E | 15623.725 | 10260.109 | AK000124  | 1917.679  | 1605.732  |
| NM_00684E | 576.669   | 539.315   | NM_016454 | 13118.112 | 15886.717 | NM_00448C | 2512.994  | 2440.631  |
| AF228704  | 3358.277  | 4018.785  | NM_003469 | 3063.128  | 3786.272  | BC034483  | 1644.141  | 1898.869  |
| AK022746  | 3593.752  | 3314.271  | NM_016433 | 339.058   | 363.751   | NM_00362C | 2390.672  | 2513.425  |
| NM_00656E | 5915.766  | 5872.068  | NM_000859 | 4011.66   | 4862.673  | AA586375  | 885.02    | 680.989   |
| NM_004847 | 15638.1   | 17286.42  | NM_00548C | 1822.569  | 2101.248  | AF254067  | 913.289   | 904.49    |
| NM_00225E | 2533.321  | 2419.033  | AB034694  | 892.513   | 1202.373  | NM_016363 | 1294.774  | 1577.292  |
| AF151889  | 19324.506 | 23198.67  | NM_003273 | 3623.542  | 3651.648  | AY009090  | 684.296   | 766.829   |
| BC034483  | 3038.477  | 3187.825  | AK026404  | 2180.863  | 2208.767  | U81380    | 695.976   | 730.432   |
| NM_00362C | 4605.207  | 5027.254  | NM_000392 | 1745.051  | 2364.775  | NM_002303 | 780.277   | 720.033   |
| NM_01328E | 673.897   | 731.896   | AF208536  | 2215.983  | 1819.171  | NM_01650E | 351.561   | 665.893   |
| AA586375  | 1482.369  | 1604.105  | AB037848  | 916.619   | 789.569   | AF041038  | 754.712   | 926.087   |
| BE910339  | 28485.357 | 36989.84  | AF082657  | 2816.477  | 2545.507  | NM_00453E | 1093.715  | 1518.521  |
| U89715    | 1037.014  | 1224.052  | NM_006744 | 950.053   | 1155.48   | NM_014672 | 1863.389  | 2226.469  |
| NM_005227 | 3205.66   | 3173.393  | NM_006497 | 4402.106  | 4216.401  | AB058719  | 945.066   | 685.686   |
| NM_00028E | 19165.654 | 11343.14  | NM_006892 | 1391.983  | 1767.899  | AK025935  | 616.041   | 706.447   |
| NM_016454 | 18817.709 | 20127.258 | AK000124  | 1520.827  | 1697.895  | AB032953  | 574.089   | 688.934   |
| NM_00346E | 3858.504  | 3672.048  | NM_00448C | 2345.609  | 2810.422  | NM_016441 | 1389.273  | 1253.708  |
| NM_016433 | 602.651   | 618.689   | NM_014914 | 5467.465  | 6152.977  | NM_006334 | 499.997   | 731.979   |
| NM_00085E | 5333.527  | 5195.722  | NM_004484 | 4806.595  | 5763.674  | NM_003474 | 723.686   | 645.112   |
| NM_00548C | 2184.886  | 2427.019  | NM_01828E | 2264.552  | 2125.734  | NM_00462E | 4069.741  | 3695.114  |
| AB034694  | 1095.087  | 1060.125  | AB018260  | 2914.164  | 3187.233  | NM_00717E | 3969.871  | 3431.057  |
| NM_003273 | 4363.864  | 3818.865  | NM_01476E | 3130.488  | 3148.173  | NM_00130E | 1663.723  | 1377.602  |
| AK026404  | 2872.708  | 2994.497  | NM_016627 | 5001.197  | 5801.414  | AF297659  | 562.89    | 470.148   |
| NM_01794E | 9417.738  | 9437.285  | NM_016121 | 3289.077  | 3875.425  | NM_018231 | 3189.305  | 3002.541  |
| NM_000392 | 2664.193  | 2628.176  | NM_01476E | 2505.54   | 2659.453  | NM_000583 | 2805.855  | 2704.264  |
| AF208536  | 2135.682  | 2580.444  | NM_00634E | 23408.092 | 32296.91  | NM_005833 | 2970.802  | 3314.464  |
| AB037848  | 1438.64   | 1233.306  | AK026264  | 11940.224 | 12924.04  | NM_00310C | 5463.048  | 5402.687  |
| AF082657  | 3395.99   | 3311.071  | AF222927  | 620.192   | 826.813   | NM_013322 | 3728.065  | 4700.301  |
| NM_006744 | 2131.591  | 1646.532  | NM_01434E | 4770.984  | 4443.151  | NM_005387 | 4881.714  | 4983.296  |
| AF297659  | 1377.023  | 1243.336  | NM_018217 | 11554.153 | 10376.835 | AL137938  | 14657.342 | 15836.771 |
| NM_018231 | 6119.137  | 6486.968  | AF241831  | 1546.536  | 1420.45   | AF228704  | 1899.059  | 2177.518  |
| NM_007163 | 424.415   | 520.444   | NM_003033 | 3648.127  | 2942.19   | AK022746  | 1765.155  | 1589.884  |
| NM_000583 | 6475.029  | 6665.088  | NM_016441 | 1641.559  | 1624.932  | NM_00656E | 3106.802  | 3036.06   |
| NM_014914 | 5262.023  | 5033.251  | NM_006334 | 745.904   | 851.854   | NM_00644C | 2846.514  | 2718.812  |
| NM_004484 | 5498.335  | 5729.356  | NM_003474 | 675.399   | 878.454   | NM_004847 | 4711.525  | 4183.031  |
| NM_01828E | 3429.292  | 3504.801  | NM_00462E | 5239.773  | 4553.71   | NM_00225E | 1032.271  | 745.698   |
| AB018260  | 3244.779  | 3213.876  | NM_00717E | 4071.93   | 4041.278  | AF151889  | 9777.035  | 9137.189  |
| NM_01476E | 3482.489  | 3373.772  | NM_00130E | 1628.688  | 1993.61   | U96113    | 1197.448  | 914.183   |
| NM_016627 | 5963.728  | 5849.864  | AB046861  | 1493.63   | 1685.107  | NM_002733 | 1503.589  | 1322.677  |
| NM_016121 | 4130.63   | 4163.628  | NM_00594C | 790.21    | 659.041   | M31008    | 980.816   | 514.841   |
| NM_01476E | 3322.56   | 3156.429  | AF061034  | 8093.975  | 8658.344  | NM_016224 | 4063.985  | 3693.471  |
| NM_00634E | 30810.504 | 37142.902 | X03655    | 890.87    | 1072.013  | NM_005227 | 1537.002  | 1803.606  |
| AK026264  | 19480.479 | 21056.211 | BG696293  | 4053.148  | 5050.436  | NM_00028E | 7243.722  | 6255.472  |
| AF222927  | 1231.469  | 1476.222  | BG113873  | 691.495   | 836.126   | NM_016454 | 15429.854 | 18372.412 |
| NM_01434E | 5140.083  | 5470.912  | BC013135  | 11230.587 | 13714.161 | NM_00346E | 1589.931  | 1816.019  |
| NM_018217 | 13510.435 | 14320.488 | AI625002  | 641.142   | 693.606   | NM_016433 | 476.879   | 206.021   |

|           |           |           |           |           |           |           |           |           |
|-----------|-----------|-----------|-----------|-----------|-----------|-----------|-----------|-----------|
| AF241831  | 3408.303  | 3310.994  | AA281652  | 5308.382  | 5019.136  | NM_00085E | 4915.812  | 4970.43   |
| NM_00303E | 4621.861  | 4609.699  | U31905    | 1278.967  | 1576.53   | NM_00548C | 780.742   | 877.397   |
| U96113    | 1674.338  | 1748.211  | X52479    | 2146.038  | 1992.316  | NM_00327E | 3054.353  | 2938.578  |
| NM_00273E | 2205.236  | 1808.536  | AW408832  | 5384.852  | 5546.231  | AK026404  | 1707.063  | 1705.181  |
| M31008    | 1273.587  | 1403.837  | AA486364  | 5185.683  | 4939.228  | NM_01794E | 2401.51   | 2228.084  |
| NM_00628E | 1384.779  | 1673.911  | M15476    | 18460.906 | 18342.078 | NM_00039E | 330.165   | 570.429   |
| NM_016224 | 7161.272  | 7510.386  | U57456    | 2774.649  | 2237.585  | AF082657  | 2885.138  | 2399.219  |
| AB046861  | 1281.57   | 1338.816  | N70057    | 52092.59  | 47885.32  | NM_006497 | 4200.215  | 4185.897  |
| AB028173  | 743.455   | 756.608   | AK022746  | 2768.664  | 2665.254  | NM_00689E | 2049.25   | 1743.854  |
| NM_00594C | 623.958   | 1103.326  | NM_00656E | 4738.258  | 4803.817  | AK000124  | 1179.042  | 1405.605  |
| AF061034  | 13898.873 | 17353.865 | NM_00644C | 3510.272  | 3909.441  | NM_00448C | 2085.401  | 1820.596  |
| X03655    | 1258.675  | 1527.15   | NM_004847 | 5378.293  | 5187.754  | NM_014914 | 2952.958  | 3020.652  |
| BG696293  | 5782.168  | 6241.138  | NM_00225E | 1623.435  | 1566.885  | NM_004484 | 5251.756  | 5279.841  |
| AA777410  | 231.408   | 679.8     | AF151889  | 15502.618 | 16918.832 | NM_01828E | 1977.024  | 1602.961  |
| BG113873  | 1229.799  | 1692.04   | BC034483  | 2424.563  | 2426.675  | AB018260  | 1583.153  | 1544.566  |
| BC013135  | 28319.141 | 37336.793 | NM_00362C | 3348.739  | 4009.244  | NM_01476E | 1108.546  | 1116.988  |
| AI625002  | 1029.307  | 1013.074  | NM_01328E | 469.435   | 762.947   | NM_016627 | 3712.476  | 4586.449  |
| AA281652  | 4879.888  | 4564.682  | AA586375  | 1363.796  | 989.323   | NM_016121 | 2795.58   | 2924.642  |
| U31905    | 2486.165  | 2751.519  | BE910339  | 21753.178 | 25926.369 | NM_01476E | 1589.872  | 2047.584  |
| X52479    | 2659.919  | 2590.416  | U89715    | 1370.039  | 1588.003  | NM_00634E | 19931.234 | 24388.912 |
| BC013200  | 989.645   | 576.333   | AF254067  | 2079.148  | 2557.901  | AK026264  | 8759.085  | 9098.157  |
| AW408832  | 8816.73   | 9230.351  | NM_01636E | 2416.576  | 2160.854  | AF222927  | 595.033   | 992.537   |
| AA486364  | 10024.153 | 11991.456 | AY009090  | 1039.602  | 1101.753  | NM_01434E | 3725.422  | 4490.223  |
| M15476    | 39460.824 | 47035.719 | U81380    | 910.362   | 735.139   | NM_018217 | 4874.572  | 3782.027  |
| U57456    | 4033.455  | 4729.658  | NM_00230E | 514.862   | 572.718   | AF241831  | 1531.92   | 1284.377  |
| N70057    | 64075.762 | 55330.82  | NM_01650E | 975.067   | 1061.78   | NM_00303E | 3052.737  | 2428.817  |
| NM_006497 | 17590.346 | 21147.678 | AF041038  | 1673.934  | 1513.104  | NM_016441 | 1795.024  | 1763.471  |
| NM_00689E | 2259.817  | 2990.377  | NM_00453E | 1549.451  | 1832.59   | NM_006334 | 713.557   | 920.452   |
| AK000124  | 2305.276  | 2971.383  | NM_01467E | 2363.175  | 1889.466  | NM_003474 | 393.054   | 552.784   |
| NM_00448C | 2793.518  | 3383.269  | AB058719  | 1343.552  | 897.153   | NM_00462E | 3226.38   | 3086.587  |
| BC034483  | 2339.079  | 2688.285  | AK025935  | 1168.384  | 837.401   | NM_00717E | 2339.758  | 2570.524  |
| NM_00362C | 3296.042  | 3755.001  | AB032953  | 614.281   | 659.128   | NM_00130E | 900.337   | 823.085   |
| NM_01328E | 588.057   | 717.926   | AF208536  | 1429.293  | 1735.172  | AB046861  | 667.625   | 721.332   |
| AA586375  | 1870.779  | 1669.176  | AB037848  | 630.177   | 862.411   | AF061034  | 5253.985  | 5232.043  |
| BE910339  | 27208.379 | 34126.398 | AF082657  | 2605.352  | 2726.574  | X03655    | 188.296   | 741.331   |
| U89715    | 974.952   | 1165.479  | NM_006744 | 1243.603  | 1285.024  | BG696293  | 2460.866  | 2580.8    |
| AF254067  | 3381.297  | 3323.824  | AF297659  | 562.102   | 390.511   | BC013135  | 5885.446  | 6199.066  |
| NM_01636E | 2614.663  | 3128.861  | NM_018231 | 2554.5    | 2950.982  | AA281652  | 4590.296  | 4681.676  |
| AY009090  | 1394.956  | 1761.188  | NM_00716E | 1037.347  | 788.873   | U31905    | 948.604   | 932.777   |
| NM_00559E | 647.104   | 685.037   | NM_00058E | 2564.055  | 2449.902  | X52479    | 1416.714  | 1177.506  |
| U81380    | 937.56    | 1047.89   | NM_00583E | 3795.875  | 5667.259  | AW408832  | 2920.844  | 2702.978  |
| NM_00230E | 782.494   | 899.57    | NM_00310C | 6988.006  | 8288.692  | AA486364  | 1968.962  | 1985.63   |
| NM_01650E | 1110.229  | 1304.103  | NM_01332E | 6582.42   | 7206.63   | M15476    | 14935.12  | 14792.913 |
| AF041038  | 2885.212  | 2749.426  | NM_005387 | 4461.071  | 4456.932  | U57456    | 2029.726  | 1862.943  |
| NM_00453E | 3685.369  | 3792.035  | AL137938  | 24925.996 | 24753.646 | N70057    | 29847.203 | 28617.547 |
| NM_01467E | 3477.625  | 3882.301  | AF228704  | 2662.457  | 2311.583  | AK022746  | 2576.862  | 2084.627  |
| AB058719  | 2175.776  | 2298.634  | AF222927  | 966.385   | 805.001   | NM_00656E | 2405.299  | 3038.91   |
| AK025935  | 1843.983  | 2278.958  | NM_01434E | 4084.087  | 4152.279  | NM_00644C | 2262.364  | 2365.81   |
| AB032953  | 1379.725  | 1721.173  | NM_018217 | 12150.27  | 11288.167 | NM_004847 | 3550.322  | 3998.646  |
| NM_016441 | 2780.024  | 2995.338  | AF241831  | 1544.069  | 1485.497  | NM_00225E | 564.721   | 652.768   |
| NM_006334 | 1704.619  | 1911.932  | NM_00303E | 2629.698  | 2558.654  | BC034483  | 1143.676  | 1318.512  |
| NM_003474 | 1274.124  | 1924.049  | U96113    | 1149.446  | 1142.65   | NM_00362C | 1848.323  | 2051.792  |
| NM_00462E | 7926.51   | 8312.667  | NM_00273E | 1702.045  | 1784.251  | AA586375  | 202.797   | 648.693   |



|           |           |           |           |           |           |           |           |           |
|-----------|-----------|-----------|-----------|-----------|-----------|-----------|-----------|-----------|
| NM_007179 | 20155.676 | 21798.482 | M31008    | 784.25    | 960.597   | AF254067  | 647.39    | 613.007   |
| NM_001306 | 2473.308  | 2593.809  | NM_006288 | 327.62    | 512.572   | NM_016363 | 801.983   | 852.303   |
| AF297659  | 948.054   | 991.349   | NM_016224 | 5735.309  | 5775.145  | AY009090  | 657.459   | 740.547   |
| NM_018231 | 3254.026  | 3543.306  | NM_005227 | 3133.14   | 3249.353  | U81380    | 1094.263  | 483.557   |
| NM_000583 | 4867.628  | 5505.912  | NM_000286 | 18950.1   | 10158.521 | NM_002303 | 682.46    | 688.823   |
| NM_005833 | 4063.875  | 4816.452  | NM_016454 | 18560.361 | 18890.201 | AF041038  | 1064.414  | 998.162   |
| NM_003100 | 8289.554  | 8569.045  | NM_003469 | 3909.705  | 4273.239  | NM_004536 | 1507.125  | 1175.267  |
| NM_005387 | 6022.804  | 6616.947  | NM_000859 | 4277.199  | 4293.298  | NM_014672 | 2258.888  | 1861.45   |
| NM_006846 | 592.859   | 669.194   | NM_005480 | 1767.658  | 2588.873  | AB058719  | 755.577   | 816.918   |
| AF228704  | 4430.396  | 4717.231  | AB034694  | 1051.271  | 1141.93   | AK025935  | 1091.02   | 1106.785  |
| AK022746  | 4210.094  | 4382.405  | NM_003273 | 3990.604  | 3196.235  | AB032953  | 433.113   | 762.778   |
| NM_006568 | 6577.31   | 6772.355  | AK026404  | 2276.533  | 1928.126  | AB037848  | 504.525   | 394.683   |
| NM_006440 | 7004.551  | 7366.906  | NM_017948 | 7788.536  | 8174.205  | AF082657  | 1885.401  | 2310.81   |
| NM_004847 | 15084.997 | 16530.754 | NM_000392 | 2099.408  | 2253.182  | AF297659  | 188.511   | 386.942   |
| NM_002255 | 2395.468  | 2300.782  | NM_000267 | 3281.911  | 2589.754  | NM_018231 | 1196.481  | 1297.093  |
| AF151889  | 21182.213 | 22796.256 | NM_016603 | 4123.594  | 3342.496  | NM_005833 | 3122.192  | 3161.364  |
| U96113    | 995.829   | 1234.004  | NM_004398 | 38715.52  | 41827.531 | NM_003100 | 5516.589  | 5149.659  |
| NM_002733 | 1565.895  | 1701.148  | NM_016181 | 685.289   | 726.463   | NM_013322 | 3703.901  | 3808.464  |
| M31008    | 1177.405  | 1243.949  | NM_014966 | 6690.611  | 6546.854  | AB020627  | 1072.788  | 1202.696  |
| NM_006288 | 1170.114  | 1027.641  | NM_014962 | 1269.547  | 1571.581  | AL137938  | 17971.566 | 18529.693 |
| NM_016224 | 5700.705  | 5996.011  | D87684    | 11307.198 | 6998.347  | AF228704  | 2671.131  | 2395.889  |
| NM_005227 | 3552.045  | 4026.77   | NM_001586 | 252.502   | 452.715   | AF222927  | 887.75    | 1029.689  |
| NM_000286 | 20615.4   | 12762.864 | NM_006317 | 47494.996 | 46729.973 | NM_014345 | 3788.301  | 3573.469  |
| NM_016454 | 19136.277 | 21912.941 | NM_001219 | 4034.569  | 4759.543  | NM_018217 | 2815.779  | 2914.21   |
| NM_003469 | 4658.741  | 4351.795  | AK000124  | 1988.64   | 2779.325  | AF241831  | 1210.642  | 1227.294  |
| NM_016433 | 539.357   | 590.513   | NM_004480 | 2761.127  | 3003.415  | NM_003033 | 1929.863  | 2099.79   |
| NM_000859 | 5022.508  | 4575.297  | NM_014914 | 5994.164  | 5039.235  | U96113    | 977.907   | 817.99    |
| NM_005480 | 1983.313  | 2311.51   | NM_004484 | 5929.263  | 5228.988  | NM_002733 | 894.467   | 896.875   |
| AB034694  | 1281.559  | 1172.839  | NM_018289 | 3035.978  | 2292.553  | M31008    | 694.109   | 414.972   |
| NM_003273 | 4078.126  | 3971.418  | AB018260  | 2974.922  | 2852.417  | NM_016224 | 2870.765  | 3171.011  |
| AK026404  | 2972.224  | 2782.947  | NM_014766 | 3233.259  | 3013.779  | NM_005227 | 1441.885  | 1167.58   |
| NM_017948 | 10085.634 | 10574.479 | NM_016627 | 4942.673  | 4978.033  | NM_000286 | 8141.698  | 7127.235  |
| NM_000392 | 3641.756  | 3141.503  | NM_016121 | 3360.977  | 3341.822  | NM_016454 | 14859.624 | 15500.994 |
| AF208536  | 2479.055  | 2342.337  | NM_014769 | 2852.667  | 3327.66   | NM_003469 | 1872.864  | 2252.319  |
| AB037848  | 1445.887  | 1650.415  | NM_006349 | 27586.4   | 33816.875 | NM_016433 | 353.038   | 370.868   |
| AF082657  | 3179.225  | 3655.943  | AK026264  | 12904.331 | 13302.018 | NM_000859 | 4627.855  | 4703.381  |
| NM_006744 | 1825.735  | 1719.703  | NM_004385 | 1788.154  | 1454.583  | NM_005480 | 383.558   | 750.763   |
| NM_006497 | 7642.066  | 9195.48   | NM_005876 | 14377.904 | 12741.364 | AB034694  | 1319.522  | 689.335   |
| NM_006892 | 1369.453  | 1827.241  | AF284436  | 642.017   | 604.617   | NM_003273 | 2659.895  | 2392.774  |
| AK000124  | 1448.755  | 1641.255  | NM_004445 | 1049.081  | 795.902   | AK026404  | 1884.142  | 1434.581  |
| NM_004480 | 2298.786  | 2087.142  | U39657    | 8610.707  | 7520.849  | NM_017948 | 4342.499  | 3721.296  |
| NM_014914 | 6129.473  | 5739.903  | NM_016340 | 2962.448  | 2500.732  | NM_000392 | 1171.261  | 1138.294  |
| NM_004484 | 5633.55   | 5713.844  | NM_006449 | 7692.05   | 5287.118  | NM_000267 | 3244.698  | 2567.684  |
| NM_018289 | 2998.829  | 3028.501  | BF216030  | 5321.684  | 4501.595  | NM_016603 | 2854.404  | 2354.817  |
| AB018260  | 3079.457  | 2813.931  | NM_002757 | 3635.093  | 2608.12   | NM_004398 | 15886.408 | 16998.635 |
| NM_014766 | 3072.723  | 3138.538  | NM_003684 | 4717.599  | 3537.187  | NM_016181 | 511.328   | 532.646   |
| NM_016627 | 5990.961  | 6072.922  | NM_005657 | 2632.424  | 1597.591  | NM_014966 | 2292.534  | 2174.548  |
| NM_016121 | 4315.691  | 4865.222  | NM_017671 | 1226.515  | 629.046   | NM_014962 | 1230.444  | 1275.855  |
| NM_014769 | 4012.247  | 4560.137  | NM_018639 | 5242.683  | 3966.022  | D87684    | 7052.952  | 5802.603  |
| NM_006349 | 32379.303 | 41584.93  | AF264628  | 752.16    | 570.476   | NM_006317 | 28419.334 | 33231.477 |
| AK026264  | 18350.764 | 22104.846 | NM_001715 | 2257.776  | 1873.599  | NM_001219 | 3363.221  | 4124.045  |
| AF222927  | 1376.868  | 1324.317  | NM_004395 | 7358.293  | 6349.778  | AK000124  | 1793.671  | 1779.252  |
| NM_014345 | 6162.375  | 6384.396  | NM_002663 | 848.773   | 694.429   | NM_004480 | 2020.137  | 2176.281  |

|           |           |           |           |           |           |           |           |           |
|-----------|-----------|-----------|-----------|-----------|-----------|-----------|-----------|-----------|
| NM_018217 | 15192.9   | 13805.241 | NM_006094 | 4308.057  | 4307.934  | NM_014914 | 3610.906  | 3710.746  |
| AF241831  | 2685.896  | 2832.903  | AF080158  | 5048.04   | 4617.883  | NM_004484 | 5884.303  | 5901.97   |
| NM_003033 | 3988.586  | 3702.352  | AB037794  | 1248.916  | 878.999   | NM_018285 | 2115.997  | 2631.607  |
| NM_016441 | 1381.603  | 1759.071  | NM_005935 | 1958.499  | 1371.908  | AB018260  | 2284.098  | 2445.707  |
| NM_006334 | 878.899   | 1070.529  | NM_012415 | 1241.408  | 1200.891  | NM_014766 | 1776.352  | 1766.989  |
| NM_003474 | 847.319   | 939.449   | NM_014178 | 4387.57   | 3530.704  | NM_016627 | 4634.069  | 4824.143  |
| NM_004625 | 5864.791  | 5740.327  | NM_001251 | 11616.81  | 10330.627 | NM_016121 | 1995.149  | 2627.483  |
| NM_007179 | 13702.104 | 14131.382 | NM_004789 | 979.69    | 815.559   | NM_014765 | 2732.225  | 2548.832  |
| NM_001306 | 1695.902  | 2122.705  | AB011112  | 3833.435  | 3365.753  | NM_006345 | 27468.334 | 29339.037 |
| AB046861  | 1574.938  | 1869.604  | NM_018669 | 2690.334  | 2128.876  | AK026264  | 12421.865 | 10225.872 |
| AB028173  | 594.023   | 589.739   | NM_002623 | 2339.628  | 1485.339  | NM_004385 | 1461.885  | 1069.333  |
| NM_005940 | 566.891   | 706.325   | NM_018844 | 6379.543  | 4017.532  | NM_005876 | 12571.61  | 14280.353 |
| AF061034  | 12625.908 | 13936.95  | AF279778  | 1445.998  | 624.895   | U39657    | 3855.781  | 3439.191  |
| X03655    | 1470.857  | 1703.77   | NM_015477 | 6259.693  | 3629.465  | NM_016340 | 1919.055  | 2628.455  |
| BG696293  | 5308.929  | 5239.334  | AK023212  | 4928.058  | 2541.424  | NM_006445 | 7756.831  | 7283.307  |
| AA777410  | 225.739   | 678.214   | AL353943  | 1402.137  | 846.251   | BF216030  | 2610.156  | 3034.89   |
| BG113873  | 1077.703  | 1224.087  | BE568801  | 3098.416  | 1709.771  | NM_002757 | 3121.75   | 3435.455  |
| BC013135  | 25662.762 | 32324.588 | AB002336  | 1172.434  | 413.394   | NM_003684 | 3641.899  | 3952.163  |
| AI625002  | 1208.326  | 1186.955  | NM_013286 | 8929.841  | 4755.457  | NM_005657 | 2599.211  | 2238.791  |
| AA281652  | 6455.381  | 7174.061  | NM_006082 | 68911.836 | 56025.984 | NM_017671 | 744.612   | 588.576   |
| U31905    | 2984.421  | 3441.407  | NM_006633 | 866.706   | 763.047   | AB040883  | 637.273   | 950.318   |
| X52479    | 3187.728  | 3271.564  | NM_016262 | 3394.131  | 3148.72   | NM_018635 | 4212.556  | 4637.408  |
| BC013200  | 731.377   | 723.67    | AB011116  | 12198.256 | 11614.788 | AF264628  | 639.865   | 792.587   |
| AW408832  | 7726.687  | 8824.32   | AB037858  | 1120.126  | 1190.613  | NM_001715 | 1648.186  | 1395.315  |
| AA486364  | 8999.675  | 10600.203 | NM_005775 | 2829.375  | 2937.478  | NM_004395 | 4270.322  | 4563.964  |
| M15476    | 37241.258 | 44267.391 | NM_017639 | 978.632   | 843.6     | NM_002663 | 836.355   | 478.726   |
| U57456    | 3543.825  | 4319.467  | AL157437  | 8432.195  | 6303.717  | NM_006094 | 3133.053  | 3300.257  |
| N70057    | 62637.387 | 54891.859 | L25629    | 2647.529  | 2440.94   | AF080158  | 2710.656  | 2391.891  |
| AK022746  | 2552.823  | 2507.237  | AJ245539  | 756.218   | 604.839   | AB037794  | 641.206   | 815.223   |
| NM_006568 | 4333.231  | 4212.947  | NM_001490 | 2373.882  | 2030.091  | NM_005935 | 2464.575  | 2508.209  |
| NM_006440 | 3951.258  | 4508.369  | NM_017740 | 2989.581  | 1941.658  | NM_014178 | 2855.147  | 2864.472  |
| NM_004847 | 10391.743 | 11313.83  | AB033052  | 5351.817  | 3480.012  | NM_001251 | 10505.317 | 11185.244 |
| NM_002255 | 2241.501  | 1893.458  | NM_002055 | 2476.303  | 1386.8    | AB011112  | 2060.301  | 2520.868  |
| BC034483  | 2708.089  | 2868.438  | NM_005803 | 9576.265  | 7268.349  | NM_018665 | 1194.821  | 1830.553  |
| NM_003620 | 3832.15   | 4296.422  | NM_015515 | 5515.393  | 4234.024  | NM_002623 | 611.572   | 920.918   |
| NM_013285 | 452.204   | 703.408   | AK001579  | 13080.077 | 13087.405 | NM_018844 | 5727.595  | 6926.28   |
| AA586375  | 1751.801  | 1414.329  | AF163302  | 3936.2    | 5403.988  | AF279778  | 1521.666  | 1852.314  |
| BE910339  | 27621.727 | 31077.395 | NM_006408 | 2300.58   | 2374.033  | NM_015477 | 5259.783  | 5513.767  |
| U89715    | 1185.744  | 1068.664  | NM_002419 | 4502.999  | 4389.253  | AK023212  | 3404.829  | 3391.337  |
| AF254067  | 2335.578  | 2657.954  | NM_005604 | 1172.016  | 764.596   | AL353943  | 1702.674  | 1557.426  |
| NM_016363 | 2480.561  | 2266.337  | S69023    | 2233.408  | 1582.673  | BE568801  | 1477.048  | 1547.543  |
| AY009090  | 1310.558  | 1201.154  | NM_003454 | 2948.408  | 1562.988  | AB002336  | 976.6     | 616.625   |
| NM_005592 | 719.54    | 578.647   | M25077    | 5590.823  | 7567.268  | NM_003127 | 565.297   | 397.933   |
| U81380    | 865.841   | 836.66    | NM_018702 | 5339.896  | 6334.673  | NM_013286 | 3584.909  | 3544.166  |
| NM_002303 | 962.006   | 857.552   | M62843    | 1310.847  | 1583.938  | NM_006082 | 75865.359 | 57019.219 |
| NM_016505 | 1578.074  | 1467.519  | NM_018084 | 24159.244 | 15403.797 | NM_006633 | 180.114   | 458.398   |
| AF041038  | 3584.963  | 3432.646  | AF164797  | 65064.305 | 47916.789 | NM_016262 | 962.436   | 967.952   |
| NM_004536 | 3589.278  | 4207.856  | NM_017840 | 32191.424 | 36763.102 | AB011116  | 5596.952  | 5632.557  |
| NM_014672 | 3534.909  | 3373.639  | NM_004564 | 7283.235  | 5829.379  | AB037858  | 870.233   | 752.626   |
| AB058719  | 2265.254  | 2392.938  | NM_000968 | 68572.711 | 49107.477 | NM_005775 | 1971.82   | 2252.862  |
| AK025935  | 1782.523  | 1846.117  | AL355743  | 3435.861  | 2144.635  | NM_003270 | 977.068   | 1229.339  |
| AB032953  | 1125.661  | 1312.325  | L77571    | 525.914   | 471.459   | AL157437  | 6020.182  | 5475.353  |
| AF208536  | 1731.986  | 1424.372  | NM_002202 | 1399.645  | 1921.26   | L25629    | 1583.502  | 1634.347  |

|           |           |           |           |           |           |           |           |           |
|-----------|-----------|-----------|-----------|-----------|-----------|-----------|-----------|-----------|
| AB037848  | 964.102   | 1011.981  | NM_014364 | 2026.2    | 1979.189  | NM_00149C | 363.579   | 756.658   |
| AF082657  | 2400.796  | 2857.257  | NM_001685 | 66573.734 | 50330.871 | NM_01774C | 1874.362  | 1796.986  |
| NM_006744 | 1552.089  | 1295.979  | NM_006067 | 27632.23  | 40548.379 | AB033052  | 4887.124  | 3980.786  |
| AF297659  | 982.643   | 953.463   | NM_000284 | 4391.541  | 5100.746  | NM_018227 | 2123.532  | 2293.322  |
| NM_018231 | 4767.989  | 4873.283  | NM_004813 | 6183.114  | 8033.689  | NM_00334C | 26152.211 | 30596.469 |
| NM_007163 | 328.844   | 460.183   | AK023008  | 3335.72   | 4104.561  | U46752    | 974.11    | 725.603   |
| NM_000583 | 5102.818  | 5926.578  | NM_004689 | 7300.769  | 8979.733  | NM_002794 | 11909.618 | 11776.068 |
| NM_005833 | 3628.82   | 3253.264  | NM_006026 | 12080.121 | 13500.448 | BF244646  | 24598.744 | 24703.408 |
| NM_00310C | 6743.941  | 6847.853  | BG339855  | 956.061   | 1285.443  | AK024030  | 3128.826  | 3478.679  |
| NM_005387 | 6414.512  | 8583.359  | NM_017953 | 2228.35   | 1731.223  | AF275808  | 983.218   | 721.171   |
| NM_006846 | 704.139   | 586.706   | BC000124  | 22493.115 | 10166.223 | AK024038  | 6391.052  | 6319.183  |
| AF228704  | 3780.773  | 4080.936  | Z11773    | 2993.236  | 3355.851  | NM_002055 | 1905.242  | 1396.473  |
| AF222927  | 718.955   | 1307.583  | NM_006914 | 488.567   | 771.785   | NM_005803 | 7396.17   | 7225.176  |
| NM_014345 | 3765.238  | 4144.973  | NM_003446 | 23592.08  | 31123.195 | NM_015515 | 4256.051  | 3579.724  |
| NM_018217 | 11428.397 | 11893.675 | NM_001485 | 5339.461  | 5018.907  | AK001579  | 8817.437  | 7643.511  |
| AF241831  | 2490.219  | 2383.999  | NM_002702 | 1149.297  | 1265.664  | NM_00267C | 3122.528  | 2650.073  |
| NM_003033 | 2924.253  | 3170.087  | AK021510  | 874.759   | 633.472   | AF163302  | 2656.575  | 2268.465  |
| U96113    | 1162.218  | 1416.143  | AK022711  | 1829.539  | 1581.061  | NM_00640E | 1433.171  | 1198.403  |
| NM_002733 | 1732.954  | 2040.81   | AK024310  | 1153.366  | 1138.741  | NM_002415 | 2733.159  | 2426.58   |
| M31008    | 1239.598  | 1187.861  | AK023039  | 1082.723  | 899.482   | NM_00198E | 3107.46   | 3739.194  |
| NM_00628E | 1379.399  | 1444.311  | AL109688  | 3175.926  | 2487.573  | NM_002653 | 3862.91   | 3726.919  |
| NM_016224 | 6927.222  | 6259.156  | D42044    | 4307.166  | 4324.689  | NM_005604 | 957.508   | 722.426   |
| NM_005227 | 3761.305  | 3580.747  | AK026149  | 3041.244  | 4177.052  | S69023    | 2333.522  | 1795.935  |
| NM_00028E | 19061.229 | 11282.124 | AF038185  | 5731.789  | 7264.877  | NM_003454 | 2233.248  | 2053.077  |
| NM_016454 | 17613.605 | 15959.85  | AK025305  | 1633.781  | 2283.576  | NM_00341E | 20409.678 | 25407.01  |
| NM_00346E | 3725.016  | 3275.6    | AF131788  | 421.84    | 752.397   | NM_01790E | 1258.83   | 953.118   |
| NM_00085E | 5023.726  | 4970.85   | AL117415  | 14515.444 | 18119.74  | M25077    | 4225.477  | 4704.017  |
| NM_00548C | 2411.939  | 2359.03   | AK023616  | 1201.867  | 1158.39   | NM_018702 | 2992.263  | 2316.441  |
| NM_003273 | 4199.077  | 3905.704  | AL355694  | 1198.516  | 472.161   | M62843    | 615.816   | 608.457   |
| AK026404  | 2774.511  | 2831.629  | AL049257  | 1209.492  | 1911.055  | NM_001515 | 77.516    | 344.779   |
| NM_01794E | 9522.203  | 10215.799 | AF191492  | 1865.103  | 1428.403  | NM_004593 | 1856.787  | 1620.074  |
| NM_000392 | 2825.552  | 2825.974  | BC037530  | 17513.006 | 17486.916 | NM_00577E | 9644.168  | 9315.249  |
| NM_000267 | 2994.642  | 3348.393  | NM_014851 | 7886.836  | 8170.859  | NM_001032 | 72789.688 | 48207.59  |
| NM_016603 | 3649.434  | 3719.345  | AK022811  | 644.079   | 1213.817  | NM_018084 | 9619.262  | 9370.919  |
| NM_00439E | 59107.652 | 52055.781 | AL117635  | 1764.088  | 1431.125  | AF164797  | 23627.133 | 22714.93  |
| NM_016181 | 1122.056  | 1197.205  | AK025332  | 2427.25   | 2246.318  | NM_01784C | 12672.865 | 10936.832 |
| NM_01496E | 7262.242  | 7154.079  | AB040929  | 1702.254  | 1041.058  | AK001052  | 30154.723 | 32831.598 |
| NM_014962 | 2002.709  | 1895.73   | D17010    | 617.855   | 1190.892  | NM_001415 | 52373.461 | 44122.566 |
| D87684    | 12737.955 | 9221.76   | AJ011596  | 6060.451  | 7572.503  | NM_004564 | 1487.634  | 1039.893  |
| NM_006317 | 52160.492 | 49640.688 | U17639    | 672.417   | 1143.215  | NM_00096E | 73361.484 | 47905.094 |
| NM_00121E | 6140.298  | 7716.744  | X51779    | 2088.145  | 3209.809  | AL355743  | 3659.575  | 3665.069  |
| AK000124  | 1279.568  | 1768.442  | X81001    | 674.258   | 945.379   | AF070595  | 328.195   | 686.122   |
| NM_00448C | 2856.424  | 2806.631  | AL049254  | 2540.355  | 2953.108  | NM_002202 | 1143.24   | 1009.779  |
| NM_014914 | 6751.714  | 6481.263  | L17326    | 540.48    | 370.167   | NM_006005 | 699.234   | 954.458   |
| NM_004484 | 6187.282  | 5704.646  | D17207    | 4877.985  | 4517.071  | NM_002625 | 30913.73  | 38674.035 |
| NM_01828E | 3149.965  | 2870.264  | D55640    | 2401.628  | 2391.584  | NM_014364 | 841.649   | 705.911   |
| AB018260  | 3070.894  | 2687.046  | AF085897  | 787.689   | 1043.037  | NM_00168E | 40210.469 | 43735.109 |
| NM_01598E | 547.12    | 586.651   | AF085822  | 681.494   | 997.082   | NM_006067 | 15223.528 | 16252.264 |
| NM_01476E | 3714.194  | 3488.158  | AK021551  | 4140.47   | 3840.66   | NM_000284 | 4724.026  | 4962.979  |
| NM_016627 | 6267.028  | 6148.512  | AK025117  | 1674.271  | 1437.228  | NM_004813 | 2898.573  | 3224.708  |
| NM_016121 | 4980.662  | 5415.455  | AK022357  | 901.19    | 616.068   | AK023008  | 1879.446  | 2166.855  |
| NM_01476E | 4189.243  | 5068.141  | AK000024  | 6463.396  | 8004.073  | NM_00468E | 5093.571  | 4567.864  |
| NM_00634E | 30097.082 | 40668.258 | AK026693  | 3734.881  | 4105.051  | NM_00602E | 4346.574  | 4787.492  |

|           |           |           |           |           |           |           |           |           |
|-----------|-----------|-----------|-----------|-----------|-----------|-----------|-----------|-----------|
| AK026264  | 19129.758 | 22979.246 | AK001128  | 431.881   | 576.212   | BG339855  | 467.123   | 536.712   |
| NM_004385 | 3737.033  | 4273.268  | AK000794  | 3979.833  | 4638.752  | AB040956  | 2104.83   | 2101.935  |
| NM_005876 | 29609.791 | 34844.535 | AK000950  | 2208.925  | 2896.791  | NM_016587 | 2446.657  | 1731.819  |
| AF039697  | 724.803   | 914.958   | AK026812  | 3534.831  | 4057.386  | NM_003516 | 5332.961  | 4247.384  |
| NM_004445 | 1212.135  | 1175.952  | AK000176  | 2659.547  | 2938.88   | NM_017953 | 1644.528  | 1635.901  |
| U39657    | 10325.324 | 9753.604  | AK000831  | 4875.013  | 5826.283  | BC000124  | 11635.299 | 9555.632  |
| NM_016340 | 2025.09   | 2344.671  | AK024615  | 1482.907  | 2148.772  | Z11773    | 1194.183  | 1609.951  |
| NM_018373 | 330.782   | 690.737   | AK025054  | 2773.948  | 3268.747  | NM_003446 | 14534.835 | 16752.244 |
| NM_006449 | 10576.098 | 9531.68   | AK024556  | 1105.765  | 934.568   | NM_001485 | 3387.915  | 2531.077  |
| BF216030  | 6994.566  | 7236.265  | AK024935  | 1052.729  | 1555.989  | NM_002702 | 301.431   | 589.016   |
| AF131839  | 681.97    | 663.565   | AK025325  | 3702.75   | 3394.671  | AK021510  | 544.379   | 938.179   |
| NM_002757 | 3932.196  | 4115.625  | U50531    | 5394.661  | 4016.688  | AK022711  | 745.664   | 1337.894  |
| NM_003684 | 4540.674  | 4631.827  | NM_005318 | 20559.645 | 19507.027 | AK024310  | 556.136   | 538.134   |
| NM_005657 | 2626.751  | 2869.887  | U85653    | 374.807   | 623.037   | AK023039  | 227.007   | 431.986   |
| NM_017671 | 1146.235  | 1381.2    | AL117474  | 371.32    | 501.129   | AL109688  | 1373.397  | 1277.22   |
| AB040883  | 1016.489  | 945.19    | NM_005421 | 2463.209  | 2842.998  | AF074981  | 285.077   | 596.818   |
| NM_018639 | 5600.864  | 5224.547  | AK024580  | 22212.551 | 29251.35  | AK025863  | 1132.457  | 1093.967  |
| AF264628  | 1001.977  | 978.848   | AL442093  | 8055.34   | 11199.654 | D42044    | 1210.312  | 1148.163  |
| NM_001715 | 3441.468  | 3549.158  | AK024331  | 941.025   | 741.287   | AK023009  | 403.497   | 474.849   |
| NM_004395 | 11963.341 | 11626.818 | AK024452  | 4370.393  | 6681.909  | AK026149  | 1130.116  | 988.276   |
| NM_002663 | 1297.43   | 1381.359  | AK021556  | 3887.582  | 4491.422  | AF038185  | 3152.489  | 3206.836  |
| NM_006094 | 6096.582  | 6159.598  | AJ249975  | 796.713   | 885.667   | AB027011  | 6759.96   | 6979.885  |
| AF080158  | 4649.375  | 4681.09   | AK021733  | 1972.151  | 2680.923  | AK025305  | 860.271   | 1177.265  |
| AB037794  | 1332.665  | 1589.767  | NM_012449 | 1589.264  | 2831.743  | AF131805  | 186.02    | 501.449   |
| NM_005935 | 2437.161  | 2093.939  | AK000543  | 14256.629 | 13266.287 | AL117415  | 7650.958  | 8485.185  |
| NM_012415 | 1488.025  | 1626.977  | AK026683  | 3903.184  | 3397.527  | AK023616  | 467.096   | 581.984   |
| NM_014178 | 8884.088  | 9692.535  | D16906    | 7412.287  | 7572.606  | AK025665  | 6539.927  | 6139.289  |
| NM_004789 | 1338.119  | 1496.926  | AL110280  | 2591.216  | 2630.208  | AF191492  | 414.157   | 608.931   |
| AB011112  | 4030.785  | 4439.854  | AF014457  | 554.698   | 556.082   | BC037530  | 17476.381 | 16743.313 |
| NM_018669 | 2525.828  | 2613.272  | NM_017458 | 2049.628  | 2273.526  | NM_014851 | 6456.795  | 5727.339  |
| NM_002623 | 2853.088  | 2863.728  | AF086196  | 1476.574  | 1244.001  | AK022811  | 351.63    | 415.03    |
| NM_018844 | 7136.379  | 7948.026  | NM_005542 | 48293.727 | 47648.465 | AL117635  | 796.409   | 788.791   |
| AF279778  | 1648.357  | 1603.621  | X95095    | 2903.449  | 4609.997  | AK025332  | 980.422   | 1187.126  |
| NM_015477 | 6092.104  | 5961.146  | AB007902  | 1367.158  | 1128.681  | AB020735  | 347.254   | 702.764   |
| AK023212  | 5413.487  | 4910.129  | NM_018224 | 9375.251  | 4307.158  | D17010    | 464.4     | 660.675   |
| AL353943  | 1513.548  | 1272.454  | NM_019896 | 5439.532  | 4109.896  | AJ011596  | 1347.864  | 1731.076  |
| BE568801  | 2960.291  | 2869.822  | NM_018569 | 4357.326  | 4404.669  | AL049215  | 24587.854 | 26950.221 |
| AB002336  | 1179.172  | 1024.058  | J04118    | 760.606   | 762.983   | X51779    | 801.046   | 1189.933  |
| NM_003127 | 688.216   | 1361.37   | NM_000730 | 6160.777  | 3722.317  | AL049254  | 760.451   | 992.617   |
| NM_013286 | 8646.669  | 8357.445  | U31734    | 32311.289 | 26150.582 | Z83954    | 3849.298  | 3609.643  |
| NM_006082 | 75038.133 | 73428.109 | AF085885  | 2496.624  | 2373.24   | M74093    | 2756.566  | 2160.365  |
| NM_006633 | 967.411   | 1290.749  | M24751    | 1373.192  | 1208.389  | M28219    | 1261.792  | 1026.004  |
| NM_016262 | 3627.892  | 4120.845  | AL049974  | 2159.077  | 1991.894  | L17326    | 174.701   | 544.091   |
| AB011116  | 13759.16  | 14514.755 | AL365519  | 838.527   | 1807.452  | D17207    | 3153.813  | 2834.458  |
| AB037858  | 1402.434  | 1508.549  | NM_020530 | 1596.661  | 1378.738  | D55640    | 1959.484  | 1530.062  |
| NM_005775 | 2861.156  | 3057.467  | AK022418  | 2721.515  | 2432.797  | AF085897  | 784.107   | 510.529   |
| NM_017639 | 1349.49   | 1309.734  | AF279777  | 3201.771  | 3616.453  | AF085822  | 1249.07   | 1082.951  |
| NM_003270 | 1949.097  | 1789.741  | AK021748  | 19656.936 | 20424.789 | AK021551  | 1841.116  | 2176.762  |
| AL157437  | 11827.399 | 12711.396 | AK021771  | 1282.105  | 1319.548  | AK025117  | 767.767   | 751.62    |
| L25629    | 6172.47   | 5103.125  | AL137257  | 14813.875 | 18010.324 | AK000024  | 2129.089  | 2191.599  |
| AJ245539  | 739.627   | 834.262   | AF086503  | 906.478   | 833.686   | AK026693  | 805.599   | 1035.561  |
| NM_001490 | 3122.101  | 3273.959  | CY3Cy5    | 8004.175  | 245.522   | AK000794  | 1463.675  | 1434.056  |
| NM_017740 | 6165.196  | 7814.059  | AA778392  | 8814.794  | 11442.876 | AK000950  | 2165.477  | 1693.643  |

|           |           |           |           |           |           |           |           |           |
|-----------|-----------|-----------|-----------|-----------|-----------|-----------|-----------|-----------|
| AB033052  | 6032.901  | 6031.261  | AI478178  | 2543.917  | 3101.22   | AK026812  | 1000.066  | 1127.98   |
| NM_018227 | 2612.303  | 2010.542  | AA101279  | 398.267   | 736.929   | AK000176  | 492.983   | 727.574   |
| NM_003340 | 26604.762 | 32204.684 | M19154    | 2976.416  | 3619.401  | AK000831  | 1437.156  | 1379.901  |
| U46752    | 2067.112  | 2325.414  | AA399410  | 9052.89   | 10120.12  | AK000981  | 856.942   | 675.884   |
| NM_002794 | 23037.506 | 26495.611 | AA137031  | 2532.906  | 2521.979  | AK025054  | 2571.985  | 2117.378  |
| BF244646  | 58866.336 | 52124.094 | AA292226  | 10472.484 | 10296.904 | AK024556  | 781.654   | 523.579   |
| AK024030  | 3815.268  | 3606.897  | NM_000500 | 2929.21   | 3482.83   | AK024935  | 724.898   | 783.518   |
| AF275808  | 1803.646  | 1694.168  | BC007031  | 4792.89   | 4980.267  | AK025325  | 2596.796  | 3001.999  |
| AK024038  | 8374.416  | 8300.753  | AF129756  | 10994.596 | 11712.459 | U50531    | 1257.142  | 1338.638  |
| NM_002055 | 2624.889  | 2219.645  | NM_002957 | 15725.664 | 15103.165 | NM_005315 | 14852.966 | 14464.232 |
| NM_005803 | 11474.117 | 12484.06  | BC036369  | 3022.862  | 3057.118  | NM_005421 | 1069.379  | 904.513   |
| NM_015515 | 6833.373  | 6254.053  | X12492    | 17164.348 | 17705.146 | AK024580  | 15315.536 | 15844.445 |
| AK001579  | 18821.432 | 21660.672 | U93051    | 17883.932 | 17414.336 | AL442093  | 5620.152  | 5715.024  |
| NM_002670 | 5884.094  | 6913.012  | SR2       | 69856.57  | 59718.559 | AK024331  | 1339.505  | 716.949   |
| AF163302  | 5083.795  | 5420.454  | SR8       | 12765.5   | 38259.035 | AK024452  | 1253.447  | 1413.645  |
| NM_006405 | 6959.897  | 7084.606  | SR10      | 41933.859 | 14007.632 | AK021733  | 958.196   | 841.092   |
| NM_002415 | 6285.358  | 5078.497  | CY3Cy5    | 6155.448  | 96.821    | AK000543  | 10460.121 | 10732.06  |
| NM_001985 | 9217.96   | 8657.477  | NM_005682 | 1779.39   | 2224.251  | AK026683  | 2562.961  | 2922.096  |
| NM_002653 | 13108.87  | 12069.598 | NM_002926 | 1929.558  | 2016.406  | D16906    | 5487.064  | 6167.073  |
| NM_005604 | 1848.232  | 1841.517  | NM_018697 | 1413.63   | 2121.982  | AK022335  | 585.173   | 827.239   |
| S69023    | 2916.146  | 3246.803  | NM_014030 | 27010.799 | 37201.547 | AL110280  | 1736.336  | 1707.644  |
| NM_003454 | 3811.623  | 3480.975  | NM_004224 | 2532.397  | 3156.431  | NM_017455 | 707.713   | 757.201   |
| NM_003415 | 27554.051 | 35144.262 | NM_003735 | 569.34    | 716.856   | NM_005542 | 35986.656 | 38830.383 |
| NM_017905 | 2838.079  | 2921.506  | NM_016185 | 21537.52  | 22898.184 | X95095    | 1374.774  | 1244.481  |
| NM_006885 | 1143.119  | 1269.735  | NM_012110 | 7315.321  | 7916.895  | AF078528  | 8858.448  | 9252.489  |
| M25077    | 4835.23   | 4908.533  | NM_005461 | 964.589   | 1229.374  | AF161411  | 2523.919  | 2208.637  |
| NM_018702 | 5539.857  | 5926.722  | AF052693  | 5054.722  | 5508.737  | AK000450  | 12306.531 | 10271.348 |
| M62843    | 972.783   | 956.087   | L09100    | 2375.743  | 2691.041  | NM_018224 | 7875.271  | 7128.395  |
| NM_001515 | 290.906   | 1034.472  | NM_005472 | 2560.957  | 3139.294  | NM_019895 | 3532.949  | 3030.321  |
| NM_004593 | 2171.093  | 3067.77   | NM_004313 | 967.385   | 836.442   | NM_018565 | 4365.878  | 3825.792  |
| NM_005775 | 16949.785 | 17967.789 | NM_013435 | 1240.545  | 1285.564  | NM_000730 | 4132.355  | 4534.129  |
| NM_001032 | 68360.242 | 62587.625 | NM_001727 | 5055.124  | 5628.957  | U31734    | 27597.77  | 31854.855 |
| NM_018084 | 26438.84  | 28722.17  | BG717460  | 5081.79   | 4944.662  | AF085885  | 1400.963  | 1788.342  |
| AF164797  | 66707.93  | 52335.277 | NM_004161 | 15508.921 | 18827.988 | AL049974  | 895.121   | 777.821   |
| NM_017840 | 35366.598 | 41505.203 | NM_001295 | 2700.101  | 3183.266  | AF009319  | 1731.972  | 1403.802  |
| AK001052  | 50238.48  | 50613.223 | NM_005161 | 2011.253  | 2052.113  | AL365519  | 597.034   | 626.123   |
| NM_001415 | 62018.227 | 51788.973 | AB037749  | 334.654   | 576.134   | NM_018465 | 4517.198  | 4777.733  |
| NM_004564 | 6467.12   | 5428.112  | NM_020347 | 864.073   | 1058.052  | Z36845    | 1445.922  | 1282.891  |
| NM_000965 | 67773.5   | 53600.082 | NM_001462 | 2103.422  | 2736.181  | M73792    | 514.907   | 780.493   |
| AL355743  | 5255.951  | 5271.271  | NM_004072 | 828.599   | 922.668   | NM_016127 | 5786.165  | 6322.387  |
| L77571    | 853.599   | 1010.16   | AF068286  | 487.163   | 614.436   | AF085939  | 891.411   | 760.306   |
| X81896    | 780.743   | 647.488   | NM_003110 | 3746.447  | 3773.68   | NM_006792 | 30246.037 | 36244.449 |
| AF070595  | 965.152   | 770.278   | NM_003612 | 2705.738  | 3059.003  | Z36874    | 44085.516 | 43936.344 |
| NM_002202 | 2282.191  | 1964.222  | NM_013230 | 2899.718  | 2930.129  | AK095477  | 3589.82   | 3344.615  |
| NM_006005 | 2313.583  | 2355.113  | X72308    | 2945.657  | 3266.839  | AK023326  | 1628.308  | 1198.754  |
| NM_002625 | 50531.266 | 50294.977 | NM_005405 | 635.876   | 709.259   | AK022462  | 891.174   | 1154.518  |
| NM_014364 | 2626.421  | 2877.46   | AB041269  | 1332.394  | 1591.669  | NM_020530 | 799.115   | 940.491   |
| NM_001685 | 60569     | 53530.688 | AK024908  | 4890.435  | 5014.271  | AK022418  | 1580.555  | 1165.353  |
| NM_006067 | 24184.775 | 28089.762 | NM_018270 | 6612.192  | 8414.342  | AF279777  | 1470.939  | 965.675   |
| NM_000284 | 6754.85   | 7055.739  | NM_014160 | 9707.978  | 10768.257 | AK021748  | 12233.607 | 9664.05   |
| NM_004813 | 4905.504  | 4557.243  | AF230877  | 9082.802  | 8044.703  | AK021771  | 682.578   | 1006.828  |
| AK023008  | 3585.021  | 3349.428  | AB033049  | 24099.713 | 25287.234 | AL137257  | 15747.328 | 13620.605 |
| NM_004685 | 7631.733  | 7453.801  | NM_004377 | 3819.447  | 4520.979  | AF086503  | 821.875   | 565.299   |

|           |           |           |           |           |           |           |           |           |
|-----------|-----------|-----------|-----------|-----------|-----------|-----------|-----------|-----------|
| NM_006026 | 12482.924 | 13582.445 | AB037815  | 13178.617 | 15859.959 | CY3Cy5    | 19197.547 | 963.327   |
| BG339855  | 1136.681  | 1432.535  | NM_003645 | 8777.701  | 10698.593 | AA778392  | 6254.452  | 7028.931  |
| AB040956  | 5577.87   | 6732.133  | AF263613  | 3233.169  | 3553.258  | AI478178  | 735.583   | 1311.845  |
| NM_016587 | 2836.638  | 2734.737  | NM_017750 | 2731.892  | 2903.236  | M19154    | 976.587   | 961.439   |
| NM_003516 | 15995.193 | 13204.481 | AK026196  | 1957.538  | 3302.818  | AA399410  | 5543.529  | 5959.863  |
| NM_017953 | 2567.31   | 2804.687  | NM_013348 | 2421.376  | 2458.116  | AA137031  | 1501.599  | 1761.638  |
| BC000124  | 22055.273 | 21219.059 | NM_004977 | 6011.577  | 6927.691  | AA292226  | 4717.833  | 4312.284  |
| Z11773    | 2050.296  | 2242.107  | NM_012283 | 51079.801 | 56497.094 | NM_000500 | 906.624   | 1277.607  |
| NM_006914 | 911.455   | 813.496   | AB020706  | 6972.559  | 6610.788  | BC007031  | 1519.872  | 1799.141  |
| NM_003446 | 31565.443 | 39865.738 | NM_007166 | 5991.638  | 5495.108  | AF129756  | 4441.448  | 5582.599  |
| NM_001485 | 8182.613  | 6858.395  | NM_002869 | 4810.709  | 5570.356  | NM_002957 | 6535.86   | 6854.276  |
| NM_002702 | 1178.161  | 1241.108  | NM_006755 | 7396.969  | 8555.311  | BC036369  | 2412.583  | 1781.931  |
| AK021510  | 1128.324  | 1396.586  | NM_005881 | 1420.551  | 1562.543  | X12492    | 9293.598  | 8996.082  |
| AK022711  | 2208.595  | 2023.645  | L40519    | 1587.008  | 2083.796  | U93051    | 10141.35  | 9414.427  |
| AK024310  | 513.171   | 662.313   | NM_004204 | 1990.408  | 2652.348  | SR2       | 53495.027 | 55973.145 |
| AK023039  | 657.055   | 684.124   | AK002181  | 885.634   | 1132.591  | SR4       | 10774.936 | 10537.768 |
| AL109688  | 3447.993  | 3154.746  | AK025769  | 5404.534  | 9897.328  | SR6       | 1707.254  | 1115.928  |
| AF074981  | 907.204   | 1090.396  | AW945166  | 1846.248  | 1935.413  | SR8       | 9762.948  | 18981.525 |
| AK025863  | 1420.587  | 1461.594  | NM_005236 | 3986.293  | 4785.775  | SR10      | 33220.27  | 7059.659  |
| D42044    | 3311.679  | 3632.912  | NM_006384 | 10687.996 | 11345.311 | CY3Cy5    | 10766.65  | 159.237   |
| AK026149  | 2262.615  | 2571.144  | NM_013257 | 2628.144  | 2901.237  | NM_005682 | 1271.784  | 1407.712  |
| AF038185  | 5923.709  | 6192.607  | AF163473  | 1549.314  | 1685.009  | NM_002926 | 738.845   | 1460.701  |
| AB027011  | 14557.027 | 14269.168 | NM_006256 | 6364.139  | 6780.155  | NM_018697 | 1042.625  | 1150.606  |
| AK025305  | 1140.286  | 1263.503  | NM_002846 | 2202.717  | 6677.815  | NM_014030 | 6319.303  | 7066.403  |
| AF131788  | 360.469   | 603.54    | NM_002837 | 4839.279  | 4604.268  | NM_004224 | 540.474   | 578.183   |
| AF131805  | 215.332   | 825.847   | U06715    | 1577.901  | 1455.8    | Z21967    | 1049.159  | 1598.171  |
| AL117415  | 11258.025 | 10661.492 | NM_002662 | 989.163   | 991.644   | NM_016185 | 8451.855  | 8494.255  |
| AK023616  | 1036.097  | 1004.523  | NM_000132 | 11778.836 | 14438.762 | NM_012110 | 4100.845  | 5441.073  |
| AK022249  | 750.026   | 705.179   | NM_001727 | 4784.184  | 4552.055  | AF052693  | 1601.192  | 1552.051  |
| AK025665  | 10061.266 | 9205.477  | NM_004076 | 3390.302  | 3914.2    | L09100    | 677.253   | 1493.656  |
| AL355694  | 1287.683  | 1432.952  | BG717460  | 4491.586  | 5835.428  | NM_005472 | 598.763   | 937.778   |
| AK027152  | 321.113   | 427.164   | AA778392  | 11166.8   | 15544.896 | NM_013435 | 338.95    | 530.781   |
| AF191492  | 634.376   | 644.678   | AI478178  | 2193.914  | 3768.297  | NM_000132 | 9465.274  | 8159.388  |
| BC037530  | 30090.871 | 33966.215 | AA101279  | 567.141   | 1175.696  | BG717460  | 3847.329  | 2362.904  |
| NM_014851 | 8470.552  | 7665.532  | AA137031  | 2266.27   | 3034.774  | NM_004161 | 14714.627 | 19304.852 |
| NM_007166 | 371.055   | 464.635   | AA292226  | 9855.021  | 10538.374 | NM_001295 | 2051.568  | 2053.583  |
| AK022811  | 649.944   | 724.978   | NM_000500 | 2668.484  | 3183.677  | NM_005161 | 762.567   | 1115.917  |
| AL117635  | 1970.577  | 1666.618  | BC007031  | 4995.735  | 5331.837  | AB037749  | 342.378   | 446.737   |
| AK025332  | 2822.115  | 2108.46   | AF129756  | 12235.36  | 11940.508 | NM_020347 | 460.042   | 734.796   |
| AB020735  | 1149.795  | 1415.5    | NM_002957 | 18573.033 | 19949.584 | NM_001462 | 1415.635  | 1773.915  |
| AL109700  | 489.235   | 433.857   | BC036369  | 3099.338  | 3380.181  | NM_003110 | 1188.378  | 2007.324  |
| D17010    | 548.405   | 806.096   | X12492    | 16301.219 | 15929.187 | NM_013230 | 1138.921  | 994.48    |
| AJ011596  | 7721.9    | 8353.735  | U93051    | 15028.622 | 13671.719 | X72308    | 849.926   | 1457.407  |
| U17639    | 755.958   | 734.276   | NM_017540 | 1340.188  | 1280.439  | AB041269  | 738.907   | 1045.937  |
| AL049215  | 53008.816 | 43579.508 | NM_018270 | 7548.041  | 8732.203  | AK024908  | 3629.562  | 3566.527  |
| X51779    | 2021.753  | 2006.438  | NM_000260 | 51097.957 | 54743.465 | NM_018270 | 5555.984  | 6141.802  |
| X81001    | 224.456   | 616.883   | NM_014160 | 10430.112 | 11825.336 | AF230877  | 4150.283  | 4555.804  |
| AL049254  | 1988.405  | 2074.75   | NM_017668 | 4162.178  | 4876.758  | AB033049  | 13759.359 | 9979.532  |
| Z83954    | 5194.385  | 4189.343  | AB033049  | 29150.313 | 41811.555 | NM_004377 | 3085.889  | 4405.621  |
| M74093    | 4138.19   | 4032.568  | NM_005682 | 2212.51   | 2736.034  | AB037815  | 8724.312  | 11222.354 |
| M28219    | 2957.756  | 2796.129  | NM_002926 | 2039.785  | 3014.485  | NM_003645 | 5935.803  | 6810.11   |
| L17326    | 1152.223  | 935.374   | NM_000233 | 641.298   | 894.633   | AF263613  | 2039.012  | 2562.744  |
| D17207    | 7542.988  | 6442.492  | NM_018697 | 1830.266  | 2970.701  | NM_017750 | 671.65    | 876.981   |

|           |           |           |           |           |           |           |           |           |
|-----------|-----------|-----------|-----------|-----------|-----------|-----------|-----------|-----------|
| D55640    | 2188.822  | 1785.56   | NM_003738 | 4515.337  | 6335.089  | AK026196  | 1377.454  | 1416.313  |
| AF085897  | 1048.604  | 783.499   | NM_016185 | 23840.893 | 25421.07  | NM_013348 | 647.094   | 883.422   |
| AF085822  | 1465.987  | 1054.103  | NM_012110 | 7517.252  | 7447.203  | NM_004977 | 3382.123  | 6167.849  |
| AK021551  | 2892.547  | 2878.366  | NM_005461 | 923.805   | 837.77    | NM_012283 | 25848.707 | 31035.391 |
| AK025117  | 1049.018  | 909.266   | AF052693  | 4860.316  | 4131.523  | NM_004162 | 172.97    | 220.444   |
| AK000024  | 9126.548  | 8978.35   | NM_001129 | 13067.537 | 10618.383 | AB020706  | 6816.103  | 5745.466  |
| AK026693  | 3125.212  | 3007.227  | L09100    | 2289.682  | 1769.709  | NM_007166 | 6269.194  | 4066.025  |
| NM_012285 | 666.065   | 627.305   | NM_005472 | 2538.875  | 2611.256  | NM_002866 | 4941.551  | 4059.974  |
| AK000090  | 632.006   | 689.461   | NM_004313 | 635.308   | 778.156   | NM_006755 | 2699.614  | 3461.972  |
| AK000794  | 5075.119  | 4794.275  | AB020706  | 7190.703  | 7152.442  | NM_005881 | 1202.397  | 1647.337  |
| AK000950  | 3236.759  | 2618.575  | NM_007166 | 5021.407  | 5428.995  | L40519    | 1184.482  | 2008.258  |
| AK026812  | 1898.444  | 1839.819  | NM_002866 | 4917.494  | 5786.211  | NM_004204 | 652.038   | 1052.748  |
| AK000176  | 958.665   | 972.836   | NM_004161 | 17880.111 | 20807.699 | AK002181  | 443.068   | 566.841   |
| AK000831  | 2188.458  | 1904.433  | NM_001295 | 2761.228  | 2936.729  | AK025769  | 2425.67   | 2665.853  |
| AK000981  | 711.348   | 563.111   | NM_005161 | 2290.352  | 2725.821  | AW945166  | 690.622   | 547.239   |
| AK024615  | 1244.064  | 703.113   | NM_020347 | 836.942   | 797.493   | NM_005236 | 2357.662  | 2473.87   |
| AK025054  | 3674.674  | 2371.84   | NM_001462 | 2319.048  | 2709.346  | NM_006384 | 3910.967  | 3688.464  |
| AK024556  | 1171.636  | 988.736   | NM_004072 | 857.956   | 672.85    | NM_013257 | 1736.76   | 1584.459  |
| AK024935  | 1394.693  | 909.345   | AF068286  | 402.213   | 542.709   | NM_006256 | 3885.359  | 4505.592  |
| AK025325  | 5222.912  | 4407.369  | AB040957  | 3307.57   | 2558.337  | NM_002846 | 1153.349  | 2466.077  |
| U50531    | 2956.815  | 2797.652  | NM_003612 | 3062.616  | 2806.74   | NM_002837 | 2418.657  | 2149.989  |
| NM_005318 | 19057.521 | 17783.359 | NM_013230 | 2946.136  | 2797.19   | AK025211  | 2744.411  | 2783.137  |
| L09099    | 1670.254  | 1759.306  | X72308    | 2840.979  | 2644.492  | U06715    | 1729.894  | 1087.477  |
| AL117474  | 610.017   | 556.24    | BC008376  | 14754.354 | 13869.122 | NM_002662 | 1520.55   | 750.771   |
| NM_005421 | 2754.717  | 2308.571  | X87895    | 845.499   | 835.759   | NM_000132 | 7152.434  | 8661.767  |
| AK024580  | 39894.484 | 32578.061 | AB041269  | 2133.736  | 2125.251  | NM_001727 | 2268.064  | 2781.012  |
| AL442093  | 8879.331  | 5545.243  | AK024908  | 4763.084  | 4334.827  | NM_004076 | 2543.07   | 3109.22   |
| AK024331  | 1219.868  | 825.935   | NM_002837 | 4840.494  | 5818.511  | NM_007123 | 17519.428 | 19730.229 |
| AK024452  | 1740.308  | 1255.699  | AL133077  | 26259.301 | 31320.141 | BG717460  | 2069.105  | 2421.203  |
| AJ249975  | 928.773   | 591.261   | AK025211  | 2918.172  | 3762.398  | AA778392  | 6493.143  | 6749.935  |
| AK021733  | 2692.281  | 1556.023  | U06715    | 1114.56   | 1288.584  | AI478178  | 764.709   | 1146.826  |
| NM_012446 | 587.593   | 480.243   | NM_002662 | 1322.108  | 1309.289  | M19154    | 1142.422  | 941.165   |
| AK000543  | 14708.617 | 14625.939 | NM_004377 | 3648.285  | 4611.685  | AA399410  | 5232.305  | 5207.374  |
| AK026683  | 3974.005  | 3239.626  | AB037815  | 13687.162 | 16547.775 | AA137031  | 1699.26   | 1738.241  |
| D16906    | 7784.453  | 6433.622  | NM_003645 | 9271.402  | 10563.132 | AA292226  | 4465.357  | 4800.588  |
| AJ012492  | 171.881   | 401.608   | AF263613  | 3136.486  | 3346.177  | NM_000500 | 1355.503  | 2170.098  |
| AK022335  | 1311.736  | 864.257   | NM_017750 | 2206.332  | 1989.119  | BC007031  | 2230.048  | 2088.952  |
| AL110280  | 2801.241  | 2026.285  | NM_013348 | 1919.72   | 1937.574  | AF129756  | 6143.002  | 6613.624  |
| AK024235  | 665.132   | 314.205   | NM_004977 | 5907.711  | 6111.984  | NM_002957 | 9979.563  | 9844.5    |
| AF014457  | 497.567   | 397.604   | NM_002251 | 992.144   | 653.473   | BC036369  | 2609.469  | 2752.725  |
| NM_017458 | 1614.317  | 1029.861  | NM_012283 | 34838.715 | 38447.949 | X12492    | 10155.871 | 6642.641  |
| AF086196  | 1185.296  | 491.515   | NM_004700 | 1630.485  | 2152.58   | U93051    | 13437.293 | 10977.241 |
| NM_005542 | 39660.363 | 31309.246 | U93051    | 13711.14  | 14206.167 | NM_017540 | 1063.873  | 585.292   |
| X95095    | 2481.721  | 1566.175  | NM_017540 | 1083.178  | 1336.39   | NM_014160 | 5353.443  | 7232.112  |
| AB007902  | 838.584   | 412.039   | NM_006755 | 8407.405  | 8895.895  | AF230877  | 2714.137  | 3490.385  |
| AF078528  | 16542.375 | 9795.991  | NM_005881 | 1283.979  | 1462.174  | AB033049  | 16267.162 | 20760.646 |
| AF161411  | 3149.022  | 1856.171  | L40519    | 1578.926  | 1897.463  | NM_005682 | 1089.897  | 1178.748  |
| AK000450  | 22228.299 | 13636.46  | NM_004204 | 2304.276  | 2343.067  | NM_002926 | 1150.051  | 1205.502  |
| NM_018224 | 12369.052 | 7505.325  | AK002181  | 771.417   | 1339.176  | NM_018697 | 1321.769  | 1148.398  |
| NM_019896 | 4933.125  | 3202.349  | AW945166  | 758.155   | 814.354   | NM_014030 | 8927.001  | 11724.083 |
| NM_018566 | 4943.89   | 3119.487  | NM_005236 | 3469.395  | 3420.615  | NM_004224 | 864.745   | 1096.029  |
| NM_000730 | 6447.665  | 4218.571  | NM_006384 | 10488.903 | 9585.478  | NM_000254 | 4823.452  | 9084.924  |
| U31734    | 42885.793 | 32987.5   | NM_013257 | 2467.818  | 2176.804  | Z21967    | 3217.028  | 3170.608  |

|           |           |           |           |           |           |           |           |           |
|-----------|-----------|-----------|-----------|-----------|-----------|-----------|-----------|-----------|
| AF085885  | 2488.519  | 1449.318  | AF163473  | 1018.898  | 1227.619  | NM_00373E | 2034.393  | 4604.433  |
| AL049974  | 1826.831  | 1079.803  | NM_00625E | 5213.776  | 4838.09   | NM_01618E | 16334.596 | 19404.348 |
| AK022953  | 559.828   | 517.126   | NM_00284E | 1724.216  | 3666.65   | NM_01211C | 5637.226  | 5154.495  |
| AF009319  | 3122.597  | 1847.961  | AF052693  | 4332.14   | 4334.181  | NM_005461 | 7032.757  | 6247.367  |
| AL365519  | 919.455   | 773.792   | NM_001129 | 15174.252 | 13221.201 | AF052693  | 2459.969  | 1343.533  |
| NM_01846E | 5974.871  | 3803.325  | L09100    | 2677.444  | 2446.342  | NM_001129 | 7286.6    | 3932.088  |
| Z36845    | 1673.897  | 1085.362  | NM_00547E | 2546.348  | 2609.443  | L09100    | 1235.864  | 951.733   |
| M73792    | 1160.665  | 811.149   | NM_00431E | 492.128   | 706.348   | NM_00547E | 1505.005  | 963.846   |
| NM_016127 | 9093.214  | 5401.483  | NM_01343E | 888.692   | 967.55    | NM_00431E | 387.214   | 359.948   |
| AF085939  | 1546.238  | 885.795   | NM_00013E | 12048.492 | 12315.597 | AB020706  | 5373.657  | 6728.201  |
| NM_00679E | 33673.309 | 25135.627 | NM_001727 | 4548.348  | 4624.317  | NM_00716E | 5788.276  | 6137.724  |
| Z36874    | 38742.383 | 32661.527 | NM_00407E | 2849.655  | 3115.839  | NM_004161 | 12367.599 | 14454.989 |
| AK095477  | 3871.947  | 2370.058  | NM_00712E | 49281.5   | 52803.809 | NM_00129E | 2459.283  | 3739.548  |
| AK023326  | 1406.772  | 820.433   | BG717460  | 4415.217  | 4785.953  | NM_005161 | 737.352   | 1311.722  |
| AK022462  | 1804.461  | 1153.08   | AA778392  | 10396.166 | 9819.763  | NM_020347 | 601.719   | 709.674   |
| NM_02053C | 2474.409  | 1656.073  | AI478178  | 2115.276  | 2101.67   | NM_00146E | 1215.852  | 1750.32   |
| AK022418  | 4825.631  | 2646.697  | AA101279  | 304.677   | 418.487   | AB040957  | 3450.634  | 3410.442  |
| AF279777  | 2114.874  | 1492.728  | AA292226  | 9031.296  | 7833.831  | NM_00311C | 2745.207  | 2535.297  |
| AK021748  | 32967.262 | 29468.844 | NM_00050C | 2175.059  | 2005.325  | NM_00361E | 1252.704  | 1180.03   |
| AK021771  | 719.621   | 402.62    | BC007031  | 4222.924  | 3977.552  | NM_01323C | 1743.289  | 1895.373  |
| AL137257  | 13688.585 | 8083.323  | NM_002957 | 16656.684 | 12956.334 | X72308    | 1614.298  | 1375.288  |
| AF086503  | 1196.478  | 684.289   | BC036369  | 2884.64   | 2585.825  | BC008376  | 12066.613 | 8118.817  |
| CY3Cy5    | 4923.744  | 259.64    | X12492    | 9446.684  | 7756.66   | AB041269  | 1415.371  | 810.881   |
| AA778392  | 16297.302 | 20060.689 | X72308    | 2704.81   | 3012.415  | AK024908  | 4537.447  | 3589.298  |
| AI478178  | 2501.733  | 3126.914  | NM_00540E | 631.274   | 696.613   | NM_002837 | 1305.197  | 1346.807  |
| AA101279  | 860.784   | 1151.551  | BC008376  | 17179.512 | 16734.793 | AK025211  | 1956.544  | 2449.906  |
| M19154    | 4771.361  | 6140.998  | AB041269  | 1481.869  | 1331.77   | U06715    | 1457.316  | 1651.743  |
| AA399410  | 10419.308 | 9421.919  | AK024908  | 5324.257  | 4799.66   | NM_00266E | 1032.911  | 869.292   |
| AA137031  | 4572.542  | 4670.464  | NM_01827C | 7279.176  | 7176.668  | NM_004377 | 2309.404  | 2710.82   |
| AA292226  | 10751.127 | 7925.854  | NM_00026C | 46710.25  | 51445.34  | AF263613  | 2489.448  | 3550.951  |
| NM_00050C | 2658.36   | 2829.019  | NM_01416C | 9658.692  | 10332.729 | NM_01775C | 2152.358  | 3386.426  |
| BC007031  | 5404.003  | 5024.801  | AF230877  | 6645.523  | 6529.921  | AK026196  | 2295.45   | 2558.09   |
| AF129756  | 16422.311 | 18855.473 | NM_01766E | 3646.51   | 3295.367  | NM_01334E | 1450.743  | 970.439   |
| NM_002957 | 14094.151 | 15344.499 | AB033049  | 25397.947 | 30371.045 | NM_004977 | 4141.127  | 4203.611  |
| BC036369  | 3025.821  | 3456.001  | NM_00568E | 1955.052  | 1729.184  | NM_00488E | 27465.223 | 21256.863 |
| X12492    | 13293.077 | 12068.218 | NM_00292E | 2036.573  | 1722.366  | NM_01228E | 21274.787 | 14251.649 |
| U93051    | 7530.223  | 5450.054  | NM_018697 | 1665.398  | 1556.388  | U93051    | 11643.334 | 14725.71  |
| SR2       | 64338.148 | 54576.57  | NM_004224 | 2422.45   | 2547.615  | NM_01754C | 876.06    | 990.404   |
| SR4       | 23589.971 | 18337.723 | NM_000254 | 8324.764  | 6422.685  | NM_00675E | 2771.103  | 2799.084  |
| SR6       | 4121.461  | 3279.29   | Z21967    | 4589.426  | 3862.705  | NM_005881 | 1712.153  | 1355.389  |
| SR8       | 13856.963 | 36092.82  | NM_01618E | 20766.563 | 15715.998 | L40519    | 1334.381  | 1458.586  |
| SR10      | 45931.809 | 16911.525 | NM_01211C | 6966.725  | 6343.084  | NM_004204 | 720.037   | 912.462   |
| CY3Cy5    | 3191.188  | 88.529    | NM_005461 | 735.142   | 602.293   | AK002181  | 471.05    | 868.922   |
| NM_00292E | 3306.378  | 3823.939  | NM_01334E | 2057.57   | 2194.649  | AW945166  | 750.499   | 925.791   |
| NM_00023E | 646.456   | 734.842   | NM_004977 | 6688.684  | 7216.833  | NM_00523E | 3455.564  | 4135.382  |
| NM_018697 | 1963.569  | 2638.497  | NM_00488E | 24139.756 | 29224.037 | NM_006384 | 9208.89   | 6426.878  |
| AF090116  | 609.063   | 974.144   | NM_01228E | 43419.203 | 41941.879 | NM_013257 | 2421.548  | 1953.183  |
| NM_01403C | 50180.125 | 50662.379 | AB020706  | 6584.788  | 7074.341  | NM_01422E | 49990.992 | 34640.637 |
| NM_004224 | 5160.85   | 7454.162  | NM_00716E | 5774.245  | 5970.122  | NM_00625E | 5729.333  | 2826.233  |
| Z21967    | 6070.357  | 5355.356  | NM_00286E | 4340.058  | 5315.763  | NM_00284E | 2009.188  | 3075.966  |
| NM_00373E | 938.911   | 1377.224  | NM_004161 | 15026.347 | 14136.483 | AF052693  | 2266.684  | 2974.144  |
| NM_01618E | 23266.572 | 22845.252 | NM_00129E | 2974.656  | 2219.093  | NM_001129 | 5336.546  | 6912.232  |
| NM_01211C | 7462.143  | 7543.615  | NM_005161 | 2205.467  | 1862.369  | L09100    | 1066.174  | 1505.107  |



|           |           |           |           |           |           |           |           |           |
|-----------|-----------|-----------|-----------|-----------|-----------|-----------|-----------|-----------|
| NM_005461 | 1251.576  | 1305.59   | AB037749  | 332.397   | 368.416   | NM_005472 | 1391.875  | 2141.999  |
| AF052693  | 4065.502  | 3791.227  | NM_020347 | 942.611   | 728.665   | NM_01343E | 458.939   | 685.533   |
| NM_001129 | 15121.777 | 11546.587 | NM_004072 | 703.088   | 607.844   | NM_000132 | 9422.573  | 8460.091  |
| L09100    | 1433.517  | 1128.296  | AF068286  | 5317.114  | 6213.653  | NM_001727 | 2181.893  | 2250.525  |
| NM_005472 | 1617.203  | 1374.404  | AB040957  | 3239.126  | 2134.492  | NM_00407E | 2518.17   | 2901.998  |
| NM_004313 | 757.969   | 698.21    | NM_003110 | 2573.635  | 2464.295  | NM_007123 | 19144.912 | 18522.137 |
| NM_01343E | 1261.212  | 979.051   | NM_003612 | 2975.4    | 2524.299  | BG717460  | 2382.541  | 2669.409  |
| NM_000132 | 11622.514 | 10741.812 | NM_013230 | 2049.533  | 1935.501  | AA778392  | 5714.463  | 5502.45   |
| NM_001727 | 5468.793  | 5313.391  | NM_013257 | 2072.114  | 2560.952  | AI478178  | 674.12    | 1193.897  |
| NM_00407E | 3211.323  | 3572.385  | AF163473  | 786.927   | 942.995   | AA292226  | 7269.161  | 5537.037  |
| NM_007123 | 48698.105 | 51951.219 | NM_00625E | 5359.2    | 5829.747  | NM_00050C | 2394.036  | 2871.186  |
| BG717460  | 4627.332  | 5297.493  | NM_00284E | 2209.352  | 6278.33   | BC007031  | 2903.091  | 2032.154  |
| NM_004161 | 17257.279 | 13815.077 | NM_002837 | 4601.069  | 4347.849  | AF129756  | 9209.908  | 5121.874  |
| NM_005161 | 3275.864  | 4629.933  | AL133077  | 25237.523 | 27292.334 | NM_002957 | 11692.901 | 6934.263  |
| AB037749  | 615.936   | 747.005   | AK025211  | 2770.219  | 3698.731  | BC036369  | 3013.923  | 1599.34   |
| NM_020347 | 1087.585  | 1340.747  | U06715    | 1380.898  | 1723.446  | X12492    | 14996.474 | 9078.583  |
| NM_001462 | 2863.719  | 3011.338  | NM_002662 | 1410.207  | 1087.535  | X72308    | 1404.976  | 1912.927  |
| NM_004072 | 1497.742  | 1784.484  | NM_004377 | 3719.865  | 4273.074  | NM_00540E | 265.107   | 506.78    |
| AF068286  | 808.079   | 528.547   | AB037815  | 13784.082 | 13770.386 | BC008376  | 10437.806 | 12836.568 |
| NM_003110 | 3331.721  | 3135.118  | NM_00364E | 7958.17   | 8638.372  | AB041269  | 1062.25   | 1241.217  |
| NM_003612 | 1703.144  | 1733.496  | AF263613  | 2795.991  | 2387.243  | AK024908  | 3908.846  | 4933.076  |
| NM_013230 | 3101.73   | 3011.863  | NM_017750 | 2035.477  | 1604.221  | NM_01827C | 6118.9    | 6977.548  |
| X72308    | 3625.923  | 2995.263  | AK026196  | 1796.313  | 1655.829  | AF230877  | 2228.28   | 1894.744  |
| NM_00540E | 854.866   | 902.224   | NM_016444 | 1154.812  | 1214.699  | NM_01766E | 2215.736  | 2413.728  |
| BC008376  | 13051.862 | 10501.207 | NM_017839 | 4074.192  | 5007.044  | AB033049  | 13538.773 | 15704.938 |
| AB041269  | 1279.484  | 1336.178  | AL137718  | 1448.963  | 1698.739  | NM_005682 | 1241.681  | 1365.188  |
| AK024908  | 5130.386  | 4125.519  | NM_003460 | 8651.526  | 7872.993  | NM_00292E | 1565.602  | 1242.827  |
| NM_01827C | 8465.359  | 8392.327  | U94354    | 731.48    | 661.61    | NM_018697 | 1368.359  | 2215.521  |
| NM_000260 | 44079.113 | 54031.098 | NM_002904 | 26786.842 | 31707.697 | NM_01403C | 16208.039 | 20589.719 |
| NM_014160 | 10291.805 | 10393.836 | NM_014189 | 5452.679  | 5562.701  | NM_004224 | 1362.099  | 1830.419  |
| AF230877  | 8517.995  | 7928.229  | NM_00568E | 4106.877  | 4685.554  | NM_000254 | 6053.122  | 3470.285  |
| NM_01766E | 5322.183  | 5041.813  | NM_006767 | 895.92    | 970.978   | Z21967    | 3625.13   | 2195.086  |
| AB033049  | 29184.752 | 39738.059 | NM_017540 | 1311.035  | 1314.711  | NM_01618E | 23588.656 | 13795.393 |
| NM_004377 | 5585.289  | 6455.672  | NM_00675E | 7761.044  | 8126.256  | NM_012110 | 5398.707  | 3546.566  |
| AB037815  | 24109.688 | 24149.613 | NM_005881 | 1641.639  | 1380.448  | NM_005461 | 1484.572  | 577.893   |
| NM_00364E | 11775.437 | 12189.411 | L40519    | 1714.042  | 1584.127  | NM_01334E | 941.438   | 1273.539  |
| AF263613  | 3691.102  | 3350.606  | NM_004204 | 2614.788  | 1913.409  | NM_004977 | 4602.144  | 5590.35   |
| NM_017750 | 3129.002  | 3911.289  | AK002181  | 1234.351  | 1169.366  | NM_00488E | 21338.525 | 26626.463 |
| AK026196  | 2364.058  | 3165.977  | BC015750  | 66858.008 | 60194.059 | NM_012283 | 34534.512 | 44501.617 |
| NM_01334E | 2398.958  | 2726.671  | AK025769  | 4078.169  | 3540.825  | NM_004161 | 12306.947 | 12486.788 |
| NM_004977 | 6124.344  | 6966.301  | NM_00523E | 3509.322  | 2917.672  | NM_00129E | 2185.147  | 1979.362  |
| NM_012283 | 53640.883 | 51941.895 | NM_006384 | 10656.864 | 7820.086  | NM_005161 | 1005.124  | 1045.732  |
| AB020706  | 7444.802  | 5993.39   | NM_002589 | 6960.545  | 8582.927  | NM_020347 | 555.563   | 845.287   |
| NM_00716E | 5945.584  | 5509.919  | AF064846  | 1901.043  | 1812.518  | NM_001462 | 1656.732  | 2373.958  |
| NM_016223 | 71190.305 | 56733.113 | AL110227  | 1508.604  | 2067.034  | AF068286  | 2914.815  | 2732.334  |
| NM_00286E | 5889.177  | 5972.351  | NM_001400 | 5196.852  | 4959.125  | AB040957  | 3187.968  | 1752.802  |
| NM_00675E | 8868.8    | 8892.254  | AB033281  | 4538.903  | 3487.626  | NM_003110 | 2575.418  | 1788.162  |
| NM_005881 | 1592.747  | 1589.922  | NM_002882 | 23421.074 | 25471.678 | NM_003612 | 1529.297  | 724.389   |
| L40519    | 1952.5    | 1820.274  | AB011161  | 2538.74   | 2062.383  | NM_013230 | 2356.742  | 1672.076  |
| NM_004204 | 3278.091  | 3035.952  | NM_002944 | 2015.818  | 2143.888  | NM_002837 | 3050.343  | 3315.645  |
| AK002181  | 2182.392  | 2849.594  | AF327354  | 1832.127  | 2273.656  | U06715    | 1205.917  | 1042.028  |
| NM_001641 | 24077.529 | 27257.922 | AB014513  | 9202.809  | 8730.055  | NM_013402 | 15533.72  | 14442.525 |
| BC015750  | 65688.891 | 56008.934 | NM_004747 | 823.745   | 1282.732  | NM_002662 | 814.408   | 775.131   |

|           |           |           |           |           |           |           |           |           |
|-----------|-----------|-----------|-----------|-----------|-----------|-----------|-----------|-----------|
| AK025769  | 5519.389  | 6235.332  | NM_002341 | 9307.134  | 7023.276  | NM_004377 | 2948.521  | 1973.156  |
| AW945166  | 1426.37   | 1934.119  | AL137651  | 2541.499  | 2017.526  | AB037815  | 5853.092  | 5878.74   |
| NM_005236 | 4901.92   | 6079.563  | NM_018945 | 3662.804  | 3403.933  | NM_003645 | 5782.476  | 4781.186  |
| NM_006384 | 12257.583 | 12752.91  | AB029018  | 2643.97   | 2442.262  | NM_017750 | 2168.214  | 1174.352  |
| NM_013257 | 2817.929  | 3166.577  | NM_006650 | 1495.048  | 1413.907  | AK026196  | 2184.819  | 1373.856  |
| AF163473  | 1404.873  | 1197.419  | AK024436  | 4613.286  | 3707.836  | NM_016444 | 972.487   | 1230.839  |
| NM_006256 | 4227.472  | 3659.858  | NM_006648 | 1589.851  | 1308.874  | NM_017835 | 3577.527  | 4279.402  |
| NM_002846 | 2101.714  | 6389.859  | NM_000868 | 731.564   | 397.827   | AL137718  | 1613.249  | 1758.769  |
| NM_002837 | 3882.344  | 3745.537  | NM_004711 | 5020.421  | 3996.948  | NM_003460 | 6544.476  | 8359.099  |
| AL133077  | 21540.861 | 20061.861 | U63542    | 597.436   | 455.207   | U94354    | 710.252   | 512.445   |
| AK025211  | 3467.877  | 2959.389  | AF161361  | 797.201   | 1387.288  | NM_002904 | 23466.588 | 32368.154 |
| U06715    | 1575.446  | 1741.266  | NM_006463 | 9645.571  | 10127.988 | NM_014185 | 2906.298  | 2937.306  |
| NM_013402 | 21885.5   | 21158.699 | NM_001444 | 8120.573  | 8081.989  | NM_005686 | 4084.423  | 4581.091  |
| NM_002662 | 1527.515  | 1220.467  | AK027208  | 869.248   | 586.98    | NM_017540 | 652.03    | 927.963   |
| NM_000132 | 11962.3   | 13338.823 | NM_016521 | 8562.115  | 7656.147  | NM_006755 | 3547.559  | 2790.572  |
| NM_004076 | 4014.967  | 4420.132  | X98494    | 9631.57   | 8175.979  | NM_005881 | 1596.271  | 972.951   |
| BG717460  | 5217.123  | 4769.43   | NM_001240 | 2733.862  | 2477.797  | L40519    | 1672.416  | 1283.376  |
| AA778392  | 15289.479 | 16709.088 | NM_002709 | 10181.245 | 10748.391 | NM_004204 | 1321.316  | 1104.528  |
| AI478178  | 3247.868  | 2946.185  | NM_001099 | 2773.111  | 2787.902  | AK002181  | 864.342   | 905.036   |
| AA101279  | 1258.763  | 1277.296  | NM_006823 | 2596.272  | 2684.18   | NM_001641 | 19072.439 | 11715.608 |
| M19154    | 4701.667  | 4253.638  | NM_007031 | 1318.782  | 931.687   | BC015750  | 65838.93  | 54711.141 |
| AA399410  | 12159.581 | 13857.071 | NM_002657 | 2960.806  | 3441.283  | AK025769  | 4375.41   | 3157.77   |
| AA137031  | 4177.561  | 3589.282  | NM_001350 | 14453.954 | 12343.358 | AW945166  | 1199.956  | 513.94    |
| AA292226  | 11114.026 | 8003.773  | NM_014809 | 2234.241  | 2002.924  | NM_005236 | 4074.204  | 2483.829  |
| NM_000500 | 2927.344  | 3412.973  | NM_016074 | 39320.547 | 34209.473 | NM_006384 | 10660.634 | 5839.193  |
| M29873    | 835.54    | 456.586   | NM_003921 | 2845.033  | 2144.36   | NM_002585 | 4517.284  | 6082.064  |
| BC007031  | 4280.829  | 3638.484  | NM_004208 | 20991.51  | 17999.74  | AF064846  | 995.688   | 1209.483  |
| AF129756  | 12980.123 | 8952.529  | NM_001843 | 2353.625  | 1812.501  | AL110227  | 2036.618  | 2311.217  |
| NM_002957 | 16216.393 | 13842.817 | NM_000419 | 979.39    | 562.933   | NM_001400 | 1374.348  | 2298.107  |
| BC036369  | 3092.472  | 2936.502  | NM_017768 | 3075.044  | 2607.724  | AB033281  | 2688.766  | 2748.46   |
| X12492    | 13026.933 | 11566.615 | NM_002776 | 1310.683  | 1153.664  | NM_002882 | 25318.236 | 34154.895 |
| U93051    | 12679.516 | 11424.504 | AK023398  | 4304.485  | 4611.379  | AB011161  | 2077.208  | 2257.581  |
| NM_017540 | 2139.142  | 2115.669  | NM_015711 | 70088.43  | 60371.242 | NM_002944 | 2315.827  | 2403.162  |
| NM_002396 | 1567.443  | 529.11    | NM_000050 | 695.9     | 899.802   | AF327354  | 1715.775  | 2033.71   |
| NM_014160 | 10957.854 | 11974.57  | NM_000481 | 1199.416  | 1755.922  | NM_004747 | 1195.151  | 2522.705  |
| NM_017668 | 4590.442  | 3529.179  | AK025681  | 3057.503  | 3560.682  | NM_002341 | 6341.098  | 4026.138  |
| AB033049  | 53416.758 | 50806.543 | NM_014905 | 5631.242  | 5483.528  | AL137651  | 1425.973  | 1434.79   |
| NM_000406 | 850.395   | 811.85    | NM_012137 | 4750.478  | 5377.002  | NM_018945 | 3939.098  | 3623.399  |
| NM_005682 | 2674.125  | 2772.831  | NM_004483 | 25597.951 | 25454.967 | AB029018  | 2383.791  | 1928.414  |
| NM_002926 | 2107.269  | 1920.985  | NM_001281 | 4593.065  | 3685.072  | NM_000818 | 4017.17   | 3039.462  |
| NM_000233 | 507.952   | 662.86    | NM_016835 | 1349.832  | 628.811   | NM_006650 | 1845.683  | 1037.674  |
| NM_018697 | 2269.027  | 2593.318  | NM_003981 | 19039.854 | 17391.334 | AK024436  | 5459.633  | 3610.148  |
| AF090116  | 745.778   | 944.799   | U26596    | 23995.494 | 24038.117 | NM_006648 | 1532.871  | 756.707   |
| NM_000254 | 8417.76   | 6410.87   | AB014522  | 13192     | 10244.421 | NM_000868 | 930.007   | 504.181   |
| Z21967    | 3720.074  | 3337.834  | NM_014875 | 5849.083  | 4666.145  | NM_004711 | 5051.453  | 3384.738  |
| NM_003738 | 5786.792  | 5068.417  | AB033023  | 10714.673 | 9689.007  | NM_006463 | 3099.862  | 4215.391  |
| NM_016185 | 24378.459 | 21292.221 | AF116238  | 4310.629  | 4505.233  | NM_001444 | 7191.457  | 8798.214  |
| NM_012110 | 8436.955  | 8662.463  | NM_006982 | 1303.71   | 1202.935  | AK027208  | 688.832   | 798.079   |
| NM_005461 | 8260.747  | 8197.341  | AB033085  | 3381.867  | 2756.371  | NM_016521 | 6584.741  | 8318.381  |
| AF052693  | 3131.511  | 2749.201  | AF024703  | 21401.018 | 22833.732 | X98494    | 7219.613  | 8561.264  |
| NM_001129 | 17027.557 | 13547.985 | NM_016531 | 2140.791  | 2445.049  | NM_001240 | 2312.34   | 2423.566  |
| L09100    | 2047.255  | 2347.038  | NM_003593 | 13902.093 | 13028.565 | NM_002709 | 9117.344  | 10534.627 |
| NM_005472 | 2468.873  | 2814.039  | NM_014383 | 34455.969 | 37599.07  | NM_001095 | 2551.047  | 2575.075  |

|           |           |           |           |           |           |           |           |           |
|-----------|-----------|-----------|-----------|-----------|-----------|-----------|-----------|-----------|
| NM_01343E | 1291.309  | 1924.076  | NM_000244 | 3457.229  | 3649.234  | NM_00682E | 1714.58   | 2024.644  |
| AB020706  | 7687.27   | 9108.202  | NM_01428E | 2552.54   | 2513.832  | NM_00135C | 10516.805 | 9943.148  |
| NM_00716E | 7576.732  | 7315.281  | AF026816  | 31267.053 | 31207.537 | NM_01480E | 1097.615  | 963.232   |
| NM_00286E | 5718.6    | 4569.833  | NM_00471E | 4407.704  | 3845.678  | NM_016074 | 17543.68  | 10730.813 |
| NM_004161 | 20193.383 | 17580.996 | NM_01855E | 3341.812  | 3061.556  | NM_003921 | 2938.406  | 1416.522  |
| NM_00129E | 5947.266  | 5444.663  | NM_004704 | 5582.252  | 5493.03   | NM_00420E | 19766.346 | 13332.98  |
| NM_005161 | 4133.876  | 6221.488  | NM_01463E | 3314.048  | 2462.606  | NM_00184E | 1501.6    | 706.399   |
| AB037749  | 792.488   | 769.384   | NM_00197C | 35097.18  | 30804.717 | NM_01776E | 3432.594  | 1898.497  |
| NM_020347 | 1221.602  | 1633.695  | NM_00681C | 18118.916 | 13017.813 | NM_00277E | 642.906   | 1048.453  |
| NM_00146E | 3051.859  | 3055.594  | NM_00196E | 551.179   | 373.704   | AK023398  | 2724.076  | 3736.276  |
| NM_00407E | 1782.327  | 1519.872  | NM_00411E | 3254.178  | 2843.661  | NM_001907 | 518.525   | 461.956   |
| AF068286  | 744.696   | 442.25    | AK024508  | 4462.156  | 3383.192  | NM_015711 | 66602.469 | 56208.953 |
| AB040957  | 2793.263  | 2334.06   | AK027213  | 4500.234  | 3025.879  | NM_00005C | 785.512   | 738.044   |
| NM_00689C | 663.118   | 461.992   | AL096749  | 14937.499 | 17305.197 | NM_000481 | 970.132   | 1260.448  |
| NM_003110 | 3658.871  | 3270.466  | AK023620  | 4057.56   | 4794.25   | AK025681  | 2819.226  | 3232.766  |
| NM_00361E | 2428.735  | 1938.967  | AF086189  | 4619.48   | 5897.317  | NM_01490E | 5388.068  | 4102.906  |
| NM_01323C | 2284.622  | 2182.547  | AL050055  | 5499.43   | 6678.956  | NM_012137 | 2752.007  | 2742.132  |
| X72308    | 2519.971  | 2178.361  | NM_00500E | 16937.777 | 19463.584 | NM_00448E | 19511.023 | 18601.258 |
| NM_00540E | 671.929   | 663.407   | NM_01459E | 7183.895  | 7636.027  | NM_001281 | 3012.06   | 2017.412  |
| BC008376  | 12784.871 | 13563.834 | NM_00670E | 17712.633 | 16927.301 | NM_003981 | 17010.932 | 15226.424 |
| AB041269  | 1778.309  | 2258.087  | NM_004037 | 2385.14   | 2291.18   | AB014522  | 11682.717 | 6178.399  |
| AK024908  | 6264.461  | 7839.786  | NM_00511E | 1753.568  | 1961.53   | NM_01487E | 6799.241  | 4312.289  |
| AK025211  | 2686.103  | 3964.544  | NM_00276E | 4966.261  | 5000.467  | AB033023  | 11212.861 | 6021.489  |
| U06715    | 1782.748  | 1865.226  | AJ404857  | 677.457   | 841.256   | AF116238  | 3828.418  | 4409.734  |
| NM_00266E | 1355.907  | 1390.057  | NM_00078E | 18325.463 | 18815.891 | NM_00698E | 907.23    | 870.379   |
| NM_004377 | 5721.501  | 5072.274  | AF254088  | 2670.039  | 3007.363  | AB033085  | 3024.032  | 2848.889  |
| AF263613  | 3796.202  | 4326.18   | NM_00142C | 1241.859  | 1259.918  | AF024703  | 16206.729 | 18075.219 |
| NM_01775C | 2511.07   | 1865.317  | NM_00024E | 1558.151  | 1607.155  | NM_016531 | 2260.803  | 2606.029  |
| AK026196  | 1975.742  | 2098.445  | AB031046  | 1678.154  | 2015.93   | NM_00359E | 10995.739 | 12115.768 |
| NM_01334E | 1987.661  | 1773.231  | NM_00244E | 25359.061 | 25629.631 | NM_01438E | 28151.07  | 32169.486 |
| NM_004977 | 6101.188  | 5539.435  | AK025388  | 1642.39   | 1411.474  | NM_000244 | 3189.826  | 3598.459  |
| NM_00488E | 16315.232 | 19358.025 | NM_006147 | 961.619   | 510.348   | NM_01428E | 2602.81   | 2445.694  |
| NM_01228E | 59103.34  | 56041.605 | AB006631  | 1228.805  | 1046.517  | AF026816  | 19169.551 | 18021.416 |
| U93051    | 19994.373 | 23153.594 | AF291181  | 1261.914  | 855.611   | NM_00471E | 3770.34   | 2872.114  |
| NM_01754C | 1600.605  | 1711.394  | NM_005741 | 2903.816  | 2242.653  | NM_01855E | 2110.503  | 1572.62   |
| NM_00675E | 8155.375  | 5158.576  | NM_000964 | 3075.135  | 2049.566  | NM_004704 | 3693.727  | 2770.219  |
| NM_005881 | 1664.94   | 1404.358  | NM_01326E | 4923.585  | 4081.765  | NM_00545E | 5591.815  | 4750.481  |
| NM_005794 | 332.542   | 751.48    | AL137407  | 3017.225  | 3808.401  | NM_01463E | 3416.429  | 1438.622  |
| L40519    | 1851.895  | 1235.236  | NM_01817E | 15474.238 | 16469.232 | NM_00197C | 31580.896 | 15212.524 |
| NM_004204 | 2444.543  | 2518.587  | AK025204  | 1216.361  | 1169.074  | NM_00681C | 14904.441 | 7448.317  |
| AK002181  | 1605.926  | 1732.012  | AK027256  | 376.986   | 774.54    | NM_00411E | 4859.386  | 2217.996  |
| NM_001641 | 21464.789 | 14260.856 | AF143330  | 1700.326  | 1745.203  | AK024508  | 5304.593  | 2249.517  |
| AK025769  | 4606.101  | 4220.746  | AK025178  | 3157.635  | 2918.137  | AL096749  | 11700.757 | 12595.117 |
| AW945166  | 1162.532  | 980.972   | AF147359  | 976.525   | 1004.299  | AK023620  | 4497.637  | 4457.307  |
| NM_00523E | 3738.24   | 2866.02   | NM_01483E | 11185.197 | 12369.719 | AF086189  | 5182.663  | 5484.938  |
| NM_006384 | 11233.729 | 7960.18   | AK001822  | 5366.727  | 5161.213  | AL050055  | 4724.544  | 5270.409  |
| NM_01422E | 47980.598 | 64264.922 | AK026969  | 2405.481  | 2562.28   | NM_00500E | 13846.207 | 13710.324 |
| NM_00625E | 7590.012  | 9586.186  | AF086287  | 2529.673  | 2190.601  | NM_01459E | 6304.886  | 6903.813  |
| NM_00284E | 3124.78   | 11012.403 | AF086409  | 1225.467  | 883.99    | NM_00670E | 15558.357 | 16387.58  |
| AF052693  | 8042.998  | 8768.485  | AK024268  | 3420.113  | 2932.608  | NM_004037 | 2298.709  | 2331.433  |
| NM_00112E | 23707.994 | 30266.125 | AF086295  | 1825.286  | 1603.877  | NM_00511E | 2987.97   | 2939.051  |
| L09100    | 4291.424  | 4937.566  | AF086344  | 5744.168  | 4763.034  | NM_00276E | 4595.256  | 5835.651  |
| NM_00547E | 2871.578  | 3516.334  | AF086424  | 1423.038  | 1327.67   | AJ404857  | 980.443   | 972.143   |

|           |           |           |           |           |           |           |           |           |
|-----------|-----------|-----------|-----------|-----------|-----------|-----------|-----------|-----------|
| NM_004313 | 621.075   | 862.583   | NM_018087 | 4060.008  | 3511.238  | NM_000788 | 17494.961 | 17864.998 |
| NM_013435 | 1543.443  | 1739.381  | AL360260  | 1048.193  | 788.159   | AF254088  | 2336.549  | 2491.792  |
| NM_000132 | 11532.481 | 10188.727 | AL137366  | 1494.201  | 1603.694  | NM_001420 | 1037.694  | 645.613   |
| NM_001727 | 6947.29   | 5739.471  | BC031635  | 1144.585  | 1057.792  | NM_000248 | 1156.324  | 1315.174  |
| NM_004076 | 3493.624  | 3224.721  | AF085916  | 598.534   | 496.326   | AB031046  | 2166.641  | 3027.082  |
| NM_007123 | 58498.734 | 57162.691 | AL359598  | 980.937   | 1021.475  | NM_002448 | 17884.674 | 25192.813 |
| BG717460  | 6697.385  | 8241.299  | AF085980  | 959.232   | 1144.264  | AK025388  | 1271.189  | 719.66    |
| AA778392  | 13154.796 | 12819.147 | AF085927  | 2224.223  | 2053.216  | AB006631  | 1042.755  | 607.227   |
| AI478178  | 3191.107  | 2715.276  | AF085954  | 4892.055  | 5832.764  | NM_005741 | 2060.343  | 865.863   |
| AA101279  | 992.376   | 1110.608  | AL137337  | 1289.503  | 1205.609  | NM_000964 | 2712.848  | 891.725   |
| M19154    | 4241.036  | 2747.212  | AL161969  | 1034.183  | 1051.203  | NM_013263 | 5767.239  | 6909.876  |
| AA137031  | 2571.133  | 1826.964  | AL442095  | 3835.887  | 3385.998  | AL137407  | 2572.595  | 2744.983  |
| AA292226  | 9903.541  | 6129.698  | AL137378  | 2120.763  | 1834.221  | NM_018178 | 15118.654 | 17575.217 |
| NM_000500 | 2654.937  | 2501.933  | AL137609  | 22047.439 | 24044.947 | AK025204  | 1334.067  | 1121.72   |
| J04449    | 1227.073  | 686.167   | AL353946  | 4968.261  | 5027.209  | AF143330  | 1401.53   | 1279.324  |
| BC007031  | 7416.817  | 8847.618  | X69081    | 5775.888  | 5824.719  | AK025178  | 2543.901  | 3163.204  |
| AF129756  | 17081.023 | 21218.383 | NM_005714 | 3402.596  | 3399.177  | AF147359  | 728.321   | 893.774   |
| NM_002957 | 17827.889 | 24060.123 | AL359931  | 7128.667  | 5445.76   | NM_014835 | 7961.123  | 10009.372 |
| BC036369  | 2983.311  | 3922.976  | AK000954  | 2553.563  | 1893.804  | AK001822  | 5526.436  | 5066.401  |
| X12492    | 20767.416 | 27150.295 | AK025800  | 3885.205  | 2986.124  | AK026969  | 2027.124  | 2387.248  |
| X72308    | 5941.363  | 6759.851  | AK022333  | 1206.701  | 951.359   | AF086287  | 2643.831  | 1796.897  |
| NM_005408 | 1118.914  | 1427.925  | AK023294  | 806.812   | 817.452   | AF086356  | 326.465   | 390.544   |
| X87895    | 796.038   | 2236.984  | AF095854  | 1610.167  | 1854.842  | AK024268  | 3334.65   | 2782.605  |
| AB041269  | 2053.778  | 2612.52   | NM_014162 | 935.553   | 943.101   | AF086295  | 1239.797  | 860.247   |
| AK024908  | 5675.233  | 5366.736  | AF159093  | 4910.017  | 4992.781  | AF086344  | 5419.987  | 3483.092  |
| NM_018270 | 10033.289 | 8082.031  | AF113679  | 959.007   | 966.281   | AF086424  | 943.912   | 392.217   |
| AF230877  | 21525.617 | 29048.902 | AK021997  | 3603.588  | 3711.569  | AL110130  | 609.892   | 427.141   |
| NM_017668 | 6937.777  | 7579.271  | AK022125  | 1216.89   | 1185.44   | AL360260  | 902.654   | 1173.98   |
| AB033049  | 47714.695 | 48028.91  | AK022244  | 5713.97   | 5442.585  | AK023647  | 634.824   | 936.205   |
| NM_000406 | 626.925   | 596.49    | AK022381  | 6382.647  | 6038.172  | BC031635  | 1162.826  | 857.41    |
| NM_005682 | 2252.533  | 1862.427  | AK022012  | 1284.517  | 1120.313  | AL359598  | 1196.442  | 1135.041  |
| NM_002926 | 2117.764  | 1454.418  | AK022149  | 775.135   | 675.954   | AF085980  | 1064.167  | 977.52    |
| NM_000233 | 650.573   | 391.281   | AK022286  | 2588.02   | 2709.314  | AF085927  | 1730.668  | 1701.149  |
| NM_018697 | 1608.039  | 1262.778  | AK022411  | 393.758   | 893.402   | AF085954  | 2351.021  | 3177.701  |
| NM_014030 | 26147.145 | 19123.396 | AK022613  | 6381.539  | 5485.898  | AL161969  | 1058.057  | 941.247   |
| NM_004224 | 3479.175  | 3269.842  | AL359557  | 2496.196  | 1848.769  | AL442095  | 2692.025  | 2712.947  |
| NM_000254 | 10913.912 | 13373.632 | AK027257  | 401.176   | 446.132   | AL137378  | 790.374   | 1104.025  |
| Z21967    | 7238.111  | 9776.116  | AK024143  | 538.564   | 573.828   | AL137609  | 7903.607  | 6071.93   |
| NM_003738 | 990.61    | 1083.303  | NM_014367 | 2038.865  | 2355.295  | AL353946  | 2412.329  | 2345.996  |
| NM_016185 | 28999.146 | 41255.852 | AK024901  | 375.19    | 327.028   | X69081    | 4415.877  | 7446.015  |
| NM_012110 | 6884.375  | 8605.224  | NM_019073 | 372.132   | 497.053   | NM_005714 | 1725.477  | 1514.787  |
| NM_005461 | 1480.57   | 2025.241  | AK025835  | 851.799   | 873.983   | AL359931  | 4903.929  | 3080.158  |
| NM_013348 | 4144.841  | 5219.288  | NM_002365 | 3184.146  | 2956.508  | AK000954  | 2789.983  | 1474.698  |
| NM_004977 | 9959.579  | 12897.051 | AF161441  | 4362.721  | 4430.425  | AK025800  | 4876.469  | 8253.056  |
| NM_002251 | 1602.792  | 2975.382  | AL137474  | 3440.501  | 2873.884  | AK022333  | 504.936   | 1234.37   |
| NM_012283 | 64722.512 | 53409.117 | AK021572  | 1257.598  | 1232.402  | AK023294  | 1184.5    | 795.447   |
| AB020706  | 6836.41   | 5387.779  | AK026757  | 1351.887  | 773.724   | AF095854  | 1643.202  | 1494.894  |
| NM_002869 | 5523.028  | 4570.864  | AF119908  | 2760.031  | 3655.752  | NM_014162 | 1498.793  | 1276.338  |
| NM_004161 | 16880.566 | 10474.244 | U50539    | 1032.953  | 913.002   | AF159093  | 4131.338  | 4255.829  |
| NM_001295 | 3383.787  | 2198.929  | AK000653  | 11060.785 | 11078.18  | AF113679  | 650.56    | 571.32    |
| NM_005161 | 2835.571  | 2332.705  | AK000908  | 1417.682  | 1388.682  | AK021997  | 1574.183  | 1712.185  |
| AB037749  | 787.466   | 518.617   | AK000993  | 751.674   | 637.934   | AK022125  | 396.724   | 528.196   |
| NM_020347 | 1280.635  | 855.141   | Z70696    | 1732.21   | 1570.737  | AK022244  | 3246.658  | 3261.103  |

|           |           |           |           |           |           |           |           |           |
|-----------|-----------|-----------|-----------|-----------|-----------|-----------|-----------|-----------|
| NM_001462 | 2108.418  | 1659.124  | NM_005792 | 6573.405  | 6009.744  | AK022381  | 3371.984  | 3585.271  |
| NM_004072 | 1260.62   | 1861.938  | AF048847  | 5378.042  | 5252.606  | AK022012  | 573.908   | 515.651   |
| AF068286  | 1232.916  | 1283.608  | L37718    | 67499.813 | 57541.691 | AK022149  | 403.095   | 737.566   |
| AB040957  | 4513.352  | 4139.519  | AL137717  | 3611.179  | 2793.151  | AK022286  | 1744.997  | 1470.637  |
| NM_006890 | 923.448   | 1108.644  | AF035297  | 1446.631  | 1571.009  | AK024582  | 876.603   | 2046.598  |
| NM_003110 | 4416.685  | 5645.329  | NM_014039 | 3316.136  | 2683.614  | AK024143  | 415.441   | 1164.496  |
| NM_003612 | 2118.944  | 3006.915  | S67154    | 5237.61   | 3241.704  | AK022099  | 466.154   | 889.447   |
| NM_013230 | 1450.44   | 1700.131  | AK026181  | 5700.946  | 4520.399  | NM_014367 | 2400.19   | 2743.954  |
| NM_006256 | 6773.617  | 6816.787  | AK021451  | 1617.527  | 1402.625  | AK025835  | 626.342   | 1024.936  |
| NM_002837 | 4203.486  | 3565.686  | AK001971  | 719.15    | 862.547   | NM_002365 | 3328.398  | 3061.349  |
| U06715    | 1826.485  | 1513.597  | AF086468  | 2207.45   | 2142.716  | AF161441  | 2925.32   | 3042.784  |
| NM_002662 | 1211.394  | 996.582   | AK027239  | 2131.918  | 1957.288  | AL137474  | 1897.414  | 914.307   |
| NM_004377 | 5780.447  | 4804.966  | AF005082  | 27826.461 | 26606.459 | AK023484  | 375.354   | 842.083   |
| AB037815  | 23488.041 | 17652.285 | AL117595  | 3250.619  | 2993.483  | AK021572  | 2034.578  | 4129.038  |
| NM_003645 | 11041.17  | 9571.817  | AB028988  | 20899.717 | 17251.021 | AK026757  | 949.817   | 1381.022  |
| AF263613  | 3469.185  | 2631.716  | AK023072  | 2383.542  | 1672.176  | AF119908  | 2049.833  | 2316.504  |
| NM_017750 | 3201.488  | 3601.932  | AF086105  | 5510.265  | 3842.875  | U50539    | 426.376   | 434.447   |
| AK026196  | 2616.912  | 3595.209  | Y10697    | 1425.403  | 1405.233  | AK000653  | 11412.026 | 10871.634 |
| NM_016444 | 1587.365  | 2336.977  | AY007166  | 12411.453 | 8825.297  | AK000908  | 1230.693  | 1031.21   |
| NM_017839 | 5876.944  | 7289.139  | NM_004937 | 2879.118  | 2359.588  | AK000993  | 770.59    | 485.629   |
| AL137718  | 1798.471  | 2398.048  | CY3Cy5    | 9241.235  | 223.755   | Z70696    | 1101.97   | 1914.193  |
| NM_003460 | 13935.394 | 16248.316 | AI298884  | 28295.729 | 39414.668 | NM_005792 | 7682.104  | 7034.124  |
| U94354    | 1551.029  | 1974.34   | D87845    | 1792.508  | 2567.683  | AF048847  | 4278.263  | 3078.614  |
| NM_002904 | 30521.957 | 37583.957 | X53279    | 546.717   | 736.146   | AL137717  | 3609.939  | 1503.681  |
| NM_014189 | 6053.412  | 6155.752  | M83254    | 1721.417  | 2397.222  | NM_014039 | 4203.686  | 7015.147  |
| NM_005686 | 5328.271  | 3933.503  | S56770    | 1023.087  | 1167.59   | S67154    | 6201.782  | 9959.503  |
| NM_006767 | 931.202   | 826.63    | H58872    | 14662.909 | 17025.775 | AK026181  | 2395.269  | 4155.968  |
| NM_017540 | 1979.272  | 2219.904  | J02938    | 496.956   | 861.658   | AK021451  | 943.668   | 1561.931  |
| NM_006755 | 8785.099  | 4865.543  | J04543    | 5751.361  | 5543.675  | AK001971  | 313.743   | 751.68    |
| NM_005881 | 1824.351  | 1222.764  | AA456295  | 1057.623  | 883.66    | AF086468  | 1609.255  | 2056.335  |
| L40519    | 2021.488  | 1428.515  | BE733577  | 2848.559  | 2873.16   | AK027239  | 1824.215  | 2059.731  |
| NM_004204 | 3166.661  | 2432.099  | AI817942  | 783.483   | 718.043   | AF005082  | 17214.711 | 17888.248 |
| AK002181  | 1928.641  | 2556.635  | BG762340  | 2381.989  | 1922.282  | AL117595  | 1907.979  | 2102.086  |
| BC015750  | 65662.203 | 54561.426 | AA009484  | 947.866   | 774.92    | AB028988  | 16667.014 | 15858.641 |
| AW945166  | 2100.723  | 2619.215  | NM_005456 | 1674.268  | 1511.158  | AK023072  | 2443.031  | 2166.29   |
| NM_005236 | 4565.281  | 6179.279  | NM_016453 | 1846.079  | 1555.105  | AF086105  | 3624.598  | 3546.789  |
| NM_006384 | 11581.397 | 13724.301 | NM_017701 | 2374.209  | 2093.297  | Y10697    | 1321.657  | 534.734   |
| NM_002589 | 8690.729  | 9669.817  | NM_014226 | 2730.368  | 2236.293  | NM_004937 | 2697.322  | 5061.934  |
| AF064846  | 1853.336  | 2279.694  | AF142567  | 1432.223  | 1186.787  | CY3Cy5    | 14074.94  | 1422.997  |
| AL110227  | 2738.194  | 3503.777  | NM_005621 | 753.101   | 785.49    | AI298884  | 10199.767 | 14156.369 |
| NM_001400 | 12496.818 | 13939.714 | NM_006202 | 32204.246 | 29138.297 | D87845    | 668.645   | 644.24    |
| AB033281  | 5068.338  | 4841.057  | NM_017410 | 12754.709 | 9055.22   | M83254    | 1047.902  | 918.218   |
| NM_002882 | 27361.594 | 34157.156 | X99680    | 5034.89   | 3949.833  | S56770    | 527.889   | 593.589   |
| AB011161  | 2581.92   | 2615.233  | NM_001448 | 2453.369  | 2131.29   | H58872    | 6863.831  | 7538.843  |
| NM_000827 | 924.928   | 783.115   | NM_016072 | 4537.109  | 3908.972  | J04543    | 4391.324  | 4585.438  |
| NM_002944 | 2912.728  | 2476.59   | AK026349  | 5609.585  | 6434.968  | S60415    | 238.3     | 236.355   |
| AF327354  | 2481.885  | 2395.048  | NM_014733 | 1320.558  | 1413.346  | AA456295  | 499.682   | 565.359   |
| NM_006259 | 526.794   | 549.667   | D12485    | 1603.666  | 1606.089  | BE733577  | 1384.441  | 1486.84   |
| AB014513  | 14026.051 | 10822.555 | S78774    | 3140.106  | 2213.964  | BG762340  | 1275.245  | 1393.558  |
| NM_004747 | 2295.683  | 1787.531  | NM_004922 | 5005.782  | 3467.139  | NM_005456 | 886.647   | 781.433   |
| NM_002341 | 11285.343 | 7410.992  | NM_002871 | 749.589   | 417.554   | SR9       | 14906.051 | 2506.963  |
| AL137651  | 5644.25   | 5872.629  | BE873653  | 28979.842 | 23414.357 | CY3Cy5    | 13523.45  | 642.823   |
| NM_018945 | 6200.624  | 8412.97   | NM_006987 | 420.8     | 270.22    | NM_016453 | 1343.042  | 1861.314  |

|           |           |           |           |           |           |           |           |           |
|-----------|-----------|-----------|-----------|-----------|-----------|-----------|-----------|-----------|
| AB029018  | 3585.634  | 3990.51   | NM_001282 | 2877.714  | 1616.891  | NM_017701 | 457.283   | 639.905   |
| NM_006650 | 2469.194  | 3192.394  | NM_016830 | 1036.166  | 826.567   | NM_014226 | 1327.357  | 1103.679  |
| NM_006648 | 1885.727  | 2439.978  | U44105    | 724.944   | 427.475   | AF142567  | 446.074   | 566.285   |
| NM_000868 | 1183.36   | 1471.663  | NM_016103 | 1501.641  | 1500.632  | NM_006202 | 16516.613 | 19236.09  |
| NM_004711 | 5411.138  | 7351.905  | AL133654  | 2515.893  | 1944.7    | NM_017410 | 6194.996  | 6634.986  |
| AF161361  | 987.943   | 1308.378  | AL137262  | 842.524   | 689.378   | X99680    | 1734.927  | 1715.467  |
| NM_006463 | 11039.331 | 11504.964 | NM_002860 | 3227.281  | 3061.734  | NM_001448 | 1308.062  | 1287.866  |
| NM_001444 | 9952.23   | 10679.829 | NM_006169 | 1611.607  | 1580.197  | NM_016072 | 2775.711  | 2918.519  |
| AK027208  | 1246.425  | 980.625   | NM_001218 | 601.939   | 358.406   | AK026349  | 4032.481  | 4875.296  |
| NM_016521 | 10181.204 | 11868.292 | NM_014183 | 12583.34  | 7629.281  | NM_014733 | 991.113   | 881.681   |
| X98494    | 13298.536 | 11620.742 | AB046780  | 12932.944 | 11135.178 | D12485    | 1081.209  | 1042.971  |
| NM_001240 | 5286.41   | 3128.329  | NM_018353 | 4596.744  | 3123.474  | AK023204  | 3771.751  | 3963.671  |
| NM_002709 | 12739.519 | 9774.783  | NM_003560 | 28528.314 | 26590.576 | NM_003448 | 832.898   | 947.351   |
| NM_001098 | 4088.868  | 4567.103  | NM_014403 | 2079.664  | 1940.736  | NM_002478 | 1132.922  | 1339.371  |
| NM_006823 | 3376.167  | 3677.036  | AL050100  | 1901.113  | 1542.146  | D38163    | 437.589   | 451.498   |
| NM_007031 | 1564.163  | 902.233   | NM_020139 | 722.314   | 863.95    | D28449    | 953.104   | 951.203   |
| NM_002657 | 2938.266  | 2542.076  | AL080207  | 605.491   | 510.114   | S78774    | 2513.588  | 3347.722  |
| NM_001350 | 20051.141 | 13519.157 | U53531    | 664.687   | 823.438   | NM_004922 | 4107.176  | 5026.332  |
| NM_014808 | 3308.736  | 4722.72   | NM_004925 | 4299.126  | 3918.99   | NM_002871 | 402.809   | 238.052   |
| NM_016074 | 20103.775 | 25024.174 | AB051826  | 1203.825  | 1307.714  | BE873653  | 20331.033 | 21881.494 |
| NM_003921 | 3828.435  | 4470.37   | M20697    | 712.51    | 878.8     | NM_006987 | 459.072   | 617.457   |
| NM_004208 | 25952.939 | 39371.898 | NM_015046 | 2668.655  | 2883.618  | NM_001282 | 1919.732  | 1672.779  |
| NM_001843 | 1484.294  | 2011.828  | NM_002014 | 8124.109  | 11699.865 | NM_016830 | 760.685   | 601.328   |
| NM_013266 | 1134.778  | 1206.775  | NM_006927 | 13394.131 | 11247.669 | NM_016103 | 742.958   | 922.467   |
| NM_000418 | 1209.06   | 1446.195  | NM_006928 | 1752.191  | 1806.205  | AL133654  | 1902.078  | 2013.281  |
| NM_017768 | 4156.305  | 5961.355  | NM_000067 | 1206.085  | 2080.989  | AL137262  | 634.237   | 477.85    |
| NM_002776 | 2650.612  | 3387.062  | AF237700  | 1020.399  | 903.452   | NM_020437 | 187.387   | 173.647   |
| AK023398  | 6210.286  | 6392.094  | D38163    | 305.279   | 311.373   | NM_018643 | 988.85    | 1134.473  |
| NM_001907 | 575.794   | 954.426   | D28449    | 1002.632  | 812.881   | M30142    | 2032.242  | 2080.363  |
| NM_015711 | 74335.602 | 60379.289 | NM_003281 | 545.876   | 504.796   | NM_005018 | 688.496   | 288.2     |
| NM_000050 | 1600.323  | 1297.766  | AA460480  | 426.947   | 404.14    | NM_013378 | 3399.89   | 3100.236  |
| NM_000481 | 1689.428  | 1374.904  | AI298884  | 21293.295 | 21749.418 | NM_001088 | 661.331   | 456.43    |
| AK025681  | 3065.539  | 2646.464  | D87845    | 876.349   | 948.072   | NM_002860 | 1916.815  | 2261.653  |
| NM_014908 | 7189.48   | 5742.433  | M83254    | 1326.207  | 1214.605  | NM_006169 | 1372.871  | 1659.341  |
| NM_012137 | 6871.015  | 4613.89   | S56770    | 810.659   | 701.502   | AB046780  | 10391.229 | 10131.563 |
| NM_004483 | 28957.834 | 19721.781 | H58872    | 10246.411 | 9777.49   | NM_018353 | 4183.549  | 3338.629  |
| NM_001513 | 69069.656 | 52951.605 | J02938    | 419.935   | 624.846   | NM_001801 | 671.434   | 362.98    |
| NM_001281 | 5580.536  | 7119.022  | J04543    | 6152.619  | 5873.069  | NM_003560 | 19867.264 | 23334.504 |
| NM_016835 | 1532.858  | 1997.974  | S60415    | 585.163   | 613.971   | NM_014403 | 1067.162  | 1075.142  |
| NM_003981 | 19471.834 | 26286.693 | AA456295  | 971.283   | 1115.281  | AL050100  | 2529.647  | 1798.255  |
| AB014522  | 16976.824 | 20997.645 | BE733577  | 3343.957  | 4066.359  | NM_020139 | 463.865   | 311.483   |
| NM_014875 | 9874.397  | 12750.042 | AI817942  | 739.187   | 943.312   | NM_000748 | 5365.3    | 6013.241  |
| AB033023  | 13644.897 | 17494.158 | BG762340  | 2835.764  | 2699.205  | NM_000048 | 2758.635  | 3093.974  |
| BC027895  | 1374.316  | 1452.088  | AA009484  | 567.926   | 735.822   | U53531    | 343.681   | 479.318   |
| AF116238  | 6098.596  | 7068.175  | NM_005456 | 2011.848  | 2098.729  | NM_004925 | 3459.9    | 3604.634  |
| NM_006982 | 1770.303  | 1641.24   | NM_006534 | 5242.99   | 5358.719  | NM_003234 | 6746.364  | 6267.349  |
| AB033085  | 4734.672  | 3504.12   | M30142    | 1239.402  | 1315.92   | NM_004858 | 790.886   | 483.517   |
| AF024703  | 27624.268 | 32097.477 | NM_005018 | 411.554   | 552.103   | AB051826  | 1106.471  | 1324.419  |
| NM_016531 | 2777.652  | 2753.577  | NM_013378 | 3123.53   | 3028.164  | M20697    | 582.793   | 727.91    |
| NM_003593 | 15589.372 | 15932.472 | NM_001088 | 667.084   | 717.372   | NM_015046 | 2015.932  | 1774.539  |
| NM_014383 | 33372.047 | 34637.82  | NM_006110 | 653.783   | 643.947   | NM_002014 | 5119.002  | 6142.766  |
| NM_000244 | 3652.179  | 2842.211  | NM_016453 | 1221.365  | 1248.871  | NM_002538 | 5014.529  | 4685.622  |
| NM_014288 | 3029.155  | 1744.187  | NM_017701 | 843.828   | 756.081   | NM_016588 | 6352.812  | 6919.024  |

|           |           |           |           |           |           |           |           |           |
|-----------|-----------|-----------|-----------|-----------|-----------|-----------|-----------|-----------|
| AF026816  | 37512.141 | 29246.615 | NM_014226 | 1567.673  | 1397.915  | NM_006927 | 7874.502  | 7737.487  |
| NM_004719 | 5224.611  | 2902.058  | AF142567  | 899.372   | 688.175   | NM_006928 | 348.142   | 388.443   |
| NM_018553 | 2968.03   | 2006.679  | NM_006202 | 20837.645 | 22156.754 | AF237700  | 678.022   | 603.943   |
| NM_004704 | 6629.996  | 3762.676  | NM_017410 | 15953.865 | 18465.893 | D28449    | 926.932   | 541.443   |
| NM_005455 | 8629.724  | 6803.683  | X99680    | 8161.749  | 8776.395  | AA460480  | 350.925   | 284.836   |
| NM_014633 | 5551.522  | 6038.158  | NM_001448 | 2929.625  | 3348.356  | AI298884  | 17253.912 | 17037.85  |
| NM_001970 | 42240.836 | 49974.285 | NM_016072 | 4765.003  | 5708.585  | D87845    | 257.862   | 465.311   |
| AL049674  | 1017.038  | 1167.546  | AK026349  | 5730.575  | 7016.61   | X53279    | 245.468   | 224.593   |
| NM_001969 | 1326.38   | 1104.779  | NM_014733 | 1388.381  | 1338.98   | M83254    | 786.053   | 1047.525  |
| NM_004116 | 6185.454  | 8083.666  | D12485    | 1710.416  | 1996.749  | S56770    | 238.47    | 332.094   |
| AK024508  | 7256.91   | 8995.89   | AK023204  | 5254.666  | 5228.22   | H58872    | 5468.343  | 4825.461  |
| AK027213  | 5824.393  | 5390.465  | NM_003449 | 7031.359  | 10595.271 | J04543    | 4340.064  | 4048.29   |
| AL096749  | 21236.201 | 25021.07  | NM_003234 | 7842.52   | 5807.08   | AA456295  | 559.363   | 512.82    |
| AK023620  | 5426.786  | 5497.206  | NM_004858 | 1108.752  | 743.191   | BE733577  | 1488.554  | 1490.276  |
| AF086189  | 5115.253  | 6020.824  | S78774    | 3256.272  | 2944.497  | AI817942  | 747.631   | 403.87    |
| AL050055  | 7978.916  | 7705.304  | NM_004922 | 5124.135  | 4111.027  | BG762340  | 1417.141  | 1172.356  |
| NM_005009 | 19605.994 | 19488.109 | NM_002871 | 511.126   | 619.156   | NM_005456 | 804.322   | 724.937   |
| NM_014596 | 8516.356  | 8568.739  | NM_006987 | 894.868   | 576.799   | M30142    | 1451.876  | 1368.692  |
| NM_006703 | 19075.582 | 18781.98  | NM_001282 | 3269.17   | 2561.764  | NM_013378 | 2416.101  | 2613.412  |
| NM_004037 | 2700.294  | 2854.714  | NM_016830 | 1520.552  | 1926.97   | NM_001085 | 502.053   | 505.903   |
| NM_005116 | 3260.5    | 2714.285  | U44105    | 507.81    | 756.192   | NM_006110 | 188.196   | 325.461   |
| NM_002766 | 5579.345  | 4060.788  | NM_016103 | 2106.096  | 1979.452  | NM_016453 | 929.972   | 987.268   |
| NM_000788 | 19984.07  | 16111.872 | AL133654  | 3163.496  | 3519.15   | NM_017701 | 624.666   | 609.209   |
| AF254088  | 2597.927  | 1898.773  | AL137262  | 1181.772  | 1107.177  | NM_014226 | 730.315   | 704.169   |
| NM_001420 | 2220.577  | 1532.792  | NM_006927 | 7839.625  | 6578.354  | AF142567  | 358.529   | 346.584   |
| NM_000248 | 3114.854  | 2548.166  | NM_014601 | 1436.649  | 1307.084  | NM_006202 | 13585.434 | 13669.704 |
| AB031046  | 4224.296  | 3866.029  | NM_017761 | 10450.275 | 8395.666  | NM_017410 | 5464.95   | 5921.075  |
| NM_002449 | 42014.723 | 48143.352 | AF237700  | 1016.32   | 394.176   | X99680    | 2024.014  | 2025.638  |
| AK025388  | 3936.54   | 4851.961  | NM_002860 | 3481.278  | 3275.883  | NM_001448 | 1711.895  | 1654.772  |
| NM_006147 | 1383.948  | 1728.743  | NM_006169 | 2482.708  | 1913.717  | NM_016072 | 3885.235  | 3382.951  |
| AB006631  | 2294.206  | 3262.072  | NM_001218 | 503.447   | 391.142   | AK026349  | 4670.756  | 5321.433  |
| AF291181  | 1676.593  | 1906.494  | NM_014183 | 11067.591 | 8579.977  | D12485    | 1197.282  | 1341.214  |
| NM_005741 | 4515.039  | 4754      | NM_018353 | 4428.371  | 4259.564  | AK023204  | 3537.161  | 2420.461  |
| NM_000964 | 3097.707  | 3443.654  | NM_001801 | 528.446   | 841.104   | NM_003449 | 764.82    | 612.315   |
| BF343886  | 1147.391  | 1293.353  | NM_003560 | 34004.98  | 43457.141 | NM_002478 | 918.439   | 579.692   |
| NM_013263 | 6241.692  | 5381.829  | NM_014403 | 2856.405  | 3586.572  | NM_003234 | 5287.392  | 4812.294  |
| AL137407  | 4199.025  | 4544.706  | AL050100  | 2560.516  | 2939.008  | NM_004858 | 1142.178  | 929.633   |
| NM_018178 | 16876.504 | 14144.252 | NM_020139 | 2683.831  | 3410.727  | S78774    | 2412.492  | 2179.315  |
| AK025204  | 1539.916  | 1167.677  | AL080207  | 639.006   | 719.988   | NM_003059 | 444.154   | 216.996   |
| AF143330  | 1766.159  | 1392.074  | NM_000748 | 16404.031 | 19553.947 | NM_004922 | 4211.598  | 3213.276  |
| AK025178  | 4695.109  | 3236.971  | NM_000048 | 4483.884  | 6004.848  | NM_002871 | 281.367   | 346.971   |
| AF147359  | 1650.356  | 1140.178  | NM_004925 | 5219.997  | 6400.399  | NM_001282 | 1819.576  | 1550.674  |
| NM_014835 | 19126     | 17224.135 | NM_005456 | 781.714   | 842.91    | NM_016830 | 799.26    | 725.189   |
| AK001822  | 8266.729  | 6716.356  | NM_006534 | 2724.241  | 2441.352  | NM_016103 | 801.075   | 899.615   |
| AK026969  | 2749.311  | 2288.409  | AB051826  | 1703.873  | 1886.643  | AL133654  | 1880.016  | 1250.822  |
| AF086287  | 3456.108  | 2539.322  | M20697    | 1124.276  | 1063.335  | AL137262  | 612.475   | 596.925   |
| AF086409  | 1609.119  | 1441.397  | NM_015046 | 3282.56   | 3682.153  | NM_018643 | 917.564   | 470.804   |
| AK024268  | 6128.37   | 7275.025  | NM_002014 | 7934.349  | 10382.657 | NM_006927 | 6877.701  | 6630.186  |
| AF086295  | 2547.876  | 3205.476  | AK026349  | 3200.06   | 3022.743  | NM_014601 | 1727.384  | 1719.024  |
| AF086344  | 10838.046 | 13616.725 | NM_014733 | 832.469   | 549.292   | NM_017761 | 10718.749 | 9546.881  |
| AF086424  | 2996.185  | 4106.495  | D12485    | 530.462   | 616.91    | NM_006928 | 655.253   | 524.925   |
| AL110130  | 1453.671  | 1731.404  | AK023204  | 2876.366  | 2113.353  | AF237700  | 813.688   | 551.686   |
| AF052116  | 970.328   | 1061.432  | NM_003449 | 2456.304  | 1654.818  | NM_002860 | 2583.492  | 2374.713  |

|           |           |           |           |           |           |           |           |          |
|-----------|-----------|-----------|-----------|-----------|-----------|-----------|-----------|----------|
| NM_018087 | 6118.033  | 8781.079  | NM_002478 | 1639.334  | 1419.414  | NM_006165 | 1408.391  | 1325.509 |
| AL360260  | 879.403   | 1099.61   | D28449    | 1383.651  | 1208.613  | NM_014183 | 4166.402  | 2775.641 |
| AK023647  | 962.829   | 1157.816  | NM_003281 | 950.735   | 1191.817  | NM_018353 | 4020.873  | 2665.246 |
| AL137366  | 1562.622  | 1270.051  | AA460480  | 583.157   | 527.403   | NM_001801 | 383.17    | 316.137  |
| BC031635  | 1584.197  | 1332.606  | AI298884  | 24228.84  | 31153.516 | NM_003560 | 25121.686 | 26754.98 |
| AL359598  | 1352.212  | 1324.187  | D87845    | 1391.347  | 1552.82   | NM_014403 | 1847.731  | 1549.084 |
| AF085980  | 1131.017  | 927.716   | X53279    | 639.592   | 754.46    | AL050100  | 1955.229  | 2013.312 |
| AF085927  | 2143.343  | 1698.096  | M83254    | 1422.394  | 2195.392  | NM_020135 | 592.801   | 623.968  |
| AF085954  | 6131.339  | 6740.251  | S56770    | 928.793   | 1164.023  | U53531    | 618.081   | 445.95   |
| AL137337  | 1478.942  | 1114.377  | H58872    | 12414.149 | 12889.104 | NM_004925 | 2864.666  | 1607.11  |
| AL161969  | 2934.258  | 2022.401  | J04543    | 6043.238  | 6383.031  | NM_005456 | 904.097   | 992.933  |
| AL442095  | 7486.836  | 5893.371  | S60415    | 734.457   | 333.524   | NM_006534 | 3737.624  | 4737.702 |
| AL137378  | 3278.775  | 2931.614  | AA456295  | 972.859   | 1120.703  | AB051826  | 1575.021  | 1648.782 |
| AL137609  | 35580.934 | 27665.65  | BE733577  | 3447.538  | 4376.859  | M20697    | 793.569   | 889.425  |
| AL353946  | 7053.53   | 4822.332  | AA009484  | 508.464   | 631.258   | NM_015046 | 2846.859  | 2616.832 |
| X69081    | 10888.718 | 11759.357 | NM_018643 | 719.305   | 837.786   | NM_002014 | 5299.524  | 5732.58  |
| NM_005714 | 9833.849  | 11779.214 | M30142    | 2876.219  | 1872.75   | AK026349  | 4659.462  | 5118.964 |
| AL359931  | 14801.049 | 16624.135 | NM_005018 | 929.218   | 1109.056  | NM_014733 | 898.192   | 719.557  |
| AK000954  | 4083.711  | 5566.995  | NM_013378 | 4549.207  | 4769.663  | D12485    | 963.144   | 1088.124 |
| AF086099  | 856.491   | 946.197   | NM_001085 | 923.847   | 1063.206  | AK023204  | 3753.447  | 2856.655 |
| AK021922  | 582.02    | 593.72    | NM_006110 | 789.582   | 817.032   | NM_003445 | 1016.189  | 869.778  |
| AK025800  | 6393.973  | 8591.336  | NM_016453 | 2051.891  | 2177.06   | NM_002478 | 827.024   | 906.499  |
| AK022333  | 925.19    | 1078.435  | NM_017701 | 1174.919  | 1314.429  | D38163    | 230.584   | 385.343  |
| AK023294  | 1035.855  | 662.12    | NM_014226 | 2955.203  | 3393.804  | D28449    | 1106.465  | 934.853  |
| AF095854  | 2632.109  | 1658.133  | AF142567  | 1121.52   | 1651.254  | NM_003281 | 537.401   | 551.554  |
| NM_014162 | 2161.576  | 1316.574  | AY009398  | 244.689   | 670.219   | AA460480  | 281.034   | 431.312  |
| NM_014133 | 742.892   | 681.47    | X99680    | 8409.413  | 10183.873 | AI298884  | 12707.051 | 15731.16 |
| AF113689  | 727.371   | 652.404   | NM_001448 | 3385.661  | 3910.675  | D87845    | 626.227   | 685.644  |
| AF159093  | 5421.153  | 4876.992  | NM_016072 | 4767.848  | 4981.448  | X53279    | 152.465   | 279.113  |
| AF113679  | 2051.349  | 2300.037  | NM_000748 | 6693.385  | 5302.652  | M83254    | 1110.443  | 1345.693 |
| AK021997  | 5947.218  | 5200.396  | NM_000048 | 2061.351  | 1742.019  | S56770    | 903.026   | 735.128  |
| AK022125  | 2735.621  | 2506.747  | AF104032  | 14038.469 | 11957.123 | AI193606  | 513.478   | 338.642  |
| AK022244  | 11388.112 | 9700.468  | U53531    | 641.433   | 449.895   | H58872    | 7938.898  | 7214.651 |
| AK022381  | 10695.534 | 7311.362  | NM_004925 | 3096.268  | 2300.912  | J04543    | 5019.751  | 4137.761 |
| AK022012  | 2418.292  | 1770.291  | NM_003234 | 13963.772 | 11945.776 | AA456295  | 566.562   | 559.31   |
| AK022149  | 1146.216  | 985.262   | NM_004858 | 1743.589  | 1461.805  | BE733577  | 1706.598  | 1574.911 |
| AK022286  | 4260.91   | 4478.47   | S78774    | 5175.567  | 5482.258  | NM_018643 | 797.625   | 911.825  |
| AK022411  | 764.936   | 1106.885  | NM_004922 | 6936.469  | 7710.155  | M30142    | 1596.911  | 1683.784 |
| AK022613  | 15634.216 | 16661.412 | NM_002871 | 650.395   | 630.026   | NM_005018 | 315.401   | 416.662  |
| AK023843  | 1089.471  | 1398.686  | NM_006987 | 534.35    | 644.855   | NM_013378 | 2931.507  | 3039.086 |
| AL359557  | 2815.819  | 3884.638  | NM_016830 | 1811.874  | 1709.756  | NM_001085 | 569.068   | 526.948  |
| AK027257  | 967.563   | 1122.828  | U44105    | 1002.986  | 817.801   | NM_016453 | 1141.461  | 1007.204 |
| AK024582  | 1060.052  | 1909.91   | AL133654  | 3910.265  | 4013.018  | NM_017701 | 1064.852  | 825.853  |
| AK024143  | 634.506   | 775.323   | AL137262  | 1236.033  | 1217.483  | NM_014226 | 1523.362  | 1708.209 |
| NM_014367 | 2462.308  | 1888.172  | NM_020437 | 170.491   | 554.584   | AF142567  | 611.557   | 719.15   |
| AK025835  | 1595.795  | 1204.45   | NM_002014 | 5331.473  | 5338.987  | NM_005621 | 562.778   | 519.704  |
| NM_002365 | 5291.486  | 5313.438  | NM_002538 | 6277.566  | 4930.331  | NM_003391 | 973.393   | 771.348  |
| AF161441  | 7275.499  | 6261.335  | NM_016585 | 5664.658  | 5007.034  | NM_017410 | 7275.632  | 6960.024 |
| AL137474  | 7005.869  | 7745.71   | NM_003333 | 71055.047 | 54676.527 | X99680    | 3123.647  | 3368.276 |
| AL133023  | 1045.012  | 1183.449  | NM_002013 | 5451.218  | 4080.001  | NM_000748 | 7226.485  | 6925.025 |
| AK023484  | 715.451   | 638.792   | NM_006927 | 8205.4    | 6677.632  | NM_000048 | 3252.834  | 2742.436 |
| AK021572  | 2925.865  | 2924.339  | NM_014601 | 2567.441  | 2594.703  | U53531    | 438.3     | 410.977  |
| AK026757  | 1048.276  | 944.23    | NM_017761 | 12437.023 | 11535.588 | NM_004925 | 2686.919  | 2667.625 |



|           |           |           |           |           |           |           |           |           |
|-----------|-----------|-----------|-----------|-----------|-----------|-----------|-----------|-----------|
| AF119908  | 3793.677  | 3991.403  | NM_006928 | 490.155   | 715.029   | NM_003234 | 6838.136  | 7100.354  |
| U50539    | 1301.727  | 1469.042  | AF237700  | 856.54    | 686.604   | NM_004858 | 1177.828  | 1426.137  |
| AK000653  | 16666.289 | 16335.557 | NM_002860 | 5028.259  | 5363.509  | S78774    | 2722.051  | 4435.424  |
| AK000908  | 2356.371  | 2475.745  | NM_006169 | 4143.9    | 4265.782  | NM_004922 | 4040.192  | 4411.632  |
| AK000993  | 1266.484  | 1422.234  | NM_001218 | 594.532   | 795.203   | NM_002871 | 641.001   | 591.547   |
| Z70696    | 2931.412  | 3574.081  | NM_014183 | 12394.472 | 9579.507  | NM_016830 | 616.695   | 1005.353  |
| NM_005792 | 8065.926  | 10202.851 | NM_018353 | 5108.489  | 4778.384  | U44105    | 569.312   | 571.283   |
| AF048847  | 5526.681  | 6125.772  | NM_001801 | 594.649   | 705.582   | NM_016103 | 1487.216  | 1639.249  |
| L37718    | 71953.055 | 84171.516 | NM_003560 | 40745.359 | 45113.965 | AL133654  | 2086.971  | 2424.958  |
| AL137717  | 5180.328  | 6827.653  | NM_014403 | 3707.371  | 3719.967  | AL137262  | 759.547   | 792.503   |
| AF035297  | 2064.703  | 2444.834  | AL050100  | 2971.548  | 2751.253  | NM_002014 | 5920.606  | 6370.163  |
| NM_014038 | 3968.231  | 3790.379  | NM_020139 | 1389.696  | 1261.554  | NM_002538 | 5554.333  | 4819.953  |
| S67154    | 7148.781  | 9479.522  | AL080207  | 558.635   | 529.968   | NM_016588 | 8131.295  | 7891.568  |
| AK026181  | 4094.319  | 5913.469  | NM_017730 | 2495.911  | 1832.032  | NM_006927 | 5969.231  | 8250.031  |
| AK021451  | 2768.856  | 3002.273  | AB051826  | 2307.52   | 2408.44   | NM_014601 | 1835.93   | 1974.728  |
| AK001971  | 1176.331  | 1561.867  | M20697    | 1204.114  | 1095.252  | NM_017761 | 9364.115  | 9625.853  |
| AF086468  | 4046.55   | 4609.945  | NM_015046 | 3035.116  | 2941.163  | NM_006928 | 374.937   | 510.385   |
| AK027239  | 4085.184  | 3540.438  | AF231022  | 11369.004 | 8767.649  | AF237700  | 784.386   | 462.554   |
| AF005082  | 31751.664 | 30649.52  | NM_016327 | 1848.277  | 1531.034  | NM_002860 | 2474.038  | 3137.687  |
| AL117595  | 7171.415  | 6669.922  | NM_006322 | 2004      | 1865.984  | NM_006169 | 1677.763  | 1930.467  |
| AB028988  | 31929.133 | 32816.559 | U66702    | 55491.883 | 43334.773 | NM_001218 | 145.936   | 349.248   |
| AK023072  | 3847.523  | 4657.586  | AF216381  | 15813.429 | 15033.275 | NM_014183 | 1936.943  | 2891.492  |
| AF086105  | 15071.751 | 16475.596 | AB014593  | 1057.488  | 787.509   | NM_018353 | 4136.761  | 3829.611  |
| Y10697    | 3362.664  | 3833.526  | AK074832  | 16416.57  | 20142.564 | NM_001801 | 602.272   | 565.358   |
| AY007166  | 23474.232 | 28604.771 | AK026353  | 1123.614  | 1444.24   | NM_003560 | 25012.592 | 28184.551 |
| NM_004937 | 4777.979  | 4809.11   | L24123    | 1651.945  | 1581.8    | NM_014403 | 2055.931  | 1551.732  |
| CY3Cy5    | 2324.605  | 124.392   | NM_015942 | 2586.276  | 1582.518  | AL050100  | 2101.492  | 2003.171  |
| AI298884  | 22007.211 | 20462.158 | NM_017907 | 4222.118  | 3450.983  | NM_020139 | 831.6     | 552.339   |
| D87845    | 1028.144  | 1101.533  | NM_002044 | 7210.808  | 7620.199  | NM_017730 | 3095.262  | 3156.229  |
| X53279    | 361.045   | 427.707   | NM_002103 | 5261.594  | 5000.027  | AB051826  | 1561.028  | 1959.754  |
| M83254    | 2096.292  | 1776.822  | NM_006665 | 2849.617  | 3109.533  | AK024964  | 149.667   | 332.089   |
| S56770    | 759.171   | 950.901   | NM_000270 | 6097.555  | 7370.459  | M20697    | 580.272   | 758.269   |
| H58872    | 11417.663 | 10880.616 | U89277    | 301.401   | 427.257   | AF231022  | 8346.271  | 9167.936  |
| J02938    | 618.353   | 487.156   | AK026670  | 166.902   | 435.622   | NM_016327 | 1483.225  | 1476.296  |
| J04543    | 5197.946  | 5016.717  | NM_002876 | 2524.687  | 3282.39   | NM_006322 | 1494.01   | 1467.737  |
| S60415    | 335.378   | 587.098   | AK022332  | 1841.496  | 2463.386  | U66702    | 25384.75  | 30157.133 |
| AA456295  | 643.624   | 827.79    | NM_006465 | 1106.376  | 1355.254  | AF216381  | 10638.383 | 11668.225 |
| BE733577  | 2709.389  | 2886.824  | NM_006769 | 6052.111  | 5992.164  | AB014593  | 642.779   | 756.75    |
| AI817942  | 692.434   | 828.788   | NM_001189 | 2491.017  | 2958.436  | AK074832  | 13950.439 | 14010.037 |
| BG762340  | 2219.15   | 2154.436  | NM_006992 | 690.162   | 603.72    | NM_006235 | 474.19    | 470.108   |
| NM_005456 | 1850.416  | 2096.559  | AL365370  | 3087.462  | 2890.243  | AK026353  | 793.401   | 740.21    |
| NM_006534 | 6397.482  | 6987.053  | AF085912  | 697.811   | 463.361   | L24123    | 1413.005  | 1615.326  |
| SR5       | 5190.972  | 6049.52   | AB028963  | 471.992   | 1235.287  | AF071111  | 312.644   | 314.766   |
| SR7       | 6047.5    | 34898.781 | U79256    | 7476.605  | 8101.101  | NM_015942 | 2388.242  | 2816.198  |
| SR9       | 24495.316 | 5489.858  | AL832550  | 925.33    | 1065.815  | NM_017907 | 3361.681  | 3421.143  |
| CY3Cy5    | 3600.358  | 146.678   | AF131798  | 469.812   | 568.283   | NM_002044 | 5980.726  | 5753.823  |
| NM_016453 | 1239.895  | 1193.791  | AF143876  | 439.557   | 806.959   | AJ272267  | 897.243   | 758.551   |
| NM_017701 | 1107.266  | 990.377   | AF052176  | 608.034   | 645.471   | NM_002103 | 3130.984  | 3087.541  |
| NM_014226 | 2268.371  | 2258.096  | NM_001412 | 4040.847  | 3284.125  | NM_006665 | 1177.746  | 1398.58   |
| AF142567  | 880.632   | 920.983   | AF095771  | 1163.518  | 991.437   | NM_000270 | 3648.069  | 4816.233  |
| NM_006202 | 38265.824 | 42382.879 | AF086205  | 1000.224  | 640.799   | AK026670  | 322.913   | 430.982   |
| NM_017410 | 9226.245  | 9443.858  | AF147395  | 1167.262  | 875.553   | NM_002876 | 2092.306  | 2591.231  |
| AY009398  | 123.882   | 432.432   | AF087967  | 82.818    | 457.674   | AK022332  | 1958.685  | 1818.068  |

|           |           |           |           |           |           |           |           |           |
|-----------|-----------|-----------|-----------|-----------|-----------|-----------|-----------|-----------|
| X99680    | 7391.673  | 7185.491  | AK025217  | 685.692   | 716.323   | NM_006465 | 1190.909  | 1158.065  |
| NM_001448 | 2093.08   | 2975.418  | AF075105  | 1529.872  | 1613.833  | NM_006765 | 5579.185  | 4923.822  |
| NM_016072 | 3772.201  | 4667.966  | U03241    | 498.019   | 1768.839  | NM_001189 | 1866.623  | 1711.131  |
| AK026349  | 4863.542  | 6837.274  | NM_005117 | 978.15    | 636.609   | AL365370  | 2362.584  | 2206.981  |
| NM_014733 | 1000.955  | 1236.323  | AK021625  | 1828.296  | 870.865   | AF085912  | 140.048   | 238.651   |
| D12485    | 1346.677  | 1842.263  | AK001380  | 1774.211  | 694.669   | AK001127  | 360.73    | 676.579   |
| AK023204  | 4683.928  | 5486.839  | AK025312  | 990.637   | 1204.282  | U79256    | 6768.401  | 7059.811  |
| NM_003449 | 1258.972  | 1886.209  | AK002042  | 735.146   | 685.713   | AF052176  | 420.95    | 481.713   |
| NM_002478 | 1933.183  | 2369.714  | AL049268  | 820.623   | 899.457   | NM_001412 | 3161.125  | 2771.582  |
| D38163    | 668.633   | 1050.163  | AK023304  | 268.604   | 472.301   | AF095771  | 270.554   | 496.243   |
| D28449    | 1435.571  | 1442.161  | AK023963  | 15479.414 | 14941.786 | AF086205  | 666.378   | 780.857   |
| NM_003281 | 2593.912  | 3222.132  | AK022473  | 3244.095  | 3094.236  | AF147395  | 780.866   | 784.334   |
| AA460480  | 2210.892  | 2621.92   | AK023810  | 1205.149  | 1032.711  | AK026384  | 346.92    | 327.82    |
| S78774    | 4237.606  | 3826.177  | U80761    | 3106.533  | 4273.804  | AK025217  | 285.264   | 498.493   |
| NM_004922 | 4588.436  | 4458.247  | NM_018582 | 957.385   | 170.436   | AF075105  | 724.437   | 753.065   |
| NM_002871 | 499.261   | 456.371   | M21539    | 5858.221  | 3535.304  | U03241    | 271.267   | 493.302   |
| BE873653  | 43135.441 | 45043.102 | AF130117  | 484.565   | 353.739   | NM_005117 | 643.838   | 769.012   |
| NM_006987 | 728.975   | 734.422   | AK024125  | 755.346   | 678.347   | AK021625  | 1445.825  | 1367.623  |
| NM_001282 | 2862.524  | 2289.143  | AK024761  | 4707.207  | 4885.593  | AK001380  | 1662.329  | 1149.827  |
| NM_016830 | 1550.699  | 1651.006  | NM_014335 | 15636.582 | 12077.713 | AK024938  | 281.985   | 334.887   |
| U44105    | 568.873   | 452.444   | AF086067  | 3057.507  | 3446.306  | AK025312  | 1695.906  | 1545.536  |
| NM_016103 | 1592.436  | 1634.087  | AK024967  | 6702.017  | 6137.95   | NM_018606 | 248.641   | 527.367   |
| AL133654  | 2664.034  | 2246.078  | AK025102  | 2319.323  | 2092.119  | AK023963  | 9331.887  | 8893.171  |
| AL137262  | 1099.335  | 1135.148  | AF086562  | 810.23    | 931.804   | AK022473  | 2238.038  | 2618.787  |
| NM_018643 | 1505.223  | 1436.477  | AY007113  | 1742.157  | 1859.907  | AK023810  | 949.184   | 1110.582  |
| M30142    | 2068.586  | 2247.58   | AF130083  | 12738.201 | 12368.721 | U80761    | 2934.17   | 2749.973  |
| NM_013378 | 5716.442  | 6742.168  | NM_002700 | 3516.885  | 2465.955  | NM_018582 | 388.489   | 440.968   |
| NM_001085 | 831.117   | 921.025   | AB002437  | 26916.793 | 8058.235  | M21539    | 3325.491  | 3566.601  |
| NM_006110 | 949.066   | 999.398   | AK022250  | 524.869   | 629.413   | AF130117  | 274.958   | 737.696   |
| NM_002860 | 3578.604  | 3139.097  | J05063    | 284.927   | 368.721   | AK024125  | 443.299   | 430.167   |
| NM_006169 | 2090.764  | 2418.564  | NM_012369 | 318.067   | 540.002   | AK024761  | 4520.943  | 4330.085  |
| NM_001218 | 650.286   | 472.309   | AK025092  | 2084.546  | 2535.284  | NM_014335 | 8311.863  | 7984.814  |
| NM_014183 | 7450.889  | 6307.939  | AF130047  | 759.914   | 716.291   | AF086067  | 1528.181  | 1671.249  |
| AB046780  | 9861.066  | 10035.32  | Z83944    | 1760.929  | 1701.898  | AK024967  | 5500.28   | 5007.929  |
| NM_018353 | 4666.499  | 4041.677  | AF026564  | 1283.65   | 1280.366  | AK025102  | 1890.521  | 1954.175  |
| NM_001801 | 599.766   | 548.278   | X97301    | 2641.603  | 2314.584  | AF086562  | 870.136   | 690.853   |
| NM_016373 | 527.528   | 417.042   | NM_014336 | 439.996   | 633.656   | Y11897    | 138.501   | 263.552   |
| NM_003560 | 20847.447 | 22978.42  | AB002308  | 1143.866  | 873.014   | AY007113  | 1586.147  | 1450.315  |
| NM_014403 | 2432.713  | 2560.387  | NM_012143 | 5055.114  | 2743.261  | AF130083  | 7005.938  | 6735.84   |
| AL050100  | 2240.485  | 2210.486  | AF075114  | 2411.295  | 2197.186  | NM_002700 | 3193.332  | 3221.848  |
| NM_020139 | 1289.301  | 1503.337  | AK022218  | 62629.414 | 47492.535 | AB002437  | 9692.792  | 8326.665  |
| AL080207  | 461.239   | 594.837   | NM_007112 | 2806.181  | 2879.941  | NM_006777 | 2141.987  | 2429.744  |
| NM_000748 | 14230.74  | 15561.934 | S82075    | 4780.8    | 4391.727  | AK024969  | 3549.242  | 3778.858  |
| U53531    | 603.737   | 897.581   | Z70766    | 577.182   | 605.795   | AK022250  | 612.111   | 711.369   |
| NM_004925 | 4387.788  | 3534.448  | AK000660  | 5877.814  | 5801.057  | J05063    | 330.932   | 287.987   |
| NM_003234 | 12161.92  | 8473.324  | NM_014711 | 2168.437  | 1782.207  | NM_012369 | 446.859   | 404.962   |
| NM_004858 | 1849.697  | 1479.562  | AK022015  | 2426.14   | 2058.66   | AK025092  | 1403.321  | 1917.303  |
| AB051826  | 1484.499  | 1718.194  | D63135    | 946.054   | 875.848   | AF130047  | 436.536   | 289.987   |
| M20697    | 740.855   | 686.561   | AB033083  | 3763.369  | 3350.941  | Z83944    | 731.63    | 826.06    |
| NM_015046 | 2751.454  | 2633.06   | CY3Cy5    | 4676.58   | 109.088   | AF085871  | 624.294   | 593.346   |
| NM_002014 | 6827.714  | 7007.392  | H41522    | 1400      | 1315.016  | AF026564  | 327.29    | 661.659   |
| NM_002538 | 8008.178  | 6765.922  | AA460291  | 5533.33   | 4587.089  | X97301    | 1278.854  | 1417.185  |
| NM_006927 | 10604.626 | 9548.675  | BI821333  | 12608.655 | 13764.443 | AL110141  | 52501.355 | 44771.582 |

|           |           |           |           |           |           |           |           |           |
|-----------|-----------|-----------|-----------|-----------|-----------|-----------|-----------|-----------|
| NM_014601 | 3460.098  | 2925.531  | X51841    | 21948.279 | 23163.699 | NM_019063 | 16373.231 | 15667.058 |
| NM_017761 | 13506.288 | 12210.76  | BG506100  | 6005.82   | 7111.379  | AB002308  | 894.673   | 880.421   |
| NM_00692E | 861.18    | 664.562   | X53586    | 243.524   | 1137.115  | NM_012143 | 2078.147  | 1895.467  |
| D38163    | 682.998   | 676.118   | M26576    | 1391.818  | 1418.051  | AF085892  | 1480.337  | 1471.908  |
| D28449    | 1262.434  | 1113.401  | M32972    | 3312.36   | 2609.524  | AF075114  | 2955.739  | 3422.046  |
| NM_003281 | 782.006   | 753.096   | D89854    | 575.322   | 830.581   | AK022218  | 43588.715 | 47141.211 |
| AA460480  | 695.907   | 710.86    | M13207    | 531.748   | 810.393   | NM_007112 | 837.1     | 948.748   |
| AI298884  | 20723.518 | 21373.758 | M97815    | 962.584   | 1137.351  | S82075    | 3099.613  | 2818.862  |
| D87845    | 837.695   | 804.53    | NM_00632E | 5280.169  | 6621.397  | Z70766    | 343.396   | 462.767   |
| M83254    | 1567.657  | 1604.249  | SR2       | 55004.27  | 57122.988 | AK000660  | 3565.785  | 4111.443  |
| S56770    | 908.585   | 936.289   | SR4       | 19162.439 | 23403.711 | NM_014711 | 1339.9    | 1505.182  |
| H58872    | 9302.636  | 5942.612  | SR6       | 2837.901  | 2774.878  | AK022015  | 1918.412  | 2466.989  |
| J02938    | 583.105   | 344.852   | SR8       | 9980.333  | 32362.217 | D63135    | 746.392   | 678.747   |
| J04543    | 4953.541  | 3978.47   | SR10      | 36395.656 | 13955.073 | AB033083  | 2306.829  | 2923.011  |
| S60415    | 411.579   | 288.481   | CY3Cy5    | 4625.257  | 137.508   | NM_01782E | 3867.629  | 4218.392  |
| AA456295  | 619.24    | 447.194   | AK025588  | 2311.647  | 2089.778  | CY3Cy5    | 9239.328  | 242.464   |
| BE733577  | 2458.773  | 1580.079  | NM_00318E | 2609.836  | 2203.044  | H41522    | 715.977   | 629.03    |
| AI817942  | 581.517   | 326.658   | NM_007118 | 621.874   | 576.379   | AA460291  | 1659.774  | 1835.399  |
| BG762340  | 1953.766  | 1329.173  | U59431    | 2748.337  | 2944.207  | BI821333  | 3031.649  | 2447.258  |
| AA009484  | 613.98    | 592.314   | NM_013404 | 1876.175  | 2486.638  | X51841    | 5023.15   | 3385.937  |
| NM_00545E | 2146.159  | 2211.674  | AF300648  | 2455.979  | 2454.352  | AF051344  | 1412.137  | 932.825   |
| NM_006534 | 6319.348  | 8933.791  | NM_00396E | 623.175   | 619.033   | BG506100  | 2906.142  | 2830.006  |
| M30142    | 2324.152  | 1914.208  | AK024443  | 63380.289 | 57122.789 | M17176    | 1039.19   | 1018.53   |
| NM_00501E | 633.071   | 584.843   | X06710    | 3407.785  | 2996.36   | M26576    | 488.454   | 475.438   |
| NM_01337E | 6051.319  | 5922.556  | AK000896  | 1077.03   | 1328.727  | M32972    | 1328.973  | 957.828   |
| NM_00108E | 654.376   | 662.178   | NM_020384 | 2480.596  | 2800.176  | D89854    | 836.529   | 609.021   |
| NM_006110 | 610.839   | 557.3     | NM_00605E | 18445.43  | 20380.012 | NM_00632E | 3141.764  | 3544.779  |
| NM_016453 | 1303.051  | 1142.371  | AK026074  | 1065.953  | 1252.191  | SR4       | 9087.791  | 10296.216 |
| NM_017701 | 1367.601  | 987.988   | NM_003172 | 4398.898  | 4109.66   | SR6       | 1109.167  | 1510.356  |
| NM_01422E | 1938.995  | 1706.034  | NM_00480E | 1340.084  | 1104.646  | SR8       | 4667.938  | 18235.672 |
| AF142567  | 801.797   | 740.859   | NM_017817 | 6507.164  | 6001.582  | SR10      | 24508.242 | 9723.207  |
| NM_00620E | 33513.266 | 28094.398 | NM_018184 | 31217.072 | 31022.254 | CY3Cy5    | 14578.659 | 581.647   |
| NM_01741C | 8276.276  | 6388.584  | AB046823  | 1296.182  | 1412.177  | AK025588  | 869.502   | 907.059   |
| AY009398  | 329.291   | 375.332   | NM_00492E | 1319.849  | 1330.265  | NM_00318E | 695.479   | 325.098   |
| NM_016072 | 3931.518  | 3930.267  | NM_004662 | 1198.774  | 1374.711  | U59431    | 701.952   | 502.203   |
| AK026349  | 6813.666  | 10148.111 | NM_01663E | 43593.934 | 49953.141 | NM_020152 | 1166.718  | 496.493   |
| NM_014733 | 1227.032  | 1535      | U61739    | 8131.717  | 10483.212 | AF300648  | 1762.362  | 1170.495  |
| D12485    | 1927.399  | 2569.992  | AJ132089  | 1275.077  | 1608.455  | AK024443  | 63671.117 | 52197.539 |
| AK023204  | 6624.724  | 8403.222  | U92819    | 34875.379 | 45805.41  | X06710    | 1998.815  | 1491.639  |
| NM_00344E | 1451.723  | 1695.447  | AB020626  | 945.163   | 918.196   | AK000896  | 574.336   | 941.673   |
| NM_00247E | 2446.183  | 3526.545  | NM_00203E | 6301.175  | 6711.435  | NM_020384 | 2137.622  | 2232.09   |
| NM_003234 | 12292.68  | 8591.163  | NM_01240C | 730.87    | 667.461   | NM_00605E | 3616.034  | 3726.682  |
| NM_00485E | 1359.559  | 1008.552  | NM_005384 | 2209.388  | 2389.704  | M97496    | 7784.825  | 8916.555  |
| S78774    | 4952.592  | 3828.126  | NM_00685C | 940.862   | 791.348   | AK026074  | 711.817   | 895.639   |
| NM_004922 | 5198.186  | 3654.844  | AB013103  | 797.211   | 773.541   | NM_003172 | 2107.586  | 2309.554  |
| NM_006987 | 491.115   | 682.795   | AF019225  | 3329.135  | 3134.79   | NM_00480E | 1169.706  | 1267.636  |
| NM_001282 | 3060.572  | 1864.602  | Z36803    | 7922.525  | 8673.592  | NM_017817 | 683.739   | 664.532   |
| NM_01683C | 1421      | 1132.812  | NM_013371 | 855.634   | 861.39    | NM_018184 | 4752.644  | 5893.026  |
| U44105    | 647.134   | 635.755   | NM_000707 | 7122.921  | 7817.68   | NM_00203E | 3138.904  | 2259.544  |
| NM_016103 | 1976.786  | 2202.754  | AB011139  | 2200.552  | 2359.162  | NM_005384 | 1186.785  | 964.151   |
| AL133654  | 3658.768  | 3298.284  | NM_00691E | 1715.832  | 1851.745  | NM_00685C | 588.705   | 480.671   |
| AL137262  | 895.822   | 1097.011  | AK022625  | 4808.261  | 5083.852  | AF019225  | 1142.034  | 1005.7    |
| NM_018643 | 1672.498  | 1612.468  | NM_00542E | 1373.041  | 1728.741  | Z36803    | 3342.927  | 3669.517  |

|           |           |           |           |           |           |           |           |           |
|-----------|-----------|-----------|-----------|-----------|-----------|-----------|-----------|-----------|
| NM_006927 | 14899.781 | 17003.094 | AK023084  | 4178.206  | 4058.71   | NM_013371 | 456.383   | 761.569   |
| NM_014601 | 4218.933  | 4608.822  | BC012333  | 7759.353  | 8394.767  | NM_000707 | 2759.331  | 2970.072  |
| NM_017761 | 14051.493 | 13754.225 | AF237952  | 4666.753  | 4848.621  | AF202092  | 10942.789 | 13330.843 |
| NM_006928 | 839.576   | 583.724   | AL079287  | 3879.881  | 3989.099  | NM_003201 | 3796.712  | 4042.477  |
| AF237700  | 785.249   | 672.724   | NM_014427 | 4894.599  | 5171.044  | AB011139  | 1796.058  | 1899.793  |
| NM_002860 | 3751.891  | 2835.012  | AB046769  | 4929.584  | 7258.113  | NM_006919 | 1378.128  | 1654.888  |
| NM_006169 | 3595.339  | 3286.54   | NM_015922 | 15183.415 | 16273.31  | AK022625  | 1363.259  | 1612.359  |
| NM_001218 | 753.396   | 813.108   | NM_020381 | 3863.963  | 5059.084  | NM_005425 | 238.87    | 523.037   |
| NM_014183 | 9758.271  | 9445.789  | NM_002957 | 8776.913  | 9021.869  | AK023084  | 2710.105  | 3603.708  |
| NM_018353 | 7803.611  | 8111.027  | NM_018106 | 7137.582  | 8825.294  | BC012333  | 1579.914  | 732.783   |
| NM_001801 | 690.596   | 847.371   | NM_003725 | 688.449   | 843.871   | NM_015922 | 2157.229  | 2574.968  |
| NM_016373 | 456.74    | 566.709   | BE899154  | 2069.24   | 2479.346  | NM_020381 | 1119.442  | 1697.292  |
| NM_003560 | 30602.785 | 45223.91  | NM_004863 | 2610.79   | 2389.579  | NM_002957 | 3750.427  | 5290.336  |
| NM_014403 | 3460.969  | 3677.021  | AK024573  | 3183.199  | 3363.947  | NM_004863 | 1399.317  | 1070.112  |
| AL050100  | 3066.603  | 2908.168  | NM_002299 | 3469.499  | 3686.026  | AK024573  | 2438.419  | 1973.513  |
| NM_020139 | 1434.655  | 1545.266  | D79998    | 25522.068 | 26143.859 | NM_002299 | 2280.173  | 1997.551  |
| AL080207  | 411.168   | 513.21    | AB032963  | 1838.575  | 1654.741  | D79998    | 7278.453  | 5123.583  |
| NM_000748 | 16974.473 | 26077.256 | NM_000385 | 1201.763  | 1444.336  | AB032963  | 1602.906  | 1717.038  |
| NM_000048 | 4811.903  | 6243.708  | AF301013  | 4342.549  | 4638.855  | NM_000385 | 1104.334  | 723.886   |
| U53531    | 535.58    | 362.938   | U15688    | 3574.906  | 3640.808  | AF301013  | 4731.562  | 4720.689  |
| NM_004925 | 3943.041  | 2437.41   | NM_018448 | 5667.551  | 6559.705  | NM_018992 | 65698.688 | 53469.105 |
| NM_005456 | 1919.673  | 1905.837  | NM_001659 | 14672.855 | 15842.67  | U15688    | 1809.94   | 1884.91   |
| NM_006534 | 7972.915  | 7696.554  | AB020663  | 12587.945 | 13357.716 | NM_018448 | 5360.123  | 5575.064  |
| AB051826  | 3321.033  | 4883.399  | AF297866  | 956.301   | 1167.458  | NM_001659 | 12257.597 | 16683.68  |
| M20697    | 637.82    | 625.558   | NM_002864 | 1624.771  | 1970.402  | AB020663  | 6679.193  | 8298.825  |
| NM_015046 | 3098.864  | 3123.515  | NM_014305 | 3551.192  | 3990.386  | AF297866  | 847.519   | 1051.69   |
| NM_002014 | 9282.635  | 12064.007 | NM_012123 | 10940.869 | 16656.098 | NM_002864 | 1040.377  | 1142.403  |
| AK026349  | 7737.145  | 10807.876 | U87972    | 1624.872  | 2311.959  | NM_012123 | 3432.187  | 3485.695  |
| NM_014733 | 1906.543  | 2275.551  | NM_017925 | 3582.819  | 3646.004  | NM_017925 | 1248.564  | 1832.946  |
| D12485    | 1796.564  | 2136.667  | NM_003171 | 1619.29   | 1867.74   | NM_003171 | 1214.456  | 2020.806  |
| AK023204  | 5272.243  | 6354.735  | NM_006437 | 16418.518 | 28456.367 | NM_006437 | 8626.388  | 11509.06  |
| NM_003449 | 1665.692  | 2059.294  | NM_017890 | 1647.023  | 1644.004  | NM_016481 | 924.127   | 555.851   |
| NM_002478 | 3287.433  | 4312.678  | AK021654  | 2026.447  | 1981.097  | NM_003925 | 7190.898  | 5711.038  |
| D38163    | 1110.114  | 1404.221  | NM_016481 | 901.874   | 1033.866  | Z15114    | 3237.287  | 2595.275  |
| NM_004967 | 532.664   | 633.367   | NM_003925 | 12454.038 | 12080.509 | AB040812  | 16828.994 | 17474.703 |
| D28449    | 2107.519  | 2316.317  | Z15114    | 4001.846  | 4282.458  | NM_006285 | 4142.127  | 3765.298  |
| NM_003281 | 1046.873  | 1141.786  | AB040812  | 19831.514 | 21590.021 | NM_003656 | 63302.012 | 53512.504 |
| AA460480  | 1037.802  | 1143.473  | NM_017625 | 579.596   | 579.41    | NM_001348 | 1930.069  | 1910.483  |
| AI298884  | 22673.49  | 20503.639 | NM_006285 | 6231.002  | 6409.659  | AK027148  | 4558.784  | 5029.16   |
| D87845    | 1070.674  | 949.33    | NM_001348 | 2567.516  | 2625.035  | NM_005084 | 4193.938  | 4480.426  |
| M83254    | 2524.103  | 3305.129  | AK027148  | 14227.455 | 16586.979 | NM_007283 | 525.502   | 704.825   |
| S56770    | 1432.277  | 2062.918  | NM_005084 | 5567.893  | 5951.305  | NM_006111 | 2486.419  | 3890.834  |
| H58872    | 11602.616 | 8007.6    | NM_007283 | 812.382   | 1103.596  | AK026071  | 2986.824  | 3823.85   |
| J02938    | 295.461   | 503.502   | NM_006111 | 4912.134  | 5965.85   | NM_003172 | 2672.64   | 2348.438  |
| J04543    | 4997.396  | 3578.905  | AK026071  | 3910.806  | 5234.338  | NM_004809 | 1332.594  | 1447.124  |
| S60415    | 423.384   | 359.781   | NM_002309 | 1966.704  | 3214.677  | H41522    | 953.071   | 1405.922  |
| AA456295  | 777.466   | 551.289   | AK026074  | 1095.065  | 1458.734  | AA460291  | 2735.201  | 3554.08   |
| BE733577  | 2776.763  | 2384.282  | NM_003172 | 4954.94   | 4418.821  | BI821333  | 4875.288  | 6340.794  |
| BG762340  | 1536.596  | 1083.316  | NM_004809 | 1636.053  | 1661.428  | X51841    | 6014.391  | 8365.246  |
| NM_018643 | 1930.865  | 1871.435  | AA903183  | 722.694   | 740.058   | AF051344  | 1698.349  | 2509.769  |
| NM_016186 | 588.05    | 388.088   | H41522    | 1659.628  | 1968.338  | BG506100  | 3855.115  | 5241.746  |
| M30142    | 3145.338  | 2393.6    | X51841    | 11043.386 | 11217.461 | M17176    | 967.353   | 810.722   |
| NM_005018 | 795.335   | 956.481   | AF051344  | 3600.703  | 3649.8    | M26576    | 930.957   | 418.34    |

|           |           |           |           |           |           |           |           |           |
|-----------|-----------|-----------|-----------|-----------|-----------|-----------|-----------|-----------|
| NM_01337E | 7681.905  | 8004.106  | BG506100  | 5514.466  | 5828.207  | M32972    | 1992.606  | 1586.01   |
| NM_00108E | 994.905   | 784.231   | X53586    | 604.627   | 772.725   | D89854    | 1325.166  | 1435.647  |
| NM_006110 | 780.358   | 569.424   | M17176    | 1600.441  | 1835.035  | M13207    | 637.391   | 654.373   |
| NM_01645E | 1314.489  | 1357.432  | M26576    | 1394.538  | 1443.709  | NM_00632E | 3906.5    | 4210.305  |
| NM_017701 | 1175.531  | 1248.13   | M32972    | 2941.9    | 2334.916  | AF085893  | 341.237   | 1942.8    |
| NM_01422E | 2620.038  | 2559.873  | M13207    | 576.678   | 794.34    | NM_003201 | 3326.313  | 3476.152  |
| AF142567  | 1147.591  | 1063.084  | X14885    | 249.051   | 615.761   | AB011139  | 1415.323  | 1756.038  |
| NM_00620E | 30091.109 | 22688.518 | M97815    | 1057.826  | 1329.571  | NM_00691E | 1448.497  | 1394.68   |
| NM_01741C | 9367.647  | 7532.108  | NM_00632E | 4951.145  | 5753.389  | AK022625  | 1980.245  | 2324.323  |
| X99680    | 6724.987  | 5745.018  | AF085893  | 623.522   | 814.802   | AK023084  | 3225.543  | 3165.838  |
| NM_00144E | 1860.733  | 1755.764  | NM_003201 | 5038.214  | 6404.808  | AK025588  | 1370.36   | 1850.674  |
| NM_01607E | 4048.635  | 3324.609  | AB011139  | 1878.683  | 2111.028  | NM_00318E | 2331.826  | 2672.024  |
| NM_00004E | 4698.362  | 4838.6    | NM_00691E | 1710.076  | 1866.77   | U59431    | 745.404   | 1090.874  |
| U53531    | 664.037   | 604.714   | AK022625  | 6387.543  | 6258.731  | U49349    | 627.734   | 638.084   |
| NM_00492E | 4555.664  | 4406.315  | NM_00542E | 475.463   | 692.95    | NM_02015E | 2120.106  | 2780.277  |
| NM_00323A | 15084.433 | 11381.262 | AK023084  | 6044.281  | 5199.27   | NM_01340A | 1475.711  | 1004.551  |
| NM_00485E | 1981.728  | 1145.443  | AK025588  | 1653.003  | 1820.081  | AF300648  | 2014.132  | 1448.993  |
| S78774    | 5084.318  | 4477.073  | NM_00711E | 468.424   | 594.215   | AK024443  | 61597.305 | 55041.621 |
| NM_00492E | 5440.217  | 4299.245  | U59431    | 1691.253  | 1756.088  | X06710    | 2310.769  | 2074.329  |
| NM_002871 | 816.847   | 521.285   | U49349    | 920.464   | 955.964   | AK000896  | 606.137   | 1122.468  |
| NM_006987 | 793.677   | 430.295   | NM_02015E | 2824.293  | 2749.171  | NM_02038A | 1929.914  | 2418.177  |
| NM_00128E | 3080.196  | 1712.256  | NM_01340A | 1577.745  | 1644.738  | NM_00605E | 5282.297  | 6347.424  |
| NM_01683C | 1364.193  | 1050.738  | AF300648  | 2572.663  | 2366.527  | NM_00662E | 10413.3   | 12996.498 |
| U44105    | 640.464   | 358.6     | NM_00396E | 476.327   | 696.002   | M97496    | 8002.49   | 9348.422  |
| NM_01610E | 1507.375  | 1169.38   | AK024443  | 60760.758 | 56769.746 | NM_01844E | 4243.722  | 4743.246  |
| AL133654  | 1771.641  | 1307.409  | X06710    | 3732.365  | 4159.205  | NM_00165E | 11042.055 | 12899.395 |
| AL137262  | 878.613   | 903.597   | AK000896  | 1975.989  | 2480.109  | AB020663  | 7816.148  | 8436.836  |
| NM_00201A | 8648.563  | 13908.464 | NM_02038A | 1973.385  | 2777.163  | AF297866  | 809.932   | 800.809   |
| NM_01658E | 10868.563 | 17334.957 | NM_00605E | 16025.82  | 16039.486 | NM_00286A | 640.625   | 1021.815  |
| NM_006927 | 14384.301 | 15794.76  | NM_00662E | 9806.809  | 10497.935 | NM_017817 | 3909.001  | 4019.283  |
| NM_014601 | 3984.716  | 4081.322  | M97496    | 11534.425 | 12330.885 | NM_01818A | 21780.871 | 23039.246 |
| NM_017761 | 13830.653 | 13899.437 | NM_00048E | 52793.508 | 52962.492 | AB046823  | 517.257   | 627.206   |
| NM_00692E | 869.96    | 684.307   | NM_01844E | 5793.197  | 5364.934  | NM_01663E | 13399.372 | 19368.84  |
| AF237700  | 1154.624  | 770.932   | NM_00165E | 15406.154 | 15224.831 | AJ132089  | 996.507   | 786.956   |
| NM_00286C | 4244.993  | 3452.745  | AB020663  | 12179.802 | 12148.755 | U92819    | 24797.246 | 21957.361 |
| NM_00616E | 3233.993  | 2511.469  | AF297866  | 1435.797  | 1464.969  | AB020626  | 451.52    | 656.19    |
| NM_01418E | 7815.362  | 5023.558  | NM_00286A | 1873.026  | 1787.583  | NM_00203E | 2739.363  | 3206.57   |
| NM_01835E | 4982.161  | 3581.685  | NM_017817 | 6162.422  | 5762.466  | NM_01240C | 757.132   | 283.401   |
| NM_001801 | 429.675   | 604.42    | NM_01818A | 28423.033 | 35920.613 | NM_00538A | 1190.956  | 1453.18   |
| NM_00356C | 22350.547 | 23706.238 | AB046823  | 1113.627  | 1303.456  | NM_00685C | 739.478   | 721.323   |
| NM_01440E | 2324.965  | 1971.866  | NM_00492E | 959.749   | 1031.796  | AF019225  | 1048.578  | 1110.676  |
| AL050100  | 1900.623  | 1843.243  | NM_00466E | 1099.867  | 903.734   | Z36803    | 3490.331  | 3633.178  |
| NM_02013E | 1440.736  | 1531.968  | NM_01663E | 26551.254 | 29560.932 | NM_013371 | 250.218   | 547.898   |
| AL080207  | 459.996   | 757.448   | U61739    | 6996.315  | 6560.103  | NM_000707 | 3023.46   | 3021.724  |
| NM_01773C | 3773.583  | 3814.888  | AJ132089  | 1924.068  | 1769.161  | AF202092  | 11451.534 | 11430.764 |
| AB051826  | 1756.538  | 2029.427  | U92819    | 33438.637 | 47050.875 | NM_00728E | 602.104   | 716.457   |
| NM_01504E | 2775.573  | 3617.786  | AB020626  | 897.042   | 971.725   | NM_006111 | 2850.389  | 3592.047  |
| AF231022  | 27893.207 | 26239.143 | NM_00203E | 6040.946  | 7166.722  | AK026071  | 3251.703  | 3919.426  |
| NM_016327 | 2282.08   | 1769.887  | NM_01240C | 553.066   | 789.603   | BC012333  | 6638.263  | 5510.221  |
| U66702    | 54537.742 | 52818.078 | NM_00538A | 2619.73   | 3599.918  | AF237952  | 2570.775  | 2614.864  |
| AF216381  | 12798.397 | 17325.289 | NM_00685C | 788.864   | 1525.267  | AL079287  | 2496.691  | 1734.149  |
| L08442    | 335.529   | 261.956   | AB013103  | 2574.049  | 4009.462  | NM_014427 | 2372.958  | 1841.952  |
| AB014593  | 1475.632  | 1411.057  | AF019225  | 3423.638  | 4714.094  | AB046769  | 1189.104  | 1624.28   |

|           |           |           |           |           |           |           |           |           |
|-----------|-----------|-----------|-----------|-----------|-----------|-----------|-----------|-----------|
| AK074832  | 21762.539 | 22600.041 | Z36803    | 7230.999  | 8526.253  | NM_015922 | 6240.045  | 7451.528  |
| NM_016269 | 1106.637  | 554.061   | NM_013371 | 1094.111  | 969.354   | NM_018106 | 6887.361  | 5103.703  |
| NM_006235 | 867.238   | 965.396   | NM_000707 | 5311.217  | 5456.438  | NM_003725 | 605.51    | 743.244   |
| AK026353  | 1223.001  | 950.946   | AF202092  | 11452.767 | 12282.706 | BE899154  | 1803.702  | 1885.642  |
| L24123    | 1693.326  | 1786.366  | NM_000215 | 8744.631  | 9693.131  | NM_004863 | 1648.901  | 1648.363  |
| AF071111  | 554.084   | 393.795   | AK027148  | 18560.92  | 16958.277 | AK024573  | 2398.874  | 2290.592  |
| NM_015942 | 2890.2    | 2558.777  | NM_005084 | 6429.932  | 6120.889  | NM_002299 | 2790.906  | 2588.058  |
| NM_017907 | 5346.096  | 4667.687  | NM_007283 | 1050.086  | 828.565   | D79998    | 7076.546  | 6019.83   |
| NM_002044 | 8230.244  | 7289.596  | NM_006111 | 6380.292  | 7020.074  | AB032963  | 1725.478  | 1594.69   |
| AJ272267  | 1074.48   | 1084.334  | AK026071  | 7765.75   | 8905.339  | NM_000385 | 1482.676  | 1534.514  |
| NM_000673 | 246.839   | 320.658   | BC012333  | 7827.372  | 6984.367  | AF301013  | 3574.971  | 3209.918  |
| NM_002103 | 3759.989  | 3438.251  | AF237952  | 4281.448  | 4115.892  | NM_018992 | 58768.777 | 53488.25  |
| NM_006665 | 1813.571  | 1741.583  | AL079287  | 3658.353  | 3938.548  | U15688    | 1503.09   | 1654.002  |
| NM_000270 | 4878.342  | 6224.876  | NM_014427 | 3981.706  | 3972.333  | AF085893  | 423.811   | 520.21    |
| U89277    | 318.155   | 317.733   | AB046769  | 3114.698  | 3530.752  | NM_014305 | 1905.675  | 1993.052  |
| NM_002876 | 2387.643  | 2630.938  | NM_015922 | 13520.892 | 11887.802 | NM_012123 | 4219.315  | 3478.892  |
| AK022332  | 1974.918  | 2027.543  | NM_020381 | 3721.166  | 4267.5    | U87972    | 394.691   | 572.217   |
| NM_006465 | 1211.331  | 1158.942  | NM_002957 | 8154.277  | 8831.071  | NM_017925 | 2884.587  | 2291.949  |
| NM_006769 | 5137.979  | 5258.132  | NM_018106 | 7224.851  | 8374.724  | NM_003171 | 2047.477  | 1432.342  |
| NM_001189 | 2114.921  | 2276.578  | NM_003725 | 619.313   | 763.195   | NM_006437 | 13142.198 | 11218.228 |
| NM_006992 | 753.607   | 780.19    | BE899154  | 2352.01   | 2659.942  | NM_017890 | 1265.621  | 1057.652  |
| AL365370  | 2481.822  | 2714.794  | NM_004863 | 2410.957  | 2767.419  | AK021654  | 952.178   | 1023.758  |
| AK022204  | 792.748   | 664.625   | AK024573  | 3662.635  | 5073.736  | NM_016481 | 809.711   | 718.135   |
| AL109726  | 535.37    | 414.968   | NM_002299 | 4452.251  | 4925.912  | NM_003925 | 10843.124 | 9434.062  |
| AF085912  | 828.292   | 745.885   | D79998    | 22794.834 | 30848.977 | Z15114    | 3434.444  | 3093.003  |
| AK001127  | 748.193   | 749.242   | AB032963  | 1285.123  | 1262.919  | AB040812  | 15904.966 | 16182.176 |
| U79256    | 7934.29   | 9067.979  | NM_000385 | 724.655   | 868.871   | NM_017625 | 825.759   | 215.794   |
| AL832550  | 529.168   | 860.027   | AF301013  | 2793.685  | 2756.575  | NM_006285 | 3630.896  | 2864.322  |
| AF131798  | 612.885   | 539.998   | NM_018992 | 61720.969 | 54816.508 | NM_003656 | 64019.508 | 53097.523 |
| AF052176  | 589.278   | 650.092   | U15688    | 1665.587  | 1775.318  | NM_001348 | 1798.374  | 1693.657  |
| NM_001412 | 3846.697  | 3595.994  | NM_006325 | 5388.777  | 4590.815  | NM_006058 | 5875.477  | 5763.777  |
| AF095771  | 430.735   | 566.69    | AF085893  | 795.49    | 671.879   | NM_006628 | 10313.53  | 10134.466 |
| AF086205  | 1352.209  | 1120.13   | NM_014305 | 3769.406  | 3406.457  | M97496    | 7856.373  | 7726.96   |
| AK024169  | 402.214   | 531.387   | NM_012123 | 8773.543  | 7138.393  | AK026074  | 946.426   | 716.006   |
| AF147395  | 916.096   | 1068.633  | U87972    | 1996.129  | 1808.851  | NM_003172 | 2464.148  | 2065.136  |
| AF085985  | 359.691   | 483.579   | NM_017925 | 3428.909  | 3560.417  | NM_004809 | 891.178   | 1052.721  |
| AK026384  | 350.105   | 471.217   | NM_003171 | 4095.073  | 3712.948  | H41522    | 752.498   | 970.867   |
| AK025217  | 416.684   | 636.21    | NM_006437 | 14921.002 | 16695.904 | AA460291  | 3153.046  | 2500.475  |
| AF075105  | 1024.599  | 1285.902  | NM_017890 | 1516.142  | 1882.75   | BI821333  | 5771.145  | 4060.381  |
| U03241    | 725.048   | 614.84    | AK021654  | 3016.002  | 4193.931  | X51841    | 9204.641  | 6372.048  |
| NM_005117 | 1375.577  | 1204.52   | NM_016481 | 1098.187  | 1329.364  | AF051344  | 2148.347  | 2076.908  |
| AJ007733  | 463.503   | 379.787   | NM_003925 | 10884.247 | 14413.223 | BG506100  | 4919.838  | 4332.888  |
| AK021625  | 2661.256  | 2474.973  | Z15114    | 3912.482  | 4701.168  | M17176    | 1169.886  | 1251.407  |
| AK021679  | 651.797   | 513.742   | AB040812  | 19129.418 | 26629.629 | M26576    | 1252.436  | 839.785   |
| AK001380  | 1546.841  | 1090.8    | NM_017625 | 1020.567  | 884.383   | M32972    | 2199.373  | 1872.065  |
| AK025312  | 1404.697  | 1334.073  | NM_006285 | 5763.563  | 5602.533  | D89854    | 994.722   | 724.664   |
| AK026493  | 583.527   | 654.836   | NM_003656 | 56807.172 | 53966.465 | AF019225  | 437.25    | 1663.46   |
| AK002042  | 657.19    | 963.704   | NM_001348 | 1891.672  | 1926.779  | NM_013371 | 634.01    | 426.862   |
| AL049268  | 467.613   | 559.284   | NM_003872 | 441.007   | 536.246   | NM_000707 | 2002.05   | 2621.968  |
| AK023963  | 8974.678  | 9169.885  | NM_020384 | 2810.309  | 2792.724  | AF202092  | 7883.481  | 8081.167  |
| AK022473  | 2147.367  | 2280.375  | NM_006058 | 15104.351 | 12971.822 | NM_003201 | 3222.234  | 3692.584  |
| AK023810  | 1146.935  | 1207.625  | NM_006628 | 10340.671 | 8858.009  | AB011139  | 1340.098  | 1490.469  |
| AK024133  | 478.138   | 582.043   | M97496    | 10417.082 | 8993.637  | NM_006919 | 1078.181  | 1158.246  |

|           |           |           |           |           |           |           |           |           |
|-----------|-----------|-----------|-----------|-----------|-----------|-----------|-----------|-----------|
| U80761    | 4596.767  | 4965.274  | AK026074  | 1069.262  | 942.101   | AK022625  | 1617.414  | 1825.532  |
| U61100    | 526.341   | 430.267   | NM_003172 | 4484.324  | 3619.068  | AK023084  | 3159.061  | 3418.332  |
| M21539    | 5363.054  | 5718.934  | NM_004809 | 1626.45   | 1400.338  | AK025588  | 1905.576  | 1504.599  |
| AK024125  | 388.973   | 551.429   | H41522    | 1747.667  | 1543.81   | NM_003188 | 2507.977  | 1765.392  |
| AK024761  | 2448.078  | 2091.471  | AA460291  | 6281.752  | 5851.045  | U59431    | 879.951   | 778.344   |
| NM_014335 | 13755.049 | 13975.384 | BI821333  | 13817.136 | 15000.658 | NM_020152 | 2511.468  | 2124.325  |
| AF086067  | 2083.947  | 2712.573  | X51841    | 12822.835 | 13116.102 | NM_013404 | 1000.367  | 968.414   |
| AK024967  | 4213.579  | 4443.99   | AF051344  | 4159.185  | 5767.344  | AF300648  | 3076.429  | 2346.19   |
| AK025102  | 1960.506  | 1987.541  | BG506100  | 6191.115  | 7255.358  | AK024443  | 61704.535 | 54188.332 |
| AF086562  | 1020.094  | 1220.815  | X53586    | 3290.599  | 5387.039  | X06710    | 1806.449  | 2196.185  |
| AY007113  | 1611.14   | 1213.803  | M17176    | 2913.356  | 4934.568  | AK000896  | 670.722   | 940.487   |
| AF130083  | 8909.132  | 8623.582  | M26576    | 2574.094  | 3515.448  | NM_000385 | 523.862   | 831.759   |
| NM_002700 | 12693.617 | 11430.134 | M32972    | 4850.546  | 5645.171  | AF301013  | 3218.316  | 4902.943  |
| AB002437  | 25806.275 | 21116.115 | D11151    | 2276.322  | 2335.279  | NM_018992 | 55768.176 | 54608.125 |
| NM_006777 | 1908.383  | 1764.086  | D89854    | 689.109   | 1172.69   | U15688    | 1762.038  | 1982.647  |
| AK024969  | 3282.164  | 3113.246  | M13207    | 902.824   | 781.96    | NM_000483 | 42234.574 | 53542.59  |
| AK022250  | 918.806   | 988.598   | AB013103  | 840.203   | 827.542   | NM_018448 | 4096.631  | 4468.898  |
| NM_012369 | 513.55    | 768.871   | AF019225  | 4037.161  | 3285.194  | NM_001659 | 12242.194 | 11549.294 |
| AK025092  | 2031.357  | 2384.941  | Z36803    | 7656.643  | 6853.935  | AB020663  | 6818.1    | 7239.195  |
| AF130047  | 648.085   | 1022.171  | NM_013371 | 896.04    | 771.896   | AF297866  | 881.79    | 993.192   |
| Z83944    | 3507.898  | 3780.882  | NM_000707 | 6202.137  | 5337.771  | NM_002864 | 1029.21   | 1011.604  |
| AF085871  | 1669.765  | 2200.615  | AF202092  | 11996.079 | 11556.521 | NM_017817 | 3772.022  | 3489.725  |
| AF026564  | 837.828   | 946.691   | NM_003201 | 4563.596  | 3591.183  | NM_018184 | 25696.098 | 28578.418 |
| X97301    | 4378.656  | 4292.017  | AB011139  | 1781.669  | 1436.982  | AB046823  | 752.364   | 761.895   |
| NM_019063 | 16278.203 | 14628.9   | NM_006919 | 1350.231  | 1489.328  | NM_004929 | 480.677   | 548.772   |
| NM_014336 | 1239.018  | 1242.56   | AK022625  | 5445.238  | 4793.368  | NM_004662 | 401.384   | 668.629   |
| AB002308  | 795.989   | 777.377   | NM_005425 | 445.743   | 534.528   | NM_016639 | 14441.713 | 16834.662 |
| NM_012143 | 4672.958  | 4140.508  | AK023084  | 4799.921  | 4797.716  | U61739    | 1896.286  | 2582.147  |
| AF085892  | 1134.65   | 986.3     | AK025588  | 1910.606  | 1999.997  | AJ132089  | 857.993   | 1223.075  |
| AF075114  | 4180.454  | 4415.911  | NM_003188 | 2939.634  | 2761.305  | U92819    | 24716.904 | 36258.543 |
| AK022218  | 45061.102 | 50181.531 | NM_007118 | 643.008   | 1011.525  | AB020626  | 410.061   | 1030.802  |
| NM_007112 | 2665.02   | 3330.797  | NM_020152 | 2297.908  | 2505.692  | NM_002036 | 3316.638  | 3803.233  |
| S82075    | 3993.395  | 4597.787  | NM_013404 | 1649.322  | 1633.906  | NM_005384 | 1410.244  | 1656.044  |
| Z70766    | 667.347   | 656.708   | AF300648  | 2396.043  | 2859.118  | NM_006850 | 785.037   | 883.214   |
| AK000660  | 7262.18   | 8049.509  | AK024443  | 62102.852 | 55721.617 | NM_006285 | 3986.724  | 3116.624  |
| AK026298  | 3066.481  | 2738.706  | X06710    | 2245.179  | 1980.504  | NM_001348 | 1388.194  | 2021.374  |
| NM_014711 | 723.148   | 782.459   | AK000896  | 688.972   | 586.826   | NM_000215 | 5652.901  | 8236.76   |
| AK022015  | 1763.715  | 2037.283  | D79998    | 23850.771 | 21748.414 | AK027148  | 6632.354  | 10019.404 |
| D17234    | 523.537   | 426.261   | AB032963  | 2034.675  | 1567.098  | NM_005084 | 3547.578  | 6005.275  |
| D63135    | 643.038   | 679.185   | NM_000385 | 1137.388  | 1104.391  | NM_007283 | 419.013   | 1029.647  |
| AB033083  | 3384.495  | 4044.435  | AF301013  | 4389.91   | 3732.245  | NM_006111 | 3392.363  | 5343.709  |
| CY3Cy5    | 2662.313  | 179.699   | NM_000483 | 53255.246 | 50753.57  | AK026071  | 4235.928  | 4092.355  |
| H41522    | 2890.108  | 3330.921  | NM_018448 | 5500.693  | 4498.032  | BC012333  | 8450.367  | 6999.397  |
| AA460291  | 8876.878  | 9389.913  | NM_001659 | 13151.049 | 11477.054 | AF237952  | 2977.645  | 2547.846  |
| BI821333  | 12439.299 | 11210.052 | AB020663  | 12379.451 | 11566.777 | AL079287  | 2871.705  | 2376.427  |
| X51841    | 25469.832 | 30371.684 | AF297866  | 1122.625  | 1058.085  | NM_014427 | 2526.436  | 2067.538  |
| AF051344  | 7863.279  | 8371.45   | NM_002864 | 1750.8    | 1724.297  | AB046769  | 1937.994  | 1847.075  |
| BG506100  | 7886.092  | 9998.994  | NM_017817 | 6681.997  | 6277.896  | NM_015922 | 8511.794  | 6828.522  |
| X53586    | 601.958   | 527.239   | NM_018184 | 28923.377 | 36335.539 | NM_020381 | 1987.969  | 2419.162  |
| M17176    | 2057.531  | 2061.201  | AB046823  | 1181.048  | 1846.306  | NM_002957 | 6009.18   | 5160.261  |
| M26576    | 2304.288  | 2733.657  | NM_016639 | 23465.75  | 30788.318 | NM_018106 | 6869.412  | 6261.64   |
| M32972    | 4041.479  | 3158.092  | U61739    | 5142.589  | 5696.09   | NM_003725 | 578.141   | 694.238   |
| D11151    | 469.896   | 417.278   | AJ132089  | 1231.652  | 1410.452  | BE899154  | 2163.026  | 1712.203  |

|           |           |           |           |           |           |           |           |           |
|-----------|-----------|-----------|-----------|-----------|-----------|-----------|-----------|-----------|
| D89854    | 850.195   | 442.859   | U92819    | 30264.338 | 41589.461 | NM_004863 | 2379.282  | 2036.403  |
| M13207    | 1083.104  | 600.979   | AB020626  | 719.349   | 1204.541  | AK024573  | 3236.364  | 2602.688  |
| X14885    | 676.358   | 315.623   | NM_002036 | 4776.505  | 6029.747  | NM_002295 | 2863.019  | 2529.981  |
| M97815    | 1460.391  | 848.146   | NM_005384 | 1333.925  | 1153.797  | NM_015642 | 1201.548  | 1309.774  |
| NM_006325 | 5647.708  | 3862.311  | NM_006850 | 672.409   | 508.153   | NM_004640 | 19163.404 | 21614.016 |
| SR2       | 67157.383 | 54447.695 | Z15114    | 4958.811  | 4063.511  | NM_016222 | 6412.866  | 6235.032  |
| SR4       | 23626.959 | 15095.764 | AB040812  | 21773.959 | 19211.014 | AB037823  | 2900.072  | 2693.239  |
| SR6       | 3196.862  | 2135.342  | NM_017625 | 550.789   | 518.086   | NM_015380 | 9007.279  | 9003.32   |
| SR8       | 12337.512 | 24249.869 | NM_006285 | 5704.04   | 4838.091  | BE254485  | 792.442   | 951.948   |
| SR10      | 39851.219 | 8797.86   | NM_000215 | 7163.943  | 6703.665  | NM_002732 | 702.83    | 579.389   |
| CY3Cy5    | 2384.021  | 92.59     | AK027148  | 12422.684 | 11229.969 | AF085893  | 1154.207  | 792.42    |
| AK025588  | 3803.103  | 3939.773  | NM_005084 | 4924.168  | 4218.595  | NM_002045 | 1563.603  | 1294.334  |
| NM_003185 | 2868.111  | 2694.249  | NM_007283 | 862.97    | 1013.954  | NM_014305 | 3032.115  | 2599.894  |
| NM_007118 | 611.942   | 652.585   | NM_006111 | 5699.799  | 5603.942  | NM_012123 | 5480.134  | 4608.217  |
| U59431    | 4866.255  | 4371.815  | AK026071  | 7165.009  | 8397.805  | U87972    | 906.368   | 604.699   |
| U49349    | 1151.347  | 1047.633  | BC012333  | 8220.722  | 7672.161  | NM_017925 | 2728.038  | 2198.386  |
| NM_020152 | 2745.992  | 1908.824  | AF237952  | 4086.747  | 4779.589  | NM_003171 | 2095.464  | 1881.57   |
| NM_013404 | 2506.125  | 1834.171  | AL079287  | 3125.103  | 4080.592  | NM_006437 | 16295.346 | 13939.931 |
| AF300648  | 2086.996  | 1471.988  | NM_014427 | 3152.254  | 3464.864  | NM_017890 | 1549.191  | 1223.027  |
| NM_003965 | 657.157   | 604.474   | AB046769  | 2709.528  | 3056.521  | AK021654  | 1819.118  | 1521.85   |
| AK024443  | 72677.594 | 64743.801 | NM_015922 | 13690.874 | 14012.759 | NM_016481 | 1149.632  | 704.093   |
| X06710    | 3281.55   | 2495.176  | NM_020381 | 3114.724  | 3672.261  | NM_003925 | 9372.809  | 8328.763  |
| AK000896  | 1453.217  | 900.77    | NM_002957 | 7137.709  | 7674.787  | AF217974  | 4494.362  | 4514.704  |
| NM_020384 | 2807.58   | 2219.229  | NM_018106 | 5512.413  | 6128.448  | NM_000885 | 2754.314  | 3076.559  |
| NM_006055 | 18347.525 | 12988.567 | NM_003725 | 421.842   | 687.242   | NM_000595 | 2546.6    | 2707.623  |
| NM_006625 | 15210.947 | 14401.005 | BE899154  | 1951.026  | 2377.574  | X99663    | 2837.368  | 2731.624  |
| M97496    | 24889.447 | 22432.375 | NM_004863 | 1791.718  | 2473.397  | NM_016552 | 1316.02   | 1085.448  |
| NM_002305 | 578.622   | 374.575   | AK024573  | 2365.512  | 2494.016  | NM_004114 | 946.543   | 773.022   |
| AK026074  | 1631.063  | 1054.818  | NM_002295 | 2817.48   | 2553.262  | NM_018440 | 4984.037  | 4027.208  |
| NM_003172 | 4810.917  | 3033.335  | NM_003830 | 1285.699  | 1205.115  | AK025470  | 848.423   | 539.454   |
| NM_004805 | 2480.694  | 1790.632  | NM_000842 | 2919.952  | 2151.662  | M35410    | 2738.395  | 2087.393  |
| AA903183  | 603.201   | 565.151   | NM_015642 | 2034.584  | 1671.272  | AB023227  | 1123.994  | 665.805   |
| NM_017817 | 6146.605  | 4450.938  | NM_004640 | 20239.096 | 19054.467 | NM_005775 | 15269.085 | 12672.363 |
| NM_018184 | 29389.664 | 21277.545 | NM_016222 | 7674.227  | 7283.005  | AK023071  | 4129.026  | 3275.969  |
| AB046823  | 1832.357  | 1271.704  | AB037823  | 3632.878  | 3855.475  | NM_004041 | 1297.952  | 1168.094  |
| NM_004925 | 1472.222  | 975.388   | NM_015380 | 10553.066 | 9495.158  | AK022888  | 4737.43   | 3638.634  |
| NM_004662 | 1095.08   | 712.037   | BE254485  | 1274.067  | 1605      | AK024484  | 7093.377  | 5592.665  |
| NM_016635 | 37418.426 | 37371.098 | NM_002732 | 951.146   | 918.16    | NM_001953 | 46876.449 | 42948.52  |
| U61739    | 14259.653 | 10058.773 | AF085893  | 727.98    | 657.984   | NM_002292 | 4564.132  | 3490.876  |
| AJ132089  | 1794.313  | 1816.605  | NM_012123 | 9053.205  | 9106.098  | NM_000165 | 372.652   | 547.583   |
| U92819    | 36580.473 | 40404.816 | U87972    | 1480.833  | 1696.721  | AF305200  | 488.576   | 409.661   |
| AB020626  | 1349.202  | 924.426   | NM_017925 | 2468.73   | 2511.672  | AL570170  | 1747.235  | 1717.371  |
| NM_002035 | 15666.288 | 16840.537 | NM_003171 | 3400.951  | 3876.632  | D56495    | 1190.075  | 987.183   |
| NM_012400 | 1308.684  | 1001.772  | NM_017890 | 781.466   | 1068.737  | NM_014583 | 767.04    | 1139.748  |
| NM_005384 | 2929.048  | 2453.08   | AK021654  | 1346.734  | 1359.085  | NM_014180 | 8652.101  | 6990.582  |
| NM_006850 | 529.792   | 497.821   | NM_016481 | 678.125   | 484.027   | NM_017705 | 1695.728  | 1571.171  |
| AB013103  | 1070.945  | 566.539   | NM_003925 | 10143.394 | 10288.576 | AF334406  | 1738.085  | 1637.379  |
| AF019225  | 3984.632  | 2066.052  | AF217974  | 6164.712  | 4803.044  | NM_017444 | 3833.073  | 3089.009  |
| Z36803    | 11087.284 | 7505.929  | NM_000885 | 2917.609  | 3018.529  | NM_018025 | 1972.134  | 1617.464  |
| NM_013371 | 1174.76   | 1181.875  | NM_000595 | 3099.248  | 2639.968  | NM_015995 | 5007.105  | 4595.124  |
| NM_000707 | 8911.587  | 9769.456  | X99663    | 3036.624  | 2777.585  | NM_003804 | 8439.992  | 7079.871  |
| AF202092  | 18310.844 | 21111.754 | NM_016552 | 1347.509  | 1034.769  | NM_018453 | 4680.377  | 3620.872  |
| NM_003201 | 7462.904  | 6502.954  | NM_003565 | 4339.54   | 3972.3    | NM_004705 | 66916.18  | 55709.129 |



|           |           |           |           |           |           |           |           |           |
|-----------|-----------|-----------|-----------|-----------|-----------|-----------|-----------|-----------|
| AB011139  | 2758.39   | 2936.708  | NM_004841 | 1760.739  | 2068.896  | NM_016001 | 5598.339  | 4292.475  |
| NM_006919 | 2225.472  | 1955.966  | NM_004114 | 307.305   | 511.204   | NM_016109 | 20177.055 | 23445.586 |
| AK022625  | 14483.833 | 11198.613 | NM_018440 | 7973.191  | 7888.937  | S49432    | 509.093   | 508.232   |
| NM_005425 | 571.174   | 517.86    | AK025470  | 803.436   | 985.489   | D86984    | 1779.593  | 1843.806  |
| AK023084  | 6538.218  | 5018.868  | AK023071  | 4713.854  | 4229.9    | NM_015959 | 527.838   | 740.618   |
| BC012333  | 9164.155  | 6270.22   | NM_004041 | 1217.594  | 1151.09   | AK026904  | 2699.824  | 3023.912  |
| AF237952  | 4236.466  | 3379.475  | AK022888  | 3137.244  | 3004.407  | NM_001910 | 1277.058  | 1321.06   |
| AL079287  | 4095.979  | 3573.023  | AK024484  | 8325.82   | 8636.576  | J03210    | 2003.567  | 1804.714  |
| NM_014427 | 6589.116  | 6683.98   | NM_001406 | 519.458   | 849.989   | NM_001909 | 6439.708  | 5483.647  |
| AB046769  | 4991.572  | 5379.604  | NM_002292 | 3398.846  | 3355.453  | NM_012199 | 1366.284  | 1339.726  |
| NM_015922 | 17316.609 | 18493.43  | NM_000166 | 1097.26   | 871.63    | NM_003369 | 2208.865  | 2792.493  |
| NM_020381 | 5115.474  | 5915.875  | AF305200  | 383.623   | 557.252   | AB040886  | 650.032   | 1107.395  |
| NM_002957 | 12486.004 | 11708.089 | AL570170  | 2639.149  | 2694.091  | NM_012333 | 7054.859  | 6437.085  |
| NM_018106 | 9560.916  | 13406.736 | D56495    | 2770.705  | 1856.957  | AF217798  | 1465.875  | 1386.111  |
| NM_003725 | 1111.556  | 1206.345  | NM_014583 | 1093.206  | 551.177   | AF161472  | 2916.126  | 2761.479  |
| BE899154  | 3949.424  | 4475.639  | NM_006613 | 9155.883  | 6952.126  | AL133642  | 6428.969  | 5595.131  |
| NM_004863 | 4029.027  | 4567.568  | NM_004639 | 14049.343 | 11752.228 | AB011154  | 1211.687  | 885.015   |
| AK024573  | 4642.452  | 5501.45   | NM_005373 | 792.34    | 368.914   | AF124432  | 2172.882  | 1722.007  |
| NM_002299 | 7400.429  | 6633.437  | L40027    | 2538.875  | 2391.618  | NM_006330 | 11139.379 | 11159.012 |
| D79998    | 51425.645 | 53404.828 | NM_003719 | 35732.203 | 36692.355 | NM_015873 | 2232.696  | 2753.576  |
| AB032963  | 2750.943  | 2633.746  | NM_007062 | 1438.821  | 1373.593  | NM_000377 | 3963.941  | 5909.754  |
| NM_000385 | 2384.621  | 2796.248  | NM_014180 | 17564.645 | 13131.165 | NM_006819 | 1059.232  | 1306.553  |
| AF301013  | 6350.5    | 7158.059  | NM_017706 | 3174.073  | 3007.01   | NM_016823 | 2531.833  | 3124.609  |
| U15688    | 5422.849  | 6378.363  | AF334406  | 1614.091  | 1752.484  | NM_003120 | 11731.295 | 11327.035 |
| NM_018449 | 8991.684  | 9702.688  | NM_017444 | 3900.425  | 4336.585  | X52360    | 1729.094  | 2068.59   |
| NM_001659 | 24153.141 | 29576.266 | NM_015999 | 5917.864  | 6585.366  | NM_002639 | 13429.49  | 13232.465 |
| AB020663  | 18439.031 | 21800.412 | NM_003804 | 8842.556  | 8274.653  | NM_016494 | 16341.665 | 17286.465 |
| AF297866  | 2939.728  | 2887.805  | NM_018453 | 3903.123  | 3677.12   | U09410    | 2645.75   | 2636.685  |
| NM_002864 | 2429.416  | 2718.356  | NM_004709 | 66760.992 | 57970.16  | NM_001186 | 5605.65   | 5033.012  |
| NM_003102 | 883.511   | 774.643   | NM_016001 | 9990.759  | 9899.067  | NM_004502 | 2415.821  | 2473.051  |
| NM_014305 | 5741.55   | 6481.786  | S49432    | 792.211   | 902.314   | AF000560  | 7809.657  | 8239.441  |
| NM_012123 | 14536.859 | 15362.915 | D86984    | 1708.331  | 1675.687  | NM_013282 | 4266.433  | 5062.867  |
| U87972    | 3994.751  | 4536.748  | NM_015959 | 880.679   | 581.504   | NM_005777 | 5539.04   | 6061.549  |
| NM_017925 | 4195.418  | 4782.287  | AK026904  | 3675.322  | 3858.119  | NM_012345 | 1680.056  | 2242.449  |
| NM_003171 | 5961.929  | 6202.182  | AB002364  | 640.026   | 470.575   | NM_005829 | 9583.198  | 12825.419 |
| NM_006437 | 22276.496 | 26830.627 | NM_001910 | 1338.732  | 1350.712  | NM_015001 | 5718.391  | 5297.995  |
| NM_017890 | 3069.683  | 3342.719  | J03210    | 2239.878  | 2277.387  | NM_019027 | 1341.942  | 1306.687  |
| AK021654  | 4206.269  | 3974.555  | NM_001909 | 7918.289  | 9531.547  | NM_016107 | 2433.74   | 2118.247  |
| NM_016481 | 1968.69   | 1898.39   | NM_012199 | 2576.559  | 2416.605  | NM_002567 | 16258.589 | 13612.338 |
| NM_003925 | 23218.76  | 23672.928 | NM_003369 | 3156.645  | 3054.88   | NM_001404 | 2790.228  | 2390.303  |
| Z15114    | 7835.888  | 8170.653  | AB040886  | 1106.814  | 948.938   | NM_001605 | 24392.547 | 33666.797 |
| AB040812  | 27204.389 | 33131.473 | AB029020  | 2142.82   | 1668.546  | AF225422  | 6485.292  | 6447.364  |
| NM_017625 | 1031.79   | 916.737   | AK022759  | 2440.774  | 2387.808  | AB040960  | 7600.066  | 8906.701  |
| NM_006285 | 8889.573  | 9171.269  | NM_012333 | 7232.547  | 6781.243  | NM_015949 | 2409.941  | 2821.564  |
| NM_001349 | 4403.496  | 4880.253  | AF217798  | 1291.426  | 1269.482  | NM_006303 | 6514.513  | 9209.21   |
| AK027148  | 29011.387 | 36319.762 | AF161472  | 2489.348  | 2062.36   | AL080219  | 3683.073  | 3652.874  |
| NM_005084 | 7232.947  | 7085.132  | AL133642  | 5933.054  | 5658.472  | AK026709  | 466.103   | 386.571   |
| NM_007283 | 1461.188  | 1501.853  | AB011154  | 662.197   | 925.277   | AK024165  | 496.301   | 468.043   |
| NM_006111 | 6868.494  | 5543.083  | AF124432  | 3391.928  | 3013.647  | NM_003001 | 1678.439  | 1424.98   |
| AK026071  | 10335.679 | 8992.542  | NM_006330 | 12399.119 | 11378.178 | NM_001985 | 2466.642  | 3186.376  |
| AK026074  | 2097.596  | 2558.151  | NM_015873 | 2850.04   | 3016.217  | NM_000102 | 719.504   | 753.299   |
| NM_003172 | 6700.057  | 6826.596  | NM_000377 | 3743.042  | 3857.809  | NM_002490 | 17142.475 | 17354.418 |
| NM_004809 | 4229.732  | 4312.452  | NM_006819 | 816.421   | 933.817   | BE563532  | 958.098   | 1077.223  |

|           |           |           |           |           |           |           |           |           |
|-----------|-----------|-----------|-----------|-----------|-----------|-----------|-----------|-----------|
| AA903183  | 1018.649  | 1062.799  | NM_016823 | 2332.228  | 2153.043  | NM_001916 | 7206.692  | 7585.134  |
| H41522    | 4431.545  | 5466.354  | NM_003120 | 13702.254 | 12250.042 | NM_002491 | 1092.773  | 1192.746  |
| AA460291  | 11806.314 | 14295.76  | X52360    | 2654.355  | 2213.398  | NM_015425 | 1975.461  | 1947.195  |
| BI821333  | 18841.18  | 23057.93  | NM_002636 | 19485.238 | 17825.613 | NM_015153 | 3805.757  | 4642.352  |
| X51841    | 30181.957 | 44533.793 | NM_016494 | 22856.264 | 21616.742 | AB032966  | 8547.541  | 8999.262  |
| AF051344  | 11573.065 | 14037.157 | U09410    | 5345.888  | 4916.348  | NM_014820 | 7068.89   | 6105.27   |
| BG506100  | 9919.057  | 10238.223 | NM_020229 | 796.563   | 1044.509  | NM_005035 | 1177.123  | 915.75    |
| X53586    | 1187.424  | 1326.427  | NM_001186 | 6861.916  | 9793.622  | NM_019014 | 3780.059  | 3392.906  |
| M17176    | 3232.421  | 3399.352  | NM_004502 | 3071.345  | 2993.722  | NM_002097 | 15300.466 | 16367.966 |
| M26576    | 2110.319  | 2422.017  | AF000560  | 8842.388  | 8994.358  | X04706    | 1924.652  | 1826.299  |
| M32972    | 6051.25   | 5397.549  | NM_013282 | 5427.231  | 5217.133  | NM_018035 | 930.836   | 844.385   |
| D11151    | 617.111   | 609.744   | NM_005777 | 7093.392  | 6488.196  | NM_006494 | 3726.432  | 3538.088  |
| D89854    | 1242.268  | 1486.716  | NM_012345 | 2100.69   | 2263.708  | X52343    | 3706.527  | 4082.961  |
| M13207    | 1226.247  | 1726.498  | U94387    | 475.066   | 554.188   | NM_005853 | 11701.763 | 10958.289 |
| X14885    | 761.433   | 1037.285  | NM_005826 | 12164.556 | 10800.74  | X99681    | 653.277   | 579.122   |
| M97815    | 1617.002  | 2014.471  | NM_004592 | 2323.104  | 2092.931  | NM_014065 | 522.678   | 633.589   |
| NM_006325 | 8119.247  | 8430.777  | NM_015001 | 3737.308  | 3585.645  | NM_017814 | 2355.519  | 2811.115  |
| AF085893  | 1626.246  | 1163.189  | NM_019027 | 1173.981  | 853.914   | AF074996  | 711.518   | 457.904   |
| NM_003201 | 6874.178  | 7770.562  | NM_016107 | 2862.571  | 3286.566  | AF131811  | 951.888   | 956.708   |
| AB011139  | 4504.524  | 5403.71   | NM_002567 | 22414.508 | 22626.055 | AF293026  | 8048.854  | 9259.025  |
| NM_006915 | 2732.096  | 3486.39   | NM_001404 | 3306.479  | 3097.636  | AF236158  | 1254.465  | 2395.272  |
| AK022625  | 20481.908 | 24209.434 | NM_001605 | 28573.521 | 36963.813 | AK026320  | 886.622   | 1216.156  |
| NM_005425 | 901.112   | 992.844   | AF225422  | 7436.654  | 6653.115  | AL137530  | 2082.801  | 1828.946  |
| AK023084  | 9956.555  | 10721.357 | AB040960  | 6587.774  | 6660.405  | NM_015953 | 5962.116  | 6465.959  |
| AK025588  | 4306.982  | 5029.098  | NM_015946 | 2270.186  | 1770.54   | AF147310  | 899.143   | 673.564   |
| NM_003185 | 6533.217  | 8225.535  | NM_006303 | 5596.422  | 4328.076  | AK024775  | 2946.719  | 3642.846  |
| NM_007118 | 1095.501  | 1385.937  | AL080059  | 811.326   | 622.387   | AK025562  | 1742.302  | 2249.696  |
| U59431    | 7520.064  | 8826.419  | AL080219  | 4985.571  | 4036.951  | AF088024  | 1455.827  | 1604.39   |
| U49349    | 1727.555  | 2260.999  | AK024165  | 612.727   | 600.677   | AK025887  | 1831.054  | 2173.091  |
| NM_020152 | 4217.172  | 4534.801  | NM_003001 | 1866.582  | 1507.029  | AB037719  | 2177.208  | 2184.891  |
| NM_013404 | 2862.38   | 3321.093  | NM_001985 | 3113.442  | 3774.992  | AF086229  | 464.916   | 438.308   |
| AF300648  | 4028.207  | 4052.925  | NM_000102 | 826.609   | 1069.696  | AK026143  | 1669.852  | 1257.247  |
| NM_002364 | 559.579   | 479.889   | NM_002490 | 18357.461 | 16377.662 | AL137578  | 709.775   | 518.472   |
| NM_003966 | 881.554   | 1078.233  | BE563532  | 927.03    | 1047.094  | AL110252  | 1049.033  | 564.255   |
| AK024443  | 69272.258 | 64329.191 | NM_001916 | 7607.538  | 6721.788  | AL050143  | 784.299   | 1073.399  |
| X06710    | 4930.572  | 5072.278  | NM_002491 | 1106.756  | 1102.549  | AL137616  | 901.366   | 1129.083  |
| AK000896  | 2267.019  | 2211.462  | NM_015425 | 1717.117  | 1295.49   | AK021752  | 1023.232  | 1184.74   |
| NM_003872 | 180.475   | 1120.637  | NM_015153 | 4289.627  | 3931.983  | AL109706  | 5985.418  | 6713.792  |
| NM_020384 | 3853.783  | 3953.205  | AB032966  | 11297.923 | 10744.266 | AK001118  | 862.225   | 921.03    |
| NM_006055 | 18389.162 | 14186.59  | NM_014820 | 5515.819  | 4207.47   | AF035291  | 57227.75  | 54327.773 |
| NM_006625 | 13660.144 | 9934.68   | NM_005035 | 1374.76   | 921.291   | AL080208  | 655.939   | 658.63    |
| M97496    | 20243.447 | 16837.82  | NM_019014 | 4013.027  | 3900.805  | L35592    | 7601.455  | 6718.92   |
| NM_018445 | 8330.756  | 9840.682  | NM_002097 | 15959.228 | 15559.118 | NM_012075 | 1101.681  | 1162.581  |
| NM_001655 | 21616.793 | 28946.875 | X04706    | 2426.488  | 2167.561  | AL360274  | 10451.921 | 10846.472 |
| AB020663  | 18028.063 | 21900.457 | NM_018035 | 745.302   | 603.022   | AK021858  | 776.361   | 947.226   |
| AF297866  | 2615.001  | 3908.447  | NM_006494 | 4336.054  | 4253.424  | NM_014050 | 5519.313  | 5548.126  |
| NM_002864 | 2355.942  | 3718.067  | X52343    | 2823.903  | 2842.512  | AF085854  | 445.98    | 877.703   |
| NM_017817 | 7234.726  | 8235.198  | NM_005853 | 8250.913  | 6710.921  | AF074997  | 557.211   | 1209.958  |
| NM_018184 | 30668.619 | 37219.773 | X99681    | 744.719   | 452.112   | AK027027  | 870.141   | 834.433   |
| AB046823  | 1834.389  | 2195.489  | NM_014065 | 686.218   | 632.044   | AF009289  | 2409.527  | 3249.317  |
| NM_004925 | 1837.323  | 2107.423  | NM_017814 | 3538.651  | 2845.062  | AF040247  | 810.555   | 1795.461  |
| NM_004662 | 1450.904  | 1915.199  | AF131811  | 1684.868  | 1415.184  | AF009303  | 845.452   | 979.039   |
| NM_016635 | 53122.23  | 54183.91  | AF293026  | 9455.672  | 8282.066  | NM_004474 | 1392.556  | 1551.945  |

|           |           |           |           |           |           |            |           |           |
|-----------|-----------|-----------|-----------|-----------|-----------|------------|-----------|-----------|
| U61739    | 17113.846 | 16810.164 | AF236158  | 1389.067  | 1157.435  | AF056449   | 551.206   | 954.801   |
| AJ132089  | 2057.867  | 2161.697  | AF217986  | 4900.422  | 4077.829  | AK001033   | 796.216   | 1496.866  |
| U92819    | 36627.59  | 33572.789 | AK026320  | 978.48    | 1045.896  | AK021463   | 674.451   | 630.473   |
| AB020626  | 1340.168  | 653.514   | AL137530  | 2411.672  | 1904.651  | AK001082   | 1500.94   | 2082.203  |
| NM_002036 | 15988.397 | 12481.847 | NM_015953 | 7354.621  | 6125.788  | AK021521   | 934.688   | 758.023   |
| NM_012400 | 974.294   | 970.808   | AF147310  | 1022.941  | 850.088   | AK021743   | 1336.946  | 1437.847  |
| NM_005384 | 3020.788  | 2903.788  | AK024775  | 2106.352  | 2018.406  | AK026699   | 949.874   | 604.13    |
| NM_006850 | 903.73    | 828.972   | AK025562  | 1640.129  | 1398.755  | AK025589   | 1583.829  | 2341.945  |
| AB013103  | 1122.989  | 903.287   | AF088024  | 1949.216  | 1484.683  | AK026734   | 415.606   | 680.354   |
| AF019225  | 5600.106  | 4932.817  | AK025887  | 1602.069  | 939.027   | NM_016633  | 11972.921 | 12636.34  |
| Z36803    | 14368.547 | 13375.606 | AB037719  | 1557.905  | 1335.166  | AK023250   | 4661.469  | 5183.21   |
| NM_013371 | 1361.79   | 980.773   | AF086229  | 413.23    | 519.516   | AK024882   | 2408.205  | 3810.44   |
| NM_000707 | 7338.506  | 5115.054  | AK026143  | 1471.158  | 1145.877  | NM_014062  | 18332.352 | 24188.891 |
| AF202092  | 12748.195 | 9100.865  | AL137578  | 439.16    | 451.121   | NM_006304  | 41238.371 | 45156.781 |
| AK027148  | 27760.029 | 37570.313 | AL050143  | 1117.522  | 936.927   | AF293367   | 1723.664  | 1643.758  |
| NM_005084 | 6950.385  | 8195.773  | AL137616  | 1294.642  | 1046.883  | AF086231   | 2443.583  | 2540.201  |
| NM_007283 | 1707.342  | 1702.732  | AK021752  | 1092.882  | 722.769   | AK001494   | 1254.953  | 1299.064  |
| NM_006111 | 8421.4    | 10249.074 | AL050012  | 868.14    | 486.317   | AL133438   | 2074.719  | 2089.551  |
| AK026071  | 11530.902 | 13747.465 | AL109706  | 6765.994  | 5796.072  | unknown (S | 602.415   | 299.805   |
| BC012333  | 10166.771 | 9150.354  | AK001118  | 922.773   | 814.742   | AK022310   | 846.794   | 571.718   |
| AF237952  | 5231.797  | 4843.011  | AF035291  | 48668.477 | 39269.508 | AK021784   | 804.917   | 872.813   |
| AL079287  | 5115.941  | 4184.279  | AK026291  | 4539.431  | 4143.841  | AF230800   | 836.324   | 1046.368  |
| NM_014427 | 6719.72   | 6638.759  | AL080208  | 636.252   | 554.261   | NM_018520  | 1302.036  | 1709.782  |
| AB046769  | 5201.028  | 5418.256  | L35592    | 6610.046  | 5020.201  | AK026647   | 1468.982  | 1680.639  |
| NM_015922 | 16705.096 | 17341.002 | NM_012079 | 1348.74   | 1528.059  | AK022152   | 1074.182  | 1117.583  |
| NM_020381 | 5307.947  | 4193.016  | BC017695  | 488.937   | 875.281   | NM_003534  | 42588.699 | 46277.191 |
| NM_002957 | 12275.862 | 8164.961  | AL360274  | 15154.596 | 20161.447 | L08437     | 2522.614  | 2493.729  |
| NM_018106 | 7949.869  | 6171.619  | AK021858  | 2037.848  | 3064.952  | AK057143   | 9984.966  | 10411.761 |
| NM_003725 | 540.523   | 675.345   | NM_014050 | 5214.872  | 4786.219  | NM_015594  | 12672.763 | 13866.66  |
| BE899154  | 2552.968  | 1849.903  | AF085854  | 960.327   | 848.427   | AF056423   | 1720.593  | 1660.59   |
| NM_004863 | 2937.189  | 1958.932  | AF074997  | 723.733   | 596.671   | U00956     | 640.403   | 583.182   |
| AK024573  | 3639.198  | 2315.576  | AK027027  | 851.799   | 787.434   | X04293     | 848.462   | 677.682   |
| NM_002299 | 5431.513  | 3455.975  | NM_014911 | 426.533   | 574.529   | AK026475   | 566.49    | 514.653   |
| D79998    | 45654.598 | 41658.453 | AF009289  | 2786.385  | 2438.078  | U00962     | 7829.036  | 7430.545  |
| AB032963  | 2492.05   | 1784.916  | AF040247  | 997.774   | 844.595   | NM_000522  | 4598.965  | 3094.49   |
| NM_000385 | 1678.754  | 1273.188  | AF009303  | 1958.504  | 1668.834  | AK026130   | 8125.458  | 7235.637  |
| AF301013  | 5453.471  | 3828.691  | NM_004474 | 2147.251  | 1694.407  | NM_012480  | 3768.041  | 3489.154  |
| NM_018992 | 68138.188 | 55168.785 | AF056449  | 712.661   | 763.76    | AK024144   | 4161.866  | 5368.891  |
| U15688    | 3644.16   | 2520.651  | AK001033  | 1301.432  | 943.771   | Y08959     | 750.06    | 846.055   |
| NM_006325 | 6496.337  | 5728.965  | AK001781  | 601.862   | 557.348   | NM_005346  | 6369.414  | 6186.115  |
| AF085893  | 2127.452  | 2414.503  | AK021463  | 916.648   | 696.429   | NM_005343  | 17706.533 | 15910.806 |
| NM_014305 | 4200.107  | 2645      | AK001082  | 1582.422  | 1383.499  | AF196865   | 955.809   | 1105.771  |
| NM_012123 | 9977.418  | 5573.574  | AK021521  | 820.033   | 720.784   | AJ008114   | 36079.578 | 40219.129 |
| U87972    | 2614.99   | 1676.551  | AK021743  | 1006.429  | 847.888   | AF147432   | 2198.054  | 2429.509  |
| NM_017925 | 3643.844  | 2398.906  | AK026699  | 909.258   | 1015.446  | AK024690   | 1090.865  | 1667.384  |
| NM_003171 | 4737.771  | 2482.808  | AK025589  | 2662.147  | 2614.412  | BC005946   | 49498.934 | 42314.242 |
| NM_006437 | 16020.695 | 10847.856 | NM_016633 | 15529.143 | 12206.041 | AK021893   | 1766.925  | 2227.249  |
| NM_017890 | 1463.252  | 942.66    | AK023250  | 4826.659  | 4347.355  | NM_001048  | 12515.971 | 12640.616 |
| AK021654  | 2802.001  | 2162.597  | AK024882  | 3185.351  | 2697.934  | AK026497   | 5404.804  | 4768.549  |
| NM_016481 | 1100.664  | 808.253   | NM_014062 | 18314.961 | 14624.231 | BE958139   | 1072.089  | 1012.422  |
| NM_003925 | 16504.732 | 12861.621 | NM_006304 | 42022.035 | 40678.551 | AF085359   | 913.839   | 683.786   |
| Z15114    | 7237.043  | 6222.933  | X74804    | 765.833   | 764.656   | AF086516   | 903.724   | 1158.63   |
| AB040812  | 25865.602 | 26576.844 | AF293367  | 2060.471  | 1723.219  | D86978     | 4662.271  | 4318.808  |

|           |           |           |           |           |           |           |           |           |
|-----------|-----------|-----------|-----------|-----------|-----------|-----------|-----------|-----------|
| NM_017625 | 550.446   | 554.973   | AF086231  | 2913.681  | 3200.131  | AL080060  | 2074.632  | 2129.29   |
| NM_006285 | 7139.694  | 6177.697  | AK001494  | 1247.354  | 1268.447  | NM_005267 | 1479.207  | 1777.755  |
| NM_003656 | 71612.789 | 61894.398 | AL133438  | 2012.74   | 1589.751  | U80763    | 707.599   | 624.486   |
| NM_001348 | 3018.361  | 2924.783  | AK022310  | 504.13    | 740.448   | AF086017  | 1445.766  | 2252.222  |
| NM_020384 | 3416.236  | 2170.928  | AK021784  | 973.393   | 907.719   | AJ227894  | 623.058   | 446.999   |
| NM_006058 | 15044.604 | 8203.404  | AF230800  | 824.8     | 787.19    | NM_020357 | 13611.459 | 11580.561 |
| NM_006628 | 9532.399  | 5130.965  | NM_018520 | 1161.949  | 1281.489  | AK026836  | 1815.13   | 1727.013  |
| M97496    | 19242     | 11881.553 | AK026647  | 1196.954  | 1412.028  | T59562    | 16206.607 | 15177.096 |
| AK026074  | 1241.526  | 893.587   | AK022152  | 886.845   | 824.186   | NM_018219 | 1135.589  | 1061.946  |
| NM_003172 | 4265.145  | 2484.608  | NM_003534 | 55784.684 | 43519.738 | NM_014114 | 2225.779  | 2002.611  |
| NM_004809 | 2997.351  | 1985.064  | L08437    | 3158.752  | 2642.075  | U62822    | 4276.436  | 2488.267  |
| AA903183  | 1516.768  | 1011.322  | AK057143  | 10049.378 | 9428.601  | CY3Cy5    | 20327.117 | 1485.274  |
| H41522    | 2798.368  | 2274.004  | NM_015594 | 11380.947 | 8978.073  | AA220921  | 2620.265  | 3782.507  |
| AA460291  | 10030.313 | 7997.889  | AF056423  | 1652.342  | 1867.642  | N67770    | 433.618   | 584.032   |
| BI821333  | 13503.651 | 10539.14  | U00956    | 640.71    | 757.781   | AA486200  | 46362.621 | 51517.797 |
| X51841    | 25364.762 | 24667.592 | X04293    | 798.675   | 669.662   | AJ005898  | 1595.547  | 2162.302  |
| AF051344  | 7648.818  | 7786.813  | AK026475  | 762.26    | 784.301   | X57303    | 2428.091  | 3645.254  |
| BG506100  | 7184.99   | 7985.857  | K01884    | 984.979   | 1141.681  | BG248802  | 1872.228  | 1937.663  |
| X53586    | 755.506   | 956.857   | U00962    | 9337.08   | 8402.095  | L19605    | 682.266   | 1093.184  |
| M17176    | 2591.897  | 3225.19   | NM_000522 | 4260.012  | 2422.878  | AA876532  | 1812.188  | 1668.34   |
| M26576    | 1635.934  | 2302.237  | AK026130  | 10032.172 | 7295.498  | S74349    | 1249.035  | 1737.985  |
| M32972    | 5284.792  | 5799.557  | NM_012480 | 2884.982  | 2460.311  | X07979    | 19005.9   | 25583.971 |
| D11151    | 711.801   | 534.814   | AK024144  | 5672.245  | 4985.488  | BG324670  | 648.963   | 686.835   |
| D89854    | 982.293   | 947.128   | Y08959    | 972.342   | 535.789   | BG744224  | 7587.839  | 9724.698  |
| M13207    | 1072.781  | 1192.216  | NM_005346 | 5744.475  | 4989.393  | NM_006079 | 33612.941 | 50432.715 |
| X14885    | 409.016   | 899.164   | NM_005343 | 12771.458 | 11501.391 | NM_006696 | 2603.605  | 3246.596  |
| M97815    | 1379.972  | 1508.875  | AB032985  | 438.464   | 611.017   | SR5       | 4636.909  | 5306.996  |
| AB013103  | 834.612   | 697.894   | AF196865  | 1060.48   | 1122.543  | SR7       | 7128.384  | 47156.934 |
| AF019225  | 3248.613  | 2193.538  | AJ008114  | 44598.805 | 40548.895 | SR9       | 23076.18  | 5358.377  |
| Z36803    | 7553.197  | 3935.621  | AF147432  | 1727.329  | 1724.763  | CY3Cy5    | 16760.088 | 657.56    |
| NM_013371 | 796.728   | 695.067   | AK024690  | 1630.596  | 1601.989  | AK002163  | 2090.135  | 2468.539  |
| NM_000707 | 6257.904  | 4439.847  | BC005946  | 56154.531 | 43338.754 | NM_002287 | 5738.912  | 7177.166  |
| AF202092  | 13209.638 | 12202.069 | AK021893  | 2351.365  | 1757.09   | NM_012344 | 494.244   | 798.039   |
| NM_003201 | 5088.999  | 4734.421  | NM_001048 | 12022.167 | 9696.719  | NM_002351 | 1107.926  | 1125.306  |
| AB011139  | 2272.856  | 2059.307  | AK026497  | 6220.056  | 5535.562  | NM_014385 | 689.237   | 874.871   |
| NM_006919 | 1483.942  | 1611.223  | BE958139  | 1563.293  | 1248.919  | NM_001704 | 564.395   | 715.079   |
| AK022625  | 13338.458 | 13427.933 | AF085359  | 824.862   | 826.24    | AB036432  | 3872.577  | 4171.754  |
| NM_005425 | 677.726   | 739.206   | AF086516  | 1265.646  | 1369.01   | NM_014872 | 3635.523  | 4171.162  |
| AK023084  | 7408.267  | 8788.001  | D86978    | 5418.584  | 5467.525  | NM_003643 | 589.562   | 916.222   |
| AK025588  | 3277.777  | 3846.543  | AL080060  | 3588.724  | 2663.229  | NM_003480 | 911.13    | 1543.265  |
| NM_003188 | 3297.776  | 3378.956  | NM_005267 | 1929.403  | 1803.318  | NM_000899 | 665.998   | 1083.958  |
| NM_007118 | 867.824   | 840.554   | U80763    | 984.037   | 795.18    | NM_032951 | 1696.609  | 1728.948  |
| U59431    | 5155.215  | 6999.47   | AF086017  | 1383.664  | 1785.315  | NM_000503 | 3091.036  | 3850.151  |
| U49349    | 1225.748  | 1395.09   | AK024978  | 4778.91   | 3692.72   | NM_002405 | 1671.534  | 1964.14   |
| NM_020152 | 2772.556  | 3594.667  | U12897    | 3681.129  | 2983.675  | AK000004  | 1550.728  | 1189.711  |
| NM_013404 | 2426.272  | 2811.254  | NM_020357 | 12163.852 | 9991.843  | NM_012421 | 13550.603 | 17419.943 |
| AF300648  | 3584.344  | 4455.789  | AK026836  | 1842.016  | 1486.849  | AB014601  | 2959.184  | 2728.742  |
| NM_003966 | 680.953   | 1004.086  | T59562    | 19249.441 | 14346.563 | AF022654  | 874.999   | 1062.357  |
| AK024443  | 64509.852 | 55619.758 | NM_018219 | 1297.923  | 1166.154  | AK022638  | 4544.914  | 4956.495  |
| X06710    | 3928.346  | 4315.95   | AK026368  | 588.94    | 605.56    | BG698409  | 803.8     | 952.988   |
| AK000896  | 1711.913  | 1786.722  | NM_014114 | 2511.811  | 2199.304  | AF224741  | 698.125   | 919.935   |
| D79998    | 34712.699 | 39886.102 | U62822    | 4697.738  | 2223.093  | NM_006594 | 1810.464  | 2329.511  |
| AB032963  | 2022.979  | 1881.39   | CY3Cy5    | 6823.772  | 323.839   | NM_004177 | 655.148   | 1026.722  |

|           |           |           |           |           |           |           |           |           |
|-----------|-----------|-----------|-----------|-----------|-----------|-----------|-----------|-----------|
| NM_000385 | 1508.94   | 1495.933  | AA220921  | 8204.01   | 6962.751  | NM_012425 | 826.307   | 749.066   |
| AF301013  | 3951.955  | 4069.79   | AA486200  | 61551.344 | 57070.332 | NM_004871 | 1388.742  | 1720.824  |
| NM_018992 | 64596.996 | 54456.57  | AJ005898  | 2488.15   | 1982.676  | NM_005695 | 5081.02   | 5173.041  |
| U15688    | 3984.373  | 4154.457  | X57303    | 2999.819  | 2928.906  | AF202146  | 3290.212  | 3901.376  |
| NM_000483 | 52590.738 | 53111.375 | BG248802  | 5936.367  | 4386.336  | NM_014923 | 1567.489  | 2159.187  |
| NM_018445 | 5120.776  | 8439.856  | L19605    | 1478.639  | 1809.385  | NM_005477 | 1954.909  | 2797.575  |
| NM_001655 | 13928.062 | 16346.188 | AA876532  | 4265.784  | 4129.1    | NM_004315 | 560.457   | 627.674   |
| AB020663  | 11758.33  | 13369.656 | S74349    | 1771.446  | 1523.458  | NM_002640 | 1747.917  | 1948.405  |
| AF297866  | 2276.662  | 2094.953  | X07979    | 21779.82  | 18503.463 | M15530    | 3557.681  | 4105.587  |
| NM_002864 | 1415.323  | 1665.896  | BG744224  | 11433.029 | 11853.962 | NM_014207 | 4474.528  | 3920.981  |
| NM_017817 | 5965.569  | 6031.56   | NM_006079 | 35078.543 | 46006.031 | NM_001634 | 12845.348 | 13454.352 |
| NM_018184 | 29090.035 | 35829.418 | NM_006696 | 3902.06   | 5959.924  | NM_002267 | 2968.529  | 3895.344  |
| AB046823  | 1636.187  | 1846.637  | SR5       | 6263.453  | 6211.92   | NM_006412 | 7347.643  | 9123.231  |
| NM_004925 | 1134.105  | 1527.892  | SR7       | 8434.272  | 46817.688 | NM_003063 | 2227.108  | 2981.921  |
| NM_004662 | 1300.389  | 1196.306  | SR9       | 33873.777 | 7822.538  | NM_014041 | 29168.021 | 40878.629 |
| NM_016635 | 29507.74  | 36838.66  | CY3Cy5    | 7501.437  | 276.953   | NM_007165 | 2046.892  | 2731.76   |
| U61739    | 12962.402 | 13929.269 | AK002163  | 2333.741  | 2139.983  | NM_014313 | 309.611   | 679.424   |
| AJ132089  | 1378.48   | 2061.085  | NM_002287 | 11385.876 | 9082.649  | AK024966  | 2085.262  | 2097.941  |
| U92819    | 35278.602 | 48489.148 | NM_012344 | 1013.139  | 959.757   | AF178941  | 6721.32   | 8893.908  |
| AB020626  | 1607.979  | 1565.709  | NM_002351 | 1385.904  | 1457.454  | NM_016033 | 2645.65   | 3101.521  |
| NM_002035 | 16206.51  | 17465.092 | NM_014385 | 942.812   | 903.165   | NM_017585 | 3083.74   | 3089.854  |
| NM_012400 | 865.95    | 918.274   | NM_001704 | 1103.846  | 1058.493  | U61737    | 16528.707 | 19593.629 |
| NM_005384 | 2323.258  | 2819.701  | AB036432  | 7533.984  | 5764.068  | NM_000033 | 2206.005  | 2147.51   |
| NM_006850 | 1172.698  | 1168.329  | NM_014872 | 7325.939  | 6073.712  | NM_014861 | 406.131   | 757.383   |
| Z15114    | 5283.324  | 5191.903  | NM_003643 | 1100.306  | 1440.803  | NM_012434 | 1272.2    | 1215.145  |
| AB040812  | 20767.646 | 22423.588 | NM_003480 | 975.304   | 1132.017  | NM_005694 | 6350.172  | 5341.545  |
| NM_017625 | 569.511   | 585.851   | NM_000895 | 812.093   | 668.218   | NM_014865 | 4747.081  | 6634.251  |
| NM_006285 | 6569.251  | 8182.67   | NM_032951 | 2635.278  | 2724.803  | AL442089  | 3092.042  | 3835.865  |
| NM_001345 | 2488.059  | 3300.683  | NM_000503 | 3034.888  | 2823.617  | NM_001200 | 1489.324  | 2023.736  |
| NM_000215 | 8679.442  | 10354.97  | NM_002405 | 2022.513  | 1815.351  | AF128541  | 2222.055  | 2895.364  |
| AK027148  | 20595.709 | 21309.117 | AK000004  | 1467.934  | 1537.64   | AK026305  | 1335.193  | 1504.658  |
| NM_005084 | 4459.141  | 5072.015  | NM_012421 | 30681.262 | 36313.984 | NM_002552 | 2234.914  | 2949.592  |
| NM_007283 | 958.31    | 994.76    | AB014601  | 2497.376  | 2997.551  | NM_014321 | 3477.627  | 4964.013  |
| NM_006111 | 6021.52   | 6150.31   | AF022654  | 1664.051  | 1895.368  | AK022733  | 1737.809  | 1484.364  |
| AK026071  | 8613.221  | 9500.963  | NM_001143 | 970.742   | 1010.71   | AB011132  | 4301.323  | 4915.975  |
| BC012333  | 8618.142  | 8261.688  | NM_003282 | 1599.123  | 3030.964  | NM_020362 | 2064.078  | 3145.028  |
| AF237952  | 4418.375  | 4644.541  | AK022638  | 6907.042  | 8298.223  | AB040937  | 1840.147  | 2893.071  |
| AL079287  | 3860.893  | 4750.446  | AF224741  | 781.856   | 672.903   | AF275798  | 20834.684 | 29158.125 |
| NM_014427 | 6199.544  | 7069.909  | NM_006594 | 1990.243  | 1845.254  | NM_005441 | 7644.321  | 8529.573  |
| AB046769  | 4215.995  | 4426.352  | NM_004177 | 991.306   | 1462.87   | NM_016075 | 10594.188 | 11435.744 |
| NM_015922 | 14289.81  | 14320.237 | NM_012425 | 967.836   | 953.535   | AK023108  | 2039.557  | 2184.852  |
| NM_020381 | 5665.849  | 6169.619  | NM_004871 | 4502.373  | 4013.019  | AK026409  | 12128.927 | 13893.702 |
| NM_002957 | 12732.113 | 13129.213 | NM_005695 | 7888.044  | 6935.262  | AF097025  | 5452.833  | 5315.898  |
| NM_018105 | 9860.224  | 11629.922 | AF202146  | 5213.103  | 4274.563  | Y11339    | 4069.659  | 4445.64   |
| NM_003725 | 863.502   | 823.083   | NM_014923 | 1160.23   | 1339.713  | AB030176  | 972.665   | 1120.111  |
| BE899154  | 2935.034  | 3149.052  | NM_005477 | 3792.208  | 4074.685  | NM_003937 | 5520.175  | 5034.732  |
| NM_004863 | 3534.723  | 3853.316  | NM_007015 | 627.763   | 850.781   | NM_002537 | 4834.771  | 4905.562  |
| AK024573  | 3385.292  | 3796.521  | NM_004315 | 713.615   | 922.245   | NM_003135 | 5172.671  | 5137.326  |
| NM_002295 | 5298.315  | 4643.75   | M15530    | 7818.133  | 9036.717  | NM_012315 | 3824.714  | 2785.054  |
| NM_003830 | 1405.637  | 1858.862  | NM_001877 | 1642.281  | 2386.91   | AF022654  | 748.523   | 789.104   |
| NM_000842 | 1054.902  | 1375.65   | NM_001634 | 23935.609 | 12982.613 | AK022638  | 2802.094  | 3989.313  |
| NM_015642 | 1343.883  | 1428.748  | NM_002267 | 3557.777  | 2895.014  | BG698409  | 828.309   | 875.166   |
| NM_004640 | 23457.975 | 27620.459 | NM_006412 | 12355.101 | 11489.625 | AA220921  | 4118.838  | 5555.017  |

|           |           |           |           |           |           |           |           |           |
|-----------|-----------|-----------|-----------|-----------|-----------|-----------|-----------|-----------|
| NM_016222 | 8540.159  | 9017.115  | NM_003063 | 4829.66   | 5185.929  | N67770    | 859.035   | 833.37    |
| AB037823  | 5196.857  | 5364.956  | NM_014041 | 35175.5   | 40073.098 | AA486200  | 63413.934 | 49273.57  |
| NM_015380 | 11262.668 | 12306.362 | NM_007169 | 4528.778  | 5957.021  | AJ005898  | 1461.904  | 1671.27   |
| BE254485  | 2135.115  | 2659.385  | AK024966  | 2179.334  | 2354.61   | X57303    | 2752.875  | 3758.896  |
| NM_002732 | 1279.52   | 1333.595  | AF178941  | 11032.893 | 16748.785 | BG248802  | 2097.188  | 2698.034  |
| AF085893  | 1610.607  | 1561.266  | NM_016033 | 7058.8    | 6853.853  | L19605    | 1325.352  | 1376.557  |
| NM_003102 | 997.812   | 1020.131  | NM_017585 | 4150.641  | 4159.047  | AA876532  | 2503.352  | 2758.892  |
| NM_014305 | 4179.958  | 4535.518  | U61737    | 23652.865 | 30853.016 | S74349    | 1422.49   | 1430.929  |
| NM_012123 | 11022.996 | 10919.73  | NM_014861 | 1645.135  | 2222.906  | X07979    | 18287.805 | 20059.787 |
| U87972    | 3327.66   | 3157.152  | NM_012434 | 1746.68   | 1825.943  | BG744224  | 6658.854  | 8337.393  |
| NM_017925 | 3860.566  | 3555.06   | NM_005694 | 8226.717  | 8414.088  | NM_006079 | 36293.313 | 40786.816 |
| NM_003171 | 5769.186  | 5223.718  | AK022983  | 805.148   | 763.976   | NM_006696 | 2792.064  | 2769.596  |
| NM_006437 | 20123.535 | 20509.404 | NM_014868 | 5638.438  | 5418.948  | NM_018026 | 3186.545  | 2143.887  |
| NM_017890 | 2042.466  | 2181.237  | AL442089  | 7104.943  | 6336.765  | NM_001707 | 17457.244 | 15603.724 |
| AK021654  | 3627.396  | 3325.013  | NM_001200 | 1966.372  | 1760.385  | M15530    | 1812.089  | 2277.053  |
| NM_016481 | 1242.025  | 1263.077  | AF128541  | 2986.25   | 3120.966  | NM_014207 | 2523.094  | 3101.286  |
| NM_003925 | 16799.98  | 15643.649 | AK026305  | 2344.436  | 2608.212  | AK002163  | 2205.888  | 2453.766  |
| AF217974  | 8443.52   | 13259.015 | NM_002552 | 3435.568  | 3956.261  | NM_002287 | 7569.823  | 7874.365  |
| NM_003285 | 863.14    | 1012.429  | NM_014321 | 6004.07   | 6683.192  | NM_012344 | 505.008   | 711.149   |
| NM_000888 | 2382.306  | 2114.006  | AK022733  | 1472.9    | 1359.128  | NM_014385 | 464.062   | 764.781   |
| NM_000595 | 6625.734  | 6068.047  | AB011132  | 4434.122  | 4794.859  | NM_001704 | 891.862   | 698.07    |
| X99663    | 6772.939  | 7103.239  | NM_020362 | 5082.074  | 8069.582  | AB036432  | 4126.91   | 3439.273  |
| NM_016552 | 3888.616  | 3933.979  | AB040937  | 5412.586  | 5525.422  | NM_014872 | 4448.37   | 3987.339  |
| AK025340  | 756.563   | 1160.741  | AF275798  | 23515.775 | 31545.066 | NM_003643 | 897.812   | 893.471   |
| NM_003565 | 5248.69   | 7141.585  | NM_005441 | 12184.674 | 11999.691 | NM_003480 | 1356.159  | 1149.208  |
| NM_004841 | 3394.431  | 4497.441  | NM_016079 | 23243.641 | 24153.99  | NM_032951 | 1957.317  | 1911.061  |
| NM_004114 | 308.745   | 1338.263  | AK023108  | 2260.573  | 2350.852  | NM_000503 | 3227.162  | 3085.988  |
| NM_018440 | 10404.013 | 11760.088 | AK026409  | 15971.091 | 15363.543 | NM_002405 | 1605.533  | 1204.256  |
| AK025470  | 730.756   | 1097.474  | AF097025  | 6841.748  | 7286.729  | AK000004  | 1427.638  | 1065.029  |
| M35410    | 3944.419  | 4620.997  | Y11339    | 5708.166  | 4931.647  | NM_012421 | 18342.852 | 17290.402 |
| AB023227  | 880.932   | 931.478   | AB030176  | 2907.28   | 5511.249  | AB014601  | 3017.56   | 2397.588  |
| NM_005776 | 18465.959 | 23060.885 | NM_003937 | 7696.162  | 7696.844  | AK001393  | 5327.256  | 4068.439  |
| AK023071  | 7782.703  | 8216.45   | NM_002537 | 6436.727  | 6553.796  | NM_000023 | 3687.474  | 2812.349  |
| NM_004041 | 2926.649  | 3343.665  | NM_003139 | 5633.72   | 6928.071  | NM_012434 | 1008.081  | 905.021   |
| AK022888  | 5051.857  | 4829.88   | AF022654  | 1213.95   | 1298.343  | NM_005694 | 5560.863  | 4737.154  |
| AK024484  | 9608.618  | 9209.345  | AK022638  | 5664.315  | 6392.138  | AF224741  | 1034.591  | 639.709   |
| NM_002632 | 667.455   | 794.259   | BG698409  | 1202.24   | 1569.741  | NM_006594 | 2361.304  | 2121.151  |
| NM_001406 | 1376.428  | 1023.991  | AA220921  | 9063.521  | 10642.695 | NM_004177 | 848.28    | 1013.791  |
| NM_002292 | 5831.228  | 5331.988  | N67770    | 857.977   | 1394.302  | NM_004871 | 1745.07   | 1812.553  |
| NM_000166 | 1025.526  | 885.987   | AJ005898  | 2043.368  | 2256.542  | NM_005696 | 5935.115  | 5193.206  |
| AF305200  | 553.022   | 941.216   | X57303    | 2123.018  | 3261.844  | AF202146  | 4372.778  | 3487.294  |
| AL570170  | 2723.89   | 2645.819  | AA463224  | 627.777   | 701.363   | NM_014923 | 1930.998  | 1854.207  |
| D56495    | 1546.596  | 1763.993  | BG248802  | 5837.3    | 5221.594  | NM_007018 | 456.841   | 407.869   |
| NM_014583 | 773.442   | 949.997   | L19605    | 2085.07   | 3178.04   | NM_004318 | 1015.88   | 503.072   |
| NM_006613 | 13484.65  | 13570.139 | AA876532  | 5815.926  | 4656.027  | NM_002640 | 1654.591  | 1417.399  |
| NM_004638 | 18963.006 | 17532.691 | S74349    | 1818.679  | 1848.627  | Y11339    | 2901.42   | 2842.581  |
| NM_005373 | 689.164   | 577.107   | X07979    | 23196.289 | 21140.484 | AB030176  | 795.365   | 971.309   |
| L40027    | 2978.483  | 3138.108  | BG324670  | 718.654   | 435.669   | NM_003937 | 3304.925  | 3491.636  |
| NM_003718 | 45908.156 | 51323.637 | NM_006696 | 3219.967  | 3293.912  | NM_002537 | 2761.475  | 2480.35   |
| NM_007062 | 1288.821  | 1437.855  | NM_018026 | 3255.86   | 3609.439  | NM_003139 | 4515.255  | 4307.622  |
| NM_014180 | 20119.494 | 28989.291 | M15530    | 5675.167  | 5385.624  | NM_012316 | 2913.729  | 2284.873  |
| NM_017706 | 3499.642  | 4146.767  | NM_001877 | 744.797   | 939.332   | NM_001634 | 16250.255 | 11381.297 |
| AF334406  | 1786.345  | 2171.065  | NM_014207 | 5088.897  | 5163.91   | NM_002267 | 4175.111  | 3230.274  |

|           |           |           |           |           |           |           |           |           |
|-----------|-----------|-----------|-----------|-----------|-----------|-----------|-----------|-----------|
| NM_017444 | 5071.167  | 5916.074  | AK002163  | 2952.443  | 3487.162  | NM_006412 | 8334.049  | 8024.47   |
| NM_018025 | 2523.849  | 2960.331  | NM_012344 | 1403.495  | 1553.811  | NM_014041 | 30329.525 | 31697.436 |
| NM_015995 | 6752.656  | 7717.213  | NM_002351 | 1675.099  | 1739.313  | NM_007165 | 2554.157  | 2196.395  |
| NM_003804 | 13998.557 | 14045.31  | NM_014385 | 1088.62   | 1042.705  | NM_014313 | 286.757   | 441.099   |
| NM_018453 | 3827.355  | 3858.208  | NM_001704 | 1053.976  | 1480.243  | AK024966  | 2626.778  | 1817.703  |
| NM_004705 | 67702.063 | 61535.844 | AB036432  | 7456.815  | 6596.039  | AF178941  | 8221.437  | 7655.742  |
| NM_016001 | 10140.518 | 9602.606  | NM_014872 | 8037.975  | 8168.095  | NM_016033 | 4131.212  | 3748.946  |
| AL137722  | 628.887   | 834.832   | NM_003643 | 1263.16   | 1287.153  | NM_017585 | 4402.448  | 3370.415  |
| S49432    | 2793.152  | 3105.693  | NM_003480 | 1699.974  | 1622.961  | U61737    | 22045.646 | 20878.58  |
| D86984    | 2813.281  | 3438.486  | NM_000899 | 1171.636  | 921.109   | NM_000033 | 2244.659  | 1741.235  |
| NM_015955 | 1016.836  | 879.456   | NM_032951 | 3105.165  | 2943.802  | NM_006075 | 27409.748 | 32736.676 |
| AK026904  | 3756.384  | 3907.728  | NM_002405 | 1813.337  | 1853.01   | NM_006695 | 2082.363  | 2267.075  |
| AB002364  | 84.218    | 918.289   | AK000004  | 1472.568  | 1551.704  | NM_018025 | 2201.878  | 1830.577  |
| NM_003793 | 505.718   | 613.698   | NM_012421 | 32930.516 | 36552.027 | NM_001707 | 13166.807 | 12895.775 |
| NM_001910 | 2384.571  | 2712.228  | AB014601  | 3042.508  | 3170.741  | NM_014865 | 5879.98   | 5305.733  |
| J03210    | 2551.021  | 2760.495  | AK001393  | 7191.305  | 9019.357  | AL442089  | 4309.74   | 4603.634  |
| NM_001905 | 9044.147  | 8945.726  | NM_000023 | 6151.118  | 8082.976  | NM_001200 | 1672.391  | 1329.303  |
| NM_012195 | 5345.296  | 6462.849  | NM_014861 | 746.155   | 1203.351  | AF128541  | 2428.104  | 2021.906  |
| NM_003365 | 3535.98   | 4083.492  | NM_012434 | 950.038   | 1150.861  | AK026305  | 1609.817  | 1397.979  |
| AB040886  | 931.113   | 1546.151  | NM_005694 | 6739.123  | 6545.496  | NM_002552 | 2586.971  | 2627.106  |
| AB029020  | 2677.723  | 2824.992  | AF224741  | 1245.012  | 1290.961  | NM_014321 | 4903.548  | 4523.878  |
| AK022759  | 2907.938  | 2739.434  | NM_006594 | 3670.545  | 3605.009  | AK022733  | 1518.149  | 1497.189  |
| NM_012333 | 9770.842  | 9257.391  | NM_004177 | 1317.799  | 1265.902  | AB011132  | 4075.623  | 4276.735  |
| AF217798  | 1783.966  | 2097.401  | NM_012425 | 1107.128  | 1259.712  | NM_020362 | 2801.415  | 2334.414  |
| AF161472  | 3365.839  | 2963.153  | NM_004871 | 4466.609  | 4556.552  | AB040937  | 3031.917  | 2771.364  |
| AL133642  | 10370.926 | 9926.779  | NM_005695 | 8766.655  | 7914.16   | AF275798  | 23489.771 | 21008.215 |
| AB011154  | 1189.19   | 1317.528  | AF202146  | 6360.797  | 5724.981  | NM_005441 | 10574.732 | 8697.558  |
| AF124432  | 2643.766  | 3249.549  | NM_014923 | 2009.196  | 2367.766  | NM_016075 | 21043.551 | 16384.006 |
| NM_006330 | 15580.671 | 18483.627 | NM_005477 | 3085.559  | 2660.167  | AK023108  | 2440.976  | 1732.112  |
| NM_015873 | 7307.954  | 6634.637  | NM_007015 | 365.634   | 839.991   | AK026409  | 15803.358 | 11784.43  |
| NM_000377 | 4405.097  | 4783.458  | NM_002640 | 2010.687  | 2067.26   | AF097025  | 8015.885  | 5120.313  |
| NM_006815 | 1315.116  | 1364.375  | Y11339    | 2338.038  | 2093.373  | NM_002405 | 1449.126  | 1566.777  |
| NM_016823 | 3680.725  | 4142.063  | AB030176  | 1133.572  | 1229.983  | AK000004  | 810.255   | 994.252   |
| NM_003120 | 15349.88  | 18392.357 | NM_003937 | 1860.242  | 1729.087  | NM_012421 | 12612.087 | 12238.606 |
| X52360    | 3949.615  | 3852.732  | NM_002537 | 5067.635  | 5018.335  | AB014601  | 2357.391  | 1996.338  |
| NM_002635 | 32891.672 | 40072.293 | NM_003135 | 4207.059  | 4263.335  | AK001393  | 3435.357  | 3708.99   |
| NM_016494 | 33137.355 | 39894.094 | NM_012316 | 3462.714  | 3579.895  | NM_000023 | 3112.968  | 2731.731  |
| U09410    | 5713.136  | 5525.196  | NM_004055 | 399.525   | 488.206   | AF022654  | 830.956   | 737.568   |
| NM_020225 | 1380.217  | 1584.342  | NM_001634 | 26319.502 | 15424.951 | AK022638  | 4010.341  | 3727.819  |
| NM_001186 | 6087.326  | 5727.819  | NM_002267 | 7570.982  | 5658.535  | BG698409  | 1013.353  | 837.037   |
| NM_004502 | 3688.88   | 3678.245  | NM_006412 | 10613.284 | 11217.104 | AA220921  | 5060.17   | 5422.395  |
| AF000560  | 5994.63   | 6026.594  | NM_003063 | 5680.227  | 7082.182  | N67770    | 369.417   | 533.934   |
| NM_013282 | 5876.546  | 6800.307  | NM_007165 | 4099.281  | 5286.728  | AJ005898  | 1978.937  | 1688.079  |
| NM_005777 | 7257.136  | 8269.028  | NM_014313 | 1098.791  | 1071.332  | X57303    | 2952.211  | 3243.931  |
| NM_012345 | 2251.466  | 2819.564  | AK024966  | 2557.419  | 3031.967  | BG248802  | 3310.565  | 3259.49   |
| U94387    | 500.525   | 593.63    | AF178941  | 10653.553 | 13201.95  | L19605    | 1620.896  | 1180.522  |
| NM_005825 | 20125.59  | 22785.496 | NM_016033 | 7392.898  | 7450.85   | AA876532  | 3499.708  | 3129.876  |
| NM_004592 | 2853.926  | 3064.93   | NM_017585 | 4191.631  | 4698.96   | S74349    | 1991.442  | 1738.26   |
| NM_015001 | 8484.216  | 8575.557  | U61737    | 25501.713 | 29748.422 | X07979    | 26155.012 | 24034.092 |
| NM_019027 | 1763.625  | 1991.906  | X06389    | 618.691   | 618.215   | BG744224  | 13733.603 | 14128.769 |
| NM_016107 | 4513.605  | 4767.883  | NM_000033 | 2957.587  | 2963.607  | NM_005477 | 2223.13   | 2844.617  |
| NM_002567 | 25592.234 | 24250.768 | NM_006075 | 28442.016 | 33328.742 | NM_002640 | 1029.122  | 1486.431  |
| NM_001404 | 3471.988  | 3156.538  | NM_006695 | 2613.397  | 2556.253  | M15530    | 3149.97   | 4045.044  |

|           |           |           |           |           |           |           |           |           |
|-----------|-----------|-----------|-----------|-----------|-----------|-----------|-----------|-----------|
| NM_00160E | 38019.801 | 48306.457 | NM_01802E | 2825.233  | 3048.157  | NM_001877 | 888.442   | 703.43    |
| AF225422  | 17680.977 | 16624.199 | NM_001707 | 18044.402 | 19724.68  | NM_014207 | 3762.236  | 5071.061  |
| AB040960  | 9585.913  | 10750.939 | NM_01486E | 6707.005  | 6459.999  | AK002163  | 2747.256  | 3069.338  |
| NM_01594E | 4052.304  | 4677.757  | AL442089  | 8356.868  | 8912.17   | NM_012344 | 650.937   | 710.677   |
| NM_00630E | 7907.365  | 7533.205  | NM_00120C | 2049.589  | 2479.341  | NM_002351 | 1316.12   | 1923.691  |
| AL080059  | 854.366   | 1203.385  | NM_00255E | 3145.133  | 4040.763  | NM_01438E | 822.411   | 1210.668  |
| AL080219  | 6796.021  | 7692.564  | NM_014321 | 5750.124  | 6534.555  | NM_001704 | 1391.67   | 912.978   |
| AK026709  | 564.862   | 788.636   | AK022733  | 1628.292  | 1799.577  | AB036432  | 5761.448  | 6523.329  |
| AK024165  | 640.825   | 651.216   | AB011132  | 5637.159  | 6395.787  | NM_01487E | 6129.125  | 7651.792  |
| NM_003001 | 1872.792  | 1733.585  | NM_02036E | 4058.53   | 4495.979  | NM_00364E | 1338.56   | 1945.449  |
| NM_00198E | 3436.662  | 3257.97   | AB040937  | 11717.302 | 13411.02  | NM_00348C | 2195.073  | 2864.004  |
| NM_00010E | 3664.134  | 3630.587  | AF275798  | 23937.43  | 26886.75  | NM_00089E | 1463.676  | 1565.033  |
| NM_00249C | 17160.525 | 17797.5   | NM_005441 | 12240.047 | 12500.401 | NM_032951 | 3562.459  | 5027.905  |
| BE563532  | 1150.746  | 1283.834  | AK026409  | 15964.695 | 16819.336 | NM_00050E | 6209.962  | 7047.853  |
| NM_00191E | 8382.664  | 9934.466  | AF097025  | 7317.515  | 6250.582  | NM_01758E | 3110.706  | 2977.17   |
| NM_002491 | 2376.037  | 2908.646  | NM_00240E | 700.812   | 599.451   | U61737    | 16656.947 | 18567.793 |
| NM_01542E | 2515.286  | 3277.443  | AK000004  | 781.484   | 1191.271  | NM_00003E | 1865.59   | 1904.481  |
| NM_01515E | 6190.541  | 6012.605  | NM_012421 | 23771.367 | 24866.365 | NM_014861 | 445.282   | 567.77    |
| AB032966  | 26566.824 | 33034.949 | AB014601  | 1413.223  | 2109.124  | NM_012434 | 1373.043  | 789.056   |
| M26747    | 717.044   | 809.185   | AK001393  | 6975.917  | 9206.717  | NM_005694 | 6682.477  | 4865.276  |
| NM_01482C | 9255.949  | 11723.051 | NM_00002E | 4347.706  | 4850.85   | AF224741  | 897.453   | 767.08    |
| NM_00503E | 1030.923  | 1290.423  | AF022654  | 888.415   | 1125.963  | NM_006594 | 2073.646  | 1925.263  |
| NM_019014 | 4920.611  | 4682.172  | NM_00114E | 672.174   | 694.39    | NM_004177 | 1053.981  | 853.319   |
| NM_002097 | 19188.084 | 18619.586 | AK022638  | 5565.865  | 5734.941  | NM_01242E | 1100.08   | 954.957   |
| X04706    | 5548.024  | 5258.283  | BG698409  | 909.548   | 1104.391  | NM_004871 | 3023.465  | 2522.003  |
| NM_01803E | 736.744   | 979.428   | U90065    | 466.876   | 504.511   | NM_00569E | 9531.688  | 7294.973  |
| NM_006494 | 9831.542  | 9241.317  | AJ005898  | 3406.841  | 3700.006  | AF202146  | 5938.597  | 5018.71   |
| X52343    | 8288.254  | 7983.009  | AA463224  | 787.308   | 990.528   | NM_00639E | 738.709   | 586.02    |
| NM_00585E | 13064.633 | 12312.452 | BG248802  | 5842.958  | 5534.949  | NM_01492E | 2254.829  | 1679.948  |
| X99681    | 1201.609  | 1066.555  | L19605    | 1662.7    | 1560.271  | AF275798  | 20353.137 | 23005.285 |
| NM_01406E | 3212.12   | 2207.21   | AA876532  | 4316.354  | 4930.071  | NM_005441 | 6768.633  | 8301.658  |
| NM_017814 | 5124.805  | 5177.51   | S74349    | 1595.001  | 1803.603  | NM_01607E | 14446.147 | 13897.964 |
| AF074996  | 1096.529  | 1076.058  | X07979    | 24096.338 | 26987.07  | AK023108  | 1896.885  | 1867.693  |
| AF131811  | 1120.001  | 952.53    | BG324670  | 627.362   | 814.742   | AK026409  | 11245.191 | 11500.729 |
| AF293026  | 9836.158  | 8976.964  | BG744224  | 12485.031 | 13027.327 | AF097025  | 4765.391  | 4468.405  |
| AF236158  | 1321.335  | 1253.954  | NM_005477 | 1858.415  | 1945.05   | Y11339    | 3652.983  | 2800.872  |
| AF217986  | 5226.847  | 4864.905  | NM_00264C | 1675.253  | 1233.911  | AB030176  | 914.831   | 764.345   |
| AK026320  | 1353.892  | 1286.859  | M15530    | 7002.036  | 7868.689  | NM_003937 | 4518.191  | 3973.932  |
| AL137530  | 2689.139  | 2997.119  | NM_001877 | 983.851   | 1416.78   | NM_002537 | 3682.677  | 3132.686  |
| NM_01595E | 7608.343  | 8755.007  | NM_014207 | 6422.684  | 6980.833  | NM_00313E | 5169.748  | 4527.383  |
| AF147310  | 1306.786  | 2053.468  | AK002163  | 3859.44   | 4274.707  | NM_01231E | 3816.695  | 2512.896  |
| AK024775  | 5477.647  | 5610.366  | NM_012344 | 1548.642  | 1713.211  | NM_001634 | 22369.873 | 11897.265 |
| AK025562  | 2940.939  | 3026.228  | NM_002351 | 2706.534  | 3416.53   | NM_002267 | 4643.422  | 3184.702  |
| AF088024  | 2462.005  | 2651.905  | NM_01438E | 1700.405  | 2007      | NM_00641E | 11034.166 | 10963.298 |
| AK025887  | 2332.89   | 2091.344  | AB036432  | 7709.42   | 6550.49   | NM_00306E | 4482.993  | 3799.67   |
| AB037719  | 2028.44   | 2260.416  | NM_01487E | 7611.546  | 7598.188  | NM_014041 | 41646.211 | 37846.777 |
| AF086229  | 593.498   | 800.083   | NM_00364E | 1211.656  | 1294.189  | NM_00716E | 4014.673  | 2701.838  |
| AK026143  | 2110.096  | 1694.645  | NM_00348C | 1540.745  | 1637.969  | AK024966  | 3866.337  | 3135.586  |
| AL137578  | 2212.507  | 2111.165  | NM_00089E | 1147.685  | 1198.726  | AF178941  | 20278.09  | 14964.89  |
| AL110252  | 760.283   | 1024.681  | NM_032951 | 3030.16   | 3729.173  | NM_01603E | 10112.088 | 6469.265  |
| AL050143  | 2449.611  | 2408.157  | NM_00050E | 2892.559  | 2819.823  | NM_01343E | 17627.27  | 17296.078 |
| AL137616  | 1641.49   | 1772.323  | NM_01758E | 1970.418  | 2361.573  | NM_00340E | 24540.045 | 26052.811 |
| AK021752  | 1040.193  | 1036.231  | U61737    | 20674.359 | 22473.768 | NM_01831E | 1268.208  | 1242.149  |



|           |           |           |           |           |           |           |           |           |
|-----------|-----------|-----------|-----------|-----------|-----------|-----------|-----------|-----------|
| AL050012  | 733.02    | 794.563   | NM_000033 | 838.145   | 896.235   | AB011180  | 947.013   | 969.051   |
| AL109706  | 8899.798  | 8779.289  | NM_014861 | 1137.011  | 1316.582  | NM_007167 | 5883.115  | 6078.788  |
| AK001118  | 1153.086  | 987.94    | NM_012434 | 1216.169  | 1432.464  | NM_014832 | 2037.386  | 1570.821  |
| AF035291  | 65935.508 | 54201.258 | NM_005694 | 7602.624  | 8438.503  | NM_003243 | 211.307   | 402.223   |
| AK026291  | 4184.94   | 4538.082  | AF224741  | 1344.941  | 1370.884  | NM_013359 | 519.259   | 569.532   |
| AK021924  | 572.125   | 625.325   | NM_006594 | 3063.983  | 2981.827  | NM_002477 | 5161.994  | 5239.211  |
| AL050026  | 1398.851  | 2031.18   | NM_004177 | 1665.577  | 1798.462  | NM_018026 | 2585.059  | 2364.7    |
| AL080106  | 584.121   | 707.715   | NM_012429 | 1647.543  | 1676.931  | NM_001707 | 14889.123 | 13000.299 |
| AL117520  | 1138.338  | 1293.757  | NM_004871 | 6222.745  | 6223.266  | NM_014868 | 6864.625  | 6081.169  |
| AL049303  | 1215.48   | 1338.978  | NM_005698 | 8105.21   | 6986.546  | AL442089  | 5677.869  | 4829.117  |
| AL080208  | 1318.235  | 999.445   | AF202146  | 6344.889  | 4875.897  | NM_001200 | 2441.644  | 2312.339  |
| L23851    | 729.581   | 771.622   | NM_014923 | 1781.517  | 1771.066  | AF128541  | 4291.47   | 3684.125  |
| L35592    | 10652.654 | 9847.532  | AF275798  | 17879.928 | 19221.816 | AK026305  | 2854.022  | 2122.874  |
| NM_012079 | 1371.716  | 1174.257  | NM_005441 | 5472.103  | 5357.585  | NM_002552 | 3870.004  | 3177.267  |
| BC017695  | 532.343   | 499.004   | NM_016079 | 17050.805 | 16760.813 | NM_014321 | 8189.009  | 6433.6    |
| AL360274  | 16748.664 | 16307.641 | AK023108  | 1166.4    | 1296.2    | AK022733  | 2381.267  | 1435.891  |
| AK021858  | 1450.93   | 1301.292  | AK026409  | 10742.091 | 10346.262 | AB011132  | 3882.735  | 3247.984  |
| NM_014050 | 9144.756  | 7169.509  | AF097025  | 3371.136  | 3095.55   | NM_020362 | 4479.22   | 3349.927  |
| AF085854  | 1307.095  | 1101.865  | Y11339    | 4527.287  | 5291.266  | AB040937  | 8954.552  | 6476.933  |
| AF074997  | 1057.524  | 898.688   | AB030176  | 899.542   | 1387.677  | AL137493  | 589.379   | 574.556   |
| AK027027  | 877.129   | 1357.616  | NM_003937 | 4760.262  | 4816.287  | NM_001338 | 2787.26   | 2380.534  |
| NM_014911 | 2176.232  | 2135.671  | NM_002537 | 6643.865  | 8421.79   | NM_003637 | 607.732   | 867.652   |
| AF009289  | 5401.009  | 5901.441  | NM_003139 | 5132.426  | 6090.921  | NM_004233 | 1868.893  | 1347.33   |
| AF040247  | 1098.598  | 870.771   | NM_012316 | 4924.842  | 4093.27   | NM_001544 | 9899.203  | 10298.416 |
| AF056439  | 1282.452  | 1261.455  | NM_001634 | 24573.072 | 14799.703 | X58531    | 628.945   | 492.582   |
| AF007835  | 507.32    | 560.826   | NM_002267 | 6777.368  | 4475.375  | AB011168  | 2403.67   | 1957.886  |
| AF009303  | 2466.537  | 2224.68   | NM_006412 | 13806.883 | 15133.545 | BE794262  | 1400.124  | 1282.238  |
| NM_004474 | 3663.648  | 4082.476  | NM_003063 | 6295.591  | 5904.317  | NM_003212 | 4830.725  | 4851.238  |
| AF056449  | 904.899   | 1361.949  | NM_014041 | 35715.043 | 46657.832 | NM_006382 | 727.968   | 1059.822  |
| AK001033  | 1448.012  | 1456.309  | NM_007169 | 4282.337  | 4122.689  | NM_004811 | 979.777   | 1343.237  |
| AK001781  | 558.069   | 673.412   | NM_014313 | 1577.52   | 2022.582  | AK021910  | 61731.723 | 48520.594 |
| AK021463  | 1324.17   | 1916.564  | AK024966  | 2769.07   | 2743.206  | M62402    | 943.518   | 724.128   |
| AK021698  | 597.905   | 946.737   | AF178941  | 13442.031 | 15443.4   | NM_002547 | 542.551   | 679.751   |
| AK001082  | 4419.691  | 4160.467  | NM_016033 | 7763.067  | 6370.875  | NM_004748 | 4001.584  | 3622.692  |
| AK021521  | 1196.684  | 1423.707  | NM_013439 | 18077.85  | 21603.912 | NM_002668 | 13077.199 | 10426.896 |
| AK021743  | 3731.42   | 4043.56   | NM_003406 | 12255.441 | 10787.079 | NM_001058 | 3165.929  | 2265.069  |
| AK025152  | 539.259   | 812.658   | NM_018316 | 765.93    | 558.776   | NM_001380 | 527.753   | 296.209   |
| AK026699  | 1012.503  | 1179.539  | AB011180  | 941.09    | 1100.264  | NM_014316 | 9834.646  | 7752.892  |
| AK025182  | 545.594   | 499.054   | NM_007167 | 2441.302  | 2440.976  | NM_004054 | 7542.072  | 4818.851  |
| AK025589  | 2453.085  | 2053.921  | NM_013359 | 643.259   | 861.511   | NM_001138 | 3877.782  | 3575.028  |
| AK026734  | 1208.203  | 1107.495  | NM_002477 | 5477.99   | 6102.81   | NM_004219 | 29201.42  | 39158.996 |
| NM_016633 | 27947.238 | 26074.395 | NM_018026 | 3157.812  | 3261.937  | NM_003443 | 26651.891 | 35113.793 |
| AK023250  | 6508.163  | 7166.131  | NM_001707 | 19001.018 | 20065.945 | NM_002025 | 476.594   | 751.113   |
| AK024882  | 4965.758  | 4654.754  | AK022983  | 713.629   | 802.701   | AB015228  | 1103.441  | 1741.081  |
| NM_014062 | 21404.896 | 19191.111 | NM_014868 | 7609.942  | 7157.717  | AL049685  | 2082.847  | 2348.151  |
| NM_006304 | 47221.242 | 48791.871 | AL442089  | 8609.793  | 9029.688  | AK026800  | 4859.658  | 6228.674  |
| X74804    | 1014.463  | 748.04    | NM_001200 | 2968.67   | 3338.088  | NM_001442 | 1253.487  | 1409.545  |
| AF293367  | 1655.753  | 1352.691  | AF128541  | 3079.946  | 3080.412  | NM_017775 | 3992.667  | 5747.412  |
| AF086231  | 3690.484  | 3118.222  | AK026305  | 2301.709  | 2171.863  | AK001958  | 739.829   | 1330.154  |
| AK001494  | 2225.444  | 2134.939  | NM_002552 | 2793.358  | 3290.367  | AK025947  | 2790.528  | 3333.274  |
| AL133438  | 2138.46   | 2223.932  | NM_014321 | 6485.002  | 6354.848  | AF217973  | 3023.598  | 2793.659  |
| AK022310  | 713.593   | 940.127   | AK022733  | 1976.193  | 1601.095  | NM_007033 | 7665.328  | 9137.193  |
| AK021784  | 1253.488  | 1110.335  | AB011132  | 5330.238  | 6204.606  | AF226048  | 4953.849  | 5230.604  |

|           |           |           |           |           |           |           |           |           |
|-----------|-----------|-----------|-----------|-----------|-----------|-----------|-----------|-----------|
| AF230800  | 1962.097  | 1341.972  | NM_020362 | 3585.296  | 3504.691  | NM_005573 | 10987.919 | 11301.795 |
| NM_01852C | 1886.175  | 1929.983  | AB040937  | 5762.807  | 5090.505  | D50918    | 6573.015  | 6582.337  |
| AK026647  | 2190.145  | 1642.999  | NM_000095 | 1166.566  | 1210.546  | U48734    | 8302.643  | 9819.45   |
| AK022152  | 1635.391  | 1495.311  | AL137493  | 521.122   | 451.949   | NM_00640C | 7001.622  | 7772.169  |
| NM_003534 | 52923.047 | 52533.531 | NM_001338 | 3136.938  | 3412.348  | NM_003903 | 5210.639  | 4879      |
| L08437    | 3304.549  | 3503.564  | NM_004233 | 1193.77   | 2372.235  | NM_01795E | 2505.88   | 2391.58   |
| AK057143  | 10733.112 | 11131.109 | NM_001544 | 14592.275 | 12904.869 | NM_01606C | 4205.082  | 3835.549  |
| NM_015594 | 21900.559 | 20823.629 | X58531    | 765.157   | 896.93    | NM_00220E | 6425.633  | 5001.97   |
| AF056423  | 2880.247  | 2715.155  | AB011168  | 1910.493  | 2115.699  | NM_00721E | 3023.162  | 2524.999  |
| U00956    | 543.298   | 671.624   | BE794262  | 1685.8    | 1821.185  | AK023518  | 1283.027  | 1169.857  |
| X04293    | 684.903   | 725.511   | NM_003212 | 5597.33   | 5899.581  | NM_000944 | 6389.755  | 7149.03   |
| K01884    | 729.893   | 726.519   | NM_006382 | 1140.96   | 1467.527  | NM_01223C | 916.853   | 1460.122  |
| U00962    | 15844.224 | 15305.929 | NM_004811 | 1271.168  | 1282.819  | NM_012262 | 898.362   | 985.335   |
| NM_000522 | 5156.197  | 3779.624  | AK021910  | 58336.352 | 46187.844 | NM_01339C | 3164.026  | 3384.008  |
| AK026130  | 20261.877 | 19897.959 | M62402    | 1582.317  | 1400.202  | NM_00282E | 1485.808  | 1932.131  |
| NM_01248C | 4838.474  | 4686.073  | NM_00474E | 4195.816  | 3420.203  | J02783    | 70364.023 | 57793.152 |
| AK024144  | 8225.78   | 8357.226  | NM_00266E | 12361.825 | 13299.001 | NM_018137 | 648.145   | 538.045   |
| Y08959    | 1463.066  | 1360.316  | NM_00105E | 2456.663  | 2375.988  | NM_006577 | 19602.582 | 37218.516 |
| NM_00534E | 11264.784 | 11298.658 | NM_01431E | 9538.393  | 7940.007  | NM_004413 | 547.345   | 536.706   |
| AF086047  | 544.677   | 526.357   | NM_004054 | 4998.262  | 3965.809  | NM_005317 | 437.818   | 662.237   |
| NM_005343 | 23885.867 | 27099.744 | NM_001138 | 2481.859  | 1792.8    | AF120493  | 534.112   | 673.885   |
| AF116698  | 1030.646  | 1122.966  | NM_004219 | 33528.633 | 34203.844 | U12597    | 1959.721  | 1824.643  |
| AF196865  | 1223.275  | 1223.108  | NM_003443 | 35923.309 | 50236.18  | AB044343  | 2270.43   | 2182.544  |
| AJ008114  | 60837.813 | 56162.832 | AB015228  | 1683.321  | 1575.905  | NM_00517E | 3486.023  | 3280.703  |
| AJ008141  | 578.595   | 446.361   | AL049685  | 1635.207  | 1829.21   | NM_017702 | 3404.735  | 2887.762  |
| AF147432  | 3189.802  | 2633.025  | AK026800  | 3117.973  | 3282.136  | AB014516  | 2791.287  | 2497.902  |
| AK024690  | 1891.568  | 1720.602  | NM_001442 | 641.957   | 687.58    | Z83950    | 1262.963  | 1164.378  |
| BC005946  | 61058.191 | 51829.695 | NM_01777E | 3961.853  | 4087.363  | AL080063  | 2389.275  | 2028.947  |
| AK021893  | 3009.522  | 2926.479  | AK025947  | 2286.416  | 2721.381  | NM_00562E | 15829.18  | 13986.776 |
| NM_00104E | 11672.242 | 10043.812 | AF217973  | 4516.103  | 4900.476  | X15262    | 6804.93   | 4427.107  |
| AK026497  | 6226.802  | 4783.489  | NM_007033 | 11141.852 | 15804.853 | NM_00547E | 1379.507  | 803.773   |
| BE958139  | 1164.169  | 927.396   | AF226048  | 5345.098  | 6339.833  | AB040918  | 1528.621  | 2089.358  |
| AF085359  | 1030.574  | 775.246   | NM_005573 | 14570.563 | 18895.236 | NM_01585E | 1854.977  | 2083.336  |
| AF086516  | 1132.565  | 919.952   | D50918    | 7478.286  | 6366.214  | X60152    | 1017.572  | 1007.689  |
| D86978    | 5036.89   | 4513.155  | U48734    | 13551.328 | 14438.511 | NM_00231E | 1812.247  | 2566.229  |
| AL080060  | 6920.655  | 5681.25   | NM_00640C | 6403.418  | 6681.595  | NM_00457E | 467.251   | 684.894   |
| NM_005267 | 3024.405  | 3067.738  | NM_003903 | 4317.363  | 4831.05   | AB023232  | 1294.627  | 1724.348  |
| U80763    | 798.587   | 976.74    | NM_01795E | 3305.934  | 4182.015  | AL137589  | 1638.958  | 1978.005  |
| AF086017  | 1234.259  | 1470.654  | NM_01606C | 4349.758  | 4349.808  | AF036943  | 272.703   | 313.162   |
| NM_00578C | 374.962   | 550.64    | NM_00220E | 4955.743  | 3851.818  | NM_002502 | 1823.637  | 2099.876  |
| AK024978  | 11541.855 | 11156.31  | NM_00721E | 2617.031  | 1859.792  | AF226732  | 2647.387  | 2504.494  |
| U12897    | 5124.32   | 4988.376  | AK023518  | 2374.887  | 3234.664  | NM_006312 | 8775.501  | 9459.848  |
| AJ227894  | 468.727   | 712.6     | NM_000944 | 4905.044  | 3220.933  | NM_00280E | 1143.308  | 1124.557  |
| NM_020357 | 14883.97  | 11816.359 | NM_01223C | 920.612   | 975.783   | NM_003662 | 2061.96   | 2086.017  |
| AK026836  | 2216.927  | 1851.966  | NM_01339C | 2483.344  | 2048.121  | NM_00293E | 10056.026 | 9010.888  |
| T59562    | 26592.117 | 28151.924 | J02783    | 71379.555 | 64764.988 | NM_01583E | 22896.229 | 21369.32  |
| NM_01821E | 1950.855  | 1956.843  | NM_006577 | 19711.336 | 17857.035 | NM_004713 | 2575.21   | 1635.883  |
| AK026368  | 753.043   | 820.375   | NM_005317 | 735.021   | 925.348   | NM_00169E | 11319.427 | 8553.932  |
| NM_014114 | 2904.248  | 2872.627  | U12597    | 1767.367  | 1720.844  | NM_000661 | 67072.117 | 54414.734 |
| U62822    | 5323.747  | 3005.501  | U28055    | 1003.924  | 837.512   | NM_000973 | 64371.527 | 52256.258 |
| CY3Cy5    | 3804.318  | 123.904   | AB044343  | 2075.733  | 2370.625  | AF086431  | 1423.707  | 1904.894  |
| AA220921  | 8405.451  | 7122.667  | NM_014662 | 680.558   | 790.89    | AL110204  | 206.874   | 781.582   |
| N67770    | 1196.004  | 883.433   | NM_00517E | 4087.368  | 3429.493  | NM_01418E | 42927.688 | 46656.32  |

|           |           |           |           |           |           |           |          |          |
|-----------|-----------|-----------|-----------|-----------|-----------|-----------|----------|----------|
| AA486200  | 69759.75  | 53897.293 | NM_017702 | 4507.265  | 3507.627  | AK026365  | 2193.014 | 3272.192 |
| U90065    | 616.561   | 474.14    | AB014516  | 3449.676  | 3131.646  | S70004    | 998.311  | 1050.531 |
| AJ005898  | 5378.82   | 5755.597  | Z83950    | 828.894   | 768.701   | NM_000167 | 2516.292 | 2981.583 |
| X57303    | 5631.162  | 7752.241  | AL080063  | 1759.748  | 2162.379  | AY007125  | 4258.179 | 4741.98  |
| AA463224  | 1257.46   | 803.84    | NM_005625 | 14734.562 | 13607.077 | AB032987  | 1491.127 | 1636.073 |
| BG248802  | 7422.48   | 7702.988  | NM_005475 | 1155.675  | 1008.387  | NM_017567 | 6250.613 | 6563.231 |
| L19605    | 2112.355  | 1902.5    | AB040918  | 2101.665  | 1575.871  | NM_000691 | 1482.766 | 2058.374 |
| AA876532  | 5789.561  | 5545.592  | NM_015859 | 1351.716  | 1265.087  | Y18643    | 631.406  | 690.085  |
| S74349    | 2462.926  | 2887.417  | NM_002316 | 1314.656  | 1153.889  | NM_000305 | 2439.349 | 2168.009 |
| X07979    | 41574.477 | 48981.34  | AL137589  | 987.115   | 985.799   | D86971    | 8805.365 | 9516.939 |
| BG324670  | 1374.345  | 1392.269  | NM_002502 | 1562.035  | 1429.671  | NM_003073 | 6091.392 | 6851.034 |
| BG744224  | 27198.572 | 40486.082 | AF226732  | 3360.957  | 2987.6    | NM_014048 | 793.668  | 738.167  |
| SR5       | 9579.455  | 9145.397  | NM_006312 | 9652.702  | 9086.76   | AF274863  | 832.143  | 586.681  |
| SR7       | 13847.548 | 53376.355 | NM_002805 | 794.927   | 951.675   | AF319458  | 777.725  | 609.195  |
| SR9       | 49031.715 | 11387.604 | NM_004290 | 6256.457  | 6306.604  | AF024697  | 2633.979 | 2487.181 |
| CY3Cy5    | 9949.438  | 323.437   | NM_003662 | 2446.828  | 2412.031  | NM_018651 | 810.875  | 624.238  |
| AK002163  | 2941.593  | 2453.082  | NM_002939 | 14369.437 | 12525.53  | AF164156  | 639.272  | 412.385  |
| NM_002287 | 13120.353 | 11575.237 | NM_015836 | 28595.055 | 26582.396 | NM_005612 | 3678.156 | 1370.844 |
| NM_012344 | 2176.36   | 1900.232  | NM_004713 | 2266.923  | 1846.213  | AK025281  | 878.881  | 576.417  |
| NM_002351 | 2544.517  | 2482.744  | NM_003769 | 858.306   | 637.248   | D17018    | 978.046  | 1263.804 |
| NM_014385 | 1689.185  | 2482.978  | NM_001698 | 12269.216 | 10522.012 | AB046852  | 358.714  | 661.323  |
| NM_001704 | 1711.578  | 2419.621  | AF086431  | 919.048   | 471.498   | AF086167  | 578.253  | 713.325  |
| AB036432  | 15626.67  | 20091.771 | NM_014188 | 40819.039 | 35895.379 | AF085891  | 2126.197 | 3245.408 |
| NM_014872 | 8763.972  | 9434.491  | NM_000167 | 3784.172  | 3147.595  | AF019618  | 1157.099 | 1219.943 |
| NM_003643 | 1250.906  | 1741.192  | AY007125  | 2515.853  | 1682.326  | AK025656  | 1022.898 | 1068.815 |
| NM_003480 | 2321.822  | 3345.629  | AB032987  | 1159.017  | 1144.694  | AF138859  | 676.384  | 618.301  |
| NM_000899 | 1419.603  | 1669.118  | NM_017567 | 4846.918  | 4107.292  | AF161414  | 2029.077 | 2156.981 |
| NM_032951 | 4516.062  | 6148.005  | NM_000691 | 1548.286  | 1204.743  | AK025967  | 835.423  | 720.187  |
| NM_000503 | 7995.472  | 8335.411  | NM_000305 | 1763.628  | 2324.12   | AL110177  | 2947.343 | 2320.771 |
| NM_002405 | 2751.765  | 3017.375  | D86971    | 11710.301 | 17101.357 | NM_002763 | 6106.844 | 6453.258 |
| AK000004  | 2374.225  | 2146.38   | NM_003073 | 5805.355  | 5753.2    | AF070628  | 775.032  | 619.479  |
| NM_012421 | 39706.773 | 50038.93  | NM_014048 | 721.58    | 688.594   | NM_015434 | 4286.521 | 3787.11  |
| AB014601  | 3864.725  | 4481.091  | AF274863  | 902.241   | 754.844   | NM_014055 | 1743.925 | 1603.662 |
| AK001393  | 10292.364 | 11736.239 | AF024697  | 2717.513  | 2189.146  | NM_018691 | 2176.301 | 1267.393 |
| NM_000023 | 8642.988  | 10017.599 | NM_005612 | 3660.114  | 1641.714  | AK001020  | 700.698  | 796.18   |
| AF022654  | 1539.995  | 2046.524  | D17018    | 953.508   | 848.971   | AK022098  | 599.607  | 846.409  |
| NM_001143 | 1605.972  | 1784.46   | AF085891  | 1788.973  | 1534.515  | AB040933  | 418.191  | 852.128  |
| NM_003282 | 526.719   | 785.367   | AF019618  | 769.051   | 758.525   | AK021875  | 504.15   | 729.427  |
| AK022638  | 7611.822  | 8566.801  | AK025656  | 1299.641  | 846.7     | AK022072  | 668.134  | 1105.516 |
| BG698409  | 2945.623  | 2998.421  | AF161414  | 1798.331  | 1552.038  | AK026900  | 2129.108 | 2780.742 |
| AF224741  | 890.42    | 1116.738  | AK025967  | 2969.879  | 4607.59   | AK025020  | 4132.99  | 4870.041 |
| NM_006594 | 3144.517  | 4598.237  | AL110177  | 4661.983  | 7081.598  | AF086009  | 675.477  | 497.837  |
| NM_004177 | 1700.17   | 1377.756  | NM_002763 | 5365.488  | 5133.921  | AF086463  | 1122.917 | 1143.93  |
| NM_012429 | 1477.484  | 1335.565  | AF070628  | 797.671   | 1090.006  | AK024130  | 596.059  | 687.396  |
| NM_004871 | 5044.08   | 4598.255  | NM_015434 | 3991.063  | 4090.504  | AK024598  | 1237.652 | 1811.981 |
| NM_005698 | 10608.937 | 8074.909  | NM_014055 | 1374.841  | 1635.741  | AF087983  | 762.706  | 1018.82  |
| AF202146  | 6157.548  | 5122.054  | NM_018691 | 1579.957  | 1104.875  | NM_020234 | 4913.334 | 5841.431 |
| NM_006393 | 1300.095  | 696.407   | AK001020  | 890.95    | 742.792   | Z36825    | 5042.201 | 5682.729 |
| NM_014923 | 1433.857  | 1095.962  | AK022098  | 1345.855  | 1186.343  | Z36846    | 556.043  | 575.728  |
| NM_005477 | 8773.434  | 7305.104  | AB040933  | 960.561   | 1054.214  | AF086157  | 2462.491 | 1423.911 |
| NM_007018 | 527.928   | 438.502   | AK021875  | 1393.894  | 848.387   | AK023793  | 2204.014 | 3150.656 |
| NM_004318 | 1051.395  | 623.664   | AK022072  | 1745.969  | 1196.674  | AK023286  | 1939.515 | 2421.795 |
| L09089    | 612.602   | 577.591   | AK026900  | 2449.513  | 1784.416  | AK022079  | 260.197  | 377.826  |

|           |           |           |           |           |           |           |           |           |
|-----------|-----------|-----------|-----------|-----------|-----------|-----------|-----------|-----------|
| NM_002640 | 2830.287  | 2224.315  | AK025020  | 3351.4    | 2598.871  | AF116714  | 409.579   | 460.417   |
| X03084    | 906.321   | 381.865   | AF086463  | 1451.375  | 1167.045  | NM_014058 | 1095.224  | 1281.455  |
| NM_000948 | 633.977   | 308.047   | AK024130  | 596.78    | 792.788   | AK026340  | 311.561   | 497.47    |
| M15530    | 11615.677 | 11639.542 | AK024598  | 1894.211  | 1925.567  | AK022686  | 5372.058  | 4383.328  |
| NM_000488 | 710.489   | 611.132   | AF087983  | 1208.553  | 1188.934  | AK023516  | 3759.853  | 3058.643  |
| NM_001877 | 1561.687  | 1291.063  | NM_020234 | 5074.037  | 5731.548  | AK023864  | 4261.229  | 3550.396  |
| NM_014207 | 7890.427  | 6033.916  | U70772    | 894.053   | 951.547   | AK023017  | 6522.636  | 5564.539  |
| NM_004058 | 491.829   | 468.389   | Z36825    | 7540.454  | 7285.38   | AK023908  | 2453.701  | 1663.696  |
| NM_001634 | 28017.205 | 18700.102 | Z36846    | 571.129   | 526.082   | AK024236  | 749.296   | 952.121   |
| NM_002267 | 6004.191  | 4712.021  | AF086127  | 799.408   | 553.042   | Z24724    | 9627.811  | 13843.115 |
| NM_006412 | 13295.207 | 12365.779 | AF086157  | 2474.473  | 1757.1    | AK022712  | 5892.386  | 7603.294  |
| NM_003063 | 5903.493  | 6871.395  | AK023793  | 2296.208  | 2092.219  | AK024132  | 1547.544  | 1183.123  |
| NM_014041 | 44766.133 | 46536.543 | AK023286  | 1194.781  | 809.671   | AK021863  | 16869.279 | 21278.801 |
| NM_007168 | 5548.649  | 5914.691  | AK021544  | 675.17    | 818.714   | AK024208  | 501.043   | 755.586   |
| NM_014313 | 1286.961  | 1544.521  | AL079282  | 1908.509  | 1419.192  | AK022293  | 979.857   | 877.217   |
| AK024966  | 4044.15   | 3639.471  | NM_014058 | 947.458   | 797.462   | AL117439  | 1107.276  | 1149.839  |
| AF178941  | 19688.232 | 15127.761 | AK022686  | 3785.53   | 3836.907  | AL133065  | 2768.621  | 3095.284  |
| NM_016033 | 7228.047  | 4969.203  | AK023516  | 2816.209  | 2556.533  | NM_005297 | 7631.484  | 8486.048  |
| NM_017585 | 6979.327  | 5655.857  | AK023864  | 2713.853  | 2463.834  | U80769    | 1306.791  | 1452.355  |
| U61737    | 39108.949 | 37376.613 | AK023017  | 5464.552  | 4219.383  | unknown ( | 374.772   | 586.582   |
| X06389    | 792.627   | 589.428   | AK023908  | 2153.793  | 2160.11   | AK021678  | 1145.765  | 159.285   |
| NM_000033 | 3734.006  | 3072.49   | AK024236  | 639.994   | 699.146   | AJ011377  | 879.74    | 509.366   |
| NM_014861 | 975.942   | 815.133   | Z24724    | 7899.196  | 8467.903  | AL137734  | 1260.064  | 718.812   |
| NM_012434 | 1435.557  | 895.566   | AK022712  | 5823.425  | 5675.915  | AK023784  | 1037.201  | 514.438   |
| NM_005694 | 7558.593  | 5250.15   | AK024132  | 973.33    | 1071.101  | AK026323  | 2162.938  | 975.632   |
| AK022983  | 1289.197  | 667.499   | AK021863  | 23883.502 | 21306.896 | AL133430  | 9819.31   | 16727.246 |
| NM_014868 | 7475.792  | 5797.219  | AL117439  | 568.731   | 690.044   | AF070633  | 33523.383 | 42041.305 |
| AL442089  | 12391.867 | 8685.79   | AL133065  | 1920.031  | 1483.617  | S51971    | 68249.469 | 52675.512 |
| NM_001200 | 2785.805  | 2178.895  | NM_005297 | 4890.716  | 3533.181  | NM_018370 | 1226.791  | 1045.883  |
| AB007964  | 538.216   | 363.792   | U80769    | 997.075   | 897.702   | AF054996  | 8370.577  | 10129.123 |
| AF128541  | 5129.008  | 4423.576  | AK023784  | 651.768   | 675.653   | AF090098  | 4329.672  | 4173.002  |
| AK026305  | 4358.256  | 3484.2    | AK026323  | 1310.583  | 1265.429  | AF146694  | 3774.872  | 4471.474  |
| NM_002552 | 3813.725  | 4378.678  | AL133430  | 13363.908 | 14308.563 | AK057104  | 1634.47   | 1917.563  |
| NM_014321 | 8212.269  | 7467.576  | AF070633  | 30909.309 | 28806.887 | AL133555  | 3509.197  | 5016.414  |
| AK022733  | 2252.325  | 1671.775  | S51971    | 68780.531 | 56182.527 | AK024979  | 14070.685 | 16224.627 |
| AB011132  | 4586.485  | 3188.116  | NM_018370 | 754.932   | 603.453   | AF233648  | 1715.001  | 1991.931  |
| NM_020362 | 3619.234  | 2994.218  | AF054996  | 6851.749  | 4671.202  | NM_018584 | 1279.572  | 1138.727  |
| AB040937  | 4512.539  | 3422.903  | AF090098  | 1239.899  | 739.711   | AK026776  | 633.011   | 368.457   |
| AF275798  | 25180.795 | 19478.865 | AF146694  | 2693.606  | 1847.162  | AY007126  | 10930.097 | 10170.264 |
| NM_005441 | 9578.019  | 6857.344  | AK057104  | 964.855   | 688.903   | AF085951  | 2504.882  | 2054.458  |
| NM_016078 | 21551.758 | 14844.647 | AL133555  | 2051.435  | 2136.912  | AF087989  | 2186.32   | 1540.713  |
| AK023108  | 2852.39   | 1865.371  | AK024979  | 10646.785 | 7885.463  | Z70715    | 1091.039  | 1085.061  |
| AK026409  | 25110.717 | 17739.314 | AF233648  | 1719.411  | 1533.901  | NM_018182 | 5741.794  | 5089.613  |
| AF097025  | 8321.702  | 6236.561  | AK021781  | 1150.175  | 906.32    | U80771    | 6865.265  | 4500.142  |
| Y11339    | 6627.604  | 4327.812  | NM_018584 | 1340.469  | 1073.039  | AJ272173  | 14822.803 | 10854.987 |
| AB030176  | 896.146   | 711.33    | AY007126  | 9635.528  | 7588.763  | NM_005648 | 2678.693  | 3984.029  |
| NM_003937 | 4822.095  | 3006.42   | AF085951  | 2116.242  | 2098.207  | NM_002037 | 537.072   | 877.598   |
| NM_002537 | 8014.359  | 5475.576  | AF087989  | 1815.654  | 1803.055  | NM_016348 | 958.324   | 1360.347  |
| NM_003138 | 5878.774  | 4132.185  | Z70715    | 928.883   | 809.001   | NM_020157 | 9908.531  | 11666.984 |
| NM_012318 | 4859.575  | 3563.735  | NM_018182 | 3703.413  | 3112.83   | X64991    | 770.24    | 708.323   |
| AF022654  | 1041.703  | 775.669   | U80771    | 5191.247  | 3943.795  | NM_014320 | 4150.881  | 4746.968  |
| NM_001143 | 605.796   | 515.856   | AJ272173  | 11834.133 | 9876.041  | AK025703  | 7840.313  | 12667.133 |
| AK022638  | 4744.28   | 3093.187  | NM_005648 | 2426.58   | 2891.499  | NM_018185 | 2995.253  | 3203.174  |

|           |           |           |           |           |           |           |           |           |
|-----------|-----------|-----------|-----------|-----------|-----------|-----------|-----------|-----------|
| BG698409  | 2022.392  | 1424.033  | NM_016346 | 2399.149  | 848.293   | AK022598  | 4768.062  | 4909.125  |
| AA220921  | 8508.357  | 7520.816  | NM_020157 | 11332.11  | 7821.775  | AK024306  | 1969.323  | 2027.443  |
| N67770    | 944.854   | 714.687   | NM_014320 | 3389.424  | 2640.603  | NM_018322 | 5471.396  | 5881.823  |
| U90065    | 502.742   | 386.091   | AK025703  | 3249.766  | 2213.3    | AK025862  | 28887.793 | 33711.207 |
| AJ005898  | 4207.912  | 3731.98   | NM_018185 | 1106.938  | 604.047   | AK026495  | 3827.695  | 4357.65   |
| X57303    | 3652.997  | 3567.485  | AK022598  | 4018.105  | 2292.508  | AK025052  | 1984.067  | 1901.249  |
| BG248802  | 5400.64   | 3634.352  | AK024306  | 1297.152  | 874.212   | NM_01438E | 1984.112  | 1516.592  |
| L19605    | 1821.304  | 1199.35   | NM_018322 | 4947.897  | 3344.383  | U85044    | 1439.797  | 829.427   |
| AA876532  | 5104.023  | 3983.467  | AK025862  | 28821.34  | 19782.338 | AF086090  | 1610.736  | 972.51    |
| S74349    | 1998.702  | 1159.266  | AK026495  | 3885.43   | 2712.778  | AK002173  | 27863.186 | 23859.26  |
| X07979    | 33488.133 | 23583.789 | AK025052  | 1249.063  | 1367.6    | NM_01774E | 2447.428  | 1584.95   |
| BG324670  | 841.535   | 402.049   | NM_01438E | 1369.29   | 1208.772  | NM_02018E | 15992.088 | 13456.806 |
| NM_00669E | 3472.779  | 2478.893  | AF086090  | 1085.335  | 1143.851  | U88897    | 12200.85  | 8399.006  |
| NM_01802E | 4253.415  | 3255.126  | AK002173  | 26958.541 | 23040.268 | CY3Cy5    | 6863.594  | 300.255   |
| NM_001707 | 21954.078 | 16836.248 | NM_01774E | 2121.39   | 1622.579  | AA927698  | 2394.628  | 3066.585  |
| M15530    | 6122.02   | 4230.488  | NM_02018E | 13259.192 | 9195.323  | AI498426  | 911.316   | 1156.626  |
| NM_00048E | 496.796   | 515.171   | U88897    | 13256.271 | 9413.648  | BG824773  | 790.466   | 1031.11   |
| NM_001877 | 943.41    | 909.332   | CY3Cy5    | 4087.095  | 237.159   | D01038    | 7920.226  | 9728.621  |
| NM_014207 | 4848.037  | 3434.945  | U37448    | 594.877   | 783.226   | AB019205  | 1476.625  | 1816.813  |
| AK002163  | 2740.694  | 2086.494  | AA927698  | 2722.007  | 2959.097  | J05008    | 646.115   | 800.913   |
| NM_012344 | 1838.399  | 1443.065  | AI498426  | 631.03    | 694.387   | U11087    | 513.719   | 608.646   |
| NM_002351 | 1911.643  | 1298.748  | BG824773  | 685.134   | 592.308   | D50640    | 1893.093  | 2717.163  |
| NM_01438E | 1303.879  | 1004.596  | D01038    | 9324.936  | 10440.142 | M98776    | 585.148   | 650.313   |
| NM_001704 | 1151.402  | 815.45    | AB019205  | 1318.423  | 1849.735  | X99135    | 47447.191 | 42546.66  |
| AB036432  | 10241.162 | 6982.417  | J05008    | 1253.613  | 1212.243  | AF009744  | 1186.945  | 1056.078  |
| NM_014872 | 6215.491  | 5058.45   | U11087    | 384.967   | 698.225   | NM_17214C | 1742.699  | 1220.952  |
| NM_003643 | 903.627   | 959.719   | D50640    | 1922.598  | 2297.216  | SR2       | 57144.277 | 44232.402 |
| NM_00348C | 2159.432  | 1335.808  | M98776    | 661.663   | 706.01    | SR4       | 17112.902 | 20215.109 |
| NM_00089E | 1093.484  | 842.031   | X99135    | 56606.336 | 56811.492 | SR6       | 3422.989  | 6869.381  |
| NM_032951 | 3491.909  | 2598.546  | AF009744  | 1549.532  | 1588.369  | SR8       | 10913.966 | 42031.055 |
| NM_000503 | 5640.026  | 4256.252  | NM_17214C | 2475.604  | 3070.003  | SR10      | 38629.07  | 11189.959 |
| NM_00240E | 1789.934  | 1441.337  | SR6       | 2717.458  | 2631.423  | CY3Cy5    | 7881.086  | 398.932   |
| AK000004  | 1614.226  | 1443.282  | SR8       | 9449.873  | 26425.611 | NM_005311 | 3545.286  | 4427.292  |
| NM_012421 | 29736.902 | 31539.951 | SR10      | 33663.465 | 11236.578 | NM_00590E | 829.775   | 1058.212  |
| AB014601  | 2263.893  | 2446.056  | CY3Cy5    | 2596.15   | 76.414    | NM_00535E | 710.976   | 1126.468  |
| AK001393  | 7515.226  | 8924.106  | NM_005311 | 3371.757  | 4908.196  | NM_002511 | 836.974   | 1305.137  |
| NM_000023 | 5153.815  | 6305.5    | NM_00590E | 925.094   | 991.163   | AF295378  | 2912.937  | 3357.072  |
| NM_014861 | 967.765   | 604.708   | NM_00096C | 508.494   | 685.189   | NM_00408E | 2770.54   | 3145.266  |
| NM_012434 | 1097.978  | 747.887   | NM_00535E | 723.506   | 647.2     | NM_01244E | 15442.814 | 17508.883 |
| NM_005694 | 6134.812  | 4521.265  | NM_002511 | 892.93    | 1108.955  | NM_018104 | 2916.649  | 3259.085  |
| AF224741  | 758.767   | 543.736   | AF295378  | 2476.004  | 2741.25   | NM_00442E | 2984.665  | 2957.203  |
| NM_006594 | 2904.523  | 2242.492  | NM_00408E | 3022.045  | 3257.816  | U64564    | 1447.269  | 1425.633  |
| NM_004177 | 1424.241  | 1034.891  | NM_01244E | 17620.568 | 19521.418 | NM_00647C | 1771.24   | 1187.571  |
| NM_01242E | 1154.735  | 1005.749  | NM_018104 | 2888.329  | 3321.234  | NM_00285E | 1535.837  | 1059.253  |
| NM_004871 | 5355.888  | 4521.431  | NM_00442E | 3111.323  | 3722.739  | AB038463  | 2145.278  | 2125.384  |
| NM_00569E | 8566.538  | 8326.405  | U64564    | 1407.027  | 1781.462  | M30262    | 1783.267  | 3443.393  |
| AF202146  | 5722.104  | 5661.869  | NM_00647C | 2399.261  | 2516.504  | NM_00546C | 1261.679  | 3279.814  |
| NM_00639E | 1658.656  | 1861.966  | NM_00285E | 3143.504  | 3304.004  | AF160477  | 1321.447  | 2534.502  |
| NM_01492E | 2850.409  | 3825.404  | AB038463  | 1182.19   | 1307.034  | NM_00322E | 234.083   | 476.041   |
| NM_005477 | 5080.048  | 6055.615  | M30262    | 2152.99   | 2141.431  | M12883    | 527.146   | 880.772   |
| NM_00701E | 571.704   | 795.825   | NM_00546C | 2259.113  | 1467.45   | BG288747  | 848.02    | 1719.849  |
| NM_00431E | 1065.783  | 1101.394  | AF160477  | 1937.97   | 2025.457  | AI524814  | 5722.873  | 7028.959  |
| L09089    | 472.097   | 690.782   | M12883    | 1180.168  | 1016.08   | AB024411  | 600.043   | 891.239   |

|           |           |           |           |           |           |           |           |           |
|-----------|-----------|-----------|-----------|-----------|-----------|-----------|-----------|-----------|
| NM_002640 | 2205.348  | 2160.088  | BG288747  | 842.949   | 732.102   | NM_002444 | 45292.082 | 53194.465 |
| Y11339    | 6240.821  | 5511.596  | AI524814  | 5412.758  | 6685.323  | NM_001104 | 1387.291  | 1611.602  |
| AB030176  | 691.86    | 620.179   | AB024411  | 670.077   | 844.659   | NM_002989 | 5781.545  | 5350.429  |
| NM_003937 | 4324.742  | 3053.243  | NM_002444 | 42643.285 | 49520.543 | U88898    | 3762.755  | 4308.303  |
| NM_002537 | 7467.709  | 5532.313  | NM_001104 | 1238.198  | 1538.29   | NM_020154 | 31881.35  | 33361.078 |
| NM_003139 | 4991.128  | 4694.552  | NM_002989 | 4411.522  | 4694.68   | NM_004665 | 2255.112  | 2208.836  |
| NM_012316 | 4332.548  | 4035.678  | U88898    | 2663.374  | 3271.051  | NM_005300 | 1982.303  | 1923.039  |
| NM_001634 | 24163.281 | 15020.891 | NM_020154 | 25247.594 | 29453.148 | NM_000893 | 1003.644  | 1031.815  |
| NM_002267 | 7151.458  | 6928.349  | NM_004665 | 1488.364  | 1679.672  | NM_000698 | 21420.176 | 22969.516 |
| NM_006412 | 12867.127 | 13656.088 | NM_005300 | 1587.149  | 1508.445  | NM_003204 | 1952.018  | 1872.181  |
| NM_003063 | 7001.571  | 8659.957  | NM_000893 | 886.023   | 895.648   | AF254069  | 1449.667  | 1109.503  |
| NM_014041 | 33667.125 | 42697.754 | NM_000698 | 20316.275 | 20949.639 | AL117600  | 7635.987  | 4929.793  |
| NM_007169 | 3842.093  | 4796.737  | AF031167  | 517.763   | 504.245   | NM_004487 | 13287.249 | 6149.289  |
| NM_014313 | 651.395   | 985.943   | NM_003204 | 2370.137  | 2527.862  | AB029000  | 6094.731  | 9698.694  |
| AK024966  | 3301.333  | 3551.029  | AF254069  | 1862.114  | 1775.193  | AK026965  | 4513.639  | 9138.402  |
| AF178941  | 19712.658 | 22706.232 | AL117600  | 7843.897  | 8458.614  | AK025859  | 5749.094  | 7486.572  |
| NM_016033 | 8585.101  | 10074.213 | NM_004487 | 12387.188 | 12964.91  | AL117499  | 12996.879 | 23500.572 |
| NM_017585 | 8127.296  | 9961.188  | AB029000  | 5795.938  | 6540.961  | AB007957  | 317.85    | 752.173   |
| U61737    | 36525.379 | 44622.398 | AK026965  | 7501.137  | 7692.972  | AK000160  | 988.899   | 2749.366  |
| Y10506    | 95.701    | 275.928   | AK025859  | 5290.538  | 3989.78   | NM_006032 | 3867.121  | 5446.231  |
| X06389    | 1243.826  | 1749.417  | AL117499  | 11201.715 | 10941.013 | NM_014788 | 1234.623  | 1867.766  |
| NM_000033 | 3375.541  | 3877.685  | AB007957  | 238.047   | 428.02    | NM_002153 | 641.234   | 582.074   |
| NM_006079 | 33338.02  | 42406.805 | AK000160  | 1529.243  | 1528.17   | AB040890  | 1470.909  | 1785.465  |
| NM_006696 | 3209.366  | 3834.24   | NM_006032 | 4001.711  | 4608.5    | AK024233  | 1224.632  | 1569.374  |
| NM_018026 | 3445.857  | 4116.483  | NM_014788 | 1393.643  | 1963.367  | AK021870  | 1853.491  | 2021.231  |
| NM_001707 | 24349.277 | 29177.727 | AB040890  | 1112.386  | 1453.708  | U06680    | 4854.033  | 5498.739  |
| AK022983  | 836.739   | 864.903   | AK024233  | 936.115   | 1172.949  | NM_005123 | 910.532   | 1116.67   |
| NM_014868 | 7812.379  | 7570.049  | AK021870  | 1946.056  | 1810.734  | NM_015584 | 6913.502  | 6351.142  |
| AL442089  | 12752.351 | 12598.633 | U06680    | 3223.811  | 3537.851  | NM_001697 | 43736.551 | 45944.172 |
| NM_001200 | 2320.17   | 2679.151  | NM_005123 | 685.261   | 894.087   | NM_016098 | 20664.469 | 22744.641 |
| AB007964  | 691.95    | 678.99    | NM_015584 | 5195.659  | 5030.822  | NM_006667 | 36262.906 | 27388.594 |
| AF128541  | 5050.377  | 5869.188  | NM_016098 | 19466.154 | 20057.242 | AK025125  | 6178.976  | 4169.09   |
| AK026305  | 3990.937  | 4183.518  | NM_002063 | 655.498   | 920.747   | NM_000815 | 764.139   | 753.368   |
| NM_002552 | 3338.426  | 4271.06   | NM_006667 | 26040.32  | 28278.377 | NM_001293 | 677.654   | 417.684   |
| NM_014321 | 7104.58   | 8709.813  | AK025125  | 5428.464  | 6245.544  | AB023173  | 5052.333  | 2471.589  |
| AK022733  | 1691.74   | 1755.237  | NM_000815 | 1017.788  | 1037.289  | AF156548  | 2777.449  | 6138.107  |
| AB011132  | 5348.877  | 6332.03   | NM_001293 | 667.238   | 592.131   | NM_004663 | 2284.734  | 4255.045  |
| NM_020362 | 3927.947  | 4573.069  | AB023173  | 4530.541  | 4952.587  | NM_015310 | 1485.378  | 2418.532  |
| AB040937  | 5699.085  | 7023.367  | AF156548  | 2484.602  | 2426.713  | AB002338  | 1260.103  | 3484.812  |
| AF275798  | 27609.775 | 38322.488 | NM_000387 | 10064.072 | 10022.348 | NM_001072 | 823.129   | 1511.223  |
| NM_005441 | 10861.892 | 11937.622 | NM_004663 | 2003.869  | 1757.814  | NM_014070 | 592.939   | 968.361   |
| NM_016079 | 21779.314 | 26074.877 | NM_015310 | 1263.247  | 1042.356  | NM_016280 | 25700.473 | 24743.119 |
| AK023108  | 2995.96   | 3918.37   | NM_016154 | 10286.104 | 9351.407  | NM_016027 | 2799.804  | 2394.293  |
| AK026409  | 30587.635 | 37530.703 | NM_005013 | 39476.074 | 39681.609 | NM_014297 | 8035.997  | 7953.409  |
| AF097025  | 10331.837 | 10659.689 | AB002338  | 1149.802  | 1000.613  | NM_018156 | 18724.287 | 18272.174 |
| NM_002405 | 1784.357  | 1827.424  | NM_001072 | 954.705   | 1291.26   | X98266    | 1784.123  | 1531.965  |
| AK000004  | 1304.709  | 1587.649  | NM_014070 | 810.919   | 1234.142  | U00930    | 21683.91  | 18606.029 |
| NM_012421 | 27338.244 | 30805.621 | NM_016280 | 21234.74  | 26160.869 | AK024958  | 1004.806  | 876.758   |
| AB014601  | 2399.053  | 2528.414  | NM_016027 | 2415.78   | 2630.429  | NM_014575 | 2526.761  | 2557.624  |
| AK001393  | 6671.66   | 6430.458  | NM_014297 | 6867.766  | 8234.441  | NM_002439 | 4264.559  | 4168.579  |
| NM_000023 | 5640.068  | 6078.283  | NM_018156 | 11178.472 | 13048.056 | AL117552  | 1161.564  | 1167.87   |
| AF022654  | 1179.729  | 1193.326  | X98266    | 907.722   | 974.887   | NM_002692 | 7870.966  | 5717.867  |
| NM_001143 | 942.83    | 832.633   | U00930    | 11734.302 | 13763.413 | AB023190  | 21301.469 | 14989.635 |

|           |           |           |           |           |           |           |           |           |
|-----------|-----------|-----------|-----------|-----------|-----------|-----------|-----------|-----------|
| AK022638  | 5143.037  | 5948.444  | AK024958  | 650.423   | 562.793   | NM_007064 | 1549.961  | 1111.902  |
| BG698409  | 1735.029  | 1786.595  | NM_002439 | 3979.68   | 4038.548  | NM_006281 | 2453.861  | 1258.018  |
| U36798    | 389.408   | 374.963   | AL117552  | 1178.724  | 1297.744  | NM_002738 | 10046.397 | 5545.049  |
| AA220921  | 8941.547  | 11517.953 | NM_002692 | 7900.841  | 8422.508  | U23460    | 34048.883 | 26502.131 |
| N67770    | 1172.617  | 1147.791  | AB023190  | 13729.13  | 15089.204 | NM_005356 | 1117.871  | 3497.712  |
| AA486200  | 75480.281 | 63593.973 | NM_007064 | 1546.37   | 1506.186  | NM_005884 | 13770.88  | 30195.371 |
| U90065    | 413.949   | 477.093   | NM_006281 | 1749.298  | 1926.739  | NM_012396 | 13819.594 | 22036.373 |
| AJ005898  | 4439.404  | 5197.839  | NM_002738 | 8111.842  | 8573.781  | AF229804  | 7408.08   | 14498.059 |
| X57303    | 4439.476  | 5827.455  | U23460    | 26080.729 | 29986.92  | U90552    | 9949.723  | 21323.613 |
| AA463224  | 681.88    | 694.751   | NM_005356 | 1282.473  | 1403.977  | AF160477  | 1489.59   | 1788.766  |
| BG248802  | 5990.817  | 6552.665  | Z25434    | 4918.112  | 5109.421  | M12883    | 914.047   | 945.921   |
| L19605    | 2057.426  | 2015.032  | NM_005884 | 10235.575 | 12645.142 | BG288747  | 850.967   | 680.311   |
| AA876532  | 4967.688  | 5003.723  | NM_012396 | 9378.746  | 8381.705  | BG617923  | 626.055   | 493.932   |
| S74349    | 1955.005  | 1964.611  | AF229804  | 24532.463 | 21871.568 | U37448    | 688.977   | 862.524   |
| X07979    | 32710.506 | 42750.031 | AF151638  | 1500.145  | 1104.97   | AA927698  | 3448.744  | 2730.473  |
| BG324670  | 770.915   | 701.79    | U90552    | 5635.013  | 6231.376  | AI498426  | 1086.375  | 916.51    |
| BG744224  | 21907.322 | 28360.045 | NM_005460 | 692.574   | 995.359   | BG824773  | 768.768   | 888.02    |
| NM_005477 | 8968.913  | 12324.781 | AF160477  | 1914.988  | 2275.276  | D01038    | 9401.306  | 8378.578  |
| NM_007018 | 382.912   | 512.986   | M12883    | 923.886   | 1268.761  | AB019205  | 1581.078  | 1158.813  |
| NM_004318 | 700.15    | 781.394   | BG288747  | 796.96    | 1532.297  | J05008    | 909.838   | 737.383   |
| L09089    | 346.705   | 565.019   | BG617923  | 256.131   | 368.988   | D50640    | 2344.804  | 1678.685  |
| NM_002640 | 1931.395  | 1963.594  | U37448    | 733.162   | 658.223   | M98776    | 897.697   | 503.84    |
| M15530    | 7263.792  | 7501.878  | AA927698  | 2464.858  | 2479.922  | X99135    | 55154.273 | 39524.406 |
| NM_000488 | 1255.769  | 1515.58   | AI498426  | 764.377   | 464.997   | AF009744  | 2300.172  | 3411.192  |
| NM_001877 | 1006.573  | 1349.822  | BG824773  | 748.963   | 676.061   | NM_172140 | 2880.991  | 5607.907  |
| NM_014207 | 6402.628  | 6372.667  | D01038    | 8375.588  | 8812.811  | AF086109  | 373.158   | 1195.356  |
| AK002163  | 3405.129  | 3401.957  | AB019205  | 1560.702  | 1372.834  | AK026965  | 5449.7    | 5657.419  |
| NM_002287 | 11920.354 | 11894.459 | J05008    | 1455.744  | 1252.28   | AK025859  | 4803.652  | 3898.774  |
| NM_012344 | 1995.07   | 2029.912  | U11087    | 999.484   | 720.956   | AL117499  | 12235.523 | 10446.237 |
| NM_002351 | 1771.484  | 2009.721  | D50640    | 2114.142  | 2401.055  | AK000160  | 1511.796  | 1556.962  |
| NM_014385 | 1442.66   | 1505.966  | M98776    | 811.505   | 559.865   | NM_005311 | 4328.753  | 3716.523  |
| NM_001704 | 1535.52   | 1696.863  | AF009744  | 1399.139  | 1227.854  | NM_005905 | 957.729   | 959.714   |
| AB036432  | 12628.865 | 14098.151 | NM_172140 | 2316.961  | 2686.214  | NM_005356 | 870.414   | 805.898   |
| NM_014872 | 7084.334  | 7462.566  | AF086109  | 770.782   | 535.046   | NM_002511 | 1181.762  | 991.11    |
| NM_003643 | 1279.008  | 1376.016  | AK026965  | 5855.877  | 6617.386  | AF295378  | 2665.503  | 2529.465  |
| NM_003480 | 1627.042  | 2076.126  | AK025859  | 4897.023  | 4966.081  | NM_004085 | 3810.901  | 2831.742  |
| NM_000896 | 1093.99   | 1439.311  | AL117499  | 10850.286 | 13096.434 | NM_012445 | 24247.938 | 25294.879 |
| NM_032951 | 2946.847  | 3961.214  | AB007957  | 381.302   | 405.619   | NM_018104 | 3849.14   | 3815.279  |
| NM_000503 | 5096.766  | 5565.112  | AK000160  | 1410.024  | 1342.491  | NM_006080 | 453.552   | 1341.4    |
| NM_017585 | 8169.95   | 8544.939  | NM_005311 | 3286.994  | 3766.649  | NM_004426 | 3664.078  | 6829.599  |
| U61737    | 33429.398 | 39315.625 | NM_005905 | 1119.304  | 1174.054  | U64564    | 1962.799  | 4161.307  |
| X06389    | 761.66    | 950.338   | NM_000960 | 514.353   | 486.843   | NM_006470 | 2911.091  | 5211.485  |
| NM_000033 | 2784.133  | 3147.575  | NM_005356 | 696.219   | 757.006   | NM_002855 | 2659.728  | 5188.625  |
| NM_014861 | 731.696   | 1241.692  | NM_002511 | 782.627   | 888.438   | AB038463  | 1892.7    | 3742.243  |
| NM_012434 | 1410.616  | 1303.543  | NM_000794 | 389.281   | 413.837   | M30262    | 1142.994  | 2238.351  |
| NM_005694 | 7204.355  | 6781.941  | AF295378  | 2663.095  | 3019.13   | NM_000387 | 9543.658  | 8406.382  |
| AF224741  | 1843.344  | 2005.964  | NM_004085 | 2871.95   | 3126.726  | NM_004663 | 1527.741  | 1621.725  |
| NM_006594 | 3103.92   | 2832.558  | NM_012445 | 17224.781 | 19285.129 | NM_015310 | 1051.318  | 1308.583  |
| NM_004177 | 1392.704  | 1348.527  | NM_004426 | 3124.151  | 3666.771  | NM_016154 | 9780.613  | 8980.319  |
| NM_012426 | 1514.352  | 1508.765  | U64564    | 1476.144  | 1513.164  | NM_005013 | 43464.258 | 47266.168 |
| NM_004871 | 5403.348  | 6246.082  | NM_006470 | 1777.82   | 1867.857  | AB002338  | 1157.744  | 1430.742  |
| NM_005696 | 9288.021  | 11609.426 | NM_002855 | 2800.132  | 2437.012  | AI524814  | 5863.181  | 5139.094  |
| AF202146  | 6115.397  | 6435.632  | AB038463  | 1275.001  | 1034.284  | AB024411  | 490.732   | 1462.967  |

|           |           |           |           |           |           |           |           |           |
|-----------|-----------|-----------|-----------|-----------|-----------|-----------|-----------|-----------|
| NM_006393 | 2391.407  | 2415.09   | M30262    | 1987.929  | 1813.501  | NM_002444 | 49240.309 | 50930.199 |
| NM_014923 | 1989.233  | 2230.293  | NM_000387 | 9401.37   | 10917.01  | Z83802    | 1823.099  | 1524.953  |
| AF275798  | 27109.031 | 35421.316 | NM_004663 | 1751.276  | 1878.046  | NM_001104 | 1434.699  | 1502.327  |
| NM_005441 | 11118.856 | 11026.812 | NM_015310 | 1270.516  | 1299.058  | NM_002983 | 4438.315  | 3943.281  |
| NM_016079 | 22414.465 | 22248.844 | NM_016154 | 10148.268 | 12465.427 | U88898    | 3494.317  | 3637.083  |
| AK023108  | 3050.329  | 3431.521  | NM_005013 | 35666.75  | 42451.121 | NM_020154 | 32768.383 | 26604.967 |
| AK026409  | 26858.861 | 33088.52  | AB002338  | 1303.99   | 1421.597  | NM_004665 | 1876.504  | 1594.749  |
| AF097025  | 9036.405  | 9463.747  | AI524814  | 5843.299  | 6682.17   | NM_005300 | 1915.713  | 1811.422  |
| Y11339    | 6956.146  | 7977.471  | AB024411  | 966.179   | 991.982   | NM_000893 | 1045.864  | 1479.715  |
| AB030176  | 948.625   | 1141.22   | NM_002444 | 38679.605 | 42557.746 | AF031167  | 602.082   | 1078.842  |
| NM_003937 | 4611.661  | 4552.448  | NM_001104 | 1156.51   | 966.428   | NM_003204 | 2729.206  | 5663.611  |
| NM_002537 | 8305.606  | 8674.191  | NM_002989 | 4014.894  | 3790.396  | AF254069  | 2026.91   | 3953.075  |
| NM_003139 | 5481.395  | 6267.277  | U88898    | 2784.34   | 2933.101  | AL117600  | 11286.017 | 21564.059 |
| NM_012316 | 5254.86   | 6166.867  | NM_020154 | 26024.504 | 27269.699 | NM_001712 | 640.574   | 1516.176  |
| NM_001634 | 26556.635 | 16833.893 | NM_004665 | 2168.571  | 1902.557  | NM_004487 | 10537.38  | 17857.68  |
| NM_002267 | 7082.338  | 6378.818  | NM_005300 | 1789.218  | 1856.215  | AB029000  | 8785.768  | 16892.201 |
| NM_006412 | 13422.965 | 14175.572 | NM_000893 | 831.476   | 1012.454  | Z25434    | 4036.38   | 4578.211  |
| NM_003063 | 8092.135  | 9098.072  | NM_005091 | 423.811   | 460.073   | NM_005884 | 11411.038 | 13320.034 |
| NM_014041 | 38248.352 | 41005.207 | AF031167  | 492.144   | 427.666   | NM_012399 | 9634.137  | 8727.513  |
| NM_007169 | 4656.739  | 4955.626  | NM_003204 | 2286.157  | 2251.269  | AF229804  | 28962.975 | 30516.807 |
| NM_014313 | 799.289   | 989.287   | AF254069  | 1441.802  | 1445.446  | AF151638  | 1743.586  | 1992.961  |
| AK024966  | 3325.434  | 4481.214  | AL117600  | 7135.705  | 7134.479  | U90552    | 7478.63   | 9026.656  |
| AF178941  | 16431.838 | 19869.072 | NM_004487 | 11233.97  | 9655.726  | NM_006032 | 4242.57   | 5691.052  |
| NM_016033 | 5939.721  | 6520.512  | AB029000  | 5887.166  | 5995.968  | NM_014788 | 1606.456  | 2412.461  |
| NM_018316 | 2438.298  | 2427.756  | Z25434    | 4632.097  | 6430.527  | NM_002153 | 509.684   | 904.996   |
| AB011180  | 2627.322  | 2488.037  | NM_005884 | 10028.797 | 14477.474 | AB040890  | 1610.781  | 2432.355  |
| NM_007167 | 8158.836  | 8772.797  | NM_012399 | 8728.551  | 10041.3   | AK024233  | 877.487   | 1593.597  |
| NM_014832 | 2666.389  | 2659.111  | AF229804  | 21328.193 | 25222.898 | AK021870  | 2126.694  | 1974.056  |
| NM_003243 | 725.663   | 733.844   | AF151638  | 1342.949  | 1566.565  | U06680    | 5178.896  | 4825.88   |
| NM_013359 | 743.647   | 803.894   | U90552    | 5795.509  | 6699.45   | NM_005123 | 1226.452  | 1343.9    |
| NM_002477 | 16368.546 | 17578.389 | NM_006032 | 3235.223  | 3385.603  | NM_015584 | 7369.566  | 9939.704  |
| NM_018026 | 4165.018  | 4426.055  | NM_014788 | 1808.873  | 1784.191  | NM_001697 | 47988.277 | 55924.504 |
| NM_001707 | 28163.666 | 35813.055 | AB040890  | 1189.19   | 1211.606  | NM_002063 | 724.352   | 1318.608  |
| NM_014868 | 8413.646  | 8232.777  | AK024233  | 985.114   | 883.078   | AK025125  | 6803.495  | 12380.86  |
| AL442089  | 13821.371 | 13482.265 | AK021870  | 1810.363  | 1727.283  | NM_000815 | 934.293   | 3313.591  |
| NM_001200 | 3080.772  | 2774.497  | U06680    | 3410.171  | 3015.163  | NM_001293 | 747.233   | 2408.775  |
| AF128541  | 5948.227  | 6176.068  | NM_005123 | 826.63    | 955.125   | AB023173  | 7185.419  | 13647.608 |
| AK026305  | 5564      | 5519.353  | NM_015584 | 6089.205  | 6537.691  | AF156548  | 3774.038  | 7525.007  |
| NM_002552 | 3539.506  | 3883.991  | NM_002063 | 550.927   | 810.461   | NM_172140 | 1712.449  | 1866.111  |
| NM_014321 | 8480.16   | 8822.76   | NM_006667 | 32983.922 | 34861.492 | NM_001072 | 1018.023  | 1569.345  |
| AK022733  | 1978.608  | 1854.389  | AK025125  | 4823.025  | 5626.394  | NM_014070 | 966.722   | 1172.373  |
| AB011132  | 5535.595  | 6105.176  | NM_000815 | 806.247   | 1011.733  | NM_016280 | 24698.133 | 32490.014 |
| NM_020362 | 4030.299  | 5134.938  | NM_001293 | 352.807   | 477.941   | NM_016027 | 2984.663  | 4472.029  |
| AB040937  | 7953.276  | 10122.324 | AB023173  | 4695.43   | 3782.874  | NM_014297 | 8062.951  | 11581.336 |
| NM_000095 | 2915.276  | 3282.595  | AF156548  | 2190.782  | 1893.667  | NM_018156 | 16597.875 | 22897.197 |
| AL137493  | 758.23    | 981.466   | NM_172140 | 1805.829  | 2737.048  | U00930    | 20509.299 | 34899.395 |
| NM_002457 | 556.984   | 624.411   | AF086109  | 541.263   | 690.65    | AK024958  | 1216.306  | 1691.895  |
| NM_001338 | 8512.521  | 9644.907  | NM_001072 | 951.408   | 1038.783  | NM_014575 | 3241.756  | 4595.576  |
| NM_003637 | 802.513   | 1091.457  | NM_014070 | 1177.374  | 1118.234  | NM_002439 | 5304.422  | 6476.468  |
| BC035133  | 928.661   | 1055.442  | NM_016280 | 17584.789 | 16625.039 | AL117552  | 1912.453  | 1453.74   |
| NM_004233 | 2002.56   | 2155.412  | NM_016027 | 2316.888  | 2057.11   | NM_002692 | 9753.703  | 18711.053 |
| NM_001544 | 23075.912 | 23596.518 | NM_014297 | 6688.24   | 6599.434  | NM_007064 | 1885.934  | 4663.658  |
| X58531    | 1352.766  | 1536.711  | NM_018156 | 12603.079 | 12412.834 | NM_006281 | 2567.574  | 5697.707  |



|           |           |           |           |           |           |           |           |           |
|-----------|-----------|-----------|-----------|-----------|-----------|-----------|-----------|-----------|
| AB011168  | 7097.052  | 7360.36   | X98266    | 1149.147  | 1228.73   | NM_00273E | 11149.945 | 23863.172 |
| BE794262  | 2322.519  | 2746.955  | U00930    | 15005.553 | 17876.881 | U23460    | 29368.361 | 47020.777 |
| NM_003212 | 10108.438 | 10769.617 | AK024958  | 893.076   | 1093.05   | NM_00535E | 1137.619  | 2140.426  |
| NM_006382 | 2291.388  | 2257.053  | NM_002439 | 4508.537  | 5022.073  | NM_00442E | 3365.097  | 5836.141  |
| NM_004811 | 1506.629  | 1582.708  | AL117552  | 1410.798  | 1547.507  | U64564    | 2045.477  | 2354.708  |
| AK021910  | 66288.898 | 58633.191 | NM_002692 | 8620.858  | 8990.796  | NM_00647C | 1771.653  | 2633.953  |
| M62402    | 1281.44   | 1605.882  | AB023190  | 15427.184 | 15827.471 | NM_00285E | 1964.621  | 2696.876  |
| NM_002547 | 603.267   | 763.428   | NM_007064 | 1669.046  | 1361.85   | AB038463  | 1356.656  | 2777.595  |
| NM_00474E | 8820.796  | 12343.583 | NM_006281 | 1773.798  | 1888.295  | M30262    | 1841.553  | 3414.218  |
| NM_00266E | 13045.237 | 15384.421 | NM_00273E | 7815.183  | 7384.665  | NM_00546C | 1101.45   | 1795.573  |
| NM_00105E | 2713.047  | 2303.954  | U23460    | 26533.539 | 26330.998 | AF160477  | 1682.655  | 2674.688  |
| NM_01431E | 9845.997  | 9906.301  | NM_00535E | 1084.48   | 888.327   | NM_00322E | 367.236   | 541.473   |
| NM_004054 | 7296.85   | 7558.224  | NM_00442E | 2686.929  | 3567.382  | M12883    | 884.115   | 1422.93   |
| NM_001138 | 4804.287  | 5603.897  | U64564    | 1875.675  | 2750.969  | BG288747  | 591.634   | 1239.629  |
| NM_00728E | 544.162   | 852.606   | NM_00647C | 1676.809  | 1617.511  | U37448    | 478.91    | 856.842   |
| NM_00421E | 43454.621 | 47485.156 | NM_00285E | 1995.925  | 2318.561  | AA927698  | 3625.571  | 3119.866  |
| NM_00344E | 62714.582 | 56170.176 | AB038463  | 1144.261  | 1266.516  | BG824773  | 1282.211  | 1379.726  |
| NM_00202E | 671.958   | 1088.28   | M30262    | 1531.149  | 1494.77   | D01038    | 12683.855 | 15846.951 |
| AB015228  | 2105.985  | 2166.245  | NM_00546C | 709.731   | 512.387   | AB019205  | 2032.922  | 1505.107  |
| AL049685  | 3141.437  | 2652.867  | AF160477  | 1791.203  | 1852.518  | J05008    | 1385.211  | 2742.191  |
| AK026800  | 8047.125  | 7653.874  | NM_00322E | 845.581   | 1141.508  | U11087    | 1200.874  | 2339.082  |
| NM_00144E | 1615.653  | 1787.095  | M12883    | 876.918   | 821.51    | D50640    | 2514.537  | 5706.126  |
| NM_01777E | 6275.934  | 6269.436  | BG288747  | 426.477   | 535.782   | D43747    | 546.761   | 1343.369  |
| AK001958  | 1139.691  | 1258.15   | U37448    | 640.318   | 677.807   | M98776    | 639.525   | 2143.747  |
| AK025947  | 3034.528  | 3154.89   | AA927698  | 2726.737  | 2397.319  | X99135    | 61522.746 | 57989.988 |
| AF217973  | 5832.838  | 6288.754  | AI498426  | 1027.581  | 1017.054  | AF009744  | 2326.525  | 4153.719  |
| NM_00703E | 10078.931 | 10871.396 | BG824773  | 1037.927  | 648.901   | NM_003204 | 3269.595  | 5632.325  |
| AF226048  | 5354.015  | 5864.72   | D01038    | 11617.359 | 12193.661 | AF254069  | 2220.711  | 3329.787  |
| NM_00557E | 12293.111 | 13261.072 | AB019205  | 1468.281  | 1715.633  | AL117600  | 8257.659  | 12046.569 |
| D50918    | 7733.358  | 7456.349  | J05008    | 1343.38   | 1237.979  | NM_004487 | 12669.134 | 15508.206 |
| U48734    | 15989.291 | 18206.934 | U11087    | 816.273   | 918.697   | AB029000  | 6745.771  | 9177.475  |
| NM_00640C | 7059.108  | 10017.833 | D50640    | 1894.536  | 1910.578  | AK026965  | 6162.224  | 7062.9    |
| NM_00390E | 5888.455  | 6978.272  | M98776    | 827.289   | 550.256   | AK025859  | 5608.25   | 4963.469  |
| NM_01795E | 3694.004  | 4385.567  | X99135    | 51760.598 | 48370.145 | AL117499  | 14642.237 | 12486.146 |
| NM_01606C | 4219.933  | 3785.417  | AF009744  | 1421.325  | 1136.356  | AK000160  | 1842.112  | 2563.756  |
| NM_00220E | 6130.778  | 6637.806  | NM_003204 | 2183.888  | 2902.552  | NM_005311 | 4352.059  | 3881.222  |
| NM_00721E | 2452.425  | 2575.083  | AF254069  | 1496.113  | 1699.544  | NM_00590E | 1140.72   | 975.987   |
| AK023518  | 1081.45   | 1312.771  | AL117600  | 6691.099  | 8221.636  | NM_00096C | 528.566   | 653.466   |
| NM_000944 | 8275.038  | 6879.017  | NM_001712 | 469.94    | 588.772   | NM_00535E | 1456.937  | 1240.529  |
| NM_01223E | 1551.287  | 1730.747  | NM_004487 | 9421.896  | 9276.827  | NM_002511 | 1507.154  | 1487.668  |
| NM_01226E | 1363.19   | 1485.82   | AB029000  | 4113.374  | 4897.291  | NM_000794 | 326.718   | 1343.663  |
| NM_01339C | 4928.335  | 6021.642  | AK026965  | 5289.179  | 6014.546  | AF295378  | 3678.313  | 7344.503  |
| NM_00282E | 3880.805  | 4239.41   | AK025859  | 4183.876  | 4086.421  | NM_00408E | 4194.939  | 7814.817  |
| J02783    | 74800.57  | 60503.047 | AL117499  | 10110.332 | 10856.598 | NM_018104 | 3836.988  | 7517.495  |
| NM_018137 | 773.37    | 595.905   | NM_007054 | 494.118   | 752.787   | NM_00608C | 876.925   | 2003.588  |
| NM_006577 | 18261.791 | 18532.248 | AK000160  | 1036.742  | 1291.26   | NM_006667 | 52393.418 | 54902.789 |
| NM_005317 | 1549.717  | 1574.746  | NM_005311 | 3481.258  | 3493.155  | AK025125  | 7613.874  | 11705.122 |
| AF120493  | 934.483   | 939.036   | NM_00590E | 814.891   | 758.165   | NM_00081E | 1130.962  | 1771.613  |
| U12597    | 2257.66   | 2619.101  | NM_00096C | 466.392   | 767.587   | NM_00129E | 1008.432  | 1042.429  |
| U28055    | 858.144   | 808.026   | NM_00535E | 1033.387  | 730.646   | AB023173  | 5269.979  | 4761.615  |
| AB044343  | 4814.576  | 4664.872  | NM_002511 | 1047.319  | 1089.389  | AF156548  | 3295.671  | 2580.9    |
| NM_00128E | 797.291   | 521.805   | AF295378  | 2308.304  | 2888.855  | NM_000387 | 12735.954 | 9933.117  |
| NM_01840E | 659.547   | 481.32    | NM_00408E | 3165.273  | 3032.744  | NM_00466E | 2230.704  | 1948.626  |

|           |           |           |           |           |           |           |           |           |
|-----------|-----------|-----------|-----------|-----------|-----------|-----------|-----------|-----------|
| NM_014662 | 831.864   | 1056.79   | NM_012445 | 20716.176 | 18766.813 | NM_01531C | 1753.41   | 1369.659  |
| NM_00517E | 8657.933  | 8453.625  | NM_018104 | 3072.349  | 2518.014  | NM_016154 | 15834.737 | 12286.143 |
| NM_017702 | 4479.548  | 4963.026  | NM_00608C | 549.98    | 364.448   | NM_005013 | 51479.637 | 45344.355 |
| AB014516  | 6835.836  | 6620.822  | NM_006667 | 37306.07  | 45080.148 | AB002338  | 1743.153  | 1215.171  |
| Z83950    | 1891.474  | 1837.582  | AK025125  | 4332.178  | 4910.416  | AI524814  | 7141.445  | 4796.917  |
| AL080063  | 2622.885  | 2819.913  | NM_000815 | 1180.087  | 1042.375  | AB024411  | 1172.68   | 832.179   |
| NM_01659C | 526.384   | 744.479   | AB023173  | 4463.214  | 4891.979  | NM_002444 | 53078.641 | 38714.086 |
| NM_00562E | 14331.465 | 16657.945 | AF156548  | 2249.227  | 1977.048  | NM_001104 | 1632.333  | 1120.78   |
| X15262    | 7093.248  | 7591.357  | NM_000387 | 8729.108  | 8762.757  | NM_00298E | 5852.292  | 3410.436  |
| NM_00547E | 946.24    | 1072.092  | NM_004663 | 1515.785  | 1608.561  | U88898    | 3843.856  | 2863.234  |
| AB040918  | 3435.523  | 4497.765  | NM_01531C | 914.939   | 955.454   | NM_020154 | 35245.148 | 36319.145 |
| NM_01585E | 1998.371  | 1807.023  | NM_016154 | 10063.315 | 9854.042  | NM_00466E | 1810.873  | 4529.635  |
| X60152    | 1270.132  | 1372.084  | NM_005013 | 39946.539 | 45123.359 | NM_00530C | 2219.715  | 3590.294  |
| NM_00231E | 5654.83   | 6699.551  | AB002338  | 1148.763  | 1156.733  | NM_00089E | 1078.188  | 2460.649  |
| NM_00457E | 888.985   | 829.565   | AI524814  | 5617.965  | 4864.235  | NM_005091 | 583.372   | 801.177   |
| AB023232  | 2546.661  | 2494.588  | AB024411  | 885.929   | 900.342   | AF031167  | 409.968   | 798.909   |
| AL137589  | 1800.941  | 2069.552  | NM_002444 | 43529.668 | 43888.926 | AB023190  | 27621.324 | 25082.637 |
| NM_002502 | 2377.697  | 2768.556  | NM_001104 | 1164.21   | 1298.762  | NM_007064 | 2728.895  | 2872.289  |
| AF226732  | 5478.232  | 5211.292  | NM_00298E | 4655.191  | 5076.388  | NM_006281 | 3161.27   | 2310.962  |
| NM_006312 | 10210.059 | 9478.304  | U88898    | 2971.479  | 3130.434  | NM_00273E | 12279.231 | 8648.107  |
| NM_00280E | 978.655   | 833.368   | NM_020154 | 26295.139 | 24691.145 | U23460    | 44666.941 | 39081.246 |
| NM_003662 | 2661.315  | 2397.498  | NM_00466E | 1860.229  | 1726.611  | NM_00535E | 1378.994  | 1430.638  |
| NM_00293E | 15429.231 | 16502.906 | NM_00530C | 1569.993  | 1734.912  | Z25434    | 5842.403  | 4457.849  |
| NM_01583E | 30216.111 | 34874.563 | NM_00089E | 753.628   | 932.198   | NM_005884 | 5832.839  | 7939.063  |
| NM_004713 | 3016.935  | 2885.85   | NM_00069E | 20483.35  | 19785.424 | NM_01239E | 13093.298 | 9312.658  |
| NM_00376E | 913.34    | 1062.775  | AB023190  | 16733.996 | 19537.477 | AF229804  | 34446.504 | 25491.051 |
| NM_00169E | 12691.424 | 13411.337 | NM_007064 | 1736.891  | 1632.421  | AF151638  | 2110.188  | 1661.033  |
| AF086431  | 2922.895  | 3927.916  | NM_006281 | 1579.443  | 2072.313  | U90552    | 8553.239  | 6731.759  |
| NM_01418E | 53980.078 | 46427.949 | NM_00273E | 8347.131  | 9370.921  | NM_006032 | 5652.492  | 3549.419  |
| AK026365  | 2890.326  | 2968.071  | NM_00535E | 1060.506  | 972.567   | NM_01478E | 1873.16   | 1318.96   |
| S70004    | 2041.637  | 2247.935  | Z25434    | 4091.95   | 4786.128  | AB040890  | 1619.131  | 1080.696  |
| AF105378  | 2259.46   | 2214.07   | NM_005884 | 9225.74   | 14091.67  | AK024233  | 1541.199  | 1058.838  |
| NM_000167 | 4712.959  | 4315.676  | NM_01239E | 7733.171  | 8034.602  | AK021870  | 2314.513  | 1434.763  |
| AY007125  | 4238.754  | 4493.273  | AF229804  | 22192.473 | 22176.799 | U06680    | 5408.716  | 2706.312  |
| AB032987  | 2049.644  | 2118.694  | AF151638  | 1283.769  | 1266.844  | NM_00512E | 1270.396  | 2243.635  |
| NM_017567 | 10105.107 | 10238.275 | U90552    | 5428.654  | 5473.194  | NM_015584 | 6884.982  | 15183.219 |
| NM_000691 | 2615.765  | 2841.752  | NM_006032 | 3540.208  | 3187.285  | NM_001697 | 49632.84  | 58094.75  |
| Y18643    | 501.945   | 800.675   | NM_01478E | 1819.595  | 1891.914  | NM_00206E | 470.525   | 1179.143  |
| NM_00030E | 2085.015  | 2363.739  | NM_00215E | 469.584   | 445.143   | AL137479  | 1309.233  | 1430.049  |
| D86971    | 14731.179 | 14100.052 | AB040890  | 1340.592  | 1414.247  | NM_004211 | 2715.696  | 1997.131  |
| NM_00307E | 6951.283  | 7430.974  | AK024233  | 1017.049  | 1084.913  | Y10776    | 2508.263  | 1810.366  |
| NM_01404E | 863.831   | 1012.796  | AK021870  | 2363.254  | 1921.581  | AK027241  | 3241.306  | 2724.358  |
| AF274863  | 1133.988  | 1708.963  | U06680    | 4030.452  | 3844.973  | NM_00697E | 11923.274 | 8934.622  |
| AF319458  | 580.121   | 709.712   | NM_00512E | 744.955   | 792.733   | NM_004561 | 730.96    | 687.022   |
| AF024697  | 4596.18   | 4725.858  | NM_015584 | 5729.809  | 5705.254  | AK024812  | 3564.723  | 3058.277  |
| NM_018651 | 803.869   | 867.157   | NM_001697 | 37575.621 | 38430.848 | M20642    | 971.444   | 693.498   |
| AF164156  | 797.137   | 693.126   | NM_01609E | 19860.684 | 16836.342 | AK026412  | 1903.833  | 1498.129  |
| NM_005612 | 3870.731  | 2569.029  | NM_00206E | 551.722   | 449.653   | X89669    | 2539.428  | 2359.03   |
| AK025281  | 727.098   | 968.676   | AL137479  | 991.165   | 1030.147  | AF086109  | 757.245   | 619.335   |
| AF088026  | 995.705   | 761.294   | NM_004211 | 1357.529  | 1531.623  | NM_00107E | 1332.992  | 948.795   |
| D17018    | 1846.792  | 1949.445  | Y10776    | 1512.981  | 1757.803  | NM_01407C | 1328.411  | 715.997   |
| AB046852  | 748.676   | 743.169   | AK027241  | 2022.299  | 2480.063  | NM_01628C | 28547.797 | 15281.078 |
| AF086167  | 1717.296  | 1446.679  | NM_004561 | 744.621   | 798.141   | NM_016027 | 3284.192  | 1683.549  |

|           |           |           |           |           |           |           |           |           |
|-----------|-----------|-----------|-----------|-----------|-----------|-----------|-----------|-----------|
| AF085891  | 5083.74   | 5552.919  | AK024812  | 2070.98   | 2095.218  | NM_014297 | 9699.279  | 6360.567  |
| AF019618  | 1750.928  | 1943.561  | M20642    | 772.337   | 1044.073  | NM_018156 | 19957.344 | 10507.72  |
| AK025656  | 1816.24   | 1821.116  | AK026412  | 1844.321  | 2195.711  | X98266    | 1622.596  | 608.168   |
| AF138859  | 563.64    | 741.742   | X89669    | 1451.698  | 1446.61   | U00930    | 21119.352 | 9189.908  |
| AF161414  | 3989.821  | 4269.22   | AF086109  | 671.091   | 571.819   | AK024958  | 1596.857  | 3003.607  |
| AK025967  | 1033.143  | 1198.99   | NM_001072 | 1181.624  | 773.45    | NM_014575 | 3256.538  | 7347.735  |
| AL110177  | 2457.782  | 2459.895  | NM_014070 | 1561.807  | 1290.613  | AL117552  | 1738.931  | 3037.031  |
| NM_002763 | 7320.019  | 6641.195  | NM_016280 | 22229.789 | 20250.59  | NM_002692 | 8960.501  | 20524.217 |
| AF070628  | 830.861   | 729.384   | NM_016027 | 2510.073  | 2117.988  | X55525    | 1626.535  | 1340.496  |
| U79293    | 600.701   | 745.516   | NM_014297 | 7990.094  | 7978.026  | AB040878  | 800.152   | 497.993   |
| NM_015434 | 4318.413  | 4840.409  | NM_018156 | 13723.131 | 13942.43  | S74647    | 1077.394  | 1090.628  |
| NM_014055 | 2424.279  | 1977.935  | X98266    | 1302.563  | 1046.959  | NM_003506 | 809.718   | 979.894   |
| NM_018691 | 1989.237  | 2108.944  | U00930    | 16742.631 | 20379.748 | NM_018093 | 8592.072  | 5759.608  |
| AK001020  | 1135.724  | 1089.914  | AK024958  | 1072.893  | 698.302   | NM_003385 | 2640.986  | 2181.447  |
| AK022098  | 1184.437  | 1434.094  | NM_014575 | 2947.993  | 2726.939  | NM_000430 | 1263.845  | 946.073   |
| AB040933  | 1181.785  | 1217.266  | NM_002439 | 4462.786  | 3864.193  | AB033030  | 857.662   | 753.661   |
| AK022072  | 733.289   | 581.634   | AL117552  | 1643.257  | 1295.937  | NM_016656 | 773.159   | 465.036   |
| AK026900  | 2830.696  | 2858.831  | NM_002692 | 8115.445  | 6190.833  | AB007871  | 2236.232  | 1885.154  |
| AK025020  | 5544.108  | 4924.024  | X55525    | 877.742   | 1417.463  | NM_017813 | 3492.519  | 2458.643  |
| AF086009  | 903.9     | 988.567   | NM_000242 | 309.883   | 430.132   | NM_003840 | 8394.186  | 6071      |
| AF086463  | 3541.125  | 4039.809  | AB040878  | 518.617   | 661.26    | NM_018378 | 1098.355  | 958.158   |
| AK024130  | 1165.025  | 842.838   | S74647    | 749.444   | 1000.956  | NM_018423 | 826.358   | 520.287   |
| AK024598  | 2100.866  | 2259.071  | NM_003506 | 844.944   | 1015.103  | NM_001741 | 11949.028 | 8382.095  |
| AF087983  | 1303.655  | 1197.445  | NM_018093 | 5649.191  | 5974.462  | NM_000745 | 1401.18   | 909.434   |
| NM_020234 | 5308.433  | 6017.309  | NM_003389 | 1340.742  | 1783.315  | AF116705  | 10894.539 | 5888.976  |
| U70772    | 572.071   | 491.161   | NM_000430 | 841.22    | 980.98    | NM_004460 | 1391.766  | 504.797   |
| Z36825    | 12102.972 | 13938.195 | AB033030  | 542.595   | 683.182   | NM_006072 | 2478.65   | 2397.09   |
| U52838    | 653.077   | 711.177   | NM_015963 | 3531.067  | 3394.477  | BE794490  | 1167.433  | 2739.126  |
| Z36846    | 934.378   | 806.952   | AB007871  | 1699.917  | 1402.057  | NM_003561 | 3263.688  | 6525.353  |
| AF086127  | 905.032   | 1266.447  | NM_017813 | 2642.28   | 2709.31   | NM_002991 | 1105.69   | 2396.045  |
| AF086157  | 2830.681  | 3088.168  | NM_003840 | 5038.767  | 4847.914  | NM_004071 | 4444.558  | 3916.68   |
| AL109710  | 696.758   | 614.76    | NM_018378 | 1043.808  | 779.744   | NM_001316 | 9584.949  | 8998.703  |
| AK021538  | 946.395   | 891.819   | NM_018423 | 1029.388  | 926.241   | AJ008149  | 3675.049  | 3236.912  |
| AK021986  | 1623.996  | 1386.449  | NM_001741 | 9484.297  | 8342.543  | NM_012153 | 1705.009  | 1338.745  |
| AK023793  | 5673.081  | 4759.712  | NM_000745 | 1055.68   | 1189.857  | NM_013241 | 4073.354  | 3110.851  |
| AK022185  | 332.852   | 524.613   | AF116705  | 9954.313  | 8910.392  | NM_017988 | 58649.469 | 55727.582 |
| AK023286  | 3810.525  | 3623.319  | NM_004460 | 772.988   | 750.451   | AF161362  | 5171.666  | 3275.748  |
| AK021544  | 803.3     | 697.485   | NM_006072 | 1301.857  | 1265.495  | NM_003928 | 61745.32  | 58327.141 |
| AL079282  | 781.658   | 731.166   | BE794490  | 894.905   | 894.3     | M57399    | 36853.82  | 30895.723 |
| AK022079  | 1005.691  | 972.771   | NM_003561 | 2115.117  | 2005.773  | NM_015935 | 5148.299  | 3390.586  |
| AF116714  | 1074.971  | 1323.611  | NM_002991 | 936.453   | 549.595   | AB046840  | 5113.726  | 3822.026  |
| NM_014055 | 3081.277  | 3684.721  | NM_004071 | 3342.072  | 3578.165  | NM_006407 | 12718.235 | 5118.8    |
| AK026340  | 925.637   | 1084.256  | NM_001316 | 7819.075  | 7280.207  | M34572    | 430.01    | 1561.603  |
| AK022686  | 9315.718  | 8581.732  | AJ008149  | 3083.142  | 3165.317  | NM_006263 | 19180.15  | 36360.578 |
| AK023516  | 3708.57   | 3658.714  | NM_012153 | 1317.316  | 1073.192  | NM_004791 | 1485.826  | 3202.696  |
| AK023864  | 6725.178  | 6671.487  | NM_013241 | 2671.058  | 2615.257  | Z36876    | 3496.662  | 4057.104  |
| AK023017  | 7930.613  | 8406.696  | NM_017988 | 57161.82  | 53099     | NM_001873 | 1604.082  | 1681.996  |
| AK023908  | 4979.278  | 5985.586  | AF161362  | 3756.845  | 3146.671  | AB029025  | 1680.871  | 1511.314  |
| AK024236  | 1053.13   | 1856.986  | NM_015935 | 3920.289  | 3014.068  | NM_007100 | 35499.328 | 28450.795 |
| Z24724    | 10543.328 | 11569.541 | AB046840  | 4090.935  | 3477.501  | NM_002954 | 63494.129 | 59049.652 |
| AK022712  | 9740.917  | 9270.439  | AF174487  | 1290.571  | 1047.88   | NM_016572 | 1377.796  | 1316.764  |
| AK024132  | 582.146   | 845.745   | NM_005041 | 682.497   | 425.923   | NM_017548 | 22358.037 | 12807.182 |
| AK021863  | 25406.291 | 25135.518 | NM_006407 | 10377.647 | 9643.412  | AF134802  | 1473.252  | 939.46    |

|           |           |           |           |           |           |           |           |           |
|-----------|-----------|-----------|-----------|-----------|-----------|-----------|-----------|-----------|
| AK024208  | 778.759   | 848.042   | NM_007373 | 3378.188  | 1643.047  | NM_005740 | 2439.786  | 1675.021  |
| NM_020426 | 617.86    | 480.455   | NM_006263 | 15244.937 | 10452.843 | NM_004308 | 17580.695 | 8526.574  |
| NM_005684 | 796.102   | 961.834   | NM_004791 | 1401.171  | 953.651   | AF112366  | 1578.372  | 543.306   |
| AK022293  | 1398.045  | 1248.368  | Z36876    | 2742.123  | 3100.154  | AK024002  | 7473.437  | 17598.508 |
| AL117439  | 1493.698  | 1412.007  | NM_001873 | 1448.406  | 1214.741  | NM_020395 | 8202.372  | 15799.38  |
| AL133065  | 2335.678  | 2445.989  | AB029025  | 1321.881  | 1415.67   | AB011117  | 2128.537  | 4343.217  |
| NM_005297 | 13168.351 | 13962.249 | NM_007100 | 25625.135 | 26057.514 | AF060935  | 4730.61   | 3976.829  |
| U80769    | 1606.046  | 1615.131  | NM_002954 | 66177.852 | 55375.699 | AK026886  | 1314.447  | 1392.208  |
| AK021678  | 432.37    | 394.548   | NM_016572 | 1056.321  | 962.938   | D83778    | 1165.853  | 1351.979  |
| AJ011377  | 714.661   | 833.371   | NM_000027 | 1201.237  | 1134.834  | NM_004264 | 1848.535  | 1472.574  |
| AL137734  | 1424.529  | 1430.413  | NM_001824 | 656.428   | 657.55    | AK024788  | 1494.751  | 1342.779  |
| AK023784  | 1769.478  | 1696.948  | NM_017548 | 20046.424 | 15145.108 | NM_004473 | 701.875   | 735.099   |
| AK026323  | 1897.009  | 2001.666  | AF134802  | 1302.17   | 1177.392  | AK022696  | 2709.924  | 1661.148  |
| NM_003493 | 75227.328 | 63156     | NM_018222 | 747.386   | 687.267   | NM_001206 | 3259.052  | 2451.688  |
| AL133430  | 16455.232 | 16258.122 | NM_005740 | 2031.815  | 1991.591  | NM_005016 | 1310.243  | 1301.813  |
| AF070633  | 40141.352 | 42304.156 | NM_004308 | 14695.452 | 15034.045 | NM_014469 | 1588.654  | 1342.813  |
| NM_018370 | 1168.593  | 898.51    | AF112366  | 1809.864  | 1248.327  | NM_014852 | 1942.26   | 1265.081  |
| AF054996  | 11886.37  | 11262.538 | NM_004274 | 1642.41   | 1386.583  | NM_000344 | 18154.961 | 12690.742 |
| AF090098  | 4340.654  | 3786.784  | AK024002  | 6077.264  | 5088.744  | AF248650  | 3436.866  | 2042.412  |
| AF146694  | 3758.232  | 3989.87   | NM_020395 | 6881.519  | 5238.878  | S74678    | 44293.934 | 29800.662 |
| AK057104  | 1311.301  | 1362.32   | AB011117  | 1673.411  | 1112.614  | AF248651  | 1253.446  | 1026.028  |
| AL133555  | 3257.021  | 3406.37   | AF060935  | 3944.959  | 3960.233  | NM_001358 | 24164.666 | 12293.389 |
| AK024979  | 26197.908 | 29655.727 | AK026886  | 1283.3    | 1506.276  | NM_004836 | 4785.354  | 3453.282  |
| AF233648  | 2205.466  | 2371.365  | D83778    | 1266.948  | 1846.057  | AB037751  | 4779.347  | 3049.797  |
| AK021781  | 669.613   | 645.632   | NM_004264 | 1557.958  | 1454.73   | S79281    | 5406.047  | 2382.188  |
| NM_018584 | 1051.647  | 1291.303  | AK024788  | 1052.924  | 1032.998  | AK025585  | 3480.943  | 1220.938  |
| AY007126  | 24226.533 | 21464.48  | AK022696  | 1710.379  | 1216.199  | D16891    | 2949.989  | 5768.583  |
| AF085951  | 3513.965  | 3257.386  | NM_001206 | 1223.33   | 1654.843  | NM_017760 | 3884.386  | 5698.251  |
| AF131787  | 1004.755  | 1124.615  | NM_005016 | 1258.757  | 1172.17   | NM_015936 | 6635.297  | 14118.135 |
| AF087989  | 3085.553  | 3702.099  | NM_014469 | 1260.27   | 1112.184  | AL109698  | 1797.835  | 2125.463  |
| Z70715    | 1395.595  | 1291.769  | NM_000344 | 8657.936  | 7916.127  | AF217980  | 6279.777  | 4539.11   |
| NM_018182 | 5841.475  | 6055.272  | AF248650  | 2528.038  | 2068.788  | AL117461  | 3269.094  | 2563.289  |
| U80771    | 6433.212  | 5213.297  | S74678    | 37259.645 | 34420.543 | NM_016495 | 2652.251  | 2566.92   |
| AJ272173  | 14866.361 | 11169.537 | AF248651  | 1493.99   | 1169.532  | AF104921  | 19545.311 | 14529.964 |
| Y17180    | 68668.109 | 59295.719 | NM_001358 | 18972.553 | 12994.557 | NM_000126 | 21260.246 | 16159.613 |
| NM_005649 | 2749.164  | 2887.661  | NM_004836 | 6018.286  | 5898.8    | BF239974  | 1959.384  | 1708.389  |
| NM_002037 | 761.015   | 791.712   | AB037751  | 3241.942  | 3179.065  | NM_000104 | 3700.024  | 3243.589  |
| NM_020157 | 29229.979 | 33010.258 | S79281    | 5769.14   | 5032.408  | NM_005015 | 20604.576 | 14405.317 |
| X64991    | 1033.508  | 1007.755  | AK025585  | 3158.885  | 2827.073  | NM_004255 | 51854.461 | 43634.457 |
| NM_014320 | 4370.446  | 4261.701  | NM_001414 | 5328.394  | 4911.614  | NM_000269 | 37202.762 | 29618.682 |
| AK025703  | 6797.125  | 5613.513  | D16891    | 2965.46   | 2291.849  | AF182288  | 4773.094  | 3989.101  |
| NM_018185 | 2644.454  | 2648.371  | NM_017760 | 4116.467  | 2634.619  | NM_004491 | 2924.025  | 982.053   |
| AK022598  | 4436.222  | 4209.676  | NM_015936 | 4808.766  | 3447.147  | AK026810  | 2603      | 1617.062  |
| AK024306  | 1652.532  | 1708.885  | AL109698  | 1459.213  | 1871.849  | NM_015629 | 6506.749  | 3325.275  |
| NM_018322 | 7199.889  | 6878.403  | AF217980  | 4074.659  | 4262.661  | AF218032  | 2990.061  | 1581.91   |
| AK025862  | 33535.27  | 34490.734 | AL117461  | 1904.08   | 2001.78   | NM_017542 | 6644.902  | 4182.08   |
| AK026495  | 3891.065  | 3802.37   | NM_016495 | 2260.595  | 2528.698  | AK024407  | 1449.309  | 761.798   |
| AK025052  | 1505.513  | 1443.326  | AF104921  | 13827.451 | 13849.532 | NM_004182 | 16525.01  | 6980.852  |
| NM_014388 | 1786.258  | 1359.475  | NM_000126 | 15494.842 | 14348.422 | NM_018419 | 1293.28   | 409.836   |
| NM_002548 | 623.584   | 482.771   | AK022291  | 517.757   | 609.029   | NM_014240 | 2266.829  | 2650.435  |
| U85044    | 1307.921  | 998.684   | BF239974  | 1395.431  | 1628.391  | BE379399  | 2406.663  | 5309.05   |
| BC018880  | 796.738   | 767.8     | NM_000104 | 1027.545  | 814.893   | NM_015877 | 4068.055  | 8186.061  |
| AF086090  | 1383.988  | 1136.127  | NM_005015 | 11470.256 | 9486.18   | AL117598  | 2675.229  | 2082.671  |

|           |           |           |           |           |           |           |           |           |
|-----------|-----------|-----------|-----------|-----------|-----------|-----------|-----------|-----------|
| AK002173  | 28053.379 | 27580.547 | NM_004255 | 55287.543 | 51789.34  | AL109670  | 1335.641  | 1061.145  |
| NM_017746 | 2294.791  | 1916.014  | NM_000269 | 25034.629 | 20469.072 | AF085831  | 1665.854  | 1443.225  |
| NM_020186 | 18730.1   | 17983.953 | AF182288  | 2967.21   | 2403.243  | AL832149  | 4879.506  | 3896.103  |
| U88897    | 15073.184 | 9531.572  | NM_004491 | 1581.616  | 712.459   | AK022839  | 3023.776  | 3280.383  |
| CY3Cy5    | 3182.602  | 120.584   | AK026810  | 1907.573  | 1884.104  | NM_018350 | 1435.929  | 1519.386  |
| BG617923  | 975.735   | 883.147   | NM_015629 | 5215.791  | 4646.5    | NM_003946 | 1195.544  | 1340.081  |
| U37448    | 1601.586  | 1838.914  | AF218032  | 2813.044  | 2187.677  | AB045292  | 3176.476  | 2437.18   |
| BG435851  | 640.233   | 478.816   | NM_017542 | 5371.94   | 5394.611  | AK025699  | 14617.047 | 10678.784 |
| AA927698  | 4856.661  | 5660.123  | AK024407  | 1104.295  | 1095.969  | AF147353  | 1121.734  | 300.74    |
| AI498426  | 1462.338  | 1746.167  | NM_004182 | 10874.158 | 9744.321  | NM_018024 | 4690.68   | 2774.56   |
| BG824773  | 1790.036  | 1880.932  | NM_018419 | 1113.471  | 888.877   | AK026783  | 784.818   | 676.138   |
| D01038    | 29621.227 | 38102.492 | NM_014240 | 1510.45   | 1181.016  | AK021814  | 813.571   | 763.846   |
| AB019205  | 3011.9    | 3800.801  | BE379399  | 2022.25   | 1827.029  | AF088035  | 2746.148  | 1488.577  |
| J05008    | 2054.969  | 1850.749  | NM_015877 | 3773.901  | 3174.749  | NM_005842 | 13886.292 | 31228.455 |
| U11087    | 1722.889  | 1527.662  | AL117598  | 1330.057  | 1926.196  | AF147419  | 1928.891  | 1406.285  |
| D50640    | 3017.896  | 2730.176  | AL109670  | 818.946   | 914.848   | AK024280  | 1265.61   | 984.732   |
| D43747    | 694.798   | 803.12    | AF085831  | 1066.225  | 1174.096  | AF075036  | 892.598   | 1166.039  |
| M98776    | 1966.913  | 1834.586  | AL832149  | 3226.491  | 3657.276  | NM_014797 | 2958.668  | 2656.051  |
| X99135    | 71716.289 | 65980.375 | AK022839  | 1215.886  | 1638.159  | AL831841  | 3134.083  | 2029.036  |
| AF009744  | 2401.726  | 2968.223  | NM_018350 | 728.017   | 1090.254  | AL110165  | 2300.644  | 1785.587  |
| NM_172140 | 6267.992  | 8551.91   | NM_003946 | 969.521   | 919.38    | AL117652  | 1091.269  | 1016.248  |
| SR6       | 3756.047  | 3154.039  | AB045292  | 2022.721  | 1667.265  | AL050168  | 2671.727  | 1300.511  |
| SR8       | 16490.893 | 53859.945 | AK022998  | 863.139   | 821.074   | AL122122  | 4588.312  | 3132.885  |
| SR10      | 50844.215 | 30232.654 | AK025699  | 9068.796  | 8204.771  | AK000122  | 6271.208  | 4573.153  |
| CY3Cy5    | 4894.3    | 264.15    | NM_018024 | 1631.851  | 1425.967  | AK023159  | 2569.467  | 1681.212  |
| NM_005311 | 4462.587  | 4449.805  | AK027173  | 652.239   | 347.477   | AK001091  | 2812.08   | 1608.114  |
| NM_005905 | 1468.721  | 1365.608  | AK026783  | 662.673   | 550.072   | AF086428  | 1715.114  | 608.867   |
| NM_016235 | 468.178   | 502.184   | AK021814  | 920.346   | 628.479   | AL049353  | 1221.915  | 3210.185  |
| NM_000960 | 936.848   | 741.528   | AF088035  | 2291.86   | 2401.788  | AF009269  | 1561.687  | 1321.303  |
| NM_005359 | 1587.492  | 1094.875  | AF086251  | 293.09    | 335.826   | AF009313  | 2692.454  | 2651.85   |
| NM_002511 | 2394.784  | 1963.648  | NM_018092 | 5320.059  | 4329.209  | AF090887  | 860.796   | 979.659   |
| NM_000794 | 326.954   | 432.748   | NM_005842 | 11147.555 | 8593.688  | AF009279  | 516.621   | 491.537   |
| AF295378  | 3245.331  | 3685.771  | NM_003787 | 408.431   | 447.003   | NM_015883 | 2294.193  | 1761.4    |
| NM_004085 | 6683.929  | 5871.035  | AF147419  | 1454.794  | 1519.017  | AF056429  | 822.323   | 772.431   |
| NM_012445 | 34982.66  | 32648.451 | AK024280  | 842.982   | 966.202   | AF070547  | 2357.739  | 2162.98   |
| NM_018104 | 5012.233  | 4164.221  | AF075036  | 1010.337  | 1112.194  | AK001110  | 11307.066 | 8037.68   |
| NM_006080 | 842.594   | 639.06    | NM_014797 | 2329.238  | 2556.051  | AK002184  | 1125.638  | 1335.341  |
| NM_004429 | 8204.189  | 8701.582  | AL831841  | 1968.798  | 2036.984  | AK021652  | 598.287   | 826.77    |
| U64564    | 3048.643  | 3817.155  | AL110165  | 1812.558  | 1488.478  | AK025826  | 1192.434  | 884.684   |
| NM_006470 | 3435.1    | 4527.499  | AL117652  | 551.792   | 625.326   | AK026439  | 1185.875  | 845.196   |
| NM_002855 | 10258.81  | 14440.348 | AL050168  | 1029.495  | 916.841   | AK025278  | 1126.075  | 561.753   |
| AB038463  | 1673.949  | 2500.611  | AL122122  | 1046.996  | 1035.276  | AY007163  | 5088.364  | 4223.417  |
| M30262    | 5677.134  | 7833.909  | AK000122  | 4942.799  | 4608.873  | NM_006236 | 31673.408 | 24491.125 |
| NM_005460 | 1367.845  | 1703.342  | AK023159  | 2009.201  | 1816.661  | AK023734  | 1258.571  | 1356.293  |
| AF160477  | 4579.28   | 6093.688  | AK001091  | 2328.713  | 2264.259  | D17265    | 46907.742 | 31482.943 |
| NM_003226 | 593.166   | 823.044   | AF086428  | 1491.198  | 1418.732  | AF085827  | 1379.967  | 1104.598  |
| M12883    | 975.27    | 1356.616  | AK025310  | 2342.084  | 1630.398  | Y08266    | 22060.889 | 17010.404 |
| BG288747  | 932.438   | 1279.08   | AL049353  | 1321.472  | 1077.994  | AK002171  | 8189.747  | 5346.757  |
| AI524814  | 6833.96   | 5558.199  | AF009269  | 1037.835  | 1132.643  | AJ002572  | 2716.337  | 1623.941  |
| AB024411  | 1243.438  | 1249.24   | AF009313  | 1607.681  | 1899.126  | AK026897  | 5148.775  | 3145.125  |
| NM_002444 | 47209.09  | 41581.355 | AF090887  | 907.428   | 741.062   | AB037861  | 6377.192  | 4720.963  |
| NM_001104 | 2638.484  | 1958.154  | AF009279  | 501.687   | 472.379   | AK021887  | 3932.857  | 3077.724  |
| NM_002989 | 6308.008  | 5518.529  | NM_015883 | 1264.686  | 1398.382  | AF086180  | 10633.386 | 8302.155  |

|           |           |           |           |           |           |           |           |           |
|-----------|-----------|-----------|-----------|-----------|-----------|-----------|-----------|-----------|
| U88898    | 3349.334  | 2754.872  | AF070547  | 1457.834  | 1070.531  | AK022135  | 2101.992  | 1142.63   |
| NM_020154 | 30795.572 | 24139.162 | AK001110  | 6762.984  | 7181.421  | AK022898  | 1136.766  | 655.762   |
| NM_004665 | 2607.261  | 1875.153  | AK021859  | 655.641   | 643.658   | NM_017555 | 13531.175 | 4342.654  |
| NM_005300 | 1916.779  | 1574.762  | AK025826  | 1325.405  | 1271.035  | NM_003547 | 689.297   | 656.528   |
| NM_000893 | 1302.027  | 1087.567  | AK026439  | 1213.307  | 906.172   | AL049980  | 3691.361  | 2695.904  |
| NM_000695 | 35311.957 | 31220.785 | AK025278  | 537.34    | 896.901   | NM_006683 | 844.802   | 629.643   |
| NM_005091 | 467.341   | 510.476   | AY007163  | 6017.721  | 5882.814  | AF070529  | 898.281   | 606.795   |
| AF031167  | 654.698   | 383.576   | NM_006236 | 24858.672 | 23581.391 | AK022978  | 3333.456  | 2877.309  |
| NM_003204 | 4035.738  | 2603.662  | AK023734  | 734.482   | 973.092   | AK021447  | 3876.159  | 3088.54   |
| AF254069  | 2003.203  | 1297.427  | D17265    | 35597.563 | 30739.689 | AK025096  | 1084.374  | 966.675   |
| AL117600  | 11537.326 | 10215.024 | AF085827  | 831.804   | 840.96    | AF131774  | 2120.046  | 1714.717  |
| NM_001712 | 832.458   | 1071.271  | Y08266    | 14565.378 | 15183.608 | AK025793  | 736.94    | 944.669   |
| NM_004487 | 26370.723 | 39156.09  | AK002171  | 5753.039  | 5465.905  | AL389942  | 548.213   | 518.895   |
| AB029000  | 8216.781  | 10918.891 | AJ002572  | 1861.276  | 1543.611  | D17052    | 1147.531  | 1110.573  |
| AK026965  | 15831.799 | 24856.939 | AK026897  | 3465.005  | 2901.054  | D28378    | 62993.574 | 53458.422 |
| AK025859  | 8245.804  | 9536.437  | AB037861  | 3765.878  | 3476.233  | L41143    | 5268.644  | 2674.801  |
| AL117499  | 17512.689 | 24523.031 | AK021887  | 3264.678  | 3208.413  | NM_005331 | 25110.682 | 15439.859 |
| NM_007054 | 643.636   | 783.985   | AF086180  | 7451.051  | 5788.246  | NM_014111 | 1120.557  | 999.191   |
| AB007957  | 648.315   | 967.167   | AK022135  | 1690.968  | 1699.209  | AJ008129  | 2465.246  | 1575.137  |
| AK000160  | 1363.515  | 1619.047  | AL117406  | 353.874   | 343.176   | AF161451  | 9727.795  | 3926.068  |
| NM_006032 | 6508.518  | 5946.759  | NM_017555 | 9729.891  | 7980.587  | X02067    | 19211.482 | 9592.534  |
| NM_014785 | 2036.946  | 1439.22   | NM_003547 | 657.336   | 532.794   | U92013    | 12057.611 | 9596.711  |
| NM_002153 | 658.131   | 656.033   | AL049980  | 2212.236  | 2432.688  | AK023965  | 2739.22   | 2001.134  |
| AB040890  | 1526.058  | 1485.577  | NM_006683 | 445.272   | 587.848   | AK026211  | 1470.29   | 1076.199  |
| AK024233  | 1315.563  | 1135.32   | AF070529  | 568.703   | 647.265   | X58968    | 3563.198  | 2299.923  |
| AK021870  | 1613.394  | 1394.454  | AK022978  | 2538.865  | 2440.255  | U92020    | 4375.591  | 3844.654  |
| U06680    | 5866.566  | 5435.158  | AK021447  | 3174.29   | 3127.741  | AL117542  | 1226.97   | 1062.549  |
| NM_005123 | 945.431   | 865.765   | AK025096  | 547.153   | 719.25    | AL109712  | 10776.976 | 8329.673  |
| NM_015584 | 7520.923  | 6001.342  | AF131774  | 1120.761  | 1129.965  | X04215    | 841.163   | 598.485   |
| NM_001697 | 43257.23  | 35319.145 | D17052    | 1156.09   | 562.499   | NM_017782 | 4266.712  | 3006.686  |
| NM_016095 | 23913.877 | 18323.607 | D28378    | 62193.777 | 51938.375 | NM_018145 | 3135.775  | 1883.591  |
| NM_002063 | 859.511   | 818.209   | M64700    | 603.221   | 280.314   | NM_018465 | 17074.006 | 12056.849 |
| AK025125  | 5795.704  | 4164.708  | L41143    | 3981.098  | 3797.757  | Z36814    | 1955.923  | 1550.986  |
| NM_000815 | 1572.3    | 720.033   | NM_005331 | 16422.424 | 13513.328 | D17045    | 1124.934  | 815.387   |
| NM_001293 | 1229.058  | 1377.727  | NM_014111 | 749.347   | 699.807   | AK000827  | 3725.132  | 2115.976  |
| AB023173  | 8319.874  | 10204.576 | AJ008129  | 2507.308  | 1925.315  | NM_002503 | 26824.51  | 15651.808 |
| AF156548  | 4853.025  | 5521.47   | AJ008158  | 251.638   | 385.121   | NM_005315 | 8426.385  | 5048.757  |
| NM_000387 | 22194.43  | 35388.168 | AF161451  | 8394.259  | 6431.136  | AK022351  | 1856.179  | 1186.007  |
| NM_004663 | 3075.644  | 3866.633  | X02067    | 11403.007 | 7982.37   | AK022059  | 1431.001  | 708.585   |
| NM_015310 | 2201.684  | 2648.282  | U92013    | 12959.229 | 12910.504 | NM_020194 | 6085.292  | 3774.69   |
| NM_016154 | 25561.414 | 39398.223 | AK023965  | 2326.179  | 2332.131  | AF038183  | 24463.629 | 12483.648 |
| NM_005013 | 56904.43  | 56145.109 | AK026211  | 1507.781  | 1297.025  | NM_017882 | 4847.021  | 2334.02   |
| AB002338  | 1387.542  | 2049.161  | X58968    | 2549.175  | 2137.988  | NM_003521 | 2043.874  | 637.171   |
| NM_001072 | 1224.575  | 959.088   | U92020    | 3659.301  | 3621.828  | CY3Cy5    | 10378.698 | 418.174   |
| NM_014070 | 1391.412  | 1326.11   | AL117542  | 658.262   | 776.239   | J03571    | 5831.932  | 5791.207  |
| NM_016280 | 25470.795 | 17371.496 | AL109712  | 8118.646  | 11131.19  | T57791    | 2083.285  | 2240.325  |
| NM_016027 | 2953.099  | 2061.95   | X04215    | 771.518   | 531.905   | AI421041  | 17205.059 | 22432.049 |
| NM_014297 | 7929.122  | 5689.818  | NM_017782 | 2882.52   | 2605.915  | BI759091  | 2076.036  | 2681.219  |
| NM_018155 | 18367.959 | 14589.239 | NM_018145 | 1654.964  | 1382.775  | BG685843  | 4662.603  | 6788.727  |
| X98266    | 1435.069  | 1242.167  | NM_018465 | 11738.604 | 9300.956  | BI490011  | 988.987   | 1349.829  |
| U00930    | 17379.309 | 15421.137 | Z36814    | 1504.541  | 1473.13   | AF035771  | 808.413   | 948.896   |
| AK024958  | 1168.842  | 1099.582  | D17045    | 898.73    | 601.744   | N20475    | 4147.91   | 5257.555  |
| NM_014575 | 3331.369  | 2403.725  | AK000827  | 2255.752  | 1609.629  | H61726    | 805.222   | 775.165   |

|           |           |           |           |           |           |           |           |           |
|-----------|-----------|-----------|-----------|-----------|-----------|-----------|-----------|-----------|
| NM_00243E | 4323.324  | 4366.828  | NM_002503 | 21611.873 | 15512.054 | NM_004774 | 2993.266  | 3212.799  |
| AL117552  | 1469.364  | 1695.135  | NM_005319 | 5845.311  | 3139.874  | SR5       | 3226.781  | 4287.356  |
| NM_002692 | 10291.415 | 10413.945 | AK022351  | 1748.416  | 919.183   | SR7       | 5753.763  | 48577.609 |
| NM_007064 | 2458.094  | 2484.952  | AK022059  | 627.222   | 673.318   | SR9       | 16024.088 | 3934.699  |
| NM_006281 | 1844.839  | 1799.594  | NM_020194 | 4142.915  | 3359.646  | CY3Cy5    | 11934.111 | 476.284   |
| NM_00273E | 10875.773 | 5779.846  | AF038183  | 18870.219 | 12479.49  | AF212842  | 846.893   | 465.317   |
| U23460    | 54619.941 | 58452.223 | NM_017882 | 3775.75   | 2099.743  | M27544    | 826.606   | 1038.379  |
| NM_00535E | 2108.916  | 2625.035  | NM_003521 | 1894.468  | 948.968   | AL133097  | 2610.796  | 2662.091  |
| Z25434    | 10024.698 | 14902.564 | CY3Cy5    | 12653.452 | 397.783   | NM_001165 | 1266.487  | 1724.485  |
| NM_005884 | 15287.328 | 21789.266 | J03571    | 7476.164  | 12920.245 | NM_001381 | 57463.563 | 51363.777 |
| NM_01239E | 16319.372 | 21829.4   | AI421041  | 21327.133 | 24094.887 | NM_00645E | 2391.046  | 3194.324  |
| AF229804  | 57057.23  | 60708.852 | BI759091  | 2439.117  | 2675.655  | NM_00409E | 669.689   | 641.365   |
| AF151638  | 1777.343  | 2619.841  | BG685843  | 5185.089  | 7479.222  | NM_00144E | 2497.639  | 3030.394  |
| U90552    | 9512.772  | 12789.241 | BI490011  | 1058.587  | 1348.445  | AF086122  | 968.578   | 919.719   |
| NM_00546C | 1400.529  | 1351.318  | AF035771  | 1293.794  | 1247.586  | AK024397  | 4777.594  | 4485.779  |
| AF160477  | 2970.901  | 3077.686  | N20475    | 6354.397  | 7786.262  | AF073931  | 919.109   | 1028.644  |
| NM_00322E | 547.483   | 394.312   | BI199286  | 1709.04   | 1602.14   | NM_018047 | 930.544   | 1061.946  |
| M12883    | 1513.336  | 1448.693  | AA026626  | 1285.758  | 1697.545  | NM_00128E | 434.12    | 591.324   |
| BG288747  | 1349.978  | 1146.336  | H61726    | 1111.333  | 1303.589  | NM_003564 | 752.236   | 1007.432  |
| BG617923  | 432.719   | 649.494   | NM_004774 | 3978.196  | 4314.352  | AF317516  | 2933.477  | 3911.711  |
| U37448    | 948.711   | 1303.105  | NM_005234 | 4314.096  | 4564.747  | S78203    | 657.684   | 587.212   |
| AA927698  | 3820.825  | 3998.284  | SR5       | 5335.871  | 5519.391  | NM_01620E | 8194.654  | 8360.765  |
| AI498426  | 1039.745  | 1189.835  | SR7       | 8082.444  | 53874.254 | NM_00563E | 14303.784 | 15728.283 |
| BG824773  | 1224.883  | 1221.854  | SR9       | 24186.316 | 6329.953  | NM_00723E | 13806.217 | 18212.41  |
| D01038    | 21361.678 | 25900.801 | CY3Cy5    | 4185.349  | 236.089   | NM_00726E | 3354.21   | 3506.616  |
| AB019205  | 2024.451  | 2567.673  | AF212842  | 242.306   | 1233.173  | AK026014  | 1650.128  | 2329.154  |
| J05008    | 1555.402  | 1466.538  | M27544    | 698.182   | 1457.683  | NM_01484E | 1517.554  | 1908.247  |
| U11087    | 1103.589  | 1412.03   | AL133097  | 2372.15   | 1710.177  | NM_00429E | 3236.994  | 4175.431  |
| D50640    | 2740.528  | 2665.061  | NM_001165 | 1729.412  | 1464.001  | NM_00123E | 1296.797  | 1374.939  |
| D43747    | 613.155   | 568.004   | NM_001381 | 32819.277 | 34684.723 | AB007857  | 554.499   | 537.216   |
| M98776    | 1364.433  | 988.228   | U90908    | 448.941   | 579.02    | NM_004997 | 6770.063  | 6379.398  |
| X99135    | 70645.578 | 51854.813 | NM_00645E | 2416.206  | 3123.739  | NM_00592E | 2792.269  | 2414.554  |
| AF009744  | 2630.939  | 3345.894  | NM_01445E | 703.72    | 990.748   | NM_00346E | 659.469   | 796.481   |
| NM_17214C | 6341.268  | 8510.255  | NM_00409E | 993.393   | 1132.291  | AF289028  | 782.144   | 818.728   |
| AF086109  | 933.127   | 828.622   | NM_00144E | 4422.421  | 5238.701  | NM_005567 | 2041.845  | 2404.234  |
| AK026965  | 12976.929 | 16530.42  | AF086122  | 1532.272  | 1771.688  | NM_00521E | 10253.021 | 11427.111 |
| AK025859  | 6238.17   | 5377.434  | AK024397  | 6382.676  | 8156.617  | NM_004584 | 1358.629  | 1371.982  |
| AL117499  | 13822.27  | 14765.95  | AF073931  | 937.949   | 1360.034  | X15183    | 37418.125 | 49817.445 |
| NM_007054 | 418.575   | 556.185   | NM_018047 | 786.231   | 1375.167  | AK023618  | 1904.24   | 2054.989  |
| AB007957  | 665.999   | 579.088   | NM_00128E | 571.648   | 642.576   | NM_00149E | 1672.46   | 1588.545  |
| AK000160  | 1788.142  | 2144.192  | NM_003564 | 993.68    | 1556.321  | AB012643  | 9161.309  | 8204.663  |
| NM_005311 | 4143.94   | 4725.26   | AK023414  | 443.735   | 677.781   | AB023170  | 577.997   | 883.208   |
| NM_00590E | 1715.557  | 1695.76   | AF317516  | 4862.712  | 8480.744  | NM_01415E | 4648.842  | 5594.782  |
| NM_01623E | 653.371   | 446.559   | NM_002581 | 2348.827  | 3701.352  | NM_00229E | 6150.514  | 7477.448  |
| NM_00096C | 855.363   | 992.571   | AI417964  | 2933.816  | 4538.531  | NM_000414 | 4080.422  | 4737.581  |
| AF172932  | 306.502   | 673.002   | S78203    | 817.958   | 1392.417  | NM_01884E | 3842.105  | 4047.997  |
| NM_00535E | 1119.576  | 1475.094  | NM_01620E | 12033.971 | 19735.598 | NM_00550E | 3781.923  | 4106.393  |
| NM_002511 | 2388.026  | 3038.635  | NM_00163E | 419.637   | 776.245   | AK026964  | 655.685   | 849.52    |
| NM_000794 | 545.184   | 512.412   | NM_00723E | 14546.253 | 9607.79   | NM_001134 | 819.201   | 763.82    |
| AF295378  | 3241.595  | 3730.616  | NM_00726E | 4553.306  | 3493.433  | NM_01601E | 3691.892  | 4517.524  |
| NM_00408E | 6747.118  | 6866.478  | AK026014  | 1999.91   | 1999.31   | AF118274  | 2646.397  | 2964.735  |
| NM_01244E | 30947.039 | 28841.652 | NM_01484E | 1725.117  | 1942.471  | NM_018344 | 1610.48   | 1444.573  |
| NM_018104 | 4292.92   | 2872.138  | NM_00429E | 3162.029  | 3341.447  | NM_00007E | 3766.395  | 4259.292  |

|           |           |           |           |           |           |           |           |           |
|-----------|-----------|-----------|-----------|-----------|-----------|-----------|-----------|-----------|
| NM_00608C | 1145.946  | 756.242   | NM_001232 | 2031.177  | 2272.992  | NM_000083 | 1121.504  | 1177.625  |
| NM_00442E | 9961.64   | 15022.774 | NM_007181 | 1191.774  | 1050.69   | AL110245  | 1426.173  | 1791.909  |
| U64564    | 3519.4    | 4957.378  | AB007857  | 844.173   | 1146.596  | NM_00562E | 14535.219 | 16412.023 |
| NM_00647C | 3078.195  | 4762.388  | NM_004997 | 10406.885 | 9922.85   | NM_01660E | 10698.209 | 10313.859 |
| NM_00285E | 10579.854 | 14278.429 | NM_005923 | 3418.134  | 3621.914  | NM_004172 | 623.706   | 720.866   |
| AB038463  | 1707.975  | 2312.928  | NM_00346E | 3863.781  | 3732.429  | X74609    | 12043.11  | 12181.26  |
| M30262    | 3495.617  | 4667.589  | AF289028  | 441.241   | 1706.501  | NM_013363 | 624.465   | 695.855   |
| NM_000387 | 17534.947 | 22300.107 | NM_005567 | 1946.798  | 2266.991  | NM_000947 | 2665.85   | 3233.936  |
| NM_004663 | 2355.758  | 2930.638  | NM_00521E | 12593.973 | 13466.385 | AL096750  | 14317.451 | 15992.56  |
| NM_01531C | 1668.779  | 2128.24   | NM_004584 | 1678.162  | 1921.987  | NM_016061 | 3583.734  | 3850.034  |
| NM_016154 | 18515.986 | 23724.49  | X15183    | 52462.883 | 56188.078 | NM_016062 | 18064.879 | 20820.648 |
| NM_005013 | 44043.813 | 52028.223 | AK023618  | 2628.654  | 3194.048  | NM_004153 | 2275.298  | 2969.098  |
| AB002338  | 1431.388  | 1451.359  | NM_001492 | 2456.67   | 4843.789  | AK024740  | 2136.147  | 2249.201  |
| AI524814  | 6558.402  | 7215.667  | AB012643  | 3442.311  | 7629.58   | AF078164  | 8157.283  | 9267.816  |
| AB024411  | 1165.577  | 1476.339  | AB023170  | 891.413   | 1830.87   | NM_01904E | 2834.339  | 2471.937  |
| NM_002444 | 45648.605 | 48668.297 | NM_014153 | 7866.894  | 13862.544 | AF130101  | 747.861   | 657.672   |
| Z83802    | 383.265   | 398.296   | NM_000414 | 4741.722  | 3027.918  | NM_00465E | 3029.557  | 2638.117  |
| NM_001104 | 2404.662  | 2877.722  | NM_01884E | 5339.144  | 4870.871  | AF071569  | 2511.351  | 2171.183  |
| NM_00298E | 7239.784  | 8177.623  | NM_00550E | 5748.437  | 5856.305  | NM_00226E | 1952.234  | 2356.808  |
| U88898    | 3731.688  | 4149.427  | AK026964  | 667.51    | 772.057   | J04948    | 752.619   | 724.984   |
| NM_020154 | 30528.588 | 35764.063 | NM_001134 | 1617.657  | 1165.26   | AK022564  | 60080.359 | 54843.883 |
| NM_00466E | 1945.34   | 2600.49   | NM_01601E | 5095.808  | 5377.334  | NM_003564 | 675.104   | 697.518   |
| NM_00530C | 2097.502  | 2470.295  | NM_020407 | 766.682   | 1097.967  | AF317516  | 2357.032  | 2149.547  |
| NM_000893 | 1043.711  | 1370.612  | AF118274  | 3868.154  | 6052.328  | T57791    | 2075.898  | 1964.992  |
| NM_00069E | 31389.266 | 33400.176 | NM_018344 | 1298.526  | 1731.364  | AI421041  | 18944.016 | 23092.381 |
| NM_005091 | 569.872   | 575.98    | NM_000079 | 5627.704  | 5964.105  | BI759091  | 2825.211  | 2469.037  |
| NM_003204 | 4943.69   | 6117.535  | NM_000083 | 2173.992  | 2305.539  | BG685843  | 5498.928  | 6066.891  |
| AF254069  | 2502.944  | 3590.962  | AL110245  | 1716.09   | 1780.364  | BI490011  | 1450.516  | 1679.48   |
| AL117600  | 14629.643 | 20479.752 | NM_00562E | 18481.52  | 21295.266 | AF035771  | 1251.729  | 971.307   |
| NM_001712 | 502.782   | 1050.776  | NM_01660E | 14895.685 | 16418.729 | N20475    | 5707.38   | 5609.319  |
| AB029000  | 8330.428  | 12625.397 | NM_004172 | 657.702   | 708.543   | AA026626  | 1268.161  | 1098.03   |
| Z25434    | 6943.995  | 9214.202  | X74609    | 6694.196  | 12395.494 | H61726    | 980.544   | 1089.014  |
| NM_005884 | 12087.42  | 16009.261 | NM_000947 | 3104.641  | 2693.409  | NM_004774 | 4040.7    | 3410.098  |
| NM_01239E | 11385.97  | 11941.541 | AL096750  | 6238.538  | 5744.892  | NM_005234 | 3379.28   | 3562.233  |
| AF229804  | 43535.133 | 52057.656 | NM_016061 | 4640.669  | 4012.381  | NM_00521E | 7595.416  | 7173.831  |
| AF151638  | 1768.332  | 1762.803  | NM_016062 | 21689.516 | 24823.957 | NM_004584 | 693.786   | 916.909   |
| U90552    | 8465.54   | 9297.637  | NM_004153 | 2099.87   | 2417.474  | M27544    | 1433.657  | 1702.535  |
| NM_006032 | 6788.888  | 6677.868  | AK024740  | 2078.362  | 2041.243  | NM_001118 | 721.856   | 749.463   |
| NM_01478E | 2225.162  | 2370.401  | AF078164  | 8746.179  | 7838.876  | AL133097  | 3889.691  | 3940.052  |
| NM_002153 | 481.235   | 747.399   | NM_01904E | 3215.504  | 3161.953  | NM_00645E | 3172.99   | 3223.525  |
| AB040890  | 1713.535  | 1819.368  | NM_012413 | 480.062   | 746.78    | NM_01445E | 741.37    | 550.898   |
| AK024233  | 1149.342  | 1407.266  | AF130101  | 863.662   | 1286.162  | NM_004093 | 877.57    | 999.695   |
| AK021870  | 1846.315  | 1851.137  | NM_00465E | 2930.471  | 3653.825  | NM_00144E | 3304.696  | 3698.552  |
| U06680    | 6757.245  | 7336.319  | AF247820  | 1933.593  | 1892.462  | AF086122  | 1610.752  | 1194.151  |
| NM_005123 | 915.949   | 1093.317  | AF071569  | 3155.424  | 2254.636  | AK024397  | 7283.496  | 6892.369  |
| NM_015584 | 6996.915  | 7709.418  | NM_00226E | 2855.554  | 2927.483  | AF073931  | 922.202   | 1058.896  |
| NM_001697 | 43886.527 | 47204.766 | J04948    | 1444.892  | 1516.788  | NM_018047 | 793.733   | 765.544   |
| NM_01609E | 23572.846 | 23651.123 | NM_018043 | 643.976   | 806.013   | NM_005022 | 968.276   | 723.178   |
| NM_002063 | 1115.607  | 903.955   | AK022564  | 70543.344 | 66215.016 | NM_000083 | 528.802   | 482.115   |
| NM_006667 | 47105.34  | 25264.313 | NM_003564 | 491.353   | 1367.513  | AL110245  | 1187.131  | 1283.688  |
| AK025125  | 9010.103  | 12303.874 | AK023414  | 311.981   | 845.481   | NM_00562E | 13005.4   | 13799.537 |
| NM_00081E | 2250.744  | 3159.301  | AF317516  | 3015.761  | 6073.533  | NM_01660E | 7012.02   | 8792.368  |
| NM_001293 | 1122.985  | 1395.162  | NM_002581 | 554.248   | 947.828   | NM_004172 | 744.815   | 708.811   |



|           |           |           |           |           |           |           |           |           |
|-----------|-----------|-----------|-----------|-----------|-----------|-----------|-----------|-----------|
| AF156548  | 3885.186  | 4795.303  | J03571    | 4155.02   | 2547.848  | S78203    | 961.734   | 725.373   |
| NM_17214C | 3789.952  | 4178.808  | T57791    | 2402.366  | 1685.426  | NM_01620E | 9970.586  | 10810.312 |
| NM_001072 | 1167.463  | 1312.707  | NM_00145E | 493.915   | 733.629   | NM_00726E | 4291.321  | 3987.588  |
| NM_01407C | 1484.222  | 1694.594  | AI421041  | 19202.174 | 19192.52  | AK026014  | 2397.889  | 1920.859  |
| NM_01628C | 24631.232 | 27910.771 | BI759091  | 2265.262  | 2069.458  | NM_01484E | 2155.865  | 1664.468  |
| NM_016027 | 2942.706  | 2514.722  | BG685843  | 5399.927  | 5591.379  | NM_00429E | 3375.97   | 3566.983  |
| NM_014297 | 8546.502  | 8735.974  | BI490011  | 1323.831  | 1291.913  | NM_00123Z | 1876.798  | 1619.059  |
| NM_01815E | 19672.135 | 20221.074 | AF035771  | 1319.786  | 1550.968  | NM_007181 | 485.802   | 592.634   |
| X98266    | 1380.716  | 1593.124  | N20475    | 7148.33   | 7761.019  | AB007857  | 638.713   | 616.44    |
| U00930    | 17368.338 | 21249.188 | BI199286  | 458.727   | 749.823   | NM_004997 | 9115.082  | 8899.121  |
| AK024958  | 1104.03   | 1322.62   | AA026626  | 1012.28   | 1613.748  | NM_00592Z | 2946.272  | 2911.856  |
| NM_01457E | 2813.79   | 3234.81   | H61726    | 1120.556  | 977.442   | NM_00346E | 826.757   | 598.556   |
| NM_00243E | 6190.998  | 5934.517  | NM_004774 | 4478.755  | 3991.21   | AF289028  | 498.843   | 565.897   |
| AL117552  | 1618.356  | 1390.089  | NM_005234 | 4431.484  | 4704.551  | NM_005567 | 1336.673  | 1475.714  |
| NM_00269Z | 10463.235 | 8249.111  | NM_00521E | 8229.326  | 17889.738 | AF071569  | 2168.69   | 1360.246  |
| AB023190  | 33234.141 | 22821.555 | NM_004584 | 1449.065  | 2326.69   | NM_00226E | 1786.296  | 1734.268  |
| NM_007064 | 3511.757  | 2669.167  | AK023618  | 853.68    | 740.899   | J04948    | 776.636   | 873.606   |
| NM_006281 | 3250.941  | 4380.637  | M27544    | 558.852   | 671.008   | AK022564  | 39841.047 | 41008.082 |
| NM_00273E | 13683.916 | 20516.717 | AL133097  | 2574.588  | 2461.204  | NM_00149Z | 1909.904  | 1866.876  |
| U23460    | 51958.445 | 56066.605 | NM_001165 | 1546.452  | 1212.69   | AB012643  | 6580.533  | 6409.445  |
| NM_00535E | 1892.658  | 2194.552  | NM_001381 | 66391.641 | 56285.859 | AB023170  | 1098.382  | 1077.524  |
| NM_00442E | 6965.498  | 10325.533 | NM_00645E | 3917.82   | 4055.472  | NM_01415Z | 6797.663  | 7256.983  |
| U64564    | 2224.589  | 3149.457  | NM_00409Z | 962.517   | 1495.763  | NM_01884E | 5778.077  | 5048.515  |
| NM_00647C | 2440.832  | 2964.169  | NM_00144E | 5291.557  | 10535.46  | NM_00550E | 4412.206  | 4105.729  |
| NM_00285E | 7706.831  | 8524.485  | AF086122  | 1880.361  | 1609.219  | AK026964  | 485.92    | 596.395   |
| AB038463  | 1624.255  | 1896.263  | AK024397  | 6020.324  | 6915.081  | NM_001134 | 838.378   | 819.007   |
| M30262    | 4130.126  | 5016.842  | AF073931  | 1148.604  | 1156.853  | NM_01601E | 4710.692  | 5021.176  |
| NM_00546C | 1164.195  | 1325.282  | NM_018047 | 1201.285  | 1093.172  | NM_020407 | 581.682   | 640.073   |
| AF160477  | 2948.922  | 3410.952  | NM_00502Z | 912.699   | 1086.842  | AF118274  | 2271.585  | 2673.611  |
| NM_00322E | 509.367   | 547.828   | NM_00128E | 826.522   | 719.122   | NM_018344 | 1309.914  | 1222.785  |
| M12883    | 1416.763  | 1675.252  | NM_00008Z | 334.346   | 937.002   | NM_00007E | 3979.663  | 3824.371  |
| BG288747  | 1020.042  | 945.677   | AL110245  | 361.57    | 1123.954  | NM_004774 | 2136.318  | 1928.143  |
| BG617923  | 498.253   | 678.426   | NM_00562E | 10824.36  | 24154.262 | NM_005234 | 2836.206  | 2466.01   |
| U37448    | 1203.718  | 1162.801  | NM_00417Z | 975.229   | 491.889   | X74609    | 14121.408 | 14471.652 |
| BG435851  | 344.605   | 548.504   | S78203    | 731.359   | 304.808   | AB002316  | 596.972   | 637.28    |
| AA927698  | 3601.56   | 3334.87   | NM_01620E | 9115.823  | 8615.356  | NM_01899C | 623.548   | 528.859   |
| AI498426  | 1095.831  | 1016.233  | NM_00563E | 12792.637 | 12703.871 | NM_01336Z | 729.922   | 720.463   |
| BG824773  | 1259.432  | 1349.684  | NM_00723E | 13858.313 | 12638.007 | NM_000947 | 4076.258  | 4383.856  |
| D01038    | 21581.256 | 23073.164 | NM_00726E | 3612.925  | 3049.878  | AL096750  | 11927.533 | 10926.45  |
| AB019205  | 2272.554  | 1938.17   | AK026014  | 2112.833  | 1595.391  | NM_016061 | 4869.962  | 3209.88   |
| J05008    | 1548.843  | 1431.371  | NM_01484E | 2002.101  | 1760.103  | NM_01606Z | 20996.285 | 20257.965 |
| U11087    | 1553.163  | 1314.086  | NM_00429E | 3563.686  | 3563.632  | NM_00415Z | 2878.217  | 2802.083  |
| D50640    | 2364.646  | 1367.795  | NM_00123Z | 1911.096  | 2000.299  | AK024740  | 2240.874  | 2071.749  |
| D43747    | 1090.42   | 595.668   | NM_004997 | 8422.9    | 7809.238  | AF078164  | 9734.127  | 9499.465  |
| M98776    | 1795.828  | 2381.352  | NM_00592Z | 3831.856  | 4222.664  | NM_01904E | 2964.42   | 2581.661  |
| X99135    | 66998.281 | 67887.711 | NM_00346E | 1048.54   | 1049.43   | NM_01241Z | 677.079   | 743.989   |
| AF009744  | 2554.125  | 3080.884  | AF289028  | 919.378   | 830.484   | AF130101  | 1087.342  | 713.064   |
| NM_003204 | 4165.929  | 5640.487  | NM_005127 | 755.373   | 371.192   | NM_00465E | 3085.977  | 2811.329  |
| AF254069  | 1603.154  | 2277.482  | NM_005567 | 3327.951  | 3397.423  | AF086122  | 1273.337  | 771.203   |
| AL117600  | 11334.813 | 12535.826 | AF071569  | 1182.013  | 1490.704  | AK024397  | 2857.724  | 2404.327  |
| NM_00171Z | 539.663   | 583.921   | NM_00226E | 1374.055  | 2658.799  | AF073931  | 875.187   | 621.954   |
| NM_004487 | 19697.74  | 23000.869 | J04948    | 554.777   | 1080.401  | NM_018047 | 719.864   | 582.924   |
| AB029000  | 6549.513  | 7481.079  | AK022564  | 24759.143 | 19101.32  | NM_003564 | 605.489   | 769.375   |

|           |           |           |           |           |           |           |           |           |
|-----------|-----------|-----------|-----------|-----------|-----------|-----------|-----------|-----------|
| AK026965  | 13856.01  | 15569.402 | NM_001492 | 757.173   | 684.717   | AK023414  | 459.548   | 469.697   |
| AK025859  | 6147.574  | 6281.115  | AB012643  | 2808.59   | 2744.872  | AF317516  | 2755.034  | 2659.175  |
| AL117499  | 13807.103 | 14189.034 | AB023170  | 497.106   | 639.056   | NM_002581 | 450.227   | 577.003   |
| NM_007054 | 434.521   | 600.403   | NM_014153 | 4878.534  | 5001.454  | J03571    | 5822.214  | 5428.986  |
| AB007957  | 595.983   | 553.246   | NM_002296 | 11041.482 | 9943.608  | T57791    | 2915.126  | 2719.127  |
| AK000160  | 1998.414  | 2047.332  | NM_000414 | 4497.244  | 3885.05   | AI421041  | 20014.371 | 24161.328 |
| NM_005311 | 3937.049  | 4355.854  | NM_018845 | 4983.54   | 4082.084  | BI759091  | 2452.854  | 2635.246  |
| NM_005905 | 1526.129  | 1567.948  | NM_005505 | 5765.082  | 5510.439  | BG685843  | 5193.172  | 6671.283  |
| NM_016235 | 360.52    | 612.602   | AK026964  | 799.189   | 766.796   | BI490011  | 1454.701  | 1610.281  |
| NM_000960 | 864.285   | 957.186   | NM_001134 | 913.326   | 1226.54   | AF035771  | 1062.988  | 1072.772  |
| AF172932  | 466.154   | 597.035   | NM_016016 | 6031.631  | 5560.339  | N20475    | 6091.386  | 7147.478  |
| NM_005359 | 1076.453  | 1252.777  | NM_020407 | 851.698   | 895.081   | BI199286  | 400.987   | 401.154   |
| NM_002511 | 2581.477  | 2428.828  | AF118274  | 3584.018  | 3001.953  | AA026626  | 1125.954  | 1206.984  |
| AF295378  | 3148.556  | 2660.07   | NM_018344 | 1333.45   | 1239.501  | H61726    | 1052.876  | 1130.691  |
| NM_004085 | 6561.836  | 4839.682  | NM_000079 | 5323.332  | 5222.136  | NM_004997 | 3237.534  | 2520.542  |
| NM_012445 | 37503.445 | 44185.281 | NM_004774 | 923.453   | 1958.402  | NM_005923 | 2144.441  | 1797.649  |
| NM_018104 | 5279.283  | 6623.591  | NM_005234 | 1232.047  | 2382.176  | NM_003465 | 619.838   | 561.206   |
| NM_006080 | 1002.207  | 1085.315  | X74609    | 4090.085  | 4149.432  | AF289028  | 703.023   | 493.944   |
| NM_006667 | 52382.016 | 56481.309 | NM_000947 | 2762.062  | 2851.324  | NM_005216 | 8310.699  | 7462.632  |
| AK025125  | 5034.217  | 6407.112  | AL096750  | 21468.521 | 19747.773 | NM_004584 | 939.104   | 895.558   |
| NM_000815 | 1320.195  | 1855.909  | NM_016061 | 4619.478  | 3666.455  | X15183    | 29451.15  | 35973.578 |
| NM_001293 | 732.346   | 1090.544  | NM_016062 | 23758.404 | 26548.115 | AK023618  | 1778.77   | 1618.067  |
| AB023173  | 5577.469  | 5397.483  | NM_004153 | 2868.08   | 2847.79   | AF212842  | 460.741   | 561.08    |
| AF156548  | 2810.14   | 3129.661  | AK024740  | 2136.685  | 2329.467  | M27544    | 1059.651  | 925.372   |
| NM_000387 | 17021.359 | 21592.377 | AF078164  | 9129.182  | 9055.568  | NM_002255 | 277.094   | 468.643   |
| NM_004663 | 2282.573  | 2742.913  | NM_019049 | 3304.583  | 3067.635  | NM_001118 | 940.57    | 1176.51   |
| NM_015310 | 1637.991  | 1599.138  | AF130101  | 861.887   | 761.96    | AL133097  | 3600.993  | 3119.023  |
| NM_016154 | 18199.467 | 20224.5   | NM_004656 | 3457.453  | 2697.784  | NM_001165 | 1851.892  | 1797.815  |
| NM_005013 | 41389.898 | 48144.758 | AF086122  | 451.938   | 898.367   | NM_006455 | 3275.024  | 3263.031  |
| AB002338  | 1363.859  | 1368.839  | AK024397  | 432.888   | 1580.648  | NM_014455 | 654.459   | 715.599   |
| AI524814  | 6568.14   | 7004.174  | AF073931  | 351.468   | 894.85    | NM_004093 | 1080.481  | 1061.001  |
| AB024411  | 1404.946  | 1352.418  | AF317516  | 2166.44   | 2035.081  | NM_001445 | 3581.094  | 3999.794  |
| NM_002444 | 42484.168 | 50554.195 | J03571    | 5791.341  | 4695.278  | NM_016016 | 2593.42   | 2373.04   |
| NM_001104 | 3095.002  | 2769.917  | T57791    | 2021.332  | 2017.62   | AF118274  | 819.465   | 1047.862  |
| NM_002989 | 7032.548  | 7598.496  | X56134    | 670.848   | 587.414   | NM_000079 | 1886.677  | 1846.788  |
| U88898    | 3039.614  | 3226.368  | AI421041  | 19975.463 | 23591.32  | NM_000083 | 824.364   | 702.243   |
| NM_020154 | 30197.541 | 30756.805 | BI759091  | 2392.696  | 2582.22   | NM_016605 | 5512.738  | 5687.902  |
| NM_004665 | 2263.679  | 1710.66   | BG685843  | 5424.848  | 5999.86   | NM_004172 | 661.022   | 662.122   |
| NM_005300 | 1752.927  | 1357.4    | BI490011  | 1345.937  | 1325.652  | S78203    | 679.649   | 838.808   |
| NM_000893 | 1204.251  | 916.938   | AF035771  | 1528.355  | 1011.255  | NM_016205 | 11867.785 | 10701.203 |
| NM_000695 | 34909.223 | 18952.875 | N20475    | 7027.155  | 6654.217  | NM_005635 | 18223.561 | 19484.361 |
| NM_005091 | 1058.09   | 733.73    | BI199286  | 635.721   | 422.739   | NM_007235 | 18157.283 | 21085.934 |
| AF031167  | 593.324   | 838.613   | AA026626  | 1223.009  | 1067.93   | NM_007265 | 4528.257  | 4362.317  |
| AB023190  | 32860.145 | 42667.434 | H61726    | 1030.064  | 956.357   | NM_014845 | 1987.526  | 2388.895  |
| NM_007064 | 2450.611  | 2822.36   | NM_004997 | 1196.118  | 2600.442  | NM_004295 | 3734.436  | 3679.763  |
| NM_006281 | 2105.924  | 2761.319  | NM_005923 | 506.022   | 1300.751  | NM_001232 | 1764.528  | 1836.84   |
| NM_002735 | 9908.146  | 11074.058 | NM_005216 | 5167.42   | 4663.607  | NM_007181 | 528.938   | 571.116   |
| U23460    | 49223.918 | 49961.598 | NM_004584 | 804.847   | 941.225   | AB007857  | 573.039   | 668.425   |
| NM_005356 | 1615.285  | 1948.206  | X15183    | 35299.512 | 37792.434 | NM_019045 | 1558.288  | 1190.652  |
| Z25434    | 7288.586  | 8531.297  | AK023618  | 1099.662  | 983.78    | AF130101  | 626.025   | 528.23    |
| NM_005884 | 11595.625 | 14913.635 | M27544    | 1590.504  | 1612.543  | NM_004656 | 1432.139  | 1348.908  |
| NM_012395 | 11223.665 | 11011.17  | NM_001118 | 783.974   | 882.6     | AF071569  | 1937.63   | 1664.971  |
| AF229804  | 40662.656 | 46627.246 | AL133097  | 4772.005  | 5425.133  | NM_002265 | 1982.543  | 2239.726  |

|           |           |           |           |           |           |           |           |           |
|-----------|-----------|-----------|-----------|-----------|-----------|-----------|-----------|-----------|
| AF151638  | 1533.166  | 1595.102  | NM_001165 | 1509.686  | 1467.76   | J04948    | 865.492   | 572.487   |
| U90552    | 8724.237  | 8503.915  | NM_006458 | 3608.442  | 3179.85   | AK022564  | 39055.688 | 39996.137 |
| NM_006032 | 6956.771  | 7440.16   | NM_014459 | 631.957   | 601.168   | NM_001492 | 1884.933  | 1675.948  |
| NM_014788 | 2236.63   | 2355.952  | NM_004093 | 1060.066  | 861.927   | AB012643  | 6729.379  | 5926.4    |
| NM_002153 | 513.084   | 770.205   | NM_001449 | 4340.11   | 4016.058  | AB023170  | 1155.914  | 987.884   |
| AB040890  | 1476.405  | 1526.176  | NM_000079 | 1338.672  | 1422.397  | NM_014153 | 6654.065  | 6628.173  |
| AK024233  | 1229.729  | 1409.284  | AL110245  | 410.162   | 589.958   | NM_002296 | 12436.493 | 11876.018 |
| AK021870  | 1820.872  | 1877.437  | NM_005628 | 10626.902 | 11391.996 | NM_000414 | 5470.802  | 4789.108  |
| U06680    | 6216.612  | 6505.676  | NM_016605 | 6127.941  | 5704.804  | NM_018845 | 3889.648  | 3650.476  |
| NM_005123 | 1057.923  | 930.655   | S78203    | 708.102   | 575.711   | NM_005505 | 4798.592  | 5236.23   |
| NM_015584 | 7034.764  | 5555.172  | NM_016208 | 11744.024 | 10897.344 | AK026964  | 760.007   | 871.796   |
| NM_001697 | 40934.367 | 35108.172 | NM_005638 | 16380.092 | 15436.653 | NM_001134 | 896.484   | 2167.313  |
| NM_016098 | 21640.771 | 13509.271 | NM_007235 | 18659.508 | 21448.879 | AK023497  | 282.555   | 925.799   |
| NM_002063 | 1410.355  | 1348.392  | NM_007269 | 4001.898  | 4072.134  | NM_004815 | 539.5     | 622.358   |
| AL137479  | 1089.782  | 1226.989  | NM_014845 | 1826.326  | 1628.008  | NM_004147 | 642.592   | 579.677   |
| NM_004211 | 2034.521  | 2431.611  | NM_004298 | 3699.562  | 3499.374  | AB037743  | 1357.428  | 1230.201  |
| Y10776    | 2284.821  | 2400.518  | NM_001232 | 1964.66   | 1797.124  | AB046820  | 1912.422  | 1690.431  |
| AK027241  | 4844.646  | 5832.704  | AB007857  | 811.581   | 521.56    | NM_014646 | 696.051   | 734.992   |
| NM_006978 | 9803.209  | 10542.955 | NM_019049 | 635.488   | 656.446   | NM_006375 | 1295.25   | 1226.731  |
| NM_004561 | 789.435   | 988.325   | NM_004656 | 1441.749  | 1510.482  | AF123659  | 1393.99   | 1284.262  |
| AK024812  | 2855.958  | 3245.839  | AF071569  | 1420.077  | 947.469   | X74609    | 13035.462 | 12014.916 |
| M20642    | 846.671   | 1064.972  | NM_002269 | 1295.704  | 1469.76   | AB002316  | 466       | 905.697   |
| AK026412  | 1774.811  | 1807.389  | J04948    | 649.42    | 645.72    | NM_018990 | 480.907   | 866.734   |
| X89669    | 3007.691  | 3114.011  | AK022564  | 54647.313 | 46978.684 | NM_013363 | 586.349   | 861.821   |
| AF086109  | 532.512   | 1064.028  | NM_001492 | 1645.757  | 1913.805  | NM_000947 | 4285.067  | 3993.328  |
| NM_001072 | 1365.299  | 1118.422  | AB012643  | 8886.334  | 7204.64   | AL096750  | 16620.818 | 16400.629 |
| NM_014070 | 1848.075  | 1688.929  | AB023170  | 1796.598  | 1487.246  | NM_016061 | 4976.047  | 4044.198  |
| NM_016280 | 25774.104 | 23140.547 | NM_014153 | 12069.11  | 12601.356 | NM_016062 | 22760.697 | 26939.207 |
| NM_016027 | 3067.582  | 3144.905  | NM_002296 | 14189.351 | 13123.858 | NM_004153 | 2627.521  | 3135.796  |
| NM_014297 | 8865.113  | 9171.119  | NM_000414 | 5837.662  | 5673.408  | NM_003628 | 1462.282  | 1153.275  |
| NM_018156 | 22027.262 | 22215.84  | NM_018845 | 5777.571  | 4882.64   | NM_004648 | 1506.071  | 1244.203  |
| X98266    | 1494.578  | 1369.863  | NM_005505 | 5483.502  | 5545.242  | AF029325  | 1005.371  | 870.317   |
| U00930    | 18358.506 | 17594.566 | NM_001134 | 1118.302  | 976.189   | AF097021  | 474.351   | 512.784   |
| AK024958  | 1057.302  | 979.026   | NM_004815 | 299.646   | 603.287   | NM_001365 | 1878.109  | 1769.785  |
| NM_014575 | 3666.721  | 2723.978  | AB037743  | 713.262   | 486.658   | NM_000677 | 6339.667  | 5903.499  |
| NM_002439 | 6447.435  | 4224.291  | AB046820  | 770.693   | 762.179   | BF308728  | 621.594   | 628.641   |
| AL117552  | 1285.921  | 946.469   | NM_006375 | 631.76    | 606.752   | NM_013280 | 1417.564  | 1597.689  |
| NM_002692 | 9639.128  | 5996.91   | AF123659  | 1620.052  | 1394.461  | NM_018315 | 3622.598  | 3666.362  |
| X55525    | 1571.222  | 2101.438  | X74609    | 21259.873 | 20777.371 | AF142421  | 9208.512  | 9428.007  |
| AB040878  | 1334.235  | 1432.388  | AB002316  | 549.452   | 473.187   | AB037836  | 6305.284  | 6023.819  |
| S74647    | 1271.187  | 1454.574  | NM_018990 | 676.267   | 1014.058  | NM_014247 | 725.27    | 872       |
| NM_003506 | 1311.65   | 1554.605  | NM_013363 | 949.82    | 955.047   | NM_018695 | 33546.492 | 44100.996 |
| NM_018093 | 8940.558  | 9493.455  | NM_000947 | 2043.399  | 2402.964  | NM_006343 | 906.422   | 1059.035  |
| NM_003389 | 2320.994  | 2629.688  | AL096750  | 23173.316 | 24000.67  | NM_014786 | 1700.421  | 1372.195  |
| NM_000430 | 1257.153  | 1257.741  | NM_016061 | 5372.906  | 5359.216  | NM_001423 | 715.755   | 710.238   |
| AB033030  | 1301.012  | 1349.417  | NM_016062 | 25031.393 | 26995.248 | NM_015716 | 4652.538  | 4175.384  |
| NM_016656 | 761.667   | 685.659   | NM_004153 | 2829.177  | 3046.953  | NM_003955 | 287.788   | 534.453   |
| NM_015963 | 5484.193  | 5351.996  | AK024740  | 2515.563  | 2395.426  | NM_005739 | 1318.363  | 1435.802  |
| AB007871  | 4450.964  | 4831.561  | AF078164  | 9079.714  | 8100.359  | AB023166  | 1278.001  | 1445.121  |
| NM_017813 | 3739.979  | 3401.983  | NM_003628 | 879.104   | 803.51    | AB028966  | 6107.479  | 6621.192  |
| NM_003840 | 10086.986 | 9458.686  | NM_004648 | 511.013   | 542.599   | NM_005758 | 3510.726  | 2944.648  |
| NM_018378 | 1373.908  | 1287.288  | NM_001365 | 1627.578  | 1154.787  | AF044774  | 1500.712  | 819.525   |
| NM_018423 | 1140.757  | 1369.124  | NM_000677 | 4700.827  | 2860.144  | NM_005402 | 3729.955  | 3351.988  |

|           |           |           |           |           |           |           |           |           |
|-----------|-----------|-----------|-----------|-----------|-----------|-----------|-----------|-----------|
| NM_001741 | 10848.242 | 10446.391 | NM_013280 | 1340.284  | 1079.783  | AF055027  | 1941.225  | 1890.29   |
| NM_000745 | 1311.815  | 1230.921  | NM_018315 | 4989.037  | 4836.995  | U63541    | 1555.199  | 1445.259  |
| AF116705  | 13147.822 | 11413.506 | AF142421  | 7829.813  | 6743.741  | AB033045  | 1643.127  | 1740.579  |
| NM_004460 | 1044.087  | 894.594   | AB037836  | 6585.286  | 6319.061  | AF055006  | 6916.203  | 6491.896  |
| NM_006072 | 2017.379  | 1885.007  | NM_014247 | 1028.318  | 980.87    | NM_004935 | 1058.04   | 1222.516  |
| BE794490  | 2480.803  | 2214.033  | NM_018695 | 60580.902 | 55421.488 | NM_006951 | 1036.953  | 899.999   |
| NM_003561 | 3729.207  | 2950.863  | NM_006343 | 1037.454  | 1100.38   | NM_001896 | 6139.884  | 5179.438  |
| NM_002991 | 882.913   | 519.887   | NM_014786 | 1370.687  | 1488.213  | NM_014023 | 783.368   | 565.18    |
| NM_004071 | 3840.669  | 5009.976  | NM_001423 | 704.618   | 879.129   | NM_002745 | 1605.508  | 1488.047  |
| NM_001316 | 8911.151  | 11337.568 | NM_015716 | 3198.608  | 3623.92   | D26488    | 3538.638  | 2947.505  |
| AJ008149  | 6912.337  | 8559.018  | NM_005739 | 1114.853  | 910.167   | NM_001432 | 597.177   | 643.882   |
| NM_001192 | 341.33    | 543.446   | AB023166  | 1169.171  | 1255.921  | AB014554  | 761.215   | 888.203   |
| NM_012153 | 1681.511  | 1987.703  | AB028966  | 5217.244  | 4584.25   | AF097431  | 7715.947  | 8154.377  |
| NM_013241 | 3795.57   | 3679.835  | NM_005758 | 1241.056  | 1179.468  | NM_001978 | 594.716   | 359.451   |
| NM_017988 | 55257.84  | 56845.074 | NM_005402 | 2234.462  | 2031.917  | NM_002579 | 1226.375  | 1239.653  |
| AF161362  | 5442.907  | 5121.655  | AF055027  | 610.733   | 536.435   | NM_004221 | 1140.522  | 974.197   |
| NM_015939 | 4133.323  | 4546.294  | U63541    | 1143.948  | 814.256   | NM_003019 | 382.95    | 660.171   |
| AB046840  | 5028.212  | 4546.711  | AB033045  | 1125.274  | 1026.527  | AL109790  | 505.952   | 696.434   |
| AF174487  | 1770.26   | 1754.093  | AF055006  | 5498.477  | 4072.53   | NM_006923 | 1722.377  | 1421.408  |
| NM_005041 | 542.128   | 495.447   | NM_004935 | 966.848   | 886.902   | AF119889  | 6468.515  | 6148.788  |
| NM_006407 | 10131.294 | 7739.837  | NM_006951 | 1207.061  | 960.842   | NM_006699 | 1542.283  | 1450.725  |
| NM_007373 | 3390.302  | 1816.701  | NM_001896 | 5356.573  | 4612.854  | AK025645  | 993.963   | 1140.717  |
| M34572    | 846.572   | 727.252   | NM_014023 | 654.234   | 895.903   | AK023266  | 796.109   | 673.995   |
| NM_006263 | 17581.559 | 11203.66  | NM_002745 | 4372.965  | 4118.938  | NM_006814 | 5750.072  | 6233.112  |
| NM_004791 | 2262.432  | 1355.568  | D26488    | 4367.219  | 3184.65   | NM_005067 | 4380.06   | 5340.686  |
| Z36876    | 4063.358  | 4860.59   | NM_001432 | 1232.457  | 1028.344  | AB007899  | 764.555   | 655.95    |
| NM_000892 | 1254.863  | 1582.664  | AB014554  | 1375.68   | 1095.967  | NM_002817 | 4185.29   | 4367.465  |
| NM_005046 | 1053.176  | 1147.409  | AF097431  | 10247.846 | 18464.277 | NM_002801 | 6208.997  | 6850.252  |
| NM_001873 | 1659.51   | 1860.596  | NM_001978 | 667.336   | 677.346   | NM_014780 | 1242.716  | 1576.618  |
| AB029025  | 1439.937  | 1761.955  | NM_002579 | 1456.922  | 1350.298  | NM_014730 | 4590.146  | 5075.188  |
| NM_007100 | 31238.002 | 35742.855 | NM_004221 | 1108.345  | 1060.42   | NM_014167 | 1130.323  | 1598.318  |
| NM_002954 | 61528.004 | 53389.262 | NM_003019 | 759.919   | 635.189   | NM_016063 | 1929.927  | 2095.748  |
| NM_003940 | 608.505   | 592.418   | NM_006923 | 1252.055  | 856.222   | U82987    | 3272.975  | 2642.108  |
| NM_016572 | 959.573   | 1101.826  | AF119889  | 5606.613  | 8647.125  | NM_005732 | 1753.483  | 1618.094  |
| NM_000027 | 1571.609  | 1438.521  | NM_006699 | 1311.625  | 874.861   | NM_014890 | 585.65    | 730.119   |
| NM_001824 | 620.387   | 943.254   | AK025645  | 1438.408  | 1253.146  | AK056481  | 2916.966  | 2818.238  |
| NM_017548 | 24250.301 | 22229.012 | NM_006814 | 7317.081  | 6022.94   | NM_005433 | 1156.273  | 1130.553  |
| AF134802  | 1583.979  | 1398.583  | NM_005067 | 5230.981  | 4355.359  | NM_018118 | 943.744   | 327.082   |
| NM_018222 | 980.344   | 875.543   | AB007899  | 842.587   | 735.203   | L35035    | 2321.213  | 1967.888  |
| NM_005740 | 2561.818  | 2394.963  | NM_002817 | 4399.375  | 4333.399  | NM_007152 | 2411.361  | 1982.207  |
| NM_004308 | 15334.672 | 11614.16  | NM_002801 | 13245.802 | 11276.422 | NM_018293 | 1093.833  | 965.752   |
| AF112366  | 3283.34   | 2559.506  | BE905810  | 560.168   | 698.12    | NM_002955 | 906.283   | 392.396   |
| NM_004274 | 2966.368  | 2109.084  | NM_014780 | 1835.807  | 1697.934  | NM_001938 | 4458.087  | 4134.278  |
| AK024002  | 11067.349 | 8650.875  | NM_014730 | 7358.775  | 7817.335  | AF230808  | 1282.003  | 1392.99   |
| NM_020399 | 9177.979  | 6973.252  | NM_014167 | 925.659   | 1028.704  | U18910    | 720.661   | 784.624   |
| AB011117  | 2047.372  | 1208.246  | NM_016063 | 2042.039  | 2668.864  | NM_005238 | 854.217   | 683.015   |
| AF060935  | 4399.568  | 4691.672  | U82987    | 2928.901  | 2906.749  | AK075306  | 4600.063  | 4347.428  |
| AK026886  | 1292.021  | 1647.931  | NM_005732 | 2382.621  | 2169.313  | AB037820  | 489.098   | 562.512   |
| D83778    | 1434.139  | 1773.359  | NM_014890 | 1044.989  | 1085.66   | NM_001280 | 6266.511  | 6755.311  |
| NM_004264 | 1820.389  | 1978.984  | AK056481  | 1886.717  | 1896.193  | AB019572  | 72256.93  | 59548.684 |
| AK024788  | 1357.998  | 1665.481  | NM_005433 | 1120.111  | 1150.474  | NM_002948 | 61085.656 | 54931.41  |
| NM_004473 | 652.366   | 865.535   | L35035    | 2114.791  | 2120.904  | AF113008  | 2006.094  | 1694.949  |
| AK022696  | 2350.621  | 1910.669  | NM_007152 | 2735.66   | 4576.231  | NM_020217 | 2461.24   | 2335.061  |

|           |           |           |           |           |           |           |           |           |
|-----------|-----------|-----------|-----------|-----------|-----------|-----------|-----------|-----------|
| NM_001206 | 2909.541  | 3046.431  | NM_018293 | 1113.078  | 1127.185  | AF085983  | 1512.387  | 895.165   |
| NM_005016 | 1778.078  | 2020.348  | NM_002955 | 818.266   | 720.321   | AF052105  | 1087.209  | 745.683   |
| NM_014469 | 3476.998  | 3859.511  | NM_001938 | 5139.665  | 4357.708  | AK001204  | 5137.334  | 4571.426  |
| NM_014852 | 2924.673  | 2433.093  | AF230808  | 2446.894  | 2036.957  | M15465    | 1820.888  | 1729.06   |
| NM_000344 | 16632.059 | 17040.846 | U18910    | 1030.318  | 728.522   | J03866    | 4019.806  | 3114.552  |
| AF248650  | 3951.207  | 3737.07   | NM_005238 | 2073.742  | 1588.886  | AK022836  | 2761.534  | 2326.81   |
| S74678    | 40545.34  | 41108.594 | AK075306  | 5436.871  | 4688.494  | NM_012343 | 7157.449  | 6675.81   |
| AF248651  | 1237.137  | 1288.033  | AB037820  | 843.846   | 830.628   | NM_000397 | 688.882   | 623.577   |
| NM_001358 | 21280.322 | 16318.336 | NM_001280 | 10518.993 | 16860.553 | NM_002046 | 71536.852 | 57152.02  |
| NM_004836 | 7737.672  | 6441.379  | AB019572  | 70558.68  | 67239.133 | BF217340  | 329.04    | 434.515   |
| AB037751  | 4258.689  | 4193.149  | NM_002948 | 59115.277 | 53949.922 | NM_003078 | 1616.333  | 1842.564  |
| S79281    | 6026.999  | 4639.603  | AF113008  | 2571.374  | 2585.748  | AL137703  | 1034.892  | 971.947   |
| AK025585  | 2916.196  | 2425.92   | NM_020217 | 2823.455  | 2844.921  | NM_001809 | 4067.745  | 4247.805  |
| NM_001414 | 6327.894  | 4656.056  | NM_018135 | 64301.398 | 57358.023 | AL117477  | 1097.058  | 1394.354  |
| D16891    | 2754.179  | 2043.149  | AF085983  | 1443.118  | 882.353   | NM_012107 | 3943.694  | 4787.624  |
| NM_017760 | 2476.9    | 1485.836  | AF052105  | 713.151   | 770.414   | AB037760  | 2203.908  | 3009.668  |
| NM_015936 | 9724.807  | 6919.96   | AK001204  | 5529.3    | 5435.433  | NM_015680 | 1811.691  | 2236.374  |
| AL109698  | 1687.452  | 2248.544  | M15465    | 3145.342  | 2873.584  | M22637    | 5702.803  | 6437.754  |
| AF217980  | 9030.303  | 10345.358 | J03866    | 4067.329  | 2784.668  | NM_006778 | 673.377   | 466.695   |
| AL117461  | 2883.993  | 3144.844  | AK022836  | 3461.872  | 2770.016  | NM_007022 | 950.728   | 616.119   |
| NM_016498 | 2708.605  | 2798.629  | NM_012343 | 8706.507  | 6810.277  | AL049943  | 9208.443  | 6444.008  |
| AF104921  | 18152.588 | 17862.678 | NM_000397 | 682.967   | 686.978   | AL137303  | 1689.722  | 1849.327  |
| NM_000126 | 21089.268 | 22649.49  | NM_002046 | 67714.414 | 61435.379 | AB002449  | 1641.15   | 1443.485  |
| AK022291  | 792.602   | 1085.965  | AL157461  | 798.783   | 846.389   | NM_016480 | 12545.269 | 10595.155 |
| BF239974  | 2323.899  | 2769.563  | BF217340  | 793.786   | 707.932   | AK001489  | 1784.238  | 2203.444  |
| NM_000104 | 1391.564  | 1402.94   | NM_003078 | 2445.211  | 2286.809  | NM_015681 | 1355.839  | 1376.282  |
| NM_005015 | 18372.602 | 15851.606 | AL137703  | 1177.16   | 1237.197  | AF070582  | 1925.341  | 2457.507  |
| NM_004255 | 61897.273 | 50436.301 | NM_001809 | 4606.983  | 5796.78   | AL359561  | 772.651   | 919.222   |
| NM_000269 | 46791.637 | 43808.262 | NM_018259 | 473.269   | 847.695   | AK001362  | 614.32    | 689.781   |
| AF182288  | 5385.24   | 5347.604  | AL117477  | 2166.939  | 2406.666  | AL110235  | 3441.556  | 2789.17   |
| NM_004491 | 2885.495  | 1431.195  | NM_012107 | 4603.337  | 5363.094  | U79245    | 635.983   | 538.114   |
| AK026810  | 2962.946  | 3135.328  | AB037760  | 2582.222  | 2688.835  | AK024820  | 694.141   | 531.799   |
| NM_015629 | 6237.349  | 5603.443  | NM_015680 | 1893.087  | 2273.325  | AB033105  | 1632.521  | 1197.986  |
| AF218032  | 2853.543  | 2670.381  | NM_018364 | 5414.541  | 3340.738  | AF038192  | 693.646   | 316.943   |
| NM_017542 | 7507.324  | 5837.509  | NM_006778 | 626.008   | 749.763   | AJ001865  | 802.917   | 612.082   |
| AK024407  | 1119.66   | 881.425   | NM_007022 | 2739.133  | 2180.268  | D61704    | 3557.49   | 2993.908  |
| NM_004182 | 14756.396 | 10835.563 | AL049943  | 12233.948 | 9326.481  | AJ227889  | 370.602   | 761.753   |
| NM_018419 | 1250.965  | 1021.315  | AL137303  | 1958.664  | 2093.271  | Y12017    | 793.128   | 960.873   |
| NM_014240 | 2062.972  | 1580.549  | AL355708  | 690.246   | 298.563   | X64989    | 659.989   | 952.826   |
| BE379399  | 1937.458  | 1498.957  | AL161980  | 753.232   | 631.333   | L34409    | 11180.876 | 13092.27  |
| NM_015877 | 5530.485  | 4084.932  | AB002449  | 1492.04   | 1530.057  | U12210    | 4349.384  | 4300.913  |
| AL117598  | 2578.487  | 2963.144  | NM_016480 | 15573.054 | 11995.23  | L08440    | 2742.688  | 2951.158  |
| AL109670  | 1617.791  | 1677.229  | AK001489  | 2298.823  | 2073.694  | M19866    | 975.539   | 1676.721  |
| AF085831  | 1069.258  | 1413.667  | NM_015681 | 2117.565  | 1803.459  | M73799    | 2057.104  | 2332.65   |
| AL832149  | 4102.796  | 4460.81   | AF070582  | 2274.052  | 2246.278  | AF086119  | 1098.418  | 1016.43   |
| AK022839  | 2835.813  | 2832.401  | NM_006383 | 4380.166  | 4385.097  | NM_003782 | 760.116   | 758.174   |
| NM_018350 | 1413.114  | 1762.101  | NM_015400 | 8047.355  | 8735.462  | NM_018228 | 670.357   | 371.909   |
| AK025839  | 654.855   | 580.205   | AF131786  | 711.025   | 931.6     | NM_017790 | 1221.517  | 837.716   |
| NM_003946 | 1522.753  | 1656.684  | AK022400  | 1722.313  | 1804.89   | AK000023  | 1713.771  | 1740.115  |
| AB045292  | 2929.716  | 3016.737  | AF052100  | 1589.894  | 1659.26   | AK000901  | 903.142   | 667.952   |
| AK022998  | 1181.452  | 1221.025  | AK024820  | 442.99    | 593.45    | AK024351  | 765.47    | 882.827   |
| AK025699  | 17772.955 | 17877.531 | AF052117  | 426.946   | 540.153   | AK025002  | 1942.142  | 2130.51   |
| AF147316  | 522.905   | 626.118   | AB033105  | 1780.913  | 1399.023  | AF119913  | 867.39    | 605.908   |

|           |           |           |           |           |           |           |           |           |
|-----------|-----------|-----------|-----------|-----------|-----------|-----------|-----------|-----------|
| AF147353  | 904.889   | 585.173   | AF038192  | 550.202   | 460.418   | NM_01834C | 1440.877  | 896.461   |
| NM_018024 | 7191.588  | 6749.859  | AJ001865  | 1002.234  | 816.731   | AF049883  | 589.16    | 677.37    |
| AK027173  | 664.706   | 752.655   | D61704    | 6750.491  | 6540.801  | L10148    | 3172.033  | 2201.653  |
| AK026783  | 853.257   | 785.88    | AJ227889  | 1084.842  | 768.688   | AK026247  | 834.622   | 727.229   |
| AK021814  | 1094.236  | 972.697   | Y12017    | 865.727   | 860.047   | AK024893  | 951.432   | 414.795   |
| AF088035  | 2565.24   | 1903.928  | X64989    | 623.752   | 738.088   | AL110175  | 1016.765  | 1002.837  |
| NM_018092 | 5899.072  | 4612.051  | Y10512    | 809.935   | 674.75    | AK027156  | 17639.609 | 15421.972 |
| NM_005842 | 10833.635 | 8851.193  | L34409    | 13070.538 | 11507.297 | AL157504  | 4127.551  | 3499.373  |
| NM_003787 | 556.897   | 473.969   | U12210    | 5467.193  | 4544.287  | AK023328  | 7643.569  | 6980.186  |
| AF147419  | 2144.972  | 2449.045  | M19866    | 440.001   | 1540.453  | AF119879  | 18308.924 | 16370.709 |
| AK024280  | 1545.59   | 1735.278  | M73799    | 1689.239  | 1582.056  | Y10482    | 7783.017  | 5685.523  |
| AF075036  | 2446.361  | 2403.955  | AF086119  | 1217.634  | 1578.736  | AL161992  | 4813.999  | 4118.363  |
| NM_014797 | 3954.442  | 3903.495  | NM_003782 | 1021.523  | 890.056   | AK023910  | 1985.66   | 1634.045  |
| AK027139  | 319.001   | 549.417   | AL442096  | 700.969   | 800.485   | D16991    | 4091.765  | 3308.699  |
| AL831841  | 3883.788  | 4546.146  | AK021509  | 1219.431  | 1263.872  | AK023538  | 893.701   | 872.887   |
| AL110165  | 3532.813  | 3054.038  | NM_018228 | 540.159   | 528.408   | X77485    | 8458.96   | 9328.564  |
| AL117652  | 1063.286  | 1157.774  | AJ270693  | 563.533   | 450.788   | AB046765  | 1791.675  | 1893.589  |
| AL050168  | 3650.74   | 3678.367  | NM_01779C | 1367.866  | 1120.271  | AF133333  | 3386.876  | 2970.151  |
| AL117447  | 568.687   | 645.383   | AK000861  | 801.973   | 609.531   | NM_01836E | 1621.933  | 1310.814  |
| AL122122  | 5716.28   | 5891.004  | AK000023  | 2037.6    | 1751.302  | NM_004881 | 12330.063 | 10251.359 |
| AK000122  | 9937.892  | 9904.318  | AK000901  | 1111.222  | 812.116   | NM_00515E | 10241.172 | 7432.877  |
| AK023159  | 2365.846  | 2143.479  | AK024351  | 1087.108  | 917.092   | NM_01909E | 9868.436  | 7726.186  |
| AK001091  | 6012.808  | 6025.44   | AK024867  | 884.025   | 630.695   | U80764    | 12837.608 | 10970.223 |
| U80775    | 439.25    | 398.6     | AK025002  | 2600.917  | 2251.917  | AB020684  | 14145.675 | 12432.3   |
| AF086428  | 1723.212  | 1295.702  | AF119913  | 1034.036  | 473.13    | AF077036  | 48000.059 | 42039.137 |
| AK025310  | 2347.482  | 2253.292  | NM_01834C | 1304.826  | 1215.227  | NM_020421 | 870.504   | 861.09    |
| AL049353  | 1431.562  | 1243.15   | AF049883  | 1446.181  | 1042.561  | L37690    | 15767.29  | 10418.285 |
| AI793165  | 313.42    | 483.518   | L10148    | 3199.369  | 2488.422  | D61707    | 645.545   | 2121.957  |
| NM_01489E | 239.667   | 640.926   | AK026247  | 828.221   | 778.121   | AK021610  | 2541.6    | 1932.124  |
| AF009269  | 1938.027  | 1875.818  | AL110175  | 1158.497  | 1028.15   | AK023767  | 4859.14   | 4078.611  |
| AF009313  | 2135.71   | 3238.135  | AF288406  | 845.096   | 633.082   | AF084516  | 561.68    | 712.943   |
| AF056420  | 470.824   | 487.989   | AK027156  | 17349.639 | 14488.88  | AL137554  | 749.203   | 802.234   |
| AF090887  | 1091.729  | 1310.019  | AL157504  | 3557.806  | 3052.313  | AJ001907  | 821.924   | 769.659   |
| AF009279  | 660.841   | 778.508   | AK023328  | 7468.105  | 6728.525  | M32220    | 3481.212  | 3459.394  |
| NM_015883 | 2222.025  | 1793.947  | AJ012499  | 75008.391 | 58313.945 | D17188    | 11373.743 | 9451.148  |
| AF056429  | 725.438   | 875.011   | AK024900  | 2426.999  | 3244.942  | AJ001432  | 18779.402 | 21473.424 |
| AF070547  | 2687.111  | 3148.299  | AF119879  | 24933.535 | 20643.691 | NM_02043E | 14063.424 | 13467.014 |
| AK001110  | 15113.03  | 11981.883 | Y10482    | 11121.487 | 6950.147  | AF052169  | 1482.87   | 1224.072  |
| AK021609  | 261.202   | 723.543   | AF086244  | 1401.136  | 1419.299  | CY3Cy5    | 9148.179  | 274.797   |
| AK021801  | 490.09    | 477.378   | AL161992  | 4711.123  | 4207.065  | BF942101  | 2324.2    | 3068.786  |
| AK001153  | 607.481   | 612.403   | AK023910  | 1557.646  | 1255.074  | BI825012  | 8905.631  | 11030.969 |
| AK002184  | 927.431   | 1098.622  | D16991    | 3523.502  | 3187.203  | BM051302  | 595.039   | 671.738   |
| AK021652  | 749.242   | 1051.2    | AK023538  | 927.539   | 673.194   | BE314182  | 8416.906  | 10599.469 |
| AK021859  | 1542.649  | 1347.022  | X77485    | 12202.767 | 9774.003  | AI808029  | 997.997   | 1030.973  |
| AK025826  | 3286.671  | 3159.164  | AK021555  | 915.055   | 859.889   | X03225    | 3264.542  | 4576.295  |
| AK026439  | 1880.003  | 1792.318  | AB046765  | 2760.06   | 2097.376  | AK097395  | 2537.48   | 2968.238  |
| AK025278  | 1325.744  | 1168.649  | AF133333  | 3793.795  | 2937.318  | M12783    | 1240.095  | 1862.356  |
| AK026466  | 758.98    | 683.652   | NM_004881 | 7096.062  | 5878.954  | AK091535  | 979.101   | 1054.577  |
| AY007163  | 8601.827  | 8180.353  | U94903    | 772.654   | 706.482   | AF085357  | 2596.562  | 2757.462  |
| NM_00623E | 42298.215 | 35003.625 | NM_00515E | 11326.09  | 8878.381  | NM_003841 | 1927.134  | 2065.768  |
| AK023734  | 1420.622  | 1260.555  | NM_01909E | 9821.134  | 7256.922  | NM_080824 | 411.178   | 389.3     |
| D17265    | 37028.656 | 30052.5   | U80764    | 17131.617 | 12763.146 | SR2       | 65206.566 | 59614.598 |
| AF085827  | 966.526   | 765.061   | AB020684  | 9533.285  | 7471.142  | SR4       | 15890.336 | 16729.363 |

|           |           |           |           |           |           |           |           |           |
|-----------|-----------|-----------|-----------|-----------|-----------|-----------|-----------|-----------|
| Y08266    | 26672.191 | 24030.238 | AF077036  | 61160.531 | 52674.586 | SR6       | 2204.243  | 1896.018  |
| AK002171  | 7378.844  | 5398.042  | NM_020421 | 1094.181  | 998.137   | SR8       | 8300.584  | 28572.004 |
| AJ002572  | 2445.016  | 2043.932  | D17094    | 3412.321  | 3845.513  | SR10      | 34184.84  | 13782.536 |
| AK026897  | 4819.934  | 3986.16   | L37690    | 15305.122 | 11648.627 | CY3Cy5    | 10743.29  | 312.08    |
| AB037861  | 6908.995  | 7433.379  | D61707    | 1000.257  | 747.81    | NM_014322 | 1673.205  | 1732.645  |
| AK021887  | 4138.735  | 3696.1    | AK021610  | 2302.431  | 1617.304  | NM_004122 | 1632.02   | 2027.898  |
| AF086180  | 11998.815 | 10667.602 | AK023767  | 4351.117  | 3487.64   | NM_002922 | 10394.916 | 12159.704 |
| AK022135  | 3339.441  | 2601.041  | AF084516  | 1223.02   | 888.947   | NM_000160 | 1358.09   | 1887.715  |
| AK022898  | 1375.59   | 1137.297  | AL137554  | 1035.461  | 602.596   | NM_003301 | 679.184   | 1004.712  |
| NM_017552 | 18321.949 | 15614.489 | AJ001907  | 876.495   | 619.228   | NM_000952 | 1390.614  | 2109.351  |
| AK024897  | 552.321   | 424.757   | M32220    | 3912.089  | 2806.962  | U27768    | 697.15    | 1068.286  |
| NM_003547 | 940.991   | 922.075   | D17188    | 13309.357 | 8575.651  | AF305550  | 1571.375  | 1859.959  |
| AL049980  | 3060.936  | 2430.347  | AJ001432  | 24946.633 | 21529.281 | U66582    | 6269.73   | 8900.983  |
| NM_006683 | 991.105   | 879.175   | AF052169  | 2126.306  | 1643.036  | NM_006192 | 1368.685  | 1701.587  |
| AF070529  | 933.357   | 666.869   | CY3Cy5    | 2345.387  | 111.45    | NM_003812 | 488.812   | 565.538   |
| AK022978  | 2735.288  | 1991.018  | BF942101  | 2513.955  | 2526.93   | NM_000842 | 5115.06   | 5669.889  |
| AK021447  | 6214.945  | 3881.189  | BI825012  | 11057.746 | 11834.376 | NM_004672 | 863.664   | 1060.88   |
| AK025096  | 1483.369  | 1137.642  | M21574    | 617.778   | 894.718   | NM_000032 | 36533.73  | 44484.086 |
| L31955    | 445.238   | 518.075   | BM051302  | 806.835   | 1270.635  | NM_020470 | 3578.042  | 3764.584  |
| AF131774  | 2205.465  | 1818.369  | BE314182  | 11038.695 | 14483.838 | AA478950  | 1103.586  | 1551.916  |
| AK025793  | 867.155   | 595.234   | AI808029  | 1131.965  | 1434.61   | AB029033  | 3988.449  | 4435.883  |
| AK000151  | 657.152   | 759.025   | X03225    | 4650.171  | 10169.845 | AF091034  | 1994.332  | 2514.415  |
| AL389942  | 1030.04   | 742.325   | AK097395  | 4205.255  | 5509.092  | NM_005301 | 11640.698 | 11567.67  |
| D17052    | 1099.436  | 1085.633  | M12783    | 1841.21   | 1937.306  | NM_004167 | 500.754   | 539.376   |
| D28378    | 64425.777 | 54943.254 | AK091535  | 1330.939  | 1433.208  | NM_016652 | 1927.877  | 2247.277  |
| M64700    | 897.878   | 1002.404  | AF085357  | 2933.876  | 3076.409  | AB035124  | 2457.659  | 3619.936  |
| NM_001267 | 639.296   | 544.754   | NM_003841 | 2713.645  | 1882.481  | AF060170  | 408.868   | 1199.949  |
| L41143    | 5532.45   | 4474.866  | NM_080824 | 547.29    | 694.302   | NM_016602 | 479.97    | 510.554   |
| NM_005331 | 35379.809 | 33327.773 | SR2       | 47666.578 | 58597.707 | NM_004402 | 6899.912  | 6843.3    |
| NM_014111 | 1427.906  | 1491.913  | SR4       | 15820.486 | 15939.372 | AK023397  | 1614.203  | 1865.396  |
| S85075    | 665.854   | 603.592   | SR6       | 2548.099  | 2669.731  | NM_001722 | 996.364   | 1015.504  |
| AJ008129  | 2831.643  | 2285.642  | SR8       | 8188.897  | 28997.055 | NM_004072 | 10006.473 | 12555.756 |
| AJ008158  | 869.208   | 486.704   | SR10      | 28499.424 | 12832.451 | NM_002992 | 510.917   | 803.183   |
| AF161451  | 10337.726 | 8152.059  | CY3Cy5    | 2884.655  | 103.776   | X01394    | 19619.98  | 21356.465 |
| X02067    | 20762.213 | 14399.199 | NM_014322 | 1468.003  | 1437.103  | NM_000041 | 22866.459 | 28425.773 |
| U92013    | 14307.303 | 9540.178  | NM_004122 | 2145.241  | 2335.087  | NM_002984 | 2903.881  | 2970.235  |
| AK023965  | 2107.587  | 2119.197  | NM_002922 | 12518.024 | 14598.39  | AB037752  | 3651.44   | 4377.267  |
| AK026211  | 1090.748  | 883.276   | NM_000160 | 2343.021  | 4040.879  | AK024821  | 9644.943  | 9257.463  |
| X58968    | 3252.735  | 2845.804  | NM_003301 | 1218.959  | 2433.913  | AB002340  | 1011.901  | 1118.199  |
| U92020    | 6058.716  | 4402.172  | NM_000952 | 864.272   | 1356.503  | NM_000224 | 2286.134  | 2138.768  |
| AL117542  | 2344.589  | 1762.904  | U27768    | 824.47    | 1176.808  | NM_014322 | 3644.314  | 3435.385  |
| AL109712  | 16735.305 | 12565.604 | AF305550  | 2184.516  | 3170.872  | NM_006414 | 4359.056  | 4822.981  |
| X04215    | 674.081   | 454.337   | U66582    | 11257.308 | 12258.138 | NM_018472 | 7893.427  | 7707.197  |
| NM_017782 | 3579.104  | 2324.543  | S73288    | 539.24    | 1013.782  | NM_014362 | 2962.974  | 3893.267  |
| NM_018142 | 2213.042  | 1460.58   | NM_006192 | 1774.244  | 1824.41   | NM_018302 | 1087.853  | 1354.394  |
| NM_018462 | 13001.779 | 10904.966 | NM_003812 | 632.435   | 702.056   | NM_001832 | 6188.77   | 7423.928  |
| Z36814    | 1687.281  | 1603.422  | NM_000842 | 4502.004  | 3895.571  | NM_017774 | 8106.693  | 8510.477  |
| D17045    | 1046.737  | 1073.817  | NM_004672 | 963.318   | 1199.892  | AB037716  | 2951.444  | 3428.724  |
| AK000827  | 3755.96   | 2886.116  | NM_000950 | 7558.065  | 7702.123  | NM_016297 | 2934.274  | 2883.745  |
| NM_002502 | 35111.965 | 35327.52  | NM_005132 | 4345.134  | 4278.219  | NM_001752 | 9683.044  | 9333.048  |
| NM_005312 | 7027.088  | 5883.966  | L10139    | 1528.061  | 2041.206  | AL137672  | 195.92    | 836.214   |
| AK022351  | 1856.388  | 1610.453  | NM_020470 | 3308.127  | 4386.809  | X64177    | 4722.931  | 46072.387 |
| AK022059  | 1346.787  | 932.93    | AA478950  | 1096.398  | 1388.598  | NM_015994 | 3072.725  | 3259.639  |

|           |           |           |           |           |           |           |           |           |
|-----------|-----------|-----------|-----------|-----------|-----------|-----------|-----------|-----------|
| NM_020194 | 5296.631  | 4251.139  | AB029033  | 5343.289  | 5562.621  | NM_014065 | 1654.012  | 2039.454  |
| AK026853  | 586.195   | 554.768   | AF091034  | 2702.671  | 2680.736  | NM_001695 | 2004.749  | 2866.731  |
| AF038183  | 22308.945 | 17499.439 | NM_005301 | 14271.639 | 14798.577 | NM_002248 | 2114.294  | 2996.1    |
| NM_017882 | 5570.736  | 4500.678  | NM_004167 | 466.481   | 755.481   | NM_012281 | 1725.12   | 1658.753  |
| NM_003521 | 1788.102  | 1493.937  | NM_016653 | 2497.075  | 3317.074  | AK025772  | 1730.59   | 1594.159  |
| CY3Cy5    | 1921.457  | 156.673   | AB035124  | 3182.378  | 5772.535  | NM_005509 | 1290.864  | 1149.662  |
| J03571    | 12379.799 | 11394.554 | AF060170  | 573.499   | 1040.844  | NM_152747 | 1671.374  | 1497.166  |
| T57791    | 2113.8    | 2230.098  | NM_016602 | 1207.626  | 1454.255  | NM_017415 | 921.141   | 863.837   |
| X56134    | 593.113   | 552.141   | NM_004409 | 8084.172  | 9785.231  | NM_001667 | 15417.232 | 17520.197 |
| AI421041  | 14713.065 | 14560.024 | AK023397  | 2274.479  | 2930.689  | AB046834  | 434.175   | 507.859   |
| BI759091  | 1537.853  | 2312.899  | NM_001725 | 783.832   | 829.652   | NM_000262 | 1845.583  | 1889.891  |
| BG685843  | 5105.104  | 6920.373  | NM_004079 | 11644.434 | 10805.438 | NM_017831 | 1911.656  | 2204.362  |
| BI490011  | 1391.904  | 1774.927  | NM_000383 | 443.713   | 617.575   | AK022537  | 4056.905  | 4122.672  |
| AF035771  | 1420.508  | 1363.865  | X01394    | 19978.453 | 19997.602 | AF064597  | 865.636   | 860.41    |
| N20475    | 6234.589  | 8556.254  | NM_000041 | 30863.746 | 34780     | NM_006345 | 2476.094  | 2949.228  |
| BI199286  | 695.686   | 763.026   | NM_002984 | 2243.562  | 1952.943  | NM_006875 | 1710.137  | 1458.324  |
| AA026626  | 1033.977  | 1620.91   | AB037752  | 3882.934  | 4094.847  | D87119    | 1273.46   | 1525.412  |
| H61726    | 1330.936  | 1120.039  | AK024821  | 9663.146  | 11403.735 | AL050040  | 476.208   | 2899.955  |
| NM_004774 | 4531.975  | 5230.074  | NM_000224 | 2081.58   | 2397.542  | NM_006556 | 6847.926  | 8291.294  |
| SR5       | 4818.573  | 4794.899  | NM_014328 | 3993.292  | 3902.466  | AL133066  | 294.198   | 383.523   |
| SR7       | 6325.521  | 42419.863 | NM_006414 | 3826.973  | 4103.219  | AF264717  | 1738.028  | 1369.709  |
| SR9       | 22448.465 | 5034.873  | NM_018479 | 8658.999  | 9212.644  | NM_012260 | 4199.374  | 4459.703  |
| CY3Cy5    | 2850.578  | 195.767   | NM_014362 | 3224.172  | 3141.379  | NM_001141 | 614.601   | 547.966   |
| AF212842  | 758.034   | 945.969   | NM_018308 | 1414.386  | 1627.911  | NM_000018 | 8872.316  | 9972.562  |
| NM_018404 | 382.831   | 415.186   | NM_001832 | 6622.896  | 7537.167  | AB028992  | 272.789   | 608.341   |
| M27544    | 3077.987  | 2885.216  | NM_017774 | 9469.075  | 11008.215 | NM_020470 | 2452.981  | 3829.012  |
| NM_001118 | 1021.155  | 888.463   | AB037716  | 3716.879  | 4302.032  | AA478950  | 1109.451  | 1104.096  |
| AL133097  | 3061.302  | 3090.22   | NM_001926 | 323.768   | 645.408   | BF942101  | 2030.245  | 1849.504  |
| NM_001165 | 1301.751  | 1355.965  | NM_016297 | 3187.954  | 2911.565  | BI825012  | 7438.209  | 7892.585  |
| NM_001381 | 64849.824 | 58997.211 | NM_001752 | 10486.435 | 11072.851 | BM051302  | 402.107   | 598.239   |
| U90908    | 313.642   | 576.601   | AL137672  | 704.71    | 890.451   | BE314182  | 9215.438  | 9997.496  |
| NM_006458 | 4402.64   | 4935.209  | X64177    | 6447.341  | 46364.371 | AI808029  | 1146.063  | 1040.684  |
| NM_014459 | 604.534   | 721.836   | NM_015994 | 3401.295  | 3214.759  | AI971217  | 507.99    | 535.027   |
| NM_004093 | 870.914   | 1096.196  | NM_014065 | 1594.291  | 1649.144  | X03225    | 3703.258  | 3856.623  |
| NM_001449 | 4422.814  | 5974.352  | NM_001695 | 1981.675  | 1916.765  | AK097395  | 2613.289  | 3122.917  |
| AF086122  | 1485.786  | 1814.933  | NM_002248 | 1966.952  | 2127.734  | M12783    | 1139.18   | 1283.257  |
| AK024397  | 7456.645  | 9035.951  | NM_012281 | 1511.656  | 1665.214  | AK091535  | 860.555   | 797.79    |
| AF073931  | 1055.534  | 967.957   | AK025772  | 1790.496  | 1865.732  | AF085357  | 2522.521  | 3273.055  |
| NM_018047 | 1152.146  | 1573.581  | NM_005509 | 1254.664  | 1489.167  | NM_003841 | 1670.583  | 1816.83   |
| NM_005022 | 941.695   | 1375.279  | NM_152747 | 1476.688  | 1841.266  | NM_080824 | 322.567   | 454.589   |
| NM_001288 | 713.071   | 898.279   | NM_017415 | 880.256   | 1188.62   | AB032956  | 38.475    | 765.276   |
| NM_003564 | 1617.584  | 2138.563  | NM_001667 | 15378.262 | 17035.193 | NM_018002 | 2040.568  | 2192.185  |
| AK023414  | 576.303   | 593.476   | NM_000262 | 2106.859  | 2348.986  | AB002340  | 809.148   | 868.082   |
| AF317516  | 3845.242  | 4759.521  | NM_017831 | 2746.843  | 4394.456  | NM_000224 | 1910.946  | 1808.639  |
| NM_002581 | 1044.839  | 1222.26   | AK022537  | 6220.894  | 6410.993  | NM_014328 | 3089.49   | 2950.917  |
| AI417964  | 947.414   | 1351.06   | AF064597  | 1066.017  | 1173.605  | NM_006414 | 3269.593  | 3562.822  |
| S78203    | 849.71    | 717.448   | NM_006345 | 2254.769  | 3034.029  | NM_014322 | 1341.356  | 1228.075  |
| NM_016208 | 11622.531 | 10211.712 | D87119    | 1345.469  | 1799.519  | NM_004122 | 1776.022  | 1733.3    |
| NM_005638 | 15515.387 | 15358.893 | AB037769  | 219.232   | 683.576   | NM_002928 | 11605.802 | 12272.98  |
| NM_007235 | 12394.443 | 12998.44  | AL050040  | 613.161   | 890.447   | NM_000160 | 1698.877  | 1463.119  |
| NM_007269 | 3852.64   | 3428.392  | NM_006556 | 9792.342  | 9859.202  | NM_003301 | 652.441   | 636.696   |
| AK026014  | 1881.166  | 1861.619  | AF264717  | 1696.644  | 2105.577  | NM_000955 | 823.595   | 704.077   |
| NM_014845 | 1262.583  | 1162.647  | NM_012260 | 5135.224  | 5146.641  | U27768    | 803.527   | 780.179   |



|           |           |           |           |           |           |           |           |           |
|-----------|-----------|-----------|-----------|-----------|-----------|-----------|-----------|-----------|
| NM_00429E | 2006.331  | 2587.832  | NM_001141 | 781.029   | 807.656   | AF305550  | 1596.825  | 1575.365  |
| NM_001232 | 1632.303  | 1943.931  | NM_00001E | 8789.33   | 11337.822 | U66582    | 7448.604  | 7532.718  |
| NM_007181 | 490.816   | 716.123   | AB028992  | 802.245   | 903.559   | NM_00619E | 1623.556  | 1423.668  |
| AB007857  | 677.328   | 937.726   | NM_02047C | 2951.316  | 2708.02   | NM_003812 | 361.05    | 479.201   |
| NM_00177E | 602.038   | 815.219   | AA478950  | 1317.584  | 1365.711  | NM_00084E | 5446.796  | 5227.09   |
| NM_004997 | 10179.685 | 12652.243 | BF942101  | 3250.922  | 3473.194  | NM_00467E | 1017.612  | 917.581   |
| NM_005923 | 2639.83   | 2932.928  | BI825012  | 13145.328 | 14216.208 | NM_00095C | 11613.246 | 10255.802 |
| NM_00346E | 866.68    | 866.326   | M21574    | 613.124   | 593.248   | AK025772  | 1585.454  | 1817.43   |
| AF289028  | 731.633   | 869.821   | BM051302  | 655.593   | 704.08    | NM_00550E | 981.565   | 1459.806  |
| NM_005127 | 585.576   | 745.376   | BE314182  | 10053.398 | 10079.367 | NM_152747 | 1342.573  | 1740.597  |
| NM_005567 | 2613.17   | 4239.28   | AI808029  | 827.078   | 1025.554  | NM_01741E | 910.319   | 891.291   |
| NM_00521E | 9977.626  | 13688.253 | AI971217  | 1726.789  | 1548.355  | NM_001667 | 12465.614 | 14327.451 |
| NM_00396E | 398.163   | 437.606   | X03225    | 3365.314  | 3825.93   | AB029033  | 3870.588  | 4279.579  |
| NM_004584 | 1523.753  | 1430.811  | NM_003841 | 2889.59   | 2250.432  | AF091034  | 2337.077  | 2330.465  |
| X15183    | 44046.047 | 53827.184 | AF296673  | 361.316   | 456.586   | NM_005301 | 13409.387 | 13632.149 |
| AK023618  | 2636.583  | 2987.099  | NM_080824 | 447.898   | 581.575   | NM_004167 | 542.503   | 917.594   |
| NM_001492 | 1517.499  | 1468.157  | AB032956  | 1786.123  | 2555.436  | NM_01665E | 2518.329  | 2804.438  |
| AB012643  | 9928.301  | 9542.759  | NM_018002 | 2934.705  | 2657.583  | AB035124  | 2656.608  | 3355.075  |
| AB023170  | 1625.408  | 1449.503  | AB002340  | 1696.25   | 2030.806  | NM_00440E | 6782.267  | 6693.457  |
| NM_01415E | 12310.288 | 12830.826 | NM_000224 | 2163.142  | 2044.32   | AK023397  | 1645.851  | 1991.715  |
| NM_00229E | 12623.559 | 10779.182 | NM_01432E | 3862.589  | 3792.724  | NM_00172E | 788.162   | 673.378   |
| NM_000414 | 6871.711  | 5930.146  | NM_006414 | 4816.949  | 4414.854  | NM_00407E | 9876.537  | 8830.816  |
| NM_01884E | 4055.249  | 3137.576  | NM_014322 | 1555.527  | 1544.993  | X01394    | 18766.568 | 18845.344 |
| NM_00550E | 4549.833  | 4563.17   | NM_004122 | 2885.3    | 3032.204  | NM_000041 | 22586.004 | 22739.131 |
| AK026964  | 471.415   | 655.969   | NM_00292E | 11798.597 | 11324.169 | NM_002984 | 2929.561  | 2723.763  |
| NM_001134 | 1866.286  | 2185.777  | NM_00016C | 1973.338  | 2386.64   | AF264717  | 1436.851  | 1589.119  |
| NM_01601E | 4654.338  | 6188.58   | NM_003301 | 678.72    | 644.423   | NM_01226C | 3386.814  | 4241.416  |
| NM_020407 | 768.371   | 864.086   | NM_00095E | 723.478   | 854.865   | NM_001141 | 412.037   | 606.109   |
| AF118274  | 3311.893  | 3631.585  | U27768    | 635.467   | 743.302   | NM_00001E | 7420.483  | 9050.384  |
| NM_018344 | 1505.43   | 1813.902  | U66582    | 11046.001 | 14360.554 | AB028992  | 356.856   | 349.927   |
| NM_00007E | 4522.789  | 5707.641  | NM_00619E | 1700.598  | 1926.536  | NM_01847E | 7405.47   | 7252.476  |
| NM_00008E | 828.567   | 1379.249  | NM_003812 | 663.948   | 809.216   | NM_01436E | 2677.293  | 2982.853  |
| AL110245  | 2379.429  | 2765.555  | NM_00084E | 6682.037  | 10304.508 | NM_01830E | 1650.638  | 1733.253  |
| NM_00562E | 15406.531 | 19753.238 | NM_00467E | 1152.37   | 1260.854  | NM_00183E | 8232.165  | 14666.128 |
| NM_01660E | 18055.967 | 22421.795 | NM_00095C | 10792.438 | 11515.001 | NM_017774 | 9087.361  | 12696.947 |
| NM_004172 | 760.442   | 1637.174  | NM_00513E | 5056.201  | 6214.003  | AB037716  | 2815.785  | 3759.428  |
| X74609    | 24661.133 | 24511.197 | AK025772  | 2298.234  | 1619.588  | NM_016297 | 3046.763  | 2650.377  |
| AB002316  | 489.569   | 470.739   | NM_152747 | 2168.476  | 2051.119  | NM_00175E | 8858.979  | 9323.287  |
| NM_01899C | 814.773   | 740.947   | NM_01741E | 1424.129  | 1188.625  | AL137672  | 471.575   | 559.79    |
| NM_01336E | 613.158   | 815.367   | NM_001667 | 16446.984 | 15779.279 | X64177    | 4311.545  | 39215.555 |
| NM_000947 | 3295.245  | 2952.91   | AB046834  | 456.514   | 693.379   | NM_015994 | 3208.656  | 2939.376  |
| AL096750  | 29277.094 | 34621.297 | AB029033  | 6182.652  | 5559.079  | NM_01406E | 1633.583  | 1441.598  |
| NM_016061 | 3200.887  | 2134.269  | AF091034  | 2815.594  | 2911.489  | NM_00169E | 2081.314  | 1847.204  |
| NM_01606E | 18164.365 | 19623.279 | NM_005301 | 16861.955 | 17782.35  | NM_00224E | 2540.262  | 2538.006  |
| NM_00415E | 1946.044  | 2434.893  | NM_004167 | 882.814   | 1457.776  | NM_012281 | 1812.92   | 2237.05   |
| AK024740  | 1823.701  | 1953.005  | NM_01665E | 2164.988  | 2554.702  | AL137698  | 135.849   | 575.506   |
| AF078164  | 7511.8    | 9032.528  | AB035124  | 2532.095  | 2988.736  | NM_015957 | 301.726   | 283.769   |
| NM_01904E | 2156.963  | 2213.96   | AF060170  | 522.934   | 593.723   | NM_00026E | 1815.868  | 2897.448  |
| NM_005447 | 1118.366  | 1499.445  | NM_01660E | 413.005   | 720.393   | NM_017831 | 2416.919  | 2074.774  |
| NM_01241E | 537.317   | 663.326   | NM_00440E | 7754.988  | 8398.772  | AK022537  | 3919.416  | 3927.957  |
| AF130101  | 750.438   | 720.927   | AK023397  | 1984.991  | 2304.435  | AF064597  | 712.684   | 990.029   |
| NM_00465E | 3040.31   | 3129.045  | NM_00172E | 910.087   | 1068.83   | NM_00634E | 1986.885  | 2680.717  |
| AF071569  | 2504.744  | 2610.78   | NM_00407E | 11946.292 | 11683.393 | NM_00687E | 1386.425  | 1245.456  |

|           |           |           |           |           |           |           |           |           |
|-----------|-----------|-----------|-----------|-----------|-----------|-----------|-----------|-----------|
| NM_002269 | 2374.94   | 3502.929  | NM_000383 | 568.469   | 557.342   | D87119    | 1597.602  | 1538.301  |
| J04948    | 1309.481  | 1618.682  | X01394    | 16470.494 | 21027.307 | AL050040  | 412.057   | 791.372   |
| NM_018043 | 716.676   | 687.523   | NM_000041 | 29356.896 | 35879.797 | NM_006556 | 8822.628  | 8322.405  |
| AK022564  | 36555.406 | 40180.98  | NM_002984 | 2421.645  | 2476.225  | AL133066  | 610.685   | 1355.525  |
| NM_003564 | 1060.838  | 1291.302  | AF264717  | 2142.639  | 1794.71   | NM_000846 | 5288.118  | 5564.198  |
| AK023414  | 383.791   | 666.576   | NM_012260 | 5317.027  | 4812.593  | NM_004678 | 931.161   | 950.53    |
| AF317516  | 3126.9    | 2923.134  | NM_001141 | 570.778   | 653.283   | NM_000950 | 9094.656  | 11212.603 |
| NM_002581 | 776.63    | 601.047   | NM_000018 | 8558.251  | 9258.667  | NM_005136 | 3807.679  | 4544.782  |
| AI417964  | 580.558   | 591.492   | AB028992  | 502.968   | 606.232   | L10139    | 401.464   | 276.76    |
| J03571    | 11440.88  | 10817.637 | NM_018479 | 7765.467  | 6953.686  | NM_000036 | 40019.59  | 52006.645 |
| T57791    | 2179.074  | 1665.796  | NM_014362 | 3060.262  | 2692.453  | NM_020470 | 3135.685  | 3066.071  |
| X56134    | 512.446   | 398.798   | NM_018308 | 1364.048  | 1250.64   | AA478950  | 1262.06   | 1133.652  |
| AI421041  | 18644.043 | 23152.271 | NM_001832 | 7582.156  | 8794.783  | BF942101  | 2537.781  | 2393.28   |
| BI759091  | 1242.07   | 1521.52   | NM_017774 | 9735.472  | 10373     | BI825012  | 10656.531 | 10171.664 |
| BG685843  | 5600.248  | 7696.976  | AB037716  | 3337.294  | 3970.117  | M21574    | 450.375   | 366.48    |
| BI490011  | 1437.558  | 1604.69   | NM_016297 | 2907.118  | 3552.796  | BM051302  | 654.094   | 647.996   |
| AF035771  | 1195.278  | 1343.286  | NM_001752 | 10408.194 | 11433.878 | BE314182  | 9688.842  | 8594.729  |
| N20475    | 5912.035  | 6140.607  | AL137672  | 675.372   | 663.345   | AI808029  | 639.887   | 990.686   |
| BI199286  | 583.131   | 668.299   | X64177    | 6836.102  | 50722.008 | M12783    | 1350.422  | 1280.961  |
| AA026626  | 1394.424  | 1447.102  | NM_015994 | 2967.842  | 3732.547  | AK091535  | 1078.213  | 969.602   |
| H61726    | 787.096   | 928.44    | NM_014065 | 1894.555  | 1681.862  | AF085357  | 3021.584  | 2505.367  |
| NM_004774 | 3845.463  | 5567.447  | NM_001695 | 2086.211  | 2310.942  | NM_003841 | 2047.882  | 1458.235  |
| NM_005234 | 6050.534  | 12733.796 | NM_002248 | 2033.923  | 2386.928  | NM_004633 | 539.187   | 501.564   |
| NM_005216 | 7155.515  | 6519.67   | NM_012281 | 1374.455  | 1662.802  | X01394    | 23166.221 | 30695.25  |
| NM_004584 | 1040.134  | 968.571   | NM_080824 | 623.962   | 535.251   | NM_002984 | 2569.75   | 3347.496  |
| X15183    | 35945.477 | 37241.07  | AB032956  | 286.8     | 611.251   | AB037752  | 3538.123  | 4126.753  |
| AK023618  | 1690.735  | 1474.012  | NM_000262 | 1926.723  | 2328.153  | NM_018002 | 2281.546  | 2370.989  |
| AF212842  | 773.18    | 820.561   | NM_017831 | 4016.066  | 5676.237  | AK024821  | 9707.188  | 9688.886  |
| NM_018404 | 554.472   | 522.803   | AK022537  | 5792.127  | 5900.519  | AB002340  | 1047.199  | 1210.667  |
| M27544    | 2507.36   | 2000.909  | AF064597  | 979.432   | 1050.469  | NM_000224 | 1792.561  | 1833.615  |
| NM_001118 | 555.623   | 669.66    | NM_006345 | 3226.638  | 7123.288  | NM_014328 | 3061.426  | 3033.18   |
| AL133097  | 4726.36   | 4958.165  | NM_006875 | 2527.729  | 2370.803  | NM_006414 | 3539.079  | 3535.852  |
| NM_001165 | 1581.807  | 1775.847  | D87119    | 1827.706  | 1905.344  | NM_014322 | 1632.507  | 1210.466  |
| NM_001381 | 64638.816 | 61525.66  | AL050040  | 689.823   | 1011.834  | NM_004122 | 1882.914  | 1751.912  |
| U90908    | 593.761   | 682.709   | NM_006556 | 11671.136 | 16795.732 | NM_002928 | 12324.923 | 10733.059 |
| NM_006458 | 3663      | 4121.333  | AL133066  | 603.562   | 636.269   | NM_000160 | 1528.365  | 1449.442  |
| NM_004093 | 714.426   | 695.357   | NM_000849 | 5136.271  | 3978.642  | NM_003301 | 445.157   | 443.191   |
| NM_001449 | 4166.433  | 4256.864  | NM_004678 | 1073.31   | 1011.606  | AF305550  | 1539.456  | 1625.407  |
| AF086122  | 1345.137  | 1810.177  | NM_000950 | 9288.225  | 8434.599  | U66582    | 8870.605  | 7147.791  |
| NM_018047 | 1170.905  | 1924.795  | NM_005139 | 4434.129  | 4481.568  | NM_006198 | 1906.633  | 1584.128  |
| NM_000083 | 501.097   | 548.374   | NM_000039 | 51132.984 | 52053.426 | NM_003812 | 742.367   | 664.835   |
| AL110245  | 1723.18   | 1663.76   | NM_020470 | 2779.609  | 2168.098  | NM_002241 | 207.214   | 503.284   |
| NM_005628 | 11637.5   | 11416.526 | AA478950  | 1199.17   | 1171.572  | NM_001695 | 2769.115  | 3820.034  |
| NM_016605 | 11932.353 | 11889.777 | BF942101  | 3417.785  | 4285.104  | NM_002248 | 1944.721  | 2392.701  |
| NM_004172 | 606.134   | 657.866   | BI825012  | 13409.964 | 24530.414 | NM_012281 | 1507.792  | 1726.235  |
| S78203    | 742.867   | 786.254   | M21574    | 691.781   | 1251.162  | AK025772  | 1842.581  | 1815.744  |
| NM_016208 | 9560.53   | 7305.622  | BM051302  | 770.926   | 891.91    | NM_005509 | 1040.671  | 1253.091  |
| NM_005638 | 14923.671 | 15501.494 | BE314182  | 10413.743 | 9839.936  | NM_152747 | 1817.649  | 2699.954  |
| NM_007235 | 10125.287 | 11908.578 | AI808029  | 922.162   | 927.576   | NM_017415 | 1229.934  | 903.157   |
| NM_007269 | 3661.469  | 3546.519  | AI971217  | 707.042   | 474.389   | NM_001667 | 12172.357 | 12306.046 |
| AK026014  | 1574.4    | 1657.661  | X03225    | 3131.091  | 3655.488  | AB029033  | 3666.94   | 4039.552  |
| NM_014845 | 1560.353  | 1638.49   | AK097395  | 3874.373  | 4135.738  | AF091034  | 2746.158  | 2439.169  |
| NM_004298 | 2225.334  | 2482.329  | M12783    | 1373.803  | 1301.505  | NM_005301 | 14682.796 | 13680.418 |

|           |           |           |           |           |           |           |           |           |
|-----------|-----------|-----------|-----------|-----------|-----------|-----------|-----------|-----------|
| NM_001232 | 1404.577  | 1336.059  | AK091535  | 1021.029  | 1363.713  | NM_016653 | 2186.76   | 2088.111  |
| NM_007181 | 446.885   | 398.693   | AF085357  | 2808.443  | 3035.429  | AB035124  | 2689.833  | 2954.452  |
| AB007857  | 680.615   | 727.504   | AK092768  | 323.213   | 618.109   | AF060170  | 360.771   | 1046.727  |
| NM_001778 | 701.616   | 524.953   | NM_003841 | 3076.043  | 2271.268  | NM_016602 | 284.985   | 495.05    |
| NM_004997 | 11229.37  | 13745.468 | X01394    | 19396.938 | 16618.434 | NM_004409 | 7174.686  | 6744.081  |
| NM_005923 | 2950.31   | 3393.865  | NM_000041 | 24670.73  | 25952.234 | AK023397  | 1902.436  | 1798.667  |
| NM_003465 | 666.167   | 1012.365  | NM_002984 | 2527.054  | 1929.39   | NM_001725 | 748.746   | 621.832   |
| AF071569  | 2074.759  | 1416.598  | NM_018002 | 2307.802  | 2405.768  | NM_004079 | 12181.233 | 9129.991  |
| NM_002269 | 1743.219  | 1643.818  | AK024821  | 9768.832  | 8727.077  | NM_006875 | 1675.976  | 1529.729  |
| J04948    | 996.723   | 1095.772  | AB002340  | 1428.958  | 1288.081  | D87119    | 1708.477  | 2266.11   |
| NM_018043 | 579.073   | 430.43    | NM_000224 | 1886.229  | 1696.014  | AL050040  | 1179.82   | 2294.288  |
| AK022564  | 65107.855 | 56035.98  | NM_014328 | 3580.682  | 2983.576  | NM_006556 | 7784.738  | 9650.391  |
| NM_001492 | 1611.111  | 1882.221  | NM_006414 | 4108.308  | 4693.93   | AF264717  | 1844.487  | 2160.413  |
| AB012643  | 9768.871  | 9880.806  | NM_014322 | 1398.773  | 2136.813  | NM_012260 | 4421.982  | 5134.016  |
| AB023170  | 1357.731  | 1372.015  | NM_004122 | 2390.615  | 3046.855  | NM_001141 | 568.962   | 462.483   |
| NM_014153 | 12356.962 | 14522.436 | NM_002928 | 13631.714 | 14751.572 | NM_000018 | 7555.118  | 9023.762  |
| NM_002296 | 10811.217 | 10737.021 | NM_000160 | 1918.36   | 1641.683  | AB028992  | 372.627   | 463.131   |
| NM_000414 | 6501.724  | 6523.745  | NM_003301 | 647.272   | 615.262   | NM_018479 | 7345.482  | 9023.908  |
| NM_018845 | 4844.491  | 4561.375  | NM_000955 | 879.68    | 721.866   | NM_014362 | 2887.987  | 2795.643  |
| NM_005505 | 4396.164  | 4847.822  | U27768    | 784.426   | 845.178   | NM_018308 | 1169.357  | 980.745   |
| AK026964  | 388.888   | 631.818   | AF305550  | 1467.43   | 1456.878  | NM_001832 | 7290.53   | 6565.489  |
| NM_001134 | 1826.54   | 1695.085  | U66582    | 11643.56  | 10400.164 | NM_017774 | 9426.636  | 8637.266  |
| NM_016016 | 4254.006  | 5076.793  | S73288    | 360.137   | 470.427   | AB037716  | 3418.175  | 3165.378  |
| NM_020407 | 1068.469  | 1127.522  | NM_006198 | 1751.388  | 1440.414  | NM_016297 | 2816.61   | 2422.869  |
| AF118274  | 3716.993  | 5465.347  | NM_003812 | 632.448   | 637.335   | NM_001752 | 10686.175 | 9046.443  |
| NM_000079 | 5928.691  | 10594.627 | NM_014065 | 1678.59   | 1581.353  | AL137672  | 991.191   | 768.974   |
| NM_004774 | 2752.523  | 2529.601  | NM_001695 | 2085.427  | 2226.888  | X64177    | 6886.38   | 40886.172 |
| NM_005234 | 3305.794  | 3293.682  | NM_002248 | 1705.35   | 2254.301  | NM_015994 | 4146.944  | 3142.881  |
| X74609    | 20576.223 | 20139.813 | NM_012281 | 1517.558  | 1514.008  | NM_018476 | 9962.534  | 10155.224 |
| AB002316  | 574.428   | 664.937   | AK025772  | 1843.173  | 1809.674  | AF220492  | 6457.392  | 5795.3    |
| NM_018990 | 783.999   | 578.134   | NM_005509 | 1207.862  | 1332.84   | X89671    | 1763.48   | 1859.65   |
| NM_013363 | 1016.956  | 964.771   | NM_152747 | 1552.681  | 1628.791  | NM_014941 | 4542.729  | 4926.939  |
| NM_000947 | 2377.496  | 2497.758  | NM_017415 | 943.894   | 1011.175  | NM_018372 | 5930.639  | 5765.6    |
| AL096750  | 33650.941 | 42915.309 | NM_001667 | 15338.597 | 13299.322 | NM_013253 | 1768.459  | 1700.526  |
| NM_016061 | 4497.777  | 4044.543  | AB046834  | 407.783   | 667.304   | NM_005895 | 4694.759  | 4937.568  |
| NM_016062 | 18842.871 | 21045.008 | AB029033  | 5661.884  | 5753.439  | D82345    | 548.559   | 673.132   |
| NM_004153 | 2145.456  | 2479.519  | AF091034  | 2506.017  | 2981.218  | NM_003814 | 966.452   | 915.16    |
| AK024740  | 2079.517  | 2321.251  | NM_005301 | 17280.666 | 16755.123 | NM_002968 | 382.514   | 439.119   |
| AF078164  | 7955.999  | 8076.964  | NM_004167 | 400.194   | 600.773   | NM_000262 | 1989.781  | 1591.806  |
| NM_019049 | 2585.009  | 3852.482  | NM_016653 | 2247.6    | 2157.438  | NM_017831 | 2425.773  | 2069.201  |
| NM_005447 | 338.694   | 484.765   | AB035124  | 3106.307  | 3104.02   | AK022537  | 5367.117  | 4091.112  |
| AF130101  | 686.18    | 859.254   | AF060170  | 823.701   | 769.305   | AF064597  | 902.186   | 1220.718  |
| AF086122  | 1305.919  | 1161.864  | NM_016602 | 531.385   | 727.991   | AF198444  | 684.917   | 380.346   |
| AK024397  | 6412.371  | 5744.072  | NM_004409 | 8055.537  | 6530.504  | NM_006345 | 3115.081  | 2625.156  |
| AF073931  | 667.188   | 652.325   | AK023397  | 1805.642  | 1709.674  | NM_003259 | 18214.061 | 18875.414 |
| NM_018047 | 810.248   | 970.58    | NM_001725 | 813.15    | 886.982   | AL080128  | 3771.516  | 3835.009  |
| NM_005022 | 722.886   | 768.832   | NM_004079 | 11459.796 | 10051.849 | AB037787  | 2328.968  | 1762.797  |
| NM_001288 | 504.248   | 448.168   | NM_006875 | 1850.862  | 2021.534  | AB033072  | 841.692   | 650.178   |
| NM_003564 | 1268.637  | 1651.503  | D87119    | 945.154   | 880.263   | AB040892  | 1468.184  | 1211.506  |
| AF317516  | 2574.167  | 2608.171  | AB037769  | 392.783   | 605.019   | NM_018268 | 15350.899 | 14355.802 |
| NM_002581 | 947.467   | 961.135   | AL050040  | 1257.308  | 1573.365  | AF230904  | 6998.603  | 6719.788  |
| AI417964  | 657.175   | 428.335   | NM_006556 | 9937.482  | 10626.335 | NM_017596 | 1122.465  | 1127.019  |
| J03571    | 12019.305 | 12766.795 | AL133066  | 448.81    | 648.778   | AL157480  | 3890.504  | 3759.44   |

|           |           |           |           |           |           |           |           |           |
|-----------|-----------|-----------|-----------|-----------|-----------|-----------|-----------|-----------|
| T57791    | 2703.113  | 2910.316  | AF264717  | 1851.496  | 1873.953  | NM_014386 | 707.046   | 1023.85   |
| X56134    | 634.354   | 492.382   | NM_012260 | 5193.299  | 5317.979  | NM_018110 | 2537.46   | 2411.654  |
| NM_001456 | 370.902   | 437.668   | NM_001141 | 688.242   | 629.197   | AF312678  | 919.676   | 798.128   |
| AI421041  | 18211.627 | 22390.963 | NM_000018 | 7772.481  | 7876.772  | NM_006253 | 2013.04   | 1406.103  |
| BI759091  | 2020.598  | 2749.827  | AB028992  | 436.872   | 678.943   | NM_003866 | 787.199   | 547.181   |
| AF035771  | 1219.89   | 1242.045  | NM_018479 | 7782.863  | 7053.958  | NM_018262 | 1526.182  | 1570.137  |
| N20475    | 5881.148  | 6048.2    | NM_014362 | 2426.808  | 2405.412  | NM_006207 | 1773.352  | 1367.928  |
| BI199286  | 707.698   | 740.887   | NM_018308 | 1267.187  | 1333.461  | AF009674  | 3939.844  | 3548.441  |
| AA026626  | 1323.775  | 1546.433  | NM_001832 | 6769.154  | 7012.994  | NM_000360 | 1257.85   | 844.036   |
| H61726    | 968.134   | 1254.769  | NM_017774 | 9269.257  | 8950.224  | NM_000844 | 928.385   | 692.708   |
| NM_004997 | 8896.832  | 7931.168  | AB037716  | 3712.719  | 3483.138  | NM_005510 | 4887.351  | 3818.901  |
| NM_005923 | 2044.923  | 1971.122  | NM_016297 | 3036.023  | 2364.57   | Z36817    | 1287.096  | 1071.819  |
| NM_003465 | 764.848   | 696.697   | NM_001752 | 10091.896 | 10400.473 | NM_014505 | 13341.392 | 11440.385 |
| AF289028  | 320.553   | 669.894   | AL137672  | 789.245   | 750.049   | NM_004209 | 7701.512  | 5598.099  |
| NM_005127 | 618.784   | 425.655   | X64177    | 7041.751  | 41616.457 | NM_016162 | 2019.422  | 1690.438  |
| NM_005567 | 3064.085  | 2787.689  | NM_015994 | 3644.211  | 3223.8    | AF130056  | 2257.183  | 1770.637  |
| NM_005216 | 8976.606  | 7687.908  | NM_018476 | 11379.606 | 16197.056 | NM_002201 | 41658.973 | 41613.203 |
| NM_003965 | 411.793   | 484.387   | AF220492  | 5633.88   | 6435.811  | AK025047  | 1808.831  | 1646.69   |
| NM_004584 | 1114.618  | 1204.851  | X89671    | 1366.18   | 2013.95   | NM_006806 | 1659.763  | 1731.264  |
| X15183    | 37981.637 | 42570.246 | NM_014941 | 3922.5    | 5000.605  | NM_006763 | 1059.905  | 687.023   |
| AK023618  | 1636.794  | 1547.896  | NM_018372 | 5449.6    | 6607.844  | NM_006119 | 4326.76   | 3464.102  |
| AF212842  | 704.822   | 1062.146  | NM_013253 | 1388.394  | 1946.529  | NM_004465 | 1151.185  | 953.193   |
| NM_018404 | 2831.66   | 2741.86   | NM_005895 | 6211.746  | 11773.98  | AK026927  | 2234.098  | 1693.654  |
| M27544    | 2477.499  | 2416.079  | NM_003814 | 1122.052  | 1191.434  | NM_014059 | 5382.224  | 5413.103  |
| NM_002258 | 1360.485  | 1214.465  | NM_002968 | 457.673   | 861.691   | NM_001761 | 2347.323  | 2004.306  |
| NM_001118 | 1289.838  | 937.751   | AB032956  | 307.85    | 492.577   | BE884341  | 1805.08   | 2094.72   |
| AL133097  | 6252.18   | 7524.314  | NM_000262 | 1923.262  | 1694.112  | AF231997  | 1130.6    | 2466.353  |
| NM_001165 | 2030.833  | 2877.681  | NM_017831 | 1966.206  | 2128.078  | NM_007125 | 789.931   | 972.323   |
| NM_006458 | 4541.014  | 5465.73   | AK022537  | 6166.451  | 5866.189  | NM_002598 | 7631.1    | 6660.5    |
| NM_014459 | 906.768   | 808.197   | AF064597  | 817.086   | 1325.533  | NM_020184 | 763.465   | 677.017   |
| NM_004093 | 839.567   | 1060.359  | NM_006345 | 1516.451  | 1758.858  | NM_005815 | 1444.831  | 1430.842  |
| NM_001449 | 3743.667  | 3997.509  | AB037787  | 1969.195  | 2162.501  | NM_001229 | 1073.488  | 1114.041  |
| NM_016016 | 3713.552  | 2992.95   | AB033072  | 684.659   | 561.984   | NM_000250 | 1538.632  | 1227.036  |
| NM_020407 | 761.424   | 564.418   | AB040892  | 1283.636  | 1208.308  | NM_018147 | 10845.621 | 7629.478  |
| AF118274  | 2858.54   | 2278.145  | NM_018268 | 14422.42  | 16263.121 | NM_018967 | 2715.397  | 1693.359  |
| NM_018344 | 1053.291  | 1198.28   | AF230904  | 6321.708  | 6721.896  | NM_001850 | 735.946   | 735.374   |
| NM_000079 | 4167.641  | 3944.991  | NM_017596 | 1211.921  | 1373.086  | NM_002160 | 1646.393  | 1439.472  |
| NM_000083 | 743.378   | 701.899   | AL157480  | 4104.856  | 2741.626  | NM_005675 | 1386.795  | 1052.817  |
| AL110245  | 1383.182  | 1297.34   | NM_014386 | 919.496   | 1033.287  | BC030636  | 2627.347  | 2166.782  |
| NM_005628 | 12821.193 | 15108.212 | NM_018110 | 1807.977  | 1857.786  | NM_006587 | 327.627   | 301.637   |
| NM_016605 | 13626.998 | 14786.813 | AF312678  | 749.907   | 659.219   | D21064    | 611.749   | 467.501   |
| NM_004172 | 593.956   | 686.855   | NM_006253 | 1695.467  | 1512.077  | NM_002812 | 2684.226  | 2491.173  |
| S78203    | 912.835   | 916.387   | NM_018262 | 992.612   | 1106.901  | NM_020365 | 2899.13   | 2743.763  |
| NM_016208 | 10098.714 | 9713.313  | AF009674  | 3517.168  | 3317.983  | NM_003982 | 1639.536  | 1719.973  |
| NM_005638 | 13214.623 | 12291.729 | NM_000360 | 774.549   | 909.01    | NM_002079 | 2883.454  | 3042.858  |
| NM_007235 | 16141.311 | 19630.428 | NM_000844 | 656.689   | 898.925   | NM_002112 | 6022.123  | 5492.086  |
| NM_007269 | 4253.192  | 5102.661  | NM_005510 | 5069.205  | 4383.329  | NM_004121 | 1776.334  | 2164.16   |
| NM_014845 | 1437.934  | 2256.87   | Z36817    | 1226.838  | 1387.017  | AY007092  | 1648.087  | 1749.904  |
| NM_004298 | 3231.119  | 3676.033  | NM_014505 | 12145.929 | 10492.318 | NM_001902 | 452.092   | 594.374   |
| NM_001232 | 1639.629  | 1571.634  | NM_004209 | 6104.576  | 5433.535  | AL137605  | 17443.68  | 15483.04  |
| NM_007181 | 637.408   | 601.996   | NM_016162 | 1721.979  | 2327.814  | NM_016261 | 1467.035  | 1422.192  |
| AB007857  | 732.831   | 666.408   | AF130056  | 1741.001  | 1990.267  | NM_006519 | 654.63    | 751.692   |
| NM_001778 | 829.808   | 555.474   | NM_002201 | 39884.168 | 45152.945 | NM_004607 | 64465.457 | 53339.75  |

|           |           |           |           |           |           |           |           |           |
|-----------|-----------|-----------|-----------|-----------|-----------|-----------|-----------|-----------|
| NM_01904  | 1567.807  | 1433.326  | AK025047  | 1090.202  | 1127.279  | NM_01207  | 879.469   | 292.14    |
| AF130101  | 676.786   | 356.765   | NM_00680  | 1749.473  | 1918.901  | NM_00728  | 12693.946 | 8762.14   |
| NM_00465  | 2283.602  | 2005.801  | NM_00676  | 1061.559  | 774.387   | D14678    | 5756.262  | 4350.654  |
| AF071569  | 1716.839  | 899.885   | NM_006119 | 4511.014  | 3695.676  | NM_016221 | 3695.969  | 2684.745  |
| NM_00226  | 2365.705  | 2679.385  | NM_00446  | 1286.27   | 1045.343  | NM_018113 | 895.493   | 646.846   |
| J04948    | 1489.039  | 1378.086  | AK026927  | 2193.508  | 1684.3    | NM_005187 | 1860.059  | 1601.462  |
| NM_01804  | 942.601   | 758.032   | NM_01405  | 8805.144  | 5932.493  | U73377    | 4297.556  | 3404.673  |
| AK022564  | 63933.008 | 57420.781 | NM_001761 | 2249.182  | 1679.474  | NM_00219  | 2122.743  | 1899.974  |
| NM_00149  | 1787.771  | 2056.995  | BE884341  | 1657.587  | 1144.27   | BC005219  | 4863.732  | 4524.997  |
| AB012643  | 10518.438 | 10212.383 | AF231997  | 889.99    | 889.92    | NM_00426  | 1023.14   | 892.588   |
| AB023170  | 1526.416  | 1374.402  | NM_00712  | 804.092   | 729.965   | NM_00154  | 355.181   | 212.361   |
| NM_01415  | 12909.775 | 13466.008 | NM_00259  | 6323.641  | 5266.552  | NM_00666  | 4691.881  | 4070.188  |
| NM_00229  | 13290.089 | 10519.969 | NM_020184 | 689.764   | 669.863   | NM_004031 | 892.392   | 937.936   |
| NM_000414 | 6939.226  | 6135.09   | NM_01491  | 2056.362  | 1872.736  | NM_004514 | 3354.072  | 2825.623  |
| NM_01884  | 4931.64   | 4932.358  | NM_00025  | 1557.564  | 1336.005  | NM_00616  | 1705.173  | 1421.49   |
| NM_00550  | 5146.682  | 4890.414  | NM_018147 | 12093.706 | 9160.759  | NM_00127  | 6600.876  | 3952.818  |
| AK026964  | 495.129   | 820.845   | NM_018967 | 1981.726  | 1791.158  | NM_00619  | 40759.945 | 42618.48  |
| NM_001134 | 1729.62   | 1411.223  | NM_00185  | 808.666   | 783.636   | AV733560  | 996.341   | 984.639   |
| NM_00669  | 1222.875  | 1146.472  | NM_00216  | 1588.022  | 1729.909  | D17129    | 55463.121 | 54350.934 |
| NM_00481  | 540.868   | 638.791   | NM_00567  | 1218.329  | 1137.505  | NM_003091 | 12743.797 | 11729.62  |
| NM_004147 | 623.35    | 542.508   | BC030636  | 1838.321  | 1921.336  | NM_004247 | 3226.04   | 2856.801  |
| AK000959  | 528.112   | 245.712   | NM_00281  | 3158.655  | 2327.494  | NM_01772  | 2979.288  | 2162.978  |
| AB037743  | 1447.76   | 1394.867  | NM_02036  | 3838.501  | 3243.835  | AL137730  | 2179.035  | 1740.652  |
| AB046820  | 1878.03   | 1465.176  | NM_00398  | 1531.947  | 1292.82   | NM_00450  | 21292.896 | 22528.396 |
| AK025922  | 614.193   | 2582.707  | NM_00207  | 2817.921  | 2106.35   | NM_00327  | 5260.924  | 3480.173  |
| NM_00637  | 1000.196  | 1256.781  | NM_00211  | 6311.419  | 3833.499  | AL137681  | 2075.81   | 1379.879  |
| AF123659  | 3888.216  | 4340.666  | NM_004121 | 2102.368  | 1900.809  | AK025694  | 51334.141 | 44943.016 |
| X74609    | 20465.609 | 19513.463 | AY007092  | 1807.537  | 1524.075  | NM_002157 | 58086.363 | 51114.75  |
| AB002316  | 539.549   | 529.981   | NM_00190  | 615.603   | 578.363   | NM_00409  | 17228.926 | 12817.465 |
| NM_01899  | 1658.169  | 1378.378  | AL137605  | 13967.49  | 11377.573 | NM_01436  | 985.431   | 685.374   |
| NM_01336  | 907.379   | 852.364   | NM_016261 | 1461.093  | 1412.24   | NM_005147 | 3354.414  | 2694.848  |
| NM_000947 | 3797.421  | 3543.176  | NM_01207  | 502.066   | 580.72    | NM_01466  | 4602.255  | 3442.665  |
| AL096750  | 36181.637 | 43407.594 | NM_00728  | 10841.431 | 8771.222  | AK023609  | 1549.217  | 1497.655  |
| NM_016061 | 4539.624  | 3915.383  | D14678    | 5575.342  | 4701.273  | NM_01801  | 2054.823  | 2044.255  |
| NM_01606  | 21294.381 | 21617.34  | NM_016221 | 2808.858  | 2370.756  | AK027220  | 1535.636  | 1435.429  |
| NM_00415  | 2666.631  | 2617.919  | NM_018113 | 835.097   | 788.975   | NM_018011 | 3944.719  | 3700.772  |
| AK024740  | 1989.918  | 2311.762  | NM_005187 | 1608.775  | 1593.993  | NM_00047  | 1158.841  | 876.739   |
| AF078164  | 8372.195  | 8664.562  | U73377    | 4647.572  | 5533.035  | AF132733  | 2816.456  | 2819.594  |
| NM_00362  | 1778.352  | 1368.073  | NM_00219  | 2154.806  | 2739.849  | NM_001071 | 7207.617  | 7036.622  |
| NM_00464  | 1562.047  | 1703.49   | BC005219  | 5349.884  | 4919.267  | NM_006187 | 514.852   | 385.788   |
| AF029325  | 1161.643  | 1002.83   | NM_00426  | 1015.877  | 1054.575  | NM_020354 | 2790.317  | 2530.562  |
| NM_005704 | 874.506   | 513.574   | NM_00666  | 3128.101  | 2443.437  | AF202637  | 5705.993  | 5748.832  |
| AF097021  | 689.76    | 717.582   | NM_004031 | 1288.171  | 953.265   | NM_00002  | 23573.186 | 26650.33  |
| NM_00136  | 2477.372  | 2081.722  | NM_004514 | 3091.495  | 2146.183  | AB033016  | 6102.569  | 5463.375  |
| BF308728  | 1618.591  | 1440.491  | NM_00616  | 2098.777  | 1544.783  | D87452    | 1061.44   | 1083.703  |
| NM_01328  | 2339.156  | 2402.347  | NM_00127  | 8210.122  | 3850.613  | AB037864  | 2331.637  | 2047.336  |
| NM_01831  | 21227.559 | 25111.289 | NM_00619  | 48173.059 | 29734.039 | L26494    | 177.94    | 630.07    |
| AF051151  | 981.268   | 1062.099  | AV733560  | 1215.86   | 756.681   | AK024322  | 819.934   | 772.141   |
| AF142421  | 8731.012  | 7997.758  | D17129    | 52791.367 | 47657.141 | BF382513  | 2558.387  | 1996.97   |
| AF257238  | 318.553   | 600.778   | NM_003091 | 9857.466  | 10231.111 | AB020713  | 9850.627  | 8975.816  |
| AB037836  | 7657.26   | 7969.82   | NM_004247 | 3003.695  | 2434.989  | AK025426  | 921.687   | 554.811   |
| NM_014247 | 724.865   | 715.567   | NM_01772  | 2620.459  | 2133.07   | NM_01655  | 5899.357  | 4097.854  |
| NM_01869  | 44064.324 | 38697.578 | AL137730  | 2260.917  | 1715.297  | NM_00714  | 8590.31   | 5964.656  |

|           |           |           |           |           |           |            |           |           |
|-----------|-----------|-----------|-----------|-----------|-----------|------------|-----------|-----------|
| NM_006343 | 927.639   | 695.87    | NM_004500 | 23439.986 | 24926.781 | AL133112   | 765.818   | 503.945   |
| NM_014780 | 1641.624  | 1425.302  | NM_003270 | 5566.043  | 4010.456  | AK002078   | 1599.022  | 1700.484  |
| NM_001423 | 748.724   | 849.573   | AL137681  | 1717.016  | 1532.404  | AF085837   | 2320.224  | 1949.721  |
| NM_015710 | 6291.53   | 6002.512  | AK025694  | 35038.895 | 31621.969 | AK023165   | 900.193   | 784.805   |
| NM_003955 | 600.094   | 613.525   | NM_002157 | 53740.668 | 54369.008 | NM_016115  | 2368.98   | 1605.874  |
| NM_005730 | 502.889   | 489.38    | NM_004095 | 17242.082 | 14185.198 | NM_014950  | 2278.186  | 1859.605  |
| AB023166  | 1476.038  | 1178.706  | NM_014365 | 930.424   | 871.953   | AL080180   | 585.844   | 431.15    |
| AB028966  | 8488.023  | 8792.95   | NM_005147 | 2640.426  | 2311.057  | X89067     | 546.885   | 679.366   |
| NM_005750 | 3781.01   | 3433.662  | NM_014665 | 3905.3    | 3479.959  | AF147376   | 434.07    | 660.011   |
| AF044774  | 1075.556  | 719.083   | AK023609  | 2135.395  | 2892.747  | AK027190   | 595.637   | 920.348   |
| NM_005402 | 3185.764  | 2603.025  | NM_018019 | 2423.318  | 2739.036  | AL360136   | 3272.314  | 2585.982  |
| AF055027  | 1925.884  | 1527.472  | AK027220  | 2052.385  | 2185.777  | AF086259   | 968.07    | 794.201   |
| U63541    | 2280.764  | 1658.478  | NM_018011 | 4147.189  | 4038.03   | AF086328   | 1291.555  | 1149.985  |
| AB033045  | 1876.567  | 1450.859  | NM_000470 | 724.239   | 728.418   | AF086427   | 457.706   | 390.014   |
| AF055006  | 7476.069  | 4399.853  | AF132733  | 2653.916  | 2104.438  | AK024196   | 616.78    | 599.76    |
| NM_004935 | 1945.572  | 1868.433  | NM_001071 | 6538.96   | 6085.717  | AK001099   | 444.068   | 448.891   |
| NM_006951 | 1308.821  | 1262.579  | NM_020354 | 3695.76   | 2673.668  | AK023753   | 1231.437  | 776.847   |
| NM_001890 | 5327.828  | 5005.847  | AF202637  | 6252.39   | 3818.103  | AF086441   | 17450.928 | 13534.533 |
| NM_014023 | 589.185   | 460.103   | NM_000020 | 22323.648 | 18425.25  | AK022487   | 5589.987  | 3596.124  |
| NM_002745 | 8687.529  | 9362.35   | AB033016  | 9823.566  | 6865.099  | NM_014117  | 1613.775  | 1119.498  |
| D26488    | 4214.773  | 3217.799  | D87452    | 1164.882  | 821.337   | AF086087   | 4052.385  | 4462.315  |
| NM_001432 | 860.712   | 963.923   | AB037864  | 2086.004  | 1545.365  | AK000671   | 26356.234 | 24458.723 |
| AB014554  | 1367.93   | 1342.222  | L26494    | 605.81    | 545.857   | AK094020   | 693.223   | 659.313   |
| AF097431  | 6933.949  | 5683.4    | AK024322  | 780.62    | 850.464   | AL137425   | 1562.18   | 1716.109  |
| NM_001970 | 932.909   | 726.05    | BF382513  | 2248.907  | 1774.026  | AL359584   | 881.606   | 775.258   |
| NM_002570 | 1051.721  | 1102.22   | AB020713  | 9014.389  | 9498.431  | AL137285   | 563.263   | 853.953   |
| NM_004221 | 998.388   | 1014.556  | AK025426  | 901.508   | 686.702   | AL137456   | 1007.073  | 1157.546  |
| NM_003010 | 1133.473  | 1060.201  | NM_016550 | 3568.77   | 3916.986  | AL157489   | 719.946   | 439.335   |
| NM_006923 | 2451.529  | 2229.138  | NM_007145 | 8297.658  | 19250.502 | AL390157   | 641.782   | 488.811   |
| AF119889  | 9022.053  | 8153.882  | AL133112  | 952.924   | 1939.265  | AK024874   | 749.721   | 308.404   |
| M90657    | 665.625   | 420.006   | AF085855  | 1594.28   | 3221.464  | AK021847   | 923.715   | 540.391   |
| NM_006690 | 1923.777  | 1693.712  | AF085877  | 1392.322  | 2175.9    | AK023086   | 3478.576  | 2888.469  |
| AK025645  | 2374.172  | 3184.421  | AK002078  | 2078.874  | 1948.366  | AF241534   | 681.99    | 614.663   |
| AK023266  | 556.667   | 675.305   | AF085837  | 1829.609  | 1596.292  | NM_017621  | 4773.354  | 4396.09   |
| NM_006814 | 8345.729  | 9532.901  | AK023165  | 808.469   | 718.563   | AK023574   | 765.315   | 1021.267  |
| NM_005067 | 5358.314  | 5563.933  | NM_016115 | 1871.478  | 1131.497  | AF131767   | 1791.651  | 2088.031  |
| AB007899  | 501.771   | 401.221   | NM_014950 | 2450.688  | 1539.247  | AF211976   | 295.848   | 272.795   |
| NM_002817 | 4337.644  | 4089.711  | AL080180  | 616.837   | 564.817   | AK021907   | 1514.066  | 1822.405  |
| NM_002801 | 12479.995 | 13359.848 | AF147376  | 1135.43   | 774.283   | AK022029   | 914.379   | 1270.479  |
| BE905810  | 949.253   | 1034.926  | AL360136  | 2885.467  | 2118.576  | AK022167   | 1011.924  | 1605.305  |
| NM_014780 | 1322.489  | 1271.604  | AF086259  | 918.224   | 827.143   | AK022320   | 633.592   | 877.415   |
| NM_014730 | 5489.009  | 4190.491  | AF086328  | 971.234   | 856.612   | AK022058   | 1010.217  | 704.298   |
| NM_014167 | 998.507   | 795.877   | AF086427  | 684.993   | 460.863   | AK022196   | 722.252   | 686.625   |
| NM_016063 | 1262.089  | 1264.715  | AK024196  | 616.536   | 618.685   | AK022429   | 221.365   | 305.223   |
| U82987    | 2825.632  | 2503.604  | AK023753  | 1085.575  | 1029.771  | AK025763   | 545.992   | 524.226   |
| NM_005732 | 1630.344  | 1826.514  | AF086441  | 8471.396  | 7943.467  | AK024381   | 975.159   | 855.143   |
| NM_014890 | 687.124   | 539.234   | AK027255  | 603.781   | 549.801   | AK026503   | 1002.872  | 1078.005  |
| AK056481  | 3055.319  | 2951.216  | AK022487  | 4248.183  | 3632.438  | AK026671   | 1273.749  | 1179.962  |
| NM_005433 | 1031.915  | 1000.58   | NM_014117 | 1370.724  | 2197.65   | AK025522   | 9138.021  | 9598.551  |
| AF232000  | 32233.186 | 31541.623 | AF086087  | 5569.001  | 10444.593 | NM_020400  | 1019.2    | 1273.454  |
| NM_018118 | 875.423   | 638.708   | AK000671  | 23513.922 | 16838.057 | NM_004980  | 5496.73   | 6748.763  |
| L35035    | 2262.526  | 2216.567  | AK094020  | 847.2     | 600.261   | unknown (S | 171.202   | 688.437   |
| NM_007152 | 2377.239  | 1961.357  | AL137425  | 1511.673  | 1051.746  | AL080151   | 1573.634  | 1820.555  |

|           |           |           |            |           |           |           |           |           |
|-----------|-----------|-----------|------------|-----------|-----------|-----------|-----------|-----------|
| NM_018293 | 1020.281  | 710.842   | AL137637   | 721.637   | 383.773   | AL050085  | 610.845   | 518.076   |
| NM_002955 | 946.762   | 1845.236  | AL359584   | 796.467   | 636.104   | AK001308  | 409.121   | 312.714   |
| NM_001935 | 4488.282  | 3659.661  | AL137285   | 727.827   | 694.023   | AK024127  | 1082.94   | 843.663   |
| AF230808  | 3346.324  | 2935.389  | AL137456   | 1434.237  | 1181.223  | AK024243  | 883.932   | 880.524   |
| U18910    | 1184.038  | 1051      | AL157489   | 623.508   | 715.131   | AK021574  | 2503.698  | 1958.749  |
| NM_005235 | 4457.194  | 3126.441  | AL390157   | 844.947   | 648.639   | AF119911  | 9446.852  | 9959.042  |
| AK075306  | 5814.737  | 5506.367  | AK024874   | 654.826   | 384.661   | AF116656  | 3670.07   | 3229.72   |
| AB037820  | 766.336   | 752.807   | AK021847   | 719.715   | 555.306   | NM_001050 | 2652.848  | 2372.001  |
| NM_001280 | 5568.699  | 3858.593  | AK023086   | 2189.998  | 2185.314  | AF132206  | 1211.878  | 1569.575  |
| AB019572  | 66803.836 | 56752.699 | AF241534   | 941.535   | 1211.235  | AJ001869  | 3890.566  | 3922.782  |
| NM_002945 | 56661.543 | 52350.313 | NM_017621  | 4966.308  | 4925.045  | AJ002969  | 277.252   | 263.003   |
| AF113008  | 1703.583  | 1440.77   | AK023574   | 1243.302  | 1240.655  | NM_005295 | 1315.446  | 1289.134  |
| NM_020217 | 2340.663  | 1817.021  | AF131767   | 1809.252  | 1295.424  | AF200341  | 649.974   | 715.75    |
| NM_018135 | 61625.797 | 57635.926 | AF147424   | 611.285   | 816.483   | AJ238214  | 1026.382  | 1040.914  |
| AF205435  | 14557.539 | 12684.779 | NM_016637  | 239.931   | 1338.665  | AB040944  | 1975.086  | 1627.128  |
| L05093    | 70948.703 | 62550.297 | AK021907   | 1237.871  | 866.874   | NM_018145 | 2878.476  | 2646.976  |
| AF085983  | 1873.531  | 1287.555  | AK022029   | 513.476   | 557.468   | AK024326  | 1021.782  | 1026.137  |
| AF052105  | 1107.813  | 959.946   | AK022320   | 897.46    | 639.462   | U61088    | 678.982   | 547.336   |
| AK001204  | 5353.91   | 4338.426  | AK022058   | 787.259   | 553.23    | AK024538  | 425.713   | 375.51    |
| M15465    | 3670.183  | 2796.785  | AK022196   | 887.695   | 499.937   | AF086467  | 2021.066  | 1647.859  |
| J03866    | 5046.562  | 3579.585  | NM_018280  | 706.918   | 690.774   | AL137345  | 1626.815  | 922.234   |
| AK022836  | 3030.027  | 2794.894  | AK025763   | 502.47    | 365.896   | AK000967  | 2154.771  | 1751.814  |
| NM_012343 | 12034.021 | 10830.458 | AK026503   | 761.76    | 829.727   | AK021583  | 1385.923  | 1348.534  |
| NM_000397 | 528.61    | 568.072   | AK026671   | 1144.538  | 1133.125  | AL137442  | 3291.536  | 2847.152  |
| NM_002045 | 66921.719 | 58109.07  | AK025522   | 9452.402  | 7702.805  | AL049281  | 1581.131  | 1858.53   |
| AL157461  | 1105.247  | 1202.6    | AK025464   | 41871.551 | 37291.539 | NM_001205 | 26057.105 | 32298.932 |
| NM_003075 | 1987.108  | 1921.49   | AL049962   | 2062.549  | 1668.12   | AL050061  | 1282.176  | 1347.945  |
| AL137703  | 847.148   | 699.579   | NM_020405  | 1099.469  | 815.488   | AL050206  | 1341.569  | 1267.192  |
| NM_001805 | 3827.052  | 3117.838  | NM_004985  | 5787.716  | 3644.172  | AK026898  | 5847.024  | 4981.741  |
| AL117477  | 1671.673  | 1689.505  | unknown (S | 1379.775  | 2283.86   | NM_006637 | 902.735   | 829.499   |
| NM_012107 | 3622.286  | 3354.569  | AL080151   | 2332.394  | 4491.993  | AK022419  | 441.448   | 424.084   |
| AB037760  | 2540.638  | 2264.75   | AK024127   | 676.649   | 744.47    | AJ251832  | 608.478   | 760.314   |
| NM_015680 | 2894.42   | 2977.06   | AK024243   | 657.03    | 646.518   | NM_014624 | 34365.477 | 39074.664 |
| M22637    | 6409.122  | 7384.223  | AK021574   | 1601.755  | 1349.495  | NM_013935 | 716.566   | 871.178   |
| AB037770  | 530.089   | 435.834   | AF119911   | 10906.45  | 8145.981  | AF086145  | 1196.047  | 1003.924  |
| NM_018364 | 6724.125  | 5438.38   | AF116656   | 4557.902  | 3112.547  | BC002538  | 4310.498  | 3343.916  |
| NM_007022 | 2283.096  | 1757.488  | NM_001050  | 3282.766  | 1855.012  | NM_017835 | 3219.605  | 3458.112  |
| AL049943  | 13660.853 | 11415.998 | AF132206   | 1598.35   | 846.446   | AK096584  | 17550.043 | 20256.875 |
| AL137303  | 2961.78   | 4282.522  | AJ001869   | 3717.523  | 2088.445  | Z29070    | 714.391   | 664.018   |
| AL355708  | 439.807   | 1114.058  | NM_005295  | 1225.532  | 824.98    | AL078636  | 990.829   | 945.101   |
| AL161980  | 989.55    | 803.923   | NM_020213  | 2722.723  | 1645.303  | AK022382  | 325.76    | 467.061   |
| AB002449  | 1975.387  | 1806.98   | D17267     | 8319.812  | 5308.71   | S72917    | 735.647   | 565.891   |
| NM_016480 | 14252.848 | 12231.416 | AJ238214   | 732.316   | 440.648   | AF076617  | 67252.656 | 50874.387 |
| AK001489  | 2340.9    | 1891.111  | AB040944   | 1980.675  | 1330.206  | M91159    | 222.98    | 196.576   |
| NM_015681 | 3063.376  | 2762.947  | NM_018145  | 2669.177  | 1669.286  | AK025129  | 353.544   | 298.481   |
| AF070582  | 2112.81   | 1976.449  | AK024326   | 671.06    | 574.138   | NM_014392 | 3395.503  | 3286.461  |
| NM_006383 | 5180.302  | 5353.342  | U61088     | 507.944   | 675.423   | AK023291  | 7738.002  | 9032.815  |
| NM_015400 | 9215.666  | 8663.709  | AF086467   | 1652.581  | 1253.303  | CY3Cy5    | 13722.218 | 887.679   |
| AL359561  | 603.563   | 472.736   | AL137345   | 932.739   | 1063.775  | X07696    | 1879.489  | 2600.043  |
| AK026464  | 1803.863  | 1307.744  | AK000967   | 1275.616  | 1179.932  | AA481015  | 453.395   | 884.238   |
| AK001362  | 814.115   | 684.752   | AK021583   | 1614.872  | 1339.586  | AI925826  | 5565.486  | 8021.131  |
| AK023491  | 388.966   | 494.133   | AL137442   | 2500.4    | 2708.831  | U04209    | 4253.924  | 4631.414  |
| AK022400  | 1240.858  | 1229.187  | AL049281   | 1010.82   | 1006.674  | AI393201  | 4924.204  | 6988.937  |

|           |           |           |           |           |           |           |           |           |
|-----------|-----------|-----------|-----------|-----------|-----------|-----------|-----------|-----------|
| AF052100  | 1508.431  | 1443.704  | NM_001208 | 25204.238 | 27962.309 | M34664    | 65586.82  | 63659.105 |
| AL110235  | 3160.914  | 2648.155  | AL050061  | 1024.334  | 802.53    | Z15108    | 845.572   | 1292.426  |
| U79245    | 778.091   | 686.365   | AL050206  | 1025.054  | 680.234   | M55284    | 449.336   | 846.329   |
| AF086124  | 536.746   | 499.978   | AK026898  | 6041.069  | 2659.127  | AA679391  | 877.946   | 1430.224  |
| AK024820  | 398.532   | 553.8     | NM_006637 | 1297.016  | 496.554   | BG682146  | 3272.057  | 3996.828  |
| AF052117  | 213.235   | 540.327   | AJ251832  | 374.711   | 170.902   | AA884709  | 493.288   | 803.133   |
| AB033105  | 1123.326  | 1032.312  | NM_014624 | 34929.309 | 11229.352 | NM_00506C | 1891.493  | 2207.838  |
| AJ001865  | 855.084   | 760.949   | NM_013936 | 823.594   | 377.232   | CY3Cy5    | 7337.505  | 171.672   |
| X64982    | 475.978   | 358.33    | AF086145  | 1217.097  | 540.245   | NM_003974 | 1407.716  | 3313.064  |
| D61704    | 9817.843  | 8862.429  | BC002538  | 3874.571  | 2236.888  | NM_006065 | 2214.396  | 3868.756  |
| AJ227889  | 1761.359  | 1561.591  | AK022355  | 545.874   | 369.669   | NM_014335 | 27912.449 | 43346.254 |
| Y12017    | 686.957   | 513.648   | NM_017836 | 2571.428  | 1428.248  | NM_002288 | 2247.18   | 2707.516  |
| X64989    | 614.981   | 628.438   | AK096584  | 14347.546 | 8985.201  | NM_004416 | 513.094   | 819.539   |
| L34409    | 17216.465 | 13464.254 | AL078636  | 1015.849  | 653.096   | NM_000628 | 8193.881  | 10230.853 |
| U12210    | 4060.337  | 3333.413  | S72917    | 784.615   | 570.047   | AB005216  | 905.638   | 1039.397  |
| Z83936    | 496.497   | 514.781   | AF076617  | 60995.113 | 56870.84  | AF015041  | 1167.359  | 1631.212  |
| L08440    | 6527.972  | 6044.209  | M91159    | 664.915   | 694.687   | NM_002363 | 614.542   | 958.969   |
| M73799    | 2329.286  | 2104.136  | NM_014392 | 3140.524  | 3078.699  | AK000184  | 1001.371  | 1302.736  |
| AF086119  | 1232.655  | 1156.105  | AK023291  | 5709.054  | 4310.205  | AF055020  | 3498.438  | 4765.174  |
| NM_003782 | 946.033   | 776.169   | X07696    | 2001.923  | 2046.852  | NM_006986 | 723.398   | 1507.288  |
| AL353947  | 478.38    | 501.407   | AI925826  | 2389.256  | 2528.757  | AF272043  | 3961.083  | 4322.92   |
| AL442096  | 1334.66   | 1279.779  | U04209    | 1529.753  | 871.853   | NM_002587 | 8193.207  | 10197.511 |
| AL133658  | 126.962   | 822.091   | AI393201  | 1893.556  | 2140.045  | NM_002238 | 1095.957  | 1322.671  |
| NM_018228 | 755.46    | 808.941   | M34664    | 52784.344 | 60510.883 | NM_004868 | 2106.973  | 1933.529  |
| AJ270693  | 634.489   | 691.196   | Z15108    | 501.464   | 623.666   | NM_007028 | 6566.419  | 5017.816  |
| NM_01779C | 1586.639  | 1237.776  | AA679391  | 765.495   | 812.12    | AF130728  | 1178.595  | 939.931   |
| AK000861  | 797.383   | 764.292   | BG682146  | 2351.805  | 2443.715  | NM_001288 | 19641.535 | 15508.51  |
| AK000023  | 1041.755  | 763.046   | NM_00506C | 1597.192  | 1777.829  | NM_001131 | 28072.871 | 21582.668 |
| AK000901  | 689.318   | 514.572   | NM_005437 | 6793.969  | 10378.852 | NM_002414 | 10046.61  | 11448.832 |
| AK024351  | 1318.631  | 999.675   | CY3Cy5    | 3311.849  | 192.108   | NM_000355 | 1020.942  | 1278.252  |
| AK025002  | 3512.186  | 3355.153  | NM_006065 | 1337.35   | 1733.315  | AL133580  | 2257.841  | 3109.412  |
| AK024011  | 654.242   | 555.894   | NM_014339 | 25127.814 | 32157.143 | NM_014666 | 11715.687 | 19453.953 |
| AF119913  | 1014.143  | 667.404   | NM_001495 | 358.073   | 691.103   | NM_005451 | 2194.924  | 3722.036  |
| L10148    | 4151.955  | 3755.357  | NM_002288 | 1157.196  | 1029.691  | NM_007172 | 2101.507  | 3132.091  |
| AK026247  | 1466.898  | 1451.824  | NM_000628 | 3732.42   | 4682.271  | NM_006152 | 2200.055  | 3423.881  |
| AK024893  | 624.534   | 420.871   | NM_000325 | 2811.299  | 3316.216  | NM_013333 | 16468.428 | 18317.434 |
| AK023302  | 270.119   | 405.727   | AF015041  | 798.676   | 826.574   | NM_002333 | 3190.565  | 4580.865  |
| AL110175  | 1255.21   | 1286.47   | AK000184  | 677.714   | 775.465   | NM_006705 | 2336.644  | 2834.801  |
| AF288406  | 665.762   | 563.149   | AF055020  | 2722.61   | 2722.919  | NM_014435 | 507.373   | 1000.439  |
| AK027156  | 11846.153 | 9945.207  | NM_006986 | 601.631   | 592.468   | NM_005582 | 710.942   | 1272.364  |
| AL157504  | 3063.412  | 2848.069  | AF272043  | 2961.045  | 2946.307  | NM_012266 | 3352.593  | 3771.12   |
| AK023328  | 6683.39   | 5821.728  | NM_002587 | 4583.697  | 4836.01   | NM_004555 | 2221.929  | 2398.413  |
| AJ012499  | 71201.602 | 62847.891 | NM_002238 | 1027.781  | 1195.273  | X56692    | 4185.107  | 4598.074  |
| AK024900  | 2413.813  | 1817.591  | NM_004868 | 1928.24   | 2885.926  | NM_014278 | 1701.061  | 1318.22   |
| AF119879  | 32969.191 | 26332.752 | NM_004669 | 2109.769  | 2535.281  | NM_005838 | 290.309   | 572.744   |
| AF086244  | 2622.387  | 2213.144  | AF130728  | 663.088   | 948.532   | NM_000734 | 1517.494  | 1291.638  |
| AL161992  | 6173.865  | 5790.205  | NM_001289 | 13612.093 | 16207.083 | NM_012331 | 3835.586  | 2703.658  |
| AK023551  | 822.927   | 631.856   | NM_001131 | 15162.809 | 19142.172 | NM_006644 | 3665.842  | 2436.559  |
| AK023910  | 2482.343  | 2061.929  | AL133580  | 1759.396  | 2444.855  | NM_006583 | 69017.438 | 1221.626  |
| D16991    | 3719.944  | 3447.702  | NM_014666 | 8523.784  | 9845.607  | X82693    | 6126.836  | 8111.486  |
| AK023538  | 1441.823  | 1609.68   | NM_005451 | 1881.676  | 2256.471  | NM_007176 | 10014.152 | 13338.502 |
| AB007866  | 1744.517  | 1816.857  | NM_007172 | 1055.886  | 1166.496  | NM_002722 | 906.48    | 1363.212  |
| AF075086  | 23844.145 | 22934.35  | NM_006152 | 1518.815  | 1605.434  | M22538    | 14580.227 | 17518.629 |



|           |           |           |           |           |           |           |           |           |
|-----------|-----------|-----------|-----------|-----------|-----------|-----------|-----------|-----------|
| X77485    | 16111.227 | 12006.713 | NM_013333 | 9130.774  | 8078.957  | NM_00602E | 865.113   | 818.022   |
| NM_01449E | 868.498   | 716.828   | NM_002333 | 1645.597  | 1461.042  | NM_014904 | 645.739   | 992.199   |
| AK021555  | 789.863   | 799.841   | NM_003400 | 3099.457  | 2855.198  | AL137576  | 9282.831  | 9829.927  |
| AB046765  | 2421.552  | 1973.558  | NM_006705 | 2201.754  | 1969.995  | NM_01835E | 3120.363  | 4261.456  |
| AF133333  | 4031.21   | 3391.924  | NM_014439 | 734.26    | 596.615   | AF131781  | 3031.86   | 3086.134  |
| NM_01836E | 1628.683  | 1342.423  | NM_005582 | 589.93    | 700.658   | NM_00651E | 16727.348 | 14134.541 |
| NM_004881 | 12900.349 | 9716.546  | NM_01226E | 3021.665  | 2844.67   | NM_01586E | 974.522   | 737.917   |
| U94903    | 1030.056  | 905.132   | NM_004559 | 2040.271  | 1997.604  | NM_00305E | 8953.616  | 6833.385  |
| NM_00515E | 13539.832 | 8454.689  | X56692    | 3410.418  | 3958.719  | NM_00507E | 867.283   | 693.701   |
| NM_01909E | 8635.508  | 6559.319  | NM_01447E | 858.338   | 1343.143  | NM_006841 | 532.822   | 611.103   |
| AB020684  | 8599.021  | 7885.959  | NM_01427E | 1130.764  | 1379.849  | NM_014824 | 2308.204  | 3181.94   |
| AF077036  | 60158.125 | 52787.973 | NM_00583E | 149.305   | 753.706   | NM_014504 | 2094.722  | 2631.283  |
| NM_020421 | 1475.384  | 1116.005  | NM_000734 | 1093.788  | 1077.131  | NM_01440E | 5667.537  | 8075.512  |
| D17094    | 2476.83   | 2153.901  | NM_012331 | 2829.377  | 2639.175  | NM_014741 | 2649.098  | 4643.193  |
| L37690    | 18926.979 | 17909.262 | NM_006644 | 2533.173  | 3070.04   | AF212247  | 5321.349  | 7366.428  |
| D61707    | 1309.002  | 1220.426  | NM_006583 | 66713.586 | 1764.524  | AF161407  | 12291.264 | 13696.329 |
| AK021610  | 1954.838  | 1623.748  | NM_00717E | 9525.032  | 12023.594 | NM_01473E | 2525.91   | 3228.804  |
| Z36835    | 4671.883  | 3941.358  | NM_002722 | 947.778   | 1152.221  | NM_01640E | 2391.81   | 2582.417  |
| L37703    | 21955.465 | 19798.371 | M22538    | 11867.457 | 12626.182 | NM_01808C | 6548.479  | 7010.619  |
| AK023767  | 8364.862  | 6788.434  | NM_00602E | 422.868   | 537.768   | AF174605  | 599.331   | 849.535   |
| AF084516  | 853.555   | 1226.57   | NM_014904 | 911.945   | 779.337   | AL050107  | 256.831   | 758.266   |
| AL137554  | 872.992   | 843.526   | AL137576  | 7983.477  | 8217.496  | NM_014453 | 11574.852 | 14818.331 |
| AJ001907  | 2008.267  | 1700.522  | NM_01835E | 3535.393  | 3668.173  | NM_005713 | 1272.467  | 1600.279  |
| M32220    | 6861.999  | 6780.765  | NM_01335E | 467.704   | 570.59    | AK023553  | 1406.345  | 1440.526  |
| D17188    | 10601.21  | 8989.172  | AF131781  | 2610.89   | 2895.971  | NM_01460C | 883.167   | 761.944   |
| AJ001432  | 17741.918 | 16568.854 | NM_00651E | 11963.611 | 14962.82  | NM_016733 | 1437.266  | 1258.143  |
| NM_02043E | 13879.028 | 15535.859 | NM_00305E | 3702.18   | 4192.133  | AF181994  | 3504.789  | 3078.798  |
| AF052169  | 1934.373  | 1816.514  | NM_00507E | 592.386   | 812.517   | NM_018962 | 2024.984  | 1740.452  |
| CY3Cy5    | 2072.703  | 117.461   | NM_014504 | 1178.772  | 1098.027  | AF125100  | 3985.462  | 3034.097  |
| BF942101  | 2833.516  | 3632.682  | NM_01440E | 2452.537  | 2656.529  | NM_006114 | 13858.539 | 9825.318  |
| BI825012  | 14480.987 | 13848.258 | NM_014741 | 785.687   | 1119.987  | AF130728  | 941.407   | 2054.487  |
| BM051302  | 807.295   | 829.421   | AF212247  | 1782.362  | 1948.332  | NM_00128E | 12614.171 | 15726.836 |
| BE314182  | 11386.079 | 9494.217  | AF161407  | 10697.071 | 11393.18  | NM_001131 | 16580.195 | 21461.828 |
| AI808029  | 801.268   | 790.221   | NM_01473E | 2234.708  | 2200.765  | X07696    | 2459.795  | 3684.792  |
| AI971217  | 906.547   | 738.301   | NM_01640E | 2041.322  | 2405.277  | AA481015  | 684.287   | 719.552   |
| X03225    | 3955.526  | 4044.394  | NM_01808C | 4504.913  | 4840.729  | AI925826  | 5470.54   | 6183.621  |
| AK097395  | 7871.874  | 7685.04   | AF174605  | 743.064   | 544.163   | U04209    | 3410.294  | 3159.117  |
| M12783    | 1356.977  | 1835.685  | NM_014453 | 9613.577  | 10865.177 | Z15108    | 1209.011  | 1369.807  |
| AK091535  | 1905.439  | 2163.665  | NM_005713 | 1238      | 1326.927  | AA001218  | 198.627   | 1101.535  |
| AF085357  | 3527.744  | 4335.036  | AK021951  | 574.567   | 1492.36   | AA679391  | 803.682   | 1153.744  |
| NM_003841 | 8183.844  | 9512.354  | AK023553  | 1002.085  | 1396.379  | BG682146  | 3193.596  | 3157.675  |
| AF296673  | 846.06    | 1098.681  | NM_01460C | 640.194   | 670.977   | NM_00506C | 2206.022  | 1600.045  |
| NM_080824 | 641.136   | 972.756   | NM_016733 | 1089.245  | 1073.306  | NM_005437 | 8020.324  | 6668.317  |
| SR8       | 10318.64  | 33286.434 | AF181994  | 2616.381  | 2480.045  | AK022417  | 3205.915  | 2082.604  |
| SR10      | 35620.207 | 16077.115 | NM_018962 | 1055.594  | 1124.22   | U50534    | 1407.471  | 1009.171  |
| CY3Cy5    | 4919.786  | 670.438   | AF125100  | 2116.414  | 2524.515  | NM_01427E | 1554.628  | 1952.57   |
| NM_014322 | 1398.953  | 1541.969  | NM_006114 | 9417.608  | 9279.752  | NM_00583E | 188.853   | 922.681   |
| NM_004122 | 3166.765  | 3050.295  | NM_00128E | 12622.631 | 16379.601 | NM_000734 | 1083.035  | 1298.602  |
| NM_00292E | 13003.839 | 12235.854 | NM_001131 | 15537.94  | 19669.486 | NM_012331 | 2437.451  | 3417.341  |
| NM_00016C | 1641.492  | 1681.12   | X07696    | 1511.893  | 1571.781  | NM_006644 | 2950.598  | 4134.071  |
| NM_003301 | 830.058   | 675.087   | AI925826  | 4225.16   | 3873.108  | NM_006583 | 1808.113  | 1138.993  |
| NM_00095E | 1073.288  | 890.506   | U04209    | 3162.174  | 2463.875  | NM_003974 | 1336.25   | 1352.357  |
| U27768    | 994.486   | 1018.862  | AI393201  | 4004.038  | 4235.737  | NM_00606E | 2672.723  | 2541.052  |

|           |           |           |           |           |           |           |           |           |
|-----------|-----------|-----------|-----------|-----------|-----------|-----------|-----------|-----------|
| AF305550  | 1935.773  | 2130.492  | M34664    | 53073.188 | 60453.203 | NM_01433E | 34564.719 | 42637.145 |
| U66582    | 11282.483 | 12279.196 | Z15108    | 628.261   | 713.181   | NM_00149E | 726.861   | 739.465   |
| S73288    | 599.736   | 653.249   | AA679391  | 1141.794  | 1726.337  | NM_00228E | 3088.292  | 2813.428  |
| NM_00619E | 2065.582  | 2569.652  | BG682146  | 2163.245  | 2779.895  | NM_00441E | 9352.399  | 11078.313 |
| NM_00381E | 891.08    | 1366.628  | NM_00506C | 1523.055  | 1475.865  | NM_00062E | 9722.015  | 11564.495 |
| NM_00084E | 5704.594  | 6195.472  | NM_005437 | 7201.317  | 7934.904  | NM_00032E | 7434.774  | 7620.852  |
| NM_00467E | 1273.842  | 1809.445  | AK022417  | 2128.192  | 2234.534  | AF015041  | 1056.628  | 1593.516  |
| NM_00095C | 21768.906 | 33933.367 | U50534    | 902.734   | 1299.089  | NM_00236E | 426.838   | 1352.547  |
| NM_00513E | 6341.638  | 7736.219  | NM_012331 | 2069.231  | 2949.503  | AK000184  | 1059.249  | 1215.356  |
| L10139    | 989.158   | 1001.023  | NM_006644 | 2112.394  | 2388.162  | AF055020  | 3104.908  | 3287.847  |
| NM_02047C | 4299.862  | 4815.294  | NM_00658E | 66837.016 | 1728.787  | NM_00698E | 1013.038  | 803.077   |
| NM_006574 | 552.515   | 572.738   | NM_003974 | 870.785   | 1068.131  | AF272043  | 4217.25   | 3032.976  |
| AA478950  | 2032.73   | 2029.003  | NM_00606E | 591.461   | 688.312   | NM_002587 | 8277.015  | 6023.349  |
| AB029033  | 8245.367  | 9091.549  | NM_01433E | 22852.516 | 22586.535 | NM_00223E | 1158.957  | 794.556   |
| AF091034  | 2726.024  | 2721.142  | NM_00228E | 2139.074  | 1861.913  | NM_00486E | 2468.101  | 1812.259  |
| NM_005301 | 21013.98  | 22767.385 | NM_00441E | 5848.676  | 7540.378  | NM_00466E | 3006.087  | 1746.824  |
| NM_01665E | 2124.52   | 2048.047  | NM_00062E | 7715.14   | 7574.728  | NM_00702E | 8312.438  | 5178.472  |
| AB035124  | 3045.071  | 2893.5    | AB005216  | 639.043   | 681.548   | AF131781  | 1247.145  | 1943.813  |
| AF060170  | 679.791   | 585.954   | NM_00032E | 5330.793  | 5914.425  | NM_00651E | 12731.371 | 17857.973 |
| NM_01660E | 552.459   | 714.278   | AF015041  | 823.633   | 794.084   | NM_00305E | 6417.299  | 7881.171  |
| NM_00440E | 8234.715  | 7331.936  | AK000184  | 578.209   | 774.664   | NM_00507E | 710.671   | 795.196   |
| AK023397  | 2480.852  | 2422.93   | AF055020  | 3015.981  | 3442.332  | NM_006841 | 530.555   | 654.219   |
| NM_00172E | 1374      | 1784.948  | NM_00698E | 691.989   | 824.396   | NM_002414 | 10919.628 | 12258.339 |
| NM_00407E | 13065.39  | 13702.283 | AF272043  | 2836.663  | 2682.726  | NM_00035E | 975.002   | 1016.575  |
| NM_00299E | 627.633   | 949.365   | NM_002587 | 4394.086  | 5069.755  | AL133580  | 2875.743  | 3151.5    |
| NM_00038E | 602.344   | 732.04    | NM_00223E | 1002.583  | 945.253   | NM_01466E | 12995.813 | 13503.758 |
| NM_00463E | 649.768   | 899.249   | NM_00486E | 1439.864  | 1704.785  | NM_005451 | 2951.131  | 3509.463  |
| X01394    | 36474.102 | 46395.98  | NM_00466E | 2155.962  | 2012.034  | NM_00717E | 2814.88   | 2647.406  |
| NM_000041 | 43670.02  | 51995.992 | NM_00702E | 5867.642  | 6389.722  | NM_00615E | 3149.177  | 3466.935  |
| NM_002984 | 3592.178  | 4001.212  | AF131781  | 2569.045  | 3989.155  | NM_01333E | 24193.072 | 22069.65  |
| AB037752  | 7165.247  | 7366.165  | NM_00305E | 3656.83   | 5379.771  | NM_00233E | 3449.5    | 4041.479  |
| AK024821  | 10836.67  | 10314.712 | NM_00507E | 687.172   | 970.83    | NM_00340C | 12589.752 | 15794.283 |
| NM_000224 | 2687.082  | 3160.115  | NM_002414 | 9581.473  | 8518.922  | NM_00670E | 2778.97   | 2607.589  |
| NM_01432E | 3999.371  | 4397.57   | AL133580  | 1463.59   | 1595.035  | NM_01443E | 756.662   | 891.358   |
| NM_006414 | 5315.892  | 5006.864  | NM_01466E | 5526.926  | 4973.641  | NM_00558E | 1233.872  | 930.242   |
| NM_01847E | 8313.704  | 8095.478  | NM_005451 | 2640.939  | 3579.819  | NM_01226E | 3382.098  | 2421.219  |
| NM_01436E | 2854.721  | 3495.84   | NM_00717E | 1969.42   | 2380.454  | NM_00455E | 2066.896  | 1495.476  |
| NM_01830E | 3411.877  | 6273.193  | NM_00615E | 2646.827  | 2798.375  | X56692    | 4502.83   | 3711.099  |
| NM_00183E | 12176.723 | 14767.724 | NM_01333E | 19708.068 | 19600.02  | NM_01460C | 596.239   | 951.22    |
| NM_017774 | 8762.452  | 8510.818  | NM_00233E | 2613.465  | 2326.54   | NM_01673E | 1027.273  | 1295.058  |
| AB037716  | 3543.3    | 3289.427  | NM_00340C | 5334.516  | 5339.314  | AF181994  | 2635.879  | 3222.854  |
| NM_016297 | 3292.413  | 2751.522  | NM_00670E | 1515.954  | 1603.433  | NM_01896E | 1428.496  | 1513.015  |
| NM_00175E | 9196.836  | 8921.136  | NM_01443E | 549.713   | 557.729   | AF125100  | 3125.137  | 3442.014  |
| AL137672  | 1002.869  | 1295.483  | NM_00558E | 661.686   | 694.58    | NM_006114 | 11133.965 | 12512.156 |
| X64177    | 7685.735  | 47234.684 | NM_01226E | 2644.511  | 2632.833  | X82693    | 6580.851  | 8154.078  |
| NM_015994 | 4499.225  | 6445.269  | NM_00455E | 1757.843  | 1769.018  | NM_00717E | 11846.514 | 12285.714 |
| NM_00223E | 636.597   | 637.577   | X56692    | 3194.583  | 3676.751  | NM_00272E | 1282.954  | 1398.095  |
| NM_002241 | 488.467   | 716.502   | NM_01447E | 560.486   | 604.402   | M22538    | 16635.412 | 13592.232 |
| NM_01406E | 2088.762  | 2379.046  | NM_01460C | 532.436   | 1009.326  | NM_00602E | 845.08    | 635.69    |
| NM_00169E | 2877.208  | 2627.602  | NM_01896E | 1061.642  | 1358.864  | NM_014904 | 1107.726  | 735.548   |
| NM_00224E | 2581.177  | 3290.046  | AF125100  | 2046.207  | 2426.613  | AL137576  | 10954.136 | 7214.521  |
| NM_012281 | 2449.593  | 2419.143  | NM_006114 | 7347.324  | 8209.069  | NM_01835E | 3776.647  | 3016.395  |
| AK025772  | 2039.744  | 1740.58   | X82693    | 4048.525  | 4225.36   | NM_00506C | 1353.979  | 1816.058  |

|           |           |           |           |           |           |           |           |           |
|-----------|-----------|-----------|-----------|-----------|-----------|-----------|-----------|-----------|
| NM_005509 | 1446.134  | 1239.298  | NM_007176 | 7547.157  | 6445.393  | NM_005437 | 7235.902  | 8206.101  |
| NM_152747 | 1699.54   | 1849.495  | NM_002722 | 967.647   | 933.304   | AK022417  | 2935.696  | 3125.03   |
| NM_017415 | 1206.057  | 1516.884  | M22538    | 12379.484 | 14059.631 | U50534    | 1278.055  | 1466.498  |
| NM_001667 | 23456.357 | 36691.008 | NM_006028 | 705.615   | 687.563   | NM_014824 | 2130.358  | 2176.665  |
| AB046834  | 664.605   | 699.273   | NM_014904 | 585.691   | 764.954   | NM_014504 | 2593.799  | 2562.726  |
| NM_000262 | 3248.978  | 3173.751  | AL137576  | 8306.096  | 7236.43   | NM_014408 | 7201.195  | 7772.831  |
| NM_017831 | 2493.286  | 1975.021  | NM_018358 | 3109.563  | 2974.871  | NM_014741 | 2583.384  | 2711.666  |
| AK022537  | 5885.964  | 5329.073  | NM_016321 | 435.516   | 623.649   | AF212247  | 6151.431  | 6418.973  |
| AF064597  | 1075.85   | 1401.509  | NM_013356 | 423.189   | 798.817   | AF161407  | 15971.982 | 13968.166 |
| NM_006345 | 2931.659  | 3723.912  | NM_005060 | 1646.844  | 2500.88   | NM_014738 | 3598.615  | 2783.221  |
| NM_006875 | 2333.509  | 2286.769  | AK022417  | 1969.76   | 2189.923  | NM_016406 | 3045.177  | 2607.264  |
| D87119    | 3799.3    | 5601.432  | U50534    | 755.224   | 907.971   | NM_018080 | 7039      | 5114.843  |
| AB037769  | 579.195   | 571.024   | NM_014504 | 1715.874  | 1558.989  | AF174605  | 854.627   | 383.361   |
| AL050040  | 873.13    | 887.408   | NM_014408 | 5488.715  | 5954.528  | NM_014453 | 13132.567 | 9416.246  |
| NM_006556 | 9912.28   | 8787.704  | NM_014741 | 2220.888  | 2181.531  | NM_005713 | 2005.385  | 1088.369  |
| AL133066  | 560.271   | 600.696   | AF212247  | 3778.831  | 3775.632  | AK023553  | 1615.557  | 1034.767  |
| AF264717  | 2056.365  | 1821.283  | AF161407  | 11473.393 | 10062.857 | AF272043  | 3129.147  | 3897.116  |
| NM_012260 | 7915.988  | 7941.631  | NM_014738 | 2268.331  | 2531.738  | NM_002587 | 5907.23   | 7051.846  |
| NM_001141 | 796.638   | 1040.559  | NM_016406 | 2312.465  | 2223.522  | NM_002238 | 859.475   | 1211.686  |
| NM_000018 | 8163.566  | 10884.658 | NM_018080 | 4563.354  | 4334.78   | NM_004868 | 1420.066  | 2106.399  |
| AB028992  | 724.697   | 1220.511  | AF174605  | 452.122   | 631.067   | NM_004668 | 2143.349  | 2040.125  |
| L10139    | 641.09    | 847.15    | NM_014453 | 9508.624  | 8928.27   | NM_007028 | 5527.18   | 5556.872  |
| NM_020470 | 4533.053  | 5413.794  | NM_005713 | 1344.609  | 1300.928  | AF130728  | 907.603   | 1150.74   |
| NM_006574 | 1034.452  | 1156.895  | AK021951  | 592.374   | 689.073   | NM_001288 | 12814.727 | 13094.994 |
| AA478950  | 1636.172  | 1414.371  | AK023553  | 969.56    | 1255.408  | NM_001131 | 14490.168 | 14877.129 |
| BF942101  | 3292.739  | 2583.754  | AF272043  | 2612.995  | 3389.361  | X07696    | 2614.056  | 3115.139  |
| BI825012  | 16392.961 | 12565.284 | NM_002587 | 5097.567  | 6724.64   | AA481015  | 747.198   | 819.698   |
| M21574    | 539.802   | 493.186   | NM_002238 | 916.55    | 1327.626  | AI925826  | 5028.98   | 4829.77   |
| BM051302  | 728.124   | 1033.591  | NM_004868 | 1405.804  | 1777.506  | U04209    | 4421.868  | 3135.975  |
| BE314182  | 12539.659 | 11531.522 | NM_004668 | 1931.115  | 1756.934  | AI393201  | 5376.225  | 4491.938  |
| AI808029  | 1137.104  | 1137.503  | NM_007028 | 4739.016  | 4306.034  | M34664    | 66207.016 | 56579.68  |
| AI971217  | 859.519   | 929.458   | NM_001288 | 11855.919 | 10779.363 | Z15108    | 1148.316  | 883.676   |
| X03225    | 4553.471  | 4975.665  | NM_001131 | 14851.611 | 13584.733 | M55284    | 925.099   | 249.625   |
| AK097395  | 8223.547  | 8568.791  | X07696    | 1805.548  | 1916.943  | AA679391  | 1170.991  | 989.652   |
| M12783    | 1801.926  | 1928.479  | AI925826  | 2908.379  | 3064.269  | BG682146  | 4006.657  | 2571.363  |
| AK091535  | 1920.141  | 2150.289  | U04209    | 3172.681  | 2521.011  | AK024467  | 585.411   | 1122.794  |
| AF085357  | 3670.691  | 4078.443  | AI393201  | 3892.317  | 4206.03   | NM_014476 | 536.245   | 656.582   |
| NM_003841 | 8997.061  | 7856.644  | M34664    | 48902.203 | 53691.316 | NM_014278 | 1122.799  | 1333.335  |
| AF296673  | 679.781   | 644.174   | Z15108    | 461.29    | 706.259   | NM_000734 | 1181.109  | 1177.733  |
| NM_080824 | 751.37    | 658.283   | AA679391  | 774.459   | 827.142   | NM_012331 | 2847.485  | 2936.681  |
| NM_018002 | 2902.881  | 3502.606  | BG682146  | 2646.46   | 2977.225  | NM_006644 | 3041.324  | 2744.756  |
| AB002340  | 1898.968  | 2444.155  | NM_012266 | 2662.75   | 2659.263  | NM_006583 | 66420.414 | 1900.796  |
| NM_000224 | 2429.881  | 2439.016  | NM_004559 | 1964.247  | 1910.044  | NM_003974 | 1948.814  | 1707.736  |
| NM_014328 | 3300.486  | 2786.161  | X56692    | 2874.28   | 3309.44   | NM_001495 | 731.173   | 812.884   |
| NM_006414 | 5183.238  | 4065.01   | NM_014278 | 966.805   | 983.204   | NM_002288 | 3053.576  | 2737.069  |
| NM_014322 | 1210.952  | 1362.852  | NM_005838 | 221.308   | 376.763   | NM_004416 | 9150.259  | 8979.841  |
| NM_004122 | 2851.845  | 2759.448  | NM_000734 | 988.292   | 928.897   | NM_000628 | 11207.257 | 8305.697  |
| NM_002928 | 13817.52  | 12372.146 | NM_012331 | 1681.11   | 1516.064  | AB005216  | 973.837   | 550.678   |
| NM_000160 | 1787.35   | 1884.728  | NM_006644 | 2127.912  | 1899.848  | NM_000325 | 9526.018  | 7087.271  |
| NM_003301 | 809.442   | 707.441   | NM_006583 | 67486.836 | 1692.672  | AF015041  | 1503.442  | 749.22    |
| NM_000955 | 1161.014  | 1118.495  | NM_003974 | 1600.478  | 1214.472  | AK000184  | 1198.118  | 1113.157  |
| U27768    | 1265.785  | 1431.164  | NM_006065 | 1886.345  | 1654.641  | AF055020  | 4688.567  | 3203.163  |
| AF305550  | 1995.991  | 2237.981  | NM_014339 | 24579.631 | 25532.65  | NM_006986 | 1082.806  | 856.785   |

|           |           |           |           |           |           |           |           |           |
|-----------|-----------|-----------|-----------|-----------|-----------|-----------|-----------|-----------|
| U66582    | 13174.539 | 13225.989 | NM_001495 | 1134.898  | 957.672   | AF131781  | 2314.981  | 2458.417  |
| S73288    | 468.28    | 760.69    | NM_002288 | 2150.778  | 1595.439  | NM_006516 | 14761.532 | 15198.32  |
| NM_006198 | 2231.693  | 1922.418  | NM_004416 | 6708.896  | 7956.318  | NM_003055 | 3886.814  | 3889.731  |
| NM_003812 | 1285.658  | 1206.084  | NM_000628 | 7869.052  | 7913.516  | NM_005075 | 956.464   | 810.824   |
| NM_000849 | 6172.462  | 5174.829  | AB005216  | 784.892   | 916.961   | NM_006841 | 468.766   | 807.735   |
| NM_004678 | 1259.758  | 1349.391  | NM_000325 | 6289.498  | 6877.365  | NM_002414 | 15598.926 | 14200.522 |
| NM_000950 | 21011.207 | 28384.809 | AF015041  | 915.613   | 972.869   | NM_000355 | 1036.654  | 1283.003  |
| NM_005139 | 5511.781  | 5500.488  | NM_002363 | 425.093   | 685.868   | AL133580  | 2887.235  | 3566.467  |
| NM_152747 | 1582.52   | 1754.983  | AK000184  | 751.463   | 847.122   | NM_014666 | 15457.79  | 14421.603 |
| NM_017415 | 1009.482  | 1023.746  | AF055020  | 2979.921  | 3122.755  | NM_005451 | 3080.091  | 3250.608  |
| NM_001667 | 20239.646 | 17959.369 | NM_006986 | 656.753   | 769.871   | NM_007172 | 2782.237  | 2378.562  |
| AB046834  | 796.779   | 538.474   | NM_014904 | 641.109   | 800.12    | NM_006152 | 2945.271  | 2313.878  |
| AB029033  | 7679.492  | 8075.567  | AL137576  | 7407.127  | 8601.695  | NM_013333 | 28400.104 | 19788.824 |
| AF091034  | 2693.08   | 2526.782  | NM_018358 | 2898.389  | 3766.743  | NM_002333 | 4335.323  | 3834.736  |
| NM_005301 | 19331.594 | 21261.57  | NM_016321 | 545.616   | 400.148   | NM_003400 | 13516.986 | 10759.432 |
| NM_004167 | 465.89    | 566.796   | AF131781  | 1895.164  | 1360.437  | NM_006705 | 2695.471  | 2279.35   |
| NM_016653 | 2474.577  | 2520.953  | NM_006516 | 8643.089  | 8345.14   | NM_014439 | 973.561   | 706.82    |
| AB035124  | 3048.77   | 3456.232  | NM_015865 | 599.339   | 507.986   | NM_005582 | 1045.684  | 838.065   |
| AF060170  | 578.118   | 698.823   | NM_003055 | 3221.283  | 2736.533  | AK023553  | 988.994   | 1463.192  |
| NM_016602 | 452.387   | 832.712   | NM_005075 | 806.612   | 667.499   | NM_014600 | 1027.333  | 1284.532  |
| NM_004409 | 8870.325  | 9270.577  | NM_002414 | 11780.756 | 9511.476  | NM_016733 | 1468.858  | 1842.228  |
| AK023397  | 2672.678  | 3676.294  | NM_000355 | 1254.899  | 1061.042  | AF181994  | 3406.397  | 3537.466  |
| NM_001725 | 1355.618  | 1400.114  | AL133580  | 2096.602  | 2647.323  | NM_018962 | 1528.333  | 1725.109  |
| NM_004079 | 13769.983 | 12052.712 | NM_014666 | 7178.381  | 6275.173  | AF125100  | 3519.622  | 3710.945  |
| NM_004633 | 403.043   | 646.271   | NM_005451 | 2265.184  | 2436.849  | NM_006114 | 11742.339 | 12826.617 |
| X01394    | 38965.16  | 47450.434 | NM_007172 | 2208.858  | 2036.378  | X82693    | 9367.477  | 9202.216  |
| NM_000041 | 41895.145 | 50534.672 | NM_006152 | 2448.262  | 2537.68   | NM_007176 | 14702.354 | 13852.019 |
| NM_002984 | 3535.288  | 3286.343  | NM_013333 | 18740.355 | 20039.748 | NM_002722 | 1630.089  | 1692.296  |
| AB037752  | 7129.518  | 7099.417  | NM_002333 | 3083.76   | 2665.954  | M22538    | 17558.881 | 10887.382 |
| AF317425  | 2367.277  | 2144.415  | NM_003400 | 8518.926  | 8585.699  | NM_006028 | 867.815   | 487.876   |
| AF264717  | 2317.24   | 2698.259  | NM_006705 | 1600.798  | 1435.364  | NM_012297 | 8711.07   | 9983.946  |
| NM_012260 | 8199.822  | 9608.428  | NM_014439 | 674.028   | 706.329   | NM_003836 | 4033.14   | 4275.751  |
| NM_001141 | 879.403   | 1132.846  | NM_005582 | 868.94    | 850.258   | NM_017987 | 1016.194  | 754.281   |
| NM_000018 | 7555.055  | 8276.6    | AF174605  | 533.297   | 642.508   | NM_018203 | 772.605   | 888.177   |
| NM_018479 | 7478.825  | 5968.462  | NM_014453 | 10602.483 | 11249.388 | NM_014244 | 1334.253  | 1373.589  |
| NM_014362 | 2681.737  | 2240.684  | NM_005713 | 1185.798  | 1022.736  | AK022417  | 3012.862  | 3250.046  |
| NM_018308 | 1844.639  | 2053.975  | AK023553  | 937.893   | 958.439   | U50534    | 1554.295  | 1520.346  |
| NM_001832 | 10745.614 | 13646.617 | NM_014600 | 641.096   | 648.783   | NM_014824 | 2566.614  | 2213.704  |
| NM_017774 | 8908.47   | 8910.471  | NM_016733 | 883.554   | 918.205   | NM_014504 | 2827.41   | 2454.253  |
| AB037716  | 3352.776  | 3692.56   | AF181994  | 2187.83   | 1668.678  | NM_014408 | 8075.147  | 6141.641  |
| NM_016297 | 3387.651  | 3529.95   | AF125100  | 1937.041  | 1817.746  | NM_014741 | 3650.368  | 2819.652  |
| NM_001752 | 9796.754  | 9275.397  | NM_006114 | 9565.875  | 7942.853  | AF212247  | 6646.04   | 5607.098  |
| AL137672  | 1065.396  | 1053.929  | X82693    | 7066.353  | 5493.987  | AF161407  | 16290.446 | 12134.683 |
| X64177    | 7050.255  | 40610.066 | NM_007176 | 9108.493  | 8498.575  | NM_014738 | 3161.781  | 2367.481  |
| NM_015994 | 3534.096  | 3380.428  | NM_002722 | 1183.039  | 1355.246  | NM_016406 | 3191.52   | 2069.823  |
| NM_002241 | 489.723   | 578.152   | M22538    | 12117.81  | 13003.423 | NM_018080 | 8093.53   | 5098.368  |
| NM_014065 | 3251.554  | 3867.384  | NM_006028 | 498.157   | 740.802   | NM_007115 | 739.739   | 1070.879  |
| NM_001695 | 2997.91   | 3044.903  | NM_012297 | 5716.904  | 5214.483  | NM_004616 | 843.986   | 888.284   |
| NM_002248 | 2844.202  | 3116.722  | AB007925  | 26787.771 | 31610.121 | NM_004360 | 703.922   | 982.981   |
| NM_012281 | 2398.365  | 2237.521  | NM_018180 | 1878.017  | 1998.143  | NM_003821 | 1799.943  | 1765.967  |
| NM_080824 | 2286.711  | 4057.336  | NM_000361 | 7446.509  | 7121.571  | NM_017692 | 3412.402  | 4236.019  |
| AB032956  | 632.075   | 891.523   | NM_002475 | 21132.295 | 19368.443 | NM_003975 | 1490.749  | 2482.719  |
| NM_000262 | 2945.105  | 3368.632  | NM_003836 | 4157.547  | 3594.785  | NM_004834 | 4228.021  | 5606.62   |

|           |           |           |           |           |           |           |           |           |
|-----------|-----------|-----------|-----------|-----------|-----------|-----------|-----------|-----------|
| NM_017831 | 2413.228  | 2571.178  | NM_018203 | 731.709   | 457.334   | NM_000812 | 906.332   | 1363.212  |
| AK024393  | 483.818   | 669.698   | NM_014244 | 625.001   | 661.326   | AK024747  | 17662.713 | 18714.338 |
| AK022537  | 6131.413  | 5699.491  | AK022417  | 2207.23   | 1866.107  | NM_00639C | 2894.692  | 3389.333  |
| AF064597  | 995.508   | 945.879   | U50534    | 909.35    | 1087.082  | NM_00358C | 5732.513  | 7262.218  |
| NM_00634E | 2992.751  | 2767.738  | NM_014824 | 1668.5    | 1361.211  | NM_00650E | 1368.047  | 1894.62   |
| NM_00687E | 1704.793  | 1791.341  | NM_014504 | 1298.941  | 1275.24   | NM_00323E | 6394.568  | 5693.535  |
| D87119    | 3367.28   | 3509.023  | NM_01440E | 5252.75   | 5922.684  | AB042562  | 1632.571  | 1084.496  |
| AB037769  | 365.955   | 603.61    | NM_014741 | 2508.241  | 2286.839  | NM_01600E | 4951.215  | 4263.867  |
| AL050040  | 959.177   | 1419.534  | AF212247  | 4358.329  | 5039.051  | NM_00237E | 3592.797  | 3156.062  |
| NM_00655E | 12189.878 | 15974.168 | AF161407  | 11261.48  | 11724.087 | NM_001364 | 817.301   | 620.162   |
| AL133066  | 524.187   | 799.664   | NM_01473E | 2708.129  | 3081.222  | NM_017431 | 696.33    | 632.238   |
| NM_00084E | 6219.401  | 6808.876  | NM_01640E | 2515.93   | 2636.75   | NM_006097 | 9703.373  | 6092.17   |
| NM_00467E | 1605.158  | 2179.25   | NM_01808C | 4770.191  | 4713.334  | NM_006113 | 4563.805  | 3420.379  |
| NM_00095C | 21614.092 | 26207.35  | NM_007115 | 792.548   | 820.427   | NM_015313 | 6768.179  | 4405.164  |
| NM_00513E | 5782.893  | 6658.027  | NM_00461E | 778.754   | 816.59    | AK022287  | 4293.038  | 2790.036  |
| L10139    | 646.452   | 558.809   | NM_00436C | 543.949   | 793.518   | NM_015897 | 2095.732  | 1639.384  |
| NM_00003E | 50709.469 | 50973.32  | NM_003821 | 1381.815  | 1506.558  | NM_00543E | 3011.851  | 3221.696  |
| NM_02047C | 4008.118  | 4066.573  | NM_017692 | 2875.538  | 2328.159  | AF177473  | 10358.596 | 9699.873  |
| NM_006574 | 337.325   | 424.999   | NM_00397E | 649.513   | 529.019   | NM_00054E | 4309.834  | 4530.257  |
| AA478950  | 1608.521  | 1624.505  | NM_004834 | 2417.544  | 2386.027  | AB023223  | 622.087   | 725.408   |
| BF942101  | 2928.105  | 3035.813  | NM_000812 | 582.831   | 451.532   | AB018257  | 3223.923  | 5355.932  |
| BI825012  | 16066.128 | 15902.915 | AK024747  | 10326.268 | 8755.105  | NM_00270E | 12833.311 | 17556.813 |
| M21574    | 620.092   | 746.453   | NM_00639C | 1708.411  | 1788.729  | AK001059  | 2100.259  | 2317.571  |
| BM051302  | 823.475   | 906.352   | NM_00358C | 4146.075  | 3227.793  | NM_007282 | 4181.695  | 5330.377  |
| BE314182  | 12280.59  | 10735.552 | NM_00650E | 1320.617  | 1093.733  | NM_01777C | 536.925   | 924.609   |
| AI808029  | 966.783   | 880.741   | NM_00323E | 5343.506  | 4628.472  | NM_01761C | 1444.368  | 2292.124  |
| AI971217  | 821.447   | 716.561   | AB042562  | 1037.383  | 714.228   | AL122070  | 680.637   | 1766.728  |
| X03225    | 4484.122  | 3577.819  | NM_01600E | 1713.633  | 1709.329  | AK025133  | 25860.287 | 28460.059 |
| AK097395  | 8164.359  | 7652.807  | NM_00237E | 1619.332  | 1933.543  | AB020704  | 1008.328  | 704.8     |
| M12783    | 1598.912  | 1852.794  | NM_001364 | 676.863   | 635.628   | NM_004087 | 4475.636  | 3639.982  |
| AK091535  | 1840.923  | 1632.654  | NM_017431 | 681.493   | 329.444   | NM_01870C | 1362.784  | 1194.709  |
| AF085357  | 3215.015  | 3866.537  | NM_006097 | 6845.075  | 5862.958  | NM_00011E | 5769.652  | 4935.515  |
| NM_003841 | 8840.989  | 9702.308  | NM_006113 | 3022.67   | 2902.042  | NM_00106E | 15513.171 | 10155.516 |
| AF296673  | 616.586   | 537.061   | NM_015313 | 4688.562  | 5619.42   | AK027100  | 1100.824  | 589.956   |
| NM_00463E | 1117.759  | 945.321   | AK022287  | 3274.697  | 3356.956  | NM_003622 | 1906.572  | 859.025   |
| X01394    | 39824.453 | 44039.789 | NM_015897 | 1231.747  | 1578.108  | NM_001774 | 14877.409 | 13321.271 |
| NM_000041 | 45601.973 | 53624.035 | NM_00543E | 3092.854  | 3819.379  | AK021645  | 1527.744  | 1524.631  |
| NM_018002 | 2717.992  | 3179.669  | AF177473  | 10099.189 | 10874.61  | NM_01333E | 2199.4    | 2447.435  |
| AK024821  | 10206.063 | 9834.66   | NM_00054E | 4357.668  | 4355.582  | NM_001491 | 1716.146  | 1943.119  |
| AB002340  | 1521.854  | 1729.839  | AB018257  | 1263.641  | 929.941   | NM_002642 | 460.812   | 762.158   |
| NM_000224 | 2977.283  | 3628.081  | NM_00270E | 10687.77  | 10112.506 | AK026541  | 2704.122  | 3347.096  |
| NM_01432E | 3472.184  | 3415.399  | AK001059  | 1422.207  | 1009.392  | AL137349  | 1381.404  | 2374.374  |
| NM_006414 | 4873.937  | 5576.813  | NM_007282 | 1857.208  | 1521.268  | NM_00333E | 935.803   | 1286.216  |
| NM_014322 | 2126.082  | 2206.224  | NM_01777C | 291.166   | 444.857   | NM_01647E | 32499.123 | 38931.957 |
| NM_004122 | 3201.063  | 3262.74   | AK025133  | 22456.625 | 22020.123 | NM_015902 | 1332.981  | 940.863   |
| NM_00292E | 14328.837 | 12519.472 | AB020704  | 625.607   | 655.996   | NM_02015E | 2001.07   | 1849.487  |
| NM_00016C | 1828.73   | 1528.036  | NM_004087 | 3530.464  | 3375.443  | BE874471  | 3586.723  | 3476.171  |
| NM_003301 | 736.21    | 721.522   | NM_01870C | 1052.152  | 1276.115  | NM_006121 | 2015.406  | 1762.287  |
| NM_00095E | 1115.886  | 1282.276  | NM_000119 | 6830.152  | 6696.341  | AK023520  | 5048.507  | 4329.333  |
| U27768    | 1247.773  | 1076.245  | NM_00106E | 9936.729  | 9277.573  | NM_00469E | 843.299   | 837.547   |
| NM_001742 | 1461.808  | 1238.732  | AK027100  | 395.08    | 624.101   | NM_007211 | 3342.583  | 2413.377  |
| AF305550  | 3523.702  | 4300.116  | NM_003622 | 1268.904  | 875.063   | AB011152  | 1750.629  | 1271.509  |
| U66582    | 12289.579 | 14797.181 | NM_001774 | 18499.736 | 17279.494 | NM_01495E | 4999.639  | 4584.064  |

|           |           |           |           |           |           |           |           |           |
|-----------|-----------|-----------|-----------|-----------|-----------|-----------|-----------|-----------|
| S73288    | 737.468   | 528.968   | AK021645  | 2007.948  | 1894.104  | AB014592  | 1008.053  | 602.653   |
| NM_00619E | 2246.517  | 2137.189  | NM_01333E | 1869.415  | 1876.963  | NM_01695E | 2043.899  | 1153.474  |
| NM_00381E | 933.256   | 942.797   | NM_001491 | 1342.039  | 1265.011  | NM_001654 | 4007.734  | 2410.036  |
| NM_00223E | 698.665   | 807.947   | AK026541  | 1717.896  | 1694.572  | NM_01451E | 653.215   | 744.123   |
| NM_002241 | 818.535   | 648.467   | NM_00589E | 10031.185 | 7618.516  | NM_00714E | 3629.293  | 3590.051  |
| NM_01406E | 2876.2    | 3429.807  | D42055    | 5311.219  | 4628.614  | X65463    | 4568.094  | 3331.269  |
| AK025772  | 1839.049  | 1645.573  | AL137349  | 907.156   | 790.797   | AK024418  | 1148.821  | 1246.963  |
| NM_00550E | 1142.539  | 1281.462  | NM_00333E | 828.537   | 573.802   | NM_00336E | 2787.572  | 2547.362  |
| NM_15274E | 1492.316  | 1891.026  | NM_01647E | 34192.746 | 28861.355 | NM_005194 | 10411.993 | 11026.185 |
| NM_01741E | 965.896   | 1028.472  | NM_01590E | 1345.511  | 858.113   | NM_01431E | 3004.802  | 5845.628  |
| NM_00166E | 21113.711 | 22810.363 | NM_02015E | 1826.909  | 1408.039  | NM_01208E | 987.361   | 1746.486  |
| AB046834  | 807.844   | 563.408   | BE874471  | 2826.349  | 2555.797  | AF165520  | 968.702   | 1200.058  |
| AB029033  | 9172.557  | 8612.251  | NM_006121 | 1517.679  | 1492.658  | AK026072  | 568.482   | 1059.1    |
| AF091034  | 3048.124  | 2742.145  | AK023520  | 4259.955  | 4505.106  | NM_01567E | 3518.401  | 3441.538  |
| NM_005301 | 21924.221 | 20904.969 | NM_00469E | 829.603   | 762.528   | AF299118  | 64507.352 | 54294.211 |
| NM_00416E | 496.859   | 476.469   | NM_007211 | 2846.593  | 2708.076  | AK025353  | 16129.158 | 11851.67  |
| NM_01665E | 2356.237  | 2195.82   | AB011152  | 1167.907  | 1564.62   | AK056896  | 40286.07  | 36696.617 |
| AB035124  | 3245.398  | 3022.533  | NM_01495E | 4845.968  | 4562.42   | AK022763  | 23548.951 | 16180.049 |
| AF060170  | 548.162   | 532.187   | AB014592  | 733.803   | 778.572   | AF288207  | 26089.977 | 17459.395 |
| NM_01660E | 675.318   | 895.61    | NM_01695E | 1502.509  | 1531.159  | NM_001001 | 61468.242 | 53186.617 |
| NM_00440E | 8982.774  | 10040.831 | NM_001654 | 3278.078  | 3024.777  | NM_00571E | 1911.391  | 1709.168  |
| AK023397  | 2174.072  | 2648.002  | NM_01451E | 885.073   | 1060.699  | AK026992  | 3331.867  | 3316.77   |
| NM_00172E | 1316.812  | 1264.32   | NM_00714E | 5251.674  | 5201.801  | X81895    | 638.672   | 706.415   |
| NM_00407E | 13437.161 | 11235.831 | X65463    | 4674.541  | 4846.442  | NM_004541 | 43128.75  | 43894.84  |
| NM_00038E | 392.435   | 642.644   | AK024418  | 1350.971  | 1331.278  | NM_00683E | 41162.918 | 39110.281 |
| NM_00687E | 1739.905  | 1736.567  | NM_00336E | 2713.873  | 1972.209  | NM_00262E | 29584.354 | 46906.145 |
| D87119    | 4059.962  | 3817.498  | NM_005194 | 5499.215  | 4415.667  | NM_01843E | 12798.156 | 19913.504 |
| AB037769  | 393.45    | 696.05    | AB002296  | 967.996   | 704.531   | AF157115  | 3589.656  | 4704.383  |
| AF264717  | 2266.95   | 2168.3    | NM_01431E | 2522.64   | 1664.965  | AJ223353  | 5945.515  | 5716.752  |
| NM_01226E | 8175.445  | 8936.516  | NM_01208E | 1093.168  | 825.836   | NM_012241 | 5977.801  | 5668.995  |
| NM_001141 | 951.064   | 1226.054  | AF165520  | 871.947   | 511.736   | NM_01848E | 3079.263  | 2533.959  |
| NM_00001E | 8007.862  | 9872.919  | AK026072  | 640.263   | 588.079   | NM_005324 | 21537.389 | 17371.191 |
| AB028992  | 681.241   | 595.239   | NM_01567E | 2797.713  | 2579.153  | AL080201  | 13592.723 | 10331.539 |
| NM_01847E | 7949.508  | 8024.741  | AF299118  | 57436.684 | 56930.508 | NM_01536E | 944.324   | 660.434   |
| NM_01436E | 2928.975  | 2856.427  | AK025353  | 15425.539 | 15173.914 | NM_00180E | 9118.186  | 6680.389  |
| NM_01830E | 2172.797  | 2054.999  | AK056896  | 34291.598 | 30099.637 | AB040941  | 4193.623  | 3449.93   |
| NM_00183E | 14026.372 | 15202.172 | AK022763  | 18956.74  | 17466.076 | AL137241  | 1480.189  | 891.558   |
| NM_017774 | 8862.313  | 7799.588  | AF288207  | 19688.395 | 20178.965 | AB037742  | 2031.744  | 1185.157  |
| AB037716  | 3695.004  | 3191.946  | NM_001001 | 55725.91  | 55540.758 | AF272375  | 1406.209  | 1034.127  |
| NM_00192E | 570.982   | 369.282   | NM_00571E | 1992.136  | 2573.135  | AK025078  | 684.333   | 906.479   |
| NM_01629E | 3976.571  | 3526.604  | AK026992  | 2509.757  | 2734.148  | AK024737  | 1461.558  | 1175.361  |
| NM_00175E | 10495.455 | 10392.773 | X81895    | 581.381   | 451.938   | AB007890  | 6742.156  | 6873.965  |
| AL137672  | 3406.216  | 3276.904  | AL137343  | 852.729   | 814.547   | AF070591  | 1355.445  | 1335.049  |
| X64177    | 7246.687  | 44961.109 | NM_004541 | 42409.297 | 38351.461 | AF275800  | 2062.044  | 2543.237  |
| NM_015994 | 3953.459  | 4077.072  | NM_00683E | 37358.938 | 25966.229 | AL359605  | 1847.503  | 2554.052  |
| NM_01847E | 18578.91  | 18097.861 | AK026414  | 6294.971  | 5285.137  | AB020633  | 4071.071  | 5572.421  |
| AF220492  | 7063.468  | 6311.908  | D17297    | 499.285   | 431.222   | AK025445  | 8755.003  | 8169.171  |
| X89671    | 1458.482  | 1437.339  | NM_004074 | 18146.061 | 13583.422 | AL357200  | 2047.116  | 1611.3    |
| NM_014941 | 4546.947  | 3534.182  | NM_00262E | 22911.59  | 17978.906 | NM_01772E | 15204.842 | 12484.85  |
| NM_01837E | 5662.003  | 4843.317  | NM_01843E | 9378.56   | 7706.922  | NM_01831E | 3088.619  | 2967.903  |
| NM_01325E | 1886.488  | 1394.796  | AF157115  | 3063.649  | 2330.016  | AL359559  | 1223.409  | 870.975   |
| NM_00589E | 4879.523  | 3531.89   | AJ223353  | 5008.897  | 4291.903  | AY008301  | 1244.323  | 961.244   |
| D82345    | 581.283   | 845.495   | NM_012241 | 4887.894  | 4843.703  | AK021714  | 908.116   | 938.108   |

|           |           |           |           |           |           |           |           |           |
|-----------|-----------|-----------|-----------|-----------|-----------|-----------|-----------|-----------|
| NM_003814 | 908.284   | 1122.614  | NM_018486 | 1826.941  | 1423.776  | NM_020314 | 4922.144  | 3998.295  |
| NM_002968 | 1102.709  | 1278.337  | NM_005324 | 17872.906 | 17431.527 | AK022972  | 3132.316  | 2364.324  |
| AB032956  | 574.19    | 647.294   | AL080201  | 11790.579 | 11829.32  | AK025996  | 4377.171  | 2723.867  |
| NM_000262 | 3114.916  | 3373.312  | NM_015363 | 816.638   | 626.535   | AF088015  | 913.575   | 835.524   |
| NM_017831 | 2825.774  | 2501.315  | NM_001806 | 6688.486  | 6967.192  | AF007132  | 984.817   | 878.748   |
| AK022537  | 6495.225  | 6324.654  | AB040941  | 3076.427  | 2825.498  | AK026711  | 6715.845  | 5023.193  |
| AF064597  | 1242.01   | 1163.316  | AL137241  | 948.344   | 1168.225  | NM_017864 | 4947.102  | 4562.612  |
| NM_006345 | 2214.93   | 2437.223  | AB037742  | 1446.418  | 1478.799  | NM_004865 | 5076.583  | 4389.949  |
| NM_003255 | 23482.762 | 26362.699 | AF272375  | 1284.289  | 1219.671  | AF136408  | 1214.289  | 1420.193  |
| AL080128  | 4262.436  | 3622.095  | AK025078  | 732.537   | 1106.647  | AL110203  | 697.842   | 911.376   |
| AB037787  | 1722.119  | 1415.178  | AK023754  | 498.097   | 583.376   | AJ011595  | 960.909   | 694.217   |
| AB033072  | 400.037   | 440.298   | AK021689  | 437.602   | 532.284   | X51527    | 1547.55   | 1726.564  |
| AB040892  | 2449.845  | 1419.835  | AK024737  | 897.982   | 1029.661  | AJ011602  | 518.015   | 878.107   |
| NM_018265 | 21953.094 | 19070.893 | AB007890  | 4497.528  | 3144.223  | AJ002787  | 2836.737  | 2415.564  |
| AF230904  | 6652.041  | 6632.096  | AF070591  | 863.694   | 1088.539  | Z70764    | 1535.198  | 1499.024  |
| NM_017595 | 1393.935  | 1700.888  | NM_020411 | 48468.055 | 38164.527 | Z83948    | 900.646   | 1101.553  |
| AL157480  | 4420.658  | 4356.388  | AF275800  | 1046.295  | 881.12    | M25785    | 1803.933  | 1342.521  |
| NM_014385 | 2132.916  | 2976.493  | AL359605  | 1548.66   | 1507.951  | M32443    | 2110.332  | 1599.045  |
| NM_018110 | 2589.735  | 2616.762  | AB020633  | 2895.546  | 2155.947  | D16908    | 988.919   | 827.972   |
| AF312678  | 1024.546  | 957.211   | AK025445  | 7432.154  | 5447.001  | D16477    | 1130.944  | 980.071   |
| NM_006253 | 2370.85   | 3271.241  | AL357200  | 1529.51   | 1264.146  | AK026808  | 567.427   | 1442.204  |
| NM_003865 | 999.062   | 1043.442  | NM_017727 | 10074.455 | 8416.079  | AK022309  | 1164.574  | 1455.681  |
| NM_018262 | 1482.992  | 1741.167  | NM_018315 | 1979.393  | 1831.341  | AK000063  | 870.54    | 728.054   |
| NM_006207 | 2518.412  | 3101.16   | AY008301  | 840.78    | 1386.432  | AK000949  | 1188.624  | 1072.206  |
| NM_003220 | 1603.481  | 1801.987  | AK021714  | 732.876   | 1036.325  | AK000974  | 1134.079  | 982.682   |
| AF009674  | 7455.527  | 7077.525  | NM_020314 | 3645.778  | 3912.109  | AK025051  | 1088.916  | 937.269   |
| NM_000360 | 1052.058  | 993.399   | AK022972  | 2645.428  | 2568.578  | AK024553  | 22230.574 | 15950.358 |
| NM_000844 | 2714.67   | 2824.965  | AK025996  | 3069.125  | 3184.923  | AF143879  | 6436.653  | 6948.909  |
| NM_005510 | 4276.236  | 3903.197  | AF088015  | 650.444   | 639.386   | AL157449  | 23611.82  | 23798.795 |
| Z36817    | 3039.435  | 2822.663  | AK026702  | 495.172   | 708.456   | AL117582  | 1233.38   | 1207.242  |
| NM_014505 | 20259.383 | 22372.996 | AF007132  | 537.59    | 522.534   | AK025525  | 1148.986  | 727.218   |
| NM_004205 | 7516.284  | 8363.519  | AK026711  | 5890.34   | 4926.393  | NM_018233 | 8278.178  | 6260.702  |
| NM_016162 | 2307.258  | 1744.396  | NM_017864 | 4201.477  | 3764.877  | AV740891  | 1168.003  | 896.834   |
| AF130056  | 2293.521  | 1541.229  | NM_004865 | 3225.501  | 2312.662  | AF143329  | 973.532   | 1280.229  |
| NM_002201 | 58221.832 | 46295.664 | AF136408  | 1209.432  | 976.854   | AF090916  | 865.494   | 532.551   |
| AK025047  | 1450.852  | 949.874   | AJ011602  | 488.683   | 618.4     | AK026860  | 9079.628  | 6333.87   |
| NM_006805 | 1644.054  | 837.154   | AJ002787  | 2684.622  | 2299.254  | NM_014895 | 727.989   | 685.136   |
| NM_006763 | 1502.752  | 633.321   | Z70764    | 1160.398  | 891.831   | AK023435  | 907.616   | 923.039   |
| NM_006119 | 5967.405  | 2451.824  | AL049252  | 677.056   | 672.547   | AF086035  | 13047.118 | 15307.791 |
| NM_004465 | 1954.906  | 1224.249  | Z83948    | 741.201   | 475.629   | D16905    | 935.604   | 1332.363  |
| AK026927  | 2570.331  | 2191.444  | M25785    | 1258.635  | 1192.478  | AJ012491  | 745.457   | 633.511   |
| NM_014055 | 8719.467  | 8422.046  | M32443    | 1205.292  | 1345.885  | U25750    | 2199.206  | 1757.32   |
| NM_001761 | 3002.012  | 2680.232  | D16477    | 712.506   | 1205.76   | AK023691  | 3789.563  | 3793.512  |
| BE884341  | 2357.755  | 2505.316  | AK024759  | 352.275   | 553.236   | AK026744  | 1077.959  | 943.534   |
| AF231997  | 1673.268  | 2010.773  | AK026808  | 514.357   | 669.236   | AK002105  | 876.126   | 748.721   |
| NM_007125 | 1039.364  | 1153.255  | AK022309  | 612.309   | 480.712   | NM_005234 | 5218.009  | 3785.414  |
| NM_002595 | 9684.064  | 12111.143 | AK000063  | 827.895   | 505.603   | BC023536  | 1583.371  | 1171.447  |
| NM_020184 | 1159.172  | 990.905   | AK000949  | 1260.325  | 793.027   | NM_001803 | 5362.033  | 3784.302  |
| NM_005815 | 1650.849  | 1940.436  | AK000974  | 986.451   | 986.741   | NM_006233 | 11419.299 | 9975.853  |
| NM_001225 | 1731.208  | 1616.328  | AK025051  | 1066.522  | 988.148   | AK021889  | 1075.079  | 886.161   |
| NM_014915 | 513.499   | 538.371   | AK024553  | 14587.031 | 14578.087 | AK000992  | 821.873   | 811.071   |
| NM_000250 | 1616.455  | 1760.734  | AK024930  | 377.033   | 431.871   | L23544    | 18894.736 | 15377.976 |
| NM_018147 | 11141.831 | 8897.122  | AF143879  | 3439.765  | 3725.896  | NM_019020 | 2420.839  | 1950.248  |

|           |           |           |           |           |           |           |           |           |
|-----------|-----------|-----------|-----------|-----------|-----------|-----------|-----------|-----------|
| NM_018967 | 3696.382  | 3277.957  | AK024621  | 19876.936 | 21188.719 | NM_016474 | 1129.497  | 1046.514  |
| NM_00185C | 1513.432  | 1044.78   | AL157449  | 18181.459 | 14956.087 | AL117560  | 24705.994 | 24218.418 |
| NM_00216C | 2006.531  | 2015.466  | AL117582  | 996.182   | 930.498   | M24749    | 7754.701  | 6900.248  |
| NM_005675 | 1340.201  | 1475.609  | AK025525  | 928.119   | 675.505   | NM_005831 | 60205.621 | 47110.664 |
| BC030636  | 1999.746  | 1216.764  | NM_018233 | 11226.323 | 8464.981  | NM_00585C | 54714.16  | 45165.637 |
| NM_002812 | 2237.291  | 1733.564  | AV740891  | 793.294   | 604.353   | NM_000554 | 45257.715 | 34393.176 |
| NM_020365 | 4115.397  | 4247.873  | AF143329  | 661.147   | 393.253   | AF009317  | 5932.078  | 4129.291  |
| NM_003982 | 2414.317  | 3622.013  | AF090916  | 626.147   | 431.852   | AK026583  | 3225.07   | 2619.209  |
| NM_002079 | 2970.837  | 3369.036  | AF086214  | 621.501   | 538.678   | AF218031  | 3790.266  | 3007.724  |
| NM_002112 | 5886.348  | 5214.942  | AK026860  | 7681.883  | 6118.989  | AF210650  | 3647.327  | 2343.301  |
| NM_004121 | 4548.183  | 4216.632  | NM_014898 | 990.616   | 1566.564  | NM_018356 | 4173.2    | 3362.497  |
| AY007092  | 2073.652  | 2183.878  | AK023435  | 583.483   | 682.181   | AF085896  | 1635.309  | 1159.609  |
| NM_001902 | 763.553   | 906.834   | AF086035  | 8058.742  | 8655.254  | X74613    | 6215.436  | 5202.854  |
| AL137605  | 29781.824 | 34995.395 | AK022159  | 3052.879  | 3310.567  | AF075080  | 4273.571  | 3742.47   |
| NM_016261 | 1703.524  | 1538.513  | U25750    | 3164.06   | 2597.418  | Y13897    | 1228.863  | 1364.953  |
| NM_006519 | 885.64    | 772.159   | AK023691  | 4298.559  | 3335.093  | AK001857  | 1337.034  | 1199.713  |
| NM_004607 | 64015.238 | 56995.934 | AK026744  | 655.453   | 634.233   | AL133577  | 4112.012  | 3318.164  |
| NM_012076 | 876.09    | 668.347   | NM_005234 | 5670.849  | 4507.948  | AK025378  | 1187.044  | 785.579   |
| NM_007285 | 12504.361 | 10848.947 | BC023536  | 980.745   | 652.514   | NM_000479 | 1317.686  | 816.174   |
| D14678    | 6690.723  | 5242.165  | NM_006233 | 10050.289 | 8794.241  | AF038199  | 4588.563  | 2967.735  |
| NM_016221 | 3827.438  | 2701.57   | AK021889  | 700.489   | 745.15    | CY3Cy5    | 4041.965  | 177.713   |
| NM_018113 | 758.095   | 755.148   | AK000992  | 786.411   | 721.07    | BE908993  | 13816.464 | 15441.878 |
| NM_005187 | 1802.74   | 1422.812  | L23544    | 13596.277 | 14780.529 | AB012701  | 1617.855  | 1865.671  |
| U73377    | 4329.235  | 3640.998  | NM_01902C | 2251.355  | 1963.648  | M61156    | 791.341   | 1285.036  |
| NM_002199 | 2550.523  | 2629.857  | AF119892  | 719.407   | 715.478   | R44005    | 1244.446  | 1636.042  |
| BC005219  | 5139.151  | 3560.951  | NM_016474 | 1243.981  | 961.941   | AI942392  | 3131.157  | 3844.096  |
| NM_004031 | 1768.393  | 2976.154  | NM_00091C | 1582.292  | 1335.534  | M55040    | 453.571   | 853.918   |
| NM_006163 | 2382.074  | 1587.365  | AF086001  | 34704.313 | 39597.977 | AW009739  | 2507.714  | 2815.387  |
| NM_001272 | 8164.775  | 5458.758  | AL117560  | 20007.119 | 17961.836 | BC036805  | 7032.019  | 8393.263  |
| NM_016303 | 583.694   | 380.242   | M24749    | 5878.681  | 5227.114  | Z74615    | 10584.647 | 12687.146 |
| NM_006196 | 44169.957 | 45202.527 | NM_005831 | 51052.387 | 44087.266 | X03884    | 3309.302  | 3768.031  |
| AV733560  | 1172.765  | 892.862   | NM_00585C | 54389.258 | 51695.934 | U36759    | 2128.356  | 1497.895  |
| D17129    | 53580.066 | 49631.344 | NM_000554 | 31441.979 | 23702.959 | X91625    | 1951.225  | 2562.752  |
| NM_003091 | 15705.164 | 13811.38  | AF009317  | 5221.112  | 4289.698  | AF090901  | 409.238   | 427.344   |
| NM_004247 | 3602.05   | 3510.267  | AK026583  | 2147.062  | 1558.17   | AF004231  | 867.586   | 678.46    |
| NM_017722 | 3432.42   | 3178.636  | AF218031  | 3977.555  | 3123.544  | AF001862  | 2720.553  | 2676.542  |
| AL137730  | 3983.893  | 3869.943  | AF210650  | 3255.079  | 2077.14   | NM_058197 | 568.566   | 509.037   |
| NM_00450C | 25021.252 | 22714.852 | NM_018356 | 4220.049  | 3207.482  | SR6       | 2580.056  | 2330.799  |
| NM_003276 | 6551.547  | 4279.541  | AF085896  | 1113.008  | 812.841   | SR8       | 8700.431  | 24368.174 |
| AL137681  | 1911.008  | 1964.257  | AF075080  | 6782.143  | 6005.108  | SR10      | 24490.918 | 8304.526  |
| AK025694  | 58249.496 | 50399.73  | AL390183  | 714.781   | 754.502   | CY3Cy5    | 2657.857  | 73.208    |
| NM_002157 | 61605.16  | 54007.672 | Y13897    | 1009.297  | 619.864   | NM_004126 | 547.093   | 696.23    |
| NM_004095 | 17047.564 | 13224.618 | AK001857  | 1191.431  | 856.952   | U87460    | 7538.076  | 8998.735  |
| NM_005147 | 3174.476  | 2572.755  | AK021525  | 711.027   | 446.853   | NM_003617 | 631.372   | 944.265   |
| NM_014665 | 3515.141  | 2539.602  | AF067801  | 709.983   | 439.431   | NM_001841 | 966.786   | 974.619   |
| AK023609  | 1989.182  | 1552.85   | AL133577  | 3326.681  | 3067.594  | NM_002054 | 3387.37   | 4474.821  |
| NM_018019 | 2671.809  | 1588.161  | AK025378  | 514.485   | 544.534   | AF300649  | 1539.741  | 1708.306  |
| NM_000476 | 1468.459  | 2225.312  | NM_000479 | 841.929   | 841.145   | NM_004125 | 957.498   | 888.547   |
| NM_006187 | 612.792   | 387.515   | AF038199  | 3014.801  | 3051.33   | NM_000823 | 2642.509  | 2753.837  |
| NM_020354 | 3578.669  | 2910.326  | CY3Cy5    | 3168.218  | 214.798   | NM_004414 | 1508.003  | 1397.061  |
| AF202637  | 6552.504  | 5448.872  | BE908993  | 12978.137 | 16692.078 | NM_003317 | 2616.223  | 2833.133  |
| NM_000026 | 13032.992 | 10804.659 | AB012701  | 1457.217  | 1838.165  | NM_001139 | 1975.932  | 2374.656  |
| AB033016  | 15132.457 | 19678.398 | M61156    | 729.506   | 1176.352  | NM_004609 | 20864.74  | 21225.07  |



|           |           |           |           |           |           |           |           |           |
|-----------|-----------|-----------|-----------|-----------|-----------|-----------|-----------|-----------|
| D87452    | 1859.961  | 1668.733  | R44005    | 1086.156  | 1571.19   | NM_003772 | 864.723   | 951.317   |
| AB037864  | 3247.084  | 2570.582  | AI942392  | 3382.66   | 3763.182  | NM_001541 | 2495.221  | 2827.355  |
| L26494    | 1614.263  | 1279.059  | M55040    | 646.904   | 906.474   | NM_005416 | 1031.396  | 1227.606  |
| AK024322  | 1050.511  | 1209.815  | AW009739  | 2637.044  | 3467.106  | NM_004670 | 506.531   | 416.237   |
| BF382513  | 4114.468  | 3717.336  | BC036805  | 5567.506  | 5791.506  | L09081    | 2686.299  | 2917.62   |
| AB020713  | 10363.652 | 8588.471  | Z74615    | 9014.618  | 10181.427 | NM_000218 | 60981.684 | 65674.242 |
| AK025426  | 1435.292  | 1086.421  | X03884    | 2583.246  | 2419.351  | NM_016113 | 3755.471  | 3532.226  |
| NM_016558 | 4392.865  | 3040.887  | U36759    | 1719.656  | 1128.853  | NM_014222 | 2871.332  | 3503.826  |
| NM_007145 | 7342.536  | 5829.749  | X91625    | 2040.284  | 1996.542  | NM_000509 | 1879.588  | 1602.195  |
| AL080180  | 1050.717  | 948.196   | AF004231  | 554.953   | 704.5     | NM_004542 | 660.331   | 513.063   |
| X89067    | 1115.746  | 1065.555  | AF001862  | 2292.514  | 1995.022  | X06182    | 965.849   | 1054.27   |
| AF147376  | 1292.219  | 1042.732  | SR6       | 2114.606  | 2484.784  | BF217496  | 3648.99   | 5551.76   |
| AK027190  | 1565.761  | 1426.479  | SR8       | 7824.444  | 26348.656 | NM_004762 | 3316.623  | 4168.613  |
| AL360136  | 3288.594  | 2608.992  | SR10      | 27414.516 | 8940.445  | NM_006641 | 45320.719 | 49917.32  |
| AF086259  | 1506.109  | 1486.893  | CY3Cy5    | 2200.604  | 117.972   | NM_000634 | 6438.739  | 7875.183  |
| AF086328  | 3000.261  | 2706.105  | U87460    | 6299.03   | 8083.53   | NM_014679 | 21102.396 | 22226.961 |
| AF086427  | 560.406   | 612.968   | NM_003617 | 703.835   | 861.753   | AB040969  | 1957.299  | 2104.471  |
| AK024196  | 765.332   | 1017.911  | NM_001841 | 870.323   | 1077.027  | NM_003467 | 3215.977  | 3747.63   |
| AK001099  | 1140.014  | 962.922   | NM_002054 | 2602.553  | 3559.613  | NM_014936 | 815.886   | 689.855   |
| AK023753  | 2852.118  | 2238.48   | NM_004125 | 679.638   | 973.443   | NM_003943 | 1230.053  | 1712.42   |
| AF086441  | 17443.545 | 15102.842 | NM_000823 | 1734.125  | 2127.606  | NM_019052 | 3880.34   | 6214.027  |
| AK027255  | 699.277   | 621.151   | NM_004414 | 1186.622  | 1387.545  | NM_003202 | 585.269   | 921.624   |
| AK022487  | 4354.043  | 3159.879  | NM_003317 | 2568.661  | 2602.135  | AF119902  | 677.569   | 820.175   |
| NM_014117 | 1940.954  | 1749.415  | NM_001139 | 1805.452  | 2217.157  | NM_020525 | 3426.716  | 3953.352  |
| AF086087  | 3705.722  | 2693.77   | NM_004609 | 17869.551 | 17061.033 | X62468    | 439.099   | 540.152   |
| AK094020  | 1001.723  | 801.325   | NM_003772 | 787.797   | 936.795   | NM_003890 | 2537.274  | 2752.722  |
| AL137425  | 1579.748  | 1343.102  | NM_001541 | 1974.62   | 2030.143  | BF127978  | 2584.715  | 2743.986  |
| AL137637  | 693.854   | 402.011   | NM_005416 | 800.795   | 851.135   | NM_016579 | 10425.206 | 11596.88  |
| AL359584  | 1033.378  | 705.721   | NM_004670 | 490.495   | 422.122   | AB018297  | 988.342   | 882.887   |
| AL137285  | 1117.969  | 717.061   | L09081    | 2167.927  | 2406.143  | AK022565  | 10637.567 | 10431.52  |
| AL137456  | 1493.964  | 1290.565  | NM_016113 | 3170.722  | 3271.227  | AK023151  | 1739.165  | 1731.69   |
| AL157489  | 947.927   | 795.131   | NM_014222 | 2864.324  | 3639.846  | AB033076  | 1292.588  | 847.421   |
| AL390157  | 1084.5    | 735.943   | NM_000509 | 2019.953  | 2011.639  | AK022876  | 943.573   | 1019.429  |
| AK021649  | 604.781   | 649.913   | NM_004542 | 622.523   | 832.923   | AF134894  | 4683.506  | 4125.06   |
| AK024874  | 749.593   | 909.08    | X06182    | 973.174   | 997.403   | NM_003938 | 7312.255  | 5498.622  |
| AF086071  | 502.263   | 687.004   | BF217496  | 2743.669  | 3723.388  | NM_014827 | 12543.622 | 10934.057 |
| AK021847  | 877.46    | 933.049   | NM_004762 | 2202.718  | 2837.757  | NM_001441 | 1283.092  | 1946.584  |
| AK023086  | 2606.169  | 2338.417  | NM_006641 | 33425.75  | 44519.949 | NM_018324 | 779.912   | 833.003   |
| AF241534  | 959.19    | 786.46    | NM_000634 | 4392.519  | 5435.232  | AF064255  | 16948.283 | 18675.957 |
| NM_017621 | 6673.796  | 5120.129  | NM_014679 | 17708.236 | 19600.184 | NM_016368 | 34882.25  | 39403.715 |
| AK021907  | 1379.103  | 989.807   | AB040969  | 1378.14   | 1624.427  | U08853    | 2329.774  | 3557.767  |
| AK022029  | 991.57    | 880.922   | NM_003467 | 2954.289  | 3348.297  | NM_004261 | 17152.17  | 21545.574 |
| AK022167  | 584.349   | 545.195   | NM_014936 | 864.008   | 825.012   | NM_016006 | 1857.495  | 2627.35   |
| AK022320  | 1238.505  | 889.04    | NM_003943 | 1143.191  | 1394.518  | NM_016245 | 14872.439 | 18996.625 |
| AK022058  | 1326.881  | 1273.445  | NM_019052 | 3443.509  | 4526.441  | AF005632  | 3418.852  | 4422.534  |
| AK022196  | 1066.447  | 949.903   | NM_003202 | 577.269   | 684.374   | NM_000903 | 13668.493 | 14714.153 |
| AK022429  | 343.189   | 545.646   | NM_020525 | 2078.092  | 2093.74   | NM_004493 | 9637.482  | 11923.743 |
| NM_018280 | 1112.108  | 1275.521  | NM_003890 | 2125.655  | 2317.931  | AF309489  | 654.658   | 340.253   |
| AK025763  | 458.059   | 981.075   | BF127978  | 2059.81   | 1953.221  | NM_004047 | 25411.676 | 23023.014 |
| AK024381  | 701.649   | 812.794   | NM_016579 | 7870.933  | 7970.291  | NM_004823 | 1433.977  | 1507.895  |
| AK026503  | 959.621   | 764.366   | AK022565  | 6523.268  | 6993.815  | Y17179    | 55873.336 | 63590.063 |
| AK026671  | 1273.997  | 1285.453  | AK023151  | 1325.542  | 1343.784  | NM_000891 | 724.993   | 517.328   |
| AK025522  | 9542.115  | 8135.044  | AB033076  | 1050.172  | 767.586   | AF239613  | 4790.208  | 4544.889  |

|           |           |           |           |           |           |           |           |           |
|-----------|-----------|-----------|-----------|-----------|-----------|-----------|-----------|-----------|
| NM_02040E | 935.152   | 895.179   | AK022876  | 967.872   | 712.916   | AK026840  | 1273.435  | 1112.999  |
| NM_00498E | 11524.431 | 9184.695  | AF134894  | 4253.036  | 4233.467  | NM_00028E | 1417.879  | 1539.677  |
| AL080151  | 1646.321  | 1852.614  | NM_00393E | 6463.6    | 4305.696  | AK026317  | 7706.365  | 7524.295  |
| AL050085  | 959.854   | 987.803   | NM_014827 | 11306.818 | 10691.938 | X82207    | 9736.712  | 11098.31  |
| AK001308  | 1386.444  | 1394.611  | NM_001441 | 962.843   | 1569.223  | NM_015044 | 3544.763  | 4057.684  |
| AK024127  | 1121.435  | 1205.518  | NM_018324 | 604.568   | 888.019   | NM_002867 | 629.981   | 714.102   |
| AK024243  | 719.136   | 666.632   | AF064255  | 13042.074 | 15235.89  | NM_00052C | 4044.064  | 4947.122  |
| AK021574  | 2279.834  | 1986.01   | NM_01636E | 19913.563 | 24375.326 | NM_00028E | 907.622   | 1308.351  |
| AF119911  | 10228.434 | 9767.715  | U08853    | 2608.078  | 3074.782  | NM_00150C | 1601.386  | 1928.123  |
| AF116656  | 6098.501  | 8139.417  | NM_004261 | 15423.459 | 22261.137 | NM_00438E | 2424.951  | 3190.348  |
| NM_00529E | 2978.693  | 2533.564  | NM_01600E | 1389.857  | 2292.967  | NM_02037E | 471.022   | 819.41    |
| NM_02021E | 3372.935  | 3131.438  | NM_01624E | 13085.977 | 19479.871 | AL110127  | 1486.053  | 1870.214  |
| D17267    | 9092.837  | 7736.84   | AF005632  | 2308.13   | 2595.019  | NM_00252E | 1527.37   | 1821.39   |
| AF200341  | 526.252   | 619.869   | NM_00090E | 11586.438 | 11571.617 | D38438    | 4309.151  | 5463.347  |
| AJ238214  | 857.51    | 844.081   | NM_00449E | 8489.581  | 8721.688  | AV714945  | 582.273   | 564.585   |
| AB040944  | 2329.161  | 2080.529  | NM_00482E | 1328.649  | 1008.979  | AF007872  | 1839.103  | 1627.019  |
| NM_01814E | 4591.959  | 4584.82   | Y17179    | 61001.453 | 57013.492 | M30938    | 5014.505  | 3628.8    |
| AK024326  | 874.527   | 984.738   | NM_000891 | 650.459   | 474.343   | NM_01514E | 919.228   | 955.14    |
| U61088    | 874.191   | 757.165   | AF239613  | 3600.177  | 3785.989  | NM_004714 | 926.121   | 901.494   |
| AF086467  | 3068.947  | 3705.585  | AK026840  | 1199.302  | 1264.488  | NM_005401 | 929.229   | 986.998   |
| AL137345  | 1574.231  | 1506.937  | NM_00028E | 1465.822  | 1547.134  | NM_002497 | 5743.01   | 4964.019  |
| AK000967  | 1587.987  | 1390.152  | AK026317  | 6970.853  | 8011.643  | AB025194  | 3806.55   | 4069.537  |
| AK021583  | 1878.934  | 2204.013  | X82207    | 9720.085  | 9967.912  | NM_00623E | 629.122   | 798.532   |
| AL137442  | 4420.068  | 5735.01   | NM_015044 | 3905.919  | 4061.026  | NM_017897 | 2121.599  | 1977.431  |
| AL049281  | 1316.232  | 1568.044  | NM_00052C | 4792.209  | 5737.363  | NM_00426E | 18103.232 | 18146.207 |
| NM_00120E | 31428.129 | 34330.891 | NM_00028E | 950.529   | 1152.725  | NM_00257E | 1914.742  | 1956.598  |
| AL050061  | 1730.437  | 1981.451  | NM_00150C | 1600.859  | 2375.49   | NM_00050E | 1988.412  | 2289.622  |
| AL050206  | 1023.018  | 1044.106  | NM_00438E | 2566.388  | 3179.117  | NM_00454E | 665.943   | 662.562   |
| AK026898  | 6762.45   | 5315.371  | AL110127  | 1255.205  | 1284.679  | X06182    | 1051.755  | 1291.82   |
| NM_006637 | 1106.139  | 1065.098  | NM_00252E | 1457.899  | 1653.218  | BE908993  | 13370.432 | 15228.718 |
| AK022419  | 937.439   | 814.635   | D38438    | 2588.383  | 2437.357  | AB012701  | 1422.576  | 2000.786  |
| NM_01393E | 943.538   | 729.096   | AV714945  | 776.786   | 574.495   | M61156    | 821.467   | 941.641   |
| AF086145  | 1782.91   | 851.792   | M30938    | 4027.949  | 4389.117  | R44005    | 1363.278  | 1061.423  |
| Z70709    | 477.961   | 551.291   | NM_01514E | 873.996   | 1219.839  | AI942392  | 3749.626  | 3679.967  |
| BC002538  | 4364.701  | 3735.134  | NM_004714 | 917.951   | 949.879   | M55040    | 694.854   | 657.548   |
| AK022355  | 767.709   | 969.438   | NM_005401 | 882.359   | 805.947   | AW009739  | 2900.038  | 2804.382  |
| NM_01783E | 3695.806  | 3810.645  | NM_002497 | 5148.932  | 4444.934  | BC036805  | 7434.66   | 7667.8    |
| AK096584  | 25607.654 | 26146.162 | AB025194  | 3166.551  | 3566.756  | Z74615    | 13965.172 | 12654.869 |
| Z29070    | 653.267   | 682.422   | NM_00623E | 650.458   | 708.67    | X03884    | 3517.237  | 3149.166  |
| AL078636  | 1298.86   | 1413.268  | BC020863  | 681.883   | 615.76    | U36759    | 2159.963  | 1551.237  |
| AK022382  | 897.647   | 985.797   | NM_017897 | 1644.36   | 1455.108  | X91625    | 2183.409  | 2528.916  |
| AF147362  | 610.399   | 526.79    | NM_00426E | 16014.786 | 17012.328 | AF090901  | 452.627   | 450.662   |
| S72917    | 773.564   | 722.121   | NM_00257E | 2013.723  | 1518.671  | AF004231  | 578.484   | 740.688   |
| AF076617  | 66845.273 | 56217.16  | L14819    | 434.572   | 495.426   | AF001862  | 2586.895  | 2274.646  |
| M91159    | 711.01    | 346.055   | NM_00050E | 1730.999  | 1950.525  | NM_016044 | 1099.562  | 1079.096  |
| AK025129  | 607.867   | 731.549   | NM_00454E | 540.509   | 661.358   | AK023151  | 1783.788  | 2215.678  |
| NM_01439E | 6531.792  | 5600.01   | X06182    | 995.582   | 1426.613  | AB033076  | 1316.354  | 1411.716  |
| AK023291  | 6718.612  | 5781.944  | AB012701  | 1499.979  | 1744.619  | AK022876  | 951.506   | 1152.983  |
| BF541820  | 585.48    | 978.472   | M61156    | 880.851   | 1006.898  | AF134894  | 4958.389  | 6026.478  |
| CY3Cy5    | 3537.089  | 153.904   | R44005    | 1139.152  | 1123.323  | NM_00412E | 553.184   | 522.179   |
| BG752013  | 458.884   | 669.656   | AI942392  | 3004.725  | 3254.304  | U87460    | 7459.357  | 8191.317  |
| X07696    | 3860.634  | 4735.233  | M55040    | 650.957   | 444.494   | NM_003617 | 827.568   | 734.244   |
| AI925826  | 8567.411  | 10652.383 | AW009739  | 2289.563  | 2191.17   | NM_001841 | 768.037   | 999.877   |

|           |           |           |           |           |           |           |           |           |
|-----------|-----------|-----------|-----------|-----------|-----------|-----------|-----------|-----------|
| U04209    | 3605.582  | 3241.199  | BC036805  | 5760.329  | 6131.387  | NM_002054 | 3300.435  | 3655.222  |
| Z15108    | 1423.573  | 1514.792  | Z74615    | 9727.118  | 9592.604  | AF300649  | 1767.841  | 1359.119  |
| M55284    | 1002.921  | 2463.337  | X03884    | 2335.292  | 1590.333  | NM_004125 | 909.681   | 819.814   |
| AA001218  | 648.742   | 1044.21   | U36759    | 1902.968  | 1185.356  | NM_000823 | 2617.091  | 2191.748  |
| AA679391  | 1640.681  | 2453.693  | X91625    | 1801.796  | 1940.697  | NM_004414 | 1418.65   | 1367.031  |
| BG682146  | 3303.028  | 5428.561  | AF004231  | 572.143   | 768.844   | NM_003317 | 2981.328  | 2533.531  |
| AA884709  | 547.87    | 792.151   | AF001862  | 2496.343  | 2381.121  | NM_001139 | 2518.29   | 2388.124  |
| NM_005060 | 3227.385  | 3235.796  | NM_016044 | 1249.451  | 1356.967  | NM_004609 | 21455.104 | 19804.602 |
| NM_005437 | 7061.394  | 7756.572  | AK023151  | 1379.287  | 1781.021  | NM_003772 | 896.569   | 1256.949  |
| SR5       | 5223.778  | 4034.03   | AB033076  | 994.511   | 897.198   | NM_001541 | 2025.74   | 1910.658  |
| SR7       | 6703.404  | 35091.477 | AK022876  | 1070.709  | 920.627   | NM_005416 | 1212.507  | 1013.748  |
| SR9       | 22436.152 | 2774.282  | AF134894  | 3316.844  | 4337.374  | NM_004670 | 292.756   | 389.863   |
| CY3Cy5    | 1370.568  | 91.004    | NM_003938 | 5661.646  | 5023.655  | L09081    | 2664.042  | 2426.505  |
| NM_003974 | 1510.66   | 1665.386  | NM_004126 | 370.913   | 428.068   | NM_000218 | 66228.18  | 67183.82  |
| NM_006065 | 2844.002  | 3329.854  | U87460    | 6614.272  | 7085.882  | NM_016113 | 3160.261  | 3582.576  |
| NM_014339 | 37069.672 | 49255.438 | NM_003617 | 700.156   | 798.548   | NM_014222 | 3526.979  | 4049.512  |
| NM_001495 | 950.906   | 1244.82   | NM_001841 | 797.55    | 731.187   | AK026840  | 1196.008  | 1604.458  |
| NM_002288 | 2660.237  | 3427.423  | NM_002054 | 2594.97   | 2778.425  | NM_000288 | 1447.17   | 2021.256  |
| NM_004416 | 692.607   | 729.637   | AF300649  | 1117.81   | 1076.912  | AK026317  | 9097.676  | 10977.771 |
| NM_000628 | 8958.514  | 11090.999 | NM_004125 | 707.22    | 598.754   | X82207    | 15463.108 | 18764.361 |
| AB005216  | 709.138   | 967.363   | NM_000823 | 1779.885  | 1510.715  | NM_015044 | 4431.639  | 5174.17   |
| NM_000325 | 6936.689  | 7873.722  | NM_004414 | 1086.33   | 859.399   | NM_002867 | 377.686   | 702.534   |
| AF015041  | 1437.908  | 2095.779  | NM_003317 | 2467.373  | 2218.136  | BF217496  | 3216.026  | 3706.645  |
| NM_002363 | 449.125   | 920.702   | NM_001139 | 2037.52   | 1858.53   | NM_004762 | 2499.421  | 3003.206  |
| AK000184  | 1269.994  | 1614.87   | NM_004609 | 17814.342 | 17506.555 | NM_006641 | 40145.648 | 40321.918 |
| AF055020  | 8933.214  | 13044.293 | NM_003772 | 940.043   | 927.463   | NM_000634 | 5823.046  | 6051.542  |
| NM_006986 | 1404.99   | 1859.398  | NM_001541 | 1712.389  | 1714.924  | NM_014679 | 18013.67  | 17021.045 |
| AF272043  | 4489.194  | 6026.251  | NM_005416 | 931.704   | 887.636   | AB040969  | 1579.957  | 1620.289  |
| NM_002587 | 16683.072 | 18319.668 | NM_004670 | 527.352   | 417.615   | NM_003467 | 3154.534  | 2890.04   |
| NM_002238 | 931.515   | 1172.251  | L09081    | 2412.208  | 2194.375  | NM_014936 | 738.475   | 667.496   |
| NM_004868 | 2062.043  | 1894.902  | NM_000218 | 66999.539 | 69588.07  | NM_003943 | 1186.601  | 1320.041  |
| NM_007028 | 5078.269  | 4384.049  | NM_016113 | 2903.338  | 2658.32   | NM_019052 | 4412.06   | 5177.951  |
| AF130728  | 836.405   | 715.064   | NM_014222 | 2987.585  | 3216.842  | NM_003202 | 642.057   | 639.523   |
| NM_001289 | 13430.008 | 9477.164  | AK026840  | 1097.003  | 1656.875  | AF119902  | 731.874   | 529.956   |
| NM_001131 | 42908.492 | 31530.637 | NM_000288 | 1307.565  | 1535.812  | NM_020525 | 3513.793  | 3124.857  |
| NM_002414 | 12571.773 | 14648.314 | AK026317  | 6839.778  | 8777.827  | NM_003890 | 2188.12   | 2675.14   |
| NM_000355 | 1511.157  | 2097.227  | X82207    | 8227.874  | 8885.811  | BF127978  | 1918.95   | 1902.786  |
| AL133580  | 2295.298  | 2871.615  | NM_015044 | 3390.66   | 4428.111  | NM_016579 | 9485.939  | 8583.597  |
| NM_014666 | 10748.834 | 12613.823 | BF217496  | 2232.567  | 2710.829  | AB018297  | 796.136   | 903.106   |
| NM_005451 | 2762.873  | 3761.412  | NM_004762 | 2153.388  | 2503.876  | AK022565  | 11099.98  | 8941.509  |
| NM_007172 | 2657.23   | 3823.643  | NM_006641 | 33537.477 | 42350.617 | AB025194  | 4172.535  | 5966.059  |
| NM_006152 | 3494.64   | 3961.712  | NM_000634 | 4833.007  | 4993.235  | NM_006239 | 750.156   | 918.561   |
| NM_013333 | 20165.721 | 25517.787 | NM_014679 | 17411.301 | 16292.754 | BC020863  | 655.546   | 536.18    |
| NM_002333 | 4151.922  | 4663.672  | AB040969  | 1404.413  | 1328.053  | NM_017897 | 2135.696  | 2414.972  |
| NM_003400 | 7833.582  | 9471.436  | NM_003467 | 2555.096  | 2166.054  | NM_004265 | 19165.303 | 25162.549 |
| NM_006705 | 3638.69   | 4420.184  | NM_014936 | 845.816   | 556.207   | NM_002572 | 2157.259  | 2659.665  |
| NM_014439 | 1133.897  | 1466.172  | NM_003943 | 1174.584  | 916.366   | NM_001441 | 1396.33   | 1822.479  |
| NM_005582 | 1592.166  | 2369.17   | NM_019052 | 3284.891  | 4109.986  | NM_018324 | 684.803   | 730.517   |
| NM_012266 | 3623.949  | 4256.931  | NM_003202 | 707.949   | 852.884   | AF064255  | 15333.595 | 16328.697 |
| NM_004559 | 2070.687  | 1891.298  | AF119902  | 641.653   | 644.818   | NM_016368 | 33757.145 | 35699.613 |
| X56692    | 5736.588  | 5135.328  | NM_020525 | 1980.62   | 1880.713  | U08853    | 2706.725  | 2698.095  |
| NM_014476 | 415.61    | 563.64    | NM_003890 | 2087.432  | 2152.821  | NM_004261 | 17005.914 | 18460.523 |
| NM_014278 | 1741.007  | 1244.144  | BF127978  | 1605.016  | 1342.75   | NM_016006 | 1655.63   | 1659.078  |

|           |           |           |           |           |           |           |           |           |
|-----------|-----------|-----------|-----------|-----------|-----------|-----------|-----------|-----------|
| NM_00583E | 468.649   | 731.458   | AF110801  | 639.266   | 266.279   | NM_01624E | 13986.658 | 14913.346 |
| NM_000734 | 3202.964  | 2186.577  | NM_016579 | 8409.662  | 7170.671  | AF005632  | 2778.537  | 3486.337  |
| NM_012331 | 2566.991  | 1861.249  | AB018297  | 873.457   | 625.111   | NM_000903 | 12713.05  | 11102.023 |
| NM_006644 | 2497.157  | 1422.44   | AK022565  | 8585.244  | 7302.394  | NM_004493 | 9894.371  | 8191.482  |
| NM_006583 | 64165.469 | 1011.219  | AB025194  | 3767.896  | 5173.903  | NM_004047 | 25715.801 | 20947.574 |
| X82693    | 11008.821 | 13785.352 | NM_006239 | 638.698   | 1037.114  | NM_004823 | 1302.338  | 1314.048  |
| NM_00717E | 9090.231  | 10374.178 | BC020863  | 556.597   | 659.474   | Y17179    | 55810.867 | 60605.895 |
| NM_002722 | 1630.353  | 2031.972  | NM_017897 | 1937.57   | 2384.176  | NM_000891 | 695.142   | 438.503   |
| AF317058  | 586.513   | 584.551   | NM_004265 | 14735.51  | 17927.348 | AF239613  | 4046.01   | 3521.626  |
| M22538    | 13044.313 | 16956.602 | NM_002572 | 1966.5    | 2045.671  | NM_016044 | 1269.291  | 1646.906  |
| NM_014904 | 1056.557  | 1340.851  | NM_001441 | 1174.649  | 1587.28   | NM_00052C | 4707.905  | 4668.236  |
| AL137576  | 8539.814  | 9203.3    | NM_018324 | 476.738   | 766.96    | NM_00028E | 1091.582  | 1190.388  |
| NM_01835E | 4687.531  | 4453.45   | AF064255  | 13325.503 | 15290.823 | NM_00150C | 1800.217  | 1683.399  |
| NM_016321 | 520.641   | 492.941   | NM_01636E | 23272.723 | 25916.816 | NM_00438E | 2742.815  | 3321.156  |
| AF131781  | 2974.893  | 2092.124  | U08853    | 2140.933  | 2481.314  | NM_02037E | 427.981   | 661.247   |
| NM_00651E | 13640.709 | 9978.189  | NM_004261 | 14220.984 | 15004.09  | AL110127  | 1769.558  | 1426.475  |
| NM_01586E | 1017.066  | 840.202   | NM_01600E | 1798.337  | 1514.216  | NM_00252E | 1682.181  | 1639.962  |
| NM_00305E | 7755.896  | 5519.726  | NM_01624E | 12215.397 | 12986.743 | D38438    | 4197.648  | 3643.907  |
| NM_00507E | 738.192   | 536.323   | AF005632  | 2167.001  | 1684.823  | AV714945  | 765.004   | 605.154   |
| NM_006841 | 430.322   | 549.431   | NM_000903 | 10949.811 | 9207.021  | AF089897  | 527.694   | 90.732    |
| NM_014824 | 1290.5    | 1790.105  | NM_004493 | 8786.21   | 8093.572  | AF007872  | 1976.567  | 1700.005  |
| NM_014504 | 2611.055  | 2643.978  | AF309489  | 382.439   | 324.313   | M30938    | 4376.086  | 3377.832  |
| NM_014741 | 2167.381  | 3019.425  | NM_004047 | 21439.748 | 19781.316 | NM_01514E | 927.787   | 852.621   |
| AF212247  | 4797.611  | 5499.908  | NM_004823 | 1481.411  | 1288.745  | NM_004714 | 1021.994  | 746.195   |
| AF161407  | 15136.029 | 18704.498 | Y17179    | 61304.102 | 56703.32  | NM_005401 | 777.832   | 744.583   |
| NM_01473E | 2992.716  | 4136.956  | AF239613  | 4096.306  | 3874.678  | NM_002497 | 5877.164  | 4045.053  |
| AF174605  | 576.886   | 1015.303  | NM_016044 | 1165.773  | 1396.79   | NM_00541E | 864.954   | 912.617   |
| AL050107  | 1172.154  | 909.473   | NM_00052C | 4213.261  | 4657.468  | NM_00467C | 381.777   | 551.795   |
| NM_014453 | 13195.299 | 11664.319 | NM_00028E | 823.084   | 1007.805  | L09081    | 2153.938  | 2305.722  |
| NM_005713 | 1159.819  | 754.989   | NM_00150C | 1829.372  | 1885.232  | NM_00021E | 56234.535 | 65039.836 |
| AK023553  | 1171.829  | 889.077   | NM_00438E | 2354.145  | 2951.484  | NM_016113 | 2898.698  | 3039.947  |
| NM_01460C | 1070.064  | 779.924   | AL110127  | 1332.492  | 1231.925  | NM_014222 | 2952.846  | 3801.849  |
| NM_016733 | 1469.17   | 933.059   | NM_00252E | 1555.551  | 1623.325  | L14819    | 363.304   | 569.014   |
| AF181994  | 2893.492  | 2280.415  | D38438    | 2205.164  | 2028.466  | NM_00050E | 2080.648  | 1758.934  |
| NM_018962 | 2173.575  | 2107.848  | AV714945  | 597.546   | 492.862   | NM_004542 | 570.456   | 622.279   |
| AF125100  | 2759.991  | 2820.912  | AF007872  | 1591.893  | 1389.89   | X06182    | 1113.706  | 870.656   |
| NM_006114 | 10366.687 | 10680.035 | M30938    | 4376.452  | 3574.051  | BE908993  | 13532.546 | 13631.934 |
| AF130728  | 1359.472  | 1986.137  | NM_01514E | 730.274   | 722.215   | AB012701  | 1674.68   | 1389.207  |
| NM_004987 | 657.783   | 1038.889  | NM_004714 | 504.88    | 779.64    | M61156    | 795.393   | 634.683   |
| NM_00128E | 14116.873 | 16610.965 | NM_005401 | 520.246   | 580.986   | R44005    | 1180.655  | 854.501   |
| NM_001131 | 41948.32  | 54367.48  | NM_002497 | 5162.912  | 4433.675  | AI942392  | 3330.71   | 2684.184  |
| M54894    | 2365.823  | 1065.75   | NM_00541E | 855.047   | 1229.232  | M55040    | 663.125   | 592.759   |
| BG752013  | 584.662   | 848.495   | L09081    | 1961.987  | 2238.105  | AW009739  | 2610.666  | 2092.859  |
| X07696    | 3708.837  | 3922.54   | NM_00021E | 60022.906 | 58726.352 | BC036805  | 6213.217  | 5294.759  |
| AA481015  | 1003.662  | 1095.232  | NM_016113 | 2504.595  | 2403.559  | Z74615    | 10155.39  | 9455.306  |
| AI925826  | 7992.171  | 9666.084  | NM_014222 | 2550.274  | 3168.18   | X03884    | 2760.482  | 2243.715  |
| U04209    | 3101.658  | 2402.964  | L14819    | 370.858   | 339.616   | U36759    | 2404.712  | 1256.642  |
| Z15108    | 949.218   | 1069.041  | NM_00050E | 1942.484  | 1713.804  | X91625    | 2224.943  | 2075.254  |
| M55284    | 500.7     | 560.375   | NM_004542 | 512.918   | 677.787   | AF001862  | 2402.117  | 2198.87   |
| AA001218  | 596.65    | 511.708   | X06182    | 935.252   | 878.457   | NM_00389C | 2161.35   | 2757.339  |
| AA679391  | 743.727   | 537.86    | BE908993  | 12509.081 | 11905.725 | BF127978  | 1960.724  | 2005.437  |
| BG682146  | 2587.371  | 1748.002  | AB012701  | 1414.829  | 1205.501  | NM_01657E | 9248.853  | 9615.856  |
| AA884709  | 685.4     | 405.582   | M61156    | 741.626   | 676.273   | AB018297  | 881.153   | 979.478   |

|           |           |           |           |           |           |           |           |           |
|-----------|-----------|-----------|-----------|-----------|-----------|-----------|-----------|-----------|
| NM_00506C | 2918.504  | 1833.485  | R44005    | 1267.587  | 887.819   | AK022565  | 10284.218 | 11588.391 |
| NM_005437 | 7794.873  | 7805.032  | AI942392  | 2962.883  | 2186.34   | AK023151  | 1333.069  | 1758.332  |
| AK022417  | 3627.248  | 4178.991  | M55040    | 584.46    | 495.963   | AB033076  | 1186.902  | 982.971   |
| U50534    | 1165.453  | 1390.609  | AW009739  | 2316.857  | 2403.925  | AK022876  | 824.894   | 974.014   |
| NM_01427E | 1507.106  | 2318.907  | BC036805  | 5732.845  | 5128.614  | AF134894  | 4910.708  | 4926.923  |
| NM_00583E | 454.929   | 1043.578  | Z74615    | 9101.273  | 8771.952  | NM_00393E | 6681.398  | 5196.374  |
| NM_000734 | 2820.916  | 3620.349  | X03884    | 2407.089  | 1876.7    | NM_014827 | 13087.114 | 11454.006 |
| NM_012331 | 3086.607  | 3716.854  | U36759    | 1596.584  | 857.515   | NM_00412E | 640.823   | 495.76    |
| NM_006644 | 2575.885  | 2704.55   | X91625    | 1698.165  | 1681.194  | U87460    | 7643.984  | 6562.582  |
| NM_00658E | 68924.43  | 2432.337  | AF004231  | 704.968   | 711.099   | NM_003617 | 605.951   | 594.125   |
| NM_003974 | 1247.646  | 1656.369  | AF001862  | 2248.66   | 1854.134  | NM_001841 | 748.13    | 775.343   |
| NM_00606E | 3336.404  | 4626.072  | NM_00389C | 1735.282  | 2781.207  | NM_002054 | 3211.382  | 2617.973  |
| NM_01433E | 38106.508 | 48825.328 | BF127978  | 1703.465  | 1739.592  | AF300649  | 1260.116  | 1175.256  |
| NM_00149E | 1103.627  | 1205.063  | NM_01657E | 6494.061  | 6680.144  | NM_00412E | 835.09    | 806.584   |
| NM_00228E | 2217.129  | 2507.256  | AB018297  | 808.026   | 705.48    | NM_00082E | 2655.385  | 2301.788  |
| NM_00062E | 9738.629  | 14117.48  | AK022565  | 7008.973  | 6663.571  | NM_004414 | 1562.55   | 1228.283  |
| AB005216  | 789.158   | 1056.062  | AK023151  | 1362.321  | 1465.148  | NM_003317 | 2309.087  | 1730.679  |
| NM_00032E | 5807.021  | 5703.918  | AB033076  | 1079.399  | 949.02    | NM_00113E | 2135.313  | 1735.382  |
| AF015041  | 1069.872  | 1122.795  | AK022876  | 868.436   | 864.864   | NM_00460E | 20984.488 | 17519.275 |
| NM_00236E | 770.889   | 618.749   | AF134894  | 3675.187  | 4446.335  | NM_00377E | 992.619   | 995.223   |
| AK000184  | 754.176   | 411.934   | NM_00393E | 5901.804  | 4612.208  | NM_001541 | 2313.17   | 2229.029  |
| AF055020  | 6620.764  | 4242.5    | NM_014827 | 11062.389 | 11130.392 | NM_00482E | 1098.59   | 1762.509  |
| NM_00698E | 1041.378  | 763.508   | U87460    | 6253.843  | 5501.044  | Y17179    | 53377.289 | 61197.23  |
| AF272043  | 3587.942  | 3150.65   | NM_001841 | 651.018   | 692.034   | NM_000891 | 554.889   | 776.534   |
| NM_002587 | 18079.352 | 17528.367 | NM_002054 | 2827.889  | 2276.973  | AF239613  | 4624.154  | 5087.231  |
| NM_00223E | 1252.675  | 1388.978  | AF300649  | 1219.708  | 1012.198  | AK026840  | 1314.163  | 1361.715  |
| NM_00486E | 2455.463  | 2991.354  | NM_00412E | 797.438   | 822.68    | NM_00028E | 1351.358  | 1610.356  |
| NM_00466E | 2391.941  | 1385.348  | NM_00082E | 1548.677  | 1215.326  | AK026317  | 8297.883  | 8891.218  |
| NM_00702E | 7091.85   | 8765.561  | NM_004414 | 1064.101  | 671.469   | X82207    | 11723.446 | 12611.552 |
| AF131781  | 3572.772  | 4304.902  | NM_00113E | 1817.619  | 1666.559  | NM_015044 | 3565.181  | 4042.559  |
| NM_00651E | 13924.264 | 17215.465 | NM_00460E | 18608.127 | 15209.044 | NM_002867 | 468.859   | 398.56    |
| NM_01586E | 919.16    | 1447.21   | NM_00377E | 789.602   | 645.848   | BF217496  | 2905.296  | 3180.372  |
| NM_00305E | 7051.61   | 9355.628  | NM_001541 | 2060.397  | 1807.253  | NM_00476E | 2583.294  | 2939.573  |
| NM_00507E | 781.019   | 989.99    | NM_00482E | 1188.397  | 1268.238  | NM_006641 | 39480.074 | 33299.957 |
| NM_006841 | 656.354   | 1246.749  | Y17179    | 57557.707 | 57105.445 | NM_000634 | 6460.254  | 5604.067  |
| NM_002414 | 12992.393 | 14602.096 | NM_000891 | 503.403   | 494.994   | NM_01467E | 19846.055 | 13805.77  |
| NM_00035E | 1900.956  | 2306.987  | AF239613  | 4645.675  | 4773.895  | AB040969  | 1918.566  | 1727.544  |
| AL133580  | 1982.56   | 2907.577  | AK026840  | 1075.676  | 1275.204  | NM_003467 | 3093.177  | 2382.662  |
| NM_01466E | 10436.01  | 12383.595 | NM_00028E | 1364.106  | 1438.043  | NM_01493E | 679.5     | 791.976   |
| NM_005451 | 2549.117  | 2741.044  | AK026317  | 6725.207  | 7743.085  | NM_00394E | 1388.476  | 1103.105  |
| NM_00717E | 1756.478  | 1812.592  | X82207    | 9627.036  | 10202.536 | NM_01905E | 3781.471  | 4500.998  |
| NM_00615E | 2880.078  | 2838.91   | NM_015044 | 3539.455  | 3558.81   | NM_00320E | 715.932   | 595.851   |
| NM_01333E | 17918.945 | 16248.02  | BF217496  | 2050.788  | 2049.395  | AF119902  | 818.164   | 802.626   |
| NM_00233E | 2350.341  | 2125.193  | NM_00476E | 2041.739  | 1936.059  | NM_02052E | 3548.729  | 3244.63   |
| NM_00340C | 5995.653  | 5135.63   | NM_006641 | 29589.58  | 27392.688 | NM_01514E | 786.247   | 1092.076  |
| NM_00670E | 2530.955  | 1807.889  | NM_000634 | 4565.162  | 3732.746  | NM_004714 | 824.689   | 1359.705  |
| NM_01443E | 679.571   | 577.29    | NM_01467E | 15300.402 | 11299.339 | NM_005401 | 876.224   | 1033.425  |
| NM_00558E | 2062.374  | 1842.012  | AB040969  | 1513.11   | 1445.188  | NM_002497 | 5569.902  | 5546.613  |
| NM_01226E | 3074.697  | 3184.051  | NM_003467 | 2963.096  | 2709.401  | AB025194  | 4613.449  | 5158.79   |
| NM_00455E | 2465.649  | 3034.204  | NM_01493E | 753.432   | 620.275   | NM_00623E | 483.548   | 765.917   |
| X56692    | 7803.54   | 9063.25   | NM_00394E | 1018.131  | 860.592   | BC020863  | 708.692   | 537.809   |
| NM_01447E | 632.828   | 656.967   | AF119902  | 687.013   | 624.903   | NM_017897 | 2262.155  | 2204.056  |
| NM_01460C | 1015.431  | 1374.045  | NM_02052E | 2345.648  | 2051.328  | NM_00426E | 17880.969 | 18441.377 |

|           |           |           |           |           |           |           |           |           |
|-----------|-----------|-----------|-----------|-----------|-----------|-----------|-----------|-----------|
| NM_016733 | 1565.936  | 1810.939  | NM_015148 | 774.473   | 1278.122  | NM_002572 | 1884.224  | 1987.484  |
| AF181994  | 4089.399  | 6734.209  | NM_004714 | 925.124   | 1167.653  | NM_001441 | 1131.022  | 1247.07   |
| NM_018962 | 1981.658  | 2870.519  | NM_005401 | 669.083   | 837.528   | AF064255  | 16729.154 | 12864.794 |
| AF125100  | 2391.139  | 2856.734  | NM_002497 | 4759.726  | 3744.669  | NM_016368 | 29495.66  | 27228.408 |
| NM_006114 | 10228.275 | 16976.125 | AB025194  | 3298.488  | 4325.857  | U08853    | 3145.102  | 2463.31   |
| X82693    | 12486.078 | 15489.244 | NM_006239 | 590.367   | 683.114   | NM_004261 | 16869.604 | 15091.682 |
| NM_007176 | 10136.771 | 10514.982 | BC020863  | 595.668   | 523.598   | NM_016006 | 1801.874  | 1568.221  |
| NM_002722 | 1713.213  | 1978.795  | NM_017897 | 2073.251  | 1834.163  | NM_016245 | 15000.437 | 15030.88  |
| AK025965  | 3006.272  | 113.042   | NM_004265 | 16820.436 | 19513.92  | AF005632  | 3006.2    | 2428.412  |
| M22538    | 10349.306 | 8520.688  | NM_002572 | 1869.484  | 2060.4    | NM_000903 | 13079.855 | 11866.681 |
| NM_006028 | 684.759   | 789.741   | NM_001441 | 1087.706  | 993.525   | NM_004493 | 10522.878 | 9915.771  |
| NM_014904 | 646.539   | 843.9     | NM_018324 | 622.228   | 583.824   | AF309489  | 430.938   | 293.369   |
| AL137576  | 9170.615  | 7497.04   | AF064255  | 13186.863 | 11264.038 | NM_004047 | 25362.174 | 22371.479 |
| NM_018358 | 4811.343  | 6387.042  | NM_016368 | 20342.506 | 17091.619 | NM_006773 | 1276.188  | 1742.701  |
| NM_016321 | 825.39    | 443.573   | U08853    | 2266.593  | 1864.899  | AK024439  | 5548.684  | 6674.058  |
| NM_013356 | 439.636   | 534.7     | NM_004261 | 14958.347 | 14006.479 | X89676    | 736.47    | 838.475   |
| NM_005060 | 3225.172  | 3988.342  | NM_016006 | 1499.121  | 1688.706  | NM_012444 | 400.127   | 452.76    |
| NM_005437 | 6804.386  | 9570.965  | NM_016245 | 12218.129 | 13533.321 | Z32684    | 1396.094  | 1775.095  |
| AK022417  | 3180.763  | 3944.093  | AF005632  | 2038.607  | 1780.843  | NM_016512 | 443.344   | 458.603   |
| U50534    | 1073.415  | 1302.286  | NM_000903 | 11443.789 | 10470.372 | NM_017488 | 5384.056  | 5108.74   |
| NM_014824 | 1787.38   | 1999.865  | NM_004493 | 8482.705  | 8127.451  | NM_005066 | 789.336   | 813.91    |
| NM_014504 | 2024.922  | 1846.035  | AF309489  | 423.064   | 324.641   | NM_016044 | 1328.196  | 1211.696  |
| NM_014408 | 4731.241  | 3475.115  | NM_004047 | 24734.824 | 21777.609 | NM_000520 | 4789.964  | 3937.11   |
| NM_014741 | 1819.728  | 1320.252  | NM_006773 | 1287.894  | 1787.857  | NM_000288 | 1063.162  | 1026.746  |
| AF212247  | 3075.411  | 2127.505  | AK024439  | 5424.914  | 7506.503  | NM_001500 | 1810.752  | 1328.51   |
| AF161407  | 12838.201 | 7928.568  | X89676    | 620.337   | 663.847   | NM_004388 | 2558.534  | 2491.35   |
| NM_014738 | 1585.954  | 1573.016  | NM_012444 | 571.639   | 256.378   | NM_020379 | 332.188   | 446.375   |
| NM_016406 | 1795.107  | 1804.381  | Z32684    | 1265.468  | 1591.818  | AL110127  | 1761.597  | 1579.189  |
| NM_018080 | 6156.292  | 6326.152  | NM_017488 | 5198      | 5616.027  | NM_002528 | 1681.621  | 1498.623  |
| AL050107  | 444.577   | 750.574   | NM_005066 | 672.316   | 639.175   | D38438    | 4460.894  | 4050.899  |
| NM_014453 | 14916.925 | 17061.41  | NM_016044 | 1279.953  | 1342.4    | AV714945  | 677.384   | 636.71    |
| NM_005713 | 1276.149  | 758.136   | NM_000520 | 4497.315  | 3982.716  | AF089897  | 313.47    | 268.017   |
| AK023553  | 1230.835  | 979.039   | NM_000288 | 1068.459  | 1270.6    | AF007872  | 1876.776  | 1775.777  |
| AF272043  | 3017.733  | 3703.115  | NM_001500 | 1654.297  | 1791.237  | M30938    | 4322.395  | 3789.191  |
| NM_002587 | 12141.488 | 15931.805 | NM_004388 | 2619.219  | 2063.855  | NM_017586 | 5685.99   | 7389.968  |
| NM_002238 | 1310.368  | 1851.373  | NM_020379 | 425.558   | 345.311   | NM_004148 | 3277.009  | 4313.999  |
| NM_004868 | 2362.723  | 3572.358  | AL110127  | 1196.56   | 1256.104  | X03168    | 692.95    | 789.59    |
| NM_004666 | 2343.943  | 2692.812  | NM_002528 | 1763.763  | 1532.998  | NM_005168 | 1435.305  | 1461.263  |
| NM_007028 | 5335.141  | 6708.951  | D38438    | 1925.612  | 1922.586  | NM_017801 | 7581.386  | 8723.086  |
| AF130728  | 1027.58   | 1308.742  | AV714945  | 574.777   | 660.808   | NM_007348 | 5389.443  | 5366.033  |
| NM_004987 | 677.929   | 1040.752  | AF007872  | 1530.26   | 1538.432  | U65473    | 2838.512  | 2585.572  |
| NM_001288 | 12851.501 | 13611.837 | M30938    | 4374.938  | 3990.99   | D63481    | 4448.357  | 3951.805  |
| NM_001131 | 41643.02  | 52437.059 | NM_017586 | 4127.838  | 4698.809  | AY009951  | 480.122   | 573.357   |
| AA831963  | 817.276   | 465.869   | NM_004148 | 3021.717  | 3435.246  | AK024422  | 1616.795  | 1956.69   |
| BG752013  | 15473.037 | 1539.149  | X03168    | 663.67    | 917.53    | NM_002673 | 2661.55   | 1972.005  |
| X07696    | 2402.072  | 1321.258  | NM_005168 | 1219.897  | 1864.571  | NM_003876 | 3192.398  | 3273.521  |
| AI925826  | 6729.775  | 6355.646  | NM_017801 | 6429.121  | 7404.438  | AJ276310  | 537.145   | 453.84    |
| U04209    | 2250      | 1688.583  | NM_007348 | 3958.79   | 3484.73   | NM_012295 | 4663.103  | 3778.073  |
| AI393201  | 3980.863  | 3153.275  | NM_016953 | 317.679   | 448.688   | NM_015910 | 734.294   | 520.888   |
| M34664    | 55110.754 | 56589.199 | U65473    | 1713.278  | 2307.406  | AL133666  | 803.04    | 815.604   |
| Z15108    | 887.437   | 648.073   | D63481    | 4135.899  | 4423.205  | NM_000663 | 672.452   | 768       |
| M55284    | 555.84    | 422.802   | AY009951  | 497.673   | 389.35    | NM_004710 | 4051.927  | 2329.968  |
| AA001218  | 569.515   | 908.546   | AL157424  | 605.178   | 683.016   | NM_004396 | 12262.152 | 11267.212 |

|           |           |           |           |           |           |           |           |           |
|-----------|-----------|-----------|-----------|-----------|-----------|-----------|-----------|-----------|
| AA679391  | 1063.416  | 877.734   | AK024422  | 1473.736  | 1603.266  | NM_017995 | 2103.396  | 2272.278  |
| BG682146  | 3236.685  | 3159.038  | NM_002673 | 2347.614  | 1939.473  | NM_015985 | 34055.145 | 26342.803 |
| AA884709  | 627.252   | 495.731   | NM_003876 | 3235.347  | 3902.745  | NM_001043 | 1156.697  | 1045.15   |
| NM_012266 | 2973.072  | 3599.95   | NM_012295 | 3208.578  | 2421.445  | NM_004775 | 6086.241  | 7551.582  |
| NM_004555 | 1959.361  | 2885.517  | AL133666  | 727.387   | 527.871   | NM_019071 | 2161.658  | 2634.026  |
| X56692    | 5947.195  | 8196.856  | NM_000663 | 564.361   | 463.443   | AF113685  | 618.827   | 623.298   |
| NM_014476 | 577.763   | 801.247   | NM_004710 | 2769.252  | 2062.55   | NM_005470 | 2973.157  | 3058.734  |
| NM_014278 | 2234.942  | 3414.024  | NM_004396 | 10456.939 | 8904.208  | AF142570  | 427.18    | 645.695   |
| NM_005838 | 635.311   | 1085.992  | NM_017999 | 1636.757  | 1745.294  | NM_004225 | 8144.216  | 7440.935  |
| NM_000734 | 2932.197  | 2713.324  | NM_015989 | 24102.869 | 21468.459 | NM_003862 | 1086.899  | 759.73    |
| NM_012331 | 2638.048  | 2489.635  | NM_001043 | 1198.637  | 750.789   | NM_002873 | 2431.014  | 1986.462  |
| NM_006644 | 2072.948  | 1378.465  | NM_004779 | 5182.322  | 6116.278  | NM_015571 | 6980.908  | 5851.635  |
| NM_006583 | 70339.758 | 933.645   | NM_019071 | 1748.513  | 2079.489  | NM_004701 | 3523.906  | 3834.012  |
| NM_003974 | 1111.568  | 532.197   | AF113685  | 430.606   | 560.819   | AK025554  | 1629.902  | 1729.101  |
| NM_006065 | 1911.789  | 1051.2    | NM_005470 | 2334.712  | 2496.522  | BI824151  | 3218.454  | 3076.634  |
| NM_014335 | 33246.363 | 28020.883 | NM_004225 | 7939.832  | 8397.742  | AK021791  | 2274.823  | 2019.972  |
| NM_001495 | 927.935   | 777.824   | NM_003862 | 789.945   | 1214.686  | NM_004052 | 7034.317  | 8322.393  |
| NM_002288 | 1955.826  | 2193.137  | NM_002873 | 1778.163  | 1745.404  | NM_004394 | 12550.163 | 10689.927 |
| NM_004416 | 591.893   | 673.774   | NM_015571 | 5694.128  | 5431.674  | NM_005727 | 15497.248 | 14082.557 |
| NM_000628 | 8421.144  | 9854.031  | NM_004701 | 3037.477  | 3328.074  | AK027242  | 1587.283  | 1417.121  |
| AB005216  | 528.201   | 1079.056  | AK025554  | 1793.231  | 1605.791  | NM_001275 | 10782.158 | 9888.28   |
| NM_000325 | 6717.73   | 4898.638  | BI824151  | 2850.349  | 2669.064  | NM_005010 | 1093.617  | 1038.435  |
| AF015041  | 1473.002  | 1077.615  | AK021791  | 2031.38   | 1648.011  | NM_019055 | 1404.694  | 1037.996  |
| NM_002363 | 706.583   | 674.522   | NM_004052 | 6282.811  | 6484.348  | NM_005941 | 364.22    | 472.623   |
| AK000184  | 965.332   | 653.858   | NM_004394 | 10210.165 | 7546      | NM_015884 | 377.09    | 464.555   |
| AF055020  | 9242.085  | 9946.476  | NM_005727 | 13495.405 | 10115.109 | AF201380  | 2535.781  | 2932.534  |
| NM_006986 | 1715.053  | 2681.465  | AK027242  | 1317.16   | 1005.368  | NM_003619 | 3000.561  | 2957.233  |
| NM_014904 | 1288.448  | 1696.474  | NM_001275 | 8581.747  | 8821.816  | NM_012392 | 3123.914  | 3652.489  |
| AL137576  | 8564.985  | 11263.806 | NM_005010 | 786.305   | 882.373   | NM_014833 | 12579.178 | 13439.404 |
| NM_018358 | 4907.813  | 7090.112  | NM_019055 | 1095.18   | 1229.064  | NM_003878 | 3225.165  | 4051.352  |
| NM_016321 | 738.948   | 1078.324  | AF188747  | 374.939   | 521.442   | NM_004832 | 401.073   | 571.256   |
| NM_013356 | 1111.171  | 1890.598  | NM_005941 | 458.189   | 359.803   | NM_005957 | 742.857   | 510.677   |
| AF131781  | 3214.222  | 4373.565  | NM_015884 | 318.473   | 248.065   | AK024374  | 1221.951  | 1368.344  |
| NM_006516 | 13540.802 | 16843.758 | AF201380  | 2289.248  | 2709.113  | NM_018234 | 2546.245  | 2179.426  |
| NM_015865 | 629.102   | 936.844   | NM_003619 | 2347.359  | 2342.042  | AB033062  | 824.105   | 764.801   |
| NM_003055 | 6883.627  | 9463.23   | NM_012392 | 2490.165  | 2824.174  | NM_016437 | 14229.362 | 14073.024 |
| NM_005075 | 538.739   | 495.846   | NM_014833 | 10233.918 | 11419.261 | NM_002720 | 5891.575  | 4791.198  |
| NM_002414 | 8805.09   | 3881.709  | NM_000045 | 365.46    | 481.901   | AK024716  | 12199.824 | 11434.095 |
| NM_000355 | 1520.644  | 1313.199  | NM_003878 | 3052.703  | 3574.234  | X67155    | 643.161   | 570.243   |
| AL133580  | 2061.167  | 2302.105  | NM_004832 | 542.27    | 439.643   | NM_020380 | 4400.387  | 4173.618  |
| NM_014666 | 10438.604 | 9733.545  | NM_005957 | 556.15    | 596.632   | NM_002890 | 22962.576 | 18162.422 |
| NM_005451 | 2441.596  | 2669.28   | AK024374  | 1123.732  | 1268.128  | NM_001330 | 25288.283 | 19491.57  |
| NM_007172 | 2107.767  | 2767.552  | NM_018234 | 1983.495  | 1410.998  | NM_015927 | 683.153   | 776.892   |
| NM_006152 | 3038.323  | 3854.613  | AB033062  | 948.898   | 564.363   | NM_014552 | 2315.964  | 2623.853  |
| NM_013333 | 20044.193 | 23110.711 | NM_016437 | 9811.436  | 8873.04   | NM_003072 | 6926.426  | 7254.979  |
| NM_002333 | 4145.883  | 2080.361  | NM_002720 | 5669.162  | 4103.326  | NM_001913 | 1999.796  | 3037.14   |
| NM_003400 | 8309.052  | 5672.114  | AK024716  | 11703.806 | 10329.806 | AK025594  | 838.053   | 1121.778  |
| NM_006705 | 5930.553  | 8596.687  | X67155    | 641.989   | 498.796   | AB040931  | 2620.769  | 2779.767  |
| NM_014439 | 1293.123  | 2071.671  | NM_020380 | 3660.036  | 3512.523  | NM_003595 | 1036.829  | 1294.821  |
| NM_005582 | 3342.802  | 4471.447  | NM_002890 | 20461.674 | 16016.743 | NM_015911 | 1570.518  | 1308.252  |
| AF174605  | 629.579   | 932.223   | NM_001330 | 19374.654 | 14111.756 | BC011826  | 3045.892  | 2765.56   |
| AL050107  | 514.575   | 707.295   | NM_015927 | 774.402   | 728.072   | NM_017647 | 2414.445  | 2581.308  |
| NM_014453 | 14371.406 | 16070.452 | NM_005122 | 450.207   | 468.947   | NM_012091 | 999.615   | 911.222   |

|           |           |           |           |           |           |           |           |           |
|-----------|-----------|-----------|-----------|-----------|-----------|-----------|-----------|-----------|
| NM_005713 | 1177.62   | 1507.728  | NM_014552 | 1328.243  | 1319.304  | NM_012321 | 1664.033  | 1541.866  |
| AK021951  | 860.76    | 1282.487  | NM_003072 | 6837.595  | 6677.392  | D13642    | 4687.761  | 3994.204  |
| AK023553  | 2633.199  | 4028.442  | NM_001913 | 1976.353  | 2020.96   | NM_004741 | 7176.175  | 4909.815  |
| NM_014600 | 1368.299  | 1833.066  | AK025594  | 607.424   | 573.129   | NM_018032 | 3127.574  | 2191.381  |
| NM_016733 | 1963.882  | 2284.775  | AB040931  | 2313.06   | 2529.553  | NM_003675 | 3616.866  | 3101.649  |
| AF181994  | 2399.036  | 2342.567  | NM_003599 | 1166.823  | 1230.035  | NM_017518 | 1447.642  | 1110.686  |
| NM_018962 | 1901.891  | 1555.489  | NM_015911 | 1524.238  | 1591.062  | NM_004117 | 5183.194  | 4365.904  |
| AF125100  | 2015.449  | 1175.435  | BC011826  | 2599.365  | 2701.619  | NM_016594 | 1165.029  | 885.904   |
| NM_006114 | 6943.621  | 3761.954  | NM_017647 | 2553.936  | 2314.334  | NM_030752 | 2471.433  | 1685.125  |
| X82693    | 10237.738 | 7587.126  | NM_012091 | 952.469   | 836.719   | D26068    | 21034.885 | 14244.127 |
| NM_007176 | 9296.548  | 8477.024  | NM_012321 | 1736.741  | 1664.724  | NM_018559 | 5097.591  | 3569.145  |
| NM_002722 | 1542.075  | 1811.732  | D13642    | 4543.953  | 3764.14   | NM_017593 | 790.697   | 658.526   |
| M22538    | 16082.348 | 19202.066 | NM_004741 | 6364.313  | 4600.124  | NM_004282 | 10195.789 | 8602.299  |
| NM_006028 | 1408.628  | 1885.443  | NM_018032 | 2734.866  | 1630.634  | AK025695  | 1184.049  | 1531.641  |
| NM_012297 | 7844.888  | 10628.057 | NM_003675 | 3480.387  | 2619.964  | AK025442  | 4499.553  | 5624.693  |
| AB007925  | 43291.34  | 51253.078 | NM_017518 | 1749.943  | 1479.363  | AL050041  | 857.853   | 1005.985  |
| NM_018180 | 1817.963  | 2132.95   | NM_004117 | 5955.073  | 4943.504  | NM_002451 | 1410.056  | 1737.894  |
| NM_000361 | 8342.849  | 9549.139  | NM_016594 | 1625.275  | 1566.606  | NM_013411 | 898.457   | 1170.046  |
| NM_002475 | 33668.258 | 47226.949 | NM_030752 | 4022.03   | 3176.303  | NM_020200 | 373.091   | 507.236   |
| NM_003836 | 10927.718 | 14874.011 | D26068    | 18279.225 | 13248.192 | NM_000180 | 2805.353  | 2541.02   |
| NM_017987 | 503.465   | 830.267   | NM_018559 | 5067.955  | 3919.19   | NM_000858 | 3252.851  | 3064.145  |
| NM_018203 | 528.411   | 896.763   | NM_017593 | 881.711   | 489.772   | AF254087  | 1523.028  | 1445.018  |
| NM_014244 | 1781.588  | 1268.148  | NM_004282 | 9040.865  | 8146.031  | NM_017715 | 999.285   | 826.606   |
| AK022417  | 2559.031  | 1613.652  | AK025695  | 1044.17   | 1068.368  | AL117607  | 3279.729  | 3372.886  |
| U50534    | 1079.626  | 631.519   | AK025442  | 4389.608  | 4760.038  | AB037774  | 1718.909  | 1328.006  |
| NM_014824 | 1375.593  | 1071.644  | AL050041  | 814.415   | 895.907   | NM_005438 | 1041.898  | 1169.829  |
| NM_014504 | 2060.873  | 2461.371  | NM_002451 | 1476.139  | 1546.389  | AK024361  | 1149.159  | 1024.333  |
| NM_014408 | 5434.912  | 5730.924  | NM_013411 | 721.483   | 612.206   | NM_004350 | 1110.98   | 959.628   |
| NM_014741 | 3403.202  | 4865.096  | AB007956  | 273.689   | 748.733   | NM_018044 | 2029.951  | 1758.212  |
| AF212247  | 8357.355  | 13591.175 | NM_020200 | 491.368   | 707.099   | AF274347  | 3497.473  | 2529.013  |
| AF161407  | 17798.455 | 11193.693 | NM_000180 | 2872.785  | 2590.464  | NM_018555 | 3081.535  | 2530.495  |
| NM_014738 | 2601.37   | 1790.702  | NM_000858 | 3856.362  | 3368.243  | AK023525  | 3925.076  | 3859.356  |
| NM_016406 | 3257.837  | 3773.571  | AF254087  | 1496.993  | 1291.998  | AF085829  | 1228.169  | 1119.33   |
| NM_018080 | 11948.108 | 14767.073 | NM_017715 | 778.125   | 598.823   | AF075029  | 686.875   | 560.273   |
| NM_007115 | 618.615   | 839.023   | AL117607  | 2446.438  | 1779.774  | AK021903  | 3419.68   | 3344.664  |
| NM_004616 | 980.428   | 1288.131  | AB037774  | 1415.305  | 1215.297  | AL390143  | 3776.543  | 3927.645  |
| NM_004360 | 1080.411  | 1394.619  | NM_005438 | 849.166   | 633.261   | AL162075  | 2005.75   | 2059.754  |
| NM_003821 | 1754.766  | 2871.041  | AK024361  | 1072.488  | 890.597   | AF147384  | 395.997   | 628.67    |
| NM_017692 | 3337.283  | 4417.788  | NM_004350 | 1342.383  | 987.395   | AK021595  | 980.945   | 1043.359  |
| NM_003975 | 1257.026  | 1305.871  | NM_018044 | 1902.657  | 1855.774  | AK021648  | 2971.701  | 2862.261  |
| NM_004834 | 3850.179  | 3030.946  | AF274347  | 3125.647  | 2359.438  | AF147358  | 11094.951 | 10920.081 |
| NM_000812 | 1073.312  | 692.959   | NM_018555 | 2577.974  | 2216.824  | AL110290  | 435.756   | 518.455   |
| AK024747  | 10209.412 | 7649.833  | AK023525  | 2544.228  | 3170.934  | NM_018410 | 1386.741  | 1616.786  |
| NM_006390 | 1755.905  | 1533.464  | AF085829  | 872.679   | 1043.183  | AF147404  | 367.003   | 541.741   |
| NM_003580 | 4201.951  | 4232.945  | AK021903  | 2738.412  | 2573.861  | AF086278  | 472.452   | 208.058   |
| NM_006506 | 1096.998  | 1184.207  | AL390143  | 3082.373  | 3287.957  | AF086355  | 586.624   | 255.571   |
| NM_003235 | 9906.934  | 11204.16  | AL162075  | 1699.973  | 1744.078  | AF086314  | 608.434   | 466.607   |
| AB042562  | 1345.794  | 1258.407  | AF147384  | 479.33    | 531.357   | NM_016364 | 645.349   | 582.056   |
| NM_016009 | 2560.189  | 1454.62   | AK021648  | 2678.542  | 2873.368  | AF086419  | 3337.697  | 2863.021  |
| NM_002378 | 3510.333  | 2369.019  | AF147358  | 8653.788  | 10512.301 | AF086461  | 810.942   | 878.768   |
| NM_001364 | 687.55    | 549.272   | NM_018410 | 1617.845  | 1976.272  | AL833296  | 1655.991  | 1110.729  |
| NM_017431 | 930.588   | 1268.428  | AF086355  | 583.543   | 665.411   | AL110240  | 3404.808  | 2531.35   |
| NM_006097 | 8870.658  | 5355.4    | AF086452  | 588.006   | 595.464   | AF085919  | 1503.322  | 1427.394  |



|           |           |           |           |           |           |           |           |           |
|-----------|-----------|-----------|-----------|-----------|-----------|-----------|-----------|-----------|
| NM_006113 | 6306.159  | 4763.267  | NM_016364 | 759.983   | 412.195   | AF085933  | 799.837   | 901.932   |
| NM_015313 | 5274.707  | 2927.735  | AF086419  | 2973.337  | 2592.774  | AF147431  | 576.667   | 783.543   |
| AK022287  | 4636.966  | 4553.713  | AF086461  | 662.223   | 565.422   | AK026422  | 6854.762  | 6903.705  |
| NM_015897 | 1730.828  | 1683.822  | AF131795  | 359.902   | 645.301   | AF085938  | 211.187   | 448.224   |
| NM_005436 | 4774.647  | 4816.383  | AL833296  | 1415.335  | 1167.212  | AK022264  | 1016.215  | 1065.271  |
| AF177473  | 19500.369 | 23155.67  | AL110240  | 3161.207  | 2563.734  | AL137331  | 964.726   | 917.46    |
| NM_000546 | 5377.119  | 6549.996  | AF085919  | 1105.507  | 1018.259  | AL162040  | 1792.886  | 1913.309  |
| AB023223  | 1315.966  | 2076.695  | AF085933  | 755.722   | 922.037   | AL442084  | 792.509   | 814.67    |
| AB018257  | 2213.391  | 1953.686  | AF147431  | 514.742   | 435.169   | AL137371  | 6648.461  | 6297.917  |
| NM_002706 | 12885.094 | 9408.974  | AK026422  | 4560.517  | 4296.37   | AL137596  | 2239.753  | 2247.735  |
| AK001059  | 1550.442  | 842.214   | AK022264  | 694.364   | 879.614   | AL353942  | 7912.542  | 6687.461  |
| NM_007282 | 2144.43   | 1427.71   | AL137331  | 914.191   | 1223.52   | Z38010    | 6638.273  | 5069.796  |
| NM_017610 | 971.626   | 878.481   | AL162040  | 1690.319  | 1684.752  | AF088003  | 426.894   | 283.832   |
| AL122070  | 401.332   | 625.448   | AL442084  | 678.805   | 647.783   | AK024713  | 746.845   | 558.695   |
| AK025133  | 23549.822 | 29187.357 | AL137371  | 6495.841  | 6211.252  | AK023737  | 790.278   | 721.353   |
| AB020704  | 893.283   | 451.524   | AL137596  | 2417.641  | 2304.15   | NM_006609 | 1644.266  | 1172.201  |
| NM_004087 | 4381.325  | 5765.374  | AL353942  | 11372.655 | 10518.517 | NM_014118 | 541.546   | 340.727   |
| NM_018700 | 1079.24   | 1039.959  | Z38010    | 7010.279  | 5539.681  | AK023643  | 814.43    | 868.889   |
| NM_000119 | 8557.933  | 8709.064  | AK024713  | 663.174   | 602.885   | NM_014157 | 702.767   | 1206.917  |
| NM_001065 | 10769.326 | 5401.261  | AK024204  | 416.126   | 303.68    | AF111851  | 3177.918  | 3327.758  |
| AK027100  | 687.528   | 439.321   | AK023737  | 792.094   | 499.605   | AF152529  | 413.873   | 577.219   |
| NM_003622 | 1338.56   | 826.301   | NM_006609 | 1376.897  | 1038.737  | AL360200  | 603.537   | 684.356   |
| NM_001774 | 17959.168 | 17464.146 | AK023643  | 753.07    | 967.336   | AK021992  | 608.393   | 417.442   |
| AK021645  | 1786.064  | 1845.085  | NM_014157 | 405.662   | 774.192   | AK022102  | 603.986   | 422.622   |
| NM_013339 | 2209.527  | 2715.002  | AF090933  | 699.515   | 337.7     | AK022235  | 684.19    | 684.392   |
| NM_001491 | 2018.132  | 2303.985  | AF111851  | 2566.372  | 2427.304  | AK022378  | 1712.206  | 1372.173  |
| AK026541  | 1964.851  | 1508.543  | AL360200  | 560.735   | 639.234   | AK022009  | 352.197   | 365.551   |
| NM_005899 | 15498.131 | 7170.767  | AK021992  | 445.086   | 454.786   | AK027174  | 529.546   | 338.679   |
| D42055    | 10518.3   | 8898.242  | AK022102  | 568.229   | 509.395   | AL110173  | 666.59    | 497.102   |
| AL137349  | 1126.229  | 1304.248  | AK022235  | 392.078   | 505.71    | AK027254  | 1245.288  | 1136.728  |
| NM_003339 | 595.843   | 892.493   | AK022378  | 1677.192  | 1677.149  | AK021772  | 1582.537  | 854.735   |
| NM_016476 | 25537.17  | 14069.594 | AK022274  | 331.284   | 309.868   | AK054831  | 14114.096 | 17031.215 |
| NM_015902 | 927.867   | 602.268   | AK027174  | 441.915   | 347.061   | AK021770  | 921.775   | 1293.828  |
| NM_020155 | 2439.145  | 3290.097  | AL110173  | 532.739   | 356.307   | AK027248  | 1190.286  | 1341.505  |
| BE874471  | 1492.256  | 1427.187  | AK027254  | 1068.634  | 973.989   | AK022804  | 9070.398  | 8649.149  |
| NM_006121 | 2841.589  | 3989.73   | AK021772  | 1339.29   | 931.074   | AF009263  | 1935.057  | 2336.067  |
| AK023520  | 4299.733  | 3834.179  | AK054831  | 9741.634  | 11049.201 | AF009283  | 254.603   | 327.089   |
| NM_004693 | 670.986   | 446.21    | AK021770  | 901.71    | 1051.606  | AF086329  | 4437.773  | 4502.331  |
| NM_007211 | 3995.242  | 1868.905  | AK027248  | 1374.399  | 1100.23   | AK025799  | 384.686   | 437.242   |
| AB011152  | 1229.983  | 637.47    | AK022804  | 8919.719  | 7682.605  | AL110206  | 799.84    | 797.478   |
| NM_014956 | 5765.572  | 3792.856  | AF009263  | 1363.459  | 1398.776  | NM_004821 | 1129.709  | 860.583   |
| AB014592  | 749.292   | 476.401   | AF086329  | 3532.003  | 3320.974  | AK024292  | 1030.241  | 820.685   |
| NM_016952 | 1621.415  | 1240.192  | AK022857  | 929.672   | 620.893   | AK026263  | 1343.914  | 913.281   |
| NM_001654 | 3054.037  | 2174.459  | AL110206  | 813.07    | 958.832   | U50526    | 408.453   | 706.934   |
| NM_014519 | 904.904   | 1313.144  | NM_004821 | 918.109   | 741.81    | S75105    | 2134.978  | 2400.271  |
| NM_002517 | 778.19    | 937.964   | AK024292  | 980.833   | 1070.452  | AF056455  | 5483.221  | 6134.904  |
| NM_007147 | 10217.573 | 10580.521 | AK026263  | 1238.639  | 972.223   | NM_018510 | 1367.113  | 1578.715  |
| X65463    | 5335.753  | 5368.756  | U50526    | 493.858   | 814.947   | U50537    | 525.44    | 656.665   |
| AK024418  | 2596.569  | 2375.005  | S75105    | 1840.572  | 2063.645  | AK024988  | 737.857   | 965.633   |
| NM_003367 | 3403.478  | 2111.611  | AF056455  | 4480.543  | 4567.826  | AK025719  | 460.026   | 476.781   |
| NM_005194 | 6735.296  | 4785.057  | NM_018510 | 979.498   | 1015.483  | AF026943  | 1508.28   | 1413.236  |
| AB002296  | 1287.987  | 847.622   | U50537    | 337.027   | 546.062   | NM_005419 | 2932.868  | 2695.808  |
| NM_014315 | 2203.486  | 1151.144  | AK024988  | 582.373   | 658.829   | NM_003479 | 8867.567  | 8260.046  |

|           |           |           |           |           |           |           |           |           |
|-----------|-----------|-----------|-----------|-----------|-----------|-----------|-----------|-----------|
| NM_012087 | 782.06    | 467.449   | AK025719  | 557.811   | 359.569   | AK022078  | 374.725   | 413.652   |
| NM_015679 | 5531.824  | 7448.051  | AF026943  | 1442.13   | 1390.233  | AF075101  | 281.756   | 319.393   |
| AF299118  | 64950.734 | 59892.094 | NM_020448 | 574.904   | 603.077   | NM_020224 | 4298.428  | 3480.497  |
| AK025353  | 11229.766 | 6591.243  | NM_005419 | 2508.36   | 2716.392  | U17617    | 1107.775  | 951.845   |
| AK056896  | 25110.688 | 10482.193 | NM_003479 | 8449.03   | 9256.659  | AK022952  | 5248.963  | 5099.004  |
| AK022763  | 14941.626 | 6296.476  | AK022078  | 463.501   | 537.669   | BF218888  | 905.19    | 518.137   |
| AF288207  | 17118.859 | 8419.816  | NM_020224 | 3608.32   | 3070.668  | AF086401  | 2891.305  | 3011.963  |
| NM_001001 | 53142.93  | 30728.01  | U17617    | 1109.852  | 933.69    | L23869    | 1380.317  | 1303.487  |
| NM_005715 | 3795.656  | 5299.35   | AK022952  | 4793.055  | 4407.541  | Z21853    | 1522.768  | 2090.741  |
| AK026992  | 4792.69   | 8016.956  | BF218888  | 675.718   | 497.248   | U80770    | 493.972   | 402.922   |
| AL137343  | 583.861   | 738.235   | AF086401  | 2685.793  | 2905.186  | NM_018342 | 867.749   | 930.078   |
| NM_004541 | 42103.227 | 33033.504 | L23869    | 1369.892  | 1541.034  | BC020260  | 1117.709  | 865.616   |
| NM_006830 | 36145.539 | 21425.199 | Z21853    | 1541.475  | 1620.046  | D17156    | 3839.581  | 3172.366  |
| AK026414  | 6718.869  | 3269.255  | NM_018342 | 824.517   | 675.409   | L04461    | 480.724   | 590.224   |
| D17297    | 611.479   | 390.199   | BC020260  | 944.21    | 756.733   | AK026938  | 5761.83   | 6212.295  |
| NM_004074 | 18088.436 | 11698.027 | D17156    | 2970.094  | 2341.172  | AK024373  | 8258.764  | 7787.169  |
| NM_002626 | 20894.291 | 11284.618 | L04461    | 599.009   | 440.109   | AK022343  | 4529.403  | 3848.198  |
| NM_018436 | 7752.369  | 4510.464  | AK026938  | 5353.781  | 4129.761  | AK026400  | 611.827   | 589.76    |
| AF157115  | 3976.229  | 3779.584  | AK024373  | 6027.24   | 7320.014  | U92989    | 3541.909  | 3065.603  |
| AJ223353  | 4927.136  | 3849.139  | AK022343  | 3487.756  | 3057.828  | AF075102  | 1490.213  | 1338.823  |
| NM_012241 | 6738.58   | 11093.448 | AK026400  | 726.381   | 498.753   | NM_018463 | 3793.025  | 2972.713  |
| NM_018486 | 1170.958  | 846.611   | U92989    | 3145.718  | 2648.803  | X74956    | 14973.739 | 12504.06  |
| NM_005324 | 9960.787  | 4320.371  | AF075102  | 1678.308  | 1249.561  | AK025546  | 681.562   | 533.603   |
| AL080201  | 5579.666  | 2175.744  | NM_018463 | 3124.982  | 2746.884  | AL137487  | 1888.078  | 1672.356  |
| AB040941  | 4543.669  | 2929.46   | X74956    | 11438.202 | 10883.959 | AK023800  | 500.115   | 361.408   |
| AL137241  | 978.894   | 328.298   | AK025546  | 667.222   | 615.097   | AK024120  | 1462.681  | 1315.204  |
| AB037742  | 1346.379  | 679.67    | AL137487  | 1504.286  | 1271.854  | CY3Cy5    | 10449.383 | 635.03    |
| AF272375  | 2012.878  | 2372.829  | AK024120  | 1249.926  | 1065.152  | W96179    | 1770.243  | 2070.643  |
| AK025078  | 935.872   | 1225.851  | CY3Cy5    | 3436.957  | 289.588   | AW247841  | 4335.604  | 4942.137  |
| AK023754  | 830.135   | 1156.447  | W96179    | 1725.37   | 1778.986  | BG568198  | 370.831   | 458.435   |
| AK021689  | 598.085   | 676.247   | AW247841  | 4567.428  | 4507.784  | M76559    | 3065.472  | 3519.139  |
| AK024737  | 1397.684  | 940.999   | M76559    | 2882.507  | 3175.317  | AI222585  | 780.03    | 680.656   |
| AB007890  | 6112.814  | 2662.53   | AI222585  | 524.01    | 737.777   | AA411678  | 4458.419  | 4850.482  |
| AF070591  | 1603.308  | 1104.14   | AA411678  | 5338.433  | 6160.426  | AA862813  | 11641.898 | 13268.145 |
| NM_020411 | 60000.781 | 52996.949 | AA862813  | 14772.363 | 17624.037 | AA398427  | 856.975   | 1113.213  |
| AF275800  | 1058.003  | 887.706   | AA398427  | 1164.647  | 1373.646  | T55728    | 2974.322  | 3323.371  |
| AL359605  | 2535.163  | 2778.304  | T55728    | 2978.913  | 3120.144  | H20856    | 1184.085  | 1132.621  |
| AB020633  | 1830.697  | 2257.72   | H20856    | 1205.236  | 1153.498  | N62586    | 2356.919  | 2333.705  |
| AK025445  | 5416.022  | 5680.253  | N62586    | 2313.733  | 2689.426  | AA242743  | 1464.967  | 1557.798  |
| AL357200  | 1532.735  | 2087.979  | AA242743  | 2663.87   | 3743.8    | NM_004758 | 557.578   | 688.936   |
| NM_017727 | 5985.409  | 8638.957  | NM_004758 | 784.788   | 1019.458  | NM_005163 | 2714.902  | 3254.522  |
| AK021714  | 1135.504  | 1182.036  | NM_005163 | 3523.568  | 3239.651  | SR5       | 3319.345  | 3978.647  |
| NM_020314 | 3925.185  | 3848.684  | SR5       | 4260.841  | 3477.283  | CY3Cy5    | 10941.254 | 521.05    |
| AK022972  | 2167.66   | 1218.751  | SR7       | 5076.808  | 30500.275 | NM_016382 | 720.233   | 707.103   |
| AK025996  | 3409.092  | 2146.806  | SR9       | 15296.701 | 1549.124  | AL122046  | 294.51    | 538.685   |
| AF088015  | 1010.234  | 1297.913  | CY3Cy5    | 3623.484  | 227.599   | NM_000855 | 1174.655  | 999.944   |
| AF007132  | 714.476   | 1012.007  | NM_016382 | 989.793   | 834.72    | NM_005536 | 3158.707  | 3550.734  |
| AK026711  | 5759.772  | 4015.413  | AK023117  | 1755.004  | 1713.13   | NM_005077 | 1587.203  | 1571.78   |
| NM_017864 | 4200.05   | 2595.69   | AL122046  | 379.457   | 552.94    | NM_004423 | 3945.149  | 3628.744  |
| NM_004869 | 3759.142  | 1580.873  | NM_000855 | 853.615   | 1179.637  | NM_001990 | 483.58    | 194.966   |
| AF136408  | 1348.6    | 862.587   | NM_005536 | 2487.252  | 2381.262  | NM_002141 | 589.106   | 800.477   |
| AL110203  | 364.697   | 571.21    | NM_005077 | 1383.141  | 1580.783  | NM_003311 | 4454.564  | 4676.916  |
| AJ011602  | 840.746   | 1085.402  | NM_004423 | 2944.491  | 3517.941  | NM_003776 | 2668.663  | 2518.827  |

|           |           |           |           |           |           |           |          |          |
|-----------|-----------|-----------|-----------|-----------|-----------|-----------|----------|----------|
| AJ002787  | 5084.593  | 7678.099  | NM_001990 | 414.302   | 571.725   | NM_00709E | 1287.365 | 1414.934 |
| Z70764    | 695.645   | 1099.688  | NM_002141 | 836.399   | 927.28    | NM_015719 | 1029.868 | 1257.65  |
| AL049252  | 297.398   | 888.093   | NM_003311 | 4332.02   | 4505.166  | NM_006129 | 850.898  | 948.773  |
| M25785    | 789.301   | 339.758   | NM_003776 | 2866.446  | 3239.52   | NM_005593 | 980.337  | 918.958  |
| M32443    | 1503.133  | 1011.26   | NM_00709E | 1277.876  | 1541.284  | AF100756  | 6539.975 | 6760.916 |
| M73048    | 617.086   | 579.02    | NM_015719 | 1317.123  | 1779.741  | NM_00682E | 7352.494 | 7589.627 |
| D16908    | 963.355   | 868.034   | NM_006129 | 1733.099  | 1167.462  | NM_004862 | 2289.448 | 2605.822 |
| D16477    | 1062.705  | 1042.304  | NM_000582 | 1863.532  | 1761.745  | NM_001661 | 735.433  | 1074.868 |
| AK026808  | 298.057   | 554.509   | NM_005593 | 1019.015  | 1081.566  | NM_014563 | 1741.564 | 1735.762 |
| AK000063  | 585.192   | 613.427   | AF204171  | 271.608   | 462.334   | NM_02015C | 2187.872 | 2046.703 |
| AK000974  | 724.279   | 706.635   | AF100756  | 5353.887  | 5894.045  | NM_00715C | 1650.993 | 2037.857 |
| AK024553  | 40983.93  | 45782.363 | NM_00682E | 6259.657  | 6632.974  | NM_006831 | 992.294  | 1129.295 |
| AF143879  | 5117.276  | 6002.453  | NM_004862 | 2247.756  | 2411.862  | AL162044  | 2089.276 | 2574.337 |
| AK024621  | 23102.234 | 36484.047 | NM_001661 | 653.078   | 563.173   | BE892273  | 17978.51 | 17308.52 |
| AL157449  | 21969.449 | 29920.236 | NM_014563 | 1318.167  | 1527.036  | NM_016734 | 520.846  | 566.582  |
| AL117582  | 1141.846  | 1213.029  | NM_02015C | 2137.244  | 2941.75   | D00174    | 1965.945 | 2478.184 |
| AK025525  | 1320.242  | 733.613   | NM_00715C | 2621.552  | 2657.131  | AB000520  | 1068.276 | 1051.47  |
| NM_018233 | 9493.5    | 7698.747  | NM_006831 | 1445.998  | 1591.647  | NM_006907 | 779.375  | 728.033  |
| AF143329  | 646.222   | 871.152   | AL162044  | 2358.203  | 2680.506  | NM_00268E | 287.436  | 378.098  |
| AF090916  | 1104.306  | 1098.05   | AK024004  | 500.637   | 208.742   | NM_006267 | 987.428  | 810.592  |
| AK026860  | 7148.59   | 5836.605  | BE892273  | 22078.916 | 23658.377 | NM_002661 | 8176.285 | 8113.472 |
| AK024211  | 801.201   | 658.685   | AF026929  | 334.982   | 702.27    | NM_001263 | 272.469  | 596.832  |
| NM_01489E | 575.536   | 738.553   | NM_016734 | 677.381   | 725.217   | NM_01846E | 979.766  | 914.036  |
| AK023435  | 1119.586  | 1042.864  | AF035803  | 268.923   | 869.127   | Y11312    | 465.548  | 468.994  |
| AF086035  | 8583.781  | 9248.791  | D00174    | 5077.501  | 9576.277  | AB014533  | 1869.733 | 2549.902 |
| AK022159  | 4534.559  | 4353.306  | NM_006907 | 586.922   | 729.756   | NM_000744 | 356.938  | 354.221  |
| AF007136  | 595.485   | 296.988   | NM_006267 | 1044.685  | 876.475   | NM_003039 | 4782.491 | 4889.642 |
| U25750    | 4426.03   | 3492.081  | NM_002661 | 7001.959  | 8547.362  | NM_014509 | 490.501  | 484.389  |
| AK023691  | 1824.344  | 1452.16   | NM_001263 | 324.277   | 451.556   | NM_020372 | 753.987  | 960.079  |
| AK026744  | 646.915   | 645.305   | AK023982  | 272.455   | 434.584   | NM_004979 | 515.946  | 620.311  |
| AK002105  | 879.547   | 726.803   | NM_01846E | 894.836   | 789.251   | NM_016077 | 2114.1   | 2098.76  |
| NM_005234 | 4645.961  | 4913.291  | AB014533  | 2508.696  | 3480.388  | NM_015537 | 2553.557 | 2540.359 |
| BC023536  | 834.812   | 693.776   | NM_000744 | 724.023   | 606.639   | NM_01652C | 5719.649 | 5502.404 |
| NM_001803 | 2688.896  | 1434.122  | NM_003039 | 6499.791  | 6655.888  | AB018353  | 1740.372 | 1811.781 |
| NM_006233 | 5870.876  | 2352.966  | NM_014509 | 1174.193  | 1228.562  | NM_00703E | 1458.897 | 1358.108 |
| AK000992  | 608.412   | 519.362   | U26662    | 686.99    | 905.094   | NM_002617 | 1491.045 | 1223.475 |
| L23544    | 11327.685 | 12799.432 | NM_020372 | 2864.413  | 4666.428  | NM_003313 | 8737.883 | 8155.571 |
| NM_01902C | 1951.899  | 2353.839  | NM_002635 | 53781.73  | 57723.926 | AF090907  | 1509.282 | 1699.998 |
| AF119892  | 493.313   | 656.596   | NM_004979 | 959.337   | 1765.926  | AK024476  | 2085.301 | 2126.015 |
| NM_016474 | 1011.856  | 396.854   | NM_016077 | 3879.831  | 4475.27   | X74794    | 4439.067 | 4968.934 |
| NM_00091C | 1459.712  | 1148.585  | NM_015537 | 1964.558  | 2464.477  | AL050298  | 1992.254 | 2179.855 |
| AF086001  | 48603.418 | 46076.137 | NM_01652C | 4302.138  | 4092.437  | M20696    | 1889.699 | 3227.702 |
| AL117560  | 19701.059 | 13426.882 | AB018353  | 1607.914  | 1991.418  | NM_00291E | 380.23   | 647.971  |
| M24749    | 5440.513  | 3091.127  | NM_00703E | 1117.972  | 1274.941  | NM_00673E | 624.418  | 512.715  |
| NM_000554 | 25146.492 | 23894.043 | NM_002617 | 1087.842  | 1124.687  | NM_00364C | 879.861  | 843.507  |
| AF009317  | 2889.003  | 2216.166  | NM_003313 | 6352.827  | 6056.366  | NM_014444 | 3099.41  | 3104.295 |
| AK026583  | 1877.303  | 1817.287  | AF090907  | 1479.08   | 1849.097  | NM_01224E | 5567.676 | 5254.902 |
| AF218031  | 3778.378  | 5096.334  | NM_007079 | 35284.004 | 57407.266 | NM_014393 | 2463.724 | 4446.026 |
| AF210650  | 1743.298  | 2499.611  | M20696    | 3913.936  | 6029.62   | U63336    | 213.366  | 843.229  |
| NM_01835E | 3151.031  | 1944.396  | NM_00291E | 827.979   | 1023.817  | NM_004684 | 203.43   | 438.094  |
| AF085896  | 749.654   | 306.908   | NM_00673E | 773.569   | 1422.635  | BF338709  | 384.165  | 537.351  |
| X74613    | 19745.881 | 16781.518 | NM_00364C | 1591.576  | 2308.237  | AF204171  | 385.636  | 278.358  |
| AF075080  | 15331.129 | 10150.037 | NM_014444 | 5590.236  | 9401.368  | W96179    | 1782.893 | 1870.182 |

|           |           |           |           |           |           |           |           |           |
|-----------|-----------|-----------|-----------|-----------|-----------|-----------|-----------|-----------|
| Y13897    | 1163.996  | 773.255   | NM_012248 | 8936.525  | 15626.559 | AW247841  | 5001.395  | 4623.777  |
| AK001857  | 411.064   | 511.372   | NM_014970 | 6898.089  | 13018.623 | BG568198  | 354.538   | 250.889   |
| AL133577  | 3098.17   | 4210.273  | NM_014393 | 4225.501  | 7608.983  | M76559    | 2748.647  | 2969.584  |
| AF279773  | 1072.924  | 1099.564  | NM_004223 | 8198.316  | 14164.531 | AI222585  | 769.039   | 1583.873  |
| AK025378  | 2350.551  | 2924.477  | NM_006813 | 767.352   | 1140.132  | AA411678  | 4401.678  | 5862.124  |
| NM_000479 | 1636.212  | 1203.327  | AJ224741  | 602.673   | 828.387   | AA862813  | 10786.967 | 12163.521 |
| AF038199  | 2993.132  | 3585.442  | NM_004684 | 667.212   | 1316.747  | AA398427  | 831.279   | 1078.455  |
| CY3Cy5    | 1070.568  | 107.801   | BF338709  | 647.186   | 972.097   | T55728    | 2490.439  | 2346.914  |
| BE908993  | 12742.587 | 9476.245  | AF204171  | 576.429   | 928.973   | H20856    | 941.241   | 948.213   |
| AB012701  | 2269.354  | 2029.336  | W96179    | 2356.651  | 3242.015  | N62586    | 2302.064  | 2631.073  |
| M61156    | 1478.141  | 1568.542  | AW247841  | 6315.675  | 9479.566  | AA242743  | 2357.336  | 3128.355  |
| R44005    | 2067.429  | 2168.209  | M76559    | 3560.457  | 5557.46   | NM_015361 | 8418.913  | 9794.088  |
| AI942392  | 3690.734  | 3734.455  | AI222585  | 1160.698  | 2282.875  | NM_004310 | 475.028   | 875.551   |
| M55040    | 774.752   | 742.297   | AA411678  | 7362.006  | 12051.612 | Y08147    | 1442.878  | 1357.849  |
| AW009739  | 2626.294  | 2276.261  | AA862813  | 17002.811 | 31165.768 | D00174    | 2871.661  | 3246.695  |
| BC036805  | 7013.538  | 4812.147  | AA398427  | 1382.914  | 2428.159  | AB000520  | 1108.4    | 871.717   |
| Z74615    | 27173.652 | 18515.754 | T55728    | 4050.677  | 6819.828  | NM_016382 | 846.481   | 838.383   |
| X03884    | 5409.972  | 4365.204  | H20856    | 1728.857  | 2348.105  | AK023117  | 1939      | 1764.429  |
| U36759    | 2171.973  | 1448.113  | N62586    | 3252.888  | 4074.765  | AL122046  | 592.596   | 374.591   |
| X91625    | 2438.939  | 2793.472  | AA242743  | 2497.544  | 3648.471  | NM_000855 | 735.072   | 838.408   |
| AF090901  | 405.561   | 569.536   | NM_004758 | 803.736   | 934.364   | NM_005536 | 2735.718  | 3933.996  |
| AF004231  | 1348.733  | 1415.485  | NM_005163 | 3365.255  | 3240.131  | NM_005077 | 1076.355  | 1366.695  |
| AF001862  | 3657.306  | 2860.504  | AF035803  | 485.04    | 597.05    | NM_004423 | 2394.353  | 2474.426  |
| NM_058197 | 404.559   | 485.768   | Y08147    | 1630.41   | 3051.674  | NM_001990 | 576.496   | 372.09    |
| SB        | 71.494    | 272.745   | D00174    | 3429.766  | 6763.024  | NM_002141 | 525.764   | 745.08    |
| SR2       | 63050.777 | 55200.16  | AB000520  | 1041.067  | 1881.955  | NM_003311 | 4701.06   | 5280.877  |
| SR4       | 17535.494 | 14661.371 | NM_016382 | 1475.437  | 1376.552  | NM_003776 | 3289.944  | 4180.663  |
| SR6       | 2662.799  | 2292.206  | AK023117  | 2385.854  | 2433.526  | NM_006129 | 1609.394  | 2472.288  |
| SR8       | 9333.681  | 23564.688 | AL122046  | 807.604   | 624.756   | NM_000582 | 1405.512  | 2087.718  |
| SR10      | 33146.652 | 9375.25   | NM_000855 | 1117.642  | 1857.205  | NM_005593 | 840.133   | 1276.195  |
| CY3Cy5    | 1084.536  | 88.292    | NM_005536 | 3587.349  | 3696.218  | NM_004979 | 593.958   | 390.95    |
| NM_004126 | 542.457   | 468.752   | NM_005077 | 1340.738  | 1650.942  | NM_016077 | 1779.058  | 1483.059  |
| U87460    | 7168.463  | 6746.687  | NM_004423 | 3055.774  | 3364.114  | AF100756  | 6173.045  | 6573.551  |
| NM_003617 | 924.84    | 919.914   | NM_001990 | 556.801   | 886.515   | NM_006825 | 6570.286  | 7370.982  |
| NM_001841 | 775.365   | 892.507   | NM_002141 | 731.055   | 768.948   | NM_004862 | 1947.16   | 2502.211  |
| NM_002054 | 4656.187  | 5960.93   | NM_003311 | 4790.223  | 4193.896  | NM_001661 | 706.021   | 686.602   |
| AF300649  | 2668.876  | 3460.527  | NM_003776 | 2866.847  | 2845.03   | NM_014563 | 1081.079  | 1492.163  |
| NM_004125 | 1247.012  | 1711.797  | NM_007098 | 1422.293  | 1294.167  | NM_020150 | 2015.196  | 1771.721  |
| NM_000823 | 3236.729  | 2920.332  | NM_015719 | 1046.186  | 1341.249  | NM_007150 | 1978.98   | 1688.904  |
| NM_004414 | 1743.363  | 1550.912  | NM_004979 | 638.24    | 358.115   | NM_006831 | 1670.578  | 1428.787  |
| NM_003317 | 6615.162  | 4576.547  | NM_016077 | 1961.078  | 2055.368  | AL162044  | 2909.943  | 3028.136  |
| NM_001139 | 2652.707  | 2462.53   | AF100756  | 7059.715  | 7785.962  | AK024004  | 433.922   | 848.13    |
| NM_004609 | 50465.902 | 47920.586 | NM_006825 | 6543.917  | 6914.686  | NM_016734 | 787.077   | 1036.648  |
| NM_003772 | 1011.056  | 1407.883  | NM_004862 | 2314.899  | 2346.525  | NM_014393 | 2163.805  | 2350.241  |
| NM_001541 | 5053.074  | 5184.307  | NM_001661 | 824.813   | 887.891   | NM_004223 | 4579.504  | 4651.582  |
| NM_005416 | 1462.699  | 1455.888  | NM_014563 | 1915.352  | 2066.78   | NM_006813 | 404.133   | 227.892   |
| NM_004670 | 487.462   | 571.855   | NM_020150 | 2988.579  | 4305.501  | NM_001355 | 7222.954  | 8202.027  |
| L09081    | 6667.221  | 6588.032  | NM_007150 | 2231.308  | 2329.361  | U63336    | 608.999   | 351.91    |
| NM_000218 | 64417.992 | 52865.422 | NM_006831 | 1506.365  | 1408.739  | NM_006907 | 901.904   | 984.465   |
| NM_016113 | 7056.871  | 7967.712  | AL162044  | 2705.333  | 2190.974  | NM_002686 | 403.845   | 544.687   |
| NM_014222 | 4135.879  | 4671.664  | AK024004  | 842.529   | 585.919   | NM_006267 | 805.58    | 1029.943  |
| L14819    | 356.087   | 626.518   | BE892273  | 17757.689 | 15005.182 | NM_002661 | 8297.447  | 8255.453  |
| NM_000509 | 2273.528  | 1786.55   | NM_016734 | 639.687   | 428.57    | NM_018466 | 637.492   | 712.051   |

|           |           |           |           |           |           |           |           |           |
|-----------|-----------|-----------|-----------|-----------|-----------|-----------|-----------|-----------|
| NM_004542 | 695.602   | 799.832   | NM_014393 | 1767.697  | 2285.113  | Y11312    | 179.291   | 637.371   |
| X06182    | 1317.175  | 1332.11   | NM_004223 | 4167.833  | 4863.963  | AB014533  | 2684.603  | 2506.35   |
| BF217496  | 7218.543  | 8999.52   | NM_001355 | 6848.164  | 7610.887  | NM_020372 | 1359.974  | 1504.218  |
| NM_004762 | 3608.268  | 3927.852  | U63336    | 342.654   | 528.072   | NM_004758 | 542.2     | 572.716   |
| NM_006641 | 60922.824 | 56911.895 | NM_006907 | 794.171   | 837.93    | NM_005163 | 2680.635  | 2560.139  |
| NM_000634 | 8996.424  | 10488.302 | NM_002686 | 459.021   | 409.448   | NM_015361 | 7985.334  | 7058.495  |
| NM_014679 | 28462.648 | 36324.469 | NM_006267 | 1065.711  | 1085.713  | NM_015537 | 3208.629  | 3377.335  |
| AB040969  | 1940.854  | 2678.001  | NM_002661 | 7448.656  | 7324.241  | NM_016520 | 5939.091  | 5877.299  |
| NM_003467 | 3299.186  | 3887.34   | NM_001263 | 419.974   | 380.077   | AB018353  | 1841.59   | 1860.417  |
| NM_014936 | 899.052   | 1144.153  | NM_018466 | 1067.458  | 888.874   | NM_007036 | 1310.695  | 1373.817  |
| NM_003943 | 1737.169  | 2162.302  | Y11312    | 502.519   | 625.234   | NM_002617 | 1047.075  | 1210.71   |
| NM_019052 | 3990.196  | 5440.18   | AB014533  | 2267.664  | 2062.651  | NM_003313 | 6059.97   | 6034.628  |
| NM_003202 | 658.596   | 679.511   | M11427    | 365.152   | 381.568   | AF090907  | 1323.047  | 1427.075  |
| AF119902  | 820.722   | 877.644   | NM_003039 | 5894.283  | 4577.323  | AK024476  | 1328.777  | 1478.762  |
| NM_020525 | 7430.808  | 7363.752  | NM_014509 | 535.061   | 601.304   | X74794    | 4080.088  | 4177.933  |
| X62468    | 421.074   | 710.61    | NM_020372 | 1056.068  | 618.133   | AL050298  | 2023.969  | 1885.488  |
| NM_003890 | 4601.071  | 4813.478  | NM_002635 | 52238.168 | 31670.619 | NM_007079 | 24693.533 | 26597.734 |
| BF127978  | 3295.533  | 3237.272  | NM_004758 | 665.645   | 904.908   | M20696    | 3286.484  | 2581.733  |
| AF110801  | 335.752   | 461.018   | NM_005163 | 2522.435  | 2648.861  | NM_002915 | 458.351   | 674.32    |
| NM_016579 | 16876.666 | 17350.215 | NM_015361 | 7240.298  | 7068.934  | NM_006736 | 705.83    | 619.245   |
| AB018297  | 968.47    | 1001.201  | NM_015537 | 2321.691  | 2625.883  | NM_014444 | 3546.991  | 3296.557  |
| AK022565  | 13635.16  | 12291.873 | NM_016520 | 5149.167  | 4252.502  | NM_012248 | 6583.072  | 5840.224  |
| AK023151  | 2090.911  | 2151.328  | AB018353  | 1870.054  | 2108.476  | NM_007098 | 1104.058  | 965.847   |
| AB033076  | 1232.617  | 1453.486  | NM_007036 | 1217.073  | 1279.181  | NM_015719 | 812.681   | 1025.176  |
| AK022876  | 1343.839  | 1369.887  | NM_002617 | 1097.846  | 1108.675  | NM_006129 | 1211.97   | 1013.382  |
| AF134894  | 5745.707  | 4895.199  | NM_003313 | 8142.804  | 7645.668  | NM_000582 | 1666.445  | 1325.817  |
| NM_003938 | 7711.021  | 6061.831  | AF090907  | 1668.313  | 1814.819  | NM_005593 | 743.872   | 1021.862  |
| NM_014827 | 14852.384 | 12536.821 | AK024476  | 2075.284  | 1967.578  | AF204171  | 104.736   | 894.614   |
| NM_001441 | 1697.561  | 1340.649  | X74794    | 6775.042  | 7351.758  | W96179    | 1691.492  | 2087.82   |
| NM_018324 | 963.341   | 1361.249  | AL050298  | 2185.199  | 1967.039  | AW247841  | 4209.751  | 4425.656  |
| AF064255  | 27792.326 | 33127.383 | NM_007079 | 23701.18  | 23730.652 | M76559    | 2134.189  | 1956.907  |
| NM_016368 | 45368.027 | 52433.828 | M20696    | 2892.544  | 2317.653  | AI222585  | 629.857   | 573.066   |
| U08853    | 2978.263  | 4616.747  | NM_002915 | 482.267   | 731.12    | AA411678  | 5609.813  | 4653.142  |
| NM_004261 | 19959.941 | 27938.594 | NM_003640 | 722.193   | 900.462   | AA862813  | 14339.345 | 13920.436 |
| NM_016006 | 2112.763  | 3552.964  | NM_014444 | 3146.395  | 2860.887  | AA398427  | 1154.045  | 903.661   |
| NM_016245 | 19071.75  | 27257.902 | NM_012248 | 5770.236  | 4682.075  | T55728    | 2718.752  | 2224.794  |
| AF005632  | 5562.527  | 6754.862  | NM_014970 | 4476.956  | 3146.485  | H20856    | 1202.084  | 882.714   |
| NM_000903 | 14653.279 | 15350.275 | NM_007098 | 890.539   | 1065.697  | N62586    | 2213.186  | 1963.71   |
| NM_004493 | 9275.15   | 8936.536  | NM_015719 | 942.298   | 1895.068  | AA242743  | 1801.871  | 1537.658  |
| AF309489  | 583.285   | 451.453   | NM_006129 | 1571.927  | 2637.787  | BE892273  | 12426.323 | 11899.851 |
| NM_004047 | 25382.465 | 20045.475 | NM_000582 | 1265.299  | 1416.894  | NM_016734 | 718.698   | 586.765   |
| AF287303  | 296.72    | 389.834   | NM_005593 | 604.784   | 719.76    | AB000520  | 1032.289  | 1385.612  |
| NM_004823 | 2074.883  | 2194.64   | NM_004684 | 395.646   | 408.946   | NM_016382 | 1073.679  | 883.822   |
| Y17179    | 65097.832 | 57151.363 | AF204171  | 350.346   | 459.037   | AK023117  | 1638.366  | 1433.312  |
| NM_000891 | 658.896   | 783.727   | W96179    | 1909.624  | 1658.656  | NM_000855 | 953.194   | 1044.004  |
| AF239613  | 4888.695  | 4408.946  | AW247841  | 5632.508  | 4938.358  | NM_005536 | 2975.945  | 2687.383  |
| AK026840  | 1064.477  | 1484.12   | M76559    | 3391.408  | 3213.625  | NM_005077 | 1516.999  | 1184.835  |
| NM_000288 | 1725.225  | 1650.251  | AI222585  | 670.84    | 640.218   | NM_004423 | 3471.134  | 3040.682  |
| AK026317  | 12615.46  | 11274.381 | AA411678  | 5465.069  | 5212.103  | NM_001990 | 559.321   | 508.279   |
| X82207    | 26560.844 | 26750.281 | AA862813  | 13366.178 | 11637.188 | NM_002141 | 699.65    | 640.407   |
| NM_015044 | 4589.499  | 4155.014  | AA398427  | 781.191   | 934.761   | NM_003311 | 4392.533  | 3903.267  |
| NM_002867 | 425.406   | 498.138   | T55728    | 2725.187  | 2372.761  | NM_003776 | 2803.82   | 2463.742  |
| NM_000520 | 4071.698  | 2392.239  | H20856    | 1191.99   | 628.808   | NM_000744 | 404.675   | 310.869   |

|           |           |           |           |           |           |           |           |           |
|-----------|-----------|-----------|-----------|-----------|-----------|-----------|-----------|-----------|
| NM_00028E | 1083.735  | 907.464   | N62586    | 1849.901  | 1555.718  | NM_00303E | 4288.2    | 3830.718  |
| NM_00150C | 1679.152  | 1739.67   | AA242743  | 1636.665  | 1316.712  | NM_01450E | 557.587   | 664.223   |
| NM_00438E | 3003.155  | 3866.795  | BE892273  | 14034.199 | 14554.942 | NM_02037E | 1547.641  | 1430.093  |
| NM_02037E | 342.869   | 731.425   | NM_016734 | 629.502   | 603.197   | NM_00263E | 45476.828 | 41052.414 |
| AL110127  | 764.098   | 673.326   | Y08147    | 950.574   | 1091.354  | NM_00497E | 529.089   | 588.026   |
| AK001997  | 292.273   | 465.52    | D00174    | 2283.791  | 2284.21   | AF100756  | 6494.542  | 5867.152  |
| NM_00252E | 2113.505  | 3360.559  | AB000520  | 1058.512  | 872.01    | NM_00682E | 7218.87   | 6661.331  |
| D38438    | 6098.051  | 9344.374  | NM_01638E | 1277.585  | 881.753   | NM_00486E | 2490.089  | 2046.49   |
| AV714945  | 582.149   | 924.528   | AK023117  | 1849.847  | 1540.942  | NM_001661 | 769.523   | 568.137   |
| AF089897  | 228.403   | 191.321   | AL122046  | 541.557   | 542.203   | NM_01456E | 1338.114  | 1405.74   |
| AF007872  | 1655.638  | 1238.813  | NM_00085E | 857.141   | 782.274   | NM_02015C | 2020.061  | 1914.134  |
| M30938    | 4911.344  | 4358.442  | NM_00553E | 3078.383  | 2385.742  | NM_00715C | 2201.533  | 1682.505  |
| NM_01514E | 1000.113  | 1120.227  | NM_005077 | 1451.476  | 1396.83   | NM_006831 | 1289.651  | 1152.533  |
| NM_004714 | 1207.616  | 1465.929  | NM_00442E | 2721.584  | 2469.564  | AL162044  | 2418.54   | 1925.218  |
| NM_005401 | 991.308   | 1045.737  | NM_00199C | 522.047   | 394.51    | NM_00673E | 476.664   | 537.449   |
| NM_017677 | 170.661   | 626.859   | NM_002141 | 584.888   | 670.209   | NM_00364C | 956.638   | 809.655   |
| NM_002497 | 5751.967  | 5109.621  | NM_003311 | 4472.542  | 3580.071  | NM_014444 | 2440.894  | 2267.984  |
| AB025194  | 5628.358  | 4909.603  | NM_00377E | 2533.023  | 2086.418  | NM_01224E | 5327.201  | 4745.507  |
| NM_00623E | 1208.022  | 1372.203  | NM_000744 | 424.686   | 551.508   | NM_01497C | 4248.923  | 3950.263  |
| BC020863  | 674.321   | 701.762   | NM_00303E | 4687.264  | 3981.672  | NM_01439E | 2725.646  | 2986.426  |
| NM_017897 | 2530.668  | 2459.528  | NM_01450E | 618.138   | 785.941   | NM_00422E | 5055.413  | 6638.811  |
| NM_00426E | 18322.063 | 20126.703 | NM_02037E | 1013.184  | 829.131   | NM_00681E | 392.656   | 666.779   |
| NM_00257E | 2391.738  | 2207.745  | NM_00263E | 43569.035 | 37580.914 | NM_00135E | 6676.764  | 8617.569  |
| L14819    | 370.319   | 412.569   | NM_00497E | 375.94    | 279.563   | U63336    | 399.642   | 532.191   |
| NM_00050E | 1779.912  | 1007.485  | NM_016077 | 2175.75   | 1615.987  | NM_006907 | 1032.464  | 831.827   |
| NM_00454E | 476.221   | 690.237   | AF100756  | 7796.209  | 7098.383  | NM_00268E | 410.321   | 258.076   |
| X06182    | 1147.083  | 1039.369  | NM_00682E | 6980.982  | 5686.19   | NM_006267 | 994.025   | 739.79    |
| BE908993  | 14469.213 | 10739.027 | NM_00486E | 2946.982  | 2234.682  | NM_002661 | 8531.536  | 8030.744  |
| AB012701  | 2284.262  | 2995.494  | NM_001661 | 759.468   | 694.284   | AK023982  | 185.931   | 689.401   |
| M61156    | 1651.646  | 1845.34   | NM_01456E | 1660.603  | 1397.611  | Y11312    | 515.628   | 395.871   |
| R44005    | 1982.853  | 2253.491  | NM_02015C | 2278.615  | 1892.284  | AB014533  | 1995.412  | 1729.351  |
| AI942392  | 4162.418  | 5393.844  | NM_00715C | 2068.249  | 1817.669  | AK022097  | 2314.936  | 2014.278  |
| M55040    | 987.572   | 1300.845  | NM_006831 | 1235.313  | 904.405   | NM_00216E | 15790.716 | 14450.461 |
| AW009739  | 3371.276  | 2830.49   | AL162044  | 2535.479  | 1921.476  | NM_00466C | 6483.819  | 5701.419  |
| BC036805  | 7343.081  | 4668.081  | NM_00673E | 355.855   | 451.338   | NM_00616E | 2763.217  | 2652.803  |
| Z74615    | 33160.082 | 28836.512 | NM_00364C | 696.594   | 763.033   | NM_016011 | 4538.626  | 5380.58   |
| X03884    | 5585.723  | 5226.256  | NM_014444 | 3226.6    | 3431.198  | AL035307  | 1270.622  | 2211.382  |
| U36759    | 2025.341  | 1662.782  | NM_01224E | 5356.018  | 5118.978  | AK023772  | 448.565   | 638.247   |
| X91625    | 2712.128  | 2687.069  | NM_01497C | 3214.346  | 3210.306  | NM_012234 | 3396.914  | 3725.22   |
| AF090901  | 494.255   | 569.136   | NM_01439E | 1900.138  | 2222.146  | NM_015361 | 6421.376  | 6478.039  |
| AF004231  | 1367.056  | 1585.325  | NM_00422E | 4136.822  | 4601.496  | NM_00431C | 443.956   | 217.752   |
| AF001862  | 3562.48   | 3257.508  | NM_00135E | 7341.527  | 6768.962  | NM_015537 | 2967.82   | 3356.208  |
| NM_058197 | 415.222   | 686.952   | U63336    | 452.543   | 377.86    | NM_01652C | 5770.195  | 4698.529  |
| NM_016044 | 1429.058  | 1750.013  | NM_006907 | 888.638   | 969.609   | AB018353  | 1993.569  | 1504.681  |
| AK023151  | 1592.964  | 1593.159  | NM_00268E | 411.367   | 360.792   | NM_00703E | 1673.232  | 1272.339  |
| AB033076  | 1449.481  | 1217.48   | NM_006267 | 1305.026  | 1064.082  | NM_002617 | 1405.122  | 1076.509  |
| AK022876  | 1388.429  | 1576.423  | NM_002661 | 8720.434  | 8251.815  | NM_00331E | 10300.271 | 7472.944  |
| AF134894  | 4659.626  | 5220.956  | NM_00126E | 413.682   | 294.851   | AF090907  | 1758.527  | 1507.907  |
| NM_00393E | 9078.009  | 10456.643 | AK023982  | 503.011   | 233.34    | AK024476  | 1718.245  | 1566.957  |
| NM_014827 | 13300.205 | 11221.94  | NM_01846E | 937.024   | 967.796   | X74794    | 5256.221  | 4063.271  |
| NM_00412E | 716.376   | 1133.492  | Y11312    | 509.534   | 516.077   | AL050298  | 2352.143  | 1671.299  |
| U87460    | 8219.704  | 9475.05   | AB014533  | 1970.422  | 1850.038  | NM_00707E | 23279.688 | 20443.707 |
| NM_003617 | 984.53    | 1238.245  | M11427    | 366.266   | 574.507   | M20696    | 2844.384  | 2190.16   |

|           |           |           |           |           |           |           |           |           |
|-----------|-----------|-----------|-----------|-----------|-----------|-----------|-----------|-----------|
| NM_001841 | 970.476   | 880.735   | AK022097  | 1697.769  | 1727.043  | AK026015  | 317.351   | 235.844   |
| NM_002054 | 4789.056  | 6715.884  | NM_002166 | 10326.345 | 10409.06  | AK026154  | 7251.286  | 6104.601  |
| AF300649  | 3316.97   | 3054.885  | NM_004660 | 7763.768  | 7236.726  | AL117546  | 17078.006 | 13438.005 |
| NM_004125 | 1124.706  | 889.237   | NM_006165 | 2069.961  | 1858.624  | AK027073  | 1046.754  | 1303.06   |
| NM_000823 | 3202.137  | 2710.924  | NM_016011 | 2891.929  | 3070.937  | NM_000384 | 331.177   | 740.069   |
| NM_004414 | 1549.008  | 1576.964  | AL035307  | 905.22    | 703.325   | AL157482  | 3751.43   | 5733.183  |
| NM_003317 | 7535.635  | 6980.533  | NM_012234 | 3508.284  | 3493.758  | NM_005428 | 3014.277  | 3352.924  |
| NM_001139 | 3085.862  | 3137.586  | NM_015361 | 6778.792  | 5579.533  | NM_017974 | 670.199   | 631.609   |
| NM_004609 | 50525.348 | 48002.164 | NM_004310 | 228.962   | 351.909   | NM_003979 | 345.574   | 468.889   |
| NM_003772 | 1202.079  | 1425.388  | NM_015537 | 2903.087  | 3173.405  | X14677    | 2272.592  | 1710.326  |
| NM_001541 | 6168.489  | 6631.639  | NM_016520 | 5541.125  | 5063.602  | NM_005863 | 13048.313 | 10850.981 |
| NM_005416 | 1435.207  | 1399.234  | AB018353  | 2114.239  | 1993.949  | U17077    | 1677.83   | 1476.809  |
| NM_004670 | 356.621   | 519.196   | NM_007036 | 1719.889  | 1199.872  | NM_000915 | 1335.143  | 1131.879  |
| L09081    | 7588.528  | 6424.911  | NM_002617 | 1095.338  | 1063.933  | NM_002344 | 856.87    | 607.796   |
| NM_000218 | 67315.047 | 59682.246 | NM_003313 | 8716.047  | 6748.972  | AK024475  | 1181.537  | 1245.476  |
| NM_016113 | 6966.858  | 6684.106  | AF090907  | 1791.281  | 1630.681  | AB026542  | 12245.911 | 8655.854  |
| NM_014222 | 3716.393  | 4103.677  | AK024476  | 1333.043  | 1250.604  | NM_019846 | 3355.416  | 2080.944  |
| AK026840  | 1479.989  | 2027.318  | X74794    | 5889.927  | 5826.165  | NM_014433 | 680.212   | 604.893   |
| NM_000288 | 1826.364  | 2605.624  | AL050298  | 2260.128  | 2068.826  | NM_002062 | 6482.811  | 5554.983  |
| AK026317  | 14258.039 | 17055.592 | NM_007079 | 23946.941 | 19901.438 | NM_014394 | 37780.793 | 32707.854 |
| X82207    | 26263.498 | 36776.664 | M20696    | 3132.181  | 2848.561  | NM_005243 | 8047.393  | 7870.17   |
| NM_015044 | 6292.215  | 9354.401  | NM_002915 | 630.544   | 485.079   | NM_006218 | 1544.198  | 1431.191  |
| NM_002867 | 533.981   | 1082.869  | AK026154  | 7152.962  | 6171.459  | NM_018140 | 2746.278  | 2601.802  |
| BF217496  | 7953.234  | 11469.891 | AL117546  | 12697.165 | 11920.677 | NM_016948 | 959.373   | 902.003   |
| NM_004762 | 4249.005  | 6796.311  | AB018325  | 1906.428  | 2019.706  | NM_000142 | 1208.424  | 1318.406  |
| NM_006641 | 61865.844 | 57181.102 | AL157482  | 3320.091  | 2907.061  | AF272372  | 18054.486 | 18705.732 |
| NM_000634 | 10518.766 | 13960.769 | NM_005428 | 3562.806  | 3207.607  | AK097045  | 995.13    | 1648.807  |
| NM_014679 | 28729.656 | 32392.887 | NM_017974 | 558.745   | 512.282   | NM_018256 | 2783.796  | 3970.036  |
| AB040969  | 1808.721  | 1693.931  | NM_003979 | 547.381   | 316.914   | AK024611  | 6977.759  | 6414.514  |
| NM_003467 | 3201.361  | 2395.527  | X14677    | 1427.637  | 1394.938  | BC010420  | 3678.818  | 3350.573  |
| NM_014936 | 827.261   | 563.072   | NM_005863 | 10652.365 | 10653.546 | NM_012280 | 12089.794 | 11410.565 |
| NM_003943 | 1371.8    | 1729.365  | U17077    | 1922.782  | 1634.862  | NM_018172 | 3044.295  | 2774.326  |
| NM_019052 | 4291.083  | 4822.147  | NM_000915 | 1417.775  | 1236.669  | U03886    | 742.111   | 419.438   |
| NM_003202 | 848.908   | 982.398   | NM_002344 | 925.761   | 592.961   | AK022040  | 797.545   | 642.104   |
| AF119902  | 718.087   | 859.67    | AK024475  | 1700.538  | 1452.264  | AK022722  | 817.066   | 696.949   |
| NM_020525 | 8437.977  | 8304.636  | AB026542  | 11412.064 | 10165.386 | AL080111  | 3103.501  | 1821.229  |
| X62468    | 526.939   | 481.991   | NM_019846 | 2657.655  | 2635.303  | NM_003550 | 8154.166  | 6429.002  |
| NM_003890 | 4638.479  | 4513.775  | NM_014433 | 590.786   | 480.493   | NM_014642 | 3070.555  | 2486.657  |
| BF127978  | 3361.556  | 2963.84   | NM_002062 | 9502.65   | 18361.465 | NM_003829 | 2170.044  | 1152.631  |
| NM_016579 | 18774.176 | 17228.354 | NM_014394 | 26537.396 | 24952.205 | AL110168  | 1558.139  | 1380.554  |
| AB018297  | 806.253   | 931.838   | NM_005243 | 8243.213  | 9032.599  | NM_002831 | 13221.332 | 11991.438 |
| AK022565  | 12159.753 | 10517.185 | NM_006218 | 1259.209  | 1292.937  | AL833409  | 1815.972  | 1902.391  |
| AB025194  | 7562.699  | 11236.095 | NM_018140 | 2886.885  | 2489.917  | NM_015966 | 637.262   | 547.755   |
| NM_006239 | 1809.648  | 3511.82   | NM_016948 | 627.623   | 687.465   | NM_016147 | 2442.536  | 2574.762  |
| BC020863  | 763.482   | 1233.122  | NM_000142 | 849.784   | 1104.237  | NM_002833 | 1450.118  | 1436.31   |
| NM_017897 | 3082.379  | 3932.656  | AF272372  | 14973.881 | 13300.829 | NM_016592 | 614.335   | 452.971   |
| NM_004265 | 30262.893 | 50508.5   | AK097045  | 1035.323  | 695.573   | NM_001868 | 537.995   | 755.127   |
| NM_002572 | 2757.713  | 3392.591  | AF161356  | 49865.793 | 58648.59  | NM_014773 | 665.824   | 761.537   |
| NM_001441 | 1862.884  | 2653.666  | AB014548  | 2237.87   | 2210.958  | AF134707  | 665.002   | 445.732   |
| NM_018324 | 1201.624  | 1746.584  | NM_018256 | 2764.929  | 2267.715  | AK025265  | 4056.317  | 2982.429  |
| AF064255  | 30328.203 | 38999.793 | AK024611  | 7209.171  | 7257.543  | NM_013279 | 331.26    | 306.106   |
| NM_016368 | 53070.824 | 55966.059 | BC010420  | 3206.495  | 3569.222  | NM_018652 | 8623.271  | 6742.883  |
| U08853    | 3238.516  | 4545.628  | NM_012280 | 11679.04  | 9810.257  | AB011166  | 1169.974  | 871.027   |

|           |           |           |           |           |           |           |           |           |
|-----------|-----------|-----------|-----------|-----------|-----------|-----------|-----------|-----------|
| NM_004261 | 19774.334 | 23513.824 | NM_018172 | 2486.396  | 2489.821  | AK024460  | 2511.653  | 1971.716  |
| NM_016006 | 1839.554  | 2283.898  | U03886    | 595.01    | 328.854   | NM_006606 | 5049.374  | 3431.818  |
| NM_016245 | 14319.491 | 11310.565 | AK022040  | 742.079   | 530.521   | S78570    | 435.454   | 242.781   |
| AF005632  | 4860.109  | 4121.226  | AK022722  | 663.437   | 727.522   | NM_006442 | 8752.745  | 8414.206  |
| NM_000903 | 12777.807 | 9848.15   | NM_003591 | 16605.623 | 12297.542 | NM_003902 | 6589.614  | 6743.207  |
| NM_004493 | 9096.969  | 7877.949  | AL080111  | 2358.232  | 2020.689  | NM_016427 | 2825.418  | 2765.982  |
| AF309489  | 764.911   | 648.288   | NM_003550 | 7924.897  | 7013.581  | U80741    | 4577.911  | 2425.425  |
| NM_004047 | 26390.664 | 24260.207 | NM_014642 | 3072.528  | 2847.341  | NM_014497 | 1812.35   | 1007.551  |
| AF287303  | 236.047   | 538.298   | NM_003829 | 2092.538  | 1078.042  | AL133598  | 6284.965  | 4996.985  |
| NM_004823 | 1867.356  | 1999.715  | AL110168  | 1953.432  | 1336.069  | NM_015511 | 2900.879  | 2663.521  |
| Y17179    | 63440.266 | 54292.66  | NM_014522 | 482.721   | 143.881   | NM_006625 | 3373.556  | 2803.377  |
| NM_000891 | 780.783   | 805.899   | NM_002831 | 12796.843 | 11720.397 | NM_004891 | 15258.054 | 10830.437 |
| AF239613  | 4744.375  | 4500.421  | AL833409  | 2021.978  | 1722.012  | NM_002879 | 393.775   | 561.375   |
| NM_058197 | 496.326   | 758.856   | NM_015966 | 635.805   | 629.087   | AF075068  | 15698.771 | 12465.523 |
| NM_016044 | 2662.785  | 4063.216  | NM_016147 | 2129.713  | 2174.886  | AF085881  | 807.923   | 755.479   |
| NM_000520 | 5462.925  | 5257.414  | NM_002833 | 1280.402  | 1377.406  | AK022737  | 5565.542  | 4797.626  |
| NM_000289 | 1834.107  | 3251.094  | NM_016592 | 279.166   | 454.146   | NM_003472 | 21431.203 | 19043.402 |
| NM_001500 | 2524.487  | 2841.014  | NM_018527 | 439.261   | 492.65    | U92980    | 579.971   | 516.111   |
| NM_004388 | 3684.315  | 4736.449  | NM_018326 | 1497.332  | 1059.735  | AF133658  | 656.233   | 444.944   |
| NM_020379 | 439.634   | 670.794   | NM_001223 | 2291.941  | 2244.515  | AB048287  | 3354.162  | 2896.227  |
| AL110127  | 1308.209  | 1158.123  | BE730629  | 787.217   | 358.49    | AB020648  | 850.957   | 1347.684  |
| NM_002528 | 1893.164  | 1419.783  | AK027167  | 1490.057  | 1243.939  | AK025798  | 18063.598 | 39100.145 |
| D38438    | 5627.842  | 5305.38   | AK025265  | 3077.642  | 2765.016  | AK025164  | 452.173   | 234.434   |
| AV714945  | 774.722   | 638.226   | NM_018652 | 9044.131  | 7667.408  | NM_018366 | 5217.29   | 4592.454  |
| AF007872  | 1648.725  | 1663.479  | AB011166  | 1028.885  | 824.171   | NM_019848 | 6710.77   | 5302.34   |
| M30938    | 4532.612  | 4236.365  | AK024460  | 2080.799  | 1605.74   | AK021497  | 792.463   | 946.243   |
| NM_015148 | 917.587   | 1139.092  | NM_006606 | 4061.097  | 3212.278  | AF124367  | 657.601   | 487.426   |
| NM_004714 | 1434.066  | 1269.563  | S78570    | 420.749   | 145.093   | AK023803  | 734.364   | 692.587   |
| NM_005401 | 859.888   | 961.333   | NM_006442 | 10569.324 | 8814.989  | AK026947  | 8211.251  | 7562.738  |
| NM_017677 | 243.769   | 349.922   | NM_003902 | 4900.212  | 3802.943  | U84526    | 6951.939  | 6033.289  |
| NM_002497 | 5702.044  | 4825.274  | NM_016427 | 2730.455  | 2037.378  | L23401    | 1234.248  | 1237.584  |
| NM_005416 | 2814.568  | 3916.493  | U80741    | 3906.267  | 3038.63   | NM_018090 | 33686.977 | 27587.568 |
| NM_004670 | 646.28    | 1321.454  | NM_014497 | 1525.873  | 867.321   | AK022728  | 10893.974 | 9355.019  |
| L09081    | 10089.272 | 16397.596 | AL133598  | 6394.241  | 5097.982  | AL109678  | 867.716   | 1002.597  |
| NM_000218 | 64340.797 | 56202.113 | NM_015511 | 3030.416  | 2232.08   | AL137524  | 665.544   | 633.295   |
| NM_016113 | 7732.742  | 13023.378 | NM_006625 | 3645.396  | 2763.461  | AF218008  | 5907.57   | 6342.217  |
| NM_014222 | 5779.909  | 9685.669  | NM_004891 | 15554.703 | 10868.295 | M22404    | 8748.849  | 11096.813 |
| L14819    | 546.99    | 1204.519  | NM_002879 | 678.861   | 310.31    | NM_014019 | 10026.902 | 10244.01  |
| NM_000509 | 3138.542  | 4493.152  | AF075068  | 16152.575 | 11329.566 | Z70711    | 623.76    | 388.41    |
| NM_004542 | 1040.402  | 1952.333  | AK024366  | 760.88    | 1464.264  | AF116653  | 532.963   | 407.733   |
| X06182    | 1402.926  | 1417.943  | X78938    | 819.023   | 456.206   | NM_012368 | 706.541   | 584.654   |
| BE908993  | 14441.816 | 9423.157  | AK023375  | 13868.65  | 65.773    | AK025323  | 550.98    | 606.869   |
| AB012701  | 2171.941  | 1578.115  | AF085881  | 832.46    | 770.843   | NM_013326 | 3782.035  | 2690.606  |
| M61156    | 1603.16   | 1280.265  | AK022737  | 4676.059  | 4781.124  | BC037322  | 1079.225  | 945.39    |
| R44005    | 1911.495  | 1160.865  | NM_003472 | 17631.51  | 17050.139 | Y12022    | 959.857   | 711.857   |
| AI942392  | 3380.669  | 2931.431  | U92980    | 1007.506  | 986.876   | AK001375  | 995.043   | 703.874   |
| M55040    | 795.01    | 638.385   | AF133658  | 616.183   | 643.47    | AL137559  | 1016.573  | 512.734   |
| AW009739  | 3484.957  | 3019.854  | AB048287  | 3128.944  | 3054.499  | AF026944  | 2456.78   | 1570.781  |
| BC036805  | 7850.477  | 7043.971  | Y11159    | 571.979   | 588.697   | AK021493  | 2830.883  | 2351.434  |
| Z74615    | 33681.598 | 30475.559 | AB020648  | 1001.672  | 1188.034  | NM_006161 | 4360.517  | 3180.661  |
| X03884    | 5506.2    | 4341.903  | AK025798  | 17351.619 | 13538.85  | NM_006192 | 775.069   | 361.086   |
| U36759    | 2259.144  | 1666.914  | NM_018366 | 5438.01   | 4185.354  | NM_012155 | 4958.129  | 3773.408  |
| X91625    | 2554.907  | 2539.89   | AB040290  | 904.801   | 819.872   | AF144700  | 1241.801  | 1079.856  |



|           |           |           |           |           |           |           |           |           |
|-----------|-----------|-----------|-----------|-----------|-----------|-----------|-----------|-----------|
| AF090901  | 473.842   | 458.569   | NM_019848 | 4161.652  | 3540.784  | NM_004105 | 3090.151  | 2945.766  |
| AF004231  | 1340.899  | 1391.103  | AK021497  | 857.541   | 657.874   | AB046825  | 1947.372  | 1685.656  |
| AF001862  | 3672.197  | 3219.62   | AF124367  | 715.373   | 864.706   | X64975    | 401.924   | 600.608   |
| NM_003890 | 5296.226  | 6470.979  | AK026947  | 9950.564  | 8099.903  | AL050297  | 1840.023  | 1834.608  |
| BF127978  | 5126.351  | 7587.799  | U84526    | 5102.29   | 4654.057  | AK026966  | 1288.611  | 1189.127  |
| AF110801  | 418.565   | 848.974   | L23401    | 1341.22   | 1284.643  | AJ009817  | 394.312   | 316.014   |
| NM_016579 | 20584.83  | 28954.219 | NM_018090 | 34812.816 | 27521.576 | AK025268  | 1435.199  | 1087.168  |
| AB018297  | 1055.482  | 1611.569  | AK022728  | 10483.48  | 8669.638  | AL833005  | 2941.129  | 2088.133  |
| AK022565  | 14105.579 | 18871.752 | AL109678  | 886.445   | 642.209   | L43366    | 2550.245  | 2065.329  |
| AK023151  | 2789.804  | 3901.706  | AL137524  | 627.652   | 605.67    | AK026124  | 4134.242  | 2867.095  |
| AB033076  | 1567.33   | 2217.98   | AF218008  | 6109.884  | 4349.884  | NM_015505 | 1341.419  | 983.2     |
| AK022876  | 2114.657  | 3767.397  | M22404    | 8696.146  | 6320.719  | AL110157  | 14252.671 | 9491.379  |
| AF134894  | 5737.326  | 9662.064  | AF052115  | 711.695   | 655.9     | L38712    | 5584.517  | 3667.596  |
| NM_003938 | 13132.547 | 17568.68  | NM_014019 | 13532.187 | 10367.039 | U84508    | 1024.092  | 718.641   |
| NM_014827 | 16865.932 | 22652.049 | Z70711    | 544.795   | 682.387   | NM_017793 | 3742.924  | 2496.351  |
| NM_004126 | 455.166   | 423.085   | AF116653  | 342.281   | 630.105   | NM_012131 | 3057.089  | 2154.865  |
| U87460    | 7674.79   | 5371.787  | NM_012368 | 802.254   | 915.085   | S41540    | 1229.8    | 827.041   |
| NM_003617 | 845.891   | 686.169   | AK025323  | 639.327   | 439.592   | CY3Cy5    | 3708.057  | 127.939   |
| NM_001841 | 720.487   | 512.493   | NM_013326 | 2941.596  | 2589.494  | BI906766  | 926.147   | 1337.887  |
| NM_002054 | 4239.322  | 3538.159  | BC037322  | 1195.417  | 729.569   | U60519    | 1027.729  | 1816.132  |
| AF300649  | 2681.602  | 2491.138  | Y12022    | 1069.306  | 855.491   | AA282906  | 1256.968  | 1236.135  |
| NM_004125 | 1286.932  | 1303.105  | AK001375  | 1023.99   | 816.406   | L02870    | 998.288   | 1293.448  |
| NM_000823 | 3660.22   | 2842.152  | NM_019597 | 6759.651  | 5027.831  | BG755482  | 2789.131  | 3391.737  |
| NM_004414 | 1710.682  | 1371.298  | AL137559  | 968.67    | 857.053   | AI480307  | 2306.516  | 2631.014  |
| NM_003317 | 7387.269  | 6469.535  | AF026944  | 2150.694  | 1848.886  | X51757    | 382.834   | 745.966   |
| NM_001139 | 3051.284  | 2572.175  | AK021493  | 2336.704  | 2429.346  | L24038    | 836.072   | 960.875   |
| NM_004605 | 50137.762 | 44809.199 | NM_012155 | 4129.506  | 3502.881  | NM_053056 | 2443.712  | 2719.319  |
| NM_003772 | 1077.912  | 1199.19   | AF144700  | 1394.35   | 973.294   | NM_002751 | 1230.046  | 1482.172  |
| NM_001541 | 5234.263  | 5110.873  | NM_004105 | 3000.551  | 2604.846  | M55593    | 4448.495  | 5054.172  |
| NM_004823 | 2921.924  | 4770.848  | AB046825  | 1866.436  | 1441.128  | NM_078467 | 4590.491  | 5145.325  |
| AB013889  | 250.884   | 591.231   | AL050297  | 1600.983  | 1433.548  | SR2       | 56081.59  | 51462.824 |
| Y17179    | 62909.559 | 60895.391 | AK026966  | 1209.571  | 815.921   | SR4       | 14907.644 | 17333.258 |
| NM_000891 | 994.72    | 1569.322  | AK025268  | 1353.019  | 1112.319  | SR6       | 2211.095  | 2298.718  |
| NM_004974 | 125.707   | 383.607   | AL833005  | 2272.031  | 2063.819  | SR8       | 7638.656  | 27630.193 |
| AF239613  | 5678.724  | 7880.966  | L43366    | 2107.043  | 1817.031  | SR10      | 30475.713 | 11791.196 |
| AK026840  | 1677.652  | 2522.131  | AK026124  | 3134.38   | 2498.393  | CY3Cy5    | 3097.112  | 166.4     |
| NM_000288 | 1782.134  | 2513.773  | NM_015505 | 1155.362  | 865.689   | NM_016848 | 1903.493  | 2641.717  |
| AK026317  | 18507.057 | 27588.27  | AL110157  | 14138.02  | 10094.102 | NM_000514 | 1490.512  | 1902.877  |
| X82207    | 26987.84  | 37259.973 | U84508    | 857.734   | 513.96    | AL137432  | 1693.595  | 1787.143  |
| NM_015044 | 4570.981  | 6007.841  | NM_017793 | 2699.225  | 2210.088  | NM_000957 | 1160.036  | 1554.103  |
| NM_002867 | 568.866   | 1076.854  | NM_012131 | 1954.84   | 2219.811  | NM_019043 | 1590.033  | 1767.786  |
| BF217496  | 8498.978  | 12118.748 | S41540    | 962.596   | 1377.053  | NM_003240 | 1753.527  | 1754.31   |
| NM_004762 | 3475.202  | 3052.899  | AI480307  | 2368.266  | 2702.29   | NM_016564 | 11295.472 | 11913.556 |
| NM_006641 | 58086.215 | 52752.645 | X51420    | 987.289   | 1129.316  | NM_000796 | 236.543   | 403.189   |
| NM_000634 | 8513.107  | 4937.483  | X51757    | 343.473   | 580.386   | AB007933  | 18820.064 | 25252.494 |
| NM_014679 | 23252.16  | 16996.51  | L24038    | 449.132   | 771.679   | NM_006702 | 2523.871  | 3524.455  |
| AB040969  | 1756.169  | 1622.03   | NM_053056 | 2749.86   | 2197.416  | NM_001396 | 1938.78   | 1753.443  |
| NM_003467 | 3133.104  | 2346.021  | NM_006186 | 551.32    | 573.148   | NM_014474 | 1165.017  | 1469.512  |
| NM_014936 | 680.542   | 805.614   | NM_002751 | 984.144   | 1186.148  | NM_016246 | 1143.924  | 1803.446  |
| NM_003943 | 1492.966  | 1431.716  | M55593    | 3066.891  | 3482.987  | NM_006181 | 834.589   | 1959.562  |
| NM_019052 | 3917.128  | 4380.398  | NM_078467 | 4028.929  | 4802.233  | NM_003796 | 10075.764 | 12123.74  |
| NM_003202 | 951.737   | 967.453   | SR2       | 49760.773 | 54096.68  | NM_002973 | 2783.796  | 2795.179  |
| AF119902  | 831.793   | 996.319   | SR4       | 13515.788 | 16860.154 | NM_004436 | 38736.078 | 45856.918 |

|           |           |           |           |           |           |           |           |           |
|-----------|-----------|-----------|-----------|-----------|-----------|-----------|-----------|-----------|
| NM_020525 | 7306.133  | 7467.487  | SR6       | 1787.964  | 2340.632  | NM_006580 | 5941.817  | 6196.299  |
| X62468    | 432.6     | 502.299   | SR8       | 7080.842  | 24763.025 | NM_001305 | 1610.229  | 1782.803  |
| NM_015148 | 1414.253  | 2274.884  | SR10      | 24004.711 | 10007.566 | NM_005082 | 520.834   | 1062.089  |
| NM_004714 | 2107.176  | 3354.983  | CY3Cy5    | 762.085   | 147.696   | D17028    | 17016.723 | 21304.037 |
| NM_005401 | 979.814   | 2039.821  | NM_016848 | 1708.07   | 4967.351  | NM_013442 | 17853.598 | 24113.979 |
| NM_017677 | 314.429   | 832.922   | NM_000514 | 1598.638  | 3211.488  | BG611243  | 1299.434  | 1669.839  |
| NM_002497 | 6937.198  | 9733.977  | AL137432  | 1787.051  | 2988.593  | AK023221  | 4550.579  | 4544.152  |
| AB025194  | 9267.739  | 11869.047 | NM_016564 | 8414.455  | 7428.271  | NM_003664 | 4690.175  | 6109.917  |
| NM_006239 | 1405.202  | 2155.341  | AF279656  | 496.959   | 488.223   | NM_002426 | 1344.909  | 2286.604  |
| BC020863  | 833.036   | 1559.938  | AB007933  | 16752.887 | 22864.234 | AK027182  | 602.336   | 876.792   |
| NM_017897 | 3135.272  | 3846.83   | NM_006702 | 2508.977  | 2947.206  | J03651    | 1881.624  | 1752.96   |
| NM_004265 | 21546.465 | 28236.816 | NM_001396 | 1712.802  | 1608.077  | U61738    | 1425.228  | 1524.832  |
| NM_002572 | 2916.489  | 3194.089  | NM_014474 | 1161.049  | 1137.954  | AJ132087  | 631.192   | 811.011   |
| NM_001441 | 2385.368  | 3589.755  | NM_016249 | 743.63    | 787.719   | U92818    | 1789.008  | 1917.5    |
| NM_018324 | 964.956   | 1357.052  | NM_006181 | 607.285   | 896.209   | NM_000442 | 7068.694  | 6999.497  |
| AF064255  | 28573.547 | 24557.771 | NM_003796 | 8640.837  | 11082.882 | NM_002934 | 52142.059 | 50605.715 |
| NM_016368 | 38119.816 | 26076.076 | NM_002973 | 2081.006  | 3554.31   | AK023011  | 8451.688  | 8349.517  |
| U08853    | 2741.179  | 1908.548  | NM_004436 | 33737.523 | 49763.801 | NM_016816 | 1490.942  | 1571.143  |
| NM_004261 | 16593.279 | 13792.277 | NM_005082 | 633.462   | 854.506   | L17325    | 1142.865  | 639.194   |
| NM_016006 | 1754.113  | 1701.463  | D17028    | 12754.19  | 15826.373 | NM_017716 | 657.574   | 828.122   |
| NM_016245 | 14335.819 | 13017.546 | NM_013442 | 14764.077 | 15867.57  | M58603    | 3616.061  | 3761.087  |
| AF005632  | 4514.93   | 3613.753  | BG611243  | 790.158   | 1145.578  | NM_003639 | 2190.719  | 3140.395  |
| NM_000903 | 13555.462 | 9906.877  | AK023221  | 4951.89   | 12540.17  | NM_001549 | 645.869   | 670.084   |
| NM_004493 | 9562.875  | 6985.489  | NM_003664 | 5014.613  | 13883.688 | NM_000115 | 2163.518  | 2460.991  |
| AF309489  | 755.214   | 740.815   | NM_002426 | 1390.245  | 3490.379  | AF308801  | 2879.804  | 3335.643  |
| NM_004047 | 25782.891 | 24594.82  | AK027182  | 799.289   | 2557.148  | NM_007318 | 52338.27  | 50053.359 |
| AF287303  | 333.739   | 282.586   | U92818    | 1674.512  | 1295.766  | NM_014874 | 1211.056  | 1504.106  |
| NM_006773 | 1548.64   | 2260.276  | NM_000442 | 5976.529  | 4987.129  | NM_012397 | 1382.027  | 3906.866  |
| AK024439  | 7539.753  | 9316.581  | NM_002934 | 43531.543 | 43816.992 | NM_005765 | 19577.572 | 28482.723 |
| X89676    | 1465.599  | 2521.463  | AK023011  | 11087.972 | 30683.211 | NM_002762 | 475.16    | 1039.743  |
| NM_012444 | 527.242   | 794.598   | NM_016816 | 1493.426  | 1903.973  | NM_006324 | 7673.024  | 9320.231  |
| Z32684    | 1850.053  | 3395      | L17325    | 930.859   | 1219.995  | NM_005469 | 5417.76   | 5911.816  |
| NM_016512 | 782.01    | 1178.861  | NM_017716 | 683.147   | 781.377   | NM_016361 | 2497.33   | 2793.461  |
| NM_017488 | 6934.68   | 8224.51   | M58603    | 2948.829  | 2564.985  | NM_003708 | 23693.801 | 31482.514 |
| NM_005069 | 1163.629  | 1831.035  | NM_003639 | 1937.638  | 2332.814  | NM_014349 | 3814.25   | 4629.702  |
| NM_016044 | 1596.705  | 948.437   | NM_000115 | 2442.083  | 5302.5    | AB040895  | 624.107   | 942.805   |
| NM_000520 | 6785.937  | 9803.545  | NM_005765 | 16339.678 | 17171.115 | NM_018210 | 1719.206  | 1897.601  |
| NM_000289 | 1374.79   | 826.652   | NM_006324 | 5200.134  | 6046.321  | NM_001096 | 7134.896  | 7649.114  |
| NM_001500 | 1522.929  | 1153.269  | NM_005469 | 4926.015  | 13339.173 | NM_016014 | 1628.465  | 2265.806  |
| NM_004388 | 2741.631  | 1966.939  | NM_016361 | 2910.894  | 5981.595  | NM_000198 | 396.322   | 297.284   |
| NM_020379 | 660.998   | 359.754   | NM_003708 | 13410.051 | 24111.381 | NM_018327 | 690.169   | 673.391   |
| AL110127  | 1742.104  | 1212.717  | NM_014349 | 3929.809  | 9041.604  | NM_017581 | 1242.058  | 1683.067  |
| AK001997  | 338.564   | 496.707   | NM_001096 | 5613.245  | 4698.195  | AA488804  | 8641.3    | 6931.722  |
| NM_002528 | 1874.1    | 1610.753  | NM_016014 | 1220.102  | 852.321   | NM_006539 | 656.719   | 508.371   |
| D38438    | 10294.044 | 6471.118  | NM_017581 | 1338.838  | 1689.478  | NM_001684 | 1820.532  | 1706.784  |
| AV714945  | 813.529   | 746.313   | AA488804  | 6783.423  | 7185.641  | NM_000808 | 871.806   | 1404.85   |
| AF007872  | 1759.886  | 2003.291  | NM_006539 | 428.449   | 630.86    | NM_016318 | 6535.197  | 6417.795  |
| M30938    | 5300.827  | 4322.07   | NM_001684 | 970.326   | 1256.071  | NM_013309 | 294.871   | 510.976   |
| NM_017586 | 11948.275 | 14186.073 | NM_016318 | 5782.627  | 7874.892  | NM_019891 | 1622.588  | 1436.767  |
| NM_004148 | 6153.603  | 9590.573  | AF038186  | 1192.025  | 2108.811  | AF038186  | 1662.766  | 2281.078  |
| X03168    | 1423.955  | 979.546   | NM_016277 | 3008.917  | 3601.378  | NM_016277 | 5840.516  | 7712.458  |
| NM_017801 | 11166.545 | 13843.81  | NM_007247 | 1807.02   | 2184.546  | NM_007247 | 2714.256  | 5106.213  |
| NM_007348 | 7184.091  | 9158.107  | NM_006554 | 2713.567  | 2626.155  | NM_006554 | 3381.612  | 5359.279  |

|           |           |           |           |           |           |           |           |           |
|-----------|-----------|-----------|-----------|-----------|-----------|-----------|-----------|-----------|
| NM_016953 | 750.973   | 1507.487  | X99962    | 4159.106  | 5734.077  | X99962    | 6548.268  | 8258.484  |
| U65473    | 5329.05   | 7083.927  | AK025587  | 3364.95   | 7650.761  | AL050114  | 1078.096  | 1088.914  |
| D63481    | 13654.369 | 21080.693 | AL050114  | 1172.665  | 2490.214  | AK021492  | 1465.713  | 1838.824  |
| AY009951  | 815.038   | 1056.807  | AK021492  | 1899.282  | 2580.067  | AK023794  | 6466.117  | 7961.492  |
| AL157424  | 934.639   | 1181.379  | AK023794  | 3159.542  | 6355.571  | NM_019885 | 1721.723  | 2095.085  |
| AK024422  | 2651.415  | 3077.844  | AK024098  | 497.073   | 493.326   | AB033103  | 1538.216  | 1585.929  |
| NM_002673 | 4435.165  | 6387.904  | AK022371  | 2020.397  | 2206.006  | NM_002907 | 641.957   | 832.047   |
| NM_003876 | 3669.18   | 2463.444  | D42045    | 2064.567  | 1955.394  | AK024098  | 925.624   | 990.088   |
| AJ276310  | 619.113   | 360.503   | AB007953  | 1264.043  | 1235.18   | AK001116  | 406.951   | 444.59    |
| NM_012295 | 5108.157  | 2669.756  | NM_014002 | 3791.295  | 3654.382  | AK022371  | 2710.824  | 1845.511  |
| NM_015910 | 583.492   | 275.844   | NM_004197 | 3970.583  | 3858.776  | D42045    | 1858.695  | 2122.406  |
| NM_000222 | 547.14    | 467.41    | NM_004073 | 684.969   | 1081.633  | AB007953  | 1431.228  | 1453.403  |
| AL133666  | 1785.366  | 1218.349  | NM_001278 | 2538.924  | 3227.343  | NM_014002 | 3567.847  | 3438.708  |
| NM_000663 | 805.568   | 650.939   | NM_019105 | 2315.535  | 3206.122  | NM_004197 | 5965.631  | 7050.627  |
| NM_004710 | 3753.849  | 2878.429  | NM_000294 | 2866.542  | 4702.864  | NM_004073 | 1130.545  | 1512.747  |
| NM_004396 | 13201.959 | 10102.052 | NM_001626 | 10005.37  | 14023.053 | NM_001278 | 3110.71   | 3282.941  |
| NM_017999 | 2420.558  | 2004.378  | NM_005677 | 1805.139  | 2566.96   | NM_019105 | 2260.493  | 3051.888  |
| NM_015989 | 41663.688 | 36059.391 | AF229803  | 482.315   | 914.609   | NM_000294 | 3090.289  | 3361.115  |
| NM_001043 | 1418.698  | 1240.361  | NM_002130 | 21180.52  | 25823.338 | AJ272212  | 1808.523  | 1698.222  |
| NM_004779 | 7279.791  | 6134.99   | NM_005082 | 780.433   | 2370.395  | NM_001626 | 16733.627 | 18861.977 |
| NM_019071 | 4456.327  | 6902.851  | D17028    | 10414.086 | 20587.418 | NM_005677 | 3464.981  | 4452.788  |
| AF113685  | 921.54    | 886.276   | BI906766  | 1068.543  | 310.976   | AF229803  | 933.581   | 1542.153  |
| NM_005470 | 3287.481  | 4702.999  | U60519    | 923.103   | 744.761   | AF151810  | 576.748   | 783.024   |
| AF142570  | 1291.099  | 2217.184  | AA282906  | 1312.572  | 1098.316  | NM_002130 | 27454.09  | 39948.789 |
| NM_004225 | 11717.614 | 13865.561 | L02870    | 1025.247  | 849.583   | NM_001305 | 829.787   | 929.477   |
| NM_003862 | 1065.733  | 1205.851  | BG755482  | 2820.759  | 2202.776  | NM_005082 | 666.426   | 742.551   |
| NM_002873 | 4505.485  | 6244.572  | AI480307  | 2261.924  | 1995.263  | D17028    | 13759.736 | 19801.746 |
| NM_015571 | 8161.723  | 10642.903 | X51420    | 1016.878  | 1089.123  | NM_013442 | 15105.013 | 20010.475 |
| NM_004701 | 4093.098  | 5319.353  | L24038    | 467.368   | 528.248   | BG611243  | 1010.785  | 1420.279  |
| AK025554  | 2257.637  | 3225.439  | NM_053056 | 2625.498  | 2592.088  | BI906766  | 1234.873  | 1280.91   |
| BI824151  | 4450.657  | 5313.674  | NM_006186 | 311.682   | 895.026   | U60519    | 1366.621  | 2319.262  |
| AK021791  | 3134.681  | 3997.921  | NM_078467 | 3448.466  | 4549.525  | AA282906  | 1455.459  | 1489.306  |
| NM_004052 | 7083.109  | 4438.848  | AK001883  | 7043.507  | 5673.592  | L02870    | 1414.972  | 1488.19   |
| NM_004394 | 12628.032 | 7122.759  | NM_014629 | 1254.708  | 2069.66   | BG755482  | 3478.899  | 3470.693  |
| NM_005727 | 23931.135 | 14451.647 | NM_016848 | 2090.151  | 1714.756  | AI480307  | 3218.892  | 2507.795  |
| AK027242  | 1667.366  | 1490.713  | NM_000514 | 1820.409  | 1280.625  | X51420    | 1301.993  | 1335.718  |
| NM_001279 | 10208.414 | 7717.911  | AL137432  | 1265.621  | 695.29    | D28235    | 254.32    | 427.743   |
| NM_005010 | 1127.866  | 1040.878  | NM_000957 | 1034.968  | 870.829   | X51757    | 506.71    | 370.17    |
| NM_019055 | 1276.706  | 1301.49   | NM_019043 | 1426.97   | 903.433   | L24038    | 586.672   | 644.263   |
| NM_020199 | 476.345   | 547.868   | NM_003240 | 1625.069  | 1433.187  | NM_053056 | 3008.512  | 3186.31   |
| U96136    | 581.39    | 617.151   | NM_016564 | 10415.813 | 9472.156  | NM_006186 | 326.178   | 508.615   |
| AF188747  | 478.544   | 364.159   | AF279656  | 671.9     | 740.261   | NM_002751 | 963.97    | 1263.455  |
| NM_005941 | 444.895   | 214.405   | AB007933  | 15295.264 | 18109.652 | M55593    | 4442.728  | 3905.634  |
| NM_015884 | 407.782   | 310.804   | NM_006702 | 2160.833  | 3346.733  | NM_078467 | 5319.114  | 5586.183  |
| AF201380  | 2910.56   | 4584.278  | NM_001396 | 3076.491  | 3526.287  | AK001883  | 10184.447 | 9209.33   |
| NM_003619 | 3551.961  | 3864.931  | NM_014474 | 1352.883  | 4177.379  | NM_014629 | 1824.77   | 2018.206  |
| NM_012392 | 4180.473  | 5212.775  | NM_006181 | 610.404   | 1079.644  | NM_007318 | 40087.992 | 48365.18  |
| NM_014833 | 23486.986 | 37576.344 | NM_003796 | 7348.591  | 9332.562  | NM_014874 | 833.687   | 1102.458  |
| NM_000045 | 1050.769  | 1472.433  | NM_002973 | 1685.638  | 2566.557  | NM_002762 | 571.599   | 669.536   |
| NM_003878 | 3779.967  | 5937.95   | NM_004436 | 30688.785 | 28011.564 | NM_006324 | 6026.561  | 7175.713  |
| NM_004832 | 654.503   | 984.55    | NM_006580 | 4428.212  | 4906.866  | NM_016848 | 2546.865  | 3698.232  |
| NM_005957 | 653.592   | 1108.539  | NM_007247 | 1931.945  | 1166.69   | NM_000514 | 2181.753  | 2209.543  |
| AK024374  | 2302.75   | 4501.567  | NM_006554 | 2017.172  | 1349.198  | AL137432  | 1650.983  | 1180.091  |

|           |           |           |           |           |           |           |           |           |
|-----------|-----------|-----------|-----------|-----------|-----------|-----------|-----------|-----------|
| NM_007101 | 859.699   | 755.883   | X99962    | 4007.285  | 3623.805  | NM_000957 | 1361.549  | 1114.146  |
| NM_018234 | 2055.082  | 1142.725  | AK023221  | 3802.168  | 2148.701  | NM_019043 | 1909.38   | 1310.914  |
| AB033062  | 1329.561  | 616.027   | NM_003664 | 3607.609  | 2353.434  | NM_003240 | 1938.453  | 1769.995  |
| NM_016437 | 18966.984 | 9655.086  | NM_002426 | 1153.806  | 753.984   | NM_016564 | 12642.316 | 11553.433 |
| NM_002720 | 6296.893  | 4117.349  | AK027182  | 648.135   | 787.439   | NM_000796 | 498.326   | 351.837   |
| AK024716  | 13858.104 | 9544.887  | J03651    | 2080.645  | 1780.704  | AF279656  | 744.471   | 503.482   |
| X67155    | 682.818   | 485.861   | U61738    | 1342.273  | 1285.158  | AB007933  | 15558.267 | 17367.998 |
| NM_020380 | 3899.978  | 3882.05   | AJ132087  | 581.082   | 448.081   | NM_006702 | 2383.442  | 2800.682  |
| AL137519  | 437.661   | 372.6     | U92818    | 1918.939  | 1956.528  | NM_001396 | 2117.029  | 2048.357  |
| NM_002890 | 21874.76  | 19745.369 | NM_000442 | 6880.128  | 7382.18   | NM_014474 | 1449.349  | 1568.326  |
| NM_001330 | 30158.051 | 24679.195 | NM_002934 | 49585.172 | 44659.762 | NM_016246 | 1321.12   | 1204.849  |
| NM_015927 | 951.42    | 994.165   | AK023011  | 7978.73   | 11336.209 | NM_006181 | 980.096   | 819.576   |
| NM_014552 | 2767.057  | 1454.128  | NM_017716 | 687.396   | 1246.423  | NM_003796 | 12212.145 | 10849.828 |
| NM_003072 | 7137.823  | 3248.087  | M58603    | 3352.971  | 4407.773  | NM_002973 | 3335.18   | 3683.148  |
| NM_001913 | 2023.026  | 1013.287  | NM_003639 | 1923.169  | 2420.118  | NM_004436 | 39848.883 | 39345.973 |
| AK025594  | 1036.372  | 1071.232  | NM_001549 | 391.448   | 378.579   | NM_006580 | 5703.025  | 4583.822  |
| AB040931  | 2660.802  | 1209.437  | NM_000115 | 1586.237  | 1936.969  | NM_019891 | 1037.429  | 1187.372  |
| NM_003596 | 1042.443  | 773.321   | AF308801  | 2552.401  | 3727.337  | AF038186  | 1344.515  | 1780.67   |
| NM_015911 | 2027.998  | 2170.873  | AJ272212  | 1358.685  | 844.547   | NM_006554 | 2887.597  | 3460.157  |
| BC011826  | 4523.784  | 4843.161  | NM_001626 | 6261.462  | 3840.55   | X99962    | 5753.605  | 6014.695  |
| NM_017647 | 4521.741  | 7132.962  | NM_005677 | 2236.999  | 1271.869  | AK023221  | 4527.2    | 4528.964  |
| NM_012091 | 974.073   | 1430.348  | AF229803  | 1101.701  | 818.539   | NM_003664 | 5611.301  | 4827.555  |
| NM_012321 | 2140.73   | 1692.862  | AF151810  | 754.912   | 1125.372  | NM_002426 | 2002.427  | 1550.396  |
| D13642    | 7160.737  | 10400.552 | NM_002130 | 22184.18  | 22697.047 | AK027182  | 581.342   | 654.567   |
| NM_004741 | 10792.331 | 9227.376  | NM_005469 | 4712.884  | 3652.45   | J03651    | 1935.201  | 1981.835  |
| NM_018032 | 2329.549  | 1380.784  | NM_016361 | 2274.118  | 1851.127  | U61738    | 1599.456  | 1375.764  |
| NM_003675 | 4226.175  | 1756.34   | NM_003708 | 21521.33  | 14219.515 | AJ132087  | 477.841   | 603.479   |
| NM_017518 | 1633.817  | 1132.061  | NM_014349 | 4117.734  | 3167.047  | U92818    | 1724.721  | 1991.927  |
| NM_004117 | 5965.792  | 4154.946  | NM_018210 | 1239.939  | 1241.503  | NM_000442 | 7988.367  | 8674.487  |
| NM_016594 | 1313.599  | 1113.84   | NM_001096 | 6049.047  | 5667.412  | NM_016816 | 1173.031  | 1457.215  |
| NM_030752 | 4309.75   | 2520.185  | NM_016014 | 1682.164  | 1593.2    | L17325    | 1264.612  | 1245.066  |
| D26068    | 21861.379 | 15542.757 | NM_000198 | 562.09    | 418.384   | NM_017716 | 1138.62   | 1203.722  |
| NM_018556 | 8605.585  | 6926.622  | NM_018327 | 597.426   | 784.968   | M58603    | 4488.037  | 4265.397  |
| NM_017593 | 983.406   | 797.823   | NM_017581 | 1631.824  | 2477.445  | NM_003636 | 3042.394  | 2614.522  |
| NM_004282 | 9667.711  | 8628.603  | AA488804  | 6878.29   | 10003.963 | NM_001546 | 794.394   | 825.039   |
| AF070549  | 208.965   | 497.339   | NM_006539 | 358.229   | 572.589   | NM_000115 | 3021.784  | 2457.235  |
| AK025695  | 1346.554  | 1588.311  | NM_001684 | 976.686   | 1372.574  | AF308801  | 2965.364  | 3634.032  |
| AK025442  | 4401.678  | 2710.41   | NM_016318 | 5474.754  | 5169.019  | AJ272212  | 1719.491  | 1500.66   |
| AL050041  | 682.222   | 456.769   | NM_078467 | 2275.994  | 1707.297  | NM_001626 | 11193.708 | 11718.474 |
| NM_002451 | 1534.593  | 1243.202  | AK001883  | 7564.553  | 9894.424  | NM_005677 | 2171.5    | 2799.5    |
| NM_013411 | 1008.42   | 567.743   | NM_014629 | 1431.082  | 1267.835  | AF151810  | 430.132   | 654.65    |
| NM_001248 | 399.016   | 456.664   | AL050114  | 724.86    | 597.515   | NM_002130 | 24466.67  | 27496.502 |
| NM_000180 | 6861.994  | 7906.754  | AK021492  | 2116.885  | 1592.425  | NM_005466 | 5898.04   | 5931.639  |
| NM_000858 | 4549.166  | 5207.063  | AK023794  | 11242.376 | 8894.403  | NM_016361 | 2199.722  | 1470.578  |
| AF254087  | 1708.41   | 1862.689  | NM_019885 | 1771.442  | 1316.826  | NM_003708 | 26819.334 | 25281.385 |
| NM_017715 | 1065.684  | 1645.295  | AB033103  | 1188.09   | 1669.914  | NM_014346 | 5344.814  | 5236.98   |
| AL117607  | 3306.364  | 2183.754  | NM_002907 | 970.152   | 918.92    | AB040895  | 445.437   | 435.003   |
| AB037774  | 1222.644  | 632.204   | AK022371  | 2179.448  | 2791.958  | NM_004820 | 426.713   | 1138.487  |
| NM_005438 | 1038.104  | 562.471   | D42045    | 1588.26   | 2084.622  | NM_018210 | 1607.339  | 1884.061  |
| AK024361  | 1048.621  | 620.998   | AB007953  | 1384.637  | 1457.78   | NM_001096 | 7038.849  | 7449.522  |
| NM_004350 | 1383.695  | 1043.56   | NM_014002 | 3867.851  | 4148.006  | NM_016014 | 1786.096  | 2156.811  |
| NM_018044 | 1786.059  | 1572      | NM_004197 | 3783.358  | 5300.935  | NM_018327 | 480.574   | 935.247   |
| AF274347  | 5578.346  | 4185.283  | NM_004073 | 513.32    | 893.142   | NM_017581 | 1812.84   | 2731.812  |

|           |           |           |           |           |           |           |           |           |
|-----------|-----------|-----------|-----------|-----------|-----------|-----------|-----------|-----------|
| AK001144  | 341.74    | 252.065   | NM_001278 | 2713.427  | 3134.375  | AA488804  | 8384.874  | 9884.464  |
| NM_01855E | 3480.771  | 3238.479  | NM_019105 | 2376.218  | 2204.089  | NM_001684 | 1498.473  | 1734.358  |
| AK023525  | 2947.687  | 1956.02   | NM_000294 | 3299.683  | 3656.518  | NM_00080E | 710.832   | 933.957   |
| AF085829  | 2032.551  | 3353.594  | NM_006181 | 422.843   | 526.87    | NM_01631E | 6587.817  | 7589.611  |
| AF075029  | 538.736   | 777.351   | NM_003796 | 7063.568  | 6106.193  | NM_01330E | 211.152   | 502.427   |
| AK021903  | 5668.95   | 5150.639  | NM_002973 | 1667.947  | 1726.066  | NM_078467 | 3469.436  | 3341.4    |
| AL390143  | 3521.998  | 3353.588  | NM_004436 | 29313.25  | 21834.301 | AK001883  | 8631.146  | 6720.343  |
| AL162075  | 1608.618  | 1000.863  | NM_006580 | 4174.112  | 3365.476  | NM_01462E | 1446.535  | 1920.532  |
| AF147384  | 784.862   | 650.105   | NM_001305 | 1042.02   | 785.917   | AL050114  | 904.737   | 885.773   |
| AK021595  | 904.277   | 899.449   | NM_005082 | 578.981   | 579.564   | AK021492  | 1773.732  | 1811.549  |
| AK021648  | 3225.58   | 2637.018  | D17028    | 11706.906 | 8903.822  | AK023794  | 8428.452  | 8979.79   |
| AF147358  | 12234.338 | 14876.23  | NM_013442 | 14195.933 | 11128.138 | NM_01988E | 2212.666  | 2089.305  |
| AL110290  | 346.696   | 527.416   | BG611243  | 849.795   | 847.281   | AB033103  | 1554.511  | 2047.078  |
| NM_01841C | 1905.55   | 3317.288  | BI906766  | 1022.366  | 511.561   | AK024098  | 1108.791  | 1763.81   |
| AF147404  | 353.093   | 806.241   | U60519    | 1793.883  | 1816.867  | AK001116  | 338.827   | 573.024   |
| AF086278  | 661.62    | 1284.313  | BG755482  | 2816.012  | 3361.791  | AK022371  | 2654.636  | 2950.1    |
| AF086355  | 873.415   | 1420.929  | AI480307  | 1934.444  | 2532.214  | D42045    | 2296.315  | 2541.457  |
| AF086403  | 448.496   | 131.638   | X51420    | 1270.998  | 2430.215  | AB007953  | 1476.652  | 1774.765  |
| AF086314  | 428.076   | 354.746   | L24038    | 532.25    | 558.869   | NM_014002 | 4119.111  | 3403.551  |
| NM_016364 | 867.617   | 641.941   | NM_05305E | 2732.254  | 2501.698  | NM_004197 | 4712.098  | 5250.366  |
| AF086419  | 4012.849  | 2384.1    | NM_002751 | 715.232   | 1003.095  | NM_004073 | 891.428   | 1405.351  |
| AF086461  | 1004.009  | 721.245   | M55593    | 3009.787  | 4219.95   | NM_00127E | 3198.387  | 3673.747  |
| AF131795  | 191.772   | 624.328   | NM_01771E | 703.165   | 529.692   | NM_000294 | 4214.16   | 5798.136  |
| AL833296  | 1799.07   | 1757.756  | M58603    | 2965.082  | 1982.15   | NM_01624E | 747.649   | 694.802   |
| AL110240  | 3540.491  | 3020.619  | NM_00363E | 1676.28   | 1357.516  | NM_006181 | 703.412   | 476.221   |
| AF075081  | 330.349   | 436.49    | NM_000115 | 1438.537  | 1146.36   | NM_00443E | 32532.4   | 29044.41  |
| NM_015372 | 533.945   | 545.791   | AF308801  | 2380.25   | 2266.333  | NM_006580 | 4110.055  | 3676.535  |
| AF085919  | 1310.116  | 1053.094  | NM_00731E | 49669.137 | 30827.303 | NM_00130E | 1369.955  | 1017.596  |
| AF085933  | 768.507   | 696.478   | NM_014874 | 723.135   | 750.591   | NM_005082 | 514.547   | 641.736   |
| AK026422  | 7605.704  | 5597.873  | NM_00576E | 14921.819 | 10271.668 | D17028    | 13759.524 | 13286.161 |
| AK022264  | 775.694   | 655.221   | NM_006324 | 5207.454  | 4686.68   | NM_013442 | 15162.436 | 19791.596 |
| AL137331  | 929.572   | 558.053   | NM_01684E | 2362.862  | 2039.613  | BG611243  | 1467.152  | 2628.411  |
| AL162040  | 1603.912  | 705.07    | NM_000514 | 2578.19   | 2349.162  | BI906766  | 1343.319  | 973.105   |
| AL442084  | 585.467   | 681.376   | AL137432  | 1491.328  | 1330.031  | U60519    | 932.271   | 1012.392  |
| AL137371  | 8827.646  | 9124.387  | NM_000957 | 994.753   | 922.437   | AA282906  | 1566.589  | 1879.958  |
| AL137596  | 2916.38   | 3690.775  | NM_019043 | 1578.909  | 1645.64   | L02870    | 1360.719  | 1424.802  |
| AL353942  | 12683.694 | 7856.484  | NM_003240 | 1369.362  | 1434.746  | BG755482  | 3393.158  | 2944.67   |
| Z38010    | 20457.307 | 30902.908 | NM_016564 | 6577.654  | 7799.708  | AI480307  | 2900.529  | 3060.168  |
| AF088003  | 1056.384  | 1017.147  | AF279656  | 622.918   | 566.477   | X51420    | 1517.694  | 1474.414  |
| AK024713  | 555.493   | 297.729   | AB007933  | 16893.639 | 19676.102 | D28235    | 263.425   | 385.056   |
| AK023737  | 963.431   | 620.976   | NM_006702 | 2198.196  | 2983.089  | L24038    | 677.849   | 846.391   |
| NM_00660E | 1757.242  | 1696.992  | NM_00139E | 1683.213  | 1837.208  | NM_05305E | 3649.411  | 5675.016  |
| NM_014118 | 267.148   | 464.563   | NM_014474 | 1132.701  | 1683.842  | NM_00618E | 501.583   | 611.926   |
| AK023643  | 694.723   | 987.595   | NM_001684 | 889.552   | 816.144   | NM_002751 | 960.277   | 1139.85   |
| AL390159  | 350.278   | 571.362   | NM_01631E | 5212.021  | 4019.994  | M55593    | 4857.744  | 5124.833  |
| AF095853  | 364.215   | 245.538   | NM_019891 | 764.695   | 616.717   | NM_01771E | 610.819   | 626.872   |
| NM_014157 | 519.212   | 521.253   | AF038186  | 921.463   | 853.218   | M58603    | 3664.266  | 2759.036  |
| AF090933  | 455.333   | 579.443   | NM_016277 | 3000.2    | 2323.447  | NM_000115 | 1902.211  | 1430.12   |
| AF111851  | 3888.629  | 2838.08   | NM_007247 | 1427.53   | 1692.207  | AF308801  | 2320.82   | 2007.567  |
| AF152529  | 256.272   | 291       | NM_006554 | 2271.707  | 2035.48   | NM_00731E | 47625.629 | 43898.703 |
| AL360200  | 707.045   | 383.389   | X99962    | 4733.818  | 4359.616  | NM_00576E | 16135.116 | 15963.955 |
| AK021992  | 432.87    | 237.528   | AK023221  | 4137.292  | 3571.455  | NM_002762 | 195.387   | 654.603   |
| AK022102  | 476.719   | 420.916   | NM_003664 | 4737.824  | 3638.232  | NM_006324 | 6601.808  | 7755.82   |

|           |           |           |           |           |           |           |           |           |
|-----------|-----------|-----------|-----------|-----------|-----------|-----------|-----------|-----------|
| AK022235  | 623.056   | 517.682   | NM_002426 | 1465.243  | 1290.378  | NM_01684E | 2454.173  | 2894.702  |
| AK022378  | 1931.083  | 1603.943  | AK027182  | 658.85    | 809.738   | NM_000514 | 2267.151  | 1772.915  |
| AK022401  | 467.112   | 769.978   | J03651    | 1683.591  | 1765.591  | AL137432  | 1542.337  | 1138.251  |
| AK027174  | 458.068   | 264.898   | U61738    | 1444.787  | 1855.284  | NM_000957 | 1150.924  | 956.838   |
| AK024106  | 589.203   | 333.46    | AJ132087  | 445.897   | 799.539   | NM_019043 | 1819.406  | 1598.015  |
| AK025833  | 323.982   | 224.092   | U92818    | 1484.261  | 1922.624  | NM_00324C | 1608.81   | 1572.331  |
| AK027254  | 1631.96   | 1320.288  | NM_000442 | 7870.114  | 8914.742  | NM_016564 | 14420.167 | 12790.724 |
| AK021772  | 1604.66   | 1617.896  | NM_002934 | 49924.301 | 47380.418 | AF279656  | 656.507   | 833.793   |
| AK026297  | 448.212   | 384.282   | AK023011  | 7200.876  | 9690.663  | AB007933  | 16940.338 | 29320.734 |
| AK054831  | 24207.189 | 17790.449 | NM_016816 | 892.467   | 1229.761  | NM_006702 | 2981.62   | 3391.646  |
| AK021770  | 1063.933  | 611.35    | L17325    | 1332.839  | 2026.777  | NM_001396 | 1908.182  | 2051.688  |
| AK027248  | 1505.125  | 1273.366  | NM_014002 | 3388.193  | 2804.401  | NM_014474 | 1121.875  | 1717.003  |
| AK022804  | 8920.177  | 7419.322  | NM_004197 | 3929.76   | 3435.985  | NM_006535 | 600.331   | 401.017   |
| AF009263  | 1609.38   | 1242.495  | NM_004073 | 748.635   | 1006.022  | NM_001684 | 1478.705  | 1079.92   |
| AF086329  | 4621.814  | 2909.637  | NM_001278 | 2455.084  | 2625.911  | NM_000808 | 781.721   | 643.579   |
| AK025799  | 429.966   | 260.226   | NM_019105 | 1796.017  | 1435.705  | NM_01631E | 6210.53   | 5436.217  |
| AK022857  | 643.349   | 351.705   | NM_000294 | 2653.647  | 1906.648  | NM_019891 | 3251.448  | 3809.299  |
| AL110206  | 1059.154  | 774.662   | AJ272212  | 1350.646  | 1046.062  | AF038186  | 1373.045  | 1552.023  |
| NM_004821 | 921.995   | 1236.886  | NM_001626 | 12209.962 | 9655.23   | NM_016277 | 3747.849  | 2651.488  |
| AK024292  | 1003.551  | 1092.559  | NM_005677 | 1907.635  | 1605.552  | NM_007247 | 2036.008  | 2244.895  |
| AK026263  | 1577.253  | 1460.394  | AF229803  | 395.45    | 357.181   | NM_006554 | 2980.919  | 3009.26   |
| U50526    | 570.062   | 787.549   | AF151810  | 374.674   | 373.702   | X99962    | 6134.008  | 5429.862  |
| S75105    | 3065.717  | 2902.723  | NM_00213C | 21907.52  | 19688.957 | AK023221  | 4574.177  | 4368.333  |
| AF056455  | 9158.193  | 6339.774  | NM_005469 | 5116.219  | 4829.431  | NM_003664 | 5358.929  | 3731.447  |
| NM_01851C | 905.133   | 648.591   | NM_016361 | 3450.885  | 2751.283  | NM_00242E | 1890.567  | 1580.79   |
| U50537    | 406.019   | 569.323   | NM_003708 | 16661.27  | 16849.049 | AK027182  | 676.552   | 576.19    |
| AK024988  | 755.165   | 656.097   | NM_014349 | 4561.416  | 4596.257  | J03651    | 1755.82   | 1781.9    |
| AK025719  | 610.742   | 598.413   | NM_01821C | 1937.918  | 5531.527  | U61738    | 1662.626  | 1381.849  |
| NM_02044E | 789.385   | 680.749   | NM_001096 | 6105.433  | 8054.946  | AJ132087  | 610.231   | 715.038   |
| NM_005419 | 2804.007  | 2144.802  | NM_016014 | 1192.822  | 1932.884  | U92818    | 2167.875  | 2068.687  |
| L31956    | 432.091   | 512.953   | NM_017581 | 2196.83   | 5915.549  | NM_000442 | 8241.791  | 9151.311  |
| AK022078  | 381.985   | 381.119   | AA488804  | 11364.924 | 26615.83  | NM_002934 | 56812.453 | 50763.203 |
| NM_020224 | 6600.148  | 6466.978  | L29496    | 2975.301  | 2830.439  | AK023011  | 8261.371  | 9002.967  |
| U17617    | 2054.541  | 1794.668  | NM_007002 | 6209.173  | 7578.364  | NM_01681E | 1387.039  | 1292.063  |
| AK022952  | 5067.681  | 2848.404  | NM_012121 | 875.02    | 1965.004  | L17325    | 1357.605  | 1669.668  |
| BF218888  | 638.355   | 573.286   | NM_003255 | 4460.912  | 3311.608  | NM_014002 | 4039.119  | 2740.572  |
| AF086401  | 2923.376  | 2324.564  | NM_014155 | 1927.78   | 1525.954  | NM_004197 | 6168.635  | 5089.827  |
| L23869    | 1475.09   | 765.058   | AK026331  | 9368.88   | 7940.818  | NM_004073 | 623.703   | 942.051   |
| Z21853    | 1461.641  | 1125.591  | M30773    | 1987.889  | 1661.981  | NM_00127E | 3103.837  | 2847.146  |
| U80770    | 421.885   | 151.979   | NM_01633E | 5934.686  | 4426.041  | NM_019105 | 2432.431  | 2096.281  |
| AB075846  | 396.324   | 180.69    | AF113699  | 10376.809 | 7084.315  | NM_000294 | 2899.283  | 2645.29   |
| NM_018342 | 857.264   | 391.282   | AK001883  | 8003.777  | 5190.066  | AJ272212  | 1709.149  | 1588.483  |
| BC020260  | 912.396   | 514.298   | NM_014629 | 1770.814  | 1872.246  | NM_00162E | 14421.14  | 12530.962 |
| D17156    | 2748.53   | 1116.661  | AL050114  | 793.985   | 688.362   | NM_005677 | 2356.238  | 2182.361  |
| L04461    | 452.018   | 159.176   | AK021492  | 2041.504  | 2206.581  | AF229803  | 728.766   | 700.515   |
| AK026938  | 6018.744  | 2177.786  | AK023794  | 6166.586  | 5726.345  | AF151810  | 327.42    | 745.68    |
| AK024373  | 7016.324  | 3416.866  | NM_019885 | 1650.576  | 1917.048  | NM_00213C | 26696.016 | 24242.334 |
| AK022343  | 5149.158  | 2086.774  | NM_002907 | 697.909   | 894.122   | NM_00546E | 6487.006  | 5777.497  |
| AK026400  | 809.267   | 382.846   | AK024098  | 501.177   | 781.382   | NM_016361 | 2733.245  | 2094.168  |
| U92989    | 2727.732  | 1227.011  | AK022371  | 2030.807  | 2593.217  | NM_00370E | 26720.125 | 21459.785 |
| AF075102  | 1400.058  | 673.19    | D42045    | 2289.318  | 2676.564  | NM_01434E | 5687.843  | 4272.838  |
| NM_018463 | 5517.866  | 2406.926  | AB007953  | 1600.791  | 2047.584  | AB040895  | 421.139   | 1418.229  |
| AK025546  | 617.494   | 486.406   | NM_001849 | 1654.128  | 1119.258  | NM_00019E | 335.622   | 540.734   |

|           |           |           |           |           |           |           |           |           |
|-----------|-----------|-----------|-----------|-----------|-----------|-----------|-----------|-----------|
| AL137487  | 1508.899  | 765.872   | NM_003734 | 4858.209  | 4057.263  | NM_018327 | 622.945   | 776.594   |
| AK023800  | 584.896   | 366.308   | NM_014935 | 3534.186  | 3100.43   | NM_017581 | 1611.826  | 1969.964  |
| AK024120  | 1470.464  | 1384.396  | X99660    | 6411.167  | 5364.149  | L29496    | 3279.025  | 2486.922  |
| CY3Cy5    | 1883.749  | 150.242   | X03635    | 2470.008  | 1682.431  | NM_000925 | 322.662   | 360.095   |
| W96179    | 1565.681  | 1414.29   | NM_004351 | 2929.681  | 1972.924  | NM_007002 | 6637.788  | 5846.005  |
| AW247841  | 5027.142  | 3201.002  | NM_004236 | 7227.06   | 5750.816  | NM_012121 | 1097.068  | 1379.618  |
| M76559    | 2553.651  | 2240.033  | AB011093  | 2629.25   | 2019.87   | NM_003255 | 5685.422  | 4538.636  |
| AI222585  | 649.073   | 908.695   | NM_005618 | 3801.155  | 3780.281  | NM_014155 | 2104.262  | 1944.114  |
| AA411678  | 5586.949  | 5664.784  | NM_020533 | 3564.536  | 3579.734  | AK026331  | 13154.147 | 12011.619 |
| AA862813  | 12639.557 | 13828.377 | NM_001894 | 4961.472  | 4283.313  | M30773    | 2648.475  | 2505.669  |
| AA398427  | 986.39    | 1213.611  | AK022884  | 1228.97   | 1382.324  | NM_016335 | 7878.08   | 6676.257  |
| T55728    | 2930.066  | 3542.583  | AF305072  | 1800.114  | 1965.762  | AF113699  | 10651.512 | 11727.808 |
| H20856    | 940.551   | 892.196   | NM_006620 | 4703.184  | 4974.009  | AK001883  | 9805.51   | 9385.794  |
| N62586    | 2392.946  | 2766.644  | NM_001397 | 570.503   | 574.732   | NM_014625 | 1613.394  | 1540.558  |
| AA242743  | 4173.699  | 3788.62   | NM_004772 | 6662.815  | 7884.548  | AL050114  | 845.712   | 704.184   |
| NM_004755 | 642.372   | 616.854   | NM_003714 | 2879.167  | 3517.531  | AK021492  | 2171.867  | 1790.932  |
| NM_005163 | 3240.316  | 2766.195  | AF024540  | 813.234   | 530.406   | AK023794  | 10771.575 | 9221.564  |
| SR5       | 3978.854  | 3622.327  | NM_002189 | 784.482   | 860.152   | AK001116  | 354.43    | 459.28    |
| SR7       | 5319.167  | 32403.705 | U42977    | 1755.393  | 1705.38   | AK022371  | 2868.951  | 3537.073  |
| SR9       | 18240.332 | 3125.326  | NM_002881 | 3810.17   | 3551.878  | NM_017820 | 676.443   | 526.209   |
| CY3Cy5    | 2718.12   | 171.661   | NM_003666 | 1472.941  | 1141.983  | NM_001845 | 2171.551  | 1345.784  |
| NM_016382 | 1039.834  | 956.678   | NM_003285 | 3807.643  | 2839.946  | NM_003734 | 6405.525  | 5652.135  |
| AK023117  | 1775.631  | 1588.545  | M83822    | 1356.587  | 998.285   | NM_014935 | 4591.61   | 4143.378  |
| AL122046  | 284.295   | 1506.564  | NM_018434 | 2974.532  | 2291.153  | X99660    | 8111.621  | 7114.547  |
| NM_000855 | 1718.62   | 1479.539  | NM_003914 | 4093.895  | 2776.728  | X03635    | 3192.474  | 3448.393  |
| NM_005535 | 3158.169  | 3068.356  | NM_020423 | 537.941   | 556.27    | X97671    | 2671.778  | 2429.425  |
| NM_005077 | 2050.865  | 1938.491  | AK021437  | 1194.094  | 924.784   | NM_004351 | 3983.165  | 4195.767  |
| NM_004423 | 3628.33   | 4030.911  | NM_003831 | 8303.036  | 7727.146  | NM_005618 | 4687.607  | 3824.151  |
| NM_001990 | 490.796   | 527.486   | AB007965  | 3297.359  | 2973.035  | NM_020533 | 5275.844  | 5139.007  |
| NM_002141 | 973.985   | 1241.395  | NM_017649 | 655.837   | 541.08    | NM_001894 | 6046.106  | 5465.183  |
| NM_003311 | 4724.886  | 4987.904  | NM_000066 | 351.999   | 549.134   | NM_005543 | 237.716   | 515.288   |
| NM_003775 | 2289.176  | 2807.564  | NM_001196 | 8232.414  | 8563.493  | Y08770    | 445.08    | 401.488   |
| NM_007095 | 1246.121  | 1212.338  | NM_016005 | 1396.15   | 1298.387  | NM_004772 | 9205.736  | 11205.708 |
| NM_015715 | 921.254   | 1119.851  | NM_017744 | 854.009   | 987.472   | AF024540  | 1024.643  | 540.642   |
| NM_006125 | 1587.3    | 1280.418  | NM_001924 | 600.429   | 748.347   | NM_002185 | 1451.462  | 1386.938  |
| NM_000582 | 3244.434  | 3188.22   | NM_017705 | 6969.402  | 7389.581  | U42977    | 1979.358  | 2279.006  |
| NM_005593 | 1584.035  | 1310.205  | NM_001796 | 963.128   | 952.759   | NM_002881 | 4766.551  | 7004.019  |
| AJ224741  | 473.105   | 476.997   | AB040880  | 1009.488  | 901.295   | NM_003666 | 1671.056  | 1523.418  |
| NM_004684 | 368.522   | 393.474   | NM_009587 | 8377.88   | 8767.209  | NM_003285 | 4353.247  | 3376.859  |
| BF338709  | 639.864   | 935.706   | AL133566  | 507.648   | 463.528   | NM_018242 | 665.314   | 832.514   |
| AF204171  | 508.511   | 491.579   | M36118    | 2372.276  | 1832.72   | M83822    | 1625.478  | 1995.581  |
| M18182    | 485.819   | 875.755   | NM_003399 | 12212.928 | 11677.282 | NM_018434 | 2646.203  | 2515.717  |
| AF100756  | 5583.724  | 4745.896  | NM_002630 | 566.803   | 500.163   | NM_020423 | 1020.023  | 946.322   |
| NM_006825 | 6898.155  | 5999.371  | AJ295149  | 21725.975 | 18666.977 | AK021437  | 1135.779  | 1031.353  |
| NM_004862 | 1812.278  | 1198.796  | NM_013435 | 3963.052  | 2763.012  | NM_003831 | 9459.768  | 8351.67   |
| NM_001661 | 698.526   | 882.185   | NM_005099 | 1589.536  | 1104.58   | AB007965  | 4751.146  | 3261.699  |
| NM_014563 | 1850.104  | 1702.912  | NM_014685 | 2843.327  | 2076.505  | NM_017645 | 622.661   | 635.188   |
| NM_020150 | 2197.916  | 1972.067  | AL359623  | 633.62    | 608.617   | NM_000066 | 801.273   | 973.879   |
| NM_007150 | 1909.972  | 1734.961  | AK026920  | 1950.22   | 1710.695  | NM_001924 | 1784.101  | 2179.923  |
| NM_006831 | 1428.286  | 1389.432  | AL137255  | 721.857   | 569.311   | NM_017705 | 9735.975  | 9458.685  |
| AL162044  | 2375.067  | 2868.208  | NM_003370 | 14002.841 | 15303.662 | NM_001796 | 1339.557  | 1341.055  |
| AK024004  | 417.587   | 375.45    | AB037715  | 1173.209  | 1099.005  | AL133566  | 1018.702  | 935.148   |
| BE892273  | 37712.309 | 35323.598 | AF250924  | 5847.159  | 5513.688  | M36118    | 2260.738  | 1982.43   |

|           |           |           |           |           |           |           |           |           |
|-----------|-----------|-----------|-----------|-----------|-----------|-----------|-----------|-----------|
| NM_016734 | 768.037   | 884.194   | D86979    | 546.377   | 572.17    | NM_00339  | 17493.875 | 15125.042 |
| AF035803  | 345.273   | 343.331   | AF018081  | 12791.656 | 10997.619 | NM_00263C | 1082.241  | 904.284   |
| Y08147    | 3470.861  | 3521.188  | NM_020202 | 9119.246  | 10115.016 | AJ295149  | 24998.076 | 23374.201 |
| D00174    | 6866.118  | 7569.086  | AK022889  | 9989.423  | 8792.914  | NM_01343E | 5335.126  | 4204.394  |
| AB000520  | 1380.528  | 1693.476  | X52357    | 29846.545 | 22104.291 | NM_00509  | 1849.362  | 1672.967  |
| NM_006907 | 615.549   | 620.37    | AF211891  | 656.723   | 756.349   | NM_01468E | 3498.254  | 3444.042  |
| NM_00268E | 215.341   | 277.137   | NM_005641 | 1475.784  | 2363.995  | AL359623  | 1103.4    | 776.59    |
| NM_006267 | 851.01    | 564.008   | NM_00166E | 2392.107  | 2149.439  | AK026920  | 2342.796  | 2018.411  |
| NM_002661 | 8199.273  | 6655.767  | AK025362  | 712.761   | 525.271   | AL137255  | 1097.573  | 1137.251  |
| AK023982  | 323.144   | 331.862   | AK021776  | 1467.594  | 929.632   | NM_00337C | 18417.584 | 22834.836 |
| NM_01846E | 879.832   | 805.39    | AK026042  | 772.009   | 671.899   | AB037715  | 1719.712  | 1759.517  |
| AB014533  | 3503.106  | 3864.124  | NM_014233 | 10290.668 | 7879.009  | AF250924  | 7116.409  | 6730.886  |
| M11427    | 665.319   | 884.837   | NM_002137 | 45861.988 | 30483.557 | D86979    | 829.245   | 513.885   |
| NM_000744 | 426.367   | 703.114   | NM_002911 | 863.442   | 811.611   | NM_018212 | 345.363   | 324.205   |
| NM_00303E | 6046.146  | 6005.211  | U94386    | 619.231   | 536.909   | AB023230  | 356.628   | 416.819   |
| NM_01450E | 581.194   | 711.48    | NM_01600C | 4214.595  | 3479.283  | AK022889  | 11733.188 | 8487.013  |
| NM_020372 | 4671.037  | 3620.648  | NM_006372 | 5611.798  | 4801.119  | X52357    | 34707.266 | 29023.225 |
| NM_00497E | 679.193   | 756.892   | NM_01415C | 893.78    | 867.397   | AF211891  | 753.992   | 747.764   |
| NM_016077 | 2922.956  | 2922.292  | NM_00680E | 14878.398 | 12491.38  | NM_005641 | 1003.284  | 840.28    |
| NM_015537 | 3424.789  | 3308.378  | AF132027  | 13456.106 | 10260.836 | NM_00166E | 2518.968  | 2688.764  |
| NM_01652C | 3625.883  | 2332.242  | NM_004681 | 2596.11   | 1922.554  | AK025362  | 849.113   | 1042.681  |
| AB018353  | 1111.967  | 978.86    | AB033096  | 4504.28   | 4615.399  | AK021776  | 1770.8    | 1716.874  |
| NM_00703E | 837.827   | 728.691   | NM_01488E | 746.438   | 725.641   | AK026042  | 992.086   | 1220.161  |
| NM_002617 | 662.713   | 578.456   | L31408    | 5759.813  | 4801.63   | NM_014233 | 10313.35  | 9122.383  |
| NM_003313 | 8770.401  | 7631.422  | NM_00154E | 5325.639  | 4608.276  | NM_002137 | 58019.945 | 50593.797 |
| AF090907  | 1215.797  | 1224.715  | NM_00444E | 9455.019  | 9944.392  | NM_002911 | 1281.669  | 1087.268  |
| AK024476  | 1613.783  | 1627.991  | AF070625  | 1579.68   | 1698.052  | U94386    | 741.51    | 687.888   |
| X74794    | 4302.808  | 5038.05   | AL365512  | 1280.133  | 1070.346  | NM_01600C | 5765.328  | 4160.098  |
| AL050298  | 1747.302  | 1674.072  | AK001740  | 2283.288  | 2053.213  | NM_006372 | 7064.546  | 4895.563  |
| NM_00291E | 497.876   | 822.963   | AF131793  | 601.282   | 779.153   | NM_01415C | 1042.161  | 861.414   |
| NM_00673E | 666.306   | 778.77    | NM_00591E | 15786.089 | 13049.554 | NM_00680E | 14268.604 | 10458.882 |
| NM_00364C | 792.498   | 1086.252  | J02625    | 5420.417  | 4213.477  | AF132027  | 16531.309 | 11067.22  |
| NM_014444 | 2981.537  | 2804.697  | Y17175    | 60832.367 | 55115.719 | NM_004681 | 3383.051  | 2278.102  |
| NM_01224E | 4768.289  | 4015.396  | NM_00454E | 11401.767 | 8352.344  | AB033096  | 7266.451  | 4860.475  |
| NM_014393 | 2025.287  | 2597.26   | NM_005333 | 9770.876  | 6597.079  | NM_01488E | 830.525   | 785.485   |
| NM_004223 | 5132.213  | 5469.091  | AK026161  | 1067.392  | 787.098   | L31408    | 9528.13   | 7470.061  |
| NM_006813 | 501.276   | 537.981   | NM_004553 | 21480.041 | 18375.713 | NM_00154E | 7957.537  | 7380.307  |
| NM_00135E | 9321.606  | 9956.354  | D63484    | 966.286   | 1006.97   | NM_00444E | 14305.302 | 11577.706 |
| BF338709  | 375.652   | 295.28    | AK026745  | 2076.331  | 1571.302  | AF070625  | 1742.015  | 1488.034  |
| AF204171  | 221.106   | 1256.342  | AL157440  | 1461.651  | 1365.362  | AL365512  | 1608.116  | 1273.475  |
| W96179    | 853.512   | 776.483   | NM_016423 | 3255.881  | 2498.156  | AK001740  | 3283.604  | 2791.815  |
| AW247841  | 4388.607  | 3796.284  | AB040975  | 1141.753  | 1064.049  | AF131793  | 712.853   | 658.623   |
| M76559    | 2108.134  | 1892.062  | NM_005119 | 3061.359  | 1881.924  | NM_00591E | 19036.127 | 18345.238 |
| AI222585  | 586.201   | 921.068   | NM_00316E | 7510.194  | 6221.149  | J02625    | 6467.815  | 7318.042  |
| AA411678  | 5784.848  | 6144.938  | AK055844  | 524.957   | 479.93    | Y17175    | 71018.203 | 55939.898 |
| AA862813  | 12242.222 | 15372.815 | NM_01828E | 13813.673 | 13396.088 | NM_00454E | 14326.194 | 16118.097 |
| AA398427  | 996.148   | 1188.337  | NM_00314E | 2522.117  | 2368.861  | NM_005333 | 12315.549 | 10646.317 |
| T55728    | 2881.281  | 2725.085  | NM_003131 | 8450.114  | 7356.94   | AK026161  | 1613.911  | 1380.285  |
| H20856    | 992.746   | 848.12    | NM_00523E | 1339.498  | 1425.823  | NM_004553 | 24667.73  | 19876.986 |
| N62586    | 2377.677  | 2021.848  | NM_01853E | 2194.013  | 1713.742  | D63484    | 1388.517  | 980.176   |
| AA242743  | 3053.794  | 3453.675  | NM_01334E | 801.823   | 652.61    | AK026745  | 2574.999  | 1678.243  |
| NM_00475E | 637.076   | 766.35    | NM_017851 | 686.394   | 440.113   | AL157440  | 1909.294  | 1257.79   |
| NM_005163 | 2932.752  | 2803.505  | AK026182  | 56640.461 | 54234.207 | NM_016423 | 4123.419  | 2578.365  |



|           |           |           |           |           |           |           |           |           |
|-----------|-----------|-----------|-----------|-----------|-----------|-----------|-----------|-----------|
| NM_015361 | 10973.934 | 13656.804 | AK025603  | 836.833   | 727.378   | AB040975  | 1340.675  | 836.411   |
| Y08147    | 1386.589  | 1344.06   | NM_016085 | 7587.473  | 6114.667  | NM_005119 | 4325.847  | 2075.08   |
| D00174    | 2710.019  | 2037.517  | AK025768  | 3209.687  | 2103.053  | NM_003168 | 10904.19  | 7546.277  |
| AB000520  | 713.964   | 561.297   | AL117502  | 1578.394  | 1324.581  | AK055844  | 778.707   | 492.176   |
| NM_016382 | 901.804   | 675.197   | AK001846  | 459.809   | 552.687   | NM_018288 | 16257.047 | 13340.618 |
| AK023117  | 2036.807  | 1860.741  | AK024108  | 433.737   | 596.06    | NM_003146 | 3204.266  | 2340.712  |
| AL122046  | 339.3     | 366.95    | AL117454  | 9288.507  | 9367.607  | X52342    | 641.096   | 402.045   |
| NM_000855 | 1721.638  | 1679.485  | AF272890  | 2724.372  | 2645.734  | NM_003131 | 11180.572 | 7201.529  |
| NM_005536 | 3274.304  | 3809.632  | U00684    | 440.484   | 552.73    | NM_005235 | 2097.25   | 1595.01   |
| NM_005077 | 2101.991  | 2544.131  | NM_016459 | 3480.599  | 2861.939  | NM_018538 | 2873.019  | 2113.802  |
| NM_004423 | 3395.353  | 4888.703  | AF086227  | 918.158   | 1129.607  | NM_013346 | 958.543   | 910.629   |
| NM_001990 | 294.555   | 793.864   | AK026246  | 1499.214  | 1405.659  | AF131784  | 306.19    | 371.844   |
| NM_002141 | 1049.733  | 1544.369  | AF035281  | 840.556   | 904.306   | NM_017851 | 1059.27   | 997.884   |
| NM_003311 | 5411.313  | 5098.316  | AL133446  | 1183.519  | 1156.896  | AK026182  | 55542.586 | 44722.219 |
| NM_003776 | 2605.914  | 2398.965  | U56251    | 628.107   | 516.817   | AK025603  | 918.967   | 568.403   |
| NM_007098 | 1250.772  | 1218.729  | AL049277  | 890.626   | 568.298   | NM_016085 | 9311.831  | 9723.899  |
| NM_015719 | 779.506   | 1260.694  | AL050043  | 1215.886  | 3661.263  | AK025768  | 3982.843  | 3957.319  |
| NM_006129 | 1626.294  | 1885.602  | AL117571  | 1164.818  | 1083.723  | AL117502  | 2141.771  | 1887.677  |
| NM_000582 | 3246.641  | 4805.403  | AF131814  | 716.15    | 960.828   | AK001846  | 809.648   | 737.982   |
| NM_005593 | 1735.462  | 2332.086  | AL360144  | 1626.254  | 1163.283  | AF147300  | 440.679   | 404.563   |
| NM_016077 | 2035.042  | 1464.477  | BC028617  | 2247.682  | 2020.419  | AK024637  | 569.485   | 493.718   |
| AF100756  | 7261.779  | 7283.656  | AF087999  | 572.693   | 456.657   | AK024108  | 649.063   | 568.498   |
| NM_006825 | 7694.274  | 9244.852  | NM_003740 | 2362.346  | 1982.428  | NM_013345 | 801.483   | 681.858   |
| NM_004862 | 2353.214  | 3171.076  | AL050078  | 697.501   | 734.566   | AL117454  | 12716.975 | 8637.965  |
| NM_001661 | 844.609   | 1254.329  | NM_014276 | 1455.151  | 1286.929  | AF272890  | 4854.223  | 3012.617  |
| NM_014563 | 2190.524  | 3068.611  | AF056438  | 739.128   | 749.372   | U00684    | 702.61    | 709.487   |
| NM_007150 | 1735.61   | 2745.62   | AF003737  | 17374.273 | 10953.824 | NM_016459 | 5219.722  | 3758.219  |
| NM_006831 | 1240.202  | 1447.02   | AF009296  | 715.98    | 615.611   | AF086227  | 1356.543  | 1003.808  |
| AL162044  | 2583.49   | 3314.51   | AK001011  | 2124.254  | 2028.51   | AK026246  | 2085.008  | 1395.678  |
| AK024004  | 340.499   | 694.023   | AK021690  | 1015.383  | 1235.14   | AF070524  | 629.725   | 937.511   |
| BE892273  | 40629.547 | 36855.258 | AK001840  | 767.514   | 649.736   | AF035281  | 1214.496  | 1089.552  |
| AF026929  | 494.608   | 857.18    | AK025564  | 1256.288  | 1246.746  | AK026304  | 1057.167  | 728.591   |
| NM_016734 | 663.825   | 1007.433  | AK026286  | 509.978   | 597.311   | AK023501  | 839.382   | 524.571   |
| NM_014393 | 1829.479  | 1626.27   | AK026731  | 848.851   | 820.681   | AL133446  | 2233.069  | 2007.476  |
| NM_004223 | 3437.023  | 2861.908  | NM_004192 | 1352.873  | 1431.033  | AF147406  | 445.615   | 413.569   |
| NM_001355 | 6402.488  | 4177.406  | AK024160  | 977.914   | 1036.804  | NM_006553 | 522.42    | 614.503   |
| NM_006907 | 521.888   | 619.455   | AK025077  | 1048.196  | 836.982   | U56251    | 868.701   | 975.133   |
| NM_002686 | 255.023   | 447.48    | NM_006417 | 1911.846  | 1775.119  | AK024689  | 188.15    | 601.096   |
| NM_002661 | 8459.946  | 9031.354  | NM_020317 | 4879.02   | 4888.954  | BC035667  | 656.806   | 630.005   |
| NM_001263 | 429.974   | 558.063   | AL080234  | 4510.214  | 3046.735  | AL049277  | 1841.797  | 1440.443  |
| AK023982  | 352.445   | 636.786   | AK025105  | 449.56    | 326.349   | AL117506  | 496.641   | 564.361   |
| NM_018466 | 999.945   | 1519.035  | AF212220  | 1564.766  | 1187.048  | AL050043  | 959.85    | 758.124   |
| AB014533  | 3503.928  | 7049.384  | AL137709  | 924.56    | 753.629   | AL117571  | 1795.443  | 1076.501  |
| M11427    | 458.753   | 939.307   | AK023277  | 566.891   | 715.185   | L22263    | 673.694   | 455.453   |
| NM_000744 | 520.492   | 736.22    | AK000425  | 777.146   | 793.441   | AF131814  | 1489.87   | 857.509   |
| NM_003039 | 4525.956  | 4888.989  | Z27200    | 969.874   | 1326.674  | AL360144  | 2272.315  | 1339.052  |
| NM_014509 | 706.032   | 774.902   | AF070571  | 2820.98   | 3468.802  | BC028617  | 2651.876  | 2083.829  |
| NM_020372 | 5569.37   | 6463.275  | AK023554  | 826.549   | 632.658   | AL117653  | 420.443   | 685.929   |
| NM_002635 | 52326.242 | 50510.84  | NM_003513 | 2257.864  | 1386.448  | AF087999  | 727.347   | 652.321   |
| NM_004758 | 447.228   | 510.672   | AF161427  | 48855.344 | 46115.816 | NM_003740 | 2769.345  | 1974.956  |
| NM_005163 | 2118.173  | 1852.458  | AK021715  | 4546.438  | 3189.948  | AL050078  | 730.726   | 528.063   |
| NM_015361 | 4858.397  | 3531.723  | AK000315  | 4112.161  | 2977.851  | AK021616  | 597.387   | 419.902   |
| NM_015537 | 3760.443  | 3784.864  | AK023248  | 663.2     | 669.518   | AK022933  | 455.519   | 604.967   |

|           |           |           |           |           |           |           |           |           |
|-----------|-----------|-----------|-----------|-----------|-----------|-----------|-----------|-----------|
| AB018353  | 1814.902  | 2316.549  | NM_012404 | 14583.113 | 10505.682 | NM_014276 | 2630.945  | 2077.447  |
| NM_007036 | 1373.423  | 1726.492  | AF251190  | 452.065   | 420.855   | AF056438  | 1067.939  | 1181.41   |
| NM_002617 | 1342.698  | 2028.688  | AF130075  | 4120.193  | 2872.093  | AF003737  | 23643.027 | 19233.102 |
| M20696    | 3110.142  | 4298.931  | NM_005444 | 994.855   | 727.019   | AF009296  | 1109.283  | 1028.085  |
| NM_002915 | 496.021   | 853.557   | V00589    | 13934.06  | 11273.715 | AK001011  | 1974.917  | 1809.367  |
| NM_006736 | 551.413   | 727.454   | AL390163  | 320.614   | 468.998   | AK021690  | 1106.92   | 814.358   |
| NM_003640 | 853.503   | 1010.664  | NM_018572 | 889.426   | 884.004   | AK001078  | 544.818   | 479.23    |
| NM_014444 | 3007.481  | 3258.322  | AK000175  | 2050.212  | 1977.965  | AK001840  | 992.794   | 857.778   |
| NM_012248 | 5170.531  | 6244.636  | AL137736  | 2746.825  | 2403.646  | AK021740  | 729.513   | 318.267   |
| NM_014970 | 4379.535  | 6183.172  | AF143870  | 564.663   | 873.458   | AK025148  | 429.564   | 409.632   |
| NM_007098 | 671.909   | 729.368   | AK021897  | 6300.404  | 5491.372  | AK026238  | 543.283   | 372.287   |
| NM_012464 | 233.887   | 1452.724  | AK001051  | 1027.559  | 920.332   | AK025564  | 1559.658  | 1390.277  |
| NM_006129 | 809.702   | 567.746   | AF086051  | 647.915   | 752.858   | AK026286  | 858.069   | 879.841   |
| NM_000582 | 1761.07   | 1422.163  | AK024356  | 1076.55   | 1719.473  | AK026731  | 1162.969  | 1112.904  |
| NM_005593 | 680.311   | 711.171   | AL049370  | 670.8     | 595.916   | NM_004192 | 1186.74   | 1544.313  |
| AJ224741  | 212.811   | 170.571   | AL365410  | 6786.682  | 4964.167  | AK024160  | 837.302   | 1025.608  |
| NM_004684 | 313.024   | 180.583   | D17082    | 12388.591 | 8621.651  | AK025077  | 1343.287  | 1112.882  |
| AA411678  | 4965.574  | 5211.214  | D17252    | 31475.025 | 19222.781 | NM_006417 | 3141.734  | 2855.61   |
| AA862813  | 11209.194 | 10925.391 | NM_003673 | 1652.973  | 1324.727  | L43350    | 564.16    | 767.692   |
| AA398427  | 818.031   | 1093.639  | Z36823    | 1820.773  | 1382.313  | NM_020317 | 5831.912  | 5610.771  |
| T55728    | 3035.9    | 3022.26   | AF147387  | 1803.232  | 1480.324  | AL080234  | 5366.766  | 4606.161  |
| H20856    | 975.656   | 979.907   | NM_012081 | 783.85    | 842.404   | AK027025  | 1116.919  | 904.411   |
| N62586    | 2545.882  | 2463.32   | AL137463  | 583.817   | 404.769   | AK025105  | 557.704   | 653.29    |
| AA242743  | 3877.408  | 4293.121  | AF085909  | 12536.512 | 11441.94  | AF212220  | 2056.43   | 1374.243  |
| AK022365  | 190.208   | 160.167   | AF086471  | 3470.799  | 2687.228  | AK025010  | 722.078   | 411.178   |
| BE892273  | 30946.816 | 23579.305 | NM_018455 | 4132.149  | 4033.485  | AL137709  | 1228.187  | 1025.331  |
| AF026929  | 258.479   | 318.634   | AF113018  | 673.505   | 677.661   | AK023277  | 1215.202  | 816.621   |
| NM_016734 | 503.171   | 300.935   | AK021996  | 1138.136  | 1210.17   | AK000425  | 1358.718  | 1808.635  |
| Y08147    | 1641.148  | 1677.786  | AL049337  | 1819.533  | 2072.615  | Z27200    | 2321.906  | 2256.687  |
| NM_016382 | 1476.547  | 1614.238  | CY3Cy5    | 3394.623  | 212.685   | AF070571  | 4011.94   | 3441.873  |
| AK023117  | 2408.89   | 3067.63   | U13697    | 2324.081  | 2811.279  | AK023554  | 719.373   | 855.484   |
| AL122046  | 1065.022  | 1305.456  | U04270    | 2571.673  | 2533.766  | NM_003513 | 2955.486  | 2280.511  |
| AF119914  | 716.458   | 1024.329  | L02840    | 537.454   | 518.92    | AL079294  | 204.833   | 270.395   |
| NM_000855 | 1448.204  | 1374.129  | AA629719  | 61066.934 | 62958.766 | AK024844  | 1243.59   | 801.436   |
| NM_005536 | 3383.438  | 2681.202  | AA927528  | 710.09    | 745.275   | AL049437  | 543.637   | 420.946   |
| NM_004423 | 2951.221  | 2618.997  | X02152    | 59975.637 | 61646.129 | AF161427  | 58386.211 | 45398.656 |
| NM_001990 | 557.818   | 367.824   | BG676364  | 2329.329  | 2240.676  | AK021715  | 6660.29   | 5431.786  |
| NM_002141 | 1075.247  | 767.481   | BG181154  | 735.084   | 381.495   | AK000315  | 5078.66   | 3835.663  |
| NM_003311 | 5463.168  | 4496.769  | AA843679  | 1286.119  | 1565.45   | AK023248  | 980.51    | 1007.178  |
| NM_003776 | 2737.81   | 1976.514  | H68922    | 417.729   | 637.684   | NM_012404 | 18440.896 | 12313.246 |
| NM_000744 | 351.72    | 429.626   | SR9       | 21464.248 | 5758.035  | AF251190  | 583.4     | 608.202   |
| NM_003039 | 3541.643  | 2409.695  | NM_002930 | 380.551   | 576.747   | AF130075  | 5158.817  | 3885.103  |
| NM_014509 | 535.123   | 535.595   | NM_004380 | 5794.75   | 7185.472  | NM_005444 | 1657.216  | 1233.313  |
| U26662    | 424.818   | 488.484   | NM_004119 | 1565.888  | 1760.032  | V00589    | 13891.082 | 10792.303 |
| NM_020372 | 3652.867  | 2700.146  | AY007378  | 854.448   | 894.743   | AL390163  | 641.822   | 444.883   |
| NM_002635 | 41343.934 | 28868.518 | D26070    | 2732.787  | 3111.981  | NM_018572 | 1708.924  | 1490.198  |
| NM_004979 | 436.369   | 339.725   | NM_001642 | 16841.412 | 20903.859 | AL109959  | 278.979   | 433.907   |
| NM_006364 | 251.846   | 105.079   | NM_003392 | 579.852   | 818.765   | AK024838  | 430.109   | 746.197   |
| AF100756  | 6960.219  | 4983.121  | NM_000501 | 12641.806 | 13455.941 | AK000175  | 2360.399  | 2177.686  |
| NM_006825 | 7040.866  | 4582.429  | NM_000114 | 1615.731  | 1666.077  | AL137736  | 2967.099  | 1813.632  |
| NM_004862 | 2639.558  | 1718.318  | NM_005156 | 1732.195  | 1408.166  | AF143870  | 534.45    | 368.219   |
| NM_020150 | 1927.46   | 1171.932  | NM_015193 | 583.097   | 528.755   | AK021897  | 9357.201  | 6536.12   |
| AL162044  | 2922.676  | 2378.894  | X98834    | 1717.292  | 2136.171  | AK001051  | 1719.117  | 1185.484  |

|           |           |           |           |           |           |           |           |           |
|-----------|-----------|-----------|-----------|-----------|-----------|-----------|-----------|-----------|
| AK024004  | 411.494   | 479.557   | AB019562  | 568.351   | 612.38    | NM_018317 | 499.561   | 397.795   |
| NM_006736 | 477.096   | 356.788   | AF036364  | 1667.444  | 1546.069  | AF086051  | 1045.868  | 1036.35   |
| NM_003640 | 834.694   | 693.02    | NM_020203 | 890.848   | 999.742   | AK024356  | 1343.594  | 1149.096  |
| NM_014444 | 2295.344  | 2072.216  | L40992    | 2007.463  | 1671.458  | AL049370  | 882.125   | 739.763   |
| NM_012248 | 5606.301  | 5305.237  | U20582    | 16845.305 | 21820.666 | AL365410  | 8574.869  | 7365.135  |
| NM_014970 | 3390.707  | 2684.789  | NM_000337 | 534.341   | 927.571   | D17082    | 17937.748 | 13789.821 |
| NM_004223 | 5227.959  | 3120.594  | NM_006808 | 15935.143 | 17337.219 | D17252    | 40045.387 | 32884.156 |
| U63336    | 552.626   | 359.898   | NM_006634 | 1013.884  | 1033.037  | D16476    | 594.326   | 422.748   |
| NM_006907 | 1108.571  | 607.616   | NM_016465 | 860.731   | 880.827   | NM_003673 | 1915.701  | 1322.436  |
| NM_002686 | 736.629   | 415.199   | NM_013399 | 2201.626  | 1654.606  | Z36823    | 2480.217  | 2105.253  |
| NM_006267 | 1468.541  | 926.512   | NM_002410 | 559.155   | 525.582   | AF147387  | 2642.842  | 1848.711  |
| NM_002661 | 9514.987  | 9231.753  | AL122120  | 1194.197  | 922.977   | NM_012081 | 1637.019  | 1257.338  |
| NM_001263 | 875.787   | 812.039   | NM_014684 | 821.087   | 682.232   | AL137463  | 1058.115  | 616.308   |
| AK023982  | 1056.896  | 544.926   | AK027247  | 583.053   | 549.935   | AF085909  | 15202.631 | 11388.563 |
| NM_018466 | 1027.397  | 683.76    | NM_002480 | 3151.186  | 3395.779  | AF090888  | 696.572   | 559.51    |
| Y11312    | 277.074   | 346.81    | NM_017571 | 2612.933  | 1698.952  | AK027193  | 738.359   | 607.056   |
| AB014533  | 5612.179  | 7136.94   | AB007946  | 597.697   | 588.993   | AF086471  | 3900.375  | 3329.964  |
| M11427    | 565.39    | 738.032   | AK026095  | 519.042   | 513.701   | NM_018455 | 6213.098  | 4020.388  |
| AK022097  | 2922.701  | 2302.748  | L03169    | 431.245   | 728.483   | AF113018  | 1052.677  | 611.49    |
| NM_002166 | 13651.409 | 7960.59   | NM_001928 | 47617.656 | 43050.695 | AK021996  | 1722.053  | 1189.448  |
| NM_004660 | 8273.793  | 5782.925  | NM_018965 | 3545.888  | 3974.033  | AL049337  | 2385.925  | 1873.304  |
| NM_006165 | 3007.931  | 2284.896  | NM_000185 | 1895.072  | 2179.79   | CY3Cy5    | 9529.104  | 539.323   |
| AK023772  | 358.24    | 134.392   | NM_001055 | 6982.557  | 8162.784  | U13697    | 2370.658  | 2209.443  |
| NM_015361 | 5035.341  | 2913.855  | NM_015878 | 499.689   | 738.783   | U04270    | 819.167   | 1058.751  |
| NM_004310 | 552.211   | 427.669   | NM_002271 | 32200.18  | 36286.555 | L02840    | 678.909   | 406.969   |
| NM_015537 | 2268.473  | 2083.45   | NM_018361 | 2326.832  | 2497.373  | AA629719  | 61573.75  | 57768.555 |
| NM_016520 | 7029.058  | 6666.92   | NM_019893 | 435.773   | 488.834   | AA927528  | 804.763   | 1116.872  |
| AB018353  | 2191.414  | 2765.186  | AB040966  | 3014.277  | 3627.772  | BG181154  | 1014.074  | 801.786   |
| NM_007036 | 1621.3    | 1417.598  | NM_020132 | 3289.76   | 2968.246  | AA843679  | 721.317   | 1361.876  |
| NM_002617 | 1764.71   | 2064.897  | NM_016467 | 9440.292  | 8861.471  | H68922    | 415.113   | 399.009   |
| AF090907  | 1803.213  | 1909.083  | NM_007253 | 2394.738  | 2018.336  | NM_004957 | 1068.938  | 1390.697  |
| X74794    | 5377.353  | 3882.462  | NM_019106 | 893.242   | 721.033   | NM_005252 | 752.52    | 962.805   |
| AL050298  | 2694.877  | 2583.273  | L08436    | 609.339   | 589.54    | SR5       | 4768.751  | 4772.059  |
| M20696    | 6295.217  | 7294.737  | NM_000558 | 1442.186  | 1446.346  | SR7       | 5906.29   | 48963.043 |
| NM_002915 | 429.605   | 585.229   | NM_004198 | 910.192   | 1076.847  | SR9       | 23545.232 | 4455.271  |
| AK026015  | 242.809   | 129.071   | AF116652  | 6167.928  | 7100.735  | CY3Cy5    | 5748.959  | 164.848   |
| NM_005203 | 550.384   | 484.834   | NM_000835 | 533.557   | 594.97    | NM_004380 | 7155.487  | 8567.47   |
| NM_006566 | 573.878   | 1023.203  | AK000271  | 589.356   | 701.061   | NM_004119 | 2118.151  | 2218.937  |
| AK027073  | 817.522   | 1046.063  | NM_018835 | 774.967   | 1073.928  | AY007378  | 889.914   | 1172.633  |
| NM_000384 | 933.981   | 1015.359  | NM_003401 | 1389.991  | 1860.331  | D26070    | 4896.652  | 4084.564  |
| AL157482  | 4435.833  | 4240.854  | AL137724  | 1050.135  | 1462.908  | NM_000114 | 1419.908  | 1423.499  |
| NM_005428 | 3217.118  | 2892.751  | NM_004758 | 825.37    | 1027.29   | NM_005156 | 2254.029  | 2726.038  |
| NM_017974 | 745.006   | 517.886   | NM_002913 | 1394.243  | 1376.271  | NM_015193 | 508.916   | 687.212   |
| NM_003979 | 682.361   | 583.74    | AK022797  | 752.272   | 772.637   | X98834    | 2058.925  | 2287.152  |
| X14677    | 1332.211  | 1643.617  | NM_007370 | 1717.701  | 1720.062  | NM_007035 | 7665.011  | 6987.565  |
| U17077    | 1366.209  | 1928.134  | NM_006231 | 614.153   | 676.982   | AB019562  | 889.08    | 850.724   |
| NM_000915 | 859.444   | 1003      | AK023471  | 1251.889  | 1090.158  | AF036364  | 1966.257  | 1809.934  |
| NM_002344 | 908.582   | 686.461   | AF044578  | 1059.624  | 999.662   | AK022847  | 1890.458  | 2020.421  |
| AJ278865  | 869.818   | 1077.504  | NM_001948 | 1240.372  | 1216.476  | NM_020203 | 1571.909  | 1559.73   |
| NM_019846 | 3918.377  | 2680.959  | NM_001067 | 4111.123  | 4017.521  | U20582    | 19577.105 | 16212.726 |
| NM_014394 | 59416.934 | 54657.188 | NM_014034 | 2765.233  | 3275.967  | NM_000337 | 815.07    | 637.207   |
| NM_005243 | 9916.205  | 8053.642  | NM_005335 | 11757.884 | 11552.265 | NM_002079 | 3221.097  | 2513.968  |
| NM_006218 | 1382.45   | 2071.178  | J04474    | 5272.362  | 5535.958  | NM_001149 | 629.468   | 594.749   |

|           |           |           |           |           |           |           |           |           |
|-----------|-----------|-----------|-----------|-----------|-----------|-----------|-----------|-----------|
| NM_01814C | 3366.984  | 3694.325  | NM_004726 | 1537.31   | 1816.266  | NM_00680E | 18471.795 | 18215.439 |
| NM_01694E | 1856.057  | 2695.769  | NM_014011 | 3901.916  | 4485.67   | NM_006634 | 902.498   | 918.985   |
| NM_000142 | 2352.436  | 3377.764  | AK025994  | 1219.56   | 1479.824  | NM_01646E | 1293.399  | 1309.62   |
| AF272372  | 32219.617 | 44422.266 | L29306    | 863.235   | 1227.266  | NM_00032E | 715.465   | 414.321   |
| AK097045  | 1357.752  | 1598.604  | NM_013989 | 1878.712  | 4102.767  | NM_01339E | 2412.669  | 1600.922  |
| AB014548  | 3261.553  | 4483.033  | NM_00173E | 990.464   | 1568.618  | NM_00241C | 963.633   | 841.837   |
| AK025150  | 782.956   | 829.16    | NM_00227C | 144.085   | 510.228   | AL122120  | 1426.545  | 1110.476  |
| AK024611  | 6113.786  | 5077.39   | NM_020203 | 1278.871  | 1269.943  | NM_014684 | 937.933   | 724.391   |
| BC010420  | 3998.558  | 5062.166  | U20582    | 13200.964 | 14675.489 | AK027247  | 758.651   | 608.39    |
| NM_003591 | 21570.813 | 28344.098 | NM_000337 | 417.193   | 699.558   | NM_00248C | 3753.467  | 3804.042  |
| AL080111  | 3984.64   | 5368.444  | NM_002079 | 2068.799  | 5167.785  | NM_017571 | 2885.156  | 2442.362  |
| NM_014642 | 4487.331  | 5516.202  | U13697    | 2252.597  | 2569.872  | AB007946  | 678.393   | 391.744   |
| NM_00382E | 2938.454  | 3436.255  | U04270    | 2062.751  | 1894.504  | NM_001391 | 446.849   | 402.016   |
| NM_014522 | 469.643   | 627.123   | L02840    | 569.668   | 524.096   | L03169    | 540.386   | 794.995   |
| NM_002831 | 19784.039 | 20115.674 | AA629719  | 60000.059 | 62787.094 | M81349    | 1366.504  | 1157.481  |
| AL833409  | 4504.45   | 5258.125  | AA927528  | 806.425   | 728.428   | NM_00192E | 56116.289 | 52279.277 |
| NM_01596E | 857.133   | 761.921   | X02152    | 59070.293 | 62943.68  | NM_01896E | 3959.531  | 3172.322  |
| NM_016147 | 3410.372  | 5073.74   | BG676364  | 2356.612  | 2348.816  | NM_00018E | 2740.955  | 2276.354  |
| NM_002833 | 2526.69   | 3555.517  | BG181154  | 698.106   | 580.403   | Y00816    | 977.938   | 773.892   |
| NM_016592 | 1093.567  | 1468.648  | AA843679  | 1684.573  | 2620.851  | NM_004512 | 1925.172  | 1405.939  |
| NM_018527 | 665.719   | 1075.701  | NM_004957 | 1311.799  | 1466.777  | NM_00105E | 6038.689  | 8092.373  |
| NM_01832E | 1663.845  | 2314.958  | NM_005252 | 587.115   | 872.16    | NM_01587E | 512.673   | 739.246   |
| NM_014773 | 681.943   | 446.923   | AF090906  | 885.466   | 1080.062  | NM_002271 | 44343.563 | 51461.809 |
| AK027167  | 1022.701  | 1530.296  | AB023219  | 2084.355  | 2057.516  | NM_018361 | 2994.016  | 2703.501  |
| NM_018652 | 15533.954 | 21632.148 | NM_00192E | 46867.777 | 47790.105 | NM_019893 | 535.722   | 407.582   |
| AB011166  | 2078.474  | 2026.035  | NM_01896E | 2607.303  | 2718.747  | AB040966  | 4331.29   | 3688.605  |
| NM_00670E | 1424.622  | 957.933   | NM_00018E | 1796.438  | 1985.284  | NM_020132 | 3823.432  | 2935.991  |
| NM_014497 | 2605.434  | 2960.343  | Y00816    | 1074.67   | 2192.986  | NM_016467 | 11537.46  | 10233.14  |
| NM_015511 | 4879.146  | 6104.22   | NM_004512 | 1315.845  | 1379.896  | NM_007253 | 3822.804  | 3503.991  |
| AB018348  | 452.037   | 205.346   | NM_00293C | 210.71    | 581.086   | NM_01910E | 840.989   | 959.801   |
| AF075068  | 6249.504  | 3388.962  | NM_00438C | 5619.779  | 5958.603  | L08436    | 625.44    | 913.29    |
| AF086474  | 209.667   | 223.716   | NM_004119 | 1803.068  | 1742.524  | AB033002  | 485.94    | 643.376   |
| AK024366  | 477.175   | 635.428   | AY007378  | 898.868   | 825.382   | NM_00055E | 955.212   | 1449.778  |
| AK022171  | 609.446   | 436.737   | D26070    | 4027.451  | 3843.948  | NM_01417C | 2701.125  | 3122.85   |
| U96191    | 178.033   | 85.243    | NM_001642 | 19002.668 | 18202.148 | AF116652  | 39364.879 | 42180.09  |
| AK022379  | 550.502   | 344.134   | NM_001542 | 580.383   | 434.129   | NM_00083E | 702.929   | 958.1     |
| AK022452  | 309.668   | 358.306   | NM_003392 | 558.497   | 709.218   | NM_01414E | 1126.453  | 1514.091  |
| AF085881  | 376.664   | 298.25    | NM_01745E | 372.89    | 473.44    | NM_01883E | 1136.177  | 1672.175  |
| AK022737  | 3055.716  | 1868.146  | NM_000501 | 10980.359 | 13290.291 | NM_003401 | 2346.862  | 3639.929  |
| NM_003472 | 23005.453 | 10775.521 | NM_000114 | 1619.782  | 2001.824  | AL137724  | 1318.315  | 1689.419  |
| U92980    | 722.754   | 476.724   | NM_00515E | 1545.786  | 1494.102  | NM_00475E | 765.492   | 1160.399  |
| AF133658  | 1146.96   | 959.612   | NM_015193 | 497.743   | 531.788   | NM_002913 | 1735.69   | 1658.979  |
| AB048287  | 4579.66   | 2254.893  | X98834    | 1649.639  | 2002.849  | AK022797  | 889.215   | 763.907   |
| Y11159    | 657.72    | 380.043   | NM_00703E | 6768.888  | 8767.158  | NM_00737C | 1870.339  | 1545.22   |
| AB020648  | 2003.949  | 1538.927  | AB019562  | 785.769   | 1018.547  | NM_006231 | 822.097   | 819.443   |
| AK025798  | 15355.937 | 8431.537  | AF036364  | 1908.978  | 2254.12   | AF044578  | 961.493   | 889.883   |
| AF086173  | 725.865   | 446.547   | AK022847  | 1608.198  | 2167.206  | NM_00194E | 1355.402  | 1290.589  |
| AK025164  | 478.548   | 363.901   | AK000271  | 449.923   | 442.954   | NM_001067 | 5071.038  | 6542.566  |
| NM_01836E | 4991.437  | 2864.633  | NM_00680E | 16637.771 | 13912.175 | NM_014034 | 3374.467  | 4986.625  |
| AB040290  | 786.881   | 571.108   | NM_006634 | 883.162   | 697.623   | J04474    | 6174.969  | 6609.763  |
| NM_01984E | 5709.978  | 4137.068  | NM_01646E | 1252.678  | 1016.768  | NM_003761 | 36696.754 | 37086.305 |
| AK021497  | 1266.045  | 1097.235  | NM_00032E | 596.328   | 741.983   | NM_00472E | 455.207   | 493.076   |
| AF124367  | 733.549   | 1312.354  | NM_01339E | 2042.267  | 1982.403  | NM_014011 | 5907.269  | 4892.598  |

|           |           |           |           |           |           |           |           |           |
|-----------|-----------|-----------|-----------|-----------|-----------|-----------|-----------|-----------|
| AK023803  | 727.148   | 1116.813  | NM_002410 | 525.364   | 385.136   | AK025994  | 1784.649  | 1633.64   |
| AK026947  | 16116.604 | 7309.106  | AL122120  | 1278.369  | 985.398   | L29306    | 499.011   | 499.46    |
| U84526    | 4301.65   | 2254.404  | NM_014684 | 903.039   | 788.375   | NM_013985 | 1766.413  | 1780.912  |
| L23401    | 1737.331  | 984.302   | AK027247  | 643.428   | 628.392   | NM_001735 | 1215.716  | 898.981   |
| NM_018090 | 48341.574 | 24186.811 | NM_002480 | 2869.082  | 2993.522  | NM_020203 | 1170.064  | 1542.689  |
| AK022728  | 12462.283 | 6465.437  | NM_017571 | 2340.792  | 1540.914  | U20582    | 16354.094 | 41125.555 |
| AL109678  | 781.117   | 622.725   | L03169    | 572.993   | 856.84    | NM_000337 | 648.473   | 1745.814  |
| AL137524  | 1057.154  | 705.978   | M81349    | 91.658    | 246.199   | NM_002075 | 2495.51   | 3343.01   |
| AF052115  | 767.404   | 900.082   | NM_014011 | 4389.483  | 4664.525  | U13697    | 2692.209  | 2587.52   |
| NM_014015 | 10358.73  | 9912.476  | AK025994  | 1424.655  | 1665.809  | U04270    | 259.877   | 623.685   |
| Z70711    | 442.431   | 373.87    | L29306    | 568.832   | 470.792   | Z34820    | 2940.112  | 3161.698  |
| AF116653  | 371.765   | 500.796   | NM_013985 | 1454.022  | 1463.136  | L02840    | 921.652   | 942.696   |
| NM_012365 | 890.15    | 799.157   | NM_001735 | 957.534   | 1069.899  | BG569143  | 220.452   | 978.893   |
| AK025323  | 378.368   | 476.007   | NM_001055 | 7668.608  | 7336.511  | AA629719  | 55989.633 | 55583.723 |
| NM_013325 | 3669.629  | 3455.184  | NM_002271 | 33160.824 | 26224.357 | AA927528  | 608.004   | 1312.775  |
| BC037322  | 1134.731  | 927.33    | NM_018361 | 2454.256  | 2077.634  | BG181154  | 745.795   | 753.628   |
| Y12022    | 1219.815  | 1094.408  | NM_019893 | 463.971   | 486.181   | AA843679  | 2212.935  | 2781.658  |
| AK001375  | 1233.611  | 1203.452  | AB040966  | 3050.018  | 3028.34   | NM_004957 | 1853.503  | 1769.765  |
| AL137559  | 988.548   | 1060.021  | NM_020132 | 3181.385  | 2771.246  | NM_005252 | 784.538   | 982.84    |
| AF026944  | 1746.675  | 1324.56   | NM_016467 | 10074.393 | 9092.483  | AF090906  | 1108.414  | 844.632   |
| AK021493  | 862.572   | 1236.895  | NM_007253 | 2483.935  | 2565.895  | AB023219  | 2522.935  | 1988.832  |
| NM_006161 | 6320.279  | 6042.958  | NM_019105 | 920.193   | 952.8     | NM_001925 | 49258.219 | 57289.223 |
| NM_006192 | 421.297   | 494.611   | L08436    | 630.316   | 566.12    | NM_018965 | 3352.447  | 4970.693  |
| NM_012155 | 3938.356  | 2234.043  | NM_000555 | 1251.357  | 1429.933  | NM_000185 | 1488.494  | 2341.184  |
| AF144700  | 1067.161  | 805.537   | NM_014170 | 2306.836  | 3204.319  | Y00816    | 949.252   | 854.012   |
| NM_004105 | 3296.522  | 2411.705  | AF116652  | 26556.355 | 32855.957 | NM_004380 | 4940.652  | 4901.553  |
| AB046825  | 2208.689  | 1564.941  | NM_000835 | 568.209   | 764.725   | NM_004119 | 4772.635  | 4898.203  |
| X64975    | 1423.292  | 1226.297  | NM_004957 | 1368.714  | 1431.385  | NM_001642 | 18163.471 | 22679.467 |
| AF064876  | 242.63    | 258.095   | NM_005252 | 530.709   | 1037.233  | NM_001542 | 567.76    | 1152.082  |
| AL050297  | 2350.625  | 2825.072  | AF090906  | 852.485   | 868.865   | NM_003392 | 636.911   | 1062.333  |
| AK026966  | 831.319   | 817.189   | AB023219  | 1974.758  | 1521.927  | NM_000501 | 14914.852 | 18218.586 |
| AF185573  | 396.209   | 301.809   | NM_018835 | 1053.656  | 925.266   | NM_000114 | 2754.869  | 2405.313  |
| AK025268  | 1318.088  | 1117.923  | NM_003401 | 1773.773  | 1681.917  | NM_005155 | 2283.543  | 1966.229  |
| AL833005  | 2740.781  | 2225.45   | AL137724  | 958.603   | 646.315   | X98834    | 2399.63   | 2041.454  |
| L43366    | 3720.158  | 2790.806  | NM_004755 | 845.842   | 828.375   | NM_007035 | 8011.638  | 6848.736  |
| AK026124  | 4354.429  | 3643.024  | NM_002913 | 1378.474  | 1145.037  | AB019562  | 931.223   | 794.156   |
| NM_015505 | 1376.5    | 1288.334  | AK022797  | 827.647   | 732.987   | AF036364  | 2243.564  | 1597.815  |
| AL110157  | 15936.489 | 14321.857 | NM_007370 | 1875.936  | 1830.866  | AK022847  | 1687.84   | 1521.952  |
| L38712    | 8258.335  | 10149.335 | NM_006231 | 771.707   | 596.975   | AK000271  | 891.364   | 942.43    |
| U84508    | 795.046   | 923.856   | AK023471  | 1420.992  | 1137.621  | NM_006634 | 1161.284  | 1251.46   |
| NM_017793 | 2741.176  | 2973.933  | AF044578  | 1822.676  | 2238.807  | NM_016465 | 1246.145  | 1284.812  |
| NM_012131 | 2598.241  | 2924.336  | NM_001945 | 1352.894  | 1514.263  | NM_000325 | 324.727   | 889.784   |
| S41540    | 1209.347  | 1177.74   | NM_001067 | 3972.477  | 4489.401  | NM_013395 | 2429.197  | 3572.732  |
| AI417481  | 415.3     | 959.073   | NM_014034 | 2318.156  | 2448.176  | NM_002410 | 1101.259  | 1309.539  |
| BI906766  | 1422.157  | 1215.331  | NM_005335 | 11317.792 | 11392.358 | NM_014684 | 1091.838  | 1217.874  |
| U60519    | 1180.248  | 1133.813  | J04474    | 5351.653  | 6821.268  | AK027247  | 774.349   | 858.656   |
| AA282906  | 3004.513  | 3186.688  | NM_003761 | 30256.162 | 34386.27  | NM_002480 | 3522.098  | 3795.381  |
| L02870    | 4513.769  | 4124.234  | NM_004725 | 408.288   | 507.962   | NM_017571 | 3295.727  | 2306.673  |
| BG755482  | 5600.185  | 4903.551  | X98834    | 1439.523  | 1671.059  | L03169    | 778.27    | 458.898   |
| AI480307  | 2638.186  | 2779.392  | NM_007035 | 5145.781  | 5212.58   | NM_014011 | 5043.124  | 7434.91   |
| X51420    | 1230.479  | 1467.364  | AB019562  | 603.039   | 630.119   | AK025994  | 1586.067  | 2886.401  |
| D28235    | 679.268   | 1081.808  | AF036364  | 2017.306  | 2032.8    | L29306    | 423.03    | 722.82    |
| X51757    | 542.897   | 599.345   | AK022847  | 1360.817  | 1227.903  | NM_013985 | 1452.081  | 1941.044  |

|           |           |           |           |           |           |           |           |           |
|-----------|-----------|-----------|-----------|-----------|-----------|-----------|-----------|-----------|
| L24038    | 773.302   | 889.019   | NM_020203 | 1321.221  | 1161.609  | NM_00173E | 1258.703  | 1544.998  |
| NM_05305E | 4074.32   | 6036.462  | U20582    | 14688.292 | 11721.106 | NM_00105E | 6109.57   | 7044.314  |
| NM_00618E | 646.69    | 883.703   | NM_000337 | 530.642   | 426.66    | NM_01587E | 989.562   | 797.3     |
| NM_002751 | 2064.001  | 4476.641  | NM_002079 | 2068.18   | 2002.003  | NM_018361 | 3430.062  | 3634.315  |
| M55593    | 5288.253  | 4817.916  | U13697    | 2552.076  | 2286.12   | NM_01989E | 565.974   | 750.183   |
| NM_078467 | 7563.427  | 8179.773  | U04270    | 2681.624  | 2465.85   | AB040966  | 4500.79   | 12203.313 |
| SR2       | 57498.563 | 53632.969 | L02840    | 775.139   | 524.456   | NM_02013E | 4059.041  | 6583.243  |
| SR4       | 15938.406 | 14313.475 | AA629719  | 56116.488 | 62475.043 | NM_016467 | 11946.925 | 15454.914 |
| SR6       | 2374.552  | 2237.687  | AA927528  | 589.104   | 716.852   | NM_00725E | 3494.052  | 3934.828  |
| SR8       | 6275.373  | 15011.568 | X02152    | 61057.332 | 62821.801 | NM_01910E | 1107.604  | 1059.976  |
| SR10      | 25302.008 | 7884.532  | BG676364  | 2515.342  | 2817.596  | L08436    | 686.459   | 742.791   |
| CY3Cy5    | 1077.87   | 112.216   | BG181154  | 736.238   | 637.812   | AB033002  | 417.222   | 568.152   |
| NM_01684E | 5060.034  | 5908.745  | AA843679  | 1504.977  | 2386.628  | NM_00055E | 2856.566  | 2745.724  |
| NM_000514 | 3940.688  | 4747.521  | H68922    | 345.745   | 547.587   | NM_01417C | 2548.114  | 2720.525  |
| AL137432  | 1690.919  | 1673.439  | NM_017571 | 2150.258  | 1787.571  | AF116652  | 37018.805 | 29820.137 |
| NM_000957 | 2575.347  | 2408.335  | L03169    | 625.11    | 450.895   | NM_00083E | 831.325   | 677.592   |
| NM_01904E | 2005.637  | 1620.626  | NM_00192E | 45985.133 | 37614.402 | NM_004957 | 1519.459  | 2818.327  |
| NM_00324C | 3957.874  | 3523.899  | NM_01896E | 3048.864  | 2223.063  | NM_00525E | 620.627   | 1120.908  |
| NM_016564 | 21924.068 | 19167.148 | NM_00018E | 2063.749  | 1590.178  | AF090906  | 1176.624  | 1536.39   |
| AF279656  | 1126.109  | 1166.277  | Y00816    | 720.988   | 494.255   | AB023219  | 2218.322  | 2248.228  |
| AK021660  | 406.825   | 610.155   | NM_00451E | 1743.221  | 1499.345  | NM_00475E | 1202.274  | 1361.63   |
| AB007933  | 36773.746 | 40690.922 | NM_00438C | 6245.831  | 6380.784  | NM_00291E | 1565.911  | 3044.69   |
| NM_00670E | 3686.561  | 4020.72   | NM_004119 | 1975.06   | 1790.983  | AK022797  | 1723.783  | 2394.379  |
| NM_00139E | 4835.258  | 5699.188  | AY007378  | 834.194   | 839.348   | NM_00737C | 2342.382  | 4552.731  |
| NM_006181 | 832.112   | 1136.222  | D26070    | 4191.06   | 4421.354  | NM_006231 | 761.394   | 1334.792  |
| NM_00379E | 10568.417 | 10056.856 | NM_00164E | 20844.125 | 23575.084 | AK023471  | 1563.498  | 1727.72   |
| NM_00297E | 3088.966  | 4233.898  | NM_00154E | 336.492   | 569.568   | AF044578  | 1286.322  | 1259.673  |
| NM_00443E | 45179.281 | 51182.926 | NM_00339E | 575.319   | 592.012   | NM_00194E | 1701.71   | 1768.748  |
| NM_00658C | 6285.865  | 6606.846  | NM_000501 | 11115.036 | 13445.51  | NM_001067 | 4830.295  | 5463.783  |
| NM_00130E | 2473.837  | 2251.048  | NM_000114 | 1859.419  | 2220.09   | NM_014034 | 3220.543  | 2916.67   |
| NM_00508E | 742.705   | 741.536   | NM_00515E | 1720.145  | 2848.914  | NM_00533E | 13571.465 | 13193.148 |
| D17028    | 16160.679 | 15433.845 | AB033002  | 461.702   | 148.396   | J04474    | 7097.76   | 6356.854  |
| NM_01344E | 19474.965 | 18945.807 | NM_00055E | 1409.95   | 1486.336  | NM_003761 | 37703.824 | 28189.143 |
| BG611243  | 1764.094  | 3711.539  | NM_01417C | 1829.193  | 2022.882  | NM_00703E | 6596.534  | 9991.347  |
| AK023221  | 4929.23   | 5591.4    | AF116652  | 24896.434 | 26400.537 | AB019562  | 777.233   | 1266.702  |
| NM_003664 | 4925.934  | 4883.202  | NM_00083E | 680.327   | 705.569   | AF036364  | 2335.279  | 3639.517  |
| NM_00242E | 2308.326  | 2269.876  | AK000271  | 560.011   | 263.435   | AK022847  | 2176.294  | 2846.645  |
| AK027182  | 689.097   | 765.56    | NM_00680E | 19621.146 | 16176.632 | NM_02020E | 1683.185  | 2546.695  |
| J03651    | 3412.199  | 3279.561  | NM_006634 | 969.402   | 796.132   | U20582    | 16245.191 | 18051.771 |
| U61738    | 4072.334  | 3145.56   | NM_01646E | 1226.475  | 1361.308  | NM_000337 | 609.214   | 682.113   |
| AJ132087  | 796.66    | 818.959   | NM_01339E | 1930.003  | 1931.574  | NM_00207E | 2393.06   | 2737.425  |
| U92818    | 2084.007  | 2182.233  | NM_00241C | 339.075   | 407.158   | U13697    | 2862.692  | 3561.267  |
| NM_00044E | 10946.082 | 10341.888 | AL122120  | 1363.732  | 1010.98   | X75308    | 294.796   | 1430.96   |
| NM_002934 | 49301.719 | 48053.355 | NM_014684 | 909.884   | 1091.295  | U04270    | 2750.938  | 3808.843  |
| AK023011  | 15439.958 | 15782.1   | AK027247  | 699.414   | 886.31    | L02840    | 688.807   | 686.694   |
| NM_01681E | 1119.937  | 1184.1    | NM_00248C | 3525.278  | 4337.633  | AA629719  | 60170.426 | 58186.215 |
| L17325    | 1335.69   | 1725.34   | NM_014034 | 2314.826  | 2880.103  | AA927528  | 807.288   | 834.084   |
| NM_00363E | 2276.181  | 3153.142  | NM_00533E | 11116.933 | 11561.218 | X02152    | 60815.105 | 59366.551 |
| NM_00154E | 611.176   | 652.035   | J04474    | 5311.716  | 6123.025  | BG676364  | 2715.872  | 2191.089  |
| NM_000115 | 2058.599  | 2120.814  | NM_00472E | 568.31    | 385.474   | AA843679  | 1985.729  | 1502.451  |
| AF308801  | 3354.769  | 3990.981  | NM_014011 | 4564.461  | 4451.988  | NM_001391 | 1025.021  | 3429.117  |
| NM_00731E | 59659.172 | 51817.988 | AK025994  | 1661.221  | 1297.64   | L03169    | 1737.061  | 2709.388  |
| NM_014874 | 1154.644  | 1307.048  | L29306    | 658.655   | 420.383   | NM_01896E | 3835.26   | 3550.809  |

|           |           |           |           |           |           |           |           |           |
|-----------|-----------|-----------|-----------|-----------|-----------|-----------|-----------|-----------|
| NM_005765 | 17275.586 | 13699.808 | NM_013989 | 1368.323  | 1266.948  | NM_000185 | 2192.516  | 2034.764  |
| NM_002762 | 844.351   | 822.485   | NM_001738 | 953.797   | 768.06    | Y00816    | 916.513   | 931.291   |
| NM_006324 | 6595.146  | 5606.434  | NM_001055 | 7422.633  | 6328.812  | NM_004512 | 1870.797  | 1891.764  |
| NM_005469 | 6030.262  | 6478.936  | NM_015878 | 629.2     | 444.867   | NM_004380 | 7666.651  | 7637.778  |
| NM_016361 | 2854.667  | 3052.718  | NM_002271 | 37492.871 | 35124.293 | NM_004119 | 2232.848  | 2436.379  |
| NM_003708 | 41742.09  | 41824.863 | NM_018361 | 2987.482  | 2740.806  | AY007378  | 1314.85   | 1309.763  |
| NM_014349 | 5436.859  | 5322.915  | NM_019893 | 580.155   | 639.095   | D26070    | 5679.609  | 6244.661  |
| AB040895  | 412.905   | 1053.714  | AB040966  | 3593.081  | 3729.207  | NM_001642 | 26517.307 | 39520.383 |
| NM_018210 | 1185.496  | 1653.924  | NM_020132 | 3582.656  | 3641.863  | NM_001542 | 524.237   | 668.75    |
| NM_001096 | 5918.181  | 5763.333  | NM_016467 | 10160.497 | 10311.266 | NM_003392 | 757.954   | 948.213   |
| NM_016014 | 1712.516  | 1708.015  | NM_007253 | 2166.608  | 2138.493  | NM_000501 | 15199.816 | 13496.612 |
| NM_000198 | 379.45    | 314.896   | NM_019106 | 1223.438  | 2263.171  | NM_000114 | 2198.313  | 1586.221  |
| NM_018327 | 731.653   | 884.503   | L08436    | 474.668   | 1048.253  | NM_005156 | 2233.438  | 1537.125  |
| NM_017581 | 2020.912  | 2355.595  | NM_005607 | 1564.653  | 1604.453  | NM_000558 | 1475.742  | 2478.31   |
| AA488804  | 10078.274 | 15148.32  | NM_006761 | 35945.988 | 38491.434 | NM_014170 | 3185.702  | 5100.046  |
| NM_006539 | 480.272   | 728.209   | NM_014897 | 925.34    | 1055.47   | AF116652  | 22803.35  | 47521.273 |
| NM_000808 | 770.739   | 909.365   | NM_003453 | 5064.494  | 5284.392  | NM_000835 | 878.251   | 1273.843  |
| NM_016318 | 7965.43   | 8392.8    | NM_014390 | 10563.923 | 9589.734  | AK000271  | 495.431   | 567.536   |
| NM_013309 | 541.752   | 565.665   | NM_018143 | 382.63    | 610.346   | NM_001149 | 187.863   | 738.983   |
| NM_019891 | 1216.157  | 1464.072  | X78924    | 3408.522  | 2743.303  | NM_006808 | 24089.977 | 26626.262 |
| AF038186  | 1346.029  | 1631.777  | NM_013250 | 583.339   | 499.367   | NM_006634 | 1213.603  | 1402.976  |
| NM_016277 | 3128.019  | 3247.807  | AF090906  | 946.011   | 795.924   | NM_016465 | 1424.295  | 1618.354  |
| NM_007247 | 1970.024  | 2673.896  | AB023219  | 2092.402  | 1461.881  | NM_013399 | 2734.365  | 3023.448  |
| NM_006554 | 2892.638  | 2821.606  | NM_018835 | 1693.403  | 1373.846  | NM_002410 | 614.205   | 722.977   |
| X99962    | 5415.091  | 4473.939  | NM_003401 | 1770.293  | 1475.905  | AL122120  | 1535.783  | 1260.246  |
| AL050114  | 700.102   | 1040.89   | AL137724  | 949.36    | 812.589   | NM_014684 | 986.103   | 1015.111  |
| AK021492  | 2255.843  | 2176.892  | NM_004758 | 970.85    | 893.188   | AK027247  | 656.59    | 740.411   |
| AK023794  | 18091.686 | 18841.328 | NM_002913 | 1679.363  | 1858.402  | NM_002480 | 3357.773  | 2426.034  |
| NM_019885 | 1864.718  | 1853.212  | AK022797  | 746.11    | 657.847   | NM_014034 | 2912.485  | 3507.802  |
| NM_005328 | 162.256   | 199.521   | NM_007370 | 2318.13   | 2362.392  | NM_005335 | 12596.527 | 15496.528 |
| AB033103  | 1629.107  | 1825.777  | NM_006231 | 556.778   | 814.852   | J04474    | 6367.479  | 9340.056  |
| NM_002907 | 697.737   | 821.135   | AK023471  | 1570.67   | 1686.39   | NM_014011 | 5405.987  | 6008.281  |
| AK024098  | 1527.778  | 1613.257  | AF044578  | 1212.073  | 2014.502  | AK025994  | 1645.811  | 1796.879  |
| AK001116  | 288.399   | 311.249   | NM_001948 | 1425.541  | 2394.591  | L29306    | 357.525   | 696.68    |
| AK022371  | 1877.428  | 2146.436  | NM_001067 | 4876.2    | 8617.796  | NM_013989 | 1746.195  | 1738.216  |
| D42045    | 1687.533  | 2369.576  | AF063936  | 460.502   | 654.359   | NM_001738 | 1134.687  | 1129.291  |
| AB007953  | 1271.566  | 1707.676  | AK025337  | 769.078   | 673.617   | NM_001055 | 10665.672 | 10840.162 |
| NM_014002 | 4431.219  | 5205.383  | AB028984  | 557.723   | 614.241   | NM_015878 | 733.807   | 550.13    |
| NM_004197 | 7924.377  | 8184.911  | NM_005602 | 1298.781  | 1330.776  | NM_002271 | 44209.008 | 58264.086 |
| NM_004073 | 1008.914  | 1256.463  | NM_003573 | 3344.849  | 3426.419  | NM_018361 | 3523.051  | 4408.028  |
| NM_001278 | 2890.351  | 2756.383  | NM_000296 | 4249.903  | 3601.109  | NM_019893 | 796.351   | 1107.286  |
| NM_019105 | 3066.56   | 3400.213  | NM_012302 | 3781.213  | 3230.181  | AB040966  | 4860.185  | 6757.202  |
| NM_000294 | 3527.268  | 3454.651  | NM_017422 | 5182.02   | 4577.584  | NM_020132 | 4794.569  | 5639.875  |
| AJ272212  | 2024.939  | 2074.48   | NM_005879 | 682.328   | 591.165   | NM_016467 | 12825.614 | 14364.573 |
| NM_001626 | 18295.279 | 21013.148 | AF147790  | 602.757   | 631.528   | NM_007253 | 3617.72   | 3145.987  |
| NM_005677 | 2607.487  | 3117.894  | NM_018969 | 480.936   | 478.397   | NM_019106 | 1123.57   | 905.839   |
| AF229803  | 879.129   | 1085.238  | NM_004112 | 1362.311  | 1121.75   | L08436    | 716.479   | 568.31    |
| AF151810  | 552.115   | 687.996   | AK025592  | 3453.604  | 2860.382  | NM_005607 | 1687.766  | 1987.323  |
| NM_002130 | 24231.945 | 22500.055 | NM_004635 | 10018.393 | 8615.621  | NM_006761 | 38843.305 | 49639.871 |
| NM_001305 | 2093.712  | 2491.52   | AK023023  | 5319.421  | 4426.738  | NM_014897 | 928.181   | 1069.13   |
| NM_005082 | 639.534   | 827.64    | NM_015993 | 2684.008  | 2933.402  | NM_003453 | 5719.233  | 6810.376  |
| D17028    | 15439.083 | 15368.352 | NM_002659 | 1216.166  | 979.27    | NM_014390 | 12384.181 | 12246.284 |
| NM_013442 | 17977.699 | 16676.91  | Z36776    | 1978.438  | 1837.052  | X78924    | 6166.905  | 5797.526  |

|           |           |           |           |           |           |           |           |           |
|-----------|-----------|-----------|-----------|-----------|-----------|-----------|-----------|-----------|
| BG611243  | 1079.682  | 1184.807  | AB029015  | 879.316   | 1295.63   | NM_01325C | 848.014   | 827.776   |
| AI417481  | 595.156   | 622.086   | NM_00615C | 2093.079  | 2105.008  | AF090906  | 1090.505  | 1116.387  |
| BI906766  | 1754.77   | 2451.939  | NM_020345 | 570.535   | 725.626   | AB023219  | 2658.869  | 1705.911  |
| U60519    | 1308.622  | 1392.332  | NM_003287 | 568.689   | 607.725   | NM_018835 | 1264.833  | 1152.182  |
| AA282906  | 2413.977  | 2646.097  | NM_012325 | 8374.84   | 8539.663  | NM_003401 | 2129.094  | 2456.216  |
| L02870    | 4277.664  | 5029.417  | NM_014434 | 938.345   | 880.185   | AL137724  | 1197.211  | 1420.22   |
| BG755482  | 4789.704  | 4422.616  | NM_019607 | 3222.221  | 2947.852  | NM_004755 | 1270.818  | 1664.295  |
| AI480307  | 2687.533  | 2593.869  | U79260    | 10689.908 | 8460.311  | NM_002913 | 1735.27   | 3425.709  |
| X51420    | 1233.918  | 1446.189  | NM_001895 | 5434.158  | 5766.816  | AK022797  | 1477.976  | 2235.194  |
| D28235    | 454.888   | 464.544   | NM_006447 | 2071.29   | 1828.824  | NM_00737C | 2393.663  | 3247.534  |
| X51757    | 435.494   | 574.891   | AF119851  | 683.693   | 478.13    | NM_006231 | 1003.737  | 1136.705  |
| L24038    | 668.621   | 836.532   | NM_014129 | 5351.242  | 4621.689  | AK023471  | 1824.417  | 1569.968  |
| NM_05305E | 4177.041  | 6322.011  | D87455    | 2031.465  | 1411.724  | AF044578  | 1547.504  | 1239.114  |
| NM_00618E | 763.335   | 938.146   | AF080577  | 903.379   | 873.467   | NM_00194E | 1657.077  | 1355.132  |
| NM_002751 | 2321.401  | 2696.345  | L22005    | 4252.386  | 3355.629  | NM_001067 | 5320.976  | 4353.633  |
| M55593    | 4490.757  | 4458.695  | NM_012291 | 9042.625  | 8001.149  | AF063936  | 615.729   | 1028.704  |
| NM_078467 | 9064.488  | 13366.526 | NM_01336E | 1771.481  | 1354.873  | AK025337  | 946.288   | 1063.861  |
|           | 1209.889  | 1653.659  | NM_003807 | 6637.992  | 6470.899  | AB028984  | 620.666   | 389.163   |
| AK001883  | 14646.198 | 14051.374 | NM_00435E | 843.729   | 672.91    | NM_005602 | 1312.671  | 1200.41   |
| NM_01462E | 1725.752  | 1620.991  | NM_00179C | 1185.293  | 1056.429  | NM_003573 | 3351.726  | 3271.367  |
| NM_00731E | 59195.051 | 49418.645 | NM_018243 | 2788.718  | 2032.476  | NM_00029E | 4569.949  | 4383.632  |
| NM_014874 | 1100.123  | 1127.974  | NM_014939 | 2288.131  | 2029.389  | NM_012302 | 3812.008  | 3231.396  |
| NM_00576E | 17102.529 | 14491.189 | Y17866    | 470.602   | 585.267   | NM_017422 | 4258.242  | 3642.622  |
| NM_002762 | 623.736   | 625.498   | AK024247  | 404.459   | 951.88    | NM_00587E | 927.352   | 963.432   |
| NM_006324 | 6181.666  | 5800.405  | NM_00300E | 3843.747  | 6571.646  | AF147790  | 792.485   | 711.275   |
| NM_01684E | 4553.825  | 4342.73   | NM_002842 | 1867.266  | 2020.46   | NM_01896E | 711.821   | 685.472   |
| NM_000514 | 4124.929  | 4192.127  | AF290204  | 51.159    | 1010.167  | NM_004112 | 1681.303  | 1471.115  |
| AL137432  | 1570.133  | 1572.804  | NM_01212E | 344.165   | 609.426   | AK025592  | 4558.292  | 4345.896  |
| NM_000957 | 2314.622  | 2585.686  | NM_00441E | 1152.567  | 1133.737  | NM_00463E | 13439.173 | 14234.442 |
| NM_019043 | 1842.127  | 1630.956  | NM_000917 | 9218.982  | 9046.698  | AK023023  | 6869.923  | 8190.913  |
| NM_00324C | 3980.747  | 3779.561  | NM_005389 | 8238.974  | 8525.157  | NM_015993 | 4560.778  | 6745.386  |
| NM_016564 | 21141.316 | 19142.551 | NM_01444E | 27701.162 | 23554.252 | NM_00265E | 1834.582  | 2780.527  |
| NM_00079E | 393.821   | 643.613   | AL832826  | 821.758   | 610.746   | Z36776    | 2169.609  | 2013.728  |
| AF279656  | 1163.12   | 1160.775  | NM_016123 | 1016.348  | 693.943   | AB029015  | 1114.026  | 846.914   |
| AK021660  | 518.711   | 452.389   | AB048365  | 536.594   | 516.918   | NM_002067 | 17908.664 | 13506.71  |
| AB007933  | 36111.164 | 43341.34  | NM_000391 | 3796.143  | 2756.402  | NM_00105E | 63575.098 | 59326.055 |
| NM_006702 | 3509.852  | 4538.663  | NM_014771 | 5280.368  | 5238.863  | NM_00243C | 306.538   | 581.13    |
| NM_00139E | 5784.666  | 9258.737  | NM_00227E | 2004.115  | 2011.674  | NM_00615C | 2087.042  | 2138.375  |
| NM_014474 | 1410.584  | 1685.77   | AK025215  | 5915.12   | 4877.928  | NM_02034E | 696.96    | 764.261   |
| NM_01624E | 1321.702  | 1593.313  | AK024625  | 603.808   | 323.874   | NM_003287 | 791.262   | 733.032   |
| NM_006181 | 788.558   | 953.428   | NM_018131 | 1301.454  | 1283.087  | NM_01232E | 9869.35   | 9475.207  |
| NM_00379E | 9505.593  | 9533.335  | NM_014834 | 567.717   | 619.122   | NM_014434 | 743.236   | 846.488   |
| NM_002973 | 2582.21   | 3714.71   | NM_01763E | 22500.672 | 27784.908 | NM_019607 | 3246.055  | 2701.427  |
| NM_00443E | 47541.172 | 53148.691 | NM_01246E | 694.931   | 1021.541  | U79260    | 13389.949 | 10606.288 |
| NM_00658C | 6912.023  | 6349.162  | M27877    | 23070.49  | 41034.863 | NM_00189E | 6706.925  | 5752.901  |
| NM_019891 | 1164.028  | 1318.988  | D70836    | 38537.195 | 39219.902 | NM_006447 | 2928.026  | 2875.95   |
| AF038186  | 1266.596  | 1166.311  | D16878    | 809.169   | 905.285   | AF119851  | 502.757   | 771.465   |
| NM_016277 | 3153.533  | 2888.575  | NM_014943 | 1867.931  | 2097.927  | NM_01412E | 6189.554  | 5969.504  |
| NM_007247 | 2341.54   | 2358.146  | AK024392  | 1922.412  | 2046.997  | D87455    | 2339.02   | 2078.465  |
| NM_006554 | 2496.516  | 2575.157  | NM_01326C | 732.708   | 716.859   | AF080577  | 2994.718  | 2566.499  |
| X99962    | 4909.734  | 5091.546  | NM_01830C | 952.063   | 619.15    | L22005    | 5660.832  | 4461.193  |
| AK023221  | 4503.12   | 4386.748  | NM_00487E | 1796.714  | 1494.652  | NM_012291 | 10912.609 | 11352.349 |
| NM_003664 | 4700.964  | 5013.79   | NM_018254 | 5701.037  | 4557.677  | NM_01336E | 1996.5    | 2059.076  |



|           |           |           |           |           |           |           |           |           |
|-----------|-----------|-----------|-----------|-----------|-----------|-----------|-----------|-----------|
| NM_002426 | 1793.93   | 1967.901  | NM_017745 | 2658.036  | 1910.97   | NM_003807 | 7659.356  | 8393.486  |
| AK027182  | 824.23    | 744.062   | NM_018433 | 2283.737  | 1413.021  | NM_004358 | 1153.891  | 2146.407  |
| J03651    | 3320.113  | 4248.462  | AB028451  | 583.407   | 442.51    | NM_001790 | 1994.536  | 4348.684  |
| U61738    | 3374.145  | 3308.673  | AK024810  | 10504.821 | 8595.736  | NM_018243 | 4042.166  | 3639.867  |
| AJ132087  | 580.523   | 622.632   | AK022615  | 32337.439 | 26596.762 | NM_014938 | 3778.456  | 3323.817  |
| U92818    | 2574.979  | 2450.959  | NM_004043 | 4412.249  | 3541.575  | Y17866    | 802.818   | 587.379   |
| NM_000442 | 10933.123 | 11184.524 | BM458096  | 12236.56  | 9126.088  | NM_003005 | 4348.302  | 2404.632  |
| NM_002934 | 50413.703 | 49603.109 | NM_005626 | 6443.162  | 5153.146  | NM_000873 | 1142.408  | 751.241   |
| AK023011  | 15856.998 | 14502.188 | D29958    | 9919.523  | 9422.718  | NM_002842 | 2650.709  | 2760.813  |
| NM_016816 | 1207.469  | 1340.566  | NM_015971 | 10665.438 | 10485.803 | AF290204  | 131.033   | 590.892   |
| L17325    | 1770.864  | 2399.917  | D17257    | 57438.844 | 60586.43  | NM_012126 | 444.601   | 640.964   |
| NM_017716 | 963.401   | 1038.555  | AK000724  | 2224.549  | 2142.657  | NM_004418 | 1277.698  | 1718.837  |
| M58603    | 3707.557  | 3205.942  | NM_003720 | 9375.96   | 12561.946 | NM_000917 | 10228.31  | 12272.374 |
| NM_003638 | 2220.436  | 2113.944  | AF097159  | 979.139   | 2047.963  | NM_005388 | 8678.104  | 7373.337  |
| NM_001548 | 770.637   | 707.239   | NM_003918 | 1207.574  | 936.168   | NM_014445 | 32069.402 | 25189.09  |
| NM_000115 | 1976.813  | 2273.805  | NM_004807 | 1262.784  | 1377.483  | AL832826  | 724.46    | 544.256   |
| AF308801  | 3395.495  | 3601.521  | J03569    | 30370.555 | 22268.088 | NM_016123 | 1118.467  | 922.094   |
| AJ272212  | 1759.879  | 1800.695  | NM_003115 | 7053.714  | 5431.778  | AB048365  | 645.432   | 795.825   |
| NM_001626 | 18136.58  | 14804.885 | NM_000687 | 17242.859 | 12148.558 | NM_000391 | 6853.869  | 5899.06   |
| NM_005677 | 2812.638  | 2451.237  | NM_018200 | 1237.563  | 777.256   | AF229179  | 289.01    | 433.138   |
| AF229803  | 670.19    | 830.553   | NM_014838 | 1580.336  | 1210.204  | NM_014771 | 6938.334  | 6175.361  |
| AF151810  | 518.68    | 641.744   | NM_007212 | 1775.852  | 1707.259  | NM_002275 | 2842.789  | 2683.266  |
| NM_002130 | 23935.799 | 21998.76  | AF005067  | 1617.521  | 1436.641  | AB032945  | 501.1     | 490.157   |
| NM_005468 | 5009.298  | 5611.217  | NM_005710 | 7088.669  | 5685.807  | AK025215  | 8904.43   | 12226.865 |
| NM_016361 | 3255.839  | 3110.98   | AF252284  | 2006.243  | 1401.575  | BF569160  | 648.548   | 697.744   |
| NM_003708 | 40717.688 | 41514.77  | NM_014930 | 783.798   | 545.961   | NM_018131 | 1821.91   | 1422.502  |
| NM_014348 | 5701.259  | 5789.293  | NM_001530 | 1332.56   | 1273.432  | NM_017636 | 28212.625 | 16865.605 |
| AB040895  | 1110.294  | 2359.098  | U80232    | 9955.408  | 9770.982  | NM_012468 | 653.805   | 584.764   |
| NM_018210 | 1515.442  | 1832.872  | AF086526  | 520.332   | 664.634   | M27877    | 22384.945 | 27134.688 |
| NM_001096 | 6151.864  | 5752.374  | AK025788  | 2096.656  | 2122.88   | D70836    | 40923.254 | 44672.613 |
| NM_016014 | 1487.946  | 1767.481  | AF086164  | 1202.159  | 1184.828  | D16878    | 723.956   | 1181.549  |
| NM_000198 | 401.036   | 446.943   | AK025577  | 1744.416  | 1683.341  | NM_014943 | 2200.087  | 3962.651  |
| NM_018327 | 872.337   | 849.769   | AK000216  | 2334.99   | 2292.631  | AK024392  | 2224.954  | 1714.741  |
| NM_017581 | 1494.88   | 1163.211  | AK023440  | 697.134   | 983.456   | NM_013260 | 964.658   | 600.465   |
| AA488804  | 8673.247  | 7584.047  | AB033041  | 7488.867  | 7358.462  | NM_018300 | 917.339   | 751.819   |
| NM_006538 | 539.046   | 524.855   | NM_014894 | 52180.945 | 41046.641 | NM_004875 | 2729.906  | 2167.441  |
| NM_001684 | 1469.778  | 1198.832  | AY007155  | 2351.495  | 2027.159  | NM_018254 | 5251.573  | 4059.651  |
| NM_000808 | 727.486   | 658.274   | AK027160  | 4548.145  | 2257.792  | NM_017745 | 2416.579  | 1761.168  |
| NM_016318 | 9110.966  | 6058.602  | U79264    | 2820.516  | 2210.03   | NM_018433 | 1948.6    | 1685.278  |
| NM_013308 | 665.453   | 350.66    | NM_015698 | 5245.27   | 4548.425  | NM_000937 | 640.802   | 355.179   |
| NM_078467 | 5530.474  | 4510.157  | AF070530  | 12702.392 | 10206.771 | AB028451  | 791.507   | 531.14    |
| AK001883  | 14345.624 | 11909.474 | AF086487  | 487.467   | 286.191   | AK024810  | 14274.535 | 12872.509 |
| NM_014628 | 1600.978  | 1609.528  | NM_006420 | 1354.031  | 1137.201  | AK022615  | 46269.324 | 43461.25  |
| AK025587  | 404.533   | 505.948   | AF131855  | 665.661   | 634.014   | NM_004043 | 5734.566  | 4279.771  |
| AL050114  | 961.769   | 1198.907  | AF086046  | 4078.364  | 3534.385  | BM458096  | 13874.676 | 10810.246 |
| AK021492  | 2432.501  | 2160.184  | AK024962  | 660.702   | 1077.479  | NM_005626 | 7957.572  | 5793.875  |
| AK023794  | 18187.643 | 16857.762 | AK022164  | 488.517   | 741.262   | D29958    | 15294.387 | 11800.339 |
| NM_019885 | 1865.76   | 1767.728  | AK025135  | 4279.2    | 4869.803  | NM_015971 | 12451.975 | 6876.059  |
| AB033103  | 1642.199  | 1198.189  | NM_017926 | 2548.154  | 2536.987  | D17257    | 60263.215 | 54688.34  |
| NM_002907 | 825.958   | 586.123   | AY007145  | 1146.861  | 1123.018  | AK000724  | 2345.366  | 2869.73   |
| AK024098  | 1013.572  | 955.613   | D38549    | 2420.297  | 2925.677  | NM_003720 | 10124.759 | 10993.629 |
| AK022371  | 1918.438  | 1003.418  | AK024780  | 1260.636  | 1515.334  | AF097159  | 876.556   | 1203.692  |
| D42045    | 1466.663  | 951.364   | AF085947  | 781.169   | 929.277   | NM_003918 | 1220.122  | 1396.099  |

|           |           |           |           |           |           |           |           |           |
|-----------|-----------|-----------|-----------|-----------|-----------|-----------|-----------|-----------|
| AB007953  | 1216.525  | 758.041   | AF086000  | 473.944   | 529.825   | NM_004807 | 1477.196  | 1140.55   |
| NM_014002 | 4281.631  | 2528.854  | AK022123  | 392.43    | 521.516   | J03569    | 35984.828 | 25333.531 |
| NM_004197 | 7410.004  | 4036.12   | AK024184  | 716.686   | 96.299    | NM_003115 | 8107.022  | 7224.458  |
| NM_004073 | 964.865   | 678.52    | U10510    | 5201.461  | 3932.718  | NM_000687 | 18325.793 | 13857.163 |
| NM_001278 | 2715.634  | 1951.706  | Z36818    | 529.732   | 210.838   | NM_018200 | 1146.798  | 1105.192  |
| NM_019105 | 3703.627  | 2787.469  | Z36842    | 862.447   | 956.328   | NM_014838 | 2038.544  | 1552.047  |
| NM_000294 | 3572.198  | 2696.779  | AF086137  | 570.686   | 458.705   | NM_007212 | 2705.336  | 1944.207  |
| NM_016249 | 999.475   | 837.03    | AF086155  | 949.99    | 1073.053  | AF005067  | 2314.446  | 1431.509  |
| NM_006181 | 730.514   | 482.128   | AK001872  | 586.157   | 616.046   | NM_005710 | 8898.977  | 6050.183  |
| NM_003796 | 8403.86   | 6107.711  | AK022010  | 462.238   | 534.502   | AF252284  | 2574.741  | 1708.918  |
| NM_002973 | 1878.383  | 1592.096  | NM_014159 | 3042.41   | 1710.231  | NM_014930 | 1090.041  | 654.255   |
| NM_004436 | 33594.738 | 20561.16  | AK021795  | 580.839   | 1069.226  | NM_001530 | 1448.261  | 1108.444  |
| NM_006580 | 4660.402  | 3291.425  | AL162042  | 1315.679  | 2385.57   | U80232    | 12173.435 | 7129.245  |
| NM_001305 | 1611.886  | 1337.08   | AK026131  | 866.826   | 1417.731  | AF086526  | 729.375   | 740.532   |
| NM_005082 | 631.954   | 411.859   | AK023312  | 977.742   | 1027.321  | AK025788  | 2566.66   | 2214.775  |
| D17028    | 14554.586 | 8864.351  | AL133570  | 1039.371  | 785.425   | AF086164  | 1178.003  | 1006.829  |
| NM_013442 | 16208.741 | 9546.58   | AK022678  | 590.218   | 543.026   | AK025577  | 1909.104  | 1391.415  |
| BG611243  | 1404.049  | 1184.394  | AK023835  | 1272.301  | 1153.231  | AK000216  | 3357.833  | 2546.463  |
| BI906766  | 1626.793  | 764.547   | AK023012  | 702.161   | 679.753   | AK023440  | 861.815   | 760.698   |
| U60519    | 1082.988  | 819.472   | AK023906  | 2412.055  | 2230.09   | AB033041  | 10094.86  | 6936.762  |
| AA282906  | 2798.545  | 1878.492  | AK024234  | 554.204   | 331.582   | NM_014894 | 53674.449 | 45958.332 |
| L02870    | 1901.858  | 1366.555  | NM_012409 | 1397.61   | 1803.814  | AY007155  | 1686.49   | 1909.876  |
| BG755482  | 4545.111  | 2422.368  | AK021708  | 501.089   | 1187.382  | AK027160  | 5788.143  | 3298.117  |
| AI480307  | 2543.264  | 1329.328  | AL050205  | 4349.572  | 5227.003  | AF070526  | 705.91    | 616.181   |
| X51420    | 1246.612  | 743.863   | AK023947  | 505.015   | 611.029   | U79264    | 4369.966  | 2947.425  |
| D28235    | 576.598   | 275.2     | NM_005691 | 1011.245  | 1078.041  | NM_015695 | 8474.173  | 5626.25   |
| X51757    | 688.928   | 289.178   | AF086156  | 537.079   | 684.577   | AK023619  | 715.444   | 140.018   |
| L24038    | 1024.532  | 711.801   | AK023814  | 699.107   | 613.894   | AF070530  | 17017.07  | 12334.126 |
| NM_053056 | 4254.508  | 3590.396  | AF130063  | 419.589   | 420.643   | AF086487  | 621.022   | 533.085   |
| NM_006186 | 1006.648  | 857.365   | AF086528  | 464.5     | 453.975   | NM_006420 | 1814.319  | 1166.052  |
| NM_002751 | 2058.648  | 1629.804  | AL162043  | 312.463   | 462.725   | AF131855  | 985.625   | 428.985   |
| M55593    | 5208.412  | 4207.14   | NM_006543 | 1187.763  | 919.156   | AF086046  | 5577.915  | 3918.048  |
| NM_017716 | 788.369   | 595.825   | AK023018  | 586.453   | 528.677   | AK024962  | 894.134   | 929.088   |
| M58603    | 3326.875  | 2007.298  | AK022672  | 1013.1    | 978.393   | AK022164  | 547.249   | 681.424   |
| NM_003639 | 1776.888  | 1056.2    | AK023870  | 867.882   | 769.181   | AK025135  | 5889.405  | 7007.888  |
| NM_001549 | 648.329   | 292.927   | AK021599  | 1080.762  | 1224.935  | NM_017926 | 3025.608  | 2652.422  |
| NM_000115 | 1541.107  | 1067.985  | AK024263  | 979.658   | 1216.45   | AY007145  | 1464.084  | 1459.346  |
| AF308801  | 3236.768  | 2350.814  | NM_016613 | 2067.705  | 2239.364  | D38549    | 3280.143  | 2758.448  |
| NM_007318 | 60345.875 | 44985.715 | AF086414  | 1027.465  | 889.819   | AK024780  | 1165.479  | 807.977   |
| NM_014874 | 1036.002  | 633.451   | AJ012490  | 4983.309  | 5724.33   | AF085947  | 965.181   | 758.431   |
| NM_005765 | 16527.754 | 9106.276  | AL049270  | 1169.404  | 1374.548  | AF086000  | 714.167   | 523.027   |
| NM_002762 | 656.202   | 450.844   | U88834    | 2996.633  | 3616.548  | U10510    | 7625.762  | 4879.464  |
| NM_006324 | 6783.33   | 5030.193  | BC025324  | 817.607   | 1080.723  | Z36818    | 775.641   | 463.257   |
| NM_016848 | 5197.452  | 4249.979  | NM_006087 | 59654.539 | 61833.824 | Z36842    | 1046.456  | 756.398   |
| NM_000514 | 4545.884  | 3532.637  | AK023564  | 1758.311  | 1688.189  | AF086137  | 694.456   | 421.625   |
| AL137432  | 1744.563  | 1112.737  | NM_003533 | 1086.909  | 925.586   | AF086155  | 1343.816  | 1062.942  |
| NM_000957 | 2276.882  | 1462.061  | AK023726  | 1781.011  | 1698.306  | AF116677  | 551.052   | 972.002   |
| NM_019043 | 1713.882  | 770.636   | AK024906  | 341.434   | 406.437   | NM_014155 | 3538.966  | 1718.058  |
| NM_003240 | 4121.248  | 2606.908  | AF131836  | 1050.089  | 813.073   | AK021795  | 693.626   | 587.809   |
| NM_016564 | 26717.688 | 19888.957 | AF275804  | 15431.146 | 11549.642 | AL162042  | 1384.493  | 1455.096  |
| NM_000796 | 498.302   | 517.505   | AL137488  | 984.724   | 904.862   | AK026131  | 927.95    | 546.454   |
| AF279656  | 1256.044  | 909.526   | AL049447  | 32348.365 | 24678.777 | AK023312  | 945.274   | 702.451   |
| AK021660  | 935.052   | 827.205   | NM_020527 | 1839.905  | 1453.236  | AK022483  | 767.707   | 173.892   |

|           |           |           |           |           |           |           |           |           |
|-----------|-----------|-----------|-----------|-----------|-----------|-----------|-----------|-----------|
| AB007933  | 48599.316 | 51153.051 | AB020637  | 527.26    | 569.284   | AL133570  | 1238.759  | 1093.917  |
| NM_006702 | 4813.593  | 5436.498  | NM_005286 | 1234.541  | 1043.942  | AK022678  | 784.411   | 506.378   |
| NM_001396 | 6013.475  | 4361.708  | AK024365  | 2511.855  | 1983.254  | AK023835  | 1722.965  | 1129.888  |
| NM_014474 | 1672.159  | 1648.833  | AJ251759  | 750.277   | 617.857   | AK024159  | 50.796    | 579.688   |
| NM_006539 | 694.887   | 614.071   | AK024371  | 947.705   | 1171.427  | AK023012  | 874.342   | 799.047   |
| NM_001684 | 1695.81   | 1255.315  | NM_005454 | 639.016   | 461.153   | AK023906  | 3284.029  | 1879.717  |
| AB028977  | 425.125   | 319.612   | AB019569  | 60836.605 | 55869.082 | NM_012409 | 1892.484  | 2128.879  |
| NM_000808 | 939.314   | 797.928   | NM_001889 | 4177.657  | 4860.034  | AK021708  | 449.944   | 829.959   |
| NM_016318 | 10970.433 | 10074.442 | NM_004999 | 1360.339  | 1491.103  | AL050205  | 4640.489  | 5751.178  |
| NM_013309 | 797.505   | 967.748   | X89668    | 13489.461 | 13731.951 | AK023947  | 547.069   | 429.512   |
| NM_019891 | 1322.741  | 1801.427  | NM_004458 | 6262.693  | 7451.022  | NM_005691 | 1046.353  | 930.382   |
| AF038186  | 1422.269  | 1569.535  | NM_018530 | 3699.504  | 3912.527  | AK023814  | 652.776   | 656.857   |
| NM_016277 | 4171.999  | 3244.631  | AK022855  | 9143.764  | 11383.797 | AF130063  | 625.919   | 436.696   |
| NM_007247 | 2605.86   | 2156.401  | AK023816  | 1137.216  | 1230.47   | AF086528  | 576.042   | 759.891   |
| NM_006554 | 3219.073  | 2457.725  | AL050102  | 1035.473  | 1105.096  | AL162043  | 689.129   | 290.637   |
| X99962    | 8524.8    | 8733.118  | AF305686  | 1571.44   | 1923.052  | NM_006543 | 1262.226  | 1851.147  |
| AK023221  | 6408.075  | 6129.079  | AF085832  | 1008.953  | 838.458   | AK023018  | 875.612   | 544.325   |
| NM_003664 | 7271.511  | 7319.27   | AK025981  | 855.079   | 738.781   | AK022672  | 1540.766  | 1224.864  |
| NM_002426 | 2674.583  | 2062.656  | AF113212  | 1784.658  | 1029.284  | AK023870  | 1085.838  | 724.346   |
| AK027182  | 924.806   | 786.577   | AF086266  | 687.684   | 593.383   | AK021599  | 1469.279  | 914.255   |
| J03651    | 2444.877  | 1555.925  | AF086252  | 948.278   | 627.182   | AK024263  | 965.308   | 1003.188  |
| U61738    | 3629.277  | 1883.642  | AK026703  | 2004.129  | 1473.844  | NM_016613 | 2706.296  | 3466.48   |
| AJ132087  | 894.32    | 825.92    | NM_017866 | 2714.438  | 2102.683  | AF086414  | 1745.772  | 4739.459  |
| U92818    | 2524.854  | 1444.214  | NM_003536 | 863.858   | 763.272   | AJ012490  | 6763.796  | 9572.894  |
| NM_000442 | 16629.953 | 17592.48  | AF116707  | 784.26    | 570.487   | U84516    | 13172.528 | 13130.254 |
| NM_002934 | 61231.602 | 51391.723 | U90910    | 2437.562  | 2550.709  | AL049270  | 1208.513  | 868.198   |
| AK023011  | 20735.76  | 21496.088 | AK025765  | 759.838   | 565.304   | U88834    | 2050.671  | 1921.658  |
| NM_016816 | 1664.068  | 1400.161  | CY3Cy5    | 1310.833  | 188.49    | BC025324  | 715.827   | 444.685   |
| L17325    | 2190.598  | 1689.953  | AA143087  | 5080.121  | 5161.594  | NM_006087 | 65224.145 | 55076.832 |
| NM_014002 | 5787.861  | 6020.833  | U25804    | 3530.472  | 3916.234  | AK023564  | 2202.52   | 1365.948  |
| NM_004197 | 9657.477  | 8270.314  | BI870965  | 1382.059  | 1316.833  | NM_003533 | 1215.432  | 850.484   |
| NM_004073 | 1584.51   | 1589.195  | NM_001903 | 6733.589  | 7263.556  | AK023726  | 1894.279  | 1938.906  |
| NM_001278 | 3493.548  | 3154.893  | BI835536  | 6609.277  | 6558.3    | AK024906  | 540.498   | 481.376   |
| NM_019105 | 4882.314  | 5072.604  | BF205051  | 1858.202  | 2125.401  | AF131836  | 1526.152  | 1057.668  |
| NM_000294 | 4520.742  | 5054.737  | X02761    | 852.367   | 888.647   | AF275804  | 20990.826 | 15380.603 |
| AJ272212  | 2811.69   | 3019.815  | M91463    | 541.506   | 696.834   | AL137488  | 1125.44   | 842.329   |
| NM_001626 | 23660.803 | 22217.246 | J03060    | 2189.25   | 2192.642  | AL049447  | 43710.684 | 29803.096 |
| NM_005677 | 2991.501  | 3175.039  | NM_003743 | 975.195   | 1105.957  | NM_020527 | 2587.474  | 1675.236  |
| AF229803  | 1205.578  | 1520.694  | AA829383  | 3196.131  | 3405.092  | NM_005286 | 1979.099  | 1376.788  |
| AF151810  | 552.225   | 727.654   | AF012434  | 7611.849  | 7717.314  | AK024365  | 5403.672  | 4055.958  |
| NM_002130 | 31861.193 | 38553.82  | SR6       | 1902.045  | 1320.272  | AJ251759  | 634.022   | 625.818   |
| NM_005469 | 7558.04   | 8133.336  | SR8       | 7521.677  | 19842.502 | AK024371  | 1456.774  | 1101.913  |
| NM_016361 | 3606.833  | 3503.194  | SR10      | 23901.629 | 6271.613  | NM_005454 | 702.118   | 323.367   |
| NM_003708 | 51504.031 | 44588.27  | CY3Cy5    | 796.697   | 143.554   | AB019569  | 64996.18  | 58787.961 |
| NM_014349 | 7400.971  | 6779.388  | NM_005902 | 2696.284  | 2913.971  | NM_001889 | 5774.726  | 6129.066  |
| AB040895  | 757.299   | 927.335   | NM_002850 | 51119.336 | 62381.301 | NM_004999 | 1426.485  | 2043.669  |
| NM_018210 | 1863.562  | 2711.547  | NM_005903 | 790.711   | 971.132   | X89668    | 13380.118 | 23751.736 |
| NM_001096 | 8378.686  | 9513.053  | NM_000861 | 546.942   | 765.046   | NM_004458 | 8388.955  | 10243.838 |
| NM_016014 | 2437.142  | 2729.782  | NM_000024 | 519.31    | 646.448   | NM_006901 | 1441.653  | 1840.852  |
| NM_000198 | 419.518   | 520.898   | U77493    | 380.051   | 472.689   | NM_018530 | 4771.617  | 4002.904  |
| NM_018327 | 1041.689  | 1426.125  | NM_003873 | 372.749   | 345.907   | AJ003145  | 703.541   | 572.455   |
| NM_017581 | 2255.345  | 2584.2    | NM_000263 | 2202.137  | 2122.418  | AK022855  | 10140.295 | 7693.993  |
| AA488804  | 10670.356 | 11959.769 | AF073519  | 1610.38   | 1511.697  | AK023816  | 1213.9    | 1305.357  |

|           |           |           |           |           |           |           |           |           |
|-----------|-----------|-----------|-----------|-----------|-----------|-----------|-----------|-----------|
| L29496    | 5115.783  | 5972.006  | NM_017583 | 3959.868  | 4454.485  | AL050102  | 1179.34   | 741.301   |
| NM_00092E | 524.477   | 842.563   | Y16132    | 6071.158  | 7843.482  | AF305686  | 1684.559  | 1328.073  |
| NM_007002 | 9378.407  | 9894.526  | NM_002521 | 621.867   | 419.204   | AF085832  | 893.93    | 599.067   |
| NM_012121 | 2019.239  | 2707.032  | NM_001150 | 1596.838  | 1605.331  | AK025981  | 1148.316  | 753.572   |
| NM_00325E | 8273.761  | 8134.266  | NM_00285E | 2241.301  | 2128.391  | AF086266  | 1096.721  | 689.316   |
| NM_01415E | 3872.624  | 4551.688  | NM_00322E | 557.502   | 545.616   | AF086252  | 1125.289  | 760.212   |
| AK026331  | 17886.537 | 22488.357 | NM_00009E | 1190.155  | 999.767   | AK026703  | 2810.236  | 1824.176  |
| M30773    | 3372.817  | 4593.015  | NM_01904E | 782.257   | 1025.259  | NM_01786E | 4099.361  | 2372.839  |
| NM_01633E | 13542.355 | 16164.514 | NM_00638C | 1391.98   | 1547.012  | AJ131244  | 626.268   | 355.717   |
| AF113699  | 26903.773 | 32440.162 | AB020710  | 1206.044  | 1309.216  | NM_00353E | 1286.87   | 746.448   |
| AK001883  | 21430.822 | 23586.578 | NM_016174 | 2628.398  | 3168.375  | AF116707  | 1378.134  | 1049.046  |
| NM_01462E | 2885.601  | 3115.05   | NM_020377 | 577.86    | 490.759   | U90910    | 3892.341  | 2629.786  |
| AL050114  | 1290.841  | 1796.789  | U88896    | 3998.235  | 4458.437  | AK025765  | 1075.912  | 1114.48   |
| AK021492  | 3968.762  | 4262.964  | NM_005724 | 6357.053  | 7600.413  | CY3Cy5    | 1842.687  | 177.488   |
| AK023794  | 27269.881 | 27376.053 | NM_00173E | 1594.915  | 1626.813  | AA143087  | 6145.378  | 5913.741  |
| NM_01988E | 3293.317  | 3086.369  | NM_00234E | 1189.184  | 1310.354  | U25804    | 3808.228  | 4790.797  |
| NM_00532E | 485.574   | 501.886   | NM_00508C | 22180.895 | 28787.881 | BI870965  | 1293.404  | 1595.717  |
| AB033103  | 2509.264  | 2935.743  | NM_004887 | 4261.861  | 5681.25   | NM_00190E | 7511.361  | 8534.213  |
| NM_002907 | 1182.741  | 1316.177  | NM_006404 | 362.754   | 358.763   | BI835536  | 7382.481  | 8086.871  |
| AK024098  | 2092.865  | 2327.939  | NM_01479E | 4194.039  | 3124.464  | BF205051  | 2435.323  | 2463.424  |
| AK023920  | 63.846    | 171.186   | M15330    | 853.216   | 1203.119  | X02761    | 891.97    | 1266.536  |
| AK001116  | 497.796   | 508.747   | NM_01439E | 2081.054  | 2128.175  | M91463    | 637.352   | 831.736   |
| AK022371  | 3178.108  | 3879.81   | AK027201  | 1747.535  | 1766.365  | J03060    | 2253.247  | 2375.63   |
| D42045    | 3506.921  | 3886.085  | NM_00048E | 6248.935  | 5994.898  | X54156    | 291.258   | 303.437   |
| AB007953  | 1966.468  | 2679.363  | X98507    | 1790.713  | 1478.398  | NM_00374E | 861.506   | 752.708   |
| NM_01782C | 1086.754  | 1315.697  | NM_01603C | 24495.924 | 22851.199 | AA829383  | 3252.959  | 2598.987  |
| NM_00184E | 4592.804  | 4446.551  | NM_01466E | 5277.174  | 5312.417  | AF012434  | 7719.473  | 6524.17   |
| NM_003734 | 13881.46  | 15782.984 | NM_00565E | 3694.834  | 3135.534  | SR2       | 53208.863 | 47692.039 |
| NM_01493E | 11855.726 | 13782.531 | AL133064  | 1815.753  | 2743.456  | SR4       | 14821.403 | 13771.349 |
| X99660    | 20856.156 | 24982.604 | NM_006227 | 3290.117  | 4021.47   | SR6       | 2306.03   | 1827.786  |
| X03635    | 6054.765  | 7315.458  | NM_00290E | 3474.025  | 4471.94   | SR8       | 7654.968  | 22946.129 |
| X97671    | 753.712   | 981.412   | NM_00070C | 2739.839  | 3063.849  | SR10      | 25018.281 | 8982.293  |
| NM_004351 | 10770.219 | 13009.285 | NM_01902E | 3238.832  | 4331.339  | CY3Cy5    | 1336.885  | 136.915   |
| NM_00423E | 12234.729 | 14958.271 | NM_000431 | 2051.54   | 2410.335  | NM_01884E | 370.753   | 702.176   |
| AB011093  | 4864.132  | 5900.152  | NM_013421 | 519.789   | 469.089   | NM_00590E | 2994.25   | 3593.492  |
| NM_00246E | 315.535   | 666.901   | AB033118  | 3091.266  | 3516.089  | NM_00285C | 49329.734 | 71515.203 |
| NM_00456C | 493.205   | 489.687   | NM_01960E | 2105.251  | 2158.326  | NM_00590E | 853.806   | 1077.106  |
| NM_00561E | 6971.797  | 8001.461  | NM_00169C | 4463.005  | 3872.998  | NM_000861 | 515.371   | 394.667   |
| NM_02053E | 9404.466  | 9304.146  | AF034374  | 6418.77   | 7197.286  | NM_000024 | 617.18    | 641.661   |
| NM_001894 | 10443.486 | 11531.224 | NM_01611E | 1912.908  | 1786.75   | U77493    | 608.024   | 614.694   |
| NM_000614 | 1052.473  | 1116.528  | NM_018674 | 5823.124  | 6730.633  | NM_00026E | 1889.661  | 1547.389  |
| AK022884  | 969.73    | 1426.109  | NM_00168E | 13431.27  | 13864.723 | AF073519  | 1747.863  | 1657.924  |
| NM_00662C | 8299.276  | 8846.608  | NM_00168E | 907.351   | 749.108   | AB001451  | 3018.567  | 3074.503  |
| NM_001397 | 1015.157  | 1415.117  | NM_01440E | 1115.261  | 1280.505  | NM_01758E | 3906.655  | 3794.383  |
| NM_00554E | 1130.336  | 1226.228  | NM_00081E | 633.334   | 746.315   | Y16132    | 5302.36   | 4945.589  |
| Y08770    | 882.09    | 1020.717  | NM_01492E | 539.154   | 467.537   | NM_01659E | 762.389   | 635.958   |
| NM_00477E | 12629.868 | 14610.396 | AK025130  | 3454.732  | 4100.286  | NM_00115C | 1846.636  | 1455.235  |
| NM_003714 | 7489.723  | 8351.155  | NM_01787E | 690.894   | 809.176   | NM_00285E | 2577.001  | 2796.695  |
| NM_004004 | 512.246   | 832.187   | AK023232  | 1829.126  | 1907.505  | NM_00322E | 671.24    | 496.315   |
| AF024540  | 1585.073  | 1499.7    | NM_000271 | 4200.987  | 3717.655  | NM_00009E | 932.312   | 843.293   |
| NM_00218E | 2761.513  | 3249.333  | NM_01820E | 2327.637  | 2066.564  | NM_01904E | 755.895   | 930.203   |
| U42977    | 2918.058  | 3321.251  | AB018268  | 3694.641  | 3315.36   | NM_00638C | 1552.466  | 1648.565  |
| NM_002881 | 7275.354  | 7788.219  | Z70701    | 7240.865  | 10166.292 | AB020710  | 1234.911  | 1351.279  |

|           |           |           |           |           |           |           |           |           |
|-----------|-----------|-----------|-----------|-----------|-----------|-----------|-----------|-----------|
| NM_003666 | 4065.882  | 4688.289  | AB040972  | 1571.537  | 1853.582  | NM_016174 | 2915.108  | 3959.921  |
| NM_003288 | 6995.937  | 7540.028  | AF148505  | 1334.371  | 1689.405  | NM_020377 | 835.432   | 1121.158  |
| NM_018242 | 1108.078  | 977.739   | NM_018686 | 3756.223  | 4883.905  | U88896    | 4422.532  | 5441.229  |
| M83822    | 2583.839  | 3265.358  | NM_017676 | 1357.846  | 1419.268  | NM_001735 | 1788.144  | 2151.845  |
| NM_018434 | 3743.932  | 4629.667  | NM_005431 | 1337.479  | 1743.314  | NM_002345 | 1378.996  | 1496.941  |
| NM_003914 | 6808.989  | 8005.074  | AB036063  | 1214.954  | 1533.511  | NM_005080 | 27803.355 | 31031.352 |
| NM_020423 | 1571.927  | 1455.47   | NM_002894 | 2747.421  | 2691.461  | NM_004887 | 6211.692  | 5297.417  |
| AK021437  | 2497.04   | 2723.001  | NM_004629 | 3477.498  | 3793.989  | NM_006404 | 397.386   | 367.296   |
| NM_003831 | 15734.245 | 17435.771 | NM_004260 | 4069.603  | 4624.076  | NM_014795 | 4802.388  | 3414.861  |
| NM_001759 | 851.602   | 1009.203  | AL050067  | 1173.116  | 1343.512  | NM_002986 | 826.796   | 888.262   |
| AB007965  | 8281.047  | 8872.709  | NM_004972 | 3924.078  | 4084.392  | M15330    | 935.162   | 1115.032  |
| NM_017649 | 907.555   | 1349.185  | NM_006251 | 4216.037  | 4059.012  | NM_014396 | 2232.778  | 1791.135  |
| NM_000066 | 2270.839  | 2228.395  | NM_004103 | 4422.817  | 4880.07   | AK027201  | 2011.644  | 1626.49   |
| NM_001196 | 15127.208 | 15618.405 | NM_002314 | 5735.894  | 5630.135  | NM_000485 | 6562.271  | 5058.34   |
| NM_016008 | 2023.588  | 2694.657  | NM_001744 | 1627.14   | 1822.597  | X98507    | 1724.745  | 1401.877  |
| NM_017744 | 2463.984  | 2944.058  | NM_006296 | 2781.748  | 3509.28   | NM_016030 | 29037.732 | 25777.035 |
| NM_001924 | 2212.433  | 2607.515  | Z25433    | 1629.458  | 1606.435  | NM_014665 | 5940.085  | 6115.081  |
| NM_017705 | 15589.889 | 16927.73  | NM_005922 | 5273.155  | 4933.57   | NM_005652 | 2994.229  | 2748.608  |
| AB002325  | 852.457   | 826.748   | NM_018638 | 2263.719  | 2191.62   | AK026686  | 469.499   | 381.949   |
| NM_001796 | 4140.143  | 4893.233  | AL137593  | 8255.56   | 8437.023  | AL133064  | 1526.882  | 2242.322  |
| AB040880  | 2027.758  | 2910.393  | NM_000382 | 1811.635  | 1718.554  | NM_006227 | 3712.97   | 4966.86   |
| NM_009587 | 20710.637 | 25410.838 | NM_001150 | 1717.372  | 2744.598  | NM_002905 | 4050.043  | 5032.38   |
| AL133566  | 1427.861  | 1781.384  | NM_002856 | 1562.154  | 2348.63   | NM_000700 | 3036.072  | 3959.151  |
| M36118    | 10172.756 | 13438.251 | NM_003225 | 601.569   | 638.417   | NM_019028 | 3515.477  | 4492.269  |
| NM_003395 | 31658.727 | 38389.863 | NM_000096 | 710.106   | 934.04    | NM_000431 | 2471.797  | 2876.72   |
| NM_001097 | 415.412   | 662.758   | AA143087  | 4817.194  | 4295.128  | NM_013421 | 779.571   | 1163.625  |
| NM_002630 | 1491.744  | 1600.381  | U25804    | 3434.157  | 3989.304  | AB033118  | 4747.996  | 5340.607  |
| AJ295149  | 49782.16  | 52518.508 | BI870965  | 1143.805  | 1379.094  | NM_019606 | 2243.512  | 3045.826  |
| NM_013438 | 7785.887  | 9339.377  | NM_001903 | 6215.056  | 7099.707  | NM_001690 | 4877.426  | 4828.986  |
| NM_005095 | 3492.888  | 3957.16   | BI835536  | 6722.021  | 6074.569  | AF034374  | 5617.152  | 6773.053  |
| NM_014688 | 7531.499  | 8835.542  | BF205051  | 2106.74   | 2293.273  | NM_016118 | 2190.02   | 1895.072  |
| AB037784  | 478.253   | 786.856   | X02761    | 956.497   | 1068.472  | NM_018674 | 5211.066  | 5608.19   |
| AL359623  | 1654.021  | 1770.112  | J03060    | 1926.402  | 2070.308  | NM_001683 | 18875.922 | 16591.662 |
| AK026920  | 3915.808  | 4227.194  | X54156    | 309.239   | 416.655   | NM_001682 | 1067.034  | 915.941   |
| AL137255  | 1844.979  | 2457.465  | NM_003743 | 786.963   | 660.555   | NM_014405 | 1261.454  | 1124.071  |
| NM_003370 | 23964.916 | 31675.596 | AA829383  | 2935.761  | 3408.088  | NM_000816 | 805.002   | 971.104   |
| AB037715  | 3468.963  | 4978.926  | AF012434  | 7232.84   | 7627.74   | NM_014928 | 515.682   | 634.987   |
| AF250924  | 14994.953 | 20770.314 | AB037791  | 734.303   | 472.313   | AK025130  | 3196.403  | 3343.374  |
| D86979    | 1526.418  | 1838.43   | NM_018124 | 4915.546  | 3994.301  | NM_017875 | 744.378   | 649.465   |
| NM_018212 | 874.058   | 1310.988  | NM_000489 | 5498.64   | 6340.353  | AK023232  | 1885.141  | 1791.631  |
| AF018081  | 35548.031 | 44945.746 | X98507    | 1146.13   | 1251.422  | NM_000271 | 5193.505  | 5000.29   |
| NM_020202 | 17908.547 | 21118.725 | NM_016030 | 18126.49  | 21566.801 | NM_018205 | 1971.047  | 1994.862  |
| AK022889  | 11874.205 | 14862.381 | NM_014669 | 4377.731  | 5337.806  | NM_006184 | 23690.98  | 20615.406 |
| X52357    | 51651.695 | 50143.297 | NM_005652 | 2636.546  | 3057.931  | AB018268  | 4808.249  | 4682.711  |
| AF211891  | 1407.444  | 1650.479  | NM_005902 | 2555.55   | 2709.987  | Z70701    | 6882.265  | 10188.722 |
| NM_005641 | 1651.735  | 1860.336  | NM_002850 | 54587.922 | 63767.102 | AB040972  | 1948.49   | 2108.489  |
| NM_001668 | 4636.002  | 5327.291  | NM_005903 | 888.901   | 981.039   | AF148505  | 1353.087  | 1830.486  |
| AK025362  | 1703.423  | 2012.889  | NM_000861 | 623.066   | 503.655   | NM_018686 | 4162.824  | 5237.568  |
| AK021776  | 3313.017  | 3425.675  | NM_000024 | 666.857   | 563.489   | NM_017676 | 1224.552  | 1606.297  |
| AK026042  | 2303.241  | 3294.915  | U77493    | 402.388   | 533.627   | AK021764  | 328.476   | 233.394   |
| NM_014233 | 18611.064 | 23978.254 | NM_000263 | 2030.208  | 2014.276  | NM_005431 | 1380.094  | 1649.307  |
| NM_002137 | 62833.68  | 56631.211 | AF073519  | 1718.083  | 1658.914  | AB036063  | 1658.656  | 1668.275  |
| NM_002911 | 2926.477  | 3144.463  | AB001451  | 2819.476  | 2997.385  | NM_002894 | 2967.357  | 3078.856  |

|           |           |           |           |           |           |           |           |           |
|-----------|-----------|-----------|-----------|-----------|-----------|-----------|-----------|-----------|
| U94386    | 955.063   | 1322.335  | NM_017583 | 3401.244  | 3265.742  | NM_004625 | 3969.839  | 4700.685  |
| NM_016000 | 12978.048 | 16204.608 | Y16132    | 5747.829  | 4525.588  | NM_004260 | 4311.51   | 4510.605  |
| NM_006372 | 10977.573 | 11974.422 | NM_016593 | 676.438   | 744.905   | AL050067  | 961.037   | 996.238   |
| NM_014150 | 1849.932  | 2742.61   | NM_002521 | 393.074   | 361.126   | NM_004972 | 3657.384  | 3289.562  |
| NM_006805 | 31519.699 | 37773.547 | AK023232  | 1345.544  | 1804.472  | NM_006251 | 4462.055  | 4418.3    |
| AF132027  | 24325.248 | 22632.363 | NM_000271 | 4016.736  | 4530.657  | NM_004103 | 5197.673  | 5097.574  |
| AB033096  | 9101.366  | 9018.569  | NM_018209 | 1437.036  | 2398.808  | NM_002314 | 5847.313  | 5726.415  |
| NM_014880 | 2555.599  | 2019.009  | NM_006184 | 20178.369 | 18426.061 | NM_001744 | 2038.913  | 2291.892  |
| L31408    | 10774.819 | 10121.063 | AB018268  | 3820.066  | 4388.354  | NM_006290 | 2961.223  | 3180.06   |
| NM_001545 | 8156.848  | 6976.823  | NM_019045 | 654.729   | 644.089   | Z25433    | 1657.775  | 1508.784  |
| NM_004440 | 18494.313 | 19310.953 | NM_006380 | 1402.124  | 1233.457  | NM_005922 | 5684.653  | 5031.038  |
| AF070625  | 4181.915  | 4655.254  | AB020710  | 970.135   | 1127.278  | NM_018630 | 2838.095  | 2561.977  |
| AL365512  | 1810.154  | 1957.472  | NM_016174 | 3216.318  | 3165.784  | AL137593  | 9384.798  | 9589.259  |
| AK001740  | 5990.235  | 6831.178  | NM_020377 | 679.612   | 858.122   | NM_003915 | 1937.895  | 1819.219  |
| AF131793  | 1077.731  | 1182.688  | U88896    | 4404.179  | 4678.484  | NM_000382 | 1671.343  | 1665.825  |
| NM_005910 | 26602.037 | 31427.887 | NM_005724 | 6571.666  | 7194.564  | NM_001150 | 1682.097  | 2295.165  |
| J02625    | 8139.068  | 9341.704  | NM_001735 | 1651.075  | 1654.936  | NM_002850 | 1793.859  | 2738.882  |
| Y17175    | 68602.938 | 59760.664 | NM_002349 | 1323.341  | 1542.13   | NM_003225 | 435.237   | 710.03    |
| NM_004540 | 17815.975 | 16848.209 | NM_004887 | 5077.658  | 5915.722  | NM_000090 | 960.228   | 878.709   |
| NM_000767 | 598.1     | 427.545   | NM_014795 | 3894.203  | 2801.107  | AA143087  | 5765.492  | 5969.515  |
| AK026161  | 2508.473  | 3000.041  | NM_002980 | 645.899   | 656.091   | U25804    | 3801.296  | 4296.359  |
| NM_004553 | 35319.48  | 47324.031 | M15330    | 916.353   | 944.405   | BI870965  | 1341.699  | 1401.646  |
| D63484    | 2116.408  | 2371.188  | NM_014390 | 2009.691  | 1565.153  | NM_001903 | 7222.826  | 7926.873  |
| AK026745  | 2666.622  | 1847.817  | AK027201  | 1808.109  | 1443.822  | BI835536  | 7552.023  | 6995.56   |
| AL157440  | 1453.864  | 933.658   | Z25433    | 1736.366  | 2760.392  | BF205051  | 2147.187  | 2615.965  |
| NM_016423 | 3107.128  | 1671.947  | NM_005922 | 4783.204  | 4845.474  | X02761    | 1068.34   | 1066.069  |
| AB040975  | 2313.97   | 1496.606  | NM_018630 | 2373.753  | 2781.154  | M91463    | 619.196   | 410.703   |
| NM_005119 | 4331.308  | 1630.899  | AL137593  | 7481.1    | 9282.83   | J03060    | 2074.105  | 1771.93   |
| NM_003160 | 7976.37   | 3653.199  | NM_003915 | 1690.488  | 1658.378  | NM_003743 | 724.195   | 624.108   |
| AK055844  | 821.325   | 372.599   | NM_000382 | 1431.873  | 1733.018  | AA829383  | 2954.365  | 2806.692  |
| NM_018280 | 14469.041 | 7015.805  | AL133064  | 1503.338  | 1680.141  | AF012434  | 7397.27   | 6879.489  |
| NM_003140 | 2435.24   | 1549.604  | NM_006227 | 3425.83   | 3617.577  | AB037791  | 899.342   | 584.545   |
| NM_003131 | 10132.646 | 4573.493  | NM_002905 | 3499.454  | 4875.488  | NM_018124 | 4591.176  | 4185.087  |
| NM_005230 | 2154.219  | 1204.956  | NM_000700 | 2515.569  | 2614.553  | NM_000480 | 4916.715  | 6022.658  |
| NM_018530 | 2674.38   | 1552.81   | NM_019020 | 3410.128  | 3660.368  | X98507    | 1176.524  | 1689.634  |
| NM_013340 | 924.69    | 529.09    | NM_000431 | 1951.627  | 2210.638  | NM_016030 | 21710.613 | 25195.783 |
| AF131784  | 508.32    | 222.204   | NM_013421 | 707.569   | 746.522   | NM_014660 | 4666.312  | 6263.567  |
| NM_017851 | 921.19    | 477.297   | AB033118  | 3953.983  | 5068.532  | NM_005652 | 3005.787  | 3577.401  |
| AK026182  | 66934.063 | 53313.969 | NM_001690 | 4685.631  | 3796.244  | AK026686  | 450.914   | 517.439   |
| AK025603  | 1824.93   | 884.048   | AF034374  | 6212.55   | 7039.744  | NM_005903 | 808.595   | 1182.005  |
| NM_016080 | 10867.494 | 7122.901  | NM_018674 | 5909.209  | 7080.342  | NM_000861 | 514.169   | 463.947   |
| AK025768  | 3767.63   | 2037.697  | NM_001683 | 13409.289 | 14449.835 | NM_000024 | 699.257   | 550.097   |
| AL117502  | 2838.091  | 2042.637  | NM_001682 | 889.089   | 697.195   | U77493    | 501.051   | 629.221   |
| AK001846  | 1401.172  | 1056.395  | NM_014405 | 1205.863  | 1049.959  | NM_000263 | 1903.169  | 1447.972  |
| AF147300  | 1070.935  | 684.654   | NM_014920 | 538.542   | 384.608   | AF073519  | 1858.182  | 1620.452  |
| AK024637  | 834.515   | 345.566   | AK025130  | 3702.338  | 3697.925  | AB001451  | 3287.228  | 2858.318  |
| AK024108  | 852.659   | 537.857   | AB037791  | 720.843   | 651.13    | NM_017583 | 3821.887  | 3930.815  |
| NM_013340 | 793.26    | 434.593   | NM_018124 | 4690.588  | 6036.626  | Y16132    | 5928.61   | 4926.561  |
| AL117454  | 14913.363 | 8323.093  | Z70701    | 8394.579  | 9196.859  | NM_016593 | 642.44    | 678.611   |
| AF272890  | 3622.372  | 1858.286  | AB040972  | 1599.202  | 2095.89   | NM_002521 | 394.25    | 358.819   |
| U00684    | 948.935   | 503.517   | AF148505  | 1394.233  | 1685.755  | NM_017875 | 590.948   | 1059.628  |
| NM_016450 | 6782.588  | 3614.057  | NM_018680 | 3817.912  | 4155.904  | AK023232  | 1586.246  | 2197.191  |
| AF086227  | 1185.844  | 600.075   | NM_017670 | 1244.784  | 1237.71   | NM_000271 | 4160.916  | 5014.404  |

|           |           |           |           |           |           |           |           |           |
|-----------|-----------|-----------|-----------|-----------|-----------|-----------|-----------|-----------|
| AK026246  | 1895.899  | 1025.234  | NM_005431 | 1527.252  | 1991.654  | NM_018209 | 2046.608  | 2496.598  |
| AF070524  | 729.483   | 490.721   | AB036063  | 1514.285  | 1619.301  | NM_006184 | 23192.146 | 27619.574 |
| AF035281  | 1272.111  | 1030.158  | NM_002894 | 2276.021  | 2285.758  | AB018268  | 4840.263  | 5894.248  |
| AK026304  | 772.149   | 657.683   | NM_004629 | 3896.738  | 4259.362  | NM_019045 | 848.668   | 775.946   |
| AL133446  | 3040.018  | 1724.473  | NM_004260 | 4536.877  | 4773.111  | NM_006380 | 1550.75   | 1810.727  |
| AF147406  | 617.209   | 392.567   | AL050067  | 1222.02   | 1185.993  | AB020710  | 1337.514  | 1426.491  |
| NM_006553 | 565.048   | 158.693   | NM_004972 | 4337.306  | 5022.539  | NM_016174 | 2687.449  | 3452.76   |
| U56251    | 1047.571  | 485.451   | NM_006251 | 4320.316  | 4449.086  | NM_020377 | 754.434   | 912.839   |
| AK024689  | 533.429   | 340.021   | NM_004103 | 4791.469  | 3718.404  | U88896    | 4956.33   | 4493.404  |
| BC035667  | 756.849   | 435.326   | NM_002314 | 6638.94   | 5673.514  | NM_005724 | 7486.908  | 6884.399  |
| AL049277  | 1803.29   | 1342.375  | NM_001744 | 2118.073  | 2038.998  | X58794    | 47807.996 | 45366.863 |
| AL117506  | 606.474   | 571.864   | NM_006296 | 2715.417  | 2807.564  | NM_001735 | 1746.236  | 1970.945  |
| AL049302  | 580.394   | 346.456   | AF073519  | 1581.23   | 1676.401  | NM_002345 | 1246.052  | 1170.798  |
| AL050043  | 1020.932  | 919.655   | AB001451  | 2537.359  | 3796.426  | NM_005080 | 26405.898 | 28497.096 |
| AL117571  | 1206.748  | 931.363   | NM_017583 | 3334.177  | 4771.624  | NM_004887 | 6925.357  | 5807.364  |
| L22263    | 413.354   | 297.839   | Y16132    | 4455.361  | 5107.688  | NM_014795 | 4815.466  | 3160.402  |
| AK091573  | 696.111   | 713.016   | NM_016593 | 587.607   | 537.611   | M15330    | 972.261   | 1169.75   |
| AF131814  | 1239.471  | 1108.674  | NM_002521 | 425.553   | 451.159   | NM_014396 | 2257.829  | 1964.403  |
| AL359600  | 462.357   | 414.932   | NM_001150 | 1571.704  | 1661.36   | AK027201  | 1805.641  | 1802.984  |
| AL360144  | 2368.854  | 2005.824  | NM_002856 | 1640.812  | 1956.609  | Z25433    | 1495.983  | 2477.983  |
| BC028617  | 2803.001  | 1791.812  | NM_003225 | 417.004   | 636.875   | NM_005922 | 5340.142  | 7498.194  |
| AL117653  | 728.947   | 642.61    | NM_000096 | 772.536   | 792.345   | NM_018635 | 2416.188  | 3231.754  |
| AF087999  | 957.028   | 1079.301  | AA143087  | 5150.979  | 5084.4    | AL137593  | 8035.664  | 10862.023 |
| NM_003740 | 3452.015  | 2813.957  | U25804    | 3397.283  | 3561.819  | NM_003915 | 2042.686  | 2021.597  |
| AL050078  | 1778.339  | 1727.814  | BI870965  | 1360.248  | 1762.845  | NM_000382 | 1747.09   | 2270.073  |
| AK021616  | 619.784   | 419.654   | NM_001903 | 6257.054  | 7825.355  | AL133064  | 1862.611  | 2294.952  |
| AK022933  | 501.868   | 386.627   | BI835536  | 6871.212  | 6182.704  | NM_006227 | 3677.959  | 4478.921  |
| NM_014276 | 3326.097  | 2562.024  | BF205051  | 1771.778  | 2090.435  | NM_002905 | 4299.595  | 4724.254  |
| AF035303  | 604.313   | 369.204   | X02761    | 915.442   | 879.545   | NM_000700 | 2751.546  | 3628.824  |
| AF056438  | 1392.92   | 1815.362  | M91463    | 740.012   | 594.025   | NM_019025 | 3656.998  | 4149.559  |
| AF003737  | 25516.355 | 19043.705 | J03060    | 1943.005  | 2291.944  | NM_000431 | 2434.943  | 2471.98   |
| AF009296  | 1010.6    | 1043.964  | NM_003743 | 947.806   | 740.948   | NM_013421 | 716.801   | 759.959   |
| AF041410  | 1807.725  | 3598.721  | AA829383  | 3147.936  | 2789.574  | AB033118  | 4669.421  | 4789.983  |
| AF056448  | 4139.188  | 3984.489  | AF012434  | 7885.748  | 6178.826  | NM_019606 | 2252.158  | 2281.542  |
| AK001011  | 2978.206  | 2855.624  | NM_014795 | 3880.347  | 3509.01   | NM_001690 | 5300.624  | 4212.054  |
| AK001398  | 720.426   | 927.178   | NM_002986 | 579.022   | 686.22    | AF034374  | 6155.52   | 6501.714  |
| AK021457  | 417.232   | 460.136   | M15330    | 671.669   | 1050.324  | NM_016118 | 2239.052  | 2125.947  |
| AK021690  | 1111.448  | 979.108   | NM_014396 | 1827.272  | 1774.068  | NM_018674 | 4955.864  | 5007.18   |
| AK001078  | 509.067   | 356.126   | AK027201  | 1542.326  | 1667.859  | NM_001683 | 19357.107 | 16529.625 |
| AK001840  | 1720.441  | 1756.005  | NM_000489 | 6177.219  | 5968.281  | NM_001682 | 961.018   | 722.407   |
| AK021486  | 704.138   | 701.629   | X98507    | 1280.488  | 1227.456  | NM_014405 | 1250.011  | 1058.36   |
| AK021740  | 477.927   | 419.543   | NM_016030 | 24365.988 | 25998.004 | NM_000816 | 710.317   | 841.672   |
| AK025148  | 302.104   | 504.02    | NM_014669 | 4936.912  | 5318.293  | NM_014925 | 561.593   | 899.821   |
| AK026238  | 386.358   | 526.316   | NM_005652 | 2803.302  | 2787.189  | AK025130  | 3151.094  | 3051.113  |
| AK026694  | 982.342   | 831.941   | AK026686  | 453.317   | 456.87    | AB037791  | 734.484   | 962.735   |
| AK025564  | 2160.686  | 2355.685  | NM_005902 | 3002.063  | 3279.131  | NM_018124 | 4976.764  | 5704.839  |
| AK026286  | 1549.743  | 1503.345  | NM_002850 | 57432.25  | 68769.227 | Z70701    | 8280.546  | 9489.098  |
| AK026731  | 1173.81   | 1044.568  | NM_005903 | 891.553   | 712.545   | AB040972  | 1641.661  | 1700.613  |
| NM_004192 | 1776.419  | 1325.241  | NM_000861 | 717.855   | 754.467   | AF148505  | 1468.108  | 1660.385  |
| AK024160  | 834.756   | 820.668   | NM_000024 | 749.618   | 920.19    | BE260997  | 413.579   | 413.175   |
| AK025077  | 1236.731  | 974.816   | U77493    | 452.872   | 406.383   | NM_018686 | 4491.141  | 5175.317  |
| NM_006417 | 3245.19   | 3355.528  | NM_003873 | 338.635   | 244.708   | NM_017676 | 1429.455  | 1387.081  |
| L43350    | 771.889   | 687.167   | NM_000263 | 2116.653  | 1393.838  | NM_005431 | 1510.367  | 1540.875  |

|           |           |           |           |           |           |           |           |           |
|-----------|-----------|-----------|-----------|-----------|-----------|-----------|-----------|-----------|
| NM_020317 | 5442.224  | 5264.929  | NM_001683 | 12251.24  | 15505.157 | AB036063  | 1980.985  | 1666.37   |
| AL080234  | 5762.466  | 4896.174  | NM_001682 | 814.164   | 1125.798  | NM_002894 | 2879.155  | 2716.458  |
| AK027025  | 937.079   | 926.544   | NM_014405 | 1104.712  | 1265.841  | NM_004625 | 4516.734  | 4018.871  |
| AB002446  | 433.22    | 254.394   | NM_000816 | 539.602   | 1098.737  | NM_004260 | 4247.102  | 4495.812  |
| AF212220  | 2121.54   | 3108.348  | NM_014928 | 515.93    | 443.961   | AL050067  | 1075.564  | 1050.747  |
| AK025010  | 508.485   | 553.189   | AK025130  | 2707.949  | 3150.471  | NM_004972 | 3688.369  | 3572.049  |
| AK022082  | 201.415   | 477.68    | NM_017875 | 619.924   | 621.308   | NM_006251 | 4779.855  | 4295.838  |
| AL137709  | 1299.946  | 1150.14   | AK023232  | 1690.534  | 1779.838  | NM_004103 | 4870.167  | 4577.173  |
| AK023277  | 861.835   | 855.169   | NM_000271 | 4471.467  | 5204.08   | NM_002314 | 5965.761  | 6069.384  |
| AK000425  | 1417.961  | 1328.178  | NM_018209 | 2065.615  | 2427.063  | NM_001744 | 2287.194  | 1878.579  |
| Z27200    | 2203.02   | 2286.406  | NM_006184 | 21144.182 | 17023.291 | NM_006296 | 2991.985  | 2563.569  |
| AF070571  | 3776.749  | 3188.051  | AB018268  | 4360.608  | 5173.541  | AF073519  | 1661.421  | 2506.769  |
| AK023554  | 1073.506  | 945.734   | NM_019045 | 698.352   | 657.068   | AB001451  | 2811.832  | 3258.604  |
| NM_003513 | 3161.683  | 2356.57   | NM_006380 | 1774.166  | 1195.587  | NM_017583 | 3736.804  | 4138.014  |
| AL079294  | 372.045   | 271.242   | AB020710  | 1057.268  | 1259.221  | Y16132    | 4860.973  | 6133.891  |
| AK024844  | 1149.11   | 1318.954  | NM_016174 | 3363.033  | 3554.135  | NM_016593 | 795.808   | 1019.777  |
| AL049437  | 373.781   | 445.165   | NM_020377 | 791.085   | 840.046   | NM_002521 | 424.092   | 487.847   |
| AF161427  | 66365.977 | 53751.273 | U88896    | 4581.461  | 4772.771  | NM_001150 | 1539.054  | 2026.753  |
| AK021715  | 3567.443  | 2424.381  | AF116702  | 46851.207 | 42934.434 | NM_002856 | 2510.711  | 3142.641  |
| AK000315  | 5008.235  | 4215.821  | NM_005724 | 7165.267  | 7001.142  | NM_003225 | 534.121   | 469.432   |
| AK023248  | 825.921   | 979.929   | X58794    | 42546.797 | 42416.27  | NM_000096 | 900.368   | 1009.154  |
| NM_012404 | 18325.646 | 18273.572 | NM_001735 | 1647.509  | 1499.321  | AA143087  | 5681.854  | 5955.094  |
| AF251190  | 708.008   | 724.066   | NM_002349 | 1204.849  | 996.73    | U25804    | 3746.2    | 3577.478  |
| AF130075  | 6674.524  | 6240.932  | NM_005080 | 24864.406 | 21953.979 | BI870965  | 1263.896  | 1335.116  |
| NM_005444 | 1218.634  | 1289.75   | NM_004887 | 6894.714  | 5635.896  | NM_001903 | 6990.623  | 6089.766  |
| V00589    | 29912.699 | 31406.557 | NM_004972 | 4399.784  | 5650.969  | BI835536  | 6785.301  | 5782.075  |
| AL390163  | 683.192   | 1047.376  | NM_006251 | 4948.683  | 6790.64   | BF205051  | 2154.772  | 2247.418  |
| NM_018572 | 1373.554  | 1718.407  | NM_004103 | 4622.958  | 6380.144  | X02761    | 782.546   | 738.432   |
| AL109959  | 518.691   | 588.153   | NM_002314 | 5592.278  | 6511.053  | M91463    | 634.949   | 574.443   |
| AK024838  | 410.806   | 461.988   | NM_001744 | 1310.025  | 2032.631  | J03060    | 2289.254  | 1813.98   |
| AK000175  | 3173.015  | 3156.141  | NM_006296 | 2380.058  | 3360.484  | NM_003743 | 754.789   | 648.424   |
| AL137736  | 3950.369  | 3467.949  | Z25433    | 1286.521  | 1720.12   | AA829383  | 3165.18   | 2362.62   |
| AF143870  | 548.783   | 793.237   | NM_005922 | 4971.285  | 4607.138  | AF012434  | 6933.063  | 5550.351  |
| AK021897  | 6659.366  | 5239.233  | NM_018638 | 2612.072  | 2729.908  | NM_014795 | 4185.541  | 3720.004  |
| AK001051  | 1329.078  | 1179.614  | AL137593  | 8140.23   | 8738.602  | NM_002986 | 679.264   | 778.736   |
| NM_018317 | 510.536   | 644.802   | NM_003915 | 1699.392  | 1334.349  | M15330    | 819.67    | 1173.78   |
| AF086051  | 918.792   | 821.184   | NM_000382 | 1519.161  | 1869.021  | NM_014396 | 2040.96   | 2048.307  |
| AK026434  | 617.604   | 675.155   | AL133064  | 1749.97   | 1759.799  | AK027201  | 1871.133  | 2291.76   |
| AK024356  | 1475.384  | 1504.079  | NM_006227 | 4206.35   | 4231.814  | NM_000489 | 5604.746  | 6558.243  |
| AL049370  | 3409.169  | 3078.328  | NM_002905 | 4637.067  | 4209.178  | X98507    | 1321.596  | 1441.809  |
| AL365410  | 7290.283  | 5412.533  | NM_000700 | 2718.922  | 2608.5    | NM_016030 | 25835.617 | 24437.641 |
| D17082    | 14562.38  | 10578.233 | NM_019028 | 3782.114  | 3812.244  | NM_014669 | 5351.528  | 7189.681  |
| D17252    | 36107.594 | 31811.771 | NM_000431 | 2389.076  | 2356.456  | NM_005652 | 3159.826  | 3190.533  |
| D16476    | 449.487   | 351.15    | NM_013421 | 740.292   | 752.612   | NM_018842 | 456.576   | 422.516   |
| NM_003673 | 3872.621  | 3650.024  | NM_012474 | 4254.262  | 4146.018  | NM_005902 | 3253.362  | 2788.397  |
| Z36823    | 3244.671  | 2894.723  | AB033118  | 4295.109  | 5330.387  | NM_002850 | 52373.965 | 50484.98  |
| AK022110  | 207.472   | 560.096   | NM_019606 | 2051.665  | 2169.089  | NM_005903 | 923.688   | 932.311   |
| AF147387  | 4465.944  | 4080.385  | NM_001690 | 4964.005  | 3414.543  | NM_000861 | 438.572   | 409.362   |
| NM_012081 | 1611.005  | 1549.639  | AF034374  | 5200.54   | 5297.767  | NM_000024 | 1095.899  | 927.093   |
| AL137463  | 1073.36   | 980.79    | NM_016118 | 2064.809  | 1600.186  | U77493    | 553.607   | 557.394   |
| AF085909  | 15413.9   | 17975.531 | NM_018674 | 5144.63   | 3971.393  | NM_003873 | 398.297   | 345.13    |
| AK027193  | 1028.323  | 1358.342  | NM_000068 | 1004.55   | 1414.853  | NM_000263 | 1772.184  | 1607.517  |
| AF086471  | 4673.57   | 5744.186  | AB033046  | 4929.542  | 5795.876  | NM_001683 | 18720.365 | 22847.826 |



|           |           |           |           |           |          |           |           |           |
|-----------|-----------|-----------|-----------|-----------|----------|-----------|-----------|-----------|
| NM_01845E | 6162.445  | 5686.908  | NM_01591E | 3631.125  | 3433.384 | NM_00168E | 936.379   | 911.483   |
| AF113018  | 1054.006  | 1112.96   | NM_01324E | 802.552   | 862.829  | NM_01440E | 1135.83   | 1190.803  |
| AK021996  | 1666.453  | 1782.666  | AB029041  | 6279.359  | 7106.838 | NM_00081E | 611.876   | 1189.508  |
| AL049337  | 3615.883  | 3347.552  | AK026642  | 1963.434  | 2046.36  | NM_01492E | 661.017   | 785.438   |
| CY3Cy5    | 1339.802  | 128.983   | AL359063  | 655.524   | 750.55   | AK025130  | 3309.848  | 4346.141  |
| U13697    | 2012.14   | 1459.703  | AL079292  | 2126.89   | 2984.153 | NM_01787E | 800.427   | 994       |
| U04270    | 3117.656  | 2411.191  | X89667    | 1077.607  | 1120.434 | AK023232  | 1793.962  | 1983.408  |
| L02840    | 965.402   | 609.555   | AB037791  | 685.146   | 581.522  | NM_000271 | 5197.873  | 4649.883  |
| AA629719  | 63851.605 | 59484.598 | NM_018124 | 5481.917  | 5111.423 | NM_01820E | 2465.623  | 2660.046  |
| AA927528  | 476.532   | 417.215   | Z70701    | 9557.991  | 10069.09 | NM_006184 | 23930.24  | 22770.902 |
| X02152    | 61568.797 | 55816.355 | AB040972  | 1810.527  | 1655.479 | AB018268  | 5210.384  | 6537.425  |
| BG676364  | 2744.909  | 3044.939  | AF148505  | 1555.075  | 1939.428 | NM_01904E | 609.745   | 647.811   |
| AA843679  | 2880.261  | 3592.364  | BE260997  | 463.145   | 562.719  | NM_00638C | 1604.989  | 1408.331  |
| NM_004957 | 1658.692  | 1122.05   | NM_01868E | 4490.095  | 4263.293 | AB020710  | 1481.549  | 1235.522  |
| NM_00525E | 1024.661  | 994.486   | NM_01767E | 1292.611  | 1740.046 | NM_016174 | 2630.032  | 2645.251  |
| SR5       | 3965.865  | 2611.065  | AK021764  | 459.099   | 524.53   | NM_020377 | 705.814   | 814.642   |
| SR7       | 5962.711  | 33011.52  | NM_005431 | 1633.018  | 1804.427 | U88896    | 4961.093  | 4702.944  |
| SR9       | 19230.443 | 2728.443  | AB036063  | 1509.447  | 1388.636 | AF116702  | 47335.852 | 40017.434 |
| CY3Cy5    | 571.801   | 98.569    | NM_002894 | 2720.714  | 2559.927 | NM_005724 | 6827.098  | 5353.678  |
| NM_00438C | 7549.993  | 4477.542  | NM_00462E | 3660.523  | 3255.589 | X58794    | 44176.918 | 44756.77  |
| NM_004119 | 1915.642  | 2425.972  | NM_00426C | 4464.748  | 3669.653 | NM_00173E | 1668.562  | 1289.315  |
| AY007378  | 869.34    | 1253.626  | AL050067  | 985.047   | 859.367  | NM_00234E | 1246.332  | 1001.298  |
| D26070    | 2353.585  | 2205.829  | AK024732  | 1709.71   | 1835.901 | NM_00508C | 27040.676 | 26063.346 |
| NM_00164E | 14767.642 | 15083.063 | NM_015564 | 874.272   | 1130.682 | NM_004887 | 6632.396  | 5497.01   |
| NM_00154E | 402.698   | 892.059   | AF160476  | 288.644   | 273.612  | NM_00497E | 3783.896  | 5552.902  |
| NM_00339E | 729.67    | 1578.566  | L22650    | 763.019   | 796.073  | NM_006251 | 4391.417  | 5815.494  |
| NM_000501 | 27431.395 | 21785.006 | AB014520  | 6533.475  | 7179.361 | NM_00410E | 4766.19   | 5836.167  |
| NM_000114 | 1803.172  | 1581.466  | AF161420  | 979.17    | 739.214  | NM_002314 | 6299.546  | 7619.717  |
| NM_00515E | 1527.114  | 1616.602  | NM_004907 | 1115.711  | 1284.153 | NM_001744 | 1849.024  | 2363.073  |
| NM_01519E | 823.798   | 1009.926  | NM_002891 | 479.311   | 697.143  | NM_00629E | 2909.521  | 4047.949  |
| X98834    | 1452.231  | 1580.263  | NM_00177E | 713.896   | 833.565  | Z25433    | 1350.191  | 2322.207  |
| NM_00703E | 9906.597  | 12912.91  | X04526    | 8185.184  | 6916.604 | NM_00592E | 5593.835  | 5727.288  |
| AB019562  | 704.367   | 744.475   | D26067    | 2148.265  | 1720.714 | NM_01863E | 2939.615  | 3108.212  |
| NM_02020E | 1656.682  | 1452.74   | AF227924  | 2180.099  | 1989.661 | AL137593  | 9353.89   | 11643.32  |
| L40992    | 415.825   | 641.762   | NM_00571E | 7116.143  | 8009.048 | NM_00391E | 1821.886  | 2184.984  |
| U20582    | 19341.035 | 24821.418 | NM_00618E | 1717.597  | 1746.018 | NM_00038E | 1622.514  | 2322.365  |
| NM_000337 | 892.492   | 723.943   | NM_016087 | 563.005   | 811.738  | AL133064  | 1875.448  | 2144.053  |
| NM_00207E | 2647.991  | 2400.302  | S59184    | 2327.895  | 2365.285 | NM_006227 | 4210.303  | 4150.067  |
| NM_00680E | 15489.272 | 8746.589  | NM_006661 | 1045.429  | 1325.25  | NM_00290E | 5095.17   | 4850.654  |
| NM_006634 | 971.113   | 1226.758  | NM_00574E | 6901.594  | 6167.886 | NM_00070C | 2824.731  | 3175.465  |
| NM_01646E | 891.209   | 1403.287  | U16126    | 595.644   | 395.15   | NM_01902E | 4222.002  | 3601.396  |
| NM_01339E | 1634.539  | 1394.881  | NM_00217E | 11034.482 | 7737.117 | NM_000431 | 2347.619  | 2256.562  |
| AL122120  | 698.173   | 434.734   | NM_00565E | 1056.86   | 1265.06  | NM_013421 | 763.575   | 718.768   |
| NM_014684 | 370.59    | 239.82    | NM_007314 | 1377.837  | 1548.613 | NM_012474 | 4729.104  | 4206.874  |
| NM_00248C | 1115.742  | 957.715   | NM_00660C | 4280.515  | 3248.991 | AB033118  | 4577.163  | 4086.186  |
| NM_017571 | 2709.672  | 3258.504  | AF297709  | 1056.466  | 1061.266 | NM_01960E | 2414.257  | 2110.32   |
| L03169    | 720.447   | 1084.52   | L77564    | 661.493   | 570.96   | NM_00169C | 4679.733  | 3366.509  |
| NM_01896E | 3785.743  | 4171.697  | NM_015384 | 2456.215  | 2340.587 | AF034374  | 5461.666  | 5708.269  |
| NM_00018E | 2802.48   | 2114.78   | AK023327  | 1033.484  | 816.759  | NM_01611E | 2057.722  | 1736.71   |
| Y00816    | 1108.587  | 1386.95   | AB046858  | 664.768   | 425.666  | NM_018674 | 4151.508  | 4113.759  |
| NM_00451E | 2716.919  | 1572.178  | D50914    | 2730.873  | 2481.136 | NM_00006E | 1058.684  | 1413.117  |
| NM_00105E | 6960.551  | 6552.942  | NM_002007 | 245.258   | 324.672  | AB033046  | 5050.621  | 6398.083  |
| NM_01587E | 396.661   | 394.416   | NM_01589E | 929.343   | 638.572  | NM_01591E | 4176.415  | 4215.42   |

|           |           |           |           |           |           |           |           |           |
|-----------|-----------|-----------|-----------|-----------|-----------|-----------|-----------|-----------|
| NM_002271 | 22192.58  | 13948.564 | NM_002305 | 48123.391 | 38516.449 | AK023228  | 445.243   | 524.146   |
| NM_018361 | 2280.52   | 2025.083  | AK025439  | 2173.725  | 1723.036  | NM_013245 | 3210.541  | 31967.969 |
| NM_019893 | 459.487   | 442.147   | NM_001737 | 892.64    | 889.12    | AB029041  | 5852.258  | 7547.01   |
| AB040966  | 1714.316  | 1663.551  | NM_016626 | 5936.233  | 5746.287  | AK026642  | 2006.207  | 2977.881  |
| NM_020132 | 4965.515  | 7867.453  | NM_007213 | 401.42    | 470.897   | AL359063  | 591.317   | 642.109   |
| NM_016467 | 10283.856 | 16236.496 | NM_000094 | 1301.441  | 832.221   | AL079292  | 2897.255  | 2873.403  |
| NM_007253 | 3027.182  | 2700.305  | NM_000439 | 360.434   | 433.085   | X89667    | 1280.117  | 1492.866  |
| NM_019106 | 1088.045  | 1243.628  | AJ295148  | 859.917   | 953.899   | AB037791  | 856.758   | 1082.81   |
| L08436    | 449.879   | 657.173   | NM_016302 | 1912.253  | 1612.78   | NM_018124 | 5684.84   | 6040.217  |
| NM_000558 | 3868.586  | 4086.39   | NM_004159 | 25468.602 | 22562.707 | Z70701    | 9413.982  | 9724.331  |
| NM_014170 | 1942.283  | 2592.395  | NM_003249 | 4839.518  | 4236.404  | AB040972  | 2077.241  | 2062.549  |
| AF116652  | 58271.617 | 60856.18  | M21897    | 642.168   | 600.768   | AF148505  | 1636.262  | 1459.391  |
| NM_000835 | 816.99    | 774.124   | AF301463  | 627.224   | 586.173   | NM_018686 | 4650.884  | 4872.882  |
| NM_018835 | 678.065   | 668.475   | NM_015984 | 2722.95   | 2233.222  | NM_017676 | 1668.139  | 1292.162  |
| NM_003401 | 1367.514  | 868.975   | NM_006894 | 403.485   | 245.94    | NM_005431 | 1579.603  | 1324.772  |
| NM_004758 | 1009.492  | 1587.929  | AK023031  | 2559.311  | 2107.399  | AB036063  | 1631.75   | 1345.743  |
| NM_002913 | 670.529   | 493.716   | NM_005717 | 18699.152 | 15470.886 | NM_002894 | 2793.596  | 2205.666  |
| AK022797  | 370.137   | 408.657   | NM_012090 | 792.63    | 719.462   | NM_004625 | 3997.404  | 3267.586  |
| NM_007370 | 1391.342  | 1205.568  | BE793385  | 509.497   | 615.964   | NM_004260 | 4505.114  | 3566.268  |
| AK023471  | 911.091   | 521.055   | AF177292  | 616.153   | 622.691   | AL050067  | 1087.957  | 1223.168  |
| AF044578  | 790.315   | 477.436   | NM_003088 | 5342.078  | 5607.544  | AK024732  | 1721.041  | 1959.326  |
| NM_001948 | 886.559   | 658.605   | NM_004082 | 1819.172  | 1269.472  | NM_015564 | 1103.542  | 1337.432  |
| NM_001067 | 4890.303  | 7379.915  | NM_014398 | 1130.93   | 654.693   | AB014520  | 7376.673  | 9395.046  |
| NM_014034 | 1420.517  | 2371.292  | NM_005934 | 7658.841  | 5147.267  | AF161420  | 844.522   | 1287.001  |
| NM_005335 | 11929.697 | 17517.395 | NM_007129 | 7426.979  | 9350.051  | NM_004907 | 1277.089  | 938.003   |
| J04474    | 6163.677  | 8397.072  | AY004253  | 4158.606  | 4031.882  | NM_002891 | 655.009   | 668.381   |
| NM_003761 | 30624.855 | 27772.199 | NM_002698 | 347.919   | 364.392   | NM_001775 | 953.066   | 1262.339  |
| NM_004726 | 411.785   | 520.097   | NM_002148 | 711.605   | 551.867   | X04526    | 8999.549  | 8879.047  |
| NM_014011 | 3582.273  | 4050.613  | AL137449  | 517.956   | 414.461   | D26067    | 2273.945  | 2323.979  |
| AK025994  | 1575.99   | 2224.314  | U88153    | 671.302   | 489.8     | AF227924  | 2371.64   | 1838.587  |
| L29306    | 430.523   | 580.906   | X03910    | 6804.726  | 5714.564  | NM_005716 | 6696.483  | 5791.409  |
| NM_013989 | 2179.276  | 1166.44   | NM_018428 | 4855.215  | 4266.184  | NM_006183 | 1684.679  | 1645.143  |
| NM_001738 | 832.024   | 558.875   | NM_006924 | 12419.707 | 9885.678  | NM_016087 | 528.719   | 482.402   |
| NM_020203 | 1594.169  | 1533.975  | NM_016024 | 4100.378  | 2657.783  | S59184    | 2376.321  | 2102.003  |
| U20582    | 8726.351  | 3778.139  | NM_018107 | 1354.334  | 1044.566  | NM_006661 | 1290.172  | 1171.932  |
| NM_000337 | 482.36    | 435.883   | NM_012279 | 653.948   | 517.843   | NM_005746 | 7255.522  | 5693.184  |
| NM_002079 | 2228.164  | 3147.6    | NM_018387 | 7033.251  | 4911.545  | NM_004588 | 596.279   | 628.385   |
| U13697    | 1846.628  | 1013.253  | BF310673  | 1009.101  | 690.201   | U16126    | 606.695   | 470.588   |
| U04270    | 4884.955  | 6233.801  | R97012    | 18342.764 | 15680.477 | NM_004572 | 322.151   | 292.432   |
| L02840    | 569.503   | 274.066   | U77700    | 8601.054  | 6873.437  | NM_002172 | 10371.388 | 9142.119  |
| AA629719  | 64321.262 | 57999.301 | NM_006567 | 3284.411  | 2585.001  | NM_002614 | 503.417   | 504.191   |
| X02152    | 65368.582 | 58586.227 | AF038554  | 9805.144  | 6389.083  | NM_005655 | 1079.437  | 1104.868  |
| BG676364  | 2298.486  | 1523.445  | AF264621  | 2754.179  | 1694.879  | NM_007314 | 1027.505  | 1143.809  |
| BG181154  | 490.98    | 461.968   | NM_005875 | 9188.69   | 6004.849  | NM_006600 | 8247.271  | 9419.498  |
| AA843679  | 2438.125  | 2183.879  | NM_004184 | 4510.332  | 2866.589  | AF297709  | 1014.93   | 1312.788  |
| H68922    | 284.527   | 647.311   | AK075087  | 465.661   | 1044.485  | L77564    | 685.437   | 678.631   |
| NM_004957 | 2186.682  | 2059.867  | AK026571  | 1139.933  | 1179.561  | NM_015384 | 2974.712  | 2645.98   |
| NM_005252 | 1096.691  | 1191.315  | AK024673  | 4505.683  | 4516.118  | AK023327  | 1051.813  | 1185.537  |
| AF090906  | 654.082   | 339.21    | AF070618  | 659.231   | 813.71    | AB046858  | 537.484   | 542.69    |
| AB023219  | 2075.985  | 1058.137  | AF131748  | 2341.229  | 2326.642  | D50914    | 3217.662  | 3428.866  |
| NM_001928 | 45350.309 | 36265.59  | NM_000456 | 1680.031  | 1635.502  | NM_015896 | 827.4     | 778.025   |
| NM_018965 | 2387.929  | 1324.242  | NM_002496 | 3986.785  | 3678.087  | NM_002305 | 47297.43  | 42637.773 |
| NM_000185 | 2500.45   | 1414.811  | NM_016243 | 1257.829  | 1224.745  | AK025439  | 2032.947  | 1742.116  |

|           |           |           |           |           |           |           |           |           |
|-----------|-----------|-----------|-----------|-----------|-----------|-----------|-----------|-----------|
| NM_004512 | 3195.861  | 4781.47   | X53943    | 828.327   | 537.731   | NM_001737 | 816.647   | 851.448   |
| NM_002930 | 341.942   | 436.083   | NM_004649 | 3601.854  | 2769.326  | Z36784    | 484.385   | 551.689   |
| NM_004380 | 8517.276  | 12078.652 | NM_006540 | 1428.068  | 1449.032  | NM_016626 | 5864.667  | 4887.285  |
| U86813    | 447.959   | 773.195   | NM_002811 | 5367.794  | 3207.393  | NM_007213 | 557.274   | 380.193   |
| NM_004119 | 2573.253  | 5145.355  | NM_020310 | 1276.421  | 1055.036  | NM_019064 | 533.738   | 416.193   |
| AY007378  | 1304.395  | 1939.798  | AK024444  | 422.605   | 332.07    | NM_000094 | 1182.61   | 1051.683  |
| D26070    | 4112.995  | 4542.425  | NM_005802 | 2301.616  | 1493.048  | AJ295148  | 699.267   | 726.369   |
| NM_000501 | 31779.404 | 28858.188 | AB002331  | 1607.362  | 1212.488  | AF176701  | 406.902   | 487.726   |
| NM_000114 | 1808.491  | 1222.116  | NM_002504 | 2147.451  | 1487.908  | NM_016302 | 1725.396  | 1867.917  |
| NM_005156 | 1622.928  | 1591.086  | AB046775  | 801.247   | 530.974   | NM_004155 | 29304.824 | 29592.795 |
| NM_015193 | 700.033   | 573.705   | X74862    | 1093.589  | 998.392   | NM_003245 | 4924.769  | 5078.246  |
| X98834    | 1778.786  | 2661.311  | X65663    | 2620.04   | 1568.298  | M21897    | 703       | 739.254   |
| NM_007035 | 7566.736  | 9721.252  | NM_003185 | 2860.34   | 1995.659  | AF301463  | 761.86    | 731.584   |
| AB019562  | 663.362   | 379.363   | NM_004456 | 3118.708  | 2084.864  | NM_015984 | 2827.309  | 2781.611  |
| AF036364  | 1496.024  | 770.016   | NM_004284 | 17017.734 | 12389.757 | NM_006894 | 465.334   | 500.276   |
| AK022847  | 1366.414  | 982.765   | NM_012243 | 2217.139  | 2338.878  | AK023031  | 2835.908  | 2184.062  |
| NM_006805 | 19098.393 | 15065.11  | AK025743  | 664.508   | 882.095   | NM_005717 | 18887.186 | 17353.051 |
| NM_006634 | 1002.827  | 651.951   | AL122040  | 402.033   | 533.109   | NM_012090 | 879.413   | 743.443   |
| NM_016465 | 911.832   | 594.637   | AK023974  | 1044.736  | 1121.991  | AF177292  | 554.934   | 381.748   |
| NM_013395 | 2030.895  | 1372      | AK023768  | 997.2     | 1052.903  | NM_003085 | 6129.104  | 5671.493  |
| NM_002410 | 370.236   | 306.396   | NM_016323 | 8499.676  | 1572.428  | NM_004082 | 2041.417  | 1798.257  |
| AL122120  | 892.728   | 484.416   | AK022216  | 2007.844  | 1690.925  | NM_014395 | 878.35    | 774.326   |
| NM_014684 | 668.358   | 283.693   | AK025812  | 2060.156  | 1875.889  | NM_005934 | 7895.882  | 5317.656  |
| NM_002480 | 2825.546  | 1608.143  | U00960    | 553.101   | 590.947   | NM_007125 | 7062.531  | 7160.13   |
| NM_017571 | 2093.639  | 798.483   | AK022262  | 632.274   | 621.391   | AY004253  | 2647      | 3009.195  |
| L03169    | 531.624   | 453.049   | AF088039  | 48265.984 | 46017.605 | NM_002695 | 466.482   | 409.46    |
| NM_014011 | 4217.044  | 2748.99   | AF143888  | 503.65    | 329.887   | NM_002145 | 543.927   | 621.409   |
| AK025994  | 1535.633  | 1186.309  | AF086220  | 1324.482  | 1243.53   | AL137449  | 563.387   | 628.216   |
| NM_013985 | 2108.228  | 990.919   | AK023941  | 1046.406  | 818.127   | U88153    | 750.961   | 743.135   |
| NM_001735 | 1053.208  | 774.395   | AL390083  | 4390.842  | 3279.262  | X03910    | 7407.743  | 8901.336  |
| NM_001055 | 12347.063 | 9842      | AB020702  | 264.935   | 405.468   | NM_018425 | 4808.956  | 4639.636  |
| NM_002271 | 34919.125 | 35194.348 | NM_013355 | 732.084   | 1277.312  | NM_006924 | 12927.552 | 12437.853 |
| NM_018361 | 2667.259  | 2669.621  | NM_003847 | 5219.328  | 4901.092  | NM_016024 | 4019.511  | 3459.634  |
| NM_019893 | 494.207   | 407.103   | AF075054  | 244.737   | 107.877   | NM_018107 | 1585.948  | 1654.848  |
| AB040966  | 3360.28   | 3058.211  | AL050165  | 39485.855 | 35173.168 | NM_012275 | 654.597   | 509.945   |
| NM_020132 | 4732.302  | 5142.421  | AL117445  | 680.656   | 545.485   | NM_018387 | 7419.977  | 5905.502  |
| NM_016467 | 8989.511  | 8758.598  | AL122113  | 4699.244  | 3536.366  | BF310673  | 1061.096  | 895.402   |
| NM_007253 | 4302.516  | 4666.946  | AK024415  | 1973.309  | 1492.532  | R97012    | 20280.955 | 15612.664 |
| NM_019105 | 1536.515  | 1342.358  | AL049365  | 1179.329  | 956.444   | U77700    | 8974.707  | 6281.456  |
| L08436    | 669.159   | 884.859   | AK025132  | 656.855   | 526.249   | NM_006567 | 3751.251  | 2847.314  |
| AB033002  | 736.588   | 450.054   | AK025157  | 3673.6    | 3447.981  | AF038554  | 9430.89   | 7392.37   |
| NM_000555 | 4957.654  | 4867.909  | AK022001  | 2072.386  | 1898.341  | AF264621  | 2805.308  | 2001.375  |
| NM_014170 | 2605.369  | 2385.643  | AK000079  | 2462.595  | 1173.909  | NM_005875 | 8858.135  | 7371.252  |
| AF116652  | 55218.109 | 49438.496 | AJ227874  | 822.945   | 964.613   | NM_004184 | 4919.977  | 3799.262  |
| NM_000835 | 1071.889  | 903.855   | AF009312  | 435.073   | 517.878   | AK026571  | 1415.737  | 1177.642  |
| NM_004957 | 2226.566  | 1526.111  | AF009276  | 602.319   | 561.202   | AK024673  | 4772.29   | 4570.096  |
| NM_005252 | 1526.232  | 1160.482  | AF056428  | 4247.751  | 3740.599  | AF070618  | 684.521   | 597.978   |
| AF090906  | 1762.755  | 1619.558  | AK021635  | 878.7     | 733.136   | AF131748  | 2858.646  | 3124.195  |
| AB023219  | 3195.428  | 2927.259  | AK021856  | 585.815   | 557.47    | NM_000455 | 1983.757  | 2307.027  |
| NM_014145 | 532.982   | 776.286   | AK025276  | 1327.285  | 893.342   | NM_002495 | 3992.723  | 3620.992  |
| NM_018835 | 1254.623  | 1235.741  | AK026027  | 505.901   | 633.16    | NM_016243 | 1458.648  | 1207.981  |
| NM_003401 | 2854.229  | 3036.185  | AK026457  | 1754.89   | 1187.065  | NM_004645 | 4579.783  | 4089.702  |
| AL137724  | 1581.29   | 2084.091  | AJ008131  | 10760.923 | 15809.366 | NM_006540 | 1708.307  | 1401.923  |

|           |           |           |           |           |           |           |           |           |
|-----------|-----------|-----------|-----------|-----------|-----------|-----------|-----------|-----------|
| NM_00475E | 1203.239  | 1470.947  | AF086338  | 447.446   | 401.256   | NM_002811 | 4896.596  | 3702.111  |
| NM_002913 | 1507.347  | 1134.971  | AL160131  | 3082.026  | 3363.39   | NM_02031C | 1646.639  | 1088.661  |
| AK022797  | 852.406   | 985.702   | AF086045  | 2067.571  | 1828.731  | AK024444  | 526.066   | 307.405   |
| NM_00737C | 1710.016  | 1904.367  | AK027028  | 2422.729  | 1862.723  | NM_005802 | 2262.238  | 1607.17   |
| NM_006231 | 1156.929  | 1528.656  | AK027069  | 4985.401  | 4621.45   | AB002331  | 1570.303  | 1330.983  |
| AK023471  | 1409.717  | 1793.379  | AK026916  | 1478.675  | 1254.276  | NM_002504 | 2068.168  | 1490.293  |
| AF044578  | 2360.77   | 2042.203  | AK026914  | 1641.745  | 1244.584  | AB046775  | 714.388   | 370.322   |
| NM_00194E | 1587.566  | 2234.342  | Y11166    | 875.546   | 820.656   | X74862    | 1024.771  | 617.852   |
| NM_001067 | 6373.725  | 8249.578  | AK023515  | 1685.215  | 1389.311  | X65663    | 2459.195  | 1297.085  |
| NM_014034 | 3174.199  | 2791.337  | AL137623  | 7846.102  | 6203.31   | NM_00318E | 3632.144  | 2233.072  |
| NM_00533E | 14718.357 | 14626.303 | NM_00354E | 1746.435  | 2161.808  | NM_00445E | 3096.145  | 2182.03   |
| J04474    | 7570.573  | 5941.479  | AF118077  | 1556.902  | 1668.884  | NM_004284 | 17893.752 | 14357.551 |
| NM_003761 | 36681.336 | 21627.668 | AL137625  | 352.177   | 431.452   | NM_012243 | 1879.381  | 2042.093  |
| NM_00472E | 753.281   | 516.149   | AK025750  | 1261.917  | 1384.508  | AK025743  | 761.831   | 683.9     |
| NM_015193 | 936.247   | 806.52    | AK025783  | 1118.51   | 1085.581  | AL137466  | 329.335   | 351.089   |
| X98834    | 2292.374  | 2748.215  | AF113675  | 972.296   | 901.723   | AL122040  | 395.967   | 229.359   |
| NM_00703E | 8927.995  | 9428.043  | AK024514  | 477.073   | 673.795   | AK023974  | 1213.156  | 1442.616  |
| AB019562  | 1566.391  | 1544.06   | NM_020119 | 1587.365  | 1170.911  | AK023768  | 1010.728  | 1127.47   |
| AF036364  | 2499.311  | 2573.295  | AL049417  | 9298.652  | 7330.271  | NM_016323 | 7233.168  | 1882.861  |
| AK022847  | 2832.33   | 3040.675  | AK023507  | 363.263   | 548.63    | AK022216  | 1822.063  | 2009.226  |
| NM_020203 | 2610.159  | 3186.563  | NM_005169 | 1287.418  | 1039.644  | AK025812  | 1966.227  | 1686.965  |
| U20582    | 21711.189 | 28957.693 | NM_017929 | 651.825   | 379.827   | U00960    | 903.824   | 664.389   |
| NM_000337 | 894.507   | 1232.608  | NM_018472 | 940.981   | 783.227   | AK022262  | 737.217   | 514.129   |
| NM_00207E | 2954.074  | 3582.354  | AJ008128  | 13070.346 | 10664.096 | AF088039  | 43549.023 | 47760.516 |
| AI660957  | 708.413   | 781.801   | AL449243  | 6053.406  | 3972.306  | AF143888  | 535.349   | 308.145   |
| U13697    | 3664.737  | 4508.078  | M12211    | 573.484   | 297.136   | AF086220  | 1363.214  | 986.404   |
| U04270    | 9173.32   | 11264.713 | AK026449  | 3462.674  | 4709.851  | AK023941  | 1156.777  | 888.752   |
| L02840    | 1929.837  | 1534.144  | NM_014027 | 3289.414  | 4060.959  | AL390083  | 5169.834  | 3691.744  |
| BG569143  | 500.708   | 831.568   | AF116621  | 2729.616  | 2477.67   | AB020702  | 381.319   | 361.58    |
| AA629719  | 65033.895 | 60518.223 | AF086554  | 1261.295  | 1248.164  | AL050227  | 444.815   | 319.951   |
| AA927528  | 1030.59   | 1552.39   | AL390136  | 11196.501 | 12786.307 | NM_01335E | 898.662   | 900.01    |
| X02152    | 63424.191 | 60775.129 | AF086398  | 51391.156 | 53855.074 | NM_003847 | 4902.953  | 5634.956  |
| BG676364  | 4831.985  | 3908.963  | AK023444  | 565.265   | 457.331   | AK021973  | 322.043   | 540.955   |
| BG181154  | 968.916   | 913.896   | AK025953  | 368.949   | 329.432   | AL050165  | 29794.211 | 27635.924 |
| AA843679  | 3450.265  | 3371.63   | NM_00318C | 653.284   | 674.478   | AL117445  | 544.062   | 578.53    |
| H68922    | 692.507   | 444.725   | AF086406  | 6488.425  | 5225.869  | AL122113  | 4381.736  | 4392.915  |
| NM_017571 | 3720.291  | 3113.068  | D17216    | 2882.792  | 2065.296  | AK024415  | 2325.829  | 2168.754  |
| L03169    | 830.235   | 909.198   | AL137581  | 737.426   | 789.236   | AL049365  | 1156.009  | 1386.734  |
| NM_00192E | 60921.148 | 54824.434 | AK024942  | 670.669   | 507.777   | AK025132  | 657.762   | 625.035   |
| NM_00639E | 491.474   | 487.004   | AJ227873  | 6667.64   | 4743.099  | AK025157  | 3907.135  | 2969.153  |
| NM_01896E | 4445.968  | 4999.25   | AK022886  | 2906.789  | 2010.982  | AK022001  | 2359.639  | 2015.571  |
| NM_00018E | 3575.549  | 3500.596  | AK024665  | 4584.347  | 3572.473  | AK022633  | 477.626   | 496.827   |
| Y00816    | 1125.921  | 1480.203  | AF147363  | 568.395   | 600.806   | AK000079  | 2475.356  | 1762.335  |
| NM_004512 | 4591.094  | 5970.487  | AJ227880  | 463.149   | 395.841   | AJ227874  | 860.221   | 1044.73   |
| NM_00293C | 633.348   | 806.311   | AK000691  | 619.736   | 613.333   | AF009268  | 456.286   | 631.042   |
| NM_00438C | 12665.259 | 14490.448 | AL049321  | 3328.319  | 2781.49   | AF009312  | 561.746   | 535.425   |
| NM_004119 | 3496.322  | 5045.33   | CY3Cy5    | 1870.077  | 194.069   | AF009276  | 809.928   | 948.003   |
| AY007378  | 1939.511  | 2734.725  | W74254    | 1342.311  | 1229.645  | AF056428  | 4630.546  | 3971.241  |
| D26070    | 6148.121  | 7946.896  | M58603    | 1618      | 1600.565  | AK021635  | 801.474   | 846.023   |
| NM_001642 | 31683.398 | 46677.309 | AB003334  | 1743.786  | 1679.093  | AK025276  | 1647.973  | 1440.72   |
| NM_001542 | 930.162   | 1317.364  | AW276315  | 711.758   | 646.709   | AK026027  | 993.379   | 724.826   |
| NM_003392 | 1065.712  | 1385.268  | AA490737  | 814.257   | 935.242   | AK026457  | 2564.7    | 1764.025  |
| NM_00228C | 549.116   | 1023.339  | AI878886  | 16931.529 | 17986.137 | AJ008131  | 9674.413  | 11859.902 |

|           |           |           |           |           |           |           |           |           |
|-----------|-----------|-----------|-----------|-----------|-----------|-----------|-----------|-----------|
| NM_01745E | 588.966   | 952.382   | BG697179  | 4115.293  | 3775.907  | AK024303  | 573.14    | 747.703   |
| NM_000501 | 43320.254 | 41513.469 | NM_00213E | 32192.135 | 34296.582 | AL160131  | 3280.064  | 4058.451  |
| NM_000114 | 3306.405  | 3097.028  | BM012504  | 3829.933  | 4073.955  | AF086045  | 2395.047  | 2576.198  |
| NM_00515E | 2910.919  | 2600.119  | AA664145  | 1085.863  | 1023.318  | AK027028  | 2730.362  | 2993.79   |
| AB033002  | 816.783   | 970.319   | X72308    | 3567.378  | 4440.149  | AK027069  | 5754.324  | 6027.561  |
| NM_00055E | 5511.675  | 7679.61   | T50790    | 577.111   | 800.437   | AK026916  | 1710.165  | 1730.092  |
| NM_00419E | 980.712   | 1466.026  | R48168    | 10810.208 | 11349.432 | AK026914  | 1761.11   | 2115.933  |
| NM_01417C | 3112.879  | 4412.54   | NM_00394E | 1876.883  | 1977.581  | Y11166    | 927.363   | 1000.472  |
| AF116652  | 57993.113 | 56926.355 | NM_00445E | 642.08    | 656.794   | AK023515  | 1853.715  | 1531.455  |
| NM_00083E | 997.754   | 1224.549  | SR5       | 4234.424  | 4283.595  | AL137623  | 8823.073  | 7787.55   |
| AK000271  | 357.152   | 675.214   | SR7       | 4716.94   | 31328.707 | AK026485  | 505.637   | 352.342   |
| NM_00680E | 19992.775 | 19864.85  | SR9       | 14822.768 | 2705.88   | NM_00354E | 1647.359  | 2371.703  |
| NM_006634 | 1844.404  | 2052.538  | CY3Cy5    | 2161.041  | 325.249   | AF118077  | 1806.42   | 1766.23   |
| NM_01646E | 2805.583  | 3389.715  | NM_00041E | 417.511   | 467.18    | AL137625  | 318.616   | 300.59    |
| NM_00032E | 554.26    | 898.364   | NM_01324E | 331.878   | 651.109   | AK025750  | 1316.716  | 1810.731  |
| NM_01339E | 3682.391  | 3307.649  | NM_000591 | 694.511   | 701.785   | AK025783  | 1188.48   | 1290.219  |
| AL122120  | 1815.65   | 2049.637  | NM_00056E | 5371.459  | 4499.295  | AF113675  | 983.993   | 1116.99   |
| NM_014684 | 1342.196  | 1342.428  | AF253318  | 550.009   | 472.062   | AK024514  | 819.326   | 614.842   |
| AK027247  | 1102.387  | 1143.347  | NM_017767 | 5589.667  | 6500.728  | NM_02011E | 1992.319  | 1678.587  |
| NM_00248C | 5770.165  | 5103.382  | AK024848  | 2748.303  | 2861.037  | AL049417  | 11297.396 | 10075.619 |
| NM_014034 | 3259.227  | 4777.635  | NM_00485E | 592.159   | 572.323   | NM_00516E | 1324.913  | 1168.557  |
| J04474    | 8330.72   | 9777.869  | NM_00363E | 226.215   | 464.341   | NM_01792E | 562.508   | 424.002   |
| NM_00472E | 692.476   | 683.548   | NM_00054E | 524.415   | 582.94    | NM_01847E | 603.873   | 566.311   |
| NM_014011 | 6856.132  | 6245.182  | U06699    | 2753.21   | 3109.231  | AJ008128  | 12466.858 | 10564.28  |
| AK025994  | 2348.335  | 2948.469  | AJ290954  | 3004.31   | 3161.378  | AL449243  | 6140.719  | 4591.103  |
| L29306    | 881.653   | 957.154   | AK025451  | 2587.758  | 2229.127  | M12211    | 504.988   | 292.023   |
| NM_01398E | 3591.171  | 4359.642  | NM_001047 | 2099.344  | 2242.426  | AK026449  | 4333.254  | 5343.145  |
| NM_00173E | 1508.544  | 1585.798  | AK024396  | 713.233   | 794.473   | NM_014027 | 3239.875  | 3594.423  |
| NM_00105E | 18910.965 | 23262.359 | U58514    | 715.71    | 828.613   | AF116621  | 2841.578  | 3057.601  |
| NM_01587E | 830.627   | 889.231   | NM_000544 | 2165.943  | 2305.516  | AF086554  | 1296.993  | 1491.882  |
| NM_002271 | 43063.84  | 52891.848 | NM_004644 | 399.499   | 517.083   | AL390136  | 14264.627 | 14342.109 |
| NM_018361 | 4271.266  | 4985.188  | AV681967  | 1069.048  | 1056.986  | AK023156  | 276.119   | 476.712   |
| NM_01989E | 1003.101  | 1224.681  | NM_01825C | 596.549   | 665.945   | AF086398  | 45894.938 | 53001.516 |
| AB040966  | 4942.107  | 5631.688  | NM_01655E | 3288.39   | 3834.75   | AK023444  | 674.362   | 688.134   |
| NM_02013E | 5863.644  | 6841.787  | NM_00379E | 25477.4   | 24988.838 | AK025953  | 517.884   | 387.628   |
| NM_016467 | 15311.043 | 18703.406 | NM_01423E | 928.017   | 1158.211  | NM_00318C | 515.514   | 561.003   |
| NM_00725E | 5218.625  | 5703.85   | NM_005701 | 1126.257  | 1211.475  | AF086406  | 7552.111  | 5606.286  |
| NM_01910E | 1866.373  | 2072.263  | NM_001231 | 524.532   | 760.681   | D17216    | 3418.346  | 2839.437  |
| L08436    | 708.223   | 990.934   | NM_00681E | 12348.553 | 14095.778 | AL137581  | 859.312   | 782.71    |
| NM_005607 | 2053.241  | 2716.432  | NM_014744 | 2018.455  | 2072.737  | AK024942  | 1016.804  | 711.666   |
| NM_00345E | 7556.461  | 8934.318  | AF146759  | 500.844   | 916.609   | AJ227873  | 8821.125  | 7444.756  |
| NM_01439C | 16902.891 | 16888.383 | AB032993  | 2379.069  | 2133.198  | AK022886  | 3220.281  | 2597.403  |
| X78924    | 12887.727 | 13963.136 | NM_000854 | 1610.052  | 1743.473  | AK024665  | 4373.924  | 3823.052  |
| NM_01325C | 758.082   | 874.258   | AL117423  | 2535.327  | 2867.973  | AF147363  | 331.818   | 429.075   |
| AF090906  | 1444.995  | 1357.776  | NM_00614C | 444.881   | 437.992   | AJ227880  | 460.406   | 518.507   |
| AB023219  | 3372.431  | 3264.447  | NM_00475C | 1223.237  | 1163.48   | AK000691  | 535.191   | 497.791   |
| NM_01414E | 773.054   | 647.553   | NM_00729E | 1297.391  | 1536.035  | AK001448  | 629.701   | 533.857   |
| NM_01883E | 1520.891  | 2045.586  | NM_003651 | 5306.383  | 5169.837  | AK026890  | 450.085   | 448.556   |
| NM_003401 | 2440.344  | 3078.104  | NM_00326E | 1801.79   | 1700.745  | AL049321  | 3638.448  | 3343.049  |
| AL137724  | 1303.047  | 1534.727  | AK022832  | 1725.111  | 1624.906  | CY3Cy5    | 4587.757  | 205.746   |
| NM_00475E | 2133.5    | 2845.168  | NM_014641 | 1380.18   | 1374.732  | W74254    | 1232.613  | 1263.855  |
| NM_00291E | 2342.913  | 2412.179  | NM_00446E | 8425.365  | 9095.79   | M58603    | 1525.778  | 1685.831  |
| AK022797  | 1131.965  | 1428.47   | AB020664  | 2077.002  | 2232.861  | AB003334  | 1569.86   | 1708.158  |

|           |           |           |           |           |           |           |           |           |
|-----------|-----------|-----------|-----------|-----------|-----------|-----------|-----------|-----------|
| NM_00737C | 3293.96   | 3859.138  | NM_00664C | 2407.251  | 2857.046  | AW276315  | 436.926   | 608.769   |
| NM_006231 | 1199.342  | 1780.955  | NM_000343 | 513.203   | 661.437   | AA490737  | 783.865   | 862.544   |
| AK023471  | 2258.26   | 2156.356  | NM_019112 | 1797.179  | 2247.408  | AI878886  | 15958.107 | 17861.029 |
| AF044578  | 3159.808  | 3303.629  | NM_012336 | 5882.214  | 7479.085  | BG697179  | 3795.473  | 4217.94   |
| NM_00194E | 2146.394  | 2594.528  | NM_020161 | 501.617   | 411.831   | NM_002136 | 31798.516 | 38836.52  |
| NM_001067 | 7036.01   | 8144.798  | NM_020246 | 1367.464  | 1254.668  | BM012504  | 3412.484  | 4303.503  |
| AF063936  | 1114.246  | 1577.566  | NM_000084 | 1620.579  | 2021.93   | AA664145  | 1044.572  | 892.034   |
| NM_005602 | 2598.49   | 3340.071  | NM_016354 | 1485.931  | 1474.061  | X72308    | 4366.446  | 4076.104  |
| NM_003573 | 9302.675  | 11597.928 | NM_003038 | 1330.165  | 1307.073  | T50790    | 887.785   | 916.361   |
| NM_000296 | 7864.216  | 9366.271  | NM_018155 | 2781.229  | 3025.736  | R48168    | 11535.886 | 9935.993  |
| NM_012302 | 6183.133  | 6645.787  | AL050358  | 966.774   | 924.263   | NM_003942 | 1781.1    | 1767.872  |
| NM_017422 | 13029.959 | 14452.38  | NM_004731 | 722.867   | 550.226   | NM_004452 | 712.995   | 729.478   |
| NM_006149 | 679.3     | 1100.21   | AB023139  | 1576.338  | 1595.661  | SR7       | 4532.36   | 48382.887 |
| NM_005879 | 1158.516  | 1498.361  | NM_017885 | 870.374   | 795.713   | SR9       | 15434.44  | 3145.669  |
| AF147790  | 957.497   | 1183.95   | D80004    | 2774.247  | 3497.885  | CY3Cy5    | 4291.817  | 177.964   |
| NM_018969 | 1042.506  | 1174.25   | NM_000946 | 2264.742  | 2148.993  | NM_000418 | 427.65    | 391.477   |
| NM_004112 | 3840.637  | 4135.122  | NM_01607C | 1331.022  | 1176.692  | NM_000591 | 622.55    | 906.496   |
| AY007233  | 675.425   | 817.349   | NM_01639C | 832.175   | 896.297   | NM_000565 | 4596.867  | 6464.914  |
| AK025592  | 5430.731  | 5096.842  | NM_016101 | 4664.149  | 5040.534  | AF253318  | 506.598   | 288.858   |
| NM_004635 | 16126.397 | 14460.474 | NM_005859 | 11213.869 | 12692.118 | NM_017767 | 6110.556  | 6636.871  |
| AK023023  | 10484.824 | 10586.654 | NM_020313 | 481.648   | 680.036   | AK024848  | 2871.973  | 3269.674  |
| NM_015993 | 6728.116  | 6549.271  | NM_014628 | 3377.545  | 4179.017  | NM_004852 | 561.739   | 178.283   |
| NM_002659 | 3031.659  | 2926.553  | AK025630  | 1166.368  | 1348.473  | NM_000543 | 537.13    | 511.705   |
| Z36776    | 4355.135  | 5172.415  | AL365404  | 7247.609  | 15411.748 | U06699    | 3271.412  | 3149.726  |
| AB029015  | 1499.44   | 1608.973  | AK022907  | 1512.431  | 1702.015  | AJ290954  | 2723.583  | 2828.951  |
| NM_00243C | 477.086   | 908.39    | NM_014793 | 1555.616  | 1951.282  | NM_001047 | 2437.158  | 2573.334  |
| NM_020345 | 881.258   | 1809.179  | NM_004245 | 612.403   | 661.671   | AK024396  | 744.566   | 1101.07   |
| NM_003287 | 1244.86   | 1326.274  | NM_003241 | 862.108   | 917.274   | U58514    | 844.886   | 1087.723  |
| NM_012325 | 15957.428 | 20017.824 | NM_002685 | 2490.064  | 2625.887  | NM_000544 | 2189.376  | 2430.695  |
| NM_014434 | 2155.535  | 3175.719  | AK024504  | 540.973   | 708.046   | AV681967  | 1050.568  | 1254.609  |
| NM_019607 | 6964.138  | 8857.869  | AF039023  | 1281.282  | 1462.707  | NM_01825C | 601.53    | 586.615   |
| U79260    | 21305.766 | 25034.975 | NM_005511 | 2599.129  | 3302.393  | NM_016553 | 3189.897  | 5259.973  |
| NM_001895 | 9425.081  | 11827.732 | NM_014698 | 6484.24   | 6270.972  | AB023136  | 385.313   | 1367.178  |
| NM_006447 | 4054.925  | 5757.429  | NM_018475 | 4475.029  | 3977.163  | NM_003795 | 25135.246 | 34834.844 |
| AF119851  | 785.485   | 961.458   | X52005    | 9069.768  | 8370.144  | NM_014232 | 961.152   | 1297.182  |
| NM_014129 | 8183.478  | 8442.682  | AK024396  | 735.576   | 561.772   | NM_005701 | 1065.708  | 1005.06   |
| D87455    | 3217.198  | 3104.723  | U58514    | 6903.804  | 5520.148  | NM_006819 | 14310.005 | 15851.112 |
| AF080577  | 1608.339  | 1834.816  | W74254    | 1492.17   | 1092.648  | NM_014744 | 1846.627  | 2189.558  |
| L22005    | 7994.833  | 8418.855  | M58603    | 1740.443  | 1205.117  | AF146759  | 532.359   | 839.457   |
| NM_012291 | 15952.186 | 17185.242 | AB003334  | 2076.116  | 1703.421  | AB032993  | 3032.197  | 2402.701  |
| NM_013368 | 3097.03   | 2796.39   | AW276315  | 586.001   | 740.101   | NM_000854 | 1912.541  | 1788.045  |
| NM_003807 | 22044.365 | 20986.684 | AA490737  | 1052.906  | 918.579   | AL117423  | 2319.35   | 2473.711  |
| NM_004358 | 2273.491  | 2050.717  | BG697179  | 4020.147  | 4421.378  | NM_002084 | 1483.946  | 1381.74   |
| NM_00179C | 2258.344  | 1831.36   | NM_002136 | 32948.016 | 33000.836 | NM_00475C | 1253.379  | 1179.154  |
| NM_018243 | 4947.942  | 3715.561  | BM012504  | 3814.409  | 4495.633  | NM_007295 | 1267.329  | 1361.922  |
| NM_014939 | 4837.179  | 4235.244  | AA664145  | 1225.262  | 1354.152  | NM_003651 | 5076.935  | 5177.595  |
| Y17866    | 1030.379  | 1014.22   | X72308    | 3026.392  | 3488.194  | NM_003262 | 2405.947  | 4128.524  |
| AK024247  | 822.757   | 572.736   | T50790    | 869.135   | 941.273   | AK022832  | 1353.175  | 1427.445  |
| NM_002842 | 4078.983  | 6025.958  | R48168    | 11254.669 | 11456.765 | NM_014641 | 1620.923  | 2160.641  |
| AF290204  | 519.744   | 2572.202  | NM_003942 | 1867.686  | 2169.599  | NM_004462 | 7940.182  | 9884.046  |
| NM_012126 | 740.187   | 1635.363  | NM_004452 | 672.736   | 986.724   | AB020664  | 2049.293  | 2470.031  |
| AB033025  | 478.531   | 894.006   | AB040954  | 2049.873  | 1868.857  | NM_00664C | 2360.324  | 2842.59   |
| NM_004418 | 2528.485  | 3009.346  | NM_002081 | 821.071   | 608.93    | NM_000343 | 630.425   | 701.666   |

|           |           |           |           |           |           |           |           |           |
|-----------|-----------|-----------|-----------|-----------|-----------|-----------|-----------|-----------|
| NM_000917 | 18821.301 | 25035.143 | NM_002084 | 1490.122  | 1345.547  | NM_019112 | 1914.364  | 1998.862  |
| NM_005389 | 14848.411 | 20203.811 | NM_004750 | 968.879   | 889.022   | NM_012336 | 5740.743  | 5747.017  |
| NM_014445 | 48727.391 | 57470.965 | NM_007295 | 1472.556  | 1633.852  | NM_020161 | 511.739   | 211.395   |
| AL832826  | 1596.814  | 2379.807  | NM_003651 | 4871.39   | 4371.599  | NM_020246 | 1029.467  | 1030.905  |
| NM_016123 | 805.029   | 1317.527  | NM_000591 | 896.294   | 888.138   | NM_000084 | 1190.839  | 1070.839  |
| AB048365  | 1154.04   | 1499.003  | AF253318  | 565.65    | 676.943   | NM_016354 | 912.582   | 1013.797  |
| NM_000391 | 8193.613  | 8433.08   | NM_017767 | 6636.127  | 7180.973  | NM_003036 | 1239.287  | 1171.67   |
| AF229179  | 735.495   | 616.63    | AK024848  | 3179.714  | 3671.387  | NM_018155 | 2935.523  | 3535.677  |
| NM_014771 | 8646.729  | 8396.627  | NM_004852 | 352.361   | 562.339   | AL050358  | 933.613   | 1178.122  |
| NM_002275 | 5489.689  | 5337.809  | NM_000543 | 399.203   | 596.875   | NM_004731 | 753.29    | 795.138   |
| AB032945  | 488.395   | 689.687   | U06699    | 3041.381  | 3531.367  | AB023139  | 1623.348  | 2167.91   |
| AK025215  | 10216.64  | 10801.074 | NM_006148 | 542.698   | 734.996   | NM_017885 | 889.316   | 763.794   |
| BF569160  | 935.462   | 1216.721  | AJ290954  | 4149.318  | 9418.455  | D80004    | 3198.479  | 3552.436  |
| AK024625  | 923.197   | 1161.125  | AK025451  | 2398.088  | 2017.987  | NM_000946 | 2608.683  | 3720.52   |
| NM_018131 | 2593.219  | 2776.074  | NM_002783 | 793.242   | 934.244   | NM_016070 | 1461.588  | 1577.799  |
| NM_014834 | 616.898   | 848.628   | NM_000084 | 616.311   | 811.499   | NM_016390 | 985.75    | 1235.757  |
| NM_017636 | 35285.242 | 39965.762 | NM_016354 | 688.602   | 869.057   | NM_016101 | 5753.813  | 6602.353  |
| NM_012468 | 874.222   | 1021.829  | NM_003036 | 954.573   | 1243.347  | NM_005855 | 16712.984 | 19334.439 |
| AJ237589  | 480.751   | 961.905   | NM_018155 | 2423.666  | 2486.07   | NM_020313 | 595.763   | 790.903   |
| M27877    | 37135.695 | 55901.055 | AL050358  | 785.937   | 706.716   | NM_014628 | 3324.293  | 3669.928  |
| D70836    | 59631.117 | 59725.563 | NM_004731 | 749.149   | 452.436   | AK025630  | 1172.379  | 1058.928  |
| D16878    | 1555.44   | 2034.333  | NM_000544 | 2543.908  | 1846.387  | AL365404  | 7670.906  | 7351.268  |
| NM_014943 | 2490.01   | 2786.903  | NM_004644 | 466.304   | 478.705   | AK022907  | 1780.34   | 1627.169  |
| AK024392  | 2123.816  | 1304.396  | AV681967  | 1161.85   | 1226.484  | NM_014793 | 1976.41   | 2027.418  |
| NM_013260 | 955.969   | 726.778   | NM_018250 | 706.627   | 755.535   | NM_004245 | 712.546   | 606.339   |
| NM_018300 | 1357.902  | 1267.45   | NM_016553 | 3989.415  | 4535.875  | NM_003241 | 842.26    | 589.877   |
| NM_004875 | 2625.736  | 2097.276  | NM_003795 | 29886.156 | 30745.996 | NM_002685 | 2709.353  | 2475.57   |
| NM_018254 | 7959.713  | 7363.791  | NM_014232 | 1169.807  | 1178.198  | AK024504  | 851.082   | 896.975   |
| NM_017745 | 2716.396  | 2610.896  | NM_005701 | 1349.058  | 1649.293  | AF039023  | 1301.46   | 1552.505  |
| NM_018433 | 2640.817  | 2194.996  | NM_001231 | 391.163   | 599.847   | NM_005511 | 2429.771  | 2646.224  |
| NM_000937 | 817.088   | 362.207   | NM_006819 | 17943.609 | 20482.664 | NM_014696 | 8405.711  | 8301.44   |
| AB028451  | 821.846   | 400.009   | NM_014744 | 2022.093  | 2259.917  | NM_018475 | 4611.651  | 4788.337  |
| AK024810  | 13514.37  | 10102.029 | AF146759  | 767.175   | 922.791   | X52005    | 5353.43   | 7138.619  |
| AK022615  | 42571.488 | 38659.363 | AB032993  | 2698.349  | 2311.698  | AK024396  | 501.193   | 810.71    |
| NM_004043 | 3031.846  | 2364.297  | NM_000854 | 2723.537  | 3787.935  | U58514    | 958.912   | 1101.47   |
| BM458096  | 15698.188 | 12635.918 | AL117423  | 2543.559  | 2840.686  | W74254    | 1337.069  | 1423.175  |
| NM_005626 | 8266.363  | 5777.629  | NM_006140 | 442.909   | 648.016   | M58603    | 1585.873  | 1892.087  |
| D29958    | 14384.62  | 9213.326  | NM_002685 | 2048.782  | 1907.245  | AB003334  | 1868.315  | 2454.945  |
| NM_015971 | 9314.933  | 5209.72   | AK024504  | 454.105   | 590.678   | AW276315  | 657.897   | 757.378   |
| D17257    | 46445.645 | 34408.434 | AF039023  | 1211.48   | 1319.575  | AA490737  | 865.431   | 872.294   |
| AK022077  | 1005.921  | 1044.265  | NM_005511 | 1939.733  | 2219.379  | BG697179  | 3952.639  | 3953.643  |
| AK000724  | 3895.673  | 3916.81   | NM_014696 | 6345.354  | 5532.024  | NM_002136 | 34064.316 | 35236.566 |
| NM_003720 | 13480.589 | 13495.384 | NM_018475 | 3560.623  | 3594.867  | BM012504  | 3638.993  | 3819.768  |
| AF097159  | 1328.109  | 1279.975  | NM_003262 | 2519.292  | 2344.167  | AA664145  | 958.027   | 876.223   |
| NM_003918 | 1290.01   | 750.528   | AK022832  | 1987.548  | 1596.34   | X72308    | 3453.953  | 3284.205  |
| NM_004807 | 1210.721  | 727.965   | NM_014641 | 1941.967  | 2138.151  | T50790    | 787.286   | 915.214   |
| J03569    | 42573.074 | 22802.512 | NM_004462 | 9808.698  | 12413.091 | R48168    | 11160.755 | 9780.406  |
| NM_003115 | 6782.909  | 3288.832  | AB020664  | 2375.802  | 3218.648  | NM_003942 | 1789.764  | 1664.688  |
| NM_000687 | 14996.688 | 6638.17   | NM_006640 | 3096.075  | 3278.978  | NM_004452 | 802.088   | 670.41    |
| NM_018200 | 1298.734  | 781.573   | NM_000343 | 522.826   | 911.89    | AB040954  | 2207.429  | 1979.74   |
| NM_014838 | 1508.289  | 795.661   | NM_019112 | 2298.295  | 2436.592  | NM_002081 | 842.06    | 734.307   |
| NM_007212 | 1696.776  | 949.283   | NM_012336 | 4893.955  | 5221.083  | NM_002084 | 1067.005  | 1320.05   |
| AF005067  | 1689.27   | 696.149   | NM_020161 | 237.177   | 519.028   | NM_004750 | 1156.949  | 1294.435  |

|           |           |           |           |           |           |           |           |           |
|-----------|-----------|-----------|-----------|-----------|-----------|-----------|-----------|-----------|
| NM_00571C | 7779.32   | 3215.251  | NM_020246 | 1005.722  | 985.243   | NM_00729E | 1219.03   | 1606.567  |
| AF252284  | 1807.155  | 1061.605  | NM_003942 | 1562.244  | 1400.367  | NM_003651 | 4286.569  | 6010.334  |
| NM_01493C | 1215.339  | 647.442   | NM_004452 | 582.575   | 732.506   | NM_00041E | 299.641   | 734.108   |
| NM_00153C | 1137.81   | 673.722   | AB040954  | 1674.968  | 1529.719  | NM_01324E | 374.259   | 434.779   |
| U80232    | 10011.81  | 5244.586  | NM_002081 | 441.795   | 469.316   | NM_000591 | 725.972   | 892.588   |
| AK025788  | 2982.853  | 2262.599  | AB023139  | 1853.568  | 1404.846  | NM_017767 | 6329      | 6908.487  |
| AF086164  | 1122.861  | 798.168   | NM_01788E | 1252.495  | 1447.096  | AK024848  | 2986.616  | 3092.217  |
| AK025577  | 2088.514  | 1398.175  | D80004    | 3396.746  | 2940.154  | NM_00054E | 554.897   | 403.787   |
| AK000216  | 2564.986  | 1619.398  | X63966    | 547.715   | 407.657   | U06699    | 3043.979  | 3780.34   |
| AK023440  | 860.148   | 614.435   | NM_00094E | 2769.514  | 2931.157  | AJ290954  | 3141.913  | 3165.458  |
| AB033041  | 6297.413  | 3983.235  | NM_01607C | 1566.737  | 1857.324  | AK025451  | 2693.811  | 2264.828  |
| NM_014894 | 63249.793 | 51899.781 | NM_01639C | 1753.186  | 1985.125  | NM_00278E | 891.076   | 470.518   |
| AY007155  | 1447.005  | 1002.348  | NM_02031E | 1605.047  | 1935.841  | NM_000084 | 692.917   | 1326.517  |
| AK027160  | 5153.661  | 1877.762  | NM_01462E | 3993.804  | 8973.7    | NM_016354 | 1075.83   | 1574.332  |
| AF070526  | 682.716   | 440.556   | AK025630  | 1351.735  | 1966.358  | NM_00303E | 1150.926  | 1470.696  |
| U79264    | 4571.543  | 2620.192  | AL365404  | 7804.325  | 9447.581  | NM_01815E | 2916.701  | 3658.206  |
| NM_01569E | 9649.5    | 5511.487  | AK022907  | 1962.312  | 2234.187  | AL050358  | 982.316   | 1172.575  |
| AF070530  | 12426.708 | 6284.882  | NM_01479E | 1891.198  | 2124.305  | NM_004731 | 705.042   | 1255.802  |
| AF086487  | 498.303   | 344.533   | NM_00424E | 914.009   | 794.648   | NM_004644 | 542.84    | 457.125   |
| NM_00642C | 1055.578  | 571.238   | NM_003241 | 895.426   | 768.891   | AV681967  | 967.146   | 1222.559  |
| AF131855  | 492.922   | 318.84    | NM_00054E | 368.179   | 491.019   | NM_01825C | 609.081   | 670.212   |
| AF086046  | 3412.066  | 1705.03   | U06699    | 2483.153  | 2792.081  | NM_01655E | 3638.356  | 3948.874  |
| AK022164  | 394.447   | 792.325   | AJ290954  | 2349.655  | 2596.966  | AB023136  | 547.921   | 755.264   |
| AK025135  | 5913.383  | 5530.705  | AK025451  | 1904.205  | 1530.954  | NM_00379E | 27591.648 | 28593.877 |
| NM_01792E | 2155.044  | 1795.329  | NM_00278E | 566.484   | 549.744   | NM_01423E | 967.868   | 999.051   |
| AY007145  | 1852.117  | 1894.778  | X52005    | 9116.098  | 8256.742  | NM_005701 | 1211.007  | 1069.895  |
| AK021573  | 472.614   | 519.006   | NM_001047 | 1982.76   | 1777.383  | NM_00681E | 15879.224 | 16015.638 |
| D38549    | 3656.052  | 3693.372  | AK024396  | 652.921   | 645.601   | NM_014744 | 1999.927  | 1888.781  |
| AK024780  | 838.606   | 799.951   | U58514    | 863.843   | 737.821   | AF146759  | 573.295   | 749.972   |
| AF085947  | 1106.642  | 1038.427  | W74254    | 1550.677  | 1248.328  | AB032993  | 2306.113  | 2322.63   |
| AF086000  | 465.585   | 611.013   | M58603    | 1961.165  | 1902.49   | NM_000854 | 1874.694  | 1721.084  |
| U10510    | 7637.57   | 5356.176  | AA443286  | 470.712   | 262.721   | AL117423  | 3080.041  | 2573.368  |
| Z36818    | 481.332   | 429.21    | AB003334  | 2231.47   | 2432.521  | NM_00268E | 2940.849  | 4124.44   |
| Z36842    | 1043.815  | 471.194   | AW276315  | 743.655   | 1461.057  | AK024504  | 735.962   | 854.883   |
| AF086137  | 392.976   | 341.038   | AI878886  | 20699.223 | 24480.777 | AF039023  | 1516.117  | 1569.374  |
| AF086155  | 733.116   | 664.829   | BG697179  | 5071.451  | 6285.283  | NM_005511 | 2369.046  | 2644.23   |
| AF116677  | 471.95    | 542.171   | NM_00213E | 42497.906 | 45564.879 | NM_01469E | 8340.973  | 9870.729  |
| AK022010  | 882.764   | 644.859   | BM012504  | 4853.404  | 5595.122  | NM_01847E | 3516.683  | 6212.561  |
| NM_01415E | 3211.762  | 1846.055  | AA664145  | 1298.356  | 1226.56   | AK022832  | 2013.464  | 1751.986  |
| AK021795  | 1081.769  | 910.238   | X72308    | 4136.331  | 4119.288  | NM_014641 | 1524.268  | 1501.352  |
| AL162042  | 2688.955  | 3300.104  | T50790    | 828.331   | 772.981   | NM_00446E | 8547.283  | 8115.944  |
| AK026131  | 1106.854  | 1157.904  | R48168    | 11629.36  | 9018.035  | AB020664  | 1980.353  | 1670.934  |
| AK023312  | 903.724   | 732.227   | AB032993  | 1997.724  | 1365.887  | NM_00664C | 2469.937  | 2730.978  |
| AK022483  | 374.872   | 353.378   | NM_000854 | 1409.417  | 1764.323  | NM_00034E | 615.773   | 642.094   |
| AL133570  | 1220.341  | 2070.71   | AL117423  | 1892.343  | 2198.175  | NM_01911E | 2826.011  | 2441.037  |
| AK026496  | 1427.07   | 1464.398  | NM_002084 | 1134.158  | 895.582   | NM_01233E | 7017.701  | 7143.029  |
| AK021462  | 426.396   | 837.069   | D16892    | 18811.465 | 13354.472 | NM_020161 | 601.662   | 409.157   |
| AK022678  | 506.099   | 561.945   | NM_00475C | 1047.969  | 1203.896  | NM_02024E | 1170.541  | 1160.067  |
| AK023835  | 1186.961  | 950.157   | NM_00729E | 1481.127  | 1443.539  | NM_00394E | 1878.92   | 2972.485  |
| AK023012  | 649.59    | 757.863   | NM_003651 | 5422.726  | 4593.319  | NM_00445E | 789.108   | 973.228   |
| AK023906  | 2820.396  | 2193.689  | NM_00041E | 349.427   | 420.323   | AB040954  | 1828.34   | 2161.331  |
| AK021708  | 468.895   | 600.11    | NM_01324E | 407.07    | 505.942   | NM_002081 | 386.511   | 583.439   |
| AL050205  | 4439.804  | 3901.411  | NM_000591 | 1042.44   | 1586.706  | AB023139  | 1653.878  | 2129.018  |



|           |           |           |           |           |           |           |           |           |
|-----------|-----------|-----------|-----------|-----------|-----------|-----------|-----------|-----------|
| AK023947  | 405.883   | 480.173   | NM_000565 | 6833.624  | 7929.618  | NM_017885 | 955.582   | 937.042   |
| NM_005691 | 1260.461  | 922.069   | NM_002019 | 1145.834  | 1687.739  | D80004    | 2898.05   | 3098.357  |
| AF086156  | 324.027   | 429.267   | AF253318  | 473.037   | 697.786   | X63966    | 464.211   | 605.788   |
| AK023814  | 600.892   | 646.919   | NM_017767 | 6637.036  | 6493.772  | NM_000946 | 2583.839  | 2605.465  |
| AF130063  | 481.824   | 767.674   | AK024848  | 3199.711  | 3177.038  | NM_016070 | 1427.757  | 1329.944  |
| AF086528  | 485.129   | 606.881   | NM_000343 | 518.78    | 796.942   | NM_016390 | 864.426   | 798.785   |
| AL162043  | 414.239   | 864.701   | NM_019112 | 1697.401  | 2034.688  | NM_016101 | 5273.979  | 5264.312  |
| AF251187  | 843.609   | 999.57    | NM_012336 | 5423.558  | 6003.098  | NM_005855 | 14127.823 | 13607.49  |
| NM_006543 | 1415.803  | 1238.051  | NM_020161 | 376.226   | 470.072   | NM_020313 | 502.191   | 625.215   |
| AK023018  | 492.951   | 556.531   | NM_020246 | 697.583   | 663.795   | NM_014628 | 3578.677  | 3263.288  |
| AK022672  | 1525.039  | 1354.833  | NM_000084 | 646.668   | 615.113   | AK025630  | 1496.928  | 1532.036  |
| AK023870  | 1170.56   | 1096.429  | NM_016354 | 735.614   | 661.556   | AL365404  | 7373.731  | 7724.604  |
| AK021599  | 1148.497  | 991.702   | NM_003038 | 1268.067  | 1217.479  | AK022907  | 1943.673  | 1850.515  |
| AK024263  | 1286.11   | 2737.246  | NM_018155 | 2584.345  | 2517.553  | NM_014793 | 2177.473  | 2576.92   |
| NM_016613 | 2740.791  | 2687.511  | AL050358  | 822.372   | 784.507   | NM_004245 | 952.586   | 905.084   |
| AF086414  | 1936.008  | 1913.291  | NM_004731 | 795.805   | 643.806   | NM_003241 | 1171.732  | 994.619   |
| AJ012490  | 5510.685  | 4667.345  | NM_000544 | 2651.113  | 2223.011  | NM_000543 | 457.543   | 554.73    |
| U84516    | 17078.619 | 14638.39  | NM_004644 | 550.413   | 701.401   | U06699    | 3340.46   | 3917.847  |
| AL049270  | 1240.088  | 1011.64   | AV681967  | 1415.371  | 2632.396  | NM_006148 | 590.015   | 477.304   |
| U88834    | 7173.785  | 6345.797  | NM_018250 | 756.776   | 958.918   | AJ290954  | 2777.253  | 3566.16   |
| BC025324  | 1022.227  | 1049.836  | NM_016553 | 4252.759  | 5795.297  | AK025451  | 1746.869  | 1618.674  |
| NM_006087 | 66512.031 | 58018.629 | AB023136  | 235.592   | 616.247   | NM_002783 | 646.956   | 707.679   |
| AK023564  | 1972.487  | 1763.215  | NM_003795 | 30638.047 | 34660.277 | X52005    | 6140.631  | 7865.528  |
| NM_003533 | 1443.622  | 1772.971  | NM_014232 | 1082.203  | 1387.655  | NM_001047 | 2015.464  | 1984.991  |
| AL157478  | 739.259   | 873.82    | NM_005701 | 1330.132  | 1387.256  | U58514    | 656.213   | 542.594   |
| AK023726  | 4406.291  | 4845.476  | NM_001231 | 940.544   | 1054.449  | W74254    | 1024.955  | 943.44    |
| AK024906  | 707.048   | 759.102   | NM_006819 | 15237.32  | 15617.778 | M58603    | 1453.51   | 1580.439  |
| AF131836  | 1474.838  | 1638.318  | NM_014744 | 1867.757  | 2064.035  | AB003334  | 1808.281  | 1625.818  |
| AF275804  | 22575.58  | 37561.262 | AF146759  | 639.943   | 708.946   | AW276315  | 496.769   | 706.161   |
| AL137488  | 1597.13   | 1764.526  | AL365404  | 5678.064  | 4906.84   | AA490737  | 847.235   | 650.872   |
| AL049447  | 43218.332 | 46745.539 | AK022907  | 1133.134  | 933.864   | AI878886  | 17169.59  | 15561.492 |
| NM_020527 | 3395.574  | 2845.088  | NM_014793 | 1738.766  | 1691.79   | BG697179  | 4044.271  | 3361.911  |
| AB020637  | 533.17    | 361.335   | NM_004245 | 613.511   | 440.084   | NM_002136 | 35051.137 | 36680.754 |
| NM_005286 | 2641.509  | 1762.643  | NM_003241 | 606.099   | 573.361   | BM012504  | 4036.468  | 4094.779  |
| AK024365  | 4156.002  | 3072.89   | NM_002685 | 2471.492  | 2262.685  | AA664145  | 1250.639  | 905.262   |
| AJ251759  | 648.641   | 432.61    | AK024504  | 504.203   | 453.803   | X72308    | 3925.264  | 3804.404  |
| AK024371  | 2115.418  | 1965.579  | AF039023  | 1264.534  | 1267.661  | T50790    | 842.661   | 961.226   |
| NM_005454 | 794.784   | 603.418   | NM_005511 | 2214.614  | 1899.677  | R48168    | 12093.344 | 10990.688 |
| AB019569  | 63498.492 | 54994.387 | NM_014698 | 8541.031  | 8713.028  | AB032993  | 2858.995  | 2175.621  |
| NM_001889 | 4607.572  | 5835.775  | NM_018475 | 4083.806  | 4759.07   | NM_000854 | 1574.314  | 1459.875  |
| NM_004999 | 1175.97   | 1733.586  | NM_003262 | 3083.397  | 2951.263  | AL117423  | 2054.922  | 2250.431  |
| X89668    | 14134.675 | 13970.768 | AB028127  | 290.486   | 615.401   | NM_006140 | 266.759   | 429.173   |
| NM_004458 | 7004.642  | 6044.623  | AK022832  | 2279.846  | 2167.003  | NM_002084 | 1285.751  | 1390.222  |
| NM_006901 | 1533.884  | 1694.434  | NM_014641 | 2122.16   | 2346.771  | D16892    | 19643.945 | 17387.309 |
| NM_018530 | 6464.019  | 4989.767  | NM_004462 | 12202.968 | 24112.043 | NM_004750 | 1076.889  | 995.676   |
| AJ003145  | 550.75    | 600.267   | AB020664  | 1789.401  | 1647.656  | NM_007295 | 1238.867  | 1309.735  |
| AK022855  | 12066.991 | 10755.506 | NM_006640 | 2727.971  | 2325.686  | NM_003651 | 4345.201  | 4114.319  |
| AK023816  | 1780.615  | 2409.847  | NM_000857 | 821.904   | 673.328   | NM_013246 | 468.463   | 494.2     |
| AL050102  | 919.084   | 920.701   | L20688    | 18037.715 | 12169.21  | NM_000591 | 786.55    | 747.125   |
| AF305686  | 1590.192  | 1422.264  | X69111    | 4185.877  | 3762.124  | NM_000565 | 5430.44   | 4943.99   |
| AF085832  | 1273.324  | 1318.535  | AF252283  | 478.858   | 312.704   | NM_017767 | 7275.406  | 6558.631  |
| AK025981  | 940.413   | 1054.828  | AB037799  | 2019.2    | 2086.435  | AK024848  | 3137.261  | 3239.552  |
| AF113212  | 754.202   | 1007.127  | AB007950  | 3490.779  | 3203.981  | NM_000343 | 436.728   | 679.612   |

|           |           |           |           |           |           |           |           |           |
|-----------|-----------|-----------|-----------|-----------|-----------|-----------|-----------|-----------|
| AF086266  | 855.43    | 948.858   | AK025593  | 1111.843  | 1049.018  | NM_019112 | 1651.596  | 1620.645  |
| AF086252  | 1287.51   | 1524.73   | AB018304  | 2321.912  | 2321.918  | NM_012336 | 5942.075  | 6144.568  |
| AK026703  | 2203.493  | 2154.808  | NM_007061 | 8924.774  | 8625.622  | NM_020246 | 690.817   | 677.303   |
| AK024367  | 338.783   | 356.856   | AB040954  | 2300.561  | 1848.057  | NM_000084 | 675.026   | 785.001   |
| NM_017866 | 3436.397  | 2383.586  | NM_002081 | 513.607   | 621.063   | NM_016354 | 834.865   | 922.867   |
| AJ131244  | 370.284   | 403.355   | AB023139  | 1927.395  | 1987.948  | NM_003036 | 1322.518  | 1080.792  |
| NM_003536 | 918.149   | 719.821   | NM_017885 | 1296.946  | 1041.25   | NM_018155 | 3073.493  | 2759.342  |
| AF116707  | 1335.868  | 1196.589  | D80004    | 3783.731  | 4446.415  | AL050358  | 887.378   | 914.031   |
| U90910    | 5087.533  | 3251.331  | X63966    | 405.481   | 530.839   | NM_004731 | 689.298   | 751.659   |
| AK025765  | 1073.637  | 968.588   | NM_000946 | 2723.06   | 3290.406  | NM_000544 | 2485.65   | 2085.175  |
| AA143087  | 7740.216  | 2535.559  | NM_016070 | 1290.521  | 1369.543  | NM_004644 | 741.16    | 698.253   |
| U25804    | 3126.336  | 1535.242  | NM_016390 | 710.003   | 923.565   | AV681967  | 1594.596  | 1121.262  |
| BI870965  | 1835.093  | 972.023   | NM_016101 | 5728.756  | 6317.866  | NM_018250 | 1046.619  | 663.043   |
| NM_001903 | 6158.569  | 2098.622  | NM_005859 | 18461.986 | 19088.018 | NM_016553 | 3779.606  | 3901.14   |
| BI835536  | 5998.924  | 1864.997  | NM_020313 | 512.148   | 518.838   | NM_003795 | 28039.418 | 33273.84  |
| BF205051  | 2298.651  | 1243.446  | NM_014628 | 3763.481  | 3678.1    | NM_014232 | 1005.062  | 1068.147  |
| X02761    | 1409.025  | 622.423   | AK025630  | 1363.316  | 1324.337  | NM_005701 | 1432.632  | 1294.123  |
| J03060    | 2295.889  | 980.022   | NM_014718 | 900.682   | 820.81    | NM_001231 | 542.045   | 510.01    |
| NM_003743 | 588.812   | 268.275   | NM_000632 | 607.912   | 412.811   | NM_006819 | 15630.799 | 15015.013 |
| AA829383  | 2520.978  | 1040.375  | AB002298  | 372.66    | 493.635   | NM_014744 | 2137.583  | 1941.971  |
| AF012434  | 7321.063  | 2594.202  | AK024488  | 628.706   | 568.035   | AF146759  | 673.766   | 778.082   |
| SR2       | 53826.859 | 16092.465 | AK023249  | 42226.836 | 28386.934 | AL365404  | 5951.123  | 8592.755  |
| SR4       | 16312.73  | 5386.979  | NM_017442 | 2475.334  | 2150.612  | AK022907  | 1540.234  | 1720.99   |
| SR6       | 1811.488  | 773.531   | NM_000743 | 708.34    | 626.451   | NM_014793 | 1712.85   | 1942.604  |
| SR8       | 7494.235  | 6548.54   | NM_007218 | 822.622   | 730.803   | NM_003241 | 678.929   | 480.264   |
| SR10      | 25830.266 | 2614.262  | Z25436    | 1600.36   | 1402.729  | NM_002685 | 2532.828  | 2361.681  |
| CY3Cy5    | 339.862   | 105.2     | NM_005275 | 4022.717  | 3456.065  | AK024504  | 736.888   | 426.536   |
| NM_005902 | 2548.379  | 1365.225  | NM_003844 | 8894.592  | 9448.235  | AF039023  | 1340.201  | 1322.013  |
| NM_002850 | 68753.32  | 49775.598 | NM_002005 | 12450.545 | 12433.078 | NM_005511 | 2541.922  | 2362.789  |
| NM_005903 | 775.795   | 460.338   | NM_012324 | 1678.454  | 1362.454  | NM_014698 | 8978.606  | 10029.913 |
| NM_000861 | 561.56    | 428.685   | AK000039  | 749.921   | 577.524   | NM_018475 | 4403.212  | 3877.545  |
| NM_000024 | 620.07    | 404.14    | AL137352  | 1120.758  | 1118.305  | NM_003262 | 3256.766  | 3252.587  |
| NM_019062 | 357.573   | 291.052   | NM_014749 | 1554.941  | 1791.778  | NM_020125 | 595.448   | 516.936   |
| NM_003873 | 329.161   | 275.686   | NM_004489 | 2211.516  | 3067.417  | AB028127  | 272.171   | 411.202   |
| NM_000263 | 1562.869  | 967.143   | BI461699  | 820.046   | 362.394   | AK022832  | 2344.922  | 2273.876  |
| AF073519  | 1480.743  | 901.985   | AF172264  | 1476.211  | 1306.518  | NM_014641 | 1787.491  | 1509.445  |
| AB001451  | 2553.297  | 1561.897  | Y08267    | 769.906   | 866.642   | NM_004462 | 8394.848  | 7966.578  |
| NM_017583 | 3475.371  | 1531.324  | U80756    | 8949.538  | 8468.219  | AB020664  | 2091.716  | 1889.494  |
| Y16132    | 8672.062  | 3252.166  | NM_018161 | 661.274   | 820.799   | NM_006640 | 2600.309  | 2323.011  |
| NM_016593 | 658.579   | 371.676   | NM_005248 | 687.031   | 587.306   | NM_000857 | 746.094   | 891.319   |
| NM_002521 | 466.801   | 204.181   | NM_004810 | 603.476   | 387.667   | L20688    | 19764.525 | 20258.693 |
| NM_001150 | 1584.201  | 914.155   | AL117629  | 1586.092  | 1557.008  | X69111    | 3090.968  | 2828.127  |
| NM_002856 | 2158.058  | 1100.207  | NM_002595 | 1064.357  | 929.126   | AB037799  | 2221.839  | 2122.264  |
| NM_003225 | 460.733   | 383.169   | NM_015726 | 660.701   | 650.657   | AB007950  | 6308.541  | 5998.914  |
| NM_000096 | 751.566   | 402.313   | AF174604  | 1000.992  | 982.547   | AK025593  | 866.308   | 926.581   |
| NM_019045 | 696.092   | 288.457   | AB002379  | 2779.915  | 2398.83   | AB018304  | 1927.557  | 2145.755  |
| NM_006380 | 1340.052  | 804.643   | AF113223  | 659.457   | 399.31    | NM_007061 | 6704.219  | 6672.001  |
| AB020710  | 1194.236  | 733.991   | AB046851  | 1425.465  | 1473.49   | AB040954  | 1782.76   | 1450.093  |
| NM_016174 | 5257.443  | 3264.674  | NM_018174 | 817.953   | 693.247   | NM_002081 | 601.325   | 728.652   |
| NM_020377 | 772.171   | 502.809   | NM_004437 | 605.177   | 617.317   | AB023139  | 2068.171  | 1769.412  |
| U88896    | 6021.383  | 3167.216  | AK025875  | 1198.375  | 1450.735  | NM_017885 | 942.377   | 812.656   |
| AF116702  | 47790.082 | 24989.1   | BC014152  | 58075.043 | 60071.137 | D80004    | 3671.055  | 2902.217  |
| NM_005724 | 7754.634  | 3842.447  | AB037779  | 20096.566 | 20653.539 | NM_000946 | 2715.995  | 2770.175  |

|           |           |           |           |           |           |           |           |           |
|-----------|-----------|-----------|-----------|-----------|-----------|-----------|-----------|-----------|
| NM_00173E | 1642.114  | 1078.606  | NM_00065E | 765.693   | 587.155   | NM_01607C | 1459.587  | 1247.661  |
| NM_00234E | 1764.186  | 1128.325  | NM_00039E | 686.949   | 955.999   | NM_01639C | 802.503   | 1045.26   |
| NM_00508C | 29140.846 | 15749.781 | NM_00088E | 684.65    | 645.375   | NM_01610I | 5722.839  | 5627.834  |
| NM_004887 | 5878.826  | 2473.556  | NM_00385E | 7191.378  | 6342.594  | NM_00585E | 17951.836 | 18657.172 |
| NM_006404 | 453.656   | 196.004   | NM_00023E | 1391.238  | 914.298   | NM_02031E | 575.447   | 593.93    |
| NM_01479E | 4219.536  | 1903.031  | NM_00290E | 16843.043 | 15308.516 | NM_01462E | 3639.54   | 3770.438  |
| NM_00298E | 753.311   | 560.827   | NM_01233E | 1006.217  | 916.524   | AK025630  | 1200.818  | 1535.93   |
| M15330    | 1056.132  | 976.277   | NM_005787 | 17145.186 | 12855.348 | NM_01471E | 1067.441  | 931.931   |
| NM_01439E | 2222.225  | 1190.706  | NM_00214E | 1956.774  | 1939.499  | NM_00063E | 642.717   | 665.174   |
| AK027201  | 1710.872  | 949.017   | AF284421  | 3377.019  | 3075.188  | AB002298  | 437.023   | 222.894   |
| NM_00048E | 11428.966 | 3247.461  | NM_00604E | 2160.25   | 2239.46   | AK023249  | 35298.484 | 25292.277 |
| X98507    | 1656.285  | 755.216   | NM_00636C | 22349.865 | 19137.32  | NM_01744E | 2147.055  | 1882.132  |
| NM_01603C | 41390.895 | 14006.737 | NM_00396E | 4055.875  | 4046.879  | NM_00721E | 913.707   | 831.048   |
| NM_01466E | 5571.773  | 2557.97   | NM_00278E | 1646.478  | 1448.061  | Z25436    | 1731.571  | 1459.812  |
| NM_00565E | 4053.367  | 1523.341  | NM_00334E | 7628.727  | 6333.487  | NM_00527E | 4154.68   | 3289.342  |
| AL133064  | 1577.979  | 885.328   | NM_00278E | 21704.859 | 18771.707 | NM_003844 | 8067.891  | 7505.403  |
| NM_006227 | 3676.109  | 2319.396  | NM_00347C | 3092.047  | 3287.826  | NM_00200E | 11392.596 | 10343.269 |
| NM_00290E | 4917.621  | 2741.208  | AL080137  | 580.581   | 586.645   | NM_012324 | 1335.597  | 1660.123  |
| NM_00070C | 3412.923  | 2237.046  | NM_01767E | 706.159   | 969.495   | AK000039  | 664.42    | 561.293   |
| NM_01902E | 6383.352  | 4930.733  | AF155103  | 555.59    | 603.138   | AL137352  | 1036.576  | 1059.214  |
| NM_000431 | 1884.862  | 1436.959  | NM_017704 | 1554.119  | 3281.564  | NM_01474E | 1715.765  | 1908.154  |
| NM_013421 | 1169.368  | 864.511   | BC006359  | 813.281   | 952.203   | NM_00448E | 2141.435  | 2745.329  |
| NM_012474 | 5045.693  | 3346.069  | BC016062  | 8530.708  | 9739.546  | AF172264  | 1426.929  | 1338.029  |
| AB033118  | 4027.729  | 2977.521  | NM_002814 | 2053.105  | 2144.089  | Y08267    | 953.039   | 1307.317  |
| NM_01960E | 2272.041  | 1565.975  | NM_01225C | 477.064   | 1471.709  | U80756    | 11222.628 | 10785.766 |
| NM_00169C | 4891.262  | 1846.473  | NM_00628E | 2343.694  | 2487.039  | NM_018161 | 1001.183  | 1258.003  |
| AF034374  | 11732.384 | 4952.013  | NM_002701 | 438.318   | 393.538   | NM_00524E | 1115.064  | 821.297   |
| NM_016118 | 2010.749  | 1054.886  | NM_00569E | 541.826   | 583.382   | AL117629  | 1680.441  | 2080.12   |
| NM_018674 | 16162.659 | 7926.111  | X97303    | 4140.52   | 3423.952  | NM_00259E | 892.07    | 1061.808  |
| NM_00168E | 22119.654 | 9062.054  | NM_01753C | 2490.823  | 1937.447  | NM_01572E | 824.808   | 474.032   |
| NM_00168E | 957.778   | 509.372   | AL360183  | 960.216   | 837.672   | AF174604  | 767.814   | 716.836   |
| NM_01440E | 2160.736  | 1527.528  | AK027046  | 1046.063  | 1155.956  | AB002379  | 1784.403  | 1997.867  |
| NM_00081E | 778.727   | 626.852   | NM_00311E | 1826.014  | 1454.04   | AB046851  | 1599.248  | 1212.227  |
| NM_01492E | 860.654   | 520.726   | NM_01657E | 2614.915  | 2668.519  | NM_018174 | 603.361   | 584.011   |
| AK025130  | 3350.581  | 1917.17   | NM_01583E | 4094.695  | 4153.63   | NM_01454E | 1478.841  | 1538.243  |
| NM_01787E | 769.236   | 460.553   | NM_01431E | 1359.188  | 1148.82   | AK025875  | 1187.461  | 999.922   |
| AK023232  | 2149.536  | 1432.553  | NM_00486E | 1731.588  | 2127.874  | BC014152  | 52239.766 | 44250.25  |
| NM_000271 | 6613.675  | 2590.021  | AB019566  | 63951.906 | 68207.539 | NM_00022E | 544.747   | 593.886   |
| NM_01820E | 1822.392  | 1092.822  | NM_000981 | 59934.266 | 64416.5   | AB037779  | 16899.039 | 19972.498 |
| NM_006184 | 25092.029 | 7390.683  | NM_002047 | 12448.724 | 15990.396 | NM_00065E | 383.158   | 654.932   |
| AB018268  | 6960.095  | 2772.058  | NM_001031 | 60721.055 | 63449.613 | NM_00039E | 601.71    | 709.788   |
| Z70701    | 9260.83   | 3707.946  | NM_00720E | 9798.842  | 11333.604 | NM_00088E | 655.081   | 650.145   |
| AB040972  | 2457.996  | 1819.292  | BF130622  | 9266.973  | 8155.473  | NM_00385E | 9624.034  | 10050.726 |
| AF148505  | 1518.508  | 1414.906  | BU165106  | 1550.436  | 1569.485  | NM_00023E | 1348.222  | 1375.942  |
| BE260997  | 559.133   | 527.229   | AF038202  | 1046.985  | 1076.356  | NM_00290E | 24459.27  | 24509.258 |
| NM_01868E | 4699.462  | 2802.276  | AB040925  | 689.634   | 507.145   | NM_01233E | 1260.802  | 1167.644  |
| NM_01767E | 1392.789  | 976.139   | NM_001861 | 802.104   | 541.512   | NM_005787 | 17909.021 | 18258.711 |
| AK021764  | 392.22    | 419.625   | AK025558  | 3787.98   | 3132.563  | NM_00214E | 2439.56   | 2713.545  |
| NM_005431 | 1594.558  | 1246.584  | AK024355  | 1013.155  | 959.385   | AF284421  | 4351.013  | 3971.984  |
| AB036063  | 1346.887  | 721.849   | NM_001864 | 15127.3   | 12231.506 | NM_00604E | 2539.222  | 2693.683  |
| NM_002894 | 2254.065  | 1016.317  | NM_003477 | 4713.035  | 4288.178  | NM_00636C | 20510.002 | 18626.557 |
| NM_00462E | 3716.542  | 1680.751  | NM_002654 | 16958.053 | 13203.788 | NM_00396E | 3782.39   | 3724.852  |
| NM_00426C | 5466.787  | 2292.174  | NM_02038E | 2156.167  | 1405.615  | NM_00278E | 1376.499  | 1368.952  |

|           |           |           |           |           |          |           |           |           |
|-----------|-----------|-----------|-----------|-----------|----------|-----------|-----------|-----------|
| AL050067  | 1024.7    | 529.355   | NM_007192 | 4125.299  | 4092.26  | NM_003343 | 7131.597  | 5812.215  |
| NM_004972 | 5626.622  | 2930.69   | AB002337  | 6067.004  | 5301.569 | NM_002785 | 19604.281 | 17879.33  |
| NM_006251 | 4088.894  | 1996.59   | NM_014933 | 5972.902  | 6081.167 | NM_003470 | 3518.608  | 3007.623  |
| NM_004103 | 6921.134  | 3695.725  | AK024250  | 942.877   | 2185.703 | AL080137  | 673.237   | 763.349   |
| NM_002314 | 5817.341  | 2770.947  | NM_003456 | 2550.809  | 2542.066 | NM_017675 | 821.73    | 841.985   |
| NM_001744 | 1999.362  | 1148.119  | AB029016  | 1456.064  | 1624.745 | AF155103  | 514.091   | 631.519   |
| NM_006296 | 2621.549  | 1717.084  | AK000445  | 826.04    | 785.104  | NM_017704 | 1157.613  | 1324.494  |
| Z25433    | 1570.933  | 977.589   | AL049390  | 1081.993  | 772.998  | AK026127  | 395.839   | 645.828   |
| NM_005922 | 4867.11   | 2610.741  | AK000584  | 4499.659  | 3390.681 | BC016062  | 8208.304  | 12154.551 |
| NM_018635 | 2934.645  | 1840.43   | AJ297363  | 1133.737  | 904.246  | NM_012250 | 508.452   | 889.199   |
| AL137593  | 9876.85   | 4289.847  | AK026379  | 2263.331  | 1910.484 | NM_006283 | 2572.295  | 2863.961  |
| NM_003915 | 1691.77   | 765.865   | AK022965  | 1310.164  | 1380.45  | NM_002701 | 635.635   | 736.885   |
| NM_000382 | 1422.456  | 671.588   | AK024278  | 10413.296 | 17200.76 | NM_005693 | 513.107   | 650.894   |
| NM_001150 | 1586.982  | 911.563   | AK026982  | 998.93    | 1018.282 | X97303    | 5060.815  | 4862.285  |
| NM_002856 | 2478.465  | 1119.827  | NM_018022 | 2273.357  | 2375.094 | NM_017530 | 3324.928  | 2673.236  |
| NM_003225 | 782.882   | 489.608   | AB056722  | 3312.978  | 3469.572 | AL360183  | 1165.677  | 1339.726  |
| NM_000096 | 995.241   | 763.611   | NM_013242 | 3044.018  | 2289.927 | AK027046  | 1124.377  | 1443.797  |
| AA143087  | 10902.519 | 4988.618  | NM_012066 | 6851.445  | 5430.751 | NM_003113 | 2000.131  | 1396.966  |
| U25804    | 4353.469  | 3598.207  | AF052168  | 3489.656  | 2916.561 | NM_016575 | 2732.208  | 2629.898  |
| BI870965  | 3148.505  | 1758.857  | NM_014650 | 965.165   | 1091.811 | NM_014315 | 1266.117  | 1135.629  |
| NM_001903 | 7717.25   | 4345.774  | AK022632  | 2404.577  | 2134.269 | NM_004865 | 1482.121  | 1442.221  |
| BI835536  | 8977.129  | 3718.742  | AK021554  | 1181.22   | 1246.127 | AB019566  | 71557.297 | 62925.586 |
| BF205051  | 3391.502  | 1691.276  | AL162039  | 2005.396  | 1969.737 | NM_000981 | 64180.082 | 58239.465 |
| X02761    | 1737.777  | 916.518   | AK024896  | 1951.42   | 1597.127 | NM_002047 | 14553.016 | 14370.778 |
| M91463    | 937.483   | 386.097   | AK024059  | 754.243   | 578.982  | BF130622  | 9599.083  | 10477.853 |
| J03060    | 3143.524  | 1361.033  | AK023663  | 1680.594  | 1383     | BU165106  | 1993.711  | 2650.753  |
| NM_003743 | 973.512   | 358.92    | AB007928  | 566.114   | 561.448  | AF038202  | 1307.185  | 1424.19   |
| AA829383  | 3850.245  | 1570.825  | AK023645  | 774.399   | 564.446  | AB040925  | 676.644   | 509.192   |
| AF012434  | 8864.424  | 3209.922  | D83543    | 1083.552  | 701.826  | AK025558  | 3971.834  | 5113.207  |
| AB037791  | 727.599   | 443.764   | NM_016930 | 1711.3    | 1419.74  | AK024355  | 656.333   | 604.473   |
| NM_018124 | 4292.2    | 1546.612  | AJ001861  | 810.394   | 865.649  | NM_001864 | 13775.552 | 10344.614 |
| NM_000485 | 12467.589 | 4767.653  | X64981    | 837.453   | 956.246  | NM_003477 | 4792.153  | 3916.253  |
| X98507    | 1943.184  | 1372.265  | X75692    | 2485.649  | 1664.537 | NM_002654 | 15427.869 | 12372.76  |
| NM_016030 | 52590.184 | 30474.971 | X64988    | 576.468   | 1006.585 | NM_020382 | 1561.634  | 1099.927  |
| NM_014665 | 4948.434  | 2656.656  | Y10511    | 4195.167  | 2994.669 | NM_007192 | 3964.277  | 3545.32   |
| NM_005652 | 5293.838  | 3686.058  | AF018254  | 977.119   | 1014.983 | AB002337  | 5794.939  | 4511.923  |
| AK026686  | 997.157   | 1063.165  | NM_016240 | 1311.417  | 1052.569 | NM_014933 | 5653.655  | 4880.325  |
| NM_005902 | 3787.767  | 3919.315  | AK025238  | 672.742   | 382.291  | NM_003076 | 6868.739  | 7265.772  |
| NM_002850 | 65570.875 | 64824.902 | AK026416  | 7275.583  | 6387.977 | NM_006385 | 807.175   | 668.646   |
| NM_005302 | 618.501   | 679.876   | AK025797  | 466.582   | 587.575  | NM_003456 | 2493.871  | 2812.841  |
| NM_004302 | 419.425   | 1001.291  | AK000019  | 537.188   | 581.37   | AB029016  | 1025.635  | 1699.939  |
| NM_005903 | 1182.626  | 2035.953  | AK024947  | 1255.798  | 1168.824 | AK000445  | 953.606   | 789.151   |
| NM_000861 | 956.466   | 1350.083  | AK024606  | 2324.17   | 2106.491 | AL049390  | 1584.381  | 1564.675  |
| NM_000024 | 782.964   | 1249.819  | NM_016417 | 5536.011  | 4074.841 | AK000584  | 4635.629  | 4426.892  |
| AB037734  | 440.273   | 465.285   | NM_019105 | 403.575   | 520.357  | AJ297363  | 1223.344  | 990.868   |
| U77493    | 830.692   | 660.247   | AL080118  | 2690.042  | 2308.123 | AK026379  | 2169.561  | 2131.938  |
| NM_019062 | 758.967   | 1097.014  | AL049378  | 2480.812  | 2276.952 | AK022965  | 1529.451  | 3351.43   |
| NM_003873 | 795.533   | 894.544   | AK021505  | 1608.335  | 1734.473 | AK024278  | 8143.674  | 9115.305  |
| AF073519  | 1915.763  | 683.568   | AK021598  | 3506.383  | 2451.235 | AK026982  | 978.505   | 789.481   |
| AB001451  | 3685.469  | 1585.738  | AJ012498  | 683.458   | 632.115  | NM_018022 | 2436.277  | 1943.79   |
| NM_017583 | 4204.919  | 2006.676  | NM_005973 | 8621.083  | 8022.259 | AB056722  | 4043.483  | 3665.164  |
| Y16132    | 7547.901  | 2993.937  | X04547    | 2100.221  | 1931.395 | NM_013242 | 2742.534  | 2031.311  |
| NM_016593 | 663.197   | 388.487   | AK025823  | 946.567   | 887.871  | NM_012066 | 6014.98   | 5633.603  |

|           |           |           |           |           |           |           |           |           |
|-----------|-----------|-----------|-----------|-----------|-----------|-----------|-----------|-----------|
| NM_017875 | 1024.405  | 1357.696  | AK026691  | 600.668   | 468.069   | AF052168  | 2838.517  | 2663.161  |
| AK023232  | 4070.169  | 3490.094  | AL359941  | 1153.801  | 1034.66   | NM_01465C | 1137.348  | 887.129   |
| NM_000271 | 13245.2   | 7710.468  | U52076    | 648.208   | 744.521   | AK022632  | 2485.114  | 1740.487  |
| NM_018209 | 2667.306  | 2025.365  | AF035278  | 1075.634  | 852.033   | AK021554  | 844.333   | 817.394   |
| NM_006184 | 28567.613 | 13093.422 | AL050202  | 494.891   | 478.688   | NM_020235 | 1249.293  | 1250.829  |
| AB018268  | 11864.714 | 8351.65   | U32999    | 5311.479  | 4818.288  | AL162039  | 2184.09   | 1931.421  |
| NM_019045 | 1038.542  | 836.442   | U66052    | 2440.105  | 2255.051  | AK024896  | 1853.01   | 1955.389  |
| NM_00638C | 2286.206  | 3954.323  | AK024156  | 1127.734  | 905.989   | AK095125  | 531.51    | 1090.641  |
| AB020710  | 1860.345  | 2906.295  | AF086288  | 749.755   | 716.766   | AK024059  | 982.18    | 1110.791  |
| NM_016174 | 8967.897  | 11787.565 | NM_016944 | 536.875   | 524.927   | AK023663  | 2291.72   | 1952.951  |
| NM_020377 | 1072.83   | 1632.101  | AK023109  | 866.526   | 985.465   | AB007928  | 851.866   | 709.777   |
| U88896    | 10680.514 | 12477.748 | NM_005293 | 7694.918  | 6727.38   | AK023645  | 864.707   | 686.686   |
| NM_005724 | 12799.848 | 14794.77  | AF133332  | 1374.362  | 1239.303  | D83543    | 1176.851  | 1082.015  |
| NM_001735 | 2731.183  | 3946.884  | AK022805  | 476.398   | 263.442   | NM_01693C | 2001.158  | 2423.076  |
| NM_002349 | 3547.196  | 5117.443  | NM_001088 | 4483.772  | 3696.43   | AJ001861  | 1095.447  | 950.233   |
| NM_00508C | 41188.32  | 49743.91  | BC015991  | 4217.788  | 3560.167  | X64981    | 913.772   | 695.811   |
| NM_004887 | 11056.228 | 9080.572  | U94902    | 627.212   | 624.503   | X75692    | 2341.769  | 2052.957  |
| NM_006404 | 707.572   | 631.423   | U46214    | 2490.456  | 2356.204  | Y10511    | 5307.185  | 4029.533  |
| NM_014795 | 6525.794  | 5450.48   | NM_00031C | 36134.668 | 25384.68  | AF018254  | 889.013   | 887.041   |
| NM_002986 | 1586.999  | 2075.483  | AF161343  | 2797.902  | 2546.966  | NM_01624C | 1333.601  | 1172.499  |
| M15330    | 1423.257  | 903.531   | NM_004765 | 2314.574  | 2061.618  | AK025238  | 689.577   | 772.997   |
| NM_014396 | 2933.097  | 1209.133  | AK022246  | 890.89    | 692       | AK026416  | 8925.51   | 7574.207  |
| AK027201  | 1814.242  | 663.163   | X75684    | 1841.213  | 1685.462  | AK000019  | 526.744   | 566.536   |
| Z25433    | 3311.281  | 3320.733  | AF113701  | 7852.339  | 7449.172  | AK024947  | 1436.024  | 1600.651  |
| NM_005922 | 8191.929  | 6668.017  | Y11158    | 888.424   | 725.847   | AK024606  | 2779.123  | 2568.552  |
| NM_018638 | 5504.396  | 5575.059  | NM_006771 | 8782.368  | 7071.012  | NM_016417 | 6629.369  | 4292.169  |
| AL137593  | 25316.285 | 24490.367 | L37702    | 6861.552  | 7018.527  | NM_019108 | 905.702   | 676.294   |
| NM_003915 | 3858.379  | 3225.142  | AK022812  | 887.107   | 1435.944  | AL080118  | 2981.612  | 2272.324  |
| NM_000382 | 2391.993  | 4005.033  | U79301    | 2067.527  | 1853.2    | AL049378  | 4488.566  | 2908.181  |
| AL133064  | 3345.829  | 5656.464  | AK022260  | 3599.716  | 3012.916  | L09086    | 773.927   | 919.014   |
| NM_006227 | 7759.063  | 10217.432 | M32219    | 4491.403  | 4223.185  | AK021505  | 1566.36   | 1289.676  |
| NM_002905 | 10195.227 | 12750.969 | BC018868  | 531.703   | 416.299   | AK021598  | 3917.121  | 3078.941  |
| NM_00070C | 6817.393  | 8212.616  | AF007128  | 2634.056  | 1998.868  | AJ012498  | 849.058   | 591.801   |
| NM_019028 | 9513.525  | 13056.349 | CY3Cy5    | 1143.409  | 143.771   | NM_005973 | 9044.66   | 6727.488  |
| NM_000431 | 3444.492  | 4948.231  | AI351740  | 1650.138  | 1319.745  | X04547    | 3094.768  | 2080.101  |
| NM_013421 | 1798.344  | 3521.702  | AA444051  | 515.331   | 713.361   | AK025823  | 1140.81   | 732.52    |
| AB033118  | 7647.494  | 12141.113 | NM_007164 | 802.361   | 722.036   | AK026691  | 752.081   | 522.669   |
| NM_00169C | 8029.895  | 9013.714  | BE783826  | 6201.701  | 7465.744  | AL359941  | 1862.182  | 1081.615  |
| AF034374  | 19318.064 | 31062.863 | X04827    | 1017.14   | 999.042   | U52076    | 836.638   | 955.685   |
| NM_016118 | 3750.616  | 4787.728  | H07088    | 425.173   | 520.924   | AF035278  | 1190.894  | 1084.327  |
| NM_018674 | 23811.281 | 36733.055 | AI004656  | 875.353   | 687.891   | AL050202  | 589.874   | 468.528   |
| NM_001683 | 28525.719 | 41534.051 | BC020596  | 1077.335  | 1006.955  | U32999    | 6925.435  | 4719.939  |
| NM_001682 | 1792.158  | 3310.612  | AF116606  | 30387.729 | 24659.58  | U66052    | 3190.617  | 2607.022  |
| NM_014405 | 1893.495  | 3351.28   | X98922    | 1380.292  | 1239.46   | AK024156  | 1120.981  | 1101.933  |
| NM_000816 | 1128.366  | 2089.639  | AK098435  | 2168.441  | 1714.585  | AF086288  | 1034.407  | 718.497   |
| NM_014928 | 1211.573  | 1271.636  | AK092872  | 2075.465  | 2298.662  | AK023109  | 1001.044  | 830.897   |
| AK025130  | 3946.974  | 1946.232  | AF230496  | 871.508   | 983.649   | NM_005293 | 7701.109  | 6192.661  |
| NM_033334 | 690.327   | 793.445   | M16801    | 563.405   | 721.203   | AF133332  | 1567.815  | 1113.011  |
| AB037791  | 1370.67   | 1878.887  | NM_145904 | 18249.723 | 21068.076 | NM_001088 | 7650.903  | 6077.286  |
| NM_018124 | 9038.355  | 10726.468 | SR2       | 40861.645 | 38969.004 | BC015991  | 4131.992  | 2852.46   |
| Z70701    | 18116.789 | 27605.621 | SR4       | 10078.021 | 9563.255  | U94902    | 903.722   | 522.402   |
| AB040972  | 5682.974  | 7400.167  | SR6       | 1734.287  | 1567.422  | U46214    | 2218.319  | 1458.186  |
| AF148505  | 2129.914  | 3739.472  | SR8       | 5540.322  | 17289.689 | NM_00031C | 43007.359 | 26921.816 |

|           |           |           |           |           |           |           |           |           |
|-----------|-----------|-----------|-----------|-----------|-----------|-----------|-----------|-----------|
| BE260997  | 671.705   | 1464.949  | SR10      | 20159.682 | 7147.857  | AF161343  | 2396.18   | 1848.145  |
| NM_018686 | 7941.901  | 11095.397 | CY3Cy5    | 1197.366  | 182.502   | NM_004765 | 3263.901  | 2419.058  |
| NM_017676 | 2439.479  | 4115.845  | NM_002418 | 348.268   | 401.14    | AK022246  | 911.511   | 502.716   |
| AK021764  | 472.785   | 1213.5    | NM_004485 | 682.769   | 997.838   | X75684    | 1896.311  | 1403.015  |
| NM_005431 | 3413.478  | 5401.099  | NM_013296 | 3344.851  | 4185.822  | AF113701  | 9515.771  | 7563.018  |
| AB036063  | 3431.28   | 5103.358  | AL117478  | 885.559   | 742.192   | Y11158    | 982.433   | 604.738   |
| NM_002894 | 4663.889  | 7460.366  | NM_005307 | 414.473   | 349.877   | NM_006771 | 10036.723 | 8038.302  |
| NM_004629 | 7705.794  | 12456.076 | NM_005958 | 999.401   | 840.099   | L37702    | 8123.604  | 5805.23   |
| NM_004260 | 10605.246 | 14770.047 | NM_013436 | 726.859   | 821.597   | AK022812  | 723.772   | 744.813   |
| AL050067  | 2388.698  | 3944.033  | AF225426  | 510.145   | 434.636   | U79301    | 2331.356  | 2719.477  |
| NM_004972 | 8473.337  | 11882.491 | NM_005208 | 2318.781  | 2428.22   | AK022260  | 2679.205  | 2346.743  |
| NM_006251 | 6911.87   | 9867.37   | AK025687  | 6420.763  | 6833.722  | M32219    | 5246.438  | 4285.566  |
| NM_004103 | 8892.39   | 14009.188 | AF218941  | 378.204   | 334.397   | BC018868  | 551.717   | 532.303   |
| NM_002314 | 9542.945  | 14867.954 | AL137264  | 1777.136  | 1719.67   | AF007128  | 2743.952  | 1984.547  |
| NM_001744 | 3475.703  | 6654.008  | NM_002226 | 1036.17   | 1175.897  | CY3Cy5    | 3880.552  | 168.707   |
| NM_006296 | 4622.141  | 7142.248  | X84370    | 3266.282  | 3543.749  | AI351740  | 2263.12   | 2066.073  |
| AF073519  | 3136.182  | 2980.311  | NM_004039 | 619.094   | 641.198   | AA444051  | 887.372   | 1773.583  |
| AB001451  | 5509.716  | 6473.507  | NM_000508 | 409.345   | 405.13    | NM_007164 | 1120.125  | 1893.929  |
| NM_017583 | 7073.914  | 7070.62   | AB014558  | 568.27    | 547.52    | BE783826  | 8770.551  | 13201.44  |
| Y16132    | 15754.386 | 12995.33  | NM_000118 | 200.182   | 344.512   | X04827    | 1198.594  | 1537.787  |
| NM_016593 | 1377.676  | 1619.294  | NM_000913 | 4224.604  | 4277.516  | H07088    | 751.117   | 1141.131  |
| NM_002521 | 1061.414  | 1754.087  | NM_001298 | 510.378   | 473.165   | AI004656  | 1118.862  | 1144.35   |
| NM_001150 | 3074.433  | 4779.299  | BG325046  | 698.684   | 957.911   | BC020596  | 1277.682  | 2089.815  |
| NM_002856 | 4687.92   | 7044.267  | AK026248  | 1232.292  | 1417.312  | AF116606  | 45458.273 | 55032.27  |
| NM_003225 | 974.469   | 1819.837  | NM_004578 | 2292.4    | 2266.701  | X98922    | 1572.472  | 1893.362  |
| NM_000096 | 1303.009  | 2392.358  | NM_000647 | 546.639   | 599.649   | AK098435  | 2354.189  | 2495.024  |
| AA418251  | 476.437   | 746.531   | NM_017604 | 577.423   | 625.238   | AK092872  | 2835.984  | 3366.855  |
| AA143087  | 15429.254 | 19891.061 | NM_017738 | 2800.7    | 2793.844  | AF230496  | 204.73    | 730.423   |
| U25804    | 6985.792  | 8456.76   | NM_016557 | 381.203   | 292.043   | NM_145904 | 27009.428 | 26905.172 |
| BI870965  | 3961.08   | 6345.581  | NM_000623 | 2340.713  | 1949.535  | SR6       | 2016.839  | 1736.211  |
| NM_001903 | 12754.991 | 14749.769 | AF161348  | 1570.182  | 1380.947  | SR8       | 7451.805  | 20402.137 |
| BI835536  | 13146.238 | 15279.018 | NM_018467 | 4192.885  | 3847.145  | SR10      | 28107.42  | 7434.813  |
| BF205051  | 4323.668  | 7287.614  | NM_006068 | 665.29    | 600.756   | CY3Cy5    | 3791.539  | 144.45    |
| X02761    | 2661.836  | 4786.694  | U16752    | 294.387   | 464.756   | NM_002418 | 500.414   | 721.698   |
| M91463    | 1322.594  | 2250.744  | NM_002038 | 1424.571  | 1450.49   | NM_004485 | 640.507   | 1065.524  |
| U88317    | 689.08    | 837.561   | NM_005729 | 9154.511  | 9432.111  | NM_013296 | 3992.429  | 6642.924  |
| J03060    | 4631.278  | 7461.997  | NM_015493 | 668.35    | 1025.379  | AL117478  | 961.924   | 1194.909  |
| X54156    | 643.258   | 1043.359  | NM_003747 | 1056.006  | 1253.611  | NM_005307 | 460.758   | 655.512   |
| NM_003743 | 1253.117  | 2318.877  | AB037744  | 1993.428  | 2433.861  | NM_005958 | 1330.5    | 1722.642  |
| AA829383  | 6608.475  | 8301.858  | AF141901  | 568.607   | 605.77    | NM_013436 | 424.781   | 953.423   |
| L22524    | 522.913   | 737.202   | AL109708  | 528.366   | 511.758   | AF225426  | 786.599   | 1952.138  |
| AF012434  | 14528.672 | 16564.754 | AF234532  | 1426.626  | 1473.939  | NM_005208 | 3326.807  | 5672.652  |
| NM_006404 | 837.55    | 1013.88   | AF099740  | 665.888   | 648.977   | NM_000421 | 458.977   | 933.324   |
| NM_014795 | 7445.467  | 5795.116  | NM_006117 | 5111.775  | 5881.357  | AK025687  | 8977.206  | 10324.729 |
| NM_002986 | 1434.816  | 1683.73   | NM_002225 | 1445.572  | 1460.347  | AF218941  | 676.043   | 737.403   |
| M15330    | 1611.3    | 1924.521  | NM_006229 | 308.027   | 376.108   | AL137264  | 3484.278  | 3022.399  |
| NM_014396 | 4280.38   | 3672.51   | NM_015415 | 9172.475  | 11081.789 | NM_002226 | 1388.3    | 1392.028  |
| AK027201  | 3081.589  | 4379.654  | NM_004897 | 758.538   | 1430.101  | X84370    | 4923.182  | 4992.19   |
| NM_000489 | 21388.629 | 26352.98  | NM_002555 | 1416.763  | 1589.963  | NM_004039 | 998.837   | 852.866   |
| X98507    | 3446.74   | 4879.343  | NM_000309 | 1070.914  | 1127.668  | AB014558  | 949.788   | 798.674   |
| NM_016030 | 69481.156 | 66806.031 | NM_004528 | 23497.688 | 23231.34  | NM_006287 | 504.177   | 423.964   |
| NM_014669 | 11355.592 | 14050.675 | NM_002450 | 7721.354  | 47104.25  | NM_000913 | 6779.474  | 4714.565  |
| NM_005652 | 8183.641  | 9886.938  | NM_001686 | 495.297   | 534.78    | NM_001296 | 556.737   | 481.662   |

|           |           |           |           |           |           |           |           |           |
|-----------|-----------|-----------|-----------|-----------|-----------|-----------|-----------|-----------|
| AK026686  | 621.548   | 1201.884  | NM_000705 | 346.944   | 450.647   | BG325046  | 830.316   | 735.653   |
| NM_018842 | 528.943   | 1314.914  | NM_004231 | 27663.232 | 26938.482 | AK026248  | 1525.496  | 2014.291  |
| NM_005902 | 4901.862  | 6195.585  | AK023107  | 4584.056  | 5017.103  | NM_004578 | 2766.262  | 3447.127  |
| NM_005302 | 446.976   | 964.045   | NM_006854 | 11130.883 | 13220.483 | NM_000647 | 2146.031  | 2635.318  |
| NM_004302 | 355.133   | 1289.89   | NM_004580 | 9055.896  | 9516.543  | NM_017604 | 875.66    | 1342.049  |
| NM_005903 | 1448.549  | 2269.465  | NM_020387 | 12856.891 | 14625.06  | NM_017738 | 4053.375  | 7933.6    |
| NM_000861 | 990.275   | 2365.39   | NM_007246 | 1168.135  | 1079.172  | NM_016557 | 481.19    | 820.596   |
| NM_000024 | 819.792   | 1838.421  | AF150735  | 2355.929  | 2711.137  | NM_000623 | 2738.505  | 4231.91   |
| U77493    | 848.817   | 1533.87   | NM_018183 | 1439.025  | 1165.372  | AF161348  | 2120.419  | 2807.663  |
| NM_019062 | 330.833   | 906.753   | NM_012382 | 1453.099  | 1233.097  | NM_018467 | 5810.635  | 9097.682  |
| NM_003873 | 515.088   | 1245.403  | BF038366  | 339.424   | 328.99    | NM_006068 | 985.248   | 1652.437  |
| NM_000263 | 3609.407  | 5145.237  | NM_016440 | 7916.675  | 8086.712  | U16752    | 552.872   | 459.844   |
| NM_001683 | 34976.121 | 33312.473 | NM_007194 | 1200.474  | 1246.656  | M30134    | 286.124   | 220.236   |
| NM_001682 | 1865.26   | 1955.851  | NM_000314 | 4122.876  | 4197.788  | NM_002038 | 2047.287  | 1484.321  |
| NM_014405 | 3090.829  | 3701.159  | AB002369  | 945.552   | 928.954   | NM_005729 | 13666.133 | 13468.088 |
| NM_000816 | 1333.966  | 1506.289  | S74620    | 321.704   | 651.044   | NM_015493 | 1049.213  | 943.221   |
| NM_014928 | 1357.841  | 1515.019  | AF305239  | 1183.577  | 932.919   | NM_003747 | 1537.875  | 1375.138  |
| AK025130  | 6405.741  | 5293.581  | NM_002827 | 1949.901  | 2036.929  | AB037744  | 2594.081  | 1907.805  |
| NM_017875 | 1056.95   | 2192.545  | NM_001946 | 1437.669  | 1888.024  | AF141901  | 624.918   | 594.727   |
| AK023232  | 5641.914  | 7563.9    | BF035425  | 13854.405 | 16451.494 | NM_007008 | 574.93    | 512.731   |
| NM_000271 | 19449.18  | 23226.66  | NM_000159 | 23324.891 | 25093.068 | AL109708  | 767.298   | 650.292   |
| NM_018209 | 4009.6    | 5879.955  | NM_014638 | 1185.153  | 1670.833  | L29143    | 331.569   | 412.964   |
| NM_006184 | 38138.148 | 49333.566 | NM_000118 | 267.456   | 168.162   | AF234532  | 1567.523  | 904.886   |
| AB018268  | 19283.027 | 24534.863 | NM_000913 | 3912.468  | 3190.459  | AF099740  | 867.841   | 994.181   |
| NM_019045 | 1387.418  | 2086.338  | NM_001298 | 948.327   | 754.918   | NM_006117 | 6854.617  | 7982.462  |
| NM_006380 | 2252.223  | 2733.73   | BG325046  | 767.25    | 858.881   | NM_002225 | 1893.038  | 2638.909  |
| NM_016174 | 8204.194  | 10982.472 | AI351740  | 1650.815  | 1818.845  | NM_006229 | 760.188   | 1153.453  |
| NM_020377 | 1254.096  | 2488.719  | NM_007164 | 645.927   | 559.14    | NM_015415 | 11977.341 | 18455.01  |
| U88896    | 11600.513 | 13983.874 | BE783826  | 6388.221  | 6535.215  | NM_004897 | 1244.751  | 1561.786  |
| AF116702  | 63943.078 | 65555.578 | X04827    | 809.495   | 744.221   | NM_002555 | 1730.771  | 2251.761  |
| NM_005724 | 13848.327 | 17580.861 | H07088    | 414.244   | 304.787   | NM_000309 | 1288.35   | 1741.866  |
| X58794    | 68364.688 | 65397.863 | AI004656  | 962.7     | 663.694   | NM_004528 | 33841.844 | 38031.441 |
| NM_001735 | 3415.739  | 5451.147  | BC020596  | 1018.824  | 879.121   | AK026381  | 13145.623 | 15143.586 |
| NM_002349 | 3034.067  | 4512.274  | AF116606  | 29583.008 | 27604.676 | NM_002450 | 10816.305 | 54306.379 |
| NM_005080 | 46963.305 | 59340.496 | X98922    | 1230.435  | 1041.13   | NM_001686 | 850.811   | 1109.155  |
| NM_004887 | 15121.307 | 16923.824 | AK098435  | 2150.111  | 2065.749  | NM_000705 | 514.945   | 588.078   |
| NM_004972 | 11202.665 | 9489.927  | AK092872  | 2330.633  | 2343.268  | NM_004231 | 38650.754 | 31124.703 |
| NM_006251 | 8451.168  | 7309.723  | AF230496  | 272.033   | 375.566   | NM_016577 | 466.287   | 451.392   |
| NM_004103 | 14519.61  | 11159.987 | M16801    | 281.906   | 283.635   | AK023107  | 5992.036  | 4455.336  |
| NM_002314 | 11103.61  | 9121.425  | NM_145904 | 20619.43  | 23452.236 | NM_006854 | 15967.968 | 13297.109 |
| NM_001744 | 4142.418  | 3309.937  | NM_013334 | 2465.185  | 3389.934  | NM_004580 | 11169.606 | 8945.37   |
| NM_006296 | 5409.523  | 4595.865  | AB037744  | 2000.219  | 2121.013  | NM_020387 | 18290.221 | 19566.332 |
| Z25433    | 3690.468  | 5171.394  | AF141901  | 440.661   | 377.863   | NM_007246 | 1376.892  | 1193.003  |
| NM_005922 | 9180.681  | 9858.604  | NM_007008 | 250.462   | 265.028   | AB049629  | 21.039    | 172.003   |
| NM_018638 | 5881.407  | 7655.039  | AL109708  | 441.912   | 402.507   | AF150735  | 2933.193  | 3737.559  |
| AL137593  | 26842.777 | 38992.438 | AF234532  | 1202.881  | 1149.024  | NM_018183 | 1630.189  | 2001.02   |
| NM_003915 | 3282.128  | 4709.291  | NM_004485 | 673.675   | 421.365   | NM_012382 | 1741.339  | 1862.073  |
| NM_000382 | 2664.304  | 4212.408  | NM_013296 | 3402.089  | 3322.496  | BF038366  | 466.641   | 691.873   |
| AL133064  | 3351.294  | 4861.549  | AL117478  | 859.059   | 775.21    | NM_002452 | 8180.371  | 10369.373 |
| NM_006227 | 7391.011  | 8980.678  | NM_005307 | 353.654   | 386.916   | NM_012304 | 440.666   | 680.325   |
| NM_002905 | 8890.556  | 10360.28  | NM_005958 | 895.507   | 819.109   | NM_016440 | 13158.509 | 12413.404 |
| NM_000700 | 6266.5    | 6166.256  | NM_013436 | 425.827   | 406.154   | NM_007194 | 2216.473  | 1965.336  |
| NM_019028 | 9974.162  | 11572.448 | AF225426  | 402.309   | 261.7     | NM_000314 | 5866.152  | 5664.529  |

|           |           |           |           |           |           |           |           |           |
|-----------|-----------|-----------|-----------|-----------|-----------|-----------|-----------|-----------|
| NM_000431 | 3481.975  | 4970.276  | NM_005208 | 2830.152  | 3641.666  | AB002369  | 1427.024  | 1058.759  |
| NM_013421 | 1559.005  | 2666.259  | NM_000421 | 272.345   | 121.655   | S74620    | 655.893   | 318.234   |
| NM_012474 | 8004.961  | 10351.523 | AK025687  | 7717.456  | 10290.612 | AF305239  | 1213.158  | 758.197   |
| AB033118  | 7299.916  | 9445.043  | AF218941  | 495.689   | 501.813   | NM_002827 | 2309.097  | 1633.701  |
| NM_019606 | 3516.908  | 5312.62   | AL137264  | 3567.154  | 3331.541  | NM_001946 | 1645.082  | 1384.976  |
| NM_001690 | 8599.667  | 10118.373 | NM_002226 | 1427.523  | 1548.294  | BF035425  | 12993.191 | 10624.247 |
| AF034374  | 16068.454 | 20575.506 | X84370    | 3998.742  | 4773.071  | NM_001608 | 287.156   | 339.201   |
| NM_016118 | 3620.328  | 5017.362  | NM_004039 | 768.587   | 947.403   | NM_000159 | 40149.465 | 31090.877 |
| NM_018674 | 21678.031 | 30413.297 | AB014558  | 716.601   | 723.207   | NM_014638 | 1580.792  | 1304.333  |
| NM_000068 | 2875.973  | 2776.076  | NM_016577 | 247.888   | 146.987   | NM_006287 | 266.037   | 988.4     |
| AB033046  | 10722.425 | 8931.83   | NM_006854 | 10621.115 | 9912.838  | NM_000118 | 217.611   | 520.2     |
| NM_015918 | 7840.726  | 6483.964  | NM_004580 | 8569.868  | 7631.315  | NM_000913 | 4580.914  | 4844.065  |
| AK023228  | 1179.925  | 1228.698  | NM_020387 | 12471.483 | 11840.568 | NM_001298 | 505.074   | 665.529   |
| NM_013249 | 1722.596  | 1538.748  | NM_007246 | 920.363   | 1603.506  | BG325046  | 689.464   | 1219.257  |
| AB029041  | 31877.107 | 23636.043 | AK026248  | 1051.761  | 1074.798  | AI351740  | 2277.593  | 2374.622  |
| AK026642  | 3999.271  | 3554.581  | NM_004578 | 2266.184  | 2142.75   | AA444051  | 797.438   | 1021.612  |
| AL359063  | 1051.099  | 1646.982  | NM_000647 | 449.819   | 390.347   | NM_007164 | 1270.969  | 2005.357  |
| AL079292  | 5352.378  | 7135.57   | NM_017604 | 689.475   | 821.629   | BE783826  | 9395.604  | 12639.485 |
| X89667    | 2488.508  | 4196.362  | NM_017738 | 2887.411  | 2896.568  | X04827    | 962.715   | 1128.416  |
| AB037791  | 1399.843  | 2446.453  | NM_016557 | 422.648   | 476.743   | H07088    | 664.509   | 761.893   |
| NM_018124 | 11296.038 | 14051.767 | NM_000623 | 2147.206  | 2046.936  | AI004656  | 1090.636  | 1377.735  |
| Z70701    | 18301.01  | 24023.459 | AF161348  | 1534.704  | 1461.4    | BC020596  | 1826.154  | 2423.143  |
| AB040972  | 5040.855  | 7057.564  | NM_018467 | 4284.681  | 4417.927  | AF116606  | 50437.352 | 45760.867 |
| AF148505  | 2436.448  | 4105.483  | NM_006068 | 800.343   | 724.855   | X98922    | 1715.589  | 1224.398  |
| BE260997  | 795.665   | 1297.334  | U16752    | 563.633   | 541.057   | AK098435  | 2974.139  | 2509.366  |
| NM_018686 | 8182.865  | 10601.419 | NM_002038 | 2066.551  | 2121.183  | AK092872  | 2691.752  | 2339.161  |
| NM_017676 | 2130.511  | 3390.065  | NM_005729 | 10750.823 | 12997.803 | NM_145904 | 26271.33  | 22788.318 |
| AK021764  | 555.99    | 1040.319  | NM_015493 | 861.084   | 1365.631  | NM_021969 | 44.915    | 263.268   |
| NM_005431 | 2437.316  | 4458.554  | NM_003747 | 1525.197  | 2914.64   | NM_013334 | 3196.492  | 2537.501  |
| AB036063  | 3266.437  | 5230.339  | NM_002827 | 2023.151  | 1720.562  | AB037744  | 2251.41   | 2847.716  |
| NM_002894 | 5897.364  | 7407.218  | BF035425  | 10532.461 | 10054.492 | AF141901  | 526.8     | 595.133   |
| NM_004629 | 6364.86   | 8980.114  | NM_000159 | 29935.025 | 24047.795 | AL109708  | 615.937   | 828.248   |
| NM_004260 | 10169.491 | 12375.583 | NM_014638 | 1075.215  | 1246.624  | AF234532  | 1418.095  | 1717.921  |
| AL050067  | 2910.906  | 4835.158  | AF099740  | 671.282   | 735.351   | NM_002418 | 767.922   | 1048.818  |
| AK024732  | 3273.588  | 2422.925  | NM_006117 | 5450.737  | 5304.533  | NM_002090 | 1401.852  | 2684.943  |
| J05158    | 529.025   | 573.486   | NM_002225 | 1620.613  | 1427.857  | NM_004488 | 1056.049  | 1520.009  |
| NM_015564 | 1686.151  | 2144.714  | NM_015415 | 9397.741  | 8857.393  | NM_013296 | 3805.493  | 5134.494  |
| AF160476  | 699.766   | 732.292   | NM_004897 | 782.724   | 700.643   | AL117478  | 893.703   | 1059.243  |
| L22650    | 2102.637  | 2130.31   | NM_002555 | 1782.648  | 1792.563  | NM_005307 | 496.591   | 488.97    |
| AB014520  | 26784.85  | 18389.188 | NM_000309 | 864.599   | 962.785   | NM_005958 | 1319.268  | 1371.495  |
| AF161420  | 2275.606  | 1555.094  | NM_004528 | 23105.975 | 24512.457 | NM_013436 | 793.3     | 637.8     |
| NM_004907 | 3552.701  | 5130.3    | AK026381  | 10119.704 | 11197.341 | AF225426  | 719.069   | 533.521   |
| NM_002891 | 1413.755  | 2336.635  | NM_002450 | 7953.863  | 55938.766 | NM_005208 | 3928.123  | 3694.422  |
| NM_001775 | 1620.559  | 3316.792  | NM_001686 | 592.441   | 732.42    | AK025687  | 8745.217  | 6941.597  |
| BE083789  | 795.953   | 1041.648  | NM_000705 | 370.866   | 682.072   | AF218941  | 467.756   | 387.947   |
| X04526    | 17406.621 | 19132.576 | NM_004231 | 34101.387 | 39142.926 | AL137264  | 3413.965  | 2605.593  |
| D26067    | 3553.111  | 4513.527  | NM_145904 | 18232.287 | 18383.961 | NM_002226 | 1453.716  | 1238.189  |
| AF227924  | 3811.547  | 5155.963  | NM_013334 | 2291.512  | 2123.174  | X84370    | 4750.704  | 3966.226  |
| NM_005716 | 20720.303 | 26283.271 | AF150735  | 3111.203  | 4863.925  | NM_004039 | 857.013   | 624.588   |
| NM_006183 | 2479.561  | 3834.664  | NM_018183 | 1361.809  | 1393.078  | AB014558  | 858.366   | 584.916   |
| NM_016087 | 904.806   | 1808.964  | NM_012382 | 1452.178  | 1117.515  | NM_016577 | 365.184   | 473.492   |
| S59184    | 3488.345  | 4737.32   | BF038366  | 437.989   | 374.649   | AK023107  | 5962.075  | 6050.596  |
| NM_005130 | 697.824   | 1033.86   | NM_002452 | 5895.974  | 7834.77   | NM_006854 | 14110.363 | 18427.723 |



|           |           |           |           |           |           |           |           |           |
|-----------|-----------|-----------|-----------|-----------|-----------|-----------|-----------|-----------|
| NM_006661 | 3800.725  | 5934.153  | NM_012304 | 766.097   | 922.683   | NM_00458C | 9989.85   | 15309.687 |
| M54886    | 481.385   | 916.541   | NM_01644C | 9457.552  | 9966.879  | AK026248  | 1675.018  | 2278.937  |
| NM_00574E | 10961.559 | 13497.167 | NM_007194 | 1322.026  | 1916.809  | NM_00457E | 3161.057  | 4083.332  |
| NM_00458E | 1018.851  | 1994.15   | NM_000314 | 4252.804  | 4516.621  | NM_000647 | 1187.868  | 1645.384  |
| U16126    | 950.335   | 1700.916  | AB002369  | 927.229   | 1371.472  | AB046793  | 1343.745  | 2273.098  |
| NM_00457Z | 489.577   | 1096.156  | S74620    | 301.638   | 360.6     | NM_017604 | 1079.154  | 955.23    |
| NM_00217Z | 29645.461 | 42856.313 | AF305239  | 1249.344  | 1127.082  | NM_01773E | 3920.503  | 5441.573  |
| NM_002614 | 991.198   | 1024.558  | AL137264  | 3378.172  | 2902.308  | NM_016557 | 761.108   | 594.768   |
| NM_00565E | 2166.269  | 1809.62   | NM_00222E | 1153.983  | 1067.581  | NM_00062E | 2763.634  | 2297.607  |
| AJ008144  | 697.617   | 816.676   | X84370    | 3436.838  | 3542.277  | AF161348  | 2370.033  | 2006.304  |
| NM_007314 | 2552.991  | 2528      | NM_00403E | 759.15    | 780.358   | NM_018467 | 6675.657  | 5584.072  |
| NM_01607E | 934.753   | 777.109   | NM_00050E | 277.934   | 247.192   | NM_00606E | 923.484   | 1134.842  |
| NM_00660C | 16203.601 | 10579.663 | AB014558  | 485.388   | 462.981   | NM_002704 | 475.895   | 192.907   |
| AF297709  | 3630.999  | 2960.9    | NM_00091E | 3735.502  | 2657.747  | U16752    | 460.94    | 542.287   |
| L77564    | 1551.254  | 1774.391  | NM_00129E | 450.631   | 369.811   | NM_00203E | 1932.664  | 1133.312  |
| NM_015384 | 6282.385  | 8648.272  | BG325046  | 580.021   | 609.46    | NM_00572E | 12618.835 | 9136.696  |
| AK023327  | 2430.607  | 4056.384  | AI351740  | 1606.626  | 1075.727  | NM_01549E | 1046.084  | 972.565   |
| AB046858  | 1117.834  | 1969.958  | AA444051  | 620.095   | 589.808   | NM_003747 | 1714.865  | 1080.189  |
| D50914    | 6403.074  | 7787.922  | NM_007164 | 960.239   | 835.757   | NM_002827 | 3368.784  | 3471.82   |
| BE878692  | 891.106   | 1247.899  | BE783826  | 6244.101  | 7936.952  | NM_00194E | 1701.006  | 2285.691  |
| NM_002007 | 441.349   | 1032.494  | X04827    | 882.707   | 855.061   | BF035425  | 15078.571 | 19196.18  |
| NM_01589E | 1431.875  | 2463.454  | H07088    | 574.982   | 457.827   | AF099740  | 1021.368  | 1574.009  |
| NM_00230E | 62341.02  | 55903.16  | AI004656  | 810.561   | 732.001   | NM_006117 | 7212.116  | 9835.991  |
| AK025439  | 3082.676  | 4820.23   | BC020596  | 1003.209  | 1086.271  | NM_00222E | 2296.458  | 2554.877  |
| NM_001737 | 3441.416  | 5446.095  | AF116606  | 35970.793 | 35889.82  | NM_00622E | 480.025   | 649.112   |
| Z36784    | 764.172   | 1500.379  | X98922    | 1423.979  | 1369.152  | NM_01541E | 13591.217 | 17711.426 |
| NM_01662E | 10901.701 | 15043.038 | AK098435  | 1886.634  | 2186.938  | NM_004897 | 926.129   | 1152.964  |
| NM_00721E | 724.019   | 1180.423  | AK092872  | 2046.19   | 2488.609  | NM_00255E | 2376.62   | 2395.992  |
| AF131842  | 187.946   | 976.978   | M16801    | 384.165   | 297.113   | AF225418  | 321.643   | 502.504   |
| NM_019064 | 692.276   | 1267.043  | NM_00203E | 1545.876  | 1049.799  | NM_00030E | 1593.958  | 1353.032  |
| NM_01893E | 334.523   | 886.011   | NM_00572E | 9253.646  | 7313.456  | NM_00452E | 33463.141 | 25433.438 |
| NM_000094 | 3552.483  | 5279.142  | NM_003747 | 1417.522  | 1324.336  | AK026381  | 12981.74  | 11739.905 |
| NM_00043E | 991.023   | 993.193   | AB037744  | 2100.013  | 2114.186  | NM_00245C | 10255.045 | 46865.875 |
| AJ295148  | 1591.646  | 1436.597  | AF141901  | 496.317   | 349.474   | NM_00168E | 765.42    | 830.912   |
| AF176701  | 835.199   | 689.567   | AL109708  | 427.322   | 337.858   | NM_00070E | 628.923   | 406.638   |
| NM_01630Z | 2717.549  | 2621.695  | AF234532  | 1384.106  | 971.885   | NM_004231 | 42476.852 | 29175.002 |
| NM_00415E | 47016.723 | 37631.41  | NM_00241E | 448.245   | 593.222   | NM_145904 | 26551.777 | 28814.762 |
| AK021866  | 728.957   | 627.452   | NM_01329E | 3413.182  | 3646.294  | NM_013334 | 2847.342  | 4115.336  |
| NM_00324E | 9149.662  | 6844.185  | AL117478  | 806.854   | 714.423   | AF150735  | 3152.391  | 3364.531  |
| M21897    | 1352.42   | 1311.608  | NM_005307 | 257.876   | 396.625   | NM_01818E | 1776.15   | 1554.009  |
| AF301463  | 1548.124  | 2136.563  | NM_00595E | 988.488   | 1371.777  | NM_01238E | 1623.403  | 1746.274  |
| NM_015984 | 6144.579  | 7694.2    | NM_01343E | 472.698   | 410.748   | NM_00245E | 8380.196  | 7913.377  |
| AK022471  | 584.933   | 756.604   | AF225426  | 524.236   | 393.184   | NM_012304 | 518.257   | 375.299   |
| NM_006894 | 1674.751  | 2714.236  | NM_00520E | 3149.067  | 3544.503  | NM_01644C | 9575.295  | 6885.014  |
| AK023031  | 4030.28   | 6291.782  | AK025687  | 7612.138  | 8932.903  | NM_007194 | 1775.069  | 1683.772  |
| NM_005717 | 44305.48  | 49887.316 | AF218941  | 617.313   | 1180.534  | NM_000314 | 5687.748  | 3634.933  |
| NM_01209C | 2202.311  | 3600.078  | NM_00070E | 394.43    | 503.74    | AB002369  | 1598.79   | 1142.28   |
| BE793385  | 867.797   | 1197.116  | NM_004231 | 28795.133 | 24154.242 | AF305239  | 1202.572  | 701.942   |
| AF177292  | 1468.06   | 1876.543  | AK023107  | 4638.056  | 3386.612  | AL137264  | 4614.552  | 3971.566  |
| NM_00308E | 11565.364 | 15441.081 | NM_006854 | 10446.944 | 9624.274  | NM_00222E | 1720.985  | 1387.732  |
| AF043290  | 485.909   | 1009.841  | NM_00458C | 8467.278  | 7890.887  | X84370    | 4600.385  | 5768.381  |
| NM_00408Z | 3362.239  | 5170.865  | NM_020387 | 12355.212 | 12747.173 | NM_00403E | 670.407   | 1187.562  |
| NM_01439E | 2124.26   | 3162.764  | NM_00724E | 928.766   | 1286.495  | NM_00050E | 209.105   | 686.371   |

|           |           |           |           |           |           |           |           |           |
|-----------|-----------|-----------|-----------|-----------|-----------|-----------|-----------|-----------|
| NM_005934 | 23228.719 | 33415.188 | NM_004578 | 2800.793  | 3503.758  | AB014558  | 672.134   | 939.073   |
| NM_007129 | 15471.49  | 10806.173 | NM_000647 | 590.328   | 481.984   | NM_006287 | 241.073   | 295.759   |
| AY004253  | 11755.885 | 9056.563  | NM_017604 | 726.086   | 663.016   | NM_000118 | 289.495   | 388.485   |
| Z46967    | 807.825   | 595.198   | NM_017738 | 2834.435  | 3370.441  | NM_000913 | 4179.697  | 3888.703  |
| NM_002698 | 1126.906  | 980.504   | NM_016557 | 375.142   | 344.495   | NM_001298 | 596.382   | 518.821   |
| NM_002148 | 991.961   | 980.975   | NM_000623 | 2345.899  | 2835.556  | BG325046  | 737.709   | 1153.345  |
| AL137449  | 1049.447  | 1035.082  | AF161348  | 1516.878  | 1855.478  | AI351740  | 2110.426  | 1803.772  |
| U88153    | 1853.458  | 2757.764  | NM_018467 | 4189.259  | 5223.118  | AA444051  | 722.526   | 880.293   |
| X03910    | 19984.514 | 25510.215 | NM_006068 | 937.883   | 1008.582  | NM_007164 | 938.889   | 877.266   |
| NM_018428 | 11529.332 | 13567.65  | U16752    | 457.802   | 650.694   | BE783826  | 6815.252  | 7645.25   |
| NM_005058 | 655.885   | 1807.969  | NM_016440 | 8758.3    | 9151.464  | X04827    | 1071.445  | 1050.12   |
| NM_006924 | 27994.012 | 38270.73  | NM_007194 | 1460.33   | 1600.583  | H07088    | 889.744   | 521.86    |
| NM_016024 | 7723.241  | 9941.247  | NM_000314 | 4619.312  | 3535.938  | AI004656  | 1038.6    | 848.565   |
| NM_018107 | 2978.387  | 4215.325  | AB002369  | 958.516   | 870.947   | BC020596  | 1412.214  | 952.193   |
| NM_012279 | 934.745   | 1602.293  | AF305239  | 954.941   | 784.554   | AF116606  | 46810.156 | 32683.279 |
| NM_018387 | 14378.332 | 16264.098 | NM_002827 | 2126.474  | 1705.374  | X98922    | 1387.666  | 1115.792  |
| BF310673  | 1293.85   | 2846.64   | NM_001946 | 1401.07   | 1283.769  | AK098435  | 2523.16   | 1507.06   |
| R97012    | 31760.15  | 42188.414 | BF035425  | 12762.889 | 12416.465 | AK092872  | 2635.161  | 1863.188  |
| U77700    | 16198.805 | 17857.213 | NM_000159 | 32041.146 | 30305.17  | AF230496  | 364.363   | 244.195   |
| NM_006567 | 7251.521  | 10632.175 | NM_014638 | 1161.443  | 1241.298  | NM_002038 | 1966.515  | 2101.272  |
| AF038554  | 20437.408 | 26760.209 | NM_006117 | 5170.209  | 5406.998  | NM_005729 | 12443.188 | 14926.802 |
| AF264621  | 7137.064  | 9437.688  | NM_002225 | 1685.007  | 1656.861  | NM_015493 | 794.041   | 1415.173  |
| NM_005875 | 15798.378 | 21428.33  | NM_006229 | 302.867   | 363.234   | NM_003747 | 1304.78   | 1484.873  |
| NM_004184 | 8043.361  | 10600.301 | NM_015415 | 10648.481 | 10474.2   | AB037744  | 2142.724  | 2718.582  |
| AK026571  | 2164.796  | 1165.841  | NM_004897 | 892.928   | 918.049   | AF141901  | 394.663   | 659.19    |
| AK024673  | 5393.497  | 2491.115  | NM_002555 | 1551.85   | 1630.35   | AL109708  | 575.432   | 672.27    |
| AF070618  | 1319.086  | 1029.639  | NM_000309 | 1145.006  | 1012.934  | L29143    | 170.945   | 426.621   |
| AF131748  | 5240.07   | 4214.778  | NM_004528 | 23535.105 | 30863.227 | AF234532  | 1370.548  | 1420.254  |
| NM_000456 | 3985.278  | 3153.624  | AK026381  | 9796.698  | 11090.243 | NM_002418 | 486.226   | 748.876   |
| NM_002496 | 12698.231 | 8439.866  | NM_002450 | 7843.688  | 48282.277 | NM_004485 | 1000.42   | 1013.468  |
| NM_016243 | 2286.052  | 1685.194  | NM_001686 | 605.726   | 874.563   | NM_013296 | 4330.674  | 4360.54   |
| X53943    | 742.381   | 971.102   | NM_014723 | 292.493   | 346.511   | AL117478  | 1078.27   | 809.198   |
| NM_014402 | 58610.586 | 53854.477 | AB011106  | 501.886   | 604.782   | NM_005307 | 549.11    | 339.18    |
| NM_004649 | 7300.545  | 8014.571  | D26362    | 2358.154  | 2403.308  | NM_005958 | 1344.395  | 953.185   |
| NM_006540 | 2476.78   | 2108.905  | NM_013452 | 1130.552  | 918.378   | NM_013436 | 804.464   | 690.711   |
| NM_017766 | 1785.825  | 2514.039  | AY009402  | 1669.986  | 1671.709  | AF225426  | 728.682   | 600.003   |
| NM_002811 | 9213.42   | 9824.732  | NM_018451 | 609.016   | 453.062   | NM_005208 | 3428.885  | 2170.188  |
| NM_020310 | 2841.888  | 3932.123  | NM_012443 | 560.876   | 481.657   | AK025687  | 8468.194  | 6229.027  |
| AK024444  | 838.253   | 1530.491  | NM_007009 | 232.764   | 257.522   | AF218941  | 514.348   | 366.32    |
| NM_005802 | 3255.599  | 4038.326  | NM_002584 | 3365.591  | 3007.37   | NM_000705 | 461.328   | 563.63    |
| AB002331  | 2904.276  | 4605.547  | NM_013334 | 3312.96   | 3343.817  | NM_004231 | 43108.422 | 48062.59  |
| NM_002504 | 4465.845  | 5267.474  | AF150735  | 2641.304  | 3111.611  | NM_016577 | 758.962   | 1250.059  |
| AB046775  | 1302.147  | 2134.059  | NM_018183 | 1249.36   | 1429.714  | AK023107  | 5168.855  | 6492.032  |
| X74862    | 2315.514  | 3561.285  | NM_012382 | 1507.761  | 2041.389  | NM_006854 | 13641.106 | 16280.98  |
| X65663    | 3659.958  | 4457.723  | BF038366  | 484.188   | 478.687   | NM_004580 | 9822.456  | 11942.671 |
| NM_003185 | 5049.913  | 7500.645  | NM_002452 | 6480.133  | 8070.868  | NM_020387 | 15699.281 | 18425.34  |
| NM_004456 | 4974.667  | 7714.046  | NM_012304 | 980.255   | 1226.76   | NM_007246 | 1495.693  | 2999.379  |
| NM_004284 | 33073.695 | 47643.848 | AF245505  | 565.068   | 651.542   | AK026248  | 1491.238  | 1920.918  |
| NM_012243 | 1898.539  | 1012.935  | AF196976  | 2472.954  | 2379.801  | NM_004578 | 2961.832  | 2425.731  |
| AK025743  | 1645.158  | 852.952   | AL050379  | 568.812   | 482.828   | NM_000647 | 765.096   | 485.108   |
| AK023974  | 1203.353  | 620.382   | NM_003161 | 997.849   | 818.481   | NM_017604 | 852.446   | 705.821   |
| AK023768  | 1253.137  | 1051.092  | NM_014496 | 417.051   | 307.686   | NM_017738 | 3459.628  | 2740.804  |
| NM_014729 | 1018.916  | 809.407   | NM_016215 | 10341.062 | 8935.504  | NM_016557 | 513.481   | 352.649   |

|           |           |           |           |           |           |           |           |           |
|-----------|-----------|-----------|-----------|-----------|-----------|-----------|-----------|-----------|
| AF147335  | 2239.073  | 1842.077  | NM_001501 | 2442.885  | 2500.882  | NM_000623 | 2648.648  | 2174.507  |
| BI768072  | 1512.638  | 1096.646  | NM_006176 | 16028.258 | 13480.65  | AF161348  | 1183.067  | 810.889   |
| AK022216  | 7750.319  | 9438.991  | AL137459  | 628.878   | 704.068   | NM_018467 | 5875.416  | 4214.092  |
| AK025812  | 7422.476  | 9232.189  | AB007932  | 689.675   | 554.729   | NM_006068 | 723.603   | 613.039   |
| AK021459  | 457.922   | 722.921   | AF219257  | 12783.6   | 13585.121 | U16752    | 534.009   | 351.958   |
| U00960    | 1355.945  | 2116.845  | NM_003978 | 678.384   | 927.75    | NM_016440 | 9458.589  | 12460.836 |
| AK022262  | 1664.343  | 2498.315  | NM_002561 | 1046.337  | 1196.936  | NM_007194 | 1674.97   | 4195.594  |
| AF088039  | 61039.461 | 56723.055 | NM_006103 | 14254.609 | 13753.231 | NM_000314 | 5526.494  | 8113.792  |
| AF143888  | 730.583   | 1019.969  | AL359933  | 7609.994  | 6999.57   | AB002369  | 1082.969  | 1537.438  |
| AF086220  | 2241.656  | 3385.68   | NM_001302 | 391.824   | 522.323   | S74620    | 450.678   | 421.697   |
| AK023941  | 2229.969  | 3840.73   | M17783    | 4139.892  | 4162.756  | AF305239  | 1324.388  | 838.711   |
| AF086265  | 750.812   | 1056.257  | NM_018590 | 3953.942  | 4556.619  | NM_002827 | 2848.465  | 3619.593  |
| AL390083  | 11269.371 | 11822.637 | NM_003178 | 998.274   | 1005.044  | NM_001946 | 1564.025  | 2016.019  |
| AB020702  | 600.883   | 1252.692  | NM_012437 | 5171.564  | 7394.188  | BF035425  | 14668.404 | 15576.323 |
| AL050227  | 753.404   | 1371.628  | AF090944  | 278.508   | 377.181   | NM_000150 | 44569.543 | 44744.293 |
| AF085905  | 633.692   | 933.393   | NM_002607 | 676.484   | 702.536   | NM_014638 | 1248.507  | 1524.997  |
| NM_013355 | 1132.856  | 704.27    | AF116626  | 1262.074  | 1255.882  | AF099740  | 878.824   | 876.202   |
| NM_003847 | 12621.044 | 3681.963  | NM_001760 | 19359.885 | 19771.221 | NM_006117 | 6885.391  | 6265.775  |
| AF075054  | 12965.915 | 7020.688  | NM_002527 | 601.431   | 392.967   | NM_002225 | 2187.655  | 1859.667  |
| AL117638  | 1196.248  | 299.038   | NM_005890 | 591.743   | 506.674   | NM_006220 | 425.383   | 481.793   |
| AL050165  | 57109.086 | 55739.992 | NM_007065 | 23217.07  | 17740.328 | NM_015415 | 13050.957 | 10919.597 |
| AL117445  | 2298.323  | 3307.104  | AF149785  | 1560.813  | 1508.852  | NM_004897 | 1131.589  | 1004.958  |
| AL122113  | 12811.263 | 13076.961 | NM_012068 | 7157.249  | 7427.034  | NM_002555 | 2231.422  | 1541.332  |
| AK024415  | 4841.199  | 6389.186  | NM_004064 | 5084.246  | 5450.607  | AF225418  | 441.906   | 209.829   |
| AL049365  | 2018.807  | 3569.501  | NM_001256 | 1263.965  | 1439.102  | NM_000300 | 1283.514  | 1123.223  |
| AB007877  | 276.276   | 772.288   | NM_014704 | 1683.277  | 1598.59   | NM_004528 | 33213.844 | 31780.982 |
| AK025132  | 1631.124  | 2097.836  | NM_020205 | 534.216   | 542.995   | AK026381  | 12734.15  | 8062.626  |
| AK025157  | 6650.233  | 7495.662  | NM_001227 | 473.138   | 540.34    | NM_002450 | 10480.485 | 41727.445 |
| NM_020215 | 740.735   | 972.994   | NM_001191 | 1555.623  | 1533.165  | NM_001686 | 723.144   | 654.265   |
| AK022001  | 4507.979  | 6131.876  | U15174    | 478.307   | 536.548   | NM_014723 | 741.86    | 743.527   |
| AK022633  | 1130.752  | 2212.554  | NM_013342 | 1003.932  | 1065.362  | AB011106  | 534.674   | 1279.605  |
| AK027199  | 652.318   | 829.619   | NM_014344 | 448.967   | 736.092   | D26362    | 2536.222  | 4264.043  |
| AK000079  | 3483.399  | 6355.645  | AB040917  | 466.638   | 595.878   | NM_013452 | 891.558   | 1643.808  |
| AJ227874  | 691.507   | 511.852   | AL110261  | 3929.209  | 4164.38   | AY009402  | 1802.929  | 2279.636  |
| AF009312  | 527.13    | 237.372   | AK021786  | 444.465   | 481.426   | NM_012443 | 529.419   | 610.062   |
| AF009276  | 1175.32   | 526.683   | NM_005932 | 485.878   | 622.258   | NM_007000 | 145.905   | 492.137   |
| AF056428  | 6856.034  | 1728.48   | NM_004279 | 3925.93   | 4216.696  | NM_002584 | 4154.056  | 4949.661  |
| AF069136  | 522.107   | 224.638   | NM_001908 | 1313.666  | 1028.343  | NM_013334 | 2763.937  | 2688.752  |
| AK001097  | 730.028   | 652.727   | NM_000285 | 2813.5    | 2135.012  | AF150735  | 3825.726  | 3266.876  |
| AK001995  | 550.47    | 1150.144  | NM_005911 | 12738.395 | 11466.61  | NM_018183 | 1564.024  | 1143.809  |
| AK021594  | 913.815   | 1566.975  | AV702690  | 563.566   | 626.819   | NM_012382 | 1977.172  | 1684.112  |
| AK002150  | 822.138   | 1674.287  | AL117452  | 1628.653  | 1405.113  | BF038366  | 537.45    | 519.825   |
| AK021635  | 1501.41   | 2634.487  | NM_012230 | 586.996   | 397.071   | NM_002452 | 8971.937  | 6735.759  |
| AK021856  | 1971.602  | 2919.011  | NM_014038 | 4274.866  | 4002.458  | NM_012304 | 520.831   | 465.281   |
| AK025670  | 377.9     | 797.286   | NM_002061 | 2355.686  | 2566.901  | AF245505  | 556.168   | 786.251   |
| AK026419  | 555.802   | 905.323   | AF169974  | 1486.103  | 1421.808  | AB037776  | 576.976   | 720.73    |
| AK026789  | 350.326   | 941.04    | NM_004522 | 420.301   | 232.559   | AF196976  | 2914.149  | 4830.653  |
| AK025276  | 3979.845  | 4766.668  | NM_005733 | 1088.423  | 1082.552  | AL050379  | 894.012   | 941.637   |
| AK026027  | 1627.659  | 2677.923  | NM_018138 | 1594.823  | 1682.301  | NM_003161 | 1190.558  | 1334.919  |
| AK026457  | 4481.489  | 6425.318  | NM_019619 | 2341.774  | 2538.51   | NM_014496 | 237.83    | 1293.313  |
| AK026825  | 217.573   | 874.007   | AF183411  | 1720.392  | 1744.035  | NM_016215 | 11387.791 | 15670.655 |
| AJ008131  | 18621.418 | 9574.423  | BF244591  | 844.717   | 888.833   | NM_001501 | 2683.392  | 3252.258  |
| AF086338  | 734.302   | 465.885   | NM_005886 | 3544.01   | 4125.559  | NM_006176 | 18985.363 | 26876.543 |

|           |           |           |           |           |           |           |           |           |
|-----------|-----------|-----------|-----------|-----------|-----------|-----------|-----------|-----------|
| AK024303  | 421.227   | 279.254   | U63785    | 857.41    | 751.659   | AL137459  | 750.414   | 945.252   |
| AL160131  | 3192.241  | 1876.05   | NM_005966 | 984.545   | 937.249   | AB037812  | 338.511   | 401.722   |
| AF086045  | 1581.292  | 740.868   | NM_003156 | 951.981   | 985.13    | AB007932  | 1007.047  | 826.295   |
| AK027028  | 2320.717  | 1250.741  | NM_013310 | 2631.609  | 1845.762  | AF219257  | 11754.638 | 10549.024 |
| AK027069  | 8134.903  | 4418.328  | BC004958  | 841.981   | 827.311   | NM_003978 | 926.453   | 769.801   |
| AK026916  | 1831.908  | 884.091   | NM_005762 | 4727.894  | 4118.369  | NM_002561 | 1498.708  | 1148.262  |
| AK026914  | 1731.499  | 544.815   | NM_006473 | 376.654   | 261.155   | NM_006103 | 15496.151 | 12491.854 |
| Y11166    | 1933.139  | 2803.573  | NM_014643 | 1899.362  | 1972.17   | AL359933  | 9355.533  | 5598.386  |
| AK023515  | 2856.437  | 4668.413  | NM_005653 | 969.024   | 963.476   | NM_001302 | 819.199   | 399.078   |
| AL137544  | 498.038   | 613.884   | NM_014553 | 397.748   | 304.046   | M17783    | 5365.972  | 3751.881  |
| AL137623  | 18385.387 | 21668.348 | NM_003440 | 1162.893  | 1140.413  | NM_018590 | 5024.255  | 3224.384  |
| AK026485  | 681.971   | 1402.456  | NM_004698 | 7343.784  | 6596.555  | NM_003178 | 1477.298  | 898.488   |
| NM_003546 | 1474.133  | 1405.985  | U41387    | 11267.855 | 6787.5    | NM_012437 | 6475.542  | 4090.816  |
| AF118077  | 1375.526  | 1244.362  | NM_004516 | 4315.077  | 3724.102  | AF090944  | 494.49    | 713.617   |
| AL137625  | 516.126   | 463.285   | NM_006513 | 761.394   | 410.635   | NM_002607 | 777.875   | 1684.244  |
| AK025750  | 1123.372  | 939.453   | NM_003685 | 12470.529 | 10936.604 | AF116626  | 2278.684  | 3010.07   |
| BF031253  | 626.573   | 566.797   | NM_002486 | 260.445   | 260.047   | NM_001760 | 25090.439 | 28759.828 |
| AK025783  | 1144.78   | 494.01    | NM_006295 | 6104.229  | 5632.29   | NM_002527 | 883.765   | 1159.492  |
| AF113675  | 909.447   | 382.285   | NM_001540 | 1793.684  | 1712.739  | NM_005890 | 821.5     | 1046.088  |
| NM_020119 | 1625.771  | 704.42    | NM_012111 | 4806.213  | 4156.156  | NM_007065 | 30093.566 | 30623.498 |
| AL049417  | 11629.735 | 3063.512  | NM_004470 | 7728.038  | 7887.301  | AF149785  | 2210.694  | 2435.407  |
| AK023507  | 1120.213  | 575.568   | NM_001418 | 3985.681  | 4080.333  | NM_012068 | 9796.807  | 11764.508 |
| NM_005166 | 4342.434  | 6343.048  | NM_003756 | 23730.396 | 20877.264 | NM_004064 | 3918.503  | 4359.467  |
| AL109818  | 496.516   | 1018.011  | AL049680  | 2585.526  | 2497.823  | NM_001256 | 1642.935  | 1510.59   |
| S97393    | 303.331   | 1016.145  | AL133660  | 413.316   | 404.508   | NM_014704 | 1850.359  | 1682.874  |
| NM_017928 | 956.218   | 1928.485  | AK001595  | 945.483   | 814.566   | NM_020205 | 651.552   | 589.855   |
| NM_018472 | 1847.971  | 2446.006  | NM_003715 | 4342.049  | 3393.047  | NM_001227 | 792.721   | 741.185   |
| AL133108  | 114.008   | 849.356   | M94065    | 830.138   | 699.35    | NM_001191 | 1714.861  | 1269.82   |
| AJ008128  | 36649.961 | 41774.375 | BF036874  | 853.259   | 681.598   | U15174    | 737.736   | 542.322   |
| AL449243  | 10536.66  | 11536.422 | BE888487  | 432.111   | 339.83    | NM_013342 | 1748.001  | 1085.748  |
| M12211    | 1429.511  | 3089.288  | AF182419  | 771.679   | 630.524   | NM_014344 | 840.055   | 556.144   |
| AK026449  | 5879.02   | 4073.299  | NM_004293 | 208.236   | 171.099   | AB040917  | 769.905   | 412.956   |
| NM_014027 | 3207.549  | 2543.978  | NM_007016 | 776.826   | 596.671   | AL110261  | 5334.318  | 3018.636  |
| AF116621  | 3193.67   | 2127.999  | NM_002703 | 2027.68   | 1719.891  | AA203539  | 448.986   | 268.648   |
| AF086554  | 1777.488  | 1375.31   | NM_005375 | 5394.836  | 4155.123  | AK021786  | 449.044   | 352.4     |
| AL390136  | 23007.488 | 8653.613  | NM_005985 | 2287.842  | 1876.227  | NM_005932 | 446.907   | 648.766   |
| AK023156  | 304.592   | 365.835   | NM_015906 | 2594.899  | 2622.187  | M26663    | 76.954    | 577.171   |
| AF086398  | 64486.188 | 37329.668 | AK023759  | 1149.049  | 1289.224  | NM_004279 | 4193.012  | 5333.667  |
| NM_003180 | 1145.446  | 598.737   | L25270    | 9861.189  | 9309.688  | NM_004851 | 321.935   | 334.382   |
| AF086406  | 8126.206  | 2592.988  | AB033111  | 761.701   | 644.547   | NM_001908 | 1645.008  | 2835.943  |
| D17216    | 6251.268  | 7031.736  | AJ276316  | 846.965   | 684.428   | NM_000285 | 4086.479  | 9827.907  |
| AL137581  | 1420.359  | 2386.849  | AF229246  | 4954.173  | 5030.204  | NM_005911 | 17211.172 | 19221.951 |
| AK024942  | 1923.673  | 3111.997  | S64709    | 2420.397  | 2390.412  | AV702690  | 1266.888  | 1470.282  |
| AJ227873  | 19366.713 | 20749.164 | NM_018488 | 933.067   | 815.697   | AL117452  | 2625.081  | 2692.08   |
| AK022886  | 4776.783  | 6363.898  | X56465    | 333.134   | 218.622   | NM_012230 | 1074.13   | 842.563   |
| AK024665  | 7630.926  | 9534.903  | NM_003071 | 4855.905  | 5336.632  | NM_014038 | 6343.727  | 5813.888  |
| AF147363  | 828.764   | 1413.527  | AK021494  | 1275.915  | 1119.63   | NM_002061 | 3497.016  | 2568.771  |
| AJ227880  | 475.863   | 1083.574  | AF075023  | 477.47    | 423.204   | AF169974  | 1624.875  | 1188.821  |
| AK000691  | 1740.41   | 2448.629  | AL360160  | 10230.159 | 7736.319  | NM_004522 | 611.069   | 353.055   |
| AK001448  | 1730.922  | 2492.191  | AK001092  | 16714.51  | 14006.241 | NM_005733 | 1418.04   | 1251.461  |
| AK026890  | 926.169   | 1292.61   | NM_014144 | 887.995   | 858.247   | NM_018138 | 1952.557  | 1371.622  |
| AL049321  | 6329.838  | 7563.647  | AF147345  | 438.384   | 532.512   | NM_019619 | 3162.952  | 2547.101  |
| CY3Cy5    | 835.715   | 162.262   | AF147373  | 2992.245  | 2220.432  | AF183411  | 2373.875  | 1491.546  |

|           |           |           |           |           |           |           |           |           |
|-----------|-----------|-----------|-----------|-----------|-----------|-----------|-----------|-----------|
| W74254    | 1276.672  | 1171.296  | AK026209  | 428.194   | 542.745   | BF244591  | 953.713   | 816.914   |
| M58603    | 1262.898  | 992.001   | AF086253  | 618.752   | 642.193   | NM_00588E | 7751.422  | 5286.572  |
| AA443286  | 538.721   | 406.812   | AF086303  | 295.189   | 483.645   | U63785    | 998.768   | 692.61    |
| AB003334  | 1898.796  | 1763.791  | AF086434  | 687.933   | 882.947   | NM_00596E | 1383.048  | 777.061   |
| AW276315  | 652.887   | 967.174   | AK022063  | 1561.854  | 1690.686  | NM_00315E | 1135.587  | 877.648   |
| AA490737  | 960.428   | 1262.577  | AF086345  | 1620.484  | 1621.142  | NM_00310E | 489.436   | 518.566   |
| AI878886  | 18128.787 | 36978.496 | AF086464  | 640.447   | 619.878   | NM_01331C | 2889.044  | 3020.966  |
| BM012504  | 4552.459  | 5974.79   | AL049278  | 1203.915  | 1320.008  | BC004958  | 1161.893  | 1316.441  |
| AA664145  | 986.384   | 1272.464  | NM_00506C | 279.116   | 231.395   | NM_00576E | 6103.538  | 8284.877  |
| X72308    | 7771.04   | 8996.13   | AF085935  | 255.77    | 195.878   | NM_00647E | 541.5     | 563.685   |
| T50790    | 4348.569  | 5306.638  | AL035369  | 855.84    | 686.285   | NM_01464E | 2224.912  | 2089.161  |
| R48168    | 10696.618 | 12999.943 | AF075097  | 2287.449  | 2203.846  | NM_00565E | 1540.425  | 2163.419  |
| NM_00394E | 1945.68   | 2047.755  | AK022801  | 272.086   | 259.003   | NM_01455E | 773.276   | 1163.992  |
| NM_00445E | 1261.558  | 1760.565  | AL133075  | 3692.483  | 2592.155  | NM_00344C | 1676.608  | 1884.288  |
| SR9       | 14664.877 | 3160.348  | AL137630  | 1446.195  | 1270.703  | NM_00469E | 9518.398  | 11885.587 |
| CY3Cy5    | 1087.724  | 71.527    | AL137277  | 4200.05   | 3807.108  | U41387    | 15207.623 | 14615.311 |
| NM_000591 | 695.368   | 676.304   | AL137447  | 463.333   | 674.383   | NM_00451E | 5546.303  | 4827.78   |
| NM_00056E | 5764.033  | 6178.77   | BC023609  | 587.085   | 497.452   | NM_00651E | 695.024   | 602.082   |
| AF253318  | 1359.67   | 1993.645  | AK025100  | 1707.835  | 1654.653  | NM_00368E | 15667.865 | 9797.665  |
| NM_017767 | 6675.217  | 8439.521  | AF086395  | 654.452   | 857.151   | NM_00629E | 8335.885  | 5234.689  |
| AK024848  | 2604.999  | 3339.195  | AF086049  | 1057.686  | 1272.643  | NM_00154C | 2516.999  | 1840.821  |
| U06699    | 5115.407  | 6731.587  | AF114263  | 532.403   | 540.105   | NM_012111 | 5628.256  | 3745.146  |
| AJ290954  | 2987.308  | 3893.331  | AK026142  | 2955.486  | 3437.984  | NM_00447C | 9922.948  | 6586.557  |
| AK025451  | 2464.045  | 2479.683  | AF161369  | 1356.915  | 1377.188  | NM_00141E | 5823.385  | 3268.789  |
| NM_00278E | 1399.552  | 1587.148  | AK027176  | 1642.336  | 1503.392  | NM_00375E | 34399.66  | 17711.994 |
| X52005    | 7698.607  | 11112.926 | Y12019    | 2126.426  | 1357.96   | AL049680  | 3854.03   | 2445.313  |
| NM_001047 | 2269.786  | 2517.466  | AL137326  | 500.912   | 652.436   | AL133660  | 467.6     | 401.346   |
| AK024396  | 1616.681  | 2146.172  | AK021898  | 885.409   | 697.001   | AK001595  | 1054.729  | 938.967   |
| U58514    | 675.522   | 1008.46   | AK022024  | 1476.549  | 1231.102  | NM_01801E | 508.457   | 525.411   |
| NM_000544 | 2255.039  | 2069.954  | AK022163  | 183.73    | 262.554   | NM_00371E | 5166.304  | 6210.364  |
| AV681967  | 596.304   | 647.394   | AK022301  | 690.678   | 637.764   | M94065    | 950.842   | 1105.469  |
| NM_01825C | 546.145   | 633.688   | AK021948  | 670.078   | 699.602   | BF036874  | 939.906   | 996.655   |
| NM_01655E | 2878.603  | 2697.466  | AK022341  | 840.247   | 1340.253  | AF182419  | 829.967   | 1073.632  |
| NM_00379E | 27409.193 | 32576.953 | AK021642  | 3055.228  | 3646.246  | NM_00429E | 222.524   | 392.26    |
| NM_01423E | 1129.186  | 1792.837  | AK022455  | 480.452   | 568.577   | NM_00701E | 1091.75   | 1087.879  |
| NM_005701 | 1101.673  | 1963.807  | AK021987  | 1057.615  | 1081.02   | NM_00270E | 3249.281  | 3213.839  |
| NM_001231 | 499.723   | 1051.887  | AK026905  | 733.499   | 754.982   | NM_00537E | 9940.608  | 9503.416  |
| NM_00681E | 21933.176 | 25971.242 | AK026704  | 596.488   | 643.629   | NM_00598E | 2372.168  | 1941.171  |
| NM_014744 | 1669.585  | 1987.657  | NM_000134 | 386.004   | 253.713   | NM_01590E | 2904.172  | 2351.467  |
| AF146759  | 1053.305  | 1399.844  | NM_00663E | 2003.666  | 1822.481  | AK023759  | 1171.663  | 769.308   |
| AB032993  | 3319.295  | 2861.13   | X14675    | 992.966   | 809.58    | L25270    | 9403.16   | 6336.872  |
| NM_000854 | 2102.624  | 2184.149  | AF071170  | 2556.198  | 2201.573  | AB033111  | 983.029   | 666.115   |
| AL117423  | 2876.52   | 3251.805  | AF075075  | 374.944   | 266.239   | AJ276316  | 849.469   | 479.07    |
| NM_00614C | 428.478   | 627.22    | AK025259  | 1088.519  | 543.712   | AF229246  | 5641.027  | 4175.197  |
| NM_002084 | 1181.401  | 1271.859  | NM_018304 | 3373.792  | 2827.462  | S64709    | 3110.074  | 1918.149  |
| D16892    | 23655.434 | 24515.254 | AK024457  | 1934.105  | 2365.316  | NM_01848E | 770.852   | 644.992   |
| NM_00475C | 1567.585  | 1873.586  | AK026894  | 712.379   | 886.087   | NM_003071 | 5702.362  | 4089.296  |
| NM_00729E | 2398.51   | 2897.383  | AK026372  | 483.132   | 498.645   | AK021494  | 1377.64   | 1668.481  |
| NM_003651 | 5585.308  | 7207.346  | AL109684  | 285.121   | 257.982   | AK022117  | 368.181   | 738.828   |
| NM_00326E | 2053.866  | 2179.144  | NM_01418E | 2800.924  | 2598.897  | AF075023  | 539.9     | 727.82    |
| AK022832  | 1386.062  | 1011.114  | AF056442  | 434.188   | 538.409   | AL360160  | 13406.9   | 14191.691 |
| NM_014641 | 2105.445  | 2626.308  | AK024752  | 22935.563 | 15393.529 | AK001092  | 18396.373 | 21655.959 |
| NM_00446E | 10725.079 | 15523.923 | BG117194  | 607.86    | 605.788   | AK023427  | 337.92    | 512.207   |

|           |           |           |           |           |           |           |          |          |
|-----------|-----------|-----------|-----------|-----------|-----------|-----------|----------|----------|
| AB020664  | 1533.089  | 1854.955  | AF131859  | 3283.794  | 2026.683  | NM_014144 | 1029.044 | 1845.149 |
| NM_006640 | 2380.923  | 2308.191  | AK023632  | 459.792   | 344.993   | AF147345  | 519.057  | 744.188  |
| NM_000343 | 415.605   | 609.817   | AF086118  | 3554.414  | 2529.06   | AF147373  | 2919.922 | 2866.278 |
| NM_019112 | 2563.932  | 2439.986  | NM_014138 | 731.441   | 504.803   | AK026209  | 473.716  | 480.471  |
| NM_012336 | 5595.151  | 6134.474  | AK025044  | 507.869   | 385.981   | AF086253  | 812.625  | 701.303  |
| NM_020246 | 1173.273  | 1416.08   | AK023690  | 421.98    | 377.654   | AF086303  | 548.509  | 514.875  |
| NM_000084 | 1356.085  | 1203.488  | AK023806  | 1741.137  | 1725.003  | AF086434  | 873.46   | 636.947  |
| NM_016354 | 1088.753  | 1550.66   | Y16696    | 10356.323 | 13469.057 | AK022063  | 1674.922 | 964.656  |
| NM_003038 | 1200.031  | 1504.401  | AK026094  | 1123.704  | 1339.858  | AF086345  | 1921.869 | 1258.146 |
| NM_018155 | 3123.003  | 4035.517  | AF161344  | 3685.095  | 4252.278  | AF086464  | 872.893  | 649.843  |
| AL050358  | 1863.298  | 2931.45   | AF086027  | 845.331   | 1139.433  | AL049278  | 1795.849 | 987.646  |
| NM_004731 | 808.466   | 1098.875  | AF075045  | 295.104   | 380.109   | NM_013318 | 108.976  | 400.335  |
| AB023139  | 1307.526  | 1505.958  | AK022199  | 658.154   | 491.228   | NM_005060 | 460.433  | 665.636  |
| D80004    | 2538.21   | 1977.447  | NM_006211 | 280.944   | 254.125   | AF085935  | 367.849  | 471.888  |
| NM_000946 | 2503.307  | 2983.878  | NM_003524 | 4678.855  | 2404.158  | AL035369  | 986.039  | 1281.442 |
| NM_016070 | 1656.084  | 2795.53   | AK021438  | 748.843   | 472.419   | AF075097  | 2107.499 | 2453.578 |
| NM_016390 | 1430.898  | 2609.505  | NM_005913 | 390.65    | 395.701   | AK022801  | 641.166  | 913.804  |
| NM_020313 | 770.893   | 1053.755  | S39891    | 621.326   | 903.923   | AL133075  | 5029.013 | 6777.756 |
| NM_014628 | 3279.194  | 3615.486  | AK021624  | 755.426   | 735.102   | AL137692  | 906.255  | 1270.217 |
| AK025630  | 1314.769  | 1809.631  | AF278605  | 6014.102  | 3536.521  | AL137630  | 1935.93  | 3476.872 |
| AL365404  | 9551.01   | 11485.021 | NM_006497 | 8838.292  | 6934.322  | AL137277  | 5191.558 | 5523.956 |
| AK022907  | 3186.554  | 3887.479  | AL133599  | 653.415   | 481.574   | AL137447  | 597.304  | 549.156  |
| NM_014793 | 2093.317  | 2492.255  | NM_016472 | 740.894   | 689.927   | AL157467  | 558.362  | 474.735  |
| NM_004245 | 1931.882  | 1590.409  | AF086064  | 414.576   | 280.366   | BC023609  | 801.137  | 639.622  |
| NM_003241 | 1260.307  | 1311.284  | AK023042  | 2802.404  | 3150.617  | AK025100  | 1824.516 | 1254.376 |
| NM_002685 | 2740.952  | 2721.32   | AK026429  | 259.258   | 214.868   | AF086395  | 861.349  | 644.675  |
| AK024504  | 753.475   | 830.73    | NM_016550 | 1907.953  | 2390.638  | AF086049  | 840.632  | 717.232  |
| AF039023  | 1318.327  | 1572.918  | AK024813  | 3061.804  | 3582.734  | AF114263  | 946.486  | 863.558  |
| NM_005511 | 2888.826  | 3512.874  | AJ227909  | 10829.329 | 15766.73  | AK026142  | 3587.107 | 2521.082 |
| NM_014698 | 17752.318 | 20430.816 | CY3Cy5    | 2261.682  | 230.881   | AF161369  | 1712.988 | 1657.592 |
| NM_018475 | 4487.208  | 5801.521  | BG534366  | 761.074   | 793.971   | AK027176  | 1751.086 | 2124.787 |
| X52005    | 5529.448  | 5645.632  | BG698522  | 3602.515  | 4098.212  | AF073328  | 813.175  | 1146.824 |
| NM_001047 | 1771.84   | 1596.123  | AA152346  | 570.946   | 680.581   | AF211968  | 285.855  | 576.565  |
| AK024396  | 1039.04   | 1027.373  | AF022912  | 1776.638  | 1913.99   | Y12019    | 3004.295 | 4637.824 |
| U58514    | 458.66    | 444.258   | AA477428  | 7647.39   | 7737.746  | AF147418  | 439.087  | 376.292  |
| W74254    | 1243.675  | 1150.3    | AA156342  | 965.426   | 783.444   | AL137326  | 614.487  | 971.046  |
| M58603    | 1605.996  | 1584.27   | R45594    | 9651.722  | 9922.479  | AK021898  | 1008.573 | 1145.504 |
| AA443286  | 785.175   | 1028.538  | H46425    | 660.289   | 702.724   | AK022024  | 2243.921 | 1736.087 |
| AB003334  | 2394.386  | 3826.021  | AI355949  | 263.861   | 542.854   | AK022301  | 982.786  | 852.519  |
| AW276315  | 1417.287  | 2678.601  | AA278152  | 4017.663  | 4643.568  | AK021948  | 951.756  | 796.371  |
| BG697179  | 4573.759  | 4916.891  | H75530    | 1547.898  | 1307.045  | AK022054  | 435.335  | 230.412  |
| NM_002136 | 38106.281 | 40082.492 | NM_004176 | 2632.717  | 2854.46   | AK021642  | 3005.273 | 1739.142 |
| BM012504  | 6742.752  | 7552.379  | NM_004548 | 10210.131 | 10192.056 | AK022455  | 724.118  | 292.611  |
| AA664145  | 1135.322  | 1164.025  | SR1       | 65018.5   | 73357.102 | AK021987  | 924.626  | 616.052  |
| X72308    | 10141.139 | 8668.471  | SR3       | 38360.387 | 34893.613 | AK026905  | 560.014  | 547.311  |
| T50790    | 1814.449  | 1837.381  | SR5       | 3260.259  | 2728.261  | AK026704  | 620.667  | 484.125  |
| R48168    | 11457.313 | 11166.957 | SR7       | 4202.176  | 27393.471 | NM_006638 | 2340.169 | 2451.847 |
| NM_003942 | 2150.234  | 2506.802  | SR9       | 12948.373 | 2318.502  | X14675    | 1085.703 | 1251.356 |
| NM_004452 | 886.066   | 1067.42   | CY3Cy5    | 1755.401  | 148.026   | AF071170  | 4029.105 | 5807.637 |
| AB040954  | 2951.212  | 3215.985  | NM_001315 | 6603.761  | 7955.8    | AF161364  | 646.71   | 863.657  |
| NM_002081 | 899.718   | 1283.54   | AF286095  | 902.258   | 1230.423  | AF075075  | 550.648  | 703.812  |
| NM_002084 | 850.909   | 921.391   | NM_000878 | 513.37    | 878.083   | AK025259  | 1081.017 | 1147.331 |
| D16892    | 17698.877 | 14134.808 | S66407    | 1005.435  | 1349.782  | NM_005453 | 99.592   | 237.167  |

|           |           |           |           |           |           |           |           |           |
|-----------|-----------|-----------|-----------|-----------|-----------|-----------|-----------|-----------|
| NM_00475C | 1145.195  | 943.89    | NM_016523 | 704.904   | 1200.052  | NM_018304 | 3611.341  | 3193.981  |
| NM_00729E | 1223.854  | 993.694   | NM_00425E | 28375     | 36628.172 | AK024457  | 1575.521  | 949.498   |
| NM_003651 | 4256.971  | 3738.965  | NM_001981 | 2663.378  | 2876.727  | AK026894  | 921.391   | 502.258   |
| NM_00041E | 513.948   | 778.958   | NM_014654 | 623.576   | 642.892   | AK026372  | 447.384   | 496.542   |
| NM_01324E | 385.751   | 735.45    | NM_00158E | 19150.752 | 19174.988 | AL109684  | 562.909   | 491.455   |
| NM_018431 | 281.862   | 757.227   | AK026108  | 3748.271  | 3676.254  | NM_01418E | 3154.349  | 4129.099  |
| NM_000591 | 1231.224  | 1842.772  | NM_00637E | 1355.121  | 1380.147  | AF056442  | 489.156   | 846.894   |
| AF253318  | 1639.371  | 1362.159  | BF571428  | 999.042   | 1099.864  | AK024752  | 36376.887 | 40619.496 |
| NM_017767 | 8123.641  | 6661.827  | AB037723  | 1989.014  | 1847.764  | BG117194  | 980.058   | 1153.296  |
| AK024848  | 3273.487  | 3504.594  | NM_00624E | 1879.662  | 1779.624  | AF131859  | 3911.912  | 4046.605  |
| NM_00054E | 597.471   | 648.605   | U58096    | 16719.406 | 12769.962 | AK023632  | 554.949   | 534.218   |
| U06699    | 4591.269  | 5141.716  | NM_01692E | 1971.992  | 1904.535  | AF086118  | 3933.363  | 3947.941  |
| AJ290954  | 3287.243  | 4066.419  | NM_01394E | 696.239   | 481.81    | NM_01413E | 1105.283  | 1061.918  |
| AK025451  | 2744.389  | 2423.786  | NM_00163E | 2692.834  | 2935.161  | AK025044  | 259.106   | 566.861   |
| NM_00278E | 1768.209  | 2341.764  | AF182404  | 1780.065  | 2369.526  | AK023690  | 548.042   | 361.004   |
| NM_000084 | 817.276   | 946.894   | NM_000804 | 904.042   | 1581.813  | AK023806  | 1654.886  | 1214.863  |
| NM_016354 | 750.747   | 1143.371  | NM_00655E | 1701.18   | 2244.774  | Y16696    | 14985.718 | 10154.45  |
| NM_00303E | 844.004   | 870.947   | NM_014521 | 692.832   | 935.889   | AK026094  | 1511.38   | 776.216   |
| NM_01815E | 2385.87   | 2098.546  | NM_00244E | 700.92    | 873.167   | AF161344  | 4657.169  | 3354.534  |
| AL050358  | 1463.589  | 1494.745  | NM_01780E | 427.056   | 493.802   | AF086027  | 794.647   | 591.659   |
| NM_004731 | 688.872   | 722.264   | AK023202  | 1317.826  | 1890.464  | NM_001207 | 62357.227 | 43698.938 |
| NM_000544 | 2752.783  | 3191.019  | D63877    | 2645.054  | 3336.058  | AK022154  | 214.726   | 328.769   |
| NM_001044 | 510.701   | 802.475   | AF131760  | 651.802   | 990.675   | AK022199  | 789.455   | 817.887   |
| NM_004644 | 643.224   | 2187.035  | NM_01869E | 1265.365  | 1277.699  | NM_006211 | 402.379   | 437.76    |
| AV681967  | 1231.067  | 1712.234  | NM_006461 | 847.977   | 963.543   | NM_003524 | 6709.713  | 4887.34   |
| NM_01825C | 779.581   | 1095.564  | NM_018201 | 2027.36   | 1786.28   | AK021438  | 1411.073  | 1125.28   |
| NM_01655E | 4020.833  | 4044.469  | NM_01443E | 505.016   | 520.338   | AK022315  | 218.632   | 437.496   |
| NM_00379E | 27502.168 | 24921.045 | NM_01488C | 1850.191  | 1840.427  | S39891    | 760.74    | 767.436   |
| NM_01423E | 1278.123  | 1353.141  | NM_003764 | 2250.208  | 1807.413  | R17536    | 329.88    | 352.21    |
| NM_005701 | 1593.288  | 1387.742  | NM_00482E | 328.683   | 305.677   | AK021624  | 815.965   | 702.753   |
| NM_001231 | 589.259   | 644.546   | NM_00679E | 19292.23  | 18591.148 | AF278605  | 7198.821  | 6533.068  |
| NM_00681E | 26757.494 | 23067.104 | D87666    | 38488.973 | 29101.494 | NM_006497 | 8282.975  | 7272.028  |
| NM_014744 | 2257.166  | 2413.831  | AF149304  | 368.402   | 552.967   | AL133599  | 984.58    | 772.333   |
| AF146759  | 1208.276  | 1513.488  | NM_01209E | 5739.149  | 8033.637  | NM_01647E | 1237.736  | 810.325   |
| AB032993  | 3265.889  | 2734.48   | NM_01643E | 357.662   | 657.124   | AK023042  | 3210.512  | 2792.723  |
| NM_000854 | 2051.194  | 1993.321  | X73079    | 14193.131 | 18591.574 | AK026429  | 420.816   | 390.538   |
| AL117423  | 3425.13   | 3942.386  | NM_019091 | 696.823   | 643.962   | NM_01655C | 3063.775  | 1455.889  |
| NM_00614C | 544.906   | 644.034   | AF264781  | 1062.319  | 1210.005  | AK024813  | 4169.712  | 2176.346  |
| NM_00268E | 2311.102  | 2352.212  | NM_00245E | 457.906   | 409.37    | AJ227909  | 14932.267 | 10968.529 |
| AK024504  | 374.516   | 502.994   | AK024215  | 8704.685  | 10560.478 | AK021880  | 734.788   | 525.485   |
| AF039023  | 943.979   | 1020.687  | AB044661  | 2525.981  | 2913.037  | AK024107  | 440.582   | 249.467   |
| NM_005511 | 1842.546  | 1604.003  | NM_00060E | 4716.312  | 4675.494  | CY3Cy5    | 4925.963  | 293.283   |
| NM_01469E | 12654.274 | 11291.968 | NM_016124 | 3558.365  | 4316.913  | BG534366  | 506.532   | 1430.285  |
| NM_01847E | 3636.692  | 2397.631  | NM_01907E | 284.013   | 388.786   | BG698522  | 2947.177  | 5470.22   |
| NM_00326E | 3020.759  | 2806.045  | U53530    | 1144.032  | 930.027   | AA152346  | 588.043   | 756.175   |
| AB028127  | 440.907   | 616.656   | NM_00659E | 873.68    | 1124.46   | L15189    | 2158.735  | 3042.456  |
| AK022832  | 2138.066  | 2758.139  | NM_01594E | 2249.519  | 2159.92   | AB023420  | 8095.55   | 9871.897  |
| NM_014641 | 2153.548  | 1716.699  | NM_003054 | 1304.063  | 1170.163  | AF022912  | 2123.259  | 2308.306  |
| NM_00446E | 9473.786  | 7947.032  | NM_00221E | 10425.292 | 11407.586 | AA477428  | 8407.49   | 8122.227  |
| AB020664  | 2144      | 2220.854  | NM_00282E | 5326.472  | 6548.115  | AA156342  | 910.837   | 1027.599  |
| NM_00664C | 4450.471  | 4343.461  | AF159141  | 1973.928  | 2353.937  | R45594    | 10671.91  | 12686.021 |
| NM_00034E | 607.783   | 781.549   | NM_01645E | 10730.761 | 12061.721 | H46425    | 569.868   | 721.241   |
| NM_01911E | 3030.294  | 5026.161  | AK022233  | 2306.164  | 2736.839  | AA278152  | 4822.662  | 5265.095  |

|           |           |           |           |           |           |           |           |           |
|-----------|-----------|-----------|-----------|-----------|-----------|-----------|-----------|-----------|
| NM_01233E | 6580.264  | 8751.658  | AK026410  | 4579.651  | 4450.148  | H75530    | 1357.07   | 1456.422  |
| NM_02024E | 1523.21   | 1745.905  | NM_014637 | 1771.038  | 1857.261  | NM_00417E | 3170.34   | 2754.313  |
| NM_00394E | 1374.738  | 1279.718  | NM_01337E | 12547.731 | 15331.674 | NM_00454E | 13563.9   | 14124.141 |
| NM_00445E | 800.632   | 1110.721  | AF113208  | 3693.242  | 3036.664  | SR5       | 4128.195  | 4068.851  |
| AB040954  | 2095.118  | 1922.91   | NM_00615E | 3579.893  | 3264.97   | SR7       | 5623.063  | 39916.777 |
| NM_002081 | 603.595   | 563.294   | NM_012164 | 1187.253  | 1127.885  | SR9       | 18217.332 | 3445.584  |
| AB023139  | 1662.652  | 1645.95   | AK026010  | 670.412   | 663.928   | CY3Cy5    | 3640.815  | 184.201   |
| NM_01788E | 1135.442  | 1148.088  | NM_004721 | 459.812   | 435.487   | NM_00131E | 7157.361  | 12595.714 |
| D80004    | 3292.033  | 3290.485  | AB011156  | 700.807   | 664.83    | AF286095  | 1313.468  | 3412.877  |
| X63966    | 555.606   | 448.584   | NM_01807E | 797.563   | 1014.326  | NM_00087E | 433.767   | 2375.989  |
| NM_00094E | 2470.181  | 2614.215  | NM_00476C | 2111.379  | 2067.591  | S66407    | 817.701   | 1320.623  |
| NM_01607C | 1517.81   | 1541.314  | NM_00675E | 2341.758  | 2163.896  | NM_00425E | 38430.648 | 61044.281 |
| NM_01639C | 1254.374  | 1077.248  | NM_00680E | 2826.707  | 3867.676  | NM_001981 | 3138.406  | 4532.279  |
| NM_016101 | 5842.305  | 5210.843  | NM_00694E | 708.104   | 920.038   | NM_014654 | 700.166   | 794.144   |
| NM_00585E | 31093.682 | 26996.264 | NM_01394E | 827.92    | 1126.975  | NM_00158E | 12593.017 | 14153.731 |
| NM_01462E | 3565.226  | 3805.718  | NM_00163E | 2798.516  | 4132.835  | AK026108  | 3393.089  | 4832.14   |
| AL365404  | 11669.232 | 12699.975 | BG698522  | 3090.71   | 3111.829  | NM_00637E | 1485.52   | 2222.188  |
| AK022907  | 3786.05   | 4049.304  | L15189    | 1885.055  | 1930.349  | BF571428  | 1021.79   | 1054.574  |
| NM_01479E | 2914.748  | 4584.187  | AB023420  | 6277.223  | 5030.221  | AB037723  | 1302.949  | 1549.294  |
| NM_00424E | 1977.141  | 2055.538  | AF022912  | 1768.388  | 1379.765  | NM_00624E | 2117.015  | 2005.033  |
| NM_00054E | 421.506   | 646.323   | AA477428  | 7011.599  | 6855.445  | U58096    | 19959.865 | 14770.833 |
| U06699    | 3733.047  | 3383.802  | AA156342  | 842.169   | 671.392   | NM_01232E | 536.13    | 583.818   |
| AJ290954  | 2271.059  | 2092.369  | R45594    | 9284.719  | 9409.438  | NM_01394E | 671.907   | 774.189   |
| AK025451  | 1532.113  | 1171.401  | H46425    | 746.696   | 528.935   | NM_00163E | 3554.392  | 3218.56   |
| NM_00278E | 1172.97   | 968.285   | AA278152  | 4008.927  | 4260.979  | AF182404  | 1917.496  | 2557.226  |
| X52005    | 5798.325  | 5586.431  | H75530    | 1490.059  | 1382.138  | NM_000804 | 960.564   | 1569.694  |
| NM_001047 | 2149.191  | 2345.216  | NM_00417E | 2760.355  | 2572.656  | NM_00655E | 1556.266  | 4414.814  |
| AK024396  | 1247.766  | 1634.276  | NM_00454E | 10773.09  | 9572.08   | NM_014521 | 1985.663  | 3717.64   |
| U58514    | 661.975   | 786.82    | AK000554  | 1928.716  | 1942.807  | NM_00244E | 954.476   | 1625.406  |
| W74254    | 1238.75   | 1452.353  | NM_00647E | 2923.759  | 3217.213  | NM_01780E | 528.621   | 992.334   |
| M58603    | 1779.087  | 1593.664  | NM_00153E | 1927.522  | 1868.07   | AK023202  | 1586.242  | 2353.441  |
| AA443286  | 781.732   | 573.024   | X97261    | 12306.773 | 70835.086 | D63877    | 3521.713  | 5600.491  |
| AB003334  | 1886.082  | 1447.25   | NM_00131E | 6338.09   | 6582.533  | AF131760  | 1079.637  | 1837.961  |
| AW276315  | 913.123   | 954.154   | AF286095  | 649.064   | 706.61    | NM_01869E | 1404.254  | 1570.603  |
| AA490737  | 1409.357  | 1157.309  | NM_00087E | 533.145   | 388.26    | NM_006461 | 981.306   | 919.29    |
| AI878886  | 18464.162 | 16195.761 | S66407    | 872.563   | 974.182   | NM_018201 | 2240.665  | 2472.125  |
| BG697179  | 5400.843  | 5286.49   | NM_00425E | 24829.791 | 22983.996 | NM_01443E | 703.695   | 936.347   |
| NM_00213E | 39966.898 | 34830.906 | NM_001981 | 2622.088  | 2814.018  | NM_01488C | 2349.273  | 1809.501  |
| BM012504  | 6836.624  | 7118.372  | NM_014654 | 482.67    | 534.371   | NM_003764 | 2221.567  | 1942.689  |
| AA664145  | 1302.463  | 1173.167  | NM_00158E | 17470.678 | 15897.755 | NM_00679E | 25249.754 | 19327.139 |
| X72308    | 11666     | 12724.514 | AK026108  | 4295.28   | 4208.027  | NM_00153E | 1956.944  | 1824.01   |
| AB032993  | 2369.508  | 1916.556  | NM_00637E | 1560.485  | 2157.55   | X97261    | 15534.027 | 61646.016 |
| NM_000854 | 1402.694  | 1128.833  | BF571428  | 1073.319  | 1020.618  | D87666    | 46184.93  | 27660.824 |
| AL117423  | 2111.357  | 1522.045  | AB037723  | 1545.887  | 1211.188  | AF149304  | 452.047   | 917.267   |
| NM_002084 | 1118.847  | 952.594   | NM_00624E | 2036.247  | 2026.808  | NM_01209E | 6723.214  | 8605.691  |
| D16892    | 21046.729 | 19453.529 | U58096    | 15554.9   | 13468.758 | X73079    | 21084.031 | 39928.883 |
| NM_00475C | 1350.377  | 1461.946  | NM_01692E | 1692.114  | 1892.822  | NM_019091 | 616.826   | 1126.192  |
| NM_00729E | 1242.965  | 1484.799  | NM_01232E | 529.176   | 633.951   | AF264781  | 1193.125  | 1705.973  |
| NM_003651 | 3873.434  | 3625.339  | NM_01594E | 3220.046  | 4001.634  | NM_00245E | 400.648   | 489.74    |
| NM_000591 | 1048.544  | 1018.867  | NM_003054 | 2281.16   | 2825.106  | AK024215  | 9426.377  | 7545.927  |
| NM_00056E | 7040.146  | 4944.046  | NM_00221E | 10552.265 | 12614.386 | AB044661  | 3212.743  | 3330.351  |
| AF253318  | 1846.299  | 1540.668  | AF182404  | 1565.572  | 1864.039  | NM_00060E | 5398.814  | 5375.128  |
| NM_017767 | 9014.322  | 9021.003  | NM_000804 | 616.836   | 626.783   | NM_016124 | 4410.386  | 5190.914  |



|           |           |           |           |           |           |           |           |           |
|-----------|-----------|-----------|-----------|-----------|-----------|-----------|-----------|-----------|
| AK024848  | 3710.797  | 5089.375  | NM_006555 | 1618.283  | 1511.887  | NM_019079 | 197.856   | 701.325   |
| NM_004852 | 856.448   | 696.33    | NM_014521 | 668.191   | 781.99    | U53530    | 1324.525  | 1874.662  |
| NM_003633 | 475.715   | 555.75    | NM_002445 | 517.414   | 647.938   | NM_006598 | 1071.192  | 1061.963  |
| NM_000343 | 403.297   | 583.924   | AK023202  | 1273.631  | 1270.916  | NM_015948 | 4291.005  | 4179.755  |
| NM_019112 | 1997.292  | 2012.057  | D63877    | 2755.118  | 2324.121  | NM_003054 | 2959.917  | 2640.055  |
| NM_012336 | 4211.721  | 3502.336  | AF131760  | 747.044   | 669.314   | NM_002219 | 14744.522 | 12884.467 |
| NM_020161 | 818.667   | 1140.086  | NM_018698 | 1347.709  | 1230.729  | NM_002826 | 5780.614  | 6663.226  |
| NM_020246 | 818.654   | 906.485   | NM_006461 | 846.686   | 884.925   | AF159141  | 1729.803  | 2467.497  |
| NM_000084 | 1048.568  | 963.601   | NM_018201 | 14259.93  | 1636.923  | NM_016458 | 16977.488 | 17144.412 |
| NM_016354 | 1195.84   | 1288.998  | NM_014438 | 481.537   | 418.011   | AK022233  | 2771.155  | 2790.931  |
| NM_003038 | 1002.93   | 1324.222  | NM_014880 | 1845.533  | 1577.576  | AL137713  | 288.147   | 252.196   |
| NM_018155 | 3018.152  | 3202.356  | NM_003764 | 2161.18   | 1742.563  | AK026410  | 4561.441  | 4131.581  |
| AL050358  | 2096.091  | 2784.763  | NM_004829 | 670.742   | 612.181   | NM_014637 | 2382.88   | 2268.645  |
| NM_004731 | 718.474   | 954.337   | NM_006793 | 18657.018 | 18842.744 | NM_013379 | 16091.997 | 15169.054 |
| NM_000544 | 2766.257  | 2636.409  | NM_018079 | 914.411   | 1552.483  | AF113208  | 4109.161  | 4932.058  |
| AV681967  | 936.896   | 792.074   | NM_004760 | 2540.099  | 2780.884  | NM_006153 | 3229.038  | 3293.536  |
| NM_018250 | 872.476   | 649.791   | NM_006752 | 5063.414  | 6027.026  | NM_012164 | 1433.223  | 1599.751  |
| NM_016553 | 3719.324  | 3388.578  | NM_006809 | 2903.558  | 3913.469  | AK026010  | 807.038   | 895.79    |
| NM_003795 | 29305.721 | 23631.414 | AF149304  | 465.023   | 689.277   | AB011156  | 713.9     | 890.007   |
| NM_014232 | 1144.93   | 1213.467  | NM_012095 | 6294.39   | 6801.026  | NM_018079 | 1122.035  | 1031.531  |
| NM_005701 | 1826.74   | 1444.324  | X73079    | 15465.227 | 13777.404 | NM_004760 | 3170.976  | 2857.029  |
| NM_001231 | 815.397   | 778.938   | NM_019091 | 726.204   | 506.975   | NM_006752 | 7612.135  | 7335.662  |
| NM_006819 | 29483.943 | 29353.242 | AF264781  | 1065.194  | 899.16    | NM_006809 | 3428.494  | 3908.688  |
| NM_014744 | 2296.32   | 2891.509  | NM_002456 | 414.738   | 260.606   | NM_013943 | 733.98    | 739.092   |
| AF146759  | 1421.628  | 1864.062  | AK024215  | 7814.525  | 5783.525  | NM_001638 | 3265.758  | 3715.871  |
| AL365404  | 9407.159  | 7959.474  | AB044661  | 2561.41   | 2045.504  | BG534366  | 779.691   | 702.199   |
| AK022907  | 2456.521  | 2547.054  | NM_000606 | 4773.028  | 4742.545  | BG698522  | 3608.306  | 3462.467  |
| NM_014793 | 1999.536  | 2227.074  | NM_016124 | 3781.413  | 3008.849  | AA152346  | 436.489   | 266.78    |
| NM_004245 | 1289.888  | 1072.239  | NM_019079 | 342.886   | 408.144   | L15189    | 2191.27   | 1994.595  |
| NM_003241 | 1057.922  | 934.692   | U53530    | 793.26    | 883.129   | AB023420  | 8194.101  | 6613.033  |
| NM_002685 | 2827.906  | 3102.658  | NM_006598 | 690.242   | 552.201   | AF022912  | 2296.626  | 2038.573  |
| AK024504  | 711.7     | 782.776   | NM_004176 | 2886.109  | 2904.265  | AA477428  | 8593.771  | 8997.146  |
| AF039023  | 1391.541  | 1558.96   | NM_004548 | 11077.272 | 12136.526 | AA156342  | 1002.08   | 1214.686  |
| NM_005511 | 2650.868  | 2647.052  | AK000554  | 1820.723  | 2105.268  | R45594    | 11709.544 | 12833.928 |
| NM_014698 | 14204.474 | 13073.103 | NM_006472 | 3132.488  | 3322.153  | H46425    | 715.282   | 749.635   |
| NM_018475 | 4175.334  | 4367.407  | NM_002826 | 5283.078  | 5820.795  | AI355949  | 422.474   | 902.639   |
| NM_003262 | 3524.906  | 3787.15   | AF159141  | 2070.888  | 1868.164  | AA278152  | 5510.232  | 6290.837  |
| AK022832  | 2065.481  | 1319.817  | NM_002420 | 478.224   | 341.246   | H75530    | 1855.675  | 1780.98   |
| NM_014641 | 1975.216  | 1465.143  | NM_016458 | 15762.956 | 16044.388 | NM_004176 | 3947.146  | 3446.892  |
| NM_004462 | 10229.739 | 7208.706  | AK022233  | 2382.434  | 2907.005  | NM_004548 | 15727.778 | 12823.595 |
| AB020664  | 2297.203  | 2253.688  | AK026410  | 4741.987  | 7016.99   | AK000554  | 2920.817  | 2459.863  |
| NM_006640 | 4454.119  | 5027.886  | NM_014637 | 2106.283  | 2055.174  | NM_006472 | 4151.011  | 3732.291  |
| NM_000857 | 1076.1    | 1171.574  | NM_013379 | 12489.89  | 12209.747 | NM_001538 | 1490.167  | 1669.591  |
| L20688    | 17152.006 | 13074.157 | AF113208  | 3129.858  | 2914.114  | X97261    | 14205.272 | 61917.094 |
| X69111    | 6062.02   | 5637.685  | NM_006153 | 3356.11   | 3280.551  | D87666    | 45866.668 | 31956.508 |
| AB037799  | 2531.08   | 2344.73   | NM_012164 | 1162.109  | 1160.276  | NM_001315 | 8133.204  | 6343.984  |
| AB007950  | 9650.467  | 9462.365  | AK026010  | 729.605   | 589.931   | AF286095  | 796.697   | 948.976   |
| NM_007061 | 16236.369 | 18748.146 | AB011156  | 688.084   | 694.322   | NM_000878 | 625.528   | 564.663   |
| AB040954  | 2320.617  | 2181.171  | NM_006246 | 1562.557  | 1671.949  | S66407    | 807.021   | 914.846   |
| NM_002081 | 810.658   | 989.134   | NM_004316 | 279.63    | 303.425   | NM_016523 | 323.669   | 596.391   |
| AB023139  | 1466.513  | 1700.879  | U58096    | 14650.648 | 12112.362 | NM_004258 | 23503.297 | 28799.529 |
| NM_017885 | 827.663   | 659.386   | NM_016929 | 1672.774  | 1807.515  | NM_001981 | 2996.616  | 4644.584  |
| D80004    | 3195.101  | 3063.504  | NM_012323 | 503.818   | 808.381   | NM_014654 | 755.441   | 970.581   |

|           |           |           |           |           |           |           |           |           |
|-----------|-----------|-----------|-----------|-----------|-----------|-----------|-----------|-----------|
| X63966    | 486.905   | 612.344   | NM_006942 | 605.162   | 364.74    | NM_001585 | 14444.811 | 19444.225 |
| NM_000946 | 2502.718  | 2629.855  | NM_018199 | 770.121   | 1529.362  | AK026108  | 4071.396  | 5295.954  |
| NM_016070 | 1667.663  | 1768.763  | NM_013943 | 507.858   | 687.989   | NM_006379 | 1653.17   | 2591.478  |
| NM_016390 | 1355.455  | 1126.283  | NM_001639 | 2812.239  | 2654.354  | BF571428  | 1209.608  | 1083.065  |
| NM_016101 | 6514.385  | 5099.385  | BG534366  | 765.018   | 727.971   | AB037723  | 1665.327  | 1693.706  |
| NM_005859 | 33125.121 | 27423.332 | BG698522  | 2965.417  | 2911.372  | NM_006246 | 2537.551  | 1942.736  |
| NM_020313 | 1003.974  | 1024.334  | AA152346  | 574.589   | 414.195   | U58096    | 20989.227 | 14559.311 |
| NM_014628 | 3568.523  | 4248.268  | L15189    | 1881.967  | 1565.766  | NM_016929 | 2152.985  | 1826.216  |
| AK025630  | 1539.038  | 1978.298  | AB023420  | 6565.523  | 6060.982  | NM_012323 | 554.188   | 601.609   |
| NM_014718 | 1087.293  | 835.693   | AF022912  | 1825.08   | 1449.646  | NM_015948 | 3055.463  | 3490.996  |
| AK024488  | 1181.984  | 827.365   | AA477428  | 7096.501  | 7167.653  | NM_003054 | 2117.533  | 2338.169  |
| NM_000743 | 591.722   | 576.064   | AA156342  | 948.455   | 700.007   | NM_002219 | 14003.466 | 13147.09  |
| NM_007218 | 900.312   | 816.943   | R45594    | 9796.313  | 9752.688  | AF182404  | 2043.482  | 2116.911  |
| Z25436    | 1662.153  | 1871.228  | H46425    | 465.385   | 662.495   | NM_000804 | 910.586   | 1149.111  |
| NM_005275 | 4152.149  | 4263.016  | AI355949  | 311.203   | 376.43    | NM_006555 | 1902.165  | 1915.932  |
| NM_002005 | 13580.858 | 11198.965 | AA278152  | 3545.591  | 4231.715  | NM_014521 | 769.432   | 626.688   |
| NM_012324 | 1929.063  | 1725.333  | H75530    | 1449.584  | 1443.477  | NM_002445 | 758.77    | 793.278   |
| AK000039  | 1127.539  | 963.185   | NM_003764 | 1715.876  | 1715.365  | AK023202  | 1598.107  | 2837.451  |
| AL137352  | 1273.797  | 1090.321  | NM_004829 | 513.089   | 1055.48   | D63877    | 4116.642  | 9394.453  |
| NM_014749 | 2533.369  | 2143.773  | NM_006793 | 17311     | 20339.613 | AF131760  | 743.219   | 1632.974  |
| NM_004489 | 3869.785  | 3886.743  | NM_001538 | 1738.619  | 1873.155  | NM_018698 | 1976.912  | 3868.848  |
| BI461699  | 414.993   | 553.413   | X97261    | 11780.146 | 67639.109 | NM_006461 | 1098.868  | 1507.603  |
| AF172264  | 1535.064  | 1244.723  | D87666    | 39130.613 | 30010.207 | NM_018201 | 2760.684  | 3387.191  |
| Y08267    | 1045.724  | 1092.531  | NM_001315 | 6263.374  | 7039.664  | NM_014438 | 819.259   | 761.322   |
| U80756    | 7955.836  | 6816.889  | AF286095  | 607.831   | 766.918   | NM_014880 | 2278.392  | 1833.588  |
| NM_018161 | 1150.375  | 1029.156  | NM_000878 | 605.286   | 494.952   | NM_003764 | 2818.591  | 2338.302  |
| NM_005248 | 1326.732  | 1059.489  | S66407    | 938.928   | 914.967   | NM_006793 | 26520.754 | 20515.713 |
| NM_004810 | 706.88    | 841.126   | NM_016523 | 273.434   | 432.993   | NM_018079 | 735.55    | 770.237   |
| AL117629  | 2878.938  | 3461.899  | NM_004258 | 26853.709 | 21889.479 | NM_004760 | 2512.583  | 2480.802  |
| NM_015726 | 1109.908  | 1396.951  | NM_001981 | 2689.144  | 2478.818  | NM_006752 | 5836.448  | 5537.954  |
| AF174604  | 1385.613  | 1448.503  | NM_014654 | 691.289   | 633.652   | NM_006809 | 3637.071  | 3827.711  |
| AB002379  | 4219.51   | 3903.219  | NM_001585 | 15221.436 | 14249.168 | AF149304  | 644.813   | 1128.017  |
| AB046851  | 1574.09   | 1739.958  | AK026108  | 3545.084  | 3565.333  | NM_012095 | 7334.562  | 8907.379  |
| NM_018174 | 626.576   | 513.201   | NM_006379 | 1152.298  | 1268.744  | X73079    | 19596.18  | 15580.024 |
| NM_014548 | 2182.486  | 1882.29   | BF571428  | 954.391   | 1003.445  | NM_019091 | 888.121   | 638.819   |
| NM_004437 | 557.922   | 580.189   | AB037723  | 1734.792  | 1663.756  | AF264781  | 1054.082  | 2854.349  |
| AK025875  | 892.805   | 1128.896  | NM_000606 | 3826.301  | 4230.064  | AK024215  | 9493.049  | 8432.081  |
| BC014152  | 47785.109 | 44543.852 | NM_016124 | 2896.598  | 3673.856  | AB044661  | 2991.463  | 2698.948  |
| AB037779  | 36736.352 | 34744.5   | NM_019079 | 346.874   | 538.116   | NM_000606 | 4727.721  | 4478.789  |
| NM_000393 | 652.032   | 667.69    | U53530    | 1209.151  | 1314.173  | NM_016124 | 3802.319  | 4124.601  |
| NM_000889 | 1038.272  | 1140.748  | NM_006598 | 1087.199  | 2061.952  | NM_019079 | 361.087   | 371.39    |
| NM_003859 | 7489.196  | 6969.464  | NM_015948 | 2818.656  | 3124.202  | U53530    | 1909.599  | 1490.463  |
| NM_000236 | 1156.446  | 798.696   | NM_003054 | 1810.143  | 1961.35   | NM_006598 | 1037.352  | 1048.439  |
| NM_002903 | 28973.951 | 23370.133 | NM_003042 | 407.428   | 465.914   | NM_004176 | 2598.509  | 2611.687  |
| NM_012339 | 1140.213  | 872.492   | NM_002219 | 10602.202 | 12085.298 | NM_004548 | 11941.207 | 9837.491  |
| NM_005787 | 16296.899 | 12920.983 | AF182404  | 2075.536  | 2491.802  | AK000554  | 1915.736  | 2223.382  |
| NM_002143 | 2937.929  | 2847.058  | NM_000804 | 673.461   | 753.942   | NM_006472 | 3421.505  | 3398.824  |
| AF284421  | 13197.119 | 15453.044 | NM_006555 | 1644.031  | 1550.725  | NM_002826 | 5811.34   | 4666.87   |
| NM_006048 | 3893.47   | 5156.935  | NM_014521 | 699.468   | 602.656   | AF159141  | 1521.542  | 1587.688  |
| NM_006360 | 23065.453 | 25137.5   | NM_002445 | 730.664   | 705.803   | NM_002420 | 573.493   | 1112.839  |
| NM_003968 | 3722.802  | 3076.345  | NM_017809 | 507.009   | 439.305   | AK026410  | 5176.546  | 8492.815  |
| NM_002786 | 2004.055  | 1849.277  | AK023202  | 1371.578  | 1521.503  | NM_014637 | 1809.891  | 2628.126  |
| NM_002810 | 59323.41  | 54404.176 | D63877    | 2810.296  | 2796.545  | NM_013379 | 15446.005 | 17091.395 |

|           |           |           |           |           |           |           |           |           |
|-----------|-----------|-----------|-----------|-----------|-----------|-----------|-----------|-----------|
| NM_003343 | 9221.641  | 11249.635 | AF131760  | 787.247   | 551.776   | AF113208  | 4126.931  | 3404.521  |
| NM_002789 | 19858.707 | 20037.256 | NM_018698 | 1323.545  | 1204.883  | NM_006153 | 3980.156  | 3438.806  |
| NM_003470 | 3285.633  | 3151.738  | NM_006461 | 769.585   | 791.323   | NM_012164 | 1404.644  | 1333.218  |
| AL080137  | 512.528   | 358.415   | NM_018201 | 1927.267  | 1781.85   | AK026010  | 691.317   | 833.683   |
| NM_017679 | 1087.645  | 758.025   | NM_014438 | 535.093   | 408.484   | AB011156  | 853.86    | 901.194   |
| AF155103  | 547.916   | 495.373   | NM_014880 | 1931.458  | 1802.092  | NM_006246 | 1724.911  | 1941.901  |
| NM_017704 | 1130.765  | 1424.167  | NM_006153 | 3110.818  | 3466.149  | U58096    | 16773.273 | 12060.841 |
| BC016062  | 8085.308  | 7831.928  | NM_012164 | 1001.646  | 1126.852  | NM_016929 | 1526.594  | 1690.063  |
| NM_002814 | 2272.775  | 2863.056  | AK026010  | 492.289   | 690.105   | NM_012323 | 590.016   | 544.116   |
| NM_012250 | 544.384   | 711.659   | AB011156  | 669.713   | 828.385   | NM_013943 | 575.339   | 495.49    |
| NM_006283 | 3207.58   | 3565.316  | NM_018079 | 760.565   | 762.078   | NM_001639 | 2652.375  | 2595.45   |
| NM_002701 | 937.995   | 752.681   | NM_004760 | 2022.502  | 2228.469  | BG534366  | 711.808   | 703.455   |
| X97303    | 4444.993  | 3624.59   | NM_006752 | 4077.925  | 4250.217  | BG698522  | 2924.353  | 5578.532  |
| NM_017530 | 3930.895  | 3371.17   | NM_006809 | 3250.187  | 3437.944  | L15189    | 2011.909  | 3428.285  |
| AB029030  | 743.904   | 414.747   | AF149304  | 586.739   | 614.57    | AB023420  | 7082.346  | 8765.483  |
| AL360183  | 824.518   | 771.18    | NM_012095 | 6004.386  | 7491.593  | AF022912  | 2217.084  | 2099.167  |
| AK027046  | 1651.207  | 1395.703  | X73079    | 15193.189 | 13770.009 | AA477428  | 8558.454  | 7998.09   |
| NM_003113 | 2143.786  | 1764.92   | NM_019091 | 746.933   | 850.832   | AA156342  | 1048.664  | 855.588   |
| NM_016578 | 3277.132  | 2937.111  | AF264781  | 1222.109  | 1022.95   | R45594    | 11009.935 | 9087.5    |
| NM_015832 | 4221.413  | 4276.121  | AK024215  | 8104.111  | 6585.033  | H46425    | 760.65    | 550.787   |
| NM_001326 | 2761.316  | 2887.906  | AB044661  | 2575.953  | 2663.634  | AA278152  | 4797.92   | 4600.828  |
| NM_014319 | 1138.493  | 1903.753  | NM_015376 | 1276.386  | 1270.249  | H75530    | 2057.999  | 1682.078  |
| NM_004865 | 1223.364  | 1455.597  | NM_001176 | 668.676   | 679.142   | NM_003764 | 2025.651  | 1791.474  |
| AB019566  | 65413.875 | 57380.887 | NM_013341 | 453.061   | 485.025   | NM_006793 | 20849.221 | 18257.51  |
| NM_000981 | 59865.582 | 57060.309 | NM_004066 | 319.102   | 384.374   | NM_001538 | 1450.558  | 1791.99   |
| NM_002047 | 12862.663 | 10815.171 | NM_004941 | 2604.348  | 2063.099  | X97261    | 12809.991 | 61598.547 |
| NM_001031 | 67062.109 | 68673.773 | AF151831  | 2068.302  | 2391.978  | D87666    | 38200.703 | 28126.686 |
| NM_007208 | 7419.879  | 6466.091  | AB011121  | 838.096   | 611.756   | NM_001315 | 7467.197  | 7369.733  |
| BF130622  | 9655.609  | 9317.241  | AF083255  | 5007.976  | 5191.948  | AF286095  | 733.866   | 1121.214  |
| BU165106  | 1738.856  | 1626.758  | AK022605  | 626.419   | 869.515   | NM_000878 | 519.672   | 786.527   |
| AF038202  | 928.282   | 547.723   | AK000554  | 1571.479  | 1939.801  | S66407    | 834.395   | 763.719   |
| AK025558  | 5240.412  | 4449.85   | NM_006472 | 3072.517  | 3614.342  | NM_004258 | 24484.711 | 19597.902 |
| NM_001864 | 14189.155 | 11314.733 | NM_002826 | 5515.464  | 7826.39   | NM_001981 | 3159.695  | 2282.83   |
| NM_003477 | 4471.574  | 3334.886  | AF159141  | 2520.827  | 2214.499  | NM_014654 | 695.922   | 606.312   |
| NM_002654 | 14583.993 | 12905.265 | NM_002420 | 487.255   | 451.983   | NM_001585 | 12877.301 | 11591.376 |
| NM_020382 | 1727.608  | 1352.348  | NM_016458 | 15679.021 | 14408.021 | AK026108  | 3436.523  | 2823.205  |
| NM_007192 | 3213.553  | 3391.79   | AK022233  | 2574.053  | 2410.654  | NM_006379 | 1505.781  | 1612.724  |
| AB002337  | 4754.522  | 3565.031  | AL137713  | 230.616   | 250.434   | BF571428  | 907.309   | 681.068   |
| NM_014933 | 2499.274  | 1844.125  | AK026410  | 3537.21   | 2833.47   | AB037723  | 1304.02   | 1261.181  |
| NM_003076 | 6587.875  | 4928.024  | NM_014637 | 2063.967  | 1878.581  | NM_000606 | 3751.657  | 4039.727  |
| NM_003456 | 2674.538  | 1716.597  | NM_013379 | 12771.098 | 13760.16  | NM_016124 | 3699.4    | 3641.937  |
| NM_002585 | 1803.514  | 1448.542  | AF113208  | 3168.555  | 3121.098  | U53530    | 1252.189  | 1064.583  |
| AB029016  | 988.682   | 1012.254  | AF019382  | 528.362   | 667.448   | NM_006598 | 714.979   | 804.58    |
| AK000445  | 611.347   | 658.419   | BC012757  | 1251.958  | 1052.85   | NM_000111 | 562.544   | 406.648   |
| AL049390  | 1704.815  | 1348.635  | M96686    | 273.862   | 390.443   | NM_015948 | 2882.845  | 2406.656  |
| AK000584  | 3452.533  | 3029.415  | NM_004062 | 1033.511  | 910.75    | NM_003054 | 2162.478  | 1391.998  |
| AK026379  | 1486.624  | 1263.96   | NM_005883 | 491.433   | 648.783   | NM_002219 | 11856.161 | 8167.175  |
| AK022965  | 1162.905  | 808.712   | NM_004449 | 959.317   | 946.335   | AF182404  | 1878.91   | 1322.906  |
| AK024278  | 6880.068  | 4786.796  | NM_014591 | 2140.065  | 2246.302  | NM_000804 | 1027.201  | 824.881   |
| AK026982  | 892.768   | 500.38    | NM_014592 | 1226.044  | 1297.143  | NM_006555 | 1823.03   | 1856.424  |
| NM_018022 | 1955.617  | 1666.227  | NM_001945 | 1591.537  | 1880.787  | NM_014521 | 402.669   | 726.705   |
| AB056722  | 8027.044  | 7555.075  | NM_020039 | 1046.427  | 1233.42   | NM_002445 | 899.934   | 931.15    |
| NM_013242 | 2683.631  | 1929.595  | NM_006653 | 690.43    | 1024.021  | NM_017809 | 404.485   | 263.203   |

|           |           |           |           |           |           |           |           |           |
|-----------|-----------|-----------|-----------|-----------|-----------|-----------|-----------|-----------|
| AK023198  | 700.521   | 779.285   | NM_014442 | 1734.468  | 2195.618  | AK023202  | 1471.661  | 1449.907  |
| NM_01206E | 7297.498  | 6899.759  | NM_005409 | 1110.172  | 1200.158  | D63877    | 3141.635  | 2520.801  |
| AF052168  | 4642.24   | 3798.241  | NM_00020E | 2221.268  | 1742.989  | AF131760  | 890.987   | 602.687   |
| AK022632  | 1634.296  | 1498.812  | NM_00218E | 20695.416 | 18377.465 | NM_01869E | 1481.349  | 1374.552  |
| AK021554  | 822.55    | 797.481   | AK027119  | 8664.965  | 6640.733  | NM_006461 | 885.008   | 768.473   |
| NM_02023E | 537.916   | 376.181   | AB037727  | 21492.086 | 19171.855 | NM_018201 | 2510.079  | 2055.75   |
| AL162039  | 892.552   | 613.461   | NM_00542E | 2835.64   | 2253.741  | NM_01443E | 661.364   | 568.74    |
| AK024896  | 950.748   | 614.04    | NM_004763 | 432.853   | 346.947   | NM_01488C | 2250.389  | 2006.086  |
| AK023663  | 1650.23   | 1452.682  | NM_014063 | 5171.183  | 4111.935  | NM_006153 | 3016.753  | 3497.805  |
| AB007928  | 426.356   | 683.469   | D86964    | 3714.688  | 5689.043  | NM_012164 | 1166.448  | 1113.062  |
| AK023645  | 599.602   | 369.067   | AL049801  | 1510.888  | 1760.704  | AK026010  | 887.18    | 618.361   |
| NM_01693C | 1642.975  | 1167.843  | NM_01639E | 4981.111  | 4068.571  | AB011156  | 599.901   | 905.719   |
| AJ001861  | 948.373   | 992.199   | NM_003152 | 798.233   | 856.49    | NM_01807E | 948.687   | 690.794   |
| X64981    | 1265.724  | 997.703   | NM_014727 | 2137.283  | 2521.747  | NM_00476C | 2398.9    | 1789.147  |
| X75692    | 2231.401  | 1750.468  | BE885010  | 501.793   | 564.211   | NM_006752 | 5909.039  | 3606.497  |
| Y10511    | 1236.005  | 1017.404  | NM_006342 | 1125.2    | 1145.012  | NM_00680E | 3167.32   | 2008.381  |
| NM_01624C | 722.131   | 548.16    | NM_01639E | 2633.972  | 2660.62   | AF149304  | 461.957   | 400.492   |
| AK026416  | 23694.631 | 19052.555 | NM_00568E | 489.569   | 562.767   | NM_01209E | 6535.991  | 5024.373  |
| AK025797  | 683.016   | 570.164   | NM_005552 | 7156.93   | 8156.827  | X73079    | 18679.875 | 16171.204 |
| AK024864  | 385.026   | 256.969   | NM_006717 | 1106.624  | 2269.472  | NM_019091 | 595.356   | 547.643   |
| AK024947  | 1007.855  | 736.991   | AK026479  | 2653.604  | 3975.131  | AF264781  | 1147.99   | 1013.606  |
| AK024606  | 3249.408  | 2800.077  | AK022860  | 3501.315  | 4475.07   | NM_00245E | 569.456   | 336.747   |
| NM_016417 | 7067.222  | 5359.604  | X60188    | 11040.223 | 15268.622 | AK024215  | 9563.026  | 6311.373  |
| NM_01910E | 603.481   | 492.722   | NM_005977 | 1712.824  | 2364.173  | AB044661  | 2843.592  | 2428.183  |
| AL080118  | 3056.956  | 2418.46   | NM_002747 | 996.325   | 1189.206  | NM_01537E | 1297.91   | 1266.868  |
| AL049378  | 4091.174  | 3229.873  | NM_00626E | 4774.074  | 5242.916  | NM_00117E | 833.078   | 783.342   |
| AK021505  | 1810.547  | 1300.243  | NM_00312E | 312.2     | 269.485   | NM_00406E | 497.596   | 753.059   |
| AK021598  | 3454.885  | 2462.707  | NM_00605E | 1776.614  | 1404.899  | NM_004941 | 2590.49   | 1979.875  |
| AJ012498  | 498.888   | 834.912   | NM_000347 | 2227.396  | 1674.162  | AF151831  | 2374.699  | 2084.065  |
| NM_005973 | 8681.441  | 8781.798  | M13452    | 4890.94   | 3586.017  | AB011121  | 535.576   | 458.102   |
| X04547    | 1822.913  | 1628.527  | NM_016114 | 1397.148  | 968.167   | AF083255  | 6078.868  | 2861.074  |
| AK025823  | 1080.551  | 660.704   | AY007114  | 878.979   | 814.409   | AK000554  | 2100.859  | 1072.643  |
| AK026691  | 876.991   | 1093.047  | AB000895  | 592.951   | 438.133   | NM_006472 | 3054.358  | 1819.75   |
| AL359941  | 3368.735  | 2582.158  | X80031    | 431.528   | 571.553   | NM_00282E | 6078.439  | 6299.65   |
| AF035278  | 1752.095  | 1406.73   | NM_006011 | 264.222   | 1084.884  | AF159141  | 1519.014  | 2118.896  |
| U32999    | 5486.276  | 4278.679  | L00635    | 588.136   | 520.117   | NM_01645E | 19223.592 | 17996.354 |
| U66052    | 2282.051  | 1833.162  | NM_015601 | 820.24    | 767.726   | AK022233  | 2578.976  | 2639.543  |
| NM_005293 | 11822.541 | 8022.608  | NM_00178C | 20166.785 | 23020.805 | AK026410  | 5265.033  | 4625.655  |
| AF133332  | 1055.703  | 635.056   | AJ277442  | 570.086   | 522.107   | NM_014637 | 2035.646  | 2180.813  |
| NM_00108E | 7677.388  | 8385.738  | NM_00456E | 2173.038  | 1945.501  | NM_01337E | 16560.371 | 15875.631 |
| BC015991  | 3681.851  | 3303.158  | D78514    | 2885.4    | 3177.417  | AF113208  | 4080.977  | 3715.095  |
| U46214    | 5019.473  | 3866.968  | AK021665  | 457.961   | 706.205   | BC012757  | 1399.787  | 1119.052  |
| NM_00031C | 33046.824 | 22569.021 | NM_01336E | 301.176   | 226.041   | NM_004062 | 1083.081  | 1107.683  |
| AF161343  | 3216.856  | 1854.968  | NM_002787 | 13753.044 | 13509.617 | NM_00444E | 1071.077  | 921.208   |
| NM_00476E | 2703.042  | 1581.805  | U95006    | 5557.029  | 4358.102  | NM_014591 | 2005.265  | 1559.521  |
| AK022246  | 1283.243  | 995.81    | NM_003347 | 4676.344  | 3214.222  | NM_00218E | 19705.596 | 15375.134 |
| AF113701  | 1396.662  | 1083.633  | NM_01451E | 4950.089  | 3075.495  | AK027119  | 6820.587  | 5981.275  |
| NM_006771 | 7399.981  | 6090.458  | AK021868  | 523.278   | 458.143   | AB037727  | 16814.699 | 12164.444 |
| L37702    | 6513.136  | 4631.266  | AK000643  | 52560.465 | 62799.742 | NM_00542E | 3259.311  | 2570.825  |
| AK022812  | 1072.04   | 662.729   | NM_018421 | 2745.955  | 2242.556  | NM_004763 | 298.486   | 356.886   |
| U79301    | 3054.371  | 2340.061  | AB014574  | 25737.166 | 20375.461 | NM_014063 | 5146.703  | 4056.047  |
| AK022260  | 3871.79   | 2509.344  | NM_020127 | 987.835   | 955.643   | D86964    | 4316.08   | 3034.812  |
| M32219    | 3467.115  | 2181.137  | NM_015623 | 7369.568  | 6649.837  | AL049801  | 1596.287  | 1431.674  |

|           |           |           |           |           |           |           |           |           |
|-----------|-----------|-----------|-----------|-----------|-----------|-----------|-----------|-----------|
| BC018868  | 508.873   | 350.743   | AB045116  | 742.773   | 601.276   | NM_01639E | 5765.902  | 4387.688  |
| AF007128  | 1860.421  | 1538.434  | L49054    | 529.023   | 769.416   | NM_00315Z | 887.301   | 794.094   |
| CY3Cy5    | 1085.261  | 102.649   | NM_001675 | 1151.472  | 1464.965  | NM_014727 | 1952.495  | 1907.204  |
| AI351740  | 2359.837  | 2284.485  | NM_00342Z | 2571.804  | 6234.224  | NM_00634Z | 1387.217  | 1107.988  |
| AA444051  | 806.22    | 667.798   | NM_001451 | 873.988   | 1654.418  | NM_01639E | 3016.202  | 2144.319  |
| NM_007164 | 2275.792  | 2540.283  | NM_014779 | 796.625   | 947.09    | NM_00568E | 1143.482  | 842.8     |
| BE783826  | 17365.199 | 18568.244 | NM_00294Z | 1797.334  | 1900.215  | NM_00555Z | 8103.036  | 4317.887  |
| X04827    | 1119.084  | 1189.639  | AL133649  | 732.462   | 723.881   | AK022860  | 4782.173  | 13349.404 |
| H07088    | 967.077   | 1329.662  | AB018303  | 559.262   | 1053.954  | X60188    | 14209.225 | 40155.5   |
| AI004656  | 1020.005  | 992.329   | NM_01584E | 2073.177  | 2053.596  | NM_00605E | 1178.393  | 895.685   |
| BC020596  | 1223.739  | 1107.649  | NM_01597Z | 6306.483  | 5429.181  | NM_000347 | 1550.471  | 1009.707  |
| AF116606  | 40831.188 | 33460.496 | NM_01613Z | 994.981   | 909.628   | M13452    | 5427.831  | 3498.76   |
| X98922    | 1733.994  | 1660.324  | NM_01800E | 1292.844  | 929.117   | NM_016114 | 1689.862  | 1322.867  |
| AK098435  | 2983.853  | 3345.299  | NM_01609C | 1214.64   | 845.908   | AY007114  | 1011.255  | 929.263   |
| AK092872  | 3223.003  | 4439.549  | NM_00101Z | 44609.684 | 30678.412 | AK022178  | 389.053   | 388.083   |
| NM_145904 | 25599.572 | 30779.598 | AK024040  | 3033.467  | 1925.569  | L00635    | 525.39    | 507.096   |
| SR6       | 1905.026  | 1929.736  | NM_005061 | 2636.268  | 1849.531  | NM_015601 | 1128.65   | 700.157   |
| SR8       | 7603.258  | 22105.18  | AL137354  | 12838.685 | 11326.656 | NM_00178C | 24685.814 | 19153.393 |
| SR10      | 25682.309 | 7899.744  | NM_00102Z | 50978.336 | 62509.207 | AJ277442  | 545.484   | 509.638   |
| CY3Cy5    | 1333.18   | 124.335   | AK021571  | 6980.234  | 6444.618  | NM_00456E | 2505.717  | 1233.994  |
| NM_00241E | 774.908   | 647.846   | AF052149  | 1842.28   | 3327.872  | D78514    | 3691.79   | 9162.723  |
| NM_00448E | 954.716   | 787.122   | AK025586  | 505.477   | 943.696   | AK021665  | 433.759   | 1523.225  |
| NM_01329E | 4288.079  | 4077.678  | AL137512  | 546.12    | 574.558   | NM_01336E | 403.02    | 1451.026  |
| AL117478  | 1147.802  | 1040.843  | NM_00503E | 577.714   | 749.577   | U95006    | 6546.48   | 6128.081  |
| NM_005307 | 1211.902  | 1197.223  | NM_002541 | 1117.31   | 1056.516  | NM_003347 | 7238.834  | 5424.24   |
| NM_00595E | 1540.085  | 1550.823  | NM_00005E | 1905.118  | 1916.199  | AF273051  | 875.272   | 574.097   |
| NM_01343E | 1018.141  | 1131.042  | NM_016311 | 6299.626  | 5815.005  | NM_01451E | 4614.508  | 4246.568  |
| AF225426  | 1019.64   | 918.191   | NM_001867 | 54867.516 | 50087.707 | AK021868  | 618.664   | 557.863   |
| NM_00520E | 6638.161  | 6468.446  | NM_00230C | 53216.023 | 64543.008 | AK000643  | 57502.074 | 59795.133 |
| AK025687  | 14937.596 | 16207.257 | NM_00029C | 1673.026  | 1662.194  | NM_018421 | 4027.813  | 3269.386  |
| AF218941  | 963.401   | 1136.093  | NM_01653E | 3594.048  | 2433.498  | AB014574  | 38786.762 | 32486.273 |
| AL137264  | 8454.667  | 9758.085  | AK023275  | 5680.93   | 2664.75   | NM_020127 | 1150.867  | 967.565   |
| NM_00222E | 1858.68   | 2024.301  | AJ223352  | 4252.739  | 1916.717  | NM_01562Z | 8747.362  | 7793.596  |
| X84370    | 6473.439  | 8427.681  | NM_01223E | 1923.131  | 1376.92   | AB045116  | 662.529   | 358.101   |
| NM_00403E | 1073.955  | 962.852   | NM_01653E | 5243.928  | 1500.756  | L49054    | 607.836   | 535.793   |
| AB014558  | 647.864   | 798.499   | NM_006807 | 5520.788  | 3248.13   | NM_00167E | 731.191   | 677.966   |
| NM_006287 | 309.834   | 770.486   | NM_00653Z | 1988.908  | 1574.047  | NM_00342Z | 1850.759  | 1631.724  |
| NM_000118 | 301.474   | 313.773   | U07132    | 3722.426  | 3021.335  | NM_01477E | 848.222   | 914.058   |
| NM_00091Z | 5602.648  | 4520.518  | NM_00343E | 931.226   | 1710.283  | NM_00294Z | 1621.143  | 1242.746  |
| NM_00129E | 1175.112  | 664.794   | AL035301  | 986.29    | 1317.483  | AL133649  | 830.339   | 965.514   |
| BG325046  | 1122.468  | 1109.067  | NM_017687 | 2521.776  | 2886.556  | NM_01584E | 2881.233  | 7544.5    |
| AK026248  | 1534.725  | 1605.362  | NM_01797E | 1202.484  | 1395.807  | NM_01597Z | 9772.755  | 23883.742 |
| NM_00457E | 3251.06   | 3541.415  | AK025036  | 745.109   | 1170.129  | NM_01613Z | 1276.985  | 1109.25   |
| NM_000647 | 867.286   | 921.016   | AK024843  | 5112.42   | 5450.881  | NM_01800E | 1324.542  | 915.713   |
| NM_017604 | 964.257   | 995.345   | NM_01767C | 2896.568  | 2911.968  | NM_01609C | 1366.242  | 1206.785  |
| NM_01773E | 5413.399  | 5285.457  | AK021468  | 593.984   | 380.211   | NM_00101Z | 56125.145 | 39823.434 |
| NM_016557 | 832.61    | 927.084   | BC033020  | 558.743   | 691.348   | AK024040  | 4308.242  | 2707.123  |
| NM_00062Z | 3224.08   | 3111.415  | NM_00436E | 4264.879  | 3604.582  | NM_005061 | 3792.63   | 2091.292  |
| AF161348  | 2324.361  | 2159.704  | AK026168  | 1263.126  | 1020.147  | NM_000997 | 60864.727 | 63268.813 |
| NM_018467 | 7664.661  | 6690.986  | AJ296152  | 8602.447  | 5616.315  | AF182417  | 41997.051 | 28297.201 |
| NM_00606E | 1495.197  | 1540.196  | AK001067  | 1187.093  | 1006.585  | AL137354  | 15270.007 | 10979.964 |
| NM_002704 | 279.202   | 520.046   | AK027088  | 4646.721  | 2878.291  | NM_00102Z | 62367.891 | 60609.324 |
| U16752    | 816.669   | 911.34    | AB037721  | 4665.64   | 2892.516  | AK021571  | 8170.367  | 5705.227  |

|           |           |           |           |           |           |           |           |           |
|-----------|-----------|-----------|-----------|-----------|-----------|-----------|-----------|-----------|
| M30134    | 848.434   | 1212.484  | AK027120  | 7660.41   | 5142.068  | AF052149  | 1306.463  | 1191.95   |
| NM_00203E | 4815.174  | 5125.875  | AB029001  | 1839.083  | 1343.773  | AL137512  | 567.161   | 621.113   |
| NM_00572E | 19225.201 | 25215.447 | AB006624  | 1831.105  | 1937.607  | NM_002541 | 1031.145  | 797.507   |
| NM_01549E | 1105.882  | 1413.384  | AL109717  | 453.375   | 234.64    | AJ223352  | 5192.678  | 2376.036  |
| NM_003747 | 1885.654  | 2220.428  | AK025473  | 904.084   | 487.314   | NM_01223E | 2415.96   | 1875.104  |
| AB037744  | 2877.593  | 2974.724  | AF271070  | 9791.168  | 7152.739  | NM_01653E | 6500.167  | 1864.043  |
| AF141901  | 578.284   | 745.402   | NM_01490E | 1492.851  | 1593.004  | NM_006807 | 8013.719  | 4919.456  |
| NM_00700E | 642.975   | 695.206   | AK055959  | 550.689   | 444.537   | NM_00653E | 2202.69   | 1741.903  |
| AL109708  | 1577.613  | 1414.125  | AF052141  | 314.172   | 397.748   | U07132    | 4224.804  | 3182.674  |
| L29143    | 558.198   | 516.67    | AK021705  | 3760.146  | 4066.909  | NM_00343E | 569.618   | 459.092   |
| AF234532  | 2147.3    | 2023.312  | NM_016141 | 8285.178  | 18677.25  | AL035301  | 1021.537  | 1160.576  |
| AF099740  | 912.218   | 1169.473  | AL109702  | 1049.453  | 1388.531  | NM_017687 | 2134.471  | 2695.31   |
| NM_006117 | 7201.517  | 7119.144  | AK025624  | 9037.43   | 14782.736 | NM_01797E | 1018.435  | 949.202   |
| NM_00222E | 2020.388  | 1995.697  | AK026684  | 333.525   | 516.49    | AK025036  | 563.187   | 659.852   |
| NM_00622E | 1151.397  | 983.325   | AL110125  | 2454.652  | 2502.469  | AK024843  | 6515.889  | 4821.64   |
| NM_01541E | 15509.792 | 13381.395 | X89744    | 247.517   | 199.546   | NM_01767C | 3340.295  | 2229.099  |
| NM_004897 | 943.347   | 1119.828  | AJ011600  | 753.372   | 610.399   | AF286598  | 689.754   | 183.335   |
| NM_00255E | 2075.413  | 2221.612  | AJ002785  | 452.785   | 343.862   | AK001067  | 1732.423  | 1389.323  |
| NM_00030E | 1400.728  | 1578.899  | Z70716    | 392.51    | 337.548   | AK027088  | 6372.5    | 4619.145  |
| NM_00452E | 32100.566 | 31199.559 | AL049251  | 341.236   | 262.155   | AB037721  | 4450.072  | 3192.168  |
| NM_00245C | 12747.295 | 54762.566 | Z83945    | 455.906   | 495.902   | AK027120  | 9739.81   | 5840.767  |
| NM_00168E | 808.61    | 1146.212  | L32606    | 728.433   | 451.126   | AB029001  | 1882.161  | 1524.466  |
| NM_00070E | 908.709   | 1210.908  | AK091125  | 710.031   | 520.564   | AB006624  | 2719.822  | 2548.544  |
| NM_004231 | 49007.641 | 52575.09  | D16904    | 332.858   | 370.497   | AK025473  | 1045.892  | 626.498   |
| NM_016577 | 718.657   | 583.891   | M93056    | 5498.283  | 4200.021  | AF146693  | 613.295   | 528.974   |
| AK023107  | 6059.27   | 5260.744  | D16474    | 2681.518  | 2356.954  | AF271070  | 12488.058 | 8382.579  |
| NM_006854 | 16458.127 | 14111.705 | AL080072  | 730.6     | 745.395   | NM_01490E | 1957.34   | 1737.75   |
| NM_00458C | 12662.898 | 10745.359 | AL049280  | 941.396   | 1083.312  | AK055959  | 536.177   | 349.171   |
| NM_020387 | 25231.895 | 24494.535 | AK025212  | 7313.221  | 17483.469 | AK021705  | 3517.612  | 3468.726  |
| NM_00724E | 1355.274  | 2135.1    | AB021925  | 237.923   | 209.654   | NM_016141 | 4338.41   | 4646.268  |
| AF150735  | 2827.627  | 2851.839  | AL157503  | 1632.592  | 1268.018  | AL109702  | 1206.592  | 1104.339  |
| NM_01818E | 1791.334  | 1989.681  | AK000786  | 860.37    | 480.618   | AK025624  | 11366.534 | 10771.776 |
| NM_01238E | 3141.697  | 3576.223  | AK021458  | 1574.331  | 892.028   | AK026684  | 620.106   | 794.618   |
| BF038366  | 574.062   | 612.252   | NM_017674 | 1855.331  | 1221.201  | AL110125  | 1758.588  | 1521.146  |
| NM_012304 | 995.062   | 1673.501  | AK000966  | 399.079   | 275.135   | Z83945    | 701.49    | 620.721   |
| NM_01644C | 16877.703 | 25408.904 | AK024525  | 2209.678  | 1668.249  | L32606    | 573.95    | 390.668   |
| NM_007194 | 1807.719  | 2561.92   | AK024544  | 1025.832  | 789.1     | AK091125  | 552.347   | 518.341   |
| NM_000314 | 6370.202  | 6884.476  | AK025097  | 294.58    | 289.086   | M93056    | 7031.104  | 4772.604  |
| AB002369  | 1026.29   | 1233.786  | AK001880  | 2592.795  | 2940.798  | D16474    | 2805.564  | 2075.431  |
| S74620    | 797.656   | 1013.48   | AF156166  | 3150.884  | 3425.352  | AL080072  | 599.553   | 391.405   |
| AF305239  | 1531.978  | 1331.226  | NM_01437E | 26254.66  | 27828.131 | AL049280  | 703.69    | 541.438   |
| NM_002827 | 4635.777  | 4410.485  | NM_01420E | 18451.615 | 18035.189 | AK025212  | 5842.581  | 5557.508  |
| NM_00194E | 1943.148  | 1945.353  | NM_001651 | 3616.815  | 7081.208  | AK022594  | 35.201    | 9046.653  |
| BF035425  | 31120.523 | 30016.332 | L32786    | 1800.971  | 1595.835  | AL157503  | 3183.548  | 6942.447  |
| NM_00015E | 59773.344 | 55411.063 | AL355720  | 2145.575  | 1937.681  | AK000786  | 1257.869  | 591.671   |
| NM_01463E | 2003.249  | 2272.726  | AK002023  | 1237.189  | 1075.694  | AK021458  | 1626.075  | 1907.574  |
| NM_006287 | 482.417   | 526.972   | NM_016464 | 318.024   | 434.38    | NM_017674 | 1487.897  | 1834.9    |
| NM_00091E | 4396.044  | 4175.706  | L40402    | 854.564   | 723.916   | AK000966  | 353.298   | 339.165   |
| NM_00129E | 1308.281  | 691.814   | AK022422  | 483.328   | 430.675   | AK024525  | 1890.212  | 2020.904  |
| BG325046  | 1107.752  | 993.261   | AK023485  | 572.925   | 535.304   | AK024544  | 944.123   | 796.085   |
| AI351740  | 2648.079  | 1962.601  | AK022474  | 13337.247 | 11907.5   | AK001880  | 2780.222  | 2395.546  |
| AA444051  | 675.07    | 935.534   | AK022392  | 1711.508  | 1504.935  | AF156166  | 2514.665  | 3524.312  |
| NM_007164 | 2522.807  | 2617.954  | AL117451  | 370.433   | 393.556   | NM_01437E | 33466.16  | 55457.52  |

|           |           |           |           |           |           |           |           |           |
|-----------|-----------|-----------|-----------|-----------|-----------|-----------|-----------|-----------|
| BE783826  | 20594.047 | 33277.691 | AK025949  | 1279.957  | 1335.821  | NM_014206 | 21527.256 | 20965.068 |
| X04827    | 1489.874  | 1539.226  | Y10259    | 1189.739  | 1283.879  | NM_001651 | 2346.17   | 2507.63   |
| H07088    | 844.557   | 895.425   | AK021725  | 1471.998  | 1633.727  | L32786    | 1548.096  | 1495.189  |
| AI004656  | 1196.312  | 1365.49   | NM_002408 | 2957.467  | 3139.328  | AL355720  | 2629.554  | 2058.099  |
| BC020596  | 1441.078  | 1497.507  | AK024282  | 969.991   | 915.614   | AK002023  | 1274.773  | 1040.599  |
| AF116606  | 43464.328 | 43947.703 | AF085838  | 1206.023  | 995.281   | NM_016464 | 475.375   | 372.841   |
| X98922    | 2182.962  | 1988.058  | NM_018277 | 684.817   | 571.729   | AK022422  | 628.541   | 735.244   |
| AK098435  | 3029.375  | 3390.568  | AF014455  | 350.853   | 338.706   | AK023485  | 857.423   | 662.669   |
| AK092872  | 4399.8    | 5104.504  | AF086335  | 974.561   | 646.476   | AK022474  | 15712.392 | 12149.791 |
| AF230496  | 603.272   | 516.343   | AB011118  | 10798.087 | 6755.862  | AK022392  | 1719.606  | 1352.189  |
| M16801    | 688.139   | 796.193   | AK021476  | 1003.137  | 730.88    | AK025949  | 1513.629  | 1589.771  |
| NM_145904 | 30480.865 | 38928.715 | NM_018630 | 1815.604  | 1197.717  | Y10259    | 1539.189  | 2166.548  |
| NM_021969 | 464.518   | 509.288   | AF086175  | 451.806   | 260.13    | AK021725  | 1330.502  | 1900.039  |
| NM_013334 | 5798.328  | 7701.894  | NM_004576 | 514.982   | 532.25    | NM_002408 | 3735.71   | 3312.752  |
| AB037744  | 2669.949  | 3301.572  | AF040097  | 395.11    | 456.448   | AK024282  | 738.363   | 876.947   |
| AF141901  | 1590.953  | 1774.234  | AK024182  | 1264.476  | 959.43    | AF085838  | 1727.341  | 1322.393  |
| NM_007008 | 790.621   | 1141.594  | NM_006913 | 8262.921  | 7449.719  | NM_018277 | 605.915   | 476.015   |
| AL109708  | 903.945   | 894.42    | NM_000499 | 4655.718  | 4145.141  | AF014455  | 340.606   | 294.674   |
| L29143    | 726.642   | 737.032   | AL049955  | 11379.379 | 12283.704 | AF086335  | 921.527   | 897.05    |
| AF234532  | 2191.492  | 1911.738  | AF155654  | 5137.422  | 6193.787  | AB011118  | 10494.428 | 9801.423  |
| NM_002418 | 603.067   | 814.397   | AK000028  | 1853.511  | 2746.119  | S66666    | 426.193   | 442.528   |
| NM_002090 | 363.588   | 1072.092  | NM_013320 | 38591.867 | 34303.137 | AK021476  | 1000.348  | 1392.554  |
| NM_004485 | 1181.659  | 1377.745  | AL050039  | 402.658   | 354.739   | NM_018630 | 2690.381  | 4003.737  |
| NM_013296 | 5238.243  | 6357.368  | AF087987  | 375.65    | 255.017   | AF086175  | 842.499   | 2229.846  |
| AL117478  | 1230.266  | 1098.6    | Z36840    | 215.35    | 223.299   | AK002196  | 1604.331  | 1806.626  |
| NM_005307 | 1435.927  | 1534.783  | H09474    | 673.914   | 368.143   | NM_004576 | 709.536   | 745.057   |
| NM_005958 | 1523.19   | 1521.114  | AB002368  | 4815.149  | 3706.398  | AF040097  | 757.502   | 707.244   |
| NM_013436 | 636.593   | 779.681   | AL360263  | 36177.551 | 17551.707 | AK024182  | 1453.942  | 1046.585  |
| AF225426  | 770.796   | 938.952   | Z36780    | 1369.196  | 1225.824  | NM_006913 | 10124.317 | 8032.867  |
| NM_005208 | 8015.861  | 8062.631  | AK022403  | 1068.507  | 842.165   | NM_000499 | 4491.512  | 3770.154  |
| NM_000421 | 418.201   | 614.615   | AK022955  | 3029.712  | 1853.954  | AL049955  | 14818.212 | 13930.099 |
| AK025687  | 16709.025 | 17781.469 | AK021760  | 285.804   | 197.206   | AF155654  | 5185.477  | 4156.375  |
| AF218941  | 1102.419  | 990.339   | BC035855  | 1029.195  | 817.265   | AK000028  | 1668.769  | 1627.76   |
| AL137264  | 9410.814  | 9355.359  | AL137408  | 4610.147  | 3825.081  | NM_013320 | 52408.348 | 51009.422 |
| NM_002226 | 1610.352  | 1721.661  | AF054995  | 917.242   | 817.168   | H09474    | 627.649   | 797.783   |
| X84370    | 6650.652  | 7073.917  | AL080176  | 1986.063  | 1536.824  | AB002368  | 6872.178  | 7906.625  |
| NM_004039 | 1130.239  | 973.708   | AK023627  | 622.748   | 758.977   | AL360263  | 52583.352 | 49824.453 |
| AB014558  | 968.549   | 2876.838  | CY3Cy5    | 1551.09   | 145.771   | Z36780    | 1383.795  | 3408.599  |
| NM_016577 | 460.174   | 567.406   | BI759406  | 2786.48   | 2699.873  | AK022403  | 1491.667  | 2209.224  |
| AK023107  | 6502.554  | 7399.921  | R76099    | 500.9     | 577.833   | AK022955  | 3647.412  | 3880.443  |
| NM_006854 | 17367.648 | 18710.865 | S74445    | 502.555   | 549.549   | BC035855  | 967.588   | 820.9     |
| NM_004580 | 11847.665 | 10003.66  | BI763360  | 607.036   | 580.484   | AL137408  | 7839.765  | 5679.49   |
| NM_020387 | 26183.039 | 23775.328 | D25538    | 1014.759  | 916.937   | AF054995  | 1369.853  | 902.054   |
| NM_007246 | 1381.967  | 1279.26   | NM_000360 | 4360.446  | 6133.224  | AL080176  | 2372.343  | 1493.819  |
| AK026248  | 1485.022  | 1415.756  | D49950    | 3947.278  | 4253.824  | AK023627  | 1007.972  | 737.865   |
| NM_004578 | 4177.332  | 5734.801  | NM_001849 | 810.801   | 744.98    | CY3Cy5    | 2434.12   | 193.848   |
| NM_000647 | 1116.118  | 1042.438  | X03635    | 1743.71   | 1771.614  | BI759406  | 2267.183  | 2743.204  |
| NM_017604 | 965.695   | 841.4     | AF353674  | 3581.673  | 3254.864  | R76099    | 490.144   | 641.712   |
| NM_017738 | 5814.949  | 6450.51   | BC002645  | 2336.485  | 2152.723  | S74445    | 458.452   | 815.516   |
| NM_016557 | 912.186   | 918.011   | NM_021138 | 1704.038  | 1284.207  | BI763360  | 617.915   | 889.472   |
| NM_000623 | 3796.226  | 3662.997  | BC002792  | 752.014   | 771.077   | D25538    | 994.885   | 1124.394  |
| AF161348  | 2616.626  | 2390.632  | NM_021005 | 1739.936  | 1578.548  | NM_000360 | 4929.874  | 4974.019  |
| NM_018467 | 10444.788 | 15531.336 | SR2       | 48844.121 | 53809.523 | D49950    | 4086.066  | 4790.894  |

|           |           |           |           |           |           |           |           |           |
|-----------|-----------|-----------|-----------|-----------|-----------|-----------|-----------|-----------|
| NM_00606E | 1795.768  | 1653.31   | SR4       | 12816.431 | 12112.415 | NM_00184E | 751.727   | 1087.99   |
| U16752    | 883.59    | 861.418   | SR6       | 2066.427  | 2750.866  | X03635    | 1814.426  | 1991.624  |
| M30134    | 567.588   | 834.354   | SR8       | 8532.983  | 50698.34  | BC011847  | 52788.98  | 72949.922 |
| NM_00203E | 4765.441  | 4212.296  | SR10      | 24076.393 | 10865.915 | X03348    | 1958.827  | 2134.961  |
| NM_00572E | 21429.369 | 20420.02  | CY3Cy5    | 1180.306  | 126.267   | AF353674  | 3669.711  | 3955.836  |
| NM_01549E | 1175.037  | 1564.515  | X07203    | 316.128   | 444.757   | BC002645  | 2519.763  | 2249.058  |
| NM_003747 | 1949.329  | 2834.02   | NM_003834 | 1693.224  | 2020.14   | NM_02113E | 1521.973  | 1827.434  |
| NM_002827 | 6000.589  | 5367.335  | NM_00595E | 1957.639  | 2439.182  | BC002792  | 764.805   | 549.656   |
| NM_00194E | 2038.347  | 2118.021  | NM_003381 | 693.735   | 740.875   | NM_02100E | 1699.912  | 1568.042  |
| BF035425  | 42429.828 | 42442.816 | NM_00575E | 616.611   | 774.284   | SR6       | 1651.511  | 1399.614  |
| NM_00015E | 63777.879 | 52441.984 | NM_00370E | 8539.991  | 10247.628 | SR8       | 5362.527  | 15696.752 |
| NM_01463E | 2272.521  | 2321.463  | NM_00036E | 518.263   | 676.876   | SR10      | 22027.018 | 7571.07   |
| AF099740  | 903.786   | 1004.647  | NM_016351 | 514.409   | 756.039   | CY3Cy5    | 1828.607  | 148.789   |
| NM_006117 | 7586.445  | 7786.217  | NM_00440E | 695.054   | 449.786   | NM_003834 | 1437.831  | 2266.601  |
| NM_00222E | 2475.34   | 2521.404  | NM_00198E | 2656.808  | 2742.17   | NM_00595E | 2429.391  | 3122.543  |
| NM_00622E | 448.012   | 633.203   | NM_00606C | 1332.593  | 1269.266  | NM_003381 | 890.318   | 1152.094  |
| NM_01541E | 17453.24  | 17058.066 | NM_005667 | 1397.726  | 1470.482  | NM_00575E | 650.109   | 787.735   |
| NM_004897 | 1436.297  | 2256.402  | NM_00630E | 431.03    | 513.51    | NM_00370E | 8809.242  | 10726.92  |
| NM_00255E | 2532.119  | 2619.407  | NM_00006C | 776.189   | 557.735   | NM_00036E | 409.373   | 626.99    |
| AF225418  | 258.955   | 341.821   | NM_00958E | 762.462   | 576.921   | NM_016351 | 728.593   | 786.308   |
| NM_00030E | 1809.285  | 2657.707  | L09080    | 951.508   | 821.017   | NM_00440E | 633.422   | 706.417   |
| NM_00452E | 36714.117 | 39221.836 | NM_00732E | 2010.45   | 1600.691  | NM_00198E | 3147.645  | 3248.811  |
| AK026381  | 18757.822 | 18814.965 | NM_00188E | 3839.968  | 3698.169  | NM_00606C | 1926.068  | 2112.139  |
| NM_00245C | 12700.287 | 54672.984 | NM_004467 | 340.419   | 635.946   | NM_005667 | 1639.711  | 1582.939  |
| NM_00168E | 909.436   | 838.861   | NM_00562E | 678.143   | 737.07    | NM_00630E | 555.169   | 685.705   |
| NM_00070E | 646.694   | 765.567   | NM_01805E | 3936.36   | 4478.899  | NM_00006C | 898.088   | 727.132   |
| NM_004231 | 51277.387 | 45087.02  | NM_00454E | 4603.837  | 3963.718  | NM_00958E | 774.93    | 646.831   |
| NM_14590A | 26832.893 | 27025.217 | X69079    | 9257.676  | 7774.406  | L09080    | 778.06    | 648.894   |
| NM_02196E | 345.182   | 336.162   | AF091033  | 426.787   | 479.283   | NM_00732E | 3025.106  | 2315.338  |
| NM_01333A | 5854.93   | 5599.068  | NM_00112E | 4230.416  | 5292.809  | NM_00188E | 3428.547  | 3215.681  |
| AF150735  | 3424.145  | 3544.514  | NM_004591 | 1056.283  | 1196.851  | NM_00562E | 652.152   | 636.324   |
| NM_01818E | 2039.273  | 1970.105  | AL133027  | 488.326   | 523.478   | NM_01805E | 4037.168  | 3601.844  |
| NM_01238E | 3127.883  | 3579.136  | AB037732  | 1273.623  | 1493.079  | NM_00454E | 3892.404  | 3224.743  |
| BF038366  | 496.236   | 786.912   | NM_001837 | 391.603   | 596.578   | X69079    | 8080.24   | 7214.314  |
| NM_00245E | 9513.901  | 9757.114  | M27487    | 370.743   | 430.619   | AF091033  | 338.904   | 534.547   |
| NM_01230A | 655.913   | 564.691   | NM_00216A | 364.743   | 560.719   | NM_00112E | 4528.436  | 5494.102  |
| NM_01644C | 17221.451 | 19230.881 | NM_003811 | 3178.347  | 3570.659  | NM_004591 | 704.155   | 1013.558  |
| NM_00719A | 1915.404  | 2145.602  | NM_002981 | 2674.833  | 2800.778  | NM_00627A | 217.527   | 376.299   |
| NM_00031A | 6529.284  | 5893.525  | NM_00124A | 1585.72   | 1172.94   | AL133027  | 552.874   | 823.897   |
| AB002369  | 1708.485  | 1448.363  | NM_01613E | 26935.555 | 20630.51  | AB037732  | 1562.987  | 2058.439  |
| S74620    | 718.414   | 829.702   | AL117468  | 1596.455  | 1531.648  | NM_001837 | 530.026   | 580.217   |
| AF305239  | 1464.411  | 1588.822  | NM_01961E | 1972.178  | 1827.792  | NM_00183E | 55009.152 | 73059.523 |
| AL137264  | 9578.057  | 8475.66   | NM_00538E | 636.123   | 1820.753  | M27487    | 388.156   | 457.854   |
| NM_00222E | 1781.964  | 1585.132  | AK027086  | 2540.976  | 2931.075  | NM_00216A | 580.177   | 404.468   |
| X84370    | 6022.913  | 6468.08   | AB032997  | 725.085   | 659.462   | NM_003811 | 3434.547  | 3545.232  |
| NM_00403E | 875.298   | 916.373   | AL096857  | 1947.073  | 1916.562  | NM_002981 | 3399.411  | 3407.178  |
| AB014558  | 765.346   | 821.606   | AF073770  | 910.956   | 1223.735  | NM_00124A | 1965.052  | 1827.381  |
| NM_006287 | 415.647   | 392.139   | AL359401  | 4703.796  | 5047.713  | NM_01227E | 400.028   | 296.891   |
| NM_000118 | 287.07    | 991.356   | NM_01221E | 1444.168  | 1766.393  | NM_01613E | 31351.338 | 26107.043 |
| NM_00091E | 5268.938  | 4357.861  | NM_01657E | 2475.191  | 2328.274  | AL117468  | 1899.786  | 1913.82   |
| NM_00129E | 1568.744  | 1093.153  | NM_00130E | 3696.619  | 3858.853  | NM_01961E | 2016.646  | 1797.048  |
| BG325046  | 1308.294  | 1392.281  | M21304    | 901.748   | 806.537   | NM_00538E | 636.11    | 1606.753  |
| AI351740  | 2700.844  | 2219.199  | NM_00197E | 338.891   | 595.004   | AK027086  | 2592.171  | 2160.459  |



|           |           |           |           |           |           |           |           |           |
|-----------|-----------|-----------|-----------|-----------|-----------|-----------|-----------|-----------|
| AA444051  | 941.555   | 960.86    | AB040896  | 1285.335  | 1451.222  | AB032997  | 1045.895  | 684.527   |
| NM_007164 | 3187.06   | 2896.411  | NM_001107 | 1239.549  | 1618.602  | AL096857  | 2451.023  | 2172.673  |
| BE783826  | 19882.328 | 20400.533 | AF084645  | 419.874   | 484.632   | AB002351  | 357.538   | 345.632   |
| X04827    | 1981.366  | 1520.193  | NM_003636 | 3346.83   | 3358.381  | AF073770  | 923.223   | 1416.847  |
| H07088    | 761.248   | 859.445   | NM_002234 | 709.658   | 868.975   | AL359401  | 4701.367  | 6053.513  |
| AI004656  | 1312.297  | 1379.03   | NM_000701 | 1257.93   | 1321.544  | NM_012213 | 1743.965  | 2027.338  |
| BC020596  | 1621.001  | 1538.959  | AB022696  | 2077.324  | 1909.961  | NM_016573 | 2552.2    | 2675.391  |
| AF116606  | 43705.801 | 42463.563 | AF137372  | 2588.121  | 2511.166  | NM_001303 | 4638.181  | 5823.661  |
| X98922    | 2155.119  | 1974.216  | AF220417  | 991.2     | 1068.108  | M21304    | 1159.706  | 1250.783  |
| AK098435  | 3198.574  | 2769.622  | D83782    | 3357.54   | 2834.741  | NM_001979 | 413.134   | 390.927   |
| AK092872  | 3346.437  | 3589.058  | NM_002078 | 1702.649  | 1481.62   | AB040896  | 1761.077  | 2042.639  |
| AF230496  | 1334.713  | 1552.329  | NM_000287 | 3046.938  | 2920.472  | NM_001107 | 1457.382  | 2031.784  |
| M16801    | 563.71    | 529.36    | NM_001656 | 944.488   | 844.233   | AF084645  | 401.407   | 411.083   |
| M30134    | 286.084   | 313.552   | Z70705    | 747.888   | 570.14    | NM_003636 | 3579.675  | 3809.178  |
| NM_002038 | 4497.921  | 4267.312  | NM_002611 | 816.32    | 828.843   | NM_002234 | 749.022   | 781.584   |
| NM_005729 | 19284.119 | 16725.438 | NM_017417 | 599.675   | 557.537   | NM_000701 | 1717.39   | 1687.265  |
| NM_015493 | 1184.333  | 1201.922  | AL133602  | 715.014   | 718.406   | AB022696  | 1540.452  | 1857.658  |
| NM_003747 | 1721.052  | 1656.709  | AF037219  | 1637.964  | 1877.701  | AF137372  | 3153.351  | 2921.358  |
| AB037744  | 3058.134  | 2988.197  | AK026075  | 519.827   | 661.913   | AF220417  | 1152.223  | 973.502   |
| AF141901  | 561.889   | 752.705   | NM_000251 | 2349.516  | 2232.513  | D83782    | 3919.482  | 3675.657  |
| NM_007008 | 266.472   | 374.658   | NM_006038 | 1688.384  | 1788.586  | NM_002078 | 1979.181  | 1593.771  |
| AL109708  | 576.005   | 616.82    | AB011133  | 1891.533  | 1674.083  | NM_000287 | 3063.638  | 2710.625  |
| L29143    | 705.358   | 570.951   | NM_017572 | 19608.236 | 14371.388 | NM_001656 | 1074.523  | 1246.213  |
| AF234532  | 2304.897  | 2235.793  | NM_018444 | 1302.257  | 1149.068  | Z70705    | 614.19    | 939.448   |
| NM_002418 | 790.49    | 884.715   | NM_000252 | 2147.415  | 2222.244  | NM_002611 | 850.766   | 1019.249  |
| NM_004485 | 964.684   | 912.586   | NM_006947 | 7437.268  | 6306.014  | NM_017417 | 786.948   | 786.679   |
| NM_013296 | 4651.368  | 5042.481  | NM_017917 | 2036.371  | 2084.105  | AL133602  | 822.276   | 996.779   |
| AL117478  | 1206.381  | 1179.787  | NM_004090 | 4040.325  | 3873.881  | AF037219  | 2083.202  | 1977.545  |
| NM_005307 | 1482.016  | 1553.302  | NM_014634 | 5787.54   | 5140.096  | AK026075  | 500.604   | 654.318   |
| NM_005958 | 1447.99   | 1507.895  | NM_001919 | 9157.104  | 9141.44   | NM_000251 | 2709.699  | 3101.21   |
| NM_013436 | 699.967   | 873.442   | BC031485  | 1950.099  | 2132.227  | NM_006038 | 1657.138  | 1880.149  |
| AF225426  | 725.669   | 648.898   | NM_004092 | 5563.212  | 6093.881  | AB011133  | 1919.227  | 1638.18   |
| NM_005208 | 5845.873  | 5425.356  | X15624    | 1186.026  | 1049.341  | NM_017572 | 21743.713 | 16997.279 |
| NM_000421 | 1439.158  | 1218.77   | NM_004467 | 739.971   | 839.24    | NM_018444 | 1569.729  | 1411.954  |
| AK025687  | 12934.245 | 14677.343 | NM_005622 | 697.257   | 674.123   | NM_000252 | 2398.025  | 2274.204  |
| AF218941  | 1047.286  | 1130.001  | NM_018058 | 3659.783  | 4257.098  | NM_006947 | 8111.041  | 8323.289  |
| NM_000705 | 487.54    | 577.915   | NM_004548 | 3702.427  | 3614.885  | NM_017917 | 2237.838  | 2002.724  |
| NM_004231 | 58037.93  | 51318.945 | X69079    | 8690.809  | 8067.907  | NM_004090 | 5148.17   | 4369.724  |
| NM_016577 | 589.586   | 780.134   | BI759406  | 2785.123  | 2499.555  | NM_014634 | 6903.062  | 5634.865  |
| AK023107  | 6655.997  | 6851.07   | S74445    | 487.228   | 642.672   | NM_001919 | 9036.49   | 9908.621  |
| NM_006854 | 16098.581 | 13263.599 | BI763360  | 611.318   | 1100.816  | BC031485  | 2164.859  | 1917.502  |
| NM_004580 | 12509.075 | 12126.62  | D25538    | 835.057   | 846.247   | NM_004092 | 5895.441  | 6519.646  |
| NM_020387 | 26622.664 | 28781.852 | NM_000360 | 4865.348  | 4416.553  | X15624    | 1125.781  | 1170.46   |
| NM_007246 | 1405.814  | 1515.412  | D49950    | 4565.556  | 4385.558  | NM_004467 | 486.354   | 835.437   |
| AK026248  | 1746.883  | 2079.465  | NM_001849 | 1574.308  | 1556.18   | NM_005622 | 701.231   | 836.413   |
| NM_004578 | 3456.875  | 3682.145  | X03635    | 1611.86   | 1643.426  | NM_018058 | 4157.635  | 5023.012  |
| NM_000647 | 1735.926  | 2959.791  | BC011847  | 54621.824 | 65705.344 | NM_004548 | 4224.489  | 4400.143  |
| NM_017604 | 1111.147  | 1196.278  | X03348    | 1873.66   | 1862.806  | X69079    | 8355.865  | 10002.886 |
| NM_017738 | 7570.521  | 10311.468 | AF353674  | 3664.287  | 3163.514  | BI759406  | 2635.753  | 3299.737  |
| NM_016557 | 893.222   | 900.587   | BC002645  | 2425.165  | 1942.598  | R76099    | 533.81    | 529.437   |
| NM_000623 | 3750.612  | 4194.34   | NM_021138 | 1625.948  | 1335.752  | S74445    | 739.426   | 800.734   |
| AF161348  | 2369.936  | 1910.916  | BC002792  | 729.229   | 773.237   | BI763360  | 616       | 650.004   |
| NM_018467 | 8009.361  | 8526.89   | NM_021005 | 1459.539  | 1510.474  | D25538    | 1199.653  | 994.244   |

|           |           |           |           |           |           |           |           |           |
|-----------|-----------|-----------|-----------|-----------|-----------|-----------|-----------|-----------|
| NM_00606E | 2107.2    | 3333.95   | SB        | 308.497   | 343.619   | NM_00036C | 5195.667  | 6103.903  |
| U16752    | 944.386   | 1058.536  | NM_001523 | 561.328   | 567.838   | D49950    | 4235.946  | 4461.464  |
| NM_01644C | 15821.85  | 14431.022 | NM_017423 | 858.76    | 710.893   | NM_00184E | 1073.463  | 867.149   |
| NM_007194 | 1716.844  | 2064.022  | NM_019613 | 1979.5    | 2297.909  | X03635    | 1755.109  | 1573.643  |
| NM_000314 | 6890.661  | 5305.251  | NM_005382 | 496.666   | 1735.212  | BC011847  | 51039.523 | 68658.789 |
| AB002369  | 1374.878  | 1237.44   | AK027086  | 2462.712  | 2759.082  | X03348    | 2255.351  | 2142.392  |
| S74620    | 819.283   | 774.3     | AB032997  | 770.875   | 738.226   | AF353674  | 3782.72   | 3344.119  |
| AF305239  | 1351.915  | 1168.725  | AL096857  | 1820.573  | 1668.897  | BC002645  | 2576.14   | 2243.18   |
| NM_002827 | 5635.473  | 5349.554  | AB040104  | 343.825   | 513.773   | NM_021138 | 1933.895  | 1597.327  |
| NM_00194E | 2053.059  | 1938.574  | NM_003834 | 1794.703  | 2101.656  | BC002792  | 750.698   | 842.733   |
| BF035425  | 44789.496 | 43918.219 | NM_005959 | 1994.965  | 1967.534  | NM_02100E | 1603.733  | 1725.074  |
| NM_00015E | 64387.352 | 55266.492 | NM_003381 | 881.263   | 900.999   | SB        | 316.262   | 173.439   |
| NM_01463E | 1905.152  | 2539.773  | NM_00575E | 849.26    | 812.641   | NM_001523 | 638.044   | 412.725   |
| AF099740  | 1083.06   | 1219.011  | NM_003702 | 10247.716 | 9965.733  | NM_017423 | 1007.073  | 844.457   |
| NM_006117 | 8975.951  | 9652.026  | NM_000369 | 606.974   | 671.741   | NM_019613 | 2285.82   | 3703.584  |
| NM_00222E | 2714.766  | 3061.847  | NM_016351 | 860.084   | 761.364   | NM_005382 | 544.12    | 2059.468  |
| NM_00622E | 502.531   | 614.883   | NM_00440E | 639.372   | 706.739   | AK027086  | 2401.813  | 2881.542  |
| NM_01541E | 19169.793 | 19066.732 | NM_00198E | 2721.357  | 1829.476  | AB032997  | 725.927   | 813.412   |
| NM_004897 | 1271.315  | 1532.661  | NM_00606C | 1403.401  | 1164.647  | AL096857  | 2129.164  | 2854.563  |
| NM_00255E | 2758.972  | 2457.133  | NM_005667 | 1431.268  | 1315.378  | NM_003834 | 1767.652  | 1566.518  |
| AF225418  | 479.134   | 444.969   | NM_00630E | 560.314   | 422.568   | NM_00595E | 2636.253  | 3048.374  |
| NM_00030E | 1210.196  | 1633.749  | NM_00006C | 592.795   | 538.826   | NM_003381 | 1056.906  | 875.43    |
| NM_00452E | 34036.211 | 32019.67  | NM_00958E | 804.716   | 816.575   | NM_00575E | 774.027   | 842.728   |
| NM_00245C | 14066.08  | 58289.527 | L09080    | 1256.803  | 1281.646  | NM_003702 | 9220.546  | 9072.636  |
| NM_00168E | 801.738   | 934.513   | NM_00732E | 1986.085  | 1544.143  | NM_00036E | 494.418   | 397.157   |
| NM_014723 | 1056.692  | 794.588   | NM_00188E | 3301.496  | 2162.919  | NM_016351 | 651.976   | 597.876   |
| AB011106  | 893.949   | 929.231   | AF137372  | 2536.181  | 3380.898  | NM_00440E | 610.95    | 532.137   |
| D26362    | 3684.437  | 3281.876  | AF220417  | 976.147   | 1032.652  | NM_00198E | 3066.26   | 2839.532  |
| NM_013452 | 2649.795  | 2549.115  | D83782    | 3273.302  | 3088.596  | NM_00606C | 1405.254  | 1316.185  |
| AY009402  | 3305.289  | 4086.909  | NM_00207E | 1445.976  | 1613.564  | NM_005667 | 1388.616  | 1581.106  |
| NM_018451 | 819.728   | 734.357   | NM_000287 | 2419.042  | 2506.851  | NM_00630E | 621.123   | 418.109   |
| NM_012443 | 612.639   | 709.949   | NM_00165E | 806.831   | 1102.157  | NM_00006C | 954.396   | 476.356   |
| NM_002584 | 5404.222  | 6049.718  | AF091033  | 425.487   | 603.611   | NM_00958E | 773.625   | 585.756   |
| NM_013334 | 7673.28   | 9259.715  | NM_001122 | 4051.495  | 5099.621  | L09080    | 828.268   | 814.153   |
| AF150735  | 3235.366  | 3185.32   | NM_004591 | 958.09    | 1122.544  | NM_00732E | 2717.863  | 2121.463  |
| NM_018183 | 1992.172  | 1761.045  | AL133027  | 566.079   | 668.828   | NM_00188E | 3055.866  | 3065.711  |
| NM_012382 | 3206.839  | 3236.015  | AB037732  | 1639.024  | 1891.218  | AF137372  | 2822.625  | 3757.163  |
| BF038366  | 1691.831  | 1273.258  | NM_001837 | 499.597   | 536.147   | AF220417  | 934.35    | 1481.227  |
| NM_012304 | 807.393   | 608.479   | BC016029  | 596.61    | 388.766   | D83782    | 3964.253  | 3921.759  |
| AF245505  | 785.728   | 621.293   | M27487    | 365.929   | 216.722   | NM_00207E | 1837.943  | 1916.611  |
| AB037776  | 609.703   | 451.353   | NM_002164 | 643.554   | 501.977   | NM_000287 | 2987.008  | 4099.225  |
| AF196976  | 4587.424  | 4028.071  | NM_003811 | 3145.852  | 3368.21   | NM_00165E | 981.471   | 1566.824  |
| AL050379  | 1096.503  | 922.182   | NM_002981 | 3192.808  | 3132.605  | AF091033  | 426.939   | 294.675   |
| NM_003161 | 1454.846  | 1537.965  | NM_001244 | 1374.412  | 1193.2    | NM_001122 | 4764.148  | 5497.843  |
| NM_01449E | 545.964   | 643.973   | NM_01227E | 404.176   | 434.301   | NM_004591 | 1023.868  | 1128.066  |
| NM_01621E | 23558.982 | 22071.037 | NM_006137 | 461.418   | 436.473   | AL133027  | 782.696   | 655.333   |
| AK026919  | 379.718   | 373.405   | NM_01613E | 29011.295 | 30998.703 | AB037732  | 1484.804  | 2231.598  |
| NM_001501 | 7396.892  | 9312.057  | AL117468  | 1634.375  | 1193.698  | NM_005767 | 424.991   | 332.731   |
| NM_00617E | 44017.406 | 55280.441 | NM_00409C | 4911.718  | 5273.823  | NM_001837 | 377.479   | 341.557   |
| AL137459  | 1633.63   | 2261.406  | NM_014634 | 6839.191  | 7151.888  | BC016029  | 432.804   | 326.396   |
| AB037812  | 841.026   | 1381.07   | NM_00191E | 9887.598  | 12480.619 | M27487    | 307.248   | 278.497   |
| AB007932  | 2474.565  | 3203.647  | BC031485  | 1935.451  | 2294.334  | NM_003811 | 3227.885  | 3318.793  |
| AF219257  | 36024.047 | 48511.617 | NM_004092 | 4815.05   | 6087.474  | NM_002981 | 3817.31   | 4070.122  |

|           |           |           |           |           |           |           |           |           |
|-----------|-----------|-----------|-----------|-----------|-----------|-----------|-----------|-----------|
| NM_00397E | 1169.932  | 1644.248  | X15624    | 1064.144  | 1410.045  | NM_001244 | 1976.871  | 1615.889  |
| NM_002561 | 2904.852  | 2793.51   | AF073770  | 988.796   | 1057.764  | NM_01227E | 393.815   | 446.601   |
| NM_00610E | 27446.223 | 24976.877 | AL359401  | 4588.931  | 4562.469  | NM_006137 | 344.95    | 342.978   |
| NM_00080E | 485.594   | 365.768   | NM_01221E | 1670.577  | 1677.886  | NM_01613E | 30874.59  | 23860.361 |
| AL359933  | 12178.203 | 10664.409 | NM_01657E | 2264.23   | 1974.505  | AL117468  | 1882.22   | 1424.853  |
| NM_00130E | 585.817   | 564.744   | NM_00130E | 4423.813  | 5115.729  | NM_00409C | 4887.645  | 6347.438  |
| M17783    | 5817.877  | 5011.298  | M21304    | 976.632   | 824.381   | NM_014634 | 6647.623  | 7079.769  |
| NM_00317E | 1702.46   | 1466.492  | NM_00197E | 555.628   | 514.749   | NM_00191E | 9293.838  | 10870.701 |
| NM_012437 | 6772.501  | 6048.854  | AB040896  | 1428.297  | 1678.885  | BC031485  | 2192.043  | 2542.858  |
| AF090944  | 698.506   | 600.564   | AF084645  | 426.297   | 382.629   | NM_00409E | 6038.469  | 7972.996  |
| NM_002607 | 678.635   | 506.789   | NM_00517E | 513.269   | 418.53    | X15624    | 1265.892  | 1872.872  |
| AF116712  | 466.156   | 481.383   | NM_00363E | 3479.337  | 3095.981  | AF073770  | 1006.749  | 1303.334  |
| AF116626  | 2482.142  | 2287.371  | NM_002234 | 747.914   | 613.938   | AL359401  | 4838.222  | 5316.305  |
| NM_00176C | 29085.926 | 30440.695 | NM_000701 | 1621.715  | 1589.117  | NM_01221E | 1896.805  | 1727.847  |
| NM_002527 | 1872.312  | 1993.808  | AB022696  | 2578.52   | 2354.479  | NM_01657E | 2733.877  | 2881.157  |
| NM_00589C | 1972.742  | 2389.809  | NM_02100E | 1450.027  | 1610.914  | NM_00130E | 4612.668  | 5883.542  |
| AF149785  | 4766.43   | 5925.111  | NM_00152E | 721.143   | 578.455   | M21304    | 1194.821  | 1184.483  |
| NM_01206E | 15007.734 | 23836.662 | NM_01742E | 825.53    | 1557.242  | AB040896  | 1871.162  | 1576.16   |
| NM_004064 | 8766.69   | 12641.374 | Z70705    | 613.812   | 759.731   | AF084645  | 505.801   | 316.071   |
| NM_00125E | 2759.006  | 4432.471  | NM_002611 | 627.246   | 1035.944  | NM_00517E | 315.391   | 200.167   |
| NM_014704 | 3410.329  | 4517.208  | NM_017417 | 693.445   | 570.43    | NM_00363E | 3893.504  | 3402.958  |
| NM_02020E | 999.181   | 1292.411  | AL133602  | 886.072   | 1021.376  | NM_002234 | 677.33    | 639.199   |
| NM_001227 | 732.51    | 818.715   | AF037219  | 2441.01   | 2400.596  | NM_000701 | 1675.186  | 1535.625  |
| NM_001191 | 3470.133  | 3336.513  | AK026075  | 634.956   | 635.851   | AB022696  | 2377.516  | 2106.079  |
| U15174    | 909.529   | 802.278   | NM_000251 | 2456.124  | 2123.853  | NM_02100E | 1361.138  | 2052.647  |
| NM_01334E | 1448.891  | 1505.078  | NM_00603E | 1645.346  | 1401.811  | SB        | 298.026   | 170.284   |
| NM_014344 | 701.63    | 735.771   | AB011133  | 1759.327  | 1591.45   | NM_00152E | 691.855   | 755.649   |
| AB040917  | 663.85    | 702.979   | NM_01757E | 20234.254 | 16426.152 | NM_01742E | 789.127   | 1157.487  |
| AA203539  | 408.401   | 561.753   | NM_018444 | 1589.976  | 1511.631  | Z70705    | 629.402   | 769.202   |
| AK021786  | 890.282   | 683.677   | NM_00025E | 2330.067  | 1885.664  | NM_002611 | 790.595   | 979.134   |
| NM_00427E | 6060.914  | 5042.408  | NM_006947 | 7574.313  | 6970.427  | NM_017417 | 898.982   | 881.67    |
| NM_004851 | 392.795   | 495.047   | NM_017917 | 2064.578  | 1986.192  | AL133602  | 767.489   | 895.179   |
| NM_00190E | 3601.034  | 3792.41   | NM_00006C | 748.583   | 742.381   | AF037219  | 2151.007  | 2063.429  |
| NM_00028E | 5344.821  | 5783.575  | NM_00958E | 604.525   | 706.691   | AK026075  | 557.919   | 540.062   |
| AV702690  | 1019.949  | 1294.221  | L09080    | 1022.201  | 1406.204  | NM_000251 | 2566.433  | 2605.537  |
| AL117452  | 2242.043  | 2623.463  | NM_00732E | 577.941   | 657.826   | NM_00603E | 2065.444  | 1741.59   |
| NM_01223C | 1271.428  | 1801.181  | NM_00188E | 2502.998  | 2413.259  | AB011133  | 1770.159  | 1532.635  |
| NM_01403E | 8073.94   | 13288.915 | NM_004467 | 361.032   | 685.815   | NM_01757E | 21281.572 | 16582.266 |
| NM_002061 | 4736.325  | 7325.231  | NM_00562E | 653.313   | 891.636   | NM_018444 | 1557.299  | 1370.799  |
| AF169974  | 3117.526  | 3937.229  | NM_01805E | 4303.473  | 10559.086 | NM_00025E | 2418.633  | 2015.405  |
| NM_00452E | 495.254   | 459.684   | NM_00454E | 2139.126  | 1946.203  | NM_006947 | 8268.3    | 6964.622  |
| NM_00573E | 1565.531  | 1449.274  | X69079    | 8899.959  | 9898.235  | NM_017917 | 2419.052  | 1812.677  |
| NM_01813E | 2444.578  | 2235.494  | BI759406  | 2375.155  | 3262.383  | NM_00006C | 632.495   | 585.893   |
| NM_01961E | 3469.454  | 2910.007  | R76099    | 559.71    | 912.92    | NM_00958E | 612.134   | 722.328   |
| AF183411  | 3036.438  | 2819.08   | S74445    | 634.182   | 770.104   | L09080    | 579.838   | 727.891   |
| BF244591  | 1056.945  | 905.231   | BI763360  | 790.244   | 729.791   | NM_00732E | 1923.223  | 2236.106  |
| NM_00588E | 8721.93   | 7501.4    | D25538    | 1176.623  | 963.409   | NM_00188E | 2834.921  | 3404.619  |
| NM_00596E | 1503.998  | 1133.613  | NM_00036C | 4996.336  | 3956.87   | NM_004467 | 362.377   | 490.968   |
| NM_00315E | 1538.144  | 1274.836  | D49950    | 4156.13   | 3412.26   | NM_00562E | 520.591   | 700.517   |
| NM_01331C | 3658.893  | 2335.183  | NM_00184E | 989.373   | 603.975   | NM_01805E | 4021.245  | 4245.83   |
| BC004958  | 1079.563  | 996.688   | X03635    | 1625.816  | 1550.849  | NM_00454E | 4068.464  | 4100.935  |
| NM_00576E | 6224.101  | 5180.868  | BC011847  | 61362.488 | 69766.547 | X69079    | 9249.645  | 10414.419 |
| NM_00647E | 742.108   | 548.836   | X03348    | 1974.22   | 1924.936  | BI759406  | 2755.052  | 2793.433  |

|           |           |           |           |           |           |           |           |           |
|-----------|-----------|-----------|-----------|-----------|-----------|-----------|-----------|-----------|
| NM_014643 | 2999.692  | 2178.988  | AF353674  | 3818.347  | 2770.328  | R76099    | 410.048   | 369.729   |
| NM_005653 | 1708.38   | 1489.475  | BC002645  | 2324.854  | 2060.542  | S74445    | 617.931   | 688.791   |
| NM_014553 | 1164.477  | 1070.781  | NM_021138 | 1843.902  | 1516.386  | BI763360  | 712.664   | 538.305   |
| NM_003440 | 1655.642  | 2134.198  | BC002792  | 638.691   | 707.535   | D25538    | 1059.272  | 943.889   |
| NM_00469E | 11654.868 | 12574.849 | NM_002981 | 2530.99   | 3140.706  | NM_000360 | 4904.763  | 4131.643  |
| U41387    | 19326.248 | 20782.479 | NM_001244 | 1291.638  | 1502.928  | D49950    | 4498.397  | 3742.794  |
| NM_00451E | 8038.335  | 8939.711  | NM_01227E | 289.453   | 543.618   | NM_00184E | 1007.46   | 727.895   |
| NM_006513 | 1308.509  | 1448.064  | NM_006137 | 516.797   | 606.262   | X03635    | 1874.115  | 1582.4    |
| NM_00368E | 17365.105 | 14978.974 | NM_016139 | 24624.75  | 24037.223 | BC011847  | 50015.184 | 68262.32  |
| NM_00248E | 473.532   | 335.794   | AL117468  | 1506.009  | 1913.426  | X03348    | 1855.149  | 1827.272  |
| NM_00629E | 9283.088  | 7745.066  | NM_019613 | 1694.523  | 2293.363  | AF353674  | 4196.538  | 3123.444  |
| NM_001540 | 1691.948  | 1408.757  | NM_005382 | 605.98    | 1598.442  | BC002645  | 2574.556  | 2131.89   |
| NM_012111 | 10823.894 | 9338.159  | AK027086  | 2305.345  | 2844.906  | NM_021138 | 1687.036  | 1289.674  |
| NM_004470 | 11655.124 | 9188.115  | AB032997  | 483.634   | 519.883   | BC002792  | 595.819   | 583.283   |
| NM_00141E | 4952.932  | 4051.267  | AL096857  | 1677.766  | 2001.87   | NM_002981 | 2513.907  | 3435.284  |
| AL049680  | 3049.06   | 2264.751  | AB002351  | 322.451   | 486.672   | NM_001244 | 1815.389  | 2229.508  |
| AK001595  | 1217.01   | 958.242   | X07203    | 604.574   | 2073.492  | NM_01227E | 265.53    | 299.385   |
| NM_01801E | 437.678   | 336.963   | AB040104  | 431.525   | 922.679   | NM_006137 | 300.542   | 238.971   |
| NM_00371E | 6585.378  | 4658.61   | NM_003834 | 1544.741  | 2047.661  | NM_01613E | 27477.012 | 29677.477 |
| M94065    | 1312.357  | 1065.218  | NM_00595E | 2184.936  | 2065.121  | AL117468  | 1882.106  | 1974.695  |
| BF036874  | 2030.421  | 1697.286  | NM_003381 | 723.623   | 715.989   | NM_019613 | 1830.851  | 2435.709  |
| BE888487  | 840.008   | 869.223   | NM_00575E | 604.838   | 670.846   | NM_00538E | 465.613   | 1666.819  |
| AF182419  | 1836.38   | 2458.972  | NM_003702 | 9824.617  | 7318.317  | AK027086  | 2481.51   | 2622.055  |
| NM_00701E | 1120.151  | 1439.708  | NM_00036E | 672.247   | 738.943   | AB032997  | 738.679   | 717.946   |
| NM_002703 | 4126.747  | 4548.886  | NM_016351 | 614.539   | 688.618   | AL096857  | 1919.208  | 2599.57   |
| NM_00537E | 13642.409 | 14096.494 | NM_00440E | 616.702   | 624.584   | NM_003834 | 1520.281  | 1458.506  |
| NM_00598E | 7068.984  | 7845.615  | NM_00198E | 2629.54   | 1848.409  | NM_00595E | 2396.719  | 2050.207  |
| NM_01590E | 4133.676  | 4610.62   | NM_006060 | 1351.086  | 801.202   | NM_003381 | 815.939   | 554.994   |
| AK023759  | 2345.405  | 2307.363  | NM_005667 | 1502.603  | 1159.464  | NM_00575E | 723.618   | 695.937   |
| L25270    | 25806.906 | 23787.756 | NM_00630E | 462.324   | 402.594   | NM_003702 | 10607.051 | 8734.244  |
| AB033111  | 1169.198  | 999.508   | NM_002234 | 756.987   | 841.815   | NM_00440E | 604.496   | 451.301   |
| AJ276316  | 1612.176  | 1423.962  | NM_000701 | 1383.468  | 1854.434  | NM_00198E | 3328.396  | 2507.405  |
| AF229246  | 14004.649 | 11188.541 | AB022696  | 2072.766  | 2221.666  | NM_006060 | 1478.725  | 979.888   |
| S64709    | 3625.705  | 2937.811  | AF137372  | 2739.513  | 3449.431  | NM_005667 | 1333.32   | 1151.019  |
| NM_003071 | 8905.005  | 6351.619  | AF220417  | 966.052   | 1292.933  | NM_00630E | 573.044   | 426.231   |
| AK021494  | 1802.338  | 1258.77   | D83782    | 3102.243  | 3493.651  | NM_002234 | 767.623   | 814.578   |
| AF075023  | 1240.344  | 1004.115  | NM_00207E | 967.626   | 1189.583  | NM_000701 | 1523.796  | 1983.598  |
| AL360160  | 33606.582 | 24147.477 | NM_000287 | 2595.26   | 3223.379  | AB022696  | 2051.322  | 2801.78   |
| AK001092  | 56851.914 | 54097.969 | NM_00165E | 1072.953  | 1168.007  | AF137372  | 2761.272  | 3593.113  |
| NM_014144 | 2066.681  | 2812.34   | AF091033  | 500.716   | 697.308   | AF220417  | 906.528   | 1177.579  |
| AF147345  | 1368.849  | 1608.662  | NM_001122 | 4937.711  | 6549.572  | D83782    | 3468.375  | 3344.911  |
| AF147373  | 7971.579  | 8218.332  | NM_004591 | 1070.127  | 1094.35   | NM_00207E | 1808.897  | 2073.606  |
| AK022044  | 403.599   | 503.892   | NM_006274 | 381.607   | 527.292   | NM_000287 | 3188.54   | 2825.477  |
| AK026209  | 473.953   | 542.092   | AL133027  | 645.593   | 652.3     | NM_00165E | 971.098   | 1327.766  |
| AF086253  | 1050.151  | 1049.082  | AB037732  | 1347.023  | 1296.25   | AF091033  | 456.757   | 383.934   |
| AF086303  | 604.02    | 541.933   | NM_001837 | 384.271   | 360.444   | NM_001122 | 4296.704  | 4183.824  |
| AF086434  | 1191.325  | 966.645   | NM_00183E | 57425.582 | 63988.434 | AL133027  | 483.014   | 692.667   |
| AK022063  | 5332.388  | 5292.726  | BC016029  | 362.457   | 280.268   | AB037732  | 1495.643  | 1559.971  |
| AF086345  | 4182.669  | 3966.536  | NM_00228E | 41992.066 | 27656.547 | NM_001837 | 358.038   | 354.343   |
| AF086464  | 875.737   | 702.284   | NM_003811 | 2683.547  | 1926.421  | BC016029  | 401.639   | 346.336   |
| AL049278  | 1757.577  | 1349.474  | AB011133  | 1621.099  | 2006.422  | M27487    | 282.929   | 282.188   |
| NM_005060 | 716.662   | 654.856   | NM_01757E | 19337.279 | 18138.16  | NM_003811 | 3188.512  | 3365.422  |
| AL035369  | 1843.5    | 1355.378  | NM_018444 | 1211.543  | 1571.21   | AB011133  | 1661.806  | 2591.241  |

|           |           |           |           |           |           |           |           |           |
|-----------|-----------|-----------|-----------|-----------|-----------|-----------|-----------|-----------|
| AF075097  | 6212.147  | 6349.618  | NM_000252 | 2043.285  | 2591.839  | NM_017572 | 20702.172 | 21638.672 |
| AK022801  | 532.523   | 804.295   | NM_006947 | 7556.25   | 8573.137  | NM_018444 | 1416.587  | 1463.222  |
| AL133075  | 8193.729  | 9314.486  | NM_017917 | 2108.949  | 2680.381  | NM_000252 | 2120.528  | 2443.727  |
| AL137692  | 369.147   | 576.326   | NM_004090 | 4068.615  | 4954.501  | NM_006947 | 7881.958  | 9771.117  |
| AL137630  | 2741.618  | 2806.751  | NM_014634 | 6455.718  | 7494.956  | NM_017917 | 1995.873  | 2095.598  |
| AL137277  | 11996.813 | 11954.521 | NM_001919 | 9112.48   | 12653.146 | NM_004090 | 4865.115  | 6053.586  |
| AL137447  | 705.571   | 685.753   | BC031485  | 1605.65   | 2108.12   | NM_014634 | 6634.407  | 7246.055  |
| AL157467  | 946.267   | 991.658   | NM_004092 | 5430.149  | 7365.819  | NM_001919 | 8951.273  | 10207.406 |
| BC023609  | 1604.935  | 1612.202  | X15624    | 1121.734  | 1414.282  | BC031485  | 2566.595  | 2592.111  |
| AK025100  | 3032.456  | 2469.752  | AF073770  | 1009.513  | 1137.58   | NM_004092 | 5777.88   | 7547.612  |
| AF088016  | 1573.334  | 1239.811  | AL359401  | 4694.018  | 4879.465  | X15624    | 1197.212  | 1777.982  |
| AF086395  | 1210.609  | 1036.806  | NM_012213 | 1721.536  | 1758.833  | AF073770  | 947.027   | 1156.997  |
| AF086049  | 2910.233  | 2870.934  | NM_016573 | 2927.811  | 2433.691  | AL359401  | 4686.988  | 4706.157  |
| AF088020  | 729.098   | 580.641   | NM_001303 | 4180.389  | 4223.772  | NM_012213 | 1471.764  | 1445.547  |
| AF114263  | 971.262   | 797.898   | M21304    | 963.177   | 730.36    | NM_016573 | 2244.198  | 2297.03   |
| AF086073  | 517.969   | 1019.398  | NM_001979 | 468.369   | 472.229   | NM_001303 | 3786.486  | 4095.853  |
| AK026142  | 4354.89   | 3361.437  | AB040896  | 1226.27   | 1095.44   | M21304    | 986.396   | 803.038   |
| AF161369  | 2983.045  | 2248.145  | NM_001107 | 1404.164  | 1323.958  | NM_001979 | 508.521   | 565.015   |
| AK027176  | 4210.113  | 3779.819  | AF084645  | 481.302   | 208.983   | AB040896  | 1721.727  | 1773.558  |
| AF073328  | 687.343   | 624.15    | AF151851  | 3880.192  | 3031.112  | NM_001107 | 1269.884  | 1564.492  |
| AF211968  | 476.043   | 323.793   | NM_005176 | 295.362   | 319.109   | AF084645  | 382.017   | 294.286   |
| Y12019    | 4931.16   | 4516.706  | NM_003636 | 3431.975  | 2880.341  | NM_003636 | 3706.565  | 3534.453  |
| AF147418  | 591.462   | 584.596   | AF040723  | 5271.082  | 5218.291  | AF040723  | 4159.672  | 5872.836  |
| AL137326  | 960.338   | 1972.058  | NM_015527 | 2339.657  | 2225.595  | NM_015527 | 2292.234  | 2401.631  |
| AK021898  | 2256.831  | 2162.817  | X89675    | 971.954   | 1114.325  | X89675    | 1080.485  | 1062.542  |
| AK022024  | 3152.176  | 3603.88   | NM_005798 | 8112.425  | 14557.048 | NM_012188 | 334.84    | 461.237   |
| AK022163  | 429.864   | 794.176   | NM_004216 | 2181.913  | 3883.455  | NM_005798 | 7096.026  | 8636.9    |
| AK022301  | 714.544   | 865.065   | NM_016289 | 17834.219 | 22464.203 | NM_004216 | 1971.842  | 2306.976  |
| AK021948  | 1085.621  | 1149.764  | NM_001464 | 628.397   | 683.444   | NM_016289 | 17320.584 | 17781.342 |
| AK022341  | 616.356   | 670.515   | NM_002051 | 1462.371  | 1690.569  | NM_001464 | 444.914   | 535.438   |
| AK026861  | 796.412   | 634.941   | NM_001523 | 754.088   | 716.027   | NM_002051 | 1504.777  | 1659.492  |
| AK021642  | 6708.083  | 6473.68   | NM_017423 | 778.718   | 1022.894  | NM_001523 | 545.448   | 811.083   |
| AK022455  | 856.136   | 856.021   | Z70705    | 769.007   | 878.564   | NM_017423 | 868.581   | 1226.758  |
| AK021987  | 1818.88   | 1376.857  | NM_002611 | 1112.752  | 1101.837  | Z70705    | 646.199   | 696.274   |
| AK026905  | 1392.149  | 1277.65   | NM_017417 | 623.261   | 557.284   | NM_002611 | 990.397   | 995.109   |
| AK023449  | 914.996   | 1057.82   | AL133602  | 833.244   | 617.027   | NM_017417 | 838.187   | 701.816   |
| AK026704  | 1419.58   | 1646.678  | AF037219  | 2372.563  | 2021.948  | AL133602  | 782.604   | 858.908   |
| NM_000134 | 603.522   | 512.703   | AK026075  | 556.195   | 789.247   | AF037219  | 2330.105  | 2398.987  |
| NM_006638 | 1937.301  | 1853.102  | NM_000251 | 2556.027  | 2223.022  | AK026075  | 592.081   | 546.157   |
| X14675    | 1802.152  | 1564.484  | NM_006038 | 701.053   | 538.515   | NM_000251 | 2285.508  | 2001.955  |
| AF071170  | 3222.565  | 2604.898  | U87223    | 1518.999  | 1607.334  | NM_006038 | 1613.623  | 1527.772  |
| AF075075  | 340.462   | 423.909   | NM_000093 | 430.447   | 559.71    | U87223    | 1078.97   | 1158.404  |
| AK025259  | 1104.354  | 1263.175  | NM_001779 | 1863.55   | 2451.253  | NM_000093 | 458.02    | 402.511   |
| NM_018304 | 5962.177  | 6340.002  | AB033059  | 631.523   | 723.672   | NM_001779 | 2291.987  | 2671.635  |
| AK024457  | 3897.255  | 3389.508  | NM_002600 | 2035.463  | 5326.03   | AB033059  | 364.561   | 536.453   |
| AK022022  | 365.777   | 757.246   | NM_003646 | 14282.364 | 14806.656 | NM_016484 | 1497.707  | 1617.885  |
| AK026894  | 1446.766  | 1172.13   | NM_006663 | 592.887   | 563.57    | NM_014452 | 993.565   | 922.276   |
| AK026372  | 864.257   | 766.071   | NM_006092 | 594.359   | 617.544   | NM_014683 | 383.934   | 418.577   |
| NM_014186 | 3013.719  | 2207.687  | NM_012424 | 870.74    | 622.427   | AK021536  | 4353.08   | 4434.645  |
| AF056442  | 1156.864  | 971.194   | NM_002446 | 599.886   | 443.326   | U31285    | 133.802   | 305.645   |
| AK024752  | 28798.451 | 21387.42  | NM_000863 | 724.113   | 596.258   | NM_002600 | 1553.555  | 1657.242  |
| BG117194  | 822.117   | 826.314   | NM_006651 | 1838.004  | 1343.666  | NM_003646 | 12580.689 | 10600.122 |
| AF131859  | 5421.919  | 4961.872  | NM_005336 | 7805.197  | 6048.646  | NM_006663 | 531.125   | 455.711   |

|           |           |           |           |           |           |           |           |           |
|-----------|-----------|-----------|-----------|-----------|-----------|-----------|-----------|-----------|
| AK023632  | 484.677   | 607.213   | NM_001419 | 5306.954  | 4125.416  | NM_006092 | 716.168   | 506.199   |
| AF086118  | 4519.078  | 4661.426  | AF119817  | 9552.013  | 7441.746  | NM_012424 | 612.731   | 575.657   |
| NM_01413E | 1135.249  | 1488.035  | AL035306  | 1323.566  | 744.769   | NM_00244E | 541       | 484.483   |
| AK025044  | 1534.781  | 1568.548  | NM_00132E | 8634.304  | 7762.584  | NM_000863 | 725.75    | 692.818   |
| AK023690  | 957.147   | 897.638   | NM_005749 | 2561.862  | 2533.949  | NM_006651 | 1621.887  | 1362.419  |
| U48697    | 216.195   | 616.703   | NM_00423C | 2179.25   | 2549.392  | NM_00533E | 7841.438  | 6424.141  |
| AF230317  | 549.016   | 651.259   | NM_014659 | 789.36    | 1021.138  | NM_00141E | 5293.849  | 5074.369  |
| AK023806  | 3682.403  | 3552.534  | NM_004399 | 2543.436  | 2791.305  | AF119817  | 7332.847  | 5977.988  |
| Y16696    | 18512.189 | 15361.697 | NM_006337 | 2749.502  | 3160.436  | AL035306  | 1222.501  | 920.21    |
| AK026094  | 1481.047  | 1272.294  | NM_004507 | 2487.242  | 2389.754  | NM_00132E | 7770.237  | 8267.791  |
| AF161344  | 7555.709  | 7182.72   | NM_01406C | 2617.227  | 3474.69   | NM_00574E | 2571.681  | 2615.914  |
| AF086027  | 906.934   | 783.431   | NM_004749 | 5798.44   | 7173.398  | NM_00423C | 1844.762  | 2364.829  |
| NM_001207 | 66010.406 | 50788.563 | BQ446064  | 1139.24   | 1919.288  | AK024372  | 317.628   | 337.297   |
| AK022199  | 754.564   | 705.579   | AF274571  | 694.77    | 695.983   | NM_01465E | 694.672   | 790.341   |
| NM_006211 | 443.319   | 488.474   | NM_003879 | 2665.163  | 2607.714  | NM_00439E | 1941.842  | 1974.867  |
| NM_003524 | 5782.332  | 3804.167  | NM_016052 | 3329.584  | 1762.528  | NM_006337 | 2441.524  | 2426.111  |
| AK021438  | 771.247   | 713.372   | NM_00671E | 1027.928  | 683.659   | NM_004507 | 1975.179  | 2096.786  |
| NM_005913 | 477.105   | 539.213   | NM_005427 | 574.166   | 423.564   | NM_00271C | 11810.192 | 11749.611 |
| S39891    | 908.863   | 829.857   | NM_016312 | 504.782   | 350.97    | NM_01406C | 2352.181  | 2951.894  |
| AK021624  | 1068.544  | 1019.233  | NM_00177E | 920.88    | 736.193   | NM_00474E | 5980.554  | 6050.969  |
| AF278605  | 8427.569  | 7315.238  | NM_001903 | 6466.748  | 5041.738  | BQ446064  | 873.6     | 1066.143  |
| NM_006497 | 20767.441 | 30217.756 | NM_001874 | 2939.733  | 2724.198  | AF274571  | 764.095   | 639.488   |
| AK022329  | 1142.699  | 1019.795  | NM_001869 | 407.11    | 945.864   | NM_00544E | 486.907   | 614.112   |
| AL133599  | 1786.341  | 1789.411  | NM_005857 | 11578.658 | 11072.631 | NM_00387E | 3050.875  | 2816.953  |
| NM_016472 | 1509.249  | 1334.37   | NM_002429 | 518.731   | 419.832   | NM_016052 | 3809.665  | 2884.305  |
| AF086064  | 786.466   | 712.878   | AK027037  | 1392.572  | 1496.843  | NM_00671E | 1111.295  | 869.854   |
| AK023042  | 4046.961  | 3542.069  | NM_00387E | 6927.009  | 6736.911  | NM_005427 | 499.574   | 512.732   |
| AK026429  | 502.779   | 481.715   | AF191687  | 1277.243  | 1294.223  | NM_016312 | 552.453   | 452.789   |
| NM_01655C | 2801.299  | 2230.488  | NM_00304E | 458.127   | 321.648   | NM_00177E | 1088.625  | 961.293   |
| AK024813  | 5792.298  | 4348.63   | NM_000274 | 6221.569  | 5696.148  | NM_001903 | 6044.228  | 4607.877  |
| AJ227909  | 24911.188 | 22836.447 | NM_00017C | 929.001   | 1034.318  | NM_001874 | 2945.191  | 2909.659  |
| AK021880  | 944.888   | 993.414   | NM_000281 | 6312.79   | 12628.367 | NM_005857 | 11492.096 | 11409.668 |
| L19365    | 498.747   | 1220.83   | AK001295  | 2922.363  | 2686.69   | NM_00242E | 606.667   | 582.961   |
| AK024107  | 502.81    | 508.824   | NM_006031 | 1501.229  | 1301.547  | AK027037  | 1475.337  | 1415.25   |
| CY3Cy5    | 2129.989  | 109.344   | NM_00271E | 3748.093  | 2601.033  | NM_00387E | 7128.231  | 7138.839  |
| BG534366  | 771.356   | 553.626   | NM_00102C | 58249.406 | 64870.848 | AF191687  | 1188.17   | 1311.361  |
| BG698522  | 5232.501  | 5442.819  | AB020660  | 1714.355  | 1190.832  | NM_000274 | 5943.41   | 5029.668  |
| L15189    | 1732.445  | 1997.004  | NM_006659 | 9327.029  | 7446.143  | NM_00017C | 503.123   | 582.778   |
| AB023420  | 7119.431  | 6993.838  | NM_018051 | 1199.466  | 685.142   | NM_000281 | 5468.888  | 4618.872  |
| AF022912  | 2030.015  | 1747.811  | NM_015371 | 1732.116  | 941.079   | AK001295  | 3102.75   | 2931.532  |
| AA477428  | 8583.439  | 9335.825  | AB040915  | 799.167   | 501.547   | NM_006031 | 1398.936  | 1338.594  |
| AA156342  | 1102.651  | 844.993   | NM_006481 | 787.412   | 695.661   | NM_00271E | 3692.774  | 3699.083  |
| R45594    | 8844.415  | 10152.84  | AB011115  | 411.236   | 433.475   | NM_00102C | 52898.109 | 68531.109 |
| H46425    | 1289.483  | 2723.609  | NM_00391C | 10730.116 | 10774.876 | AB020660  | 2239.356  | 2095.837  |
| AI355949  | 401.435   | 736.819   | AB007913  | 848.411   | 806.58    | NM_00665E | 10262.648 | 7903.036  |
| AA278152  | 4650.282  | 7225.229  | NM_00669E | 2335.429  | 2455.961  | NM_018051 | 1029.612  | 880.578   |
| H75530    | 1658.291  | 1875.297  | NM_004599 | 7413.176  | 8163.773  | NM_015371 | 1721.385  | 1455.055  |
| NM_00417E | 3359.238  | 3437.053  | NM_006037 | 7306.712  | 6298.5    | AB040915  | 714.276   | 770.259   |
| NM_00454E | 12478.664 | 12729.283 | NM_015871 | 3398.653  | 2972.54   | AF147791  | 337.314   | 171.181   |
| SR5       | 3343.323  | 2614.235  | NM_019037 | 4290.023  | 3647.79   | NM_006481 | 1224.591  | 1405.507  |
| SR7       | 4645.09   | 30076.9   | NM_015891 | 2438.15   | 1719.936  | NM_00391C | 10011.684 | 9117.418  |
| SR9       | 15700.111 | 2515.906  | NM_006802 | 618.133   | 591.252   | AB007913  | 726.743   | 762.355   |
| CY3Cy5    | 1249.43   | 85.968    | AB037778  | 647.857   | 438.706   | NM_00669E | 2500.4    | 2150.771  |

|           |           |           |           |           |           |           |           |           |
|-----------|-----------|-----------|-----------|-----------|-----------|-----------|-----------|-----------|
| NM_00131E | 6445.266  | 7148.5    | NM_00506E | 22909.367 | 17719.887 | NM_00459E | 6839.933  | 7641.379  |
| AF286095  | 1068.097  | 1257.991  | NM_00308E | 3559.455  | 2551.814  | NM_006037 | 6541.885  | 5090.545  |
| NM_00087E | 757.565   | 679.725   | NM_003753 | 13995.429 | 9996.491  | NM_015871 | 3052.789  | 3365.2    |
| S66407    | 1217.184  | 1318.927  | NM_006223 | 534.815   | 342.838   | NM_019037 | 4229.431  | 3986.106  |
| NM_00425E | 48966.477 | 46421.25  | NM_01759C | 1398.861  | 904.947   | NM_015891 | 2127.697  | 1676.457  |
| NM_001981 | 2750.348  | 2646.64   | AB011145  | 4190.572  | 3019.767  | NM_006802 | 444.317   | 353.267   |
| NM_014654 | 676.927   | 705.454   | NM_00375C | 18635.594 | 11193.244 | AB037778  | 469.935   | 490.671   |
| NM_00158E | 32345.797 | 32076.066 | M92422    | 1590.648  | 801.146   | NM_00506E | 22666.895 | 17721.098 |
| AK026108  | 6462.698  | 7045.155  | NM_01786E | 1272.333  | 641.889   | NM_00308E | 3937.744  | 2875.988  |
| NM_00637E | 1565.535  | 1930.221  | AK021888  | 772.888   | 835.673   | NM_003753 | 14959.979 | 13060.335 |
| BF571428  | 3102.323  | 4091.364  | AK022848  | 2424.575  | 2998.425  | NM_006223 | 502.033   | 249.631   |
| AB037723  | 4178.955  | 5263.966  | AK055302  | 228.711   | 214.249   | NM_01759C | 1648.146  | 1137.325  |
| NM_00624E | 2084.091  | 2581.331  | NM_01815E | 7383.135  | 7607.419  | AB011145  | 4199.068  | 2964.361  |
| NM_00431E | 472.567   | 545.636   | NM_00081E | 4644.093  | 4447.64   | NM_00375C | 19806.254 | 12231.517 |
| U58096    | 17569.434 | 14853.124 | NM_002513 | 1966.991  | 1892.445  | M92422    | 1552.288  | 1024.388  |
| NM_01692E | 4561.679  | 4083.286  | NM_017424 | 697.958   | 530.012   | NM_01786E | 1266.615  | 901.936   |
| NM_012323 | 764.036   | 868.528   | NM_001522 | 3969.808  | 4835.768  | AK021888  | 742.864   | 762.295   |
| NM_013943 | 782.01    | 747.388   | NM_000883 | 1743.934  | 1936.493  | AK022848  | 2128.754  | 2480.365  |
| NM_00163E | 2934.345  | 2884.046  | AF254086  | 1403.649  | 1520.522  | AL049957  | 253.565   | 417.701   |
| AF182404  | 1951.553  | 2305.469  | AL390142  | 1207.198  | 1253.324  | NM_01815E | 6163.542  | 7207.377  |
| NM_000804 | 911.614   | 1061.594  | NM_00656E | 1598.823  | 1311.429  | NM_00081E | 3454.93   | 3477.149  |
| NM_00655E | 1816.677  | 1868.754  | AB007930  | 7790.038  | 6331.355  | NM_002513 | 1695.25   | 1568.966  |
| NM_014521 | 815.302   | 738.608   | AJ005273  | 1673.095  | 1270.526  | NM_017424 | 588.944   | 533.059   |
| NM_00244E | 1075.662  | 885.782   | AK021892  | 1782.006  | 1385.21   | NM_001522 | 3334.579  | 3678.551  |
| NM_01780E | 704.566   | 460.349   | NM_003437 | 976.446   | 763.624   | NM_000883 | 1503.079  | 1708.666  |
| AK023202  | 1454.653  | 1349.413  | NM_018337 | 2769.386  | 1942.825  | AF254086  | 1453.121  | 1444.45   |
| D63877    | 3022.157  | 2967.091  | AA193295  | 12675.735 | 6540.303  | AL390142  | 1165.102  | 833.461   |
| AF131760  | 850.168   | 792.302   | NM_01804E | 1939.062  | 1358.906  | NM_00656E | 1463.508  | 1257.606  |
| NM_01869E | 1309.323  | 1163.731  | NM_014803 | 1337.353  | 1208.214  | AB007930  | 8117.338  | 7181.367  |
| NM_006461 | 850.633   | 884.148   | AF147386  | 1387.202  | 1186.449  | AJ005273  | 1838.55   | 1534.811  |
| NM_018201 | 2228.213  | 2181.762  | AF273052  | 7213.481  | 6948.072  | AK021892  | 1602.193  | 1444.403  |
| NM_01443E | 613.168   | 860.348   | NM_017943 | 3728.709  | 3576.92   | NM_003437 | 1054.879  | 1031.65   |
| NM_01488C | 2674.479  | 3446.436  | AK025682  | 545.392   | 585.941   | NM_018337 | 2833.607  | 1677.813  |
| NM_003764 | 2471.219  | 3093.783  | AL389986  | 2656.458  | 2691.914  | AA193295  | 13885.395 | 10450.079 |
| NM_00482E | 546.354   | 709.227   | AF142409  | 1474.797  | 1898.333  | NM_01804E | 2216.533  | 1621.759  |
| NM_006793 | 20548.152 | 20140.959 | AF088052  | 729.207   | 556.54    | NM_014803 | 1164.886  | 1048.018  |
| NM_00153E | 2925.006  | 2807.226  | AF086342  | 340.395   | 377.093   | AK024956  | 328.462   | 438.887   |
| X97261    | 12100.847 | 59054.969 | AF086387  | 438.839   | 379.617   | AF147386  | 1291.114  | 1456.507  |
| D87666    | 42694.723 | 30554.297 | AF086443  | 682.969   | 382.76    | AF273052  | 6757.214  | 6905.287  |
| AF149304  | 664.445   | 828.587   | AL389941  | 780.857   | 477.328   | NM_017943 | 3809.405  | 4050.637  |
| NM_01209E | 6481.445  | 7588.236  | AB037756  | 1570.697  | 1335.291  | AK025682  | 659.113   | 500.707   |
| NM_01643E | 589.774   | 834.953   | AK001853  | 2185.458  | 1432.725  | NM_01647E | 3688.161  | 3487.995  |
| X73079    | 13815.481 | 13559.83  | AK025071  | 494.954   | 396.992   | AL389986  | 2599.59   | 2493.592  |
| NM_019091 | 718.141   | 597.45    | AF075082  | 739.505   | 729.432   | AF142409  | 1664.43   | 1261.811  |
| AF264781  | 1183.633  | 1091.666  | NM_01537C | 1294.562  | 1585.569  | AF088052  | 803.018   | 447.718   |
| NM_00245E | 442.219   | 328.116   | AF085917  | 783.666   | 705.549   | AF086342  | 360.694   | 214.995   |
| AK024215  | 8269.644  | 8524.272  | AF085989  | 726.572   | 753.093   | AF086387  | 605.131   | 630.637   |
| AB044661  | 2684.774  | 2912.018  | AL360139  | 42171.609 | 37905.688 | AF086443  | 374.744   | 287.82    |
| NM_01907E | 1068.738  | 1559.027  | AF075110  | 2221.44   | 1672.693  | AL389941  | 607.964   | 483.364   |
| U53530    | 1615.565  | 1561.308  | AL137323  | 695.221   | 943.636   | AB037756  | 2060.21   | 1484.485  |
| NM_00659E | 1234.831  | 1222.707  | AL137494  | 3125.939  | 3767.944  | AK001853  | 2279.57   | 1596.897  |
| NM_01594E | 4314.603  | 3924.633  | AL162037  | 4130.647  | 5611.043  | AK025071  | 495.147   | 293.141   |
| NM_003054 | 2344.041  | 2029.174  | AL137575  | 428.391   | 461.918   | NM_01537C | 974.401   | 939.738   |

|           |           |           |           |           |           |           |           |           |
|-----------|-----------|-----------|-----------|-----------|-----------|-----------|-----------|-----------|
| NM_003042 | 381.404   | 408.972   | NM_002761 | 515.383   | 554.926   | AF085917  | 595.057   | 588.278   |
| NM_004790 | 358.926   | 304.442   | AF086098  | 638.72    | 279.669   | AF085989  | 569.364   | 725.041   |
| NM_002219 | 11178.931 | 10732.736 | AF086076  | 643.375   | 383.263   | AL360139  | 40783.984 | 37330.57  |
| NM_002826 | 5754.251  | 6136.926  | AL833393  | 1055.309  | 840.023   | AF075110  | 1983.085  | 1981.783  |
| AF159141  | 3502.989  | 3242.528  | AF088005  | 956.379   | 440.044   | AL137323  | 602.848   | 714.977   |
| NM_002420 | 663.105   | 703.007   | AF086096  | 2817.543  | 2177.58   | AL137494  | 2572.575  | 2892.156  |
| NM_016458 | 20754.75  | 20881.432 | AL390132  | 512.662   | 297.044   | AL162037  | 3471.402  | 3570.862  |
| AK022233  | 2427.411  | 2628.585  | NM_017933 | 1492.419  | 869.974   | AL390150  | 1178.645  | 1370.746  |
| AL137713  | 467.752   | 98.12     | NM_017819 | 5632.092  | 3147.038  | NM_002761 | 400.737   | 322.839   |
| AK026410  | 6281.852  | 6137.698  | AK024653  | 9753.568  | 9292.839  | AF086063  | 508.563   | 344.426   |
| NM_014637 | 1711.01   | 1666.895  | AF103907  | 1013.676  | 1135.998  | AF086098  | 518.182   | 353.619   |
| NM_013379 | 14943.953 | 16032.3   | AF094508  | 374.257   | 436.804   | AF086076  | 699.341   | 539.398   |
| AF113208  | 5201.057  | 5597.878  | AF161351  | 1419.583  | 1558.322  | AL833393  | 1490.516  | 964.556   |
| NM_012164 | 1286.029  | 1533.333  | AF257098  | 613.123   | 636.073   | AF088005  | 937.671   | 601.229   |
| AK026010  | 753.747   | 1071.414  | AF111782  | 1236.696  | 1152.461  | AF086096  | 2903.62   | 2247.63   |
| AB011156  | 826.693   | 964.54    | AF151530  | 665.958   | 658.276   | AL390132  | 339.096   | 330.476   |
| NM_018079 | 1084.028  | 876.935   | AK021991  | 569.551   | 1329.469  | NM_017933 | 1596.034  | 1213.759  |
| NM_004760 | 2274.144  | 2125.85   | AK022093  | 2601.401  | 2616.525  | NM_017819 | 5750.416  | 2786.479  |
| NM_006752 | 5384.363  | 4876.813  | AK022232  | 502.93    | 382.09    | AK024653  | 10558.697 | 11202.623 |
| NM_004428 | 403.06    | 376.595   | AK022376  | 439.097   | 209.498   | AF103907  | 1173.468  | 1348.939  |
| NM_006809 | 2841.002  | 2947.075  | AK022137  | 380.094   | 401.307   | AF094508  | 282.756   | 228.084   |
| NM_013943 | 1020.164  | 1129.733  | AK022272  | 537.984   | 502.98    | AF161351  | 1287.817  | 1593.528  |
| NM_001639 | 3002.388  | 3150.719  | AK027155  | 1494.016  | 1053.816  | AF111782  | 814.867   | 1049.507  |
| H39560    | 299.748   | 334.612   | AF221846  | 355.984   | 162.149   | AF151530  | 282.802   | 415.189   |
| BG534366  | 792.756   | 693.13    | AK024528  | 5028.006  | 3989.77   | AK022093  | 2653.652  | 2548.434  |
| BG698522  | 5448.724  | 5466.964  | AK000016  | 1032.075  | 1415.191  | AK022376  | 437.329   | 370.718   |
| AA152346  | 617.108   | 470.25    | AK023367  | 1389.18   | 1650.589  | AK022005  | 418       | 423.138   |
| L15189    | 2031.941  | 1658.971  | AL080209  | 1801.844  | 1944.481  | AK022272  | 475.379   | 426.555   |
| AB023420  | 8003.535  | 6478.825  | NM_016255 | 1465.485  | 1491.916  | AK027155  | 1528.187  | 1365.237  |
| BI822179  | 336.329   | 341.963   | NM_014318 | 1135.733  | 1200.14   | AK027219  | 312.838   | 321.293   |
| AF022912  | 2181.789  | 1832.647  | AK056674  | 732.561   | 555.99    | AK024528  | 3450.473  | 2835.868  |
| AA477428  | 9374.545  | 9798.32   | AK022042  | 445.102   | 250.211   | AK000016  | 906.741   | 1038.995  |
| AA156342  | 1113.189  | 1007.429  | NM_017708 | 387.913   | 535.938   | AL080209  | 1797.399  | 2226.169  |
| R45594    | 9684.595  | 12270.891 | BE895529  | 1378.588  | 1537.806  | NM_016255 | 1524.912  | 1276.916  |
| H46425    | 1112.588  | 1141.143  | AK000964  | 632.465   | 866.582   | NM_014318 | 1028.129  | 917.817   |
| AI355949  | 613.373   | 1028.761  | AL117536  | 1088.063  | 2084.341  | AK056674  | 796.837   | 591.522   |
| AA278152  | 4180.551  | 4726.92   | NM_017751 | 2762.464  | 3028.904  | AK022042  | 591.156   | 568.745   |
| H75530    | 1771.432  | 1298.467  | NM_003771 | 1310.754  | 1510.451  | AL117588  | 330.929   | 310.597   |
| NM_004176 | 3269.432  | 3265.902  | NM_017860 | 4848.611  | 3353.192  | BE895529  | 1301.8    | 1567.228  |
| NM_004548 | 12424.417 | 9852.674  | X91195    | 38087.164 | 34547.184 | AK000964  | 399.751   | 697.095   |
| AK000554  | 1965.134  | 2109.519  | AF086190  | 549.724   | 753.933   | AL117536  | 886.488   | 794.797   |
| NM_006472 | 3073.83   | 2838.943  | AL050035  | 1646.948  | 2479.495  | NM_017751 | 2815.484  | 3285.34   |
| NM_001538 | 2905.36   | 3682.693  | AK024449  | 2308.969  | 2408.682  | NM_003771 | 994.961   | 1230.438  |
| X97261    | 12382.934 | 60919.395 | AF279780  | 24936.395 | 34424.691 | NM_017860 | 4585.739  | 2807.816  |
| NM_001468 | 540.091   | 481.964   | AK022510  | 787.673   | 733.773   | X91195    | 35911.398 | 30004.182 |
| D87666    | 45517.855 | 41204.258 | AK023878  | 342.724   | 366.972   | AF086190  | 575.349   | 661.762   |
| NM_001315 | 6573.744  | 6806.457  | L37717    | 256.805   | 241.682   | NM_006143 | 477.916   | 522.243   |
| AF286095  | 1196.722  | 1129.172  | AJ131609  | 989.946   | 813.573   | AL050035  | 1387.97   | 2046.182  |
| NM_000878 | 833.33    | 714.299   | BC019280  | 2229.275  | 1417.073  | AK024449  | 2444.899  | 2157.201  |
| S66407    | 1799.883  | 1533.278  | AF086498  | 384.129   | 301.13    | AL357201  | 274.105   | 93.917    |
| NM_016523 | 488.764   | 303.863   | AF079567  | 465.481   | 281.599   | AF279780  | 35565.168 | 26795.369 |
| NM_018727 | 835.342   | 1079.726  | AK022177  | 1201.292  | 2376.688  | AK022510  | 934.557   | 835.092   |
| NM_004258 | 50378.262 | 47510.473 | AK023852  | 571.933   | 427.399   | AK023878  | 345.526   | 262.23    |



|           |           |           |           |           |           |           |           |           |
|-----------|-----------|-----------|-----------|-----------|-----------|-----------|-----------|-----------|
| NM_001981 | 2520.257  | 2636.425  | AF086466  | 855.033   | 1026.114  | AK021851  | 314.933   | 168.707   |
| NM_014654 | 800.639   | 933.666   | AB007962  | 10745.523 | 11747.646 | L37717    | 199.015   | 275.097   |
| NM_001585 | 37415.645 | 37602.668 | AF005081  | 727.957   | 922.795   | AJ131609  | 1373.133  | 923.207   |
| AK026108  | 6090.811  | 5780.957  | AK026438  | 754.053   | 715.059   | BC019280  | 2741.704  | 2141.351  |
| NM_006379 | 1958.256  | 1593.729  | AK021546  | 791.639   | 616.974   | AF086498  | 463.064   | 477.204   |
| BF571428  | 2314.577  | 2014.36   | AL050186  | 9171.142  | 9681.672  | AK000687  | 358.868   | 345.05    |
| AB037723  | 4225.871  | 3415.723  | AK021918  | 3133.189  | 3220.634  | AF079567  | 401.543   | 554.864   |
| NM_006246 | 2116.457  | 1988.662  | AK021669  | 2624.757  | 3898.435  | AK022177  | 878.954   | 1116.693  |
| NM_004316 | 487.106   | 341.377   | AL080113  | 32137.977 | 27641.521 | AK023852  | 326.144   | 362.51    |
| U58096    | 16822.93  | 12312.583 | AL050083  | 879.585   | 943.581   | AF086466  | 940.755   | 1290.623  |
| NM_016929 | 3185.001  | 2989.494  | AK022766  | 442.581   | 637.382   | AB007962  | 10312.047 | 11643.774 |
| NM_012323 | 821.903   | 692.899   | AL049422  | 5417.547  | 11268.993 | AF005081  | 939.154   | 943.391   |
| NM_000111 | 248.271   | 428.27    | AL133089  | 461.116   | 527.069   | AK026438  | 609.002   | 577.286   |
| NM_015948 | 4675.419  | 7018.149  | AK023526  | 2026.284  | 2300.243  | AK021546  | 599.786   | 488.408   |
| NM_003054 | 2693.794  | 3328.472  | BE266129  | 569.681   | 452.143   | AL050186  | 9370.842  | 9276.704  |
| NM_003042 | 384.645   | 553.81    | AK025602  | 4445.417  | 3464.418  | AK021918  | 2834.458  | 2625.961  |
| NM_004790 | 317.434   | 340.905   | AK026309  | 1253.558  | 1112.085  | AK021669  | 2859.755  | 3240.243  |
| NM_002219 | 11897.313 | 13341.963 | AL137486  | 1981.966  | 1727.023  | AL080113  | 34762.316 | 26767.68  |
| AF182404  | 2194.001  | 2047.808  | AL110162  | 341.41    | 455.262   | AL050083  | 879.472   | 773.755   |
| NM_000804 | 802.225   | 902.411   | AK022681  | 8362.89   | 7509.398  | AK022766  | 453.134   | 489.64    |
| NM_006555 | 1849.156  | 1802.165  | CY3Cy5    | 1283.88   | 161.283   | AL049422  | 4755.214  | 3552.834  |
| NM_014521 | 819.43    | 849.46    | Y18483    | 289.845   | 193.9     | AL133089  | 341.055   | 240.287   |
| NM_002445 | 965.417   | 841.079   | AI565117  | 51619.113 | 65300.043 | AK023526  | 2326.459  | 1896.448  |
| NM_017809 | 701.042   | 636.492   | AI299075  | 1308.317  | 1038.637  | BE266129  | 735.025   | 581.005   |
| AK023202  | 1387.963  | 1423.958  | M59979    | 314.485   | 324.24    | AK025602  | 5131.17   | 4221.38   |
| D63877    | 2647.91   | 2558.645  | AB011098  | 538.319   | 616.289   | AK026309  | 1923.449  | 1208.089  |
| AF131760  | 1000.639  | 899.202   | AA609759  | 464.145   | 488.69    | AL137486  | 2262.389  | 1848.069  |
| NM_018698 | 1760.343  | 1404.554  | AA029418  | 1632.026  | 1608.726  | AL110162  | 532.545   | 638.973   |
| NM_006461 | 833.555   | 835.141   | L20815    | 1530.376  | 1572.231  | AK022681  | 9563.601  | 8916.896  |
| NM_018201 | 2553.128  | 2093.097  | AI364483  | 3150.993  | 2869.493  | CY3Cy5    | 3243.646  | 183.129   |
| NM_014438 | 1118.242  | 1075.976  | AA456001  | 3798.869  | 4012.158  | Y18483    | 315.629   | 382.19    |
| NM_014880 | 2449.466  | 1844.389  | AA451686  | 2836.76   | 3444.156  | AI565117  | 62980.453 | 59114.91  |
| NM_003764 | 2602.557  | 2030.699  | NM_003822 | 606.416   | 537.616   | AI299075  | 1442.573  | 1242.958  |
| NM_004829 | 567.471   | 793.719   | NM_004412 | 1448.422  | 1636.362  | M59979    | 358.608   | 369.245   |
| NM_006793 | 21718.842 | 17622.324 | SR1       | 54643.715 | 65942.023 | AB011098  | 555.114   | 652.671   |
| NM_018079 | 862.943   | 1360.583  | SR3       | 32382.051 | 29282.496 | AA609759  | 610.388   | 557.036   |
| NM_004760 | 3700.247  | 7429.213  | SR5       | 2607.91   | 3219.007  | AA029418  | 2150.895  | 1922.828  |
| NM_006752 | 5462.876  | 7586.101  | SR7       | 3507.537  | 30319.818 | L20815    | 2284.192  | 3132.053  |
| NM_004428 | 346.643   | 542.681   | CY3Cy5    | 1280.729  | 169.087   | AI364483  | 3667.227  | 4619.343  |
| NM_006809 | 3660.177  | 5110.177  | NM_012096 | 4192.576  | 4020.658  | AA456001  | 3974.186  | 4009.62   |
| AF149304  | 725.033   | 824.355   | NM_003905 | 8646.141  | 8715.098  | AA451686  | 2259.022  | 2477.304  |
| NM_012095 | 6245.555  | 6843.267  | L12052    | 1497.338  | 1392.562  | NM_003822 | 418.404   | 706.875   |
| NM_016438 | 525.36    | 396.017   | AB028976  | 1693.792  | 1573.961  | NM_004412 | 1410.88   | 1434.212  |
| X73079    | 14502.884 | 14367.611 | NM_015869 | 1002.604  | 784.561   | SR5       | 3371.815  | 3912.029  |
| NM_019091 | 890.56    | 452.997   | NM_004626 | 609.179   | 568.94    | SR7       | 4019.73   | 36152.859 |
| AF264781  | 1127.203  | 1053.06   | NM_001899 | 262.893   | 180.68    | SR9       | 12868.519 | 3163.862  |
| AB002293  | 93.739    | 460.081   | NM_004305 | 9975.154  | 11806.296 | CY3Cy5    | 3295.679  | 146.864   |
| NM_002456 | 401.03    | 466.686   | NM_006089 | 1046.73   | 1222.518  | NM_012096 | 4486.25   | 5016.6    |
| AK024215  | 9218.27   | 7090.738  | NM_005992 | 1404.431  | 1706.248  | NM_003905 | 9848.769  | 10859.048 |
| AB044661  | 2833.387  | 2555.774  | NM_003144 | 38552.844 | 34684.949 | L12052    | 1451.904  | 1563.819  |
| NM_000606 | 9456.983  | 8872.643  | NM_000908 | 434.712   | 413.084   | AB028976  | 1785.548  | 1945.745  |
| NM_016124 | 4402.704  | 3758.793  | AB011102  | 2380.419  | 2719.368  | AK026337  | 268.193   | 718.51    |
| NM_019079 | 488.882   | 597.001   | D63480    | 1187.937  | 1301.98   | NM_015869 | 783.625   | 1031.05   |

|           |           |           |           |           |           |           |           |           |
|-----------|-----------|-----------|-----------|-----------|-----------|-----------|-----------|-----------|
| U53530    | 1540.046  | 1402.537  | NM_002969 | 1531.687  | 1907.323  | NM_004626 | 534.84    | 608.381   |
| NM_006598 | 1197.835  | 1164.882  | NM_004620 | 571.453   | 618.106   | NM_001898 | 422.372   | 218.23    |
| NM_004176 | 3468.592  | 4478.195  | AK023749  | 347.783   | 412.396   | NM_004305 | 11079.092 | 11159.358 |
| NM_004548 | 13628.459 | 17141.424 | NM_002337 | 2055.251  | 1366.727  | NM_006088 | 1067.762  | 1247.652  |
| AK000554  | 2601.68   | 2886.929  | NM_013245 | 938.226   | 993.821   | AF072506  | 224.886   | 544.704   |
| NM_006472 | 3045.921  | 4081.193  | NM_006423 | 2761.115  | 2007.721  | NM_005992 | 1396.878  | 1705.004  |
| NM_002826 | 5542.624  | 5194.955  | NM_004766 | 1583.818  | 1688.214  | NM_003144 | 42609.996 | 33494.633 |
| AF159141  | 4078.265  | 4336.901  | NM_005819 | 2509.98   | 2411.695  | NM_000908 | 562.747   | 675.197   |
| NM_002420 | 756.779   | 849.285   | AK025520  | 1622.068  | 856.833   | AB011102  | 2177.341  | 2351.718  |
| NM_014637 | 1575.616  | 1485.859  | NM_004892 | 5827.402  | 5402.896  | D63480    | 935.41    | 1047.114  |
| NM_013379 | 15630.324 | 14688.571 | NM_014597 | 6278.51   | 5652.979  | NM_002968 | 1273.556  | 1687.727  |
| AF113208  | 5409.572  | 4924.947  | NM_017896 | 3879.045  | 3243.65   | NM_004620 | 622.477   | 1577.82   |
| NM_006153 | 4799.73   | 3918.782  | AB002374  | 1564.476  | 1479.609  | AF087940  | 1583.334  | 1762.786  |
| NM_012164 | 1276.096  | 1100.853  | U17327    | 620.811   | 599.779   | AJ277587  | 1809.156  | 2483.13   |
| AK026010  | 668.795   | 835.561   | M87790    | 5862.577  | 6040.853  | D87432    | 3197.5    | 8055.082  |
| AB011156  | 921.746   | 800.189   | NM_001768 | 1514.262  | 1802.612  | AK023749  | 328.067   | 318.805   |
| NM_006246 | 2260.362  | 3792.391  | NM_000029 | 6053.125  | 6557.235  | NM_002337 | 1791.213  | 1860.603  |
| NM_004316 | 614.971   | 694.77    | NM_000715 | 370.61    | 389.756   | NM_013245 | 1114.602  | 1059.568  |
| U58096    | 17568.117 | 16661.258 | AF035802  | 2139.029  | 2393.976  | NM_006423 | 2814.747  | 2075.391  |
| NM_016929 | 3936.344  | 4294.456  | M26123    | 588.707   | 486.295   | NM_004766 | 1410.022  | 1461.355  |
| NM_012323 | 754.757   | 1076.395  | NM_013328 | 16223.352 | 14828.944 | NM_005819 | 2814.445  | 2654.224  |
| NM_006942 | 321.631   | 372.648   | NM_000790 | 217.387   | 261.339   | AK025520  | 1306.592  | 984.096   |
| NM_018199 | 389.307   | 459.902   | NM_002660 | 1124.316  | 1044.231  | NM_004892 | 6188.958  | 5869.596  |
| NM_013943 | 781.118   | 852.342   | NM_015900 | 560.694   | 474.906   | NM_014597 | 6851.657  | 6022.844  |
| NM_001639 | 2882.372  | 2903.809  | NM_003706 | 528.685   | 448.248   | NM_017896 | 4197.775  | 3747.823  |
| BG534366  | 1097.606  | 853.495   | NM_005218 | 5156.89   | 6470.242  | AB002374  | 1361.947  | 1368.958  |
| AA152346  | 533.153   | 1223.606  | AB033054  | 7553.761  | 7614.693  | U17327    | 586.054   | 718.882   |
| L15189    | 1898.066  | 2904.056  | NM_016122 | 527.142   | 559.129   | M87790    | 4904.18   | 4472.811  |
| AB023420  | 8378.282  | 8190.304  | AF153330  | 476.717   | 732.867   | NM_001768 | 831.341   | 829.899   |
| AF022912  | 2030.876  | 1330.552  | NM_001652 | 534.722   | 974.636   | NM_000029 | 5101.35   | 5788.048  |
| AA477428  | 8731.725  | 7748.976  | D87446    | 2806.744  | 2649.983  | NM_000715 | 469.406   | 1134.639  |
| AA156342  | 1102.604  | 868.837   | BF540935  | 991.147   | 967.507   | AF035802  | 1911.922  | 2280.683  |
| R45594    | 9625.435  | 8881.704  | NM_004466 | 273.129   | 324.298   | NM_001838 | 212.728   | 646.454   |
| H46425    | 1031.168  | 992.88    | NM_007081 | 1918.738  | 1808.372  | NM_013328 | 16257.233 | 15553.953 |
| AI355949  | 485.404   | 492.91    | AB032964  | 1799.344  | 1694.788  | NM_002660 | 1193.274  | 1721.747  |
| AA278152  | 4502.579  | 4578.737  | BE733605  | 1612.461  | 1885.016  | NM_015900 | 332.188   | 457.684   |
| H75530    | 1728.97   | 1389.575  | NM_003334 | 8893.044  | 8135.036  | NM_003706 | 554.142   | 529.477   |
| NM_003764 | 3384.913  | 5849.375  | NM_002693 | 1539.991  | 1508.017  | NM_005218 | 5280.515  | 7025.369  |
| NM_004829 | 751.382   | 1003.923  | NM_003671 | 621.477   | 779.716   | AL122071  | 316.422   | 420.034   |
| NM_006793 | 22280     | 22957.08  | AK026000  | 1615.342  | 1737.247  | AB033054  | 7873.463  | 7929.535  |
| NM_001538 | 3309.892  | 2978.152  | NM_017833 | 862.14    | 875.382   | NM_016122 | 434.2     | 728.821   |
| NM_001468 | 736.377   | 712.222   | NM_006675 | 3291.525  | 6833.354  | AF153330  | 568.334   | 745.093   |
| NM_005410 | 160.044   | 460.521   | NM_003022 | 9474.584  | 9407.021  | NM_001652 | 337.883   | 298.116   |
| D87666    | 46484.672 | 39991.613 | NM_004873 | 3114.151  | 3285.247  | D87446    | 3517.244  | 3595.406  |
| S66407    | 1883.566  | 2450.794  | NM_019842 | 1093.668  | 1566.695  | BF540935  | 1204.672  | 1271.863  |
| NM_016523 | 421.799   | 286.808   | NM_002951 | 14323.023 | 19038.799 | NM_007081 | 1914.773  | 1841.837  |
| NM_004258 | 49095.492 | 44004.895 | NM_002317 | 793.563   | 878.52    | AB032964  | 2215.888  | 2200.047  |
| NM_001981 | 2759.406  | 2327.83   | NM_000320 | 3215.365  | 3465.581  | BE733605  | 2027.989  | 2181.197  |
| NM_014654 | 702.583   | 681.1     | NM_003136 | 3773.865  | 3747.143  | NM_003334 | 9005.437  | 8758.029  |
| NM_001585 | 37137.418 | 36294.695 | NM_004620 | 421.291   | 483.642   | NM_002693 | 1616.992  | 1740.252  |
| AK026108  | 6994.313  | 6127.162  | AF087940  | 1412.443  | 1147.699  | NM_003671 | 844.429   | 901.396   |
| NM_006379 | 1973.844  | 1585.205  | AJ277587  | 1296.559  | 1389.3    | AK026000  | 1696.896  | 1640.862  |
| BF571428  | 2453.929  | 2105.653  | D87432    | 2725.748  | 2454.09   | NM_017833 | 887.086   | 988.3     |

|           |           |           |           |           |           |           |           |           |
|-----------|-----------|-----------|-----------|-----------|-----------|-----------|-----------|-----------|
| AB037723  | 3869.891  | 3065.725  | Y18483    | 238.331   | 286.709   | NM_006675 | 2094.362  | 1935.002  |
| NM_000606 | 11236.735 | 15564.767 | AI565117  | 52264.965 | 62722.422 | NM_003022 | 9882.87   | 8932.735  |
| NM_016124 | 4652.745  | 5703.585  | AI299075  | 1276.29   | 1087.018  | NM_004873 | 2716.655  | 2221.486  |
| NM_019079 | 585.544   | 606.044   | M59979    | 285.018   | 198.759   | NM_019842 | 939.518   | 1244.993  |
| U53530    | 1852.465  | 2055.145  | AB011098  | 601.095   | 515.864   | NM_002951 | 10416.192 | 9446.925  |
| NM_006598 | 1095.399  | 1239.42   | AA609759  | 488.67    | 615.259   | NM_002317 | 701.135   | 611.407   |
| NM_003054 | 2536.729  | 2843.672  | AA029418  | 1770.579  | 1532.562  | NM_000320 | 3370.928  | 2874.757  |
| NM_003042 | 377.778   | 494.283   | L20815    | 1974.306  | 1812.336  | NM_003136 | 3980.041  | 4639.096  |
| NM_002219 | 11849.877 | 12517.646 | AI364483  | 3211.544  | 3329.539  | NM_004620 | 574.048   | 611.943   |
| AF182404  | 2423.45   | 2901.619  | AA456001  | 3439.123  | 3457.78   | AF087940  | 1313.17   | 1855.174  |
| NM_000804 | 1000.529  | 1488.224  | AA451686  | 2474.055  | 2954.833  | AJ277587  | 1176.509  | 1446.931  |
| NM_006555 | 1546.331  | 1864.59   | NM_003822 | 589.832   | 691.478   | D87432    | 2557.499  | 2713.505  |
| NM_014521 | 997.256   | 1208.95   | NM_004412 | 1932.553  | 2047.32   | Y18483    | 331.652   | 195.002   |
| NM_002445 | 1015.356  | 1011.959  | NM_002050 | 1673.677  | 1458.704  | AI565117  | 59615.902 | 54695.23  |
| NM_017809 | 635.27    | 462.769   | NM_007097 | 6538.572  | 5778.382  | AI299075  | 1265.038  | 1173.655  |
| AK023202  | 1205.128  | 1185.544  | NM_000029 | 4680.605  | 3964.819  | AB011098  | 469.94    | 685.532   |
| D63877    | 2865.784  | 2660.066  | NM_000715 | 196.53    | 340.774   | AA609759  | 667.725   | 620.39    |
| AF131760  | 885.331   | 885.872   | AF035802  | 1517.56   | 1555.711  | AA029418  | 2141.428  | 1995.848  |
| NM_018698 | 1538.045  | 1335.802  | Y08145    | 218.276   | 391.617   | L20815    | 2289.54   | 2391.53   |
| NM_006461 | 925.723   | 935.529   | M26123    | 393.979   | 444.877   | AI364483  | 4030.736  | 3697.643  |
| NM_018201 | 2629.172  | 2063.958  | NM_001838 | 304.5     | 562.111   | AA456001  | 4122.742  | 4172.594  |
| NM_014438 | 1266.503  | 611.495   | NM_019555 | 486.43    | 1207.212  | AA451686  | 2368.157  | 2049.277  |
| NM_014880 | 2374.73   | 1733.53   | NM_012096 | 3979.063  | 3543.056  | NM_003822 | 459.454   | 478.693   |
| NM_006153 | 4972.435  | 6784.488  | NM_003905 | 8980.867  | 7755.184  | NM_004412 | 2068.99   | 1301.946  |
| NM_012164 | 1327.041  | 1909.466  | L12052    | 1263.816  | 1457.547  | NM_002050 | 1713.811  | 1922.333  |
| AK026010  | 961.632   | 911.814   | AB028976  | 1612.122  | 1576.147  | NM_007097 | 7465.752  | 7767.508  |
| NM_004721 | 374.369   | 414.034   | NM_015869 | 958.691   | 814.549   | NM_000029 | 4196.86   | 4630.969  |
| AB011156  | 1014.63   | 1127.686  | NM_004626 | 586.31    | 540.759   | AF035802  | 1445.353  | 2053.363  |
| NM_018079 | 856.288   | 1035.969  | NM_004305 | 9908.251  | 10371.852 | M26123    | 403.094   | 412.544   |
| NM_004760 | 2760.657  | 2699.09   | NM_006089 | 1119.401  | 1033.302  | NM_012096 | 4196.448  | 3825.31   |
| NM_006752 | 5242.847  | 5008.445  | AF072506  | 344.307   | 203.497   | NM_003905 | 7565.516  | 7037.481  |
| NM_004428 | 467.441   | 388.614   | NM_005992 | 1721.046  | 1952.573  | L12052    | 1192.926  | 1437.554  |
| NM_006809 | 3389.17   | 4206.576  | NM_003144 | 41066.402 | 35423.715 | AB028976  | 1355.674  | 1149.26   |
| AF149304  | 1140.327  | 1354.814  | NM_000908 | 494.08    | 492.873   | NM_015869 | 1166.435  | 916.162   |
| NM_012095 | 6644.206  | 7808.437  | AB011102  | 3017.094  | 3034.122  | NM_004626 | 609.625   | 613.478   |
| NM_016438 | 432.913   | 531.196   | D63480    | 1738.946  | 1569.372  | NM_004305 | 11462.927 | 8570.392  |
| X73079    | 15171.963 | 15590.886 | NM_002969 | 1583.569  | 1665.472  | NM_006089 | 1016.866  | 1115.019  |
| NM_019091 | 792.881   | 503.508   | AK023749  | 317.309   | 299.205   | NM_005992 | 1453.231  | 1062.093  |
| L07518    | 417.968   | 372.736   | NM_002337 | 1859.616  | 1884.102  | NM_003144 | 47367.047 | 26514.738 |
| AF264781  | 1220.135  | 1118.162  | NM_013245 | 981.276   | 1018.043  | NM_000908 | 500.052   | 623.181   |
| NM_002456 | 561.939   | 324.067   | NM_006423 | 2680.357  | 2042.527  | AB011102  | 3746.727  | 5403.505  |
| AK024215  | 8516.48   | 6696.393  | NM_004766 | 1305.403  | 1854.968  | D63480    | 1332.814  | 1438.664  |
| AB044661  | 2592.123  | 1859.343  | NM_005819 | 2464.298  | 2601.589  | NM_002969 | 1943.302  | 2139.75   |
| NM_015376 | 1545.488  | 1730.886  | AK025520  | 1528.92   | 934.169   | AK023749  | 283.5     | 282.936   |
| NM_001176 | 1296.571  | 1915.735  | NM_004892 | 5902.861  | 8347.813  | NM_002337 | 1548.333  | 1626.578  |
| NM_013341 | 701.867   | 521.565   | NM_014597 | 5353.6    | 5720.329  | NM_013245 | 974.661   | 975.926   |
| NM_016536 | 462.652   | 498.229   | NM_017896 | 3088.632  | 3361.198  | NM_006423 | 2768.697  | 2065.42   |
| NM_004941 | 3516.272  | 2847.112  | AB002374  | 1324.783  | 1445.735  | NM_004766 | 1674.885  | 1117.604  |
| AF151831  | 2981.255  | 3179.355  | M87790    | 7934.787  | 6994.329  | NM_005819 | 2880.415  | 2551.015  |
| AB011121  | 886.92    | 850.936   | NM_001768 | 1219.618  | 1182.236  | AK025520  | 1677.112  | 788.838   |
| AF083255  | 6219.905  | 6454.774  | NM_002951 | 9555.857  | 10567.295 | NM_004892 | 6473.83   | 4705.719  |
| AK022605  | 1132.513  | 1217.035  | NM_002317 | 671.024   | 659.207   | NM_014597 | 6209.452  | 4544.296  |
| AK000554  | 2515.113  | 2212.188  | NM_000320 | 2579.717  | 2932.283  | NM_017896 | 3700.016  | 2254.331  |

|           |           |           |           |           |           |           |           |           |
|-----------|-----------|-----------|-----------|-----------|-----------|-----------|-----------|-----------|
| NM_006472 | 3867.752  | 4142.269  | NM_003136 | 3497.128  | 3266.035  | AB002374  | 1333.5    | 913.039   |
| NM_002826 | 5794.426  | 6369.743  | NM_013328 | 14172.114 | 13705.175 | U17327    | 458.419   | 398.803   |
| AF159141  | 4280.042  | 4156.016  | NM_002660 | 901.457   | 1250.78   | M87790    | 6738.208  | 5900.603  |
| NM_002420 | 450.741   | 591.101   | NM_015900 | 378.263   | 353.733   | NM_001768 | 1048.604  | 960.643   |
| NM_016458 | 21590.035 | 22027.576 | NM_003706 | 462.812   | 553.407   | NM_002951 | 12586.009 | 15402.664 |
| AK022233  | 2038.766  | 2514.795  | NM_005218 | 4718.902  | 6487.977  | NM_002317 | 601.39    | 699.792   |
| AL137713  | 288.139   | 273.251   | AL122071  | 658.147   | 698.426   | NM_000320 | 2483.95   | 2501.758  |
| AK026410  | 7611.791  | 7966.178  | AB033054  | 8299.388  | 8990.886  | NM_003136 | 3416.747  | 2978.935  |
| NM_014637 | 2674.504  | 2676.634  | NM_016122 | 770.836   | 664.076   | NM_013328 | 16877.953 | 13645.179 |
| NM_013379 | 15056.816 | 14541.824 | AF153330  | 954.181   | 1225.684  | NM_002660 | 1303.565  | 1111.695  |
| AF113208  | 4998.56   | 4635.709  | NM_001652 | 479.653   | 504.229   | NM_015900 | 298.985   | 436.442   |
| AF019382  | 753.468   | 994.189   | NM_003822 | 537.222   | 432.647   | NM_003706 | 623.533   | 547.142   |
| BC012757  | 1727.807  | 2336.155  | NM_004412 | 1303.807  | 1586.553  | NM_005218 | 5080.324  | 4923.904  |
| M96686    | 420.718   | 446.899   | NM_002050 | 1241.974  | 1419.133  | AB033054  | 8938.352  | 6653.857  |
| NM_004062 | 1267.584  | 1102.653  | NM_007097 | 5611.283  | 5597.655  | NM_016122 | 569.928   | 425.824   |
| NM_005883 | 815.997   | 957.276   | D87446    | 3381.088  | 2733.908  | AF153330  | 779.841   | 654.122   |
| NM_014591 | 1967.528  | 2128.73   | BF540935  | 906.028   | 685.331   | NM_001652 | 293.12    | 240.833   |
| NM_014592 | 1699.297  | 1514.692  | NM_004466 | 271.43    | 201.769   | NM_003822 | 319.346   | 841.237   |
| NM_001945 | 2288.283  | 1822.805  | NM_007081 | 1496.642  | 1498.495  | NM_004412 | 1279.12   | 1511.15   |
| NM_020039 | 1825.217  | 1497.989  | AB032964  | 1873.293  | 1904.83   | NM_002050 | 1131.479  | 1519.891  |
| NM_006653 | 901.387   | 818.181   | BE733605  | 1547.378  | 1949.605  | NM_007097 | 6015.466  | 5921.01   |
| NM_014442 | 3545.409  | 3629.615  | NM_003334 | 8719.669  | 9785.744  | D87446    | 3826.675  | 3099.561  |
| AB002313  | 1723.053  | 1794.589  | NM_002693 | 1538.974  | 1600.356  | BF540935  | 1053.213  | 970.492   |
| AB011167  | 1430.345  | 1395.254  | NM_003671 | 643.259   | 791.954   | NM_004466 | 439.546   | 329.355   |
| NM_005409 | 1203.303  | 1295.046  | AK026000  | 1790.875  | 1828.524  | NM_007081 | 2019.302  | 1254.789  |
| NM_000208 | 3330.653  | 3031.535  | NM_017833 | 1134.499  | 1473.694  | AB032964  | 2240.034  | 1712.534  |
| NM_002188 | 33627.973 | 41020.078 | NM_006675 | 2795.863  | 3742.086  | BE733605  | 2361.137  | 1931.22   |
| AK027119  | 12351.603 | 12789.744 | NM_003022 | 10721.907 | 10164.469 | NM_003334 | 8850.772  | 5697.637  |
| AB037727  | 29922.6   | 31493.648 | NM_004873 | 2939.751  | 3124.99   | NM_002693 | 1410.063  | 1065.595  |
| NM_005426 | 3050.867  | 2828.334  | NM_019842 | 1363.924  | 1256.018  | NM_003671 | 662.343   | 515.047   |
| NM_014063 | 6908.846  | 6710.395  | NM_005992 | 1352.272  | 1459.198  | AK026000  | 1529.425  | 1013.042  |
| D86964    | 3312.109  | 2937.132  | NM_003144 | 36079.949 | 27266.053 | NM_017833 | 931.621   | 590.142   |
| AL049801  | 1539.032  | 1271.025  | NM_000908 | 460.242   | 628.289   | NM_006675 | 3151.963  | 2151.84   |
| NM_016395 | 5138.501  | 4171.028  | AB011102  | 2348.216  | 2513.656  | NM_003022 | 11951.367 | 7158.657  |
| NM_003152 | 859.794   | 710.363   | D63480    | 827.796   | 1089.155  | NM_004873 | 2509.538  | 2084.19   |
| NM_014727 | 3287.732  | 3358.347  | NM_002969 | 1450.163  | 1429.714  | NM_019842 | 1044.292  | 1160.401  |
| BE885010  | 507.321   | 618.586   | AF087940  | 1137.157  | 1101.625  | NM_005992 | 1403.728  | 1478.853  |
| NM_006342 | 1505.415  | 2060.397  | AJ277587  | 1204.712  | 1011.972  | NM_003144 | 41708.309 | 30734.652 |
| NM_016396 | 4052.647  | 3694.392  | D87432    | 2007.224  | 2043.514  | NM_000908 | 355.952   | 547.516   |
| NM_005689 | 716.577   | 793.904   | AI565117  | 52694.328 | 64963.738 | AB011102  | 2434.453  | 2735.384  |
| AF086546  | 343.5     | 414.251   | AI299075  | 1373.822  | 1433.038  | D63480    | 1073.788  | 1283.513  |
| NM_005552 | 11713.577 | 11946.174 | M59979    | 301.606   | 256.169   | NM_002969 | 1353.933  | 1283.963  |
| NM_006717 | 1405.71   | 1203.41   | AB011098  | 584.401   | 574.068   | NM_004620 | 531.574   | 576.939   |
| AL109786  | 946.129   | 973.701   | AA609759  | 517.441   | 724.719   | AF087940  | 1137.094  | 1256.082  |
| AK026479  | 3521.635  | 2972.185  | AA029418  | 1790.427  | 1559.627  | AJ277587  | 1416.459  | 1075.863  |
| AK022860  | 3938.917  | 3300.239  | L20815    | 2090.59   | 1974.262  | D87432    | 1845.368  | 1300.056  |
| X60188    | 19622.742 | 22929.85  | AI364483  | 3719.599  | 3357.476  | AI565117  | 60280.727 | 57369.445 |
| NM_005977 | 1921.771  | 1911.21   | AA456001  | 4158.5    | 4472.443  | AI299075  | 1352.828  | 1064.272  |
| NM_006265 | 5025.13   | 4820.289  | AA451686  | 2586.805  | 2445.38   | M59979    | 364.299   | 291.39    |
| NM_003126 | 407.38    | 500.981   | M87790    | 4408.812  | 4018.408  | AB011098  | 469.208   | 368.922   |
| NM_006059 | 1327.482  | 1221.18   | NM_001768 | 845.701   | 1000.946  | AA609759  | 456.33    | 244.559   |
| NM_000347 | 3872.984  | 4113.458  | NM_000029 | 4912.806  | 8493.981  | AA029418  | 1554.715  | 590.419   |
| M13452    | 3927.007  | 4000.797  | NM_000715 | 300.658   | 232.715   | L20815    | 1873.856  | 1041.453  |

|           |           |           |           |           |           |           |           |           |
|-----------|-----------|-----------|-----------|-----------|-----------|-----------|-----------|-----------|
| AF082075  | 417.064   | 351.85    | AF035802  | 1262.163  | 1332.519  | AI364483  | 3498.156  | 1543.46   |
| NM_016114 | 1625.429  | 1294.048  | M26123    | 282.794   | 624.039   | AA456001  | 4260.034  | 1409.868  |
| AY007114  | 777.597   | 725.681   | NM_012096 | 4132.777  | 3527.56   | AA451686  | 2354.993  | 2035.665  |
| AF086604  | 705.884   | 488.139   | NM_003905 | 9503.629  | 13660.858 | M87790    | 5986.259  | 4312.072  |
| AB000895  | 1067.434  | 622.616   | L12052    | 1234.191  | 1785.623  | NM_001766 | 1100.026  | 900.932   |
| X80031    | 581.741   | 342.773   | AB028976  | 1592.688  | 1925.564  | NM_000025 | 4870.786  | 3207.568  |
| AK022178  | 931.882   | 775.05    | NM_015869 | 1003.869  | 821.15    | AF035802  | 1220.553  | 1053.09   |
| NM_006011 | 510.78    | 408.951   | NM_004626 | 557.151   | 916.118   | M26123    | 362.432   | 346.149   |
| L00635    | 878.776   | 1156.555  | NM_001899 | 267.291   | 261.807   | NM_012096 | 4167.503  | 2703.417  |
| NM_015601 | 963.581   | 1275.816  | NM_004305 | 10793.502 | 9550.524  | NM_003905 | 8413.336  | 6006.31   |
| NM_001780 | 23357.072 | 21344.646 | NM_006089 | 984.309   | 1259.221  | L12052    | 1368.205  | 788.108   |
| AJ277442  | 675.555   | 734.331   | AB033054  | 6135.77   | 6634.908  | AB028976  | 1517.005  | 1048.164  |
| NM_004569 | 2170.648  | 1907.519  | NM_016122 | 501.91    | 608.243   | NM_015869 | 742.917   | 292.357   |
| AF089088  | 914.715   | 959.935   | AF153330  | 641.588   | 721.637   | NM_004305 | 8411.514  | 3844.798  |
| L07557    | 1414.264  | 1198.703  | NM_001652 | 377.002   | 419.183   | NM_006089 | 902.008   | 891.449   |
| D78514    | 3048.265  | 2458.418  | NM_004770 | 899.428   | 1988.204  | AF072506  | 488.507   | 1632.115  |
| AK021665  | 477.338   | 508.546   | AK023749  | 306.438   | 321.787   | AB033054  | 7793.743  | 7899.402  |
| NM_013366 | 461.663   | 458.021   | NM_002337 | 1930.397  | 1893.871  | NM_016122 | 463.399   | 559.872   |
| NM_002787 | 16019.64  | 16708.605 | NM_013245 | 823.595   | 822.236   | AF153330  | 613.534   | 739.058   |
| U95006    | 5990.007  | 5469.03   | NM_006423 | 2392.881  | 2262.827  | NM_001652 | 362.273   | 298.165   |
| NM_003347 | 7495.58   | 7258.717  | NM_004766 | 1269.781  | 1618.465  | NM_002337 | 1882.802  | 1295.894  |
| AF273051  | 667.119   | 858.219   | NM_005819 | 2837.713  | 3182.013  | NM_013245 | 1147.059  | 602.044   |
| NM_014516 | 8121.229  | 7359.987  | AK025520  | 1811.27   | 941.261   | NM_006423 | 2537.474  | 1103.497  |
| AK021868  | 413.374   | 522.619   | NM_004892 | 8324.266  | 18504.145 | NM_004766 | 1421.727  | 578.628   |
| AK000643  | 54986.523 | 64696.133 | NM_014597 | 6351.497  | 5901.131  | NM_005819 | 2415.394  | 1284.885  |
| NM_018421 | 2979.034  | 2926.391  | NM_017896 | 3966.279  | 3228.707  | AK025520  | 1263.535  | 1115.17   |
| AB014574  | 48183.258 | 50699.148 | AB002374  | 1592.54   | 1251.207  | NM_014597 | 5509.671  | 7843.383  |
| NM_020127 | 769.621   | 519.941   | U17327    | 649.581   | 600.305   | AB002374  | 966.898   | 872.132   |
| NM_015623 | 5454.226  | 4215.481  | NM_017833 | 921.44    | 736.137   | U17327    | 695.422   | 1208.627  |
| AB045116  | 1310.701  | 1011.95   | NM_006675 | 2212.877  | 2339.088  | NM_017833 | 766.478   | 630.745   |
| L49054    | 503.612   | 535.829   | NM_003022 | 10070.049 | 9233.736  | NM_006675 | 2272.68   | 2376.557  |
| NM_001675 | 879.807   | 969.278   | NM_004873 | 2498.029  | 2243.496  | NM_003022 | 10066.229 | 8481.978  |
| NM_003422 | 2041.128  | 2157.296  | NM_019842 | 1502.087  | 1602.596  | NM_004873 | 2704.585  | 2036.34   |
| NM_001451 | 639.192   | 872.099   | NM_002951 | 9771.635  | 10109.903 | NM_019842 | 930.627   | 901.984   |
| NM_014779 | 1036.447  | 1784.507  | NM_002317 | 550.013   | 614.939   | NM_002951 | 10125.561 | 8203.724  |
| NM_002943 | 2911.953  | 3076.532  | NM_000320 | 2504.112  | 2638.068  | NM_002317 | 634.713   | 628.174   |
| AL133649  | 910.129   | 1121.949  | NM_003136 | 3213.638  | 3320.667  | NM_000320 | 2311.15   | 1755.773  |
| AB018303  | 434.406   | 533.188   | NM_013328 | 15711.326 | 17089.557 | NM_003136 | 3062.016  | 2737.784  |
| NM_015846 | 2456.803  | 2133.623  | NM_000790 | 353.195   | 888.181   | NM_013328 | 18129     | 13186.556 |
| NM_015972 | 6866.105  | 5923.254  | NM_002660 | 1181.392  | 1107.28   | NM_002660 | 1316.003  | 881.148   |
| NM_016132 | 1183.592  | 1213.513  | NM_015900 | 368.392   | 446.919   | AL122071  | 803.404   | 1450.671  |
| NM_018006 | 1377.511  | 1509.57   | NM_003706 | 549.823   | 631.313   | NM_014913 | 8312.968  | 6913.896  |
| NM_016090 | 1465.544  | 1467.056  | NM_005218 | 4801.372  | 6751.257  | NM_005864 | 6332.379  | 4856.863  |
| NM_001013 | 47966.34  | 56792     | NM_014913 | 7375.218  | 6373.817  | NM_012341 | 2301.113  | 1963.6    |
| AK024040  | 2942.618  | 2466.935  | NM_005864 | 5974.194  | 4432.421  | NM_003256 | 14058.246 | 10085.904 |
| NM_005061 | 2268.409  | 2033.396  | NM_012341 | 2215.46   | 2333.283  | D87450    | 2237.194  | 1859.093  |
| NM_000997 | 56315.609 | 62673.84  | NM_003256 | 11702.001 | 13080.65  | NM_017797 | 6045.954  | 4521.087  |
| AF182417  | 31428.508 | 25593.105 | D87450    | 2081.331  | 2030.282  | AK021919  | 569.624   | 540.519   |
| AL137354  | 10185.305 | 7688.269  | NM_017797 | 5701.125  | 5323.844  | AF000562  | 1478.281  | 1514.97   |
| NM_001023 | 57852.859 | 59263.113 | AK021919  | 664.965   | 632.886   | AK025713  | 845.753   | 593.947   |
| AK021571  | 6368.263  | 5079.36   | AF000562  | 1577.055  | 1473.165  | NM_018100 | 304.319   | 449.683   |
| AF052149  | 1818.404  | 1871.742  | AK025713  | 1273.63   | 1400.901  | NM_002050 | 1210.365  | 1255.409  |
| AK025586  | 646.923   | 588.794   | NM_018100 | 391.521   | 417.405   | NM_007097 | 5716.345  | 4944.011  |

|           |           |           |           |           |           |           |           |           |
|-----------|-----------|-----------|-----------|-----------|-----------|-----------|-----------|-----------|
| AL137512  | 788.784   | 724.512   | NM_002050 | 1274.301  | 1759.817  | D87446    | 3748.854  | 3002.72   |
| NM_005036 | 701.106   | 674.096   | NM_007097 | 5710.856  | 5902.988  | BF540935  | 801.909   | 912.265   |
| NM_002541 | 1294.835  | 1280.284  | D87446    | 3785.775  | 4613.722  | AK026000  | 1536.457  | 1284.289  |
| NM_000056 | 2513.226  | 2717.728  | BF540935  | 990.671   | 2415.841  | NM_005814 | 535.656   | 753.393   |
| NM_016311 | 6431.638  | 5714.392  | NM_004466 | 351.511   | 448.112   | NM_000211 | 14208.502 | 10848.206 |
| NM_001867 | 54970.93  | 51292.648 | NM_007081 | 1685.358  | 1919.596  | AB037830  | 1091.066  | 1091.536  |
| NM_002300 | 59155.48  | 61842.992 | AB032964  | 2131.623  | 2118.398  | NM_015685 | 864.782   | 1179.144  |
| NM_000290 | 3015.599  | 2851.029  | BE733605  | 1836.979  | 1895.555  | NM_004357 | 10854.686 | 9155.93   |
| NM_016538 | 4072.618  | 4105.259  | NM_003334 | 11025.476 | 12458.336 | X03324    | 2033.599  | 1797.757  |
| AK023275  | 6356.099  | 4261.39   | NM_002693 | 1655.79   | 1637.861  | NM_014934 | 672.682   | 893.11    |
| AJ223352  | 4834.548  | 2940.526  | NM_003671 | 726.259   | 838.257   | NM_015385 | 456.892   | 392.729   |
| NM_012238 | 2403.32   | 2405.357  | AK026000  | 1535.789  | 1959.512  | NM_003690 | 2175.195  | 2013.027  |
| NM_016539 | 5931.846  | 2516.112  | NM_005814 | 613.789   | 497.002   | NM_000876 | 3877.156  | 3656.03   |
| NM_006807 | 6709.835  | 6477.374  | NM_016279 | 401.427   | 493.771   | NM_014214 | 3062.57   | 3364.848  |
| NM_000326 | 292.664   | 308.567   | NM_000211 | 13433.346 | 12648.309 | NM_005232 | 176.528   | 740.961   |
| L16464    | 610.163   | 507.066   | AB037830  | 1144.985  | 1136.711  | NM_002752 | 1874.71   | 2043.717  |
| NM_006532 | 3442.093  | 2591.823  | NM_015685 | 1052.795  | 1112.055  | X85106    | 317.446   | 1404.509  |
| U07132    | 3473.682  | 2696.976  | NM_004357 | 12872.825 | 11211.174 | NM_003931 | 1530.387  | 3798.795  |
| NM_003436 | 465.063   | 276.957   | X03324    | 1821.39   | 1633.38   | AL157475  | 3587.33   | 4406.606  |
| AL035301  | 1247.053  | 974.601   | AF130988  | 262.037   | 309.735   | NM_003704 | 1656.331  | 2188.351  |
| NM_017687 | 2758.03   | 2989.951  | NM_014934 | 672.824   | 671.352   | AK023140  | 959.324   | 1757.981  |
| NM_017975 | 958.26    | 1060.481  | NM_015385 | 291.339   | 276.529   | AF084362  | 325.129   | 804.946   |
| AK025036  | 932.918   | 940.737   | NM_003690 | 2191.88   | 2197.653  | NM_001553 | 2423.214  | 4112.206  |
| AK024843  | 5978.941  | 6049.756  | NM_000876 | 2646.811  | 2249.052  | NM_014173 | 11284.822 | 16744.482 |
| AF074994  | 546.192   | 1044.877  | NM_014214 | 2571.62   | 3614.79   | NM_001731 | 12746.316 | 19760.158 |
| NM_017670 | 3932.115  | 4382.698  | NM_002752 | 1802.479  | 2093.818  | AL137506  | 1189.731  | 2213.184  |
| AF286598  | 379.715   | 445.763   | NM_013281 | 901.839   | 778.547   | AK022961  | 2907.648  | 3446.935  |
| AK021468  | 711.871   | 920.606   | Y11306    | 613.148   | 588.697   | NM_007375 | 5058.791  | 6751.868  |
| BC033020  | 859.026   | 803.332   | NM_016112 | 386.143   | 534.436   | AB002323  | 1409.186  | 3710.878  |
| NM_004366 | 7342.214  | 6676.426  | X85106    | 407.704   | 358.889   | AK022241  | 3041.068  | 6593.938  |
| AK026168  | 1199.215  | 871.213   | NM_003931 | 1430.404  | 1307.768  | NM_020185 | 937.863   | 1710.129  |
| AJ296152  | 9606.496  | 8702.843  | NM_012479 | 25518.371 | 18520.887 | NM_002832 | 32581.867 | 37094.043 |
| AK001067  | 1661.745  | 1843.549  | AF250226  | 5188.839  | 4758.342  | NM_017732 | 4419.594  | 6149.305  |
| AK027088  | 6148.979  | 5258.938  | NM_003217 | 19861.477 | 16869.01  | NM_002851 | 1835.422  | 3206.944  |
| AB037721  | 8751.949  | 8396.298  | AL157475  | 2693.629  | 2464.424  | NM_002071 | 522.049   | 665.507   |
| AK027120  | 8037.296  | 7231.215  | NM_006069 | 7303.976  | 7279.606  | NM_005339 | 9731.373  | 12709.841 |
| AB029001  | 1959.759  | 2086.991  | NM_006534 | 2181.124  | 2050.553  | NM_001906 | 1908.121  | 2134.772  |
| AB006624  | 3302.575  | 3862.469  | NM_017601 | 1427.539  | 1629.324  | NM_004142 | 549.422   | 979.367   |
| AL109717  | 1080.792  | 1180.814  | AF110265  | 6108.601  | 4621.412  | AF108138  | 1059.498  | 1884.484  |
| AK025473  | 949.71    | 827.125   | AF272371  | 48236.871 | 54214.297 | NM_004347 | 501.67    | 764.096   |
| AF146693  | 791.049   | 554.626   | AK021848  | 690.295   | 735.333   | BF340302  | 2063.635  | 2898.342  |
| AF271070  | 7247.878  | 5698.977  | NM_003704 | 1025.645  | 1189.209  | NM_018010 | 386.734   | 1319.25   |
| NM_014903 | 991.577   | 1058.939  | AK023140  | 620.415   | 550.244   | NM_002274 | 3201.5    | 9663.688  |
| AK055959  | 747.56    | 485.331   | AF084362  | 277.959   | 177.641   | NM_004383 | 8697.006  | 5985.562  |
| AF052141  | 365.18    | 254.965   | NM_001553 | 1470.601  | 1489.421  | NM_012256 | 3368.796  | 3490.987  |
| AK021705  | 3629.867  | 3597.424  | NM_014173 | 8542.922  | 7083.459  | NM_006006 | 487.667   | 478.573   |
| NM_016141 | 11080.877 | 10402.21  | AK022961  | 2435.51   | 2653.461  | NM_016325 | 1010.569  | 1069.495  |
| AL109702  | 1200.011  | 1114.145  | NM_007375 | 4309.568  | 4856.048  | NM_001604 | 1269.24   | 1145.93   |
| AK025624  | 11229.785 | 11374.859 | NM_014371 | 2323.149  | 2288.737  | NM_017656 | 1959.857  | 1394.579  |
| AK026684  | 621.468   | 637.427   | AF290512  | 3208.304  | 3658.097  | X16282    | 5407.703  | 4534.673  |
| AL110125  | 5218.989  | 5568.156  | NM_006716 | 3346.904  | 2832.988  | AK022519  | 560.889   | 497.745   |
| AK022764  | 381.949   | 492.341   | AB002323  | 1484.58   | 1359.769  | NM_014415 | 1255.428  | 1061.847  |
| AJ011600  | 1462.808  | 1268.553  | AK022241  | 2738.22   | 2986.606  | S75264    | 5855.588  | 5417.678  |

|           |           |           |           |           |           |           |           |           |
|-----------|-----------|-----------|-----------|-----------|-----------|-----------|-----------|-----------|
| AJ002785  | 1236.468  | 1419.377  | AK022587  | 4542.761  | 4379.951  | AF027513  | 877.541   | 845.897   |
| Z70716    | 597.875   | 559.948   | NM_005506 | 989.372   | 812.562   | NM_001379 | 1421.35   | 1644.824  |
| AL049251  | 592.421   | 388.096   | AL137404  | 41720.168 | 36744.797 | NM_018664 | 1852.097  | 1547.889  |
| Z83945    | 837.131   | 766.886   | NM_020185 | 873.692   | 933.202   | BC006428  | 2192.885  | 1514.169  |
| L32606    | 941.678   | 807.866   | NM_002832 | 23992.57  | 17646.215 | NM_005034 | 412.695   | 433.33    |
| L05148    | 789.993   | 552.936   | NM_017732 | 2523.12   | 2213.699  | NM_014763 | 8389.688  | 4901.422  |
| AK091125  | 923.811   | 816.975   | NM_002851 | 1401.273  | 1270.092  | AF086534  | 466.199   | 450.332   |
| D16904    | 550.487   | 506.807   | NM_002071 | 316.265   | 299.144   | AF070617  | 1073.177  | 1010.456  |
| M93056    | 5269.49   | 4729.938  | NM_005339 | 9707.759  | 6926.07   | NM_014918 | 6265.259  | 4786.191  |
| D16474    | 3707.229  | 2756.283  | NM_001906 | 2758.197  | 2639.128  | NM_000152 | 2228.86   | 1842.166  |
| AL080072  | 807.862   | 655.812   | NM_004142 | 446.463   | 385.832   | D17222    | 16594.498 | 12323.397 |
| AK024898  | 337.15    | 393.87    | AF108138  | 981.375   | 1030.338  | NM_000154 | 1241.727  | 992.334   |
| AL049280  | 1691.988  | 1439.955  | NM_004347 | 543.185   | 717.995   | NM_006297 | 5686.228  | 4819.798  |
| AK025212  | 7021.572  | 6630.34   | BF340302  | 1544.795  | 1607.863  | X85325    | 34531.59  | 15266.845 |
| BU633384  | 21.89     | 124.986   | AK024210  | 668.353   | 716.772   | AF318366  | 4412.166  | 1809.768  |
| AB021925  | 446.351   | 413.21    | NM_002276 | 2045.556  | 2319.74   | AF182423  | 845.878   | 439.626   |
| AL157503  | 2343.803  | 2083.899  | AL133087  | 1076.233  | 1064.903  | D26018    | 1832.13   | 914.182   |
| AK000786  | 1624.058  | 1405.204  | NM_018010 | 525.369   | 371.382   | NM_005919 | 927.071   | 734.792   |
| AK000935  | 582.6     | 563.894   | NM_002274 | 3681.052  | 4337.529  | AL137254  | 487.871   | 520.446   |
| AK021458  | 2886.686  | 2485.422  | AL080200  | 341.344   | 339.737   | AF085884  | 960.006   | 895.469   |
| NM_017674 | 3266.377  | 2991.728  | BF337874  | 1126.19   | 1370.997  | S81522    | 2923.541  | 2319.557  |
| AK000966  | 573.774   | 435.686   | NM_003475 | 7011.265  | 6686.812  | S94541    | 699.533   | 725.651   |
| AK024525  | 3884.468  | 3530.691  | NM_000243 | 2076.523  | 1924.192  | L36587    | 9573.742  | 5674.121  |
| AK024909  | 498.985   | 547.605   | NM_004383 | 8213.872  | 8424.164  | AK024228  | 815.264   | 521.779   |
| AK024544  | 1539.054  | 1508.515  | NM_012256 | 2435.012  | 2037.469  | NM_016647 | 1814.046  | 1035.185  |
| AK001880  | 2763.175  | 2697.482  | NM_016325 | 998.3     | 942.589   | AK024695  | 815.98    | 695.382   |
| AF156166  | 4183.226  | 4400.644  | NM_001604 | 1043.215  | 875.456   | AK023623  | 773.731   | 616.701   |
| NM_014373 | 26960.713 | 27076.262 | NM_017656 | 1371.928  | 920.21    | AK021539  | 3430.968  | 2741.643  |
| NM_014206 | 16210.012 | 17184.492 | X16282    | 4629.367  | 3506.758  | AK021819  | 330.534   | 553.718   |
| NM_001651 | 2968.248  | 3645.975  | NM_014415 | 1385.683  | 814.774   | AK026738  | 709.168   | 679.174   |
| L32786    | 2564.987  | 3336.137  | S75264    | 5484.48   | 4722.244  | AK025011  | 399.603   | 306.358   |
| AL355720  | 2913.711  | 3532.58   | AF027513  | 950.858   | 844.949   | AL157491  | 547.959   | 402.945   |
| AK002023  | 3023.952  | 4373.055  | NM_001379 | 1436.811  | 1359.809  | NM_005266 | 1095.164  | 1005.255  |
| AF150156  | 283.749   | 515.127   | NM_018664 | 1948.858  | 1846.198  | AF085998  | 902.229   | 705.694   |
| NM_016464 | 624.312   | 563.708   | BC006428  | 2368.232  | 2300.579  | AK024681  | 740.793   | 644.657   |
| L40402    | 1531.157  | 1780.746  | NM_005034 | 530.14    | 670.945   | NM_014907 | 9038.275  | 4885.488  |
| AK022422  | 897.118   | 811.665   | NM_003926 | 4256.055  | 4515.159  | AB007977  | 3416.394  | 1565.071  |
| AK023485  | 792.921   | 679.304   | NM_016047 | 25303.967 | 22194.689 | NM_014221 | 994.276   | 284.874   |
| AK022474  | 10777.8   | 8907.603  | NM_001499 | 6989.074  | 9030.808  | U58663    | 513.74    | 553.464   |
| AK022392  | 2469.699  | 2337.014  | BF030165  | 9477.564  | 10969.463 | U84515    | 1263.765  | 819.773   |
| AK025949  | 1856.297  | 1813.201  | NM_016732 | 8534.829  | 8480.441  | Y11180    | 1195.288  | 438.523   |
| Y10259    | 1556.38   | 1521.884  | NM_014763 | 8318.117  | 7633.069  | AF086143  | 3416.718  | 2276.173  |
| AK021725  | 2035.349  | 2295.582  | AF086534  | 405.55    | 423.769   | AK024244  | 1745.205  | 1270.45   |
| NM_002408 | 3740.425  | 3694.103  | AF070617  | 1052.428  | 1116.394  | AK023812  | 375.797   | 88.662    |
| AK024282  | 1358.092  | 1318.6    | NM_014918 | 6882.184  | 6225.075  | AL390084  | 603.562   | 257.7     |
| AF085838  | 1555.076  | 2147.411  | NM_000152 | 3602.282  | 2545.253  | AK023565  | 415.364   | 258.278   |
| NM_018277 | 2180.986  | 2587.971  | D17222    | 17582.666 | 12514.842 | AK021479  | 690.127   | 522.474   |
| AF014455  | 525.673   | 650.394   | NM_000154 | 1531.102  | 1163.95   | NM_003835 | 749.672   | 495.629   |
| AF086335  | 2523.575  | 3527.915  | NM_006213 | 208.46    | 158.24    | AK000245  | 1003.478  | 585.031   |
| AL355741  | 370.335   | 316.206   | NM_000671 | 1237.622  | 1153.654  | AF118072  | 538.832   | 353.101   |
| AB011118  | 18933.521 | 21448.842 | NM_006297 | 7754.415  | 7586.377  | AF085900  | 8127.364  | 4107.946  |
| S66666    | 997.198   | 1042.353  | X85325    | 39786.254 | 32117.336 | AK022420  | 630.015   | 159.013   |
| AK021476  | 1697.961  | 1785.595  | AF318366  | 4469.098  | 5520.5    | AK023945  | 4154.538  | 2475.073  |

|           |           |           |           |          |           |            |           |           |
|-----------|-----------|-----------|-----------|----------|-----------|------------|-----------|-----------|
| NM_01863C | 2167.421  | 2287.704  | AB037863  | 403.096  | 559.208   | AK022446   | 610.697   | 603.739   |
| AF086175  | 529.823   | 549.989   | BC000363  | 504.224  | 420.073   | AK023773   | 438.499   | 704.218   |
| AK002196  | 350.495   | 480.932   | NM_007237 | 554.939  | 693.371   | AF116709   | 826.444   | 883.71    |
| NM_00457E | 1153.003  | 890.509   | NM_00460E | 372.3    | 371.478   | AK025533   | 879.985   | 779.486   |
| AF040097  | 769.963   | 716.418   | NM_018257 | 2704.648 | 2511.622  | AK021911   | 3312.508  | 2253.92   |
| NM_02043E | 354.041   | 266.229   | NM_00591E | 891.362  | 751.494   | D17225     | 391.73    | 337.118   |
| AK024182  | 1180.769  | 1236.43   | AF086112  | 346.84   | 444.167   | AF147430   | 1572.788  | 1264.156  |
| NM_00691E | 9843.611  | 11784.571 | AL137254  | 842.09   | 739.435   | AK025766   | 6005.11   | 4352.46   |
| NM_00049E | 5079.131  | 4088.094  | AK026359  | 414.72   | 404.481   | U35875     | 8625.556  | 5395.502  |
| AL049955  | 13117.631 | 12658.718 | AF085884  | 1043.661 | 878.622   | AK021857   | 14286.986 | 8666.872  |
| AF155654  | 6656.489  | 7611.16   | S81522    | 3276.439 | 2595.368  | AK022257   | 1031.237  | 681.06    |
| AF088044  | 648.334   | 583.295   | S94541    | 809.769  | 1084.993  | BE887356   | 21732.088 | 14174.797 |
| AK000028  | 2069.876  | 2219.19   | L36587    | 9698.245 | 10893.618 | X84369     | 631.431   | 702.199   |
| NM_01332C | 39948.199 | 41025.574 | AK024228  | 1008.548 | 1245.408  | AK023329   | 2554.542  | 952.96    |
| AJ245902  | 568.662   | 548.894   | NM_016647 | 936.744  | 1076.909  | AK021773   | 1498.819  | 2723.504  |
| AL050039  | 556.563   | 841.369   | AK024695  | 916.007  | 1094.131  | AL365456   | 613.855   | 834.077   |
| AF009316  | 335.267   | 366.077   | AF070632  | 506.053  | 580.183   | U84522     | 1372.078  | 1431.602  |
| AF087987  | 594.119   | 836.593   | AF161359  | 1825.188 | 1842.036  | AK021694   | 1020.511  | 796.408   |
| Z36840    | 321.323   | 497.238   | AL365520  | 935.046  | 983.924   | U84505     | 1717.862  | 1356.086  |
| AK021723  | 794.937   | 1103.913  | AL359338  | 1020.758 | 996.081   | X81005     | 550.456   | 328.208   |
| H09474    | 1772.652  | 1847.551  | AK023623  | 886.464  | 1150.757  | AL049265   | 853.826   | 837.88    |
| AB002368  | 6185.402  | 6133.842  | AK021539  | 3124.122 | 3007.257  | AL137635   | 510.389   | 364.677   |
| AL360263  | 40999.277 | 35478.43  | AK021819  | 594.177  | 663.618   | AL049430   | 1221.335  | 888.831   |
| Z36780    | 2033.558  | 2642.171  | AK026738  | 848.396  | 776.235   | AB015349   | 572.783   | 269.388   |
| AK022403  | 1293.705  | 1293.064  | AK025011  | 333.931  | 205.345   | AL079274   | 6785.833  | 3035.565  |
| AK022955  | 3420.405  | 2941.649  | AL157491  | 594.353  | 456.739   | AF108756   | 7590.411  | 9379.973  |
| AK021760  | 450.46    | 266.299   | NM_00526E | 1117.418 | 833.93    | NM_00407E  | 2734.009  | 2241.535  |
| BC035855  | 2326.45   | 2198.542  | AF087965  | 321.411  | 311.618   | NM_001887  | 2320.347  | 2062.797  |
| AL137408  | 13426.398 | 12974.972 | AF085998  | 766.965  | 604.486   | NM_00653E  | 1388.044  | 1315.052  |
| AF054995  | 1023.153  | 875.188   | AK024681  | 514.814  | 599.552   | AK026747   | 2720.688  | 2200.507  |
| AL080176  | 2094.859  | 1752.96   | NM_014907 | 7864.249 | 9477.606  | AL110150   | 2758.742  | 1987.588  |
| AK023627  | 714.532   | 622.426   | AB007977  | 4628.542 | 5320.839  | NM_00199E  | 1967.87   | 1240.922  |
| CY3Cy5    | 607.951   | 149.006   | NM_014221 | 1120.078 | 1297.176  | X87825     | 1404.095  | 1093.554  |
| BI759406  | 3295.904  | 2966.18   | U58663    | 295.855  | 380.862   | AK001285   | 14483.058 | 7789.302  |
| S74445    | 681.253   | 790.106   | AF086143  | 4569.908 | 3958.625  | D17215     | 3842.188  | 2375.236  |
| BI763360  | 848.887   | 947.877   | AK022364  | 354.394  | 329.925   | BE781513   | 623.017   | 346.94    |
| D25538    | 888.931   | 852.686   | AK024674  | 405.718  | 437.023   | NM_015714  | 9438.604  | 5692.285  |
| NM_00036C | 4294.035  | 3662.135  | AK024244  | 2116.858 | 1679.684  | AK075564   | 874.084   | 628.44    |
| D49950    | 4035.725  | 3337.88   | AK023812  | 380.921  | 211.965   | AK026219   | 516.712   | 405.193   |
| NM_00184E | 834.259   | 358.849   | AK023565  | 558.439  | 465.154   | D28446     | 844.505   | 318.791   |
| X03635    | 2341.598  | 1752.59   | AK021479  | 578.406  | 530.274   | D87466     | 4279.626  | 3329.835  |
| BC011847  | 56648.371 | 61735.559 | NM_00383E | 887.914  | 781.096   | CY3Cy5     | 1611.243  | 93.059    |
| X03348    | 1435.757  | 997.544   | AK000245  | 833.879  | 741.247   | AA608568   | 2532.352  | 3052.316  |
| AF353674  | 2961.799  | 1709.155  | AF118072  | 536.281  | 537.363   | BG831301   | 13336.423 | 15615.568 |
| BC002792  | 829.968   | 2139.113  | AK024112  | 454.936  | 349.158   | AA478647   | 1428.806  | 1634.077  |
| NM_02100E | 2095.825  | 4942.982  | AF085900  | 8371.663 | 13099.089 | AW058501   | 170.928   | 796.991   |
| SB        | 490.463   | 1037.74   | AK026195  | 231.235  | 88.325    | ID 2623896 | 2450.499  | 2397.338  |
| SR6       | 2902.286  | 5334.416  | AL049443  | 171.466  | 769.67    | ID 2602214 | 1517.37   | 1723.914  |
| SR8       | 9853.803  | 55054.707 | AK022420  | 854.692  | 1235.702  | ID 2071279 | 3095.832  | 2975.882  |
| CY3Cy5    | 3743.889  | 530.288   | AK023254  | 467.808  | 620.055   | L10709     | 2783.476  | 2581.996  |
| X07203    | 295.492   | 431.204   | AK023945  | 6184.991 | 6710.148  | N35489     | 639.992   | 538.783   |
| AB040104  | 344.855   | 439.507   | AK022446  | 475.664  | 520.56    | AI928195   | 747.416   | 749.44    |
| NM_003834 | 2224.841  | 2455.478  | AK023773  | 488.332  | 501.977   | AA482489   | 303.017   | 224.453   |



|           |           |           |           |           |           |           |           |           |
|-----------|-----------|-----------|-----------|-----------|-----------|-----------|-----------|-----------|
| NM_00595E | 2176.093  | 2678.577  | AF116709  | 555.318   | 626.167   | AA458922  | 5755.604  | 5044.402  |
| NM_003381 | 915.585   | 980.338   | AK025533  | 747.75    | 742.008   | NM_14565E | 1428.549  | 1161.917  |
| NM_00575E | 628.277   | 757.239   | AK021911  | 4526.586  | 3845.256  | SR2       | 50498.633 | 34995.684 |
| NM_00370Z | 9355.306  | 6480.914  | D17225    | 464.194   | 365.363   | SR4       | 11750.388 | 10202.692 |
| NM_00036E | 529.079   | 561.581   | AF147430  | 1347.882  | 1112.932  | SR6       | 1637.521  | 1122.073  |
| NM_016351 | 752.779   | 605.526   | AK025766  | 4955.292  | 3827.349  | SR8       | 6296.091  | 15296.65  |
| NM_00440E | 780.504   | 754.239   | U35875    | 7638.017  | 6218.96   | SR10      | 22501.301 | 5388.845  |
| NM_00198E | 3214.449  | 2162.54   | AK021857  | 12707.607 | 10363.087 | CY3Cy5    | 1525.522  | 93.7      |
| NM_00606C | 1085.853  | 768.817   | AK022257  | 1093.325  | 812.672   | NM_01772E | 682.422   | 838.139   |
| NM_005667 | 1160.19   | 655.211   | BE887356  | 17442.771 | 14020.133 | NM_00525E | 578.069   | 719.52    |
| NM_00630E | 558.261   | 236.455   | X84369    | 450.641   | 358.734   | NM_00284C | 1140.915  | 1994.871  |
| NM_00958E | 972.499   | 1891.998  | AK023329  | 2308.353  | 2708.025  | NM_006174 | 454.529   | 440.884   |
| L09080    | 3819.409  | 7145.31   | AK025181  | 585.185   | 464.139   | NM_01585C | 1730.49   | 2395.824  |
| NM_00732E | 6748.502  | 14057.816 | AK000477  | 1025.453  | 886.521   | NM_004864 | 608.77    | 1012.442  |
| AK023080  | 261.094   | 1078.087  | AK021773  | 1452.464  | 1263.882  | NM_00283E | 2077.557  | 2852.733  |
| NM_004467 | 679.789   | 1573.517  | AK027074  | 2010.401  | 1689.698  | NM_01468E | 48809.23  | 49153.547 |
| X69079    | 17015.982 | 37465.848 | AL365456  | 601.12    | 794.514   | BF528358  | 411.213   | 632.688   |
| AF091033  | 531.401   | 650.508   | NM_01803E | 483.812   | 374.373   | NM_00546Z | 453.799   | 363.644   |
| NM_001122 | 6351.437  | 5786.235  | U84522    | 1120.508  | 1109.029  | NM_01231E | 1402.855  | 1138.622  |
| NM_004591 | 1173.205  | 1091.07   | AK021694  | 1568.585  | 1289.46   | AK026235  | 509.817   | 434.107   |
| AL133027  | 713.276   | 1257.991  | AF086013  | 649.548   | 537.459   | NM_00651C | 6743.181  | 5415.966  |
| AB037732  | 1527.786  | 2067.045  | U84505    | 2124.84   | 1862.324  | NM_003141 | 983.186   | 719.939   |
| NM_005767 | 403.904   | 465.595   | X81005    | 758.735   | 765.946   | NM_02024E | 2315.749  | 1506.725  |
| NM_001837 | 591.045   | 935.808   | AL049265  | 943.77    | 761.04    | NM_00717E | 1266.233  | 1061.334  |
| NM_00183E | 66938.195 | 66507.477 | AL137635  | 387.899   | 335.072   | AJ011497  | 830.301   | 536.861   |
| NM_002164 | 502.388   | 404.899   | AL049430  | 1275.401  | 1087.63   | NM_00033E | 787.857   | 527.241   |
| NM_003811 | 4102.785  | 2763.42   | AK021461  | 332.332   | 330.385   | W61100    | 11776.592 | 11459.729 |
| NM_002981 | 2392.838  | 1300.102  | AL079274  | 9701.395  | 15849.677 | AF215923  | 1448.84   | 1912.058  |
| NM_001244 | 1929.86   | 1233.817  | S46403    | 443.605   | 479.916   | U66621    | 3635.075  | 5482.582  |
| NM_006137 | 655.104   | 1563.145  | AL137398  | 1392.145  | 1483.484  | NM_00572C | 12527.139 | 12921.834 |
| NM_01613E | 44540.035 | 66021.93  | Y12021    | 683.26    | 558.073   | AB040936  | 487.472   | 383.074   |
| AL117468  | 2991.705  | 7132.556  | BC016172  | 568.766   | 474.13    | U61736    | 153.119   | 642.997   |
| AB032997  | 1276.835  | 2574.898  | AF127771  | 1352.633  | 1154.62   | AJ132086  | 856.156   | 1106.539  |
| AL096857  | 2836.977  | 5768.524  | Z83949    | 1806.882  | 1709.102  | U92816    | 3997.612  | 5637.503  |
| AB002351  | 482.888   | 1384.758  | NM_01330C | 10345.359 | 11082.72  | BC011987  | 8841.754  | 10738.368 |
| AF073770  | 1094.174  | 960.332   | AK026039  | 3493.148  | 3484.674  | NM_00410E | 20706.158 | 22644.34  |
| AL359401  | 3691.073  | 3239.485  | AF108756  | 5361.663  | 5028.929  | NM_00348E | 1352.543  | 1637.282  |
| NM_01221E | 1455.589  | 1456.475  | NM_00407E | 1775.115  | 1922.704  | NM_00503E | 2593.88   | 2466.679  |
| NM_01657E | 2775.954  | 2272.469  | NM_001887 | 2035.555  | 1652.289  | L03418    | 5827.247  | 4476.493  |
| NM_00130E | 5195.527  | 4418.905  | NM_00653E | 1179.121  | 1221.904  | M95923    | 448.45    | 312.919   |
| M21304    | 1006.828  | 961.516   | AK026747  | 2815.503  | 2470.447  | NM_00241E | 55289.48  | 55556.242 |
| NM_00197E | 654.69    | 907.737   | AL110150  | 2381.79   | 1845.187  | NM_00633Z | 776.187   | 670.618   |
| AB040896  | 1648.184  | 1512.893  | NM_00199E | 2323.483  | 2276.841  | NM_00091E | 1394.95   | 862.61    |
| NM_001107 | 1574.811  | 2294.69   | X87825    | 1848.042  | 1306.194  | NM_01866E | 2979.757  | 2231.967  |
| NM_00363E | 3377.394  | 2581.162  | AK001285  | 12509.028 | 8847.887  | NM_145904 | 11150.195 | 8452.26   |
| NM_002234 | 984.003   | 750.742   | D17215    | 2757.742  | 2578.151  | NM_00679E | 5173.659  | 3542.889  |
| NM_000701 | 2664.069  | 3327.171  | BE781513  | 517.452   | 440.254   | NM_00070E | 608.347   | 491       |
| AB022696  | 6838.712  | 12643.486 | NM_015714 | 10750.962 | 10399.577 | NM_015941 | 1008.956  | 801.272   |
| NM_00223E | 397.124   | 581.441   | AK075564  | 927.213   | 988.091   | NM_00365E | 4121.281  | 4101.272  |
| D83782    | 4450.632  | 9004.466  | AK026219  | 591.947   | 476.906   | NM_014837 | 1432.046  | 1400.132  |
| NM_00207E | 2512.519  | 4839.332  | D28446    | 904.218   | 769.084   | NM_00173Z | 890.541   | 1310.957  |
| NM_000287 | 4160.097  | 9168.9    | AK024756  | 804.835   | 807.945   | NM_01869C | 4918.335  | 6638.381  |
| NM_00165E | 1563.389  | 4086.736  | NM_017911 | 963.164   | 944.655   | NM_00086C | 985.163   | 1320.748  |

|           |           |           |            |           |           |            |           |           |
|-----------|-----------|-----------|------------|-----------|-----------|------------|-----------|-----------|
| Z70705    | 713.327   | 697.309   | AJ224168   | 2193.502  | 2163.835  | AB037798   | 1758.516  | 2130.885  |
| NM_002611 | 794.023   | 1018.048  | S69873     | 492.5     | 487.313   | AF272663   | 3696.967  | 4749.062  |
| NM_017417 | 795.993   | 782.855   | AF147325   | 52003.133 | 61052.086 | NM_01219C  | 885.469   | 1022.216  |
| AL133602  | 1019.189  | 1122.656  | NM_014428  | 423.258   | 513.595   | NM_000791  | 1835.64   | 2487.446  |
| AF037219  | 1973.538  | 1822.317  | NM_018497  | 270.384   | 202.575   | NM_003681  | 2511.316  | 6258.473  |
| AK026075  | 526.318   | 847.03    | AK023584   | 334.657   | 335.609   | NM_00480C  | 8906.307  | 10106.67  |
| NM_000251 | 2090.709  | 2599.513  | D87466     | 3919.534  | 4042.072  | AB037738   | 387.811   | 391.073   |
| AB011133  | 1319.366  | 1075.524  | CY3Cy5     | 504.065   | 95.392    | NM_014954  | 10450.05  | 9022.026  |
| NM_017572 | 18733.549 | 8618.759  | AA608568   | 2349.453  | 2221.093  | NM_000807  | 391.191   | 217.863   |
| NM_018444 | 1611.797  | 999.905   | BG831301   | 11061.226 | 9427.673  | NM_01490C  | 1248.483  | 1124.596  |
| NM_006947 | 13093.458 | 28558.408 | AA478647   | 1737.701  | 1257.727  | NM_01570C  | 5627.165  | 5530.423  |
| NM_014634 | 9417.28   | 19349.785 | M35999     | 315.523   | 237.086   | NM_019087  | 2593.69   | 1753.146  |
| NM_00191C | 12637.968 | 26110.633 | ID 2623896 | 3811.639  | 3953.896  | NM_004277  | 8.124     | 776.154   |
| BC031485  | 3331.913  | 6876.44   | ID 2602214 | 1311.188  | 1035.566  | AF308802   | 1369.503  | 3278.704  |
| NM_004092 | 7724.125  | 19033.494 | ID 2071279 | 2576.576  | 1831.535  | S76984     | 11303.782 | 15968.685 |
| X15624    | 1421.093  | 3952.718  | L10709     | 1996.383  | 2011.95   | NM_01449C  | 47401.156 | 51837.57  |
| NM_004467 | 456.909   | 659.641   | N35489     | 654.252   | 1032.952  | NM_014081  | 635.944   | 523.323   |
| NM_005622 | 508.784   | 615.909   | AI928195   | 607.596   | 740.572   | NM_005651  | 664.966   | 707.69    |
| NM_01805E | 3792.398  | 4186.369  | AA458922   | 4502.852  | 4854.096  | NM_00719C  | 1212.674  | 1918.474  |
| NM_00454E | 3419.15   | 3273.32   | NM_14565C  | 1059.877  | 1199.09   | AB037842   | 615.408   | 668.633   |
| X69079    | 18628.07  | 16515.291 | NM_021957  | 289.416   | 637.543   | NM_019011  | 2031.177  | 2552.163  |
| BI759406  | 3719.065  | 3321.425  | SR2        | 46764.645 | 41770.059 | AF459094   | 4055.359  | 4051.806  |
| R76099    | 452.462   | 539.24    | SR4        | 10006.547 | 11445.324 | NM_003157  | 1641.954  | 1733.582  |
| S74445    | 665.906   | 684.126   | SR6        | 1521.665  | 1682.627  | NM_00493E  | 1579.521  | 1311.755  |
| BI763360  | 1015.461  | 1004.084  | SR8        | 5164.433  | 19882.311 | NM_01432C  | 767.123   | 524.424   |
| D25538    | 928.672   | 991.603   | SR10       | 18284.213 | 6805.404  | NM_00444E  | 499.887   | 286.976   |
| NM_00036C | 4834.287  | 4839.019  | CY3Cy5     | 701.293   | 123.952   | NM_015981  | 537.329   | 477.563   |
| D49950    | 4591.819  | 4409.46   | NM_01772C  | 518.256   | 781.109   | NM_00045E  | 3022.443  | 2532.551  |
| NM_00184C | 1174.059  | 1108.307  | NM_00525C  | 1046.293  | 939.559   | NM_014791  | 4060.986  | 3608.17   |
| X03635    | 3033.298  | 2958.894  | NM_00284C  | 1098.262  | 821.571   | NM_00331E  | 1264.282  | 1150.899  |
| BC011847  | 59080.625 | 67372.461 | NM_006174  | 399.227   | 400.232   | NM_004362  | 1755.206  | 1857.727  |
| X03348    | 1722.017  | 1506.624  | NM_01585C  | 2149.767  | 1782.216  | NM_000182  | 15339.526 | 21940.146 |
| AF353674  | 3886.135  | 1828.546  | NM_004864  | 599.927   | 609.6     | AK023384   | 1157.352  | 2767.772  |
| NM_021138 | 3795.059  | 8428.191  | NM_00283E  | 1826.408  | 1579.379  | NM_01602C  | 4219.166  | 5314.298  |
| NM_02100E | 2637.033  | 5349.667  | NM_01468E  | 43380.176 | 32509.572 | AB046381   | 436.793   | 549.92    |
| SB        | 514.827   | 1480.615  | BF528358   | 429.19    | 469.723   | AJ011497   | 1116.024  | 1269.583  |
| NM_001523 | 717.586   | 2451.719  | NM_01633C  | 322.138   | 233.882   | NM_00301E  | 259.678   | 258.265   |
| NM_017423 | 1267.729  | 2982.76   | NM_005462  | 514.402   | 519.349   | NM_00033C  | 633.078   | 855.65    |
| NM_019613 | 1860.614  | 1757.885  | NM_01231C  | 952.263   | 935.268   | W61100     | 15933.271 | 19755.678 |
| NM_005382 | 533.558   | 1466.907  | NM_00651C  | 6958.013  | 17454.766 | AA608568   | 2722.927  | 3808.012  |
| AK027086  | 1894.953  | 2151.545  | NM_003141  | 779.138   | 1101.593  | BG831301   | 11373.339 | 19841.943 |
| AB032997  | 649.434   | 796.45    | NM_02024E  | 1948.962  | 2638.86   | ID 2623896 | 2047.196  | 2167.263  |
| AL096857  | 1763.407  | 1934.322  | NM_00717E  | 1230.018  | 1656.727  | ID 2602214 | 1423.145  | 1297.075  |
| X07203    | 284.088   | 610.838   | AB046381   | 862.424   | 2868.917  | ID 2071279 | 3270.373  | 2864.409  |
| AB040104  | 499.577   | 308.212   | AJ011497   | 1536.217  | 2350.651  | L10709     | 2077.777  | 2133.435  |
| NM_003834 | 2743.295  | 2525.859  | NM_00301E  | 379.5     | 230.314   | N35489     | 607.809   | 515.45    |
| NM_00595C | 2201.935  | 2198.267  | NM_00033C  | 547.881   | 501.511   | AI928195   | 721.629   | 758.026   |
| NM_003381 | 725.028   | 954.282   | W61100     | 16865.719 | 19572.43  | AA458922   | 5401.609  | 4598.713  |
| NM_00575E | 616.817   | 756.9     | AF215923   | 1173.356  | 1028.622  | NM_14565C  | 1106.962  | 906.452   |
| NM_003702 | 9589.074  | 7444.739  | U66621     | 2865.156  | 3343.953  | NM_021957  | 452.883   | 367.898   |
| NM_00036C | 404.548   | 672.507   | NM_00572C  | 11371.809 | 8963.769  | NM_00171C  | 3777.057  | 6136.252  |
| NM_016351 | 803.23    | 878.625   | AB023161   | 142.611   | 158.395   | AL080062   | 960.476   | 1492.72   |
| NM_00440E | 867.249   | 796.015   | U61736     | 287.952   | 374.38    | NM_145904  | 9996.709  | 10866.284 |

|           |           |           |           |           |           |           |           |           |
|-----------|-----------|-----------|-----------|-----------|-----------|-----------|-----------|-----------|
| NM_00198E | 3578.973  | 2125.27   | AJ132086  | 861.556   | 700.969   | NM_00679E | 5254.416  | 4957.191  |
| NM_00006C | 1248.173  | 2355.137  | U92816    | 3526.23   | 2916.197  | NM_00070E | 580.754   | 804.868   |
| NM_00958E | 1150.171  | 2758.808  | BC011987  | 8652.788  | 8303.606  | NM_015941 | 892.726   | 1252.027  |
| L09080    | 1354.379  | 3152.183  | NM_00410E | 17381.914 | 15166.105 | NM_00365E | 4524.658  | 5696.565  |
| NM_00732E | 3295.575  | 6242.046  | NM_00348E | 1409.282  | 1570.293  | NM_014837 | 1630.415  | 2207.138  |
| AK023080  | 628.143   | 1277.862  | NM_00503E | 1885.199  | 1694.175  | NM_01772E | 902.649   | 1519.211  |
| NM_00188E | 4725.524  | 9257.341  | L03418    | 4466.823  | 3736.987  | NM_00284C | 1623.755  | 4227.941  |
| AF137372  | 2703.835  | 3030.998  | M95923    | 391.406   | 602.055   | NM_01585C | 2070.429  | 1932.659  |
| AF220417  | 909.405   | 1134.89   | NM_00241E | 53243.23  | 53468.27  | NM_004864 | 761.321   | 927.81    |
| D83782    | 3724.767  | 3345.691  | NM_00633E | 530.71    | 854.482   | NM_00283E | 2202.975  | 2113.148  |
| NM_00207E | 1435.999  | 1356.585  | NM_00091E | 1373.38   | 1683.076  | NM_01468E | 34178.551 | 32554.248 |
| NM_000287 | 2861.031  | 3022.999  | NM_01866E | 2491.145  | 3314.895  | BF528358  | 647.449   | 559.239   |
| NM_00165E | 913.714   | 1150.643  | NM_145904 | 7905.158  | 10757.899 | NM_002487 | 230.487   | 79.174    |
| AF091033  | 538.423   | 534.748   | NM_00679E | 5347.221  | 11087.191 | NM_00546E | 541.836   | 425.514   |
| NM_001122 | 6577.159  | 5845.719  | NM_00070E | 720.133   | 952.118   | NM_01231E | 1137.273  | 1064.039  |
| NM_004591 | 1321.717  | 1493.613  | NM_015941 | 872.486   | 1167.94   | NM_00651C | 5899.915  | 8616.658  |
| AL133027  | 817.103   | 922.649   | NM_00365E | 4165.99   | 4736.46   | NM_003141 | 884.095   | 1072.8    |
| AB037732  | 1349.397  | 1437.233  | NM_014837 | 1522.873  | 1499.745  | NM_02024E | 1933.573  | 2147.839  |
| NM_001837 | 462.857   | 792.175   | NM_00173E | 803.676   | 866.959   | NM_00717E | 1338.817  | 1956.228  |
| NM_00183E | 65589.133 | 68288.852 | NM_01869C | 3925.396  | 3779.131  | X91148    | 428.519   | 418.308   |
| BC016029  | 512.83    | 566.968   | NM_00086C | 625.809   | 457.465   | NM_01570C | 5669.551  | 5803.119  |
| M27487    | 711.077   | 826.129   | AB037798  | 1277.775  | 992.741   | NM_019087 | 2304.534  | 2112.766  |
| NM_002981 | 5374.891  | 10359.699 | NM_00078C | 276.678   | 230.268   | NM_01632E | 426.657   | 614.204   |
| NM_001244 | 2349.891  | 4686.99   | AF272663  | 3483.78   | 2627.767  | NM_00507E | 577.126   | 761.204   |
| NM_01227E | 917.558   | 1665.532  | NM_01219C | 688.113   | 658.416   | AF215923  | 1916.419  | 2579.105  |
| NM_006137 | 570.525   | 1666.309  | AF277719  | 997.223   | 909.602   | AB040936  | 330.444   | 498.292   |
| NM_01613E | 46966.074 | 68282.023 | NM_000791 | 1571.917  | 1557.112  | U61736    | 323.487   | 714.786   |
| AL117468  | 2586.096  | 5352.863  | NM_003681 | 1767.784  | 1883.68   | AJ132086  | 963.714   | 840.522   |
| NM_00409C | 4314.719  | 4125.301  | NM_00480C | 7535.964  | 7535.191  | U92816    | 4358.532  | 4801.122  |
| NM_014634 | 8495.332  | 7520.14   | S82769    | 221.224   | 229.941   | BC011987  | 9511.807  | 10485.818 |
| NM_00191E | 11438.851 | 11043.13  | NM_014954 | 4873.599  | 7349.719  | NM_00410E | 20707.082 | 21819.801 |
| BC031485  | 2102.35   | 2082.58   | NM_000807 | 255.866   | 461.542   | NM_00348E | 1361.9    | 1292.086  |
| NM_00409E | 5843.978  | 5240.225  | NM_01490E | 1374.274  | 1829.741  | NM_00503E | 1957.408  | 2008.592  |
| X15624    | 1076.54   | 1367.272  | X91148    | 413.114   | 636.254   | L03418    | 5219.057  | 5698.375  |
| AF073770  | 797.362   | 1169.547  | NM_01570C | 4651.87   | 6598.911  | M95923    | 274.558   | 536.889   |
| AL359401  | 4308.181  | 3988.617  | NM_019087 | 1836.815  | 2149.645  | NM_00241E | 52587.613 | 59747.695 |
| NM_01221E | 1825.982  | 1535.631  | NM_01632E | 842.78    | 1027.483  | NM_00633E | 877.224   | 1320.12   |
| NM_01657E | 2628.132  | 2244.517  | NM_00507E | 697.276   | 1040.123  | NM_00091E | 857.031   | 1264.754  |
| NM_00130E | 5047.396  | 4724.491  | AF308802  | 838.402   | 759.359   | NM_01866E | 2697.014  | 2507.688  |
| M21304    | 951.187   | 966.149   | S76984    | 8526.48   | 6318.122  | NM_014791 | 4236.774  | 5453.071  |
| NM_00197E | 774.833   | 818.057   | NM_01449E | 46943.133 | 49810.672 | NM_00331E | 1108.67   | 1359.396  |
| AB040896  | 1141.848  | 1241.776  | NM_014081 | 421.099   | 416.866   | NM_00436E | 1921.168  | 2338.348  |
| NM_001107 | 1803.17   | 1932.92   | NM_005651 | 528.927   | 415.679   | NM_00018E | 14056.645 | 13770.23  |
| AF084645  | 354.393   | 452.614   | NM_00719E | 1132.76   | 1366.26   | AK023384  | 1204.121  | 1676.198  |
| NM_002234 | 977.252   | 1332.936  | AK023337  | 1735.443  | 1627.392  | NM_01602E | 4262.139  | 5020.938  |
| NM_003471 | 567.635   | 813.013   | NM_01327E | 6511.948  | 6592.446  | AK025111  | 712.3     | 802.551   |
| NM_000701 | 2623.459  | 5450.728  | AB037842  | 500.348   | 299.681   | NM_00173E | 723.332   | 1071.818  |
| AB022696  | 1823.625  | 4119.403  | U92074    | 328.454   | 344.221   | NM_01869C | 4483.499  | 8178.163  |
| NM_00223E | 555.256   | 687.026   | NM_019011 | 1822.389  | 2010.219  | NM_00086C | 1046.128  | 2064.198  |
| NM_01437E | 903.953   | 733.965   | AF459094  | 3141.079  | 4009.552  | AB037798  | 1706.261  | 1591.53   |
| NM_02100E | 1634.111  | 1723.421  | NM_003157 | 1054.102  | 1486.693  | NM_00078C | 257.01    | 388.203   |
| NM_00152E | 674.198   | 697.002   | NM_00493E | 981.615   | 1520.533  | AF272663  | 4231.037  | 6133.053  |
| Z70705    | 833.976   | 925.615   | NM_01432E | 392.19    | 805.504   | NM_01219C | 1017.11   | 955.259   |

|           |           |           |            |           |           |            |           |           |
|-----------|-----------|-----------|------------|-----------|-----------|------------|-----------|-----------|
| NM_002611 | 922.804   | 1049.233  | NM_004448  | 266.158   | 493.575   | AF277719   | 1303.253  | 3488.566  |
| NM_017417 | 786.626   | 763.921   | NM_015981  | 469.665   | 527.348   | NM_00480C  | 9040.439  | 8110.74   |
| AL133602  | 1017.516  | 1041.49   | NM_000455  | 2905.347  | 3969.028  | AB037738   | 340.622   | 789.463   |
| AF037219  | 2049.569  | 1938.025  | NM_014791  | 3511.711  | 4079.117  | S82769     | 161.548   | 169.721   |
| AK026075  | 337.533   | 575.648   | NM_003318  | 970.365   | 1202.405  | NM_014954  | 7131.834  | 10125.301 |
| NM_000251 | 2170.088  | 1760.845  | NM_004362  | 2213.069  | 2503.05   | NM_000807  | 265.457   | 612.681   |
| NM_006038 | 2176.757  | 2184.289  | NM_000182  | 14331.856 | 16513.223 | NM_014909  | 1004.622  | 1744.466  |
| AB011133  | 1974.968  | 2954.806  | AK023384   | 1139.147  | 1366.563  | NM_145659  | 913.804   | 1830.502  |
| NM_006947 | 9990.947  | 16822.498 | NM_016026  | 3746.896  | 3918.168  | NM_021957  | 539.62    | 944.191   |
| NM_017917 | 2681.99   | 4031.921  | AB046381   | 271.546   | 184.281   | NM_001719  | 4587.069  | 5740.773  |
| NM_00006C | 623.964   | 775.064   | AJ011497   | 657.719   | 609.696   | AL080062   | 1059.278  | 961.816   |
| NM_009589 | 628.03    | 927.513   | NM_000336  | 357.886   | 262.206   | AF308802   | 851.436   | 1198.599  |
| L09080    | 2356.697  | 2299.029  | W61100     | 11727.561 | 9540.271  | S76984     | 9977.017  | 10729.156 |
| NM_007326 | 4143.167  | 3643.162  | AA608568   | 2423.637  | 2281.534  | NM_014495  | 47343.395 | 50794.051 |
| AK023080  | 263.896   | 319.534   | BG831301   | 8478.794  | 11501.991 | NM_014081  | 629.501   | 703.148   |
| NM_001886 | 3539.644  | 3556.561  | AA478647   | 1410.994  | 1553.358  | NM_005651  | 654.78    | 734.769   |
| NM_004467 | 648.144   | 586.163   | AW058501   | 154.947   | 280.273   | NM_007195  | 1462.762  | 1177.83   |
| NM_005622 | 492.905   | 811.401   | M81379     | 152.185   | 86.346    | AK023337   | 2249.804  | 2676.165  |
| NM_018058 | 3887.751  | 4164.923  | ID 2623896 | 1908.669  | 2281.234  | NM_013275  | 8524.174  | 9741.544  |
| NM_004548 | 3326.174  | 3147.069  | ID 2602214 | 1270.5    | 1358.857  | AB037842   | 451.845   | 593.687   |
| X69079    | 18313.816 | 15055.473 | ID 2071279 | 3365.784  | 6257.35   | NM_019011  | 2437.545  | 3137.757  |
| BI759406  | 3497.752  | 3302.981  | L10709     | 1866.928  | 2322.091  | AF459094   | 4017.27   | 6324.166  |
| R76099    | 383.034   | 315.804   | N35489     | 572.929   | 753.725   | NM_003157  | 2637.774  | 5012.802  |
| S74445    | 539.347   | 584.887   | AI928195   | 822.325   | 1277.209  | NM_004938  | 1878.431  | 4887.538  |
| BI763360  | 1013.775  | 890.658   | AA482489   | 68.814    | 829.738   | NM_014326  | 580.142   | 920.744   |
| D25538    | 1041.284  | 805.005   | AA458922   | 4243.502  | 6419.36   | NM_004448  | 442.433   | 521.919   |
| NM_00036C | 4413.831  | 3452.592  | NM_145659  | 1078.57   | 1379.127  | NM_015981  | 668.749   | 1026.888  |
| D49950    | 4220.562  | 3388.636  | NM_021957  | 317.787   | 407.554   | NM_000455  | 2785.59   | 3081.709  |
| X03635    | 1779.002  | 2309.931  | NM_001719  | 3570.67   | 3828.371  | NM_012319  | 793.007   | 1341.776  |
| BC011847  | 47859.363 | 37652.355 | AL080062   | 1212.042  | 1185.448  | AK026235   | 341.938   | 404.938   |
| X03348    | 1938.913  | 1817.724  | NM_145904  | 7900.125  | 6100.056  | NM_00651C  | 6117.573  | 8236.059  |
| AF353674  | 3670.771  | 2603.048  | NM_006796  | 4570.13   | 3432.034  | NM_003141  | 730.056   | 1446.079  |
| BC002645  | 2594.489  | 2221.713  | NM_000706  | 596.36    | 518.077   | NM_020245  | 1911.722  | 2535.229  |
| NM_021138 | 1396.344  | 1142.884  | NM_015941  | 965.968   | 933.085   | NM_007175  | 971.456   | 1176.392  |
| BC002792  | 799.485   | 902.305   | NM_003655  | 3937.296  | 3110.12   | AJ011497   | 803.342   | 888.282   |
| NM_002981 | 2339.491  | 2339.319  | NM_014837  | 1383.731  | 1109.067  | NM_003018  | 304.537   | 336.246   |
| NM_001244 | 2037.948  | 1806.934  | NM_017729  | 781.561   | 1352.665  | NM_000336  | 687.296   | 776.946   |
| NM_012275 | 301.11    | 483.592   | NM_005259  | 1185.26   | 3367.594  | W61100     | 15820.581 | 31771.533 |
| NM_006137 | 341.687   | 383.196   | NM_00284C  | 1379.757  | 2054.109  | AA608568   | 2803.246  | 3607.344  |
| NM_016139 | 27237.164 | 21616.461 | NM_006174  | 283.161   | 541.625   | BG831301   | 14344.127 | 14353.559 |
| AL117468  | 2037.534  | 2428.714  | NM_01585C  | 1648.859  | 1780.9    | M14764     | 394.431   | 178.956   |
| NM_019613 | 1665.451  | 1561.928  | NM_004864  | 768.568   | 924.676   | AA478647   | 1808.532  | 1571.171  |
| NM_005382 | 400.226   | 1462.448  | NM_002838  | 2053.705  | 2237.807  | M81379     | 441.648   | 939.514   |
| AK027086  | 2290.478  | 2498.704  | AK027377   | 405.45    | 474.233   | ID 2623896 | 2168.572  | 3033.155  |
| AB032997  | 820.255   | 616.527   | NM_014686  | 35464.512 | 56092.754 | ID 2602214 | 1411.628  | 1898.974  |
| AL096857  | 2223.781  | 1978.682  | BF528358   | 451.267   | 579.413   | ID 2071279 | 3519.008  | 6524.104  |
| X07203    | 497.091   | 429.267   | NM_016339  | 251.593   | 278.591   | L10709     | 2297.352  | 4735.293  |
| NM_003834 | 2401.005  | 2397.039  | NM_01334C  | 516.644   | 1573.454  | N35489     | 635.161   | 861.795   |
| NM_005959 | 2601.241  | 2583.712  | NM_005462  | 434.055   | 838.229   | AI928195   | 1319.826  | 2439.28   |
| NM_003381 | 934.316   | 707.077   | NM_012319  | 1170.379  | 1280.729  | AA458922   | 4698.079  | 4236.729  |
| NM_005756 | 624.898   | 484.561   | AK026235   | 391.965   | 341.705   | M95923     | 129.428   | 589.718   |
| NM_003702 | 9022.142  | 5483.253  | NM_00651C  | 5116.567  | 6501.873  | NM_002415  | 50433.301 | 55793.781 |
| NM_000369 | 826.11    | 698.07    | NM_003141  | 899.061   | 879.684   | NM_006332  | 686.673   | 1071.728  |

|           |           |           |           |           |           |           |           |           |
|-----------|-----------|-----------|-----------|-----------|-----------|-----------|-----------|-----------|
| NM_016351 | 678.782   | 547.025   | NM_020245 | 1877.612  | 1838.135  | NM_000916 | 1632.34   | 2759.708  |
| NM_004405 | 719.005   | 574.913   | NM_007175 | 1116.1    | 1594.564  | NM_018663 | 2412.533  | 3417.895  |
| NM_001988 | 1880.636  | 1020.494  | X91148    | 323.381   | 389.5     | NM_145904 | 8401.264  | 8595.867  |
| NM_006060 | 1310.025  | 799.5     | NM_015700 | 4395.587  | 4822.491  | NM_006796 | 4697.533  | 4221.673  |
| NM_005667 | 1319.146  | 756.558   | NM_019087 | 1886.283  | 1468.299  | NM_000706 | 562.57    | 579.766   |
| NM_006308 | 454.875   | 344.915   | NM_016322 | 395.845   | 403.584   | NM_015941 | 1086.672  | 1129.588  |
| NM_002234 | 1137.459  | 1577.535  | NM_005072 | 1954.915  | 2656.615  | NM_003655 | 4032.469  | 4945.403  |
| NM_000701 | 1457.121  | 1575.408  | AF215923  | 1407.315  | 1757.587  | NM_014837 | 1756.198  | 1635.91   |
| AB022696  | 4071.161  | 3788.718  | U66621    | 3577.338  | 5760.925  | NM_017729 | 820.601   | 718.089   |
| AF137372  | 2769.761  | 2908.102  | NM_005720 | 12204.9   | 14951.283 | NM_005259 | 762.849   | 733.264   |
| AF220417  | 789.096   | 901.226   | AB023161  | 434.264   | 632.57    | NM_004864 | 686.395   | 932.942   |
| D83782    | 3876.939  | 3440.069  | U61736    | 334.474   | 491.601   | NM_002838 | 1972.033  | 2308.588  |
| NM_002078 | 1612.606  | 1483.677  | AJ132086  | 643.609   | 809.519   | AK027377  | 23.663    | 822.69    |
| NM_000287 | 3383.199  | 3635.695  | U92816    | 2266.484  | 2778.529  | NM_014686 | 42397.18  | 44965.535 |
| NM_001656 | 1078.327  | 1197.261  | BC011987  | 7980.224  | 9722.923  | BF528358  | 734.902   | 997.477   |
| AF091033  | 557.729   | 763.096   | NM_004106 | 16791.758 | 19345.088 | NM_016339 | 233.252   | 278.926   |
| NM_001122 | 6378.187  | 5407.021  | NM_003485 | 1026.903  | 1259.503  | NM_005462 | 462.237   | 365.849   |
| NM_004591 | 1737.827  | 1584.805  | NM_005038 | 2084.413  | 2842.471  | NM_014954 | 9089.896  | 15910.102 |
| AL133027  | 955.248   | 882.621   | L03418    | 4637.046  | 5525.971  | NM_000807 | 846.478   | 2040.485  |
| AB037732  | 1173.889  | 1173.274  | NM_002415 | 50623.27  | 56416.277 | NM_014909 | 1191.028  | 2179.166  |
| NM_005767 | 317.015   | 192.63    | NM_006332 | 654.822   | 813.614   | NM_015700 | 4872.268  | 4863.823  |
| NM_001837 | 555.064   | 383.052   | NM_000916 | 1487.321  | 1652.702  | NM_019087 | 2059.145  | 1611.613  |
| NM_001839 | 46727.07  | 23764.799 | NM_018663 | 2303.188  | 2622.969  | NM_016322 | 453.639   | 501.849   |
| BC016029  | 407.823   | 368.058   | NM_014791 | 3714.172  | 3459.54   | NM_005072 | 596.225   | 578.524   |
| M27487    | 413.138   | 445.113   | NM_003318 | 1019.273  | 1095.818  | AF215923  | 1430.376  | 1653.439  |
| NM_002286 | 17938.031 | 6327.976  | NM_004362 | 1382.682  | 1751.404  | AJ132086  | 836.933   | 759.37    |
| NM_003811 | 1858.335  | 1061.595  | NM_000182 | 5852.002  | 6013.339  | U92816    | 3714.419  | 3665.376  |
| AB011133  | 1837.06   | 2140.454  | AK023384  | 742.424   | 737.55    | BC011987  | 9141.755  | 9186.671  |
| NM_017572 | 19537.553 | 16570.563 | NM_016026 | 3502.269  | 3213.631  | NM_004106 | 19878.889 | 17700.76  |
| NM_018444 | 1396.919  | 1502.103  | AK025111  | 477.506   | 684.74    | NM_003485 | 1164.636  | 883.805   |
| NM_000252 | 2005.875  | 1764.936  | NM_001732 | 893.67    | 1089.14   | NM_005038 | 2274.858  | 1694.23   |
| NM_006947 | 7107.268  | 6900.144  | NM_018690 | 4827.897  | 8395.044  | L03418    | 5506.652  | 3847.415  |
| NM_017917 | 2043.901  | 2139.917  | NM_000860 | 1403.032  | 3579.245  | NM_003157 | 1398.754  | 2226.466  |
| NM_004090 | 4697.606  | 4434.588  | AB037798  | 1460.887  | 2783.404  | NM_004938 | 1160.676  | 1612.515  |
| NM_014634 | 8429.715  | 7344.066  | NM_000780 | 562.695   | 947.584   | NM_014326 | 593.808   | 877.485   |
| NM_001919 | 11940.782 | 11037.761 | AF272663  | 2009.623  | 2206.996  | NM_004448 | 330.091   | 765.483   |
| BC031485  | 1873.004  | 1683.118  | NM_012190 | 609.366   | 442.853   | NM_015981 | 872.298   | 1444.947  |
| NM_004092 | 6146.502  | 6356.378  | AB033015  | 261.746   | 284.789   | NM_000455 | 2920.454  | 3582.797  |
| X15624    | 1206.987  | 1734.89   | AF277719  | 842.298   | 861.995   | NM_014791 | 4350.899  | 4279.429  |
| AF073770  | 1007.237  | 1306.458  | NM_000791 | 1473.967  | 1730.301  | NM_003318 | 866.292   | 704.924   |
| AL359401  | 4420.861  | 4731.881  | NM_003681 | 1437.305  | 1688.864  | NM_004362 | 1873.499  | 1661.144  |
| NM_012213 | 1710.526  | 1719.126  | NM_004800 | 7044.341  | 7471.538  | NM_000182 | 13894.08  | 14341.459 |
| NM_016573 | 3225.94   | 3110.228  | AB037738  | 257.856   | 448.776   | AK023384  | 992.024   | 1220.185  |
| NM_001303 | 5669.7    | 5128.623  | NM_004677 | 84.598    | 459.118   | NM_016026 | 4579.9    | 4026.911  |
| M21304    | 1161.876  | 786.11    | NM_014954 | 8730.975  | 12931.141 | NM_018690 | 4776.574  | 3443.895  |
| NM_001979 | 541.855   | 527.501   | NM_014909 | 1396.775  | 1670.672  | NM_000780 | 468.087   | 706.207   |
| AB040896  | 1172.497  | 1028.452  | NM_145659 | 802.392   | 737.086   | AF272663  | 3884.352  | 3771.189  |
| NM_001107 | 1303.249  | 809.274   | NM_001719 | 2857.615  | 2741.331  | NM_012190 | 1040.918  | 629.921   |
| AF084645  | 236.335   | 109.224   | AL080062  | 1035.176  | 874.408   | AF277719  | 877.649   | 665.518   |
| AF151851  | 2682.791  | 1137.811  | AF308802  | 733.311   | 805.446   | NM_000791 | 2006.149  | 1424.777  |
| NM_005176 | 492.598   | 293.235   | S76984    | 8488.093  | 7974.163  | NM_003681 | 2487.602  | 2003.042  |
| NM_003636 | 3096.656  | 1548.614  | NM_014495 | 48580.352 | 55249.441 | NM_004800 | 9120.257  | 8046.172  |
| AF040723  | 11606.438 | 11583.755 | NM_014081 | 690.158   | 1152.923  | AB037738  | 332.528   | 497.137   |

|           |           |           |            |           |           |           |           |          |
|-----------|-----------|-----------|------------|-----------|-----------|-----------|-----------|----------|
| NM_015527 | 2026.13   | 2297.734  | NM_005651  | 589.105   | 781.503   | NM_004952 | 1218.122  | 1334.037 |
| X89675    | 1449.161  | 1531.926  | AK023699   | 325.618   | 291.234   | NM_020414 | 1783.5    | 2151.612 |
| NM_012189 | 467.021   | 615.357   | NM_007195  | 1215.599  | 1511.885  | AB037730  | 2505.867  | 2576.219 |
| NM_005798 | 6359.728  | 6625.535  | AK023337   | 1322.056  | 1160.812  | NM_001357 | 5970.283  | 5605.196 |
| NM_004216 | 1768.318  | 1693.558  | NM_013275  | 5063.484  | 5062.897  | NM_003893 | 1463.227  | 1432.23  |
| NM_016289 | 22066.064 | 19821.314 | AB037842   | 598.71    | 597.654   | NM_014380 | 620.224   | 319.347  |
| NM_001464 | 366.586   | 529.436   | NM_019011  | 1615.758  | 1940.664  | NM_001719 | 4623.693  | 4806.472 |
| NM_002051 | 994.211   | 1030.557  | AF459094   | 3545.958  | 5383.114  | AL080062  | 1144.368  | 923.536  |
| NM_001523 | 756.439   | 949.05    | NM_003157  | 1060.911  | 1084.254  | NM_005651 | 583.856   | 751.749  |
| NM_017423 | 967.831   | 916.618   | NM_004938  | 1110.985  | 1752.417  | NM_005418 | 216.279   | 330.568  |
| Z70705    | 985.403   | 993.599   | NM_014326  | 453.362   | 487.477   | NM_007195 | 1188.984  | 1181.778 |
| NM_002611 | 906.43    | 1291.05   | NM_015981  | 832.197   | 862.767   | AK023337  | 2272.09   | 1921.853 |
| NM_017417 | 1123.215  | 1108.062  | NM_000455  | 2782.896  | 3552.599  | NM_013275 | 8452.068  | 7557.569 |
| AL133602  | 1221.693  | 1129.113  | NM_012319  | 875.743   | 891.367   | NM_019011 | 1872.424  | 2197.763 |
| AF037219  | 2068.779  | 1424.018  | NM_006510  | 4125.373  | 4248.976  | AF459094  | 4177.476  | 3440.104 |
| AK026075  | 439.604   | 217.574   | NM_003141  | 744.691   | 697.174   | NM_002544 | 768.658   | 529.986  |
| NM_000251 | 1906.002  | 905.223   | NM_020245  | 1478.67   | 1125.94   | AB011542  | 529.958   | 382.657  |
| NM_006038 | 991.122   | 530.733   | NM_007175  | 950.654   | 1259.781  | NM_001853 | 1519.947  | 1193.941 |
| U87223    | 1481.529  | 1702.372  | AJ011497   | 735.464   | 714.945   | U41737    | 361.344   | 287.205  |
| NM_000093 | 476.952   | 608.725   | NM_000336  | 539.091   | 580.028   | NM_005798 | 475.197   | 488.749  |
| NM_001779 | 2540.45   | 2595.819  | W61100     | 5839.648  | 5591.465  | X99661    | 1165.604  | 859.898  |
| AB033059  | 363.348   | 351.647   | AA608568   | 2314.62   | 2383.998  | AB037800  | 450.527   | 515.133  |
| NM_016484 | 1348.541  | 1715.726  | BG831301   | 2611.906  | 2367.761  | AK026377  | 251.143   | 354.63   |
| NM_014452 | 667.731   | 1029.195  | M14764     | 176.938   | 108.97    | NM_018660 | 3883.004  | 3639.447 |
| NM_014683 | 406.782   | 621.601   | AA478647   | 1196.301  | 1217.186  | NM_003394 | 1917.318  | 1776.213 |
| AK021536  | 3991.082  | 3616.694  | ID 2623896 | 2257.66   | 1849.736  | NM_007086 | 1041.973  | 1231.702 |
| NM_002600 | 1409.228  | 1624.35   | ID 2602214 | 1154.317  | 1197.547  | AK024507  | 520.787   | 409.936  |
| NM_003646 | 12144.737 | 9391.852  | ID 2071279 | 2605.283  | 2555.373  | NM_001243 | 2677.908  | 1858.102 |
| NM_006663 | 598.619   | 500.21    | L10709     | 1983.869  | 2115.067  | AK025997  | 1730.954  | 1411.339 |
| NM_006092 | 616.278   | 754.75    | N35489     | 436.561   | 400.991   | NM_014887 | 3891.559  | 2931.748 |
| NM_003939 | 487.436   | 380.599   | AA458922   | 3973.572  | 5881.471  | NM_002590 | 860.788   | 757.81   |
| NM_012424 | 711.723   | 535.426   | M95923     | 400.97    | 358.607   | NM_005824 | 739.936   | 271.538  |
| NM_002446 | 1019.37   | 1116.573  | NM_002415  | 50866.367 | 41046.805 | AF052211  | 2115.66   | 1369.826 |
| NM_000863 | 439.083   | 192.915   | NM_006332  | 568.413   | 630.577   | NM_005600 | 1735.686  | 1386.713 |
| NM_006651 | 1329.469  | 643.171   | NM_000916  | 1367.257  | 1133.997  | NM_005967 | 1813.74   | 1339.697 |
| NM_005336 | 6591.527  | 3096.16   | NM_018663  | 2303.633  | 2964.512  | NM_013315 | 353.451   | 211.164  |
| NM_001419 | 4571.114  | 2368.006  | NM_145904  | 6654.512  | 6866.84   | AB014566  | 500.167   | 354.773  |
| AF119817  | 7250.902  | 3413.099  | NM_006796  | 4121.811  | 3358.169  | NM_014223 | 1602.796  | 1282.25  |
| AL035306  | 1000.334  | 534.305   | NM_000706  | 1039.993  | 1134.923  | NM_016194 | 1318.49   | 1112.817 |
| NM_001328 | 15280.693 | 14240.082 | NM_015941  | 719.306   | 682.478   | AL050385  | 495.036   | 389.479  |
| NM_005749 | 2828.811  | 2469.261  | NM_003655  | 3641.18   | 3023.19   | NM_007027 | 1922.103  | 1861.26  |
| NM_004230 | 3333.073  | 3056.19   | NM_014837  | 1227.388  | 1142.31   | AK024524  | 4562.23   | 3181.778 |
| NM_014503 | 584.868   | 648.086   | NM_017729  | 719.126   | 588.934   | NM_000562 | 1104.703  | 1048.344 |
| NM_014659 | 1030.745  | 1164.941  | NM_005259  | 502.071   | 488.24    | NM_019011 | 4247.277  | 2984.33  |
| NM_004399 | 2003.478  | 2012.981  | NM_002840  | 875.927   | 917.277   | NM_004879 | 10137.472 | 8581.257 |
| NM_006337 | 2490.247  | 2642.23   | NM_006174  | 316.003   | 236.03    | AB020694  | 1719.596  | 1367.742 |
| NM_004507 | 2274.946  | 1955.489  | NM_015850  | 653.808   | 699.128   | NM_016071 | 2478.363  | 1760.816 |
| NM_002710 | 12471.266 | 9205.315  | NM_004864  | 793.348   | 776.905   | AL050131  | 344.042   | 209.651  |
| NM_014060 | 2298.569  | 2499.691  | NM_002838  | 1945.241  | 1530.925  | NM_004475 | 3797.109  | 1845.259 |
| NM_004749 | 6403.521  | 5447.18   | NM_014686  | 26679.699 | 22571.057 | NM_001627 | 5355.258  | 4447.561 |
| BQ446064  | 884.484   | 1033.328  | BF528358   | 557.958   | 762.025   | NM_001226 | 782.612   | 647.78   |
| AF302502  | 590.393   | 416.098   | NM_002487  | 474.232   | 741.811   | NM_001336 | 572.056   | 523.516  |
| AF274571  | 737.313   | 524.537   | NM_005462  | 460.865   | 693.896   | AB050716  | 1021.787  | 651.088  |

|           |           |           |           |           |           |           |           |           |
|-----------|-----------|-----------|-----------|-----------|-----------|-----------|-----------|-----------|
| NM_003879 | 2853.52   | 2371.791  | NM_014954 | 6030.181  | 6167.564  | X77690    | 978.637   | 569.379   |
| NM_016052 | 3940.597  | 2839.266  | NM_000807 | 300.925   | 196.356   | NM_006536 | 341.479   | 282.926   |
| NM_006718 | 1023.911  | 903.343   | NM_014909 | 1161.451  | 1534.899  | NM_002422 | 283.407   | 289.478   |
| NM_016312 | 379.212   | 307.826   | NM_015700 | 3982.052  | 3430.805  | AF218022  | 1514.352  | 1436.247  |
| NM_001776 | 903.475   | 580.172   | NM_019087 | 1571.045  | 1278.949  | NM_003348 | 1779.465  | 1643.965  |
| NM_001903 | 5878.323  | 2853.192  | NM_016322 | 376.736   | 242.625   | AB006198  | 5654.253  | 4389.467  |
| NM_001874 | 2786.52   | 2650.554  | NM_005072 | 658.777   | 426.731   | U72518    | 1361.737  | 1057.167  |
| NM_005857 | 11469.832 | 8975.295  | AF215923  | 1594.516  | 1305.462  | AF264765  | 429.237   | 540.837   |
| NM_000429 | 297.64    | 190.828   | U66621    | 1529.562  | 1027.492  | NM_015322 | 3214.249  | 1934.616  |
| AK027037  | 1076.151  | 1106.433  | NM_005720 | 8978.459  | 6698.518  | NM_016607 | 1851.356  | 1364.795  |
| NM_003875 | 7170.119  | 6216.662  | AB023161  | 255.69    | 262.632   | NM_003275 | 775.761   | 436.108   |
| AF191687  | 1368.953  | 1563.93   | U61736    | 335.133   | 281.407   | NM_000268 | 5999.505  | 3671.104  |
| NM_000274 | 6107.036  | 4560.604  | AJ132086  | 650.961   | 620.174   | M30493    | 7995.674  | 6230.697  |
| NM_000170 | 1225.754  | 1355.336  | U92816    | 1989.981  | 2391.586  | NM_004343 | 25584.889 | 18490.143 |
| NM_000281 | 4737.671  | 3695.903  | BC011987  | 8853.902  | 11296.654 | X52355    | 2679.798  | 1737.909  |
| AK001295  | 2367.726  | 2272.251  | NM_004106 | 17559.98  | 23229.092 | NM_006963 | 6499.347  | 4996.479  |
| NM_006031 | 1309.551  | 1362.735  | NM_003485 | 869.399   | 1502.747  | U66561    | 3800.68   | 2524.422  |
| NM_002715 | 3086.023  | 2971.618  | L03418    | 4107.275  | 5484.438  | NM_000306 | 1471.051  | 1220.019  |
| NM_001020 | 56993.906 | 63406.836 | NM_003157 | 1047.668  | 1221.305  | NM_002200 | 1799.346  | 1275.074  |
| AB020660  | 1873.76   | 841.376   | NM_004938 | 1012.907  | 1145.478  | AF017433  | 799.087   | 336.607   |
| NM_006659 | 5156.631  | 2350.114  | NM_014326 | 593.504   | 398.943   | AF130111  | 1772.868  | 1466.399  |
| NM_015371 | 1258.192  | 813.289   | NM_000455 | 2175.051  | 1969.52   | NM_016307 | 1060.281  | 744.997   |
| AB040915  | 699.481   | 575.686   | NM_014791 | 3152.776  | 2765.565  | AB028449  | 1679.707  | 2043.33   |
| NM_006481 | 1108.349  | 1089.323  | NM_003318 | 914.901   | 573.889   | NM_004697 | 1773.248  | 3214.064  |
| AB011115  | 421.258   | 543.158   | NM_004362 | 1530.346  | 1285.225  | AF131776  | 1600.358  | 1504.979  |
| NM_003910 | 10099.779 | 9196.359  | NM_000182 | 11090.148 | 7289.86   | NM_020528 | 3862.401  | 3682.3    |
| AB007913  | 1462.011  | 1537.947  | NM_016026 | 3562.54   | 2228.342  | NM_007040 | 14306.23  | 10563.064 |
| NM_006696 | 1943.893  | 2367.963  | AK025111  | 664.694   | 413.335   | NM_014483 | 7334.037  | 5709.621  |
| NM_004599 | 6305.962  | 5543.445  | NM_001732 | 602.974   | 440.935   | AK024249  | 1151.681  | 788.121   |
| NM_006037 | 6632.133  | 4241.86   | NM_018690 | 1387.867  | 1391.764  | AF239156  | 5191.401  | 3059.946  |
| NM_015871 | 2487.858  | 2105.532  | NM_000860 | 896.531   | 691.094   | NM_020390 | 1242.311  | 951.541   |
| NM_019037 | 4703.842  | 4454.616  | AB037798  | 1115.338  | 1176.503  | NM_003321 | 11600.094 | 9122.259  |
| NM_015891 | 2155.298  | 1514.095  | NM_000780 | 352.969   | 373.082   | U18937    | 8480.464  | 5350.085  |
| NM_006802 | 511.369   | 334.128   | AF272663  | 1957.235  | 2009.183  | U01925    | 637.331   | 645.055   |
| AB037778  | 800.02    | 726.139   | NM_012190 | 571.932   | 658.233   | AJ420488  | 54673.109 | 56666.047 |
| NM_005066 | 21802.057 | 16256.14  | AF277719  | 925.478   | 1071.482  | AF268872  | 1322.922  | 772.138   |
| NM_003089 | 4053.92   | 2931.714  | NM_000791 | 1503.651  | 1786.687  | AK022180  | 11791.483 | 6087.907  |
| NM_003753 | 13934.724 | 10281.896 | NM_003681 | 1782.802  | 2946.666  | AK001384  | 417.7     | 237.289   |
| NM_017590 | 1024.318  | 599.061   | NM_004800 | 7298.315  | 9227.111  | AK025437  | 1553.31   | 1328.821  |
| AB011145  | 3190.045  | 1676.482  | NM_004952 | 963.603   | 1069.835  | AK074164  | 591.931   | 523.917   |
| NM_003750 | 16180.146 | 5549.443  | NM_020414 | 1522.763  | 1335.634  | NM_004168 | 7567.041  | 5358.025  |
| M92422    | 1124.586  | 596.541   | AB037730  | 1744.086  | 1303.069  | AF161353  | 5135.896  | 4046.779  |
| NM_017868 | 907.498   | 477.692   | NM_001357 | 4621.335  | 3380.266  | NM_000764 | 923.185   | 721.508   |
| AK021888  | 662.997   | 547.647   | NM_003893 | 748.365   | 667.623   | NM_004146 | 11718.091 | 7923.537  |
| AK022848  | 3992.378  | 3780.137  | AB037816  | 1049.336  | 868.71    | NM_003002 | 5770.244  | 3866.518  |
| AL049957  | 344.497   | 447.284   | NM_014380 | 522.638   | 213.157   | D42047    | 1280.303  | 1082.875  |
| NM_018159 | 12850.538 | 12221.603 | AL080062  | 530.129   | 299.853   | AB009282  | 8319.7    | 7530.667  |
| NM_000819 | 1773.511  | 2175.268  | AF308802  | 708.011   | 390.324   | NM_005004 | 29939.838 | 24840.199 |
| NM_002513 | 1288.514  | 1565.468  | S76984    | 7835.488  | 5790.78   | NM_003670 | 4817.938  | 4398.48   |
| NM_017424 | 461.516   | 486.176   | NM_014495 | 48018.043 | 46231.191 | NM_014639 | 1742.81   | 1391.719  |
| NM_001522 | 3016.989  | 3118.558  | NM_007195 | 1028.645  | 1200.594  | NM_006392 | 2203.931  | 1568.354  |
| NM_000883 | 1459.914  | 1691.991  | AK023337  | 1843.23   | 2582.212  | NM_014717 | 862.485   | 709.094   |
| AF254086  | 1471.735  | 1637.526  | NM_013275 | 6868.718  | 8950.41   | NM_017922 | 1322.01   | 887.499   |

|           |           |           |           |          |          |           |           |           |
|-----------|-----------|-----------|-----------|----------|----------|-----------|-----------|-----------|
| AL390142  | 1430.614  | 1469.513  | AB037842  | 527.876  | 629.693  | NM_002823 | 58135.824 | 57583.336 |
| NM_006565 | 1057.676  | 1359.335  | U92074    | 293.183  | 567.187  | NM_017916 | 10806.395 | 6228.061  |
| AB007930  | 8094.758  | 6305.502  | NM_019011 | 1857.875 | 2309.346 | NM_001805 | 2988.489  | 4472.229  |
| X76978    | 252.82    | 112.732   | AF459094  | 3661.634 | 4704.904 | AK022360  | 1693.036  | 1632.793  |
| AJ005273  | 1470.79   | 1332.911  | NM_002544 | 1201.162 | 1012.142 | AK095694  | 965.826   | 716.228   |
| AK021892  | 1564.346  | 1417.942  | AB011542  | 694.823  | 606.839  | X52341    | 36021.914 | 20412.469 |
| NM_003437 | 1202.205  | 952.584   | NM_001853 | 1080.814 | 1066.949 | NM_003082 | 4347.64   | 2571.56   |
| NM_018337 | 1899.354  | 707.807   | NM_005799 | 333.15   | 231.673  | AL133632  | 1546.97   | 1092.837  |
| AA193295  | 10886.749 | 4082.239  | X99661    | 491.594  | 434.075  | AL833249  | 1692.625  | 1149.571  |
| NM_018045 | 1484.473  | 873.09    | NM_005927 | 1373.214 | 881.111  | NM_018374 | 1897.122  | 1526.441  |
| NM_014803 | 1091.287  | 1328.991  | AB028983  | 678.942  | 727.343  | AK021894  | 1590.77   | 1022.6    |
| AK024956  | 468.019   | 427.23    | AB037800  | 641.542  | 839.372  | NM_020424 | 1452.626  | 1395.171  |
| AF147386  | 1365.898  | 1631.482  | AK026377  | 454.163  | 282.838  | AF438313  | 1575.549  | 1384.997  |
| AF273052  | 6404.324  | 5770.423  | NM_006747 | 456.127  | 262.545  | AB033009  | 10074.154 | 9785.821  |
| NM_017943 | 3021.338  | 3297.57   | NM_007086 | 384.77   | 515.859  | AL137761  | 312.733   | 310.168   |
| AF147383  | 407.074   | 534.653   | NM_003870 | 3470.841 | 2488.518 | AF147320  | 925.687   | 879.505   |
| AK025682  | 786.857   | 774.926   | NM_001243 | 1977.305 | 1434.468 | AK027024  | 369.695   | 469.019   |
| NM_016478 | 6853.181  | 6222.385  | AK025997  | 1251.658 | 1615.794 | AK022339  | 708.682   | 555.451   |
| AL389986  | 2644.823  | 2661.717  | NM_005546 | 505.301  | 380.483  | AK022138  | 1165.617  | 1127.45   |
| AF142409  | 1223.399  | 1169.73   | NM_005478 | 308.198  | 296.934  | AF086191  | 1925.495  | 1407.12   |
| AF086279  | 222.79    | 251.698   | NM_014887 | 3168.797 | 4173.104 | AF143880  | 373.387   | 288.661   |
| AF088052  | 845.954   | 733.787   | NM_002590 | 828.486  | 867.322  | NM_017638 | 3785.646  | 2967.051  |
| AF086342  | 397.931   | 477.7     | NM_018556 | 4314.244 | 4793.884 | AL133052  | 1569.434  | 828.883   |
| AF086387  | 559.815   | 451.729   | NM_005824 | 907.206  | 775.988  | AB037824  | 1271.924  | 1056.834  |
| AF086443  | 290.468   | 274.378   | AF052211  | 1706.873 | 1505.166 | AF361494  | 666.018   | 429.147   |
| AL389941  | 618.881   | 351.318   | NM_005600 | 1316.214 | 1176.346 | AK022810  | 711.223   | 369.97    |
| AB037756  | 1379.265  | 634.901   | NM_005967 | 1686.841 | 1447.758 | AF147408  | 911.734   | 643.72    |
| AK001853  | 1779.893  | 1061.501  | AB014566  | 450.065  | 323.118  | AK027222  | 2749.265  | 1936.722  |
| AK025071  | 399.27    | 244.403   | NM_015678 | 225.511  | 235.699  | AK054767  | 279.732   | 497.808   |
| NM_015370 | 1861.156  | 1937.265  | NM_014223 | 1620.83  | 922.596  | AL050042  | 1655.872  | 1691.608  |
| AF085917  | 810.784   | 717.518   | NM_016194 | 1029.4   | 804.736  | NM_018465 | 1247.166  | 781.509   |
| AF085989  | 683.249   | 684.92    | NM_000562 | 638.406  | 572.986  | NM_014867 | 6792.929  | 4633.435  |
| AL360139  | 50126.668 | 51032.281 | NM_020353 | 538.938  | 806.895  | AL359932  | 450.148   | 297.731   |
| AF075110  | 1828.183  | 1679.407  | NM_019011 | 3885.534 | 3342.756 | AB037850  | 2016.102  | 1199.463  |
| AL137323  | 619.207   | 789.058   | NM_004879 | 8117.452 | 8549.239 | AK002197  | 1210.256  | 646.451   |
| AL137494  | 2286.792  | 1937.51   | AB020694  | 1470.679 | 1335.232 | AK021710  | 1976.645  | 947.68    |
| AL162037  | 3041.915  | 2545.049  | NM_016071 | 2430.177 | 2965.655 | NM_007017 | 479.543   | 379.395   |
| AL390150  | 983.165   | 1178.238  | AL050131  | 371.886  | 366.343  | AL137446  | 844.417   | 1961.999  |
| NM_002761 | 406.116   | 420.699   | NM_004475 | 3635.146 | 3875.373 | AB025286  | 1156.766  | 1292.393  |
| AF086063  | 466.517   | 449.996   | NM_001627 | 4582.461 | 5446.411 | AF009286  | 547.724   | 482.936   |
| AF086098  | 723.02    | 599.641   | NM_001226 | 834.565  | 967.425  | AF056437  | 511.144   | 450.06    |
| AF086076  | 540.013   | 422.783   | NM_001336 | 497.675  | 401.085  | AB032364  | 289.407   | 341.303   |
| AL833393  | 1019.371  | 1141.693  | AB050716  | 596.472  | 435.271  | NM_005025 | 803.937   | 574.018   |
| AF088005  | 1142.613  | 729.012   | X77690    | 749.756  | 506.975  | AF056447  | 599.666   | 804.838   |
| AF086096  | 3808.935  | 3150.935  | NM_006536 | 297.298  | 285.751  | AK001010  | 809.443   | 756.532   |
| NM_017933 | 1096.309  | 492.031   | NM_002422 | 332.406  | 280.903  | NM_018076 | 551.254   | 1025.325  |
| NM_017819 | 4186.866  | 1427.752  | NM_006690 | 870.669  | 879.591  | AK001076  | 466.416   | 476.052   |
| AK024653  | 16435.229 | 14943.233 | AF218022  | 1276.711 | 768.177  | AK001820  | 261.482   | 324.908   |
| AF103907  | 1209.893  | 1477.558  | NM_003348 | 1368.263 | 956.58   | AK021482  | 1752.299  | 1567.868  |
| AF094508  | 580.032   | 451.396   | AB033029  | 248.821  | 132.273  | AK025126  | 300.891   | 162.802   |
| AF161351  | 1479.878  | 1582.096  | NM_002021 | 231.752  | 184.554  | AK025317  | 5188.4    | 2807.855  |
| AF257098  | 348.743   | 301.822   | AB006198  | 4725.361 | 3970.534 | AK026725  | 831.879   | 441.727   |
| AF111782  | 1971.553  | 1981.728  | U72518    | 1207.01  | 1259.469 | AJ008118  | 50902.664 | 46097.691 |



|           |           |           |           |           |           |           |           |           |
|-----------|-----------|-----------|-----------|-----------|-----------|-----------|-----------|-----------|
| AF151530  | 629.394   | 795.208   | AF264765  | 382.906   | 263.412   | NM_005523 | 1590.363  | 1141.307  |
| AK021991  | 288.321   | 417.004   | NM_015322 | 2958.254  | 2928.488  | AK024512  | 2765.955  | 2261.191  |
| AK022093  | 3075.536  | 3226.744  | NM_016607 | 2096.841  | 2265.909  | AK023454  | 1120.976  | 988.647   |
| AK022376  | 371.87    | 316.571   | NM_003275 | 725.996   | 785.953   | L23207    | 939.974   | 853.118   |
| AK022005  | 604.197   | 622.336   | NM_000268 | 8466.001  | 8998.48   | NM_018062 | 1049.733  | 739.568   |
| AK022137  | 393.685   | 476.678   | M30493    | 9667.594  | 9478.754  | NM_007128 | 4671.936  | 3416.603  |
| AK022272  | 1005.132  | 1198.047  | AJ008160  | 363.148   | 557.709   | NM_015377 | 563.167   | 326.191   |
| AK027155  | 2949.623  | 2716.453  | NM_004343 | 21739.488 | 17773.01  | AL137531  | 865.266   | 330.986   |
| AF221846  | 456.882   | 362.902   | X52355    | 2697.458  | 2590.588  | AL080085  | 3231.46   | 1485.256  |
| AF264626  | 309.506   | 291.619   | NM_006963 | 4513.707  | 3960.978  | AF086519  | 511.955   | 582.056   |
| AK027219  | 346.652   | 366.893   | NM_000307 | 179.516   | 152.627   | AF055012  | 2371.194  | 1810.507  |
| AK024528  | 3896.989  | 2264.681  | U66561    | 3188.841  | 2438.871  | AK022307  | 2025.398  | 2064.278  |
| AK000016  | 1810.873  | 2151.836  | NM_000306 | 1487.265  | 1049.945  | NM_005172 | 694.417   | 623.328   |
| AK023367  | 1185.985  | 1244.574  | NM_002200 | 1248.484  | 804.306   | AK025192  | 3678.673  | 4082.495  |
| AL080209  | 1551.252  | 1788.419  | AF017433  | 773.839   | 488.052   | NM_012403 | 2786.27   | 3588.683  |
| NM_016255 | 1256.289  | 1193.883  | AF130111  | 1405.486  | 881.886   | NM_006346 | 896.241   | 519.747   |
| NM_014318 | 1158.683  | 1014.356  | NM_016307 | 1025.785  | 982.925   | AK025240  | 1692.555  | 1259.581  |
| AK056674  | 829.441   | 688.023   | AB028449  | 1267.398  | 1001.49   | NM_017633 | 10709.59  | 6228.925  |
| AK022042  | 458.976   | 480.849   | NM_004697 | 1019.483  | 769.688   | AF086186  | 12046.921 | 7932.366  |
| AL117588  | 585.004   | 493.114   | AF131776  | 1439.532  | 1004.878  | NM_017802 | 3795.991  | 1513.461  |
| NM_017708 | 339.011   | 428.595   | NM_020528 | 2372.598  | 1753.912  | AK023667  | 790.065   | 382.127   |
| BE895529  | 1787.877  | 1968.276  | NM_007040 | 9538.304  | 7157.733  | AJ008137  | 5024.196  | 3000.373  |
| AK000964  | 483.985   | 488.406   | NM_014483 | 4282.594  | 3614.632  | AF085841  | 532.329   | 323.899   |
| AL117536  | 600.188   | 667.577   | AK024249  | 793.572   | 636.302   | U92026    | 507.183   | 567.654   |
| NM_017751 | 3325.521  | 3714.344  | AF239156  | 4507.54   | 3910.051  | AF086234  | 25521.637 | 22712.984 |
| NM_003771 | 1528.74   | 1565.695  | NM_020390 | 889.659   | 904.87    | AK023680  | 2541.196  | 2744.702  |
| NM_017860 | 3819.538  | 3305.043  | NM_003321 | 10872.971 | 10673.783 | AF009324  | 2144.247  | 1630.142  |
| X91195    | 33506.395 | 28554.066 | U18937    | 6717.468  | 6877.214  | AF019226  | 1665.846  | 1149.776  |
| AF086190  | 642.14    | 397.01    | U01925    | 739.417   | 641.489   | AL137480  | 7490.094  | 6450.856  |
| AL050035  | 1618.607  | 1757.531  | AJ420488  | 50420.57  | 63716.938 | D16473    | 1943.411  | 1963.264  |
| AK024449  | 2345.688  | 2512.036  | AF268872  | 975.256   | 1389.315  | AB028968  | 1067.453  | 1236.566  |
| AL357201  | 286.553   | 281.473   | AK022180  | 16760.248 | 15713.216 | AK001202  | 514.923   | 685.969   |
| AF279780  | 28732.457 | 22807.639 | AK001384  | 490.423   | 374.277   | AF195764  | 26210.436 | 22316.557 |
| AK022510  | 844.913   | 904.983   | AK025437  | 1798.631  | 1610.863  | AF055029  | 582.36    | 548.527   |
| AK023878  | 476.261   | 371.407   | AK074164  | 621.467   | 510.407   | S82164    | 712.209   | 566.282   |
| AK021851  | 481.604   | 416.585   | NM_004168 | 6622.279  | 4874.555  | AK024394  | 411.83    | 365.417   |
| AJ131609  | 1131.923  | 1078.562  | AF161353  | 3573.833  | 3110.109  | AF147374  | 1003.866  | 811.902   |
| BC019280  | 2930.914  | 2585.147  | NM_000764 | 747.527   | 471.429   | AF130091  | 457.344   | 190.688   |
| AF086498  | 528.093   | 527.936   | NM_004146 | 9551.719  | 6978.149  | L43338    | 4969.286  | 3249.177  |
| AK022177  | 498.668   | 566.975   | NM_003002 | 6797.148  | 4140.421  | AJ227866  | 7370.809  | 3933.35   |
| AK023852  | 417.614   | 334.856   | D42047    | 1049.211  | 753.669   | AF458223  | 4258.96   | 1768.654  |
| AF086466  | 964.332   | 850.923   | AB009282  | 6360.803  | 4495.311  | AK022838  | 4639.314  | 2284.312  |
| AB007962  | 9077.392  | 7333.389  | NM_005004 | 24346.914 | 13430.697 | CY3Cy5    | 4614.61   | 360.834   |
| AF005081  | 906.535   | 1127.999  | NM_003670 | 4083.506  | 2690.129  | AA700390  | 3229.724  | 3076.569  |
| AK026438  | 604.816   | 698.985   | NM_014639 | 1433.871  | 917.891   | Y18474    | 442.878   | 238.017   |
| AK021546  | 474.951   | 640.623   | NM_006392 | 1647.752  | 1175.775  | AA436163  | 637.657   | 816.424   |
| AL050186  | 8436.078  | 6840.392  | NM_014717 | 708.14    | 485.93    | BI907981  | 563.248   | 492.591   |
| AK021918  | 2423.007  | 2369.912  | NM_017922 | 930.993   | 719.384   | BI603841  | 1335.819  | 2107.052  |
| AK021669  | 2637.842  | 3098.073  | NM_002823 | 54667.855 | 57143.48  | BG696638  | 5164.861  | 10719.552 |
| AL080113  | 29330.451 | 25462.225 | NM_017916 | 8921.82   | 8193.168  | M19888    | 2219.84   | 4592.745  |
| AL050083  | 946.971   | 1047.203  | NM_001805 | 4087.851  | 3920.881  | Y08136    | 670.066   | 2609.612  |
| AK022766  | 535.051   | 486.456   | AK022360  | 1157.722  | 1507.842  | AA156863  | 2909.235  | 6697.992  |
| AL049422  | 3792.106  | 3223.065  | NM_003082 | 3634.455  | 3848.56   | AA398951  | 2522.001  | 3403.806  |

|           |           |           |           |           |           |           |           |           |
|-----------|-----------|-----------|-----------|-----------|-----------|-----------|-----------|-----------|
| AL133089  | 736.003   | 597.86    | AL133632  | 1810.588  | 1752.436  | AI218732  | 1560.438  | 1803.367  |
| AK023526  | 1771.578  | 2008.908  | AK024551  | 248.768   | 290.257   | NM_004102 | 1703.184  | 2096.26   |
| AK025602  | 4750.988  | 3712.011  | AL833249  | 2086.78   | 1717.965  | NM_004544 | 4200.909  | 4611.827  |
| AK026309  | 1712.495  | 1454.722  | NM_018374 | 1709.768  | 1411.962  | SR5       | 3231.888  | 3272.391  |
| AL137486  | 3691.341  | 2982.246  | AK021894  | 1334.228  | 1318.685  | SR7       | 4742.074  | 38048.375 |
| AL110162  | 714.933   | 559.202   | NM_020424 | 1336.781  | 941.547   | SR9       | 15277.934 | 3034.159  |
| AK022681  | 8944.255  | 6993.842  | AF438313  | 1088.892  | 687.589   | CY3Cy5    | 3639.043  | 199.868   |
| CY3Cy5    | 1133.585  | 74.235    | AF147341  | 202.469   | 179.374   | NM_018045 | 3575.566  | 3777.773  |
| Y18483    | 366.083   | 366.853   | AB033009  | 7813.767  | 5267.913  | NM_005160 | 1350.832  | 1391.989  |
| AI565117  | 54396.293 | 51532.32  | AK022086  | 328.001   | 249.587   | X78817    | 10536.611 | 13526.607 |
| AI299075  | 1291.519  | 895.822   | AF147320  | 1282.474  | 734.39    | AB023135  | 277.949   | 660.577   |
| M59979    | 415.074   | 331.109   | AK022339  | 437.832   | 373.435   | AY009401  | 626.844   | 1582.021  |
| AB011098  | 716.894   | 606.948   | AK022138  | 923.837   | 1093.392  | AF294628  | 485.747   | 1431.608  |
| AA609759  | 447.01    | 339.801   | AF086191  | 2027.01   | 1569.137  | AK026960  | 486.975   | 953.3     |
| AA029418  | 1331.965  | 1125.756  | AF143880  | 389.808   | 427.893   | NM_000193 | 798.661   | 1360.249  |
| L20815    | 948.445   | 828.088   | NM_017635 | 3375.174  | 3031.577  | BC014586  | 240.027   | 482.124   |
| AI364483  | 5492.009  | 4549.694  | AL133052  | 1525.689  | 1452.576  | NM_002445 | 842.144   | 983.301   |
| AA456001  | 4897.869  | 3273.003  | AB037824  | 1629.257  | 1619.733  | AF053952  | 13977.142 | 13853.274 |
| AA176581  | 236.894   | 186.897   | AF361494  | 820.665   | 1085.654  | NM_003213 | 6473.671  | 5421.331  |
| AA451686  | 1235.759  | 977.847   | AK022810  | 710.989   | 882.287   | NM_014044 | 1955.214  | 1943.9    |
| NM_003822 | 470.753   | 330.888   | X92110    | 259.197   | 249.098   | NM_000900 | 1230.459  | 1467.157  |
| NM_004412 | 856.837   | 606.078   | AF147408  | 662.49    | 569.871   | AK023684  | 3340.101  | 3472.59   |
| SR1       | 61127.023 | 56286.813 | AK027222  | 3289.309  | 2583.242  | NM_015057 | 647.664   | 650.46    |
| SR3       | 26756.592 | 17216.953 | AK054767  | 333.423   | 280.291   | AF303398  | 2854.414  | 3601.591  |
| SR5       | 2257.645  | 1619.518  | AL117486  | 671.118   | 852.876   | NM_014810 | 1329.075  | 1309.035  |
| SR7       | 2775.597  | 15099.85  | AL050042  | 1576.58   | 944.887   | NM_004735 | 995.088   | 1560.747  |
| SR9       | 8893.594  | 1130.554  | NM_018465 | 1280.88   | 1525.001  | NM_007357 | 2765.792  | 3743.76   |
| CY3Cy5    | 1042.275  | 104.611   | NM_014867 | 6658.102  | 7135.664  | NM_003763 | 3447.567  | 5576.001  |
| NM_019555 | 442.458   | 203.209   | AL359932  | 357.904   | 468.701   | AK023448  | 642.494   | 1158.005  |
| NM_012095 | 3577.855  | 4087.081  | AB037850  | 1626.181  | 1693.658  | Y18213    | 1330.27   | 2243.218  |
| NM_003905 | 7796.106  | 7163.573  | AK002197  | 1146.662  | 1419.389  | NM_003283 | 1779.406  | 2726.342  |
| L12052    | 1407.352  | 2034.272  | AF087996  | 904.331   | 1006.644  | AF249898  | 6326.695  | 8195.476  |
| AB028976  | 4208.208  | 3124.368  | AK021710  | 1893.379  | 2274.873  | M69181    | 5250.97   | 5029.892  |
| AK026337  | 779.104   | 823.819   | NM_007017 | 379.293   | 362.498   | NM_002652 | 513.119   | 422.326   |
| NM_015865 | 651.245   | 639.656   | AL137446  | 843.766   | 691.724   | NM_001311 | 542.281   | 593.419   |
| NM_001895 | 189.631   | 262.536   | AB025286  | 862.607   | 614.058   | NM_017795 | 4423.488  | 3971.926  |
| NM_004305 | 21327.594 | 17348.854 | AF009286  | 421.404   | 359.212   | NM_012410 | 2050.959  | 1773.653  |
| NM_006085 | 889.654   | 778.107   | AF056437  | 433.846   | 335.476   | NM_001111 | 4472.763  | 4239.885  |
| AF072506  | 234.773   | 228.628   | AB032364  | 279.912   | 199.633   | BU565263  | 53469.914 | 71063.094 |
| NM_005992 | 962.389   | 1101.146  | NM_005025 | 745.572   | 448.205   | NM_005025 | 1777.725  | 2125.149  |
| NM_003144 | 33818.637 | 25738.713 | AF056447  | 775.407   | 658.144   | NM_001611 | 368.735   | 429.725   |
| NM_000905 | 476.55    | 316.602   | AK001010  | 498.477   | 240.37    | AB018310  | 1422.841  | 1588.782  |
| AB011102  | 1820.339  | 1307.162  | NM_018075 | 530.003   | 325.125   | NM_015375 | 13991.02  | 21980.486 |
| D63480    | 885.484   | 714.483   | AK021442  | 699.993   | 401.872   | NM_004875 | 573.685   | 2549.468  |
| NM_002965 | 1238.903  | 1254.64   | AK001076  | 610.194   | 567.095   | NM_005502 | 369.102   | 291.351   |
| NM_004620 | 435.382   | 386.768   | AK021482  | 2864.756  | 2515.997  | NM_000742 | 583.647   | 507.962   |
| AF087940  | 2564.948  | 2089.327  | AK021730  | 251.669   | 204.141   | NM_002355 | 7711.659  | 6652.495  |
| AJ277587  | 1120.665  | 869.482   | AK025126  | 258.016   | 221.307   | AK026608  | 736.929   | 728.024   |
| D87432    | 3062.109  | 3049.919  | AK025317  | 5564.174  | 4560.772  | AB046836  | 421.988   | 768.505   |
| AK023749  | 385.514   | 407.217   | AK025177  | 274.611   | 426.709   | NM_017815 | 3687.02   | 3857.791  |
| NM_002337 | 1528.579  | 1481.909  | AK026725  | 1094.209  | 1653.033  | AJ224166  | 1141.394  | 1278.44   |
| NM_013245 | 846.473   | 736.683   | AJ008118  | 49706.828 | 44561.555 | AK026098  | 1865.354  | 2049.67   |
| NM_006423 | 2304.817  | 1662.853  | NM_005523 | 1165.097  | 830.247   | NM_012381 | 1426.215  | 1708.997  |

|           |           |           |           |           |           |           |           |           |
|-----------|-----------|-----------|-----------|-----------|-----------|-----------|-----------|-----------|
| NM_004766 | 1808.051  | 1413.651  | AK024512  | 2285.484  | 2227.734  | M20702    | 586.335   | 303.729   |
| NM_005819 | 5377.142  | 4889.91   | AK023454  | 1124.379  | 731.426   | NM_006397 | 6645.679  | 9651.217  |
| AK025520  | 705.111   | 279.208   | L23207    | 836.781   | 641.237   | D83776    | 1393.489  | 2275.767  |
| NM_004892 | 2914.432  | 3491.36   | NM_018062 | 577.869   | 401.128   | NM_004088 | 2391.028  | 4038.989  |
| NM_014597 | 4571.128  | 4272.517  | NM_007128 | 3681.246  | 2573.682  | NM_000138 | 2046.719  | 2497.145  |
| NM_017896 | 2421.631  | 1913.935  | NM_007160 | 187.685   | 131.786   | NM_018163 | 1217.573  | 1318.823  |
| AB002374  | 1038.027  | 774.41    | NM_018627 | 383.524   | 338.366   | AK026362  | 2795.655  | 2560.253  |
| U17327    | 519.206   | 401.852   | NM_015377 | 544.444   | 607.004   | NM_004968 | 2188.58   | 2226.764  |
| M87790    | 8656.49   | 7099.407  | AL137531  | 989.563   | 696.458   | NM_005908 | 1359.776  | 1599.579  |
| NM_001768 | 1222.503  | 969.948   | AK022210  | 243.197   | 191.658   | NM_004785 | 2737.392  | 2466.981  |
| NM_000029 | 5806.226  | 5128.262  | AL080085  | 2933.824  | 2954.477  | NM_002428 | 1713.076  | 1749.844  |
| NM_000715 | 325.474   | 307.014   | AK022106  | 142.576   | 610.872   | NM_014674 | 6413.799  | 6245.63   |
| AF035802  | 2418.647  | 1535.625  | AF086519  | 475.421   | 594.013   | NM_018271 | 842.865   | 891.024   |
| M26123    | 301.966   | 261.619   | AF055012  | 2189.087  | 1430.387  | NM_014652 | 1437.482  | 1603.78   |
| NM_013328 | 16917.574 | 17541.568 | AK022307  | 1814.107  | 1241.207  | AL133020  | 5670.643  | 5501.611  |
| NM_000790 | 319.767   | 332.772   | NM_005172 | 1653.022  | 1363.901  | NM_014044 | 1574.807  | 1992.873  |
| NM_002660 | 1694.901  | 1688.169  | AK025192  | 2730.453  | 1856.095  | NM_000900 | 860.049   | 1213.985  |
| NM_015900 | 736.581   | 550.684   | NM_012403 | 2069.377  | 1471.605  | AK023684  | 2865.911  | 3434.531  |
| NM_005218 | 3784.23   | 3785.708  | AK022611  | 3659.964  | 2408.888  | NM_000232 | 305.242   | 467.237   |
| AL122071  | 294.365   | 590.477   | NM_006158 | 6540.28   | 4752.965  | AA700390  | 3271.693  | 3379.128  |
| AB033054  | 6754.807  | 5617.945  | NM_006346 | 1081.85   | 1059.018  | Y18474    | 418.985   | 464.578   |
| NM_016122 | 322.054   | 433.313   | AK025240  | 2805.619  | 2171.477  | AA436163  | 486.221   | 823.332   |
| AF153330  | 464.896   | 401.372   | NM_017633 | 9499.493  | 8883.476  | BI907981  | 565.165   | 492.857   |
| D87446    | 4557.523  | 6693.939  | AF086186  | 10525.646 | 10700.12  | BI603841  | 1458.802  | 1892.316  |
| BF540935  | 2299.044  | 2136.909  | NM_017802 | 3220.515  | 3225.316  | BG696638  | 5097.802  | 6483.522  |
| NM_004466 | 454.452   | 564.878   | AK023667  | 760.836   | 1013.109  | M19888    | 1278.264  | 1710.349  |
| NM_007081 | 1795.386  | 1939.938  | AJ008137  | 8241.367  | 7460.877  | Y08136    | 422.476   | 399.313   |
| NM_002693 | 1349.842  | 1887.642  | AF085841  | 498.847   | 540.323   | AA156863  | 2633.678  | 2624.706  |
| NM_003671 | 301.857   | 414.794   | U92026    | 634.504   | 898.707   | BI915199  | 1072.333  | 1183.181  |
| AK026000  | 1367.982  | 1158.493  | AF086234  | 20737.305 | 14188.645 | R82957    | 53493.961 | 52142.5   |
| NM_017833 | 1544.441  | 1263.263  | AK023680  | 3160.092  | 2154.836  | AA398951  | 2215.698  | 2151.276  |
| NM_006675 | 1609.934  | 1676.929  | AF009324  | 1472.104  | 1026.599  | AI218732  | 1459.267  | 1479.206  |
| NM_003022 | 6612.394  | 5141.613  | AF019226  | 1651.432  | 1049.432  | NM_004102 | 1320.732  | 1487.455  |
| NM_004873 | 2152.429  | 2024.561  | AK022112  | 369.039   | 549.658   | NM_004544 | 3815.581  | 3766.563  |
| NM_019842 | 1394.928  | 1190.887  | AL137480  | 8640.291  | 5844.111  | NM_018890 | 22719.502 | 16476.34  |
| NM_002951 | 9458.416  | 10917.794 | AK022182  | 346.486   | 211.109   | NM_016204 | 514.965   | 677.355   |
| NM_002317 | 721.622   | 603.314   | D16473    | 1310.709  | 829.031   | NM_002652 | 265.598   | 449.775   |
| NM_000320 | 2437.002  | 2788.393  | AB028968  | 755.72    | 704.051   | NM_001311 | 476.13    | 949.46    |
| NM_003136 | 2897.545  | 2692.405  | AK001202  | 465.529   | 251.181   | NM_017798 | 3599.843  | 2859.169  |
| NM_006475 | 308.148   | 579.208   | AF195764  | 26287.732 | 18438.486 | NM_012410 | 1747.368  | 1839.794  |
| NM_004620 | 588.521   | 519.12    | AF055029  | 620.543   | 522.188   | NM_001111 | 3531.576  | 3943.707  |
| AF087940  | 2817.132  | 2798.581  | S82164    | 639.879   | 465.67    | NM_018048 | 3664.571  | 3476.746  |
| AJ277587  | 1202.875  | 999.36    | AK024394  | 1042.253  | 771.792   | NM_014395 | 427.211   | 501.488   |
| D87432    | 2950.98   | 2874.967  | AF147374  | 895.929   | 900.029   | NM_005160 | 1185.489  | 1368.187  |
| Y18483    | 312.109   | 412.828   | AF130091  | 1487.441  | 3475.143  | X78817    | 9903.347  | 11307.228 |
| AI565117  | 55936.645 | 60614.078 | L43338    | 8543.004  | 9897.906  | AY009401  | 580.768   | 671.043   |
| AI299075  | 1491.37   | 2435.494  | AJ227866  | 9728.42   | 9624.77   | AF294628  | 463.429   | 379.636   |
| M59979    | 381.46    | 460.101   | AF458223  | 3609.58   | 3918.183  | NM_001991 | 534.843   | 389.504   |
| AB011098  | 509.145   | 583.066   | AK026822  | 425.243   | 524.699   | NM_000193 | 524.741   | 657.086   |
| AA609759  | 511.787   | 806.722   | AK022838  | 4922.475  | 5437.188  | NM_002448 | 695.611   | 864.02    |
| AA029418  | 1821.163  | 1608.74   | NM_003509 | 496.058   | 386.696   | AF053952  | 11592.134 | 11255.248 |
| L20815    | 1670.436  | 1374.97   | CY3Cy5    | 2664.754  | 202.15    | NM_003213 | 5724.522  | 5103.729  |
| AI364483  | 8220.992  | 6545.998  | AA700390  | 3458.893  | 4461.279  | NM_015057 | 650.271   | 569.164   |

|           |           |           |           |           |           |           |           |           |
|-----------|-----------|-----------|-----------|-----------|-----------|-----------|-----------|-----------|
| AA456001  | 4524.108  | 3290.405  | Y18474    | 388.983   | 468.061   | AF303398  | 2808.326  | 3060.965  |
| AA451686  | 1503.478  | 1364.925  | AA436163  | 617.023   | 951.679   | NM_01481C | 1565.649  | 1364.383  |
| NM_003822 | 537.349   | 381.284   | BI907981  | 564.808   | 581.622   | NM_00473E | 1103.62   | 1489.505  |
| NM_004412 | 1004.939  | 914.588   | BI603841  | 1333.677  | 1558.018  | NM_007357 | 2752.459  | 3322.138  |
| NM_00205C | 1620.497  | 1416.045  | BG696638  | 4545.078  | 4652.869  | NM_00376E | 3269.828  | 2878.71   |
| NM_007097 | 4810.39   | 4226.335  | M19888    | 1121.019  | 939.466   | AK023448  | 614.459   | 576.896   |
| NM_00002E | 6838.619  | 8167.443  | AA156863  | 2409.279  | 1698.638  | Y18213    | 982.653   | 916.849   |
| NM_00071E | 537.524   | 340.067   | BI915199  | 1036.599  | 949.126   | NM_00328E | 1586.748  | 1447.706  |
| AF035802  | 2517.466  | 2313.654  | R82957    | 52897.602 | 32069.658 | AF249898  | 4871.497  | 4766.041  |
| Y08145    | 375.091   | 518.398   | AA398951  | 2693.906  | 1940.457  | M69181    | 4338.87   | 4170.718  |
| M26123    | 301.254   | 439.967   | AI218732  | 1202.536  | 975.716   | NM_00242E | 1605.716  | 2245.754  |
| NM_00183E | 466.555   | 179.642   | NM_004102 | 1982.743  | 1477.461  | NM_014674 | 4783.455  | 5102.313  |
| NM_01955E | 245.063   | 454.934   | NM_004544 | 3269.991  | 2850.863  | NM_018271 | 563.856   | 813.837   |
| NM_01209E | 3769.093  | 4899.297  | SR5       | 3261.518  | 2610.909  | NM_014652 | 1194.039  | 1207.249  |
| NM_00390E | 7897.025  | 8790.744  | SR7       | 4215.71   | 26399.15  | AL133020  | 4456.331  | 4268.461  |
| L12052    | 958.023   | 1462.041  | SR9       | 13999.699 | 2441.562  | NM_001611 | 389.544   | 450.754   |
| AB028976  | 3035.472  | 3123.918  | CY3Cy5    | 2224.318  | 139.99    | AB018310  | 1931.497  | 2450.115  |
| AK026337  | 791.635   | 971.197   | NM_01804E | 4081.027  | 4512.526  | NM_01537E | 13244.143 | 11479.795 |
| NM_01586E | 1030.33   | 852.451   | AJ133439  | 370.932   | 486.975   | AF144638  | 32589.395 | 25359.961 |
| AB031038  | 280.434   | 89.969    | NM_001561 | 335.9     | 425.596   | NM_000742 | 518.463   | 642.271   |
| NM_00462E | 522.775   | 429.096   | NM_00516C | 1217.984  | 1001.229  | NM_00235E | 7546.949  | 6231.698  |
| NM_00189E | 244.255   | 210.188   | X78817    | 12463.395 | 11030.694 | AK026608  | 617.757   | 680.172   |
| NM_00430E | 22201.607 | 17597.859 | AY009401  | 671.508   | 566.484   | NM_004102 | 1059.46   | 1621.913  |
| NM_00608E | 934.623   | 1003.228  | NM_001991 | 526.502   | 287.102   | NM_004544 | 3307.442  | 3784.433  |
| NM_005992 | 1178.714  | 1388.907  | NM_000193 | 698.644   | 703.641   |           | 68.805    | 927.163   |
| NM_003144 | 35585.77  | 25674.695 | NM_00244E | 841.709   | 568.409   | NM_01889C | 18852.053 | 19491.947 |
| NM_00090E | 465.092   | 547.366   | AF053952  | 12939.682 | 10650.526 | NM_016204 | 339.952   | 834.568   |
| AB011102  | 1997.498  | 2155.117  | NM_003213 | 5711.607  | 4135.216  | AB046836  | 470.54    | 641.022   |
| D63480    | 1091.086  | 949.268   | NM_014044 | 2001.579  | 1905.869  | AJ224166  | 1367.434  | 1319.735  |
| NM_00296E | 1478.785  | 1676.198  | NM_00090C | 1254.669  | 1270.535  | AK026098  | 1750.523  | 1958.559  |
| M81768    | 265.327   | 169.934   | AK023684  | 3045.92   | 3889.977  | NM_012381 | 1333.163  | 1681.104  |
| AK023749  | 310.587   | 365.361   | NM_000232 | 471.661   | 639.156   | M20702    | 330.303   | 390.833   |
| NM_002337 | 1450.166  | 1464.145  | NM_015057 | 711.45    | 986.426   | NM_006397 | 6461.013  | 6271.756  |
| NM_01324E | 903.22    | 1049.623  | AF303398  | 4308.205  | 4344.558  | D83776    | 1458.408  | 1353.76   |
| NM_00642E | 2263.48   | 1533.014  | NM_01481C | 1385.686  | 1188.766  | NM_00408E | 2379.338  | 2208.302  |
| NM_00476E | 1157.413  | 1228.63   | NM_00473E | 1485.809  | 1217.438  | NM_00218C | 699.059   | 1076.727  |
| NM_00581E | 4272.695  | 4470.694  | NM_007357 | 3168.027  | 2498.155  | NM_00013E | 1775.772  | 1883.121  |
| AK025520  | 1319.007  | 667.946   | NM_00376E | 3311.614  | 2481.837  | NM_01816E | 994.283   | 949.405   |
| NM_004892 | 4633.44   | 3808.719  | AK023448  | 815.089   | 474.325   | AK026362  | 2882.507  | 2392.419  |
| NM_014597 | 4140.398  | 2500.222  | Y18213    | 1123.658  | 696.95    | NM_00496E | 2273.281  | 2155.861  |
| NM_01789E | 2706.333  | 1491.421  | NM_00328E | 1369.994  | 1118.562  | NM_00590E | 1540.328  | 1629.257  |
| AB002374  | 1207.817  | 897.219   | AF249898  | 5224.789  | 3080.701  | NM_00478E | 3109.587  | 3186.173  |
| U17327    | 644.461   | 343.599   | M69181    | 5706.623  | 3910.664  | NM_00019E | 506.994   | 876.758   |
| M87790    | 9700.872  | 7790.39   | L09078    | 745.951   | 541.149   | BC014586  | 237.657   | 535.946   |
| NM_00176E | 1718.642  | 1220.651  | NM_002652 | 542.698   | 1037.7    | NM_00244E | 913.476   | 1808.538  |
| NM_002951 | 12469.138 | 17219.777 | NM_001311 | 900.866   | 880.716   | AF053952  | 9524.087  | 13777.438 |
| NM_002317 | 830.521   | 832.46    | NM_01779E | 4594.28   | 3896.889  | NM_00321E | 5050.334  | 6910.754  |
| NM_00032C | 2450.715  | 2801.579  | NM_01241C | 2037.35   | 2215.937  | NM_014044 | 1720.234  | 1721.186  |
| NM_00313E | 1600.33   | 1286.844  | NM_001111 | 4708.974  | 4834.255  | NM_00090C | 993.882   | 1187.335  |
| NM_01332E | 16274.245 | 15628.246 | NM_001611 | 458.583   | 708.956   | AK023684  | 2923.245  | 3247.042  |
| NM_00079C | 305.015   | 241.77    | M59979    | 390.997   | 568.085   | NM_00023E | 320.152   | 560.929   |
| NM_00266C | 1330.09   | 1418.095  | AB018310  | 1799.406  | 1702.325  | AA700390  | 3152.456  | 2788.165  |
| NM_01590C | 555.012   | 648.919   | NM_01537E | 12918.707 | 9172.628  | Y18474    | 474.545   | 255.237   |

|           |           |           |           |           |           |           |           |           |
|-----------|-----------|-----------|-----------|-----------|-----------|-----------|-----------|-----------|
| NM_003706 | 381.002   | 403.978   | AF144638  | 51617.703 | 32044.289 | AA436163  | 551.906   | 775.74    |
| NM_005218 | 4028.327  | 4097.439  | NM_000742 | 412.634   | 466.005   | BI907981  | 393.813   | 471.077   |
| AL122071  | 461.196   | 425.697   | NM_002355 | 6966.313  | 4720.555  | BI603841  | 1239.444  | 1328.401  |
| AB033054  | 8308.321  | 8461.799  | AK026608  | 770.655   | 560.901   | BG696638  | 5090.111  | 5241.947  |
| NM_016122 | 449.228   | 494.268   | AB046836  | 557.655   | 859.878   | M19888    | 1125.019  | 1236.395  |
| AF153330  | 528.933   | 646.219   | AK026098  | 1873.141  | 1645.264  | Y08136    | 425.827   | 410.308   |
| NM_001652 | 244.726   | 373.801   | NM_012381 | 1227.096  | 1463.627  | AA156863  | 2674.265  | 2086.415  |
| NM_003822 | 518.513   | 406.948   | M20702    | 386.168   | 165.529   | BI915199  | 1239.401  | 1131.368  |
| NM_004412 | 1227.146  | 1193.012  | NM_006397 | 7821.141  | 5635.486  | R82957    | 50537.25  | 52246.887 |
| NM_002050 | 1715.724  | 1459.619  | D83776    | 1142.327  | 967.452   | AA398951  | 2472.397  | 1969.322  |
| NM_007097 | 3864.657  | 2975.893  | NM_004088 | 2142.649  | 1525.147  | AI218732  | 1546.764  | 1584.448  |
| D87446    | 3584.164  | 3096.759  | NM_002180 | 790.917   | 860.292   | AF249898  | 4186.87   | 5225.105  |
| BF540935  | 2741.475  | 2565.553  | NM_000138 | 1441.708  | 1225.331  | M69181    | 3953.945  | 5289.49   |
| NM_007081 | 2092.107  | 2987.945  | NM_018163 | 1036.732  | 820.109   | NM_001311 | 634.514   | 672.61    |
| AB032964  | 1732.495  | 1832.597  | AK026362  | 2299.923  | 1503.99   | NM_017798 | 3787.461  | 3505.104  |
| BE733605  | 1488.696  | 1430.628  | NM_004968 | 2089.648  | 1590.64   | NM_012410 | 1652.07   | 1799.095  |
| NM_003334 | 13536.1   | 12518.56  | NM_005908 | 1257.424  | 1162.064  | NM_001111 | 3711.298  | 3187.008  |
| NM_002693 | 1508.966  | 1175.711  | NM_004785 | 2893.32   | 2124.485  | NM_018048 | 3692.833  | 3202.601  |
| NM_003671 | 435.791   | 322.521   | NM_002428 | 1604.253  | 1886.95   | NM_014395 | 315.062   | 345.123   |
| AK026000  | 1547.817  | 1807.119  | NM_014652 | 1499.914  | 1711.42   | NM_005160 | 1404.587  | 902.404   |
| NM_017833 | 2066.382  | 2163.849  | AL133020  | 4884.394  | 5974.17   | X78817    | 11447.314 | 10041.66  |
| NM_006675 | 2115.988  | 2231.031  | NM_014044 | 1989.68   | 1997.688  | AY009401  | 743.512   | 700.319   |
| NM_003022 | 7978.876  | 5546.008  | NM_000900 | 1236.536  | 1519.17   | NM_001991 | 490.947   | 407.032   |
| NM_004873 | 2285.419  | 2267.778  | AK023684  | 3257.76   | 4499.472  | NM_015057 | 695.612   | 736.415   |
| NM_019842 | 1506.11   | 1228.236  | J05070    | 588.24    | 260.721   | AF303398  | 3402.954  | 3031.005  |
| NM_005992 | 1370.644  | 1522.887  | AA700390  | 3072.254  | 3150.627  | NM_014810 | 1515.333  | 1093.159  |
| NM_003144 | 33228.938 | 28230.059 | Y18474    | 355.464   | 525.603   | NM_004738 | 1200.804  | 1162.515  |
| NM_000908 | 357.472   | 432.906   | AA436163  | 550.369   | 540.805   | NM_007357 | 3126.011  | 2538.301  |
| AB011102  | 1714.178  | 1414.105  | BI907981  | 487.996   | 331.226   | NM_003763 | 3694.366  | 3304.277  |
| D63480    | 711.149   | 637.108   | BI603841  | 1395.596  | 1101.749  | AK023448  | 931.95    | 702.474   |
| NM_002968 | 1571.326  | 1288.79   | BG696638  | 4490.84   | 4072.942  | Y18213    | 1619.474  | 1041.955  |
| NM_006475 | 346.107   | 301.446   | M19888    | 1213.741  | 762.095   | NM_003283 | 1916.798  | 1778.27   |
| NM_004620 | 527.104   | 535.164   | AA156863  | 2380.947  | 1464.567  | NM_018163 | 819.423   | 1542.89   |
| AF087940  | 2647.502  | 3405.948  | BI915199  | 1256.048  | 773.562   | NM_004968 | 2481.551  | 6599.362  |
| AJ277587  | 1028.352  | 1468.046  | R82957    | 53447.367 | 30438.193 | NM_002428 | 1549.064  | 1847.224  |
| D87432    | 2741.89   | 4077.31   | BI830442  | 591.007   | 337.472   | NM_014674 | 4711.722  | 4509.86   |
| AI565117  | 56128.504 | 60574.93  | AA398951  | 2999.29   | 2041.507  | NM_018271 | 743.124   | 827.123   |
| U28015    | 390.44    | 491.65    | AI218732  | 1301.453  | 1493.368  | NM_014652 | 1156.083  | 1356.792  |
| AI299075  | 1231.815  | 960.815   | NM_018890 | 21404.555 | 20901.119 | AL133020  | 4558.785  | 4825.066  |
| M59979    | 363.494   | 277.339   | NM_016204 | 646.351   | 864.357   | NM_005028 | 1815.271  | 1562.855  |
| AB011098  | 471.7     | 345.536   | NM_001311 | 886.332   | 1144.484  | NM_001611 | 583.441   | 629.188   |
| AA609759  | 525.162   | 361.003   | NM_017798 | 3661.392  | 4063.034  | AB018310  | 1905.403  | 1780.068  |
| AA029418  | 2056.629  | 1567.836  | NM_012410 | 1893.401  | 2225.519  | NM_015378 | 14858.861 | 11662.595 |
| L20815    | 1798.437  | 1615.16   | NM_001111 | 4040.677  | 4695.884  | NM_001777 | 8267.48   | 12236.973 |
| AI364483  | 7908.37   | 6705.689  | NM_018048 | 3363.809  | 3496.478  | NM_001298 | 10592.462 | 13771.452 |
| AA456001  | 5778.344  | 4813.479  | AJ133439  | 280.449   | 387.684   | NM_004344 | 7407.082  | 7518.401  |
| AA451686  | 2068.886  | 1736.865  | NM_014395 | 433.568   | 273.986   | AF085972  | 231.05    | 374.832   |
| M87790    | 5974.242  | 5028.768  | NM_005160 | 1372.941  | 752.63    | NM_000757 | 503.994   | 404.586   |
| NM_001768 | 1303.452  | 856.289   | X78817    | 12855.209 | 9207.629  | AB046786  | 670.802   | 713.307   |
| NM_000028 | 5454.554  | 5394.367  | AB023135  | 528.417   | 156.941   | NM_016620 | 11527.107 | 13040.007 |
| NM_000715 | 433.912   | 351.189   | AY009401  | 718.812   | 445.5     | NM_018890 | 21710.867 | 28950.422 |
| M26123    | 358.245   | 853.644   | AF294628  | 754.932   | 338.128   | NM_016204 | 523.076   | 775.775   |
| NM_012098 | 4147.415  | 4204.164  | NM_001991 | 1415.307  | 1135.469  | AB046836  | 695.474   | 442.706   |

|           |           |           |           |           |           |           |           |           |
|-----------|-----------|-----------|-----------|-----------|-----------|-----------|-----------|-----------|
| NM_00390E | 7768.727  | 6636.353  | NM_000193 | 916.925   | 1197.845  | AJ224166  | 1235.046  | 956.567   |
| L12052    | 951.783   | 806.68    | NM_00244E | 906.399   | 1163.446  | AK026098  | 1920.38   | 1832.74   |
| AB028976  | 3140.064  | 2256.87   | AF053952  | 15204.966 | 17940.537 | NM_012381 | 1486.68   | 1513.647  |
| AK026337  | 550.692   | 295.848   | NM_003213 | 5933.785  | 6515.377  | M20702    | 442.859   | 446.419   |
| NM_01586E | 1018.746  | 677.278   | BF184738  | 445.731   | 458.957   | NM_006397 | 7086.5    | 7951.451  |
| NM_00189E | 250.584   | 163.48    | NM_015057 | 733.351   | 555.09    | D83776    | 1563.651  | 1471.864  |
| NM_00430E | 22116.805 | 15572.168 | AF303398  | 3817.12   | 2413.628  | NM_00408E | 2615.113  | 2476.964  |
| NM_00608E | 1072.386  | 1148.647  | NM_014810 | 1202.016  | 588.574   | NM_00013E | 2486.779  | 2256.052  |
| AF072506  | 311.655   | 212.412   | NM_00473E | 1092.443  | 739.013   | AB011541  | 1868.177  | 2311.574  |
| AB033054  | 7704.678  | 8845.154  | NM_007357 | 2436.294  | 1602.696  | BC032460  | 5952.367  | 11701.692 |
| NM_01612E | 539.783   | 434.41    | NM_003763 | 3741.381  | 2396.063  | NM_014071 | 1577.519  | 3759.653  |
| AF153330  | 271.201   | 277.622   | AK023448  | 673.874   | 555.764   | AK024404  | 1499.507  | 1720.688  |
| AK023749  | 348.182   | 357.776   | Y18213    | 1147.671  | 858.26    | NM_00632E | 712.709   | 859.547   |
| NM_002337 | 1377.617  | 1143.735  | NM_003283 | 1643.956  | 1273.943  | NM_000213 | 4253.026  | 3568.001  |
| NM_01324E | 768.393   | 538.774   | AF249898  | 6143.009  | 5499.127  | BE906107  | 5606.747  | 4977.533  |
| NM_00642E | 1815.15   | 995.072   | M69181    | 5407.628  | 4565.569  | NM_01551E | 1561.118  | 1470.588  |
| NM_00476E | 1074.236  | 641.189   | NM_00242E | 1428.752  | 1875.317  | AB033065  | 827.722   | 761.114   |
| NM_00581E | 4499.092  | 3211.043  | NM_014674 | 4913.915  | 7295.087  | NM_005211 | 424.365   | 252.683   |
| AK025520  | 1325.448  | 561.038   | NM_014652 | 1348.955  | 1559.184  | NM_004857 | 2993.157  | 2033.799  |
| NM_00489E | 5275.408  | 3636.435  | AL133020  | 4071.717  | 4644.577  | NM_00325E | 419.663   | 383.544   |
| NM_014597 | 4415.473  | 2330.53   | BU565263  | 56037.684 | 66516.93  | NM_01328E | 3160.254  | 2533.208  |
| NM_01789E | 2718.884  | 1233.18   | NM_00502E | 1468.878  | 1350.532  | NM_00287E | 15011.558 | 11068.854 |
| AB002374  | 1247.196  | 813.517   | NM_001611 | 558.223   | 386.894   | NM_00483E | 513.167   | 782.546   |
| U17327    | 542.35    | 225.876   | AB018310  | 1508.144  | 1234.818  | NM_01219E | 887.254   | 800.351   |
| NM_01783E | 1411.961  | 1971.649  | NM_01537E | 12864.862 | 7763.523  | NM_00340E | 6028.718  | 4558.033  |
| NM_00667E | 1598.156  | 1709.117  | NM_00487E | 398.018   | 363.555   | NM_00472C | 5009.345  | 3766.251  |
| NM_00302E | 7610.579  | 6980.837  | AF144638  | 47317.41  | 28362.471 | NM_001057 | 1005.582  | 713.184   |
| NM_00487E | 2051.345  | 2132.224  | NM_00550E | 229.71    | 640.222   | NM_005561 | 4116.317  | 3766.653  |
| NM_01984E | 1462.993  | 1150.274  | NM_00074E | 404.996   | 581.42    | AF272381  | 3031.089  | 4127.512  |
| NM_002951 | 10438.039 | 12211.084 | NM_00235E | 7477.482  | 6839.709  | NM_004524 | 1526.147  | 2355.329  |
| NM_002317 | 703.999   | 735.492   | AK026608  | 716.292   | 920.786   | NM_00631E | 1623.583  | 1996.078  |
| NM_00032C | 2623.406  | 2591.73   | NM_00410E | 1401.743  | 1960.242  | NM_018401 | 753.219   | 608.013   |
| NM_00313E | 3127.741  | 3783.686  | NM_016204 | 439.432   | 829.952   | NM_00516E | 2089.051  | 2349.203  |
| NM_01332E | 15646.159 | 15737.388 | AB046836  | 535.791   | 673.81    | NM_00727E | 25541.35  | 21814.547 |
| NM_00079C | 942.073   | 936.65    | NM_01781E | 3871.476  | 3496.102  | BE894943  | 463.218   | 329.742   |
| NM_00266C | 1016.843  | 761.833   | AJ224166  | 1116.537  | 1357.695  | NM_01642E | 1378.673  | 1518.74   |
| NM_01590C | 561.624   | 163.115   | AK026098  | 1540.111  | 1262.306  | NM_01787E | 1619.919  | 1616.73   |
| NM_00370E | 706.245   | 517.338   | NM_012381 | 810.594   | 726.13    | NM_004494 | 47236.953 | 54052.969 |
| NM_00521E | 4633.834  | 3654.076  | M20702    | 331.778   | 511.484   | AL049687  | 566.515   | 436.841   |
| AL122071  | 520.458   | 229.976   | NM_006397 | 8247.647  | 5568.557  | NM_00564E | 8954.154  | 7259.309  |
| NM_01491E | 8952.827  | 19820.088 | D83776    | 1519.692  | 1114.493  | NM_00359E | 1599.483  | 1413.596  |
| NM_005864 | 2791.686  | 2288.797  | NM_00408E | 2068.74   | 1523.708  | NM_01495E | 1570.33   | 962.06    |
| NM_012341 | 2216.677  | 1889.288  | NM_00218C | 727.099   | 786.918   | AF179995  | 682.66    | 550.114   |
| NM_00325E | 8133.612  | 7160.419  | NM_00013E | 1628.882  | 1686.356  | NM_01619E | 3345.784  | 1180.413  |
| D87450    | 1709.233  | 1547.354  | NM_01816E | 1157.285  | 1035.702  | NM_00452E | 961.974   | 771.189   |
| NM_017797 | 4443.585  | 3210.121  | AK026362  | 2690.333  | 2110.462  | NM_004404 | 5498.457  | 3976.68   |
| AK021919  | 627.38    | 610.294   | NM_00496E | 2192.94   | 2269.063  | NM_00296C | 1540.465  | 1704.411  |
| AF000562  | 1051.359  | 1030.888  | NM_00590E | 1438.629  | 1802.656  | NM_00679C | 509.499   | 439.615   |
| AK025713  | 1602.753  | 1783.043  | NM_00478E | 2863.157  | 3184.711  | AL117522  | 4495.3    | 4370.766  |
| NM_01810C | 430.95    | 354.715   | AK023684  | 2844.182  | 2515.793  | NM_00657E | 4502.269  | 4116.86   |
| NM_00205C | 1733.763  | 1699.566  | NM_00023E | 443.528   | 511.567   | NM_019061 | 1778.19   | 1517.838  |
| NM_007097 | 5074.583  | 5969.742  | AA700390  | 3016.543  | 2366.461  | AB033007  | 1465.896  | 1553.152  |
| D87446    | 3049.156  | 3551.485  | AA436163  | 626.473   | 579.355   | NM_003781 | 643.168   | 573.952   |

|           |           |           |           |           |           |           |           |           |
|-----------|-----------|-----------|-----------|-----------|-----------|-----------|-----------|-----------|
| BF540935  | 2061.273  | 2009.631  | BI907981  | 562.262   | 177.897   | NM_001304 | 403.229   | 549.222   |
| NM_007081 | 1259.089  | 615.742   | BI603841  | 1408.375  | 985.373   | NM_003130 | 570.163   | 480.462   |
| AB032964  | 1903.423  | 1349.822  | BG696638  | 4599.237  | 4076.091  | NM_004710 | 7470.518  | 5295.313  |
| BE733605  | 1664.055  | 1547.059  | M19888    | 1116.604  | 888.93    | D29810    | 2912.284  | 2132.37   |
| NM_003334 | 18747.32  | 17404.715 | Y08136    | 395.287   | 566.648   | NM_000120 | 413.018   | 646.461   |
| NM_002693 | 1759.638  | 2099.26   | AA156863  | 2633.752  | 2117.725  | AB002384  | 528.644   | 543.16    |
| NM_003671 | 612.153   | 802.998   | BI915199  | 1128.172  | 881.176   | NM_018437 | 772.445   | 357.999   |
| AK026000  | 1849.232  | 1253.124  | R82957    | 52881.309 | 44247.547 | AK023164  | 1104.779  | 768.235   |
| NM_005814 | 1200.225  | 1315.955  | BI830442  | 363.769   | 344.555   | NM_005370 | 605.231   | 650.595   |
| NM_016270 | 410.327   | 627.099   | AA398951  | 3030.894  | 2789.088  | AK027121  | 1940.969  | 2103.775  |
| NM_000211 | 10174.021 | 9162.063  | AI218732  | 1290.802  | 1315.073  | NM_017433 | 773.018   | 681.576   |
| NM_015685 | 3433.815  | 2152.816  | NM_002652 | 442.001   | 386.191   | AL117661  | 1470.45   | 1218.259  |
| NM_004357 | 24031.83  | 17211.629 | NM_001311 | 818.679   | 856.105   | X64643    | 1613.178  | 1117.794  |
| X03324    | 1409.536  | 1208.121  | NM_017790 | 4114.781  | 3287.672  | NM_005380 | 7246.679  | 5958.357  |
| AF130988  | 376.173   | 558.211   | NM_012410 | 1554.913  | 1436.097  | D70835    | 37489.297 | 25514.074 |
| NM_014934 | 664.599   | 686.261   | NM_001111 | 3616.193  | 2709.507  | NM_002697 | 1671.317  | 1291.321  |
| NM_015385 | 431.668   | 542.337   | NM_018040 | 3452.871  | 2737.212  | NM_001510 | 5591.898  | 4395.502  |
| NM_003690 | 1734.13   | 2157.349  | NM_014395 | 556.218   | 493.383   | NM_003412 | 4582.17   | 4386.358  |
| NM_000870 | 6167.877  | 6449.771  | NM_005160 | 1185.268  | 772.197   | NM_018330 | 572.256   | 521.764   |
| NM_014214 | 3034.519  | 3839.576  | X78817    | 12039.82  | 8042.39   | AK022668  | 1504.064  | 1350.422  |
| NM_002752 | 1061.169  | 468.526   | AY009401  | 701.741   | 588.282   | AW975132  | 914.817   | 909.884   |
| NM_013281 | 997.392   | 291.433   | AF294628  | 545.311   | 616.568   | NM_006051 | 1412.198  | 1335.222  |
| Y11306    | 573.716   | 291.198   | NM_001991 | 654.549   | 718.674   | NM_018427 | 1368.9    | 1354.402  |
| NM_016112 | 395.981   | 450.467   | NM_015057 | 742.945   | 382.172   | AB037814  | 477.619   | 358.436   |
| X85106    | 512.267   | 605.004   | AF303398  | 3597.147  | 2368.435  | NM_014663 | 6731.845  | 4723.584  |
| NM_003931 | 1252.913  | 981.293   | NM_014810 | 1420.76   | 696.69    | AF007217  | 954.729   | 644.037   |
| NM_012470 | 20010.996 | 17632.938 | NM_004730 | 1269.769  | 1022.33   | AB037753  | 2937.486  | 2461.217  |
| AF250226  | 10594.338 | 8817.713  | NM_007357 | 3117.288  | 2580.276  | NM_004674 | 1529.678  | 1350.528  |
| AL157475  | 2633.965  | 2890.914  | NM_003763 | 3630.706  | 3215.723  | AB037801  | 2234.08   | 1296.097  |
| NM_006060 | 16707.043 | 15262.892 | AK023448  | 769.756   | 748.948   | AL080159  | 8428.97   | 4953.551  |
| NM_006534 | 2450.323  | 2137.189  | Y18213    | 1265.093  | 1373.933  | NM_017823 | 40675.465 | 24255.75  |
| NM_017601 | 1033.372  | 902.682   | NM_003283 | 1865.977  | 1603.458  | U55185    | 1197.511  | 735.929   |
| AF110265  | 5428.812  | 3957.506  | NM_018163 | 1063.518  | 1466.933  | U30828    | 7804.841  | 5239.723  |
| AF272371  | 51090.152 | 50071.242 | AK026362  | 2666.075  | 3522.165  | AF085886  | 54456.766 | 48985.563 |
| AK021848  | 630.975   | 787.512   | NM_004960 | 2015.14   | 2774.149  | AK023828  | 1782.002  | 1232.593  |
| NM_003704 | 848.893   | 1034.302  | NM_005900 | 1540.155  | 1761.07   | AK022664  | 593.157   | 381.689   |
| AK023140  | 675.609   | 843.979   | NM_004785 | 2215.308  | 2981.953  | AL080223  | 1499.404  | 1197.38   |
| AF084362  | 411.278   | 797.491   | NM_002420 | 1576.124  | 2069.059  | AK001630  | 581.207   | 470.509   |
| NM_001553 | 3515.5    | 4937.871  | NM_014674 | 4790.098  | 4896.673  | NM_014612 | 4477.413  | 3760.267  |
| NM_014173 | 6535.397  | 5344.951  | NM_018271 | 654.377   | 771.884   | AF079098  | 543.319   | 408.659   |
| NM_001731 | 8252.224  | 7004.308  | NM_014652 | 1374.544  | 1348.562  | AK021815  | 627.286   | 635.183   |
| AK022961  | 1680.168  | 1027.147  | AL133020  | 4625.842  | 5273.572  | NM_001543 | 327.419   | 571.278   |
| NM_007375 | 2863.064  | 1229.351  | NM_004152 | 169.304   | 413.7     | NM_016641 | 2954.153  | 2709.201  |
| NM_014371 | 1567.447  | 786.977   | NM_001611 | 578.511   | 534.177   | AB018010  | 594.769   | 430.763   |
| AF290512  | 5522.883  | 3345.639  | AB018310  | 1887.023  | 1509.579  | NM_014610 | 7214.911  | 6352.857  |
| NM_006710 | 2698.021  | 2088.905  | NM_015370 | 13427.96  | 12025.357 | NM_000680 | 340.198   | 284.147   |
| AB002323  | 1376.277  | 1106.728  | NM_004870 | 320.14    | 965.553   | NM_006621 | 3454.315  | 2607.039  |
| AK022241  | 4502.698  | 8912.966  | NM_014347 | 4486.219  | 5202.834  | BF347398  | 861.806   | 902.341   |
| AK022587  | 3653.267  | 2407.638  | NM_001290 | 11106.007 | 14878.02  | AK026762  | 1407.724  | 1324.041  |
| NM_005512 | 298.084   | 120.148   | NM_004344 | 7433.414  | 16014.892 | NM_004412 | 323.147   | 415.49    |
| NM_005500 | 1876.176  | 4993.244  | AF085972  | 310.346   | 781.106   | L48516    | 1063.649  | 807.212   |
| NM_005723 | 405.126   | 321.724   | NM_000757 | 449.691   | 425.205   | NM_016640 | 3320.768  | 1963.427  |
| NM_020185 | 768.931   | 1056.348  | AB046786  | 385.714   | 649.07    | AF083930  | 1609.88   | 1453.397  |

|           |           |           |           |           |           |           |          |           |
|-----------|-----------|-----------|-----------|-----------|-----------|-----------|----------|-----------|
| NM_002832 | 22887.063 | 18556.637 | NM_016620 | 10288.229 | 12021.519 | NM_003426 | 472.48   | 614.135   |
| NM_017732 | 2139.662  | 2064.986  | NM_018890 | 20893.555 | 26573.18  | AK027159  | 692.875  | 564.314   |
| NM_002851 | 1391.168  | 1272.501  | NM_016204 | 585.746   | 930.647   | AF075112  | 371.189  | 338.449   |
| NM_002071 | 947.637   | 824.121   | AB046836  | 736.77    | 1034.279  | AK001796  | 607.978  | 353.694   |
| NM_005339 | 14685.69  | 15168.872 | NM_017816 | 4292.722  | 2927.68   | AF086152  | 1427.768 | 1173.986  |
| NM_001906 | 4028.404  | 5474.733  | AJ224166  | 1130.625  | 950.53    | U78519    | 772.415  | 831.263   |
| NM_004142 | 1703.645  | 4643.469  | AK026098  | 2150.394  | 2387.272  | AK026872  | 573.555  | 623.672   |
| AF108138  | 840.326   | 1012.306  | NM_012381 | 1367.206  | 1421.818  | NM_007190 | 1835.051 | 1512.82   |
| BF340302  | 2515.694  | 844.79    | NM_006397 | 9169.01   | 9414.646  | AF043897  | 801.508  | 704.003   |
| AK024210  | 827.198   | 1110.135  | D83776    | 1633.749  | 1806.277  | U79246    | 1380.036 | 1448.558  |
| NM_002276 | 3692.227  | 2649.559  | NM_004088 | 2386.663  | 2911.636  | AF052140  | 412.038  | 489.295   |
| AL133087  | 779.389   | 932.625   | NM_000138 | 2014.152  | 2153.026  | AF007147  | 543.945  | 326.562   |
| NM_018010 | 876.369   | 2239.215  | BC032460  | 5822.54   | 6155.48   | AF052127  | 1177.23  | 1315.261  |
| NM_002274 | 7695.819  | 7329.562  | NM_014071 | 1861.725  | 2030.497  | AK024261  | 305.535  | 307.125   |
| AL080200  | 520.794   | 244.185   | AK024404  | 1675.934  | 2013.259  | AF052150  | 319.645  | 444.949   |
| BF337874  | 2627.509  | 3157.039  | NM_006329 | 738.795   | 1550.448  | AF086481  | 410.763  | 415.956   |
| NM_003475 | 11900.643 | 8268.271  | NM_000213 | 2814.888  | 2792.806  | AK024885  | 1074.861 | 1099.709  |
| NM_000243 | 2956.946  | 2247.479  | BE906107  | 5695.586  | 8959.088  | AK026208  | 1692.699 | 1255.813  |
| NM_004383 | 6803.933  | 4541.168  | NM_015516 | 2206.992  | 3826.713  | NM_016947 | 52590.41 | 43747.055 |
| NM_012256 | 8542.29   | 15457.504 | AB033065  | 965.086   | 1656.345  | AL359940  | 1896.198 | 2113.971  |
| NM_006006 | 554.409   | 723.653   | NM_004857 | 4462.076  | 3279.188  | NM_018286 | 728.057  | 574.675   |
| NM_016325 | 830.719   | 807.891   | NM_012108 | 425.529   | 375.795   | AF085961  | 288.483  | 257.711   |
| NM_001604 | 890.743   | 865.483   | NM_003253 | 660.424   | 428.986   | AK024925  | 4050.802 | 3159.688  |
| NM_017656 | 1095.947  | 898.573   | NM_013285 | 3010.442  | 2193.858  | AL049460  | 1681.268 | 1568.425  |
| X16282    | 4440.978  | 4211.374  | NM_002872 | 13098.582 | 10639.216 | AF075113  | 416.141  | 308.018   |
| AK022519  | 376.151   | 486.544   | NM_000490 | 478.715   | 533.716   | AK022892  | 2017.172 | 1239.831  |
| NM_014415 | 991.875   | 1164.352  | NM_004839 | 809.634   | 766.219   | U50536    | 411.826  | 235.206   |
| S75264    | 7871.103  | 9567.545  | NM_012193 | 996.123   | 1395.229  | Z36807    | 7046.856 | 4991.398  |
| AF027513  | 675.55    | 1128.667  | NM_003405 | 6259.851  | 6723.813  | NM_017935 | 1670.485 | 1206.068  |
| NM_001379 | 1301.43   | 1655.68   | NM_004720 | 4533.644  | 4558.8    | AK021837  | 789.365  | 612.87    |
| NM_018664 | 1333.441  | 1186.837  | NM_001057 | 828.87    | 895.299   | AK002088  | 4387.348 | 3488.689  |
| BC006428  | 1723.782  | 484.858   | NM_005561 | 4191.424  | 4119.853  | X98206    | 315.154  | 216.13    |
| NM_005034 | 490.984   | 311.609   | AF272381  | 3672.403  | 4840.123  | AK000106  | 892.733  | 696.429   |
| NM_003926 | 3736.265  | 1684.401  | NM_004524 | 1782.029  | 1708.728  | AK022370  | 937.356  | 492.837   |
| AF085356  | 363.2     | 278.04    | NM_006315 | 1494.223  | 1775.106  | AK026765  | 404.457  | 395.975   |
| NM_016047 | 22753.672 | 19965.639 | NM_018401 | 697.651   | 786.941   | AL080191  | 1151.012 | 751.583   |
| NM_001499 | 5688.91   | 3104.263  | NM_005163 | 1985.489  | 3490.636  | AK021639  | 8957.763 | 5931.405  |
| BF030165  | 9091.913  | 5477.93   | NM_007273 | 26755.941 | 37063.328 | AK023189  | 533.783  | 488.153   |
| NM_016732 | 10295.412 | 5813.781  | BE894943  | 351.202   | 989.716   | AF306347  | 288.234  | 431.021   |
| NM_014763 | 7426.153  | 4933.111  | NM_016422 | 1773.417  | 4374.608  | AK024157  | 446.967  | 440.017   |
| AF086534  | 503.171   | 476.017   | NM_017878 | 1801.324  | 5250.718  | AK023905  | 656.808  | 642.813   |
| AF070617  | 879.263   | 963.671   | NM_004494 | 51838.695 | 69668.844 | AK024231  | 1201.295 | 1275.265  |
| NM_014918 | 5099.558  | 4200.34   | AL049687  | 657.22    | 846.61    | NM_016940 | 1178.202 | 785.537   |
| NM_000152 | 5999.586  | 10565.195 | NM_005643 | 8023.928  | 7912.048  | AK025757  | 950.036  | 615.511   |
| D17222    | 13061.208 | 16179.215 | NM_003592 | 1756.815  | 1374.484  | Y16713    | 438.493  | 320.652   |
| NM_000154 | 1265.229  | 1522.226  | NM_014953 | 1426.269  | 868.044   | L07394    | 3730.136 | 2072.582  |
| NM_003549 | 118.696   | 345.049   | AF179995  | 600.824   | 439.196   | AK056133  | 769.361  | 587.287   |
| NM_000671 | 1125.508  | 830.49    | NM_016195 | 3347.833  | 1269.149  | NM_017845 | 2260.219 | 1654.585  |
| NM_006297 | 11883.178 | 8075.38   | NM_004523 | 873.38    | 685.181   | AF130080  | 368.124  | 253.866   |
| AF318366  | 4420.119  | 3562.533  | NM_004404 | 5383.937  | 4475.872  | AK026006  | 621.647  | 388.4     |
| AF182423  | 694.046   | 295.974   | NM_002960 | 2396.755  | 2289.25   | NM_019085 | 2977.432 | 2486.183  |
| D26018    | 1684.989  | 1949.542  | AB046788  | 531.149   | 1625.076  | AL122072  | 1232.499 | 1180.928  |
| AB037863  | 587.322   | 624.027   | NM_006790 | 1277.381  | 2890.517  | AK026221  | 374.779  | 365.458   |



|           |           |           |           |           |           |            |           |           |
|-----------|-----------|-----------|-----------|-----------|-----------|------------|-----------|-----------|
| BC000363  | 878.236   | 870.979   | AL117522  | 7021.218  | 7953.245  | Y13870     | 508.231   | 460.264   |
| NM_007237 | 930.733   | 1298.597  | NM_006572 | 5022.516  | 6386.75   | AK026403   | 982.286   | 728.418   |
| NM_00460E | 703.694   | 859.49    | NM_019061 | 2257.782  | 2454.031  | AK022980   | 454.858   | 466.721   |
| NM_018257 | 4220.677  | 4968.155  | AB033007  | 2016.377  | 2914.125  | AL359058   | 963.952   | 1007.607  |
| NM_00591E | 1340.853  | 2099.982  | NM_003781 | 678.811   | 897.416   | AK026237   | 1441.452  | 985.436   |
| AF086112  | 352.505   | 458.717   | NM_001304 | 614.103   | 741.665   | NM_017632  | 567.348   | 489.264   |
| AL137254  | 959.07    | 859.38    | NM_000504 | 517.571   | 1110.424  | AK026655   | 661.415   | 528.298   |
| AK026359  | 432.095   | 575.085   | NM_003130 | 672.051   | 917.131   | AF129926   | 1101.983  | 820.763   |
| AF085884  | 1051.711  | 1039.434  | NM_00471E | 9777.017  | 9216.312  | AK025822   | 1776.891  | 1074.7    |
| S81522    | 2120.374  | 2656.874  | D29810    | 2986.256  | 2479.181  | AL360140   | 422.562   | 386.459   |
| AF075070  | 384.79    | 280.231   | NM_00012E | 653.123   | 553.046   | AF201937   | 18730.662 | 14846.932 |
| S94541    | 1031.067  | 502.222   | AB002384  | 845.85    | 733.406   | AL390128   | 682.019   | 847.394   |
| AK024228  | 2687.69   | 5822.1    | NM_018437 | 883.498   | 597.545   | AL157429   | 1671.51   | 1673.332  |
| NM_016647 | 668.555   | 330.281   | NM_000422 | 419.932   | 299.274   | NM_012071  | 24956.141 | 17209.992 |
| AK024695  | 918.232   | 1010.801  | AK023164  | 974.693   | 649.399   | AF055018   | 2272.7    | 2136.476  |
| AF038174  | 2127.986  | 3536.464  | NM_00537E | 720.743   | 670.203   | AF070599   | 643.282   | 981.811   |
| NM_013243 | 485.622   | 1266.223  | AK027121  | 2158.784  | 2630.617  | NM_00545C  | 992.306   | 988.566   |
| AF070632  | 763.36    | 1823.247  | NM_017433 | 1325.213  | 1525.559  | AK023600   | 446.102   | 478.003   |
| AF161359  | 2292.953  | 6545.382  | AL117661  | 1941.515  | 2237.139  | NM_00552E  | 1362.573  | 735.837   |
| AL365520  | 2198.877  | 5265.562  | X64643    | 1803.218  | 1860.522  | NM_00528E  | 1274.71   | 880.053   |
| AL359338  | 1348.949  | 2163.23   | NM_00538C | 7118.163  | 7826.887  | AK001918   | 539.432   | 520.915   |
| AK023623  | 2344.919  | 3670.552  | D70835    | 44324.887 | 41299.797 | NM_01863E  | 16235.144 | 11931.083 |
| AK021539  | 3509.09   | 2998.717  | NM_002697 | 1781.062  | 1996.365  | AF086048   | 1814.978  | 1351.215  |
| AK021819  | 535.963   | 315.066   | NM_00151E | 4616.658  | 4815.925  | L15616     | 2751.615  | 2414.693  |
| AK026738  | 879.887   | 796.298   | NM_003412 | 6905.338  | 8321.405  | AB019565   | 5526.023  | 3766.756  |
| AK025011  | 447.05    | 436.22    | NM_01833E | 674.378   | 1007.705  | D16914     | 50037.563 | 34999.551 |
| AL157491  | 426.051   | 500.556   | AK022668  | 2126.253  | 2362.807  | AA084879   | 404.864   | 249.079   |
| NM_00526E | 3269.646  | 3913.874  | AW975132  | 1335.317  | 1540.707  | NM_000833  | 1152.309  | 797.006   |
| AF085998  | 804.424   | 1079.057  | NM_006051 | 1934.201  | 2919.799  | NM_000283  | 1006.301  | 541.224   |
| AK024681  | 964.022   | 723.313   | NM_018427 | 1505.856  | 1944.831  | NM_01246C  | 1924.337  | 1278.927  |
| NM_014907 | 6784.862  | 5671.564  | AB037814  | 596.408   | 579.866   | NM_01211E  | 1847.954  | 1331.196  |
| AB007977  | 8709.742  | 6168.255  | NM_014663 | 6474.015  | 6357.548  | AK001133   | 298.657   | 181.61    |
| NM_014221 | 957.472   | 349.818   | AF007217  | 917.437   | 830.787   | AK024092   | 861.538   | 733.898   |
| U84515    | 1115.264  | 2211.94   | AB037753  | 2780.237  | 1773.904  | AK002044   | 4569.865  | 4319.429  |
| U92021    | 300.759   | 772.031   | NM_004674 | 1728.186  | 1201.567  | U90904     | 6624.554  | 5493.284  |
| AF086106  | 428.599   | 617.801   | AB037801  | 4123.494  | 2237.442  | AF088053   | 2003.415  | 1552.529  |
| AF086143  | 8786.901  | 15421.261 | AL080159  | 6158.748  | 4771.294  | AL133662   | 447.933   | 485.844   |
| AK022239  | 294.422   | 372.401   | NM_017823 | 32811.836 | 20449.197 | U90903     | 762.155   | 581.315   |
| AK022364  | 340.792   | 372.839   | U55185    | 881.772   | 698.29    | AF278760   | 885.263   | 740.626   |
| AK024244  | 2605.967  | 1945.737  | U30828    | 7053.25   | 5784.097  | X58061     | 343.476   | 282.956   |
| AK023812  | 316.251   | 266.068   | AF085886  | 50208.273 | 63817.273 | AB032954   | 921.157   | 783.19    |
| AL390084  | 906.482   | 1063.44   | AK023828  | 1969.187  | 2054.306  | NM_006003  | 16173.502 | 11309.783 |
| AK023565  | 552.272   | 536.116   | AK022664  | 843.554   | 893.804   | AL110197   | 2775.493  | 2004.623  |
| NM_00383E | 1915.009  | 1937.464  | AL080223  | 2024.209  | 2138.566  | AF085995   | 1000.072  | 697.813   |
| AK000245  | 1321.975  | 1387.952  | AK001630  | 622.715   | 844.766   | CY3Cy5     | 1070.917  | 170.603   |
| AF113684  | 414.353   | 405.329   | NM_014612 | 9146.535  | 10023.375 | AA029300   | 2303.811  | 3054.866  |
| AF118072  | 1014.383  | 843.347   | AF079098  | 559.597   | 638.829   | BG708842   | 13430.478 | 15689.6   |
| AK024112  | 440.018   | 270.573   | AK021815  | 766.101   | 913.95    | M19723     | 44919.352 | 56176.59  |
| AF085900  | 14870.934 | 26033.318 | NM_001543 | 572.418   | 662.13    | X06256     | 3271.214  | 4807.764  |
| AK022420  | 1048.976  | 2519.496  | NM_016641 | 2787.074  | 3407.202  | AA709271   | 493.687   | 607.347   |
| AK023254  | 1136.973  | 2848.218  | AB018010  | 624.646   | 681.088   | M34057     | 435.879   | 608.716   |
| AK023748  | 261.739   | 536.169   | NM_01461C | 8142.916  | 8043.314  | ID 1984668 | 1106.261  | 1146.239  |
| AK023945  | 5138.135  | 11220.896 | NM_00068E | 485.952   | 579.474   | ID 1832579 | 912.979   | 1015.987  |

|           |           |           |           |           |           |            |           |           |
|-----------|-----------|-----------|-----------|-----------|-----------|------------|-----------|-----------|
| AK022446  | 1131.774  | 2613.61   | NM_006621 | 3455.468  | 4206.838  | H-430185 N | 1072.367  | 1112.148  |
| AK023352  | 719.96    | 2232.309  | BF347398  | 2567.031  | 2652.923  | D16583     | 3180.762  | 3182.561  |
| AK023773  | 1132.132  | 3297.74   | AK026762  | 1494.826  | 945.846   | H44051     | 244.128   | 195.503   |
| AK024123  | 491.782   | 1068.829  | L48516    | 1140.145  | 542.227   | AA481547   | 533.179   | 576.465   |
| AF116709  | 937.588   | 1361.249  | NM_016648 | 3030.969  | 1843.28   | AA831880   | 615.627   | 608.615   |
| AK025533  | 753.923   | 1091.893  | AF083930  | 1340.534  | 1138.77   | T64880     | 723.814   | 667.702   |
| AK021911  | 3687.69   | 3006.746  | NM_003426 | 596.231   | 706.489   | NM_020967  | 1083.217  | 1186.486  |
| D17225    | 452.097   | 407.902   | NM_014862 | 508.516   | 428.332   | NM_001071  | 6131.512  | 6841.135  |
| AF147430  | 1138.598  | 1326.8    | AK027159  | 872.23    | 647.714   | SR6        | 1639.079  | 1142.458  |
| AK025766  | 4547.944  | 4156.649  | AF075112  | 383.8     | 510.112   | SR8        | 5572.306  | 16126.538 |
| U35875    | 15468.385 | 14283.874 | AK001796  | 505.431   | 559.572   | SR10       | 19436.061 | 6213.517  |
| AK021857  | 23830.607 | 18760.057 | AF086152  | 3926.571  | 4025.008  | CY3Cy5     | 841.227   | 143.771   |
| AK022257  | 851.359   | 780.482   | U78519    | 864.976   | 1206.494  | NM_005027  | 1779.952  | 2530.151  |
| BE887356  | 41512.605 | 54464.438 | AK026872  | 930.863   | 1184.159  | NM_004612  | 1496.496  | 1489.32   |
| X84369    | 334.852   | 362.817   | AL157505  | 401.397   | 512.596   | NM_005608  | 890.33    | 792.35    |
| AK023329  | 3279.681  | 3900.996  | NM_007190 | 4138.884  | 3426.463  | NM_001106  | 821.385   | 951.414   |
| AK025181  | 438.699   | 929.848   | AF043897  | 811.682   | 744.857   | NM_015583  | 888.536   | 1125.801  |
| AK000477  | 171.326   | 396.696   | U79246    | 1447.369  | 1306.149  | NM_018490  | 1717.02   | 2459.203  |
| AK021773  | 2377.454  | 6065.95   | AF052140  | 582.688   | 423.981   | NM_006245  | 2983.84   | 3544.252  |
| AK027074  | 3429.378  | 9128.771  | NM_018836 | 658.811   | 357.385   | NM_005103  | 2606.797  | 2475.706  |
| AL365456  | 899.982   | 2025.172  | AF007147  | 629.51    | 515.428   | NM_004822  | 477.212   | 484.087   |
| NM_018038 | 882.772   | 1912.749  | AF052127  | 1578.549  | 1213.708  | AK022349   | 445.879   | 314.454   |
| AK025048  | 363.702   | 689.825   | AK024261  | 444.139   | 305.817   | NM_004973  | 1836.138  | 1722.484  |
| U84522    | 1827.695  | 1712.147  | AF086481  | 364.69    | 448.912   | NM_007245  | 2788.439  | 3145.633  |
| AK021694  | 780.903   | 673.839   | AK024885  | 1258.037  | 1147.239  | NM_001286  | 1245.633  | 1280.956  |
| AF086013  | 421.395   | 322.642   | AK022441  | 673.493   | 813.399   | NM_005073  | 410.726   | 323.348   |
| U84505    | 2371.179  | 2039.852  | AK026208  | 1952.016  | 2050.965  | NM_000951  | 913.416   | 763.799   |
| X81005    | 891.514   | 914.132   | NM_016947 | 56364.246 | 61624.938 | X52599     | 347.475   | 297.274   |
| AL049265  | 688.354   | 842.977   | AY007136  | 519.112   | 482.832   | AK000158   | 2844.615  | 3542.096  |
| AK022225  | 985.14    | 1268.741  | AK026759  | 225.534   | 706.196   | NM_005766  | 1815.767  | 2170.051  |
| AL137635  | 558.345   | 450.565   | AL359940  | 2062.72   | 2340.054  | AK024500   | 5216.106  | 5693.118  |
| AL049430  | 1632.985  | 1472.288  | NM_018286 | 1093.718  | 1055.349  | NM_002564  | 6562.033  | 8502.524  |
| AK021461  | 630.215   | 628.006   | AK024925  | 6740.65   | 7114.991  | NM_000963  | 3135.407  | 3771.598  |
| AB015349  | 864.652   | 1258.598  | AL049460  | 2679.695  | 2493.373  | NM_013308  | 3912.76   | 5215.345  |
| AL079274  | 18585.479 | 24398.309 | AK022396  | 575.384   | 761.127   | AF027302   | 2452.448  | 3280.75   |
| S46403    | 890.813   | 611.558   | AF075113  | 679.177   | 2494.896  | NM_002852  | 2495.831  | 3593.375  |
| AL137398  | 2995.86   | 6338.373  | AF086037  | 567.212   | 946.351   | NM_001817  | 2656.806  | 3631.963  |
| Y12021    | 825.897   | 2182.371  | AK022892  | 3636.335  | 2066.672  | AF063611   | 901.258   | 1116.767  |
| BC016172  | 142.751   | 740.476   | Z36807    | 10732.8   | 5565.898  | NM_006039  | 1829.267  | 1614.118  |
| AF127771  | 703.989   | 1808.338  | U52836    | 493.504   | 281.66    | NM_014656  | 2786.194  | 2632.07   |
| Z83949    | 128.069   | 921.696   | NM_017939 | 1482.153  | 1454.037  | NM_002076  | 2229.868  | 2013.914  |
| NM_013300 | 13817.347 | 25879.1   | AK021837  | 1188.112  | 1090.594  | X05299     | 3269.28   | 2708.149  |
| AK026039  | 6379.95   | 13147.238 | AK002088  | 5488.188  | 6955.005  | BM468475   | 794.311   | 535.45    |
| AF108756  | 14822.182 | 29648.016 | X98206    | 559.515   | 652.758   | NM_000318  | 1925.983  | 1507.66   |
| AF086394  | 283.263   | 820.196   | AK000106  | 1314.265  | 1843.689  | NM_002060  | 2611.467  | 2108.042  |
| NM_004075 | 2193.545  | 2032.756  | AK022370  | 1067.592  | 1242.796  | AK001230   | 1267.091  | 1174.753  |
| NM_001887 | 1546.091  | 1589.716  | AK026765  | 716.392   | 1145.15   | NM_014680  | 3970.466  | 2944.24   |
| NM_006533 | 723.858   | 740.674   | AL117530  | 540.264   | 625.878   | NM_000229  | 1506.009  | 2102.598  |
| AK026747  | 1927.669  | 1520.121  | AK025016  | 450.447   | 923.928   | NM_006995  | 17782.252 | 17508.639 |
| AL110150  | 5175.927  | 4679.222  | AL080191  | 1845.626  | 1692.849  | NM_003129  | 11641.771 | 14144.778 |
| NM_001998 | 3878.188  | 4503.496  | AK021639  | 9804.656  | 6278.272  | NM_001956  | 1456.486  | 1704.45   |
| X87825    | 2811.487  | 3414.274  | AK023189  | 585.608   | 479.087   | AB033064   | 868.012   | 1092.021  |
| NM_000914 | 375.322   | 660.938   | AF118062  | 929.395   | 868.102   | AK022317   | 1887.583  | 2715.745  |

|            |           |           |           |           |           |            |           |           |
|------------|-----------|-----------|-----------|-----------|-----------|------------|-----------|-----------|
| AK001285   | 14579.321 | 14378.083 | AF306347  | 720.229   | 593.988   | NM_018396  | 6002.219  | 6446.321  |
| BE781513   | 967.629   | 1682.482  | AL359651  | 660.073   | 478.531   | NM_003124  | 2004.111  | 2560.621  |
| NM_015714  | 38119.281 | 40386.883 | AK024157  | 408.57    | 385.144   | AL133581   | 729.314   | 959.658   |
| AK075564   | 1249.8    | 1475.472  | AK023905  | 1086.532  | 1214.978  | NM_002558  | 3426.578  | 3535.321  |
| AK026219   | 1089.99   | 1388.157  | AK024231  | 1775.205  | 1742.079  | NM_005031  | 2269.535  | 2908.664  |
| D28446     | 1750.026  | 1912.097  | NM_016940 | 1935.563  | 2219.493  | AB040920   | 391.102   | 264.814   |
| AK024756   | 2065.753  | 2600.899  | AK025757  | 1446.219  | 2203.62   | NM_000720  | 355.974   | 205.163   |
| NM_017911  | 1026.57   | 1928.054  | Y16713    | 1098.692  | 1697.904  | NM_004842  | 866.192   | 941.598   |
| AJ224168   | 3037.19   | 5193.25   | L07394    | 4618.976  | 5062.472  | AK024639   | 3666.918  | 3114.707  |
| S69873     | 501.173   | 988.728   | AK056133  | 813.571   | 794.101   | NM_015720  | 2603.858  | 2572.811  |
| AF147325   | 55990.176 | 65527.844 | NM_017845 | 2730.829  | 3472.914  | AB007915   | 579.121   | 768.906   |
| NM_014428  | 289.499   | 1191.892  | AF130080  | 571.433   | 573.18    | AB033070   | 628.39    | 357.689   |
| NM_018497  | 363.86    | 696.037   | AK026006  | 728.602   | 669.266   | NM_018228  | 1104.523  | 1027.218  |
| NM_003774  | 1093.172  | 2036.752  | NM_019089 | 4903.808  | 3925.037  | NM_006328  | 3602.363  | 3204.551  |
| D87466     | 7294.476  | 13661.407 | AF147440  | 321.943   | 329.941   | AY009127   | 7048.62   | 7218.756  |
| CY3Cy5     | 813.785   | 46.86     | AL122072  | 1733.477  | 1319.149  | NM_014868  | 1290.153  | 1215.435  |
| AA608568   | 2714.668  | 2307.499  | AK026221  | 422.646   | 418.191   | NM_006708  | 19201.949 | 19008.439 |
| BG831301   | 22150.967 | 18307.814 | Y13870    | 486.065   | 481.442   | AB037835   | 1419.477  | 1386.458  |
| M14764     | 564.211   | 468.386   | AK026403  | 1149.377  | 991.972   | NM_016228  | 471.665   | 438.093   |
| AA478647   | 2511.686  | 2635.306  | AF086361  | 375.856   | 613.531   | NM_000157  | 2763.698  | 2737.072  |
| M35999     | 2768.059  | 3087.291  | AK022980  | 686.077   | 552.302   | NM_000712  | 6611.174  | 7036.81   |
| AW058501   | 484.093   | 526.003   | AL359058  | 966.214   | 965.632   | NM_018088  | 762.955   | 929.126   |
| M81379     | 449.277   | 848.41    | AK026237  | 1408.718  | 1626.268  | BC013695   | 13058.079 | 14991.627 |
| ID 2623896 | 2696.312  | 2800.008  | AK023687  | 449.727   | 425.304   | AB011164   | 2199.24   | 3334.382  |
| ID 2602214 | 3883.86   | 4918.498  | NM_017632 | 1511.182  | 3227.305  | M24750     | 971.267   | 1090.908  |
| ID 2071279 | 4143.288  | 3621.331  | AK026655  | 1023.107  | 4481.594  | NM_005968  | 1097.721  | 1456.956  |
| L10709     | 2578.468  | 2854.553  | S41522    | 995.794   | 2880.615  | NM_002740  | 2474.629  | 2303.725  |
| N35489     | 657.329   | 715.365   | AF129926  | 1288.828  | 1661.597  | AL117482   | 1748.604  | 1253.903  |
| AI928195   | 990.957   | 1553.843  | AK025822  | 1759.799  | 1546.303  | NM_006548  | 13775.765 | 11293.864 |
| AA482489   | 535.064   | 590.382   | AL360140  | 709.896   | 725.476   | AB018324   | 6909.72   | 6031.056  |
| AA458922   | 6358.87   | 7044.13   | AF201937  | 24908.727 | 16698.219 | NM_002742  | 31273.953 | 31992.418 |
| NM_145658  | 1561.738  | 1506.656  | AL390128  | 1070.073  | 921.396   | Z25431     | 3720.666  | 2836.443  |
| SR2        | 50480.578 | 44049.484 | AL157429  | 3931.089  | 3449.959  | NM_005627  | 3153.674  | 2617.257  |
| SR4        | 13074.894 | 11047.098 | NM_012071 | 23889.174 | 15005.133 | M64497     | 2070.523  | 2036.01   |
| SR6        | 1775.567  | 1422.542  | AF055018  | 2437.331  | 1900.14   | NM_007274  | 4297.813  | 4381.246  |
| SR8        | 6949.276  | 15063.065 | AF070599  | 1617.378  | 1052.49   | NM_003358  | 2133.044  | 1582.938  |
| SR10       | 23485.275 | 6471.229  | NM_005450 | 860.724   | 433.845   | AF238315   | 306.932   | 454.072   |
| CY3Cy5     | 772.227   | 90.811    | AK023600  | 674.845   | 417.176   | NM_005073  | 396.862   | 267.652   |
| NM_017728  | 888.951   | 635.418   | NM_005210 | 854.69    | 581.406   | NM_000951  | 802.735   | 1184.384  |
| NM_005258  | 2634.698  | 2116.023  | NM_005528 | 895.932   | 602.512   | X52599     | 315.754   | 401.946   |
| NM_002840  | 1097.225  | 1035.476  | NM_005288 | 1550.457  | 1158.731  | AA029300   | 2238.498  | 2772.521  |
| NM_006174  | 439.762   | 420.721   | AK001918  | 639.311   | 492.892   | BG708842   | 15700.262 | 18334.373 |
| NM_015850  | 5171.833  | 5672.826  | NM_018635 | 18881.797 | 12998.33  | M19723     | 44919.359 | 54644.168 |
| NM_004864  | 872.092   | 918.47    | AF086048  | 1959.012  | 1875.684  | X06256     | 3250.419  | 3986.178  |
| NM_002838  | 3296.562  | 4761.301  | L15616    | 2844.814  | 3433.624  | AA709271   | 484.322   | 667.243   |
| AK027377   | 241.744   | 362.828   | AB019565  | 5305.593  | 5034.8    | M34057     | 706.142   | 846.618   |
| NM_014688  | 56553.031 | 52473.633 | D16914    | 53318.637 | 67545.406 | ID 1984668 | 1086.178  | 1474.241  |
| BF528358   | 484.782   | 562.684   | AA084879  | 546.039   | 1816.9    | ID 1832579 | 962.873   | 963.608   |
| NM_016338  | 509.218   | 533.089   | NM_000833 | 2386.305  | 2603.58   | H-430185 N | 1086.148  | 962.077   |
| NM_002487  | 1113.31   | 1249.921  | NM_000283 | 1693.053  | 1949.529  | D16583     | 2932.65   | 2585.159  |
| NM_013340  | 329.588   | 897.892   | NM_012460 | 2269.881  | 2380.676  | H44051     | 254.496   | 217.214   |
| NM_005462  | 851.304   | 1083.612  | NM_012118 | 2307.934  | 2273.951  | AA481547   | 776.058   | 529.131   |
| NM_012318  | 1395.258  | 1816.127  | AK001133  | 381.613   | 479.101   | AA831880   | 546.498   | 540.036   |

|           |           |           |            |           |           |           |           |           |
|-----------|-----------|-----------|------------|-----------|-----------|-----------|-----------|-----------|
| NM_00651C | 8138.123  | 8598.015  | AK024092   | 1049.418  | 733.859   | T64880    | 730.076   | 708.411   |
| NM_003141 | 1878.584  | 2277.837  | AK002044   | 3995.763  | 2893.421  | NM_020967 | 848.281   | 780.784   |
| NM_02024E | 3469.125  | 3412.244  | AK021967   | 465.041   | 238.165   | NM_001071 | 5955.396  | 5547.486  |
| NM_00717E | 1674.031  | 1664.145  | U90904     | 5514.013  | 2471.669  | AB028990  | 562.216   | 546.882   |
| AB046381  | 416.166   | 283.941   | AF088053   | 2363.16   | 996.483   | X05299    | 3174.231  | 3744.507  |
| AJ011497  | 1843.742  | 1526.704  | AL133662   | 717.862   | 392.614   | BM468475  | 535.763   | 729.274   |
| NM_00301E | 413.184   | 323.712   | U90903     | 913.498   | 428.737   | NM_00031E | 1714.349  | 1938.551  |
| NM_00033E | 893.446   | 836.091   | AF278760   | 1121.233  | 732.794   | NM_00206C | 2306.437  | 2946.254  |
| W61100    | 38413.688 | 36536.328 | AB032954   | 1192.251  | 1193.427  | AK001230  | 990.685   | 1251.677  |
| AF215923  | 1264.926  | 980.117   | NM_006003  | 18713.701 | 22485.24  | NM_01468C | 3580.388  | 3924.279  |
| U66621    | 7712.028  | 6891.196  | AL110197   | 3042.718  | 2826.869  | NM_005027 | 1971.354  | 2585.284  |
| NM_00572C | 18185.811 | 14589.729 | AF085995   | 860.209   | 849.081   | NM_004612 | 1805.131  | 1428.643  |
| AB023161  | 273.052   | 492.196   | CY3Cy5     | 640.767   | 146.676   | NM_00560E | 1037.284  | 982.947   |
| U61736    | 589.883   | 584.275   | AA029300   | 2663.316  | 3356.968  | NM_012294 | 186.174   | 258.985   |
| AJ132086  | 727.862   | 1297.594  | BG708842   | 20155.979 | 21576.789 | NM_00110E | 729.914   | 791.582   |
| U92816    | 8448.835  | 8729.563  | M19723     | 46568.074 | 45711.77  | NM_015583 | 789.499   | 1385.192  |
| BC011987  | 11700.695 | 13711.004 | X06256     | 3400.021  | 4304.367  | NM_01849C | 1723.663  | 1975.565  |
| NM_00410E | 23249.311 | 24950.234 | AA709271   | 593.775   | 682.474   | NM_00624E | 2967.409  | 2831.868  |
| NM_00348E | 2188.618  | 2032.381  | M34057     | 597.434   | 645.121   | NM_005103 | 2473.528  | 1994.385  |
| NM_00503E | 3423.074  | 3698.558  | ID 1984668 | 954.802   | 1182.916  | NM_004822 | 354.711   | 306.842   |
| L03418    | 5896.623  | 6410.781  | ID 1832579 | 1218.734  | 3409.043  | AK022349  | 404.734   | 325.11    |
| M95923    | 983.582   | 1147.094  | H-430185 N | 949.052   | 1033.119  | NM_004973 | 1780.784  | 1693.163  |
| NM_00241E | 59731.969 | 56499.086 | D16583     | 3239.363  | 3169.096  | NM_00724E | 2708.295  | 2803.004  |
| NM_006332 | 1068.133  | 1131.685  | AA481547   | 971.865   | 845.848   | NM_00189C | 624.078   | 507.829   |
| NM_00091E | 4235.726  | 3693.508  | T64880     | 675.904   | 684.005   | NM_00128E | 1186.273  | 1167.669  |
| NM_018663 | 3042.045  | 3190.923  | NM_020967  | 818.604   | 779.488   | AB007915  | 581.543   | 916.075   |
| NM_145904 | 9975.931  | 8274.006  | NM_001071  | 6223.028  | 5723.156  | AB033070  | 621.809   | 886.449   |
| NM_00679E | 6485.732  | 5012.574  | SR2        | 44815.422 | 29790.047 | NM_01822E | 1000.438  | 1304.384  |
| NM_00070E | 782.892   | 730.445   | SR4        | 10269.91  | 7793.663  | NM_00632E | 3400.414  | 4602.292  |
| NM_015941 | 1167.863  | 1022.021  | SR6        | 1750.679  | 1128.502  | AY009127  | 6887.471  | 9669.815  |
| NM_00365E | 6044.595  | 4912.084  | SR8        | 5730.62   | 11662.275 | NM_01486E | 1177.701  | 1882.163  |
| NM_014837 | 2160.996  | 1760.326  | SR10       | 18347.713 | 4522.836  | AK000158  | 2708.883  | 3428.161  |
| AK025111  | 627.236   | 353.116   | CY3Cy5     | 489.369   | 123.387   | NM_00576E | 1611.452  | 2199.561  |
| NM_001732 | 1265.602  | 1046.598  | NM_005027  | 2300.197  | 2998.674  | AK024500  | 4680.749  | 5328.023  |
| NM_01869C | 6979.063  | 6180.263  | NM_004612  | 1557.733  | 1978.738  | NM_002564 | 6637.308  | 8048.976  |
| NM_00086C | 1299.729  | 1029.791  | NM_00560E  | 961.013   | 1237.024  | NM_000963 | 3059.51   | 3092.251  |
| AB037798  | 1680.163  | 1573.431  | NM_00110E  | 863.159   | 941.402   | NM_01330E | 3863.422  | 3883.328  |
| NM_00078C | 512.784   | 661.09    | NM_015583  | 948.262   | 2023.998  | AF027302  | 2337.862  | 2131.924  |
| AF272663  | 8173.219  | 10344.14  | NM_01849C  | 2236.703  | 2723.83   | NM_002852 | 2332.007  | 2050.552  |
| NM_01219C | 976.088   | 1162.57   | NM_00624E  | 3929.267  | 9336.531  | NM_001817 | 2570.459  | 2370.366  |
| AB033015  | 427.685   | 437.545   | NM_005103  | 2737.057  | 2163.892  | AF063611  | 1047.555  | 1064.121  |
| AF277719  | 1126.543  | 1290.344  | NM_004822  | 352.092   | 400.364   | NM_00603E | 1896.033  | 1562.945  |
| NM_000791 | 2006.631  | 2345.161  | AK022349   | 334.926   | 362.42    | NM_00208E | 334.928   | 355.895   |
| NM_003681 | 3970.633  | 4065.323  | NM_004973  | 1780.246  | 1385.189  | NM_01465E | 2590.685  | 2255.775  |
| NM_00480C | 10959.805 | 10997.358 | NM_00724E  | 2776.268  | 2350.427  | NM_00207E | 2072.3    | 1696.752  |
| AB037738  | 1385.038  | 2040.525  | NM_00189C  | 626.013   | 535.214   | Z25431    | 3288.752  | 3686.348  |
| NM_014954 | 24382.783 | 27734.939 | NM_00128E  | 1190.52   | 957.928   | NM_005627 | 3113.787  | 2961.91   |
| NM_000807 | 307.977   | 312.932   | NM_005073  | 431.9     | 341.124   | M64497    | 2118.33   | 2456.264  |
| NM_01490E | 3398.438  | 3495.524  | NM_000951  | 844.291   | 805.855   | NM_007274 | 3733.834  | 5082.602  |
| X91148    | 531.011   | 435.264   | AK000158   | 3625.412  | 5266.854  | NM_00335E | 2080.388  | 2408.305  |
| NM_01570C | 6177.068  | 4994.783  | AK024500   | 6612.506  | 6859.009  | AF238315  | 376.072   | 732.103   |
| NM_019087 | 2098.207  | 1402.297  | NM_002564  | 8905.558  | 10720.149 | NM_006224 | 22526.463 | 24052.219 |
| NM_016322 | 577.155   | 747.442   | NM_000963  | 3844.501  | 4951.7    | AL137300  | 5429.626  | 6036.623  |

|            |           |           |           |           |           |            |           |           |
|------------|-----------|-----------|-----------|-----------|-----------|------------|-----------|-----------|
| NM_005072  | 689.419   | 628.864   | NM_013308 | 3818.966  | 6293.347  | NM_000225  | 1594.351  | 2027.459  |
| AF308802   | 1478.802  | 1096.76   | AF027302  | 2339.566  | 2759.502  | NM_006995  | 16966.604 | 18237.891 |
| S76984     | 10314.05  | 8871.338  | NM_002852 | 2415.952  | 2965.421  | NM_003125  | 10836.316 | 15616.715 |
| NM_014495  | 55605.883 | 55604.215 | NM_001817 | 2841.654  | 3246.53   | NM_001955  | 1812.146  | 2775.627  |
| NM_014081  | 753.877   | 671.927   | AF063611  | 865.965   | 1101.931  | AB033064   | 745.191   | 1070.186  |
| NM_005651  | 610.278   | 662.289   | NM_006039 | 2118.393  | 1882.648  | AK022317   | 1895.652  | 2336.453  |
| NM_007195  | 1473.979  | 1901.215  | NM_002089 | 297.22    | 301.092   | NM_018395  | 5820.603  | 5874.352  |
| AK023337   | 5310.745  | 8115.831  | NM_014655 | 3141.115  | 2638.75   | NM_003124  | 1544.844  | 2071.651  |
| NM_013275  | 13382.726 | 13338.313 | NM_002075 | 2369.781  | 1767.698  | NM_004531  | 800.38    | 795.452   |
| AB037842   | 662.016   | 765.605   | X05299    | 3071.491  | 2426.066  | AL133581   | 631.092   | 636.412   |
| NM_019011  | 2902.942  | 3167.776  | BM468475  | 648.227   | 522.994   | NM_002555  | 3076.049  | 2913.088  |
| AF459094   | 3987.852  | 4550.586  | NM_000315 | 1859.231  | 1547.223  | NM_005031  | 2275      | 2504.287  |
| NM_003157  | 1838.1    | 1947.593  | NM_002060 | 2701.101  | 2377.829  | AB040920   | 414.794   | 194.177   |
| NM_004935  | 1374.23   | 1689.048  | AK001230  | 1339.059  | 1397.847  | NM_000720  | 371.12    | 249.326   |
| NM_014325  | 880.367   | 1055.636  | NM_014680 | 4638.161  | 3087.862  | NM_004842  | 834.682   | 748.77    |
| NM_004445  | 511.32    | 518.612   | NM_003129 | 13496.688 | 17415.311 | AK024639   | 3585.52   | 2820.275  |
| NM_015981  | 1754.748  | 1565.22   | NM_001955 | 2363.845  | 3017.426  | NM_015720  | 2561.144  | 2066.593  |
| NM_000455  | 3680.367  | 3334.393  | AB033064  | 1199.324  | 1334.504  | NM_020967  | 953.948   | 1076.695  |
| NM_014791  | 5499.15   | 5078.069  | AK022317  | 2683.834  | 3697.207  | NM_001071  | 5152.447  | 6492.031  |
| NM_003315  | 1465.894  | 1017.252  | NM_018395 | 6560.202  | 8362.76   | AB028990   | 542.781   | 552.652   |
| NM_004362  | 3460.365  | 3235.629  | NM_003124 | 2356.13   | 3020.493  | NM_006705  | 18145.889 | 18839.955 |
| NM_000182  | 16866.813 | 14194.996 | NM_006885 | 53520.742 | 51313.953 | AB037835   | 1278.294  | 1486.418  |
| AK023384   | 1338.188  | 1145.555  | NM_004531 | 883.371   | 1305.72   | NM_016225  | 447.342   | 420.196   |
| NM_016025  | 5162.851  | 3652.004  | AL133581  | 750.899   | 884.653   | NM_000157  | 2531.076  | 3164.799  |
| AB046381   | 329.724   | 410.089   | NM_002555 | 3209.06   | 3620.722  | NM_000712  | 6343.37   | 6443.584  |
| AJ011497   | 1836.093  | 2258.721  | NM_005031 | 2301.889  | 2654.75   | NM_018085  | 841.927   | 812.489   |
| NM_003015  | 683.887   | 753.448   | AB040920  | 394.508   | 486.487   | NM_014845  | 2684.409  | 2772.789  |
| NM_000335  | 871.258   | 676.163   | NM_000720 | 302.735   | 394.162   | AB011164   | 1993.127  | 1849.598  |
| W61100     | 44228.559 | 47106.344 | NM_004842 | 770.286   | 1078.419  | M24750     | 970.45    | 986.272   |
| AA608568   | 3164.366  | 3732.207  | AK024639  | 3340.057  | 2591.434  | NM_005965  | 641.959   | 703.141   |
| BG831301   | 25042.299 | 34873.188 | NM_015720 | 3513.449  | 3070.277  | NM_002740  | 2443.534  | 1828.553  |
| M14764     | 1853.878  | 2267.729  | AB007915  | 619.202   | 593.549   | AL117482   | 1624.854  | 1512.042  |
| AA478647   | 2492.431  | 2455.842  | AB033070  | 504.494   | 755.214   | NM_006545  | 12947.712 | 11089.081 |
| M35999     | 367.52    | 590.097   | NM_018225 | 999.597   | 980.328   | AB018324   | 6609.551  | 5752.507  |
| AW058501   | 434.64    | 745.863   | NM_006325 | 3757.522  | 3425.54   | NM_002742  | 32088.863 | 28738.295 |
| ID 2623896 | 3018.202  | 3312.333  | AY009127  | 7731.486  | 7022.155  | NM_004973  | 1698.739  | 1661.647  |
| ID 2602214 | 2613.386  | 2846.111  | NM_014865 | 1380.013  | 1340.672  | NM_007245  | 2422.481  | 3169.149  |
| ID 2071279 | 3595.56   | 3701.343  | NM_000712 | 7149.544  | 8127.591  | NM_001890  | 606       | 595.577   |
| L10709     | 3336.372  | 3612.664  | NM_018085 | 828.425   | 929.302   | NM_001285  | 1110.44   | 1469.246  |
| N35489     | 618.036   | 756.589   | AK023035  | 1366.702  | 1200.842  | NM_005073  | 316.766   | 319.917   |
| AI928195   | 1094.95   | 957.69    | NM_014845 | 2559.52   | 2715.663  | NM_000951  | 972.922   | 1032.854  |
| AA458922   | 6221.963  | 6125.55   | AB011164  | 2143.679  | 2426.228  | X52599     | 451.145   | 466.052   |
| NM_145655  | 1421.988  | 1135.053  | M24750    | 1070.006  | 1227.767  | AA029300   | 2453.867  | 2931.074  |
| NM_021957  | 719.566   | 729.206   | NM_005965 | 1382.756  | 1903.212  | BG708842   | 15241.432 | 17394.711 |
| NM_001715  | 6584.533  | 5296.968  | NM_002740 | 2436.037  | 2188.107  | M19723     | 41332.566 | 42839.145 |
| AL080062   | 1262.115  | 906.823   | AL117482  | 1605.626  | 1417.994  | AA709271   | 585.234   | 365.192   |
| NM_145904  | 7742.644  | 7056.5    | NM_006545 | 17363.324 | 13062.34  | M34057     | 332.755   | 343.207   |
| NM_006795  | 9867.312  | 17887.248 | AB018324  | 7510.91   | 5647.117  | ID 1984668 | 1078.39   | 933.106   |
| NM_000705  | 817.1     | 905.861   | NM_002742 | 41776.953 | 32014.109 | ID 1832579 | 838.902   | 681.902   |
| NM_015941  | 1352.946  | 1255.179  | Z25431    | 3497.279  | 2385.802  | H-430185 N | 1187.536  | 792.051   |
| NM_003655  | 6691.951  | 6211.943  | NM_005627 | 3300.468  | 2203.227  | D16583     | 2407.552  | 1778.375  |
| NM_014837  | 2305.776  | 2120.406  | M64497    | 2209.703  | 2225.457  | H44051     | 261.27    | 391.934   |
| NM_017725  | 1040.036  | 1075.797  | NM_007274 | 4906.03   | 4305.934  | AA481547   | 523.925   | 489.596   |

|           |           |           |            |           |           |           |           |          |
|-----------|-----------|-----------|------------|-----------|-----------|-----------|-----------|----------|
| NM_00525E | 2929.469  | 3334.3    | NM_00335E  | 2462.341  | 2140.603  | AA831880  | 474.813   | 311.509  |
| NM_00284C | 1577.483  | 1812.117  | AF238315   | 331.562   | 272.447   | T64880    | 588.71    | 590.357  |
| NM_006174 | 513.893   | 622.52    | AA029300   | 2664.11   | 4589.044  | NM_00603E | 1730.407  | 1901.93  |
| NM_01585C | 5097.321  | 5458.039  | BG708842   | 16978.096 | 20778.986 | NM_01465E | 2514.514  | 2870.141 |
| NM_004864 | 845.569   | 1041.165  | M19723     | 51103.273 | 66326.406 | NM_00207E | 1903.382  | 2237.545 |
| NM_00283E | 3040.853  | 3923.976  | AA709271   | 526.199   | 544.066   | X05299    | 3232.645  | 3216.32  |
| AK027377  | 1612.178  | 1114.673  | M34057     | 583.594   | 373.198   | BM468475  | 605.349   | 699.901  |
| NM_01468E | 53543.223 | 51316.152 | ID 1984668 | 918.498   | 1159.331  | NM_00031E | 1867.848  | 2067.435 |
| BF528358  | 563.244   | 522.673   | ID 1832579 | 729.183   | 759.651   | NM_00206C | 2547.719  | 3043.18  |
| NM_01633E | 1261.965  | 1795.125  | H-430185 M | 1170.486  | 1382.199  | AK001230  | 1236.019  | 1335.566 |
| NM_002487 | 991.512   | 967.53    | D16583     | 2885.438  | 2555.478  | NM_01468C | 4149.131  | 4101.491 |
| NM_01334C | 445.888   | 626.877   | AA481547   | 780.848   | 654.937   | NM_005027 | 2139.134  | 2327.835 |
| NM_00546E | 790.371   | 913.543   | T64880     | 643.621   | 565.624   | NM_00461E | 1514.323  | 1339.389 |
| NM_01231E | 1268.143  | 1189.262  | NM_020967  | 910.325   | 765.285   | NM_00560E | 725.853   | 704.268  |
| AK026235  | 558.292   | 364.457   | NM_001071  | 6524.994  | 4999.822  | NM_00110E | 791.851   | 675.401  |
| NM_00651C | 8058.654  | 6954.261  | AB028990   | 482.586   | 309.473   | NM_01558E | 744.024   | 800.652  |
| NM_003141 | 1428.881  | 1418.8    | NM_00206C  | 3838.678  | 7365.316  | NM_01849C | 1603.563  | 1669.652 |
| NM_02024E | 2849.823  | 2326.341  | NM_01468C  | 5153.111  | 6803.232  | NM_00624E | 2617.001  | 2149.278 |
| NM_00717E | 1358.194  | 1217.88   | NM_005027  | 2354.64   | 3495.119  | NM_00510E | 2600.939  | 1555.452 |
| X91148    | 379.405   | 591.276   | NM_00461E  | 1737.035  | 1958.058  | NM_00482E | 447.396   | 313.081  |
| NM_01570C | 5763.97   | 6850.768  | NM_00560E  | 943.234   | 1259.745  | AK022349  | 319.995   | 322.767  |
| NM_019087 | 1992.593  | 2301.286  | NM_00110E  | 786.735   | 758.766   | NM_005031 | 1978.598  | 2972.689 |
| NM_01632E | 585.387   | 560.472   | NM_01558E  | 885.662   | 990.364   | AB040920  | 319.465   | 390.552  |
| NM_00507E | 979.193   | 845.974   | NM_01849C  | 2159.55   | 2050.831  | NM_00072C | 390.98    | 393.917  |
| AF215923  | 1651.276  | 1793.054  | NM_00624E  | 2643.298  | 2542.453  | NM_00484E | 638.283   | 946.143  |
| U66621    | 8071.424  | 9373.808  | NM_00510E  | 2361.892  | 2023.798  | AK024639  | 3374.037  | 3459.094 |
| NM_00572C | 17330.352 | 18713.428 | NM_00482E  | 368.533   | 540.432   | NM_01572C | 2888.308  | 3418.068 |
| AB040936  | 587.852   | 716.185   | AK022349   | 359.149   | 302.636   | AB007915  | 603.09    | 692.35   |
| U61736    | 653.154   | 939.704   | NM_00497E  | 1850.731  | 1279.74   | AB033070  | 561.464   | 765.292  |
| AJ132086  | 1097.774  | 1148.005  | NM_00724E  | 2841.909  | 2046.289  | NM_01822E | 899.446   | 1195.786 |
| U92816    | 8586.385  | 11326.438 | NM_00189C  | 562.522   | 540.795   | NM_00632E | 3464.77   | 4346.107 |
| BC011987  | 10010.484 | 12851.848 | NM_00128E  | 1345.16   | 1119.002  | AY009127  | 6869.617  | 8997.979 |
| NM_00410E | 22472.619 | 24152.783 | NM_01822E  | 1287.884  | 2255.128  | NM_01486E | 1389.844  | 1833.215 |
| NM_00348E | 1919.059  | 1894.388  | NM_01486E  | 1568.451  | 2569.893  | AK000158  | 2987.02   | 2804.615 |
| NM_00503E | 2688.401  | 2895.399  | NM_00576E  | 1834.003  | 2803.87   | NM_00576E | 1936.916  | 1877.021 |
| L03418    | 5893.273  | 5203.688  | AK024500   | 5648.983  | 5866.935  | AK024500  | 5212.737  | 4901.079 |
| M95923    | 956.825   | 847.335   | NM_002564  | 7151.342  | 6646.598  | NM_002564 | 6431.839  | 5652.187 |
| NM_00241E | 58582.133 | 52230.391 | NM_00096E  | 3524.987  | 3450.257  | NM_00096E | 2961.669  | 2990.712 |
| NM_00633E | 780.008   | 602.337   | NM_01330E  | 3687.563  | 4068.346  | NM_01330E | 3618.858  | 4027.968 |
| NM_00091E | 2632.276  | 2185.378  | AF027302   | 2323.15   | 2007.052  | AF027302  | 2072.367  | 1782.727 |
| NM_01866E | 2885.127  | 2304.894  | NM_00285E  | 2229.401  | 2465.358  | NM_00285E | 2276.23   | 2002.992 |
| NM_014791 | 4970.986  | 5087.211  | NM_001817  | 2581.34   | 2614.971  | NM_001817 | 2473.289  | 2315.486 |
| NM_00331E | 1241.909  | 1525.721  | AF063611   | 987.79    | 869.896   | AF063611  | 1004.896  | 845.944  |
| NM_00436E | 3861.253  | 4592.194  | NM_00603E  | 1899.009  | 1290.052  | NM_00596E | 764.772   | 863.292  |
| NM_00018E | 15840.025 | 15047.99  | NM_00208E  | 276.992   | 339.135   | NM_00274C | 2357.71   | 2522.045 |
| AK023384  | 1709.237  | 1631.626  | NM_01465E  | 2931.819  | 2421.607  | AL117482  | 1622.339  | 1758.85  |
| NM_01602E | 5296.237  | 4905.59   | NM_00207E  | 2273.938  | 1834.121  | NM_00654E | 14568.327 | 14598.54 |
| AK025111  | 617.033   | 618.495   | Z25431     | 3636.035  | 5258.367  | AB018324  | 7483.226  | 8677.668 |
| NM_00173E | 1343.035  | 1543.355  | NM_005627  | 3378.339  | 4500.433  | NM_00274E | 35584.047 | 39975.25 |
| NM_01869C | 6052.056  | 6410.331  | M64497     | 2132.62   | 3530.808  | Z25431    | 3312.675  | 3604.756 |
| NM_00086C | 1247.931  | 1521.223  | NM_00335E  | 3599.599  | 4398.631  | NM_005627 | 3176.479  | 2733.104 |
| AB037798  | 1675.559  | 1848.891  | AF238315   | 428.807   | 664.938   | M64497    | 2084.365  | 2324.608 |
| NM_00078C | 476.739   | 502.696   | NM_006224  | 32890.164 | 37294.262 | NM_007274 | 4289.083  | 4711.743 |

|            |           |           |            |           |           |           |           |           |
|------------|-----------|-----------|------------|-----------|-----------|-----------|-----------|-----------|
| AF272663   | 7917.412  | 8660.506  | NM_000229  | 2159.227  | 3097.245  | NM_003356 | 2416.497  | 2789.142  |
| NM_01219C  | 1031.552  | 1111.05   | NM_006995  | 19880.504 | 20109.27  | AF238315  | 340.176   | 545.353   |
| AB033015   | 273.587   | 315.351   | NM_003129  | 12017.247 | 12416.579 | NM_000229 | 1761.467  | 2023.929  |
| AF277719   | 993.581   | 1014.616  | NM_001956  | 2203.705  | 2654.187  | NM_006995 | 18524.926 | 16991.557 |
| NM_000791  | 1596.933  | 1869.541  | AB033064   | 1100.78   | 1391.716  | NM_003129 | 11938.127 | 10420.171 |
| NM_003681  | 3923.423  | 3956.766  | AK022317   | 2246.855  | 2778.107  | NM_001956 | 1640.32   | 1667.078  |
| NM_00480C  | 10468.106 | 11722.281 | NM_018396  | 5769.268  | 5303.891  | AB033064  | 734.126   | 636.509   |
| S82769     | 672.513   | 529.621   | NM_003124  | 2230.328  | 2133.924  | AK022317  | 1906.205  | 1847.493  |
| NM_014954  | 23216.686 | 22707.516 | NM_006886  | 52045.629 | 40023.492 | NM_018396 | 5815.199  | 4619.617  |
| NM_014909  | 2527.955  | 2262.78   | NM_004531  | 822.344   | 870.285   | NM_003124 | 1559.797  | 1520.028  |
| NM_145659  | 1394.025  | 1578.832  | AL133581   | 765.432   | 636.887   | NM_006886 | 47947.258 | 40395.141 |
| NM_021957  | 1212.001  | 2100.217  | NM_002558  | 3067.697  | 2911.731  | NM_004531 | 783.023   | 615.877   |
| NM_001719  | 7220.529  | 6931.774  | NM_005031  | 1554.105  | 1367.179  | AL133581  | 791.842   | 586.847   |
| AL080062   | 1350.367  | 1393.405  | NM_004842  | 792.689   | 809.623   | NM_002558 | 3174.256  | 2505.922  |
| AF308802   | 1436.194  | 1459.977  | AK024639   | 3300.062  | 2437.214  | NM_000922 | 1746.793  | 2031.47   |
| NM_014081  | 869.546   | 1001.15   | NM_01572C  | 3182.59   | 2641.141  | NM_013232 | 3482.031  | 3280.595  |
| NM_005651  | 636.535   | 912.923   | NM_020967  | 874.45    | 1457.108  | NM_017993 | 1183.767  | 1373.967  |
| NM_007195  | 1507.957  | 1990.198  | NM_001071  | 6777.22   | 9515.351  | NM_000362 | 7064.294  | 5541.799  |
| AK023337   | 4232.717  | 4987.361  | AB028990   | 694.821   | 707.699   | NM_014429 | 1411.847  | 1218.341  |
| NM_013275  | 12098.898 | 14097.792 | AB037835   | 1525.182  | 1684.651  | AK000770  | 1004.754  | 1048.21   |
| AB037842   | 694.447   | 463.67    | NM_016228  | 395.361   | 422.745   | NM_00237C | 7807.122  | 9484.331  |
| NM_019011  | 2495.464  | 2694.282  | NM_000157  | 2608.697  | 2493.094  | NM_01567C | 1447.002  | 1431.34   |
| AF459094   | 4945.172  | 4859.096  | NM_000712  | 6811.732  | 6432.804  | NM_014709 | 881.926   | 1046.808  |
| NM_003157  | 2214.305  | 2259.139  | NM_018088  | 823.875   | 1156.94   | AB028990  | 818.802   | 637.617   |
| NM_004938  | 1580.203  | 1766.584  | AK023035   | 1545.706  | 2268.511  | AB037835  | 1491.1    | 1337.777  |
| NM_014326  | 913.705   | 836.948   | NM_014846  | 2538.461  | 3055.613  | NM_016228 | 557.221   | 492.895   |
| NM_004448  | 458.224   | 523.031   | AB011164   | 2020.415  | 1862.072  | NM_000157 | 2600.919  | 2056.026  |
| NM_015981  | 1818.488  | 1475.896  | M24750     | 1060.939  | 1034.286  | NM_000712 | 6173.943  | 5579.079  |
| NM_000455  | 3706.599  | 2935.896  | NM_005965  | 1158.657  | 972.568   | NM_018088 | 756.833   | 661.206   |
| NM_012319  | 1269.969  | 1132.009  | NM_00274C  | 2550.09   | 1730.903  | BC013695  | 12501.812 | 11229.414 |
| AK026235   | 356.073   | 438.682   | AL117482   | 1865.988  | 1086.823  | AK023035  | 1220.608  | 1095.205  |
| NM_00651C  | 7596.391  | 8228.925  | NM_006549  | 19720.563 | 13721.335 | NM_014846 | 2681.636  | 2426.559  |
| NM_003141  | 1412.652  | 1384.642  | AB018324   | 7375.269  | 5054.37   | AB011164  | 2044.666  | 1477.062  |
| NM_020245  | 2703.195  | 2704.23   | NM_002742  | 37769.539 | 27822.053 | M24750    | 1103.568  | 848.419   |
| NM_007175  | 1456.691  | 1450.989  | NM_004973  | 1951.657  | 2046.806  | AB046776  | 424.502   | 401.059   |
| AB046381   | 442.755   | 646.155   | NM_007245  | 3040.796  | 3136.625  | NM_002687 | 6591.494  | 6458.214  |
| AJ011497   | 2041.572  | 2232.383  | NM_00189C  | 807.272   | 644.045   | NM_000627 | 918.325   | 915.639   |
| NM_000336  | 985.452   | 931.258   | NM_001286  | 1183.833  | 1273.847  | NM_000038 | 571.594   | 493.71    |
| W61100     | 53289.805 | 57440.535 | NM_005073  | 483.883   | 420.724   | NM_000825 | 303.339   | 321.435   |
| AA608568   | 3518.699  | 4174.746  | NM_000951  | 1084.019  | 1203.955  | NM_001963 | 269.176   | 239.14    |
| BG831301   | 23045.313 | 34224.336 | AA029300   | 2546.862  | 2426.701  | NM_004334 | 799.558   | 612.875   |
| M14764     | 481.136   | 474.228   | BG708842   | 23166.152 | 28100.656 | NM_003886 | 1733.028  | 1810.268  |
| AA478647   | 2399.512  | 2769.274  | M19723     | 48980.621 | 48805.945 | NM_005843 | 1194.611  | 1383.067  |
| M35999     | 430.736   | 368.322   | AA709271   | 830.606   | 1392.495  | NM_01798C | 309.33    | 308.45    |
| AW058501   | 845.603   | 747.803   | M34057     | 509.737   | 426.147   | NM_001252 | 12440.024 | 11567.967 |
| ID 2623896 | 3421.904  | 4722.247  | ID 1984668 | 1038.021  | 598.461   | AF053712  | 603.753   | 495.544   |
| ID 2602214 | 3444.169  | 4190.319  | ID 1832579 | 827.545   | 605.009   | NM_003947 | 689.429   | 719.354   |
| ID 2071279 | 3753.562  | 3643.323  | H-430185 N | 1052.99   | 825.008   | NM_002821 | 11028.441 | 9117.682  |
| L10709     | 2877.586  | 2662.701  | D16583     | 3445.815  | 2270.985  | M96652    | 4051.799  | 3968.214  |
| N35489     | 719.267   | 553.083   | AA481547   | 769.204   | 404.039   | L41690    | 2016.228  | 1608.308  |
| AI928195   | 900.15    | 730.667   | AA831880   | 391.789   | 247.641   | NM_018059 | 395.671   | 362.81    |
| AA458922   | 5837.402  | 4742.152  | T64880     | 709.074   | 597.265   | NM_000939 | 38646.531 | 29637.322 |
| M95923     | 985.845   | 525.218   | NM_006039  | 1882.853  | 2138.423  | NM_006514 | 1461.383  | 1083.743  |

|           |           |           |           |           |           |           |           |           |
|-----------|-----------|-----------|-----------|-----------|-----------|-----------|-----------|-----------|
| NM_00241E | 61702.918 | 48769.902 | NM_01465E | 4112.255  | 3705.373  | AF065164  | 2816.728  | 2153.492  |
| NM_00633E | 898.192   | 546.681   | NM_00207E | 2294.491  | 2495.337  | AB028991  | 2474.901  | 2717.025  |
| NM_00091E | 3838.737  | 2900.947  | X05299    | 3159.699  | 3002.67   | AF263547  | 2415.835  | 2197.181  |
| NM_01866E | 2634.335  | 2362.413  | BM468475  | 752.51    | 792.285   | AJ008143  | 2634.597  | 2355.919  |
| NM_145904 | 9292.318  | 9174.303  | NM_00031E | 1960.811  | 2194.198  | NM_007144 | 683.327   | 586.198   |
| NM_00679E | 8146.425  | 7612.549  | NM_00206C | 3693.143  | 3699.58   | NM_004424 | 2143.137  | 2218.861  |
| NM_00070E | 824.856   | 854.994   | AK001230  | 1313.575  | 1262.277  | AL133117  | 2086.743  | 2092.255  |
| NM_015941 | 1190.531  | 1603.559  | NM_01468C | 5042.259  | 4334.121  | AF070586  | 1501.964  | 1388.64   |
| NM_00365E | 6049.651  | 6587.514  | NM_005027 | 2497.645  | 2856.698  | NM_01441E | 1056.443  | 1099.739  |
| NM_014837 | 2250.61   | 2247.686  | NM_00461E | 1570.161  | 1228.46   | NM_01330E | 1399.744  | 1282.231  |
| NM_01772E | 1014.42   | 1016.753  | NM_00560E | 1010.099  | 964.538   | NM_012227 | 2538.379  | 2528.856  |
| NM_00525E | 2836.499  | 2615.777  | NM_00110E | 742.2     | 639.065   | NM_006101 | 773.565   | 729.025   |
| NM_00284C | 1753.85   | 3000.999  | NM_01558E | 928.13    | 771.944   | NM_001237 | 2730.168  | 2693.296  |
| NM_006174 | 443.975   | 573.41    | NM_01849C | 1895.254  | 1615.814  | NM_002507 | 1235.995  | 1361.738  |
| NM_01585C | 4048.129  | 4579.373  | NM_00624E | 2861.65   | 2649.359  | NM_01596E | 1164.295  | 1293.169  |
| NM_004864 | 793.051   | 835.982   | NM_00510E | 3068.857  | 1619.468  | NM_01614E | 458.194   | 218.32    |
| NM_00283E | 2532.489  | 2852.267  | NM_00482E | 427.279   | 403.024   | NM_01607E | 2192.106  | 1819.398  |
| NM_01468E | 58896.406 | 49697.266 | NM_005031 | 2867.475  | 4443.906  | NM_004401 | 985.171   | 566.146   |
| BF528358  | 594.87    | 527.251   | NM_00072C | 349.833   | 319.655   | NM_00184E | 2604.262  | 1750.411  |
| NM_002487 | 1098.57   | 841.15    | NM_00484E | 862.459   | 1333.533  | AF255910  | 646.372   | 529.247   |
| NM_01334C | 326.203   | 326.852   | AK024639  | 3167.078  | 2771.74   | NM_01614E | 2542.361  | 1604.63   |
| NM_00546E | 935.112   | 855.619   | NM_01572C | 3521.568  | 3820.616  | AK024343  | 1202.069  | 997.474   |
| NM_014954 | 23713.67  | 18785.549 | AB007915  | 618.655   | 925.585   | NM_00193E | 337.953   | 429.444   |
| NM_01490E | 3181.921  | 2725.291  | AB033070  | 541.239   | 892.445   | NM_00256E | 651.687   | 644.496   |
| X91148    | 631.564   | 825.483   | NM_01822E | 969.534   | 1362.923  | D42084    | 2127.715  | 2201.499  |
| NM_01570C | 6311.48   | 6463.084  | NM_00632E | 3764.984  | 4048.112  | NM_001734 | 423.656   | 300.788   |
| NM_019087 | 2533.545  | 2590.729  | AY009127  | 7535.308  | 8252.338  | NM_01469E | 439.5     | 408.745   |
| NM_01632E | 515.807   | 719.1     | NM_01486E | 1329.482  | 1598.567  | AB007896  | 1021.073  | 1208.883  |
| NM_00507E | 654.177   | 979.16    | AK000158  | 2904.82   | 3165.366  | AB007916  | 6156.04   | 5044.004  |
| AF215923  | 1697.701  | 1746.933  | NM_00576E | 1896.088  | 2057.903  | NM_002874 | 809.004   | 548.158   |
| U66621    | 8917.639  | 8565.475  | AK024500  | 5971.593  | 5090.039  | AB028980  | 191.205   | 148.268   |
| NM_00572C | 18183.756 | 16575.264 | NM_002564 | 6608.158  | 6265.34   | AF049140  | 1266.247  | 964.525   |
| AB040936  | 381.973   | 741.799   | NM_00096E | 3647.081  | 2886.5    | AL136794  | 678.927   | 622.336   |
| AJ132086  | 864.717   | 894.884   | NM_01330E | 4089.766  | 4232.516  | BC035601  | 18578.494 | 15398.527 |
| U92816    | 7509.883  | 7905.756  | AF027302  | 2559.513  | 2299.473  | NM_00145E | 674.909   | 606.086   |
| BC011987  | 11221.388 | 14201.102 | NM_00285E | 2705.876  | 2473.563  | NM_02038E | 3727.12   | 3813.327  |
| NM_00410E | 22178.256 | 21074.127 | NM_001817 | 2990.605  | 2020.385  | AB046829  | 508.818   | 656.946   |
| NM_00348E | 1900.029  | 1304.331  | NM_00596E | 904.21    | 1065.738  | NM_00337E | 10832.938 | 9252.178  |
| NM_00503E | 2415.869  | 1838.81   | NM_00274C | 2475.652  | 2136.211  | NM_004521 | 5192.664  | 3818.914  |
| L03418    | 7033.957  | 4299.954  | AL117482  | 1708.611  | 1854.962  | AF229162  | 1505.959  | 1091.766  |
| NM_003157 | 1835.17   | 1285.316  | NM_00654E | 20130.361 | 18893.441 | U02309    | 24890.467 | 19014.777 |
| NM_00493E | 1199.453  | 941.42    | AB018324  | 7436.272  | 6158.691  | NM_005257 | 10472.324 | 12147.676 |
| NM_01432E | 755.308   | 554.573   | NM_00274E | 50475     | 51726.887 | AF011573  | 3593.449  | 3427.406  |
| NM_00444E | 607.488   | 244.212   | Z25431    | 3340.723  | 2972.736  | NM_00214E | 1398.791  | 1563.674  |
| NM_015981 | 1563.492  | 1435.484  | NM_005627 | 3196.641  | 3109.188  | NM_00392E | 412.989   | 417.878   |
| NM_00045E | 3474.443  | 2732.093  | M64497    | 2094.005  | 2566.819  | NM_01421E | 2362.914  | 2865.105  |
| NM_014791 | 6453.162  | 6951.199  | NM_007274 | 5930.296  | 6169.721  | NM_00016E | 1407.357  | 1530.38   |
| NM_00331E | 1639.67   | 1618.823  | NM_00335E | 2446.768  | 2359.821  | AF294629  | 1158.883  | 1228.271  |
| NM_00436E | 4671.305  | 4942.883  | NM_006224 | 31153.709 | 26285.699 | NM_00054E | 4068.131  | 3943.402  |
| NM_00018E | 18202.447 | 20419.4   | AL137300  | 7124.708  | 7386.68   | NM_00213E | 37902.996 | 36730.332 |
| AK023384  | 1835.628  | 2556.595  | NM_00022E | 1838.308  | 2526.286  | AK025571  | 610.927   | 750.448   |
| NM_01602E | 5914.875  | 6147.348  | NM_00699E | 21597.568 | 36591.27  | NM_01446E | 18639.191 | 16742.559 |
| AK025111  | 712.447   | 704.494   | NM_00312E | 11685.117 | 10585.641 | NM_00552C | 14057.764 | 12478.89  |



|           |           |           |           |           |           |           |           |           |
|-----------|-----------|-----------|-----------|-----------|-----------|-----------|-----------|-----------|
| NM_001732 | 1559.199  | 1400.861  | NM_001956 | 1998.746  | 2331.209  | AK023265  | 654.488   | 701.106   |
| NM_018690 | 7313.911  | 6739.964  | AB033064  | 1198.686  | 876.684   | NM_018723 | 293.722   | 323.161   |
| NM_000860 | 1331.503  | 1569.145  | AK022317  | 2168.705  | 2153.442  | AB029009  | 2035.614  | 1919.963  |
| AB037798  | 1981.929  | 2320.519  | NM_018396 | 5988.856  | 4803.708  | AF112207  | 1539.057  | 1375.907  |
| NM_000780 | 535.062   | 539.491   | NM_003124 | 2047.185  | 1495.079  | NM_005594 | 4881.885  | 4304.066  |
| AF272663  | 7223.087  | 7852.042  | NM_004531 | 664.896   | 535.332   | NM_004461 | 44385.91  | 35985.102 |
| NM_012190 | 1080.849  | 1161.039  | AL133581  | 731.763   | 446.581   | NM_018473 | 3453.244  | 2582.442  |
| AB033015  | 976.838   | 1079.988  | NM_003586 | 960.696   | 816.566   | BF106121  | 622.725   | 693.898   |
| AF277719  | 1245.417  | 1372.908  | NM_000922 | 1480.128  | 1816.199  | AK022590  | 2303.863  | 1754.811  |
| NM_000791 | 2252.093  | 1721.523  | NM_013232 | 5042.893  | 5574.234  | AK023719  | 3589.972  | 3636.322  |
| NM_003681 | 4047.257  | 2995.626  | NM_017993 | 1163.365  | 1158.981  | AK025590  | 1002.178  | 1145.803  |
| NM_004800 | 10323.799 | 7434.061  | NM_000362 | 7165.034  | 4393.1    | AY007149  | 2739.068  | 2632.395  |
| AB037738  | 756.196   | 1510.476  | NM_014429 | 1297.372  | 991.734   | M12078    | 328.977   | 370.879   |
| NM_004952 | 2764.267  | 1729.655  | AK000770  | 1345.406  | 1187.346  | NM_004550 | 9733.959  | 9185.497  |
| NM_020414 | 2004.045  | 1134.667  | NM_002370 | 7830.97   | 8924.822  | NM_000785 | 623.018   | 963.806   |
| AB037730  | 2204.552  | 1250.202  | NM_015670 | 1320.924  | 1697.7    | NM_004110 | 1754.579  | 1402.319  |
| NM_001357 | 7628.579  | 5305.704  | NM_014709 | 797.979   | 968.883   | NM_013387 | 26851.465 | 25440.297 |
| NM_003893 | 1213.23   | 1260.021  | AB028990  | 590       | 570.827   | NM_005262 | 3238.075  | 3071.609  |
| AB037816  | 1585.752  | 2317.514  | NM_006708 | 20362.604 | 18975.49  | NM_016483 | 261.887   | 178.042   |
| NM_014380 | 1733.426  | 1427.796  | AB037835  | 1404.685  | 1307.439  | NM_020128 | 391.442   | 353.872   |
| NM_001719 | 7667.606  | 8467.014  | NM_016228 | 381.644   | 492.282   | NM_005068 | 1601.173  | 1835.745  |
| AL080062  | 1727.291  | 2560.969  | NM_000157 | 2939.44   | 2726.886  | NM_018223 | 4157.799  | 2987.914  |
| AF308802  | 1879.176  | 2032.245  | NM_000712 | 6455.173  | 5319.144  | NM_006693 | 10935.462 | 8729.76   |
| S76984    | 12243.093 | 12364.859 | NM_018088 | 741.18    | 747.897   | NM_001722 | 1443.959  | 1418.558  |
| NM_014495 | 53123.484 | 56479.941 | BC013695  | 12779.32  | 10535.592 | AB046802  | 895.883   | 893.339   |
| NM_014081 | 711.453   | 1110.005  | NM_014846 | 2665.337  | 1996.708  | NM_003297 | 821.099   | 527.465   |
| NM_005651 | 2923.05   | 4845.931  | AB011164  | 1971.619  | 1285.029  | NM_006940 | 288.439   | 298.735   |
| NM_007195 | 1452.013  | 1479.547  | AB046776  | 592.888   | 539.903   | NM_018266 | 8648.003  | 4925.74   |
| AK023337  | 4891.349  | 4335.188  | NM_002687 | 8880.22   | 8463.534  | AK024633  | 2086.469  | 1439.258  |
| NM_013275 | 12327.957 | 12728.796 | NM_000627 | 1202.573  | 1067.616  | NM_001453 | 5944.691  | 4837.869  |
| AB037842  | 548.504   | 452.804   | NM_000038 | 612.575   | 368.591   | NM_012075 | 724.047   | 1031.886  |
| NM_019011 | 2097.178  | 2260.123  | NM_000825 | 283.639   | 330.883   | AB004851  | 590.398   | 711.03    |
| AF459094  | 5082.62   | 4684.261  | NM_004334 | 1073.706  | 1268.278  | NM_013381 | 323.226   | 440.321   |
| NM_002544 | 2090.46   | 1116.956  | NM_003886 | 2106.787  | 2396.567  | AK023911  | 1011.786  | 902.821   |
| AB011542  | 762.622   | 298.865   | NM_005843 | 1105.336  | 1167.085  | NM_001283 | 1941.741  | 1898.826  |
| NM_001853 | 2626.989  | 939.871   | NM_003854 | 422.125   | 566.598   | AL110237  | 325.351   | 396.363   |
| U41737    | 675.249   | 189.782   | NM_017980 | 341.441   | 320.817   | AF147307  | 3976.432  | 4094.514  |
| NM_005796 | 578.995   | 333.094   | NM_001252 | 12903.573 | 10886.006 | AK001829  | 1223.448  | 1325.236  |
| X99661    | 774.063   | 613.726   | AF053712  | 639.878   | 631.554   | NM_016525 | 2018.225  | 2000.057  |
| NM_005927 | 2521.55   | 2088.034  | NM_003947 | 627.871   | 670.557   | AK024931  | 5856.431  | 6176.957  |
| AB028983  | 2486.579  | 1970.394  | NM_002821 | 12264.707 | 10545.788 | AL109715  | 441.247   | 479.258   |
| AB037800  | 1726.766  | 1924.427  | M96652    | 6773.394  | 6477.402  | D86985    | 485.278   | 465.329   |
| AK026377  | 588.786   | 500.068   | L41690    | 1864.183  | 1860.418  | AK022258  | 474.132   | 617.794   |
| NM_018660 | 5287.297  | 6276.707  | NM_018059 | 463.198   | 393.746   | AF088043  | 248.179   | 162.874   |
| NM_003394 | 5458.057  | 6183.843  | NM_000939 | 42141.602 | 27674.109 | AF131799  | 599.516   | 512.614   |
| NM_014636 | 457.691   | 518.689   | NM_006514 | 1627.323  | 1038.76   | AK000455  | 683.545   | 411.317   |
| NM_006747 | 702.061   | 1178.626  | AF065164  | 3058.411  | 2202.296  | NM_005230 | 531.694   | 358.252   |
| NM_007086 | 1204.177  | 1580.219  | AB028991  | 2715.255  | 2503.514  | AL365407  | 1393.274  | 1464.158  |
| NM_003870 | 7836.39   | 9193.305  | AF263547  | 2220.143  | 2253.381  | AK000840  | 653.205   | 664.89    |
| AK024507  | 1001.544  | 1115.108  | AJ008143  | 4299.643  | 3573.554  | AL162073  | 487.359   | 523.819   |
| NM_001243 | 2509.575  | 2295.683  | NM_007144 | 639.723   | 614.602   | AL390160  | 376.386   | 313.994   |
| AK025997  | 2404.467  | 2969.667  | NM_005093 | 303.047   | 264.908   | AJ006835  | 3019.09   | 2910.699  |
| NM_005546 | 523.886   | 476.124   | NM_004424 | 2686.069  | 1979.919  | AL110138  | 355.781   | 336.058   |

|           |           |           |           |           |           |           |           |           |
|-----------|-----------|-----------|-----------|-----------|-----------|-----------|-----------|-----------|
| S51112    | 728.603   | 428.249   | AL133117  | 2058.016  | 1927.556  | AL122039  | 418.838   | 431.065   |
| NM_014887 | 4261.118  | 4497.237  | AF070586  | 2676.702  | 2780.449  | AF070577  | 2651.165  | 2560.513  |
| NM_002590 | 1055.469  | 748.396   | NM_014412 | 887.712   | 855.244   | AL157484  | 3465.041  | 3102.295  |
| NM_018556 | 7537.397  | 6517.201  | NM_013303 | 1469.634  | 826.33    | AK024850  | 1196.972  | 746.951   |
| NM_005824 | 712.975   | 289.425   | NM_012227 | 2599.616  | 2475.768  | Y09836    | 2071.864  | 1714.395  |
| AF052211  | 2354.154  | 1178.145  | NM_006101 | 951.764   | 769.147   | AL137597  | 7278.82   | 4382.381  |
| NM_005600 | 2039.604  | 660.142   | NM_001237 | 2698.42   | 2714.394  | AF086044  | 576.895   | 599.019   |
| NM_005967 | 3373.519  | 1576.515  | NM_002507 | 973.644   | 1127.625  | NM_014926 | 320.315   | 191.128   |
| NM_015678 | 413.108   | 673.35    | NM_015962 | 1424.85   | 1614.295  | AF131790  | 378.937   | 224.068   |
| NM_014223 | 2897.408  | 2727.056  | NM_016145 | 560.268   | 878.325   | AJ011378  | 401.828   | 493.622   |
| NM_016194 | 1777.028  | 2092.076  | NM_016078 | 2506.185  | 2076.299  | AF009266  | 429.02    | 416.422   |
| AL050385  | 1143.415  | 1687.561  | NM_004401 | 1019.281  | 549.467   | AF009310  | 321.644   | 515.879   |
| NM_007027 | 4215.797  | 6758.63   | NM_001849 | 3563.827  | 2369.63   | AF060168  | 927.029   | 886.9     |
| NM_000633 | 22318.881 | 24462.287 | AF255910  | 455.212   | 355.488   | AF009275  | 430.28    | 423.719   |
| AB037855  | 1265.651  | 1612.279  | NM_016146 | 2709.527  | 2917.605  | AF015251  | 328.488   | 303.183   |
| AK024524  | 5311.511  | 6138.898  | AK024343  | 1121.01   | 876.698   | AF056426  | 497.361   | 779.523   |
| NM_000562 | 4952.468  | 7538.298  | NM_001936 | 529.553   | 376.079   | AF064850  | 317.113   | 211.628   |
| NM_020353 | 976.144   | 1112.004  | NM_002569 | 776.289   | 725.596   | NM_018325 | 681.843   | 917.966   |
| AB020694  | 2292.323  | 2022.331  | D42084    | 2060.474  | 2137.308  | AK021565  | 642.582   | 624.241   |
| NM_016071 | 3419.436  | 3225.379  | NM_001734 | 327.721   | 372.177   | AK021778  | 312.679   | 424.906   |
| AL050131  | 911.496   | 581.362   | NM_014693 | 435.062   | 645.08    | AK001150  | 1790.051  | 1265.915  |
| NM_004475 | 6125.423  | 4917.127  | AB007896  | 951.609   | 1021.725  | AK002123  | 289.234   | 244.942   |
| NM_001627 | 6683.594  | 5425.942  | AB007916  | 6363.558  | 6438.947  | AK021633  | 712.719   | 590.92    |
| NM_001226 | 1320.409  | 2407.022  | NM_002874 | 495.241   | 465.642   | AK025659  | 1036.351  | 741.715   |
| NM_001336 | 775.578   | 480.512   | AF049140  | 1064.256  | 1147.625  | AK026788  | 533.314   | 336.18    |
| AB050716  | 796.479   | 666.853   | AL136794  | 862.24    | 740.496   | AK026020  | 83.973    | 281.108   |
| X77690    | 1366.814  | 563.596   | BC035601  | 42587.137 | 71529.75  | AK026824  | 414.541   | 271.892   |
| NM_006536 | 650.812   | 257.561   | NM_001458 | 917.572   | 1007.311  | AJ008130  | 8336.086  | 8758.606  |
| NM_002422 | 569.99    | 485.544   | NM_020388 | 4164.522  | 3558.594  | AF086502  | 1209.609  | 982.461   |
| NM_006690 | 3182.217  | 2323.374  | NM_003379 | 18054.633 | 12797.471 | L39924    | 1229.701  | 1067.874  |
| AF218022  | 3399.039  | 4066.893  | NM_004521 | 5203.302  | 3122.178  | U52054    | 3457.735  | 2982.015  |
| NM_003348 | 2516.135  | 2467.217  | AF229162  | 1523.654  | 1040.003  | AK023325  | 1387.381  | 1413.524  |
| AL137663  | 460.032   | 699.088   | U02309    | 25929.625 | 35835.809 | NM_017985 | 841.026   | 644.109   |
| AB006198  | 7567.134  | 7657.917  | NM_005257 | 10078.493 | 9339.856  | AK025866  | 2303.75   | 2190.868  |
| U72518    | 1520.44   | 1903.641  | AF011573  | 4418.349  | 4264.058  | AF088058  | 967.583   | 964.416   |
| AF264765  | 744.716   | 838.032   | NM_002145 | 1731.814  | 1785.128  | NM_000513 | 1253.681  | 1010.341  |
| NM_015322 | 4244.301  | 4089.711  | NM_003923 | 451.372   | 303.234   | Y11165    | 1231.271  | 1277.509  |
| NM_016607 | 3540.787  | 3018.057  | NM_004831 | 582.91    | 821.588   | BC028422  | 511.244   | 344.162   |
| NM_003275 | 1246.852  | 943.036   | NM_014213 | 2598.555  | 2671.871  | AK022219  | 314.503   | 227.475   |
| NM_000268 | 23408.215 | 18870.799 | NM_000168 | 1945.034  | 2290.56   | NM_013244 | 190.98    | 119.028   |
| M30493    | 18593.209 | 14622.964 | AF294629  | 1658.618  | 1746.495  | NM_003545 | 327.906   | 343.798   |
| AJ008160  | 764.99    | 671.677   | NM_000545 | 5899.607  | 4997.896  | AK024413  | 354.516   | 411.417   |
| NM_004343 | 27977.098 | 12224.916 | NM_002136 | 41163.27  | 30961.748 | AK022247  | 558.102   | 747.692   |
| X52355    | 3752.714  | 1957.432  | AK025571  | 694.802   | 729.326   | AK001453  | 1882.8    | 1772.974  |
| NM_006963 | 6993.579  | 4322.449  | NM_014463 | 20446.26  | 17658.547 | AB007972  | 1610.239  | 1712.296  |
| U66561    | 3376.042  | 1703.506  | NM_005520 | 14136.97  | 12318.574 | AL390144  | 2425.641  | 2702.93   |
| NM_000306 | 3047.777  | 1487.458  | AK023265  | 905.386   | 1205.68   | AK024017  | 1406.767  | 1140.418  |
| NM_002200 | 1747.275  | 1072.396  | AB029009  | 2017.603  | 1935.608  | X56196    | 527.15    | 439.036   |
| AF017433  | 1161.565  | 1011.353  | AF112207  | 1618.016  | 1795.681  | D17220    | 3794.375  | 4124.188  |
| AF130111  | 2193.339  | 3135.338  | NM_005594 | 8363.137  | 5568.108  | D28363    | 38291.754 | 34940.711 |
| NM_016307 | 3432.118  | 3282.175  | NM_004461 | 49640.629 | 43120.254 | AB011171  | 1290.208  | 1581.21   |
| AB028449  | 2691.764  | 4888.234  | NM_018473 | 4552.533  | 2748.778  | NM_005322 | 1236.84   | 1546.538  |
| NM_004697 | 1986.338  | 2647.641  | BF106121  | 1012.927  | 382.092   | AK024465  | 1382.576  | 1187.03   |

|           |           |           |           |           |           |           |           |           |
|-----------|-----------|-----------|-----------|-----------|-----------|-----------|-----------|-----------|
| AF131776  | 4200.533  | 4040.591  | AK022590  | 2554.911  | 3277.376  | AF075119  | 585.922   | 672.244   |
| NM_02052E | 4319.708  | 3983.97   | AK023719  | 4143.387  | 4246.356  | AK021478  | 1293.665  | 1246.759  |
| NM_00704C | 38486.301 | 54146.801 | AK025590  | 1272.712  | 1408.173  | AF131782  | 926.208   | 788.115   |
| NM_014483 | 8014.721  | 7930.275  | AY007149  | 2922.803  | 3207.418  | NM_01421C | 3945.545  | 2932.026  |
| AF239156  | 8048.301  | 6437.379  | M12078    | 500.398   | 582.067   | AK021603  | 497.06    | 586.779   |
| NM_02039C | 1623.943  | 1214.219  | NM_00455C | 10943.34  | 10669.222 | AL110136  | 1206.57   | 1187.874  |
| NM_003321 | 18467.576 | 17551.574 | NM_000785 | 757.222   | 954.466   | AK002203  | 274.972   | 195.112   |
| U18937    | 9424.847  | 7835.131  | NM_004110 | 2588.585  | 2102.001  | AK026469  | 908.208   | 852.199   |
| U01925    | 840.602   | 593.337   | NM_013387 | 25633.047 | 19671.504 | D16935    | 3547.288  | 3136.219  |
| AJ420488  | 59611.039 | 57205.414 | NM_005262 | 4197.498  | 3590.551  | AK027019  | 859.786   | 763.446   |
| AF268872  | 1591.11   | 1586.58   | NM_02012E | 496.976   | 435.655   | U92019    | 361.517   | 589.704   |
| AK022180  | 34671.574 | 29208.514 | NM_00506E | 1728.512  | 1678.001  | U52835    | 2554.62   | 2186.972  |
| AK001384  | 1138.887  | 1409.787  | NM_018223 | 3759.363  | 3248.647  | NM_00075E | 1571.121  | 1573.039  |
| AK025437  | 3467.069  | 2841.276  | NM_006693 | 11444.805 | 9287.464  | AK022148  | 317.677   | 313.658   |
| AK074164  | 967.561   | 1343.96   | NM_001722 | 1522.776  | 1153.604  | Z36811    | 42643.184 | 46653.621 |
| NM_00416E | 9923.936  | 9182.062  | AB046802  | 1029.915  | 1058.655  | K03200    | 4254.269  | 4392.082  |
| AF161353  | 5513.038  | 3561.85   | NM_003297 | 560.336   | 621.077   | U17629    | 2194.041  | 2174.62   |
| NM_000764 | 2563.787  | 1590.215  | NM_018269 | 8110.383  | 3500.977  | NM_02042E | 1199.715  | 1058.532  |
| NM_00414E | 19951.914 | 17962.379 | AK024633  | 2324.818  | 1329.586  | U79265    | 2748.482  | 2076.308  |
| NM_003002 | 10518.583 | 9222.435  | NM_001453 | 6594.487  | 9526.211  | AK022868  | 3387.604  | 2749.341  |
| D42047    | 2158.177  | 1984.621  | NM_012075 | 1130.017  | 1138.804  | NM_00353C | 624.356   | 414.369   |
| AB009282  | 10863.469 | 12036.79  | AB004851  | 546.327   | 614.763   | AJ227871  | 667.489   | 775.6     |
| NM_005004 | 34875.273 | 37089.945 | NM_013381 | 307.089   | 583.297   | AK025344  | 1567.756  | 1517.45   |
| NM_00367C | 6748.552  | 7254.428  | AK023911  | 1846.823  | 1939.43   | D28589    | 6601.235  | 5422.563  |
| NM_01463E | 2134.866  | 2750.094  | NM_001283 | 1926.941  | 1801.523  | AF301223  | 389.469   | 532.721   |
| NM_006392 | 3023.23   | 3178.915  | D87470    | 748.781   | 1054.415  | NM_017867 | 3744.873  | 2732.806  |
| NM_014717 | 1904.092  | 1880.862  | AF147307  | 4755.436  | 4473.103  | U92820    | 6792.219  | 4473.832  |
| NM_017922 | 1852.368  | 1526.699  | AK001829  | 1264.292  | 1235.547  | NM_017937 | 1378.666  | 1801.106  |
| NM_002823 | 63190.027 | 56639.996 | NM_016525 | 2131.859  | 1807.424  | AL360266  | 1197.657  | 948.206   |
| NM_01791E | 13906.743 | 13774.847 | AK024931  | 7867.484  | 8001.007  | AL160132  | 11039.521 | 11063.135 |
| NM_00180E | 10274.326 | 9806.768  | AL109715  | 550.302   | 462.702   | NM_019557 | 3002.416  | 2295.949  |
| AK022360  | 1918.983  | 1636.178  | AF086181  | 305.556   | 244.329   | CY3Cy5    | 2617.563  | 159.935   |
| AK095694  | 1405.096  | 1446.638  | AK022258  | 616.057   | 505.861   | AA150828  | 827.833   | 812.685   |
| X52341    | 57093.117 | 54263.973 | AF131799  | 781.347   | 482.595   | H64379    | 3572.666  | 2630.418  |
| NM_003082 | 5294.628  | 3805.073  | AK000455  | 653.709   | 570.947   | BE208258  | 36157.242 | 25312.555 |
| AL133632  | 2843.068  | 2447.982  | NM_00523C | 385.085   | 360.406   | T72202    | 529.75    | 452.505   |
| AK024551  | 1453.767  | 1431.629  | AL365407  | 1941.386  | 2740.002  | BI831922  | 1776.09   | 1318.87   |
| AL833249  | 5124.35   | 7296.769  | AK000840  | 2350.102  | 2156.233  | M69238    | 2562.623  | 1932.318  |
| NM_018374 | 3109.646  | 3465.582  | AL162073  | 758.262   | 763.736   | SR9       | 12087.559 | 1840.984  |
| AF131852  | 463.653   | 397.945   | AL390160  | 420.255   | 435.268   | CY3Cy5    | 2530.946  | 101.192   |
| AK021894  | 2056.54   | 2545.318  | AJ006835  | 3748.476  | 3860.866  | NM_00156C | 2713.365  | 2242.403  |
| NM_020424 | 2310.85   | 2884.44   | AL110138  | 343.104   | 515.791   | NM_001783 | 4977.831  | 4098.831  |
| AF438313  | 1702.291  | 896.524   | AL122039  | 511.299   | 536.611   | J03171    | 1535.301  | 1522.456  |
| AF147341  | 1049.262  | 1059.857  | AF070577  | 3448.291  | 2906.807  | NM_005312 | 876.089   | 1341.321  |
| AB033009  | 19049.584 | 25816.328 | AL157484  | 4540.693  | 3217.74   | NM_001711 | 975.276   | 1538.758  |
| AL137761  | 544.441   | 566.084   | AK024850  | 902.827   | 707.179   | NM_00702E | 495.665   | 993.934   |
| AK022086  | 518.723   | 671.496   | Y09836    | 2452.469  | 1636.719  | NM_00250C | 375.491   | 1462.575  |
| AF147320  | 2953.732  | 3314.912  | AL137597  | 7150.606  | 4470.511  | AK026232  | 1579.893  | 4446.565  |
| AK027024  | 554.35    | 1123.346  | AF086044  | 625.163   | 470.421   | NM_014892 | 4454.485  | 9680.179  |
| AK022339  | 1449.929  | 2083.626  | NM_01492E | 258.385   | 297.672   | NM_018557 | 936.092   | 616.072   |
| AK022138  | 1615.1    | 1907.502  | AF131790  | 410.219   | 394.683   | NM_00104E | 3749.862  | 6449.023  |
| AF086191  | 5510.385  | 5742      | AJ011378  | 786.783   | 764.552   | NM_005697 | 4032.819  | 6269.541  |
| AF143880  | 410.837   | 540.017   | AK023363  | 668.521   | 831.74    | NM_00309E | 3818.676  | 6724.23   |

|           |           |           |           |           |           |           |           |           |
|-----------|-----------|-----------|-----------|-----------|-----------|-----------|-----------|-----------|
| NM_01763E | 4695.385  | 4491.31   | AF009266  | 448.766   | 579.323   | NM_004781 | 990.178   | 1668.882  |
| AL050013  | 1266.705  | 3425.448  | AF015251  | 371.488   | 551.624   | NM_01475E | 1212.021  | 2415.866  |
| AL133052  | 1824.077  | 1703.404  | AF056426  | 541.241   | 978.159   | AL133047  | 154.646   | 671.945   |
| AB037824  | 2251.737  | 2031.968  | AF064850  | 281.057   | 329.629   | NM_005124 | 1846.947  | 3424.472  |
| AF361494  | 1460.701  | 1378.01   | NM_01832E | 649.111   | 740.798   | AK000947  | 3252.967  | 5979.496  |
| AK022810  | 1630.303  | 1226.259  | AK021565  | 510.646   | 555.657   | L08240    | 510.209   | 962.566   |
| X92110    | 824.771   | 790.871   | AK001150  | 1961.219  | 1602.467  | NM_01795E | 1158.035  | 2454.937  |
| AF147408  | 1550.402  | 1481.158  | AK021633  | 645.69    | 631.854   | NM_016081 | 8592.937  | 11107.854 |
| AK027222  | 8974.878  | 7526.935  | AK025659  | 1040.799  | 531.871   | M30818    | 256.14    | 1218.446  |
| AK054767  | 632.067   | 406.682   | AK026788  | 513.388   | 326.459   | NM_00016E | 646.357   | 1180.057  |
| AL117486  | 278.704   | 917.016   | AK026824  | 445.285   | 437.155   | NM_01433C | 8304.504  | 10427.092 |
| AL049301  | 1602.297  | 2383.111  | AJ008130  | 15032.601 | 12601.919 | NM_007214 | 7934.009  | 13839.336 |
| AL050042  | 3651.71   | 4956.594  | AF086502  | 1449.512  | 2275.95   | NM_000311 | 1863.202  | 3083.906  |
| AL117570  | 510.123   | 776.927   | L39924    | 1111.21   | 1444.651  | NM_01790E | 2332.653  | 4418.638  |
| NM_01846E | 1999.137  | 2087.87   | AK023325  | 1461.952  | 1897.493  | AL133561  | 2642.916  | 3801.068  |
| NM_014867 | 8373.112  | 9908.171  | NM_01798E | 1181.145  | 1447.04   | NM_017731 | 733.747   | 1012.718  |
| AK002197  | 2353.978  | 2523.421  | AK025866  | 2377.931  | 2474.934  | AB040891  | 2096.607  | 3870.195  |
| AF087996  | 3028.836  | 2808.059  | AF088058  | 1554.168  | 1748.188  | AB037780  | 878.566   | 1127.209  |
| AK021710  | 3379.881  | 3303.624  | NM_00051E | 1065.391  | 1438.068  | NM_00584E | 10387.578 | 12281.116 |
| NM_007017 | 1146.921  | 1491.747  | Y11165    | 1100.703  | 1006.408  | NM_01620E | 6556.634  | 5828.076  |
| AL137446  | 3391.693  | 4125.615  | BC028422  | 538.903   | 470.872   | AK075415  | 619.371   | 948.429   |
| AB025286  | 3929.004  | 6007.131  | AK022219  | 310.808   | 198.103   | NM_018964 | 2897.604  | 8152.37   |
| AF009286  | 1056.305  | 1179.03   | AK024413  | 380.189   | 690.229   | NM_00008C | 1070.15   | 2578.547  |
| AF056437  | 1431.995  | 1391.404  | AK022247  | 965.361   | 1065.806  | AF283645  | 1240.611  | 1781.389  |
| AB032364  | 617.693   | 723.669   | AK001453  | 2147.427  | 2419.926  | NM_01657E | 1079.217  | 1089.17   |
| AF009295  | 650.962   | 318.331   | AL390144  | 2733.364  | 3813.174  | NM_003897 | 1344.736  | 1743.028  |
| NM_00502E | 1499.723  | 976.356   | AK024017  | 1734.61   | 2124.152  | AL442085  | 3444.673  | 3170.378  |
| AF056447  | 2246.132  | 1742.891  | X56196    | 499.695   | 521.335   | NM_01331E | 2069.744  | 1930.532  |
| AK001010  | 2046.786  | 1758.446  | D17220    | 3605.108  | 4374.318  | NM_01473E | 5374.943  | 4636.462  |
| NM_01807E | 1250.18   | 1279.851  | D28363    | 39180.254 | 38080.559 | AK023886  | 1252.512  | 924.051   |
| AK021442  | 2381.469  | 2696.037  | AB011171  | 1312.6    | 1060.978  | NM_00255E | 1008.877  | 940.095   |
| AK001076  | 1098.993  | 1111.826  | AK023606  | 334.817   | 341.219   | AJ404615  | 2710.386  | 2038.054  |
| AK001820  | 786.702   | 854.171   | NM_00532E | 1931.845  | 1814.69   | NM_01605E | 10892.913 | 8173.839  |
| AK021482  | 8654.421  | 8489.551  | AK024465  | 1191.673  | 1037.779  | AB007869  | 1923.408  | 1448.339  |
| AK021730  | 1081.667  | 1768.516  | AF075119  | 450.821   | 304.715   | AB046844  | 513.129   | 738.928   |
| AK025126  | 365.695   | 512.243   | AK021478  | 1621.755  | 1456.372  | NM_01440C | 5653.711  | 7261.525  |
| AK025317  | 11126.385 | 10876.033 | AF131782  | 963.68    | 739.138   | AL157492  | 694.397   | 680.222   |
| AK025177  | 447.331   | 609.114   | NM_01421C | 4123.397  | 2451.897  | AL353957  | 1735.9    | 1701.278  |
| AK026725  | 3004.008  | 3314.564  | AK021603  | 986.696   | 657.041   | NM_000231 | 1367.234  | 1332.736  |
| AJ008118  | 68027.234 | 68790.586 | AL110136  | 1122.016  | 778.031   | L07517    | 548.657   | 446.259   |
| AK000939  | 652.149   | 715.197   | AK002203  | 384.588   | 774.48    | AK022451  | 943.786   | 1018.946  |
| NM_00552E | 1943.021  | 2164.199  | AK026469  | 2110.24   | 2469.479  | BM918441  | 1060.505  | 774.061   |
| AK024512  | 4159.163  | 5547.597  | D16935    | 3490.502  | 4060.081  | AA150828  | 966.695   | 968.393   |
| AK023454  | 3775.405  | 2757.118  | AK027019  | 909.483   | 912.933   | H64379    | 5101.59   | 3252.952  |
| L23207    | 2324.918  | 1394.05   | U52835    | 2912.358  | 2373.587  | BE208258  | 32592.609 | 17587.613 |
| NM_01806E | 1586.272  | 2842.685  | NM_00075E | 2236.138  | 2352.096  | T72202    | 413.088   | 363.17    |
| NM_00712E | 7945.64   | 4488.011  | Z36811    | 51663.371 | 72330.648 | AK026092  | 1312.486  | 1336.248  |
| NM_00716C | 724.776   | 392.75    | K03200    | 4468.932  | 6402.029  | AK001175  | 1497.198  | 1191.045  |
| AB002442  | 1561.251  | 1556.741  | U17629    | 2027.123  | 2180.682  | NM_00332E | 50428.633 | 35507.277 |
| NM_018627 | 877.616   | 912.066   | NM_02042E | 1620.872  | 1698.22   | NM_00329E | 35896.977 | 28705.615 |
| AL157458  | 487.645   | 482.18    | U79265    | 3178.899  | 2993.288  | NM_00156C | 2775.768  | 1895.682  |
| NM_015377 | 687.912   | 921.817   | AK022868  | 3195.042  | 2629.964  | NM_00178E | 5042.973  | 3194.827  |
| AL137531  | 1194.375  | 1183.526  | NM_00353C | 377.825   | 449.58    | J03171    | 1500.744  | 1156.645  |

|           |           |           |           |           |           |           |           |           |
|-----------|-----------|-----------|-----------|-----------|-----------|-----------|-----------|-----------|
| AL080085  | 4496.53   | 3214.833  | AJ227871  | 484.179   | 381.471   | NM_004323 | 9661.394  | 6134.702  |
| AF086519  | 1489.825  | 4114.88   | AK025344  | 1803.403  | 1205.333  | NM_005312 | 1010.051  | 625.31    |
| AF055012  | 3530.122  | 4004.707  | D28589    | 8257.42   | 5513.034  | NM_004210 | 8161.73   | 9881.317  |
| AK022307  | 5436.727  | 8437.935  | AF301223  | 471.553   | 472.538   | NM_020140 | 1122.555  | 2842.724  |
| U00950    | 385.726   | 474.89    | NM_017867 | 3409.087  | 3003.526  | AK026232  | 1016.319  | 1367.823  |
| NM_005172 | 3504.505  | 2785.612  | U92820    | 7565.526  | 4023.554  | NM_014892 | 3490.564  | 3661.156  |
| AK025192  | 10776.149 | 7412.188  | NM_017937 | 1834.162  | 1392.136  | AK023827  | 1186.248  | 1163.369  |
| NM_012403 | 5634.619  | 4832.472  | AL360266  | 1379.849  | 761.348   | NM_001825 | 645.158   | 428.49    |
| AK023251  | 815.18    | 2086.382  | AL160132  | 13666.321 | 9244.749  | AF283645  | 1502.439  | 1220.718  |
| AK022611  | 5969.048  | 5922.479  | NM_019557 | 2986.274  | 2148.241  | NM_016575 | 1647.294  | 1431.303  |
| NM_006155 | 17445.783 | 15046.437 | CY3Cy5    | 1454.406  | 95.541    | NM_001045 | 3387.574  | 2531.719  |
| NM_006346 | 2028.799  | 2148.198  | AA150828  | 962.497   | 941.778   | NM_005697 | 3183.318  | 2091.319  |
| AK025240  | 4347.943  | 3897.42   | AI859208  | 334.411   | 320.295   | NM_003095 | 3291.661  | 2032.147  |
| NM_017633 | 13297.678 | 10949.701 | H64379    | 3674.515  | 3497.71   | NM_004781 | 808.415   | 517.279   |
| AF086186  | 30367.674 | 30276.646 | BE208258  | 27698.576 | 21310.361 | NM_018303 | 917.579   | 639.1     |
| NM_017802 | 5586.814  | 5465.255  | T72202    | 458.06    | 401.958   | NM_014755 | 739.07    | 689.842   |
| AF155194  | 512.23    | 552.385   | BI831922  | 1364.08   | 1347.403  | NM_005124 | 1414.224  | 3049.177  |
| AK023667  | 1262.831  | 1133.1    | M69238    | 1782.541  | 1900.629  | AK000947  | 2318.85   | 3261.961  |
| AJ008137  | 18145.533 | 17003.838 | AA664180  | 411.977   | 386.396   | NM_016081 | 6471.637  | 4765.943  |
| AF085841  | 1291.681  | 1333.825  | AA599158  | 6900.907  | 8465.176  | NM_006385 | 3091.28   | 3110.573  |
| U92026    | 1569.845  | 2800.895  | SR5       | 2812.052  | 2928.604  | NM_000163 | 579.601   | 550.957   |
| AF086234  | 31221.344 | 43695.637 | SR7       | 3875.688  | 27002.658 | NM_001125 | 245.007   | 277.055   |
| AK023680  | 6002.571  | 8808.842  | SR9       | 11968.888 | 1937.845  | AB023216  | 843.279   | 724.502   |
| AF009324  | 3519.003  | 5894.785  | CY3Cy5    | 1613.592  | 103.594   | NM_002266 | 22410.426 | 16563.182 |
| AF144056  | 374.063   | 533.967   | NM_001560 | 2483.082  | 2113.828  | NM_014400 | 6483.756  | 5020.715  |
| AF019226  | 2566.215  | 2216.402  | NM_001783 | 4254.137  | 3508.081  | AL157492  | 690.485   | 594.114   |
| AK022112  | 491.501   | 918.87    | J03171    | 1205.544  | 1070.166  | AL353957  | 2174.571  | 1888.678  |
| AL137480  | 15022.697 | 9213.938  | NM_005856 | 286.491   | 318.988   | NM_007214 | 9324.742  | 6743.473  |
| AK022182  | 488.761   | 152.293   | NM_004323 | 8871.853  | 5879.306  | NM_000311 | 1711.606  | 1172.052  |
| D16473    | 1925.61   | 1446.135  | NM_005312 | 844.272   | 750.433   | NM_017905 | 2018.101  | 1468.147  |
| AB028968  | 1102.482  | 1294.217  | NM_001711 | 503.952   | 408.983   | NM_006335 | 8452.354  | 5432.391  |
| AK001202  | 546.535   | 570.576   | NM_004210 | 6150.374  | 6204.971  | NM_000786 | 9520.724  | 5341.654  |
| AF195764  | 38508.285 | 38648.512 | NM_020140 | 1080.695  | 1332.219  | AL133561  | 1911.716  | 1571.354  |
| AF055029  | 1098.09   | 783.487   | NM_001496 | 2044.167  | 2667.548  | AB040891  | 1527.913  | 3692.536  |
| S82164    | 1711.225  | 1609.799  | U65404    | 623.42    | 847.248   | AB037780  | 624.427   | 2072.529  |
| AK024394  | 1465.625  | 1448.929  | NM_002500 | 804.003   | 1007.897  | NM_018964 | 1932.593  | 1960.131  |
| AF147374  | 1416.549  | 1259.616  | AK026232  | 1093.831  | 1254.394  | NM_000080 | 680.482   | 903.367   |
| AF130091  | 669.471   | 600.928   | NM_014892 | 3559.924  | 3847.601  | NM_002711 | 332.032   | 349.285   |
| L43338    | 20621.813 | 21789.057 | AK023827  | 1380.808  | 1435.749  | AK026092  | 817.913   | 691.047   |
| AJ227866  | 29830.264 | 32229.854 | NM_001117 | 400.179   | 466.643   | AK001175  | 1732.363  | 1430.7    |
| AF458223  | 4766.006  | 4662.708  | NM_000231 | 1492.843  | 1842.784  | NM_003897 | 1373.129  | 1035.956  |
| AK026822  | 664.8     | 410.1     | L07517    | 1290.047  | 1945.764  | NM_014165 | 5900.695  | 3935.603  |
| AK022838  | 9530.776  | 8734.549  | AK022451  | 659.525   | 567.739   | AL442085  | 3219.694  | 2220.167  |
| NM_003505 | 593.97    | 614       | NM_014359 | 56685.77  | 64351.41  | NM_013313 | 1909.2    | 1853.621  |
| CY3Cy5    | 2502.596  | 185.351   | BM918441  | 893.409   | 988.304   | AK023886  | 1429.456  | 2206.623  |
| AA700390  | 5198.438  | 5343.292  | NM_001045 | 2149.817  | 2341.546  | NM_002553 | 1772.823  | 2119.214  |
| Y18474    | 644.774   | 729.896   | NM_005697 | 2611.285  | 2167.829  | AJ404615  | 2795.469  | 4631.052  |
| AA436163  | 910.282   | 1339.369  | NM_003095 | 3099.66   | 2569.246  | NM_016053 | 9267.089  | 12166.637 |
| BI907981  | 1022.619  | 1124.554  | NM_004781 | 961.204   | 876.432   | NM_000302 | 1463.966  | 1310.483  |
| BI603841  | 3073.363  | 3508.132  | NM_018303 | 969.802   | 738.478   | NM_013235 | 18816.15  | 17711.051 |
| BG696638  | 6128.574  | 9912.697  | NM_014755 | 825.139   | 913.406   | NM_016015 | 2860.494  | 2845.741  |
| M19888    | 2505.98   | 5487.649  | AK000947  | 2185.931  | 2249.229  | NM_020120 | 1129.944  | 1657.296  |
| Y08136    | 752.686   | 1261.828  | L08240    | 596.216   | 309.677   | AK022900  | 999.675   | 835.742   |

|           |           |           |           |           |           |           |           |           |
|-----------|-----------|-----------|-----------|-----------|-----------|-----------|-----------|-----------|
| AA156863  | 5939.983  | 13959.704 | NM_017952 | 880.97    | 1101.811  | AK026232  | 1166.002  | 1046.087  |
| BI915199  | 1509.702  | 2153.12   | NM_002940 | 1140.585  | 1236.954  | NM_014892 | 3967.108  | 3031.76   |
| R82957    | 65690.219 | 68321.742 | NM_016081 | 8027.057  | 8527.996  | AK023827  | 1071.262  | 918.569   |
| BI830442  | 752.829   | 680.925   | NM_006389 | 2182.842  | 2573.204  | NM_001117 | 460.178   | 423.069   |
| AA398951  | 3917.723  | 3588.976  | M30818    | 289.791   | 221.866   | NM_000231 | 1590.482  | 1350.999  |
| AI218732  | 1822.547  | 1597.145  | NM_000163 | 452.304   | 370.243   | L07517    | 621.976   | 482.479   |
| NM_004102 | 2860.894  | 2453.519  | NM_003329 | 46887.652 | 41410.621 | AK022451  | 697.792   | 470.017   |
| NM_004544 | 4203.247  | 3765.37   | NM_003299 | 26691.854 | 23916.066 | BM918441  | 758.069   | 431.933   |
| SR5       | 3822.466  | 3092.573  | NM_014330 | 9871.909  | 8874.54   | AA150828  | 998.417   | 741.183   |
| SR7       | 5372.312  | 31658.891 | NM_007214 | 8075.791  | 7236.242  | AI859208  | 643.409   | 1040.417  |
| SR9       | 17354.271 | 2696.049  | NM_000311 | 1658.103  | 1576.999  | H64379    | 4409.401  | 7045.917  |
| CY3Cy5    | 2111.355  | 172.508   | NM_017909 | 2077.527  | 2301.317  | BI831922  | 1550.773  | 1126.264  |
| NM_018049 | 5345.134  | 5745.343  | NM_006335 | 8368.948  | 6864.003  | M69238    | 1755.057  | 1769.576  |
| AJ133439  | 621.983   | 806.669   | NM_000786 | 11285.695 | 7478.653  | BE294756  | 462.325   | 1266.931  |
| NM_014395 | 1263.722  | 1443.063  | AL133561  | 1910.032  | 1505.933  | NM_016081 | 6940.214  | 6789.301  |
| NM_001561 | 984.233   | 936.28    | NM_017731 | 282.638   | 366.668   | NM_006389 | 2832.923  | 1817.25   |
| NM_005160 | 1821.406  | 1520.809  | AB040891  | 1474.905  | 1597.552  | M30818    | 235.711   | 377.779   |
| NM_000596 | 1021.188  | 2169.93   | AB037780  | 572.022   | 504.002   | NM_003329 | 50534.758 | 34386.418 |
| X78817    | 23612.383 | 38893.754 | NM_005845 | 7122.22   | 6773.865  | NM_003299 | 26965.154 | 17788.641 |
| AB023135  | 730.235   | 854.646   | NM_016209 | 4967.357  | 4751.408  | NM_001560 | 3327.197  | 1524.568  |
| AY009401  | 2160.049  | 3520.198  | NM_018964 | 2188.848  | 2558.507  | J03171    | 1209.336  | 1460.648  |
| AF294628  | 802.862   | 1888.782  | NM_000080 | 778.118   | 805.667   | NM_005856 | 623.989   | 587.941   |
| AK026960  | 445.761   | 486.778   | NM_001829 | 511.386   | 511.868   | NM_005312 | 1496.856  | 1899.386  |
| NM_001991 | 805.165   | 874.602   | AF283645  | 1120.247  | 1201.523  | NM_001711 | 466.419   | 514.88    |
| NM_000193 | 1698.691  | 1708.255  | NM_016575 | 1337.045  | 1495.134  | NM_004210 | 7303.801  | 7907.76   |
| BC014586  | 677.369   | 869.292   | NM_003897 | 1303.287  | 1470.356  | NM_020140 | 1209.552  | 1606.229  |
| NM_002448 | 963.325   | 849.152   | NM_014165 | 5813.968  | 4503.889  | NM_001496 | 1795.281  | 2351.871  |
| AF053952  | 24271.451 | 23757.41  | AL442085  | 3376.251  | 2881.268  | AK075415  | 292.737   | 587.644   |
| NM_003213 | 6763.207  | 5801.779  | NM_013313 | 2070.487  | 1720.061  | AK025616  | 262.849   | 436.118   |
| BF184738  | 582.432   | 428.416   | NM_014736 | 4701.281  | 3901.292  | NM_018964 | 2784.664  | 2078.955  |
| NM_014044 | 2628.273  | 2359.785  | AK023886  | 1039.297  | 1050.984  | NM_000080 | 710.806   | 815.995   |
| NM_000900 | 1665.163  | 1675.303  | NM_002553 | 992.953   | 1090.602  | NM_001829 | 498.239   | 453.411   |
| AK023684  | 4135.626  | 3087.633  | AJ404615  | 2142.844  | 2273.116  | AF283645  | 1176.209  | 1033.908  |
| NM_000232 | 1048.047  | 789.543   | NM_016053 | 9065.37   | 9661.726  | NM_016575 | 1258.396  | 919.781   |
| NM_015057 | 1175.909  | 1584.015  | AB007869  | 1867.274  | 2149.142  | NM_001045 | 3357.539  | 1805.335  |
| AF303398  | 7407.731  | 7446.349  | AB046844  | 430.038   | 566.685   | NM_003099 | 3828.956  | 3347.287  |
| NM_014810 | 2558.605  | 3671.428  | NM_000302 | 1329.739  | 1778.782  | NM_004781 | 1358.549  | 612.956   |
| NM_004738 | 1644.22   | 1632.105  | NM_013235 | 16409.689 | 17444.754 | NM_016315 | 772.254   | 43.078    |
| NM_007357 | 4447.814  | 4703.549  | NM_016015 | 2782.582  | 2545.203  | NM_018303 | 1370.404  | 1391.397  |
| NM_003763 | 5036.535  | 6151.941  | NM_020120 | 1391.151  | 1408.709  | NM_014758 | 1261.799  | 1613.188  |
| AK023448  | 1087.086  | 1283.999  | AK022900  | 959.996   | 615.685   | NM_005124 | 1299.363  | 1428.221  |
| Y18213    | 1865.488  | 1984.393  | NM_001125 | 414.878   | 878.578   | AK000947  | 2653.735  | 2197.975  |
| NM_003283 | 2069.625  | 2160.938  | AB023216  | 690.954   | 774.564   | L08240    | 409       | 433.755   |
| AF249898  | 7897.806  | 7700.172  | NM_002266 | 15666.265 | 17555.447 | NM_017952 | 735.713   | 1081.687  |
| M69181    | 10075.987 | 7999.054  | NM_014400 | 4616.552  | 4788.53   | NM_002940 | 1357.189  | 1660.599  |
| NM_002652 | 463.4     | 485.417   | AL157492  | 526.053   | 835.331   | AB046844  | 474.413   | 470.739   |
| NM_001311 | 1406.87   | 1278.013  | AL353957  | 1674.095  | 1678.833  | NM_000302 | 1679.189  | 1510.037  |
| NM_017798 | 4545.513  | 3985.77   | NM_000231 | 1181.941  | 1397.745  | NM_013235 | 22126.621 | 16716.328 |
| NM_012410 | 2434.658  | 2033.809  | AK022451  | 643.778   | 515.37    | NM_016015 | 3252.487  | 2656.281  |
| NM_001111 | 6365.336  | 5534.315  | BM918441  | 989.548   | 912.956   | NM_020120 | 1649.974  | 1211.931  |
| BU565263  | 66024.945 | 70425.398 | AA150828  | 925.371   | 666.664   | AK022900  | 926.362   | 668.558   |
| NM_005028 | 2358.938  | 2340.691  | H64379    | 3955.979  | 4024.903  | AB023216  | 660.806   | 590.607   |
| NM_001611 | 1038.196  | 1033.023  | BE208258  | 29743.264 | 28398.166 | NM_002266 | 17114.045 | 12532.816 |

|           |           |           |           |           |           |           |           |           |
|-----------|-----------|-----------|-----------|-----------|-----------|-----------|-----------|-----------|
| M59979    | 370.976   | 427.452   | T72202    | 430.03    | 489.697   | NM_01440C | 5044.874  | 3369.003  |
| AB018310  | 2965.447  | 2467.988  | BI831922  | 1427.255  | 1550.304  | AL157492  | 584.648   | 624.172   |
| NM_015379 | 16584.529 | 17441.682 | M69238    | 2055.739  | 2754.201  | AL353957  | 1982.91   | 1201.686  |
| NM_004878 | 249.355   | 751.789   | AK026092  | 1473.771  | 1408.305  | NM_007214 | 8880.21   | 6535.646  |
| NM_000742 | 826.285   | 805.101   | AK001175  | 1496.811  | 1403.907  | NM_000311 | 2052.009  | 1269.107  |
| NM_002355 | 7702.307  | 5767.542  | NM_003329 | 44069.883 | 33828.359 | NM_000786 | 11557.896 | 8737.89   |
| AK026608  | 1331.878  | 1054.425  | NM_003299 | 24786.24  | 19034.512 | AL133561  | 1698.388  | 1711.935  |
| AB046836  | 1601.108  | 1329.335  | NM_001560 | 3042.033  | 2074.181  | NM_017731 | 436.149   | 409.769   |
| NM_017816 | 4900.864  | 4901.264  | NM_001783 | 4709.982  | 3678.892  | AB040891  | 1625.972  | 2263.282  |
| AJ224166  | 1524.378  | 1376.649  | J03171    | 1371.106  | 1059.676  | AB037780  | 643.876   | 801.654   |
| AK026098  | 2061.172  | 2211.321  | NM_004323 | 8907.688  | 8508.045  | NM_005845 | 6979.355  | 8553.917  |
| NM_012381 | 1611.639  | 1866.911  | NM_005312 | 926.396   | 1253.019  | NM_016209 | 4865.965  | 4972.615  |
| M20702    | 403.772   | 633.951   | NM_001711 | 565.089   | 601.042   | AK002114  | 1058.303  | 998.316   |
| NM_006397 | 13493.497 | 15536.179 | NM_004210 | 5473.569  | 6650.797  | AL390184  | 470.755   | 500.157   |
| D83776    | 2028.342  | 1945.925  | NM_020140 | 936.678   | 1328.515  | NM_018699 | 547.093   | 297.224   |
| NM_004088 | 3081.03   | 3878.993  | NM_002500 | 459.988   | 524.217   | AK026318  | 714.647   | 586.647   |
| NM_000138 | 2026.546  | 2370.59   | AK026232  | 1108.63   | 1192.655  | NM_004365 | 5744.175  | 4310.995  |
| NM_018163 | 1398.762  | 1595.535  | NM_014892 | 3931.777  | 3560.551  | NM_016355 | 1835.462  | 1121.948  |
| AK026362  | 3559.756  | 2447.538  | AK023827  | 1505.185  | 1787.883  | AJ296290  | 1266.767  | 633.503   |
| NM_004968 | 2705.885  | 2206.296  | NM_001117 | 355.031   | 507.809   | AK026092  | 1004.063  | 619.046   |
| NM_005908 | 1766.022  | 1621.632  | NM_001829 | 518.036   | 559.387   | AK001175  | 1430.907  | 923.62    |
| NM_004785 | 3623.678  | 3044.791  | AF283645  | 1285.709  | 1041.946  | NM_003897 | 1968.802  | 1298.398  |
| NM_002428 | 2080.135  | 1920.739  | NM_016575 | 1496.293  | 1398.691  | NM_014165 | 6983.331  | 7296.88   |
| NM_014674 | 6360.652  | 5567.358  | NM_001045 | 3465.796  | 2825.178  | AL442085  | 2923.197  | 3170.081  |
| NM_018271 | 999.258   | 907.589   | NM_005697 | 3441.168  | 2541.815  | NM_013313 | 2054.488  | 1996.495  |
| NM_000547 | 283.785   | 222.224   | NM_003099 | 2759.999  | 2500.605  | NM_014736 | 5871.395  | 4812.573  |
| NM_014652 | 1648.147  | 1417.5    | NM_004781 | 696.459   | 569.696   | AK023886  | 941.758   | 1368.86   |
| AL133020  | 5345.474  | 5249.187  | NM_018303 | 903.456   | 978.67    | NM_002553 | 1331.029  | 1497.977  |
| NM_014044 | 2704.598  | 2578.374  | NM_014758 | 756.469   | 862.53    | AJ404615  | 3287.293  | 9755.162  |
| NM_000900 | 2102.204  | 2804.481  | NM_005124 | 1287.093  | 1613.503  | NM_016053 | 9632.101  | 14678.811 |
| AK023684  | 3799.996  | 4030.352  | AK000947  | 2200.73   | 2488.442  | AB007869  | 1329.498  | 2269.636  |
| NM_000232 | 943.82    | 824.077   | L08240    | 457.062   | 555.045   | M64108    | 1815.966  | 1696.563  |
| AA700390  | 4722.384  | 4148.845  | NM_017952 | 540.705   | 682.544   | Y17867    | 1377.878  | 1232.412  |
| Y18474    | 898.96    | 824.092   | NM_002940 | 962.037   | 924.615   | M92642    | 325.063   | 349.005   |
| AA436163  | 1148.016  | 1380.167  | NM_016081 | 7137.917  | 7151.491  | NM_018071 | 1681.751  | 1330.462  |
| BI907981  | 989.976   | 932.269   | NM_006389 | 2515.241  | 3424.917  | NM_004333 | 2452.091  | 2216.326  |
| BI603841  | 2633.795  | 2279.365  | M30818    | 282.195   | 450.344   | M31520    | 56274.391 | 58709.707 |
| BG696638  | 5618.458  | 6892.699  | NM_000163 | 503.608   | 517.845   | NM_002020 | 2124.569  | 1679.121  |
| M19888    | 1791.386  | 1771.456  | NM_001125 | 367.468   | 289.786   | AL050137  | 296.268   | 281.545   |
| Y08136    | 773.409   | 826.8     | AB023216  | 705.944   | 615.226   | AK024423  | 1244.952  | 1165.045  |
| AA156863  | 3806.367  | 3693.843  | NM_002266 | 16920.279 | 14712.448 | NM_005043 | 11184.87  | 7172.464  |
| BI915199  | 1450.558  | 1397.787  | NM_014400 | 4805.147  | 4314.247  | NM_005979 | 5964.445  | 3519.6    |
| R82957    | 65825.766 | 57702.781 | AL157492  | 553.573   | 517.06    | NM_006282 | 2415.208  | 1884.474  |
| BI830442  | 700.257   | 462.324   | AL353957  | 1936.098  | 1731.523  | NM_015920 | 15562.331 | 10766.321 |
| AA398951  | 4202.698  | 3725.917  | NM_007214 | 8046.35   | 6473.491  | AB011113  | 1471.304  | 1362.867  |
| AI218732  | 1583.482  | 1590.704  | NM_000311 | 1763.742  | 1256.414  | NM_004115 | 895.287   | 702.055   |
| NM_004102 | 3216.289  | 2644.686  | NM_017909 | 2243.196  | 1642.684  | NM_018287 | 1468.424  | 1359.223  |
| NM_004544 | 4380.308  | 3742.163  | NM_006335 | 8843.52   | 6756.499  | NM_001955 | 1456.682  | 1184.331  |
| NM_018890 | 21808.678 | 18924.527 | NM_000786 | 10496.226 | 7687.795  | AF016004  | 1412.7    | 1844.24   |
| NM_016204 | 974.328   | 861.429   | AL133561  | 1630.967  | 1753.965  | NM_003567 | 5901.898  | 5391.204  |
| NM_002652 | 316.034   | 385.464   | AB040891  | 1693.542  | 1922.364  | NM_007315 | 2509.893  | 2238.936  |
| NM_001311 | 1350.657  | 1470.367  | AB037780  | 574.644   | 617.091   | L20686    | 2038.106  | 3122.914  |
| NM_017798 | 4881.963  | 4829.787  | NM_005845 | 5691.742  | 6115.903  | NM_000304 | 392.097   | 541.956   |

|           |           |           |           |           |           |           |           |           |
|-----------|-----------|-----------|-----------|-----------|-----------|-----------|-----------|-----------|
| NM_01241C | 2498.469  | 2042.645  | NM_016209 | 5146.657  | 4554.989  | AK023362  | 320.473   | 357.587   |
| NM_001111 | 6316.373  | 5362.577  | NM_018964 | 1991.392  | 2461.172  | S72604    | 12979.231 | 11108.662 |
| NM_018049 | 5139.72   | 4499.286  | NM_000080 | 912.21    | 1014.966  | NM_017984 | 382.451   | 401.947   |
| AJ133439  | 908.949   | 742.237   | NM_002711 | 295.811   | 339.515   | NM_002675 | 944.406   | 770.837   |
| NM_014395 | 617.397   | 563.586   | AK026092  | 1727.904  | 1472.798  | NM_012432 | 13606.926 | 10529.364 |
| NM_001561 | 874.212   | 746.476   | AK001175  | 1704.947  | 1378.574  | NM_005007 | 6067.847  | 4168.201  |
| NM_005160 | 1628.217  | 1130.763  | NM_003897 | 1653.551  | 1566.108  | AK024996  | 2099.573  | 1640.487  |
| X78817    | 20813.604 | 21922.436 | NM_014165 | 5715.606  | 4973.482  | NM_012290 | 2129.213  | 1547.301  |
| AB023135  | 876.914   | 910.412   | AL442085  | 3600.708  | 4188.638  | NM_002431 | 2197.345  | 1456.521  |
| AY009401  | 877.305   | 1059.338  | NM_013313 | 1827.978  | 2112.124  | NM_001827 | 15621.535 | 12296.093 |
| NM_001991 | 693.349   | 580.054   | NM_014736 | 4896.698  | 5867.83   | NM_020466 | 2448.37   | 1452.064  |
| NM_000193 | 1837.536  | 1727.987  | AK023886  | 1142.529  | 1282.647  | NM_002853 | 3367.786  | 2385.599  |
| BC014586  | 449.238   | 505.382   | NM_002553 | 984.258   | 1122.89   | NM_003174 | 523.415   | 289.821   |
| NM_002448 | 878.328   | 838.094   | AJ404615  | 2355.191  | 2929.209  | NM_012307 | 8605.323  | 6985.534  |
| AF053952  | 25917.979 | 24296.58  | NM_016053 | 8033.587  | 8813.111  | NM_002540 | 895.255   | 839.43    |
| NM_003213 | 6886.019  | 6710.239  | AB007869  | 1495.228  | 1699.353  | NM_006371 | 2010.089  | 2961.939  |
| BF184738  | 631.529   | 700.905   | AB046844  | 540.879   | 583.046   | NM_018834 | 653.111   | 671.27    |
| NM_015057 | 922.372   | 912.997   | NM_000302 | 1580.019  | 2303.302  | AK026882  | 620.246   | 855.068   |
| AF303398  | 7284.942  | 7162.716  | NM_013235 | 16656.861 | 19047.348 | NM_004574 | 753.855   | 663.294   |
| NM_014810 | 2098.701  | 1534.495  | NM_016015 | 2822.565  | 3081.542  | NM_004848 | 1424.903  | 1571.027  |
| NM_004738 | 1946.12   | 2020.096  | AK022900  | 824.639   | 1083.817  | NM_001944 | 353.859   | 494.954   |
| NM_007357 | 4372.863  | 6241.479  | NM_002500 | 298.363   | 248.499   | AF014459  | 1505.476  | 2270.027  |
| NM_003763 | 4782.49   | 5075.545  | AK026232  | 1028.728  | 1002.752  | AK024601  | 2865.64   | 2823.542  |
| AK023448  | 939.339   | 650.719   | NM_014892 | 3979.122  | 3151.714  | S68069    | 3594.02   | 2818.516  |
| Y18213    | 1850.026  | 1422.816  | AK023827  | 1489.08   | 1163.25   | AB011095  | 765.792   | 506.478   |
| NM_003283 | 2025.734  | 1563.421  | NM_001117 | 512.126   | 474.196   | NM_001503 | 519.499   | 474.561   |
| AF249898  | 6951.98   | 5827.417  | NM_000231 | 1665.556  | 1317.89   | NM_006302 | 2222.924  | 1719.237  |
| M69181    | 9665.806  | 7821.888  | L07517    | 630.96    | 544.61    | AJ224875  | 2269.719  | 1897.326  |
| AK027224  | 327.834   | 286.283   | AK022451  | 583.288   | 409.063   | NM_002149 | 6307.353  | 3724.15   |
| NM_002428 | 2046.126  | 1940.762  | BM918441  | 869.09    | 752.623   | AF043324  | 2508.292  | 1911.466  |
| NM_014674 | 6900.756  | 6819.022  | AA425102  | 1472.085  | 1627.174  | AK024172  | 648.987   | 561.384   |
| NM_018271 | 1113.167  | 1195.735  | AA150828  | 824.78    | 890.337   | NM_014814 | 3697.24   | 2574.992  |
| NM_014652 | 1558.671  | 1514.301  | AI859208  | 1819.824  | 2828.824  | NM_002797 | 9086.385  | 5757.377  |
| AL133020  | 5710.295  | 6431.055  | H64379    | 4386.637  | 5002.729  | AK024318  | 813.967   | 495.764   |
| NM_004152 | 429.489   | 498.08    | T72202    | 318.003   | 410.194   | NM_016129 | 2017.229  | 1464.864  |
| NM_001611 | 958.276   | 921.719   | BI831922  | 1584.38   | 1769.214  | NM_002809 | 4656.673  | 2864.358  |
| AB018310  | 2766.428  | 2509.716  | M69238    | 1687.966  | 1875.256  | NM_017912 | 4168.368  | 2937.4    |
| NM_015379 | 16927.301 | 19792.506 | AA664180  | 434.936   | 327.233   | NM_000423 | 4624.367  | 3823.292  |
| NM_004878 | 495.308   | 474.138   | NM_016081 | 7441.646  | 6446.039  | AB046838  | 1885.215  | 2794.336  |
| AF144638  | 62278.656 | 60931.668 | NM_006389 | 2689.821  | 2533.395  | AK026339  | 1085.683  | 1701.536  |
| NM_000742 | 634.205   | 609.532   | NM_005755 | 423.841   | 306.629   | X98411    | 3476.936  | 5080.642  |
| NM_002355 | 7834.816  | 5862.783  | NM_003329 | 46494.266 | 27079.363 | AF116658  | 2890.397  | 4160.222  |
| AK026608  | 1034.489  | 886.725   | NM_003299 | 28127.342 | 18005.205 | NM_014865 | 5112.774  | 5096.858  |
| NM_004102 | 2809.932  | 2509.039  | NM_001560 | 2697.107  | 2374.664  | AB032977  | 4263.572  | 4050.379  |
| NM_004544 | 4471.709  | 4834.344  | NM_001783 | 4208.756  | 4108.194  | AK001725  | 614.879   | 854.622   |
| NM_018890 | 22534.238 | 19637.1   | J03171    | 1447.881  | 1413.879  | NM_003036 | 2104.224  | 2762.01   |
| NM_016204 | 1282.024  | 1268.307  | NM_002310 | 1258.899  | 1601.475  | NM_020529 | 2349.899  | 5407.426  |
| AB046836  | 1147.904  | 1032.8    | NM_005312 | 1847.144  | 4525.272  | NM_020395 | 1575.376  | 1458.114  |
| NM_017816 | 4896.17   | 4724.133  | NM_001711 | 488.501   | 653.013   | NM_003425 | 1059.177  | 1284.719  |
| AJ224166  | 1317.354  | 1074.789  | NM_004210 | 6271.362  | 9128.627  | NM_013388 | 5592.102  | 3769.748  |
| AK026098  | 1905.346  | 2344.623  | AK075415  | 305.094   | 295.234   | AF038951  | 7941.526  | 5143.382  |
| NM_012381 | 1676.877  | 1862.433  | AK025616  | 289.402   | 294.233   | NM_006492 | 958.918   | 837.002   |
| M20702    | 588.87    | 643.445   | NM_018964 | 2006.956  | 1993.028  | AK021811  | 1207.55   | 792.164   |



|           |           |           |           |           |           |           |           |           |
|-----------|-----------|-----------|-----------|-----------|-----------|-----------|-----------|-----------|
| NM_006397 | 16327.027 | 38352.336 | NM_000080 | 932.993   | 630.075   | NM_00342E | 1283.118  | 1095.812  |
| D83776    | 2891.264  | 4721.042  | NM_001829 | 425.618   | 380.228   | AF055030  | 1128.805  | 1019.147  |
| NM_00408E | 3144.798  | 4317.104  | AF283645  | 1355.276  | 1348.526  | AK000589  | 1417.964  | 945.041   |
| NM_00218C | 980.814   | 1260.79   | NM_01657E | 1408.941  | 1137.729  | X53281    | 4126.619  | 2741.653  |
| NM_00013E | 1925.762  | 2069.856  | NM_00104E | 3373.751  | 3321.929  | BC012782  | 1065.773  | 723.783   |
| NM_01816E | 1496.662  | 1480.199  | NM_005697 | 3104.739  | 2851.968  | AF132026  | 42625.258 | 21691.916 |
| AK026362  | 3328.257  | 2766.974  | NM_003099 | 2843.647  | 3202.156  | AL050353  | 1127.738  | 928.153   |
| NM_00496E | 2878.83   | 2366.896  | NM_004781 | 891.624   | 977.839   | AB037788  | 7548.034  | 6402.215  |
| NM_00590E | 1788.677  | 1600.383  | NM_01830E | 895.881   | 1149.153  | NM_004587 | 3250.173  | 6733.016  |
| NM_00478E | 3760.24   | 2841.031  | NM_01475E | 989.057   | 1180.117  | AK024570  | 10354.635 | 11488.696 |
| NM_00019E | 1733.62   | 1625.586  | NM_005124 | 1658.02   | 2308.653  | AF161401  | 4587.861  | 4564.741  |
| BC014586  | 511.481   | 687.566   | AK000947  | 2708.624  | 2642.543  | NM_00099C | 8454.935  | 9568.697  |
| NM_00244E | 1084.378  | 785.084   | L08240    | 619.469   | 471.843   | NM_01474C | 2882.388  | 3559.517  |
| AF053952  | 28350.926 | 29472.053 | NM_00294C | 1590.307  | 1482.598  | NM_01595E | 5959.348  | 8529.782  |
| NM_00321E | 7348.518  | 7045.125  | AB046844  | 530.828   | 408.165   | AF075008  | 2244.021  | 1746.113  |
| BF184738  | 699.664   | 806.594   | NM_00030E | 1413.862  | 1346.204  | NM_006504 | 4183.233  | 3059.422  |
| NM_014044 | 2747.188  | 2430.451  | NM_01323E | 14915.828 | 14427.747 | AL137430  | 482.27    | 488.461   |
| NM_00090C | 1815.392  | 1651.162  | NM_01601E | 2794.952  | 2431.146  | NM_00069E | 4563.791  | 2908.347  |
| AK023684  | 3991.048  | 4066.338  | NM_02012C | 1491.742  | 1471.05   | NM_00248E | 14541.714 | 9644.222  |
| NM_00023E | 836.58    | 1099.858  | AK022900  | 979.129   | 781.954   | NM_00400E | 6241.791  | 4328.505  |
| AA700390  | 5200.213  | 5013.821  | AB023216  | 704.327   | 688.228   | NM_00018E | 621.075   | 480.704   |
| Y18474    | 562.657   | 716.274   | NM_00226E | 17376.91  | 14170.131 | BF244401  | 1550.978  | 1236.632  |
| AA436163  | 1077.375  | 1482.145  | NM_01440C | 5177.643  | 3944.193  | NM_00471E | 21688.564 | 12846.085 |
| BI907981  | 1030.488  | 1639.768  | AL157492  | 685.249   | 591.298   | AL359585  | 1687.431  | 1294.054  |
| BI603841  | 4445.312  | 9253.698  | AL353957  | 1997.811  | 1852.571  | AB046850  | 1779.69   | 1093.63   |
| BG696638  | 6013.287  | 9576.485  | NM_00078E | 14169.454 | 20404.346 | NM_014801 | 1261.769  | 818.578   |
| M19888    | 1658.36   | 1875.512  | AK023180  | 329.581   | 631.23    | NM_00364E | 3898.359  | 2776.583  |
| Y08136    | 852.664   | 874.118   | NM_00251E | 107.961   | 451.308   | AB027013  | 1395.746  | 1368.386  |
| AA156863  | 3913.444  | 3740.063  | AL133561  | 2553.36   | 5041.605  | BF185480  | 2029.665  | 2222.185  |
| BI915199  | 1786.669  | 1410.051  | AB040891  | 2727.242  | 4875.706  | NM_00212E | 10143.608 | 14939.576 |
| R82957    | 58384.121 | 56656.113 | AB037780  | 960.587   | 1503.543  | NM_00710E | 959.214   | 871.413   |
| BI830442  | 744.058   | 533.179   | NM_00584E | 8969.635  | 14914.466 | AL360195  | 619.917   | 1253.597  |
| AA398951  | 4202.02   | 3834.776  | NM_01620E | 8651.491  | 15467.717 | U14383    | 360.255   | 415.423   |
| AI218732  | 1589.496  | 1684.584  | AK002114  | 1277.384  | 1455.833  | NM_01781C | 695.163   | 786.821   |
| AF249898  | 7063.182  | 6533.296  | AL390184  | 585.695   | 488.414   | NM_003181 | 50124.148 | 51201.695 |
| M69181    | 9554.133  | 9134.804  | NM_01869E | 678.349   | 664.702   | NM_004451 | 1477.365  | 1920.515  |
| NM_00265E | 602.116   | 689.469   | AK026318  | 731.221   | 811.127   | NM_004364 | 34658.852 | 28424.807 |
| NM_001311 | 1722.279  | 1511.998  | AF291673  | 1068.625  | 934.715   | AK023505  | 1724.412  | 1589.199  |
| NM_01241C | 2019.369  | 1680.408  | NM_00436E | 7580.223  | 9384.654  | AB037851  | 3127.343  | 2727.177  |
| NM_001111 | 6008.507  | 5316.815  | NM_01635E | 2872.011  | 4012.726  | AL050389  | 1755.322  | 1392.889  |
| NM_01804E | 5131.411  | 5396.283  | AJ296290  | 2340.612  | 2781.766  | AK024684  | 1281.7    | 1230.805  |
| AJ133439  | 1265.926  | 1597.376  | AK026092  | 2959.816  | 5036.691  | NM_01494E | 6905.636  | 4886.229  |
| NM_01439E | 1097.106  | 1141.599  | AK001175  | 2813.112  | 4974.969  | AK001546  | 1498.437  | 1241.783  |
| AB023135  | 797.859   | 648.939   | NM_003897 | 2700.806  | 5693.446  | NM_006537 | 5007.508  | 3402.103  |
| AY009401  | 1088.992  | 1013.216  | NM_01416E | 9092.275  | 16919.801 | AF007155  | 4326.013  | 3460.579  |
| AF294628  | 724.407   | 577.063   | AL442085  | 5635.161  | 10626.777 | AL049282  | 3293.638  | 2334.135  |
| AK026960  | 396.984   | 620.247   | NM_01331E | 2790.366  | 6507.758  | AK021443  | 846.883   | 1076.826  |
| NM_001991 | 660.688   | 633.582   | NM_00255E | 1634.732  | 3414.044  | AF070569  | 457.45    | 342.624   |
| NM_00074E | 651.604   | 780.251   | AJ404615  | 3329.247  | 6734.837  | NM_02023E | 1493.534  | 1132.99   |
| NM_00235E | 7534.088  | 6733.537  | NM_01605E | 12707.766 | 20301.434 | AF143873  | 410.466   | 513.587   |
| AK026608  | 1382.786  | 1149.646  | AB007869  | 1328.927  | 1453.42   | AL355732  | 786.235   | 1255.467  |
| NM_015057 | 1348.82   | 2121.391  | M64108    | 2486.861  | 3522.119  | NM_01796E | 2256.517  | 3146.826  |
| AF303398  | 7571.034  | 16122.445 | NM_014767 | 536.347   | 887.463   | AF143327  | 778.541   | 1451.232  |

|           |           |           |           |           |           |           |           |           |
|-----------|-----------|-----------|-----------|-----------|-----------|-----------|-----------|-----------|
| NM_00473E | 1767.163  | 2310.363  | Y17867    | 1934.451  | 3317.602  | AL137535  | 270.572   | 574.278   |
| NM_007357 | 4368.358  | 4903.784  | M92642    | 593.102   | 1142.122  | AL049991  | 266.235   | 404.237   |
| NM_003763 | 4778.366  | 4678.334  | NM_018071 | 2678.862  | 3795.008  | AL049990  | 527.348   | 744.544   |
| AK023448  | 1053.732  | 858.836   | NM_004333 | 4381.067  | 6099.731  | AF131843  | 619.647   | 534.337   |
| Y18213    | 1644.535  | 1459.861  | M31520    | 51316.039 | 60584.305 | AK026653  | 361.056   | 787.606   |
| NM_003283 | 2028.952  | 2070.694  | NM_002020 | 4904.484  | 7692.214  | NM_020231 | 777.164   | 1023.145  |
| NM_018163 | 1294.954  | 1127.848  | AL050137  | 600.636   | 1073.962  | AL133118  | 1234.702  | 1381.419  |
| AK026362  | 3292.924  | 2712.267  | AK024423  | 2743.173  | 4403.271  | AK023571  | 1209.057  | 1208.882  |
| NM_00496E | 2579.939  | 2619.325  | NM_005043 | 20432.432 | 31616.521 | NM_001702 | 2651.044  | 2361.931  |
| NM_00590E | 1828.149  | 1843.273  | NM_005979 | 10348.105 | 17683.648 | AL833558  | 356.734   | 295.758   |
| NM_00478E | 3004.824  | 2841.386  | NM_006282 | 4008.083  | 6726.645  | AF087991  | 7141.672  | 5574.209  |
| NM_00242E | 1879.024  | 2277.228  | NM_020321 | 373.124   | 878.819   | AJ227884  | 952.842   | 783.555   |
| NM_018271 | 809.563   | 1097.097  | NM_000826 | 303.163   | 922.836   | X64986    | 754.456   | 567.635   |
| NM_000547 | 335       | 401.013   | NM_015920 | 22887.84  | 41026.355 | Y10510    | 628.014   | 616.819   |
| NM_014652 | 1368.966  | 1290.168  | NM_018287 | 1450.803  | 2688.797  | L38282    | 1969.503  | 2625.177  |
| AL133020  | 5529.098  | 7008.635  | NM_001955 | 2469.427  | 4482.773  | NM_01805E | 1718.09   | 2710.72   |
| NM_001611 | 1004.827  | 1624.084  | AF016004  | 1299.303  | 2128.865  | L25446    | 394.116   | 1078.603  |
| M59979    | 497.025   | 762.814   | NM_003567 | 8690.05   | 8920.001  | NM_01900E | 1346.753  | 1686.384  |
| AB018310  | 2482.863  | 3862.608  | NM_007315 | 3339.438  | 2385.459  | M20838    | 476.889   | 529.847   |
| NM_01537E | 16353.516 | 15762.911 | L20686    | 2347.908  | 2094.869  | AK022738  | 480.443   | 537.396   |
| NM_00487E | 674.096   | 747.357   | NM_000304 | 552.116   | 566.064   | Y11918    | 194.307   | 316.151   |
| BF028822  | 392.04    | 515.537   | S72604    | 19934.279 | 24611.828 | AK002095  | 436.605   | 516.224   |
| NM_001777 | 9251.282  | 7583.003  | NM_017984 | 723.931   | 1164.667  | AK000821  | 2334.346  | 1765.984  |
| U79457    | 4516.874  | 3652.026  | NM_002675 | 1136.624  | 1490.433  | AK024526  | 6980.852  | 4781.433  |
| NM_014347 | 8588.153  | 9085.419  | NM_012432 | 18933.066 | 20482.607 | AK000848  | 328.733   | 273.438   |
| NM_00129E | 12939.417 | 12212.86  | NM_005007 | 10648.188 | 11359.677 | AK023307  | 393.458   | 371.537   |
| NM_004344 | 7722.641  | 7615.18   | AK024996  | 2259.669  | 2055.25   | NM_01761E | 1478.766  | 1079.977  |
| NM_016204 | 441.779   | 473.872   | NM_00125E | 454.939   | 742.113   | AK024315  | 4921.743  | 5963.095  |
| AJ224166  | 1444.886  | 2145.626  | NM_004417 | 556.689   | 382.929   | AK024945  | 649.01    | 686.14    |
| AK026098  | 1889.397  | 3884.832  | NM_012290 | 3980.829  | 5255.393  | AK024411  | 723.343   | 713.116   |
| NM_012381 | 1784.544  | 3264.496  | NM_002431 | 2757.644  | 2840.698  | AK024579  | 2931.396  | 3045.348  |
| M20702    | 677.261   | 951.882   | NM_001827 | 21899.74  | 20486.014 | S75708    | 6380.793  | 5399.351  |
| NM_006397 | 14452.395 | 16634.285 | NM_02046E | 3225.57   | 3841.048  | U79291    | 5834.71   | 3989.519  |
| D83776    | 2177.906  | 2824.632  | NM_002853 | 3326.338  | 3348.889  | D17172    | 6054.854  | 4193.306  |
| NM_00408E | 2915.133  | 3357.73   | NM_003174 | 624.257   | 546.664   | AJ227859  | 865.572   | 654.725   |
| NM_00013E | 2029.775  | 1865.029  | NM_012307 | 9690.285  | 8300.077  | NM_018544 | 368.881   | 368.83    |
| AB011541  | 1674.967  | 1483.895  | NM_002540 | 820.48    | 977.217   | AK022670  | 239.942   | 243.572   |
| BC032460  | 7645.28   | 7125.832  | NM_006371 | 2540.947  | 2342.41   | L10141    | 522.799   | 497.143   |
| NM_014071 | 3210.497  | 4271.386  | NM_018834 | 791.524   | 907.659   | AB020699  | 3368.323  | 2624.737  |
| AK024404  | 1989.24   | 1591.76   | AK026882  | 857.839   | 896.849   | AF086269  | 808.154   | 610.19    |
| NM_00632E | 776.242   | 650.756   | NM_004574 | 752.26    | 820.142   | U90437    | 1675.585  | 1486.576  |
| NM_000213 | 5304.443  | 5131.133  | NM_00484E | 1491.501  | 1233.466  | AK000842  | 8741.49   | 10322.173 |
| BE906107  | 5697.973  | 6626.154  | AF014459  | 1604.402  | 1941.925  | AK023386  | 3858.733  | 4103.659  |
| NM_01551E | 1687.635  | 1598.47   | AK024601  | 2155.665  | 1740.168  | NM_007053 | 16540.404 | 16137.927 |
| AB033065  | 900.314   | 1075.742  | S68069    | 3484.48   | 2801.75   | AK022153  | 344.302   | 444.299   |
| NM_004857 | 6012.716  | 6325.169  | AB011095  | 835.823   | 545.445   | AK022789  | 418.189   | 640.658   |
| NM_01210E | 675.728   | 852.365   | NM_001503 | 676.319   | 549.553   | AK023756  | 590.879   | 574.907   |
| NM_003253 | 843.795   | 1069.059  | NM_006302 | 1215.332  | 1423.146  | NM_00112E | 4532.321  | 4249.633  |
| NM_000490 | 1070.275  | 1329.759  | AJ224875  | 2300.027  | 1829.816  | AK023673  | 1504.909  | 1301.728  |
| NM_00483E | 1437.798  | 1515.087  | NM_00214E | 5844.397  | 4160.888  | NM_018252 | 1284.803  | 912.521   |
| NM_012193 | 2040.775  | 2226.583  | AF043324  | 2595.215  | 2118.078  | NM_018000 | 25161.389 | 16554.117 |
| NM_00340E | 9110.361  | 7987.376  | AK024172  | 681.554   | 571.218   | AF164963  | 463.031   | 380.403   |
| NM_004720 | 4915.962  | 4460.046  | NM_014814 | 3493.256  | 2910.247  | AF124366  | 12401.313 | 9255.613  |

|           |           |           |           |           |           |           |           |           |
|-----------|-----------|-----------|-----------|-----------|-----------|-----------|-----------|-----------|
| NM_001057 | 825.712   | 839.691   | NM_002797 | 9436.824  | 7938.067  | AF130112  | 590.662   | 570.658   |
| NM_005561 | 5292.681  | 4862.153  | AK024318  | 825.881   | 730.49    | NM_000551 | 2913.02   | 2166.915  |
| AF272381  | 8432.549  | 8196.165  | NM_016129 | 2597.844  | 2166.033  | AL365518  | 2397.406  | 1337.471  |
| NM_004524 | 2351.515  | 2212.82   | NM_002809 | 4675.899  | 3908.479  | AF086257  | 2851.08   | 2011.62   |
| NM_006315 | 2504.032  | 2674.199  | NM_017912 | 4464.558  | 3965.89   | AC119751  | 443.669   | 351.623   |
| NM_018401 | 932.227   | 789.501   | NM_000423 | 4584.721  | 4855.747  | NM_019056 | 2288.039  | 1744.926  |
| NM_005163 | 3180.106  | 2982.331  | AB046838  | 1688.323  | 1833.985  | AF279783  | 2969.702  | 2234.607  |
| NM_007273 | 30069.174 | 29899.682 | AK026339  | 872.61    | 715.661   | AF182422  | 5890.032  | 3756.794  |
| BE894943  | 1064.214  | 1062.922  | X98411    | 3317.057  | 3524.605  | NM_016943 | 379.643   | 311.401   |
| NM_016422 | 1979.518  | 2506.084  | AF116658  | 3286.411  | 3963.771  | AF070602  | 795.442   | 667.437   |
| NM_017878 | 791.875   | 1044.176  | NM_014865 | 6250.684  | 6456.946  | BE393290  | 895.813   | 1043.65   |
| NM_005643 | 8680.935  | 12185.782 | AB032977  | 5232.932  | 5242.214  | NM_017622 | 1159.028  | 910.122   |
| NM_003592 | 2859.593  | 3301.518  | AK001725  | 581.901   | 712.98    | AF133331  | 1373.823  | 1395.389  |
| NM_014953 | 2145.673  | 2460.723  | NM_003036 | 2123.412  | 2071.848  | L34408    | 299.617   | 360.137   |
| AF179995  | 1093.037  | 1039.993  | NM_020529 | 1702.028  | 1943.159  | AF161403  | 4477.26   | 4607.445  |
| NM_004523 | 1101.813  | 1474.922  | NM_020395 | 1627.933  | 1498.324  | NM_020183 | 1827.139  | 1981.487  |
| NM_004404 | 6557.308  | 9826.152  | NM_003425 | 1326.591  | 1154.052  | NM_018025 | 522.009   | 417.084   |
| NM_002960 | 4730.256  | 5383.424  | NM_013388 | 4742.584  | 3838.141  | AL389954  | 762.133   | 633.334   |
| NM_006790 | 1236.733  | 1209.01   | AF038951  | 7785.262  | 5696.992  | NM_019852 | 2199.846  | 1778.16   |
| AL117522  | 13819.915 | 13651.689 | NM_006492 | 1169.191  | 1046.132  | NM_006118 | 3430.059  | 2130.149  |
| NM_006572 | 6804.339  | 5954.69   | AK021811  | 885.651   | 713.964   | AK026225  | 19456.096 | 14611.213 |
| NM_019061 | 3466.961  | 3655.54   | NM_003428 | 1402.788  | 964.638   | AL050032  | 1546.093  | 1263.392  |
| AB033007  | 5081.975  | 4928.04   | AF055030  | 1447.978  | 937.498   | AF009304  | 492.837   | 328.621   |
| NM_004716 | 4131.878  | 5552.429  | AK000589  | 1304.622  | 581.628   | AF086177  | 9327.217  | 6351.316  |
| D29810    | 3666.695  | 4639.143  | X53281    | 6204.326  | 5027.3    | NM_018945 | 846.225   | 583.669   |
| NM_000128 | 1676.869  | 2292.502  | BC012782  | 1192.227  | 696.867   | AK021593  | 343.301   | 337.228   |
| NM_000422 | 651.126   | 669.714   | AF132026  | 42722.066 | 28650.02  | D17187    | 1447.265  | 964.332   |
| AK023164  | 1509.052  | 1432.482  | AL050353  | 1266.68   | 1127.4    | AJ243672  | 824.539   | 782.784   |
| NM_005379 | 2015.581  | 1945.847  | AB037788  | 7660.832  | 7008.526  | AL122087  | 618.892   | 519.238   |
| AK027121  | 3042.064  | 4891.379  | NM_004587 | 3536.584  | 2348.154  | D17169    | 26724.518 | 19683.977 |
| NM_017433 | 3010.52   | 3356.154  | NM_000975 | 50168.5   | 65963.945 | NM_017924 | 5108.613  | 3376.157  |
| AL117661  | 2074.492  | 1874.313  | AF147412  | 14454.563 | 14743.768 | S81578    | 855.13    | 714.07    |
| X64643    | 1881.087  | 1430.928  | AK024570  | 10587.477 | 9573.259  | NM_017546 | 3806.742  | 2799.791  |
| NM_005380 | 9677.344  | 9600.027  | AF161401  | 4970.652  | 4356.737  | AJ001889  | 267.96    | 254.783   |
| D70835    | 50320.277 | 51145.234 | NM_000990 | 10405.569 | 9470.143  | NM_006511 | 368.923   | 503.754   |
| NM_002697 | 2475.044  | 2816.401  | NM_014740 | 2820.312  | 2192.219  | AF007142  | 1080.889  | 1660.793  |
| NM_001518 | 7769.868  | 7118.259  | NM_015956 | 6648.995  | 6222.567  | AF119853  | 3299.704  | 3747.232  |
| NM_003412 | 14437.658 | 14054.47  | AF075008  | 1700.001  | 1313.939  | CY3Cy5    | 2120.158  | 141.274   |
| NM_018336 | 924.466   | 844.694   | NM_006504 | 4159.585  | 2845.026  | AI248827  | 579.645   | 963.6     |
| AK022668  | 3237.7    | 3404.053  | AF070538  | 461.184   | 480.06    | AI970239  | 656.051   | 962.948   |
| NM_018427 | 2118.452  | 1881.347  | AL137430  | 470.555   | 435.985   | AA496452  | 2733.326  | 2759.383  |
| NM_014663 | 7735.114  | 11545.401 | NM_000696 | 3669.381  | 2866.626  | X67594    | 1157.036  | 1419.818  |
| NM_004674 | 2247.853  | 2176.197  | NM_002488 | 12882.807 | 8346.99   | BC008837  | 653.74    | 1244.979  |
| AB037801  | 5463.469  | 4726.059  | NM_004003 | 6361.433  | 4110.108  | NM_015865 | 1488.449  | 1713.444  |
| AL080159  | 14097.733 | 14572.468 | NM_000188 | 658.678   | 540.148   | NM_005987 | 52089.102 | 63742.949 |
| NM_017823 | 41598.082 | 44851.953 | BF244401  | 2429.012  | 1864.968  | X87838    | 886.978   | 674.836   |
| U55185    | 1067.105  | 1155.345  | NM_004718 | 22133.006 | 12866.397 | NM_033195 | 374.622   | 236.739   |
| U30828    | 8634.164  | 9948.642  | AL359585  | 2012.696  | 1434.924  | NM_015001 | 863.344   | 730.135   |
| AF085886  | 65942.203 | 66569.406 | AB046850  | 1870.84   | 1570.659  | SR2       | 40978.309 | 28745.357 |
| AK023828  | 5566.146  | 4605.921  | NM_014801 | 1582.35   | 1404.133  | SR4       | 10031.516 | 5692.139  |
| AK022664  | 1063.301  | 1064.204  | NM_003642 | 4062.169  | 3804.938  | SR6       | 1424.365  | 814.41    |
| AL080223  | 2821.728  | 2619.667  | AB027013  | 1782.277  | 2052.591  | SR8       | 5330.464  | 7734.526  |
| AK001630  | 1218.214  | 1237.094  | BC032686  | 469.258   | 419.389   | SR10      | 18688.955 | 3431.383  |

|           |           |           |           |           |           |           |           |           |
|-----------|-----------|-----------|-----------|-----------|-----------|-----------|-----------|-----------|
| NM_014612 | 16895.41  | 25128.791 | BF185480  | 1971.839  | 1958.592  | CY3Cy5    | 1412.94   | 100.724   |
| AF079098  | 762.452   | 809.009   | NM_002128 | 9615.962  | 11343.324 | X00094    | 1078.067  | 1379.953  |
| AK021815  | 797.959   | 1014.749  | NM_007105 | 610.347   | 448.171   | NM_003775 | 693.567   | 1163.294  |
| NM_001543 | 758.15    | 609.811   | NM_003074 | 2733.602  | 1972.074  | NM_002082 | 2855.388  | 6443.86   |
| NM_016641 | 3227.68   | 3183.617  | AL360195  | 1377.683  | 1600.948  | NM_006056 | 1405.579  | 1778.619  |
| AB018010  | 849.187   | 880.401   | U14383    | 524.82    | 379.164   | AF045229  | 5763.305  | 6091.769  |
| AK026762  | 1767.018  | 1812.114  | NM_017810 | 927.179   | 745.571   | NM_001840 | 4728.811  | 4949.756  |
| NM_004412 | 636.664   | 588.923   | NM_003181 | 51498.34  | 51848.941 | NM_000228 | 821.02    | 1311.405  |
| L48516    | 1579.154  | 1750.062  | NM_004451 | 1895.441  | 2375.534  | NM_000830 | 536.286   | 879.114   |
| NM_016648 | 4224.781  | 3660.792  | NM_004364 | 37788.836 | 30417.521 | NM_005209 | 363.432   | 343.862   |
| AF083930  | 2068.974  | 1956.557  | AK023505  | 1586.027  | 1673.158  | NM_001155 | 4935.939  | 3101.664  |
| NM_003426 | 733.844   | 975.541   | AB037851  | 3182.961  | 2947.006  | M62896    | 7841.218  | 6197.842  |
| NM_014862 | 544.542   | 600.435   | AL050389  | 2069.5    | 1635.764  | NM_017736 | 2073.646  | 1259.41   |
| AK027159  | 915.981   | 830.59    | AK024684  | 1372.96   | 1009.28   | NM_000313 | 430.428   | 211.004   |
| AF075112  | 448.917   | 640.746   | NM_014945 | 5849.338  | 3663.8    | NM_001498 | 32149.123 | 15054.246 |
| AF086152  | 8924.743  | 9138.371  | AK001546  | 1620.792  | 1569.439  | AF263523  | 1352.201  | 751.321   |
| U78519    | 1450.65   | 1217.228  | NM_006537 | 4828.216  | 3104.833  | L08441    | 7658.739  | 4321.919  |
| AK026872  | 1670.478  | 1667.96   | AF007155  | 5369.98   | 4030.885  | AA641953  | 1625.591  | 654.103   |
| AL157505  | 725.802   | 902.782   | AK023055  | 472.548   | 405.578   | NM_000710 | 281.217   | 769.729   |
| NM_007190 | 6735.347  | 6016.341  | AL049282  | 3551.413  | 2679.567  | NM_000752 | 566.216   | 1538.925  |
| AF043897  | 1269.427  | 1011.596  | AK021443  | 1000.898  | 950.474   | NM_002018 | 3972.937  | 4436.471  |
| U79246    | 1727.23   | 2058.943  | AF070569  | 405.977   | 321.25    | NM_002377 | 584.637   | 649.119   |
| AF052140  | 649.472   | 491.123   | NM_020233 | 1392.769  | 1806.923  | AF161383  | 2110.276  | 2530.747  |
| NM_018836 | 1104.111  | 1460.067  | AF143873  | 522.423   | 560.16    | U72882    | 2670.463  | 4247.345  |
| AF007147  | 1890.994  | 2119.075  | AL355732  | 737.16    | 666.559   | NM_014337 | 4353.949  | 5033.713  |
| AF052127  | 3826.052  | 4306.789  | NM_017966 | 1474.061  | 1259.014  | NM_007161 | 24812.637 | 32631.574 |
| AK024261  | 544.548   | 731.205   | AF143327  | 989.075   | 813.318   | NM_014387 | 753.24    | 585.931   |
| AF052150  | 777.112   | 1032.684  | AL137535  | 343.681   | 464.398   | NM_003641 | 1485.922  | 933.549   |
| AF086481  | 706.488   | 650.353   | AL049991  | 340.727   | 382.78    | NM_012463 | 1044.238  | 937.579   |
| AK021982  | 946.167   | 830.241   | AL049990  | 683.467   | 630.917   | L29140    | 9530.999  | 5825.105  |
| AL355689  | 385.025   | 231.889   | AF131843  | 888.286   | 778.352   | AK026448  | 798.067   | 510.436   |
| AK024885  | 1406.431  | 1396.309  | AK026653  | 587.778   | 669.947   | AK057418  | 3487.544  | 2120.902  |
| AK022441  | 1012.26   | 911.911   | NM_020231 | 1053.913  | 1104.953  | L37199    | 541.234   | 279.238   |
| AK026208  | 2099.734  | 2333.751  | AL133118  | 1637.946  | 1317.167  | NM_007260 | 1129.974  | 470.543   |
| NM_016947 | 69381.883 | 64604.723 | AK023571  | 1321.204  | 1141.094  | AF148646  | 2483.524  | 1276.481  |
| AY007136  | 529.91    | 447.693   | NM_001702 | 3730.887  | 3018.219  | AL110218  | 809.638   | 304.171   |
| AL359940  | 2763.801  | 2816.324  | AK026657  | 628.871   | 316.083   | AB023201  | 3774.836  | 1643.584  |
| NM_018286 | 1238.534  | 1170.717  | AL833558  | 415.228   | 349.079   | NM_000072 | 1254.128  | 996.997   |
| AF085961  | 367.796   | 412.118   | AF087991  | 6699.335  | 5298.195  | NM_000697 | 1126.983  | 1015.171  |
| AK024925  | 11341.004 | 10424.352 | Y12839    | 628.055   | 379.997   | NM_000017 | 2581.706  | 2689.199  |
| AL049460  | 4963.072  | 3891.72   | AJ001876  | 318.916   | 466.603   | NM_000237 | 1177.782  | 1442.318  |
| AK022396  | 860.351   | 979.062   | AJ227884  | 932.835   | 1201.679  | NM_018346 | 2502.27   | 2995.764  |
| AF075113  | 517.64    | 514.643   | X64986    | 1122.15   | 1062.952  | AL122054  | 2378.788  | 2671.643  |
| AK022892  | 6730.94   | 3870.089  | L38282    | 2462.748  | 2444.365  | AB011182  | 3874.823  | 2786.731  |
| U50536    | 767.011   | 877.645   | NM_018056 | 1426.673  | 1378.476  | NM_000140 | 2998.752  | 3559.666  |
| Z36807    | 19772.141 | 16890.496 | NM_019008 | 1467.848  | 1354.977  | NM_005125 | 2073.775  | 3621.669  |
| U20896    | 521.285   | 440.605   | M20838    | 626.284   | 743.649   | NM_016246 | 664.386   | 1176.523  |
| U52836    | 853.845   | 653.252   | AK022738  | 365.551   | 431.814   | NM_015926 | 2911.794  | 4014.037  |
| NM_017936 | 2313.541  | 3373.003  | AK024252  | 460.419   | 232.157   | X03757    | 1438.205  | 3153.167  |
| AK021837  | 2270.886  | 2047.975  | AK002095  | 656.927   | 554.365   | NM_001183 | 10857.296 | 10216.659 |
| AK002088  | 10831.53  | 10516.676 | AK000821  | 2250.299  | 1805.124  | NM_000890 | 351.142   | 190.543   |
| X98206    | 597.12    | 575.082   | AK024526  | 7596.185  | 6014.931  | NM_004976 | 8233.221  | 5692.067  |
| AK000106  | 980.4     | 1470.589  | AK000848  | 471.536   | 606.638   | AK021597  | 9428.085  | 5753.494  |

|           |           |           |           |           |           |           |           |           |
|-----------|-----------|-----------|-----------|-----------|-----------|-----------|-----------|-----------|
| AK022370  | 1437.07   | 947.33    | NM_017618 | 1653.884  | 1496.096  | NM_005737 | 11308.105 | 5790.087  |
| AK026765  | 1392.838  | 1486.15   | NM_017848 | 293.644   | 420.592   | NM_006803 | 426.524   | 227.572   |
| AL117530  | 751.408   | 649.451   | AK024315  | 3830.508  | 4099.57   | NM_002533 | 1174.651  | 598.345   |
| AK025016  | 384.454   | 546.557   | AK024945  | 917.866   | 879.922   | AF235022  | 512.018   | 227.694   |
| AL080191  | 3034.79   | 2541.079  | AK024579  | 3518.176  | 3928.488  | AF182814  | 2054.576  | 1700.618  |
| AK021639  | 10995.213 | 8826.61   | S75708    | 5460.56   | 3657.619  | NM_005329 | 481.187   | 381.23    |
| AK023189  | 569.209   | 338.312   | U79291    | 4721.772  | 3127.278  | NM_000107 | 695.803   | 696.648   |
| AK023872  | 791.812   | 691.585   | D17172    | 5252.642  | 3891.519  | AL157445  | 455.791   | 336.437   |
| AF306347  | 628.273   | 605.628   | AJ227859  | 582.524   | 733.605   | NM_001517 | 4708.839  | 3896.625  |
| AK023464  | 689.283   | 690.246   | NM_018544 | 587.764   | 398.099   | NM_005053 | 1234.757  | 1706.682  |
| AK024157  | 583.274   | 638.806   | L10141    | 640.615   | 317.111   | D86974    | 1603.999  | 3480.352  |
| AK023905  | 2760.896  | 2674.834  | AB020699  | 2899.412  | 2305.984  | NM_018283 | 777.919   | 1641.632  |
| AK024231  | 3206.586  | 3498.704  | AF086269  | 1004.579  | 710.768   | NM_001983 | 2709.389  | 4260.25   |
| NM_016940 | 2149.746  | 2443.289  | U90437    | 1469.624  | 1211.375  | M29551    | 5339.234  | 5460.532  |
| AK025757  | 1722.149  | 1380.517  | AK000842  | 7369.444  | 9003.975  | NM_002929 | 900.213   | 800.875   |
| Y16713    | 602.75    | 535.774   | AK023386  | 3446.514  | 3489.637  | BC028375  | 837.923   | 342.379   |
| L07394    | 10000.995 | 9856.109  | NM_007053 | 14334.741 | 14322.146 | AB026436  | 1176.901  | 748.718   |
| AK056133  | 1116.511  | 1547.761  | AK022153  | 660.008   | 681.542   | NM_016029 | 3080.97   | 1504.765  |
| NM_017845 | 3875.846  | 3379.103  | AK022789  | 878.55    | 917.932   | AK024562  | 715.085   | 367.952   |
| AF130080  | 634.648   | 558.795   | AK023756  | 567.508   | 652.467   | NM_014066 | 1140.212  | 603.956   |
| AK026006  | 630.223   | 826.297   | NM_001126 | 4292.104  | 3218.531  | NM_004573 | 1108.132  | 436.154   |
| NM_019089 | 8722.414  | 7913.994  | AK023673  | 1107.941  | 1064.171  | NM_001498 | 29208.297 | 23027.277 |
| AL122072  | 2674.863  | 2309.763  | NM_018252 | 997.091   | 960.814   | AF263523  | 1511.814  | 1181.638  |
| AK026221  | 623.236   | 481.607   | NM_018000 | 33924.5   | 22585.393 | L08441    | 7531.558  | 6694.157  |
| Y13870    | 771.151   | 667.211   | AF164963  | 573.452   | 437.59    | AA641953  | 1373.378  | 1096.045  |
| AK026403  | 1591.858  | 1572.615  | AF124366  | 11641.114 | 8205.975  | AI248827  | 792.25    | 445.815   |
| AK022980  | 712.617   | 826.821   | AF130112  | 650.789   | 370.617   | R45026    | 896.096   | 774.545   |
| AL359058  | 1593.846  | 1383.625  | NM_000551 | 2919.215  | 2076.451  | BI768063  | 319.686   | 304.4     |
| AK026237  | 2240.349  | 2092.255  | AL365518  | 2062.169  | 1244.803  | AI970239  | 886.679   | 687.944   |
| AK023687  | 634.206   | 1076.007  | AF086257  | 2473.6    | 1658.878  | AA496452  | 2359.697  | 2786.872  |
| NM_017632 | 1622.026  | 1350.784  | AF075056  | 370.476   | 389.199   | X67594    | 1547.014  | 2681.699  |
| AK026655  | 1068.884  | 1116.063  | AC119751  | 943.02    | 1182.335  | BC008837  | 265.596   | 733.572   |
| NM_005279 | 288.253   | 365.679   | U00928    | 544.507   | 535.37    | NM_005987 | 49527.621 | 62472.391 |
| AF129926  | 1595.543  | 1622.147  | NM_019056 | 1982.403  | 1535.841  | X87838    | 3247.951  | 2323.315  |
| AK025822  | 1926.704  | 1764.448  | AF279783  | 2196.027  | 2450.061  | NM_033199 | 327.86    | 235.595   |
| AL360140  | 1512.802  | 1277.203  | AF182422  | 4843.021  | 6057.333  | NM_015001 | 984.618   | 616.398   |
| AF201937  | 31600.242 | 31460.66  | NM_016943 | 478.719   | 400.63    | NM_000169 | 2838.822  | 1543.411  |
| AL390128  | 1521.52   | 1501.071  | AF070602  | 863.204   | 791.636   | AK057418  | 3874.106  | 2526.177  |
| AL157429  | 8155.934  | 9140.543  | BE393290  | 599.955   | 703.319   | L37199    | 508.209   | 487.746   |
| NM_012071 | 24644.373 | 24155.551 | NM_017622 | 1205.174  | 1194.622  | NM_007260 | 966.102   | 981.238   |
| AF055018  | 5299.56   | 5692.149  | AF133331  | 1978.571  | 1572.882  | AF148646  | 2514.444  | 2433.059  |
| AF070599  | 1924.746  | 1809.92   | AK022289  | 814.414   | 979.781   | AL110218  | 862.273   | 675.486   |
| NM_005450 | 2314.581  | 2407.884  | L34408    | 376.345   | 221.314   | AB023201  | 4071.138  | 3202.197  |
| AK023600  | 696.8     | 749.707   | AF161403  | 9258.724  | 8710.809  | X00094    | 474.984   | 357.744   |
| Z83952    | 643.103   | 817.404   | NM_020183 | 1488.446  | 1237.806  | NM_003775 | 352.579   | 414.378   |
| NM_005210 | 277.305   | 313.586   | NM_018029 | 613.077   | 418.407   | NM_002082 | 2381.627  | 1997.657  |
| NM_005525 | 1361.312  | 1346.877  | AL389954  | 745.808   | 521.558   | AF155657  | 8052.704  | 7774.677  |
| NM_005285 | 3168.682  | 2916.522  | NM_019852 | 1812.436  | 1577.471  | NM_006056 | 1751.849  | 1609.707  |
| AK001918  | 6470.019  | 5036.113  | NM_006118 | 4089.586  | 3393.319  | AF045229  | 4267.814  | 5033.896  |
| NM_018635 | 29013.885 | 25325.02  | AK026225  | 19339.006 | 13072.161 | NM_001840 | 4222.052  | 7785.202  |
| AF086048  | 2531.079  | 2037.75   | AL050032  | 1958.463  | 1444.345  | NM_000228 | 1087.876  | 1445.792  |
| L15616    | 4269.637  | 4118.204  | AF009304  | 506.355   | 390.837   | NM_000830 | 647.574   | 610.317   |
| AB019565  | 7680.515  | 7611.712  | AF086177  | 7566.928  | 4917.237  | NM_001155 | 4287.389  | 2137.743  |

|            |           |           |           |           |           |           |           |           |
|------------|-----------|-----------|-----------|-----------|-----------|-----------|-----------|-----------|
| D16914     | 58903.305 | 59566.551 | NM_018949 | 774.882   | 664.516   | M62896    | 6658.056  | 3609.845  |
| AA084879   | 558.061   | 503.168   | AK021593  | 358.582   | 206.284   | NM_017736 | 1662.87   | 1140.42   |
| NM_000833  | 3068.919  | 2824.835  | D17187    | 976.889   | 746.223   | AK021597  | 9206.755  | 7482.738  |
| NM_000283  | 2903.513  | 2955.39   | AJ243672  | 812.855   | 813.548   | NM_005737 | 10577.364 | 8174.568  |
| NM_012460  | 2705.283  | 2433.555  | AL122087  | 581.354   | 557.456   | NM_000014 | 329.631   | 113.654   |
| NM_012118  | 2961.74   | 2419.146  | D17169    | 22483.998 | 21965.189 | NM_006803 | 519.889   | 499.076   |
| AK001133   | 767.361   | 788.474   | NM_017924 | 4566.552  | 3538.532  | NM_002533 | 1182.04   | 915.607   |
| AK024092   | 1386.085  | 1190.394  | S81578    | 1130.976  | 1084.3    | AF235022  | 589.811   | 533.677   |
| AK002044   | 4770.758  | 4744.392  | NM_017546 | 3281.76   | 3800.542  | AL137764  | 18291.938 | 15053.371 |
| AK022206   | 1179.995  | 817.361   | AF086210  | 340.473   | 355.914   | NM_001660 | 13493.32  | 12679.851 |
| U90904     | 6108.786  | 5782.608  | AL137400  | 495.742   | 561.93    | NM_000752 | 731.752   | 725.56    |
| AF088053   | 2635.524  | 2268.43   | AF007142  | 1522.138  | 1767.868  | AB040945  | 213.782   | 317.763   |
| AL133662   | 581.546   | 740.246   | AF119853  | 4085.418  | 4030.293  | NM_002018 | 3692.959  | 3029.279  |
| U90903     | 1053.58   | 884.819   | AF279782  | 487.77    | 2666.251  | NM_002377 | 553.193   | 516.382   |
| AF278760   | 1955.837  | 1578.943  | CY3Cy5    | 754.098   | 123.259   | NM_006018 | 206.409   | 712.653   |
| X58061     | 373.655   | 464.507   | AI248827  | 386.622   | 357.491   | NM_000410 | 3250.676  | 4981.641  |
| AB032954   | 1909.179  | 1714.417  | R45026    | 585.406   | 481.046   | AF224266  | 619.514   | 1023.881  |
| NM_006003  | 17854.725 | 16095.109 | AI970239  | 648.087   | 438.37    | U72882    | 2510.523  | 1898.969  |
| AL110197   | 3428.462  | 3181.219  | AA496452  | 1834.785  | 1265.931  | NM_014337 | 4046.5    | 3015.279  |
| AF085995   | 1032.391  | 1073.923  | X67594    | 899.396   | 790.571   | NM_007161 | 29414.834 | 18953.838 |
| CY3Cy5     | 594.313   | 103.509   | NM_015869 | 585.361   | 449.657   | NM_014387 | 1488.914  | 854.202   |
| AA029300   | 2844.859  | 2994.315  | NM_001631 | 321.703   | 69.514    | NM_003641 | 1841.738  | 884.92    |
| BG708842   | 29626.076 | 27990.096 | AB000734  | 486.259   | 343.191   | NM_012463 | 809.735   | 433.159   |
| M19723     | 53171.391 | 62042.773 | NM_005987 | 50678.602 | 47668.219 | L29140    | 7956.207  | 3977.021  |
| X06256     | 3055.75   | 2843.258  | X87838    | 3070.445  | 2126.552  | AK026448  | 555.634   | 318.216   |
| AA709271   | 883.858   | 753.524   | NM_015001 | 841.311   | 855.169   | AB026436  | 1012.076  | 957.813   |
| M34057     | 993.687   | 905.214   | SR2       | 42479.941 | 33295.492 | NM_016029 | 3167.949  | 2663.595  |
| ID 1984668 | 974.143   | 1001.298  | SR4       | 9638.638  | 8711.136  | AK024562  | 806.692   | 733.256   |
| ID 1832579 | 861.068   | 810.914   | SR10      | 19325.1   | 6670.744  | NM_014066 | 1331.816  | 1038.416  |
| H-430185 M | 1240.557  | 1291.089  | CY3Cy5    | 778.862   | 97.414    | NM_004573 | 1333.999  | 1013.29   |
| D16583     | 4986.864  | 4066.052  | NM_003775 | 326.264   | 429.683   | NM_000072 | 1163.826  | 825.846   |
| H44051     | 501.738   | 471.134   | NM_002082 | 2012.672  | 1750.515  | NM_000697 | 1004.742  | 1123.704  |
| AA481547   | 1849.792  | 1723.878  | AF155657  | 8249.37   | 6766.975  | NM_000017 | 2102.992  | 2270.887  |
| AA831880   | 710.626   | 705.094   | NM_006056 | 1235.098  | 989.513   | NM_000237 | 1238.961  | 1213.772  |
| T64880     | 1166.304  | 961.84    | AF045229  | 4573.438  | 3346.513  | NM_018346 | 2107.744  | 2428.769  |
| NM_020967  | 990.225   | 774.873   | NM_001840 | 3101.946  | 2111.527  | AL122054  | 2792.602  | 2899.922  |
| NM_001071  | 7269.87   | 7171.673  | AK025099  | 806.193   | 732.931   | AB011182  | 3790.042  | 4180.35   |
| SR2        | 43410.102 | 27308.004 | NM_016099 | 7378.615  | 4680.871  | AB023151  | 244.462   | 677.251   |
| SR4        | 10858.374 | 7059.726  | NM_000228 | 756.945   | 512.619   | NM_000140 | 2439.683  | 4687.624  |
| SR6        | 1604.043  | 977.202   | NM_000830 | 529.825   | 473.06    | NM_016246 | 940.016   | 1081.297  |
| SR8        | 6506.955  | 11391.041 | AF148950  | 310.485   | 505.759   | NM_015926 | 4268.626  | 3181.072  |
| SR10       | 19723.381 | 4204.36   | NM_001155 | 3777.476  | 3057.861  | X03757    | 1744.326  | 1385.552  |
| CY3Cy5     | 298.876   | 120.269   | M62896    | 10393.192 | 9526.733  | NM_018658 | 3287.543  | 2376.545  |
| NM_004612  | 1724.745  | 1658.553  | NM_017736 | 1623.431  | 1898.805  | NM_001183 | 10910.623 | 5853.724  |
| NM_005608  | 1811.322  | 1801.616  | AF263523  | 1126.554  | 1315.793  | NM_000890 | 364.572   | 119.367   |
| NM_001106  | 923.212   | 866.875   | L08441    | 5940.387  | 5626.688  | NM_004976 | 7402.915  | 3905.608  |
| NM_015583  | 1131.653  | 1026.734  | AA641953  | 1406.212  | 1413.136  | NM_033199 | 77.201    | 405.567   |
| NM_018490  | 2599.645  | 2358.422  | AL137764  | 15791.651 | 13885.037 | NM_015001 | 889.413   | 740.089   |
| NM_006245  | 2794.204  | 2498.048  | NM_001660 | 12499.131 | 9591.21   | NM_000169 | 3582.459  | 2668.001  |
| NM_004352  | 235.704   | 207.878   | NM_000752 | 532.799   | 395.653   | AF182814  | 2122.799  | 2225.328  |
| NM_005103  | 2906.665  | 1829.526  | AB040945  | 309.121   | 61.707    | NM_005329 | 455.853   | 709.562   |
| NM_004822  | 756.567   | 835.154   | NM_002018 | 2772.636  | 1869.399  | NM_000107 | 846.654   | 1021.367  |
| AK022349   | 771.954   | 556.74    | NM_002377 | 455.886   | 266.707   | AL157445  | 467.716   | 775.141   |

|           |           |           |           |           |           |           |           |           |
|-----------|-----------|-----------|-----------|-----------|-----------|-----------|-----------|-----------|
| NM_004973 | 1909.511  | 1490.447  | AF161383  | 1713.909  | 1430.06   | NM_001517 | 4482.809  | 6002.942  |
| NM_007245 | 3059.989  | 2709.544  | NM_000410 | 5885.517  | 6067.722  | NM_018283 | 1148.699  | 1134.015  |
| NM_001890 | 697.56    | 585.304   | AF224266  | 760.243   | 620.601   | NM_001983 | 3227.126  | 2447.015  |
| NM_001286 | 1399.188  | 965.386   | U72882    | 3104.143  | 2482.784  | Y12337    | 699.288   | 364.178   |
| NM_005073 | 492.217   | 251.385   | NM_014337 | 3120.287  | 2792.274  | M29551    | 8309.413  | 4214.194  |
| NM_000951 | 1475.746  | 1200.903  | NM_007161 | 27937.832 | 15370.272 | AB023148  | 287.039   | 150.654   |
| X52599    | 578.165   | 457.57    | NM_014387 | 1309.354  | 1123.416  | NM_002929 | 992.905   | 706.349   |
| NM_005769 | 2388.725  | 2608.008  | NM_003641 | 2398.87   | 1929.441  | BC028375  | 694.595   | 308.443   |
| AK024500  | 8480.773  | 8779.787  | NM_012463 | 810.745   | 1011.207  | NM_005209 | 296.357   | 385.89    |
| NM_002564 | 9690.718  | 9823.729  | L29140    | 10464.814 | 7997.122  | AF148950  | 80.704    | 401.604   |
| NM_000963 | 3518.424  | 4417.901  | AK026448  | 844.637   | 909.544   | NM_001155 | 5434.52   | 3582.789  |
| NM_013308 | 5238.973  | 5112.1    | AK057418  | 3471.673  | 3419.016  | M62896    | 7901.135  | 7331.465  |
| AF027302  | 2831.438  | 2748.479  | L37199    | 331.982   | 631.776   | NM_017736 | 1769.547  | 1659.237  |
| NM_002852 | 3294.423  | 3057.606  | AF148646  | 1961.778  | 2254.83   | NM_000390 | 281.23    | 363.638   |
| NM_001817 | 3755.442  | 3589.265  | AL110218  | 643.961   | 953.782   | NM_000313 | 363.304   | 395.8     |
| AF063611  | 1178.271  | 941.531   | AB023201  | 3560.403  | 3608.053  | NM_001498 | 28820.57  | 28719.119 |
| NM_006039 | 2391.503  | 2285.436  | NM_000072 | 1037.319  | 898.108   | AF263523  | 1201.426  | 1393.646  |
| NM_002089 | 665.284   | 578.952   | NM_000697 | 1182.477  | 1159.303  | L08441    | 7316.187  | 7867.618  |
| NM_014656 | 5546.815  | 4711.517  | NM_000017 | 1802.606  | 1696.508  | AA641953  | 1526.252  | 1644.298  |
| NM_002076 | 2479.389  | 1733.541  | NM_000237 | 827.896   | 837.012   | BI768063  | 478.456   | 292.535   |
| X05299    | 3284.954  | 2196.28   | NM_018346 | 1941.165  | 1961.22   | BG386057  | 347.047   | 409.464   |
| BM468475  | 653.926   | 428.016   | AL122054  | 1975.297  | 1482.946  | AI970239  | 781.767   | 776.269   |
| NM_000318 | 1835.001  | 1367.234  | AB011182  | 2876.407  | 1898.462  | AA496452  | 2475.368  | 2038.524  |
| NM_002060 | 5378.154  | 4084.936  | NM_000140 | 3087.803  | 2191.947  | X67594    | 1243.555  | 960.008   |
| AK001230  | 1489.902  | 1437.331  | NM_005125 | 2210.009  | 1872.473  | NM_015869 | 642.011   | 266.845   |
| NM_014680 | 5615.518  | 3379.386  | NM_020038 | 268.438   | 149.691   | NM_005987 | 52381.734 | 52412.801 |
| NM_000229 | 2730.706  | 3228.359  | NM_016246 | 831.868   | 660.985   | X87838    | 3517.961  | 1808.146  |
| NM_006995 | 16844.834 | 18402.801 | NM_015926 | 3460.178  | 2470.306  | NM_007161 | 30867.459 | 29395.279 |
| NM_003129 | 12310.944 | 12434.815 | X03757    | 1516.936  | 1372.042  | NM_014387 | 1564.49   | 1225.02   |
| NM_001956 | 3737.318  | 4110.136  | NM_018658 | 3604.666  | 2878.228  | NM_003641 | 2012.095  | 1739.615  |
| AB033064  | 1603.53   | 2001.776  | NM_005136 | 334.728   | 281.073   | NM_012463 | 854.709   | 922.699   |
| AK022317  | 3890.565  | 4183.508  | NM_001183 | 8816.344  | 8121.958  | L29140    | 10374.146 | 9837.739  |
| NM_018396 | 5527.581  | 6352.772  | NM_004976 | 6679.414  | 6519.061  | AK026448  | 821.229   | 907.013   |
| NM_003124 | 2767.781  | 2955.279  | AK021597  | 9025.11   | 7864.863  | AK057418  | 4118.586  | 3548.589  |
| NM_004531 | 1018.125  | 1109.728  | NM_005737 | 11508.111 | 11407.713 | L37199    | 494.075   | 640.176   |
| NM_002558 | 3513.978  | 3949.013  | NM_006803 | 557.932   | 817.353   | NM_007260 | 959.042   | 1712.274  |
| NM_005031 | 3333.855  | 3845.637  | NM_002533 | 1128.16   | 1431.334  | AF148646  | 2567.259  | 2847.69   |
| AB040920  | 540.451   | 507.879   | AF235022  | 539.645   | 475.256   | AL110218  | 600.865   | 1166.199  |
| NM_000720 | 472.733   | 342.367   | AF182814  | 1486.061  | 1340.664  | NM_002082 | 1636.717  | 1702.142  |
| NM_004842 | 898.502   | 838.245   | NM_005329 | 485.679   | 682.011   | AF155657  | 9543.894  | 7434.337  |
| AK024639  | 3432.743  | 2557.507  | NM_000107 | 495.234   | 500.9     | NM_006056 | 1500.924  | 1208.512  |
| AB007915  | 670.478   | 624.239   | AL157445  | 576.051   | 442.961   | AF045229  | 5940.91   | 4056.084  |
| AB033070  | 921.968   | 728.905   | NM_001517 | 4886.401  | 3278.378  | NM_001840 | 4571.927  | 3004.541  |
| NM_018229 | 1144.339  | 893.72    | NM_005053 | 1709.343  | 1331.786  | AK025099  | 982.757   | 711.63    |
| NM_006325 | 4701.031  | 3805.632  | D86974    | 1327.447  | 941.992   | NM_016099 | 6515.454  | 3396.857  |
| AY009127  | 7915.955  | 6213.311  | NM_018283 | 959.763   | 631.822   | NM_000228 | 878.105   | 387.49    |
| NM_014869 | 1679.129  | 1138.159  | NM_001983 | 2562.766  | 1905.25   | NM_000830 | 698.042   | 446.088   |
| AB037835  | 1291.792  | 1499.585  | NM_004993 | 233.771   | 274.987   | NM_018658 | 3772.677  | 3769.318  |
| NM_000157 | 3353.225  | 3046.843  | NM_003384 | 2478.438  | 2354.477  | NM_001183 | 10777.896 | 12680.578 |
| NM_000712 | 6555.757  | 6509.483  | Y12337    | 1102.929  | 988.708   | NM_004976 | 7800.253  | 8487.329  |
| NM_018088 | 1044.497  | 1071.266  | M29551    | 9220.895  | 7235.909  | AK021597  | 10385.89  | 15123.039 |
| BC013695  | 12295.452 | 13238.131 | NM_002929 | 759.359   | 770.998   | NM_005737 | 11925.934 | 22707.25  |
| NM_014846 | 2493.452  | 2608.992  | BC028375  | 758.845   | 667.189   | NM_000014 | 741.664   | 1184.81   |

|            |           |           |           |           |           |           |           |           |
|------------|-----------|-----------|-----------|-----------|-----------|-----------|-----------|-----------|
| M24750     | 995.293   | 999.356   | AB026436  | 1140.488  | 1027.271  | NM_006803 | 460.301   | 862.156   |
| NM_005965  | 1184.847  | 1076.009  | NM_016029 | 3053.431  | 3109.098  | NM_002533 | 1050.192  | 1489.982  |
| NM_002740  | 2229.865  | 2125.247  | AK024562  | 1304.233  | 1984.388  | AF235022  | 609.692   | 637.816   |
| AL117482   | 1478.54   | 1445.022  | NM_014066 | 1106.5    | 1562.825  | AL137764  | 16914.834 | 20065.773 |
| NM_006549  | 24216.824 | 19093.096 | NM_004573 | 1105.828  | 1569.315  | NM_001660 | 14713.241 | 12585.097 |
| AB018324   | 6361.524  | 5516.123  | NM_001498 | 24588.443 | 18518.652 | NM_000752 | 514.981   | 457.677   |
| Z25431     | 2646.035  | 1986.567  | AF263523  | 883.138   | 877.363   | AB040945  | 302.546   | 219.889   |
| NM_005627  | 2372.161  | 1825.915  | L08441    | 4699.269  | 3510.652  | NM_002018 | 3294.074  | 2383.823  |
| M64497     | 2159.583  | 1724.569  | AA641953  | 1005.551  | 798.202   | NM_002377 | 606.903   | 341.208   |
| NM_007274  | 7869.07   | 5837.045  | AI248827  | 356.485   | 319.015   | NM_006018 | 213.658   | 209.71    |
| NM_003356  | 4379.585  | 3212.856  | R45026    | 666.683   | 437.822   | AF161383  | 1998.794  | 1324.906  |
| AF238315   | 453.337   | 368.906   | AI970239  | 608.263   | 486.151   | NM_000410 | 6410.397  | 3672.778  |
| NM_014648  | 267.252   | 468.458   | AA496452  | 2052.311  | 1501.882  | AF224266  | 556.113   | 319.154   |
| NM_005073  | 470.23    | 580.066   | X67594    | 1121.06   | 941.866   | U72882    | 2274.556  | 1794.885  |
| NM_000951  | 1980.927  | 2117.311  | AB000734  | 442.876   | 418.587   | NM_014337 | 3577.011  | 1682.102  |
| X52599     | 887.25    | 997.435   | NM_005987 | 54138.035 | 57708.438 | M29551    | 9191.316  | 10487.343 |
| AA029300   | 2579.416  | 3144.011  | X87838    | 2479.255  | 2110.237  | AB023148  | 370.113   | 561.046   |
| BG708842   | 29383.355 | 32044.648 | NM_015001 | 705.968   | 948.084   | NM_002929 | 946.774   | 1474.827  |
| M19723     | 55432.469 | 62898.219 | NM_000169 | 3073.73   | 2891.404  | BC028375  | 490.934   | 630.907   |
| X06256     | 3799.924  | 4232.312  | AK057418  | 2699.965  | 2868.965  | AB026436  | 1543.337  | 2025.507  |
| AA709271   | 965.455   | 988.254   | NM_007260 | 834.983   | 845.554   | NM_016029 | 3328.838  | 5862.804  |
| M34057     | 845.865   | 836.255   | AF148646  | 1657.31   | 1078.467  | AK024562  | 1051.415  | 2452.521  |
| ID 1984668 | 1126.354  | 1120.364  | AL110218  | 657.594   | 386.206   | NM_014066 | 1266.529  | 1720.226  |
| ID 1832579 | 900.612   | 787.505   | AB023201  | 2957.746  | 1961.92   | NM_004573 | 1382.698  | 1374.276  |
| H-430185 N | 1304.398  | 1372.937  | X00094    | 365.064   | 281.824   | NM_000072 | 1373.633  | 1123.538  |
| D16583     | 4960.617  | 4274.009  | NM_003775 | 422.884   | 370.694   | NM_000697 | 1238.407  | 1123.229  |
| H44051     | 669.08    | 493.715   | NM_002082 | 2199.115  | 1680.252  | NM_000017 | 2298.24   | 2455.897  |
| AA481547   | 1656.594  | 1318.827  | AF155657  | 7856.742  | 5087.228  | NM_000237 | 1297.02   | 1019.207  |
| AA831880   | 722.443   | 745.098   | NM_006056 | 1554.839  | 1068.893  | NM_018346 | 2236.544  | 1798.343  |
| T64880     | 1028.635  | 1136.536  | AF045229  | 4509.87   | 3586.772  | AL122054  | 2626.705  | 1888.41   |
| NM_020967  | 862.456   | 773.638   | NM_001840 | 3164.717  | 2538.667  | AB011182  | 3994.699  | 2292.5    |
| NM_001071  | 6725.134  | 5281.921  | AK025099  | 838.18    | 616.026   | AB023151  | 388.133   | 388.712   |
| AB028990   | 573.338   | 468.459   | NM_016099 | 7898.321  | 4979.511  | NM_000140 | 2323.578  | 1870.952  |
| X05299     | 3518.1    | 3342.402  | NM_000228 | 834.53    | 885.933   | NM_005125 | 2022.377  | 1140.626  |
| BM468475   | 737.498   | 951.128   | NM_000830 | 705.556   | 956.162   | NM_016246 | 650.477   | 335.136   |
| NM_000318  | 1963.4    | 2134.538  | NM_001155 | 3477.637  | 3693.887  | NM_015926 | 3286.296  | 1860.231  |
| NM_002060  | 7545.68   | 8493.695  | M62896    | 8795.156  | 8947.88   | X03757    | 1469.521  | 699.491   |
| AK001230   | 1553.535  | 1709.462  | NM_017736 | 1598.811  | 1906.291  | NM_020248 | 6654.234  | 6723.594  |
| NM_014680  | 7154.81   | 7074.728  | NM_000390 | 271.803   | 284.423   | X89670    | 455.792   | 803.786   |
| NM_005027  | 2891.117  | 3089.21   | AK021597  | 7973.34   | 7584.884  | NM_001726 | 331.796   | 298.687   |
| NM_004612  | 1598.844  | 1386.482  | NM_005737 | 8235.344  | 7697.868  | NM_004053 | 4478.98   | 6875.73   |
| NM_005608  | 1621.596  | 1710.051  | NM_002533 | 1039.038  | 912.593   | NM_014420 | 418.413   | 744.832   |
| NM_001106  | 1086.161  | 962.852   | AF235022  | 379.426   | 306.321   | NM_001489 | 1205.988  | 1594.056  |
| NM_015583  | 879.856   | 1164.547  | AL137764  | 16851.658 | 9995.48   | M20259    | 259.749   | 496.125   |
| NM_018490  | 2881.018  | 2810.173  | NM_001660 | 12600.646 | 7773.756  | NM_020374 | 1722.431  | 4734.869  |
| NM_004778  | 260.021   | 172.813   | NM_000752 | 499.619   | 429.007   | NM_014922 | 1024.177  | 2539.257  |
| NM_006245  | 2727.728  | 2825.1    | AB040945  | 293.271   | 256.961   | NM_000169 | 3908.519  | 5231.604  |
| NM_005103  | 2559.514  | 1735.03   | NM_002018 | 3225.935  | 2498.807  | AF182814  | 2588.906  | 2071.548  |
| NM_004822  | 540.878   | 816.578   | NM_002377 | 373.485   | 339.979   | NM_005329 | 577.97    | 511.296   |
| AK022349   | 556.619   | 420.225   | AF161383  | 1776.084  | 1626.361  | AL157445  | 661.825   | 655.51    |
| NM_004973  | 1928.201  | 1279.56   | NM_000410 | 5081.02   | 6202.358  | NM_001517 | 4264.586  | 2485.47   |
| NM_007245  | 2805.872  | 2052.211  | AF224266  | 1239.362  | 2976.163  | NM_005053 | 1000.481  | 731.273   |
| NM_001890  | 786.098   | 457.787   | U72882    | 3545.3    | 3609.145  | D86974    | 1600.82   | 823.789   |



|           |           |           |           |           |           |           |           |           |
|-----------|-----------|-----------|-----------|-----------|-----------|-----------|-----------|-----------|
| NM_001286 | 1453.722  | 952.311   | NM_014337 | 2994.688  | 3275.741  | NM_018283 | 1134.82   | 657.967   |
| AB007915  | 754.216   | 839.584   | NM_007161 | 29813.07  | 22062.004 | NM_001983 | 3534.987  | 2043.049  |
| AB033070  | 1022.87   | 1530.573  | NM_014387 | 1462.549  | 1389.469  | NM_001793 | 4832.388  | 4177.112  |
| NM_018229 | 1122.015  | 1492.206  | NM_003641 | 2551.762  | 2797.435  | NM_001943 | 1994.359  | 2217.561  |
| NM_006325 | 5514.575  | 6823.082  | NM_012463 | 1802.924  | 1815.109  | NM_004927 | 3073.877  | 3091.128  |
| AY009127  | 8630.207  | 9593.292  | L29140    | 12746.5   | 14356.622 | AB040928  | 284.031   | 641.606   |
| NM_014869 | 1818.573  | 2268.214  | AK026448  | 833.147   | 1158.495  | NM_001459 | 671.87    | 760.798   |
| AK000158  | 5084.14   | 5223.399  | AB026436  | 1001.443  | 1181.321  | NM_015513 | 3537.726  | 3927.021  |
| NM_005769 | 2225.369  | 2572.215  | NM_016029 | 2498.672  | 2404.392  | NM_006219 | 7061.547  | 8553.498  |
| AK024500  | 9134.163  | 9187.646  | AK024562  | 833.268   | 980.204   | NM_004443 | 1659.121  | 2731.499  |
| NM_002564 | 10345.782 | 10121.563 | NM_014066 | 913.326   | 782.078   | NM_001932 | 592.44    | 952.438   |
| NM_000963 | 3279.543  | 3588.801  | NM_004573 | 925.129   | 1013.219  | NM_017412 | 206.108   | 877.155   |
| NM_013308 | 5351.071  | 5365.543  | NM_000072 | 968.208   | 505.588   | NM_005544 | 201.342   | 643.719   |
| AF027302  | 2713.604  | 2463.532  | NM_000697 | 1224.281  | 1146.504  | NM_002964 | 7609.786  | 8329.594  |
| NM_002852 | 2882.433  | 2518.465  | NM_000017 | 2398.15   | 1843.869  | AF311862  | 25494.117 | 28759.002 |
| NM_001817 | 3455.281  | 3099.331  | NM_000237 | 984.91    | 886.221   | NM_003215 | 523.373   | 495.036   |
| AF063611  | 998.519   | 642.042   | NM_018346 | 2072.487  | 1705.232  | NM_016447 | 660.055   | 527.949   |
| NM_006039 | 1944.946  | 1418.299  | AL122054  | 2125.53   | 2156.924  | NM_015626 | 3204.181  | 2858.776  |
| NM_002089 | 672.62    | 618.738   | AB011182  | 3214.125  | 2477.958  | NM_004899 | 3735.693  | 2882.213  |
| NM_014656 | 4647.074  | 3576.072  | NM_000140 | 3158.518  | 3229.202  | AB006628  | 4011.211  | 2913.512  |
| NM_002076 | 2513.094  | 1619.711  | NM_005125 | 2329.362  | 1910.549  | AF272036  | 4247.786  | 2020.599  |
| Z25431    | 3307.281  | 3417.776  | NM_020038 | 414.252   | 390.115   | AF231023  | 747.102   | 650.744   |
| NM_005627 | 2826.392  | 2428.794  | NM_016246 | 436.425   | 633.478   | NM_005148 | 1639.184  | 1133.623  |
| M64497    | 2075.834  | 2367.958  | NM_015926 | 4000.608  | 4006.777  | NM_004746 | 629.744   | 370.469   |
| NM_007274 | 10370.598 | 12245.686 | X03757    | 2242.159  | 2602.502  | AF146019  | 4038.24   | 1787.809  |
| NM_003356 | 5002.458  | 7066.948  | NM_018658 | 4393.317  | 5189.708  | Z36782    | 6554.993  | 2988.37   |
| AF238315  | 503.111   | 652.983   | NM_005136 | 256.364   | 542.638   | M70435    | 325.078   | 208.532   |
| NM_006224 | 48797.387 | 52927.336 | AK094513  | 457.882   | 605.816   | NM_003490 | 3883.591  | 1830.215  |
| AL137300  | 10748.169 | 10575.34  | NM_001183 | 9532.961  | 9129.274  | AF090942  | 366.854   | 415.174   |
| NM_000229 | 3096.296  | 3204.471  | NM_000890 | 908.711   | 761.405   | AF508940  | 2745.321  | 2844.779  |
| NM_006995 | 16144.951 | 15215.471 | NM_004976 | 7381.072  | 8229.433  | NM_005429 | 2828.487  | 3184.802  |
| NM_003129 | 12041.486 | 12782.771 | NM_015001 | 602.124   | 752.719   | NM_020237 | 529.77    | 544.003   |
| NM_001956 | 3733.279  | 4514.809  | NM_000169 | 2974.413  | 2817.843  | AF130051  | 440.455   | 445.386   |
| AB033064  | 1896.098  | 2124      | BE799167  | 168.916   | 83.906    | M25753    | 7242.637  | 8052.489  |
| AK022317  | 3454.912  | 3965.88   | AF182814  | 1483.737  | 1220.058  | NM_003883 | 1200.297  | 1426.157  |
| NM_018396 | 6320.396  | 6146.92   | NM_005329 | 401.759   | 456.617   | NM_014929 | 2128.512  | 2483.805  |
| NM_003124 | 3353.781  | 3333.739  | NM_000107 | 616.301   | 698.137   | NM_004203 | 4220.562  | 4917.986  |
| NM_006886 | 51604.938 | 43048.383 | AL157445  | 1089.991  | 1245.684  | NM_001951 | 1299.474  | 1491.734  |
| NM_004531 | 1032.273  | 956.693   | NM_001517 | 4862.029  | 4817.325  | NM_002391 | 427.86    | 377.49    |
| AL133581  | 899.988   | 814.065   | NM_005053 | 1858.613  | 1716.657  | NM_007066 | 1940.537  | 1839.926  |
| NM_002558 | 3157.511  | 2714.156  | D86974    | 1497.783  | 1552.671  | NM_003674 | 8257.999  | 8726.926  |
| NM_005031 | 2776.806  | 2576.103  | NM_018283 | 1065.743  | 1248.113  | NM_001197 | 3609.21   | 4239.91   |
| NM_000720 | 438.371   | 259.684   | NM_001983 | 2672.166  | 3223.914  | NM_006682 | 574.134   | 978.997   |
| NM_004842 | 773.974   | 612.47    | Y12337    | 1085.639  | 1364.85   | NM_006410 | 1468.487  | 1201.906  |
| AK024639  | 3116.44   | 2314.123  | M29551    | 10976.469 | 12173.031 | NM_014977 | 10691.084 | 8803.557  |
| NM_015720 | 5687.76   | 3740.919  | NM_002929 | 1001.769  | 1147.069  | AK026325  | 1490.737  | 1003.044  |
| NM_020967 | 1226.477  | 1663.725  | BC028375  | 752.321   | 821.802   | U83857    | 623.439   | 560.404   |
| NM_001071 | 7625.074  | 8327.259  | AF148950  | 240.525   | 119.386   | NM_001230 | 845.765   | 722.982   |
| AB028990  | 707.623   | 719.472   | NM_001155 | 3198.281  | 2761.37   | AK025662  | 856.194   | 617.093   |
| NM_006708 | 20715.881 | 22697.182 | M62896    | 8671.607  | 7842.229  | AB011539  | 537.163   | 267.465   |
| AB037835  | 1487.624  | 1751.782  | NM_017736 | 1514.371  | 1442.75   | U37028    | 499.966   | 273.057   |
| NM_016228 | 534.553   | 596.373   | NM_000390 | 204.68    | 134.797   | AB014597  | 1612.751  | 818.504   |
| NM_000157 | 3539.378  | 3411.402  | NM_000313 | 386.156   | 277.876   | S81361    | 165.154   | 436.908   |

|            |           |           |           |           |           |           |           |           |
|------------|-----------|-----------|-----------|-----------|-----------|-----------|-----------|-----------|
| NM_000712  | 6812.724  | 6505.219  | NM_001498 | 29117.682 | 17133.725 | AK024313  | 2439.966  | 2843.064  |
| NM_018088  | 784.268   | 1174.713  | AF263523  | 837.431   | 859.97    | NM_003891 | 1532.962  | 1527.513  |
| NM_007205  | 470.569   | 448.249   | L08441    | 5371.052  | 3994.331  | AL359575  | 219.288   | 230.198   |
| AK023035   | 1519.132  | 1254.979  | AA641953  | 919.609   | 742.457   | NM_002022 | 541.857   | 631.224   |
| NM_014846  | 2486.89   | 2541.416  | AI248827  | 330.8     | 195.116   | NM_015524 | 2080.603  | 2025.132  |
| AB011164   | 2760.657  | 2042.193  | R45026    | 730.345   | 766.556   | NM_001673 | 5578.832  | 5440.748  |
| M24750     | 1124.53   | 765.155   | BI768063  | 287.009   | 250.663   | NM_016510 | 1596.283  | 2215.776  |
| NM_005965  | 1243.711  | 1083.26   | AI970239  | 891.48    | 781.465   | NM_014270 | 1029.26   | 1454.927  |
| NM_002740  | 2674.385  | 2283.694  | AA496452  | 2418.332  | 2601.887  | NM_000071 | 4191.99   | 7060.533  |
| AL117482   | 1690.963  | 961.878   | X67594    | 2010.916  | 4881.167  | NM_006843 | 1524.393  | 2764.793  |
| NM_006549  | 26488.715 | 18001.771 | NM_015869 | 565.553   | 462.511   | NM_004321 | 814.446   | 766.55    |
| AB018324   | 6486.396  | 4588.818  | NM_001631 | 511.979   | 511.547   | AF311212  | 853.264   | 798.189   |
| NM_002742  | 52764.535 | 43352.691 | AB000734  | 1030.776  | 805.994   | NM_006915 | 886.556   | 691.454   |
| NM_005750  | 562.77    | 398.615   | NM_005987 | 53170.762 | 67296.461 | NM_006035 | 1317.648  | 1066.365  |
| NM_004973  | 2252.828  | 2279.854  | X87838    | 3863.24   | 5672.525  | NM_006086 | 2756.195  | 1898.298  |
| NM_007245  | 3103.777  | 3663.913  | NM_007161 | 29116.686 | 21230.15  | NM_004520 | 5180.98   | 2432.682  |
| NM_001890  | 796.431   | 960.239   | NM_014387 | 1366.466  | 1282.854  | AK027118  | 2646.899  | 1227.571  |
| NM_001286  | 1517.249  | 1846.143  | NM_003641 | 2196.996  | 1773.358  | AK022882  | 9790.761  | 4640.353  |
| NM_014648  | 344.717   | 415.899   | NM_012463 | 950.141   | 788.559   | NM_006105 | 1241.861  | 588.276   |
| NM_005073  | 514.363   | 604.774   | L29140    | 10223.211 | 7482.922  | NM_005981 | 1128.724  | 453.084   |
| NM_000951  | 1677.352  | 2063.165  | AK026448  | 647.208   | 589.758   | NM_000474 | 4611.759  | 5088.209  |
| X52599     | 733.901   | 840.04    | AK057418  | 3131.786  | 2421.294  | NM_016264 | 773.326   | 1069.894  |
| AA029300   | 2976.991  | 3146.644  | L37199    | 512.312   | 932.057   | NM_006079 | 25651.738 | 31928.121 |
| BG708842   | 33686.492 | 39559.02  | NM_007260 | 1063.272  | 1239.618  | AB037837  | 810.857   | 919.452   |
| M19723     | 54227.328 | 62246.91  | AF148646  | 2028.928  | 2291.512  | NM_014595 | 1786.614  | 2030.923  |
| AA709271   | 790.767   | 739.441   | AL110218  | 624.316   | 735.301   | NM_014788 | 536.146   | 961.627   |
| M34057     | 786.52    | 712.461   | AB023201  | 3475.069  | 2530.031  | AB046784  | 342.619   | 421.117   |
| ID 1984668 | 1275.797  | 838.22    | X00094    | 426.798   | 304.948   | X52402    | 1440.728  | 1511.627  |
| ID 1832579 | 737.954   | 594.706   | NM_001840 | 5702.585  | 10346.144 | AL133663  | 677.782   | 495.232   |
| H-430185 N | 1227.468  | 943.01    | AK025099  | 1550.243  | 3186.68   | NM_004992 | 1592.841  | 1386.362  |
| D16583     | 4623.76   | 2787.28   | NM_016099 | 13467.392 | 25611.98  | NM_014462 | 1812.618  | 1691.048  |
| H44051     | 475.164   | 311.049   | NM_000394 | 202.882   | 809.679   | NM_014156 | 33158.07  | 39746.523 |
| AA481547   | 1608.608  | 1178.691  | NM_000228 | 1863.127  | 3682.19   | NM_003137 | 3076.274  | 3721.697  |
| AA831880   | 681.486   | 495.684   | NM_000830 | 1149.071  | 3086.542  | AF176085  | 832.654   | 1198.35   |
| T64880     | 1081.101  | 855.719   | NM_005136 | 900.635   | 951.49    | NM_006985 | 1224.445  | 1039.963  |
| NM_006039  | 2317.628  | 2468.055  | AK094513  | 757.8     | 866.188   | AF265228  | 816.414   | 428.043   |
| NM_002089  | 697.343   | 799.656   | NM_001183 | 12354.809 | 20905.752 | NM_003757 | 14069.608 | 10261.523 |
| NM_014656  | 6250.493  | 6693.052  | NM_005737 | 16850.342 | 27318.141 | AK025561  | 1803.969  | 1168.985  |
| NM_002076  | 2890.493  | 3510.673  | NM_000014 | 557.58    | 443.806   | NM_018602 | 7774.61   | 3906.217  |
| X05299     | 3773.123  | 3762.672  | NM_006803 | 1241.283  | 4025.89   | NM_004096 | 3766.359  | 1688.688  |
| BM468475   | 794.081   | 985.813   | NM_002533 | 2053.663  | 5265.035  | NM_017629 | 3031.092  | 1525.119  |
| NM_000318  | 2217.831  | 2414.732  | NM_000752 | 1124.432  | 2607.665  | AL049681  | 1176.699  | 667.096   |
| NM_002060  | 7328.573  | 6901.094  | NM_002018 | 6370.027  | 11021.029 | NM_006584 | 535.594   | 262.25    |
| AK001230   | 1959.87   | 2388.713  | NM_002377 | 924.154   | 1944.296  | AF052181  | 917.625   | 2253.559  |
| NM_014680  | 7291.075  | 7281.255  | NM_006018 | 436.082   | 761.968   | AL050074  | 2982.946  | 6719.268  |
| NM_005027  | 2551.727  | 3223.322  | AF161383  | 2518.277  | 5699.326  | AK026436  | 326.724   | 684.846   |
| NM_004612  | 1878.472  | 1602.238  | NM_000410 | 8239.374  | 18986.615 | NM_018061 | 1341.169  | 2214.121  |
| NM_005608  | 1863.711  | 1756.795  | AF224266  | 1439.759  | 3129.399  | AK023059  | 485.09    | 710.071   |
| NM_001106  | 1069.845  | 717.363   | U72882    | 5425.329  | 9601.207  | NM_003551 | 2221.219  | 4238.495  |
| NM_015583  | 1232.243  | 936.546   | NM_014337 | 5006.529  | 8422.094  | AK021900  | 2570.823  | 3419.961  |
| NM_018490  | 2629.714  | 2288.464  | Y12337    | 1927.91   | 3590.027  | NM_002764 | 4529.616  | 5732.62   |
| NM_006245  | 2808.367  | 2143.574  | M29551    | 16695.02  | 28090.799 | NM_019857 | 829.32    | 1156.829  |
| NM_005103  | 2381.671  | 1387.064  | AB023148  | 226.527   | 1160.808  | NM_015455 | 8263.902  | 10739.793 |

|           |           |           |           |           |           |           |           |           |
|-----------|-----------|-----------|-----------|-----------|-----------|-----------|-----------|-----------|
| NM_004822 | 684.957   | 501.238   | NM_002929 | 1532.584  | 3140.413  | X74864    | 1096.653  | 1808.487  |
| AK022349  | 507.34    | 400.854   | BC028375  | 873.726   | 1790.967  | AK026804  | 386.993   | 526.807   |
| NM_005031 | 3437.691  | 4793.243  | AB026436  | 1844.151  | 4303.589  | NM_01617C | 2893.744  | 2493.081  |
| AB040920  | 493.556   | 652.735   | NM_016029 | 4745.784  | 8421.237  | NM_002114 | 493.847   | 357.186   |
| NM_00072C | 541.918   | 462.324   | AK024562  | 1203.256  | 2422.477  | NM_00616E | 797.855   | 626.926   |
| NM_004842 | 888.233   | 1137.75   | NM_01406E | 1752.404  | 3536.225  | S72620    | 19455.201 | 12646.798 |
| AK024639  | 3499.49   | 3779.452  | NM_004573 | 2165.329  | 3421.972  | NM_005263 | 12346.293 | 7137.882  |
| NM_01572C | 6441.479  | 8245.287  | NM_000072 | 2041.474  | 2967.033  | AB033022  | 3238.614  | 1305.616  |
| AB007915  | 952.264   | 895.706   | NM_000697 | 2453.214  | 4693.682  | AF147397  | 477.421   | 1135.865  |
| AB033070  | 1006.15   | 1547.792  | NM_000017 | 4738.173  | 7244.405  | AK027158  | 432.787   | 839.743   |
| NM_01822E | 1394.344  | 1761.638  | NM_000237 | 1837.108  | 2788.006  | AK002187  | 282.957   | 413.605   |
| NM_00632E | 5247.736  | 5584.737  | NM_01834E | 3720.057  | 5865.865  | AF085836  | 2222.77   | 3117.625  |
| AY009127  | 8596.928  | 10691.491 | AL122054  | 3549.594  | 6373.799  | AL049449  | 430.429   | 1518.129  |
| NM_01486E | 1894.388  | 2423.403  | AB011182  | 5205.459  | 8163.124  | AF147347  | 685.339   | 1696.424  |
| AK000158  | 5032.037  | 5227.182  | AB023151  | 871.151   | 1382.365  | AL359654  | 415.399   | 698.921   |
| NM_00576E | 2215.597  | 2223.813  | NM_00014C | 5144.292  | 9215.079  | AK024224  | 989.994   | 1204.947  |
| AK024500  | 8907.89   | 7068.927  | NM_00512E | 4135.587  | 8969.876  | NM_015362 | 3569.674  | 3882.652  |
| NM_002564 | 9569.143  | 7872.394  | NM_02003E | 1078.45   | 987.92    | AF147344  | 364.352   | 687.492   |
| NM_001884 | 251.352   | 162.659   | NM_01624E | 1349.344  | 1556.974  | AF147371  | 551.585   | 750.952   |
| NM_000963 | 2772.598  | 2617.722  | NM_01592E | 5981.838  | 6745.2    | AK023745  | 53.625    | 597.351   |
| NM_01330E | 4932.184  | 3710.492  | X03757    | 2514.44   | 2775.172  | NM_018982 | 1127.4    | 1746.545  |
| AF027302  | 2572.306  | 1698.137  | NM_02024E | 11295.495 | 20119.857 | AF086324  | 326.144   | 591.98    |
| NM_002852 | 2943.314  | 2056.22   | X89670    | 773.33    | 1951.425  | AF086261  | 455.75    | 365.924   |
| NM_001817 | 3562.844  | 2498.528  | NM_00172E | 1071.371  | 2477.256  | AF086367  | 1514.813  | 1202.945  |
| AF063611  | 822.269   | 643.825   | NM_004053 | 5607.73   | 9353.668  | AF086437  | 410.642   | 330.898   |
| NM_00596E | 1239.357  | 1260.84   | NM_01442C | 507.753   | 864.904   | AK025088  | 1930.73   | 1119.883  |
| NM_00274C | 2381.251  | 2854.278  | NM_00148E | 1847.999  | 3860.608  | U79295    | 671.196   | 368.739   |
| AL117482  | 1817.35   | 1957.801  | NM_020374 | 1952.154  | 3575.989  | AK002107  | 417.792   | 296.12    |
| NM_00654E | 32323.211 | 33632.191 | NM_014922 | 1290.889  | 2644.323  | NM_00359E | 1144.637  | 702.42    |
| AB018324  | 7887.631  | 9952.387  | NM_00016E | 4899.502  | 8435.863  | NM_01883E | 2323.531  | 2433.525  |
| NM_002742 | 55724.762 | 64248.199 | BE799167  | 315.079   | 533.361   | AF075083  | 160.735   | 364.346   |
| Z25431    | 3565.542  | 3897.067  | AF182814  | 2087.606  | 1812.259  | AK021454  | 1135.353  | 1224.195  |
| NM_005627 | 3085.075  | 3297.202  | NM_000107 | 792.745   | 804.582   | AK022069  | 763.742   | 1098.011  |
| M64497    | 2356.402  | 2963.022  | AL157445  | 759.726   | 958.332   | AL137457  | 216.069   | 492.445   |
| NM_007274 | 9668.496  | 11050.32  | NM_001517 | 4819.905  | 4126.84   | AF085944  | 498.876   | 864.307   |
| NM_00335E | 5310.429  | 6528.625  | NM_005053 | 1623.677  | 1937.269  | AL133038  | 554.536   | 690.284   |
| AF238315  | 513.107   | 766.458   | D86974    | 1505.237  | 1726.622  | AL137414  | 737.916   | 783.233   |
| NM_006224 | 47782.348 | 52627.082 | NM_018283 | 1146.875  | 1301.016  | AL359574  | 1209.863  | 1452.363  |
| NM_00022E | 2624.74   | 2965.414  | NM_001983 | 3128.295  | 3860.707  | AL133569  | 1810.909  | 2533.584  |
| NM_00699E | 15565.154 | 14929.793 | NM_004993 | 346.213   | 642.23    | AL157463  | 148.537   | 331.737   |
| NM_00312E | 12385.8   | 10956.801 | NM_001793 | 5748.105  | 4920.863  | AK027189  | 574.166   | 731.723   |
| NM_00195E | 4001.86   | 3518.023  | NM_001943 | 1807.448  | 1850.075  | AF088014  | 675.176   | 611.127   |
| AB033064  | 1638.287  | 1666.413  | NM_004927 | 2460.26   | 2361.948  | U92022    | 485.472   | 610.079   |
| AK022317  | 3607.691  | 2934.693  | NM_00145E | 687.488   | 717.927   | NM_00365C | 9103.051  | 6239.235  |
| NM_01839E | 6175.026  | 4595.186  | NM_015513 | 3088.719  | 2404.217  | AK022119  | 644.122   | 302.67    |
| NM_003124 | 3065.237  | 2454.248  | NM_00621E | 5339.32   | 3790.179  | AL157488  | 608.556   | 276.868   |
| NM_00688E | 50521.688 | 35419.949 | NM_004443 | 1972.433  | 1340.755  | NM_016644 | 626.12    | 387.06    |
| NM_004531 | 966.096   | 723.177   | NM_001932 | 401.163   | 471.352   | AK026750  | 384.35    | 468.618   |
| AL133581  | 984.985   | 697.612   | NM_017412 | 511.559   | 529.554   | AF072164  | 948.965   | 1264.765  |
| NM_00255E | 3359.665  | 2596.65   | NM_002964 | 9392.468  | 5582.336  | NM_01861C | 366.753   | 438.103   |
| NM_00358E | 999.478   | 1295.717  | AF311862  | 35129.219 | 23065.201 | NM_017773 | 915.26    | 713.972   |
| NM_000922 | 1668.339  | 2223.506  | NM_00321E | 340.673   | 109.818   | AK021885  | 419.805   | 1079.292  |
| NM_013232 | 7982.125  | 8155.255  | NM_016447 | 593.654   | 653.262   | AK022018  | 283.066   | 474.74    |

|           |           |           |           |           |           |           |           |           |
|-----------|-----------|-----------|-----------|-----------|-----------|-----------|-----------|-----------|
| NM_017993 | 1148.679  | 1430.049  | NM_015626 | 2691.413  | 1884.395  | AK022161  | 367.666   | 345.648   |
| NM_000362 | 7562.958  | 6998.77   | NM_004899 | 2775.963  | 2085.569  | AK021940  | 464.086   | 441.916   |
| NM_014429 | 2128.37   | 3694.219  | AB006628  | 4551.997  | 3464.728  | AK022189  | 400.676   | 366.225   |
| AK000770  | 2123.123  | 2627.573  | AF272036  | 4251.234  | 2988.107  | AK022338  | 288.107   | 295.645   |
| NM_002370 | 8639.186  | 9283.197  | AF231023  | 647.217   | 932.157   | AK026856  | 453.925   | 303.211   |
| NM_015670 | 1359.658  | 1915.891  | NM_005148 | 1355.983  | 1270.069  | AL162033  | 751.35    | 726.972   |
| NM_014709 | 1172.521  | 1613.776  | NM_004746 | 490.605   | 656.367   | NM_005001 | 8217.607  | 7031.932  |
| AB028990  | 658.014   | 970.289   | AF146019  | 3127.502  | 3485.671  | AK024175  | 2962.928  | 2518.434  |
| AB037835  | 1708.601  | 1696.043  | Z36782    | 5627.854  | 5791.221  | NM_000510 | 474.445   | 457.915   |
| NM_016228 | 724.993   | 656.429   | M70435    | 296.689   | 259.256   | NM_017787 | 1559.848  | 2151.094  |
| NM_000157 | 3568.543  | 3123.319  | NM_003490 | 6574.89   | 7533.535  | NM_020315 | 4044.159  | 8089.492  |
| NM_000712 | 6216.343  | 4924.083  | AF210651  | 254.597   | 330.66    | AK001910  | 407.526   | 436.992   |
| NM_018088 | 929.447   | 1147.644  | AF090942  | 425.668   | 377.56    | AF265210  | 4728.141  | 2380.217  |
| BC013695  | 12003.251 | 8987.665  | AF508940  | 2527.509  | 3048.726  | AK024241  | 551.801   | 548.371   |
| NM_007205 | 337.337   | 309.526   | NM_005429 | 2462.414  | 2099.028  | AK025061  | 765.478   | 431.197   |
| AK023035  | 1279.055  | 962.968   | NM_020237 | 469.245   | 363.771   | AF088067  | 3771.244  | 2953.714  |
| NM_014846 | 2434.11   | 1786.758  | AF130051  | 327.376   | 202.557   | AF056441  | 805.9     | 829.913   |
| AB011164  | 2546.411  | 1805      | M25753    | 5387.265  | 4244.894  | Y10509    | 253.446   | 540.625   |
| M24750    | 970.688   | 689.272   | NM_003883 | 825.577   | 661.75    | AK024389  | 2946.99   | 2731.868  |
| AB046776  | 991.031   | 1043.683  | NM_014929 | 1649.169  | 1104.621  | AK026793  | 1148.129  | 1104.14   |
| AF217289  | 362.753   | 451.917   | NM_004203 | 3571.994  | 3282.076  | NM_001672 | 614.415   | 616.113   |
| NM_002687 | 9632.965  | 10226.878 | NM_001951 | 1105.03   | 875.921   | AJ276253  | 9193.381  | 7992.212  |
| NM_000627 | 1203.339  | 1269.565  | NM_002391 | 463.351   | 291.068   | AF147314  | 921.607   | 1002.115  |
| NM_000038 | 713.997   | 758.88    | NM_007066 | 1780.78   | 1151.659  | NM_018980 | 1597.441  | 1860.456  |
| NM_000825 | 578.379   | 717.381   | NM_003674 | 10143.707 | 5745.533  | AF086201  | 1149.754  | 1270.022  |
| NM_001963 | 302.124   | 583.485   | NM_001197 | 2755.039  | 2265.516  | U48696    | 543.121   | 416.871   |
| NM_004334 | 1882.675  | 2266.63   | NM_006682 | 551.35    | 520.636   | AF230316  | 4138.101  | 3361.249  |
| NM_003886 | 3748.041  | 4288.095  | NM_006410 | 1100.768  | 688.052   | AK024515  | 1544.173  | 2161.993  |
| NM_005843 | 1299.119  | 1779.779  | NM_014977 | 26567.203 | 19053.301 | AF085862  | 3773.911  | 4358.019  |
| NM_003854 | 607.398   | 708.494   | AK026325  | 1624.244  | 1471.803  | NM_017998 | 889.487   | 1066.012  |
| NM_017980 | 617.584   | 708.662   | U83857    | 818.829   | 888.378   | AL049271  | 19311.354 | 13163.359 |
| NM_001252 | 12423.031 | 14290.719 | NM_001230 | 1121.07   | 1348.982  | AK023079  | 27734.416 | 18914.994 |
| AF053712  | 1227.551  | 1362.968  | AK025662  | 1071.506  | 1024.981  | NM_019609 | 1225.005  | 1049.201  |
| NM_003947 | 892.781   | 920.663   | NM_000201 | 301.742   | 190.767   | AK026198  | 951.681   | 528.11    |
| NM_002821 | 15128.27  | 13128.704 | AB011539  | 598.11    | 837.904   | AF183570  | 558.069   | 350.171   |
| M96652    | 11028.974 | 10043.161 | U37028    | 827.611   | 962.664   | NM_005497 | 5610.382  | 5434.854  |
| L41690    | 2118.017  | 1929.894  | AB014597  | 1731.241  | 1925.574  | AK024048  | 2075.843  | 1939.212  |
| NM_018059 | 602.388   | 483.133   | L37033    | 2084.038  | 4429.243  | AB033093  | 916.682   | 862.186   |
| NM_000939 | 47247.137 | 39893.82  | AK024313  | 2813.379  | 2456.469  | NM_005912 | 559.46    | 698.078   |
| NM_006514 | 2884.665  | 2285.543  | NM_003891 | 1363.418  | 1275.885  | NM_005909 | 18079.27  | 16974.338 |
| AF065164  | 5538.81   | 4159.137  | AL359575  | 405.694   | 20.331    | AK021879  | 306.145   | 399.83    |
| AB028991  | 3483.281  | 3813.033  | NM_002022 | 372.112   | 324.898   | AK055991  | 559.754   | 628.364   |
| AF263547  | 2299.273  | 2413.711  | NM_015524 | 1264.595  | 926.663   | AF113697  | 436.131   | 625.934   |
| AJ008143  | 8919.882  | 9044.438  | NM_001673 | 4082.497  | 3139.413  | AK022326  | 598.765   | 607.777   |
| NM_007144 | 1006.799  | 866.315   | NM_016510 | 1316.158  | 1186.165  | AF085991  | 412.98    | 476.89    |
| NM_004424 | 4985.952  | 5320.595  | NM_014270 | 766.901   | 627.334   | NM_005683 | 605.574   | 457.675   |
| AL133117  | 2165.515  | 2732.952  | NM_000071 | 3350.026  | 2867.36   | NM_020427 | 7687.799  | 5895.63   |
| AF070586  | 5090.897  | 5846.535  | NM_006843 | 1636.585  | 1121.042  | U79275    | 1576.744  | 1884.245  |
| NM_014412 | 1062.859  | 1307.183  | NM_004321 | 924.376   | 617.868   | AJ227908  | 509.331   | 407.864   |
| NM_013303 | 1736.272  | 1600.289  | AF311212  | 4067.193  | 3216.616  | AF007193  | 692.098   | 440.982   |
| NM_012227 | 3126.261  | 3110.013  | NM_006915 | 1096.298  | 1194.611  | AK022367  | 474.855   | 552.283   |
| NM_006101 | 1110.989  | 1593.389  | NM_006035 | 1480.139  | 1297.204  | BC028589  | 1985.837  | 1451.02   |
| NM_001237 | 3523.993  | 8725.6    | NM_006086 | 4856.202  | 4502.755  | CY3Cy5    | 1805.621  | 108.693   |

|           |           |           |           |           |           |           |           |           |
|-----------|-----------|-----------|-----------|-----------|-----------|-----------|-----------|-----------|
| NM_002507 | 1491.762  | 1761.33   | NM_004520 | 4085.588  | 4229.589  | M65134    | 281.797   | 243.04    |
| NM_015962 | 2187.924  | 2027.738  | AK027118  | 2319.706  | 2741.321  | BG539651  | 4644.867  | 3028.542  |
| NM_016145 | 780.766   | 583.704   | AK022882  | 8682.748  | 6990.901  | N52646    | 6065.682  | 4023.803  |
| NM_016078 | 4844.821  | 3347.968  | NM_006105 | 1552.79   | 1940.311  | AW160671  | 38737.762 | 21959.59  |
| NM_004401 | 1107.996  | 742.356   | NM_005981 | 1179.896  | 2157.895  | BI870529  | 3008.955  | 2628.284  |
| NM_001849 | 6296.499  | 3991.842  | NM_000474 | 4034.685  | 4366.336  | AA702698  | 624.121   | 532.374   |
| AF255910  | 1237.004  | 742.776   | NM_016264 | 1464.088  | 3327.051  | AI681514  | 379.181   | 425.299   |
| NM_016146 | 2194.502  | 1475.483  | NM_006079 | 34161.809 | 63273.41  | NM_001300 | 1190.461  | 1166.97   |
| AK024343  | 1124.216  | 1037.278  | AB037837  | 699.374   | 898.713   | BG748827  | 4674.079  | 7015.63   |
| NM_002569 | 947.774   | 1118.218  | NM_014595 | 2110.156  | 1854.37   | AA952897  | 997.243   | 3241.024  |
| D42084    | 2591.656  | 3000.154  | NM_014789 | 574.385   | 607.867   | BG760342  | 1533.912  | 1680.422  |
| NM_001734 | 511.868   | 772.216   | AB046784  | 461.789   | 427.228   | AA703141  | 445.7     | 546.112   |
| NM_014693 | 1048.549  | 877.37    | X52402    | 1425.997  | 1168.478  | AI122630  | 5395.402  | 5345.343  |
| AB007896  | 1050.697  | 1259.366  | AL133663  | 421.278   | 284.135   | NM_002103 | 8175.767  | 8734.179  |
| AB007916  | 7081.329  | 8326.815  | NM_004992 | 959.828   | 700.868   | NM_003379 | 5738.556  | 4974.961  |
| NM_002874 | 794.479   | 978.272   | NM_014462 | 1063.953  | 929.438   | SR1       | 63040.984 | 54677.176 |
| NM_015853 | 108.474   | 114.03    | NM_014156 | 35679.477 | 22137.701 | SR3       | 34984.512 | 18351.832 |
| AF049140  | 1418.901  | 1427.184  | NM_003137 | 3735.197  | 2957.96   | SR5       | 2850.011  | 2230.108  |
| AL136794  | 814.224   | 964.745   | NM_006938 | 18044.604 | 11639.589 | SR7       | 4119.805  | 25730.58  |
| BC035601  | 43918.836 | 44541.043 | NM_020158 | 1334.536  | 1331.624  | SR9       | 12552.114 | 2071.957  |
| NM_001458 | 1484.069  | 1288.769  | AF176085  | 1867.767  | 1105.589  | CY3Cy5    | 1895.88   | 120.444   |
| NM_020388 | 5799.459  | 5350.079  | NM_006985 | 3486.005  | 2363.253  | NM_012428 | 2186.007  | 1196.716  |
| AB046829  | 549.042   | 469.041   | AF265228  | 719.857   | 633.543   | NM_001728 | 14259.199 | 7503.841  |
| NM_016445 | 694.182   | 486.228   | NM_003757 | 13380.352 | 9302.149  | NM_005565 | 6304.579  | 3950.248  |
| NM_003379 | 29705.838 | 20737.797 | AK025561  | 1885.844  | 1545.807  | NM_003824 | 2570.231  | 1765.22   |
| NM_004521 | 5254.223  | 3641.788  | NM_018602 | 13836.468 | 13210.518 | NM_000686 | 562.773   | 446.979   |
| AF229162  | 1544.137  | 1202.001  | NM_004096 | 3243.83   | 3546.527  | NM_012452 | 1109.25   | 835.291   |
| U02309    | 32743.186 | 24651.385 | NM_017629 | 2626.315  | 3067.345  | AF229166  | 244.664   | 440.972   |
| NM_005257 | 12491.04  | 13774.003 | AL049681  | 877.69    | 1135.959  | NM_005137 | 1007.409  | 856.744   |
| AF011573  | 6459.037  | 6130.436  | NM_006584 | 433.092   | 467.391   | NM_006764 | 1094.455  | 1285.515  |
| NM_002145 | 2248.352  | 3038.626  | AF052181  | 619.61    | 638.882   | NM_001386 | 605.032   | 1473.242  |
| NM_003923 | 750.479   | 740.56    | AL050074  | 3438.511  | 3616.108  | NM_001163 | 654.278   | 1140.592  |
| NM_004831 | 909.768   | 1076.702  | AK026436  | 446.972   | 897.095   | NM_005878 | 673.277   | 1126.937  |
| NM_014213 | 4089.173  | 5801.962  | NM_018061 | 1383.448  | 1274.8    | AF308602  | 909.497   | 1476.892  |
| NM_000168 | 3439.947  | 4690.835  | AK023059  | 385.632   | 368.654   | AB011089  | 399.391   | 361.098   |
| AF294629  | 2921.577  | 3539.226  | NM_003551 | 1199.858  | 1169.633  | AF007192  | 492.59    | 501.731   |
| NM_000545 | 8688.757  | 10084.928 | AK021900  | 2170.259  | 1866.583  | NM_001276 | 5256.827  | 3467.265  |
| NM_002136 | 45982.395 | 54147.25  | NM_002764 | 3476.189  | 2890.899  | NM_016157 | 312.945   | 242.136   |
| AK025571  | 1539.937  | 2314.041  | NM_019857 | 717.387   | 502.503   | NM_014915 | 15793.013 | 11286.807 |
| NM_004940 | 377.384   | 556.088   | NM_015455 | 12943.28  | 7894.398  | NM_012286 | 935.19    | 641.95    |
| NM_014463 | 21198.354 | 25809.625 | AF024702  | 4004.152  | 3028.96   | NM_002195 | 2194.668  | 1865.205  |
| NM_005520 | 17654.928 | 18040.568 | NM_001964 | 1283.041  | 525.767   | D84294    | 1529.906  | 1389.687  |
| AK023265  | 1301.51   | 1364.077  | NM_005962 | 6700.389  | 4079.472  | M31659    | 726.308   | 462.341   |
| NM_018723 | 681.71    | 735.478   | X74864    | 759.11    | 572.333   | NM_003056 | 4582.5    | 2757.634  |
| AB029009  | 2734.076  | 2430.161  | AK026804  | 728.448   | 798.38    | NM_016226 | 6106.393  | 3774.609  |
| AF112207  | 1684.919  | 1182.823  | NM_016170 | 3743.938  | 3066.959  | AK024311  | 613.034   | 533.115   |
| NM_005594 | 16444.422 | 10351.431 | NM_002114 | 360.842   | 268.592   | AF052155  | 3736.963  | 2366.335  |
| NM_004461 | 53192.109 | 42553     | NM_006166 | 643.942   | 614.704   | NM_005085 | 582.682   | 496.536   |
| NM_018473 | 4153.667  | 2621.625  | S72620    | 22118.713 | 17603.875 | AF060902  | 421.591   | 441.725   |
| BF106121  | 986.339   | 745.448   | NM_005263 | 12614.569 | 11799.755 | AF121858  | 1830.046  | 1460.008  |
| AK022590  | 2121.768  | 1413.524  | AB033022  | 3181.406  | 3303.868  | NM_013437 | 712.783   | 746.615   |
| AK023719  | 5052.336  | 6188.701  | AF147397  | 473.105   | 509.856   | AK025966  | 1301.726  | 1657.498  |
| AK025590  | 1332.068  | 1992.645  | AK027158  | 660.999   | 517.129   | NM_018725 | 372.175   | 413.397   |

|           |           |           |           |          |           |           |           |           |
|-----------|-----------|-----------|-----------|----------|-----------|-----------|-----------|-----------|
| AY007149  | 3217.192  | 4103.225  | AF085836  | 2489.511 | 2210.714  | NM_003081 | 7615.509  | 12662.616 |
| M12078    | 938.62    | 1276.94   | AL049449  | 502.448  | 207.744   | NM_016495 | 1323.545  | 1595.857  |
| NM_004550 | 11294.444 | 12976.23  | AL359654  | 789.416  | 698.595   | D50402    | 6705.376  | 6617.892  |
| NM_000785 | 853.73    | 1194.107  | AK024224  | 836.842  | 484.285   | M73547    | 4820.458  | 3974.77   |
| NM_004110 | 5003.413  | 6073.478  | NM_015362 | 2471.74  | 1948.515  | NM_003687 | 583.458   | 488.859   |
| NM_013387 | 31130.264 | 37345.078 | AF147344  | 454.679  | 443.895   | NM_004134 | 2643.692  | 1787.823  |
| NM_005262 | 7745.676  | 8844.035  | AF147371  | 444.899  | 222.778   | NM_005955 | 1003.331  | 802.667   |
| NM_005757 | 481.161   | 653.152   | NM_018982 | 1677.502 | 1108.662  | NM_004048 | 432.025   | 286.868   |
| NM_020128 | 557.74    | 688.583   | AF086254  | 1985.353 | 1275.398  | NM_005313 | 36335.133 | 16065.858 |
| NM_005068 | 3516.393  | 4080.096  | AF086324  | 276.332  | 142.29    | NM_017765 | 4854.092  | 2725.558  |
| NM_018223 | 4465.404  | 5131.526  | AF086261  | 440.308  | 386.375   | NM_000428 | 541.668   | 346.101   |
| NM_006693 | 12094.244 | 10038.331 | AF086367  | 1208.233 | 831.358   | AB040967  | 5778.617  | 2874.921  |
| NM_001722 | 1445.93   | 1353.962  | AF086437  | 616.791  | 552.533   | NM_014721 | 1383.981  | 993.805   |
| AB046802  | 2184.018  | 1824.297  | AK025088  | 1983.742 | 1943.156  | AK026352  | 377.647   | 541.505   |
| NM_003297 | 828.52    | 553.941   | U79295    | 777.633  | 678.502   | AL137705  | 2428.837  | 6585.143  |
| NM_006940 | 238.681   | 269.001   | AK002107  | 356.858  | 521.09    | U41898    | 287.892   | 1287.672  |
| NM_018269 | 8549.555  | 4696.517  | NM_003596 | 1938.902 | 2128.286  | AF169257  | 300.264   | 326.016   |
| AK024633  | 2299.028  | 1755.824  | NM_018838 | 2018.986 | 2159.886  | NM_014848 | 399.411   | 420.993   |
| NM_001453 | 6037.138  | 4389.147  | AK021454  | 837.432  | 896.448   | BF217766  | 493.435   | 673.119   |
| NM_012075 | 1408.736  | 1845.536  | AK022069  | 808.244  | 879.549   | NM_000184 | 1198.121  | 1163.755  |
| AB004851  | 712.288   | 1031.311  | AL137457  | 262.233  | 385.75    | NM_000112 | 399.176   | 255.091   |
| NM_013381 | 473.781   | 496.523   | AF085944  | 658.285  | 475.68    | NM_005827 | 3437.235  | 2762.362  |
| AK023911  | 3331.331  | 4123.641  | AL133038  | 412.301  | 313.704   | NM_003053 | 1464.085  | 1051.308  |
| NM_001283 | 2033.956  | 2507.74   | AL137414  | 550.928  | 417.284   | NM_003044 | 276.583   | 251.497   |
| AL110237  | 895.828   | 1310.853  | AL359574  | 1066.822 | 809.948   | NM_006672 | 2594.647  | 1753.301  |
| D87470    | 972.02    | 1224.895  | AL133569  | 1637.022 | 1565.809  | AB007875  | 586.831   | 237.941   |
| AF147307  | 5047.714  | 8024.386  | AK027189  | 553.248  | 431.831   | NM_018261 | 487.87    | 381.521   |
| AK001829  | 1552.777  | 2615.774  | AF088014  | 705.391  | 591.697   | AL050288  | 21660.568 | 14490.223 |
| NM_016525 | 2756.803  | 3619.205  | AL109719  | 457.818  | 469.762   | NM_005040 | 3225.632  | 3457.009  |
| AK024931  | 10345.009 | 14621.594 | AF086093  | 179.201  | 215.303   | NM_016391 | 8107.139  | 15283.005 |
| AL109715  | 759.523   | 940.415   | U92022    | 420.089  | 435.216   | AF075033  | 2337.53   | 2555.563  |
| AF086181  | 613.509   | 1028.09   | NM_003650 | 9165.328 | 13666.508 | D50911    | 8906.402  | 10466.024 |
| AK021540  | 511.828   | 382.158   | AK022119  | 1640.18  | 1491.616  | AB011104  | 1273.955  | 1512.896  |
| D86985    | 615.354   | 494.617   | AL157488  | 728.655  | 956.361   | AK024069  | 6110.121  | 5926.161  |
| AK022258  | 585.622   | 542.379   | NM_016644 | 586.478  | 491.652   | NM_004582 | 7651.17   | 8445.108  |
| AF088043  | 379.498   | 347.112   | AF085842  | 283.249  | 368.509   | NM_015640 | 11867.434 | 10200.141 |
| AF131799  | 641.486   | 406.113   | AK023882  | 362.699  | 243.142   | AF233450  | 627.393   | 898.036   |
| AK000455  | 856.839   | 504.313   | AK026750  | 765.511  | 1073.542  | NM_016233 | 641.733   | 577.989   |
| NM_005230 | 689.278   | 533.075   | AF072164  | 936.163  | 1184.923  | NM_000821 | 5913.083  | 4380.547  |
| AL365407  | 2163.362  | 2583.409  | NM_018610 | 423.187  | 264.113   | NM_020121 | 409.333   | 440.777   |
| AK022407  | 385.459   | 640.367   | AF181286  | 234.96   | 365.816   | NM_003145 | 34812.602 | 22031     |
| AK000840  | 6061.208  | 6643.832  | AF083122  | 265.028  | 297.223   | NM_001632 | 1128.641  | 805.965   |
| AL162073  | 1411.813  | 2984.767  | AF232216  | 313.401  | 516.036   | NM_012264 | 756.691   | 656.187   |
| AL390160  | 600.573   | 1058.253  | NM_017773 | 858.545  | 851.063   | AF311312  | 1499.73   | 1211.025  |
| AJ006835  | 3406.167  | 4909.272  | AK021885  | 219.464  | 627.375   | NM_014915 | 11503.484 | 7011.686  |
| AL110138  | 906.018   | 1141.211  | AK022018  | 151.96   | 160.52    | NM_012286 | 619.131   | 341.08    |
| AL049445  | 561.163   | 937.361   | AK022189  | 302.27   | 190.951   | NM_002195 | 1622.341  | 1026.958  |
| AL122039  | 550.117   | 754.309   | AK022338  | 409.183  | 255.558   | D84294    | 1401.957  | 655.072   |
| AF070577  | 9379.48   | 11019.815 | AK026856  | 326.363  | 234.366   | BG539651  | 4724.865  | 4648.231  |
| AL157484  | 8093.582  | 6915.179  | AL162033  | 692.153  | 777.339   | AW160671  | 41759.93  | 37322.07  |
| AK024850  | 1152.168  | 844.991   | NM_005001 | 6403.955 | 6349.288  | BI870529  | 3131.51   | 4274.481  |
| Y09836    | 1974.166  | 1632.464  | AK024175  | 2643.186 | 3087.62   | AA702698  | 675.905   | 679.532   |
| AL137597  | 7167.96   | 4863.816  | NM_000510 | 609.776  | 556.033   | AI681514  | 526.554   | 740.775   |

|           |           |           |           |           |           |           |          |           |
|-----------|-----------|-----------|-----------|-----------|-----------|-----------|----------|-----------|
| AK022144  | 478.395   | 429.6     | NM_017787 | 1319.239  | 668.543   | NM_00130C | 1279.986 | 1268.058  |
| AF086044  | 655.317   | 610.535   | NM_020315 | 2453.552  | 1823.418  | BG748827  | 4969.946 | 6070.02   |
| NM_01492E | 436.972   | 317.686   | AK001910  | 697.336   | 469.644   | AA952897  | 777.309  | 1107.014  |
| AF131790  | 527.775   | 311.845   | AK023892  | 241.833   | 308.533   | BG760342  | 1500.883 | 1385.465  |
| AJ011378  | 1032.593  | 1425.401  | AF124368  | 368.126   | 357.048   | AA703141  | 513.477  | 488.362   |
| AF009266  | 598.196   | 786.375   | AF265210  | 4370.929  | 4573.956  | AI122630  | 5415.056 | 4145.257  |
| AF009310  | 829.909   | 1223.642  | AK024241  | 490.896   | 493.974   | NM_002103 | 7732.66  | 6823.047  |
| AF060168  | 1418.488  | 3267.62   | AK025061  | 708.711   | 989.534   | NM_003379 | 5943.06  | 5538.437  |
| AF009275  | 954.313   | 1232.222  | AF088067  | 2956.2    | 2845.185  | NM_006589 | 3874.042 | 2933.747  |
| AF015251  | 665.063   | 1741.182  | AK022213  | 399.037   | 655.929   | NM_004134 | 2125.081 | 1125.741  |
| AF056426  | 925.429   | 1337.456  | AF056441  | 944.802   | 938.55    | NM_005955 | 873.712  | 550.017   |
| AF064850  | 364.21    | 666.711   | AK024142  | 249.996   | 233.959   | NM_012428 | 2253.07  | 1785.973  |
| AK001096  | 397.02    | 532.277   | Y10509    | 373.894   | 273.187   | NM_013269 | 344.514  | 462.622   |
| NM_018329 | 1011.915  | 1299.919  | AK024389  | 3750.023  | 2891.703  | NM_005565 | 6918.436 | 9448.545  |
| AK021565  | 771.902   | 1177.041  | AK026793  | 1473.125  | 1007.388  | NM_003824 | 2715.978 | 3451.901  |
| AK021778  | 561.637   | 895.96    | NM_001672 | 324.438   | 322.811   | NM_000686 | 658.592  | 800.23    |
| AK001150  | 2751.351  | 3071.324  | AJ276253  | 7358.571  | 4188.074  | NM_012452 | 1236.62  | 1615.727  |
| AK021633  | 1070.444  | 999.895   | AF147314  | 909.12    | 748.111   | AF229166  | 285.398  | 551.292   |
| AK025659  | 1382.454  | 965.502   | NM_018980 | 2118.89   | 1495.138  | NM_005137 | 1835.164 | 2477.917  |
| AK026407  | 323.887   | 371.772   | AF086201  | 635.79    | 481.893   | NM_006764 | 1062.217 | 1349.506  |
| AK026788  | 917.413   | 573.741   | U48696    | 329.325   | 355.126   | NM_001163 | 739.388  | 661.214   |
| AK026824  | 595.859   | 508.532   | AF230316  | 3335.157  | 2178.922  | NM_005878 | 657.559  | 655.881   |
| AJ008130  | 23183.811 | 26973.871 | AK024515  | 1617.228  | 1469.722  | AF308602  | 940.082  | 634.288   |
| AF086502  | 1989.018  | 2810.35   | AF085862  | 2925.619  | 3291.679  | AB011089  | 568.019  | 259.421   |
| L39924    | 1310.946  | 1491.946  | NM_017998 | 686.24    | 863.172   | AF007192  | 328.415  | 439.081   |
| U52054    | 3789.688  | 4578.304  | AL049271  | 14115.334 | 13449.417 | NM_001276 | 5198.39  | 4021.627  |
| D17226    | 398.828   | 573.926   | AK023079  | 21539.674 | 18414.932 | NM_016157 | 368.737  | 334.994   |
| AK023325  | 1824.829  | 2879.537  | NM_019609 | 1189.964  | 1205.306  | NM_000112 | 296.502  | 223.616   |
| NM_017985 | 1727.603  | 2294.032  | AK026198  | 1356.835  | 1839.331  | NM_005827 | 2707.589 | 1808.936  |
| AK025866  | 2835.333  | 3072.547  | AF183570  | 522.444   | 719.61    | NM_003053 | 1061.152 | 676.883   |
| AF088058  | 2390.31   | 2725.545  | NM_005497 | 9736.798  | 9840.216  | NM_006672 | 2003.337 | 1090.96   |
| NM_000513 | 1490.916  | 2184.915  | AK024048  | 1709.257  | 1685.746  | M31659    | 737.489  | 622.321   |
| Y11165    | 1410.143  | 2096.06   | AB033093  | 1128.18   | 776.786   | NM_016226 | 6367.822 | 11603.283 |
| BC028422  | 399.262   | 301.413   | NM_005912 | 681.433   | 628.385   | AK024311  | 492.419  | 884.24    |
| NM_003545 | 367.459   | 572.201   | NM_005909 | 23146.559 | 15590.361 | AF052155  | 3916.725 | 5618.55   |
| AK024413  | 756.89    | 1069.433  | AK055991  | 451.117   | 410.079   | NM_005085 | 661.396  | 748.713   |
| AK022247  | 931.108   | 1103.471  | AF113697  | 411.186   | 250.429   | AF060902  | 582.727  | 982.605   |
| AK001453  | 1951.091  | 2675.287  | AK022326  | 688.453   | 552.914   | AF121858  | 2567.667 | 4486.8    |
| AB007972  | 3520.504  | 4642.55   | AF085991  | 686.731   | 351.369   | NM_013437 | 607.483  | 1313.71   |
| AL390144  | 3552.805  | 4523.958  | NM_005683 | 459.432   | 451.972   | AK025966  | 1620.391 | 1090.355  |
| AK024017  | 2342.961  | 3150.333  | NM_020427 | 6740.953  | 4406.107  | NM_018725 | 362.26   | 411.963   |
| X56196    | 528.158   | 746.782   | AF085920  | 610.95    | 575.767   | NM_003081 | 7558.794 | 6037.941  |
| D17220    | 4875.733  | 6377.671  | AK023173  | 6059.564  | 4546.16   | NM_016495 | 1123.902 | 981.334   |
| D28363    | 40919.953 | 49646.086 | AK025225  | 365.087   | 516.255   | D50402    | 7235.829 | 5120.917  |
| AB011171  | 2080.427  | 2515.581  | U79275    | 1731.942  | 1919.136  | M73547    | 4659.427 | 3499.429  |
| AF090099  | 354.038   | 539.602   | AJ227908  | 394.872   | 519.207   | NM_003687 | 546.492  | 607.367   |
| AK023606  | 358.892   | 465.762   | AF007193  | 864.234   | 938.741   | NM_020121 | 275.163  | 196.666   |
| AF189251  | 399.044   | 534.387   | AK022367  | 555.251   | 465.752   | NM_003145 | 29279.98 | 14295.17  |
| NM_005322 | 2250.416  | 2587.592  | BC028589  | 1398.415  | 1871.673  | NM_001632 | 1050.669 | 681.438   |
| AK024465  | 1534.075  | 1662.002  | CY3Cy5    | 1013.177  | 158.424   | NM_012264 | 612.824  | 473.501   |
| AF075119  | 617.124   | 894.717   | K02765    | 726.331   | 858.017   | AF311312  | 1335.132 | 1015.914  |
| AK021478  | 2388.746  | 2039.41   | M65134    | 520.091   | 716.205   | NM_017765 | 3877.663 | 8407.018  |
| AF131782  | 1450.042  | 1401.067  | BG539651  | 7423.526  | 6127.803  | NM_000428 | 624.889  | 1065.642  |

|           |           |           |           |           |           |           |           |           |
|-----------|-----------|-----------|-----------|-----------|-----------|-----------|-----------|-----------|
| NM_01421C | 3852.524  | 2282.607  | N52646    | 17209.852 | 25707.045 | AB040967  | 6080.648  | 7412.546  |
| AK021603  | 1774.995  | 1396.219  | AW160671  | 50436.316 | 28634.223 | NM_014721 | 1435.698  | 1751.585  |
| AL110136  | 1965.933  | 1423.161  | BI870529  | 4046.913  | 3561.837  | AK026352  | 418.014   | 545.697   |
| AK002203  | 703.898   | 648.131   | AA702698  | 549.863   | 495.784   | AL137705  | 2235.448  | 2868.964  |
| AK026469  | 3319.087  | 4059.993  | AI681514  | 449.486   | 595.79    | U41898    | 346.426   | 193.853   |
| D16935    | 3660.317  | 3925.932  | NM_00130C | 1797.662  | 2577.034  | NM_01484E | 347.387   | 355.65    |
| AK027019  | 1073.694  | 1116.96   | BG748827  | 7680.951  | 12616.61  | BF217766  | 375.602   | 366.065   |
| U92019    | 570.409   | 751.565   | AA952897  | 785.746   | 681.791   | NM_000184 | 1046.268  | 822.857   |
| U52835    | 3808.899  | 3757.18   | BG760342  | 1614.71   | 1121.951  | NM_002103 | 7042.592  | 4613.203  |
| NM_00075E | 3179.341  | 3801.241  | AI122630  | 5525.176  | 1355.259  | NM_00337E | 5013.93   | 2631.075  |
| AK022148  | 640.387   | 752.073   | NM_002103 | 15470.593 | 5231.846  | NM_00658E | 3619.57   | 3394.244  |
| Z36811    | 54171.332 | 66113.609 | SR1       | 60772.344 | 26054.332 | AB007875  | 610.349   | 534.646   |
| NM_01895C | 386.195   | 434.509   | SR3       | 37724.977 | 9052.265  | NM_018261 | 696.857   | 941.973   |
| K03200    | 5670.318  | 11588.229 | SR5       | 4565.212  | 4885.452  | NM_01479E | 301.959   | 486.758   |
| U17629    | 2720.403  | 3158.455  | SR7       | 5828.021  | 20186.885 | AL050288  | 23659.525 | 26468.484 |
| NM_02042E | 2241.365  | 2953.053  | SR9       | 15225.034 | 1726.86   | NM_00504C | 3639.739  | 3624.078  |
| U79265    | 3296.199  | 3459.722  | CY3Cy5    | 575.263   | 153.386   | NM_016391 | 8414.671  | 9129.898  |
| AK022868  | 3368.615  | 3515.044  | NM_01242E | 2921.012  | 2924.616  | AF075033  | 2586.489  | 3005.522  |
| NM_00353C | 495.589   | 533.097   | NM_00172E | 14426.096 | 9602.78   | D50911    | 9617.385  | 8201.617  |
| AJ227871  | 665.929   | 732.751   | NM_00556E | 8297.887  | 6488.335  | AB011104  | 1330.058  | 1170.726  |
| AK025344  | 1689.695  | 1623.586  | NM_003824 | 3467.784  | 2817.925  | AK024069  | 5603.081  | 4445.99   |
| D28589    | 11625.23  | 10568.215 | NM_00068E | 1068.462  | 978.542   | NM_00458E | 7560.049  | 5934.184  |
| AF301223  | 517.096   | 387.169   | NM_01245E | 3622.979  | 3266.915  | NM_01564C | 11833.908 | 8149.15   |
| NM_017867 | 3901.428  | 2806.29   | AF229166  | 440.004   | 430.445   | AF233450  | 633.025   | 599.451   |
| U92820    | 7993.149  | 6228.027  | NM_005137 | 1546.849  | 1183.611  | NM_01623E | 627.834   | 526.355   |
| NM_017937 | 2028.408  | 1880.681  | NM_006764 | 917.271   | 800.96    | NM_000821 | 5993.312  | 4973.755  |
| AL360266  | 1595.258  | 1101.3    | NM_00138E | 775.116   | 737.246   | AF308602  | 799.586   | 436.531   |
| AL160132  | 20601.361 | 19597.119 | NM_00587E | 760.187   | 477.41    | AB011089  | 292.257   | 248.073   |
| NM_019557 | 2965.316  | 2217.99   | AF308602  | 663.879   | 295.031   | AF007192  | 474.251   | 357.954   |
| CY3Cy5    | 503.943   | 137.375   | NM_00127E | 4593.374  | 1044.627  | NM_00127E | 5278.643  | 4400.02   |
| AA150828  | 1531.392  | 3307.49   | NM_01491E | 15178.408 | 3955.218  | NM_01491E | 17072.449 | 12340.45  |
| H90764    | 2768.608  | 4405.392  | NM_01228E | 2339.418  | 859.888   | NM_01228E | 845.702   | 1022.248  |
| AI859208  | 738.81    | 899.449   | NM_00219E | 2399.807  | 1511.529  | NM_00219E | 2269.938  | 2485.093  |
| H64379    | 10726.651 | 18953.969 | D84294    | 1656.932  | 1112.228  | D84294    | 1547.855  | 2561.026  |
| BE208258  | 52663.316 | 55479.754 | M31659    | 624.232   | 718.238   | X59770    | 528.937   | 987.026   |
| T72202    | 700.096   | 817.167   | NM_00305E | 5799.358  | 5263.96   | K02765    | 1164.529  | 2071.659  |
| BI831922  | 2262.316  | 3226.647  | NM_01622E | 7758.478  | 6487.034  | BG539651  | 5661.482  | 6337.032  |
| M69238    | 3812.457  | 4959.397  | AK024311  | 416.895   | 483.401   | N52646    | 7198.867  | 7591.667  |
| AA599158  | 8270.124  | 8435.999  | AF052155  | 4044.779  | 3327.931  | AW160671  | 45170.203 | 38698.691 |
| BE294756  | 201.323   | 1051.651  | NM_00508E | 932.039   | 910.228   | BI870529  | 3555.335  | 4467.047  |
| NM_00107E | 279.008   | 980.598   | AF060902  | 583.214   | 687.264   | AA702698  | 593.906   | 732.322   |
| NM_002711 | 479.816   | 903.374   | AF121858  | 3079.212  | 2323.143  | AI681514  | 383.041   | 349.955   |
| SR5       | 4264.906  | 7426.019  | NM_013437 | 891.209   | 779.064   | NM_00130C | 1071.589  | 832.681   |
| SR7       | 5048.58   | 44842.254 | AK025966  | 1317.644  | 799.951   | BG748827  | 4804.008  | 4390.424  |
| SR9       | 10251.276 | 1355.799  | NM_01872E | 293.835   | 260.979   | AA952897  | 753.479   | 742.401   |
| CY3Cy5    | 2417.938  | 167.674   | NM_003081 | 13003.178 | 3710.517  | BG760342  | 1527.41   | 1263.252  |
| NM_00156C | 5106.69   | 6942.45   | NM_01649E | 837.491   | 334.756   | AA703141  | 508.802   | 490.094   |
| NM_00178E | 5411.281  | 6722.642  | NM_004134 | 1976.954  | 569.718   | AI122630  | 5694.606  | 4043.148  |
| J03171    | 1918.471  | 3511.994  | NM_00595E | 663.635   | 311.456   | NM_003081 | 9577.252  | 6347.211  |
| NM_00585E | 664.618   | 774.852   | NM_00531E | 51362.773 | 45760.574 | NM_01649E | 888.36    | 587.873   |
| NM_00432E | 19003.35  | 30413.213 | NM_01776E | 10080.023 | 6841.292  | D50402    | 6269.163  | 4056.934  |
| NM_00531E | 949.006   | 1346.4    | NM_00042E | 426.149   | 473.679   | M73547    | 4690.251  | 2808.656  |
| NM_001711 | 1155.932  | 1724.521  | AB040967  | 7046.437  | 4594.367  | NM_003687 | 528.099   | 416.865   |



|           |           |           |           |           |           |           |           |          |
|-----------|-----------|-----------|-----------|-----------|-----------|-----------|-----------|----------|
| NM_00421C | 7994.412  | 10484.142 | NM_014721 | 1291.022  | 1234.803  | NM_004134 | 2534.689  | 1882.399 |
| NM_02014C | 1591.108  | 3233.447  | AK026352  | 498.188   | 781.199   | NM_00595E | 1104.591  | 1095.033 |
| NM_00196Z | 681.653   | 850.562   | AL137705  | 2552.525  | 2140.545  | NM_00404E | 374.498   | 580.467  |
| NM_00250C | 870.649   | 1872.383  | NM_005827 | 3491.993  | 2303.873  | NM_01242E | 2838.74   | 3125.581 |
| AK026232  | 1451.382  | 1896.503  | NM_00305Z | 901.869   | 481.798   | NM_01326E | 315.13    | 481.689  |
| NM_01489Z | 7035.709  | 13602.042 | NM_00667Z | 1706.899  | 1627.284  | NM_00172E | 14288.741 | 14125.5  |
| AK023827  | 3263.463  | 5559.096  | AB007875  | 745.576   | 773.682   | NM_00556E | 6830.976  | 7897.511 |
| NM_001117 | 519.346   | 921.513   | NM_018261 | 607.839   | 789.482   | NM_00382Z | 2816.167  | 2978.722 |
| NM_000231 | 2614.883  | 6587.636  | AL050288  | 28890.604 | 21124.297 | NM_00068E | 901.549   | 1080.422 |
| L07517    | 853.861   | 1351.696  | NM_00504C | 4226.217  | 3657.93   | NM_01245Z | 1451.076  | 1871.134 |
| AK022451  | 1728.982  | 3455.696  | NM_016391 | 11539.34  | 7009.479  | AF229166  | 404.897   | 346.266  |
| NM_01435E | 68189.992 | 80954.914 | AF075033  | 2538.641  | 1208.505  | NM_005137 | 1185.544  | 693.489  |
| BM918441  | 2709.154  | 4539.24   | D50911    | 10307.455 | 5707.831  | NM_00676Z | 896.866   | 677.864  |
| NM_00104E | 5704.638  | 6624.444  | AB011104  | 993.857   | 463.069   | NM_00138E | 391.218   | 412.301  |
| NM_005697 | 2970.735  | 2373.954  | AK024069  | 6051.901  | 2286.985  | NM_00116Z | 680.475   | 581.978  |
| NM_00309E | 1839.065  | 1397.635  | NM_00163Z | 1126.929  | 794.116   | NM_00587E | 501.704   | 483.338  |
| NM_004781 | 391.48    | 254.05    | NM_01226Z | 878.18    | 1043.051  | NM_01484E | 430.744   | 233.571  |
| NM_01830Z | 1669.568  | 2277.244  | NM_01491E | 16222.684 | 9183.308  | BF217766  | 368.221   | 245.724  |
| NM_01475E | 2418.614  | 3815.551  | NM_01228E | 837.508   | 1018.429  | NM_00018Z | 1083.771  | 813.768  |
| NM_00512Z | 3089.856  | 6421.473  | NM_00219E | 2483.862  | 2175.175  | NM_01618C | 310.339   | 379.39   |
| AK000947  | 3945.375  | 6815.063  | D84294    | 1383.755  | 1474.662  | NM_00011Z | 350.256   | 444.897  |
| L08240    | 1172.205  | 1976.212  | K02765    | 615.857   | 734.698   | NM_005827 | 3189.466  | 4013.604 |
| NM_01795Z | 1446.512  | 2298.332  | M65134    | 489.998   | 686.487   | NM_00305Z | 1581.404  | 2268.75  |
| NM_00294C | 1732.945  | 2240.913  | BG539651  | 7540.063  | 5456.213  | NM_00304Z | 423.569   | 697.835  |
| NM_016081 | 16536.527 | 21333.906 | N52646    | 11660.714 | 6783.116  | NM_00667Z | 2494.824  | 3596.462 |
| NM_00638E | 3139.435  | 3062.565  | AW160671  | 45367.871 | 21200.816 | M31659    | 773.033   | 1314.803 |
| M30818    | 364.459   | 405.163   | BI870529  | 3444.651  | 2080.189  | NM_01622E | 6801.262  | 7572.597 |
| NM_00016Z | 1359.602  | 2182.413  | AA702698  | 548.994   | 432.971   | AK024311  | 579.716   | 1026.495 |
| NM_00575E | 500.868   | 932.852   | AI681514  | 727.906   | 1217.415  | AF052155  | 4096.039  | 4482.405 |
| NM_01433C | 48265.527 | 63295.355 | NM_00130C | 1164.259  | 561.064   | NM_00508E | 684.491   | 759.645  |
| NM_00703Z | 427.828   | 1278.405  | BG748827  | 5782.332  | 7691.916  | AF060902  | 505.096   | 543.468  |
| NM_00721Z | 9325.718  | 10505.157 | NM_00413Z | 2904.416  | 2244.86   | AF121858  | 1797.833  | 1629.247 |
| NM_000311 | 2045.277  | 1832.615  | NM_00595E | 1798.268  | 1411.405  | NM_013437 | 691.894   | 636.865  |
| NM_01790E | 1740.488  | 1370.256  | NM_00404E | 400.439   | 345.062   | AK025966  | 1419.778  | 1065.114 |
| NM_00633E | 9105.399  | 8153.18   | NM_01242E | 2988.238  | 2975.347  | NM_01872E | 376.871   | 288.082  |
| NM_00078E | 6901.746  | 3706.987  | NM_00172E | 16668.666 | 24863.719 | AK024069  | 5194.597  | 2793.422 |
| AL133561  | 1458.697  | 1102.998  | NM_00556E | 9704.579  | 6817.564  | NM_00458Z | 6839.933  | 3913.517 |
| NM_017731 | 456.447   | 484.494   | NM_00382Z | 3760.84   | 1854.197  | NM_01564C | 10689.79  | 5589.819 |
| AB040891  | 2314.302  | 1936.763  | NM_00068E | 1085.265  | 799.381   | AF233450  | 550.957   | 405.657  |
| AB037780  | 821.667   | 460.329   | NM_01245Z | 3728.106  | 1673.882  | NM_01623Z | 889.366   | 650.76   |
| NM_00584E | 6512.939  | 4753.302  | NM_00011Z | 459.263   | 385.339   | NM_000821 | 6466.397  | 6490.331 |
| NM_01620E | 5905.232  | 3037.446  | NM_005827 | 4768.449  | 4194.764  | NM_020121 | 357.506   | 513.049  |
| AK075415  | 628.718   | 445.081   | NM_00305Z | 2325.761  | 1844.167  | NM_00163Z | 1608.436  | 4735.722 |
| AK025616  | 560.744   | 419.995   | NM_00304Z | 679.398   | 733.186   | NM_01226Z | 1194.482  | 1697.676 |
| NM_01896Z | 3821.304  | 6744.503  | NM_00667Z | 4925.761  | 3530.486  | AF311312  | 1324.568  | 1981.808 |
| NM_00008C | 2123.27   | 5251.369  | M31659    | 615.385   | 767.197   | NM_01776E | 5758.146  | 8013.733 |
| NM_00182E | 1072.882  | 2525.708  | NM_01622E | 7728.227  | 7801.286  | NM_00042E | 404.852   | 754.679  |
| NM_00725E | 560.659   | 1373.791  | AK024311  | 513.602   | 609.496   | AB040967  | 6717.049  | 5829.752 |
| NM_00033E | 403.155   | 753.9     | AF052155  | 4011.899  | 2336.95   | NM_014721 | 1466.726  | 1119.793 |
| AF283645  | 1870.122  | 3907.543  | NM_00508E | 1141.067  | 731.408   | AK026352  | 277.642   | 421.961  |
| NM_01657E | 3746.557  | 8831.259  | AF060902  | 716.621   | 607.346   | AL137705  | 2050.274  | 1868.032 |
| NM_01416E | 3726.883  | 2523.948  | X57655    | 508.572   | 1162.152  | NM_00726Z | 12041.521 | 6207.169 |
| AL442085  | 3634.699  | 3874.143  | AK025966  | 3059.119  | 4646.651  | NM_01478Z | 4324.57   | 3035.233 |

|           |           |           |           |           |           |           |           |           |
|-----------|-----------|-----------|-----------|-----------|-----------|-----------|-----------|-----------|
| NM_013313 | 2932.657  | 3789.766  | NM_020121 | 381.236   | 720.84    | NM_014053 | 2005.851  | 1130.94   |
| NM_014736 | 3435.688  | 3023.57   | NM_003145 | 41999.797 | 28265.748 | NM_002571 | 533.426   | 295.894   |
| AK023886  | 1002.057  | 1023.58   | NM_001632 | 890.015   | 1189.243  | NM_004936 | 2448.664  | 2287.316  |
| NM_002553 | 937.486   | 807.97    | NM_012264 | 795.968   | 852.352   | NM_001425 | 15030.834 | 15449.05  |
| AJ404615  | 1809.891  | 1222.433  | AF311312  | 1582.153  | 1460.833  | NM_014155 | 3654.692  | 5946.148  |
| NM_016053 | 9515.382  | 6631.74   | NM_017765 | 12856.683 | 9372.57   | NM_014675 | 692.128   | 1101.181  |
| AB007869  | 4030.577  | 1971.506  | NM_000428 | 581.508   | 493.423   | NM_006585 | 4342.545  | 5386.478  |
| AB046844  | 514.737   | 712.04    | AB040967  | 7208.074  | 3807.511  | AB007875  | 595.543   | 641.843   |
| NM_000302 | 1273.03   | 880.86    | NM_014721 | 2186.457  | 1891.864  | AL050288  | 23791.096 | 22750.445 |
| NM_013235 | 16241.418 | 11410.564 | AL137705  | 4404.747  | 9696.495  | NM_005040 | 3879.019  | 4695.807  |
| NM_016015 | 3359.988  | 5699.56   | NM_002103 | 20905.855 | 14248.44  | NM_016391 | 8394.164  | 7918.399  |
| NM_020120 | 2149.26   | 5892.859  | NM_003379 | 7354.087  | 6021.002  | AF075033  | 2828.183  | 2808.682  |
| AK022900  | 1698.009  | 3242.775  | NM_006589 | 5867.825  | 4001.533  | D50911    | 9026.42   | 7300.022  |
| NM_001125 | 583.92    | 1035.15   | AB007875  | 1573.19   | 1626.831  | AB011104  | 1366.477  | 1448.463  |
| AB023216  | 898.097   | 1839.686  | AL050288  | 47152.277 | 51889.25  | NM_003245 | 762.743   | 372.475   |
| NM_002266 | 30180.742 | 50740.164 | AF075033  | 4313.695  | 9187.766  | NM_001075 | 523.664   | 421.049   |
| NM_014400 | 8155.373  | 19638.424 | D50911    | 18356.703 | 27668.814 | NM_000552 | 3350.393  | 2021.747  |
| AL157492  | 971.568   | 2242.1    | AB011104  | 2496.761  | 5074.007  | AK021529  | 1245.499  | 1166.849  |
| AL353957  | 3383.419  | 9029.65   | AF233450  | 1745.979  | 2917.697  | AB037845  | 2333.039  | 2290.278  |
| NM_000231 | 1646.664  | 1450.789  | NM_016233 | 1771.259  | 3341.158  | NM_005980 | 1657.291  | 2217.762  |
| L07517    | 817.944   | 1174.043  | AF308602  | 1867.843  | 2524.106  | NM_016190 | 16372.487 | 16980.889 |
| AK022451  | 1125.902  | 1135.376  | AB011089  | 882.857   | 1727.313  | NM_012383 | 4119.644  | 4071.959  |
| BM918441  | 856.317   | 899.688   | AF007192  | 839.346   | 1350.791  | AJ271684  | 481.846   | 590.307   |
| AA150828  | 964.334   | 984.892   | NM_001276 | 10394.552 | 11227.23  | AF255342  | 1783.334  | 1543.484  |
| H64379    | 6172.545  | 5620.388  | NM_016157 | 1086.876  | 1494.874  | NM_003300 | 2071.873  | 2311.153  |
| BE208258  | 29845.625 | 19967.67  | NM_014915 | 24716.74  | 26453.232 | AK026682  | 1260.352  | 1905.445  |
| BI831922  | 1628.688  | 2603.553  | NM_012286 | 1675.442  | 2217.822  | NM_017720 | 26298.096 | 26695.615 |
| NM_001073 | 288.304   | 844.94    | NM_002195 | 4264.796  | 5904.804  | NM_004655 | 1819.514  | 1343.047  |
| NM_002711 | 587.617   | 1367.062  | D84294    | 2313.374  | 2726.706  | NM_003942 | 2237.23   | 1846.37   |
| AK026092  | 4050.815  | 11616.682 | K02765    | 1137.081  | 1784.582  | NM_006471 | 17784.809 | 18120.525 |
| AK001175  | 2859.089  | 7185.223  | M65134    | 1098.237  | 1561.421  | NM_004165 | 3398.306  | 2398.761  |
| NM_003329 | 49722.684 | 49159.133 | AW160671  | 52085.125 | 57042.766 | NM_000365 | 749.849   | 626.717   |
| NM_003295 | 36703.965 | 34728.539 | BI870529  | 6468.877  | 11875.731 | NM_016586 | 800.15    | 780.115   |
| NM_001560 | 3179.192  | 3024.399  | AI681514  | 518.785   | 1119.166  | NM_002866 | 2335.377  | 1332.77   |
| NM_001783 | 9820.171  | 12592.344 | NM_001300 | 2441.298  | 6275.078  | NM_003860 | 409.109   | 218.628   |
| J03171    | 1388.416  | 1591.779  | BG748827  | 7379.974  | 14860.097 | NM_005414 | 383.303   | 303.093   |
| NM_005856 | 360.393   | 296.441   | AA952897  | 1634.688  | 3068.127  | NM_004465 | 2479.84   | 2293.322  |
| NM_004323 | 11203.951 | 9509.311  | BG760342  | 1982.098  | 4688.589  | NM_004804 | 844.437   | 798.194   |
| NM_005312 | 736.903   | 731.608   | AA703141  | 1231.79   | 2011.77   | M92439    | 5758.314  | 4421.909  |
| NM_001711 | 754.42    | 1396.768  | NM_003081 | 25384.625 | 32296.354 | AL117665  | 1931.919  | 1755.539  |
| NM_020140 | 1030.772  | 1015.848  | NM_016495 | 2418.838  | 3880.009  | AF263541  | 1237.471  | 1599.54   |
| NM_001962 | 544.789   | 1010.423  | D50402    | 22896.252 | 28090.188 | BE873030  | 567.963   | 716.63    |
| NM_002500 | 1329.093  | 2658.692  | M73547    | 9892.099  | 15696.623 | NM_002440 | 418.541   | 524.451   |
| AK026232  | 2161.388  | 4092.228  | AF181722  | 554.569   | 547.146   | NM_003625 | 434.712   | 659.962   |
| NM_014892 | 7759.249  | 19080.77  | NM_003687 | 1252.71   | 1838.382  | BC006990  | 3399.395  | 3966.699  |
| AK023827  | 3925.842  | 9253.404  | NM_004134 | 4901.369  | 7399.551  | NM_002277 | 660.406   | 679.522   |
| NM_001117 | 474.901   | 675.003   | NM_005955 | 2518.99   | 3842.249  | NM_019114 | 1227.387  | 1162      |
| NM_001829 | 530.42    | 1028.719  | NM_004045 | 847.361   | 1580.614  | M33552    | 3178.443  | 3434.3    |
| NM_007256 | 471.151   | 585.39    | NM_012425 | 3876.105  | 3132.839  | AJ252060  | 1273.747  | 1365.743  |
| NM_000339 | 235.181   | 428.06    | NM_005565 | 17251.178 | 27214.35  | NM_006403 | 3023.384  | 3174.235  |
| AF283645  | 1198.825  | 981.72    | NM_003824 | 5695.083  | 11043.6   | NM_018977 | 400.523   | 210.747   |
| NM_016575 | 1959.955  | 1878.898  | AF229166  | 1229.429  | 2222.559  | AJ001402  | 640.87    | 906.409   |
| NM_001045 | 6475.987  | 9031.356  | NM_005137 | 2005.33   | 4486.125  | NM_004540 | 652.454   | 798.898   |

|           |           |           |           |           |           |           |           |           |
|-----------|-----------|-----------|-----------|-----------|-----------|-----------|-----------|-----------|
| NM_005697 | 5119.265  | 9203.208  | NM_006764 | 1521.609  | 3439.728  | NM_000235 | 2364.166  | 1000.787  |
| NM_003099 | 3159.974  | 3487.682  | NM_001386 | 1820.454  | 2693.517  | AF068236  | 7065.136  | 3358.681  |
| NM_004781 | 716.346   | 777.204   | NM_001163 | 879.852   | 2040.39   | L25628    | 1265.241  | 556.057   |
| NM_018303 | 1055.766  | 849.374   | NM_020346 | 1122.972  | 1435.693  | M37033    | 1202.796  | 901.777   |
| NM_014758 | 1811.978  | 2000.196  | NM_014848 | 971.771   | 1240.375  | AK000336  | 1786.952  | 1460.633  |
| NM_005124 | 1698.017  | 1787.496  | BF217766  | 1622.902  | 2011.029  | NM_002795 | 11847.975 | 14411.669 |
| AK000947  | 2228.553  | 1622.555  | NM_000184 | 1924.251  | 1567.836  | AB033066  | 1171.773  | 1302.398  |
| L08240    | 526.442   | 305.189   | NM_016180 | 486.424   | 393.602   | AF126028  | 1337.87   | 1793.649  |
| NM_017952 | 638.82    | 313.842   | NM_000112 | 759.311   | 695.026   | NM_007019 | 2168.268  | 2258.478  |
| NM_002940 | 1191.546  | 436.334   | NM_005827 | 4884.237  | 3667.441  | NM_007075 | 425.956   | 703.161   |
| NM_016081 | 10762.717 | 4679.105  | NM_003053 | 2718.492  | 2215.602  | NM_017640 | 645.659   | 596.264   |
| NM_006389 | 2119.113  | 941.848   | NM_003044 | 612.958   | 553.137   | NM_017721 | 1368.363  | 1588.45   |
| NM_000163 | 1265.075  | 477.857   | NM_006672 | 4728.208  | 1900.358  | NM_019088 | 4786.059  | 6359.63   |
| NM_005755 | 889.135   | 827.279   | M31659    | 767.86    | 667.277   | AB002373  | 1241.412  | 2201.515  |
| AB023216  | 607.82    | 575.745   | AF121858  | 2425.581  | 2890.735  | NM_016350 | 5132.025  | 5573.309  |
| NM_002266 | 15579.3   | 14913.462 | NM_013437 | 1559.422  | 1906.641  | AK024167  | 2273.487  | 2373.613  |
| NM_014400 | 4095.01   | 3800.162  | NM_017681 | 597.283   | 1512.191  | AK025308  | 487.633   | 425.859   |
| AL157492  | 373.829   | 668.367   | X57655    | 726.318   | 1796.692  | NM_005026 | 2758.07   | 2466.024  |
| AL353957  | 1740.23   | 1535.568  | NM_018725 | 888.747   | 720.885   | AF213356  | 1985.144  | 868.097   |
| NM_007214 | 6577.957  | 7132.709  | AK024069  | 7209.7    | 5787.793  | BC035716  | 935.642   | 555.824   |
| NM_000311 | 1855.688  | 2116.482  | NM_004582 | 9898.474  | 7409.828  | NM_018014 | 571.303   | 455.634   |
| NM_017909 | 2050.596  | 2277.008  | NM_015640 | 19454.672 | 29265.857 | NM_002359 | 6710.89   | 2862.096  |
| NM_006335 | 7655.849  | 8899.008  | AF233450  | 645.234   | 948.897   | AF230809  | 780.366   | 283.525   |
| NM_000786 | 9005.126  | 6883.539  | NM_016233 | 975.635   | 1298.068  | AK025447  | 987.875   | 2774.377  |
| AL133561  | 1688.149  | 2189.409  | NM_000821 | 11359.937 | 8860.603  | NM_002624 | 10134.298 | 31231.928 |
| NM_017731 | 348.41    | 763.757   | NM_020121 | 515.95    | 741.818   | NM_004554 | 2391.481  | 2342.789  |
| AB040891  | 1461.967  | 1427.963  | NM_003145 | 46608.355 | 51945.309 | NM_014576 | 333.772   | 366.976   |
| AB037780  | 778.262   | 606.598   | NM_001632 | 722.472   | 849.796   | AL162035  | 1446.083  | 1971.547  |
| NM_005845 | 5491.344  | 3402.022  | NM_012264 | 669.345   | 436.877   | NM_006692 | 471.318   | 815.111   |
| NM_016209 | 5568.369  | 2660.394  | AF311312  | 1363.242  | 765.36    | NM_003084 | 1529.413  | 1545.984  |
| AK075415  | 450.929   | 373.871   | AL137705  | 2913.736  | 2948.206  | NM_002582 | 2308.428  | 2858.569  |
| NM_018964 | 3221.104  | 1558.607  | U41898    | 633.11    | 790.962   | NM_001009 | 55391.93  | 60614.176 |
| NM_000080 | 1065.992  | 650.644   | NM_007262 | 14927.475 | 10218.853 | AB061315  | 321.624   | 275.916   |
| AK026092  | 2115.462  | 2395.522  | NM_014783 | 5430.061  | 5846.316  | D17289    | 4707.004  | 4287.424  |
| AK001175  | 1611.467  | 1595.409  | NM_014053 | 2609.143  | 2636.163  | NM_002949 | 10708.041 | 9362.845  |
| NM_003897 | 1358.408  | 1699.831  | NM_002571 | 905.117   | 673.276   | NM_014230 | 4694.615  | 3760.39   |
| NM_014165 | 5531.158  | 5273.38   | NM_004939 | 3367.652  | 3011.286  | NM_017748 | 1930.657  | 1400.278  |
| AL442085  | 4650.07   | 4543.241  | NM_001425 | 17826.443 | 13250.133 | AK025374  | 457.876   | 401.162   |
| NM_013313 | 2264.513  | 4255.16   | NM_015710 | 326.702   | 365.53    | NM_014901 | 3494.827  | 2039.875  |
| NM_014736 | 6715.961  | 18849.375 | NM_014158 | 3304.263  | 2735.349  | AK000005  | 4190.921  | 1881.781  |
| AK023886  | 1277.948  | 1999.287  | AK021591  | 715.561   | 685.225   | NM_018128 | 1384.473  | 5016.613  |
| NM_002553 | 952.534   | 914.266   | NM_014675 | 746.511   | 639.603   | NM_016931 | 2465.118  | 8885.94   |
| AJ404615  | 1948.017  | 1342.784  | NM_006589 | 5490.4    | 2336.445  | NM_005566 | 55356.363 | 47186.969 |
| NM_016053 | 9633.817  | 7022.997  | AB007875  | 910.905   | 574.448   | NM_000162 | 870.973   | 1080.855  |
| AB007869  | 4289.187  | 2730.972  | NM_016391 | 12383.524 | 9317.636  | AK027067  | 340.815   | 367.82    |
| AB046844  | 467.753   | 348.172   | AF075033  | 3316.166  | 2209.705  | NM_016287 | 3135.548  | 4247.58   |
| NM_000302 | 1484.181  | 846.848   | D50911    | 10984.798 | 8483.689  | NM_003864 | 1544.745  | 1611.56   |
| NM_013235 | 16659.008 | 11612.185 | NM_003248 | 1117.525  | 1145.816  | NM_006824 | 9612.847  | 9250.947  |
| NM_016015 | 2551.831  | 1451.084  | NM_001078 | 1119.414  | 1389.582  | NM_002107 | 521.927   | 834.178   |
| AK022900  | 1235.377  | 966.813   | NM_000552 | 3902.992  | 4841.007  | NM_002694 | 5101.781  | 4259.736  |
| NM_002500 | 387.682   | 740.004   | NM_003809 | 580.781   | 736.832   | NM_004454 | 1600.599  | 1191.618  |
| AK026232  | 1257.227  | 1316.235  | AK000860  | 6329.34   | 11481.853 | NM_012482 | 1749.769  | 1643.651  |
| NM_014892 | 4589.918  | 4485.585  | NM_014961 | 476.871   | 437.627   | AF217227  | 1522.135  | 1137.254  |

|           |           |           |           |           |           |           |          |          |
|-----------|-----------|-----------|-----------|-----------|-----------|-----------|----------|----------|
| AK023827  | 2052.206  | 1796.833  | NM_020145 | 1264.802  | 1355.662  | AK024141  | 1666.186 | 2575.863 |
| NM_001117 | 338.728   | 351.92    | AK021529  | 1946.863  | 1409.033  | NM_002813 | 3007.176 | 1687.814 |
| NM_000231 | 1653.197  | 2125.996  | AB037845  | 2725.874  | 1554.222  | NM_001198 | 317.34   | 221.106  |
| AK022451  | 1188.502  | 1851.784  | NM_005980 | 2220.023  | 1582.868  | AK022745  | 1943.759 | 1282.708 |
| BM918441  | 1943.61   | 1877.937  | NM_016190 | 50122.336 | 18587.969 | AL049450  | 2044.972 | 878.5    |
| AA150828  | 1108.85   | 1652.667  | AL137579  | 5266.494  | 2398.632  | NM_007238 | 1710.578 | 3636.661 |
| H90764    | 738.035   | 1992.439  | NM_012383 | 5513.093  | 3957.369  | U68494    | 735.086  | 3006.567 |
| H64379    | 6826.336  | 5827.534  | AJ271684  | 1306.389  | 1747.305  | AL137360  | 3073.541 | 7261.733 |
| BE208258  | 28812.574 | 16411.855 | AF255342  | 5592.03   | 4841.497  | AF201941  | 1134.368 | 1832.848 |
| T72202    | 407.429   | 213.545   | NM_003300 | 4698.146  | 2753.521  | AF026941  | 683.791  | 680.414  |
| BI831922  | 1481.329  | 1000.437  | AK026682  | 1636.33   | 924.743   | NM_007070 | 2713.36  | 2972.266 |
| M69238    | 1935.89   | 1260.317  | NM_004655 | 2405.221  | 1249.762  | AL133019  | 2547.311 | 2874.858 |
| AA664180  | 355.408   | 189.624   | NM_003942 | 2417.314  | 1266.496  | AK026192  | 211.701  | 505.112  |
| NM_016081 | 14128.754 | 31082.164 | NM_006471 | 22456.227 | 10205.543 | NM_014895 | 663.56   | 1013.701 |
| NM_006388 | 2070.433  | 2650.16   | NM_004165 | 4382.965  | 1828.532  | AK024883  | 2244.15  | 1559.998 |
| M30818    | 419.772   | 486.08    | NM_000368 | 686.041   | 706.46    | AF217989  | 986.576  | 434.769  |
| NM_000163 | 1017.412  | 846.231   | NM_016586 | 800.5     | 554.01    | NM_017654 | 479.559  | 337.425  |
| NM_001560 | 3351.136  | 2491.096  | NM_004140 | 350.508   | 404.348   | NM_013288 | 723.933  | 906.279  |
| NM_001783 | 11173.09  | 12466.037 | NM_002866 | 5628.212  | 5026.882  | M60721    | 7928.73  | 7739.045 |
| J03171    | 1489.994  | 1498.843  | NM_003860 | 897.536   | 887.276   | L39061    | 1809.902 | 1104.211 |
| NM_005856 | 416.356   | 395.073   | NM_005414 | 521.031   | 484.974   | AF071508  | 844.977  | 871.138  |
| NM_004323 | 12629.055 | 8275.768  | NM_004468 | 4274.414  | 3846.588  | L07265    | 3794.327 | 3965.442 |
| NM_005312 | 894.638   | 600.25    | NM_016031 | 15592.189 | 9848.642  | L19369    | 297.238  | 386.031  |
| NM_001711 | 710.108   | 612.992   | NM_004804 | 870.291   | 988.859   | D16472    | 946.686  | 1073.18  |
| NM_004210 | 5946.554  | 3380.604  | M92439    | 9855.877  | 6853.844  | AL157459  | 956.242  | 510.243  |
| NM_020140 | 1036.464  | 1024.286  | AL117665  | 2877.802  | 1621.82   | AB020654  | 379.939  | 105.679  |
| NM_018964 | 3084.449  | 3078.158  | AF263541  | 1232.457  | 1044.081  | AL353954  | 545.198  | 345.615  |
| NM_000080 | 1083.177  | 1005.004  | NM_001262 | 5017.768  | 2164.448  | NM_017630 | 1317.631 | 1108.994 |
| AF283645  | 1139.276  | 1437.023  | BE873030  | 1059.051  | 507.89    | AK000778  | 446.633  | 923.175  |
| NM_016575 | 2268.224  | 2182.501  | NM_002440 | 643.447   | 852.057   | AL133573  | 2702.191 | 9893.575 |
| NM_001045 | 7941.168  | 6846.991  | NM_003625 | 932.434   | 1118.851  | NM_017958 | 308.117  | 410.121  |
| NM_005697 | 4334.148  | 3105.243  | BC006990  | 3926.331  | 3100.717  | AK000958  | 412.65   | 432.743  |
| NM_003098 | 3012.601  | 2448.415  | NM_002277 | 1415.092  | 1136.04   | AK024523  | 389.145  | 373.176  |
| NM_004781 | 885.974   | 652.223   | NM_019114 | 1345.748  | 1070.114  | AK024600  | 616.663  | 496.689  |
| NM_018303 | 1362.352  | 825.272   | M33552    | 6730.13   | 5399.46   | AK024543  | 996.241  | 845.371  |
| NM_014758 | 1652.501  | 1169.542  | AJ252060  | 1730.422  | 1154.478  | AK024624  | 3217.289 | 3254.216 |
| NM_005124 | 1618.532  | 1193.205  | NM_006403 | 3377.816  | 2906.617  | AK025090  | 613.475  | 384.809  |
| AK000947  | 2020.758  | 1483.34   | NM_018977 | 439.261   | 315.411   | D87682    | 743.939  | 341.798  |
| L08240    | 551.625   | 365.859   | AJ001402  | 1700.017  | 1212.328  | AF321617  | 1465.224 | 865.085  |
| NM_002940 | 1271.196  | 1417.818  | NM_004540 | 766.707   | 829.915   | AF223389  | 533.446  | 179.042  |
| AB046844  | 266.395   | 558.074   | NM_000235 | 2986.526  | 2583.215  | AF086208  | 873.905  | 816.162  |
| NM_000302 | 1262.61   | 1601.397  | AF068236  | 26562.592 | 17464.109 | AK023335  | 1970.319 | 1685.03  |
| NM_013235 | 17493.326 | 17864.93  | L25628    | 2255.315  | 1785.201  | AK023187  | 959.498  | 711.258  |
| NM_016015 | 2548.802  | 2856.156  | M37033    | 1735.751  | 1364.945  | AK022231  | 845.998  | 835.22   |
| NM_020120 | 1319.163  | 1345.033  | NM_007171 | 2231.285  | 1647.287  | AL133101  | 1195.522 | 733.672  |
| AK022900  | 888.165   | 1060.679  | NM_004278 | 705.761   | 889.711   | AK024602  | 4289.456 | 3265.823 |
| NM_001125 | 458.212   | 524.91    | NM_005632 | 786.286   | 952.885   | NM_000485 | 7474.88  | 3955.933 |
| AB023216  | 889.843   | 890.783   | AK021499  | 826.365   | 780.182   | AK025503  | 793.359  | 603.949  |
| NM_002266 | 18239.225 | 17308.549 | AK000336  | 2005.674  | 1246.528  | AF130073  | 1071.721 | 705.061  |
| NM_014400 | 4968.145  | 4944.062  | NM_002795 | 16170.064 | 8445.299  | AK024225  | 9375.778 | 5690.053 |
| AL157492  | 455.141   | 516.597   | NM_006292 | 2798.666  | 1830.185  | AF086334  | 547.469  | 327.849  |
| AL353957  | 2255.143  | 1746.105  | AB007948  | 837.416   | 465.762   | AF075035  | 2286.384 | 1492.115 |
| NM_007214 | 8633.673  | 7398.833  | AB033066  | 1175.438  | 760.67    | AL110180  | 1974.917 | 1567.009 |

|           |           |           |           |           |           |           |           |           |
|-----------|-----------|-----------|-----------|-----------|-----------|-----------|-----------|-----------|
| NM_000311 | 1760.52   | 1539.885  | AF126028  | 1453.363  | 717.386   | BC024924  | 5492.903  | 6211.14   |
| NM_017909 | 1972.381  | 1590.996  | NM_007019 | 2571.194  | 1749.037  | NM_017909 | 3903.695  | 4649.203  |
| NM_006335 | 8176.075  | 6424.783  | NM_007075 | 375.548   | 444.36    | AL110286  | 2166.217  | 2309.851  |
| NM_000786 | 10522.336 | 6342.918  | NM_017640 | 588.854   | 747.04    | AF086374  | 685.405   | 785.191   |
| AL133561  | 1820.626  | 1229.494  | NM_017721 | 1800.892  | 1335.507  | AL162066  | 4274.593  | 6121.5    |
| AB040891  | 1632.56   | 1603.646  | NM_019088 | 5367.15   | 4167.897  | NM_016096 | 10301.971 | 10250.682 |
| AB037780  | 902.972   | 637.754   | AB002373  | 1099.162  | 980.611   | U79290    | 974.415   | 921.275   |
| NM_005845 | 5078.484  | 4911.963  | NM_016350 | 23890.125 | 12763.473 | AK022121  | 273.818   | 99.2      |
| NM_016209 | 6010.034  | 5961.563  | AK024167  | 2562.237  | 2271.793  | AK024197  | 342.069   | 1198.371  |
| AK002114  | 1351.529  | 1727.753  | NM_005026 | 3097.24   | 2608.934  | NM_014040 | 3067.392  | 1903.155  |
| AL390184  | 716.463   | 768.967   | AF213356  | 2542.796  | 1799.695  | AK000799  | 2566.826  | 1446.622  |
| NM_018699 | 814.962   | 1265.552  | BC035716  | 1435.374  | 1174.968  | NM_015582 | 8847.297  | 4728.604  |
| AK026318  | 751.932   | 696.282   | NM_018014 | 610.107   | 601.804   | AK027091  | 1042.486  | 586.849   |
| NM_004365 | 9902.417  | 11257.646 | NM_002359 | 11667.425 | 8505.296  | NM_001526 | 612.962   | 418.577   |
| NM_016355 | 2025.252  | 1924.445  | AF230809  | 1557.764  | 1630.013  | U31738    | 817.493   | 442.175   |
| AJ296290  | 1581.191  | 1230.508  | NM_017894 | 16212.275 | 11188.737 | AF179890  | 2505.308  | 1342.506  |
| AK026092  | 2992.753  | 2422.785  | NM_006509 | 1240.368  | 1089.594  | AK023536  | 3246.379  | 1627.44   |
| AK001175  | 1877.048  | 1566      | AK025447  | 1043.666  | 1031.16   | AK026561  | 359.105   | 338.991   |
| NM_003897 | 1389.378  | 1418.897  | NM_002624 | 29855.639 | 18951.996 | AK021568  | 2779.448  | 1518.766  |
| NM_014165 | 5460.792  | 4128.586  | AF006199  | 918.471   | 899.11    | AK023881  | 1443.45   | 1367.401  |
| AL442085  | 4658.935  | 3859.206  | NM_004554 | 4111.048  | 2930.843  | AK027114  | 52783.508 | 45798.965 |
| NM_013313 | 2053.24   | 1665.949  | NM_018119 | 1183.601  | 843.971   | NM_016296 | 1129.574  | 1238.221  |
| NM_014736 | 3571.025  | 3082.453  | AL162035  | 1637.202  | 794.958   | NM_003155 | 788.784   | 723.256   |
| AK023886  | 1054.566  | 1068.492  | NM_003084 | 1464.674  | 812.404   | AF086256  | 1004.64   | 1667.7    |
| NM_002553 | 884.914   | 949.074   | NM_002582 | 4544.578  | 3335.63   | NM_015492 | 1873.644  | 1752.948  |
| AJ404615  | 2002.962  | 1782.981  | NM_001009 | 64242.734 | 57186.797 | AF132204  | 521.449   | 614.51    |
| NM_016053 | 9622.593  | 9213.95   | NM_001026 | 58782.996 | 57071.852 | AK022874  | 3380.102  | 3536.733  |
| AB007869  | 4268.591  | 4537.298  | NM_001011 | 57747.355 | 50914.676 | CY3Cy5    | 1506.968  | 206.545   |
| M64108    | 1602.127  | 1965.391  | D17289    | 3163.958  | 2552.803  | BI912037  | 534.307   | 551.351   |
| Y17867    | 2425.337  | 2699.456  | NM_002949 | 13506.392 | 8870.677  | AA454646  | 1897.418  | 1724.73   |
| M92642    | 858.667   | 890.229   | NM_014230 | 5810.076  | 4653.364  | U18087    | 6906.232  | 7302.911  |
| NM_018071 | 1626.416  | 1883.338  | NM_017748 | 3143.407  | 2195.947  | U66349    | 428.086   | 367.074   |
| NM_004333 | 2356.89   | 3242.309  | AK025374  | 597.925   | 687.949   | AA057156  | 998.015   | 770.725   |
| AL050137  | 554.708   | 470.544   | NM_014901 | 4972.384  | 4711.918  | U19487    | 1134.919  | 1115.148  |
| AK024423  | 2001.631  | 1797.031  | AK000005  | 5534.919  | 4152.243  | AF166327  | 6835.59   | 7462.739  |
| NM_005043 | 19873.508 | 15344.91  | AF086790  | 642.415   | 607.884   | AF260739  | 1560.964  | 1417.729  |
| NM_005979 | 8441.883  | 7715.309  | NM_000108 | 9646.492  | 7460.208  | AF531423  | 1369.714  | 1673.428  |
| NM_006282 | 2959.931  | 2130.5    | NM_018128 | 1820.349  | 1623.537  | X76555    | 424.53    | 501.457   |
| NM_015920 | 11964.581 | 9188.171  | NM_016931 | 5986.406  | 4424.493  | NM_005432 | 871.736   | 712.788   |
| AB011113  | 1635.8    | 1282.129  | NM_004373 | 22088.781 | 11707.232 | L10386    | 2630.409  | 2301.791  |
| NM_004115 | 935.183   | 717.152   | NM_005566 | 58602.199 | 37613.816 | AF061812  | 694.589   | 678.077   |
| NM_018287 | 830.32    | 712.687   | NM_000162 | 1193.849  | 894.937   | AL136756  | 648.919   | 656.36    |
| NM_001955 | 3322.729  | 2379.436  | NM_006824 | 12187.866 | 6507.712  | NM_012465 | 2838.833  | 2899.769  |
| AF016004  | 2200.814  | 2568.437  | NM_002107 | 546.033   | 382.736   | NM_134260 | 4328.265  | 4085.939  |
| NM_003567 | 6559.879  | 4535.432  | NM_002694 | 5690.282  | 4098.206  | SR6       | 1591.917  | 1037.173  |
| NM_007315 | 3088.67   | 1981.938  | NM_004454 | 1555.757  | 1269.433  | SR8       | 5390.923  | 12435.693 |
| L20686    | 3190.193  | 3319.654  | NM_012482 | 2258.345  | 1567.979  | SR10      | 17743.568 | 5853.065  |
| NM_000304 | 470.954   | 494.64    | AF217227  | 1396.031  | 1114.796  | CY3Cy5    | 1134.13   | 164.184   |
| AK023362  | 523.206   | 682.449   | AK024141  | 3191.789  | 2566.575  | AL080157  | 354.821   | 477.844   |
| S72604    | 15643.778 | 16589.072 | NM_002813 | 8237.931  | 6667.105  | NM_005306 | 635.756   | 441.658   |
| NM_017984 | 584.395   | 515.802   | AK022745  | 2319.686  | 2166.569  | NM_007227 | 368.345   | 510.882   |
| NM_002675 | 1455.41   | 1603.087  | AL049450  | 2897.738  | 2039.855  | NM_007023 | 636.207   | 654.82    |
| NM_012432 | 24902.377 | 21381.469 | NM_005086 | 28727.201 | 22145.83  | NM_014461 | 492.693   | 629.574   |

|           |           |           |           |           |           |           |           |           |
|-----------|-----------|-----------|-----------|-----------|-----------|-----------|-----------|-----------|
| NM_005007 | 11149.547 | 11907.017 | NM_007238 | 1119.785  | 1523.039  | NM_003865 | 447.663   | 375.692   |
| NM_001258 | 453.05    | 476.594   | NM_017606 | 3659.027  | 3581.987  | AB015330  | 1379.073  | 1181.193  |
| NM_004417 | 433.66    | 244.859   | AK024644  | 5056.804  | 2523.357  | NM_001455 | 3057.7    | 2921.33   |
| NM_012290 | 3040.104  | 2551.734  | AB019573  | 413.939   | 324.671   | NM_006363 | 3694.807  | 3867.645  |
| NM_002431 | 2162.909  | 1445.703  | AF201941  | 1260.039  | 1053.4    | NM_020415 | 444.971   | 310.695   |
| NM_001827 | 15458.55  | 10063.354 | AF026941  | 800.196   | 654.875   | AL049667  | 2867.594  | 2686.89   |
| NM_020466 | 3971.422  | 2863.435  | NM_007070 | 2961.676  | 2427.066  | NM_000334 | 983.095   | 1038.254  |
| AL079280  | 414.798   | 426.243   | AL133019  | 3060.861  | 2660.2    | NM_020400 | 602.226   | 693.048   |
| NM_002853 | 2815.702  | 2484.894  | NM_014895 | 989.531   | 900.207   | NM_001504 | 530.916   | 635.088   |
| NM_003174 | 509.588   | 325.106   | AK024883  | 3334.031  | 2569.33   | D50926    | 2090.883  | 1957.472  |
| NM_012307 | 13158.88  | 8265.961  | AF217989  | 2160.529  | 1795.711  | BF205683  | 765.151   | 576.866   |
| NM_002540 | 535.698   | 369.028   | NM_017654 | 695.097   | 839.128   | NM_000755 | 6366.358  | 5298.09   |
| NM_006371 | 1872.6    | 1607.283  | AL109696  | 816.144   | 813.675   | M17017    | 706.454   | 624.605   |
| NM_018834 | 688.181   | 611.154   | AK022190  | 502.875   | 709.848   | NM_002990 | 839.134   | 928.024   |
| AK026882  | 1003.432  | 1091.218  | AJ011593  | 1143.677  | 1074.16   | NM_002432 | 7521.768  | 7068.045  |
| NM_004574 | 992.031   | 728.395   | X89743    | 462.251   | 588.913   | AB033037  | 424.207   | 417.181   |
| NM_004845 | 1289.228  | 1212.559  | NM_013285 | 860.227   | 732.784   | L40400    | 1892.259  | 1933.456  |
| NM_014813 | 415.038   | 528.916   | M60721    | 8791.746  | 5072.372  | AK025688  | 893.354   | 951.134   |
| AF014459  | 1741.601  | 1972.589  | L39061    | 2133.133  | 1335.704  | NM_014445 | 891.802   | 876.664   |
| AK024601  | 3462.574  | 2951.155  | AF071508  | 1544.589  | 1320.934  | NM_004315 | 4394.623  | 5292.458  |
| S68069    | 3386.181  | 3185.684  | L07265    | 10180.353 | 6568.727  | NM_020166 | 2383.832  | 1946.676  |
| AB011095  | 1161.849  | 1095.417  | D16472    | 3921.556  | 3246.629  | AK023860  | 918.091   | 796.659   |
| NM_001503 | 928.452   | 929.14    | AL157459  | 1060.31   | 1016.917  | NM_016285 | 4985.107  | 4633.052  |
| NM_006302 | 2000.877  | 1923.211  | AL353954  | 516.832   | 473.799   | NM_001567 | 2589.958  | 2597.589  |
| AJ224875  | 2445.99   | 2312.338  | NM_017630 | 1733.218  | 1143.706  | NM_004905 | 9784.628  | 9030.2    |
| NM_002145 | 5602.431  | 6293.039  | AK024523  | 468.423   | 422.524   | AF217971  | 1055.49   | 1285.995  |
| AF043324  | 3042.13   | 2934.472  | AK024600  | 1213.621  | 1084.094  | NM_001925 | 856.763   | 934.617   |
| AK024172  | 847.133   | 784.464   | AK024543  | 1048.347  | 938.069   | AF245517  | 534.87    | 580.8     |
| NM_014814 | 3394.351  | 2615.14   | AK024624  | 5925.277  | 4198.434  | NM_004982 | 408.175   | 335.521   |
| NM_002797 | 8859.037  | 6550.965  | AK025090  | 844.504   | 598.286   | AK026180  | 501.695   | 254.638   |
| AK024318  | 881.826   | 743.647   | D87682    | 804.14    | 866.105   | NM_013365 | 1952.901  | 1882.656  |
| NM_016125 | 2399.929  | 1626.051  | AF321617  | 2920.46   | 5637.948  | NM_005817 | 7882.844  | 6819.683  |
| NM_002805 | 4540.089  | 3583.534  | AF223389  | 621.356   | 668.322   | NM_003916 | 4687.162  | 3042.617  |
| NM_017912 | 9246.572  | 7891.225  | AV710479  | 357.925   | 1073.482  | NM_002870 | 11455.218 | 9563.108  |
| NM_000423 | 4277.683  | 3255.015  | AF086208  | 1169.004  | 951.098   | NM_001475 | 13977.528 | 14019.824 |
| AB046838  | 1596.193  | 1433.362  | AK023335  | 2668.723  | 1675.274  | AF135422  | 1393.295  | 1152.462  |
| AK026339  | 755.986   | 552.864   | AK023187  | 518.049   | 515.938   | NM_004475 | 6044.702  | 7673.225  |
| X98411    | 3557.433  | 2591.095  | AL133101  | 528.503   | 591.247   | AF070587  | 986.182   | 883.429   |
| AF116658  | 2734.122  | 2388.385  | AK024602  | 14883.563 | 24383.779 | BE250526  | 479.402   | 454.354   |
| NM_014865 | 9234.464  | 7111.176  | NM_000485 | 6928.467  | 6025.333  | NM_016815 | 1770.839  | 1424.248  |
| AB032977  | 7888.167  | 7271.749  | NM_018542 | 432.954   | 489.279   | NM_012222 | 1282.439  | 1531.384  |
| AK001725  | 591.925   | 576.963   | AK025503  | 1098.288  | 1117.006  | NM_005002 | 1096.486  | 970.985   |
| NM_003036 | 2282.489  | 2565.981  | AF130073  | 1107.96   | 1244.901  | NM_006596 | 2204.759  | 2933.622  |
| NM_020525 | 2570.262  | 2619.64   | AK024225  | 11880.236 | 10274.686 | AK023214  | 3186.09   | 2818.004  |
| NM_020395 | 1665.453  | 1768.988  | AF086334  | 668.514   | 534.266   | NM_001465 | 5689.054  | 5833.102  |
| NM_003425 | 1459.804  | 1952.144  | AF075035  | 9962.955  | 6332.57   | NM_003600 | 2332.112  | 2327.854  |
| NM_013385 | 4973.791  | 4393.832  | AL110180  | 2344.341  | 1551.335  | NM_017490 | 1853.511  | 1991.483  |
| AF038951  | 8459.495  | 7270.368  | AL162066  | 7089.673  | 5393.363  | AK026727  | 992.97    | 972.809   |
| NM_006492 | 1495.97   | 1391.46   | NM_016096 | 11720.757 | 6614.936  | NM_002830 | 269.618   | 138.349   |
| AK021811  | 982.472   | 1101.021  | U79290    | 1154.934  | 908.135   | NM_006247 | 2882.842  | 2645.588  |
| NM_003425 | 2584.275  | 2667.754  | NM_014040 | 3472.419  | 3078.638  | AB032983  | 360.605   | 235.338   |
| AF055030  | 1431.707  | 1339.902  | AK000799  | 3349.607  | 3174.719  | NM_018281 | 5116.203  | 4565.054  |
| AK000589  | 1301.189  | 928.407   | NM_015582 | 14548.405 | 9476.857  | NM_004457 | 3193.273  | 2359.202  |

|           |           |           |           |           |           |           |           |           |
|-----------|-----------|-----------|-----------|-----------|-----------|-----------|-----------|-----------|
| X53281    | 11775.867 | 8437.896  | AK027091  | 1189.416  | 1266.087  | NM_01404C | 1636.274  | 1197.297  |
| BC012782  | 866.514   | 664.648   | NM_001526 | 1827.351  | 1605.968  | NM_00539C | 211.63    | 122.827   |
| AF132026  | 39352.09  | 24823.053 | U31738    | 995.317   | 741.909   | BC036375  | 9667.332  | 8536.264  |
| AL050353  | 1469.399  | 1210.687  | AF179890  | 2845.81   | 2354.245  | BI912037  | 642.492   | 507.684   |
| AB037788  | 5565.692  | 3866.835  | AK023536  | 4160.626  | 4043.605  | AA454646  | 2179.788  | 2120.04   |
| NM_004587 | 4170.724  | 2720.995  | AK026561  | 1113.989  | 963.477   | U18087    | 7870.181  | 7022.361  |
| NM_00097E | 65700.906 | 58343.008 | AK021568  | 3598.411  | 3012.804  | U66349    | 468.8     | 407.132   |
| AF147412  | 28094.666 | 21615.58  | NM_003159 | 748.095   | 699.273   | AA057156  | 821.686   | 705.662   |
| AK024570  | 8248.785  | 6479.922  | AF086256  | 706.418   | 797.397   | U19487    | 1203.963  | 1237.022  |
| AF161401  | 5152.174  | 4422.787  | NM_015492 | 4097.326  | 3367.864  | AF166327  | 7490.087  | 7983.079  |
| NM_00099C | 8303.877  | 7839.437  | AF132204  | 1934.297  | 1541.994  | AF260739  | 532.165   | 394.632   |
| NM_01474C | 2479.658  | 2411.816  | AK022874  | 3233.461  | 1942.895  | AF531423  | 1312.813  | 1259.948  |
| NM_01595C | 6171.474  | 6238.314  | CY3Cy5    | 772.702   | 79.461    | X76555    | 400.232   | 360.331   |
| AF075008  | 1626.139  | 1771.694  | BI912037  | 705.342   | 658.405   | NM_00543Z | 766.529   | 601.317   |
| NM_006504 | 4103.458  | 3639.905  | AA454646  | 1790.766  | 1851.187  | AF061812  | 871.882   | 736.277   |
| AF070538  | 675.117   | 772.037   | U18087    | 14855.091 | 13038.835 | AL136756  | 546.977   | 517.059   |
| AL137430  | 606.378   | 630.866   | U66349    | 523.01    | 670.499   | NM_01246C | 2717.983  | 2717.382  |
| NM_00069C | 3630.203  | 3189.13   | AA057156  | 714.708   | 1015.949  | NM_13426C | 4772.561  | 3722.464  |
| NM_00248E | 10597.788 | 8770.668  | U19487    | 1454.273  | 1469.647  | AK025688  | 773.796   | 918.24    |
| NM_00400Z | 8641.266  | 7218.585  | AF166327  | 7536.632  | 8489.452  | Z36819    | 15592.3   | 13570.749 |
| NM_00018E | 675.206   | 623.557   | AF260739  | 716.296   | 758.424   | NM_01444E | 840.83    | 1009.056  |
| BF244401  | 4133.905  | 3598.523  | AF531423  | 1369.731  | 1361.511  | AL080157  | 534.603   | 556.044   |
| NM_00471E | 20959.1   | 15990.169 | X76555    | 579.191   | 397.475   | NM_00530E | 807.361   | 641.587   |
| AL359585  | 1900.653  | 1334.661  | NM_00543Z | 1226.742  | 926.412   | NM_007227 | 398.668   | 510.04    |
| AB046850  | 1289.253  | 1024.616  | L10386    | 2751.797  | 2453.973  | NM_00702Z | 527.614   | 588.469   |
| NM_014801 | 3807.878  | 3535.416  | AF061812  | 1841.406  | 1654.31   | NM_014461 | 386.788   | 377.746   |
| NM_00364Z | 4312      | 2993.107  | AL136756  | 714.636   | 587.345   | AB015330  | 1111.536  | 1008.537  |
| AB027013  | 6122.251  | 4829.854  | NM_01246C | 3175.913  | 2677.397  | L09071    | 348.773   | 337.55    |
| BC032686  | 364.471   | 448.855   | NM_13426C | 4528.758  | 3530.01   | AK026180  | 400.943   | 364.917   |
| BF185480  | 2220.941  | 1536.132  | SR2       | 42337.941 | 26284.691 | NM_01336E | 1727.189  | 1717.998  |
| NM_00212E | 8868.051  | 6220.91   | SR4       | 9468.431  | 5571.232  | NM_005817 | 7768.108  | 8077.633  |
| NM_003074 | 1782.085  | 1025.726  | SR6       | 1574.54   | 858.855   | NM_00391C | 4263.743  | 4040.255  |
| AL360195  | 2125.641  | 1867.105  | SR8       | 5079.634  | 8190.491  | NM_00287C | 11252.378 | 11577.181 |
| U14383    | 482.012   | 325.873   | SR10      | 16755.553 | 2696.265  | NM_00636Z | 3870.478  | 4182.872  |
| NM_01781C | 959.872   | 1140.343  | CY3Cy5    | 736.645   | 97.033    | NM_02041E | 464.02    | 451.452   |
| NM_003181 | 60952.301 | 55768.656 | AL080157  | 760.575   | 679.155   | AL049667  | 2554.803  | 3146.738  |
| NM_004451 | 1462.006  | 1830.524  | NM_00530E | 1146.481  | 987.315   | NM_001504 | 477.789   | 553.873   |
| NM_004364 | 36422.047 | 30788.66  | NM_007227 | 425.069   | 502.997   | D50926    | 1848.72   | 1903.059  |
| AK023505  | 2085.907  | 2319.228  | NM_00702Z | 625.43    | 625.121   | BF205683  | 790.332   | 727.192   |
| AB037851  | 4931.225  | 5592.997  | NM_014461 | 446.122   | 414.119   | NM_00075E | 6653.789  | 5845.872  |
| AL050389  | 3055.442  | 2976.224  | AB015330  | 2219.669  | 2455.032  | M17017    | 732.94    | 587       |
| AK024684  | 1556.654  | 1095.996  | NM_00145E | 3141.049  | 3354.458  | NM_00299C | 747.795   | 676.924   |
| NM_01494E | 5302.883  | 5564.517  | L09071    | 413.544   | 385.122   | NM_00243Z | 7834.919  | 5821.686  |
| AK001546  | 1586.19   | 1540.212  | BC036375  | 9824.116  | 5804.215  | AB033037  | 487.632   | 374.421   |
| NM_006537 | 4729.769  | 4892.564  | NM_00636Z | 4358.502  | 3838.938  | L40400    | 1838.394  | 1674.685  |
| AF007155  | 7126.166  | 7055.299  | NM_02041E | 645.294   | 696.785   | NM_006247 | 2314.238  | 2848.64   |
| AK023055  | 596.553   | 450.239   | NM_014879 | 279.648   | 291.366   | AB032983  | 485.347   | 345.85    |
| AL049282  | 4502.292  | 3812.746  | AL049667  | 3028.5    | 2712.55   | NM_018281 | 4773.334  | 5319.505  |
| AK021443  | 1419.818  | 1293.971  | NM_000334 | 1316.34   | 1255.292  | NM_004457 | 3040.745  | 2846.36   |
| AF070569  | 410.135   | 357.059   | NM_02040C | 639.278   | 658.21    | NM_01404C | 1697.195  | 1443.562  |
| NM_02023Z | 1671.221  | 1370.794  | NM_001504 | 705.512   | 815.37    | NM_00431E | 4142.125  | 5332.431  |
| AF143873  | 859.972   | 667.258   | D50926    | 2306.133  | 2369.795  | NM_02016C | 2615.245  | 2304.213  |
| AL355732  | 2232.511  | 1868.317  | BF205683  | 1108.071  | 1166.864  | AK023860  | 892.117   | 816.672   |

|           |           |           |           |           |           |           |           |           |
|-----------|-----------|-----------|-----------|-----------|-----------|-----------|-----------|-----------|
| NM_01796E | 1822.487  | 1746.446  | NM_00075E | 5996.687  | 5769.003  | NM_000031 | 2014.351  | 2129.063  |
| AF143327  | 959.2     | 687.72    | M17017    | 771.056   | 709.813   | NM_01628E | 5214.796  | 4953.265  |
| AL137535  | 296.385   | 233.334   | NM_00299C | 824.369   | 686.572   | NM_001567 | 2517.23   | 2664.112  |
| AL049990  | 706.91    | 860.029   | NM_00243Z | 7700.785  | 6833.44   | NM_00490E | 8980.896  | 8843.878  |
| AF131843  | 950.864   | 881.401   | AB033037  | 482.59    | 487.743   | AF217971  | 1026.391  | 1104.096  |
| AK026653  | 739.154   | 759.335   | L40400    | 1987.982  | 1556.391  | NM_00192E | 843.415   | 951.803   |
| NM_020231 | 935.137   | 1147.852  | AK025688  | 1029.837  | 865.385   | AF245517  | 642.719   | 664.528   |
| AL133118  | 1562.754  | 1609.398  | NM_01444E | 1077.321  | 629.671   | NM_00498Z | 336.673   | 189.865   |
| AK023571  | 1571.723  | 1705.384  | NM_00431E | 4404.704  | 4876.223  | NM_00169A | 37202.125 | 28820.242 |
| NM_00170Z | 4712.853  | 4883.82   | NM_02016E | 2817.19   | 2550.532  | NM_000217 | 228.841   | 274.185   |
| AK026657  | 577.834   | 434.408   | AK023860  | 1071.151  | 1307.678  | NM_01246E | 2593.44   | 2781.93   |
| AL833558  | 447.639   | 482.164   | AK026061  | 355.065   | 578.963   | NM_13426C | 3424.949  | 3349.774  |
| NM_01805C | 375.171   | 386.721   | NM_01628E | 5054.479  | 5942.122  | NM_00147E | 15448.046 | 14548.791 |
| AF087991  | 6724.479  | 6498.939  | NM_001567 | 2621.353  | 3070.577  | AF135422  | 1517.159  | 1487.455  |
| Y12839    | 1150.852  | 878.805   | NM_00490E | 11019.511 | 11769.729 | NM_00447E | 6458.147  | 8003.227  |
| X64979    | 666.604   | 497.931   | AF217971  | 1720.591  | 1760.081  | AF070587  | 957.477   | 721.843   |
| AJ001876  | 611.138   | 647.588   | NM_00192E | 872.01    | 1041.737  | BE250526  | 439.298   | 225.861   |
| AJ227884  | 1932.475  | 1934.457  | AF245517  | 555.056   | 810.797   | NM_01681E | 1578.834  | 1484.845  |
| X64986    | 4290.626  | 2842.587  | NM_00498Z | 472.403   | 516.887   | NM_01222Z | 1237.954  | 1395.953  |
| L38282    | 4272.352  | 3183.565  | NM_00169A | 44771.668 | 42092.668 | NM_00500Z | 1013.163  | 1041.783  |
| NM_01805E | 1382.821  | 1226.869  | AF286370  | 329.711   | 279.463   | NM_00659E | 2369.397  | 2654.557  |
| NM_01900E | 1360.205  | 1098.976  | AK026180  | 445.254   | 369.03    | AK023214  | 3363.893  | 3297.463  |
| M20838    | 787.469   | 873.179   | NM_005817 | 7473.942  | 4263.808  | NM_00146E | 6096.578  | 6408.458  |
| AK022738  | 632.874   | 665.834   | NM_00391E | 4210.886  | 2079.907  | NM_00360C | 2205.015  | 1829.438  |
| AK024252  | 407.122   | 544.637   | NM_00287C | 11657.229 | 7084.282  | NM_01749C | 1853.489  | 1743.395  |
| AK002095  | 1054.771  | 1102.068  | NM_00147E | 26420.428 | 23656.857 | NM_00271E | 1105.921  | 900.232   |
| AK000821  | 3383.081  | 4373.906  | AF135422  | 2149.057  | 1999.359  | AK026727  | 1252.737  | 824.308   |
| AK024526  | 15546.743 | 16964.387 | NM_00447E | 10145.097 | 11587.692 | L09071    | 308.115   | 288.985   |
| AK000848  | 1114.284  | 1231.891  | NM_00261C | 496.522   | 434.773   | BC036375  | 9965.603  | 10289.803 |
| AK023307  | 632.377   | 518.635   | AF070587  | 1129.402  | 932.849   | BI912037  | 479.366   | 627.868   |
| NM_01761E | 2438.257  | 1683.698  | BE250526  | 406.97    | 649.291   | AA454646  | 1910.422  | 1896.768  |
| NM_01784E | 379.379   | 306.936   | NM_01681E | 1783.97   | 1986.868  | U18087    | 7489.936  | 6848.297  |
| AK024315  | 3448.63   | 3400.405  | NM_01222Z | 1957.541  | 2770.428  | U66349    | 489.37    | 352.158   |
| AK024945  | 1787.49   | 1379.21   | NM_00500Z | 1483.788  | 3470.408  | AA057156  | 869.784   | 780.617   |
| AK024579  | 5369.605  | 5449.191  | NM_00659E | 2308.736  | 3055.858  | AF260739  | 403.368   | 320.904   |
| S75708    | 8806.493  | 8218.575  | AK023214  | 3833.922  | 4630.785  | AF531423  | 1256.968  | 1161.799  |
| U79291    | 5705.265  | 5033.115  | NM_00146E | 5607.309  | 6566.167  | NM_00543Z | 817.862   | 629.521   |
| D17172    | 4955.978  | 4693.045  | NM_00360C | 3601.666  | 3113.386  | L10386    | 1875.542  | 1750.244  |
| AJ227859  | 888.5     | 834.118   | NM_01749C | 2236.102  | 2398.266  | AF061812  | 1083.843  | 880.446   |
| NM_01854A | 830.31    | 808.1     | NM_00271E | 1086.359  | 948.989   | AL136756  | 588.987   | 461.511   |
| AK022670  | 619.827   | 631.958   | AK026727  | 1131.894  | 1159.58   | NM_00299C | 653.003   | 752.553   |
| L10141    | 1083.992  | 1233.671  | NM_00283C | 316.874   | 416.278   | NM_00243Z | 7033.21   | 6598.236  |
| AB020699  | 3999.413  | 5655.885  | NM_006247 | 2450.791  | 2168.481  | AB033037  | 498.653   | 340.32    |
| AF086269  | 1826.31   | 3622.425  | AB032983  | 438.097   | 215.712   | L40400    | 1795.743  | 1705.416  |
| S71604    | 399.766   | 628.424   | NM_018281 | 4665.711  | 3250.847  | AK025688  | 993.565   | 1189.143  |
| AK000842  | 7911.709  | 7620.112  | NM_004457 | 3106.538  | 1740.422  | Z36819    | 15646.826 | 13956.156 |
| AK023386  | 5148.361  | 4559.014  | NM_01404E | 1470.902  | 728.859   | NM_01444E | 847.892   | 932.475   |
| NM_00705E | 15365.975 | 12431.434 | BC036375  | 10110.353 | 11070.221 | AL080157  | 388.811   | 292.066   |
| AK022153  | 1440.747  | 1242.112  | BI912037  | 1002.732  | 1184.714  | NM_00530E | 627.355   | 700.206   |
| AK022789  | 1043.68   | 1309.046  | AA454646  | 1908.228  | 1972.317  | NM_007227 | 356.705   | 441.827   |
| AK023756  | 682.25    | 713.677   | U18087    | 12200.851 | 13076.255 | NM_00702Z | 572.891   | 348.895   |
| NM_00112E | 4785.414  | 4451.606  | U66349    | 511.967   | 647.494   | NM_00587Z | 7663.2    | 7073.883  |
| AK023673  | 1517.615  | 1835.949  | AA057156  | 843.101   | 875.645   | NM_00462A | 1037.856  | 1001.948  |



|           |           |           |           |           |           |           |           |           |
|-----------|-----------|-----------|-----------|-----------|-----------|-----------|-----------|-----------|
| NM_018252 | 1135.463  | 1019.898  | U19487    | 1173.682  | 1435.472  | NM_003865 | 545.5     | 518.786   |
| AF164963  | 676.202   | 530.975   | AF166327  | 10533.405 | 29949.588 | AB015330  | 1229.853  | 834.119   |
| AF124366  | 13489.146 | 13920.572 | AF260739  | 549.025   | 848.638   | NM_001455 | 2994.203  | 2692.382  |
| AF130112  | 858.463   | 1009.715  | AF531423  | 1172.762  | 1465.101  | NM_004982 | 479.383   | 328.499   |
| NM_000551 | 3839.256  | 5373.542  | X76555    | 251.166   | 535.39    | NM_001694 | 34313.852 | 29614.668 |
| AL365518  | 3049.208  | 6193.735  | NM_005432 | 1017.825  | 901.004   | AF286370  | 211.107   | 137.405   |
| AF075056  | 770.115   | 1513.557  | L10386    | 2530.937  | 2706.744  | AK026180  | 451.855   | 339.17    |
| AC119751  | 694.173   | 895.161   | AF061812  | 1274.329  | 1036.075  | NM_013365 | 1779.504  | 1970.205  |
| U00928    | 850.775   | 694.064   | AL136756  | 697.679   | 572.94    | NM_005817 | 7819.901  | 9422.783  |
| NM_019056 | 2128.63   | 1867.492  | NM_012469 | 3194.477  | 2640.386  | NM_003916 | 4510.733  | 3974.429  |
| AF279783  | 3145.806  | 2416.74   | NM_134260 | 4783.358  | 3323.126  | NM_002870 | 11876.804 | 13608.402 |
| AF182422  | 4227.315  | 3198.292  | AK025688  | 1097.712  | 1530.88   | NM_006363 | 3987.187  | 4353.624  |
| NM_016943 | 741.978   | 651.992   | Z36819    | 16279.434 | 15506.192 | NM_020415 | 498.354   | 485.433   |
| AF070602  | 1304.619  | 1280.614  | NM_014448 | 1551.541  | 1696.132  | AL049667  | 2991.903  | 3301.17   |
| BE393290  | 721.65    | 626.184   | AL080157  | 741.037   | 740.936   | NM_000334 | 896.293   | 1000.804  |
| NM_017622 | 1078.363  | 801.379   | NM_005308 | 896.271   | 1093.385  | NM_020400 | 646.586   | 558.723   |
| AF133331  | 1484.788  | 1346.351  | NM_007227 | 553.474   | 442.545   | NM_001504 | 457.642   | 426.882   |
| AK022289  | 665.36    | 637.601   | NM_004624 | 1263.172  | 1455.471  | D50926    | 1905.877  | 1717.573  |
| L34408    | 335.358   | 359.624   | NM_003865 | 345.267   | 514.287   | BF205683  | 889.433   | 694.62    |
| AF161403  | 14560.149 | 18181.879 | AB015330  | 1794.918  | 1567.776  | NM_000758 | 6101.627  | 5043.62   |
| NM_020183 | 1545.103  | 1835.098  | NM_001455 | 2788.754  | 2620.941  | M17017    | 720.453   | 528.403   |
| NM_018029 | 509.572   | 675.262   | L09071    | 556.246   | 366.946   | NM_003600 | 2218.27   | 2225.315  |
| AL389954  | 800.971   | 1064.903  | AK026180  | 650.873   | 1037.911  | NM_017490 | 1888.016  | 2043.627  |
| NM_019852 | 2387.509  | 2102.39   | NM_013365 | 1863.555  | 1959.819  | NM_002718 | 902.773   | 908.812   |
| AK026225  | 17722.322 | 16132.475 | NM_005817 | 8969.221  | 9836.585  | AK026727  | 1145.128  | 1856.536  |
| AL050032  | 6112.533  | 7252.739  | NM_003916 | 5412.056  | 4462.601  | NM_002830 | 217.18    | 367.88    |
| AF086177  | 8201.17   | 9705.253  | NM_002870 | 18749.643 | 17340.1   | NM_006247 | 2883.138  | 3297.595  |
| NM_018949 | 2886.923  | 4308.533  | NM_006363 | 4232.985  | 4770.521  | AB032983  | 295.776   | 428.245   |
| D17187    | 1291.488  | 1423.316  | NM_020415 | 620.467   | 866.857   | NM_018281 | 5558.647  | 5909.041  |
| AJ243672  | 1316.127  | 1365.421  | NM_014879 | 303.537   | 270.726   | NM_004457 | 3366.753  | 3288.025  |
| AL122087  | 659.554   | 365.626   | NM_020400 | 796.756   | 684.656   | NM_014049 | 1557.452  | 1494.912  |
| D17169    | 23124.477 | 19532.408 | NM_001504 | 854.588   | 812.248   | NM_004315 | 4518.376  | 5150.026  |
| NM_017924 | 4199.501  | 2795.258  | D50926    | 2167.596  | 2240.18   | NM_020166 | 2486.42   | 2396.558  |
| S81578    | 1170.544  | 1244.634  | BF205683  | 1116.465  | 1200.716  | AK023860  | 797.337   | 997.125   |
| NM_017546 | 3425.487  | 3613.357  | NM_001548 | 336.96    | 375.994   | NM_000031 | 1978.147  | 2030.723  |
| AJ001889  | 612.482   | 572.405   | NM_000758 | 6381.246  | 4905.051  | NM_016286 | 4895.626  | 5162.223  |
| AF086210  | 380.591   | 550.298   | M17017    | 836.304   | 863.313   | NM_001567 | 2727.245  | 2985.832  |
| AL137400  | 554.307   | 477.724   | NM_002990 | 715.337   | 705.726   | NM_004905 | 9629.376  | 8692.171  |
| NM_006511 | 343.46    | 406.187   | NM_002432 | 7501.814  | 5042.832  | AF217971  | 1120.823  | 987.065   |
| AF007142  | 2053.542  | 2243.967  | AB033037  | 486.396   | 401.02    | NM_001925 | 681.171   | 720.982   |
| AF119853  | 5864.646  | 6484.985  | L40400    | 1590.455  | 963.221   | AF245517  | 572.396   | 362.618   |
| CY3Cy5    | 605.177   | 122.722   | NM_006247 | 1350.887  | 1449.011  | X78926    | 7397.832  | 3445.813  |
| AI248827  | 1000.189  | 1029.481  | AB032983  | 461.036   | 608.212   | AJ278110  | 539.269   | 666.213   |
| R45026    | 2267.286  | 2934.706  | NM_018281 | 6501.908  | 7841.851  | NM_014237 | 1919.443  | 1681.13   |
| BI768063  | 738.218   | 936.92    | NM_004457 | 3333.727  | 3523.064  | NM_020396 | 326.571   | 618.876   |
| AI970239  | 1632.882  | 928.783   | NM_014049 | 1656.291  | 1778.386  | AF029900  | 1348.931  | 1518.603  |
| AA496452  | 3041.517  | 2536.973  | NM_004315 | 4942.182  | 6142.689  | NM_003325 | 2920.601  | 3590.244  |
| X67594    | 2969.086  | 4487.013  | NM_020166 | 3002.996  | 3377.206  | NM_016178 | 2276.359  | 2738.811  |
| NM_015869 | 1163.751  | 1293.463  | S56138    | 342.658   | 330.17    | AK022639  | 604.073   | 541.293   |
| NM_001631 | 707.327   | 741.241   | AK023860  | 1161.776  | 1535.102  | D31766    | 1102.233  | 1329.306  |
| AB000734  | 1424.247  | 1527.461  | NM_016286 | 4989.714  | 6083.86   | NM_001478 | 16611.033 | 17785.025 |
| NM_005987 | 63619.355 | 62557.945 | NM_001567 | 2656.788  | 3808.074  | AF135422  | 1686.76   | 1565.144  |
| X87838    | 4207.129  | 4884.776  | NM_004905 | 10251.021 | 9898.614  | NM_004479 | 6414.947  | 7276.708  |

|           |           |           |           |           |           |           |           |           |
|-----------|-----------|-----------|-----------|-----------|-----------|-----------|-----------|-----------|
| NM_03319  | 591.521   | 1135.502  | AF217971  | 1629.671  | 1477.261  | AF070587  | 1129.842  | 856.846   |
| NM_015001 | 1208.272  | 1534.198  | NM_001925 | 775.855   | 968.86    | BE250526  | 432.947   | 367.186   |
| SR2       | 56157.047 | 53165.727 | AF245517  | 517.773   | 557.986   | NM_01681  | 1728.168  | 1584.396  |
| SR4       | 13457.945 | 14039.938 | NM_004982 | 531.699   | 375.559   | NM_01222  | 1468.106  | 1508.494  |
| SR10      | 20654.281 | 7025.391  | NM_001694 | 39939.852 | 23515.852 | NM_00500  | 1066.754  | 930.805   |
| CY3Cy5    | 1091.438  | 110.239   | AF286370  | 305.859   | 222.982   | NM_00659  | 2348.491  | 2248.623  |
| X00094    | 830.443   | 1311.68   | NM_01246  | 4456.853  | 10485.68  | AK023214  | 3079.969  | 2671.35   |
| NM_00377  | 1375.647  | 2176.418  | NM_13426  | 3864.947  | 4024.767  | NM_00146  | 6050.202  | 4909.362  |
| NM_00208  | 8833.634  | 15670.086 | NM_00147  | 28329.605 | 26636.777 | NM_001851 | 742.524   | 733.894   |
| NM_00292  | 510.452   | 772.375   | AF135422  | 1921.729  | 2306.675  | S67789    | 486.651   | 443.854   |
| AF155657  | 11756.618 | 9677.469  | NM_00447  | 14680.682 | 38971.516 | AK022689  | 1307.657  | 1536.682  |
| NM_00605  | 3148.223  | 3247.191  | NM_00261  | 388.616   | 736.258   | NM_016227 | 395.319   | 486.568   |
| AF045229  | 8201.479  | 12890.587 | AF070587  | 1096.501  | 940.491   | NM_00419  | 5725.86   | 6809.636  |
| NM_00184  | 4487.475  | 3397.262  | BE250526  | 451.282   | 581.177   | NM_00470  | 1198.799  | 1552.346  |
| AK025099  | 1592.583  | 947.579   | NM_01681  | 1579.096  | 1861.809  | NM_02019  | 3570.65   | 3222.383  |
| NM_01609  | 15722.764 | 8555.776  | NM_01222  | 2167.157  | 2904.15   | NM_014357 | 793.676   | 993.097   |
| NM_00022  | 2481.673  | 3039.922  | NM_00500  | 1009.927  | 1116.264  | NM_004067 | 329.277   | 314.427   |
| NM_00083  | 1553.522  | 1585.03   | NM_00659  | 2127.875  | 2731.562  | NM_000121 | 3445.514  | 3885.49   |
| AF148950  | 939.371   | 1476.243  | AK023214  | 3339.69   | 2519.047  | NM_002091 | 891.311   | 1141.651  |
| NM_001155 | 6053.434  | 7239.292  | NM_00146  | 5623.797  | 5159.211  | AB033092  | 1690.249  | 1933.141  |
| M62896    | 21162.9   | 25559.184 | NM_00360  | 3154.538  | 2371.194  | NM_00302  | 838.944   | 768.212   |
| NM_01773  | 2719.802  | 3111.886  | NM_01749  | 2387.3    | 1599.324  | BC035030  | 843.18    | 871.598   |
| NM_00031  | 618.199   | 559.787   | NM_00271  | 939.698   | 701.118   | NM_00534  | 13648.007 | 15530.108 |
| AF263523  | 1724.926  | 1968.536  | AK026727  | 1151.544  | 848.594   | NM_016201 | 489.651   | 333.204   |
| L08441    | 6736.698  | 6771.952  | NM_00283  | 358.82    | 201.877   | NM_000864 | 1910.005  | 1813.982  |
| AA641953  | 1689.252  | 1452.95   | L09071    | 468.464   | 477.931   | NM_017977 | 1089.772  | 721.893   |
| AL137764  | 40977.145 | 58217.609 | BC036375  | 11366.239 | 12894.302 | AF147727  | 921.263   | 651.337   |
| NM_00166  | 23581.486 | 41391.77  | BI912037  | 667.95    | 786.244   | NM_006751 | 2520.158  | 2119.187  |
| NM_00075  | 2017.141  | 3950.965  | AA454646  | 1946.633  | 2325.069  | AB037834  | 7907.475  | 3174.379  |
| AB040945  | 943.274   | 966.055   | U18087    | 13372.253 | 12833.492 | NM_00356  | 656.554   | 654.121   |
| NM_00201  | 5549.72   | 4662.243  | U66349    | 552.616   | 712.649   | NM_01405  | 11736.108 | 11517.497 |
| NM_002377 | 841.588   | 768.771   | AA057156  | 786.132   | 584.182   | NM_002777 | 38063.871 | 37504.391 |
| NM_00601  | 473.697   | 478.384   | U19487    | 3834.269  | 4232.576  | AF202635  | 948.993   | 829.111   |
| AF161383  | 2357.76   | 1423.494  | AF166327  | 6927.08   | 6042.839  | NM_01412  | 365.135   | 314.766   |
| NM_00041  | 8900.805  | 5384.384  | AF260739  | 550.928   | 537.471   | NM_013367 | 2666.481  | 2834.592  |
| AF224266  | 2586.656  | 2074.594  | AF531423  | 1176.275  | 902.654   | NM_000321 | 2843.249  | 2762.618  |
| U72882    | 10331.849 | 9303.256  | X76555    | 409.284   | 359.493   | NM_006341 | 4923.575  | 5588.19   |
| NM_014337 | 6401.232  | 6615.824  | NM_00543  | 905.872   | 579.21    | NM_00170  | 1478.555  | 1255.046  |
| NM_003641 | 5065.301  | 6700.057  | L10386    | 2703.488  | 1414.181  | NM_006191 | 2405      | 2488.449  |
| NM_01246  | 1435.045  | 1805.33   | AF061812  | 1052.362  | 849.205   | NM_00180  | 655.271   | 869.603   |
| L29140    | 25034.986 | 27851.289 | AL136756  | 568.177   | 262.966   | NM_00433  | 2092.522  | 2109.694  |
| AK026448  | 2035.018  | 2079.801  | NM_00299  | 843.591   | 776.331   | NM_01594  | 977.031   | 1107.649  |
| AK057418  | 6988.559  | 7509.209  | NM_00243  | 6057.939  | 6475.986  | NM_01397  | 989.277   | 1190.629  |
| L37199    | 476.819   | 579.802   | AB033037  | 503.056   | 342.224   | NM_00379  | 887.057   | 934.933   |
| AF148646  | 4043.529  | 4185.419  | L40400    | 2056.99   | 2290.247  | NM_000494 | 1126.072  | 1333.643  |
| AL110218  | 951.509   | 794.762   | AK025688  | 942.267   | 1050.764  | NM_01602  | 577.817   | 546.238   |
| AB023201  | 4328.95   | 3410.982  | NM_01444  | 1646.332  | 1766.914  | NM_00372  | 5315.464  | 5215.734  |
| NM_00007  | 2058.135  | 3248.414  | AL080157  | 777.864   | 934.163   | NM_00049  | 586.755   | 484.549   |
| NM_000697 | 2768.123  | 4887.991  | NM_00530  | 1227.274  | 2967.805  | AF085883  | 773.434   | 658.472   |
| NM_000017 | 5967.315  | 8846.651  | NM_000911 | 344.885   | 379.828   | NM_016571 | 1014.549  | 947.112   |
| NM_000237 | 2019.514  | 3981.911  | NM_007227 | 463.585   | 365.321   | NM_01644  | 1067.795  | 824.263   |
| NM_01834  | 4338.481  | 5168.146  | NM_00702  | 509.935   | 584.575   | NM_00251  | 331.715   | 372.718   |
| AL122054  | 3152.091  | 2395.399  | NM_00587  | 7741.23   | 6130.531  | NM_00187  | 325.583   | 467.849   |

|           |           |           |           |           |           |           |           |           |
|-----------|-----------|-----------|-----------|-----------|-----------|-----------|-----------|-----------|
| AB011182  | 5307.558  | 5302.583  | NM_004624 | 880.81    | 1030.633  | AJ271216  | 564.441   | 525.562   |
| NM_000140 | 7371.917  | 4748.728  | NM_003865 | 518.172   | 377.859   | U23028    | 2424.707  | 2102.805  |
| NM_005125 | 4644.946  | 2891.959  | AB015330  | 1543.439  | 967.687   | NM_000817 | 3411.589  | 3719.765  |
| NM_020035 | 950.735   | 482.187   | NM_001455 | 2799.795  | 1879.522  | AF113132  | 6726.367  | 7730.121  |
| NM_016246 | 2040.304  | 1675.349  | NM_004982 | 603.655   | 845.298   | NM_006571 | 3616.894  | 3869.632  |
| NM_015926 | 6607.191  | 4469.34   | NM_001694 | 46494.457 | 43951.926 | AK022680  | 602.708   | 695.934   |
| X03757    | 3876.49   | 3769.308  | AF286370  | 310.754   | 378.003   | NM_018946 | 4960.799  | 5126.179  |
| NM_018655 | 11794.405 | 12922.766 | AK026180  | 577.099   | 481.699   | NM_016355 | 3376.532  | 3218.593  |
| NM_005136 | 1088.021  | 2342.829  | NM_005817 | 8739.076  | 8953.36   | NM_004156 | 3200.552  | 3857.482  |
| AK094513  | 615.909   | 729.663   | NM_003916 | 5038.72   | 4278.665  | AK000561  | 603.019   | 642.235   |
| NM_001183 | 11214.575 | 13241.053 | NM_002870 | 19557.408 | 19206.896 | AB051449  | 5850.73   | 5729.512  |
| NM_000890 | 3176.833  | 3487.334  | NM_006363 | 4334.049  | 4332.515  | BC009187  | 5886.43   | 4751.075  |
| NM_004976 | 8040.52   | 7853.624  | NM_020415 | 683.514   | 763.76    | AL133617  | 606.721   | 419.864   |
| AK021597  | 11994.915 | 12763.392 | AL049667  | 3087.862  | 3037.872  | NM_016485 | 3327.873  | 2751.669  |
| NM_005737 | 17671.303 | 18306.857 | NM_000334 | 952.56    | 1379.94   | NM_002615 | 9545.04   | 7955.919  |
| NM_006803 | 1200.282  | 1180.015  | NM_020400 | 626.928   | 409.308   | AF090894  | 282.308   | 115.77    |
| NM_002533 | 1666.357  | 1710.866  | NM_001504 | 819.188   | 575.211   | NM_016357 | 1880.458  | 1573.783  |
| AF235022  | 1123.662  | 1218.385  | D50926    | 1932.604  | 2052.641  | NM_014500 | 4577.539  | 4739.947  |
| BE799167  | 367.791   | 336.482   | BF205683  | 1030.288  | 934.165   | NM_020145 | 1713.824  | 1917.492  |
| AF182814  | 3575.614  | 6183.437  | NM_001545 | 365.162   | 122.008   | NM_006237 | 620.103   | 585.614   |
| NM_005325 | 837.561   | 732.074   | NM_000755 | 5997.29   | 4278.238  | NM_001271 | 2982.234  | 2166.39   |
| NM_000107 | 1115.688  | 989.493   | M17017    | 799.04    | 385.001   | NM_003683 | 1584.806  | 1144.124  |
| AL157445  | 1286.058  | 1014.13   | NM_003600 | 4380.154  | 3876.321  | AF039019  | 3240.194  | 3135.32   |
| NM_001517 | 10686.042 | 5353.437  | NM_017490 | 2811.077  | 2832.358  | NM_012255 | 4635.855  | 4156.585  |
| NM_005053 | 3949.126  | 2583.058  | NM_002715 | 1184.505  | 1832.211  | NM_018196 | 1314.476  | 1280.621  |
| D86974    | 2671.451  | 1798.26   | AK026727  | 1451.32   | 1513.056  | NM_004815 | 2253.703  | 1970.081  |
| NM_018283 | 1396.885  | 1157.638  | NM_002830 | 367.336   | 258.512   | J04205    | 5445.182  | 5704.671  |
| NM_001983 | 3738.434  | 2945.81   | NM_006247 | 3067.182  | 3070.19   | D38491    | 2858.85   | 2374.361  |
| NM_004993 | 350.336   | 391.522   | AB032983  | 483.346   | 560.713   | AK026835  | 1742.983  | 1383.558  |
| NM_003384 | 4020.119  | 4465.995  | NM_018281 | 6887.657  | 8491.494  | NM_002815 | 9767.665  | 11030.093 |
| Y12337    | 1772.456  | 1573.641  | NM_004457 | 3387.593  | 3404.222  | NM_013264 | 2653.368  | 2326.186  |
| M29551    | 18526.658 | 19484     | NM_014049 | 1970.77   | 1577.574  | NM_003315 | 7142.999  | 7387.054  |
| AB023148  | 446.475   | 267.447   | NM_005396 | 353.219   | 384.498   | NM_005570 | 5705.543  | 5698.314  |
| NM_002925 | 1326.146  | 1160.009  | NM_004315 | 5303.346  | 6390.208  | NM_000086 | 2273.222  | 1891.922  |
| BC028375  | 923.297   | 1117.505  | NM_020166 | 2984.047  | 3198.761  | NM_003752 | 2043.499  | 1732.484  |
| AB026436  | 2088.272  | 2123.806  | S56138    | 306.229   | 139.894   | NM_003932 | 6647.349  | 6240.883  |
| NM_016025 | 4289.357  | 5213.309  | AK023860  | 1223.892  | 1429.72   | NM_016491 | 8004.601  | 7616.954  |
| AK024562  | 1517.419  | 1803.46   | NM_000031 | 2098.069  | 2276.746  | NM_006425 | 11283.837 | 9664.476  |
| NM_014066 | 1299.108  | 1378.907  | NM_016286 | 4947.577  | 4933.16   | NM_003307 | 3682.945  | 4328.163  |
| NM_004573 | 1214.683  | 1297.329  | NM_001567 | 2475.853  | 2712.176  | AF070565  | 134.23    | 1010.428  |
| NM_000313 | 655.178   | 1034.946  | NM_004905 | 9746.927  | 7563.685  | AK021644  | 784.465   | 832.368   |
| AF263523  | 2401.815  | 3451.052  | AF217971  | 1395.285  | 1236.826  | NM_002064 | 521.034   | 520.244   |
| L08441    | 6701.971  | 5999.802  | NM_001925 | 698.178   | 524.703   | NM_015523 | 3210.812  | 2705.15   |
| AA641953  | 1420.787  | 713.408   | AF245517  | 601.988   | 542.311   | NM_015960 | 4068.518  | 4058.032  |
| AI248827  | 546.947   | 285.978   | X78926    | 8222.42   | 3021.727  | NM_006085 | 1670.004  | 1721.752  |
| R45026    | 1370.286  | 737.616   | AJ278110  | 657.97    | 858.64    | NM_000907 | 3116.787  | 3211.865  |
| BG386057  | 544.149   | 465.883   | NM_014237 | 3410.656  | 4287.563  | AF254085  | 1705.697  | 1486.32   |
| AI970239  | 1438.902  | 961.676   | NM_020396 | 374.001   | 354.809   | NM_001987 | 1322.118  | 1253.843  |
| AA496452  | 2739.458  | 2218.927  | AF029900  | 2096.733  | 2593.844  | AF244088  | 1000.056  | 1210.624  |
| X67594    | 1989.402  | 1873.158  | NM_003325 | 3088.717  | 3532.181  | NM_007136 | 576.238   | 488.111   |
| NM_015865 | 430.375   | 424.879   | NM_016175 | 2430.781  | 3068.899  | AK025434  | 633.312   | 546.862   |
| NM_001631 | 531.446   | 489.136   | AK022639  | 1077.002  | 1203.446  | AJ251845  | 344.112   | 303.079   |
| AB000734  | 1027.059  | 915.849   | D31766    | 1495.572  | 1532.408  | AK000435  | 740.867   | 715.298   |

|           |           |           |           |           |           |           |          |          |
|-----------|-----------|-----------|-----------|-----------|-----------|-----------|----------|----------|
| NM_005987 | 67903.117 | 65501.895 | NM_006547 | 345.936   | 374.976   | AK000569  | 1403.925 | 1349.08  |
| X87838    | 3878.64   | 4214.847  | NM_001478 | 31633.678 | 36702.957 | NM_006048 | 1078.951 | 1023.915 |
| NM_033198 | 550.359   | 774.635   | NM_002612 | 156.838   | 497.246   | NM_017661 | 1132.702 | 760.429  |
| NM_015001 | 1229.09   | 1316.108  | AF135422  | 1809.243  | 2154.37   | BC016698  | 4602.189 | 3460.954 |
| NM_000168 | 5137.624  | 4770.786  | NM_004479 | 10702.591 | 11374.782 | AK027185  | 859.457  | 1671.625 |
| AK057418  | 6631.181  | 6448.302  | AF070587  | 1033.487  | 611.738   | AK025576  | 613.655  | 788.79   |
| NM_007260 | 1612.443  | 901.988   | BE250526  | 563.978   | 519.405   | AF147385  | 473.827  | 573.22   |
| AF148646  | 2925.376  | 887.143   | NM_016819 | 1490.546  | 1392.285  | AL442086  | 1943.981 | 2108.136 |
| AL110218  | 799.325   | 253.315   | NM_012222 | 1885.167  | 1751.362  | BC034819  | 1484.978 | 1574.227 |
| AB023201  | 3980.753  | 1457.119  | NM_005002 | 1083.748  | 808.113   | AF147313  | 2321.075 | 2235.056 |
| X00094    | 592.747   | 494.368   | NM_006596 | 2352.646  | 1857.296  | AF147382  | 7626.839 | 7878.086 |
| NM_002082 | 5520.677  | 3713.695  | AK023214  | 3159.01   | 2252.902  | AK001957  | 2427.834 | 1753.895 |
| AF155657  | 11040.679 | 8001.597  | NM_001469 | 5399.717  | 4314.705  | AK000850  | 609.194  | 731.33   |
| NM_006056 | 2926.831  | 2608.551  | BC036368  | 887.466   | 828.561   | AK021833  | 1525.239 | 1569.972 |
| AF045229  | 6531.23   | 6247.914  | NM_001851 | 1504.852  | 1638.543  | AF143867  | 718.085  | 928.041  |
| NM_001840 | 4015.327  | 4133.838  | S67789    | 487.425   | 237.855   | AK025889  | 2704.026 | 2665.309 |
| AK025099  | 1485.35   | 1358.872  | AK022689  | 1885.641  | 1638.824  | NM_014715 | 667.233  | 783.117  |
| NM_016098 | 12489.051 | 9832.721  | NM_016227 | 474.63    | 405.407   | AF086448  | 1821.488 | 2268.418 |
| NM_000394 | 1306.677  | 1544.543  | NM_004195 | 12357.241 | 12945.87  | AF086386  | 849.616  | 1029.239 |
| NM_000228 | 1727.833  | 2269.207  | NM_004705 | 1650.666  | 1683.487  | AF086457  | 736.438  | 772.884  |
| NM_000830 | 1171.156  | 1527.344  | NM_020190 | 7050.424  | 7254.229  | AK025469  | 753.15   | 589.754  |
| NM_005208 | 229.99    | 573.346   | AK024003  | 353.561   | 507.868   | NM_020238 | 7408.364 | 5718.252 |
| AF148950  | 513.088   | 631.81    | NM_014357 | 2090.1    | 3977.357  | AF070581  | 643.299  | 533.505  |
| NM_001155 | 6185.269  | 6374.17   | NM_004067 | 533.768   | 682.539   | AF075079  | 258.167  | 294.129  |
| M62896    | 19681.814 | 20904.975 | NM_000121 | 5040.36   | 4943.461  | AF086004  | 2813.59  | 3552.341 |
| NM_017736 | 2404.87   | 2383.873  | NM_002091 | 5056.812  | 4964.415  | AF147433  | 303.308  | 475.983  |
| NM_000390 | 760.705   | 747.674   | AB033092  | 2444.535  | 3162.49   | AF086006  | 241.003  | 447.168  |
| AK021597  | 9129.32   | 3408.299  | M89957    | 237.451   | 478.391   | AL137318  | 707.158  | 752.278  |
| NM_005737 | 14710.782 | 5695.038  | NM_003023 | 1216.062  | 2572.713  | AL137482  | 308.705  | 602.471  |
| NM_000014 | 312.856   | 174.933   | BC035030  | 1551.842  | 1606.154  | AL162011  | 7534.332 | 8785.187 |
| NM_006803 | 932.741   | 487.19    | NM_005340 | 13826.933 | 11440.712 | AL390177  | 401.633  | 561.349  |
| NM_002533 | 1437.812  | 623.074   | NM_016201 | 670.167   | 643.553   | AL137678  | 332.029  | 253.505  |
| AF235022  | 515.904   | 279.871   | NM_000864 | 2141.698  | 1850.785  | AK056111  | 390.764  | 335.305  |
| AL137764  | 24027.936 | 12350.945 | NM_017977 | 1189.469  | 951.769   | AL162055  | 213.183  | 345.285  |
| NM_001660 | 16597.141 | 9572.06   | AF147727  | 1116.346  | 866.257   | Y13807    | 796.388  | 1060.194 |
| NM_000752 | 1307.692  | 968.067   | NM_006751 | 2478.067  | 2124.917  | AK023038  | 378.814  | 321.156  |
| AB040945  | 292.203   | 205.266   | AB037834  | 8550.307  | 2578.882  | AK026206  | 639.204  | 532.683  |
| NM_002018 | 5470.797  | 4576.196  | NM_003569 | 760.917   | 822.375   | AF086074  | 288.925  | 214.159  |
| NM_002377 | 772.689   | 481.128   | NM_014052 | 17649.434 | 41328.035 | AK023964  | 1150.031 | 1255.814 |
| NM_006018 | 481.438   | 348.489   | NM_002777 | 42206.32  | 37791.961 | AF086084  | 637.466  | 607.654  |
| AF161383  | 2326.566  | 2069.346  | AF202635  | 867.819   | 740.458   | AL050184  | 364.921  | 348.083  |
| NM_000410 | 7857.177  | 8808.29   | NM_014125 | 485.037   | 304.711   | AK027112  | 2384.866 | 2903.071 |
| AF224266  | 1695.268  | 1471.835  | NM_017904 | 411.499   | 452.851   | AL049314  | 1153.511 | 1545.692 |
| U72882    | 9190.04   | 9458.674  | NM_013367 | 3244.742  | 3304.463  | AF093016  | 3578.01  | 4075.686 |
| NM_014337 | 6150.944  | 7129.964  | NM_000321 | 3665.984  | 3768.729  | AF161345  | 843.76   | 819.698  |
| NM_007161 | 41346.996 | 39049.816 | NM_006341 | 5972.032  | 6013.089  | NM_014163 | 1441.179 | 1452.859 |
| NM_014387 | 2553.277  | 2440.657  | NM_001709 | 1484.624  | 1110.875  | AK021974  | 840.583  | 898.881  |
| NM_003641 | 4460.803  | 4459.535  | NM_006191 | 2945.467  | 2694.894  | AK022068  | 751.033  | 783.942  |
| NM_012463 | 1283.561  | 1364.028  | NM_001800 | 720.268   | 924.164   | AK022229  | 693.985  | 576.588  |
| L29140    | 23238.418 | 21776.885 | NM_004336 | 2742.749  | 2641.625  | AK022362  | 1418.021 | 1400.068 |
| AK026448  | 1724.163  | 1803.21   | NM_015949 | 1113.325  | 1915.161  | AK022004  | 1758.576 | 2056.635 |
| AB026436  | 1563.333  | 716.289   | NM_013979 | 1272.022  | 1841.758  | AK022390  | 580.081  | 563.087  |
| NM_016028 | 3271.762  | 1262.713  | NM_003790 | 1705.366  | 1564.339  | AK027134  | 693.056  | 658.705  |

|           |           |           |           |           |           |           |           |           |
|-----------|-----------|-----------|-----------|-----------|-----------|-----------|-----------|-----------|
| AK024562  | 1210.047  | 700.431   | NM_000494 | 1403.094  | 1477.205  | AK021793  | 1197.274  | 1087.941  |
| NM_014066 | 1230.284  | 655.319   | NM_016023 | 601.478   | 382.397   | AK022255  | 552.533   | 411.443   |
| NM_004573 | 1588.907  | 1206.145  | NM_003722 | 7859.548  | 7166.012  | AF161360  | 601.149   | 770.185   |
| NM_000072 | 1603.545  | 937.121   | NM_014430 | 378.157   | 370.1     | AK021720  | 673.614   | 1038.725  |
| NM_000697 | 1989.247  | 1816.33   | NM_000495 | 719.975   | 611.849   | NM_016497 | 11839.18  | 13630.015 |
| NM_000017 | 4285.222  | 3199.266  | AF085883  | 677.505   | 718.033   | AF009261  | 401.846   | 449.85    |
| NM_000237 | 1236.94   | 988.042   | NM_016571 | 944.078   | 804.201   | AB037792  | 967.155   | 1173.374  |
| NM_018346 | 3463.035  | 3011.068  | NM_016446 | 1459.649  | 1402.675  | AK022480  | 435.11    | 445.544   |
| AL122054  | 2902.01   | 2602.471  | NM_002516 | 592.829   | 654.46    | AK024158  | 331.622   | 349.837   |
| AB011182  | 4915.901  | 3963.653  | NM_001870 | 704.393   | 849.905   | AL080082  | 1880.729  | 1782.402  |
| AB023151  | 1189.269  | 1134.676  | AJ271216  | 546.888   | 630.766   | AK021623  | 1294.738  | 1374.384  |
| NM_000140 | 8072.89   | 8761.66   | U23028    | 2718.253  | 2722.752  | AF056452  | 412.18    | 894.64    |
| NM_005125 | 4820.508  | 4929.784  | NM_000817 | 4281.901  | 3958.024  | AF119901  | 1602.356  | 2387.072  |
| NM_020038 | 998.58    | 1074.227  | AF113132  | 8327.292  | 9215.504  | AK001936  | 2060.589  | 4488.594  |
| NM_016246 | 2026.96   | 1892.969  | NM_006571 | 3960.635  | 4202.09   | NM_003770 | 8163.505  | 19048.24  |
| NM_015926 | 8945.805  | 7597.177  | AK022680  | 770.503   | 753.608   | AK001395  | 5442.871  | 6300.255  |
| X03757    | 4230.022  | 3838.88   | NM_018946 | 5475.801  | 5520.328  | S57803    | 1600.955  | 1923.653  |
| NM_018658 | 11394.918 | 11705.134 | NM_016359 | 3166.221  | 3014.106  | AF131822  | 787.528   | 1011.65   |
| NM_005136 | 713.082   | 650.534   | NM_004156 | 3067.682  | 2830.938  | AK023131  | 882.704   | 985.766   |
| AK094513  | 534.496   | 522.53    | AK000561  | 557.988   | 811.981   | U61096    | 398.759   | 603.27    |
| NM_001183 | 11471.531 | 12297.951 | AB051449  | 8829.491  | 8268.89   | AF085865  | 3082.279  | 4534.346  |
| NM_000890 | 2439.007  | 2379.8    | BC009187  | 6396.657  | 5880.16   | AK025521  | 1499.981  | 2350.319  |
| NM_004976 | 8497.506  | 8032.166  | AL133617  | 597.819   | 497.225   | NM_001053 | 30968.219 | 37986.875 |
| NM_033199 | 566.698   | 369.423   | NM_016485 | 3426.75   | 3843.537  | Z70694    | 1802.24   | 2510.607  |
| NM_015001 | 1156.671  | 781.04    | NM_002615 | 10152.691 | 9899.329  | NM_015421 | 4872.775  | 6350.492  |
| NM_000169 | 4339.754  | 2375.888  | AF090894  | 312.694   | 227.012   | AF086081  | 3106.261  | 3309.046  |
| AF182814  | 2787.011  | 2235.82   | NM_016357 | 2440.095  | 3441.74   | NM_018634 | 323.728   | 337.29    |
| NM_005329 | 709.43    | 724.026   | NM_014500 | 5948.402  | 5689.912  | NM_018111 | 365.407   | 280.029   |
| NM_000107 | 1198.174  | 1363.001  | AK023792  | 423.568   | 228.854   | L23867    | 359.69    | 524.765   |
| AL157445  | 1803.797  | 1637.643  | NM_020149 | 1920.871  | 1994.953  | AB020968  | 670.405   | 929.262   |
| NM_001517 | 14257.974 | 13294.573 | NM_006237 | 692.735   | 758.489   | AL138690  | 839.799   | 1502.261  |
| NM_005053 | 4801.086  | 5204.189  | NM_001271 | 3713.66   | 2927.325  | AK000394  | 427.928   | 1279.761  |
| D86974    | 3180.497  | 3017.053  | NM_003683 | 1639.535  | 1696.983  | NM_013941 | 756.317   | 3874.308  |
| NM_018283 | 1663.294  | 1762.714  | AF039019  | 3560.012  | 4388.749  | AF074989  | 806.239   | 3042.74   |
| NM_001983 | 3965.799  | 4140.612  | NM_012255 | 4854.03   | 5521.109  | AK001107  | 482.255   | 722.695   |
| Y12337    | 2237.986  | 2060.875  | NM_018196 | 1096.955  | 1074.069  | AF147393  | 363.646   | 414.896   |
| M29551    | 18418.631 | 19881.836 | NM_004818 | 2574.759  | 2314.521  | AL080112  | 1607.095  | 1815.636  |
| AB023148  | 431.595   | 552.833   | J04205    | 5879.322  | 7921.314  | AK022299  | 343.709   | 395.611   |
| NM_002929 | 1469.832  | 1323.649  | D38491    | 2904.952  | 2176.953  | AL137325  | 397.362   | 401.489   |
| BC028375  | 858.244   | 1113.988  | AK026835  | 1683.957  | 1488.036  | AF147361  | 718.634   | 701.667   |
| AF148950  | 362.143   | 270.272   | NM_002819 | 9238.318  | 8118.48   | AL133086  | 473.927   | 861.154   |
| NM_001155 | 4283.684  | 2738.852  | NM_013264 | 2661.991  | 2032.851  | NM_012151 | 29899.953 | 39074.398 |
| M62896    | 18576.02  | 9687.948  | NM_003315 | 7557.176  | 7346.935  | AF087994  | 1056.377  | 1413.292  |
| NM_017736 | 1989.603  | 1261.436  | NM_005570 | 5722.307  | 6116.986  | AJ227912  | 465.331   | 605.568   |
| NM_000390 | 257.615   | 310.017   | NM_000086 | 2478.9    | 2309.354  | NM_018195 | 1539.057  | 2124.81   |
| NM_000313 | 414.193   | 423.233   | NM_003752 | 2114.257  | 1835.528  | AK025532  | 1470.541  | 2183.679  |
| NM_001498 | 56683.914 | 39670.137 | NM_003932 | 8392.226  | 21700.617 | AK021789  | 325.329   | 257.704   |
| AF263523  | 1642.004  | 1149.29   | NM_016491 | 9020.79   | 12023.946 | NM_003522 | 337.567   | 207.869   |
| L08441    | 6305.821  | 5232.427  | NM_006429 | 13076.624 | 13247.189 | BF217847  | 614.68    | 874.255   |
| AA641953  | 1600.492  | 1379.954  | NM_003307 | 4036.293  | 3603.46   | NM_005320 | 1049.136  | 734.982   |
| AI248827  | 788.313   | 700.072   | AF070565  | 565.989   | 448.535   | CY3Cy5    | 2552.547  | 144.523   |
| R45026    | 1842.615  | 1975.586  | AK021644  | 1010.336  | 1033.635  | BI830936  | 314.454   | 374.58    |
| BI768063  | 515.943   | 554.767   | NM_015944 | 413.694   | 425.008   | U79292    | 1465.485  | 1768.177  |

|           |           |           |           |           |           |           |           |           |
|-----------|-----------|-----------|-----------|-----------|-----------|-----------|-----------|-----------|
| AI970239  | 1864.574  | 1805.824  | NM_002064 | 583.673   | 627.106   | BI830753  | 289.573   | 214.286   |
| AA496452  | 3585.433  | 3258.116  | NM_015523 | 3038.213  | 3267.432  | X71973    | 20766.605 | 16027.132 |
| X67594    | 2987.403  | 3333.155  | NM_015960 | 4810.894  | 5638.92   | T49651    | 3156.931  | 2147.023  |
| NM_015869 | 902.545   | 858.446   | NM_006085 | 1776.091  | 1588.606  | N51014    | 1819.077  | 1292.909  |
| NM_001631 | 529.306   | 556.52    | NM_000907 | 3485.921  | 5966.165  | BE392471  | 8217.788  | 5819.801  |
| AB000734  | 1610.913  | 1616.542  | AF254085  | 1906.232  | 2051.343  | AI802950  | 639.572   | 481.415   |
| NM_005987 | 67970.398 | 64132.078 | NM_001987 | 1253.704  | 1183.905  | AA682423  | 557.458   | 329.482   |
| X87838    | 3966.346  | 4025.28   | AF244088  | 1350.811  | 1173.176  | AL043686  | 1917.383  | 1501.393  |
| NM_014387 | 2204.116  | 1574.335  | NM_007136 | 553.844   | 593.846   | AA490172  | 705.588   | 579.345   |
| NM_003641 | 4062.017  | 2782.214  | AK025434  | 672.703   | 783.908   | AA775212  | 1951.04   | 1074.245  |
| NM_012463 | 1267.071  | 948.289   | AJ251845  | 395.074   | 153.318   | NM_000945 | 1115.81   | 836.439   |
| L29140    | 20878.586 | 13131.468 | AK000435  | 1038.357  | 793.928   | SR5       | 2887.765  | 2982.383  |
| AK026448  | 1482.566  | 946.577   | AK000569  | 1964.503  | 1742.542  | SR7       | 3823.031  | 35076.77  |
| AK057418  | 5986.461  | 4112.674  | NM_006049 | 953.668   | 850.07    | SR9       | 11915.904 | 2782.445  |
| NM_007260 | 1521.639  | 1169.948  | NM_017661 | 1164.011  | 986.488   | CY3Cy5    | 2870.546  | 156.344   |
| AF148646  | 3811.456  | 3228.639  | BC016698  | 5072.583  | 4895.997  | NM_003371 | 2379.605  | 2672.271  |
| AL110218  | 1162.523  | 1093.511  | AK027185  | 857.057   | 858.235   | AK023114  | 2415.116  | 2345.313  |
| AB023201  | 4965.694  | 4500.748  | AK025576  | 773.065   | 840.044   | NM_003678 | 2229.525  | 1960.549  |
| X00094    | 665.566   | 703.731   | AF147385  | 510.195   | 593.729   | NM_005631 | 251.895   | 206.492   |
| NM_003775 | 1077.188  | 1474.258  | AL442086  | 2312.788  | 2128.514  | NM_014419 | 1230.029  | 1070.881  |
| NM_002082 | 7231.708  | 9113.932  | BC034819  | 2058.594  | 2333.894  | NM_014938 | 1627.396  | 1529.317  |
| AF155657  | 12443.037 | 12903.444 | AF147313  | 7390.943  | 8465.712  | AF049460  | 264.326   | 237.236   |
| NM_006056 | 3881.605  | 4208.478  | AF147382  | 22320.287 | 26752.879 | AK026066  | 1000.071  | 696.289   |
| AF045229  | 7613.139  | 7655.266  | AK001957  | 3032.631  | 4804.977  | NM_005244 | 643.612   | 585.704   |
| NM_001840 | 4166.652  | 4531.309  | AK000850  | 910.279   | 865.836   | AF054589  | 600.698   | 341.833   |
| AK025099  | 1738.658  | 1918.963  | AK021833  | 1208.798  | 1183.018  | NM_005270 | 615.837   | 300.92    |
| NM_016099 | 15167.455 | 15670.628 | AF143867  | 868.328   | 911.468   | NM_014815 | 926.198   | 678.957   |
| NM_000394 | 406.089   | 496.068   | AK025889  | 3538.458  | 3543.058  | X54163    | 11486.174 | 11241.418 |
| NM_000228 | 1869.373  | 2470.222  | NM_014715 | 1089.921  | 1259.523  | AK025395  | 410.12    | 282.385   |
| NM_000830 | 1037.956  | 1288.796  | AK021584  | 387.144   | 63.1      | NM_000388 | 530.873   | 528.009   |
| NM_005136 | 954.706   | 903.609   | AF086448  | 1653.438  | 1277.511  | X58377    | 227.641   | 288.256   |
| NM_001183 | 9059.777  | 6267.439  | AF086386  | 887.333   | 687.249   | NM_002469 | 395.611   | 488.779   |
| NM_000890 | 2258.3    | 1238.591  | AF086457  | 868.191   | 636.392   | NM_014668 | 469.571   | 659.745   |
| NM_004976 | 7227.236  | 5083.123  | AK025469  | 726.492   | 702.378   | NM_004722 | 1193.885  | 1250.862  |
| AK021597  | 10352.922 | 7138.416  | NM_020239 | 7369.681  | 4718.909  | NM_014425 | 492.557   | 584.586   |
| NM_005737 | 17084.035 | 12300.97  | AF070581  | 735.381   | 651.054   | NM_012133 | 1401.58   | 1157.409  |
| NM_006803 | 886.58    | 869.573   | AK024187  | 424.408   | 481.876   | NM_017954 | 186.182   | 241.487   |
| NM_002533 | 1683.434  | 1415.721  | AF075079  | 384.523   | 204.298   | NM_006612 | 802.845   | 676.17    |
| AF235022  | 663.795   | 715.676   | AK022479  | 505.503   | 407.03    | NM_016451 | 1226.822  | 1035.695  |
| AL137764  | 28833.398 | 27885.115 | AK023572  | 426.146   | 485.311   | NM_007351 | 8522.889  | 5974.209  |
| NM_001660 | 19587.418 | 19426.65  | AF086004  | 4900.325  | 4462.011  | AK026266  | 4417.981  | 3208.457  |
| NM_000710 | 409.945   | 571.954   | AF147433  | 358.544   | 400.189   | NM_007124 | 1840.022  | 1416.586  |
| NM_000752 | 1350.024  | 1899.881  | AF085978  | 321.707   | 469.455   | NM_003176 | 1429.7    | 1177.004  |
| AB040945  | 603.348   | 641.06    | AF086006  | 553.738   | 503.071   | NM_000723 | 644.941   | 353.873   |
| NM_002018 | 6521.105  | 6709.391  | AL137318  | 938.348   | 1370.847  | AL096751  | 1671.107  | 1301.162  |
| NM_002377 | 642.634   | 743.764   | AL162011  | 7515.548  | 7176.325  | NM_000364 | 311.706   | 279.574   |
| NM_006018 | 396.876   | 356.631   | AL390177  | 429.206   | 369.516   | AF026920  | 1365.461  | 1317.485  |
| AF161383  | 1154.901  | 1290.498  | AL137678  | 326.973   | 302.408   | NM_004931 | 1959.094  | 1777.409  |
| NM_000410 | 10053.106 | 11147.804 | AK056111  | 539.448   | 574.243   | NM_000607 | 6924.458  | 9240.087  |
| AF224266  | 2444.934  | 2645.017  | AL162055  | 354.921   | 174.383   | NM_002575 | 3163.498  | 3698.224  |
| U72882    | 9321.862  | 8684.74   | Y13807    | 776.552   | 758.699   | NM_004244 | 1588.201  | 2155.041  |
| NM_014337 | 6272.492  | 6302.981  | AK022053  | 434.827   | 264.783   | AK001500  | 597.484   | 745.537   |
| M29551    | 17595.539 | 16172.643 | AK023038  | 449.158   | 459.695   | NM_006774 | 285.956   | 356.76    |

|           |           |           |           |           |           |           |           |           |
|-----------|-----------|-----------|-----------|-----------|-----------|-----------|-----------|-----------|
| NM_002929 | 1219.107  | 631.695   | AK026206  | 812.268   | 659.222   | NM_020129 | 498.531   | 520.994   |
| BC028375  | 818.853   | 512.179   | AF086074  | 732.313   | 607.01    | Y16521    | 1349.492  | 1242.723  |
| AB026436  | 1498.758  | 1285.803  | AK023964  | 1460.76   | 1224.43   | AL050371  | 2261.879  | 2164.148  |
| NM_016029 | 4143.953  | 3378.757  | AF086084  | 567.016   | 595.233   | NM_002651 | 3871.91   | 2745.446  |
| AK024562  | 1525.617  | 1342.951  | AK027112  | 3016.543  | 5309.675  | NM_002413 | 5660.442  | 4534.144  |
| NM_014066 | 1431.318  | 1302.965  | AL049314  | 1064.365  | 1165.329  | NM_017577 | 299.265   | 199.367   |
| NM_004573 | 2036.415  | 2031.109  | AF093016  | 4974.801  | 5158.561  | NM_001757 | 2082.683  | 1798.298  |
| NM_000072 | 1811.034  | 1599.992  | AF161345  | 820.262   | 605.673   | NM_001647 | 1414.786  | 1154.936  |
| NM_000697 | 2873.308  | 3317.196  | NM_014163 | 3336.843  | 2759.824  | NM_018158 | 1010.541  | 954.431   |
| NM_000017 | 3921.82   | 4366.854  | NM_014137 | 279.106   | 230.342   | NM_016301 | 3676.29   | 3288.608  |
| NM_000237 | 1834.548  | 1888.288  | AK021974  | 775.487   | 659.23    | AK021975  | 422.621   | 225.152   |
| NM_018346 | 4092.12   | 4868.15   | AK022068  | 484.908   | 543.207   | AB032952  | 10552.224 | 8953.34   |
| AL122054  | 3629.149  | 3911.674  | AK022229  | 530.97    | 630.372   | NM_002522 | 6379.866  | 5898.704  |
| AB011182  | 5377.948  | 5514.035  | AK022362  | 1671.475  | 1807.745  | NM_002978 | 482.913   | 730.719   |
| AB023151  | 321.895   | 703.75    | AK022004  | 2245.685  | 2379.551  | AB040879  | 1291.609  | 1310.679  |
| NM_000140 | 8395.336  | 9250.425  | AK022265  | 242.794   | 298.874   | AL049935  | 2580.865  | 2237.145  |
| NM_005125 | 4203.075  | 4332.605  | AK022390  | 754.952   | 932.173   | AB033043  | 3068.586  | 3264.178  |
| NM_020038 | 1077.438  | 969.6     | AK027134  | 778.259   | 861.022   | NM_014999 | 1414.836  | 1085.107  |
| NM_016246 | 2059.672  | 2110.713  | AK024168  | 406.246   | 387.306   | AK025220  | 1360.331  | 931.831   |
| NM_015926 | 8518.542  | 7904.928  | AF264622  | 756.198   | 748.192   | NM_016308 | 9283.929  | 8742.074  |
| X03757    | 3973.403  | 3998.308  | AK021793  | 1171.889  | 974.323   | D42046    | 2261.971  | 2301.708  |
| NM_020248 | 14739.794 | 17194.262 | AK022255  | 768.269   | 970.521   | NM_001033 | 2234.984  | 2282.326  |
| X89670    | 2294.993  | 3443.703  | AF161360  | 799.797   | 933.687   | NM_004526 | 8667.617  | 8562.807  |
| NM_004053 | 4156.254  | 3025.644  | AK021720  | 1103.53   | 973.368   | NM_002526 | 3665.257  | 3400.79   |
| NM_001489 | 2099.617  | 1780.33   | NM_016497 | 12002.549 | 9735.055  | NM_020135 | 2077.252  | 1694.837  |
| NM_020374 | 2050.273  | 1836.623  | AF009261  | 383.695   | 599.548   | NM_018518 | 1948.878  | 1908.248  |
| NM_014922 | 1531.732  | 1422.812  | AB037792  | 919.756   | 1042.262  | AK023149  | 981.495   | 926.352   |
| NM_000169 | 5223.324  | 4959.721  | AK022480  | 422.695   | 463.854   | AK023168  | 1467.928  | 1562.484  |
| AF182814  | 2763.912  | 3337.164  | AL080082  | 1564.653  | 1727.143  | NM_006646 | 399.788   | 468.22    |
| NM_005329 | 797.011   | 804.469   | AK021623  | 1091.979  | 1387.315  | NM_004742 | 473.933   | 375.11    |
| NM_000107 | 1388.961  | 1577.054  | U79242    | 348.257   | 551.346   | NM_014753 | 1540.178  | 1287.396  |
| AL157445  | 1715.686  | 2104.084  | AF119901  | 1856.703  | 1974.871  | NM_006585 | 23754.174 | 21693.939 |
| NM_001517 | 12293.479 | 12222.235 | AK001936  | 1808.843  | 2182.305  | NM_014331 | 2403.564  | 2375.069  |
| NM_005053 | 3638.069  | 3981.839  | NM_003770 | 25587.492 | 28543.547 | NM_006795 | 5164.073  | 6389.348  |
| D86974    | 2737.992  | 2702.377  | AK001395  | 5123.305  | 5172.055  | AF070568  | 1259.186  | 1312.362  |
| NM_018283 | 1600.915  | 1852.925  | S57803    | 2402.109  | 2443.329  | NM_000240 | 1617.801  | 2268.303  |
| NM_001983 | 3768.662  | 4079.646  | AF131822  | 774.053   | 881.875   | AK055733  | 10484.765 | 12765.954 |
| NM_004993 | 517.046   | 606.145   | AK023131  | 1368.358  | 1784.996  | AF298880  | 6156.813  | 6681.803  |
| NM_001793 | 11897.59  | 9861.922  | U61096    | 613.588   | 1623.218  | AK025395  | 395.415   | 502.042   |
| NM_001943 | 2717.781  | 2026.871  | AF085865  | 3548.47   | 6601.972  | NM_000388 | 601.721   | 669.017   |
| NM_004927 | 3961.831  | 3275.084  | X78261    | 476.806   | 1745.603  | NM_002469 | 306.116   | 300.269   |
| NM_001459 | 1072.238  | 964.983   | AK025521  | 1525.761  | 1761.287  | BI830936  | 250.384   | 272.356   |
| NM_015513 | 7666.987  | 5670.435  | NM_001053 | 38872.148 | 52747.707 | U79292    | 1411.472  | 1455.602  |
| NM_004443 | 4275.964  | 3460.827  | Z70694    | 2402.316  | 1895.654  | BI830753  | 293.121   | 275.134   |
| NM_001932 | 507.421   | 576.353   | L77602    | 501.977   | 277.754   | X71973    | 19805.758 | 14982.212 |
| NM_005544 | 343.489   | 240.449   | NM_015421 | 4035.99   | 3477.668  | T49651    | 2692.564  | 1973.716  |
| NM_002964 | 25685.723 | 26530.141 | AF086081  | 3431.095  | 3385.962  | N51014    | 1226.673  | 1098.361  |
| NM_003215 | 577.586   | 991.46    | NM_018634 | 374.734   | 888.213   | BE392471  | 6552.979  | 5231.23   |
| NM_016447 | 922.873   | 969.941   | NM_018111 | 406.189   | 296.552   | AI802950  | 605.428   | 612.637   |
| NM_015626 | 4194.248  | 4939.938  | L23867    | 551.875   | 527.189   | AL043686  | 2091.536  | 1635.284  |
| NM_004899 | 4615.229  | 5213.625  | AB020968  | 703.747   | 595.726   | AA775212  | 1734.638  | 1601.482  |
| AB006628  | 12516.641 | 13054.927 | AL138690  | 907.986   | 987.69    | NM_000945 | 1274.013  | 1736.964  |
| AF272036  | 6521.896  | 5914.928  | NM_013941 | 781.239   | 766.469   | NM_002574 | 17664.055 | 17927.865 |

|           |           |           |           |           |           |           |           |           |
|-----------|-----------|-----------|-----------|-----------|-----------|-----------|-----------|-----------|
| AF231023  | 1053.168  | 1261.469  | AF074989  | 939.977   | 945.479   | AB011174  | 958.783   | 1194.974  |
| NM_00514E | 1727.942  | 2031.114  | AK001107  | 692.776   | 686.137   | NM_000607 | 11312.917 | 12776.423 |
| NM_00474E | 1001.6    | 1107.584  | AF147393  | 407.713   | 448.592   | NM_00257E | 3189.24   | 3336.481  |
| AF146019  | 3801.914  | 4973.376  | AK022368  | 352.849   | 299.671   | NM_004244 | 1817.387  | 1572.556  |
| Z36782    | 7456.193  | 8448.814  | AL080112  | 1439.868  | 1385.157  | NM_003371 | 1538.063  | 1670.813  |
| NM_00349C | 14219.4   | 16439.824 | AK022299  | 380.843   | 524.626   | AK023114  | 2702.758  | 2115.937  |
| AF090942  | 494.457   | 435.216   | AL137325  | 337.29    | 613.161   | NM_00367E | 2307.119  | 2198.704  |
| AF508940  | 3431.052  | 2235.283  | AF147361  | 1017.364  | 1142.592  | NM_01441E | 957.227   | 674.576   |
| NM_00542E | 2715.42   | 1704.475  | AL133086  | 818.503   | 986.598   | NM_01493E | 1520.661  | 1290.296  |
| NM_020237 | 687.849   | 682.921   | NM_012151 | 33670.703 | 38298.266 | AK026066  | 680.169   | 615.591   |
| M25753    | 6766.047  | 5221.213  | AF087994  | 1205.738  | 1378.783  | NM_005244 | 816.316   | 709.286   |
| NM_00388E | 1367.518  | 1533.538  | AJ227912  | 521.971   | 465.929   | NM_00527C | 512.971   | 457.16    |
| NM_01492E | 2217.823  | 1913.316  | NM_01819E | 1459.565  | 1391.432  | NM_01481E | 927.795   | 924.943   |
| NM_00420E | 5733.201  | 6219.347  | AK025532  | 4121.596  | 3744.901  | NM_007221 | 2726.118  | 3489.387  |
| NM_001951 | 1527.897  | 1519.854  | NM_003522 | 377.904   | 363.516   | X54163    | 9215.13   | 10431.977 |
| NM_002391 | 844.92    | 739.888   | BF217847  | 858.752   | 1351.417  | NM_018607 | 222.201   | 382.903   |
| NM_003674 | 30200.209 | 32646.674 | NM_00532C | 1164.541  | 1082.227  | NM_00297E | 548.746   | 467.845   |
| NM_001197 | 4255.829  | 5604.596  | CY3Cy5    | 845.796   | 126.037   | NM_01466E | 465.009   | 394.298   |
| NM_00668E | 1188.513  | 1619.542  | BI830936  | 356.137   | 272.767   | NM_00472E | 1146.353  | 1121.85   |
| NM_00641C | 2185.83   | 2659.837  | U79292    | 1657.695  | 1508.54   | NM_01442E | 558.077   | 659.724   |
| NM_014977 | 51071.777 | 54664.973 | BI830753  | 264.939   | 270.208   | NM_01213E | 1241.887  | 1110.046  |
| AK026325  | 2513.438  | 2830.547  | X71973    | 16607.846 | 12847.21  | NM_00661E | 683.982   | 628.836   |
| U83857    | 972.663   | 1175.11   | T49651    | 2275.622  | 1631.94   | NM_016451 | 827.738   | 847.948   |
| NM_00123C | 1580.051  | 1691.696  | N51014    | 1123.162  | 900.038   | NM_007351 | 6628.727  | 5120.104  |
| AK025662  | 1362.582  | 1523.977  | BE392471  | 5752.636  | 4770.977  | AK026266  | 3189.6    | 2665.677  |
| NM_000201 | 476.024   | 650.372   | AI802950  | 595.849   | 602.005   | NM_007124 | 1468.57   | 1192.198  |
| AB011539  | 1082.669  | 1483.287  | AA490172  | 283.304   | 288.741   | NM_00317E | 1261.265  | 1156.688  |
| U37028    | 1793.6    | 1996.547  | AA775212  | 1652.443  | 1822.783  | NM_00072E | 662.994   | 670.302   |
| AB014597  | 2273.73   | 2494.351  | NM_00094E | 1353.431  | 1619.511  | AL096751  | 1861.006  | 1965.118  |
| S81361    | 311.585   | 223.187   | NM_002574 | 16529.059 | 18388.348 | AF026920  | 1019.871  | 1457.593  |
| AK024313  | 5735.989  | 3906.189  | SR5       | 3349.394  | 4374.727  | NM_004931 | 1857.636  | 2119.964  |
| NM_003891 | 2964.096  | 2401.183  | SR7       | 4464.729  | 36254.762 | NM_00679E | 7613.238  | 7827.892  |
| NM_00202E | 782.623   | 659.447   | SR9       | 14291.118 | 3793.411  | AF070568  | 1680.957  | 1671.964  |
| NM_015524 | 2439.912  | 2139.498  | CY3Cy5    | 1020.432  | 162.515   | NM_00024C | 1917.999  | 1894.187  |
| NM_00167E | 5451.538  | 6218.896  | NM_003371 | 3358.626  | 2797.422  | AK055733  | 11293.16  | 10669.134 |
| NM_01651C | 2858.605  | 2872.843  | AK023114  | 2186.278  | 1990.656  | AF298880  | 7072.743  | 6065.366  |
| NM_01427C | 2057.159  | 2467.965  | NM_00367E | 1925.823  | 1880.839  | AK001500  | 684.331   | 626.244   |
| NM_000071 | 5252.473  | 6201.406  | NM_01441E | 1064.333  | 773.39    | NM_006774 | 243.506   | 494.735   |
| NM_00684E | 3814.053  | 4554.309  | NM_01493E | 1525.77   | 1220.765  | NM_02012E | 546.68    | 497.384   |
| NM_004321 | 1766.476  | 2126.009  | NM_005244 | 978.928   | 1259.675  | Y16521    | 1274.359  | 966.092   |
| AF311212  | 6392.492  | 6779.705  | NM_01481E | 772.933   | 861.889   | AL050371  | 2069.621  | 1723.641  |
| NM_00691E | 1471.673  | 1676.199  | NM_00038E | 747.376   | 733.013   | NM_002651 | 3686.409  | 2892.573  |
| NM_00603E | 1856.083  | 2253.946  | X58377    | 321.106   | 243.53    | NM_00241E | 4990.01   | 4187.296  |
| NM_00608E | 9119.875  | 10722.164 | NM_00246E | 341.88    | 545.91    | NM_017577 | 282.706   | 235.233   |
| NM_00452C | 6412.459  | 6321.632  | NM_01466E | 358.518   | 272.506   | NM_001757 | 1922.557  | 1314.548  |
| AK027118  | 3865.189  | 3659.016  | NM_00472E | 1020.22   | 955.666   | NM_001647 | 1342.917  | 1655.519  |
| AK022882  | 10872.741 | 11148.235 | NM_01442E | 468.009   | 542.318   | NM_01815E | 1131.489  | 1473.081  |
| NM_00610E | 2123.249  | 2328.795  | NM_01213E | 1122.577  | 1134.029  | NM_016301 | 3926.6    | 4365.16   |
| NM_005981 | 1372.031  | 1535.381  | NM_017954 | 235.204   | 407.683   | AK021975  | 511.585   | 450.143   |
| NM_000474 | 5257.701  | 3596.864  | NM_00661E | 729.715   | 580.345   | AB032952  | 9954.181  | 13490.987 |
| NM_016264 | 943.562   | 627.698   | NM_016451 | 894.615   | 638.825   | NM_00252E | 5501.781  | 7119.914  |
| NM_00607E | 25357.631 | 14722.898 | NM_007351 | 5680.92   | 4353.83   | NM_00094E | 1486.003  | 1616.941  |
| AB037837  | 679.869   | 403.19    | AK026266  | 2947.737  | 2202.227  | NM_002574 | 18746.041 | 17377.688 |



|           |           |           |           |           |           |           |           |           |
|-----------|-----------|-----------|-----------|-----------|-----------|-----------|-----------|-----------|
| NM_01459E | 5910.475  | 3637.981  | NM_007124 | 1372.718  | 1323.548  | AB011174  | 1141.145  | 1071.725  |
| NM_01478E | 1126.86   | 737.141   | NM_00317E | 1134.984  | 1279.197  | AB040879  | 1192.702  | 1015.571  |
| AB046784  | 808.287   | 788.543   | NM_000723 | 553.111   | 571.49    | AL049935  | 2410.752  | 2202.731  |
| X52402    | 3384.45   | 3015.186  | AL096751  | 1614.478  | 1847.69   | AB033043  | 2880.668  | 3179.984  |
| AL133663  | 900.974   | 730.513   | NM_000364 | 259.579   | 551.994   | NM_01499E | 1685.307  | 1570.192  |
| NM_00499E | 1264.118  | 1236.408  | AF026920  | 1199.925  | 1507.815  | AK025220  | 1223.482  | 1234.298  |
| NM_01446E | 2053.474  | 1590.199  | NM_004931 | 2619.853  | 3316.912  | NM_01630E | 9808.783  | 8167.617  |
| NM_01415E | 58255.73  | 54398.633 | NM_00257E | 3646.703  | 4280.051  | D42046    | 2183.319  | 2139.782  |
| NM_003137 | 6091.119  | 7261.646  | NM_004244 | 2340.02   | 2462.335  | NM_00103E | 2367.646  | 1967.298  |
| NM_00693E | 29147.477 | 29890.875 | AK001500  | 741.779   | 644.528   | NM_00452E | 9247.471  | 8953.223  |
| NM_02015E | 2956.719  | 3289.502  | NM_006774 | 401.681   | 282.598   | NM_00252E | 3487.4    | 3458.423  |
| AF176085  | 3012.938  | 3166.569  | NM_02012E | 394.626   | 391.533   | NM_02013E | 1927.981  | 1801.878  |
| NM_00698E | 6237.005  | 6515.36   | Y16521    | 1166.73   | 1133.903  | NM_01851E | 1970.402  | 2001.099  |
| AF265228  | 1373.371  | 1551.684  | AL050371  | 1857.752  | 1733.937  | AK023149  | 967.065   | 1148.606  |
| NM_003757 | 17481.047 | 18216.279 | NM_002651 | 3752.76   | 2583.937  | AK023168  | 1423.985  | 1822.879  |
| AK025561  | 2922.129  | 3268.861  | NM_00241E | 5328.596  | 4232.259  | NM_00664E | 540.675   | 676.305   |
| NM_01860E | 23983.6   | 28563.645 | NM_001757 | 1786.541  | 1601.927  | NM_00474E | 464.957   | 428.007   |
| NM_00409E | 6106.764  | 6427.61   | NM_001647 | 2092.244  | 2772.33   | NM_01475E | 1806.354  | 2215.239  |
| NM_01762E | 4385.216  | 4326.895  | NM_01815E | 994.672   | 1012.111  | NM_00658E | 24433.211 | 32559.977 |
| AL049681  | 1380.151  | 1444.656  | NM_016301 | 3346.978  | 3732.692  | NM_014331 | 2499.529  | 2678.304  |
| NM_006584 | 679.272   | 680.696   | AB032952  | 10049.102 | 11045.387 | AF054589  | 369.934   | 274.394   |
| AF052181  | 1079.841  | 950.912   | NM_00252E | 5199.903  | 5497.328  | NM_00527E | 597.359   | 643.079   |
| AL050074  | 5070.531  | 3739.069  | NM_00297E | 1125.721  | 1213.048  | NM_01481E | 1089.831  | 1016.455  |
| AK026436  | 431.288   | 463.198   | AB040879  | 1137.082  | 818.298   | NM_00544E | 353.818   | 459.509   |
| NM_018061 | 1592.545  | 1043.45   | AL049935  | 2381.034  | 1788.898  | NM_007221 | 3247.854  | 2942.906  |
| AK023059  | 776.071   | 416.829   | AB033043  | 2792.038  | 2838.461  | X54163    | 10280.676 | 9077.407  |
| NM_003551 | 1593.168  | 1184.265  | NM_01499E | 1483.91   | 1287.517  | AK025395  | 375.417   | 200.75    |
| AF305210  | 440.378   | 471.803   | AK025220  | 946.619   | 892.144   | NM_00038E | 619.664   | 588.776   |
| AK021900  | 3598.97   | 3526.667  | NM_01630E | 8252.279  | 6001.752  | BI830936  | 282.608   | 173.089   |
| NM_002764 | 6264.446  | 5725.326  | D42046    | 2073.812  | 1961.455  | U79292    | 1569.168  | 1503.997  |
| NM_019857 | 991.033   | 1117.321  | NM_00103E | 1781.904  | 1683.041  | BI830753  | 298.06    | 251.725   |
| NM_01545E | 18308.787 | 18277.883 | NM_00452E | 8378.637  | 6772.927  | X71973    | 19274.99  | 15321.667 |
| AF024702  | 8891.32   | 9311.015  | NM_00252E | 4101.786  | 3044.476  | T49651    | 2526.339  | 2015.231  |
| NM_001964 | 1605.479  | 1481.869  | NM_02013E | 1659.927  | 1622.708  | N51014    | 1340.989  | 1108.964  |
| NM_00596E | 9885.558  | 10131.249 | NM_01851E | 2456.106  | 2078.531  | BE392471  | 7630.969  | 7353.16   |
| X74864    | 2758.924  | 2957.768  | AK023149  | 995.878   | 988.308   | AI802950  | 813.048   | 649.817   |
| AK026804  | 1530.075  | 1904.629  | AK023168  | 1282.932  | 1491.55   | AL043686  | 2205.43   | 2453.647  |
| NM_01617E | 8064.6    | 8271.308  | NM_00664E | 366.179   | 432.98    | AA490172  | 550.635   | 737.861   |
| NM_00616E | 1366.171  | 1622.568  | NM_00474E | 516.112   | 427.815   | AA775212  | 1827.502  | 2002.622  |
| S72620    | 32817.051 | 33999.75  | NM_00658E | 22252.355 | 20414.309 | NM_00072E | 724.405   | 779.854   |
| NM_00526E | 16964.637 | 17544.701 | NM_014331 | 2818.569  | 3126.84   | AL096751  | 2084.946  | 2057.671  |
| AB033022  | 4437.306  | 3865.001  | NM_00679E | 6564.529  | 8318.869  | NM_000364 | 524.23    | 472.184   |
| AF147397  | 691.218   | 741.101   | AF070568  | 1483.843  | 1916.72   | AF026920  | 1214.402  | 1365.332  |
| AK027158  | 732.881   | 729.416   | NM_000277 | 320.61    | 231.193   | NM_004931 | 2241.341  | 2157.465  |
| AF085836  | 7669.396  | 4760.864  | NM_00024E | 2478.04   | 2962.465  | NM_000607 | 10341.258 | 10684.353 |
| AL049449  | 781.327   | 601.231   | AK055733  | 11411.864 | 12225.554 | NM_00257E | 3179.078  | 3716.276  |
| AL359654  | 793.765   | 698.728   | AF298880  | 7810.446  | 8028.01   | NM_004244 | 2020.857  | 1685.743  |
| AK024224  | 1381.868  | 1477.133  | AK025395  | 318.817   | 374.247   | NM_003371 | 1976.992  | 2012.135  |
| NM_01536E | 3877.132  | 3915.52   | NM_00038E | 475.792   | 396.18    | AK023114  | 2219.966  | 2091.048  |
| AF147344  | 579.155   | 700.153   | X58377    | 285.132   | 203.376   | NM_00367E | 2099.596  | 2226.569  |
| AF147371  | 682.229   | 680.549   | U79292    | 1430.874  | 1177.184  | NM_01441E | 865.949   | 1293.735  |
| AK023745  | 548.065   | 774.226   | X68314    | 343.411   | 127.114   | NM_01493E | 1762.43   | 1696.58   |
| NM_01898E | 2776.115  | 3268.534  | X71973    | 16596.977 | 12121.676 | AF049460  | 292.792   | 362.795   |

|           |           |           |           |           |           |           |           |           |
|-----------|-----------|-----------|-----------|-----------|-----------|-----------|-----------|-----------|
| AF086254  | 3453.231  | 3649.794  | T49651    | 2142.302  | 1231.18   | AK026066  | 781.299   | 1029.182  |
| AF086324  | 663.111   | 538.931   | N51014    | 1109.182  | 949.857   | NM_005244 | 844.632   | 933.931   |
| AF086261  | 1177.46   | 1142.789  | BE392471  | 6104.64   | 4948.836  | NM_01815E | 1286.66   | 1118.967  |
| AF086367  | 2015.181  | 1907.898  | AI802950  | 679.117   | 588.348   | NM_016301 | 4277.32   | 4720.812  |
| AF086437  | 1025.397  | 1096.945  | AA775212  | 1798.226  | 2073.362  | AK021975  | 427.478   | 647.922   |
| AK025088  | 3641.447  | 3768.143  | NM_000945 | 1558.098  | 1770.958  | AB032952  | 11683.124 | 13350.473 |
| U79295    | 966.952   | 928.277   | NM_002574 | 18460.822 | 18773.227 | NM_002522 | 6408.641  | 5594.442  |
| AK002107  | 514.393   | 389.276   | AB011174  | 1211.827  | 1385.465  | NM_00297E | 455.908   | 692.988   |
| NM_00359E | 3302.599  | 3600.892  | AB043635  | 460.806   | 418.36    | NM_01466E | 428.668   | 383.315   |
| NM_01883E | 2946.336  | 3625.462  | NM_000607 | 10131.814 | 7641.703  | NM_004722 | 857.258   | 945.043   |
| AF075083  | 613.176   | 451.482   | AF090409  | 202.137   | 425.016   | NM_01442E | 549.888   | 484.701   |
| AK021454  | 1256.257  | 978.939   | NM_00257E | 2891.875  | 2336.959  | NM_012133 | 1340.696  | 1063.179  |
| AK022069  | 1736.89   | 1160.474  | NM_004244 | 1546.353  | 1437.347  | NM_006612 | 809.72    | 1148.966  |
| AL137457  | 935.3     | 620.766   | NM_003371 | 2487.286  | 1937.876  | NM_016451 | 1108.783  | 1682.886  |
| AF085944  | 1133.096  | 1196.317  | AK023114  | 2175.571  | 1512.455  | NM_007351 | 7659.878  | 7810.187  |
| AL133038  | 765.076   | 786.001   | NM_00367E | 1898.387  | 1332.518  | AK026266  | 4049.206  | 4038.671  |
| AL137414  | 978.718   | 828.706   | NM_014419 | 1014.028  | 934.155   | NM_007124 | 1945.595  | 2290.316  |
| AL359574  | 2338.424  | 2636.297  | NM_01493E | 1529.148  | 1464.64   | NM_00317E | 1345.302  | 2165.047  |
| AL133569  | 3779.239  | 4256      | AK026066  | 639.004   | 659.709   | AK023168  | 1578.117  | 1638.532  |
| AL137435  | 291.804   | 403.923   | NM_005244 | 1007.585  | 1415.729  | NM_00664E | 567.485   | 608.673   |
| AL359604  | 592.164   | 592.655   | NM_00527C | 512.38    | 535.706   | NM_004742 | 637.637   | 785.572   |
| AK027189  | 766.281   | 793.167   | NM_01481E | 1067.277  | 1094.582  | NM_014753 | 1779.331  | 2096.047  |
| AF088014  | 1506.539  | 1570.791  | NM_005443 | 318.41    | 365.296   | NM_00658E | 25509.928 | 23064.834 |
| AL109719  | 1073.884  | 1502.598  | NM_00297E | 683.103   | 513.135   | NM_014331 | 2338.633  | 2096.31   |
| U92022    | 768.461   | 1301.311  | NM_01466E | 468.411   | 498.596   | NM_00679E | 6118.352  | 6221.877  |
| NM_00365C | 10433.108 | 10762.311 | NM_004722 | 990.486   | 784.501   | AF070568  | 1280.593  | 1525.144  |
| AK022119  | 3674.487  | 3794.735  | NM_01442E | 670.721   | 457.121   | NM_00024C | 1557.572  | 1523.342  |
| AL157488  | 676.612   | 1036.752  | NM_012133 | 1122.585  | 754.537   | AK055733  | 10724.64  | 11280.018 |
| NM_016644 | 638.625   | 826.132   | NM_006612 | 753.868   | 794.698   | AF298880  | 7625.384  | 6039.095  |
| AF085842  | 547.341   | 445.302   | NM_016451 | 990.653   | 1043.666  | AK001500  | 621.364   | 544.37    |
| AK023882  | 539.688   | 428.604   | NM_007351 | 5420.174  | 5010.277  | NM_006774 | 260.37    | 193.515   |
| AK026750  | 968.604   | 1203.803  | AK026266  | 3101.156  | 3049.068  | NM_02012E | 558.645   | 537.17    |
| AF072164  | 1630.684  | 1225.695  | NM_007124 | 1516.852  | 2069.962  | Y16521    | 1119.351  | 970.574   |
| NM_01861C | 585.559   | 534.17    | NM_00317E | 1436.907  | 1941.129  | AL050371  | 2427.743  | 2704.429  |
| AF232216  | 797.911   | 1039.511  | NM_000723 | 765.592   | 1002.628  | NM_002651 | 4413.593  | 4683.473  |
| NM_017773 | 2774.743  | 2309.816  | AL096751  | 2145.744  | 1913.326  | NM_002413 | 6409.482  | 6745.717  |
| AK021885  | 294.342   | 294.465   | NM_004931 | 2587.635  | 2730.834  | NM_017577 | 447.107   | 343.288   |
| AK022018  | 303.511   | 432.543   | NM_00679E | 6718.273  | 4957.623  | NM_001757 | 2061.09   | 2209.677  |
| AK022161  | 414.161   | 374.674   | AF070568  | 1221.481  | 1060.5    | NM_001647 | 1497.475  | 2117.499  |
| AK022296  | 511.01    | 794.358   | NM_00024C | 1986.71   | 1996.342  | NM_00622E | 414.824   | 450.616   |
| AK022052  | 676.476   | 856.77    | AK055733  | 9968.179  | 8084.817  | NM_00376E | 3639.807  | 3762.214  |
| AK022189  | 778.814   | 808.536   | AF298880  | 6217.51   | 5082.228  | NM_018393 | 632.423   | 809.387   |
| AK022338  | 832.185   | 1074.846  | AK001500  | 649.207   | 607.915   | BF032535  | 1589.442  | 1436.898  |
| AK026856  | 749.638   | 953.407   | NM_02012E | 394.232   | 410.781   | NM_018332 | 2047.068  | 1765.105  |
| AL162033  | 2103.88   | 2274.45   | Y16521    | 1215.527  | 851.933   | NM_00509E | 9228.899  | 7696.472  |
| AL162010  | 372.94    | 331.084   | AL050371  | 1970.743  | 1711.759  | NM_00676C | 616.828   | 797.458   |
| AK026893  | 285.965   | 481.264   | NM_002651 | 3638.581  | 3759.827  | NM_01228E | 3848.319  | 4563.309  |
| AK026761  | 841.23    | 454.235   | NM_002413 | 5242.621  | 4695.977  | AB037775  | 805.797   | 850.656   |
| NM_005001 | 9606.823  | 10266.579 | NM_001757 | 1763.203  | 1342.555  | L27560    | 721.211   | 768.518   |
| AK024175  | 3536.084  | 3711.161  | NM_001647 | 1706.819  | 1799.193  | AB011174  | 1071.858  | 1305.298  |
| NM_00051C | 946.324   | 838.387   | NM_01815E | 1061.459  | 1340.729  | AB043635  | 296.377   | 280.019   |
| NM_017787 | 1959      | 1732.25   | NM_016301 | 4060.026  | 4799.161  | AB040879  | 1281.71   | 1013.115  |
| NM_02031E | 4381.805  | 5128.438  | AK021975  | 581.232   | 617.984   | AL049935  | 2518.318  | 2533.398  |

|           |           |           |           |           |           |           |           |           |
|-----------|-----------|-----------|-----------|-----------|-----------|-----------|-----------|-----------|
| unknown ( | 255.866   | 686.435   | NM_000945 | 1188.11   | 888.069   | AB033043  | 2906.83   | 3006.677  |
| AK001910  | 1045.308  | 1282.814  | NM_002574 | 16081.188 | 9853.005  | NM_014995 | 1726.671  | 1575.245  |
| AK023892  | 547.615   | 862.177   | AB011174  | 1101.597  | 1137.9    | AK025220  | 1403.458  | 1343.998  |
| AF124368  | 1020.921  | 1141.993  | AB040879  | 1147.357  | 734.208   | NM_016305 | 10350.448 | 8599.272  |
| AF265210  | 7314.279  | 7051.769  | AL049935  | 1969.174  | 1733.951  | D42046    | 2139.669  | 2277.325  |
| AK024241  | 970.512   | 921.628   | AB033043  | 2453.561  | 2203.917  | NM_001033 | 2233.602  | 2783.176  |
| AK025061  | 1649.195  | 1955.187  | NM_014995 | 1435.067  | 1129.211  | NM_004525 | 10258.398 | 10886.615 |
| AF088067  | 7298.415  | 9569.078  | AK025220  | 1043.673  | 802.993   | NM_002525 | 4435.812  | 5376.404  |
| AK022213  | 485.823   | 584.24    | NM_016305 | 8630.992  | 7055.339  | NM_020135 | 2328.844  | 3146.133  |
| AF056441  | 1544.323  | 1593.635  | D42046    | 1935.358  | 1916.024  | NM_018515 | 2297.904  | 2688.555  |
| Y10509    | 532.424   | 678.699   | NM_001033 | 1915.243  | 1979.031  | AK023149  | 1293.487  | 1554.468  |
| AK024389  | 8292.965  | 16765.686 | NM_004525 | 8059.338  | 8743.27   | NM_006435 | 675.271   | 686.54    |
| AK026793  | 2552.172  | 2632.119  | NM_002525 | 4653.907  | 4025.938  | NM_001845 | 820.036   | 758.176   |
| NM_001672 | 469.806   | 473.662   | NM_020135 | 1767.034  | 1904.432  | AK024697  | 812.588   | 917.984   |
| AJ276253  | 14508.47  | 13670.085 | NM_018515 | 2343.216  | 2094.255  | NM_006460 | 1610.789  | 1399.604  |
| AF147314  | 1341.595  | 1604.442  | AK023149  | 1015.216  | 989.746   | L34156    | 302.032   | 206.905   |
| NM_018980 | 6592.085  | 7848.61   | AK023168  | 1319.195  | 1583.869  | NM_003745 | 14945.439 | 11418.064 |
| AF086201  | 1310.043  | 1302.032  | NM_006645 | 431.418   | 548.485   | NM_003557 | 1282.905  | 1302.232  |
| AK024712  | 595.213   | 809.251   | NM_004742 | 564.561   | 662.54    | NM_001257 | 6671.582  | 5905.299  |
| U48696    | 709.004   | 1003.519  | AF054589  | 247.239   | 157.78    | D85245    | 4285.552  | 4832.789  |
| AF230316  | 5859.022  | 6283.68   | NM_005270 | 606.699   | 267.294   | NM_000943 | 1145.582  | 1013.594  |
| AK024515  | 4710.208  | 5332.387  | NM_014815 | 1013.368  | 630.468   | NM_004655 | 1477.172  | 1602.919  |
| AF085862  | 4921.556  | 6230.625  | NM_007221 | 2476.778  | 2264.126  | NM_001250 | 3137.597  | 3015.28   |
| NM_017995 | 1170.928  | 1907.751  | X54163    | 7712.582  | 6811.029  | AF298812  | 584.089   | 539.545   |
| AL049271  | 19248.834 | 19547.912 | NM_000385 | 4955.641  | 5171.828  | NM_004965 | 1291.67   | 1106.328  |
| AK023079  | 28000.119 | 27043.809 | U79292    | 1394.226  | 1341.554  | AJ249900  | 409.95    | 319.058   |
| NM_019605 | 1491.927  | 2008.357  | X68314    | 444.848   | 254.58    | AK022581  | 4108.035  | 3917.396  |
| AK026198  | 3458.662  | 3805.978  | X71973    | 19060.295 | 13904.238 | NM_018054 | 1690.138  | 1599.32   |
| AF183570  | 842.37    | 1008.695  | T49651    | 2510.42   | 1964.253  | NM_006185 | 548.853   | 565.399   |
| NM_005497 | 23030.172 | 23543.432 | N51014    | 1285.349  | 961.458   | NM_000955 | 5542.378  | 5583.042  |
| AK024048  | 2278.269  | 2203.425  | BE392471  | 6062.738  | 5427.74   | NM_001401 | 799.822   | 730.832   |
| AB033093  | 1364.194  | 1332.903  | AI802950  | 611.484   | 632.532   | NM_013271 | 4194.955  | 4074.806  |
| NM_005912 | 645.935   | 785.062   | NM_000723 | 620.688   | 349.89    | NM_004157 | 4488.123  | 5518.979  |
| NM_005905 | 36622.637 | 36747.328 | AL096751  | 1815.316  | 1325.229  | NM_000684 | 1638.379  | 1733.354  |
| AK055991  | 859.426   | 668.831   | NM_000364 | 277.234   | 533.486   | NM_015913 | 8043.766  | 8710.795  |
| AF113697  | 592.49    | 715.961   | AF026920  | 1174.746  | 1104.079  | NM_005157 | 3728.422  | 3989.86   |
| AK022326  | 1322.288  | 1816.849  | NM_004931 | 1670.552  | 1571.919  | U67037    | 876.924   | 990.317   |
| AF085991  | 1409.145  | 1653.027  | NM_000607 | 9223.666  | 7779.694  | NM_004960 | 11505.755 | 11283.111 |
| NM_005683 | 1034.366  | 1239.802  | NM_002575 | 2675.866  | 2228.719  | AF272370  | 3930.852  | 4522.404  |
| NM_020427 | 14602.636 | 18025.881 | NM_004244 | 1873.14   | 1216.965  | AF130050  | 3239.94   | 2762.385  |
| AF085920  | 1381.339  | 1800.995  | NM_003371 | 2422.535  | 2022.648  | AF119898  | 229.907   | 191.862   |
| AK023173  | 13345.631 | 15825.493 | AK023114  | 2205.225  | 1789.053  | NM_012197 | 2540.386  | 2142.08   |
| AK025225  | 563.847   | 662.905   | NM_003675 | 1867.243  | 2124.264  | AK024016  | 1360.304  | 1509.021  |
| U79275    | 4831.675  | 5110.756  | NM_014419 | 1074.729  | 1068.4    | NM_003581 | 5491.078  | 4886.778  |
| AJ227908  | 754.679   | 850.054   | NM_014935 | 1527.645  | 1783.422  | NM_012407 | 704.829   | 613.591   |
| AF007193  | 1493.339  | 1533.686  | NM_005244 | 1037.774  | 1542.456  | AF302505  | 346.422   | 97.527    |
| AK022367  | 905.11    | 879.996   | NM_018155 | 915.812   | 593.328   | NM_007185 | 884.558   | 639.955   |
| BC028589  | 1922.853  | 1923.092  | NM_016301 | 3337.291  | 2892.749  | NM_007044 | 1877.896  | 1764.649  |
| CY3Cy5    | 1928.219  | 159.291   | AK021975  | 442.313   | 347.595   | AF294326  | 4485.736  | 4163.079  |
| K02765    | 1411.266  | 1406.211  | AB032952  | 10943.22  | 9445.131  | NM_014675 | 1314.423  | 1348.067  |
| M65134    | 698.592   | 687.867   | NM_002522 | 5701.637  | 4340.657  | NM_012317 | 52423.98  | 53924.785 |
| BG539651  | 8060.866  | 6956.002  | NM_002975 | 573.814   | 312.948   | NM_017853 | 2457.456  | 1961.206  |
| N52646    | 16121.497 | 14246.436 | NM_014665 | 455.729   | 338.175   | NM_016097 | 8975.549  | 10043.546 |

|           |           |           |           |           |           |           |           |           |
|-----------|-----------|-----------|-----------|-----------|-----------|-----------|-----------|-----------|
| AW160671  | 44919.238 | 36990.309 | NM_004722 | 1092.142  | 988.333   | AB035301  | 792.577   | 907.034   |
| BI870529  | 4952.446  | 4332.274  | NM_014425 | 589.601   | 655.166   | AB046800  | 1613.537  | 1922.709  |
| AA702698  | 945.144   | 656.754   | NM_012133 | 947.072   | 803.242   | NM_002162 | 2846.174  | 3221.47   |
| AI681514  | 837.603   | 1035.609  | NM_017954 | 266.167   | 279.909   | NM_015458 | 2661.308  | 3100.969  |
| NM_00130C | 1302.374  | 1203.911  | NM_006612 | 952.25    | 733.608   | D13540    | 2925.395  | 3695.246  |
| BG748827  | 5321.583  | 4727.449  | NM_016451 | 963.479   | 1150.52   | NM_01657C | 5576.003  | 6573.542  |
| AA952897  | 1281.382  | 1199.314  | NM_007351 | 6790.684  | 7091.08   | AF209198  | 1062.387  | 1337.889  |
| BG760342  | 2160.121  | 2023.09   | AK026266  | 3538.059  | 3632.265  | L09247    | 423.94    | 446.605   |
| AA703141  | 616.301   | 615.161   | NM_003176 | 1223.725  | 1330.213  | M69012    | 22640.328 | 23740.277 |
| AI122630  | 6507.195  | 6262.842  | AK023168  | 1597.139  | 1353.617  | NM_016347 | 209.233   | 379.399   |
| NM_002103 | 29414.586 | 31747.258 | NM_006646 | 460.02    | 358.112   | NM_006936 | 13417.489 | 12311.837 |
| NM_003379 | 9147.231  | 9043.769  | NM_004742 | 395.252   | 478.691   | NM_001327 | 5990.244  | 5948.799  |
| SR1       | 60191.137 | 57208.371 | NM_014753 | 1586.278  | 1661.368  | NM_000063 | 422.814   | 454.506   |
| SR3       | 39463.367 | 32479.996 | NM_006585 | 23983.781 | 17711.838 | NM_018388 | 751.742   | 517.132   |
| SR5       | 3918.505  | 3384.578  | NM_014331 | 2089.106  | 1931.072  | AB033026  | 705.14    | 714.549   |
| SR7       | 5071.878  | 33111.203 | NM_006795 | 6207.893  | 5852.526  | AF104914  | 14421.795 | 14119.934 |
| SR9       | 17292.512 | 2678.977  | AF070568  | 1436.414  | 1221.559  | NM_014716 | 1288.095  | 1092.824  |
| CY3Cy5    | 1332.903  | 103.16    | NM_00024C | 1694.816  | 1475.605  | AK023845  | 2266.894  | 2484.841  |
| NM_012428 | 3397.157  | 2622.196  | AK055733  | 11181.134 | 9966.239  | NM_002638 | 2593.627  | 2687.401  |
| NM_013269 | 416.489   | 464.1     | AF298880  | 8641.661  | 15621.368 | NM_016487 | 812.977   | 1161.266  |
| NM_001728 | 12907.217 | 11405.99  | AK001500  | 959.559   | 1395.972  | NM_005808 | 5454.354  | 7100.489  |
| NM_005565 | 9737.979  | 9524.128  | NM_006774 | 289.729   | 445.55    | NM_006401 | 23341.68  | 29621.953 |
| NM_003824 | 4767.847  | 5314.685  | NM_020129 | 484.708   | 700.157   | AF269249  | 374.634   | 465.727   |
| NM_000686 | 1806.664  | 1774.997  | Y16521    | 1517.781  | 1448.97   | D31763    | 1951.195  | 1774.688  |
| NM_012452 | 7852.079  | 7529.167  | AL050371  | 2122      | 2601.205  | NM_018168 | 2751.379  | 2736.463  |
| AF229166  | 614.888   | 797.31    | NM_002651 | 4314.568  | 4323.122  | AK021452  | 6485.666  | 5751.148  |
| NM_005137 | 2440.527  | 2462.834  | NM_002413 | 6196.054  | 6300.619  | NM_004506 | 1233.643  | 1491.179  |
| NM_006764 | 1468.382  | 1186.909  | NM_001757 | 2106.026  | 2081.408  | S74529    | 27092.189 | 25299.623 |
| NM_001386 | 1319.773  | 1632.018  | NM_006228 | 492.539   | 257.153   | NM_005933 | 353.698   | 146.832   |
| NM_001163 | 932.961   | 731.679   | NM_003768 | 2831.521  | 1922.561  | NM_001421 | 893.332   | 806.234   |
| NM_005878 | 1798.429  | 2065.266  | NM_018393 | 618.331   | 566.294   | U69127    | 15612.694 | 14541.424 |
| AF308602  | 1915.042  | 1454.746  | BF032535  | 1599.432  | 1400.011  | NM_005838 | 4043.555  | 2461.271  |
| AB011089  | 1136.725  | 1134.072  | NM_018332 | 1709.516  | 1717.375  | AK023379  | 1153.075  | 897.285   |
| AF007192  | 863.062   | 949.192   | NM_005096 | 8769.122  | 7311.788  | NM_006076 | 280.624   | 287.949   |
| NM_001276 | 7665.604  | 10514.485 | NM_012289 | 3893.208  | 3164.016  | AK021904  | 8545.102  | 9211.755  |
| NM_016157 | 727.471   | 771.698   | AB037775  | 781.242   | 725.521   | -         | 917.19    | 955.091   |
| NM_014915 | 15484.157 | 14934.475 | L27560    | 881.043   | 751.488   | NM_018292 | 490.051   | 573.832   |
| NM_012286 | 1456.202  | 1297.603  | AB011174  | 943.769   | 1165.164  | AL049705  | 4226.715  | 6841.202  |
| NM_002195 | 3754.404  | 3122.34   | AB040879  | 1126.844  | 1105.525  | AK022294  | 779.1     | 1075.89   |
| D84294    | 2145.302  | 1923.229  | AL049935  | 2204.467  | 2036.314  | AF086507  | 665.085   | 834.624   |
| M31659    | 968.3     | 933.092   | AB033043  | 2943.945  | 3232.26   | U79289    | 1109.58   | 1301.934  |
| NM_016226 | 8066.459  | 7778.063  | NM_014999 | 1504.74   | 1518.579  | NM_014028 | 2564.781  | 2356.672  |
| AK024311  | 850.331   | 975.983   | AK025220  | 1235.676  | 1469.805  | NM_000402 | 1055.915  | 919.867   |
| AF052155  | 5030.818  | 4655.354  | NM_016308 | 10139.59  | 10130.867 | NM_00069C | 6151.528  | 5571.132  |
| NM_005085 | 1871.964  | 1773.529  | D42046    | 2474.054  | 2650.213  | NM_000155 | 3755.452  | 3838.617  |
| AF060902  | 1646.905  | 1546.14   | NM_001033 | 2324.325  | 2792.413  | NM_000181 | 5805.895  | 5470.765  |
| AF121858  | 4406.118  | 4217.342  | NM_004526 | 9484.706  | 12468.55  | NM_014121 | 718.761   | 635.729   |
| NM_013437 | 953.054   | 935.908   | NM_002526 | 5265.419  | 5889.049  | NM_00673C | 1717.313  | 1422.161  |
| AK025966  | 2486.957  | 2225.528  | NM_020135 | 1917.656  | 2509.532  | NM_005644 | 2048.005  | 2005.526  |
| NM_018725 | 636.613   | 714.516   | NM_018518 | 2554.177  | 3204.538  | NM_018442 | 2759.977  | 2164.376  |
| NM_003081 | 22977.188 | 23580.922 | AK023149  | 1137.997  | 1664.507  | AF182416  | 2875.832  | 2891.817  |
| NM_016495 | 1463.991  | 1754.76   | NM_006438 | 603.759   | 634.472   | NM_005995 | 10527.225 | 8775.72   |
| D50402    | 19676.342 | 19301.18  | NM_001845 | 585.635   | 427.059   | NM_006015 | 614.208   | 415.074   |

|           |           |           |           |           |           |           |           |           |
|-----------|-----------|-----------|-----------|-----------|-----------|-----------|-----------|-----------|
| M73547    | 7066.812  | 7974.124  | AK024697  | 942.485   | 628.703   | NM_004634 | 1466.664  | 1334.517  |
| NM_003687 | 1178.228  | 1159.305  | NM_006460 | 1454.87   | 1240.772  | NM_002017 | 4753.449  | 4250.589  |
| NM_004134 | 3007.396  | 2695.402  | NM_003749 | 13003.986 | 9500.865  | NM_017523 | 6473.314  | 6962.449  |
| NM_005955 | 2371.267  | 2014.708  | NM_003557 | 1568.483  | 1120.317  | NM_002382 | 9064.668  | 9053.091  |
| NM_004045 | 581.888   | 400.498   | NM_001257 | 7008.357  | 5820.156  | NM_002155 | 647.361   | 852.322   |
| NM_001179 | 340.322   | 709.055   | D85245    | 5008.507  | 4200.49   | U13223    | 5490.148  | 6745.688  |
| NM_017765 | 12254.474 | 12061.655 | NM_000943 | 1105.677  | 1512.222  | NM_016270 | 1996.159  | 2600.523  |
| NM_000425 | 641.892   | 677.493   | NM_004655 | 1578.083  | 1818.271  | AK001357  | 1097.578  | 1454.752  |
| AB040967  | 6890.601  | 6621.066  | NM_001250 | 3368.258  | 3831.193  | NM_015721 | 1975.189  | 2053.063  |
| NM_003575 | 678.1     | 848.015   | AF298812  | 919.247   | 873.835   | AF086298  | 828.186   | 1032.969  |
| NM_014721 | 1533.823  | 1397.047  | AK022581  | 3878.387  | 4577.817  | AK027238  | 719.992   | 903.455   |
| AK026352  | 821.191   | 1749.85   | NM_018054 | 2498.006  | 2345.793  | AK000032  | 233.684   | 216.16    |
| AL137705  | 3946.804  | 3808.124  | NM_006186 | 559.002   | 733.415   | AK025758  | 322.925   | 382.908   |
| U41898    | 557.779   | 583.758   | NM_000955 | 5152.917  | 5651.197  | S94540    | 7574.352  | 7876.849  |
| NM_014845 | 777.255   | 732.551   | NM_001401 | 910.682   | 912.947   | U79297    | 403.281   | 503.221   |
| BF217766  | 768.038   | 597.389   | NM_013271 | 5268.799  | 6067.037  | AK002164  | 603.045   | 434.041   |
| NM_000184 | 1506.337  | 1440.686  | NM_004157 | 4306.225  | 4572.51   | AF052122  | 3844.552  | 3337.811  |
| NM_016180 | 660.46    | 507.993   | NM_000684 | 1301.833  | 1669.638  | NM_001310 | 1301.717  | 1452.601  |
| NM_000112 | 615.46    | 638.732   | NM_015913 | 7038.762  | 4852.046  | AK026924  | 3397.495  | 2903.522  |
| NM_005827 | 6180.188  | 5018.244  | NM_005157 | 3846.514  | 2494.495  | AL122047  | 6014.909  | 5397.665  |
| NM_003053 | 3475.451  | 3103.124  | NM_007354 | 298.609   | 264.807   | AF052091  | 701.734   | 574.129   |
| NM_003044 | 1400.175  | 1393.921  | U67037    | 1050.456  | 780.036   | AK024447  | 43260.102 | 37398.605 |
| NM_006672 | 7645.494  | 6991.771  | NM_004960 | 10548.868 | 8792.689  | AF052145  | 1453.154  | 1867.07   |
| AB007875  | 976.357   | 909.119   | AF272370  | 4121.214  | 3714.991  | AF086458  | 2819.56   | 2941.608  |
| NM_014795 | 517.717   | 460.528   | AF130050  | 2783.318  | 2246.253  | AF086548  | 2067.273  | 2309.138  |
| AL050288  | 27930.127 | 26693.557 | NM_012197 | 1823.689  | 1380.968  | AK024350  | 898.088   | 966.783   |
| NM_005040 | 4117.353  | 3912.24   | AK024016  | 1866.058  | 1708.94   | AK023717  | 1518.257  | 1469.896  |
| NM_016391 | 12360.137 | 12181.693 | NM_003581 | 3606.055  | 2990.229  | AK023727  | 627.398   | 1071.756  |
| AF075033  | 2579.363  | 2137.346  | NM_012407 | 832.645   | 1140.535  | AK025271  | 661.534   | 797.979   |
| D50911    | 9520.278  | 9496.71   | NM_007044 | 2287.411  | 2641.054  | AF086204  | 2002.131  | 2500.64   |
| AB011104  | 1374.184  | 1375.106  | AF294326  | 4669.242  | 5214.515  | NM_007021 | 493.771   | 538.184   |
| AK024069  | 7505.333  | 6851.83   | NM_014675 | 1581.096  | 1776.993  | AK026283  | 182.825   | 229.706   |
| NM_004582 | 9433.432  | 8805.908  | NM_012317 | 57696.156 | 60535.484 | AK022076  | 321.676   | 320.929   |
| NM_015640 | 13272.568 | 11949.129 | NM_017853 | 2081.498  | 2308.833  | AK023065  | 217.547   | 335.353   |
| AF233450  | 875.614   | 910.608   | NM_016097 | 8361.227  | 10092.229 | AK021570  | 441.689   | 482.454   |
| NM_016233 | 1812.633  | 1584.687  | AB046800  | 2683.776  | 3002.793  | AK000103  | 721.257   | 705.993   |
| NM_000821 | 13228.573 | 11643.891 | NM_002162 | 2611.941  | 3038.891  | AF085959  | 711.697   | 851.371   |
| NM_020121 | 656.023   | 599.509   | NM_015455 | 2299.367  | 1773.837  | AK023104  | 627.925   | 620.374   |
| NM_003145 | 35957.656 | 32309.502 | D13540    | 3116.47   | 2058.345  | AK026923  | 700.754   | 780.295   |
| NM_001632 | 1487.983  | 1079.064  | NM_016570 | 5586.608  | 4210.598  | Y11177    | 851.411   | 852.993   |
| NM_012264 | 1054.579  | 874.381   | AF209198  | 1040.537  | 927.168   | U61091    | 329.782   | 302.195   |
| AF311312  | 2015.544  | 1543.794  | L09247    | 432.427   | 505.556   | AK021691  | 9395.035  | 11538.76  |
| NM_014915 | 12167.641 | 11394.214 | M69012    | 20104.889 | 15425.707 | U52832    | 181.084   | 278.079   |
| NM_012285 | 1305.259  | 1589.041  | NM_006935 | 12390.265 | 9361.758  | AK022037  | 267.79    | 416.617   |
| NM_002195 | 3586.816  | 3688.35   | NM_001327 | 5206.761  | 4924.272  | AK000141  | 2719.264  | 2771.563  |
| D84294    | 1735.894  | 1727.81   | NM_000063 | 572.923   | 533.709   | AL137758  | 1202.342  | 1615.945  |
| K02765    | 1714.749  | 1688.158  | NM_018385 | 638.711   | 646.875   | AK025786  | 781.645   | 963.357   |
| M65134    | 795.548   | 771.84    | AB033026  | 710.334   | 878.716   | AK024188  | 537.229   | 570.401   |
| BG539651  | 8320.365  | 6919.433  | AF104914  | 13947.083 | 16055.142 | AK024379  | 494.057   | 356.251   |
| N52646    | 17862.439 | 15205.981 | NM_014715 | 1582.338  | 2005.041  | AK026820  | 589.525   | 474.21    |
| AW160671  | 44856.059 | 37965.777 | AB002354  | 381.311   | 393.363   | AK001716  | 1079.764  | 1140.259  |
| BI870529  | 3907.213  | 3423.509  | AK023845  | 2054.713  | 3048.333  | AK026821  | 594.279   | 202.307   |
| AA702698  | 611.455   | 698.058   | NM_002635 | 3317.906  | 4297.369  | AK026280  | 1287.693  | 1253.485  |

|           |           |           |           |           |           |           |           |           |
|-----------|-----------|-----------|-----------|-----------|-----------|-----------|-----------|-----------|
| AI681514  | 1024.725  | 799.711   | NM_016487 | 835.251   | 1122.548  | AF113017  | 1249.001  | 1310.76   |
| NM_00130C | 1449.615  | 1456.821  | NM_00580E | 5610.827  | 7381.931  | AL080232  | 2223.839  | 1890.898  |
| BG748827  | 5618.21   | 4958.549  | NM_006401 | 24097.871 | 25401.76  | AK001120  | 1479.699  | 1592.062  |
| AA952897  | 1282.372  | 1189.314  | AF269249  | 390.217   | 365.22    | AK022416  | 537.194   | 389.437   |
| BG760342  | 2364.916  | 2056.302  | X51417    | 247.066   | 245.056   | AK023224  | 986.735   | 960.29    |
| AA703141  | 735.72    | 601.606   | D31763    | 1875.202  | 1282.257  | AK023731  | 809.151   | 572.623   |
| AI122630  | 6911.146  | 6596.679  | NM_018169 | 2604.062  | 2253.28   | AK022442  | 602.479   | 899.004   |
| NM_002103 | 29473.342 | 30182.338 | AK021452  | 4425.344  | 3869.453  | AK023336  | 607.17    | 641.519   |
| NM_003379 | 8735.908  | 8712.792  | NM_004506 | 1431.052  | 1061.611  | AK023771  | 378.331   | 708.792   |
| NM_006589 | 5438.629  | 3987.439  | S74529    | 30496.17  | 21662.9   | AK026873  | 2054.471  | 2323.179  |
| NM_004134 | 2433.879  | 1868.47   | NM_005933 | 686.434   | 1460.807  | AK026394  | 2187.666  | 2619.84   |
| NM_00595E | 2414.309  | 2203.144  | NM_001421 | 509.051   | 600.824   | NM_00544E | 787.315   | 1083.889  |
| NM_00404E | 292.031   | 753.351   | M73837    | 750.808   | 922.811   | AK025943  | 11751.266 | 12313.094 |
| NM_01242E | 3015.838  | 2968.483  | U69127    | 21087.334 | 21905.477 | BG106479  | 537.633   | 788.968   |
| NM_013269 | 427.439   | 420.027   | NM_005839 | 4503.911  | 3734.761  | AF130069  | 9766.093  | 9976.675  |
| NM_00172E | 13476.607 | 11438.482 | AK023379  | 1102.512  | 1424.876  | AL109669  | 1301.427  | 1396.556  |
| NM_00556E | 9397.869  | 9071.68   | NM_006076 | 465.302   | 502.025   | AB037766  | 1164.073  | 903.754   |
| NM_003824 | 4208.786  | 3459.38   | AK021904  | 13653.303 | 33890.004 | AK026995  | 390.377   | 328.061   |
| NM_00068E | 1825.369  | 1746.743  | -         | 1016.063  | 1555.828  | AL133091  | 729.357   | 540.631   |
| NM_012452 | 7727.418  | 6959      | NM_018292 | 598.269   | 539.844   | BF842915  | 340.551   | 252.644   |
| AF229166  | 643.278   | 827.531   | AL049705  | 5183.459  | 6339.965  | X82545    | 1265.33   | 1626.594  |
| NM_005137 | 2563.878  | 2433.696  | AK022294  | 688.355   | 557.919   | AK024632  | 2309.522  | 2238.646  |
| NM_006764 | 1717.821  | 1761.809  | AF086507  | 574.671   | 512.625   | NM_018474 | 4161.521  | 3883.875  |
| NM_00138E | 1572.024  | 1687.808  | U79289    | 954.916   | 937.5     | AK024937  | 773.865   | 651.665   |
| NM_001163 | 956.283   | 1117.308  | NM_01402E | 1655.297  | 1479.962  | D17178    | 712.406   | 552.63    |
| NM_00587E | 1659.411  | 1781.442  | NM_000402 | 1118.473  | 867.067   | AK022094  | 1832.497  | 1893.802  |
| AF308602  | 1824.942  | 1419.539  | NM_00069C | 5899.492  | 4695.249  | AK026695  | 737.547   | 907.816   |
| AB011089  | 999.263   | 1238.202  | NM_00015E | 2360.957  | 2248.965  | AK022220  | 447.86    | 389.096   |
| AF007192  | 959.614   | 864.993   | AK024489  | 332.393   | 220.032   | AL137539  | 296.77    | 290.353   |
| NM_00127E | 5956.637  | 5427.424  | NM_000181 | 5602.732  | 4914.816  | U84520    | 1633.589  | 2180.871  |
| NM_016157 | 779.541   | 725.749   | NM_014121 | 665.444   | 866.662   | AL133616  | 3966.537  | 4823.708  |
| NM_005827 | 5551.662  | 5551.478  | NM_00673C | 1540.901  | 1953.419  | AK026382  | 1470.337  | 1389.424  |
| NM_003053 | 3418.165  | 3440.468  | NM_005644 | 1981.168  | 2412.77   | AK091169  | 2417.968  | 2426.442  |
| NM_003044 | 1337.663  | 1422.92   | NM_018442 | 2865.512  | 2707.683  | NM_01474E | 26245.248 | 26150.109 |
| NM_006672 | 6762.262  | 6328.089  | NM_00601E | 609.355   | 788.797   | AF086026  | 5373.421  | 6530.356  |
| M31659    | 1033.366  | 979.392   | NM_004634 | 1965.949  | 3014.932  | AL133011  | 348.54    | 224.372   |
| NM_01622E | 7996.311  | 7592.336  | NM_002017 | 4750.179  | 7975.884  | NM_01630C | 424.861   | 497.279   |
| AK024311  | 731.173   | 735.14    | NM_017523 | 8591.705  | 24298.617 | NM_015607 | 13495.822 | 12633.293 |
| AF052155  | 4589.516  | 3509.97   | NM_002382 | 13116.322 | 16140.641 | AK026955  | 1410.64   | 1316.688  |
| NM_00508E | 1945.781  | 1669.131  | NM_00215E | 593.518   | 665.515   | AL110202  | 11837.101 | 11879.137 |
| AF060902  | 1767.557  | 1711.096  | U13223    | 5729.365  | 7309.701  | AK021980  | 545.543   | 659.547   |
| AF121858  | 5220.722  | 5177.576  | NM_01627C | 2016.839  | 2233.405  | S46402    | 770.046   | 624.016   |
| NM_013437 | 985.052   | 850.749   | AK001357  | 1225.348  | 726.721   | Z83940    | 712.328   | 669.059   |
| AK025966  | 2707.46   | 3459.037  | NM_015721 | 1508.915  | 1150.523  | NM_00580C | 1051.424  | 941.448   |
| NM_01444C | 527.052   | 665.711   | AF086298  | 552.598   | 556.179   | AF019617  | 2797.343  | 2556.687  |
| NM_01872E | 694.651   | 799.504   | AK027238  | 582.246   | 659.966   | AL137305  | 4832.068  | 4186.978  |
| NM_003081 | 22072.191 | 24721.617 | AK025758  | 449.101   | 283.453   | NM_00529C | 428.77    | 368.526   |
| NM_01649E | 2109.529  | 1496.423  | S94540    | 12874.187 | 17042.379 | AK025802  | 409.276   | 480.848   |
| D50402    | 20304.414 | 19892.57  | U79297    | 558.147   | 485.565   | AF085973  | 351.514   | 424.819   |
| M73547    | 6054.484  | 5320.35   | AK002164  | 510.818   | 939.332   | NM_018013 | 1995.207  | 2539.698  |
| NM_003687 | 1283.222  | 1204.733  | AF052122  | 6858.203  | 7743.921  | AK022517  | 919.535   | 1060.137  |
| NM_00314E | 39123.996 | 36527.336 | AL122047  | 6492.773  | 11040.145 | NM_00032E | 13010.942 | 15872.307 |
| NM_001632 | 1200.681  | 1135.687  | AF052091  | 1194.984  | 1747.969  | NM_001182 | 3508.36   | 4242.988  |

|           |           |           |           |           |           |             |           |           |
|-----------|-----------|-----------|-----------|-----------|-----------|-------------|-----------|-----------|
| NM_012264 | 1027.867  | 904.842   | AK024447  | 46310.52  | 47872.023 | NM_000333   | 1600.716  | 1629.663  |
| AF311312  | 1871.625  | 1910.287  | AF052145  | 1170.041  | 1296.189  | NM_000172   | 2460.662  | 2821.979  |
| NM_017765 | 14698.88  | 14057.514 | AF086458  | 1644.824  | 2328.647  | NM_002297   | 2749.826  | 3109.757  |
| NM_000425 | 710.225   | 843.355   | AF086548  | 1927.03   | 2290.411  | AB040968    | 7518.739  | 8171.309  |
| AB040967  | 6805.843  | 5139.768  | AK024350  | 706.355   | 932.489   | X85323      | 605.623   | 779.969   |
| NM_003575 | 504.327   | 630.512   | AK023717  | 1199.443  | 1620.955  | U17615      | 1596.806  | 1299.214  |
| NM_014721 | 1348.046  | 1564.658  | AK023727  | 522.637   | 364.95    | NM_005303   | 2396.281  | 2269.406  |
| AK026352  | 831.603   | 1778.026  | AK025271  | 634.05    | 432.635   | NM_016125   | 8723.529  | 9047.361  |
| AL137705  | 4375.454  | 5131.561  | AF086204  | 2556.442  | 1979.176  | U84119      | 905.6     | 874.915   |
| U41898    | 560.456   | 673.742   | NM_007021 | 584.392   | 497.31    | NM_003605   | 1109.27   | 1083.349  |
| NM_014845 | 849.475   | 1147.538  | AK026283  | 280.676   | 235.165   | AF302079    | 8924.657  | 7562.703  |
| BF217766  | 700.406   | 720.675   | AK021570  | 476.475   | 555.566   | AJ224167    | 303.078   | 520.702   |
| NM_000184 | 1783.048  | 1795.588  | AL360204  | 420.917   | 357.921   | NM_002550   | 255.323   | 279.843   |
| NM_016180 | 500.995   | 649.956   | AK000103  | 820.449   | 628.795   | NM_000692   | 1452.3    | 1460.01   |
| NM_002103 | 11972.424 | 13222.271 | AF085959  | 632.372   | 992.308   | AF086062    | 1036.059  | 1200.532  |
| NM_003375 | 7234.323  | 6760.752  | AF075107  | 413.104   | 277.068   | L47668      | 11741.534 | 13194.282 |
| NM_006585 | 6143.013  | 6750.442  | AK023104  | 766.588   | 718.149   | NM_017920   | 1864.171  | 2121.181  |
| AB007875  | 1228.284  | 968.993   | AK022181  | 200.256   | 329.287   | AK025345    | 574.281   | 797.653   |
| NM_014795 | 349.704   | 625.088   | AK026923  | 1098.406  | 1864.567  | D25274      | 5063.211  | 6708.462  |
| AL050288  | 32167.416 | 42318.605 | Y11177    | 826.878   | 1740.588  | CY3Cy5      | 1554.499  | 133.863   |
| NM_005040 | 5400.107  | 7278.804  | U61091    | 323.14    | 181.359   | D50373      | 304.217   | 710.105   |
| NM_016391 | 13414.166 | 15085.636 | AK021691  | 9302.408  | 9990.053  | AA488757    | 1607.642  | 1582.375  |
| AF075033  | 3098.836  | 2856.635  | AK023595  | 314.154   | 372.325   | AI394286    | 1533.169  | 1182.263  |
| D50911    | 11179.764 | 12486.597 | AK000141  | 2379.946  | 1891.968  | H07071      | 661.101   | 1074.363  |
| AB011104  | 2278.126  | 2781.172  | AL137758  | 1450.182  | 1168.832  | M25322      | 1101.748  | 919.975   |
| AK024069  | 7672.483  | 7768.858  | AK025786  | 617.629   | 559.47    | H-L 27586 I | 1163.308  | 986.437   |
| NM_004582 | 10327.521 | 9810.343  | AK024188  | 693.72    | 685.955   | ID 1867426  | 1539.489  | 975.298   |
| NM_015640 | 14897.399 | 13888.506 | AK026820  | 452.551   | 419.902   | W99328      | 621.801   | 377.576   |
| AF233450  | 974.105   | 1009.188  | AK001716  | 1354.597  | 1328.234  | BE735403    | 647.986   | 465.277   |
| NM_016233 | 2033.989  | 1928.445  | AK026821  | 727.335   | 612.821   | NM_022552   | 1887.625  | 1082.781  |
| NM_000821 | 14707.251 | 13308.163 | AK026280  | 3488.708  | 3413.851  | NM_014385   | 2955.519  | 2060.243  |
| AF308602  | 1281.249  | 1293.057  | AF113017  | 2356.888  | 2913.895  | SR6         | 1786.529  | 1332.104  |
| AB011089  | 830.107   | 851.495   | AL080232  | 3265.88   | 3583.978  | SR8         | 6534.323  | 12303.002 |
| AF007192  | 951.162   | 947.565   | AK001120  | 3166.413  | 3940.896  | SR10        | 23144.182 | 4053.453  |
| NM_001275 | 5794.736  | 5491.279  | AK022416  | 391.508   | 593.697   | CY3Cy5      | 1278.323  | 79.264    |
| NM_016157 | 897.082   | 833.746   | AK023224  | 1672.301  | 1886.097  | NM_005811   | 1562.853  | 4044.137  |
| NM_014915 | 14851.002 | 14547.823 | AK023731  | 1989.143  | 1534.088  | NM_005764   | 422.511   | 563.37    |
| NM_012285 | 1418.482  | 1458.354  | AK023929  | 207.649   | 369.798   | NM_016362   | 517.477   | 522.873   |
| NM_002195 | 3915.73   | 3891.107  | AK022442  | 626.258   | 924.625   | NM_004214   | 3479.119  | 3320.323  |
| D84294    | 1764.75   | 2194.956  | AK023336  | 685.043   | 705.827   | NM_004325   | 4409.228  | 4417.181  |
| K02765    | 1704.294  | 1553.794  | AK023771  | 464.62    | 572.697   | NM_002835   | 2142.258  | 1832.146  |
| M65134    | 808.075   | 887.771   | AK026873  | 1537.429  | 1358.416  | NM_020167   | 895.046   | 1038.462  |
| BG539651  | 8765.979  | 7912.086  | AK026394  | 935.718   | 814.65    | AL049963    | 7713.39   | 5914.071  |
| N52646    | 16609.244 | 16405.604 | NM_005445 | 664.805   | 733.908   | NM_016055   | 12267.458 | 10195.804 |
| AW160671  | 47829.867 | 43439.246 | AK025943  | 12160.548 | 9999.653  | NM_014005   | 574.96    | 429.925   |
| BI870529  | 4487.088  | 4413.511  | BG106479  | 649.099   | 534.732   | NM_004635   | 847.284   | 553.336   |
| AA702698  | 801.729   | 1257.888  | AF130069  | 11487.438 | 8830.945  | AK022603    | 548.674   | 317.744   |
| AI681514  | 848.401   | 934.526   | AL109669  | 1336.648  | 1314.946  | NM_004895   | 2423.324  | 1229.82   |
| NM_001300 | 1808.158  | 2162.411  | AB037766  | 1012.741  | 828.429   | NM_003975   | 2114.637  | 1430.678  |
| BG748827  | 6443.583  | 7083.487  | AK026995  | 366.49    | 115.645   | NM_017685   | 562.932   | 512.644   |
| AA952897  | 1294.262  | 1536.365  | AL133091  | 666.808   | 553.684   | AK025612    | 1470.521  | 1021.554  |
| BG760342  | 2204.254  | 2261.405  | AF086212  | 401.387   | 275.72    | NM_012265   | 861.029   | 949.037   |
| AA703141  | 648.127   | 847.139   | X82545    | 2821.233  | 2645.636  | NM_012203   | 769.027   | 1164.049  |

|           |           |           |           |           |           |           |           |           |
|-----------|-----------|-----------|-----------|-----------|-----------|-----------|-----------|-----------|
| AI122630  | 6834.947  | 6904.547  | AK024632  | 3105.132  | 3172.99   | NM_004736 | 2328.859  | 1580.536  |
| NM_003081 | 21924.273 | 21337.338 | NM_018474 | 5374.085  | 5393.552  | NM_006456 | 5086.118  | 2874.972  |
| NM_016495 | 1207.178  | 1220.575  | AK024937  | 759.522   | 1065.537  | NM_003827 | 4194.763  | 5675.275  |
| D50402    | 19314.725 | 18032.451 | D17178    | 652.996   | 647.536   | NM_004583 | 687.765   | 904.59    |
| M73547    | 5484.566  | 5062.395  | AK022094  | 2619.006  | 2399.239  | NM_001103 | 525.964   | 1080.532  |
| NM_003687 | 1616.601  | 1652.88   | AK026695  | 667.774   | 896.927   | AF228710  | 5978.462  | 6796.775  |
| NM_004134 | 2915.666  | 2578.289  | U84520    | 1470.129  | 1504.693  | NM_018396 | 419.98    | 456.997   |
| NM_005955 | 2484.906  | 2246.026  | AL133616  | 3627.747  | 3194.871  | AY007131  | 13655.42  | 12846.905 |
| NM_004048 | 479.458   | 474.076   | AK026382  | 1410.662  | 1089.457  | U61735    | 2749.629  | 2136.867  |
| NM_012428 | 3198.188  | 2930.72   | AK091169  | 1130.728  | 1239.759  | NM_001144 | 1715.333  | 1361.5    |
| NM_013269 | 443.588   | 407.2     | NM_014745 | 29219.588 | 21433.492 | AK023766  | 4101.074  | 3490.544  |
| NM_001728 | 13578.786 | 13131.735 | AF086026  | 4499.045  | 4014.149  | NM_001897 | 1036.989  | 1443.468  |
| NM_005565 | 10127.981 | 10433.686 | AL133011  | 410.75    | 335.503   | NM_003853 | 1045.615  | 1168.422  |
| NM_003824 | 4894.736  | 4654.9    | NM_016300 | 540.097   | 540.746   | AB033109  | 1347.299  | 1179.819  |
| NM_000686 | 2015.263  | 2483.776  | NM_015607 | 17505.844 | 13957.154 | NM_002053 | 6534.527  | 4833.464  |
| NM_012452 | 8742.288  | 9861.875  | AK026955  | 1440.876  | 1215.714  | NM_006886 | 982.003   | 529.469   |
| AF229166  | 748.46    | 951.539   | AL110202  | 12052.209 | 11742.055 | NM_014586 | 657.664   | 420.512   |
| NM_005137 | 3413.084  | 3640.778  | AK021980  | 699.235   | 658.234   | NM_000756 | 629.702   | 587.417   |
| NM_006764 | 1852.975  | 2132.288  | S46402    | 1003.018  | 1202.857  | AK023334  | 826.707   | 572.451   |
| NM_001386 | 1617.84   | 2527.971  | AF075048  | 370.45    | 488.212   | NM_002563 | 5159.615  | 3741.76   |
| NM_001163 | 1247.025  | 1361.59   | Z83940    | 650.174   | 887.298   | NM_002437 | 848.762   | 681.77    |
| NM_005878 | 2508.967  | 4661.061  | NM_005800 | 1132.087  | 1397.278  | D79991    | 1375.43   | 1299.433  |
| BF217766  | 650.227   | 655.273   | AF019617  | 7058.138  | 8380.05   | AK022425  | 408.504   | 275.616   |
| NM_000184 | 1716.153  | 1575.481  | AL137305  | 6357.031  | 7411.987  | NM_000054 | 1462.712  | 1053.239  |
| NM_016180 | 582.203   | 578.721   | NM_005290 | 462.479   | 583.125   | NM_014713 | 2856.594  | 2157.383  |
| NM_000112 | 843.087   | 628.573   | AK025802  | 518.533   | 588.122   | NM_001812 | 1148.712  | 497.505   |
| NM_005827 | 5663.226  | 6121.042  | AF085973  | 429.544   | 476.148   | NM_014785 | 490.842   | 333.635   |
| NM_003053 | 3475.299  | 3526.136  | NM_018013 | 2712.612  | 3324.831  | NM_006033 | 1550.492  | 1850.741  |
| NM_003044 | 1634.814  | 1481.102  | AK022517  | 792.536   | 462.337   | NM_004837 | 4832.437  | 5825.382  |
| NM_006672 | 7991.18   | 6710.148  | NM_000329 | 11632.289 | 9735.48   | NM_000370 | 1283.953  | 1339.794  |
| M31659    | 934.461   | 1000.79   | NM_001182 | 2675.928  | 2488.247  | BE865893  | 1683.555  | 1913.284  |
| NM_003056 | 6807.757  | 7657.415  | NM_000333 | 1491.915  | 1108.75   | NM_003123 | 28725.297 | 27932.207 |
| NM_016226 | 7396.279  | 7783.101  | NM_000172 | 2425.54   | 2162.569  | AY005822  | 3514.675  | 3066.362  |
| AK024311  | 761.74    | 784.252   | NM_002297 | 2175.214  | 1831.287  | NM_018126 | 7473.733  | 5841.694  |
| AF052155  | 5045.641  | 5999.382  | AB040968  | 6705.93   | 5659.882  | AF289022  | 1922.108  | 1489.67   |
| NM_005085 | 2428.657  | 2799.994  | X85323    | 586.383   | 555.371   | M17252    | 288.273   | 271.593   |
| AF060902  | 2312.263  | 2374.741  | U17615    | 1323.292  | 878.819   | NM_016025 | 2129.947  | 1658.709  |
| AF121858  | 5802.852  | 6398.781  | NM_005303 | 3149.301  | 2518.84   | NM_013316 | 1403.765  | 1053.276  |
| NM_013437 | 1255.857  | 1637.527  | NM_016126 | 7363.496  | 7591.55   | NM_000746 | 614.938   | 581.782   |
| NM_017681 | 417.431   | 501.263   | U84119    | 933.625   | 978.325   | NM_000722 | 625.569   | 479.053   |
| X57655    | 424.527   | 559.196   | NM_003608 | 1802.76   | 1579.052  | NM_006030 | 469.425   | 194.636   |
| AK025966  | 2833.17   | 3240.785  | AF302079  | 12172.441 | 12471.036 | NM_020410 | 4013.95   | 2672.459  |
| NM_014440 | 371.115   | 409.446   | AJ224167  | 382.856   | 378.661   | AF000143  | 5118.843  | 4269.136  |
| NM_018725 | 730.875   | 765.818   | NM_002550 | 351.617   | 519.837   | NM_000814 | 405.062   | 239.145   |
| AK024069  | 7540.386  | 6969.809  | NM_000692 | 1696.932  | 1545.768  | NM_000453 | 1230.524  | 1185.609  |
| NM_004582 | 9151.066  | 8236.689  | AF086062  | 1263.248  | 1502.528  | J03077    | 9724.366  | 9272.334  |
| NM_015640 | 12088.206 | 11322.365 | L47668    | 20098.701 | 18267.986 | J03048    | 6673.703  | 11734.541 |
| AF233450  | 816.268   | 965.25    | NM_017920 | 2401.31   | 2641.539  | NM_002868 | 3285.079  | 2688.457  |
| NM_016233 | 2016.395  | 2093.428  | AK025345  | 605.778   | 905.602   | AK024100  | 2038.851  | 1267.772  |
| NM_000821 | 15691.805 | 18038.795 | D25274    | 5159.125  | 5968.734  | NM_005135 | 890.429   | 483.31    |
| NM_020121 | 636.956   | 907.086   | CY3Cy5    | 577.488   | 114.453   | NM_000317 | 3857.442  | 3253.797  |
| NM_003145 | 39688.934 | 38868.617 | D50373    | 404.956   | 491.105   | NM_018376 | 4606.17   | 4454.408  |
| NM_001632 | 1404.18   | 1406.763  | AA488757  | 2325.63   | 1945.056  | NM_017615 | 386.698   | 337.085   |



|           |           |           |             |           |           |             |           |          |
|-----------|-----------|-----------|-------------|-----------|-----------|-------------|-----------|----------|
| NM_012264 | 1023.898  | 853.568   | AI394286    | 1453.744  | 1079.27   | NM_01743E   | 2064.817  | 1801.288 |
| AF311312  | 1936.117  | 1965.936  | H07071      | 835.755   | 672.229   | U59209      | 1738.532  | 1537.327 |
| NM_001179 | 387.327   | 394.611   | M25322      | 1384.666  | 777.383   | NM_02019E   | 1940.473  | 1812.496 |
| NM_00531E | 49166.992 | 51346.711 | H-L 27586 I | 833.529   | 526.815   | AK023824    | 2207.143  | 1922.528 |
| NM_01776E | 16106.146 | 17516.32  | ID 214180   | 383.19    | 339.88    | AL133069    | 2628.949  | 1921.193 |
| NM_00042E | 877.087   | 970.231   | ID 1867426  | 1485.055  | 750.117   | AL117574    | 411.217   | 443.87   |
| AB040967  | 8257.351  | 8534.027  | W99328      | 456.936   | 262.731   | AK026055    | 4166.46   | 2611.574 |
| NM_00357E | 889.713   | 650.676   | BE735403    | 603.775   | 415.904   | AK024126    | 1009.478  | 707.911  |
| NM_014721 | 1881.73   | 2210.448  | NM_02255E   | 2236.073  | 1032.884  | NM_00151E   | 3664.7    | 2299.309 |
| AK026352  | 1758.762  | 2913.257  | NM_01438E   | 3549.952  | 2589.491  | NM_002744   | 1252.535  | 1070.772 |
| AL137705  | 4157.399  | 5207.445  | SR2         | 40903.68  | 21618.789 | NM_015917   | 5376.231  | 3727.009 |
| U41898    | 483.883   | 675.404   | SR4         | 9625.707  | 5232.111  | NM_000061   | 4314.996  | 3288.888 |
| NM_00726E | 15887.108 | 14967.901 | SR6         | 1202.624  | 1037.209  | AB046859    | 3857.764  | 2804.506 |
| NM_01478E | 8203.117  | 9125.468  | SR8         | 5451.324  | 12392.078 | NM_00510E   | 3342.952  | 3094.578 |
| NM_01405E | 2274.18   | 2438.542  | SR10        | 18698.123 | 5319.215  | AK023573    | 1903.783  | 2179.201 |
| NM_002571 | 881.498   | 808.833   | CY3Cy5      | 609.944   | 56.877    | NM_00273C   | 2859.812  | 2592.643 |
| NM_00493E | 3313.178  | 3232.618  | NM_005811   | 2349.919  | 1773.402  | NM_00482E   | 2465.457  | 2016.572 |
| NM_00142E | 15545.693 | 17710.277 | NM_005764   | 460.973   | 272.586   | AB011540    | 5206.572  | 3646.526 |
| NM_01571C | 650.459   | 861.261   | NM_01636E   | 952.439   | 584.623   | NM_00004C   | 1619.685  | 1076.247 |
| NM_01415E | 5460.45   | 5286.251  | NM_004214   | 3316.973  | 2490.529  | NM_004631   | 2643.251  | 1599.935 |
| AK021591  | 848.133   | 922.469   | NM_00432E   | 5139.314  | 3219.692  | NM_00329E   | 453.064   | 567.552  |
| NM_01467E | 1305.609  | 1330.26   | NM_00283E   | 1841.897  | 1152.294  | NM_00473E   | 2587.243  | 2680.162 |
| NM_00658E | 4671.936  | 4184.432  | NM_020167   | 655.839   | 332.189   | NM_00689E   | 290.549   | 486.084  |
| AB007875  | 1505.755  | 1364.93   | AL049963    | 5790.708  | 3187.612  | NM_00645E   | 5367.128  | 5963.559 |
| NM_018261 | 1061.253  | 1344.867  | NM_01605E   | 8983.322  | 4331.002  | D50373      | 550.136   | 469.47   |
| NM_01479E | 856.884   | 892.69    | NM_01400E   | 670.77    | 328.331   | AA488757    | 2242.959  | 2034.971 |
| NM_00504C | 4328.398  | 5036.25   | NM_00463E   | 664.725   | 425.602   | AI394286    | 1282.671  | 1011.01  |
| M80783    | 378.394   | 447.847   | NM_00489E   | 3839.795  | 2279.506  | H07071      | 541.714   | 428.17   |
| AF075033  | 2872      | 3394.665  | NM_00397E   | 2039.96   | 1287.797  | M25322      | 1226.203  | 783.8    |
| D50911    | 12009.879 | 13683.926 | NM_01768E   | 568.93    | 226.701   | H-L 27586 I | 1062.062  | 983.318  |
| AB011104  | 2779.704  | 3299.415  | AK025612    | 1654.727  | 1047.734  | ID 214180   | 329.879   | 509.714  |
| NM_00324E | 1054.989  | 1183.563  | NM_01226E   | 918.634   | 631.419   | ID 1867426  | 1459.907  | 929.195  |
| NM_00107E | 2245.525  | 2662.43   | NM_01220E   | 481.802   | 234.285   | W99328      | 654       | 437.715  |
| NM_00055E | 4813.011  | 4802.915  | NM_00473E   | 1787.637  | 1805.842  | AI434176    | 385.055   | 216.135  |
| NM_00380E | 588.397   | 544.005   | NM_00689E   | 355.549   | 333.411   | BE735403    | 573.814   | 742.886  |
| AK000860  | 6887.072  | 7030.068  | NM_00645E   | 5375.431  | 5698.573  | AF116659    | 999.207   | 313.307  |
| NM_014961 | 1040.209  | 1240.696  | NM_003827   | 4182.513  | 4282.173  | D79991      | 1315.525  | 1237.006 |
| NM_02014E | 1656.109  | 1698.313  | NM_00458E   | 477.873   | 394.027   | AK022425    | 247.978   | 553.159  |
| AK021529  | 2765.23   | 2294.968  | NM_00110E   | 651.998   | 793.08    | NM_000054   | 1754.853  | 2185.796 |
| AB037845  | 2661.947  | 2521.68   | AF228710    | 6220.091  | 4448.744  | NM_01471E   | 3466.902  | 4383.215 |
| NM_00598C | 2235.514  | 2773.494  | NM_01839E   | 445.061   | 388.251   | NM_00181E   | 1239.048  | 1223.145 |
| NM_01619C | 55607.59  | 53475.242 | AY007131    | 14702.972 | 11861.843 | NM_01478E   | 671.146   | 603.178  |
| AL137579  | 11546.256 | 12113.192 | U61735      | 1958.16   | 1464.089  | NM_005811   | 2376.225  | 2158.678 |
| NM_01238E | 5954.679  | 5998.438  | NM_001144   | 1533.4    | 945.871   | NM_005764   | 465.674   | 281.817  |
| AJ271684  | 1421.295  | 1401.303  | AK023766    | 2531.756  | 1519.524  | NM_01636E   | 597.23    | 555.951  |
| AF255342  | 4804.291  | 7059.922  | NM_001897   | 887.693   | 712.705   | NM_004214   | 3623.393  | 3900.288 |
| NM_00330C | 7146.359  | 9393.331  | NM_00385E   | 963.057   | 569.527   | NM_00432E   | 5115.527  | 4906.31  |
| AK026682  | 2363.319  | 2774.821  | AB033109    | 1292.215  | 852.781   | NM_00283E   | 2144.341  | 2078.025 |
| NM_006471 | 26228.266 | 30680.006 | NM_00205E   | 7520.741  | 4658.542  | AL049963    | 6969.277  | 4324.288 |
| NM_00416E | 5524.485  | 6350.163  | NM_00688E   | 854.064   | 390.955   | NM_01605E   | 11957.897 | 7419.613 |
| NM_00036E | 938.287   | 1354.858  | NM_00243E   | 713.287   | 518.884   | NM_01400E   | 640.041   | 451.048  |
| NM_01658E | 1009.759  | 1158.944  | NM_01458E   | 969.578   | 574.737   | NM_00463E   | 821.385   | 594.105  |
| NM_00414C | 473.85    | 423.459   | NM_00075E   | 664.085   | 495.042   | NM_00489E   | 5452.013  | 7503.455 |

|           |           |           |           |           |           |           |           |           |
|-----------|-----------|-----------|-----------|-----------|-----------|-----------|-----------|-----------|
| NM_002866 | 9792.952  | 9813.785  | AK023334  | 632.951   | 224.17    | NM_003976 | 2629.084  | 5811.055  |
| NM_003860 | 1537.227  | 1548.343  | NM_002563 | 4781.08   | 2757.586  | NM_017688 | 605.242   | 728.606   |
| NM_005414 | 766.063   | 665.606   | NM_002437 | 679.9     | 364.143   | AK025612  | 1764.895  | 1359.926  |
| NM_004468 | 8520.017  | 9693.235  | D79991    | 891.959   | 804.745   | NM_012268 | 739.695   | 493.551   |
| NM_016031 | 17498.74  | 21043.617 | AK022425  | 397.508   | 141.825   | NM_012203 | 572.736   | 277.181   |
| NM_004804 | 1410.83   | 1171.71   | NM_000054 | 2846.569  | 2364.235  | J03077    | 9080.597  | 9699.106  |
| M92439    | 11976.761 | 11822.355 | NM_014713 | 3045.887  | 3032.685  | J03048    | 6686.788  | 15898.746 |
| AL117665  | 2999.656  | 2860.635  | NM_001812 | 839.813   | 733.413   | AL157469  | 468.921   | 651.06    |
| AF263541  | 1600.157  | 1430.059  | NM_014785 | 970.289   | 630.924   | NM_002868 | 3558.227  | 4944.536  |
| NM_001262 | 7916.168  | 8436.548  | NM_006033 | 1518.202  | 1309.13   | AK024100  | 1895.228  | 2279.356  |
| BE873030  | 2768.372  | 2428.41   | NM_004837 | 4055.418  | 3170.1    | NM_005135 | 952.885   | 1116.95   |
| NM_002440 | 844.198   | 1066.539  | NM_000370 | 1230.67   | 981.716   | NM_003827 | 4244.361  | 3726.168  |
| NM_003625 | 1095.887  | 1374.065  | BE865893  | 2260.696  | 1791.047  | NM_001103 | 508.634   | 206.919   |
| M33552    | 10625.781 | 10829.88  | NM_003123 | 31943.232 | 21542.211 | AF228710  | 5960.717  | 5014.057  |
| AJ252060  | 1876.873  | 2041.732  | AY005822  | 3036.609  | 2428.138  | AY007131  | 13422.148 | 12954.469 |
| NM_006403 | 4528.244  | 4845.505  | NM_018129 | 10443.016 | 7546.263  | U61735    | 2563.146  | 2389.043  |
| NM_018977 | 504.313   | 498.322   | AF289022  | 885.094   | 917.358   | NM_001144 | 1614.906  | 1377.488  |
| AJ001402  | 2796.669  | 2714.052  | M17252    | 289.071   | 352.407   | AK023766  | 3913.416  | 2839.145  |
| NM_004540 | 1493.651  | 1614.773  | NM_016025 | 1469.422  | 795.967   | NM_001897 | 988.005   | 895.022   |
| NM_000235 | 3048.359  | 2792.894  | NM_013319 | 1146.401  | 574.438   | NM_003853 | 896.014   | 902.091   |
| NM_015879 | 556.91    | 424.163   | NM_000746 | 591.775   | 397.94    | AB033109  | 1292.375  | 1076.178  |
| AF068236  | 41713.719 | 43743.773 | NM_000722 | 546.175   | 451.08    | NM_002053 | 6050.979  | 6034.645  |
| L25628    | 2484.024  | 2061.047  | NM_006030 | 544.28    | 431.476   | NM_014588 | 814.324   | 1241.38   |
| M37033    | 1828.806  | 1359.043  | NM_020410 | 3106.713  | 1784.143  | NM_000758 | 658.253   | 726.635   |
| NM_007171 | 2690.303  | 3151.189  | AF000143  | 6417.006  | 4554.458  | AK023334  | 942.773   | 508.028   |
| NM_004278 | 1911.466  | 2009.837  | NM_014211 | 561.929   | 67.65     | NM_002563 | 6478.775  | 4060.991  |
| NM_005632 | 1337.19   | 1574.837  | NM_000814 | 463.601   | 125.695   | NM_002437 | 791.262   | 446.542   |
| AK021499  | 1357.989  | 1464.847  | NM_000453 | 1092.017  | 768.487   | AK023573  | 1988.997  | 2158.427  |
| AK000336  | 1863.492  | 1727.062  | J03077    | 8479.534  | 6269.34   | NM_002730 | 2590.932  | 2572.057  |
| NM_002795 | 16395.818 | 15616.647 | J03048    | 6208.165  | 7894.207  | NM_004828 | 2645.932  | 2891.217  |
| NM_006292 | 3637.619  | 3413.372  | NM_002868 | 2868.167  | 3858.24   | AB011540  | 6911.252  | 8086.974  |
| AB007948  | 1415.721  | 1171.809  | AK024100  | 2004.069  | 2249.978  | NM_000040 | 2345.347  | 2822.169  |
| AB033066  | 1810.187  | 1149.191  | NM_005135 | 835.291   | 875.859   | NM_004631 | 2728.03   | 3653.193  |
| AF126028  | 2084.892  | 2260.444  | NM_000317 | 4431.023  | 3300.491  | NM_006033 | 1485.185  | 1728.489  |
| NM_007019 | 3085.617  | 3146.513  | NM_018376 | 3623.306  | 2639.535  | NM_004837 | 3401.956  | 3023.751  |
| NM_007075 | 751.575   | 940.841   | NM_017438 | 1597.064  | 1397.564  | NM_000370 | 1323.881  | 1134.765  |
| NM_017640 | 932.72    | 925.638   | U59209    | 1456.955  | 1064.518  | BE865893  | 1629.266  | 1420.536  |
| NM_017721 | 1859.551  | 2195.274  | NM_020195 | 1725.893  | 1551.112  | NM_003123 | 29079.027 | 23069.707 |
| NM_019088 | 5955.674  | 6072.442  | AK023824  | 2032.821  | 1649.969  | AY005822  | 3015.446  | 2549.579  |
| AB002373  | 1609.999  | 1853.513  | AL133069  | 1872.099  | 1272.63   | NM_018129 | 7264.779  | 5732.992  |
| NM_016350 | 32298.828 | 33906.387 | AK026055  | 2816.584  | 2291.569  | AF289022  | 1592.016  | 1171.089  |
| AK024167  | 3276.944  | 3125.04   | AK024126  | 720.793   | 630.619   | NM_016025 | 2224.933  | 1797.461  |
| AK025308  | 622.217   | 334.29    | NM_001516 | 3079.411  | 1912.412  | NM_013319 | 1366.334  | 1221.264  |
| NM_005026 | 3852.877  | 3222.213  | NM_002744 | 1504.271  | 1119.979  | NM_000746 | 738.631   | 720.224   |
| AF213356  | 2441.878  | 2225.624  | NM_015917 | 4452.943  | 2746.301  | NM_000722 | 628.235   | 670.808   |
| BC035716  | 2388.353  | 2306.93   | NM_020397 | 483.379   | 354.237   | NM_006030 | 791.077   | 721.513   |
| NM_018014 | 1098.771  | 813.76    | NM_000061 | 2748.359  | 1947.346  | NM_020410 | 4274.516  | 4458.375  |
| NM_002359 | 16754.777 | 16255.693 | AB046859  | 6655.678  | 3752.621  | AF000143  | 5202.344  | 5039.951  |
| AF230809  | 2293.567  | 2662.199  | NM_005109 | 3315.364  | 2064.797  | NM_000814 | 381.342   | 327.5     |
| NM_017894 | 39135.797 | 38387.426 | AK023573  | 2257.913  | 1586.714  | NM_000453 | 1397.225  | 906.596   |
| NM_006509 | 1634.686  | 1455.818  | NM_002730 | 1676.671  | 1646.13   | NM_022552 | 2166.98   | 2149.388  |
| AK025447  | 1305.122  | 1501.437  | NM_004828 | 2285.317  | 2204.01   | NM_014388 | 2909.424  | 3660.583  |
| NM_002624 | 47543.547 | 47674.945 | AB011540  | 13359.153 | 12805.589 | NM_001718 | 337.181   | 249.107   |

|           |           |           |             |           |           |             |          |          |
|-----------|-----------|-----------|-------------|-----------|-----------|-------------|----------|----------|
| AF006199  | 1486.616  | 1606.662  | NM_000040   | 4814.448  | 7378.959  | AF116659    | 1273.205 | 1381.656 |
| NM_004554 | 8337.071  | 7633.338  | NM_004631   | 2676.596  | 2632.343  | NM_000317   | 4547.593 | 4180.754 |
| NM_018119 | 2226.225  | 2318.565  | NM_003296   | 49.049    | 542.107   | NM_018376   | 4647.713 | 3824.836 |
| NM_014576 | 275.832   | 374.18    | NM_004736   | 1438.59   | 1442.442  | NM_017615   | 337.014  | 639.71   |
| AL162035  | 2150.628  | 2197.115  | NM_006895   | 286.548   | 303.942   | NM_017438   | 2067.553 | 1669.128 |
| NM_006692 | 1526.995  | 1886.806  | NM_006459   | 4705.638  | 4587.724  | U59209      | 1902.354 | 1532.014 |
| NM_003084 | 2198.745  | 2193.302  | D50373      | 493.052   | 298.854   | NM_020195   | 2308.684 | 1576.732 |
| NM_002582 | 5499.276  | 6288.449  | AA488757    | 1424.266  | 1322.954  | AK023824    | 1957.284 | 1829.527 |
| NM_001005 | 58192.855 | 56297.277 | AI394286    | 1174.659  | 826.3     | AL133069    | 2369.915 | 2053.568 |
| NM_001026 | 65997.516 | 67365.477 | H07071      | 491.648   | 511.669   | AL117574    | 439.998  | 229.658  |
| NM_001011 | 57997.445 | 57112.789 | M25322      | 1275.302  | 791.727   | AK026055    | 4741.17  | 3832.021 |
| D17289    | 7675.582  | 7356.283  | AA436187    | 888.196   | 981.571   | AK024126    | 1060.692 | 817.731  |
| NM_002946 | 16835.834 | 16364.294 | H-L 27586 I | 809.266   | 874.93    | NM_001516   | 4108.278 | 3447.585 |
| NM_014230 | 6950.438  | 5795.679  | ID 1867426  | 1404.549  | 815.716   | NM_002744   | 1446.503 | 1365.419 |
| NM_017748 | 3492.351  | 3501.465  | ID 396450   | 228.367   | 255.083   | NM_015917   | 5807.319 | 5032.507 |
| AK025374  | 953.845   | 1019.36   | W99328      | 370.199   | 285.323   | NM_020397   | 445.444  | 428.922  |
| NM_014901 | 5709.758  | 6030.68   | BE735403    | 820.69    | 477.099   | NM_000061   | 5044.825 | 4228.559 |
| AK000005  | 6504.255  | 7375.679  | NM_022552   | 1953.744  | 1145.5    | AB046859    | 4879.708 | 2914.076 |
| AF086790  | 1640.404  | 1816.222  | NM_014389   | 3189.438  | 2707.808  | NM_005105   | 3225.032 | 1926.345 |
| U28480    | 622.097   | 541.795   | AF116659    | 1356.547  | 1523.358  | NM_003976   | 2155.53  | 2490.08  |
| NM_000108 | 10136.783 | 10118.752 | AK022425    | 323.76    | 542.719   | AK025612    | 1893.984 | 1665.96  |
| NM_018128 | 2298.595  | 2374.612  | NM_000054   | 1676.739  | 1594.048  | NM_012268   | 828.083  | 822.331  |
| NM_016931 | 11354.729 | 14527.988 | NM_014713   | 2803.092  | 2432.652  | NM_012203   | 494.449  | 595.486  |
| NM_004373 | 26653.535 | 26090.225 | NM_001812   | 940.616   | 717.703   | NM_004736   | 1750.133 | 1830.128 |
| NM_005566 | 57487.328 | 52710.59  | NM_014785   | 585.54    | 456.793   | NM_006895   | 302.984  | 206.777  |
| NM_000162 | 2936.545  | 2368.85   | NM_005811   | 1651.773  | 1230.061  | NM_006455   | 5399.428 | 4730.094 |
| AK027067  | 655.369   | 485.057   | NM_005764   | 402.182   | 242.527   | D50373      | 471.004  | 561.731  |
| NM_016287 | 6112.734  | 6461.332  | NM_016362   | 741.086   | 442.182   | AA488757    | 2070.352 | 2043.68  |
| NM_003864 | 4070.049  | 3888.223  | NM_004214   | 3015.302  | 2369.012  | AI394286    | 1702.683 | 1060.521 |
| NM_006824 | 13466.527 | 13977.565 | NM_004329   | 5025.699  | 4271.381  | H07071      | 388.795  | 386.274  |
| NM_002107 | 933.091   | 845.366   | NM_002836   | 1732.865  | 1380.883  | M25322      | 1200.467 | 766.552  |
| NM_002694 | 9864.968  | 9951.432  | NM_020167   | 613.216   | 365.284   | AA436187    | 456.759  | 306.016  |
| NM_004454 | 1660.189  | 1804.964  | AL049963    | 5702.788  | 3861.272  | H-L 27586 I | 1062.794 | 825.982  |
| NM_000966 | 588.324   | 564.067   | NM_016058   | 9523.728  | 5107.99   | ID 214180   | 336.692  | 386.593  |
| NM_012482 | 2576.536  | 2626.608  | NM_004636   | 695.572   | 565.235   | ID 1867426  | 1198.916 | 949.12   |
| AF217227  | 1823.807  | 1810.706  | AK022603    | 467.525   | 318.447   | W99328      | 610.226  | 461.448  |
| AK024141  | 4805.699  | 5490.631  | NM_004896   | 4692.588  | 3264.56   | BE735403    | 671.227  | 438.374  |
| U13706    | 494.128   | 437.273   | NM_003976   | 1666.76   | 1493.757  | NM_002438   | 823.816  | 995.622  |
| NM_002813 | 12768.787 | 11620.097 | NM_017688   | 694.467   | 996.099   | NM_014585   | 619.814  | 649.02   |
| NM_001198 | 499.708   | 401.619   | AK025612    | 2318.676  | 1809.768  | NM_000755   | 676.466  | 922.573  |
| AK022745  | 2459.026  | 2475.233  | NM_012268   | 1120.996  | 1007.448  | AK023334    | 723.276  | 803.226  |
| AL049450  | 4085.048  | 3748.695  | NM_012203   | 508.628   | 496.316   | NM_002563   | 6576.35  | 6285.823 |
| NM_005086 | 34611.707 | 39085.031 | AL157469    | 353.262   | 245.366   | NM_002437   | 805.93   | 720.983  |
| NM_007238 | 1522.427  | 1160.593  | NM_002868   | 2283.552  | 2788.191  | D79991      | 1274.015 | 1228.918 |
| NM_017606 | 4138.748  | 4784.76   | AK024100    | 2112.534  | 2049.281  | NM_000054   | 1733.724 | 1530.128 |
| AK024644  | 6383.266  | 5437.354  | NM_005135   | 838.559   | 671.722   | NM_014713   | 3246.201 | 3121.569 |
| AB019573  | 726.568   | 700.346   | AF228710    | 5895.355  | 3580.499  | NM_001812   | 1066.208 | 1215.265 |
| U68494    | 1183.111  | 3434.7    | NM_018399   | 400.153   | 181.033   | NM_014785   | 641.894  | 598.386  |
| AF064254  | 966.481   | 872.925   | AY007131    | 15181.225 | 11617.924 | AK025175    | 461.52   | 752.627  |
| AL137360  | 5315.076  | 5155.57   | U61735      | 1710.951  | 1370.973  | NM_005811   | 1799.705 | 1804.139 |
| AF143331  | 489.563   | 775.234   | NM_001144   | 1240.44   | 860.613   | NM_005764   | 427.092  | 318.476  |
| AK000819  | 759.756   | 923.208   | AK023766    | 3247.874  | 2185.715  | NM_016362   | 448.217  | 379.395  |
| AF201941  | 1677.897  | 1625.08   | NM_001897   | 786.649   | 672.032   | NM_004214   | 3603.868 | 3306.261 |

|           |           |           |           |           |          |           |           |           |
|-----------|-----------|-----------|-----------|-----------|----------|-----------|-----------|-----------|
| AF026941  | 1565.798  | 2303.327  | NM_003853 | 885.668   | 743.82   | NM_004325 | 3985.242  | 3348.1    |
| NM_007070 | 3233.923  | 3358.49   | AB033109  | 814.736   | 744.377  | NM_002836 | 1425.482  | 1256.131  |
| AL133019  | 3676.48   | 3882.061  | NM_002053 | 8932.837  | 7156.031 | NM_020167 | 402.329   | 496.932   |
| AK026192  | 346.948   | 303.723   | NM_006889 | 820.34    | 760.91   | AL049963  | 6866.321  | 5371.724  |
| NM_014895 | 1493.953  | 1359.226  | NM_002438 | 831.578   | 634.206  | NM_016058 | 12585.588 | 9867.803  |
| AK024883  | 3810.707  | 3520.947  | NM_014589 | 827.964   | 765.443  | NM_014005 | 423.793   | 551.576   |
| AF217989  | 2938.91   | 2726.314  | NM_000759 | 908.651   | 1032.894 | NM_004636 | 639.819   | 615.453   |
| NM_017654 | 1262.064  | 1033.942  | AK023334  | 875.112   | 706.449  | NM_004896 | 5123.481  | 3106.675  |
| AL109696  | 860.195   | 941.218   | NM_002563 | 5525.993  | 5552.934 | NM_006030 | 535.848   | 577.032   |
| AK022190  | 1224.964  | 1008.104  | NM_002437 | 687.232   | 834.737  | NM_020410 | 4371.034  | 4370.146  |
| AJ011593  | 1267.325  | 1145.049  | NM_004828 | 1782.701  | 1801.064 | AF000143  | 5537.462  | 6095.113  |
| AJ227907  | 518.665   | 773.312   | AB011540  | 9614.042  | 8729.29  | NM_000814 | 331.254   | 452.884   |
| X89743    | 599.959   | 1056.948  | NM_000040 | 2958.575  | 3243.673 | NM_000453 | 1403.653  | 1523.913  |
| U17621    | 648.897   | 814.539   | NM_004631 | 2076.405  | 1952.56  | J03077    | 10216.562 | 12119.2   |
| AL049239  | 3429.778  | 3624.663  | NM_004837 | 3830.612  | 2791.594 | J03048    | 6476.768  | 12918.548 |
| NM_013288 | 1616.543  | 1435.767  | NM_000370 | 687.041   | 709.664  | AL157469  | 75.851    | 587.716   |
| M60721    | 9622.093  | 9776.825  | BE865893  | 1772.022  | 1177.61  | NM_002868 | 3445.753  | 3649.797  |
| L39061    | 2379.897  | 1911.213  | NM_003123 | 29090.803 | 14627.57 | AK024100  | 2340.734  | 2242.809  |
| AF071508  | 2101.135  | 2101.985  | AY005822  | 2616.711  | 2018.657 | NM_005135 | 920.544   | 882.15    |
| L07265    | 20308.557 | 22082.518 | NM_018129 | 10748.35  | 7243.087 | NM_003827 | 4195.727  | 4594.254  |
| L19369    | 325.938   | 512.28    | AF289022  | 861.647   | 733.316  | NM_004583 | 655.437   | 703.432   |
| D16472    | 6565.934  | 6793.523  | M17252    | 333.397   | 150.088  | NM_001103 | 523.975   | 443.446   |
| AL157459  | 1475.866  | 1578.631  | NM_016025 | 1767.138  | 1334.595 | AF228710  | 4757.406  | 4627.747  |
| AB020654  | 677.609   | 401.779   | NM_013319 | 1330.943  | 951.005  | NM_018396 | 959.83    | 911.461   |
| AL353954  | 953.648   | 767.855   | NM_000746 | 553.301   | 530.572  | AY007131  | 10849.266 | 11318.093 |
| NM_017630 | 3040.765  | 3742.769  | NM_000722 | 618.525   | 474.766  | U61735    | 2138.932  | 1936.246  |
| AK000778  | 1153.949  | 1235.98   | NM_006030 | 705.999   | 568.443  | NM_001144 | 1333.501  | 1795.066  |
| AK000932  | 484.473   | 447.193   | NM_020410 | 3493.148  | 3179.178 | AK023766  | 3621.544  | 3154.234  |
| AL133573  | 8116.622  | 8275.733  | AF000143  | 8861.424  | 8508.849 | NM_001897 | 1118.925  | 990.82    |
| AK000115  | 471.41    | 442.556   | NM_014211 | 521.528   | 482.51   | NM_003853 | 907.584   | 693.34    |
| AK000958  | 883.366   | 703.522   | NM_000814 | 610.576   | 645.22   | AB033109  | 1238.165  | 1135.284  |
| AK024523  | 762.671   | 645.222   | NM_000453 | 1098.43   | 1650.67  | NM_002053 | 6229.923  | 5155.07   |
| AK024600  | 2516.487  | 2189.854  | AF116659  | 1182.824  | 1198.084 | NM_002744 | 2214.851  | 2220.957  |
| AK024543  | 1886.234  | 2057.793  | NM_000317 | 5022.114  | 3398.268 | NM_015917 | 6291.926  | 5973.567  |
| AK024624  | 13292.255 | 11574.409 | NM_018376 | 3350.222  | 2332.07  | NM_020397 | 784.546   | 723.655   |
| AK025090  | 1242.418  | 1357.713  | NM_017615 | 288.532   | 205.849  | NM_000061 | 4598.998  | 5149.962  |
| NM_014152 | 257.585   | 593.014   | NM_017438 | 1379.085  | 1063.541 | AB046859  | 3840.129  | 4195.172  |
| D87682    | 1258.252  | 1469.229  | U59209    | 1063.044  | 720.952  | NM_005109 | 3309.447  | 3217.336  |
| AF321617  | 5604.597  | 8433.465  | NM_020195 | 1487.248  | 1090.504 | AK023573  | 2603.313  | 2724.615  |
| AF223389  | 974.384   | 907.494   | AK023824  | 2172.729  | 1662.635 | NM_002730 | 2907.457  | 3036.537  |
| AF086208  | 1304.498  | 1088.427  | AL133069  | 2154.987  | 2395.396 | NM_004828 | 2615.097  | 2543.935  |
| AK023335  | 3712.884  | 3323.731  | AK026055  | 3398.452  | 3040.757 | AB011540  | 8454.374  | 6958.797  |
| AK023187  | 1145.796  | 1303.002  | AK024126  | 705.129   | 668.185  | NM_000040 | 2567.643  | 2458.982  |
| AK022231  | 567.006   | 592.646   | NM_001516 | 3081.496  | 2272.878 | NM_004631 | 2757.596  | 2709.786  |
| NM_019033 | 1284.939  | 1533.143  | NM_002744 | 1759.993  | 1623.657 | NM_006033 | 1316.805  | 1632.335  |
| AL133101  | 1143.586  | 1027.213  | NM_015917 | 4881.926  | 4138.192 | NM_004837 | 4579.93   | 3912.226  |
| AK024602  | 29001.096 | 40115.836 | NM_020397 | 503.375   | 654.016  | NM_000370 | 1435.292  | 1296.901  |
| NM_018507 | 629.113   | 617.678   | NM_000061 | 3248.84   | 4167.696 | BE865893  | 1553.722  | 1406.297  |
| NM_000485 | 8303.705  | 8474.903  | AB046859  | 6461.097  | 6253.867 | NM_003123 | 24392.926 | 21436.369 |
| NM_018542 | 755.13    | 1077.126  | NM_005109 | 3952.07   | 7669.447 | AY005822  | 2938.791  | 3033.354  |
| AK025503  | 1854.022  | 2321.665  | NM_017688 | 589.215   | 485.726  | NM_018129 | 5266.193  | 5020.548  |
| AF130073  | 1851.263  | 1832.914  | AK025612  | 1597.814  | 1393.989 | AF289022  | 1284.046  | 1946.267  |
| AK024225  | 11386.229 | 13231.583 | NM_012268 | 804.934   | 814.35   | NM_016025 | 2069.334  | 1676.13   |

|           |           |           |             |           |           |           |           |          |
|-----------|-----------|-----------|-------------|-----------|-----------|-----------|-----------|----------|
| AF086334  | 1000.825  | 1053.972  | NM_012203   | 348.094   | 403.674   | NM_013319 | 1171.879  | 1034.703 |
| AL137602  | 479.355   | 785.299   | NM_004736   | 1395.519  | 1329.333  | NM_000746 | 663.2     | 488.592  |
| AF075035  | 21350.168 | 20424.576 | NM_006895   | 230.591   | 292.268   | NM_000722 | 433.283   | 395.75   |
| AL110180  | 3036.114  | 3092.094  | NM_006459   | 4089.359  | 2915.135  | NM_016116 | 469.176   | 519.077  |
| BC024924  | 7033.298  | 7105.44   | D50373      | 487.637   | 575.647   | NM_000929 | 569.726   | 529.549  |
| NM_017906 | 5120.744  | 5478.09   | AA488757    | 1784.926  | 1477.793  | NM_018655 | 1089.091  | 1081.113 |
| AL110286  | 3807.27   | 4100.309  | AI394286    | 1314.083  | 936.55    | NM_005663 | 1025.856  | 1679.993 |
| AF086374  | 738.062   | 691.766   | H07071      | 646.533   | 732.762   | X89960    | 1065.245  | 1115.386 |
| AL162066  | 13582.882 | 13852.888 | M25322      | 1185.83   | 1094.576  | NM_005773 | 836.444   | 1122.602 |
| NM_016096 | 12685.528 | 10069.625 | H-L 27586 I | 844.865   | 842.855   | NM_017644 | 3880.333  | 4225.312 |
| U79290    | 1583.402  | 1613.235  | ID 214180   | 385.07    | 166.079   | AB032971  | 211.415   | 410.068  |
| X98114    | 604.981   | 588.391   | ID 1867426  | 1566.066  | 1284.905  | NM_002482 | 1260.082  | 1220.047 |
| AK024197  | 591.31    | 361.366   | W99328      | 471.609   | 462.889   | AF116659  | 1149.743  | 1174.739 |
| NM_014040 | 4207.115  | 4476.286  | BE735403    | 737.896   | 749.729   | NM_000317 | 5279.151  | 5166.154 |
| AK000799  | 4422.735  | 4537.355  | NM_000759   | 668.042   | 707.686   | NM_018376 | 4741.157  | 3673.097 |
| NM_015582 | 18239.67  | 19359.436 | AK023334    | 764.748   | 699.284   | NM_017615 | 411.495   | 314.705  |
| AK027091  | 1239.945  | 1443.856  | NM_002563   | 5308.525  | 4549.967  | NM_017438 | 1783.361  | 1713.609 |
| NM_001526 | 2232.342  | 2270.858  | NM_002437   | 2984.608  | 2566.06   | U59209    | 1719.272  | 1630.253 |
| U31738    | 964.282   | 1033.171  | D79991      | 824.232   | 698.243   | NM_020195 | 2073.856  | 2322.155 |
| AF179890  | 3023.052  | 2637.922  | NM_000054   | 1717.196  | 1377.766  | AK023824  | 2101.606  | 3948.71  |
| AK023536  | 4385.138  | 4403.942  | NM_014713   | 2598.839  | 2075.438  | AL133069  | 2625.444  | 3532.623 |
| AK026561  | 2255.186  | 2482.875  | NM_001812   | 630.926   | 488.501   | AL117574  | 376.426   | 664.863  |
| AK021568  | 4640.575  | 4600.795  | NM_014785   | 540.973   | 477.759   | AK026055  | 4693.336  | 4046.718 |
| Z36838    | 855.316   | 535.583   | NM_005811   | 1782.858  | 1685.119  | AK024126  | 907.043   | 906.248  |
| AF088054  | 490.598   | 505.996   | NM_005764   | 488.755   | 325.952   | NM_001516 | 4082.092  | 4581.576 |
| AK023881  | 3067.003  | 3060.79   | NM_016362   | 740.59    | 597.719   | NM_019086 | 1023.837  | 999.554  |
| AK027114  | 57082.141 | 60992.586 | NM_004214   | 2983.593  | 2671.756  | NM_006670 | 2328.12   | 2428.066 |
| NM_016296 | 2347.182  | 2025.999  | NM_004329   | 4476.491  | 4446.231  | NM_012425 | 4329.107  | 5035.745 |
| AK002146  | 845.481   | 920.759   | NM_002836   | 1438.716  | 1465.381  | NM_002750 | 2763.551  | 2860.47  |
| NM_003159 | 1152.918  | 986.125   | NM_020167   | 570.307   | 486.703   | NM_000081 | 1766.1    | 1825.852 |
| AF086256  | 1118.802  | 792.242   | AL049963    | 6451.739  | 4384.164  | AK024134  | 2468.479  | 2803.655 |
| NM_015492 | 6598.616  | 7752.738  | NM_016058   | 10641.625 | 7599.655  | NM_003014 | 979.078   | 870.06   |
| NM_006933 | 735.656   | 789.382   | NM_014005   | 710.575   | 657.158   | NM_018558 | 759.376   | 817.422  |
| AF132204  | 2777.819  | 2903.75   | NM_004636   | 677.184   | 913.587   | NM_001974 | 1966.114  | 1629.878 |
| AK022874  | 4114.215  | 3874.044  | AK022603    | 409.499   | 361.598   | NM_013957 | 984.147   | 1101.416 |
| CY3Cy5    | 996.597   | 86.231    | NM_004896   | 4228.783  | 4383.539  | NM_002468 | 2601.778  | 2485.505 |
| BI912037  | 1216.366  | 1152.242  | NM_006030   | 726.772   | 707.694   | NM_003028 | 1379.039  | 1635.681 |
| AA454646  | 2431.793  | 2334.398  | AF000143    | 7798.327  | 7550.27   | NM_001566 | 523.159   | 530.197  |
| U18087    | 28963.74  | 26343.016 | NM_014211   | 522.676   | 492.195   | NM_016541 | 528.29    | 609.577  |
| U66349    | 680.963   | 689.842   | NM_000814   | 360.797   | 514.086   | NM_018548 | 3707.947  | 4077.707 |
| AA057156  | 1198.214  | 1327.542  | NM_000453   | 1099.697  | 1194.372  | NM_013401 | 906.188   | 892.065  |
| U19487    | 2157.456  | 2797.821  | J03077      | 7258.518  | 6700.819  | NM_018238 | 2272.383  | 3922.251 |
| AF166327  | 9570.054  | 11111.554 | J03048      | 7147.875  | 9063.367  | NM_006858 | 3507.414  | 9383.075 |
| AF260739  | 1576.738  | 2000.562  | AL157469    | 391.239   | 167.698   | NM_001405 | 2244.192  | 3979.963 |
| AF531423  | 2574.293  | 4111.633  | NM_002868   | 2654.565  | 2385.589  | NM_003880 | 495.325   | 499.947  |
| X76555    | 880.916   | 953.521   | AK024100    | 1576.545  | 1321.967  | AF131778  | 600.399   | 718.967  |
| NM_005432 | 1987.466  | 1854.457  | NM_005135   | 790.549   | 543.004   | NM_001562 | 5535.065  | 5236.021 |
| L10386    | 4035.817  | 4408.557  | NM_003827   | 3415.262  | 3237.229  | NM_013278 | 658.861   | 659.569  |
| AF061812  | 5102.387  | 5443.35   | NM_004583   | 322.895   | 421.503   | NM_003487 | 1588.585  | 1203.194 |
| AL136756  | 2061.791  | 2303.596  | NM_001103   | 299.897   | 271.447   | NM_006887 | 10415.434 | 8142.252 |
| NM_012469 | 7274.424  | 14075.881 | AF228710    | 5882.662  | 5044.614  | NM_006477 | 1130.047  | 1398.222 |
| NM_134260 | 6778.899  | 6203.481  | NM_018399   | 308.089   | 308.636   | NM_002880 | 4509.393  | 4685.343 |
| SR2       | 51377.086 | 33327.438 | AY007131    | 13754.462 | 13538.613 | NM_000678 | 2666.089  | 3139.821 |

|           |           |           |           |           |           |           |           |           |
|-----------|-----------|-----------|-----------|-----------|-----------|-----------|-----------|-----------|
| SR4       | 12358.197 | 7741.454  | U61735    | 1963.681  | 2299.572  | NM_001066 | 2310.773  | 2447.337  |
| SR6       | 2105.681  | 1095.655  | NM_001144 | 1321.335  | 1233.743  | NM_004657 | 756.035   | 670.064   |
| SR8       | 6693.072  | 12423.443 | AK023766  | 2432.06   | 1940.998  | NM_006291 | 2355.559  | 2335.094  |
| SR10      | 21993.613 | 4818.586  | NM_001897 | 735.451   | 896.125   | NM_018170 | 3995.704  | 3884.599  |
| CY3Cy5    | 618.143   | 108.162   | NM_003853 | 1030.204  | 1076.316  | NM_003867 | 509.093   | 307.82    |
| AL080157  | 1434.348  | 1824.948  | AB033109  | 923.971   | 1017.855  | AL162062  | 372.615   | 299.736   |
| NM_005308 | 1426.129  | 1345.738  | NM_002053 | 11314.094 | 11815.471 | NM_003173 | 3607.624  | 3669.938  |
| NM_000911 | 667.138   | 660.497   | NM_006889 | 674.304   | 880.015   | NM_005030 | 2625.669  | 3011.427  |
| NM_007227 | 545.399   | 506.943   | NM_002744 | 1919.596  | 2053.116  | NM_017584 | 1444.04   | 3522.49   |
| NM_007023 | 803.822   | 738.065   | NM_015917 | 7198.426  | 13129.235 | NM_020359 | 2126.747  | 2405.315  |
| NM_014461 | 826.273   | 693.712   | NM_020397 | 868.503   | 1069.813  | AB014541  | 5479.727  | 6805.58   |
| NM_003865 | 898.638   | 1056.94   | NM_000061 | 3921.994  | 3810.161  | NM_002583 | 1472.74   | 2138.557  |
| AB015330  | 4508.052  | 6008.868  | AB046859  | 6408.505  | 6901.182  | NM_006570 | 9622.354  | 12426.388 |
| NM_001455 | 4336.422  | 4961.182  | NM_005109 | 3436.708  | 3014.914  | NM_020348 | 581.075   | 1166.955  |
| L09071    | 579.032   | 1058.443  | AK023573  | 2161.093  | 2147.253  | NM_006034 | 3870.885  | 5754.913  |
| NM_003322 | 441.993   | 232.097   | NM_002730 | 2421.28   | 1939.203  | X56807    | 1535.566  | 2219.568  |
| BC036375  | 13196.438 | 8225.368  | NM_004828 | 1922.452  | 1932.519  | NM_000092 | 506.503   | 348.943   |
| NM_006363 | 5118.653  | 5054.652  | AB011540  | 8929.694  | 6780.483  | AF174600  | 3586.082  | 3856.591  |
| NM_020415 | 1557.255  | 1931.451  | NM_000040 | 2831.139  | 2328.985  | AK001003  | 1820.367  | 2110.822  |
| AL049667  | 4188.665  | 4118.371  | NM_004631 | 2342.896  | 1930.562  | NM_002800 | 16638.814 | 16508.729 |
| NM_000334 | 2294.701  | 2499.629  | NM_006033 | 1547.014  | 1647.353  | NM_018384 | 6184.052  | 7485.648  |
| NM_020400 | 770.412   | 978.136   | NM_004837 | 4497.859  | 4596.049  | AF282617  | 886.113   | 1264.947  |
| NM_001504 | 1637.063  | 1755.758  | NM_000370 | 898.253   | 1190.049  | AF157323  | 1671.471  | 1651.837  |
| D50926    | 2786.732  | 2825.348  | BE865893  | 1940.004  | 1798.06   | NM_006025 | 339.441   | 491.079   |
| BF205683  | 1952.336  | 1794.414  | NM_003123 | 29126.268 | 23312.209 | NM_005877 | 7144.793  | 6060.473  |
| NM_001548 | 478.719   | 563.922   | AY005822  | 2743.571  | 2934.107  | NM_003338 | 1674.615  | 1900.531  |
| NM_000758 | 8244.13   | 8356.036  | NM_018129 | 11383.053 | 15713.649 | NM_013396 | 810.296   | 939.555   |
| M17017    | 1145.232  | 1041.333  | AF289022  | 1041.952  | 2009.414  | NM_017752 | 847.476   | 803.82    |
| NM_002990 | 1095.495  | 1170.596  | NM_016025 | 1768.532  | 1838.681  | D26069    | 5516.766  | 5955.338  |
| NM_002432 | 10251.192 | 10476.224 | NM_013319 | 1174.201  | 1208.807  | BF107577  | 4825.003  | 5739.802  |
| AB033037  | 655.495   | 534.377   | NM_000746 | 732.737   | 759.841   | NM_005837 | 6332.103  | 7558.71   |
| L40400    | 2705.837  | 2183.477  | NM_000722 | 703.304   | 987.501   | NM_016625 | 3861.984  | 3186.038  |
| AK025688  | 1205.743  | 982.785   | NM_018655 | 989.344   | 978.65    | NM_017493 | 1020.501  | 1129.352  |
| Z36819    | 19554.727 | 13605.357 | NM_005663 | 1036.123  | 875.267   | NM_006136 | 3594.904  | 3356.587  |
| NM_014448 | 2264.651  | 1694.16   | X89960    | 802.327   | 1162.274  | AK025934  | 1053.488  | 861.226   |
| NM_004315 | 5558.675  | 5890.21   | NM_006550 | 586.17    | 661.314   | AJ008154  | 747.822   | 796.109   |
| NM_020166 | 3512.939  | 3374.551  | NM_005773 | 822.875   | 936.385   | NM_006856 | 3149.444  | 3918.654  |
| AK023860  | 1891.187  | 2043.385  | NM_017644 | 2567.657  | 2474.036  | X52350    | 56840.551 | 54602.191 |
| AK026061  | 703.107   | 495.889   | NM_002482 | 1082.215  | 1013.579  | AF071554  | 730.365   | 921.819   |
| NM_016286 | 5999.091  | 5869.826  | NM_001718 | 240.858   | 218.646   | U90919    | 1861.644  | 2128.674  |
| NM_001567 | 3119.949  | 3306.644  | AF116659  | 1317.774  | 1521.452  | NM_006177 | 457.126   | 522.199   |
| NM_004905 | 12027.42  | 11571.533 | NM_000317 | 5596.721  | 5983.5    | AL137286  | 3295.853  | 3207.176  |
| AF217971  | 3402.514  | 3616.249  | NM_018376 | 4057.161  | 5533.864  | NM_016358 | 3167.722  | 3984.691  |
| NM_001925 | 1186.611  | 1423.05   | NM_017615 | 328.085   | 505.614   | NM_016275 | 7247.423  | 6839.315  |
| AF245517  | 757.922   | 892.152   | NM_017438 | 1612.378  | 1554.309  | NM_020418 | 1177.477  | 1400.303  |
| NM_004982 | 1246.279  | 1642.172  | U59209    | 1149.547  | 1219.456  | NM_013293 | 1657.885  | 1616.507  |
| NM_000217 | 535.371   | 385.74    | NM_020195 | 1691.994  | 1745.328  | AF315592  | 3644.996  | 3500.815  |
| AK026180  | 644.234   | 341.21    | AK023824  | 2447.781  | 2713.217  | AF095844  | 868.153   | 903.101   |
| NM_013365 | 2487.747  | 2019.941  | AL133069  | 2271.364  | 2361.571  | NM_015833 | 1244.697  | 1069.742  |
| NM_005817 | 9625.333  | 7244.459  | AL117574  | 295.222   | 390.946   | NM_000986 | 57614.738 | 61829.324 |
| NM_003916 | 6027.834  | 4457.388  | AK026055  | 3456.216  | 3912.761  | AK026760  | 8036.587  | 7949.712  |
| NM_002870 | 21787.6   | 14941.09  | AK024126  | 778.993   | 923.303   | NM_014772 | 1543.87   | 1760.171  |
| NM_001478 | 42179.453 | 40313.211 | NM_001516 | 3773.716  | 4130.279  | AK025248  | 1068.183  | 1059.663  |

|           |           |           |           |           |           |           |           |           |
|-----------|-----------|-----------|-----------|-----------|-----------|-----------|-----------|-----------|
| NM_002612 | 242.207   | 234.047   | NM_019086 | 1155.36   | 1214.852  | NM_004536 | 9980.548  | 10142.159 |
| AF135422  | 3248.312  | 3772.04   | NM_006670 | 1653.874  | 2056.913  | NM_006428 | 5816.408  | 5059.221  |
| NM_004479 | 17583.869 | 18865.063 | NM_002750 | 2295.728  | 2681.303  | NM_004280 | 8651.716  | 8268.022  |
| AF070587  | 1202.214  | 1165.251  | NM_000081 | 1304.806  | 1705.859  | AF110399  | 606.285   | 799.038   |
| BE250526  | 860.888   | 812.883   | AK024134  | 2058.773  | 2325.606  | AK027094  | 1596.931  | 1696.852  |
| NM_016819 | 2156.818  | 2079.839  | NM_003014 | 775.72    | 764.976   | AL359596  | 601.659   | 729.551   |
| NM_012222 | 3915.051  | 3936.564  | NM_018558 | 493.95    | 491.616   | U79249    | 586.195   | 641.634   |
| NM_005002 | 1322.268  | 1544.243  | NM_001974 | 1220.268  | 1239.215  | AK022114  | 503.204   | 658.527   |
| NM_006596 | 2634.193  | 3087.61   | NM_013957 | 764.44    | 908.437   | AL133585  | 932.992   | 1023.904  |
| AK023214  | 5781.631  | 5835.944  | NM_002468 | 2038.943  | 1851.557  | NM_002631 | 10544.645 | 9240.132  |
| NM_001469 | 7165.732  | 8788.169  | NM_003028 | 1484.458  | 2096.48   | BF217864  | 2574.298  | 2949.228  |
| NM_003600 | 6585.724  | 7339.343  | NM_018548 | 3220.464  | 4394.476  | NM_005917 | 20209.346 | 20225.486 |
| NM_017490 | 4119.624  | 4428.014  | NM_013401 | 987.281   | 1687.058  | AV758498  | 1070.387  | 1024.889  |
| AK026727  | 2139.486  | 2159.115  | NM_018238 | 2601.847  | 2856.299  | NM_020196 | 1318.628  | 1464.788  |
| NM_006247 | 3328.438  | 2533.472  | NM_006858 | 5345.464  | 5447.706  | NM_018657 | 713.429   | 797.841   |
| AB032983  | 732.686   | 464.519   | NM_001405 | 3847.922  | 4626.358  | L40410    | 4257.154  | 4987.941  |
| NM_018281 | 7203.57   | 5385.992  | AF131778  | 920.496   | 1179.065  | NM_007055 | 1107.329  | 1068.019  |
| NM_004457 | 3817.56   | 2611.455  | NM_001562 | 5301.982  | 5679.018  | NM_016652 | 547.42    | 516.116   |
| NM_014049 | 1955.237  | 1605.222  | NM_013278 | 908.017   | 1331.458  | NM_016310 | 4092.724  | 3879.147  |
| NM_005396 | 467.654   | 206.791   | NM_003487 | 1764.403  | 1653.188  | AK021562  | 520.014   | 426.706   |
| BC036375  | 14985.596 | 13377.646 | NM_006887 | 8996.957  | 7175.079  | BC006560  | 469.9     | 152.499   |
| BI912037  | 1160.253  | 1270.323  | NM_002880 | 3687.962  | 3029.175  | NM_006296 | 712.224   | 812.473   |
| AA454646  | 2373.664  | 2101.184  | NM_000678 | 2981.885  | 3441.123  | AF060938  | 11800.646 | 12803.005 |
| U18087    | 26471.34  | 23088.643 | NM_001066 | 1669.834  | 2234.602  | NM_001973 | 1514.502  | 1889.232  |
| U66349    | 673.106   | 575.554   | NM_004657 | 2602.544  | 5052.408  | NM_014468 | 3051.29   | 6092.334  |
| AA057156  | 1274.235  | 1251.173  | NM_006291 | 2109.77   | 2035.114  | AL050015  | 1150.176  | 948.932   |
| U19487    | 2022.304  | 2136.552  | NM_018170 | 2676.433  | 2647.609  | AY007117  | 2858.928  | 2747.72   |
| AF166327  | 9867.301  | 11503.414 | NM_003867 | 508.747   | 509.763   | AF039698  | 1841.511  | 2336.96   |
| AF260739  | 1327.494  | 1390.478  | AL162062  | 249.911   | 330.74    | AB046828  | 2464.337  | 2891.115  |
| AF531423  | 1733.517  | 2008.664  | NM_003173 | 3089.661  | 4464.249  | AF144487  | 668.237   | 678.8     |
| X76555    | 933.019   | 993.997   | NM_006570 | 9114.341  | 8636.67   | AL137532  | 1319.595  | 1705.56   |
| NM_005432 | 1881.826  | 1759.873  | NM_020348 | 357.33    | 389.925   | AK025419  | 1550.474  | 1783.255  |
| L10386    | 3635.037  | 3153.533  | NM_006034 | 7484.225  | 8395.95   | NM_017413 | 554.968   | 542.96    |
| AF061812  | 4907.964  | 4500.07   | AB040943  | 124.66    | 473.146   | NM_013259 | 2691.354  | 2776.421  |
| AL136756  | 1470.538  | 1070.12   | NM_005201 | 6674.085  | 6978.519  | NM_018375 | 1997.244  | 1685.157  |
| NM_012469 | 4940.91   | 4313.112  | X56807    | 1548.991  | 1630.588  | NM_004913 | 501.085   | 473.596   |
| NM_134260 | 5997.667  | 3924.002  | NM_000092 | 313.587   | 379.829   | AK026838  | 864.239   | 779.703   |
| AK025688  | 1258.937  | 1052.564  | AF174600  | 3077.242  | 3186.281  | AK022443  | 852.977   | 898.958   |
| Z36819    | 21085.211 | 20267.975 | AK001003  | 1713.007  | 1906.499  | AK023371  | 979.298   | 1265.323  |
| NM_001195 | 287.311   | 585.083   | NM_018384 | 6171.677  | 5241.216  | AK025015  | 2593.966  | 4152.554  |
| NM_014448 | 3767.368  | 3156.296  | AF282617  | 816.53    | 881.329   | AF086187  | 2815.752  | 2899.701  |
| AL080157  | 1250.83   | 1350.079  | AF157323  | 1984      | 4266.384  | AF305836  | 31590.535 | 31076.135 |
| NM_005308 | 1201.721  | 1176.024  | NM_006025 | 425.823   | 504.612   | AL137383  | 202.969   | 364.469   |
| NM_000911 | 598.226   | 604.372   | NM_005877 | 6043.571  | 5567.25   | AL035295  | 427.96    | 401.745   |
| NM_007227 | 564.949   | 417.3     | NM_003338 | 1645.813  | 2036.496  | NM_018302 | 2170.299  | 1987.402  |
| NM_007023 | 859.758   | 849.975   | NM_013396 | 676.667   | 1015.586  | AK027252  | 1277.553  | 1369.626  |
| NM_014461 | 544.812   | 756.214   | BF107577  | 11156.539 | 12258.943 | AF165527  | 1129.297  | 1510.704  |
| AB015330  | 4589.984  | 4038.994  | NM_005837 | 6036.426  | 5939.913  | NM_014092 | 731.884   | 759.078   |
| NM_001455 | 3937.423  | 3565.236  | NM_016625 | 3598.627  | 2811.386  | AL110133  | 5264.09   | 5922.331  |
| L09071    | 512.452   | 408.55    | NM_017493 | 900.001   | 1063.935  | AK000529  | 1877.646  | 1889.825  |
| NM_003322 | 364.86    | 408.995   | NM_006136 | 3762.923  | 4062.518  | AK027243  | 1114.331  | 1018.774  |
| AK026180  | 630.886   | 568.063   | AF237772  | 13148.966 | 12888.932 | AF147415  | 736.537   | 859.453   |
| NM_013365 | 2366.484  | 2910.487  | AK025934  | 880.125   | 1226.943  | AL049273  | 592.101   | 919.707   |

|           |           |           |           |           |           |           |           |           |
|-----------|-----------|-----------|-----------|-----------|-----------|-----------|-----------|-----------|
| NM_005817 | 10098.666 | 11587.78  | AJ008154  | 792.763   | 1143.185  | AK098474  | 1052.385  | 1042.164  |
| NM_003916 | 7303.841  | 8908.165  | NM_006856 | 2454.895  | 2731.93   | AL117475  | 1121.531  | 1078.16   |
| NM_002870 | 31092.553 | 31459.127 | X52350    | 49791.32  | 57347.77  | NM_017535 | 2054.486  | 2188.676  |
| NM_006363 | 5228.091  | 4671.748  | AF071554  | 774.707   | 1031.292  | NM_003887 | 1017.82   | 1094.794  |
| NM_020415 | 1016.526  | 981.789   | U90919    | 1628.548  | 1786.042  | NM_004267 | 2444.222  | 2323.493  |
| AL049667  | 4275.942  | 4487.463  | AL137286  | 2927.962  | 3672.248  | AL357212  | 151.625   | 410.818   |
| NM_000334 | 2510.386  | 3259.902  | NM_016358 | 2731.707  | 2847.155  | AK026687  | 1801.592  | 1713.425  |
| NM_020400 | 903.084   | 1225.918  | NM_016275 | 5620.193  | 6773.032  | AL117444  | 404.7     | 611.41    |
| NM_001504 | 1809.203  | 2008.138  | NM_020418 | 1206.512  | 1332.285  | NM_017994 | 5556.933  | 5661.87   |
| D50926    | 2889.5    | 2676.821  | NM_013293 | 1476.392  | 1700.755  | AK021693  | 1161.281  | 1693.734  |
| BF205683  | 1953.552  | 1805.538  | AF315592  | 3590.39   | 4174.773  | AB023177  | 4322.185  | 5658.596  |
| NM_001548 | 457.746   | 347.217   | AF095844  | 890.954   | 1139.633  | Y11609    | 1125.907  | 1104.761  |
| NM_000758 | 7503.259  | 5932.977  | NM_015833 | 876.793   | 964.762   | NM_012122 | 4310.694  | 3896.313  |
| M17017    | 963.557   | 720.524   | NM_000986 | 53154.281 | 65526.988 | AF009285  | 3639.587  | 3986.936  |
| NM_002990 | 998.289   | 682.512   | AK026760  | 12805.496 | 13300.398 | NM_012125 | 1914.355  | 2224.381  |
| NM_002432 | 9460.911  | 6141.49   | NM_014772 | 1731.933  | 1984.017  | AB032363  | 331.009   | 317.624   |
| AB033037  | 800.786   | 626.355   | AK025248  | 1152.323  | 1144.96   | AF009294  | 1996.448  | 2215.59   |
| L40400    | 2346.37   | 1701.537  | NM_004539 | 10662.247 | 12486.321 | NM_001524 | 847.387   | 904.089   |
| NM_006247 | 3376.659  | 3030.354  | NM_006428 | 7171.943  | 12920.627 | AK000998  | 997.543   | 2288.631  |
| AB032983  | 815.413   | 613.868   | NM_004280 | 8457.653  | 10582.535 | AK001225  | 584.476   | 1377.521  |
| NM_018281 | 7957.616  | 8572.646  | AF110399  | 775.671   | 994.758   | AK021684  | 1381.813  | 1389.53   |
| NM_004457 | 3766.9    | 4035.055  | AK027094  | 1704.397  | 2014.319  | AK001060  | 486.309   | 414.561   |
| NM_014049 | 2339.829  | 2842.544  | AL359596  | 779.061   | 576.169   | AK021480  | 258.548   | 443.915   |
| NM_005396 | 440.607   | 464.109   | U79249    | 526.536   | 661.516   | AK025112  | 762.148   | 576.019   |
| NM_004315 | 6104.386  | 7071.008  | AK022114  | 544.961   | 547.2     | AK025173  | 1302.586  | 1493.443  |
| NM_020166 | 3524.646  | 3225.398  | AL133585  | 857.809   | 829.554   | AK026722  | 390.608   | 790.566   |
| AK023860  | 1878.328  | 1819.029  | NM_002631 | 8739.541  | 8404.172  | AF117338  | 1209.906  | 1085.879  |
| NM_000031 | 2689.399  | 2975.297  | BF217864  | 2651.439  | 3449.932  | AK025567  | 1348.994  | 1501.755  |
| NM_002085 | 32381.936 | 32506.15  | NM_005917 | 16009.288 | 18095.898 | U56857    | 1059.793  | 1354.958  |
| AK026061  | 526.849   | 524.302   | NM_007052 | 305.996   | 687.855   | L43349    | 330.932   | 473.052   |
| NM_016286 | 6652.968  | 6950.628  | BC017044  | 2332.352  | 5138.626  | BE905682  | 349.814   | 437.079   |
| NM_001567 | 3489.604  | 3794.463  | AV758498  | 1700.763  | 2365.11   | AF086421  | 1510.888  | 1928.48   |
| NM_004905 | 12582.055 | 12632.503 | NM_020196 | 1106.916  | 1430.622  | AK001612  | 1214.801  | 1362.029  |
| AF217971  | 3121.28   | 3358.917  | NM_018657 | 505.22    | 449.733   | AF161522  | 3532.099  | 3598.687  |
| NM_001925 | 997.05    | 1078.3    | L40410    | 3608.26   | 3676.87   | AF086028  | 3941.197  | 3530.401  |
| AF245517  | 787.788   | 822.549   | NM_007055 | 870.126   | 822.627   | U46119    | 1199.221  | 1020.148  |
| NM_004982 | 1199.611  | 798.68    | NM_016310 | 3768.383  | 3790.005  | AK025365  | 647.583   | 996.877   |
| NM_001694 | 54794.016 | 42336.098 | AK021562  | 445.36    | 700.683   | AK023489  | 424.369   | 614.527   |
| AF286370  | 441.944   | 347.455   | BC006560  | 466.76    | 654.769   | AK021561  | 712.36    | 803.334   |
| NM_000217 | 421.754   | 281.472   | NM_006298 | 529.526   | 743.113   | AK025222  | 628.91    | 1112.026  |
| NM_012469 | 5546.747  | 5787.848  | AF060938  | 13493.507 | 14880.084 | NM_003531 | 889.108   | 1102.908  |
| NM_134260 | 6061.514  | 5046.358  | NM_001973 | 1807.692  | 2455.8    | NM_017799 | 812.684   | 792.762   |
| NM_001478 | 46097.582 | 46027.922 | NM_014468 | 2678.146  | 3631.632  | AL137403  | 662.196   | 1443.203  |
| AF135422  | 2875.106  | 2526.469  | AL050015  | 1052.41   | 1003.494  | AL049348  | 278.782   | 393.388   |
| NM_004479 | 20579.711 | 23923.879 | AY007117  | 2157.186  | 2450.773  | NM_018534 | 345.71    | 660.195   |
| NM_002610 | 686.481   | 612.741   | AF039698  | 1197.394  | 1629.836  | AB037847  | 1317.214  | 1415.176  |
| AF070587  | 1554.274  | 986.234   | AB046828  | 2107.208  | 2419.469  | AL080186  | 564.409   | 537.347   |
| BE250526  | 890.664   | 1048.923  | AF144487  | 408.697   | 678.154   | NM_005306 | 13021.962 | 12901.411 |
| NM_016819 | 2467.859  | 2338.047  | AL137532  | 1795.521  | 1892.999  | NM_001646 | 3426.051  | 4181.817  |
| NM_012222 | 4176.36   | 4903.101  | AK025419  | 1048.225  | 1415.461  | AL137327  | 909.767   | 776.196   |
| NM_005002 | 1369.129  | 1214.084  | NM_017413 | 356.065   | 567.68    | AF358454  | 1801.573  | 2010.347  |
| NM_006596 | 2905.448  | 2973.044  | NM_013259 | 5389.98   | 12849.706 | AK026090  | 836.143   | 1565.465  |
| AK023214  | 5525.397  | 7188.213  | NM_018375 | 2005.632  | 2586.382  | AF070637  | 523.67    | 2774.908  |



|           |           |           |           |           |          |           |           |           |
|-----------|-----------|-----------|-----------|-----------|----------|-----------|-----------|-----------|
| NM_00146E | 6625.958  | 5810.523  | NM_004913 | 434.297   | 347.248  | AL137634  | 545.523   | 1050.256  |
| NM_00360C | 5769.17   | 4495.475  | AK026838  | 1046.058  | 1080.596 | AK024863  | 3017.908  | 4659.827  |
| NM_01749C | 3837.006  | 2671.194  | AK022443  | 463.228   | 548.611  | AJ008135  | 19050.627 | 26288.482 |
| NM_00271E | 1693.946  | 1065.493  | AK023371  | 1097.35   | 1053.878 | AK026908  | 2556.366  | 3952.668  |
| AK026727  | 1862.43   | 1558.629  | AK025015  | 1912.644  | 1491.593 | AB046766  | 669.942   | 763.833   |
| L09071    | 740.821   | 784.829   | AF086187  | 1445.403  | 1566.722 | AF009323  | 548.521   | 678.869   |
| NM_00332Z | 553.589   | 589.003   | AF305836  | 39916.793 | 40212.43 | Z25437    | 430.371   | 639.314   |
| BC036375  | 15751.095 | 14448.521 | AL035295  | 1001.311  | 1777.366 | AK001526  | 2425.335  | 2673.429  |
| BI912037  | 1326.558  | 1224.193  | NM_01830Z | 2264.865  | 3718.25  | AF086183  | 531.264   | 458.485   |
| AA454646  | 2708.213  | 2523.684  | AK027252  | 1751.899  | 2104.127 | AL137434  | 1196.778  | 1782.049  |
| U18087    | 28440.803 | 27992.254 | AF165527  | 1600.83   | 2591.5   | AL080216  | 1164.469  | 1388.925  |
| U66349    | 882.118   | 825.911   | NM_01409Z | 604       | 1028.285 | AF038188  | 5294.586  | 6048.056  |
| AA057156  | 1304.693  | 1546.665  | AL110133  | 5226.729  | 5319.585 | D17046    | 645.825   | 834.566   |
| U19487    | 1958.448  | 2119.458  | AL050053  | 309.554   | 158.383  | NM_01764E | 2450.073  | 4166.09   |
| AF166327  | 12621.444 | 27313.322 | AK000529  | 1724.384  | 2081.922 | AJ227864  | 1259.357  | 2039.018  |
| AF260739  | 1302.342  | 1178.795  | AK027243  | 843.084   | 971.999  | AF157562  | 4494.227  | 7100.151  |
| AF531423  | 1377.699  | 1356.837  | AF147415  | 542.145   | 924.644  | AK021958  | 6744.79   | 8106      |
| X76555    | 651.847   | 551.214   | AL049273  | 489.337   | 552.192  | M31164    | 1764.303  | 1918.574  |
| NM_00543Z | 1651.331  | 1204.506  | AK098474  | 327.385   | 411.39   | AF113674  | 7204.548  | 10000.974 |
| L10386    | 3634.198  | 2644.211  | AL117475  | 873.875   | 818.415  | NM_003511 | 493.401   | 1750.254  |
| AF061812  | 4876.396  | 4553.965  | NM_01753E | 2291.834  | 1933.151 | CY3Cy5    | 2372.204  | 174.107   |
| AL136756  | 1431.334  | 1433.08   | AL117539  | 172.971   | 288.755  | H97792    | 865.851   | 661.607   |
| NM_00299C | 1122.206  | 1213.872  | NM_003887 | 1060.166  | 1291.057 | M13509    | 483.191   | 326.473   |
| NM_00243Z | 10326.031 | 9585.525  | NM_004267 | 5106.762  | 4688.324 | X04076    | 4581.83   | 2363.03   |
| AB033037  | 753.321   | 796.376   | NM_020147 | 252.444   | 211.857  | AA485362  | 910.455   | 583.874   |
| L40400    | 3089.299  | 3347.951  | AL357212  | 379.339   | 314.494  | AJ222801  | 843.268   | 964.688   |
| AK025688  | 1348.61   | 1344.402  | AK026687  | 1435.008  | 1788.753 | W72207    | 34907.281 | 15523.238 |
| NM_01444E | 4152.563  | 3904.523  | AL117444  | 576.324   | 639.649  | BI772354  | 1533.547  | 1253.789  |
| AL080157  | 1227.446  | 1516.347  | AB023177  | 3895.136  | 5726.249 | AA733033  | 397.399   | 317.145   |
| NM_00530E | 1384.247  | 1487.154  | Y11609    | 1315.168  | 1779.58  | AA927490  | 1555.313  | 2384.235  |
| NM_000911 | 556.25    | 600.578   | NM_01212Z | 4308.769  | 4462.745 | SR5       | 2955.214  | 4987.934  |
| NM_007227 | 641.019   | 835.425   | AF009285  | 7016.915  | 6491.201 | CY3Cy5    | 2277.005  | 277.845   |
| NM_00702Z | 808.995   | 862.844   | NM_01212E | 2371.498  | 2465.81  | NM_01781E | 1109.003  | 796.769   |
| NM_00587Z | 10927.377 | 10625.426 | AB032363  | 230.323   | 326.206  | AF028823  | 1965.475  | 1102.28   |
| NM_004624 | 1508.209  | 1456.083  | AF009294  | 2236.419  | 2840.597 | NM_00429E | 2647.781  | 1992.141  |
| NM_014461 | 425.563   | 336.393   | NM_001524 | 631.242   | 675.635  | NM_002087 | 3057.919  | 2590.32   |
| NM_00386E | 1080.023  | 881.004   | AK000998  | 500.661   | 634.364  | NM_01458E | 438.65    | 303.752   |
| AB015330  | 4179.292  | 3446.321  | AK001225  | 460.742   | 173.657  | BF679789  | 1449.953  | 1716.478  |
| NM_00145E | 3842.662  | 3327.541  | AK021684  | 1798.66   | 1837.203 | AB007859  | 453.094   | 295.285   |
| NM_00498Z | 1440.108  | 1586.006  | AK021480  | 282.123   | 583.442  | NM_001127 | 1583.108  | 1056.841  |
| NM_001694 | 58580.68  | 60117.473 | AK025112  | 596.9     | 787.11   | NM_01243C | 889.699   | 610.124   |
| AF286370  | 858.52    | 757.628   | AK025173  | 2558.069  | 3087.049 | NM_003917 | 1749.679  | 1189.438  |
| NM_000217 | 496.122   | 1051.016  | AK025430  | 368.019   | 540.625  | NM_00295E | 643.754   | 539.18    |
| AK026180  | 631.882   | 678.351   | AF117338  | 1557.49   | 1902.553 | AB018739  | 554.679   | 593.019   |
| NM_005817 | 9558.284  | 10781.925 | AK025567  | 1463.405  | 1893.234 | NM_00675C | 7259.201  | 4179.45   |
| NM_00391E | 6275.669  | 6764.95   | NM_01910Z | 345.941   | 469.74   | NM_020164 | 1528.602  | 1262.366  |
| NM_00287C | 33198.895 | 36352.895 | U56857    | 2233.272  | 2396.15  | AK023521  | 1568.409  | 1541.351  |
| NM_00636Z | 5238.004  | 5636.032  | L43349    | 319.896   | 359.659  | NM_014267 | 10085.952 | 10074.877 |
| NM_02041E | 1112.478  | 1164.861  | AF086421  | 1339.732  | 1694.389 | NM_02046E | 2514.514  | 9557.451  |
| NM_01487E | 223.035   | 110.657   | AK001612  | 1085.529  | 1259.311 | M74782    | 1405.243  | 1601.326  |
| AL049667  | 4411.7    | 4741.946  | AF161522  | 1878.433  | 2213.645 | NM_00105E | 576.111   | 812.785   |
| NM_000334 | 2373.681  | 2623.272  | AF086028  | 3910.994  | 4008.939 | AY026461  | 1576.836  | 1252.499  |
| NM_02040C | 887.35    | 688.187   | AK025365  | 781.27    | 1365.263 | AK025708  | 1278.032  | 678.119   |

|           |           |           |           |           |           |           |           |           |
|-----------|-----------|-----------|-----------|-----------|-----------|-----------|-----------|-----------|
| NM_001504 | 1759.871  | 1289.056  | AK023445  | 629.108   | 1110.579  | NM_000405 | 353.985   | 232.712   |
| D50926    | 2560.96   | 1952.566  | AK023489  | 341.002   | 718.343   | NM_005564 | 20319.115 | 10230.266 |
| BF205683  | 1876.8    | 1427.736  | AK021561  | 1307.118  | 2579.953  | NM_004508 | 820.584   | 824.681   |
| NM_000758 | 7780.619  | 5036.749  | AK025222  | 531.474   | 616.236   | NM_006405 | 2110.524  | 1888.038  |
| M17017    | 1114.84   | 616.607   | NM_003531 | 919.316   | 1185.982  | AL137619  | 847.042   | 3125.634  |
| NM_003600 | 8688.853  | 8784.662  | NM_017799 | 936.694   | 924.148   | NM_003615 | 232.485   | 1277.94   |
| NM_017490 | 4568.293  | 4670.245  | AL137403  | 1202.255  | 1611.261  | AF319476  | 418.528   | 238.83    |
| NM_002718 | 1964.846  | 2123.872  | AL049348  | 363.398   | 773.235   | AK001913  | 2329.158  | 1882.506  |
| AK026727  | 2682.204  | 3642.825  | NM_018534 | 454.706   | 630.524   | NM_004292 | 594.663   | 272.592   |
| NM_002830 | 350.451   | 420.699   | AB037847  | 1159.517  | 1501.414  | NM_015484 | 2198.927  | 1135.939  |
| NM_006247 | 3429.694  | 4047.257  | NM_005170 | 1346.787  | 1919.976  | NM_018046 | 1166.954  | 585.109   |
| AB032983  | 841.584   | 863.003   | S96437    | 1029.639  | 1119.533  | NM_013316 | 633.462   | 482.313   |
| NM_018281 | 8584.897  | 8961.409  | NM_015176 | 1104.344  | 1313.059  | M20701    | 1623.321  | 1330.923  |
| NM_004457 | 3989.436  | 3652.365  | AL353939  | 655.101   | 797.069   | NM_002912 | 559.427   | 455.544   |
| NM_014049 | 2335.154  | 2691.782  | AL117573  | 1990.073  | 2048.2    | NM_013284 | 971.118   | 702.875   |
| NM_005396 | 607.773   | 671.423   | AL080186  | 983.98    | 920.48    | NM_006739 | 702.521   | 631.348   |
| NM_004315 | 5954.554  | 7516.779  | NM_005306 | 26081.93  | 23915.018 | NM_013274 | 2406.833  | 3172.328  |
| NM_020166 | 4254.635  | 4004.387  | AF358454  | 1830.375  | 2254.719  | AL050187  | 1782.112  | 4383.628  |
| AK023860  | 2161.97   | 2558.726  | AK026090  | 984.352   | 1241.617  | NM_004252 | 9278.395  | 26998.682 |
| AK026061  | 577.275   | 550.902   | AL137634  | 749.166   | 814.232   | NM_003833 | 7548.564  | 4505.857  |
| NM_016286 | 6161.623  | 5243.577  | AK024863  | 2925.688  | 4287.375  | AK000868  | 1411.102  | 947.353   |
| NM_001567 | 3155.153  | 2911.322  | AK026908  | 2950.397  | 5353.956  | NM_001233 | 1505.97   | 1152.615  |
| NM_004905 | 11698.043 | 9641.543  | U92025    | 298.226   | 299.982   | NM_001234 | 1357.377  | 1035.715  |
| AF217971  | 2860.677  | 2473.035  | AB046766  | 943.129   | 1190.785  | BF679789  | 1110.516  | 652.809   |
| NM_001925 | 998.548   | 1144.763  | AF009323  | 582.56    | 964.63    | H97792    | 920.504   | 652.696   |
| AF245517  | 992.97    | 1158.156  | U52829    | 376.068   | 334.397   | M13509    | 425.586   | 424.861   |
| X78926    | 9930.632  | 4531.344  | Z25437    | 223.554   | 546.64    | X04076    | 4399.38   | 2544.027  |
| AJ278110  | 932.483   | 1062.208  | AK001526  | 4412.376  | 10093.256 | AA485362  | 927.067   | 555.979   |
| NM_014237 | 4505.706  | 4491.765  | AF086183  | 483.404   | 680.129   | AJ222801  | 916.017   | 561.697   |
| NM_020396 | 728.622   | 845.615   | AK000525  | 608.325   | 653.489   | W72207    | 33003.711 | 17824.316 |
| AF029900  | 4220.475  | 4760.53   | AL137434  | 711.677   | 617.891   | BI772354  | 1493.249  | 1442.318  |
| NM_003325 | 4002.279  | 5405.764  | Z36795    | 1482.426  | 1871.077  | AA733033  | 456.352   | 953.756   |
| NM_016178 | 3240.92   | 3282.806  | AL080216  | 1888.373  | 2345.216  | AA583574  | 655.153   | 1867.538  |
| AK022639  | 2261.872  | 2289.303  | D17046    | 830.805   | 847.999   | NM_005052 | 7901.349  | 7051.269  |
| D31766    | 1816.044  | 2144.93   | NM_017645 | 2917.253  | 3448.003  | NM_014734 | 1056.964  | 933.788   |
| NM_006547 | 515.728   | 517.009   | AJ227864  | 480.347   | 282.015   | AK026408  | 734.518   | 509.938   |
| NM_001478 | 49958.602 | 54926.996 | AF157562  | 4005.363  | 4351.527  | NM_005025 | 390.396   | 456.34    |
| AF135422  | 3128.103  | 3201.902  | AK021958  | 5157.984  | 6058.536  | M74782    | 983.901   | 699.503   |
| NM_004479 | 20949.721 | 23494.109 | NM_003511 | 332.578   | 1327.604  | NM_017818 | 1145.797  | 653.631   |
| AF070587  | 1340.111  | 934.828   | CY3Cy5    | 1244.965  | 186.435   | AF028823  | 1886.661  | 1480.376  |
| BE250526  | 938.125   | 677.674   | H97792    | 1499.872  | 1743.477  | NM_004295 | 3675.134  | 2887.647  |
| NM_016819 | 2257.207  | 1890.182  | L33404    | 514.158   | 506.574   | NM_002087 | 3091.767  | 2176.901  |
| NM_012222 | 3874.899  | 3700.592  | M13509    | 1771.107  | 3470.239  | NM_014585 | 503.643   | 808.453   |
| NM_005002 | 1478.541  | 963.879   | X04076    | 6290.93   | 7706.847  | AF200815  | 336.489   | 1021.599  |
| NM_006596 | 2945.232  | 3051.814  | AA485362  | 1515.133  | 1175.139  | NM_004300 | 2063.829  | 1274.778  |
| AK023214  | 5568.275  | 5824.864  | AJ222801  | 1928.823  | 1733.528  | NM_001127 | 1867.787  | 2774.9    |
| NM_001469 | 6738.027  | 5039.783  | W72207    | 36148.355 | 38151.805 | NM_012430 | 1158.66   | 1092.187  |
| BC036368  | 753.444   | 816.618   | BI772354  | 1795.329  | 1847.193  | NM_003917 | 1921.438  | 1836.712  |
| NM_001851 | 2688.48   | 2350.745  | AA733033  | 613.244   | 787.606   | NM_002956 | 442.778   | 563.853   |
| S67789    | 749.038   | 708.494   | AA583574  | 749.884   | 554.357   | AB018739  | 484.395   | 572.155   |
| AK022689  | 2408.42   | 2717.486  | AA927490  | 1937.279  | 1612.916  | NM_006750 | 6740.521  | 6909.24   |
| NM_016227 | 755.015   | 874.989   | NM_001824 | 50963.977 | 51270.418 | NM_020164 | 1298.331  | 2335.334  |
| NM_004195 | 26364.188 | 34914.762 | NM_002964 | 1310.263  | 1018.478  | AK023521  | 1382.383  | 2418.671  |

|           |           |           |           |           |           |           |           |           |
|-----------|-----------|-----------|-----------|-----------|-----------|-----------|-----------|-----------|
| NM_00470E | 1875.242  | 1903.163  | SR5       | 3702.635  | 2918.344  | NM_014267 | 10423.989 | 15074.724 |
| NM_02019C | 11351.002 | 12171.951 | CY3Cy5    | 765.964   | 109.935   | NM_00263E | 631.891   | 958.656   |
| AK024003  | 491.496   | 547.194   | NM_01781E | 1445.713  | 1924.425  | NM_00639E | 5316.933  | 4161.729  |
| NM_014357 | 3108.844  | 3146.556  | AF028823  | 3322.129  | 3592.503  | AK025655  | 970.49    | 842.274   |
| NM_004067 | 1055.334  | 1244.058  | NM_00429E | 7969.054  | 8375.624  | NM_00105E | 595.461   | 361.571   |
| NM_000121 | 8235.11   | 8885.934  | NM_002087 | 3604.078  | 3109.11   | AY026461  | 1805.03   | 1305.65   |
| NM_002091 | 8478.896  | 10053.375 | NM_01458E | 469.941   | 555.471   | AK025708  | 1369.138  | 1136.908  |
| AB033092  | 4187.786  | 4642.939  | AF200815  | 706.722   | 565.074   | NM_00040E | 430.857   | 482.207   |
| NM_00302E | 1179.754  | 1173.726  | NM_013441 | 1069.947  | 869.455   | NM_005564 | 20398.611 | 14276.586 |
| BC035030  | 3832.589  | 4549.887  | NM_014421 | 632.727   | 607.45    | NM_00450E | 932.033   | 1297.074  |
| NM_00534C | 17519.572 | 20022.162 | M60499    | 1922.209  | 1693.546  | NM_00640E | 1927.378  | 2075.565  |
| NM_016201 | 1431.22   | 2085.603  | NM_00383E | 10012.374 | 6824.295  | NM_00674E | 556.097   | 739.082   |
| NM_000864 | 2218.267  | 2083.792  | AK000868  | 2310.601  | 1599.576  | NM_004694 | 646.363   | 472.028   |
| NM_017977 | 1940.316  | 1446.546  | NM_00123E | 1846.374  | 1542.056  | AL137619  | 797.529   | 1187.772  |
| AF147727  | 1824.078  | 1397.952  | NM_001234 | 2139.753  | 1681.255  | NM_001824 | 24851.164 | 13107.979 |
| NM_006751 | 3004.865  | 2492.384  | BF679789  | 1956.977  | 1655.734  | NM_002964 | 1019.828  | 639.069   |
| AB037834  | 9617.76   | 2943.246  | NM_01438E | 708.498   | 895.167   | NM_00505E | 5661.212  | 3456.471  |
| NM_00356E | 731.647   | 586.308   | AB007859  | 549.87    | 540.998   | AF319476  | 335.381   | 192.988   |
| NM_013344 | 671.826   | 647.684   | NM_001127 | 2277.442  | 2016.873  | AK001913  | 2781.565  | 2251.001  |
| NM_01405E | 15793.585 | 14812.476 | NM_01243C | 1429.566  | 1756.277  | NM_00429E | 682.483   | 678.343   |
| NM_002777 | 48439.867 | 44853.738 | NM_003917 | 6063.483  | 6221.29   | NM_015484 | 1996.262  | 1658.425  |
| AF202635  | 1089.229  | 1305.589  | NM_007077 | 629.129   | 853.043   | NM_01804E | 1080.932  | 824.693   |
| NM_01412E | 549.389   | 703.041   | NM_00295E | 1007.256  | 906.932   | NM_01331E | 766.508   | 719.56    |
| NM_017904 | 694.022   | 996.142   | AB018739  | 1069.364  | 1477.796  | M20701    | 2118.41   | 2452.498  |
| NM_013367 | 4059.358  | 3663.984  | NM_00675C | 9264.092  | 9092.766  | NM_00291E | 640.061   | 1034.139  |
| NM_000321 | 4602.495  | 4113.968  | NM_020164 | 1824.709  | 1800.314  | NM_013284 | 1412.934  | 1541.673  |
| NM_006341 | 8585.248  | 7537.209  | AK023521  | 1908.2    | 1729.826  | NM_00673E | 1140.471  | 1343.284  |
| NM_00170E | 1919.522  | 1920.827  | NM_014267 | 10183.135 | 9357.866  | NM_013274 | 2356.131  | 2152.767  |
| NM_006191 | 3495.458  | 3646.648  | NM_02046E | 2591.692  | 2575.17   | AL050187  | 1556.042  | 1525.623  |
| NM_00180C | 1167.919  | 1276.309  | NM_014734 | 1594.498  | 1161.748  | NM_012387 | 8598.04   | 6487.039  |
| NM_00433E | 3255.41   | 4065.363  | NM_00228E | 389.099   | 258.715   | NM_01473E | 977.686   | 1215.265  |
| NM_01594E | 1453.081  | 1712.561  | AK026408  | 1007.102  | 841.114   | NM_00425E | 8573.788  | 6532.145  |
| NM_01397E | 1357.497  | 1763.352  | NM_00502E | 795.507   | 615.811   | AF172929  | 4182.984  | 3421.363  |
| NM_00379C | 4164.816  | 7225.076  | M74782    | 1394.154  | 1065.526  | M60499    | 1430.702  | 1094.22   |
| NM_000494 | 2226.012  | 2753.337  | NM_00105E | 685.555   | 861.129   | NM_001614 | 67745.922 | 63493.223 |
| NM_01602E | 610.138   | 509.465   | AY026461  | 2078.575  | 2130.831  | NM_00383E | 8539.702  | 3709.887  |
| NM_00372E | 13767.337 | 16631.678 | AK025708  | 1808.569  | 1496.568  | AK000868  | 1578.923  | 812.591   |
| NM_01443C | 440.827   | 327.178   | NM_00040E | 821.795   | 828.976   | NM_00123E | 1708.509  | 1250.277  |
| NM_00049E | 832.347   | 793.678   | NM_005564 | 34794.301 | 27726.479 | NM_001234 | 1518.319  | 1163.25   |
| AF085883  | 879.863   | 831.668   | NM_00450E | 1628.259  | 1902.997  | BF679789  | 1114.535  | 1318.697  |
| NM_016571 | 1643.245  | 1585.624  | NM_00640E | 4903.213  | 4238.572  | H97792    | 983.335   | 896.362   |
| NM_01644E | 2843.14   | 2775.775  | NM_000324 | 279.826   | 377.273   | M13509    | 475.174   | 421.083   |
| NM_00251E | 1626.451  | 1559.663  | AL137619  | 1371.863  | 1004.243  | X04076    | 4316.811  | 3862.905  |
| NM_00187C | 927.131   | 1185.716  | NM_00430C | 2584.427  | 2130.618  | AA485362  | 826.342   | 632.595   |
| AJ271216  | 805.704   | 866.024   | AF319476  | 541.251   | 810.798   | AJ222801  | 868.351   | 779.751   |
| U23028    | 3243.464  | 3205.478  | AK001913  | 3588.884  | 3687.022  | W72207    | 32520.91  | 18057.229 |
| NM_000817 | 6715.263  | 6807.318  | NM_017737 | 473.252   | 608.223   | BI772354  | 1309.083  | 1101.302  |
| AF113132  | 13442.973 | 16767.504 | NM_00429E | 845.93    | 837.287   | AA733033  | 405.729   | 343.653   |
| NM_006571 | 6224.062  | 9982.783  | NM_015484 | 3183.15   | 2777.118  | AA583574  | 537.303   | 495.715   |
| NM_00187E | 537.69    | 614.197   | NM_01804E | 1392.885  | 1720.371  | AI690184  | 8788.939  | 5997.273  |
| AK022680  | 1314.451  | 1441.338  | NM_01331E | 1504.317  | 1911.778  | AA927490  | 1815.136  | 1850.111  |
| NM_01894E | 6492.69   | 7974.938  | M20701    | 5916.556  | 5105.32   | U30872    | 486.847   | 673.596   |
| NM_01635E | 4253.374  | 5047.17   | NM_00291E | 1343.758  | 1501.914  | NM_02046E | 1571.027  | 1850.071  |

|           |           |           |           |           |           |           |           |           |
|-----------|-----------|-----------|-----------|-----------|-----------|-----------|-----------|-----------|
| NM_004156 | 3882.139  | 3604.664  | NM_013284 | 1877.086  | 1808.91   | NM_002639 | 520.866   | 367.573   |
| AK000561  | 787.687   | 748.392   | NM_006739 | 1417.102  | 1803.565  | NM_014734 | 1080.57   | 700.287   |
| BC009187  | 7459.536  | 5824.902  | NM_012387 | 8486.787  | 9615.325  | AK026408  | 703.621   | 737.005   |
| AL133617  | 785.113   | 612.727   | NM_004252 | 9396.603  | 9802.583  | NM_005025 | 509.042   | 398.458   |
| NM_016485 | 4204.726  | 3772.557  | AF172929  | 4253.028  | 3125.054  | M74782    | 1078.304  | 898.621   |
| NM_002615 | 11970.229 | 12713.909 | NM_006398 | 8186.954  | 7643.881  | NM_017818 | 1122.42   | 974.002   |
| AF090894  | 516.792   | 334.159   | AK025655  | 1367.702  | 1504.805  | AF028823  | 2109.537  | 1763.236  |
| NM_006167 | 699.878   | 663.126   | NM_004056 | 373.603   | 298.262   | NM_004295 | 2442.228  | 2348.91   |
| NM_016357 | 2521.817  | 2353.34   | NM_003833 | 10078.303 | 9709.266  | NM_002087 | 2917.943  | 2272.983  |
| NM_014500 | 10517.647 | 9958.388  | AK000868  | 2132.283  | 1798.151  | NM_014585 | 534.71    | 469.071   |
| AK023792  | 657.974   | 668.329   | NM_001233 | 1857.207  | 1813.114  | AF200815  | 497.779   | 575.148   |
| NM_020149 | 3051.927  | 4291.439  | NM_001234 | 2183.522  | 2685.375  | NM_013441 | 562.889   | 670.079   |
| NM_006237 | 1174.916  | 1164.149  | BF679789  | 1791.2    | 1498.836  | NM_006749 | 561.208   | 563.478   |
| NM_001271 | 4070.521  | 2899.08   | M13509    | 1166.005  | 961.503   | AL137619  | 720.921   | 713.458   |
| NM_003683 | 2241.508  | 1958.742  | X04076    | 4993.077  | 4498.285  | NM_004300 | 2480.524  | 1706.159  |
| AF039019  | 4105.747  | 4068.135  | AA485362  | 1449.314  | 1216.752  | AB007859  | 457.824   | 331.949   |
| NM_012255 | 6476.162  | 6226.622  | AJ222801  | 1749.561  | 1797.524  | NM_001127 | 1753.365  | 1986.448  |
| NM_018196 | 1729.931  | 1785.617  | W72207    | 33353.297 | 30698.18  | NM_012430 | 1001.362  | 1240.557  |
| NM_004818 | 3609.93   | 5131.708  | BI772354  | 1625.277  | 1840.029  | NM_003917 | 1913.574  | 1916.146  |
| J04205    | 8230.857  | 10617.826 | AI690184  | 17566.678 | 16015.599 | NM_007077 | 366.049   | 337.647   |
| D38491    | 3867.164  | 3381.415  | AA927490  | 1940.887  | 1541.317  | NM_002956 | 604.579   | 760.302   |
| AK026835  | 2369.816  | 2308.954  | NM_001824 | 54883.469 | 60539.063 | AB018739  | 682.999   | 579.849   |
| NM_002819 | 13018.708 | 13598.687 | NM_002964 | 1383.354  | 956.817   | NM_006750 | 8874.67   | 6895.21   |
| NM_013264 | 3366.097  | 2704.663  | NM_005052 | 7667.682  | 5576.628  | NM_020164 | 1716.295  | 1525.689  |
| NM_003315 | 8882.468  | 7163.644  | NM_014734 | 1323.327  | 1278.923  | AK023521  | 1645.675  | 1326.529  |
| NM_000086 | 3850.141  | 3247.813  | AK026408  | 1121.244  | 1202.053  | NM_014267 | 9517.778  | 6601.327  |
| NM_003752 | 2557.934  | 1993.799  | NM_005025 | 674.039   | 714.315   | AL050187  | 1640.974  | 2015.536  |
| NM_003932 | 8488.482  | 6621.49   | NM_017818 | 1411.805  | 1480.966  | NM_012387 | 6844.509  | 4920.203  |
| NM_016491 | 11303.644 | 9357.557  | NM_020433 | 356.523   | 476.87    | NM_014735 | 566.654   | 475.953   |
| NM_006429 | 14533.417 | 10467.546 | AF028823  | 3037.462  | 2933.217  | NM_004252 | 7615.286  | 5977.876  |
| NM_003307 | 5481.767  | 5401.777  | NM_004295 | 11553.318 | 12344.696 | AF172929  | 3481.23   | 2828.859  |
| AF070565  | 737.42    | 637.218   | NM_002087 | 3284.244  | 3126.992  | NM_006398 | 7280.488  | 4894.237  |
| AK021644  | 1848.814  | 1441.073  | AF200815  | 580.878   | 688.657   | AK025655  | 1238.029  | 1063.117  |
| NM_016599 | 394.262   | 589.108   | NM_013441 | 1206.333  | 923.498   | NM_001056 | 571.604   | 895.159   |
| NM_015944 | 808.755   | 1165.958  | NM_014421 | 580.529   | 399.899   | AY026461  | 1699.762  | 1751.796  |
| NM_002064 | 847.806   | 799.18    | M60499    | 1720.127  | 1394.778  | AK025708  | 1254.222  | 1185.787  |
| NM_015523 | 4341.103  | 3805.695  | NM_004300 | 2644.289  | 2239.083  | NM_005564 | 25206.586 | 19878.982 |
| NM_015960 | 7147.702  | 6619.024  | AB007859  | 558.945   | 629.086   | NM_004508 | 995.802   | 1071.79   |
| NM_006085 | 1255.621  | 1049.106  | NM_001127 | 2280.511  | 2174.436  | NM_006405 | 2354.414  | 1929.358  |
| NM_000907 | 4081.951  | 4101.582  | NM_012430 | 1503.496  | 1475.625  | NM_002390 | 882.688   | 1416.556  |
| AF254085  | 2424.135  | 2795.897  | NM_003917 | 7109.292  | 7274.201  | NM_014910 | 2186.698  | 2041.777  |
| NM_001987 | 1817.926  | 2185.889  | NM_007077 | 607.634   | 671.284   | AK001064  | 2010.895  | 1484.085  |
| AF244088  | 2201.595  | 2478.283  | NM_006750 | 8518.188  | 8043.901  | AB029031  | 3564.319  | 2650.198  |
| NM_007136 | 1177.276  | 1104.132  | NM_020164 | 1906.328  | 1653.409  | NM_001294 | 2653.927  | 2124.9    |
| AK025434  | 745.377   | 969.764   | AK023521  | 1941.519  | 1769.081  | NM_014241 | 3748.109  | 2571.27   |
| AJ251845  | 358.425   | 481.758   | NM_014267 | 9918.448  | 7279.378  | AF302786  | 1797.904  | 1350.52   |
| AK000435  | 1327.176  | 1061.96   | U30872    | 603.011   | 570.867   | AL122083  | 1136.936  | 972.921   |
| AK000569  | 3202.724  | 2570.214  | NM_002639 | 639.375   | 573.852   | NM_005052 | 6817.332  | 4110.192  |
| NM_006049 | 1349.047  | 889.895   | NM_006398 | 7547.39   | 11042.241 | AF319476  | 542.419   | 544.365   |
| NM_017661 | 1352.402  | 1140.412  | AK025655  | 1293.346  | 1602.16   | AK001913  | 3015.736  | 2695.134  |
| BC016698  | 5464.188  | 4800.054  | NM_004056 | 684.749   | 657.497   | NM_004292 | 649.968   | 752.206   |
| NM_007374 | 360.494   | 226.92    | NM_001056 | 747.968   | 818.752   | NM_015484 | 2493.882  | 2468.904  |
| AK027185  | 1129.497  | 963.409   | AY026461  | 1950.343  | 2072.225  | NM_018046 | 1339.701  | 1199.875  |

|           |           |           |           |           |           |           |           |           |
|-----------|-----------|-----------|-----------|-----------|-----------|-----------|-----------|-----------|
| AK025576  | 1539.64   | 1194.179  | AK025708  | 1943.998  | 1915.965  | NM_013316 | 877.648   | 849.328   |
| AF147385  | 862.954   | 923.736   | NM_000405 | 880.179   | 921.927   | M20701    | 2752.797  | 3277.908  |
| AL442086  | 4724.954  | 5485.632  | NM_005564 | 36715.523 | 29768.723 | NM_002912 | 626.894   | 967.297   |
| AK026784  | 687.494   | 739.464   | NM_004508 | 1643.914  | 1541.488  | NM_013284 | 1820.844  | 1855.879  |
| BC034819  | 4101.466  | 4302.24   | NM_006405 | 4484.624  | 4188.173  | NM_006739 | 1460.917  | 1432.219  |
| AF147313  | 18410.025 | 20281.211 | NM_006749 | 818.033   | 894.989   | NM_013274 | 2879.068  | 2862.091  |
| AF147382  | 42044.137 | 47066.922 | AL137619  | 1394.543  | 1402.34   | AK024955  | 5388.827  | 5090.957  |
| AK001957  | 3568.822  | 3299.896  | NM_001824 | 51295.348 | 59825.641 | L23206    | 1262.905  | 1116.583  |
| AK000850  | 1030.479  | 968.864   | NM_002964 | 1428.88   | 1351.389  | NM_012192 | 2228.24   | 1685.043  |
| AK021833  | 1653.318  | 1769.931  | NM_005052 | 7437.826  | 7106.358  | NM_006293 | 1537.421  | 1302.646  |
| AF143867  | 1530.406  | 1894.069  | BF038439  | 1215.358  | 1121.954  | NM_007229 | 1792.312  | 1554.812  |
| AK025889  | 5801.842  | 7727.355  | AF319476  | 670.521   | 1034.469  | AB011105  | 821.37    | 691.478   |
| NM_014715 | 2775.331  | 5069.466  | AK001913  | 3185.235  | 3977.423  | NM_004814 | 3145.374  | 2946.614  |
| AF086448  | 2330.868  | 3482.485  | NM_017737 | 816.653   | 1310.888  | D86976    | 15149.813 | 10322.526 |
| AB019391  | 443.767   | 517.067   | NM_004292 | 1042.573  | 1126.036  | AF307080  | 1245.698  | 1144.325  |
| AF086386  | 1158.571  | 1018.917  | NM_015484 | 3130.172  | 3199.844  | NM_004057 | 564.706   | 439.698   |
| AF086413  | 314.725   | 257.669   | NM_018046 | 1492.578  | 1551.175  | NM_006496 | 11008.105 | 7416.112  |
| AF086457  | 1549.718  | 1099.464  | NM_013316 | 1988.439  | 2246.851  | NM_003182 | 395.824   | 293.069   |
| AK025469  | 989.838   | 785.947   | M20701    | 6087.146  | 6190.886  | BE904126  | 5340.247  | 5224.669  |
| NM_020239 | 8763.765  | 7397.003  | NM_002912 | 1172.404  | 1181.446  | AF272380  | 10258.324 | 6637.802  |
| AF070581  | 1288.836  | 1211.086  | NM_013284 | 1975.089  | 1976.508  | NM_004431 | 1535.125  | 1588.33   |
| AK024187  | 879.073   | 1599.824  | NM_006739 | 1635.335  | 2053.209  | NM_002012 | 754.5     | 658.596   |
| AF075079  | 375.622   | 330.723   | NM_013274 | 3110.166  | 2829.761  | NM_002070 | 31998.609 | 16239.678 |
| AK022479  | 637.744   | 614.739   | AL050187  | 1952.018  | 1781.103  | AF227969  | 838.168   | 864.104   |
| AK023572  | 608.467   | 826.035   | NM_012387 | 8101.77   | 7067.851  | NM_003944 | 5994.304  | 3711.971  |
| AF086004  | 10777.177 | 11255.578 | NM_014735 | 814.769   | 829.741   | NM_016120 | 18084.879 | 11541.916 |
| AF147433  | 498.726   | 719.397   | NM_004252 | 8800.163  | 8584.055  | NM_002893 | 797.125   | 809.577   |
| AF086006  | 548.705   | 746.59    | AF172929  | 3603.017  | 3151.793  | NM_002393 | 1444.902  | 1389.302  |
| AL137318  | 1114.609  | 1013.105  | NM_003833 | 8253.225  | 7846.727  | NM_002669 | 2428.53   | 2696.634  |
| AL137482  | 722.427   | 829.746   | AK000868  | 2118.915  | 1781.921  | AB014600  | 790.863   | 801.224   |
| AL162011  | 11216.661 | 11468.455 | NM_001233 | 1543.248  | 1745.245  | NM_018312 | 935.27    | 909.961   |
| AL390177  | 566.206   | 855.453   | NM_001234 | 1652.284  | 1671.807  | X98260    | 4718.487  | 3459.177  |
| AL137678  | 353.49    | 506.421   | BF679789  | 1857.089  | 2162.151  | NM_007217 | 3748.591  | 2547.265  |
| AK056111  | 997.406   | 1171.966  | H97792    | 1245.395  | 1383.347  | NM_014777 | 1345.225  | 1388.769  |
| AL162055  | 248.138   | 411.832   | L33404    | 476.203   | 359.19    | NM_001102 | 5787.801  | 5140.395  |
| Y13807    | 1187.25   | 1095.755  | M13509    | 1110.4    | 1176.64   | NM_002818 | 48205.582 | 23577.496 |
| AK022053  | 329.059   | 459.771   | X04076    | 5257.263  | 4715.827  | NM_001937 | 1450.09   | 1227.434  |
| AK023038  | 749.28    | 914.284   | AA485362  | 1325.871  | 1328.924  | AK024778  | 568.774   | 449.925   |
| AK026206  | 1471.698  | 1216.207  | AJ222801  | 1661.047  | 1630.716  | AK021608  | 1420.725  | 1933.124  |
| AF086074  | 1734.07   | 1437.508  | W72207    | 32956.836 | 29456.262 | NM_006044 | 3970.216  | 4025.364  |
| AK023964  | 1762.295  | 1741.359  | BI772354  | 1737.664  | 1436.855  | AK025498  | 794.896   | 555.697   |
| AF086084  | 961.853   | 720.684   | AA733033  | 556.541   | 391.391   | NM_001395 | 2464.107  | 2289.758  |
| AK000156  | 304.913   | 388.129   | AA583574  | 860.024   | 650.766   | NM_002068 | 3884.696  | 3368.135  |
| AL050184  | 547.354   | 584.632   | AI690184  | 13192.763 | 10494.925 | NM_013338 | 1586.489  | 1656.004  |
| AF085853  | 751.884   | 616.383   | AA927490  | 1900.188  | 1510.349  | NM_014671 | 2011.313  | 1625.72   |
| AK027112  | 3214.957  | 2674.511  | NM_001481 | 436.597   | 480.925   | NM_001814 | 7364.731  | 4729.171  |
| AL049314  | 1203.507  | 1396.806  | U30872    | 805.419   | 880.655   | NM_018439 | 724.953   | 735.662   |
| AF093016  | 8317.21   | 7656.632  | NM_002639 | 913.802   | 2209.11   | NM_005656 | 545.072   | 877.475   |
| AF161345  | 1759.264  | 1511.856  | NM_014734 | 1680.897  | 3567.539  | NM_006012 | 3156.432  | 3147.105  |
| -         | 869.392   | 1223.274  | AK026408  | 1091.293  | 1308.218  | NM_002151 | 370.658   | 429.213   |
| AF090925  | 435.663   | 639.614   | NM_005025 | 754.701   | 673.417   | NM_014889 | 817.321   | 850.45    |
| NM_014163 | 4723.322  | 5349.81   | M74782    | 1510.345  | 1663.953  | AF173935  | 499.908   | 474.713   |
| AK021659  | 505.304   | 768.411   | NM_017818 | 1524.489  | 1580.573  | AK025322  | 1586.214  | 1500.718  |

|           |           |           |           |           |           |           |           |           |
|-----------|-----------|-----------|-----------|-----------|-----------|-----------|-----------|-----------|
| NM_014137 | 599.92    | 520.862   | NM_001767 | 810.222   | 855.093   | NM_017887 | 2699.884  | 2544.397  |
| AK021974  | 1373.937  | 1592.623  | AF028823  | 4293.929  | 8973.288  | AF007152  | 1659.473  | 1747.467  |
| AK022068  | 875.916   | 880.995   | NM_004295 | 12567.597 | 12179.528 | NM_00531C | 323.44    | 373.617   |
| AK022362  | 3204.252  | 5235.481  | NM_002087 | 3549.095  | 2956.418  | NM_014423 | 4302.126  | 3470.413  |
| AK022004  | 3335.1    | 3506.514  | NM_014585 | 599.929   | 520.046   | NM_018083 | 737.029   | 1387.44   |
| AK022390  | 1239.614  | 1301.708  | AF200815  | 742.891   | 696.419   | AL110188  | 2717.466  | 3515.957  |
| AK027134  | 1333.225  | 1082.905  | NM_013441 | 1490.528  | 816.987   | D70834    | 13135.765 | 11030.775 |
| AK024168  | 884.777   | 769.246   | NM_014421 | 653.008   | 304.605   | NM_00097C | 60032.363 | 55393.238 |
| AF264622  | 1051.08   | 932.624   | NM_006749 | 763.848   | 964.865   | AK000102  | 589.565   | 490.494   |
| AK027203  | 331.824   | 365.972   | NM_000324 | 354.116   | 327.146   | AB040916  | 900.811   | 913.675   |
| AK021793  | 2611.178  | 2686.343  | AL137619  | 1174.859  | 1253.275  | NM_005587 | 764.415   | 501.801   |
| AK022255  | 1514.565  | 1411.927  | NM_00430C | 2710.312  | 2590.986  | AF038362  | 1035.548  | 795.762   |
| AF161360  | 1068.905  | 1281.358  | AB007859  | 508.523   | 533.401   | NM_005195 | 15366.093 | 8910.344  |
| AK021720  | 1408.423  | 1427.455  | NM_001127 | 2268.461  | 2464.298  | NM_004715 | 1344.187  | 1476.844  |
| NM_016497 | 15532.866 | 13729.051 | NM_01243C | 1585.806  | 2015.619  | L40392    | 1232.806  | 963.281   |
| AB037792  | 1239.945  | 1109.927  | NM_003917 | 7331.675  | 7227.245  | NM_001007 | 59098.164 | 62234.035 |
| AK022480  | 858.803   | 751.195   | NM_007077 | 736.277   | 619.769   | NM_003017 | 2452.873  | 2811.453  |
| AK024158  | 875.042   | 701.743   | NM_002956 | 944.421   | 968.493   | NM_020366 | 2059.886  | 1681.924  |
| AL080082  | 2279.78   | 1706.641  | AB018739  | 656.863   | 515.799   | NM_020141 | 2370.068  | 2824.664  |
| AK021623  | 1624.675  | 1636.918  | NM_00675C | 8844.021  | 6502.994  | NM_003775 | 360.151   | 479.402   |
| U79242    | 475.601   | 565.934   | NM_020164 | 1781.991  | 1213.356  | NM_000662 | 1214.001  | 1328.587  |
| AF056452  | 656.601   | 778.907   | AK023521  | 1755.99   | 1734.757  | NM_000292 | 863.933   | 547.376   |
| AF119901  | 3413.521  | 4361.866  | NM_014267 | 10385.796 | 9146.422  | NM_003685 | 20737.023 | 11844.256 |
| AK001936  | 2229.463  | 2366.658  | AL050187  | 1960.078  | 2528      | NM_016173 | 676.482   | 659.317   |
| NM_00377C | 42442.383 | 44190.207 | NM_012387 | 9014.422  | 9576.508  | NM_002875 | 2110.116  | 2418.012  |
| AK001395  | 6121.615  | 6983.399  | NM_014735 | 970.008   | 1184.98   | NM_004427 | 2533.854  | 2350.359  |
| S57803    | 4610.771  | 5271.648  | NM_004252 | 9341.486  | 10985.111 | U90549    | 2289.15   | 2061.12   |
| AF131822  | 774.875   | 1182.466  | AF172929  | 4181.831  | 4118.824  | NM_01324C | 4122.667  | 3374.426  |
| AK023131  | 2321.094  | 2640.977  | NM_006398 | 8405.067  | 8751.905  | NM_015874 | 15038.275 | 7011.479  |
| U61096    | 477.398   | 873.345   | AK025655  | 1310.886  | 1291.635  | NM_004965 | 37921.043 | 22125.453 |
| AF085865  | 4206.126  | 4818.338  | NM_001056 | 783.363   | 998.484   | AF312393  | 13258.987 | 7775.565  |
| X78261    | 459.361   | 508.328   | AY026461  | 2633.652  | 2838.165  | AF272898  | 2333.838  | 2075.968  |
| AK025521  | 2098.577  | 3039.837  | AK025708  | 2085.821  | 1641.792  | AB032951  | 2285.425  | 2067.671  |
| NM_001053 | 57196.289 | 57670.992 | NM_000405 | 894.761   | 920.384   | NM_003417 | 641.424   | 608.759   |
| Z70694    | 4399.993  | 4741.83   | NM_005564 | 36793.238 | 27926.213 | NM_005145 | 2938.188  | 2137.71   |
| L77602    | 726.296   | 857.578   | NM_004508 | 1864.171  | 1439.256  | AK024073  | 485.646   | 459.194   |
| NM_015421 | 6541.625  | 4565.964  | NM_006405 | 4558.441  | 3986.038  | NM_005887 | 2843.274  | 3397.283  |
| AF086081  | 4155.588  | 3618.585  | NM_00239C | 1693.444  | 3812.705  | AK026103  | 1679.137  | 1484.505  |
| NM_018634 | 448.081   | 534.56    | NM_006142 | 700.653   | 839.262   | NM_016353 | 4088.966  | 3472.589  |
| NM_018111 | 724.971   | 1274.291  | NM_01491C | 6525.831  | 7270.075  | AK022567  | 707.067   | 484.221   |
| L23867    | 887.834   | 837.019   | AK001064  | 3088.998  | 2743.673  | AK023450  | 435.237   | 509.898   |
| AB020968  | 1135.481  | 961.045   | AB029031  | 4648.676  | 4596.117  | AL080280  | 869.002   | 923.296   |
| AL138690  | 1337.897  | 1354.749  | NM_001294 | 3496.585  | 3182.067  | AF035314  | 612.569   | 557.103   |
| AK000394  | 943.146   | 1240.218  | NM_014241 | 4881.069  | 5348.491  | NM_018036 | 682.075   | 1009.953  |
| NM_013941 | 1007.087  | 1266.297  | AF302786  | 2121.003  | 1994.666  | AF052087  | 752.362   | 1094.335  |
| AF074989  | 1217.833  | 1295.717  | AL122083  | 2336.264  | 2173.686  | AF007143  | 541.404   | 564.655   |
| AK001107  | 968.359   | 1112.176  | NM_005052 | 11863.09  | 18901.527 | AK023656  | 658.124   | 616.723   |
| AF147393  | 772.962   | 683.356   | AF319476  | 617.719   | 704.499   | AF086511  | 521.695   | 543.13    |
| AK022368  | 493.447   | 695.925   | AK001913  | 3563.552  | 3938.471  | AK022989  | 594.725   | 740.026   |
| AL080112  | 2550.872  | 2583.358  | NM_017737 | 744.36    | 792.705   | AK001604  | 2051.068  | 2040.346  |
| AK022299  | 665.964   | 954.136   | NM_004292 | 1218.494  | 1014.555  | AK021619  | 352.944   | 544.915   |
| AL137325  | 470.174   | 656.548   | NM_015484 | 3381.353  | 3650.849  | AF131762  | 9538.774  | 6906.539  |
| AF147361  | 1633.494  | 2174.379  | NM_018046 | 1649.884  | 1789.87   | AY007089  | 5116.037  | 3865.007  |

|           |           |           |           |           |           |           |           |           |
|-----------|-----------|-----------|-----------|-----------|-----------|-----------|-----------|-----------|
| AL133086  | 1224.711  | 1394.799  | NM_013316 | 1722.938  | 1711.401  | AK021816  | 1734.652  | 2088.576  |
| NM_012151 | 41043.766 | 48822.238 | M20701    | 6807.129  | 6463.411  | D43770    | 4275.69   | 3608.176  |
| AF087994  | 1291.926  | 1806.33   | NM_002912 | 1321.795  | 1330.002  | AK021519  | 521.08    | 797.718   |
| AJ227912  | 837.906   | 1391.362  | NM_013284 | 2012.582  | 1666.677  | NM_014254 | 1324.043  | 1505.938  |
| NM_018195 | 2282.648  | 2672.662  | NM_006739 | 1390.131  | 1264.914  | U09197    | 1137.015  | 2054.352  |
| AK025532  | 7759.439  | 8494.724  | NM_013274 | 3254.032  | 3202.233  | U15553    | 774.35    | 950.125   |
| AK021789  | 315.528   | 291.457   | AK024955  | 13656.85  | 16147.845 | AK024734  | 2077.255  | 2296.073  |
| NM_003522 | 582.358   | 498.206   | NM_016580 | 747.781   | 854.868   | AK000144  | 485.779   | 778.794   |
| BF217847  | 1445.321  | 1479.833  | AF169693  | 974.412   | 845.7     | AK023422  | 294.646   | 488.735   |
| NM_005320 | 2217.116  | 1582.421  | L23206    | 2521.575  | 2705.791  | AK022796  | 503.991   | 515.826   |
| CY3Cy5    | 863.798   | 117.642   | NM_012192 | 3073.175  | 2642.565  | AL122088  | 484.902   | 560.553   |
| BI830936  | 457.764   | 643.883   | NM_006293 | 1877.566  | 1895.273  | AL137518  | 305.174   | 364.683   |
| U79292    | 4476.029  | 4352.459  | NM_007229 | 2807.744  | 3060.437  | AK023437  | 555.392   | 796.903   |
| BI830753  | 321.042   | 280.403   | AB011105  | 1628.625  | 1889.27   | AK022897  | 869.969   | 936.232   |
| X68314    | 630.06    | 718.806   | NM_018970 | 415.026   | 552.368   | AK023898  | 2211.295  | 2483.719  |
| X71973    | 18337.676 | 15546.472 | NM_004814 | 4212.17   | 4175.465  | NM_019040 | 3275.204  | 5758.248  |
| T49651    | 3117.392  | 2382.524  | D86976    | 16040.09  | 15299.622 | NM_005978 | 641.714   | 1261.271  |
| N51014    | 1704.486  | 1414.436  | AF307080  | 1247.884  | 1184.431  | Y16711    | 603.129   | 1346.732  |
| AI741278  | 470.19    | 1063.634  | NM_004057 | 1656.406  | 1451.03   | AJ272179  | 2406.606  | 2681.828  |
| AA682423  | 421.176   | 380.598   | NM_006496 | 12346.198 | 10748.77  | AJ007015  | 573.314   | 545.572   |
| AL043686  | 2716.594  | 2054.899  | NM_004826 | 503.668   | 362.267   | AL049317  | 677.599   | 848.322   |
| AA490172  | 566.794   | 346.987   | NM_013314 | 379.558   | 212.284   | AL050090  | 832.208   | 1123.46   |
| AA775212  | 1664.301  | 1217.763  | NM_002072 | 1017.385  | 870.52    | AF086309  | 439.201   | 367.429   |
| NM_000945 | 1314.175  | 1374.037  | BE904126  | 14323.614 | 15929.973 | AF238870  | 635.65    | 652.322   |
| NM_002574 | 19719.008 | 20915.756 | AF272380  | 23070.74  | 22695.207 | AK026279  | 2615.529  | 2324.154  |
| SR5       | 3265.682  | 2587.88   | NM_004431 | 5808.012  | 7066.296  | AF130094  | 4865.87   | 4098.568  |
| SR7       | 3812.913  | 23619.074 | NM_002012 | 1367.051  | 1252.037  | AK026673  | 1052.956  | 908.262   |
| SR9       | 10961.012 | 1936.713  | NM_002070 | 35261.867 | 29674.557 | NM_005452 | 3140.586  | 3007.174  |
| CY3Cy5    | 1112.45   | 124.439   | AF227969  | 1259.739  | 1570.17   | AF170935  | 13755.117 | 11797.982 |
| NM_003371 | 7676.271  | 6859.874  | AF116657  | 625.888   | 616.579   | AJ227899  | 625.602   | 822.582   |
| AK023114  | 2769.213  | 2954.251  | NM_004102 | 285.139   | 505.417   | AF161371  | 7258.511  | 6057.829  |
| NM_003678 | 2607.307  | 2589.493  | NM_003944 | 17059.664 | 15940.813 | AF086230  | 625.978   | 428.659   |
| NM_012301 | 521.731   | 534.663   | NM_016120 | 43437.363 | 40172.094 | AK023408  | 1613.706  | 2223.826  |
| NM_000680 | 254.448   | 371.755   | NM_002893 | 764.32    | 622.766   | U84509    | 795.601   | 1802.441  |
| NM_014419 | 2136.271  | 1931.896  | NM_002393 | 2849.041  | 2956.071  | AK002036  | 3603.762  | 4393.024  |
| AK026066  | 816.164   | 1212.278  | NM_002669 | 3297.843  | 3932.327  | AK025775  | 3435.596  | 3171.765  |
| NM_005244 | 2483.532  | 2074.392  | AB014600  | 1881.239  | 1853.042  | AF043469  | 814.762   | 861.639   |
| NM_014815 | 990.102   | 772.703   | NM_018312 | 1418.272  | 1194.609  | AK022008  | 2131.402  | 2539.813  |
| NM_007221 | 3188.861  | 2986.554  | X98259    | 417.348   | 595.037   | NM_018186 | 1362.773  | 1692.764  |
| X54163    | 9456.991  | 8320.393  | X98260    | 5072.045  | 4597.986  | AL080188  | 1482.124  | 1661      |
| AK025395  | 316.407   | 240.683   | NM_007217 | 4857.496  | 4100.404  | T99941    | 1963.2    | 2287.038  |
| NM_000388 | 519.816   | 399.807   | NM_014777 | 2804.589  | 2624.16   | AF113678  | 886.517   | 978.457   |
| X58377    | 255.085   | 212.937   | NM_001102 | 5332.511  | 4811.995  | AL137313  | 35099.461 | 23410.328 |
| NM_014668 | 584.621   | 554.411   | NM_003803 | 422.207   | 264.96    | AB002363  | 4511.9    | 3928.428  |
| NM_004722 | 1412.679  | 1439.09   | NM_002818 | 36923.48  | 29798.207 | NM_005284 | 1024.074  | 1258.228  |
| NM_014425 | 758.457   | 875.515   | NM_001937 | 2671.864  | 2281.218  | AF086351  | 2023.173  | 1925.354  |
| NM_012133 | 1298.504  | 1704.785  | AK024778  | 831.52    | 583.099   | D83199    | 17657.297 | 16929.424 |
| NM_017954 | 301.111   | 496.911   | AK021608  | 2414.429  | 2619.327  | AK025957  | 629.928   | 556.634   |
| NM_006612 | 965.821   | 881.243   | NM_004297 | 849.693   | 877.38    | Y16708    | 477.369   | 529.715   |
| NM_016451 | 833.872   | 1095.217  | NM_006044 | 6509.021  | 10061.432 | AL157453  | 2370.774  | 3081.039  |
| NM_007351 | 7935.413  | 9512.457  | AK025498  | 1133.891  | 1253.632  | NM_019098 | 3098.888  | 6270.529  |
| AK026266  | 4407.754  | 6599.809  | NM_001395 | 5111.672  | 4908.243  | AK022212  | 10536.923 | 16592.969 |
| NM_007124 | 1737.985  | 2207.484  | NM_002068 | 5212.334  | 5187.923  | X64974    | 1199.557  | 2496.444  |

|           |           |           |           |           |           |            |           |           |
|-----------|-----------|-----------|-----------|-----------|-----------|------------|-----------|-----------|
| NM_003176 | 1374.457  | 1034.944  | NM_013338 | 2547.349  | 2966.251  | NM_000834  | 3035.431  | 5785.863  |
| NM_000723 | 559.579   | 378.371   | NM_014671 | 3310.064  | 3718.386  | NM_006485  | 9277.444  | 9453.666  |
| AL096751  | 2291.39   | 1518.328  | NM_001814 | 8910.87   | 11714.513 | NM_012459  | 868.775   | 1195.723  |
| NM_000364 | 329.378   | 185.444   | NM_018439 | 1080.608  | 1190.045  | AL137268   | 1688.101  | 1629.584  |
| AF026920  | 1821.948  | 2016.89   | NM_005656 | 857.503   | 775.27    | AK024109   | 1053.578  | 1035.031  |
| NM_004931 | 2059.16   | 1895.409  | NM_006012 | 3730.988  | 3903.068  | AF088048   | 397.234   | 471.061   |
| NM_000607 | 12199.013 | 12037.05  | NM_002151 | 1003.306  | 1092.267  | AK001143   | 1803.284  | 1587.086  |
| NM_002575 | 3397.136  | 3706.784  | NM_014889 | 1093.995  | 1104.845  | AK001701   | 2701.589  | 2812.745  |
| NM_004244 | 1810.953  | 2177.571  | AF173935  | 1369.619  | 2326.493  | AF217970   | 746.803   | 758.846   |
| AK001500  | 1027.063  | 1170.594  | AK025322  | 5678.665  | 10036.268 | AF086297   | 550.345   | 1063.661  |
| NM_006774 | 479.119   | 289.359   | NM_017887 | 3467.496  | 3452.96   | AK025455   | 1023.176  | 1389.974  |
| NM_020129 | 543.074   | 711.277   | NM_000526 | 503.525   | 503.596   | AK026799   | 3271.391  | 2646.789  |
| Y16521    | 2084.296  | 1842.028  | AF007152  | 1559.525  | 1370.168  | NM_01486C  | 421.805   | 412.484   |
| AL050371  | 2502.724  | 2537.798  | NM_005310 | 801.165   | 510.764   | AK022549   | 734.982   | 822.336   |
| NM_002651 | 4266.997  | 3667.361  | NM_014423 | 4971.252  | 4546.905  | NM_018157  | 426.631   | 627.008   |
| NM_002413 | 7561.663  | 6697.348  | NM_018083 | 1452.404  | 2319.308  | Z70714     | 2294.217  | 2764.299  |
| NM_017577 | 790.602   | 1107.584  | AL110188  | 6653.583  | 8185.663  | AK021640   | 2082.39   | 2321.928  |
| NM_001757 | 2052.348  | 1528.721  | D70834    | 19450.385 | 21441.416 | NM_016565  | 38266.738 | 29549.416 |
| NM_001647 | 3077.813  | 1664.601  | NM_000970 | 55552.992 | 66881.203 | CY3Cy5     | 1594.099  | 133.453   |
| NM_018158 | 958.067   | 492.649   | NM_033288 | 977.132   | 1539.846  | BF310427   | 1290.978  | 1435.877  |
| NM_016301 | 3813.51   | 2305.693  | NM_003269 | 3037.624  | 2007.828  | AA045192   | 810.219   | 1173.292  |
| AK021975  | 430.664   | 228.677   | AK000102  | 921.944   | 912.191   | M92642     | 305.664   | 458.711   |
| AB032952  | 14748.189 | 10143.892 | AB040916  | 1556.089  | 2742.875  | H-U 44385  | 8872.379  | 7017.431  |
| NM_002522 | 13991.214 | 13642.814 | NM_005587 | 1414.284  | 2933.398  | ID 1654970 | 4051.853  | 3480.711  |
| NM_002978 | 1474.115  | 1715.479  | AF038362  | 2023.732  | 1910.448  | ID 2531132 | 3374.296  | 3129.247  |
| AB040879  | 1232.415  | 1262.278  | NM_005195 | 16954.953 | 16018.687 | BF125928   | 9091.164  | 6095.89   |
| AL049935  | 2636.517  | 2509.52   | NM_005481 | 769.228   | 767.152   | BG571026   | 880.025   | 724.818   |
| AB033043  | 5032.899  | 6592.611  | NM_004715 | 2617.042  | 2795.091  | AA489017   | 2721.799  | 2242.839  |
| NM_014999 | 1798.358  | 1729.765  | L40392    | 1637.391  | 1468.731  | NM_012245  | 7140.818  | 6344.048  |
| AK025220  | 1371.404  | 1288.202  | NM_001007 | 57712.387 | 68031.25  | SR6        | 1636.244  | 1690.753  |
| NM_016308 | 10599.741 | 8299.186  | NM_003017 | 4550.905  | 3710.397  | SR8        | 6465.932  | 24387.186 |
| D42046    | 2640.331  | 2585.782  | NM_020366 | 2273.766  | 2160.47   | SR10       | 21422.984 | 4607.867  |
| NM_001033 | 2013.348  | 2337.545  | NM_020141 | 3279.78   | 3355.901  | CY3Cy5     | 1378.652  | 150.282   |
| NM_004526 | 9038.595  | 9278.402  | NM_006482 | 449.083   | 617.664   | NM_01745C  | 1521.561  | 2060.995  |
| NM_002526 | 8795.025  | 7101.863  | NM_003779 | 749.555   | 825.93    | NM_002023  | 441.6     | 722.634   |
| NM_020135 | 1932.12   | 1553.066  | NM_003635 | 661.068   | 727.596   | AF190500   | 780.235   | 575.342   |
| NM_018518 | 3407.681  | 3255.168  | NM_000662 | 1280.143  | 1468.368  | NM_005904  | 444.063   | 559.974   |
| AK023149  | 1251.436  | 666.08    | NM_000292 | 1039.074  | 1255.548  | NM_005273  | 9774.37   | 9862.81   |
| AK023168  | 1481.145  | 791.954   | NM_003689 | 32859.746 | 27562.129 | NM_000524  | 1514.248  | 1143.803  |
| NM_006646 | 449.091   | 287.022   | NM_016173 | 859.313   | 1009.782  | NM_006576  | 518.716   | 434.625   |
| NM_004742 | 742.339   | 273.156   | NM_002875 | 2621.35   | 3238.785  | NM_018645  | 800.511   | 684.904   |
| NM_014753 | 1381.454  | 965.435   | NM_004427 | 3993.126  | 3798.708  | AB035266   | 969.02    | 749.082   |
| NM_006585 | 23708.227 | 18338.035 | U90549    | 2618.596  | 3257.473  | NM_003744  | 1354.748  | 1237.741  |
| NM_014331 | 2316.769  | 2184.127  | NM_013240 | 5049.94   | 4911.633  | NM_006378  | 756.023   | 780.18    |
| NM_006795 | 9389.232  | 10337.457 | NM_015874 | 17533.414 | 11851.351 | NM_018132  | 2315.083  | 2281.496  |
| AF070568  | 1385.985  | 3611.002  | NM_004965 | 40528.742 | 32910.203 | NM_018207  | 331.156   | 485.707   |
| NM_000240 | 2865.253  | 3277.145  | AF312393  | 22802.154 | 18159.721 | NM_000345  | 2563.645  | 3181.838  |
| AK055733  | 10327.079 | 11003.435 | AF272898  | 3924.294  | 3852.763  | NM_006531  | 744.934   | 892.872   |
| AF298880  | 8289.156  | 8043.804  | AB037817  | 409.907   | 255.58    | AB029021   | 2612.982  | 2882.572  |
| AK025395  | 351.511   | 336.735   | AB032951  | 3791.648  | 3120.7    | NM_002101  | 17619.752 | 17020.588 |
| NM_000388 | 594.472   | 496.025   | NM_003417 | 663.407   | 624.299   | Z36789     | 862.146   | 536.379   |
| X58377    | 257.066   | 381.492   | NM_005149 | 4710.815  | 4478.463  | J02874     | 1494.356  | 1265.839  |
| BI830936  | 552.35    | 546.801   | AK024073  | 552.26    | 556.214   | AF070525   | 4801.071  | 13871.818 |



|           |           |           |           |          |           |           |           |           |
|-----------|-----------|-----------|-----------|----------|-----------|-----------|-----------|-----------|
| U79292    | 5043.361  | 4258.374  | AK022223  | 358.397  | 644.83    | NM_001177 | 4619.661  | 7080.562  |
| BI830753  | 364.172   | 504.757   | NM_005887 | 3239.312 | 4217.481  | NM_014447 | 1378.479  | 1592.613  |
| X68314    | 727.636   | 825.129   | AL110232  | 231.34   | 936.685   | NM_002356 | 318.424   | 500.92    |
| X71973    | 17229.197 | 11013.789 | AK026103  | 1936.65  | 2287.756  | NM_006691 | 707.142   | 818.068   |
| T49651    | 2352.609  | 1077.099  | NM_016353 | 9920.036 | 10599.806 | NM_003710 | 588.461   | 771.547   |
| N51014    | 1169.941  | 758.176   | AK022567  | 1270.393 | 1526.307  | NM_004666 | 1029.706  | 1039.402  |
| BE392471  | 4858.455  | 2276.014  | S77357    | 533.67   | 508.744   | NM_003614 | 487.944   | 433.931   |
| AI802950  | 952.078   | 618.2     | AK023450  | 711.164  | 802.638   | NM_014257 | 1306.751  | 957.012   |
| AA682423  | 264.774   | 234.876   | AL080280  | 2666.68  | 2880.3    | NM_004843 | 1021.073  | 958.553   |
| AL043686  | 2404.974  | 1212.123  | AB028947  | 1427.79  | 1410.504  | AK022845  | 545.799   | 464.459   |
| AA490172  | 446.994   | 287.865   | AF035314  | 817.661  | 772.326   | NM_002985 | 5117.352  | 5872.816  |
| AA775212  | 1555.479  | 1313.077  | NM_018036 | 635.636  | 788.236   | AB018347  | 1921.295  | 2193.327  |
| NM_000945 | 1259.882  | 1428.974  | AF052087  | 1029.671 | 1106.525  | NM_003284 | 559.629   | 398.018   |
| NM_002574 | 18542.307 | 18513.865 | AF007143  | 1245.402 | 1313.901  | NM_018152 | 822.396   | 889.26    |
| AB011174  | 1219.657  | 1425.026  | AK023656  | 825.364  | 519.06    | NM_000319 | 1075.166  | 1310.683  |
| AB043635  | 371.326   | 377.58    | AF086511  | 1330.615 | 1134.396  | NM_012461 | 1772.106  | 1167.665  |
| NM_000607 | 11965.306 | 10445.039 | AK022989  | 1551.353 | 1474.218  | AK001379  | 682.874   | 566.862   |
| NM_002575 | 3745.191  | 3512.895  | AK001604  | 3345.984 | 2572.872  | NM_007072 | 1181.887  | 2554.568  |
| NM_004244 | 1986.505  | 1428.86   | AK021619  | 379.714  | 586.837   | NM_012320 | 2495.743  | 4482.988  |
| NM_003371 | 8824.995  | 7803.703  | AK021816  | 4920.375 | 5514.145  | NM_018208 | 1556.731  | 2688.612  |
| AK023114  | 2489.446  | 1814.02   | D43770    | 4552.57  | 4967.708  | NM_015925 | 4300.222  | 5033.626  |
| NM_003678 | 2297.035  | 1871.639  | AF085960  | 435.434  | 389.836   | U90653    | 2332.392  | 3271.002  |
| NM_012301 | 509.266   | 267.867   | AK021519  | 795.574  | 1152.362  | NM_000196 | 383.36    | 533.796   |
| NM_014419 | 2251.586  | 4971.793  | NM_014254 | 1798.414 | 1808.785  | NM_018335 | 1402.487  | 1428.33   |
| NM_014938 | 1966.157  | 3167.192  | AF086036  | 550.744  | 638.742   | NM_006745 | 21399.736 | 16983.047 |
| AF049460  | 379.408   | 794.394   | U09197    | 1463.952 | 1189.019  | NM_000275 | 458.979   | 589.398   |
| AK026066  | 798.949   | 465.125   | U50529    | 524.356  | 548.173   | AK000037  | 578.384   | 737.725   |
| NM_005244 | 2537.975  | 1965.663  | Z36800    | 356.681  | 383.785   | NM_014760 | 1548.163  | 1905.911  |
| AF054589  | 418.398   | 325.077   | U15553    | 2515.181 | 2409.68   | NM_018398 | 771.658   | 801.944   |
| NM_005270 | 590.154   | 625.111   | Z36829    | 570.752  | 588.581   | NM_002560 | 6304.726  | 4927.041  |
| NM_014815 | 835.673   | 865.875   | AK024734  | 2306.836 | 1888.058  | NM_014404 | 613.733   | 552.483   |
| NM_007221 | 3035.503  | 3456.361  | NM_017741 | 782.468  | 459.804   | NM_002042 | 5907.797  | 8845.031  |
| X54163    | 10057.814 | 9692.417  | AK000144  | 831.013  | 925.38    | AB028944  | 450.704   | 920.168   |
| NM_002978 | 2192.446  | 1954.13   | AK022275  | 730.46   | 653.064   | AJ006268  | 668.648   | 1558.26   |
| NM_014668 | 721.893   | 689.364   | AL117533  | 982.115  | 687.042   | AF190864  | 4253.18   | 5655.185  |
| NM_004722 | 1817.384  | 1439.554  | AK026036  | 766.015  | 760.513   | NM_002775 | 2680.509  | 3031.506  |
| NM_014425 | 585.074   | 670.938   | AK023422  | 966.399  | 905.909   | L40397    | 8789.183  | 7474.343  |
| NM_012133 | 1264.27   | 808.899   | AK022796  | 1078.489 | 1024.022  | NM_020198 | 3389.688  | 2720.584  |
| NM_017954 | 372.085   | 209.361   | AK095193  | 1044.993 | 715.285   | AA098879  | 374.939   | 392.089   |
| NM_007124 | 1447.661  | 841.069   | AK025081  | 682.843  | 811.124   | D38521    | 2380.296  | 4603.746  |
| NM_003176 | 1100.641  | 711.602   | AL122088  | 999.496  | 1078.562  | NM_000403 | 2023.701  | 2609.68   |
| NM_000723 | 756.538   | 592.436   | AF119912  | 430.27   | 410.005   | NM_018127 | 6736.051  | 7011.133  |
| AL096751  | 2763.641  | 2297.466  | AL137518  | 966.885  | 970.823   | AB020677  | 5337.082  | 5438.178  |
| NM_000364 | 423.962   | 413.846   | AK023437  | 1257.29  | 1225.533  | AB033097  | 982.9     | 954.818   |
| AF026920  | 2030.966  | 2136.847  | AK022897  | 794.147  | 757.948   | NM_000135 | 831.742   | 997.307   |
| NM_004931 | 2075.501  | 2016.367  | AK023898  | 4546.147 | 4875.582  | AJ223948  | 2271.274  | 2630.118  |
| NM_006795 | 8407.817  | 8465.22   | NM_019040 | 4516.34  | 6032.405  | NM_016218 | 725.619   | 744.083   |
| AF070568  | 1172.377  | 1170.913  | NM_005978 | 960.91   | 1198.246  | AK022947  | 1646.802  | 1880.2    |
| NM_000240 | 3045.099  | 3608.129  | Y16711    | 699.128  | 1064.759  | AL050029  | 1615.422  | 1649.449  |
| AK055733  | 10867.328 | 11212.117 | AJ272179  | 2907.435 | 3728.657  | AL049966  | 313.839   | 378.152   |
| AF298880  | 8345.669  | 7817.753  | AJ007015  | 843.76   | 711.992   | NM_005204 | 1738.898  | 1377.862  |
| AK001500  | 1366.637  | 1267.746  | AL049317  | 1053.933 | 1008.413  | NM_016203 | 653.812   | 724.005   |
| NM_006774 | 446.852   | 613.87    | AL050090  | 861.893  | 946.141   | NM_007271 | 1733.005  | 3435.298  |

|           |           |           |           |           |           |            |          |           |
|-----------|-----------|-----------|-----------|-----------|-----------|------------|----------|-----------|
| NM_020129 | 568.804   | 543.317   | AF086309  | 768.522   | 931.371   | NM_00625E  | 2104.655 | 3215.396  |
| Y16521    | 1862.781  | 690.495   | AF238870  | 1030.438  | 853.145   | AB037718   | 3439.32  | 4692.621  |
| AL050371  | 3968.653  | 7731.96   | AK026279  | 3562.732  | 4039.867  | AL389994   | 641.986  | 768.886   |
| NM_01815E | 987.06    | 961.541   | AF130094  | 7146.111  | 7164.231  | NM_00390E  | 2538.279 | 2394.857  |
| NM_016301 | 5129.207  | 5791.487  | AK026673  | 1385.242  | 1160.706  | NM_001277  | 3350.44  | 3042.731  |
| AK021975  | 540.164   | 441.534   | NM_005452 | 3776.151  | 3624.403  | NM_00365E  | 3094.384 | 2694.676  |
| AB032952  | 16264.705 | 13243.231 | AF170935  | 16140.435 | 16435.838 | Z36789     | 908.245  | 1664.484  |
| NM_002522 | 12476.947 | 11488.192 | AK025218  | 623.541   | 689.411   | J02874     | 1486.474 | 2020.257  |
| NM_00094E | 1342.877  | 1452.215  | AJ227899  | 1065.859  | 1161.557  | BF310427   | 982.438  | 1469.939  |
| NM_002574 | 16487.365 | 13795.257 | AL359607  | 567.199   | 536.463   | AA045192   | 835.693  | 919.823   |
| AB011174  | 1315.81   | 1598.854  | AF161371  | 7254.993  | 5763.6    | M92642     | 459.938  | 1103.96   |
| AB043635  | 332.316   | 503.489   | AK022464  | 761.689   | 683.229   | AA464532   | 616.074  | 1404.578  |
| AB040879  | 1397.635  | 1499.474  | AF086230  | 924.81    | 866.535   | H-U 44385  | 8834.992 | 9239.272  |
| AL049935  | 2680.932  | 2493.429  | AK023408  | 1820.542  | 1987.768  | ID 1654970 | 4218.046 | 3197.859  |
| AB033043  | 4982.696  | 4497.582  | U84509    | 1576.76   | 1837.08   | ID 2531132 | 2971.192 | 2768.61   |
| NM_01499E | 1907.372  | 1761.085  | AK002036  | 4672.985  | 4161.817  | BF125928   | 9251.185 | 8795.561  |
| AK025220  | 1568.713  | 1260.295  | AK025775  | 3981.808  | 3693.807  | BG571026   | 933.671  | 1115.034  |
| D42046    | 3400.825  | 7464.157  | AB046791  | 576.069   | 544.904   | AA489017   | 2552.328 | 3530.303  |
| NM_00103E | 3785.356  | 7982.137  | AF043469  | 963.543   | 1236.861  | NM_13326E  | 946.731  | 1519.227  |
| AK023168  | 1654.16   | 1480.057  | AL109671  | 783.415   | 783.232   | NM_012461  | 1874.989 | 2499.006  |
| NM_00664E | 1178.169  | 2725.105  | AK022008  | 2855.766  | 3261.961  | AK001379   | 575.337  | 814.672   |
| NM_004742 | 1083.163  | 860.418   | NM_01818E | 1639.04   | 1818.757  | NM_01745C  | 4844.229 | 2325.919  |
| NM_01475E | 1553.354  | 1349.675  | AL080188  | 2163.437  | 2101.315  | NM_00202E  | 493.129  | 418.893   |
| NM_00658E | 24088.805 | 21049.834 | T99941    | 5301.782  | 5066.807  | NM_00283E  | 399.249  | 358.055   |
| NM_014331 | 2096.508  | 2222.278  | AF113678  | 1656.3    | 1656.414  | AF190500   | 643.286  | 740.96    |
| AF054589  | 279.182   | 306.411   | AL137313  | 52668.457 | 61014.375 | NM_00161E  | 588.433  | 1303.997  |
| NM_00527C | 613.18    | 558.136   | AB002363  | 4815.184  | 4421.305  | NM_005904  | 2166.37  | 3020.431  |
| NM_01481E | 1014.736  | 1078.965  | NM_005284 | 2322.074  | 2415.831  | NM_00527E  | 9223.579 | 9209.698  |
| NM_007221 | 3232.121  | 3549.196  | AF086351  | 2108.641  | 1700.531  | NM_00657E  | 483.093  | 378.897   |
| X54163    | 11095.033 | 11189.148 | D83199    | 14402.91  | 14667.224 | NM_01864E  | 641.275  | 860.952   |
| AK025395  | 430.515   | 813.083   | AK025957  | 540.115   | 488.992   | AB035266   | 919.089  | 842.218   |
| NM_00038E | 994.483   | 1255.031  | Y16708    | 855.156   | 806.275   | NM_003744  | 1891.509 | 2303.263  |
| X58377    | 579.532   | 858.149   | AL157453  | 2365.722  | 2577.469  | NM_00637E  | 864.829  | 1105.459  |
| NM_00246E | 531.661   | 909.545   | NM_01909E | 4144.013  | 4425.461  | NM_01813E  | 2004.093 | 2749.536  |
| BI830936  | 885.323   | 1226.347  | AK022212  | 29858.256 | 32598.854 | NM_018207  | 594.326  | 1760.031  |
| BI830753  | 356.1     | 978.719   | X64974    | 1921.155  | 2134.932  | NM_00034E  | 1864.153 | 1450.545  |
| AI802950  | 702.156   | 571.357   | NM_000834 | 3277.873  | 3235.905  | NM_006531  | 689.383  | 383.845   |
| AL043686  | 2673.558  | 2100.379  | NM_00648E | 25545.453 | 24890.189 | L40397     | 8470.609 | 15744.986 |
| AA490172  | 717.172   | 680.432   | NM_01245E | 1073.239  | 1196.202  | NM_02019E  | 3316.417 | 5103.896  |
| AA775212  | 1591.89   | 1524.585  | AL137268  | 2833.794  | 2285.567  | AA098879   | 395.626  | 679.123   |
| NM_00072E | 1297.991  | 2401.78   | AK022398  | 548.946   | 517.746   | AF070525   | 3983.654 | 4582.437  |
| AL096751  | 4338.99   | 6568.025  | AK024109  | 1555.273  | 1667.011  | NM_001177  | 3977.473 | 4289.577  |
| NM_000364 | 930.601   | 1116.12   | AF088048  | 536.172   | 385.799   | NM_014447  | 994.604  | 1402.553  |
| AF026920  | 3617.256  | 5751.671  | AK001143  | 2588.82   | 1799.084  | NM_00235E  | 302.811  | 355.432   |
| NM_004931 | 4438.385  | 5091.875  | AK001701  | 3031.253  | 2697.065  | NM_006691  | 741.49   | 1155.259  |
| NM_000607 | 22113.02  | 33396.121 | AF217970  | 768.531   | 892.672   | NM_00150E  | 407.903  | 485.072   |
| NM_00257E | 5662.155  | 7725.43   | AF086297  | 866.48    | 1004.18   | NM_00371C  | 719.482  | 805.013   |
| NM_004244 | 3428.485  | 3362.934  | AK025455  | 1360.231  | 1570.078  | Z83805     | 235.034  | 328.474   |
| AK023114  | 3405.414  | 6771.622  | AK026799  | 8101.74   | 5662.185  | NM_00466E  | 1390.762 | 1260.993  |
| NM_00367E | 3592.71   | 7268.341  | NM_01486C | 660.039   | 673.161   | NM_003614  | 415.881  | 328.66    |
| NM_01493E | 1350.197  | 1212.419  | AK022549  | 761.994   | 627.624   | NM_014257  | 1134.789 | 873.577   |
| AF049460  | 255.546   | 165.741   | NM_018157 | 529.161   | 423.43    | NM_00484E  | 1019.687 | 1124.381  |
| AK026066  | 774.941   | 791.134   | Z70714    | 2452.028  | 2582.66   | AK022845   | 492.535  | 454.699   |

|           |           |           |            |           |           |           |           |           |
|-----------|-----------|-----------|------------|-----------|-----------|-----------|-----------|-----------|
| NM_005244 | 2264.344  | 2696.542  | AK021640   | 5923.416  | 5574.264  | NM_003004 | 255.687   | 296.141   |
| NM_018158 | 1876.856  | 2610.938  | NM_016565  | 40805.359 | 39893.469 | S77835    | 180.895   | 602.159   |
| NM_016301 | 6883.29   | 10933.117 | CY3Cy5     | 498.782   | 110.695   | NM_002985 | 4174.919  | 3687.036  |
| AK021975  | 969.939   | 1510.727  | BF310427   | 1176.193  | 1275.347  | AB033073  | 2396.178  | 1510.76   |
| AB032952  | 27036.307 | 43844.586 | N94424     | 434.542   | 282.376   | NM_005813 | 1904.219  | 4584.051  |
| NM_002522 | 24276.963 | 38319.266 | AA045192   | 1173.517  | 883.214   | AB037718  | 3499.422  | 7172.835  |
| NM_002978 | 1536.735  | 1486.726  | M92642     | 689.836   | 778.42    | AL389994  | 759.764   | 2413.672  |
| NM_004722 | 2581.823  | 4440.848  | H-U 44385  | 8114.743  | 7520.503  | NM_003905 | 2930.823  | 4930.985  |
| NM_007351 | 4957.077  | 3328.625  | ID 1654970 | 3874.011  | 3600.396  | NM_001277 | 4618.538  | 5433.535  |
| AK026266  | 2521.473  | 1909.574  | ID 2531132 | 3850.245  | 6331.192  | NM_003655 | 3355.952  | 4509.26   |
| NM_007124 | 1264.597  | 1307.741  | BF125928   | 7794.37   | 7057.775  | NM_007072 | 1213.461  | 1915.15   |
| NM_003176 | 1444.305  | 1610.436  | BG571026   | 884.712   | 849.363   | NM_012320 | 2740.334  | 3732.82   |
| AK023168  | 2430.295  | 3697.183  | AA489017   | 2093.72   | 1921.555  | NM_018208 | 1804.223  | 3023.076  |
| NM_006646 | 828.17    | 1530.427  | NM_012245  | 8201.597  | 7737.092  | NM_015925 | 4354.116  | 6502.224  |
| NM_004742 | 1502.808  | 1986.248  | NM_133263  | 898.754   | 772.18    | U90653    | 2344.763  | 3292.529  |
| NM_014753 | 2291.746  | 2602.331  | SR2        | 38960.004 | 33293.781 | NM_000196 | 269.902   | 373.696   |
| NM_006585 | 29435.533 | 33273.773 | SR4        | 9634.569  | 7761.36   | NM_018335 | 1393.032  | 1223.35   |
| NM_014331 | 2929.01   | 3283.045  | SR6        | 1694.773  | 1234.273  | NM_006745 | 20162.645 | 14689.393 |
| NM_006795 | 10370.159 | 10366.361 | SR8        | 5466.272  | 11590.061 | NM_000275 | 555.12    | 700.581   |
| AF070568  | 1282.812  | 1361.284  | SR10       | 17410.701 | 4483.372  | AK000037  | 591.576   | 393.042   |
| NM_000240 | 2681.813  | 2266.743  | CY3Cy5     | 499.139   | 116.286   | NM_014760 | 1490.187  | 1348.367  |
| AK055733  | 9404.373  | 6669.342  | NM_017450  | 1310.63   | 1152.484  | NM_018395 | 705.002   | 678.342   |
| AF298880  | 7940.142  | 4873.105  | NM_002023  | 426.322   | 291.571   | NM_002560 | 5722.334  | 4555.903  |
| AL050371  | 2353.896  | 2088.7    | NM_002839  | 556.503   | 539.292   | NM_014404 | 623.493   | 486.42    |
| NM_002651 | 3649.156  | 2776.039  | AF190500   | 568.036   | 551.951   | NM_015947 | 2382.539  | 2514.697  |
| NM_002413 | 5726.282  | 3502.101  | NM_005904  | 600.615   | 507.719   | NM_002042 | 2836.688  | 2578.41   |
| NM_001757 | 1761.343  | 1883.971  | NM_005273  | 9048.653  | 9256.537  | AB028944  | 378.624   | 354.034   |
| NM_001647 | 2684.156  | 3467.773  | NM_000524  | 347.542   | 386.169   | AJ006268  | 621.091   | 514.282   |
| NM_006228 | 164.852   | 130.315   | NM_006576  | 751.956   | 950.397   | NM_012245 | 7600.411  | 8250.193  |
| NM_003768 | 2831.276  | 2788.447  | NM_018645  | 509.406   | 404.924   | NM_133263 | 1010.868  | 1445.052  |
| NM_018393 | 701.779   | 833.826   | AB035266   | 1894.658  | 1978.779  | NM_000403 | 2407.625  | 3466.201  |
| BF032535  | 3235.744  | 2947.832  | NM_003744  | 1719.329  | 1383.312  | NM_018127 | 6408.794  | 6022.143  |
| NM_018332 | 1994.326  | 2035.509  | NM_006378  | 976.148   | 998.599   | AB020677  | 5170.315  | 4811.891  |
| NM_005096 | 10592.552 | 9691.631  | NM_018132  | 1942.929  | 2037.381  | AB033097  | 966.022   | 810.083   |
| NM_006760 | 755.437   | 739.595   | NM_018207  | 567.603   | 387.238   | NM_000135 | 1001.544  | 760.256   |
| NM_012289 | 4457.735  | 3563.952  | NM_000345  | 5430.363  | 4319.533  | AJ223948  | 2146.461  | 1744.949  |
| AB037775  | 992.607   | 847.911   | NM_006531  | 922.814   | 811.244   | NM_016218 | 476.55    | 288.526   |
| L27560    | 1091.557  | 983.074   | AB029021   | 3664.428  | 3693.051  | AK022947  | 1409.206  | 1353.581  |
| AB011174  | 1024.93   | 1112.62   | Z36789     | 640.512   | 559.149   | AL050029  | 1504.786  | 1222.461  |
| AB040879  | 1166.245  | 893.056   | J02874     | 1611.231  | 1442.089  | AL049966  | 377.287   | 309.348   |
| NM_016308 | 12686.096 | 18559.516 | AF070525   | 3968.395  | 4779.491  | NM_005204 | 1497.273  | 1365.455  |
| D42046    | 2341.695  | 2520.753  | NM_001177  | 3435.273  | 3470.544  | NM_016203 | 530.557   | 594.557   |
| NM_001033 | 1937.537  | 1757.818  | NM_014447  | 972.845   | 752.223   | NM_002755 | 2846.404  | 2409.788  |
| NM_004526 | 7913.307  | 7041.158  | NM_002356  | 293.976   | 316.978   | NM_007271 | 1301.776  | 1228.193  |
| NM_002526 | 6751.222  | 4960.73   | NM_006691  | 666.23    | 607.43    | NM_006255 | 1374.584  | 1440.137  |
| NM_020135 | 1749.7    | 1947.935  | NM_001505  | 376.607   | 368.539   | BE392143  | 1729.361  | 1816.768  |
| NM_018518 | 3277.714  | 3937.577  | NM_003710  | 856.196   | 934.192   | NM_018132 | 1980.854  | 2283.897  |
| NM_006438 | 1087.033  | 1044.576  | NM_004666  | 959.481   | 1080.116  | NM_018207 | 297.77    | 575.033   |
| NM_001845 | 735.093   | 673.139   | NM_003614  | 844.333   | 754.393   | NM_000345 | 2867.516  | 2777.53   |
| AK024697  | 967.013   | 1012.875  | NM_014257  | 1575.04   | 1281.941  | NM_001862 | 49616.969 | 40348.93  |
| NM_006460 | 1743.088  | 1444.889  | NM_001140  | 346.283   | 415.527   | NM_006531 | 754.858   | 831.687   |
| L34156    | 456.043   | 403.232   | NM_004843  | 1162.603  | 1312.421  | AB029021  | 2737.542  | 4214.945  |
| NM_003749 | 13638.379 | 11839.852 | AK022845   | 433.998   | 394.356   | J02874    | 1655.516  | 2661.176  |

|           |           |           |           |           |           |            |          |           |
|-----------|-----------|-----------|-----------|-----------|-----------|------------|----------|-----------|
| NM_003557 | 2295.225  | 2204.832  | NM_003004 | 325.345   | 204.321   | BF310427   | 1302.358 | 1506.891  |
| NM_001257 | 10443.305 | 9459.01   | NM_002985 | 3848.016  | 3736.695  | AA045192   | 689.38   | 542.199   |
| D85245    | 7270.686  | 5311.358  | AB018347  | 2733.689  | 2728.603  | H-U 44385  | 9074.62  | 6026.018  |
| NM_000943 | 1220.426  | 1140.632  | NM_003284 | 652.316   | 475.901   | ID 1654970 | 4265.483 | 2860.133  |
| NM_004658 | 2232.249  | 2073.822  | NM_018152 | 3084.003  | 3239.428  | ID 2531132 | 2942.409 | 2160.629  |
| NM_001250 | 3264.468  | 2279.335  | NM_003257 | 275.917   | 174.308   | BF125928   | 8299.146 | 6870.566  |
| AK022581  | 4376.021  | 2802.864  | NM_012461 | 1416.565  | 1096.045  | BG571026   | 765.414  | 569.332   |
| NM_018054 | 2216.587  | 2177.643  | AK001379  | 699.338   | 515.526   | AA489017   | 2124.769 | 1515.37   |
| NM_006186 | 957.096   | 726.441   | NM_007072 | 1015.63   | 1345.854  | AK022845   | 437.095  | 390.787   |
| NM_000958 | 4277.746  | 3200.178  | NM_012320 | 2625.406  | 2320.854  | NM_003004  | 428.886  | 184.832   |
| NM_001401 | 802.684   | 527.426   | NM_018208 | 1645.591  | 1801.125  | S77835     | 303.462  | 252.885   |
| NM_013271 | 4555.142  | 3446.296  | NM_015929 | 3742.818  | 3598.352  | NM_002985  | 4317.88  | 4434.305  |
| NM_004157 | 4599.792  | 3667.575  | U90653    | 2028.071  | 1789.375  | AB018347   | 1625.307 | 1613.769  |
| NM_000684 | 1425.4    | 1759.41   | NM_000196 | 420.519   | 290.744   | AB033073   | 2293.157 | 1951.709  |
| NM_015913 | 5812.356  | 4804.91   | NM_018339 | 1476.183  | 1529.252  | NM_003284  | 379.74   | 652.684   |
| NM_005157 | 4969.926  | 3643.629  | NM_006745 | 19047.783 | 20298.094 | NM_003257  | 595.943  | 1254.06   |
| NM_007354 | 612.235   | 577.033   | NM_000275 | 575.441   | 608.094   | NM_012461  | 1767.458 | 2379.287  |
| U67037    | 1324.81   | 1250.951  | AK000037  | 585.346   | 547.94    | AK001379   | 604.894  | 849.63    |
| NM_004960 | 13906.593 | 12371.813 | NM_014760 | 1276.606  | 1252.814  | NM_017450  | 1288.11  | 1341.997  |
| AF272370  | 6293.52   | 5790.591  | NM_018398 | 785.322   | 699.051   | AF190500   | 516.773  | 406.8     |
| AF130050  | 2797.826  | 2395.668  | NM_002560 | 10541.07  | 11410.627 | NM_005904  | 564.362  | 507.144   |
| NM_012197 | 2373.102  | 2140.968  | NM_014404 | 1064.335  | 1374.118  | NM_005273  | 9005.956 | 6395.351  |
| AK024016  | 1761.162  | 2068.04   | NM_018713 | 470.597   | 507.33    | NM_006576  | 479.052  | 419.95    |
| NM_003581 | 5645.784  | 4447.726  | NM_015947 | 2544.192  | 2774.312  | AB035266   | 988.581  | 736.479   |
| NM_002888 | 245.697   | 177.762   | NM_002042 | 18648.037 | 17675.314 | NM_003744  | 1368.775 | 904.883   |
| NM_012407 | 688.26    | 721.317   | AB028944  | 607.766   | 503.578   | NM_006378  | 774.224  | 533.513   |
| NM_007186 | 1953.472  | 1963.599  | AJ006268  | 559.489   | 681.761   | NM_014404  | 633.37   | 630.886   |
| NM_007044 | 2084.39   | 1893.286  | M74089    | 1690.173  | 1887.538  | NM_015947  | 2740.173 | 1989.744  |
| AF294326  | 4788.478  | 4027.479  | AF190864  | 3793.452  | 4247.75   | NM_002042  | 6960.581 | 5940.882  |
| NM_014678 | 1757.68   | 1502.578  | NM_002779 | 2846.102  | 2902.727  | AB028944   | 414.184  | 356.818   |
| NM_012317 | 61543.102 | 57520.172 | L40397    | 7167.615  | 7127.585  | AJ006268   | 598.19   | 761.272   |
| NM_017853 | 2144.588  | 1934.736  | NM_020198 | 2846.036  | 2592.738  | M74089     | 1785.35  | 2313.984  |
| NM_016097 | 8202.423  | 5883.896  | NM_000025 | 7233.101  | 6168.038  | AF190864   | 3947.25  | 4323.636  |
| AB046800  | 4591.309  | 4319.195  | D38521    | 2170.24   | 1748.907  | NM_002779  | 2791.629 | 3908.936  |
| NM_002162 | 3142.99   | 4318.319  | NM_000403 | 2275.404  | 1689.113  | L40397     | 7726.226 | 11442.551 |
| NM_015458 | 2989.053  | 2867.24   | NM_018127 | 5839.851  | 6589.982  | NM_020198  | 3387.65  | 4419.927  |
| D13540    | 3307.27   | 2683.223  | AB020677  | 5362.458  | 5018.165  | AA098879   | 755.465  | 825.989   |
| NM_016570 | 5677.774  | 4193.528  | AB033097  | 1901.112  | 1922.487  | AF070525   | 3976.829 | 3686.705  |
| AF209198  | 1156.814  | 1204.32   | NM_000135 | 981.359   | 1005.065  | NM_001177  | 3982.761 | 3010.786  |
| L09247    | 444.967   | 510.424   | AJ223948  | 2252.33   | 2324.335  | NM_014447  | 1033.568 | 823.543   |
| M69012    | 45475.859 | 33757.41  | NM_016218 | 454.32    | 396.951   | NM_002356  | 392.043  | 474.629   |
| NM_006936 | 12139.991 | 10772.519 | AK022947  | 1186.357  | 1266.401  | NM_006691  | 588.253  | 585.798   |
| NM_001327 | 5295.961  | 4575.562  | AL050029  | 1383.15   | 1371.575  | NM_001505  | 277.251  | 397.178   |
| AF321182  | 272.761   | 257.712   | NM_005204 | 1736.526  | 1424.355  | NM_003710  | 575.892  | 561.257   |
| NM_003652 | 468.293   | 557.271   | NM_016203 | 468.171   | 418.942   | NM_004666  | 998.462  | 1052.581  |
| NM_000063 | 965.903   | 1044.046  | NM_002759 | 3101      | 2560.826  | NM_003614  | 384.404  | 498.957   |
| NM_018389 | 696.547   | 389.249   | NM_007271 | 1368.19   | 1442.396  | NM_014257  | 976.801  | 743.073   |
| AB033026  | 843.585   | 622.016   | NM_006255 | 1948.854  | 2127.458  | NM_001140  | 316.799  | 187.498   |
| AF104914  | 13703.25  | 11886.421 | BE392143  | 2309.335  | 1924.539  | NM_004843  | 1002.502 | 613.222   |
| NM_014716 | 2822.287  | 2122.073  | NM_005813 | 1471.112  | 1929.218  | NM_005204  | 1642.515 | 1277.516  |
| AK023845  | 1709.283  | 1249.773  | AB037718  | 3180.502  | 6419.829  | NM_016203  | 514.278  | 328.851   |
| NM_002638 | 3804.654  | 2990.763  | AL389994  | 759.748   | 1645.615  | NM_002755  | 3052.334 | 1785.009  |
| NM_016487 | 1028.656  | 1055.305  | NM_003909 | 2145.692  | 2195.197  | NM_007271  | 1453.281 | 1115.444  |

|           |           |           |            |           |           |           |           |           |
|-----------|-----------|-----------|------------|-----------|-----------|-----------|-----------|-----------|
| NM_00580E | 5790.559  | 6272.431  | NM_001277  | 3495.92   | 3085.389  | NM_00625E | 2105.525  | 2136.094  |
| NM_006401 | 22562.324 | 25495.525 | NM_003659  | 2865.792  | 2167.228  | BE392143  | 2636.953  | 2281.467  |
| AF269249  | 335.167   | 417.613   | AB029021   | 4141.771  | 4034.313  | NM_005813 | 1654.109  | 1644.237  |
| D31763    | 1555.624  | 1390.589  | NM_002101  | 12643.047 | 11026.042 | AB037718  | 3565.313  | 3624.84   |
| NM_01816E | 2798.383  | 2331.851  | NM_005423  | 317.528   | 298.734   | AL389994  | 1128.324  | 1138.3    |
| AK021452  | 6639.754  | 4857.338  | Z36789     | 636.478   | 544.912   | NM_00390E | 2750.602  | 2723.874  |
| NM_00450E | 1242.707  | 1444.688  | J02874     | 1901.734  | 1912.07   | NM_001277 | 4653.648  | 4733.583  |
| S74529    | 36508.602 | 27893.441 | BF310427   | 1247.926  | 1293.176  | NM_00365E | 3206.696  | 3096.865  |
| NM_005933 | 385.923   | 773.606   | N94424     | 288.053   | 319.706   | NM_007072 | 889.635   | 981.044   |
| NM_001421 | 719.482   | 802.609   | AA045192   | 1064.467  | 957.733   | NM_01232C | 2307.752  | 2002.766  |
| M73837    | 996.948   | 616.759   | M92642     | 414.585   | 422.513   | NM_01820E | 1588.907  | 1272.037  |
| NM_00583E | 4503.569  | 2961      | H-U 44385  | 7741.617  | 8430.606  | NM_01592E | 4060.644  | 3092.235  |
| AK023379  | 1261.473  | 982.401   | ID 1654970 | 3863.726  | 3580.214  | U90653    | 2411.051  | 2014.921  |
| AK021904  | 7326.113  | 5115.183  | ID 2531132 | 2583.899  | 2752.646  | NM_00019E | 412.394   | 343.593   |
| -         | 631.709   | 604.46    | BF125928   | 6999.203  | 6345.212  | NM_01833E | 1663.134  | 1704.061  |
| NM_018292 | 478.132   | 493.693   | BG571026   | 830.483   | 750.465   | AK000037  | 571.185   | 747.367   |
| AL049705  | 5029.956  | 4215.569  | AA489017   | 1923.32   | 1610.586  | NM_01476C | 1623.757  | 997.047   |
| AK022294  | 1152.715  | 1012.236  | NM_01224E  | 6426.803  | 7204.077  | NM_01839E | 693.131   | 629.551   |
| AF086507  | 691.672   | 540.327   | NM_133263  | 911.766   | 985.26    | NM_00256C | 6511.577  | 4432.633  |
| U79289    | 1339.208  | 1097.795  | NM_003284  | 743.349   | 711.785   | NM_000787 | 348.538   | 367.416   |
| NM_01402E | 2110.787  | 2201.546  | NM_018152  | 554.859   | 553.444   | U57962    | 1830.316  | 1479.666  |
| NM_000402 | 1141.259  | 1123.61   | NM_000319  | 978.528   | 946.491   | NM_01617E | 6116.12   | 3337.87   |
| NM_004273 | 388.344   | 318.791   | NM_003257  | 205.947   | 170.371   | NM_005574 | 16843.918 | 10615.946 |
| NM_00069C | 6858.291  | 5463.045  | NM_012461  | 1634.533  | 1357.911  | NM_01789E | 5022.461  | 3201.521  |
| NM_00015E | 5226.238  | 4266.424  | AK001379   | 518.596   | 651.017   | NM_00461C | 801.277   | 936.668   |
| AK024489  | 255.051   | 227.478   | NM_01745C  | 4457.716  | 1791.422  | NM_001612 | 1331.942  | 1320.932  |
| NM_000181 | 6007.35   | 4841.96   | NM_002023  | 652.271   | 458.728   | AK027002  | 850.652   | 717.258   |
| NM_014121 | 447.519   | 985.079   | NM_002839  | 396.713   | 400.538   | AB025254  | 3273.262  | 2883.538  |
| NM_00673C | 1636.68   | 1691.212  | AF190500   | 567.045   | 535.801   | NM_004081 | 786.301   | 834.365   |
| NM_005644 | 1807.327  | 1922.808  | NM_005904  | 501.381   | 468.344   | NM_00002E | 5559.688  | 4624.191  |
| NM_018442 | 2962.952  | 2130.071  | NM_005273  | 8189.862  | 8409.162  | D38521    | 2323.12   | 1622.87   |
| AF182416  | 3287.159  | 2097.076  | NM_000524  | 179.604   | 126.012   | NM_000403 | 2003.982  | 1364.047  |
| NM_002017 | 5369.812  | 7590.249  | NM_00657E  | 769.691   | 729.538   | NM_018127 | 6753.164  | 5717.285  |
| NM_002382 | 20335.189 | 16181.614 | NM_01864E  | 459.872   | 518.807   | AB033097  | 1109.65   | 1160.32   |
| NM_00215E | 565.511   | 417.307   | AB035266   | 1782.735  | 1639.984  | NM_00013E | 1186.251  | 1758.889  |
| U13223    | 6309.805  | 4643.079  | NM_003744  | 1304.453  | 1003.224  | NM_01621E | 563.26    | 890.787   |
| NM_01627C | 2024.074  | 1775.885  | NM_00637E  | 1024.413  | 989.573   | AK022947  | 1650.295  | 1558.422  |
| AK001357  | 1211.808  | 1126.095  | NM_018132  | 1688.093  | 2470.567  | AL050029  | 1469.466  | 1510.795  |
| NM_015721 | 1701.541  | 1455.298  | NM_018207  | 439.14    | 314.219   | AL049966  | 290.138   | 253.003   |
| AF086298  | 825.398   | 665.692   | NM_00034E  | 1491.26   | 1168.583  | AB040976  | 1783.182  | 1608.001  |
| AK027238  | 705.188   | 968.801   | NM_006531  | 599.029   | 300.419   | NM_018641 | 2986.403  | 2396.46   |
| AK000032  | 352.101   | 349.415   | M74089     | 1728.504  | 1991.243  | NM_002221 | 1038.725  | 748.94    |
| AK025758  | 472.95    | 441.034   | AF190864   | 3537.645  | 3076.492  | AK024502  | 4544.936  | 4651.747  |
| S94540    | 21364.422 | 17407.625 | NM_002779  | 2668.941  | 2826.297  | NM_001124 | 985.79    | 983.941   |
| U79297    | 563.077   | 460.843   | L40397     | 9599.382  | 10859.136 | NM_00458E | 1545.097  | 1260.586  |
| AK002164  | 605.122   | 488.431   | NM_02019E  | 3700.363  | 3119.396  | NM_004844 | 4378.647  | 3052.658  |
| AF052122  | 10712.18  | 8233.847  | AA098879   | 563.117   | 515.249   | NM_013447 | 1232.344  | 874.972   |
| NM_00131C | 1419.419  | 1222.122  | AF070525   | 3545.843  | 3592.228  | NM_000051 | 1733.921  | 2149.925  |
| AK026924  | 6333.726  | 5510.016  | NM_001177  | 3542.977  | 3703.754  | NM_00418C | 4366.261  | 3234.756  |
| AF086458  | 2415.6    | 2634.405  | NM_014447  | 1091.581  | 1011.67   | NM_00478E | 25942.064 | 16153.494 |
| AF086548  | 2889.606  | 2824.156  | NM_006691  | 737.725   | 747.406   | AF302109  | 2998.116  | 2723.843  |
| AK024350  | 774.156   | 911.023   | NM_00150E  | 380.889   | 490.589   | NM_00350E | 498.71    | 513.784   |
| AK023717  | 1554.107  | 1684.593  | NM_00371C  | 800.371   | 894.742   | NM_007191 | 595.474   | 888.737   |

|           |           |          |           |          |          |           |           |           |
|-----------|-----------|----------|-----------|----------|----------|-----------|-----------|-----------|
| AK023727  | 558.804   | 419.927  | NM_004666 | 856.265  | 1074.295 | AL109667  | 364.096   | 530.933   |
| AK025271  | 636.27    | 517.057  | NM_003614 | 624.115  | 820.334  | NM_000840 | 592.907   | 715.713   |
| AF086204  | 3723.984  | 3261.394 | NM_014257 | 1554.247 | 1107.738 | AF205437  | 843.027   | 366.927   |
| NM_007021 | 784.868   | 840.387  | NM_001140 | 324.315  | 271.102  | AF034102  | 5855.007  | 4009.899  |
| AK023065  | 295.519   | 396.504  | NM_004843 | 836.271  | 1018.162 | AJ008142  | 4231.568  | 2745.391  |
| AK021570  | 594.551   | 618.207  | AK022845  | 661.846  | 895.587  | NM_001343 | 2610.474  | 2117.581  |
| AL360204  | 370.017   | 207.067  | NM_003004 | 351.783  | 387.499  | NM_007275 | 4680.623  | 2990.862  |
| AK000103  | 713.831   | 561.92   | NM_002985 | 3675.173 | 2904.103 | NM_019025 | 4659.68   | 3567.123  |
| AF085959  | 521.042   | 506.281  | AB033073  | 1913.013 | 828.603  | NM_018461 | 2348.493  | 1933.956  |
| AF075107  | 534.98    | 518.7    | NM_005813 | 1689.191 | 1930.47  | AF235023  | 1544.972  | 1730.63   |
| AK023104  | 580.725   | 519.7    | AB037718  | 3166.718 | 2939.594 | NM_006910 | 2708.055  | 2366.38   |
| AK026923  | 1663.393  | 1611.327 | AL389994  | 646.525  | 772.446  | AF162667  | 1517.672  | 1452.973  |
| U84511    | 505.318   | 45.343   | NM_003909 | 2300.639 | 2625.771 | AB046847  | 1524.797  | 1576.415  |
| U61091    | 752.756   | 1231.128 | NM_001277 | 5528.864 | 4919.361 | NM_000447 | 1144.783  | 977.829   |
| AK021691  | 8275.936  | 9193.997 | NM_003659 | 3368.932 | 3715.179 | NM_006354 | 5868.692  | 3601.31   |
| AK023595  | 473.277   | 563.912  | NM_007072 | 1087.77  | 1052.483 | AF303378  | 3544.846  | 2540.404  |
| AK000141  | 2562.244  | 2133.884 | NM_012320 | 2613.059 | 2167.19  | NM_016037 | 5067.802  | 3730.08   |
| AL137758  | 1548.433  | 1468.791 | NM_018208 | 1427.859 | 1571.312 | NM_000043 | 409.467   | 262.699   |
| AK023865  | 390.081   | 294.825  | NM_015929 | 3444.769 | 3434.704 | NM_015965 | 291.669   | 263.351   |
| AK025786  | 740.562   | 697.215  | U90653    | 2366.71  | 2119.327 | NM_000417 | 2031.086  | 2061.643  |
| AK024188  | 897.776   | 1123.522 | NM_000196 | 202.363  | 273.393  | NM_020356 | 457.325   | 577.06    |
| AK024379  | 403.486   | 360.841  | NM_018339 | 1272.836 | 1404.27  | NM_018235 | 11765.503 | 7911.721  |
| AK026820  | 455.208   | 607.267  | NM_006745 | 17360.4  | 18806.02 | NM_012104 | 3066.551  | 1797.005  |
| AK001716  | 2455.197  | 2457.491 | NM_000275 | 523.722  | 530.46   | NM_006144 | 426.626   | 209.809   |
| AK026821  | 1199.488  | 958.015  | AK000037  | 581.638  | 502.316  | AL136549  | 518.595   | 458.297   |
| AK026280  | 8215.586  | 6435.253 | NM_014760 | 1431.367 | 1242.101 | NM_012168 | 560.273   | 578.825   |
| AF113017  | 5181.933  | 5086.325 | NM_018398 | 932.853  | 922.242  | NM_007038 | 784.822   | 680.281   |
| AL080232  | 4665.578  | 3856.59  | NM_002560 | 3541.303 | 3643.213 | AF311324  | 1316.959  | 1054.548  |
| AK001120  | 5336.347  | 5028.151 | NM_014404 | 895.746  | 1949.172 | NM_001461 | 626.258   | 465.888   |
| AF264629  | 274.502   | 278.263  | NM_018713 | 282.095  | 297.527  | AF061556  | 329.957   | 300.071   |
| AK023224  | 3547.404  | 4221.232 | NM_015947 | 2231.168 | 1910.073 | AL162049  | 989.116   | 629.37    |
| AK023731  | 5314.782  | 3533.274 | NM_002042 | 838.49   | 759.303  | NM_005032 | 570.692   | 611.194   |
| AK023929  | 1458.798  | 2003.457 | AB028944  | 398.809  | 592.889  | NM_004160 | 2864.936  | 2818.022  |
| AK022442  | 916.807   | 984.578  | AJ006268  | 498.619  | 257.031  | AL109677  | 822.908   | 671.968   |
| AK023336  | 818.754   | 1111.141 | NM_012245 | 8503.434 | 8545.459 | NM_003941 | 14115.846 | 10928.202 |
| AK026873  | 2031.038  | 1883.729 | NM_133263 | 837.139  | 909.513  | AF177909  | 540.379   | 607.659   |
| AK026394  | 1998.014  | 2182.959 | NM_000025 | 7635.001 | 7083.375 | NM_002664 | 6402.304  | 14495.389 |
| NM_005448 | 804.988   | 836.998  | D38521    | 1815.825 | 2059.142 | AB018271  | 2480.07   | 3195.589  |
| AK025943  | 12107.448 | 9876.688 | NM_000403 | 2210.359 | 2238.583 | AL137665  | 1816.587  | 1429.262  |
| BG106479  | 698.023   | 656.724  | NM_018127 | 5648.749 | 5708.358 | NM_016434 | 957.425   | 860.569   |
| AF130069  | 19430.207 | 15814.37 | AB020677  | 5443.996 | 6572.078 | NM_005634 | 1561.952  | 1180.144  |
| AL109669  | 1462.682  | 1624.777 | AB033097  | 1641.875 | 1625.578 | NM_017757 | 2631.363  | 1580.627  |
| AB037766  | 1470.908  | 1268.64  | NM_000135 | 1027.095 | 1219.849 | NM_002146 | 3630.549  | 2161.672  |
| AL133091  | 760.605   | 802.809  | AJ223948  | 2260.764 | 2681.66  | AB007892  | 1147.5    | 867.28    |
| BF842915  | 574.175   | 613.617  | NM_016218 | 511.425  | 376.792  | AB037748  | 659.769   | 707.529   |
| AF086212  | 383.594   | 243.984  | AK022947  | 1295.826 | 1355.461 | AB002306  | 1311.56   | 1000.369  |
| X82545    | 1981.721  | 1805.556 | AL050029  | 1519.843 | 1049.137 | NM_001300 | 1244.882  | 1088.608  |
| AK024632  | 3942.088  | 3079.383 | AL049966  | 300.898  | 299.402  | NM_012472 | 498.889   | 302.177   |
| NM_018474 | 7854.143  | 6091.029 | NM_005204 | 2100.658 | 2502.602 | NM_018187 | 6200.388  | 4683.516  |
| AK024937  | 810.268   | 766.837  | NM_016203 | 554.641  | 644.755  | NM_003016 | 16207.373 | 12991.829 |
| D17178    | 710.607   | 682.591  | NM_002759 | 2705.413 | 2320.034 | NM_005463 | 4390.545  | 3247.858  |
| AK022094  | 4341.229  | 7429.993 | NM_007271 | 1464.169 | 1246.664 | NM_001325 | 1370.003  | 1389.604  |
| AK026695  | 895.642   | 992.318  | NM_006255 | 2120.985 | 3463.847 | NM_018282 | 9176.023  | 6041.88   |

|             |           |           |            |           |           |           |           |           |
|-------------|-----------|-----------|------------|-----------|-----------|-----------|-----------|-----------|
| AL137539    | 272.037   | 585.565   | BE392143   | 2320.653  | 1248.128  | BC019932  | 2307.998  | 2013.779  |
| U84520      | 1985.654  | 1885.379  | NM_018132  | 2009.417  | 2299.464  | AF114818  | 1795.688  | 1977.215  |
| AL133616    | 3753.838  | 3058.895  | NM_018207  | 390.246   | 271.998   | AK025106  | 1559.779  | 1520.737  |
| AK026382    | 1569.134  | 1413.246  | NM_000345  | 5846.72   | 5877.096  | NM_020144 | 1624.296  | 1433.838  |
| AK091169    | 1997.441  | 2076.065  | NM_001862  | 35766.371 | 32676.402 | NM_003908 | 40483.539 | 28493.199 |
| NM_014745   | 42979.184 | 35006.016 | NM_006531  | 1096.888  | 1033.952  | BE893142  | 1140.829  | 909.054   |
| AF086026    | 8063.787  | 6483.041  | AB029021   | 4392.647  | 4420.097  | NM_003103 | 4322.234  | 3335.662  |
| AL133011    | 842.6     | 729.128   | NM_002101  | 13682.029 | 10908.9   | NM_015340 | 3985.76   | 4225.566  |
| NM_016300   | 667.38    | 519.569   | Z36789     | 607.296   | 511.83    | NM_006451 | 2807.889  | 2252.28   |
| NM_015607   | 18898.047 | 14170.433 | J02874     | 2522.185  | 3774.454  | NM_002094 | 1184.565  | 906.901   |
| AK026955    | 1325.987  | 1465.792  | BF310427   | 1320.003  | 1208.286  | NM_002937 | 399.419   | 400.57    |
| AL110202    | 10280.801 | 6831.577  | N94424     | 345.188   | 312.234   | AL137476  | 1288.143  | 984.34    |
| AK021980    | 563.998   | 557.977   | AA045192   | 1014.216  | 920.884   | AF052174  | 1222.08   | 902.7     |
| S46402      | 967.985   | 814.702   | M92642     | 492.149   | 405.71    | AF070590  | 730.118   | 524.438   |
| AF075048    | 512.882   | 332.287   | H-U 44385  | 7318.938  | 6232.173  | NM_000761 | 14615.636 | 9596.77   |
| Z83940      | 696.252   | 727.993   | ID 1654970 | 3355.815  | 2757.881  | NM_020142 | 1173.092  | 904.476   |
| NM_005800   | 1473.32   | 1343.395  | ID 2531132 | 2829.457  | 3331.94   | NM_000774 | 1227.793  | 842.835   |
| AF019617    | 13207.137 | 12198.197 | AA485665   | 236.012   | 381.195   | NM_017781 | 6921.048  | 5168.482  |
| AL137305    | 7192.048  | 6235.917  | BF125928   | 8134.341  | 6927.36   | NM_006004 | 58067.547 | 50250.629 |
| NM_005290   | 564.728   | 549.428   | BG571026   | 1098.467  | 980.716   | AB028960  | 774.526   | 569.19    |
| AK025802    | 462.948   | 612.576   | AA489017   | 1812.614  | 781.434   | NM_005648 | 19652.584 | 12011.386 |
| AF085973    | 377.585   | 474.88    | AK022845   | 453.184   | 434.827   | NM_006943 | 11392.464 | 8292.35   |
| NM_018013   | 4973.503  | 5016.701  | NM_003004  | 323.785   | 355.173   | NM_006741 | 2100.271  | 1409.871  |
| AK022517    | 772.716   | 766.092   | NM_002985  | 3988.863  | 3981.676  | NM_014166 | 4485.245  | 3873.982  |
| NM_000329   | 13893.878 | 10564.7   | AB018347   | 2523.502  | 2274.789  | AL117606  | 4469.701  | 3902.813  |
| NM_001182   | 5542.596  | 5242.378  | AB033073   | 2704.668  | 2191.323  | AF294278  | 637.859   | 437.022   |
| NM_000333   | 1691.049  | 1978.853  | NM_003284  | 686.559   | 624.484   | NM_018211 | 798.349   | 717.325   |
| NM_000172   | 3294.225  | 2936.995  | NM_018152  | 505.148   | 683.201   | NM_014520 | 2603.934  | 1805.058  |
| NM_002297   | 4212.592  | 3651.927  | NM_000319  | 990.04    | 1048.171  | NM_002616 | 1010.907  | 875.265   |
| AB040968    | 10923.404 | 10116.227 | NM_003257  | 233.777   | 255.502   | AK025712  | 7200.593  | 4296.327  |
| X85323      | 854.663   | 832.298   | NM_012461  | 1501.797  | 1270.955  | AK026375  | 1171.222  | 1037.51   |
| U17615      | 1788.12   | 1259.187  | AK001379   | 512.411   | 692.748   | U85992    | 626.86    | 431.379   |
| NM_005303   | 5283.885  | 3993.982  | NM_017450  | 1302.497  | 1192.643  | AL117565  | 1661.63   | 1297.082  |
| NM_016126   | 7861.45   | 7316.569  | NM_002023  | 438.701   | 377.311   | AK022103  | 406.621   | 388.741   |
| U84119      | 567.406   | 1003.965  | NM_002839  | 400.469   | 473.976   | AF143882  | 789.416   | 728.55    |
| NM_003608   | 730.779   | 699.973   | AF190500   | 675.103   | 527.035   | U00953    | 483.825   | 480.43    |
| AF302079    | 13737.512 | 10856.321 | NM_005904  | 596.607   | 508.784   | NM_017742 | 712.019   | 1044.443  |
| AJ224167    | 432.515   | 407.326   | NM_005273  | 8275.222  | 6768.959  | NM_005108 | 828.126   | 733.907   |
| NM_002550   | 986.986   | 933.964   | NM_000524  | 221.119   | 296.906   | AK022292  | 1271.744  | 1154.218  |
| NM_000692   | 1545.289  | 1348.137  | NM_006576  | 483.756   | 425.362   | AB051436  | 1645.713  | 1240.367  |
| AF086062    | 1581.912  | 1391.437  | NM_018645  | 583.864   | 755.59    | AK026482  | 4201.406  | 4431.606  |
| AF000268    | 212.922   | 322.826   | AB035266   | 567.587   | 339.914   | AL137473  | 1492.986  | 1223.061  |
| L47668      | 25220.703 | 21661.988 | NM_003744  | 1342.174  | 733.18    | AJ001873  | 2171.989  | 1776.151  |
| NM_017920   | 3308.051  | 2658.672  | NM_006378  | 651.075   | 270.902   | U66048    | 348.071   | 355.263   |
| AK025345    | 558.435   | 547.563   | NM_014404  | 908.406   | 1040.041  | AL080095  | 207.733   | 222.079   |
| D25274      | 5728.602  | 4650.098  | NM_018713  | 345.321   | 529.483   | AK023401  | 679.453   | 888.058   |
| CY3Cy5      | 788.314   | 106.137   | NM_015947  | 2812.248  | 2941.864  | AK001865  | 710.703   | 647.64    |
| D50373      | 931.348   | 943.246   | NM_002042  | 17186.441 | 18074.115 | AK024035  | 4570.71   | 3277.005  |
| AA488757    | 6180.021  | 6059.517  | AB028944   | 425.084   | 316.894   | AL050079  | 640.042   | 426.822   |
| AI394286    | 1627.625  | 1361.291  | AJ006268   | 505.533   | 538.383   | AL080233  | 849.588   | 754.119   |
| H07071      | 1193.896  | 1116.477  | M74089     | 1881.677  | 2025.807  | AL050132  | 363.795   | 342.113   |
| M25322      | 2354.682  | 1771.027  | AF190864   | 3819.887  | 3283.646  | AL117663  | 770.857   | 1340.152  |
| H-L 27586 I | 1129.531  | 1057.099  | NM_002779  | 3030.712  | 3790.81   | NM_014293 | 920.458   | 1053.568  |

|            |           |           |           |           |           |           |           |           |
|------------|-----------|-----------|-----------|-----------|-----------|-----------|-----------|-----------|
| ID 214180  | 541.04    | 536.052   | L40397    | 9323.02   | 8850.168  | AK024432  | 1408.197  | 1621.139  |
| ID 1867426 | 3538.141  | 4072.981  | NM_020198 | 3881.919  | 3147.518  | AL137513  | 692.584   | 834.918   |
| ID 396450  | 484.413   | 1230.073  | AA098879  | 532.227   | 620.221   | NM_018067 | 1863.352  | 1840.966  |
| W99328     | 785.227   | 985.687   | AF070525  | 3819.902  | 4019.879  | NM_018956 | 1553.659  | 1584.803  |
| AI434176   | 406.064   | 602.101   | NM_001177 | 3741.77   | 3355.798  | NM_014787 | 1031.371  | 1019.071  |
| H08563     | 857.777   | 953.598   | NM_014447 | 923.146   | 819.958   | AL122109  | 1083.238  | 1064.491  |
| BE735403   | 2076.665  | 2275.234  | NM_002356 | 324.078   | 255.178   | AF074988  | 873.112   | 786.802   |
| NM_022552  | 4089.905  | 3473.389  | NM_006691 | 719.101   | 615.264   | AK024946  | 1155.619  | 941.076   |
| NM_014388  | 7055.833  | 8275.202  | NM_001505 | 353.073   | 294.953   | AK001432  | 893.236   | 873.807   |
| SR2        | 57865.871 | 55250.664 | NM_003710 | 626.212   | 623.581   | AL133568  | 2729.296  | 2271.248  |
| SR4        | 13732.555 | 13364.268 | NM_004666 | 1007.449  | 1255.415  | AF009265  | 1006.789  | 907.176   |
| SR6        | 1845.218  | 1760.328  | NM_003614 | 341.843   | 151.125   | AF009309  | 329.827   | 365.682   |
| SR8        | 7492.667  | 20791.209 | NM_014257 | 752.838   | 557.186   | NM_002360 | 748.602   | 508.349   |
| SR10       | 26522.865 | 8255.471  | NM_001140 | 253.17    | 229.929   | AF009322  | 467.479   | 375.607   |
| CY3Cy5     | 1077.243  | 93.129    | NM_004843 | 900.094   | 534.25    | AF056425  | 534.379   | 290.793   |
| AK025175   | 857.936   | 2633.252  | NM_005204 | 1543.755  | 1723.372  | NM_018033 | 3827.136  | 3024.528  |
| NM_005811  | 3977.799  | 4871.646  | NM_016203 | 486.141   | 665.629   | AK021766  | 1092.615  | 1150.966  |
| NM_005764  | 735.302   | 868.657   | NM_002759 | 2817.672  | 2107.232  | AK001147  | 547.963   | 531.497   |
| NM_016362  | 2096.918  | 1890.505  | NM_007271 | 1533.372  | 1747.841  | AK021630  | 475.598   | 451.753   |
| NM_004214  | 4392.661  | 4044.814  | BE392143  | 2273.233  | 2353.027  | AK021831  | 734.478   | 781.513   |
| NM_004329  | 6678.117  | 6952.362  | NM_005813 | 1889.338  | 1742.802  | AK025650  | 1366.419  | 1808.565  |
| NM_002836  | 2965.439  | 2857.552  | AB037718  | 3654.71   | 3734.2    | AK026401  | 529.126   | 461.713   |
| NM_020167  | 1112.124  | 1306.996  | AL389994  | 737.607   | 881.596   | AK026773  | 680.562   | 576.621   |
| AL049963   | 7703.727  | 7075.424  | NM_003909 | 2262.92   | 2336.967  | AF086158  | 2752.793  | 2209.519  |
| NM_016058  | 15713.361 | 25376.361 | NM_001277 | 6195.975  | 6282.329  | AF086050  | 1703.158  | 1540.155  |
| NM_014005  | 1751.074  | 2205.905  | NM_003659 | 3228.307  | 2964.979  | AF147375  | 710.34    | 566.577   |
| NM_004636  | 1659.76   | 2517.77   | NM_007072 | 1211.41   | 1309.653  | X51524    | 3063.886  | 2513.346  |
| AK022603   | 764.867   | 1063.92   | NM_012320 | 2784.331  | 2300.591  | AK025759  | 2510.717  | 1963.492  |
| NM_004896  | 5555.884  | 5132.93   | NM_018208 | 1520.656  | 1693.796  | NM_006896 | 452.878   | 426.933   |
| NM_013372  | 440.073   | 840.868   | NM_015929 | 3608.387  | 4517.637  | AK023429  | 421.118   | 479.445   |
| NM_003976  | 4089.655  | 4526.85   | U90653    | 2278.444  | 2404.085  | AK022276  | 395.1     | 645.047   |
| NM_017688  | 1046.77   | 1236.626  | NM_000196 | 369.104   | 262.035   | AL133653  | 288.699   | 260.065   |
| AK025612   | 4291.196  | 4119.235  | NM_018339 | 1480.655  | 2285.113  | AK023774  | 338.206   | 386.534   |
| NM_012268  | 2016.963  | 2185.907  | NM_000275 | 425.371   | 431.814   | AL049377  | 450.795   | 354.847   |
| NM_012203  | 673.622   | 761.421   | AK000037  | 365.637   | 182.156   | NM_003544 | 21401.951 | 24498.652 |
| NM_004736  | 2284.052  | 2359.555  | NM_014760 | 1324.85   | 959.992   | AK001187  | 746.686   | 709.269   |
| NM_006895  | 547.05    | 494.772   | NM_018398 | 625.319   | 819.677   | NM_003529 | 10853.136 | 11259.277 |
| NM_006459  | 7356.356  | 8094.545  | NM_002560 | 2912.552  | 1369.107  | AF056436  | 1161.827  | 2037.504  |
| NM_003827  | 3787.694  | 5084.245  | NM_000787 | 400.071   | 571.851   | AB023191  | 945.401   | 763.352   |
| NM_004583  | 848.867   | 889.303   | U57962    | 2551.136  | 2884.04   | AK027212  | 5812.748  | 4193.639  |
| NM_001103  | 487.496   | 634.246   | NM_016176 | 4843.903  | 4388.801  | X56197    | 461.253   | 370.382   |
| AF228710   | 10802.5   | 9783.604  | NM_005574 | 15926.541 | 16952.258 | NM_005199 | 1153.305  | 923.449   |
| AY007131   | 26044.563 | 24554.938 | NM_017895 | 5928.645  | 4971.258  | U90905    | 738.912   | 1123.397  |
| U61735     | 2662.498  | 2380.177  | NM_004610 | 1214.023  | 1527.2    | AF161422  | 1154.021  | 905.354   |
| NM_001144  | 1709.326  | 1848.389  | NM_001612 | 1320.842  | 1380.514  | AL137384  | 652.597   | 452.488   |
| AK023766   | 4044.318  | 5384.477  | AK027002  | 1113.264  | 1370.836  | NM_005321 | 1739.774  | 1820.215  |
| NM_001897  | 1313.921  | 1408.756  | AB025254  | 3306.176  | 3450.809  | AF143885  | 511.932   | 779.018   |
| NM_003853  | 1499.254  | 1722.463  | NM_004081 | 1243.856  | 1253.426  | NM_014015 | 3971.272  | 11045.799 |
| AB033109   | 1639.066  | 1848.172  | NM_000025 | 8139.399  | 7631.309  | AK024973  | 613.157   | 843.624   |
| NM_002053  | 22910.904 | 32166.578 | D38521    | 2193.988  | 2148.901  | AJ008123  | 1685.953  | 2084.051  |
| NM_006889  | 1509.155  | 2911.778  | NM_000403 | 2765.125  | 2462.071  | AJ008156  | 657.431   | 688.31    |
| NM_002438  | 1421.724  | 1851.255  | NM_018127 | 6166.365  | 7612.388  | AF161437  | 3154.505  | 1950.327  |
| NM_014588  | 2416.645  | 2682.036  | AJ223948  | 2088.728  | 2336.866  | AK001039  | 1464.601  | 1800.308  |



|           |           |           |           |           |           |           |           |           |
|-----------|-----------|-----------|-----------|-----------|-----------|-----------|-----------|-----------|
| NM_000759 | 1883.923  | 2112.763  | NM_016218 | 608.809   | 536.801   | AK026465  | 614.614   | 699.571   |
| AK023334  | 1176.077  | 1363.28   | AK022947  | 1409.638  | 1485.472  | AJ227898  | 373.843   | 471.827   |
| NM_002563 | 6536.275  | 6936.539  | AL050029  | 1440.781  | 1233.014  | NM_017865 | 3296.752  | 3369.88   |
| NM_002437 | 1437.031  | 1349.066  | NM_004063 | 423.52    | 578.581   | AF075100  | 445.369   | 333.894   |
| D79991    | 1350.689  | 1361.057  | AB040976  | 3641.795  | 3962.49   | AL080066  | 6843.221  | 5675.9    |
| AK022425  | 494.792   | 533.567   | NM_018641 | 3163.242  | 3568.191  | AL137620  | 457.143   | 462.517   |
| NM_000054 | 4555.318  | 4843.423  | NM_002221 | 1765.334  | 1756.174  | NM_005294 | 642.109   | 1035.194  |
| NM_014713 | 3996.691  | 4268.527  | NM_002562 | 407.503   | 1292.402  | AF085826  | 728.027   | 862.018   |
| NM_001812 | 1256.777  | 1043.271  | AK024502  | 3559.761  | 4177.503  | AK024362  | 522.979   | 771.115   |
| NM_014785 | 776.193   | 859.251   | NM_001124 | 999.206   | 829.435   | AF118068  | 1728.031  | 2034.461  |
| NM_006033 | 3880.389  | 3681.144  | NM_004586 | 1500.378  | 1169.975  | NM_004164 | 391.594   | 458.69    |
| NM_004837 | 4817.249  | 4841.483  | NM_004844 | 4069.948  | 4080.417  | NM_019018 | 4630.679  | 4017.261  |
| NM_000370 | 1267.177  | 1496.7    | NM_013447 | 1229.613  | 1141.678  | M87931    | 349.186   | 495.825   |
| BE865893  | 4255.892  | 4028.636  | NM_000051 | 1688.936  | 2181.751  | CY3Cy5    | 3354.927  | 99.115    |
| NM_003123 | 50975.105 | 46360.645 | NM_004180 | 3006.516  | 3221.55   | BE790116  | 4188.99   | 4343.946  |
| NM_018129 | 24301.625 | 21807.617 | NM_004786 | 21520.691 | 20875.203 | AI922341  | 673.457   | 620.926   |
| AF289022  | 1281.984  | 1275.201  | AL109667  | 373.273   | 433.338   | M12824    | 1029.694  | 802.543   |
| NM_016025 | 2344.514  | 2233.444  | NM_000840 | 586.281   | 496.13    | W60100    | 784.276   | 618.035   |
| NM_013319 | 1593.353  | 1630.015  | AF205437  | 777.85    | 810.292   | AA457153  | 2671.275  | 2306.014  |
| NM_000746 | 1041.364  | 1068.85   | AF034102  | 5177.369  | 5724.637  | AA283122  | 1730.415  | 1441.228  |
| NM_000722 | 1232.323  | 1564.903  | AJ008142  | 7874.038  | 7940.709  | AA868504  | 1365.968  | 1129.051  |
| NM_006030 | 1237.377  | 1313.944  | NM_001343 | 2413.828  | 2460.764  | AA877845  | 2939.306  | 2355.735  |
| NM_020410 | 4788.095  | 6040.803  | NM_007275 | 6157.479  | 6291.912  | AA664241  | 5454.478  | 4741.863  |
| AF000143  | 16854     | 18373.5   | NM_019025 | 10239.732 | 10445.716 | NM_000588 | 11258.324 | 10163.193 |
| NM_014211 | 762.511   | 751.549   | NM_018461 | 2985.189  | 3466.717  | SR5       | 3609.421  | 3900.362  |
| NM_000814 | 834.849   | 956.131   | AF235023  | 1439.707  | 1715.443  | SR7       | 4344.059  | 46893.973 |
| NM_000453 | 1945.517  | 2213.414  | NM_006910 | 2467.686  | 2595.063  | SR9       | 13635.374 | 2933.47   |
| J03077    | 9043.881  | 10694.964 | AF162667  | 1474.536  | 1586.463  | CY3Cy5    | 4223.184  | 176.747   |
| J03048    | 11908.432 | 17609.102 | AB046847  | 1885.182  | 1767.007  | NM_005810 | 2217.66   | 2216.758  |
| AL157469  | 412.024   | 620.085   | NM_000447 | 1479.429  | 1496.367  | M28170    | 1852.204  | 1623.079  |
| NM_002868 | 3568.698  | 4670.678  | NM_006354 | 5021.229  | 4972.335  | AK026223  | 2918.92   | 2405.958  |
| AK024100  | 2892.816  | 2965.179  | AF303378  | 4201.974  | 3626.52   | NM_000874 | 1129.018  | 801.514   |
| NM_005135 | 1227.966  | 1091.149  | NM_016037 | 4599.676  | 3847.591  | NM_005854 | 1008.831  | 756.838   |
| NM_000317 | 7927.076  | 6131.274  | NM_000043 | 427.016   | 286.185   | AB007863  | 6415.277  | 4800.046  |
| NM_018376 | 4592.461  | 4052.021  | NM_018235 | 20190.164 | 20572.908 | AK024456  | 2490.243  | 2087.852  |
| NM_017615 | 585.202   | 416.907   | NM_012104 | 7503.508  | 8265.824  | NM_017788 | 686.708   | 507.268   |
| NM_017438 | 2096.74   | 2115.825  | NM_006144 | 821.657   | 754.726   | D31887    | 2634.891  | 2011.444  |
| U59209    | 1457.927  | 1302.234  | AL136549  | 1251.904  | 1504.695  | NM_002313 | 660.44    | 571.328   |
| NM_020195 | 2593.266  | 2192.69   | NM_012168 | 886.006   | 847.211   | NM_004459 | 653.621   | 568.745   |
| AK023824  | 4995.614  | 4513.555  | NM_007038 | 1305.122  | 1709.262  | NM_005503 | 1616.336  | 1261.987  |
| AL133069  | 2905.918  | 3006.104  | AF311324  | 1712.878  | 1746.419  | NM_001502 | 1016.672  | 944.404   |
| AL117574  | 466.659   | 463.21    | AF124433  | 396.255   | 357.812   | NM_005721 | 705.63    | 453.552   |
| AK026055  | 4166.327  | 4475.481  | NM_001461 | 511.778   | 686.409   | AF284223  | 20349.492 | 15243.386 |
| AK024126  | 1059.327  | 994.238   | AF061556  | 527.335   | 518.633   | BE743838  | 3508.329  | 3168.691  |
| NM_001516 | 4272.807  | 4814.101  | AL162049  | 1039.017  | 989.97    | AF273046  | 2142.014  | 2756.023  |
| NM_002744 | 3970.259  | 4158.321  | NM_005032 | 459.713   | 583.639   | NM_001081 | 1468.095  | 1513.304  |
| NM_015917 | 6689.174  | 7810.802  | NM_004160 | 2752.634  | 2901.805  | NM_002483 | 1520.061  | 1551.717  |
| NM_020397 | 817.221   | 882.274   | AL109677  | 626.942   | 500.47    | BF002026  | 371.142   | 424.192   |
| NM_000061 | 3836.363  | 4451.632  | NM_003941 | 9646.463  | 10493.61  | NM_004171 | 641.309   | 607.728   |
| AB046859  | 11573.577 | 12166.631 | AF177909  | 463.701   | 489.081   | NM_014037 | 2074.667  | 2039.349  |
| NM_005109 | 5088.338  | 5472.798  | NM_002664 | 4487.476  | 3313.329  | NM_004866 | 10197.514 | 8765.172  |
| AK023573  | 3034.854  | 3196.08   | AB018271  | 2093.304  | 1676.77   | NM_018688 | 1492.429  | 1274.232  |
| NM_002730 | 3031.538  | 2884.687  | AL137665  | 1288.102  | 752.67    | AK056652  | 3107.287  | 2661.094  |

|             |           |           |           |           |           |           |           |           |
|-------------|-----------|-----------|-----------|-----------|-----------|-----------|-----------|-----------|
| NM_00482E   | 2513.673  | 2632.577  | NM_016434 | 491.671   | 352.501   | AL137438  | 1271.601  | 956.16    |
| AB011540    | 22465.18  | 22396.148 | U36561    | 46457.172 | 51851.156 | NM_017957 | 1600.013  | 1359.66   |
| NM_00004C   | 4799.728  | 5232.094  | NM_005634 | 1905.55   | 2085.219  | NM_003024 | 1506.278  | 1005.563  |
| NM_004631   | 3434.244  | 3003.15   | NM_017757 | 3012.298  | 3484.765  | NM_01324E | 2193.95   | 1831.922  |
| NM_00329E   | 169.518   | 274.129   | NM_00214E | 9553.895  | 9464.996  | NM_000034 | 66742     | 64862.559 |
| NM_00473E   | 2133.342  | 2432.016  | AB007892  | 1093.346  | 1235.055  | AK022230  | 1768.649  | 1237.77   |
| NM_00689E   | 730.209   | 891.662   | AB037748  | 541.299   | 1009.163  | AK022147  | 3090.713  | 2807.509  |
| NM_00645E   | 7766.666  | 8583.664  | AB002306  | 1192.96   | 1464.223  | L25664    | 725.101   | 758.238   |
| D50373      | 868.31    | 791.32    | NM_00130C | 1321.899  | 1414.403  | NM_01494C | 2144.96   | 1474.439  |
| AA488757    | 5286.073  | 4631.326  | NM_012472 | 385.887   | 370.936   | NM_00578E | 416.782   | 297.243   |
| AI394286    | 1760.252  | 1554.351  | NM_018187 | 5471.007  | 6423.309  | NM_00690C | 969.543   | 687.676   |
| H07071      | 1376.901  | 1299.856  | NM_00301E | 14404.628 | 13908.646 | AJ289111  | 2777.974  | 2390.432  |
| M25322      | 2514.338  | 2060.417  | NM_00546E | 9081.442  | 9881.724  | NM_01635E | 1604.706  | 1276.23   |
| AA436187    | 475.774   | 341.788   | NM_00132E | 1637.434  | 1688.179  | NM_00640E | 4883.779  | 3850.18   |
| H-L 27586 I | 1277.965  | 1255.926  | NM_01828E | 12418.995 | 11803.059 | AF216292  | 23016.227 | 19281.871 |
| ID 214180   | 558.441   | 407.583   | BC019932  | 2085.229  | 1957.011  | NM_00095E | 394.976   | 429.535   |
| ID 1867426  | 3687.575  | 3672.7    | AF114818  | 2023.068  | 1657.227  | NM_005894 | 661.498   | 634.952   |
| ID 396450   | 462.184   | 493.741   | AK025106  | 1520.177  | 1413.651  | NM_014584 | 2045.739  | 2210.377  |
| W99328      | 831.592   | 664.557   | NM_020144 | 1979.993  | 1709.999  | NM_01664E | 2468.26   | 2764.255  |
| AI434176    | 361.757   | 452.273   | NM_00390E | 36547.258 | 30656.111 | AK090536  | 11705.382 | 12115.704 |
| H08563      | 624.301   | 535.609   | BE893142  | 1332.381  | 1401.419  | D63477    | 773.286   | 709.675   |
| BE735403    | 1259.277  | 1397.329  | NM_00310E | 4168.634  | 3569.945  | NM_02024E | 15411.466 | 13463.231 |
| NM_02255E   | 3261.691  | 2732.618  | NM_01534C | 3654.044  | 2477.646  | NM_014051 | 2180.005  | 1995.604  |
| NM_01438E   | 5877.875  | 6097.174  | NM_006451 | 2387.52   | 1691.988  | AK025398  | 10615.001 | 9016.226  |
| NM_00171E   | 344.856   | 441.772   | NM_002094 | 1269.767  | 617.649   | AB037750  | 2220.298  | 2046.447  |
| AF116659    | 2188.515  | 1951.261  | NM_002937 | 288.459   | 201.151   | AK023056  | 505.943   | 589.163   |
| D79991      | 1169.598  | 1134.427  | NM_003191 | 1642.483  | 754.38    | NM_01788E | 1176.192  | 889.12    |
| AK022425    | 450.25    | 511.344   | AL137476  | 4238.522  | 4849.473  | NM_00491E | 844.756   | 820.902   |
| NM_000054   | 5451.769  | 5158.09   | AF052174  | 1292.578  | 1439.659  | AK022207  | 572.437   | 585.936   |
| NM_01471E   | 3905.563  | 4179.083  | AF070590  | 767.96    | 724.792   | AV708752  | 2728.226  | 2425.874  |
| NM_00181E   | 1597.969  | 1333.93   | NM_000761 | 26304.029 | 27209.414 | AF119885  | 2167.555  | 1959.218  |
| NM_01478E   | 896.538   | 676.522   | NM_02014E | 2055.828  | 1917.914  | NM_00499E | 1927.824  | 1893.11   |
| NM_005811   | 3635.261  | 3678.267  | NM_000774 | 1846.416  | 2108.584  | NM_005971 | 1735.741  | 1383.453  |
| NM_005764   | 706.982   | 692.111   | NM_017781 | 21658.439 | 20961.768 | NM_01743E | 736.656   | 6864.085  |
| NM_01636E   | 2058.645  | 1546.038  | NM_006004 | 45552.039 | 57712.688 | NM_01338E | 3518.065  | 3803.697  |
| NM_004214   | 4692.323  | 4178.518  | NM_004894 | 11524.15  | 9311.073  | NM_006517 | 1664.747  | 1668.443  |
| NM_00432E   | 8333.374  | 8112.743  | AB028960  | 566.743   | 517.99    | AK026680  | 3531.721  | 3812.396  |
| NM_00283E   | 4110.216  | 4156.862  | NM_00564E | 17138.359 | 17053.453 | NM_01243E | 49352.484 | 53499.742 |
| NM_020167   | 1430.575  | 1564.209  | AK000689  | 344.742   | 251.47    | AK001299  | 9623.347  | 9213.999  |
| AL049963    | 8991.147  | 8133.304  | NM_00694E | 10482.549 | 9154.516  | AB014559  | 6342.419  | 5710.843  |
| NM_01605E   | 14064.03  | 12863.689 | NM_006741 | 4328.757  | 3701.971  | NM_01648E | 3687.518  | 3056.54   |
| NM_01400E   | 1541.101  | 1494.89   | NM_01416E | 4099.832  | 3332.445  | NM_00503E | 3328.845  | 3003.281  |
| NM_00463E   | 1494.399  | 1680.224  | AL117606  | 3781.571  | 2670.064  | NM_01593E | 54721.43  | 49400.336 |
| AK022603    | 698.887   | 650.262   | NM_01233C | 1323.882  | 952.727   | NM_01794E | 698.257   | 510.076   |
| NM_00489E   | 5819.724  | 5473.16   | AF294278  | 693.477   | 624.628   | AK022169  | 704.651   | 576.136   |
| NM_01337E   | 413.73    | 525.887   | NM_018211 | 520.777   | 370.959   | AF015592  | 1364.565  | 1093.411  |
| NM_00397E   | 3207.848  | 3210.259  | NM_01452C | 1884.673  | 1433.398  | AK026795  | 1930.726  | 1527.331  |
| NM_01768E   | 1046.554  | 1227.023  | NM_00261E | 1104.451  | 683.76    | NM_016617 | 5477.415  | 4531.815  |
| AK025612    | 3982.509  | 4407.64   | AK025712  | 5731.123  | 3122.95   | NM_002027 | 5811.274  | 5152.075  |
| NM_01226E   | 2094.896  | 2370.685  | AF052497  | 237.428   | 439.494   | AL162078  | 1322.628  | 1315.808  |
| NM_01220E   | 1027.183  | 990.596   | AK026375  | 1374.845  | 1645.782  | NM_00091E | 416.231   | 488.199   |
| J03077      | 9167.245  | 9240.03   | U85992    | 590.365   | 849.521   | NM_01338E | 6906.854  | 5239.983  |
| J03048      | 11580.336 | 16671.863 | AL110152  | 520.251   | 720.337   | AB002314  | 659.881   | 555.386   |

|           |           |           |           |          |          |           |           |           |
|-----------|-----------|-----------|-----------|----------|----------|-----------|-----------|-----------|
| NM_00286E | 3535.876  | 4094.303  | AF131745  | 477.361  | 768.798  | NM_01462Z | 704.137   | 617.352   |
| AK024100  | 2955.549  | 3072.904  | AL117565  | 1994.074 | 2632.923 | AB011114  | 33036.09  | 42639.609 |
| NM_00513E | 2306.624  | 2430.091  | AF147305  | 302.24   | 442.373  | D11466    | 13865.127 | 18700.553 |
| NM_003827 | 4084.629  | 4308.263  | AK022109  | 1183.407 | 1101.547 | NM_01405E | 9378.291  | 9762.949  |
| NM_00458E | 667.331   | 575.495   | AK022103  | 546.792  | 570.639  | D31885    | 9802.762  | 10697.555 |
| NM_001103 | 689.985   | 549.14    | NM_00703C | 558.503  | 456.778  | BE743838  | 2994.652  | 2637.255  |
| AF228710  | 12273.332 | 11211.124 | AK022111  | 283.624  | 371.467  | AF273046  | 2027.933  | 2105.241  |
| NM_01839E | 437.669   | 761.79    | AK021527  | 389.955  | 464.397  | NM_001081 | 1120.339  | 1246.52   |
| AY007131  | 29998.389 | 35833.43  | AF143882  | 726.108  | 703.088  | NM_00248E | 1078.037  | 1232.829  |
| U61735    | 2715.393  | 2971.774  | U00953    | 604.661  | 773.924  | BE790116  | 5354.254  | 4530.802  |
| NM_001144 | 2185.181  | 2241.831  | AF086176  | 648.282  | 659.779  | AI922341  | 621.316   | 447.298   |
| AK023766  | 3643.054  | 3297.204  | NM_01774Z | 589.42   | 449.432  | M12824    | 771.507   | 482.783   |
| NM_001897 | 1363.139  | 1677.894  | NM_00510E | 635.999  | 793.341  | W60100    | 681.409   | 597.213   |
| NM_00385E | 1607.592  | 1533.782  | AK022292  | 1019.763 | 700.062  | AA457153  | 2103.843  | 1741.666  |
| AB033109  | 1384.538  | 1783.302  | AB051436  | 1769.797 | 1009.287 | AA283122  | 1183.15   | 1111.693  |
| NM_00205E | 19496.111 | 21880.236 | AK026482  | 1979.294 | 1309.233 | AA868504  | 1084.667  | 1064.508  |
| NM_00688E | 1142.173  | 1295.741  | AL137473  | 1244.616 | 915.199  | AA877845  | 2718.281  | 2388.847  |
| NM_00243E | 1345.246  | 1432.471  | AJ001873  | 756.883  | 423.999  | AA664241  | 6193.978  | 5698.385  |
| NM_01458E | 2086.75   | 2373.145  | AB026054  | 260.879  | 258.9    | AK026281  | 472.86    | 481.719   |
| NM_00075E | 1448.903  | 1709.741  | AK022604  | 980.5    | 849.186  | NM_00640E | 4022.512  | 3999.615  |
| AK023334  | 1227.164  | 1320.93   | U66048    | 943.801  | 1339.328 | AF216292  | 20604.176 | 20805.223 |
| NM_00256E | 7070.337  | 7291.775  | AL080095  | 210.269  | 753.034  | NM_005894 | 428.448   | 435.766   |
| NM_002437 | 1284.588  | 1166.657  | AK023401  | 1469.773 | 1297.995 | NM_014584 | 2221.292  | 1909.989  |
| AK023573  | 3095.645  | 2967.164  | AK001865  | 578.136  | 781.689  | NM_00581C | 2232.964  | 2016.788  |
| NM_00273C | 3113.028  | 2565.585  | AK024035  | 7521.433 | 7826.131 | M28170    | 2375.567  | 1808.549  |
| NM_00482E | 2433.186  | 2681.737  | AL050079  | 1513.958 | 3109.149 | AK026223  | 1878.267  | 1568.525  |
| AB011540  | 24608.992 | 24886.514 | AL080233  | 1735.756 | 1550.106 | NM_000874 | 827.482   | 550.335   |
| NM_00004C | 6796.863  | 7932.63   | AL049361  | 257.416  | 787.621  | NM_005854 | 829.355   | 632.106   |
| NM_004631 | 3248.43   | 3359.336  | AL050132  | 284.804  | 178.182  | AB007863  | 4377.558  | 3953.232  |
| NM_00603E | 4569.069  | 4867.195  | AL117663  | 1005.57  | 1299.462 | AK024456  | 1627.89   | 1627.89   |
| NM_004837 | 5192.645  | 4480.69   | NM_01429E | 1515.267 | 1644.781 | NM_01778E | 461.514   | 407.916   |
| NM_00037C | 1325.708  | 1305.797  | AK024432  | 1971.391 | 2429.304 | D31887    | 2270.766  | 2481.081  |
| BE865893  | 4631.168  | 4589.87   | AL137513  | 717.55   | 720.802  | NM_00231E | 705.061   | 707.131   |
| NM_00312E | 52975.77  | 50115.82  | AF088001  | 218.644  | 279.659  | NM_00445E | 664.124   | 564.57    |
| AY005822  | 4052.98   | 4787.309  | NM_018067 | 1414.703 | 1379.951 | NM_00550E | 1721.568  | 1521.482  |
| NM_01812E | 25950.412 | 30032.891 | NM_01895E | 1218.292 | 777.645  | NM_00150E | 1046.798  | 1000.057  |
| AF289022  | 1536.514  | 1516.36   | NM_014787 | 1324.081 | 1134.46  | NM_005721 | 656.023   | 616.44    |
| M17252    | 265.476   | 474.646   | AL122109  | 860.308  | 547.583  | AF284223  | 19675.115 | 22580.455 |
| NM_01602E | 2233.755  | 2652.466  | AF074988  | 960.621  | 639.952  | AF176012  | 2660.202  | 2873.135  |
| NM_01331E | 1587.812  | 1831.382  | AK024946  | 1009.496 | 627.798  | NM_005971 | 1565.671  | 1608.91   |
| NM_00074E | 944.893   | 1117.574  | AK001432  | 2095.795 | 2332.286 | NM_01743E | 276.387   | 2949.597  |
| NM_00072Z | 1287.127  | 1283.171  | AL133568  | 3026.813 | 3137.539 | NM_01338E | 3585.378  | 3604.909  |
| NM_00603C | 1314.55   | 1259.716  | AF009265  | 788.457  | 1086.713 | NM_006517 | 1590.133  | 1265.561  |
| NM_02041C | 5060.584  | 5557.101  | AF009309  | 1195.704 | 1574.951 | NM_004171 | 659.786   | 577.888   |
| AF000143  | 16813.205 | 17823.721 | NM_00236C | 1101.118 | 1112.704 | NM_014037 | 1801.585  | 2117.675  |
| NM_014211 | 585.135   | 793.394   | AF009322  | 468.882  | 532.625  | NM_00486E | 9659.628  | 7995.34   |
| NM_000814 | 985.605   | 1140.746  | AF056425  | 950.577  | 1333.133 | NM_01868E | 1127.822  | 1113.007  |
| NM_00045E | 2264.524  | 2864.332  | AF090893  | 503.152  | 496.338  | AK056652  | 2701.047  | 2439.885  |
| NM_02255Z | 3489.796  | 2432.74   | NM_01803E | 6513.297 | 6186.33  | AL137438  | 926.732   | 855.914   |
| NM_01438E | 6157.823  | 5477.691  | AK001945  | 567.425  | 547.246  | NM_017957 | 1047.902  | 1048.714  |
| NM_00171E | 906.945   | 1204.119  | AK021541  | 291.201  | 348.449  | NM_003024 | 1159.165  | 978.868   |
| AF116659  | 2270.151  | 2537.131  | AK001147  | 223.731  | 192.638  | NM_01324E | 1606.248  | 1761.591  |
| NM_000317 | 8942.357  | 6834.784  | AK021630  | 725.563  | 619.616  | NM_000034 | 65841.141 | 65150.449 |

|             |           |           |           |           |           |           |           |           |
|-------------|-----------|-----------|-----------|-----------|-----------|-----------|-----------|-----------|
| NM_01837E   | 4632.424  | 3641.746  | AK021831  | 735.501   | 1038.715  | AK022230  | 1475.107  | 1268.401  |
| NM_01761E   | 484.456   | 292.106   | AK025193  | 182.285   | 277.471   | AK022147  | 3133.09   | 3468.896  |
| NM_01743E   | 2238.628  | 1830.539  | AK025650  | 1447.543  | 1503.796  | L25664    | 984.997   | 683.293   |
| U59209      | 1855.156  | 1715.085  | AK026401  | 487.626   | 377.585   | NM_01494C | 2405.433  | 1956.746  |
| NM_02019E   | 2590.625  | 3074.281  | AF086158  | 2285.6    | 2608.404  | NM_00690C | 1021.801  | 1560.71   |
| AK023824    | 6203.436  | 6700.547  | AF086050  | 1632.937  | 2267.257  | AJ289111  | 2452      | 2916.335  |
| AL133069    | 3376.397  | 3600.531  | AF147375  | 936.352   | 1329.548  | NM_01635E | 1612.491  | 1950.658  |
| AL117574    | 422.186   | 520.664   | X51524    | 5435.635  | 6767.071  | NM_01404E | 2143.115  | 2482.11   |
| AK026055    | 4276.282  | 4668.757  | AK025759  | 2632.541  | 3682.868  | NM_01462E | 698.866   | 793.358   |
| AK024126    | 934.95    | 917.803   | AK024105  | 371.964   | 415.117   | AB011114  | 35980.234 | 34061.371 |
| NM_00151E   | 4533.147  | 4595.59   | AJ238556  | 444.329   | 666.264   | D11466    | 14098.16  | 13537.145 |
| NM_002744   | 3959.113  | 3914.75   | AK021516  | 2237.135  | 2130      | NM_01405E | 10231.603 | 9459.945  |
| NM_015917   | 7007.734  | 6576.499  | Z70699    | 621.834   | 591.716   | D31885    | 9420.198  | 8967.602  |
| NM_020397   | 772.197   | 1133.443  | NM_00689E | 767.794   | 698.873   | NM_01664E | 2682.799  | 2277.534  |
| NM_000061   | 4556.333  | 5473.958  | AK023429  | 510.413   | 433.706   | AK090536  | 10979.192 | 9831.59   |
| AB046859    | 13056.184 | 12700.898 | AK022276  | 356.625   | 218.825   | D63477    | 650.201   | 606.791   |
| NM_00510E   | 5706.046  | 6035.635  | AK026881  | 118.76    | 292.312   | NM_02024E | 14864.609 | 14137.433 |
| NM_01337E   | 321.518   | 318.556   | NM_003544 | 23296.1   | 35982.352 | NM_014051 | 2326.318  | 1964.872  |
| NM_00397E   | 3213.996  | 3045.981  | U17640    | 620.072   | 672.218   | AK025398  | 8837.278  | 7946.932  |
| NM_01768E   | 1113.717  | 1009.095  | AK001187  | 1048.821  | 1257.327  | AB037750  | 2090.526  | 2139.884  |
| AK025612    | 4155.243  | 4292.911  | NM_00352E | 19549.225 | 47666.184 | AK023056  | 550.031   | 593.031   |
| NM_01226E   | 2386.477  | 2849.175  | AF056436  | 1437.532  | 1845.79   | NM_00112C | 22690.734 | 21778.492 |
| NM_01220E   | 612.352   | 757.812   | AB023191  | 859.796   | 1151.073  | NM_01788E | 1369.128  | 1028.353  |
| NM_00329E   | 341.875   | 324.848   | AK027212  | 5164.419  | 6419.271  | NM_00491E | 860.494   | 927.834   |
| NM_00473E   | 1964.524  | 2170.177  | X56197    | 489.561   | 403.017   | AK022207  | 629.39    | 737.693   |
| NM_00689E   | 479.684   | 501.46    | NM_00519E | 2911.06   | 3040.418  | AV708752  | 2613.118  | 2900.602  |
| NM_00645E   | 7216.746  | 7014.548  | U90905    | 825.255   | 1048.837  | AF119885  | 1978.656  | 2959.169  |
| D50373      | 964.945   | 778.951   | AF161422  | 1229.294  | 1376.208  | NM_00075C | 355.308   | 277.061   |
| AA488757    | 6168.442  | 6323.708  | AL137384  | 633.343   | 381.059   | NM_00499E | 1647.443  | 2142.958  |
| AA205399    | 343.956   | 146.135   | AF070619  | 941.585   | 1418.828  | NM_00058E | 12342.721 | 13614.229 |
| AI394286    | 2127.095  | 1522.566  | NM_02015E | 382.146   | 547.542   | AK026281  | 501.038   | 314.19    |
| H07071      | 1053.274  | 1248.218  | NM_005321 | 4008.481  | 4171.728  | AK026680  | 3652.894  | 3800.957  |
| M25322      | 2606.725  | 1982.214  | AF073520  | 854.545   | 974.958   | NM_01243E | 49695.887 | 51213.238 |
| AA436187    | 386.287   | 412.294   | NM_01401E | 4084.538  | 4454.054  | AK001299  | 8193.948  | 8142.862  |
| H-L 27586 I | 1171.519  | 1197.68   | AK026839  | 341.822   | 411.506   | AB014559  | 6319.333  | 5587.446  |
| ID 214180   | 462.319   | 571.104   | AK024973  | 400.492   | 436.405   | NM_01648E | 3447.048  | 3343.499  |
| ID 1867426  | 3781.363  | 3402.576  | AJ008123  | 2322.428  | 1909.934  | NM_00503E | 3363.961  | 2922.896  |
| W99328      | 802.375   | 876.088   | AJ008156  | 629.691   | 530.826   | NM_01593E | 54376.238 | 53894.547 |
| AI434176    | 273.121   | 500.24    | AF147321  | 434.694   | 1039.505  | NM_01794E | 606.728   | 469.257   |
| H08563      | 734.232   | 478.121   | AF161437  | 2545.198  | 1043.389  | AK022169  | 822.845   | 801.93    |
| BE735403    | 1711.412  | 1644.178  | AK001039  | 2808.54   | 5611.792  | AF015592  | 1171.73   | 1282.864  |
| NM_00243E   | 1099.943  | 906.982   | AK026465  | 747.345   | 879.036   | AK026795  | 1665.944  | 1578.924  |
| NM_01458E   | 1614.851  | 1748.979  | AK024321  | 208.779   | 176.673   | NM_01639E | 2378.775  | 2394.18   |
| NM_00075E   | 1142.673  | 1283.797  | U52834    | 358.14    | 436.616   | AL162078  | 1518.419  | 1904.59   |
| AK023334    | 1120.021  | 978.568   | NM_00353E | 498.577   | 398.939   | NM_00091E | 464.747   | 530.247   |
| NM_00256E   | 6156.15   | 6461.378  | NM_01786E | 4319.471  | 4790.384  | NM_01338E | 6453.099  | 8454.837  |
| NM_002437   | 1315.144  | 1057.497  | AF075100  | 418.059   | 591.615   | AB002314  | 692.24    | 631.114   |
| D79991      | 1447.746  | 1518.133  | AF203447  | 4895.666  | 5856.848  | NM_00550E | 1785.555  | 1731.704  |
| NM_000054   | 5429.759  | 4530.09   | NM_01850E | 871.646   | 1176.147  | NM_00150E | 968.237   | 1215.513  |
| NM_01471E   | 3807.674  | 3684.5    | AL080066  | 6585.225  | 9791.153  | NM_005721 | 394.894   | 528.866   |
| NM_00181E   | 1286.623  | 1127.67   | AJ227870  | 963.852   | 1024.849  | AF284223  | 18743.248 | 16618.672 |
| NM_01478E   | 1056.534  | 914.75    | AL137620  | 643.386   | 1100.152  | AF176012  | 2587.168  | 2568.802  |
| NM_005811   | 4013.075  | 3613.63   | NM_005294 | 1071.099  | 2980.813  | BE743838  | 2974.623  | 3073.529  |

|           |           |           |           |           |           |           |           |           |
|-----------|-----------|-----------|-----------|-----------|-----------|-----------|-----------|-----------|
| NM_005764 | 763.355   | 844.508   | AK026879  | 265.555   | 350.318   | AF273046  | 1900.376  | 2036.302  |
| NM_016362 | 2246.822  | 2089.109  | AF085826  | 597.245   | 1056.156  | NM_001081 | 1080.322  | 1042.138  |
| NM_004214 | 4306.996  | 4053.305  | AK024362  | 406.535   | 613.322   | NM_002483 | 952.12    | 1088.214  |
| NM_004329 | 7584.363  | 7633.062  | AF118068  | 1616.067  | 1610.567  | BE790116  | 4411.449  | 4049.731  |
| NM_002836 | 3995.373  | 4034.857  | NM_004164 | 394.15    | 307.107   | AI922341  | 489.904   | 517.637   |
| NM_020167 | 1515.846  | 1595.29   | NM_019018 | 4360.67   | 9518.639  | M12824    | 598.557   | 667.516   |
| AL049963  | 9391.004  | 9072.862  | M87931    | 391.954   | 394.511   | W60100    | 684.742   | 541.998   |
| NM_016058 | 13904.112 | 12398.354 | CY3Cy5    | 1379.428  | 250.66    | AA457153  | 2651.201  | 2601.968  |
| NM_014005 | 1786.867  | 1587.447  | BE790116  | 4166.673  | 3073.827  | AA283122  | 1507.134  | 1732.738  |
| NM_004636 | 1816.485  | 1753.781  | AI922341  | 715.091   | 429.649   | AA868504  | 1061.579  | 1627.771  |
| AK022603  | 643.733   | 578.694   | M12824    | 1012.594  | 754.301   | AA877845  | 2736.982  | 4326.596  |
| NM_004896 | 6196.844  | 5428.357  | W60100    | 645.705   | 474.191   | AA664241  | 5943.256  | 7963.276  |
| NM_006030 | 988.466   | 1115.746  | M24898    | 327.888   | 185.393   | NM_014940 | 2589.579  | 2516.747  |
| NM_020410 | 4445.093  | 4768.775  | AA457153  | 2594.107  | 1930.814  | NM_005783 | 395.045   | 464.526   |
| AF000143  | 14063.71  | 13057.352 | AA283122  | 1628.072  | 1378.179  | NM_006900 | 1176.144  | 1072.847  |
| NM_014211 | 630.829   | 786.782   | AA868504  | 1284.827  | 1179.904  | AJ289111  | 3106.72   | 2878.324  |
| NM_000814 | 964.977   | 876.199   | AA877845  | 3338.853  | 3188.585  | NM_016356 | 2100.886  | 1674.682  |
| NM_000453 | 1921.448  | 1710.337  | AA664241  | 6875.653  | 5920.558  | NM_006406 | 4211.511  | 4260.844  |
| J03077    | 9803.829  | 11014.608 | NM_000588 | 10857.693 | 9220.104  | AF216292  | 19697.918 | 15840.689 |
| J03048    | 11923.673 | 15400.038 | SR5       | 3726.528  | 3360.335  | NM_014584 | 2031.954  | 1816.232  |
| AL157469  | 333.326   | 499.129   | SR7       | 4710.865  | 33443.504 | M30627    | 121.973   | 915.372   |
| NM_002868 | 3377.558  | 4288.756  | SR9       | 14479.161 | 2931.417  | NM_005810 | 2882.967  | 2826.545  |
| AK024100  | 2812.537  | 3258.733  | CY3Cy5    | 1793.939  | 138.011   | M28170    | 2297.334  | 2360.734  |
| NM_005135 | 1279.913  | 1048.16   | NM_005810 | 2286.651  | 1468.459  | AK026223  | 2393.496  | 2106.935  |
| NM_003827 | 4775.444  | 4703.052  | M28170    | 3035.352  | 2213.163  | NM_000874 | 791.082   | 731.322   |
| NM_004583 | 566.51    | 684.494   | AK026223  | 2822.75   | 2047.12   | NM_005854 | 864.405   | 866.653   |
| NM_001103 | 515.265   | 571.477   | NM_000874 | 1044.914  | 536.607   | AB007863  | 7043.855  | 6920.199  |
| AF228710  | 10451.306 | 10186.66  | NM_005854 | 906.094   | 736.952   | AK024456  | 1997.242  | 2180.812  |
| NM_018396 | 467.523   | 799.769   | AB007863  | 7352.782  | 5346.297  | NM_017789 | 649.212   | 667.409   |
| AY007131  | 29334.447 | 33351.395 | AK024456  | 1981.49   | 1861.329  | NM_002313 | 637.924   | 951.205   |
| U61735    | 2954.453  | 3034.701  | NM_017789 | 538.575   | 603.036   | NM_004459 | 747.748   | 1027.008  |
| NM_001144 | 1834.695  | 2303.969  | D31887    | 2805.966  | 3068.831  | NM_004915 | 1487.028  | 1375.133  |
| AK023766  | 3682.249  | 4157.649  | NM_002313 | 1017.175  | 1244.438  | AK022207  | 900.579   | 1111.024  |
| NM_001897 | 1337.746  | 1535.094  | NM_004459 | 696.262   | 796.616   | AV708752  | 3293.304  | 2854.367  |
| NM_003853 | 1493.721  | 1518.728  | NM_005503 | 1635.918  | 1282.678  | AF119885  | 2590.951  | 2550.31   |
| AB033109  | 1549.678  | 1319.473  | NM_001502 | 1010.348  | 822.869   | NM_000750 | 417.427   | 743.517   |
| NM_002053 | 18555.709 | 18136.148 | NM_005721 | 563.714   | 363.372   | NM_004996 | 2277.738  | 2010.39   |
| NM_006889 | 1388.889  | 1268.328  | AF284223  | 17610.102 | 15085.916 | NM_005971 | 1537.57   | 1735.053  |
| NM_002744 | 3094.522  | 3299.754  | AF176012  | 2612.31   | 2450.432  | NM_017435 | 600.817   | 5599.638  |
| NM_015917 | 5846.498  | 6074.975  | BE743838  | 3306.124  | 3460.962  | NM_013386 | 3348.638  | 3417.685  |
| NM_020397 | 793.267   | 874.674   | AF273046  | 2273.873  | 2587.481  | NM_006517 | 1507.523  | 1486.572  |
| NM_000061 | 4532.103  | 5822.437  | NM_001081 | 1340.705  | 1431.655  | NM_004171 | 871.578   | 854.516   |
| AB046859  | 11470.446 | 13037.162 | NM_002483 | 1997.811  | 4811.94   | NM_014037 | 3224.781  | 2760.13   |
| NM_005109 | 5423.643  | 6164.72   | BF002026  | 2317.232  | 6686.132  | NM_004866 | 10232.891 | 8783.771  |
| AK023573  | 3188.579  | 3099.317  | NM_004171 | 634.82    | 645.034   | NM_018688 | 1341.62   | 1446.505  |
| NM_002730 | 2666.067  | 2358.203  | NM_014037 | 2216.804  | 1631.286  | AK056652  | 2575.239  | 3015.498  |
| NM_004828 | 2244.616  | 2068.49   | NM_004866 | 8785.515  | 5733.565  | AL137438  | 857.297   | 1035.631  |
| AB011540  | 20150.639 | 18098.574 | NM_018688 | 1482.775  | 989.519   | NM_017957 | 1267.554  | 1290.377  |
| NM_000040 | 4993.238  | 4517.631  | AK056652  | 2897.49   | 2166.058  | NM_003024 | 1246.341  | 1189.669  |
| NM_004631 | 2774.926  | 2623.797  | NM_015839 | 405.702   | 278.767   | NM_013248 | 1960.404  | 2622.631  |
| NM_006033 | 4438.932  | 5177.999  | AL137438  | 860.316   | 726.922   | AK022147  | 3912.419  | 6843.754  |
| NM_004837 | 5614.035  | 5908.304  | NM_017957 | 1864.518  | 1575.117  | L25664    | 971.865   | 1375.976  |
| NM_000370 | 1509.141  | 1543.222  | NM_003024 | 1419.51   | 1004.553  | NM_002027 | 6630.346  | 6900.358  |

|           |           |           |           |           |           |           |           |           |
|-----------|-----------|-----------|-----------|-----------|-----------|-----------|-----------|-----------|
| BE865893  | 4875.319  | 5343.594  | NM_013248 | 1931.847  | 1571.211  | AL162078  | 1952.165  | 2030.283  |
| NM_003123 | 55780.84  | 49570.539 | NM_000034 | 62084.828 | 64544.473 | NM_000919 | 561.551   | 482.057   |
| AY005822  | 3868.485  | 4343.931  | AK022230  | 1849.634  | 1371.695  | NM_013382 | 9048.535  | 8742.974  |
| NM_018129 | 26201.568 | 27395.631 | AK022147  | 3901.726  | 3397.844  | AB002314  | 778.366   | 800.302   |
| AF289022  | 1448.52   | 1340.127  | L25664    | 1231.128  | 995.337   | NM_014043 | 2186.021  | 2189.005  |
| AB002326  | 328.417   | 271.349   | NM_014940 | 2420.413  | 1857.669  | NM_014622 | 680.631   | 596.368   |
| NM_016025 | 2691.348  | 2102.965  | NM_005783 | 433.11    | 400.407   | AB011114  | 29532.799 | 27000.768 |
| NM_013319 | 1645.619  | 1411.21   | NM_006900 | 860.14    | 916.35    | D11466    | 11750.203 | 11440.568 |
| NM_000746 | 929.505   | 774.711   | AJ289111  | 2069.574  | 1983.209  | NM_014056 | 8839.774  | 8002.304  |
| NM_000722 | 1076.679  | 944.293   | NM_016356 | 2153.14   | 1963.035  | D31885    | 8078.248  | 8836.719  |
| NM_016116 | 380.079   | 281.444   | NM_006406 | 4716.796  | 3995.615  | NM_016649 | 2244.692  | 2439.121  |
| NM_018655 | 1389.258  | 2792.65   | AF216292  | 20528.719 | 20282.393 | AK090536  | 10476.913 | 10979.056 |
| NM_005663 | 1991.731  | 2919.589  | NM_000952 | 441.019   | 311.703   | D63477    | 775.078   | 526.584   |
| X89960    | 1156.82   | 1558.507  | NM_005894 | 405.145   | 579.336   | NM_020243 | 13531.482 | 13636.236 |
| NM_006550 | 445.098   | 450.242   | NM_014584 | 2431.461  | 3113.495  | NM_014051 | 2167.495  | 2408.337  |
| NM_005773 | 1145.851  | 1243.54   | NM_016649 | 2048.678  | 1610.731  | AK025398  | 8955.075  | 9933.087  |
| NM_017644 | 2874.646  | 3028.797  | AK090536  | 9920.997  | 6877.862  | AB037750  | 1939.406  | 3131.912  |
| AB032971  | 357.993   | 319.589   | D63477    | 711.244   | 547.849   | AK023056  | 735.557   | 1264.037  |
| NM_002482 | 1267.921  | 986.088   | NM_020243 | 13576.345 | 9422.649  | NM_001120 | 22963.547 | 34621.801 |
| NM_001718 | 978.262   | 796.319   | NM_014051 | 2287.304  | 1761.853  | NM_017888 | 1263.567  | 1758.898  |
| AF116659  | 1806.913  | 1707.058  | AK025398  | 8597.225  | 6992.181  | NM_003150 | 2507.422  | 2789.152  |
| NM_000317 | 7926.901  | 7345.333  | AB037750  | 2255.03   | 2143.542  | NM_014784 | 2374.156  | 2647.991  |
| NM_018376 | 4950.56   | 5073.629  | AK023056  | 818.569   | 629.746   | AK026383  | 3457.037  | 3803.655  |
| NM_017615 | 518.921   | 544.032   | NM_001120 | 24949.793 | 21661.824 | AK023821  | 648.238   | 583.871   |
| NM_017438 | 2254.411  | 2205.737  | NM_017888 | 1304.486  | 1345.346  | AB014594  | 2694.267  | 2969.226  |
| U59209    | 1496.487  | 1774.291  | NM_004915 | 1136.169  | 1088.502  | M94547    | 1075      | 1031.397  |
| NM_020195 | 2447.278  | 2580.88   | AK022207  | 707.568   | 907.977   | NM_005087 | 9820.155  | 9039.135  |
| AK023824  | 5962.539  | 5790.857  | AV708752  | 2274.279  | 2382.463  | NM_012098 | 721.076   | 732.269   |
| AL133069  | 3042.783  | 3448.118  | AF119885  | 1649.155  | 1720.421  | NM_018095 | 1202.053  | 912.222   |
| AL117574  | 482.792   | 596.834   | NM_000750 | 459.592   | 354.882   | AB023164  | 1778.49   | 1589.418  |
| AK026055  | 4293.266  | 4125.576  | NM_004996 | 1565.84   | 1755.566  | AK026680  | 3414.713  | 3342.19   |
| AK024126  | 859.593   | 897.584   | NM_005971 | 1565.389  | 1737.886  | NM_012436 | 49666.68  | 51167.52  |
| NM_001516 | 4191.86   | 3907.123  | NM_017435 | 774.243   | 7050.601  | AK001299  | 7940.51   | 8193.274  |
| NM_019086 | 2146.679  | 2225.655  | NM_013386 | 3573.491  | 3970.576  | AB014559  | 4200.177  | 3846.366  |
| NM_006670 | 1688.295  | 1894.789  | NM_006517 | 1581.577  | 2046.008  | NM_016489 | 3190.772  | 3248.702  |
| NM_012425 | 4344.301  | 4495.369  | AK026680  | 3854.843  | 2843.963  | NM_005033 | 2552.627  | 2636.625  |
| NM_002750 | 4035.173  | 3797.018  | NM_012436 | 56096.297 | 38445.781 | NM_015932 | 52311.039 | 54705.453 |
| NM_000081 | 2022.754  | 2659.885  | AK001299  | 14895.419 | 11077.291 | NM_017949 | 410.445   | 629.364   |
| AK024134  | 4689.125  | 4770.541  | AB014559  | 8902.725  | 6130.911  | AK022169  | 681.179   | 996.221   |
| NM_003014 | 989.12    | 1098.243  | NM_016489 | 3828.353  | 2685.986  | AF015592  | 1153.79   | 2091.217  |
| NM_018558 | 595.933   | 556.171   | NM_005033 | 2861.355  | 2460.422  | AK026795  | 1735.365  | 2807.942  |
| NM_001974 | 1584.414  | 1250.184  | NM_015932 | 54806.254 | 46483.449 | NM_016399 | 1509.031  | 2680.368  |
| NM_013957 | 1187.465  | 1114.523  | AK022169  | 1003.195  | 979.554   | NM_016617 | 5867.122  | 7780.205  |
| NM_002468 | 2664.648  | 2065.742  | AF015592  | 1179.915  | 1277.483  | NM_002338 | 1414.004  | 1433.798  |
| NM_003028 | 2025.909  | 1880.296  | AK026795  | 1617.435  | 1499.986  | AL117666  | 601.869   | 628.822   |
| NM_001566 | 719.679   | 673.194   | NM_016399 | 2147.598  | 2165.138  | Y17865    | 603.956   | 732.823   |
| NM_016541 | 2229.216  | 2275.471  | NM_016617 | 6318.078  | 5433.132  | AK022630  | 423.616   | 340.847   |
| NM_018548 | 4652.652  | 4975.752  | NM_002027 | 6096.862  | 5992.038  | NM_005825 | 12000.38  | 12506.416 |
| NM_013401 | 877.311   | 894.339   | AL162078  | 1847.391  | 1750.512  | NM_002756 | 2428.362  | 2024.909  |
| NM_018238 | 3692.254  | 3400.87   | NM_013382 | 7453.087  | 6075.244  | U79299    | 439.771   | 570.465   |
| NM_006858 | 9329.417  | 8538.278  | AB002314  | 679.672   | 585.389   | AJ000414  | 1073.243  | 1044.188  |
| NM_001405 | 5776.491  | 6273.708  | NM_014043 | 2309.331  | 3116.888  | AK025674  | 5149.134  | 4849.66   |
| NM_003880 | 956.484   | 640.28    | NM_014622 | 671.741   | 1236.537  | AF007194  | 2936.299  | 2429.539  |

|           |           |           |           |           |           |           |           |           |
|-----------|-----------|-----------|-----------|-----------|-----------|-----------|-----------|-----------|
| AF131778  | 1295.183  | 1317.269  | AB011114  | 32135.074 | 30662.531 | NM_01906  | 1072.551  | 1045.949  |
| NM_001562 | 7201.998  | 6245.562  | D11466    | 14075.735 | 15341.066 | NM_004761 | 2993.313  | 2839.012  |
| NM_013278 | 1400.552  | 1435.43   | NM_014056 | 9594.848  | 11062.413 | Z25424    | 1250.567  | 1301.196  |
| NM_003487 | 2420.051  | 2037.285  | D31885    | 11793.246 | 14235.408 | U79458    | 4158.798  | 4664.54   |
| NM_006887 | 9666.014  | 7226.669  | BE743838  | 3055.921  | 2230.611  | NM_01829  | 636.578   | 461.983   |
| NM_006477 | 1832.005  | 1391.559  | AF273046  | 2108.778  | 1503.643  | NM_00067  | 1711.707  | 1803.693  |
| NM_002880 | 3811.34   | 3439.757  | NM_001081 | 1090.203  | 903.34    | AL133022  | 556.177   | 1275.816  |
| NM_000678 | 6256.222  | 5933.951  | NM_002483 | 777.557   | 848.016   | NM_003953 | 777.921   | 1509.607  |
| NM_001066 | 2042.444  | 1652.194  | BF002026  | 495.33    | 318.853   | NM_006301 | 480.208   | 635.12    |
| NM_004657 | 2638.102  | 2852.271  | BE790116  | 4700.103  | 3525.702  | AL049925  | 1346.635  | 1382.531  |
| NM_006291 | 2411.358  | 2067.477  | AI922341  | 764.926   | 567.056   | NM_01221  | 3105.211  | 2492.633  |
| NM_018170 | 3667.151  | 3162.63   | M12824    | 988.799   | 1247.936  | X72887    | 1619.771  | 1651.398  |
| NM_003867 | 649.322   | 684.944   | W60100    | 645.685   | 686.839   | NM_00452  | 582.1     | 660.258   |
| AL162062  | 395.094   | 288.338   | AA457153  | 2429.264  | 2336.311  | NM_000127 | 846.674   | 752.523   |
| NM_003173 | 4070.177  | 4053.293  | AA283122  | 1728.417  | 1686.979  | Y10483    | 6395.48   | 6304.086  |
| NM_005030 | 4044.651  | 3669.861  | AA868504  | 1398.279  | 1160.992  | NM_006784 | 1295.697  | 1324.017  |
| NM_017584 | 2597.882  | 2736.38   | AA877845  | 3122.532  | 3402.781  | NM_01787  | 1609.228  | 1544.435  |
| NM_020359 | 2306.35   | 2189.082  | AA664241  | 6573.36   | 6911.34   | NM_001087 | 19038.758 | 17038.244 |
| AB014541  | 10969.069 | 11288.924 | AI016456  | 358.255   | 838.397   | NM_00182  | 398.077   | 397.967   |
| NM_002583 | 5689.261  | 5654.132  | NM_00058  | 11194.24  | 12788.068 | AK025352  | 362.396   | 400.418   |
| NM_006570 | 13491.722 | 13825.156 | AK026281  | 456.039   | 638.959   | NM_003721 | 6431.509  | 6758.358  |
| NM_020348 | 553.074   | 667.85    | NM_006406 | 4261.426  | 2740.861  | NM_004724 | 728.302   | 725.443   |
| NM_006034 | 11915.112 | 12799.97  | AF216292  | 18591.979 | 13402.61  | NM_000427 | 611.443   | 565.092   |
| AB040943  | 325.075   | 366.93    | NM_005894 | 438.055   | 390.221   | NM_000174 | 29173.26  | 37358.09  |
| NM_005201 | 8946.948  | 8217.104  | NM_014584 | 2599.712  | 2265.979  | NM_00250  | 2696.656  | 4844.679  |
| X56807    | 1938.92   | 1577.422  | NM_005810 | 2928.015  | 2524.182  | NM_014343 | 2571.875  | 5790.598  |
| NM_000092 | 416.161   | 381.663   | M28170    | 3411.212  | 2803.219  | D25303    | 767.989   | 1261.313  |
| AF174600  | 2669.677  | 2480.247  | AK026223  | 3921.812  | 11031.562 | AB043007  | 24986     | 21940.293 |
| AK001003  | 1511.635  | 1696.468  | NM_000874 | 976.615   | 969.224   | NM_004861 | 880.356   | 901.673   |
| NM_002800 | 16031.73  | 11853.67  | NM_005854 | 837.726   | 826.303   | NM_016161 | 449.557   | 568.663   |
| NM_018384 | 8456.836  | 7148.119  | AB007863  | 6725.322  | 5852.376  | AF022913  | 3039.168  | 2886.684  |
| AF282617  | 1003.58   | 828.518   | AK024456  | 2046.354  | 2243.178  | NM_00002  | 1217.293  | 1074.776  |
| AF157323  | 1837.071  | 1794.487  | NM_017789 | 524.635   | 425.776   | NM_001382 | 4978.975  | 4420.58   |
| NM_006025 | 316.319   | 395.112   | D31887    | 2396.35   | 2850.435  | M93718    | 3269.598  | 3229.217  |
| NM_005877 | 6754.056  | 5195.363  | NM_002313 | 797.053   | 979.191   | NM_00538  | 842.144   | 816.975   |
| NM_003338 | 2279.42   | 2225.937  | NM_004459 | 829.34    | 957.418   | AK023807  | 5114.037  | 5004.365  |
| NM_013396 | 1226      | 1027.854  | NM_005503 | 1519.114  | 1889.987  | NM_01818  | 4280.246  | 4150.961  |
| NM_017752 | 922.917   | 856.506   | NM_001502 | 1017.831  | 2072.935  | AK024273  | 1094.07   | 1089.037  |
| D26069    | 7401.61   | 7179.602  | NM_005721 | 1173.067  | 1930.157  | X59417    | 13572.591 | 13395.907 |
| BF107577  | 20036.154 | 21912.268 | AF284223  | 19225.65  | 23932.16  | NM_00565  | 20476.281 | 19299.123 |
| NM_005837 | 6781.805  | 7410.698  | AF176012  | 3000.236  | 3426.664  | D28476    | 5857.665  | 6742.871  |
| NM_016625 | 4636.073  | 4136.821  | NM_005971 | 1530.208  | 1381.796  | NM_016263 | 1159.871  | 1188.21   |
| NM_017493 | 1214.56   | 1245.492  | NM_017435 | 677.086   | 5390.02   | NM_00333  | 6489.585  | 6321.417  |
| NM_006136 | 5338.617  | 4727.974  | NM_013386 | 3894.347  | 3500.992  | AB002376  | 1866.319  | 1911.179  |
| AF237772  | 16945.611 | 19331.848 | NM_006517 | 1484.63   | 1425.667  | NM_01824  | 156.921   | 716.797   |
| AK025934  | 1070.085  | 1207.027  | NM_004171 | 920.633   | 830.733   | NM_00555  | 1039.818  | 1115.245  |
| AJ008154  | 1119.711  | 1215.27   | NM_014037 | 3019.797  | 2870.591  | NM_016631 | 806.196   | 934.033   |
| NM_006856 | 2916.323  | 2202.453  | NM_004866 | 9343.347  | 10101.835 | AB015617  | 10524.458 | 11787.162 |
| X52350    | 64169.223 | 56368.703 | NM_01868  | 1706.47   | 2164.424  | AK022730  | 1621.917  | 1339.318  |
| AF071554  | 1094.559  | 843.078   | AK056652  | 3589.264  | 5568.679  | NM_00225  | 9126.685  | 11925.681 |
| NM_002147 | 370.678   | 532.509   | AL137438  | 925.464   | 1010.946  | AF064839  | 15862.231 | 22464.131 |
| U90919    | 1894.056  | 1674.734  | NM_017957 | 1824.006  | 1976.775  | NM_00543  | 4641.825  | 8020.704  |
| NM_006177 | 731.645   | 891.717   | NM_003024 | 1480.097  | 1505.393  | AB037810  | 487.15    | 733.87    |

|           |           |           |           |           |           |           |           |           |
|-----------|-----------|-----------|-----------|-----------|-----------|-----------|-----------|-----------|
| AL137286  | 3511.412  | 2983.086  | NM_013248 | 2025.373  | 2106.925  | NM_000376 | 3473.45   | 3845.654  |
| NM_016358 | 5844.098  | 4522.357  | NM_000034 | 66364.234 | 66172.719 | NM_000475 | 3130.41   | 3664.049  |
| NM_016275 | 7344.299  | 6859.33   | AK022230  | 1401.636  | 1590.222  | M61872    | 12656.287 | 12109.131 |
| NM_020418 | 2690.801  | 2302.274  | AK022147  | 4026.663  | 4143.691  | AK027089  | 1957.609  | 2244.044  |
| NM_013293 | 1493.836  | 1576.316  | L25664    | 1321.493  | 1584.037  | NM_006284 | 3952.358  | 3754.814  |
| AF315592  | 5380.529  | 5358.602  | NM_014940 | 2894.652  | 3145.291  | U18909    | 1126.089  | 995.904   |
| AF095844  | 1209.152  | 1514.868  | NM_005783 | 499.772   | 687.196   | NM_003488 | 1849.545  | 1927.257  |
| NM_015833 | 1439.21   | 1616.509  | NM_006900 | 1533.183  | 2402.187  | NM_016588 | 6916.057  | 6537.748  |
| NM_000986 | 58655.242 | 55797.09  | AJ289111  | 3460.605  | 6061.199  | NM_003597 | 990.705   | 1075.056  |
| AK026760  | 17338.971 | 18573.48  | NM_016356 | 3910.466  | 6907.824  | NM_002566 | 31942.105 | 27941.984 |
| NM_014772 | 24763.717 | 19226.824 | NM_014043 | 2504.215  | 2998.948  | NM_006561 | 2197.658  | 2350.695  |
| AK025248  | 1551.713  | 1385.748  | NM_014622 | 978.029   | 839.565   | NM_017521 | 453.122   | 383.173   |
| NM_004538 | 13606.947 | 12769.78  | AB011114  | 45725.207 | 54043.695 | AK025200  | 3223.834  | 2918.332  |
| NM_006428 | 9477.153  | 9516.183  | D11466    | 19995.193 | 27451.785 | NM_001383 | 3641.235  | 3452.962  |
| NM_004280 | 10757.618 | 11937.436 | NM_014056 | 14388.788 | 18308.982 | NM_001028 | 24057.963 | 25860.701 |
| AF110399  | 1476.005  | 1306.304  | D31885    | 15460.887 | 19900.686 | NM_005008 | 17441.869 | 19328.523 |
| AK027094  | 2082.705  | 2029.025  | NM_016649 | 3394.985  | 4638.403  | NM_016304 | 26381.16  | 32978.895 |
| AL359596  | 906.727   | 620.685   | AK090536  | 16053.379 | 25224.611 | NM_006013 | 35494.129 | 48930.414 |
| AK022114  | 785.955   | 603.54    | D63477    | 1256.349  | 2024.857  | NM_014046 | 9340.807  | 15046.543 |
| AL133585  | 1262.193  | 1023.01   | NM_020243 | 22879.691 | 38716.184 | L34071    | 5180.652  | 10686.07  |
| NM_002631 | 9566.186  | 8251.328  | NM_014051 | 4107.81   | 6306.518  | AK025201  | 5165.256  | 4729.135  |
| NM_000775 | 466.293   | 193.472   | AK025398  | 14250.9   | 26122.584 | AK021927  | 451.439   | 477.608   |
| BF217864  | 5430.593  | 5206.64   | AB037750  | 3545.454  | 6708.039  | AK022995  | 2004.652  | 2110.253  |
| NM_005917 | 19680.377 | 14318.452 | AK023056  | 1122.996  | 1550.457  | NM_006066 | 5924.357  | 5467.027  |
| AV758498  | 1015.995  | 830.695   | NM_017888 | 1939.375  | 3476.911  | NM_005165 | 1309.934  | 1277.322  |
| NM_020196 | 1931.548  | 1570.426  | NM_004915 | 1687.244  | 3594.147  | NM_005138 | 13056.256 | 10930.42  |
| AK024113  | 489.829   | 650.935   | AK022207  | 981.745   | 2335.81   | NM_002115 | 7616.916  | 8592.647  |
| NM_018657 | 708.35    | 838.928   | AV708752  | 3211.681  | 5972.162  | AK023162  | 1524.73   | 1151.552  |
| L40410    | 5264.57   | 5779.865  | AF119885  | 2569.176  | 4397.146  | NM_006396 | 2059.788  | 2025.16   |
| NM_007055 | 1423.974  | 1273.506  | NM_000750 | 622.756   | 918.624   | NM_018648 | 997.667   | 953.634   |
| NM_016652 | 683.056   | 754.18    | NM_004996 | 2544.001  | 4126.078  | NM_013448 | 1673.996  | 1896.228  |
| NM_016310 | 4931.369  | 4932.041  | NM_000588 | 17614.432 | 24228.668 | NM_004537 | 726.611   | 683.581   |
| AK021562  | 601.418   | 757.183   | AK026281  | 835.357   | 1005.573  | NM_020226 | 878.942   | 539.181   |
| BC006560  | 939.314   | 807.265   | U23862    | 356.68    | 552.678   | NM_017865 | 2413.974  | 2285.508  |
| NM_006298 | 733.871   | 916.024   | AK026680  | 6673.117  | 9932.481  | NM_003427 | 991.736   | 1203.583  |
| AF060938  | 22071     | 23752.826 | NM_012436 | 53358.336 | 60868.211 | NM_005920 | 3661.951  | 6971.539  |
| NM_001973 | 3103.223  | 3202.957  | AK001299  | 25745.01  | 34400.871 | Y09321    | 877.106   | 3218.815  |
| NM_014468 | 3617.869  | 3213.812  | AB014559  | 13038.159 | 19324.662 | AK001499  | 3152.738  | 2597.008  |
| AL050015  | 1322.691  | 1040.107  | NM_016489 | 5051.645  | 6969.074  | AK023568  | 800.302   | 937.719   |
| AY007117  | 2920.232  | 2858.494  | NM_005033 | 3884.43   | 6133.299  | AK021728  | 537.774   | 710.297   |
| AF039698  | 1714.214  | 1692.616  | NM_015932 | 57079.426 | 63734.133 | AK026852  | 1274.827  | 1469.631  |
| AL109679  | 240.053   | 317.876   | NM_017949 | 705.099   | 1200.236  | AL110257  | 28226.936 | 27124.484 |
| AB046828  | 3009.132  | 2768.118  | AK022169  | 1225.947  | 1586.157  | AB013384  | 1335.686  | 1147.128  |
| AF144487  | 862.509   | 717.997   | AF015592  | 1498.517  | 2620.421  | AK024824  | 642.818   | 664.594   |
| AL137532  | 2750.065  | 2332.587  | AK026795  | 1981.55   | 3371.555  | AK024270  | 1530.681  | 1678.563  |
| AK025419  | 1545.557  | 1563.321  | NM_016617 | 6941.968  | 7135.523  | AK025569  | 2334.388  | 2051.591  |
| AK074298  | 222.191   | 202.849   | NM_002027 | 6469.048  | 7754.476  | AK023060  | 1026.767  | 942.007   |
| NM_017413 | 413.906   | 329.271   | AL162078  | 2100.94   | 2328.848  | NM_014870 | 781.602   | 1046.691  |
| NM_013259 | 9259.812  | 8679.221  | NM_000919 | 454.255   | 591.626   | AK021917  | 325.592   | 378.497   |
| NM_018375 | 6725.99   | 6342.917  | NM_013382 | 9755.267  | 10774.938 | AF052146  | 19027.273 | 17408.91  |
| NM_004913 | 717.01    | 674.928   | AB002314  | 793.622   | 897.457   | NM_004870 | 2413.924  | 2212.548  |
| AK026838  | 2269.541  | 2666.488  | NM_005503 | 1665.724  | 1464.646  | AF143872  | 8760.037  | 9058.856  |
| AK022443  | 882.575   | 1133.798  | NM_001502 | 1061.724  | 932.371   | AF143326  | 1312.353  | 1457.539  |



|           |           |           |           |           |           |           |           |           |
|-----------|-----------|-----------|-----------|-----------|-----------|-----------|-----------|-----------|
| AK023371  | 2381.538  | 2572.365  | NM_005721 | 412.035   | 580.405   | AL049229  | 2801.457  | 2631.514  |
| AK025015  | 3034.248  | 2813.927  | AF284223  | 20614.916 | 17392.875 | NM_018306 | 19308.561 | 20533.598 |
| AF086187  | 1982.569  | 2805.887  | AF176012  | 3107.172  | 2629.684  | AK026146  | 2163.133  | 2792.579  |
| AF305836  | 57139.355 | 54267.184 | BE743838  | 2912.061  | 2856.458  | AK023152  | 3186.054  | 3894.02   |
| AL109784  | 389.828   | 345.938   | AF273046  | 1983.168  | 2164.514  | AK000155  | 2069.908  | 3909.438  |
| AL137383  | 525.297   | 614.193   | NM_001081 | 1397.532  | 1251.396  | AL389937  | 3014.525  | 5350.307  |
| AL035295  | 2896.521  | 3096.456  | NM_002483 | 1036.691  | 1045.438  | AK022628  | 40739.977 | 38811.414 |
| NM_018302 | 3110.05   | 3268.609  | BF002026  | 485.596   | 528.189   | AK021737  | 4006.318  | 4550.942  |
| AK027252  | 2930.581  | 2724.945  | BE790116  | 4199.516  | 3745.339  | AL357454  | 700.659   | 704.207   |
| AF165527  | 4134.323  | 3632.189  | AI922341  | 645.867   | 690.182   | AK026295  | 7021.588  | 7437.729  |
| NM_014092 | 927.74    | 898.315   | M12824    | 1011.267  | 871.773   | AK022346  | 523.211   | 648.592   |
| AL110133  | 7164.99   | 6671.674  | W60100    | 609.962   | 616.776   | AK025007  | 1467.215  | 1515.338  |
| AL050053  | 552.006   | 559.952   | AA457153  | 2605.572  | 2973.142  | NM_016486 | 6332.012  | 6194.892  |
| AK000529  | 1880.58   | 2141.502  | AA283122  | 1800.799  | 2365.338  | AK026490  | 21215.646 | 19703.826 |
| AK027243  | 999.985   | 1089.934  | AA868504  | 1299.443  | 1596.676  | AJ227861  | 1276.919  | 1242.149  |
| AL110176  | 138.986   | 828.621   | AA877845  | 3587.186  | 4461.355  | AJ001875  | 1830.701  | 1979.396  |
| AF147415  | 1310.717  | 1411.669  | AA664241  | 8149.554  | 10153.048 | L13433    | 1302.126  | 1217.284  |
| AL049273  | 696.375   | 605.04    | NM_014940 | 2480.369  | 1629.943  | NM_007220 | 648.838   | 799.308   |
| AK098474  | 645.487   | 472.321   | NM_005783 | 442.056   | 266.736   | NM_017777 | 1139.605  | 1677.148  |
| AL117475  | 2135.485  | 1618.622  | NM_006900 | 1007.089  | 889.839   | AK021989  | 567.968   | 569.014   |
| AL049300  | 354.94    | 207.096   | AJ289111  | 2235.215  | 2053.188  | AK022298  | 1389.243  | 1408.32   |
| NM_017535 | 5213.606  | 5102.929  | NM_016356 | 1836.866  | 1383.014  | AJ277441  | 14274.036 | 14770.132 |
| L23852    | 279.075   | 249.764   | NM_006406 | 4616.63   | 3403.56   | NM_006057 | 356.805   | 391.838   |
| NM_003887 | 2337.808  | 2803.642  | AF216292  | 19100.178 | 16663.545 | AK024242  | 6347.262  | 7702.871  |
| NM_004267 | 12296.722 | 14009.681 | NM_005894 | 482.33    | 427.753   | AK024559  | 567.297   | 557.833   |
| NM_020147 | 225.576   | 470.178   | NM_014584 | 2522.703  | 1929.068  | AK024943  | 722.727   | 729.828   |
| AL357212  | 628.864   | 624.424   | M30627    | 362.535   | 357.057   | AL359943  | 31214.463 | 28355.982 |
| AK026687  | 2179.053  | 2413.171  | NM_005810 | 2940.628  | 2245.603  | NM_000534 | 3778.723  | 3758.757  |
| AL117444  | 827.163   | 833.752   | M28170    | 3327.125  | 2529.478  | L10140    | 612.974   | 514.074   |
| NM_017994 | 7087.122  | 6131.823  | AK026223  | 2147.661  | 2092.371  | AL133447  | 874.65    | 693.047   |
| AK021693  | 2106.083  | 1891.521  | NM_000874 | 747.975   | 668.615   | AB037853  | 14679.118 | 14311.455 |
| AB023177  | 5153.485  | 5144.402  | NM_005854 | 911.961   | 790.24    | D28450    | 33456.668 | 31398.52  |
| Y11609    | 3003.698  | 3780.293  | AB007863  | 7544.11   | 7850.511  | AK056222  | 1367.537  | 1526.982  |
| AF009285  | 14389.54  | 14301.16  | AK024456  | 1834.719  | 2342.195  | AK002028  | 16595.475 | 18250.621 |
| NM_012125 | 3730.345  | 3434.482  | NM_017789 | 635.71    | 663.46    | AL050127  | 1066.551  | 1218.405  |
| AB032363  | 471.68    | 614.92    | D31887    | 2503.542  | 3124.782  | AK024805  | 7093.997  | 8027.637  |
| AF009294  | 3794.417  | 4000.475  | NM_002313 | 802.455   | 812.298   | AK001423  | 669.954   | 854.208   |
| NM_001524 | 1003.286  | 867.949   | NM_004459 | 874.895   | 1156.108  | AJ012496  | 453.319   | 376.066   |
| AF056445  | 164.486   | 391.848   | NM_004915 | 1011.19   | 820.244   | AK024090  | 30218.65  | 28077.432 |
| AK000998  | 1041.069  | 944.135   | AK022207  | 636.599   | 624.52    | AL133574  | 1696.578  | 1895.33   |
| AK001225  | 250.944   | 436.361   | AV708752  | 2527.421  | 1983.739  | AF131754  | 500.341   | 196.073   |
| AK021435  | 611.125   | 402.481   | AF119885  | 1784.513  | 1595.264  | AF147339  | 18883.553 | 17372.682 |
| AK021684  | 3105.602  | 2858.858  | NM_004996 | 1849.36   | 1512.62   | AL390181  | 16367.997 | 15174.334 |
| AK001060  | 590.478   | 669.897   | NM_005971 | 1667.406  | 1365.946  | NM_017914 | 15654.75  | 13876.835 |
| AK001819  | 294.75    | 238.915   | NM_017435 | 838.858   | 5678.744  | AK024953  | 3800.745  | 3730.693  |
| AK021480  | 577.625   | 764.787   | NM_013386 | 3372.527  | 2730.425  | AK024276  | 1665.696  | 1863.681  |
| AK021726  | 370.948   | 431.712   | NM_006517 | 1538.105  | 1050.791  | S83374    | 970.351   | 966.605   |
| AK025112  | 1924.301  | 2003.63   | NM_004171 | 831.944   | 776.069   | AK025784  | 12079.658 | 11775.913 |
| AK026079  | 588.515   | 727.127   | NM_014037 | 2687.229  | 2036.56   | U07199    | 1610.257  | 1607.944  |
| AK025173  | 5043.186  | 4567.485  | NM_004866 | 8831.017  | 7882.4    | AK023713  | 693.911   | 844.971   |
| AK025430  | 625.783   | 609.246   | NM_018688 | 1307.116  | 1102.139  | X81445    | 710.169   | 826.451   |
| AK026269  | 237.611   | 141.871   | AK056652  | 2670.771  | 2815.951  | U95091    | 722.578   | 980.09    |
| AK026722  | 492.652   | 350.569   | AL137438  | 811.387   | 933.977   | NM_017900 | 18989.051 | 22997.84  |

|           |           |           |           |           |           |           |           |           |
|-----------|-----------|-----------|-----------|-----------|-----------|-----------|-----------|-----------|
| AF117338  | 4272.01   | 4043.976  | NM_017957 | 1555.816  | 1624.775  | S50182    | 1360.44   | 1722.848  |
| U56857    | 5095.352  | 4995.086  | NM_003024 | 1250.933  | 1328.642  | AL360145  | 662.013   | 908.648   |
| L43349    | 471.379   | 345.02    | NM_013248 | 1844.86   | 2533.813  | Y12016    | 511.963   | 710.283   |
| Z70695    | 353.433   | 520.253   | NM_000034 | 64477.313 | 68060.992 | NM_001178 | 821.319   | 778.689   |
| AF086421  | 2240.897  | 2293.428  | AK022230  | 1563.663  | 2052.274  | AK023696  | 3694.948  | 3911.556  |
| AK001612  | 1322.838  | 1159.658  | AK022147  | 4205.847  | 5193.101  | NM_000704 | 1107.966  | 1471.611  |
| AF161522  | 2444.677  | 2318.042  | L25664    | 1308.445  | 1861.208  | NM_015987 | 892.074   | 864.301   |
| AF086028  | 8759.54   | 8103.818  | NM_002027 | 6384.564  | 4941.752  | NM_019605 | 1336.299  | 1499.618  |
| U46119    | 346.765   | 432.767   | AL162078  | 1689.483  | 1100.453  | NM_015365 | 431.261   | 433.238   |
| AK025365  | 665.757   | 752.331   | NM_013382 | 6811.72   | 4936.409  | Z49090    | 1889.161  | 2044.535  |
| AK023445  | 217.454   | 192.873   | AB002314  | 676.371   | 445.86    | AK021592  | 2412.783  | 2694.516  |
| AK023489  | 962.438   | 792.506   | NM_014043 | 2090.555  | 1957.407  | AK025467  | 3261.254  | 3113.146  |
| AK021561  | 3130.389  | 2597.963  | NM_014622 | 682.983   | 713.653   | AK026593  | 3103.665  | 3165.457  |
| AK025222  | 604.538   | 612.844   | AB011114  | 34161.16  | 28877.092 | L37700    | 643.013   | 670.656   |
| NM_003531 | 896.772   | 1123.878  | D11466    | 12774.147 | 10678.32  | NM_017665 | 2176.966  | 2673.69   |
| L08434    | 449.445   | 466.566   | NM_014056 | 6943.359  | 5014.632  | AB007976  | 497.135   | 597.348   |
| NM_017795 | 1129.693  | 1308.842  | D31885    | 9101.523  | 7084.035  | AF052106  | 2519.752  | 2612.219  |
| NM_003510 | 699.504   | 581.924   | NM_016649 | 2169.819  | 1566.217  | AK022391  | 1144.152  | 1368.838  |
| NM_003535 | 614.498   | 368.808   | AK090536  | 9697.863  | 8000.644  | NM_016125 | 1977.239  | 2161.684  |
| AL137403  | 2256.018  | 2375.409  | D63477    | 763.361   | 709.474   | CY3Cy5    | 2949.842  | 115.63    |
| AL049348  | 838.165   | 730.091   | NM_020243 | 12749.065 | 11367.965 | R72122    | 1285.717  | 1112.609  |
| NM_018534 | 1026.023  | 997.851   | NM_014051 | 1999.102  | 2158.798  | Z35309    | 821.561   | 786.455   |
| AB037847  | 1480.287  | 1418.611  | AK025398  | 8735.581  | 10060.336 | AA700005  | 1213.92   | 1667.654  |
| NM_005170 | 2071.906  | 2195.229  | AB037750  | 2238.021  | 3200.241  | AA292025  | 680.577   | 1077.292  |
| S96437    | 1552.776  | 1306.471  | AK023056  | 936.828   | 1251.963  | AA437226  | 572.386   | 468.764   |
| NM_001645 | 11577.109 | 11813.481 | NM_001120 | 22596.109 | 26469.752 | R36143    | 503.165   | 501.659   |
| AL137327  | 885.214   | 907.012   | NM_017885 | 1277.52   | 1924.498  | D10353/NM | 1719.891  | 1259.344  |
| AF358454  | 1985.889  | 1887.051  | NM_003150 | 2151.948  | 1586.599  | AK096645  | 8314.746  | 9845.245  |
| AK026090  | 1385.53   | 1284.444  | NM_014784 | 1803.531  | 1491.831  | AK092859  | 568.051   | 409.94    |
| AF070637  | 304.894   | 609.517   | AK026383  | 2568.934  | 2747.269  | NM_019884 | 3014.479  | 2491.53   |
| AL137634  | 1199.079  | 1145.703  | AB014594  | 2483.355  | 1872.424  | SR2       | 54122.832 | 55322.207 |
| AK024863  | 3823.17   | 3275.156  | M94547    | 1042.238  | 752.344   | SR4       | 12989.825 | 15145.948 |
| AJ008135  | 49933.004 | 44049.59  | NM_005087 | 9040.411  | 8414.716  | SR6       | 1642.065  | 1846.153  |
| AK026908  | 5116.506  | 5250.438  | NM_012095 | 929.065   | 810.682   | SR8       | 6764.603  | 20085.605 |
| AL050068  | 621.632   | 558.377   | NM_018095 | 1252.902  | 1226.409  | SR10      | 24740.512 | 8998.973  |
| U92025    | 436.454   | 322.487   | AB023164  | 1751.081  | 1730.395  | CY3Cy5    | 3347.706  | 125.695   |
| AB046766  | 653.019   | 532.114   | AK026281  | 488.398   | 299.848   | NM_005291 | 4679.32   | 4362.831  |
| AF009323  | 911.283   | 648.225   | AK026680  | 3827.698  | 3011.797  | NM_002923 | 880.547   | 860.452   |
| U52829    | 407.076   | 312.103   | NM_012436 | 52439.371 | 42360.625 | NM_006794 | 560.139   | 842.679   |
| Z25437    | 227.872   | 467.926   | AK001299  | 11182.764 | 10529.938 | NM_018653 | 4053.507  | 5529.631  |
| AK001526  | 2990.702  | 2686.486  | AB014559  | 7911.198  | 7656.603  | NM_005385 | 1996.075  | 2132.442  |
| AF086183  | 1335.745  | 1228.038  | NM_016489 | 3460.909  | 3334.835  | NM_007232 | 8973.729  | 8154.885  |
| AK000525  | 1096.711  | 1131.144  | NM_005033 | 2857.82   | 3157.035  | NM_020175 | 1892.791  | 1770.702  |
| AL137434  | 1100.449  | 1878.932  | NM_015932 | 53632.613 | 53315.758 | NM_004306 | 22263.551 | 23577.266 |
| AF038188  | 10584.009 | 12164.76  | NM_017949 | 460.467   | 771.019   | NM_001153 | 595.799   | 533.072   |
| AJ227888  | 260.377   | 458.799   | AK022169  | 1173.602  | 1674.674  | NM_006786 | 1375.307  | 1197.955  |
| D17046    | 1387.037  | 1704.395  | AF015592  | 1136.17   | 1513.279  | NM_006205 | 1331.707  | 1208.721  |
| NM_017645 | 5238.255  | 4469.103  | AK026795  | 1990.884  | 2598.797  | NM_004034 | 2165.45   | 2430.659  |
| AJ227864  | 247.362   | 408.653   | NM_016395 | 2378.27   | 3465.404  | NM_000130 | 1043.958  | 1302.123  |
| AF157562  | 4665.178  | 4030.925  | NM_016617 | 6613.121  | 9498.159  | AI492087  | 17848.715 | 14914.148 |
| AK021958  | 4950.302  | 4904.274  | NM_002335 | 1180.337  | 795.244   | NM_004193 | 1351.978  | 1136.629  |
| M31164    | 1015.626  | 1059.235  | AL117666  | 496.418   | 392.263   | NM_002803 | 7573.137  | 6434.088  |
| AF113674  | 7637.076  | 7058.939  | NM_005825 | 9271.623  | 8480.541  | NM_005505 | 1874.315  | 1677.184  |

|           |           |           |           |           |           |           |           |           |
|-----------|-----------|-----------|-----------|-----------|-----------|-----------|-----------|-----------|
| NM_003511 | 503.915   | 962.543   | NM_002756 | 2013.463  | 1416.245  | NM_00678E | 573.95    | 765.867   |
| CY3Cy5    | 3401.22   | 169.489   | U79299    | 407.666   | 256.758   | AK025039  | 715.052   | 968.221   |
| H97792    | 2762.632  | 4238.628  | AJ000414  | 894.619   | 728.942   | NM_01656E | 581.272   | 793.649   |
| L33404    | 677.605   | 770.184   | AK025674  | 3357.77   | 3044.065  | AB033102  | 4763.173  | 4187.018  |
| M13509    | 1610.128  | 1560.592  | AF007194  | 3719.227  | 2988.406  | NM_014774 | 3892.757  | 3008.26   |
| X04076    | 5835.029  | 5792.244  | NM_019069 | 1338.969  | 1290.04   | NM_014143 | 6979.167  | 6271.464  |
| W95082    | 378.099   | 494.983   | NM_004761 | 2784.781  | 1951.943  | M55646    | 5257.648  | 6610.823  |
| AA485362  | 1785.257  | 1792.865  | Z25424    | 1258.151  | 965.256   | NM_003361 | 1174.813  | 1527.623  |
| AJ222801  | 2675.979  | 2648.491  | U79458    | 4401.732  | 3257.584  | NM_01209E | 1467.411  | 1189.085  |
| W72207    | 39176.406 | 40384.223 | NM_014920 | 413.893   | 570.867   | NM_018684 | 5430.519  | 4708.072  |
| BI772354  | 2192.293  | 2267.926  | NM_000676 | 2413.08   | 2311.6    | NM_017983 | 1446.463  | 1374.902  |
| AA733033  | 871.081   | 1136.03   | NM_005766 | 436.564   | 680.639   | AF116909  | 1350.295  | 1478.792  |
| AA583574  | 1338.078  | 1626.99   | AL133022  | 846.627   | 1272.235  | AJ276095  | 10141.892 | 11907.558 |
| AI690184  | 30498.58  | 33213.422 | NM_003953 | 1055.273  | 1605.426  | NM_00481E | 2785.853  | 2715.95   |
| AA927490  | 2119.042  | 1935.279  | NM_006301 | 663.894   | 951.542   | NM_007184 | 2367.191  | 2152.834  |
| NM_001824 | 67369.672 | 65379.543 | AF222694  | 425.913   | 555.905   | AF231916  | 1197.943  | 1114.234  |
| NM_002964 | 1559.173  | 1135.232  | AL049925  | 1164.549  | 765.094   | NM_003501 | 2688.489  | 2316.449  |
| SR5       | 4084.151  | 3564.232  | NM_012219 | 2238.353  | 1458.32   | AK022654  | 23389.975 | 23019.861 |
| SR7       | 5504.111  | 35684.535 | X72887    | 1039.111  | 820.949   | BC002905  | 3991.536  | 3897.427  |
| SR9       | 17520.025 | 3145.828  | NM_004529 | 453.669   | 501.283   | NM_018091 | 6273.629  | 6466.679  |
| CY3Cy5    | 2510.341  | 96.058    | NM_000127 | 647.456   | 519.734   | NM_00110E | 3683.311  | 4162.759  |
| NM_01781E | 1591.833  | 1827.732  | Y10483    | 4692.236  | 3551.185  | NM_001637 | 631.584   | 568.394   |
| NM_020433 | 378.215   | 629.723   | NM_006784 | 1027.978  | 847.189   | NM_016630 | 7384.993  | 7210.458  |
| NM_001767 | 387.81    | 315.077   | NM_017876 | 1398.161  | 1183.77   | NM_014291 | 3884.736  | 4305.113  |
| AF028823  | 3241.943  | 3121.888  | NM_001087 | 20990.871 | 17902.822 | NM_014631 | 649.458   | 533.934   |
| NM_004970 | 16.666    | 608.064   | NM_001826 | 504.265   | 302.021   | NM_00108E | 2548.029  | 2698.872  |
| NM_00429E | 18119.648 | 18185.09  | AK025352  | 544.391   | 284.141   | NM_000120 | 4140.921  | 4036.401  |
| NM_002087 | 4115.857  | 3885.244  | NM_003721 | 6570.077  | 4705.266  | NM_00167E | 7605.599  | 5678.753  |
| NM_01458E | 754.103   | 743.83    | NM_004724 | 716.442   | 767.519   | NM_006860 | 3176.538  | 3539.557  |
| AF200815  | 1166.219  | 1409.217  | NM_000381 | 527.615   | 541.625   | NM_004163 | 5910.041  | 6815.329  |
| NM_013441 | 1879.482  | 1568.743  | NM_000427 | 811.52    | 1081.49   | AK026308  | 960.239   | 722.192   |
| NM_014421 | 673.463   | 745.412   | NM_014924 | 423.232   | 625.62    | NM_013337 | 1257.261  | 1349.225  |
| NM_017680 | 248.243   | 300.396   | NM_006946 | 590.631   | 744.204   | NM_00689E | 3602.797  | 3050.736  |
| M60499    | 2370.941  | 1859.755  | NM_00250E | 3216.947  | 4197.25   | NM_012200 | 1895.562  | 1986.307  |
| NM_003833 | 13560.461 | 12555.318 | NM_014343 | 2262.624  | 3979.131  | NM_001724 | 1583.209  | 1672.226  |
| AK000868  | 2704.165  | 2447.521  | D25303    | 745.62    | 1214.565  | NM_000150 | 584.032   | 793.793   |
| NM_001233 | 2342.086  | 2224.201  | AB043007  | 22153.578 | 13267.115 | AB023152  | 728.852   | 661.322   |
| NM_001234 | 3099.294  | 2776.365  | NM_004861 | 833.172   | 613.812   | NM_006212 | 966.14    | 1116.813  |
| BF679789  | 3807.147  | 3590.537  | AF022913  | 1296.465  | 1025.681  | AK022872  | 3573.609  | 3525.061  |
| AB007859  | 824.234   | 729.653   | NM_00002E | 852.608   | 728.033   | AK024272  | 3990.242  | 5090.571  |
| NM_006754 | 231.017   | 339.409   | NM_001382 | 4107.255  | 2977.022  | NM_016381 | 1964.576  | 1966.484  |
| NM_001127 | 2147.33   | 1992.655  | M93718    | 2936.769  | 2190.342  | AL591715  | 554.815   | 508.14    |
| NM_012430 | 1825.441  | 1728.937  | NM_00538E | 865.143   | 705.808   | NM_012433 | 5186.144  | 3330.571  |
| NM_003917 | 12337.631 | 11802.866 | AK023807  | 4738.982  | 3895      | NM_00257E | 980.554   | 839.175   |
| NM_007077 | 945.062   | 1090.628  | NM_01818E | 4206.356  | 3413.622  | NM_003582 | 1387.382  | 905.388   |
| NM_00295E | 1399.532  | 1370.787  | AK024273  | 928.336   | 878.162   | NM_000282 | 2590.613  | 3148.554  |
| AB018739  | 875.26    | 810.653   | X59417    | 11273.57  | 8748.44   | NM_000532 | 9650.221  | 11537.907 |
| NM_006750 | 11718.362 | 10480.716 | NM_005659 | 24792.484 | 16647.037 | NM_016341 | 892.371   | 1489.454  |
| NM_020164 | 2776.097  | 2561.077  | D28476    | 5602.462  | 3728.01   | NM_004034 | 2138.127  | 1823.237  |
| AK023521  | 2903.526  | 2617.337  | NM_016263 | 1419.669  | 1117.42   | NM_000130 | 1615.226  | 1428.13   |
| NM_014267 | 12611.313 | 12191.653 | NM_003335 | 9131.418  | 7903.619  | AF193756  | 582.553   | 634.244   |
| U30872    | 845.37    | 803.901   | AB002376  | 2078.164  | 2390.391  | AI492087  | 19874.381 | 24940.076 |
| NM_02046E | 3747.191  | 3287.593  | NM_00555E | 1257.878  | 1859.325  | R72122    | 1590.527  | 1872.66   |

|           |           |           |           |           |           |           |           |           |
|-----------|-----------|-----------|-----------|-----------|-----------|-----------|-----------|-----------|
| NM_014734 | 1877.427  | 2045.076  | NM_016631 | 980.019   | 1607.21   | Z35309    | 798.281   | 770.557   |
| NM_002289 | 562.636   | 525.089   | AK022730  | 1966.187  | 2327.535  | AA700005  | 1262.213  | 1412.385  |
| AK026408  | 1647.064  | 1497.033  | AF064839  | 17628.844 | 22681.484 | AA292025  | 676.212   | 623.009   |
| NM_005025 | 1171.677  | 1467.801  | NM_005439 | 6039.485  | 8196.705  | AA437226  | 667.46    | 501.345   |
| NM_006307 | 528.705   | 504.96    | AB037810  | 645.371   | 918.596   | R36143    | 556.915   | 388.767   |
| M74782    | 2020.126  | 1957.705  | NM_000376 | 3015.819  | 2163.529  | D10353/NM | 2143.935  | 2339.466  |
| NM_001056 | 1054.462  | 1088.164  | NM_000475 | 2713.811  | 2204.09   | M15042    | 2026.413  | 1851.139  |
| AY026461  | 3121.256  | 3123.555  | M61872    | 11587.51  | 7850.389  | AK056843  | 914.678   | 663.408   |
| AK025708  | 2013.307  | 1672.087  | AK027089  | 1654.92   | 1297.364  | U49928    | 3703.86   | 2897.417  |
| NM_000405 | 1282.937  | 1340.19   | X59845    | 528.881   | 347.556   | AK096645  | 7378.947  | 5484.451  |
| NM_005564 | 50769.629 | 49515.938 | NM_006284 | 4040.918  | 3090.915  | AK092859  | 391.02    | 302.882   |
| NM_004508 | 2636.771  | 3742.211  | U18909    | 1091.174  | 990.234   | NM_019884 | 2536.868  | 1969.125  |
| NM_006405 | 8988.48   | 9972.011  | NM_003489 | 1972.516  | 1634.725  | AF116909  | 1493.311  | 1197.538  |
| AJ245946  | 375.931   | 525.094   | NM_016589 | 6821.887  | 5952.602  | BE906724  | 1404.604  | 1376.994  |
| NM_006749 | 787.532   | 1011.88   | NM_003597 | 1151.501  | 1090.463  | NM_002283 | 2968.444  | 2871.68   |
| NM_004694 | 376.08    | 354.329   | NM_002568 | 34305.086 | 21735.57  | AJ276095  | 11234.165 | 12384.002 |
| NM_000324 | 551.459   | 532.451   | NM_006561 | 2800.236  | 2222.286  | NM_004819 | 3103.107  | 3824.146  |
| AL137619  | 2168.951  | 2184.817  | NM_017521 | 572.574   | 487.948   | NM_007184 | 2709.056  | 3000.34   |
| NM_003615 | 469.632   | 239.061   | AK025200  | 5231.669  | 5551.485  | NM_005291 | 5931.665  | 6429.952  |
| NM_004300 | 3054.453  | 2852.907  | NM_001383 | 4314.193  | 5487.537  | NM_005855 | 287.738   | 779.825   |
| AF319476  | 867.52    | 826.224   | NM_005008 | 23361.818 | 27833.912 | NM_002923 | 977.182   | 929.346   |
| AK001913  | 3815.473  | 4199.55   | NM_016304 | 31380.301 | 37540.18  | NM_006794 | 658.06    | 638.767   |
| NM_017737 | 584.769   | 733.849   | NM_006013 | 39231.383 | 48482.301 | NM_018653 | 4383.948  | 2949.087  |
| NM_004292 | 1261.627  | 1376.948  | NM_014046 | 12211.854 | 15999.321 | NM_005388 | 2131.852  | 1546.376  |
| NM_015484 | 3669.091  | 3623.884  | L34071    | 4737.256  | 7212.809  | NM_007232 | 12041.379 | 7559.025  |
| NM_018046 | 1631.595  | 1786.061  | AK025201  | 4838.112  | 3282.694  | NM_003027 | 460.483   | 570.279   |
| NM_013316 | 2685.742  | 2964.281  | AK021927  | 434.452   | 331.317   | NM_002717 | 3240.355  | 2069.533  |
| M20701    | 11444.259 | 12819.886 | AK022995  | 910.922   | 937.714   | NM_003025 | 3788.058  | 3173.019  |
| NM_002912 | 2010.741  | 2279.319  | NM_006066 | 5640.922  | 4125.436  | NM_020179 | 1574.971  | 1400.844  |
| NM_013284 | 2479.732  | 3180.609  | NM_005165 | 1498.235  | 1476.34   | NM_004306 | 22293.818 | 18269.682 |
| NM_006739 | 2641.907  | 4309.676  | NM_005138 | 20922.648 | 17085.797 | NM_001153 | 768.732   | 903.382   |
| NM_013274 | 3692.468  | 4391.502  | NM_002115 | 12529.754 | 11166.27  | NM_006860 | 4367.501  | 3498.791  |
| AL050187  | 2465.152  | 2822.101  | AK023162  | 1772.712  | 1179.113  | NM_004794 | 9966.254  | 10070.41  |
| NM_007127 | 422.584   | 339.507   | NM_006396 | 1992.957  | 1731.227  | NM_004283 | 1548.875  | 2012.246  |
| NM_012387 | 9182.512  | 9013.055  | NM_018649 | 937.591   | 892.29    | NM_004163 | 7045.955  | 12261.354 |
| NM_014735 | 1114.519  | 1073.379  | NM_013449 | 2027.898  | 2032.376  | AK026308  | 1031.84   | 1442.107  |
| NM_004252 | 11015.783 | 11658.556 | NM_004537 | 848.786   | 896.473   | NM_013337 | 1379.649  | 1710.032  |
| AF172929  | 4307.248  | 3976.122  | AL390134  | 658.216   | 662.116   | NM_004193 | 1669.299  | 1895.286  |
| NM_006398 | 9052.319  | 8928.638  | NM_020226 | 1391.564  | 1824.128  | NM_002803 | 7512.135  | 7906.762  |
| AK025655  | 1563.593  | 1582.811  | NM_017865 | 3630.926  | 4311.987  | NM_005508 | 1540.663  | 1496.099  |
| NM_001362 | 435.678   | 451.727   | NM_003427 | 2320.036  | 3244.566  | NM_006788 | 574.205   | 509.465   |
| NM_004056 | 444.993   | 486.699   | AK021842  | 671.664   | 818.42    | NM_016568 | 548.857   | 561.033   |
| NM_003833 | 13075.927 | 15367.526 | NM_005920 | 5456.052  | 7730.538  | AB033102  | 4673.03   | 3012.747  |
| AK000868  | 2801.189  | 2561.736  | Y09321    | 1007.008  | 1139.608  | NM_014774 | 3312.954  | 2253.924  |
| NM_001233 | 2378.769  | 2000.037  | AK001499  | 2664.199  | 1956.633  | NM_014143 | 5768.041  | 3865.176  |
| NM_001234 | 2506.63   | 2910.665  | AK023568  | 809.828   | 541.805   | M55646    | 5497.034  | 3819.378  |
| BF679789  | 3625.546  | 3766.029  | AK021728  | 462.112   | 457.071   | NM_006112 | 18393.098 | 13731.202 |
| H97792    | 1749.637  | 1662.564  | AK026852  | 1292.319  | 910.968   | M12807    | 1028.89   | 902.428   |
| L33404    | 782.375   | 740.256   | AK021629  | 580.642   | 567.723   | NM_001765 | 710.156   | 536.506   |
| M13509    | 1997.715  | 1771.244  | AL110257  | 30257.318 | 20467.855 | NM_003361 | 1334.061  | 1094.043  |
| X04076    | 6663.942  | 6971.089  | AB013384  | 952.593   | 700.201   | NM_012099 | 1161.046  | 1303.768  |
| W95082    | 455.829   | 469.317   | AK024824  | 876.156   | 716.664   | NM_018684 | 5393.087  | 5655.761  |
| AA485362  | 2430.902  | 2122.497  | AK024270  | 1373.5    | 1295.819  | NM_017983 | 934.017   | 1208.572  |

|           |           |           |           |           |           |           |           |           |
|-----------|-----------|-----------|-----------|-----------|-----------|-----------|-----------|-----------|
| AJ222801  | 3143.586  | 3581.913  | AK025569  | 2625.737  | 2662.06   | AF169351  | 7771.68   | 6598.935  |
| W72207    | 40980.441 | 45717.16  | AK023060  | 909.017   | 872.982   | M14200    | 54456.781 | 49721.414 |
| BI772354  | 2139.317  | 2432.26   | NM_014870 | 765.001   | 715.377   | NM_000282 | 3361.813  | 3727.749  |
| AA733033  | 976.09    | 1038.46   | AK021917  | 607.977   | 460.89    | NM_000532 | 11710.733 | 12837.977 |
| AA583574  | 1114.546  | 776.386   | AF052146  | 29453.422 | 21346.254 | NM_016341 | 751.491   | 1040.877  |
| AI690184  | 31499.143 | 29100.975 | NM_004870 | 2164.272  | 1660.885  | AF231916  | 1159.231  | 1296.258  |
| AA927490  | 2273.09   | 1889.083  | AF143872  | 10325.833 | 9296.82   | NM_003501 | 2604.853  | 2617.804  |
| NM_001824 | 60275.977 | 57776.07  | AF143326  | 2144.048  | 2847.94   | AK022654  | 21122.84  | 20072.236 |
| NM_002964 | 1515.483  | 1208.98   | AL049229  | 3203.185  | 4006.011  | BC002905  | 3664.093  | 2905.32   |
| NM_005052 | 12602.96  | 12810.57  | AK026146  | 3718.411  | 6388.121  | NM_018091 | 5901.408  | 5419.525  |
| BF038439  | 471.276   | 451.496   | AK023152  | 3303.685  | 5159.379  | NM_001108 | 3705.956  | 2594.042  |
| NM_014734 | 1935.06   | 2022.825  | AK000155  | 2252.076  | 3602.573  | NM_001637 | 620.879   | 558.688   |
| NM_002289 | 644.814   | 397.412   | AL389937  | 4401.721  | 6367.982  | NM_016630 | 7823.485  | 5328.766  |
| AK026408  | 1704.841  | 1494.115  | AK022628  | 36807.676 | 23317.281 | NM_014291 | 3743.949  | 3484.295  |
| NM_005025 | 831.664   | 862.669   | AK021737  | 3777.584  | 2824.018  | NM_014631 | 713.413   | 574.433   |
| NM_006307 | 632.407   | 453.652   | AL357454  | 493.61    | 457.266   | NM_001089 | 2285.649  | 1870.395  |
| M74782    | 1991.8    | 1766.69   | AK026295  | 6020.218  | 4384.174  | NM_000120 | 3679.581  | 2812.797  |
| NM_017818 | 1945.017  | 1634.861  | AK025007  | 1870.323  | 1267.018  | AF172327  | 18379.875 | 13776.225 |
| NM_020433 | 981.86    | 1184.463  | NM_016486 | 5632.891  | 4271.25   | NM_001676 | 1802.431  | 1629.073  |
| NM_001767 | 511.945   | 468.914   | AK026490  | 22622.717 | 19030.828 | NM_001679 | 7028.065  | 6089      |
| AF028823  | 4772.494  | 4367.75   | AJ227861  | 1777.986  | 1354.965  | NM_004046 | 63355.121 | 62236.715 |
| NM_004970 | 341.28    | 204.79    | AJ001020  | 654.252   | 505.839   | NM_019884 | 3232.647  | 2701.497  |
| NM_004295 | 22604.873 | 25368.926 | AJ001875  | 2407.884  | 1919.441  | NM_018291 | 3080.623  | 3687.078  |
| NM_002087 | 4726.08   | 5394.597  | L77562    | 406.728   | 505.009   | NM_005530 | 2662.644  | 2946.853  |
| NM_014585 | 755.585   | 781.695   | NM_007220 | 2062.706  | 4782.792  | NM_006899 | 4058.52   | 5185.253  |
| AF200815  | 962.462   | 884.865   | NM_017777 | 1032.82   | 1645.927  | NM_012200 | 1798.312  | 1750.019  |
| NM_013441 | 1565.073  | 1220.431  | AK021989  | 705.804   | 489.001   | NM_001724 | 1332.26   | 1025.695  |
| NM_014421 | 685.647   | 619.097   | AK023407  | 474.149   | 463.386   | NM_000150 | 583.763   | 681.515   |
| NM_017680 | 335.724   | 285.254   | AK022298  | 1799.005  | 1640.13   | AB023152  | 738.398   | 564.643   |
| NM_012465 | 430.04    | 203.951   | AJ277441  | 26920.061 | 20165.664 | NM_006212 | 1201.607  | 772.961   |
| M60499    | 2295.807  | 2251.663  | NM_006057 | 748.306   | 498.797   | AK022872  | 3878.344  | 2817.917  |
| NM_001614 | 61189.379 | 63400.383 | AK024242  | 7941.836  | 10207.7   | AK024272  | 4680.255  | 3031.263  |
| NM_000366 | 676.751   | 507.536   | AK024559  | 700.083   | 1083.644  | NM_016381 | 1664.349  | 1417.904  |
| NM_003615 | 199.833   | 228.016   | AK024851  | 675.108   | 1091.112  | AL591715  | 531.722   | 498.79    |
| NM_004300 | 3329.138  | 2904      | AK024943  | 866.013   | 1145.386  | NM_018042 | 1436.411  | 1321.069  |
| NM_000085 | 364.915   | 175.189   | AK024410  | 404.988   | 763.148   | BE741525  | 726.627   | 554.982   |
| AB007859  | 707.36    | 823.34    | AK024995  | 412.334   | 723.069   | BF030555  | 10372.54  | 8923.922  |
| NM_001127 | 2779.239  | 3059.796  | AL359943  | 32184.455 | 22891.59  | NM_012433 | 5395.958  | 5321.287  |
| NM_012430 | 2220.93   | 2339.119  | NM_000534 | 4052.506  | 3069.242  | NM_005605 | 1973.784  | 3209.642  |
| NM_003917 | 14779.478 | 17914.271 | L10140    | 796.34    | 751.925   | NM_002576 | 987.095   | 1178.361  |
| NM_007077 | 1204.207  | 1600.365  | AL133447  | 914.219   | 953.715   | NM_003582 | 1308.007  | 1451.471  |
| NM_002956 | 1167.227  | 1735.578  | AB037853  | 15410.408 | 14205.188 | NM_020179 | 1850.969  | 1719.508  |
| AB018739  | 944.798   | 911.722   | D28450    | 34508.938 | 28445.178 | NM_004306 | 25861.834 | 25766.385 |
| NM_006750 | 11392.366 | 10681.56  | AK056222  | 1556.918  | 1654.694  | NM_001153 | 558.115   | 521.29    |
| NM_020164 | 2257.808  | 2200.729  | AK002028  | 22079.518 | 27002.045 | NM_006786 | 1665.626  | 1913.287  |
| AK023521  | 2667.475  | 2223.361  | AL050127  | 1461.556  | 2279.77   | NM_006205 | 1505.317  | 1376.909  |
| NM_014267 | 11914.11  | 9550.382  | AK024805  | 8065.722  | 11770.982 | NM_004034 | 1803.336  | 2006.393  |
| NM_001481 | 583.307   | 487.573   | AK001423  | 1125.954  | 1794.157  | NM_000130 | 1234.874  | 1275.836  |
| U30872    | 851.652   | 805.642   | AK024090  | 25863.172 | 15441.655 | AF193756  | 572.084   | 411.891   |
| AF111783  | 221.555   | 290.593   | AL133574  | 1449.303  | 1263.352  | AI492087  | 19504.756 | 16495.971 |
| NM_020469 | 3837.932  | 4261.035  | AF131754  | 484.167   | 297.691   | R72122    | 1732.255  | 1367.95   |
| NM_002639 | 1056.335  | 855.844   | AK021936  | 364.346   | 598.443   | Z35309    | 822.768   | 729.583   |
| NM_006398 | 9671.086  | 10268.891 | AF147339  | 21703.008 | 15365.178 | AA700005  | 1252.88   | 962.832   |

|           |           |           |           |           |           |           |           |           |
|-----------|-----------|-----------|-----------|-----------|-----------|-----------|-----------|-----------|
| AK025655  | 1533.877  | 1623.495  | AL390181  | 17089.928 | 13089.76  | AA292025  | 724.583   | 454.116   |
| NM_001362 | 351.061   | 453.7     | NM_017914 | 17601.029 | 13480.681 | AA437226  | 581.978   | 441.928   |
| NM_004056 | 433.881   | 286.144   | AK024953  | 4231.046  | 2972.361  | XM_056359 | 298.439   | 295.373   |
| NM_001056 | 906.754   | 895.237   | AK024276  | 2443.106  | 2331.852  | D10353/NM | 1500.736  | 1300.681  |
| AY026461  | 3006.918  | 3578.049  | S83374    | 1481.478  | 1331.6    | M15042    | 2261.239  | 1700.474  |
| AK025708  | 2533.094  | 2349.029  | AK025784  | 14215.283 | 11900.393 | AK056843  | 1041.052  | 891.382   |
| NM_000405 | 1214.347  | 1679.064  | U07199    | 2199.172  | 1979.69   | U49928    | 4372.933  | 5073.466  |
| NM_005564 | 48257.086 | 48761.484 | AK023713  | 929.768   | 906.668   | AK096645  | 7749.469  | 8791.425  |
| NM_004508 | 2415.383  | 2476.356  | X81445    | 769.457   | 834.102   | AK092859  | 552.557   | 803.588   |
| NM_006405 | 8760.586  | 8400.359  | U95091    | 952.92    | 1420.027  | M12807    | 1057.945  | 1020.134  |
| AJ245946  | 618.691   | 367.975   | NM_017900 | 26201.156 | 31718.822 | NM_001765 | 1518.853  | 1188.884  |
| NM_006749 | 1021.48   | 813.577   | S50182    | 1867.547  | 2565.166  | NM_003361 | 1419.965  | 1251.827  |
| NM_004694 | 411.473   | 406.051   | AL360145  | 1268.19   | 1884.198  | NM_012095 | 1457.314  | 1482.209  |
| NM_000324 | 638.602   | 500.787   | Y12016    | 815.247   | 1163.155  | NM_018684 | 5630.952  | 5540.696  |
| AL137619  | 2078.904  | 1788.737  | NM_001178 | 753.785   | 611.17    | NM_017983 | 938.022   | 921.856   |
| NM_001824 | 60438.715 | 57847.492 | AK023696  | 4225.843  | 2657.843  | AF116909  | 1195.127  | 1203.432  |
| NM_002964 | 1534.502  | 1489.18   | NM_000704 | 1624.933  | 1266.54   | BE906724  | 1445.003  | 1588.869  |
| NM_005052 | 12406.626 | 11907.205 | NM_015987 | 970.939   | 870.169   | NM_002283 | 2398.097  | 2462.184  |
| BF038439  | 491.93    | 389.279   | NM_019605 | 1567.181  | 1366.481  | AJ276095  | 10689.253 | 10255.9   |
| AF319476  | 781.816   | 829.345   | NM_015369 | 387.899   | 653.494   | NM_004819 | 3221.028  | 3354.25   |
| AK001913  | 3784.635  | 4107.426  | Z49090    | 2512.991  | 2228.691  | NM_007184 | 2872.771  | 2622.155  |
| NM_017737 | 533.797   | 657.313   | AK021592  | 3069.947  | 3075.548  | NM_005291 | 6128.815  | 4808.594  |
| NM_004292 | 1347.4    | 1323.786  | AK025467  | 3344.216  | 2379.739  | NM_002923 | 933.002   | 818.081   |
| NM_015484 | 4088.92   | 4096.614  | AK026593  | 3444.167  | 2822.162  | NM_006794 | 763.312   | 523.729   |
| NM_018046 | 2181.52   | 2751.119  | L37700    | 717.184   | 645.77    | NM_018653 | 3989.223  | 3177.25   |
| NM_013316 | 2854.252  | 3915.146  | NM_017665 | 2895.57   | 2232.891  | NM_005388 | 2336.593  | 1717.134  |
| M20701    | 13621.515 | 22807.117 | AB007976  | 557.274   | 720.509   | NM_007232 | 12356.287 | 11477.063 |
| NM_002912 | 1641.877  | 2091.793  | AK024819  | 519.267   | 509.539   | NM_002717 | 3015.078  | 2804.715  |
| NM_013284 | 2551.415  | 2633.936  | AF052106  | 3975.208  | 4870.399  | NM_001679 | 7743.6    | 8105.11   |
| NM_006739 | 1895.073  | 2176.694  | AK000441  | 734.688   | 945.282   | NM_004046 | 59822.855 | 56956.578 |
| NM_013274 | 4022.675  | 3929.969  | AK022391  | 1751.648  | 2850.688  | NM_004983 | 535.549   | 418.007   |
| AL050187  | 2332.128  | 2193.709  | NM_016125 | 2225.372  | 3319.609  | NM_006860 | 3460.682  | 3912.008  |
| NM_007127 | 370.555   | 365.682   | CY3Cy5    | 1260.52   | 199.983   | NM_004794 | 9414.78   | 10170.824 |
| NM_012387 | 9904.979  | 9927.229  | R72122    | 1219.642  | 1264.905  | NM_004283 | 1664.918  | 1995.047  |
| NM_014735 | 1077.267  | 1035.922  | Z35309    | 742.119   | 707.753   | NM_004163 | 7026.877  | 6325.987  |
| NM_004252 | 10772.731 | 11275.994 | AA700005  | 999.029   | 1058.74   | AK026308  | 946.664   | 1034.185  |
| AF172929  | 4519.364  | 3974.314  | AA292025  | 570.189   | 560.342   | NM_013337 | 1589.909  | 1598.859  |
| NM_017680 | 303.698   | 390.078   | AA437226  | 439.993   | 523.746   | NM_004193 | 1766.349  | 1724.463  |
| NM_012465 | 283.385   | 324.843   | R36143    | 457.122   | 502.845   | NM_002803 | 8170.547  | 6777.801  |
| M60499    | 2111.78   | 2102.499  | XM_056359 | 255.718   | 269.245   | NM_005508 | 1776.995  | 1485.402  |
| NM_000366 | 652.941   | 413.274   | D10353/NM | 2158.977  | 1577.236  | NM_006788 | 519.684   | 420.935   |
| NM_003833 | 13131.519 | 12153.806 | M15042    | 2239.358  | 1504.485  | NM_016568 | 727.635   | 493.182   |
| AK000868  | 2854.124  | 2074.129  | AK056843  | 1746.465  | 1281.534  | AB033102  | 4386.833  | 3695.399  |
| NM_001233 | 2245.577  | 1950.786  | U49928    | 6269.25   | 3776.639  | NM_014774 | 3199.55   | 2721.647  |
| NM_001234 | 2991.2    | 2718.133  | AK096645  | 8890.551  | 5772.127  | NM_014143 | 5868.442  | 5041.007  |
| BF679789  | 4145.478  | 3990.79   | AK092859  | 601.598   | 589.31    | M55646    | 6454.295  | 5937.388  |
| H97792    | 2034.705  | 1932.141  | NM_019884 | 3194.656  | 2462.193  | NM_006112 | 19717.68  | 22502.045 |
| L33404    | 1014.457  | 931.074   | SR4       | 13400.269 | 9399.765  | BE741525  | 1025.443  | 818.637   |
| M13509    | 2009.646  | 2261.794  | SR6       | 1895.338  | 1443.255  | BF030555  | 13820.82  | 12376.701 |
| X04076    | 6624.793  | 7134.816  | SR8       | 7263.371  | 16434.713 | NM_012433 | 5879.797  | 4862.604  |
| W95082    | 374.565   | 513.654   | SR10      | 24626.988 | 6163.852  | NM_005605 | 1434.333  | 1745.417  |
| AA485362  | 2076.968  | 1668.412  | CY3Cy5    | 972.418   | 104.62    | NM_002576 | 1037.064  | 1356.884  |
| AJ222801  | 2597.876  | 2475.792  | NM_005291 | 5497.725  | 5108.921  | NM_003582 | 1530.537  | 1553.266  |

|           |           |           |           |           |           |           |           |           |
|-----------|-----------|-----------|-----------|-----------|-----------|-----------|-----------|-----------|
| W72207    | 38136.836 | 37199.594 | NM_002923 | 885.482   | 838.371   | AF169351  | 8404.295  | 9423.313  |
| BI772354  | 1822.982  | 1889.737  | NM_006794 | 646.755   | 614.616   | M14200    | 56888.605 | 54558.977 |
| AA733033  | 826.584   | 879.444   | NM_018653 | 5172.152  | 7922.438  | NM_000282 | 3123.719  | 3322.403  |
| AA583574  | 1120.76   | 918.631   | NM_005388 | 2144.284  | 2183.494  | NM_000532 | 11610.069 | 12042.92  |
| AI690184  | 32575.863 | 28927.283 | NM_007232 | 12183.918 | 9383.819  | NM_016341 | 963.776   | 1041.633  |
| AA927490  | 2428.243  | 2076.399  | NM_003027 | 279.922   | 414.519   | AF231916  | 1451.158  | 1862.373  |
| U30872    | 871.615   | 922.241   | NM_002717 | 3250.243  | 1850.961  | NM_003501 | 3095.719  | 3111.663  |
| NM_002639 | 895.993   | 760.359   | NM_003025 | 7393.145  | 4168.896  | AK022654  | 30680.783 | 25617.932 |
| NM_014734 | 1852.43   | 1405.01   | NM_020179 | 2873.446  | 2046.474  | BC002905  | 4380.914  | 3927.267  |
| NM_002289 | 515.408   | 406.674   | NM_004306 | 28973.482 | 18072.041 | NM_018091 | 6522.177  | 4936.514  |
| AK026408  | 1522.98   | 1349.841  | NM_001153 | 510.228   | 340.509   | NM_001108 | 3527.753  | 2704.411  |
| NM_005025 | 880.688   | 883.236   | NM_006205 | 1317.338  | 881.156   | NM_016630 | 7488.422  | 6213.013  |
| NM_006307 | 463.941   | 387.104   | NM_004034 | 2412.899  | 1328.957  | NM_014291 | 3049.642  | 3683.324  |
| M74782    | 1571.571  | 2031.43   | AF193756  | 676.081   | 1218.755  | NM_014631 | 524.84    | 443.258   |
| NM_017818 | 1714.637  | 2038.435  | AI492087  | 16560.389 | 8450.739  | NM_001089 | 1965.545  | 1794.39   |
| NM_020433 | 398.933   | 603.622   | NM_004193 | 1588.596  | 1894.5    | NM_000120 | 3956.184  | 3548.09   |
| NM_001767 | 378.395   | 476.397   | NM_002803 | 5952.945  | 6055.494  | AF172327  | 18269.279 | 17799.102 |
| AF028823  | 4291.026  | 4752.667  | NM_005508 | 1231.726  | 1378.469  | NM_001676 | 1548.855  | 2446.257  |
| NM_004295 | 20564.252 | 23037.996 | NM_006788 | 499.269   | 486.655   | AB018338  | 6941.098  | 6645.412  |
| NM_002087 | 4478.777  | 4240.264  | NM_016568 | 697.788   | 702.92    | NM_004923 | 1166.44   | 1325.751  |
| AB023154  | 128.67    | 293.392   | AB033102  | 6325.831  | 4859.629  | NM_003971 | 1808.363  | 1384.856  |
| NM_014585 | 579.976   | 897.269   | NM_014774 | 2584.291  | 2094.532  | AK026973  | 580.548   | 694.918   |
| AF200815  | 791.997   | 934.413   | NM_014143 | 5407.116  | 4041.473  | NM_005822 | 666.964   | 549.559   |
| NM_013441 | 1686.167  | 1476.701  | M55646    | 7500.119  | 5028.473  | U81002    | 2586.666  | 3533.351  |
| NM_014421 | 817.81    | 801.664   | NM_006112 | 18820.789 | 12701.239 | NM_016299 | 4326.911  | 4868.721  |
| NM_006749 | 833.652   | 919.701   | M12807    | 1340.759  | 856.642   | NM_014185 | 3653.365  | 3802.646  |
| NM_005639 | 73.004    | 566.69    | NM_001765 | 1088.437  | 756.683   | L38517    | 2165.428  | 2119.952  |
| NM_004694 | 185.985   | 678.154   | NM_003361 | 1822.315  | 1516.315  | NM_018291 | 3085.365  | 3430.621  |
| NM_000324 | 502.97    | 487.565   | NM_012099 | 1524.419  | 1138.654  | NM_005530 | 2629.923  | 2480.59   |
| AL137619  | 2152.463  | 2341.521  | NM_018684 | 5681.277  | 3745.318  | NM_006899 | 3656.717  | 3605.151  |
| NM_003615 | 311.688   | 227.85    | NM_017983 | 912.991   | 570.341   | NM_012200 | 2137.924  | 1749.736  |
| NM_004300 | 3093.228  | 2707.031  | AF116909  | 1197.313  | 498.288   | NM_001724 | 1483.809  | 952.304   |
| NM_000052 | 285.045   | 199.861   | AF231916  | 1170.022  | 948.936   | NM_006212 | 926.979   | 874.228   |
| AB007859  | 671.545   | 838.008   | NM_003501 | 2768.307  | 2656.456  | AK022872  | 3267.633  | 2607.694  |
| NM_006754 | 402.906   | 397.469   | AK022654  | 32028.121 | 38923.379 | AK024272  | 3337.901  | 3550.915  |
| NM_001127 | 3455.215  | 4578.309  | BC002905  | 4197.086  | 4242.056  | NM_016381 | 1525.433  | 1371.71   |
| NM_012430 | 2107.249  | 2417.103  | NM_018091 | 5407.649  | 5354.351  | AL591715  | 410.805   | 236.777   |
| NM_003917 | 17859.646 | 18521.066 | NM_001108 | 3419.954  | 2864.227  | NM_018042 | 1612.788  | 1375.527  |
| NM_007077 | 1435.73   | 1165.243  | NM_001637 | 617.757   | 452.853   | NM_014944 | 3174.121  | 2955.742  |
| NM_002956 | 1564.051  | 1369.363  | NM_016630 | 7230.588  | 6343.589  | AF200348  | 1025.885  | 972.802   |
| AB018739  | 1020.72   | 844.022   | NM_014291 | 4362.66   | 4052.12   | NM_002650 | 1498.846  | 1890.862  |
| NM_006750 | 12874.952 | 11237.654 | NM_014631 | 527.057   | 340.79    | NM_003260 | 5114.069  | 5521.103  |
| NM_020164 | 2552.455  | 2606.821  | NM_001089 | 3129.882  | 2300.522  | AK024071  | 1506.359  | 1372.633  |
| AK023521  | 2909.117  | 2594.055  | NM_000120 | 3756.444  | 2737.077  | AF056490  | 1015.123  | 1232.262  |
| NM_014267 | 12377.762 | 10940.295 | AF172327  | 19161.461 | 12290.542 | NM_005539 | 2510.233  | 2407.382  |
| AL050187  | 2890.023  | 3094.601  | NM_001676 | 3083.431  | 2513.199  | NM_005541 | 8061.746  | 8733.825  |
| NM_007127 | 533.1     | 379.031   | NM_000220 | 285.883   | 249.885   | AB002319  | 926.444   | 1056.805  |
| NM_012387 | 9292.307  | 9015.347  | NM_001679 | 11038.233 | 6477.409  | AF039942  | 3219.39   | 2364.071  |
| NM_014735 | 1252.475  | 1480.677  | NM_004046 | 63693.121 | 59711.59  | M62403    | 6079.19   | 4896.73   |
| NM_004252 | 12239.397 | 14016.758 | NM_004983 | 506.87    | 330.73    | NM_017883 | 2086.084  | 1576.53   |
| AF172929  | 4445.625  | 4382.979  | NM_006860 | 6038.863  | 6505.298  | AK025131  | 1290.278  | 1245.001  |
| NM_006398 | 9786.047  | 9669.307  | NM_006899 | 3906.7    | 3408.642  | NM_000754 | 12692.562 | 11269.149 |
| AK025655  | 1603.356  | 1664.311  | NM_012200 | 1730.83   | 1591.156  | NM_005629 | 6742.283  | 5592.286  |

|           |           |           |           |           |           |           |           |           |
|-----------|-----------|-----------|-----------|-----------|-----------|-----------|-----------|-----------|
| NM_001362 | 690.694   | 423.71    | NM_001724 | 1109.839  | 880.105   | J04621    | 1730.831  | 1577.309  |
| NM_004056 | 259.722   | 379.483   | NM_000150 | 1041.403  | 817.487   | NM_000718 | 1766.845  | 1511.414  |
| NM_001056 | 1006.287  | 1026.674  | AB023152  | 505.882   | 581.36    | NM_000161 | 3592.077  | 3229.861  |
| AY026461  | 3500.489  | 3922.932  | NM_006212 | 1322.199  | 914.11    | NM_002634 | 7687.3    | 7523.011  |
| AK025708  | 2638.275  | 2502.521  | AK022872  | 3472.404  | 2660.292  | NM_017746 | 1756.952  | 1682.649  |
| NM_000405 | 1224.142  | 1617.635  | AK024272  | 4519.614  | 3954.882  | NM_001972 | 57688.688 | 55770.609 |
| NM_005564 | 48875.102 | 49502.238 | NM_016381 | 1764.196  | 1574.935  | NM_002006 | 9811.308  | 11793.854 |
| NM_004508 | 3353.085  | 3347.454  | NM_018042 | 3216.089  | 2332.976  | NM_007111 | 3835.625  | 5267.525  |
| NM_006405 | 10796.946 | 11421.396 | BE741525  | 958.978   | 698.025   | NM_004702 | 660.205   | 853.669   |
| AJ245946  | 469.24    | 410.206   | BF030555  | 17971.1   | 11640.883 | NM_007109 | 1267.629  | 1683.318  |
| NM_002390 | 1414.675  | 1219.962  | NM_012433 | 6991.826  | 4911.108  | AK023404  | 2066.651  | 2069.174  |
| NM_006142 | 390.857   | 390.536   | NM_005605 | 2259.398  | 1590.572  | NM_013236 | 943.122   | 925.658   |
| NM_014910 | 7918.623  | 8662.428  | NM_002576 | 1115.318  | 1006.82   | NM_001788 | 1556.627  | 1624.802  |
| AK001064  | 3827.55   | 3468.482  | M14200    | 63759.449 | 60417.43  | NM_002655 | 745.973   | 667.033   |
| AB029031  | 5046.219  | 4634.612  | NM_000282 | 4611.591  | 7721.876  | NM_016022 | 13464.545 | 9622.479  |
| NM_001294 | 3961.444  | 3354.571  | NM_004034 | 1902.675  | 2030.365  | NM_004874 | 1433.723  | 1048.922  |
| NM_014241 | 4979.354  | 4412.373  | NM_000130 | 1864.927  | 1612.465  | NM_014204 | 1279.673  | 1234.302  |
| AF302786  | 2698.347  | 2827.181  | AF193756  | 522.447   | 618.542   | S70385    | 15599.087 | 13389.783 |
| AL122083  | 3694.377  | 3459.401  | AI492087  | 18476.107 | 16049.412 | NM_018509 | 8337.395  | 7580.536  |
| NM_005052 | 13865.078 | 13044.99  | R72122    | 1226.861  | 1259.801  | NM_004086 | 586.607   | 662.697   |
| BF038439  | 435.256   | 558.055   | Z35309    | 900.107   | 731.904   | AL050199  | 704.408   | 594.909   |
| AF319476  | 777.53    | 951.071   | AA700005  | 822.429   | 943.507   | NM_001748 | 3262.986  | 2720.175  |
| AK001913  | 3705.941  | 5169.049  | AA292025  | 557.185   | 624.924   | AF176706  | 1863.989  | 2003.723  |
| NM_017737 | 637.89    | 684.787   | AA437226  | 535.864   | 454.603   | NM_014484 | 741.493   | 726.746   |
| NM_004292 | 1609.049  | 1545.688  | R36143    | 489.409   | 514.773   | NM_001086 | 1205.354  | 1251.965  |
| NM_015484 | 4704.136  | 4816.492  | D10353/NM | 3079.965  | 2763.391  | NM_014670 | 1269.295  | 1252.607  |
| NM_018046 | 1796.641  | 2239.007  | M15042    | 2822.15   | 2798.432  | NM_019048 | 4458.099  | 4482.832  |
| NM_013316 | 3164.523  | 3509.863  | AK056843  | 2558.681  | 3496.854  | NM_001040 | 1037.957  | 1187.747  |
| M20701    | 14230.15  | 14854.393 | U49928    | 10248.253 | 12391.123 | AF279698  | 1479.002  | 1714.833  |
| NM_002912 | 2049.966  | 2366.064  | AK096645  | 13756.028 | 17439.752 | NM_019846 | 1335.583  | 1133.283  |
| NM_013284 | 3213.115  | 4785.083  | NM_018291 | 4081.834  | 7340.746  | NM_003372 | 8772.249  | 6739.479  |
| NM_006739 | 2198.389  | 2804.864  | AF116909  | 1353.205  | 1249.748  | NM_007317 | 3036.947  | 3299.222  |
| NM_013274 | 4514.945  | 5242.002  | BE906724  | 1504.947  | 1385.942  | AB037826  | 28796.721 | 26208.125 |
| AL157500  | 583.523   | 524.791   | NM_002283 | 2843.404  | 2968.865  | AK021466  | 1644.678  | 1591.751  |
| AK024955  | 23790.037 | 25283.088 | AJ276095  | 11637.22  | 12715.947 | NM_006443 | 18804.504 | 17791.447 |
| NM_016580 | 1403.939  | 1285.531  | NM_004819 | 3328.238  | 4027.286  | NM_004959 | 1333.172  | 1033.118  |
| AF169693  | 1062.798  | 1010.123  | NM_007184 | 2672.441  | 3585.003  | AK026022  | 18025.057 | 18142.229 |
| L23206    | 4594.121  | 4296.011  | NM_005291 | 11433.426 | 14196.991 | NM_003199 | 1357.09   | 1346.049  |
| NM_012192 | 3217.225  | 2582.33   | NM_005855 | 380.68    | 544.11    | NM_002938 | 2496.354  | 2552.74   |
| NM_006293 | 1077.953  | 1016.015  | NM_002923 | 1379.149  | 1471.561  | AK023652  | 2965.296  | 2983.852  |
| NM_007229 | 3984.859  | 3340.103  | NM_006794 | 1058.274  | 1458.912  | AF099032  | 469.827   | 764.399   |
| AB011105  | 3003.757  | 2809.084  | NM_018653 | 5372.619  | 6528.848  | NM_003070 | 4889.365  | 6184.225  |
| NM_002213 | 923.215   | 810.378   | NM_005388 | 3163.526  | 3954.947  | AL122101  | 977.216   | 1332.246  |
| NM_018970 | 766.593   | 744.736   | NM_007232 | 17968.354 | 20981.434 | NM_004780 | 2388.527  | 2294.435  |
| NM_004814 | 5327.259  | 5351.149  | NM_003027 | 483.1     | 833.851   | NM_016216 | 2371.758  | 2221.413  |
| D86976    | 19476.838 | 19875.926 | NM_002717 | 5206.352  | 5696.028  | AK001649  | 515.143   | 747.346   |
| AF307080  | 2499.618  | 2457.892  | NM_004306 | 41291.242 | 54692.973 | NM_016638 | 8328.77   | 8174.848  |
| NM_004057 | 2900.791  | 3281.088  | NM_001153 | 2438.603  | 3957.203  | AB018274  | 7201.524  | 7256.864  |
| NM_018971 | 502.192   | 588.261   | NM_006860 | 5958.221  | 8675.4    | AF121255  | 2881.146  | 2849.517  |
| K03175    | 833.601   | 867.854   | NM_004794 | 11642.048 | 13523.063 | NM_005494 | 2517.021  | 2260.239  |
| NM_003015 | 794.637   | 787.061   | NM_004283 | 2093.73   | 3094.743  | NM_017946 | 730.962   | 706.693   |
| NM_006496 | 16068.188 | 16611.635 | NM_004163 | 14754.214 | 17061.563 | NM_004953 | 3043.659  | 2854.633  |
| NM_000828 | 585.362   | 641.405   | AK026308  | 1212.354  | 1623.512  | AL049682  | 893.558   | 714.199   |



|           |           |           |           |           |           |           |           |           |
|-----------|-----------|-----------|-----------|-----------|-----------|-----------|-----------|-----------|
| NM_004826 | 1144.039  | 1079.491  | NM_013337 | 1894.091  | 2414.568  | NM_005526 | 3583.272  | 3085.381  |
| NM_013314 | 491.408   | 725.944   | NM_004193 | 2419.094  | 3256.363  | NM_007006 | 18098.955 | 16795.977 |
| NM_002072 | 1466.403  | 1149.098  | NM_002803 | 9511.677  | 13688.796 | AL137346  | 1684.586  | 1518.909  |
| NM_003182 | 609.912   | 531.061   | NM_005508 | 2657.217  | 3393.463  | NM_017756 | 10998.531 | 11898.737 |
| BE904126  | 22890.953 | 26944.277 | NM_006788 | 726.54    | 798.885   | NM_005793 | 3423.872  | 3681.135  |
| AF272380  | 29139.545 | 27037.789 | NM_016568 | 654.87    | 463.837   | NM_004901 | 917.198   | 823.324   |
| NM_004431 | 8795.912  | 8503.732  | AB033102  | 5691.135  | 5186.665  | U77088    | 1351.547  | 1423.301  |
| NM_002012 | 1466.465  | 1602.745  | NM_014774 | 3364.924  | 2825.452  | NM_006721 | 16489.324 | 16168.709 |
| NM_002070 | 39619.668 | 37286.324 | NM_014143 | 5823.755  | 4092.595  | NM_016282 | 1709.819  | 1724.685  |
| AF227969  | 1935.202  | 2217.041  | M55646    | 9715.235  | 7121.06   | NM_002765 | 1907.208  | 2581.168  |
| AF116657  | 882.977   | 807.372   | NM_006112 | 19658.27  | 13938.699 | NM_001905 | 2844.363  | 3601.712  |
| NM_004102 | 701.373   | 594.199   | M12807    | 1940.517  | 3189.534  | AF292100  | 2207.43   | 2088.793  |
| NM_003944 | 34143.254 | 35317.73  | AF169351  | 7167.017  | 6728.531  | NM_003434 | 30956.68  | 32809.094 |
| NM_002893 | 2104.427  | 1911.162  | M14200    | 56066.828 | 47865.199 | AF024698  | 57838.07  | 52485.406 |
| NM_002393 | 6920.125  | 7815.382  | NM_000282 | 2670.926  | 2596.785  | BE904617  | 4572.851  | 4634.147  |
| NM_002669 | 3962.341  | 4298.869  | NM_000532 | 10121.01  | 11236.417 | AF024694  | 2217.998  | 2459.375  |
| AB014600  | 2901.804  | 3211.3    | NM_016341 | 854.993   | 793.267   | AF091081  | 3422.123  | 4177.836  |
| NM_018312 | 1855.89   | 2287.629  | AF231916  | 1241.932  | 1088.618  | AK001758  | 3861.525  | 4069.454  |
| X98259    | 665.044   | 738.668   | NM_003501 | 3701.911  | 3440.511  | AF086325  | 1019.65   | 849.013   |
| U05255    | 480.498   | 640.051   | AK022654  | 37329.359 | 30114.654 | NM_004928 | 671.964   | 486.523   |
| X98260    | 6152.967  | 5546.627  | BC002905  | 5203.83   | 4235.369  | AF147401  | 1877.445  | 1614.625  |
| NM_007217 | 5657.15   | 5329.716  | NM_018091 | 5749.334  | 4884.845  | AF075022  | 870.081   | 815.017   |
| NM_014777 | 6358.361  | 6490.056  | NM_001108 | 3572.899  | 3001.138  | AF075060  | 1754.113  | 1883.898  |
| NM_001102 | 7241.266  | 7465.946  | NM_001637 | 377.011   | 513.061   | AK021441  | 539.158   | 694.681   |
| NM_003803 | 1675.956  | 1716.92   | NM_016630 | 7403.831  | 5584.382  | AK026018  | 824.821   | 836.092   |
| NM_002818 | 46728.91  | 47217.359 | NM_014291 | 4696.977  | 3910.515  | AF085846  | 2607.594  | 2647.901  |
| NM_001937 | 6943.394  | 5848.773  | NM_014631 | 672.204   | 384.013   | AK023901  | 1917.423  | 2463.012  |
| AK024778  | 983.784   | 880.594   | NM_001089 | 2864.541  | 2143.959  | AL109705  | 1123.748  | 1246.899  |
| AK021608  | 2909.607  | 2940.074  | NM_000120 | 4487.659  | 2936.08   | AF088057  | 1216.64   | 1267.027  |
| NM_004297 | 1018.538  | 1175.856  | AF172327  | 18494.656 | 13062.942 | AF088051  | 702.337   | 731.955   |
| NM_006044 | 5068.722  | 5267.425  | NM_001676 | 3043.34   | 2937.4    | AK023883  | 906.143   | 918.637   |
| AK025498  | 1431.294  | 1589.18   | NM_000220 | 1004.498  | 1178.954  | AF086366  | 344.672   | 661.03    |
| NM_001395 | 9447.484  | 10861.778 | NM_004519 | 1022.305  | 1155.029  | AF086360  | 2501.677  | 4163.198  |
| NM_002068 | 5336.096  | 5743.467  | NM_019884 | 2784.019  | 2557.618  | AF087993  | 1644.942  | 1851.732  |
| NM_019854 | 274.538   | 356.16    | NM_018291 | 2832.25   | 3100.19   | AF035282  | 807.541   | 953.491   |
| NM_013338 | 3116.428  | 2922.555  | NM_005530 | 2284.02   | 2110.645  | AK021966  | 3814.934  | 3465.674  |
| NM_014671 | 6139.234  | 6211.737  | NM_006899 | 3643.271  | 3586.112  | AB018292  | 3317.056  | 3309.21   |
| NM_018439 | 1316.722  | 1236.581  | NM_012200 | 2003.609  | 2021.226  | AF075032  | 2143.038  | 2320.574  |
| NM_005656 | 1010.185  | 1117.462  | NM_001724 | 1361.674  | 1063.875  | AF085971  | 838.255   | 668.77    |
| NM_006012 | 4884.213  | 6840.011  | NM_000150 | 1615.85   | 1334.054  | AF147302  | 777.489   | 835.339   |
| NM_002151 | 1792.862  | 2489.635  | AB023152  | 767.898   | 782.892   | AF085929  | 1301.263  | 1639.385  |
| NM_014889 | 1210.032  | 1393.653  | NM_006212 | 1489.963  | 1093      | AK001126  | 986.028   | 1117.537  |
| AF173935  | 683.057   | 848.761   | AK022872  | 3152.318  | 2490.874  | AF085976  | 1778      | 2397.468  |
| AK025322  | 8429.067  | 9135.6    | AK024272  | 3446.717  | 3069.159  | AF075104  | 3670.217  | 4716.175  |
| NM_017887 | 3942.386  | 3951.372  | NM_016381 | 1668.636  | 1512.501  | AL133025  | 409.2     | 448.288   |
| NM_017650 | 442.905   | 351.404   | AL591715  | 358.735   | 419.685   | AL137402  | 7898.695  | 10086.153 |
| NM_000526 | 1387.275  | 1654.124  | NM_018042 | 3462.762  | 2642.765  | AL137617  | 843.976   | 1157.787  |
| AF007152  | 1886.301  | 2129.27   | BE741525  | 1148.791  | 1351.081  | AL359568  | 14284.916 | 18259.09  |
| NM_017575 | 528.762   | 662.456   | BF030555  | 26243.85  | 35551.949 | AL133564  | 1529.812  | 1743.455  |
| AL122100  | 757.122   | 748.38    | NM_012433 | 8332.506  | 11452.201 | AL137428  | 705.82    | 1110.615  |
| NM_005310 | 1577.168  | 1406.716  | NM_005605 | 2691.648  | 4624.973  | AL157462  | 1258.218  | 1297.602  |
| NM_014423 | 6054.196  | 5972.895  | NM_002576 | 1422.996  | 2140.478  | NM_018190 | 21033.133 | 39343.656 |
| NM_018083 | 1420.018  | 1661.711  | NM_003582 | 2409.246  | 2654.458  | AF086054  | 1297.833  | 1852.04   |

|           |           |           |           |           |           |           |           |           |
|-----------|-----------|-----------|-----------|-----------|-----------|-----------|-----------|-----------|
| AL110188  | 10299.102 | 13949.828 | U52051    | 443.57    | 381.148   | AK022259  | 41284.043 | 47389.691 |
| D70834    | 22867.373 | 26729.463 | NM_020179 | 2234.025  | 2249.807  | AK022461  | 930.806   | 846.305   |
| NM_000970 | 58059.957 | 57961.824 | NM_004306 | 21997.691 | 19877.389 | NM_016010 | 1876.68   | 2046.86   |
| NM_033288 | 971.072   | 1032.932  | NM_001153 | 454.053   | 563.715   | AF070647  | 13300.511 | 13167.171 |
| AK000102  | 1037.507  | 1068.44   | NM_006786 | 1324.016  | 1282.903  | AF174394  | 2304.485  | 2726.693  |
| AB040916  | 1862.875  | 1518.831  | NM_006205 | 952.053   | 1028.605  | AF083121  | 492.78    | 751.485   |
| NM_005587 | 1386.36   | 1318.325  | NM_004034 | 2239.664  | 2057.031  | AF144054  | 589.339   | 878.623   |
| AF038362  | 2604.851  | 2197.665  | NM_000130 | 2055.674  | 1720.192  | AK021876  | 3406.825  | 4845.385  |
| NM_005195 | 21937.813 | 22005.84  | AF193756  | 885.912   | 673.107   | AK022017  | 814.932   | 1148.188  |
| NM_005481 | 867.069   | 979.914   | AI492087  | 18767.162 | 15519.395 | AK022160  | 1423.825  | 1444.155  |
| NM_004715 | 4645.19   | 4822.474  | R72122    | 1518.33   | 1440.602  | AK021935  | 921.445   | 983.793   |
| L40392    | 2139.667  | 1829.048  | Z35309    | 821.143   | 833.853   | AK022187  | 1443.32   | 2052.628  |
| BF541482  | 518.81    | 360.91    | AA700005  | 1012.367  | 1057.835  | AK022337  | 898.017   | 961.668   |
| NM_001007 | 68032.047 | 66610.961 | AA292025  | 578.556   | 635.953   | AK026847  | 599.63    | 698.368   |
| NM_003017 | 6080.726  | 5657.944  | AA437226  | 511.414   | 452.434   | AK023048  | 832.943   | 684.054   |
| NM_020366 | 2877.005  | 2928.066  | R36143    | 417.082   | 458.962   | AK026891  | 1311.293  | 1505.209  |
| AF086497  | 466.102   | 342.514   | D10353/NM | 2646.623  | 2499.265  | AK025573  | 771.907   | 696.291   |
| NM_020141 | 3220.459  | 3002.693  | M15042    | 2424.5    | 1846.249  | AL137562  | 2716.121  | 2689.716  |
| NM_006482 | 560.091   | 618.613   | AK056843  | 1713.439  | 2240.123  | M90355    | 62439.203 | 54749.641 |
| NM_003779 | 798.477   | 853.821   | U49928    | 6696.104  | 7188.512  | AK022495  | 1363.382  | 1592.669  |
| NM_003635 | 1032.733  | 886.12    | AK096645  | 10115.708 | 10034.579 | AK026373  | 10281.532 | 10635.267 |
| NM_000662 | 1746.952  | 1684.082  | AK092859  | 650.169   | 572.512   | AK021581  | 1183.381  | 1610.727  |
| NM_000292 | 1497.009  | 1361.451  | M12807    | 1104.356  | 1035.756  | AK021744  | 823.519   | 820.856   |
| NM_003689 | 50188.559 | 48916.5   | NM_001765 | 884.347   | 898.22    | NM_018430 | 2561.517  | 2565.91   |
| NM_016173 | 978.519   | 1191.331  | NM_003361 | 1710.575  | 1938.615  | AL110200  | 948.815   | 653.808   |
| NM_002875 | 3245.562  | 4297.575  | NM_012099 | 1200.185  | 1346.502  | AL133640  | 1795.521  | 1628.356  |
| NM_004427 | 5799.724  | 5655.772  | NM_018684 | 5294.424  | 4713.047  | AJ012502  | 8360.325  | 7227.125  |
| U90549    | 3668.354  | 3608.771  | NM_017983 | 735.992   | 787.533   | AK021722  | 1980.492  | 1772.101  |
| NM_013240 | 6811.303  | 6116.781  | AF116909  | 1059.606  | 1123.719  | AF147445  | 1098.879  | 1163.872  |
| NM_015874 | 20256.686 | 15748.359 | BE906724  | 1353.826  | 1311.34   | Y10508    | 7893.252  | 7445.203  |
| NM_004965 | 47774.484 | 49887.211 | NM_002283 | 3136.188  | 2702.304  | NM_005182 | 30610.225 | 30937.924 |
| AF312393  | 42769.137 | 52349.488 | AJ276095  | 12070.271 | 11890.589 | D17074    | 937.966   | 1022.447  |
| AF272898  | 7407.691  | 8346.453  | NM_004819 | 3539.965  | 3069.617  | AF039944  | 10503.613 | 10507.689 |
| AB037817  | 541.079   | 540.584   | NM_007184 | 2569.943  | 2644.145  | AJ276252  | 385.299   | 612.489   |
| AB032951  | 6426.044  | 5928.479  | NM_005291 | 9412.319  | 7720.383  | AK021716  | 4298.964  | 6836.693  |
| NM_003417 | 919.719   | 1016.9    | NM_002923 | 1492.989  | 2307.333  | AK025035  | 7628.163  | 11587.779 |
| NM_005149 | 6658.497  | 5998.545  | NM_006794 | 783.93    | 1119.336  | AK002085  | 3627.415  | 4962.914  |
| AK024073  | 644.361   | 687.099   | NM_018653 | 3390.877  | 2672.281  | AF086200  | 217.977   | 846.665   |
| AK022223  | 416.329   | 464.378   | NM_005388 | 2344.807  | 1939.049  | AL133618  | 2593.576  | 3248.156  |
| NM_005887 | 3757.672  | 3373.837  | NM_007232 | 15427.079 | 23255.861 | AJ131610  | 3051.444  | 2962.744  |
| AK024921  | 470.252   | 389.711   | NM_003027 | 500.742   | 641.71    | AF119872  | 5542.073  | 4938.894  |
| AL110232  | 517.335   | 421.753   | NM_002717 | 2941.535  | 2312.862  | AK023255  | 22821.023 | 20391.795 |
| AK026103  | 2368.53   | 2384.554  | NM_003025 | 6474.027  | 5622.915  | NM_002622 | 21733.609 | 18868.127 |
| NM_016353 | 14568.07  | 14099.518 | NM_001679 | 8636.94   | 7649.927  | AK024185  | 828.372   | 902.122   |
| AK022567  | 1957.476  | 1747.885  | NM_004046 | 60472.988 | 58799.887 | AK026101  | 4208.501  | 3827.309  |
| S77357    | 572.266   | 600.08    | NM_004983 | 412.012   | 358.01    | AK022194  | 9195.289  | 7394.147  |
| AK023450  | 981.612   | 1127.556  | NM_006860 | 4065.397  | 3312.618  | AF085963  | 1198.615  | 1064.95   |
| AL080280  | 5673.651  | 6136.075  | NM_004794 | 8601.546  | 8342.852  | AK021436  | 588.318   | 594.603   |
| AB028947  | 2925.712  | 3049.65   | NM_004283 | 1532.815  | 1654.436  | AL137569  | 1145.439  | 1428.663  |
| AF035314  | 1166.891  | 1064.36   | NM_004163 | 15025.617 | 14763.565 | AK021920  | 2671.481  | 2864.132  |
| NM_018036 | 1148.837  | 1162.25   | AK026308  | 1156.016  | 1128.918  | AL049415  | 897.108   | 1235.317  |
| AF052087  | 1045.465  | 1026.085  | NM_013337 | 1417.161  | 1159.263  | AK022375  | 714.262   | 1059.606  |
| AF007143  | 2031.47   | 2062.387  | NM_004193 | 1504.825  | 1718.368  | NM_003378 | 30845.807 | 44509.688 |

|           |           |           |           |           |           |           |           |           |
|-----------|-----------|-----------|-----------|-----------|-----------|-----------|-----------|-----------|
| AF147417  | 648.005   | 836.2     | NM_002803 | 6513.756  | 7361.104  | AL110194  | 7637.631  | 10248.84  |
| AK023656  | 936.931   | 1034.226  | NM_005508 | 1475.472  | 1581.641  | NM_014106 | 712.968   | 895.477   |
| AF086511  | 3783.827  | 4093.684  | NM_006788 | 578.945   | 460.23    | NM_006687 | 722.502   | 875.97    |
| AK022989  | 3601.113  | 3745.209  | NM_016568 | 544.261   | 408.431   | NM_013301 | 1148.466  | 903.758   |
| AK001604  | 4835.507  | 4304.248  | AB033102  | 7557.76   | 8617.297  | NM_017673 | 1502.712  | 1313.718  |
| AK021619  | 496.951   | 435.99    | NM_014774 | 3121.427  | 2914.587  | AK024408  | 4069.429  | 3229.611  |
| AK022347  | 364.523   | 299.986   | NM_014143 | 5926.335  | 5989.686  | AF086307  | 7537.117  | 6581.762  |
| AK025872  | 638.7     | 492.512   | M55646    | 9051.872  | 7955.942  | L19364    | 1415.257  | 1270.818  |
| AF131762  | 12232.043 | 12295.922 | NM_006112 | 19979.367 | 17284.564 | NM_00539C | 1338.005  | 1132.251  |
| AY007089  | 5174.113  | 5721.752  | BE741525  | 773.969   | 909.544   | CY3Cy5    | 3958.914  | 196.336   |
| AK021816  | 8659.36   | 9513.31   | BF030555  | 17026.697 | 15079.318 | BI906283  | 746.089   | 2713.354  |
| AK024018  | 280.47    | 331.095   | NM_012433 | 5740.677  | 4742.405  | L07738    | 388.695   | 296.306   |
| D43770    | 5914.124  | 5821.422  | NM_005605 | 1806.684  | 1514.839  | Z48054    | 492.831   | 453.315   |
| AF085960  | 489.999   | 561.052   | NM_002576 | 1263.318  | 1607.127  | H90415    | 974.193   | 643.899   |
| AK021519  | 1127.44   | 1357.72   | NM_003582 | 1541.771  | 1421.852  | AA676470  | 4263.553  | 2821.983  |
| NM_014254 | 2117.695  | 2429.633  | AF057354  | 371.664   | 396.553   | AA457155  | 1975.527  | 1835.162  |
| AF086036  | 544.675   | 600.006   | AF169351  | 8172.288  | 8623.07   | BM014365  | 891.539   | 1180.746  |
| AF086010  | 416.133   | 356.546   | M14200    | 58755.797 | 49926.539 | U78045    | 768.592   | 390.003   |
| U09197    | 1701.239  | 1513.398  | NM_000282 | 3562.785  | 4658.831  | AA878561  | 59038.746 | 58490.133 |
| U50529    | 563.922   | 618.756   | NM_000532 | 11698.585 | 12349.536 | AI538525  | 2820.166  | 1568.323  |
| U66050    | 411.238   | 485.543   | NM_016341 | 969.987   | 1144.079  | NM_000941 | 1224.377  | 723.225   |
| Z36800    | 607.665   | 629.397   | AF231916  | 1730.311  | 1555.232  | SR1       | 60828.266 | 60418.02  |
| U15553    | 4390.027  | 4042.169  | NM_003501 | 3751.922  | 3413.251  | SR3       | 31421.102 | 20023.068 |
| U52831    | 386.861   | 399.354   | AK022654  | 35415.078 | 29910.777 | SR5       | 2558.163  | 1857.842  |
| Z36829    | 1068.99   | 971.776   | BC002905  | 4863.883  | 4509.97   | SR7       | 4102.204  | 25782.02  |
| AK024734  | 3005.233  | 2770.162  | NM_018091 | 5896.844  | 5011.814  | SR9       | 12005.548 | 1655.8    |
| NM_017741 | 891.136   | 797.646   | NM_001108 | 3341.363  | 2701.434  | CY3Cy5    | 2417.682  | 91.83     |
| AK000144  | 1002.141  | 851.201   | NM_001637 | 326.832   | 663.424   | U62858    | 2352.145  | 4312.302  |
| AK022275  | 565.855   | 509.561   | NM_016630 | 7811.894  | 7266.996  | NM_014432 | 1352.189  | 1326.787  |
| AK000942  | 479.779   | 456.239   | NM_014291 | 4354.602  | 4686.395  | NM_001558 | 408.77    | 388.91    |
| NM_016348 | 331.735   | 429.208   | NM_014631 | 765.925   | 561.718   | NM_006953 | 1049.581  | 758.773   |
| AL117533  | 2105.026  | 2104.103  | NM_001089 | 3537.563  | 3237.17   | U96173    | 1159.612  | 781.163   |
| AK026036  | 978.839   | 689.62    | NM_000120 | 4892.379  | 4344.78   | NM_018941 | 764.542   | 553.554   |
| AK023422  | 1676.859  | 2172.351  | AF172327  | 20860.096 | 20459.604 | NM_001980 | 268.648   | 215.636   |
| AK022796  | 1672.759  | 1683.273  | NM_001676 | 3140.386  | 3166.524  | NM_005954 | 1220.994  | 1001.51   |
| AK095193  | 1561.209  | 1418.315  | AB018338  | 10185.777 | 10466.203 | NM_012471 | 2495.484  | 1978.973  |
| AK025081  | 966.572   | 1168.146  | NM_004923 | 1391.72   | 1460.26   | NM_001321 | 1073.046  | 923.719   |
| AL122088  | 1648.143  | 1573.856  | NM_003971 | 1802.306  | 1296.33   | AB018264  | 1335.476  | 827.877   |
| AF119912  | 752.367   | 434.976   | AK026973  | 592.437   | 802.416   | U92544    | 793.951   | 535.259   |
| AL137518  | 1367.563  | 1302.934  | NM_005822 | 505.394   | 461.066   | NM_006791 | 1717.743  | 1236.242  |
| AK022556  | 389.238   | 344.336   | U81002    | 2957.747  | 2794.16   | AJ278348  | 6017.208  | 4363.583  |
| AK023437  | 1666.156  | 1944.072  | NM_016299 | 5133.323  | 5174.547  | AK023106  | 986.83    | 1227.457  |
| AK024147  | 651.405   | 730.515   | NM_014185 | 4080.006  | 4669.609  | NM_016730 | 7629.526  | 9695.873  |
| AK022897  | 1262.793  | 1488.882  | L38517    | 3236.543  | 6137.017  | AL035297  | 1048.197  | 1065.955  |
| AK023556  | 201.092   | 489.141   | NM_018291 | 3971.758  | 3892.394  | NM_004408 | 1968.779  | 1883.024  |
| AK023898  | 6680.751  | 7275.938  | NM_005530 | 2913.44   | 2524.565  | AJ131244  | 876.321   | 1332.026  |
| NM_019040 | 6482.059  | 7169.828  | NM_006899 | 4307.283  | 4042.667  | NM_002532 | 4253.959  | 4596.813  |
| NM_005978 | 1311.456  | 1284.696  | NM_012200 | 1548.687  | 2347.765  | NM_012388 | 1972.031  | 1532.99   |
| Y16711    | 930.38    | 808.546   | NM_001724 | 1287.395  | 1098.201  | NM_019843 | 2346.458  | 1983.255  |
| AJ272179  | 3957.611  | 3775.222  | NM_000150 | 1356.457  | 1380.613  | NM_016192 | 2545.723  | 1862.686  |
| AJ007015  | 1004.436  | 840.833   | AB023152  | 802.697   | 656.963   | BE878426  | 51615.668 | 47157.289 |
| AL049317  | 1382.406  | 1369.003  | NM_006212 | 1161.454  | 1189.891  | NM_001745 | 6521.277  | 4347.646  |
| AL050090  | 1304.92   | 1279.48   | NM_016381 | 1647.332  | 2213.713  | NM_003825 | 4925.4    | 4360.221  |

|           |           |           |           |           |           |           |           |           |
|-----------|-----------|-----------|-----------|-----------|-----------|-----------|-----------|-----------|
| AF086309  | 1328.77   | 1112.317  | NM_018042 | 4263.577  | 4440.405  | AK025006  | 12842.69  | 7922.771  |
| AF238870  | 1344.862  | 1237.263  | NM_014944 | 4055.945  | 4235.993  | AF218014  | 2450.587  | 1822.242  |
| AK026279  | 4081.819  | 3574.288  | AF200348  | 1369.106  | 1189.771  | NM_00667E | 1262.328  | 722.804   |
| AF130094  | 12184.081 | 10760.539 | NM_002650 | 1916.961  | 1925.363  | AY007729  | 6715.981  | 5054.881  |
| AK026673  | 1748.386  | 1440.509  | NM_003260 | 7253.115  | 7538.216  | BC007318  | 1464.317  | 841.694   |
| NM_005452 | 4234.054  | 3955.735  | AK024071  | 1722.896  | 1337.547  | M36693    | 1131.706  | 679.439   |
| AF170935  | 15964.523 | 16066.647 | AF056490  | 1020.389  | 1355.283  | NM_016292 | 5602.07   | 4179.733  |
| AK025218  | 740.243   | 624.193   | NM_005539 | 2811.479  | 3077.019  | NM_002601 | 2140.839  | 1350.225  |
| AJ227899  | 1469.316  | 1594.476  | NM_005541 | 8478.64   | 8753.939  | NM_00589E | 8908.256  | 10148.962 |
| AL359607  | 1126.338  | 1214.337  | AB002319  | 1375.583  | 1367.475  | NM_00288E | 10041.282 | 12570.088 |
| AF161371  | 9116.285  | 7735.438  | AF039942  | 3134.435  | 2705.677  | AF078866  | 1864.476  | 1870.627  |
| AK022464  | 1704.094  | 1658.539  | NM_004421 | 1506.064  | 1478.105  | BF311880  | 777.499   | 1086.643  |
| AF086230  | 1652.759  | 1745.108  | NM_018654 | 790.247   | 594.072   | NM_01607E | 603.687   | 586.821   |
| AK023408  | 2553.827  | 2899.805  | AB046863  | 5287.201  | 4833.681  | NM_001360 | 9980.793  | 7365.394  |
| U84509    | 2464.743  | 2513.859  | M62403    | 6602.486  | 6249.861  | AK026656  | 1498.909  | 1294.757  |
| AK002036  | 6025.88   | 5523.661  | NM_000754 | 18355.66  | 18261.957 | AJ276207  | 4724.204  | 3823.95   |
| U84512    | 548.478   | 469.893   | NM_014619 | 1001.521  | 1153.013  | AB011131  | 4895.874  | 3513.921  |
| AK025775  | 5493.365  | 4576.64   | NM_005629 | 10925.37  | 12340.328 | NM_000751 | 1477.649  | 1296.435  |
| AB046791  | 1014.576  | 1112.61   | J04621    | 2543.118  | 4434.325  | NM_001042 | 3417.425  | 2775.421  |
| AF043469  | 1266.973  | 1388.382  | NM_00071E | 2030.481  | 2259.303  | NM_01222E | 3220.995  | 2538.117  |
| AL109671  | 1117.65   | 1352.44   | NM_000161 | 4752.982  | 4938.118  | AB023147  | 11200.113 | 7167.29   |
| NM_01237E | 427.242   | 361.399   | NM_002634 | 8692.921  | 8694.961  | NM_01661E | 4002.971  | 3211.403  |
| AK022008  | 4561.767  | 4052.852  | NM_017749 | 1943.57   | 1918.368  | NM_005630 | 1331.769  | 1079.46   |
| NM_01818E | 1967.788  | 2522.085  | NM_001972 | 56088.086 | 58753.715 | NM_012201 | 1503.196  | 1798.714  |
| AJ132194  | 273.069   | 361.681   | NM_004702 | 510.534   | 657.094   | AK022385  | 9431.875  | 10539.388 |
| AL080188  | 3643.359  | 3336.081  | NM_007109 | 1235.89   | 1631.875  | NM_00277E | 1223.362  | 1850.204  |
| T99941    | 9700.542  | 9442.681  | AK023404  | 2831.454  | 2616.825  | AK024584  | 2198.878  | 1766.549  |
| AF113678  | 2082.312  | 2085.766  | NM_013239 | 603.863   | 349.673   | NM_003504 | 4615.155  | 4967.198  |
| AL137313  | 56532.078 | 53978.164 | NM_001789 | 1376.23   | 1537.916  | NM_01329E | 3127.797  | 2539.854  |
| Z83951    | 487.431   | 289.779   | NM_016004 | 3430.338  | 3373.635  | NM_007267 | 2171.837  | 1690.374  |
| AL833529  | 404.908   | 318.836   | NM_00265E | 578.997   | 497.313   | Z36816    | 864.407   | 711.848   |
| AB002363  | 6498.818  | 6217.698  | AB028955  | 6891.245  | 6410.771  | NM_00586E | 1343.649  | 1117.662  |
| NM_005284 | 3130.982  | 3286.292  | U66879    | 5177.465  | 5549.487  | NM_006413 | 3863.489  | 2771.925  |
| AF086351  | 2759.833  | 2445.057  | NM_014204 | 1269.009  | 1525.035  | NM_017684 | 447.762   | 315.353   |
| D83199    | 22356.232 | 24978.4   | S70385    | 20028.396 | 33454.211 | AK025542  | 529.958   | 453.279   |
| AK025957  | 612.253   | 698.547   | NM_018509 | 8935.872  | 9308.48   | AF207547  | 273.717   | 201.553   |
| Y16708    | 1462.104  | 1534.963  | NM_00408E | 921.124   | 941.425   | NM_00276E | 1777.214  | 1595.81   |
| AL157453  | 3407.785  | 3195.779  | AL050199  | 648.078   | 694.235   | NM_003691 | 1743.451  | 1302.718  |
| NM_01909E | 4260.824  | 4254.248  | NM_00174E | 3975.649  | 3419.118  | NM_002950 | 16955.023 | 13133.396 |
| AK022212  | 37998.383 | 36151.539 | NM_001109 | 425.426   | 566.045   | NM_00231E | 760.391   | 799.621   |
| X64974    | 1954.745  | 2379.275  | AF176706  | 2261.26   | 3783.076  | AK022278  | 13.896    | 1986.147  |
| NM_000834 | 3845.802  | 4570.864  | NM_014484 | 768.787   | 667.162   | NM_003134 | 47007.902 | 32769.105 |
| NM_00648E | 39378.789 | 40587.254 | NM_00108E | 1136.497  | 1433.589  | NM_004314 | 2017.5    | 1885.413  |
| NM_01245E | 1278.484  | 1268.896  | NM_014670 | 2590.559  | 3785.263  | NM_018247 | 4625.207  | 4386.875  |
| NM_012360 | 610.076   | 470.578   | NM_01904E | 4971.81   | 4593.406  | NM_01797E | 2745.409  | 2036.021  |
| AL137268  | 3696.167  | 3097.225  | NM_001040 | 1413.566  | 1251.18   | NM_006791 | 1777.187  | 2438.957  |
| AK001130  | 537.756   | 416.465   | AF279698  | 2187.332  | 2173.44   | AJ278348  | 5851.432  | 6579.929  |
| AK022398  | 981.613   | 893.158   | NM_019849 | 1997.417  | 1847.683  | Z48054    | 465.817   | 322.932   |
| AK024109  | 2844.67   | 2623.159  | NM_000049 | 566.866   | 505.175   | H90415    | 993.76    | 681.096   |
| AF088048  | 639.41    | 738.536   | AB032996  | 27059.49  | 23465.346 | AA676470  | 4079.39   | 3214.916  |
| AK001143  | 3100.266  | 2825.837  | AB040881  | 2153.183  | 1999.052  | AA457155  | 1360.054  | 1025.515  |
| AK001701  | 4000.818  | 3368.655  | AY007121  | 1142.484  | 1211.029  | BM014365  | 286.201   | 310.157   |
| AK022205  | 521.864   | 477.588   | NM_003372 | 7032.141  | 6964.576  | U78045    | 816.669   | 504.568   |

|            |           |           |           |           |           |           |           |           |
|------------|-----------|-----------|-----------|-----------|-----------|-----------|-----------|-----------|
| AB007978   | 527.649   | 605.003   | NM_007317 | 3554.533  | 5533.183  | AA878561  | 59396.719 | 58880.605 |
| AF217970   | 1153.926  | 950.411   | AB037826  | 29419.766 | 28026.754 | AI538525  | 2084.197  | 1304.533  |
| AF086297   | 1456.118  | 1240.275  | AK021466  | 1427.111  | 1178.36   | NM_000941 | 1345.643  | 1187.329  |
| AK025455   | 1986.091  | 1646.377  | Z36796    | 61785.664 | 64364.289 | AF222980  | 1837.735  | 1639.887  |
| AK026799   | 13835.599 | 10579.611 | NM_006443 | 20757.582 | 19051.893 | AF159092  | 305.644   | 681.809   |
| NM_01486C  | 594.216   | 703.899   | NM_004959 | 561.321   | 847.791   | BC007318  | 1214.051  | 1581.02   |
| AK022549   | 1154.147  | 1238.622  | AK026022  | 18754.918 | 18264.402 | M36693    | 906.301   | 1238.598  |
| NM_018157  | 795.516   | 940.745   | NM_003199 | 1905.772  | 2189.624  | NM_016292 | 5357.078  | 6122.373  |
| Z70714     | 4337.317  | 4053.365  | NM_002938 | 3403.866  | 4052.491  | NM_002601 | 1688.985  | 2074.971  |
| AK021640   | 9907.244  | 9483.648  | AK023652  | 3786.226  | 4078.87   | U62858    | 2364.5    | 2322.86   |
| NM_01656E  | 53393.625 | 51157.887 | AF099032  | 676.268   | 767.521   | NM_014432 | 1320.367  | 849.059   |
| CY3Cy5     | 1667.43   | 118.76    | NM_00307C | 5278.445  | 5298.447  | NM_00155E | 400.035   | 278.983   |
| BF310427   | 1862.357  | 1753.447  | AL122101  | 1441.059  | 1125.417  | NM_006953 | 915.885   | 951.569   |
| N94424     | 925.825   | 791.039   | NM_00478C | 2173.164  | 2211.948  | U96173    | 1278.446  | 857.999   |
| AA045192   | 1554.106  | 1887.064  | NM_016216 | 2721.715  | 2462.271  | NM_018941 | 518.128   | 285.892   |
| AI521645   | 279.487   | 308.034   | AK001649  | 775.062   | 670.351   | NM_00198C | 970.364   | 672.021   |
| M92642     | 1427.854  | 1244.805  | NM_01663E | 9138.727  | 8199.316  | NM_005954 | 576.431   | 409.237   |
| H-U 44385  | 11802.259 | 11005.806 | AB018274  | 9299.17   | 8621.269  | NM_001321 | 1219.97   | 763.379   |
| ID 1654970 | 5685.985  | 5335.662  | NM_005871 | 5045.269  | 3160.916  | AB018264  | 1275.228  | 1197.301  |
| ID 2531132 | 4512.963  | 4337.45   | NM_007042 | 1572.131  | 1465.799  | NM_006911 | 461.757   | 440.778   |
| AA485665   | 656.224   | 751.238   | NM_016333 | 6285.051  | 3967.936  | U92544    | 770.665   | 680.701   |
| BF125928   | 13874.537 | 24740.324 | BE875028  | 1819.348  | 1827.18   | NM_01222E | 3326.766  | 5322.334  |
| BG571026   | 1462.452  | 1639.084  | AK000511  | 2112.583  | 2336.44   | NM_005071 | 278.432   | 458.067   |
| AA489017   | 3062.466  | 2808.466  | AF121255  | 2734.911  | 2583.497  | AB023147  | 10816.39  | 11608.195 |
| NM_01224E  | 15687.718 | 15135.197 | NM_005494 | 2384.004  | 2230.501  | NM_01661E | 3461.234  | 4118.229  |
| NM_133263  | 1507.545  | 1294.003  | NM_01794E | 843.737   | 757.77    | NM_00563C | 850.284   | 1292.434  |
| SR2        | 53123.223 | 39977.551 | NM_004953 | 1941.701  | 1793.324  | AK023106  | 920.291   | 1004.37   |
| SR4        | 12842.36  | 9897.182  | NM_012199 | 1181.934  | 1425.746  | NM_01673C | 6258.868  | 5724.451  |
| SR6        | 1867.813  | 1421.107  | AL049682  | 836.303   | 959.309   | AL035297  | 854.961   | 843.698   |
| SR8        | 7885.848  | 26726.59  | NM_00552E | 4099.242  | 4806.817  | NM_00440E | 1809.737  | 1072.511  |
| SR10       | 24367.668 | 6698.173  | AK022842  | 609.856   | 774.899   | AJ131244  | 1129.105  | 871.859   |
| CY3Cy5     | 876.737   | 94.624    | NM_00700E | 20162.107 | 17836.607 | NM_002532 | 3943.679  | 3605.912  |
| NM_01745C  | 1956.141  | 1613.453  | AL137346  | 2069.212  | 2156.038  | NM_01238E | 1863.834  | 2545.379  |
| NM_002023  | 633.845   | 543.351   | NM_01775E | 18697.391 | 25538.945 | NM_019843 | 1723.418  | 1502.049  |
| NM_00283E  | 774.912   | 861.073   | NM_005793 | 4204.578  | 4924.657  | NM_016192 | 2346.412  | 1898.634  |
| AF190500   | 898.391   | 1239.28   | NM_004901 | 747.956   | 1047.808  | BE878426  | 51921.316 | 41238.863 |
| NM_005904  | 837.866   | 650.038   | U77088    | 1388.921  | 1434.022  | NM_00174E | 6802.725  | 4831.182  |
| NM_005273  | 12909.391 | 11988.104 | NM_006721 | 14857.25  | 11594.983 | NM_00382E | 5091.429  | 4740.294  |
| NM_000524  | 468.448   | 489.661   | NM_016282 | 2492.351  | 2581.203  | AK025006  | 13400.102 | 9833.104  |
| NM_00657E  | 1679.041  | 2010.003  | NM_00276E | 1927.027  | 1803.16   | AF218014  | 2626.547  | 2249.994  |
| NM_01864E  | 632.902   | 680.184   | NM_00190E | 4176.985  | 4855.937  | NM_00667E | 1303.755  | 1141.94   |
| AB035266   | 4079.411  | 4351.161  | AF292100  | 2435.23   | 2304.638  | AY007729  | 9236.402  | 7101.941  |
| NM_003744  | 2204.077  | 2499.576  | NM_003434 | 34526.801 | 30307.475 | NM_001433 | 546.455   | 687.241   |
| NM_00637E  | 1581.953  | 1930.493  | NM_005654 | 699.813   | 584.858   | NM_003134 | 41905.551 | 49822.418 |
| NM_018132  | 2785.223  | 3054.424  | AF024698  | 61615.672 | 54090.676 | NM_004314 | 2284.472  | 3840.254  |
| NM_003061  | 71.735    | 1900.995  | AK024495  | 717.151   | 581.827   | NM_018247 | 4690.27   | 7024.757  |
| NM_018207  | 1054.097  | 676.632   | AF024694  | 2751.607  | 2588.467  | NM_01797E | 2767.731  | 3274.661  |
| NM_00034E  | 14824.215 | 15557.698 | AF091081  | 4479.473  | 4003.611  | NM_00589E | 9347.408  | 8965.879  |
| NM_006531  | 1838.116  | 1766.443  | AK001758  | 3986.62   | 3273.872  | NM_00288E | 8558.927  | 7592.724  |
| AB029021   | 9456.604  | 8097.784  | AF086325  | 988.823   | 1181.185  | AF078866  | 1555.385  | 1332.946  |
| NM_002101  | 19018.826 | 16173.577 | NM_00492E | 1037.413  | 1199.543  | BF311880  | 890.996   | 646.478   |
| NM_005423  | 488.07    | 431.781   | AF147401  | 1505.488  | 1177.526  | NM_01607E | 478.911   | 415.312   |
| Z36789     | 994.091   | 816.823   | AF075022  | 1196.776  | 1131.407  | NM_00136C | 9650.204  | 6614.573  |

|           |           |           |           |           |           |           |           |           |
|-----------|-----------|-----------|-----------|-----------|-----------|-----------|-----------|-----------|
| J02874    | 4629.465  | 7437.734  | AF075060  | 1781.083  | 1642.811  | AK026656  | 1558.538  | 1182.113  |
| AF070525  | 5043.494  | 4598.655  | AK021441  | 810.839   | 973.273   | AJ276207  | 4924.811  | 4121.665  |
| NM_001177 | 4436.037  | 3639.673  | AK026018  | 1147.232  | 1158.686  | AB011131  | 5746.478  | 4167.699  |
| NM_014447 | 1133.584  | 1210.734  | AF085846  | 3314.996  | 3463.256  | NM_000751 | 2377.592  | 1924.634  |
| NM_002356 | 532.658   | 500.017   | AK023901  | 4459.892  | 3785.524  | NM_014846 | 1318.722  | 1391.626  |
| NM_006691 | 958.062   | 1026.709  | AL109705  | 781.164   | 954.06    | NM_001042 | 4415.188  | 3780.851  |
| NM_001505 | 443.726   | 763.056   | AF147392  | 485.611   | 530.004   | NM_000941 | 845.441   | 1481.799  |
| NM_003710 | 1682.384  | 1539.854  | AF088057  | 3202.566  | 3143.903  | AF222980  | 1525.158  | 1971.832  |
| Z83805    | 536.055   | 453.771   | AF086255  | 9658.114  | 7916.808  | AK026758  | 514.993   | 686.311   |
| NM_004666 | 1367.332  | 1452.099  | AK022660  | 604.102   | 423.373   | NM_012201 | 1445.193  | 1784.634  |
| NM_003614 | 1388.024  | 1345.379  | AF088051  | 1078.417  | 884.962   | AB046774  | 524.475   | 645.667   |
| NM_014257 | 3255.795  | 2643.64   | AK023883  | 314.732   | 506.467   | AK022385  | 11049.236 | 8836.419  |
| NM_001140 | 394.862   | 542.84    | AF086366  | 650.999   | 513.849   | NM_002775 | 1224.978  | 1450.734  |
| NM_004843 | 1916.459  | 2497.051  | AF086360  | 2834.437  | 2447.573  | AK024584  | 2345.219  | 1671.111  |
| AK022845  | 977.771   | 896.195   | AF087993  | 1858.206  | 2050.338  | NM_003504 | 4965.908  | 6733.325  |
| NM_003004 | 295.928   | 451.386   | AF035282  | 937.159   | 730.027   | NM_013296 | 3117.354  | 2590.205  |
| S77835    | 363.769   | 424.066   | AK021966  | 3828.333  | 3516.387  | NM_007267 | 2471.287  | 2415.518  |
| NM_002985 | 5392.059  | 5281.928  | AB018292  | 5453.904  | 5505.634  | AK022830  | 404.694   | 228.367   |
| AB018347  | 5918.816  | 6040.679  | AF085971  | 775.002   | 963.138   | Z36816    | 972.179   | 769.729   |
| NM_003284 | 1501.062  | 1185.805  | AF147302  | 1206.037  | 1410.045  | NM_005865 | 1881.38   | 1461.056  |
| NM_018152 | 805.542   | 688.784   | AF085929  | 1880.424  | 1994.596  | NM_006413 | 4303.971  | 3272.494  |
| NM_000319 | 1376.006  | 1328.206  | AK001126  | 2324.35   | 2820.622  | NM_017684 | 643.123   | 788.762   |
| NM_003257 | 406.209   | 423.48    | AF085976  | 2654.161  | 2771.03   | AK025542  | 819.252   | 541.87    |
| NM_012461 | 1869.832  | 1946.732  | AF075104  | 7240.057  | 6389.751  | AF207547  | 484.249   | 317.802   |
| AK001379  | 1067.199  | 976.712   | AL133025  | 756.145   | 602.097   | NM_002766 | 2212.224  | 2019.407  |
| NM_007072 | 1677.094  | 1884.271  | AL137402  | 10000.797 | 11016.676 | NM_003691 | 2254.501  | 1775.215  |
| NM_012320 | 3418.76   | 3276.036  | AL137617  | 1821.057  | 1947.289  | NM_002316 | 1129.001  | 1027.98   |
| NM_018206 | 2264.039  | 1955.413  | AL359568  | 24486.135 | 32531.93  | NM_012471 | 126.246   | 779.996   |
| NM_015926 | 4842.15   | 4455.615  | AL133564  | 4814.851  | 5650.046  | NM_001321 | 904.691   | 1645.969  |
| U90653    | 3049.667  | 3059.16   | AL137428  | 872.863   | 980.4     | AB018264  | 1241.088  | 2026.046  |
| NM_000196 | 641.179   | 792.349   | AL157462  | 1261.17   | 1248.841  | NM_006911 | 453.856   | 522.637   |
| NM_018336 | 1752.517  | 1663.8    | AL359602  | 5415.628  | 4833.302  | U92544    | 808.531   | 1072.503  |
| NM_006745 | 22316.822 | 22303.959 | NM_018190 | 23051.242 | 20543.541 | NM_006791 | 2190.665  | 2827.117  |
| AK000037  | 1086.902  | 787.466   | AK022259  | 55604.555 | 48332.664 | AJ278348  | 5341.804  | 5629.518  |
| NM_014760 | 1927.539  | 1812.955  | AK022461  | 663.877   | 863.638   | AI285199  | 470.959   | 361.571   |
| NM_018396 | 1429.742  | 1514.495  | NM_016010 | 2112.753  | 1963.02   | L07738    | 608.53    | 573.44    |
| NM_002560 | 16714.715 | 17839.975 | AL358312  | 640.002   | 767.604   | Z48054    | 620.096   | 447.61    |
| NM_014404 | 1744.403  | 1702.58   | AF070647  | 15461.375 | 14088.311 | H90415    | 1018.432  | 963.942   |
| NM_018713 | 479.203   | 983.111   | AF116649  | 518.413   | 425.271   | AA676470  | 4798.752  | 3910.683  |
| NM_015947 | 4226.518  | 4877.559  | AF174394  | 3214.289  | 3341.204  | AA457155  | 2136.646  | 1709.545  |
| AB028944  | 591.141   | 771.414   | AF083121  | 602.728   | 534.396   | BM014365  | 569.29    | 412.063   |
| AJ006268  | 856.947   | 786.656   | AF144054  | 525.06    | 554.366   | H91842    | 352.833   | 197.022   |
| M74089    | 2267.328  | 2260.323  | AK025924  | 866.935   | 1341.365  | U78045    | 1124.894  | 1194.795  |
| AF190864  | 4750.72   | 4364.643  | AK021876  | 6148.692  | 6284.208  | AA878561  | 57608.18  | 60701.992 |
| NM_002776 | 5037.19   | 5028.28   | AK022017  | 792.532   | 972.265   | NM_003825 | 4592.935  | 14069.066 |
| L40397    | 12154.674 | 11597.409 | AK022160  | 2646.453  | 2858.863  | AF218014  | 2299.49   | 3127.479  |
| NM_020196 | 5931.221  | 4885.776  | AK022295  | 803.366   | 647.632   | NM_006676 | 1458.183  | 2715.392  |
| AA098879  | 628.265   | 620.097   | AK021935  | 1240.411  | 1124.803  | AY007729  | 8165.867  | 10515.921 |
| NM_000025 | 11218.523 | 9867.89   | AK022187  | 5495.842  | 5988.41   | BC007318  | 1311.409  | 1285.043  |
| D38521    | 2825.342  | 2207.131  | AK022337  | 1471.77   | 1821.046  | M36693    | 989.88    | 772.889   |
| NM_000403 | 4568.648  | 3916.737  | AK026847  | 794.917   | 781.548   | NM_016292 | 6343.955  | 5497.353  |
| NM_018127 | 7979.429  | 7605.969  | AK023048  | 1001.974  | 1244.187  | NM_002601 | 2054.635  | 1442.845  |
| AB020677  | 7628.816  | 7241.967  | AL359560  | 534.724   | 560.192   | U62858    | 3213.503  | 2921.015  |

|            |           |           |           |           |           |           |           |           |
|------------|-----------|-----------|-----------|-----------|-----------|-----------|-----------|-----------|
| AB033097   | 3279.473  | 3010.609  | AK026891  | 3734.801  | 3934.898  | AF035121  | 384.158   | 281.58    |
| NM_000135  | 1380.754  | 1337.307  | AL137562  | 3689.08   | 5749.506  | NM_014432 | 1507.713  | 1192.656  |
| AJ223948   | 2939.246  | 2745.239  | M90355    | 60359.395 | 56066.219 | NM_006953 | 1020.591  | 746.45    |
| NM_016218  | 725.204   | 627.86    | AK022495  | 1713.713  | 1864.334  | U96173    | 1496.08   | 1090.984  |
| AK022947   | 1066.071  | 1181.587  | AK021632  | 485.398   | 555.945   | NM_018941 | 777.318   | 513.377   |
| AL050029   | 1824.387  | 1743.982  | AK026373  | 12588.173 | 12030.648 | NM_000749 | 1030.775  | 789.369   |
| NM_005204  | 2108.01   | 2461.408  | AK021581  | 1399.586  | 1971.688  | NM_014849 | 1165.504  | 1951.848  |
| NM_016203  | 734.301   | 905.784   | AK021744  | 779.221   | 929.311   | NM_001042 | 3897.281  | 5801.429  |
| NM_002759  | 4415.401  | 6332.626  | NM_018430 | 4374.789  | 5077.142  | NM_012229 | 3304.768  | 4030.683  |
| NM_006255  | 3095.792  | 3932.87   | AL110200  | 1213.175  | 1438.219  | AB023147  | 11352.83  | 9817.437  |
| BE392143   | 3336.959  | 3218.763  | AK022308  | 376.653   | 638.539   | NM_016615 | 4811.812  | 3913.93   |
| NM_005813  | 2187.585  | 1892.182  | AL133640  | 1726.325  | 1996.097  | NM_005630 | 1192.774  | 1196.585  |
| AB037718   | 3565.747  | 2869.659  | AJ012502  | 9398.046  | 15031.609 | AK023106  | 1216.823  | 900.527   |
| AL389994   | 938.031   | 637.415   | AK021722  | 1716.604  | 2000.249  | NM_016730 | 10422.992 | 8539.959  |
| NM_003909  | 3460.853  | 2708.376  | AF147445  | 2088.125  | 2150.051  | AL035297  | 1008.397  | 908.62    |
| NM_001277  | 7518.755  | 6135.019  | Y10508    | 13658.337 | 12034.373 | NM_004408 | 2055.417  | 1433.496  |
| NM_003659  | 3777.582  | 2871.918  | NM_005182 | 43853.598 | 39623.188 | AJ131244  | 1087.342  | 863.638   |
| AB029021   | 10763.033 | 9302.66   | D17074    | 1221.085  | 1109.246  | NM_002532 | 3943.401  | 3701.497  |
| NM_002101  | 18302.426 | 13342.801 | AF039944  | 14942.876 | 14220.359 | NM_012388 | 2101.182  | 1737.705  |
| NM_005423  | 340.484   | 516.932   | AJ276252  | 607.233   | 721.023   | NM_019843 | 2040.672  | 1951.176  |
| Z36789     | 855.549   | 727.099   | AK021716  | 6409.146  | 5474.497  | NM_016192 | 3286.402  | 2707.644  |
| J02874     | 4400.997  | 4768.747  | AK025035  | 8159.102  | 8499.68   | BE878426  | 49903.918 | 48826.273 |
| BF310427   | 2254.286  | 2027.941  | AK002085  | 4164.314  | 4130.349  | NM_001745 | 6625.734  | 5724.762  |
| N94424     | 858.266   | 754.858   | AF086200  | 622.419   | 606.879   | AK025542  | 843.881   | 1840.107  |
| AA045192   | 1730.246  | 1683.982  | AL133618  | 3636.562  | 4151.139  | NM_002768 | 2247.254  | 3760.375  |
| AI521645   | 307.538   | 259.366   | AF230314  | 467.235   | 931.291   | NM_003691 | 1631.998  | 2699.561  |
| M92642     | 1351.991  | 1024.501  | AK001086  | 1191.555  | 1786.315  | NM_002950 | 18464.951 | 23845.299 |
| H-U 44385  | 11535.468 | 10172.944 | AJ131610  | 3792.333  | 4736.747  | NM_002318 | 897.623   | 1162.4    |
| ID 1654970 | 6110.045  | 5672.531  | AF119872  | 6528.36   | 7057.558  | NM_003134 | 44071.023 | 44633.824 |
| ID 2531132 | 4253.396  | 4770.141  | X99687    | 406.341   | 651.577   | NM_004314 | 2339.802  | 2399.211  |
| ID 4365538 | 529.664   | 542.698   | AK023255  | 28174.375 | 36202.23  | NM_018247 | 4771.268  | 4419.87   |
| AA485665   | 433.427   | 374.487   | NM_002622 | 22543.439 | 19315.307 | NM_017979 | 2690.767  | 2481.211  |
| BF125928   | 9687.18   | 10142.012 | AK024185  | 1012.967  | 1462.797  | NM_005899 | 10846.311 | 7512.453  |
| BG571026   | 1445.957  | 1153.619  | AK026101  | 5299.323  | 6015.442  | NM_002889 | 16669.453 | 11890.469 |
| AA489017   | 2611.371  | 1984.672  | AK022194  | 14376.71  | 14781.134 | AF078866  | 1540.982  | 1291.201  |
| NM_012245  | 14015.9   | 13062.263 | AF085963  | 1829.519  | 1874.58   | BF311880  | 919.999   | 555.763   |
| NM_133263  | 1338.397  | 945.734   | AK021436  | 952.173   | 1163.877  | NM_016075 | 584.5     | 662.294   |
| NM_003284  | 1823.614  | 1849.448  | U58664    | 1000.928  | 1012.331  | NM_001360 | 9564.135  | 7530.698  |
| NM_018152  | 832.888   | 714.115   | AF085937  | 579.337   | 744.16    | AK026656  | 1678.213  | 1835.692  |
| NM_000319  | 1493.152  | 1286.496  | AL137569  | 3709.225  | 3552.468  | AJ276207  | 4890.953  | 4502.745  |
| NM_003257  | 412.928   | 353.801   | AK021920  | 4205.759  | 3924.718  | AB011131  | 6918.014  | 5928.685  |
| NM_012461  | 2327.514  | 1870.15   | AL049415  | 1609.869  | 1694.329  | AF164794  | 4083.509  | 6988.522  |
| AK001379   | 1041.62   | 984.758   | AK022375  | 1018.425  | 1026.012  | AB020656  | 463.239   | 845.067   |
| NM_002839  | 792.476   | 763.32    | NM_003378 | 52092.586 | 48234.504 | AK023648  | 1556.852  | 1793.366  |
| AF190500   | 848.227   | 641.612   | AL110194  | 8946.738  | 7785.516  | NM_000412 | 805.76    | 1129.931  |
| NM_001616  | 523.895   | 580.391   | NM_006687 | 1138.881  | 1525.657  | AF077033  | 1293.956  | 1649.638  |
| NM_005904  | 681.036   | 560.953   | NM_013301 | 1064.68   | 1072.336  | AF222980  | 1511.072  | 1151.426  |
| NM_005273  | 12694.103 | 12263.106 | NM_017673 | 552.574   | 536.355   | AK026758  | 444.989   | 377.746   |
| NM_000524  | 519.879   | 376.897   | AB046857  | 739.042   | 958.396   | NM_012201 | 1397.65   | 1363.638  |
| NM_006576  | 1820.478  | 2021.572  | AK024408  | 8782.197  | 10078.001 | AB046774  | 458.158   | 347.702   |
| NM_018645  | 708.306   | 646.434   | AF086307  | 9830.229  | 10057.063 | AK022385  | 9829.575  | 8737.287  |
| AB035266   | 3995.344  | 4193.553  | L19364    | 1223.927  | 1551.353  | NM_002775 | 1425.647  | 1070.166  |
| NM_003744  | 2271.366  | 1834.366  | NM_005390 | 1430.509  | 1369.596  | AK024584  | 2068.573  | 1123.27   |

|           |           |           |           |           |           |           |           |           |
|-----------|-----------|-----------|-----------|-----------|-----------|-----------|-----------|-----------|
| NM_00637E | 1471.804  | 1173.165  | CY3Cy5    | 2022.107  | 88.978    | NM_003504 | 4609.603  | 4141.998  |
| NM_01813E | 2245.833  | 2518.344  | L07738    | 860.537   | 626.69    | NM_01329E | 2976.417  | 2920.641  |
| NM_018207 | 690.448   | 794.46    | Z48054    | 616.563   | 614.987   | NM_007267 | 2405.536  | 1923.966  |
| NM_00034E | 15851.686 | 25468.469 | H90415    | 1069.892  | 1093.734  | Z36816    | 905.446   | 1073.445  |
| NM_00186E | 56162.563 | 55853.234 | AA676470  | 7623.63   | 6637.379  | NM_00586E | 1800.359  | 1683.444  |
| NM_006531 | 1483.67   | 1311.788  | AA457155  | 3890.041  | 3252.746  | NM_00641E | 4308.983  | 3677.66   |
| M74089    | 2274.21   | 2210.683  | BM014365  | 647.211   | 544.712   | NM_017684 | 533.894   | 687.866   |
| AF190864  | 5005.464  | 4208.478  | H91842    | 217.487   | 555.259   | AL049689  | 428.939   | 575.809   |
| NM_00277E | 4925.56   | 4689.863  | U78045    | 1358.38   | 937.46    | NM_00021E | 416.487   | 734.154   |
| L40397    | 12863.464 | 12906.095 | AA878561  | 60437.09  | 60654.891 | NM_01421E | 5731.745  | 7713.969  |
| NM_02019E | 7690.965  | 7313.289  | AI538525  | 2475.313  | 2097.21   | NM_00301C | 846.575   | 1341.41   |
| AA098879  | 749.135   | 1030.11   | NM_00062E | 340.269   | 406.797   | NM_006871 | 864.712   | 1559.387  |
| AF070525  | 5395.71   | 4905.717  | NM_000941 | 1059.669  | 944.912   | NM_019074 | 1322.26   | 2419.318  |
| NM_001177 | 4672.459  | 3872.762  | SR1       | 60836.031 | 62562.402 | NM_018494 | 9478.018  | 11771.472 |
| NM_014447 | 1236.119  | 951.514   | SR3       | 41424.086 | 34009.711 | AK000006  | 443.206   | 409.54    |
| NM_00235E | 666.29    | 499.681   | SR5       | 2857.442  | 1984.023  | NM_001115 | 586.688   | 619.12    |
| NM_006691 | 875.429   | 933.68    | SR7       | 4807.962  | 24760.35  | NM_014921 | 709.967   | 630.204   |
| NM_00150E | 575.615   | 467.476   | SR9       | 11685.357 | 1520.059  | NM_016581 | 19450.861 | 14684.2   |
| NM_00371C | 1682.11   | 1320.369  | CY3Cy5    | 1678.563  | 156.858   | NM_01325E | 948.205   | 771.71    |
| Z83805    | 650.612   | 545.003   | U62858    | 3957.445  | 4268.814  | NM_00718E | 482.504   | 432.399   |
| NM_00466E | 1489.358  | 1756.063  | NM_00155E | 557.134   | 491.852   | AJ238243  | 4178.131  | 4083.105  |
| NM_003614 | 1549.41   | 2121.085  | NM_00695E | 1172.372  | 906.006   | J05046    | 3601.773  | 2829.548  |
| NM_014257 | 3022.562  | 3359.28   | NM_00253C | 412.039   | 343.389   | NM_01231E | 1169.889  | 972.226   |
| NM_001140 | 506.189   | 424.145   | U96173    | 1412.693  | 1450.518  | NM_002751 | 1016.637  | 763.995   |
| NM_00484E | 1802.34   | 1788.066  | NM_018941 | 1020.222  | 855.777   | NM_004291 | 554.538   | 401.523   |
| AK022845  | 676.02    | 699.819   | NM_00198C | 384.348   | 591.204   | NM_00381E | 2696.543  | 2373.724  |
| NM_003004 | 431.292   | 423.218   | NM_005954 | 1013.154  | 738.338   | NM_00491E | 2902.807  | 2846.753  |
| NM_00298E | 5905.442  | 6247.74   | NM_001321 | 1876.409  | 1819.535  | U79304    | 6709.535  | 5798.119  |
| AB018347  | 6841.856  | 12230.552 | AB018264  | 2619.31   | 2110.483  | NM_016267 | 1496.493  | 1301.949  |
| AB033073  | 5769.787  | 9832.551  | NM_006911 | 495.288   | 375.007   | NM_004671 | 2288.442  | 1947.306  |
| NM_00581E | 2317.738  | 2150.201  | U92544    | 1231.706  | 1047.051  | NM_00518C | 9569.233  | 13631.361 |
| AB037718  | 4226.353  | 3968.021  | NM_006791 | 2591.688  | 1848.078  | NM_00652E | 2093.563  | 2846.917  |
| AL389994  | 950.953   | 837.217   | AJ278348  | 7262.949  | 5973.535  | U35622    | 528.765   | 1243.701  |
| NM_00390E | 3546.162  | 3288.121  | NM_01587E | 317.223   | 304.152   | NM_00704E | 1388.603  | 1807.384  |
| NM_001277 | 9315.855  | 10521.531 | AI285199  | 730.27    | 540.758   | NM_003627 | 3225.978  | 4476.219  |
| NM_00365E | 5238.262  | 6977.643  | AK023106  | 1420.835  | 993.88    | NM_01214E | 11433.841 | 15737.815 |
| NM_00707E | 2187.495  | 2088.037  | NM_01673C | 17688.307 | 17358.246 | AF305779  | 605.744   | 667.144   |
| NM_01232C | 4003.699  | 3380.867  | AL035297  | 1179.058  | 1229.957  | AF225416  | 2786.417  | 3824.542  |
| NM_01820E | 2382.139  | 1833.148  | NM_00440E | 2712.797  | 2995.668  | NM_016231 | 678.384   | 835.054   |
| NM_01592E | 4734.506  | 4642.553  | NM_016651 | 361.782   | 207.031   | NM_00209E | 2199.871  | 2107.461  |
| U90653    | 2567.542  | 2800.727  | NM_01984E | 2320.918  | 2151.908  | AB042555  | 2345.467  | 2423.679  |
| NM_00019E | 370.427   | 430.694   | NM_01619E | 3996.695  | 3867.974  | NM_01776E | 689.656   | 417.652   |
| NM_01833E | 1799.437  | 1775.93   | BE878426  | 53486.211 | 58099.816 | NM_01397E | 1522.405  | 1179.21   |
| NM_00674E | 25143.789 | 34731.746 | NM_00174E | 7462.283  | 5937.183  | NM_00384E | 2667.561  | 2334.357  |
| NM_00027E | 650.449   | 944.019   | NM_00382E | 5647.763  | 5720.467  | NM_01221E | 950.218   | 795.672   |
| AK000037  | 1109.437  | 1037.527  | AK025006  | 12578.329 | 9524.837  | NM_00533E | 451.123   | 308.547   |
| NM_01476C | 1990.41   | 1886.819  | AF218014  | 4609.535  | 3840.08   | X73502    | 3005.468  | 2312.941  |
| NM_01839E | 1352.403  | 1596.594  | NM_00667E | 2431.14   | 2084.133  | NM_02044E | 16813.154 | 13950.752 |
| NM_00256C | 19174.408 | 19335.561 | AY007729  | 12225.05  | 9680.26   | NM_01637E | 4263.013  | 4069.497  |
| NM_014404 | 1556.753  | 1505.335  | NM_014424 | 378.468   | 321.663   | AB046848  | 2189.849  | 1908.139  |
| NM_01871E | 556.116   | 831.868   | AF159092  | 451.554   | 488.933   | AL133057  | 3583.753  | 3806.78   |
| NM_015947 | 4473.437  | 7506.682  | BC007318  | 1548.916  | 1020.707  | U04845    | 4560.844  | 4496.35   |
| NM_00204E | 36388.453 | 39165.887 | M36693    | 1110.814  | 814.364   | NM_01810E | 5128.714  | 4756.824  |



|            |           |           |           |           |           |           |           |           |
|------------|-----------|-----------|-----------|-----------|-----------|-----------|-----------|-----------|
| AB028944   | 772.739   | 638.45    | NM_016292 | 6749.104  | 5929.127  | AK026302  | 5097.707  | 5825.756  |
| AJ006268   | 864.966   | 797.509   | NM_002601 | 2349.497  | 1351.615  | NM_012214 | 1277.837  | 1734.027  |
| NM_012245  | 15167.256 | 12727.913 | NM_002889 | 28738.814 | 25175.949 | AF049656  | 8742.419  | 15880.125 |
| NM_133263  | 1217.833  | 1089.945  | AF078866  | 1968.84   | 2012.288  | NM_000312 | 370.097   | 721.127   |
| NM_000025  | 11747.919 | 10746.539 | NM_016075 | 666.921   | 596.061   | NM_016595 | 4209.492  | 5077.637  |
| D38521     | 2828.234  | 2215.261  | NM_001360 | 9858.469  | 8413.428  | BE874867  | 13978.609 | 23552.797 |
| NM_000403  | 3692.785  | 3738.223  | AK026656  | 2700.476  | 2481.587  | AL136719  | 1769.498  | 2146.894  |
| NM_018127  | 7667.959  | 7206.257  | AJ276207  | 4588.012  | 4497.945  | NM_014105 | 3962.755  | 4926.275  |
| AB020677   | 7596.604  | 7526.728  | AB011131  | 8117.979  | 6459.596  | NM_012160 | 1334.275  | 1135.791  |
| AB033097   | 3168.513  | 3307.051  | NM_000751 | 4113.874  | 3673.7    | NM_006357 | 36581.234 | 32465.779 |
| NM_000135  | 1993.222  | 1886.81   | NM_014849 | 2203.354  | 1670.433  | NM_014245 | 35018.566 | 25192.15  |
| AJ223948   | 3443.504  | 3695.831  | NM_001042 | 3997.965  | 3712.769  | AK027070  | 579.646   | 480.391   |
| NM_016215  | 720.152   | 682.064   | NM_012229 | 4279.722  | 2944.918  | NM_003341 | 5368.826  | 8959.336  |
| AK022947   | 1682.17   | 1994.301  | AB023147  | 10920.877 | 8051.198  | NM_017785 | 597.501   | 420.283   |
| AL050029   | 1808.409  | 2118.084  | NM_016615 | 7874.98   | 5558.451  | NM_006245 | 1805.655  | 1313.071  |
| AL049966   | 476.954   | 289.557   | NM_005630 | 1647.555  | 1197.469  | NM_018315 | 640.019   | 474.485   |
| NM_005204  | 1933.473  | 1896.712  | AB046774  | 563.452   | 796.099   | AB020640  | 957.816   | 937.344   |
| NM_016203  | 854.181   | 661.784   | AK022385  | 14049.914 | 11895.121 | D29954    | 4024.872  | 3487.434  |
| NM_002755  | 3690.913  | 3020.208  | NM_002775 | 1691.395  | 1721.837  | AF007131  | 751.347   | 877.439   |
| NM_007271  | 1629.258  | 1612.306  | AK024584  | 3298.995  | 2610.513  | NM_006835 | 1326.992  | 1366.451  |
| NM_006255  | 3036.453  | 2601.803  | NM_003504 | 5356.331  | 5748.437  | NM_000223 | 425.005   | 348.032   |
| BE392143   | 2628.065  | 2063.711  | NM_013295 | 3693.802  | 3165.477  | NM_005851 | 1166.023  | 957.181   |
| NM_018132  | 2895      | 2742.722  | AK022830  | 443.864   | 628.437   | AF119256  | 1549.716  | 1595.733  |
| NM_003061  | 726.482   | 647.235   | Z36816    | 1503.696  | 3309.322  | X74497    | 340.565   | 704.26    |
| NM_018207  | 796.702   | 692.159   | NM_005865 | 2500.615  | 2297.98   | U10072    | 1177.458  | 2119.424  |
| NM_000345  | 15331.333 | 14227.83  | NM_006413 | 4874.253  | 4212.6    | AF222749  | 8055.485  | 12414.254 |
| NM_001862  | 57049.809 | 50121.105 | AK025542  | 1777.822  | 1283.386  | NM_003410 | 1681.164  | 2261.047  |
| NM_006531  | 2164.114  | 2376.014  | AF207547  | 589.673   | 410.885   | NM_007145 | 1535.705  | 1864.831  |
| AB029021   | 11237.442 | 10840.045 | NM_002765 | 3500.787  | 3036.524  | NM_002225 | 564.246   | 791.826   |
| NM_002101  | 18946.844 | 16488.418 | NM_003691 | 1998.762  | 1705.493  | S69027    | 1250.019  | 1891.596  |
| NM_005423  | 470.635   | 544.254   | NM_002950 | 19043.1   | 15750.903 | NM_012119 | 2557.298  | 2372.589  |
| Z36789     | 875.502   | 751.545   | NM_002315 | 1524.882  | 1173.964  | X99631    | 6338.509  | 7293.709  |
| J02874     | 4026.906  | 4046.676  | NM_001433 | 760.624   | 460.709   | NM_001730 | 1551.465  | 1192.602  |
| BF310427   | 1891.838  | 1726.565  | NM_003134 | 48873.691 | 37013.949 | AB014589  | 1515.381  | 1262.428  |
| N94424     | 756.161   | 733.479   | NM_004314 | 2404.693  | 1970.681  | AF248649  | 453.287   | 372.127   |
| AA045192   | 1647.189  | 1943.396  | NM_018247 | 5980.16   | 5096.383  | U37146    | 6668.026  | 5807.7    |
| AI521645   | 282.628   | 628.671   | NM_017979 | 3263.651  | 2788.202  | NM_012085 | 1999.387  | 1809.752  |
| M92642     | 1214.683  | 1442.689  | NM_006791 | 2377.34   | 2514.908  | NM_000991 | 55647.52  | 58962.914 |
| H-U 44385  | 11644.066 | 11001.171 | AJ278348  | 7492.597  | 7014.186  | NM_016034 | 13358.426 | 10250.38  |
| ID 1654970 | 5460.468  | 5085.134  | AI285199  | 849.701   | 678.002   | NM_018285 | 8104.947  | 8146.485  |
| ID 2531132 | 4157.46   | 4075.399  | L07738    | 879.402   | 1010.056  | AK022393  | 7192.499  | 7406.075  |
| ID 4365538 | 566.097   | 408.306   | H90415    | 1403.006  | 1348.368  | AK026654  | 575.609   | 1084.478  |
| BF125928   | 10460.112 | 8757.317  | AA676470  | 7844.034  | 7521.318  | AK025245  | 580.832   | 949.167   |
| BG571026   | 1180.827  | 1120.318  | M38258    | 385.965   | 348.801   | AK025496  | 2313.001  | 3250.623  |
| AA489017   | 2426.979  | 1735.281  | AA457155  | 3887.646  | 3671.323  | NM_005205 | 30587.867 | 38605.273 |
| AK022845   | 931.377   | 804.542   | BM014365  | 721.942   | 629.429   | NM_001965 | 625.044   | 884.745   |
| NM_003004  | 520.117   | 591.506   | H91842    | 413.313   | 277.962   | NM_016135 | 1049.865  | 1519.345  |
| S77835     | 424.155   | 447.222   | U78045    | 1285.679  | 1097.912  | Z36833    | 46577.664 | 58558.609 |
| NM_002985  | 5335.982  | 5007.768  | AA878561  | 59669.199 | 61006.332 | NM_014355 | 1236.717  | 1404.876  |
| AB018347   | 6312.448  | 6426.029  | BF688309  | 401.747   | 350.126   | M21191    | 30697.73  | 30211.193 |
| AB033073   | 5314.123  | 4713.569  | AI538525  | 2436.657  | 2100.931  | AF072810  | 1055.335  | 859.328   |
| NM_003284  | 1647.287  | 1449.628  | NM_000623 | 342.341   | 469.688   | L19778    | 463.6     | 324.123   |
| NM_018152  | 901.519   | 853.644   | NM_000941 | 1292.682  | 937.109   | AF174482  | 3091.89   | 2646.76   |

|           |           |           |           |           |           |           |           |           |
|-----------|-----------|-----------|-----------|-----------|-----------|-----------|-----------|-----------|
| NM_000319 | 1444.265  | 1377.503  | AF222980  | 2195.617  | 1727.937  | NM_003528 | 695.862   | 608.776   |
| NM_003257 | 393.417   | 330.753   | AK026758  | 976.118   | 788.888   | NM_017769 | 589.248   | 469.303   |
| NM_012461 | 2293.46   | 1863.894  | BC007318  | 1771.693  | 1463.574  | D85131    | 8868.295  | 7732.054  |
| AK001379  | 979.331   | 928.776   | M36693    | 1629.032  | 1356.959  | D30612    | 3210.864  | 2650.594  |
| NM_017450 | 2296.667  | 2010.587  | NM_016292 | 7652.044  | 7598.235  | NM_002163 | 9360.81   | 8638.852  |
| NM_002023 | 967.109   | 657.641   | NM_002601 | 2278.66   | 1771.862  | U52097    | 8265.794  | 8256.095  |
| NM_002839 | 745.8     | 958.861   | U62858    | 4308.537  | 3978.79   | NM_003416 | 1895.594  | 1760.969  |
| AF190500  | 1004.858  | 1201.707  | NM_014432 | 1410.908  | 1110.255  | NM_017594 | 943.883   | 1454.6    |
| NM_001616 | 1146.251  | 1385.063  | NM_001558 | 656.616   | 658.981   | AK027237  | 782.505   | 1321.745  |
| NM_005904 | 827.607   | 863.72    | NM_006953 | 1183.393  | 824.064   | AF075017  | 402.924   | 741.562   |
| NM_005273 | 13137.486 | 12472.938 | U96173    | 1592.467  | 1329.571  | AK027104  | 867.479   | 1203.315  |
| NM_006576 | 1998.059  | 1722.16   | NM_018941 | 668.563   | 639.479   | AL133090  | 10818.019 | 14152.33  |
| NM_018645 | 562.115   | 599.254   | NM_001980 | 692.011   | 395.508   | AF085867  | 2215.813  | 3376.112  |
| AB035266  | 5348.627  | 8748.327  | NM_005954 | 947.652   | 837.598   | AK026158  | 779.104   | 1068.102  |
| NM_003744 | 2190.912  | 1814.978  | NM_012471 | 808.336   | 659.757   | AF086510  | 2892.368  | 3897.274  |
| NM_006378 | 1431.365  | 1086.019  | NM_001321 | 1688.99   | 1518.123  | Z36779    | 2013.178  | 3226.915  |
| NM_014404 | 1896.985  | 2335.931  | AB018264  | 2457.681  | 2037.284  | NM_002816 | 1478.248  | 1272.807  |
| NM_018713 | 849.599   | 798.234   | NM_006911 | 616.057   | 371.744   | NM_017822 | 4640.959  | 4025.565  |
| NM_015947 | 4018.213  | 4182.403  | U92544    | 1293.54   | 784.699   | AK026844  | 817.283   | 510.612   |
| NM_002042 | 43990.578 | 40359.719 | AB023147  | 12984.188 | 12112.994 | AK026735  | 1282.309  | 1112.735  |
| AB028944  | 720.151   | 833.385   | NM_016615 | 9425.812  | 8423.068  | AL110104  | 11440.584 | 9992.168  |
| AJ006268  | 921.356   | 1246.589  | NM_005630 | 1686.466  | 1331.493  | AF240633  | 546.654   | 356.903   |
| M74089    | 2883.791  | 4000.758  | AK023106  | 1332.969  | 1256.079  | AK027056  | 4012.401  | 2835.483  |
| AF190864  | 5288.24   | 5687.197  | NM_016730 | 18590.23  | 18050.404 | AK024294  | 1414.576  | 1220.214  |
| NM_002779 | 5370.25   | 5435.897  | AL035297  | 1155.419  | 750.375   | AL110126  | 1625.909  | 1708.653  |
| L40397    | 13710.925 | 13716.834 | NM_004408 | 2336.208  | 1978.743  | AF052172  | 6089.234  | 5720.717  |
| NM_020198 | 7954.368  | 7415.757  | AJ131244  | 3168.501  | 2697.437  | AB014573  | 1483.889  | 1352.088  |
| AA098879  | 635.174   | 757.741   | NM_002532 | 4642.356  | 4567.586  | AK091109  | 11712.59  | 14401.598 |
| AF070525  | 5054.756  | 5242.685  | NM_012388 | 3170.808  | 3556.499  | NM_014967 | 1660.013  | 2416.679  |
| NM_001177 | 4465.018  | 4584.201  | NM_019843 | 2290.264  | 2156.089  | AK022915  | 2405.002  | 3230.89   |
| NM_014447 | 1532.191  | 1653.965  | NM_016192 | 3921.661  | 3711.222  | AF131834  | 672.693   | 1027.849  |
| NM_002356 | 758.756   | 773.291   | BE878426  | 54153.418 | 53981.266 | AL355711  | 459.403   | 584.637   |
| NM_006691 | 1153.123  | 1371.017  | NM_001745 | 7689.65   | 6565.065  | AK025851  | 742.921   | 1111.755  |
| NM_001505 | 576.353   | 608.485   | NM_003825 | 8264.884  | 20349.873 | AJ011409  | 6376.073  | 7595.977  |
| NM_003710 | 1829.523  | 1882.375  | AK025006  | 13653.048 | 10078.174 | AJ227906  | 649.189   | 1068.317  |
| Z83805    | 421.342   | 539.88    | AF218014  | 4556.023  | 3623.016  | AF283776  | 6865.805  | 5423.57   |
| NM_004666 | 1299.43   | 1348.742  | NM_006678 | 2766.433  | 2610.644  | L10123    | 12319.683 | 9471.054  |
| NM_003614 | 1369.189  | 1237.397  | AY007729  | 13788.647 | 9896.113  | D16877    | 1004.441  | 1161.737  |
| NM_014257 | 3198.856  | 2949.902  | NM_003134 | 52201.57  | 51322.895 | AL109781  | 1760.607  | 2032.059  |
| NM_001140 | 534.178   | 528.328   | NM_004314 | 2483.782  | 2528.917  | AK021895  | 553.943   | 1006.168  |
| NM_004843 | 1394.756  | 1479.613  | NM_018247 | 6874.995  | 7086.358  | AK000036  | 1133.671  | 2542.407  |
| NM_005204 | 2136.315  | 2043.071  | NM_017979 | 4171.547  | 3684.683  | AK000924  | 274.692   | 484.267   |
| NM_016203 | 731.101   | 645.064   | NM_005898 | 12221.215 | 11407.519 | AK022252  | 761.051   | 638.575   |
| NM_002759 | 3747.691  | 3517.449  | NM_002889 | 28694.029 | 26201.953 | AK000114  | 1512.712  | 1235.799  |
| NM_007271 | 1997.42   | 2391.417  | AF078866  | 1959.622  | 1593.19   | AK000952  | 1219.465  | 923.466   |
| NM_006255 | 3443.685  | 4391.005  | BF311880  | 2369.62   | 1382.2    | AK024520  | 1868.937  | 1691.169  |
| BE392143  | 4251.346  | 4540.06   | NM_000078 | 379.56    | 225.783   | AK024592  | 867.395   | 864.696   |
| NM_005813 | 3249.583  | 5226.314  | NM_016075 | 735.424   | 639.625   | AK024904  | 1162.911  | 1166.166  |
| AB037718  | 5127.575  | 5978.086  | NM_001360 | 10368.147 | 8395.603  | AK025030  | 498.17    | 630.42    |
| AL389994  | 927.269   | 1132.893  | AK026656  | 3597.34   | 3383.863  | AK024542  | 1542.236  | 1352.993  |
| NM_003909 | 4059.989  | 3823.906  | AJ276207  | 5217.26   | 5114.029  | AB050477  | 1255.509  | 2045.827  |
| NM_001277 | 9323.038  | 9949.635  | AB011131  | 7933.323  | 6284.964  | NM_012132 | 351.165   | 543.683   |
| NM_003659 | 4847.948  | 5230.623  | NM_000751 | 5629.024  | 4279.384  | NM_012129 | 972.988   | 1944.925  |

|           |           |           |           |           |           |           |           |           |
|-----------|-----------|-----------|-----------|-----------|-----------|-----------|-----------|-----------|
| NM_007072 | 2187.277  | 2066.571  | NM_014849 | 2154.328  | 1571.729  | AF086202  | 5679.72   | 5683.75   |
| NM_012320 | 3969.969  | 3934.344  | NM_001042 | 4966.034  | 3931.98   | AK023270  | 795.786   | 970.328   |
| NM_018208 | 2673.408  | 2597.659  | NM_000941 | 1233.847  | 1393.187  | AF085979  | 16800.287 | 17206.863 |
| NM_015929 | 6783.159  | 10270.215 | AF222980  | 2050.633  | 1747.736  | AK023112  | 1602.353  | 1620.225  |
| U90653    | 3664.866  | 4530.921  | AK026758  | 1162.248  | 1284.801  | NM_017806 | 6335.612  | 7100.626  |
| NM_018339 | 1639.804  | 1793.389  | NM_012201 | 1927.279  | 1846.851  | AK001937  | 19445.455 | 22225.963 |
| NM_006745 | 22435.982 | 21314.039 | AB046774  | 679.896   | 698.355   | AL365517  | 389.896   | 866.721   |
| NM_000275 | 471.825   | 849.138   | AK022385  | 11607.201 | 10189.249 | AK021988  | 2687.527  | 3708.441  |
| AK000037  | 1100.828  | 816.523   | NM_002775 | 1671.243  | 1715.867  | AF086494  | 9166.502  | 10825.328 |
| NM_014760 | 2079.517  | 1566.668  | AK024584  | 3587.726  | 2180.292  | BI769977  | 435.441   | 674.315   |
| NM_018398 | 1404.196  | 1230.519  | NM_003504 | 5529.881  | 5816.613  | AL137567  | 122.861   | 633.175   |
| NM_002560 | 15337.295 | 11916.29  | NM_013298 | 3751.044  | 3296.869  | AK024913  | 2000.029  | 3691.567  |
| NM_000787 | 771.708   | 771.105   | NM_007267 | 2512.288  | 2431.385  | AF119862  | 4836.273  | 5760.914  |
| U57962    | 4420.949  | 4531.953  | AK022830  | 462.448   | 452.179   | U17628    | 944.274   | 1140.77   |
| NM_016176 | 6890.701  | 7389.904  | Z36816    | 1334.511  | 1402.313  | AF119867  | 1196.103  | 1202.547  |
| NM_005574 | 21353.338 | 21640.516 | NM_005865 | 3164.374  | 2771.956  | AL357205  | 9958.759  | 11213.099 |
| NM_017895 | 9410.98   | 9700.021  | NM_006413 | 5308.294  | 4709.053  | AF124819  | 521.998   | 360.784   |
| NM_004610 | 3044.683  | 4119.506  | NM_017684 | 846.745   | 690.813   | D17091    | 803.673   | 684.144   |
| NM_001612 | 2130.969  | 2809.917  | AK025542  | 1267.082  | 1480.334  | AL133074  | 781.999   | 923.572   |
| AK027002  | 1718.096  | 2314.116  | AF207547  | 765.3     | 552.821   | AF086318  | 2765.248  | 2523.774  |
| AB025254  | 4545.184  | 5579.638  | NM_002768 | 4057.041  | 3059.753  | AF088012  | 906.473   | 922.012   |
| NM_004081 | 1945.379  | 2182.674  | NM_003691 | 2448.413  | 1948.973  | NM_018121 | 879.589   | 871.046   |
| NM_000025 | 13009.07  | 13510.978 | NM_002950 | 22003.246 | 17676.354 | AK026708  | 1343.786  | 1622.018  |
| D38521    | 2697.099  | 2736.985  | NM_002318 | 1712.296  | 1400.887  | NM_017903 | 4373.521  | 5453.511  |
| NM_000403 | 5597.248  | 7292.267  | NM_005954 | 883.114   | 1095.581  | NM_018074 | 916.673   | 1078.511  |
| NM_018127 | 8530.58   | 14372.658 | NM_001321 | 1999.008  | 2450.666  | NM_000909 | 838.262   | 1072.122  |
| AB020677  | 8108.716  | 8937.359  | AB018264  | 3061.048  | 3177.951  | U31737    | 298.919   | 854.515   |
| AB033097  | 2887.673  | 2626.895  | NM_006911 | 689.826   | 492.483   | AK024828  | 899.805   | 1531.571  |
| NM_000135 | 1724.173  | 1627.391  | U92544    | 1439.527  | 1813.244  | AF009315  | 891.067   | 1349.753  |
| AJ223948  | 3597.222  | 2791.218  | NM_019644 | 588.809   | 378.543   | NM_019013 | 1000.547  | 1470.368  |
| NM_016218 | 615.641   | 559.184   | NM_006791 | 2972.837  | 3190.763  | AK021607  | 628.712   | 699.954   |
| AK022947  | 1817.591  | 1626.275  | AJ278348  | 7301.665  | 6962.769  | NM_020186 | 5822.296  | 5319.922  |
| AL050029  | 1863.469  | 1309.555  | AI285199  | 1277.37   | 2591.817  | AF090947  | 448.81    | 611.037   |
| AL049966  | 390.236   | 283.831   | L07738    | 832.357   | 627.175   | AJ272196  | 4713.544  | 4375.751  |
| NM_004063 | 1009.594  | 862.067   | Z48054    | 720.088   | 700.516   | X58162    | 2173.628  | 2106.395  |
| AB040976  | 6566.847  | 5702.042  | H90415    | 1731.867  | 1547.271  | CY3Cy5    | 2707.822  | 153.432   |
| NM_018641 | 4515.083  | 4865.706  | AA676470  | 8748.603  | 7800.589  | L35251    | 1645.393  | 4832.706  |
| U49089    | 500.101   | 579.847   | M38258    | 474.143   | 431.093   | BE910395  | 119.738   | 2195.267  |
| NM_002221 | 3198.929  | 3346.916  | AA457155  | 4363.593  | 4301.901  | N46828    | 601.582   | 880.794   |
| NM_002562 | 537.456   | 735.976   | BM014365  | 709.098   | 798.959   | BI908302  | 2994.909  | 3580.532  |
| AK024502  | 5707.854  | 6151.043  | H91842    | 445.574   | 287.614   | AA460969  | 992.218   | 873.903   |
| NM_001124 | 1450.152  | 1294.195  | U78045    | 1595.791  | 1230.105  | M85079    | 1573.875  | 1101.204  |
| NM_004586 | 1801.79   | 2171.247  | AA878561  | 58092.852 | 64253.434 | AA457671  | 6530.596  | 5517.912  |
| NM_004844 | 5774.714  | 5443.879  | BF688309  | 420.976   | 402.02    | X07437    | 1345.8    | 1406.708  |
| NM_013447 | 1578.634  | 1263.382  | AI538525  | 2709.395  | 2007.51   | NM_000641 | 947.057   | 685.197   |
| NM_000051 | 2594.184  | 2608.499  | NM_003825 | 6327.988  | 7714.424  | AE006466  | 674.023   | 518.309   |
| NM_005709 | 663.256   | 526.522   | AK025006  | 14541.598 | 18873.758 | BC008737  | 31512.98  | 20755.482 |
| NM_004180 | 5152.041  | 5251.637  | AF218014  | 5503.226  | 6211.085  | BC011655  | 1882.046  | 1453.833  |
| NM_004786 | 35991.148 | 54850.098 | NM_006678 | 3473.341  | 3174.784  | BC002396  | 2004.774  | 1072.348  |
| AF302109  | 4771.623  | 5447.25   | AY007729  | 16633.816 | 16223.876 | NM_022095 | 930.261   | 640.201   |
| AL117485  | 8316.887  | 7716.075  | NM_014424 | 451.131   | 500.934   | SR6       | 1814.943  | 1443.925  |
| NM_003505 | 603.063   | 548.519   | AF159092  | 756.098   | 652.929   | CY3Cy5    | 2027.584  | 102.917   |
| NM_007191 | 1631.698  | 1342.761  | BC007318  | 1945.088  | 1545.918  | NM_020370 | 449.451   | 469.962   |

|           |           |           |           |           |           |           |           |           |
|-----------|-----------|-----------|-----------|-----------|-----------|-----------|-----------|-----------|
| AL109667  | 934.085   | 864.351   | M36693    | 1530.084  | 1302.514  | BF310159  | 2805.169  | 6332.731  |
| NM_000840 | 784.787   | 793.856   | NM_016292 | 8688.427  | 8438.24   | NM_018986 | 896.199   | 881.658   |
| AF205437  | 880       | 857.722   | NM_002601 | 2892.932  | 2112.219  | AB044934  | 409.23    | 265.186   |
| AF034102  | 7049.608  | 6149.562  | U62858    | 4372.405  | 4981.684  | U27655    | 1359.689  | 768.8     |
| AJ008142  | 18391.891 | 18669.854 | AF035121  | 350.44    | 340.023   | NM_003360 | 657.866   | 501.705   |
| AL035289  | 367.702   | 424.546   | NM_014432 | 1490.146  | 1348.485  | Z21965    | 5019.678  | 4294.811  |
| NM_001343 | 3988.185  | 5567.521  | NM_001558 | 564.513   | 683.787   | NM_000852 | 7108.491  | 5424.767  |
| NM_007275 | 11590.854 | 12360.959 | NM_006953 | 2055.347  | 3357.569  | NM_000396 | 466.519   | 260.079   |
| NM_019025 | 21606.26  | 23380.135 | U96173    | 1554.43   | 1772.707  | NM_002402 | 2173.997  | 1505.762  |
| NM_018461 | 5051.961  | 5081.371  | NM_018941 | 989.787   | 1005.749  | NM_000062 | 3661.007  | 3102.411  |
| AF235023  | 2289.98   | 2801.008  | NM_020241 | 340.163   | 581.975   | NM_009590 | 1875.64   | 1478.876  |
| NM_006910 | 3733.025  | 3694.976  | NM_000749 | 533.3     | 744.631   | AL133037  | 576.703   | 295.943   |
| AF162667  | 2300.49   | 2735.071  | NM_000751 | 4603.478  | 7027.576  | NM_020350 | 2879.164  | 2725.149  |
| AB046847  | 2653.054  | 2993.317  | NM_014849 | 1954.463  | 2983.369  | NM_000350 | 666.359   | 680.233   |
| NM_000447 | 2291.66   | 2336.577  | NM_001042 | 4786.756  | 5364.132  | AA419164  | 2682.054  | 2153.053  |
| NM_006354 | 6904.451  | 6361.091  | NM_020041 | 441.801   | 470.441   | AL117235  | 418.01    | 406.682   |
| AF303378  | 7460.333  | 7515.176  | NM_012229 | 4333.63   | 4780.003  | NM_014822 | 4245.831  | 4950.996  |
| NM_016037 | 6154.298  | 6303.04   | NM_005071 | 666.909   | 475.76    | NM_005296 | 2235.351  | 2319.177  |
| NM_000043 | 725.883   | 1109.436  | AB023147  | 13266.831 | 10772.605 | NM_001337 | 361.203   | 397.696   |
| NM_016140 | 592.498   | 724.057   | NM_016615 | 9118.083  | 8343.23   | NM_003611 | 3879.161  | 4393.225  |
| NM_015965 | 273.806   | 207.715   | NM_005630 | 1596.176  | 1743.836  | AB014538  | 1021.727  | 1203.189  |
| NM_000417 | 2409.648  | 2298.68   | AK023106  | 1231.647  | 1369.497  | AK025118  | 3753.016  | 2778.196  |
| NM_020356 | 1243.146  | 948.526   | NM_016730 | 17567.088 | 17681.336 | NM_000727 | 846.418   | 646.255   |
| NM_018235 | 36717.441 | 36152.797 | AL035297  | 1182.275  | 969.408   | NM_005385 | 3184.554  | 2377.587  |
| NM_012104 | 14767.992 | 15170.773 | NM_004408 | 2395.772  | 2123.597  | NM_018985 | 1390.446  | 942.124   |
| NM_006144 | 1610.77   | 1398.654  | AJ131244  | 1208.133  | 1148.939  | NM_006074 | 9364.28   | 6232.676  |
| AL136549  | 2668.691  | 3293.473  | NM_002532 | 4498.992  | 5561.223  | AF208232  | 1316.348  | 1391.646  |
| NM_012166 | 1337.965  | 1578.834  | NM_012388 | 3403.314  | 4466.475  | NM_002988 | 851.956   | 783.972   |
| NM_002216 | 314.832   | 313.254   | NM_016651 | 577.787   | 662.691   | NM_016258 | 2993.317  | 2201.485  |
| NM_007038 | 2959.033  | 3021.112  | NM_001671 | 211.118   | 483.071   | AF203032  | 2188.16   | 1870.46   |
| AF311324  | 2813.52   | 3352.88   | NM_019843 | 2307.051  | 2513.486  | AB014542  | 9357.313  | 8274.111  |
| AF124433  | 643.788   | 786.155   | NM_016192 | 4438.494  | 3666.351  | NM_014640 | 575.345   | 472.055   |
| NM_001461 | 893.958   | 1072.925  | BE878426  | 49429.445 | 52338.402 | Y10518    | 11962.177 | 10543.139 |
| AF061556  | 1059.363  | 1319.51   | NM_001745 | 8105.543  | 9603.03   | AF155135  | 3784.654  | 4083.08   |
| AL162049  | 1416.017  | 1210.755  | AK025542  | 2459.665  | 3196.267  | NM_014790 | 852.412   | 1304.123  |
| AF036144  | 417.859   | 281.674   | AF207547  | 1417.36   | 2009.329  | AB032965  | 9629.033  | 8882.203  |
| NM_005032 | 677.925   | 767.214   | NM_002768 | 4813.559  | 11442.664 | AF133424  | 806.537   | 935.506   |
| NM_004160 | 5132.099  | 5371.048  | NM_003691 | 2917.563  | 3585.499  | NM_005003 | 11623.331 | 10510.971 |
| AL109677  | 1112.248  | 1179.442  | NM_002950 | 22323.898 | 24226.316 | AF084560  | 1502.177  | 1568.735  |
| NM_003941 | 32155.775 | 25972.539 | NM_002318 | 1896.43   | 2128.312  | NM_015715 | 1794.869  | 1847.754  |
| AF177909  | 1480.733  | 1436.835  | NM_001433 | 562.119   | 581.382   | NM_000032 | 1112.195  | 1291.951  |
| NM_002664 | 5909.734  | 4586.688  | NM_003134 | 49760.289 | 48913.922 | NM_002083 | 413.642   | 488.465   |
| AB018271  | 2465.622  | 2150.143  | NM_004314 | 2515.469  | 2775.353  | NM_002035 | 2515.236  | 2970.443  |
| AL137665  | 2962.044  | 2536.664  | NM_018247 | 6062.549  | 6704.31   | NM_014900 | 379.833   | 323.322   |
| NM_016434 | 1703.034  | 1620.989  | NM_017979 | 4622.245  | 8535.907  | AK023510  | 2092.476  | 1399.014  |
| U36561    | 57825.465 | 64465.941 | NM_005898 | 11568.576 | 12058.447 | NM_004345 | 749.657   | 616.352   |
| NM_005634 | 3091.821  | 2953.781  | NM_002889 | 29495.676 | 28599.912 | NM_000702 | 16406.164 | 12235.859 |
| NM_017757 | 3383.191  | 2808.344  | AF078866  | 1836.422  | 2019.859  | X71490    | 6313.216  | 4421.553  |
| NM_002146 | 27852.369 | 26490.678 | BF311880  | 2553.208  | 1608.106  | AF257081  | 489.834   | 437.725   |
| AB007892  | 1879.966  | 2491.36   | NM_001360 | 10869.5   | 8856.606  | NM_001688 | 33271.602 | 15684.183 |
| AB037748  | 1064.96   | 2008.487  | AK026656  | 2716.486  | 2674.186  | NM_002232 | 721.063   | 830.137   |
| AB002306  | 2182.521  | 2317.881  | AJ276207  | 5363.149  | 4845.326  | NM_016106 | 2860.997  | 2934.533  |
| NM_001300 | 1920.379  | 1953.464  | AB011131  | 8388.201  | 8054.773  | NM_014570 | 2681.604  | 2439.248  |

|           |           |           |           |           |           |           |           |           |
|-----------|-----------|-----------|-----------|-----------|-----------|-----------|-----------|-----------|
| NM_012472 | 512.107   | 702.113   | AF164794  | 6359.187  | 8345.566  | NM_014747 | 2736.381  | 3253.002  |
| NM_018187 | 7380.28   | 10230.354 | AB020656  | 1199.8    | 1852.558  | Y19240    | 3075.734  | 9064.909  |
| NM_003016 | 19560.313 | 24040.725 | AK023648  | 3683.912  | 4766.848  | AF091029  | 2540.722  | 4187.982  |
| NM_005463 | 16082.046 | 17245.475 | NM_000412 | 1641.79   | 1619.391  | X97074    | 3306.841  | 3521.566  |
| NM_001325 | 2367.221  | 2235.585  | AF077033  | 2063.795  | 2449.607  | NM_004135 | 3895.192  | 2997.272  |
| NM_018282 | 19338.383 | 17562.578 | NM_004991 | 478.11    | 647.895   | NM_013443 | 1291.449  | 1165.502  |
| BC019932  | 2897.542  | 2684.77   | AF222980  | 2001.443  | 2109.163  | NM_000925 | 6186.93   | 5824.77   |
| AF114818  | 2950.557  | 3004.037  | AK026758  | 1522.727  | 1282.353  | NM_000465 | 1156.033  | 1571.639  |
| AK025106  | 2288.504  | 2270.736  | NM_012201 | 1897.957  | 1854.774  | NM_000123 | 2453.195  | 2007.285  |
| NM_020144 | 2924.487  | 2895.224  | AB046774  | 486.312   | 621.68    | BE858979  | 720.279   | 620.938   |
| NM_003908 | 48574.258 | 47149.434 | AK022385  | 14348.553 | 14124.762 | NM_000122 | 1565.523  | 944.36    |
| BE893142  | 1386.728  | 1336.125  | NM_002775 | 1513.519  | 1730.698  | NM_006712 | 55407.91  | 46022.672 |
| NM_003103 | 5057.334  | 3619.718  | AK024584  | 3948.809  | 2514.649  | NM_007026 | 1737.106  | 1542.021  |
| NM_015340 | 4655.889  | 4378.136  | NM_003504 | 5766.624  | 5729.363  | M37712    | 4997.77   | 3719.247  |
| NM_006451 | 2521.133  | 2019.616  | NM_013298 | 3829.455  | 3606.516  | NM_002648 | 599.821   | 402.18    |
| NM_002094 | 1436.064  | 1178.58   | NM_007267 | 2929.693  | 2659.492  | AF070670  | 1755.755  | 1569.359  |
| NM_002937 | 470.616   | 764.569   | AK022830  | 415.773   | 450.954   | NM_016156 | 2555.621  | 2544.994  |
| NM_003191 | 3578.29   | 2662.731  | Z36816    | 1317.235  | 1365.428  | NM_016528 | 1055.102  | 1219.98   |
| AL137476  | 9602.075  | 9088.655  | NM_005865 | 3016.844  | 2751.896  | NM_015974 | 1498.222  | 3205.243  |
| AF052174  | 2036.687  | 2047.828  | NM_006413 | 5140.837  | 4682.051  | NM_014384 | 1011.483  | 1308.947  |
| AF070590  | 1040.62   | 941.924   | NM_017684 | 801.619   | 908.039   | NM_002573 | 2040.767  | 2464.248  |
| NM_004709 | 699.572   | 685.064   | AL049689  | 530.89    | 647.01    | AL133037  | 514.66    | 358.04    |
| NM_000761 | 52910.199 | 48189.656 | NM_000216 | 622.253   | 595.138   | NM_020350 | 2744.928  | 2175.042  |
| NM_020142 | 4686.043  | 4582.093  | NM_002203 | 378.654   | 512.774   | NM_000350 | 718.215   | 520.02    |
| NM_000774 | 3829.447  | 4007.95   | AF135960  | 910.684   | 1020.627  | X91103    | 3134.036  | 2445.619  |
| NM_004894 | 15389.03  | 15564.492 | NM_014216 | 13088.285 | 16009.683 | AA419164  | 2859.169  | 2364.345  |
| AB028960  | 961.847   | 833.047   | NM_003010 | 1604.098  | 1802.407  | L35251    | 1548.76   | 1429.908  |
| NM_005648 | 20786.01  | 18688.523 | NM_006871 | 1547.2    | 2375.679  | BE910395  | 327.964   | 492.374   |
| AK000689  | 415.001   | 302.708   | NM_019074 | 3457.991  | 7875.799  | N46828    | 627.579   | 540.305   |
| NM_006943 | 13669.698 | 11849.358 | NM_018494 | 30168.787 | 31135.271 | BI908302  | 4146.778  | 2926.057  |
| NM_006741 | 8169.429  | 7258.198  | AK000006  | 632.689   | 690.989   | AA460969  | 1323.698  | 933.054   |
| NM_014166 | 4657.473  | 3727.177  | NM_001115 | 972.677   | 1295.602  | BG695859  | 465.723   | 266.825   |
| AL117606  | 6440.725  | 5530.512  | NM_014921 | 532.105   | 554.999   | M85079    | 1993.36   | 1398.196  |
| NM_012330 | 1708.893  | 1282.2    | NM_016581 | 42533.32  | 42228.707 | AA457671  | 6896.694  | 5207.722  |
| AF294278  | 2598.955  | 2282.374  | NM_013255 | 1114.154  | 1012.981  | X07437    | 1361.49   | 1014.226  |
| NM_018211 | 1651.25   | 1498.461  | NM_007183 | 742.271   | 760.59    | NM_000641 | 960.097   | 655.34    |
| NM_014520 | 3389.079  | 3039.022  | AJ238243  | 7472.885  | 7830.978  | AE006466  | 536.906   | 345.474   |
| NM_002616 | 1163.96   | 1151.783  | J05046    | 13329.479 | 12583.164 | BC011655  | 2107.744  | 2227.634  |
| AK025712  | 9519.755  | 7841.019  | NM_012318 | 1322.964  | 1442.272  | BC002396  | 2142.332  | 1702.367  |
| AK026375  | 1825.945  | 2050.627  | NM_002751 | 2944.493  | 2535.504  | NM_022095 | 736.017   | 743.774   |
| NM_014710 | 516.836   | 538.952   | NM_004291 | 788.442   | 881.151   | AF112219  | 12962.978 | 16926.23  |
| U85992    | 987.811   | 1278.043  | NM_003816 | 3276.545  | 3257.705  | NM_014640 | 399.914   | 564.472   |
| AL110152  | 881.536   | 1116.439  | AK022635  | 491.082   | 496.474   | Y10518    | 11474.487 | 10087.742 |
| AF131745  | 756.954   | 738.262   | NM_004912 | 3526.839  | 3123.47   | AF155135  | 3480.925  | 3208.628  |
| AL117565  | 4736.104  | 4843.334  | U79304    | 8907.638  | 8136.688  | NM_014790 | 732.661   | 631.903   |
| AF147305  | 721.71    | 1008.212  | NM_016267 | 2573.268  | 2971.758  | NM_003571 | 2481.728  | 2628.988  |
| AK022109  | 2379.147  | 2853.837  | NM_004671 | 3564.637  | 4279.195  | AB032965  | 7876.972  | 6570.406  |
| AK022103  | 867.758   | 1432.39   | NM_005180 | 12545.223 | 17218.025 | NM_020370 | 313.879   | 769.306   |
| NM_007030 | 766.38    | 936.387   | NM_006526 | 1555.75   | 2226.185  | BF310159  | 3524.828  | 2451.518  |
| AK022111  | 557.036   | 594.71    | U35622    | 871.096   | 1030.132  | NM_018986 | 1155.166  | 753.713   |
| AK021527  | 673.43    | 558.831   | NM_007045 | 1634.755  | 2151.184  | AB044934  | 977.568   | 700.422   |
| AF143882  | 946.376   | 910.863   | NM_003627 | 2831.111  | 3582.243  | U27655    | 1499.332  | 846.763   |
| U00953    | 914.083   | 864.808   | NM_012145 | 14138.304 | 15198.139 | NM_003360 | 834.81    | 597.313   |

|           |           |           |           |           |           |           |           |           |
|-----------|-----------|-----------|-----------|-----------|-----------|-----------|-----------|-----------|
| AF086176  | 1258.033  | 1353.839  | AF305779  | 878.231   | 1383.291  | Z21965    | 6488.583  | 5451.289  |
| NM_017742 | 845.599   | 1033.34   | AF225416  | 5646.379  | 6718.451  | NM_012427 | 358.115   | 200.524   |
| NM_00510E | 1830.008  | 2155.46   | NM_016231 | 979.238   | 1161.448  | NM_000852 | 7293.796  | 6530.048  |
| AK022292  | 4602.756  | 4603.622  | NM_002093 | 3308.51   | 3002.542  | AW797282  | 405.649   | 171.683   |
| AK024173  | 328.124   | 318.763   | AB042555  | 5151.536  | 4846.81   | NM_002402 | 2176.198  | 2255.22   |
| AB051436  | 1990.047  | 1623.653  | NM_017763 | 912.858   | 968.689   | L09070    | 502.76    | 1092.694  |
| AK026482  | 12817.785 | 13012.174 | NM_013975 | 1127.826  | 801.244   | NM_000062 | 4162.134  | 4486.086  |
| AL137473  | 1710.4    | 1796.631  | NM_003843 | 3443.976  | 3083.171  | NM_017877 | 254.187   | 447.472   |
| AJ001873  | 12784.125 | 15441.999 | NM_012216 | 1000.704  | 921.592   | NM_00959C | 1948.137  | 5151.487  |
| AB026054  | 399.679   | 500.513   | X73502    | 3354.405  | 3649.248  | NM_01610E | 2514.902  | 2204.114  |
| AK022604  | 1020.706  | 1111.699  | NM_020445 | 33108.547 | 32801.223 | NM_01457C | 2577.136  | 2334.09   |
| U66048    | 1821.68   | 1837.537  | NM_016376 | 3779.596  | 3624.793  | NM_014747 | 2406.267  | 2446.208  |
| AL080095  | 437.21    | 646.983   | AB046848  | 3385.672  | 3803.837  | Y19240    | 2478.078  | 2023.082  |
| AK023401  | 2711.944  | 3020.513  | AL133057  | 5322.135  | 6145.022  | AF091029  | 2564.192  | 2121.437  |
| AK001865  | 904.924   | 1079.014  | U04845    | 5838.495  | 6752.624  | X97074    | 4329.747  | 3291.01   |
| AK024035  | 13312.087 | 14014.236 | NM_018103 | 6601.012  | 7046.286  | AL117235  | 525.797   | 332.297   |
| AL050079  | 2672.603  | 3176.918  | AK026302  | 7105.094  | 9359.967  | NM_014822 | 4415.667  | 4182.435  |
| AL080233  | 3187.517  | 3598.853  | NM_012214 | 2375.121  | 3999.97   | NM_00529E | 1996.26   | 1683.027  |
| AL049361  | 303.115   | 438.914   | AF049656  | 15716.32  | 19488.752 | NM_001337 | 389.154   | 316.951   |
| AL050132  | 322.874   | 620.575   | NM_000312 | 1018.11   | 1256.765  | NM_003611 | 4480.124  | 3446.457  |
| AL117663  | 3011.45   | 3335.66   | NM_003963 | 426.204   | 613.227   | AB014538  | 922.464   | 870.661   |
| NM_014293 | 3513.764  | 3711.004  | AC009729  | 439.039   | 462.215   | NM_004154 | 398.099   | 68.749    |
| AK024432  | 2692.662  | 2931.98   | NM_01659E | 5257.021  | 4621.469  | NM_00620E | 358.375   | 297.011   |
| AL137513  | 1323.904  | 1328.962  | BE874867  | 31180.619 | 31094.883 | AK025118  | 3984.29   | 3125.679  |
| AF088001  | 690.908   | 682.237   | AL136719  | 2140.317  | 2001.27   | NM_000727 | 1051.965  | 801.761   |
| NM_018067 | 3740.639  | 3507.571  | NM_014109 | 4584.361  | 5271.493  | NM_00538E | 3254.917  | 3012.651  |
| NM_01895E | 12348.702 | 12363.833 | NM_01216C | 1460.895  | 1413.356  | NM_01898E | 1580.166  | 1225.55   |
| NM_014787 | 1546.999  | 1861.897  | NM_006357 | 39266.34  | 38375.402 | NM_006074 | 10038.956 | 7676.988  |
| AL122109  | 1286.187  | 1255.577  | NM_01424E | 38648.684 | 32021.285 | AF208232  | 1529.337  | 1514.022  |
| AF074988  | 1303.103  | 1298.611  | AK027070  | 445.751   | 578.805   | NM_00298E | 727.669   | 702.45    |
| AK024946  | 1488.215  | 1479.787  | AF129533  | 310.199   | 360.605   | NM_00418E | 844.977   | 860.257   |
| AK001432  | 3240.703  | 3830.316  | NM_003341 | 5655.199  | 9712.996  | NM_01625E | 2833.003  | 3530.037  |
| AL133568  | 4341.455  | 4216.348  | NM_01778E | 651.144   | 686.043   | AF203032  | 2495.717  | 3375.733  |
| AF009265  | 1572.738  | 1576.347  | NM_006249 | 2645.759  | 2479.099  | AB014542  | 10389.999 | 10796.687 |
| AF009309  | 4240.322  | 4492.621  | NM_01831E | 723.852   | 845.652   | AF070670  | 1405.08   | 1154.435  |
| AF054830  | 161.449   | 354.925   | AB020640  | 2153.497  | 2418.733  | NM_01615E | 2325.252  | 2197.266  |
| NM_00236C | 2157.978  | 2309.514  | D29954    | 13356.021 | 12162.876 | NM_01652E | 867.377   | 702.482   |
| AF009322  | 701.779   | 760.716   | AF007131  | 745.228   | 657.444   | NM_015974 | 1609.401  | 1279.325  |
| AF056425  | 2046.999  | 2317.414  | NM_006839 | 1388.491  | 1324.306  | NM_014384 | 1064.326  | 944.94    |
| AF090893  | 761.664   | 894.324   | NM_000223 | 526.978   | 481.162   | NM_002573 | 1958.932  | 2031.117  |
| NM_018033 | 13800.067 | 15624.22  | NM_005851 | 1010.535  | 813.924   | AF133424  | 1046.327  | 1009.223  |
| AK001945  | 1138.576  | 1686.374  | AF119256  | 1328.723  | 2682.421  | NM_005003 | 13697.227 | 11178.455 |
| AK021541  | 382.736   | 545.448   | X74497    | 1412.912  | 1928.612  | AF084560  | 1638.935  | 2061.668  |
| AK021766  | 672.008   | 823.733   | NM_01221C | 447.815   | 832.831   | NM_01571E | 2239.874  | 2102.855  |
| AK001147  | 495.375   | 647.742   | U10072    | 1709.745  | 2001.195  | NM_000032 | 1225.648  | 1085.062  |
| AK021630  | 944.008   | 1137.102  | AF222749  | 10006.611 | 12075.985 | NM_002083 | 385.963   | 363.937   |
| AK021831  | 1144.64   | 1946.726  | NM_00341C | 2526.625  | 2671.874  | NM_00203E | 2498.703  | 1877.678  |
| AK025193  | 135.127   | 424.52    | NM_00714E | 2065.897  | 2624.07   | NM_01490C | 453.246   | 415.31    |
| AK025650  | 4592.317  | 4800.191  | NM_002229 | 718.449   | 871.239   | BF342908  | 435.652   | 393.116   |
| AK026401  | 1377.658  | 1448.824  | S69027    | 2644.439  | 3222.721  | AK023510  | 1953.758  | 1612.565  |
| AK026773  | 2039.167  | 2415.602  | NM_012119 | 2344.966  | 2109.141  | NM_00434E | 723.77    | 680.056   |
| AK025893  | 513.945   | 338.454   | X99631    | 11011.363 | 12070.115 | NM_000702 | 17060.66  | 14467.767 |
| U73530    | 519.835   | 576.302   | NM_00173C | 1532.902  | 1896.682  | X71490    | 6438.518  | 6397.788  |

|           |           |           |           |           |           |           |           |           |
|-----------|-----------|-----------|-----------|-----------|-----------|-----------|-----------|-----------|
| AF086158  | 2670.674  | 2983.45   | AB014589  | 2055.579  | 1960.993  | AF257081  | 580.134   | 585.361   |
| AF086050  | 2524.745  | 2405.997  | AF248649  | 530.15    | 485.267   | NM_00168E | 34316.602 | 28158.318 |
| AF147375  | 1463.046  | 1722.46   | U37146    | 14345.965 | 14567.533 | NM_003631 | 190.667   | 594.328   |
| X51524    | 10536.706 | 12030.044 | NM_01208E | 1538.247  | 1434.468  | NM_00223E | 434.48    | 542.503   |
| AK025759  | 3396.259  | 4077.623  | NM_000991 | 56821.355 | 59884.176 | NM_02209E | 741.584   | 598.379   |
| AK024105  | 436.098   | 500.052   | NM_016034 | 15144.28  | 13984.033 | AF112219  | 12883.168 | 12839.367 |
| AJ238556  | 645.507   | 619.523   | X69150    | 50277.488 | 54236.543 | NM_00413E | 4570.163  | 3633.023  |
| AK021516  | 3791.887  | 4767.326  | NM_00102E | 58458.656 | 62451.367 | NM_01344E | 1794.79   | 1239.494  |
| Z70699    | 869.976   | 1067.822  | NM_016067 | 45407.879 | 41786.98  | NM_00092E | 6364.991  | 4879.081  |
| NM_00689E | 1574.594  | 2570.557  | NM_01828E | 9466.826  | 9731.922  | NM_00046E | 1196.296  | 1107.21   |
| AK023429  | 1090.271  | 693.525   | AK022393  | 8682.155  | 8779.828  | NM_00012E | 2551.383  | 2303.054  |
| AK022276  | 913.009   | 1117.54   | AK026654  | 1339.238  | 2844.995  | AL137501  | 375.632   | 342.119   |
| AK026881  | 447.757   | 393.189   | AK025245  | 867.483   | 1093.314  | BE858979  | 703.657   | 591.393   |
| AL133653  | 770.13    | 888.435   | AK025496  | 3695.33   | 4501.3    | NM_00012E | 1527.882  | 1301.309  |
| AK023774  | 537.929   | 432.017   | NM_00520E | 51964.703 | 52254.16  | NM_00671E | 51890.426 | 51390.371 |
| AL049377  | 853.22    | 686.407   | NM_00196E | 1087.26   | 1408.459  | NM_00624E | 678.482   | 811.514   |
| NM_003544 | 44881.379 | 57933.754 | NM_01613E | 2220.066  | 4596.723  | NM_00702E | 1841.378  | 5409.021  |
| U17640    | 806.322   | 986.252   | Z36833    | 48107.012 | 52316.035 | M37712    | 5667.639  | 7931.694  |
| AK001187  | 2412.958  | 2659.362  | NM_01435E | 1347.728  | 1463.719  | NM_00264E | 466.313   | 547.161   |
| NM_00352E | 39819.102 | 39475.836 | M21191    | 31775.148 | 31544.553 | AW797282  | 380.608   | 351.36    |
| AF086284  | 933.954   | 1015.349  | AF072810  | 1159.101  | 1030.201  | NM_00240E | 1982.317  | 1983.138  |
| AF056436  | 2302.058  | 2673.054  | AF174482  | 9570.217  | 9714.565  | NM_00006E | 3702.825  | 2960.167  |
| AB023191  | 1156.303  | 1241.584  | NM_00352E | 1073.022  | 1130.99   | NM_00959E | 1781.727  | 1779.951  |
| AK027212  | 7193.336  | 7998.349  | NM_01776E | 922.213   | 920.643   | AL133037  | 1069.265  | 1045.124  |
| X56197    | 806.199   | 1082.444  | D85131    | 9498.581  | 10718.88  | NM_02035E | 3201.21   | 1982.787  |
| NM_00519E | 8469.716  | 9196.018  | D30612    | 3531.769  | 3224.068  | NM_00035E | 951.311   | 793.271   |
| U90905    | 1451.765  | 2378.9    | NM_00216E | 16145.483 | 13729.413 | X91103    | 3208.905  | 2800.937  |
| AF161422  | 1952.236  | 3121.204  | U52097    | 14594.377 | 14691.218 | AA419164  | 3003.154  | 2383.898  |
| AL137384  | 948.374   | 610.391   | NM_00341E | 2492.409  | 3113.55   | L35251    | 1522.852  | 1211.608  |
| AF070619  | 1899.802  | 1785.526  | AL079289  | 133.287   | 1382.394  | BE910395  | 358.078   | 126.414   |
| NM_005321 | 6851.626  | 7031.412  | NM_018484 | 420.193   | 518.259   | N46828    | 523.314   | 391.514   |
| AF073520  | 1445.99   | 1547.949  | NM_017594 | 1172.869  | 2156.701  | BI908302  | 3930.638  | 3233.993  |
| AF143885  | 700.619   | 550.111   | AK027237  | 540.98    | 680.463   | AA460969  | 1308.706  | 1159.949  |
| NM_01401E | 11905.768 | 19383.504 | AK027104  | 1267.258  | 1467.644  | BG695859  | 509.66    | 231.862   |
| AK024973  | 621.666   | 644.511   | AL133090  | 13555.057 | 16312.417 | M85079    | 1784.996  | 1262.885  |
| AJ008123  | 5368.875  | 4987.674  | AF085867  | 3200.019  | 3364.068  | AA457671  | 6951.214  | 7027.3    |
| AJ008156  | 932.259   | 870.48    | AK026158  | 577.102   | 745.264   | X07437    | 1372.374  | 1542.3    |
| AF147321  | 333.778   | 453.674   | AF086510  | 3487.649  | 3571.29   | NM_000641 | 1119.319  | 852.206   |
| AF161437  | 5667.407  | 9888.088  | Z36779    | 2423.612  | 2703.117  | AE006466  | 617.907   | 449.371   |
| AK001039  | 4697.91   | 5127.583  | NM_00281E | 1561.849  | 1728.903  | BC011655  | 2051.851  | 3919.03   |
| AK026465  | 1538.143  | 1811.94   | AK025288  | 639.326   | 643.336   | BC002396  | 2131.427  | 5186.438  |
| AK024321  | 594.974   | 534.051   | NM_01782E | 5584.276  | 5090.592  | AF208232  | 1300.375  | 1152.813  |
| U92018    | 510.059   | 1032.568  | AK026844  | 1997.172  | 2103.048  | NM_00298E | 1133.694  | 857.239   |
| U52834    | 903.362   | 969.736   | AK026735  | 2380.105  | 2596.142  | NM_00418E | 714.344   | 686.636   |
| AJ227898  | 437.174   | 396.977   | AL110104  | 16240.13  | 17982.531 | NM_01625E | 2727.849  | 2346.596  |
| NM_00353E | 848.797   | 1363.852  | AF240633  | 747.711   | 952.364   | AF203032  | 2106.227  | 1961.396  |
| NM_01786E | 8397.626  | 9607.492  | AK027056  | 5280.483  | 4434.995  | AB014542  | 8369.229  | 6637.914  |
| AF075100  | 724.838   | 576.431   | AK024294  | 1736.069  | 1470.719  | NM_01464E | 1759.013  | 1624.271  |
| AF203447  | 9906.863  | 10179.933 | AL110126  | 2213.785  | 1781.026  | Y10518    | 10400.978 | 7139.051  |
| NM_01850E | 1470.842  | 1685.056  | AF052172  | 10509.505 | 10094.248 | AF155135  | 3440.084  | 2807.629  |
| AL080066  | 9233.499  | 8252.186  | AB014573  | 3131.36   | 3502.829  | NM_01479E | 765.432   | 906.5     |
| AJ227870  | 1111.202  | 1337.699  | AK025418  | 524.533   | 421.616   | NM_003571 | 2582.986  | 2312.85   |
| AL137620  | 701.569   | 720.26    | AK091109  | 14433.433 | 16356.933 | AB032965  | 9277.934  | 7289.46   |

|           |           |           |           |           |           |           |           |           |
|-----------|-----------|-----------|-----------|-----------|-----------|-----------|-----------|-----------|
| NM_005294 | 2473.837  | 2488.148  | AF032897  | 364.649   | 408.267   | NM_004767 | 428.235   | 364.653   |
| AK026879  | 545.032   | 372.086   | NM_014967 | 2177.002  | 2603.53   | BF310159  | 3536.452  | 3172.761  |
| AF085826  | 625.118   | 776.236   | AK022915  | 2855.719  | 3075.46   | NM_018986 | 1203.492  | 877.163   |
| AK024362  | 546.926   | 612.785   | AK021736  | 374.007   | 375.155   | AB044934  | 558.319   | 265.96    |
| AF118068  | 2007.66   | 2017.971  | AF131834  | 785.01    | 975.159   | U27655    | 1629.772  | 1417.061  |
| NM_004164 | 437.945   | 457.687   | AL355711  | 741.211   | 1126.115  | NM_00336C | 852.371   | 697.31    |
| NM_01901E | 5131.271  | 4111.877  | AK025851  | 991.459   | 1085.276  | Z21965    | 5187.668  | 6559.601  |
| M87931    | 569.188   | 686.073   | AJ011409  | 7406.419  | 7685.727  | NM_000852 | 13817.864 | 17964.85  |
| CY3Cy5    | 661.762   | 93.096    | AJ227906  | 993.787   | 1090.577  | NM_00039C | 582.992   | 519.66    |
| BE790116  | 3995.3    | 3621.271  | AJ011598  | 391.863   | 365.693   | AF257081  | 750.863   | 652.655   |
| AI922341  | 850.591   | 904.971   | AJ001906  | 327.055   | 416.254   | NM_00168E | 27907.443 | 19335.043 |
| M12824    | 1142.633  | 915.581   | U17633    | 517.535   | 545.843   | NM_002232 | 526.113   | 469.777   |
| W60100    | 546.169   | 543.953   | L10404    | 631.371   | 839.822   | NM_01610E | 2914.822  | 2669.293  |
| U72508    | 545.497   | 454.534   | AF283776  | 6352.32   | 7181.919  | NM_01457C | 2622.249  | 2224.941  |
| AA457153  | 2011.007  | 1939.798  | L10123    | 15717.943 | 16287.14  | NM_014747 | 2384.709  | 2472.652  |
| AA283122  | 1908.417  | 1878.227  | D16877    | 1670.576  | 1758.368  | Y19240    | 2555.565  | 2429.636  |
| AA868504  | 1083.54   | 956.986   | L19363    | 615.502   | 976.086   | AF091029  | 2476.209  | 2672.085  |
| AA877845  | 3055.72   | 2427.235  | AL109781  | 3470.75   | 5549.721  | X97074    | 4443.197  | 3425.319  |
| AA664241  | 12913.757 | 11679.913 | AK021712  | 449.602   | 903.477   | AL117235  | 609.984   | 463.593   |
| NM_00058E | 10165.213 | 9281.593  | AK021895  | 1611.976  | 1962.199  | NM_014822 | 4624.304  | 3860.084  |
| SR5       | 3392.478  | 3656.768  | AK000036  | 2741.786  | 2922.543  | NM_00529E | 2335.987  | 1919.326  |
| CY3Cy5    | 1229.469  | 117.418   | AK000924  | 394.192   | 637.833   | NM_003611 | 4165.781  | 3236.483  |
| NM_00581C | 3393.514  | 3125.938  | AK022252  | 1493.636  | 1148.993  | AB014538  | 1050.797  | 1051.56   |
| M28170    | 3650.503  | 2679.863  | AK000114  | 1577.99   | 1606.614  | NM_004154 | 408.245   | 326.06    |
| AK026223  | 2318.656  | 2526.113  | AK000952  | 2465.375  | 2590.674  | NM_00620C | 420.872   | 388.387   |
| NM_000874 | 820.697   | 801.472   | AK024520  | 1314.924  | 1478.303  | AK025118  | 4136.794  | 3774.884  |
| NM_005854 | 739.254   | 855.619   | AK024592  | 1635.339  | 1459.316  | NM_000727 | 872.762   | 749.593   |
| AB007863  | 9605.908  | 9130.779  | AK024904  | 1780.268  | 1567.637  | NM_00538E | 3317.364  | 4664.124  |
| AK024456  | 1719.316  | 1805.707  | AK025030  | 927.67    | 967.782   | NM_01898E | 1497.529  | 2108.935  |
| NM_01778E | 349.249   | 542.2     | AK024542  | 2108.546  | 2499.07   | NM_006074 | 9307.386  | 9826.263  |
| D31887    | 2178.859  | 2039.404  | AB050477  | 2046.909  | 2453.001  | NM_006712 | 55178.344 | 55801.223 |
| NM_002313 | 528.827   | 514.832   | AK000152  | 668.784   | 979.049   | NM_00624C | 773.249   | 591.988   |
| NM_00445E | 664.344   | 687.822   | AK024300  | 910.173   | 996.504   | NM_00702E | 1876.635  | 1841.605  |
| NM_005503 | 1167.055  | 981.458   | L09092    | 507.388   | 685.147   | M37712    | 5803.298  | 4076.453  |
| NM_001502 | 1057.353  | 1167.537  | NM_012132 | 700.287   | 930.03    | NM_00264E | 456.984   | 416.593   |
| AF284223  | 15468.357 | 13312.985 | NM_012129 | 1438.467  | 1559.256  | AF070670  | 1786.248  | 1471.488  |
| AF176012  | 2268.803  | 2209.153  | AK025716  | 1152.775  | 1379.161  | NM_01615E | 2657.858  | 2261.184  |
| BE743838  | 2905.552  | 3546.227  | AF086202  | 7672.219  | 9803.197  | NM_01652E | 890.89    | 650.218   |
| AF273046  | 2759.117  | 3969.618  | AK022352  | 598.137   | 824.56    | NM_015974 | 1631.61   | 1477.661  |
| NM_001081 | 1190.01   | 1573.352  | AK023270  | 1803.344  | 1794.992  | NM_014384 | 974.045   | 1128.044  |
| NM_002483 | 789.142   | 1115.767  | AF085979  | 16984.891 | 22502.34  | NM_002573 | 2044.256  | 1786.896  |
| BF002026  | 447.235   | 621.587   | AK023112  | 1847.24   | 1822.627  | AF133424  | 1062.71   | 849.45    |
| NM_004171 | 1111.399  | 827.492   | NM_01780E | 17771.254 | 19712.699 | NM_005003 | 13240.194 | 10448.255 |
| NM_014037 | 3392.15   | 3353.981  | AK001937  | 34812.18  | 33689.07  | AF084560  | 1908.429  | 1565.18   |
| NM_00486E | 7662.551  | 7208.596  | AL365517  | 911.165   | 991.53    | NM_01571E | 2394.436  | 2106.974  |
| NM_01868E | 1159.572  | 1238.038  | AK021988  | 5276.135  | 5847.08   | NM_000032 | 1317.515  | 1142.819  |
| AK056652  | 2667.334  | 2258.705  | AF086494  | 11254.602 | 12981.822 | NM_002083 | 545.672   | 499.959   |
| AL137438  | 847.745   | 907.262   | BI769977  | 544.175   | 626.612   | NM_00203E | 2524.696  | 2568.157  |
| NM_017957 | 2240.26   | 2177.796  | AL137567  | 251.963   | 604.298   | NM_01490C | 526.002   | 504.126   |
| NM_003024 | 1147.048  | 1086.531  | AK024913  | 2519.917  | 2724.06   | BF342908  | 545.55    | 705.063   |
| NM_01324E | 1388.028  | 1389.838  | AB007961  | 1736.063  | 1834.89   | AF118073  | 391.889   | 405.736   |
| NM_000034 | 68851.82  | 68506.383 | NM_005547 | 1406.561  | 1439.361  | AK023510  | 1816.278  | 2084.764  |
| AK022230  | 1814.005  | 1869.97   | AF119862  | 5648.663  | 6115.779  | NM_00434E | 831.758   | 1192.063  |



|           |           |           |           |           |           |           |           |           |
|-----------|-----------|-----------|-----------|-----------|-----------|-----------|-----------|-----------|
| AK022147  | 4270.116  | 4714.999  | U17628    | 1121.927  | 1185.952  | X71490    | 5974.948  | 7886.892  |
| L25664    | 1412.201  | 1611.296  | AF119867  | 2132.933  | 2065.877  | NM_014273 | 6284.321  | 6640.986  |
| NM_014940 | 2152.499  | 1605.697  | AL357205  | 12889.169 | 20041.252 | AF039442  | 688.243   | 788.105   |
| NM_005783 | 296.212   | 277.051   | AF124819  | 1155.688  | 876.566   | NM_004680 | 605.346   | 396.317   |
| NM_006900 | 1021.367  | 996.875   | D17091    | 1403.483  | 2386.287  | NM_005671 | 3123.393  | 3023.98   |
| AJ289111  | 1877.721  | 1662.34   | AL133074  | 938.436   | 1267.433  | NM_019625 | 1337.398  | 1207.086  |
| NM_016356 | 2958.73   | 2929.709  | AF086318  | 5575.978  | 5656.794  | NM_006725 | 1678.97   | 1357.242  |
| NM_006406 | 3193.363  | 2948.871  | AF088012  | 1463.054  | 1319.292  | NM_006071 | 522.62    | 363.197   |
| AF216292  | 19265.324 | 18850.455 | NM_018121 | 1014.919  | 1038.401  | NM_012236 | 6387.25   | 5253.482  |
| NM_000952 | 595.74    | 527.578   | AK026708  | 2216.648  | 2250.681  | AF112219  | 13248.261 | 13225.125 |
| NM_005894 | 536.121   | 579.568   | NM_017903 | 5611.442  | 6449.625  | NM_004135 | 4593.433  | 3722.718  |
| NM_014584 | 1315.613  | 1481.404  | NM_018074 | 1386.344  | 1306.214  | NM_000203 | 370.031   | 252.128   |
| NM_016649 | 1862.237  | 1817.638  | NM_000909 | 1792.58   | 1742.439  | NM_013443 | 1656.627  | 1319.404  |
| AK090536  | 8551.378  | 9492.553  | U31737    | 445.873   | 416.232   | NM_000925 | 6926.819  | 6013.387  |
| D63477    | 552.852   | 574.115   | AK024828  | 909.595   | 1120.965  | NM_000465 | 1709.755  | 1913.552  |
| NM_020243 | 10916.941 | 12023.814 | AF009315  | 1016.857  | 1157.334  | NM_000123 | 2540.271  | 2839.238  |
| NM_014051 | 1547.165  | 1324.14   | NM_019013 | 1161.192  | 1386.043  | BE858979  | 607.599   | 1344.18   |
| AK025398  | 7612.841  | 7734.717  | NM_006783 | 402.21    | 406.407   | U87223    | 469.009   | 384.288   |
| AB037750  | 1610.903  | 1722.518  | L37711    | 390.415   | 418.264   | X91348    | 8649.481  | 8353.907  |
| AK023056  | 680.041   | 545.988   | S70313    | 4829.561  | 5350.063  | Z36505    | 912.792   | 813.018   |
| NM_001120 | 17336.668 | 17514.244 | AK021607  | 933.026   | 1342.23   | NM_001854 | 668.822   | 626.81    |
| NM_017885 | 869.259   | 1145.205  | NM_020186 | 7034.302  | 7846.33   | NM_017913 | 917.229   | 777.981   |
| NM_004915 | 1429.381  | 1633.461  | AF090947  | 1266.791  | 1369.014  | NM_002755 | 3699.724  | 4163.659  |
| AK022207  | 792.064   | 780.878   | AJ272196  | 5437.149  | 5353.15   | AK024799  | 6272.303  | 6073.88   |
| AV708752  | 1994.601  | 1443.932  | X58162    | 4801.26   | 5760.119  | NM_000924 | 2990.009  | 2231.938  |
| AF119885  | 1335.879  | 1117.1    | AK022825  | 401.075   | 601.345   | NM_003330 | 3551.854  | 3118.786  |
| NM_000750 | 426.689   | 531.915   | CY3Cy5    | 1099.843  | 81.834    | NM_003647 | 412.587   | 689.094   |
| NM_004996 | 1293.788  | 1313.269  | L35251    | 1503.291  | 1482.979  | NM_018351 | 314.015   | 290.663   |
| NM_005971 | 1425.731  | 1637.482  | BE910395  | 510.916   | 882.717   | NM_147171 | 1895.326  | 1086.842  |
| NM_017435 | 734.197   | 4966.102  | N46828    | 1066.063  | 755.247   | AF238083  | 1399.456  | 1056.015  |
| NM_013386 | 2880.546  | 3150.661  | BI908302  | 7549.975  | 6602.388  | NM_002962 | 787.014   | 654.467   |
| NM_006517 | 1721.173  | 2070.672  | AA460969  | 1469.358  | 1649.25   | NM_016385 | 1210.108  | 1410.143  |
| AK026680  | 4450.973  | 4116.256  | BG695859  | 646.994   | 568.331   | AB046783  | 536.1     | 528.049   |
| NM_012436 | 53331.465 | 60173.621 | M85079    | 2556.649  | 2433.59   | NM_000845 | 684.781   | 632.218   |
| AK001299  | 14904.529 | 16173.204 | AA457671  | 7443.247  | 6774.132  | NM_004882 | 5524.903  | 10706.209 |
| AB014559  | 8671.169  | 8092.526  | X07437    | 2364.577  | 2333.008  | AK024055  | 875.274   | 1257.438  |
| NM_016489 | 3301.686  | 3254.177  | NM_000641 | 1116.879  | 1110.2    | U10485    | 340.178   | 333.239   |
| NM_005033 | 2948.952  | 2305.788  | AE006466  | 1596.717  | 3669.507  | AK025326  | 1824.783  | 1926.886  |
| NM_015932 | 45859.824 | 44162.445 | BC008737  | 39293.59  | 35787.184 | NM_013376 | 546.109   | 641.429   |
| NM_017949 | 435.809   | 404.549   | BC011655  | 1993.912  | 1927.296  | NM_017964 | 1755.712  | 1887.315  |
| AK022169  | 903.04    | 1078.287  | BC002396  | 2431.585  | 2017.415  | NM_016428 | 650.147   | 646.544   |
| AF015592  | 982.832   | 996.657   | SR6       | 1760.355  | 1093.001  | NM_004083 | 8078.548  | 7169.896  |
| AK026795  | 1451.015  | 1353.136  | SR8       | 5972.833  | 12396.736 | NM_016039 | 3591.251  | 3254.361  |
| NM_016399 | 1718.467  | 1865.018  | SR10      | 19215.066 | 4173.54   | NM_001184 | 1110.98   | 1018.58   |
| NM_016617 | 5296.711  | 4631.509  | CY3Cy5    | 797.297   | 70.957    | NM_015530 | 5147.255  | 4441.632  |
| NM_002027 | 4587.645  | 4536.86   | NM_020370 | 429.218   | 605.526   | NM_016235 | 3147.817  | 3197.951  |
| AL162078  | 1945.171  | 1943.694  | NM_004767 | 396.167   | 323.635   | NM_004725 | 5162.251  | 3664.538  |
| NM_013382 | 8285.89   | 7446.491  | BF310159  | 3552.307  | 2726.788  | NM_015997 | 2204.963  | 2212.249  |
| AB002314  | 740.969   | 744.119   | NM_018986 | 908.464   | 859.64    | NM_001167 | 2773.866  | 2669.106  |
| AB011114  | 27959.936 | 26381.639 | AB044934  | 403.069   | 470.731   | NM_012115 | 1976.093  | 1638.089  |
| D11466    | 10957.942 | 12766.856 | U27655    | 2264.694  | 1898.409  | NM_004933 | 8691.714  | 8571.863  |
| D31885    | 11018.719 | 17215.131 | NM_003360 | 847.965   | 857.722   | M96577    | 5411.795  | 7948.987  |
| BE743838  | 2377.916  | 1856.506  | Z21965    | 12998.796 | 12536.722 | NM_003842 | 1235.411  | 1645.06   |

|           |           |           |           |           |           |           |           |           |
|-----------|-----------|-----------|-----------|-----------|-----------|-----------|-----------|-----------|
| AF273046  | 1999.964  | 2038.814  | NM_000852 | 6743.855  | 6639.088  | L11238    | 4267.868  | 4142.177  |
| NM_001081 | 930.395   | 962.23    | NM_000399 | 386.264   | 547.345   | K02046    | 1560.167  | 2147.148  |
| NM_002483 | 908.256   | 904.805   | NM_002402 | 1812.098  | 1927.733  | AL110151  | 1239.068  | 1420.198  |
| BF002026  | 549.009   | 550.333   | L09070    | 579.545   | 528.847   | AK024841  | 1444.588  | 1688.975  |
| BE790116  | 4109.719  | 3996.799  | NM_000062 | 4018.931  | 2951.433  | NM_004995 | 2038.878  | 2660.653  |
| AI922341  | 905.174   | 801.474   | NM_009590 | 1781.596  | 2324.072  | NM_000386 | 3453.789  | 3620.693  |
| M12824    | 970.627   | 777.619   | AL133037  | 604.432   | 530.859   | NM_001190 | 1950.993  | 1872.275  |
| W60100    | 537.472   | 426.113   | NM_020350 | 3002.126  | 2141.848  | NM_005271 | 5866.726  | 7699.136  |
| U72508    | 495.836   | 404.244   | NM_000350 | 894.558   | 573.786   | NM_015654 | 5437.534  | 5559.437  |
| AA457153  | 1881.421  | 1718.279  | X91103    | 3932.382  | 2678.178  | NM_012244 | 1311.007  | 1235.666  |
| AA283122  | 1766.14   | 1749.549  | AA419164  | 2494.874  | 2091.58   | NM_004341 | 1322.901  | 1133.203  |
| AA868504  | 1052.266  | 1079.278  | AL117235  | 580.786   | 657.535   | AB082521  | 3267.238  | 2605.756  |
| AA877845  | 2758.73   | 2476.469  | NM_014822 | 4589.24   | 4422.221  | AL050182  | 486.565   | 352.155   |
| AA664241  | 12843.014 | 12074.721 | NM_005296 | 2060.769  | 1865.755  | NM_020040 | 442.621   | 685.841   |
| AI016456  | 523.77    | 1084.309  | NM_001337 | 365.337   | 289.126   | NM_002374 | 485.37    | 957.943   |
| NM_006406 | 3085.475  | 2465.142  | NM_003611 | 4683.429  | 4825.137  | AF155117  | 1871.148  | 3052.217  |
| AF216292  | 15750.754 | 13994.169 | AB014538  | 1161.51   | 1338.147  | AB014527  | 498.785   | 790.139   |
| NM_005894 | 478.011   | 563.036   | NM_006209 | 688.214   | 667.81    | NM_004411 | 965.553   | 1117.154  |
| NM_014584 | 2095.546  | 1839.19   | AK025118  | 5073.506  | 10672.968 | NM_015938 | 4884.95   | 5985.47   |
| NM_005810 | 3694.124  | 3748.389  | NM_000727 | 1320.316  | 935.41    | NM_000740 | 459.773   | 513.452   |
| M28170    | 4032.813  | 3752.26   | NM_002621 | 381.759   | 357.466   | NM_017843 | 283.034   | 384.347   |
| AK026223  | 2183.358  | 2288.985  | NM_005385 | 4496.539  | 4930.285  | AK025985  | 1016.569  | 2189.649  |
| NM_000874 | 823.313   | 702.518   | NM_018985 | 1682.921  | 1794.903  | NM_013256 | 1126.195  | 1318.488  |
| NM_005854 | 850.629   | 893.209   | NM_006074 | 12589.241 | 10754.421 | NM_004143 | 795.615   | 1081.58   |
| AB007863  | 10597.759 | 10140.734 | AF208232  | 1860.774  | 1854.351  | NM_016328 | 2166.595  | 2466.813  |
| AK024456  | 1742.336  | 1734.466  | NM_002988 | 1645.283  | 1509.272  | NM_017544 | 9896.751  | 12193.782 |
| NM_017789 | 506.979   | 297.288   | NM_004186 | 779.134   | 721.323   | NM_003153 | 737.218   | 639.116   |
| D31887    | 2110.503  | 2015.917  | NM_016258 | 2449.638  | 2285.998  | NM_016285 | 1068.464  | 996.068   |
| NM_002313 | 514.92    | 577.134   | AF203032  | 2327.189  | 2446.259  | NM_014707 | 460.925   | 465.568   |
| NM_004459 | 624.364   | 687.714   | AB014542  | 12749.59  | 9653.278  | AF025771  | 1683.655  | 2059.569  |
| NM_005503 | 1554.396  | 1190.779  | NM_014640 | 499.1     | 394.991   | AB033110  | 505.349   | 602.813   |
| NM_001502 | 1497.556  | 1285.735  | Y10518    | 23237.65  | 19784.633 | NM_005083 | 3861.249  | 3090.261  |
| NM_005721 | 377.213   | 308.293   | AF155135  | 3996.109  | 3667.451  | NM_007187 | 6616.473  | 4955.365  |
| AF176012  | 2158.405  | 2811.461  | NM_014790 | 621.448   | 493.636   | NM_018983 | 6960.014  | 6505.168  |
| NM_005971 | 1296.98   | 1178.468  | NM_003571 | 3164.28   | 2343.521  | NM_003096 | 4162.447  | 3208.25   |
| NM_017435 | 442.297   | 2873.557  | AB032965  | 17048.678 | 39919.598 | NM_007279 | 2335.883  | 2642.254  |
| NM_013386 | 2880.615  | 2637.596  | AF133424  | 1500.6    | 1652.121  | NM_006115 | 12426.229 | 14781.638 |
| NM_006517 | 1498.649  | 1272.523  | NM_005003 | 18041.369 | 17306.914 | NM_005801 | 2117.72   | 2219.49   |
| NM_004171 | 1094.938  | 1324.57   | AF084560  | 2440.155  | 2162.564  | NM_018198 | 1653.503  | 1737.961  |
| NM_014037 | 3937.688  | 3783.376  | NM_015715 | 2285.208  | 4058.284  | NM_001539 | 13772.19  | 12936.271 |
| NM_004866 | 7792.043  | 7441.934  | NM_000032 | 1986.791  | 2430.889  | AK027232  | 1159.318  | 1419.133  |
| NM_018688 | 1343.055  | 1153.182  | NM_002083 | 1224.213  | 1126.628  | NM_003613 | 669.52    | 553.151   |
| AK056652  | 2593.694  | 2809.07   | NM_002035 | 2785.018  | 2964.5    | NM_000022 | 2471.469  | 3134.884  |
| AL137438  | 720.207   | 846.258   | NM_014900 | 650.553   | 743.324   | NM_016576 | 2361.117  | 2654.648  |
| NM_017957 | 2333.258  | 2632.244  | BF342908  | 642.565   | 686.973   | NM_004213 | 1074.496  | 1148.203  |
| NM_003024 | 961.715   | 922.155   | AF118073  | 537.341   | 443.551   | NM_000480 | 1897.187  | 2341.211  |
| NM_013248 | 1416.786  | 1372.97   | AK023510  | 2180.978  | 1877.676  | AF254084  | 15347.17  | 13323.612 |
| NM_000034 | 65425.547 | 68682.492 | NM_004345 | 964.379   | 882.702   | AK022648  | 565.084   | 618.451   |
| AK022230  | 1861.96   | 1856.291  | NM_000702 | 18499.654 | 18069.795 | AK022976  | 984.752   | 576.008   |
| AK022147  | 4629.084  | 4648.167  | X71490    | 7461.25   | 7433.944  | AB048791  | 1509.288  | 1732.101  |
| L25664    | 1547.38   | 1774.172  | AF257081  | 918.425   | 920.462   | NM_003107 | 706.698   | 558.542   |
| NM_014940 | 2469.879  | 1884.36   | NM_001688 | 33082.383 | 24382.686 | NM_006874 | 2582.52   | 2537.912  |
| NM_005783 | 394.057   | 365.113   | NM_000219 | 476.424   | 365.233   | AB046777  | 3855.469  | 5797.949  |

|           |           |           |           |           |           |           |           |           |
|-----------|-----------|-----------|-----------|-----------|-----------|-----------|-----------|-----------|
| AJ289111  | 1606.294  | 2362.933  | NM_002232 | 512.249   | 584.962   | NM_00188C | 2381.031  | 3147.847  |
| NM_01635E | 818.078   | 1165.733  | NM_01610E | 2497.724  | 2320.316  | AB028943  | 1411.831  | 1564.176  |
| NM_014043 | 1642.502  | 1269.753  | NM_01457C | 2716.51   | 1857.656  | NM_006194 | 599.037   | 613.978   |
| AB011114  | 25684.191 | 22903.846 | NM_014747 | 2849.8    | 2908.172  | AK001603  | 2091.184  | 2136.299  |
| D11466    | 11132.294 | 11724.19  | Y19240    | 2371.734  | 1533.846  | U71601    | 1201.537  | 1244.723  |
| NM_01405E | 7454.105  | 6281.309  | AF091029  | 3145.784  | 1860.211  | AF042838  | 2370.118  | 3029.379  |
| D31885    | 10240.119 | 11173.42  | X97074    | 4658.2    | 4649.992  | AF075062  | 3295.971  | 4081.061  |
| NM_01664E | 2198.364  | 1926.527  | NM_004135 | 3171.339  | 2939.315  | NM_00418E | 495.596   | 956.7     |
| AK090536  | 10063.172 | 10690.882 | NM_000203 | 681.021   | 1529.779  | AF147381  | 2964.987  | 4570.667  |
| D63477    | 840.893   | 589.674   | NM_013443 | 1741.364  | 1855.446  | AB002452  | 426.818   | 1056.51   |
| NM_020243 | 12044.339 | 10800.538 | NM_000925 | 7443.675  | 6691.903  | AK027101  | 8762.931  | 11957.102 |
| NM_014051 | 2051.522  | 1959.472  | NM_000465 | 1415.654  | 2394.438  | AF088075  | 616.029   | 427.98    |
| AK025398  | 7742.147  | 7642.007  | NM_000123 | 2716.808  | 3065.376  | AK026376  | 1008.862  | 969.204   |
| AB037750  | 1803.368  | 1822.754  | AL137501  | 510.45    | 422.031   | AF088061  | 2714.373  | 2281.015  |
| AK023056  | 702.828   | 532.941   | BE858979  | 1127.828  | 832.359   | AF086286  | 1531.322  | 1939.887  |
| NM_001120 | 17958.975 | 18081.498 | NM_000122 | 1484.322  | 1184.705  | AK022997  | 3334.248  | 4162.671  |
| NM_01788E | 1064.536  | 1161.518  | NM_006712 | 60004.871 | 63995.594 | NM_017617 | 1867.427  | 1875.821  |
| NM_00491E | 1410.554  | 1652.264  | NM_00624C | 1034.335  | 920.197   | AF131830  | 915.39    | 1015.206  |
| AK022207  | 1041.258  | 1100.863  | NM_00702E | 2154.381  | 2211.599  | NM_014811 | 627.922   | 662.221   |
| AV708752  | 2110.256  | 2112.446  | M37712    | 5972.088  | 4542.407  | AF147426  | 685.312   | 909.253   |
| NM_00075C | 535.644   | 678.499   | NM_00264E | 510.695   | 489.531   | BC019667  | 7627.339  | 10173.116 |
| NM_00499E | 1390.185  | 2587.796  | AF070670  | 2244.88   | 2202.453  | AK026026  | 5069.065  | 5634.942  |
| NM_00058E | 12069.409 | 10923.771 | NM_01615E | 2266.834  | 1802.453  | AF085941  | 6101.221  | 7184.082  |
| AK026281  | 419.824   | 371.232   | NM_01652E | 1104.595  | 898.819   | Z69892    | 1664.472  | 1901.893  |
| AK026680  | 5523.325  | 5104.79   | NM_015974 | 1438.521  | 766.359   | AL137309  | 994.526   | 1108.035  |
| NM_01243E | 53451.727 | 61016.578 | NM_002573 | 1796.555  | 1066.211  | AL137475  | 565.456   | 888.247   |
| AK001299  | 21794.529 | 20705.354 | NM_02035C | 3193.397  | 2719.967  | AL161956  | 1992.36   | 3520.765  |
| AB014559  | 10675.578 | 10819.268 | NM_00035C | 1166.198  | 976.868   | AL390176  | 950.213   | 1356.535  |
| NM_01648E | 3768.737  | 3664.972  | X91103    | 5121.679  | 4824.841  | AL137547  | 622.501   | 594.469   |
| NM_005033 | 2681.808  | 2599.034  | AA419164  | 3161.007  | 2571.016  | AK021994  | 765.312   | 709.28    |
| NM_015932 | 48521.457 | 45942.09  | BE910395  | 590.544   | 438.099   | Z70763    | 397.824   | 404.708   |
| NM_01794E | 394.984   | 460.714   | N46828    | 877.338   | 882.716   | AK023802  | 2737.756  | 2282.337  |
| AK022169  | 889.057   | 888.948   | BI908302  | 7412.59   | 6810.663  | AF088064  | 489.35    | 599.269   |
| AF015592  | 1007.885  | 912.889   | AA460969  | 1428.214  | 1356.101  | AK023158  | 853.554   | 1905.109  |
| AK026795  | 1438.9    | 1341.785  | BG695859  | 737.267   | 503.763   | AK000580  | 184.503   | 431.109   |
| NM_01639E | 1771.219  | 1971.745  | M85079    | 2529.008  | 2262.496  | AF085852  | 1364.702  | 1360.126  |
| NM_016617 | 5695.114  | 4911.249  | AA457671  | 8383.633  | 7414.901  | AK023952  | 737.635   | 946.925   |
| NM_002027 | 4871.558  | 5300.777  | X07437    | 2600.43   | 2299.539  | AK000787  | 635.957   | 770.906   |
| AL162078  | 2339.122  | 2432.958  | NM_000641 | 1095.29   | 1080.127  | AF090885  | 6440.704  | 7230.765  |
| AB002314  | 817.814   | 1321.776  | AE006466  | 1139.372  | 1029.096  | NM_01664E | 442.059   | 508.291   |
| NM_005503 | 1238.879  | 1118.599  | BC011655  | 1997.378  | 1529.114  | NM_014082 | 600.694   | 788.61    |
| NM_001502 | 1011.109  | 1292.177  | BC002396  | 2391.339  | 1926.11   | AF100636  | 383.504   | 429.209   |
| NM_005721 | 381.1     | 511.403   | NM_02209E | 857.073   | 510.725   | AK022197  | 654.752   | 856.393   |
| AF284223  | 14584.297 | 13101.555 | AF112219  | 9685.86   | 6887.052  | AK022066  | 31541.273 | 31852.963 |
| AF176012  | 2274.84   | 1884.815  | NM_01464C | 425.772   | 495.499   | AK022224  | 833.087   | 896.583   |
| BE743838  | 2668.919  | 2377.208  | Y10518    | 30231.396 | 28591.242 | AK022359  | 583.507   | 541.076   |
| AF273046  | 2473.342  | 2525.686  | AF155135  | 4246.238  | 4516.035  | AK022000  | 288.404   | 557.251   |
| NM_001081 | 1165.845  | 962.857   | NM_01479C | 629.451   | 750.135   | AK022129  | 817.723   | 901.849   |
| NM_002483 | 1097.205  | 990.663   | NM_003571 | 5067.323  | 4575.181  | AK022263  | 3974.902  | 3486.927  |
| BF002026  | 634.559   | 587.609   | NM_02037C | 479.389   | 378.895   | AK022384  | 584.279   | 683.108   |
| BE790116  | 4570.066  | 4031.913  | NM_004767 | 451.674   | 555.44    | AK027097  | 1129.142  | 1828.552  |
| AI922341  | 1067.972  | 1051.529  | BF310159  | 3828.181  | 4602.65   | AL117437  | 272.588   | 629.583   |
| M12824    | 1118.784  | 916.567   | NM_01898E | 969.481   | 1165.812  | AK000257  | 589.762   | 661.445   |

|           |           |           |           |           |           |           |           |           |
|-----------|-----------|-----------|-----------|-----------|-----------|-----------|-----------|-----------|
| W60100    | 548.394   | 330.75    | AB044934  | 470.442   | 576.969   | NM_00616C | 2620.918  | 3103.362  |
| U72508    | 574.766   | 595.383   | U27655    | 2314.81   | 3489.593  | AL110159  | 432.402   | 571.503   |
| AA457153  | 1983.12   | 1940.617  | NM_005795 | 535.48    | 396.416   | AF009259  | 379.016   | 486.035   |
| AA283122  | 1916.006  | 1900.576  | NM_00336C | 1146.07   | 1018.484  | AF009260  | 604.085   | 758.845   |
| AA868504  | 1229.713  | 1334.529  | Z21965    | 13687.306 | 13931.73  | NM_003075 | 1026.775  | 1342.192  |
| AI016456  | 756.351   | 1492.483  | NM_012427 | 447.833   | 325.18    | NM_017902 | 1374.45   | 1723.268  |
| NM_01494C | 2096.462  | 1589.588  | NM_000852 | 5977.935  | 4588.167  | AK021977  | 23.703    | 655.374   |
| NM_00690C | 1346.402  | 1189.578  | NM_000399 | 463.415   | 404.044   | AK026716  | 339.947   | 536.536   |
| AJ289111  | 2041.839  | 1666.65   | AW797282  | 378.21    | 195.716   | AL049325  | 6285.78   | 7244.462  |
| NM_01635E | 3124.608  | 2978.741  | NM_002402 | 1887.348  | 1292.989  | AK024154  | 4057.719  | 6038.674  |
| NM_00640E | 3503.76   | 3282.909  | L09070    | 496.018   | 364.716   | AF086341  | 726.791   | 1123.058  |
| AF216292  | 18186.764 | 15501.023 | NM_000062 | 3603.062  | 2060.06   | AK026672  | 876.926   | 1037.855  |
| NM_000952 | 590.113   | 433.439   | NM_00959C | 2232.34   | 1578.936  | S83282    | 52778.215 | 54379.957 |
| NM_005894 | 536.489   | 675.436   | NM_01610E | 2656.203  | 2945.26   | AK024164  | 8473.453  | 10518.178 |
| NM_014584 | 2379.875  | 1898.75   | NM_01457C | 2646.428  | 2938.65   | AF052130  | 3961.721  | 6143.414  |
| M30627    | 363.566   | 430.985   | NM_014747 | 3419.532  | 4201.089  | AF130090  | 7301.442  | 7564.188  |
| NM_00581C | 4373.738  | 4351.365  | Y19240    | 2513.227  | 2947.313  | AL096727  | 776.749   | 719.138   |
| M28170    | 4374.608  | 3883.064  | AF091029  | 5289.969  | 4648.848  | AL080110  | 1462.64   | 1588.051  |
| AK026223  | 2255.626  | 2107.837  | X97074    | 10259.713 | 10123     | NM_020425 | 976.082   | 865.756   |
| NM_000874 | 656.339   | 564.412   | AL117235  | 591.762   | 753.044   | AK024076  | 1149.726  | 1713.869  |
| NM_005854 | 735.643   | 577.646   | NM_014822 | 4757.708  | 5632.614  | M87940    | 1467.529  | 1739.085  |
| AB007863  | 10517.973 | 9534.444  | NM_00529E | 2898.886  | 3684.14   | L77588    | 652.525   | 829.88    |
| AK024456  | 1749.163  | 1831.241  | NM_001337 | 475.817   | 631.35    | AF086304  | 7913.781  | 8046.635  |
| NM_01778E | 620.978   | 510.84    | NM_003611 | 4910.667  | 5881.05   | U61094    | 1245.729  | 1410.221  |
| D31887    | 2339.063  | 2521.777  | AB014538  | 1395.731  | 1765.584  | AB032976  | 1363.741  | 1664.231  |
| NM_00491E | 1690.925  | 1735.346  | NM_004154 | 396.094   | 353.428   | AF301222  | 6384.187  | 9377.813  |
| AK022207  | 943.292   | 839.573   | NM_006209 | 759.992   | 888.119   | AF215981  | 2074.729  | 3868.989  |
| AV708752  | 2422.642  | 2525.434  | AK025118  | 4140.494  | 3995.956  | NM_000732 | 12217.879 | 18780.139 |
| AF119885  | 2019.208  | 1775.859  | NM_000727 | 1393.711  | 926.557   | AF130044  | 777.432   | 660.717   |
| NM_00075C | 454.881   | 525.021   | NM_00538E | 4097.878  | 3498.709  | AF087980  | 603.361   | 706.724   |
| NM_00499E | 1637.71   | 1721.639  | NM_01898E | 1763.189  | 1029.334  | AB038651  | 1506.731  | 1658.655  |
| NM_005971 | 1677.747  | 1706.964  | NM_006074 | 11854.904 | 8888.361  | AL359603  | 760.587   | 1122.323  |
| NM_01743E | 834.66    | 5635.99   | AF208232  | 1702.604  | 1583.107  | X84838    | 368.057   | 416.472   |
| NM_01338E | 2916.869  | 3036.718  | NM_00298E | 1626.409  | 940.455   | NM_01394C | 480.312   | 546.9     |
| NM_006517 | 1533.915  | 1409.051  | NM_00418E | 915.201   | 442.73    | AL117643  | 617.209   | 601.687   |
| NM_004171 | 1323.391  | 1288.088  | NM_01625E | 2367.712  | 1610.519  | AF075063  | 937.869   | 788.802   |
| NM_014037 | 4087.729  | 4066.114  | AF203032  | 2174.853  | 1085.438  | AF069135  | 1319.752  | 1278.594  |
| NM_00486E | 8018.651  | 6605.583  | AB014542  | 11526.894 | 6506.599  | AK026524  | 939.635   | 1133.696  |
| NM_01868E | 1251.592  | 1003.588  | AF070670  | 3322.354  | 3024.516  | AB011157  | 3256.575  | 4255.238  |
| AK056652  | 2323.238  | 2437.921  | NM_01615E | 2676.503  | 2466.83   | U17632    | 1024.044  | 1199.162  |
| AL137438  | 776.893   | 1046.956  | NM_01652E | 1015.368  | 931.079   | AK026764  | 2262.325  | 1991.468  |
| NM_017957 | 2152.411  | 2279.156  | NM_015974 | 1579.17   | 2078.853  | AF113700  | 1487.325  | 1558.78   |
| NM_003024 | 992.887   | 829.915   | NM_014384 | 1127.82   | 1060.856  | NM_01783E | 6683.322  | 7426.03   |
| NM_01324E | 1727.457  | 1740.762  | NM_002573 | 2574.806  | 2363.054  | NM_018347 | 951.494   | 760.679   |
| NM_000034 | 63689.074 | 69695.289 | AF133424  | 1934.365  | 2094.949  | AK024986  | 715.215   | 1038.144  |
| AK022230  | 1975.1    | 1782.31   | NM_005003 | 20676.596 | 21430.877 | AK026730  | 591.993   | 749.384   |
| AK022147  | 5229.208  | 5219.171  | AF084560  | 3405.906  | 3344.739  | AK024739  | 745.891   | 919.816   |
| NM_002027 | 4880.991  | 4866.182  | NM_01571E | 2633.191  | 2522.086  | AK098681  | 388.379   | 532.56    |
| AL162078  | 2469.498  | 2236.438  | NM_000032 | 2501.602  | 2848.921  | AK026772  | 1307.019  | 1650.219  |
| NM_013382 | 8353.845  | 8936.366  | NM_002083 | 912.333   | 993.724   | NM_01426C | 10644.939 | 11330.727 |
| AB002314  | 642.306   | 679.314   | NM_00203E | 2934.352  | 2894.453  | AK022266  | 58.76     | 696.488   |
| NM_014043 | 1903.791  | 1773.18   | NM_01490C | 728.756   | 649.585   | CY3Cy5    | 4724.138  | 167.868   |
| NM_014622 | 802.291   | 759.432   | BF342908  | 768.071   | 809.744   | M23254    | 5240.416  | 3765.72   |

|           |           |           |           |           |           |           |           |           |
|-----------|-----------|-----------|-----------|-----------|-----------|-----------|-----------|-----------|
| AB011114  | 29404.545 | 27183.332 | AK023510  | 2135.885  | 1742.266  | R28062    | 2029.529  | 2067.543  |
| D11466    | 12184.039 | 12237.776 | NM_004345 | 1039.961  | 933.374   | U38545    | 539.478   | 479.249   |
| NM_014056 | 8238.827  | 8291.077  | NM_000702 | 16385.838 | 14538.406 | AI627464  | 1676.747  | 1398.434  |
| D31885    | 11876.881 | 12257.305 | X71490    | 6627.198  | 5708.295  | BI756258  | 769.387   | 625.08    |
| NM_016649 | 2095.529  | 1868.242  | AF257081  | 873.413   | 576.274   | AA608557  | 4244.795  | 3369.004  |
| AK090536  | 9483.875  | 9157.367  | NM_001688 | 31844.129 | 15071.278 | AL050095  | 1421.643  | 1438.424  |
| D63477    | 615.621   | 459.099   | NM_002232 | 667.269   | 470.125   | U03272    | 1677.62   | 1765.424  |
| NM_020243 | 10989.563 | 9919.577  | NM_022095 | 833.714   | 637.81    | NM_000498 | 499.805   | 720.399   |
| NM_014051 | 1737.772  | 1895.917  | AF112219  | 12700.748 | 13566.302 | NM_000664 | 1379.686  | 1807.537  |
| AK025398  | 7704.693  | 7678.536  | NM_004135 | 4651.793  | 4299.968  | SR7       | 4602.373  | 38005.547 |
| AB037750  | 2109.867  | 2493.201  | NM_000203 | 408.119   | 518.507   | SR9       | 15362.682 | 2840.567  |
| AK023056  | 617.136   | 826.496   | NM_013443 | 2018.116  | 2104.339  | CY3Cy5    | 5927.69   | 183.21    |
| NM_017888 | 965.827   | 1061.233  | NM_000925 | 7343.368  | 7561.122  | NM_014808 | 793.024   | 826.219   |
| NM_003150 | 2110.542  | 1713.545  | NM_000465 | 1531.495  | 1972.985  | AB006627  | 688.473   | 477.191   |
| NM_014784 | 2460.922  | 2509.528  | AF116685  | 587.954   | 454.965   | NM_000416 | 2375.593  | 1966.642  |
| AK026383  | 3463.861  | 3829.086  | NM_000123 | 2877.861  | 3243.567  | NM_002965 | 4524.635  | 4339.043  |
| AB014594  | 2614.654  | 2289.763  | AL137501  | 508.286   | 280.662   | AB007883  | 1802.11   | 1304.156  |
| M94547    | 1037.181  | 1045.27   | BE858979  | 1047.2    | 780.615   | AK093780  | 3723.527  | 3227.259  |
| NM_005087 | 7956.315  | 7821.402  | NM_000122 | 1540.956  | 1103.075  | AY009397  | 32288.719 | 25551.146 |
| NM_012098 | 1787.815  | 1679.747  | NM_006712 | 58234.867 | 50848.199 | NM_007037 | 5742.051  | 4767.89   |
| NM_018095 | 1124.184  | 1103.433  | NM_006240 | 919.434   | 548.976   | NM_001649 | 878.866   | 639.585   |
| AB023164  | 2114.471  | 2269.212  | NM_007026 | 1849.504  | 1021.504  | NM_005492 | 863.061   | 538.393   |
| AK026281  | 525.702   | 496.364   | M37712    | 5329.928  | 2750.071  | AF038196  | 2928.933  | 2384.148  |
| AK026680  | 5154.571  | 5365.766  | AW797282  | 295.241   | 241.164   | NM_004859 | 5231.489  | 4608.245  |
| NM_012436 | 53595.063 | 60875.563 | NM_002402 | 2084.481  | 2595.602  | NM_016352 | 374.476   | 552.533   |
| AK001299  | 17447.988 | 17506.945 | L09070    | 516.314   | 592.581   | NM_005014 | 620.349   | 598.624   |
| AB014559  | 10033.851 | 9159.024  | NM_000062 | 4559.022  | 10728.992 | NM_000070 | 1224.266  | 1092.632  |
| NM_016489 | 3404.231  | 3829.319  | NM_009590 | 2666.93   | 2503.03   | NM_001202 | 589.301   | 434.723   |
| NM_005033 | 2360.914  | 2743.973  | AL133037  | 485.967   | 561.147   | AB037804  | 845.996   | 758.971   |
| NM_015932 | 46839.18  | 48352.059 | NM_020350 | 3182.189  | 3202.218  | U34249    | 498.031   | 566.436   |
| AK022169  | 976.892   | 1345.084  | NM_000350 | 1196.552  | 1231.811  | NM_006323 | 4640.437  | 4073.882  |
| AF015592  | 874.256   | 1226.203  | X91103    | 5559.571  | 5271.152  | NM_016466 | 864.657   | 579.339   |
| AK026795  | 1461.264  | 1553.038  | AA419164  | 3428.161  | 3407.138  | NM_001493 | 3462.302  | 3246.995  |
| NM_016617 | 5726.639  | 5408.491  | L35251    | 1869.332  | 2340.031  | NM_014841 | 599.736   | 449.622   |
| NM_002338 | 1839.847  | 1903.997  | BE910395  | 511.43    | 597.939   | NM_014426 | 3397.962  | 3132.612  |
| AL117666  | 685.951   | 854.568   | N46828    | 813.91    | 851.876   | NM_006816 | 14142.268 | 12830.733 |
| Y17865    | 1472.748  | 1361.651  | BI908302  | 6997.838  | 6866.587  | AK026518  | 21536.605 | 18549.908 |
| NM_005825 | 8656.47   | 7755.869  | AA460969  | 1527.728  | 1449.803  | NM_000258 | 5524.825  | 4706.454  |
| NM_002756 | 1824.091  | 1721.015  | BG695859  | 616.469   | 597.582   | AB033055  | 3067.799  | 2559.579  |
| U79299    | 423.602   | 398       | M85079    | 2436.133  | 2069.847  | AF311287  | 1774.714  | 1836.833  |
| AJ000414  | 781.803   | 850.269   | AA457671  | 7280.497  | 6095.498  | NM_003098 | 685.896   | 652.906   |
| AK025674  | 6768.13   | 6837.923  | X07437    | 2489.823  | 2324.772  | NM_014781 | 2672.389  | 2604.111  |
| AF007194  | 4340.855  | 4149.131  | NM_000641 | 1217.411  | 904.537   | BU629989  | 521.745   | 640.012   |
| NM_019069 | 1614.295  | 1477.02   | AE006466  | 1119.705  | 609.775   | X87896    | 888.801   | 1367.807  |
| NM_004761 | 2703.101  | 2686.237  | BC008737  | 29807.227 | 15561.17  | M88310    | 1405.519  | 1254.995  |
| Z25424    | 1631.128  | 1380.288  | BC011655  | 1919.268  | 1166.618  | NM_000042 | 1084.719  | 1185.441  |
| U79458    | 4515.96   | 4143.438  | BC002396  | 2189.104  | 1244.812  | NM_016335 | 455.327   | 498.348   |
| NM_014920 | 419.128   | 343.265   | AF208232  | 2283.675  | 3056.696  | NM_003165 | 1903.35   | 2143.265  |
| NM_002961 | 41482.68  | 28904.922 | NM_002988 | 2001.867  | 2016.688  | NM_003906 | 2794.972  | 2516.305  |
| NM_018298 | 524.26    | 480.043   | NM_004186 | 698.41    | 808.458   | AL359590  | 18074.135 | 15429.626 |
| NM_000676 | 3367.715  | 3363.553  | NM_016258 | 2840.136  | 3009.763  | NM_002861 | 5927.578  | 4549.271  |
| NM_005766 | 652.942   | 723.055   | AF203032  | 2783.5    | 3139.805  | NM_003080 | 2257.51   | 2028.843  |
| AL133022  | 479.06    | 424.488   | AB014542  | 17704.631 | 16590.115 | NM_002645 | 1580.727  | 1353.751  |

|           |           |           |           |           |           |           |           |           |
|-----------|-----------|-----------|-----------|-----------|-----------|-----------|-----------|-----------|
| NM_003953 | 741.8     | 833.585   | NM_014640 | 415.245   | 600.654   | AB033027  | 1915.26   | 1526.166  |
| NM_006301 | 677.03    | 683.475   | Y10518    | 39142.176 | 62353.66  | AK021805  | 4175.901  | 3594.574  |
| AF222694  | 527.278   | 629.788   | AF155135  | 4882.78   | 5995.082  | AB014550  | 1607.875  | 1682.744  |
| AL049925  | 1536.943  | 1524.766  | NM_014790 | 878.842   | 965.503   | AF320294  | 1462.159  | 1534.227  |
| NM_012219 | 2342.912  | 2306.008  | NM_003571 | 6529.711  | 7043.797  | AF161436  | 3322.544  | 3332.614  |
| X72887    | 1007.706  | 1132.932  | AB032965  | 24577.52  | 23930.957 | NM_020402 | 1803.671  | 2066.833  |
| NM_004529 | 549.066   | 414.159   | NM_020370 | 745.153   | 930.976   | NM_004299 | 2910.628  | 3762.333  |
| NM_000127 | 979.932   | 939.875   | NM_004767 | 633.933   | 637.349   | NM_001171 | 1050.056  | 1335.933  |
| Y10483    | 4369.411  | 4245.197  | BF310159  | 3860.105  | 3659.23   | NM_002250 | 3944.258  | 3928.067  |
| NM_006784 | 791.151   | 691.598   | NM_000316 | 423.355   | 437.777   | S81591    | 545.619   | 369.344   |
| NM_017876 | 1522.914  | 1179.193  | NM_018986 | 1254.724  | 1171.189  | NM_006478 | 714.94    | 591.572   |
| NM_001087 | 38298.723 | 35070.016 | AB044934  | 527.751   | 299.204   | AF132734  | 10230.662 | 9892.266  |
| NM_001826 | 400.223   | 419.32    | U27655    | 1940.135  | 1422.733  | NM_018379 | 2029.027  | 1568.554  |
| AK025352  | 335.443   | 429.995   | NM_003360 | 827.076   | 578.142   | NM_016403 | 9482.363  | 8055.068  |
| NM_003721 | 6863.755  | 6871.214  | Z21965    | 10429.642 | 7111.663  | NM_015603 | 795.261   | 728.516   |
| NM_004724 | 753.987   | 753.398   | NM_000852 | 5908.713  | 3446.972  | NM_001921 | 5230.678  | 4446.145  |
| NM_001431 | 5176.314  | 5168.626  | NM_000399 | 368.08    | 246.5     | NM_006230 | 7393.976  | 6624.33   |
| NM_000381 | 530.676   | 712.851   | AF257081  | 837.574   | 1136.007  | NM_014699 | 3016.703  | 2458.762  |
| NM_000427 | 590.399   | 829.594   | NM_001688 | 32543.713 | 28733.193 | NM_013400 | 5830.479  | 5621.816  |
| NM_000174 | 43346.055 | 50244.676 | NM_003631 | 262.457   | 286.343   | AK026257  | 1920.749  | 1543.842  |
| NM_002508 | 1920.027  | 2171.118  | NM_002232 | 674.716   | 599.01    | AK023836  | 2334.599  | 2083.713  |
| NM_014343 | 2064.416  | 2787.206  | NM_016106 | 2814.156  | 3207.064  | NM_018109 | 2302.159  | 2301.889  |
| D25303    | 743.443   | 783.868   | NM_014570 | 2758.773  | 3452.244  | AJ299442  | 4434.712  | 5020.677  |
| AB043007  | 16650.178 | 14117.427 | NM_014747 | 3632.137  | 4895.77   | NM_000129 | 928.891   | 1131.437  |
| NM_004861 | 1427.315  | 1445.847  | Y19240    | 3031.38   | 2984.354  | NM_003762 | 4846.459  | 7452.747  |
| AF022913  | 1835.69   | 1986.046  | AF091029  | 5185.855  | 6294.251  | NM_018446 | 3820.865  | 4166.714  |
| NM_000028 | 867.444   | 982.348   | X97074    | 9570.555  | 10106.385 | NM_000187 | 551.25    | 776.365   |
| NM_001382 | 4279.877  | 3934.589  | AL117235  | 741.309   | 790.552   | NM_014465 | 1222.628  | 1097.834  |
| M93718    | 3166.107  | 3189.949  | NM_014822 | 3710.255  | 3956.806  | D87292    | 5778.234  | 5196.535  |
| NM_005386 | 1037.877  | 1026.25   | NM_005296 | 1995.591  | 2530.627  | NM_005498 | 1078.685  | 1061.994  |
| AK023807  | 4736.054  | 4369.404  | NM_001337 | 549.172   | 1000.293  | NM_001202 | 796.769   | 647.223   |
| NM_018188 | 6956.578  | 6849.792  | NM_003611 | 4704.336  | 4677.748  | AB037804  | 684.2     | 856.135   |
| AK024273  | 1152.39   | 1398.606  | AB014538  | 1276.735  | 1371.111  | NM_003289 | 12453.377 | 10829.656 |
| X59417    | 11216.911 | 11153.452 | NM_006209 | 713.948   | 588.62    | M23254    | 4699.563  | 3280.218  |
| NM_005659 | 37634.68  | 34346.84  | AK025118  | 4102.965  | 3167.058  | BE618539  | 405.935   | 406.579   |
| D28476    | 4677.12   | 4201.993  | NM_000727 | 1125.797  | 597.604   | R28062    | 1952.961  | 1822.249  |
| NM_016263 | 1755.138  | 1574.573  | NM_002621 | 478.731   | 209.382   | U38545    | 1226.506  | 1322.826  |
| NM_003335 | 14225.066 | 14159.871 | NM_018985 | 1643.84   | 1011.268  | AI627464  | 2000.433  | 1464.823  |
| AB002376  | 1906.374  | 2263.279  | NM_006074 | 9093.568  | 4952.079  | BI756258  | 1113.628  | 1253.026  |
| NM_018249 | 365.356   | 482.602   | NM_006712 | 51813.301 | 62027.473 | J04599    | 310.065   | 684.259   |
| NM_005558 | 1185.494  | 1812.187  | NM_006240 | 1241.939  | 1545.693  | AA608557  | 4089.683  | 3793.652  |
| NM_016631 | 1123.577  | 1493.644  | NM_007026 | 2337.573  | 2769.997  | AL050095  | 1183.476  | 1635.698  |
| AB015617  | 15177.248 | 18044.078 | M37712    | 5640.21   | 4278.146  | U03272    | 1545.595  | 1583.378  |
| AK022730  | 1739.281  | 2090.996  | NM_002648 | 700.975   | 820.321   | NM_000498 | 547.011   | 700.706   |
| AF064839  | 14825.802 | 19647.043 | AF070670  | 3724.996  | 3969.142  | NM_000664 | 1402.701  | 1719.905  |
| NM_005439 | 4883.652  | 5532.633  | NM_016156 | 2560.987  | 3350.368  | AF075085  | 35530.18  | 35705.398 |
| AB037810  | 823.26    | 1313.398  | NM_016528 | 1106.466  | 1371.976  | NM_005892 | 1669.014  | 1665.723  |
| NM_000376 | 4260.14   | 4389.17   | NM_015974 | 2054.269  | 2304.32   | NM_000042 | 1220.423  | 1261.983  |
| NM_000475 | 2544.737  | 2656.15   | NM_014384 | 1168.173  | 1499.493  | NM_005024 | 1397.65   | 1470.541  |
| M61872    | 9462.331  | 9179.549  | NM_002573 | 2281.333  | 2632.872  | NM_014808 | 1088.504  | 834.641   |
| NM_016153 | 446.076   | 277.273   | AF133424  | 1965.283  | 2071.453  | AB006627  | 572.603   | 406.857   |
| AK027089  | 1490.568  | 1918.503  | NM_005003 | 20407.244 | 21254.32  | NM_000416 | 2149.139  | 1830.378  |
| NM_006284 | 4616.054  | 4092.604  | AF084560  | 3264.643  | 3182.599  | NM_003382 | 761.797   | 613.043   |

|           |           |           |           |           |           |           |           |           |
|-----------|-----------|-----------|-----------|-----------|-----------|-----------|-----------|-----------|
| U18909    | 1291.127  | 1188.103  | NM_015715 | 2378.915  | 2290.194  | NM_00296E | 4594.668  | 4312.592  |
| NM_00348E | 1699.6    | 1597.301  | NM_000032 | 2461.738  | 2617.484  | AB007883  | 2443.699  | 1952.991  |
| NM_01658E | 5711.375  | 6024.865  | NM_002083 | 1171.392  | 985.489   | AK093780  | 3818.924  | 4118.771  |
| NM_003597 | 1250.732  | 1263.237  | NM_002035 | 2703.292  | 2541.537  | AY009397  | 48947.543 | 49195.945 |
| NM_00256E | 23945.613 | 22567.135 | NM_014900 | 576.886   | 562.457   | NM_007037 | 8155.494  | 9197.449  |
| NM_006561 | 2826.147  | 2572.987  | BF342908  | 583.106   | 585.222   | NM_00164E | 1018.943  | 970.3     |
| NM_017521 | 604.403   | 618.477   | AF118073  | 360.764   | 291.444   | NM_00549Z | 997.404   | 1332.527  |
| AK025200  | 5005.451  | 6007.337  | AK023510  | 2014.165  | 1393.279  | AF038196  | 2889.182  | 3469.312  |
| NM_00138E | 3346.424  | 3718.943  | NM_00434E | 998.29    | 577.671   | NM_00485E | 5061.058  | 5016.445  |
| NM_00102E | 45773.199 | 40446.086 | NM_000702 | 16583.02  | 11883.772 | NM_01635Z | 535.056   | 728.371   |
| NM_00500E | 19745.166 | 23940.623 | X71490    | 5940.475  | 3324.749  | NM_005014 | 527.856   | 528.383   |
| NM_00601E | 28532.059 | 38457.207 | NM_01427E | 10929.366 | 23446.672 | NM_00007C | 1124.598  | 865.526   |
| NM_01404E | 9468.607  | 10140.767 | AF039442  | 862.8     | 1243.418  | NM_00225C | 3579.795  | 3089.805  |
| L34071    | 5247.628  | 6850.371  | NM_00468C | 645.632   | 734.368   | NM_00632E | 5036.051  | 4697.829  |
| AK025201  | 3623.045  | 3023.458  | AF104260  | 355.887   | 346.825   | NM_01646E | 888.65    | 646.656   |
| AK022995  | 1291.816  | 1367.782  | NM_005671 | 3674.912  | 4158.373  | NM_00149E | 4542.345  | 3787.294  |
| NM_00606E | 5472.768  | 4399.655  | NM_01740E | 576.947   | 539.619   | NM_01442E | 4272.957  | 4776.191  |
| NM_00516E | 1708.273  | 1788.186  | NM_01962E | 3192.917  | 3755.406  | NM_00681E | 17088.869 | 17489.648 |
| NM_00513E | 25386.598 | 20126.686 | NM_00672E | 2410.174  | 2959.293  | AK026518  | 25206.381 | 27641.646 |
| NM_00211E | 30784.787 | 28608.563 | NM_006071 | 658.18    | 684.695   | NM_00025E | 7019.724  | 7264.83   |
| AK023162  | 1585.641  | 1421.09   | NM_01223E | 9250.891  | 10052.563 | AB033055  | 3018.905  | 3801.196  |
| NM_00639E | 1904.731  | 1854.333  | AF112219  | 14199.205 | 16515.602 | AF311287  | 1796.736  | 2733.653  |
| NM_01864E | 1076.646  | 942.854   | NM_00413E | 4626.708  | 4608.52   | NM_00309E | 832.244   | 1133.544  |
| NM_01344E | 2282.171  | 2345.635  | NM_00020E | 447.179   | 368.885   | NM_014781 | 2755.876  | 2914.181  |
| NM_004537 | 645.444   | 669.162   | NM_01344E | 2025.79   | 1841.719  | BU629989  | 512.03    | 406.607   |
| AL390134  | 531.293   | 635.613   | NM_00092E | 6835.363  | 6245.545  | X87896    | 853.969   | 689.316   |
| NM_02022E | 1398.898  | 1274.92   | NM_00046E | 1292.783  | 1568.609  | M88310    | 988.697   | 1096.366  |
| NM_01786E | 2890.988  | 3737.784  | NM_00012E | 2538.702  | 2501.376  | NM_01844E | 4157.158  | 4304.021  |
| NM_003427 | 2488.251  | 4422.993  | AL137501  | 368.56    | 240.573   | NM_000187 | 758.473   | 705.773   |
| NM_00592C | 4948.209  | 5612.46   | BE858979  | 869.44    | 470.751   | NM_01446E | 1461.688  | 1247.307  |
| Y09321    | 844.496   | 872.083   | NM_00012E | 1334.291  | 862.712   | D87292    | 4941.54   | 4643.503  |
| AK001499  | 1921.642  | 1450.685  | U87223    | 907.351   | 1113.717  | NM_00549E | 981.43    | 936.749   |
| AK023568  | 700.449   | 735.248   | X91348    | 18184.781 | 21741.018 | NM_01633E | 497.041   | 408.194   |
| AK026852  | 1163.384  | 1016.672  | Z36505    | 1211.047  | 1515.197  | NM_00316E | 3078.47   | 2846.06   |
| AK021629  | 487.184   | 528.593   | NM_001854 | 1126.546  | 1451.197  | NM_00390E | 3465.889  | 3436.301  |
| AL110257  | 25948.951 | 20869.828 | NM_01791E | 991.961   | 1141.43   | AL359590  | 23434.396 | 21149.738 |
| AB013384  | 1432.054  | 1249.391  | NM_00275E | 4698.44   | 5553.809  | NM_002861 | 4589.55   | 5150.668  |
| AK024824  | 1171.749  | 1081.774  | NM_000924 | 3558.016  | 4045.141  | NM_00308C | 3128.917  | 3208.098  |
| AK024270  | 1704.269  | 1415.282  | NM_00333C | 4649.678  | 5428.446  | NM_01326E | 476.946   | 529.164   |
| AK025569  | 2856.281  | 2690.367  | NM_002481 | 432.442   | 335.458   | NM_00264E | 2087.662  | 1867.598  |
| AK023060  | 1237.836  | 1320.068  | NM_003647 | 623.978   | 790.297   | AB033027  | 2124.036  | 1938.859  |
| NM_01487C | 909.623   | 1210.919  | NM_00169E | 20658.953 | 23145.947 | AK021805  | 3324.833  | 4720.06   |
| AK021917  | 931.432   | 795.274   | AB006589  | 402.163   | 599.547   | AB014550  | 1432.432  | 2427.267  |
| AF052146  | 43353.691 | 36980.75  | NM_018351 | 703.399   | 734.936   | AF320294  | 1551.508  | 1925.638  |
| NM_00487C | 2125.855  | 2160.391  | AK023019  | 426.098   | 490.912   | AF161436  | 3047.59   | 3583.507  |
| AF143872  | 13625.271 | 14674.526 | NM_147171 | 2383.166  | 1874.569  | NM_02040Z | 1808.335  | 1962.551  |
| AK025686  | 367.661   | 743.491   | AF238083  | 3419.654  | 3169.426  | NM_00429E | 2802.18   | 3037.738  |
| AF143326  | 2636.685  | 3566.455  | NM_00296E | 273.928   | 375.819   | NM_001171 | 752.132   | 984.911   |
| AL049229  | 3099.741  | 3054.455  | NM_01638E | 1311.317  | 897.935   | NM_00049E | 682.369   | 503.176   |
| NM_01830E | 50994.004 | 56772.625 | AB046783  | 699.701   | 641.873   | NM_000664 | 1837.58   | 1685.717  |
| AK026146  | 3908.561  | 5208.03   | NM_01496E | 2371.452  | 1873.032  | AF075085  | 37824.109 | 34130.199 |
| AK023152  | 3454.284  | 4186.011  | NM_00488E | 8094.348  | 4379.966  | NM_00589Z | 1693.504  | 1215.961  |
| AK000155  | 1735.802  | 2145.373  | AL390148  | 4842.256  | 2948.959  | NM_00647E | 566.85    | 472.369   |

|           |           |           |           |           |           |           |           |           |
|-----------|-----------|-----------|-----------|-----------|-----------|-----------|-----------|-----------|
| AL389937  | 4599.139  | 5504.875  | AK024055  | 785.032   | 700.95    | AF132734  | 10870.519 | 9662.903  |
| AK022628  | 26101.986 | 20897.955 | U10485    | 494.051   | 598.502   | NM_018379 | 2304.744  | 2264.87   |
| AK021737  | 1669.322  | 1796.39   | AK025326  | 6145.854  | 7454.155  | NM_016403 | 10741.246 | 9099.332  |
| AL357454  | 1057.081  | 581.105   | NM_013376 | 672.788   | 904.907   | NM_015603 | 1404.432  | 951.287   |
| AK026295  | 4726.879  | 4539.959  | NM_017964 | 2366.252  | 3484.149  | NM_001921 | 5715.813  | 5188.131  |
| AK025007  | 1558.692  | 1549.602  | NM_016428 | 939.352   | 976.553   | NM_006230 | 8108.735  | 9001.296  |
| NM_016486 | 5074.178  | 4522.137  | NM_016039 | 6883.503  | 8618.372  | NM_014699 | 4445.273  | 4282.168  |
| AL117601  | 538.998   | 563.93    | NM_001184 | 1389.677  | 1529.199  | NM_013400 | 6625.708  | 8158.752  |
| AK026490  | 19065.949 | 18255.596 | NM_015530 | 6359.752  | 7260.83   | AK026257  | 1756.147  | 1973.235  |
| AJ227861  | 2001.813  | 1898.615  | NM_001758 | 3025.091  | 3083.865  | AK023836  | 2741.637  | 3040.768  |
| AJ001020  | 588.424   | 660.086   | BE546276  | 712.771   | 743.368   | NM_018109 | 2522.818  | 3254.33   |
| AJ001875  | 1938.811  | 2333.831  | NM_004725 | 5578.805  | 5394.112  | AJ299442  | 4923.598  | 6351.806  |
| X64985    | 496.219   | 491.535   | NM_015997 | 3616.42   | 3784.871  | NM_000129 | 1066.966  | 1246.587  |
| L33813    | 230.276   | 299.866   | NM_001167 | 4655.064  | 4576.507  | NM_003762 | 3775.823  | 4068.233  |
| L13433    | 2373.938  | 2687.358  | NM_012115 | 2660.005  | 2376.546  | NM_004859 | 4458.031  | 4289.482  |
| NM_007220 | 709.388   | 990.809   | NM_004933 | 21163.518 | 20629.434 | NM_005014 | 556.653   | 495.382   |
| NM_017777 | 1249.821  | 1903.174  | M96577    | 4949.645  | 4722.179  | NM_000070 | 1018.979  | 938.344   |
| AL109722  | 353.552   | 479.444   | NM_013258 | 19829.824 | 17635.479 | NM_001202 | 715.269   | 317.489   |
| AK021989  | 723.304   | 662.701   | NM_003842 | 1285.335  | 1078.01   | AB037804  | 901.298   | 630.251   |
| AK023407  | 546.387   | 652.117   | L11238    | 4955.197  | 3496.559  | U34249    | 497.49    | 280.311   |
| AK022298  | 1709.743  | 1660.086  | NM_012205 | 2744.199  | 1666.064  | NM_003289 | 19076.91  | 19306.926 |
| AJ277441  | 17695.443 | 18968.107 | K02046    | 1455.783  | 1346.541  | M23254    | 6113.174  | 4686.62   |
| NM_006057 | 1133.244  | 1167.719  | AL110151  | 1575.291  | 1880.569  | R28062    | 2740.776  | 2582.966  |
| AK024242  | 7126.31   | 7796.086  | NM_003293 | 305.691   | 773.287   | U38545    | 638.589   | 660.759   |
| AK024559  | 474.772   | 769.728   | AK024841  | 1897.265  | 2372.457  | AI627464  | 2185.368  | 2232.431  |
| AK024851  | 1274.837  | 1413.691  | NM_004995 | 2578.568  | 3292.732  | BI756258  | 939.818   | 1309.651  |
| AK024943  | 1013.877  | 1163.678  | NM_000386 | 4032.409  | 5238.151  | AA608557  | 3586.137  | 3268.587  |
| AK024410  | 262.74    | 757.174   | NM_007231 | 351.004   | 619.355   | AL050095  | 934.615   | 1193.347  |
| AK024995  | 1518.267  | 1923.005  | NM_001190 | 2650.188  | 3128.238  | U03272    | 1215.264  | 1219.565  |
| AL359943  | 23368.688 | 18940.342 | NM_015654 | 5862.828  | 6082.93   | NM_003099 | 572.506   | 650.13    |
| NM_000534 | 3075.025  | 2897.693  | NM_012244 | 1587.444  | 1918.275  | NM_014781 | 2193.55   | 1892.411  |
| L10140    | 1009.23   | 874.042   | NM_004341 | 1410.224  | 1875.189  | X87896    | 701.766   | 470.413   |
| AL133447  | 977.024   | 808.925   | AB082521  | 5346.449  | 7233.516  | M88310    | 1314.932  | 1052.325  |
| AB037853  | 15556.297 | 15359.492 | AL050182  | 882.601   | 715.308   | NM_000042 | 1210.089  | 1014.108  |
| D28450    | 28437.918 | 24151.758 | NM_020040 | 925.806   | 696.822   | NM_005024 | 1466.398  | 1629.801  |
| AK056222  | 1781.539  | 1744.756  | NM_002374 | 1173.506  | 1110.639  | NM_014808 | 951.228   | 1061.219  |
| AK002028  | 14874.669 | 16249.345 | AK026940  | 2127.36   | 1699.328  | AB006627  | 761.384   | 991.328   |
| AL050127  | 1888.308  | 2100.939  | AF155117  | 2442.286  | 2037.143  | NM_000416 | 2584.968  | 2322.446  |
| AK024805  | 6762.685  | 9702.472  | AB014527  | 644.373   | 500.68    | NM_003382 | 537.24    | 661.162   |
| AK000189  | 393.279   | 1853.615  | NM_004411 | 978.502   | 592.89    | NM_002965 | 4546.993  | 5690.434  |
| AK001423  | 1567.104  | 2907.525  | NM_015938 | 4315.547  | 2351.565  | AB007883  | 2039.851  | 1715.708  |
| AK024090  | 23055.607 | 22310.492 | NM_000740 | 639.867   | 360.393   | AK093780  | 4214.675  | 4762.558  |
| AL133574  | 1675.303  | 2137.313  | AK025985  | 3686.813  | 8665.343  | AY009397  | 46120.539 | 47813.531 |
| AF147339  | 20243.885 | 18022.4   | NM_013256 | 1585.43   | 2107.785  | NM_007037 | 7147.383  | 6635.186  |
| AL390181  | 12470.541 | 12312.297 | NM_004143 | 1186.029  | 1527.186  | NM_001649 | 1103.93   | 845.334   |
| NM_017914 | 18309.193 | 16433.578 | X66087    | 297.068   | 649.191   | NM_005492 | 791.645   | 627.049   |
| AK024953  | 3143.15   | 2381.169  | NM_016328 | 5051.682  | 5879.891  | AF038196  | 1970.391  | 2153.124  |
| AK024276  | 3502.658  | 2789.328  | NM_017544 | 15903.126 | 20090.857 | AF320294  | 1661.08   | 1507.338  |
| S83374    | 2069.731  | 1866.5    | NM_003153 | 1058.45   | 1520.797  | AF161436  | 3189.39   | 2802.237  |
| AK025784  | 10266.124 | 9758.239  | NM_016285 | 1072.634  | 1331.329  | NM_020402 | 1796.552  | 1324.562  |
| U07199    | 1761.085  | 1605.597  | AF025771  | 1885.29   | 2476.095  | NM_004299 | 2511.06   | 2412.979  |
| AK023713  | 803.248   | 755.31    | NM_018215 | 722.926   | 701.782   | NM_001171 | 822.878   | 754.068   |
| X81445    | 885.008   | 877.486   | AB033110  | 616.923   | 638.537   | NM_002250 | 2671.824  | 2565.676  |



|           |           |           |           |           |           |           |           |           |
|-----------|-----------|-----------|-----------|-----------|-----------|-----------|-----------|-----------|
| U95091    | 814.694   | 863.834   | NM_005083 | 11384.487 | 11803.887 | NM_006323 | 6954.542  | 6838.305  |
| NM_017900 | 18620.449 | 18240.211 | NM_007187 | 8331.243  | 8327.016  | NM_016466 | 925.303   | 849.823   |
| S50182    | 1371.186  | 1316.431  | NM_018983 | 8025.85   | 7519.608  | NM_001493 | 5842.297  | 5763.984  |
| AL360145  | 1165.216  | 1096.94   | NM_003096 | 5221.215  | 4540.108  | NM_014841 | 672.476   | 935.844   |
| Y12016    | 622.348   | 585.818   | NM_007279 | 3205.403  | 3077.927  | NM_014426 | 3669.344  | 5329.664  |
| NM_001178 | 762.676   | 600.186   | BE390833  | 15812.607 | 13052.656 | NM_006816 | 13940.153 | 14043.19  |
| AK023696  | 3417.287  | 3436.212  | NM_004730 | 10032.747 | 8106.586  | AK026518  | 21208.551 | 20034.191 |
| NM_000704 | 1107.93   | 1144.695  | NM_000801 | 2367.134  | 2235.319  | NM_000258 | 5160.566  | 5265.71   |
| NM_015987 | 768.189   | 708.441   | NM_006115 | 17721.029 | 12659.316 | AB033055  | 2409.185  | 2132.692  |
| NM_019605 | 887.748   | 678.59    | NM_005801 | 2459.906  | 1620.025  | AF311287  | 1500.749  | 1405.615  |
| NM_015369 | 391.842   | 424.126   | NM_018198 | 1611.827  | 1107.852  | AJ299442  | 4212.8    | 4749.453  |
| Z49090    | 4119.619  | 3715.933  | NM_001539 | 12763.948 | 7696.189  | NM_000129 | 894.844   | 991.922   |
| AK021592  | 4832.214  | 4784.999  | AK027232  | 2889.14   | 3981.91   | NM_003762 | 3738.612  | 3226.581  |
| AK025467  | 3183.45   | 2982.813  | NM_012204 | 505.599   | 642.931   | NM_018446 | 3128.508  | 2957.721  |
| AK026593  | 2818.691  | 2862.57   | AK091117  | 416.021   | 582.6     | NM_000187 | 869.367   | 580.911   |
| L37700    | 889.356   | 784.064   | NM_003613 | 797.655   | 1021.657  | NM_014465 | 1250.905  | 1055.487  |
| NM_017665 | 2052.817  | 1735.548  | NM_000022 | 3917.885  | 4669.419  | D87292    | 5779.431  | 4634.583  |
| AK024819  | 283.512   | 438.868   | NM_016576 | 2958.88   | 3460.778  | NM_005498 | 1161.223  | 1394.258  |
| AF052106  | 3047.734  | 3296.175  | NM_004213 | 1103.099  | 1504.742  | NM_016335 | 715.343   | 837.447   |
| AK000441  | 340.553   | 369.095   | NM_001929 | 46090.637 | 45388.555 | NM_003165 | 4023.308  | 3749.771  |
| AK022391  | 1141.837  | 1152.61   | NM_000906 | 1345.715  | 1673.877  | NM_003906 | 4645.072  | 4703.752  |
| NM_016125 | 1672.947  | 1957.54   | NM_000480 | 2051.298  | 2514.095  | AL359590  | 22483.301 | 25212.068 |
| CY3Cy5    | 964.037   | 100.506   | AF254084  | 20058.232 | 21164.471 | NM_002861 | 7365.348  | 7631.818  |
| R72122    | 1465.526  | 1287.136  | AK022648  | 1125.291  | 1132.319  | NM_003080 | 2907.496  | 3712.668  |
| Z35309    | 1197.138  | 1089.825  | AK022976  | 1172.022  | 1205.525  | NM_002645 | 1528.263  | 1953.549  |
| AA700005  | 1472.929  | 1307.132  | AB048791  | 2755.625  | 3013.383  | AB033027  | 1590.494  | 1705.984  |
| AA292025  | 644.876   | 690.355   | NM_003107 | 796.846   | 758.002   | AK021805  | 2737.86   | 2796.152  |
| AA437226  | 911.398   | 761.74    | NM_006874 | 2838.582  | 2215.366  | AB014550  | 1205.822  | 1427.351  |
| R36143    | 840.518   | 1325.729  | AB046777  | 3958.609  | 3160.217  | NM_006826 | 7725.167  | 8381.78   |
| XM_056359 | 705.893   | 733.573   | AJ251844  | 2241.885  | 1877.077  | AB007973  | 4744.987  | 4519.941  |
| D10353/NM | 3722.178  | 4711.774  | D16815    | 632.684   | 627.708   | M96843    | 6193.73   | 5658.668  |
| M15042    | 3174.187  | 4274.243  | NM_001880 | 2740.97   | 1929.204  | NM_017791 | 1445.465  | 946.229   |
| SB        | 496.73    | 822.313   | AB028943  | 1617.789  | 1202.294  | NM_005882 | 5629.555  | 5010.605  |
| AK056843  | 2104.998  | 2494.729  | NM_006194 | 634.663   | 372.935   | BC012304  | 5145.046  | 4479.292  |
| U49928    | 7408.875  | 10817.923 | AK001603  | 2603.905  | 1733.624  | AB046815  | 2102.459  | 2166.939  |
| AK096645  | 9812.27   | 13502.415 | U71601    | 1151.457  | 716.339   | AF075085  | 39309.285 | 40463.609 |
| AK092859  | 784.102   | 1033.024  | AF042838  | 3140.627  | 4022.692  | NM_005892 | 1888.3    | 1864.21   |
| NM_019884 | 3310.336  | 3037.38   | AL137511  | 482.386   | 802.02    | NM_006478 | 537.669   | 690.38    |
| SR6       | 2144.412  | 1922.513  | X91221    | 525.979   | 1086.264  | AF132734  | 12377.028 | 13115.904 |
| SR8       | 8758.639  | 32202.373 | AF075031  | 428.164   | 699.768   | NM_018379 | 2476.609  | 2301.096  |
| SR10      | 28576.891 | 9668.065  | AF075062  | 5136.562  | 6021.621  | NM_016403 | 10560.604 | 10765.583 |
| CY3Cy5    | 2229.3    | 142.102   | NM_004188 | 663.662   | 1152.094  | NM_015603 | 1043.706  | 1208.493  |
| NM_005291 | 12818.791 | 8810.598  | AF147381  | 3475.919  | 4749.123  | AK021788  | 446.714   | 341.485   |
| NM_002923 | 785.56    | 605.522   | AB002452  | 517       | 782.178   | NM_001921 | 5723.713  | 6407.875  |
| NM_006794 | 1134.987  | 1227.391  | AK027101  | 20082.852 | 23811.57  | NM_006230 | 8030.978  | 9928.819  |
| NM_018653 | 4269.956  | 4188.246  | AF010236  | 377.736   | 634.603   | NM_014699 | 2933.282  | 4337.342  |
| NM_005388 | 3818.588  | 4008.939  | AK024358  | 329.968   | 557.445   | NM_013400 | 5286.134  | 6188.302  |
| NM_007232 | 17837.412 | 18775.898 | NM_014840 | 659.546   | 726.738   | AK026257  | 1744.159  | 1692.946  |
| NM_003027 | 364.936   | 401.859   | D17085    | 504.844   | 365.746   | AK023836  | 2508.829  | 2871.086  |
| NM_002717 | 3164.421  | 3754.018  | AF088075  | 800.581   | 1136.066  | NM_018109 | 1846.824  | 2274.131  |
| NM_012114 | 496.208   | 811.334   | AK026376  | 1184.071  | 1286.515  | NM_005076 | 4749.033  | 5178.267  |
| NM_014486 | 477.737   | 788.171   | AF088061  | 3349.79   | 3756.078  | AF253321  | 558.643   | 494.258   |
| NM_003025 | 5841.92   | 8474.691  | AF086286  | 1990.026  | 1780.578  | U80735    | 2009.882  | 1978.629  |

|           |           |           |           |           |           |           |           |           |
|-----------|-----------|-----------|-----------|-----------|-----------|-----------|-----------|-----------|
| U52051    | 765.448   | 908.661   | AF086376  | 1006.128  | 954.829   | NM_01785C | 884.838   | 1041.031  |
| NM_020179 | 3425.726  | 3887.585  | AF086410  | 512.585   | 488.65    | NM_002224 | 822.134   | 978.861   |
| NM_001153 | 809.595   | 867.538   | AK022997  | 3578.821  | 3031.841  | NM_003874 | 342.829   | 454.884   |
| NM_006786 | 1898.621  | 2427.937  | NM_017617 | 2039.005  | 1493.856  | NM_000082 | 691.448   | 729.388   |
| NM_006205 | 1377.907  | 1677.226  | AF131830  | 1105.229  | 714.643   | L13857    | 1691.948  | 1356.211  |
| NM_004034 | 3240.103  | 3537.321  | NM_014811 | 515.901   | 475.944   | NM_01809E | 2512.476  | 2128.677  |
| NM_00013C | 3486.128  | 3409.139  | AF147426  | 687.027   | 851.032   | AF146277  | 3889.288  | 4346.424  |
| NM_004193 | 1440.749  | 1571.561  | BC019667  | 14213.221 | 18232.799 | NM_00255E | 438.764   | 561.509   |
| NM_002803 | 6321.26   | 5315.934  | AK026026  | 9788.45   | 12297.501 | AF055033  | 8449.415  | 8278.402  |
| NM_00550E | 1164.684  | 1060.218  | AF085941  | 6255.956  | 8818.832  | NM_01770C | 827.621   | 1084.581  |
| NM_00678E | 684.601   | 972.456   | Z69892    | 1869.6    | 2215.667  | M37191    | 4962.122  | 6814.374  |
| AB033102  | 8577.917  | 10990.351 | AK023590  | 691.748   | 1128.672  | NM_00302C | 700.328   | 804.019   |
| NM_014774 | 3849.716  | 3613.095  | AF087961  | 512.185   | 834.854   | NM_003404 | 32804.738 | 27413.949 |
| NM_014143 | 5829.893  | 5710.2    | AL137309  | 1159.434  | 1555.91   | NM_001114 | 1063.227  | 1069.875  |
| M55646    | 9822.896  | 10122.497 | AL137475  | 822.26    | 1545.993  | X82240    | 1596.113  | 1542.857  |
| NM_006112 | 18258.064 | 27613.451 | AL161956  | 2848.785  | 5517.47   | NM_01399E | 10889.578 | 10444.813 |
| NM_000879 | 362.997   | 737.871   | AL390176  | 1659.862  | 2352.072  | NM_00601C | 12868.675 | 12214.367 |
| M12807    | 1231.897  | 1722.402  | AL137356  | 906.375   | 1071.075  | K03191    | 1973.748  | 2814.991  |
| NM_00176E | 1525.628  | 2009.347  | AL137547  | 828.011   | 1121.683  | NM_00507E | 7621.107  | 7315.563  |
| NM_003361 | 2307.41   | 3165.551  | AK021994  | 1230.928  | 1962.202  | NM_005192 | 8457.843  | 7646.862  |
| NM_018684 | 7890.745  | 9647.506  | Z70763    | 518.137   | 768.137   | AK022956  | 2771.297  | 2661.117  |
| NM_017983 | 1295.686  | 2225.088  | AK023802  | 5408.362  | 5434.977  | AK023121  | 1038.785  | 773.475   |
| AF116909  | 1328.39   | 1569.224  | AF086103  | 583.751   | 504.889   | NM_014104 | 19246.594 | 20031.404 |
| BE906724  | 1437.894  | 1904.159  | AL080135  | 489.13    | 282.601   | NM_002392 | 599.623   | 814.555   |
| NM_002283 | 5968.58   | 5793.165  | AK023158  | 791.406   | 414.798   | NM_00274E | 42962.609 | 41894.621 |
| AJ276095  | 13445.42  | 13245.692 | AF085852  | 1344.095  | 938.745   | NM_01821E | 2310.786  | 2515.132  |
| NM_00481E | 5235.155  | 8426.423  | AK023952  | 868.133   | 1210.177  | NM_00339C | 941.792   | 1199.099  |
| AF231916  | 1916.049  | 2141.093  | AK000787  | 562.604   | 776.717   | AL137747  | 2207.844  | 2372.029  |
| NM_001637 | 597.883   | 1232.01   | AF090885  | 7419.089  | 7906.78   | NM_01475E | 6359.931  | 6224.982  |
| NM_01663C | 7525.424  | 12930.649 | AF161342  | 389.013   | 521.531   | AF077188  | 7404.508  | 8623.805  |
| NM_014291 | 2659.579  | 4792.549  | NM_01664E | 374.016   | 649.676   | NM_01244E | 1979.98   | 2622.045  |
| NM_014631 | 1185.824  | 1362.133  | NM_014082 | 764.285   | 1222.395  | NM_01868E | 20717.572 | 22037.445 |
| NM_00108E | 3688.211  | 4162.706  | AF100636  | 496.046   | 570.563   | AF231919  | 934.094   | 1000.295  |
| NM_00012C | 4130.959  | 4833.853  | AF161366  | 409.821   | 742.869   | Y11718    | 390.12    | 622.794   |
| AF172327  | 16643.65  | 17857.055 | AK022197  | 1699.147  | 2408.917  | AL133644  | 5948.663  | 5452.683  |
| NM_00167E | 2673.777  | 4630.501  | AK021970  | 539.632   | 486.611   | NM_00270E | 2908.527  | 2676.187  |
| NM_00404E | 63628.891 | 66524.773 | AK022066  | 56175.48  | 56138.344 | NM_019023 | 56513.836 | 51333.621 |
| NM_004983 | 1383.384  | 1271.725  | AK022224  | 1268.907  | 1690.606  | NM_00442C | 767.576   | 785.087   |
| U09384    | 659.704   | 844.286   | AK022359  | 888.505   | 851.195   | NM_00297C | 712.803   | 684.25    |
| NM_00686C | 4202.026  | 4959.066  | AK022000  | 744.178   | 896.185   | NM_00549E | 21423.729 | 18231.635 |
| NM_004794 | 9741.84   | 11039.159 | AK022129  | 1547.124  | 1643.237  | NM_015387 | 3306.899  | 3714.206  |
| NM_004283 | 1664.342  | 1621.344  | AK022263  | 6241.608  | 6003.591  | NM_001733 | 1733.489  | 1147.928  |
| NM_004163 | 21745.561 | 23515.154 | AK022384  | 660.396   | 831.168   | NM_01782E | 6057.369  | 7090.203  |
| AK026308  | 1307.582  | 1747.764  | AK027097  | 453.054   | 279.06    | NM_01403E | 2564.154  | 2330.475  |
| NM_01220C | 1436.848  | 1836.904  | AK024613  | 456.865   | 482.914   | NM_020122 | 10773.696 | 12384.746 |
| NM_001724 | 1224.047  | 1132.308  | AK027198  | 1517.637  | 1087.735  | NM_013432 | 13121.505 | 17956.336 |
| NM_00015C | 811.07    | 969.429   | AK000257  | 703.09    | 954.237   | AB020716  | 589.842   | 842.59    |
| AB023152  | 726.503   | 871.33    | NM_00616C | 5465.278  | 5674.59   | NM_00229E | 42866.773 | 43534.543 |
| NM_006212 | 860.574   | 984.725   | NM_000529 | 520.3     | 519.465   | AK027130  | 575.936   | 685.659   |
| AK022872  | 3561.192  | 3839.272  | AL110159  | 438.251   | 568.314   | NM_00547E | 8277.262  | 8507.521  |
| AK024272  | 3700.376  | 5124.73   | AF009259  | 480.974   | 639.599   | NM_00573C | 16102.987 | 18465.65  |
| NM_016381 | 1425.259  | 2243.72   | AF009260  | 756.567   | 966.748   | NM_005392 | 892.119   | 1156.653  |
| AL591715  | 860.001   | 780.609   | NM_003079 | 1283.392  | 1435.596  | AL133572  | 3816.973  | 3392.77   |

|           |           |           |           |           |           |           |           |           |
|-----------|-----------|-----------|-----------|-----------|-----------|-----------|-----------|-----------|
| NM_018042 | 1918.124  | 3222.188  | NM_017902 | 1739.598  | 2369.489  | AK022500  | 1564.51   | 1337.257  |
| BF030555  | 22070.936 | 37090.363 | AL359567  | 747.276   | 739.987   | U52096    | 5577      | 5595.636  |
| NM_012433 | 6710.267  | 7619.114  | NM_017726 | 1449.477  | 1277.897  | AB013897  | 1188.398  | 1126.753  |
| NM_005605 | 1948.735  | 2202.969  | AK026716  | 429.663   | 359.197   | NM_005526 | 28215.213 | 27903.131 |
| NM_002576 | 1166.764  | 1507.386  | AL049325  | 8426.422  | 5438.589  | AK001669  | 1955.436  | 2261.769  |
| NM_003582 | 1752.807  | 1935.787  | AK024154  | 6556.521  | 11255.895 | NM_006195 | 7343.683  | 6882.039  |
| AF169351  | 8799.408  | 9200.597  | AF086341  | 996.991   | 1493.875  | NM_006190 | 7818.106  | 7407.754  |
| M14200    | 52994.492 | 47190.762 | AK026672  | 1201.516  | 1447.48   | NM_006365 | 1754.641  | 1807.135  |
| NM_000282 | 6069.933  | 5473.348  | S83282    | 53281.957 | 57042.527 | NM_001615 | 4482.625  | 4534.363  |
| NM_000532 | 10714.605 | 11845.831 | AK024164  | 15774.836 | 20050.57  | BC000401  | 7275.125  | 8806.633  |
| NM_016341 | 1037.601  | 1126.368  | AF052130  | 4347.372  | 6640.55   | NM_006425 | 4162.538  | 4905.829  |
| NM_004034 | 1695.567  | 1573.125  | AF130090  | 8565.259  | 11230.854 | BF344046  | 853.452   | 870.528   |
| NM_000130 | 1138.969  | 899.396   | AL096727  | 847.474   | 1097.107  | AF432218  | 6119.334  | 5915.758  |
| AI492087  | 16292.595 | 16477.674 | AL080110  | 1544.427  | 2279.774  | NM_004286 | 2689.939  | 3195.334  |
| R72122    | 1440.219  | 1555.899  | NM_020425 | 1119.133  | 1755.314  | AK025082  | 1156.593  | 1256.484  |
| Z35309    | 749.607   | 889.918   | AK024076  | 1842.637  | 2303.183  | AB040901  | 948.504   | 1353.114  |
| AA700005  | 1116.806  | 1461.703  | M87940    | 1899.732  | 2463.901  | AL137406  | 2830.907  | 2408.068  |
| AA437226  | 962.804   | 1213.584  | L77588    | 1259.369  | 1641.922  | NM_012253 | 3386.586  | 3546.546  |
| R36143    | 800.762   | 771.24    | AF086304  | 9953.543  | 14707.985 | NM_006876 | 1537.953  | 1159.384  |
| XM_056359 | 446.282   | 497.627   | U61094    | 1350.341  | 1611.097  | NM_000293 | 2174.266  | 1621.943  |
| D10353/NM | 1784.666  | 3034.183  | AB032976  | 2046.101  | 2180.28   | AF153821  | 954.841   | 1040.285  |
| SB        | 442.484   | 729.641   | AF301222  | 5680.211  | 6510.49   | NM_013370 | 1252.219  | 1303.559  |
| AK056843  | 2300.414  | 2045.134  | AF215981  | 3199.921  | 2990.912  | NM_003310 | 2128.717  | 2444.24   |
| U49928    | 7546.952  | 6789.266  | NM_000732 | 11222.116 | 8814.592  | AK024461  | 1257.991  | 1269.165  |
| AK096645  | 9240.687  | 8678.627  | AF130044  | 689.73    | 504.632   | NM_017635 | 1554.413  | 1581.285  |
| AK092859  | 761.322   | 733.693   | NM_013939 | 633.64    | 747.801   | X62534    | 1098.458  | 2127.016  |
| NM_019884 | 3187.259  | 3016.682  | AB038651  | 1684.12   | 1864.137  | M62399    | 2714.82   | 2622.227  |
| NM_018291 | 4282.424  | 3642.783  | AL359603  | 1102.039  | 1143.835  | U71600    | 1199.192  | 1041.747  |
| NM_005530 | 2594.332  | 2309.251  | X84838    | 388.247   | 474.576   | NM_004472 | 901.825   | 723.079   |
| AF116909  | 940.552   | 1079.791  | NM_013940 | 688.15    | 1133.078  | AB037862  | 3488.801  | 2643.361  |
| BE906724  | 577.949   | 569.056   | AL117643  | 1114.977  | 1751.555  | AF085924  | 481.945   | 558.002   |
| NM_002283 | 1115.897  | 1029.605  | AF075063  | 984.027   | 1221.283  | AK023887  | 423.532   | 500.735   |
| AJ276095  | 8637.315  | 9066.163  | AF069135  | 3446.478  | 4042.972  | AF088022  | 5991.727  | 4785.531  |
| NM_004819 | 2653.399  | 3061.986  | AK026524  | 1102.212  | 1351.176  | AK026537  | 1480.175  | 1355.498  |
| NM_007184 | 2157.097  | 2534.8    | AB011157  | 3789.237  | 4240.154  | NM_015485 | 2900.927  | 2217.85   |
| NM_005291 | 3261.061  | 3620.884  | U17632    | 1558.398  | 1819.952  | NM_002666 | 3249.505  | 3621.797  |
| NM_002923 | 969.048   | 1068.648  | AK026764  | 2332.569  | 3054.556  | AF202145  | 1576.431  | 1492.246  |
| NM_006794 | 961.104   | 1370.201  | AF113700  | 2692.287  | 6325.913  | AK026155  | 1555.331  | 1578.768  |
| NM_018653 | 3787.326  | 3604      | NM_017835 | 7257.7    | 8895.503  | NM_018052 | 14852.9   | 15088.296 |
| NM_005385 | 2466.606  | 2407.672  | NM_018347 | 2015.629  | 2408.202  | AK022386  | 2256.932  | 2577.844  |
| NM_007232 | 9964.1    | 15411.305 | AF086223  | 232.825   | 400.596   | AF131846  | 5382.056  | 5936.136  |
| NM_002717 | 3581.533  | 2612.42   | AK024986  | 771.326   | 743.274   | AF088069  | 1435.03   | 1321.412  |
| NM_003025 | 7321.231  | 7502.367  | AK026730  | 590.453   | 551.13    | NM_013393 | 5191.236  | 4836.727  |
| U52051    | 604.797   | 991.631   | AK024739  | 873.057   | 938.468   | AK025072  | 1841.166  | 1855.738  |
| NM_020179 | 4143.891  | 3838.119  | AK098681  | 661.991   | 695.877   | L10378    | 11132.672 | 9368.524  |
| NM_004306 | 27430.537 | 28242.854 | AK026772  | 1190.738  | 1159.889  | AK022179  | 598.938   | 651.963   |
| NM_001153 | 639.168   | 557.375   | NM_014260 | 10182.106 | 8059.685  | AJ227860  | 1016.595  | 971.654   |
| NM_006786 | 1455.941  | 1426.174  | AK026458  | 434.469   | 432.603   | AL157448  | 843.556   | 1035.88   |
| NM_006205 | 1164.114  | 1424.929  | CY3Cy5    | 1012.19   | 171.481   | AF026942  | 1510.706  | 1241.295  |
| NM_006860 | 2737.948  | 2515.789  | M23254    | 5115.765  | 2600.648  | AJ276429  | 1759.311  | 1424.264  |
| NM_004794 | 6772.962  | 7905.162  | R28062    | 1600.842  | 1192.637  | AL117657  | 1363.619  | 1410.452  |
| NM_004283 | 974.748   | 1189.222  | AI627464  | 1390.837  | 1192.092  | AK023589  | 818.501   | 752.24    |
| NM_004163 | 1850.667  | 2251.179  | BI756258  | 860.547   | 746.177   | AK021590  | 1871.647  | 1699.258  |

|           |           |           |           |           |           |           |           |           |
|-----------|-----------|-----------|-----------|-----------|-----------|-----------|-----------|-----------|
| AK026308  | 703.83    | 836.235   | AI342225  | 57123.367 | 47684.922 | AB002441  | 561.949   | 434.207   |
| NM_013337 | 1420.337  | 1593.308  | AA634103  | 64729.598 | 69549.516 | AK023998  | 1004.335  | 1169.29   |
| NM_004193 | 1343.91   | 1668.538  | AA608557  | 4779.96   | 3403.824  | AK000872  | 1257.302  | 1088.563  |
| NM_002803 | 7663.443  | 9542.021  | AL050095  | 1928.324  | 1755.664  | AK027147  | 6468.317  | 5671.126  |
| NM_005508 | 1569.542  | 2133.105  | U03272    | 1782.967  | 1922.402  | AK022415  | 13221.23  | 12052.609 |
| NM_006788 | 968.244   | 1286.371  | NM_000498 | 634.846   | 735.063   | AL137368  | 566.89    | 519.41    |
| NM_016568 | 675.249   | 670.716   | NM_000664 | 1881.038  | 2363.532  | AK021932  | 1105.458  | 972.998   |
| NM_014774 | 3007.786  | 2969.758  | SR1       | 65047.086 | 67395.094 | AK026787  | 3904.525  | 3621.977  |
| NM_014143 | 5725.177  | 4652.951  | SR3       | 46790.234 | 61925.367 | AK023542  | 1285.9    | 1195.16   |
| M55646    | 10659.438 | 9348.342  | SR9       | 18104.748 | 3841.601  | AK000203  | 1081.259  | 1054.648  |
| NM_006112 | 19588.793 | 23063.279 | CY3Cy5    | 3007.99   | 166.188   | AK021845  | 4527.16   | 5141.949  |
| M12807    | 1494.898  | 1776.627  | NM_014808 | 747.865   | 634.622   | NM_018592 | 1705.448  | 1962.057  |
| NM_001765 | 1632.685  | 1605.463  | AB006627  | 484.01    | 533.565   | NM_018503 | 12653.325 | 12564.054 |
| NM_003361 | 2666.906  | 2636.829  | NM_000416 | 2159.028  | 1536.903  | NM_016448 | 5373.823  | 5428.95   |
| NM_012098 | 2146.843  | 1890.747  | NM_003382 | 359.246   | 394.942   | AL049670  | 4134.057  | 3560.968  |
| NM_018684 | 7467.138  | 6644.421  | NM_002965 | 4113.284  | 3034.918  | NM_018512 | 4629.58   | 5920.928  |
| NM_017983 | 1074.15   | 1021.982  | AB007883  | 1225.721  | 877.537   | AK022412  | 2380.626  | 3027.938  |
| AF169351  | 4817.757  | 4714.89   | AK093780  | 3381.957  | 3244.141  | AK023073  | 2769.679  | 3884.264  |
| M14200    | 41745.148 | 31107.703 | AY009397  | 40870.809 | 28725.078 | AK023922  | 603.448   | 607.453   |
| NM_000282 | 2606.531  | 2034.086  | NM_007037 | 10665.026 | 7898.057  | AK022438  | 1152.357  | 1206.521  |
| NM_000532 | 8648.427  | 8568.968  | NM_001649 | 834.634   | 580.743   | AK023764  | 1093.724  | 1212.285  |
| NM_016341 | 787.486   | 914.793   | NM_005492 | 1031.13   | 1199.178  | AK024082  | 700.74    | 694.747   |
| AF231916  | 885.057   | 1202.244  | AF038196  | 2890.368  | 3520.859  | Z27405    | 10268.368 | 12314.843 |
| NM_003501 | 2293.967  | 2692.637  | NM_004859 | 5334.884  | 5384.96   | AK023412  | 1196.924  | 1194.568  |
| AK022654  | 12082.745 | 16056.34  | NM_016352 | 941.659   | 1435.516  | NM_014617 | 23111.436 | 20008.518 |
| BC002905  | 2913.886  | 3918.326  | NM_005014 | 477.982   | 684.423   | AK074682  | 3634.995  | 3357.245  |
| NM_018091 | 6390.627  | 7664.507  | NM_000070 | 2661.562  | 5478.275  | X74605    | 736.445   | 684.188   |
| NM_014291 | 5488.741  | 5038.892  | NM_001202 | 1222.243  | 2426.072  | AK024513  | 1042.301  | 1028.605  |
| NM_014631 | 747.013   | 744.323   | AB037804  | 888.822   | 1161.246  | BC036692  | 1526.671  | 2014.165  |
| NM_001088 | 4166.145  | 4131.657  | U34249    | 589.331   | 782.353   | AJ009640  | 3693.351  | 3346.276  |
| NM_000120 | 4450.71   | 4840.415  | NM_003289 | 31133.627 | 37226.305 | AF147340  | 857.068   | 964.191   |
| AF172327  | 15667.187 | 16919.365 | NM_006323 | 5800.405  | 3336.776  | AF035308  | 3699.674  | 4218.583  |
| NM_001676 | 2407.723  | 3038.729  | NM_016466 | 864.572   | 934.158   | NM_014054 | 2835.752  | 3090.214  |
| NM_001679 | 11900.398 | 11043.19  | NM_001493 | 4155.337  | 2946.927  | AK022228  | 1501.669  | 1148.28   |
| NM_004046 | 67163.141 | 67340.227 | NM_014841 | 525.065   | 473.101   | AF086480  | 1153.572  | 1941.335  |
| NM_004983 | 884.861   | 910.861   | NM_014426 | 3032.338  | 2972.117  | AK022122  | 4326.462  | 4040.225  |
| NM_019884 | 2437.824  | 2531.247  | NM_006816 | 19413.408 | 14914.307 | AK000806  | 37594.949 | 33242.43  |
| NM_018291 | 1830.537  | 1678.673  | AK026518  | 28159.99  | 22055.426 | NM_016471 | 2758.444  | 2522.313  |
| NM_005530 | 2786.834  | 2088.111  | NM_000258 | 7922.994  | 5958.924  | NM_005364 | 5421.68   | 4572.841  |
| NM_006899 | 3353.038  | 3650.586  | AB033055  | 3527.952  | 3146.387  | AK023482  | 3104.247  | 2802.26   |
| NM_012200 | 1882.862  | 2846.756  | AF311287  | 2570.398  | 1876.686  | AK022798  | 520.32    | 426.244   |
| NM_000150 | 1771.17   | 2352.165  | NM_003098 | 759.498   | 1384.158  | AL157423  | 863.502   | 718.565   |
| AK024272  | 4116.014  | 4061.305  | NM_014781 | 2933.595  | 3965.732  | AL161991  | 15298.682 | 15545.769 |
| NM_016381 | 1489.149  | 1674.303  | BU629989  | 726.012   | 751.224   | D17032    | 13266.676 | 14649.438 |
| AL591715  | 879.08    | 1170.82   | X87896    | 988.705   | 1445.088  | NM_017941 | 945.596   | 1076.132  |
| NM_018042 | 3627.24   | 3976.228  | M88310    | 1524.003  | 1945.44   | AF118079  | 20630.533 | 22727.045 |
| BE741525  | 799.748   | 1016.648  | NM_000042 | 1377.092  | 1902.568  | AF277572  | 599.221   | 1062.664  |
| BF030555  | 27173.129 | 26867.939 | NM_005024 | 2536.16   | 5576.738  | AL365413  | 3967.133  | 7023.287  |
| NM_012433 | 6741.541  | 5563.813  | NM_003403 | 370.983   | 989.142   | NM_005258 | 5932.34   | 7974.436  |
| NM_005605 | 2342.118  | 2250.151  | NM_016335 | 667.026   | 492.739   | NM_000440 | 3612.802  | 3794.802  |
| NM_002576 | 1202.885  | 1481.031  | NM_003165 | 3283.985  | 2788.22   | NM_001297 | 1863.253  | 2134.93   |
| NM_003582 | 2310.7    | 2348.855  | NM_003906 | 4826.183  | 3095.285  | NM_004403 | 2958.774  | 3085.94   |
| NM_020179 | 899.932   | 623.249   | AL359590  | 20215.938 | 17100.053 | X64993    | 781.442   | 722.858   |

|           |           |           |           |           |           |           |           |           |
|-----------|-----------|-----------|-----------|-----------|-----------|-----------|-----------|-----------|
| NM_006786 | 1459.269  | 798.284   | NM_002861 | 7069.669  | 5028.46   | NM_004434 | 6063.721  | 5438.995  |
| NM_006205 | 1309.654  | 1021.812  | NM_003080 | 2656.937  | 1952.884  | NM_016230 | 2036.518  | 1826.485  |
| AI492087  | 17539.568 | 18902.486 | NM_002645 | 1487.464  | 1285.321  | AK023966  | 3737.192  | 3352.636  |
| R72122    | 1679.333  | 1459.143  | AB033027  | 2065.466  | 1738.912  | AK025702  | 1537.95   | 1967.562  |
| Z35309    | 1238.081  | 1000.225  | AK021805  | 4522.252  | 3888.39   | NM_018958 | 493.982   | 798.628   |
| X04571    | 339.767   | 340.679   | AB014550  | 1405.369  | 1527.361  | AL050200  | 387.4     | 540.372   |
| AA700005  | 990.381   | 1062.257  | AF320294  | 1841.202  | 2204.611  | AF085866  | 1476.74   | 1691.24   |
| AA292025  | 678.923   | 500.152   | AF161436  | 2830.707  | 3769.365  | CY3Cy5    | 2504.393  | 95.224    |
| AA437226  | 659.891   | 654.518   | NM_020402 | 2042.504  | 2217.189  | AA397813  | 21925.943 | 31440.578 |
| R36143    | 712.071   | 666.649   | NM_004299 | 3381.979  | 4181.585  | W68291    | 8562.438  | 7574.218  |
| XM_056359 | 477.443   | 422.66    | NM_001171 | 1098.327  | 1709.694  | N64384    | 936.812   | 631.356   |
| D10353/NM | 4043.186  | 3740.274  | NM_002250 | 3839.904  | 4184.162  | H-X 53655 | 732.587   | 792.598   |
| M15042    | 2685.22   | 2294.696  | AF132734  | 11701.337 | 7175.35   | H-U 05770 | 4033.108  | 3783.295  |
| AK056843  | 2735.175  | 2790.8    | NM_018379 | 2119.53   | 1509.235  | H-M 65199 | 1902.14   | 2407.667  |
| U49928    | 9075.872  | 9088.612  | NM_016403 | 10485.107 | 6699.049  | H-M 32315 | 2165.23   | 3114.639  |
| AK096645  | 11547.325 | 10537.431 | NM_015603 | 1058.306  | 866.319   | H-V00536M | 770.029   | 868.658   |
| AK092859  | 910.514   | 868.998   | NM_001921 | 4185.054  | 3160.179  | H-D85429M | 2632.861  | 3187.036  |
| M12807    | 966.213   | 1228.75   | NM_006230 | 6868.151  | 4649.389  | BF439832  | 1270.952  | 1555.69   |
| NM_001765 | 855.511   | 429.095   | NM_014699 | 3275.229  | 2663.001  | NM_017532 | 1231.163  | 1382      |
| NM_012099 | 1626.118  | 649.078   | NM_013400 | 6763.024  | 5378.87   | SR6       | 1920.404  | 1372.802  |
| NM_018684 | 2891.729  | 1190.762  | AK026257  | 1669.42   | 1447.729  | SR8       | 6650.667  | 16886.387 |
| NM_017983 | 932.999   | 904.048   | AK023836  | 4408.966  | 3295.175  | SR10      | 25120.07  | 8572.094  |
| NM_004819 | 4387.153  | 4637.758  | NM_018109 | 2548.143  | 2175.259  | CY3Cy5    | 2681.905  | 120.106   |
| NM_007184 | 2634.849  | 2272.358  | NM_000129 | 1140.972  | 1564.475  | NM_004447 | 3376.771  | 3644.121  |
| NM_005291 | 14310.909 | 11767.459 | NM_003762 | 6040.319  | 5929.338  | NM_001204 | 795.299   | 1027.675  |
| NM_002923 | 922.263   | 900.703   | NM_018446 | 4006.707  | 4560.474  | NM_012116 | 623.935   | 914.802   |
| NM_006794 | 954.042   | 829.717   | NM_000187 | 470.131   | 1134.612  | NM_000020 | 742.691   | 727.066   |
| NM_018653 | 3627.095  | 2915.96   | NM_014465 | 1747.542  | 4343.999  | NM_000956 | 681.907   | 548.284   |
| NM_005388 | 3627.848  | 3790.233  | D87292    | 6454.07   | 8593.606  | NM_002442 | 1425.361  | 1318.059  |
| NM_007232 | 19869.563 | 23441.75  | NM_005498 | 1919.741  | 2930.447  | AB033091  | 4775.413  | 2702.019  |
| NM_016257 | 2083.595  | 2500.576  | AB037804  | 721.478   | 464.658   | NM_004557 | 2126.072  | 3095.997  |
| NM_002717 | 3992.21   | 3501.611  | NM_003289 | 23610.541 | 17508.018 | NM_014757 | 1568.72   | 2484.164  |
| NM_003025 | 10534.404 | 9075.409  | M23254    | 4497.199  | 2606.258  | NM_017893 | 155.071   | 578.612   |
| U09384    | 628.891   | 640.838   | R28062    | 1532.14   | 1164.528  | NM_001584 | 1289.342  | 1858.102  |
| NM_013337 | 1626.657  | 1337.151  | AI627464  | 2074.477  | 1471.221  | NM_016372 | 13639.072 | 11812.909 |
| NM_004193 | 1680.805  | 1690.137  | BI756258  | 1040.918  | 1057.493  | AB020705  | 992.71    | 518.895   |
| NM_002803 | 7309.078  | 6573.833  | AI342225  | 60488.387 | 60849.676 | NM_002980 | 1129.066  | 887.774   |
| NM_005508 | 1540.354  | 1527.319  | AA608557  | 5962.462  | 4571.38   | NM_015886 | 758.5     | 357.534   |
| NM_018485 | 965.499   | 887.751   | AL050095  | 1933.342  | 1899.633  | NM_007102 | 24212.828 | 28043.072 |
| NM_006788 | 703.848   | 642.955   | U03272    | 1812.763  | 1502.46   | BG491613  | 6373.507  | 6423.021  |
| NM_016568 | 781.984   | 1018.262  | NM_000498 | 657.092   | 705.832   | U53532    | 1220.305  | 1436.092  |
| NM_014143 | 7869.942  | 8068.578  | NM_000664 | 1826.54   | 2276.567  | AB006423  | 1035.548  | 776.392   |
| M55646    | 11434.408 | 12845.451 | AF075085  | 45121.426 | 54069.703 | NM_005719 | 61251.488 | 53269.859 |
| NM_006112 | 21865.324 | 21691.17  | NM_005892 | 4571.032  | 5193.509  | NM_006093 | 2187.254  | 2139.584  |
| BF030555  | 24605.02  | 12960.854 | NM_000042 | 1102.188  | 960.521   | NM_002728 | 559.239   | 634.072   |
| NM_012433 | 5605.706  | 2263.161  | NM_005024 | 1967.459  | 1824.078  | NM_004513 | 3332.463  | 3443.598  |
| NM_002576 | 957.429   | 722.884   | NM_014808 | 754.981   | 836.421   | NM_001708 | 15288.865 | 12810.054 |
| NM_003582 | 1827.284  | 1334.833  | NM_000416 | 1883.919  | 1531.077  | NM_017735 | 1321.601  | 1273.914  |
| NM_016341 | 1007.981  | 789.908   | NM_002965 | 4321.521  | 3909.563  | AB033044  | 1876.606  | 1511.142  |
| AF231916  | 2654.84   | 2846.633  | AB007883  | 2044.516  | 1448.343  | AB014564  | 1177.622  | 606.31    |
| NM_003501 | 3704.934  | 3744.596  | AK093780  | 5724.675  | 6200.391  | NM_020230 | 2711.252  | 1993.905  |
| AK022654  | 35941.309 | 38205.324 | AY009397  | 57015.707 | 60708.828 | NM_006762 | 33221.574 | 31684.791 |
| BC002905  | 5728.927  | 5491.179  | AF038196  | 2887.486  | 2463.824  | NM_006352 | 1555.282  | 2067.019  |

|           |           |           |           |           |           |           |           |           |
|-----------|-----------|-----------|-----------|-----------|-----------|-----------|-----------|-----------|
| NM_018091 | 6287.093  | 6350.41   | NM_004859 | 5544.701  | 5560.234  | NM_005094 | 2007.392  | 1970.379  |
| NM_001108 | 3905.531  | 3733.895  | NM_016352 | 835.859   | 1023.57   | NM_002335 | 228.985   | 758.24    |
| NM_001637 | 663.125   | 1031.615  | NM_005014 | 575.859   | 820.234   | BE382905  | 470.511   | 717.106   |
| NM_016630 | 8103.407  | 9271.037  | NM_000070 | 2651.603  | 3572.998  | NM_002152 | 6328.786  | 9850.433  |
| NM_014291 | 6080.82   | 6804.061  | NM_002250 | 3564.058  | 2661.203  | NM_001701 | 600.025   | 1011.195  |
| NM_014631 | 702.821   | 694.863   | NM_006323 | 4170.006  | 3355.753  | AK022558  | 3887.361  | 3887.743  |
| NM_001089 | 4438.745  | 4716.88   | NM_016466 | 576.358   | 625.055   | NM_006476 | 37643.652 | 36005.82  |
| NM_000120 | 4328.022  | 5301.407  | NM_001493 | 3834.813  | 3137.509  | AK023787  | 1156.906  | 969.792   |
| AF172327  | 19368.373 | 19442.07  | NM_014841 | 814.893   | 494.009   | NM_002133 | 584.021   | 523.645   |
| NM_001676 | 3943.372  | 3357.943  | NM_014781 | 2637.646  | 3383.454  | NM_015697 | 2910.586  | 2341.83   |
| AB018338  | 11719.328 | 7344.261  | X87896    | 852.167   | 1537.219  | NM_007177 | 4589.945  | 4023.058  |
| D80010    | 368.879   | 203.057   | M88310    | 1263.083  | 2251.544  | AL359592  | 560.308   | 668.008   |
| NM_004923 | 1200.66   | 562.77    | NM_018446 | 3922.708  | 2266.504  | NM_006078 | 5166.076  | 6171.326  |
| NM_003971 | 1544.939  | 798.378   | NM_000187 | 552.836   | 302.904   | NM_016274 | 1074.892  | 957.043   |
| AK026973  | 466.703   | 306.819   | NM_014465 | 1001.917  | 1008.165  | NM_014946 | 615.017   | 555.885   |
| NM_005822 | 580.661   | 425.811   | D87292    | 5012.972  | 3510.163  | NM_014251 | 1518.247  | 2613.002  |
| L38517    | 3761.344  | 3894.552  | NM_005498 | 788.771   | 761.786   | AK022750  | 3094.717  | 3912.912  |
| NM_018291 | 4534.764  | 4202.564  | NM_016335 | 561.252   | 390.344   | AK023915  | 2925.583  | 4828.487  |
| NM_005530 | 2461.384  | 1909.454  | NM_003165 | 2525.73   | 2431.717  | AK026842  | 660.907   | 853.167   |
| NM_006899 | 3959.903  | 3705.079  | NM_003906 | 3893.458  | 2999.653  | NM_002395 | 4015.153  | 3884.852  |
| NM_012200 | 2220.75   | 1966.393  | AL359590  | 19294.414 | 14188.179 | NM_014963 | 2541.649  | 2855.629  |
| NM_001724 | 1171.12   | 1133.284  | NM_002861 | 7567.229  | 5791.271  | NM_004259 | 548.703   | 605.507   |
| NM_000150 | 2586.912  | 2287.228  | NM_003080 | 3269.15   | 2428.85   | NM_016271 | 2630.077  | 2422.672  |
| AB023152  | 633.049   | 1003.824  | AF161436  | 3339.671  | 4667.375  | NM_016619 | 3707.135  | 2899.516  |
| NM_006212 | 1548.409  | 1687.18   | NM_020402 | 2325.661  | 3536.854  | NM_014481 | 769.227   | 688.066   |
| NM_016381 | 1662.812  | 1981.351  | NM_004299 | 3758.9    | 5380.513  | U22172    | 1127.393  | 1140.965  |
| AL591715  | 538.831   | 573.23    | NM_001171 | 1731.983  | 4017.543  | AB032960  | 996.047   | 1034.263  |
| NM_018042 | 6607.307  | 6774.45   | NM_000664 | 1594.396  | 830.168   | NM_014264 | 4024.041  | 4343.39   |
| NM_014944 | 5636.825  | 4045.188  | AF075085  | 37588.594 | 23517.34  | AF020089  | 1072.609  | 1123.598  |
| AF200348  | 1478.997  | 904.066   | NM_005892 | 1485.451  | 1262.104  | NM_006257 | 2766.483  | 2638.271  |
| NM_002650 | 1607.816  | 1216.54   | AF132734  | 9727.195  | 6836.3    | NM_016281 | 6033.96   | 4629.296  |
| NM_003260 | 10331.151 | 8811.166  | NM_018379 | 1950.359  | 1434.189  | NM_004734 | 13929.101 | 8935.65   |
| AK024071  | 1292.137  | 943.154   | NM_016403 | 9496.412  | 5808.64   | AK024793  | 1554.355  | 1095.983  |
| AF056490  | 1240.788  | 1229.76   | NM_015603 | 942.038   | 790.566   | AF208291  | 1134.836  | 827.402   |
| NM_005539 | 2431.18   | 2292.096  | NM_001921 | 4910.897  | 3792.6    | NM_000276 | 1216.513  | 1494.554  |
| NM_005541 | 8960.984  | 8198.041  | NM_006230 | 7712.039  | 7496.833  | NM_000019 | 72028.555 | 69978.055 |
| AB002319  | 1729.906  | 1542.543  | AK026257  | 3417.342  | 6665.663  | NM_015886 | 877.977   | 702.851   |
| AF039942  | 3183.638  | 2973.767  | NM_000129 | 2252.64   | 5288.12   | NM_004262 | 515.46    | 492.582   |
| NM_004421 | 2531.363  | 2533.48   | NM_003762 | 6145.787  | 8422.324  | BG491613  | 7005.69   | 9005.605  |
| NM_018654 | 786.997   | 829.821   | NM_004859 | 4211.091  | 2206.502  | AA397813  | 23655.955 | 28941.129 |
| AB046863  | 7251.594  | 6544.171  | NM_000070 | 1158.073  | 824.474   | W68291    | 9460.863  | 7223.122  |
| M62403    | 8616.069  | 7482.304  | AB037804  | 648.08    | 379.606   | N64384    | 754.892   | 736.216   |
| AK025131  | 2059.092  | 2194.501  | NM_003289 | 23346.303 | 18123.402 | H-X 53655 | 647.327   | 775.943   |
| NM_000754 | 19219.186 | 19235.66  | M23254    | 5388.051  | 3686.138  | H-U 05770 | 4048.619  | 3646.656  |
| NM_014619 | 1181.664  | 1167.88   | AA608557  | 5111.498  | 6295.372  | H-M 65199 | 2559.781  | 2538.508  |
| NM_005629 | 11746.813 | 12052.864 | AL050095  | 1894.674  | 3584.788  | H-M 32315 | 1895.281  | 2609.994  |
| J04621    | 2234.206  | 2667.999  | U03272    | 3669.69   | 4509.84   | H-V00536M | 663.704   | 774.079   |
| NM_000718 | 2158.406  | 2062.93   | NM_003098 | 466.611   | 311.619   | H-D85429M | 2878.153  | 2428.953  |
| NM_000161 | 4985.082  | 4668.104  | NM_014781 | 2351.621  | 1368.042  | BF439832  | 1514.279  | 1115.162  |
| NM_002634 | 8052.99   | 6079.604  | X87896    | 787.791   | 524.222   | BG819162  | 543.108   | 251.787   |
| NM_017749 | 1769.807  | 1396.766  | M88310    | 1173.541  | 856.63    | NM_017532 | 1979.954  | 1562.933  |
| NM_001972 | 54654.469 | 35733.172 | NM_000042 | 962.117   | 737.748   | M38449    | 3469.214  | 3506.043  |
| NM_002006 | 9767.367  | 6588.847  | NM_005024 | 1702.577  | 1775.415  | AK025495  | 668.281   | 486.755   |

|           |           |           |           |           |           |           |           |           |
|-----------|-----------|-----------|-----------|-----------|-----------|-----------|-----------|-----------|
| NM_007111 | 3964.48   | 2360.99   | NM_014808 | 764.036   | 856.868   | AB033044  | 2060.683  | 1437.566  |
| NM_004702 | 713.274   | 770.817   | AB006627  | 594.215   | 707.706   | AB014564  | 1189.485  | 946.195   |
| NM_007109 | 1387.655  | 1513.588  | NM_007037 | 13240.248 | 15583.288 | NM_020230 | 3116.458  | 3471.232  |
| AK023404  | 5184.284  | 4136.152  | NM_001649 | 924.796   | 1200.79   | NM_006352 | 1537.53   | 1912.163  |
| NM_013239 | 484.61    | 571.016   | NM_005492 | 1584.901  | 2507.86   | NM_016430 | 826.257   | 908.55    |
| NM_001789 | 1622.684  | 1407.303  | AF038196  | 3243.232  | 4245.62   | NM_004447 | 4272.5    | 3533.735  |
| NM_016004 | 3740.346  | 3074.753  | AF320294  | 1800.284  | 994.619   | NM_001204 | 782.223   | 686.036   |
| NM_002655 | 756.144   | 685.133   | AF161436  | 2876.347  | 1636.338  | NM_012116 | 1019.933  | 831.213   |
| AB028955  | 9208.193  | 6968.288  | NM_020402 | 1660.607  | 945.909   | NM_000020 | 1214.976  | 1115.199  |
| U66879    | 6362.896  | 5602.343  | NM_004299 | 2806.261  | 1606.858  | NM_000956 | 711.722   | 642.188   |
| NM_016022 | 10909.329 | 10935.242 | NM_001171 | 919.111   | 358.223   | NM_002442 | 1628.39   | 1832.76   |
| NM_004874 | 1517.329  | 1539.854  | NM_002250 | 3299.657  | 2046.835  | AB033091  | 6221.987  | 6359.526  |
| NM_014204 | 1998.422  | 2813.385  | NM_006323 | 4824.281  | 4039.229  | NM_004557 | 3150.827  | 3843.875  |
| S70385    | 18286.791 | 23273.861 | NM_014841 | 373.766   | 1488.764  | NM_014757 | 1769.279  | 1631.122  |
| M34671    | 1028.048  | 943.117   | NM_014426 | 3802.723  | 5472.68   | NM_001584 | 1172.162  | 1129.499  |
| NM_001941 | 450.649   | 827.804   | AK026518  | 22299.602 | 27090.564 | NM_012259 | 16641.639 | 15956.742 |
| NM_018509 | 9211.939  | 10444.303 | NM_000258 | 6659.628  | 8209.894  | AF272357  | 938.859   | 875.63    |
| NM_004086 | 796.474   | 824.991   | AB033055  | 3337.297  | 5463.996  | NM_016372 | 14483.611 | 11698.116 |
| AL050199  | 735.033   | 623.358   | AF311287  | 2507.104  | 3235.76   | AB020705  | 736.903   | 665.054   |
| NM_001748 | 3801.652  | 2004.5    | AJ299442  | 5456.06   | 4522.861  | NM_002980 | 913.393   | 832.971   |
| AF176706  | 1932.16   | 1255.637  | NM_000129 | 694.988   | 561.54    | NM_000482 | 564.913   | 346.65    |
| NM_014484 | 552.689   | 507.443   | NM_003762 | 4828.551  | 2636.206  | NM_016274 | 1246.8    | 1174.98   |
| NM_001086 | 1005.209  | 861.625   | NM_018446 | 3710.897  | 2531.147  | NM_014946 | 694.092   | 703.932   |
| NM_014670 | 2527.32   | 2451.648  | NM_000187 | 698.415   | 531.605   | AK022750  | 3332.019  | 3502.184  |
| NM_019048 | 4477.785  | 3280.008  | NM_014465 | 863.692   | 772.054   | U53532    | 1790.575  | 1890.942  |
| NM_001040 | 1171.491  | 1068.603  | D87292    | 5426.114  | 3720.783  | AB006423  | 986.451   | 1000.109  |
| AF279698  | 2324.992  | 2015.086  | NM_005498 | 996.383   | 1111.637  | NM_005719 | 63137.336 | 56244.754 |
| NM_019849 | 2066.546  | 1457.471  | NM_016335 | 514.275   | 584.556   | NM_006093 | 2990.339  | 3204.996  |
| NM_000049 | 512.158   | 508.084   | NM_003165 | 3182.368  | 3384.521  | NM_002416 | 644.55    | 1020.421  |
| AB032996  | 25802.877 | 20855.332 | AL359590  | 20821.797 | 21680.57  | NM_004513 | 2803.785  | 3669.376  |
| AB040881  | 1813.642  | 1385.443  | NM_002861 | 7031.12   | 7585.332  | NM_001708 | 12503.378 | 12819.321 |
| AY007121  | 1128.998  | 1021.294  | NM_003080 | 2936.202  | 3596.537  | NM_017735 | 1439.271  | 1466.338  |
| NM_003372 | 7126.63   | 7738.292  | NM_002645 | 2067.421  | 2787.083  | AF208291  | 868.462   | 590.846   |
| NM_007317 | 4117.706  | 5543.085  | AB014550  | 1872.272  | 2607.602  | L10284    | 65322.84  | 56346.262 |
| AB037826  | 29736.783 | 36643.547 | NM_006826 | 16535.063 | 27914.641 | NM_000276 | 1628.478  | 1659.682  |
| AK021466  | 1992.58   | 3023.521  | AB007973  | 6366.342  | 8987.941  | BE382905  | 790.008   | 931.658   |
| NM_004959 | 635.036   | 384.823   | NM_002999 | 731.31    | 1124.414  | NM_002152 | 6989.422  | 5789.491  |
| AK026022  | 23223.67  | 15906.214 | M96843    | 6660.323  | 3603.521  | AK022558  | 4987.272  | 4002.49   |
| NM_003199 | 2411.596  | 1382.713  | NM_017791 | 1250.869  | 735.308   | NM_006476 | 38917.273 | 34683.477 |
| NM_002938 | 4149.564  | 2611.309  | NM_005882 | 6392.989  | 3911.203  | AK023787  | 1629.285  | 1347.044  |
| AK023652  | 5124.923  | 3588.217  | BC012304  | 4922.856  | 3304.639  | NM_002133 | 688.374   | 817.642   |
| AF099032  | 697.683   | 436.463   | AB046815  | 2878.115  | 2047.732  | NM_015697 | 3495.304  | 3782.047  |
| NM_003070 | 4932.026  | 3996.171  | AF075085  | 40389.281 | 30365.807 | NM_032943 | 871.014   | 1162.8    |
| AL122101  | 2247.167  | 1811.589  | NM_005892 | 2286.661  | 1748.106  | NM_007177 | 5207.145  | 7169.75   |
| NM_004780 | 1994.606  | 1645.533  | AF132734  | 10112.901 | 8732.208  | AL359592  | 439.592   | 763.623   |
| NM_016216 | 2972.059  | 2074.359  | NM_018379 | 2340.149  | 2062.956  | NM_000824 | 420.9     | 462.59    |
| AK001649  | 714.086   | 707.573   | NM_016403 | 10616.782 | 8839.367  | NM_017532 | 1252.749  | 1233.172  |
| NM_016638 | 7499.233  | 5488.857  | NM_015603 | 793.345   | 1184.951  | M38449    | 5123.646  | 4707.426  |
| AB018274  | 8470.358  | 5765.109  | NM_001921 | 4669.592  | 4715.806  | AK025495  | 774.293   | 833.182   |
| NM_005871 | 4117.656  | 2276.482  | NM_006230 | 7100.425  | 7477.681  | AK023915  | 4151.672  | 5657.202  |
| NM_007042 | 1268.396  | 1099.537  | NM_014699 | 4840.431  | 5794.643  | AK026842  | 689.412   | 568.174   |
| NM_016333 | 5692.895  | 3556.906  | NM_013400 | 7607.18   | 12743.532 | NM_002395 | 3338.865  | 2382.22   |
| BE875028  | 2619.444  | 2271.528  | AK026257  | 1846.843  | 2574.042  | NM_014963 | 2396.231  | 1962.917  |

|           |           |           |           |           |           |           |           |           |
|-----------|-----------|-----------|-----------|-----------|-----------|-----------|-----------|-----------|
| AK000511  | 3236.508  | 2898.857  | NM_005076 | 5447.067  | 2820.096  | NM_004256 | 699.168   | 731.11    |
| AF121255  | 2978.294  | 4417.396  | AF253321  | 807.6     | 601.641   | NM_016271 | 2950.637  | 2861.718  |
| NM_005526 | 4317.632  | 4954.861  | U80735    | 2355.026  | 2128.674  | NM_016619 | 3547.874  | 4376.069  |
| AK022842  | 655.03    | 456.854   | NM_017850 | 981.799   | 711.437   | NM_014481 | 934.953   | 1661.315  |
| NM_007006 | 17865.889 | 14072.487 | NM_002224 | 1174.545  | 643.459   | U22172    | 1204.875  | 1615.814  |
| AL137346  | 1836.331  | 1391.552  | X07979    | 28110.729 | 19486.586 | AB032960  | 973.536   | 1231.332  |
| NM_017756 | 26839.008 | 19366.246 | NM_000082 | 786.877   | 606.339   | NM_014264 | 3811.929  | 4707.298  |
| NM_005793 | 4378.856  | 3037.27   | L13857    | 1345.01   | 1103.021  | AF020089  | 855.845   | 923.956   |
| NM_004901 | 848.835   | 583.895   | NM_018098 | 2676.41   | 2125.671  | NM_006257 | 2602.489  | 3251.271  |
| U77088    | 1450.257  | 1355.749  | AF146277  | 3434.735  | 3296.886  | NM_004734 | 13857.865 | 15411.915 |
| NM_006721 | 16989.516 | 12687.381 | AF055033  | 12927.938 | 15552.858 | AK024793  | 1507.518  | 1093.998  |
| NM_016282 | 3433.319  | 2478.115  | M37191    | 3108.001  | 3449.409  | NM_012256 | 13976.488 | 10407.005 |
| NM_002765 | 1715.857  | 1256.247  | NM_005242 | 638.406   | 856.74    | AF272357  | 869.745   | 888.906   |
| NM_001905 | 3688.84   | 3383.878  | NM_003020 | 1081.574  | 1370.368  | NM_016372 | 14167.371 | 19762.35  |
| AF292100  | 2238.094  | 1917.3    | X82240    | 1910.966  | 1345.074  | AB020705  | 940.606   | 1200.564  |
| NM_003434 | 25311.021 | 20041.051 | NM_013995 | 16557.318 | 13373.707 | NM_002980 | 1103.173  | 1219.829  |
| NM_018181 | 478.61    | 401.054   | NM_006010 | 9503.437  | 5283.766  | NM_015886 | 985.526   | 1038.906  |
| NM_005654 | 667.883   | 560.914   | K03191    | 2677.446  | 1689.705  | NM_004262 | 878.915   | 881.026   |
| AF024698  | 63864.344 | 56676.703 | NM_005079 | 10961.907 | 13841.016 | NM_007102 | 31204.576 | 32899.777 |
| BE904617  | 14259.593 | 12910.18  | NM_005192 | 11122.026 | 5926.271  | BG491613  | 6222.241  | 5092.727  |
| AK024495  | 605.123   | 839.734   | NM_015032 | 3898.439  | 2562.493  | AA397813  | 19759.801 | 21331.174 |
| AF024694  | 3155.791  | 3393.284  | AK022956  | 2715.1    | 2466.675  | W68291    | 7909.353  | 10669.766 |
| AK025076  | 2266.114  | 2164.109  | AK023121  | 805.253   | 659.807   | N64384    | 515.925   | 763.706   |
| AF086325  | 1764.645  | 2071.633  | NM_014104 | 33385.68  | 24300.824 | H-X 53655 | 503.916   | 849.477   |
| NM_004926 | 651.626   | 748.673   | NM_002392 | 628.504   | 673.277   | H-U 05770 | 3446.449  | 3903.742  |
| AF147401  | 1714.735  | 1093.299  | NM_002749 | 45751.254 | 42054.992 | H-M 65199 | 2528.442  | 2857.104  |
| AF075022  | 1633.275  | 1164.45   | NM_018216 | 2623.516  | 2667.796  | H-M 32315 | 2082.908  | 2218.549  |
| AF075060  | 2317.447  | 1538.219  | NM_003390 | 706.436   | 1116.579  | H-V00536M | 671.832   | 771.878   |
| AB002438  | 508.988   | 574.275   | AL137747  | 2292.16   | 2463.917  | H-D85429M | 3000.709  | 3709.795  |
| AF147436  | 566.995   | 632.262   | NM_014755 | 5408.284  | 5409.199  | BF439832  | 1593.11   | 1168.223  |
| AK021441  | 782.177   | 818.291   | AF077188  | 10158.172 | 12946.824 | NM_004513 | 3807.471  | 4456.307  |
| AK026018  | 1063.807  | 1023.719  | NM_012446 | 1890.161  | 2372.213  | NM_001708 | 16260.403 | 26442.303 |
| AF085846  | 2987.139  | 2526.738  | NM_018338 | 416.887   | 799.227   | NM_017735 | 1918.354  | 2267.102  |
| AK023901  | 5237.389  | 3654.691  | NM_018685 | 25909.869 | 33433.719 | AB033044  | 2157.402  | 2168.747  |
| AL109705  | 549.038   | 680.526   | NM_006984 | 1122.562  | 1533.006  | AB014564  | 1434.871  | 1324.503  |
| AF088057  | 3586.706  | 2743.378  | NM_018214 | 764.661   | 1310.039  | NM_020230 | 3207.636  | 2640.314  |
| AF086255  | 9943.07   | 6974.556  | Y11718    | 632.936   | 838.08    | NM_006762 | 33318.043 | 26609.273 |
| AK022660  | 646.306   | 435.425   | AL133644  | 5949.619  | 2859.834  | NM_006352 | 1300      | 967.537   |
| AF088051  | 1231.726  | 721.404   | NM_002706 | 3544.775  | 1983.765  | NM_016430 | 1413.004  | 1348.366  |
| AK023883  | 1300.508  | 1155.362  | NM_019023 | 49551.883 | 32998.25  | NM_004447 | 2974.66   | 2226.568  |
| AF086260  | 708.063   | 584.537   | NM_004420 | 643.553   | 716.053   | NM_001204 | 681.219   | 464.298   |
| AF086366  | 1030.924  | 970.608   | NM_002970 | 742.697   | 1134.792  | NM_012116 | 755.245   | 935.479   |
| AF086360  | 3588.4    | 4376.66   | NM_005499 | 14172.614 | 8208.411  | NM_000020 | 1027.059  | 1182.747  |
| AF086436  | 2561.838  | 3260.001  | NM_015387 | 3047.261  | 2823.411  | NM_000956 | 829.813   | 1310.475  |
| AF087993  | 4363.549  | 4161.619  | NM_001733 | 3630.149  | 1786.073  | NM_002442 | 2040.693  | 3044.147  |
| AF035282  | 952.772   | 1225.393  | NM_017825 | 6962.168  | 5492.097  | AB033091  | 6746.591  | 4551.928  |
| AK021966  | 4352.104  | 5121.964  | NM_014035 | 2165.975  | 1877.749  | NM_004557 | 3851.541  | 4384.85   |
| AB018292  | 8574.45   | 9459.093  | NM_020122 | 10537.649 | 9511.958  | NM_014757 | 2629.593  | 3873.988  |
| AF075032  | 696.582   | 468.809   | NM_013432 | 22049.945 | 20205.543 | NM_017893 | 476       | 750.25    |
| AF085971  | 1712.214  | 1671.982  | AB020716  | 550.479   | 779.698   | NM_001584 | 1606.132  | 1079.837  |
| AF147302  | 1725.616  | 1615.005  | NM_002298 | 54068.496 | 39326.93  | NM_000806 | 459.347   | 511.962   |
| AF085929  | 2459.507  | 2477.292  | AK027130  | 495.995   | 492.952   | AL359592  | 647.666   | 536.754   |
| AK001126  | 2569.253  | 1919.718  | NM_005479 | 12187.184 | 11237.06  | NM_006078 | 5083.435  | 4927.784  |



|           |           |           |           |           |           |           |           |           |
|-----------|-----------|-----------|-----------|-----------|-----------|-----------|-----------|-----------|
| AF085976  | 2432.145  | 1839.363  | NM_005730 | 37328.316 | 33346.961 | NM_000482 | 194.384   | 536.272   |
| AF075104  | 7370.774  | 6979.064  | NM_005392 | 1071.276  | 525.245   | NM_016274 | 1026.694  | 911.298   |
| AK021724  | 487.395   | 422.45    | AL133572  | 2855.212  | 1355.814  | NM_014946 | 727.021   | 462.728   |
| AL133025  | 482.257   | 403.164   | BC021298  | 655.384   | 473.461   | NM_014251 | 2217.53   | 2106.082  |
| AL137402  | 9833.01   | 7520.534  | U52096    | 4976.401  | 3160.891  | AK022750  | 2438.709  | 2301.839  |
| AL137617  | 1947.161  | 1395.63   | AB013897  | 1292.85   | 960.544   | NM_005719 | 62009.262 | 58748.855 |
| AL359568  | 19770.553 | 14393.224 | NM_005526 | 24270.949 | 18272.367 | NM_006093 | 3265.339  | 2935.346  |
| AL133564  | 4751.788  | 3889.661  | AK001669  | 2373.659  | 2102.112  | NM_014264 | 3751.055  | 3312.857  |
| AL137428  | 967.259   | 606.518   | NM_006195 | 7068.868  | 5717.051  | AF020089  | 799.832   | 1276.29   |
| AL157462  | 1212.534  | 1281.667  | NM_006190 | 7897.121  | 4747.989  | NM_006257 | 2440.094  | 2210.569  |
| AL359602  | 5652.327  | 4299.964  | NM_006368 | 1701.336  | 1088.336  | NM_016281 | 6442.582  | 5050.034  |
| NM_018190 | 18263.834 | 12686.359 | NM_001618 | 5224.172  | 3452.213  | NM_004734 | 13180.86  | 11358.81  |
| AF086089  | 403.739   | 676.096   | BC000401  | 6698.427  | 4605.427  | AK024793  | 1269.682  | 1179.897  |
| AK022259  | 59260.445 | 57799.563 | NM_006425 | 4412.254  | 2985.509  | AF208291  | 1049.149  | 1091.539  |
| AK022461  | 823.032   | 853.591   | BF344046  | 1239.688  | 875.845   | NM_000276 | 1778.86   | 1067.713  |
| NM_016010 | 2630.379  | 2194.443  | AF432218  | 9587.997  | 6410.785  | NM_000019 | 64598.551 | 56588.348 |
| AK023783  | 1058.177  | 598.507   | NM_004286 | 4116.837  | 3162.512  | AK023701  | 535.675   | 503.454   |
| AL358312  | 1222.526  | 1220.142  | AK025082  | 966.019   | 416.076   | NM_005094 | 1612.992  | 1457.346  |
| AF070647  | 12492.801 | 14586.143 | AF086535  | 1106.062  | 551.521   | BE382905  | 407.495   | 533.397   |
| AF116649  | 736.828   | 1016.189  | AB040901  | 1581.221  | 858.123   | NM_002152 | 5897.553  | 5254.356  |
| AF174394  | 3789.465  | 2815.994  | AL137406  | 2903.336  | 1918.565  | AK022558  | 6333.851  | 7359.893  |
| AF083121  | 572.312   | 474.46    | NM_012253 | 3276.716  | 2149.198  | AK023787  | 1396.895  | 1725.564  |
| AK025924  | 553.548   | 486.806   | NM_000293 | 1921.074  | 1290.535  | NM_002133 | 1339.086  | 1029.31   |
| AK021876  | 6726.677  | 5127.208  | AF153821  | 1610.504  | 1065.881  | NM_015697 | 3374.799  | 2489.617  |
| AK022017  | 616.573   | 619.938   | NM_013370 | 1236.9    | 1000.873  | NM_007177 | 5179.884  | 5988.709  |
| AK022160  | 2139.778  | 1903.744  | NM_003310 | 2786.708  | 1892.219  | M38449    | 4186.048  | 3809.193  |
| AK022295  | 805.293   | 689.238   | AK024461  | 1622.403  | 1205.954  | AK025495  | 1021.538  | 747.676   |
| AK021935  | 1019.393  | 953.659   | NM_017635 | 1529.598  | 905.055   | AK023915  | 2850.729  | 2365.723  |
| AK022187  | 5800.25   | 4784.887  | X62534    | 1030.222  | 1120.491  | AK026842  | 439.133   | 615.814   |
| AK022337  | 1803.93   | 1308.451  | AF027147  | 21781.453 | 13815.677 | NM_002395 | 2857.407  | 2397.535  |
| AK026847  | 676.146   | 638.665   | M62399    | 2921.55   | 2094.151  | AB023203  | 1228.044  | 1275.313  |
| AK023048  | 685.824   | 866.234   | NM_002357 | 556.259   | 869.894   | NM_004259 | 736.888   | 800.328   |
| AL359560  | 505.766   | 545.564   | U71600    | 1597.968  | 1115.604  | NM_016271 | 4124.669  | 3278.655  |
| AK026891  | 1899.473  | 2081.458  | AF085924  | 1273.314  | 1718.18   | NM_016619 | 4515.434  | 3488.538  |
| AK024595  | 456.847   | 416.846   | AK023887  | 576.85    | 623.422   | U22172    | 1576.024  | 2352.631  |
| AL137562  | 3254.958  | 2046.326  | AF088022  | 8371.942  | 8548.312  | AB032960  | 958.01    | 1433.593  |
| M90355    | 60674.906 | 47873.816 | AK026537  | 2156.435  | 3722.144  | NM_002342 | 2809.175  | 2365.027  |
| AK022495  | 1712.384  | 1493.089  | NM_015485 | 4064.616  | 7216.018  | NM_003712 | 2583.876  | 2542.621  |
| AK021632  | 906.531   | 904.524   | NM_002666 | 2478.617  | 2080.411  | NM_002184 | 810.119   | 653.902   |
| AK026373  | 10709.126 | 8389.784  | AF202145  | 1470.098  | 1070.011  | NM_014883 | 1642.305  | 1288.057  |
| AK021581  | 1136.64   | 934.786   | AK026155  | 1540.564  | 985.693   | NM_003657 | 467.198   | 527.297   |
| AK021744  | 858.781   | 856.559   | NM_018052 | 23282.531 | 17538.459 | AL049296  | 4590.018  | 3361.335  |
| NM_018430 | 4130.383  | 4018.871  | AK022386  | 4206.638  | 4471.767  | NM_014471 | 12470.033 | 12386.783 |
| AL110200  | 1801.29   | 1840.176  | NM_002767 | 5319.22   | 4520.427  | NM_004397 | 1176.618  | 1449.151  |
| AK022308  | 477.222   | 916.776   | AF131846  | 12126.289 | 8457.802  | NM_020238 | 1363.797  | 837.068   |
| AL133640  | 1948.181  | 1935.548  | AF088069  | 1529.861  | 1327.502  | D49356    | 692.59    | 473.539   |
| AJ012502  | 7215.518  | 5495.718  | AF086551  | 1325.946  | 1362.536  | AJ250475  | 2743.053  | 2490.423  |
| AK021722  | 1464.132  | 1368.279  | AK025072  | 2477.446  | 3465.852  | NM_018579 | 1943.017  | 1684.815  |
| NM_000681 | 815.46    | 668.466   | L10378    | 12963.93  | 10445.854 | NM_006201 | 2597.159  | 2412.779  |
| AF147445  | 2027.168  | 1696.443  | AK022179  | 705.254   | 862.566   | NM_007110 | 1097.401  | 1277.186  |
| Y10508    | 14890.247 | 11579.132 | AJ227860  | 1616.307  | 2521.8    | NM_001255 | 15110.415 | 22611.926 |
| NM_005182 | 43395.613 | 35333.078 | AL157448  | 1832.887  | 2122.035  | U50383    | 4524.108  | 5079.472  |
| D17074    | 1089.817  | 819.943   | AF026942  | 1635.036  | 2354.853  | AK025085  | 5361.968  | 4732.805  |

|           |           |           |           |           |           |           |           |           |
|-----------|-----------|-----------|-----------|-----------|-----------|-----------|-----------|-----------|
| AF039944  | 11578.05  | 8342.996  | AJ276429  | 1487.523  | 1490.597  | NM_00629C | 1473.751  | 1284.25   |
| AJ276252  | 434.85    | 203.653   | AL117657  | 1704.748  | 2336.275  | AK022290  | 841.075   | 779.252   |
| AK021716  | 5873.633  | 3958.595  | AK021590  | 3170.543  | 4728.132  | NM_00484C | 5254.322  | 4268.853  |
| AK025035  | 7972.148  | 5815.06   | AB002441  | 879.391   | 1077.676  | AL137527  | 5143.92   | 3986.893  |
| AK002085  | 3498.8    | 2533.525  | AK023998  | 1367.479  | 1957.628  | NM_00705E | 4159.293  | 4106.008  |
| AL133618  | 3437.167  | 3512.426  | AK021643  | 796.023   | 1799.603  | NM_00039E | 962.009   | 606.439   |
| AF230314  | 794.692   | 1222.665  | Z11802    | 1449.834  | 1774.066  | NM_00152E | 970.486   | 781.71    |
| X99687    | 428.529   | 429.938   | U32248    | 993.536   | 1181.705  | NM_007014 | 1539.271  | 1301.482  |
| AK023255  | 24085.367 | 25013.355 | U61086    | 1038.786  | 938.914   | AL096740  | 675.943   | 527.576   |
| AK024185  | 1349.772  | 2071.7    | AK000872  | 1897.703  | 2940.714  | NM_014554 | 1141.146  | 802.38    |
| AK026101  | 4348.367  | 4250.769  | AK022415  | 15984.447 | 12283.585 | AK023968  | 763.036   | 719.029   |
| AK022194  | 9741.748  | 9523.747  | AL137368  | 1616.645  | 1960.146  | NM_00465Z | 786.966   | 810       |
| AF085963  | 1706.418  | 1328.081  | AK021932  | 1871.625  | 3994.242  | NM_00610Z | 744.525   | 559.385   |
| AK021436  | 1384.899  | 1218.223  | AK026787  | 5699.962  | 8661.929  | AK025425  | 14751.905 | 13460.187 |
| U58664    | 1595.938  | 1355.079  | AK023542  | 1710.576  | 2406.855  | AK025974  | 6289.261  | 5473.059  |
| AF085937  | 642.651   | 640.898   | AK000203  | 1380.01   | 1701.164  | NM_01653Z | 1167.745  | 1060.981  |
| AL137569  | 4625.256  | 4208.82   | AK021845  | 5087.201  | 6189.391  | NM_005781 | 2010.993  | 1864.417  |
| AK021920  | 3854.538  | 2877.682  | NM_01859Z | 1854.618  | 2422.876  | BC036740  | 9082.322  | 6715.747  |
| AL049415  | 1428.565  | 992.728   | NM_01850Z | 16311.25  | 8025.253  | NM_00174Z | 17052.672 | 10966.147 |
| AK022375  | 784.682   | 782.069   | NM_01644Z | 11858.532 | 5666.194  | NM_004024 | 1181.253  | 1115.632  |
| NM_00337E | 47837.199 | 44077.137 | AL049670  | 4189.604  | 1894.402  | X52345    | 12212.106 | 9503.892  |
| AL110194  | 7272.403  | 5979.55   | NM_01851Z | 4643.986  | 2990.436  | NM_00696E | 5378.194  | 3995.724  |
| AF138860  | 642.261   | 538.921   | AK022412  | 2889.324  | 1834.475  | AF027142  | 45918.914 | 37647.047 |
| NM_013301 | 1213.707  | 1966.922  | AK023073  | 3235.192  | 2056.396  | S67970    | 847.965   | 664.694   |
| NM_01767Z | 966.719   | 1035.854  | AK023922  | 830.832   | 791.902   | AF221520  | 3380.667  | 2623.304  |
| AB046857  | 970.063   | 1176.125  | AK022438  | 1125.158  | 934.876   | NM_006941 | 13751.016 | 11061.398 |
| AK024408  | 11813.354 | 9611.334  | AK023764  | 1069.651  | 1748.265  | AB037852  | 556.114   | 476.937   |
| AJ227905  | 492.051   | 574.548   | AK024082  | 1193.255  | 1274.03   | NM_00434C | 2237.769  | 1563.313  |
| L19364    | 1216.816  | 1675.69   | Z27405    | 22555.486 | 37040.555 | NM_00209Z | 4571.653  | 3713.742  |
| NM_00539C | 1616.99   | 2302.906  | AK023412  | 2715.976  | 6489.065  | NM_018077 | 1412.737  | 1445.719  |
| CY3Cy5    | 3232.277  | 176.136   | NM_014617 | 48271.457 | 59350.699 | NM_01683C | 7865.555  | 10386.851 |
| L07738    | 844.373   | 630.728   | AK074682  | 6271.814  | 10138.315 | NM_00381C | 17219.832 | 16898.145 |
| Z48054    | 1014.646  | 1237.384  | X74605    | 1105.8    | 1236.542  | NM_00656C | 1822.416  | 1658.462  |
| H90415    | 1792.105  | 1834.609  | AK024513  | 1018.052  | 1327.454  | NM_01618Z | 1548.087  | 1222.161  |
| AA676470  | 11544.796 | 10005.319 | BC036692  | 1908.022  | 2647.556  | NM_00487Z | 5517.708  | 4004.597  |
| M38258    | 527.279   | 381.635   | AJ009640  | 3559.455  | 932.305   | NM_00195E | 20100.531 | 17582.953 |
| AA457155  | 10061.138 | 8007.28   | AF035308  | 4634.703  | 3216.058  | NM_004757 | 3129.924  | 2675.863  |
| BM014365  | 827.418   | 759.013   | NM_014054 | 3025.154  | 2124.993  | AF035318  | 910.21    | 924.035   |
| U78045    | 1986.349  | 1608.981  | AK021840  | 28492.258 | 19779.305 | NM_01545E | 3622.064  | 2666.331  |
| AA878561  | 59881.633 | 55598.676 | AK022228  | 1386.292  | 1065.944  | AK025056  | 1974.47   | 1414.089  |
| BF688309  | 589.596   | 367.37    | AF086480  | 2109.082  | 1825.328  | AF140710  | 2223.501  | 1806.936  |
| AI538525  | 3102.057  | 2728.528  | AK000806  | 47914.762 | 53806.16  | NM_01208E | 7610.715  | 5910.418  |
| NM_00062Z | 426.21    | 419.492   | NM_016471 | 5301.391  | 8680.479  | NM_002494 | 2385.209  | 2031.406  |
| NM_000941 | 1115.549  | 902.606   | NM_005364 | 7334.039  | 8087.536  | M58510    | 3208.149  | 2152.584  |
| SR1       | 62265.832 | 58463.008 | AK023482  | 4495.573  | 5694.207  | BE396003  | 797.473   | 806.44    |
| SR3       | 46200.324 | 40186.09  | AK022798  | 592.599   | 969.61    | AK023300  | 576.137   | 932.008   |
| SR5       | 4370.316  | 3712.804  | AL157423  | 837.335   | 574.444   | NM_006234 | 14528.131 | 12196.212 |
| SR7       | 4265.313  | 38434.891 | AK023176  | 686.519   | 367.846   | AB028987  | 2708.945  | 2494.1    |
| SR9       | 19050.01  | 3569.758  | AL161991  | 12823.147 | 6463.458  | NM_003594 | 1045.593  | 943.802   |
| CY3Cy5    | 2898.384  | 91.096    | D17032    | 14169     | 7943.713  | NM_005521 | 2438.954  | 2922.763  |
| U62858    | 4319.094  | 3722.15   | NM_017941 | 1279.282  | 776.943   | AK025844  | 1479.342  | 2206.595  |
| AF035121  | 369.889   | 497.781   | D28384    | 72192.781 | 65461.336 | AL137727  | 1199.31   | 787.285   |
| NM_01443Z | 2086.934  | 1740.146  | AF118079  | 24374.561 | 23349.016 | AF074986  | 692.296   | 396.401   |

|           |           |           |             |           |           |           |           |           |
|-----------|-----------|-----------|-------------|-----------|-----------|-----------|-----------|-----------|
| NM_00155E | 990.071   | 717.401   | AF277572    | 1267.569  | 1284.073  | AL049240  | 1324.501  | 1327.951  |
| NM_00695E | 1190.313  | 873.544   | AL365413    | 3724.902  | 4689.951  | U80773    | 1044.199  | 1553.666  |
| NM_00253C | 569.385   | 292.854   | NM_00044C   | 5127.916  | 7103.159  | AK021745  | 636.946   | 763.398   |
| U96173    | 1856.947  | 1959.927  | NM_001297   | 3521.199  | 4830.209  | L38937    | 2238.928  | 1665.017  |
| NM_018941 | 1244.216  | 961.072   | NM_00440E   | 7713.245  | 8407.301  | U90907    | 411.285   | 502.166   |
| BE730585  | 531.989   | 613.816   | X64993      | 1544.923  | 1739.43   | AK024327  | 1372.242  | 1023.001  |
| NM_00198C | 535.741   | 669.306   | NM_004434   | 10809.809 | 13439.137 | AK000801  | 1955.034  | 2384.495  |
| NM_005954 | 1017.396  | 908.587   | NM_00626E   | 726.134   | 1151.454  | D85433    | 2964.036  | 3002.13   |
| NM_012471 | 429.224   | 398.33    | NM_01623C   | 2874.854  | 3282.007  | AF086184  | 5710.686  | 4303.401  |
| NM_001321 | 3467.494  | 3209.795  | NM_00108E   | 1060.694  | 1007.719  | NM_01827E | 1829.199  | 1565.947  |
| AB018264  | 3934.195  | 3553.034  | AK023966    | 4344.75   | 3980.073  | AL049266  | 2109.9    | 2073.164  |
| NM_006911 | 506.869   | 565.584   | AK025702    | 2237.711  | 1339.021  | AK021560  | 425.564   | 780.544   |
| U92544    | 2219.893  | 2069.969  | AK022038    | 704.773   | 682.354   | AF088045  | 1213.356  | 1977.525  |
| NM_019644 | 875.085   | 464.908   | AJ224170    | 676.482   | 823.386   | AK001469  | 1053.465  | 1315.78   |
| NM_006791 | 4109.368  | 5598.415  | AF085866    | 3004.827  | 4968.373  | AK021627  | 936.162   | 736.638   |
| AJ278348  | 8631.175  | 8087.582  | CY3Cy5      | 1357.552  | 131.369   | AF085859  | 1685.591  | 1305.26   |
| NM_01587E | 424.226   | 343.12    | AA397813    | 25148.895 | 20495.488 | AJ420504  | 355.218   | 668.65    |
| AI285199  | 1399.237  | 1087.584  | W68291      | 14186.197 | 10909.099 | AK026307  | 3368.453  | 4349.231  |
| AK023106  | 1444.427  | 1469.377  | N64384      | 1327.396  | 1251.552  | AL049975  | 1273.771  | 856.852   |
| NM_01673C | 29286.244 | 25782.441 | H-X 53655 I | 1167.587  | 1151.109  | AL080067  | 816.843   | 782.188   |
| AL035297  | 1237.698  | 929.073   | H-U 05770 I | 5320.557  | 4777.247  | AL117464  | 2557.145  | 1830.002  |
| NM_00440E | 2913.839  | 3049.491  | H-M 65199   | 4314.396  | 4030.574  | AL080160  | 461.366   | 565.517   |
| AJ131244  | 1378.757  | 1211.039  | H-M 32315   | 2581.938  | 2202.459  | AL157477  | 2781.466  | 2538.181  |
| NM_00253E | 4764.883  | 5094.603  | H-V00536M   | 1151.407  | 954.861   | AB002318  | 1413.089  | 997.711   |
| NM_01238E | 4210.561  | 4191.304  | H-D85429M   | 3684.96   | 2939.616  | AL357535  | 1048.684  | 1194.012  |
| NM_016651 | 487.676   | 638.693   | BF439832    | 1661.307  | 1185.419  | AL049951  | 888.802   | 1344.532  |
| NM_001671 | 424.667   | 322.398   | BG819162    | 615.789   | 503.794   | AK024963  | 636.748   | 820.948   |
| NM_01984E | 2951.827  | 2856.194  | NM_01753E   | 3525.527  | 3326.294  | AK023725  | 691.23    | 419.706   |
| NM_01619E | 6720.043  | 4698.206  | SR2         | 54621.191 | 40369.32  | AK022936  | 2188.037  | 1969.986  |
| BE878426  | 58968.531 | 52470.094 | SR4         | 14582.149 | 9722.373  | AK024385  | 1238.348  | 1197.158  |
| NM_00174E | 8631.292  | 7413.936  | SR6         | 1946.649  | 1352.121  | NM_01770E | 422.991   | 551.78    |
| NM_00382E | 7733.378  | 7786.014  | SR8         | 8131.776  | 18434.551 | NM_01435E | 12823.871 | 11965.019 |
| AK025006  | 14308.235 | 12949.956 | SR10        | 41403.07  | 22750.535 | AF009282  | 2835.704  | 2410.511  |
| AF218014  | 6546.93   | 5760.488  | CY3Cy5      | 1089.497  | 108.154   | AF024704  | 3243.834  | 4375.744  |
| NM_00667E | 4060.609  | 3823.533  | NM_004447   | 6033.9    | 8564.215  | AF056431  | 1695.287  | 1585.455  |
| AY007729  | 20903.438 | 18233.014 | NM_001204   | 841.4     | 1032.657  | NM_01641E | 1302.365  | 1305.417  |
| NM_014424 | 498.112   | 394.99    | BF131321    | 167.086   | 1446.26   | AF009293  | 818.593   | 575.396   |
| AF159092  | 1094.199  | 1114.757  | NM_012116   | 1128.991  | 1134.263  | AK000989  | 1153.35   | 882.32    |
| BC007318  | 1937.678  | 2260.493  | NM_00002C   | 1952.825  | 1760.059  | AK002210  | 2010.031  | 1793.064  |
| M36693    | 2097.988  | 2044.83   | NM_00095E   | 1058.951  | 1018.631  | AK021677  | 438.006   | 686.382   |
| NM_01629E | 11534.653 | 10315.512 | NM_00244E   | 2214.992  | 2155.418  | AK001057  | 703.466   | 611.514   |
| NM_002601 | 2406.663  | 1761.755  | AB033091    | 7005.828  | 4488.59   | AK021471  | 363.846   | 474.604   |
| NM_00589E | 11218.5   | 11269.76  | NM_004557   | 5477.035  | 4631.748  | AK021709  | 519.545   | 493.782   |
| NM_00288E | 34290.289 | 35011.051 | NM_014757   | 2353.854  | 1874.716  | AK025109  | 1318.086  | 1102.334  |
| AF078866  | 1714.147  | 1558.721  | NM_001584   | 1479.001  | 1137.081  | AK026057  | 2033.034  | 1958.382  |
| BF311880  | 3322.054  | 3047.322  | NM_01225E   | 29033.447 | 21911.049 | AJ008117  | 6485.946  | 8878.13   |
| NM_00007E | 586.34    | 493.772   | AF272357    | 1103.582  | 1164.034  | AJ008147  | 12503.52  | 16787.189 |
| NM_01607E | 572.909   | 616.054   | NM_01637E   | 27387.535 | 19405.705 | AK024369  | 1700.308  | 2338.29   |
| NM_00136C | 9983.233  | 8673.476  | AB020705    | 1060.377  | 606.961   | L43345    | 612.131   | 610.41    |
| AK026656  | 4792.875  | 4285.58   | NM_00298C   | 1643.914  | 1759.734  | AF180297  | 1932.438  | 2630.299  |
| AJ276207  | 5189.04   | 5057.33   | NM_01588E   | 1095.281  | 1254.299  | AK023245  | 6467.437  | 6443.111  |
| AB011131  | 10156.307 | 9638.625  | BG491613    | 6552.22   | 4858.283  | S56365    | 58900.715 | 47756.07  |
| NM_00074E | 323.203   | 411.472   | AB006423    | 1048.693  | 1349.599  | AK023607  | 1671.2    | 1160.617  |

|           |           |           |             |           |           |           |           |           |
|-----------|-----------|-----------|-------------|-----------|-----------|-----------|-----------|-----------|
| NM_000751 | 6661.436  | 5863.625  | NM_005719   | 58074.344 | 57259.426 | AL049997  | 5344.135  | 5308.516  |
| NM_014849 | 3166.927  | 2503.796  | NM_006093   | 3380.002  | 2773.443  | AK024118  | 586.56    | 1141.756  |
| NM_001042 | 5839.709  | 4552.972  | NM_002728   | 499.716   | 631.606   | AK024509  | 873.749   | 888.575   |
| NM_020041 | 319.174   | 412.611   | NM_004513   | 4419.387  | 3652.153  | NM_017847 | 2716.139  | 2074.14   |
| NM_012229 | 5232.698  | 5048.564  | NM_001708   | 16676.566 | 17000.328 | AL049675  | 1480.605  | 1328.043  |
| NM_005071 | 891.67    | 941.541   | NM_017735   | 2133.537  | 1704.021  | AL050151  | 821.172   | 552.021   |
| AB023147  | 13869.656 | 14452.1   | AB033044    | 2311.429  | 1484.915  | NM_003537 | 12738.388 | 11045.791 |
| NM_016615 | 16253.18  | 14982.425 | AB014564    | 969.278   | 583.885   | AF056419  | 17178.934 | 18648.277 |
| NM_005630 | 2230.201  | 2255.772  | BE382905    | 646.217   | 716.909   | AF074983  | 858.459   | 915.499   |
| NM_012201 | 1896.564  | 1648.195  | NM_002152   | 8366.838  | 7564.848  | AK024177  | 1777.858  | 1048.762  |
| AB046774  | 676.322   | 692.418   | NM_001701   | 432.044   | 627.392   | AK024827  | 5933.703  | 3823.597  |
| AK022385  | 14510.92  | 13452.614 | AK022558    | 5021.831  | 4942.126  | AK021952  | 1371.355  | 1458.852  |
| NM_002775 | 1459.725  | 1981.293  | NM_006476   | 42739.465 | 38527.391 | K01564    | 1326.789  | 1263.48   |
| AK024584  | 3904.781  | 2460.307  | AK023787    | 2051.412  | 1773.256  | AB023175  | 411.515   | 996.928   |
| NM_003504 | 4979.711  | 5483.392  | NM_002133   | 1451.049  | 1663.557  | AL359563  | 911.117   | 1153.939  |
| NM_013298 | 4374.24   | 3788.799  | NM_015697   | 2626.631  | 2717.077  | NM_014477 | 542.879   | 390.868   |
| NM_007267 | 2686.004  | 2600.26   | NM_007177   | 7349.768  | 5754.671  | AF086478  | 2168.811  | 2173.047  |
| AK022830  | 466.564   | 414.61    | AL359592    | 694.973   | 952.582   | AF086022  | 971.237   | 1166.424  |
| Z36816    | 1232.122  | 1103.66   | NM_006078   | 5151.582  | 3875.895  | AK021514  | 42228.473 | 44359.918 |
| NM_005865 | 4550.069  | 3847.706  | NM_000482   | 432.247   | 663.335   | AJ008134  | 984.174   | 1159.666  |
| NM_006413 | 5429.45   | 5420.263  | NM_014251   | 2192.527  | 2011.098  | S71486    | 1119.695  | 1279.821  |
| NM_017684 | 749.071   | 771.57    | AK022750    | 5403.127  | 8104.207  | L33808    | 12632.884 | 10738.976 |
| AK025542  | 2770.533  | 2501.808  | AK023915    | 4391.221  | 5039.982  | D31886    | 2051.611  | 1344.487  |
| AF207547  | 722.573   | 746.809   | AK026842    | 648.246   | 905.049   | AK023330  | 2184.151  | 1800.29   |
| NM_002768 | 4970.975  | 4175.247  | NM_002395   | 4031.863  | 3211.662  | AF075071  | 802.093   | 622.285   |
| NM_003691 | 2362.199  | 2223.65   | NM_004259   | 1031.302  | 1059.025  | AF001892  | 577.1     | 323.037   |
| NM_002950 | 19383.115 | 18234.207 | NM_016271   | 4301.711  | 3966.059  | X93500    | 1316.042  | 1083.622  |
| NM_002318 | 2681.452  | 2187.492  | NM_016619   | 4624.288  | 3595.368  | U79271    | 971.558   | 896.799   |
| NM_001433 | 553.596   | 606.787   | NM_014481   | 1470.206  | 1098.335  | AK024609  | 3719.379  | 3206.21   |
| NM_003134 | 49247.93  | 49679.914 | U22172      | 1996.456  | 2208.326  | NM_018120 | 2195.557  | 3121.773  |
| NM_004314 | 3825.671  | 3277.143  | AB032960    | 1575.797  | 1388.524  | AK026874  | 3492.649  | 3139.565  |
| NM_018247 | 6994.93   | 6301.298  | NM_014264   | 4463.101  | 3698.147  | D17217    | 1124.684  | 1047.87   |
| NM_017979 | 5842.974  | 6018.164  | AF020089    | 1404.666  | 1039.486  | AF088033  | 1007.668  | 898.963   |
| NM_019644 | 585.035   | 531.499   | NM_006257   | 2935.963  | 3559.537  | NM_020422 | 1209.804  | 1049.546  |
| NM_006791 | 2481.771  | 2337.885  | NM_016281   | 5739.745  | 3846.453  | AY007156  | 1375.971  | 1170.004  |
| AJ278348  | 6109.639  | 5282.906  | AK024793    | 2572.669  | 4186.9    | AF086408  | 33328.945 | 29597.576 |
| NM_015872 | 464.739   | 320.673   | AF208291    | 1519.204  | 1970.929  | AK023979  | 1264.77   | 1027.847  |
| AI285199  | 977.054   | 850.12    | L10284      | 67577.727 | 59116.906 | CY3Cy5    | 10934.123 | 374.174   |
| Z48054    | 691.045   | 714.356   | NM_000276   | 2324.414  | 1895.315  | U13738    | 376.689   | 740.346   |
| H90415    | 1866.719  | 1529.141  | NM_000019   | 63262.156 | 58127.508 | AF068236  | 13957.321 | 13552.995 |
| AA676470  | 12961.788 | 10547.277 | AK023701    | 898.584   | 1032.07   | H94487    | 850.1     | 652.531   |
| M38258    | 489.214   | 627.869   | NM_015886   | 1157.609  | 1582.057  | BG681747  | 21734.021 | 24713.271 |
| AA457155  | 11249.761 | 10988.055 | NM_020358   | 603.002   | 1020.48   | H63077    | 1947.726  | 1655.202  |
| BM014365  | 747.125   | 852.997   | BG491613    | 9257.16   | 9180.411  | AA679352  | 18134.053 | 16379.562 |
| H91842    | 477.034   | 270.597   | AA397813    | 29368.986 | 22396.975 | X04503    | 1365.421  | 1128.217  |
| U78045    | 2191.177  | 2153.919  | W47350      | 544.27    | 473.351   | X52001    | 1477.606  | 1578.05   |
| AA878561  | 60921.129 | 55091.871 | W68291      | 14635.913 | 12405.965 | BI823872  | 5902.577  | 5055.846  |
| BF688309  | 664.376   | 718.879   | N64384      | 1341.315  | 1483.933  | AA430552  | 1184.513  | 838.147   |
| AI538525  | 3091.322  | 3070      | H-X 53655 I | 1013.318  | 1015.233  | X66142    | 928.095   | 731.414   |
| NM_000623 | 480.994   | 485.221   | H-U 05770 I | 4615.869  | 3494.612  | R45054    | 1766.186  | 1199.968  |
| NM_000941 | 1928.448  | 2387.926  | H-M 65199   | 3568.114  | 3107.663  | SR5       | 3869.937  | 3059.581  |
| AF222980  | 2400.91   | 2478.875  | H-M 32315   | 2679.779  | 2473.72   | SR7       | 5457.729  | 32440.998 |
| AK026758  | 2167.88   | 1858.109  | H-V00536M   | 790.435   | 722.746   | SR9       | 17828.572 | 2599.323  |

|           |           |           |           |           |           |           |           |           |
|-----------|-----------|-----------|-----------|-----------|-----------|-----------|-----------|-----------|
| AF159092  | 1052.506  | 757.036   | H-D85429M | 3449.865  | 2865.692  | CY3Cy5    | 8435.546  | 247.727   |
| BC007318  | 2020.297  | 1359.606  | BF439832  | 1745.51   | 988.211   | AB020668  | 934.809   | 698.452   |
| M36693    | 1547.274  | 1471.555  | BG819162  | 584.334   | 725.157   | NM_006203 | 5775.566  | 5472.124  |
| NM_016292 | 7409.403  | 6893.392  | NM_017532 | 4063.387  | 3103.682  | AF309553  | 3760.054  | 2933.005  |
| NM_002601 | 2435.473  | 2306.918  | M38449    | 4744.46   | 2761.186  | NM_003605 | 1839.412  | 1768.404  |
| U62858    | 4922.346  | 5612.525  | AK025495  | 1186.962  | 702.066   | NM_003993 | 2231.722  | 2318.145  |
| AF035121  | 754.187   | 852.797   | AB033044  | 3256.076  | 3125.091  | NM_018961 | 722.586   | 726.21    |
| NM_014432 | 1856.569  | 1814.992  | AB014564  | 1620.965  | 1936.471  | NM_005586 | 1683.166  | 1895.69   |
| NM_001558 | 850.235   | 892.667   | NM_006352 | 1910.816  | 2343.793  | NM_012242 | 2062.355  | 1430.799  |
| NM_006953 | 1190.678  | 1088.763  | NM_016430 | 598.618   | 1040.843  | NM_006896 | 511.452   | 317.556   |
| U96173    | 2071.493  | 2606.31   | NM_004447 | 4918.962  | 4361.888  | NM_001130 | 22348.484 | 16112.016 |
| NM_018941 | 1464.328  | 1569.959  | NM_001204 | 1000.922  | 1091.459  | NM_002975 | 20067.367 | 15600.289 |
| BE730585  | 696.366   | 737.215   | BF131321  | 522.358   | 600.316   | NM_014375 | 4969.119  | 3425.272  |
| NM_001980 | 772.457   | 1126.86   | NM_012116 | 1411.161  | 1509.363  | NM_017812 | 10324.377 | 8321.729  |
| NM_005954 | 1231.234  | 1150.207  | NM_000020 | 2808.914  | 2478.314  | AF204173  | 780.686   | 516.014   |
| NM_001321 | 4116.294  | 3727.293  | NM_000956 | 685.551   | 545.739   | J03260    | 471.635   | 565.952   |
| AB018264  | 4840.214  | 4656.138  | NM_002442 | 1905.337  | 1607.191  | AB014514  | 1873.933  | 2181.282  |
| NM_006911 | 748.746   | 586.245   | AB033091  | 6966.238  | 5443.301  | NM_002865 | 3579.946  | 3471.02   |
| U92544    | 2560.201  | 2299.088  | NM_004557 | 4971.716  | 9237.128  | NM_003566 | 921.195   | 604.825   |
| NM_012229 | 5403.753  | 4087.612  | NM_014757 | 2146.657  | 1663.463  | NM_013292 | 1647.498  | 1768.794  |
| NM_005071 | 809.94    | 609.591   | NM_001584 | 1486.559  | 1020.172  | NM_002387 | 1307.956  | 1068.7    |
| AB023147  | 13258.649 | 11404.66  | NM_012259 | 32607.645 | 20489.129 | J02639    | 1572.59   | 956.984   |
| NM_016615 | 12726.573 | 11085.231 | AF272357  | 1195.209  | 802.537   | M58050    | 4598.28   | 3133.565  |
| NM_005630 | 2145.824  | 2428.292  | NM_016372 | 28884.545 | 16452.957 | NM_007263 | 13208.299 | 9706.329  |
| AK023106  | 2489.719  | 3902.148  | AB020705  | 1200.381  | 607.678   | AF206020  | 1002.931  | 610.092   |
| NM_016730 | 39776.801 | 50005.098 | NM_002980 | 1134.406  | 688.45    | NM_002150 | 1639.68   | 1781.389  |
| AL035297  | 1676.07   | 1316.69   | NM_016274 | 2136.088  | 2396.901  | NM_004595 | 5199.333  | 5036.434  |
| NM_004408 | 3553.338  | 3218.013  | NM_014251 | 2311.616  | 2707.192  | NM_020178 | 340.451   | 519.042   |
| AJ131244  | 1330.925  | 1783.376  | AK022750  | 5138.631  | 5684.985  | NM_002264 | 801.041   | 840.523   |
| NM_002532 | 5579.032  | 5447.569  | AB006423  | 1733.912  | 2234.37   | NM_014754 | 12473.829 | 10476.761 |
| NM_012388 | 5462.158  | 5580.111  | NM_005719 | 62088.898 | 52611.352 | D49387    | 892.005   | 762.647   |
| NM_016651 | 943.682   | 1118.547  | NM_006093 | 3473.114  | 5984.096  | AF050146  | 2310.779  | 2149.223  |
| NM_001671 | 719.013   | 519.675   | NM_002728 | 572.436   | 384.182   | NM_000116 | 2252.77   | 2176.491  |
| NM_019843 | 3242.614  | 3570.542  | AF208291  | 1975.428  | 3750.931  | NM_006698 | 5675.371  | 5663.917  |
| NM_016192 | 6718.75   | 5796.027  | L10284    | 63306.141 | 57024.734 | NM_003051 | 1905.142  | 1574.486  |
| BE878426  | 57689.293 | 55103.82  | NM_000276 | 2499.92   | 2144.292  | NM_145342 | 3126.781  | 2252.23   |
| NM_001745 | 9582.148  | 7947.678  | NM_000019 | 61545.684 | 56114.996 | AJ278917  | 2651.587  | 1581.623  |
| NM_003825 | 7793.805  | 8958.498  | AK023701  | 1117.582  | 1401.955  | AK025641  | 16118.326 | 10642.203 |
| AK025006  | 17382.156 | 22561.846 | BE382905  | 2609.076  | 2324.01   | AK025886  | 874.724   | 418.21    |
| AF218014  | 8797.121  | 8533.613  | NM_002152 | 9086.716  | 9499.688  | NM_001720 | 5609.103  | 8244.418  |
| NM_006678 | 4491.492  | 4095.642  | NM_001701 | 606.397   | 606.614   | NM_018390 | 1477.974  | 1664.055  |
| AY007729  | 23799.746 | 20993.209 | AK022558  | 5143.866  | 5444.596  | AB037724  | 3403.134  | 3232.647  |
| NM_001433 | 400.374   | 757.821   | NM_006476 | 44504.742 | 35714.043 | AK025086  | 692.89    | 528.522   |
| NM_003134 | 48723.77  | 42758.875 | AK023787  | 1750.178  | 1711.625  | AK026151  | 2616.059  | 2482.024  |
| NM_004314 | 3034.31   | 3275.351  | NM_002133 | 1539.115  | 2795.837  | NM_014140 | 1903.42   | 2124.238  |
| NM_018247 | 7105.312  | 7599.573  | NM_015697 | 3540.078  | 3124.389  | NM_002916 | 1520.478  | 1791.897  |
| NM_017979 | 5972.556  | 6772.988  | NM_007177 | 7781.578  | 5438.042  | M20700    | 1937.318  | 1681.144  |
| NM_005898 | 13724.821 | 15369.546 | AL359592  | 964.979   | 1574.027  | NM_001034 | 4985.144  | 6238.321  |
| NM_002889 | 43825.16  | 47840.301 | NM_006078 | 7224.776  | 12073.58  | NM_002688 | 1081.232  | 1354.76   |
| AF078866  | 2033.486  | 1864.6    | NM_000824 | 954.06    | 1368.22   | AK000800  | 2417.263  | 2229.575  |
| BF311880  | 4885.084  | 4906.992  | NM_017532 | 3960.25   | 5415.028  | NM_018154 | 2210.247  | 2237.008  |
| NM_000078 | 455.144   | 490.37    | M38449    | 6357.63   | 7241.934  | BC006287  | 3730.305  | 2490.188  |
| NM_016075 | 738.826   | 880.644   | AK023915  | 7860.547  | 9682.994  | AB023198  | 4938.678  | 3346.958  |

|           |           |           |             |           |           |           |           |           |
|-----------|-----------|-----------|-------------|-----------|-----------|-----------|-----------|-----------|
| NM_00136C | 13610.027 | 10537.156 | AK026842    | 2881.694  | 3960.428  | AF304163  | 15105.224 | 8937.321  |
| AK026656  | 5670.188  | 5915.844  | NM_002395   | 6124.364  | 8713.308  | NM_005231 | 6747.139  | 4520.173  |
| AJ276207  | 6373.46   | 5822.725  | NM_014963   | 2362.651  | 1954.762  | AF064729  | 1007.875  | 904.896   |
| AB011131  | 10964.794 | 9823.277  | NM_004259   | 1437.195  | 1323.099  | NM_005412 | 20090.221 | 14264.762 |
| NM_000749 | 362.869   | 417.625   | NM_016271   | 4697.142  | 7738.594  | NM_012113 | 1756.924  | 1407.112  |
| NM_000751 | 8055.182  | 8187.489  | NM_016619   | 3912.541  | 2328.636  | NM_014375 | 4365.164  | 4553.838  |
| NM_014849 | 3369.504  | 3375.643  | NM_014481   | 1067.961  | 590.672   | NM_017812 | 9672.396  | 8886.483  |
| NM_001042 | 6181.919  | 5106.846  | NM_014264   | 5155.059  | 6685.34   | AF204173  | 467.625   | 423.765   |
| NM_000623 | 927.864   | 639.69    | AF020089    | 1928.076  | 2405.343  | J03260    | 719.84    | 798.668   |
| NM_000941 | 1509.493  | 1672.814  | NM_006257   | 3379.405  | 4168.671  | U13738    | 401.106   | 538.357   |
| AF222980  | 2704.995  | 2237.766  | NM_016281   | 9989.625  | 11179.905 | AF068236  | 12659.727 | 18980.701 |
| AK026758  | 2119.767  | 2041.591  | NM_004734   | 20223.02  | 30367.238 | H94487    | 739.068   | 994.268   |
| NM_012201 | 2204.718  | 2040.377  | AK024793    | 2050.123  | 3285.828  | BG681747  | 20101.455 | 22986.678 |
| AB046774  | 813.091   | 892.991   | NM_012259   | 34445.227 | 43983.258 | H63077    | 1709.001  | 1609.298  |
| AK022385  | 18177.268 | 16793.242 | AF272357    | 1182.479  | 2069.724  | AA679352  | 16297.696 | 15214.687 |
| NM_002775 | 1623.816  | 2094.512  | NM_016372   | 32655.854 | 36897.32  | X04503    | 1080.965  | 1123.296  |
| AK024584  | 3985.859  | 2464.049  | AB020705    | 2028.475  | 3220.674  | D45917    | 896.849   | 815.003   |
| NM_003504 | 5859.901  | 6738.764  | NM_002980   | 2164.809  | 3569.6    | X52001    | 1358.966  | 1370.292  |
| NM_013298 | 4860.734  | 4383.144  | NM_015886   | 1022.397  | 1419.928  | BI823872  | 5459.156  | 4352.81   |
| NM_007267 | 3240.661  | 3216.939  | NM_007102   | 54781.176 | 53258.285 | AA430552  | 808.835   | 764.527   |
| AK022830  | 493.823   | 488.84    | BG491613    | 9236.664  | 9178.834  | X66142    | 821.72    | 741.123   |
| Z36816    | 1423.93   | 1386.167  | AA397813    | 26564.799 | 23779.035 | R45054    | 1778.223  | 1033.722  |
| NM_005865 | 4696.001  | 4985.021  | W68291      | 10960.251 | 6705.994  | NM_000620 | 289.828   | 466.96    |
| NM_006413 | 5346.569  | 5520.029  | N64384      | 2490.046  | 2177.937  | NM_000905 | 5364.595  | 3657.426  |
| NM_017684 | 963.252   | 929.569   | H-X 53655 I | 1065.427  | 1045.094  | AL117398  | 4585.659  | 3517.684  |
| AK025542  | 2900.773  | 2919.369  | H-U 05770 I | 4193.522  | 4012.045  | AY007158  | 44516.656 | 39417.449 |
| AF207547  | 1156.561  | 1003.089  | H-M 65199   | 3347.583  | 3556.47   | M58050    | 4029.727  | 4493.835  |
| NM_002768 | 5580.992  | 4640.077  | H-M 32315   | 2695.56   | 2809.646  | NM_007263 | 10816.479 | 12469.635 |
| NM_003691 | 2843.923  | 2324.469  | H-V00536M   | 1095.701  | 1259.78   | AF206020  | 1059.272  | 822.501   |
| NM_002950 | 20625.369 | 19560.855 | H-D85429M   | 3999.745  | 4491.355  | NM_014410 | 462.112   | 555.037   |
| NM_002318 | 2326.382  | 2484.424  | BF439832    | 2324.607  | 2028.047  | AF312769  | 348.874   | 478.284   |
| NM_005954 | 1304.09   | 1190.83   | BG819162    | 551.59    | 1128.147  | AB020668  | 1230.011  | 1018.005  |
| NM_012471 | 399.339   | 435.248   | NM_002728   | 890.586   | 1107.326  | NM_006203 | 6782.083  | 7116.512  |
| NM_001321 | 4022.662  | 3554.954  | NM_000450   | 571.887   | 1004.263  | AF309553  | 3392.582  | 3281.196  |
| AB018264  | 3931.455  | 4058.933  | NM_000448   | 787.318   | 874.521   | NM_003605 | 2144.14   | 2059.508  |
| NM_006911 | 534.112   | 662.701   | NM_004513   | 7705.65   | 9874.438  | NM_003993 | 1980.398  | 1618.041  |
| U92544    | 2456.055  | 3213.139  | NM_001708   | 18785.551 | 23076.943 | NM_018961 | 762.587   | 353.733   |
| NM_006791 | 2984.072  | 2428.644  | NM_017735   | 2977.425  | 4817.475  | NM_005586 | 1912.442  | 1737.44   |
| AJ278348  | 7110.452  | 6681.72   | AB033044    | 3214.294  | 3470.799  | NM_012242 | 1745.463  | 1293.857  |
| AI285199  | 1249.348  | 1040.082  | AB014564    | 1118.647  | 1106.177  | NM_001130 | 24592.316 | 15469.189 |
| L07738    | 1104.915  | 730.855   | NM_020230   | 3319.501  | 3477.649  | NM_002975 | 21095.191 | 16639.162 |
| Z48054    | 792.12    | 760.312   | NM_006762   | 49757.977 | 48169.816 | AK023511  | 3258.204  | 2643.422  |
| H90415    | 2043.125  | 1901.48   | NM_006352   | 1860.929  | 1755.415  | NM_014556 | 2040.207  | 1525.429  |
| AA676470  | 14349.806 | 12335.429 | NM_016430   | 577.199   | 763.159   | NM_001615 | 70010.234 | 62395.391 |
| AA430512  | 659.69    | 638.978   | NM_004447   | 4130.399  | 3617.917  | AK025886  | 498.332   | 595.197   |
| M38258    | 990.922   | 909.417   | NM_001204   | 1141.519  | 2147.43   | AB014514  | 2564.952  | 3290.614  |
| AA457155  | 12811.387 | 10992.769 | NM_012116   | 2381.569  | 2340.162  | NM_002865 | 3430.24   | 3687.507  |
| BM014365  | 766.283   | 714.44    | NM_000020   | 2090.961  | 2246.274  | NM_003566 | 1332.179  | 555.325   |
| H91842    | 555.019   | 491.556   | NM_000956   | 806.271   | 875.768   | NM_007155 | 10357.896 | 8002.123  |
| U78045    | 2222.625  | 1878.933  | NM_002442   | 1577.316  | 2245.654  | NM_003731 | 4647.872  | 3535.437  |
| AA878561  | 59846.125 | 58475.27  | AB033091    | 7610.945  | 7171.983  | NM_005446 | 1489.753  | 1304.979  |
| BF688309  | 908.998   | 907.51    | NM_004557   | 4325.479  | 5271.192  | NM_013292 | 1653.691  | 1038.796  |
| AI538525  | 3191.275  | 3206.943  | NM_014757   | 3100.484  | 4657.748  | NM_002387 | 1580.966  | 1054.545  |

|           |           |           |           |           |           |           |           |           |
|-----------|-----------|-----------|-----------|-----------|-----------|-----------|-----------|-----------|
| NM_003825 | 7843.784  | 9152.594  | NM_017893 | 546.182   | 792.251   | AB023217  | 524.075   | 312.984   |
| AK025006  | 16439.41  | 15371.491 | NM_001584 | 1617.772  | 2050.956  | J02639    | 1875.993  | 1258.278  |
| AF218014  | 7614.833  | 7747.314  | NM_000809 | 566.775   | 697.589   | NM_005231 | 4760.538  | 5986.308  |
| NM_006678 | 3697.829  | 4425.953  | AB018258  | 585.705   | 888.985   | AF064729  | 1435.613  | 1536.381  |
| AY007729  | 19926.168 | 20761.164 | AL359592  | 875.163   | 1292.023  | NM_005412 | 20195.113 | 19516.172 |
| NM_014424 | 522.39    | 391.471   | NM_006078 | 6762.191  | 7163.59   | NM_012113 | 1811.241  | 1677.758  |
| AF159092  | 1114.747  | 1050.117  | NM_016274 | 1964.251  | 2514.784  | NM_020178 | 487.384   | 703.881   |
| BC007318  | 2085.354  | 1954.608  | AB006423  | 1029.176  | 1516.077  | NM_002264 | 926.547   | 1536.435  |
| M36693    | 1761.298  | 1583.365  | AJ132084  | 513.17    | 802.939   | NM_014754 | 14306.275 | 13780.99  |
| NM_016292 | 9841.354  | 9631.416  | NM_005719 | 63958.137 | 64747.125 | D49387    | 744.236   | 859.578   |
| NM_002601 | 2322.804  | 1832.61   | NM_006093 | 5117.812  | 6044.488  | AF050146  | 2382.745  | 2118.164  |
| U62858    | 5119.583  | 4730.744  | NM_014264 | 5395.213  | 5103.378  | NM_000116 | 2666.579  | 2197.613  |
| AF035121  | 474.476   | 442.104   | AF020089  | 1512.639  | 1536.105  | NM_006698 | 6483.438  | 5444.991  |
| NM_014432 | 1971.676  | 1822.233  | NM_006257 | 3380.717  | 3105.424  | NM_006804 | 4754.302  | 4644.873  |
| NM_001558 | 1004.524  | 943.758   | NM_016281 | 9935.146  | 9487.556  | NM_015968 | 5057.48   | 5108.729  |
| NM_006953 | 1332.646  | 1407.068  | NM_004734 | 19811.1   | 20319.285 | NM_003051 | 1870.055  | 1657.746  |
| NM_002530 | 531.564   | 350.277   | AK024793  | 2017.194  | 2333.588  | NM_145342 | 3748.255  | 2699.544  |
| U96173    | 2236.425  | 2119.117  | AF208291  | 2663.392  | 4535.197  | AJ278917  | 3466.671  | 2877.832  |
| NM_018941 | 1439.053  | 1459.78   | L10284    | 63762.613 | 58602.68  | AK025641  | 19497.223 | 16296.676 |
| BE730585  | 553.574   | 676.758   | NM_000276 | 3376.338  | 4413.786  | NM_000905 | 5859.314  | 5436.892  |
| NM_001980 | 1006.289  | 963.305   | NM_000019 | 58456.699 | 58482.566 | AL117398  | 5013.39   | 4894.381  |
| NM_006158 | 936.355   | 1043.896  | AK023701  | 1041.171  | 1417.53   | AY007158  | 52533.684 | 53257.156 |
| NM_000748 | 393.658   | 352.969   | BE382905  | 1703.307  | 1547.096  | NM_001720 | 6919.196  | 6748.566  |
| NM_000751 | 7407.104  | 7824.889  | NM_002152 | 9087.8    | 14452.75  | NM_018390 | 2218.525  | 2440.852  |
| NM_012228 | 5121.21   | 5092.904  | AK022558  | 7107.69   | 9620.467  | AB037724  | 4534.197  | 4440.179  |
| NM_005071 | 563.209   | 565.034   | NM_006476 | 43452.512 | 46877.734 | AK025086  | 852.195   | 1176.409  |
| AB023147  | 15414.265 | 15021.049 | AK023787  | 1514.365  | 1575.236  | AK026151  | 2756.488  | 3053.342  |
| NM_016615 | 13149.686 | 10955.317 | NM_002133 | 1392.213  | 1924.276  | NM_014140 | 2208.569  | 2675.678  |
| NM_005630 | 2005.688  | 2014.696  | NM_015697 | 3386.086  | 3552.085  | NM_002916 | 1562.529  | 2069.306  |
| AK023106  | 1542.755  | 1522.156  | NM_007177 | 7681.093  | 12876.777 | M20700    | 2392.369  | 2638.155  |
| NM_016730 | 34687.027 | 35130.527 | M38449    | 6055.877  | 5866.147  | NM_001034 | 6026.365  | 7570.098  |
| AL035297  | 1647.61   | 1148.77   | AK023915  | 4791.597  | 3409.667  | NM_002688 | 1162.206  | 1887.995  |
| NM_004408 | 3841.471  | 2992.856  | AK026842  | 975.326   | 1137.2    | NM_017688 | 1427.009  | 1830.812  |
| AJ131244  | 1187.609  | 1275.852  | NM_002395 | 4373.279  | 5192.848  | AL096734  | 507.621   | 387.826   |
| NM_002532 | 5960.377  | 5615.734  | NM_004259 | 728.4     | 1007.14   | AK000800  | 2599.607  | 2418.506  |
| NM_012388 | 5587.214  | 5460.883  | NM_016271 | 3928.736  | 3897.332  | NM_018154 | 2344.902  | 1879.421  |
| NM_016651 | 476.892   | 820.022   | NM_016619 | 3987.829  | 4229.322  | BC006287  | 4460.841  | 3423.037  |
| NM_001671 | 585.552   | 635.634   | NM_014481 | 1121.735  | 2110.804  | AB023198  | 5201.563  | 3980.389  |
| NM_019843 | 2914.24   | 3902.708  | U22172    | 2515.208  | 3594.649  | AF304163  | 16823.459 | 13087.015 |
| NM_016192 | 7073.741  | 7754.556  | AB032960  | 1864.959  | 3014.329  | NM_006896 | 528.561   | 626.336   |
| BE878426  | 56670.859 | 59542.52  | NM_017675 | 1230.183  | 1022.369  | NM_001130 | 29567.799 | 29158.41  |
| NM_001745 | 9764.636  | 10479.474 | NM_015991 | 1183.521  | 1414.482  | NM_002975 | 24442.801 | 24296.434 |
| AK025542  | 3683.83   | 3854.214  | NM_005562 | 827.104   | 1012.124  | AK023511  | 3645.269  | 3467.501  |
| AF207547  | 822.069   | 1045.286  | NM_002342 | 3484.222  | 4713.775  | NM_014556 | 2110.43   | 2269.83   |
| NM_003691 | 2490.935  | 3219.98   | NM_003712 | 2941.554  | 3537.153  | NM_014375 | 5241.333  | 6088.414  |
| NM_002950 | 20014.979 | 21778.031 | NM_002184 | 1043.434  | 1391.173  | NM_017812 | 8678.068  | 9545.283  |
| NM_002318 | 2362.191  | 2906.292  | NM_014883 | 1678.186  | 2565.725  | AF204173  | 633.852   | 377.024   |
| NM_001433 | 672.488   | 636.3     | U56387    | 886.861   | 1829.811  | J03260    | 735.486   | 1311.656  |
| NM_003134 | 49837.828 | 48681.805 | NM_003657 | 950.018   | 1060.025  | U13738    | 561.118   | 442.198   |
| NM_004314 | 3042.352  | 2576.354  | AL049296  | 6088.67   | 4363.985  | AF068236  | 25959.645 | 32214.859 |
| NM_018247 | 6747.63   | 7383.743  | NM_014471 | 36997.441 | 27565.516 | H94487    | 898.977   | 1017.123  |
| NM_017979 | 6129.481  | 5879.817  | NM_004397 | 1911.664  | 1479.873  | BG681747  | 21872.643 | 27692.434 |
| NM_005898 | 12390.248 | 10844.072 | NM_020238 | 1699.071  | 1015.898  | H63077    | 1632.6    | 2107.728  |

|           |           |           |           |           |           |           |           |           |
|-----------|-----------|-----------|-----------|-----------|-----------|-----------|-----------|-----------|
| NM_00288  | 45172.789 | 43706.703 | D49356    | 1770.184  | 1279.904  | AA679352  | 14055.639 | 24898.648 |
| AF078866  | 1857.552  | 1920.045  | AJ250475  | 3174.426  | 2829.289  | X04503    | 1328.478  | 1658.261  |
| BF311880  | 4994.818  | 4781.274  | NM_007110 | 1875.843  | 1014.934  | D45917    | 1148.734  | 952.08    |
| NM_00007  | 348.86    | 373.422   | NM_001255 | 11236.012 | 5398.822  | X52001    | 1829.726  | 1546.782  |
| NM_01607  | 839.362   | 823.184   | U50383    | 5853.349  | 5389.847  | BI823872  | 6152.938  | 4805.239  |
| NM_00136  | 12040.452 | 13373.099 | AK025085  | 5640.493  | 6146.044  | AA430552  | 1114.504  | 1012.936  |
| AK026656  | 6365.606  | 7846.653  | NM_016317 | 688.597   | 696.288   | X66142    | 1286.317  | 796.361   |
| AJ276207  | 7269.662  | 6966.637  | NM_006290 | 1924.034  | 2704.236  | R45054    | 1959.052  | 1644.734  |
| AB011131  | 10564.968 | 11925.39  | AK022290  | 1012.01   | 1424.428  | NM_002387 | 1488.488  | 1400.189  |
| AF164794  | 4135.684  | 4194.591  | NM_004849 | 5310.475  | 5268.679  | NM_00006  | 573.512   | 541.009   |
| AB020656  | 548.211   | 525.62    | AL137527  | 5068.426  | 5291.726  | M58050    | 4466.955  | 4161.935  |
| AK023648  | 4246.454  | 4353.447  | J04974    | 16370.113 | 24160.137 | NM_00726  | 11317.591 | 12527.45  |
| NM_00041  | 1584.924  | 1692.287  | NM_00705  | 6570.659  | 4675.554  | AF206020  | 934.434   | 769.183   |
| AF077033  | 2449.23   | 3310.55   | NM_00039  | 1619.375  | 876.974   | NM_01441  | 414.791   | 789.106   |
| NM_01778  | 1303.426  | 1353.068  | NM_00152  | 1820.775  | 1165.32   | AF312769  | 765.485   | 1094.331  |
| AK026758  | 2189.23   | 2137.748  | NM_007014 | 2289.194  | 1637.072  | AB020668  | 923.368   | 1369.691  |
| NM_012201 | 1752.924  | 2157.114  | AL096740  | 1216.592  | 642.4     | NM_00620  | 8959.882  | 9084.993  |
| AB046774  | 724.959   | 723.538   | NM_014554 | 2148.524  | 1643.175  | NM_00355  | 434.853   | 1408.678  |
| AK022385  | 19257.961 | 19265.777 | AL137484  | 1878.546  | 1135.844  | AF309553  | 4083.763  | 5832.861  |
| NM_00277  | 1903.074  | 2173.977  | AK023968  | 1038.894  | 753.694   | NM_00360  | 2169.488  | 2811.677  |
| AK024584  | 4377.554  | 3330.238  | NM_00465  | 1269.07   | 813.616   | NM_00010  | 25373.475 | 22086.021 |
| NM_003504 | 6423.158  | 7214.846  | NM_00610  | 1335.16   | 609.03    | NM_018961 | 722.08    | 670.292   |
| NM_01329  | 4476.129  | 4968.817  | AK025425  | 23143.721 | 34687.793 | NM_00558  | 2294.762  | 2105.469  |
| NM_007267 | 3175.783  | 3588.958  | AK025974  | 14472.541 | 15326.11  | NM_01224  | 1816.483  | 1614.454  |
| AK022830  | 637.603   | 507.236   | NM_01653  | 1293.792  | 1868.772  | NM_003051 | 1395.038  | 1065.91   |
| Z36816    | 1301.862  | 1358.288  | NM_005781 | 2335.926  | 2326.175  | NM_14534  | 3899.905  | 3674.314  |
| NM_00586  | 6622.595  | 8465.429  | BC036740  | 8021.516  | 8035.358  | AJ278917  | 4482.123  | 4989.603  |
| NM_00641  | 6448.353  | 5856.698  | NM_001747 | 14605.187 | 15257.31  | AK025641  | 16412.951 | 16925.572 |
| AL049689  | 632.304   | 668.914   | NM_001148 | 9460.967  | 14296.506 | AK025886  | 517.859   | 608.853   |
| NM_00021  | 463.198   | 610.427   | AF242522  | 2656.844  | 2691.891  | AB014514  | 2417.958  | 2700.44   |
| AF135960  | 1388.378  | 1106.803  | AJ008152  | 756.313   | 1376.14   | NM_00286  | 3885.448  | 4441.961  |
| NM_01421  | 16775.266 | 21296.256 | NM_004024 | 2357.943  | 1643.501  | NM_00356  | 1131.37   | 676.096   |
| NM_00301  | 1526.934  | 1361.631  | NM_00696  | 7102.45   | 3765.617  | NM_00715  | 10917.184 | 7968.695  |
| NM_006871 | 943.984   | 912.017   | AF027142  | 54139.387 | 43861.535 | NM_003731 | 5260.335  | 4037.553  |
| NM_019074 | 2990.027  | 3241.848  | S67970    | 1180.15   | 674.205   | NM_00544  | 2049.144  | 1536.696  |
| NM_014921 | 1268.836  | 1103.319  | AF221520  | 4658.271  | 2720.747  | NM_01329  | 1789.912  | 1481.228  |
| NM_016581 | 48121.582 | 51146.676 | NM_006941 | 31990.553 | 18273.932 | NM_018154 | 2334.91   | 3017.614  |
| NM_01325  | 1296.532  | 1143.226  | AB037852  | 1907.124  | 1362.893  | BC006287  | 5119.685  | 5140.045  |
| NM_00718  | 998.034   | 1122.407  | NM_00434  | 2958.377  | 1806.84   | AB023198  | 5066.604  | 7232.524  |
| AJ238243  | 11426.66  | 17529.096 | NM_00209  | 9608.861  | 7716.474  | AF304163  | 15083.619 | 15187.64  |
| J05046    | 20142.801 | 21416.42  | NM_018077 | 2719.16   | 2482.657  | NM_005231 | 6088.964  | 5951.74   |
| NM_01231  | 1686.322  | 1396.504  | NM_01683  | 20322.547 | 18102.336 | AF064729  | 2106.054  | 1483.961  |
| NM_002751 | 2706.853  | 3070.169  | NM_00596  | 61242.789 | 56089.566 | NM_00541  | 18510.373 | 18426.492 |
| NM_004291 | 1465.375  | 1749.332  | AK021416  | 1568.904  | 2280.314  | NM_012113 | 2048.325  | 1949.004  |
| NM_00381  | 2339.57   | 2636.14   | NM_018471 | 16430.352 | 21877.246 | NM_00215  | 2781.804  | 2740.252  |
| AK022635  | 462.931   | 639.971   | NM_00381  | 24094.99  | 33590.992 | NM_00459  | 5571.195  | 5796.82   |
| NM_00491  | 3297.084  | 3586.121  | NM_00656  | 3549.43   | 3575.066  | NM_02017  | 606.527   | 573.913   |
| U79304    | 15925.873 | 14807.694 | NM_01618  | 1844      | 2158.181  | NM_002264 | 690.23    | 906.452   |
| NM_016267 | 5473.236  | 4676.06   | NM_00487  | 5851.65   | 5622.396  | NM_014754 | 14485.854 | 14098.753 |
| NM_004671 | 4513.504  | 4515.116  | NM_00195  | 36135.141 | 38433.211 | D49387    | 822.537   | 1143.873  |
| NM_00518  | 10941.261 | 10731.775 | NM_004757 | 2354.117  | 3514.59   | AF050146  | 2329.689  | 2509.249  |
| NM_00652  | 2370.723  | 2439.457  | NM_015904 | 5580.802  | 7050.724  | NM_00011  | 2870.517  | 2605.676  |
| U35622    | 733.203   | 888.442   | NM_00196  | 36960.16  | 42918.258 | NM_00669  | 6557.004  | 4944.977  |



|           |           |           |           |           |           |           |           |           |
|-----------|-----------|-----------|-----------|-----------|-----------|-----------|-----------|-----------|
| NM_00704E | 1986.961  | 2225.133  | NM_018122 | 1663.216  | 1745.261  | NM_006804 | 6191.492  | 4968.541  |
| NM_003627 | 4458.861  | 5571.179  | AF035318  | 1409.394  | 1745.79   | NM_01596E | 5745.591  | 4476.124  |
| NM_01214E | 14508.052 | 21306.088 | NM_01545E | 6396.819  | 5521.682  | AK026935  | 7954.19   | 9269.501  |
| AF305779  | 1311.945  | 1566.434  | AK025056  | 3211.725  | 1894.84   | NM_02016E | 4062.628  | 3866.392  |
| AF225416  | 6698.033  | 8474.423  | AF140710  | 3745.776  | 2012.102  | AK027124  | 24234.123 | 26012.248 |
| NM_016231 | 1870.783  | 1768.885  | NM_01208E | 12088.933 | 7108.993  | M31212    | 31591.594 | 34582.223 |
| NM_00209E | 4642.994  | 4851.58   | NM_017947 | 876.57    | 804.83    | AL117398  | 4773.289  | 4789.933  |
| AB042555  | 8273.056  | 8585.561  | NM_002494 | 6196.207  | 5191.813  | AY007158  | 51397.191 | 54086.164 |
| NM_00172E | 512.481   | 414.776   | M58510    | 6454.548  | 5761.224  | NM_00172C | 7727.73   | 7264.237  |
| NM_01776E | 1333.79   | 1416.095  | NM_00078E | 1550.105  | 1383.002  | NM_01839C | 1835.859  | 2038.739  |
| NM_01397E | 2109.605  | 1847.851  | BE396003  | 1499.045  | 643.397   | AB037724  | 5249.861  | 6995.129  |
| NM_00384E | 5547.124  | 5657.947  | AK023300  | 966.586   | 574.268   | AK025086  | 1215.211  | 1530.819  |
| NM_01221E | 1091.069  | 1152.28   | NM_01808E | 2324.112  | 1521.563  | AK026151  | 3408.86   | 3859.151  |
| NM_00533E | 581.211   | 638.368   | NM_003904 | 4104.058  | 3741.63   | NM_01414C | 2402.724  | 3010.194  |
| X73502    | 4400.829  | 3747.161  | NM_006234 | 17686.875 | 16184.564 | NM_00291E | 1698.156  | 2599.734  |
| NM_02044E | 60862.449 | 61623.313 | AK026387  | 568.069   | 781.263   | M20700    | 2393.788  | 2613.194  |
| NM_01637E | 7496.942  | 7597.632  | AB028987  | 4083.766  | 5795.546  | NM_001034 | 5626.894  | 6716.441  |
| AB046848  | 6339.825  | 6374.713  | NM_003594 | 1577.969  | 2395.053  | NM_00268E | 1103.025  | 1121.035  |
| AL133057  | 5746.019  | 5618.695  | NM_005521 | 2405.007  | 3211.282  | NM_01768E | 1346.974  | 1051.688  |
| U04845    | 3498.262  | 3340.311  | AB040893  | 1501.232  | 1951.183  | AL096734  | 703.049   | 382.566   |
| NM_01810E | 7270.732  | 10637.142 | AK025844  | 1349.836  | 1111.326  | AK024462  | 3628.583  | 5152.242  |
| AK026302  | 5809.16   | 6163.845  | AL137727  | 2163.222  | 1799.272  | NM_019601 | 407.541   | 541.082   |
| NM_012214 | 1877.385  | 1951.931  | L17327    | 1353.856  | 1298.621  | NM_00220E | 1290.721  | 1371.433  |
| AF049656  | 11294.706 | 11108.939 | AF074986  | 1766.756  | 2497.823  | NM_00223C | 687.099   | 461.061   |
| NM_00031E | 913.946   | 1054.573  | AF075004  | 874.621   | 716.615   | NM_00381E | 1900.577  | 1863.728  |
| NM_00396E | 770.968   | 847.283   | AL049240  | 3170.356  | 3719.369  | NM_00143C | 1516.507  | 1113.704  |
| AC009729  | 536.963   | 659.987   | U80773    | 2110.658  | 2546.804  | AB010098  | 516.742   | 604.724   |
| NM_01659E | 5708.84   | 6335.516  | AK021745  | 1880.373  | 1830.097  | U17989    | 703.038   | 970.917   |
| BE874867  | 25419.439 | 26579.66  | L38937    | 5841.463  | 3923.803  | AL137595  | 609.3     | 1495.522  |
| AL136719  | 2829.266  | 3095.81   | AK000801  | 2341.31   | 1556.316  | NM_01802E | 1167.684  | 1834.251  |
| NM_01410E | 3367.168  | 4573.187  | D85433    | 2883.772  | 2619.621  | AF249267  | 23714.072 | 29986.49  |
| NM_01216C | 1922.117  | 1759.107  | AF086184  | 7017.291  | 7596.876  | NM_004113 | 621.311   | 410.066   |
| NM_006357 | 61692.953 | 60559.328 | NM_01827E | 3228.972  | 4117.732  | X84939    | 2920.647  | 3260.303  |
| NM_01424E | 40327.766 | 41483.48  | AL049266  | 2391.688  | 4052.76   | NM_01832C | 4136.85   | 4676.94   |
| AK027070  | 788.189   | 930.349   | AK021560  | 682.686   | 876.26    | NM_00206E | 1710.517  | 1928.865  |
| NM_003341 | 4406.192  | 5733.517  | NM_01470E | 917.804   | 957.74    | NM_01605E | 14370.135 | 11967.498 |
| NM_01778E | 769.783   | 840.873   | AK021627  | 1551.497  | 1079.265  | M65066    | 9721.114  | 7238.645  |
| NM_00624E | 2937.099  | 2917.743  | AF085859  | 2669.359  | 1563.051  | NM_016951 | 3080.013  | 2145.823  |
| NM_01831E | 876.431   | 688.068   | AK026307  | 1562.464  | 1552.804  | NM_013251 | 598.369   | 301.048   |
| AB020640  | 2129.336  | 2125.362  | AL080067  | 715.533   | 413.271   | NM_01232E | 827.032   | 746.786   |
| D29954    | 14365.421 | 14398.693 | AL117464  | 3720.668  | 2290.383  | NM_00308E | 9745.163  | 9144.273  |
| AF007131  | 1147.652  | 565.549   | AL157477  | 2068.403  | 2350.765  | NM_016084 | 8746.9    | 8098.372  |
| NM_00683E | 1565.83   | 1648.599  | AB002318  | 1501.269  | 1924.008  | AF095289  | 7333.986  | 8529.418  |
| NM_00022E | 613.569   | 445.112   | AL357535  | 2473.425  | 3468.398  | NM_005537 | 3288.779  | 3591.608  |
| NM_005851 | 1279.257  | 911.892   | AL049951  | 756.906   | 1519.467  | NM_01900E | 1379.074  | 1361.987  |
| AF119256  | 1383.948  | 1352.987  | AK024963  | 928.603   | 1598.138  | NM_01593E | 1495.277  | 1902.312  |
| X74497    | 733.032   | 1032.661  | AK022936  | 666.52    | 907.227   | AF182412  | 535.082   | 1020.891  |
| NM_01221C | 477.987   | 742.291   | NM_01770E | 1440.979  | 1385.738  | AK027200  | 1286.153  | 1788.694  |
| U10072    | 1743.749  | 1950.306  | AF049615  | 1596.309  | 1756.688  | U03106    | 4750.375  | 5836.673  |
| AF222749  | 10894.57  | 13593.486 | NM_01435E | 17827.299 | 13158.91  | NM_00007E | 10918.205 | 13764.169 |
| NM_00341C | 4017.065  | 5270.093  | AF009282  | 5360.476  | 3954.53   | NM_00684E | 5306.673  | 6342.946  |
| NM_00714E | 2842.66   | 2887.682  | AF024704  | 9591.239  | 6389.026  | NM_01488E | 633.504   | 674.868   |
| NM_00222E | 1089.597  | 1275.064  | AF056431  | 1382.594  | 1537.594  | NM_00494E | 4046.208  | 4273.677  |

|           |           |           |           |           |           |           |           |           |
|-----------|-----------|-----------|-----------|-----------|-----------|-----------|-----------|-----------|
| S69027    | 4053.763  | 5109.935  | AF009293  | 1157.818  | 751.534   | NM_020242 | 1471.311  | 2096.239  |
| NM_012119 | 2830.035  | 2767.884  | AK000989  | 1665.753  | 1016.981  | NM_001788 | 7906.224  | 8813.515  |
| X99631    | 14961.622 | 13767.691 | AK002210  | 2199.915  | 1283.109  | NM_007178 | 36021.203 | 35509.141 |
| NM_001730 | 2105.942  | 1926.221  | AK021709  | 777.089   | 698.853   | NM_002209 | 963.681   | 808.465   |
| AK026290  | 341.058   | 218.749   | AK025109  | 1456.745  | 1793.577  | AL137477  | 4904.345  | 4508.686  |
| AB014589  | 2305.959  | 2080.635  | AK026057  | 1066.921  | 1557.074  | NM_016068 | 2346.7    | 2432.134  |
| AF248649  | 535.874   | 544.229   | AK026666  | 289.713   | 807.566   | NM_014258 | 827.427   | 933.674   |
| U37146    | 13886.377 | 14138.589 | AK025167  | 518.513   | 1101.279  | NM_015967 | 2237.364  | 2864.593  |
| NM_012088 | 2151.786  | 2340.043  | AK024369  | 3631.252  | 2404.714  | NM_012237 | 262.067   | 511.026   |
| AB040431  | 388.73    | 278.284   | AL049244  | 2245.743  | 1344.263  | NM_004994 | 9979.798  | 10667.421 |
| NM_000991 | 56562.828 | 56577.965 | L43345    | 1612.207  | 1163.498  | NM_006610 | 1955.171  | 3035.576  |
| NM_016034 | 15335.119 | 14345.576 | AF180297  | 4294.087  | 2500.675  | NM_003791 | 4729.752  | 4686.558  |
| X69150    | 51903.309 | 54520.574 | AK023245  | 9278.119  | 5546.316  | NM_018017 | 2913.018  | 2653.551  |
| NM_018288 | 6644.841  | 6334.522  | AF147303  | 774.659   | 575.125   | AK001296  | 5587.581  | 5113.3    |
| AK022393  | 9327.063  | 8816.895  | S56365    | 63561.566 | 58239.707 | AK000173  | 262.635   | 1112.709  |
| AK026654  | 758.675   | 1017.326  | AK023607  | 2389.188  | 1561.048  | NM_018368 | 2285.817  | 2290.801  |
| AK025245  | 995.566   | 1000.847  | AL049997  | 6253.325  | 8605.284  | NM_006588 | 5671.179  | 5694.029  |
| AK025496  | 4811.769  | 5693.823  | AK024118  | 793.317   | 1550.426  | AJ272180  | 1363.647  | 1051.776  |
| NM_005208 | 55838.895 | 55765.184 | AK021549  | 1364.391  | 1363.441  | AK025709  | 850.585   | 934.684   |
| NM_001968 | 1707.336  | 2298.226  | NM_003537 | 25073.98  | 24707.629 | NM_019018 | 5290.521  | 4218.518  |
| NM_016138 | 1009.741  | 1322.622  | AK021862  | 921.467   | 1063.741  | NM_012261 | 8476.847  | 6674.993  |
| Z36833    | 41230.148 | 46263.949 | AK024177  | 2732.849  | 2156.953  | NM_015558 | 3021.724  | 2728.97   |
| NM_014358 | 1650.298  | 1573.396  | AK024827  | 10734.164 | 8779.979  | AB046808  | 1771.033  | 1570.353  |
| M21191    | 29995.531 | 29643.631 | AK021952  | 2464.484  | 2882.166  | AK026265  | 2405.563  | 2354.534  |
| AF072810  | 1469.788  | 1461.082  | K01564    | 1651.571  | 1422.952  | NM_018197 | 1306.221  | 1220.178  |
| L19778    | 612.537   | 667.852   | AB023175  | 954.519   | 821.152   | NM_006468 | 495.16    | 832.638   |
| AF174482  | 18019.363 | 19622.297 | AL359563  | 927.016   | 1203.636  | NM_005681 | 1025.875  | 1009.657  |
| NM_003528 | 1487.214  | 1227.242  | AL109791  | 1989.459  | 1490.73   | NM_015158 | 4259.03   | 6482.152  |
| NM_017768 | 668.751   | 616.612   | AF086478  | 1931.985  | 3826.658  | NM_012384 | 2278.778  | 2582.692  |
| D85131    | 10785.784 | 11230.645 | AK021514  | 48365.059 | 51280.656 | NM_004653 | 1619.748  | 1638.843  |
| NM_004958 | 597.093   | 445.706   | AJ008134  | 1097.576  | 1893.018  | AF233453  | 4188.389  | 3886.912  |
| D30612    | 3299.161  | 2926.09   | S71486    | 1397.511  | 1110.452  | D87454    | 6905.267  | 6695.963  |
| NM_002163 | 14556.936 | 14014.892 | L33808    | 7413.874  | 10638.158 | NM_007020 | 1879.44   | 2135.453  |
| U52097    | 17966.494 | 18827.785 | AF075071  | 1432.866  | 1458.721  | NM_000713 | 2352.28   | 2681.63   |
| NM_003418 | 2583.457  | 3236.987  | AL080213  | 815.633   | 1120.64   | NM_016058 | 1105.899  | 1428.4    |
| AL079289  | 362.693   | 542.284   | AF075003  | 751.484   | 808.153   | NM_013291 | 6371.438  | 4835.532  |
| NM_018484 | 543.243   | 799.674   | X93500    | 1596.179  | 1896.967  | NM_002938 | 8610.673  | 7066.431  |
| NM_017594 | 1082.82   | 1192.273  | U79271    | 2288.695  | 2224.543  | NM_014161 | 2251.766  | 1604.794  |
| AK027237  | 948.058   | 1203.546  | NM_019888 | 497.095   | 688.145   | BF312817  | 2563.847  | 2481.428  |
| AF075017  | 266.639   | 479.71    | AK024609  | 5608.114  | 4628.466  | NM_014858 | 1557.241  | 1701.222  |
| AK027104  | 1443.368  | 1805.847  | NM_018120 | 5904.374  | 5938.691  | NM_000198 | 9426.244  | 8634.482  |
| AL133090  | 14480.012 | 17833.242 | AK027209  | 743.575   | 1261.838  | NM_003778 | 62991.895 | 53164.582 |
| AF085867  | 3518.193  | 3580.516  | AK026874  | 2374.458  | 3924.643  | AK023263  | 2444.081  | 2633.494  |
| AK026158  | 1090.323  | 1230.389  | D17217    | 1284.816  | 2047.095  | NM_004622 | 1378.727  | 1854.813  |
| AF086510  | 3860.355  | 3614.909  | CY3Cy5    | 4708.307  | 192.609   | AK021445  | 788.319   | 1143.939  |
| Z36779    | 3593.219  | 3352.693  | U13738    | 705.292   | 652.247   | NM_017934 | 4760.219  | 5648.882  |
| NM_002818 | 2221.538  | 2287.084  | AA679352  | 21112.146 | 18167.436 | NM_014168 | 15567.156 | 18764.307 |
| NM_017513 | 390.702   | 468.151   | X04503    | 2625.194  | 1971.192  | AF211971  | 3435.893  | 2795.095  |
| NM_017822 | 6604.341  | 8267.785  | D45917    | 1731.197  | 1738.192  | NM_002931 | 1265.022  | 1198.623  |
| AK026844  | 3186.359  | 3780.187  | X52001    | 3802.935  | 3160.522  | NM_013448 | 19165.895 | 25779.854 |
| AK026735  | 3446.729  | 4348.885  | BI823872  | 6279.143  | 6082.009  | X65232    | 21879.852 | 25097.285 |
| AL110104  | 18297.881 | 20112.107 | AA430552  | 2342.158  | 2581.489  | U12767    | 226.565   | 455.863   |
| AF240633  | 1128.413  | 959.774   | X66142    | 1750.991  | 1121.47   | M33782    | 883.959   | 480.661   |

|           |           |           |           |           |           |           |           |           |
|-----------|-----------|-----------|-----------|-----------|-----------|-----------|-----------|-----------|
| AK027056  | 6301.45   | 5622.677  | R45054    | 2785.974  | 2290.423  | NM_00219€ | 723.231   | 468.069   |
| AK024294  | 1614.735  | 1571.535  | NM_000620 | 443.447   | 970.982   | NM_01775€ | 4070.356  | 3913.75   |
| AL110126  | 1863.772  | 1744.281  | NM_000905 | 9812.566  | 14512.975 | NM_01569€ | 3505.029  | 3740.574  |
| AF052172  | 17903.537 | 16982.59  | SR5       | 4404.594  | 3612.69   | AK022551  | 1249.911  | 1513.087  |
| AB014573  | 4054.985  | 4233.391  | SR7       | 6537.399  | 42869.504 | AF085968  | 2026.616  | 2693.647  |
| AK025418  | 539.352   | 619.732   | SR9       | 19709.438 | 3097.141  | AB011136  | 1294.387  | 1774.367  |
| AK091109  | 11037.841 | 11285.171 | CY3Cy5    | 4710.183  | 283.051   | AF085898  | 4177.557  | 4299.41   |
| AF032897  | 238.661   | 496.616   | AF312769  | 706.926   | 372.124   | AL161960  | 3528.772  | 3851.036  |
| NM_014967 | 3082.737  | 3970.161  | AB020668  | 1539.866  | 1207.93   | AL049964  | 2835.158  | 4279.369  |
| AK022915  | 2967.336  | 2825.921  | NM_006203 | 16377.823 | 15877.303 | AK023269  | 2538.054  | 4704.233  |
| AK021736  | 254.682   | 438.063   | AF309553  | 4719.434  | 5117.391  | AF070564  | 2133.748  | 3325.334  |
| AF131834  | 829.763   | 830.998   | NM_003605 | 2353.031  | 2477.873  | AK021439  | 8327.778  | 8381.446  |
| AL355711  | 1047.22   | 1367.001  | NM_003993 | 2670.123  | 2938.03   | AF052099  | 1367.714  | 1241.754  |
| AK025851  | 1117.948  | 1347.592  | NM_018961 | 942.797   | 927.548   | AL110111  | 2752.478  | 2309.702  |
| AJ011409  | 7499.942  | 7744.917  | NM_00558€ | 2834.194  | 2889.571  | AF070543  | 1199.989  | 1140.183  |
| AJ227906  | 1603.49   | 1692.516  | NM_012242 | 2224.483  | 1718.033  | AF086525  | 403.439   | 439.299   |
| AJ001906  | 738.881   | 896.158   | NM_00689€ | 633.044   | 687.193   | NM_01477€ | 1791.069  | 1226.313  |
| U17633    | 517.77    | 566.831   | NM_001130 | 47474.855 | 38266.598 | AK001171  | 6192.425  | 4736.97   |
| Z83939    | 1018.879  | 722.726   | NM_002975 | 27782.809 | 28390.223 | AK026273  | 3141.92   | 3491.69   |
| L10404    | 813.176   | 979.518   | AK023511  | 4701.998  | 4510.227  | NM_02025€ | 8162.445  | 13867.986 |
| AF283776  | 8075.177  | 9267.958  | NM_01455€ | 2914.917  | 2958.189  | AF055007  | 2044.23   | 2092.568  |
| L10123    | 19710.131 | 20614.252 | NM_014375 | 8977.048  | 7947.427  | NM_012337 | 1107.871  | 1209.096  |
| D16877    | 2975.229  | 2467.955  | NM_017812 | 13415.732 | 15523.609 | AL389879  | 3523.609  | 3621.637  |
| L19363    | 443.995   | 432.874   | AF204173  | 902.495   | 716.272   | AK022869  | 1609.063  | 1607.183  |
| D16468    | 548.951   | 1154.642  | J03260    | 1456.201  | 1281.61   | NM_016111 | 7867.237  | 9858.285  |
| AL109781  | 4354.507  | 3537.642  | AB014514  | 3365.9    | 3155.829  | AF085958  | 60353.66  | 54252.148 |
| AK021895  | 2247.983  | 2956.705  | NM_002865 | 4368.631  | 3841.837  | AF086021  | 2446.406  | 2457.38   |
| AK024563  | 241.197   | 378.517   | NM_00356€ | 1544.895  | 750.934   | AL117655  | 569.966   | 939.766   |
| AK000036  | 2732.888  | 3547.103  | NM_003731 | 6238.981  | 5493.412  | AK024472  | 927.566   | 918.925   |
| AK000769  | 568.848   | 437.107   | NM_00544€ | 2200.745  | 2172.322  | AF087981  | 606.424   | 964.48    |
| AK000924  | 742.989   | 764.141   | NM_013292 | 1891.405  | 1929.991  | NM_01797€ | 2651.713  | 3417.854  |
| AK022252  | 1805.092  | 1830.105  | NM_002387 | 2044.511  | 1552.533  | U06700    | 792.841   | 610.878   |
| AK000114  | 1367.979  | 1529.548  | NM_000069 | 620.675   | 543.972   | U63828    | 1184.719  | 756.486   |
| AK000952  | 5194.901  | 5335.05   | AB023217  | 604.577   | 599.989   | Z36828    | 3108.93   | 2227.985  |
| AK024520  | 2838.225  | 2765.132  | L08902    | 643.05    | 750.202   | AF086121  | 8102.836  | 4767.876  |
| AK024592  | 2549.85   | 2418.704  | J02639    | 1777.721  | 1926.012  | AK026915  | 660.54    | 555.087   |
| AK024904  | 1242.055  | 1309.446  | NM_007263 | 15577.954 | 14382.3   | AL110259  | 771.934   | 818.223   |
| AK025030  | 1042.499  | 1204.611  | AF206020  | 1457.957  | 1092.375  | AB033100  | 7035.141  | 6207.181  |
| AK024542  | 2769.054  | 2363.295  | NM_01441€ | 987.161   | 751.471   | AL390138  | 2226.684  | 1726.278  |
| AK024915  | 411.453   | 409.908   | NM_00215€ | 4534.432  | 5739.51   | AL137290  | 6467.207  | 5795.064  |
| AB050477  | 2171.018  | 3716.533  | NM_004595 | 8344.159  | 11399.951 | AK021606  | 552.585   | 983.374   |
| AK000152  | 769.394   | 1194.815  | NM_02017€ | 618.966   | 335.249   | NM_014124 | 17033.049 | 17544.586 |
| AK024300  | 1136.018  | 1509.487  | NM_002264 | 1192.849  | 888.493   | AK001551  | 685.316   | 856.958   |
| L09092    | 530.633   | 688.449   | NM_014754 | 15480.646 | 10417.476 | AK001825  | 1129.705  | 1146.831  |
| NM_012132 | 473.839   | 499.394   | D49387    | 1072.761  | 1056.092  | AK024714  | 572.458   | 720.673   |
| NM_01212€ | 1168.872  | 1327.584  | AF050146  | 4043.747  | 3214.03   | AK022363  | 746.769   | 429.808   |
| AK024881  | 750.612   | 801.222   | NM_000116 | 3283.034  | 3031.789  | AK023395  | 1050.739  | 1439.213  |
| AK025716  | 1400.209  | 1426.639  | NM_00669€ | 7671.318  | 7288.293  | AK023818  | 5863.723  | 6447.085  |
| AF086202  | 7937.679  | 8622.495  | NM_006804 | 8931.831  | 8790.042  | AK023895  | 769.955   | 432.206   |
| AK023270  | 2763.825  | 2510.42   | NM_015969 | 6363.524  | 5997.143  | AK024206  | 4606.281  | 3373.197  |
| AF085979  | 20711.156 | 21139.855 | NM_003051 | 2492.203  | 2646.876  | NM_006262 | 1585.194  | 1173.01   |
| AK023112  | 2035.87   | 1854.115  | NM_001133 | 670.52    | 637.619   | AK026598  | 2700.339  | 2302.232  |
| NM_01780€ | 25593.93  | 23729.363 | NM_145342 | 4587.371  | 3852.999  | AK023602  | 442.692   | 701.075   |

|           |           |           |           |           |           |           |           |           |
|-----------|-----------|-----------|-----------|-----------|-----------|-----------|-----------|-----------|
| AK001937  | 39085.227 | 43530.461 | AJ278917  | 7221.006  | 6831.946  | NM_018097 | 19549.75  | 18439.01  |
| AL365517  | 1419.654  | 1567.895  | AK025886  | 1099.863  | 1183.474  | AF130043  | 684.602   | 548.13    |
| AK021988  | 7337.457  | 8361.033  | NM_003058 | 421.675   | 625.823   | Y11167    | 875.434   | 759.304   |
| AF086494  | 10586.827 | 11514.246 | NM_001720 | 8310.585  | 4889.167  | AK026813  | 717.624   | 627.598   |
| BI769977  | 1268.058  | 1191.905  | NM_018390 | 2030.401  | 1343.24   | AK027225  | 981.352   | 1043.642  |
| AL137567  | 478.549   | 411.089   | AB037724  | 7524.35   | 9812.085  | AK023083  | 2313.847  | 2897.553  |
| AK024913  | 2956.646  | 2726.935  | AK025086  | 1026.15   | 923.352   | AF116622  | 578.362   | 650.005   |
| AB007961  | 1851.688  | 2125      | AK026151  | 4413.464  | 2790.891  | AF217967  | 523.427   | 615.339   |
| NM_005547 | 1556.414  | 1888.755  | NM_014140 | 2209.579  | 1987.715  | NM_018150 | 5674.697  | 7379.913  |
| AF119862  | 6177.983  | 6540.983  | NM_002916 | 1999.261  | 2243.845  | NM_017918 | 911.72    | 645.187   |
| U17628    | 1293.134  | 1085.172  | M20700    | 2974.157  | 2318.933  | NM_017855 | 29908.006 | 50383.703 |
| AF119867  | 3497.663  | 3417.795  | NM_001034 | 6860.307  | 7338.485  | AB007954  | 2095.009  | 1869.564  |
| AL357205  | 13393.787 | 18620.488 | NM_002689 | 1297.892  | 1519.204  | AK026494  | 2324.878  | 2464.25   |
| AF124819  | 484.435   | 585.1     | NM_017686 | 1791.452  | 1584.534  | AK023508  | 1557.769  | 954.82    |
| D17091    | 888.509   | 1039.987  | AL096734  | 639.633   | 572.854   | AK025840  | 1957.027  | 1496.509  |
| AL133074  | 1294.224  | 2026.726  | AK000800  | 3364.431  | 2892.092  | BC024009  | 3540.4    | 3101.344  |
| AF086318  | 7726.479  | 8295.789  | NM_018154 | 2202.531  | 2560.305  | AF128543  | 3528.06   | 3206.739  |
| AF088012  | 1300.354  | 1172.064  | BC006287  | 4691.805  | 3948.4    | NM_004185 | 1394.346  | 1368.208  |
| NM_018121 | 1044.024  | 898.155   | AB023198  | 4914.11   | 5214.822  | U84510    | 2950.574  | 2035.484  |
| AK026708  | 3315.299  | 4527.953  | NM_005231 | 6217.99   | 6274.66   | S83198    | 11333.189 | 9963.267  |
| NM_017903 | 6361.877  | 7949.96   | AF064729  | 1751.242  | 1523.498  | AF052119  | 13353.433 | 12413.883 |
| NM_018074 | 1035.668  | 1189.167  | NM_005412 | 21446.965 | 20356.697 | X94290    | 1492.673  | 1730.855  |
| NM_000909 | 1514.774  | 1692.867  | NM_012113 | 1998.82   | 1983.742  | AK026685  | 12522.807 | 11217.667 |
| NM_019013 | 1523.312  | 2074.114  | NM_014375 | 7268.024  | 4065.54   | AF090927  | 19728.063 | 18740.381 |
| NM_006783 | 521.367   | 646.406   | NM_017812 | 10459.975 | 8499.909  | AL137642  | 1204.67   | 1018.097  |
| L37711    | 587.409   | 660.404   | AF204173  | 565.676   | 553.49    | AL133619  | 1000.7    | 1146.987  |
| S70313    | 9726.635  | 8578.207  | J03260    | 1135.025  | 855.917   | AK025902  | 3024.943  | 2973.819  |
| AK021607  | 904.699   | 833.2     | AF068236  | 29972.572 | 21850.49  | NM_005181 | 1955.226  | 1546.794  |
| L09268    | 406.239   | 334.065   | H94487    | 1176.839  | 1084.503  | AF143676  | 2606.002  | 3150.49   |
| NM_020186 | 6293.909  | 6600.146  | BG681747  | 27308.57  | 23244.918 | U66044    | 2154.011  | 3038.792  |
| AK022424  | 1508.334  | 1652.637  | H63077    | 2578.89   | 1988.452  | NM_005247 | 14514.651 | 24419.729 |
| AF090947  | 1743.545  | 1972.933  | AA679352  | 20091.426 | 17492.078 | NM_005283 | 1034.262  | 1531.972  |
| BC016962  | 521.927   | 544.137   | X04503    | 2839.081  | 2543.574  | AL122089  | 1886.137  | 2508.115  |
| AJ272196  | 6054.697  | 5984.296  | D45917    | 1791.65   | 1782.142  | AA203665  | 1893.726  | 2497.04   |
| X58162    | 8848.392  | 9125.746  | X52001    | 2519.744  | 2384.94   | U95646    | 1688.336  | 1801.666  |
| AK022825  | 629.193   | 653.927   | BI823872  | 5613.096  | 5713.583  | Y16705    | 1131.49   | 686.696   |
| CY3Cy5    | 2613.366  | 128.776   | AA430552  | 2541.242  | 2158.808  | AF279775  | 2867.916  | 2237.097  |
| L35251    | 2485.488  | 2391.129  | X66142    | 1188.942  | 1238.056  | NM_001821 | 2749.759  | 2510.372  |
| BE910395  | 842.122   | 845.237   | R45054    | 2323.295  | 1810.75   | NM_005647 | 419.836   | 647.802   |
| N46828    | 1917.141  | 1680.486  | NM_000620 | 382.3     | 493.645   | X64978    | 3455.454  | 3123.603  |
| BI908302  | 13399.143 | 13537.696 | NM_000905 | 7237.562  | 6098.249  | NM_000912 | 16189.974 | 14520.048 |
| AA460969  | 2403.665  | 2736.722  | AL117398  | 5065.669  | 4497.851  | NM_002345 | 505.854   | 647.306   |
| BG695859  | 907.888   | 937.443   | AY007158  | 58590.387 | 57380.508 | U57971    | 1263.856  | 943.518   |
| M85079    | 3641.604  | 3896.804  | M58050    | 4566.302  | 2836.917  | X89673    | 1413.712  | 738.444   |
| AA457671  | 10019.141 | 12017.756 | NM_007263 | 12379.151 | 7945.709  | AK024593  | 1211.549  | 989.487   |
| X07437    | 4687.411  | 5630.083  | AF206020  | 1043.241  | 442.252   | Z83934    | 795.58    | 639.444   |
| NM_000641 | 1914.238  | 2362.404  | NM_014410 | 1013.656  | 534.979   | NM_018355 | 2726.063  | 2380.193  |
| AE006466  | 2606.994  | 3259.139  | AF305835  | 408.536   | 969.993   | AK022020  | 2313.788  | 2218.391  |
| BC008737  | 47375.02  | 50049.074 | AF312769  | 658.503   | 338.093   | AK000263  | 5572.181  | 4280.04   |
| BC011655  | 2638.296  | 3027.877  | AB020668  | 1306.575  | 926.729   | NM_017447 | 1023.825  | 391.37    |
| BC002396  | 3301.278  | 2946.535  | NM_006203 | 14641.339 | 9742.951  | AL049452  | 624.203   | 1302.965  |
| NM_022095 | 1202.101  | 1288.293  | AF309553  | 4784.182  | 4391.588  | NM_016622 | 1816.636  | 2517.898  |
| SR2       | 54448.387 | 47896.953 | NM_003605 | 2766.236  | 2917.347  | AK026976  | 1151.607  | 1524.351  |

|           |           |           |           |           |           |             |           |           |
|-----------|-----------|-----------|-----------|-----------|-----------|-------------|-----------|-----------|
| SR4       | 13854.521 | 11956.427 | NM_003993 | 3015.125  | 2735.365  | AF070559    | 3423.378  | 2152.619  |
| SR6       | 2246.245  | 1669.557  | NM_005586 | 2956.473  | 3161.418  | D42043      | 4267.46   | 3122.814  |
| SR8       | 6954.025  | 18636.813 | NM_012242 | 1986.771  | 1628.159  | CY3Cy5      | 2094.698  | 90.994    |
| SR10      | 26694.076 | 10619.012 | NM_006896 | 795.935   | 773.246   | BG744154    | 59340.258 | 53764.02  |
| CY3Cy5    | 1164.066  | 130.519   | NM_001130 | 45894.984 | 38122.313 | Z11694      | 5132.528  | 4670.35   |
| NM_02037C | 548.747   | 810.798   | NM_002975 | 25453.701 | 25886.467 | BF983177    | 730.537   | 546.632   |
| NM_004767 | 906.587   | 665.035   | AK023511  | 3724.177  | 3520.739  | Z26317      | 1705.035  | 1239.296  |
| BF310159  | 5129.637  | 4035.211  | NM_014556 | 2184.819  | 2432.956  | X16983      | 4395.872  | 3850.764  |
| NM_018986 | 1010.321  | 993.349   | NM_001615 | 67687.328 | 66489.031 | X56160      | 1278.312  | 940.838   |
| AB044934  | 453.376   | 674.424   | AB014514  | 2923.906  | 2905.291  | H-Y 00097 I | 2392.038  | 1525.711  |
| U27655    | 3718.029  | 3304.464  | NM_002865 | 4400.74   | 4478.336  | H-M 59964   | 1317.553  | 776.526   |
| NM_005795 | 487.162   | 927.319   | NM_003566 | 1451.485  | 1176.101  | H-Y 00711 I | 61999.516 | 59042.426 |
| NM_00336C | 1448.198  | 2595.785  | NM_007159 | 14137.356 | 12567.211 | H-X 16707 I | 1416.394  | 1115.586  |
| Z21965    | 30408.852 | 40144.582 | NM_003731 | 5412.851  | 4771.105  | AL038354    | 50282.02  | 31429.537 |
| NM_012427 | 760.536   | 1033.365  | NM_005446 | 2618.999  | 2535.439  | NM_021976   | 3523.966  | 2839.182  |
| NM_000852 | 7939.304  | 9823.115  | NM_013292 | 2128.533  | 1748.012  | SR2         | 50270.73  | 40919.996 |
| NM_000396 | 691.25    | 802.056   | NM_002387 | 1909.363  | 1738.651  | SR4         | 11358.537 | 10744.836 |
| AW797282  | 406.92    | 613.621   | NM_000069 | 808.862   | 775.268   | SR10        | 25386.236 | 6741.775  |
| NM_002402 | 2536.877  | 2578.611  | AB023217  | 491.39    | 714.089   | CY3Cy5      | 1641.354  | 60.632    |
| L09070    | 697.941   | 680.59    | L08902    | 426.983   | 622.02    | NM_001284   | 34309.867 | 32961.551 |
| NM_000062 | 4980.568  | 3855.581  | J02639    | 1832.675  | 1700.732  | NM_003242   | 2528.994  | 1868.251  |
| NM_00959C | 2801.646  | 2711.892  | NM_005231 | 7140.786  | 10867.983 | NM_001105   | 1012.743  | 635.926   |
| AL133037  | 637.398   | 457.533   | AF064729  | 1796.407  | 1495.719  | NM_005585   | 651.169   | 510.185   |
| NM_02035C | 3908.809  | 3356.6    | NM_005412 | 19928.83  | 13277.087 | NM_002075   | 950.435   | 657.185   |
| NM_00035C | 1961.385  | 3693.402  | NM_012113 | 1809.293  | 1099.337  | Y08756      | 3391.482  | 2510.579  |
| X91103    | 6709.778  | 6497.121  | NM_00215C | 4302.604  | 2475.315  | NM_005563   | 6246.313  | 4657.327  |
| AA419164  | 3100.597  | 2525.15   | NM_004595 | 8519.053  | 12758.438 | NM_005102   | 2874.408  | 1998.657  |
| AL117235  | 1022.563  | 1382.578  | NM_020178 | 630.789   | 358.25    | NM_002719   | 3175.621  | 2245.827  |
| NM_014822 | 6233.602  | 7377.258  | NM_002264 | 893.989   | 1028.751  | AV752086    | 658.564   | 597.388   |
| NM_005296 | 3514.701  | 3309.916  | NM_014754 | 17346.535 | 15771.177 | NM_016102   | 2190.744  | 1722.78   |
| NM_001337 | 478.7     | 589.83    | D49387    | 1086.432  | 1269.718  | NM_004376   | 1982.514  | 1383.968  |
| NM_003611 | 6899.428  | 7548.722  | AF050146  | 4009.633  | 4589      | NM_005603   | 6024.68   | 4964.598  |
| AB014538  | 2455.376  | 2690.552  | NM_000116 | 3516.11   | 4263.445  | NM_006834   | 3555.801  | 3430.211  |
| NM_006209 | 1350.793  | 1412.431  | NM_006698 | 8487.37   | 8621.658  | AB011100    | 1931.041  | 2017.781  |
| AK025118  | 5293.803  | 6029.546  | NM_006804 | 7392.671  | 7473.819  | U61741      | 662.278   | 595.483   |
| NM_000727 | 3019.652  | 4577.104  | NM_015969 | 6192.945  | 5541.101  | NM_012402   | 2112.43   | 2023.728  |
| NM_005385 | 7082.733  | 8536.005  | NM_003051 | 2727.828  | 2690.563  | M76676      | 1832.714  | 1633.225  |
| NM_006074 | 23217.822 | 26979.324 | NM_145342 | 4831.483  | 4767.471  | NM_003857   | 783.075   | 568.342   |
| AF208232  | 4479.092  | 5108.663  | AJ278917  | 9180.312  | 7638.838  | AL137690    | 449.734   | 408.707   |
| NM_002986 | 3495.888  | 3459.208  | AK025641  | 28270.65  | 22366.787 | Z83804      | 1258.284  | 1120.957  |
| NM_004186 | 1325.779  | 1211.783  | NM_00062C | 1008.403  | 1528.23   | NM_004386   | 1599.147  | 1237.208  |
| NM_016258 | 3074.032  | 2733.843  | AL117398  | 5378.914  | 2877.289  | U67784      | 584.176   | 409.259   |
| AF203032  | 4503.854  | 3789.161  | AY007158  | 58058.77  | 50133.348 | NM_007366   | 1139.951  | 1003.538  |
| AB014542  | 18898.709 | 14303.3   | NM_00172C | 8766.577  | 5162.721  | NM_000592   | 504.69    | 760.079   |
| NM_01464C | 586.527   | 683.75    | NM_01839C | 2659.393  | 1963.969  | NM_016584   | 4221.059  | 4240.157  |
| Y10518    | 43178.66  | 41425.035 | AB037724  | 6701.194  | 6583.237  | NM_001815   | 868.552   | 593.793   |
| AF155135  | 5745.567  | 5721.379  | AK025086  | 1363.656  | 982.551   | NM_000064   | 2964.457  | 1707.715  |
| NM_01479C | 1238.883  | 1369.104  | AK026151  | 5947.526  | 5265.697  | NM_003264   | 3112.224  | 2221.37   |
| NM_003571 | 7001.239  | 6714.077  | NM_01414C | 2809.83   | 3221.803  | NM_003326   | 921.306   | 472.197   |
| AB032965  | 28434.848 | 24072.422 | NM_002916 | 2310.042  | 3013.504  | NM_004566   | 20694.906 | 17852.27  |
| AF133424  | 3116.28   | 3851.943  | NM_002689 | 1294.427  | 1292.857  | NM_000202   | 741.347   | 802.453   |
| NM_005003 | 15582.017 | 17577.992 | NM_017686 | 1173.297  | 1021.571  | NM_005496   | 10190.959 | 7725.901  |
| AF084560  | 4244.526  | 4578.719  | AL096734  | 471.314   | 614.483   | NM_004817   | 826.81    | 496.43    |

|           |           |           |           |           |           |           |           |          |
|-----------|-----------|-----------|-----------|-----------|-----------|-----------|-----------|----------|
| NM_015715 | 2998.689  | 3791.792  | AK000800  | 2935.436  | 3004.661  | NM_018975 | 11398.766 | 9944.78  |
| NM_000032 | 4446.953  | 5770.447  | NM_018154 | 2670.818  | 3122.559  | AB023215  | 6435.309  | 5239.276 |
| NM_002083 | 1961.037  | 2485.309  | BC006287  | 5071.562  | 4303.519  | NM_018073 | 556.276   | 704.734  |
| NM_002035 | 4620.258  | 6222.651  | AB023198  | 5933.918  | 5147.605  | AL137529  | 1601.046  | 1190.342 |
| NM_014900 | 828.686   | 971.244   | AF304163  | 20433.484 | 17928.465 | NM_012332 | 1631.79   | 1510.389 |
| BF342908  | 1311.306  | 1443.259  | NM_006896 | 1505.182  | 1585.142  | AK026648  | 884.101   | 815.996  |
| AF118073  | 496.058   | 826.617   | AK023511  | 4417.084  | 6155.067  | NM_000497 | 1303.198  | 1205.837 |
| AK023510  | 3183.909  | 3853.914  | NM_014556 | 2953.839  | 2473.471  | NM_017421 | 803.96    | 632.117  |
| NM_004345 | 1687.91   | 2393.142  | NM_002725 | 870.375   | 412.024   | AK025977  | 7739.376  | 6680.488 |
| NM_000702 | 21513.832 | 23976.541 | NM_014375 | 9400.314  | 6996.583  | AK023130  | 6871.173  | 4754.146 |
| X71490    | 11123.711 | 12708.361 | NM_017812 | 15248.243 | 26750.23  | NM_002895 | 3987.824  | 6951.619 |
| AF257081  | 2444.3    | 3098.036  | AF204173  | 1248.766  | 2037.645  | NM_000486 | 605.297   | 792.415  |
| NM_001685 | 35880.176 | 28959.523 | J03260    | 1333.983  | 1039.289  | BE876237  | 785.83    | 658.544  |
| NM_000219 | 745.692   | 557.442   | U13738    | 442.803   | 720.906   | NM_005397 | 873.159   | 763.666  |
| NM_002232 | 662.735   | 576.462   | AF068236  | 34075.195 | 34600.953 | NM_000806 | 3178.228  | 2359.681 |
| NM_016106 | 3223.72   | 2742.489  | H94487    | 1588.141  | 1790.054  | NM_006320 | 1287.037  | 1022.635 |
| NM_014570 | 3109.229  | 2677.299  | X04503    | 2564.772  | 2151.708  | AB014511  | 2928.98   | 2500.886 |
| NM_014747 | 4653.28   | 4837.01   | D45917    | 1829.399  | 1327.585  | NM_014252 | 3982.762  | 3339.165 |
| Y19240    | 3446.084  | 2949.034  | X52001    | 2666.354  | 2516.492  | NM_001662 | 4799.669  | 3877.438 |
| AF091029  | 7373.884  | 6430.162  | BI823872  | 6900.087  | 7131.872  | NM_016131 | 6981.525  | 6480.843 |
| X97074    | 11257.411 | 8759.563  | AA430552  | 2369.299  | 2530.051  | NM_006822 | 1181.176  | 1081.117 |
| NM_002625 | 492.25    | 635.306   | X66142    | 1455.395  | 1380.164  | NM_012142 | 8887.033  | 6869.904 |
| NM_004135 | 5107.86   | 6821.849  | R45054    | 2314.888  | 1910.756  | NM_016425 | 1664.844  | 976.87   |
| NM_000203 | 518.466   | 721.292   | NM_002387 | 1479.059  | 1834.617  | NM_018264 | 1745.715  | 1615.742 |
| NM_013443 | 2647.999  | 3441.228  | NM_000069 | 459.996   | 838.462   | AB028998  | 613.622   | 629.805  |
| NM_000925 | 9743.489  | 14851.623 | AB023217  | 766.866   | 1124.09   | NM_000153 | 552.488   | 611.208  |
| NM_000465 | 1720.952  | 2488.062  | D45864    | 815.218   | 855.147   | NM_002033 | 5563.567  | 4773.565 |
| AF116685  | 504.553   | 593.264   | M58050    | 4521.919  | 3136.607  | AK091794  | 397.135   | 1244.158 |
| NM_000123 | 4021.314  | 4560.46   | NM_007263 | 12938     | 7888.135  | NM_004111 | 2226.012  | 2205.003 |
| AL137501  | 494.085   | 695.054   | AF206020  | 1498.238  | 892.378   | AF085966  | 4416.807  | 4104.873 |
| BE858979  | 1352.475  | 1341.041  | NM_014410 | 1070.952  | 626.029   | NM_005316 | 2037.024  | 2141.933 |
| NM_000122 | 1693.084  | 1854.754  | AF305835  | 1129.879  | 941.445   | NM_016316 | 2403.667  | 2482.396 |
| NM_006712 | 57228.98  | 60150.438 | AF312769  | 1564.256  | 1486.888  | NM_003365 | 4994.513  | 5705.729 |
| NM_006240 | 1834.126  | 1965.336  | AB020668  | 1496.121  | 1612.448  | NM_000057 | 1939.22   | 1621.385 |
| NM_007026 | 2901.08   | 2752.13   | NM_006203 | 16783.152 | 17319.273 | NM_018343 | 3434.874  | 2404.415 |
| M37712    | 6996.843  | 5461.988  | AF309553  | 3955.614  | 3094.077  | AK095793  | 986.207   | 740.419  |
| NM_002645 | 1152.273  | 1570.446  | NM_003605 | 2582.938  | 2750.11   | NM_003177 | 3309.68   | 2482.924 |
| AF070670  | 4995.24   | 5148.866  | NM_003993 | 3332.153  | 2934.662  | NM_017719 | 847.653   | 528.087  |
| NM_016156 | 2957.934  | 2557.595  | NM_018961 | 1004.158  | 946.589   | AF064078  | 662.375   | 583.813  |
| NM_016525 | 1098.748  | 962.485   | NM_005586 | 3010.666  | 3275.575  | AL049688  | 890.636   | 660.306  |
| NM_015974 | 1906.839  | 1612.952  | NM_012242 | 2160.831  | 1907.681  | NM_002737 | 1443.961  | 1060.797 |
| NM_014384 | 1233.429  | 1093.942  | NM_003051 | 2230.714  | 3000.6    | Z25427    | 1789.574  | 1374.517 |
| NM_002573 | 2291.477  | 1676.585  | NM_001133 | 202.602   | 834.075   | NM_004672 | 6191.031  | 4905.089 |
| AL133037  | 850.692   | 785.066   | NM_145342 | 5429.103  | 7634.335  | NM_001353 | 1298.925  | 1114.541 |
| NM_020350 | 4297.276  | 3619.552  | AJ278917  | 10880.516 | 17039.955 | NM_006214 | 3338.82   | 2519.448 |
| NM_000350 | 2022.441  | 1690.74   | AK025641  | 29647.215 | 25228.869 | AJ010228  | 3002.563  | 2253.79  |
| X91103    | 8698.419  | 9074.079  | AK025886  | 952.941   | 593.998   | NM_005195 | 2934.037  | 2240.629 |
| AA419164  | 3957.957  | 4537.144  | AB014514  | 3083.69   | 4200.038  | NM_001061 | 331.492   | 553.489  |
| L35251    | 2949.311  | 4454.176  | NM_002865 | 2836.261  | 3003.996  | Z11694    | 4933.913  | 4173.575 |
| BE910395  | 1067.725  | 1033.512  | NM_003566 | 1722.465  | 973.107   | BF983177  | 674.399   | 647.721  |
| N46828    | 2166.355  | 2691.916  | NM_007159 | 15075.024 | 14093.708 | Z26317    | 1867.675  | 1435.741 |
| BI908302  | 14615.26  | 14843.323 | NM_003731 | 7745.208  | 6083.46   | X16983    | 4495.812  | 4408.605 |
| AA460969  | 2085.663  | 1924.394  | NM_005446 | 3209.71   | 2338.309  | X56160    | 1276.597  | 1261.154 |

|           |           |           |           |           |           |             |           |           |
|-----------|-----------|-----------|-----------|-----------|-----------|-------------|-----------|-----------|
| BG695859  | 723.481   | 876.591   | NM_013292 | 2847.752  | 1939.403  | BG679991    | 346.701   | 335.453   |
| M85079    | 5383.435  | 5767.04   | AK000800  | 3608.035  | 5664.46   | H-Y 00097 I | 2231.656  | 1893.635  |
| AA457671  | 10156.799 | 10970.912 | NM_018154 | 3082.892  | 4997.151  | H-M 59964   | 1343.9    | 806.623   |
| X07437    | 5250.752  | 5627.874  | NM_005358 | 554.331   | 768.888   | H-Y 00711 I | 61198.555 | 58072.16  |
| NM_000641 | 1841.231  | 2300.112  | BC006287  | 5884.386  | 8686.415  | H-X 16707 I | 1688.488  | 1355.626  |
| AE006466  | 2637.571  | 2162.334  | AF304163  | 14544.677 | 12741.931 | NM_02197E   | 3034.93   | 2291.332  |
| BC008737  | 49306.109 | 45882.535 | NM_005231 | 6317.371  | 5825.389  | NM_00571E   | 11933.984 | 8396.428  |
| BC011655  | 2503.826  | 2242.181  | AF064729  | 2250.091  | 1673.281  | NM_00549E   | 10259.421 | 8562.285  |
| BC002396  | 3264.786  | 2993.252  | NM_005412 | 18111.857 | 11188.067 | NM_00285E   | 5086.947  | 4767.659  |
| NM_02209E | 875.791   | 689.38    | NM_012113 | 2106.731  | 1808.947  | NM_004817   | 610.951   | 624.971   |
| AF112219  | 13405.813 | 11492.198 | NM_002150 | 4852.645  | 3924.664  | NM_01897E   | 10807.368 | 11000.854 |
| NM_014640 | 734.902   | 742.566   | NM_00459E | 5979.576  | 5755.581  | NM_001284   | 37165.609 | 37381.766 |
| Y10518    | 51419.922 | 50541.715 | NM_02017E | 1063.705  | 736.27    | NM_003242   | 2898.194  | 3029.951  |
| AF155135  | 6596.093  | 6879.881  | NM_002264 | 1395.06   | 1347.988  | NM_001105   | 993.441   | 888.347   |
| NM_014790 | 1276.687  | 1175.627  | NM_014754 | 19289.512 | 29363.756 | NM_00558E   | 653.015   | 752.373   |
| NM_003571 | 8196.091  | 9682.095  | D49387    | 1263.02   | 1255.773  | NM_00207E   | 1166.128  | 1232.643  |
| AB032965  | 32212.58  | 40836.922 | AF050146  | 4246.832  | 4016.338  | Y08756      | 3959.324  | 3271.92   |
| NM_020370 | 665.801   | 975.9     | NM_000116 | 3787.42   | 3736.406  | NM_00556E   | 5726.718  | 5127.043  |
| NM_004767 | 1137.857  | 1198.329  | NM_00669E | 8556.418  | 9889.529  | NM_006501   | 1984.995  | 2862.468  |
| BF310159  | 5179.176  | 4556.178  | NM_006804 | 11421.021 | 9337.994  | NM_00271E   | 2417.734  | 2076.995  |
| NM_01898E | 1204.2    | 1136.098  | NM_01596E | 7061.97   | 6190.866  | AV752086    | 876.128   | 803.625   |
| AB044934  | 568.802   | 653.289   | NM_004517 | 3670.011  | 4402.845  | NM_01610E   | 2012.474  | 1625.477  |
| U27655    | 3324.788  | 2774.684  | AI017418  | 1182.202  | 1609.867  | NM_00437E   | 1715.242  | 1343.994  |
| NM_003360 | 1303.324  | 1265.328  | NM_00067E | 1605.521  | 2158.639  | NM_01425E   | 4002.574  | 4013.552  |
| Z21965    | 29879.633 | 27577.197 | NM_02016E | 4473.039  | 3211.83   | NM_00166E   | 4822.91   | 5095.05   |
| NM_012427 | 873.527   | 717.777   | AK027124  | 41126.941 | 32836.73  | NM_016131   | 7100.698  | 6181.565  |
| AF131857  | 7403.68   | 5715.554  | M31212    | 49829.375 | 42240.566 | NM_00682E   | 1025.758  | 1153.605  |
| NM_00085E | 7471.537  | 6090.647  | AL117398  | 7748.37   | 10814.222 | NM_01214E   | 8941.982  | 8026.322  |
| NM_00039E | 396.835   | 470.943   | AY007158  | 56740.125 | 54419.094 | NM_01642E   | 1620.217  | 1507.773  |
| AW797282  | 485.627   | 368.386   | NM_001720 | 10317.491 | 9621.16   | NM_006834   | 3682.981  | 4113.106  |
| NM_00240E | 2449.23   | 2027.376  | NM_018390 | 2235.964  | 2063.29   | AB011100    | 1686.255  | 1731.173  |
| L09070    | 662.347   | 561.769   | AB037724  | 7244.295  | 6674.684  | U61741      | 799.194   | 914.12    |
| NM_00006E | 4187.745  | 3149.528  | AK025086  | 1376.092  | 1382.59   | NM_01240E   | 2451.45   | 2572.555  |
| NM_009590 | 2625.266  | 2200.558  | AK026151  | 5655.962  | 5133.79   | M76676      | 2120.09   | 2616.739  |
| NM_01610E | 3820.534  | 4754.958  | NM_014140 | 2793.149  | 3174.833  | NM_003857   | 867.314   | 940.126   |
| NM_014570 | 3798.544  | 3852.786  | NM_00291E | 2128.204  | 2283.894  | AL137690    | 529.486   | 504.577   |
| NM_014747 | 5784.67   | 6486.877  | M20700    | 3346.094  | 3040.984  | Z83804      | 1432.672  | 1125.521  |
| Y19240    | 4120.679  | 4374.504  | NM_001034 | 7565.605  | 8007.241  | NM_00438E   | 1487.37   | 1408.67   |
| AF091029  | 8315.319  | 12022.729 | NM_00268E | 1710.773  | 1640.367  | U67784      | 508.559   | 430.474   |
| X97074    | 14615.637 | 17874.91  | NM_01768E | 2003.171  | 1461.898  | NM_00736E   | 995.804   | 812.571   |
| AL117235  | 1333.154  | 1435.07   | AL096734  | 594.145   | 869.363   | NM_00059E   | 690.358   | 554.507   |
| NM_01482E | 6837.567  | 7398.246  | NM_01664E | 3251.311  | 4818.297  | NM_016584   | 4114.431  | 4393.795  |
| NM_00529E | 3524.685  | 3004.075  | L14723    | 11081.502 | 15123.729 | NM_00181E   | 873.406   | 749.023   |
| NM_001337 | 705.323   | 620.987   | NM_002230 | 607.967   | 695.67    | NM_000064   | 2550.833  | 2217.369  |
| NM_003611 | 7776.57   | 7476.274  | NM_00381E | 2650.074  | 2120.155  | NM_003264   | 2683.971  | 2145.218  |
| AB014538  | 2464.413  | 2919.094  | NM_001430 | 2578.668  | 2910.565  | NM_00672E   | 914.103   | 780.239   |
| NM_004154 | 571.505   | 490.714   | AB010098  | 893.025   | 750.057   | NM_00456E   | 18831.066 | 14967.336 |
| NM_00620E | 1409.122  | 1383.122  | U17989    | 1066.482  | 882.05    | NM_00020E   | 588.395   | 487.371   |
| AK025118  | 5828.501  | 6183.298  | AL137595  | 687.241   | 701.106   | Z25427      | 1987.298  | 1992.83   |
| NM_000727 | 1749.113  | 1606.589  | NM_01802E | 1113.123  | 810.994   | NM_00467E   | 6709.822  | 6526.263  |
| NM_00538E | 7105.816  | 5705.725  | AF249267  | 36550.563 | 36886.527 | NM_00135E   | 1509.217  | 1393.974  |
| NM_01898E | 2608.359  | 1714.344  | NM_004113 | 646.982   | 637.492   | NM_006214   | 3187.748  | 3165.511  |
| NM_006074 | 20521.232 | 17162.631 | X84939    | 4435.317  | 4196.782  | AJ010228    | 3650.859  | 3842.366  |

|           |           |           |           |           |           |             |           |           |
|-----------|-----------|-----------|-----------|-----------|-----------|-------------|-----------|-----------|
| AF208232  | 3683.114  | 3104.906  | NM_018320 | 12407.922 | 9882.794  | NM_00519E   | 3331.978  | 3472.35   |
| NM_00298E | 2731.312  | 2445.963  | NM_002069 | 2211.69   | 2053.902  | NM_018073   | 762.217   | 728.905   |
| NM_00418E | 1376.344  | 1021.686  | NM_01605E | 21057.26  | 25041.908 | AL137529    | 1666.296  | 1709.615  |
| NM_01625E | 3010.527  | 2636.956  | M65066    | 12146.957 | 9529.479  | NM_012332   | 1523.794  | 1576.315  |
| AF203032  | 4347.657  | 3455.945  | NM_016951 | 3963.192  | 3083.765  | AK026648    | 1125.817  | 1619.319  |
| AB014542  | 14926.729 | 11162.541 | NM_013251 | 834.029   | 766.723   | NM_000497   | 1110.465  | 1165.398  |
| AF070670  | 6116.598  | 6257.791  | NM_006099 | 4796.979  | 7192.787  | NM_017421   | 702.353   | 788.575   |
| NM_01615E | 3981.427  | 4001.95   | AF272379  | 2807.284  | 3935.307  | AK025977    | 7855.336  | 7563.107  |
| NM_01652E | 1482.063  | 1538.064  | NM_00308E | 4034.46   | 6386.261  | AK023130    | 6338.625  | 5624.712  |
| NM_015974 | 2083.615  | 2890.843  | NM_005537 | 3846.793  | 5084.945  | NM_00289E   | 5322.375  | 4631.225  |
| NM_014384 | 1524.158  | 1710.837  | NM_019003 | 2549.537  | 1858.614  | NM_00048E   | 791.302   | 751.763   |
| NM_002573 | 2877.742  | 3509.497  | NM_01593E | 3044.949  | 2467.418  | BE876237    | 701.562   | 870.905   |
| AF133424  | 3383.072  | 3429.26   | AF182412  | 922.437   | 597.152   | NM_005397   | 863.753   | 847.864   |
| NM_005003 | 27269.719 | 29032.156 | AK027200  | 1627.569  | 1360.737  | NM_00080E   | 3429.288  | 2866.542  |
| AF084560  | 4988.018  | 4878.261  | S78372    | 330.29    | 905.265   | NM_00632C   | 1082.61   | 894.824   |
| NM_01571E | 2714.817  | 3153.537  | U03106    | 5946.379  | 7167.877  | AB014511    | 2186.339  | 1444.92   |
| NM_000032 | 4308.226  | 4191.97   | NM_00007E | 13994.338 | 12764.672 | NM_02197E   | 3270.323  | 3213.85   |
| NM_002083 | 2190.427  | 2053.851  | NM_00684E | 6826.17   | 6728.271  | NM_00571E   | 12756.497 | 11074.803 |
| NM_00203E | 3843.543  | 3731.478  | NM_01488E | 731.88    | 722.485   | NM_018264   | 1801.619  | 1756.987  |
| NM_01490C | 1181.575  | 1046.633  | NM_00494E | 5187.144  | 5222.085  | NM_01458C   | 313.214   | 363.298   |
| BF342908  | 1141.474  | 1240.535  | NM_020242 | 2243.984  | 2416.967  | AB028998    | 643.541   | 759.84    |
| AF118073  | 437.166   | 575.435   | NM_00178E | 12045.909 | 10793.134 | NM_000153   | 730.05    | 630.153   |
| AK023510  | 3037.147  | 2428.273  | NM_00717E | 53778.816 | 54338.789 | NM_002033   | 5475.408  | 6399.513  |
| NM_00434E | 1455.235  | 1512.835  | NM_017682 | 576.169   | 894.812   | AK091794    | 731.01    | 799.547   |
| NM_000702 | 19743.248 | 18133.303 | NM_002209 | 2530.597  | 2225.554  | NM_004111   | 2574.886  | 2951.155  |
| X71490    | 10351.183 | 8549.822  | NM_002291 | 444.889   | 721.59    | AF085966    | 4211.775  | 4920.976  |
| AF257081  | 1849.644  | 1914.687  | AL137477  | 6285.323  | 5281.597  | NM_00531E   | 1718.563  | 1709.099  |
| NM_00168E | 35305.293 | 27366.902 | AF284580  | 673.951   | 1167.427  | NM_01631E   | 2428.459  | 2432.59   |
| NM_00021E | 563.56    | 564.942   | NM_01425E | 1265.703  | 1930.584  | NM_00336E   | 5503.039  | 5042.199  |
| NM_002232 | 637.047   | 554.472   | NM_015967 | 3131.355  | 6922.593  | NM_000057   | 2065.365  | 2320.771  |
| NM_02209E | 1262.931  | 1369.744  | NM_00359E | 733.794   | 776.411   | NM_018343   | 3121.853  | 3204.463  |
| AF112219  | 16738.256 | 20883.379 | NM_002409 | 782.409   | 557.683   | AK095793    | 1051.338  | 1191.777  |
| NM_00413E | 5078.004  | 4211.284  | NM_004994 | 11443.558 | 7246.327  | NM_003177   | 2856.063  | 2817.537  |
| NM_000203 | 668.563   | 621.728   | NM_00661C | 9615.308  | 11439.433 | NM_01771E   | 860.975   | 547.179   |
| NM_013443 | 2534.23   | 2307.389  | NM_003791 | 5469.487  | 5516.716  | AF064078    | 1092.865  | 721.356   |
| NM_00092E | 8458.951  | 7216.048  | NM_018017 | 4079.197  | 4341.387  | AL049688    | 779.926   | 537.653   |
| NM_00046E | 1380.044  | 2140.463  | AK001296  | 7225.212  | 6390.611  | NM_002737   | 1014.686  | 841.43    |
| NM_000123 | 3644.484  | 4168.752  | AK000173  | 584.993   | 513.44    | NM_00271E   | 2902.737  | 2775.883  |
| AL137501  | 590.148   | 463.738   | NM_01836E | 3143.841  | 2953.754  | AV752086    | 750.258   | 590.384   |
| BE858979  | 1161.524  | 1125.175  | NM_00658E | 13490.044 | 11025.501 | NM_016102   | 2096.157  | 2625.652  |
| NM_000122 | 1732.764  | 1352.238  | AJ272180  | 2241.475  | 1913.842  | NM_00437E   | 1967.219  | 1962.283  |
| NM_006712 | 67414.211 | 70974.289 | AK025709  | 1489.543  | 1521.059  | NM_00684E   | 62093.441 | 58953.75  |
| NM_00624C | 1904.234  | 1622.569  | NM_01901E | 11560.817 | 9125.778  | NM_005603   | 8923.681  | 7785.802  |
| NM_00702E | 3055.212  | 4529.739  | NM_012261 | 10993.059 | 10008.255 | AI075338    | 777.492   | 775.466   |
| M37712    | 7157.881  | 4962.103  | NM_01555E | 3949.757  | 3730.284  | BF983177    | 488.615   | 845.421   |
| NM_00264E | 777.596   | 800.672   | NM_01841E | 1463.653  | 1724.582  | Z26317      | 1784.066  | 2747.002  |
| AW797282  | 551.652   | 474.291   | NM_00460E | 4338.718  | 5167.688  | X16983      | 4450.462  | 6787.668  |
| NM_002402 | 2887.062  | 3085.083  | AK026265  | 2684.245  | 2834.619  | X56160      | 1221.921  | 1552.431  |
| L09070    | 1179.625  | 1201.095  | NM_00646E | 628.773   | 779.123   | BG679991    | 244.228   | 408.456   |
| NM_000062 | 6220.119  | 9885.845  | NM_005681 | 1645.049  | 982.975   | H-Y 00097 I | 2264.416  | 2219.02   |
| NM_00959C | 4148.5    | 4130.993  | NM_01515E | 5436.727  | 8447.183  | H-M 59964   | 1266.053  | 1136.352  |
| AL133037  | 689.204   | 672.438   | NM_012384 | 3421.082  | 3166.093  | H-Y 00711 I | 61863.816 | 59394.84  |
| NM_02035C | 4023.807  | 4449.522  | NM_004653 | 1937.874  | 1756.502  | H-X 16707 I | 1554.589  | 1426.281  |



|           |           |           |           |           |           |           |           |           |
|-----------|-----------|-----------|-----------|-----------|-----------|-----------|-----------|-----------|
| NM_00035C | 2094.9    | 1631.62   | AF233453  | 5289.168  | 4831.115  | R14607    | 567.694   | 438.318   |
| X91103    | 8177.56   | 6841.27   | D87454    | 7795.906  | 7321.609  | NM_000064 | 3398.816  | 3590.946  |
| AA419164  | 3558.17   | 3230.275  | NM_00702C | 2431.13   | 2874.085  | NM_003264 | 2742.984  | 2821.689  |
| L35251    | 2895.353  | 2310.165  | NM_000713 | 5444.779  | 4656.756  | NM_006725 | 858.451   | 929.739   |
| BE910395  | 941.033   | 671.53    | NM_016055 | 2471.683  | 2376.175  | NM_003326 | 835.674   | 812.38    |
| N46828    | 1734.923  | 1488.22   | NM_013291 | 8229.186  | 7439.993  | NM_004566 | 21299.42  | 19814.025 |
| BI908302  | 12257.486 | 10964.408 | NM_002936 | 10586.005 | 9745.954  | NM_000202 | 708.255   | 812.327   |
| AA460969  | 1976.268  | 1727.198  | NM_014161 | 3214.094  | 2655.572  | NM_005496 | 10338.086 | 8117.041  |
| BG695859  | 861.954   | 680.542   | BF312817  | 3966.165  | 3849.569  | NM_002856 | 5183.708  | 4726.664  |
| M85079    | 3765.206  | 2953.843  | AF086491  | 2095.005  | 3094.433  | NM_004817 | 675.736   | 519.394   |
| AA457671  | 8936.816  | 7091.684  | NM_014856 | 867.885   | 997       | NM_018975 | 11058.344 | 13958.24  |
| X07437    | 4652.057  | 3423.981  | NM_000199 | 6738.449  | 5863.637  | NM_003242 | 2970.352  | 6140.513  |
| NM_000641 | 1543.991  | 1159.219  | NM_003778 | 43864.684 | 31032.273 | NM_001105 | 1016.774  | 1113.046  |
| AE006466  | 2345.567  | 2159.446  | NM_001041 | 806.2     | 872.096   | NM_005585 | 735.622   | 786.108   |
| BC008737  | 49332.527 | 49416.02  | AK023263  | 2590.698  | 2469.392  | NM_002075 | 1146.326  | 1226.57   |
| BC011655  | 2435.292  | 2149.768  | NM_004622 | 1349.788  | 1240.419  | Y08756    | 4654.209  | 5140.092  |
| BC002396  | 3784.674  | 4920.843  | AK021445  | 1437.141  | 1405.225  | NM_005397 | 696.748   | 871.174   |
| AF208232  | 4649.58   | 4701.103  | NM_017934 | 8011.188  | 6989.986  | NM_000806 | 5267.285  | 4532.019  |
| NM_002986 | 3581.018  | 3965.439  | NM_014166 | 39317.559 | 35789.836 | NM_00632C | 1151.139  | 1030.818  |
| NM_004186 | 1554.456  | 1627.133  | AF211971  | 5313.166  | 3624.931  | AB014511  | 2753.642  | 3025.172  |
| NM_016256 | 4081.677  | 4521.274  | NM_002931 | 2179.666  | 2110.174  | NM_014252 | 4182.09   | 3657.347  |
| AF203032  | 5521.909  | 5857.547  | NM_013446 | 38630.625 | 35436.695 | NM_001662 | 5724.284  | 5011.031  |
| AB014542  | 24347.1   | 21280.771 | X65232    | 35657.871 | 33055.223 | NM_016131 | 7981.012  | 5998.132  |
| NM_01464C | 822.043   | 765.341   | U12767    | 387.899   | 412.119   | NM_006822 | 1130.675  | 1267.515  |
| Y10518    | 55948.93  | 54813.711 | U17630    | 1027.769  | 1695.069  | NM_012142 | 8964.054  | 8945.633  |
| AF155135  | 6615.407  | 5744.511  | M33782    | 1154.957  | 1332.655  | NM_016426 | 1685.998  | 1956.928  |
| NM_01479C | 1087.826  | 1070.242  | NM_002196 | 755.67    | 762.363   | NM_006834 | 3286.58   | 5171.045  |
| NM_003571 | 8835.379  | 8549.024  | NM_017755 | 6775.057  | 5786.759  | AB011100  | 1546.092  | 2385.062  |
| AB032965  | 40978.258 | 40782.543 | NM_015696 | 3149.483  | 3583.71   | U61741    | 1099.232  | 2001.108  |
| NM_004767 | 783.69    | 775.689   | AK022551  | 1358.854  | 1455.501  | NM_012402 | 2529.156  | 3721.136  |
| BF310159  | 4310.618  | 4172.878  | AF085968  | 3167.426  | 3618.329  | M76676    | 1686.975  | 1886.112  |
| NM_000316 | 469.165   | 752.529   | AB011136  | 1334.609  | 1373.214  | NM_003857 | 850.204   | 860.631   |
| NM_018986 | 1040.92   | 1281.039  | AF085898  | 4319.88   | 3718.07   | AL137690  | 393.944   | 530.348   |
| AB044934  | 639.187   | 476.194   | AL161960  | 3568.912  | 2283.125  | Z83804    | 1897.204  | 2257.556  |
| U27655    | 2699.139  | 2192.722  | AL049964  | 3489.58   | 3608.48   | U67784    | 549.405   | 550.269   |
| NM_00336C | 1002.343  | 1045.474  | AK023269  | 2114.754  | 2340.907  | NM_007366 | 1090.014  | 873.425   |
| Z21965    | 29184.482 | 23261.029 | AF070564  | 4466.49   | 4598.863  | NM_000592 | 674.099   | 512.254   |
| NM_012427 | 850.496   | 887.521   | AK021439  | 15610.531 | 14512.506 | NM_016584 | 4365.559  | 4123.66   |
| AF131857  | 7577.771  | 7461.569  | AF052099  | 2235.183  | 1916.869  | NM_001815 | 951.756   | 647.046   |
| NM_000852 | 7279.135  | 6820.563  | AL110111  | 3176.638  | 2735.376  | AK095793  | 1086.591  | 967.208   |
| NM_000396 | 706.014   | 636.917   | AF070543  | 1877.046  | 1483.069  | NM_003177 | 3018.665  | 3345.975  |
| AF257081  | 2508.016  | 3025.475  | AF086509  | 1090.491  | 2014.01   | NM_017716 | 691.613   | 674.469   |
| NM_001686 | 38186.199 | 42444.953 | NM_014776 | 2663.282  | 2740.47   | AF064078  | 1019.869  | 936.863   |
| NM_000216 | 822.226   | 918.525   | AK001171  | 13160.641 | 11077.077 | AL049688  | 917.716   | 845.045   |
| NM_002232 | 758.081   | 842.107   | AK026273  | 6832.534  | 8435.104  | NM_002737 | 1308.989  | 1386.607  |
| NM_016106 | 3520.325  | 3651.839  | NM_02025C | 10978.131 | 14329.745 | Z25427    | 2203.178  | 2120.862  |
| NM_01457C | 3868.249  | 4067.194  | AF055007  | 2002.491  | 2615.041  | NM_004672 | 6545.458  | 6338.395  |
| NM_014747 | 5952.689  | 6346.604  | AK022869  | 1384.773  | 1345.658  | NM_001353 | 1761.31   | 1376.435  |
| Y19240    | 3847.395  | 3680.062  | NM_016111 | 9029.896  | 8284.58   | NM_006214 | 3471.014  | 3161.677  |
| AF091029  | 9418.327  | 10439.352 | AF085958  | 63170.211 | 54330.75  | AJ010228  | 3753.386  | 4197.683  |
| X97074    | 21427.205 | 21303.578 | AK021906  | 626.406   | 1274.375  | NM_005196 | 3234.329  | 3554.069  |
| AL117235  | 1252.68   | 1110.008  | AF086021  | 3784.285  | 4262.688  | NM_018073 | 684.17    | 932.58    |
| NM_014822 | 6542.398  | 5591.186  | AF085982  | 2920.333  | 3429.502  | AL137529  | 1875.02   | 2786.079  |

|           |           |           |           |           |           |           |           |           |
|-----------|-----------|-----------|-----------|-----------|-----------|-----------|-----------|-----------|
| NM_005296 | 3222.807  | 3208.256  | AK024472  | 1593.916  | 2507.012  | NM_012332 | 1414.553  | 2375.474  |
| NM_001337 | 678.344   | 1123.97   | AF087981  | 776.511   | 949.012   | AK026648  | 773.747   | 902.751   |
| NM_003611 | 6995.235  | 8479.94   | NM_017976 | 3124.376  | 3050.019  | NM_000497 | 998.915   | 1167.312  |
| AB014538  | 2440.751  | 2773.722  | U06700    | 1372.012  | 1223.603  | NM_017421 | 814.466   | 974.74    |
| NM_006209 | 888.491   | 894.835   | U63828    | 1965.423  | 2063.051  | AK025977  | 7787.69   | 8458.783  |
| AK025118  | 4634.637  | 3887.942  | Z36794    | 1031.656  | 1162.72   | AK023130  | 5038.099  | 2818.812  |
| NM_000727 | 1743.412  | 1334.561  | Z36828    | 8310.187  | 11937.012 | NM_002899 | 4571.389  | 4483.066  |
| NM_002621 | 327.199   | 522.061   | AF086121  | 10624.832 | 10347.465 | NM_000486 | 788.453   | 653.063   |
| NM_005385 | 7026.046  | 8166.945  | AF086140  | 866.609   | 916.606   | BE876237  | 748.613   | 746.066   |
| NM_018985 | 2467.234  | 1992.286  | AK026915  | 1347.85   | 1886.293  | NM_014750 | 1535.159  | 1602.639  |
| NM_006074 | 19158.613 | 16301.405 | AL110259  | 1138.591  | 1890.292  | NM_015912 | 424.037   | 521.75    |
| NM_006712 | 67455.617 | 72720.672 | AB033100  | 10387.458 | 14212.523 | NM_000460 | 1486.104  | 1493.41   |
| NM_006240 | 3599.414  | 5017.744  | AL390138  | 2805.955  | 3070.99   | AB002339  | 1541.47   | 1440.759  |
| NM_007026 | 3809.046  | 4417.178  | AL137290  | 6926.228  | 6767.505  | NM_005104 | 8491.295  | 7877.032  |
| M37712    | 8616.679  | 7370.635  | AK022095  | 908.876   | 1073.334  | NM_006886 | 19589.117 | 18460.924 |
| NM_002646 | 1187.317  | 1203.948  | AK024180  | 1304.868  | 1041.933  | AL137423  | 3311.404  | 3293.223  |
| AF070670  | 7838.718  | 6740.896  | AK021606  | 1132.996  | 1447.969  | AB018322  | 1270.988  | 1089.728  |
| NM_016156 | 3730.634  | 4291.748  | AK001551  | 1466.441  | 1622.683  | NM_007066 | 3499.189  | 3646.624  |
| NM_016526 | 1348.745  | 1437.702  | AK001825  | 1486.574  | 1516.869  | NM_005716 | 12801.53  | 11888.899 |
| NM_015974 | 2443.221  | 2202.939  | AK024714  | 1063.981  | 1282.702  | NM_018264 | 1840.519  | 2801.389  |
| NM_014384 | 1357.173  | 1629.755  | AK022363  | 1267.547  | 1530.289  | NM_014580 | 351.467   | 605.271   |
| NM_002573 | 3021.534  | 3321.036  | AK023395  | 2302.954  | 1776.242  | AB028998  | 830.423   | 1063.606  |
| AF133424  | 3466.603  | 3640.681  | AK023818  | 9575.47   | 7948.54   | NM_002033 | 4972.839  | 5457.737  |
| NM_005003 | 25844.449 | 24938.859 | AK023895  | 890.004   | 923.355   | AK091794  | 596.228   | 379.356   |
| AF084560  | 5215.806  | 5125.334  | AK024206  | 6341.39   | 5442.454  | NM_004111 | 2076.651  | 2172.433  |
| NM_015715 | 2929.75   | 4800.184  | AK023602  | 1258.545  | 1599.979  | AF085966  | 4165.755  | 4115.585  |
| NM_000032 | 5114.357  | 7429.896  | AF130043  | 989.742   | 1047.394  | NM_005316 | 1863.564  | 1890.713  |
| NM_002083 | 1804.644  | 1875.379  | Y11167    | 1514.907  | 2331.008  | NM_016316 | 2364.428  | 2283.91   |
| NM_002035 | 3141.961  | 2967.73   | AK026813  | 1208.234  | 1115.34   | NM_003366 | 5512.705  | 5308.628  |
| NM_014900 | 756.532   | 633.908   | AK027225  | 1641.038  | 2502.633  | NM_000057 | 1926.926  | 1908.775  |
| BF342908  | 1127.534  | 1007.002  | AK023083  | 2843.449  | 3113.677  | NM_018343 | 3143.463  | 2999.534  |
| AF118073  | 350.849   | 478.263   | NM_005325 | 1216.079  | 978.783   | X15880    | 51265.398 | 53011.059 |
| AK023510  | 2559.305  | 2320.504  | AF217967  | 1035.304  | 1392.518  | AL137461  | 2415.678  | 2315.169  |
| NM_004345 | 1652.514  | 1597.772  | NM_018150 | 8051.698  | 7492.732  | AF114264  | 729.537   | 608.496   |
| NM_000702 | 22063.818 | 26349.367 | NM_017916 | 611.268   | 624.344   | NM_017514 | 425.618   | 459.873   |
| X71490    | 9483.942  | 9271.604  | NM_017855 | 30202.535 | 27880.918 | NM_018972 | 1173.954  | 1285.281  |
| NM_014273 | 12225.095 | 13866.044 | AB007954  | 2100.419  | 1430.9    | AB023210  | 873.344   | 722.668   |
| AF039442  | 1139.785  | 1490.897  | AK026494  | 4201.002  | 4091.689  | AB037786  | 1491.877  | 1229.435  |
| NM_004680 | 1073.242  | 1345.754  | AK023508  | 1756.584  | 1416.851  | NM_003646 | 5533.383  | 6285.784  |
| AF104260  | 370.434   | 811.181   | AK025840  | 2559.51   | 2172.424  | AB037735  | 448.003   | 702.522   |
| NM_005671 | 4379.082  | 5045.912  | U84510    | 3439.193  | 2978.803  | AB018314  | 875.609   | 866.424   |
| NM_017409 | 624.223   | 634.642   | S83198    | 13151.096 | 14314.63  | NM_004376 | 693.013   | 952.882   |
| NM_019625 | 6416.985  | 6338.235  | AF052119  | 9117.908  | 10596.937 | AJ238899  | 618.376   | 610.47    |
| NM_006729 | 3232.434  | 3475.417  | X94290    | 1263.836  | 1028.747  | NM_018037 | 837.651   | 711.283   |
| NM_006071 | 968.787   | 973.799   | AK026685  | 12989.815 | 13676.251 | NM_001110 | 4349.336  | 3781.731  |
| NM_012236 | 12053.169 | 12538.465 | AL133619  | 2726.068  | 2802.03   | NM_003222 | 626.305   | 855.461   |
| AF112219  | 16591.393 | 17001.998 | AL157496  | 382.405   | 783.13    | NM_000841 | 2757.968  | 2516.388  |
| NM_004135 | 5284.519  | 5027.411  | AK025902  | 4093.339  | 4976.857  | NM_001245 | 1347.192  | 1165.795  |
| NM_000203 | 617.337   | 1007.358  | NM_005181 | 5280.999  | 5630.795  | NM_003672 | 15435.944 | 13701.523 |
| NM_013443 | 2929.345  | 2811.532  | AF026945  | 630.304   | 618.176   | NM_002574 | 34795.938 | 35322.598 |
| NM_000925 | 7726.608  | 7341.643  | AF143676  | 4192.851  | 3686.509  | AJ008139  | 2726.122  | 2139.185  |
| NM_000465 | 1625.555  | 1599.584  | U66044    | 5523.104  | 5303.482  | NM_004326 | 1053.078  | 970.862   |
| NM_000123 | 3251.894  | 3030.59   | NM_005247 | 32847.094 | 28028.891 | NM_004577 | 2415.021  | 2464.226  |

|           |           |           |             |           |           |           |           |           |
|-----------|-----------|-----------|-------------|-----------|-----------|-----------|-----------|-----------|
| AL137501  | 385.992   | 533.388   | NM_005283   | 965.054   | 838.413   | AF007157  | 8701.902  | 8824.946  |
| BE858979  | 1162.507  | 1223.576  | AL122089    | 1338.753  | 1700.134  | D38553    | 2643.11   | 3090.997  |
| NM_000122 | 2548.329  | 4006.106  | AA203665    | 1313.923  | 2079.103  | NM_00617C | 2074.119  | 1853.176  |
| U87223    | 1314.563  | 1344.801  | U95646      | 1923.006  | 2271.413  | NM_01429E | 13831.909 | 12098.401 |
| X91348    | 29122.982 | 38038.48  | Y16705      | 1406.997  | 1243.21   | AK001581  | 1309.549  | 1903.704  |
| Z36505    | 1600.358  | 2011.195  | AF279775    | 4128.566  | 3355.505  | NM_00054E | 2103.626  | 4183.58   |
| NM_001854 | 2511.812  | 2385.469  | NM_005647   | 649.743   | 1077.394  | NM_00502C | 12526.586 | 12729.961 |
| NM_017913 | 1264.184  | 1443.908  | X64978      | 2052.167  | 2901.259  | NM_014077 | 3450.502  | 3462.95   |
| NM_00275E | 4257.136  | 4300.561  | NM_000912   | 6547.331  | 10300.906 | NM_018412 | 1253.44   | 1491.384  |
| AK024799  | 49722.879 | 48658.711 | NM_00234E   | 934.016   | 1809.002  | NM_01232E | 1425.086  | 1841.29   |
| NM_000924 | 4906.256  | 4990.604  | U57971      | 1692.602  | 1280.485  | M14087    | 18767.826 | 16332.18  |
| NM_00333C | 5824.56   | 5210.146  | X89673      | 2256.775  | 2564.659  | AJ272324  | 678.856   | 1054.689  |
| NM_003647 | 939.951   | 943.556   | AK022020    | 2832.446  | 3282.042  | NM_00088E | 2285.694  | 2406.521  |
| NM_018351 | 953.951   | 987.341   | AK000263    | 8139.748  | 8468.47   | M59040    | 1116.769  | 1217.798  |
| NM_147171 | 2813.05   | 2552.634  | Y13895      | 1026.15   | 1391.36   | NM_017582 | 15722.278 | 13344.266 |
| AF238083  | 8302.028  | 7447.46   | NM_017447   | 1498.152  | 1652.688  | NM_01523E | 1091.779  | 923.35    |
| NM_01638E | 1636.583  | 1312.27   | AL049452    | 450.935   | 534.452   | AK026962  | 2259.585  | 1717.097  |
| AB046783  | 770.285   | 557.459   | NM_016622   | 1699.487  | 1742.038  | X04366    | 2069.439  | 2103.661  |
| NM_00084E | 795.06    | 644.148   | AK026976    | 1164.976  | 1309.783  | NM_00050E | 15854.248 | 15685.248 |
| NM_004604 | 64747.863 | 58019.211 | AF070559    | 3122.031  | 3803.401  | NM_00066E | 3845.625  | 3581.452  |
| NM_01496E | 3691.381  | 2938.872  | D42043      | 2105.799  | 1678.538  | NM_003481 | 2018.544  | 1923.073  |
| NM_004882 | 19025.342 | 15497.334 | CY3Cy5      | 1112.225  | 104.921   | NM_017664 | 2509.775  | 2700.132  |
| AL390148  | 9192.696  | 7901.649  | BG744154    | 59555.813 | 62519.648 | NM_00705E | 2409.927  | 2157.597  |
| AK024055  | 1235.243  | 760.408   | Z11694      | 7999.594  | 8469.053  | NM_00687C | 3776.764  | 3133.706  |
| U10485    | 567.781   | 622.343   | BF983177    | 980.565   | 776.758   | NM_00735E | 3923.18   | 3510.696  |
| AK025326  | 11270.043 | 19178.857 | Z26317      | 2568.797  | 2788.19   | L13283    | 526.219   | 611.692   |
| NM_01337E | 639.781   | 890.035   | X16983      | 8312.76   | 8691.28   | NM_013327 | 2470.54   | 2442.059  |
| NM_017964 | 2746.989  | 2950.949  | X56160      | 3037.838  | 4827.975  | AF303888  | 4129.898  | 3981.69   |
| NM_016272 | 1351.004  | 1511.853  | BG679991    | 477.153   | 561.266   | M97191    | 13217.02  | 12800.871 |
| NM_01642E | 1497.683  | 1605.154  | H-Y 00097 I | 2652.655  | 2313.68   | AK023015  | 1178.399  | 1301.844  |
| NM_004083 | 9272.896  | 10841.146 | H-M 59964   | 1359.524  | 1059.168  | NM_003457 | 9328.612  | 8177.977  |
| NM_01603E | 12117.04  | 14230.793 | H-Y 00711 I | 64951.609 | 67325.047 | NM_012391 | 1218.958  | 1179.269  |
| NM_001184 | 1880.783  | 1459.508  | H-X 16707 I | 2124.258  | 2189.207  | NM_005254 | 1602.797  | 2008.861  |
| NM_01553C | 7575.318  | 6905.607  | AL038354    | 50569.941 | 44330.668 | NM_005611 | 774.807   | 895.57    |
| NM_01623E | 4646.734  | 4626.253  | R14607      | 841.201   | 1062.828  | AF141655  | 798.883   | 667.398   |
| BE546276  | 915.464   | 949.727   | NM_02197E   | 3937.583  | 2804.923  | NM_00734E | 576.07    | 478.679   |
| NM_00472E | 6669.737  | 5992.075  | SR2         | 51815.93  | 40416.672 | NM_00483C | 662.302   | 707.427   |
| NM_015997 | 5753.646  | 5478.894  | SR4         | 13585.853 | 9706.926  | NM_007007 | 7862.507  | 7841.267  |
| NM_001167 | 6893.835  | 7454.098  | SR6         | 2008.26   | 1244.879  | NM_00638E | 1068.936  | 1187.307  |
| NM_01211E | 4390.096  | 4210.063  | SR8         | 6999.923  | 13438.504 | NM_00496E | 11476.671 | 12668.183 |
| NM_004933 | 31379.361 | 27755.439 | SR10        | 22827.486 | 4762.266  | NM_00670C | 1309.168  | 1241.984  |
| M96577    | 5931.015  | 6268.576  | CY3Cy5      | 799.02    | 41.61     | NM_00644E | 8500.438  | 8232.791  |
| NM_01325E | 25281.898 | 20945.402 | NM_001284   | 37582.109 | 32709.801 | NM_01210E | 4882.716  | 4451.636  |
| NM_003842 | 1353.156  | 1212.142  | NM_003242   | 7279.504  | 6827.212  | AF019633  | 939.54    | 1033.024  |
| NM_016184 | 1157.495  | 941.935   | U31099      | 407.301   | 290.579   | AB002361  | 2020.682  | 2491.758  |
| L11238    | 5555.936  | 3729.997  | NM_00110E   | 1280.363  | 1382.611  | NM_01806C | 3684.274  | 3723.757  |
| AK025684  | 555.278   | 441.07    | NM_00558E   | 822.624   | 837.526   | NM_01423E | 1814.838  | 1976.622  |
| NM_01220E | 6247.384  | 4765.431  | NM_00207E   | 2292.447  | 2347.594  | NM_017662 | 2282.832  | 2343.313  |
| K02046    | 1535.917  | 1113.573  | Y08756      | 8295.751  | 9117.573  | U88837    | 2640.071  | 9986.62   |
| AL110151  | 1710.494  | 1773.981  | NM_005563   | 6474.72   | 6715.636  | NM_01744E | 11684.273 | 10285.939 |
| AK024841  | 2307.343  | 2517.415  | AY007090    | 362.439   | 401.303   | AK001478  | 6824.963  | 7143.926  |
| NM_002217 | 1258.273  | 1453.264  | NM_00643E   | 583.797   | 313.091   | AK025697  | 3111.39   | 3087.804  |
| NM_00499E | 3980.925  | 5530.523  | NM_005102   | 3266.973  | 3520.157  | AK021734  | 536.166   | 560.769   |

|           |           |           |           |           |           |           |           |           |
|-----------|-----------|-----------|-----------|-----------|-----------|-----------|-----------|-----------|
| AK023320  | 1573.334  | 2920.917  | NM_004518 | 574.082   | 1118.558  | D00265    | 23214.166 | 23521.389 |
| NM_000386 | 5585.615  | 5958.923  | NM_002719 | 3531.596  | 3325.702  | NM_004552 | 28553.77  | 27381.1   |
| NM_007231 | 776.864   | 690.671   | AV752086  | 827.745   | 865.764   | NM_000143 | 2615.25   | 2988.845  |
| NM_001190 | 2980.203  | 3291.902  | NM_016102 | 3290.006  | 2823.87   | AL137294  | 1461.938  | 1629.026  |
| NM_005271 | 7607.656  | 9292.343  | NM_004376 | 2213.214  | 1562.058  | NM_003743 | 757.525   | 600.804   |
| NM_015654 | 6679.597  | 7048.975  | NM_005603 | 11683.241 | 6486.695  | AB037797  | 118.222   | 1442.565  |
| NM_012244 | 1814.334  | 2289.268  | NM_006834 | 3706.292  | 4339.156  | NM_001520 | 742.309   | 791       |
| NM_004341 | 1956.346  | 2388.037  | AB011100  | 1527.471  | 1655.662  | NM_017870 | 720.872   | 702.293   |
| AB082521  | 7055.854  | 6587.645  | U61741    | 943.041   | 907.569   | AL133633  | 731.6     | 1034.356  |
| AK026806  | 675.389   | 894.563   | NM_012402 | 2686.173  | 2787.264  | NM_012252 | 1398.892  | 1243.844  |
| AL050182  | 1236.544  | 1149.15   | M76676    | 2614.474  | 2384.046  | AK026817  | 627.126   | 857.118   |
| NM_020040 | 792.488   | 758.803   | NM_003857 | 948.131   | 1181.8    | AL157442  | 11695.553 | 19385.178 |
| NM_002374 | 2301.406  | 1943.012  | AL137690  | 602.972   | 506.129   | AB011148  | 1334.451  | 1591.034  |
| AK026940  | 2045.114  | 1694.933  | Z83804    | 1623.811  | 1868.247  | AL389938  | 10798.794 | 9442.428  |
| AF155117  | 3323.807  | 2528.956  | NM_004386 | 2100.657  | 2069.895  | NM_003507 | 762.166   | 740.238   |
| AB014527  | 425.031   | 543.486   | U67784    | 700.625   | 775.333   | AK026591  | 452.993   | 479.425   |
| NM_004411 | 1129.35   | 831.968   | NM_007366 | 1080.033  | 1374.03   | AK001889  | 1728.306  | 1761.948  |
| NM_015938 | 5355.564  | 4325.918  | NM_000592 | 657.757   | 878.432   | AK025726  | 1861.062  | 1847.804  |
| NM_000740 | 698.689   | 655.793   | NM_016584 | 8653.997  | 9082.804  | AJ227869  | 1784.135  | 1515.883  |
| AK025985  | 8238.915  | 19715.541 | NM_001815 | 1115.317  | 1162.94   | AL117613  | 4642.781  | 4311.562  |
| NM_013256 | 1913.566  | 2030.79   | NM_000064 | 5021.555  | 5412.62   | AL137753  | 3417.722  | 3356.236  |
| NM_004143 | 1785.129  | 1660.926  | NM_003264 | 3058.178  | 2955.14   | AK021612  | 5231.352  | 5568.511  |
| X66087    | 615.338   | 728.575   | NM_006725 | 1301.414  | 1331.633  | AF147342  | 988.957   | 1222.643  |
| NM_016328 | 8204.571  | 11144.037 | NM_003326 | 906.177   | 913.271   | AK002025  | 20196.055 | 25788.641 |
| NM_017544 | 22867.445 | 30911.371 | NM_004568 | 23055.572 | 18993.309 | AK026299  | 1047.006  | 1255.238  |
| NM_003153 | 1352.971  | 1799.722  | NM_000202 | 982.207   | 668.331   | NM_017794 | 1015.576  | 971.951   |
| NM_016285 | 1252.981  | 1477.088  | NM_005496 | 9751.104  | 6731.819  | AK025170  | 1047.71   | 1293.584  |
| NM_014707 | 596.61    | 918.871   | NM_016608 | 607.599   | 554.082   | AB033031  | 1442.836  | 1335.494  |
| AF025771  | 2449.601  | 2565.477  | NM_004817 | 529.94    | 326.295   | AF085872  | 3878.407  | 4020.061  |
| NM_018215 | 1334.618  | 1048.122  | NM_018975 | 8500.858  | 5247.222  | AK022538  | 6075.794  | 6374.679  |
| AB033110  | 984.662   | 807.026   | AB023215  | 6017.659  | 4417.374  | AL360257  | 403.132   | 455.703   |
| NM_005083 | 16293.288 | 15080.341 | NM_018073 | 851.526   | 936.746   | AK022342  | 441.478   | 595.172   |
| NM_007187 | 9259.205  | 8802.553  | AL137529  | 1535.226  | 1936.059  | AF147420  | 597.586   | 713.583   |
| NM_001828 | 1151.208  | 1041.505  | NM_012332 | 1928.751  | 2196.672  | AL049312  | 2314.365  | 1586.828  |
| NM_018983 | 8189.862  | 8881.367  | AK026648  | 952.28    | 1206.86   | AL050072  | 1618.379  | 1762.268  |
| NM_003096 | 5546.543  | 4306.24   | NM_000497 | 1386.305  | 1681.337  | AL117590  | 433.292   | 381.472   |
| NM_007279 | 3669.908  | 2997.046  | NM_017421 | 791.969   | 895.844   | AL049357  | 1951.029  | 2232.454  |
| BE390833  | 16114.583 | 11885.879 | AK025977  | 11010.379 | 13120.41  | NM_004544 | 8978.321  | 9266.698  |
| NM_004730 | 10626.27  | 7787.442  | AK023130  | 7046.963  | 7551.565  | AF086041  | 166.741   | 578.111   |
| NM_000801 | 2715.958  | 2022.422  | NM_000273 | 551.367   | 701.471   | AL133080  | 1687.674  | 1823.913  |
| NM_006115 | 24932.07  | 18318.061 | NM_002899 | 7498.616  | 9829.88   | NM_017792 | 1682.063  | 1716.637  |
| NM_005801 | 3236.003  | 2117.815  | NM_000486 | 1260.258  | 2660.314  | AK025213  | 3245.12   | 3701.206  |
| NM_018198 | 1854.625  | 1431.549  | BE876237  | 1103.623  | 1257.898  | NM_014949 | 1848.607  | 2051.876  |
| NM_001539 | 15764.082 | 13801.172 | NM_005397 | 855.249   | 1075.331  | AL080221  | 1529.286  | 1804.919  |
| AK027232  | 5011.876  | 5947.43   | NM_000806 | 6970.736  | 6681.855  | AL137370  | 710.03    | 869.049   |
| NM_012204 | 678.323   | 616.391   | NM_006320 | 1100.996  | 983.869   | AF009262  | 5426.221  | 6048.708  |
| AK091117  | 594.32    | 723.034   | AB014511  | 3939.571  | 5184.484  | AF050198  | 690.154   | 1067.947  |
| NM_003613 | 1210.075  | 1202.81   | NM_014252 | 3639.522  | 3162.573  | AK024346  | 2075.407  | 3172.759  |
| NM_000022 | 5076.291  | 4913.487  | NM_001662 | 5865.672  | 4313.635  | AF056422  | 5786.647  | 6258.647  |
| NM_016576 | 3360.81   | 3863.547  | NM_016131 | 6275.007  | 4796.37   | AF090892  | 2939.338  | 2992.19   |
| NM_004213 | 1221.606  | 1423.676  | NM_006822 | 892.462   | 680.112   | AK001919  | 713.169   | 902.228   |
| NM_000480 | 2592.67   | 2665.205  | NM_012142 | 7169.767  | 4552.911  | AK021535  | 692.635   | 770.006   |
| AF254084  | 17208.346 | 20909.793 | NM_016429 | 1443.487  | 1033.79   | AK021753  | 1563.058  | 1551.536  |

|           |           |           |             |           |           |           |           |           |
|-----------|-----------|-----------|-------------|-----------|-----------|-----------|-----------|-----------|
| AK022648  | 1199.372  | 1467.691  | NM_018264   | 1822.187  | 1819.345  | AK021822  | 605.271   | 684.55    |
| AK022976  | 1934.313  | 2003.476  | NM_014580   | 661.969   | 454.16    | AK025246  | 2929.032  | 3503.083  |
| AB048791  | 5164.091  | 5780.007  | AB028998    | 693.354   | 594.534   | AK025847  | 2126.927  | 2603.984  |
| NM_003107 | 989.848   | 765.07    | NM_000153   | 762.661   | 842.839   | AK026442  | 481.611   | 924.224   |
| NM_006874 | 3674.522  | 2628.374  | NM_002033   | 3971.851  | 4060.293  | AK026816  | 520.168   | 518.939   |
| AB046777  | 4477.338  | 3641.251  | AK091794    | 439.59    | 493.719   | NM_014174 | 4555.313  | 4829.329  |
| AJ251844  | 4900.687  | 3866.334  | NM_004111   | 4001.828  | 4342.615  | AF147337  | 1858.513  | 2228.947  |
| D16815    | 899.82    | 699.966   | AF085966    | 4545.852  | 5864.667  | AK025203  | 34499.656 | 39963.707 |
| NM_001880 | 2804.282  | 1882.768  | NM_016316   | 2581.599  | 2774.66   | AK026981  | 1771.151  | 2596.275  |
| AB028943  | 2311.033  | 1718.732  | NM_003369   | 8652.298  | 9121.5    | AL133656  | 946.4     | 1029.896  |
| NM_006194 | 716.951   | 795.438   | NM_000057   | 2350.846  | 2888.566  | AL050037  | 8940.926  | 8625.305  |
| AK001603  | 6344.323  | 6804.647  | NM_018343   | 3619.593  | 3439.839  | NM_001417 | 28682.934 | 27598.436 |
| AF042838  | 4530.084  | 6027.43   | AK095793    | 977.91    | 1251.868  | AK022236  | 2266.317  | 2373.533  |
| AL137511  | 508.821   | 630.71    | NM_003177   | 3094.211  | 3166.287  | AK000073  | 463.632   | 620.32    |
| AF075031  | 416.049   | 805.103   | NM_017719   | 871.903   | 942.285   | AL390180  | 479.257   | 1097.661  |
| AF075062  | 8519.313  | 11321.171 | AF064078    | 925.014   | 857.967   | X60484    | 487.023   | 849.218   |
| NM_00418E | 1114.992  | 1455.075  | AL049688    | 972.901   | 902.827   | AF055019  | 786.566   | 985.706   |
| AF147381  | 3994.743  | 5091.813  | NM_002737   | 1498.595  | 1072.536  | NM_00352E | 8107.848  | 7881.614  |
| AB002452  | 740.286   | 1235.421  | Z25427      | 2098.808  | 1626.77   | AK000229  | 665.891   | 1192.216  |
| AK024358  | 1914.072  | 1834.711  | NM_004672   | 6404.39   | 4236.206  | AF056432  | 2205.876  | 5490.642  |
| NM_01484C | 1726.253  | 1867.251  | NM_001353   | 1361.506  | 1119.251  | AK001987  | 17200.637 | 33566.336 |
| D17085    | 1500.366  | 1484.626  | NM_006214   | 2417.628  | 1538.917  | NM_01333Z | 1608.723  | 2307.142  |
| AF088075  | 2255.912  | 2566.177  | AJ010228    | 3377.529  | 2097.461  | X56199    | 800.503   | 916.47    |
| AK026376  | 1433.069  | 1254.007  | NM_00519E   | 2964.404  | 1799.908  | NM_00519Z | 1163.872  | 1108.227  |
| AF088061  | 3832.117  | 3023.768  | NM_00684E   | 61281.602 | 66038.969 | AL162006  | 912.059   | 898.575   |
| AF086286  | 2422.938  | 2268.896  | NM_005603   | 21450.941 | 22104.367 | NM_017971 | 13244.375 | 14400.808 |
| AF086376  | 1634.575  | 1207.519  | NM_001061   | 608.906   | 657.025   | AF090097  | 1152.332  | 1720.055  |
| AF086455  | 357.545   | 259.403   | Z11694      | 8295.935  | 9022.03   | AF293335  | 14336.362 | 18036.764 |
| AK022997  | 4398.005  | 3164.678  | BF983177    | 1011.412  | 1037.356  | X96644    | 3953.019  | 4090.147  |
| NM_017617 | 3523.055  | 3073.842  | X16983      | 5522.691  | 6954.733  | Z34281    | 12493.583 | 11863.314 |
| AF131830  | 1518.092  | 1370.125  | X56160      | 2255.335  | 2312.36   | NM_01867E | 15951.112 | 14819.394 |
| NM_014811 | 1050.26   | 785.932   | BG679991    | 1220.01   | 1135.08   | AJ008122  | 9767.374  | 10726.208 |
| AF147426  | 854.054   | 1007.478  | H-Y 00097 I | 2764.169  | 2783.658  | AK022667  | 12456.302 | 18194.039 |
| BC019667  | 22816.303 | 22871.443 | H-M 59964   | 1439.062  | 1186.682  | AK026667  | 403.331   | 622.716   |
| AK026026  | 14435.183 | 14168.381 | H-Y 00711 I | 56555.195 | 60644.086 | AF113211  | 1364.566  | 1037.417  |
| AF085941  | 7867.896  | 8602.521  | H-X 16707 I | 1916.575  | 1818.947  | AL117568  | 1178.331  | 1065.253  |
| Z69892    | 2077.608  | 2543.672  | AL038354    | 49614.945 | 42654.273 | S71805    | 1112.186  | 2088.217  |
| AF087961  | 894.384   | 1043.433  | R14607      | 1102.576  | 831.377   | NM_018391 | 1674.438  | 2817.965  |
| AL137309  | 1517.1    | 1681.697  | NM_02197E   | 3328.275  | 2387.155  | U90917    | 382.618   | 837.977   |
| AL137475  | 1452.129  | 1326.128  | NM_00571E   | 13300.851 | 7207.132  | AK022140  | 1675.088  | 2244.066  |
| AL161956  | 4251.25   | 4404.961  | NM_00549E   | 10463.676 | 9749.999  | AK023372  | 13049.43  | 12016.231 |
| AL390176  | 2246.271  | 2260.349  | NM_01660E   | 871.874   | 1250.508  | U21072    | 1601.809  | 1693.448  |
| AL137356  | 1434.226  | 1534.18   | NM_00285E   | 5803.594  | 5631.555  | AK024377  | 541.969   | 448.894   |
| AL137547  | 1198.233  | 1725.776  | NM_004817   | 703.025   | 856.867   | AK000401  | 1074.254  | 1145.715  |
| AK021994  | 1646.726  | 1757.69   | NM_01897E   | 11851.201 | 13547.741 | D17231    | 20845.566 | 38422.516 |
| AK023802  | 6986.822  | 6360.784  | NM_001284   | 42429.063 | 37592.379 | AF531295  | 780.505   | 1625.245  |
| AF088013  | 615.507   | 683.071   | NM_00324Z   | 7048.047  | 9032.763  | CY3Cy5    | 6826.921  | 203.53    |
| AF086103  | 1059.453  | 921.895   | NM_001105   | 2263.578  | 2254.328  | BF974315  | 4055.518  | 3319.013  |
| AK023158  | 778.991   | 518.388   | NM_00558E   | 1202.136  | 1332.705  | AI652705  | 1974.909  | 1483.048  |
| AK000580  | 309.079   | 241.225   | NM_00207E   | 2400.569  | 2286.741  | AA569974  | 3579.466  | 3364.441  |
| AF085852  | 2659.205  | 2109.728  | Y08756      | 9892.586  | 8949.34   | AA446028  | 1848.248  | 1760.436  |
| AK023952  | 1349.409  | 1130.979  | NM_00556Z   | 6172.33   | 6195.796  | M80583    | 1445.942  | 1146.753  |
| AK000787  | 1117.431  | 1188.199  | AY007090    | 488.41    | 415.074   | AW009565  | 3584.683  | 2938.83   |

|           |           |           |           |           |           |           |           |           |
|-----------|-----------|-----------|-----------|-----------|-----------|-----------|-----------|-----------|
| AF090885  | 8423.91   | 7705.91   | NM_005102 | 3372.802  | 2949.74   | X07767    | 2432.834  | 2477.86   |
| AF161342  | 637.342   | 678.041   | NM_004518 | 482.112   | 488.8     | AF252284  | 2548.27   | 2457.596  |
| NM_016646 | 458.868   | 898.7     | NM_006501 | 1947.811  | 2310.645  | SR5       | 3686.561  | 4624.645  |
| NM_014082 | 1709.897  | 3126.608  | NM_002719 | 2730.83   | 2039.483  | SR7       | 4655.448  | 30199.098 |
| AF100636  | 712.081   | 993.837   | AV752086  | 929.616   | 749.631   | SR9       | 15334.244 | 2131.749  |
| AF161366  | 748.525   | 748.009   | NM_016102 | 3256.514  | 2667.018  | CY3Cy5    | 5186.267  | 164.133   |
| AK022197  | 3039.967  | 3320.942  | NM_004376 | 2215.481  | 1507.33   | NM_016511 | 11852.364 | 7878.773  |
| AK021970  | 673.563   | 837.246   | NM_014252 | 4586.277  | 4867.24   | NM_003559 | 914.325   | 609.764   |
| AK022066  | 67377.992 | 63915.176 | NM_001662 | 6786.709  | 7021.659  | NM_013229 | 1170.73   | 1148.742  |
| AK022224  | 1881.247  | 2157.481  | NM_016131 | 7623.448  | 7918.332  | NM_016533 | 27247.057 | 26356.285 |
| AK022359  | 1253.305  | 1462.515  | NM_006822 | 1185.024  | 1731.277  | NM_014751 | 2904.405  | 2419.658  |
| AK022000  | 1216.776  | 1234.88   | NM_012142 | 9306.84   | 10726.173 | NM_002347 | 13282.136 | 12574.716 |
| AK022129  | 2804.998  | 2913.728  | NM_016429 | 1765.651  | 2218.746  | AB046807  | 841.867   | 854.568   |
| AK022263  | 7814.518  | 7349.381  | NM_006834 | 3962.094  | 4427.256  | M33197    | 66309.477 | 70253.836 |
| AK022384  | 1113.601  | 1113.84   | AB011100  | 1747.528  | 2122.527  | NM_014623 | 5133.206  | 4765.512  |
| AK024613  | 640.012   | 574.19    | U61741    | 922.365   | 1205.532  | NM_007244 | 2725.001  | 2547.946  |
| AL117437  | 745.461   | 681.295   | NM_012402 | 2913.744  | 3031.533  | M30629    | 1415.947  | 1997.993  |
| AK027198  | 2183.437  | 1953.561  | M76676    | 2498.196  | 2792.01   | AF193873  | 1096.855  | 951.805   |
| AK000257  | 981.958   | 1100.414  | NM_003857 | 967.189   | 1490.664  | AA190729  | 937.423   | 528.58    |
| NM_006160 | 9083.384  | 8803.919  | AL137690  | 569.178   | 666.221   | NM_015717 | 1352.453  | 1045.058  |
| NM_000529 | 1096.271  | 1200.284  | Z83804    | 2309.562  | 1980.14   | NM_003665 | 762.03    | 553.448   |
| AL110159  | 669.152   | 826.672   | NM_004386 | 1871.087  | 2166.285  | AF220217  | 685.551   | 708.265   |
| AF009259  | 821.852   | 1150.093  | U67784    | 756.997   | 941.955   | NM_013323 | 5540.672  | 4334.259  |
| AF009260  | 1297.879  | 1310.33   | NM_007366 | 1074.346  | 1368.082  | M33197    | 1681.193  | 1192.661  |
| NM_003079 | 1712.576  | 1773.741  | NM_000592 | 726.318   | 819.728   | NM_000853 | 1924.005  | 1763.639  |
| NM_017902 | 2016.105  | 2959.175  | NM_016584 | 8288.949  | 7893.404  | AF016903  | 11286.559 | 10413.659 |
| AK021981  | 355.623   | 270.039   | NM_001815 | 1111.178  | 1196.052  | NM_015675 | 2991.343  | 2268.327  |
| AL359567  | 1182.068  | 1133.98   | NM_000064 | 5286.232  | 4653.318  | NM_016040 | 1925.235  | 1057.678  |
| NM_017726 | 3159.931  | 2749.411  | NM_003264 | 3166.195  | 2292.863  | M33197    | 60299.188 | 47567.559 |
| AK026716  | 469.47    | 586.195   | NM_006725 | 1197.477  | 967.794   | AF031136  | 22253.318 | 12552.144 |
| AL049325  | 12362.145 | 9534.779  | NM_003326 | 997.213   | 678.297   | U90878    | 1033.109  | 579.882   |
| AK024154  | 10167.918 | 11229.232 | NM_004568 | 22344.33  | 15958.69  | NM_006597 | 35404.074 | 26833.807 |
| AF086341  | 1171.226  | 1005.438  | NM_000202 | 986.146   | 740.417   | NM_012483 | 3809.159  | 2852.651  |
| AK026672  | 1564.653  | 1810.428  | Z25427    | 2415.783  | 2561.896  | NM_003498 | 2343.405  | 1915.662  |
| S83282    | 57588.496 | 51885.777 | NM_004672 | 6444.201  | 7539.085  | AB023420  | 7515.405  | 4368.613  |
| AK024164  | 34230.031 | 41419.441 | NM_001353 | 2185.164  | 2556.697  | NM_007342 | 4087.976  | 5305.802  |
| AF052130  | 6093.031  | 8024.643  | NM_006214 | 3413.385  | 3952.235  | NM_005672 | 530.151   | 714.596   |
| AF130090  | 11721.549 | 11613.839 | AJ010228  | 5108.666  | 6333.879  | NM_006351 | 4481.585  | 5408.217  |
| AL096727  | 1205.703  | 1409.308  | NM_005198 | 4233.121  | 4773.693  | M33197    | 52845.125 | 54812.453 |
| AL080110  | 2059.586  | 2450.608  | NM_018073 | 1222.742  | 2261.098  | NM_004683 | 8567.212  | 6664.971  |
| NM_020425 | 1850.859  | 2352.912  | AL137529  | 1550.977  | 2620.627  | M33197    | 62746.078 | 60214.543 |
| AK024076  | 2600.781  | 3013.088  | NM_012332 | 2036.209  | 2375.441  | NM_001467 | 1983.347  | 2477.54   |
| M87940    | 3282.552  | 3725.884  | AK026648  | 1236.954  | 1297.471  | NM_018066 | 19402.84  | 25534.055 |
| L77588    | 2021.143  | 2319.06   | NM_000497 | 1508.49   | 1411.598  | NM_006931 | 2545.966  | 3247.871  |
| AF086304  | 15165.487 | 17354.623 | NM_017421 | 897.957   | 1204.458  | NM_020344 | 4548.001  | 5134.61   |
| U61094    | 1401.128  | 1567.237  | AK025977  | 14004.897 | 15219.053 | NM_005050 | 2964.495  | 2813.939  |
| AB032976  | 2450.605  | 2394.045  | AK023130  | 7711.24   | 8658.827  | M33197    | 59786.285 | 59535.52  |
| AF301222  | 7943.519  | 7273.832  | NM_000273 | 435.863   | 880.739   | NM_018976 | 7304.603  | 5153.33   |
| AF215981  | 7716.545  | 6457.943  | NM_002899 | 8183.121  | 7296.237  | NM_003355 | 4624.05   | 3386.265  |
| NM_000732 | 13339.003 | 10170.255 | NM_000486 | 1048.793  | 1065.242  | NM_005074 | 624.24    | 297.741   |
| AF130044  | 1463.985  | 1008.505  | BE876237  | 1149.531  | 2031.863  | NM_004558 | 2640.502  | 4889.413  |
| AF087980  | 587.221   | 533.137   | NM_005397 | 772.87    | 713.961   | AL079296  | 1164.001  | 1956.499  |
| NM_013939 | 719.66    | 646.747   | NM_000806 | 6114.331  | 4656.821  | NM_014770 | 1495.469  | 1884.63   |

|           |           |           |             |           |           |           |           |           |
|-----------|-----------|-----------|-------------|-----------|-----------|-----------|-----------|-----------|
| AB038651  | 2649.573  | 2603.745  | NM_006320   | 1189.546  | 799.267   | AB037737  | 865.103   | 939.681   |
| AL359603  | 1120.59   | 1731.576  | AB014511    | 2668.215  | 2032.908  | M33197    | 67597.148 | 65174.777 |
| X84838    | 682.91    | 899.563   | NM_021976   | 3873.891  | 4016.836  | AK023103  | 2256.853  | 2149.267  |
| NM_013940 | 1206.152  | 1355.888  | NM_005718   | 12992.401 | 13051.882 | NM_017858 | 1745.237  | 2320.632  |
| AL117643  | 1067.56   | 1089.866  | NM_018264   | 1999.146  | 2349.002  | NM_019058 | 56979.105 | 59894.133 |
| AF075063  | 1176.053  | 1563.57   | NM_014580   | 679.2     | 545.732   | D80008    | 1520.802  | 1171.654  |
| AF069135  | 6289.847  | 6667.239  | AB028998    | 731.188   | 1034.944  | X56789    | 1055.906  | 1034.969  |
| AK026524  | 1627.589  | 1303.248  | NM_000153   | 956.808   | 1109.504  | AK001069  | 44281.988 | 45521.723 |
| AB011157  | 4891.861  | 4235.213  | NM_002033   | 7104.938  | 6985.637  | NM_000358 | 4201.943  | 5821      |
| U17632    | 2259.743  | 2493.035  | AK091794    | 481.366   | 714.738   | NM_006398 | 4658.81   | 3954.549  |
| AK026764  | 2623.487  | 2793.82   | NM_004111   | 4576.822  | 7164.528  | NM_014308 | 4507.572  | 3614.975  |
| AF113700  | 2509.052  | 2515.993  | AF085966    | 4794.523  | 6727.372  | NM_001084 | 3271.054  | 2243.249  |
| NM_017838 | 9691.838  | 9476.434  | NM_005316   | 2305.895  | 2435.041  | NM_015983 | 1133.645  | 825.561   |
| NM_018347 | 3228.671  | 2854.689  | NM_016316   | 2613.879  | 2795.06   | NM_018622 | 4663.112  | 2755.457  |
| AK024986  | 923.284   | 739.785   | NM_003369   | 8425.241  | 8556.021  | M33197    | 61267.152 | 55376.852 |
| AK026730  | 596.199   | 326.327   | NM_000057   | 2196.138  | 2089.213  | NM_005867 | 3316.972  | 2167.135  |
| AK024739  | 1085.289  | 919.1     | NM_018343   | 3550.365  | 3038.49   | AK026031  | 3945.266  | 2746.911  |
| AK098681  | 915.007   | 964.349   | AK095793    | 1052.565  | 1055.262  | NM_016468 | 5055.286  | 4394.396  |
| AK026772  | 1458.643  | 1190.128  | NM_003177   | 3356.349  | 2616.24   | AF193873  | 1576.584  | 1399.758  |
| NM_014260 | 12806.191 | 10366.378 | NM_017719   | 919.08    | 697.09    | NM_002628 | 980.429   | 783.74    |
| AK026458  | 758.886   | 392.341   | AF064078    | 925.29    | 631.262   | AA190729  | 1220.464  | 963.703   |
| CY3Cy5    | 1271.461  | 95.313    | AL049688    | 912.949   | 716.997   | BF974315  | 3946.34   | 3179.773  |
| M23254    | 3867.191  | 2762.707  | NM_002737   | 1269.245  | 742.783   | AI652705  | 1904.071  | 1794.58   |
| BE618539  | 587.344   | 437.304   | NM_002719   | 3317.213  | 3444.712  | AA569974  | 4877.571  | 4319.694  |
| R28062    | 1443.158  | 1305.651  | AV752086    | 862.92    | 1133.402  | AA446028  | 1951.866  | 1919.114  |
| U38545    | 366.218   | 266.06    | NM_016102   | 4135.056  | 5304.558  | M80583    | 1724.96   | 1140.06   |
| AI627464  | 1387.748  | 1167.507  | NM_004376   | 2523.715  | 2596.844  | AW451878  | 838.742   | 1170.5    |
| BI756258  | 851.463   | 1057.728  | NM_006061   | 529.915   | 697.606   | AI570478  | 1153.876  | 915.193   |
| J04599    | 421.929   | 603.305   | NM_006848   | 59977.383 | 63138.68  | X07767    | 2185.391  | 1772.182  |
| AF110020  | 708.979   | 528.978   | NM_005603   | 24902.496 | 29206.986 | AF252284  | 1857.863  | 1311.549  |
| AA608557  | 3353.856  | 3072.682  | NM_001061   | 780.619   | 1027.49   | M33197    | 4573.949  | 3926.996  |
| AL050095  | 1821.693  | 1861.856  | Z11694      | 9243.867  | 10617.25  | AL050139  | 2971.782  | 4217.627  |
| U03272    | 1152.748  | 838.321   | BF983177    | 1086.073  | 864.955   | U90878    | 1039.296  | 810.561   |
| NM_000664 | 1240.084  | 1408.611  | Z26317      | 2042.326  | 2181.181  | NM_006597 | 33975.105 | 35191.652 |
| SR5       | 2832.198  | 2730.455  | X16983      | 8229.081  | 9216.684  | NM_012483 | 5477.701  | 4492.617  |
| SR7       | 3491.818  | 28247.891 | X56160      | 2408.735  | 2113.364  | NM_003498 | 2812.604  | 2267.369  |
| SR9       | 12022.19  | 2353.353  | H-Y 00097 I | 2687.525  | 1972.726  | AB023420  | 7191.077  | 5491.866  |
| CY3Cy5    | 2148.642  | 176.573   | H-M 59964   | 1342.856  | 1030.586  | NM_016511 | 14732.885 | 11200.813 |
| NM_014808 | 692.312   | 804.086   | H-Y 00711 I | 61425.309 | 61217.34  | NM_003558 | 1321.87   | 1129.753  |
| AB006627  | 1216.209  | 1100.523  | H-X 16707 I | 1529.423  | 1493.175  | M55337    | 511.695   | 533.356   |
| NM_000418 | 1524.582  | 1428.408  | AL038354    | 44411.934 | 26686.039 | M33197    | 67363.063 | 62686.91  |
| NM_002968 | 2692.518  | 2654.264  | R14607      | 877.711   | 561.518   | NM_013228 | 1192.577  | 941.232   |
| AB007883  | 1908.88   | 1589.189  | NM_000064   | 6422.609  | 6606.526  | NM_016533 | 17446.047 | 17286.57  |
| AK093780  | 3270.024  | 3125.93   | NM_003264   | 3321.633  | 3585.533  | NM_014751 | 1761.495  | 1586.528  |
| AY009397  | 52570.039 | 53149.676 | NM_006728   | 1779.882  | 2078.224  | NM_002347 | 8563.298  | 6970.054  |
| NM_007037 | 12986.117 | 12708.969 | NM_003326   | 955.202   | 1088.018  | AB046807  | 497.262   | 609.28    |
| NM_001648 | 944.149   | 831.9     | NM_004568   | 23985.176 | 27804.568 | NM_014623 | 4487.25   | 2910.142  |
| NM_005492 | 1399.053  | 1474.189  | NM_000202   | 1124.479  | 1231.229  | NM_007244 | 2194.523  | 2657.779  |
| AF038196  | 2060.076  | 1800.514  | NM_005496   | 11545.993 | 11704.21  | M30629    | 1474.117  | 1726.543  |
| NM_004858 | 4635.628  | 3504.389  | NM_016608   | 890.183   | 1513.313  | M33197    | 59242.23  | 56386.355 |
| NM_016352 | 539.249   | 522.425   | NM_002858   | 5810.808  | 8230.553  | NM_018976 | 10576.284 | 8346.124  |
| NM_005014 | 239.81    | 395.163   | NM_004817   | 789.694   | 1125.092  | NM_003358 | 7089.315  | 5207.675  |
| NM_006944 | 294.462   | 374.245   | NM_018975   | 12557.162 | 14403.526 | NM_005074 | 1022.753  | 1207.143  |

|           |           |           |           |           |           |           |           |           |
|-----------|-----------|-----------|-----------|-----------|-----------|-----------|-----------|-----------|
| NM_00007C | 2069.64   | 2064.19   | NM_001284 | 42270.617 | 39408.145 | NM_013272 | 864.965   | 540.607   |
| NM_001202 | 465.863   | 520.413   | NM_003242 | 6534.935  | 6456.955  | NM_015717 | 1245.631  | 961.446   |
| AB037804  | 708.841   | 510.162   | U31099    | 469.741   | 578.191   | NM_015925 | 1039.495  | 580.642   |
| U34249    | 527.495   | 568.419   | NM_001105 | 1472.493  | 1477.425  | NM_003665 | 883.563   | 872.956   |
| NM_003285 | 29923.512 | 30662.676 | NM_005585 | 1019.318  | 965.209   | AF220217  | 685.03    | 710.805   |
| AI200114  | 680.696   | 752.32    | NM_002075 | 1815.24   | 1788.712  | NM_013323 | 8310.999  | 6811.125  |
| NM_006323 | 3929.113  | 4045.061  | Y08756    | 7622.065  | 7316.341  | NM_017426 | 1466.926  | 1515.8    |
| NM_001493 | 2855.203  | 2411.923  | NM_005563 | 5915.943  | 5924.672  | M33197    | 1440.487  | 1181.406  |
| NM_014841 | 511.119   | 491.682   | AY007090  | 480.608   | 363.26    | NM_000853 | 973.995   | 854.477   |
| NM_014426 | 2787.388  | 2718.961  | NM_006439 | 503.112   | 516.806   | AF016903  | 7748.033  | 4478.944  |
| NM_006816 | 22318.688 | 17718.799 | NM_005102 | 2592.764  | 1991.443  | NM_015675 | 2762.023  | 1838.802  |
| AK026518  | 26983.93  | 21774.17  | NM_005397 | 994.817   | 1268.573  | NM_01604C | 1621.095  | 1418.085  |
| NM_000258 | 6702.104  | 6135.859  | NM_000806 | 9575.076  | 12182.235 | M33197    | 53177.266 | 63624     |
| AB033055  | 2761.842  | 2534.03   | NM_00632C | 1279.18   | 1556.459  | AF031136  | 21593.65  | 26566.805 |
| AF311287  | 1830.194  | 1658.541  | AB014511  | 3275.381  | 4128.768  | NM_015983 | 1370.765  | 1341.925  |
| NM_003098 | 453.849   | 427.03    | NM_014252 | 4368.014  | 5694.227  | NM_018622 | 4744.82   | 4161.706  |
| NM_014781 | 1898.159  | 1811.426  | NM_001662 | 6663.458  | 8453.583  | M33197    | 67717.594 | 64124.855 |
| BU629989  | 395.85    | 387.465   | NM_016131 | 8073.159  | 10752.412 | NM_005867 | 7850.822  | 6238.705  |
| X87896    | 655.706   | 914.207   | NM_006822 | 1426.454  | 1726.279  | AK026031  | 9399.639  | 7403.243  |
| M88310    | 700.576   | 703.36    | NM_012142 | 10064.021 | 10423.537 | NM_016468 | 5327.283  | 3990.489  |
| NM_000042 | 991.837   | 883.097   | NM_016429 | 1731.336  | 1919.819  | NM_007342 | 4181.283  | 3966.918  |
| NM_005024 | 1773.812  | 2223.089  | NM_006834 | 3996.224  | 4919.004  | NM_006351 | 4640.822  | 3354.745  |
| NM_003403 | 459.039   | 233.072   | AB011100  | 1997.66   | 2301.37   | M33197    | 51735.105 | 51354.391 |
| NM_016335 | 983.822   | 941.747   | U61741    | 874.946   | 1274.236  | NM_004683 | 9339.312  | 8159.142  |
| NM_003165 | 3269.446  | 2947.229  | NM_012402 | 2893.122  | 3049.456  | NM_018066 | 10778.258 | 6457.975  |
| NM_003906 | 7035.551  | 6199.958  | M76676    | 2092.646  | 2180.5    | NM_006931 | 1941.319  | 1210.311  |
| AL359590  | 14415.475 | 11857.578 | NM_003857 | 931.543   | 926.243   | NM_020344 | 3294.273  | 2167.949  |
| NM_002861 | 5154.2    | 4825.344  | AL137690  | 592.229   | 490.752   | AF119868  | 705.911   | 588.292   |
| NM_00308C | 2710.521  | 2643.499  | Z83804    | 1835.645  | 1591.22   | NM_00505C | 2673.522  | 3866.327  |
| NM_002645 | 1314.552  | 1409.306  | NM_004386 | 1582.649  | 1451.867  | AF252284  | 2295.223  | 1838.557  |
| AB033027  | 1933.128  | 1629.149  | U67784    | 797.008   | 546.502   | M33197    | 7995.823  | 5792.388  |
| AK021805  | 4880.146  | 4755.897  | NM_007366 | 1319.297  | 908.042   | AL050139  | 4593.997  | 3306.597  |
| AB014550  | 1526.078  | 1502.908  | NM_000592 | 805.627   | 565.451   | NM_004558 | 2175.348  | 1855.704  |
| AF320294  | 1943.908  | 2059.669  | NM_016584 | 6050.118  | 3015.191  | AL079296  | 788.724   | 638.165   |
| AF161436  | 2692.115  | 2540.505  | NM_001815 | 862.37    | 403.823   | NM_01477C | 1299.367  | 904.328   |
| NM_020402 | 1848.678  | 1915.269  | AK095793  | 1501.975  | 1672.01   | AB037737  | 652.484   | 589.278   |
| NM_004295 | 2108.538  | 2282.593  | NM_003177 | 3972.966  | 4620.501  | M33197    | 67333.023 | 67566.352 |
| NM_001171 | 997.974   | 1062.295  | NM_017719 | 1017.242  | 1015.211  | AK023103  | 2523.014  | 2342.021  |
| NM_00225C | 2074.662  | 1977.667  | AF064078  | 777.975   | 1153.566  | D80008    | 1382.316  | 1213.479  |
| NM_006478 | 588.364   | 447.981   | AL049688  | 1150.64   | 1587.509  | NM_000935 | 1106.595  | 580.553   |
| AF132734  | 9079.999  | 7921.935  | NM_002737 | 1839.908  | 1809.025  | NM_000355 | 4357.506  | 2408.344  |
| NM_018379 | 1832.405  | 1828.44   | Z25427    | 2355.567  | 2900.829  | NM_006395 | 5193.422  | 4493.329  |
| NM_016403 | 8475.362  | 7684.462  | NM_004672 | 8762.881  | 14987.457 | NM_014306 | 5034.201  | 5700.535  |
| NM_015603 | 860.877   | 748.149   | NM_001353 | 2704.344  | 3451.57   | NM_001084 | 4506.366  | 4457.543  |
| AK021788  | 328.584   | 343.687   | NM_006214 | 3668.347  | 4426.915  | NM_003508 | 412.909   | 933.495   |
| NM_001921 | 3619.061  | 3639.573  | AJ010228  | 5205.79   | 5759.62   | M33197    | 67005.719 | 75757.023 |
| NM_00623C | 5660.347  | 5866.122  | NM_005198 | 4180.343  | 5041.287  | NM_014623 | 5699.632  | 7693.299  |
| NM_014695 | 5913.749  | 6568.696  | AK021426  | 485.689   | 500.72    | NM_007244 | 3441.246  | 5120.014  |
| NM_01340C | 5773.491  | 4645.268  | NM_018073 | 1080.489  | 1362.233  | M30629    | 2222.829  | 3365.372  |
| AK026257  | 1757.558  | 1382.954  | AL137529  | 1385.121  | 1766.479  | BE539299  | 519.03    | 834.71    |
| AK023836  | 4226.123  | 3745.886  | NM_012332 | 1926.207  | 1924.98   | AF193873  | 1120.305  | 1556.34   |
| NM_018105 | 1876.522  | 1786.08   | AK026648  | 1161.693  | 1085.776  | NM_002628 | 789.716   | 1116.4    |
| AJ299442  | 3713.651  | 4086.656  | NM_000497 | 1197.297  | 1423.234  | AA190729  | 986.552   | 1198.512  |



|           |           |           |           |           |           |           |           |           |
|-----------|-----------|-----------|-----------|-----------|-----------|-----------|-----------|-----------|
| NM_000129 | 873.377   | 827.606   | NM_017421 | 941.017   | 1082.732  | BF974315  | 4504.033  | 4548.188  |
| NM_003762 | 3810.598  | 3317.616  | AK025977  | 10647.443 | 9729.799  | T74985    | 779.089   | 1639.174  |
| NM_018446 | 2254.068  | 2400.288  | AK023130  | 6930.862  | 5441.692  | AI652705  | 2876.358  | 3620.941  |
| NM_014465 | 991.226   | 786.482   | NM_000273 | 523.975   | 455.917   | AA569974  | 4910.247  | 6333.843  |
| D87292    | 4687.137  | 4475.284  | NM_002899 | 5464.313  | 2949.162  | AA923615  | 429.283   | 648.891   |
| NM_005498 | 1284.605  | 1503.621  | NM_000486 | 667.206   | 378.791   | AA446028  | 1945.006  | 1551.116  |
| NM_001202 | 455.779   | 357.194   | BE876237  | 671.483   | 365.609   | X07767    | 2580.236  | 3086.992  |
| AB037804  | 697.525   | 610.905   | NM_014750 | 1939.573  | 2032.909  | AF016903  | 11585.392 | 20618.963 |
| U34249    | 334.411   | 436.728   | NM_015912 | 586.047   | 915.35    | NM_015675 | 3379.572  | 6491.556  |
| NM_003289 | 23392.037 | 20850.002 | NM_000460 | 2077.399  | 2385.96   | AK022267  | 535.975   | 1331.276  |
| AI200114  | 607.416   | 400.636   | AB002339  | 2016.088  | 2294.578  | NM_016040 | 2101.232  | 4117.604  |
| M23254    | 3907.376  | 3282.267  | NM_005104 | 10730.661 | 12291.018 | U90878    | 1217.668  | 2279.203  |
| BE618539  | 519.814   | 606.695   | NM_006888 | 23006.629 | 23584.594 | NM_006597 | 32405.305 | 56818.953 |
| R28062    | 1780.016  | 1480.021  | AL137423  | 3907.07   | 4886.676  | NM_012483 | 4858.476  | 7266.454  |
| AI627464  | 1713.88   | 1262.431  | AB018322  | 1495.137  | 1700.438  | NM_003498 | 2827.771  | 4140.044  |
| BI756258  | 1032.612  | 952.864   | NM_007068 | 10731.66  | 11486.001 | AB023420  | 7230.507  | 11544.084 |
| J04599    | 512.759   | 490.894   | NM_005718 | 16112.15  | 15757.557 | NM_002262 | 441.875   | 724.624   |
| AF110020  | 514.372   | 582.703   | NM_018264 | 2803.037  | 3620.159  | NM_016511 | 16493.121 | 24502.488 |
| AA608557  | 3416.435  | 2908.081  | NM_014580 | 531.789   | 612.135   | NM_003558 | 1416.359  | 1640.386  |
| AL050095  | 1575.329  | 2208.036  | AB028998  | 788.276   | 815.394   | M33197    | 67482.391 | 58188.559 |
| U03272    | 1303.753  | 1205.509  | NM_000153 | 851.976   | 811.179   | NM_013229 | 1579.215  | 971.589   |
| NM_000664 | 1189.092  | 1269.186  | NM_002033 | 6736.986  | 6048.672  | NM_016533 | 28586.504 | 18285.201 |
| AF075085  | 29107.609 | 29432.697 | AK091794  | 584.303   | 407.367   | NM_014751 | 2784.775  | 3999.289  |
| NM_005892 | 4132.413  | 4005.049  | NM_004111 | 2789.226  | 2766.447  | NM_002347 | 11821.031 | 14548.65  |
| NM_000042 | 1180.384  | 782.019   | AF085966  | 4506.324  | 3679.77   | AB046807  | 900.823   | 1171.977  |
| NM_005024 | 1687.231  | 1497.686  | NM_005316 | 2107.074  | 1158.657  | NM_018066 | 16094.478 | 29437.936 |
| NM_003403 | 303.45    | 331.186   | NM_016316 | 2160.804  | 1009.844  | NM_006931 | 2500.883  | 4414.797  |
| NM_014808 | 655.029   | 583.785   | NM_003369 | 6257.584  | 2085.626  | NM_020344 | 4630.166  | 7955.031  |
| AB006627  | 975.111   | 937.839   | NM_000057 | 1545.503  | 848.782   | AF119868  | 846.476   | 1032.629  |
| NM_000416 | 1649.643  | 1627.316  | NM_018343 | 2758.761  | 1187.464  | NM_005050 | 2981.677  | 5285.614  |
| NM_003382 | 467.54    | 567.359   | X15880    | 56344.676 | 60554.383 | M33197    | 65483.867 | 63829.344 |
| NM_002965 | 3485.806  | 3361.622  | AL137461  | 2777.124  | 3635.324  | NM_018976 | 10905.275 | 18465.545 |
| AB007883  | 2222.801  | 1908.337  | AF114264  | 2068.678  | 2459.201  | NM_003355 | 6600.937  | 11605.924 |
| AK093780  | 3536.348  | 2763.98   | NM_017514 | 440.386   | 731.529   | NM_005074 | 948.046   | 2075.874  |
| AY009397  | 51742.477 | 44366.453 | NM_018972 | 1841.386  | 2008.286  | NM_013272 | 896.13    | 1148.497  |
| NM_007037 | 11931.972 | 11606.783 | AB037828  | 551.994   | 752.854   | NM_018057 | 1510.255  | 2487.103  |
| NM_001649 | 774.556   | 646.224   | AB023210  | 985.149   | 1070.219  | M33197    | 67363.898 | 70293.828 |
| NM_005492 | 1337.942  | 1369.849  | AB037786  | 1820.915  | 2181.426  | NM_015717 | 1700.908  | 3065.376  |
| AF038196  | 1971.514  | 1897.231  | NM_003648 | 7464.661  | 8367.064  | NM_015925 | 1262.071  | 2340.088  |
| NM_004859 | 4392.79   | 4572.188  | AB037735  | 774.378   | 955.53    | NM_003665 | 964.156   | 1757.912  |
| NM_016352 | 1002.165  | 886.722   | AK002177  | 5789.837  | 5708.578  | AF220217  | 847.822   | 1169.399  |
| NM_006944 | 466.749   | 481.342   | AK024429  | 1814.36   | 1803.025  | NM_013323 | 7845.762  | 9914.898  |
| NM_004407 | 423.947   | 423.742   | NM_003496 | 52194.367 | 55519.523 | NM_014937 | 1385.537  | 1805.341  |
| NM_000070 | 2471.631  | 2461.901  | AB000509  | 912.074   | 941.275   | NM_017426 | 2387.381  | 2612.148  |
| NM_002250 | 2330.847  | 1899.465  | AB018314  | 1066.409  | 1059.324  | M33197    | 1581.047  | 1268.573  |
| NM_006323 | 3935.805  | 3630.066  | NM_004378 | 1088.794  | 1040.423  | NM_000853 | 1591.001  | 1607.205  |
| NM_016466 | 698.541   | 825.79    | AJ238899  | 739.433   | 631.796   | NM_000935 | 906.984   | 1792.585  |
| NM_001493 | 3993.835  | 3484.236  | NM_018037 | 805.902   | 803.023   | NM_000359 | 5485.968  | 9308.751  |
| NM_014841 | 463.467   | 513.704   | NM_001110 | 4659.681  | 2926.751  | NM_006395 | 5429.762  | 9046.645  |
| NM_014426 | 2524.98   | 2529.123  | NM_003222 | 776.032   | 332.993   | NM_014306 | 5220.373  | 8724.848  |
| NM_006816 | 21880.822 | 18133.1   | NM_000841 | 3249.539  | 1490.34   | NM_001084 | 4178.368  | 6814.6    |
| AK026518  | 24232.943 | 20128.313 | NM_001245 | 1515.168  | 1322.363  | NM_015983 | 1628.618  | 3111.401  |
| NM_000258 | 5906.903  | 5372.241  | NM_003672 | 24631.23  | 24967.223 | NM_018622 | 5018.183  | 8570.813  |

|           |           |           |           |           |           |           |           |           |
|-----------|-----------|-----------|-----------|-----------|-----------|-----------|-----------|-----------|
| AB033055  | 2559      | 2423.049  | NM_002574 | 38939.711 | 40350.66  | M33197    | 67547.25  | 67772.969 |
| AF311287  | 1534.696  | 1708.253  | AJ008139  | 3999.747  | 4011.701  | NM_005867 | 7383.327  | 11443.17  |
| NM_00309E | 473.811   | 491.281   | NM_00432E | 1696.779  | 1975.097  | AK026031  | 9594.139  | 15298.997 |
| NM_014781 | 1999.544  | 2361.369  | NM_004577 | 3455.221  | 3795.339  | NM_01646E | 5095.431  | 6511.848  |
| BU629989  | 492.431   | 559.024   | NM_015507 | 431.632   | 1337.729  | NM_00734E | 4960.07   | 7492.186  |
| X87896    | 841.673   | 846.602   | AF007157  | 16778.406 | 19677.141 | NM_00567E | 781.372   | 1083.115  |
| M88310    | 1186.116  | 1031.544  | D38553    | 2780.804  | 3075.866  | D25217    | 16734.291 | 24165.436 |
| NM_01844E | 2900.574  | 2517.489  | NM_00617C | 3047.089  | 2694.656  | NM_006351 | 5796.002  | 6615.656  |
| NM_000187 | 610.467   | 478.342   | NM_01429E | 16811.26  | 15238.135 | M33197    | 59874.082 | 60102.047 |
| NM_01446E | 1239.203  | 1044.145  | AK001581  | 1616.094  | 1932.975  | NM_00010E | 682.275   | 576.604   |
| D87292    | 4328.964  | 3639.223  | NM_00586E | 1836.547  | 1775.253  | NM_00468E | 12972.576 | 10993.722 |
| NM_00549E | 1443.09   | 1284.894  | NM_00054E | 2856.038  | 2740.093  | M33197    | 58396.504 | 60976.188 |
| NM_01633E | 774.146   | 992.921   | AK022541  | 10325.044 | 14313.636 | NM_001467 | 1351.024  | 1602.588  |
| NM_00316E | 3175.931  | 3240.94   | AB002297  | 2677.677  | 2790.438  | M33197    | 49612.281 | 63889.977 |
| NM_00390E | 7048.628  | 6508.669  | NM_00502C | 18361.191 | 16003.557 | NM_00486C | 2946.491  | 4975.412  |
| AL359590  | 15742.66  | 15715.223 | NM_014077 | 3833.075  | 4019.931  | AF217190  | 4111.484  | 6222.618  |
| NM_002861 | 5333.652  | 5670.102  | NM_01841E | 1312.584  | 1140.762  | AB028981  | 29890.797 | 48451.453 |
| NM_00308C | 3040.396  | 3037.874  | NM_01232E | 1923.112  | 1033.634  | NM_00680C | 3160.755  | 5175.975  |
| NM_01326E | 328.62    | 344.847   | M14087    | 24330.65  | 8299.357  | NM_00247E | 1092.77   | 1778.806  |
| NM_00264E | 1327.127  | 1306.814  | AJ272324  | 995.713   | 478.577   | NM_00272E | 7073.414  | 11298.279 |
| AB033027  | 1735.577  | 1657.953  | NM_00088E | 2482.435  | 1251.363  | M33197    | 7291.814  | 7860.01   |
| AK021805  | 4830.583  | 4850.765  | M59040    | 2139.862  | 821.94    | AL050139  | 5001.38   | 6513.621  |
| AB014550  | 1662.718  | 1485.34   | NM_01758E | 16727.861 | 16337.586 | NM_00259E | 574.217   | 1052.583  |
| AF320294  | 1689.132  | 1996.852  | NM_01523E | 930.815   | 1236.518  | NM_00455E | 5189.812  | 6719.518  |
| AF320293  | 177.529   | 581.86    | AK026962  | 2772.728  | 3497.654  | AL079296  | 1714.964  | 2007.746  |
| AF161436  | 2776.942  | 3213.711  | X04366    | 2079.725  | 2302.893  | NM_01477C | 2264.91   | 2338.704  |
| NM_02040E | 1975.627  | 2664.999  | NM_00050E | 33003.602 | 36236.512 | AB037737  | 837.317   | 1040.759  |
| NM_00429E | 2425.528  | 3003.092  | NM_00066E | 4234.169  | 4933.754  | AK023103  | 2465.199  | 2040.443  |
| NM_001171 | 946.299   | 1257.553  | AB046814  | 748.021   | 853.716   | NM_01785E | 2388.096  | 2127.393  |
| NM_000664 | 1216.53   | 1384.764  | NM_017664 | 3162.176  | 2889.612  | NM_01905E | 59467.676 | 60719.863 |
| AF075085  | 28006.672 | 22165.369 | AK025523  | 284.222   | 512.838   | D80008    | 1180.891  | 861.506   |
| NM_00589E | 3073.411  | 2403.497  | NM_00705E | 2802.493  | 2241.536  | X56789    | 681.903   | 777.473   |
| NM_00647E | 609.682   | 443.01    | NM_00687C | 4723.151  | 4912.171  | AK001069  | 42907.648 | 51955.488 |
| AF132734  | 7731.82   | 7892.006  | NM_00735E | 5792.144  | 6709.729  | NM_00413E | 1429.166  | 2569.704  |
| NM_01837E | 1827.503  | 1780.229  | NM_013327 | 1955.204  | 941.314   | NM_01431E | 754.982   | 1293.17   |
| NM_01640E | 9008.075  | 7675.64   | AF303888  | 3715.32   | 1356.592  | NM_014844 | 3167.689  | 5370.345  |
| NM_01560E | 997.988   | 864.063   | NM_000077 | 599.748   | 249.537   | M33197    | 60778.512 | 64945.73  |
| AK021788  | 331.22    | 353.386   | NM_007084 | 813.611   | 911.464   | NM_01849E | 3346.64   | 5259.829  |
| NM_001921 | 3516.431  | 3644.279  | M97191    | 18773.52  | 20540.561 | NM_00134E | 1737.302  | 2786.511  |
| NM_00623C | 4941.905  | 5731.302  | AK023015  | 1605.328  | 2005.471  | NM_00314E | 1130.943  | 2149.762  |
| NM_01469E | 5183.175  | 5502.4    | NM_003457 | 13067.511 | 13663.262 | NM_003377 | 10448.667 | 12445.084 |
| NM_01340C | 5173.836  | 5167.48   | NM_012391 | 2097.601  | 1983.788  | NM_00222C | 3038.726  | 3051.71   |
| AK026257  | 1519.872  | 1319.394  | NM_005254 | 1765.958  | 2789.849  | AB033034  | 1799.362  | 1448.802  |
| AK023836  | 4473.081  | 4613.939  | NM_005611 | 1205.849  | 1139.874  | D38169    | 2325.589  | 1801.651  |
| AJ299442  | 3778.429  | 4186.688  | AF141655  | 907.625   | 1280.079  | NM_018171 | 826.921   | 848.882   |
| NM_00012E | 1047.724  | 1420.408  | NM_00734E | 518.585   | 834.747   | NM_002447 | 9138.136  | 7633.417  |
| NM_00376E | 3447.234  | 4545.438  | NM_007007 | 9041.674  | 9284.104  | NM_01414E | 12719.57  | 12599.485 |
| NM_00485E | 3331.099  | 2919.035  | NM_00638E | 1762.797  | 2076.469  | NM_00222E | 2017.367  | 1901.04   |
| NM_01635E | 550.365   | 572.211   | NM_00655E | 14261.779 | 12807.248 | M33197    | 59671.848 | 57033.16  |
| NM_005014 | 223.115   | 512.014   | NM_004501 | 45989.258 | 41808.699 | NM_00549C | 6417.282  | 5688.423  |
| NM_00007C | 2017.3    | 1730.112  | NM_00496E | 13945.7   | 11924.301 | NM_003151 | 3244.153  | 2441.547  |
| NM_00120E | 541.006   | 430.899   | NM_00670C | 1557.633  | 1457.479  | NM_006811 | 6996.731  | 4330.714  |
| AB037804  | 790.358   | 638.036   | NM_00644E | 9426.157  | 9359.04   | NM_005601 | 2908.72   | 2279.91   |

|           |           |           |           |           |           |           |           |           |
|-----------|-----------|-----------|-----------|-----------|-----------|-----------|-----------|-----------|
| U34249    | 512.021   | 546.366   | NM_012109 | 6710.77   | 5692.753  | NM_016151 | 3534.703  | 4351.706  |
| NM_003289 | 26093.025 | 23233.549 | AF019633  | 1191.357  | 557.189   | NM_004324 | 2164.444  | 2705.732  |
| AI200114  | 490.319   | 504.091   | AB002361  | 3106.934  | 1433.972  | NM_005614 | 10756.183 | 14464.926 |
| M23254    | 3723.989  | 3159.657  | NM_018060 | 4170.833  | 1432.307  | AK026270  | 1437.311  | 1256.834  |
| BE618539  | 617.85    | 713.254   | NM_014239 | 1961.769  | 745.151   | NM_004556 | 3004.747  | 2384.31   |
| R28062    | 1643.006  | 1493.264  | NM_017662 | 2290.123  | 872.468   | D90075    | 8275.236  | 6065.43   |
| AI627464  | 1572.362  | 1539.978  | U88837    | 1097.061  | 251.209   | M33197    | 59989.848 | 57929.684 |
| BI756258  | 924.569   | 983.195   | NM_017446 | 8578.129  | 2220.354  | AK023827  | 1791.104  | 1616.433  |
| J04599    | 446.259   | 684.464   | AK001478  | 8098.719  | 9458.495  | AK021702  | 1860.462  | 1550.404  |
| AF110020  | 494.289   | 675.078   | AK025697  | 3994.853  | 4078.224  | NM_003885 | 1717.461  | 1628.976  |
| AA608557  | 3616.166  | 4323.935  | AK021734  | 1348.023  | 1521.713  | NM_003936 | 1225.318  | 1461.898  |
| AL050095  | 1753.76   | 2700.044  | AF075028  | 392.39    | 533.327   | M33197    | 41589.254 | 43877.316 |
| U03272    | 1603.128  | 1668.129  | BF245026  | 560.9     | 571.645   | NM_002688 | 2297.166  | 2871.945  |
| NM_003098 | 316.138   | 406.527   | D00265    | 31552.158 | 32997.641 | NM_004415 | 2262.678  | 2811.076  |
| NM_014781 | 1681.873  | 1518.704  | NM_000779 | 483.973   | 535.659   | NM_007278 | 14955.54  | 14165.771 |
| BU629989  | 407.543   | 246.564   | NM_004552 | 31374.084 | 35433.844 | NM_005219 | 11077.993 | 10876.418 |
| X87896    | 635.657   | 531.349   | NM_000143 | 3070.115  | 4081.491  | NM_004723 | 13426.019 | 11970.864 |
| M88310    | 1092.189  | 869.748   | AL137294  | 2172.35   | 2152.255  | M33197    | 38961.109 | 36448.57  |
| NM_000042 | 1033.145  | 999.994   | NM_003743 | 977.164   | 972.148   | NM_018413 | 4772.148  | 4295.304  |
| NM_005024 | 1707.525  | 1653.067  | AB037797  | 379.616   | 571.808   | AB018299  | 20082.781 | 12728.844 |
| NM_003403 | 461.535   | 332.514   | NM_001520 | 1015.699  | 781.25    | NM_005245 | 5465.337  | 6345.82   |
| NM_014808 | 737.844   | 722.667   | AL133633  | 1138.982  | 308.849   | M33197    | 60777.961 | 59701.523 |
| AB006627  | 1307.393  | 1267.975  | NM_012252 | 1234.26   | 499.715   | NM_016219 | 8473.025  | 7692.504  |
| NM_000416 | 1541.512  | 1436.117  | AK026817  | 1056.207  | 187.982   | NM_004751 | 836.138   | 758.597   |
| NM_003382 | 421.095   | 555.612   | AL157442  | 14705.404 | 4752.701  | AK025605  | 3607.521  | 3102.897  |
| NM_002965 | 3258.066  | 3809.416  | AB011148  | 1276.478  | 499.543   | NM_003783 | 723.808   | 748.71    |
| AB007883  | 2357.19   | 2100.467  | AL389938  | 14018.299 | 4569.657  | NM_007000 | 4592.139  | 3734.522  |
| AK093780  | 3552.644  | 3584.566  | NM_001949 | 23457.057 | 8247.261  | M23161    | 7684.379  | 7678.183  |
| NM_001649 | 1118.513  | 1653.61   | NM_003507 | 1689.499  | 2557.984  | NM_006100 | 372.194   | 771.555   |
| NM_005492 | 1728.234  | 2310.407  | AK026591  | 639.523   | 746.345   | NM_003197 | 5097.61   | 4357.365  |
| AF038196  | 2125.197  | 2895.699  | AK001889  | 2492.346  | 3176.82   | AF176705  | 1282.427  | 1888.56   |
| AF320294  | 1126.564  | 1004.723  | AK025726  | 1780.082  | 2274.992  | D29012    | 8789.515  | 7840.551  |
| AF161436  | 2203.253  | 1869.521  | AJ227869  | 2109.539  | 2457.688  | NM_017414 | 855.5     | 974.951   |
| NM_020402 | 1495.134  | 1412.593  | AK026189  | 562.305   | 993.726   | NM_012179 | 24057.781 | 25528.104 |
| NM_004299 | 1819.93   | 1713.659  | AL117613  | 8178.223  | 7273.534  | NM_002793 | 5682.178  | 6840.357  |
| NM_001171 | 868.362   | 910.2     | AL137753  | 3137.517  | 3140.546  | NM_004788 | 2040.546  | 2399.218  |
| NM_002250 | 1936.787  | 1950.697  | AK021785  | 577.6     | 474.812   | M33197    | 67396.867 | 70848.281 |
| NM_006323 | 4071.471  | 4156.453  | AL110262  | 10724.533 | 7169.532  | AL442083  | 3360.374  | 3586.858  |
| NM_016466 | 905.424   | 672.561   | AK025627  | 9443.28   | 6502.911  | D63487    | 5227.136  | 5922.601  |
| NM_001493 | 3609.853  | 3640.817  | AF216077  | 1547.216  | 688.752   | AK097791  | 5651.917  | 5838.548  |
| NM_014841 | 570.993   | 446.492   | AK021612  | 7681.59   | 3881.658  | NM_020367 | 620.297   | 742.985   |
| NM_014426 | 2964.221  | 3339.721  | AK002025  | 25294.002 | 11735.622 | AK022705  | 2214.175  | 2034.343  |
| NM_000258 | 7883.983  | 9521.675  | AK026299  | 1060.57   | 501.672   | NM_016404 | 2172.969  | 2397.037  |
| AB033055  | 2961.931  | 4364.59   | NM_017794 | 1072.192  | 586.041   | L03426    | 1970.232  | 1899.788  |
| AJ299442  | 2822.17   | 2357.546  | AK025170  | 1314.782  | 781.857   | M33197    | 56472.195 | 54635.613 |
| NM_000129 | 732.521   | 738.252   | AB033031  | 1746.396  | 2120.31   | NM_020163 | 2105.417  | 1484.451  |
| NM_003762 | 3099.606  | 2465.691  | AF085872  | 8686.639  | 8429.732  | NM_006608 | 2521.358  | 2396.651  |
| NM_018446 | 2312.299  | 2416.827  | AK022538  | 13059.946 | 14038.945 | NM_000457 | 797.293   | 750.539   |
| NM_000187 | 476.864   | 345.275   | AL360257  | 708.106   | 803.084   | M34356    | 3299.63   | 2415.964  |
| NM_014465 | 1226.49   | 1098.265  | AK022342  | 875.119   | 1180.351  | AJ133115  | 5130.099  | 3792.217  |
| D87292    | 3999.818  | 3763.417  | AF147420  | 949.349   | 1081.045  | X51630    | 9116.6    | 8279.607  |
| NM_005498 | 1439.149  | 1553.095  | AL049312  | 1169.594  | 1262.837  | NM_005056 | 1917.776  | 2009.023  |
| NM_016335 | 1240.517  | 1376.645  | AL050072  | 3870.111  | 3712.247  | AF208502  | 12866.891 | 10870.43  |

|           |           |           |           |           |           |           |           |           |
|-----------|-----------|-----------|-----------|-----------|-----------|-----------|-----------|-----------|
| NM_00316E | 3551.204  | 3416.362  | AL080225  | 136.405   | 347.16    | M33197    | 58535.484 | 58420.801 |
| NM_00390E | 7900.848  | 6901.174  | AL117590  | 604.084   | 286.769   | AF264750  | 15236.717 | 14044.271 |
| AL359590  | 14262.359 | 15718.987 | AL049357  | 3928.608  | 2343.191  | NM_00698C | 1261.948  | 979.361   |
| NM_002861 | 6192.215  | 7271.355  | AL110223  | 653.689   | 196.09    | AK023904  | 2650.219  | 3033.273  |
| NM_00308C | 3228.339  | 3740.02   | AK027180  | 7523.307  | 3679.013  | NM_01795E | 4487.58   | 5026.12   |
| NM_00264E | 1723.934  | 2141.561  | NM_004544 | 9194.364  | 5039.473  | NM_01782E | 468.25    | 750.339   |
| AB033027  | 2231.526  | 3235.622  | AF086041  | 528.826   | 232.643   | NM_01649E | 1765.258  | 2204.986  |
| AK021805  | 4959.977  | 7260.856  | AL133080  | 1910.776  | 982.508   | NM_01430E | 4607.337  | 4453.14   |
| NM_00682E | 6519.864  | 6138.136  | NM_017792 | 1576.778  | 981.467   | M33197    | 36177.215 | 44856.363 |
| AB007973  | 2538.888  | 2129.327  | AK025213  | 3320.626  | 1897.971  | NM_004094 | 2678.748  | 2543.191  |
| M96843    | 5189.783  | 4535.729  | NM_014949 | 2168.332  | 1294.152  | NM_02023E | 2441.967  | 2143.114  |
| NM_017791 | 1558.791  | 1715.08   | AL080221  | 1572.107  | 989.453   | AK027059  | 6524.923  | 5668.082  |
| NM_005882 | 3650.011  | 3883.162  | AL137370  | 881.113   | 949.047   | AF151109  | 12923.371 | 9713.923  |
| BC012304  | 3163.13   | 3273.59   | AF009262  | 6259.264  | 6203.55   | NM_015414 | 67414.977 | 70848.453 |
| AB046815  | 1572.83   | 1575.843  | AK024346  | 1897.255  | 2465.582  | L34070    | 4400.184  | 3032.065  |
| AF075085  | 26741.025 | 25224.977 | AF056422  | 765.279   | 952.376   | AF038182  | 1236.546  | 1324.308  |
| NM_005892 | 3220.338  | 2996.123  | AF090892  | 666.774   | 597.658   | NM_01647E | 3357.094  | 3081.972  |
| NM_00647E | 556.159   | 551.722   | AK001089  | 751.281   | 289.503   | NM_00186E | 57548.766 | 52532.711 |
| AF132734  | 8081.195  | 7675.863  | AK001919  | 741.476   | 606.492   | NM_006441 | 4164.048  | 4369.514  |
| NM_01837E | 1640.484  | 1678.218  | AK021535  | 823.551   | 699.733   | NM_00191E | 1903.659  | 1750.883  |
| NM_01640E | 8658.077  | 7295.505  | AK021753  | 3241.798  | 1403.242  | NM_01824E | 3292.055  | 3535.356  |
| NM_01560E | 793.055   | 1055.357  | AK001139  | 1718.624  | 997.306   | M33197    | 61369.531 | 59166.219 |
| NM_001921 | 4195.04   | 4878.723  | AK002090  | 913.602   | 586.44    | NM_012117 | 6081.658  | 4737.832  |
| NM_00623C | 5678.215  | 7850.354  | AK025246  | 3719.282  | 4620.082  | D17130    | 67624.938 | 68128.398 |
| NM_01469E | 5638.949  | 6698.933  | AK025847  | 2317.14   | 2465.641  | X76302    | 5544.268  | 5389.204  |
| NM_01340C | 6344.975  | 7766.099  | AK026816  | 863.977   | 984.612   | AK026276  | 647.637   | 1094.304  |
| AK026257  | 1300.906  | 1493.793  | NM_014174 | 4899.484  | 4804.713  | X52354    | 1615.386  | 1189.227  |
| AK023836  | 5078.174  | 6902.863  | AF147337  | 2352.893  | 2354.175  | NM_00541E | 1100.142  | 1261.712  |
| NM_01810E | 2011.154  | 3261.882  | AK025203  | 49751.125 | 50094.164 | NM_00231E | 1113.672  | 964.017   |
| NM_00507E | 5831.893  | 3778.868  | AK026981  | 2621.575  | 3202.979  | AK024191  | 707.763   | 592.596   |
| AF253321  | 767.511   | 674.647   | AK023819  | 658.031   | 848.894   | D83781    | 1151.226  | 1440.862  |
| U80735    | 1246.092  | 1053.519  | AL359558  | 193.897   | 354.092   | AL832699  | 3622.671  | 3020.441  |
| NM_01785C | 921.675   | 1092.494  | AL133656  | 1256.391  | 912.681   | NM_012191 | 1148.415  | 979.264   |
| NM_01652E | 943.064   | 778.715   | AL050037  | 9400.661  | 5241.083  | AK000757  | 1038.231  | 773.376   |
| NM_002224 | 746.698   | 917.029   | NM_001417 | 30426.111 | 20790.773 | AL359577  | 1316.663  | 1270.942  |
| NM_003874 | 222.871   | 298.165   | AK022236  | 2412.94   | 3650.337  | NM_01813E | 1781.055  | 1608.765  |
| NM_00008E | 535.955   | 635.243   | AK000073  | 591.364   | 626.896   | NM_01480E | 3703.615  | 3585.811  |
| L13857    | 1076.571  | 995.485   | AK000618  | 632.45    | 588.486   | AF052120  | 1834.401  | 1767.101  |
| NM_01809E | 3106.537  | 3140.94   | AK024773  | 545.207   | 830.637   | NM_014871 | 1823.716  | 2073.508  |
| AF286164  | 633.073   | 512.575   | AL390180  | 737.026   | 831.412   | M33197    | 61389.125 | 60121.922 |
| AF146277  | 3058.679  | 2635.03   | X60484    | 797.535   | 713.685   | AL137552  | 659.503   | 1003.612  |
| AF055033  | 14869.308 | 14722.127 | AF055019  | 1200.529  | 1352.176  | AK025794  | 2750.336  | 3232.07   |
| NM_01770C | 1020.037  | 1111.685  | NM_00352E | 7150.21   | 3171.203  | AK024522  | 980.022   | 945.975   |
| M37191    | 4569.073  | 5916.441  | AK000229  | 543.504   | 374.333   | M33197    | 57168.582 | 56423.246 |
| NM_00524E | 411.598   | 719.433   | AF056432  | 2372.135  | 4503.517  | AK023220  | 475.594   | 843.181   |
| NM_00302C | 939.158   | 1076.979  | AK001987  | 30496.527 | 26385.5   | M33197    | 62486.852 | 59887.887 |
| NM_001114 | 1409.5    | 1712.756  | NM_01333E | 1718.873  | 908.96    | AK024981  | 14880.656 | 12903.137 |
| X82240    | 1089.371  | 758.795   | X56199    | 1550.927  | 961.481   | AK027246  | 1218.135  | 1077.75   |
| NM_01399E | 9519.387  | 7628.223  | NM_00519E | 1089.083  | 1305.896  | U80766    | 4184.973  | 3690.407  |
| NM_00601C | 8636.216  | 7132.248  | AL162006  | 2208.457  | 1399.043  | AK001638  | 1164.762  | 1245.561  |
| K03191    | 1915.929  | 1500.2    | NM_017971 | 13144.378 | 11911.047 | AF161386  | 7096.466  | 6362.095  |
| NM_00507E | 5212.195  | 4997.364  | AF090097  | 2053.287  | 1792.088  | AK025454  | 3688.226  | 3428.637  |
| NM_00519E | 8583.934  | 7456.1    | AF116620  | 14151.922 | 13991.841 | M33197    | 61816.113 | 59542.023 |

|           |           |           |           |           |           |            |           |           |
|-----------|-----------|-----------|-----------|-----------|-----------|------------|-----------|-----------|
| AK022956  | 1897.357  | 1882.118  | AF293335  | 28378.311 | 27477.244 | X05826     | 5550.577  | 5283.763  |
| AK023121  | 796.164   | 633.227   | AK024431  | 4765.098  | 6513.944  | Y11608     | 675.901   | 726.46    |
| NM_014104 | 28246.639 | 28851.322 | AF116635  | 563.115   | 756.454   | AJ001872   | 2213.445  | 2324.626  |
| NM_002392 | 561.274   | 447.293   | X96644    | 4582.479  | 3714.427  | M33197     | 60799.512 | 58640.324 |
| NM_002749 | 40044.629 | 41177.461 | Z34281    | 15271.26  | 20116.557 | NM_005596  | 852.551   | 1148.549  |
| NM_018216 | 2312.523  | 2323.281  | NM_018678 | 35443.477 | 44200.137 | AK023636   | 5380.736  | 4984.158  |
| NM_003390 | 595.66    | 827.868   | AJ008122  | 21058.961 | 27182.377 | D25272     | 1825.863  | 1540.442  |
| AL137747  | 2398.121  | 1835.594  | AK022667  | 14132.253 | 16240.714 | M33197     | 63507.891 | 58714.602 |
| NM_014755 | 5223.905  | 4834.578  | AF113211  | 1427.833  | 1032.296  | NM_020166  | 1075.419  | 966.912   |
| AF077188  | 11478.969 | 12325.518 | AL117568  | 1106.47   | 916.231   | AK025931   | 54088.289 | 47463.305 |
| NM_012446 | 1951.572  | 2291.61   | NM_000843 | 654.317   | 1250.537  | M33197     | 791.832   | 726.911   |
| NM_018336 | 874.235   | 883.424   | S71805    | 1503.827  | 3735.041  | AK021972   | 773.757   | 642.813   |
| NM_018685 | 18755.662 | 21131.57  | NM_018391 | 1409.849  | 962.631   | M33197     | 61082.426 | 58353.41  |
| NM_006984 | 819.83    | 1033.602  | U90917    | 682.573   | 741.921   | AK001083   | 1329.482  | 1234.369  |
| Y11718    | 436.25    | 769.532   | AK022140  | 2431.967  | 1484.201  | AK000185   | 1334.696  | 1538.836  |
| AL133644  | 5464.543  | 4159.179  | AK023372  | 21711.285 | 19996.859 | NM_017834  | 675.667   | 713.495   |
| NM_002706 | 2370.416  | 1980.818  | AF086527  | 493.768   | 373.757   | AK000865   | 596.549   | 630.505   |
| NM_019023 | 60468.727 | 53963.578 | U21072    | 1578.352  | 1872.541  | M33197     | 56123.195 | 55574.988 |
| NM_004420 | 593.536   | 345.125   | AK024377  | 1102.194  | 846.338   | AK024406   | 495.092   | 799.531   |
| NM_002970 | 528.91    | 551.527   | AK023557  | 1005.191  | 1294.811  | AK024568   | 4847.908  | 4335.833  |
| NM_005496 | 13086.272 | 11614.852 | AK027107  | 675.767   | 635.358   | M33197     | 69655.883 | 62904.23  |
| NM_015387 | 2673.349  | 2580.194  | AB040887  | 3357.622  | 3111.246  | AK026277   | 7285.272  | 5390.225  |
| NM_001733 | 4102.408  | 1853.778  | AK025196  | 1462.259  | 2047.81   | U10509     | 1683.272  | 1662.418  |
| NM_005065 | 485.009   | 491.806   | AK024800  | 566.761   | 806.379   | NM_007165  | 29131.836 | 29438.951 |
| NM_017825 | 4399.306  | 4413.812  | AK000401  | 1303.436  | 2164.654  | NM_014016  | 3235.212  | 3134.853  |
| NM_014035 | 2016.505  | 2715.618  | AF305068  | 950.865   | 1506.942  | AF085956   | 1103.05   | 1003.347  |
| NM_020122 | 9073.934  | 8412.257  | D17231    | 26980.127 | 38765.602 | NM_019116  | 880.123   | 1006.4    |
| NM_013432 | 18237.525 | 19984.885 | AF531295  | 957.987   | 1301.935  | AF147318   | 1538.928  | 1341.274  |
| AB020716  | 643.265   | 702.191   | CY3Cy5    | 4679.328  | 374.824   | unknown (S | 494.022   | 685.409   |
| NM_002296 | 32459.561 | 35781.629 | BF974315  | 6226.981  | 8032.709  | M33197     | 58509.328 | 56896.965 |
| AK027130  | 511.94    | 740.659   | T74985    | 570.694   | 780.925   | AL137556   | 931.9     | 883.672   |
| NM_005479 | 8334.504  | 9613.548  | AI652705  | 2474.346  | 3392.144  | NM_014696  | 3836.427  | 3851.72   |
| NM_005392 | 738.197   | 567.702   | AA569974  | 5107.578  | 6537.059  | AL359055   | 941.13    | 991.42    |
| AL133572  | 2597.192  | 2079.841  | AA446028  | 1981.201  | 2845.42   | NM_014906  | 2082.656  | 1673.249  |
| AK022500  | 1119.431  | 1071.71   | M80583    | 926.395   | 480.506   | AF086125   | 1269.426  | 1319.019  |
| BC021298  | 372.067   | 397.228   | AW009565  | 2450.685  | 2244.39   | AK023547   | 958.623   | 1172.767  |
| U52096    | 4115.494  | 3387.7    | X07767    | 2082.678  | 2097.99   | U67847     | 1874.03   | 1827.798  |
| AB013897  | 841.855   | 1015.196  | AF252284  | 2532.465  | 2578.525  | AL137321   | 4844.441  | 4076.667  |
| NM_005526 | 18982.354 | 17522.295 | SR1       | 56706.996 | 60009.352 | M33197     | 61447.613 | 58507.746 |
| AK001669  | 2152.405  | 2150.961  | SR3       | 47534.988 | 63662.262 | AK024207   | 2623.123  | 2572.947  |
| NM_006195 | 5014.701  | 4033.275  | SR5       | 4819.033  | 8606.585  | AK021843   | 990.081   | 1140.349  |
| NM_006190 | 5837.9    | 4901.325  | SR7       | 3554.969  | 37754.652 | AF075025   | 4410.596  | 3895.526  |
| NM_006366 | 1495.667  | 1439.441  | SR9       | 15445.51  | 4055.667  | AF116623   | 714.359   | 849.435   |
| NM_004133 | 809.193   | 680.845   | CY3Cy5    | 3064.775  | 144.056   | AF088008   | 1810.747  | 1509.88   |
| NM_001616 | 6404.348  | 6428.444  | NM_016511 | 13212.655 | 16957.072 | AK023528   | 1333.062  | 1462.183  |
| BC000401  | 6309.354  | 6833.341  | NM_003559 | 1433.094  | 1806.859  | M33197     | 59338.547 | 58774.672 |
| NM_006425 | 3817.67   | 3568.894  | NM_013229 | 1143.477  | 576.111   | AF147349   | 4328.251  | 4597.773  |
| BF344046  | 1755.344  | 1631.552  | NM_016533 | 14389.823 | 11345.47  | AL050346   | 12253.817 | 11797.624 |
| AF432218  | 6552.665  | 6830.918  | NM_014751 | 2210.083  | 2084.146  | AK001520   | 4324.546  | 4697.465  |
| AK025082  | 987.362   | 831.748   | NM_002347 | 11463.297 | 10397.021 | D90070     | 3521.421  | 3833.127  |
| AF086535  | 651.624   | 476.62    | AB046807  | 865.433   | 807.213   | M33197     | 32432.725 | 33038.863 |
| AB040901  | 807.874   | 590.757   | M33197    | 64565.043 | 75131.031 | AK025807   | 1571.941  | 1075.91   |
| AL137406  | 2009.208  | 1519.784  | NM_014623 | 5374.657  | 6952.236  | M33197     | 64025.551 | 57623.32  |

|           |           |           |           |           |           |           |           |           |
|-----------|-----------|-----------|-----------|-----------|-----------|-----------|-----------|-----------|
| NM_012253 | 2182.207  | 1545.498  | NM_007244 | 5805.69   | 7064.319  | AK025266  | 2870.082  | 2690.302  |
| NM_006876 | 1043.133  | 787.292   | M30629    | 3119.308  | 4568.434  | AK001843  | 3571.565  | 3094.284  |
| NM_000293 | 1387.443  | 1168.329  | BE539299  | 1061.769  | 1511.31   | AK000548  | 37364.051 | 35525.512 |
| NM_003748 | 481.433   | 392.246   | AF193873  | 1578.458  | 2142.527  | NM_003920 | 6974.812  | 5966.667  |
| AF153821  | 1493.283  | 1315.379  | NM_002628 | 832.417   | 1719.029  | NM_004787 | 12268.86  | 10216.654 |
| NM_013370 | 910.98    | 883.776   | AA190729  | 1361.919  | 2519.901  | AF087984  | 5292.879  | 4932.168  |
| NM_001374 | 668.734   | 538.589   | NM_004170 | 558.531   | 508.017   | M33197    | 58838.344 | 55660.594 |
| NM_003310 | 1713.466  | 1711.182  | M33197    | 63795.625 | 66828.773 | AK022273  | 2055.288  | 1801.88   |
| AK024461  | 1378.341  | 1339.828  | NM_015717 | 1157.365  | 1692.755  | NM_015882 | 682.886   | 695.339   |
| AK025485  | 255.832   | 328.884   | NM_015925 | 653.346   | 1041.736  | AK024271  | 1020.926  | 1268.932  |
| NM_017635 | 1323.734  | 1264.561  | NM_003665 | 1039.921  | 1513.574  | AK021650  | 1604.308  | 3255.267  |
| X62534    | 765.285   | 1090.576  | AF220217  | 1062.886  | 1170.199  | AL050210  | 1591.003  | 2051.675  |
| AF027147  | 19720.941 | 18390.992 | NM_013323 | 6305.778  | 5625.25   | L37699    | 1372.965  | 1466.23   |
| M62399    | 2373.208  | 2306.811  | M33197    | 890.762   | 749.386   | M33197    | 63702.402 | 62352.129 |
| NM_002357 | 591.333   | 660.927   | NM_000853 | 1073.55   | 1018.08   | D80002    | 1135.91   | 1250.853  |
| U71600    | 1218.014  | 1200.651  | AF016903  | 14072.89  | 13542.371 | U17637    | 2284.575  | 2531.253  |
| NM_004472 | 958.562   | 855.131   | NM_015675 | 4083.841  | 4454.344  | NM_003548 | 732.083   | 747.828   |
| AB037862  | 3588.318  | 4213.492  | NM_016040 | 2097.385  | 2215.571  | M33197    | 44448.41  | 40935.641 |
| AF085924  | 346.966   | 288.874   | M33197    | 64535.367 | 69141.664 | NM_018272 | 3187.696  | 2647.628  |
| AK023887  | 565.705   | 571.617   | AF031136  | 46838.047 | 45798.953 | CY3Cy5    | 4473.066  | 134.343   |
| AF088022  | 5344.978  | 4560.339  | U90878    | 1249.708  | 1602.553  | R19938    | 3170.784  | 2239.665  |
| AK026537  | 990.995   | 870.651   | NM_006597 | 42998.152 | 61408.613 | N94487    | 4560.214  | 3259.058  |
| NM_015485 | 1991.779  | 1760.134  | NM_012483 | 7828.322  | 11967.781 | AI886795  | 2062.26   | 1485.095  |
| AF147411  | 258.387   | 552.224   | NM_003498 | 3419.058  | 7189.617  | D10495    | 3165.803  | 2498.618  |
| NM_002666 | 2468.47   | 2838.966  | AB023420  | 8861.436  | 14750.111 | BF344679  | 1286.026  | 1309.411  |
| AF202145  | 1447.872  | 1923.914  | NM_007342 | 5719.7    | 7800.129  | M14156    | 776.993   | 585.304   |
| AK026155  | 1750.602  | 1880.499  | NM_005672 | 808.566   | 1015.827  | U87939    | 940.852   | 850.714   |
| NM_018052 | 21772.105 | 24038.063 | D25217    | 20546.85  | 23974.316 | U86961    | 522.604   | 691.505   |
| AK022386  | 3531.105  | 3796.681  | NM_006351 | 6423.701  | 8139.502  | AK094237  | 985.576   | 925.213   |
| NM_002767 | 3461.223  | 3108.042  | M33197    | 61229.543 | 62870.148 | L07592    | 1551.605  | 1315.098  |
| AF131846  | 10438.609 | 10877.672 | NM_004683 | 9277.623  | 7543.244  | NM_006981 | 776.241   | 375.563   |
| AF088069  | 1369.505  | 1740.081  | M33197    | 53081.602 | 41266.965 | SR2       | 48544.539 | 41561.941 |
| AF086551  | 442.442   | 398.566   | NM_001467 | 1270.551  | 1385.376  | SR4       | 12368.314 | 9229.503  |
| NM_013393 | 4172.376  | 4759.335  | NM_018066 | 21067.857 | 22439.25  | SR6       | 1784.728  | 1441.672  |
| AK025072  | 989.906   | 939.967   | NM_006931 | 2822.03   | 3045.805  | SR8       | 6259.478  | 17241.297 |
| AK022410  | 575.798   | 609.152   | NM_020344 | 4017.909  | 4917.778  | SR10      | 25583.404 | 6492.785  |
| L10378    | 6337.572  | 5226.458  | AF119868  | 320.326   | 598.084   | CY3Cy5    | 4592.175  | 110.354   |
| AJ227860  | 662.956   | 578.154   | NM_005050 | 2867.389  | 3328.667  | M33197    | 58306.992 | 53247.051 |
| AL157448  | 630.939   | 605.57    | NM_018976 | 8725.852  | 15140.127 | NM_014776 | 1375.029  | 979.449   |
| AF026942  | 951.01    | 732.183   | NM_003355 | 6273.351  | 9342.595  | NM_006480 | 9393.417  | 6095.226  |
| AJ276429  | 1225.015  | 1062.939  | NM_005074 | 1264.366  | 2800.362  | NM_007223 | 17016.811 | 10763.13  |
| AL117657  | 750.517   | 815.743   | NM_013272 | 808.787   | 1696.229  | NM_000145 | 1020.624  | 559.928   |
| AK023589  | 581.039   | 579.061   | NM_002593 | 621.877   | 1006.115  | AF030107  | 1082.925  | 636.195   |
| AK021590  | 1979.261  | 1884.725  | NM_004558 | 3814.204  | 6496.71   | NM_000871 | 761.482   | 347.331   |
| AB002441  | 323.707   | 570.433   | AL079296  | 1518.503  | 2218.216  | M33197    | 60457.91  | 55181.586 |
| AK023998  | 1081.372  | 1015.263  | NM_014770 | 1973.994  | 2815.738  | AF086924  | 26448.611 | 18008.459 |
| AK021643  | 574.502   | 689.649   | AB037737  | 1228.849  | 1739.185  | NM_000264 | 686.198   | 456.077   |
| U84507    | 640.062   | 662.973   | M33197    | 63955.449 | 71614.375 | AB058740  | 4299.374  | 2092.833  |
| NM_001213 | 649.011   | 929.978   | AK023103  | 2585.252  | 3397.583  | NM_003385 | 1733.894  | 1254.522  |
| AK000872  | 1588.354  | 2064.415  | NM_017858 | 2332.158  | 2902.723  | NM_004392 | 664.362   | 464.021   |
| AK027147  | 4741.905  | 5412.425  | NM_019059 | 64335.598 | 60932.996 | M33197    | 58838.406 | 57786.113 |
| AK022415  | 8938.277  | 8877.931  | D80008    | 831.343   | 819.169   | NM_001154 | 5988.297  | 5640.688  |
| AK021932  | 852.559   | 563.901   | X56789    | 12098.414 | 18051.398 | NM_001815 | 988.022   | 934.054   |

|           |           |           |           |           |           |           |           |           |
|-----------|-----------|-----------|-----------|-----------|-----------|-----------|-----------|-----------|
| AK026787  | 3241.309  | 3359.659  | AK001069  | 40266.262 | 36574.711 | BF575833  | 371.893   | 599.213   |
| AK023542  | 926.01    | 1094.672  | M33197    | 64620.109 | 71869.734 | NM_015725 | 5844.93   | 4833.432  |
| AK000203  | 607.536   | 922.263   | NM_000935 | 1573.846  | 1065.69   | R61452    | 918.623   | 758.829   |
| AK021845  | 3540.297  | 3717.164  | NM_000359 | 9634.943  | 9491.374  | NM_012455 | 2578.086  | 1992.406  |
| NM_018592 | 1009.816  | 1300.305  | NM_006395 | 4980.294  | 4486.832  | NM_002806 | 7484.433  | 5443.159  |
| NM_018503 | 15706.813 | 14987.802 | NM_014306 | 4415.643  | 5282.879  | M33197    | 58150.078 | 53968.961 |
| NM_016449 | 12494.555 | 11268.247 | NM_001084 | 4295.567  | 5516.629  | NM_006564 | 3773.842  | 2106.363  |
| AL049670  | 3136.911  | 3036.412  | NM_018622 | 4446.91   | 6782.706  | NM_004802 | 692.043   | 763.762   |
| AK021465  | 469.324   | 698.72    | M33197    | 64810.086 | 66055.203 | M33197    | 64433.293 | 61293.637 |
| NM_018512 | 7028.364  | 8762.058  | NM_005867 | 6150.05   | 9060.269  | NM_002983 | 765.43    | 538.522   |
| NM_018568 | 249.719   | 300.321   | AK026031  | 10993.866 | 17835.313 | NM_000074 | 2448.263  | 2139.986  |
| AK022412  | 2283.247  | 2821.632  | NM_016468 | 6018.882  | 11217.722 | BF434335  | 15571.872 | 12545.782 |
| AK023073  | 5164.944  | 5384.781  | BE539299  | 1181.203  | 1948.375  | NM_002993 | 1289.783  | 1106.728  |
| AK023697  | 357.57    | 493.473   | AF193873  | 2053.918  | 2320.597  | AK026946  | 1325.412  | 978.489   |
| AK023922  | 594.654   | 828.949   | NM_002628 | 1233.263  | 2059.161  | M33197    | 52741.59  | 54018.77  |
| AK022438  | 1278.834  | 1808.956  | M23575    | 507.605   | 1697.658  | NM_003192 | 5670.687  | 3647.803  |
| AK023316  | 758.754   | 865.313   | AA190729  | 2161.562  | 3096.286  | NM_018449 | 3349.338  | 2340.893  |
| AK023764  | 1200.502  | 1386.573  | BF974315  | 6058.848  | 5125.083  | AF086129  | 591.751   | 453.556   |
| AK024082  | 779.781   | 957.905   | AI652705  | 2213.103  | 3562.819  | D79994    | 881.525   | 674.897   |
| Z27405    | 11441.872 | 13477.072 | AA569974  | 3355.048  | 2374.185  | NM_014458 | 2155.75   | 1423.462  |
| AK023412  | 1037.83   | 893.339   | AA446028  | 1201.853  | 1177.977  | AF235049  | 3170.18   | 2328.698  |
| NM_014617 | 15517.575 | 14509.755 | M80583    | 797.529   | 822.779   | NM_005164 | 474.243   | 377.646   |
| AK074682  | 3302.111  | 3169.448  | AW009565  | 3209.006  | 3596.892  | NM_001995 | 1336.858  | 1520.456  |
| X74605    | 604.733   | 542.05    | X07767    | 2598.166  | 2529.98   | NM_000183 | 12481.146 | 11087.606 |
| AK024513  | 581.491   | 719.539   | AF252284  | 3148.925  | 5325.373  | AY004175  | 1060.726  | 1217.246  |
| BC036692  | 1047.696  | 1121.676  | BU727558  | 486.541   | 1092.774  | M33197    | 62493.605 | 59104.328 |
| AJ009640  | 2447.174  | 2101.315  | M33197    | 6130.841  | 8818.563  | NM_012327 | 2359.244  | 2351.118  |
| Y11163    | 394.156   | 550.296   | AL050139  | 4665.262  | 7119.748  | NM_000904 | 998.052   | 1481.028  |
| AF147340  | 514.914   | 565.578   | U90878    | 1243.045  | 1132.821  | NM_016048 | 1557.223  | 1868.688  |
| AF035308  | 5544.958  | 6310.57   | NM_006597 | 53834.641 | 59706.832 | NM_000375 | 8000.739  | 6433.432  |
| NM_014054 | 2597.857  | 2919.193  | NM_007329 | 475.659   | 1175.932  | NM_000265 | 6238.066  | 2784.004  |
| AK022228  | 1477.322  | 2000.95   | NM_012483 | 8226.434  | 9014.582  | NM_018849 | 2092.959  | 1467.288  |
| AK022031  | 938.567   | 1021.054  | NM_003498 | 3941.978  | 4744.886  | M33197    | 44863.402 | 36033.371 |
| AF086480  | 2061.88   | 2641.56   | AB023420  | 10151.749 | 7624.554  | AF279890  | 1582.179  | 1298.755  |
| AK022122  | 416.483   | 655.634   | NM_016511 | 10006.92  | 5891.05   | NM_002236 | 941.855   | 836.721   |
| AK000806  | 23552.658 | 17574.008 | NM_003559 | 844.771   | 679.913   | NM_012069 | 784.408   | 626.825   |
| NM_016471 | 1726.088  | 1974.493  | M33197    | 63061.016 | 59792.219 | NM_001689 | 49714.391 | 48468.453 |
| NM_005364 | 4798.397  | 4883.706  | NM_013229 | 1225.692  | 1366.62   | NM_016601 | 789.652   | 438.939   |
| AK023482  | 2149.718  | 2441.736  | NM_016533 | 46705.359 | 39220.617 | NM_017905 | 4667.694  | 4487.792  |
| AK022798  | 452.504   | 454.456   | NM_014751 | 5096.662  | 4244.471  | NM_006815 | 20297.111 | 16291.033 |
| AL157423  | 560.453   | 507.874   | NM_002347 | 17095.43  | 16895.221 | NM_001663 | 4815.063  | 4681.906  |
| AK023176  | 707.677   | 791.725   | AB046807  | 1134.311  | 1104.274  | NM_004218 | 6971.497  | 5451.049  |
| AL161991  | 9870.065  | 9020.354  | NM_003508 | 1215.369  | 2761.533  | NM_016530 | 1371.157  | 905.513   |
| D17032    | 9960.972  | 9246.933  | M33197    | 64748.301 | 81010.227 | NM_014804 | 947.78    | 727.979   |
| AL137292  | 609.366   | 622.661   | NM_014623 | 5875.262  | 9941.556  | L40520    | 2240.034  | 3035.418  |
| NM_017941 | 1810.056  | 2417.323  | M33197    | 61781.27  | 65741.289 | NM_002633 | 7330.352  | 11709.776 |
| AF301016  | 570.13    | 758.882   | NM_018976 | 16544.855 | 22031.904 | U11036    | 429.648   | 519.223   |
| Z83947    | 546.605   | 954.76    | NM_003355 | 11152.427 | 14083.223 | M33197    | 56602.258 | 60520.898 |
| AF118079  | 19951.523 | 24573.48  | NM_005074 | 1355.216  | 1999.374  | NM_002878 | 2155.78   | 2544.819  |
| AF277572  | 762.41    | 1068.591  | NM_013272 | 794.137   | 710.54    | NM_017723 | 2572.574  | 2386.376  |
| NM_005258 | 7505.689  | 10816.805 | NM_018057 | 1314.442  | 1759.786  | AK022922  | 2279.427  | 1625.453  |
| NM_000440 | 2351.827  | 1915.2    | M33197    | 62830.855 | 65397.352 | NM_006462 | 4803.37   | 3223.929  |
| NM_001297 | 1552.873  | 1399.104  | NM_015717 | 1122.214  | 781.367   | AK024750  | 1652.933  | 1181.124  |

|             |           |           |           |           |           |           |           |           |
|-------------|-----------|-----------|-----------|-----------|-----------|-----------|-----------|-----------|
| NM_004403   | 3041.138  | 2885.259  | NM_003665 | 837.966   | 610.03    | NM_00040C | 13870.78  | 9823.992  |
| X64993      | 731.711   | 708.698   | NM_013323 | 7511.182  | 6395.677  | M33197    | 59300.523 | 57294.828 |
| NM_004434   | 4987.937  | 4881.607  | NM_017426 | 1845.06   | 2004.509  | NM_002613 | 2573.831  | 2516.741  |
| NM_006269   | 429.997   | 436.508   | M33197    | 1433.494  | 1257.115  | NM_004419 | 1279.781  | 873.92    |
| NM_01623C   | 1479.062  | 1605.905  | NM_000853 | 2639.018  | 3544.174  | U47635    | 2317.926  | 1734.337  |
| NM_001083   | 617.659   | 791.593   | AF016903  | 21184.756 | 27713.139 | NM_01865C | 1601.931  | 1497.224  |
| AK023966    | 2550.148  | 2615.507  | NM_015675 | 6439.418  | 8192.265  | AK026945  | 24963.748 | 31587.809 |
| AK025702    | 1228.89   | 1248.483  | AK022267  | 503.177   | 759.988   | NM_014369 | 1278.873  | 1459.916  |
| NM_01895E   | 449.597   | 486.668   | NM_01604C | 2557.429  | 3417.966  | M33197    | 60554.707 | 58376.762 |
| AL050200    | 383.491   | 373.692   | NM_015983 | 2288.068  | 1814.458  | NM_00139E | 19668.063 | 14492.766 |
| NM_002367   | 345.387   | 451.722   | NM_018622 | 6698.739  | 5056.654  | AB050049  | 5342.496  | 4230.223  |
| AK022038    | 929.704   | 941.9     | M33197    | 64065.801 | 71356.578 | NM_001993 | 277.167   | 411.501   |
| AK025119    | 498.314   | 524.226   | NM_005867 | 10923.232 | 12198.515 | BF575833  | 278.628   | 608.706   |
| AJ224170    | 831.004   | 832.518   | AK026031  | 11701.427 | 11195.139 | NM_01572E | 4518.611  | 6476.004  |
| CY3Cy5      | 972.884   | 52.55     | NM_01646E | 6410.797  | 5707.537  | R61452    | 1098.196  | 1495.896  |
| AA397813    | 17785.148 | 10926.82  | NM_007342 | 6384.455  | 9716.647  | R19938    | 3866.726  | 4803.705  |
| W47350      | 496.335   | 423.948   | NM_005672 | 909.756   | 726.92    | N94487    | 4576.765  | 6731.458  |
| W68291      | 10780.53  | 9003.902  | D25217    | 13894.846 | 10259.554 | AI886795  | 2063.556  | 2464.6    |
| N64384      | 1240.674  | 1004.611  | NM_006351 | 3845.203  | 2050.148  | D10495    | 2947.313  | 4483.357  |
| H-X 53655 I | 1123.581  | 1029.954  | M33197    | 49891.434 | 36116.691 | BF344679  | 1348.548  | 1606.64   |
| H-U 05770 I | 3980.281  | 3211.287  | NM_004683 | 9911.148  | 6238.823  | U87939    | 1264.031  | 872.07    |
| H-M 65199   | 3450.768  | 3638.543  | AK025263  | 789.681   | 445.583   | U86961    | 748.253   | 483.833   |
| H-M 32315   | 1844.031  | 1403.546  | M33197    | 58630.355 | 60464.57  | AK094237  | 1984.207  | 1545.563  |
| H-V00536M   | 704.572   | 677.998   | NM_001467 | 1883.247  | 1960.637  | L07592    | 1486.156  | 1252.262  |
| H-D85429M   | 2746.541  | 2061.81   | NM_018066 | 29791.926 | 31761.244 | NM_006981 | 627.541   | 871.512   |
| BF439832    | 1449.04   | 1041.119  | NM_006931 | 4019.135  | 4264.728  | M33197    | 63284.844 | 59839.121 |
| BG819162    | 800.316   | 499.637   | NM_020344 | 5074.183  | 6094.993  | AK027244  | 2006.561  | 1543.88   |
| NM_017532   | 3385.46   | 3534.209  | AF119868  | 1226.817  | 1500.795  | NM_01844E | 3590.698  | 4708.875  |
| SR6         | 1927.693  | 1668.765  | NM_00505C | 2112.105  | 3044.22   | AF086129  | 449.084   | 854.241   |
| CY3Cy5      | 1651.913  | 147.647   | AF252284  | 3314.724  | 3094.482  | D79994    | 916.951   | 1204.616  |
| NM_004447   | 2492.344  | 1723.448  | M33197    | 9857.899  | 7904.09   | NM_01445E | 2295.639  | 3615.03   |
| NM_001204   | 871.1     | 585.146   | AL050139  | 5926.467  | 6564.472  | AF235049  | 4429.924  | 7713.257  |
| BF131321    | 503.872   | 485.109   | NM_00455E | 4260.315  | 3370.392  | M33197    | 59919.82  | 58758.734 |
| NM_012116   | 1042.992  | 893.373   | AL079296  | 1002.088  | 456.37    | NM_007369 | 815.771   | 827.57    |
| NM_00002C   | 2495.434  | 2133.84   | NM_01477C | 1593.86   | 894.843   | NM_01477E | 2022.05   | 2247.246  |
| NM_00095E   | 680.647   | 722.923   | M33197    | 62829.441 | 55453.789 | NM_00648C | 10989.979 | 11647.688 |
| NM_002442   | 1738.387  | 1219.969  | AK023103  | 2057.066  | 1481.027  | NM_007223 | 16602.086 | 25116.217 |
| AB033091    | 6029.708  | 3997.765  | NM_01785E | 1908.403  | 1724.941  | NM_00014E | 747.076   | 659.367   |
| NM_004557   | 4071.021  | 4333.662  | NM_019059 | 56576.695 | 41836.645 | AF030107  | 690.465   | 530.748   |
| NM_014757   | 1989.189  | 1565.998  | D80008    | 1885.178  | 2063.054  | M33197    | 56760.227 | 54456.309 |
| NM_017893   | 439.396   | 335.06    | X56789    | 1185.187  | 1292.895  | AF086924  | 28611.652 | 36396.34  |
| NM_001584   | 1116.969  | 817.257   | AK001069  | 53552.832 | 59013.324 | NM_000264 | 561.41    | 453.111   |
| NM_01225E   | 24874.295 | 21398.678 | NM_000935 | 1874.212  | 1561.059  | AB058740  | 4404.774  | 3605.788  |
| AF272357    | 922.057   | 973.948   | NM_000359 | 15359.889 | 16348.476 | NM_00338E | 339.994   | 502.649   |
| NM_016372   | 27200.58  | 23412.248 | NM_00639E | 6430.414  | 7337.364  | NM_00188E | 394.967   | 528.193   |
| AB020705    | 1134.395  | 1001.159  | NM_014306 | 6093.837  | 8328.01   | NM_004392 | 737.729   | 711.501   |
| NM_00298C   | 1353.209  | 1480.979  | NM_001084 | 2378.871  | 3379.646  | M33197    | 54545.949 | 56862.227 |
| NM_01588E   | 816.828   | 743.211   | NM_007244 | 6475.297  | 7132.548  | NM_001154 | 6575.491  | 5941.433  |
| NM_004262   | 97.909    | 561.151   | M30629    | 3675.432  | 4278.387  | NM_00181E | 1087.007  | 955.938   |
| NM_007102   | 53456.051 | 59323.414 | BE539299  | 1075.06   | 773.14    | M33197    | 53492.602 | 53368.797 |
| BG491613    | 7265.687  | 7961.292  | AF193873  | 2130.326  | 939.698   | NM_00681E | 20072.516 | 30617.152 |
| AJ132084    | 352.651   | 300.702   | NM_00262E | 1055.813  | 726.089   | NM_001663 | 5356.646  | 7775.293  |
| NM_006093   | 2848.474  | 2831.91   | BF974315  | 3815.29   | 2344.902  | NM_00421E | 6749.403  | 11150.098 |



|           |           |           |           |           |           |           |           |           |
|-----------|-----------|-----------|-----------|-----------|-----------|-----------|-----------|-----------|
| NM_00272E | 493.531   | 595.727   | AI652705  | 2621.099  | 2138.916  | NM_01653C | 2468.572  | 4535.241  |
| NM_004513 | 3744.633  | 3334.605  | AA569974  | 4486.124  | 4066.953  | NM_014804 | 1185.541  | 1846.747  |
| NM_00170E | 12962.543 | 11603.486 | AA446028  | 1841.055  | 1885.618  | NM_01245E | 3112.049  | 4307.899  |
| NM_01773E | 1956.548  | 1922.138  | M80583    | 1860.86   | 1165.04   | NM_00280E | 7959.196  | 9780.964  |
| AB033044  | 2586.865  | 2119.201  | X07767    | 2720.049  | 4064.282  | NM_00171E | 411.7     | 588.414   |
| AB014564  | 939.981   | 816.923   | AF016903  | 14238.102 | 9180.736  | NM_006564 | 1304.073  | 1127.018  |
| NM_02023C | 2338.287  | 2515.723  | NM_01567E | 5211.936  | 3862.267  | NM_00480Z | 822.183   | 722.103   |
| NM_00676Z | 39711.32  | 47450.477 | AK022267  | 955.181   | 775.136   | M33197    | 52671.094 | 54759.621 |
| NM_00635Z | 1527.235  | 1749.503  | NM_01604C | 3366.48   | 2766.345  | NM_00298Z | 816.427   | 775.432   |
| NM_01643C | 557.073   | 872.866   | M33197    | 67707.789 | 57338.352 | NM_000074 | 3016.397  | 3148.842  |
| NM_00233E | 278.269   | 214.736   | AF031136  | 32329.211 | 15528.419 | BF434335  | 14900.642 | 22235.682 |
| BE382905  | 607.578   | 442.161   | U90878    | 1225.534  | 831.614   | NM_00299Z | 1086.013  | 1266.233  |
| NM_00215Z | 6298.061  | 5586.434  | NM_006597 | 39221.391 | 22145.139 | AK026946  | 1260.098  | 1447.915  |
| AK022558  | 3645.735  | 3589.019  | NM_01248Z | 9410.309  | 4995.959  | M33197    | 57679.934 | 53520.996 |
| NM_00647E | 34275.438 | 25429.773 | NM_00349E | 3447.722  | 2054.142  | NM_00319Z | 5414.958  | 3861.191  |
| AK023787  | 1943.701  | 1428.453  | AB023420  | 8740.465  | 4813.719  | NM_00282E | 2086.114  | 2695.949  |
| NM_00213Z | 1291.313  | 1408.611  | NM_016511 | 18693.311 | 15008.445 | NM_01436E | 1432.313  | 1804.148  |
| NM_015697 | 2957.811  | 2584.685  | NM_00355E | 1889.254  | 1577.916  | M33197    | 56195.375 | 55579.531 |
| AF086489  | 243.322   | 497.24    | M55337    | 951.253   | 1183.432  | NM_00139E | 20037.418 | 32274.875 |
| NM_007177 | 6337.574  | 5180.387  | M33197    | 69654     | 66081.578 | AB050049  | 5565.504  | 8515.688  |
| NM_00080E | 383.562   | 560.431   | NM_01322Z | 2786.859  | 3343.425  | J05125    | 1099.623  | 1101.26   |
| AB018258  | 421.864   | 250.877   | NM_01653Z | 64484.945 | 65992.352 | NM_005164 | 375.656   | 770.275   |
| AL359592  | 785.49    | 513.173   | NM_014751 | 2273.302  | 3728.649  | NM_00199E | 1485.979  | 1918.502  |
| NM_00607E | 4611.117  | 3638.271  | NM_002347 | 13740.245 | 20158.209 | AY004175  | 1267.272  | 1403.82   |
| NM_016274 | 1452.961  | 1650.955  | AB046807  | 812.527   | 1489.882  | M33197    | 59043.48  | 57307.305 |
| AK026842  | 490.277   | 653.51    | NM_01806E | 19384.277 | 13614.757 | NM_012327 | 2970.709  | 3508.17   |
| NM_00239E | 2647.137  | 2197.344  | NM_006931 | 2805.493  | 2204.755  | NM_000904 | 899.474   | 943.854   |
| NM_00425E | 806.687   | 847.703   | NM_020344 | 5048.38   | 4034.338  | NM_01604E | 1514.056  | 1446.515  |
| NM_016271 | 4154.219  | 3364.657  | AF119868  | 653.559   | 637.941   | NM_00037E | 7378.924  | 5397.356  |
| NM_01661E | 3878.055  | 3322.933  | NM_00505C | 3326.721  | 2415.523  | NM_00026E | 5717.394  | 3137.241  |
| NM_014481 | 1088.801  | 1071.786  | M33197    | 63430.145 | 62209.445 | NM_01884E | 1513.469  | 1425.747  |
| U22172    | 1581.078  | 1427.893  | NM_01897E | 10819.247 | 6464.299  | M33197    | 51867.48  | 49924.285 |
| AB032960  | 1093.971  | 1126.938  | NM_00335E | 7887.449  | 4313.351  | AF279890  | 1722.73   | 2555.008  |
| NM_014264 | 3976.562  | 3836.533  | NM_005074 | 1717.795  | 1638.353  | NM_00223E | 838.978   | 1024.881  |
| AF020089  | 1498.208  | 1312.355  | NM_01327Z | 740.84    | 600.086   | NM_01206E | 965.871   | 1177.81   |
| NM_006257 | 2074.751  | 1530.78   | NM_018057 | 1580.193  | 1097.916  | NM_00168E | 48972.961 | 57479.766 |
| NM_016281 | 6597.479  | 4965.438  | M33197    | 64543.988 | 66995.477 | NM_016601 | 840.092   | 767.996   |
| NM_004734 | 12249.162 | 11655.264 | NM_015717 | 2309.407  | 2407.188  | NM_01790E | 6770.433  | 5122.65   |
| AK024793  | 1390.411  | 1491.47   | NM_01592E | 1610.871  | 2179.335  | NM_006981 | 760.154   | 739.812   |
| AF208291  | 1239.291  | 1277.894  | NM_00366E | 1689.228  | 2259.532  | M33197    | 54473.707 | 59243.438 |
| NM_00027E | 1569.481  | 1725.853  | AF220217  | 1404.762  | 1512.079  | AK027244  | 2287.098  | 2527.411  |
| NM_00001E | 64945.723 | 63287.441 | NM_01332Z | 19629.156 | 25606.588 | L40520    | 3779.736  | 4948.197  |
| AK023701  | 942.419   | 1023.206  | NM_014937 | 923.072   | 1927.203  | NM_00263Z | 8279.391  | 9323.798  |
| NM_01588E | 763.338   | 531.952   | NM_01742E | 2877.159  | 4126.573  | U11036    | 572.639   | 590.188   |
| BG491613  | 5750.45   | 5591.137  | M33197    | 1855.455  | 2022.769  | M33197    | 54339.961 | 53814.965 |
| AA397813  | 18990.789 | 13208.702 | NM_00085Z | 1811.898  | 1757.539  | NM_00287E | 2110.784  | 1957.451  |
| W47350    | 660.446   | 462.783   | NM_00084E | 2200.985  | 1883.464  | NM_01772Z | 2304.119  | 1417.32   |
| W68291    | 11072.966 | 11098.396 | M33197    | 62257.652 | 63754.863 | AK022922  | 1967.775  | 1441.628  |
| N64384    | 1121.453  | 1295.118  | NM_00093E | 1421.033  | 1129.017  | NM_00646Z | 5848.867  | 3801.861  |
| H-X 53655 | 1029.57   | 1008.838  | NM_00035E | 8390.691  | 5666.994  | AK024750  | 2203.812  | 1951.856  |
| H-U 05770 | 3914.722  | 3195.215  | NM_00639E | 6770.668  | 4081.364  | NM_00040C | 18851.898 | 18127.381 |
| H-M 65199 | 3917.464  | 3835.743  | NM_01430E | 5267.434  | 3300.359  | M33197    | 57398.977 | 54870.984 |
| H-M 32315 | 1816.451  | 1604.701  | NM_001084 | 5014.72   | 2874.578  | NM_00261Z | 2649.56   | 2029.217  |

|           |           |           |           |           |           |           |           |           |
|-----------|-----------|-----------|-----------|-----------|-----------|-----------|-----------|-----------|
| H-V00536M | 886.689   | 542.868   | NM_015983 | 2922.093  | 1872.118  | NM_004419 | 1559.525  | 1698.159  |
| H-D85429M | 2936.283  | 2336.775  | NM_018622 | 5358.35   | 3319.705  | U47635    | 4564.717  | 4062.672  |
| BF439832  | 1509.689  | 1111.052  | M33197    | 66042.07  | 65606.773 | NM_018650 | 2181.784  | 1857.506  |
| BG819162  | 680.337   | 739.005   | NM_005867 | 10746.744 | 13416.245 | AK026945  | 32520.504 | 29504.631 |
| NM_017532 | 4568.222  | 8564.601  | AK026031  | 14350.135 | 17283.404 | NM_004392 | 669.244   | 836.267   |
| M38449    | 4604.387  | 4502.536  | NM_016468 | 6083.442  | 6138.084  | M33197    | 61517.801 | 62545.41  |
| AB033044  | 2134.286  | 1523.338  | NM_007342 | 5888.773  | 8290.566  | NM_001154 | 5946.728  | 8158.93   |
| AB014564  | 847.223   | 567.867   | NM_005672 | 839.523   | 523.037   | NM_001819 | 1328.795  | 1937.324  |
| NM_020230 | 2043.697  | 1538.127  | D25217    | 23574.982 | 28561.449 | NM_001993 | 412.846   | 568.032   |
| NM_006352 | 1306.153  | 1158.86   | NM_006351 | 7136.62   | 8157.766  | BF575833  | 372.897   | 613.925   |
| NM_016430 | 626.011   | 564.676   | M33197    | 61608.086 | 66077.375 | NM_015725 | 5457.755  | 5481.484  |
| NM_004447 | 3297.463  | 2474.019  | NM_004683 | 18391.063 | 14703.772 | R61452    | 965.277   | 1123.155  |
| NM_001204 | 1073.547  | 666.459   | AK025263  | 2614.745  | 3514.586  | R19938    | 3558.883  | 4340.996  |
| BF131321  | 749.494   | 607.167   | M33197    | 63210.09  | 65503.301 | N94487    | 5337.116  | 4577.804  |
| NM_012116 | 1362.062  | 1497.628  | NM_001467 | 1569.058  | 1900.876  | AI886795  | 1857.453  | 1750.404  |
| NM_000020 | 2448.841  | 3180.895  | NM_004688 | 12934.685 | 7275.532  | D10495    | 3060.281  | 1993.874  |
| NM_000956 | 638.681   | 799.475   | M33197    | 55840.121 | 40214.262 | BF344679  | 1134.447  | 981.291   |
| NM_002442 | 1686.077  | 1608.563  | NM_004860 | 4209.145  | 5219.084  | M36634    | 714.614   | 748.622   |
| AB033091  | 5969.515  | 5101.628  | AF217190  | 7723.626  | 6877.982  | M14156    | 989.267   | 1004.028  |
| NM_004557 | 3698.188  | 3079.063  | AB028981  | 33783.023 | 43039.184 | U87939    | 1004.048  | 850.173   |
| NM_014757 | 2037.605  | 1856.934  | NM_006800 | 5726.231  | 6751.208  | U86961    | 546.267   | 653.9     |
| NM_017893 | 576.135   | 589.19    | NM_002476 | 916.4     | 1510.553  | AK094237  | 1821.923  | 1647.968  |
| NM_001584 | 1641.699  | 1551.661  | NM_002729 | 9928.628  | 12681.712 | L07592    | 2014.219  | 2199.034  |
| NM_012259 | 38673.969 | 57682.199 | M33197    | 9467.343  | 7218.392  | BF434335  | 15786.804 | 16995.494 |
| AF272357  | 1534.458  | 2038.917  | AL050139  | 6102.364  | 6033.491  | M57627    | 554.356   | 682.5     |
| NM_016372 | 32951.223 | 51940.164 | NM_004558 | 5204.034  | 5241.042  | NM_002993 | 1108.96   | 1484.079  |
| AB020705  | 1008.971  | 1156.27   | AL079296  | 1702.145  | 1086.308  | AK026946  | 1827.829  | 2492.282  |
| NM_002980 | 1359.966  | 1259.955  | NM_014770 | 3125.963  | 2605.92   | M33197    | 58404.645 | 56277.039 |
| AB006423  | 1056.676  | 1740.263  | AB037737  | 918.836   | 1097.802  | NM_003192 | 6062.838  | 8006.678  |
| NM_006093 | 2277.199  | 2018.02   | AK023103  | 2702.289  | 2942.273  | NM_018449 | 3561.446  | 6111.707  |
| NM_002416 | 358.785   | 621.996   | NM_017858 | 2131.602  | 2802.716  | AF086129  | 607.69    | 714.728   |
| NM_002728 | 822.866   | 809.602   | NM_019059 | 58172.641 | 62639.848 | D79994    | 951.715   | 1184.419  |
| NM_000450 | 402.36    | 467.22    | D80008    | 1486.822  | 1601.319  | NM_014458 | 2745.204  | 2614.426  |
| NM_000448 | 362.371   | 383.947   | X56789    | 421.501   | 961.444   | AF235049  | 3571.854  | 5422.804  |
| NM_004513 | 4283.872  | 4173.25   | AK001069  | 43810.305 | 43183.359 | M33197    | 59883.844 | 56889.895 |
| NM_001708 | 14343.233 | 12568.033 | NM_004132 | 4686.668  | 6585.302  | NM_007369 | 490.683   | 554.445   |
| NM_017735 | 2082.54   | 1921.16   | NM_014844 | 4667.152  | 6479.145  | NM_014776 | 1678.863  | 1591.729  |
| NM_000276 | 1529.826  | 1846.15   | M33197    | 63544.391 | 63452.402 | NM_006480 | 8647.481  | 9224.65   |
| NM_000019 | 59572.844 | 59021.176 | NM_018492 | 3677.636  | 3209.448  | NM_007223 | 17951.654 | 15389.127 |
| AK023701  | 1080.553  | 1119.302  | NM_001346 | 1664.886  | 951.771   | NM_000145 | 1198.125  | 1272.287  |
| BE382905  | 990.289   | 1101.713  | NM_003377 | 10103.939 | 4888.714  | AF030107  | 972.563   | 948.359   |
| NM_002152 | 7634.33   | 11706.834 | NM_002220 | 3758.811  | 2069.504  | NM_000871 | 629.708   | 729.994   |
| NM_001701 | 370.796   | 468.772   | AB033034  | 1627.136  | 833.617   | M33197    | 64574.426 | 59121.617 |
| AK022558  | 3684.528  | 4123.197  | D38169    | 3085.816  | 2510.875  | NM_018968 | 254.285   | 406.373   |
| NM_006476 | 33504.387 | 33635.578 | M33197    | 64532.633 | 65590.703 | NM_000264 | 474.937   | 519.077   |
| AK023787  | 1694.638  | 1569.816  | NM_018171 | 762.177   | 798.891   | AB058740  | 6726.267  | 6998.969  |
| NM_015697 | 3587.946  | 2892.513  | NM_002447 | 14975.345 | 12861.107 | NM_003385 | 825.715   | 700.082   |
| AF086489  | 552.468   | 625.259   | NM_014145 | 14213.246 | 12950.353 | AF279890  | 1945.751  | 2336.804  |
| NM_007177 | 6966.165  | 7690.128  | NM_002223 | 2938.348  | 2742.713  | NM_002236 | 1286.202  | 1435.318  |
| NM_000809 | 604.871   | 480.132   | M33197    | 59715.547 | 63415.551 | NM_012069 | 1116.121  | 1369.688  |
| AB018258  | 414.098   | 370.916   | NM_005490 | 4481.369  | 4148.113  | NM_001689 | 44083.141 | 56049.047 |
| AL359592  | 790.344   | 979.907   | NM_003151 | 2228.16   | 2208.333  | NM_016601 | 705.944   | 1035.19   |
| NM_006078 | 4981.623  | 5645.339  | NM_006811 | 5166.283  | 4564.186  | NM_017905 | 6504.567  | 8828.155  |

|           |           |           |           |           |           |           |           |           |
|-----------|-----------|-----------|-----------|-----------|-----------|-----------|-----------|-----------|
| NM_000824 | 639.865   | 908.819   | NM_005601 | 1652.654  | 1767.15   | M33197    | 57473.383 | 55325.543 |
| NM_017532 | 3337.721  | 4229.28   | NM_016151 | 5489.749  | 6281.441  | NM_006815 | 19912.961 | 30206.559 |
| M38449    | 3833.679  | 6148.665  | NM_004324 | 1796.821  | 2488.663  | NM_001663 | 5106.753  | 6735.846  |
| AK026842  | 663.381   | 724.496   | NM_005614 | 16297.361 | 22042.797 | NM_004218 | 7357.999  | 8479.501  |
| NM_002395 | 2850.854  | 2562.203  | AK026270  | 1824.595  | 2425.658  | NM_016530 | 1420.203  | 2059.957  |
| NM_004255 | 783.095   | 948.776   | NM_004556 | 3677.056  | 3163.823  | NM_014804 | 913.59    | 2930.667  |
| NM_016271 | 3885.951  | 3810.124  | D90075    | 3897.136  | 2448.912  | NM_012455 | 3886.135  | 3903.02   |
| NM_016619 | 3827.118  | 2541.881  | M33197    | 61874.434 | 39353.098 | NM_002806 | 8334.314  | 10383.043 |
| NM_014481 | 942.055   | 914.309   | AK023827  | 2059.631  | 966.054   | M33197    | 63037.398 | 56627.289 |
| U22172    | 1762.221  | 1856.37   | AK021702  | 1543.263  | 1087.718  | NM_001716 | 392.033   | 439.005   |
| AB032960  | 1334.083  | 1245.881  | NM_003885 | 864.642   | 687.282   | NM_006564 | 3717.563  | 5388.991  |
| NM_014264 | 3586.589  | 3968.415  | NM_016448 | 3369.165  | 3592.571  | NM_004802 | 812.323   | 830.202   |
| AF020089  | 1954.473  | 1823.963  | NM_003936 | 1389.459  | 1411.009  | NM_002983 | 861.998   | 1084.703  |
| NM_006257 | 2366.713  | 2336.451  | M33197    | 64554.453 | 66219.898 | NM_000074 | 4212.852  | 4558.798  |
| NM_016281 | 7686.438  | 6792.304  | NM_002688 | 3052.174  | 2811.008  | NM_020393 | 424.124   | 494.552   |
| AK024793  | 2657.814  | 4260.766  | NM_004415 | 3733.727  | 3597.417  | M33197    | 52661.637 | 50664.422 |
| NM_012255 | 23858.439 | 20795.111 | NM_007278 | 15605.839 | 11158.375 | NM_002613 | 2805.226  | 2946.336  |
| AF272357  | 1148.137  | 1276.033  | NM_005219 | 11249.584 | 9710.567  | NM_004415 | 1695.99   | 1702.275  |
| NM_016372 | 26306.064 | 27471.137 | NM_004723 | 12684.766 | 11909.011 | U47635    | 2468.308  | 2920.635  |
| AB020705  | 927.892   | 836.777   | M33197    | 41543.355 | 42914.938 | NM_018650 | 1257.658  | 1792.144  |
| NM_002980 | 1339.336  | 1677.184  | NM_018413 | 4756.499  | 4575.534  | AK026945  | 24968.574 | 36556.219 |
| NM_015886 | 773.551   | 926.143   | AB018299  | 24251.342 | 26170.352 | NM_002828 | 1708.928  | 2519.802  |
| BG491613  | 6374.317  | 5623.016  | NM_005245 | 3991.029  | 4475.187  | NM_014365 | 1951.194  | 2307.954  |
| AA397813  | 17986.186 | 14553.897 | M33197    | 61434.051 | 66217.344 | M33197    | 61184.52  | 61376.23  |
| W68291    | 8947.507  | 6972.344  | NM_016219 | 11825.178 | 16560.314 | NM_001398 | 17742.535 | 23651.869 |
| N64384    | 896.321   | 740.802   | NM_004751 | 1114.816  | 1450.208  | AB050049  | 4654.913  | 7122.187  |
| H-X 53655 | 923.402   | 1035.595  | AK025605  | 3443.2    | 3249.271  | J05125    | 193.507   | 1410.963  |
| H-U 05770 | 3424.327  | 3656.209  | NM_007000 | 4479.624  | 2949.114  | NM_001995 | 3121.862  | 2666.303  |
| H-M 65199 | 4377.517  | 4300.073  | M23161    | 7620.642  | 4701.896  | NM_000183 | 13188.129 | 9219.903  |
| H-M 32315 | 2243.056  | 2101.078  | NM_003197 | 4131.722  | 2589.236  | AY004175  | 1050.538  | 1355.744  |
| H-V00536M | 800.314   | 1031.315  | AF176705  | 2601.27   | 1786.225  | M33197    | 58944.609 | 54713.762 |
| H-D85429M | 3843.237  | 3761.974  | D29012    | 8968.463  | 7805.728  | NM_012327 | 2548.21   | 3977.463  |
| BG819162  | 847.603   | 1477.189  | NM_017414 | 845.58    | 923.934   | NM_000904 | 1104.063  | 1753.291  |
| NM_002728 | 622.764   | 591.18    | NM_012179 | 23454.135 | 16224.807 | NM_016048 | 1916.764  | 2104.267  |
| NM_004513 | 3714.315  | 3770.821  | NM_002793 | 5891.568  | 5167.234  | NM_000375 | 8025.35   | 8495.138  |
| NM_001708 | 11919.87  | 11924.959 | NM_004788 | 2434.254  | 1913.686  | NM_000265 | 6828.46   | 5475.168  |
| NM_017735 | 1783.802  | 1879.661  | M33197    | 61934.305 | 65704.992 | NM_018845 | 2969.319  | 3292.203  |
| AB033044  | 2260.246  | 2343.557  | AL442083  | 3749.858  | 3764.497  | M33197    | 55573.879 | 60921.324 |
| AB014564  | 1018.889  | 754.341   | D63487    | 4848.668  | 4459.641  | M16796    | 406.117   | 353.689   |
| NM_020230 | 2774.622  | 2355.359  | AK097791  | 5660.805  | 5168.963  | AF015910  | 18047.539 | 19908.328 |
| NM_006352 | 1431.451  | 1208.861  | AK022705  | 1969.359  | 1995.211  | BC009993  | 1852.815  | 2157.255  |
| NM_016430 | 404.99    | 610.557   | NM_016404 | 2230.272  | 3079.183  | M33197    | 60601.125 | 63109.359 |
| NM_004447 | 2473.921  | 2364.386  | L03426    | 2142.306  | 2203.691  | NM_016824 | 706.06    | 1270.275  |
| NM_001204 | 757.919   | 823.858   | M33197    | 57540.762 | 63310.492 | NM_003031 | 3323.216  | 4376.655  |
| BF131321  | 415.476   | 543.641   | NM_020163 | 1610.158  | 1486.088  | NM_007170 | 589.787   | 1445.101  |
| NM_012116 | 869.663   | 992.774   | NM_006608 | 3748.548  | 4737.076  | NM_003008 | 1823.614  | 1951.868  |
| NM_000020 | 2191.688  | 1871.06   | M34356    | 3128.931  | 2335.607  | M33197    | 59993.203 | 62617.465 |
| NM_000956 | 782.601   | 1173.685  | AJ133115  | 5098.004  | 3532.094  | AK027244  | 2310.231  | 2708.809  |
| NM_002442 | 1410.23   | 1444.562  | X51630    | 8065.839  | 4778.302  | L40520    | 3178.71   | 4221.593  |
| AB033091  | 5835.839  | 4614.901  | NM_005056 | 1897.673  | 792.473   | NM_002633 | 8119.389  | 7536.427  |
| NM_004557 | 4385.036  | 5218.808  | AF208502  | 11298.376 | 5673.604  | U11036    | 759.179   | 1137.851  |
| NM_014757 | 2594.189  | 2653.84   | M33197    | 55098.07  | 39041.922 | M33197    | 57500.168 | 57848.563 |
| NM_017893 | 448.075   | 627.656   | AF264750  | 12852.761 | 9382.219  | NM_002878 | 2442.369  | 2928.344  |

|           |           |           |           |           |           |           |           |           |
|-----------|-----------|-----------|-----------|-----------|-----------|-----------|-----------|-----------|
| NM_001584 | 1833.592  | 1824.495  | NM_006980 | 958.497   | 774.44    | NM_017723 | 2781.521  | 3466.277  |
| AB018258  | 439.061   | 301.08    | AK023904  | 2756.997  | 2204.843  | AK022922  | 2577.476  | 3229.357  |
| NM_006078 | 4751.692  | 4789.984  | NM_017956 | 3731.101  | 3499.665  | NM_006462 | 5450.093  | 5976.222  |
| NM_005953 | 18131.018 | 60369.012 | NM_016496 | 1924.764  | 1333.807  | AK024750  | 2187.523  | 2380.533  |
| AB006423  | 1126.3    | 1014.101  | NM_014309 | 4078.073  | 3252.576  | NM_000400 | 18413.082 | 18480.436 |
| AJ132084  | 317.331   | 359.464   | M33197    | 36632.574 | 37186.496 | NM_015885 | 3565.335  | 4533.162  |
| NM_005719 | 58911.445 | 54755.145 | NM_004094 | 1032.097  | 977.145   | NM_015888 | 44933.918 | 54942.488 |
| NM_006093 | 3609.256  | 4188.85   | NM_020236 | 2175.322  | 1651.548  | M33197    | 47647.348 | 52739.305 |
| NM_006664 | 102.462   | 662.682   | AK027059  | 5564.509  | 5956.141  | NM_004276 | 2082.283  | 2999.562  |
| NM_002416 | 397.367   | 783.557   | AF151109  | 9919.146  | 9431.743  | NM_002332 | 5644.818  | 7331.118  |
| NM_014264 | 4171.778  | 3471.316  | NM_015414 | 64505.93  | 79253.859 | NM_002855 | 1740.257  | 2283.153  |
| AF020089  | 1398.46   | 1184.574  | L34070    | 4288.313  | 4748.657  | NM_005246 | 2016.907  | 1980.152  |
| NM_006257 | 1856.016  | 1348.684  | NM_016475 | 3744.158  | 2829.301  | NM_017651 | 805.92    | 2053.312  |
| NM_016281 | 6253.427  | 4596.917  | NM_001865 | 59883.988 | 37880.582 | AF161339  | 5494.643  | 5602.508  |
| NM_004734 | 11184.467 | 11590.678 | NM_006441 | 3574.648  | 2301.494  | M33197    | 65657.945 | 62851.246 |
| AK024793  | 1407.033  | 1822.277  | NM_001918 | 1486.943  | 871.588   | AK000354  | 4627.302  | 4268.82   |
| AF208291  | 1292.109  | 1379.938  | NM_018245 | 2298.726  | 1866.334  | AL161984  | 489.907   | 503.642   |
| NM_000276 | 1353.719  | 1877.465  | M33197    | 59037.297 | 45357.832 | NM_014882 | 782.566   | 575.797   |
| NM_000019 | 58582.035 | 59010.23  | NM_012117 | 5089.318  | 2941.932  | NM_000836 | 1327.92   | 1423.254  |
| AK023701  | 733.324   | 907.933   | D17130    | 61340.113 | 62544.082 | M33197    | 61832.254 | 60714.973 |
| BE382905  | 648.077   | 721.459   | X76302    | 4695.583  | 3688.021  | NM_001510 | 647.085   | 679.617   |
| NM_002152 | 6034.394  | 5845.312  | AK026276  | 566.031   | 562.665   | AK024474  | 3127.373  | 2982.315  |
| NM_001701 | 447.061   | 421.145   | M33197    | 65819.234 | 65386.578 | NM_017901 | 1298.915  | 1112.748  |
| AK022558  | 3694.298  | 3582.812  | X52354    | 1184.613  | 1883.946  | NM_004272 | 1952.197  | 1471.088  |
| NM_006476 | 34054.809 | 33919.996 | NM_005413 | 960.727   | 1353.883  | NM_017585 | 500.406   | 639.706   |
| AK023787  | 1789.129  | 1906.722  | NM_002315 | 1036.148  | 1209.284  | AK023582  | 483.178   | 736.954   |
| NM_002133 | 1537.282  | 2359.003  | AK024191  | 591.065   | 736.78    | NM_000358 | 1269.283  | 1732.568  |
| NM_007177 | 8821.516  | 9729.991  | D83781    | 1583.032  | 1103.571  | NM_001930 | 6467.525  | 9261.523  |
| NM_001743 | 32511.826 | 38185.313 | AL832699  | 3873.267  | 2745.378  | AK025270  | 672.733   | 825.601   |
| M38449    | 4129.788  | 5048.75   | NM_012191 | 1246.954  | 998.77    | NM_001564 | 1681.807  | 2447.082  |
| AK026842  | 574.042   | 666.799   | M33197    | 66101.398 | 48738.086 | M33197    | 55211.422 | 54926.668 |
| NM_002395 | 2791.568  | 2425.336  | AK000757  | 721.446   | 414.982   | AF263537  | 16267.599 | 18029.945 |
| NM_004259 | 822.99    | 748.059   | NM_018139 | 1707.035  | 836.737   | NM_015895 | 4875.74   | 5084.462  |
| NM_016271 | 3536.476  | 4864.77   | NM_014805 | 2852.499  | 1798.731  | NM_000185 | 1291.35   | 1470.779  |
| NM_014481 | 1265.657  | 2401.986  | AF052120  | 1298.229  | 1186.404  | NM_004690 | 1180.357  | 780.627   |
| U22172    | 2486.297  | 2794.669  | NM_014871 | 1706.22   | 1239.03   | M33197    | 59618.961 | 57916.844 |
| AB032960  | 1453.627  | 1674.041  | M33197    | 59441.984 | 58396.535 | NM_013374 | 20628.691 | 14240.663 |
| NM_017675 | 817.12    | 618.421   | AK025794  | 2395.193  | 2154.102  | NM_003252 | 8011.467  | 5680.164  |
| NM_015991 | 605.429   | 514.841   | AK024522  | 656.728   | 691.585   | NM_001228 | 1165.262  | 691.612   |
| NM_005562 | 680.985   | 651.813   | NM_007198 | 3981.83   | 5438.507  | NM_016561 | 13513.308 | 12656.722 |
| NM_002342 | 2672.291  | 2516.892  | M33197    | 53057.926 | 60973.477 | NM_001225 | 3114.916  | 3457.424  |
| NM_002184 | 911.662   | 945.626   | AK023220  | 453.814   | 565.19    | NM_014245 | 13726.327 | 13979.882 |
| NM_014883 | 1111.348  | 1026.533  | M33197    | 65914.094 | 65142.121 | M33197    | 57169.441 | 56831.109 |
| U56387    | 1039.992  | 1099.662  | AK024981  | 16825.402 | 11222.035 | AB046822  | 691.43    | 556.627   |
| NM_003657 | 966.188   | 981.971   | AK027246  | 1151.241  | 848.158   | M33197    | 650.204   | 815.244   |
| AL049296  | 3831.688  | 3204.087  | U80766    | 2806.109  | 2147.814  | NM_000308 | 1656.633  | 2262.938  |
| NM_014471 | 31835.555 | 32813.82  | AK001638  | 1426.192  | 1114.763  | X69636    | 1981.086  | 1841.45   |
| NM_004397 | 1354.582  | 1628.307  | AF161386  | 7706.663  | 4940.318  | M33197    | 57702.258 | 56272.438 |
| NM_003189 | 484.967   | 381.296   | AL365369  | 3234.707  | 2605.016  | NM_004173 | 9201.673  | 9059.905  |
| NM_020238 | 2106.016  | 2297.641  | AK025454  | 3238.154  | 2187.273  | NM_013974 | 3479.582  | 2011.308  |
| D49356    | 1119.025  | 1774.262  | M33197    | 60954.969 | 53907.516 | NM_017547 | 3089.486  | 1726.514  |
| AJ250475  | 2339.98   | 2877.583  | X05826    | 4430.382  | 4124.745  | NM_003983 | 6079.777  | 5645.951  |
| NM_018579 | 2771.713  | 4887.16   | AJ001872  | 1470.63   | 1182.059  | AK023708  | 1494.644  | 1460.717  |

|           |           |           |           |           |           |           |           |           |
|-----------|-----------|-----------|-----------|-----------|-----------|-----------|-----------|-----------|
| NM_006201 | 2533.984  | 3575.921  | M33197    | 58770.383 | 56313.141 | NM_00210E | 1161.642  | 1028.718  |
| NM_007110 | 1428.392  | 2124.735  | AK023636  | 6865.215  | 9180.334  | M33197    | 57877.371 | 55799.246 |
| NM_00125E | 13525.459 | 17238.258 | D25272    | 1851.105  | 2050.812  | NM_018464 | 12423.151 | 9979.669  |
| U50383    | 6316.371  | 8862.376  | M33197    | 60114.66  | 65188.09  | D43948    | 1399.691  | 1143.278  |
| AK025085  | 5106.765  | 4291.992  | NM_02016E | 1316.425  | 1397.36   | NM_01231C | 4133.825  | 3285.761  |
| NM_00629C | 1190.611  | 1103.11   | AK025931  | 61043.309 | 42897.031 | BF382116  | 6478.584  | 5304.381  |
| AK022290  | 598.725   | 759.849   | M33197    | 966.635   | 1030.13   | NM_00319E | 7349.944  | 7289.943  |
| NM_00368C | 31834.531 | 31706.563 | AK021972  | 861.003   | 688.489   | AF113216  | 983.31    | 804.546   |
| AF118124  | 21038.643 | 20787.678 | M33197    | 58016.523 | 55873.984 | NM_005197 | 4368.813  | 3994.654  |
| NM_00484E | 4939.666  | 4608.442  | AK001083  | 1031.576  | 698.718   | AL137421  | 28259.027 | 40481.008 |
| AL137527  | 5414.584  | 4723.021  | AK000185  | 1173.101  | 769.57    | M33197    | 46478.266 | 56219.855 |
| AK026068  | 559.404   | 558.002   | M33197    | 54727.523 | 52785.727 | NM_007241 | 565.534   | 867.384   |
| J04974    | 14853.886 | 13716.555 | AK024406  | 849.155   | 1525.736  | NM_000124 | 702.097   | 849.759   |
| NM_00705E | 4834.754  | 5405.765  | AK024568  | 5376.107  | 5863.521  | NM_01799E | 3021.087  | 3961.291  |
| NM_00039E | 1170.686  | 1158.507  | M33197    | 68196.195 | 62949.863 | NM_014517 | 1969.689  | 1839.743  |
| NM_00152E | 1272.39   | 1409.097  | AK026277  | 5725.647  | 4559.353  | NM_00546E | 693.841   | 531.285   |
| NM_007014 | 1987.24   | 2777.994  | U10509    | 1590.094  | 1335.569  | NM_00426E | 984.252   | 989.761   |
| AL096740  | 650.652   | 1038.124  | NM_00716E | 31308.508 | 22403.563 | D31765    | 1155.685  | 903.507   |
| AF191545  | 392.11    | 427.255   | NM_01401E | 2800.095  | 2583.344  | NM_006107 | 6380.189  | 3325.337  |
| NM_014554 | 2501.594  | 2654.542  | AF085956  | 1541.413  | 1282.217  | NM_00417E | 1063.995  | 616.414   |
| AL137484  | 1529.677  | 1547.818  | NM_019116 | 921.29    | 774.482   | AF288288  | 8338.715  | 5525.792  |
| AK023968  | 980.05    | 1052.652  | AF147318  | 991.226   | 858.951   | NM_01764E | 4210.563  | 2717.078  |
| NM_00465E | 730.917   | 751.251   | M33197    | 52926.172 | 59536.93  | AL050368  | 981.755   | 420.717   |
| NM_00610E | 532.812   | 858.166   | AL137556  | 865.6     | 1458.074  | NM_00309E | 7741.047  | 5096.986  |
| AK025425  | 14116.213 | 11702.671 | NM_01469E | 5573.227  | 6740.919  | M33197    | 60060.93  | 54639.801 |
| AK025974  | 13397.07  | 13450.112 | AL359055  | 1420.022  | 1735.14   | NM_005861 | 903.617   | 795.227   |
| NM_01653E | 1058.235  | 945.006   | NM_01490E | 2783.332  | 2437.379  | NM_01884E | 2372.451  | 1706.643  |
| NM_005781 | 2257.573  | 2318.032  | AF086125  | 1528.405  | 1270.17   | NM_00376C | 2038.822  | 1654.137  |
| BC036740  | 9410.918  | 9974.857  | AK023547  | 1182.094  | 1132.793  | AB037759  | 1042.481  | 535.563   |
| NM_001747 | 13917.348 | 11639.932 | U67847    | 2146.103  | 1791.529  | AK025998  | 2840.863  | 2522.554  |
| NM_001148 | 8273.595  | 7225.767  | AL137321  | 4023.526  | 3094.784  | AL080080  | 7510.804  | 5959.201  |
| AF242522  | 3639.918  | 3076.73   | M33197    | 58684.148 | 55281.934 | AL117636  | 506.95    | 611.189   |
| AJ008152  | 1387.23   | 1368.84   | AK024207  | 2443.09   | 1933.028  | NM_01848E | 2003.117  | 2637.116  |
| NM_004024 | 3431.425  | 6062.548  | AK021843  | 927.128   | 965.744   | NM_01788C | 1432.181  | 1768.081  |
| X52345    | 18165.357 | 19785.115 | AF075025  | 4172.89   | 3559.01   | AF090945  | 1877.556  | 3074.869  |
| NM_00696E | 4918.98   | 5425.812  | AF088008  | 1759.427  | 1603.004  | M33197    | 54706.703 | 60009.648 |
| AF027142  | 58168.262 | 59974.379 | AK023528  | 1543.902  | 992.287   | NM_001161 | 5049.271  | 4832.963  |
| S67970    | 732.858   | 967.332   | M33197    | 58709.711 | 56443.68  | NM_004044 | 6256.882  | 7633.297  |
| AF221520  | 3456.455  | 3339.533  | AF147349  | 4520.988  | 4687.019  | NM_000221 | 4733.082  | 4701.001  |
| NM_006941 | 26808.34  | 30264.873 | AL050346  | 14862.159 | 10997.513 | H75678    | 1322.035  | 510.156   |
| AB037852  | 956.785   | 1160.874  | AK001520  | 4611.132  | 3782.905  | AB002359  | 2286.957  | 1493.998  |
| NM_00536C | 585.517   | 689.846   | D90070    | 3463.401  | 4426.277  | M33197    | 1666.249  | 1345.578  |
| NM_00434E | 2683.479  | 2685.668  | M33197    | 37610.977 | 35424.375 | NM_00219E | 1633.454  | 1568.784  |
| NM_00209E | 7276.459  | 8679.687  | AF086179  | 567.122   | 715.504   | AF024693  | 581.109   | 530.424   |
| NM_018077 | 1347.986  | 1381.329  | AK025807  | 1067.913  | 1164.56   | AK025905  | 858.843   | 914.043   |
| NM_01683E | 15947.333 | 15658.621 | M33197    | 58608.281 | 59958.598 | AL121733  | 719.958   | 642.42    |
| NM_00596E | 60050.328 | 56193.73  | AK025266  | 3660.144  | 2895.888  | M33197    | 34014.703 | 43403.68  |
| AK021416  | 1086.798  | 889.174   | AK001843  | 4148.299  | 3074.416  | NM_01448C | 1139.028  | 1414.876  |
| NM_018471 | 10655.635 | 11030.027 | AK000548  | 44923.684 | 32894.555 | NM_01416E | 4130.089  | 3844.118  |
| NM_00381E | 18474.357 | 20074.498 | NM_00392C | 8463.224  | 7212.301  | NM_004964 | 10448.949 | 9516.135  |
| NM_00656C | 1832.383  | 1673.409  | NM_004787 | 12111.466 | 8770.262  | AL117497  | 1560.535  | 1415.821  |
| NM_01618E | 1678.67   | 1605.983  | AF087984  | 4993.76   | 4398.71   | AF147437  | 845.099   | 1120.886  |
| NM_00487E | 5446.02   | 4685.481  | M33197    | 60507.332 | 63047.039 | M33197    | 57794.211 | 57196.969 |

|           |           |           |           |           |           |           |           |           |
|-----------|-----------|-----------|-----------|-----------|-----------|-----------|-----------|-----------|
| NM_00195E | 33740.805 | 31057.875 | AK022273  | 2545.8    | 2347.729  | AL137269  | 2870.782  | 2732.192  |
| NM_004757 | 2697.208  | 2840.499  | NM_015882 | 953.001   | 934.786   | AK021983  | 1294.166  | 1005.074  |
| NM_015904 | 6103.273  | 5387.772  | AK027161  | 771.149   | 475.722   | Y11681    | 6034.624  | 4972.786  |
| NM_00196C | 49254.367 | 42833.91  | AK024271  | 1303.491  | 1144.052  | AL110135  | 13482.182 | 11805.955 |
| NM_018122 | 3202.432  | 3079.549  | AK021650  | 3946.132  | 5124.346  | NM_006993 | 8674.894  | 8430.057  |
| AF035318  | 1113.523  | 907.579   | AL050210  | 3655.85   | 4522.768  | M33197    | 60575.488 | 58638.789 |
| NM_01545E | 4151.677  | 2791.666  | L37699    | 2061.124  | 2640.871  | AF086439  | 686.612   | 918.716   |
| AK025056  | 1929.411  | 1499.918  | M33197    | 62048.934 | 62622.184 | M33197    | 59511.738 | 57016.832 |
| AF140710  | 2787.462  | 3187.873  | AL050173  | 1285.938  | 1353.704  | AF038171  | 774.981   | 494.916   |
| NM_01208E | 9913.747  | 10661.561 | D80002    | 1727.888  | 2650.367  | AF052160  | 735.435   | 926.451   |
| NM_017947 | 609.586   | 682.405   | U17637    | 5465.894  | 6087.476  | AK026512  | 1147.337  | 1248.97   |
| NM_002494 | 5283.726  | 5343.444  | AF207831  | 563.544   | 905.397   | M33197    | 58134.527 | 55051.266 |
| M58510    | 4882.698  | 4746.75   | NM_00354E | 883.627   | 786.603   | AF144233  | 2747.756  | 2606.193  |
| NM_000782 | 933.035   | 776.606   | M33197    | 48094.555 | 47039.129 | AF085925  | 1209.259  | 971.627   |
| BE396003  | 1008.637  | 1124.66   | NM_018272 | 3362.568  | 3127.669  | AK022986  | 1416.888  | 684.121   |
| AK023300  | 1269.847  | 1389.177  | R19938    | 2966.465  | 3420.124  | AF085975  | 1589.161  | 1324.983  |
| NM_018082 | 2436.695  | 2161.654  | N94487    | 4631.927  | 5143.627  | M33197    | 57096.328 | 51832.848 |
| NM_003904 | 3696.191  | 4193.782  | AI886795  | 2059.215  | 2049.55   | AL137390  | 1760.53   | 1536.235  |
| NM_006234 | 12752.839 | 13512.972 | D10495    | 4087.475  | 3858.504  | AL137611  | 4090.877  | 3054.4    |
| AB028987  | 2938.224  | 2909.879  | BF344679  | 1406.938  | 1695.465  | AL359566  | 18677.867 | 16193.012 |
| NM_003594 | 1213.524  | 1349.71   | M36634    | 686.098   | 734.708   | AL137427  | 1729.986  | 1793.86   |
| NM_005521 | 2559.852  | 2810.318  | M14156    | 1710.047  | 1662.396  | AL157460  | 3926.553  | 4263.23   |
| AF164438  | 5804.75   | 6357.386  | U87939    | 1055.578  | 761.712   | AL359595  | 464.852   | 570.393   |
| AB040893  | 2014.186  | 1930.224  | U86961    | 1236.111  | 1224.044  | M33197    | 47157.254 | 47677.375 |
| AK025844  | 1586.285  | 1318.771  | L07592    | 892.983   | 1226.941  | AK026718  | 772.825   | 917.124   |
| AL137727  | 1092.77   | 875.755   | NM_006981 | 886.805   | 1165.889  | AJ245600  | 836.254   | 979.027   |
| L17327    | 558.909   | 568.018   | SR2       | 51476.898 | 59877.199 | AF085899  | 641.452   | 888.843   |
| AF074986  | 682.975   | 535.592   | SR4       | 13259.037 | 15340.146 | AK022035  | 6218.075  | 6558.926  |
| AF075004  | 323.978   | 388.309   | SR6       | 1924.72   | 2270.146  | M33197    | 58169.031 | 55520.16  |
| AL049240  | 1911.84   | 1783.478  | SR8       | 7347.083  | 27975.967 | NM_004337 | 1274.777  | 1301.613  |
| U80773    | 1058.344  | 979.568   | SR10      | 27888.41  | 10782.129 | AK022141  | 1090.959  | 947.934   |
| AK021745  | 1118.013  | 963.385   | CY3Cy5    | 6262.642  | 445.978   | AK023942  | 23914.148 | 28372.432 |
| L38937    | 3511.221  | 2992.43   | M33197    | 63105.223 | 61665.895 | M33197    | 57729.828 | 58037.246 |
| U90907    | 463.19    | 391.409   | NM_007223 | 24253.984 | 24962.039 | AK027207  | 817.9     | 932.166   |
| AK024327  | 1324.999  | 1167.905  | NM_000145 | 1035.707  | 1103.683  | AJ227892  | 4718.661  | 3835.843  |
| AK021700  | 532.744   | 513.502   | AF030107  | 1438.626  | 1620.005  | M33197    | 54427.496 | 49628.195 |
| AK000801  | 2030.742  | 2243.021  | NM_000871 | 768.707   | 898.344   | AK022013  | 460.277   | 497.83    |
| D85433    | 3068.357  | 3400.93   | M33197    | 57216.875 | 59630.344 | AK022155  | 1591.728  | 1720.692  |
| AF086184  | 6497.845  | 6239.344  | AF086924  | 35836.633 | 40172.816 | AK022288  | 1454.14   | 1377.686  |
| NM_01827E | 2490.955  | 2928.03   | AB058740  | 3473.25   | 3369.283  | AK021916  | 744.911   | 892.572   |
| AL049266  | 1639.793  | 1822.906  | NM_004392 | 726.892   | 1354.171  | AK024201  | 957.825   | 919.55    |
| AK021560  | 601.094   | 564.234   | M33197    | 57505.5   | 61376.371 | M33197    | 59449.199 | 56207.398 |
| AF088045  | 568.77    | 552.807   | NM_001154 | 6872.005  | 11982.675 | AK022084  | 366.672   | 572.982   |
| AF007149  | 579.454   | 553.239   | NM_001819 | 1370.764  | 1908.899  | AK023891  | 1216.638  | 1338.08   |
| AK001469  | 905.886   | 770.702   | NM_001993 | 995.716   | 1638.024  | AK026878  | 1056.308  | 987.046   |
| AK021627  | 912.331   | 781.575   | BF575833  | 606.695   | 1025.399  | AK023357  | 1312.06   | 1001.048  |
| AF085859  | 2125.791  | 1706.185  | NM_01572E | 3477.433  | 4059.38   | AK021589  | 707.846   | 842.001   |
| AJ420504  | 378.423   | 460.86    | R61452    | 1506.19   | 1809.966  | D17152    | 8606.824  | 7823.176  |
| AK026307  | 995.507   | 1021.975  | NM_01245E | 2678.102  | 4116.512  | AK024464  | 9272.837  | 11146.46  |
| AF075047  | 162.929   | 497.806   | NM_00280E | 6167.467  | 8120.617  | AK026748  | 695.884   | 753.779   |
| AL049260  | 472.877   | 624.121   | M33197    | 64932.207 | 64934.066 | AK023638  | 720.333   | 809.199   |
| AL049975  | 1458.669  | 1706.993  | NM_006564 | 5372.855  | 6024.529  | AK025423  | 1044.112  | 999.871   |
| AL080067  | 1013.429  | 1053.216  | NM_004802 | 1213.94   | 1233.537  | M33197    | 60824.078 | 54796.641 |

|           |           |           |           |           |           |           |           |           |
|-----------|-----------|-----------|-----------|-----------|-----------|-----------|-----------|-----------|
| AL117464  | 3928.772  | 3815.067  | M33197    | 59638.551 | 60852.637 | AK024161  | 562.284   | 629.637   |
| AL080160  | 570.576   | 637.388   | NM_000074 | 2812.723  | 2737.346  | AK021682  | 17094.488 | 18055.979 |
| AL157477  | 2584.18   | 2439.664  | M57627    | 1126.663  | 2016.313  | AJ012500  | 1529.042  | 2133.279  |
| AB002318  | 1347.773  | 1260.818  | AK026946  | 1274.529  | 1932.221  | L19368    | 407.197   | 846.235   |
| AL357535  | 1740.324  | 1882.269  | M33197    | 62703.82  | 63550.918 | U00944    | 739.821   | 782.65    |
| AL049951  | 885.23    | 1064.811  | NM_003192 | 5975.733  | 7185.358  | BC035058  | 1208.143  | 1235.619  |
| AK024963  | 810.123   | 857.883   | NM_018449 | 3807.277  | 5822.968  | X57566    | 3178.478  | 2489.594  |
| AK023725  | 858.183   | 655.108   | AF086129  | 1218.182  | 1727.115  | M33197    | 56235.352 | 54301.09  |
| AK022936  | 2023.757  | 1856.393  | D79994    | 760.208   | 997.674   | NM_018616 | 4445.086  | 4270.32   |
| AK024385  | 1817.149  | 1653.612  | NM_014458 | 1821.397  | 2235.374  | AK023809  | 1365.084  | 1372.566  |
| NM_017709 | 764.307   | 927.221   | AF235049  | 3203.736  | 4385.848  | M87943    | 62108.117 | 59121.137 |
| AF049615  | 746.288   | 562.702   | NM_001995 | 1352.208  | 1520.417  | AL360137  | 872.268   | 767.206   |
| NM_014358 | 12224.218 | 10068.563 | NM_000183 | 8110.738  | 9442.152  | U28131    | 53518.645 | 55117.098 |
| AF009282  | 3333.105  | 3319.487  | AY004175  | 1206.795  | 1594.486  | NM_006088 | 35212.23  | 37283.43  |
| AF024704  | 6960.227  | 7925.973  | M33197    | 59507.875 | 60772.762 | NM_018265 | 701.806   | 1084.096  |
| AF056431  | 920.503   | 1014.561  | NM_012327 | 2662.84   | 3319.333  | AF130086  | 2788.324  | 3290.347  |
| NM_016412 | 832.56    | 813.239   | NM_000904 | 911.002   | 1205.021  | AK023858  | 3175.718  | 3678.823  |
| AF009293  | 1115.757  | 873.65    | NM_016048 | 1807.861  | 2224.032  | M33197    | 53215.695 | 54319.793 |
| NM_004158 | 57665.348 | 55249.781 | NM_000375 | 8336.102  | 8983.288  | AF250920  | 3915.734  | 3825.769  |
| AF056444  | 6623.317  | 7729.402  | NM_000265 | 7192.774  | 5256.195  | NM_017733 | 2012.829  | 2026.089  |
| AK000989  | 1581.14   | 1676.855  | NM_018849 | 3417.477  | 4037.118  | NM_014042 | 3933.583  | 3945.289  |
| AK002210  | 2239.61   | 2516.82   | M33197    | 55259.949 | 59895.496 | M33197    | 59981.414 | 56077.191 |
| AK021677  | 728.711   | 789.398   | AF279890  | 1919.665  | 1990.936  | AF317550  | 684.855   | 1131.103  |
| AK001057  | 655.31    | 716.176   | NM_002236 | 1397.428  | 1321.345  | NM_003543 | 747.145   | 789.217   |
| AK021471  | 645.049   | 500.218   | NM_012069 | 1490.985  | 1766.176  | M33197    | 59842.953 | 54887.215 |
| AK021709  | 563.151   | 648.719   | NM_001689 | 50073.375 | 64027.219 | AK022372  | 1958.323  | 1859.31   |
| AK025109  | 1392.61   | 1507.241  | NM_006815 | 18656.674 | 18165.934 | AJ227863  | 1042.879  | 1075.684  |
| AK026057  | 1494.641  | 1557.456  | NM_001663 | 2813.183  | 3334.776  | AL137380  | 2035.386  | 2168.35   |
| AJ008117  | 9284.915  | 7278.716  | NM_004218 | 6812.495  | 8142.319  | M33197    | 61215.516 | 56072.434 |
| AJ008147  | 18502.914 | 14860.15  | NM_016530 | 1843.7    | 1914.013  | AL137658  | 12566.387 | 13904.477 |
| AK024369  | 1982.281  | 1657.405  | NM_014804 | 1196.756  | 1292.44   | D16888    | 4993.302  | 4922.051  |
| AL049244  | 433.321   | 547.632   | L40520    | 4376.454  | 5807.626  | AF068298  | 3542.4    | 4446.63   |
| L43345    | 795.984   | 804.473   | NM_002633 | 2348.257  | 2462.753  | Z70770    | 2114.763  | 2561.57   |
| AF180297  | 3247.181  | 3511.721  | NM_002878 | 3057.073  | 3821.412  | AJ227900  | 3967.75   | 4681.792  |
| AK023245  | 6006.458  | 6676.243  | NM_017723 | 3345.442  | 3807.179  | AK023242  | 1212.332  | 1452.631  |
| AF147303  | 680.145   | 745.047   | AK022922  | 2465.103  | 2729.63   | M33197    | 59402.328 | 57621.605 |
| AF086224  | 695.091   | 856.861   | NM_006462 | 6705.728  | 7290.557  | CY3Cy5    | 6212.153  | 180.007   |
| S56365    | 58612.332 | 56974.285 | AK024750  | 1763.998  | 1834.73   | BI762229  | 2429.575  | 2073.962  |
| AF186017  | 416.882   | 347.677   | NM_000400 | 16377.73  | 17271.537 | BG618320  | 688.755   | 507.611   |
| AK023607  | 1755.216  | 2038.224  | M33197    | 57481.324 | 58279.883 | Y00787    | 1323.431  | 1423.276  |
| AL049997  | 4148.413  | 4061.922  | NM_002613 | 1798.092  | 1559.231  | NM_007276 | 1972.418  | 1466.427  |
| AK024118  | 557.753   | 729.529   | NM_004419 | 1402.384  | 1238.253  | N34462    | 1117.757  | 948.264   |
| AK024509  | 972.079   | 950.219   | U47635    | 2157.97   | 1939.43   | AI658778  | 1790.722  | 1365.735  |
| NM_017847 | 2503.971  | 1868.459  | NM_018650 | 1321.367  | 1453.021  | L19067    | 2520.272  | 1746.385  |
| AL049675  | 1738.742  | 1563.659  | AK026945  | 18961.918 | 24167.41  | BI823365  | 1564.96   | 950.044   |
| AL050151  | 810.682   | 600.618   | NM_014369 | 1475.563  | 1854.634  | X06318    | 4575.468  | 2824.863  |
| NM_003537 | 17759.508 | 17336.621 | M33197    | 55178.172 | 58776.156 | AL834159  | 2358.905  | 2679.046  |
| AF056419  | 18805.408 | 22531.625 | NM_001398 | 18265.863 | 21130.701 | NM_000164 | 3353.559  | 4541.259  |
| AF074983  | 1108.215  | 1327.642  | AB050049  | 5596.22   | 5996.813  | SR5       | 4391.362  | 5703.636  |
| AK021862  | 648.477   | 794.095   | J05125    | 684.334   | 861.909   | SR9       | 16974.754 | 3250.5    |
| AK024177  | 1989.51   | 2309.14   | NM_001993 | 1030.437  | 1408.058  | CY3Cy5    | 5101.157  | 136.624   |
| AK024827  | 6815.28   | 8729.371  | BF575833  | 1152.652  | 1727.896  | NM_006314 | 1515.665  | 1444.63   |
| AK021952  | 1710.897  | 2641.405  | NM_000175 | 768.89    | 1022.378  | NM_000797 | 1295.284  | 969.719   |

|           |           |           |           |           |           |           |           |           |
|-----------|-----------|-----------|-----------|-----------|-----------|-----------|-----------|-----------|
| K01564    | 1197.584  | 1613.486  | NM_015725 | 3226.48   | 3417.415  | NM_016293 | 8248.081  | 9027.462  |
| AB023175  | 976.274   | 879.664   | M14156    | 1507.467  | 945.137   | AL080148  | 3881.911  | 2772.638  |
| AL359563  | 610.424   | 692.803   | U87939    | 683.931   | 519.9     | NM_020134 | 714.944   | 545.071   |
| NM_005304 | 316.922   | 460.931   | U47924    | 1542.178  | 1198.119  | NM_014061 | 1182.686  | 1182.176  |
| NM_014477 | 902.927   | 1058.69   | NM_005191 | 1496.856  | 1673.892  | BC034395  | 611.169   | 558.255   |
| AF086478  | 1621.439  | 1924.973  | AK094237  | 2473.854  | 2954.048  | NM_002479 | 902.566   | 538.161   |
| AF086022  | 1038.708  | 1062.405  | L07592    | 1064.907  | 1488.834  | NM_000348 | 1356.478  | 1724.53   |
| AK021514  | 36701.223 | 39679.387 | M33197    | 61559.762 | 59734.535 | NM_005059 | 518.276   | 976.895   |
| AJ008134  | 2208.17   | 2969.15   | AK027244  | 2283.974  | 2779.574  | NM_004950 | 1875.858  | 2830.35   |
| S71486    | 1169.37   | 1163.661  | NM_014458 | 3140.232  | 3064.519  | NM_002557 | 1889.369  | 1457.819  |
| L33808    | 12127.949 | 14326.4   | NM_007223 | 12161.08  | 8838.798  | AK021489  | 18521.525 | 19076.859 |
| D31886    | 1953.047  | 1408.313  | NM_000871 | 522.776   | 469.365   | NM_003895 | 516.985   | 326.118   |
| AK023330  | 2794.101  | 2563.303  | M33197    | 62102.734 | 56649.676 | NM_004317 | 3245.036  | 2810.211  |
| AF075071  | 1424.149  | 1172.752  | AF086924  | 43760.883 | 49822.145 | NM_014645 | 982.376   | 666.411   |
| AF001892  | 624.892   | 634.679   | NM_000264 | 571.307   | 1329.56   | NM_014708 | 2550.819  | 2384.415  |
| X93500    | 2047.526  | 2015.014  | AB058740  | 5831.968  | 4785.304  | NM_003693 | 619.506   | 644.469   |
| U79271    | 1580.357  | 2453.787  | NM_004392 | 1102.368  | 1277.319  | NM_000356 | 13692.604 | 14539.845 |
| NM_019888 | 880.153   | 1102.967  | M33197    | 61871.625 | 61135.16  | NM_018134 | 14264.684 | 15478.665 |
| AK024609  | 4274.951  | 5847.805  | NM_001154 | 7622.633  | 10365.517 | NM_013247 | 3010.81   | 2525.054  |
| AK023660  | 495.658   | 645.08    | NM_001819 | 1604.262  | 1903.569  | NM_006770 | 1436.262  | 939.81    |
| NM_018120 | 4281.167  | 4281.098  | NM_016938 | 957.064   | 1239.755  | NM_004703 | 1988.751  | 1724.602  |
| AK026874  | 2501.993  | 2848.093  | NM_004218 | 6636.041  | 7957.748  | NM_001512 | 1103.858  | 752.771   |
| AK024178  | 402.945   | 569.146   | NM_016530 | 1388.873  | 1518.213  | NM_014706 | 4097.437  | 3782.675  |
| D17217    | 1088.073  | 1580.195  | NM_014804 | 705.392   | 852.083   | AJ001348  | 991.386   | 468.375   |
| AF088033  | 1822.996  | 1977.536  | NM_006564 | 2342.58   | 1697.62   | NM_014007 | 1194.785  | 1369.888  |
| NM_020422 | 1335.124  | 1622.409  | NM_004802 | 932.227   | 720.355   | AF020314  | 10666.599 | 6830.698  |
| AK023628  | 447.2     | 483.084   | M33197    | 59393.402 | 58654.031 | NM_016332 | 4550.325  | 3347.523  |
| AY007156  | 1450.809  | 1428.984  | BF434335  | 14473.034 | 14927.359 | NM_006457 | 856.458   | 1240.064  |
| AF086408  | 27888.414 | 27284.283 | M57627    | 673.815   | 542.109   | NM_012105 | 486.322   | 664.378   |
| AK023979  | 1554.009  | 1562.161  | NM_002993 | 1852.519  | 1313.678  | S82470    | 1236.657  | 1156.528  |
| CY3Cy5    | 6067.371  | 318.51    | AK026946  | 1060.348  | 661.79    | AB028982  | 1454.777  | 1626.95   |
| U13738    | 614.1     | 663.154   | M33197    | 59689.996 | 56600.684 | NM_002004 | 3625.517  | 4482.923  |
| AF068236  | 38454.883 | 37824.004 | NM_003192 | 4539.235  | 3671.45   | NM_005121 | 999.044   | 800.202   |
| H94487    | 1078.483  | 1229.499  | NM_002828 | 1900.451  | 2231.763  | NM_001643 | 15411.868 | 14158.117 |
| BG681747  | 24991.891 | 26392.025 | NM_014369 | 2593.028  | 2844.647  | NM_020221 | 756.137   | 894.893   |
| H63077    | 2916.711  | 2149.75   | M33197    | 62687.023 | 61510.332 | NM_000747 | 1235.308  | 1177.728  |
| AA679352  | 17481.955 | 17292.742 | NM_001398 | 18365.914 | 18500.912 | NM_005415 | 2605.523  | 2622.364  |
| AA437291  | 481.533   | 498.475   | AB050049  | 5178.814  | 4160.721  | AJ275973  | 13573.65  | 11578.432 |
| X04503    | 3807.787  | 3670.157  | NM_005164 | 1145.015  | 1569.099  | NM_006493 | 1930.955  | 1561.095  |
| BI823872  | 5694.905  | 6821.408  | NM_000183 | 4658.481  | 3473.993  | U76362    | 1613.45   | 1079.336  |
| AA430552  | 3799.376  | 3947.63   | AY004175  | 810.912   | 702.42    | AF040248  | 794.677   | 797.795   |
| X66142    | 2118.192  | 2726.013  | M33197    | 60748.586 | 60876.09  | NM_014228 | 432.258   | 449.791   |
| NM_005913 | 369.913   | 529.288   | NM_012327 | 2116.267  | 1848.731  | AL832292  | 2930.784  | 4113.437  |
| R45054    | 2913.806  | 2889.489  | NM_000904 | 1231.623  | 1387.581  | NM_002618 | 1301.543  | 1061.366  |
| NM_000620 | 607.938   | 640.456   | NM_016048 | 755.452   | 564.453   | L27479    | 382.218   | 434.452   |
| NM_000905 | 7466.921  | 7299.897  | NM_000375 | 6534.515  | 6003.501  | NM_002193 | 826.331   | 668.23    |
| SR5       | 5085.737  | 4256.887  | NM_000265 | 6614.882  | 5824.197  | NM_001388 | 4579.298  | 4311.159  |
| SR7       | 6330.934  | 43063.961 | NM_018849 | 3426.308  | 3615.686  | X76770    | 3971.354  | 3396.678  |
| SR9       | 21090.813 | 4124.54   | AF279890  | 2011.435  | 1606.859  | AB037808  | 960.263   | 782.617   |
| CY3Cy5    | 6843.522  | 530.513   | NM_002236 | 1721.185  | 1327.914  | NM_016038 | 3457.279  | 3496.563  |
| AF312769  | 892.037   | 671.034   | NM_012069 | 1681.994  | 1632.461  | Z36821    | 4514.446  | 6059.906  |
| AB020668  | 1613.066  | 1531.019  | NM_001689 | 48678.691 | 54083.383 | AF289485  | 3321.486  | 3545.701  |
| NM_006203 | 14208.039 | 13965.012 | NM_016601 | 1040.3    | 818.354   | AF130092  | 898.834   | 1107.188  |



|           |           |           |           |           |           |           |           |           |
|-----------|-----------|-----------|-----------|-----------|-----------|-----------|-----------|-----------|
| NM_013261 | 394.602   | 323.474   | NM_017905 | 7084.384  | 5398.537  | NM_016095 | 3441.126  | 3105.677  |
| AF309553  | 3661.39   | 3675.163  | AK027244  | 1428.631  | 1116.508  | AK024794  | 1326.415  | 1273.539  |
| NM_003605 | 2748.914  | 3235.698  | L40520    | 2869.02   | 2095.959  | NM_019853 | 6418.433  | 3967.479  |
| NM_005586 | 3814.654  | 4983.251  | NM_002633 | 2545.335  | 1945.189  | NM_017992 | 5902.987  | 4806.196  |
| NM_012242 | 2308.398  | 2479.515  | NM_002878 | 2532.403  | 3105.195  | AK023061  | 443.151   | 472.886   |
| NM_006896 | 752.18    | 1047.915  | NM_017723 | 2327.47   | 1469.9    | NM_007255 | 1376.54   | 1128.81   |
| NM_001130 | 53891.887 | 56050.16  | AK022922  | 839.909   | 645.347   | NM_003668 | 6604.235  | 5016.509  |
| NM_002975 | 23069.471 | 28297.838 | NM_006462 | 5499.343  | 3866.9    | NM_013384 | 50117.617 | 46642.551 |
| AK023511  | 4176.218  | 4245.284  | AK024750  | 2804.823  | 1828.263  | NM_001187 | 932.984   | 664.061   |
| NM_002725 | 985.165   | 1048.219  | NM_000400 | 18454.955 | 12288.316 | NM_018241 | 1926.198  | 2694.5    |
| NM_014375 | 12440.919 | 14916.826 | M33197    | 58827.395 | 56824.488 | NM_000724 | 1973.012  | 1974.8    |
| NM_017812 | 12062.756 | 14243.57  | NM_002613 | 2085.687  | 1243.06   | NM_002557 | 1898.56   | 1965.205  |
| AF204173  | 808.011   | 833.944   | NM_004419 | 1615.547  | 1164.612  | BI762229  | 2562.744  | 2412.891  |
| J03260    | 2208.801  | 2364.204  | U47635    | 2432.699  | 2080.914  | BG618320  | 1201.66   | 1401.719  |
| AB014514  | 2827.751  | 3142.768  | NM_018650 | 1443.644  | 1118.609  | Y00787    | 1862.084  | 1818.03   |
| NM_002865 | 3568.586  | 3474.307  | AK026945  | 31429.08  | 22539.205 | NM_007276 | 2793.105  | 2215.153  |
| NM_003566 | 1328.648  | 786.608   | M33197    | 59833.77  | 59910.707 | N34462    | 1554.139  | 1608.976  |
| NM_013292 | 3213.348  | 3690.809  | NM_001819 | 1637.841  | 1176.14   | AI658778  | 2314.645  | 1676.624  |
| NM_002387 | 2044.503  | 2089.144  | NM_015725 | 2645.573  | 2402.105  | L19067    | 2571.883  | 2338.868  |
| NM_000069 | 975.145   | 820.408   | R61452    | 741.259   | 904.168   | Z48482    | 549.037   | 642.447   |
| AB023217  | 635.065   | 836.791   | AI886795  | 1274.483  | 932.878   | W60413    | 645.754   | 490.47    |
| L08902    | 808.231   | 753.341   | D10495    | 1625.49   | 935.365   | BI823365  | 1188.295  | 960.78    |
| J02639    | 2178.384  | 2164.089  | BF344679  | 671.166   | 665.682   | X06318    | 4494.613  | 3837.024  |
| NM_007263 | 14984.384 | 15152.378 | M36634    | 435.229   | 297.242   | AL834159  | 2732.328  | 2213.89   |
| AF206020  | 2496.06   | 2115.147  | M14156    | 1405.129  | 1039.437  | NM_000164 | 6025.356  | 5110.808  |
| NM_014410 | 1492.822  | 1338.254  | U87939    | 993.385   | 721.582   |           | 577.634   | 700.916   |
| AF305835  | 707.296   | 455.595   | AK094237  | 1282.677  | 1014.929  | NM_016217 | 3691.034  | 5553.778  |
| NM_002150 | 4515.845  | 4037.579  | L07592    | 1794.334  | 1473.917  | NM_014007 | 874.485   | 661.675   |
| NM_004595 | 4911.553  | 4764.057  | BF434335  | 18097.096 | 17161.268 | AB033006  | 2138.848  | 2075.636  |
| NM_020178 | 578.834   | 660.209   | M57627    | 713.182   | 646.79    | AF020314  | 9840.508  | 8086.49   |
| NM_002264 | 1210.458  | 1579.13   | AK026946  | 1204.14   | 1149.128  | NM_016332 | 3583.763  | 2552.136  |
| NM_014754 | 14543.606 | 15396.342 | M33197    | 59138.832 | 57480.324 | NM_006457 | 649.397   | 736.067   |
| D49387    | 1384.181  | 1362.437  | NM_003192 | 5761.586  | 5988.009  | NM_003682 | 395.145   | 511.604   |
| AF050146  | 4183.912  | 4637.527  | NM_018449 | 4168.254  | 4065.761  | NM_006314 | 5149.685  | 5118.892  |
| NM_000116 | 3204.641  | 3052.485  | D79994    | 823.793   | 602.121   | NM_001782 | 598.447   | 583.973   |
| NM_006698 | 7169.405  | 6950.992  | NM_014458 | 1481.474  | 1003.993  | NM_002754 | 591.566   | 504.717   |
| NM_006804 | 10828.71  | 12561.745 | M33197    | 64126.402 | 58460.25  | NM_000797 | 2246.075  | 2499.692  |
| NM_015969 | 6939.618  | 7510.942  | NM_014776 | 972.593   | 572.397   | NM_016293 | 9529.614  | 8400      |
| AL353933  | 512.079   | 601.33    | NM_006480 | 15854.094 | 10416.031 | AL080148  | 5070.903  | 2991.221  |
| NM_003051 | 3161.784  | 3186.431  | NM_007223 | 21922.977 | 13623.323 | NM_006731 | 655.227   | 386.963   |
| NM_001133 | 423.437   | 338.723   | AF030107  | 821.449   | 555.223   | NM_018487 | 605.929   | 715.725   |
| NM_145342 | 5806.016  | 6106.712  | NM_000871 | 842.264   | 588.029   | NM_020134 | 972.262   | 595.35    |
| AJ278917  | 14635.423 | 15403.688 | M33197    | 63972.406 | 59557.941 | NM_014061 | 890.802   | 977.258   |
| AK025886  | 1360.768  | 1122.973  | NM_018968 | 429.36    | 448.303   | NM_000348 | 1980.71   | 3143.795  |
| NM_003058 | 850.591   | 330.237   | AF086924  | 46534.246 | 34348.77  | NM_005059 | 546.063   | 799.495   |
| NM_001720 | 7870.455  | 7236.877  | AB058740  | 6680.007  | 4368.943  | NM_004950 | 1756.755  | 1760.09   |
| NM_018390 | 2279.243  | 1688.988  | NM_003385 | 458.297   | 392.87    | NM_006493 | 1551.83   | 1263.903  |
| AB037724  | 7461.416  | 11037.575 | AF279890  | 2993.649  | 2647.093  | U76362    | 821.018   | 1035.906  |
| AK025086  | 1616.191  | 2130.413  | NM_002236 | 920.236   | 760.27    | AL832292  | 2698.596  | 2530.059  |
| AK026151  | 7242.674  | 6712.163  | NM_001689 | 44328.227 | 39073.738 | NM_003045 | 3079.204  | 3219.529  |
| NM_014140 | 2189.984  | 2173.178  | NM_016601 | 739.674   | 477.131   | NM_005662 | 25820.758 | 24958.398 |
| NM_002916 | 1918.889  | 1994.012  | NM_006815 | 19008.211 | 12637.692 | AK021489  | 23092.688 | 23859.402 |
| M20700    | 2921.428  | 3066.715  | NM_001663 | 4604.407  | 3558.626  | NM_004525 | 616.683   | 183.239   |

|           |           |           |           |           |           |           |           |           |
|-----------|-----------|-----------|-----------|-----------|-----------|-----------|-----------|-----------|
| NM_001034 | 6225.193  | 6617.36   | NM_004218 | 6376.042  | 4676.152  | NM_003895 | 719.378   | 811.221   |
| NM_002688 | 1362.112  | 1382.691  | NM_016530 | 1083.988  | 749.182   | NM_004317 | 5418.254  | 4558.847  |
| NM_017686 | 1714.561  | 1863.09   | NM_014804 | 985.616   | 657.468   | NM_014645 | 1578.578  | 1703.035  |
| AL096734  | 671.168   | 712.806   | NM_001716 | 791.092   | 615.243   | NM_014708 | 3180.973  | 4568.075  |
| AK000800  | 2913.269  | 3441.44   | NM_006564 | 4893.092  | 3686.939  | NM_003693 | 706.772   | 682.49    |
| NM_018154 | 2224.526  | 3104.792  | NM_004802 | 861.121   | 932.314   | NM_000356 | 13710.968 | 11585.444 |
| NM_005355 | 319.732   | 427.076   | M33197    | 59401.359 | 58150.457 | NM_018134 | 14488.081 | 14540.909 |
| BC006287  | 5233.104  | 5238.251  | NM_002983 | 1016.282  | 477.653   | NM_013247 | 3210.674  | 1808.129  |
| AB023198  | 6648.154  | 6788.529  | NM_000074 | 5589.559  | 3729.117  | NM_006770 | 1287.48   | 1011.713  |
| NM_005231 | 5769.945  | 6145.201  | M33197    | 53976.836 | 54099.586 | BE394704  | 259.18    | 442.826   |
| AF064729  | 1607.719  | 1543.538  | NM_002613 | 2322.394  | 1748.763  | AJ001348  | 166.685   | 393.407   |
| NM_005412 | 19652.57  | 17264.297 | NM_004419 | 1727.702  | 1373.236  | NM_007255 | 1146.03   | 881.946   |
| NM_012113 | 2362.761  | 2173.433  | U47635    | 1730.967  | 1648.728  | NM_003668 | 5615.735  | 5050.667  |
| NM_002725 | 766.36    | 584.932   | NM_018650 | 1244.06   | 1008.457  | NM_013384 | 47640     | 47957.133 |
| NM_014375 | 9350.807  | 8745.461  | NM_014369 | 1419.501  | 1150.192  | NM_001187 | 737.723   | 578.176   |
| NM_017812 | 10750.042 | 10561.323 | M33197    | 60961.691 | 61003.027 | NM_018241 | 1758.482  | 1505.853  |
| AF204173  | 691.83    | 802.943   | NM_001398 | 18288.004 | 11637.719 | NM_005834 | 2967.884  | 2743.84   |
| J03260    | 2041.759  | 2233.92   | AB050049  | 3348.261  | 2302.122  | AF000381  | 3844.121  | 3692.898  |
| U13738    | 779.992   | 691.571   | J05125    | 882.437   | 1069.096  | NM_012105 | 794.403   | 1294.26   |
| AF068236  | 45558.148 | 44789.543 | AY004175  | 1718.851  | 1629.597  | S82470    | 1713.901  | 1622.772  |
| H94487    | 1320.719  | 1175.138  | M33197    | 60396.824 | 59780.473 | AB028982  | 1830.549  | 1544.777  |
| BG681747  | 24914.854 | 25131.9   | NM_012327 | 2477.56   | 1915.021  | NM_002004 | 3568.49   | 2788.956  |
| H63077    | 2996.007  | 2064.675  | NM_000904 | 1004.099  | 859.234   | NM_005121 | 783.479   | 474.773   |
| AA679352  | 18155.176 | 16499.713 | NM_016048 | 1543.447  | 1130.447  | NM_001643 | 13746.771 | 10161.676 |
| AA437291  | 421.149   | 504.359   | NM_000375 | 8055.659  | 5155.875  | AJ275973  | 14192.724 | 13818.96  |
| X04503    | 4800.882  | 3963.52   | NM_000265 | 6387.169  | 3809.512  | AL834159  | 2568.967  | 1863.069  |
| D45917    | 2095.365  | 2103.933  | NM_018849 | 4989.363  | 4515.081  | NM_000164 | 4923.934  | 4218.041  |
| X52001    | 3491.363  | 4542.515  | M33197    | 60818.109 | 55827.371 | NM_016217 | 3826.556  | 3421.279  |
| BI823872  | 6235.115  | 7330.436  | AF015910  | 5927.318  | 4291.909  | AK025971  | 4916.935  | 4142.047  |
| AA430552  | 3435.176  | 4097.547  | BC009993  | 1868.162  | 1481.467  | NM_002618 | 1614.757  | 1407.623  |
| X66142    | 1937.698  | 2124.519  | M33197    | 60721.887 | 59509.563 | L27479    | 796.336   | 584.318   |
| R45054    | 3384.612  | 3271.03   | NM_003031 | 3112.448  | 3327.333  | NM_002193 | 1646.356  | 1696.744  |
| NM_000620 | 564.917   | 410.089   | X89674    | 427.468   | 1730.438  | NM_001388 | 9959.829  | 9640.401  |
| NM_000905 | 7517.612  | 6996.104  | M33197    | 61545.695 | 57592.277 | X76770    | 4952.543  | 4653.637  |
| AL117398  | 4988.604  | 4496.917  | AK027244  | 2070.903  | 1606.718  | AB037808  | 1204.387  | 1203.175  |
| AY007158  | 61031.063 | 56067.648 | L40520    | 3457.713  | 2449.101  | NM_016038 | 2783.98   | 2705.281  |
| M58050    | 5168.247  | 5143.705  | NM_002633 | 7272.774  | 6686.805  | Z36821    | 3605.212  | 2870.287  |
| NM_007263 | 12799.526 | 10931.675 | M33197    | 55340.512 | 53390.477 | AF289485  | 2544.314  | 1802.872  |
| AF206020  | 1718.634  | 1268.919  | NM_002878 | 2822.309  | 2396.785  | AF130092  | 906.354   | 785.913   |
| NM_014410 | 1252.993  | 1200.887  | NM_017723 | 3302.007  | 2821.442  | NM_016095 | 2988.036  | 2190.487  |
| AF305835  | 668.844   | 414.792   | AK022922  | 1692.391  | 1697.264  | NM_005400 | 760.713   | 1230.602  |
| AF312769  | 1076.334  | 803.35    | NM_006462 | 7631.56   | 11617.166 | NM_014061 | 740.283   | 728.402   |
| AB020668  | 1854.21   | 1747.857  | AK024750  | 3648.643  | 4081.599  | NM_000348 | 1174.768  | 1341.559  |
| NM_006203 | 20183.807 | 20018.525 | NM_000400 | 21697.805 | 29033.537 | NM_005055 | 497.977   | 586.155   |
| NM_013261 | 514.996   | 468.605   | NM_015885 | 2781.408  | 1918.96   | NM_004950 | 1703.225  | 1434.822  |
| AF309553  | 3524.134  | 3495.232  | NM_015889 | 60465.77  | 54133.176 | NM_000724 | 1720.538  | 1695.125  |
| NM_003605 | 3217.514  | 3309.312  | M33197    | 62835.922 | 57486.098 | NM_002557 | 2164.222  | 2149.629  |
| NM_003993 | 2921.305  | 3215.42   | NM_004276 | 1833.593  | 1208.199  | BI762229  | 2654.137  | 1860.617  |
| NM_018961 | 1209.395  | 1055.543  | NM_002332 | 5723.288  | 4313.277  | BG618320  | 822.215   | 570.815   |
| NM_005586 | 3811.698  | 4146.133  | NM_002859 | 2477.667  | 1676.676  | Y00787    | 1102.385  | 853.214   |
| NM_012242 | 2194.485  | 2397.796  | NM_005246 | 2410.958  | 1776.86   | NM_007276 | 1876.973  | 1071.453  |
| NM_006896 | 805.582   | 834.44    | NM_017651 | 971.298   | 650.139   | N34462    | 1127.044  | 802.671   |
| NM_001130 | 54718.297 | 53911.375 | AF161339  | 4997.047  | 2591.891  | AI658778  | 2236.983  | 1776.719  |

|           |           |           |           |           |           |           |           |           |
|-----------|-----------|-----------|-----------|-----------|-----------|-----------|-----------|-----------|
| NM_002975 | 22348.877 | 22416.926 | M33197    | 65849     | 58576.133 | L19067    | 2695.432  | 2804.24   |
| AK023511  | 3885.472  | 3488.923  | AK000354  | 4531.521  | 2653.544  | Z48482    | 1330.104  | 1658.841  |
| NM_014556 | 2814.101  | 2460.159  | NM_000836 | 1170.979  | 1080.841  | W60413    | 821.762   | 1733.2    |
| AK025886  | 1122.688  | 1051.84   | M33197    | 62495.613 | 61933.574 | BI823365  | 1231.196  | 1185.049  |
| NM_003058 | 305.641   | 486.81    | NM_001510 | 581.373   | 753.354   | X06318    | 5225.489  | 4403.189  |
| AB014514  | 2878.31   | 3369.742  | AK024474  | 3363.595  | 3744.972  | NM_004703 | 2114.9    | 1621.87   |
| NM_002865 | 3485.84   | 3515.654  | NM_006862 | 460.912   | 712.96    | NM_001512 | 709.492   | 300.374   |
| NM_003566 | 1289.027  | 905.56    | NM_017901 | 1832.687  | 1815.522  | NM_014706 | 4605.17   | 4079.903  |
| NM_007159 | 15242.592 | 14047.678 | NM_004272 | 1659.73   | 1830.295  | NM_014007 | 1882.474  | 2197.949  |
| NM_003731 | 8144.487  | 7819.696  | AK023582  | 3843.925  | 2780.456  | AB033006  | 2657.008  | 2654.298  |
| NM_005446 | 3404.195  | 3542.369  | NM_000358 | 1186.399  | 1065.458  | AF020314  | 11088.719 | 9799.365  |
| NM_013292 | 3091.206  | 2652.297  | NM_001930 | 6458.69   | 4760.987  | NM_016332 | 4696.994  | 3997.393  |
| NM_002387 | 2193.627  | 1826.169  | NM_001564 | 1283.328  | 876.982   | AK023936  | 190.823   | 250.363   |
| NM_000069 | 890.282   | 756.589   | M33197    | 60012.957 | 48133.676 | NM_006457 | 782.246   | 807.212   |
| AB023217  | 747.756   | 587.113   | AF263537  | 14592.127 | 9897.19   | NM_003682 | 518.143   | 461.936   |
| L08902    | 769.081   | 603.92    | NM_015895 | 4830.743  | 4394.17   | NM_001782 | 655.171   | 917.134   |
| NM_005231 | 5114.438  | 4993.147  | NM_004675 | 953.183   | 708.968   | NM_002754 | 1168.249  | 487.058   |
| AF064729  | 1418.653  | 1574.766  | NM_000189 | 2908.363  | 2642.093  | NM_000797 | 1837.676  | 1627.399  |
| NM_005412 | 17540.205 | 17605.992 | M33197    | 57347.57  | 56792.445 | NM_016293 | 7463.952  | 6694.172  |
| NM_012113 | 2120.77   | 2284.74   | NM_013374 | 20993.467 | 17372.822 | AF217525  | 1160.389  | 1382.218  |
| NM_002150 | 6529.28   | 5535.699  | NM_003252 | 6767.857  | 5121.25   | AL080148  | 4780.712  | 2978.447  |
| NM_004595 | 5837.852  | 5344.335  | NM_001228 | 1032.332  | 1078.647  | NM_006731 | 652.945   | 442.366   |
| NM_020178 | 714.847   | 926.568   | AK026607  | 762.768   | 755.449   | NM_020134 | 692.536   | 950.85    |
| NM_002264 | 934.24    | 1128.927  | NM_016561 | 13092.884 | 12375.253 | NM_020221 | 2013.268  | 2232.339  |
| NM_014754 | 15360.137 | 15958.521 | NM_001225 | 3216.971  | 2955.753  | NM_000747 | 1096.761  | 934.116   |
| D49387    | 1407.021  | 1615.671  | NM_014245 | 21909.832 | 22227.607 | NM_005415 | 2484.677  | 2758.51   |
| AF050146  | 4135.173  | 4237.594  | M33197    | 62832.137 | 64009.371 | AJ275973  | 12953.366 | 13587.141 |
| NM_000116 | 3430.584  | 3347.181  | AL110226  | 65462.055 | 68207.875 | NM_006493 | 1773.011  | 1716.182  |
| NM_006698 | 7490.991  | 7117.805  | AB046822  | 608.751   | 955.076   | U76362    | 1670.673  | 1236.185  |
| NM_006804 | 12487.587 | 16086.465 | M33197    | 652.487   | 597.077   | AF040248  | 725.922   | 705.541   |
| NM_015969 | 6280.211  | 6248.593  | L09097    | 2093.697  | 1986.74   | NM_014228 | 662.059   | 503.278   |
| AL353933  | 225.353   | 445.295   | NM_000308 | 1643.555  | 1498.444  | AL832292  | 3725.45   | 4947.144  |
| NM_003051 | 3000.803  | 3130.486  | X69636    | 1703.604  | 1446.159  | NM_003045 | 4130.17   | 4317.679  |
| NM_145342 | 5003.101  | 5226.707  | M33197    | 64415.238 | 70749.414 | NM_005662 | 28355.037 | 24632.918 |
| AJ278917  | 13077.027 | 11429.196 | NM_004173 | 22459.682 | 30147.836 | NM_004317 | 3947.908  | 5849.293  |
| AK025641  | 33703.305 | 34398.723 | NM_013974 | 3777.708  | 3593.638  | NM_014645 | 1258.683  | 2286.087  |
| NM_000620 | 783.871   | 1095.169  | NM_017547 | 1810.975  | 2608.3    | NM_014708 | 2649.4    | 4583.066  |
| NM_000905 | 6290.77   | 5592.807  | NM_003983 | 3884.399  | 3581.508  | NM_003693 | 849.523   | 1032.441  |
| AL117398  | 5304.273  | 5221.183  | AK023708  | 763.337   | 736.266   | NM_000356 | 10665.341 | 10095.765 |
| AY007158  | 58559.023 | 55548.148 | NM_002108 | 1560.268  | 1307.785  | NM_018134 | 18862.682 | 16213.716 |
| NM_001720 | 9842.735  | 9290.579  | M33197    | 61792.156 | 59974.098 | NM_013247 | 2907.121  | 1939.148  |
| NM_018390 | 2283.873  | 2286.294  | NM_018464 | 11771.895 | 11080.219 | NM_006770 | 2285.679  | 1918.663  |
| AB037724  | 8250.998  | 12235.487 | D43948    | 1434.985  | 1250.374  | BE394704  | 376.202   | 594.456   |
| AK025086  | 1561.341  | 1597.568  | NM_012310 | 4519.484  | 4725.336  | AK024794  | 912.589   | 1234.392  |
| AK026151  | 6936.597  | 6838.564  | BF382116  | 6566.623  | 5781.161  | NM_019853 | 6681.926  | 4686.708  |
| NM_014140 | 2492.164  | 2501.643  | NM_003193 | 8570.004  | 8205.8    | NM_017992 | 5693.578  | 4730.159  |
| NM_002916 | 1978.356  | 2345.744  | AK055825  | 59534.277 | 67506.836 | BF851643  | 126.315   | 298.407   |
| M20700    | 2497.24   | 2261.687  | M33197    | 59527.48  | 61540.391 | AK023061  | 670.365   | 359.386   |
| NM_001034 | 6800.279  | 7859.647  | AF113216  | 540.578   | 597.138   | NM_007255 | 1740.942  | 1552.637  |
| NM_002689 | 1259.529  | 1468.958  | NM_005197 | 4577.357  | 3338.626  | NM_003668 | 7140.928  | 7090.206  |
| NM_017686 | 1889.721  | 1924.327  | AL137421  | 46058.66  | 44737.645 | NM_013384 | 58201.438 | 47770.867 |
| AL096734  | 664.629   | 752.424   | M33197    | 55799.77  | 56958.738 | NM_001187 | 1147.382  | 1030.732  |
| AK000800  | 2618.313  | 2932.584  | NM_017996 | 2663.456  | 3298.865  | NM_018241 | 2378.438  | 2253.021  |

|           |           |           |           |           |           |           |           |           |
|-----------|-----------|-----------|-----------|-----------|-----------|-----------|-----------|-----------|
| NM_018154 | 2369.757  | 2574.709  | NM_014517 | 1308.213  | 1013.828  | NM_005834 | 3958.7    | 4075.011  |
| NM_00535E | 387.274   | 393.444   | D31765    | 1333.828  | 1206.243  | AF000381  | 5095.277  | 4289.588  |
| BC006287  | 4955.981  | 4263.32   | NM_00417E | 972.912   | 1033.375  | NM_01210E | 980.587   | 784.516   |
| AB023198  | 6118.988  | 5546.331  | AF288288  | 14850.665 | 12263.049 | S82470    | 1460.512  | 1970.906  |
| AF304163  | 14652.818 | 12277.147 | NM_01764E | 3775.301  | 3414.479  | AB020695  | 229.683   | 550.179   |
| NM_00689E | 693.37    | 691.022   | AL050368  | 963.572   | 796.883   | AB028982  | 1365.208  | 1787.343  |
| NM_001130 | 45278.656 | 45286.867 | NM_00309E | 7636.53   | 6876.578  | NM_002004 | 3012.365  | 4241.684  |
| NM_00297E | 20783.852 | 20878.527 | M33197    | 62618.359 | 63949.102 | NM_01909E | 3156.316  | 3849.557  |
| AK023511  | 3580.243  | 3182.788  | NM_005861 | 1563.071  | 1529.055  | NM_01472E | 1317.275  | 1065.235  |
| NM_01455E | 2593.004  | 2791.372  | NM_01884E | 2268.185  | 2242.06   | NM_00689E | 1566.012  | 1667.875  |
| NM_00272E | 894.01    | 853.51    | NM_00376C | 2242.067  | 2477.707  | NM_019117 | 769.851   | 774.961   |
| NM_01437E | 11873.836 | 12361.645 | AB037759  | 702.92    | 518.888   | NM_01830E | 2111.534  | 2031.813  |
| NM_01781E | 11570.279 | 13673.284 | AK025998  | 2542.188  | 2924.495  | NM_01765E | 1593.813  | 1395.438  |
| AF204173  | 958.269   | 1438.149  | AL080080  | 6433.259  | 6647.671  | NM_01867E | 5319.027  | 4782.914  |
| J03260    | 1654.216  | 1996.718  | NM_01848E | 1413.507  | 1975.949  | NM_01664E | 566.038   | 655.619   |
| U13738    | 752.856   | 647.669   | NM_01788C | 1101.721  | 1308.761  | NM_00258C | 557.065   | 648.984   |
| AF068236  | 44739.508 | 46577.992 | AF090945  | 3364.405  | 4403.281  | NM_00677E | 4571.87   | 3592.928  |
| H94487    | 1420.767  | 1263.998  | M33197    | 57494.852 | 54775.152 | NM_016217 | 10303.888 | 11198.006 |
| BG681747  | 25020.592 | 25352.059 | NM_001161 | 3388.365  | 4193.909  | AK025971  | 4824.341  | 3825.934  |
| H63077    | 2703.297  | 1942.255  | NM_004044 | 4838.387  | 4541.772  | NM_00261E | 1934.188  | 1529.773  |
| AA679352  | 17872.332 | 16493.455 | NM_000221 | 8518.39   | 5908.783  | NM_00219E | 1009.307  | 429.409   |
| AA437291  | 587.411   | 678.767   | AB002359  | 1814.547  | 1709.546  | NM_00138E | 4860.03   | 6841.2    |
| X04503    | 3903.696  | 3463.752  | M33197    | 2255.764  | 1867.009  | X76770    | 4519.596  | 5402.054  |
| D45917    | 1701.077  | 1934.269  | AB007864  | 682.129   | 396.443   | AB037808  | 940.525   | 1663.948  |
| X52001    | 2776.879  | 2985.065  | NM_00219E | 1552.55   | 1747.231  | NM_01603E | 2917.158  | 4244.722  |
| BI823872  | 5617.061  | 6306.604  | AK025905  | 1003.09   | 681.98    | AF090911  | 424.96    | 273.122   |
| AA430552  | 2398.802  | 2391.034  | AL121733  | 886.67    | 925.567   | Z36821    | 2378.262  | 3334.67   |
| X66142    | 2093.608  | 1708.743  | M33197    | 47807.727 | 50916.957 | AF289485  | 2987.883  | 3354.904  |
| NM_00591E | 634.337   | 394.559   | NM_01753E | 479.771   | 464.685   | AF130092  | 1465.161  | 1873.21   |
| R45054    | 2912.729  | 2954.756  | NM_01448C | 1118.652  | 1264.778  | AF300612  | 41315.07  | 40991.715 |
| NM_002387 | 2130.452  | 1703.426  | NM_01416E | 4027.592  | 4279.052  | AB014557  | 695.447   | 408.829   |
| NM_00006E | 718.181   | 838.402   | NM_004964 | 11511.192 | 12061.306 | NM_00557E | 4285.419  | 2337.514  |
| AB023217  | 624.747   | 589.94    | AL117497  | 1338.591  | 946.061   | NM_00365E | 5904.508  | 4427.046  |
| L08902    | 688.586   | 657.352   | AF147437  | 1290.615  | 1361.974  | NM_018457 | 4566.617  | 3558.532  |
| M58050    | 5284.812  | 5410.264  | M33197    | 58567.781 | 56681.988 | NM_00295E | 9899.934  | 7047.244  |
| NM_00726E | 13858.536 | 12747.779 | AL137269  | 3182.795  | 2945.74   | NM_002187 | 1009.731  | 722.61    |
| AF206020  | 1998.452  | 1894.419  | AK021983  | 1109.56   | 1104.923  | NM_01424E | 3952.754  | 3592.297  |
| NM_01441C | 1406.263  | 1518.909  | Y11681    | 7942.588  | 13164.232 | NM_01485E | 445.993   | 720.696   |
| AF305835  | 482.908   | 476.356   | AL110135  | 20385.213 | 17070.654 | AF311912  | 411.592   | 459.965   |
| AF312769  | 1092.33   | 804.321   | NM_00699E | 9241.406  | 11821.697 | NM_001116 | 701.686   | 472.693   |
| AB020668  | 1853.457  | 1968.755  | NM_00233E | 479.866   | 925.333   | BC035395  | 5481.952  | 5259.093  |
| NM_00620E | 19050.805 | 18054.516 | M33197    | 61596.953 | 57641.32  | NM_01398E | 4263.733  | 4543.436  |
| NM_00355E | 385.094   | 414.293   | AF086439  | 1718.995  | 1693.493  | NM_00504E | 1532.762  | 1921.645  |
| AF309553  | 4430.219  | 4323.675  | M33197    | 59899.406 | 58462.547 | NM_00388E | 361.409   | 816.288   |
| NM_00360E | 3044.302  | 3813.924  | AK026512  | 1524.009  | 1893.497  | NM_00463C | 6122.572  | 10274.937 |
| NM_00613E | 18617.045 | 17413.26  | M33197    | 61448.773 | 61871.762 | AK023001  | 4212.961  | 5574.92   |
| NM_00010C | 23274.973 | 19266.434 | AF144233  | 2387.914  | 3207.276  | NM_01482E | 6246.004  | 8219.784  |
| NM_00190C | 62733.984 | 57558.543 | AF085925  | 386.147   | 1116.847  | AF201947  | 824.911   | 961.797   |
| NM_00399E | 2709.938  | 2594.088  | AF085975  | 1636.934  | 2067.295  | U01147    | 2590.536  | 2645.015  |
| NM_018961 | 1237.736  | 1155.974  | M33197    | 60168.461 | 60523.617 | NM_00404C | 6341.714  | 7553.326  |
| NM_00558E | 3840.09   | 4016.289  | AL137390  | 1267.966  | 1739.894  | NM_00611E | 2027.334  | 2241.388  |
| NM_01224E | 2413.188  | 2502.836  | AL137611  | 5014.799  | 6643.644  | NM_00545E | 2340.554  | 2876.541  |
| NM_003051 | 3179.567  | 3118.697  | AL359566  | 16437.098 | 21844.162 | NM_003587 | 5535.83   | 5758.127  |

|           |           |           |           |           |           |           |           |           |
|-----------|-----------|-----------|-----------|-----------|-----------|-----------|-----------|-----------|
| NM_145342 | 5171.396  | 4391.7    | AL137427  | 1820.381  | 2112.407  | X90978    | 960.939   | 917.444   |
| AJ278917  | 9995.519  | 9517.755  | AL157460  | 2977.833  | 2736.515  | BF219403  | 8409.826  | 9743.963  |
| AK025641  | 34993.445 | 43806.031 | M33197    | 54543.883 | 51542.609 | NM_016119 | 1441.262  | 1547.513  |
| AK025886  | 1488.903  | 1284.247  | AK026718  | 1092.88   | 1095.179  | AK075450  | 1523.762  | 1580.574  |
| NM_00305E | 807.198   | 484.317   | AK022035  | 9098.862  | 6629.093  | AF178983  | 2460.271  | 2469.166  |
| AB014514  | 3045.477  | 3534.265  | M33197    | 60624.297 | 58805.094 | NM_001324 | 2698.948  | 2975.928  |
| NM_00286E | 3981.845  | 3893.412  | NM_004337 | 1584.133  | 1661.992  | AB037795  | 1506.801  | 1266.993  |
| NM_00356E | 1335.201  | 912.878   | AK022141  | 735.224   | 709.301   | D43949    | 1209.078  | 1118.454  |
| NM_00715E | 16954.436 | 13544.023 | M33197    | 65691.555 | 64697.031 | NM_015344 | 1434.883  | 1064.572  |
| NM_003731 | 8426.09   | 7477.208  | AK022046  | 810.652   | 845.013   | NM_00428E | 688.32    | 427.805   |
| NM_00544E | 3998.167  | 3328.39   | AK027207  | 1159.268  | 1559.088  | AL122055  | 7702.763  | 5318.846  |
| NM_013292 | 3145.559  | 2686.845  | AF083120  | 439.871   | 790.186   | D87458    | 571.198   | 912.003   |
| AK000800  | 2518.575  | 2554.373  | AJ227892  | 4207.513  | 3915.628  | AK021750  | 873.351   | 1315.719  |
| NM_018154 | 2431.314  | 2826.075  | M33197    | 61046.73  | 56586.023 | NM_00362E | 1254.889  | 1991.515  |
| NM_00535E | 529.976   | 283.277   | AK022155  | 2232.975  | 2837.242  | NM_006932 | 389.575   | 408.957   |
| BC006287  | 4468.917  | 3561.237  | AK022288  | 624.404   | 1074.133  | AK023594  | 5026.335  | 7080.951  |
| AB023198  | 5202.162  | 4883.891  | AK024201  | 785.778   | 1036.294  | AB032989  | 1042.822  | 667.527   |
| AF304163  | 14122.552 | 11967.153 | M33197    | 59884.598 | 59324.422 | AB010099  | 10370.174 | 10760.691 |
| NM_005231 | 5206.823  | 5536.294  | AK021589  | 1065.577  | 1475.977  | AB039920  | 6161.392  | 7344.385  |
| AF064729  | 1641.415  | 1527.916  | D17152    | 7166.012  | 6272.724  | AB046782  | 2178.73   | 2950.052  |
| NM_005412 | 17417.344 | 19121.457 | AK023638  | 647.206   | 1144.372  | NM_00419C | 11720.011 | 12135.057 |
| NM_012113 | 3232.784  | 4869.523  | M33197    | 634.93    | 526.293   | NM_01427E | 3652.257  | 3927.859  |
| NM_00215C | 7051.106  | 7444.992  | AK025423  | 985.731   | 1010.477  | NM_00040E | 1656.945  | 1226.717  |
| NM_00459E | 5730.545  | 6666.216  | M33197    | 59483.27  | 59888.426 | AF208005  | 977.059   | 800.902   |
| NM_02017E | 810.152   | 678.742   | AL049846  | 1272.552  | 1372.452  | NM_002231 | 5656.975  | 4435.862  |
| NM_002264 | 1168.728  | 1048.086  | AK024161  | 785.129   | 921.186   | NM_020474 | 8069.505  | 5243.746  |
| NM_014754 | 15732.896 | 15975.83  | AK021682  | 25823.66  | 32152.473 | NM_002643 | 2221.787  | 1749.627  |
| D49387    | 1280.629  | 1639.975  | AJ012500  | 1584.902  | 1797.059  | NM_017807 | 3878.841  | 2942.62   |
| AF050146  | 4167.703  | 4732.226  | L19368    | 384.59    | 956.507   | NM_01474E | 962.736   | 959.047   |
| NM_000116 | 3315.69   | 3601.826  | U00944    | 868.449   | 1359.416  | NM_000462 | 4470.378  | 4522.775  |
| NM_00669E | 7375.917  | 8204.439  | BC035058  | 1496.918  | 1647.026  | NM_00333E | 5781.619  | 3562.62   |
| NM_006804 | 12012.059 | 12623.503 | X57566    | 3161.276  | 2930.373  | NM_00580E | 9537.437  | 7460.632  |
| NM_01596E | 6395.454  | 6445.842  | M33197    | 61861.621 | 59035.918 | AF298152  | 2689.877  | 2204.339  |
| AL353933  | 469.319   | 466.99    | NM_01861E | 5076.038  | 6597.396  | AF117233  | 2268.194  | 3179.686  |
| NM_004517 | 3415.614  | 2961.952  | AK023809  | 1522.627  | 1194.216  | NM_01584E | 701       | 881.007   |
| AI017418  | 980.837   | 1056.266  | M87943    | 61240.027 | 60183.285 | NM_001723 | 1082.919  | 1662.789  |
| NM_00067E | 1615.966  | 1394.811  | AL360137  | 920.81    | 1392.308  | AK024707  | 1337.13   | 1522.336  |
| AF218006  | 39200.141 | 37823.977 | U28131    | 62625.117 | 61008.09  | NM_01425E | 1554.177  | 1739.122  |
| AK026935  | 10752.084 | 10311.398 | AY007106  | 9604.663  | 9334.358  | AK022909  | 1704.646  | 2591.668  |
| NM_020162 | 3921.416  | 3602.967  | M33197    | 58983.301 | 55167.445 | NM_00653C | 5147.33   | 6750.008  |
| AK027124  | 43784.473 | 47358.074 | NM_00608E | 42799.703 | 39888.449 | AB033024  | 1625.632  | 1259.127  |
| AB037813  | 462.756   | 692.49    | NM_01826E | 1325.555  | 1167.355  | NM_018942 | 2276.797  | 2290.59   |
| M31212    | 40942.98  | 42905.23  | AF130086  | 2813.301  | 3124.427  | NM_006977 | 495.996   | 475.486   |
| AL117398  | 5645.108  | 6382.961  | AK023858  | 4953.742  | 5519.631  | AF217226  | 2769.299  | 2242.65   |
| AY007158  | 55235.105 | 58393.66  | M33197    | 61159.879 | 59831.691 | NM_00576C | 8100.343  | 6765.921  |
| NM_00172C | 9765.361  | 10480.354 | AF250920  | 5304.761  | 5108.233  | NM_014212 | 657.539   | 739.768   |
| NM_01839C | 2420.912  | 2133.206  | NM_017733 | 2786.07   | 2775.22   | NM_00726E | 3038.206  | 2884.047  |
| AB037724  | 7591.858  | 6686.163  | NM_014042 | 4364.674  | 6635.26   | AK023639  | 3800.166  | 3555.611  |
| AK025086  | 1684.008  | 1608.278  | M33197    | 61419.402 | 58513.973 | AL137700  | 529.102   | 681.863   |
| AK026151  | 7974.54   | 9526.381  | AF317550  | 638.532   | 948.107   | NM_004904 | 601.6     | 600.623   |
| NM_01414C | 2204.021  | 2532.115  | NM_003543 | 638.304   | 988.677   | NM_000982 | 1646.235  | 2266.944  |
| NM_00291E | 1887.235  | 2730.436  | AK025416  | 683.313   | 1313.461  | AK026367  | 22020.381 | 23905.305 |
| M20700    | 2833.093  | 3283.186  | AF090883  | 381.492   | 1049.242  | AK021747  | 675.494   | 735.747   |

|           |           |           |           |           |           |           |           |           |
|-----------|-----------|-----------|-----------|-----------|-----------|-----------|-----------|-----------|
| NM_001034 | 6739.627  | 8919.375  | M33197    | 61071.629 | 61875.125 | AK025640  | 7552.441  | 10606.34  |
| NM_002689 | 1431.64   | 1597.453  | AL049263  | 655.015   | 1332.095  | AF131772  | 1917.179  | 2305.31   |
| NM_017686 | 1866.338  | 1824.382  | AK022372  | 2737.937  | 3889.929  | NM_019101 | 831.291   | 1095.213  |
| AL096734  | 607.143   | 543.412   | AJ227863  | 984.643   | 1631.373  | NM_000920 | 1370.011  | 1240.883  |
| NM_016645 | 2564.733  | 2629.296  | NM_015916 | 1228.112  | 1387.229  | NM_020375 | 1184.409  | 866.378   |
| L14723    | 9562.095  | 10223.534 | AL137380  | 2283.632  | 2180.101  | NM_016045 | 3477.419  | 3974.704  |
| AK024462  | 11813.153 | 11129.878 | M33197    | 60671.492 | 59611.668 | NM_013311 | 4344.362  | 4714.51   |
| NM_019601 | 538.826   | 469.615   | AL137658  | 19188.182 | 16711.947 | NM_000291 | 53524.871 | 54977.5   |
| NM_002206 | 1381.962  | 1410.937  | D16888    | 4767.125  | 4686.106  | NM_018081 | 1771.471  | 1544.71   |
| NM_007074 | 741.908   | 527.149   | AF068298  | 3833.825  | 3582.56   | NM_014645 | 2391.73   | 2699.668  |
| NM_002230 | 1068.824  | 954.574   | Z70770    | 2279.852  | 2188.76   | AL117488  | 916.445   | 877.687   |
| NM_003815 | 3384.823  | 2976.796  | AJ227900  | 3719.099  | 4284.668  | NM_012240 | 942.724   | 860.254   |
| NM_001430 | 1907.859  | 1725.007  | AK023242  | 1005.65   | 1285.943  | NM_005341 | 1486.934  | 1677.621  |
| AB010098  | 592.872   | 689.998   | M33197    | 62083.738 | 62763.309 | NM_001934 | 3087.182  | 3958.852  |
| U17989    | 961.987   | 1044.607  | CY3Cy5    | 4408.06   | 130.556   | AB011090  | 1915.585  | 2163.646  |
| U62325    | 423.94    | 837.68    | BI762229  | 1364.489  | 1253.449  | NM_000205 | 1195.615  | 1476.373  |
| AL137595  | 748.118   | 630.793   | AA131406  | 460.365   | 686.201   | NM_018682 | 6173.563  | 7061.555  |
| NM_018025 | 1062.907  | 1205.389  | BG618320  | 864.368   | 589.627   | NM_006545 | 7935.008  | 8469.038  |
| AF249267  | 41362.027 | 43127.238 | Y00787    | 1153.453  | 1033.701  | NM_016534 | 1177.896  | 1493.324  |
| NM_004113 | 665.988   | 628.329   | NM_007276 | 2158.362  | 1946.498  | AB021923  | 205.192   | 498.08    |
| X84939    | 4365.108  | 3676.74   | N34462    | 1874.299  | 1472.699  | AK024240  | 559.233   | 772.059   |
| NM_018320 | 12700.959 | 10806.733 | AI658778  | 2273.179  | 2228.575  | NM_016456 | 27005.758 | 25589.58  |
| NM_002065 | 2367.25   | 2152.854  | L19067    | 3096.222  | 2728.397  | AK022677  | 2510.063  | 2159.827  |
| NM_016056 | 17010.023 | 15028.115 | Z48482    | 890.37    | 687.441   | AF035288  | 262.978   | 441.859   |
| M65066    | 11614.042 | 11703.269 | W60413    | 779.414   | 707.775   | AL137645  | 4898.779  | 4668.241  |
| NM_016951 | 3532.774  | 3688.826  | BI823365  | 1547.294  | 957.552   | AK026141  | 718.254   | 1289.471  |
| NM_013251 | 816.879   | 769.198   | X06318    | 6414.077  | 5177.724  | AK022894  | 1907.748  | 2313.217  |
| NM_006095 | 3646.955  | 3679.493  | AL834159  | 2988.293  | 2619.693  | AF217993  | 3975.974  | 4324.015  |
| AF272379  | 2187.095  | 2483.824  | NM_000164 | 3738.926  | 2803.357  | AK026324  | 5601.03   | 5316.46   |
| NM_012326 | 950.304   | 923.77    | SR5       | 4153.957  | 4154.954  | AK025253  | 1092.961  | 964.245   |
| NM_003085 | 21724.152 | 28492.824 | SR7       | 6807.556  | 50843.055 | AF131777  | 385.603   | 469.639   |
| NM_016084 | 8698.909  | 8638.397  | SR9       | 17135.908 | 2890.866  | AK025004  | 1434.74   | 1938.058  |
| AF095289  | 9852.498  | 8866.93   | CY3Cy5    | 5972.799  | 287.879   | AL136818  | 939.556   | 1182.083  |
| NM_005537 | 3755.335  | 3256.963  | NM_003682 | 619.335   | 834.763   | AF146798  | 1329.814  | 1591.532  |
| NM_019003 | 2168.679  | 1878.49   | NM_006314 | 2571.246  | 2900.098  | AK022049  | 404.942   | 785.11    |
| NM_015935 | 3817.806  | 3049.246  | NM_001782 | 425.236   | 609.555   | AF086517  | 3159.587  | 3804.608  |
| AF182412  | 908.183   | 890.066   | NM_002754 | 724.587   | 764.715   | AK025740  | 8671.371  | 10263.726 |
| AK027200  | 1425.399  | 1477.546  | NM_000797 | 1425.009  | 1086.985  | AK000311  | 3908.618  | 4551.605  |
| U03106    | 6886.301  | 11000.205 | NM_014927 | 792.482   | 510.338   | AK025346  | 40475.223 | 48831.598 |
| NM_000075 | 13207.175 | 13034.477 | NM_016293 | 9766.979  | 7270.598  | AK022583  | 2768.907  | 3005.994  |
| NM_006845 | 11174.586 | 10386.197 | AL080148  | 6252.976  | 3977.022  | AL137534  | 61160.949 | 50593.238 |
| NM_014885 | 519.89    | 690.554   | NM_006731 | 793.181   | 424.277   | AF052121  | 2605.92   | 3310.78   |
| M73239    | 527.387   | 457.584   | NM_020134 | 1400.837  | 870.226   | AL359062  | 2069.101  | 2289.425  |
| NM_004945 | 3900.653  | 3749.39   | NM_014061 | 1391.092  | 747.079   | AK026869  | 1061.776  | 1039.145  |
| NM_020242 | 1770.74   | 2092.887  | BC034395  | 1320.323  | 806.747   | NM_019095 | 34467.016 | 35384.809 |
| NM_001785 | 11027.296 | 11569.707 | NM_002479 | 671.611   | 415.11    | Y12020    | 9860.646  | 11628.021 |
| NM_007175 | 60924.504 | 54057.668 | NM_000345 | 1552.1    | 1313.687  | AJ011597  | 215.995   | 729.872   |
| NM_017682 | 462.854   | 576.774   | NM_005059 | 954.626   | 689.839   | U17635    | 1396.357  | 1313.828  |
| NM_002205 | 3134.867  | 2763.711  | NM_004950 | 1460.389  | 1279.421  | AL049930  | 545.59    | 630.766   |
| NM_002291 | 615.878   | 582.851   | NM_000724 | 1735.465  | 1326.996  | L23870    | 444.135   | 902.851   |
| AL137477  | 5371.147  | 5296.486  | NM_002557 | 1722.048  | 1262.886  | D55644    | 732.794   | 686.823   |
| AF284580  | 592.371   | 631.16    | AK021489  | 17242.205 | 15688.99  | D16951    | 484.887   | 759.386   |
| AK024961  | 6511.942  | 6346.32   | NM_003895 | 1225.722  | 1681.095  | L19362    | 985.618   | 1267.869  |

|           |           |           |           |           |           |           |           |           |
|-----------|-----------|-----------|-----------|-----------|-----------|-----------|-----------|-----------|
| NM_01606E | 2593.429  | 2725.809  | NM_004317 | 3510.78   | 3040.43   | L33807    | 1706.801  | 1738.597  |
| NM_01425E | 1465.867  | 1737.517  | NM_01464E | 1040.956  | 1090.478  | AB007975  | 558.432   | 775.822   |
| NM_015967 | 3014.542  | 5204.231  | NM_01470E | 2254.36   | 2516.955  | AK024152  | 363.432   | 507.041   |
| NM_012237 | 450.448   | 476.346   | NM_00369E | 664.071   | 505.159   | AK021821  | 247.827   | 264.63    |
| NM_00359E | 506.81    | 680.527   | NM_00035E | 12108.836 | 7979.948  | AL049328  | 770.061   | 880.628   |
| NM_00240E | 979.544   | 874.372   | NM_018134 | 19250.949 | 17348.18  | AK000030  | 591.756   | 606.973   |
| NM_004994 | 12305.245 | 9877.354  | NM_013247 | 3172.158  | 2026.637  | AK0000910 | 2239.478  | 2209.377  |
| NM_00661C | 8798.5    | 7979.969  | NM_00677C | 1994.425  | 1239.86   | AF252280  | 7208.578  | 7156.906  |
| NM_003791 | 4874.762  | 4765.645  | BE394704  | 794.322   | 654.905   | AK000107  | 688.287   | 564.754   |
| NM_018017 | 4742.257  | 4133.373  | NM_00470E | 2981.019  | 2142.711  | AK024518  | 8405.868  | 8286.237  |
| AK001296  | 7861.833  | 7044.477  | NM_00151E | 1282.099  | 725.631   | AK025017  | 2454.714  | 3107.351  |
| AK000173  | 479.548   | 583.633   | NM_01470E | 5393.922  | 4196.225  | AK024534  | 1068.624  | 1262.04   |
| NM_01836E | 2472.685  | 2468.98   | AF139768  | 978.135   | 165.582   | AK024616  | 592.579   | 568.098   |
| NM_00658E | 16250.328 | 15278.71  | NM_014007 | 1190.943  | 1245.521  | AK024914  | 4220.846  | 4347.674  |
| AJ272180  | 1784.344  | 1818.396  | AB033006  | 1510.378  | 1075.557  | BC030949  | 1727.351  | 1705.145  |
| AK025709  | 1452.043  | 1318.104  | AF020314  | 11125.29  | 7609.522  | AF116615  | 759.363   | 1098.955  |
| NM_01901E | 12766.563 | 12176.922 | NM_01633E | 3249.509  | 1903.77   | U17636    | 40067.156 | 44895.824 |
| NM_012261 | 9519.657  | 9146.909  | NM_006457 | 768.452   | 777.26    | NM_01854E | 4219.293  | 4849.936  |
| NM_01555E | 3484.791  | 3288.521  | NM_01807E | 570.817   | 345.101   | U52699    | 7913.734  | 8357.417  |
| NM_01841E | 1749.913  | 1604.121  | NM_01210E | 1190.065  | 1082.816  | S71613    | 577.602   | 831.005   |
| NM_00460E | 5021.754  | 4769.736  | S82470    | 1390.375  | 1979.456  | AJ011910  | 11991.946 | 11506.522 |
| D70833    | 65496.914 | 56378.508 | AB028982  | 1505.191  | 1045.633  | AK024378  | 612.742   | 741.572   |
| NM_016621 | 1824.864  | 1487.956  | NM_002004 | 3161.259  | 2774.983  | NM_01402E | 2394.575  | 2764.179  |
| AB046808  | 2119.141  | 1622.661  | NM_00164E | 13794.116 | 10110.149 | D61703    | 7313.331  | 8025.87   |
| AK026265  | 2762.78   | 2538.343  | NM_020221 | 1310.582  | 1095.996  | AF086198  | 9240.631  | 9907.062  |
| NM_00646E | 836.68    | 608.205   | NM_000747 | 1477.362  | 1189.591  | NM_01801E | 923.355   | 430.632   |
| NM_005681 | 1903.14   | 1696.439  | NM_00541E | 3229.046  | 3864.766  | AK024928  | 407.742   | 672.556   |
| NM_01515E | 4905.511  | 4597.275  | AL137708  | 715.224   | 582.176   | NM_01445C | 1151.31   | 1675.26   |
| NM_012384 | 3189.989  | 3019.024  | AJ275973  | 12670.956 | 16221.546 | NM_017991 | 685.544   | 763.718   |
| NM_00465E | 2045.88   | 1797.674  | NM_00649E | 2829.726  | 3238.285  | L37198    | 2366.26   | 2828.558  |
| AF233453  | 4680.647  | 4285.767  | U76362    | 2006.394  | 1814.559  | U67822    | 479.98    | 662.47    |
| D87454    | 8259.814  | 7130.552  | AL832292  | 2928.287  | 2854.833  | AK021921  | 396.245   | 548.304   |
| NM_00702C | 2580.244  | 2816.109  | NM_00304E | 2756.594  | 2967.009  | AK025431  | 786.011   | 1002.423  |
| NM_00071E | 5537.784  | 5668.545  | NM_00219E | 1430      | 1414.87   | AK023662  | 386.473   | 642.915   |
| NM_01605E | 3746.762  | 3421.67   | NM_00138E | 5214.587  | 5641.365  | AF086274  | 18693.58  | 20683.664 |
| NM_013291 | 6936.017  | 6058.422  | X76770    | 5250.727  | 5373.901  | AK023682  | 852.018   | 891.703   |
| NM_00293E | 9059.969  | 7829.386  | AB037808  | 1369.49   | 1426.283  | AK024024  | 1203.997  | 1433.331  |
| NM_014161 | 2444.434  | 2283.135  | NM_01603E | 2256.74   | 1823.689  | AK000685  | 10227.782 | 9850.569  |
| BF312817  | 3847.245  | 3782.484  | Z36821    | 3582.971  | 3820.109  | D28381    | 8058.004  | 8202.357  |
| AF086491  | 3384.726  | 3165.725  | AF289485  | 2314.355  | 1585.583  | AF130064  | 20289.039 | 30856.617 |
| NM_01485E | 1289.029  | 1219.572  | AF130092  | 913.996   | 743.77    | U17624    | 401.572   | 650.459   |
| NM_00349E | 953.907   | 1121.613  | NM_01609E | 3167.717  | 2672.616  | D16988    | 39063.391 | 49652.449 |
| NM_00378C | 24135.697 | 22566.912 | AK024794  | 1805.786  | 1906.644  | AK001959  | 3464.951  | 3858.667  |
| NM_002711 | 474.334   | 240.807   | NM_01985E | 8538.244  | 7022.998  | U36217    | 770.428   | 981.797   |
| NM_00019E | 10057.612 | 9400.504  | NM_01799E | 7346.141  | 6401.632  | AL389880  | 1408.687  | 1089.761  |
| NM_00377E | 62768.707 | 58009.289 | AK023061  | 659.585   | 521.863   | AL157452  | 2042.024  | 2081.301  |
| AK023263  | 2491.673  | 2630.714  | NM_00725E | 1225.065  | 915.251   | AK024155  | 11892.548 | 15192.557 |
| NM_00462E | 1589.507  | 1928.445  | NM_00366E | 6604.662  | 4872.62   | AL359334  | 6681.384  | 7228.665  |
| AK021445  | 1415.164  | 1401.224  | NM_013384 | 58229.336 | 38882.496 | AK027095  | 1234.92   | 1661.545  |
| NM_017934 | 7650.58   | 7150.047  | NM_001187 | 823.575   | 401.424   | AF062097  | 742.767   | 767.097   |
| NM_01416E | 37253.469 | 36449.734 | NM_018241 | 1646.664  | 1570.839  | NM_019847 | 412.561   | 436.295   |
| AF211971  | 4339.4    | 3774.178  | NM_005834 | 4265.743  | 3594.718  | D17093    | 14354.679 | 15699.774 |
| NM_002931 | 2377.786  | 2213.913  | NM_000724 | 2111.464  | 2454.512  | AK022784  | 538.201   | 749.567   |

|           |           |           |           |           |           |           |           |           |
|-----------|-----------|-----------|-----------|-----------|-----------|-----------|-----------|-----------|
| NM_01344E | 47557.035 | 45426.746 | NM_000553 | 877.085   | 786.72    | AL117521  | 1640.877  | 2272.967  |
| X65232    | 35613.766 | 35159.512 | NM_002557 | 2365.431  | 2824.167  | AK021913  | 2819.059  | 3092.968  |
| U12767    | 507.613   | 578.555   | NM_004477 | 702.316   | 877.954   | AL137489  | 9670.689  | 13619.813 |
| U17630    | 721.292   | 868.774   | BE728156  | 561.282   | 595.595   | AF009311  | 1446.459  | 1620.195  |
| M33782    | 1310.133  | 1044.957  | Y10802    | 974.927   | 773.591   | S73397    | 711.867   | 667.101   |
| NM_00219E | 720.897   | 896.352   | AI417775  | 1375.263  | 1284.941  | AK024433  | 1616.938  | 1724.424  |
| NM_01775E | 5231.158  | 5693.038  | BI762229  | 2910.479  | 3118.124  | AK023856  | 609.754   | 408.552   |
| NM_01569E | 3059.742  | 3121.908  | BG618320  | 1039.799  | 715.162   | AL050376  | 977.935   | 803.283   |
| AK022551  | 1410.918  | 1309.317  | Y00787    | 2351.443  | 2347.852  | AL359652  | 919.557   | 932.031   |
| AF085968  | 3324.11   | 2787.652  | NM_00727E | 2555.146  | 2243.579  | AF088021  | 2280.064  | 2544.582  |
| AK023665  | 792.193   | 785.888   | N34462    | 3057.837  | 3241.582  | BF509267  | 3566.771  | 3446.432  |
| AB011136  | 2047.83   | 2188.163  | AI658778  | 2925.844  | 3152.038  | NM_00245E | 4279.295  | 4774.648  |
| AF085898  | 5082.121  | 5067.94   | L19067    | 4727.33   | 4970.851  | NM_00295E | 14015.873 | 17770.096 |
| AL442094  | 671.389   | 648.087   | Z48482    | 1505.603  | 1592.355  | AK000899  | 11371.352 | 14075.341 |
| AL161960  | 4101.846  | 3759.608  | W60413    | 878.399   | 859.059   | AK023377  | 714.665   | 959.287   |
| AL049964  | 2619.422  | 2550.477  | BI823365  | 1730.422  | 1896.932  | CY3Cy5    | 5154.241  | 113.026   |
| AF038184  | 489.329   | 419.5     | X06318    | 5447.317  | 4172.814  | AW300857  | 5030.234  | 3988.815  |
| AK023269  | 2898.178  | 2893.218  | AL834159  | 2645.676  | 1958.716  | H85962    | 8607.509  | 7216.469  |
| AF070564  | 5158.764  | 7275.995  | NM_000164 | 4507.086  | 2685.691  | BG742446  | 350.613   | 398.839   |
| AK021439  | 18210.75  | 26050.514 | NM_016217 | 4450.577  | 3571.642  | AA864554  | 4139.979  | 5042.623  |
| AF052099  | 2439.616  | 2561.066  | AK025971  | 4566.502  | 4362.442  | U00482    | 331.981   | 569.847   |
| AL110111  | 3659.866  | 3375.256  | NM_014007 | 1566.901  | 1483.587  | K01904    | 11692.7   | 16238.634 |
| AF070543  | 1528.462  | 1431.829  | AB033006  | 3205.72   | 3749.034  | M57650    | 1641.365  | 2462.246  |
| AF086525  | 467.975   | 358.402   | NM_006457 | 826.31    | 653.966   | M21302    | 714.852   | 1043.774  |
| AF086509  | 446.632   | 583.566   | NM_000207 | 1624.378  | 1318.701  | NM_01634E | 1143.754  | 1036.382  |
| NM_01477E | 2618.531  | 2591.736  | NM_006314 | 2003.182  | 1490.29   | SR6       | 2555.719  | 1700.688  |
| AK001171  | 12848.02  | 14847.444 | NM_001782 | 486.734   | 402.644   | SR8       | 7589.451  | 19388.686 |
| AK026273  | 8982.378  | 7769.521  | NM_014927 | 442.628   | 265.535   | SR10      | 27320.371 | 8120.165  |
| NM_02025C | 11465.055 | 9495.511  | NM_016293 | 10462.895 | 7910.067  | CY3Cy5    | 4374.782  | 87.412    |
| AF055007  | 1586.302  | 1417.408  | AL080148  | 10298.366 | 8401.813  | NM_00152E | 12869.704 | 11234.815 |
| NM_012337 | 1635.206  | 1621.735  | NM_006731 | 1310.725  | 1478.737  | NM_00605E | 2634.448  | 1949.657  |
| AL389879  | 9483.361  | 9215.387  | NM_018487 | 1792.732  | 2470.631  | NM_00429E | 419.107   | 430.83    |
| AK021542  | 572.054   | 654.75    | NM_020134 | 1122.553  | 988.881   | AL133105  | 1224.292  | 1523.597  |
| AK022869  | 3263.266  | 3026.366  | NM_014061 | 1004.749  | 689.589   | AK022859  | 433.503   | 748.207   |
| NM_016111 | 11022.378 | 11674.736 | NM_00034E | 1972.132  | 1948.655  | NM_000214 | 582.609   | 377.596   |
| AF085958  | 63848.043 | 55711.074 | NM_00505E | 1019.322  | 1082.901  | NM_014864 | 3946.828  | 3959.284  |
| AK021906  | 475.961   | 653.114   | NM_00495C | 2019.145  | 2508.896  | NM_00372E | 3084.573  | 2993.237  |
| AF086021  | 3281.159  | 3532.942  | NM_006493 | 1812.476  | 1180.678  | NM_01435E | 3047.574  | 2681.971  |
| AF085982  | 687.11    | 751.163   | U76362    | 1412.977  | 1197.26   | NM_012481 | 587.057   | 575.737   |
| AK024472  | 1234.792  | 1698.261  | AF040248  | 541.263   | 439.772   | L09102    | 4957.067  | 4928.11   |
| AF087981  | 610.503   | 539.453   | NM_01422E | 540.215   | 267.569   | NM_016247 | 1922.146  | 1829.268  |
| NM_01797E | 3024.902  | 2921.345  | AL832292  | 2535.135  | 2143.041  | NM_01228E | 634.029   | 889.934   |
| U06700    | 1512.634  | 1484.46   | NM_00304E | 4106.756  | 2877.408  | NM_00332E | 8287.435  | 10379.003 |
| U63828    | 2299.257  | 2092.302  | NM_00566E | 22703.141 | 14298.371 | NM_01866E | 4161.958  | 3489.33   |
| Z36794    | 1442.909  | 1281.851  | NM_004317 | 3644.865  | 2433.277  | NM_004227 | 991.472   | 810.121   |
| Z36828    | 8473.465  | 9095.292  | NM_01464E | 1139.842  | 676.273   | NM_00528E | 1652.272  | 1047.654  |
| AF086121  | 9348.074  | 8350.779  | NM_01470E | 1296.1    | 1105.238  | NM_00173E | 530.502   | 515.585   |
| AF086140  | 1027.953  | 1043.04   | NM_00369E | 884.028   | 619.666   | AB028949  | 1407.803  | 1203.382  |
| AK026915  | 960.129   | 987.981   | NM_00035E | 20111.232 | 12821.528 | NM_004101 | 574.131   | 730.402   |
| AL110259  | 1036.16   | 1082.696  | NM_018134 | 22636.785 | 16328.949 | NM_00299E | 13045.408 | 19683.344 |
| AB033100  | 7595.231  | 6683.022  | NM_013247 | 2618.854  | 1802.813  | NM_01597E | 866.853   | 752.495   |
| AL390138  | 3516.657  | 3752.618  | NM_00677C | 1463.39   | 1925.391  | NM_00381C | 1360.04   | 1345.69   |
| AL137290  | 8725.061  | 9523.329  | NM_00470E | 1741.621  | 1487.806  | NM_00521E | 2408.752  | 2257.621  |



|           |           |           |           |           |           |           |           |           |
|-----------|-----------|-----------|-----------|-----------|-----------|-----------|-----------|-----------|
| AK023458  | 421.216   | 506.565   | NM_001512 | 1801.633  | 308.638   | NM_006419 | 934.149   | 688.555   |
| AF119888  | 842.732   | 1022.674  | NM_014706 | 3749.21   | 3065.519  | AB020676  | 593.723   | 428.194   |
| AK001551  | 1780.006  | 1871.731  | AK023172  | 676.537   | 572.391   | AK024715  | 568.302   | 580.39    |
| AK001825  | 1487.177  | 1362.304  | AJ001348  | 342.924   | 731.379   | U90942    | 29683.191 | 28899.041 |
| NM_018547 | 278.46    | 454.035   | NM_007255 | 1434.035  | 1046.812  | NM_01836C | 1049.386  | 903.687   |
| AK024714  | 838.068   | 913.308   | NM_00366E | 5196.259  | 4057.076  | AL365415  | 858.12    | 881.887   |
| AK022363  | 1369.935  | 1382.574  | NM_013384 | 46486.305 | 28591.127 | NM_02022E | 1748.698  | 1616.71   |
| AK022485  | 554.839   | 537.281   | NM_001187 | 529.17    | 313.144   | AK024685  | 895.551   | 586.702   |
| AK023395  | 3924.467  | 3603.893  | NM_018241 | 1274.474  | 786.145   | NM_00367E | 12767.158 | 10248.377 |
| AK023818  | 11874.561 | 11139.119 | NM_005834 | 2848.022  | 2042.026  | AF113007  | 1402.403  | 1230.829  |
| AK024139  | 666.413   | 558.152   | AF000381  | 3095.451  | 2571.474  | NM_00068E | 6369.633  | 5034.012  |
| AK023522  | 629.001   | 492.749   | S82470    | 1741.127  | 1131.218  | U39573    | 845.585   | 890.959   |
| AK023895  | 1050.333  | 978.023   | AB028982  | 1528.607  | 1085.973  | D82061    | 1040.892  | 1097.267  |
| AK024206  | 6439.523  | 6510.387  | NM_002004 | 3847.598  | 3065.29   | AJ293009  | 1170.003  | 1310.222  |
| NM_006262 | 2017.937  | 1779.886  | NM_005121 | 1110.595  | 569.098   | NM_000374 | 1451.485  | 1701.711  |
| AK026598  | 2826.951  | 2159.742  | NM_001643 | 12217.914 | 10407.811 | NM_000502 | 2478.891  | 2579.065  |
| AK023602  | 693.957   | 843.037   | NM_020221 | 731.946   | 841.533   | NM_00135E | 12286.407 | 13022.008 |
| NM_018097 | 20411.363 | 21565.6   | NM_000747 | 1153.452  | 951.883   | NM_00169E | 13022.455 | 17625.336 |
| AF130043  | 630.128   | 756.98    | NM_005415 | 1938.345  | 2120.054  | NM_00497E | 861.207   | 903.367   |
| Y11167    | 844.602   | 837.02    | AL137708  | 647.184   | 492.952   | D87445    | 5954.211  | 5822.451  |
| AK026813  | 762.593   | 797       | AJ275973  | 6167.586  | 7458.189  | NM_00023E | 1222.814  | 996.653   |
| AK027225  | 749.482   | 1006.276  | AL834159  | 2591.926  | 1662.861  | NM_002247 | 511.538   | 538.18    |
| AK023083  | 3787.483  | 5601.337  | NM_000164 | 8139.532  | 5099.489  | NM_00498C | 4905.674  | 4509.206  |
| AF116622  | 981.116   | 1308.792  | NM_016217 | 4735.637  | 3659.335  | AB011094  | 8895.059  | 8159.032  |
| NM_00532E | 1026.758  | 1242.783  | AK025971  | 5389.956  | 3882.445  | NM_003224 | 910.912   | 1081.192  |
| AF217967  | 1018.83   | 1157.318  | NM_00261E | 2051.863  | 1203.47   | NM_00165E | 47281.57  | 49459.855 |
| NM_01815C | 9052.996  | 11012.472 | L27479    | 831.327   | 258.483   | AK021761  | 3907.766  | 3269.715  |
| NM_01791E | 848.934   | 673.505   | NM_002193 | 1041.723  | 625.532   | NM_00148E | 2048.755  | 1925.482  |
| NM_01785E | 27998.449 | 28897.85  | NM_00138E | 2027.13   | 1425.47   | NM_01897E | 11461.348 | 10018.266 |
| AB007954  | 2056.548  | 1938.693  | X76770    | 2609.522  | 1794.751  | NM_002591 | 2294.398  | 2176.639  |
| AK026494  | 4172.113  | 4338.322  | AB037808  | 999.27    | 721.74    | NM_02021E | 4862.558  | 4660.943  |
| AK022067  | 462.742   | 536.294   | NM_01603E | 1387.196  | 1018.374  | AK021860  | 564.507   | 525.352   |
| AK023508  | 1892.026  | 2109.137  | AF090911  | 846.798   | 654.126   | AL137266  | 2344.456  | 2549.619  |
| AK025840  | 2689.294  | 2521.799  | Z36821    | 4581.271  | 3575.96   | NM_016457 | 748.206   | 499.258   |
| BC024009  | 2218.89   | 2325.491  | AF289485  | 3558.337  | 2564.601  | NM_005057 | 824.714   | 873.785   |
| AF128543  | 5708.22   | 5587.731  | AF130092  | 1357.927  | 844.666   | AB046842  | 935.493   | 997.227   |
| NM_00418E | 2072.371  | 1983.385  | NM_01609E | 2936.128  | 2234.578  | NM_00485C | 1788.926  | 1495.28   |
| U84510    | 4444.698  | 4671.165  | AK024794  | 1085.918  | 1039.807  | NM_002822 | 3668.976  | 3011.169  |
| S83198    | 12365.5   | 12012.709 | NM_019853 | 5726.167  | 3538.058  | BF306955  | 637.139   | 667.345   |
| AF052119  | 17981.531 | 20531.125 | NM_017992 | 4895.68   | 3878.002  | NM_001394 | 6139.011  | 4857.692  |
| X94290    | 2080.869  | 2239.072  | AK023061  | 833.286   | 689.546   | NM_018441 | 6048.232  | 5335.346  |
| AK026685  | 28665.27  | 33410.23  | NM_014061 | 744.321   | 490.868   | NM_00160E | 1064.956  | 878.672   |
| AF090927  | 26352.563 | 34567.238 | BC034395  | 369.623   | 391.346   | BE733234  | 451.765   | 463.744   |
| AL137642  | 1593.229  | 1863.357  | NM_00034E | 2707.822  | 1911.621  | NM_012282 | 685.013   | 646.307   |
| AL133619  | 3329.398  | 3019.346  | NM_00505E | 818.824   | 582.665   | NM_00332E | 9356.045  | 9153.049  |
| AL157496  | 517.813   | 613.943   | NM_00495C | 2515.287  | 1574.233  | BG685310  | 1342.601  | 1190.572  |
| AK025902  | 4048.988  | 4634.032  | NM_000724 | 2233.797  | 2066.35   | AW300857  | 3612.161  | 3595.367  |
| NM_005181 | 6192.336  | 7057.052  | NM_002557 | 2014.434  | 1700.442  | H85962    | 6855.218  | 7235.333  |
| AF026945  | 709.652   | 614.485   | BI762229  | 2562.833  | 1737.81   | BG742446  | 620.091   | 504.848   |
| AF143676  | 3127.047  | 3903.213  | BG618320  | 1990.458  | 1587.344  | AA864554  | 4240.184  | 4175.45   |
| U66044    | 7805.619  | 8045.771  | Y00787    | 1994.803  | 1323.903  | X66945    | 902.701   | 802.22    |
| NM_005247 | 31392.371 | 33474.602 | NM_00727E | 2203.376  | 1395.136  | X12830    | 7074.474  | 6123.901  |
| NM_00528E | 1402.458  | 1553.521  | N34462    | 1983.462  | 1279.845  | K01904    | 11702.171 | 11658.601 |

|             |           |           |           |           |           |           |           |           |
|-------------|-----------|-----------|-----------|-----------|-----------|-----------|-----------|-----------|
| AL122089    | 1791.642  | 2144.37   | AI658778  | 1880.983  | 1687.186  | NM_00222E | 648.456   | 466.371   |
| AA203665    | 5113.447  | 5431.826  | L19067    | 2794.827  | 1995.084  | M21302    | 724.377   | 819.145   |
| U95646      | 2078.195  | 2314.718  | Z48482    | 972.111   | 490.111   | NM_01634E | 1149.649  | 1089.861  |
| Y16705      | 1550.709  | 1717.498  | W60413    | 777.353   | 493.98    | AK024865  | 484.111   | 630.536   |
| AF279775    | 5707.705  | 6543.914  | BI823365  | 1086.936  | 1154.836  | U90942    | 33517.465 | 38269.207 |
| NM_001821   | 2661.096  | 2155.378  | X06318    | 3807.899  | 3548.855  | NM_01494E | 336.26    | 389.721   |
| NM_005647   | 879.822   | 741.206   | NM_004703 | 1471.756  | 1162.219  | NM_01836C | 1200.58   | 1153.586  |
| X64978      | 5438.095  | 4669.834  | NM_001512 | 827.362   | 449.775   | AL365415  | 813.35    | 785.627   |
| NM_000912   | 27024.854 | 26862.953 | NM_014706 | 4219.686  | 3114.885  | L29147    | 5907.862  | 6350.903  |
| NM_00234E   | 1285.454  | 1130.88   | AK023172  | 246.595   | 432.572   | NM_00152E | 12963.693 | 13227.065 |
| U57971      | 2278.539  | 2205.597  | AJ001348  | 577.631   | 462.32    | NM_00605E | 2873.362  | 3046.23   |
| X89673      | 1368.767  | 1476.114  | NM_014007 | 921.45    | 753.277   | NM_00106C | 1803.33   | 1775.046  |
| AK024593    | 2296.601  | 2030.78   | AB033006  | 2772.076  | 2217.071  | AL133105  | 1169.959  | 1087.159  |
| Z83934      | 883.776   | 1004.167  | AF020314  | 10458.545 | 7722.435  | NM_00372E | 2707.189  | 3182.394  |
| NM_01835E   | 3107.931  | 3290.584  | NM_016332 | 1406.7    | 1164.393  | NM_01435E | 2695.985  | 2359.966  |
| AK022020    | 3176.876  | 3236.958  | AK023936  | 326.135   | 407.643   | NM_012481 | 532.966   | 570.978   |
| U17634      | 474.45    | 287.58    | NM_006457 | 1162.463  | 1853.443  | L09102    | 4476.676  | 4677.656  |
| AK000263    | 8576.489  | 8179.19   | NM_003682 | 524.286   | 608.82    | U68488    | 577.269   | 598.13    |
| Y13895      | 784.025   | 670.901   | NM_006314 | 5866.491  | 5644.551  | NM_016247 | 1201.869  | 1048.876  |
| NM_017447   | 1144.823  | 1151.57   | NM_001782 | 584.525   | 631.061   | AB011094  | 7659.299  | 8467.698  |
| AK026798    | 6241.192  | 4663.923  | NM_002754 | 852.091   | 852.321   | NM_003224 | 767.062   | 1016.692  |
| AL049452    | 780.889   | 852.991   | NM_000797 | 1889.3    | 2797.392  | NM_00165E | 43504.133 | 44760.289 |
| NM_01662E   | 2284.096  | 2300.548  | NM_016293 | 10237.299 | 9088.341  | AK021761  | 3970.346  | 3978.882  |
| AK026976    | 1293.757  | 1402.103  | AL080148  | 6533.96   | 4726.691  | NM_01866E | 3839.834  | 4088.964  |
| AF070559    | 3989.24   | 4230.728  | NM_006731 | 700.067   | 354.358   | NM_004227 | 712.016   | 853.364   |
| D42043      | 7204.906  | 7105.586  | NM_020134 | 594.5     | 325.723   | NM_00528E | 1437.449  | 1240.844  |
| CY3Cy5      | 1373.107  | 132.39    | NM_020221 | 1463.639  | 1228.24   | NM_00173E | 592.878   | 419.779   |
| BG744154    | 68062.508 | 61430.07  | NM_000747 | 977.295   | 938.656   | AB028949  | 1343.372  | 1173.312  |
| Z11694      | 10552.934 | 9932.146  | NM_00541E | 1851.994  | 1770.8    | NM_00299E | 6556.025  | 7380.573  |
| BF983177    | 1561.973  | 1478.285  | AJ275973  | 9033.976  | 11179.264 | NM_01597E | 769.36    | 667.547   |
| Z26317      | 2543.195  | 2435.132  | U76362    | 1265.55   | 1622.39   | NM_00381C | 1448.88   | 1511.844  |
| X16983      | 10811.239 | 11767.394 | AL832292  | 2390.643  | 3499.093  | NM_00521E | 2148.402  | 2572.752  |
| X56160      | 3202.365  | 3845.079  | NM_00304E | 5018.871  | 5993.247  | NM_00641E | 762.965   | 984.813   |
| BG679991    | 769.554   | 744.726   | NM_00566E | 24215.004 | 24331.137 | AB020676  | 574.077   | 353.879   |
| H-Y 00097 I | 3248.769  | 3134.104  | NM_00306C | 592.862   | 826.065   | AK024715  | 579.407   | 633.366   |
| H-M 59964   | 1530.311  | 1782.051  | NM_00389E | 872.995   | 1024.135  | BF306955  | 704.181   | 625.488   |
| AL038354    | 51869.91  | 50091.227 | NM_004317 | 5300.858  | 6306.448  | NM_001394 | 6718.953  | 6608.904  |
| R14607      | 2204.95   | 2046.027  | NM_01464E | 1024.982  | 1388.325  | NM_018441 | 5829.976  | 5406.988  |
| NM_02197E   | 3878.996  | 2712.647  | NM_01470E | 2363.525  | 2525.282  | NM_00160E | 1048.631  | 1029.315  |
| SR2         | 52950.281 | 40144.895 | NM_00369E | 814.839   | 839.233   | BE733234  | 412.472   | 570.428   |
| SR4         | 14495.41  | 9811.411  | NM_00035E | 15270.518 | 14065.69  | NM_02022E | 1035.623  | 1284.679  |
| SR6         | 1986.204  | 1297.871  | NM_018134 | 13389.409 | 14448.328 | AK024685  | 514.549   | 578.467   |
| SR8         | 6952.057  | 14662.01  | NM_013247 | 1084.343  | 1252.316  | NM_00367E | 13279.237 | 12365.248 |
| SR10        | 23395.473 | 6150.655  | NM_00677C | 1528.113  | 2110.323  | AF113007  | 1662.534  | 1149.557  |
| CY3Cy5      | 521.96    | 88.479    | AK024794  | 967.939   | 1341.727  | NM_00068E | 6789.955  | 5727.51   |
| NM_001284   | 39218.801 | 36407.258 | NM_01985E | 5553.621  | 4498.984  | U39573    | 772.805   | 784.43    |
| NM_00324E   | 10092.801 | 8972.931  | NM_01799E | 4635.62   | 4498.66   | D82061    | 914.777   | 701.407   |
| U31099      | 956.118   | 896.62    | AK023061  | 747.894   | 665.274   | AJ293009  | 1327.707  | 1075.994  |
| NM_001105   | 3099.959  | 2838.143  | NM_00725E | 1426.473  | 1863.147  | NM_000374 | 1258.692  | 1403.776  |
| NM_00558E   | 985.456   | 946.58    | NM_00366E | 6819.493  | 7095.123  | NM_00050E | 2059.699  | 2189.695  |
| NM_00207E   | 4126.28   | 4263.059  | NM_013384 | 58721.953 | 54146.789 | NM_00135E | 12140.199 | 14378.335 |
| Y08756      | 18013.211 | 19938.561 | NM_018241 | 1616.194  | 1922.823  | NM_00169E | 12915.063 | 15957.795 |
| NM_00556E   | 7288.907  | 8474.549  | NM_005834 | 3737.31   | 4560.86   | NM_00497E | 925.174   | 672.289   |

|           |           |           |           |           |           |           |           |           |
|-----------|-----------|-----------|-----------|-----------|-----------|-----------|-----------|-----------|
| NM_005102 | 4298.661  | 6774.173  | AF000381  | 3590.348  | 3652.039  | D87445    | 5579.713  | 5215.455  |
| NM_004518 | 1421.015  | 2099.15   | NM_018075 | 583.677   | 956.691   | NM_000238 | 606.008   | 649.411   |
| NM_002719 | 3788.832  | 3708.049  | NM_012105 | 926.75    | 1444.571  | NM_004980 | 1652.049  | 1300.34   |
| AV752086  | 1229.772  | 1076.841  | S82470    | 1784.189  | 1674.961  | NM_016346 | 972.728   | 1157.319  |
| NM_016102 | 5238.122  | 4852.011  | AB028982  | 861.624   | 976.439   | AK024865  | 643.438   | 621.718   |
| NM_004376 | 1757.627  | 1391.251  | NM_002004 | 1493.773  | 1308.72   | NM_007210 | 555.663   | 664.413   |
| NM_005603 | 29327.16  | 23541.77  | NM_005121 | 768.624   | 457.367   | NM_001483 | 2043.499  | 2027.108  |
| AI075338  | 394.253   | 316.841   | NM_001643 | 6782.082  | 6630.545  | NM_018973 | 12391.009 | 11649.493 |
| NM_006834 | 4062.882  | 4070.729  | NM_019096 | 3934.982  | 3915.845  | NM_002591 | 1894.896  | 1836.038  |
| AB011100  | 2209.62   | 2248.617  | NM_014725 | 1827.617  | 2268.563  | AL049334  | 467.099   | 482.979   |
| U61741    | 1293.834  | 1518.489  | NM_006892 | 1874.322  | 1790.024  | NM_020216 | 6061.824  | 5545.454  |
| NM_012402 | 3256.153  | 3642.227  | NM_019117 | 855.151   | 1175.899  | AB046816  | 681.935   | 649.275   |
| M76676    | 3298.865  | 3594.689  | NM_018309 | 1828.827  | 2419.692  | AL137266  | 2223.393  | 2630.618  |
| NM_003857 | 1396.507  | 1520.852  | NM_017658 | 3043.179  | 3422.537  | NM_016457 | 696.663   | 721.162   |
| AL137690  | 557.218   | 522.511   | NM_018679 | 7033.992  | 9177.418  | NM_005057 | 983.761   | 873.328   |
| Z83804    | 2031.293  | 2153.234  | NM_016643 | 426.271   | 604.799   | AB046842  | 1331.704  | 1018.736  |
| NM_007366 | 1788.211  | 2053.025  | NM_006779 | 1264.959  | 1365.023  | NM_004850 | 1781.657  | 1397.478  |
| NM_000592 | 1426.824  | 1854.754  | NM_016217 | 6258.448  | 8730.577  | NM_002822 | 3462.616  | 2416.704  |
| NM_016584 | 12797.042 | 16287.11  | AK025971  | 6039.356  | 8358.796  | NM_014352 | 3007.75   | 3528.072  |
| NM_001815 | 1542.649  | 2077.784  | NM_002618 | 1414.2    | 1629.023  | NM_012481 | 604.685   | 683.061   |
| NM_000064 | 8007.716  | 9289.604  | L27479    | 778.226   | 966.494   | L09102    | 6391.52   | 7350.836  |
| NM_003264 | 3550.277  | 3577.189  | NM_002193 | 1645.705  | 2020.059  | NM_016247 | 1364.223  | 1861.343  |
| NM_006725 | 2680.425  | 2454.06   | NM_001388 | 6716.412  | 8361.932  | NM_012282 | 688.225   | 783.392   |
| NM_003326 | 1307.372  | 1492.803  | X76770    | 3840.086  | 4830.376  | NM_003323 | 9197.307  | 9821.132  |
| NM_004568 | 25444.676 | 20516.672 | AB037808  | 793.806   | 735.304   | BG685310  | 1502.584  | 1445.388  |
| NM_000202 | 1504.572  | 1319.38   | NM_016038 | 1976.129  | 1687.351  | AW300857  | 2674.318  | 3110.234  |
| NM_005496 | 9851.557  | 7463.604  | Z36821    | 1509.225  | 1664.775  | H85962    | 5422.693  | 5810.132  |
| NM_016608 | 875.253   | 760.54    | AF289485  | 1262.848  | 1176.775  | BG742446  | 581.925   | 563.733   |
| NM_004817 | 947.844   | 650.689   | AF130092  | 883.796   | 1259.043  | AA864554  | 4571.913  | 4790.135  |
| NM_018975 | 10877.072 | 8127.283  | NM_016095 | 2611.027  | 3030.275  | X66945    | 999.681   | 1098.888  |
| AB023215  | 9681.674  | 8524.6    | AF300612  | 55786.949 | 52389.926 | X12830    | 7957.121  | 8473.795  |
| NM_018073 | 1413.705  | 1556.576  | AB014557  | 736.416   | 891.646   | U00482    | 485.161   | 707.888   |
| AL137529  | 2097.449  | 2019.64   | NM_005578 | 3916.37   | 3487.835  | Z80998    | 9076.922  | 11114.753 |
| NM_012332 | 2558.126  | 2695.962  | NM_003653 | 6279.054  | 7372.2    | K01904    | 12040.485 | 12223.369 |
| AK026648  | 1481.403  | 1682.644  | NM_018457 | 14799.688 | 13522.122 | BE538886  | 730.826   | 533.154   |
| NM_000497 | 1364.296  | 1805.109  | NM_002953 | 11394.972 | 11807.612 | M57650    | 771.842   | 517.37    |
| NM_017421 | 1244.735  | 1234.048  | NM_002187 | 1275.529  | 1704.006  | NM_005212 | 2537.216  | 3102.952  |
| AK025977  | 15766.866 | 20110.441 | NM_014246 | 5764.92   | 7788.336  | NM_006419 | 916.752   | 1146.587  |
| NM_002899 | 11779.684 | 14187.212 | AF311912  | 342.05    | 538.54    | AB020676  | 407.244   | 475.537   |
| NM_000486 | 1677.635  | 2493.6    | NM_001116 | 727.573   | 687.032   | AK024715  | 367.714   | 609.192   |
| BE876237  | 1559.112  | 1829.803  | BC035395  | 5029.825  | 6489.542  | U90942    | 28306.297 | 36477.066 |
| NM_005397 | 998.98    | 1220.668  | NM_001703 | 8259.689  | 9159.709  | NM_018360 | 1215.203  | 1379.145  |
| NM_000806 | 11071.042 | 10501.099 | NM_020126 | 4806.611  | 5678.691  | AL365415  | 763.703   | 954.884   |
| NM_006320 | 1343.007  | 1154.238  | NM_013982 | 5684.059  | 5925.628  | L29147    | 6238.669  | 7173.98   |
| AB014511  | 3532.495  | 3190.949  | NM_005049 | 1603.14   | 1938.359  | NM_001525 | 13025.717 | 14219.823 |
| NM_014252 | 4154.077  | 3523.134  | NM_003882 | 592.666   | 585.652   | NM_006055 | 3043.3    | 2701.776  |
| NM_001662 | 7338.207  | 5822.48   | NM_004630 | 6568.844  | 6420.237  | NM_004296 | 469.321   | 513.543   |
| NM_016131 | 7004.125  | 5549.764  | AK023001  | 3749.303  | 3454.069  | NM_001060 | 2619.573  | 3717.764  |
| NM_006822 | 1440.461  | 1325.922  | NM_014826 | 4775.143  | 3960.817  | NM_018841 | 499.894   | 1048.006  |
| NM_012142 | 7568.857  | 6072.284  | U01147    | 1141.027  | 1135.364  | NM_005226 | 576.819   | 799.122   |
| NM_016429 | 1741.541  | 2169.511  | NM_004040 | 4469.564  | 3486.702  | NM_014864 | 4075.402  | 3928.54   |
| NM_018264 | 2229.85   | 1999.969  | NM_006116 | 1308.757  | 998.67    | NM_003728 | 1590.709  | 1257.266  |
| NM_014580 | 758.247   | 693.91    | NM_005456 | 1828.186  | 1597.857  | NM_004975 | 1372.059  | 970.416   |

|             |           |           |           |           |           |           |           |           |
|-------------|-----------|-----------|-----------|-----------|-----------|-----------|-----------|-----------|
| NM_000153   | 984.614   | 1091.576  | NM_003587 | 11084.952 | 9631.44   | D87445    | 5650.434  | 5345.663  |
| NM_002033   | 6521.032  | 7012.286  | X90978    | 724.828   | 844.176   | NM_000238 | 1191.298  | 1569.432  |
| AK091794    | 511.271   | 451.017   | BF219403  | 16339.963 | 22352.518 | NM_004980 | 5138.497  | 5702.683  |
| AF085966    | 6029.339  | 11526.174 | NM_016119 | 1455.15   | 1424.38   | AB011094  | 8596.774  | 8778.702  |
| NM_016316   | 3361.792  | 4382.687  | AK075450  | 1900.683  | 2276.971  | NM_003224 | 1003.859  | 1079.624  |
| NM_003369   | 10580.631 | 12983.939 | AF178983  | 2946.143  | 3928.036  | NM_001658 | 49955.703 | 57057.77  |
| NM_000057   | 3939.907  | 6743.811  | NM_001324 | 4610.563  | 5489.677  | NM_006827 | 17743.529 | 18075.105 |
| NM_018343   | 4223.058  | 4798.256  | AB037795  | 1591.092  | 2045.825  | AK021761  | 4583.862  | 4851.416  |
| AK095793    | 1422.306  | 1534.742  | D43949    | 2610.555  | 4299.675  | AK024536  | 671.538   | 548.502   |
| NM_003177   | 3808.43   | 3802.297  | AF111849  | 19747.494 | 20010.832 | NM_018668 | 4863.639  | 4854.423  |
| NM_017719   | 1014.078  | 972.11    | AK022975  | 712.177   | 729.649   | NM_004227 | 856.995   | 970.927   |
| AF064078    | 1122.203  | 1082.213  | NM_015344 | 2225.525  | 2841.885  | NM_005282 | 1505.303  | 1666.536  |
| AL049688    | 1140.508  | 1258.705  | NM_004288 | 1150.152  | 852.856   | NM_001736 | 636.596   | 639.477   |
| NM_002737   | 1953.347  | 1286.009  | AL122055  | 8701.611  | 8563.517  | AB028949  | 1325.089  | 1578.354  |
| Z25427      | 2301.068  | 1711.899  | NM_005132 | 21016.938 | 23677.25  | AL137580  | 392.731   | 908.033   |
| NM_004672   | 6396.894  | 5218.324  | X07695    | 267.487   | 584.357   | NM_004101 | 551.027   | 786.847   |
| NM_001353   | 2694.03   | 2030.654  | D87458    | 659.161   | 818.234   | NM_002995 | 4424.736  | 5803.206  |
| NM_006214   | 3099.301  | 2515.593  | AK021750  | 1447.291  | 1632.89   | NM_015978 | 1005.142  | 709.119   |
| AJ010228    | 4416.912  | 3163.467  | NM_003626 | 710.673   | 760.894   | NM_003810 | 1128.039  | 1498.855  |
| NM_005198   | 3404.736  | 3534.8    | AK023594  | 3111.624  | 2887.152  | NM_004908 | 559.382   | 778.992   |
| NM_005603   | 35768.16  | 37677.012 | AB032989  | 518.562   | 433.777   | NM_016457 | 679.895   | 623.549   |
| NM_001061   | 620.562   | 828.37    | AB010099  | 10107.729 | 9012.435  | NM_005057 | 989.132   | 869.309   |
| AI075338    | 491.093   | 457.564   | NM_004190 | 12024.458 | 11682.847 | AF143321  | 819.053   | 1037.369  |
| Z11694      | 10398.042 | 12716.871 | NM_014275 | 3203.41   | 4076.735  | AB046842  | 1122.012  | 1576.178  |
| Z26317      | 3512.978  | 5501.684  | NM_000409 | 2750.416  | 2792.965  | NM_004850 | 1653.265  | 2644.556  |
| X16983      | 16235.629 | 28971.648 | AF208005  | 905.823   | 1092.433  | NM_002822 | 3771.741  | 3611.854  |
| BG679991    | 1212.915  | 2019.746  | NM_002231 | 6387.409  | 5744.759  | BF306955  | 843.805   | 905.56    |
| H-Y 00097 I | 3952.203  | 6280.511  | NM_020474 | 9795.888  | 8770.433  | NM_001394 | 7156.616  | 6968.437  |
| H-M 59964   | 1700.316  | 1858.263  | NM_002643 | 2500.123  | 2977.743  | NM_018441 | 6978.121  | 8013.601  |
| H-Y 00711 I | 62879.063 | 60417.02  | NM_017807 | 3274.617  | 4271.523  | NM_000778 | 10734.352 | 12302.813 |
| H-X 16707 I | 2604.834  | 2610.471  | NM_014746 | 710.576   | 1108.549  | NM_001609 | 1306.595  | 1453.019  |
| AL038354    | 50096.949 | 48178.934 | NM_002788 | 32152.543 | 33605.141 | BE733234  | 569.623   | 839.798   |
| R14607      | 1968.316  | 1809.509  | NM_000462 | 4848.786  | 4947.983  | NM_020228 | 3009.313  | 2882.477  |
| W84867      | 434.022   | 429.635   | NM_003336 | 6516.717  | 7642.945  | AK024685  | 1338.542  | 1056.317  |
| NM_021976   | 3829.481  | 2613.279  | NM_005805 | 11104.775 | 12940.031 | NM_003676 | 14267.69  | 13317.349 |
| NM_005718   | 11244.625 | 7980.893  | NM_004181 | 1912.842  | 2209.461  | AF113007  | 1360.263  | 1481.441  |
| NM_005496   | 11960.782 | 11186.669 | NM_003900 | 8463.05   | 10329.718 | NM_000688 | 6344.685  | 6426.215  |
| NM_002858   | 6513.625  | 6391.634  | NM_003337 | 2979.111  | 4193.085  | U39573    | 895.324   | 828.161   |
| NM_004817   | 1054.759  | 1074.445  | AF298152  | 2148.624  | 2167.538  | D82061    | 953.96    | 990.855   |
| NM_018975   | 13185.161 | 13252.583 | AF117233  | 2620.609  | 2635.923  | AJ293009  | 1288.326  | 1149.085  |
| NM_001284   | 39442.871 | 43654.742 | NM_015848 | 515.701   | 829.277   | NM_000374 | 1552.017  | 1596.324  |
| NM_003242   | 10068.005 | 11341.148 | NM_001723 | 927.145   | 1233.526  | NM_000502 | 1889.353  | 1641.163  |
| NM_002849   | 1111.774  | 1533.474  | NM_016018 | 1387.968  | 1636.714  | NM_001359 | 12546.3   | 11875.479 |
| U31099      | 993.2     | 912.849   | M94362    | 11115.07  | 11146.727 | NM_001696 | 13445.425 | 12381.957 |
| NM_001105   | 3077.129  | 3071.243  | AK024707  | 1196.912  | 1435.342  | AF190900  | 3263.554  | 4630.737  |
| NM_005585   | 1042.563  | 1262.802  | NM_014255 | 1620.199  | 1447.771  | NM_020404 | 3632.059  | 4158.356  |
| NM_002075   | 3640.475  | 4346.175  | AB033024  | 1601.986  | 1486.077  | BE972401  | 4776.795  | 4921.993  |
| Y08756      | 16933.432 | 21925.756 | NM_018942 | 3196.497  | 3439.966  | NM_017425 | 1144.673  | 1110.197  |
| NM_005563   | 7060.089  | 8066.327  | NM_005531 | 573.111   | 735.875   | AB007922  | 572.657   | 735.415   |
| AY007090    | 716.566   | 698.556   | AF217226  | 3214.224  | 3654.478  | NM_015982 | 1344.87   | 1585.756  |
| NM_006439   | 441.948   | 429.454   | NM_005522 | 465.001   | 596.176   | NM_003746 | 29777.07  | 42138.703 |
| NM_005102   | 3307.495  | 2987.439  | NM_005760 | 8837.093  | 9828.453  | NM_002910 | 14614.944 | 20853.068 |
| NM_004518   | 882.664   | 826.24    | NM_007265 | 2863.293  | 3542.438  | AC096970  | 13047.674 | 17080.594 |

|           |           |           |           |           |           |           |           |           |
|-----------|-----------|-----------|-----------|-----------|-----------|-----------|-----------|-----------|
| NM_002719 | 3358.929  | 2783.175  | AK023639  | 4128.958  | 4475.856  | AK024865  | 637.978   | 720.765   |
| AV752086  | 1551.612  | 1342.299  | AL137700  | 656.29    | 904.487   | NM_007210 | 527.773   | 697.805   |
| NM_016102 | 4834.589  | 4015.1    | NM_004904 | 677.615   | 922.349   | NM_001483 | 2460.663  | 2173.042  |
| NM_004376 | 2064.443  | 1756.312  | NM_003083 | 1894.118  | 2341.073  | NM_018973 | 13708.442 | 12945.18  |
| NM_000272 | 2012.616  | 1904.022  | NM_006789 | 3947.628  | 4566.575  | NM_002591 | 4605.419  | 4669.628  |
| NM_014252 | 4748.104  | 4762.053  | NM_000982 | 1638.473  | 1731.586  | NM_020216 | 5538.756  | 5382.389  |
| NM_001662 | 8375.695  | 7964.166  | NM_012423 | 61079.695 | 57776.824 | AK021860  | 578.072   | 832.704   |
| NM_016131 | 8840.478  | 8334.525  | AK026367  | 26062.072 | 25817.055 | AB046816  | 927.098   | 492.373   |
| NM_006822 | 1470.801  | 2050.322  | AK026491  | 13622.314 | 13599.651 | AL137266  | 2641.315  | 2155.97   |
| NM_012142 | 9672.802  | 11771.941 | NM_001015 | 69995.039 | 66230.273 | U95031    | 593.351   | 791.223   |
| NM_016429 | 1856.916  | 2025.066  | AK021747  | 1092.425  | 1007.311  | NM_014288 | 5429.429  | 6686.319  |
| NM_006834 | 4130.768  | 4556.419  | AK025640  | 6813.468  | 7839.16   | AF035300  | 877.552   | 870.631   |
| AB011100  | 2111.727  | 2477.196  | NM_019101 | 1012.678  | 1145.655  | NM_017703 | 8776.243  | 10759.834 |
| U61741    | 1438.066  | 1716.122  | NM_000920 | 1655.44   | 2215.135  | NM_015320 | 1569.216  | 2264.646  |
| NM_012402 | 3470.024  | 3987.188  | NM_020375 | 1086.501  | 1212.13   | NM_004055 | 830.127   | 1251.769  |
| M76676    | 3525.983  | 3890.119  | NM_016049 | 5548.624  | 6913.52   | AJ297349  | 3910.214  | 5524.371  |
| NM_003857 | 1302.745  | 1296.031  | NM_013311 | 4389.08   | 4541.872  | NM_005828 | 9083.489  | 8652.143  |
| AL137690  | 627.775   | 712.496   | NM_000291 | 52840.043 | 54048.887 | NM_001619 | 2060.326  | 1848.802  |
| Z83804    | 2128.991  | 2770.105  | NM_018081 | 1787.76   | 2074.946  | NM_006599 | 1891.582  | 1805.809  |
| NM_004386 | 2578.394  | 2905.497  | NM_014649 | 3031.253  | 3560.625  | NM_005936 | 615.606   | 502.312   |
| U67784    | 1503.948  | 2123.08   | AL117488  | 1377.51   | 1766.265  | NM_006271 | 7571.81   | 7395.439  |
| NM_007366 | 2267.727  | 2929.903  | NM_012240 | 818.65    | 1129.963  | NM_018647 | 930.821   | 935.578   |
| NM_000592 | 988.943   | 975.257   | NM_019005 | 4147.774  | 3405.233  | NM_000721 | 33312.004 | 37194.605 |
| NM_016584 | 13005.308 | 11544.611 | NM_004739 | 5611.098  | 5854.852  | NM_003933 | 1030.65   | 1236.996  |
| NM_001815 | 1505.15   | 1508.887  | AV752216  | 990.802   | 1040.824  | NM_005095 | 4173.225  | 4008.143  |
| NM_000064 | 8015.488  | 6625.366  | NM_005341 | 1418.097  | 1615.87   | NM_003163 | 844.772   | 670.907   |
| NM_003264 | 3492.615  | 2364.174  | AF181999  | 1005.363  | 1648.365  | NM_019057 | 1876.804  | 2669.876  |
| NM_006725 | 2109.61   | 1764.421  | NM_001934 | 3300.591  | 3016.587  | NM_002677 | 863.931   | 945.349   |
| NM_003326 | 1024.665  | 833.042   | AB011090  | 1890.53   | 1888.146  | NM_016205 | 1718.169  | 1583.468  |
| NM_004568 | 22558.486 | 14532.795 | NM_000209 | 1321.027  | 1075.969  | NM_005759 | 1012.329  | 1077.481  |
| NM_000202 | 1210.774  | 1053.384  | NM_006545 | 12401.986 | 13955.067 | AF149724  | 1097.512  | 1209.897  |
| Z25427    | 2404.571  | 2344.205  | NM_016534 | 1511.265  | 1674.171  | BC020745  | 891.192   | 1117.63   |
| NM_004672 | 6954.102  | 6879.379  | AB021923  | 662.408   | 761.823   | NM_004354 | 1777.923  | 2765.744  |
| NM_001353 | 3096.067  | 3274.63   | AK024240  | 637.005   | 672.685   | NM_004661 | 2102.131  | 2661.028  |
| NM_006214 | 3896.352  | 3792.435  | NM_016456 | 29940.91  | 34678.48  | NM_002009 | 877.883   | 530.869   |
| AJ010228  | 5272.058  | 6512.148  | AK022677  | 1689.838  | 1836.389  | NM_001610 | 1323.774  | 1111.39   |
| NM_005198 | 4390.317  | 5530.211  | AF035288  | 681.247   | 807.861   | NM_001241 | 1357.24   | 1447.225  |
| NM_018073 | 1527.885  | 1532.518  | AL137645  | 4877.388  | 4977.596  | AF217504  | 2419.195  | 1982.429  |
| AL137529  | 1764.776  | 1829.225  | AK026141  | 853.408   | 1212.01   | AK027102  | 5220.812  | 4508.432  |
| NM_012332 | 2454.762  | 2384.083  | AK022894  | 2087.131  | 2411.198  | AL109714  | 923.753   | 743.273   |
| AK026648  | 1259.161  | 1280.557  | AF217993  | 5749.316  | 5843.025  | NM_004632 | 3146.271  | 3590.549  |
| NM_000497 | 1488.534  | 1654.225  | AF131823  | 652.937   | 869.191   | NM_017919 | 3240.625  | 3169.424  |
| NM_017421 | 1282.288  | 1232.018  | AK026324  | 8485.42   | 11443.174 | NM_014456 | 4494.94   | 4089.29   |
| AK025977  | 17760.002 | 26251.627 | AK025253  | 963.621   | 521.459   | NM_004740 | 4555.994  | 4040.971  |
| AK023130  | 8102.696  | 8820.026  | AK025004  | 1701.336  | 1788.29   | NM_003805 | 2183.755  | 2025.089  |
| NM_000273 | 930.796   | 1189.619  | AL136818  | 697.127   | 808.024   | NM_019886 | 4238.439  | 3291.199  |
| NM_002899 | 9702.052  | 11028.679 | AF146798  | 972.428   | 1241.759  | NM_003278 | 29621.285 | 29292.334 |
| NM_000486 | 1561.331  | 1573.903  | AF086517  | 2942.026  | 2963.2    | AK021957  | 35118.234 | 34300.336 |
| BE876237  | 1712.29   | 1737.946  | AK025740  | 11528.031 | 11118.883 | NM_016623 | 7511.082  | 11988.067 |
| NM_005397 | 839.1     | 726.906   | AK000311  | 3040.454  | 3150.077  | NM_001334 | 2235.23   | 1834.15   |
| NM_000806 | 10373.437 | 8908.39   | AL137534  | 62214.023 | 58143.758 | NM_004771 | 2173.475  | 2008.71   |
| NM_006320 | 1395.203  | 784.699   | AF052121  | 2575.838  | 3496.493  | AL365514  | 930.133   | 797.091   |
| AB014511  | 2794.737  | 2573.653  | AL359062  | 1547.282  | 1842.509  | NM_002104 | 1083.926  | 1234.034  |

|             |           |           |           |           |           |           |           |           |
|-------------|-----------|-----------|-----------|-----------|-----------|-----------|-----------|-----------|
| NM_021976   | 4014.069  | 3066.474  | AK026869  | 1702.767  | 1397.503  | NM_005504 | 6063.985  | 7859.152  |
| NM_005718   | 16183.126 | 22643.238 | AK023150  | 1051.472  | 970.749   | AF234654  | 1573.266  | 1508.43   |
| NM_018264   | 2305.187  | 2840.458  | AK022192  | 515.366   | 485.952   | NM_000110 | 4912.434  | 4720.286  |
| NM_014580   | 952.197   | 1017.527  | NM_019099 | 40764.988 | 50104.051 | NM_016002 | 24231.92  | 25244.777 |
| AB028998    | 1137.993  | 1090.121  | Y12020    | 9257.007  | 12635.182 | NM_014549 | 928.657   | 940.611   |
| NM_000153   | 936.546   | 1063.563  | AJ001905  | 675.258   | 906.578   | NM_017832 | 8306.208  | 7352.919  |
| NM_002033   | 6941.46   | 7346.988  | U17635    | 1559.122  | 1594.375  | NM_001713 | 2147.607  | 2380.646  |
| AK091794    | 398.412   | 722.487   | AL049930  | 698.562   | 969.594   | NM_015367 | 5917.538  | 9201.442  |
| NM_004111   | 4533.271  | 5727.716  | Z83946    | 579.656   | 689.14    | NM_014498 | 3975.816  | 3003.765  |
| AF085966    | 5273.402  | 5754.998  | D55638    | 643.152   | 569.541   | NM_002375 | 8411.492  | 7480.595  |
| NM_005316   | 2166.005  | 2084.581  | L23870    | 739.679   | 935.226   | AF055016  | 3794.82   | 3125.151  |
| NM_016316   | 3054.617  | 2919.49   | D55644    | 811.837   | 717.371   | NM_007234 | 11418.09  | 9111.447  |
| NM_003369   | 10110.715 | 10321.073 | Z97017    | 448.925   | 599.712   | Y16704    | 71938.828 | 62031.789 |
| NM_000057   | 2386.565  | 3071.996  | L19362    | 418.329   | 603.658   | NM_014567 | 1798.009  | 1470.841  |
| NM_018343   | 3889.385  | 3547.888  | L33807    | 1439.383  | 1458.668  | NM_017842 | 1152.46   | 1062.92   |
| AK095793    | 1200.052  | 1020.671  | AL049328  | 738.734   | 1251.084  | AB037809  | 1355.373  | 1337.991  |
| NM_003177   | 3348.216  | 3022.245  | AF252280  | 8472.313  | 10130.546 | AB011129  | 1113.067  | 1024.341  |
| NM_017719   | 828.92    | 734.416   | AK000951  | 750.324   | 738.133   | NM_014391 | 3353.924  | 3057.316  |
| AF064078    | 1019.887  | 707.234   | AK024518  | 10304.529 | 12173.698 | NM_004270 | 1748.371  | 1581.394  |
| AL049688    | 938.025   | 817.952   | AK024586  | 535.95    | 656.168   | NM_001537 | 3339.025  | 2854.218  |
| NM_002737   | 1441.049  | 1182.988  | AK025017  | 1906.056  | 1584.025  | U80743    | 1312.235  | 1631.539  |
| NM_002719   | 3758.856  | 3376.048  | AK024534  | 1391.481  | 1386.4    | NM_001352 | 3089.541  | 3250.162  |
| AV752086    | 1372.94   | 1344.74   | AK024616  | 876.287   | 666.241   | D15050    | 1003.796  | 647.309   |
| NM_016102   | 6673.51   | 7421.44   | AK024914  | 4231.043  | 4945.154  | NM_006527 | 5961.535  | 5659.576  |
| NM_004376   | 2371.008  | 3321.568  | AF116615  | 774.505   | 805.312   | NM_006627 | 2247.89   | 2163.69   |
| NM_006061   | 420.717   | 595.787   | U17636    | 42492.211 | 46039.563 | NM_007363 | 20224.596 | 19706.697 |
| NM_006848   | 62776.688 | 60917.402 | NM_018546 | 2143.98   | 2878.361  | NM_003093 | 47437.059 | 43858.848 |
| NM_005603   | 41682.828 | 42945.102 | U52699    | 9236.933  | 9744.882  | U05589    | 2487.211  | 1951.662  |
| NM_001061   | 666.19    | 697.774   | S71613    | 885.58    | 938.519   | NM_014473 | 12856.811 | 11746.906 |
| BG744154    | 68144.68  | 67596.195 | AJ011910  | 10657.822 | 14851.689 | NM_002295 | 71822.164 | 62790.66  |
| Z11694      | 9476.094  | 11334.925 | AF086198  | 8435.272  | 8809.045  | NM_001762 | 9481.492  | 7503.859  |
| BF983177    | 1386.31   | 1450.14   | AL137382  | 23422.223 | 20412.738 | NM_016306 | 19368.592 | 14564.034 |
| Z26317      | 2522.184  | 2623.01   | AK024599  | 3282.06   | 4257.451  | NM_003755 | 843.777   | 680.94    |
| X16983      | 11914.819 | 12984.041 | NM_018012 | 805.377   | 850.249   | NM_013238 | 6446.044  | 5494.99   |
| X56160      | 2674.103  | 2717.347  | AK024928  | 344.528   | 478.804   | BE258640  | 11114.079 | 9429.433  |
| BG679991    | 655.95    | 744.402   | NM_014450 | 1364.639  | 1240.024  | NM_003314 | 5970.369  | 5345.93   |
| H-Y 00097 I | 2934.542  | 3270.703  | NM_017991 | 434.832   | 683.534   | AL355730  | 714.661   | 781.073   |
| H-M 59964   | 1894.461  | 2768.685  | L37198    | 2501.088  | 2537.437  | U79273    | 1522.39   | 1224.912  |
| H-Y 00711 I | 60307.438 | 57379.535 | AK021921  | 432.145   | 471.166   | AK022050  | 3560.336  | 3421.058  |
| H-X 16707 I | 2205.952  | 2018.657  | AK025431  | 812.154   | 950.921   | NM_002512 | 62075.219 | 53617     |
| AL038354    | 42699.031 | 31776.188 | AK023662  | 427.725   | 476.805   | AL365411  | 2892.225  | 3262.806  |
| R14607      | 1720.553  | 1457.956  | AF086274  | 23867.52  | 25048.557 | NM_016066 | 3383.571  | 3359.728  |
| NM_000064   | 8211.145  | 7336.591  | AK023682  | 822.815   | 1327.118  | NM_001249 | 1239.225  | 1007.776  |
| NM_003264   | 3269.582  | 3270.523  | AK024024  | 1353.523  | 2352.07   | AK024677  | 858.115   | 820.051   |
| NM_006725   | 3185.088  | 2914.498  | AF130064  | 21669.469 | 26435.541 | NM_000036 | 1235.528  | 1338.186  |
| NM_003326   | 1290.428  | 1275.037  | U17624    | 765.333   | 749.993   | AF254082  | 20639.92  | 21665.166 |
| NM_004568   | 26025.896 | 29187.793 | AK025184  | 482.073   | 390.829   | AF205718  | 5120.106  | 5429.383  |
| NM_000202   | 1178.675  | 1462.787  | D16988    | 48323.633 | 48002.434 | NM_003420 | 1048.392  | 1115.617  |
| NM_005496   | 12211.626 | 13496.954 | AK001959  | 4435.458  | 4717.588  | AY004252  | 1885.608  | 1712.408  |
| NM_016608   | 1928.331  | 3275.736  | U36217    | 1357.672  | 1704.04   | NM_006261 | 5049.192  | 5304.346  |
| NM_002858   | 6446.438  | 6523.955  | AL389880  | 1217.291  | 1071.581  | AK027045  | 1129.491  | 840.236   |
| NM_004817   | 842.865   | 1033.317  | AL157452  | 1769.501  | 1804.235  | AF169796  | 1890.265  | 1954.479  |
| NM_018975   | 13445.896 | 13185.417 | AK024155  | 11993.606 | 12141.274 | AK001814  | 2977.507  | 2424.892  |

|           |           |           |           |           |           |           |           |           |
|-----------|-----------|-----------|-----------|-----------|-----------|-----------|-----------|-----------|
| AB023215  | 12099.496 | 13464.356 | AL359334  | 8715.771  | 7663.538  | NM_007222 | 1953.601  | 1207.781  |
| NM_001284 | 38763.109 | 44379.348 | AK027095  | 1271.617  | 1188.376  | NM_003435 | 1415.547  | 1227.631  |
| NM_003242 | 9636.553  | 14372.823 | AF062097  | 1257.984  | 1204.785  | NM_016291 | 4183.864  | 3508.313  |
| U31099    | 773.907   | 602.234   | NM_019847 | 577.796   | 530.586   | NM_005937 | 23686.045 | 20637.957 |
| NM_001105 | 2755.136  | 2394.86   | D17093    | 20159.658 | 21130.609 | AK023259  | 3131.158  | 2981.843  |
| NM_005585 | 934.436   | 1027.731  | AK022784  | 423.481   | 572.305   | AK001503  | 1385.565  | 1513.429  |
| NM_002075 | 3509.955  | 3525.403  | AL117521  | 2811.862  | 2687.866  | AK022880  | 1355.612  | 1299.459  |
| Y08756    | 15465.273 | 13420.385 | AK021913  | 2972.218  | 3732.381  | NM_003601 | 10709.104 | 9774.566  |
| NM_005563 | 6354.981  | 5531.361  | AL137489  | 10813.653 | 13675.199 | AF086375  | 558.176   | 662.268   |
| AY007090  | 870.043   | 757.018   | AF009311  | 2578.528  | 2700.507  | AK001228  | 4896.798  | 5431.798  |
| NM_005102 | 3038.174  | 1973.413  | S73397    | 1148.32   | 1633.095  | AK026778  | 1652.604  | 1538.095  |
| NM_004518 | 899.843   | 766.992   | AK023939  | 310.216   | 822.787   | AF074987  | 3379.782  | 2789.416  |
| NM_005397 | 883.436   | 1160.972  | AK023856  | 593.972   | 983.727   | AK001058  | 26352.352 | 29045.068 |
| NM_000806 | 11285.479 | 11212.201 | AL050376  | 707.208   | 790.707   | AK026239  | 2311.957  | 1890.182  |
| NM_006320 | 1686.247  | 1452.835  | AL359652  | 925.473   | 1265.213  | AF086283  | 869.491   | 688.582   |
| AB014511  | 3719.452  | 4040.224  | AK022423  | 998.073   | 1117.786  | AF086350  | 746.052   | 589.774   |
| NM_014252 | 4618.843  | 5314.87   | AF088021  | 3007.718  | 3948.166  | AF088047  | 877.06    | 731.031   |
| NM_001662 | 8098.802  | 9322.804  | BF509267  | 3903.759  | 4542.006  | AF086281  | 669.346   | 560.779   |
| NM_016131 | 7870.067  | 8602.799  | NM_002455 | 6644.615  | 9151.748  | AF086393  | 1686.221  | 1423.855  |
| NM_006822 | 1477.22   | 1769.714  | NM_002959 | 12834.133 | 11553.254 | AF086453  | 735.488   | 642.285   |
| NM_012142 | 9597.811  | 10012.98  | AK000899  | 10657.157 | 11567.875 | AF070621  | 5219.958  | 4916.681  |
| NM_016429 | 1661.792  | 1850.339  | CY3Cy5    | 4576.864  | 222.535   | NM_020240 | 2199.291  | 1826.746  |
| NM_006834 | 3874.193  | 5032.751  | AW300857  | 3880.216  | 2850.913  | AK023678  | 2365.851  | 1693.414  |
| AB011100  | 2417.056  | 3442.521  | H85962    | 15133.948 | 11230.021 | AF052090  | 1918.816  | 1941.261  |
| U61741    | 1277.081  | 1376.273  | BG742446  | 1322.486  | 1010.555  | AK023718  | 4105.295  | 3444.794  |
| NM_012402 | 3131.28   | 3400.442  | AA864554  | 4442.655  | 2508.813  | AF075089  | 3573.998  | 3801.962  |
| M76676    | 2832.422  | 2900.746  | X66945    | 1079.756  | 655.911   | AF241255  | 844.03    | 842.37    |
| NM_003857 | 1040.832  | 976.873   | X12830    | 9857.825  | 5577.354  | AF086007  | 65272.133 | 58781.453 |
| AL137690  | 669.532   | 808.518   | U00482    | 917.535   | 585.005   | AK000803  | 3110.145  | 4026.986  |
| Z83804    | 2121.615  | 1600.065  | K01904    | 15896.96  | 13196.041 | AK022374  | 972.08    | 853.56    |
| NM_004386 | 2626.524  | 2253.735  | BE538886  | 552.518   | 568.517   | AF085926  | 6032.867  | 5919.68   |
| U67784    | 1107.132  | 925.663   | NM_002228 | 995.894   | 521.516   | AL137307  | 2950.858  | 2633.31   |
| NM_007366 | 1614.079  | 1239.657  | M57650    | 3333.356  | 2677.243  | AL137468  | 7338.785  | 6510.606  |
| NM_000592 | 662.817   | 682.57    | BC023978  | 666.399   | 595.869   | AL162007  | 23854.074 | 22131.184 |
| NM_016584 | 10753.653 | 8193.198  | M21302    | 1833.407  | 2651.824  | AL390137  | 16161.744 | 13562.562 |
| NM_001815 | 1457.537  | 1066.563  | NM_016346 | 1882.351  | 1754.342  | AL137340  | 890.92    | 757.15    |
| AK095793  | 1361.857  | 1450.586  | SR2       | 62154.734 | 59681.793 | AL137542  | 589.372   | 701.28    |
| NM_003177 | 3659.078  | 4131.48   | SR4       | 15834.236 | 13148.778 | AL162045  | 1338.825  | 1301.522  |
| NM_017719 | 1110.312  | 992.653   | SR6       | 2563.857  | 3167.952  | AK022437  | 11245.906 | 12758.277 |
| AF064078  | 944.886   | 1129.915  | SR8       | 7922.663  | 22056.738 | AF086102  | 355.011   | 436.702   |
| AL049688  | 1196.273  | 1384.535  | SR10      | 34256.652 | 13749.513 | AF116682  | 20063.881 | 17185.166 |
| NM_002737 | 2323.737  | 1951.715  | CY3Cy5    | 2812.472  | 69.352    | AL137259  | 3182.892  | 2409.985  |
| Z25427    | 2376.3    | 2513.902  | NM_001525 | 15348.958 | 12930.21  | AF086079  | 625.039   | 634.311   |
| NM_004672 | 7200.316  | 8620.884  | NM_006055 | 3196.799  | 2351.722  | AL122107  | 2247.541  | 2028.668  |
| NM_001353 | 3204.484  | 3194.098  | NM_004296 | 798.811   | 586.576   | AK025140  | 10176.036 | 8337.379  |
| NM_006214 | 3509.259  | 3817.454  | NM_005048 | 1170.443  | 1119.781  | AK023394  | 2641.521  | 2213.167  |
| AJ010228  | 5584.5    | 6459.65   | NM_005972 | 797.202   | 728.131   | AF098666  | 474.042   | 867.3     |
| NM_005198 | 4635.498  | 6004.191  | NM_001060 | 3071.284  | 1627.236  | AK021969  | 1260.289  | 1309.457  |
| NM_018073 | 1404.351  | 1823.11   | NM_018841 | 1054.098  | 882.55    | AK022065  | 1600.85   | 1400.529  |
| AL137529  | 1848.891  | 2101.42   | AL133105  | 1937.902  | 1704.806  | AK022221  | 3346.829  | 3366.562  |
| NM_012332 | 2232.842  | 2505.534  | AK022859  | 1245.976  | 1067.069  | AK022356  | 995.727   | 903.524   |
| AK026648  | 810.529   | 1138.915  | NM_000214 | 591.849   | 751.532   | AK021998  | 2785.43   | 2748.999  |
| NM_000497 | 1395.496  | 1620.552  | NM_014864 | 7192.949  | 8956.047  | AK022126  | 1834.911  | 2348.082  |

|           |           |           |           |           |           |           |           |           |
|-----------|-----------|-----------|-----------|-----------|-----------|-----------|-----------|-----------|
| NM_017421 | 917.395   | 1542.158  | NM_003728 | 9949.331  | 10764.151 | AK022256  | 678.532   | 862.074   |
| AK025977  | 14965.363 | 15254.771 | NM_014352 | 8981.367  | 9120.717  | AK022383  | 1869.7    | 2117.951  |
| AK023130  | 7040.03   | 6460.855  | NM_012481 | 1789.609  | 1941.033  | AK027041  | 2049.243  | 1818.252  |
| NM_000273 | 739.498   | 716.674   | L09102    | 18501.846 | 19664.68  | NM_005355 | 17485.252 | 13724.456 |
| NM_002899 | 8519.702  | 7662.922  | U68488    | 1352.179  | 1413.803  | AF035306  | 2580.728  | 3073.292  |
| NM_000486 | 1073.596  | 1136.158  | NM_016247 | 3811.5    | 4448.091  | NM_003954 | 1016.197  | 1405.44   |
| BE876237  | 1111.971  | 1011.279  | NM_012282 | 1333.562  | 1639.38   | NM_016348 | 910.674   | 1599.621  |
| NM_014750 | 1907.281  | 1933.635  | NM_003323 | 11658.164 | 15668.354 | AK024213  | 20581.582 | 17598.648 |
| NM_015912 | 884.226   | 1069.932  | BG685310  | 1754.035  | 2578.317  | AK025093  | 449.564   | 506.353   |
| NM_000460 | 2032.941  | 1773.752  | NM_018668 | 4202.077  | 3428.004  | AK022184  | 1234.79   | 1050.985  |
| AB002339  | 1870.434  | 1892.476  | NM_004227 | 921.144   | 733.783   | AK024153  | 2066.578  | 2586.791  |
| NM_005104 | 10354.822 | 11043.577 | NM_005282 | 1788.281  | 1204.58   | AF056451  | 1399.354  | 2429.552  |
| NM_006888 | 19390.955 | 19946.316 | NM_001736 | 886.544   | 868.953   | AF015039  | 3729.514  | 6616.099  |
| AL137423  | 3357.006  | 3845.818  | AB028949  | 2018.828  | 1676.547  | U50528    | 693.702   | 1733.177  |
| AB018322  | 1586.77   | 1474.483  | NM_004101 | 933.717   | 553.78    | AB020632  | 2157.962  | 3439.288  |
| NM_007068 | 16654.719 | 17365.75  | NM_002995 | 28222.422 | 26487.629 | NM_018614 | 28562.895 | 50791.414 |
| NM_005718 | 15043.675 | 13448.393 | NM_015978 | 1998.769  | 2283.464  | NM_005222 | 4961.079  | 6354.125  |
| NM_018264 | 2147.644  | 2550.634  | NM_003810 | 3000.431  | 3525.93   | BC024308  | 10487.374 | 8257.266  |
| NM_014580 | 981.759   | 1131.864  | NM_004908 | 506.152   | 872.629   | NM_000538 | 2653.771  | 2036.719  |
| AB028998  | 1041.935  | 1029.88   | NM_016171 | 67703.82  | 70703.609 | AK001838  | 62999.879 | 54962.484 |
| NM_000153 | 1170.519  | 1043.401  | NM_014443 | 4416.716  | 3905.371  | NM_018295 | 2004.132  | 2512.66   |
| NM_002033 | 8603.775  | 12548.767 | NM_005212 | 5971.581  | 7535.959  | AF070574  | 685.289   | 558.389   |
| AK091794  | 1321.405  | 1574.913  | M14584    | 476.226   | 574.907   | AF086262  | 3515.301  | 3380.476  |
| NM_004111 | 4534.725  | 4626.057  | NM_006419 | 1677.013  | 1723.508  | AF086292  | 4132.591  | 3574.235  |
| AF085966  | 4277.221  | 4094.701  | AB020676  | 1192.988  | 1587.07   | AK023769  | 458.281   | 499.113   |
| NM_005316 | 1915.543  | 1456.638  | AK024715  | 913.453   | 884.539   | AK024342  | 11687.276 | 10952.568 |
| NM_016316 | 2541.061  | 2273.45   | U90942    | 61913.941 | 59431.137 | AL137712  | 6287.875  | 5757.893  |
| NM_003369 | 9302.423  | 7548.563  | NM_018360 | 2263.825  | 3037.184  | L77599    | 30095.301 | 27819.951 |
| NM_000057 | 2139.068  | 1816.284  | AL365415  | 1346.016  | 1665.892  | AK021673  | 13576.154 | 11396.452 |
| NM_018343 | 3587.688  | 2804.335  | L29147    | 21926.697 | 25266.695 | AB014543  | 1214.12   | 1407.583  |
| X15880    | 62563.129 | 58442.117 | NM_020228 | 1352.648  | 1188.133  | NM_018445 | 6165.882  | 5725.541  |
| AL137461  | 3084.421  | 2543.79   | AK024685  | 592.971   | 544.367   | AK022743  | 1840.482  | 2171.134  |
| AF114264  | 3089.766  | 2932.012  | NM_003676 | 15523.142 | 11059.383 | NM_014627 | 1474.819  | 1762.657  |
| NM_017514 | 529.03    | 463.529   | AF113007  | 1705.003  | 1331.565  | NM_013938 | 8251.827  | 10269.251 |
| NM_018972 | 1630.477  | 1907.004  | NM_000688 | 8512.418  | 7821.223  | NM_013986 | 54217.98  | 55082.332 |
| AB037828  | 514.354   | 630.173   | U39573    | 1208.212  | 1629.068  | U55055    | 1080.442  | 1578.271  |
| AB023210  | 1082.178  | 952.317   | D82061    | 2485.597  | 3323.54   | AB018319  | 1646.55   | 3367.793  |
| AB037786  | 2238.682  | 2069.311  | AJ293009  | 2107.542  | 2592.372  | BM973473  | 1368.64   | 1733.384  |
| NM_003648 | 7586.492  | 7798.307  | NM_000374 | 3820.247  | 4327.564  | AK021637  | 3027.148  | 2903.256  |
| AB037735  | 677.564   | 795.049   | NM_000502 | 7584.12   | 9532.763  | AK021658  | 973.123   | 437.152   |
| AK002177  | 6354.245  | 5802.372  | NM_001359 | 28578.012 | 32866.293 | U17631    | 1382.411  | 1499.697  |
| AK024429  | 1624.029  | 1989.628  | NM_005175 | 46715.25  | 51662.027 | AL137723  | 2160.164  | 2472.72   |
| AB000509  | 1734.026  | 2388.51   | NM_001696 | 18897.256 | 21698.785 | AK000774  | 506.308   | 490.13    |
| AB018314  | 1701.317  | 2625.406  | NM_004975 | 4402.959  | 3207.329  | AK024046  | 2709.557  | 2669.336  |
| NM_004378 | 1495.627  | 2357.364  | D87445    | 11060.512 | 12439.998 | NM_017931 | 2953.226  | 3066.786  |
| NM_018037 | 798.24    | 903.784   | NM_000238 | 3977.102  | 4164.254  | AK022793  | 1185.556  | 1145.079  |
| NM_001110 | 4638.064  | 3418.031  | NM_002247 | 902.928   | 1152.65   | AJ227910  | 989.208   | 845.089   |
| NM_003222 | 581.705   | 539.357   | NM_004980 | 13213.342 | 11765.563 | AF001893  | 1782.052  | 1820.195  |
| NM_000841 | 5052.607  | 3989.999  | AB011094  | 13441.934 | 15031.246 | X04236    | 10004.948 | 8252.988  |
| NM_001245 | 2058.189  | 1547.53   | NM_003224 | 1554.691  | 2133.339  | AK093746  | 15634.122 | 14015.121 |
| NM_003672 | 25324.586 | 24146.053 | NM_001658 | 57826.152 | 58414.313 | D16875    | 2586.681  | 1891.259  |
| NM_002574 | 38273.852 | 37017.48  | NM_006827 | 22181.865 | 23942.291 | AK027171  | 1191.581  | 791.137   |
| AJ008139  | 4802.088  | 4351.661  | AK021761  | 6810.712  | 8925.679  | AK021945  | 3544.054  | 3111.52   |



|           |           |           |           |           |           |           |           |           |
|-----------|-----------|-----------|-----------|-----------|-----------|-----------|-----------|-----------|
| NM_00432E | 1551.959  | 1464.331  | AK024536  | 891.793   | 803.129   | L23545    | 471.807   | 722.624   |
| NM_00088E | 646.307   | 414.33    | NM_00148E | 2180.323  | 1766.46   | CY3Cy5    | 7952.304  | 268.152   |
| NM_004577 | 2692.099  | 2939      | NM_01897E | 10386.069 | 9934.613  | R23251    | 19255.971 | 18199.598 |
| NM_015507 | 359.063   | 276.407   | NM_002591 | 9665.851  | 11856.823 | BG763477  | 1089.504  | 802.097   |
| AF007157  | 25585.283 | 25577.811 | NM_02021E | 8888.303  | 10540.486 | AA702640  | 1624.508  | 1398.01   |
| D38553    | 2917.625  | 2866.572  | AK021860  | 1176.798  | 1041.753  | T68583    | 2481.046  | 2560.131  |
| NM_00617C | 3493.562  | 3167.89   | AB046816  | 1312.083  | 1441.224  | AA481944  | 13098.241 | 12511.6   |
| NM_01429E | 14429.208 | 11702.852 | AL137266  | 5004.345  | 5523.199  | X14390    | 990.505   | 947.28    |
| AK001581  | 1529.163  | 1882.966  | NM_016457 | 1290.672  | 1664.148  | M31158    | 932.559   | 839.014   |
| NM_00586E | 2609.032  | 2239.255  | NM_005057 | 1784.299  | 1785.754  | H00742    | 1830.969  | 1743.503  |
| NM_00054E | 4057.887  | 4175.862  | AF143321  | 782.01    | 928.32    | D42108    | 594.796   | 533.617   |
| AB002297  | 3330.666  | 3310.588  | AB046842  | 2201.668  | 2202.119  | BG700922  | 588.189   | 509.615   |
| NM_00502C | 26234.539 | 29081.65  | NM_00485C | 2902.504  | 2865.787  | AI366068  | 19417.889 | 18095.922 |
| NM_014077 | 2979.466  | 3189.409  | NM_00282E | 4211.97   | 3262.331  | AF080158  | 1449.787  | 1264.422  |
| NM_01841E | 1476.765  | 1265.009  | BF306955  | 1882.104  | 1437.043  | BM664556  | 838.649   | 762.343   |
| NM_01232E | 3434.25   | 3099.781  | NM_001394 | 9342.888  | 7126.218  | SR5       | 4141.468  | 3769.943  |
| M14087    | 27840.045 | 18440.621 | NM_018441 | 9863.249  | 10571.237 | SR7       | 5133.953  | 41642.348 |
| AJ272324  | 1099.553  | 871.839   | NM_00077E | 12369.793 | 14745.138 | SR9       | 15691.65  | 3052.466  |
| NM_00088E | 3618.746  | 2856.817  | NM_00160E | 1548.312  | 1930.57   | CY3Cy5    | 7943.053  | 272.513   |
| M59040    | 3016.417  | 1719.52   | BE733234  | 612.665   | 770.026   | M33197    | 68665.57  | 63177.676 |
| NM_01758E | 15404.969 | 12733.004 | NM_00332E | 11228.975 | 10077.725 | NM_007024 | 3020.431  | 2675.39   |
| NM_01523E | 1019.895  | 975.576   | BG685310  | 1765.127  | 1778.992  | NM_013231 | 1980.487  | 1795.238  |
| AK026962  | 2751.976  | 2610.12   | H85962    | 19691.084 | 23278.242 | NM_01210E | 3410.903  | 3287.724  |
| X04366    | 3071.113  | 3025.91   | BG742446  | 1530.035  | 1742.966  | NM_006254 | 5774.944  | 5114.969  |
| NM_00050E | 48260     | 47550.016 | AA864554  | 7726.923  | 9056.292  | X95425    | 921.464   | 1052.919  |
| NM_00066E | 4058.351  | 3801.169  | X66945    | 2391.346  | 2382.667  | NM_00442E | 1354.304  | 1554.234  |
| NM_003481 | 2402.505  | 2043.321  | AI160703  | 314.315   | 817.946   | NM_01656E | 1099.311  | 1014.329  |
| AB046814  | 1021.199  | 1108.138  | X12830    | 16771.25  | 15556.695 | M33197    | 67670.234 | 63414.664 |
| NM_017664 | 3703.036  | 3644.171  | U00482    | 1014.724  | 1041.806  | AY009399  | 9343.824  | 9105.287  |
| NM_00705E | 3025.153  | 2902.504  | K01904    | 23170.455 | 28122.781 | NM_00489E | 5248.74   | 5092.594  |
| NM_00687C | 4175.63   | 3278.211  | BE538886  | 1108.291  | 1261.916  | U59748    | 688.708   | 771.026   |
| NM_00735E | 4750.837  | 3929.753  | NM_00222E | 1083.634  | 922.553   | L32537    | 638.287   | 703.936   |
| L13283    | 549.927   | 516.181   | M57650    | 4259.788  | 3816.982  | NM_01430E | 8874.502  | 9804.738  |
| NM_013327 | 2383.816  | 1984.151  | BC023978  | 572.589   | 687.043   | L02922    | 9915.348  | 9469.171  |
| AF303888  | 4601.213  | 3239.683  | M21302    | 1838.659  | 1980.922  | NM_003154 | 1365.315  | 1320.212  |
| NM_000077 | 762.616   | 644.026   | NM_01634E | 2345.37   | 2387.557  | AK023459  | 2592.849  | 2585.46   |
| NM_007084 | 1398.292  | 1397.886  | AK024865  | 919.167   | 961.594   | NM_01213E | 2396.501  | 2414.633  |
| M97191    | 22511.518 | 21092.705 | NM_00721C | 698.2     | 691.425   | AF121856  | 2320.84   | 2002.44   |
| AK023015  | 1874.832  | 1635.08   | U90942    | 32595.443 | 29562.367 | NM_006421 | 2269.072  | 2114.043  |
| NM_003457 | 15324.09  | 14483.543 | NM_01836C | 1458.658  | 1190.841  | NM_017457 | 19449.361 | 17445.924 |
| NM_012391 | 3083.96   | 2958.513  | AK022489  | 662.575   | 588.424   | NM_00376E | 6232.042  | 6726.633  |
| NM_005254 | 2032.612  | 2472.848  | AL365415  | 1352.381  | 1583.82   | M33197    | 21446.686 | 22896.098 |
| NM_005611 | 1202.025  | 1248.647  | NM_00605E | 4985.861  | 5911.367  | NM_01820E | 9274.386  | 9307.006  |
| AF141655  | 1272.242  | 1244.761  | NM_00429E | 1609.803  | 1546.552  | AB023197  | 2468.725  | 2296.804  |
| NM_00734E | 992.284   | 915.947   | NM_00504E | 1368.006  | 1436.373  | NM_02217E | 3386.015  | 3698.438  |
| NM_00483C | 752.769   | 872.16    | NM_00597E | 917.683   | 1173.267  | AB040970  | 2545.169  | 2528.261  |
| AF132362  | 67968.531 | 70814.313 | NM_00106C | 4709.741  | 5308.456  | NM_01833C | 2261.394  | 2375.378  |
| NM_007007 | 8318.899  | 7382.346  | NM_018841 | 1726.671  | 1593.243  | AB023222  | 604.997   | 676.211   |
| NM_00638E | 1893.657  | 1967.089  | NM_00522E | 1077.51   | 818.06    | M33197    | 43111.141 | 49307.336 |
| NM_00655E | 14023.825 | 16435.363 | AL133105  | 2431.223  | 2939.872  | U50342    | 1249.399  | 1402.281  |
| NM_004501 | 50734.914 | 59079.867 | AK022859  | 1368.194  | 1448.473  | U80018    | 402.338   | 387.931   |
| NM_00496E | 13581.693 | 13740.091 | NM_000214 | 848.397   | 915.105   | NM_000717 | 1344.377  | 1417.016  |
| NM_00670C | 1793.782  | 1541.835  | NM_014864 | 7083.114  | 6953.944  | M33197    | 72788.391 | 63155.844 |

|           |           |           |           |           |           |           |           |           |
|-----------|-----------|-----------|-----------|-----------|-----------|-----------|-----------|-----------|
| NM_00644E | 10029.851 | 8614.46   | NM_00372E | 8774.276  | 10076.866 | NM_00484E | 1741.536  | 1513.966  |
| NM_01210E | 9078.926  | 8068.889  | NM_01435E | 7616.631  | 8313.858  | NM_007107 | 12952.428 | 11599.687 |
| AF019633  | 1821.422  | 1297.143  | NM_012481 | 1942.896  | 1913.225  | NM_000047 | 6785.276  | 6907.97   |
| AB002361  | 5194.162  | 3857.385  | L09102    | 14959.13  | 17181.582 | M68874    | 2188.374  | 1981.373  |
| NM_01806C | 4114.895  | 3043.828  | U68488    | 1276.024  | 1417.638  | NM_00631E | 3559.1    | 3571.791  |
| NM_01423E | 2421.282  | 1691.107  | NM_016247 | 2738.212  | 4045.076  | NM_01822E | 5023.927  | 3728.977  |
| NM_01766E | 3511.188  | 2524.655  | AB011094  | 9045.464  | 9316.923  | Z36813    | 4126.606  | 4090.034  |
| U88837    | 954.69    | 908.607   | NM_003224 | 1506.425  | 1425.644  | M33197    | 6828.835  | 6309.564  |
| NM_01744E | 10570.665 | 7265.264  | NM_00165E | 59515.117 | 56579.48  | NM_00404E | 7355.154  | 6749.262  |
| AK001478  | 7839.012  | 8464.619  | AK021761  | 6148.144  | 6097.967  | NM_001891 | 1089.232  | 619.099   |
| AK025697  | 4688.283  | 3620.274  | AK024536  | 938.039   | 1112.196  | NM_00144C | 20649.773 | 19122.063 |
| AK021734  | 1219.111  | 1493.282  | NM_004227 | 1555.178  | 1802.105  | NM_01661E | 1807.574  | 1510.75   |
| BF245026  | 886.502   | 1098.483  | NM_00528E | 2111.365  | 2730.437  | AB014568  | 16138.056 | 13228.359 |
| D00265    | 35292.227 | 49626.66  | NM_00173E | 1119.72   | 1421.448  | NM_01224E | 1891.096  | 1923.921  |
| NM_00455E | 29403.406 | 28363.328 | AB028949  | 2714.834  | 3244.907  | AK022546  | 4075.379  | 4038.746  |
| NM_00014E | 3055.096  | 3526.214  | AL137580  | 1085.886  | 1281.798  | NM_014067 | 4079.926  | 4071.689  |
| NM_006294 | 54235.207 | 49454.508 | NM_004101 | 1157.732  | 1332.517  | NM_002914 | 3589.961  | 4103.193  |
| AL137294  | 2063.964  | 1875.175  | NM_00299E | 37521.594 | 39964.77  | NM_02038E | 1696.51   | 1481.846  |
| NM_00374E | 947.205   | 1220.185  | AB033114  | 625.199   | 879.765   | NM_006541 | 1551.109  | 2355.42   |
| AB037797  | 607.662   | 1193.303  | NM_01597E | 2062.354  | 2124.801  | NM_00432E | 2374.235  | 3253.512  |
| NM_00152C | 1018.961  | 1233.104  | NM_00381C | 3584.982  | 3860.271  | NM_004581 | 3515.172  | 4001.152  |
| NM_01787C | 1396.575  | 1187.314  | NM_00490E | 713.153   | 688.171   | NM_006817 | 18273.656 | 17814.738 |
| AL133633  | 904.946   | 793.318   | NM_01444E | 4138.191  | 3739.836  | NM_015921 | 35903.145 | 39530.613 |
| NM_01225E | 1109.725  | 901.904   | NM_00521E | 5874.734  | 6102.118  | AB040900  | 10216.648 | 10798.131 |
| AK026817  | 1228.663  | 1139.915  | NM_00641E | 1721.9    | 2032.876  | NM_00148E | 921.564   | 944.977   |
| AL157442  | 18671.625 | 13920.15  | AF035035  | 134.643   | 2755.639  | NM_001797 | 749.407   | 985.978   |
| AB011148  | 1927.546  | 1274.085  | AB020676  | 638.573   | 719.153   | NM_003154 | 1393.146  | 1944.225  |
| AL389938  | 23900.16  | 17498.205 | AK024715  | 653.514   | 547.645   | NM_00423E | 358.383   | 951.092   |
| NM_00194E | 27392.645 | 21465.064 | BF306955  | 758.888   | 817.013   | AK023459  | 2322.818  | 3749.068  |
| NM_003507 | 920.479   | 884.108   | NM_001394 | 4209.12   | 3230.604  | U13022    | 522.944   | 974.469   |
| AK026591  | 735.06    | 657.346   | NM_018441 | 6375.231  | 5951.088  | R23251    | 17063.074 | 21354.076 |
| AK001889  | 2627.144  | 2610.134  | NM_00160E | 1495.51   | 1822.288  | BG763477  | 1260.914  | 1124.638  |
| AK025726  | 2544.016  | 2965.725  | NM_02022E | 3431.297  | 3665.091  | AA702640  | 1639.244  | 1961.299  |
| AJ227869  | 2271.477  | 2541.394  | AK024685  | 1846.7    | 1902.122  | T68583    | 1966.655  | 2967.508  |
| AK026790  | 381.896   | 251.81    | NM_00367E | 16093.522 | 16657.512 | AA481944  | 10999.81  | 11208.87  |
| AL117613  | 9300.663  | 7592.054  | AF113007  | 2034.108  | 2547.464  | X14390    | 1067.608  | 759.209   |
| AL137753  | 3319.668  | 3348.198  | NM_00068E | 7978.793  | 8330.18   | M31158    | 1020.809  | 994.24    |
| AL110262  | 14133.005 | 14575.689 | U39573    | 1536.79   | 2196.77   | BG700922  | 856.71    | 574.936   |
| AK025627  | 15244.936 | 22547.602 | D82061    | 2483.31   | 2806.252  | AI366068  | 22007.846 | 21274.496 |
| AF216077  | 2962.127  | 2960.301  | AJ293009  | 2383.861  | 2704.572  | AF080158  | 2015.25   | 2046.603  |
| AK021612  | 12733.479 | 12161.354 | NM_000374 | 3287.395  | 3735.147  | BM664556  | 1544.284  | 1850.056  |
| AF147342  | 442.98    | 289.762   | NM_00050E | 6296.764  | 7406.755  | M33197    | 59156.98  | 60603.559 |
| AK002025  | 23401.709 | 16910.305 | NM_00135E | 26296.26  | 26089.699 | NM_01654E | 1662.816  | 2049.24   |
| AK026299  | 1099.683  | 852.397   | NM_00169E | 19441.18  | 22068.578 | NM_00029E | 626.103   | 743.786   |
| NM_017794 | 1026.81   | 819.207   | NM_00497E | 4151.972  | 2435.32   | M33197    | 67374.813 | 63031.879 |
| AK025170  | 2112.597  | 1579.369  | D87445    | 9463.972  | 9038.24   | NM_007024 | 2797.488  | 2416.736  |
| AB033031  | 1838.069  | 1681.359  | NM_00023E | 2652.507  | 2740.174  | NM_013231 | 2139.27   | 1790.005  |
| AF085872  | 11291.227 | 10663.084 | NM_002247 | 707.572   | 1220.434  | NM_01210E | 2998.423  | 2884.957  |
| AK022538  | 13676.809 | 15014.156 | NM_00498C | 9415.022  | 7127.377  | NM_006254 | 5181.588  | 4350.894  |
| AL360257  | 956.262   | 1120.028  | NM_01634E | 1510.156  | 1376.578  | X95425    | 1017.234  | 814.227   |
| AK022342  | 1058.119  | 1164.418  | AK024865  | 842.888   | 986.798   | NM_00442E | 1519.248  | 1358.63   |
| AF147420  | 1064.304  | 1450.999  | NM_00721C | 598.101   | 729.644   | NM_01656E | 888.349   | 957.009   |
| AL049312  | 1650.401  | 1412.657  | NM_00148E | 1943.129  | 1627.877  | M33197    | 67076.938 | 63183.246 |

|           |           |           |           |           |           |           |           |           |
|-----------|-----------|-----------|-----------|-----------|-----------|-----------|-----------|-----------|
| AL050072  | 4774.076  | 4829.219  | NM_018973 | 15254.475 | 15471.525 | AY009399  | 9541.755  | 9902.144  |
| AL117590  | 463.898   | 875.243   | NM_002591 | 12743.364 | 12630.833 | NM_004895 | 6635.821  | 6678.837  |
| AL049357  | 5237.029  | 6104.819  | NM_020216 | 6571.94   | 7355.748  | U59748    | 845.526   | 943.818   |
| AL110223  | 463.69    | 659.747   | AK021860  | 1385.668  | 1595.41   | NM_014303 | 8931.939  | 9650.321  |
| AK027180  | 8024.432  | 8195.144  | AB046816  | 1445.288  | 1359.525  | NM_003118 | 3857.312  | 3644.386  |
| NM_004544 | 9011.65   | 7483.514  | AL137266  | 4849.449  | 5490.209  | L02922    | 10918.392 | 11285.887 |
| AF086041  | 405.311   | 510.362   | NM_016457 | 1072.169  | 1097.619  | M33197    | 8761.396  | 8368.168  |
| AL133080  | 2319.064  | 1569.353  | NM_005057 | 1751.439  | 1921.752  | NM_004045 | 8171.499  | 7052.35   |
| NM_017792 | 1537.608  | 1241.033  | AF143321  | 972.111   | 793.767   | NM_001891 | 857.583   | 885.075   |
| AK025213  | 2909.158  | 2340.288  | AB046842  | 917.088   | 1099.351  | NM_012135 | 2403.365  | 2224.468  |
| NM_014945 | 1840.302  | 1448.318  | NM_004850 | 2071.01   | 2615.063  | AF121856  | 2040.821  | 2015.39   |
| AL080221  | 1262.173  | 1024.89   | NM_002822 | 3556.446  | 2689.834  | NM_006421 | 2279.114  | 2047.212  |
| AL137370  | 795.564   | 747.438   | NM_014352 | 3676.717  | 3819.062  | NM_003765 | 7366.667  | 7771.747  |
| AF009262  | 6432.155  | 5923.67   | NM_012481 | 867.596   | 665.521   | NM_018202 | 10016.284 | 10589.897 |
| AF009306  | 637.746   | 623.35    | L09102    | 8172.752  | 7665.872  | AB023197  | 2348.458  | 2716.671  |
| AF050198  | 1791.324  | 1936.244  | U68488    | 737.703   | 702.786   | NM_022173 | 3635.71   | 3427.619  |
| AK024346  | 2633.097  | 3433.188  | NM_016247 | 2619.94   | 1508.895  | AB040970  | 2769.513  | 2562.561  |
| AF056422  | 1361.199  | 1242.056  | NM_012282 | 1167.678  | 953.932   | NM_018330 | 2625.002  | 2175.301  |
| AF090892  | 701.029   | 888.591   | NM_006710 | 1096.37   | 1398.422  | U50342    | 1609.066  | 1999.886  |
| AK001089  | 621.712   | 722.797   | NM_003323 | 10723.97  | 10065.099 | NM_015921 | 37415.809 | 38007.93  |
| AK001919  | 1036.286  | 1362.945  | BG685310  | 1961.028  | 1249.949  | AB040900  | 15160.878 | 14805.418 |
| AK021535  | 852.167   | 1148.892  | AW300857  | 13496.457 | 11014.245 | NM_001080 | 649.478   | 408.075   |
| AK021753  | 4584.785  | 5204.881  | H85962    | 21953.803 | 19596.717 | NM_001482 | 1076.423  | 1218.724  |
| AK001139  | 2067.872  | 2961.513  | BG742446  | 1037.245  | 1131.122  | NM_000717 | 1427.906  | 1358.266  |
| AK002090  | 893.754   | 1146.314  | AA864554  | 5524.025  | 5106.743  | M33197    | 72158.07  | 63211.012 |
| AK021822  | 756.733   | 673.872   | X66945    | 1326.421  | 1489.211  | NM_004845 | 1648.437  | 1389.306  |
| AK025246  | 4659.951  | 4204.937  | AI160703  | 569.656   | 526.708   | M68874    | 2417.369  | 2530.138  |
| AK025847  | 2244.451  | 2109.748  | X12830    | 13182.278 | 13802.026 | NM_006315 | 4164.273  | 4354.791  |
| AK026816  | 425.509   | 366.636   | U00482    | 1456.844  | 1491.058  | NM_004605 | 358.649   | 721.75    |
| NM_014174 | 5001.3    | 4289.782  | K01904    | 21807.623 | 22053.428 | Z36813    | 4728.293  | 4667.23   |
| AF147337  | 2491.261  | 2370.668  | BE538886  | 1077.872  | 1014.291  | NM_006660 | 6765.126  | 6802.279  |
| AK025203  | 54251.297 | 53124.645 | NM_002228 | 1411.893  | 872.881   | AF080158  | 1912.122  | 1708.675  |
| AK026981  | 3491.439  | 3823.997  | M57650    | 4707.355  | 5057.67   | BM664556  | 1384.783  | 1179.211  |
| NM_006394 | 711.569   | 1516.739  | BC023978  | 580.118   | 1174.433  | M33197    | 66741.008 | 63019.844 |
| AK023819  | 756.217   | 1177.926  | M21302    | 1847.832  | 2431.665  | NM_016545 | 1847.218  | 1784.144  |
| AL133656  | 2132.082  | 2287.032  | NM_005212 | 3639.439  | 3580.619  | NM_001440 | 20991.609 | 19668.041 |
| AL050037  | 9881.7    | 9155.675  | NM_006419 | 845.275   | 790.273   | NM_016618 | 1772.584  | 1598.362  |
| NM_001417 | 32369.818 | 33406.559 | AB020676  | 825.097   | 452.153   | AB014568  | 15348.711 | 13976.115 |
| AK022236  | 2759.06   | 2345.621  | AK024715  | 785.41    | 559.857   | NM_012245 | 2161.612  | 2127.305  |
| AK000073  | 903.219   | 707.451   | U90942    | 62309.262 | 52062.398 | AK022546  | 5026.721  | 5110.619  |
| AK000618  | 557.402   | 521.998   | NM_014942 | 1120.211  | 712.631   | NM_014067 | 5497.139  | 5575.606  |
| AK024773  | 784.522   | 816.67    | NM_018360 | 1649.629  | 1196.142  | NM_002914 | 3852.188  | 4232.29   |
| AL390180  | 925.117   | 767.935   | AK022489  | 833.528   | 1202.571  | NM_020385 | 1978.166  | 1834.759  |
| X60484    | 952.687   | 936.994   | AL365415  | 1749.625  | 2027.633  | NM_006541 | 1339.622  | 1178.608  |
| AF055019  | 2349.802  | 1944.5    | L29147    | 29343.832 | 30065.594 | NM_005705 | 5069.469  | 5469.833  |
| NM_003525 | 9147.164  | 6769.498  | NM_001525 | 19890.961 | 19069.441 | NM_004328 | 2247.215  | 2851.076  |
| AK000229  | 890.839   | 931.561   | NM_006055 | 3681.219  | 3031.793  | NM_004581 | 3022.42   | 3147.058  |
| AF056432  | 2726.144  | 4650.247  | NM_004296 | 1046.733  | 812.234   | NM_006817 | 20203.301 | 23109.945 |
| AK001987  | 28750.438 | 35623.453 | NM_005972 | 915.557   | 631.273   | NM_003118 | 3949.472  | 3705.991  |
| NM_013332 | 2055.771  | 1729.131  | NM_001060 | 3388.682  | 3257.028  | L02922    | 11759.203 | 10362.942 |
| X56199    | 2552.969  | 2665.888  | NM_018841 | 1454.893  | 1834.951  | NM_001797 | 862.523   | 615.09    |
| NM_005193 | 2409.489  | 2709.858  | NM_005226 | 689.44    | 840.511   | NM_003154 | 1199.268  | 1177.898  |
| AL162006  | 744.255   | 1065.642  | AL133105  | 2296.287  | 1982.266  | AK023459  | 2453.218  | 2394.586  |

|           |           |           |           |           |           |           |           |           |
|-----------|-----------|-----------|-----------|-----------|-----------|-----------|-----------|-----------|
| NM_017971 | 22985.518 | 25342.467 | AK022859  | 1346.696  | 891.44    | R23251    | 16860.178 | 18228.529 |
| AF090097  | 2651.244  | 2995.874  | NM_000214 | 727.714   | 730.732   | BG763477  | 997.22    | 705.491   |
| AF116620  | 12681.167 | 20786.607 | NM_014864 | 8876.562  | 8708.535  | AA702640  | 1243.354  | 1431.356  |
| AF293335  | 41635.777 | 45416.57  | NM_003728 | 8354.107  | 8567.333  | T68583    | 2879.298  | 3307.707  |
| AK024431  | 5009.776  | 5252.716  | NM_004975 | 2461.227  | 1555.886  | AA481944  | 16259.962 | 18644.713 |
| X96644    | 3872.83   | 3306.783  | NM_002245 | 915.106   | 1112.509  | X14390    | 1005.254  | 1180.787  |
| Z34281    | 15719.515 | 15320.387 | D87445    | 5642.987  | 5603.366  | M31158    | 1136.326  | 1060.234  |
| NM_018678 | 42633.816 | 40530.23  | NM_000238 | 3061.619  | 3686.487  | D42108    | 784.783   | 745.094   |
| AJ008122  | 19273.449 | 19700.904 | NM_002247 | 1091.896  | 1318.348  | BG700922  | 828.386   | 921.523   |
| NM_006220 | 1228.952  | 841.969   | NM_004980 | 10092.203 | 7726.73   | AI366068  | 20745.031 | 21396.086 |
| AK022667  | 11580.144 | 8766.957  | AB011094  | 8930.994  | 7477.4    | N57553    | 693.66    | 915.958   |
| AK026667  | 520.679   | 592.909   | NM_003224 | 1929.611  | 1981.968  | AB040970  | 2875.868  | 2605.034  |
| AF113211  | 1828.538  | 1587.156  | NM_001658 | 63704.563 | 57757.023 | NM_018330 | 2633.401  | 2396.206  |
| AL117568  | 1631.742  | 1167.47   | NM_006827 | 23557.24  | 14185.474 | M33197    | 53757.602 | 55308.242 |
| S71805    | 1285.097  | 1555.791  | AK021761  | 8110.527  | 5924.584  | U50342    | 1492.835  | 1421.802  |
| NM_018391 | 1826.196  | 2011.467  | AK024536  | 1770.539  | 1108.292  | NM_000295 | 631.756   | 715.689   |
| U90917    | 520.446   | 788.127   | NM_018668 | 6885.741  | 4636.934  | AF103795  | 504.394   | 562.561   |
| AK022140  | 2797.743  | 2812.236  | NM_004227 | 1745.412  | 821.523   | NM_013231 | 2568.895  | 2227.328  |
| AK023372  | 26205.297 | 25775.201 | NM_005282 | 2381.344  | 1587.054  | NM_012106 | 3478.354  | 3827.286  |
| U21072    | 2461.784  | 2596.535  | NM_001736 | 1196.54   | 807.079   | NM_006254 | 6017.629  | 5879.751  |
| AK024377  | 483.114   | 812.904   | AB028949  | 2061.432  | 1884.714  | X95425    | 1266.291  | 1477.853  |
| AK023557  | 858.205   | 927.06    | AL137580  | 797.648   | 412.335   | NM_004422 | 1506.348  | 1561.844  |
| AK027107  | 1034.908  | 1127.525  | NM_004101 | 858.335   | 837.452   | NM_016562 | 1128.862  | 1202.969  |
| AB040887  | 3252.98   | 3317.295  | NM_002995 | 37376.387 | 45133.625 | M33197    | 67186.211 | 68193.867 |
| AK025196  | 2548.03   | 2318.79   | AB033114  | 714.322   | 609.455   | AY009399  | 9393.748  | 9945.919  |
| AK024800  | 621.425   | 552.399   | NM_015978 | 2164.563  | 2066.438  | U59748    | 720.801   | 872.319   |
| AK000401  | 1375.567  | 954.575   | NM_003810 | 3642.189  | 2992.894  | L32537    | 663.099   | 842.348   |
| AF305068  | 1045.562  | 915.481   | NM_014443 | 3457.77   | 3039.748  | NM_014303 | 10165.476 | 16694.373 |
| D17231    | 20728.635 | 18685.588 | NM_016457 | 582.98    | 1320.174  | NM_006660 | 6417.925  | 5544.3    |
| AF531295  | 1256.505  | 967.995   | NM_005057 | 726.966   | 799.858   | NM_006685 | 29816.117 | 26609.334 |
| CY3Cy5    | 624.582   | 118.383   | AF143321  | 1308.957  | 1726.536  | M33197    | 8661.806  | 7456.177  |
| BF974315  | 3346.504  | 2913.497  | AB046842  | 1111.974  | 883.527   | NM_004045 | 7491.021  | 7097.366  |
| AI652705  | 1322.699  | 1490.784  | NM_004850 | 1748.145  | 1389.661  | NM_001891 | 794.48    | 558.804   |
| AA569974  | 3106.869  | 2567.068  | NM_002822 | 3489.435  | 2330.069  | NM_012139 | 3049.984  | 3115.672  |
| AA446028  | 952.571   | 1005.393  | BF306955  | 1190.719  | 1559.824  | AF121856  | 2658.032  | 2715.921  |
| M80583    | 792.691   | 768.961   | NM_001394 | 9539.921  | 6548.526  | NM_006421 | 2576.926  | 2880.296  |
| AW009565  | 2712.527  | 2850.194  | NM_018441 | 10275.688 | 9002.234  | NM_017457 | 19700.438 | 19243.412 |
| X07767    | 1864.909  | 1783.203  | NM_000778 | 12782.83  | 11814.027 | NM_003765 | 7122.101  | 8162.631  |
| AF252284  | 2525.682  | 2961.922  | NM_001609 | 1186.311  | 1300.87   | NM_018202 | 8403.849  | 9201.733  |
| BU727558  | 894.318   | 905.678   | BE733234  | 824.645   | 524.883   | AB023197  | 2136.266  | 2959.595  |
| SR1       | 55258.027 | 60242.945 | NM_020228 | 4077.551  | 2863.703  | NM_022173 | 2227.781  | 3522.939  |
| SR3       | 34968.188 | 34034.777 | NM_003676 | 16584.787 | 10412.776 | NM_004328 | 2095.028  | 2160.833  |
| SR5       | 3251.182  | 3416.989  | AF113007  | 1646.753  | 1147.6    | NM_004581 | 3198.537  | 2659.969  |
| SR7       | 3219.027  | 25255.641 | NM_000688 | 7704.053  | 5910.418  | NM_006817 | 19413.359 | 16746.994 |
| SR9       | 10442.159 | 2537.399  | U39573    | 1853.29   | 863.932   | NM_007108 | 9784.06   | 9423.508  |
| CY3Cy5    | 2475.889  | 174.897   | D82061    | 2421.457  | 2036.329  | NM_015921 | 35966.234 | 33845.984 |
| NM_016511 | 8256.705  | 6931.678  | AJ293009  | 1933.21   | 2198.595  | AB040900  | 13336.108 | 13794.957 |
| NM_003559 | 957.878   | 1014.711  | NM_000374 | 3214.834  | 3984.449  | NM_001482 | 794.468   | 1164.527  |
| M33197    | 56016.57  | 46234.883 | NM_000502 | 7324.433  | 7787.394  | NM_000717 | 1421.174  | 1286.186  |
| NM_013229 | 1107.202  | 933.976   | NM_001359 | 25221.836 | 25289.166 | M33197    | 72608.82  | 63177.453 |
| NM_016533 | 33303.75  | 32594.26  | NM_001696 | 14441.208 | 16043.942 | NM_004845 | 2088.288  | 2234.723  |
| NM_014751 | 2735.057  | 3358.159  | AF190900  | 1657.08   | 1842.646  | NM_007107 | 13394.233 | 13622.605 |
| NM_002347 | 14834.828 | 15323.468 | NM_020404 | 9976.444  | 10454.712 | NM_000047 | 8779.749  | 9471.045  |

|           |           |           |           |           |           |           |           |           |
|-----------|-----------|-----------|-----------|-----------|-----------|-----------|-----------|-----------|
| AB046807  | 643.537   | 698.14    | BE972401  | 4852.332  | 4901.638  | M68874    | 2461.064  | 2399.927  |
| M30629    | 3078.868  | 4000.63   | U56725    | 649.246   | 675.634   | NM_00631E | 3942.033  | 3866.418  |
| BE539299  | 527.854   | 719.344   | NM_017425 | 1410.353  | 1354.644  | NM_01822E | 4833.401  | 4875.395  |
| AF193873  | 2614.595  | 2941.819  | AB007922  | 819.447   | 1224.872  | NM_00460E | 560.405   | 640.016   |
| NM_00262E | 1357.584  | 1590.969  | NM_015982 | 1913.818  | 1900.939  | Z36813    | 2888.474  | 3316.921  |
| AA190729  | 1144.875  | 1403.394  | NM_00374E | 36238.363 | 40081.281 | AF303889  | 1207.588  | 1036.859  |
| NM_00417C | 522.104   | 369.706   | NM_00291C | 43617.453 | 38943.957 | M33197    | 65309.16  | 64417.25  |
| M33197    | 57860.055 | 59594.059 | AC096970  | 29742.686 | 30517.768 | AK022649  | 3058.985  | 2897.979  |
| NM_015717 | 1055.095  | 1122.961  | AK024865  | 1025.253  | 792.382   | NM_016507 | 3643.654  | 3077.112  |
| NM_01592E | 537.845   | 811.172   | NM_00721C | 694.84    | 453.228   | NM_002024 | 3298.729  | 2739.262  |
| NM_00366E | 803.044   | 839.19    | NM_001483 | 2667.024  | 1907.126  | NM_002743 | 9151.364  | 8766.898  |
| AF220217  | 574.254   | 598.839   | NM_018973 | 15061.16  | 10924.13  | AF173358  | 6160.097  | 6121.604  |
| NM_013323 | 6741.535  | 6232.15   | NM_002591 | 6140.853  | 5009.516  | NM_01636E | 1303.234  | 1396.97   |
| NM_01742E | 1319.964  | 1357.632  | NM_02021E | 7136.404  | 6446.028  | M33197    | 61840.488 | 61838.066 |
| M33197    | 1335.855  | 1143.793  | AK021860  | 1551.342  | 1693.244  | NM_01654E | 1771.015  | 1471.546  |
| NM_000853 | 1798.861  | 1961.557  | AB046816  | 1194.338  | 1214.578  | NM_00144C | 17705.936 | 17123.057 |
| AF016903  | 15739.241 | 17109.25  | AL137266  | 3489.072  | 4259.872  | NM_01661E | 1753.545  | 1632.896  |
| NM_01567E | 5042.3    | 4434.432  | U95031    | 485.068   | 739.412   | AB014568  | 19482.943 | 20078.48  |
| NM_01604C | 2482.941  | 2590.524  | AL137311  | 414.699   | 849.458   | NM_01224E | 2812.206  | 3524.123  |
| M33197    | 56416.801 | 62897.211 | NM_01428E | 3855.935  | 4383.072  | AK022546  | 4179.373  | 5033.613  |
| U90878    | 1187.585  | 1292.605  | AF035300  | 779.971   | 1081.87   | NM_014067 | 5244.524  | 5525.482  |
| NM_006597 | 31970.594 | 37888.656 | NM_017703 | 9042.108  | 7698.399  | NM_002914 | 3790.283  | 3873.324  |
| NM_012483 | 10090.752 | 12521.826 | NM_01532C | 2205.756  | 2421.583  | NM_02038E | 1407.483  | 1375.02   |
| NM_00349E | 3282.036  | 4107.609  | NM_00405E | 2520.291  | 2246.728  | NM_006541 | 2353.881  | 2899.184  |
| AB023420  | 8849.224  | 10408.172 | AJ297349  | 5457.678  | 5779.049  | NM_01817E | 1541.673  | 1099.063  |
| NM_007342 | 3043.481  | 3013.895  | NM_00582E | 10519.77  | 8938.085  | NM_006197 | 4388.148  | 2326.237  |
| NM_005672 | 308.21    | 556.114   | NM_00161E | 2478.052  | 2021.81   | NM_014181 | 837.936   | 692.203   |
| D25217    | 12229.625 | 10572.647 | NM_00659E | 3057.626  | 2476.088  | M29273    | 2645.697  | 2241.062  |
| NM_006351 | 3534.688  | 3126.118  | NM_004463 | 1045.834  | 822.483   | M33197    | 64617.031 | 60080.809 |
| M33197    | 47521.801 | 33247.617 | NM_00593E | 1062.832  | 701.517   | NM_004854 | 1870.491  | 1566.645  |
| NM_004683 | 8802.553  | 7298.709  | U43586    | 1180.785  | 835.365   | AJ245418  | 8537.845  | 7670.055  |
| M33197    | 45448.414 | 41347.078 | NM_006271 | 7459.818  | 6342.007  | NM_006377 | 3329.588  | 2884.792  |
| NM_001467 | 1372.706  | 1709.727  | NM_018647 | 1179.025  | 937.935   | AK026427  | 808.609   | 670.211   |
| NM_01806E | 20877.158 | 23391.975 | NM_00302E | 868.751   | 883.421   | NM_00243E | 1690.78   | 1975.835  |
| NM_006931 | 1343.125  | 1471.419  | NM_000721 | 48741.547 | 40919.34  | NM_018362 | 3059.482  | 2638.12   |
| NM_020344 | 4747.972  | 5046.471  | NM_003933 | 2011.245  | 1800.044  | M33197    | 66786.438 | 63446.336 |
| AF119868  | 552.143   | 671.724   | NM_01864C | 714.268   | 749.016   | NM_00218E | 3604.551  | 3450.477  |
| NM_00505C | 2548.944  | 3344.607  | NM_00509E | 5597.348  | 7387.672  | NM_006182 | 671.503   | 1043.539  |
| M33197    | 62799.496 | 69194.414 | NM_003163 | 7748.738  | 11984.114 | AL137543  | 4682.963  | 4770.666  |
| NM_01897E | 8289.205  | 9474.703  | NM_019057 | 3796.042  | 3617.654  | NM_004444 | 5001.341  | 6179.05   |
| NM_00335E | 6097.04   | 7260.237  | NM_01620E | 2475.649  | 2662.145  | M33197    | 580.829   | 530.683   |
| NM_005074 | 1542.396  | 2790.721  | NM_00575E | 1240.812  | 1143.313  | NM_001957 | 2181.909  | 2436.884  |
| NM_013272 | 950.496   | 1374.604  | AF149724  | 1590.298  | 1800.323  | AK024533  | 9777.942  | 12156.037 |
| NM_00455E | 2715.461  | 2648.621  | BC020745  | 1422.67   | 1654.407  | NM_00273E | 17201.576 | 20830.35  |
| AL079296  | 676.063   | 530.433   | NM_006367 | 68958.852 | 60948.648 | NM_00424E | 3827.415  | 5278.106  |
| NM_01477C | 1795.709  | 1488.953  | NM_004354 | 2100.907  | 2260.953  | NM_00228E | 3070.479  | 2551.059  |
| AB037737  | 522.639   | 485.261   | NM_004661 | 3153.339  | 2760.603  | NM_006694 | 22444.281 | 21332.678 |
| M33197    | 65535.953 | 68235.953 | NM_00200E | 608.397   | 776.083   | NM_005207 | 1631.547  | 1624.185  |
| AK023103  | 1786.791  | 1636.036  | NM_00161C | 2672.547  | 2310.273  | NM_003087 | 1877.949  | 1747.23   |
| NM_01785E | 1360.126  | 1468.423  | NM_001241 | 1692.451  | 1658.949  | NM_00163C | 2191.592  | 2136.286  |
| NM_01905E | 42201.914 | 37858.617 | AF217504  | 3249.312  | 2751.767  | M33197    | 66951.602 | 68147.383 |
| D80008    | 1126.268  | 1088.303  | AK027102  | 7656.175  | 6533.922  | AF305081  | 2473.688  | 2380.231  |
| AK001069  | 43836.129 | 46249.125 | AL109714  | 1111.96   | 979.501   | NM_004712 | 7702.191  | 7929.863  |

|           |           |           |           |           |           |           |           |           |
|-----------|-----------|-----------|-----------|-----------|-----------|-----------|-----------|-----------|
| M33197    | 63213.676 | 69011.32  | NM_004632 | 4128.106  | 3602.693  | AF118078  | 1500.212  | 1496.903  |
| NM_000935 | 895.625   | 842.602   | NM_017919 | 3544.805  | 3321.501  | M33197    | 66895.773 | 66361.578 |
| NM_000355 | 10427.731 | 10239.627 | NM_014456 | 4393.54   | 3979.408  | NM_005855 | 2668.736  | 3001.61   |
| NM_006395 | 4810.487  | 4870.146  | NM_004740 | 5575.433  | 4923.203  | AK025163  | 1987.996  | 2001.067  |
| NM_014306 | 4514.702  | 5300.072  | NM_003805 | 2449.132  | 1532.128  | NM_014931 | 4285.394  | 4874.269  |
| NM_001084 | 4248.797  | 4554.689  | NM_003275 | 46412.629 | 44630.813 | NM_014487 | 3318.44   | 3810.469  |
| NM_015983 | 2528.754  | 2850.986  | NM_000426 | 903.78    | 1064.791  | NM_018070 | 4071.075  | 4181.744  |
| NM_018622 | 4005.61   | 4282.723  | AK021957  | 65747.102 | 91887.727 | NM_002484 | 4264.784  | 4700.218  |
| M33197    | 65239.719 | 69218.742 | NM_016623 | 4713.582  | 4865.049  | M33197    | 65669.539 | 65026.711 |
| NM_005867 | 6058.625  | 7036.988  | NM_001334 | 7599.979  | 10133.19  | AL162052  | 553.332   | 820.301   |
| AK026031  | 10985.595 | 13772.418 | NM_004771 | 2602.846  | 3022.017  | AK025941  | 3635.069  | 4529.643  |
| NM_016465 | 5521.388  | 6815.29   | AL365514  | 1268.042  | 1380.333  | M33197    | 62123.656 | 61106.473 |
| AF193873  | 1821.208  | 1202.289  | NM_018299 | 1522.373  | 1550.563  | NM_015914 | 1449.531  | 1472.156  |
| NM_002625 | 573.584   | 619.458   | NM_002104 | 1487.086  | 1621.403  | AF059531  | 4195.167  | 3695.24   |
| AA190729  | 861.877   | 742.524   | NM_005504 | 9650.305  | 12169.562 | NM_002707 | 8345.955  | 7259.443  |
| BF974315  | 3724.105  | 3042.231  | AF234654  | 2808.432  | 3637.212  | AF029777  | 1246.364  | 1208.597  |
| AI652705  | 2146.625  | 1981.609  | NM_000110 | 6184.2    | 6504.811  | NM_003352 | 858.058   | 665.905   |
| AA569974  | 3565.467  | 3487.608  | NM_014549 | 1468.65   | 1293.191  | AK026884  | 8642.17   | 8949.631  |
| AA446028  | 1196.224  | 1321.503  | NM_017832 | 9682.382  | 8698.824  | S82198    | 1234.382  | 871.84    |
| M80583    | 946.388   | 796.662   | NM_001713 | 3522.203  | 3451.572  | NM_002594 | 3326.687  | 2926.031  |
| AW009565  | 3002.762  | 2560.504  | NM_015367 | 8433.956  | 10702.353 | NM_031407 | 2723.737  | 3310.514  |
| X07767    | 2483.995  | 2587.632  | NM_014495 | 6070.937  | 6198.636  | M33197    | 62849.027 | 61378.672 |
| AF252284  | 2746.457  | 3029.679  | NM_002375 | 13102.819 | 11439.362 | AK000410  | 55659.242 | 59648.551 |
| BU727558  | 947.403   | 936.157   | NM_001813 | 2516.016  | 1668.045  | NM_020193 | 1184.58   | 1337.019  |
| M33197    | 6493.476  | 7254.764  | AF055016  | 3820.048  | 2102.384  | NM_005615 | 3322.388  | 3399.617  |
| AL050139  | 4403.955  | 6063.708  | NM_014567 | 6775.951  | 9897.344  | D87440    | 2723.617  | 3137.788  |
| U90878    | 692.582   | 594.037   | NM_017842 | 2259.71   | 3777.568  | AK000332  | 14066.496 | 17366.904 |
| NM_006597 | 26183.439 | 21275.697 | AB037809  | 1592.735  | 1650.993  | NM_002895 | 1286.205  | 985.345   |
| NM_012483 | 5640.674  | 4759.985  | AB011129  | 1611.396  | 1392.778  | NM_013351 | 22210.068 | 17803.25  |
| NM_003495 | 2018.912  | 1530.761  | NM_014391 | 4959.455  | 5695.735  | NM_012340 | 5114.026  | 3959.897  |
| AB023420  | 6366.823  | 5471.734  | NM_004270 | 2403.136  | 1960.57   | NM_006022 | 1208.88   | 1801.684  |
| NM_016511 | 13104.148 | 10768.598 | NM_001537 | 3539.395  | 3656.481  | AK025110  | 1736.262  | 1620.085  |
| NM_003555 | 1302.698  | 1389.723  | U80743    | 1777.946  | 2151.331  | X52339    | 42141.883 | 42597.793 |
| M55337    | 434.503   | 611.151   | NM_001352 | 3722.532  | 3861.925  | M33197    | 57609.699 | 56131.367 |
| M33197    | 59613.375 | 60320.758 | D15050    | 1709.305  | 1836.792  | AB046830  | 2432.921  | 2282.164  |
| NM_013225 | 1227.741  | 1091.294  | NM_006527 | 6819.628  | 7407.105  | NM_007122 | 2313.642  | 1703.797  |
| NM_016533 | 37425.914 | 39312.332 | NM_007363 | 25516.596 | 26161.619 | NM_001485 | 612.727   | 760.458   |
| NM_014751 | 5654.271  | 6915.957  | NM_003093 | 43291.145 | 37198.648 | NM_016202 | 7106.178  | 6918.885  |
| NM_002347 | 16532.518 | 19163.859 | U05589    | 1169.242  | 1338.063  | NM_012475 | 1034.957  | 736.188   |
| AB046807  | 820.391   | 1156.049  | NM_014473 | 14728.842 | 19239.799 | NM_016604 | 1188.16   | 1170.287  |
| M33197    | 61117.656 | 71948.914 | NM_003095 | 68574.438 | 67899.086 | M33197    | 64293.207 | 61579.008 |
| NM_014623 | 4621.315  | 5584.042  | NM_016389 | 2587.928  | 3051.822  | NM_006275 | 3379.965  | 3649.006  |
| NM_007244 | 6173.664  | 7749.899  | NM_002295 | 56257.395 | 52212.355 | NM_003407 | 4058.915  | 4036.592  |
| M30629    | 2557.587  | 3878.858  | NM_001762 | 6578.813  | 5209.565  | NM_007205 | 66582.344 | 67929.578 |
| M33197    | 55810.613 | 43610.23  | NM_016306 | 21432.203 | 16568.576 | NM_003725 | 3979.545  | 5087.535  |
| NM_018975 | 6822.719  | 6126.083  | NM_003755 | 1048.012  | 492.229   | BC015899  | 7714.177  | 9363.05   |
| NM_003355 | 4802.344  | 4189.208  | BE258640  | 18308.154 | 22982.324 | NM_017985 | 7924.012  | 6849.509  |
| NM_005074 | 690.633   | 587.864   | NM_003314 | 8958.214  | 13000.426 | AK023629  | 507.82    | 880.175   |
| NM_018057 | 1093.745  | 1146.665  | AL355730  | 1208.417  | 1385.651  | AK024846  | 1775.1    | 1784.515  |
| NM_015717 | 1281.289  | 1177.372  | U79273    | 1639.77   | 1920.407  | AK001451  | 4339.316  | 3959.126  |
| NM_015925 | 697.814   | 895.748   | AK022050  | 4729.667  | 4363.643  | M33197    | 37110.035 | 36935.438 |
| NM_003665 | 765.242   | 856.384   | NM_002512 | 67036.602 | 59531.25  | NM_007180 | 976.963   | 1122.194  |
| AF220217  | 620.252   | 575.771   | NM_001246 | 962.048   | 994.476   | NM_005475 | 4840.107  | 4507.605  |

|           |           |           |           |           |           |           |           |           |
|-----------|-----------|-----------|-----------|-----------|-----------|-----------|-----------|-----------|
| NM_013323 | 10049.111 | 10550.405 | AL365411  | 3650.168  | 3426.545  | NM_00566C | 2965.259  | 2648.174  |
| NM_01742E | 1479.558  | 1685.206  | M24470    | 791.382   | 993.239   | AK023902  | 1056.213  | 1282.429  |
| M33197    | 1637.867  | 1432.894  | NM_01606E | 4143.709  | 4842.874  | AB011173  | 4778.864  | 5103.03   |
| NM_000853 | 2568.084  | 3213.768  | NM_001249 | 1778.834  | 1689.759  | AB023195  | 1073.731  | 1363.419  |
| AF016903  | 18131.637 | 21597.473 | AK024677  | 1100.637  | 961.934   | U43431    | 1915.266  | 2209.524  |
| NM_01567E | 5237.629  | 6256.798  | NM_00003E | 2686.818  | 3182.678  | AB006622  | 1596.579  | 1681.599  |
| AK022267  | 605.692   | 640.142   | AF254082  | 27309.021 | 29869.443 | M33197    | 59321.844 | 61187.676 |
| AF031136  | 43482.648 | 48329.047 | AF205718  | 10468.225 | 9684.731  | AK097041  | 3567.406  | 4343.042  |
| NM_015983 | 926.752   | 840.049   | NM_00342C | 1273.862  | 1136.313  | AF068744  | 23882.627 | 28901.012 |
| NM_018622 | 3652.4    | 3174.667  | AY004252  | 1418.547  | 1753.195  | AK000762  | 2904.235  | 4618.004  |
| M33197    | 60137.59  | 54967.027 | NM_006261 | 3705.447  | 4807.176  | NM_004571 | 933.719   | 1376.004  |
| NM_005867 | 4759.586  | 4462.391  | AK027045  | 1802.252  | 1627.03   | AJ345030  | 2613.645  | 2550.69   |
| AK026031  | 6639.804  | 5108.411  | AF169796  | 1792.043  | 1896.687  | AK023472  | 12519.905 | 11133.039 |
| NM_01646E | 3514.575  | 2940.426  | AK001814  | 4840.259  | 3381.952  | AK021796  | 598.847   | 620.028   |
| NM_007342 | 3297.938  | 3657.777  | NM_007222 | 2679.077  | 2432.922  | AL109729  | 767.56    | 779.648   |
| NM_006351 | 3266.906  | 3347.376  | NM_00343E | 2045.363  | 1321.06   | M33197    | 62936.902 | 59307.945 |
| M33197    | 49851.254 | 42027.824 | NM_016291 | 3348.368  | 1652.285  | S79912    | 13215.8   | 13873.51  |
| NM_004683 | 12316.143 | 10426.718 | NM_005937 | 55366.816 | 52913.277 | AK026892  | 1349.794  | 1604.105  |
| AK025263  | 767.604   | 1019.476  | AK023259  | 5242.374  | 4529.816  | S83275    | 19391.854 | 20014.041 |
| M33197    | 50031.145 | 56058.992 | AK001503  | 2255.15   | 2253.397  | AL117427  | 5230.616  | 5512.314  |
| NM_001467 | 1536.467  | 2021.808  | AF075030  | 2650.056  | 2064.109  | M33197    | 63839.18  | 59812.078 |
| NM_01806E | 22637.592 | 26013.201 | AK021812  | 1658.937  | 1879.162  | AF052118  | 11684.921 | 13184.831 |
| NM_006931 | 3107.435  | 3336.822  | AK022880  | 2586.37   | 2130.441  | AK025166  | 4965.015  | 4991.125  |
| NM_020344 | 4587.216  | 5286.186  | NM_003601 | 12759.897 | 12751.518 | AL359586  | 1443.397  | 1457.329  |
| AF119868  | 640.279   | 898.315   | AF086375  | 557.789   | 790.985   | AF147421  | 685.895   | 706.285   |
| NM_00505C | 2503.377  | 3029.44   | AK001228  | 5518.009  | 7345.874  | AF035290  | 1680.063  | 1593.596  |
| AF252284  | 1578.972  | 1259.485  | AK026778  | 2261.581  | 2610.618  | AK023216  | 815.504   | 951.152   |
| M33197    | 4177.099  | 3497.602  | AF074987  | 4388.158  | 5871.837  | M33197    | 62409.418 | 61198.207 |
| AL050139  | 2788.743  | 2750.128  | AK001058  | 30461.09  | 39346.949 | AK023288  | 1455.21   | 2211.255  |
| NM_00455E | 2553.939  | 2644.093  | AK026239  | 2440.776  | 2779.281  | M33197    | 63453.484 | 60414.699 |
| AL079296  | 694.498   | 782.85    | AF086283  | 1210.665  | 1083.046  | AK022428  | 1022.82   | 929.47    |
| NM_01477C | 1942.2    | 1597.263  | AF088047  | 801.272   | 877.918   | AK000788  | 693.395   | 835.176   |
| AB037737  | 709.038   | 565.491   | AF086281  | 1561.671  | 1130.125  | AK023457  | 1963.418  | 1436.99   |
| M33197    | 64213.203 | 69197.023 | AF086393  | 1995.29   | 1479.465  | AK025089  | 5097.603  | 4909.503  |
| AK023103  | 1907.15   | 1982.695  | AF086453  | 893.022   | 770.8     | M33197    | 64567.734 | 61200.188 |
| D80008    | 1516.752  | 2217.243  | AF070621  | 6049.678  | 5523.463  | AF085996  | 1843.121  | 1604.137  |
| X56789    | 975.248   | 1091.371  | NM_02024C | 2630.79   | 1720.513  | AK001279  | 1341.481  | 1278.565  |
| AK001069  | 51942.055 | 53280.227 | AK023678  | 8145.249  | 3061.322  | AK001567  | 1788.889  | 1655.141  |
| M33197    | 62087.258 | 69029.367 | AF052090  | 4264.668  | 3207.936  | M33197    | 39396.141 | 44559.992 |
| NM_00093E | 783.582   | 735.063   | AK023718  | 4004.402  | 4123.353  | U52839    | 1340.016  | 1272.94   |
| NM_00035E | 9973.132  | 7932.378  | AF075089  | 4447.93   | 5622.095  | M33197    | 57527.344 | 55035.289 |
| NM_00639E | 4460.026  | 2981.048  | AF241255  | 1951.931  | 1884.279  | AK026984  | 19982.1   | 19208.857 |
| NM_01430E | 4482.663  | 3667.394  | AF086007  | 62885.875 | 58178.762 | NM_013391 | 841.933   | 552.807   |
| NM_001084 | 3489.651  | 2841.064  | AK000803  | 2452.687  | 2837.388  | M33197    | 62435.504 | 57599.094 |
| M33197    | 53735.609 | 46075.449 | AK022374  | 989.638   | 1146.386  | AL157466  | 3229.283  | 2697.348  |
| NM_014623 | 3886.152  | 3376.857  | AF085926  | 19046.133 | 18808.955 | AL389981  | 798.191   | 544.647   |
| NM_007244 | 3654.313  | 2756.145  | AF085948  | 717.96    | 980.549   | AK024336  | 1447.7    | 1322.87   |
| M30629    | 2455.188  | 1918.381  | AL137307  | 3810.875  | 4414.527  | AK023862  | 487.711   | 754.161   |
| AF193873  | 1737.033  | 1509.636  | AL137468  | 7533.155  | 8450.424  | NM_018621 | 1157.83   | 1051.273  |
| NM_00262E | 1126.108  | 905.517   | AL162007  | 31166.805 | 32541.951 | AK022016  | 1171.195  | 1142.375  |
| AA190729  | 1274.137  | 1110.752  | AL390137  | 23770.006 | 31290.811 | AK021628  | 711.959   | 536.597   |
| BF974315  | 4107.251  | 4029.785  | AL137340  | 1051.758  | 1401.092  | M33197    | 56851.773 | 52606.023 |
| AI652705  | 2451.434  | 2281.291  | AL137542  | 584.215   | 889.991   | AK022118  | 1261.63   | 896.017   |

|           |           |           |           |           |           |           |           |           |
|-----------|-----------|-----------|-----------|-----------|-----------|-----------|-----------|-----------|
| AA569974  | 4048.385  | 4046.154  | AL162045  | 1307.782  | 1615.17   | AK026453  | 4767.851  | 5121.998  |
| AA446028  | 1493.615  | 1357.202  | X92185    | 604.165   | 465.905   | AK025673  | 1064.045  | 854.274   |
| M80583    | 985.984   | 509.27    | AK022437  | 16901.01  | 16399.674 | M33197    | 51644.258 | 54385.219 |
| AW009565  | 3004.087  | 2366.068  | AB042410  | 566.587   | 960.028   | AK022431  | 989.664   | 1331.949  |
| X07767    | 2877.598  | 3207.383  | AF086102  | 1301.241  | 889.147   | AK023305  | 34735.637 | 42838.344 |
| AF016903  | 7229.156  | 4959.082  | AF116682  | 24669.027 | 24337.313 | AK023763  | 2029.347  | 2149.369  |
| NM_015675 | 2645.482  | 2337.531  | AL137259  | 3138.788  | 2769.876  | AK022729  | 1900.332  | 1744.607  |
| NM_016040 | 1766.067  | 1347.876  | AL122107  | 3358.289  | 1816.623  | NM_006165 | 10733.228 | 9517.883  |
| M33197    | 54976.379 | 32522.977 | AF075021  | 742.87    | 607.759   | AL050374  | 2073.314  | 1916.918  |
| AF031136  | 26426.92  | 19081.66  | AK025140  | 9482.129  | 4286.28   | M33197    | 64101.633 | 61847.676 |
| U90878    | 1159.342  | 776.337   | AK023394  | 2235.798  | 2926.164  | M28639    | 4482.652  | 3474.401  |
| NM_006597 | 30456.361 | 22747.484 | AF090093  | 10991.686 | 11203.911 | AL122073  | 13822.917 | 13456.093 |
| NM_012483 | 9695.258  | 7974.068  | AF161340  | 3189.258  | 3095.271  | AF116655  | 3694.658  | 3376.828  |
| NM_003495 | 3301.746  | 3904.739  | AF242771  | 1297.617  | 1501.112  | AJ243222  | 782.289   | 800.839   |
| AB023420  | 10014.019 | 10773.278 | NM_018562 | 10574.591 | 13646.42  | AK026132  | 2819.078  | 2427.453  |
| NM_002262 | 418.925   | 972.635   | AF098666  | 1495.193  | 1233.021  | M33197    | 60233.383 | 57039.621 |
| NM_016511 | 24774.645 | 34365.691 | AF161365  | 2297.223  | 1939.305  | AF070584  | 1360.156  | 1637.73   |
| NM_003555 | 2661.462  | 3825.541  | AK021969  | 1534.539  | 2162.956  | AF075006  | 759.93    | 823.462   |
| M55337    | 804.112   | 1074.336  | AK022065  | 2714.212  | 3615.16   | M33197    | 59167.992 | 57397.258 |
| M33197    | 65788.547 | 68795.563 | AK022221  | 3615.912  | 4692.442  | AK000903  | 25986.893 | 30598.145 |
| NM_013225 | 1673.192  | 1784.568  | AK022356  | 1409.443  | 1240.817  | AK023938  | 905.663   | 1354.665  |
| NM_016533 | 37405.918 | 38490.73  | AK021998  | 3360.201  | 3338.509  | AK026896  | 643.186   | 819.886   |
| NM_014751 | 4774.542  | 6095.949  | AK022126  | 3093.721  | 3108.368  | L13743    | 2654.962  | 2002.19   |
| NM_002347 | 17901.844 | 22424.178 | AK022256  | 926.479   | 1027.018  | U84519    | 1251.483  | 1113.906  |
| AB046807  | 946.305   | 679.282   | AK022383  | 2532.104  | 2788.264  | Z11849    | 6514.287  | 6473.914  |
| NM_018065 | 12047.242 | 13289.871 | AK027041  | 2651.555  | 2619.659  | AJ002788  | 3404.383  | 2533.294  |
| NM_006931 | 2645.528  | 2642.853  | AK024332  | 816.554   | 644.57    | M33197    | 64039.508 | 61180.543 |
| NM_020344 | 4711.519  | 5348.419  | NM_005355 | 26164.1   | 18869.436 | AF052103  | 1510.172  | 1301.668  |
| NM_005050 | 2770.908  | 4228.591  | AK000937  | 993.503   | 644.721   | AK024842  | 822.192   | 663.226   |
| M33197    | 61453.008 | 73840.414 | AK091662  | 717.342   | 1124.231  | NM_018382 | 1038.181  | 953.798   |
| NM_018975 | 11112.555 | 17714.832 | AB038318  | 493.937   | 857.963   | M33197    | 63010.07  | 59970.316 |
| NM_003355 | 7737.14   | 10024.233 | NM_003954 | 2642.603  | 2125.816  | D17203    | 46113.566 | 54041.703 |
| NM_005074 | 1486.081  | 2801.829  | NM_016345 | 1281.838  | 1445.54   | NM_006495 | 5134.658  | 5788.722  |
| NM_013272 | 1011.151  | 1969.381  | AK023877  | 881.243   | 1022.22   | NM_005285 | 751.777   | 1064.888  |
| NM_018057 | 1961.44   | 3085.442  | AK024213  | 29187.818 | 29714.334 | AK022101  | 1345.3    | 1623.751  |
| M33197    | 49748.566 | 60371.242 | AK025093  | 783.609   | 652.223   | NM_003251 | 2202.788  | 2467.414  |
| NM_015717 | 2067.925  | 3188.313  | AK022184  | 2160.032  | 1813.311  | AB046772  | 646.347   | 723.19    |
| NM_015925 | 928.897   | 1268.046  | AB007959  | 878.9     | 675.202   | M33197    | 61973.898 | 59005.07  |
| NM_003665 | 1082.91   | 1328.056  | AK024153  | 1283.637  | 1711.99   | AL442080  | 940.432   | 1031.425  |
| NM_013323 | 9446.688  | 7307.547  | Y10516    | 3123.274  | 4600.242  | AY007143  | 10633.718 | 10644.496 |
| NM_017425 | 1407.974  | 1674.991  | AF056451  | 2222.17   | 2840.957  | L15557    | 1576.575  | 1162.974  |
| M33197    | 1218.636  | 1229.513  | AF015039  | 5251.556  | 5703.856  | M33197    | 67477.555 | 68347.438 |
| NM_000853 | 1998.937  | 2519.37   | U50528    | 1321.351  | 1520.147  | NM_001563 | 7822.454  | 7012.896  |
| M33197    | 68511.492 | 69208.539 | AB020632  | 3066.17   | 4482.106  | NM_000265 | 1215.899  | 915.427   |
| NM_000935 | 994.19    | 864.463   | NM_018614 | 36729.434 | 40314.695 | X89666    | 2388.892  | 2603.27   |
| NM_000355 | 7084.13   | 7968.207  | AL117549  | 1677.807  | 1762.613  | NM_003104 | 8413.579  | 7083.798  |
| NM_006395 | 4717.837  | 4223.358  | NM_005222 | 5939.503  | 6330.381  | NM_014581 | 1966.21   | 2166.7    |
| NM_014305 | 5880.606  | 7759.539  | BC024308  | 13187.565 | 13605.009 | M33197    | 63321.027 | 60642.402 |
| NM_001084 | 4622.69   | 6923.719  | NM_000535 | 3721.653  | 4614.825  | AK024448  | 3500.282  | 3178.056  |
| NM_015983 | 1879.723  | 1675.983  | AK001838  | 63277.59  | 56812.324 | NM_014405 | 2186.454  | 2328.513  |
| NM_018622 | 4160.795  | 2813.766  | NM_018295 | 2082.199  | 3432.93   | Z11801    | 884.293   | 901.069   |
| M33197    | 72166.867 | 59344.695 | AF070574  | 882.634   | 698.629   | S68954    | 8116.377  | 44054.629 |
| NM_005867 | 5877.119  | 5230.722  | AF086262  | 4741.468  | 4310.309  | S81335    | 1623.052  | 1916.741  |



|           |           |           |           |           |           |             |           |           |
|-----------|-----------|-----------|-----------|-----------|-----------|-------------|-----------|-----------|
| AK026031  | 9472.609  | 8334.518  | AF086292  | 6958.428  | 5691.892  | AF052109    | 1595.271  | 8390.408  |
| NM_01646E | 5034.906  | 3974.08   | AK023769  | 773.499   | 811.543   | M33197      | 25830.518 | 28055.48  |
| NM_007342 | 4070.076  | 5281.753  | AK024342  | 14905.222 | 15356.576 | NM_003353   | 26528.689 | 35284.988 |
| NM_005672 | 722.665   | 645.569   | AL137712  | 6405.469  | 6102.104  | X82127      | 33411.188 | 35349.828 |
| D25217    | 12710.246 | 11525.008 | L77599    | 45705.078 | 40887.637 | AL122044    | 2773.563  | 2775.919  |
| NM_006351 | 3629.102  | 3610.477  | AK021673  | 18028     | 17740.326 | NM_01829E   | 1504.792  | 1654.887  |
| M33197    | 49701     | 43120.059 | AB014543  | 2498.464  | 2020.551  | NM_005752   | 1072.183  | 1343.584  |
| NM_004683 | 12703.269 | 11697.385 | NM_018445 | 8202.408  | 5990.742  | M33197      | 60374.375 | 62993.523 |
| AK025263  | 495.809   | 798.631   | AK022743  | 6623.57   | 4395.462  | CY3Cy5      | 4781.416  | 129.915   |
| M33197    | 50670.363 | 64588.852 | NM_014627 | 1149.189  | 1583.734  | AA418907    | 915.068   | 1019.234  |
| NM_001467 | 1103.655  | 1526.187  | NM_01393E | 7577.829  | 8735.073  | AA115473    | 1954.139  | 2521.231  |
| NM_00468E | 7362.334  | 5555.033  | NM_01398E | 62722.48  | 55228.332 | AA872397    | 3053.19   | 3162.7    |
| AB037725  | 789.822   | 538.726   | U55055    | 1299.52   | 1342.442  | AA709414    | 2144.604  | 2140.37   |
| M33197    | 43336.414 | 32560.379 | AK022186  | 666.081   | 557.033   | D12676      | 1841.742  | 1537.158  |
| NM_00486C | 2285.458  | 2009.156  | AB018319  | 2680.495  | 2406.867  | BC012593    | 840.108   | 572.911   |
| AF217190  | 3269.092  | 2105.007  | AK001101  | 2173.433  | 2033.908  | NM_00093E   | 17752.654 | 13917.033 |
| AB028981  | 9523.108  | 7883.498  | BM973473  | 1267.483  | 1537.247  | NM_00429E   | 8312.655  | 7154.839  |
| NM_00680C | 1917.061  | 1659.921  | AK021637  | 1697.617  | 1590.717  | H-X 02812 I | 1525.414  | 1487.222  |
| NM_00247E | 891.213   | 966.554   | AK021658  | 1020.137  | 728.421   | U75898      | 963.742   | 937.047   |
| NM_00272E | 4601.731  | 4346.562  | D61705    | 512.735   | 708.026   | M29039      | 535.289   | 565.04    |
| M33197    | 6711.766  | 5778.771  | U17631    | 1824.146  | 1918.329  | M59815      | 489.75    | 613.03    |
| AL050139  | 3180.083  | 3497.532  | AL137723  | 3077.2    | 2570.131  | SR2         | 49399.113 | 53899.648 |
| NM_00455E | 4380.183  | 4699.137  | AK000774  | 408.106   | 635.924   | SR4         | 11969.966 | 12892.595 |
| AL079296  | 1046.17   | 934.59    | AK024046  | 3029.39   | 2567.787  | SR6         | 1707.652  | 1801.808  |
| NM_01477C | 2314.819  | 2221.724  | NM_017931 | 4619.432  | 4333.098  | SR8         | 6724.899  | 23403.785 |
| AB037737  | 525.12    | 775.866   | AK022793  | 1814.982  | 1598.037  | SR10        | 20766.93  | 7659.124  |
| AK023103  | 1644.42   | 2222.462  | AJ227910  | 1708.794  | 1582.398  | CY3Cy5      | 6153.168  | 164.312   |
| NM_01785E | 1733.994  | 2163.877  | AF001893  | 2512.512  | 3305.345  | NM_001203   | 2017.805  | 2425.989  |
| NM_01905E | 46313.23  | 51142.184 | X04236    | 13160.523 | 15912.281 | NM_00479E   | 11498.36  | 10433.21  |
| D80008    | 1075.563  | 1937.467  | AK093746  | 16989.744 | 14668.042 | NM_006733   | 816.218   | 847.541   |
| AK001069  | 35327.113 | 37351.98  | D16875    | 3236.676  | 2714.873  | NM_014047   | 9499.472  | 8291.976  |
| NM_004132 | 1525.861  | 1492.232  | AK027171  | 1801.86   | 1177.947  | AK022901    | 876.247   | 942.954   |
| NM_014844 | 1504.764  | 1464.347  | AK021945  | 4489.7    | 4663.319  | AF037332    | 3101.936  | 2543.433  |
| M33197    | 53919.781 | 44053.047 | L23545    | 1580.863  | 1229.663  | NM_014571   | 559.016   | 598.733   |
| NM_018492 | 2040.35   | 2076.301  | CY3Cy5    | 2855.882  | 203.496   | NM_006052   | 440.525   | 662.049   |
| NM_00134E | 1574.209  | 1527.022  | U13022    | 1023.483  | 715.002   | AB040912    | 2563.28   | 2221.165  |
| NM_00314E | 990.883   | 856.813   | R23251    | 23595.291 | 18915.592 | NM_006243   | 3477.923  | 2923.559  |
| NM_003377 | 7075.484  | 5573.729  | BG763477  | 1270.554  | 908.268   | M33197      | 68495.781 | 65065.602 |
| NM_00222C | 2807.339  | 2546.188  | AA702640  | 1752.491  | 1514.795  | AJ011129    | 1185.545  | 956.108   |
| AB033034  | 1382.796  | 1345.917  | T68583    | 2742.991  | 2511.521  | NM_006387   | 4123.765  | 4773.278  |
| D38169    | 3032.662  | 3110.242  | AA481944  | 17918.057 | 13167.896 | NM_00564E   | 2725.863  | 2570.909  |
| NM_002447 | 8905.737  | 8400.432  | X14390    | 1229.323  | 813.431   | NM_00663E   | 3103.99   | 2516.921  |
| NM_01414E | 8597.425  | 9334.765  | M31158    | 1043.071  | 1142.011  | BI767871    | 984.082   | 856.463   |
| NM_002223 | 2232.192  | 2102.79   | H00742    | 2223.313  | 2031.253  | AK022817    | 1438.653  | 1412.873  |
| M33197    | 54227.926 | 59921.645 | D42108    | 1229.509  | 961.372   | M33197      | 51124.715 | 54036.43  |
| NM_003151 | 2425.835  | 3443.166  | BG700922  | 520.634   | 528.51    | AB037831    | 755.655   | 928.501   |
| NM_006811 | 5198.09   | 5715.978  | AI366068  | 21560.225 | 16983.879 | NM_012103   | 13105.736 | 12249.604 |
| NM_005601 | 1536.262  | 2187.625  | N57553    | 690.862   | 501.644   | AL122077    | 8505.885  | 8388.003  |
| NM_016151 | 4322.043  | 4455.327  | AF080158  | 1898.729  | 2824.664  | NM_014632   | 448.801   | 461.785   |
| NM_005614 | 7055.657  | 5974.974  | BM664556  | 944.588   | 1121.316  | NM_006422   | 1034.467  | 729.013   |
| AK026270  | 893.19    | 924.418   | SR1       | 56388.469 | 61860.25  | BE789195    | 614.597   | 318.019   |
| NM_00455E | 2116.29   | 1556.276  | SR3       | 51596.039 | 61536.387 | M33197      | 69599.664 | 65406.938 |
| D90075    | 3912.594  | 3430.528  | SR5       | 5231.174  | 7385.411  | NM_00725E   | 2523.79   | 2337.574  |

|           |           |           |           |           |           |           |           |           |
|-----------|-----------|-----------|-----------|-----------|-----------|-----------|-----------|-----------|
| M33197    | 37696.684 | 32381.439 | SR7       | 6059.409  | 48947.543 | AK075081  | 1785.747  | 1874.657  |
| AK023827  | 2885.329  | 2559.78   | SR9       | 16935.891 | 3258.065  | NM_00089E | 5003.254  | 4912.815  |
| AK021702  | 1320.306  | 1214.662  | CY3Cy5    | 3392.717  | 193.85    | NM_00382C | 8588.391  | 6941.086  |
| NM_00388E | 1619.512  | 1753.192  | M33197    | 65699.914 | 64871.773 | NM_01591E | 1658.047  | 1385.842  |
| NM_00393E | 619.432   | 844.377   | NM_007024 | 4457.62   | 3140.901  | M33197    | 55395.281 | 62209.57  |
| M33197    | 53160.25  | 60186.48  | NM_013231 | 2499.18   | 2221.336  | NM_01651E | 4370.639  | 4031.588  |
| NM_00268E | 1838.459  | 1915.528  | NM_01210E | 3712.976  | 3375.509  | NM_00618E | 7512.759  | 7907.594  |
| NM_00441E | 3333.46   | 4032.003  | NM_006254 | 7247.913  | 4691.257  | NM_01480C | 959.381   | 888.414   |
| NM_00727E | 10376.288 | 9916.372  | X95425    | 1117.128  | 1056.782  | NM_001557 | 984.39    | 1045.983  |
| NM_00521E | 5059.7    | 5180.283  | NM_00442E | 1984.803  | 1432.53   | AF147311  | 2374.371  | 2361.723  |
| NM_00472E | 8236.109  | 8889.521  | NM_01656E | 1124.227  | 1064.03   | NM_002131 | 36109.723 | 40221.023 |
| M33197    | 28338.418 | 29848.629 | M33197    | 63371.051 | 66942.32  | NM_017927 | 989.855   | 969.882   |
| NM_01841E | 2801.61   | 2919.267  | AY009399  | 10395.633 | 8785.979  | NM_020151 | 12333.576 | 11833.086 |
| AB018299  | 24190.859 | 26356.141 | NM_00489E | 7539.28   | 5516.058  | NM_005891 | 35904.445 | 40486.145 |
| NM_00524E | 4209.04   | 3737.107  | U59748    | 1168.917  | 1154.121  | NM_00164E | 1548.609  | 1451.43   |
| M33197    | 49809.785 | 34915.113 | L32537    | 933.604   | 641.658   | NM_00395E | 1365.917  | 987.473   |
| NM_01621E | 5699.707  | 4598.053  | NM_01430E | 14941.404 | 11372.84  | M33197    | 57678.367 | 54626.398 |
| NM_004751 | 570.483   | 494.743   | NM_00311E | 7191.516  | 9287.798  | NM_00350C | 3397.966  | 2627.719  |
| AK025605  | 2527.41   | 2125.379  | L02922    | 19823.691 | 26372.119 | NM_014317 | 2572.719  | 2163.065  |
| NM_00700C | 2775.145  | 2457.974  | NM_001797 | 1527.307  | 2469.955  | L09234    | 6229.346  | 5333.005  |
| M23161    | 6033.898  | 5191.451  | NM_003154 | 2006.552  | 2410.272  | NM_00005E | 1511.718  | 1290.73   |
| NM_003197 | 3735.153  | 2966.845  | NM_00423E | 522.672   | 868.448   | AK026740  | 1056.268  | 956.013   |
| AF176705  | 2378.46   | 2249.777  | AK023459  | 2624.135  | 3191.978  | NM_017881 | 2327.903  | 2219.657  |
| D29012    | 6462.338  | 7126.753  | NM_01213E | 3704.263  | 2941.777  | M33197    | 61916.621 | 57807.113 |
| NM_017414 | 668.437   | 670.788   | AF121856  | 3133      | 2231.184  | NM_017634 | 3641.649  | 3519.903  |
| NM_01217E | 17250.512 | 16556.316 | NM_006421 | 2889.013  | 2516.562  | NM_00081E | 619.747   | 565.307   |
| NM_00279E | 4914.713  | 4878.807  | NM_017457 | 21418.637 | 14741.338 | NM_01889E | 613.654   | 671.071   |
| NM_00478E | 1607.793  | 1623.878  | NM_00376E | 10569.836 | 7488.858  | AJ300465  | 1398.908  | 1286.98   |
| M33197    | 62985.641 | 68443.539 | M33197    | 54153.449 | 43760.035 | X86400    | 854.065   | 846.591   |
| AL442083  | 2837.172  | 3425.74   | NM_01820E | 12043.042 | 8912.733  | NM_00081C | 621.302   | 941.292   |
| D63487    | 3631.177  | 3745.4    | AB023197  | 3322.079  | 2496.765  | AF069307  | 2062.893  | 2183.245  |
| AK097791  | 3878.879  | 3987.943  | NM_02217E | 5164.055  | 3503.894  | M33197    | 57650.598 | 56156.613 |
| AK022705  | 1610.35   | 1687.463  | AB040970  | 3184.764  | 2143.459  | U92978    | 2059.875  | 2456.077  |
| NM_016404 | 1989.689  | 2419.572  | NM_01833C | 3136.623  | 2506.814  | NM_00573E | 447.456   | 541.53    |
| L03426    | 1337.353  | 1289.632  | AB023222  | 785.794   | 1190.853  | NM_01448E | 674.565   | 694.873   |
| M33197    | 53080.734 | 57142.707 | M33197    | 67262.219 | 64385.477 | NM_01338E | 3781.02   | 4529.991  |
| NM_02016E | 1626.188  | 1663.66   | U50342    | 2627.565  | 3159.54   | AB014567  | 442.222   | 473.486   |
| NM_00660E | 1525.175  | 1201.492  | NM_00029E | 848.133   | 1164.749  | NM_00532E | 9530.845  | 6607.587  |
| M34356    | 1897.755  | 1643.361  | AF026932  | 1205.647  | 1918.75   | NM_01406E | 775.962   | 777.675   |
| AJ133115  | 3295.594  | 2751.253  | NM_00621E | 1419.793  | 2135.43   | AB035130  | 1455.271  | 1412.698  |
| X51630    | 6003.466  | 5077.174  | U80018    | 889.339   | 695.306   | NM_00335E | 1181.051  | 1161.665  |
| NM_00505E | 1574.915  | 1239.564  | NM_000717 | 1849.249  | 1756.58   | M33197    | 29298.773 | 29732.602 |
| AF208502  | 9425.595  | 7749.655  | M33197    | 66793.531 | 65017.977 | AK021834  | 599.458   | 519.05    |
| M33197    | 54095.508 | 49990.457 | NM_00484E | 2050.526  | 1754.739  | NM_01791E | 1038.648  | 1083.613  |
| AF264750  | 11164.56  | 11129.821 | NM_007107 | 15554.735 | 10732.218 | NM_00357E | 1078.411  | 1234.453  |
| NM_00698C | 802.789   | 831.359   | NM_000047 | 9707.613  | 7634.682  | AL049283  | 1017.884  | 1180.834  |
| AK023904  | 2932.356  | 2598.708  | M68874    | 2705.213  | 2204.165  | M33197    | 52763.91  | 53721.742 |
| NM_01795E | 3555.1    | 3555.923  | NM_00631E | 4934.737  | 3776.542  | NM_002401 | 16551.291 | 20175.967 |
| NM_01649E | 1597.778  | 1472.916  | NM_01822E | 6502.971  | 4514.808  | NM_001274 | 1035.702  | 1094.085  |
| NM_01430E | 3853.949  | 4155.801  | NM_00460E | 663.79    | 734.39    | NM_00391E | 665.45    | 407.668   |
| M33197    | 31790.947 | 36571.414 | Z36813    | 6629.1    | 3491.729  | NM_002227 | 1633.307  | 1189.788  |
| NM_004094 | 1745.396  | 1980.136  | NM_00666C | 7242.446  | 5668.688  | NM_00719E | 1816.253  | 2470.297  |
| NM_02023E | 853.678   | 1045.369  | NM_00148E | 624.777   | 762.621   | AB014530  | 5663.938  | 6685.814  |

|           |           |           |           |           |           |             |           |           |
|-----------|-----------|-----------|-----------|-----------|-----------|-------------|-----------|-----------|
| AK027059  | 4452.111  | 4894.815  | NM_004727 | 1394.021  | 1502.504  | M33197      | 54076.488 | 54256.234 |
| AF151109  | 8622.524  | 8532.634  | NM_000559 | 528.82    | 1559.378  | NM_005989   | 2317.759  | 2780.635  |
| NM_015414 | 61375.102 | 71248.086 | M33197    | 10445.32  | 12381.209 | AB014607    | 2903.274  | 2773.453  |
| L34070    | 3697.064  | 4152.035  | NM_004045 | 8943.9    | 9061.673  | AF134401    | 1227.604  | 1130.42   |
| NM_016475 | 2037.668  | 1743.344  | NM_001891 | 1987.249  | 1705.044  | NM_006387   | 3800.684  | 3667.757  |
| NM_001865 | 51344.879 | 38808.008 | NM_001440 | 30371.654 | 25581.609 | NM_005646   | 2018.567  | 1865.534  |
| NM_006441 | 2968.169  | 2672.032  | NM_001201 | 936.203   | 621.876   | NM_006639   | 2373.435  | 2706.791  |
| NM_001918 | 1660.069  | 1487.036  | NM_016618 | 2715.9    | 2176.072  | NM_001692   | 360.114   | 567.325   |
| NM_018245 | 4075.666  | 4049.378  | AB014568  | 26865.697 | 20305.779 | BI767871    | 1089.495  | 978.404   |
| M33197    | 56305.98  | 50959.113 | NM_012249 | 4422.88   | 3496.82   | AA115473    | 1788.926  | 1587.309  |
| NM_012117 | 4191.822  | 3281.401  | AK022546  | 5954.144  | 4276.613  | AA872397    | 2403.62   | 2144.829  |
| D17130    | 61442.25  | 66416.383 | NM_014067 | 7752.168  | 6770.115  | AA709414    | 2073.736  | 1632.841  |
| X76302    | 3949.192  | 3686.982  | NM_002914 | 4316.437  | 4102.919  | D12676      | 910.727   | 1183.359  |
| AK026276  | 705.408   | 815.659   | NM_020385 | 2522.655  | 1920.879  | BC012593    | 769.451   | 904.935   |
| X52354    | 947.483   | 982.146   | NM_006541 | 2944.698  | 3044.074  | NM_000939   | 10850.688 | 11594.366 |
| NM_005413 | 1081.757  | 946.424   | NM_004328 | 3229.201  | 4659.98   | NM_004295   | 4502.82   | 3887.863  |
| NM_002315 | 1152.006  | 1335.457  | NM_004581 | 5526.575  | 9815.821  | H-X 02812 I | 1410.236  | 1321.45   |
| AK024191  | 797.244   | 640.527   | NM_006817 | 25161.189 | 28464.504 | U75898      | 640.827   | 675.807   |
| D83781    | 574.688   | 644.936   | NM_015921 | 44696.762 | 51355.863 | AB011146    | 972.809   | 972.345   |
| AL832699  | 2274.368  | 1761.54   | AB040900  | 3851.944  | 4546.613  | NM_006185   | 7840.952  | 6905.794  |
| NM_012191 | 611.276   | 531.888   | NM_001482 | 805.691   | 1164.307  | NM_014800   | 752.774   | 776.188   |
| M33197    | 52207.238 | 48667.242 | NM_001797 | 1308.754  | 1384.352  | NM_001557   | 649.534   | 683.44    |
| AK000757  | 509.654   | 543.18    | NM_003154 | 2000.296  | 1413.941  | AF147311    | 1863.486  | 2147.987  |
| AL359577  | 1000.772  | 742.285   | AK023459  | 3698.372  | 3152.795  | NM_002131   | 31823.506 | 36970.363 |
| NM_018139 | 1159.943  | 965.647   | U13022    | 1323.889  | 879.638   | NM_017927   | 1052.196  | 933.15    |
| NM_014805 | 2622.867  | 2414.644  | R23251    | 25535.238 | 21028.893 | M33197      | 62916.594 | 61008.258 |
| AF052120  | 1577.934  | 1706.223  | BG763477  | 1595.308  | 1007.706  | NM_001203   | 1699.053  | 1197.545  |
| NM_014871 | 1692.022  | 1647      | AA702640  | 1894.21   | 1719.709  | NM_004799   | 9410.229  | 6488.665  |
| M33197    | 53774.57  | 57143.391 | T68583    | 3088.999  | 2949.504  | NM_006733   | 657.198   | 643.778   |
| AL137552  | 691.491   | 816.811   | AA481944  | 22611.842 | 17342.662 | NM_014047   | 8093.998  | 8553.989  |
| AK025794  | 2233.419  | 2516.356  | X14390    | 1123.19   | 887.502   | AK022901    | 954.92    | 977.237   |
| AK024522  | 817.039   | 1111.38   | M31158    | 1011.59   | 865.988   | M33197      | 63468.277 | 59587.559 |
| M33197    | 48980.156 | 51148.008 | H00742    | 1450.401  | 1654.65   | AF037332    | 2449.051  | 2371.659  |
| M33197    | 53381.633 | 38896.535 | D42108    | 656.275   | 691.271   | NM_014571   | 636.386   | 292.134   |
| AK024981  | 8099.861  | 6210.712  | BG700922  | 724.253   | 1087.164  | NM_006052   | 730.397   | 459.534   |
| AK027246  | 738.137   | 683.797   | AI366068  | 27440.938 | 33083.816 | AB040912    | 2226.936  | 1862.706  |
| U80766    | 2896.236  | 2173.154  | AF080158  | 1913.692  | 2005.151  | NM_006243   | 2891.154  | 2978.44   |
| AK001638  | 796.808   | 671.683   | BM664556  | 672.311   | 850.759   | M33197      | 61885.461 | 63041.422 |
| AF161386  | 5025.078  | 4100.241  | M33197    | 56828.281 | 60593.633 | AJ011129    | 954.151   | 839.726   |
| AL365369  | 2623.04   | 2216.99   | NM_016545 | 1751.079  | 1832.832  | M33197      | 55357.207 | 53370.359 |
| AK025454  | 2717.568  | 2583.171  | NM_000295 | 912.965   | 839.281   | U92978      | 1515.93   | 1374.121  |
| M33197    | 43347.137 | 36407.086 | AF103795  | 705.667   | 494.819   | NM_005738   | 436.536   | 645.516   |
| X05826    | 4227.938  | 3711.424  | M33197    | 70309.43  | 64660.914 | NM_014488   | 295.398   | 577.17    |
| Y11608    | 437.839   | 388.883   | NM_007024 | 5294.476  | 3981.03   | NM_013389   | 2935.916  | 3299.42   |
| AJ001872  | 2260.378  | 2276.302  | NM_013231 | 3641.341  | 3003.259  | AK022817    | 1043.652  | 830.118   |
| M33197    | 58310.969 | 60116.992 | NM_012106 | 4254.782  | 3339.938  | NM_018034   | 4013.324  | 3347.834  |
| NM_005598 | 1123.434  | 1076.377  | NM_006254 | 7599.234  | 5081.516  | M33197      | 61859.98  | 60142.988 |
| Y10515    | 508.322   | 510.354   | X95425    | 1719.834  | 1394.05   | AB037831    | 755.266   | 845.893   |
| AK023636  | 5769.754  | 6803.038  | NM_004422 | 1868.293  | 1163.32   | NM_012103   | 12212.838 | 16073.099 |
| D25272    | 1739.372  | 1917.065  | NM_016562 | 1100.023  | 987.675   | AL122077    | 7971.571  | 9613.985  |
| M33197    | 53969.711 | 54739.824 | M33197    | 66664.875 | 64269.496 | NM_014632   | 474.697   | 725.261   |
| NM_020168 | 1323.453  | 1273.174  | AY009399  | 10123.419 | 8841.815  | NM_006422   | 849.299   | 1048.624  |
| AK025931  | 35475.402 | 24843.012 | NM_004895 | 9299.565  | 10852.296 | BE789195    | 544.318   | 522.016   |

|           |           |           |           |           |           |           |           |           |
|-----------|-----------|-----------|-----------|-----------|-----------|-----------|-----------|-----------|
| M33197    | 58596.668 | 58202.242 | U59748    | 1461.855  | 1318.398  | NM_01694E | 1810.113  | 1642.32   |
| AK001083  | 778.823   | 939.896   | L32537    | 690.973   | 892.41    | M33197    | 63773.551 | 62555.863 |
| AK000185  | 1120.234  | 1231.227  | NM_014303 | 15485.19  | 15274.787 | NM_00725E | 1735.32   | 1588.504  |
| NM_017962 | 487.178   | 493.058   | M33197    | 59973.152 | 58961.059 | AK075081  | 1548.001  | 1825.193  |
| NM_017834 | 543.622   | 515.52    | M95610    | 10615.166 | 8292.919  | NM_00089E | 5650.46   | 6229.495  |
| AK000865  | 647.638   | 656.131   | NM_003118 | 3445.28   | 2788.362  | NM_00382C | 11079.576 | 10419.163 |
| M33197    | 56788.516 | 59401.844 | L02922    | 10070.471 | 8603.488  | NM_01591E | 1678.192  | 1497.899  |
| AK024779  | 792.365   | 834.708   | M33197    | 14880.931 | 10276.711 | NM_01651E | 3296.95   | 2792.685  |
| AK024406  | 548.957   | 561.816   | NM_00404E | 12173.377 | 8344.812  | AB014530  | 4190.436  | 3588.414  |
| AK024568  | 6143.516  | 6235.251  | NM_001891 | 1795.119  | 1375.418  | M33197    | 58707.23  | 54205.219 |
| M33197    | 55468.781 | 43252.906 | NM_01213E | 4642.366  | 3902.742  | NM_00598E | 2019.29   | 2183.668  |
| AK026277  | 4057.467  | 2877.76   | AF121856  | 3095.159  | 2363.765  | AB014607  | 2763.265  | 2541.996  |
| U10509    | 1028.733  | 824.623   | NM_006421 | 3397.935  | 2888.791  | AF134401  | 1304.051  | 1500.267  |
| NM_00716E | 18973.561 | 16074.871 | NM_017457 | 20984.289 | 13094.914 | NM_020151 | 9503.209  | 9500.069  |
| NM_01401E | 1959.604  | 1516.687  | NM_00376E | 6285.633  | 4974.606  | NM_005891 | 33638.281 | 34560.18  |
| AF085956  | 1124.435  | 904.925   | M33197    | 55238.988 | 56048.988 | NM_00164E | 1470.843  | 1185.862  |
| NM_01911E | 598.909   | 723.683   | NM_018202 | 11429.876 | 7384.352  | NM_00395E | 1542.679  | 1265.694  |
| AF147318  | 1122.035  | 1426.789  | AB023197  | 2698.613  | 2315.013  | M33197    | 55940.77  | 53616.133 |
| M33197    | 56072.309 | 57018.117 | NM_022173 | 3868.494  | 3451.624  | NM_00350C | 2768.809  | 3687.376  |
| AL137556  | 941.53    | 881.939   | AB040970  | 2379.796  | 2117.453  | NM_014317 | 2465.633  | 3009.07   |
| NM_01469E | 3967.396  | 3791.896  | NM_01833C | 2151.638  | 1682.036  | L09234    | 6152.967  | 6946.145  |
| AL359055  | 956.792   | 936.195   | M33197    | 51341.438 | 46018.695 | NM_00005E | 1171.399  | 1317.52   |
| NM_01490E | 1129.497  | 1040.151  | U50342    | 998.933   | 1243.079  | AK026740  | 603.789   | 700.18    |
| AF086125  | 1122.653  | 833.064   | NM_015921 | 52126.867 | 37124.508 | NM_017881 | 1862.616  | 1854.996  |
| AK023547  | 737.969   | 478.437   | AB040900  | 19485.414 | 13901.582 | M33197    | 57958.219 | 55483.793 |
| U67847    | 940.895   | 959.317   | NM_00108C | 721.648   | 697.952   | NM_017634 | 3378.914  | 3583.4    |
| AL137321  | 2680.14   | 2237.984  | NM_001482 | 1508.28   | 1158.341  | NM_00081E | 539.992   | 667.482   |
| M33197    | 49710.406 | 39009.348 | U80018    | 808.368   | 920.826   | NM_01889E | 1289.434  | 1208.864  |
| AK024207  | 1385.365  | 965.34    | NM_000717 | 2104.192  | 1958.848  | AJ300465  | 2944.125  | 3365.196  |
| AK021843  | 583.004   | 422.738   | M33197    | 67065.953 | 64229.348 | X86400    | 989.445   | 812.045   |
| AF075025  | 2913.951  | 2665.648  | NM_00484E | 2985.479  | 1771.424  | AF069307  | 2323.355  | 1977.424  |
| AF088008  | 1483.144  | 1527.034  | NM_007107 | 14546.682 | 11026.357 | M33197    | 702.585   | 354.933   |
| AK023528  | 1127.544  | 1406.984  | NM_000047 | 3929.585  | 3404.86   | AB011146  | 1382.98   | 1210.609  |
| M33197    | 52831.555 | 59110.672 | M68874    | 2358.536  | 2074.868  | NM_00532E | 11584.674 | 10093.69  |
| AF147349  | 4418.756  | 4730.105  | NM_00631E | 5728.013  | 4749.269  | NM_01406E | 1059.319  | 1201.819  |
| AL050346  | 16066.438 | 16676.986 | NM_01822E | 6660.214  | 4513.082  | AB035130  | 1249.701  | 1534.144  |
| AK001520  | 4939.985  | 6378.759  | NM_00460E | 893.869   | 659.302   | NM_00335E | 1272.544  | 1520.451  |
| AK021731  | 382.391   | 571.31    | Z36813    | 5462.269  | 4953.19   | M33197    | 30768.006 | 36779.555 |
| D90070    | 3994.15   | 4482.964  | NM_00666C | 5983.841  | 4812.77   | AF119917  | 591.373   | 572.183   |
| M33197    | 29429.41  | 27417.029 | NM_00668E | 18172.82  | 26814.951 | NM_01791E | 545.353   | 476.136   |
| AK025807  | 1124.117  | 997.956   | AF080158  | 2363.001  | 1736.242  | AK021513  | 693.357   | 611.637   |
| M33197    | 72003.789 | 60147.719 | BM664556  | 1122.379  | 965.782   | NM_00357E | 1465.806  | 1269.281  |
| AK025266  | 2445.326  | 1805.336  | M33197    | 68005.625 | 64587.203 | AL049283  | 1321.364  | 1168.173  |
| AK001843  | 2488.774  | 2148.014  | NM_01654E | 2354.411  | 1971.497  | M33197    | 42513.547 | 52916.621 |
| AK000548  | 29447.172 | 20373.23  | NM_00144C | 31275.205 | 25484.869 | NM_002401 | 27455.801 | 39316.113 |
| NM_00392C | 6899.155  | 5191.169  | NM_001201 | 701.5     | 813.25    | NM_001274 | 1851.952  | 2050.106  |
| NM_004787 | 9981.226  | 8298.82   | NM_01661E | 2724.271  | 2531.548  | NM_00391E | 1161.8    | 961.146   |
| AF087984  | 3688.745  | 3178.319  | AB014568  | 31869.861 | 24372.793 | NM_002227 | 2142.704  | 1883.957  |
| M33197    | 53982.359 | 43221.953 | NM_01224E | 4989.368  | 3173.297  | NM_00719E | 3136.162  | 3276.503  |
| AK022273  | 1558.28   | 1374.708  | AK022546  | 4831.562  | 4121.367  | NM_00624E | 4185.95   | 3680.792  |
| NM_01588E | 624.728   | 793.954   | NM_014067 | 6497.256  | 6026.777  | M33197    | 62050.078 | 60999.961 |
| AK024271  | 1150.246  | 1041.104  | NM_002914 | 5310.434  | 6468.373  | AJ011129  | 1107.47   | 1300.088  |
| AK021650  | 3714.683  | 5538.77   | NM_02038E | 2648.912  | 2270.615  | NM_00103E | 519.783   | 364.352   |

|           |           |           |           |           |           |             |           |           |
|-----------|-----------|-----------|-----------|-----------|-----------|-------------|-----------|-----------|
| AL050210  | 3262.737  | 4015.596  | NM_006541 | 1299.188  | 1395.32   | NM_006387   | 3647.861  | 3515.733  |
| L37699    | 2161.171  | 2042.746  | NM_004328 | 2252.865  | 2643.754  | NM_005646   | 1966.021  | 1974.883  |
| M33197    | 59341.84  | 65258.543 | NM_004581 | 3952.819  | 5082.458  | NM_006639   | 2887.544  | 2167.887  |
| AL050173  | 2037.301  | 2468.218  | NM_006817 | 22817.48  | 32826.133 | NM_001692   | 435.528   | 678       |
| D80002    | 2031.605  | 1891.84   | NM_007108 | 8891.979  | 13936.903 | BI767871    | 1241.626  | 1366.152  |
| U17637    | 6075.891  | 7293.687  | M33197    | 65465.156 | 66322.703 | AA418907    | 528.591   | 591.18    |
| AF207831  | 656.246   | 770.879   | M95610    | 19169.1   | 14643.113 | AA115473    | 1434.041  | 1534.498  |
| NM_003548 | 830.089   | 759.059   | NM_003118 | 7177.817  | 4596.656  | AA872397    | 829.262   | 1006.252  |
| M33197    | 38112.801 | 29900.396 | L02922    | 21710.33  | 14293.953 | AA709414    | 853.377   | 952.698   |
| NM_018272 | 2863.756  | 2388.018  | NM_001797 | 1694.986  | 1664.793  | D12676      | 1069.13   | 867.392   |
| CY3Cy5    | 1911.897  | 114.408   | NM_003154 | 2208.751  | 1583.917  | BC012593    | 612.635   | 655.957   |
| R19938    | 3848.914  | 2441.616  | AK023459  | 3063.95   | 2717.892  | NM_000939   | 13511.07  | 12722.923 |
| N94487    | 8708.471  | 6615.467  | U13022    | 974.153   | 594.053   | NM_004295   | 5701.168  | 7398.105  |
| AI886795  | 3093.156  | 2523.948  | R23251    | 21641.676 | 15261.854 | H-X 02812 I | 1990.687  | 2711.88   |
| D10495    | 3933.005  | 3177.586  | BG763477  | 1886.609  | 1647.907  | U75898      | 1627.904  | 2044.456  |
| BF344679  | 1637.232  | 2009.599  | AA702640  | 2707.89   | 4452.291  | M29039      | 715.574   | 858.882   |
| M36634    | 643.254   | 799.743   | T68583    | 4951.679  | 8353.344  | M59815      | 809.573   | 859.736   |
| M14156    | 2495.832  | 2755.722  | AA481944  | 37806.594 | 59998.141 | AK075081    | 2018.235  | 2062.996  |
| U87939    | 1096.463  | 988.49    | X14390    | 1674.559  | 2452.206  | NM_000895   | 5270.027  | 4754.426  |
| U86961    | 891.31    | 659.805   | AF038440  | 1248.006  | 1578.262  | NM_003820   | 10011.729 | 9995.367  |
| AK094237  | 1363.802  | 1512.125  | M31158    | 1186.756  | 1727.212  | NM_015915   | 1124.091  | 1292.456  |
| L07592    | 1877.072  | 2243.402  | D42108    | 933.274   | 692.734   | M33197      | 49942.57  | 59545.969 |
| NM_006981 | 878.736   | 800.267   | BG700922  | 780.399   | 886.008   | NM_016518   | 3384.814  | 3570.404  |
| SR2       | 51189.332 | 46674.879 | AI366068  | 22273.863 | 26749.879 | NM_006185   | 6186.364  | 6002.595  |
| SR4       | 13882.615 | 11239.339 | AB040970  | 3763.052  | 2505.077  | NM_014800   | 797.673   | 783.339   |
| SR6       | 2022.787  | 1796.194  | NM_018330 | 3244.691  | 2319.463  | NM_001557   | 817.12    | 748.368   |
| SR8       | 8184.115  | 23501.635 | AB023222  | 610.631   | 754.615   | AF147311    | 2473.315  | 2862.555  |
| SR10      | 27115.561 | 11178.39  | AB033088  | 1057.09   | 817.984   | NM_002131   | 41828.23  | 49380.945 |
| CY3Cy5    | 2717.43   | 105.51    | M33197    | 70333.102 | 56545.262 | NM_017927   | 1351.443  | 1254.411  |
| M33197    | 58940.844 | 59221.668 | U50342    | 2928.572  | 1860.598  | M33197      | 68449.883 | 63992.133 |
| NM_007369 | 957.416   | 686.928   | NM_000295 | 968.94    | 822.509   | NM_001203   | 1510.825  | 1458.717  |
| NM_014776 | 1926.943  | 1630.531  | AF103795  | 471.394   | 536.812   | NM_004799   | 4413.891  | 3773.934  |
| NM_006480 | 21957.705 | 21095.916 | NM_013231 | 3854.224  | 5954.379  | NM_014047   | 3554.305  | 2985.522  |
| NM_007223 | 30992.846 | 31116.783 | NM_012106 | 5129.227  | 7225.019  | AK022901    | 929.391   | 805.263   |
| NM_000145 | 864.126   | 816.44    | NM_006254 | 8974.769  | 13273.006 | M33197      | 62262.574 | 64557.996 |
| AF030107  | 1151.831  | 1311.166  | X95425    | 2027.159  | 3378.154  | AF037332    | 3034.293  | 3514.602  |
| NM_000871 | 888.725   | 1048.886  | NM_004422 | 2550.526  | 4931.066  | NM_014571   | 409.115   | 764.463   |
| M33197    | 58188.781 | 56041.133 | NM_016562 | 1875.154  | 2932.429  | NM_006052   | 769.908   | 995.119   |
| NM_018968 | 913.93    | 647.267   | M33197    | 68718.203 | 64490.824 | AB040912    | 7955.927  | 9314.245  |
| AF086924  | 42500.75  | 41629.363 | AY009399  | 9742.386  | 8833.372  | NM_003871   | 701.453   | 652.656   |
| NM_000264 | 624.695   | 591.648   | U59748    | 1709.566  | 3374.797  | NM_000813   | 588.25    | 631.036   |
| AB058740  | 6115.829  | 5738.66   | NM_014303 | 8508.748  | 9019.771  | NM_018896   | 816.898   | 676.264   |
| NM_003385 | 377.716   | 545.826   | NM_006660 | 7576.976  | 5138.289  | AJ300465    | 1197.229  | 1345.945  |
| NM_004392 | 713.5     | 926.5     | NM_004727 | 758.258   | 579.11    | X86400      | 941.702   | 893.702   |
| M33197    | 61168.199 | 63562.719 | NM_006685 | 44041.688 | 30941.584 | NM_000810   | 828.555   | 858.605   |
| NM_001154 | 6858.084  | 6457.131  | M33197    | 14036.016 | 9876.107  | AF069307    | 2114.459  | 1908.125  |
| NM_001819 | 1485.772  | 1180.389  | NM_004045 | 10540.293 | 7587.312  | M33197      | 56827.453 | 54512.008 |
| NM_016938 | 389.164   | 525.074   | NM_001891 | 1528.914  | 1005.881  | U92978      | 2091.12   | 1880.565  |
| NM_001993 | 858.335   | 1131.288  | NM_012139 | 5574.397  | 7807.167  | NM_005738   | 798.717   | 958.531   |
| BF575833  | 581.64    | 580.767   | AF121856  | 3475.002  | 4189.494  | NM_014488   | 635.513   | 1104.492  |
| NM_000175 | 737.339   | 750.943   | NM_006421 | 4066.604  | 6524.653  | NM_013389   | 3690.77   | 4146.754  |
| NM_015725 | 6618.891  | 6698.274  | NM_017457 | 26554.473 | 38501.379 | AB014567    | 588.299   | 673.68    |
| R61452    | 2028.506  | 2320.368  | NM_003765 | 13162.461 | 25346.723 | AK022817    | 1054.849  | 1428.272  |

|           |           |           |           |           |           |           |           |           |
|-----------|-----------|-----------|-----------|-----------|-----------|-----------|-----------|-----------|
| NM_01245E | 4261.256  | 5138.761  | NM_01820E | 10986.935 | 11461.971 | NM_01803A | 4057.662  | 4105.016  |
| NM_00280E | 8324.508  | 7434.463  | AB023197  | 2302.635  | 3179.805  | M33197    | 56914.836 | 61236.148 |
| M33197    | 62360.027 | 59982.781 | NM_02217E | 3417.703  | 3472.518  | NM_01210E | 3570.794  | 3532.122  |
| NM_00171E | 767.029   | 989.678   | M33197    | 68836.969 | 64569.43  | AL122077  | 4227.947  | 4862.807  |
| NM_00656A | 5161.299  | 5412.181  | NM_00570E | 6599.732  | 5053.46   | NM_01463E | 428.068   | 420.331   |
| NM_00480E | 1113.402  | 1197.161  | NM_00432E | 2761.15   | 2416.245  | NM_00642E | 962.768   | 1009.653  |
| M33197    | 60419.621 | 61055.02  | NM_00458I | 4333.133  | 3459.981  | NM_01694E | 2185.643  | 1760.847  |
| NM_00298E | 944.973   | 532.628   | NM_006817 | 27219.002 | 20115.008 | M33197    | 64136.105 | 67254.727 |
| NM_00007A | 4393.174  | 4499.354  | NM_00710E | 13835.089 | 11075.238 | NM_00725E | 2191.154  | 2050.838  |
| BF434335  | 19235.383 | 27288.416 | NM_01592I | 48094.188 | 31710.523 | NM_01840E | 690.192   | 834.372   |
| NM_00299E | 1976.932  | 2337.042  | AB040900  | 16941.869 | 12796.283 | M33197    | 54709.004 | 50981.93  |
| AK026946  | 1927.913  | 2635.053  | NM_00108C | 404.974   | 496.294   | NM_00240I | 18429.832 | 19768.313 |
| M33197    | 57451.563 | 59009.434 | NM_00148E | 1798.359  | 1256.475  | NM_00127A | 1243.39   | 1242.678  |
| NM_00319E | 4993.675  | 4112.995  | U80018    | 917.701   | 1804.81   | NM_00391E | 715.75    | 730.033   |
| NM_01844E | 3849.718  | 3538.749  | NM_000717 | 1871.867  | 2548.335  | NM_002227 | 1519.104  | 1107.684  |
| AF086129  | 866.672   | 922.192   | M33197    | 65586.984 | 68809.688 | NM_00719E | 2053.568  | 1941.512  |
| D79994    | 1059.507  | 908.865   | NM_00484E | 3459.254  | 5180.561  | AB002301  | 798.625   | 348.721   |
| NM_01445E | 3373.424  | 3213.585  | NM_007107 | 18562.227 | 28526.059 | AB014530  | 6558.889  | 7272.325  |
| AF235049  | 3757.876  | 4217.789  | NM_000047 | 16958.42  | 30000.188 | AB014607  | 4177.709  | 4181.018  |
| NM_00516A | 761.441   | 1443.368  | M68874    | 3960.357  | 5768.04   | AF134401  | 1625.531  | 2117.129  |
| NM_00199E | 2067.965  | 2854.557  | NM_00631E | 4001.807  | 4141.412  | NM_02015I | 8813.898  | 11787.133 |
| NM_00018E | 12530.989 | 9930.099  | NM_01822E | 6437.21   | 9186.582  | NM_00589I | 24979.455 | 31090.033 |
| AY004175  | 1590.599  | 1331.167  | Z36813    | 3537.033  | 4295.783  | NM_00164E | 1483.92   | 1612.531  |
| M33197    | 60857.441 | 58587.383 | AB018327  | 2265.63   | 2235.056  | NM_00395E | 1255.403  | 1351.918  |
| NM_012327 | 2732.952  | 2942.417  | AF303889  | 778.124   | 632.337   | M33197    | 57322.738 | 53616.668 |
| NM_00090A | 1079.611  | 1264.635  | M33197    | 63941.246 | 63018.977 | NM_00350C | 759.02    | 616.856   |
| NM_01604E | 1401.292  | 1759.351  | AK022649  | 3929.105  | 3548.786  | NM_014317 | 852.415   | 861.03    |
| NM_00037E | 7476.075  | 7133.854  | NM_016507 | 3751.282  | 3145.7    | L09234    | 5630.347  | 8014.929  |
| NM_00026E | 6726.387  | 7422.713  | NM_00202A | 3650.265  | 3114.977  | NM_00005E | 940.515   | 1245.241  |
| NM_01884E | 5997.733  | 8523.959  | NM_00274E | 13137.445 | 11044.987 | AK026740  | 727.119   | 737.505   |
| M33197    | 49695.008 | 45179.883 | AF173358  | 7106.642  | 5786.401  | NM_01788I | 1693.655  | 1989.851  |
| M16796    | 418.61    | 1247.084  | NM_01636E | 1100.265  | 672.185   | M33197    | 64639.578 | 60426.375 |
| AF279890  | 3742.917  | 5816.071  | M33197    | 65517.289 | 68096.258 | NM_01763A | 3944.675  | 3871.012  |
| NM_00223E | 2920.562  | 4386.146  | NM_01654E | 2421.991  | 4179.5    | NM_01774E | 1393.634  | 1346.605  |
| NM_01206E | 3098.99   | 3158.283  | NM_00144C | 26974.098 | 40244.277 | NM_00030C | 3416.104  | 3666.756  |
| NM_00168E | 45994.426 | 49156.379 | NM_00120I | 1196.031  | 1326.436  | M33197    | 63426.117 | 57463.293 |
| NM_01660I | 1257.429  | 1495.932  | NM_01661E | 2767.079  | 3276.771  | AV756917  | 2733.143  | 2769.436  |
| NM_01790E | 7541.332  | 5852.661  | AB014568  | 41058.68  | 54447.641 | NM_01838C | 4852.667  | 4868.007  |
| M33197    | 61159.688 | 57309.941 | AK022238  | 813.272   | 2026.124  | AK001442  | 876.178   | 1063.267  |
| NM_00681E | 18769.393 | 14910.814 | NM_01224E | 6657.806  | 8202.095  | NM_01207C | 2424.151  | 2224.319  |
| NM_00166E | 4891.717  | 4261.094  | AK022546  | 8400.992  | 12699.529 | NM_01903E | 1048.792  | 895.431   |
| NM_00421E | 6579.091  | 5933.208  | NM_014067 | 11248.734 | 21532.184 | AB011146  | 801.716   | 1157.604  |
| NM_01653C | 1492.918  | 1187.197  | NM_00291A | 4403.417  | 5240.94   | NM_00532E | 8479.314  | 11097.38  |
| NM_01480A | 1003.545  | 1075.106  | NM_02038E | 2154.819  | 2280.102  | NM_01406E | 1165.4    | 1578.319  |
| L40520    | 6013.183  | 10164.073 | NM_00654I | 707.213   | 1122.248  | AB035130  | 1535.122  | 1662.174  |
| NM_00263E | 6630.362  | 5679.81   | NM_01817E | 1418.234  | 1030.893  | NM_00335E | 871.888   | 844.225   |
| M33197    | 55695.703 | 53122.66  | NM_006197 | 5306.35   | 2229.211  | M33197    | 18797.025 | 17806.252 |
| NM_00287E | 3761.867  | 6205.213  | M29273    | 1133.834  | 990.479   | AF119917  | 454.395   | 578.516   |
| NM_01772E | 2981.57   | 2841.486  | M33197    | 63248.941 | 61775.887 | AL050097  | 449.267   | 616.556   |
| AK022922  | 1787.804  | 1804.457  | NM_00485A | 1962.99   | 1667.048  | NM_00357E | 1103.537  | 1366.245  |
| NM_00646E | 4890.621  | 3602.097  | AJ245418  | 4098.237  | 4036.377  | AL049283  | 933.315   | 751.05    |
| AK024750  | 2548.993  | 2012.467  | NM_006377 | 3979.366  | 3101.547  | AF005258  | 798.983   | 849.542   |
| NM_00040C | 18222.65  | 18384.889 | AK026427  | 605.902   | 710.287   | NM_000887 | 781.285   | 929.567   |

|           |           |           |           |           |           |           |           |           |
|-----------|-----------|-----------|-----------|-----------|-----------|-----------|-----------|-----------|
| M33197    | 58851.559 | 58085.16  | NM_002436 | 3389.027  | 5121.582  | M33197    | 64068.742 | 56353.102 |
| NM_002613 | 2993.887  | 4138.555  | NM_018362 | 6070.885  | 6515.37   | X99659    | 41963.645 | 42738.832 |
| NM_004419 | 2856.925  | 3635.331  | M33197    | 65998.664 | 64705.91  | NM_015416 | 4195.662  | 3851.688  |
| U47635    | 2614.036  | 2252.221  | NM_004755 | 1680.362  | 2211.533  | NM_002731 | 895.695   | 725.793   |
| NM_018650 | 1757.603  | 2176.664  | NM_002186 | 5641.82   | 8806.386  | NM_003899 | 2579.307  | 2245.801  |
| AK026945  | 24653.6   | 23515.625 | NM_006182 | 2163.875  | 2401.865  | X99662    | 3126.219  | 3182.607  |
| NM_002828 | 1561.394  | 1265.348  | AL137543  | 6753.185  | 10457.149 | NM_003473 | 33738.516 | 32916.395 |
| NM_014369 | 1441.374  | 1473.632  | NM_004444 | 12542.788 | 17307.609 | NM_014325 | 2055.957  | 2140.7    |
| M33197    | 58440.348 | 56415.281 | NM_001957 | 2646.872  | 3266.946  | M33197    | 63253.992 | 56345.656 |
| NM_001398 | 18740.602 | 14288.427 | AK024533  | 13098.797 | 18983.611 | NM_017753 | 260.264   | 605.614   |
| AB050049  | 5055.844  | 4815.964  | NM_002736 | 14598.742 | 12936.464 | NM_012453 | 516.268   | 592.266   |
| J05125    | 620.017   | 771.467   | NM_004246 | 2690.028  | 2812.468  | NM_006016 | 40260.391 | 43743.234 |
| NM_001993 | 554.798   | 927.31    | NM_002285 | 1767.593  | 1293.291  | NM_001242 | 1381.677  | 1677.634  |
| NM_015725 | 4864.354  | 3789.03   | NM_006694 | 24783.23  | 20115.311 | NM_014891 | 4615.567  | 5526.922  |
| R61452    | 1209.604  | 1641.329  | NM_005207 | 2139.006  | 1715.548  | NM_013392 | 4600.062  | 4415.102  |
| R19938    | 3600.225  | 3947.75   | NM_003087 | 1558.782  | 1578.812  | M33197    | 59842.008 | 56085.313 |
| N94487    | 8595.125  | 12046.496 | NM_001630 | 2108.751  | 2070.518  | AF052692  | 1155.071  | 1336.651  |
| AI886795  | 2843.156  | 3188.176  | M33197    | 66929.906 | 64884.652 | NM_002820 | 653.445   | 655.462   |
| D10495    | 2930.16   | 3285.649  | NM_002031 | 891.524   | 659.372   | NM_005228 | 1219.38   | 1573.999  |
| BF344679  | 1068.018  | 1015.496  | AF305081  | 5821.784  | 6597.453  | NM_002354 | 1154.595  | 852.047   |
| M36634    | 415.121   | 456.827   | NM_004712 | 13494.979 | 18950.92  | NM_000179 | 864.064   | 902.848   |
| M14156    | 1305.574  | 1078.204  | AF118078  | 3043.645  | 4287.735  | AF062739  | 1391.193  | 1479.697  |
| U87939    | 888.681   | 785.662   | NM_020169 | 908.11    | 1138.112  | NM_006602 | 2644.33   | 3288.079  |
| U86961    | 752.285   | 669.518   | AL157428  | 1310.052  | 1647.126  | M33197    | 59389.98  | 55470.652 |
| AK094237  | 2508.612  | 4336.026  | M33197    | 65552.023 | 72782.844 | AL079314  | 5175.402  | 6200.209  |
| L07592    | 1619.439  | 1656.296  | BE904175  | 974.5     | 1090.374  | NM_001260 | 1762.729  | 1474.604  |
| NM_006981 | 615.197   | 418.428   | NM_005858 | 4665.537  | 6814.168  | NM_001950 | 4997.079  | 6551.407  |
| M33197    | 59488.793 | 58080.727 | AK025163  | 3036.948  | 4116.168  | AK026364  | 1137.481  | 1394.574  |
| AK027244  | 2183.551  | 2171.329  | NM_014931 | 6960.023  | 9677.848  | NM_018117 | 1175.741  | 970.183   |
| NM_018449 | 3748.567  | 2984.201  | NM_014487 | 4400.389  | 5368.608  | NM_006999 | 642.437   | 764.217   |
| AF086129  | 705.266   | 603.166   | NM_018070 | 4812.415  | 6808.076  | M33197    | 54941.926 | 55630.18  |
| D79994    | 1102.071  | 687.747   | NM_002484 | 3369.083  | 2790.12   | NM_004331 | 4537.234  | 4763.83   |
| NM_014458 | 3317.14   | 4064.61   | M33197    | 43797.188 | 48805.313 | NM_015703 | 3592.314  | 4201.474  |
| AF235049  | 4428.341  | 5206.208  | NM_018240 | 62242.371 | 65313.293 | AB018337  | 1295.006  | 1416.003  |
| M33197    | 59385.781 | 58812.496 | AK025941  | 1456.494  | 1606.616  | NM_014489 | 623.956   | 750.442   |
| NM_007369 | 614.564   | 667.839   | M33197    | 62979.574 | 60379.012 | AK025273  | 1752.667  | 2287.91   |
| NM_014776 | 1447.648  | 1327.591  | NM_015914 | 2051.498  | 1711.529  | M33197    | 43048.84  | 53698.211 |
| NM_006480 | 19217.471 | 14695.087 | AF059531  | 5491.277  | 4354.26   | NM_002205 | 3025.506  | 2984.585  |
| NM_007223 | 22598.164 | 15650.869 | NM_002707 | 12900.311 | 10770.998 | M33197    | 56304.422 | 53404.566 |
| NM_000145 | 554.968   | 378.592   | NM_003352 | 1474.823  | 1037.988  | NM_001911 | 25706.268 | 35370.262 |
| AF030107  | 804.259   | 598.207   | AK026884  | 14101.941 | 22950.545 | NM_000537 | 324.87    | 750.113   |
| NM_000871 | 783.526   | 440.767   | S82198    | 2199.365  | 2939.221  | NM_006503 | 1075.728  | 979.437   |
| M33197    | 60907.047 | 56684.02  | NM_002594 | 5055.23   | 6256.35   | M33197    | 808.537   | 695.868   |
| NM_018968 | 856.553   | 1093.045  | NM_001159 | 1320.716  | 1592.312  | AB020698  | 738.319   | 515.121   |
| AF086924  | 52744.125 | 55991.066 | NM_031407 | 4445.106  | 5041.485  | U68382    | 1799.906  | 1492.707  |
| NM_000264 | 622.24    | 466.56    | M33197    | 60460.832 | 64785.656 | NM_003969 | 1687.111  | 1550.07   |
| AB058740  | 7410.239  | 6890.208  | D86982    | 777.157   | 1145.846  | NM_004651 | 1199.935  | 1646.094  |
| NM_003385 | 619.21    | 767.883   | NM_005619 | 4017.297  | 4933.242  | M33197    | 50880.977 | 55309.313 |
| NM_004392 | 829.009   | 508.154   | D87440    | 3536.295  | 4722.731  | NM_017569 | 2194.03   | 2705.298  |
| M33197    | 60382.727 | 58980.508 | AK000332  | 16478.324 | 23589.727 | NM_002906 | 1556.575  | 1596.784  |
| NM_001154 | 6794.569  | 6332.522  | AL080156  | 1278.388  | 847.167   | AK024480  | 722.913   | 902.312   |
| NM_001819 | 1372.254  | 1505.172  | NM_006738 | 839.224   | 1132.353  | Y13871    | 6410.655  | 8561.683  |
| M33197    | 64202.805 | 57039.777 | NM_002895 | 935.959   | 766.836   | AL137725  | 4512.261  | 5456.6    |

|           |           |           |           |           |           |           |           |           |
|-----------|-----------|-----------|-----------|-----------|-----------|-----------|-----------|-----------|
| NM_00681E | 19663.604 | 21978.535 | NM_013351 | 15297.104 | 12592.875 | AJ008151  | 7934.252  | 7695.673  |
| NM_00166E | 6947.669  | 9948.542  | NM_01234C | 2781.063  | 2478.656  | AK024149  | 1277.84   | 1207.578  |
| NM_00421E | 7164.081  | 9075.478  | NM_006022 | 942.714   | 1252.286  | AK023094  | 791.025   | 681.227   |
| NM_01653C | 1282.284  | 1229.44   | AK025110  | 2308.409  | 1612.301  | M33197    | 48870.742 | 48677.098 |
| NM_014804 | 1237.031  | 1339.252  | X52339    | 55233.852 | 54452.426 | NM_004091 | 2133.253  | 2198.791  |
| NM_01245E | 3297.563  | 3963.993  | M33197    | 59494.023 | 64693.289 | X74070    | 60254.754 | 52234.551 |
| NM_00280E | 7592.428  | 5506.987  | AB046830  | 5505.338  | 6692.694  | AF027219  | 1275.118  | 1093.077  |
| NM_00171E | 597.447   | 620.976   | NM_007122 | 4317.773  | 4320.721  | NM_00633E | 2776.375  | 2496.532  |
| NM_006564 | 4293.135  | 2944.851  | NM_00148E | 870.991   | 1257.152  | M33197    | 56743.129 | 53116     |
| NM_004802 | 1442.481  | 1132.587  | NM_016202 | 15935.061 | 22764.844 | NM_00289E | 7062.083  | 7147.565  |
| M33197    | 61360.195 | 57437.738 | NM_01247E | 1685.682  | 2811.538  | AK022749  | 3849.653  | 3361.995  |
| NM_00298E | 985.705   | 554.033   | NM_00627E | 3755.896  | 4998.412  | BF031409  | 4459.438  | 4245.509  |
| NM_000074 | 6153.104  | 5342.862  | NM_003407 | 4789.376  | 5402.949  | NM_00704E | 1337.974  | 1341.781  |
| NM_02039E | 829.866   | 558.876   | NM_00720E | 57492.676 | 63696.211 | U94388    | 874.172   | 378.516   |
| BF434335  | 22514.893 | 14028.678 | NM_00372E | 4118.997  | 3515.881  | NM_01232E | 2806.71   | 2141.535  |
| M57627    | 439.37    | 639.993   | BC015899  | 5618.564  | 6665.526  | M33197    | 35862.574 | 38886.094 |
| NM_00299E | 2006.586  | 1590.237  | NM_01798E | 2439.759  | 2134.422  | NM_00488E | 27986.9   | 33191.961 |
| AK026946  | 1478.124  | 975.152   | AK024846  | 1594.825  | 1560.997  | AK025314  | 1303.362  | 1098.452  |
| M33197    | 59638.754 | 59308.715 | AK001451  | 3581.545  | 3048.639  | NM_00210E | 2116.553  | 2303.792  |
| NM_00319E | 6965.301  | 5817.733  | M33197    | 38282.176 | 32997.484 | NM_000984 | 65551.664 | 63381.051 |
| NM_00282E | 2651.443  | 3103.796  | NM_00718C | 1133.903  | 1004.835  | NM_00245E | 2908.958  | 2541.007  |
| NM_01436E | 1533.789  | 1308.161  | NM_00547E | 7773.602  | 3894.983  | AK026721  | 1900.684  | 2006.473  |
| M33197    | 63148.27  | 60139.66  | NM_00566C | 3629.254  | 4370.979  | AK023027  | 2554.894  | 2351.457  |
| NM_00139E | 19543.338 | 14492.231 | AK023902  | 1940.777  | 2959.617  | AK025598  | 638.504   | 633.938   |
| AB050049  | 4708.709  | 3410.466  | NM_000401 | 681.771   | 985.162   | AB002348  | 35385.844 | 34822.648 |
| J05125    | 762.55    | 511.177   | NM_00522E | 1107.373  | 1665.317  | M33197    | 24833.516 | 29160.492 |
| NM_00199E | 1875.651  | 1499.331  | AB011173  | 7821.124  | 12019.31  | AK026043  | 2566.652  | 2541.598  |
| AY004175  | 1535.775  | 955.207   | AB023195  | 1396.753  | 2192.117  | NM_00500E | 3953.745  | 4012.454  |
| M33197    | 62318.25  | 55626.547 | U43431    | 3756.202  | 4202.671  | AK027033  | 2684.77   | 2507.248  |
| NM_012327 | 2937.037  | 1831.123  | AB006622  | 1617.818  | 1491.903  | NM_00010E | 1557.264  | 1246.147  |
| NM_000904 | 1217.459  | 823.778   | M33197    | 62258.121 | 59582.973 | NM_00300C | 10990.866 | 7828.084  |
| NM_01604E | 1523.04   | 1264.462  | AK097041  | 4445.387  | 4626.176  | NM_00249E | 18951.035 | 16176.979 |
| NM_00037E | 11009.282 | 10966.663 | AF068744  | 31610.111 | 26606.922 | M33197    | 53165.133 | 46766.492 |
| NM_00026E | 8333.075  | 5780.598  | AK000762  | 1433.969  | 2322.424  | NM_016284 | 1537.803  | 1657.901  |
| NM_01884E | 7485.572  | 5919.855  | AJ345030  | 1976.67   | 1793.928  | NM_01459E | 1370.748  | 1163.798  |
| M33197    | 59717.906 | 53837.465 | AK023472  | 6954.74   | 5781.864  | NM_00683E | 6185.164  | 5523.954  |
| AF279890  | 4266.478  | 4145.404  | AL109729  | 906.988   | 660.651   | NM_012257 | 1039.51   | 710.441   |
| NM_00223E | 2863.893  | 2578.513  | M33197    | 63217.93  | 52188.398 | U37690    | 8380.563  | 7465.371  |
| NM_01206E | 3484.355  | 3242.981  | S79912    | 6462.983  | 9602.541  | NM_00512C | 1753.808  | 1541.145  |
| NM_00168E | 54866.926 | 52410.184 | AL110283  | 961.254   | 1546.061  | AB029012  | 4447.698  | 4276.102  |
| NM_016601 | 1320.643  | 1457.428  | AK026892  | 3010.749  | 3864.946  | M33197    | 50320.887 | 53162.73  |
| NM_01790E | 15098.743 | 12012.005 | S83275    | 33050.805 | 36689.953 | AJ010278  | 610.222   | 694.252   |
| NM_006981 | 827.209   | 349.358   | AL117427  | 9806.779  | 12824.889 | NM_00629E | 838.657   | 1033.704  |
| M33197    | 59191.621 | 56404.086 | M33197    | 64949.266 | 66852.703 | AF060936  | 2067.669  | 2245.004  |
| AK027244  | 2972.693  | 2186.229  | AF052118  | 15623.528 | 21155.963 | AL050088  | 2164.692  | 2270.012  |
| L40520    | 5776.575  | 6200.248  | AK025166  | 6830.175  | 9282.123  | AK024939  | 3556.799  | 3979.272  |
| NM_00263E | 10539.416 | 10693.038 | AL359586  | 2054.142  | 2805.378  | AK001561  | 2913.892  | 3318.023  |
| M33197    | 59704.414 | 52397.305 | AF035290  | 1225.783  | 1473.06   | AB007880  | 1808.011  | 1894.475  |
| NM_00287E | 6263.125  | 6722.928  | AK023216  | 887.876   | 1202.132  | AK024950  | 984.142   | 1026.183  |
| NM_01772E | 4866.749  | 4422.608  | M33197    | 61304.098 | 59604.781 | M33197    | 63339.801 | 55719.59  |
| AK022922  | 2843.451  | 3019.138  | AK023288  | 1189.058  | 1644.035  | NM_01414E | 10100.238 | 8789.35   |
| NM_00646E | 9053.747  | 8616.506  | M33197    | 65255.301 | 62944.43  | AF147356  | 803.052   | 598.114   |
| AK024750  | 5402.106  | 4222.53   | AK022428  | 1065.165  | 987.628   | NM_01884E | 4775.097  | 3500.012  |



|           |           |           |           |           |           |           |           |           |
|-----------|-----------|-----------|-----------|-----------|-----------|-----------|-----------|-----------|
| NM_00040C | 29632.283 | 31109.016 | AK023457  | 1545.434  | 1150.857  | AK024275  | 596.667   | 483.8     |
| M33197    | 61427.039 | 57463.598 | AK025089  | 4236.353  | 3259.901  | M33197    | 56330.953 | 52572.992 |
| NM_002613 | 3925.601  | 3479.131  | M33197    | 61362.941 | 63578.781 | AL109782  | 3349.167  | 2927.74   |
| NM_004419 | 3567.319  | 2881.376  | AF085996  | 942.204   | 1173.255  | AF086225  | 576.405   | 661.921   |
| U47635    | 3555.179  | 3373.96   | AK001279  | 2617.919  | 3728.158  | NM_005844 | 1799.456  | 2124.343  |
| NM_01865C | 2039.085  | 2187.098  | AF086407  | 1111.155  | 1496.468  | AK024941  | 2729.993  | 2816.417  |
| AK026945  | 36919.566 | 33364.707 | AF085949  | 1147.548  | 1044.096  | M33197    | 19088.598 | 21900.297 |
| NM_00188E | 414.615   | 569.271   | AK001567  | 2724.622  | 3277.921  | AK025489  | 1111.699  | 975.848   |
| NM_004392 | 986.128   | 1005.617  | AL109707  | 259.674   | 1012.751  | AL390152  | 1108.123  | 1275.134  |
| M33197    | 62200.168 | 62725.48  | M33197    | 43111.273 | 37168.438 | M33197    | 60911.832 | 56970.551 |
| NM_001154 | 9730.647  | 10577.467 | U52839    | 1638.81   | 1649.521  | NM_01812E | 1321.116  | 1548.427  |
| NM_001819 | 1580.615  | 1780.754  | X78262    | 740.156   | 724.346   | AK024506  | 2378.422  | 2361.364  |
| NM_01693E | 1219.466  | 1185.014  | U58667    | 1525.359  | 1515.002  | NM_01417E | 445.943   | 541.718   |
| NM_001993 | 516.732   | 388.814   | M33197    | 61206.488 | 60383.914 | AF086326  | 3897.438  | 2717.604  |
| BF575833  | 533.434   | 371.045   | AK026984  | 20093.311 | 20320.17  | M33197    | 59149.129 | 49328.613 |
| NM_01572E | 5531.571  | 2955.244  | M33197    | 65939.773 | 61649.094 | AL080057  | 1286.658  | 1001.751  |
| R61452    | 799.619   | 530.351   | AL157466  | 1985.421  | 1767.573  | M33197    | 44719.313 | 42774.566 |
| R19938    | 3069.286  | 1535.659  | AK024336  | 1047.547  | 533.493   | AK025948  | 879.075   | 742.977   |
| N94487    | 6523.567  | 3505.708  | NM_018621 | 1195.584  | 946.009   | AL353948  | 7517.871  | 7991.922  |
| AI886795  | 2455.857  | 1718.899  | AK022016  | 1165.284  | 1834.954  | M33197    | 45369.539 | 47124.113 |
| D10495    | 3566.539  | 1864.92   | AK021628  | 743.391   | 432.769   | AK025869  | 1860.602  | 1966.315  |
| BF344679  | 1553.5    | 1040.643  | M33197    | 61817.34  | 60518.359 | AK023961  | 765.373   | 922.846   |
| M36634    | 890.037   | 460.059   | NM_018603 | 824.399   | 784.657   | M33197    | 56240.914 | 50236.438 |
| M14156    | 2393.673  | 1332.655  | AK022118  | 1702.548  | 2247.106  | AF056430  | 1120.471  | 1207.602  |
| U87939    | 1101.252  | 811.095   | AK026453  | 6074.658  | 6809.97   | NM_01490E | 1344.516  | 784.415   |
| U86961    | 896.211   | 778.752   | AK025673  | 1202.76   | 1444.744  | AF009291  | 953.477   | 713.174   |
| U47924    | 3691.533  | 3581.722  | M33197    | 54949.172 | 53572.594 | AF056440  | 566.855   | 711.202   |
| NM_005191 | 697.572   | 1127.823  | AK023635  | 702.929   | 735.207   | M33197    | 63512.324 | 56981.27  |
| AK094237  | 2032.31   | 1989.466  | AK022431  | 2052.829  | 2525.089  | NM_01805E | 1906.608  | 1721.138  |
| L07592    | 2904.387  | 4136.246  | AK023305  | 41525.551 | 30725.24  | AK002199  | 1039.739  | 1253.787  |
| BF434335  | 16295.13  | 6449.561  | AK022729  | 1658.593  | 1002.018  | AK021662  | 439.661   | 963.963   |
| NM_002993 | 1772.49   | 1277.252  | NM_00616E | 3195.484  | 2000.983  | AK001038  | 724.316   | 548.232   |
| AK026946  | 1339.097  | 932.939   | AL050374  | 1045.068  | 883.545   | AK021469  | 576.823   | 627.871   |
| M33197    | 59163.836 | 51191.996 | M33197    | 60307.211 | 36758.906 | M33197    | 48485.906 | 49631.543 |
| NM_003192 | 5666.819  | 3733.715  | M28639    | 2654.119  | 1225.908  | AK026259  | 13693.313 | 12900.761 |
| NM_01844E | 3450.112  | 2472.426  | AL122073  | 11796.741 | 8081.988  | AJ008115  | 21576.221 | 20334.572 |
| AF086129  | 489.95    | 447.528   | AF116655  | 2978.41   | 2236.884  | AF083125  | 859.316   | 709.018   |
| D79994    | 1152.067  | 884.244   | AJ243222  | 1114.321  | 1360.202  | M33197    | 60653.832 | 51925.609 |
| NM_01445E | 2923.141  | 2334.121  | AK026132  | 3383.127  | 3676.876  | AK022970  | 1254.568  | 629.108   |
| AF235049  | 3441.149  | 2634.497  | Y11162    | 816.635   | 976.198   | AK026212  | 1344.868  | 1694.783  |
| M33197    | 59877.371 | 56473.395 | M33197    | 63208.66  | 62990.25  | AF086222  | 797.744   | 737.928   |
| NM_00736E | 695.156   | 669.47    | AF070584  | 1620.056  | 2301.64   | AF086415  | 3067.813  | 3418.884  |
| NM_01477E | 1855.338  | 1490.554  | AF075006  | 855.169   | 1374.241  | M33197    | 51466.438 | 52400.848 |
| NM_00648C | 25171.992 | 21413.154 | M33197    | 62614.523 | 64246.316 | AK024470  | 1207.8    | 1673.106  |
| NM_007223 | 31053.457 | 20748.488 | AK000903  | 33863.434 | 39150.793 | NM_01793E | 1145.63   | 1035.09   |
| NM_00014E | 772.904   | 431.153   | AK023938  | 2080.313  | 3172.725  | NM_00422E | 1369.445  | 1339.149  |
| AF030107  | 1306.239  | 847.328   | AL110169  | 789.517   | 598.156   | NM_006432 | 13809.722 | 10868.71  |
| NM_000871 | 1285.455  | 752.573   | L13743    | 1046.621  | 399.565   | AF025441  | 1647.88   | 1756.995  |
| M33197    | 59699.891 | 56788.914 | Z11849    | 3513.638  | 2156.447  | U62823    | 3395.677  | 2868.728  |
| NM_01896E | 681.605   | 630.851   | AJ002788  | 2249.291  | 1273.111  | NM_00353E | 23099.881 | 23168.305 |
| NM_000264 | 847.76    | 1312.068  | M33197    | 62595.102 | 58271.988 | AK026768  | 2398.49   | 1526.773  |
| AB058740  | 7372.139  | 7416.759  | AF075050  | 945.735   | 1290.735  | M33197    | 60777.785 | 57178.488 |
| NM_00338E | 577.61    | 677.736   | AK024842  | 966.775   | 866.099   | AK000852  | 15567.895 | 16387.059 |

|           |           |           |             |           |           |           |           |           |
|-----------|-----------|-----------|-------------|-----------|-----------|-----------|-----------|-----------|
| AF279890  | 1742.155  | 1856.547  | NM_018382   | 1483.157  | 1795.647  | AF251188  | 4353.753  | 4209.901  |
| NM_002236 | 1925.443  | 2953.573  | M33197      | 63219.07  | 62279.313 | AK026418  | 9153.866  | 10245.254 |
| NM_012069 | 2424.523  | 2048.192  | D17203      | 57398.191 | 55676.984 | AF086194  | 20538.969 | 23086.248 |
| NM_001689 | 42746.59  | 40715.258 | NM_006495   | 5551.826  | 7162.376  | AK026811  | 2444.728  | 2761.096  |
| NM_016601 | 619.333   | 584.685   | AK022101    | 2150.033  | 3231.224  | M33197    | 54865.441 | 57577.914 |
| NM_017905 | 8433.998  | 6689.47   | NM_003251   | 4885.366  | 5475.426  | AK023633  | 1318.61   | 1429.781  |
| M33197    | 59821.402 | 59327.203 | AF086203    | 621.202   | 962.035   | NM_006179 | 1163.167  | 1339.711  |
| NM_006815 | 18983.42  | 21274.814 | AB046772    | 1602.651  | 2038.438  | AL360165  | 1437.142  | 1563.651  |
| NM_001663 | 3864.725  | 5227.349  | M33197      | 63042.727 | 62637.855 | M33197    | 32460.367 | 33144.059 |
| NM_004218 | 6441.612  | 7070.684  | AY007143    | 2999.233  | 4019.601  | AJ008132  | 1957.178  | 2047.456  |
| NM_016530 | 1174.382  | 1120.771  | L15557      | 1056.375  | 873.163   | NM_005281 | 1704.213  | 1747.066  |
| NM_014804 | 847.006   | 776.103   | M33197      | 61834.637 | 50486.25  | NM_005549 | 722.51    | 739.619   |
| NM_012455 | 2933.19   | 2752.01   | NM_001563   | 7307.52   | 4053.076  | M33197    | 58979.148 | 57231.566 |
| NM_002806 | 7549.675  | 5405.966  | X89666      | 1963.883  | 1341.287  | U12129    | 1532.802  | 1515.127  |
| M33197    | 68275.938 | 61384.066 | NM_003104   | 7692.133  | 3572.934  | S81242    | 51514.438 | 45952.398 |
| NM_001716 | 920.48    | 853.048   | NM_014581   | 1141.635  | 835.734   | AF230801  | 1587.017  | 1570.202  |
| NM_002030 | 412.404   | 437.694   | M33197      | 62663.137 | 67451.117 | AF075072  | 1698.555  | 1595.373  |
| NM_006073 | 470.698   | 543.208   | AK024448    | 5976.234  | 6918.875  | M33197    | 61806.879 | 59636.727 |
| NM_006564 | 4746.67   | 3121.343  | NM_014406   | 2902.535  | 4161.298  | NM_002509 | 4107.67   | 3958.671  |
| NM_004802 | 1964.592  | 3291.161  | Z11801      | 1798.489  | 2423.118  | U38442    | 1901.763  | 1962.997  |
| NM_002983 | 805.903   | 897.28    | AK027253    | 1253.227  | 845.435   | AF110136  | 1113.073  | 1259.314  |
| NM_000074 | 5544.67   | 4815.708  | S68954      | 13544.734 | 54812.895 | AK026706  | 3659.58   | 3798.627  |
| M33197    | 60726.352 | 53919.707 | S81335      | 2307.354  | 3913.997  | AB007936  | 20454.313 | 24723.809 |
| NM_002613 | 2155.13   | 1631.176  | AF052109    | 2225.595  | 12359.554 | D28391    | 15691.842 | 19836.748 |
| NM_004419 | 1905.66   | 1422.517  | M33197      | 29053.426 | 25558.166 | M33197    | 21671.904 | 29285.811 |
| U47635    | 2189.489  | 2237.388  | NM_003353   | 41342.164 | 47487.383 | D86961    | 719.387   | 749.389   |
| NM_018650 | 1579.641  | 1616.273  | X82127      | 42609.547 | 46423.66  | AJ227896  | 3070.586  | 3545.515  |
| AK026945  | 27206.9   | 24054.508 | AL122044    | 3861.773  | 4190.49   | L32841    | 3332.566  | 3284.784  |
| NM_002828 | 1686.036  | 2319.774  | NM_018296   | 2631.736  | 4178.08   | M33197    | 22563.443 | 29907.967 |
| NM_014369 | 1578.221  | 1594.662  | NM_005752   | 1151.579  | 881.089   | AF131770  | 361.334   | 519.702   |
| M33197    | 62330.043 | 60591.355 | M33197      | 56223.781 | 59020.172 | CY3Cy5    | 7900.424  | 219.689   |
| NM_001398 | 16791.324 | 16928.855 | CY3Cy5      | 2863.015  | 68.652    | AI298534  | 224.063   | 538.577   |
| AB050049  | 3569.068  | 3699.132  | AA115473    | 2336.58   | 2432.723  | R71691    | 517.54    | 386.615   |
| J05125    | 469.531   | 561.099   | AA872397    | 3634.643  | 3222.917  | AW167715  | 651.242   | 718.99    |
| NM_001995 | 2446.083  | 2109.277  | AA709414    | 2340.202  | 1707.567  | AA424735  | 1146.448  | 999.788   |
| NM_000183 | 12425.529 | 10013.401 | D12676      | 1543.299  | 1186.012  | U78294    | 614.284   | 413.114   |
| AY004175  | 1761.376  | 1674.39   | BC012593    | 980.027   | 669.964   | BI760394  | 871.672   | 942.083   |
| M33197    | 56840.191 | 53061.906 | NM_000939   | 17360.195 | 14862.115 | AA555216  | 254.053   | 446.856   |
| NM_012327 | 3063.556  | 2959.611  | NM_004295   | 12692.285 | 12409.334 | U09117    | 3160.992  | 2794.455  |
| NM_000904 | 1173.448  | 1258.746  | H-X 02812 I | 2237.573  | 3228.705  | M21054    | 264.008   | 377.864   |
| NM_016048 | 1971.135  | 1452.181  | U75898      | 1895.256  | 1620.647  | M18468    | 815.552   | 521.898   |
| NM_000375 | 7258.108  | 4774.414  | M29039      | 735.552   | 714.283   | H66070    | 2037.672  | 1613.747  |
| NM_000265 | 5431.01   | 3608.957  | M59815      | 586.404   | 569.449   | AA164741  | 2197.999  | 1773.051  |
| NM_018849 | 5203.357  | 3764.45   | SR2         | 49297.598 | 53552.723 | AI189375  | 577.121   | 498.958   |
| M33197    | 54920.332 | 50434.004 | SR4         | 14068.771 | 13593.239 | AI978885  | 1115.298  | 1036.323  |
| M16796    | 488.075   | 606.503   | SR6         | 2226.317  | 2186.137  | AK054960  | 6627.644  | 6103.765  |
| AF015910  | 25208.113 | 21116.467 | SR8         | 7981.297  | 25728.67  | L15344    | 1525.015  | 1410.262  |
| BC009993  | 3076.237  | 2127.521  | SR10        | 32192.781 | 10658.229 | CY3Cy5    | 7516.66   | 249.181   |
| M33197    | 59502.578 | 54310.07  | CY3Cy5      | 6115.134  | 209.363   | NM_014586 | 2261.998  | 1908.417  |
| NM_016824 | 1093.297  | 994.614   | NM_001203   | 2408.878  | 3375.099  | NM_000923 | 494.301   | 547.431   |
| NM_003031 | 3422.068  | 3277.057  | NM_004799   | 15120.076 | 12925.3   | NM_006453 | 1178.361  | 799.164   |
| NM_007170 | 580.602   | 885.983   | NM_014047   | 10975.452 | 8709.96   | NM_018096 | 637.451   | 585.878   |
| NM_003008 | 1419.83   | 1339.003  | AK022901    | 1418.433  | 1206.718  | AL390078  | 439.096   | 322.859   |

|           |           |           |           |           |           |           |           |           |
|-----------|-----------|-----------|-----------|-----------|-----------|-----------|-----------|-----------|
| M33197    | 60071.59  | 60324.172 | M33197    | 69404.156 | 63315.938 | NM_004036 | 1718.7    | 1591.814  |
| AK027244  | 1841.284  | 1718.001  | AF037332  | 3397.965  | 2795.812  | NM_015986 | 660.811   | 579.263   |
| L40520    | 3490.567  | 2911.727  | NM_006052 | 664.956   | 781.676   | NM_006546 | 664.142   | 364.358   |
| NM_002633 | 8254.568  | 9283.927  | AB040912  | 6042.81   | 5424.485  | NM_014956 | 1280.947  | 1126.191  |
| U11036    | 1015.181  | 741.619   | NM_006243 | 4136.398  | 4284.004  | NM_003992 | 1458.147  | 1275.7    |
| M33197    | 57328.43  | 53547.684 | M33197    | 66360.883 | 65677.391 | AF279265  | 3162.337  | 2510.691  |
| NM_002878 | 4801.035  | 3898.596  | AJ011129  | 1198.953  | 1325.003  | NM_005213 | 44067.84  | 38100.875 |
| NM_017723 | 3306.156  | 2409.909  | NM_001039 | 705.857   | 612.749   | AB040914  | 697.678   | 417.759   |
| AK022922  | 2262.231  | 1805.255  | NM_006387 | 4701.107  | 5174.363  | NM_002997 | 2124.139  | 1799.638  |
| NM_006462 | 5850.564  | 4683.46   | NM_005646 | 2485.495  | 2972.635  | NM_002379 | 7903.55   | 6911.261  |
| AK024750  | 4370.749  | 4287.104  | NM_006639 | 4005.426  | 3957.198  | L12347    | 1445.999  | 1341.906  |
| NM_000400 | 22370.688 | 27329.131 | NM_001692 | 1043.359  | 1198.044  | NM_001622 | 2498.154  | 2214.423  |
| NM_015885 | 3281.74   | 2994.75   | BI767871  | 1701.813  | 2302.986  | Z36788    | 668.905   | 795.435   |
| NM_015885 | 51855.664 | 42773.57  | AK022817  | 1589.857  | 1405.079  | NM_018477 | 3786.567  | 3501.646  |
| M33197    | 58117.883 | 52055.852 | M33197    | 62336.336 | 61404.516 | U20536    | 918.604   | 749.975   |
| NM_004276 | 2424.626  | 2207.232  | AB037831  | 1248.156  | 1039.882  | NM_001494 | 11474.932 | 10656.57  |
| NM_002332 | 7441.113  | 6682.986  | NM_012103 | 19269.689 | 26580.084 | NM_004206 | 1401.609  | 1210.276  |
| NM_002859 | 1782.893  | 1410.682  | AL122077  | 15483.709 | 15250.156 | NM_004603 | 5640.239  | 5664.331  |
| NM_005246 | 2053.062  | 1755.972  | NM_014632 | 817.69    | 805.013   | AK022849  | 992.907   | 990.428   |
| NM_017651 | 751.871   | 1192.234  | NM_006422 | 1055.222  | 858.849   | AF040964  | 2744.99   | 2608      |
| AF161339  | 4231.115  | 4820.209  | NM_016946 | 2668.679  | 2186.834  | NM_001936 | 1904.989  | 1911.303  |
| AK000354  | 6880.94   | 8324.663  | M33197    | 67022.492 | 65783.367 | NM_003279 | 3087.715  | 2663.724  |
| AL161984  | 1544.701  | 1347.118  | NM_007259 | 2498.156  | 2786.419  | AB014599  | 1668.369  | 1799.849  |
| NM_014882 | 771.826   | 928.762   | NM_018009 | 712.998   | 665.597   | NM_004393 | 732.345   | 390.819   |
| NM_000836 | 1549.809  | 1995.205  | AK075081  | 2855.622  | 2852.637  | AB018345  | 369.374   | 574.327   |
| M33197    | 60727.617 | 60577.969 | NM_000895 | 6284.366  | 6007.564  | NM_001879 | 1653.858  | 1482.141  |
| NM_001510 | 866.106   | 920.2     | NM_003820 | 14367.157 | 14045.4   | AF264014  | 5186.638  | 5255.849  |
| AK024474  | 5313.28   | 5074.377  | NM_015915 | 2428.342  | 2182.714  | L09098    | 355.809   | 440.713   |
| NM_006862 | 735.813   | 768.336   | M33197    | 59031.313 | 60294.598 | NM_000137 | 3718.323  | 3765.663  |
| NM_017901 | 1654.514  | 1711.575  | NM_016518 | 4466.252  | 4576.349  | NM_012102 | 1850.813  | 2197.583  |
| NM_004272 | 1907.441  | 1705.032  | NM_006185 | 9560.46   | 10152.538 | NM_005017 | 14340.834 | 13849.679 |
| NM_017589 | 852.001   | 739.59    | NM_014800 | 1533.268  | 1728.476  | AF163572  | 6365.396  | 6062.108  |
| AK023582  | 1123.052  | 1588.346  | NM_001557 | 1579.665  | 2130.156  | NM_000897 | 2445.041  | 2292.715  |
| NM_000358 | 1436.2    | 1520.052  | AF147311  | 3999.473  | 6641.619  | NM_000487 | 576.203   | 522.262   |
| NM_001930 | 5908.05   | 4210.445  | NM_002131 | 53719.133 | 60803.961 | NM_006411 | 16766.82  | 16327.071 |
| AK025270  | 677.304   | 513.343   | NM_017927 | 2127.975  | 2957.119  | NM_014182 | 1703.194  | 1654.954  |
| NM_001564 | 1795.97   | 1224.802  | NM_020151 | 13984.435 | 14180.469 | NM_000492 | 8458.059  | 7432.5    |
| M33197    | 57219.559 | 55300.27  | NM_005891 | 40255.492 | 47439.902 | NM_012086 | 1006.956  | 570.913   |
| AF263537  | 20552.387 | 13055.084 | NM_001645 | 2321.92   | 2685.769  | NM_001170 | 2778.437  | 2749.554  |
| NM_015895 | 4130.307  | 2956.955  | NM_003956 | 2152.179  | 2891.953  | AL137716  | 1222.358  | 1203.793  |
| NM_004690 | 1166.809  | 1959.013  | M33197    | 55535.082 | 56610.258 | NM_004696 | 1080.673  | 1139.198  |
| M33197    | 66999.523 | 74970.672 | NM_003500 | 3929.825  | 3391.477  | NM_014342 | 1627.753  | 1657.543  |
| NM_013374 | 25479.891 | 43793.773 | NM_014317 | 3177.712  | 2231.049  | AB043997  | 1123.515  | 966.034   |
| NM_003252 | 10286.056 | 16892.527 | L09234    | 7586.239  | 5953.356  | NM_001773 | 543.401   | 624.187   |
| NM_001228 | 2429.776  | 2959.394  | NM_000059 | 1243.092  | 1090.28   | Z70704    | 943.773   | 878.602   |
| AK026607  | 1902.022  | 1887.696  | AK026740  | 1159.188  | 1207.536  | NM_014363 | 701.519   | 745.329   |
| NM_016561 | 13392.355 | 10857.905 | NM_017881 | 3466.048  | 4137.247  | NM_000557 | 1718.259  | 1470.964  |
| NM_001225 | 3710.22   | 3660.544  | M33197    | 62105.863 | 63120.59  | NM_001375 | 2394.195  | 2304.296  |
| NM_014245 | 25715.141 | 34742.43  | NM_017634 | 5392.332  | 5157.607  | NM_002312 | 1013.612  | 1034.548  |
| M33197    | 64950.086 | 72163.75  | NM_000813 | 669.243   | 857.502   | M20699    | 836.525   | 1054.959  |
| AB046822  | 739.137   | 912.786   | NM_018896 | 1622.821  | 1529.752  | NM_004774 | 3985.816  | 4764.75   |
| M33197    | 1460.638  | 2021.889  | AJ300465  | 2673.027  | 1955.239  | NM_016937 | 2912.208  | 3615.284  |
| NM_004921 | 900.512   | 1284.065  | X86400    | 1068.179  | 1213.143  | NM_002690 | 3150.864  | 2647.23   |

|           |           |           |             |           |           |           |           |           |
|-----------|-----------|-----------|-------------|-----------|-----------|-----------|-----------|-----------|
| NM_00030E | 1919.453  | 1268.454  | NM_00081C   | 1435.551  | 1616.16   | NM_01232E | 5131.134  | 4980.414  |
| X69636    | 2558.912  | 2121.982  | AF069307    | 2784.275  | 2889.611  | NM_007341 | 1000.678  | 680.652   |
| NM_013974 | 3782.896  | 4821.162  | M33197      | 58724.777 | 63788.953 | NM_01650E | 1489.016  | 1784.04   |
| NM_017547 | 1655.962  | 2300.692  | U92978      | 4084.34   | 5299.141  | NM_00645E | 7309.802  | 7277.955  |
| NM_00398E | 5943.767  | 7186.926  | NM_00573E   | 1517.255  | 1379.394  | AK026062  | 13986.693 | 13165.705 |
| AK023708  | 1066.376  | 1460.846  | NM_01448E   | 1192.464  | 1527.577  | AF047002  | 17687.215 | 17711.348 |
| NM_00210E | 2000.674  | 2858.398  | NM_01338E   | 6073.262  | 8215.5    | AL050082  | 1872.316  | 1768.496  |
| M33197    | 66506.164 | 70612.656 | AB014567    | 1139.617  | 1623.844  | NM_00662E | 48230.18  | 51558.973 |
| NM_018464 | 15474.857 | 24596.639 | NM_00532E   | 15035.371 | 16226.674 | NM_01658E | 1600.349  | 1411.474  |
| D43948    | 2305.025  | 4138.996  | NM_01406E   | 1198.474  | 1486.619  | NM_00313E | 7002.613  | 6377.339  |
| NM_01231C | 8287.967  | 12136.993 | AB035130    | 2090.194  | 1776.641  | L12347    | 1409.109  | 1016.413  |
| BE410824  | 805.346   | 955.052   | NM_00335E   | 1917.018  | 1471.049  | NM_00162E | 1364.593  | 1260.704  |
| BF382116  | 6854.602  | 5077.119  | M33197      | 39112.91  | 40152.523 | Z36788    | 708.373   | 538.785   |
| NM_00319E | 9571.441  | 12119.301 | AF119917    | 925.536   | 786.531   | NM_018477 | 2747.947  | 3384.728  |
| AF113216  | 1205.958  | 1525.923  | NM_01791E   | 1260.642  | 1037.214  | U20536    | 649.74    | 399.872   |
| NM_005197 | 5842.918  | 5598.233  | AL050097    | 887.774   | 945.839   | AI298534  | 460.663   | 565.603   |
| NM_007241 | 720.725   | 431.908   | AK021513    | 935.479   | 967.447   | R71691    | 442.906   | 316.597   |
| NM_000124 | 611.841   | 187.888   | NM_00357E   | 1581.928  | 1768.657  | AW167715  | 1159.503  | 1388.365  |
| NM_01799E | 2932.222  | 2364.34   | AL049283    | 1620.768  | 1770.067  | BI760394  | 1059.17   | 1555.78   |
| NM_014517 | 1850.073  | 1430.997  | M33197      | 56488.41  | 59039.539 | U09117    | 8095.468  | 6983.696  |
| NM_00426E | 1424.007  | 2117.399  | NM_002401   | 27849.514 | 27597.92  | M18468    | 831.747   | 900.621   |
| NM_006107 | 6273.984  | 5819.104  | NM_001274   | 1948.417  | 1995.687  | H66070    | 7636.069  | 7255.006  |
| NM_00417E | 1003.478  | 1126.934  | NM_00391E   | 1068.255  | 766.281   | AA164741  | 2800.844  | 2213.673  |
| AF288288  | 17951.633 | 19508.256 | NM_002227   | 2403.097  | 1849.853  | AI189375  | 394.398   | 825.185   |
| NM_01764E | 7164.258  | 9620.724  | NM_00719E   | 2595.333  | 2621.688  | AI978885  | 1439.325  | 1443.645  |
| AL050368  | 1207.511  | 1946.83   | AB014530    | 8916.012  | 11025.245 | AK054960  | 7533.692  | 7661.801  |
| NM_00309E | 9899.418  | 16238.453 | M33197      | 60544.375 | 63150.363 | L15344    | 1866.953  | 1817.621  |
| M33197    | 65743.789 | 85307.719 | NM_00598E   | 3239.811  | 4533.787  | NM_00166E | 13113.488 | 15143.329 |
| NM_005861 | 4374.179  | 6529.378  | AB014607    | 4439.148  | 6529.497  | NM_00187E | 1525.78   | 1299.787  |
| NM_01884E | 2616.456  | 1987.917  | AF134401    | 1670.862  | 2270.858  | AF264014  | 4615.611  | 4458.424  |
| NM_00376C | 4686.689  | 3940.9    | NM_006387   | 3851.866  | 4286.444  | NM_00415E | 537.031   | 822.61    |
| AB037759  | 1278.463  | 1183.79   | NM_00564E   | 2666.333  | 4281.223  | NM_01458E | 2423.029  | 2694.845  |
| AK025998  | 3183.873  | 3498.209  | NM_00663E   | 2800.74   | 2456.242  | NM_01436E | 9043.446  | 11720.7   |
| AL080080  | 7190.713  | 8037.558  | BI767871    | 1509.167  | 1173.214  | NM_00403E | 1894.344  | 1815.874  |
| AL117636  | 862.713   | 961.171   | AA418907    | 480.903   | 563.016   | NM_00654E | 441.023   | 578.002   |
| NM_01848E | 2312.511  | 2378.583  | AA115473    | 2835.455  | 2563.181  | NM_01495E | 1721.31   | 1460.88   |
| NM_01788C | 1631.902  | 1405.033  | AA872397    | 4258.428  | 3949.769  | NM_00399E | 2302.756  | 2343.172  |
| AF090945  | 3491.275  | 1999.428  | AA709414    | 3138.504  | 2775.851  | AF279265  | 4348.455  | 3409.87   |
| M33197    | 56438.457 | 39879.418 | D12676      | 1874.883  | 1871.725  | NM_00521E | 45159.043 | 44711.855 |
| NM_001161 | 4390.988  | 3804.689  | BC012593    | 991.009   | 967.678   | AB040914  | 556.012   | 452.591   |
| NM_004044 | 9671.627  | 11113.797 | NM_00093E   | 18578.701 | 18221.258 | NM_002997 | 1928.547  | 1809.605  |
| NM_000221 | 21480.072 | 34982.328 | NM_00429E   | 14454.804 | 14445.657 | NM_00237E | 8921.845  | 8372.104  |
| H75678    | 1603.478  | 2245.171  | H-X 02812 I | 2074.53   | 2407.247  | AB007929  | 7967.048  | 7854.112  |
| AB002359  | 2382.694  | 3325.922  | U75898      | 1976.144  | 1992.161  | NM_00457E | 2674.678  | 2707.877  |
| M33197    | 2589.523  | 2892.135  | M29039      | 639.682   | 737.114   | AA203126  | 2386.724  | 2981.834  |
| AB007864  | 959.583   | 1094.493  | M59815      | 785.652   | 839.482   | Z50169    | 255.809   | 270.767   |
| NM_00219E | 2527.645  | 4179.244  | M33197      | 778.838   | 763.239   | NM_00072E | 238.838   | 244.821   |
| AF024693  | 846.158   | 879.911   | AB011146    | 2049.347  | 2455.956  | AB043997  | 1209.583  | 1403.629  |
| AK025905  | 1726.39   | 2649.814  | NM_00618E   | 9172.9    | 7711.671  | NM_00034E | 152.649   | 177.596   |
| AL121733  | 1216.958  | 2224.987  | NM_01480C   | 1063.199  | 825.861   | NM_00460E | 6677.13   | 8397.818  |
| BE958072  | 1545.501  | 2644.159  | NM_001557   | 907.547   | 948.703   | AK022849  | 1130.541  | 1151.739  |
| M33197    | 46113.492 | 54921.621 | AF147311    | 3068.112  | 2930.515  | AF040964  | 3102.508  | 2840.992  |
| NM_01448C | 1811.355  | 1418.544  | NM_002131   | 44730.535 | 47737.438 | NM_00193E | 2714.885  | 2241.919  |

|           |           |           |           |           |           |           |           |           |
|-----------|-----------|-----------|-----------|-----------|-----------|-----------|-----------|-----------|
| NM_014169 | 4295.485  | 5517.24   | NM_017927 | 1741.05   | 1248.989  | NM_003279 | 5035.424  | 5071.426  |
| NM_004964 | 12800.645 | 15061.967 | M33197    | 64376.41  | 61614.516 | AB014599  | 2220.424  | 2205.975  |
| AL117497  | 1067.812  | 792.867   | NM_001203 | 2682.927  | 2133.728  | NM_004393 | 399.857   | 606.832   |
| AF075016  | 395.616   | 378.968   | NM_004799 | 17017.662 | 13084.698 | AB018345  | 578.665   | 477.199   |
| AF147437  | 3349.815  | 3064.428  | NM_006733 | 989.918   | 900.675   | NM_005832 | 453.367   | 492.354   |
| M33197    | 59816.852 | 58712.688 | NM_002039 | 499.893   | 443.133   | AL050082  | 2088.649  | 2102.736  |
| AF147360  | 895.812   | 980.53    | NM_014047 | 16237.483 | 15900.956 | NM_016588 | 1151.525  | 1466.571  |
| AL137269  | 3732.412  | 4728.641  | AK022901  | 2218.818  | 2073.168  | NM_003135 | 5484.212  | 5446.659  |
| AK021983  | 1738.971  | 2644.4    | NM_001508 | 602.222   | 642.556   | NM_000137 | 4202.396  | 4023.357  |
| Y11681    | 9199.657  | 12986.098 | M33197    | 62028.145 | 62103.477 | NM_000897 | 3389.798  | 4560.421  |
| AL110135  | 21195.865 | 28117.566 | AF037332  | 3209.921  | 3487.05   | NM_000487 | 894.278   | 766.156   |
| NM_006993 | 9246.799  | 14707.824 | NM_014571 | 669.484   | 605.218   | NM_006411 | 17653.385 | 17675.002 |
| NM_002336 | 801.649   | 1211.313  | NM_006052 | 882.618   | 986.307   | NM_014182 | 1663.151  | 1511.411  |
| M33197    | 63138.117 | 65166.055 | AB040912  | 3005.81   | 3589.864  | NM_000492 | 7488.11   | 8009.431  |
| AF086316  | 576.307   | 849.979   | NM_003871 | 895.335   | 802.965   | NM_012089 | 884.014   | 738.312   |
| AF086429  | 1146.837  | 1435.548  | NM_006243 | 4559.804  | 4628.558  | NM_001170 | 2384.616  | 2479.556  |
| NM_019060 | 534.68    | 815.457   | M33197    | 57789.207 | 60265.695 | AL137716  | 774.618   | 841.733   |
| AF086302  | 1055.066  | 804.347   | AJ011129  | 1946.678  | 1864.481  | NM_004696 | 910.8     | 1271.185  |
| AF086439  | 2146.144  | 2008.553  | NM_001039 | 739.383   | 761.318   | NM_014342 | 1714.738  | 1913.254  |
| M33197    | 56866.34  | 57669.645 | M33197    | 59270.492 | 56726.367 | AK054960  | 5529.208  | 5660.29   |
| AF038171  | 796.2     | 911.682   | U92978    | 2155.175  | 1857.529  | L15344    | 1584.53   | 1776.188  |
| AF052160  | 974.253   | 1633.353  | NM_005738 | 814.8     | 521.67    | NM_001665 | 4037.501  | 3526.374  |
| AK026512  | 1537.763  | 2012.314  | NM_014488 | 910.728   | 675.345   | AF097645  | 272.807   | 295.446   |
| M33197    | 56280.551 | 56720.188 | NM_013389 | 5014.785  | 4534.33   | NM_001773 | 664.778   | 725.569   |
| AF144233  | 2657.766  | 2229.034  | AB014567  | 760.232   | 841.478   | NM_014363 | 811.756   | 1276.988  |
| AK022986  | 2601.233  | 873.295   | AK022817  | 1410.859  | 1380.347  | NM_000557 | 2773.465  | 2322.828  |
| AF085975  | 3662.139  | 5694.518  | NM_018034 | 7895.679  | 7267.357  | NM_003239 | 585.42    | 914.909   |
| M33197    | 59470.75  | 61153.367 | M33197    | 59525.594 | 58684.574 | NM_001375 | 3697.666  | 3323.816  |
| AL137390  | 1387.619  | 1611.318  | AB037831  | 1646.667  | 1568.073  | NM_002312 | 1284.985  | 1161.803  |
| AL137611  | 4937.2    | 5349.554  | NM_012103 | 19195.553 | 19729.225 | NM_016937 | 4099.42   | 3950.06   |
| AL359566  | 28189.713 | 38738.93  | AL122077  | 19842.283 | 20053.061 | NM_002690 | 3594.083  | 3031.785  |
| AL133110  | 500.042   | 700.95    | NM_014632 | 1272.028  | 1137.493  | NM_012328 | 5509.527  | 7347.169  |
| AL137427  | 2548.613  | 4194.479  | NM_006422 | 2020.039  | 2215.586  | NM_007341 | 858.712   | 1268.904  |
| AL157460  | 5493.219  | 7786.626  | BE789195  | 1292.01   | 1092.012  | NM_016508 | 1481.377  | 1712.589  |
| AL359595  | 455.74    | 971.334   | NM_016946 | 3259.147  | 2696.476  | NM_006456 | 5432.3    | 6726.57   |
| M33197    | 52229.84  | 58616.434 | M33197    | 66972.398 | 67941.453 | AK026062  | 9866.194  | 8876.258  |
| AK026718  | 1630.184  | 1770.287  | NM_007259 | 3199.403  | 3037.515  | AF047002  | 18831.254 | 23293.641 |
| AK022035  | 8479.595  | 14194.673 | NM_018009 | 824.306   | 811.812   | AB040914  | 396.362   | 458.338   |
| M33197    | 54254.055 | 58953.035 | AK075081  | 2501.849  | 2447.891  | NM_002997 | 1058.936  | 1219.511  |
| NM_004337 | 911.275   | 1052.597  | NM_000895 | 6441.648  | 5691.026  | AB007929  | 5651.464  | 6807.103  |
| AK022141  | 737.933   | 730.609   | NM_003820 | 10663.087 | 9814.996  | NM_004579 | 2115.265  | 2278.674  |
| AK023942  | 31696.754 | 29196.771 | NM_015915 | 1864.657  | 1713.209  | AA203126  | 1279.986  | 1398.426  |
| M33197    | 54336.168 | 45150.059 | M33197    | 67181.57  | 66159.508 | L12347    | 611.54    | 707.157   |
| AK027207  | 1441.791  | 1178.295  | NM_016518 | 6403.33   | 7467.669  | NM_001622 | 1027.057  | 894.369   |
| AF083120  | 376.378   | 879.009   | AB014530  | 7098.287  | 5127.515  | Z36788    | 590.499   | 473.709   |
| AJ227892  | 6309.063  | 6924.573  | M33197    | 58825.809 | 57069.164 | NM_018477 | 2071.52   | 2778.66   |
| M33197    | 53858.961 | 53332.887 | NM_005989 | 3914.659  | 3636.133  | U20536    | 472.209   | 631.696   |
| AK022013  | 1375.742  | 1811.321  | AB014607  | 4925.241  | 4465.742  | AI298534  | 513.822   | 810.427   |
| AK022155  | 5203.963  | 7558.632  | AF134401  | 2078.114  | 1820.184  | R71691    | 679.838   | 375.221   |
| AK022288  | 1671.455  | 2358.988  | NM_020151 | 14248.695 | 12261.079 | AW167715  | 936.065   | 780.843   |
| AK021916  | 808.864   | 1226.738  | NM_005891 | 42863.555 | 40269.582 | AA424735  | 1372.626  | 1393.547  |
| AK024201  | 1640.047  | 2716.928  | NM_001645 | 2643.303  | 2275.387  | BI760394  | 1497.801  | 1456.35   |
| AK022174  | 699.197   | 860.33    | NM_003956 | 2291.293  | 2188.612  | AA555216  | 600.252   | 671.867   |

|           |           |           |             |           |           |           |           |           |
|-----------|-----------|-----------|-------------|-----------|-----------|-----------|-----------|-----------|
| AK022331  | 620.333   | 680.125   | M33197      | 56727.914 | 57142.211 | U09117    | 9146.863  | 8651.145  |
| M33197    | 60601.895 | 63942.16  | NM_003500   | 4944.488  | 4607.103  | M21054    | 650.627   | 625.907   |
| AK026878  | 405.246   | 636.32    | NM_014317   | 4108.397  | 5502.427  | M18468    | 918.914   | 1130.433  |
| AK021589  | 1146.796  | 1420.816  | L09234      | 9707.758  | 9410.125  | H66070    | 2084.324  | 2371.746  |
| D17152    | 7341.167  | 4826.001  | NM_000059   | 1718.792  | 1969.592  | AA164741  | 2575.463  | 3066.585  |
| AK024464  | 10507.543 | 7303.757  | AK026740    | 1285.309  | 1215.165  | AI189375  | 552.968   | 473.206   |
| M33197    | 907.683   | 1084.289  | NM_017881   | 4573.339  | 5079.411  | AI978885  | 1514.554  | 1671.616  |
| AK025423  | 1220.198  | 752.119   | M33197      | 62343.984 | 64022.844 | AB014599  | 1770.334  | 1635.251  |
| M33197    | 62713.563 | 67121.195 | NM_017634   | 4132.424  | 4318.926  | NM_004393 | 1678.534  | 976.231   |
| AK024198  | 1212.841  | 544.805   | NM_000813   | 622.717   | 634.182   | AB018345  | 537.468   | 557.289   |
| AL049846  | 806.105   | 811.374   | NM_018896   | 1359.139  | 1217.593  | NM_005832 | 374.2     | 592.24    |
| AK024161  | 579.219   | 527.194   | AJ300465    | 1833.388  | 2081.433  | AW407841  | 824.518   | 722.843   |
| AK021682  | 21314.631 | 22817.414 | X86400      | 1140.709  | 1397.041  | U15197    | 609.791   | 268.637   |
| AJ012500  | 1715.229  | 1407.492  | NM_000810   | 1968.738  | 1751.216  | NM_001879 | 1488.332  | 1540.836  |
| U00944    | 1909.16   | 1611.469  | AF069307    | 3248.438  | 3689.884  | AF264014  | 5681.625  | 4401.418  |
| BC035058  | 1974.039  | 2699.906  | M33197      | 797.405   | 904.687   | NM_014586 | 2884.042  | 3049.024  |
| X57566    | 4022.619  | 4364.417  | AB011146    | 1833.722  | 1867.19   | NM_014366 | 10412.069 | 9728.658  |
| M33197    | 59858.801 | 58893.418 | NM_005326   | 19239.131 | 16914.457 | NM_000923 | 500.888   | 688.214   |
| NM_018616 | 4897.312  | 4302.829  | NM_014069   | 1410.173  | 1496.397  | NM_006453 | 939.193   | 949.016   |
| AK023809  | 2192.837  | 2970.707  | AB035130    | 1882.454  | 1983.507  | NM_018096 | 927.077   | 643.267   |
| M87943    | 59311.504 | 64133.613 | NM_003359   | 3098.36   | 2802.595  | AL390078  | 443.579   | 503.184   |
| AL360137  | 1296.617  | 1921.879  | M33197      | 46705.504 | 45347.375 | NM_004036 | 1897.183  | 1882.811  |
| U28131    | 57107.652 | 65337.043 | AF119917    | 742.2     | 1129.992  | NM_015986 | 712.944   | 702.442   |
| AY007106  | 13319.846 | 19587.865 | AK021834    | 499.937   | 645.148   | NM_006546 | 637.244   | 843.074   |
| M33197    | 60099.816 | 69028.836 | NM_017915   | 1040.66   | 1148.268  | NM_014959 | 1895.023  | 1992.601  |
| AL049299  | 583.699   | 760.978   | AL050097    | 563.381   | 843.562   | NM_003992 | 1724.141  | 1906.811  |
| NM_006086 | 46756.895 | 54308.652 | AK021513    | 694.942   | 641.884   | AF279265  | 4156.089  | 3665.836  |
| NM_018265 | 1071.867  | 1578.793  | NM_003579   | 2237.01   | 2472.977  | NM_005213 | 46806.25  | 45246.676 |
| AF130086  | 3061.85   | 5690.239  | AL049283    | 1905.64   | 1889.858  | NM_001170 | 1159.092  | 1238.432  |
| AK023858  | 5414.175  | 6586.245  | M33197      | 55128.168 | 57787.441 | NM_004696 | 579.658   | 926.161   |
| M33197    | 58633.227 | 58410.359 | NM_002401   | 22800.506 | 30508.283 | NM_014342 | 1528.617  | 1454.822  |
| AF250920  | 4813.384  | 5603.68   | NM_001274   | 2140.375  | 3134.761  | AB043997  | 938.071   | 816.662   |
| NM_017733 | 2391.807  | 2460.902  | NM_003913   | 1059.754  | 1216.624  | AL133041  | 843.524   | 619.341   |
| NM_014042 | 3548.22   | 3954.274  | NM_002227   | 3115.615  | 2769.003  | NM_004853 | 4058.803  | 5209.13   |
| M33197    | 59271.781 | 37648.27  | NM_007199   | 3783.874  | 3895.817  | NM_001494 | 12518.886 | 13456.833 |
| AF317550  | 878.234   | 592.786   | NM_006243   | 4041.995  | 3376.95   | NM_017707 | 474.218   | 414.407   |
| AK025416  | 965.273   | 1144.359  | M33197      | 59805.613 | 58980.945 | NM_004206 | 1666.693  | 1523.371  |
| AK022165  | 757.675   | 735.151   | AJ011129    | 1639.402  | 1651.351  | NM_004603 | 5825.229  | 6798.431  |
| AF090883  | 758.941   | 1035.128  | NM_006387   | 3712.314  | 3550.333  | AK022849  | 912.519   | 1243.773  |
| U23860    | 945.889   | 1312.809  | NM_005646   | 3262.772  | 2935.108  | AF040964  | 2673.704  | 2786.589  |
| M33197    | 60928.305 | 59435.004 | NM_006639   | 5118.265  | 5888.753  | NM_001939 | 2428.818  | 2662.409  |
| AL049263  | 685.88    | 731.046   | NM_001692   | 1326.267  | 1521.255  | NM_003279 | 3860.371  | 4445.709  |
| AK022372  | 3973.27   | 4728.54   | BI767871    | 3303.785  | 3550.896  | NM_012328 | 3980.721  | 3759.152  |
| AJ227863  | 1667.3    | 2771.036  | AA115473    | 3166.136  | 2970.36   | NM_007341 | 366.326   | 622.446   |
| NM_015916 | 3070.442  | 5409.16   | AA872397    | 4567.688  | 4542.08   | NM_016508 | 1098.663  | 1393.594  |
| NM_003520 | 815.156   | 992.542   | AA709414    | 5056.05   | 6088.995  | NM_006456 | 2871.583  | 3688.86   |
| AL137380  | 3538.734  | 4560.928  | D12676      | 3203.811  | 3990.27   | AK026062  | 5408.643  | 5470.605  |
| M33197    | 57520.57  | 60744.582 | BC012593    | 1067.63   | 1197.051  | AF047002  | 12979.444 | 13880.837 |
| AL137658  | 18183.775 | 21438.947 | NM_000939   | 19434.266 | 22690.311 | AL050082  | 1538.834  | 1678.502  |
| D16888    | 4953.048  | 5555.82   | NM_004295   | 10699.955 | 12741.557 | NM_016588 | 1058.455  | 982.602   |
| U79277    | 621.804   | 858.264   | H-X 02812 I | 2718.111  | 2739.759  | NM_003135 | 5090.87   | 4970.261  |
| AF068298  | 4697.541  | 7329.712  | U75898      | 1884.523  | 1985.528  | NM_000137 | 5230.739  | 5516.612  |
| Z70770    | 2297.718  | 2693.647  | M29039      | 925.611   | 799.008   | NM_012102 | 2640.985  | 2467.022  |

|           |           |           |           |           |           |           |           |           |
|-----------|-----------|-----------|-----------|-----------|-----------|-----------|-----------|-----------|
| AJ227900  | 3660.749  | 3929.483  | M59815    | 884.507   | 981.155   | NM_005017 | 17330.145 | 17302.23  |
| AK023242  | 1093.564  | 1308.99   | AK075081  | 2674.786  | 2382.897  | AF163572  | 8629.425  | 8631.604  |
| M33197    | 62054.566 | 64854.324 | NM_000895 | 7196.077  | 7702.85   | NM_000897 | 3734.386  | 3186.169  |
| CY3Cy5    | 2866.101  | 110.426   | NM_003820 | 13865.546 | 12448.381 | NM_000487 | 603.947   | 742.389   |
| AI417775  | 205.964   | 214.66    | NM_015915 | 2384.918  | 2045.09   | NM_006411 | 17462.15  | 16989.791 |
| BI762229  | 2426.434  | 1806.215  | M33197    | 60737.27  | 60696.035 | NM_014182 | 1626.673  | 1866.105  |
| BG618320  | 3021.627  | 2199.527  | NM_016518 | 4933.407  | 4374.446  | AB040884  | 336.375   | 582.447   |
| Y00787    | 1910.99   | 1685.375  | NM_006185 | 11277.842 | 10771.225 | NM_000492 | 10151.993 | 9116.659  |
| NM_007276 | 2536.358  | 2049.346  | NM_014800 | 1567.544  | 1823.101  | NM_012085 | 997.055   | 1172.377  |
| N34462    | 2524.618  | 2814.934  | NM_001557 | 1458.121  | 1298.22   | AJ272057  | 5828.106  | 5489.193  |
| AI658778  | 2952.148  | 3571.682  | AF147311  | 5165.802  | 5834.772  | NM_004402 | 476.566   | 437.85    |
| L19067    | 3334.624  | 2836.882  | M33197    | 51089.629 | 51193.848 | AK024216  | 9195.625  | 9396.198  |
| Z48482    | 814.502   | 761.072   | NM_001203 | 2680.061  | 3188.267  | Y16752    | 3255.869  | 3874.288  |
| W60413    | 1627.803  | 1584.076  | NM_004799 | 19937.695 | 24764.006 | NM_020156 | 903.234   | 988.259   |
| AL834159  | 4325.953  | 3942.29   | NM_006733 | 1142.434  | 1389.337  | NM_014830 | 1574.719  | 1203.67   |
| NM_000164 | 16810.844 | 17161.396 | NM_014047 | 12351.207 | 13132.646 | AF355402  | 1587.113  | 1763.197  |
| SR5       | 5073.189  | 4385.926  | AK022901  | 1284.245  | 1280.072  | NM_014470 | 352.564   | 362.578   |
| SR7       | 6112.577  | 39582.047 | M33197    | 66241.156 | 62051.078 | NM_001665 | 8266.434  | 8800.165  |
| SR9       | 20613.795 | 3369.468  | AF037332  | 3852.759  | 3546.21   | AF097645  | 705.771   | 280.022   |
| CY3Cy5    | 3981.845  | 187.826   | NM_014571 | 658.102   | 753.885   | NM_001773 | 910.682   | 541.69    |
| NM_003682 | 748.027   | 319.666   | NM_006052 | 895.794   | 854.831   | Z70704    | 1180.698  | 1200.424  |
| NM_006314 | 6383.771  | 4691.217  | AB040912  | 4828.926  | 4733.1    | NM_014363 | 1049.929  | 1090.423  |
| NM_001782 | 638.632   | 474.816   | NM_000813 | 725.28    | 590.638   | NM_000557 | 2086.362  | 2041.736  |
| NM_002754 | 634.659   | 539.002   | NM_018896 | 2157.528  | 2198.825  | NM_003235 | 447.38    | 468.837   |
| NM_000797 | 3478.817  | 2719.635  | AJ300465  | 1509.138  | 1425.869  | NM_001375 | 3494.859  | 3403.159  |
| NM_016293 | 11250.846 | 9834.278  | X86400    | 762.712   | 991.801   | NM_002312 | 718.897   | 869.289   |
| AL080148  | 7986.152  | 7036.238  | NM_000810 | 1595.365  | 1756.562  | M20699    | 1165.317  | 1059.809  |
| NM_006731 | 802.286   | 661.796   | AF069307  | 2781.213  | 2600.145  | NM_004774 | 5073.629  | 4394.867  |
| NM_018487 | 653.25    | 726.697   | M33197    | 60055.145 | 59492.898 | NM_016937 | 2970.743  | 2905.162  |
| NM_020134 | 1215.712  | 1275.088  | U92978    | 2911.909  | 2300.649  | NM_003475 | 262.815   | 219.501   |
| BC034395  | 1221.893  | 1793.291  | NM_005738 | 3251.044  | 2431.968  | NM_002690 | 3794.689  | 3221.76   |
| NM_002479 | 741.651   | 717.935   | NM_014488 | 1820.836  | 1814.972  | NM_018235 | 693.853   | 724.07    |
| NM_000348 | 7613.846  | 7244.066  | AB014567  | 896.437   | 773.643   | U88892    | 799.892   | 922.544   |
| NM_005059 | 737.585   | 778.489   | AK022817  | 1850.719  | 2053.246  | AK023755  | 557.374   | 552.571   |
| NM_004950 | 3285.409  | 3166.462  | NM_018034 | 7503.912  | 7370.613  | NM_005725 | 228.792   | 438.061   |
| NM_000724 | 2532.415  | 2424.136  | M33197    | 65571.281 | 68842.328 | NM_012211 | 561.057   | 606.779   |
| NM_000553 | 348.072   | 304.663   | AB037831  | 1648.986  | 1909.15   | AB040877  | 546.733   | 464.766   |
| NM_002557 | 4562.861  | 4580.38   | NM_012103 | 18176.801 | 24661.504 | NM_006285 | 4259.887  | 4545.004  |
| NM_004477 | 448.128   | 456.925   | AL122077  | 9926.5    | 10913.542 | NM_019067 | 2370.926  | 2893.445  |
| NM_005662 | 18745.131 | 15973.671 | NM_014632 | 1007.945  | 1182.714  | AF251025  | 496.052   | 602.969   |
| AK021489  | 19911.041 | 13543.3   | NM_006422 | 862.546   | 1004.835  | NM_015677 | 1852.224  | 2107.515  |
| NM_003895 | 590.084   | 463.556   | NM_016946 | 2474.666  | 2353.83   | NM_001772 | 7880.422  | 7236.632  |
| NM_004317 | 4076.773  | 2762.287  | M33197    | 66798.531 | 70109.992 | AB011087  | 1312.49   | 1259.258  |
| NM_014645 | 1422.053  | 1247.449  | NM_007259 | 2913.701  | 2718.645  | AF161341  | 7463.952  | 6054.483  |
| NM_014708 | 2940.07   | 2878.388  | NM_018402 | 770.58    | 755.966   | NM_004384 | 2784.718  | 3205.285  |
| NM_003693 | 913.074   | 848.817   | NM_018009 | 541.062   | 685.652   | L05500    | 5854.87   | 5605.473  |
| NM_000356 | 18901.592 | 17397.773 | M33197    | 57944.426 | 53677.176 | NM_012306 | 8204.238  | 8503.948  |
| NM_018134 | 21728.828 | 23391.482 | NM_002401 | 25404.951 | 30527.859 | AF222903  | 2212.18   | 1824.749  |
| NM_013247 | 3261.51   | 3043.445  | NM_001274 | 1314.27   | 1221.918  | NM_006226 | 2124.713  | 1758.323  |
| NM_006770 | 2662.69   | 2740.784  | NM_003913 | 863.975   | 840.874   | L10374    | 4319.686  | 4330.493  |
| BE394704  | 578.716   | 717.603   | NM_002227 | 2564.48   | 2475.421  | M84605    | 319.631   | 474.586   |
| NM_004703 | 2209.192  | 2602.701  | NM_007199 | 2235.764  | 2131.224  | AB016902  | 567.069   | 585.905   |
| NM_001512 | 604.229   | 764.618   | AB002301  | 775.879   | 526.37    | AF272378  | 10668.507 | 10857.016 |

|           |           |           |           |           |           |           |           |           |
|-----------|-----------|-----------|-----------|-----------|-----------|-----------|-----------|-----------|
| NM_014706 | 5746.601  | 5891.277  | AB014530  | 8965.653  | 8646.45   | NM_000246 | 1248.474  | 1469.478  |
| AK023172  | 554.563   | 545.645   | M33197    | 60494.457 | 59254.141 | NM_005860 | 2103.183  | 1926.262  |
| AJ001348  | 661.646   | 655.22    | NM_005989 | 2950.663  | 2920.918  | AF095288  | 4089.513  | 4045.197  |
| NM_014007 | 1283.399  | 1182.195  | AB014607  | 5503.11   | 4988.746  | AK025116  | 296.793   | 263.134   |
| AB033006  | 3169.39   | 3140.88   | AF134401  | 2000.103  | 2435.219  | AK026271  | 4555.181  | 4439.572  |
| AF020314  | 11884.422 | 10289.229 | NM_020151 | 12556.84  | 15059.98  | NM_001796 | 4341.763  | 5114.166  |
| NM_016332 | 6834.35   | 6486.621  | NM_005891 | 43292.762 | 52560.113 | AF090895  | 1009.534  | 824.72    |
| AK023936  | 409.981   | 673.823   | NM_001645 | 2264.435  | 2611.545  | NM_005610 | 1599.181  | 1883.921  |
| NM_006457 | 1013.858  | 1046.325  | NM_003956 | 1678.015  | 1785.677  | AL133651  | 878.178   | 935.355   |
| AF000381  | 3713.374  | 2570.988  | M33197    | 61214.914 | 58759.465 | AB014532  | 3022.85   | 3041.047  |
| NM_012105 | 996.286   | 936.577   | NM_003500 | 3268.591  | 3810.341  | NM_003478 | 2317.112  | 1974.079  |
| NM_000197 | 676.484   | 747.336   | NM_014317 | 2933.155  | 2733.041  | BE275227  | 358.1     | 602.128   |
| S82470    | 2118.508  | 1891.656  | L09234    | 6726.054  | 6173.672  | NM_016237 | 6913.221  | 7205.7    |
| NM_000434 | 219.614   | 594.866   | NM_000059 | 1603.132  | 1507.792  | NM_004924 | 6564.474  | 6010.407  |
| AB028982  | 1822.125  | 1515.225  | AK026740  | 1211.589  | 1136.218  | NM_001796 | 2092.387  | 2249.074  |
| NM_002004 | 4833.36   | 3582.876  | NM_017881 | 2275.58   | 2990.368  | NM_001211 | 2891.022  | 3916.104  |
| NM_005121 | 1129.791  | 878.771   | M33197    | 63756.52  | 62657.785 | AB033050  | 2661.956  | 2567.403  |
| NM_001643 | 15375.133 | 14927.177 | NM_017634 | 4830.211  | 5863.014  | NM_004356 | 7440.676  | 6751.082  |
| NM_020221 | 1338.012  | 1362.875  | NM_017743 | 1725.786  | 1635.542  | NM_001855 | 391.001   | 275.757   |
| NM_000747 | 1510.231  | 1535.18   | NM_000300 | 1960.169  | 1867.806  | BC015022  | 3779.447  | 3269.724  |
| NM_005415 | 3571.934  | 3219.31   | M33197    | 60305.195 | 61099.117 | NM_006697 | 2195.856  | 1925.07   |
| AL137708  | 460.23    | 299.699   | AV756917  | 3879.118  | 3654.229  | M19182    | 387.798   | 344.224   |
| AJ275973  | 16354.1   | 15355.327 | NM_018380 | 9115.353  | 9958.179  | AK025707  | 526.689   | 579.652   |
| NM_006493 | 2193.335  | 2105.671  | NM_019038 | 1179.084  | 1136.295  | NM_002406 | 16241.975 | 18940.057 |
| U76362    | 2997.061  | 3410.395  | AF183423  | 3879.208  | 3333.974  | U87169    | 586.899   | 745.052   |
| AF040248  | 1148.103  | 982.148   | M33197    | 899.166   | 783.985   | NM_002073 | 299.914   | 495.37    |
| NM_014228 | 793.028   | 882.811   | AB011146  | 2296.641  | 2450.474  | NM_001935 | 15496.77  | 15632.507 |
| AL832292  | 3609.885  | 3774.958  | NM_005326 | 13216.648 | 14499.171 | NM_003291 | 5902.855  | 5950.977  |
| NM_003045 | 6306.795  | 7130.811  | NM_014069 | 1110.121  | 1269.079  | AK022950  | 1186.439  | 1288.12   |
| NM_002618 | 1850.747  | 1315.813  | AB035130  | 1827.731  | 1790.905  | S75755    | 605.496   | 637.872   |
| L27479    | 527.501   | 280.311   | NM_003359 | 1899.119  | 1816.23   | AB014576  | 4663.483  | 4639.278  |
| NM_002193 | 1806.405  | 2275.988  | M33197    | 33559.449 | 41214.332 | NM_019044 | 2364.174  | 1699.023  |
| NM_001388 | 6146.902  | 7402.904  | AF119917  | 824.661   | 900.243   | AK000145  | 523.03    | 787.76    |
| X76770    | 4558.748  | 5896.905  | AK021834  | 1552.237  | 1447.958  | AF174601  | 2286.829  | 2352.479  |
| AB037808  | 1487.394  | 2548.218  | NM_017915 | 902.7     | 1091.522  | AF279865  | 492.273   | 739.875   |
| NM_016038 | 3226.877  | 3581.355  | AL050097  | 333.114   | 710.708   | NM_014700 | 655.578   | 702.917   |
| Z36821    | 5900.932  | 5074.354  | NM_003579 | 1750.523  | 1984.568  | NM_014714 | 435.946   | 480.263   |
| AF289485  | 3125.882  | 2881.55   | AL049283  | 1412.337  | 1915.522  | NM_005687 | 5177.597  | 5150.849  |
| AF130092  | 2102.444  | 2360.659  | AF005258  | 759.345   | 774.04    | NM_005983 | 3192.086  | 3431.877  |
| NM_016095 | 3609.72   | 3742.723  | NM_000887 | 655.709   | 655.61    | NM_017652 | 2593.103  | 2713.457  |
| AK024794  | 1255.739  | 1054.756  | NM_003899 | 4338.57   | 4064.75   | X59268    | 2405.528  | 2379.229  |
| NM_019853 | 6952.902  | 5259.346  | X99662    | 4507.958  | 4025.129  | D70832    | 23649.289 | 29638.727 |
| NM_017992 | 7039.239  | 5940.22   | NM_003473 | 38202.316 | 35297.473 | NM_001425 | 1588.09   | 1791.317  |
| NM_005400 | 519.977   | 507.697   | NM_014325 | 2256.224  | 2101.047  | AK026980  | 333.598   | 546.025   |
| BF851643  | 306.282   | 437.192   | M33197    | 63694.422 | 58198.953 | AJ277915  | 718.222   | 699.367   |
| AK023061  | 610.098   | 551.599   | NM_006016 | 51503.426 | 50913.5   | NM_020368 | 796.31    | 1052.748  |
| NM_007255 | 2341.792  | 2291.957  | NM_001242 | 2333.939  | 2472.72   | AF024708  | 6938.422  | 8137.516  |
| NM_003668 | 7144.466  | 6612.873  | NM_014891 | 6694.522  | 8725.237  | NM_006467 | 917.553   | 1336.036  |
| NM_013384 | 56925.414 | 51849.754 | NM_013392 | 6699.06   | 6871.566  | NM_017566 | 741.882   | 653.927   |
| NM_001187 | 979.54    | 1071.324  | M33197    | 57970.777 | 55807.754 | NM_006582 | 543.753   | 608.588   |
| NM_018241 | 2070.605  | 1946.431  | NM_002175 | 731.772   | 1158.955  | AB033019  | 2161.056  | 2935.458  |
| NM_005834 | 3863.668  | 4957.194  | NM_003236 | 876.743   | 893.604   | NM_006162 | 338.021   | 530.379   |
| NM_000724 | 2660.425  | 2371.366  | NM_003458 | 778.26    | 805.044   | NM_014764 | 4338.617  | 4577.098  |



|           |           |           |           |           |           |           |           |           |
|-----------|-----------|-----------|-----------|-----------|-----------|-----------|-----------|-----------|
| NM_000553 | 1540.433  | 836.451   | AF052692  | 2101.701  | 2318.706  | NM_018078 | 1202.104  | 1162.638  |
| NM_002557 | 4614.162  | 6689.181  | NM_002820 | 880.387   | 662.743   | NM_007080 | 9002.043  | 10038.382 |
| NM_004477 | 157.301   | 601.874   | NM_002354 | 1363.981  | 1120.653  | AK026912  | 5395.495  | 5714.098  |
| Y10802    | 1079.643  | 930.317   | AF062739  | 1290.358  | 1225.174  | AK023531  | 3461.735  | 3330.128  |
| BI762229  | 2779.882  | 3502.24   | M33197    | 61477.004 | 63255.262 | AB011128  | 2597.734  | 2684.268  |
| AA131406  | 476.954   | 686.417   | NM_001950 | 4199.813  | 4004.314  | AK025074  | 2007.217  | 2075.989  |
| BG618320  | 3093.505  | 2333.329  | AK026364  | 1276.426  | 1335.223  | NM_000303 | 979.91    | 532.567   |
| Y00787    | 2070.222  | 1693.185  | NM_018117 | 987.696   | 862.192   | NM_006242 | 429.236   | 283.392   |
| NM_007276 | 2542.613  | 2279.449  | NM_006999 | 876.503   | 1135.96   | X78712    | 713.201   | 818.478   |
| N34462    | 2243.158  | 2163.684  | M33197    | 61298.348 | 58653.203 | NM_001497 | 642.722   | 532.809   |
| AI658778  | 2320.292  | 1993.445  | NM_004331 | 5358.427  | 5015.793  | NM_004130 | 1286.175  | 1650.428  |
| L19067    | 3009.396  | 2825.309  | NM_015996 | 884.257   | 654.436   | NM_006348 | 373.554   | 295.705   |
| Z48482    | 1107.689  | 832.798   | NM_015703 | 6036.193  | 5626.459  | AF067972  | 5968.824  | 5525.489  |
| W60413    | 1037.425  | 1122.019  | AB018337  | 2303.638  | 2619.022  | D87076    | 1106.293  | 967.247   |
| BI823365  | 1770.21   | 1598.031  | NM_014489 | 1645.75   | 1674.239  | AB020635  | 682.543   | 520.832   |
| X06318    | 6353.765  | 5356.746  | AK025273  | 4602.984  | 5922.07   | NM_006515 | 337.016   | 669.787   |
| AL834159  | 3864.882  | 3585.809  | M33197    | 55069.539 | 58730.855 | NM_005224 | 922.76    | 922.22    |
| NM_000164 | 17772.35  | 16368.896 | NM_001794 | 601.797   | 681.462   | NM_012144 | 4645.668  | 4558.08   |
| NM_016217 | 9579.664  | 9312.983  | NM_002205 | 5429.502  | 5849.677  | X65231    | 49978.277 | 43556.703 |
| AK025971  | 4700.714  | 5168.766  | M33197    | 58627.223 | 55594.586 | NM_002908 | 1238.78   | 1333.909  |
| NM_014007 | 1465.693  | 1518.721  | NM_001911 | 19354.146 | 25557.541 | NM_002397 | 4261.719  | 4272.51   |
| AB033006  | 3515.903  | 4110.005  | AB020698  | 692.191   | 734.594   | AK002195  | 717.273   | 550.62    |
| AF020314  | 13538.362 | 16444.963 | U68382    | 1954.551  | 1854.409  | AK022850  | 711.3     | 583.488   |
| NM_016332 | 6648.682  | 9354.299  | NM_003969 | 1848.474  | 1888.718  | AL137498  | 1286.815  | 1404.639  |
| AK023936  | 475.729   | 680.946   | NM_004651 | 1367.934  | 1611.624  | S66168    | 1166.134  | 1483.387  |
| NM_006457 | 1178.26   | 1517.987  | M33197    | 59885.066 | 59121.863 | AK024150  | 933.962   | 1228.227  |
| NM_006314 | 6284.486  | 5041.889  | NM_017569 | 5315.413  | 5493.317  | AF088076  | 10632.237 | 12449.231 |
| NM_001782 | 521.447   | 543.019   | NM_001456 | 550.185   | 601.065   | AF086543  | 1163.986  | 1356.616  |
| NM_002754 | 425.042   | 476.614   | NM_002906 | 2303.289  | 2106.331  | AB046797  | 1279      | 945.658   |
| NM_000797 | 2964.488  | 2898.518  | AK024480  | 1519.975  | 1646.083  | AK002098  | 1573.307  | 1151.775  |
| NM_016293 | 10081.914 | 9177.997  | Y13871    | 13625.9   | 12734.221 | AK025156  | 5211.482  | 4808.243  |
| AL080148  | 9778.807  | 8013.987  | NM_012134 | 549.101   | 583.513   | AK022116  | 2745.976  | 2469.536  |
| NM_006731 | 802.552   | 769.751   | AL137725  | 4763.066  | 4347.865  | AF026526  | 630.364   | 678.493   |
| NM_018487 | 493.12    | 508.936   | M33197    | 60003.711 | 61205.469 | AK026207  | 3307.412  | 3427.356  |
| NM_020134 | 1551.416  | 1252.545  | AJ008151  | 15111.236 | 16334.56  | AK024984  | 3104.041  | 2794.931  |
| NM_014061 | 1242.173  | 1068.564  | M33197    | 52485.453 | 53293.777 | AF085955  | 222.148   | 404.746   |
| BC034395  | 1108.518  | 1230.524  | NM_004091 | 2439.047  | 2590.344  | AF075106  | 1812.087  | 1399.722  |
| NM_002479 | 710.596   | 832.158   | X74070    | 62847.348 | 60353.699 | AK023339  | 1257.186  | 1676.449  |
| NM_000348 | 8007.372  | 8013.5    | AF027219  | 1327.402  | 1196.829  | AF086008  | 668.763   | 570.226   |
| NM_005059 | 627.428   | 634.328   | NM_006333 | 3433.302  | 3184.172  | AF087970  | 595.77    | 449.467   |
| NM_004950 | 2847.101  | 2763.914  | M33197    | 57204.973 | 57734.379 | U05597    | 771.329   | 642.23    |
| NM_006493 | 2145.621  | 2968.046  | NM_002898 | 6983.482  | 6437.734  | U73799    | 539.527   | 385.367   |
| U76362    | 2678.569  | 3627.989  | AK022749  | 4681.969  | 5218.01   | AK021668  | 14282.285 | 12445.641 |
| AF040248  | 942.555   | 1223.303  | BF031409  | 4961.684  | 5428.742  | AF086148  | 8850.897  | 6550.102  |
| NM_014228 | 889.122   | 1103.996  | NM_007043 | 1634.609  | 1486.151  | AJ245433  | 2341.479  | 2281.595  |
| AL832292  | 3470.122  | 5200.289  | U94388    | 910.536   | 754.797   | AK021942  | 8762.89   | 7415.008  |
| NM_003045 | 5818.864  | 9567.465  | NM_012322 | 4574.231  | 3540.5    | NM_014127 | 566.351   | 368.907   |
| NM_003060 | 372.074   | 677.881   | M33197    | 60060.441 | 59205.016 | AK021878  | 375.077   | 338.342   |
| AK021489  | 21030.967 | 25581.105 | NM_004889 | 40546.953 | 40187.676 | AK023217  | 539.783   | 583.555   |
| NM_004525 | 448.807   | 347.995   | AK025314  | 1590.066  | 1699.64   | AF090902  | 1149.005  | 1331.567  |
| NM_003895 | 605.122   | 607.954   | NM_002109 | 4527.247  | 4793.331  | AF119887  | 4057.08   | 3902.391  |
| NM_004317 | 4095.804  | 4126.555  | NM_000984 | 61273.891 | 63570.375 | AK091038  | 431.566   | 366.187   |
| NM_014645 | 1478.518  | 1198.843  | NM_002453 | 5750.988  | 5169.603  | AK024193  | 966.014   | 877.912   |

|           |           |           |           |           |           |           |           |           |
|-----------|-----------|-----------|-----------|-----------|-----------|-----------|-----------|-----------|
| NM_01470E | 2817.967  | 3018.375  | AK000780  | 37521.875 | 44211.75  | NM_01857E | 498.297   | 488.316   |
| NM_00369E | 1150.108  | 852.34    | AK026721  | 1739.288  | 1461.329  | NM_01854E | 435.01    | 462.831   |
| NM_00035E | 21345.98  | 19246.947 | AK023027  | 439.179   | 696.065   | AK024438  | 5968.19   | 5596.364  |
| NM_018134 | 27520.49  | 30006.434 | AB002348  | 5468.961  | 5719.735  | AK023517  | 928.002   | 665.368   |
| NM_013247 | 3201.966  | 2827.651  | M33197    | 24621.477 | 28442.912 | AK023869  | 1971.132  | 1691.421  |
| NM_00677C | 2906.126  | 2493.066  | AK026043  | 4337.083  | 3918.832  | NM_01772E | 647.619   | 637.357   |
| BE394704  | 764.769   | 672.044   | NM_00500E | 5232.276  | 4841.84   | AJ272177  | 407.403   | 482.032   |
| NM_00470E | 2315.084  | 2310.095  | AK027033  | 2853.034  | 2553.362  | AK026402  | 3984.975  | 4628.533  |
| NM_00151E | 703.013   | 772.798   | NM_00010E | 1023.433  | 1186.055  | AF111846  | 833.232   | 815.861   |
| NM_01470E | 5828.282  | 5493.335  | NM_00300C | 11594.739 | 12019.489 | M11948    | 72406.539 | 48286.039 |
| AK023172  | 372.854   | 535.938   | NM_00249E | 20271.604 | 18907.867 | AK024618  | 229.568   | 543.311   |
| AF139768  | 322.01    | 450.235   | M33197    | 54670.77  | 51562.098 | AL049969  | 409.916   | 469.609   |
| AJ001348  | 562.192   | 710.857   | NM_016284 | 1867.632  | 1914.813  | AK026366  | 20638.859 | 16399.768 |
| NM_00725E | 2616.207  | 3035.395  | NM_01459E | 2114      | 2273.139  | AK024229  | 9304.805  | 5549.804  |
| NM_00366E | 7377.679  | 9174.305  | NM_00683E | 10864.042 | 9450.865  | AK021467  | 1151.854  | 725.907   |
| NM_013384 | 54137.73  | 53741.129 | NM_012257 | 1273.337  | 1241.384  | NM_020371 | 1734.833  | 969.406   |
| NM_001187 | 1338.423  | 1626.241  | U37690    | 18223.895 | 16510.41  | AK022498  | 1571.288  | 694.047   |
| NM_018241 | 2302.27   | 3758.799  | NM_00512C | 1583.55   | 1750.129  | U84506    | 459.7     | 564.779   |
| NM_005834 | 4373.763  | 6831.15   | AB029012  | 10451.684 | 11346.69  | U21556    | 30918.82  | 33425.34  |
| NM_01807E | 358.507   | 541.562   | M33197    | 66234.023 | 63528.973 | NM_01766E | 1685.704  | 1748.766  |
| NM_01210E | 919.076   | 918.139   | AJ010278  | 1318.59   | 992.108   | AF147379  | 7716.847  | 9202.807  |
| S82470    | 2071.978  | 1701.132  | NM_00629E | 2393.922  | 2533.892  | AF086034  | 2896.102  | 3000.47   |
| AB028982  | 1964.644  | 1740.974  | AF060936  | 6434.827  | 4875.362  | AK000174  | 676.504   | 898.841   |
| NM_002004 | 5086.739  | 3758.786  | NM_018167 | 903.049   | 677.851   | AK022887  | 484.103   | 469.217   |
| NM_005121 | 1173.529  | 849.156   | AL050088  | 1037.986  | 979.301   | AK000745  | 8675.649  | 7246.918  |
| NM_00164E | 14807.343 | 12454.155 | AK024939  | 2152.525  | 1847.729  | NM_00529E | 247.343   | 362.779   |
| NM_020221 | 1321.706  | 1231.86   | AB007880  | 2030.079  | 1988.356  | NM_015901 | 400.558   | 454.302   |
| NM_000747 | 1727.252  | 1512.933  | AK024950  | 1036.741  | 996.289   | Z83935    | 711.678   | 529.309   |
| NM_00541E | 3529.706  | 3297.077  | M33197    | 62822.375 | 59021.18  | AF093744  | 1244.237  | 938.636   |
| AL137708  | 607.671   | 326.888   | NM_01414E | 13044.779 | 12827.369 | NM_018687 | 4617.901  | 4278.625  |
| AJ275973  | 17123.346 | 20573.014 | NM_01884E | 4728.297  | 4081.874  | M57417    | 20224.764 | 13244.151 |
| AL834159  | 4038.752  | 5289.813  | AL049461  | 484.459   | 690.293   | NM_020524 | 1684.276  | 2084.788  |
| NM_000164 | 15145.922 | 18605.475 | M33197    | 62360.742 | 58639.848 | NM_00199E | 841.704   | 726.46    |
|           | 764.742   | 553.009   | AL109782  | 7350.728  | 7529.503  | X64977    | 553.615   | 532.528   |
| NM_016217 | 10366.756 | 15853.771 | AF086225  | 1132.974  | 981.972   | NM_01623E | 377.804   | 447.987   |
| AK025971  | 6346.342  | 8595.535  | NM_005844 | 5374.901  | 5259.894  | AF086322  | 231.634   | 361.307   |
| NM_00261E | 3153.967  | 3602.83   | AK024941  | 5051.517  | 4828.825  | Z70717    | 522.547   | 497.075   |
| L27479    | 743.341   | 1304.473  | AF056434  | 1154.612  | 1566.539  | X79308    | 562.066   | 758.076   |
| NM_00219E | 1052.915  | 1123.097  | M33197    | 45584.539 | 47294.27  | X69110    | 394.747   | 439.771   |
| NM_00138E | 5619.663  | 4149.991  | AL390152  | 1418.378  | 1096.401  | AB011151  | 1008.982  | 880.592   |
| X76770    | 4869.292  | 4934.511  | M33197    | 61946.5   | 57607.906 | U92995    | 1380.282  | 1289.14   |
| AB037808  | 1277.875  | 1529.796  | NM_01812E | 1168.975  | 1022.5    | Z70769    | 577.238   | 450.69    |
| NM_01603E | 3290.886  | 3219.953  | AK024506  | 3333.048  | 2732.298  | NM_00710E | 1891.398  | 1400.811  |
| Z36821    | 6973.544  | 6708.318  | AF086326  | 5893.067  | 4969.45   | AL137555  | 1846.735  | 1956.292  |
| AF289485  | 3549.155  | 4965.667  | M33197    | 60093.625 | 58401.25  | AL133017  | 1352.717  | 782.516   |
| AF130092  | 2337.886  | 2152.537  | AL080057  | 905.288   | 1095.433  | CY3Cy5    | 4184.908  | 929.816   |
| NM_01609E | 3673.192  | 3716.542  | AL117528  | 801.472   | 989.212   | AI359037  | 4241.946  | 7030.409  |
| AK024794  | 1309.802  | 1202.539  | M33197    | 63003.637 | 60090.871 | BI754285  | 305.584   | 775.237   |
| NM_01985E | 6982.104  | 5506.355  | AK025948  | 1735.983  | 1605.193  | L31785    | 648.744   | 496.966   |
| NM_01799E | 7581.679  | 6272.977  | AK000674  | 792.969   | 535.541   | H-M 69043 | 2512.173  | 2107.369  |
| NM_00540C | 1111.855  | 830.158   | AJ238555  | 632.998   | 735.011   | AF077374  | 887.155   | 699.543   |
| AK023061  | 775.847   | 631.826   | AL353948  | 14446.979 | 15563.444 | U43901    | 671.467   | 537.804   |
| NM_014061 | 1406.046  | 1583.375  | AL122043  | 1353.154  | 650.012   | X59065    | 440.91    | 295.057   |

|           |           |           |           |           |           |           |           |           |
|-----------|-----------|-----------|-----------|-----------|-----------|-----------|-----------|-----------|
| BC034395  | 969.039   | 1463.151  | M33197    | 51906.895 | 51122.598 | M59828    | 2207.632  | 1859.109  |
| NM_002479 | 944.961   | 1057.944  | AK025869  | 3299.219  | 3318.181  | NM_016134 | 1372.984  | 918.174   |
| NM_000348 | 7822.479  | 11029.801 | M33197    | 46383.332 | 45842.508 | SR2       | 49506.328 | 46927.125 |
| NM_005059 | 714.06    | 1054.206  | AF056430  | 1376.906  | 999.892   | SR4       | 13065.691 | 9763.925  |
| NM_004950 | 3127.929  | 4468.874  | NM_014906 | 1394.789  | 1248.656  | SR6       | 2116.225  | 1694.577  |
| NM_000724 | 2314.03   | 2820.351  | AF009291  | 1474.274  | 1605.486  | SR8       | 6146.156  | 18053.047 |
| NM_002557 | 3428.801  | 2789.082  | M33197    | 62762.52  | 59138.789 | SR10      | 23491.559 | 7074.176  |
| NM_004477 | 414.898   | 345.333   | NM_018055 | 1652.807  | 1539.611  | CY3Cy5    | 2438.511  | 86.27     |
| BE728156  | 467.491   | 281.211   | AK002199  | 904.235   | 939.172   | NM_000612 | 3851.813  | 3348.861  |
| Y10802    | 758.206   | 814.812   | AK021662  | 482.48    | 592.036   | NM_004257 | 13691.603 | 10432.983 |
| BI762229  | 2594.897  | 2134.377  | AK021469  | 1390.735  | 1441.246  | NM_004248 | 1414.104  | 1349.384  |
| BG618320  | 4702.478  | 4077.108  | AK021706  | 2617.877  | 2295.287  | NM_002362 | 308.331   | 667.439   |
| Y00787    | 1999.445  | 1848.241  | M33197    | 61048.438 | 57863.551 | NM_004796 | 803.163   | 623.549   |
| NM_007276 | 2747.129  | 2881.027  | AK025161  | 858.194   | 552.151   | NM_000435 | 2427.781  | 2238.379  |
| N34462    | 3330.796  | 4109.137  | AK026259  | 9195.612  | 10509.074 | NM_001842 | 7914.141  | 7286.229  |
| AI658778  | 2471.307  | 2344.805  | AJ008115  | 12735.503 | 10962.922 | NM_007281 | 251.705   | 295.881   |
| L19067    | 3292.815  | 2991.174  | AF083125  | 646.046   | 668.291   | AB017169  | 368.745   | 546.574   |
| Z48482    | 749.162   | 794.126   | AL049241  | 1588.901  | 1651.846  | AL080170  | 1188.79   | 993.309   |
| W60413    | 1037.312  | 1094.825  | M33197    | 62969.695 | 55694.684 | AB039903  | 2647.765  | 2554.101  |
| BI823365  | 1873.392  | 1735.048  | X51526    | 299.187   | 641.006   | NM_000542 | 6912.348  | 5676.799  |
| X06318    | 6291.959  | 6130.207  | AK022970  | 1355.789  | 1091.289  | NM_006851 | 464.435   | 483.704   |
| NM_004703 | 1978.128  | 1487.639  | AK026212  | 1055.85   | 1166.207  | AK001560  | 332.721   | 643.16    |
| NM_014706 | 6405.836  | 7535.489  | AF086415  | 2865.46   | 2946.683  | NM_000948 | 256.423   | 266.902   |
| AF139768  | 835.7     | 1198.439  | M33197    | 59983.453 | 56831.922 | H99588    | 1516.37   | 1235.116  |
| AJ001348  | 956.86    | 795.718   | AK024470  | 1538.376  | 1852.161  | AK022600  | 1673.009  | 1236.433  |
| NM_014007 | 864.306   | 700.803   | NM_017935 | 1157.736  | 1416.255  | AK023142  | 1087.263  | 1142.482  |
| AB033006  | 2483.11   | 2271.942  | NM_004226 | 1664.288  | 1301.276  | U61740    | 5914.495  | 5492.006  |
| AF020314  | 10593.205 | 8139.544  | AK023400  | 586.026   | 619.807   | NM_006409 | 56340.484 | 51281.363 |
| NM_016332 | 6224.095  | 5109      | NM_006432 | 11857.624 | 10190.086 | AB049054  | 1732.829  | 2129.05   |
| AK023936  | 302.391   | 458.719   | AF025441  | 1876.994  | 2689.969  | NM_015071 | 1030.395  | 897.754   |
| NM_006457 | 901.06    | 936.563   | U62823    | 4488.177  | 4792.148  | NM_013227 | 717.559   | 798.566   |
| NM_003682 | 651.824   | 658.423   | NM_003535 | 41190.152 | 44289.906 | NM_001570 | 1199.562  | 1468.289  |
| NM_006314 | 8970.339  | 8027.041  | AK026768  | 2259.776  | 2216.424  | NM_015658 | 484.425   | 535.664   |
| NM_001782 | 756.881   | 740.957   | M33197    | 63863.996 | 59283.488 | NM_000589 | 1842.505  | 2378.171  |
| NM_002754 | 239.196   | 340.548   | AK000852  | 5776.424  | 5114.616  | NM_016546 | 12358.013 | 11320.674 |
| NM_000797 | 3279.782  | 3098.122  | AF251188  | 3895.796  | 3879.119  | AF309653  | 9043.129  | 8838.319  |
| NM_014927 | 264.967   | 299.725   | AK026418  | 7888.401  | 9379.783  | NM_002620 | 7899.463  | 7463.951  |
| NM_016293 | 8924.182  | 8521.487  | AF086194  | 20506.021 | 20262.748 | S79267    | 730.333   | 514.078   |
| AF217525  | 382.775   | 460.466   | AK026811  | 2306.673  | 2034.14   | NM_001816 | 556.475   | 518.725   |
| AL080148  | 10196.746 | 7648.233  | M33197    | 58204.508 | 55247.02  | NM_003784 | 22993.096 | 22628.471 |
| NM_006731 | 880.79    | 737.68    | AK023633  | 1564.601  | 1372.245  | NM_000195 | 11356.778 | 9282.194  |
| NM_018487 | 814.453   | 1133.267  | NM_006179 | 1571.561  | 1623.565  | NM_005445 | 7350.051  | 4256.227  |
| NM_020134 | 1758.773  | 1949.354  | AL360165  | 2481.487  | 2502.91   | NM_014899 | 1797.009  | 1678.712  |
| NM_020221 | 1075.382  | 1593.604  | M33197    | 60311.484 | 56312.898 | NM_003630 | 2592.09   | 2699.816  |
| NM_000747 | 1300.175  | 855.143   | AJ008132  | 3395.041  | 3608.609  | NM_000046 | 2155.842  | 1952.182  |
| NM_005415 | 2742.504  | 1595.905  | NM_005281 | 2825.823  | 3079.915  | NM_003219 | 872.814   | 645.335   |
| AL137708  | 676.223   | 347.455   | NM_005549 | 2217.501  | 2529.373  | NM_006709 | 2081.124  | 2454.262  |
| AJ275973  | 13579.063 | 10423.875 | M33197    | 48888.469 | 41702.234 | NM_004910 | 1237.528  | 1123.459  |
| NM_006493 | 1810.101  | 1697.299  | U12129    | 4421.586  | 4047.056  | AB013452  | 359.476   | 571.332   |
| U76362    | 2569.867  | 3371.698  | S81242    | 59458.457 | 58329.605 | M93107    | 3986.299  | 3471.963  |
| AF040248  | 1007.114  | 1046.495  | AF230801  | 2012.352  | 1782.546  | BC001479  | 4380.387  | 4035.58   |
| NM_014228 | 910.46    | 1264.961  | AF075072  | 1515.495  | 1332.241  | NM_002461 | 12659.302 | 13453.493 |
| AL832292  | 2875.014  | 3163.21   | M33197    | 63156.973 | 58793.57  | NM_005771 | 9802.608  | 8682.245  |

|           |           |           |           |           |           |           |           |           |
|-----------|-----------|-----------|-----------|-----------|-----------|-----------|-----------|-----------|
| NM_00304E | 5922.438  | 6533.229  | NM_002509 | 4253.498  | 4705.469  | AB032986  | 23557.957 | 25506.957 |
| NM_005662 | 25598.822 | 26837.42  | U38442    | 3016.715  | 2907.781  | NM_01752E | 15246.316 | 17426.623 |
| NM_00306C | 231.305   | 520.129   | AK026706  | 1428.571  | 1652.742  | NM_016032 | 8043.784  | 8773.413  |
| NM_00452E | 373.715   | 526.735   | AB007936  | 15496.05  | 14995.423 | NM_014324 | 63125.914 | 56214.043 |
| NM_00389E | 648.988   | 554.369   | D28391    | 22567.717 | 25427.994 | NM_001687 | 21032.186 | 22330.498 |
| NM_004317 | 3974.116  | 3344.458  | M33197    | 20056.301 | 22535.293 | AK026374  | 1149.604  | 1199.318  |
| NM_01464E | 1444.922  | 1201.389  | D86961    | 883.546   | 953.225   | NM_001169 | 996.978   | 1344.562  |
| NM_01470E | 2854.03   | 3463.738  | AJ227896  | 2982.623  | 2713.81   | AK024648  | 10662.535 | 12470.512 |
| NM_003693 | 1007.051  | 984.134   | L32841    | 5113.362  | 5925.037  | NM_00071E | 663.564   | 639.026   |
| NM_00035E | 21325.963 | 20818.084 | M33197    | 52248.547 | 53259.895 | NM_00345E | 5963.905  | 5978.857  |
| NM_018134 | 26980.635 | 30184.76  | AF131770  | 1617.909  | 1349.412  | NM_000171 | 878.595   | 820.404   |
| NM_013247 | 3565.628  | 3040.411  | CY3Cy5    | 5630.173  | 238.664   | AL354615  | 872.906   | 818.869   |
| NM_00677C | 3360.453  | 4368.492  | AI298534  | 750.03    | 733.392   | NM_01334E | 21439.432 | 18926.076 |
| BE394704  | 874.044   | 964.228   | AA424735  | 946.023   | 1065.729  | NM_00370E | 1380.26   | 1188.523  |
| AK024794  | 909.904   | 1300.309  | U78294    | 966.483   | 880.025   | NM_006861 | 1286.677  | 1304.25   |
| NM_019853 | 6062.703  | 6148.395  | BI760394  | 1501.655  | 1211      | NM_00582E | 1880.074  | 2126.981  |
| NM_017992 | 6594.77   | 5006.406  | U09117    | 6174.313  | 4918.895  | NM_015544 | 74.671    | 134.335   |
| AK023061  | 915.671   | 1074.163  | M18468    | 1064.236  | 915.404   | NM_01590E | 11498.753 | 6727.268  |
| NM_00725E | 1758.288  | 1837.933  | H66070    | 4401.471  | 5270.451  | NM_00089E | 643.458   | 685.328   |
| NM_00366E | 6530.069  | 7241.974  | AA164741  | 3353.179  | 3017.825  | AB040672  | 2268.469  | 2670.073  |
| NM_013384 | 49232.789 | 44823.945 | AK054960  | 9414.081  | 10745.488 | NM_002192 | 1255.055  | 1134.467  |
| NM_001187 | 905.796   | 747.767   | L15344    | 1944.535  | 1929.804  | NM_005491 | 4359.711  | 4388.484  |
| NM_018241 | 1989.223  | 1674.32   | SR1       | 64837.656 | 57055.434 | NM_00386E | 1872.444  | 2024.011  |
| NM_005834 | 3621.172  | 3444.658  | SR3       | 43267.695 | 46838.27  | X63417    | 7576.29   | 7784.402  |
| AF000381  | 5599.619  | 7500.253  | SR5       | 4355.567  | 3188.895  | S94539    | 14350.923 | 15779.258 |
| NM_01807E | 453.406   | 480.834   | SR7       | 4934.908  | 33281.453 | NM_006402 | 761.857   | 1140.151  |
| NM_01210E | 952.81    | 1108.852  | SR9       | 18182.818 | 3167.736  | NM_00578E | 2461.104  | 2503.473  |
| S82470    | 2113.239  | 1949.181  | CY3Cy5    | 4711.204  | 143.423   | NM_01824E | 2273.19   | 3481.199  |
| AB028982  | 2287.682  | 1950.032  | NM_01458E | 3146.899  | 3472.669  | AK001695  | 8752.568  | 8687.838  |
| NM_002004 | 4760.605  | 4407.585  | NM_000923 | 297.001   | 382.751   | NM_01788E | 2232.849  | 3443.896  |
| NM_005121 | 1069.959  | 896.117   | NM_006453 | 965.393   | 796.48    | NM_006252 | 1848.533  | 1727.427  |
| NM_001643 | 18028.309 | 20560.074 | NM_01809E | 818.249   | 810.545   | NM_001721 | 499.318   | 288.592   |
| NM_01909E | 4637.42   | 4449.137  | AL390078  | 798.72    | 524.962   | NM_014397 | 5335.842  | 4904.354  |
| NM_01472E | 2398.14   | 3957.032  | NM_00403E | 912.372   | 990.672   | AB023182  | 1007.004  | 827.753   |
| NM_006892 | 1855.715  | 1871.081  | NM_01598E | 389.365   | 748.835   | NM_003607 | 762.716   | 792.191   |
| NM_019117 | 1255.57   | 1352.326  | NM_00654E | 715.876   | 660.296   | NM_00657E | 1383.988  | 1523.917  |
| NM_01830E | 2483.368  | 3205.964  | NM_01495E | 1412.315  | 1161.748  | NM_013254 | 1963.117  | 2147.057  |
| NM_01765E | 3706.564  | 3411.726  | NM_003992 | 2464.775  | 2458.948  | NM_000437 | 6343.61   | 5848.479  |
| NM_01867E | 9062.281  | 9891.104  | AF279265  | 3141.303  | 2816.222  | AB046819  | 3329.158  | 2416.275  |
| NM_016643 | 1774.651  | 2108.142  | NM_005213 | 56089.711 | 50047.512 | NM_00609C | 2830.048  | 1725.796  |
| NM_00677E | 3502.863  | 3454.388  | NM_002997 | 2122.633  | 2217.189  | NM_00290C | 812.785   | 880.966   |
| NM_016217 | 8549.507  | 8541.868  | NM_00237E | 8968.868  | 10048.712 | NM_006851 | 435.109   | 452.798   |
| AK025971  | 5025.485  | 5191.632  | AB007929  | 8329.932  | 11460.161 | AK001560  | 571.14    | 803.219   |
| NM_00261E | 2731.484  | 2573.061  | NM_00457E | 2592.944  | 2708.712  | AB001328  | 445.066   | 522.131   |
| NM_002193 | 1750.553  | 2047.285  | AA203126  | 2376.372  | 1748.403  | H99588    | 1453.791  | 1199.486  |
| NM_00138E | 8849.12   | 12725.042 | L12347    | 1345.569  | 960.935   | X00588    | 617.642   | 783.174   |
| X76770    | 4910.344  | 4808.606  | NM_001622 | 1289.485  | 1083.521  | AI359037  | 4368.817  | 6492.915  |
| AB037808  | 1565.056  | 1268.923  | Z36788    | 290.081   | 401.567   | J04513    | 322.583   | 550.339   |
| NM_01603E | 3601.71   | 3124.033  | NM_018477 | 3887.159  | 3526.769  | BI754285  | 530.093   | 691.692   |
| AF090911  | 310.859   | 242.291   | NM_001494 | 13315.213 | 12556.547 | X15998    | 3226.239  | 4069.63   |
| Z36821    | 6700.896  | 6568.826  | NM_017707 | 616.307   | 393.262   | M76482    | 529.579   | 561.253   |
| AF289485  | 3415.928  | 3420.631  | NM_00420E | 1226.761  | 1187.858  | NM_001883 | 2253.46   | 2131.76   |
| AF130092  | 2057.025  | 2481.527  | NM_004603 | 6432.201  | 6040.543  | NM_00462E | 1401.584  | 1256.06   |

|           |           |           |           |           |           |           |           |           |
|-----------|-----------|-----------|-----------|-----------|-----------|-----------|-----------|-----------|
| NM_01609E | 3755.107  | 4534.421  | AK022849  | 1415.361  | 1623.796  | L31785    | 621.304   | 758.691   |
| AF300612  | 52886.316 | 42489.266 | AF040964  | 3558.914  | 4631.841  | H-M 69043 | 3008.799  | 2784.539  |
| AB014557  | 950.595   | 937.51    | NM_001939 | 2499.289  | 2696.246  | AF077374  | 793.046   | 757.589   |
| NM_00557E | 5245.436  | 3570.637  | NM_003279 | 4533.971  | 5127.41   | U43901    | 490.104   | 897.719   |
| NM_00365E | 5945.081  | 4695.699  | AB014599  | 3676.822  | 3816.483  | M59828    | 2257.101  | 1653.182  |
| NM_018457 | 12557.077 | 7829.48   | NM_00439E | 646.264   | 578.574   | NM_016134 | 1096.1    | 1126.578  |
| NM_00295E | 7180.99   | 5065.435  | AW407841  | 696.628   | 950.983   | AJ010482  | 1797.912  | 1285.701  |
| NM_002187 | 1277.66   | 1378.483  | NM_000137 | 6979.916  | 7730.573  | NM_00078E | 383.511   | 255.245   |
| NM_01424E | 5046.371  | 3873.258  | NM_01210E | 3889.409  | 3840.072  | NM_00544E | 7286.958  | 5157.6    |
| NM_01485E | 769.828   | 720.84    | NM_005017 | 18139.977 | 18588.025 | NM_01489E | 1352.882  | 1632.759  |
| AF311912  | 641.833   | 708.065   | AF163572  | 8106.482  | 6842.351  | NM_00363C | 3178.46   | 3355.738  |
| NM_001116 | 1277.743  | 1317.107  | NM_000897 | 3743.867  | 2803.379  | NM_00004E | 2160.281  | 2311.202  |
| BC035395  | 6583.644  | 9064.601  | NM_000487 | 720.105   | 667.404   | NM_00321E | 868.219   | 1009.214  |
| NM_00170E | 10015.058 | 11339.52  | NM_006411 | 18153.273 | 17145.527 | NM_00670E | 2018.42   | 2315.264  |
| NM_02012E | 5401.398  | 4863.329  | NM_01418E | 2768.174  | 2272.844  | NM_004257 | 11096.229 | 15574.105 |
| NM_01398E | 5708.656  | 5245.024  | AB040884  | 335.049   | 639.894   | NM_002844 | 513.761   | 471.245   |
| NM_00504E | 2053.491  | 2094.177  | NM_00049E | 10711.997 | 13783.525 | NM_00068E | 1754.752  | 1622.791  |
| NM_00388E | 688.078   | 689.133   | NM_01208E | 1589.27   | 1948.171  | NM_00362E | 885.487   | 1285.535  |
| NM_00463C | 8054.69   | 8053.067  | NM_001170 | 3185.884  | 3693.565  | NM_005901 | 7477.825  | 8587.375  |
| AK023001  | 6215.55   | 5696.825  | AL137716  | 601.559   | 652.105   | NM_00424E | 794.125   | 922.536   |
| NM_01482E | 5857.432  | 5272.094  | AB043997  | 617.564   | 765.871   | NM_00095E | 83.469    | 293.241   |
| AF201947  | 611.034   | 684.03    | AF097645  | 766.136   | 841.12    | NM_00131E | 813.145   | 776.577   |
| U01147    | 2895.414  | 2919.258  | NM_00177E | 590.567   | 862.352   | NM_00479E | 739.465   | 851.951   |
| NM_00404C | 10401.319 | 10101.41  | Z70704    | 1043.942  | 1470.799  | NM_00043E | 3367.248  | 3417.071  |
| NM_006116 | 3448.639  | 3175.721  | NM_01436E | 785.36    | 1046.038  | NM_00184E | 6697.188  | 7794.779  |
| NM_00545E | 3240.849  | 2880.241  | NM_000557 | 3945.998  | 4494.526  | AB017169  | 428.147   | 525.591   |
| NM_003587 | 11877.175 | 7230.221  | NM_00323E | 566.539   | 415.616   | AL080170  | 938.91    | 838.262   |
| X90978    | 783.947   | 870.213   | NM_00137E | 3847.838  | 3379.623  | AB039903  | 2243.795  | 1794.365  |
| BF219403  | 18450.764 | 17376.449 | NM_00231E | 1173.049  | 975.038   | NM_00054E | 5791.819  | 6227.97   |
| NM_016119 | 1293.897  | 1230.238  | M20699    | 1005.758  | 1169.992  | NM_00370E | 1365.945  | 1533.542  |
| AK075450  | 2357.772  | 2416.264  | NM_004774 | 5183.57   | 4678.506  | NM_006861 | 1342.48   | 1132.111  |
| AF178983  | 4111.772  | 3730.721  | NM_016937 | 1764.347  | 2121.467  | NM_00582E | 2136.705  | 1959.763  |
| NM_001324 | 2029.302  | 1276.555  | NM_00269C | 3877.702  | 4971.263  | NM_00046E | 741.242   | 635.732   |
| AB037795  | 1206.217  | 792.955   | NM_01232E | 7585.916  | 8372.494  | AK023142  | 1672.383  | 1949.002  |
| D43949    | 1878.748  | 1783.438  | NM_007341 | 1292.888  | 1607.408  | U61740    | 5935.84   | 7027.003  |
| AK022975  | 1967.005  | 2114.586  | NM_01650E | 1725.522  | 1774.847  | NM_00640E | 58827.504 | 53013.461 |
| NM_015344 | 2372.403  | 1586.625  | NM_00645E | 5390.082  | 4759.241  | AB049054  | 1968.394  | 2720.108  |
| NM_00428E | 845.043   | 956.753   | NM_00313E | 6634.543  | 6520.085  | NM_015071 | 1645.965  | 1763.388  |
| AL122055  | 7844.796  | 7052.733  | L12347    | 2450.93   | 3655.327  | NM_013227 | 1019.322  | 1210.376  |
| NM_00513E | 18931.77  | 17664.713 | NM_00162E | 1787.868  | 2139.905  | AF02720E  | 13802.078 | 13447.375 |
| X07695    | 844.562   | 749.144   | Z36788    | 862.242   | 919.632   | AF075012  | 1278.901  | 951.717   |
| D87458    | 1184.859  | 1295.607  | NM_018477 | 3466.079  | 3088.644  | NM_00157C | 905.146   | 1058.573  |
| AK021750  | 2392.55   | 1819.07   | U20536    | 706.588   | 755.971   | NM_01565E | 482.229   | 461.042   |
| NM_00362E | 1573.341  | 1624.032  | AI298534  | 483.778   | 412.144   | NM_00058E | 1772.036  | 2040.597  |
| AK023594  | 5901.961  | 4788.022  | AW167715  | 928.099   | 793.198   | NM_01654E | 12206.211 | 13307.045 |
| AB032989  | 463.732   | 537.516   | AA424735  | 993.597   | 1062.487  | AF309653  | 7604.208  | 8875.481  |
| AB010099  | 23036.6   | 25956.508 | AA171613  | 568.551   | 547.353   | NM_00262C | 6518.799  | 10678.893 |
| AB039920  | 9301.055  | 9457.326  | BI760394  | 961.206   | 1331.446  | S79267    | 608.195   | 900.714   |
| AB046782  | 2293.926  | 2195.677  | AA555216  | 804.469   | 825.398   | NM_00181E | 550.693   | 952.874   |
| NM_00419C | 10229.044 | 6080.538  | U09117    | 5064.46   | 5265.351  | NM_003784 | 22794.059 | 16917.5   |
| NM_01427E | 3288.889  | 2307.311  | M18468    | 714.714   | 1105.388  | NM_00019E | 7292.542  | 4334.73   |
| NM_00040E | 3552.577  | 2775.255  | H66070    | 4002.397  | 4027.399  | NM_00657E | 1518.15   | 1803.586  |
| AF208005  | 933.988   | 792.118   | AA164741  | 3171.106  | 3345.488  | NM_013254 | 1847.612  | 2232.782  |

|           |           |           |           |           |           |           |           |           |
|-----------|-----------|-----------|-----------|-----------|-----------|-----------|-----------|-----------|
| NM_002231 | 7392.411  | 6706.922  | NM_014470 | 725.303   | 307.774   | NM_000437 | 5614.629  | 6626.645  |
| NM_020474 | 9420.675  | 11009.941 | NM_001665 | 8901.769  | 7864.785  | AB046819  | 3630.018  | 3683.24   |
| NM_002643 | 1978.998  | 1365.328  | NM_001879 | 2081.002  | 3017.599  | NM_006090 | 3428.305  | 4142.036  |
| NM_017807 | 3871.757  | 4222.157  | AF264014  | 7056.498  | 7529.506  | NM_002900 | 3219.744  | 3557.144  |
| NM_014746 | 946.653   | 1293.123  | L09098    | 565.59    | 334.199   | NM_004910 | 971.853   | 1279.835  |
| NM_000462 | 4828.557  | 4655.208  | NM_004155 | 479.759   | 450.305   | AB013452  | 308.983   | 412.795   |
| NM_003336 | 5608      | 3909.096  | NM_001831 | 337.651   | 744.198   | M93107    | 3528.323  | 4710.758  |
| NM_005805 | 13782.146 | 14482.727 | NM_014586 | 2823.248  | 2497.164  | BC001479  | 3891.213  | 4582.239  |
| NM_003900 | 11023.33  | 12302.597 | NM_014366 | 4617.194  | 3946.348  | NM_002461 | 14412.347 | 15098.065 |
| NM_003337 | 3816.298  | 4920.29   | NM_006453 | 617.64    | 637.071   | NM_005771 | 8291.798  | 9158.578  |
| AF298152  | 4028.991  | 4270.372  | NM_018096 | 698.094   | 588.064   | AB032986  | 22546.059 | 40269.711 |
| AF117233  | 3037.843  | 3522.237  | NM_004036 | 1360.514  | 1493.513  | NM_001687 | 19526.188 | 24678.479 |
| NM_015848 | 865.103   | 883.8     | NM_015986 | 663.435   | 616.214   | AK026374  | 1209.099  | 1346.582  |
| NM_001723 | 1345.476  | 1112.308  | NM_006546 | 1002.607  | 882.875   | NM_001169 | 1043.787  | 1314.914  |
| NM_016018 | 2313.71   | 2091.565  | NM_014959 | 1472.457  | 1424.916  | AK024648  | 9194.639  | 11520.191 |
| M94362    | 18716.213 | 18179.582 | NM_003992 | 2467.868  | 2603.913  | NM_000719 | 464.207   | 489.59    |
| AK024707  | 1969.929  | 2052.762  | AF279265  | 3540.522  | 3019.477  | NM_003459 | 4731.427  | 5178.069  |
| NM_014255 | 2940.464  | 3237.866  | NM_004579 | 2605.736  | 3122.303  | AB032526  | 189.447   | 268.39    |
| AK022909  | 2199.395  | 2318.557  | AA203126  | 2799.209  | 2796.813  | NM_000171 | 707.258   | 746.759   |
| NM_006530 | 5554.297  | 5471.67   | AB043997  | 1252.424  | 1114.859  | AL354615  | 773.464   | 792.962   |
| AB033024  | 1259.083  | 583.521   | NM_004853 | 6390.092  | 6573.531  | NM_013349 | 16735.834 | 9353.385  |
| NM_018942 | 2630.544  | 1612.588  | NM_001494 | 16862.496 | 18721.482 | NM_016134 | 938.766   | 1039.31   |
| NM_005531 | 721.947   | 338.855   | NM_017707 | 794.619   | 803.667   | AJ010482  | 1922.533  | 1956.571  |
| NM_006977 | 551.056   | 372.922   | NM_004206 | 2098.155  | 2075.696  | NM_000896 | 465.73    | 498.921   |
| NM_004387 | 385.321   | 539.982   | NM_015888 | 1298.857  | 853.27    | AB040672  | 3487.714  | 3798.906  |
| AF217226  | 4426.62   | 4889.649  | NM_004603 | 7335.643  | 6757.377  | NM_002192 | 1541.793  | 1871.06   |
| AL359578  | 521.174   | 380.743   | AK022849  | 1489.123  | 1342.974  | NM_005491 | 3902.724  | 5213.994  |
| NM_005522 | 988.895   | 1055.718  | AF040964  | 3376.831  | 2721.737  | NM_003869 | 1898.432  | 2338.638  |
| NM_005760 | 4064.573  | 2323.506  | NM_001939 | 1858.6    | 1702.369  | AK025599  | 277.693   | 485.434   |
| NM_007265 | 2841.414  | 2408.942  | NM_005832 | 740.267   | 628.395   | X63417    | 7957.259  | 10061.052 |
| AK023639  | 4308.526  | 3100.625  | AW407841  | 889.464   | 1290.756  | NM_006402 | 667.628   | 1214.67   |
| AL137700  | 1457.365  | 2104.429  | AL050082  | 2128.476  | 1949.554  | NM_005785 | 2469.514  | 3263.159  |
| NM_004904 | 697.777   | 697.986   | NM_006623 | 53913.305 | 53684.59  | NM_018248 | 2450.827  | 3345.119  |
| NM_003083 | 3436.663  | 3927.688  | NM_016588 | 2441.728  | 1473.234  | AK001695  | 8607.98   | 7484.709  |
| NM_006789 | 4372.581  | 4568.27   | NM_003135 | 8235.801  | 6689.329  | NM_017886 | 2397.976  | 1674.834  |
| NM_000982 | 1722.302  | 1642.904  | NM_000137 | 6996.832  | 6305.164  | NM_006252 | 1064.144  | 1265.227  |
| NM_001024 | 59910.719 | 58229.043 | NM_012102 | 5082.638  | 4669.213  | NM_001721 | 500.078   | 395.528   |
| NM_016093 | 68340.742 | 67435.281 | NM_005017 | 19810.486 | 19678.803 | NM_014397 | 5153.774  | 4414.301  |
| NM_012423 | 62124.898 | 55992.324 | AF163572  | 9913.593  | 10109.416 | AB023182  | 1419.986  | 557.679   |
| AK026367  | 29144.668 | 26922.348 | NM_000897 | 3740.521  | 3613.683  | NM_003607 | 599.303   | 437.212   |
| AK026491  | 15944.768 | 15827.123 | NM_000487 | 778.909   | 969.46    | NM_007281 | 233.079   | 419.962   |
| NM_001015 | 68697.461 | 66434.078 | NM_006411 | 23518.9   | 27589.234 | AB017169  | 341.508   | 612       |
| AL110170  | 55847.109 | 51760.527 | NM_014182 | 2611.882  | 2267.309  | AL080170  | 819.783   | 1062.781  |
| AK021747  | 1023.619  | 755.43    | AB040884  | 522.644   | 566.481   | AB039903  | 2454.758  | 2589.531  |
| AK025640  | 5658.934  | 4296.795  | NM_000492 | 11557.995 | 9439.741  | NM_000542 | 8465.458  | 8315.315  |
| AL137685  | 350.799   | 505.942   | NM_001170 | 3359.698  | 2840.852  | NM_006851 | 383.431   | 426.687   |
| NM_019101 | 1185.079  | 1593.35   | AL137716  | 828.523   | 1137.444  | AK001560  | 803.293   | 968.657   |
| AB044137  | 364.293   | 343.244   | NM_004696 | 620.555   | 912.634   | AB001328  | 602.084   | 514.866   |
| NM_000920 | 1911.338  | 1970.761  | NM_014342 | 1273.001  | 1328.139  | NM_000948 | 252.145   | 325.689   |
| NM_020375 | 1633.719  | 2049.113  | AK054960  | 10751.917 | 12486.833 | H99588    | 1628.735  | 1467.341  |
| NM_016049 | 4316.43   | 3424.213  | L15344    | 2323.176  | 2188.012  | X00588    | 1080.568  | 1322.275  |
| NM_000291 | 54988.723 | 48801.289 | NM_001665 | 13377.448 | 11858.564 | AI359037  | 5225.823  | 7145.703  |
| NM_018081 | 3648.681  | 3010.07   | AF097645  | 772.443   | 543.345   | M76482    | 125.158   | 497.797   |

|           |           |           |           |           |           |           |           |           |
|-----------|-----------|-----------|-----------|-----------|-----------|-----------|-----------|-----------|
| AL117488  | 1809.863  | 1433.96   | NM_001773 | 978.678   | 782.37    | NM_001883 | 1229.351  | 2345.464  |
| NM_012240 | 1680.446  | 1998.807  | Z70704    | 2185.038  | 2099.701  | NM_004628 | 1151.578  | 1309.835  |
| NM_019005 | 4985.268  | 4824.01   | NM_014363 | 1103.054  | 1312.994  | L31785    | 706.735   | 429.981   |
| NM_004739 | 10201.095 | 13800.03  | NM_000557 | 3304.831  | 3336.224  | H-M 69043 | 2422.104  | 2746.668  |
| AV752216  | 1612.446  | 1971.627  | NM_001375 | 3839.499  | 3983.527  | AF077374  | 885.524   | 465.661   |
| NM_005645 | 533.639   | 542.287   | NM_002312 | 1716.996  | 1945.396  | U43901    | 644.783   | 383.839   |
| NM_005341 | 1758.499  | 3115.84   | M20699    | 1574.532  | 1621.465  | M59828    | 2300.073  | 2091.997  |
| AF181999  | 1422.9    | 1615.035  | NM_004774 | 6377.518  | 5093.798  | AF309653  | 6468      | 8733.311  |
| NM_001934 | 4219.915  | 4049.758  | NM_016937 | 3094.43   | 2917.372  | NM_002620 | 6250.703  | 6860.509  |
| AB011090  | 2221.178  | 2126.352  | NM_003479 | 241.962   | 253.198   | S79267    | 859.601   | 789.833   |
| NM_000209 | 1869.738  | 1605.096  | NM_002690 | 3984.266  | 3416.554  | NM_001816 | 415.365   | 469.569   |
| NM_018682 | 6338.701  | 5179.464  | NM_012328 | 7327.02   | 7156.301  | NM_003784 | 20349.74  | 21032.607 |
| AL355722  | 699.836   | 448.792   | NM_007341 | 1093.928  | 1245.453  | NM_000195 | 9056.845  | 10846.309 |
| NM_006545 | 12705.235 | 9078.609  | NM_016508 | 1537.257  | 1252.852  | NM_005445 | 6469.955  | 5852.556  |
| NM_016534 | 1316.42   | 886.841   | NM_006456 | 7112.176  | 10214.884 | NM_014895 | 1602.358  | 2436.933  |
| AB021923  | 813.885   | 1023.563  | AK026062  | 12929.208 | 13341.192 | NM_003630 | 4152.133  | 4823.65   |
| AK024240  | 621.676   | 876.004   | AF047002  | 19572.709 | 16823.273 | NM_000046 | 3131.501  | 3177.078  |
| NM_016456 | 24267.484 | 23309.838 | AB040914  | 658.702   | 1118.186  | NM_003219 | 1381.698  | 1345.493  |
| AL137645  | 5331.994  | 3507.306  | NM_002997 | 2614.182  | 2495.266  | NM_006709 | 2469.064  | 2770.231  |
| AK026141  | 905.985   | 934.947   | NM_002379 | 9009.393  | 8289.795  | NM_000612 | 4173.181  | 5485.423  |
| AK022894  | 2694.49   | 2811.343  | AB007929  | 10532.081 | 11302.781 | NM_003625 | 920.502   | 1749.93   |
| AF131823  | 695.843   | 857.059   | NM_004579 | 3185.362  | 2769.095  | NM_005901 | 6476.686  | 10135.831 |
| AK026324  | 10018.014 | 11000.774 | AA203126  | 2430.623  | 2150.291  | NM_004248 | 533.412   | 981.944   |
| AK021971  | 359.784   | 425.821   | L12347    | 1950.465  | 2773.43   | NM_001313 | 670.775   | 534.245   |
| AK025253  | 818.761   | 932.084   | NM_001622 | 2274.172  | 1798.128  | NM_004796 | 891.357   | 419.08    |
| AF131777  | 750.636   | 1094.635  | Z36788    | 1314.095  | 1189.786  | NM_000435 | 1534.65   | 2150.229  |
| AK025004  | 3023.615  | 3992.368  | NM_018477 | 4064.91   | 5810.188  | NM_001842 | 4690.082  | 5190.766  |
| AL136818  | 1203.338  | 2261.516  | U20536    | 1053.265  | 1059.388  | NM_003455 | 7782.157  | 10165.522 |
| AF146798  | 2802.886  | 4962.208  | AI298534  | 563.164   | 531.92    | AB032526  | 255.452   | 293.037   |
| AK022049  | 511.524   | 856.644   | R71691    | 562.154   | 760.066   | NM_000171 | 888.438   | 918.12    |
| AF086517  | 5470.237  | 6096.61   | AW167715  | 1319.706  | 969.039   | AL354615  | 724.824   | 1003.456  |
| AK025740  | 12898.975 | 15332.833 | AA424735  | 1255.964  | 1694.191  | NM_013345 | 20005.031 | 22261.949 |
| AK000311  | 4431.351  | 4135.705  | U78294    | 1447.772  | 1393.512  | NM_003705 | 1358.853  | 1765.459  |
| AK025346  | 49310.25  | 50344.785 | BI760394  | 1726.87   | 1470.029  | NM_006861 | 1096.881  | 1339.242  |
| AK022583  | 4218.717  | 5451.542  | AA555216  | 634.057   | 648.479   | NM_005825 | 2127.889  | 2297.956  |
| AL137534  | 58121.41  | 55438.852 | U09117    | 6370.776  | 4859.691  | NM_000466 | 1409.26   | 1600.898  |
| AF052121  | 2795.396  | 2127.019  | M21054    | 590.766   | 578.574   | NM_015908 | 12846.406 | 11815.931 |
| AL359062  | 2566.975  | 2854.335  | M18468    | 1220.985  | 905.814   | AK022600  | 1316.983  | 1381.58   |
| AK026869  | 1757.001  | 1697.537  | H66070    | 7577.384  | 7133.266  | AK023142  | 984.639   | 1527.732  |
| AK023150  | 559.378   | 528.935   | AA164741  | 3010.926  | 4209.321  | AB049054  | 2383.952  | 3483.33   |
| AK022192  | 859.432   | 664.323   | AI189375  | 671.066   | 607.246   | NM_015071 | 1379.473  | 1507.92   |
| Y12020    | 11204.097 | 11268.784 | AI978885  | 1637.618  | 1040.002  | NM_013227 | 875.921   | 1186.804  |
| AJ001905  | 1618.974  | 1609.066  | AB014599  | 3336.214  | 3035.765  | Z83803    | 754.205   | 571.373   |
| U17635    | 1767.786  | 2026.673  | NM_004393 | 739.812   | 916.715   | AF027205  | 15277.999 | 12019.526 |
| AL049930  | 813.111   | 844.216   | NM_005832 | 698.353   | 907.635   | AF075012  | 982.265   | 1631.343  |
| Z83946    | 632.144   | 870.735   | AW407841  | 823.009   | 807.523   | NM_001570 | 1000.529  | 594.701   |
| D55638    | 312.287   | 829.484   | NM_001879 | 1924.652  | 2207.256  | NM_015658 | 663.407   | 586.144   |
| L23870    | 604.473   | 775.058   | AF264014  | 6864.447  | 6091.608  | NM_000585 | 1811.272  | 1977.367  |
| D55644    | 553.251   | 643.715   | L09098    | 405.672   | 471.073   | NM_016546 | 11581.077 | 11990.331 |
| D16951    | 847.18    | 1460.078  | NM_004155 | 511.551   | 407.854   | NM_017886 | 2011.547  | 2213.996  |
| L19362    | 1293.646  | 2004.239  | NM_001831 | 387.354   | 533.843   | NM_006252 | 1172.621  | 1398.75   |
| L33807    | 1636.202  | 2710.315  | NM_014586 | 3879.957  | 4579.724  | NM_001721 | 379.677   | 697.419   |
| U80774    | 327.338   | 464.974   | NM_014366 | 14417.755 | 14354.229 | NM_014397 | 4625.276  | 4997.061  |

|            |           |           |           |           |           |           |           |           |
|------------|-----------|-----------|-----------|-----------|-----------|-----------|-----------|-----------|
| AB007975   | 623.886   | 952.278   | NM_000923 | 734.345   | 933.299   | AB023182  | 1057.557  | 1078.91   |
| AK024152   | 404.97    | 372.112   | NM_006453 | 1530.471  | 1554.468  | NM_003607 | 913.885   | 868.087   |
| AK021821   | 364.24    | 510.13    | NM_018096 | 1088.902  | 1043.028  | NM_006575 | 1304.979  | 1628.591  |
| AL049328   | 1317.576  | 1321.349  | AL390078  | 575.694   | 352.7     | NM_013254 | 2428.026  | 2667.795  |
| AK000030   | 574.834   | 443.981   | NM_004036 | 1369.559  | 1682.193  | NM_000437 | 8076.809  | 8642.934  |
| NM_017932  | 710.197   | 667.606   | NM_015986 | 801.665   | 715.331   | AB046819  | 5199.437  | 5294.574  |
| AK000910   | 4680.313  | 5032.696  | NM_006546 | 891.784   | 727.718   | NM_006090 | 4667.31   | 4610.306  |
| AF252280   | 16035.241 | 21655.916 | NM_014959 | 1946.387  | 1685.557  | NM_002900 | 3661.49   | 3766.349  |
| AK000107   | 1547.745  | 1154.805  | NM_003992 | 4001.507  | 4801.786  | NM_004910 | 1615.659  | 1471.798  |
| AK000951   | 927.877   | 813.635   | AF279265  | 3511.371  | 3683.517  | AB013452  | 626.006   | 503.01    |
| AK024518   | 9417.881  | 9884.408  | NM_005213 | 51303.641 | 48885.762 | M93107    | 4488.223  | 5113.653  |
| AK024586   | 618.329   | 638.917   | NM_001170 | 3026.781  | 2628.691  | BC001479  | 4296.794  | 5464.57   |
| AK024889   | 1132.554  | 1944.368  | AL137716  | 1041.143  | 1302.291  | NM_002461 | 15669.075 | 19408.061 |
| AK025017   | 3368.15   | 5616.247  | NM_004696 | 1584.061  | 1390.784  | NM_005771 | 11242.093 | 9735.131  |
| AK024534   | 1420.098  | 2830.195  | NM_014342 | 1618.683  | 1803.44   | AB032986  | 27990.346 | 27522.646 |
| AK024616   | 1321.816  | 3263.728  | AB043997  | 1521.49   | 1396.664  | NM_017528 | 20758.643 | 20603.791 |
| AK024914   | 5226.354  | 9268.376  | NM_004853 | 7342.216  | 7137.609  | NM_016032 | 8479.496  | 9875.189  |
| BC030949   | 2729.669  | 2004.597  | NM_001494 | 20028.996 | 23857.064 | NM_014324 | 54544.836 | 49778.746 |
| AF116615   | 1562.276  | 1775.118  | NM_017707 | 572.251   | 656.989   | NM_001687 | 21260.844 | 28831.996 |
| U17636     | 41071.523 | 37361     | NM_004206 | 2053.295  | 1990.441  | AK026374  | 1207.428  | 1444.981  |
| NM_018546  | 3224.662  | 3282.804  | NM_004603 | 12558.66  | 15015.02  | NM_001169 | 1052.359  | 1022.144  |
| U52699     | 11742.258 | 10982.298 | AK022849  | 2270.91   | 2033.122  | AK024648  | 11212.33  | 11902.516 |
| S71613     | 735.719   | 889.858   | AF040964  | 5311.602  | 4458.755  | NM_000795 | 848.068   | 936.765   |
| AJ011910   | 11868.396 | 11580.11  | NM_001939 | 3020.391  | 2882.288  | NM_014135 | 770.668   | 941.624   |
| AK024378   | 1069.243  | 1100.312  | NM_003279 | 4962.068  | 5077.263  | AB037761  | 8412.681  | 9506.75   |
| NM_014026  | 3177.063  | 2719.343  | NM_012328 | 5781.279  | 6068.45   | NM_014008 | 29342.539 | 32264.154 |
| D61703     | 16546.117 | 13772.703 | NM_007341 | 702.279   | 1036.599  | NM_014731 | 5372.562  | 6564.331  |
| unknown (S | 1054.12   | 570.144   | NM_016508 | 1588.219  | 1913.289  | AF035191  | 11801.557 | 11551.928 |
| unknown (S | 1033.306  | 561.606   | NM_006456 | 6709.581  | 6856.568  | NM_004058 | 691.003   | 1053.17   |
| AF086198   | 12651.415 | 17960.396 | AK026062  | 14029.587 | 10114.19  | NM_004527 | 855.345   | 666.56    |
| NM_018012  | 1307.941  | 1510.106  | AF047002  | 16014.441 | 14432.236 | NM_012062 | 10370.322 | 9250.146  |
| AK024928   | 503.719   | 1198.857  | AL050082  | 2244.78   | 2431.535  | AK026717  | 420.388   | 358.307   |
| NM_014450  | 1377.125  | 2298.815  | NM_016588 | 2735.282  | 1966.592  | AJ010482  | 2067.413  | 2023.318  |
| NM_017991  | 1028.015  | 1477.273  | NM_003135 | 6644.793  | 7520.703  | NM_000896 | 606.023   | 639.745   |
| L37198     | 3288.829  | 4777.442  | NM_000137 | 6534.376  | 6267.328  | AB040672  | 2028.687  | 2157.154  |
| U67822     | 854.258   | 1102.307  | NM_012102 | 5190.472  | 6233.876  | NM_002192 | 1918.243  | 2072.594  |
| AK021921   | 335.191   | 682.152   | NM_005017 | 16524.086 | 19153.666 | NM_005491 | 5549.231  | 6589.362  |
| AK025431   | 1192.522  | 883.695   | AF163572  | 7750.771  | 8533.896  | NM_003865 | 2333.508  | 3830.772  |
| AK023662   | 600.908   | 874.094   | NM_000897 | 4721.549  | 5275.621  | AK025599  | 176.353   | 295.492   |
| AF086274   | 23031.471 | 21883.371 | NM_000487 | 686.876   | 848.672   | X63417    | 9091.433  | 8666.618  |
| AK023682   | 1016.26   | 844.684   | NM_006411 | 19188.564 | 24730.979 | S94539    | 11874.5   | 11716.013 |
| AK024024   | 1884.106  | 1349.608  | NM_014182 | 3754.122  | 3944.433  | NM_006402 | 835.293   | 1388.741  |
| AF000991   | 645.432   | 580.097   | AB040884  | 932.41    | 662.961   | NM_005785 | 2964.124  | 2918.08   |
| AK000685   | 16164.252 | 14801.869 | NM_000492 | 10604.721 | 9529.304  | NM_018248 | 2728.717  | 3236.517  |
| D28381     | 14502.445 | 12488.941 | NM_012089 | 1075.752  | 992.386   | AK001695  | 8790.676  | 8135.17   |
| AK023543   | 508.087   | 518.595   | AJ272057  | 10610.85  | 10816.716 | AB040898  | 947.506   | 1184.038  |
| BE706519   | 1079.085  | 1121.933  | NM_004402 | 897.845   | 671.452   | AB031547  | 801.403   | 969.069   |
| AF130064   | 23466.342 | 27570.035 | AK024216  | 15996.305 | 14526.328 | NM_003970 | 565.334   | 713.122   |
| U17624     | 737.603   | 622.639   | Y16752    | 6906.653  | 6770.439  | AK022496  | 1461.354  | 1889.218  |
| D16988     | 39534.922 | 44599.563 | NM_014694 | 641.121   | 706.5     | AB042636  | 481.084   | 492.419   |
| AK001959   | 4427.128  | 4818.8    | NM_020156 | 982.193   | 1479.104  | AB033035  | 624.826   | 777.573   |
| U36217     | 1069.829  | 1504.396  | NM_014830 | 1858.113  | 1599.982  | NM_002883 | 2390.462  | 2608.108  |
| AL389880   | 1781.961  | 2913.726  | AF355402  | 3499.332  | 3542.58   | NM_019012 | 109.129   | 174.527   |



|           |           |           |           |           |           |           |           |           |
|-----------|-----------|-----------|-----------|-----------|-----------|-----------|-----------|-----------|
| AL359334  | 11025.378 | 20603.113 | NM_001665 | 10983.431 | 10537.228 | NM_000141 | 395.695   | 457.377   |
| AK027095  | 1347.089  | 2252.113  | NM_001773 | 838.221   | 636.911   | NM_01615C | 1583.025  | 1496.85   |
| AF062097  | 1358.5    | 2286.972  | Z70704    | 1372.632  | 1735.294  | U57058    | 608.796   | 628.437   |
| NM_019847 | 822.025   | 933.963   | NM_014363 | 1588.594  | 2161.826  | AL137452  | 1724.027  | 1425.934  |
| D17093    | 17615.18  | 24985.6   | NM_000557 | 2359.547  | 3284.118  | NM_004312 | 20318.797 | 21837.969 |
| AK022784  | 564.02    | 576.115   | NM_003239 | 668.87    | 611.853   | NM_001347 | 3308.873  | 3500.729  |
| AL117521  | 2509.833  | 3047.171  | NM_001375 | 3969.708  | 4367.961  | AK024549  | 11646.799 | 11586.85  |
| AK021913  | 4213.932  | 3625.93   | NM_002312 | 1409.598  | 1618.608  | NM_00633E | 5958.497  | 6178.546  |
| AL137489  | 10509.003 | 9084.167  | M20699    | 913.919   | 881.149   | NM_007164 | 2777.275  | 3265.061  |
| AF009311  | 4544      | 3893.371  | NM_004774 | 4767.412  | 5286.997  | NM_000261 | 1299.616  | 1163.399  |
| S73397    | 863.971   | 674.533   | NM_016937 | 2544.515  | 2560.894  | NM_00260E | 3726.402  | 2785.136  |
| AL050219  | 670.052   | 467.904   | D55716    | 808.171   | 598.642   | NM_00257C | 1323.286  | 1499.654  |
| L37709    | 630.283   | 519.345   | NM_00269C | 3550.736  | 3804.561  | NM_003183 | 2208.782  | 2023.151  |
| AK024433  | 3769.724  | 3635.716  | NM_018239 | 1282.095  | 1176.757  | NM_001657 | 381.062   | 281.337   |
| U82321    | 797.645   | 934.622   | U88892    | 1101.87   | 927.319   | NM_00358E | 675.561   | 485.994   |
| AK023856  | 915.167   | 784.305   | AK023755  | 646.841   | 770.17    | NM_019851 | 1751.6    | 2072.736  |
| AL050376  | 702.14    | 678.086   | NM_005725 | 449.144   | 629.086   | NM_00323E | 1321.95   | 1229.45   |
| AL359652  | 1265.633  | 1147.587  | NM_012211 | 1093.278  | 768.377   | NM_018367 | 575.95    | 586.94    |
| AK022423  | 1953.73   | 2281.901  | AB040877  | 1287.619  | 1224.937  | NM_001363 | 8156.736  | 10100.689 |
| AF088021  | 4279.609  | 5284.591  | AK026737  | 443.557   | 775.73    | NM_01409E | 9835.969  | 11686.005 |
| BF509267  | 3365.921  | 4157.266  | NM_006289 | 4807.523  | 4855.701  | NM_00570E | 1531.301  | 2082.394  |
| NM_00245E | 5390.562  | 8904.439  | NM_019067 | 4127.251  | 3676.549  | NM_001261 | 1716.455  | 2267.046  |
| AK026728  | 483.375   | 937.148   | AF251025  | 677.516   | 838.228   | NM_001977 | 917.862   | 1150.533  |
| NM_00295E | 4559.208  | 8412.286  | NM_015677 | 2579.236  | 2538.598  | NM_00721E | 8773.476  | 9394.829  |
| AB046773  | 550.397   | 698.008   | NM_001772 | 5814.75   | 5903.495  | AK026854  | 3042.705  | 3199.577  |
| AK000899  | 14672.987 | 25127.238 | AL162032  | 481.185   | 792.803   | NM_00126E | 2051.627  | 2087.683  |
| CY3Cy5    | 3528.952  | 180.55    | AB011087  | 1360.786  | 1715.651  | NM_00250E | 642.962   | 671.283   |
| AW300857  | 15977.467 | 13674.519 | AF161341  | 5089.895  | 5235.544  | NM_00490E | 2828.336  | 2421.815  |
| H85962    | 24120.775 | 25350.533 | AJ249902  | 580.77    | 825.713   | NM_012447 | 6652.828  | 7297.809  |
| BG742446  | 1332.732  | 1478.572  | NM_004384 | 3841.486  | 4987.521  | NM_00636E | 4151.718  | 4569.959  |
| AA864554  | 5090.034  | 5170.549  | L05500    | 8654.075  | 9926.908  | AK027013  | 25790.887 | 26081.578 |
| X66945    | 1785.646  | 1730.391  | NM_01230E | 9443.874  | 10784.193 | NM_001344 | 35808.68  | 28906.611 |
| AI160703  | 462.175   | 578.049   | AF222903  | 2704.767  | 1975.624  | NM_018294 | 2786.173  | 2372.433  |
| X12830    | 8684.111  | 7151.488  | NM_00622E | 2093.51   | 2291.587  | AL389934  | 2438.099  | 2063.422  |
| U00482    | 1129.436  | 931.764   | L10374    | 8359.92   | 9343.238  | NM_00433C | 5778.594  | 4701.047  |
| K01904    | 15792.168 | 14172.339 | AB016902  | 1703.606  | 2106.814  | AF151802  | 3462.129  | 2974.63   |
| BE538886  | 1678.536  | 1361.37   | AF272378  | 32119.965 | 31559.84  | AB006746  | 482.723   | 420.117   |
| NM_00222E | 771.004   | 807.04    | NM_000249 | 3840.357  | 3722.034  | NM_00649E | 1562.437  | 2004.502  |
| M57650    | 5610.087  | 8226.349  | NM_01431C | 617.318   | 958.091   | AB023233  | 1642.713  | 1666.26   |
| BC023978  | 523.743   | 873.898   | NM_00586C | 7093.524  | 6118.459  | NM_00436E | 659.138   | 801.234   |
| M21302    | 2463.533  | 2382.43   | AF095288  | 13460.265 | 11148.304 | NM_01813C | 2617.878  | 2916.804  |
| NM_01634E | 2751.994  | 2489.037  | AK025116  | 814.235   | 521.714   | AF085878  | 409.353   | 442.592   |
| SR2       | 55883.789 | 46937.891 | AK026271  | 7455.834  | 6557.308  | AB006630  | 1666.202  | 2017.961  |
| SR4       | 14129.955 | 12334.865 | NM_001799 | 4622.17   | 5231.014  | NM_01615E | 1537.413  | 1617.062  |
| SR6       | 2055.29   | 1403.316  | AF090895  | 1087.899  | 968.015   | NM_001224 | 6024.32   | 6610.167  |
| SR8       | 7205.188  | 16143.354 | NM_00561C | 4114.614  | 3718.639  | NM_017811 | 7285.725  | 8293.946  |
| SR10      | 22295.326 | 6396.633  | AL133651  | 1320.912  | 1341.977  | NM_00156E | 2280.925  | 2900.478  |
| CY3Cy5    | 1507.236  | 109.875   | AB014532  | 5705.748  | 4742.911  | AK023284  | 1677.156  | 1660.774  |
| NM_00152E | 16927.273 | 15168.18  | NM_00347E | 2896.566  | 3218.477  | NM_005101 | 2961.65   | 2367.288  |
| NM_00605E | 3069.067  | 3182.035  | BE275227  | 643.654   | 621.63    | AF130060  | 7518.281  | 5862.041  |
| NM_00429E | 1108.098  | 1213.092  | NM_016237 | 9099.253  | 11431.928 | NM_007057 | 11277.834 | 9550.858  |
| NM_00504E | 758.443   | 939.463   | NM_004924 | 9547.376  | 8814.275  | NM_000177 | 13125.145 | 9753.661  |
| NM_005972 | 871.902   | 841.358   | NM_00179E | 2107.694  | 2346.49   | NM_003387 | 12293.223 | 10817.521 |

|           |           |           |           |           |           |           |           |           |
|-----------|-----------|-----------|-----------|-----------|-----------|-----------|-----------|-----------|
| NM_00106C | 2988.168  | 2859.496  | NM_001211 | 4032.73   | 4650.685  | U60665    | 1458.349  | 1235.142  |
| NM_018841 | 1122.864  | 1055.465  | NM_006505 | 929.049   | 919.13    | NM_005507 | 35732.637 | 41539.797 |
| NM_00522E | 525.641   | 470.497   | AB033050  | 3527.34   | 3816.213  | AL080133  | 3268.038  | 4147.195  |
| AL133105  | 2019.707  | 1938.707  | NM_00435E | 11369.965 | 10449.641 | AY014403  | 875.055   | 925.424   |
| AK022859  | 1333.385  | 1300.265  | BC015022  | 4481.628  | 3543.858  | NM_00691Z | 2384.388  | 2942.087  |
| NM_000214 | 615.129   | 662.945   | NM_006697 | 1716.74   | 2338.498  | X12534    | 1395.26   | 1650.473  |
| NM_014864 | 5183.002  | 6254.403  | M19182    | 1166.786  | 1197.309  | X65665    | 360.283   | 255.25    |
| NM_00372E | 11219.499 | 17413.309 | AK025707  | 2137.753  | 1918.255  | NM_018951 | 7436.836  | 7033.415  |
| NM_01435Z | 8494.262  | 8889.166  | NM_00240E | 51011.363 | 52344.172 | NM_01432Z | 4619.75   | 4411.071  |
| NM_012481 | 1929.192  | 1838.073  | U87169    | 2382.809  | 2051.531  | NM_00320E | 2806.914  | 3246.227  |
| L09102    | 20789.99  | 21454.154 | NM_00207Z | 871.267   | 977.324   | AB002324  | 2493.136  | 4584.427  |
| U68488    | 937.262   | 816.808   | NM_00193E | 27672.023 | 28682.875 | NM_00216E | 198.365   | 363.966   |
| NM_016247 | 3306.808  | 2888.282  | AF090327  | 559.014   | 771.495   | AK026231  | 1425.482  | 905.942   |
| NM_01228Z | 773.166   | 756.229   | NM_003291 | 9090.779  | 8002.445  | NM_00214C | 12701.744 | 9877.853  |
| NM_00332Z | 8208.398  | 6564.669  | AK022950  | 1914.244  | 1576.672  | NM_02014Z | 2331.576  | 1873.761  |
| BG685310  | 1237.94   | 838.969   | S75755    | 1308.214  | 1244.342  | NM_01246E | 3463.635  | 3037.09   |
| NM_01866E | 6284.082  | 6358.528  | AF176518  | 696.478   | 880.199   | NM_005131 | 1569.949  | 1406.18   |
| NM_004227 | 1358.51   | 1339.001  | AB014576  | 6469.545  | 7460.175  | NM_00705E | 2246.762  | 1753.865  |
| NM_00528Z | 1942.081  | 1737.308  | NM_019044 | 2106.161  | 1840.614  | AF083383  | 2257.448  | 1472.732  |
| NM_00173E | 754.352   | 814.539   | AK000145  | 2040.094  | 1123.632  | NM_00692E | 3321.303  | 2483.953  |
| AB028949  | 1826.165  | 2116.907  | AF174601  | 2514.297  | 2531.795  | NM_00489C | 48878.891 | 43898.438 |
| AL137580  | 451.785   | 707.855   | AF279865  | 1013.304  | 989.639   | AK023181  | 2037.344  | 1567.104  |
| NM_004101 | 710.221   | 743.526   | NM_01470C | 973.564   | 861.716   | NM_004294 | 1149.701  | 771.043   |
| NM_00299E | 29270.559 | 27004.426 | NM_014714 | 549.957   | 663.151   | NM_005051 | 22494.98  | 28989.107 |
| NM_01597E | 2018.097  | 1848.042  | NM_005687 | 5156.975  | 4630.538  | NM_00196E | 16287.791 | 16870.26  |
| NM_00381C | 2988.44   | 2712.684  | NM_00598Z | 4626.204  | 4369.748  | D17259    | 60342.434 | 57100.918 |
| NM_01444Z | 3923.837  | 3497.091  | NM_01765Z | 3525.507  | 3393.87   | AF264627  | 21725.643 | 18456.76  |
| NM_00521Z | 4757.164  | 5443.396  | X59268    | 4453.878  | 4293.713  | AL133053  | 1493.834  | 1160.146  |
| M14584    | 529.385   | 587.998   | D70832    | 56452.918 | 51837.234 | NM_01814Z | 5988.31   | 5125.287  |
| NM_00641E | 1272.138  | 1226.685  | NM_00142Z | 7461.393  | 7799.975  | NM_01765Z | 4024.857  | 3369.472  |
| AB020676  | 748.782   | 743.315   | M61870    | 2648.291  | 2849.975  | AL109695  | 14330.388 | 12448.224 |
| AK024715  | 861.29    | 719.047   | AK026980  | 1537.908  | 1642.824  | NM_00216E | 1994.535  | 2174.664  |
| U90942    | 65463.887 | 64451.598 | AJ277915  | 506.369   | 568.654   | AK027115  | 380.288   | 232.613   |
| NM_01494Z | 323.25    | 428.202   | NM_02036E | 1369.38   | 1376.518  | NM_00445Z | 994.766   | 778.229   |
| NM_01836C | 1677.675  | 1446.173  | AF024708  | 15998.274 | 15098.321 | NM_01622E | 6738.066  | 4808.812  |
| AL365415  | 881.802   | 713.126   | NM_006467 | 1734.141  | 1588.779  | NM_018244 | 2694.06   | 2034.031  |
| L29147    | 19501.891 | 14834.238 | NM_01756E | 1587.095  | 1539.906  | NM_00249Z | 31157.488 | 25174.633 |
| NM_02022E | 5862.658  | 5821.797  | NM_00658Z | 1347.778  | 1121.232  | AB046855  | 420.709   | 289.275   |
| AK024685  | 1815.146  | 1769.546  | AB033019  | 3482.429  | 3532.503  | NM_00564Z | 4022.3    | 3115.388  |
| NM_00367E | 13691.607 | 12554.576 | NM_00145Z | 623.356   | 759.952   | NM_01810E | 1300.546  | 846.665   |
| AF113007  | 1426.571  | 1487.617  | NM_00616Z | 710.489   | 669.273   | AK023452  | 4086.662  | 3315.562  |
| NM_00068E | 5487.759  | 5154.076  | NM_014764 | 8639.677  | 10238.741 | NM_00033Z | 1303.569  | 1091.76   |
| U39573    | 1240.513  | 1424.271  | NM_01807E | 1756.192  | 1979.048  | AK022215  | 2566.422  | 2167.592  |
| D82061    | 2266.2    | 2208.011  | NM_01605C | 975.649   | 951.128   | NM_001527 | 13637.903 | 17316.273 |
| AJ293009  | 1925.559  | 2216.984  | NM_00708C | 12795.77  | 15505.829 | AK025269  | 5406.438  | 5743.614  |
| NM_000374 | 2240.577  | 2055.488  | AK026912  | 3632.312  | 3594.765  | NM_00143E | 423.834   | 463.433   |
| NM_00050Z | 6864.767  | 6759.53   | AK023531  | 6268.242  | 7049.97   | AB040971  | 1258.661  | 1268.049  |
| NM_00135E | 22104.381 | 21509.914 | AB011128  | 4544.692  | 5251.902  | NM_00656Z | 1824.473  | 1481.576  |
| NM_00169E | 13430.612 | 13592.92  | AK02674Z  | 296.341   | 643.515   | AK024254  | 2053.604  | 1598.502  |
| NM_00497E | 6875.335  | 4035.504  | AK025074  | 5391.185  | 5377.088  | NM_01845E | 6731.211  | 6249.62   |
| NM_00224E | 539.69    | 536.23    | NM_00030Z | 3993.638  | 4022.462  | AK026697  | 634.201   | 264.886   |
| D87445    | 7124.993  | 7771.245  | NM_00624Z | 1136.652  | 930.244   | NM_019021 | 1255.356  | 1014.198  |
| NM_00023E | 3491.034  | 3768.862  | X78712    | 875.82    | 895.707   | AK002183  | 514.107   | 739.916   |

|           |           |           |           |           |           |           |           |           |
|-----------|-----------|-----------|-----------|-----------|-----------|-----------|-----------|-----------|
| NM_002247 | 703.428   | 708.893   | NM_001497 | 990.214   | 1340.865  | NM_018996 | 1051.911  | 1011.765  |
| NM_004980 | 16615.723 | 15412.253 | NM_004130 | 2171.182  | 2795.622  | AL137304  | 1949.283  | 1735.778  |
| AB011094  | 9259.763  | 9211.894  | AF067972  | 8208.782  | 7098.485  | AL049274  | 485.734   | 637.585   |
| NM_003224 | 1424.42   | 1193.853  | NM_004958 | 809.2     | 785.904   | NM_018279 | 683.958   | 576.087   |
| NM_001658 | 58446.891 | 59101.074 | D87076    | 2067.814  | 2289.743  | AK026883  | 1300.805  | 1348.846  |
| NM_006827 | 16064.646 | 13620.897 | NM_014149 | 3305.641  | 3163.896  | NM_014350 | 9783.557  | 8974.752  |
| AK021761  | 5058.06   | 4272.967  | AB020635  | 900.468   | 910.145   | U00925    | 4424.296  | 3459.477  |
| AK024536  | 800.603   | 597.312   | NM_006515 | 1083.27   | 842.663   | AL390185  | 2287.699  | 1606.815  |
| NM_001483 | 1957.323  | 1976.767  | NM_005224 | 1615.302  | 1586.01   | AF086235  | 4415.382  | 4089.748  |
| NM_018973 | 13767.405 | 17630.648 | NM_012144 | 1970.462  | 2308.938  | AF143886  | 1194.794  | 874.53    |
| NM_002591 | 13320.207 | 13670.522 | X65231    | 56449.648 | 52161.582 | AK025975  | 875.232   | 939.415   |
| NM_020216 | 5685.733  | 5064.843  | NM_002908 | 1584.801  | 1795.551  | AK025583  | 20096.779 | 21387.994 |
| AK021860  | 1237.869  | 1125.048  | AF205632  | 1627.523  | 1842.875  | NM_014664 | 1670.359  | 2037.076  |
| AK000119  | 8086.105  | 9177.403  | NM_005378 | 12360.008 | 13223.306 | AL109788  | 624.206   | 628.812   |
| AL137266  | 3135.222  | 3026.811  | NM_002397 | 7260.771  | 5282.906  | NM_014952 | 17470.857 | 15098.177 |
| NM_016457 | 1026.609  | 1077.363  | AF000672  | 1194.667  | 1500.05   | AB037765  | 780.575   | 630.174   |
| NM_005057 | 1786.303  | 2478.578  | AK002195  | 1107.3    | 863.924   | AK025068  | 603.761   | 618.003   |
| AF143321  | 1373.979  | 2309.601  | AF086128  | 446.4     | 444.044   | AK026720  | 1084.939  | 827.891   |
| AB046842  | 1713.179  | 2070.19   | AK022850  | 1764.309  | 1496.553  | AL137566  | 2091.125  | 1405.924  |
| NM_004850 | 1771.34   | 1874.598  | NM_016490 | 1302.133  | 1444.365  | AF087962  | 2673.502  | 2479.3    |
| NM_002822 | 3705.904  | 2893.141  | AF038193  | 414.535   | 679.378   | AF075039  | 250.054   | 258.175   |
| BF306955  | 1225.963  | 1376.162  | AL137498  | 2150.102  | 2049.022  | AL050197  | 2125.365  | 1899.209  |
| NM_001394 | 7376.327  | 6907.17   | AK024289  | 665.876   | 472.299   | AF085870  | 2724.513  | 2240.045  |
| NM_018441 | 8808.793  | 9832.897  | NM_003851 | 21653.645 | 19192.375 | AL050063  | 484.608   | 336.201   |
| NM_000778 | 10110.2   | 9648.879  | AK024150  | 1493.383  | 1416.347  | AL080217  | 525.778   | 443.993   |
| NM_001609 | 985.41    | 874.763   | AF070536  | 1006.939  | 1072.584  | AL117580  | 9266.521  | 8509.987  |
| BE733234  | 631.221   | 560.132   | U79300    | 697.002   | 1159.018  | AL049355  | 171.887   | 182.792   |
| NM_012282 | 924.948   | 792.652   | AK025151  | 6078.709  | 6475.865  | AL110190  | 4012.281  | 2381.198  |
| NM_003323 | 10669.463 | 9962.405  | AK025550  | 3006.453  | 3176.186  | AL117656  | 579.378   | 437.773   |
| BG685310  | 1651.826  | 1469.039  | AF088076  | 8924.858  | 10246.795 | AJ001893  | 1163.682  | 904.803   |
| AW300857  | 15290.473 | 14730.11  | AF086543  | 2815.121  | 3139.052  | NM_014819 | 10078.687 | 7094.316  |
| H85962    | 22917.33  | 21964.941 | AB046797  | 1770.672  | 1273.09   | AF086040  | 1972.437  | 1137.185  |
| BG742446  | 1370.207  | 1450.737  | AK002098  | 2318.715  | 2193.607  | AB032988  | 1384.474  | 930.576   |
| AA864554  | 4676.112  | 3816.491  | AK025156  | 11315.024 | 11623.085 | AK023559  | 2061.3    | 1754.412  |
| X66945    | 1535.777  | 1489.749  | AK022116  | 3294.831  | 2934.043  | AL049233  | 1325.763  | 1184.692  |
| X12830    | 8837.238  | 8024.143  | AF026526  | 1088.223  | 1139.252  | NM_017696 | 2237.052  | 2585.783  |
| U00482    | 993.372   | 1049.09   | AK026207  | 8665.911  | 8047.54   | AL050166  | 2642.617  | 3109.803  |
| K01904    | 17732.322 | 17500.994 | AK024984  | 10823.421 | 10292.407 | AK026705  | 1382.859  | 1627.184  |
| BE538886  | 996.215   | 975.062   | AK000276  | 802.365   | 578.344   | NM_003602 | 817.74    | 580.396   |
| NM_002228 | 982.989   | 1084.47   | AL110236  | 704.169   | 760.292   | AF009258  | 14418.772 | 12060.121 |
| M57650    | 5517.009  | 5445.603  | AF085955  | 665.48    | 763.026   | AF009305  | 1725.916  | 1443.639  |
| BC023978  | 582.293   | 647.939   | AF075106  | 2895.558  | 3479.222  | AF056454  | 539.567   | 227.879   |
| M21302    | 2074.599  | 2016.89   | AK023339  | 2487.797  | 2666.854  | AF009270  | 749.123   | 1157.138  |
| NM_016346 | 2451.786  | 2477.881  | AF086008  | 1001.556  | 1057.153  | AF056421  | 653.398   | 563.174   |
| AK024865  | 493.013   | 551.201   | AF087970  | 660.148   | 683.857   | AF090889  | 682.487   | 381.757   |
| U90942    | 61399.664 | 59343.465 | U05597    | 576.367   | 770.917   | AK001906  | 1285.288  | 963.43    |
| NM_018360 | 2022.8    | 1576.544  | U50524    | 382.804   | 432.052   | AK021528  | 716.549   | 723.108   |
| AL365415  | 1132.754  | 1078.86   | U52050    | 611.449   | 862.607   | AK021746  | 4854.291  | 3857.729  |
| L29147    | 25462.293 | 26482.982 | U73799    | 611.541   | 752.619   | AK001136  | 1085.183  | 877.853   |
| NM_001525 | 16570.846 | 13642.3   | Z36826    | 660.517   | 610.09    | AK002066  | 186.762   | 196.13    |
| NM_006055 | 2896.392  | 2410.68   | AK021668  | 30792.994 | 35592.75  | AK021617  | 543.195   | 149.354   |
| NM_004296 | 1298.088  | 992.061   | AF086148  | 18525.449 | 15884.811 | AK021810  | 785.926   | 640.826   |
| NM_005048 | 792.371   | 853.49    | NM_018363 | 475.509   | 415.708   | AK025190  | 258.444   | 269.382   |

|           |           |           |           |           |           |           |           |           |
|-----------|-----------|-----------|-----------|-----------|-----------|-----------|-----------|-----------|
| NM_005972 | 872.311   | 793.622   | AJ245433  | 7429.608  | 6321.201  | AK026385  | 738.866   | 255.984   |
| NM_001060 | 2943.276  | 2873.476  | AK021942  | 20855.65  | 35649.543 | AK025846  | 743       | 853.979   |
| NM_018841 | 1197.311  | 1154.97   | NM_014127 | 749.571   | 914.09    | AK026440  | 381.951   | 204.398   |
| NM_005226 | 847.102   | 781.908   | AL360187  | 538.817   | 447.014   | AK026805  | 1757.408  | 1885.608  |
| AL133105  | 2928.044  | 3885.034  | AK021878  | 1363.003  | 966.461   | AL389983  | 6734.772  | 4484.464  |
| AK022859  | 1556.656  | 1753.58   | AK021817  | 1575.622  | 1621.962  | AJ008159  | 637.107   | 354.684   |
| NM_000214 | 594.775   | 738.677   | AL080103  | 808.704   | 1003.294  | AK000995  | 1277.486  | 981.683   |
| NM_014864 | 5180.309  | 4698.112  | AK023217  | 1324.728  | 1190.087  | U00959    | 2953.403  | 2449.834  |
| NM_003728 | 9208.9    | 9532.173  | AF090902  | 2075.865  | 2154.631  | NM_014578 | 8318.215  | 6102.243  |
| NM_014352 | 6636.189  | 6234.741  | AF119887  | 7067.312  | 5402.389  | AF147306  | 2382.997  | 1907.458  |
| NM_012481 | 1690.084  | 1270.114  | AK091038  | 867.521   | 750.371   | AF086267  | 1142.839  | 1151.189  |
| L09102    | 14342.976 | 13781.947 | AK024193  | 1556.531  | 1672.743  | X74606    | 677.341   | 284.973   |
| U68488    | 954.319   | 685.46    | NM_018578 | 303.257   | 728.791   | NM_012183 | 1443.156  | 1287.493  |
| NM_016247 | 2696.479  | 1909.419  | AK024438  | 13043.969 | 11367.385 | AK026785  | 1442.94   | 1021.347  |
| AB011094  | 9320.824  | 8531.021  | AK022482  | 504.59    | 803.236   | AK022994  | 662.419   | 164.341   |
| NM_003224 | 1120.656  | 1098.859  | AK024135  | 497.301   | 561.82    | NM_018225 | 10194.104 | 10201.078 |
| NM_001658 | 62357.383 | 55350.711 | AK022803  | 2138.361  | 2064.13   | AK025534  | 1174.767  | 667.525   |
| NM_006827 | 20043.746 | 19972.061 | AK023517  | 1425.849  | 1765.511  | AF091526  | 568.943   | 784.088   |
| AK021761  | 6389.587  | 7047.204  | AK023869  | 4740.742  | 4686.625  | AK022170  | 355.618   | 500.855   |
| AK024536  | 1363.992  | 1220.06   | NM_017728 | 989.069   | 1108.174  | AL390169  | 184.839   | 363.413   |
| NM_018668 | 6179.268  | 5104.352  | U80772    | 525.36    | 327.021   | M60749    | 2101.16   | 1510.606  |
| NM_004227 | 915.459   | 763.23    | NM_006189 | 411.73    | 554.81    | X79986    | 697.671   | 624.663   |
| NM_005282 | 1784.808  | 1386.893  | AJ272177  | 696.191   | 893.836   | NM_003523 | 8923.214  | 5528.766  |
| NM_001736 | 705.235   | 680.346   | AK026402  | 13066.188 | 10695.38  | X01448    | 478.5     | 549.912   |
| AB028949  | 1599.884  | 1628.629  | AF111846  | 1214.447  | 919.875   | NM_016503 | 4149.42   | 4123.371  |
| AL137580  | 706.211   | 806.682   | M11948    | 64948.504 | 53912.652 | AK056351  | 14846.354 | 12636.979 |
| NM_004101 | 894.827   | 774.032   | AK024618  | 894.944   | 1177.475  | NM_014690 | 1668.836  | 1014.005  |
| NM_002995 | 29137.795 | 32155.928 | AL049969  | 949.964   | 1168.419  | NM_017698 | 4887.521  | 3364.295  |
| AB033114  | 733.548   | 798.737   | NM_005220 | 1529.12   | 1350.348  | AF086490  | 935.489   | 714.047   |
| NM_015978 | 2067.725  | 2319.714  | AK026366  | 41090.734 | 42674.746 | AF131738  | 34612.266 | 27777.504 |
| NM_014443 | 3731.563  | 2896.064  | AK024229  | 28005.193 | 26688.975 | AK021666  | 2990.402  | 2417.245  |
| NM_005212 | 4289.525  | 3887.378  | AK021467  | 4486.942  | 5513.371  | AK024081  | 769.59    | 769.389   |
| NM_006419 | 1135.987  | 955.71    | NM_020371 | 3370.044  | 3448.92   | AK024825  | 2951.043  | 2498.927  |
| AB020676  | 639.254   | 525.159   | AK022498  | 2643.22   | 2220.163  | AF086317  | 4714.168  | 3512.497  |
| AK024715  | 702.682   | 443.491   | U84506    | 1031.843  | 1140.699  | U16850    | 4821.215  | 3377.518  |
| BF306955  | 1532.759  | 1414.091  | U21556    | 51317.609 | 47994.621 | AL390178  | 934.63    | 738.966   |
| NM_001394 | 7646.407  | 6174.178  | AB002444  | 766.556   | 891.997   | NM_005383 | 347.889   | 362.116   |
| NM_018441 | 9094.252  | 8171.733  | AB002344  | 1850.71   | 2144.803  | Z36806    | 1190.549  | 1350.196  |
| NM_000778 | 12021.019 | 14471.709 | BF210352  | 1085.401  | 1411.367  | NM_005368 | 593.945   | 655.192   |
| NM_001609 | 1159.472  | 1154.874  | NM_006829 | 1870.434  | 2172.514  | NM_018618 | 660.509   | 542.425   |
| BE733234  | 643.585   | 679.962   | NM_017669 | 12139.69  | 11912.722 | AJ008121  | 7893.858  | 4935.725  |
| NM_020228 | 5988.784  | 5767.679  | AF147379  | 42302.238 | 33024.426 | AJ008153  | 1046.789  | 1203.082  |
| AK024685  | 1526.728  | 1322.601  | AK023760  | 5752.948  | 5386.75   | AK023739  | 1099.74   | 1231.734  |
| NM_003676 | 12366.626 | 10912.699 | X98415    | 58800.746 | 49766.91  | NM_005830 | 4799.272  | 4667.664  |
| AF113007  | 1598.975  | 1438.596  | AK024205  | 2094.813  | 2402.226  | NM_001507 | 920.349   | 809.955   |
| NM_000688 | 5725.792  | 4919.589  | AF086034  | 12773.346 | 12193.631 | X92108    | 563.411   | 444.079   |
| U39573    | 1477.439  | 1631.198  | AK000174  | 1081.211  | 965.221   | AL389876  | 1137.747  | 1377.37   |
| D82061    | 2450.909  | 2796.771  | AF130071  | 648.69    | 782.447   | AK022120  | 876.769   | 929.862   |
| AJ293009  | 2244.458  | 2684.84   | AL390170  | 452.998   | 663.426   | Z70762    | 1270.136  | 1475.833  |
| NM_000374 | 2209.179  | 2738.703  | AK022887  | 1023.46   | 1081.737  | BF037206  | 2324.691  | 1802.875  |
| NM_000502 | 5765.606  | 7254.997  | AK000745  | 20131.111 | 20615.193 | AK021474  | 7522.038  | 6501.24   |
| NM_001358 | 25786.531 | 27153.646 | NM_005299 | 583.37    | 428.505   | AK023642  | 1437.956  | 2161.083  |
| NM_001696 | 11915.36  | 11034.123 | NM_015901 | 1398.015  | 1208.692  | AW511510  | 454.735   | 426.902   |

|           |           |           |           |           |           |           |           |           |
|-----------|-----------|-----------|-----------|-----------|-----------|-----------|-----------|-----------|
| NM_004975 | 5283.154  | 2896.714  | AF130065  | 727.327   | 576.908   | U52827    | 1570.888  | 1431.832  |
| D87445    | 6711.366  | 5886.671  | Z83935    | 1452.316  | 1834.101  | AL049466  | 7820.829  | 5879.146  |
| NM_000238 | 2940.796  | 2143.344  | AF093744  | 2332.263  | 2615.706  | AB037802  | 1200.506  | 1211.443  |
| NM_002247 | 583.592   | 574.289   | NM_018687 | 20769.227 | 19219.98  | U17623    | 1046.81   | 854.563   |
| NM_004980 | 12823.364 | 9940.756  | M57417    | 41484.727 | 37170.609 | AL137450  | 4679.679  | 4286.296  |
| NM_016346 | 2707.678  | 2691.404  | NM_020524 | 6352.989  | 6183.06   | AK023058  | 1092.133  | 1228.15   |
| AK024865  | 736.083   | 955.67    | NM_001999 | 4203.347  | 4027.336  | AJ227878  | 546.878   | 465.567   |
| NM_001483 | 2056.865  | 2205.451  | X64977    | 926.512   | 1194.688  | NM_012064 | 2877.2    | 2787.322  |
| NM_018973 | 14115.989 | 13922.827 | AF064851  | 904.216   | 1253.704  | AK001460  | 572.949   | 333.106   |
| NM_002591 | 15641.729 | 15488.245 | NM_002602 | 5547.74   | 4748.658  | AK092508  | 2615.109  | 1456.276  |
| NM_020216 | 5764.281  | 7540.049  | NM_003383 | 4548.131  | 3691.805  | AK027111  | 34897.813 | 41620.988 |
| AK021860  | 1441.137  | 1741.383  | D17271    | 11511.554 | 9690.99   | NM_003518 | 589.732   | 593.925   |
| AB046816  | 983.75    | 960.346   | X91648    | 2204.358  | 1981.898  |           |           |           |
| AL137266  | 3198.221  | 2667.777  | AK026658  | 1029.852  | 1038.182  |           |           |           |
| NM_016457 | 788.824   | 1018.099  | AF282264  | 15418.259 | 14828.475 |           |           |           |
| NM_005057 | 1265.526  | 934.739   | AF086322  | 1195.388  | 1185.551  |           |           |           |
| AF143321  | 631.508   | 605.792   | Z70717    | 1119.541  | 1557.84   |           |           |           |
| AB046842  | 1241.507  | 1068.054  | AK024736  | 871.172   | 693.044   |           |           |           |
| NM_004850 | 1695.527  | 1206.987  | X79308    | 1946.728  | 1639.735  |           |           |           |
| NM_002822 | 2243.628  | 1504.98   | NM_017660 | 8014.515  | 9729.552  |           |           |           |
| NM_014352 | 9264.356  | 8589.676  | AB011151  | 9458.829  | 10474.89  |           |           |           |
| NM_012481 | 1841.126  | 1807.772  | U92995    | 4378.098  | 4358.688  |           |           |           |
| L09102    | 27418.793 | 44524.156 | Z70769    | 1197.01   | 1343.884  |           |           |           |
| U68488    | 1179.753  | 1743.423  | NM_007106 | 3363.582  | 2847.79   |           |           |           |
| NM_000675 | 459.513   | 821.664   | AL137555  | 3819.273  | 2762.946  |           |           |           |
| NM_016247 | 4026.608  | 3947.437  | CY3Cy5    | 3501.005  | 131.574   |           |           |           |
| NM_012282 | 1304.452  | 1816.994  | X00588    | 1131.002  | 1704.277  |           |           |           |
| NM_006710 | 490.884   | 617.326   | AI359037  | 5352.653  | 6184.796  |           |           |           |
| NM_003323 | 10789.705 | 11510.418 | BI754285  | 799.736   | 1036.575  |           |           |           |
| BG685310  | 1610.5    | 1588.75   | X15998    | 1897.823  | 2618.717  |           |           |           |
| AW300857  | 18522.234 | 17826.006 | NM_001883 | 1878.954  | 1493.937  |           |           |           |
| H85962    | 26619.332 | 31598.973 | NM_004628 | 1284.893  | 1320.212  |           |           |           |
| BG742446  | 1705.1    | 2981.202  | L31785    | 697.408   | 674.754   |           |           |           |
| AA864554  | 5017.077  | 5780.913  | H-M 69043 | 3340.656  | 3736.516  |           |           |           |
| X66945    | 1943.258  | 2518.085  | AF077374  | 1420.103  | 1138.808  |           |           |           |
| AI160703  | 534.566   | 551.591   | U43901    | 885.349   | 1604.182  |           |           |           |
| X12830    | 10085.433 | 14004.803 | X59065    | 901.269   | 1141.568  |           |           |           |
| U00482    | 1184.594  | 1300.515  | M59828    | 2065.724  | 2334.685  |           |           |           |
| K01904    | 14603.051 | 12268.923 | NM_016134 | 1967.869  | 1624.146  |           |           |           |
| BE538886  | 775.19    | 635.741   | SR2       | 51046.789 | 52099.914 |           |           |           |
| NM_002228 | 691.83    | 431.802   | SR4       | 15394.489 | 11590.07  |           |           |           |
| M57650    | 3977.525  | 2852.559  | SR6       | 2496.843  | 1801.203  |           |           |           |
| BC023978  | 516.787   | 389.094   | SR8       | 7925.149  | 15834.956 |           |           |           |
| M21302    | 1548.191  | 1403.833  | SR10      | 26316.215 | 5778.503  |           |           |           |
| NM_005212 | 4916.128  | 4806.09   | CY3Cy5    | 593.018   | 95.931    |           |           |           |
| M14584    | 725.039   | 545.965   | NM_000612 | 4838.794  | 5035.756  |           |           |           |
| NM_006419 | 1451.209  | 1320.721  | NM_004257 | 18268.014 | 25582.824 |           |           |           |
| AF035035  | 409.176   | 541.859   | NM_000683 | 2158.67   | 2170.822  |           |           |           |
| AB020676  | 994.176   | 1278.043  | NM_003629 | 790.908   | 1017.393  |           |           |           |
| AK024715  | 849.55    | 703.012   | NM_005901 | 6709.055  | 7960.233  |           |           |           |
| U90942    | 66017.953 | 63457.242 | NM_004248 | 930.705   | 1183.311  |           |           |           |
| NM_014942 | 1314.209  | 1193.466  | NM_000435 | 3847.371  | 3468.373  |           |           |           |
| NM_018360 | 1917.603  | 2024.479  | NM_001842 | 20980.934 | 20155.189 |           |           |           |

|           |           |           |           |           |           |
|-----------|-----------|-----------|-----------|-----------|-----------|
| AL365415  | 1241.416  | 1323.015  | NM_007281 | 707.685   | 600.569   |
| L29147    | 34063.18  | 37077.363 | AB017169  | 735.214   | 738.322   |
| NM_001525 | 20224.666 | 20850.314 | AL080170  | 1580.814  | 1366.75   |
| NM_006055 | 3897.52   | 4033.802  | AB039903  | 3782.15   | 3373.173  |
| NM_004296 | 1112.753  | 1380.335  | NM_000542 | 9215.314  | 7458.254  |
| NM_005045 | 987.141   | 1354.955  | NM_006851 | 351.242   | 482.369   |
| NM_005972 | 1273.288  | 1270.362  | AK001560  | 793.899   | 551.112   |
| NM_001060 | 3398.992  | 3298.688  | AB001328  | 856.684   | 462.638   |
| NM_018841 | 1323.707  | 1238.322  | H99588    | 2356.239  | 1169.668  |
| NM_005226 | 535.459   | 595.667   | AK022600  | 2488.775  | 2863.439  |
| AL133105  | 1958.321  | 1672.865  | AK023142  | 1132.926  | 1259.824  |
| AK022859  | 1359.572  | 1111.168  | U61740    | 8572.579  | 9214      |
| NM_000214 | 613.877   | 451.598   | NM_006409 | 58427.039 | 53557.547 |
| NM_014864 | 4179.651  | 3390.966  | AB049054  | 2135.476  | 2560.731  |
| NM_003725 | 6145.821  | 5098.651  | NM_015071 | 1094.614  | 1000.368  |
| NM_004975 | 6587.261  | 3770.068  | NM_013227 | 1002.472  | 1284.34   |
| NM_002245 | 473.615   | 570.036   | Z83803    | 621.414   | 778.87    |
| D87445    | 7858.023  | 10163.681 | AF027205  | 18954.232 | 18564.539 |
| NM_000235 | 4714.805  | 4744.532  | AF075012  | 1151.292  | 1238.078  |
| NM_002247 | 1018.233  | 797.773   | NM_000589 | 2473.579  | 2173.648  |
| NM_004980 | 20096.182 | 21150.172 | NM_016546 | 14739.394 | 15853.506 |
| AB011094  | 10581.671 | 11423.48  | AF309653  | 11649.823 | 11530.817 |
| NM_003224 | 1211.329  | 1722.976  | NM_002620 | 14926.687 | 13989.503 |
| NM_001655 | 62403.68  | 60059.512 | S79267    | 790.126   | 581.059   |
| NM_006827 | 20725.621 | 22319.029 | NM_001816 | 666.491   | 622.717   |
| AK021761  | 7390.652  | 8233.737  | NM_003784 | 31438.729 | 27127.783 |
| AK024536  | 1251.401  | 1569.913  | NM_000195 | 14321.849 | 12002.982 |
| NM_018665 | 7090.094  | 11093.746 | NM_005445 | 8858.973  | 5261.093  |
| NM_004227 | 1117.6    | 1263.099  | NM_014899 | 1916.965  | 1507.361  |
| NM_005282 | 2232.709  | 2212.782  | NM_003630 | 4434.731  | 2889.844  |
| NM_001736 | 806.809   | 994.605   | NM_000046 | 3009.205  | 2386.862  |
| AB028949  | 1599.608  | 1720.484  | NM_003219 | 1192.565  | 734.419   |
| AL137580  | 802.566   | 763.982   | NM_006709 | 3057.574  | 1483.538  |
| NM_004101 | 821.682   | 842.094   | NM_004910 | 1087.046  | 1555.828  |
| NM_002995 | 29611.422 | 27553.576 | AB013452  | 552.209   | 753.934   |
| NM_015975 | 1576.412  | 1417.398  | M93107    | 1820.607  | 2056.574  |
| NM_003810 | 2288.696  | 1844.287  | BC001479  | 3201.838  | 3953.601  |
| NM_014443 | 2983.496  | 1862.534  | NM_002461 | 16613.52  | 21640.504 |
| NM_016457 | 935.558   | 1070.085  | NM_005771 | 10299.994 | 10488.398 |
| NM_005057 | 1439.154  | 1448.305  | AB032986  | 30444.141 | 33212.801 |
| AF143321  | 769.617   | 1065.879  | NM_017525 | 21409.914 | 24405.18  |
| AB046842  | 1869.557  | 2023.397  | NM_016032 | 8075.891  | 9031.194  |
| NM_004850 | 2259.334  | 2501.369  | NM_014324 | 56947.551 | 57595.242 |
| NM_002822 | 4832.684  | 4299.5    | NM_001687 | 20707.262 | 24338.141 |
| BF306955  | 2188.751  | 2309.172  | AK026374  | 1312.671  | 1369.976  |
| NM_001394 | 8723.325  | 9594.057  | NM_001169 | 1207.707  | 1268.408  |
| NM_018441 | 12197.431 | 14213.973 | AK024648  | 13267.819 | 14618.848 |
| NM_000775 | 12360.944 | 14223.33  | NM_000719 | 776.409   | 544.294   |
| NM_001609 | 1322.564  | 1734.419  | NM_003459 | 4403.828  | 4815.508  |
| BE733234  | 484.111   | 927.553   | NM_000171 | 1685.406  | 992.914   |
| NM_020225 | 5921.063  | 7489.037  | AL354615  | 1421.202  | 1136.891  |
| AK024685  | 2164.435  | 2479.405  | NM_013349 | 33069.305 | 29427.176 |
| NM_003676 | 14278.442 | 14627.791 | NM_003705 | 2072.229  | 1830.847  |

|           |           |           |           |           |           |
|-----------|-----------|-----------|-----------|-----------|-----------|
| AF113007  | 1540.47   | 1517.374  | NM_006861 | 1647.747  | 1622.536  |
| NM_00068E | 5821.719  | 5427.817  | NM_005829 | 2786.319  | 2016.503  |
| U39573    | 1797.688  | 1847.594  | NM_00046E | 1175.655  | 1232.435  |
| D82061    | 2595.539  | 2414.678  | NM_01590E | 13903.379 | 8352.859  |
| AJ293009  | 2215.424  | 2028.54   | NM_00089E | 741.341   | 791.031   |
| NM_000374 | 2449.13   | 2285.191  | AB040672  | 4294.63   | 4992.897  |
| NM_000502 | 6164.446  | 5657.4    | NM_002192 | 1471.804  | 1555.196  |
| NM_00135E | 1342.914  | 764.107   | NM_005491 | 4793.108  | 8256.802  |
| NM_00169E | 10032.083 | 7672.263  | NM_00386E | 3327.096  | 4125.835  |
| AF190900  | 4443.004  | 4741.732  | AK025599  | 748.919   | 735.637   |
| NM_020404 | 21427.713 | 32949.551 | X63417    | 6075.792  | 6449.418  |
| BE972401  | 9034.599  | 10238.514 | S94539    | 19539.248 | 27845.26  |
| U56725    | 521.389   | 666.523   | NM_006402 | 868.784   | 1176.698  |
| NM_01742E | 1397.347  | 1505.493  | NM_00578E | 2709.104  | 3055.605  |
| AB007922  | 1278.849  | 1137.79   | NM_01824E | 2616.299  | 3194.252  |
| NM_015982 | 2806.07   | 3501.428  | AK001695  | 8838.503  | 8845.305  |
| NM_00374E | 33139.746 | 43037.375 | NM_01788E | 2528.114  | 3085.435  |
| NM_00291C | 56932.301 | 65051.008 | NM_014397 | 6442.353  | 5495.781  |
| AC096970  | 32306.49  | 40964.574 | AB023182  | 1303.409  | 1226.132  |
| AK024865  | 855.486   | 1029.038  | NM_003607 | 881.967   | 829.073   |
| NM_00721C | 603.436   | 928.583   | NM_00657E | 2098.142  | 2757.104  |
| NM_00148E | 2741.011  | 2892.656  | NM_013254 | 2591.221  | 2206.808  |
| NM_01897E | 13234.556 | 14489.354 | NM_000437 | 10008.833 | 7348.521  |
| NM_002591 | 19032.824 | 31937.303 | AB046819  | 4708.434  | 3569.485  |
| NM_02021E | 5777.593  | 4622.093  | NM_00609C | 4553.059  | 2956.018  |
| AK021860  | 974.596   | 786.234   | NM_00290C | 6205.605  | 4101.565  |
| AK000119  | 11443.314 | 10414.173 | NM_006851 | 420.397   | 618.872   |
| AL137266  | 2553.773  | 1887.865  | AK001560  | 873.69    | 1295.065  |
| U95031    | 690.343   | 907.608   | AB001328  | 546.752   | 656.372   |
| AL137311  | 648.743   | 814.19    | H99588    | 1583.847  | 1842.369  |
| NM_01428E | 4318.227  | 5892.925  | X00588    | 843.097   | 1130.694  |
| AF035300  | 1037.18   | 947.863   | AI359037  | 5241.437  | 5504.888  |
| NM_01770E | 9328.675  | 8895.063  | BI754285  | 701.639   | 731.923   |
| NM_01532C | 2921.995  | 3411.282  | X15998    | 2608.036  | 2194.231  |
| NM_00405E | 2877.876  | 2694.508  | M76482    | 504.545   | 485.792   |
| NM_01472E | 13663.358 | 14538.124 | NM_00188E | 1645.129  | 1923.138  |
| AJ297349  | 3282.668  | 3562.012  | NM_00462E | 1731.208  | 1975.525  |
| NM_00582E | 7315.754  | 8127.034  | L31785    | 671.832   | 937.399   |
| NM_00161E | 2648.276  | 3210.055  | X59065    | 973.282   | 971.618   |
| NM_00659E | 2287.633  | 3101.75   | M59828    | 2867.229  | 2268.418  |
| NM_00446E | 881.563   | 1010.482  | NM_016134 | 1488.125  | 1079.661  |
| NM_00593E | 729.207   | 844.084   | AJ010482  | 2466.95   | 1704.457  |
| U43586    | 597.56    | 1204.099  | NM_00544E | 6426.381  | 5583.397  |
| NM_006271 | 10980.682 | 17580.938 | NM_01489E | 1189.597  | 1276.544  |
| NM_018647 | 835.658   | 725.553   | NM_00363C | 2889.119  | 5039.206  |
| NM_00302E | 510.642   | 608.454   | NM_00004E | 3183.322  | 5419.761  |
| NM_000721 | 35727.191 | 33828.52  | NM_00321E | 1404.301  | 2013.801  |
| NM_00393E | 1732.817  | 1558.098  | NM_00670E | 2652.796  | 2483.027  |
| NM_00509E | 3412.51   | 2808.085  | NM_000612 | 4347.513  | 4239.641  |
| NM_00316E | 8025.508  | 6130.731  | NM_004257 | 15454.93  | 15402.161 |
| NM_019057 | 4018.659  | 4567.581  | NM_002844 | 782.32    | 607.123   |
| NM_002677 | 1827.553  | 2027.437  | NM_00068E | 1741.443  | 2282.458  |
| NM_01620E | 2659.322  | 2725.964  | NM_00362E | 1426.779  | 1456.827  |

|           |           |           |           |           |           |
|-----------|-----------|-----------|-----------|-----------|-----------|
| NM_005759 | 1631.679  | 1796.676  | NM_005901 | 8317.088  | 10519.6   |
| AF149724  | 2188.083  | 1951.299  | NM_004248 | 1476.659  | 1224.884  |
| BC020745  | 1032.144  | 1061.58   | NM_000959 | 658.182   | 1113.345  |
| NM_006367 | 62279.398 | 61638.402 | NM_019066 | 398.312   | 542.755   |
| NM_006732 | 45946.18  | 53091.801 | NM_004796 | 951.559   | 1391.396  |
| NM_004354 | 2142.012  | 2174.957  | NM_000435 | 2410.198  | 4564.679  |
| NM_004661 | 1850.954  | 2044.833  | NM_001842 | 17002.498 | 20903.045 |
| NM_002009 | 1210.941  | 1461.576  | AB017169  | 719.043   | 580.121   |
| NM_001610 | 2532.645  | 2593.228  | AL080170  | 1589.484  | 1190.333  |
| NM_001241 | 1550.684  | 1674.878  | AB039903  | 3999.273  | 2722.932  |
| AF217504  | 2916.48   | 3114.85   | NM_000542 | 8825.132  | 5845.321  |
| AK027102  | 6604.857  | 7145.012  | NM_003705 | 1526.476  | 1961.665  |
| AL109714  | 682.867   | 774.524   | NM_006861 | 1579.753  | 2372.268  |
| NM_004632 | 4282.916  | 4911.005  | NM_005829 | 2158.953  | 2761.113  |
| NM_017919 | 3789.386  | 4625.538  | NM_000466 | 895.737   | 1460.425  |
| NM_014456 | 4637.897  | 4792.8    | NM_015908 | 15295.765 | 17880.816 |
| NM_004740 | 4421.283  | 4280.135  | AK022600  | 2340.871  | 2025.557  |
| NM_003805 | 2268.375  | 2155.131  | AK023142  | 1005.308  | 1336.629  |
| NM_019886 | 4432.168  | 4263.413  | U61740    | 10110.711 | 9148.283  |
| NM_003278 | 53441.262 | 52407.07  | NM_006409 | 51537.293 | 52160.922 |
| AK021957  | 40653.574 | 37582     | AB049054  | 3556.216  | 3777.885  |
| NM_016623 | 7593.475  | 9033.24   | NM_015071 | 1069.214  | 1072.318  |
| NM_001334 | 14459.758 | 14382.426 | NM_013227 | 1401.638  | 1291.252  |
| NM_004771 | 2859.249  | 2869.859  | Z83803    | 718.99    | 680.06    |
| AL365514  | 1291.737  | 1481.33   | AF027205  | 22264.639 | 18673.955 |
| NM_018299 | 1601.833  | 1506.654  | AF075012  | 2095.815  | 2521.606  |
| NM_002104 | 1127.561  | 1324.957  | NM_001570 | 1645.785  | 2173.564  |
| NM_005504 | 7859.506  | 9046.445  | NM_015658 | 624.917   | 948.067   |
| AF234654  | 1590.139  | 2595.486  | NM_000589 | 2590.615  | 2995.27   |
| NM_000110 | 5861.632  | 8970.604  | NM_016546 | 18107.354 | 15748.998 |
| NM_016002 | 34086.48  | 43012.922 | AF309653  | 10755.983 | 9147.631  |
| NM_014549 | 1452.37   | 1332.403  | NM_002620 | 13029.929 | 10226.949 |
| NM_017832 | 8231.997  | 7721.017  | NM_001816 | 762.144   | 487.551   |
| NM_001713 | 3377.428  | 3260.452  | NM_003784 | 27858.578 | 18097.404 |
| NM_015367 | 6200.337  | 6767.355  | NM_000195 | 13640.606 | 9565.187  |
| NM_014498 | 4924.175  | 5099.579  | NM_006575 | 1298.813  | 1634.354  |
| NM_002375 | 13799.526 | 13958.082 | NM_013254 | 3480.658  | 4419.79   |
| AF055016  | 3961.569  | 3052.381  | NM_000437 | 11156.882 | 17206.266 |
| NM_007234 | 9294.398  | 7878.082  | AB046819  | 5677.937  | 7632.832  |
| Y16704    | 70653.453 | 63246.066 | NM_006090 | 3059.214  | 3832.084  |
| NM_014567 | 4881.505  | 3857.335  | NM_002900 | 6831.944  | 7500.041  |
| NM_017842 | 1345.571  | 1185.575  | NM_004910 | 1100.399  | 902.282   |
| AB037809  | 2160.291  | 1935.79   | AB013452  | 436.978   | 666.323   |
| AB011129  | 1429.214  | 1625.901  | M93107    | 5062.677  | 4883.871  |
| NM_014391 | 7728.9    | 8510.803  | BC001479  | 4606.711  | 5071.265  |
| NM_004270 | 2189.373  | 2026.952  | NM_002461 | 24198.156 | 31910.389 |
| NM_012082 | 1472.046  | 1318.261  | NM_005771 | 14039.115 | 16211.395 |
| NM_001537 | 3846.642  | 4063.808  | AB032986  | 35993.563 | 36785.426 |
| U80743    | 1930.197  | 2043.385  | NM_017528 | 25205.254 | 29481.186 |
| NM_001352 | 2869.53   | 2772.56   | NM_001687 | 25941.326 | 25206.377 |
| D15050    | 687.641   | 660.189   | AK026374  | 2125.856  | 2004.308  |
| NM_006527 | 5499.789  | 6313.628  | NM_001169 | 1545.724  | 1774.915  |
| NM_006627 | 2692.677  | 2676.781  | AK024648  | 12952.699 | 11009.762 |



|           |           |           |           |           |           |
|-----------|-----------|-----------|-----------|-----------|-----------|
| NM_007363 | 21947.105 | 22117.092 | NM_000719 | 551.611   | 745.533   |
| NM_003093 | 43351.785 | 44814.586 | NM_003459 | 5517.796  | 5143.695  |
| U05589    | 844.262   | 1018.51   | NM_000171 | 1392.212  | 884.972   |
| NM_014473 | 9483.967  | 8894.643  | AL354615  | 1005.532  | 890.166   |
| NM_003095 | 67401.008 | 64519.977 | NM_013349 | 29439.744 | 20078.215 |
| NM_016389 | 2049.902  | 2096.838  | NM_016134 | 1374.653  | 1562.154  |
| NM_002295 | 67376.258 | 65618.32  | AJ010482  | 2436.716  | 2775.823  |
| NM_001762 | 10270.814 | 7969.209  | AB040672  | 4149.285  | 3913.694  |
| NM_016306 | 15722.528 | 13982.659 | NM_002192 | 2479.427  | 2056.245  |
| NM_003755 | 1029.552  | 718.024   | NM_005491 | 5820.426  | 7162.141  |
| NM_013238 | 5712.295  | 4275.356  | NM_003869 | 3952.633  | 3689.397  |
| BE258640  | 12891.292 | 10399.361 | X63417    | 10075.957 | 11665.026 |
| NM_003314 | 5891.483  | 5060.71   | S94539    | 18554.594 | 23968.271 |
| AL355730  | 1292.596  | 1818.119  | NM_005785 | 4266.741  | 3495.178  |
| U79273    | 1467.414  | 1573.281  | NM_018248 | 3164.678  | 3037.554  |
| AK022050  | 6791.496  | 6227.693  | AK001695  | 10788.969 | 7122.394  |
| NM_002512 | 60098.496 | 55943.496 | NM_017886 | 2858.737  | 2323.967  |
| NM_001246 | 871.145   | 799.282   | NM_006252 | 1749.898  | 1337.833  |
| AL365411  | 4731.41   | 5113.621  | NM_001721 | 759.225   | 1077.856  |
| M24470    | 808.068   | 1373.639  | NM_014397 | 5741.328  | 4260.875  |
| NM_016066 | 5254.199  | 7973.983  | AB023182  | 1111.765  | 754.912   |
| NM_001249 | 1568.799  | 2097.574  | NM_003607 | 758.112   | 610.077   |
| AK024677  | 958.406   | 1034.21   | AB017169  | 636.416   | 726.866   |
| NM_000036 | 1175.637  | 1399.78   | AL080170  | 1232.213  | 1821.643  |
| AF254082  | 22081.119 | 23272.855 | AB039903  | 4520.241  | 5908.922  |
| AF205718  | 15251.801 | 15537.186 | NM_000542 | 10608.773 | 10990.488 |
| NM_003420 | 770.492   | 878.586   | NM_006851 | 355.098   | 680.691   |
| AY004252  | 1064.728  | 1115.168  | AB001328  | 710.117   | 808.221   |
| NM_006261 | 2747.904  | 3087.952  | NM_000948 | 523.439   | 747.173   |
| AK027045  | 1195.907  | 1214.238  | H99588    | 2075.079  | 1791.58   |
| AF169796  | 2473.606  | 4218.221  | X00588    | 1471.847  | 1461.374  |
| AK001814  | 3848.524  | 3103.563  | AI359037  | 7663.732  | 9899.896  |
| NM_007222 | 1927.936  | 1454.511  | NM_001883 | 2149.085  | 1803.691  |
| NM_003435 | 2416.315  | 1890.564  | NM_004628 | 1500.319  | 1442.821  |
| NM_016291 | 3303.77   | 2434.969  | L31785    | 978.344   | 710.497   |
| NM_005937 | 55388.93  | 47042.91  | H-M 69043 | 3410.695  | 2850.948  |
| AK023259  | 5605.459  | 6122.646  | AF077374  | 999.351   | 669.329   |
| AK001503  | 2399.505  | 3015.148  | U43901    | 434.394   | 597.031   |
| AK022880  | 3852.892  | 3771.021  | X59065    | 454.836   | 273.194   |
| NM_003601 | 11958.368 | 13864.626 | M59828    | 3119.775  | 2100.16   |
| AK001228  | 5610.805  | 7112.519  | AF309653  | 9599.31   | 10913.796 |
| AK026778  | 1820.543  | 2251.409  | NM_002620 | 12084.432 | 13726.54  |
| AF074987  | 3694.486  | 3932.9    | S79267    | 732.968   | 897.424   |
| AK001058  | 23909.422 | 26524.955 | NM_001816 | 624.005   | 757.6     |
| AK026239  | 1905.133  | 1612.042  | NM_003784 | 26309.4   | 29507.096 |
| AF086283  | 938.764   | 1099.836  | NM_000195 | 12136.617 | 13111.108 |
| AF088047  | 690.655   | 866.481   | NM_005445 | 8119.635  | 5748.575  |
| AF086445  | 699.938   | 806.264   | NM_014899 | 2139.245  | 2103.988  |
| AF086281  | 1517.704  | 1470.849  | NM_003630 | 4947.835  | 4533.422  |
| AF086393  | 1611.054  | 1374.665  | NM_000046 | 3388.612  | 3708.732  |
| AF086453  | 784.731   | 750.053   | NM_003219 | 1825.172  | 1599.726  |
| AF070621  | 5388.1    | 4645.136  | NM_006709 | 3987.883  | 3056.84   |
| NM_020240 | 1878.395  | 1736.236  | NM_000612 | 6652.715  | 10637.752 |

|           |           |           |           |           |           |
|-----------|-----------|-----------|-----------|-----------|-----------|
| AK023678  | 7347.324  | 5479.982  | NM_004257 | 19532.135 | 17697.482 |
| AF052090  | 4268.385  | 3999.012  | NM_003629 | 1422.992  | 1434.679  |
| AK023718  | 3828.397  | 5031.356  | NM_005901 | 9080.842  | 7933.672  |
| AF075089  | 7337.513  | 11695.383 | NM_004248 | 824.15    | 826.026   |
| AF241255  | 827.048   | 1630.903  | NM_004796 | 952.023   | 598.896   |
| AF086007  | 67320.031 | 68769.883 | NM_000435 | 2336.945  | 1695.599  |
| AK000803  | 3510.569  | 3990.605  | NM_001842 | 10987.017 | 7019.508  |
| AK022374  | 1174.748  | 1387.967  | NM_000719 | 431.52    | 754.952   |
| AF085926  | 24529.465 | 25286.92  | NM_003459 | 5533.904  | 6812.758  |
| AF085948  | 739.738   | 652.805   | NM_000171 | 1026.716  | 1199.317  |
| AL137307  | 3486.04   | 3895.967  | AL354615  | 982.98    | 1499.269  |
| AL137468  | 7342.955  | 7225.012  | NM_013349 | 29678.693 | 29414.949 |
| AL162007  | 28402.377 | 27472.629 | NM_003705 | 2668.744  | 2379.946  |
| AL390137  | 16089.435 | 17264.57  | NM_006861 | 1496.034  | 1621.079  |
| AL137340  | 878.718   | 891.794   | NM_005829 | 2062.9    | 1884.702  |
| AL137542  | 439.703   | 567.186   | NM_015908 | 14318.809 | 13001.805 |
| AL162045  | 1554.265  | 1477.752  | AK022600  | 2455.653  | 2348.001  |
| AK022437  | 12855.765 | 11954.505 | AK023142  | 1286.159  | 1626.875  |
| AB042410  | 793.822   | 716.973   | U61740    | 12411.604 | 11328.105 |
| AF086102  | 1707.672  | 1416.906  | NM_006409 | 52523.191 | 49727.012 |
| AF116682  | 18758.857 | 15540.464 | AB049054  | 4522.896  | 3891.366  |
| AL137259  | 1981.509  | 1658.72   | NM_015071 | 1442.102  | 1438.163  |
| AL122107  | 3081.867  | 2819.623  | NM_013227 | 1426.3    | 1262.994  |
| AF075021  | 569.873   | 530.785   | Z83803    | 777.866   | 748.761   |
| AK025140  | 9851.953  | 6765.136  | AF027205  | 18056.816 | 12464.107 |
| AK026628  | 336.58    | 857.978   | AF075012  | 1353.348  | 1198.812  |
| AK023394  | 2583.046  | 3165.648  | NM_001570 | 1204.776  | 1015.044  |
| AF090093  | 13310.432 | 19793.82  | NM_015658 | 765.989   | 665.109   |
| AF161340  | 6122.88   | 8725.008  | NM_000589 | 2250.768  | 1379.89   |
| AF242771  | 1805.588  | 2289.137  | NM_016546 | 13977.495 | 8974.208  |
| NM_018562 | 9391.345  | 12386.006 | NM_017886 | 3655.944  | 6212.31   |
| AF098666  | 1608.427  | 1944.058  | NM_006252 | 1958.254  | 2910.282  |
| AF161365  | 945.854   | 1195.294  | NM_001721 | 422.686   | 740.277   |
| AF290544  | 770.968   | 794.422   | NM_014397 | 6567.167  | 7595.719  |
| AK021969  | 1490.374  | 1561.744  | AB023182  | 646.519   | 751.149   |
| AK022065  | 2241.279  | 2087.523  | NM_003607 | 1022.54   | 972.178   |
| AK022221  | 6995.024  | 7075.063  | NM_006575 | 1464.395  | 1697.791  |
| AK022356  | 1875.508  | 1562.851  | NM_013254 | 2534.216  | 2915.903  |
| AK021998  | 3789.256  | 3764.865  | NM_000437 | 8088.065  | 8660.706  |
| AK022126  | 2748.039  | 2697.595  | NM_002900 | 6123.549  | 5934.676  |
| AK022256  | 936.409   | 1106.428  | NM_004910 | 1394.631  | 1587.755  |
| AK022383  | 1680.48   | 1716.111  | AB013452  | 744.336   | 1171.786  |
| AK027041  | 2242.128  | 2235.469  | M93107    | 5156.55   | 5314.43   |
| NM_005355 | 22628.645 | 19985.049 | BC001479  | 7784.457  | 11862.239 |
| AK000937  | 845.643   | 795.791   | NM_002461 | 21736.1   | 21084.299 |
| AF035306  | 3063.118  | 3742.475  | NM_005771 | 13316.034 | 12427.861 |
| AK091662  | 883.381   | 1233.911  | AB032986  | 35865.398 | 29626.137 |
| AB038318  | 327.275   | 740.464   | NM_017528 | 26847.547 | 25371.443 |
| NM_003954 | 1509.14   | 1728.898  | NM_016032 | 8850.661  | 7645.313  |
| NM_016348 | 1427.813  | 1603.545  | NM_014324 | 55904.805 | 53587.137 |
| AK023877  | 927.17    | 1088.781  | NM_001687 | 22401.781 | 16199.144 |
| AK023640  | 530.489   | 726.924   | AK026374  | 1587.343  | 1098.323  |
| AK024213  | 21578.695 | 18626.805 | NM_001169 | 2652.093  | 1804.1    |

|           |           |           |           |           |           |
|-----------|-----------|-----------|-----------|-----------|-----------|
| AK025093  | 602.978   | 541.005   | AK024648  | 12274.969 | 9756.014  |
| AK022184  | 2539.731  | 2149.994  | NM_000795 | 987.516   | 1103.527  |
| AB007959  | 728.583   | 857.055   | AB037761  | 11962.169 | 15059.743 |
| AK024153  | 1736.718  | 2077.5    | NM_014008 | 45083.395 | 48663.75  |
| Y10516    | 3672.405  | 4328.865  | NM_014731 | 4373.95   | 5305.845  |
| AF056451  | 3776.5    | 4507.089  | AF035191  | 10283.063 | 14189.273 |
| AF015039  | 7977.413  | 9110.146  | NM_004058 | 1361.313  | 1246.449  |
| U50528    | 1474.354  | 1910.846  | NM_004527 | 846.777   | 710.175   |
| AB020632  | 2495.608  | 3307.169  | NM_012062 | 6202.574  | 6322.625  |
| NM_018614 | 35417.098 | 43281.684 | AK026717  | 575.377   | 657.35    |
| AL117549  | 1798.571  | 1867.6    | AJ010482  | 2420.471  | 2254.096  |
| NM_005222 | 9390.927  | 10428.13  | NM_000896 | 540.602   | 689.671   |
| BC024308  | 12781.127 | 14605.214 | AB040672  | 6244.804  | 6427.712  |
| NM_000538 | 3036.34   | 4055.638  | NM_002192 | 2771.71   | 2305.101  |
| AK001838  | 60637.066 | 58066.434 | NM_005491 | 6454.563  | 7556.705  |
| NM_018295 | 1971.393  | 2993.065  | NM_003869 | 3486.143  | 3215.231  |
| AF070574  | 970.039   | 965.151   | AK025599  | 240.885   | 443.699   |
| AF086262  | 3457.94   | 4011.316  | X63417    | 10826.241 | 9270.27   |
| AF086292  | 8561.91   | 9142.06   | S94539    | 16864.604 | 16584.357 |
| AK023769  | 459.047   | 452.135   | NM_006402 | 1387.121  | 1073.94   |
| AK024342  | 19539.369 | 24695.758 | NM_005785 | 3526.093  | 2382.365  |
| AL137712  | 7234.171  | 6654.368  | NM_018248 | 2470.349  | 2214.354  |
| L77599    | 49425.91  | 42928.734 | AK001695  | 8094.442  | 4682.646  |
| AK021673  | 14222.461 | 11476.374 | AB040898  | 1019.964  | 1275.409  |
| AB014543  | 1523.683  | 1427.346  | AB031547  | 1526.318  | 1327.097  |
| NM_018445 | 5800.193  | 4699.784  | NM_003970 | 908.509   | 1236.487  |
| AK022743  | 6176.699  | 4714.891  | AK022496  | 1905.004  | 2946.545  |
| NM_014627 | 2033.721  | 2722.871  | AB042636  | 579.923   | 752.651   |
| NM_013938 | 14909.619 | 19533.754 | AB033035  | 506.718   | 934.493   |
| NM_013986 | 60274.926 | 62106.59  | NM_002883 | 3601.78   | 4366.585  |
| U55055    | 1495.667  | 1201.101  | NM_019012 | 459.75    | 415.092   |
| AB018319  | 2922.72   | 2876.446  | NM_000141 | 465.416   | 408.009   |
| AK001101  | 3568.959  | 3693.937  | NM_016150 | 1745.27   | 1846.135  |
| BM973473  | 1544.418  | 1978.322  | U57058    | 695.315   | 941.183   |
| AK021637  | 2122.303  | 2484.562  | AL137452  | 1430.693  | 1608.946  |
| AK021658  | 1090.151  | 770.563   | NM_004312 | 36968.871 | 43068.988 |
| D61705    | 848.938   | 1297.828  | NM_001347 | 4032.091  | 3773.013  |
| U17631    | 2933.856  | 3345.174  | AK024549  | 13923.212 | 12166.822 |
| AL137723  | 2771.64   | 2444.917  | NM_006338 | 6083.731  | 5618.185  |
| AK000774  | 566.115   | 634.915   | NM_007164 | 4930.349  | 4687.815  |
| AK024046  | 2343.21   | 2109.72   | NM_000261 | 1162.588  | 1097.438  |
| NM_017931 | 4087.532  | 4240.09   | NM_002606 | 4646.092  | 3626.219  |
| AK022793  | 1459.793  | 1410.112  | NM_002570 | 1494.926  | 1352.2    |
| AJ227910  | 1213.541  | 1125.394  | NM_003183 | 2455.133  | 1991.244  |
| AF001893  | 1702.609  | 1435.6    | NM_019851 | 1533.721  | 846.294   |
| X04236    | 8721.79   | 9487.536  | NM_003238 | 1303.053  | 890.474   |
| AK093746  | 16853.947 | 15659.65  | NM_018367 | 596.117   | 829.877   |
| D16875    | 2137.211  | 1835.862  | NM_001363 | 10718     | 12514.949 |
| AK027171  | 999.819   | 1032.232  | NM_014096 | 13294.186 | 22355.957 |
| AK021945  | 2914.337  | 2851.055  | NM_005706 | 3780.129  | 4573.798  |
| L23545    | 1133.097  | 1133.4    | NM_001261 | 3370.777  | 3424.465  |
| CY3Cy5    | 1377.25   | 98.289    | NM_001977 | 1214.813  | 1489.95   |
| U13022    | 701.381   | 598.212   | NM_007219 | 9867.57   | 10843.129 |

|           |           |           |           |           |           |
|-----------|-----------|-----------|-----------|-----------|-----------|
| R23251    | 14018.023 | 10939.41  | AK026854  | 4056.632  | 3574.014  |
| BG763477  | 1003.385  | 518.676   | NM_001269 | 2488.425  | 2905.259  |
| AA702640  | 1246.536  | 1248.869  | NM_002506 | 644.869   | 476.933   |
| T68583    | 1848.209  | 1688.904  | NM_004906 | 3453.266  | 3464.787  |
| AA481944  | 17232.234 | 14312.434 | NM_012447 | 12328.452 | 12442.275 |
| X14390    | 742.964   | 534.463   | NM_006366 | 6965.091  | 6239.181  |
| AF038440  | 416.499   | 563.129   | AK027013  | 38661.512 | 35599.445 |
| M31158    | 877.255   | 795.271   | NM_001344 | 42664.066 | 53072.484 |
| H00742    | 1677.351  | 1901.708  | NM_018294 | 3495.706  | 4486.119  |
| D42108    | 957.146   | 938.536   | AL389934  | 2842.216  | 2534.727  |
| BG700922  | 697.579   | 687.193   | NM_004330 | 7355.355  | 6009.285  |
| AI366068  | 15634.387 | 14807.661 | AF151802  | 6078.516  | 4898.549  |
| N57553    | 609.783   | 691.401   | AB006746  | 1260.913  | 1058.357  |
| AF080158  | 1382.024  | 1934.524  | NM_006498 | 3068.474  | 2311.971  |
| BM664556  | 1086.653  | 982.238   | AB023233  | 1840.596  | 1558.276  |
| SR1       | 65938.289 | 67690.133 | NM_004369 | 918.902   | 630.295   |
| SR3       | 32201.051 | 26688.174 | NM_018130 | 5283.493  | 6201.94   |
| SR5       | 3094.762  | 2820.465  | AF085878  | 702.957   | 1067.112  |
| SR7       | 4029.174  | 28349.816 | AB006630  | 2707.602  | 3616.53   |
| SR9       | 12501.908 | 2495.081  | NM_016155 | 2292.275  | 2507.304  |
| CY3Cy5    | 2109.633  | 90.003    | NM_001224 | 7633.419  | 7788.591  |
| M33197    | 63124.895 | 55327.418 | NM_017811 | 10261.226 | 12678.25  |
| NM_007024 | 2949.032  | 2330.451  | NM_001569 | 3661.828  | 3163.447  |
| NM_013231 | 2482.299  | 1827.809  | AK023284  | 2331.684  | 2707.536  |
| NM_012106 | 2793.311  | 1886.485  | NM_005101 | 4379.81   | 3471.331  |
| NM_006254 | 4539.589  | 3699.551  | NM_004205 | 381.676   | 171.423   |
| X95425    | 1011.59   | 931.15    | AF130060  | 11495.683 | 18029.68  |
| NM_004422 | 1332.228  | 1259.631  | NM_007057 | 12077.542 | 14391.35  |
| NM_016562 | 586.997   | 607.807   | NM_000177 | 16988.518 | 11773.758 |
| M33197    | 59647.16  | 54836.965 | NM_003387 | 11716.736 | 12018.153 |
| AY009399  | 7064.858  | 6131.194  | U60665    | 1415.418  | 1389.331  |
| NM_004895 | 5432.124  | 5681.501  | NM_005507 | 55075.281 | 53605.926 |
| U59748    | 896.966   | 1059.495  | AL080133  | 4202.86   | 3359.985  |
| L32537    | 550.275   | 566.753   | AY014403  | 1485.159  | 1369.596  |
| NM_014303 | 11199.541 | 13075.549 | NM_006912 | 3167.675  | 2032.421  |
| M33197    | 60301.566 | 65957.211 | X12534    | 1510.482  | 1054.437  |
| M95610    | 13599.874 | 14171.275 | NM_003112 | 562.155   | 594.731   |
| NM_003118 | 3935.422  | 4138.14   | NM_003205 | 3182.498  | 4343.944  |
| L02922    | 12681.732 | 12177.169 | AB002324  | 3255.833  | 3703.285  |
| NM_001797 | 1005.904  | 1183.468  | AL359938  | 677.351   | 459.808   |
| NM_003154 | 1237.456  | 1300.244  | NM_002165 | 540.57    | 388.628   |
| NM_004235 | 505.634   | 689.989   | AK026231  | 1799.683  | 1287.87   |
| AK023459  | 2098.019  | 2088.816  | NM_002140 | 14777.249 | 14700.56  |
| NM_012139 | 2778.34   | 2305.783  | NM_020143 | 2692.872  | 2229.931  |
| AF121856  | 1953.331  | 1582.411  | NM_012469 | 4255.62   | 3489.195  |
| NM_006421 | 2035.866  | 1874.2    | NM_005131 | 2158.65   | 2506.756  |
| NM_017457 | 14031.919 | 10775.571 | NM_007056 | 3102.338  | 3854.725  |
| NM_003765 | 6370.172  | 5180.794  | AF083383  | 3058.925  | 5470.536  |
| M33197    | 39361.48  | 33100.188 | NM_006925 | 3817.448  | 3782.808  |
| NM_018202 | 8950.979  | 8256.115  | NM_004890 | 52490.434 | 51223.766 |
| AB023197  | 2517.379  | 2213.575  | AK023181  | 3062.35   | 2766.389  |
| NM_022173 | 3737.457  | 3856.533  | NM_004294 | 1355.39   | 1702.95   |
| AB040970  | 2415.009  | 2563.463  | NM_005051 | 36148.117 | 51022.332 |

|           |           |           |           |           |           |
|-----------|-----------|-----------|-----------|-----------|-----------|
| NM_01833C | 2548.656  | 2455.466  | NM_00196E | 21131.211 | 15998.936 |
| AB023222  | 819.615   | 919.736   | D17259    | 53803.672 | 55817.063 |
| AB033088  | 752.177   | 1030.599  | AF264627  | 26886.576 | 16671.475 |
| M33197    | 49160.449 | 45948.301 | AL133053  | 1800.967  | 2398.037  |
| U50342    | 1551.539  | 1629.777  | NM_018142 | 7912.396  | 10346.011 |
| NM_00029E | 590.105   | 634.448   | NM_017653 | 4513.778  | 5463.81   |
| U80018    | 584.649   | 401.489   | NM_00216E | 2935.439  | 4387.216  |
| NM_000717 | 1206.01   | 1046.626  | NM_004453 | 552.313   | 933.306   |
| M33197    | 66404.867 | 62747.004 | NM_016229 | 5838.521  | 4329.02   |
| NM_00484E | 1816.329  | 1552.698  | NM_018244 | 2871.364  | 2238.636  |
| NM_007107 | 10024.2   | 8384.721  | NM_002492 | 35621.148 | 33616.039 |
| NM_000047 | 7192.673  | 6342.419  | NM_005642 | 4750      | 4164.011  |
| M68874    | 1705.005  | 1505.614  | NM_01810E | 1817.128  | 1184.505  |
| NM_00631E | 3161.041  | 2775.788  | AK023452  | 6258.625  | 8722.657  |
| NM_01822E | 4517.478  | 3705.638  | NM_000332 | 1708.832  | 1843.782  |
| NM_00460E | 655.837   | 600.43    | AK022215  | 3342.63   | 2902.46   |
| Z36813    | 4207.166  | 4459.399  | U90305    | 735.53    | 568.804   |
| NM_00666C | 4871.091  | 5131.552  | NM_001527 | 16864.16  | 14281.213 |
| NM_00148E | 359.577   | 493.131   | AK025269  | 5802.71   | 4345.713  |
| NM_004727 | 431.438   | 820.378   | NM_00143E | 524.183   | 560.428   |
| M33197    | 3062.312  | 3100.555  | AB040971  | 1390.837  | 827.099   |
| NM_00404E | 6444.714  | 5845.727  | AK024254  | 1676.578  | 1794.855  |
| NM_001891 | 1527.544  | 1284.62   | NM_01845E | 4291.501  | 6979.756  |
| NM_00144C | 16474.746 | 12489.651 | NM_019021 | 988.068   | 1203.836  |
| NM_01661E | 1805.564  | 1407.93   | AK002183  | 671.173   | 1020.105  |
| AB014568  | 14509.064 | 11862.425 | NM_01899E | 1370.241  | 1509.679  |
| NM_01224E | 3000.538  | 2657.48   | AL137304  | 717.117   | 873.358   |
| AK022546  | 3540.526  | 3357.555  | AL049274  | 2616.944  | 4053.094  |
| NM_014067 | 3868.55   | 3664.265  | NM_01827E | 866.091   | 531.467   |
| NM_002914 | 3019.326  | 3145      | AF147343  | 687.753   | 554.231   |
| NM_02038E | 1684.955  | 1718.069  | AK026883  | 1665.892  | 1547.077  |
| NM_006541 | 1829.342  | 2541.758  | NM_01435C | 11709.468 | 11254.183 |
| NM_00432E | 1568.81   | 2248.869  | U00925    | 6852.971  | 10361.12  |
| NM_004581 | 3124.414  | 3585.813  | AL390185  | 1266.862  | 1623.897  |
| NM_006817 | 16136.998 | 18482.881 | AF086235  | 5547.163  | 7635.935  |
| NM_015921 | 29856.977 | 28263.242 | AF143886  | 1802.169  | 2846.52   |
| AB040900  | 3597.29   | 4440.977  | AK025975  | 1210.361  | 901.385   |
| NM_00148E | 976.667   | 916.574   | AK025583  | 26304.256 | 17751.996 |
| NM_00121E | 1469.577  | 1293.967  | NM_014664 | 1910.665  | 1514.23   |
| NM_001797 | 1149.328  | 980.917   | AL109788  | 811.325   | 471.069   |
| NM_003154 | 1126.191  | 1014.883  | NM_014952 | 27040.324 | 18814.166 |
| NM_00423E | 499.376   | 390.367   | AB037765  | 442.027   | 567.286   |
| AK023459  | 1943.569  | 1923.06   | AK025068  | 760.324   | 658.985   |
| BI762154  | 607.581   | 320.126   | AK026720  | 885.268   | 1551.992  |
| U13022    | 830.21    | 851.435   | AL137566  | 1358.113  | 1610.338  |
| R23251    | 12226.294 | 11083.249 | AF087962  | 1895.333  | 2518.851  |
| BG763477  | 966.224   | 827.401   | AL050197  | 1427.579  | 1441.913  |
| AA702640  | 1216.683  | 1164.637  | AF085870  | 3097.625  | 2961.817  |
| T68583    | 2549.008  | 3026.318  | AL050063  | 851.423   | 728.473   |
| AA481944  | 19751.6   | 18665.262 | AL117580  | 8449.775  | 7617.521  |
| X14390    | 776.353   | 734.542   | AL110190  | 5640.244  | 4551.575  |
| AF038440  | 380.316   | 727.192   | AL117656  | 494.644   | 676.248   |
| M31158    | 808.94    | 1043.131  | AJ001893  | 1490.245  | 1398.381  |

|           |           |           |           |           |           |
|-----------|-----------|-----------|-----------|-----------|-----------|
| H00742    | 1707.332  | 1903.475  | NM_014819 | 11212.026 | 11233.717 |
| D42108    | 1191.16   | 1305.729  | NM_017609 | 454.655   | 602.184   |
| BG700922  | 820.681   | 792.099   | AF086040  | 2371.447  | 1967.861  |
| AI366068  | 15452.216 | 14117.529 | AB032988  | 1628.484  | 1133.572  |
| N57553    | 454.086   | 517.462   | AK023559  | 4904.954  | 2984.607  |
| AF080158  | 1454.49   | 1570.58   | AB037859  | 60915.66  | 49498.852 |
| BM664556  | 1535.412  | 1463.464  | AL049233  | 1731.599  | 1096.305  |
| M33197    | 57584.047 | 43271.145 | NM_017696 | 2592.939  | 1618.359  |
| NM_016545 | 2820.447  | 4407.108  | AL050166  | 3655.278  | 2246.729  |
| NM_000295 | 657.226   | 391.285   | AK026705  | 1294.414  | 1935.513  |
| AF103795  | 547.818   | 513.249   | NM_003602 | 1091.352  | 1222.665  |
| NM_006215 | 450.273   | 545       | AF009258  | 19005.957 | 29536.445 |
| M33197    | 59711.406 | 59882.816 | AF009305  | 829.086   | 878.89    |
| NM_007024 | 2374.736  | 2600.688  | NM_006193 | 737.035   | 626.244   |
| NM_013231 | 1845.241  | 2054.755  | AF009270  | 845.296   | 738.96    |
| NM_012106 | 2627.201  | 3281.083  | AF009318  | 934.608   | 944.486   |
| NM_006254 | 4700.664  | 4605.209  | AF056421  | 1662      | 2411.695  |
| X95425    | 1338.292  | 1458.939  | AF090889  | 463.846   | 462.423   |
| NM_004422 | 1407.212  | 1837.231  | AK001085  | 1280.432  | 914.505   |
| NM_016562 | 690.045   | 1170.961  | AK001906  | 1858.859  | 1464.12   |
| M33197    | 59372.5   | 63195.582 | AK021528  | 653.201   | 653.828   |
| AY009399  | 6782.223  | 7189.61   | AK021746  | 3526.515  | 3010.478  |
| NM_004895 | 5334.469  | 6348.732  | AK001136  | 1697.67   | 1240.976  |
| U59748    | 1165.521  | 1314.896  | AK021617  | 532.392   | 627.169   |
| L32537    | 713.324   | 670.026   | AK021810  | 1079.812  | 840.88    |
| NM_014303 | 11569.08  | 12854.666 | AK025190  | 442.238   | 611.243   |
| M33197    | 58179.277 | 63295.93  | AK025214  | 481.135   | 542.562   |
| M95610    | 12898.881 | 11300.737 | AK025846  | 1179.857  | 884.023   |
| L02922    | 17015.082 | 24103.816 | AK026805  | 2985.139  | 2044.637  |
| M33197    | 5122.811  | 4048.956  | AL389983  | 4651.719  | 4615.993  |
| AF154121  | 268.764   | 499.61    | AJ008159  | 674.143   | 535.419   |
| NM_004045 | 5707.137  | 5148.309  | AK000995  | 1026.948  | 1181.059  |
| NM_001891 | 873.427   | 847.054   | U00959    | 1204.972  | 1418.229  |
| NM_012139 | 2592.109  | 2431.935  | NM_014578 | 8013.379  | 10214.54  |
| AF121856  | 2191.283  | 2260.448  | AF147306  | 2845.934  | 3123.814  |
| NM_006421 | 2030.383  | 2412.043  | AF086267  | 1421.309  | 1406.229  |
| NM_017457 | 12145.081 | 14922.731 | NM_012183 | 2022.647  | 2103.461  |
| NM_003765 | 5584.505  | 6865.01   | AK026785  | 968.104   | 1183.606  |
| NM_005865 | 447.557   | 503.562   | NM_018225 | 12130.995 | 9714.172  |
| M33197    | 17753.441 | 19019.932 | AK025534  | 1109.124  | 839.629   |
| NM_018202 | 7904.504  | 7190.712  | AF091526  | 911.902   | 469.927   |
| AB023197  | 2182.926  | 2119.802  | M60749    | 2460.714  | 2762.247  |
| NM_022173 | 3287.557  | 3676.547  | X79986    | 887.152   | 953.268   |
| AB040970  | 2372.523  | 1939.216  | NM_003523 | 8093.793  | 6416.68   |
| NM_018330 | 2116.745  | 2176.102  | X01448    | 628.55    | 739.644   |
| AB023222  | 651.191   | 600.79    | NM_016503 | 4003.816  | 5016.649  |
| AB033088  | 591.479   | 628.302   | AK056351  | 17160.4   | 18192.6   |
| U50342    | 2270.173  | 3394.739  | NM_014690 | 3706.62   | 4384.649  |
| NM_015921 | 26410.691 | 23166.574 | NM_017698 | 4892.376  | 4686.766  |
| AB040900  | 9048.873  | 7590.749  | AF086490  | 1107.567  | 833.142   |
| NM_001080 | 460.389   | 604.006   | AF131738  | 31679.625 | 31838.461 |
| NM_001482 | 1070.053  | 809.709   | AK021666  | 2431.278  | 2078.808  |
| U80018    | 551.924   | 550.032   | AK024081  | 757.921   | 501.15    |

|           |           |           |           |           |           |
|-----------|-----------|-----------|-----------|-----------|-----------|
| NM_000717 | 1299.173  | 1023.476  | AK024825  | 3569.549  | 2892.557  |
| M33197    | 61748.156 | 66642.141 | AF086317  | 6619.998  | 5052.934  |
| NM_00484E | 1470.309  | 1877.213  | U16850    | 5757.023  | 4413.988  |
| NM_007107 | 9243.423  | 11726.396 | AL390178  | 1144.326  | 1077.472  |
| NM_000047 | 4712.138  | 6269.004  | Z36806    | 1191.095  | 1050.851  |
| M68874    | 1556.407  | 2041.059  | NM_00536E | 552.598   | 440.649   |
| NM_00631E | 2905.391  | 3100.711  | NM_01861E | 1209.033  | 595.288   |
| NM_01822E | 3470.551  | 3142.796  | AJ008121  | 15039.303 | 9841.659  |
| NM_00460E | 560.306   | 517.915   | AJ008153  | 1237.028  | 1321.561  |
| Z36813    | 3674.853  | 3877.801  | AK023739  | 1019.277  | 1128.677  |
| NM_00666C | 4670.929  | 4700.657  | NM_00583C | 4832.94   | 3473.946  |
| NM_00148E | 364.151   | 506.516   | NM_001507 | 937.146   | 794.935   |
| AF080158  | 1050.415  | 1027.678  | X92108    | 487.743   | 719.23    |
| BM664556  | 754.419   | 589.594   | AL389876  | 1564.598  | 2306.833  |
| M33197    | 52289.078 | 48499.086 | AK022120  | 1548.072  | 1638.843  |
| NM_01654E | 1611.865  | 1530.647  | Z70762    | 1679.706  | 1558.421  |
| NM_00144C | 14991.25  | 13491.573 | BF037206  | 3024.808  | 4251.42   |
| NM_001201 | 501.716   | 464.346   | AK021474  | 9571.113  | 14352.951 |
| NM_01661E | 1901.73   | 1697.063  | AK023642  | 2306.822  | 2716.937  |
| AB014568  | 9082.197  | 9521.854  | AW511510  | 819.679   | 714.229   |
| AK022238  | 508.275   | 509.455   | U52827    | 1285.401  | 1006.781  |
| NM_01224E | 1072.804  | 1145.916  | AL049466  | 11510.615 | 8074.458  |
| AK022546  | 2357.494  | 2990.715  | AB037802  | 1864.217  | 1891.843  |
| NM_014067 | 2813.232  | 3104.832  | U17623    | 1325.057  | 1491.037  |
| NM_002914 | 3108.476  | 4236.671  | AL137450  | 6185.433  | 4416.187  |
| NM_02038E | 1540.276  | 1467.882  | AK023058  | 1169.005  | 956.41    |
| NM_006541 | 820.126   | 957.79    | NM_012064 | 4446.493  | 2940.163  |
| M33197    | 58557.637 | 60634.262 | AK001460  | 866.434   | 522.743   |
| NM_00570E | 4635.139  | 4295.498  | AK092508  | 3700.496  | 4141.416  |
| NM_00432E | 1735.292  | 1661.288  | AK027111  | 51144.996 | 49111.664 |
| NM_006817 | 21720.898 | 30590.094 | NM_00351E | 608.253   | 415.24    |
| M33197    | 55369.457 | 45198.582 |           |           |           |
| M95610    | 7064.713  | 6110.885  |           |           |           |
| NM_003118 | 3122.142  | 2658.934  |           |           |           |
| L02922    | 9194.681  | 8078.875  |           |           |           |
| NM_001797 | 773.037   | 803.868   |           |           |           |
| NM_003154 | 944.844   | 823.771   |           |           |           |
| NM_00423E | 420.218   | 512.854   |           |           |           |
| AK023459  | 2040.786  | 2335.23   |           |           |           |
| U13022    | 669.243   | 714.068   |           |           |           |
| R23251    | 12746.77  | 14952.219 |           |           |           |
| BG763477  | 908.629   | 995.589   |           |           |           |
| AA702640  | 1109.847  | 1591.763  |           |           |           |
| T68583    | 1843.32   | 2890.966  |           |           |           |
| AA481944  | 18490.135 | 20160.764 |           |           |           |
| X14390    | 691.68    | 814.447   |           |           |           |
| AF038440  | 498.085   | 629.267   |           |           |           |
| M31158    | 694.379   | 619.707   |           |           |           |
| H00742    | 1449.636  | 1449.633  |           |           |           |
| D42108    | 764.049   | 676.192   |           |           |           |
| N57553    | 582.289   | 673.087   |           |           |           |
| AB040970  | 1821.427  | 1301.094  |           |           |           |
| NM_01833C | 1960.377  | 1581.412  |           |           |           |

|           |           |           |
|-----------|-----------|-----------|
| AB023222  | 662.786   | 627.059   |
| AB033088  | 595.99    | 537.444   |
| M33197    | 36776.453 | 24528.449 |
| U50342    | 1087.527  | 888.136   |
| NM_00029E | 687.012   | 468.83    |
| AF103795  | 413.303   | 483.442   |
| NM_00621E | 442.846   | 323.045   |
| NM_013231 | 1752.165  | 2311.486  |
| NM_01210E | 2394.129  | 3086.318  |
| NM_006254 | 4419.714  | 5121.486  |
| X95425    | 1235.328  | 1713.789  |
| NM_00442Z | 1697.09   | 1799.51   |
| NM_01656Z | 661.243   | 749.742   |
| M33197    | 59639.348 | 44989.645 |
| AY009399  | 6297.406  | 4388.696  |
| U59748    | 1051.174  | 1572.646  |
| L32537    | 612.153   | 969.901   |
| NM_01430Z | 14949.237 | 16206.426 |
| NM_00666C | 4377.898  | 3342.774  |
| NM_00668E | 13512.947 | 10858.249 |
| M33197    | 4932.737  | 4520.708  |
| NM_00404E | 6324.747  | 5467.015  |
| NM_001891 | 721.043   | 651.187   |
| NM_01213E | 2762.938  | 2965.712  |
| AF121856  | 2097.618  | 2746.55   |
| NM_006421 | 2095.709  | 2498.379  |
| NM_017457 | 13205.714 | 13915.253 |
| NM_00376E | 6231.122  | 5622.209  |
| NM_01820Z | 6208.415  | 6088.833  |
| AB023197  | 1318.038  | 1343.965  |
| NM_02217Z | 2711.503  | 2389.193  |
| M33197    | 60696.051 | 57496.684 |
| NM_00570E | 2475.153  | 2022.869  |
| NM_00432E | 1658.209  | 1312.532  |
| NM_004581 | 1739.907  | 1476.64   |
| NM_006817 | 15288.185 | 13899.194 |
| NM_00710E | 8282.385  | 8055.532  |
| NM_015921 | 29203.121 | 24536.584 |
| AB040900  | 5644.202  | 5653.063  |
| NM_00108C | 476.967   | 497.201   |
| NM_00148Z | 934.989   | 923.749   |
| U80018    | 737.163   | 667.225   |
| NM_000717 | 1724.277  | 1707.728  |
| M33197    | 58978.66  | 64558.078 |
| NM_00484E | 2149.204  | 2216.841  |
| NM_007107 | 9030.08   | 9767.823  |
| NM_000047 | 9263.191  | 8853.106  |
| M68874    | 1689.463  | 1177.818  |
| NM_01822E | 3545.256  | 4116.126  |
| NM_00460E | 394.184   | 547.464   |
| Z36813    | 2856.24   | 2930.853  |
| AB018327  | 1471.951  | 1245.275  |
| AF303889  | 619.931   | 328.827   |



|           |           |           |
|-----------|-----------|-----------|
| M33197    | 55317.395 | 47048.168 |
| AK022649  | 2673.604  | 2422.381  |
| NM_016507 | 2615.901  | 2438.599  |
| NM_002024 | 2962.465  | 2366.303  |
| NM_002743 | 7761.555  | 6674.157  |
| AF173358  | 4771.083  | 3673.79   |
| NM_016366 | 981.726   | 1070.609  |
| M33197    | 56604.398 | 47914.059 |
| NM_016545 | 1542.138  | 1573.745  |
| NM_001440 | 15715.168 | 16733.896 |
| NM_001201 | 1055.567  | 1033.252  |
| NM_016618 | 2187.822  | 2018.911  |
| AB014568  | 11678.161 | 12702.618 |
| AK022238  | 773.479   | 1034.905  |
| NM_012249 | 4361.453  | 4713.27   |
| AK022546  | 4241.276  | 3763.53   |
| NM_002914 | 4748.763  | 8529.066  |
| NM_020385 | 1788.776  | 1988.824  |
| NM_006541 | 1498.606  | 1728.874  |
| NM_018179 | 853.976   | 738.692   |
| NM_006197 | 3516.305  | 1780.455  |
| M29273    | 1464.586  | 1016.69   |
| M33197    | 55175.359 | 38935.992 |
| NM_004854 | 1748.891  | 1296.987  |
| AJ245418  | 4232.142  | 3240.372  |
| NM_006377 | 2177.931  | 1799.155  |
| NM_002436 | 1988.328  | 1685.554  |
| NM_018362 | 3370.284  | 2822.593  |
| M33197    | 60603.816 | 62123.203 |
| NM_004755 | 876.016   | 938.834   |
| NM_002186 | 2298.362  | 2776.855  |
| NM_006182 | 1056.149  | 1580.93   |
| AL137543  | 3440.034  | 3123.693  |
| NM_004444 | 7013.933  | 5193.034  |
| NM_001957 | 2780.6    | 5172.649  |
| AK024533  | 18965.771 | 35869.457 |
| NM_002736 | 15277.74  | 21071.816 |
| NM_004246 | 5310.033  | 7307.4    |
| NM_002285 | 2099.279  | 1544.782  |
| NM_006694 | 15890.964 | 12950.143 |
| NM_005207 | 1472.108  | 1466.724  |
| NM_003087 | 1548.024  | 1310.234  |
| NM_001630 | 1441.281  | 1367.016  |
| M33197    | 57320.301 | 46607.5   |
| NM_002031 | 531.187   | 501.035   |
| AF305081  | 2317.114  | 1938.405  |
| NM_004712 | 7025.836  | 7136.321  |
| AF118078  | 1294.411  | 1381.57   |
| AL157428  | 638.617   | 885.394   |
| M33197    | 57264.137 | 55770.637 |
| NM_005858 | 2284.105  | 2282.956  |
| AK025163  | 1266.33   | 1367.855  |
| NM_014931 | 3955.501  | 3279.23   |

|           |           |           |
|-----------|-----------|-----------|
| NM_014487 | 3561.21   | 3621.602  |
| NM_01807C | 4880.183  | 7579.049  |
| NM_002484 | 5584.125  | 10980.408 |
| M33197    | 40987.313 | 52602.738 |
| NM_01824C | 63103.684 | 78810.234 |
| AK025941  | 2934.177  | 3853.236  |
| M33197    | 52914.133 | 42482.609 |
| NM_015914 | 1552.556  | 1130.356  |
| AF059531  | 4369.435  | 3169.986  |
| NM_002707 | 8307.707  | 6212.063  |
| AF029777  | 765.787   | 723.936   |
| NM_003352 | 764.451   | 653.674   |
| AK026884  | 6051.508  | 5088.866  |
| S82198    | 979.809   | 959.876   |
| NM_002594 | 2700.699  | 2231.459  |
| NM_031407 | 2990.022  | 2821.153  |
| NM_020193 | 1108.399  | 755.73    |
| D86982    | 1234.825  | 1794.363  |
| NM_005619 | 3004.602  | 5530.911  |
| D87440    | 3178.135  | 5208.673  |
| AK000332  | 19070.395 | 31424.404 |
| AL080156  | 1415.937  | 1970.206  |
| M33197    | 62954.535 | 71418.75  |
| NM_00673E | 1109.041  | 1720.053  |
| NM_00289E | 783.929   | 641.952   |
| NM_013351 | 11164.461 | 8468.998  |
| NM_01234C | 3368.968  | 3012.663  |
| NM_006022 | 871.751   | 744.945   |
| AK025110  | 1413.35   | 1193.974  |
| X52339    | 32507.648 | 22745.398 |
| M33197    | 48163.691 | 37836.508 |
| AB046830  | 2443.046  | 1957.681  |
| NM_007122 | 2131.337  | 2029.976  |
| NM_00148E | 592.744   | 491.539   |
| NM_016202 | 4103.875  | 4534.461  |
| NM_01247E | 859.691   | 900.958   |
| NM_016604 | 1383.668  | 1100.748  |
| M33197    | 52680.992 | 53900.91  |
| NM_00627E | 3368.188  | 7573.54   |
| NM_003407 | 5120.308  | 8627.836  |
| NM_00720E | 62210.16  | 73155.883 |
| NM_00372E | 4417.787  | 4576.541  |
| L05096    | 7452.588  | 8019.181  |
| BC015899  | 5382.652  | 7180.065  |
| NM_01798E | 3813.86   | 2717.848  |
| AK024846  | 1349.396  | 1084.051  |
| AK001451  | 3156.495  | 2353.835  |
| M33197    | 26581.625 | 18805.893 |
| NM_00560E | 502.891   | 748.425   |
| NM_00547E | 4192.3    | 3436.29   |
| NM_00566C | 1508.296  | 1190.27   |
| AB011173  | 3337.669  | 3317.273  |
| AB023195  | 885.911   | 960.842   |

|           |           |           |
|-----------|-----------|-----------|
| U43431    | 2156.905  | 1927.697  |
| AK021563  | 500.287   | 1023.417  |
| AB006622  | 1911.529  | 3614.268  |
| M33197    | 62283.039 | 72413.586 |
| AK097041  | 5909.967  | 10164.469 |
| AF068744  | 30260.898 | 39673.43  |
| NM_004497 | 430.084   | 482.433   |
| AK000762  | 1861.184  | 2282.131  |
| NM_004571 | 760.734   | 927.974   |
| AJ345030  | 1759.828  | 1424.986  |
| AK023472  | 7451.912  | 5842.431  |
| AL109729  | 702.337   | 607.558   |
| AF007146  | 575.116   | 484.905   |
| M33197    | 49564.23  | 36840.012 |
| S79912    | 5643.81   | 4291.601  |
| AK026892  | 1154.684  | 705.105   |
| S83275    | 9376.507  | 5878.828  |
| AL117427  | 2949.152  | 1814.587  |
| M33197    | 57575.098 | 43122.621 |
| AF052118  | 8333.017  | 6644.273  |
| AK025166  | 5725.553  | 7616.07   |
| AL359586  | 1396.698  | 1564.377  |
| AF035290  | 1419.987  | 2897.386  |
| AK023216  | 1166.679  | 2609.987  |
| M33197    | 54089.355 | 60401.953 |
| AK023288  | 1298.475  | 1622.457  |
| AK022198  | 553.496   | 1041.001  |
| M33197    | 55850.918 | 44466.262 |
| AK022428  | 994.651   | 816.122   |
| AK000788  | 437.875   | 524.036   |
| AK023457  | 1188.282  | 931.2     |
| AK025089  | 2883.036  | 2587.975  |
| M33197    | 51190.117 | 25947.639 |
| AK001279  | 1166.932  | 765.915   |
| AK001567  | 1309.208  | 1049.457  |
| AL109707  | 398.925   | 625.142   |
| M33197    | 40714.535 | 37168.906 |
| U52839    | 2223.832  | 3291.822  |
| X78262    | 663.575   | 1203.614  |
| U42379    | 282.729   | 709.356   |
| U58667    | 826.228   | 1136.099  |
| M33197    | 44579.254 | 52639.203 |
| AK026984  | 15005.301 | 24971.049 |
| M33197    | 55131.789 | 31891.385 |
| AL157466  | 1702.527  | 1037.689  |
| AK024336  | 911.036   | 561.951   |
| AK023862  | 696.641   | 240.746   |
| NM_018621 | 940.71    | 621.794   |
| M33197    | 39901.082 | 18467.258 |
| AK022118  | 703.633   | 281.083   |
| AK026453  | 3505.779  | 3099.678  |
| AK025673  | 869.715   | 978.535   |
| BF476109  | 1192.427  | 1481.562  |

|           |           |           |
|-----------|-----------|-----------|
| M33197    | 53783.172 | 61170.105 |
| AK023635  | 539.262   | 1030.532  |
| AK023912  | 468.704   | 561.682   |
| AK022431  | 1002.632  | 1916.017  |
| AK023305  | 44672.922 | 49222.508 |
| AK023763  | 2151.635  | 2309.955  |
| AK023967  | 588.537   | 969.859   |
| AK022729  | 1577.726  | 843.807   |
| NM_00616E | 5818.995  | 3180.566  |
| AL050374  | 1607.045  | 1063.459  |
| M33197    | 59127.055 | 38458.723 |
| M28639    | 2976.785  | 1829.641  |
| AL122073  | 10186.479 | 6453.299  |
| AF116655  | 2455.982  | 1733.809  |
| AJ243222  | 767.54    | 603.865   |
| AK026132  | 1929.122  | 1146.204  |
| M33197    | 53584.027 | 51527.156 |
| AF070584  | 1622.672  | 1912.854  |
| AF075006  | 925.957   | 1369.405  |
| M33197    | 54162.988 | 64131.305 |
| AK000903  | 25981.738 | 42241.336 |
| AK023938  | 996.086   | 1846.094  |
| AK026896  | 554.317   | 818.311   |
| AL110169  | 879.001   | 1518.646  |
| L13743    | 1508.645  | 1190.309  |
| Z11849    | 4104.472  | 2914.088  |
| AJ002788  | 2424.977  | 1460.017  |
| M33197    | 55329.781 | 47648.82  |
| AK024842  | 610.34    | 375.164   |
| AK022962  | 728.857   | 398.971   |
| NM_018382 | 834.162   | 1078.547  |
| M33197    | 56286.242 | 60669.688 |
| D17203    | 43674.09  | 44646.922 |
| NM_00649E | 5597.411  | 7167.964  |
| NM_00528E | 734.506   | 1112.438  |
| AK022101  | 1833.76   | 3397.489  |
| NM_003251 | 3814.522  | 6387.325  |
| AF086203  | 723.023   | 1464.776  |
| AB046772  | 1685.438  | 2705.397  |
| M33197    | 54407.043 | 63964.863 |
| AL442080  | 726.095   | 1729.313  |
| AY007143  | 11156.441 | 17520.389 |
| L15557    | 1185.182  | 2358.439  |
| M33197    | 63238.938 | 65614.508 |
| NM_001563 | 7043.614  | 6815.645  |
| NM_00026E | 748.882   | 677.677   |
| X89666    | 2235.723  | 1876.494  |
| NM_01742E | 540.21    | 545.733   |
| NM_003104 | 6499.612  | 5114.554  |
| NM_014581 | 1583.66   | 1670.568  |
| M33197    | 53186.836 | 34640.926 |
| AK024448  | 1682.363  | 1137.46   |
| NM_01440E | 1873.527  | 2173.686  |

|             |           |           |
|-------------|-----------|-----------|
| Z11801      | 852.47    | 1326.345  |
| S68954      | 10035.128 | 44398.895 |
| S81335      | 1720.098  | 1739.033  |
| AF052109    | 1857.564  | 9728.125  |
| M33197      | 37910.602 | 40609.328 |
| NM_003353   | 43162.676 | 54409.559 |
| X82127      | 39723.746 | 56613.953 |
| AL122044    | 3340.848  | 5669.054  |
| NM_018296   | 1515.396  | 2994.186  |
| NM_005752   | 1984.222  | 2730.868  |
| M33197      | 55005.957 | 66074.953 |
| AF070578    | 351.279   | 713.438   |
| CY3Cy5      | 4351.171  | 161.416   |
| AA418907    | 1614.179  | 2084.454  |
| M65291      | 336.901   | 700.184   |
| AA115473    | 4157.739  | 5108.124  |
| AA872397    | 6192.695  | 5777.039  |
| M24283      | 460.864   | 798.304   |
| AA709414    | 3862.397  | 4256.754  |
| D12676      | 2732.986  | 2643.733  |
| BC012593    | 1000.604  | 1188.872  |
| NM_000939   | 32335.348 | 32241.072 |
| H-X 02812 I | 4514.988  | 6367.637  |
| U75898      | 5989.906  | 7805.279  |
| M29039      | 1033.997  | 1289.843  |
| M59815      | 1155.031  | 1048.067  |
| NM_006917   | 670.055   | 557.311   |
| SR2         | 56950.844 | 59758.977 |
| SR4         | 13877.548 | 14165.294 |
| SR6         | 1816.164  | 1389.794  |
| SR8         | 6718.737  | 12032.24  |
| SR10        | 26005.836 | 5918.448  |
| CY3Cy5      | 2004.82   | 77.187    |
| NM_001203   | 2338.037  | 3497.344  |
| NM_004799   | 20589.947 | 19998.496 |
| NM_006733   | 626.019   | 1135.396  |
| NM_002039   | 458.857   | 793.146   |
| NM_014047   | 15410.966 | 16609.729 |
| AK022901    | 1846.466  | 2071.026  |
| M33197      | 64183.055 | 61926.156 |
| NM_006052   | 1657.174  | 1990.305  |
| AB040912    | 8114.671  | 9054.497  |
| NM_003871   | 622.458   | 876.61    |
| NM_006243   | 5220.668  | 5165.443  |
| M33197      | 60530.313 | 60522.242 |
| AJ011129    | 1594.677  | 1977.767  |
| NM_001039   | 703.171   | 515.922   |
| NM_006387   | 4211.766  | 4211.948  |
| NM_005646   | 3029.678  | 3037.03   |
| NM_006639   | 3113.312  | 2346.611  |
| BI767871    | 3357.117  | 3540.055  |
| AK022817    | 1736.589  | 2488.932  |
| M33197      | 61448.641 | 62519.523 |

|           |           |           |
|-----------|-----------|-----------|
| AB037831  | 1113.464  | 1084.356  |
| NM_012103 | 15158.754 | 18067.07  |
| AL122077  | 21752.506 | 31971.762 |
| NM_014632 | 1195.202  | 1387.82   |
| NM_006422 | 1421.289  | 1758.968  |
| BE789195  | 628.164   | 966.039   |
| NM_016946 | 4343.723  | 4282.095  |
| M33197    | 59491.902 | 64162.609 |
| NM_007259 | 3927.183  | 4798.235  |
| NM_018402 | 850.865   | 1193.116  |
| NM_018009 | 1010.651  | 976.224   |
| AK075081  | 3329.682  | 3102.054  |
| NM_000895 | 6799.002  | 6947.166  |
| NM_003820 | 18016.488 | 17983.879 |
| NM_015915 | 2872.421  | 3046.254  |
| M33197    | 66071.078 | 66511.164 |
| NM_016518 | 5257.566  | 5378.008  |
| NM_006185 | 10756.722 | 8853.826  |
| NM_014800 | 1228.898  | 927.98    |
| NM_001557 | 1019.163  | 1068.781  |
| AF147311  | 2233.371  | 2426.151  |
| NM_002131 | 42760.93  | 55977.715 |
| NM_017927 | 3231.376  | 3969.162  |
| NM_020151 | 14619.698 | 15491.155 |
| NM_005891 | 42685.898 | 45476.871 |
| NM_001645 | 2849.467  | 3402.889  |
| NM_003956 | 2024.524  | 2131.607  |
| M33197    | 59415.574 | 63700.449 |
| NM_003500 | 4611.902  | 5572.241  |
| NM_014317 | 2840.637  | 3190.032  |
| L09234    | 8327.062  | 9952.492  |
| NM_000059 | 1681.417  | 1806.231  |
| AK026740  | 1282.364  | 1165.187  |
| NM_017881 | 6212.648  | 5793.702  |
| NM_017634 | 5156.572  | 5509.583  |
| NM_000813 | 635.181   | 657.57    |
| NM_018896 | 1340.003  | 1244.839  |
| AJ300465  | 2235.17   | 2494.553  |
| X86400    | 1835.764  | 1796.707  |
| NM_000810 | 2135.049  | 2085.193  |
| AF069307  | 2806.332  | 2494.567  |
| M33197    | 56101.719 | 55610.012 |
| U92978    | 2399.366  | 2334.636  |
| NM_005738 | 910.902   | 956.753   |
| NM_014488 | 822.114   | 902.185   |
| NM_013389 | 4441.075  | 5000.947  |
| AB014567  | 639.353   | 956.098   |
| NM_005326 | 22915.436 | 30398.561 |
| NM_007286 | 282.574   | 552.06    |
| NM_014069 | 1352.699  | 1938.511  |
| AB035130  | 2024.239  | 2561.973  |
| NM_003359 | 2725.649  | 2826.905  |
| M33197    | 44364.965 | 40709.652 |

|             |           |           |
|-------------|-----------|-----------|
| AF119917    | 865.742   | 889.052   |
| AK021834    | 616.177   | 516.455   |
| NM_017915   | 926.115   | 1016.397  |
| AL050097    | 698.671   | 777.458   |
| AK021513    | 503.09    | 930.681   |
| AL049283    | 1136.676  | 1542.367  |
| M33197      | 57770.434 | 57072.598 |
| NM_002401   | 25213.824 | 26307.816 |
| NM_001274   | 2291.419  | 2301.209  |
| NM_003913   | 1408.664  | 1005.03   |
| NM_002227   | 2693.959  | 1962.863  |
| NM_007195   | 3085.023  | 2800.838  |
| AB002301    | 484.199   | 512.124   |
| AB014530    | 6638.882  | 5253.208  |
| M33197      | 60064.383 | 58961.961 |
| NM_005985   | 1770.085  | 1549.672  |
| AB014607    | 3686.383  | 3179.258  |
| AF134401    | 1679.937  | 1884.685  |
| NM_006387   | 5644.75   | 6349.147  |
| NM_005646   | 3933.278  | 5243.831  |
| NM_006635   | 4538.2    | 5446.945  |
| NM_001692   | 752.536   | 957.355   |
| BI767871    | 2803.016  | 2513.843  |
| AA418907    | 1137.189  | 1045.485  |
| AA115473    | 2449.041  | 2154.158  |
| AA872397    | 6657.416  | 5932.941  |
| M24283      | 1930.314  | 2548.414  |
| AA709414    | 4202.881  | 4508.075  |
| D12676      | 3188.382  | 3294.404  |
| BC012593    | 1878.166  | 1336.019  |
| NM_000935   | 18547.816 | 14501.29  |
| NM_004295   | 13936.482 | 9891.006  |
| H-X 02812 I | 1934.632  | 1281.12   |
| U75898      | 2793.988  | 2317.309  |
| M29039      | 965.809   | 875.043   |
| M59815      | 1077.089  | 1147.503  |
| NM_006917   | 1144.093  | 1167.283  |
| M33197      | 635.342   | 663.536   |
| AB011146    | 2791.718  | 3285.383  |
| NM_006185   | 17976.199 | 23650.775 |
| NM_014800   | 1595.661  | 1733.467  |
| NM_001557   | 1292.362  | 1713.305  |
| AF147311    | 3987.266  | 5021.719  |
| NM_002131   | 41296.914 | 50452.324 |
| NM_017927   | 2566.6    | 1883.798  |
| M33197      | 67247.836 | 64511.828 |
| NM_001203   | 2871.751  | 3039.448  |
| NM_004795   | 25124.656 | 37039.324 |
| NM_006733   | 1520.279  | 1001.708  |
| NM_014047   | 14338.548 | 13366.823 |
| AK022901    | 1670.235  | 1716.276  |
| NM_001505   | 746.691   | 455.073   |
| M33197      | 62245.918 | 58513.773 |

|           |           |           |
|-----------|-----------|-----------|
| AF037332  | 2994.696  | 2583.04   |
| NM_006052 | 1156.507  | 986.724   |
| AB040912  | 4747.893  | 4508.513  |
| NM_003871 | 775.096   | 831.12    |
| NM_006243 | 4377.845  | 4612.353  |
| NM_007252 | 464.157   | 541.872   |
| M33197    | 60963.742 | 60112.469 |
| AJ011129  | 2081.218  | 2086.535  |
| NM_001039 | 903.068   | 927.772   |
| M33197    | 59597.48  | 60338.121 |
| U92978    | 4575.405  | 5620.64   |
| NM_005738 | 685.051   | 566.116   |
| NM_014488 | 1069.122  | 996.812   |
| NM_013389 | 5499.745  | 5337.348  |
| AB014567  | 634.17    | 602.404   |
| AK022817  | 2155.61   | 2460.404  |
| NM_018034 | 9966.144  | 11324.206 |
| M33197    | 62548.586 | 54513.465 |
| AB037831  | 1499.128  | 1234.76   |
| NM_012103 | 14406.888 | 14850.465 |
| AL122077  | 16531.643 | 21991.631 |
| NM_014632 | 1462.656  | 1789.191  |
| NM_006422 | 1137.79   | 1369.261  |
| BE789195  | 793.449   | 758.263   |
| NM_016946 | 2542.614  | 2132.417  |
| M33197    | 58695.301 | 58831.891 |
| NM_007259 | 2714.801  | 2576.665  |
| NM_018402 | 520.881   | 512.933   |
| NM_018009 | 938.923   | 832.918   |
| AK075081  | 2810.504  | 2818.761  |
| NM_000895 | 5566.041  | 4461.621  |
| NM_003820 | 18779.957 | 14051.928 |
| NM_015915 | 3008.443  | 2210.418  |
| M33197    | 57559.848 | 53245.004 |
| NM_016518 | 4936.479  | 3381.133  |
| AB002301  | 893.775   | 810.501   |
| AB014530  | 10798.776 | 11742.855 |
| M33197    | 61205.535 | 59871.488 |
| NM_005989 | 4729.475  | 4938.23   |
| AB014607  | 5179.784  | 4922.172  |
| AF134401  | 2185.39   | 2820.246  |
| NM_020151 | 14293.011 | 14275.436 |
| NM_005891 | 33530.102 | 20969.281 |
| NM_001645 | 1921.263  | 2326.63   |
| NM_003956 | 2288.371  | 2315.223  |
| M33197    | 61082.852 | 59791.223 |
| NM_003500 | 3780.919  | 4174.769  |
| NM_014317 | 3027.254  | 3251.097  |
| L09234    | 6806.276  | 7336.062  |
| NM_000059 | 1168.924  | 1368.867  |
| AK026740  | 716.426   | 728.651   |
| NM_017881 | 3654.332  | 3090.128  |
| M33197    | 61669.176 | 59853.266 |



|             |           |           |
|-------------|-----------|-----------|
| NM_017634   | 4960.549  | 4309.383  |
| NM_000813   | 772.389   | 588.907   |
| NM_018896   | 1518.404  | 1177.873  |
| AJ300465    | 1797.956  | 1852.63   |
| X86400      | 945.639   | 633.101   |
| NM_000810   | 1803.151  | 1678.819  |
| AF069307    | 2675.206  | 2514.528  |
| NM_006917   | 920.032   | 843.866   |
| M33197      | 898.703   | 549.048   |
| AB011146    | 3509.882  | 3866.612  |
| NM_005326   | 14648.465 | 13311.204 |
| NM_007286   | 895.889   | 920.924   |
| NM_014069   | 1221.366  | 1700.25   |
| AB035130    | 1952.383  | 2790.481  |
| NM_003359   | 2472.292  | 2434.289  |
| M33197      | 44011.012 | 47307.57  |
| AF119917    | 865.51    | 1072.098  |
| AK021834    | 683.683   | 480.638   |
| NM_017915   | 967.249   | 914.823   |
| NM_003579   | 1807.011  | 1695.745  |
| AL049283    | 7511.643  | 6015.007  |
| M33197      | 56728.832 | 54870     |
| NM_002401   | 28484.783 | 25502.213 |
| NM_001274   | 1663.405  | 1734.868  |
| NM_003913   | 636.816   | 745.498   |
| NM_002227   | 2211.485  | 1939.266  |
| NM_007199   | 2682.439  | 2920.033  |
| NM_006243   | 4127.856  | 3409.833  |
| NM_007252   | 424.052   | 949.623   |
| M33197      | 61277.391 | 58590.445 |
| AJ011129    | 4753.876  | 5605.504  |
| AF282874    | 986.648   | 683.294   |
| NM_001039   | 827.3     | 465.469   |
| NM_006387   | 3110.781  | 1958.924  |
| NM_005646   | 2301.484  | 2055.877  |
| NM_006639   | 2953.537  | 3395.575  |
| NM_001692   | 1520.282  | 1762.913  |
| BI767871    | 3402.603  | 3220.058  |
| AA418907    | 1147.058  | 1250.599  |
| AA115473    | 2817.189  | 2941.698  |
| AA872397    | 4301.18   | 3305.213  |
| AA709414    | 2779.263  | 2439.849  |
| D12676      | 1744.224  | 1498.02   |
| BC012593    | 789.643   | 676.666   |
| NM_000939   | 26159.609 | 23049.998 |
| NM_004295   | 17504.521 | 17570.148 |
| H-X 02812 I | 2286.262  | 2272.516  |
| U75898      | 3040.812  | 3210.81   |
| M29039      | 1001.502  | 1135.615  |
| M59815      | 998.603   | 763.825   |
| AK075081    | 3082.071  | 2280.357  |
| NM_000895   | 5917.957  | 4130.09   |
| NM_003820   | 25372.475 | 24960.518 |

|           |           |           |
|-----------|-----------|-----------|
| NM_01591E | 5333.01   | 5371.206  |
| M33197    | 63469.113 | 64698.727 |
| NM_01651E | 3865.412  | 3651.965  |
| NM_00618E | 7018.453  | 4883.211  |
| NM_01480C | 826.767   | 636.774   |
| NM_001557 | 1022.434  | 1146.538  |
| AF147311  | 3663.045  | 4407.091  |
| NM_002131 | 45214     | 56233.305 |
| NM_017927 | 2758.185  | 3067.393  |
| NM_001203 | 2025.744  | 2155.617  |
| NM_00479E | 17337.6   | 14713.309 |
| NM_006733 | 1018.551  | 827.718   |
| NM_00203E | 587.121   | 293.529   |
| NM_014047 | 13412.258 | 11087.813 |
| AK022901  | 1639.828  | 1264.334  |
| M33197    | 61734.168 | 59514.918 |
| AF037332  | 3451.438  | 2945.658  |
| NM_014571 | 901.602   | 1635.284  |
| NM_006052 | 760.15    | 737.364   |
| AB040912  | 10505.669 | 8011.903  |
| NM_003871 | 1102.101  | 1219.311  |
| NM_000813 | 731.258   | 390.487   |
| NM_01889E | 1269.393  | 1254.216  |
| AJ300465  | 2552.226  | 3051.895  |
| X86400    | 1059.64   | 594.041   |
| U92978    | 2758.887  | 2160.91   |
| NM_01448E | 1120.305  | 1210.736  |
| NM_01338E | 6097.051  | 8484.797  |
| AB014567  | 783.756   | 1087.338  |
| NM_018034 | 6084.541  | 6610.192  |
| M33197    | 59278.941 | 59472.711 |
| AB037831  | 878.337   | 841.361   |
| NM_012103 | 13200.209 | 11122.337 |
| AL122077  | 13436.81  | 13941.966 |
| NM_014632 | 1133.278  | 1160.051  |
| NM_006422 | 1180.75   | 1273.653  |
| NM_01694E | 2267.273  | 2041.015  |
| M33197    | 59908.551 | 58934.813 |
| NM_00725E | 2545.362  | 2295.714  |
| NM_018402 | 850.259   | 682.123   |
| NM_01800E | 966.664   | 1076.7    |
| M33197    | 58064.289 | 50860.707 |
| NM_002401 | 30919.717 | 31250.682 |
| NM_001274 | 2662.349  | 2184.434  |
| NM_003913 | 914.987   | 982.93    |
| NM_002227 | 2211.603  | 1333.005  |
| NM_00719E | 2717.827  | 2078.505  |
| AB002301  | 873.88    | 924.059   |
| AB014530  | 6625.256  | 5013.14   |
| M33197    | 61344.172 | 60015.918 |
| NM_00598E | 3909.279  | 4422.933  |
| AB014607  | 5908.551  | 6062.36   |
| AF134401  | 1982.278  | 2321.385  |

|           |           |           |
|-----------|-----------|-----------|
| NM_020151 | 11803.185 | 15361.168 |
| NM_005891 | 34062.984 | 40461.59  |
| NM_001645 | 2152.219  | 2062.626  |
| NM_003956 | 1473.541  | 1177.817  |
| M33197    | 61321.344 | 58741.879 |
| NM_003500 | 2847.034  | 2935.813  |
| NM_014317 | 2549.738  | 2261.088  |
| L09234    | 5946.934  | 5238.201  |
| NM_000059 | 1557.032  | 1443.712  |
| AK026740  | 803.944   | 874.619   |
| NM_017881 | 3826.517  | 3409.68   |
| M33197    | 60150.637 | 59143.512 |
| NM_017634 | 5337.135  | 4485.366  |
| NM_017743 | 1575      | 1177.683  |
| NM_000300 | 4769.658  | 5703.57   |
| M33197    | 64400.891 | 49607.121 |
| AV756917  | 4133.995  | 4194.36   |
| NM_018380 | 14557.408 | 9728.674  |
| AK001442  | 1632.917  | 1527.603  |
| NM_012070 | 2153.985  | 1670.73   |
| NM_019038 | 735.195   | 931.874   |
| AF183423  | 2991.566  | 2892.238  |
| M33197    | 945.82    | 781.639   |
| AB011146  | 2629.937  | 2822.719  |
| NM_005326 | 12935.636 | 13367.405 |
| NM_014069 | 870.222   | 723.677   |
| AB035130  | 1607.123  | 1541.226  |
| NM_003359 | 1758.664  | 1609.55   |
| M33197    | 39516.664 | 40268.379 |
| AF119917  | 751.989   | 1136.833  |
| NM_017915 | 1293.566  | 1095.776  |
| AL050097  | 825.267   | 843.214   |
| AK021513  | 793.979   | 537.065   |
| NM_003579 | 2455.773  | 2215.715  |
| AL049283  | 1864.771  | 1627.136  |
| NM_002214 | 1402.732  | 1016.749  |
| AF005258  | 1818.475  | 1618.992  |
| NM_000887 | 1366.141  | 1149.075  |
| M33197    | 61285.66  | 55545.59  |
| X99659    | 50681.363 | 44533.707 |
| NM_015416 | 2742.594  | 2682.31   |
| NM_002731 | 730.585   | 792.909   |
| NM_003899 | 5365.86   | 4404.667  |
| X99662    | 4876.55   | 4108.316  |
| NM_003473 | 32265.188 | 28809.35  |
| NM_014325 | 2688.646  | 2376.177  |
| M33197    | 59466.625 | 58552.797 |
| NM_006016 | 44413.605 | 41311.477 |
| NM_001242 | 3109.151  | 2836.456  |
| NM_001882 | 3360.34   | 2369.554  |
| NM_014891 | 6918.809  | 7001.235  |
| NM_013392 | 7284.345  | 6754.447  |
| M33197    | 60263.523 | 59812.426 |

|           |           |           |
|-----------|-----------|-----------|
| NM_00323E | 1124.512  | 1218.147  |
| NM_00345E | 814.239   | 806.345   |
| AF052692  | 2077.865  | 2268.819  |
| NM_00282C | 913.82    | 1070.048  |
| NM_00522E | 2447.191  | 2441.248  |
| NM_00235A | 1518.663  | 859.962   |
| NM_00017E | 1473.245  | 989.758   |
| AF062739  | 3492.739  | 2722.542  |
| NM_00660Z | 3169.198  | 2862.599  |
| M33197    | 60526.559 | 57027.063 |
| AL079314  | 5815.301  | 6127.679  |
| NM_00126C | 1326.119  | 1328.232  |
| NM_00195C | 3923.309  | 3590.38   |
| AK026364  | 1236.79   | 843.271   |
| NM_018117 | 1181.527  | 995.286   |
| NM_00699E | 680.671   | 829.102   |
| NM_00628E | 591.165   | 718.401   |
| M33197    | 57866.992 | 57493.598 |
| NM_004331 | 6397.264  | 4789.593  |
| BE886648  | 2796.402  | 3056.139  |
| NM_01599E | 896.32    | 742.679   |
| NM_01570Z | 8871.299  | 8579.848  |
| AB018337  | 1790.133  | 1731.009  |
| NM_01448E | 933.07    | 787.227   |
| AK025273  | 3973.094  | 3720.303  |
| M33197    | 59142.215 | 61471.742 |
| NM_00179A | 709.055   | 879.652   |
| NM_00220E | 6049.832  | 5894.199  |
| M33197    | 60665.48  | 59433.957 |
| NM_00183E | 922.71    | 725.24    |
| NM_001911 | 31940.357 | 28968.936 |
| NM_000537 | 1172.673  | 1021.813  |
| NM_00650Z | 1430.835  | 1155.974  |
| AB002321  | 787.106   | 1183.155  |
| M33197    | 826.129   | 734.38    |
| AB020698  | 927.976   | 572.538   |
| U68382    | 2321.66   | 1938.877  |
| NM_00396E | 2199.291  | 2519.155  |
| NM_004651 | 1700.856  | 1539.666  |
| M33197    | 54218.535 | 54646.418 |
| NM_01756E | 6284.842  | 5896.537  |
| NM_00145E | 740.427   | 664.233   |
| NM_00290E | 2644.305  | 2333.35   |
| AK024480  | 1973.364  | 2262.859  |
| Y13871    | 18590.414 | 20103.779 |
| NM_01213A | 913.596   | 806.78    |
| AL137725  | 8186.377  | 9181.79   |
| AK024149  | 2414.661  | 1985.552  |
| AK023094  | 1063.762  | 699.221   |
| M33197    | 58107.68  | 51984.84  |
| NM_004091 | 4316.399  | 3255.113  |
| X74070    | 66388.555 | 63786.234 |
| AF027219  | 1701.881  | 1569.385  |

|           |           |           |
|-----------|-----------|-----------|
| NM_006333 | 2966.912  | 2390.025  |
| M33197    | 50535.313 | 49071.125 |
| NM_00289E | 9240.653  | 8816.502  |
| AK022749  | 7744.12   | 8175.444  |
| BF031409  | 6104.771  | 5705.917  |
| NM_007043 | 1529.665  | 1493.55   |
| U94388    | 615.715   | 528.305   |
| NM_012322 | 4035.552  | 3321.505  |
| M33197    | 54967.758 | 56838.199 |
| NM_00488E | 38442.473 | 40991.27  |
| AK025314  | 1942.891  | 2154.447  |
| NM_00210E | 3845.221  | 4298.935  |
| NM_000984 | 66041.43  | 73671.289 |
| NM_002453 | 8345.375  | 10140.648 |
| AK000780  | 27778.105 | 33727.344 |
| AK026721  | 2750.46   | 2100.212  |
| AK023027  | 4278.597  | 2692.605  |
| AK025598  | 1009.957  | 964.419   |
| AB002348  | 44266.223 | 37780.41  |
| M33197    | 36520.41  | 36508.543 |
| M64714    | 600.984   | 619.619   |
| AK026043  | 3409.947  | 2784.092  |
| NM_00500E | 5535.555  | 4880.376  |
| AK027033  | 4180.952  | 4232.924  |
| NM_00010E | 1832.661  | 1906.919  |
| NM_00300C | 11493.935 | 10981.628 |
| NM_00249E | 19034.154 | 21961.959 |
| M33197    | 55292.375 | 56316.488 |
| NM_016284 | 2669.338  | 3175.496  |
| NM_014593 | 2760.182  | 2348.162  |
| NM_006833 | 8437.799  | 6738.705  |
| NM_012257 | 1248.222  | 1082.219  |
| U37690    | 17208.271 | 13575.39  |
| NM_00512C | 1430.007  | 1213.099  |
| AB029012  | 21585.184 | 22803.236 |
| M33197    | 64589.246 | 61689.32  |
| AJ010278  | 929.158   | 1000.282  |
| NM_00629E | 1667.983  | 1673.784  |
| AF060936  | 11226.418 | 13774.195 |
| NM_00556E | 1210.112  | 1381.873  |
| NM_018167 | 1216.549  | 1352.728  |
| AL050088  | 4921.712  | 3912.074  |
| AK024939  | 3067.945  | 2273.242  |
| AK001561  | 6713.524  | 5055.475  |
| AB007880  | 4313.226  | 3623.063  |
| AK024950  | 1876.515  | 2402.622  |
| M33197    | 62355.535 | 60939.273 |
| NM_01414E | 13070.968 | 13957.687 |
| AF147356  | 803.784   | 1359.591  |
| NM_018843 | 5032.807  | 5921.168  |
| AK096204  | 416.521   | 786.208   |
| AK024275  | 620.102   | 920.549   |
| AL049461  | 516.662   | 426.788   |

|                  |           |           |
|------------------|-----------|-----------|
| <b>M33197</b>    | 57730.273 | 54909.316 |
| <b>AL109782</b>  | 5033.093  | 4606.808  |
| <b>AF086225</b>  | 710.447   | 700.262   |
| <b>NM_005844</b> | 4456.751  | 4223.064  |
| <b>AK024941</b>  | 5605.874  | 4895.092  |
| <b>AF056434</b>  | 1975.235  | 2198.929  |
| <b>AF086199</b>  | 589.31    | 910.044   |
| <b>M33197</b>    | 43323.742 | 56046.344 |
| <b>AK025489</b>  | 2465.391  | 3306.355  |
| <b>AB075853</b>  | 901.679   | 1058.922  |
| <b>AL390152</b>  | 5612.266  | 7632.106  |
| <b>M33197</b>    | 60248.109 | 53460.48  |
| <b>NM_018126</b> | 1438.491  | 1403.034  |
| <b>AK024506</b>  | 5924.529  | 5745.517  |
| <b>NM_014179</b> | 993.118   | 985.632   |
| <b>AF086326</b>  | 5208.784  | 5157.603  |
| <b>AF147409</b>  | 595.254   | 765.662   |
| <b>M33197</b>    | 62360.523 | 59406.66  |
| <b>AL049937</b>  | 611.975   | 444.369   |
| <b>AL080057</b>  | 829.219   | 1222.864  |
| <b>AL117528</b>  | 929.511   | 640.188   |
| <b>M33197</b>    | 55189.254 | 56067.797 |
| <b>AK025948</b>  | 991.994   | 905.182   |
| <b>AJ238555</b>  | 696.494   | 854.24    |
| <b>L23850</b>    | 375.254   | 403.315   |
| <b>AL353948</b>  | 22859.686 | 30645.363 |
| <b>AL122043</b>  | 1133.248  | 1896.318  |
| <b>M33197</b>    | 57759.375 | 58840.91  |
| <b>AK025869</b>  | 9604.345  | 13082.707 |
| <b>AK023961</b>  | 869.148   | 778.47    |
| <b>M33197</b>    | 58931.008 | 51481.035 |
| <b>AF009281</b>  | 684.026   | 1188.228  |
| <b>AF056430</b>  | 2238.086  | 2329.45   |
| <b>NM_014906</b> | 1417.414  | 1454.547  |
| <b>AF009291</b>  | 1792.183  | 1694.571  |
| <b>AF056440</b>  | 818.703   | 1106.496  |
| <b>M33197</b>    | 60510.031 | 57992.445 |
| <b>NM_018055</b> | 2476.955  | 3053.414  |
| <b>AK002199</b>  | 1569.283  | 1734.543  |
| <b>AK021662</b>  | 1082.375  | 1031.032  |
| <b>AK001038</b>  | 617.15    | 292.625   |
| <b>AK001802</b>  | 1441.594  | 1042.464  |
| <b>AK021469</b>  | 1899.673  | 1470.814  |
| <b>AK021706</b>  | 2738.141  | 2772.945  |
| <b>M33197</b>    | 59557.219 | 55288.59  |
| <b>AK025161</b>  | 937.925   | 1093.19   |
| <b>AK025387</b>  | 611.928   | 900.675   |
| <b>AK026259</b>  | 49151.461 | 54243.316 |
| <b>AJ008115</b>  | 22786.361 | 15917.424 |
| <b>AF083125</b>  | 809.101   | 828.894   |
| <b>U72851</b>    | 810.305   | 1069.232  |
| <b>AL049241</b>  | 1114.584  | 1214.356  |
| <b>M33197</b>    | 60406.336 | 57159.66  |

|           |           |           |
|-----------|-----------|-----------|
| X51526    | 778.416   | 1137.184  |
| AK022970  | 1420.417  | 1959.558  |
| AK026212  | 1954.002  | 2779.294  |
| AF086222  | 1482.221  | 1588.877  |
| AF143866  | 473.464   | 977.59    |
| AF086415  | 4003.39   | 4433.564  |
| M33197    | 58403.52  | 57880.602 |
| AK024470  | 1896.672  | 2413.858  |
| NM_01793E | 1636.733  | 2079.449  |
| NM_00422E | 2458.515  | 2676.606  |
| AL137436  | 863.101   | 808.591   |
| AK023400  | 861.391   | 1049.276  |
| NM_00643E | 13139.909 | 8501.311  |
| AF025441  | 2801.271  | 4823.968  |
| NM_00353E | 42706.668 | 46699.523 |
| AK026768  | 2981.833  | 3757.397  |
| M33197    | 60565.945 | 58920.453 |
| AK000852  | 35501.77  | 50050.375 |
| AF251188  | 5915.714  | 7033.964  |
| AK026418  | 11275.508 | 17068.463 |
| AF086194  | 32283.07  | 45024.008 |
| AK026811  | 3599.779  | 4288.771  |
| M33197    | 57365.238 | 51553.125 |
| AK023633  | 1911.295  | 1587.637  |
| NM_00617E | 3096.368  | 3793.062  |
| AL360165  | 3113.526  | 4142.368  |
| M33197    | 60191.094 | 60299.117 |
| AJ008132  | 6091.612  | 5526.107  |
| NM_005281 | 5245.152  | 5977.126  |
| NM_00554E | 3054.167  | 4225.229  |
| M33197    | 58826.453 | 52565.426 |
| U12129    | 4991.276  | 5423.943  |
| AF230801  | 2980.955  | 3532.227  |
| AF075072  | 3041.139  | 2745.014  |
| M33197    | 61372.727 | 63412.504 |
| NM_00250E | 5277.864  | 7466.824  |
| U38442    | 2333.99   | 3411.284  |
| AF110136  | 1499.613  | 2266.96   |
| AK026706  | 3210.446  | 3270.354  |
| AB007936  | 41549.695 | 36921     |
| D28391    | 26342.436 | 22916.055 |
| M33197    | 41513.164 | 39882.836 |
| AF086086  | 540.07    | 708.479   |
| AK026859  | 797.998   | 911.002   |
| AJ227896  | 11171.363 | 13664.729 |
| L32841    | 7869.915  | 8030.81   |
| M33197    | 55519.551 | 60956.438 |
| AF131770  | 1908.466  | 2465.108  |
| CY3Cy5    | 2527.872  | 162.232   |
| AI298534  | 1161.232  | 1145.988  |
| AA424735  | 1648.685  | 1623.091  |
| U78294    | 996.561   | 1081.433  |
| BI760394  | 1322.155  | 990.671   |

|           |           |           |
|-----------|-----------|-----------|
| AA555216  | 549.703   | 397.105   |
| U09117    | 10297.282 | 6970.387  |
| M21054    | 1990.275  | 984.268   |
| M18468    | 1890.955  | 1698.344  |
| H66070    | 11616.067 | 10018.27  |
| AA164741  | 2077.386  | 1090.969  |
| AI189375  | 634.464   | 537.26    |
| AI978885  | 3713.906  | 2871.128  |
| AK054960  | 14521.373 | 13506.399 |
| L15344    | 2626.282  | 2021.061  |
| SR1       | 60681.277 | 48492.426 |
| SR3       | 51542.398 | 50926.629 |
| SR5       | 5151.713  | 5067.104  |
| SR7       | 2906.254  | 27237.213 |
| SR9       | 16989.4   | 3739.892  |
| CY3Cy5    | 3597.024  | 151.998   |
| NM_014586 | 4412.487  | 5139.583  |
| NM_014366 | 10440.416 | 7300.527  |
| NM_000923 | 958.602   | 857.752   |
| NM_006453 | 1221.781  | 1227.188  |
| NM_018096 | 1403.604  | 1274.622  |
| AL390078  | 1360.104  | 1231.085  |
| NM_004036 | 2228.745  | 1293.571  |
| NM_015986 | 694.416   | 548.22    |
| NM_006546 | 562.189   | 497.769   |
| NM_014959 | 1798.835  | 1336.365  |
| NM_003992 | 4980.182  | 4946.552  |
| AF279265  | 4576.987  | 3608.562  |
| NM_005213 | 37216.34  | 27557.967 |
| AB040914  | 459.133   | 359.838   |
| NM_002997 | 4150.217  | 4320.991  |
| NM_002379 | 7640.658  | 6340.861  |
| AB007929  | 9070.4    | 7770.354  |
| NM_004579 | 5819.503  | 4493.259  |
| AA203126  | 3319.559  | 2603.755  |
| L12347    | 9647.63   | 8461.176  |
| NM_001622 | 2246.477  | 2231.689  |
| Z36788    | 1549.813  | 1539.462  |
| NM_018477 | 4188.935  | 4913.426  |
| U20536    | 1153.713  | 883.143   |
| NM_004853 | 5407.297  | 4443.097  |
| NM_001494 | 15858.08  | 14587.626 |
| NM_017707 | 501.636   | 715.465   |
| NM_004206 | 1906.974  | 1993.814  |
| NM_004603 | 10152.02  | 6327.489  |
| AK022849  | 2061.828  | 1177.222  |
| AF040964  | 4261.167  | 3531.062  |
| AK023527  | 164.881   | 661.261   |
| NM_001939 | 3723.531  | 2978.048  |
| NM_003279 | 12359.986 | 8481.087  |
| AB014599  | 3254.469  | 2120.684  |
| NM_004393 | 633.513   | 389.16    |
| AB018345  | 472.086   | 556.283   |



|           |           |           |
|-----------|-----------|-----------|
| NM_005832 | 1005.528  | 788.008   |
| AW407841  | 652.577   | 755.117   |
| NM_001879 | 4675.448  | 3483.262  |
| AF264014  | 7364.958  | 6647.597  |
| NM_001831 | 617.881   | 789.434   |
| NM_000137 | 7257.732  | 5607.508  |
| NM_012102 | 8485.93   | 8429.83   |
| NM_005017 | 33131.168 | 37050.836 |
| AF163572  | 20585.09  | 20451.498 |
| NM_000897 | 5322.547  | 3727.135  |
| NM_006411 | 22786.178 | 13611.221 |
| NM_014182 | 2817.233  | 2260.228  |
| AB040884  | 744.418   | 497.569   |
| NM_000492 | 9559.031  | 10021.552 |
| NM_012089 | 1049.196  | 679.103   |
| NM_001170 | 5830.711  | 5192.812  |
| AL137716  | 1246.458  | 1056.177  |
| NM_004696 | 1171.594  | 1036.734  |
| NM_014342 | 2036.233  | 1739.148  |
| Z50169    | 656.614   | 564.307   |
| AB043997  | 1512.961  | 1385.292  |
| AF097645  | 276.347   | 449.1     |
| NM_001773 | 1127.084  | 886.523   |
| Z70704    | 2440.125  | 1875.125  |
| NM_014363 | 1277.589  | 832.125   |
| NM_000557 | 6044.471  | 4520.061  |
| NM_003239 | 1084.899  | 1185.493  |
| NM_001375 | 7739.398  | 8031.617  |
| NM_002312 | 2583.499  | 2646.261  |
| M20699    | 706.466   | 487.428   |
| NM_004774 | 8526.682  | 6982.556  |
| NM_016937 | 5422.227  | 5342.167  |
| NM_002690 | 4541.411  | 3682.113  |
| NM_012328 | 5918.878  | 5594.319  |
| NM_007341 | 1197.863  | 818.565   |
| NM_016508 | 1709.745  | 1582.275  |
| NM_006456 | 14689.143 | 12919.885 |
| AK026062  | 17764.693 | 14075.263 |
| AF047002  | 13896.435 | 12899.523 |
| AL050082  | 1912.808  | 1628.975  |
| NM_006623 | 57089.254 | 52664.809 |
| NM_016588 | 1254.079  | 735.644   |
| NM_003135 | 7511.654  | 6077.087  |
| L12347    | 4734.85   | 4269.074  |
| NM_001622 | 2956.225  | 2794.337  |
| Z36788    | 943.909   | 754.804   |
| NM_018477 | 3378.788  | 2650.98   |
| U20536    | 1079.278  | 752.851   |
| AI298534  | 1095.453  | 881.405   |
| AW167715  | 1553.553  | 1157.816  |
| AA424735  | 2247.061  | 1608.63   |
| U78294    | 1231.751  | 1618.683  |
| AA171613  | 325.58    | 630.134   |

|           |           |           |
|-----------|-----------|-----------|
| BI760394  | 2821.217  | 3232.024  |
| AA555216  | 989.31    | 1028.698  |
| U09117    | 13338.318 | 10263.352 |
| M21054    | 730.24    | 714.119   |
| M18468    | 1417.32   | 1400.006  |
| H66070    | 11475.007 | 10221.315 |
| AA164741  | 3899.414  | 3117.118  |
| AI189375  | 1183.681  | 1172.75   |
| AI978885  | 4847.829  | 5094.563  |
| AK054960  | 15754.487 | 14454.169 |
| L15344    | 2923.456  | 3220.203  |
| NM_001665 | 13212.044 | 11539.444 |
| NM_001879 | 3967.217  | 3219.574  |
| AF264014  | 6165.034  | 5736.896  |
| L09098    | 515.474   | 505.086   |
| NM_014586 | 3933.075  | 2833.929  |
| NM_014366 | 10779.568 | 8951.863  |
| NM_000923 | 875.54    | 662.941   |
| NM_006453 | 1730.087  | 1818.683  |
| NM_018096 | 1029.345  | 1094.295  |
| AL390078  | 1123.887  | 1159.736  |
| NM_004036 | 3337.519  | 3016.302  |
| NM_015986 | 1256.593  | 903.86    |
| NM_006546 | 947.026   | 1004.909  |
| NM_014959 | 2190.709  | 2250.569  |
| NM_003992 | 5714.517  | 4743.223  |
| AF279265  | 4856.382  | 4521.102  |
| NM_005213 | 49581.184 | 46182.691 |
| AB040914  | 1320.517  | 1211.88   |
| NM_002997 | 6706.946  | 7075.477  |
| NM_002379 | 12715.176 | 13137.401 |
| AB007929  | 5464.344  | 4059.104  |
| NM_004579 | 5658.986  | 4861.606  |
| AA203126  | 2943.15   | 2541.151  |
| Z50169    | 540.961   | 536.173   |
| AB043997  | 1904.799  | 1465.899  |
| NM_004853 | 5187.684  | 4679.745  |
| NM_001494 | 14733.484 | 13396.333 |
| NM_017707 | 751.717   | 481.378   |
| NM_004206 | 2112.471  | 1861.697  |
| NM_004603 | 7875.939  | 7360.928  |
| AK022849  | 1848.733  | 1770.972  |
| AF040964  | 3967.32   | 3281.565  |
| NM_001939 | 4539.592  | 4327.208  |
| NM_003279 | 15294.679 | 14129.363 |
| AB014599  | 3858.243  | 3446.731  |
| NM_004393 | 770.224   | 1170.733  |
| AB018345  | 770.573   | 781.117   |
| NM_005832 | 735.065   | 672.859   |
| AW407841  | 796.258   | 809.898   |
| U15197    | 469.778   | 371.238   |
| AL050082  | 2127.017  | 1396.313  |
| NM_006623 | 52059.242 | 46700.52  |

|           |           |           |
|-----------|-----------|-----------|
| NM_01658E | 3189.414  | 1558.334  |
| NM_00313E | 7205.741  | 6743.951  |
| NM_000137 | 7691.539  | 7541.765  |
| NM_01210Z | 7327.2    | 7200.695  |
| NM_005017 | 35412.664 | 35804.078 |
| AF163572  | 17075.859 | 15000.354 |
| NM_000897 | 5914.398  | 4571.81   |
| NM_000487 | 1717.223  | 1282.157  |
| NM_006411 | 19274.699 | 17195.598 |
| NM_01418Z | 2301.182  | 2040.134  |
| AB040884  | 845.758   | 555.115   |
| NM_00049Z | 11290.572 | 10949.28  |
| NM_01208E | 1329.065  | 1217.75   |
| AK024382  | 171.572   | 544.369   |
| NM_001170 | 5495.182  | 5889.367  |
| AL137716  | 1705.029  | 2065.908  |
| NM_00469E | 1943.569  | 1812.956  |
| NM_01434Z | 1644.707  | 1405.768  |
| AK054960  | 11173.202 | 9013.029  |
| L15344    | 2522.162  | 2241.845  |
| NM_00166E | 14263.983 | 10742.985 |
| AF097645  | 484.219   | 617.898   |
| NM_00177Z | 1893.569  | 1700.409  |
| Z70704    | 2749.053  | 2667.619  |
| NM_01436Z | 1898.677  | 2003.017  |
| NM_000557 | 7039.759  | 6790.592  |
| NM_00323E | 719.036   | 1027.861  |
| NM_00137E | 6416.764  | 5682.57   |
| NM_00231Z | 2740.897  | 2013.408  |
| M20699    | 1342.015  | 1364.268  |
| NM_004774 | 6745      | 5461.382  |
| NM_016937 | 5171.841  | 4861.322  |
| NM_00269C | 4509.214  | 4779.45   |
| NM_01232E | 5801.73   | 6109.168  |
| NM_007341 | 1696.853  | 1474.255  |
| NM_01650E | 2052.268  | 2002.082  |
| NM_00645E | 16214.079 | 19019.691 |
| AK026062  | 18162.76  | 18446.529 |
| AF047002  | 20611.807 | 18393.668 |
| AB040914  | 1209.129  | 940.099   |
| NM_002997 | 3805.136  | 3816.434  |
| NM_00237E | 9902.639  | 8236.205  |
| AB007929  | 10059.826 | 10426.806 |
| NM_00457E | 5473.073  | 5254.685  |
| AA203126  | 3018.636  | 2907.068  |
| L12347    | 8774.52   | 7999.901  |
| NM_00162Z | 4740.051  | 4800.658  |
| Z36788    | 1328.764  | 1766.783  |
| NM_018477 | 3978.352  | 5707.631  |
| U20536    | 1157.111  | 1255.643  |
| AI298534  | 1755.46   | 1326.721  |
| R71691    | 605.282   | 552.86    |
| AW167715  | 1537.248  | 1707.394  |

|           |           |           |
|-----------|-----------|-----------|
| AA424735  | 2439.365  | 2270.074  |
| U78294    | 1953.053  | 1710.958  |
| AA171613  | 642.961   | 760.52    |
| BI760394  | 3118.184  | 3157.295  |
| AA555216  | 906.73    | 865.547   |
| U09117    | 13193.124 | 12879.321 |
| M21054    | 823.726   | 804.73    |
| M18468    | 1500.985  | 1926.785  |
| H66070    | 13039.992 | 13008.972 |
| AA164741  | 3782.292  | 4965.298  |
| AI189375  | 1099.488  | 1533.217  |
| AI978885  | 3839.559  | 4078.429  |
| AB014599  | 3638.208  | 2708.448  |
| NM_004393 | 709.519   | 727.388   |
| AB018345  | 564.019   | 675.841   |
| NM_005832 | 839.972   | 617.115   |
| AW407841  | 1003.026  | 964.109   |
| U15197    | 761.237   | 519.514   |
| NM_001879 | 5435.669  | 4742.474  |
| AF264014  | 7599.579  | 8107.693  |
| L09098    | 431.874   | 771.803   |
| NM_004155 | 460.739   | 499.828   |
| NM_001831 | 753.635   | 928.955   |
| NM_014586 | 4434.914  | 4505.138  |
| NM_014366 | 11955.658 | 12370.271 |
| NM_000923 | 964.713   | 884.139   |
| NM_006453 | 1323.452  | 1716.194  |
| NM_018096 | 1141.359  | 1435.758  |
| AL390078  | 1261.973  | 1391.318  |
| NM_004036 | 3743.012  | 3487.833  |
| NM_015986 | 784.884   | 776.685   |
| NM_006546 | 943.47    | 1031.111  |
| NM_014959 | 2538.395  | 3324.901  |
| NM_003992 | 5686.417  | 6458.415  |
| AF279265  | 5019.389  | 5318.545  |
| NM_007350 | 244.951   | 807.383   |
| NM_005213 | 38795.961 | 46139.98  |
| AK024382  | 407.173   | 325.598   |
| NM_001170 | 3798.766  | 4142.913  |
| AL137716  | 1294.103  | 1568.872  |
| NM_004696 | 1742.113  | 1708.52   |
| NM_017694 | 572.474   | 260.184   |
| NM_014342 | 2023.665  | 2572.878  |
| Z50169    | 1459.503  | 1316.852  |
| AB043997  | 1803.811  | 1921.802  |
| NM_001062 | 534.743   | 516.523   |
| NM_004853 | 6326.708  | 5970.412  |
| NM_001494 | 18004.766 | 21126.561 |
| NM_017707 | 449.279   | 841.964   |
| NM_004206 | 1940.09   | 2036.486  |
| NM_004603 | 15878.026 | 17638.434 |
| AK022849  | 2329.529  | 2985.6    |
| AF040964  | 4041.917  | 5615.1    |

|          |           |           |
|----------|-----------|-----------|
| NM_00193 | 4861.988  | 6011.526  |
| NM_00327 | 11556.341 | 13971.033 |
| NM_01232 | 5756.464  | 4885.805  |
| NM_00734 | 1455.505  | 1377.506  |
| NM_01650 | 2235.608  | 1955.026  |
| NM_00645 | 15919.285 | 12801.905 |
| AK02606  | 19236.176 | 20904.271 |
| AF04700  | 21239.621 | 23725.027 |
| AL05008  | 1991.639  | 2033.164  |
| NM_00662 | 49050.664 | 49752.617 |
| NM_01658 | 2984.657  | 2077.373  |
| NM_00313 | 6990.259  | 7171.743  |
| NM_00676 | 393.416   | 661.538   |
| NM_00013 | 8033.695  | 10193.175 |
| NM_01210 | 5474.523  | 7587.55   |
| NM_00501 | 39074.598 | 48617.305 |
| AF16357  | 21473.924 | 28736.646 |
| NM_00089 | 8747.021  | 10624.063 |
| NM_00048 | 1352.274  | 1106.632  |
| NM_00641 | 27540.615 | 31123.518 |
| NM_01418 | 2916.744  | 2713.233  |
| AB04088  | 415.494   | 1038.602  |
| NM_00049 | 11317.517 | 13496.191 |
| NM_01208 | 1305.974  | 1796.671  |
| AJ27205  | 7567.895  | 6974.182  |
| NM_00440 | 836.847   | 961.154   |
| NM_01469 | 1062.255  | 995.227   |
| NM_02015 | 1694.159  | 1445.132  |
| NM_01483 | 1997.476  | 1712.743  |
| AF35540  | 3049.846  | 3155.003  |
| AK00040  | 4224.037  | 4296.656  |
| NM_01447 | 419.429   | 295.249   |
| NM_00166 | 13156.236 | 13315.591 |
| NM_00177 | 1938.763  | 1964.57   |
| Z7070    | 3035.446  | 4388.468  |
| NM_01436 | 2310.741  | 2736.201  |
| NM_00055 | 7931.818  | 9707.926  |
| NM_00323 | 736.615   | 1618.058  |
| NM_00137 | 6780.26   | 9105.416  |
| NM_00231 | 2815.628  | 3351.192  |
| M2069    | 1785.249  | 1752.166  |
| NM_00477 | 7195.813  | 7425.783  |
| NM_01693 | 4957.922  | 5345.93   |
| NM_00269 | 4377.369  | 6499.197  |
| AB03308  | 648.657   | 495.788   |
| NM_01823 | 1885.827  | 1787.838  |
| U8889    | 2474.547  | 2776.295  |
| AK02375  | 1474.543  | 1470.449  |
| NM_00572 | 839.984   | 831.138   |
| NM_01221 | 975.704   | 1097.925  |
| AB04087  | 3537.461  | 3347.071  |
| AB04092  | 993.77    | 816.529   |
| AK02673  | 3185.436  | 3365.786  |

|           |           |           |
|-----------|-----------|-----------|
| NM_00021C | 501.626   | 527.051   |
| NM_00628E | 8973.072  | 9621.409  |
| NM_019067 | 4587.591  | 3685.29   |
| AF251025  | 792.203   | 869.104   |
| NM_015677 | 4094.943  | 4566.19   |
| NM_001772 | 16838.002 | 19362.977 |
| AL162032  | 614.207   | 657.319   |
| AJ249902  | 2131.967  | 2576.172  |
| NM_004384 | 4039.171  | 4464.662  |
| L05500    | 6611.129  | 8588.444  |
| NM_01230E | 19754.498 | 23479.342 |
| AF222903  | 3781.352  | 5857.525  |
| NM_00622E | 5707.813  | 7714.579  |
| L10374    | 19963.242 | 29937.283 |
| AB016902  | 3466.356  | 3202.646  |
| AF272378  | 59518.004 | 57458.348 |
| NM_00024E | 7958.812  | 10875.419 |
| NM_01431C | 757.619   | 1045.308  |
| NM_00586C | 7845.507  | 8010.078  |
| AF095288  | 13779.483 | 11541.021 |
| AK025116  | 657.09    | 934.238   |
| AF130114  | 426.478   | 456.333   |
| AK026271  | 8328.194  | 9277.102  |
| NM_00179E | 6432.227  | 7256.479  |
| AF090895  | 1715.956  | 1931.526  |
| NM_00561C | 4476.862  | 4303.461  |
| AL133651  | 1341.454  | 1548.764  |
| AB014532  | 8484.948  | 8194.934  |
| NM_00347E | 4225.251  | 5169.203  |
| BE275227  | 480.106   | 812.673   |
| NM_016237 | 9880.685  | 12857.513 |
| NM_004924 | 11924.738 | 18271.982 |
| NM_00179E | 3687.575  | 4850.292  |
| NM_00650E | 1380.504  | 1758.101  |
| AB033050  | 3911.572  | 4955.082  |
| NM_00435E | 13646.67  | 18308.451 |
| NM_00185E | 705.592   | 827.15    |
| BC015022  | 5395.947  | 5630.687  |
| NM_006697 | 2791.924  | 3136.779  |
| M19182    | 1674.879  | 1919.497  |
| U87169    | 2390.76   | 2655.822  |
| NM_00207E | 1335.956  | 1382.17   |
| NM_00604E | 108.795   | 766.577   |
| AF117222  | 654.221   | 658.738   |
| NM_00193E | 33128.699 | 45087.426 |
| NM_00174E | 712.729   | 785.312   |
| AF090327  | 1058.504  | 1465.263  |
| NM_003291 | 9375.97   | 9606.457  |
| AK022950  | 2214.813  | 1900.79   |
| S75755    | 2263.222  | 2109.034  |
| AF176518  | 801.33    | 826.897   |
| AB014576  | 13374.756 | 14570.831 |
| NM_019044 | 4634.886  | 5994.317  |

|           |           |           |
|-----------|-----------|-----------|
| AK000145  | 1070.691  | 1866.53   |
| AF174601  | 4057.929  | 4833.635  |
| AF279865  | 1165.442  | 1448.075  |
| NM_014700 | 1492.091  | 1950.557  |
| NM_014714 | 602.571   | 869.18    |
| NM_005687 | 7376.356  | 7536.066  |
| NM_005983 | 5822.594  | 5319.072  |
| NM_017652 | 9609.563  | 10172.507 |
| X59268    | 5347.563  | 5855.681  |
| D70832    | 59329.699 | 47698.754 |
| NM_001429 | 9498.602  | 8192.501  |
| M61870    | 2361.619  | 2538.852  |
| AK026980  | 1323.984  | 1669.644  |
| AJ277915  | 599.946   | 894.768   |
| NM_020368 | 2090.246  | 2779.915  |
| AF024708  | 28794.148 | 41071.129 |
| NM_006467 | 2608.477  | 2723.218  |
| NM_017566 | 3128.089  | 2744.643  |
| NM_006582 | 1397.411  | 1537.992  |
| AB033019  | 6394.968  | 5809.863  |
| NM_001452 | 1035.119  | 1052.095  |
| NM_006162 | 958.149   | 981.444   |
| NM_014764 | 8370.783  | 11332.207 |
| NM_018078 | 2211.519  | 2877.453  |
| NM_016013 | 512.608   | 731.252   |
| NM_016050 | 921.191   | 1117.495  |
| NM_007080 | 10817.987 | 10326.802 |
| AK026912  | 3959.27   | 4011.506  |
| AK023531  | 12257.319 | 11005.549 |
| AB011128  | 9426.363  | 7950.919  |
| AK026742  | 396.138   | 690.298   |
| AK025074  | 6256.453  | 5519.593  |
| NM_000303 | 6521.932  | 5188.643  |
| NM_006242 | 1237.519  | 1107.027  |
| AF282887  | 429.404   | 509.482   |
| X78712    | 1055.855  | 1105.206  |
| NM_001497 | 2412.359  | 2183.195  |
| NM_004130 | 4359.487  | 4918.826  |
| AL049679  | 552.883   | 566.268   |
| NM_006348 | 1012.428  | 1502.362  |
| AF067972  | 12284.105 | 14703.839 |
| NM_004958 | 958.301   | 1367.424  |
| D87076    | 2595.776  | 3006.638  |
| NM_014149 | 3671.504  | 4364.493  |
| AB020635  | 2090.756  | 2214.071  |
| NM_006515 | 1508.806  | 2147.047  |
| NM_005224 | 1944.669  | 2044.411  |
| AF205632  | 3284.255  | 2786.247  |
| NM_005378 | 34676.516 | 34884.84  |
| NM_002397 | 6146.323  | 4806.628  |
| AF000672  | 1533.218  | 1362.639  |
| AJ227854  | 871.385   | 819.734   |
| AK002195  | 1256.595  | 1326.645  |

|           |           |           |
|-----------|-----------|-----------|
| AF086128  | 492.438   | 758.619   |
| AK022850  | 2402.581  | 2384.178  |
| NM_01649C | 3992.869  | 3542.018  |
| AF038193  | 1422.103  | 1672.534  |
| AL137498  | 3334.907  | 4371.419  |
| AK024289  | 2765.134  | 3215.119  |
| S66168    | 9128.042  | 12004.139 |
| AF131837  | 686.291   | 984.57    |
| AK001942  | 284.61    | 976.197   |
| NM_003851 | 20825.822 | 29618.449 |
| U79244    | 702.339   | 1568.953  |
| AK024150  | 2403.111  | 3038.251  |
| AF070536  | 3085.668  | 3665.041  |
| AK022297  | 1223.002  | 1295.139  |
| AK025550  | 4619.935  | 5555.893  |
| AF088076  | 18015.311 | 19608.49  |
| AF086543  | 3086.908  | 3297.781  |
| AB046797  | 2083.325  | 2048.015  |
| AK002098  | 2275.704  | 2180.778  |
| AK025156  | 21784.436 | 23532.518 |
| AK022116  | 6726.556  | 7888.657  |
| AF026526  | 1671.87   | 1625.668  |
| AK026207  | 8292.179  | 10047.883 |
| AK024984  | 27037.83  | 27177.063 |
| AK000276  | 563.281   | 824.125   |
| AL110236  | 1138.975  | 1013.112  |
| AF075106  | 3818.112  | 5564.756  |
| AK023339  | 2530.177  | 3796.544  |
| AF085981  | 586.272   | 787.568   |
| AF086008  | 1830.154  | 1894.352  |
| AF087970  | 945.569   | 1119.177  |
| AF086029  | 1231.342  | 1791.965  |
| AF075115  | 717.093   | 682.69    |
| U05597    | 608.859   | 1163.034  |
| U50524    | 1760.504  | 1482.065  |
| U52050    | 1151.338  | 1455.998  |
| U73799    | 2023.498  | 1358.091  |
| AK021668  | 19503.732 | 14252.787 |
| AF086148  | 13341.199 | 7881.417  |
| NM_018363 | 695.806   | 947.002   |
| AJ245433  | 12997.943 | 14335.962 |
| AK021942  | 27787.93  | 30031.973 |
| NM_014127 | 1705.08   | 1747.056  |
| AL360187  | 1430.569  | 1445.02   |
| AK021878  | 1200.28   | 807.757   |
| AL080103  | 1531.563  | 2301.129  |
| AK023217  | 1841.42   | 2752.037  |
| AK021883  | 502.089   | 925.994   |
| AF090902  | 5035.284  | 6047.399  |
| AF119887  | 26232.236 | 26593.557 |
| AK091038  | 649.754   | 954.229   |
| AK024193  | 1946.193  | 2508.346  |
| NM_018578 | 1102.213  | 872.491   |



|            |           |           |
|------------|-----------|-----------|
| NM_018543  | 671.491   | 769.152   |
| AK024438   | 16467.369 | 18613.143 |
| AF161337   | 812.263   | 730.25    |
| AK022482   | 1907.178  | 2190.355  |
| AK023382   | 3172.759  | 1116.558  |
| AK024135   | 777.943   | 627.616   |
| AK022803   | 4193.46   | 3172.594  |
| AK023517   | 1991.626  | 976.559   |
| AK023869   | 4487.915  | 3613.53   |
| NM_017728  | 1642.529  | 2408.755  |
| U80772     | 815.324   | 1057.37   |
| NM_006189  | 1023.911  | 1076.862  |
| AJ272177   | 1406.253  | 1343.69   |
| AK026402   | 18675.287 | 17549.85  |
| AF111846   | 2163.49   | 1834.343  |
| Z36850     | 695.071   | 1072.707  |
| AK024618   | 1935.694  | 3203.278  |
| NM_005220  | 3431.939  | 4931.123  |
| NM_018619  | 284.774   | 645.372   |
| AK000208   | 477.507   | 635.801   |
| AK000470   | 535.061   | 584.706   |
| NM_014566  | 479.151   | 532.831   |
| unknown (9 | 930.479   | 547.316   |
| AK026366   | 39393.258 | 33537.117 |
| AK024229   | 25079.287 | 17660.586 |
| AK021467   | 11867.069 | 13090.664 |
| NM_020371  | 2794.18   | 2524      |
| AK022498   | 2793.899  | 2768.689  |
| AB002444   | 1337.368  | 1198.547  |
| AB002344   | 3492.844  | 3781.27   |
| BF210352   | 1640.998  | 1997.316  |
| NM_006829  | 2591.673  | 2786.07   |
| AF147379   | 42946.496 | 49613.145 |
| AK023760   | 4667.322  | 6511.804  |
| AK000174   | 1754.364  | 1746.085  |
| AF130071   | 1419.682  | 1578.698  |
| AL390170   | 565.604   | 835.272   |
| AK022887   | 1401.334  | 1638.145  |
| AK000745   | 20834.053 | 18980.373 |
| NM_005299  | 835.914   | 983.385   |
| NM_015901  | 1874.466  | 1928.709  |
| AF130065   | 832.525   | 1060.422  |
| Z83935     | 3205.497  | 1711.913  |
| AF093744   | 1813.671  | 1815.568  |
| NM_018687  | 28116.498 | 26950.543 |
| M57417     | 58421.68  | 49208.004 |
| NM_020524  | 11427.522 | 12766.328 |
| NM_001999  | 4043.458  | 4406.958  |
| X64977     | 819.876   | 1225.896  |
| AF064851   | 1386.682  | 1116.264  |
| NM_002602  | 7678.251  | 9078.932  |
| NM_016239  | 1351.27   | 1366.502  |
| NM_003383  | 5555.944  | 7305.745  |

|           |           |           |
|-----------|-----------|-----------|
| D17271    | 11936.973 | 18595.945 |
| AF086322  | 1964.089  | 2231.638  |
| Z70717    | 1666.884  | 2368.076  |
| AK024736  | 2105.908  | 2351.99   |
| X79308    | 2805.167  | 3645.905  |
| AF086476  | 670.649   | 631.129   |
| NM_017660 | 7482.371  | 8327.055  |
| AB011151  | 12861.646 | 12560.45  |
| U92995    | 4204.285  | 3761.331  |
| Z70769    | 989.374   | 1031.518  |
| NM_007100 | 3346.416  | 2431.429  |
| AL137555  | 3783.417  | 2864.08   |
| AL133017  | 1532.92   | 1261.848  |
| CY3Cy5    | 3817.909  | 1252.846  |
| J04513    | 370.032   | 358.757   |
| BI754285  | 772.044   | 1030.361  |
| X15998    | 3916.586  | 4079.481  |
| M76482    | 396.035   | 588.143   |
| NM_001883 | 2491.362  | 2717.785  |
| NM_004620 | 1564.14   | 1578.905  |
| L31785    | 729.741   | 1201.257  |
| H-M 69043 | 3475.753  | 4028.676  |
| AF077374  | 1173.514  | 1557.88   |
| U43901    | 549.127   | 804.31    |
| X59065    | 652.676   | 543.72    |
| M59828    | 4316.972  | 3288.298  |
| NM_016134 | 1404.691  | 972.226   |
| SR2       | 51373.387 | 38988.672 |
| SR4       | 13558.688 | 9455.928  |
| SR6       | 1909.508  | 1193.319  |
| SR8       | 7158.621  | 14646.751 |
| SR10      | 21938.609 | 5891.237  |
| CY3Cy5    | 1972.324  | 1018.839  |
| NM_000612 | 5619.625  | 7292.493  |
| NM_000683 | 2394.611  | 3050.741  |
| NM_003620 | 2472.649  | 2187.505  |
| NM_005901 | 6675.068  | 6316.676  |
| NM_004240 | 1493.391  | 1744.903  |
| NM_000950 | 503.629   | 563.858   |
| NM_001313 | 928.594   | 848.643   |
| NM_019060 | 100.776   | 259.813   |
| NM_004790 | 1292.736  | 1326.776  |
| NM_000435 | 4250.27   | 5322.418  |
| NM_001842 | 25269.902 | 33262.648 |
| AB017169  | 779.779   | 637.078   |
| AL080170  | 1233.65   | 1164.633  |
| AB039903  | 3213.125  | 2426.618  |
| NM_000542 | 10532.046 | 8690.149  |
| NM_006851 | 494.138   | 333.884   |
| AK001560  | 974.709   | 808.958   |
| AB001328  | 595.36    | 706.542   |
| H99588    | 2252.791  | 1977.63   |
| AK022600  | 5964.5    | 4954.626  |

|           |           |           |
|-----------|-----------|-----------|
| AK023142  | 1578.896  | 1859.976  |
| U61740    | 13976.32  | 16258.648 |
| NM_00640  | 56272.094 | 50646.871 |
| AB049054  | 3650.898  | 3885.176  |
| NM_015071 | 1222.786  | 1836.602  |
| NM_013227 | 1335.176  | 1371.246  |
| Z83803    | 605.233   | 688.054   |
| AF027205  | 17353.83  | 15478.232 |
| AF075012  | 1323.324  | 1520.476  |
| NM_001570 | 1107.925  | 1227.623  |
| NM_01565  | 437.761   | 635.151   |
| NM_00058  | 2094.519  | 1413.907  |
| NM_01654  | 15272.938 | 20038.533 |
| AF309653  | 10329.373 | 14072.842 |
| NM_002620 | 17420.855 | 19503.883 |
| S79267    | 770.371   | 655.558   |
| NM_00181  | 687.781   | 645.369   |
| NM_003784 | 25156.057 | 17701.832 |
| NM_00019  | 17027.604 | 13281.689 |
| NM_00544  | 7077.602  | 3769.771  |
| NM_01489  | 1669.65   | 1325.339  |
| NM_003630 | 3304.375  | 2559.37   |
| NM_00004  | 2679.736  | 1961.279  |
| NM_00321  | 2023.695  | 2017.048  |
| NM_00670  | 2676.98   | 2268.231  |
| NM_004910 | 1641.704  | 1784.221  |
| AB013452  | 884.452   | 715.768   |
| M93107    | 5053.561  | 5613.959  |
| BC001479  | 7627.585  | 8910.544  |
| NM_002461 | 21317.35  | 24474.043 |
| NM_005771 | 10442.272 | 10296.987 |
| AB032986  | 29207.865 | 29558.656 |
| NM_01752  | 26076.367 | 26596.688 |
| NM_01603  | 8487.849  | 8056.741  |
| NM_014324 | 51524.898 | 49739.477 |
| NM_001687 | 19640.52  | 17637.887 |
| AK026374  | 1679.22   | 2034.094  |
| NM_001169 | 1311.28   | 1345.075  |
| AK024648  | 10482.11  | 11502.567 |
| NM_00071  | 579.946   | 591.545   |
| NM_00345  | 6418.965  | 8650.426  |
| AB032526  | 469.798   | 563.29    |
| NM_000171 | 1293.645  | 1103.545  |
| AL354615  | 1268.749  | 761.855   |
| NM_01334  | 29502.596 | 22373.955 |
| NM_00370  | 2182.704  | 1512.938  |
| NM_006861 | 1306.631  | 1085.715  |
| NM_00582  | 1569.174  | 1439.245  |
| NM_00046  | 914.786   | 709.991   |
| NM_015544 | 845.616   | 727.965   |
| NM_01590  | 10022.846 | 7912.32   |
| NM_00089  | 827.376   | 1018.555  |
| AB040672  | 11545.911 | 11087.397 |

|           |           |           |
|-----------|-----------|-----------|
| NM_002192 | 5068.716  | 5665.148  |
| NM_005491 | 5835.066  | 6481.354  |
| NM_003869 | 4998.271  | 4669.372  |
| X63417    | 8564.405  | 7807.991  |
| S94539    | 27184.07  | 31426.516 |
| NM_006402 | 985.959   | 984.379   |
| NM_005785 | 3576.184  | 3141.529  |
| NM_018248 | 2915.375  | 2698.613  |
| AK001695  | 9404.979  | 7321.137  |
| NM_017886 | 3392.106  | 3297.22   |
| NM_006252 | 2053.092  | 2228.333  |
| NM_001721 | 537.991   | 526.971   |
| NM_014397 | 5666.486  | 4404.073  |
| AB023182  | 1083.902  | 644.264   |
| NM_003607 | 668.625   | 482.983   |
| NM_006575 | 1151.211  | 1059.51   |
| NM_013254 | 1953.498  | 1264.419  |
| NM_000437 | 8289.283  | 5939.546  |
| AB046819  | 4054.16   | 2745.618  |
| NM_006090 | 3258.575  | 2920.46   |
| NM_002900 | 5213.104  | 5245.042  |
| NM_006851 | 600.613   | 616.054   |
| AK001560  | 1267.949  | 1483.628  |
| AB001328  | 1293.875  | 1762.978  |
| NM_000948 | 597.001   | 340.245   |
| H99588    | 2637.794  | 2296.531  |
| X00588    | 1792.084  | 1738.534  |
| AI359037  | 6211.375  | 5456.997  |
| J04513    | 380.113   | 560.575   |
| BI754285  | 1395.053  | 2005.897  |
| X15998    | 4542.083  | 6417.384  |
| M76482    | 483.761   | 482.674   |
| X17519    | 368.051   | 226.313   |
| NM_001883 | 2785.37   | 2038.304  |
| NM_004628 | 1617.204  | 1454.598  |
| L31785    | 718.977   | 747.37    |
| H-M 69043 | 3209.764  | 3442.416  |
| AF077374  | 1100.224  | 1125.969  |
| U43901    | 612.028   | 653.332   |
| X59065    | 640.845   | 711.639   |
| M59828    | 4316.183  | 2752.341  |
| NM_016134 | 1009.185  | 793.785   |
| AJ010482  | 2039.667  | 1739.55   |
| NM_005445 | 9178.648  | 5752.038  |
| NM_014899 | 3639.106  | 3727.648  |
| NM_003630 | 4003.533  | 4807.892  |
| NM_000046 | 3670.13   | 3590.448  |
| NM_003219 | 1788.233  | 2352.041  |
| NM_006709 | 4214.958  | 3727.446  |
| NM_000612 | 5270.977  | 4986.536  |
| NM_004257 | 15920.749 | 14702.063 |
| NM_002844 | 1062.664  | 919.479   |
| NM_000683 | 2547.632  | 3825.201  |

|           |           |           |
|-----------|-----------|-----------|
| NM_00362  | 2231.871  | 2098.384  |
| NM_005901 | 5347.993  | 5105.948  |
| NM_00424  | 1466.625  | 1625.191  |
| NM_00095  | 352.574   | 282.753   |
| NM_00131  | 645.006   | 541.512   |
| NM_01906  | 792.493   | 511.285   |
| NM_00479  | 886.035   | 800.159   |
| NM_00043  | 4156.249  | 3432.625  |
| NM_00184  | 21462.588 | 14596.923 |
| AL080170  | 1327.08   | 1119.879  |
| AB039903  | 3089.14   | 2431.327  |
| NM_00054  | 7980.744  | 5660.344  |
| NM_00370  | 2611.951  | 2471.741  |
| NM_006861 | 1715.854  | 1567.799  |
| NM_00582  | 2822.471  | 3043.248  |
| NM_00046  | 1560.875  | 1658.338  |
| NM_01554  | 107.727   | 420.37    |
| NM_01590  | 13471.276 | 12580.495 |
| AK022600  | 4819.169  | 4511.344  |
| AK023142  | 1339.695  | 1777.141  |
| U61740    | 11717.343 | 11149.876 |
| NM_00640  | 54697.664 | 48071.367 |
| AB049054  | 4417.26   | 4105.147  |
| NM_015071 | 1436.444  | 1338.381  |
| NM_013227 | 1437.38   | 1351.916  |
| Z83803    | 776.801   | 836.469   |
| AF027205  | 21283.961 | 16878.996 |
| AF075012  | 1228.047  | 1271.821  |
| NM_00157  | 2059.906  | 1946.703  |
| NM_01565  | 911.466   | 1200.64   |
| NM_00058  | 2471.265  | 2100.794  |
| NM_01654  | 13342.297 | 13584.646 |
| AF309653  | 7995.846  | 4750.116  |
| NM_00262  | 12295.02  | 8190.145  |
| S79267    | 772.797   | 496.858   |
| NM_00181  | 743.123   | 423.482   |
| NM_00378  | 24044.188 | 14643.245 |
| NM_00019  | 7791.486  | 6822.01   |
| NM_00657  | 1656.111  | 1490.494  |
| NM_01325  | 2350.272  | 2045.408  |
| NM_000437 | 7563.918  | 8925.504  |
| AB046819  | 6868.415  | 6975.529  |
| NM_00609  | 4218.75   | 3986.792  |
| NM_00290  | 10721.521 | 9949.746  |
| NM_00491  | 1559.311  | 1613.07   |
| AB013452  | 451.497   | 525.596   |
| M93107    | 11380.162 | 8499.969  |
| BC001479  | 7565.282  | 7965.529  |
| NM_002461 | 19379.975 | 19691.594 |
| NM_005771 | 9334.519  | 7793.623  |
| AB032986  | 23684.832 | 23851.191 |
| NM_01752  | 27097.094 | 27920.865 |
| NM_01603  | 9301.737  | 7666.293  |

|           |           |           |
|-----------|-----------|-----------|
| NM_014324 | 56140.125 | 50621.961 |
| NM_001687 | 20662.891 | 25032.42  |
| AK026374  | 2346.244  | 2630.102  |
| NM_001169 | 1870.741  | 1617.77   |
| AK024648  | 9277.75   | 11278.893 |
| NM_000719 | 451.801   | 196.321   |
| NM_003459 | 3897.285  | 3674.149  |
| NM_000171 | 1061.165  | 787.485   |
| AL354615  | 914.949   | 680.832   |
| NM_013349 | 24182.535 | 19528.527 |
| NM_016134 | 1309.098  | 1149.152  |
| AJ010482  | 1232.301  | 1352.641  |
| NM_000896 | 808.702   | 686.043   |
| AB040672  | 10931.808 | 8369.496  |
| NM_002192 | 5348.521  | 4211.27   |
| NM_005491 | 6212.105  | 6442.011  |
| NM_003869 | 2215.877  | 2289.5    |
| X63417    | 7863.279  | 9609.843  |
| S94539    | 19631.816 | 20507.92  |
| NM_006402 | 949.641   | 947.69    |
| NM_005785 | 3719.274  | 3104.7    |
| NM_018248 | 2780.828  | 3495.668  |
| AK001695  | 8536.036  | 9461.838  |
| NM_017886 | 3079.18   | 2965.844  |
| NM_006252 | 1541.277  | 1195.52   |
| NM_001721 | 687.567   | 695.193   |
| NM_014397 | 4850.464  | 5819.993  |
| AB023182  | 1027.237  | 608.269   |
| NM_003607 | 769.377   | 906.477   |
| NM_007281 | 537.558   | 630.046   |
| AB017169  | 1374.677  | 1281.658  |
| AL080170  | 2098.788  | 2985.478  |
| AB039903  | 3246.029  | 3412.332  |
| NM_000542 | 15843.545 | 15736.826 |
| NM_014625 | 398.429   | 444.001   |
| NM_006851 | 630.396   | 485.764   |
| AK001560  | 1518.946  | 1332.608  |
| AB001328  | 1127.697  | 1360.18   |
| NM_000948 | 339.998   | 430.155   |
| H99588    | 2842.729  | 3497.413  |
| AI359037  | 5971.865  | 8350.625  |
| J04513    | 427.596   | 358.201   |
| BI754285  | 914.7     | 1053.832  |
| X15998    | 3715.982  | 3321.189  |
| M76482    | 557.635   | 328.788   |
| NM_001883 | 2445      | 2087.531  |
| NM_004628 | 1611.75   | 1780.619  |
| L31785    | 623.212   | 473.719   |
| H-M 69043 | 2460.269  | 1204.559  |
| AF077374  | 999.588   | 935.328   |
| U43901    | 550.861   | 353.773   |
| X59065    | 414.658   | 300.421   |
| M59828    | 3657.96   | 2397.813  |

|           |           |           |
|-----------|-----------|-----------|
| AF309653  | 8822.959  | 9113.505  |
| NM_002620 | 19571.121 | 18803.787 |
| S79267    | 1831.251  | 1852.164  |
| NM_001816 | 765.543   | 600.159   |
| NM_003784 | 25200.004 | 24590.645 |
| NM_000195 | 25481.607 | 24749.916 |
| NM_005445 | 7493.406  | 5448.669  |
| NM_014895 | 3695.676  | 3703.72   |
| NM_003630 | 4523.309  | 3953.353  |
| NM_000046 | 3720.466  | 3700.537  |
| NM_003219 | 1446.51   | 1936.506  |
| NM_000683 | 1844.109  | 1683.793  |
| NM_003629 | 1797.185  | 1528.413  |
| NM_005901 | 5701.21   | 6981.253  |
| NM_004248 | 1579.136  | 1099.94   |
| NM_001313 | 383.493   | 438.407   |
| NM_004796 | 589.05    | 484.37    |
| NM_000435 | 2781.405  | 1792.331  |
| NM_001842 | 18739.707 | 13665.414 |
| NM_000719 | 980.707   | 1051.522  |
| NM_003459 | 11234.697 | 12559.608 |
| AB032526  | 356.615   | 205.216   |
| NM_000171 | 1771.675  | 2182.778  |
| AL354615  | 1024.87   | 1036.362  |
| NM_013349 | 35306.883 | 37817.684 |
| NM_003705 | 2894.416  | 2798.074  |
| NM_006861 | 1453.36   | 1654.848  |
| NM_005829 | 2420.372  | 2621.157  |
| NM_000466 | 1291.817  | 1533.927  |
| NM_015544 | 696.492   | 796.701   |
| AK023142  | 1575.519  | 1440.841  |
| U61740    | 12796.867 | 10174.906 |
| NM_006409 | 48549.203 | 43879.406 |
| AB049054  | 3098.102  | 2450.009  |
| NM_015071 | 833.922   | 808.7     |
| NM_013227 | 1596.363  | 1098.795  |
| AF027205  | 17417.045 | 11164.342 |
| AF075012  | 1303.408  | 785.389   |
| NM_001570 | 801.827   | 520.136   |
| NM_015658 | 573.355   | 502.974   |
| NM_000589 | 1917.75   | 1279.708  |
| NM_016546 | 12369.651 | 9919.601  |
| NM_017886 | 3888.015  | 4667.07   |
| NM_006252 | 2407.395  | 2504.155  |
| NM_001721 | 556.258   | 851.071   |
| NM_014397 | 5215.476  | 5477.206  |
| AB023182  | 1035.835  | 1143.679  |
| NM_003607 | 1451.308  | 1466.403  |
| NM_006575 | 1488.57   | 1659.502  |
| NM_013254 | 2588.235  | 2664.104  |
| NM_000437 | 9564.583  | 11782.044 |
| AB046819  | 7402.582  | 7574.694  |
| NM_006090 | 3670.239  | 3956.601  |

|           |           |           |
|-----------|-----------|-----------|
| NM_00290C | 9895.932  | 10787.661 |
| NM_00491C | 1656.905  | 2140.961  |
| AB013452  | 505.681   | 621.801   |
| M93107    | 5244.385  | 3570.454  |
| BC001479  | 7234.815  | 5561.319  |
| NM_002461 | 21339.701 | 17120.641 |
| NM_005771 | 8870.896  | 7079.729  |
| AB032986  | 35409.527 | 43147.102 |
| NM_014324 | 51862.566 | 44526.898 |
| NM_001687 | 16328.146 | 7001.372  |
| AK026374  | 1391.37   | 1469.268  |
| NM_001169 | 1036.047  | 656.991   |
| AK024648  | 9604.627  | 8564.464  |
| NM_00079E | 460.539   | 920.446   |
| AB037761  | 12124.427 | 15825.391 |
| NM_01400E | 50999.883 | 49112.586 |
| NM_014731 | 7358.425  | 7454.761  |
| AF035191  | 11797.05  | 15774.128 |
| NM_00405E | 1700.71   | 1905.574  |
| NM_004527 | 1960.362  | 2154.462  |
| NM_01206Z | 9727.257  | 11131.381 |
| AK026717  | 775.573   | 1029.417  |
| AJ010482  | 2279.545  | 2312.411  |
| NM_00089E | 695.518   | 804.437   |
| AB040672  | 6887.819  | 5596.778  |
| NM_00219Z | 3259.356  | 2300.593  |
| NM_005491 | 5762.3    | 4509.603  |
| NM_00386E | 4201.978  | 2408.217  |
| X63417    | 9604.133  | 12985.884 |
| S94539    | 23044.041 | 33657.359 |
| S45570    | 781.686   | 425.747   |
| NM_00640Z | 957.359   | 587.539   |
| NM_00578E | 2821.781  | 1476.917  |
| NM_01824E | 2474.788  | 2124.371  |
| AK001695  | 7403.243  | 3989.439  |
| AB040898  | 2437.948  | 2855.7    |
| AB031547  | 1832.877  | 1940.763  |
| NM_00397C | 838.472   | 908.124   |
| AK022496  | 1243.636  | 1432.355  |
| AB042636  | 975.61    | 1095.662  |
| AB033035  | 553.874   | 613.799   |
| NM_00288Z | 3960.016  | 3821.54   |
| NM_000141 | 615.787   | 942.788   |
| NM_01615C | 5343.81   | 5337.523  |
| U57058    | 1236.801  | 984.255   |
| AL137452  | 1515.18   | 1231.739  |
| NM_00431Z | 49508.121 | 54925.711 |
| NM_001347 | 3452.516  | 3145.366  |
| AK024549  | 17866.904 | 12583.154 |
| NM_00633E | 9258.387  | 5892.96   |
| NM_007164 | 7925.316  | 5243.95   |
| NM_000261 | 1064.347  | 719.829   |
| NM_00260E | 4359.408  | 3973.197  |



|           |           |           |
|-----------|-----------|-----------|
| NM_002570 | 2373.103  | 1444.548  |
| NM_003183 | 2394.059  | 1600.113  |
| NM_001657 | 1019.179  | 1138.128  |
| NM_003585 | 515.263   | 405.894   |
| NM_019851 | 1998.261  | 2432.192  |
| NM_003235 | 1519.962  | 1244.988  |
| NM_018367 | 715.48    | 1156.685  |
| NM_001363 | 10530.134 | 12204.573 |
| NM_014096 | 12036.509 | 15123.515 |
| NM_005706 | 4015.925  | 5202.375  |
| NM_001261 | 3054.073  | 3526.386  |
| NM_001977 | 738.308   | 959.768   |
| NM_007219 | 8987.486  | 8010.546  |
| AK026854  | 3156.121  | 3247.257  |
| NM_001269 | 6274.253  | 9483.643  |
| NM_002506 | 1335.034  | 1123.569  |
| NM_004906 | 1613.519  | 1677.515  |
| X98261    | 603.103   | 642.508   |
| NM_012447 | 16112.697 | 15971.513 |
| NM_006366 | 11164.434 | 8785.2    |
| AK027013  | 24757.104 | 19452.895 |
| NM_001344 | 27353.572 | 17328.947 |
| NM_018294 | 2419.23   | 1348.014  |
| AL389934  | 3858.582  | 2727.824  |
| AL133071  | 336.625   | 510.831   |
| NM_004369 | 1401.109  | 449.184   |
| NM_018130 | 4964.542  | 5684.281  |
| AF085878  | 811.632   | 1078.176  |
| AB006630  | 2312.964  | 3036.311  |
| NM_016155 | 1596.909  | 1868.901  |
| NM_001224 | 7673.593  | 7751.755  |
| NM_017811 | 8347.88   | 7541.39   |
| NM_001569 | 3265.57   | 2656.102  |
| NM_004131 | 745.597   | 710.911   |
| AK023284  | 1760.084  | 1375.785  |
| NM_005101 | 3181.55   | 2604.887  |
| NM_000177 | 12496.745 | 15626.388 |
| NM_003387 | 11545.845 | 17920.963 |
| U60665    | 1618.176  | 2136.635  |
| NM_005507 | 51132.707 | 54090.293 |
| AL080133  | 5010.06   | 9227.649  |
| NM_006912 | 4974.496  | 2837.463  |
| X12534    | 1440.023  | 377.009   |
| NM_003112 | 985.586   | 961.95    |
| NM_018951 | 7388.086  | 7597.718  |
| NM_014323 | 5671.873  | 7213.37   |
| NM_003205 | 3774.201  | 4350.632  |
| AB002324  | 3393.688  | 3432.165  |
| AF205600  | 135.092   | 259.79    |
| AL359938  | 524.922   | 755.667   |
| NM_002165 | 371.81    | 302.522   |
| AK026231  | 1484.027  | 1319.483  |
| NM_002140 | 12215.452 | 10142.009 |

|           |           |           |
|-----------|-----------|-----------|
| NM_020143 | 2652.676  | 2896.988  |
| NM_012469 | 3466.665  | 3771.89   |
| NM_005131 | 1380.888  | 1138.55   |
| NM_007056 | 2166.048  | 1374.425  |
| NM_006925 | 2997.026  | 4254.029  |
| NM_004890 | 52174.77  | 45714.281 |
| AK023181  | 2765.455  | 2440.789  |
| NM_005051 | 28607.541 | 37084.402 |
| NM_001968 | 21444.514 | 28285.986 |
| D17259    | 58306.891 | 59343.141 |
| AF264627  | 28641.49  | 6771.72   |
| AL133053  | 1468.873  | 2126.654  |
| NM_018142 | 8039.244  | 9711.248  |
| NM_017653 | 4466.848  | 4343.441  |
| AL109695  | 12656.733 | 12619.078 |
| NM_002168 | 2177.897  | 2799.1    |
| AK027115  | 133.896   | 332.26    |
| NM_004453 | 1011.153  | 957.345   |
| NM_016229 | 12533.276 | 9627.783  |
| NM_018244 | 2287.638  | 1983.282  |
| NM_002492 | 38058.402 | 31883.916 |
| NM_005642 | 3759.396  | 3493.231  |
| AF155065  | 396.88    | 446.232   |
| NM_000332 | 1522.99   | 921.061   |
| AK022215  | 2647.912  | 2603.983  |
| U90305    | 765.636   | 1287.231  |
| NM_001527 | 16901.715 | 18806.516 |
| AK025269  | 8913.881  | 9934.16   |
| NM_001438 | 556.837   | 904.872   |
| AB040971  | 1939.372  | 3094.712  |
| AK024254  | 2229.188  | 3254.915  |
| NM_018456 | 7590.731  | 9916.784  |
| AK026697  | 534.182   | 826.468   |
| NM_019021 | 1318.389  | 1676.198  |
| NM_004717 | 507.149   | 583.119   |
| AK002183  | 1122.26   | 1625.366  |
| NM_018996 | 2148.709  | 2791.766  |
| AL137304  | 2729.081  | 3794.972  |
| AL049274  | 632.808   | 646.781   |
| NM_018279 | 639.997   | 500.648   |
| AF147369  | 301.838   | 304.641   |
| AF147343  | 407.74    | 373.675   |
| AK026883  | 1982.204  | 1594.725  |
| NM_014350 | 8722.761  | 4086.991  |
| AL390185  | 2320.04   | 2911.927  |
| AF086235  | 4449.783  | 5414.383  |
| AF143886  | 1719.893  | 2144.432  |
| AK025975  | 1395.63   | 1417.817  |
| AK025583  | 28993.844 | 31502.537 |
| NM_014664 | 2570.373  | 2846.978  |
| AL109788  | 844.113   | 1070.254  |
| AB037765  | 866.23    | 1386.187  |
| AK025068  | 667.379   | 742.932   |

|           |           |           |
|-----------|-----------|-----------|
| AK026720  | 682.686   | 576.875   |
| AL137566  | 3064.696  | 3912.522  |
| AF087962  | 4956.613  | 6443.68   |
| AL050197  | 2359.307  | 3939.709  |
| AF085870  | 11922.251 | 13861.363 |
| AL050063  | 597.008   | 726.516   |
| AL080217  | 534.446   | 684.243   |
| AL117580  | 16625.094 | 20282.367 |
| AL049355  | 232.405   | 378.904   |
| AL117656  | 985.675   | 1079.949  |
| AJ001893  | 1378.821  | 2042.181  |
| NM_014819 | 8930.245  | 10119.758 |
| AF086040  | 3009.291  | 3115.155  |
| AB032988  | 1314.804  | 1587.933  |
| AK023559  | 8604.146  | 8170.061  |
| AB037859  | 57478.559 | 51767.332 |
| AL049233  | 2683.236  | 3505.941  |
| NM_017696 | 2248.771  | 3251.737  |
| AK026705  | 5087.124  | 4089.234  |
| NM_003602 | 2461.065  | 2303.466  |
| AF009258  | 23580.074 | 27671.051 |
| AF009305  | 6238.809  | 8114.993  |
| NM_006193 | 1026.527  | 1560.289  |
| AF056454  | 309.18    | 525.133   |
| AF009270  | 1126.721  | 1204.416  |
| AF009318  | 2096.796  | 2487.407  |
| AF056421  | 1974.922  | 2606.98   |
| AF090889  | 670.877   | 1042.311  |
| AK001085  | 2281.583  | 3158.546  |
| AK001906  | 4314.75   | 4986.857  |
| AK021528  | 959.123   | 805.7     |
| AK021746  | 3419.921  | 1672.077  |
| AK021810  | 1276.528  | 1574.435  |
| AK026743  | 839.66    | 657.733   |
| AK025214  | 746.368   | 643.394   |
| AK025846  | 1440.933  | 1656.189  |
| AK026440  | 444.432   | 565.949   |
| AL389983  | 8660.361  | 12914.623 |
| U00959    | 4086.226  | 5093.338  |
| NM_014578 | 12680.526 | 14480.341 |
| AF147306  | 3592.247  | 4100.378  |
| AF086267  | 4161.683  | 4326.978  |
| X74606    | 879.141   | 944.793   |
| NM_012183 | 3157.235  | 4220.661  |
| AK026785  | 1754.37   | 2129.627  |
| AK001938  | 439.036   | 279.831   |
| AK022994  | 453.994   | 513.063   |
| NM_018225 | 17377.551 | 19682.09  |
| AK025534  | 1369.712  | 1434.966  |
| AK022577  | 304.201   | 301.728   |
| AF091526  | 1482.458  | 1643.764  |
| AK022170  | 395.256   | 534.027   |
| M60749    | 2938.504  | 3879.365  |

|           |           |           |
|-----------|-----------|-----------|
| AF056424  | 297.933   | 545.931   |
| X01448    | 949.415   | 819.706   |
| NM_016503 | 7353.665  | 8275.368  |
| AK056351  | 20565.525 | 24734.047 |
| NM_014690 | 4598.592  | 6211.042  |
| NM_017695 | 5027.304  | 6327.696  |
| AF086490  | 1091.344  | 1117.729  |
| AF131738  | 37288.488 | 46948.484 |
| AK021666  | 7905.271  | 8376.986  |
| AK024081  | 1663.025  | 496.264   |
| AF086317  | 7696.998  | 9049.916  |
| U16850    | 5647.937  | 5219.076  |
| AL390178  | 1407.529  | 1221.289  |
| NM_005383 | 512.272   | 663.2     |
| Z36806    | 1566.058  | 2143.737  |
| NM_018615 | 902.022   | 867.175   |
| AJ008121  | 16658.684 | 16921.572 |
| AJ008153  | 2099.274  | 2735.408  |
| NM_005830 | 4511.546  | 1557.976  |
| NM_001507 | 1516.216  | 2826.437  |
| X92108    | 799.764   | 1000.107  |
| AL389876  | 2697.092  | 3015.285  |
| U52830    | 403.868   | 230.095   |
| Z70762    | 2022.059  | 2333.109  |
| D17099    | 619.978   | 706.478   |
| BF037206  | 3753.58   | 3865.569  |
| AK021474  | 22238.684 | 20849.451 |
| AK023642  | 4110.052  | 3483.842  |
| AW511510  | 559.109   | 611.126   |
| U52827    | 1305.745  | 1611.245  |
| AL049466  | 11106.523 | 8876.307  |
| AB037802  | 1694.715  | 1517.052  |
| U17623    | 1821.715  | 2222.505  |
| AL137450  | 7197.554  | 7767.313  |
| AK023058  | 2889.04   | 3235.773  |
| AJ227878  | 401.522   | 606.045   |
| NM_012064 | 6463.007  | 6773.146  |
| AK001460  | 803.339   | 1041.876  |
| AK092508  | 4968.818  | 5512.282  |
| NM_003515 | 551.247   | 485.669   |

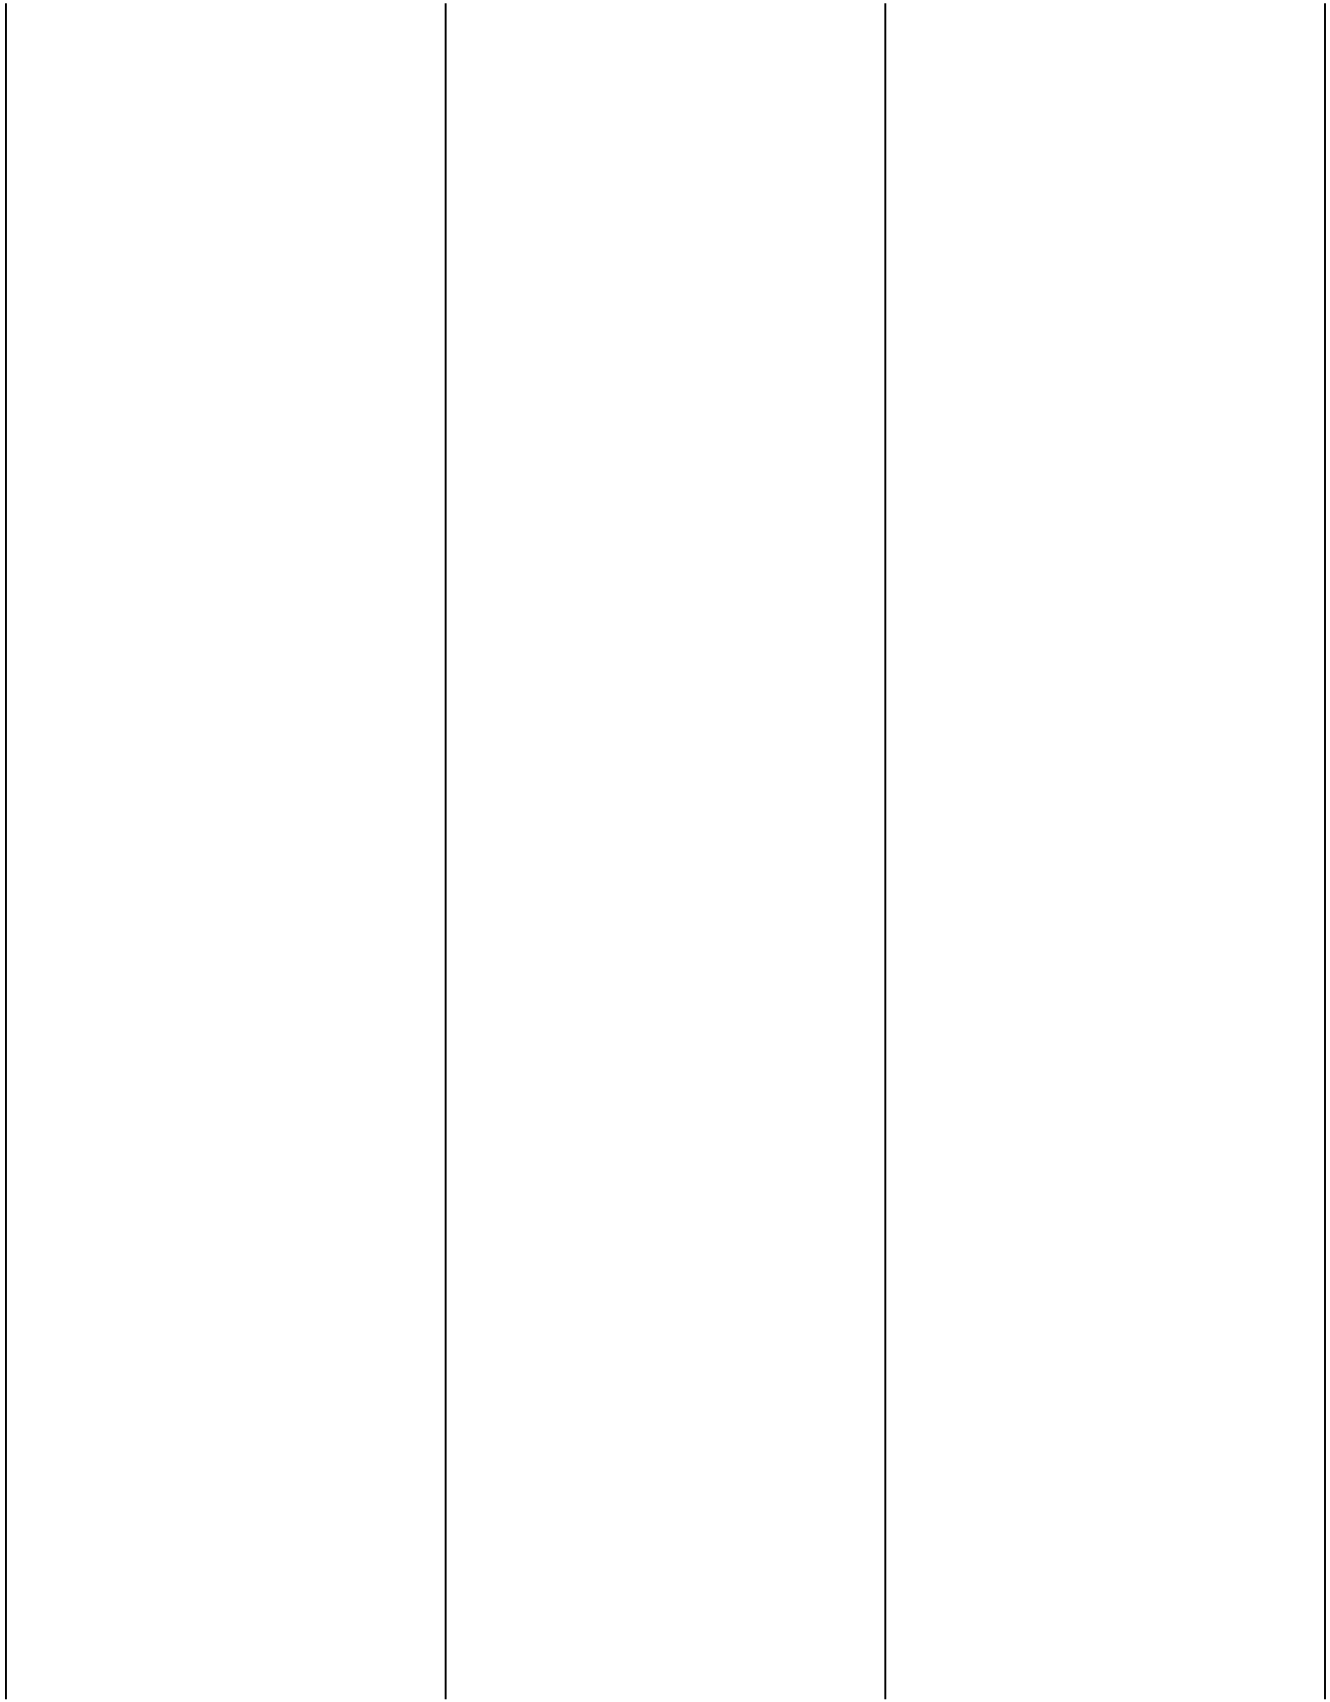



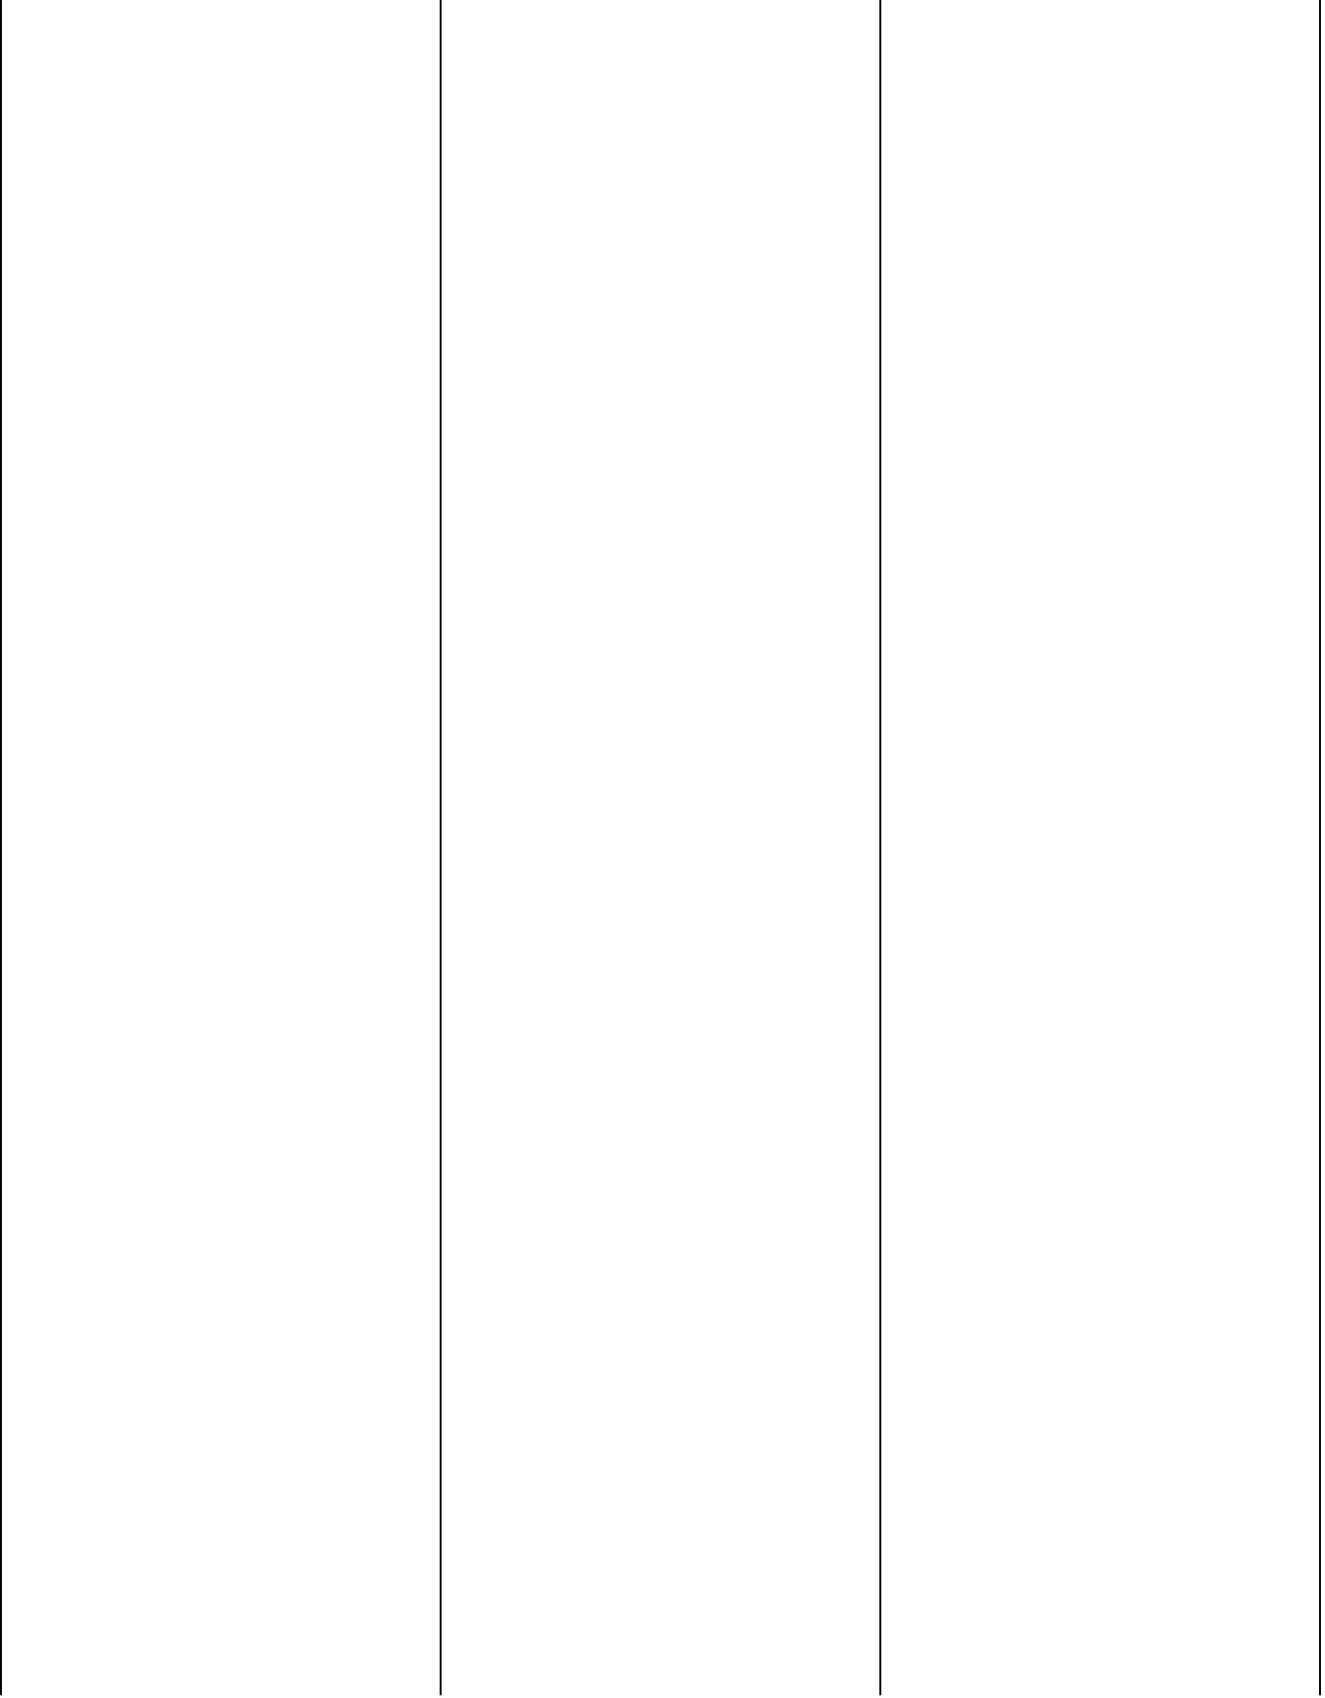















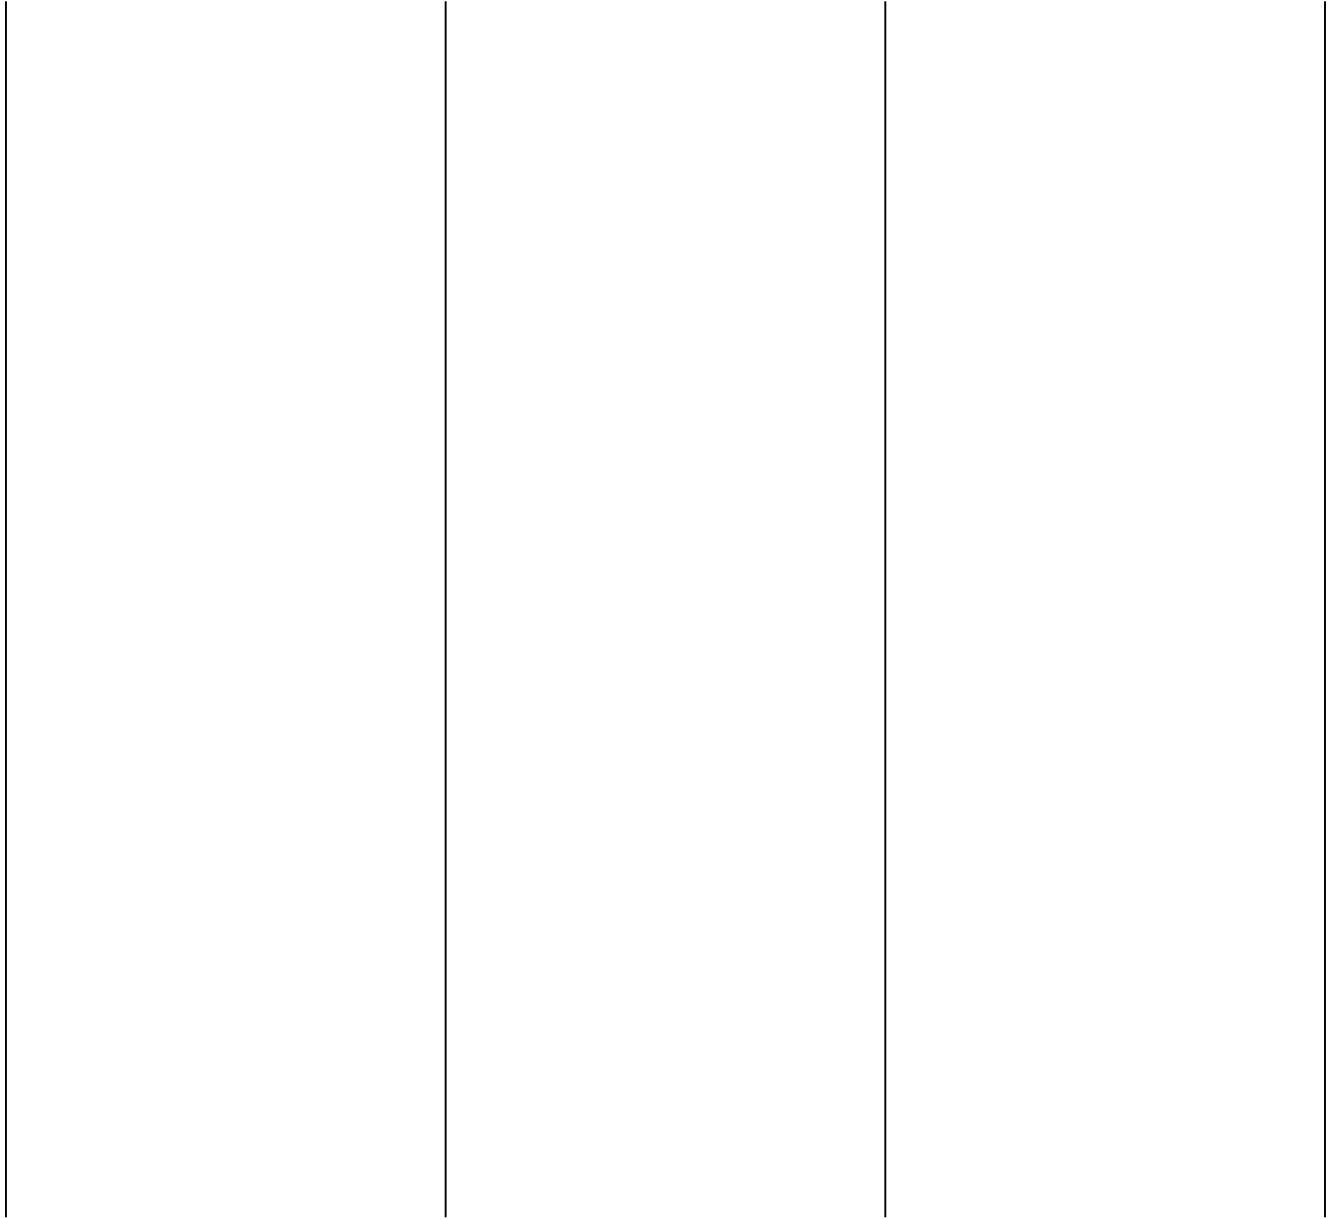

| ID        | Replicate 1 |           | ID        | Replicate 2 |           | ID        | Replicate 3 |
|-----------|-------------|-----------|-----------|-------------|-----------|-----------|-------------|
|           | 2uM TPEN    | control   |           | 2uM TPEN    | control   |           | 2uM TPEN    |
|           | AMPCH1      | AMPCH2    |           | AMPCH1      | AMPCH2    |           | AMPCH1      |
| CY3Cy5    | 24281.586   | 3237.33   | CY3Cy5    | 14495.142   | 353.021   | CY3Cy5    | 18429.6     |
| NM_000041 | 41230.594   | 28023.684 | NM_000041 | 28135.654   | 28136.438 | NM_000041 | 26709.885   |
| W69211    | 941.413     | 1075.281  | AA449931  | 4208.36     | 7165.131  | AA449931  | 878.533     |
| AA449931  | 3992.833    | 3633.74   | AA877347  | 19334.033   | 11005.752 | AA877347  | 6311.246    |
| AA877347  | 9449.633    | 8345.971  | R54049    | 775.289     | 1274.124  | S57235    | 5472.67     |
| BI755551  | 680.647     | 677.905   | BI755551  | 346.346     | 999.617   | AI376272  | 4124.761    |
| S57235    | 14958.448   | 11464.521 | S57235    | 10828.654   | 7659.392  | BF242229  | 3743.088    |
| AI376272  | 3449.286    | 3176.713  | AI376272  | 3748.439    | 2725.08   | X75756    | 23400.607   |
| BF242229  | 2220.775    | 1717.708  | BF242229  | 2884.073    | 2540.396  | AI754623  | 3275.767    |
| X75756    | 21039.266   | 23996.813 | X75756    | 34655.996   | 42354.223 | AA401326  | 8478.874    |
| AI754623  | 2896.311    | 2823.401  | AI754623  | 3975.579    | 3305.291  | N55461    | 773.462     |
| AA401326  | 6397.083    | 6145.426  | AA401326  | 10899.779   | 11792.12  | AA504482  | 10068.757   |
| N55461    | 596.582     | 828.122   | AA504482  | 8179.127    | 6072.295  | BI602175  | 941.854     |
| AA504482  | 1808.325    | 1870.049  | BI602175  | 889.466     | 693.017   | NM_006003 | 14414.191   |
| NM_006003 | 1415.387    | 1634.016  | NM_006003 | 22991.807   | 19510.156 | NM_006555 | 2108.56     |
| NM_006555 | 1549.544    | 1550.981  | NM_006555 | 2091.023    | 2139.615  | SR7       | 10130.979   |
| SR5       | 1025.731    | 896.822   | SR1       | 61796.59    | 53599.297 | SR9       | 41865.422   |
| SR7       | 1132.541    | 8453.882  | SR3       | 57002.758   | 57662.332 | CY3Cy5    | 22806.584   |
| SR9       | 1382.711    | 283.118   | SR9       | 17818.834   | 4790.372  | NM_006865 | 4807.306    |
| CY3Cy5    | 29834.154   | 5078.98   | CY3Cy5    | 18753.227   | 1700.446  | NM_015364 | 2085.324    |
| NM_006865 | 12897.193   | 14717.712 | NM_006865 | 25889.508   | 44334.406 | NM_006611 | 796.19      |
| NM_004963 | 2665.467    | 2035.008  | NM_006611 | 576.992     | 931.945   | NM_004963 | 2051.964    |
| NM_001181 | 4050.579    | 621.765   | NM_004963 | 2845.653    | 1397.498  | NM_001181 | 3847.76     |
| NM_005535 | 12362.08    | 11046.172 | NM_001181 | 3575.065    | 722.132   | NM_005535 | 3664.559    |
| AB037857  | 2138.755    | 1212.477  | NM_005535 | 20185.029   | 23369.723 | AB037857  | 977.862     |
| AF218021  | 2024.811    | 1474.142  | AB037857  | 1228.637    | 1490.017  | AF218021  | 1095.776    |
| NM_013262 | 5368.93     | 5000.43   | AF218021  | 2011.256    | 1392.587  | NM_013262 | 6595.034    |
| NM_007185 | 2506.295    | 2934.385  | NM_013262 | 9205.024    | 6095.706  | NM_007185 | 4678.295    |
| NM_003221 | 588.951     | 827.416   | NM_007185 | 3596.975    | 5070.087  | NM_003221 | 365.938     |
| NM_003357 | 6848.063    | 6658.16   | NM_003357 | 9375.979    | 9580.725  | NM_003357 | 6667.437    |
| AF195420  | 795.147     | 1059.542  | AK023261  | 7877.507    | 5075.123  | AF195420  | 265.249     |
| AK023261  | 2939.602    | 4404.123  | NM_005097 | 504.658     | 538.873   | AK023261  | 3122.474    |
| NM_005097 | 768.242     | 843.932   | AF023142  | 317.825     | 652.932   | NM_005097 | 693.022     |
| NM_012278 | 739.442     | 1035.118  | NM_016100 | 1135.15     | 1131.762  | NM_012278 | 953.325     |
| NM_001550 | 2838.54     | 4417.908  | NM_014057 | 2112.527    | 1897.022  | NM_014057 | 1374.469    |
| AK026849  | 536.184     | 1007.359  | NM_001550 | 12210.229   | 18128.586 | NM_001550 | 6739.563    |
| NM_018677 | 722.085     | 1100.633  | AK026849  | 26236.73    | 20844.912 | AK026849  | 5751.153    |
| NM_002785 | 492.055     | 770.101   | NM_018677 | 967.702     | 1333.404  | NM_018677 | 840.34      |
| NM_016582 | 6406.581    | 5468.03   | X78947    | 409.763     | 2218.688  | NM_002785 | 1226.731    |
| NM_014229 | 1319.738    | 1511.503  | NM_016582 | 8051.933    | 8196.746  | X78947    | 231.526     |
| NM_013265 | 2758.451    | 3474.602  | NM_014229 | 1745.567    | 2655.528  | NM_016582 | 5793.278    |
| NM_014964 | 1725.495    | 1326.018  | NM_013265 | 5973.749    | 10594.063 | NM_014229 | 589.331     |
| NM_014016 | 5889.934    | 6300.46   | NM_014964 | 2525.693    | 2898.718  | NM_013265 | 1772.931    |
| NM_013433 | 1487.72     | 1724.995  | NM_014016 | 9028.551    | 11766.655 | NM_014964 | 445.931     |
| NM_003794 | 8188.402    | 6906.834  | NM_013433 | 2286.308    | 2011.112  | NM_014016 | 3576.18     |
| NM_019892 | 2608.144    | 2538.292  | NM_003794 | 11181.537   | 6825.661  | NM_013433 | 1155.254    |
| NM_016165 | 2656.03     | 1708.91   | NM_019892 | 3142.049    | 4802.722  | AJ224867  | 387.887     |
| BF307652  | 867.964     | 924.514   | NM_016165 | 4398.172    | 3399.344  | NM_003794 | 7063.738    |
| NM_017772 | 1039.579    | 1234.33   | BF307652  | 2248.086    | 1594.581  | NM_019892 | 2811.524    |

|           |           |           |           |           |           |           |           |
|-----------|-----------|-----------|-----------|-----------|-----------|-----------|-----------|
| AF116574  | 1316.429  | 1121.514  | NM_017772 | 4494.292  | 2411.071  | NM_016169 | 2848.293  |
| NM_005529 | 978.904   | 1165.049  | AF116574  | 2695.8    | 2306.688  | BF307652  | 2687.01   |
| NM_005869 | 2089.041  | 2265.846  | NM_005529 | 1366.794  | 1285.29   | NM_017772 | 2220.781  |
| AF105067  | 780.347   | 670.656   | NM_005869 | 7647.721  | 5189.773  | AF116574  | 2329.685  |
| NM_018676 | 335.513   | 700.437   | AF105067  | 1563.617  | 1371.324  | NM_005529 | 1002.774  |
| NM_006014 | 430.871   | 619.048   | NM_018676 | 709.712   | 748.999   | NM_005869 | 3941.9    |
| NM_006280 | 17157.033 | 22977.328 | NM_012072 | 698.171   | 598.376   | AF105067  | 1030.384  |
| NM_002155 | 593.068   | 429.383   | NM_006014 | 1281.602  | 1224.512  | NM_018676 | 381.492   |
| NM_007355 | 35859.422 | 48392.492 | NM_006280 | 68538.688 | 62591.121 | NM_012072 | 589.924   |
| NM_006096 | 2224.925  | 4592.963  | NM_002155 | 941.311   | 1059.097  | NM_006014 | 1091.302  |
| NM_012288 | 4581.113  | 4655.125  | NM_002066 | 2090.801  | 2636.502  | NM_006280 | 44148.586 |
| NM_005264 | 1245.924  | 1374.281  | NM_006096 | 1470.188  | 4686.847  | NM_002155 | 1023.19   |
| NM_020373 | 1130.563  | 1009.664  | NM_012288 | 6065.391  | 6778.364  | NM_001771 | 499.735   |
| NM_002556 | 2005.348  | 2809.022  | NM_005264 | 1919.412  | 1875.252  | NM_002066 | 860.319   |
| NM_018089 | 1824      | 1947.173  | NM_020373 | 2256.755  | 2050.728  | NM_007355 | 40697.203 |
| L21934    | 2008.644  | 1473.393  | NM_002556 | 1551.938  | 2621.493  | NM_006096 | 1082.672  |
| AL117442  | 2584.733  | 2589.115  | NM_018089 | 1661.146  | 2843.542  | NM_012288 | 5214.267  |
| NM_004695 | 958.831   | 658.009   | L21934    | 1746.594  | 680.911   | NM_005264 | 958.048   |
| AF299075  | 278.59    | 829.329   | AL117442  | 6892.196  | 5976.594  | NM_020373 | 2695.987  |
| NM_007188 | 840.553   | 909.122   | NM_004695 | 1350.953  | 937.729   | NM_002556 | 970.275   |
| NM_001214 | 2527.576  | 2680.733  | AF299075  | 1365.802  | 1201.254  | NM_018089 | 1161.221  |
| U16851    | 6502.569  | 7387.542  | NM_000340 | 944.523   | 604.908   | AL117442  | 4706.028  |
| NM_014341 | 1361.939  | 1308.404  | NM_007188 | 3369.608  | 2471.147  | NM_004695 | 1144.664  |
| NM_020309 | 1174.756  | 541.596   | NM_001214 | 6232.829  | 5639.053  | AF299075  | 364.212   |
| AK023533  | 296.609   | 651.487   | AK022409  | 1046.282  | 761.403   | NM_000340 | 250.524   |
| NM_012450 | 859.938   | 1333.573  | U16851    | 7974.273  | 6947.146  | NM_007188 | 1616.055  |
| NM_007071 | 1491.423  | 1938.941  | NM_014341 | 6209.736  | 3815.806  | NM_001214 | 4218.485  |
| AK024434  | 4058.104  | 5477.623  | NM_020309 | 3020.769  | 2028.4    | AK022409  | 737.098   |
| NM_002388 | 2995.922  | 4235.138  | NM_000341 | 1129.137  | 1210.065  | U16851    | 4977.978  |
| NM_016069 | 9924.219  | 13518.567 | AK023533  | 1924.216  | 2965.995  | NM_014341 | 4154.352  |
| NM_017612 | 1183.744  | 2214.57   | NM_012450 | 2509.743  | 4426.185  | NM_020309 | 2218.42   |
| NM_013236 | 5661.044  | 7958.008  | NM_007071 | 6441.038  | 6980.647  | NM_006446 | 211.531   |
| NM_017841 | 3055.752  | 3513.79   | NM_012135 | 526.002   | 1030.302  | NM_000341 | 797.876   |
| NM_001254 | 852.456   | 1749.282  | AK024434  | 6287.32   | 7693.936  | AK023533  | 537.967   |
| NM_003032 | 2055.364  | 2438.94   | NM_002388 | 5662.856  | 6425.039  | NM_012450 | 1799.993  |
| NM_017453 | 2634.489  | 3221.227  | NM_016069 | 21184.268 | 20030.289 | NM_007071 | 4360.474  |
| AF038564  | 1981.544  | 2517.901  | NM_017612 | 1402.578  | 1936.642  | NM_004962 | 126.588   |
| NM_017659 | 982.24    | 1245.349  | NM_013236 | 7020.178  | 6490.815  | NM_012135 | 401.852   |
| NM_006904 | 1721.633  | 3860.134  | NM_017841 | 5058.643  | 3262.168  | AK024434  | 3424.121  |
| NM_004217 | 2471.127  | 3200.759  | NM_001254 | 2572.568  | 1519.212  | NM_002388 | 993.012   |
| NM_006347 | 7216.48   | 17067.545 | NM_020412 | 10676.109 | 11379.384 | NM_016069 | 7200.237  |
| NM_020406 | 525.36    | 1053.711  | NM_003032 | 3878.192  | 3524.683  | NM_017612 | 564.454   |
| NM_014685 | 3101.466  | 2696.272  | NM_017453 | 15833.209 | 13855.15  | NM_013236 | 2153.576  |
| NM_001550 | 2580.411  | 2928.723  | AF038564  | 3356.522  | 3278.639  | NM_017841 | 1807.23   |
| AK026849  | 1168.788  | 1344.5    | AB033768  | 1912.164  | 1915.719  | NM_001254 | 434.984   |
| NM_018677 | 974.697   | 1281.478  | NM_017659 | 2952.107  | 2689.162  | NM_020412 | 8057.586  |
| NM_002785 | 840.714   | 1213.404  | NM_006904 | 4315.619  | 2338.496  | NM_003032 | 2565.619  |
| W69211    | 608.9     | 734.187   | NM_004217 | 9975.075  | 10386.321 | NM_017453 | 10114.629 |
| AA449931  | 3006.751  | 2463.263  | NM_006347 | 26708.428 | 25060.152 | AF038564  | 2723.633  |
| AA877347  | 9518.028  | 8160.373  | NM_020406 | 2931.521  | 3331.216  | AB033768  | 518.008   |
| R54049    | 344.154   | 435.757   | NM_014685 | 20478.143 | 31883.191 | NM_017659 | 1707.029  |
| BI755551  | 459.618   | 592.151   | NM_001550 | 7857.762  | 19856.689 | NM_006904 | 1484.016  |
| S57235    | 14826.828 | 9960.513  | AK026849  | 10447.265 | 9324.432  | NM_004217 | 4320.73   |



|           |           |           |           |           |           |           |           |
|-----------|-----------|-----------|-----------|-----------|-----------|-----------|-----------|
| AI376272  | 4198.973  | 2836.793  | NM_018677 | 516.287   | 839.54    | NM_006347 | 9567.788  |
| BF242229  | 1852.585  | 2417.032  | NM_002785 | 1147.935  | 2140.067  | NM_020406 | 2331.171  |
| AI754623  | 2808.939  | 2875.352  | NM_000041 | 25818.939 | 38651.289 | NM_014685 | 16826.926 |
| AA401326  | 11649.578 | 11796.766 | W69211    | 722.282   | 948.705   | NM_001550 | 1384.391  |
| N55461    | 392.784   | 834.712   | AA449931  | 2795.163  | 5859.844  | NM_018677 | 683.8     |
| AA504482  | 3077.753  | 2138.004  | AA877347  | 17936.037 | 9218.868  | NM_002785 | 829.007   |
| NM_016516 | 299.34    | 1178.603  | R54049    | 895.27    | 1198.134  | NM_000041 | 26070.01  |
| NM_006280 | 51156.27  | 47993.121 | S57235    | 9639.25   | 7665.952  | W69211    | 565.459   |
| NM_007355 | 57096.059 | 47294.223 | AI376272  | 3208.461  | 2593.582  | AA449931  | 1974.175  |
| NM_006869 | 13730.757 | 13821.186 | BF242229  | 3155.166  | 2983.2    | AA877347  | 7872.534  |
| NM_004963 | 2633.892  | 2177.707  | X75756    | 36141.117 | 38122.523 | S57235    | 7132.5    |
| NM_001181 | 5089.446  | 623.076   | AA401326  | 8802.275  | 11140.393 | AI376272  | 2492.024  |
| NM_005535 | 11653.938 | 10182.457 | AA504482  | 12660.896 | 13127.297 | BF242229  | 2128.673  |
| AB037857  | 2203.679  | 1596.166  | BI602175  | 1469.967  | 906.787   | X75756    | 16445.807 |
| NM_013262 | 6884.646  | 7835.784  | NM_006003 | 25716.963 | 24279.535 | AI754623  | 2489.836  |
| NM_007185 | 5702.07   | 6627.859  | NM_006555 | 2475.667  | 2771.713  | AA401326  | 6832.386  |
| NM_003357 | 8297.559  | 7825.6    | NM_016516 | 2974.757  | 4758.033  | N55461    | 345.851   |
| AF023142  | 566.717   | 533.205   | AF263538  | 1134.131  | 1605.334  | AA504482  | 9570.295  |
| NM_014057 | 1409.492  | 753.366   | NM_001771 | 410.626   | 1163.192  | BI602175  | 457.001   |
| NM_020309 | 4590.025  | 2408.355  | NM_002066 | 1188.273  | 1785.733  | NM_006003 | 13678.577 |
| NM_006446 | 1519.617  | 750.333   | NM_007355 | 65664.742 | 61667.988 | NM_006555 | 2080.976  |
| NM_000341 | 1837.756  | 1622.905  | NM_006096 | 1573.882  | 3784.846  | NM_016516 | 1789.703  |
| AK023533  | 697.228   | 549.543   | NM_006869 | 27895.615 | 43036.793 | AF263538  | 1106.271  |
| NM_012450 | 1393.988  | 1468.77   | NM_006611 | 740.578   | 775.744   | NM_001771 | 377.664   |
| NM_007071 | 4316.282  | 3717.94   | NM_004963 | 3416.48   | 2188.673  | NM_002066 | 507.293   |
| NM_016582 | 5273.945  | 3767.599  | NM_001181 | 3805.025  | 493.229   | NM_007355 | 38092.227 |
| NM_014229 | 862.599   | 1617.674  | NM_005535 | 20408.117 | 20149.529 | NM_006096 | 653.728   |
| NM_013265 | 2630.709  | 4688.762  | AB037857  | 1356.185  | 1061.102  | NM_006869 | 10830.646 |
| NM_014964 | 1747.09   | 1792.473  | AF218021  | 1846.291  | 1236.239  | NM_015364 | 1828.983  |
| NM_014016 | 5633.127  | 6035.039  | NM_007185 | 5216.682  | 9636.68   | NM_006611 | 704.308   |
| NM_013433 | 1289      | 1480.108  | NM_003221 | 412.198   | 756.062   | NM_004963 | 3091.938  |
| NM_003794 | 6711.044  | 6083.202  | NM_003357 | 14617.191 | 24398.063 | NM_001181 | 3919.563  |
| NM_019892 | 3694.789  | 4527.624  | AF195420  | 640.024   | 893.685   | NM_005535 | 9064.534  |
| NM_016169 | 3004.906  | 2911.223  | AK023261  | 7479.737  | 5478.612  | AB037857  | 759.381   |
| BF307652  | 1378.47   | 798.054   | NM_005097 | 1575.336  | 1415.152  | AF218021  | 924.821   |
| NM_017772 | 1482.446  | 1542.081  | NM_012278 | 1635.037  | 1465.762  | NM_013262 | 6365.513  |
| AF116574  | 1440.805  | 1368.479  | NM_016100 | 1613.216  | 1747.344  | NM_007185 | 4603.677  |
| NM_005529 | 1256.674  | 1304.037  | NM_014057 | 2135.463  | 2266.044  | NM_003221 | 428.412   |
| AF105067  | 1276.539  | 1522.584  | NM_006446 | 488.367   | 1265.004  | NM_003357 | 6905.102  |
| NM_018676 | 842.753   | 1147.888  | NM_000341 | 1521.459  | 2449.361  | AF195420  | 252.379   |
| NM_012072 | 564.973   | 728.077   | AK023533  | 1426.667  | 2460.871  | AK023261  | 2702.364  |
| NM_006014 | 1073.924  | 1367.69   | NM_012450 | 2246.36   | 4976.39   | NM_005097 | 636.066   |
| NM_006904 | 3606.855  | 4536.339  | NM_007071 | 6334.511  | 7959.262  | NM_012278 | 698.896   |
| NM_004217 | 2950.553  | 2861.185  | NM_016582 | 6123.795  | 6503.549  | NM_016100 | 1331.99   |
| NM_006347 | 10680.242 | 20200.098 | NM_014229 | 1700.426  | 2239.459  | NM_014057 | 1211.355  |
| NM_020406 | 1066.398  | 831.462   | NM_013265 | 5849.855  | 12091.779 | NM_020309 | 2923.481  |
| NM_014685 | 9396.411  | 8756.77   | NM_014964 | 2607.096  | 1777.736  | NM_000341 | 618.519   |
| NM_012288 | 4289.284  | 4154.015  | NM_014016 | 8425.005  | 8545.684  | NM_007071 | 3503.22   |
| NM_005264 | 1423.794  | 1400.697  | NM_013433 | 2232.183  | 2004.091  | NM_016582 | 9312.531  |
| NM_020373 | 1558.021  | 1368.96   | NM_003794 | 10341.841 | 7115.723  | NM_014229 | 671.665   |
| NM_000714 | 64337.07  | 52410.965 | NM_019892 | 3099.767  | 5293.171  | NM_013265 | 2556.768  |
| NM_002556 | 2083.531  | 2641.625  | NM_016169 | 2925.16   | 2243.926  | NM_014964 | 1221.814  |
| NM_018089 | 2018.854  | 2354.168  | BF307652  | 3972.133  | 6215.008  | NM_014016 | 6211.346  |

|           |           |           |           |           |           |           |           |
|-----------|-----------|-----------|-----------|-----------|-----------|-----------|-----------|
| L21934    | 1665.564  | 1779.433  | NM_017772 | 4111.331  | 4609.826  | NM_013433 | 1122.829  |
| AL117442  | 4421.13   | 3583.139  | AF116574  | 3777.499  | 3816.508  | NM_003794 | 5963.804  |
| NM_004695 | 937.058   | 786.62    | NM_005529 | 980.388   | 1431.653  | NM_019892 | 3194.426  |
| AF299075  | 571.985   | 759.869   | NM_005869 | 6759.214  | 5163.713  | NM_016169 | 2532.878  |
| NM_007188 | 1444.429  | 1424.527  | AF105067  | 2879.336  | 1801.585  | BF307652  | 2390.888  |
| NM_001214 | 4150.624  | 3841.029  | NM_018676 | 1123.299  | 1429.575  | NM_017772 | 2511.788  |
| AK022409  | 730.904   | 786.583   | NM_012072 | 873.046   | 1523.081  | AF116574  | 2234.712  |
| U16851    | 12037.426 | 11629.253 | NM_006014 | 1370.072  | 2064.948  | NM_005529 | 592.777   |
| NM_006003 | 11125.11  | 15302.681 | NM_006904 | 9064.56   | 11284.068 | NM_005869 | 3290.929  |
| NM_006555 | 3198.513  | 2817.888  | NM_004217 | 5657.05   | 7616.097  | AF105067  | 731.68    |
| NM_016516 | 1153.5    | 1868.522  | NM_006347 | 25711.07  | 43679.813 | NM_018676 | 396.146   |
| AF263538  | 665.929   | 733.769   | NM_020406 | 2472.107  | 4200.888  | NM_012072 | 633.59    |
| NM_012135 | 1071.819  | 1041.202  | NM_014685 | 18630.783 | 39695.238 | NM_006014 | 658.531   |
| NM_006812 | 14118.99  | 11207.816 | NM_012288 | 6270.742  | 6181.625  | NM_006904 | 2466.373  |
| AK024434  | 3387.796  | 3922.796  | NM_005264 | 1564.377  | 1910.708  | NM_004217 | 4544.011  |
| NM_002388 | 2746.268  | 6603.83   | NM_020373 | 2918.503  | 2890.179  | NM_006347 | 9148.704  |
| NM_016069 | 12767.514 | 18034.313 | NM_002556 | 1192.022  | 1863.166  | NM_020406 | 1958.669  |
| NM_017612 | 1490.111  | 2199.777  | NM_018089 | 2013.972  | 1971.975  | NM_012288 | 4525.454  |
| NM_013236 | 5850.825  | 8052.729  | L21934    | 1766.05   | 827.076   | NM_005264 | 1610.646  |
| NM_017841 | 3187.943  | 3694.744  | AL117442  | 12254.075 | 15376.887 | NM_020373 | 2424.438  |
| NM_001254 | 764.586   | 1733.41   | NM_004695 | 1896.816  | 1855.215  | NM_002556 | 1289.487  |
| NM_020412 | 6471.764  | 6203.211  | AF299075  | 2112.067  | 2783.875  | NM_018089 | 1595.152  |
| NM_003032 | 3339.601  | 3976.069  | NM_000340 | 1203.712  | 895.909   | L21934    | 1402.815  |
| NM_017453 | 8262.758  | 9474.719  | NM_007188 | 2974.577  | 3022.598  | AL117442  | 4383.372  |
| AF038564  | 3711.814  | 3961.46   | NM_001214 | 8191.408  | 8378.7    | NM_004695 | 1240.956  |
| AB033768  | 667.957   | 1058.268  | AK022409  | 1532.255  | 2467.555  | AF299075  | 483.104   |
| NM_017659 | 2513.102  | 2360.368  | U16851    | 8287.805  | 7583.419  | NM_000340 | 464.47    |
| AK023261  | 3854.788  | 5336.557  | NM_014341 | 6153.501  | 4937.595  | NM_007188 | 2007.643  |
| NM_005097 | 993.809   | 864.497   | NM_006003 | 18900.652 | 22680.732 | NM_001214 | 4057.653  |
| NM_012278 | 1857.42   | 1977.637  | NM_006555 | 1944.021  | 3112.502  | AK022409  | 1111.391  |
| AF023142  | 693.477   | 557.936   | NM_016516 | 2880.493  | 5931.587  | U16851    | 4842.296  |
| NM_016100 | 937.426   | 1002.384  | AF263538  | 840.832   | 1231.194  | NM_014341 | 4781.044  |
| NM_014057 | 2257.861  | 1469.027  | NM_012135 | 691.612   | 1088.212  | NM_006003 | 13956.76  |
| NM_001550 | 1717.296  | 2084.165  | AK024434  | 6469.343  | 6042.461  | NM_006555 | 2566.302  |
| AK026849  | 1908.86   | 1864.494  | NM_002388 | 6480.64   | 7445.363  | NM_016516 | 915.307   |
| NM_018677 | 1101.823  | 1323.513  | NM_016069 | 29010.256 | 30717.236 | AF263538  | 591.959   |
| NM_002785 | 897.333   | 1040.7    | NM_017612 | 1328.43   | 1902.005  | NM_012135 | 338.944   |
| NM_000041 | 54054.441 | 43915.094 | NM_013236 | 9088.609  | 9330.552  | M37190    | 49.537    |
| W69211    | 1044.523  | 1097.712  | NM_017841 | 4929.518  | 4907.792  | AK024434  | 4447.18   |
| AA449931  | 5531.746  | 5477.333  | NM_001254 | 2465.822  | 1778.693  | NM_002388 | 992.406   |
| AA877347  | 13862.698 | 11977.674 | NM_020412 | 18976.537 | 20271.896 | NM_016069 | 10691.402 |
| S57235    | 13145.171 | 9764.426  | NM_003032 | 5333.167  | 6825.661  | NM_017612 | 948.589   |
| AI376272  | 3936.481  | 2578.832  | AB033768  | 1685.037  | 3342.737  | NM_013236 | 2932.187  |
| BF242229  | 2181.196  | 2103.233  | NM_017659 | 2726.034  | 4418.864  | NM_017841 | 2060.802  |
| X75756    | 25463.633 | 29504.908 | AK023261  | 6086.618  | 7981.284  | NM_001254 | 618.651   |
| AI754623  | 2815.836  | 2324.55   | NM_005097 | 1509.351  | 2044.266  | NM_003032 | 2256.919  |
| AA401326  | 11014.623 | 10037.554 | NM_016100 | 788.458   | 1145.782  | NM_017453 | 10472.7   |
| AA504482  | 4615.877  | 3284.378  | NM_014057 | 1779.673  | 1853.115  | AF038564  | 2604.632  |
| BI602175  | 877.785   | 783.229   | NM_001550 | 2789.18   | 5177.469  | AB033768  | 904.999   |
| NM_005529 | 1352.621  | 1532.223  | AK026849  | 4239.218  | 3758.159  | NM_017659 | 2311.596  |
| NM_005869 | 5186.248  | 4306.836  | NM_000041 | 19033.824 | 24205.688 | AK023261  | 3188.627  |
| AF105067  | 1525.184  | 1730.694  | W69211    | 838.583   | 883.634   | NM_005097 | 775.417   |
| NM_018676 | 663.123   | 1073.856  | AA449931  | 2289.571  | 4246.979  | NM_012278 | 854.882   |

|           |           |           |           |           |           |           |           |
|-----------|-----------|-----------|-----------|-----------|-----------|-----------|-----------|
| NM_012072 | 353.889   | 716.533   | AA877347  | 14088.9   | 7211.25   | AF023142  | 315.711   |
| NM_006014 | 1389.135  | 2191.185  | S57235    | 13455.939 | 10680.546 | NM_01610C | 657.164   |
| NM_00628C | 52197.867 | 47365.559 | AI376272  | 5121.475  | 4415.202  | NM_014057 | 690.709   |
| NM_002155 | 1066.636  | 893.334   | BF242229  | 3124.269  | 2674.257  | AK026849  | 3719.741  |
| NM_007355 | 60955.637 | 51559.133 | X75756    | 57818.004 | 52815.152 | NM_018677 | 410.641   |
| NM_00609E | 3121.87   | 5516.382  | AI754623  | 3757.229  | 2875.024  | NM_002785 | 569.594   |
| NM_00686E | 27717.309 | 34935.48  | AA401326  | 13318.248 | 14843.253 | NM_000041 | 25750.033 |
| NM_004963 | 3945.285  | 2738.983  | N55461    | 1296.168  | 4962.599  | W69211    | 829.596   |
| NM_001181 | 5158.375  | 578.615   | AA504482  | 10573.222 | 10309.431 | AA449931  | 2029.448  |
| NM_005535 | 14150.521 | 13944.897 | BI602175  | 1731.755  | 1798.528  | AA877347  | 9282.698  |
| AB037857  | 1911.57   | 1331.799  | NM_005529 | 781.727   | 1706.393  | R54049    | 328.743   |
| AF218021  | 1230.641  | 934.628   | NM_00586E | 5538.344  | 6134.171  | BI755551  | 635.407   |
| NM_013262 | 7605.692  | 6352.587  | AF105067  | 1759.572  | 2110.037  | S57235    | 7643.476  |
| NM_007185 | 5484.351  | 5063.438  | NM_006014 | 970.047   | 1197.047  | AI376272  | 2301.552  |
| NM_003357 | 8398.191  | 7798.265  | NM_00628C | 40399.23  | 41981.051 | BF242229  | 2170.898  |
| AF195420  | 555.975   | 619.01    | NM_007355 | 49274.762 | 39662.977 | AI754623  | 1851.4    |
| NM_00034C | 583.883   | 703.703   | NM_00609E | 2443.854  | 5375.049  | AA401326  | 4869.734  |
| NM_00718E | 1928.971  | 2099.883  | NM_004963 | 3793.676  | 2240.646  | BI602175  | 798.381   |
| NM_001214 | 3842.461  | 4055.747  | NM_001181 | 3296.105  | 460.826   | NM_005529 | 890.132   |
| AK022409  | 824.253   | 945.815   | NM_005535 | 27399.674 | 29177.65  | NM_00586E | 4826.093  |
| U16851    | 12348.549 | 13182.377 | AB037857  | 2050.128  | 2204.571  | AF105067  | 1035.685  |
| NM_000341 | 1219.146  | 1524.09   | AF218021  | 1688.433  | 1373.076  | NM_01867E | 324.977   |
| AK023533  | 897.913   | 1455.082  | NM_013262 | 8408.995  | 7215.106  | NM_012072 | 370.638   |
| NM_007071 | 5147.073  | 4598.919  | NM_007185 | 5955.127  | 7558.864  | NM_006014 | 581.961   |
| NM_016582 | 10236.368 | 7451.562  | NM_003221 | 764.755   | 1072.694  | NM_001771 | 566.038   |
| NM_014229 | 1561.628  | 2300.678  | NM_003357 | 13089.271 | 14957.938 | NM_00206E | 481.928   |
| NM_013265 | 5265.393  | 8306.461  | NM_00034C | 702.477   | 1446.461  | NM_007355 | 32583.57  |
| NM_014964 | 1859.07   | 2019.341  | NM_00718E | 3316.26   | 4841.572  | NM_00609E | 701.663   |
| NM_01401E | 5766.123  | 7335.721  | NM_001214 | 2855.132  | 3465.247  | NM_00686E | 12739.313 |
| NM_013433 | 1517.174  | 1437.573  | AK022409  | 865.545   | 1153.177  | NM_015364 | 2033.118  |
| NM_003794 | 6726.251  | 4399.091  | U16851    | 6194.58   | 5151.6    | NM_006611 | 532.638   |
| NM_019892 | 3576.906  | 3317.208  | NM_014341 | 5000.667  | 4581.187  | NM_004963 | 3934.276  |
| NM_01616E | 2823.63   | 2334.656  | NM_02030E | 3102.902  | 2247.697  | NM_001181 | 4140.576  |
| BF307652  | 1825.433  | 1131.2    | AK023533  | 1466.756  | 672.647   | NM_005535 | 8823.141  |
| NM_017772 | 2195.21   | 1934.734  | NM_01245C | 1095.987  | 1563.808  | AF218021  | 531.475   |
| NM_020412 | 6980.988  | 6936.801  | NM_007071 | 5943.177  | 4685.829  | NM_013262 | 5377.3    |
| NM_003032 | 3145.756  | 3684.868  | NM_014229 | 1817.817  | 1806.403  | NM_007185 | 2755.703  |
| NM_017453 | 8437.43   | 10480.021 | NM_013265 | 6084.789  | 8629.604  | NM_003221 | 279.472   |
| AF038564  | 4279.884  | 4977.952  | NM_014964 | 2537.155  | 1602.152  | NM_003357 | 5273.129  |
| AB033768  | 1653.441  | 2479.671  | NM_01401E | 11996.851 | 13975.285 | AF195420  | 401.988   |
| NM_01765E | 2320.608  | 3128.471  | NM_013433 | 2318.356  | 1783.563  | NM_00034C | 412.092   |
| NM_006904 | 3714.056  | 6025.103  | NM_003794 | 10536.688 | 7085.776  | NM_00718E | 1943.568  |
| NM_004217 | 4222.187  | 4823.113  | NM_019892 | 3769.8    | 6616.18   | NM_001214 | 4891.712  |
| NM_006347 | 13838.795 | 32851.5   | NM_01616E | 3344.897  | 4084.523  | AK022409  | 869.061   |
| NM_02040E | 1969.23   | 2312.936  | BF307652  | 3526.078  | 2502.332  | U16851    | 3535.96   |
| NM_014685 | 15435.499 | 14299.669 | NM_017772 | 2611.471  | 2427.491  | NM_000341 | 830.303   |
| NM_01228E | 5090.673  | 5041.381  | NM_020412 | 6201.25   | 9246.152  | AK023533  | 605.228   |
| NM_005264 | 1967.352  | 1848.608  | NM_003032 | 1568.513  | 2488.641  | NM_01245C | 987.564   |
| NM_020373 | 1115.201  | 1525.27   | NM_017453 | 11718.9   | 12410.109 | NM_007071 | 3578.218  |
| NM_000714 | 48426.059 | 42412.785 | AF038564  | 2933.429  | 3375.316  | NM_016582 | 8246.587  |
| NM_00255E | 1969.694  | 2932.415  | AB033768  | 712.692   | 1682.883  | NM_014229 | 645.988   |
| NM_01808E | 2206.605  | 2303.036  | NM_01765E | 2249.201  | 3466.37   | NM_013265 | 2905.624  |
| L21934    | 2441.529  | 1273.355  | NM_006904 | 4766.957  | 3941.773  | NM_014964 | 1351.507  |

|           |           |           |           |           |           |           |           |
|-----------|-----------|-----------|-----------|-----------|-----------|-----------|-----------|
| AL117442  | 6564.322  | 5194.655  | NM_004217 | 3401.102  | 3378.301  | NM_014016 | 6662.285  |
| NM_004695 | 1347.015  | 795.708   | NM_006347 | 18601.219 | 12581.744 | NM_013433 | 1242.641  |
| AK026663  | 982.868   | 963.213   | NM_020406 | 1867.441  | 1069.295  | NM_003794 | 5872.28   |
| NM_001174 | 1674.343  | 1919.995  | NM_014685 | 17280.301 | 14806.182 | NM_019892 | 2755.519  |
| U69645    | 3307.517  | 5655.205  | NM_012288 | 4038.559  | 3783.171  | NM_016169 | 2516.08   |
| NM_019082 | 3555.675  | 6012.548  | NM_005264 | 1619.252  | 1631.451  | BF307652  | 2832.778  |
| NM_001424 | 1973.704  | 924.578   | NM_020373 | 1901.474  | 1216.744  | NM_017772 | 2215.491  |
| AB040950  | 1239.75   | 1582.512  | NM_002556 | 609.722   | 1210.69   | NM_020412 | 9380.983  |
| NM_014003 | 6280.112  | 3648.201  | NM_018089 | 1685.897  | 2355.235  | NM_003032 | 3067.852  |
| NM_001356 | 1247.153  | 830.729   | AL117442  | 7718.106  | 6434.753  | NM_017453 | 12307.93  |
| AB002282  | 62405.879 | 48360.527 | NM_004695 | 1267.115  | 2427.079  | AF038564  | 3272.219  |
| AB037805  | 7279.709  | 6442.944  | AK026663  | 1295.231  | 1278.695  | AB033768  | 450.715   |
| NM_016516 | 1733.077  | 3154.306  | NM_001174 | 1310.231  | 1231.852  | NM_017659 | 1609.421  |
| AF263538  | 1057.6    | 909.843   | U69645    | 3253.24   | 6126.8    | NM_006904 | 1755.999  |
| NM_012135 | 450.625   | 890.017   | NM_019082 | 5565.939  | 4386.828  | NM_004217 | 3745.167  |
| NM_006812 | 13939.628 | 8438.725  | NM_001424 | 1140.966  | 831.043   | NM_006347 | 8912.168  |
| AK024434  | 4586.617  | 5297.618  | NM_014003 | 3200.434  | 2603.804  | NM_020406 | 1441.954  |
| NM_002388 | 3101.05   | 7635.839  | AB002282  | 37489.426 | 28525.209 | NM_014685 | 17836.182 |
| NM_016069 | 17373.947 | 21035.912 | AB037805  | 1127.636  | 1320.188  | NM_012288 | 3234.273  |
| NM_017612 | 1310.891  | 1636.555  | NM_016516 | 1978.161  | 1946.16   | NM_005264 | 1425.905  |
| NM_013236 | 7766.747  | 10679.803 | AK024434  | 7397.896  | 8764.902  | NM_020373 | 2273.459  |
| NM_017841 | 3750.018  | 4362.875  | NM_002388 | 5578.156  | 4949.617  | NM_002556 | 567.025   |
| NM_001254 | 1286.611  | 3091.636  | NM_016069 | 17078.131 | 15746.295 | NM_018089 | 899.449   |
| NM_004389 | 327.049   | 736.163   | NM_017612 | 1456.701  | 1942.153  | L21934    | 1102.212  |
| NM_005424 | 613.45    | 699.688   | NM_013357 | 242.246   | 836.915   | AL117442  | 5000.039  |
| NM_005975 | 5084.151  | 4232.076  | NM_013236 | 5881.707  | 6358.21   | NM_004695 | 1112.544  |
| AY007220  | 8334.506  | 6884.313  | NM_017841 | 4712.458  | 5244.574  | AK026663  | 2773.883  |
| NM_004438 | 1008.106  | 2012.286  | NM_001254 | 2216.231  | 1627.933  | NM_001174 | 752.768   |
| X89399    | 2709.972  | 2099.246  | NM_003952 | 1697.868  | 689.533   | U69645    | 1786.939  |
| NM_003808 | 2911.878  | 1459.551  | NM_005975 | 3939.752  | 2377.324  | NM_019082 | 2548.185  |
| AK023666  | 1181.818  | 1305.878  | AY007220  | 2586.202  | 1541.587  | NM_001424 | 1676.736  |
| NM_005399 | 1249.395  | 2189.422  | X89399    | 778.004   | 1524.203  | AB040950  | 937.374   |
| NM_006573 | 2276.99   | 1263.536  | NM_003808 | 2421.951  | 845.961   | NM_014003 | 3329.736  |
| NM_005118 | 296.334   | 624.421   | NM_006573 | 1239.438  | 882.35    | NM_001356 | 1908.472  |
| NM_015185 | 1930.623  | 1759.146  | NM_015185 | 2252.759  | 1458.803  | AB002282  | 49752.934 |
| AF011757  | 1064.968  | 467.384   | AF011757  | 979.154   | 794.34    | AB037805  | 5636.616  |
| NM_003632 | 2409.371  | 1865.525  | NM_003632 | 4274.355  | 4724.729  | NM_016516 | 1306.736  |
| NM_002194 | 2371.292  | 1843.639  | NM_002194 | 2484.64   | 2602.983  | AF263538  | 466.995   |
| NM_000530 | 1098.132  | 280.033   | NM_016166 | 17687.746 | 11150.531 | AK024434  | 4710.519  |
| AB028989  | 879.974   | 389.003   | NM_002086 | 12639.892 | 13053.512 | NM_002388 | 938.31    |
| NM_016166 | 12396.718 | 10478.578 | NM_016248 | 1792.43   | 1638.737  | NM_016069 | 11033.805 |
| NM_002086 | 19035.111 | 19038.115 | NM_005489 | 18892.639 | 20374.338 | NM_017612 | 671.404   |
| NM_016248 | 2002.897  | 1096.064  | NM_020482 | 3630.371  | 3577.756  | NM_013357 | 17.333    |
| NM_005489 | 13664.476 | 8828.364  | NM_002396 | 693.659   | 779.088   | NM_013236 | 3289.122  |
| NM_020482 | 2236.959  | 2126.074  | NM_005417 | 2380.664  | 1186.796  | NM_017841 | 2723.95   |
| NM_005417 | 2838.072  | 936.634   | NM_002649 | 5504.281  | 2575.453  | NM_001254 | 444.277   |
| NM_002649 | 4419.326  | 3576.562  | AK025329  | 11348.787 | 5680.757  | AF278532  | 486.018   |
| AK025329  | 8388.794  | 10797.109 | AL137679  | 3543.807  | 2034.396  | NM_005928 | 1155.11   |
| NM_001259 | 606.995   | 972.859   | NM_001786 | 4632.102  | 2476.662  | NM_003952 | 1072.181  |
| AL137679  | 1600.711  | 2223.561  | AB040965  | 833.881   | 561.064   | NM_005424 | 1003.39   |
| NM_001786 | 5517.074  | 7480.33   | AK025026  | 1512.238  | 1317.084  | NM_005975 | 1373.182  |
| AB040965  | 898.272   | 943.927   | AK023052  | 4886.521  | 3336.261  | AY007220  | 7183.006  |
| AK025026  | 1266.287  | 1719.22   | NM_006455 | 61864.574 | 55056.297 | NM_004438 | 389.713   |

|           |           |           |           |           |           |           |           |
|-----------|-----------|-----------|-----------|-----------|-----------|-----------|-----------|
| AK023052  | 1150.189  | 1145.539  | NM_01846C | 2826.71   | 3669.879  | X89399    | 1161.706  |
| AB018350  | 654.74    | 484.846   | NM_00270E | 9946.146  | 9999.997  | NM_00380E | 991.806   |
| NM_00645E | 38934.383 | 41560.266 | NM_00559I | 13387.464 | 9975.957  | AK023666  | 377.23    |
| NM_01846C | 4719.031  | 8070.57   | NM_00237E | 1254.857  | 1063.431  | NM_00539E | 535.099   |
| NM_00270E | 4376.381  | 3870.63   | AK02425I  | 1109.376  | 2611.462  | NM_00657E | 2548.794  |
| NM_00559I | 5194.043  | 4547.52   | NM_00254E | 2482.97   | 2587.999  | NM_005118 | 313.118   |
| NM_00237E | 1043.379  | 758.421   | NM_00668E | 49901.051 | 42581.754 | NM_01518E | 1917.071  |
| NM_017734 | 878.814   | 804.262   | NM_00541I | 8860.791  | 11768.128 | NM_005374 | 881.559   |
| AK02425I  | 2654.832  | 3874.063  | NM_00485E | 2833.842  | 2926.076  | NM_00363E | 3307.315  |
| NM_00254E | 1859.742  | 1264.656  | NM_004617 | 2086.349  | 823.942   | NM_002194 | 1000.754  |
| NM_00668E | 51308.957 | 45933.301 | NM_00566E | 2013.322  | 1728.996  | NM_00053C | 762.395   |
| NM_00541I | 4735.144  | 3862.013  | NM_012177 | 6218.779  | 4306.97   | AB028989  | 214.669   |
| NM_00485E | 4887.189  | 3952.217  | NM_00666E | 7311.785  | 5135.192  | NM_01616E | 10607.615 |
| NM_00695E | 1001.243  | 751.037   | NM_002807 | 11287.675 | 5218.032  | NM_00208E | 13072.669 |
| NM_00505E | 1038.975  | 703.456   | NM_00279E | 48492.473 | 38939.641 | NM_01624E | 904.015   |
| NM_00480E | 869.36    | 818.363   | NM_00279C | 27975.361 | 16696.285 | NM_00548E | 11355.363 |
| NM_004617 | 1924.485  | 1058.914  | NM_01838E | 2076.914  | 2965.879  | AF191770  | 392.16    |
| NM_00566E | 4426.519  | 3223.096  | BF217579  | 16090.274 | 17608.156 | NM_02048E | 4496.723  |
| NM_00674E | 2842.779  | 576.217   | NM_00433E | 3816.886  | 3068.756  | NM_004464 | 328.04    |
| NM_012177 | 2881.787  | 6931.881  | AF040965  | 12754.65  | 12201.288 | NM_00239E | 461.354   |
| NM_00666E | 14034.525 | 24952.947 | AB037840  | 6566.495  | 5103.208  | NM_005417 | 1938.663  |
| NM_002807 | 6522.909  | 7707.663  | NM_00701I | 3973.524  | 5484.749  | NM_00264E | 2440.471  |
| NM_00279E | 46758.059 | 47308.555 | Y10210    | 3153.392  | 2354.154  | AK025329  | 3750.224  |
| NM_00279C | 36179.574 | 42054.105 | AB020689  | 1772.464  | 1263.142  | NM_00125E | 438.363   |
| NM_01838E | 2508.684  | 4797.641  | AK023916  | 1178.698  | 1294.705  | AL137679  | 1323.961  |
| NM_01494E | 679.644   | 854.767   | AF177238  | 2622.733  | 1455.361  | NM_00178E | 1432.622  |
| BF217579  | 9058.584  | 9439.315  | AL096747  | 1185.192  | 1139.899  | AB040965  | 462.264   |
| NM_00433E | 3951.185  | 2398.31   | NM_01240E | 3096.272  | 3195.132  | AK025026  | 1379.295  |
| AF040965  | 6540.212  | 6502.057  | NM_014947 | 6181.854  | 4767.082  | AK023052  | 1975.615  |
| AB037840  | 4781.47   | 3191.26   | AB033112  | 2806.338  | 1341.287  | NM_00645E | 44955.965 |
| NM_00701I | 7653.952  | 5029.293  | NM_005674 | 688.405   | 799.965   | NM_01846C | 2035.906  |
| Y10210    | 4857.724  | 3076.783  | AK023243  | 2396.513  | 1724.073  | NM_00270E | 3669.099  |
| AB020689  | 2815.907  | 2459.703  | NM_01440E | 2706.758  | 1378.507  | NM_00559I | 976.699   |
| AK023916  | 1004.966  | 797.092   | BE791857  | 2032.362  | 1473.028  | NM_00237E | 1034.338  |
| NM_00320E | 5704.268  | 4755.893  | NM_00142E | 7674.52   | 4194.496  | AK02425I  | 345.697   |
| NM_002514 | 853.242   | 698.898   | AK022358  | 2119.621  | 2222.448  | NM_00254E | 1543.282  |
| AF177238  | 2215.317  | 1044.926  | NM_000977 | 24703.182 | 28585.682 | NM_00668E | 62606.152 |
| AL096747  | 884.641   | 806.866   | NM_01420E | 18045.545 | 20661.027 | NM_00541I | 4471.693  |
| AB021641  | 988.34    | 449.699   | NM_01814I | 13338.594 | 10538.604 | NM_00485E | 3800.325  |
| NM_01240E | 6633.54   | 7312.872  | NM_016504 | 39561.23  | 46801     | NM_00695E | 1081.356  |
| NM_014947 | 17465.566 | 16292.242 | U25752    | 61452.199 | 61663.477 | NM_00480E | 593.794   |
| AB033112  | 3060.349  | 2484.603  | X96646    | 20566.629 | 28843.277 | NM_004617 | 1705.991  |
| NM_005674 | 567.29    | 1338.925  | AB03299I  | 7266.887  | 8733.092  | NM_00566E | 2299.145  |
| AK023243  | 2324.884  | 2153.205  | AK026985  | 5553.409  | 5255.279  | NM_00674E | 2862.54   |
| NM_01440E | 1777.34   | 2496.934  | AK000855  | 1508.474  | 2622.065  | NM_012177 | 2026.447  |
| BE791857  | 851.36    | 862.441   | NM_00410E | 4109.055  | 2589.643  | NM_00666E | 11147.221 |
| NM_00142E | 4332.419  | 2501.986  | NM_00319E | 7882.647  | 4682.652  | NM_002807 | 2328.115  |
| AK022358  | 2210.323  | 1378.601  | NM_005174 | 66215.578 | 56615.688 | NM_00279E | 40476.012 |
| NM_000977 | 12249.516 | 17664.018 | NM_00036E | 3179.209  | 2033.357  | NM_00279C | 27855.998 |
| NM_01420E | 13922.466 | 17737.988 | AF110322  | 581.281   | 1112.618  | NM_01838E | 691.531   |
| NM_016504 | 31823.188 | 39929.813 | NM_01345C | 7058.721  | 9111.588  | BF217579  | 11390.625 |
| U25752    | 71094.125 | 54816.621 | NM_00453E | 4312.59   | 4363.824  | NM_00433E | 1945.689  |
| X96646    | 32750.752 | 43453.09  | NM_003077 | 1233.144  | 1415.596  | AF040965  | 7222.529  |

|           |           |           |           |           |           |           |           |
|-----------|-----------|-----------|-----------|-----------|-----------|-----------|-----------|
| AB032991  | 10741.223 | 7918.55   | NM_002105 | 1075.296  | 839.772   | AB037840  | 2304.812  |
| AK026985  | 2841.115  | 2434.446  | NM_018489 | 4408.144  | 1835.837  | NM_007011 | 3203.365  |
| AK000855  | 879.071   | 1706.116  | L13203    | 6835.674  | 6360.905  | Y10210    | 925.281   |
| NM_004109 | 3262.421  | 2914.76   | NM_018040 | 1134.23   | 772.302   | AB020689  | 1670.309  |
| NM_003198 | 7161.715  | 6737.046  | AB042646  | 9628.839  | 11142.297 | AK023916  | 1120.58   |
| AF220415  | 622.04    | 927.542   | NM_003431 | 4106.209  | 5948.827  | NM_003203 | 3501.607  |
| NM_005174 | 63282.301 | 46921.102 | M29581    | 4276.752  | 6858.12   | NM_002514 | 1096.554  |
| NM_000365 | 2367.513  | 2566.604  | AL359622  | 960.002   | 709.508   | AF177238  | 1258.616  |
| AF110322  | 957.478   | 1566.661  | AL050204  | 3071.861  | 3514.677  | AL096747  | 2091.857  |
| NM_013450 | 2979.204  | 2181.849  | AF085999  | 1937.762  | 1749.293  | AB021641  | 640.597   |
| NM_004538 | 1095.549  | 1000.447  | AK025316  | 1767.25   | 2573.022  | NM_018008 | 4056.027  |
| NM_003077 | 1829.445  | 2060.385  | AK026357  | 4084.201  | 4323.102  | NM_012406 | 4667.393  |
| NM_002105 | 1280.122  | 1259.073  | NM_018323 | 3246.934  | 2734.75   | NM_014947 | 13912.958 |
| NM_018489 | 2454.854  | 1903.804  | NM_014235 | 5722.697  | 5028.217  | AB033112  | 1829.746  |
| L13203    | 2975.622  | 2462.153  | AK026922  | 6203.367  | 7101.471  | NM_005674 | 292.486   |
| AB042646  | 5180.777  | 4220.867  | AK022645  | 1567.469  | 1593.848  | AK023243  | 1424.592  |
| NM_003431 | 3646.016  | 2028.941  | NM_014353 | 2019.559  | 2255.094  | NM_014409 | 1338.772  |
| M29581    | 2547.744  | 2368.325  | AF070541  | 2092.931  | 2194.578  | BE791857  | 907.606   |
| AL050204  | 2420.413  | 2004.778  | AK022006  | 58219.766 | 57037.043 | NM_001422 | 3256.675  |
| AF085999  | 627.798   | 720.667   | AF070552  | 16015.124 | 31688.834 | AK022358  | 1535.212  |
| AK025316  | 1698.437  | 2752.116  | AJ270695  | 1045.667  | 1183.913  | NM_000977 | 10535.721 |
| AK026357  | 3972.099  | 3834.638  | NM_004271 | 9118.003  | 10883.923 | NM_014205 | 10629.161 |
| NM_018323 | 3828.261  | 4051.058  | AF129928  | 1837.31   | 2650.876  | NM_018141 | 12551.735 |
| NM_014235 | 6860.95   | 6691.357  | AK022282  | 2434.284  | 2665.891  | NM_016504 | 20062.611 |
| AK026922  | 4477.978  | 5216.045  | NM_018266 | 3279.017  | 6186.972  | AB032991  | 6931.397  |
| AK022645  | 945.775   | 430.442   | NM_004867 | 897.732   | 1633.517  | AK026985  | 2771.649  |
| NM_014353 | 806.813   | 761.563   | AL050021  | 8002.196  | 12980.107 | AF007153  | 594.058   |
| AF070541  | 721.943   | 880.305   | AB002448  | 1671.398  | 1521.971  | AK000855  | 541.642   |
| AK022006  | 11918.013 | 11924.993 | NM_003838 | 2545.894  | 3512.851  | NM_004109 | 1870.396  |
| AF070552  | 5251.091  | 18574.992 | AK023089  | 6136.09   | 3346.397  | NM_003198 | 3802.079  |
| NM_004271 | 6265.389  | 3667.143  | AK026059  | 34478.754 | 35534.641 | AF220415  | 363.774   |
| AF129928  | 787.728   | 617.224   | AK026942  | 4372.646  | 3016.352  | NM_005174 | 51229.855 |
| AK022282  | 954.705   | 838.327   | AK025814  | 2529.497  | 2569.563  | NM_000365 | 1199.605  |
| NM_018266 | 2224.071  | 4630.974  | AK000655  | 1787.264  | 1969.942  | AF110322  | 301.614   |
| NM_004867 | 629.93    | 650.189   | AL117611  | 1466.848  | 922.635   | NM_013450 | 3238.241  |
| AL050021  | 3906.167  | 10792.824 | AF131841  | 1520.636  | 547.286   | NM_004538 | 2066.344  |
| AB002448  | 1648.813  | 909.914   | NM_017936 | 2713.954  | 1708.599  | NM_003077 | 779.608   |
| NM_003838 | 2447.62   | 2563.757  | AJ227881  | 988.373   | 621.71    | NM_002105 | 822.936   |
| AK023089  | 3765.914  | 3968.974  | D63134    | 3972.858  | 4710.958  | NM_018489 | 4036.289  |
| AK026059  | 44684.461 | 37613.766 | AJ227893  | 2299.078  | 2453.787  | L13203    | 4821.753  |
| AK026942  | 2354.52   | 1781.187  | Y12018    | 65231.574 | 60324.875 | NM_018040 | 991.957   |
| AK025814  | 1979.214  | 3742.218  | X64990    | 1713.617  | 1329.866  | AB042646  | 5743.526  |
| AK000655  | 5164.46   | 5479.189  | Y10513    | 7283.524  | 10459.382 | AL359622  | 1472.12   |
| AL117611  | 699.493   | 848.782   | M21536    | 2538.307  | 3278.361  | AL050204  | 3048.27   |
| NM_017936 | 2821.885  | 2830.49   | NM_014029 | 62884.602 | 56418.555 | AF085999  | 1058.582  |
| Y10209    | 894.852   | 724.312   | Z83937    | 954.092   | 1405.272  | AK025316  | 490.256   |
| D63134    | 1238.209  | 1224.997  | L08443    | 2322.433  | 2033.565  | AK026357  | 2664.849  |
| AJ227893  | 704.992   | 603.466   | L38936    | 1352.476  | 2158.573  | NM_018323 | 2007.699  |
| Y12018    | 31685.145 | 41878.938 | D55643    | 1940.647  | 2748.774  | NM_014235 | 3456.51   |
| Y10513    | 2638.458  | 1826.587  | AK025818  | 20667.031 | 21385.199 | AK026922  | 2517.452  |
| M21536    | 866.942   | 964.247   | AK023185  | 5811.996  | 3720.516  | AK022645  | 318.25    |
| L08443    | 1835.753  | 1492.286  | AK022183  | 1203.64   | 672.77    | NM_014353 | 437.114   |
| L38936    | 763.772   | 613.575   | NM_018278 | 5142.639  | 3795.981  | AF070541  | 721.924   |

|            |           |           |           |           |           |           |           |
|------------|-----------|-----------|-----------|-----------|-----------|-----------|-----------|
| D55643     | 1626.655  | 1488.596  | AK000864  | 8975.016  | 12295.149 | AK022006  | 22374.012 |
| AK025818   | 10707.392 | 10059.761 | AK022414  | 994.265   | 1086.001  | AF070552  | 3735.434  |
| AK023185   | 7380.918  | 2936.426  | NM_017624 | 15491.303 | 16162.095 | NM_004271 | 4041.229  |
| AK022183   | 721.634   | 1085.906  | NM_017928 | 1143.845  | 1199.996  | AF129928  | 695.084   |
| AK026345   | 1882.245  | 2032.862  | AK000907  | 4537.704  | 6095.337  | AK022282  | 2073.455  |
| AB007971   | 630.561   | 588.168   | AK024390  | 2743.232  | 4760.052  | NM_018266 | 2340.455  |
| NM_018278  | 1872.563  | 1992.044  | AK024565  | 518.584   | 2291.74   | NM_004867 | 786.661   |
| AK026328   | 533.296   | 562.284   | AK024868  | 1352.905  | 1409.656  | AL050021  | 3525.139  |
| AK000864   | 1771.965  | 1138.122  | AK024517  | 3967.399  | 4689.155  | AB002448  | 941.169   |
| AK022414   | 583.727   | 805.408   | AK024887  | 5200.825  | 8977.257  | AF070580  | 330.714   |
| NM_017624  | 8788.711  | 7616.326  | AK025005  | 631.63    | 1167.47   | NM_003838 | 1813.476  |
| AK000907   | 2618.566  | 2260.921  | AK095587  | 15671.783 | 12042.378 | AK023089  | 1899.25   |
| AK024390   | 702.194   | 639.621   | AF086043  | 1672.028  | 1396.586  | AK026059  | 68215.969 |
| AK024517   | 2331.735  | 1813.359  | AK000038  | 2109.178  | 1972.777  | AK026942  | 2093.5    |
| AK024585   | 791.45    | 614.721   | BC010084  | 345.533   | 279.907   | AK025814  | 1568.072  |
| AK024887   | 4766.447  | 3656.198  | U10513    | 2145.543  | 1680.533  | AK000655  | 4647.37   |
| AK025005   | 336.988   | 767.8     | AK022203  | 1910.336  | 1076.546  | AL117611  | 264.271   |
| AF086151   | 880.653   | 346.628   | BC032236  | 1260.942  | 589.871   | AF131841  | 809.197   |
| AK095587   | 23488.227 | 11266.345 | AK023037  | 812.11    | 600.665   | NM_017936 | 4583.775  |
| AF086043   | 1461.452  | 1140.929  | AK055950  | 649.346   | 1227.006  | D63134    | 1833.532  |
| AK024174   | 879.425   | 805.375   | AL050122  | 1286.85   | 1560.157  | AJ227893  | 425.163   |
| AK000038   | 1707.221  | 2034.335  | AK024209  | 407.65    | 1021.677  | Y12018    | 29080.33  |
| BC010084   | 895.516   | 777.061   | AK000839  | 9115.536  | 14003.761 | X64990    | 688.382   |
| U10513     | 1066.891  | 2062.438  | AF086195  | 787.907   | 947.802   | Y10513    | 3803.646  |
| L10151     | 823.118   | 678.941   | AK021963  | 1978.456  | 1932.164  | M21536    | 668.244   |
| AK022203   | 894.736   | 947.443   | AK002209  | 1718.063  | 1229.448  | NM_014029 | 24351.811 |
| BC032236   | 133.346   | 616.806   | NM_017854 | 15318.058 | 15141.1   | Z83937    | 503.435   |
| AK023037   | 1124.583  | 860.119   | NM_014354 | 1535.059  | 1127.815  | L08443    | 3227.454  |
| unknown (S | 651.297   | 263.278   | AL137548  | 5926.772  | 5407.86   | L38936    | 876.761   |
| AK055950   | 668.174   | 705.774   | AK024929  | 2154.984  | 2038.835  | D55643    | 964.805   |
| AL050122   | 1169.581  | 720.757   | NM_017779 | 1588.66   | 966.79    | AK025818  | 4603.065  |
| AK000839   | 4277.263  | 3470.755  | D17232    | 7704.063  | 2917.435  | AK023185  | 5228.294  |
| AF086195   | 685.854   | 721.521   | NM_005260 | 6068.016  | 4071.505  | AK022183  | 980.26    |
| AK021963   | 877.507   | 505.654   | AF085880  | 9164.334  | 6172.149  | AK026345  | 250.915   |
| AK002209   | 966.786   | 1034.633  | NM_016158 | 405.077   | 587.067   | NM_018278 | 3089.661  |
| NM_014354  | 1993.32   | 2117.698  | AF000990  | 926.644   | 821.992   | AK026328  | 264.893   |
| AL137548   | 4328.368  | 6582.712  | NM_016094 | 1776.288  | 1376.365  | AK000864  | 1923.306  |
| AK095051   | 1756.624  | 1011.67   | AK025003  | 3699.317  | 2589.285  | NM_017624 | 8878.938  |
| AK024929   | 2672.294  | 3293.333  | AK023601  | 1209.842  | 498.973   | NM_017928 | 194.71    |
| NM_017779  | 687.377   | 824.913   | NM_001427 | 2175.701  | 2403.018  | AK000907  | 1753.14   |
| D17232     | 2115.706  | 5559.679  | NM_016175 | 1236.733  | 1520.748  | AK024390  | 576.246   |
| NM_005260  | 1767.173  | 1399.885  | M15639    | 4781.932  | 6087.858  | AK024868  | 892.244   |
| AF085880   | 6341.987  | 7730.42   | AF133334  | 7954.157  | 11169.283 | AK024517  | 2608.911  |
| AF000990   | 616.279   | 1154.186  | NM_016290 | 2631.456  | 2286.894  | AK024887  | 2265.592  |
| NM_016094  | 3052.202  | 3383.079  | AK026498  | 1608.792  | 2374.865  | AK025005  | 170.431   |
| AK025003   | 1736.008  | 1493.095  | NM_003894 | 2466.007  | 1652.39   | AF086151  | 60.383    |
| NM_001427  | 2272.036  | 1185.41   | NM_006373 | 18642.162 | 20536.764 | AK095587  | 10729.235 |
| NM_016175  | 780.575   | 983.014   | AK001007  | 7007.554  | 3196.743  | AF086043  | 1164.686  |
| M15639     | 5389.75   | 5238.476  | AF116655  | 15402.351 | 9165.178  | AK000038  | 1277.345  |
| AF133334   | 5683.981  | 5264.049  | AF086134  | 1536.811  | 620.135   | BC010084  | 1120.957  |
| NM_016290  | 3537.174  | 2955.24   | AF009308  | 54036.957 | 30909.809 | U10513    | 775.557   |
| AK026498   | 968.802   | 1111.503  | AB032969  | 16503.764 | 12105.371 | AK022203  | 1272.08   |
| NM_003894  | 1443.526  | 1764.652  | AF085940  | 1203.336  | 467.255   | BC032236  | 667.583   |

|           |           |           |           |           |           |           |           |
|-----------|-----------|-----------|-----------|-----------|-----------|-----------|-----------|
| AK001007  | 5142.306  | 4154.803  | L37695    | 2638.967  | 1678.229  | AK023037  | 1251.014  |
| NM_014485 | 721.277   | 439.937   | NM_004627 | 3608.491  | 2107.124  | unknown ( | 17.157    |
| AF116655  | 10487.188 | 11096.982 | AK026523  | 3407.115  | 3352.415  | AK055950  | 889.025   |
| AF086134  | 1011.342  | 354.605   | AL050217  | 8350.348  | 8264.45   | AL050122  | 922.266   |
| Y11610    | 510.994   | 583.228   | L37704    | 1474.868  | 384.576   | AK024209  | 481.093   |
| AF085940  | 990.975   | 484.14    | NM_005162 | 1511.113  | 1269.587  | AK000839  | 3519.47   |
| L37695    | 1092.596  | 853.954   | NM_005664 | 29354.369 | 26283.76  | AF086195  | 315.464   |
| NM_004627 | 4036.965  | 3348.135  | NM_006270 | 27868.744 | 29084.695 | AK021963  | 620.319   |
| AK026523  | 1473.396  | 1023.234  | S81580    | 1283.882  | 1750.578  | AK002209  | 1233.066  |
| AL050217  | 5978.509  | 4740.251  | U50277    | 2071.9    | 3077.844  | NM_017854 | 31068.795 |
| NM_005162 | 1577.584  | 1882.213  | Z48633    | 5217.682  | 4783.375  | NM_014354 | 1841.397  |
| AB007968  | 1240.743  | 959.023   | M62627    | 8392.3    | 11584.225 | AL137548  | 2322.186  |
| AL117544  | 537.443   | 711.373   | NM_006686 | 4397.387  | 4974.606  | AF088062  | 621.658   |
| NM_005664 | 15342.193 | 15643.223 | CY3Cy5    | 11388.732 | 485.984   | AK024929  | 1616.926  |
| U50277    | 1257.178  | 813.03    | AI889961  | 3898.927  | 2725.524  | D17232    | 771.93    |
| Z48633    | 5106.727  | 3156.079  | AI360116  | 3076      | 3492.555  | NM_005260 | 2087.16   |
| M62627    | 16105.315 | 22840.113 | NM_013983 | 1412.543  | 1530.917  | AF085880  | 4005.072  |
| NM_006686 | 5743.251  | 5548.705  | AI572835  | 5782.558  | 7761.507  | AF000990  | 741.556   |
| AL136131  | 7459.741  | 10691.811 | R20392    | 18927.848 | 16383.013 | NM_016094 | 2654.725  |
| NM_000865 | 1003.118  | 1009.247  | AA486367  | 8471.77   | 6532.036  | AK025003  | 2384.41   |
| AF076642  | 357.376   | 1181.965  | N56684    | 823.268   | 995.539   | AK023601  | 435.572   |
| NM_002386 | 2904.203  | 3054.645  | M55153    | 1676.688  | 1585.063  | NM_001427 | 1653.057  |
| NM_005314 | 1235.116  | 1539.508  | AF414120  | 873.207   | 684.07    | NM_016175 | 895.587   |
| NM_004885 | 1146.77   | 1724.538  | AK097322  | 622.602   | 1192.489  | M15639    | 3460.729  |
| NM_005145 | 349.593   | 580.005   | AL136131  | 17481.766 | 39373.805 | AF130084  | 2863.027  |
| NM_012152 | 4753.075  | 5085.049  | NM_033357 | 3695.647  | 3239.996  | AF133334  | 6876.221  |
| AK024093  | 1558.856  | 1467.594  | AF335109  | 1749.84   | 2617.498  | NM_016290 | 1670.253  |
| NM_001940 | 3701.167  | 2816.233  | NM_003263 | 887.472   | 918.526   | AK026498  | 405.236   |
| U83115    | 2364.834  | 2055.321  | U59911    | 5445.315  | 6498.986  | NM_003894 | 1259.437  |
| NM_013364 | 10608.961 | 8142.95   | NM_002054 | 1288.587  | 1430.365  | NM_006373 | 16894.42  |
| NM_014368 | 1240.421  | 1235.923  | SR2       | 67522.438 | 54410.926 | AK001007  | 2989.686  |
| NM_004676 | 698.661   | 670.237   | SR4       | 23030.756 | 21451.422 | AF116655  | 9393.801  |
| NM_001994 | 1896.514  | 2920.632  | SR6       | 2811.477  | 2648.206  | AF086134  | 551.694   |
| AF142063  | 1198.583  | 957.318   | SR8       | 8313.92   | 22154.965 | AF009308  | 16379.77  |
| AK022790  | 10456.048 | 7232.51   | SR10      | 29308.98  | 9657.511  | AB032969  | 22056.242 |
| NM_004311 | 1661.481  | 1324.518  | CY3Cy5    | 13683.287 | 775.927   | Y11610    | 767.277   |
| NM_005624 | 1297.9    | 1018.977  | NM_000865 | 1807.673  | 1748.142  | L37695    | 1237.616  |
| NM_000579 | 602.425   | 341.403   | NM_000867 | 588.461   | 762.422   | NM_004627 | 2056.544  |
| AF263462  | 991.06    | 1166.113  | AF076642  | 1702.628  | 1515.056  | AK026523  | 2269.844  |
| AB040962  | 659.345   | 506.196   | NM_002386 | 8096.565  | 7044.376  | AL050217  | 8939.063  |
| AV697672  | 1026.161  | 461.207   | NM_005314 | 2768.837  | 4512.807  | L37704    | 853.769   |
| NM_000942 | 35320.836 | 39880.883 | NM_004885 | 3631.13   | 5100.918  | NM_005162 | 1642.469  |
| NM_002982 | 1224.77   | 474.617   | NM_005145 | 402.19    | 1871.462  | AB007968  | 1939.756  |
| AK056773  | 7893.632  | 9121.276  | NM_012152 | 13547.208 | 16534.086 | NM_005664 | 23562.223 |
| NM_002182 | 4513.438  | 7304.421  | AK024093  | 3038.035  | 3646.589  | NM_006270 | 12773.874 |
| NM_016470 | 2949.183  | 1863.555  | NM_001940 | 4332.886  | 4218.819  | U50277    | 1673.294  |
| AL365408  | 12145.271 | 14225.127 | U83115    | 8195.083  | 5332.844  | Z48633    | 4281.319  |
| AK026204  | 3967.729  | 3454.627  | NM_001264 | 10257.476 | 9956.604  | M62627    | 10261.848 |
| NM_014635 | 2245.825  | 1696.719  | NM_013364 | 36293.102 | 39216.375 | CY3Cy5    | 11684.132 |
| NM_004145 | 4774.137  | 4401.257  | NM_014368 | 2721.827  | 3439.824  | AI889961  | 3848.902  |
| AK023196  | 711.08    | 1171.774  | NM_000850 | 3624.372  | 3710.116  | AI360116  | 3036.409  |
| NM_018728 | 2972.057  | 4141.791  | NM_004676 | 1249.265  | 1417.93   | NM_013983 | 726.049   |
| AK024014  | 2917.424  | 2500.149  | NM_001994 | 5634.533  | 5189.471  | N56684    | 771.264   |



|           |           |           |           |           |           |           |           |
|-----------|-----------|-----------|-----------|-----------|-----------|-----------|-----------|
| NM_016234 | 5361.134  | 5381.373  | J00129    | 18062.002 | 16019.148 | M55153    | 480.121   |
| NM_001876 | 2782.301  | 3604.256  | NM_003320 | 5004.821  | 3555.031  | AK097322  | 684.441   |
| NM_016144 | 4081.577  | 4217.822  | L10146    | 2466.399  | 5669.856  | AL136131  | 14235.779 |
| AL133099  | 5906.132  | 5573.68   | NM_000685 | 7577.125  | 5367.152  | NM_033357 | 2245.251  |
| NM_016082 | 1393.126  | 1368.293  | AK025657  | 4967.688  | 15730.206 | AF335109  | 1280.343  |
| NM_000433 | 1998.687  | 1742.182  | AF142063  | 784.03    | 629.669   | U59911    | 5279.815  |
| NM_000190 | 2469.039  | 4027.537  | W42849    | 2910.666  | 2874.684  | NM_002054 | 1683.552  |
| X15667    | 7262.087  | 3377.143  | AK022790  | 60278.195 | 51703.93  | SR6       | 4778.729  |
| NM_017512 | 793.786   | 1488.899  | NM_004311 | 15255.491 | 6121.236  | SR8       | 17402.934 |
| NM_018661 | 774.548   | 738.744   | NM_005624 | 2869.469  | 2931.622  | SR10      | 47672.609 |
| NM_001678 | 754.29    | 518.158   | NM_002302 | 1423.56   | 2184.501  | CY3Cy5    | 15271.349 |
| AK023078  | 2738.368  | 3319.486  | AB020672  | 868.997   | 670.652   | NM_000865 | 1502.399  |
| NM_002239 | 29903.842 | 31811.049 | AK026958  | 1468.005  | 1038.758  | NM_000867 | 3308.245  |
| NM_002249 | 23948.148 | 26819.76  | NM_000579 | 2191.384  | 3380.798  | AF076642  | 879.662   |
| NM_015684 | 3033.75   | 3481.786  | NM_001480 | 519.942   | 2357.501  | NM_002386 | 2859.601  |
| NM_003945 | 24228.064 | 22344.115 | AF263462  | 2088.619  | 2720.815  | NM_005314 | 1057.065  |
| NM_004981 | 4215.825  | 4413.633  | AB040962  | 1164.564  | 877.801   | NM_004885 | 1333.047  |
| AK096507  | 657.541   | 1396.367  | NM_000639 | 634.106   | 468.07    | NM_005145 | 512.757   |
| NM_016524 | 1857.713  | 1622.074  | AV697672  | 1043.198  | 1051.439  | NM_012152 | 5057.809  |
| NM_007126 | 25124.449 | 24731.129 | NM_000942 | 46166.676 | 49643.496 | AK024093  | 1645.922  |
| AL137631  | 4995.777  | 4629.563  | NM_002982 | 1595.673  | 1885.208  | NM_001940 | 1936.518  |
| NM_014677 | 1042.172  | 850.786   | NM_002190 | 527.157   | 481.122   | U83115    | 4802.142  |
| NM_006855 | 846.881   | 1064.47   | AK056773  | 4861.517  | 7621.755  | NM_014368 | 1001.086  |
| NM_015599 | 656.274   | 1257.097  | NM_002182 | 9912.146  | 19205.525 | NM_000850 | 2619.649  |
| NM_018696 | 4872.814  | 4540.479  | NM_016470 | 3928.875  | 2633.38   | NM_004676 | 924.871   |
| NM_000136 | 5614.249  | 6327.722  | AL365408  | 45052.023 | 44953.293 | NM_007193 | 565.854   |
| AL157456  | 857.591   | 831.61    | AK026204  | 8032.701  | 8207.649  | NM_001994 | 4891.072  |
| AL162056  | 305.591   | 505.509   | NM_014635 | 5597.066  | 3655.308  | NM_003320 | 4321.428  |
| NM_000380 | 2246.172  | 2091.725  | NM_004145 | 8554.575  | 11908.713 | AF142063  | 377.551   |
| NM_004628 | 912.041   | 753.246   | AK023196  | 1749.329  | 2019.648  | W42849    | 4871.68   |
| NM_014876 | 1693.651  | 1734.77   | NM_018728 | 3416.664  | 4354.086  | AK022790  | 57185.125 |
| NM_005406 | 3879.687  | 3931.843  | AK024014  | 5297.382  | 7680.899  | NM_004311 | 9230.851  |
| NM_003328 | 544.365   | 832.665   | NM_016234 | 11319.866 | 7160.78   | NM_005624 | 1606.494  |
| X93921    | 2273.302  | 4246.404  | NM_001876 | 4439.884  | 5024.107  | NM_002302 | 1571.041  |
| NM_005990 | 2912.469  | 3546.337  | NM_016144 | 7601.042  | 6405.47   | AB020672  | 610.03    |
| NM_016276 | 17852.867 | 20857.563 | AL133099  | 25803.324 | 13333.726 | NM_000579 | 908.226   |
| NM_017762 | 1586.969  | 2311.563  | NM_016082 | 2108.344  | 2811.317  | NM_001480 | 224.148   |
| NM_001863 | 29389.082 | 32699.807 | NM_000433 | 2160.677  | 3236.843  | AF263462  | 1211.777  |
| NM_000016 | 7573.292  | 12762.591 | NM_000190 | 5467.86   | 7414.101  | AB040962  | 978.406   |
| AK026913  | 3250.774  | 3328.386  | X15667    | 24708.289 | 22240.295 | AV697672  | 442.896   |
| AL136131  | 2169.529  | 3324.965  | NM_017512 | 2052.153  | 2440.819  | NM_000942 | 18440.186 |
| AK026204  | 4044.24   | 3514.567  | NM_018661 | 1031.375  | 1055.712  | NM_002982 | 1885.429  |
| NM_014635 | 1983.817  | 1492.358  | NM_001678 | 1105.788  | 880.761   | AK056773  | 2879.023  |
| NM_004145 | 5650.527  | 5083.436  | AK023078  | 8759.276  | 7889.25   | NM_002182 | 6169.48   |
| AK023196  | 729.85    | 1146.991  | NM_002239 | 45157.105 | 51930.625 | NM_016470 | 4841.424  |
| NM_018728 | 2231.531  | 3431.566  | NM_002249 | 37588.035 | 50470.613 | AK026204  | 9247.097  |
| AK024014  | 3517.214  | 3233.295  | NM_015684 | 4246.659  | 4049.112  | NM_014635 | 6377.167  |
| NM_000865 | 1277.568  | 1244.81   | NM_003945 | 27101.025 | 31063.438 | NM_004145 | 7401.899  |
| NM_000867 | 1121.32   | 449.371   | NM_004981 | 9500.131  | 10704.622 | AK023196  | 1617.259  |
| AF076642  | 627.174   | 884.506   | AK096507  | 600.741   | 1301.437  | NM_018728 | 2247.973  |
| NM_002386 | 1614.539  | 1612.577  | NM_016524 | 2706.758  | 3243.553  | AK024014  | 7995.635  |
| NM_005314 | 466.292   | 895.994   | NM_007126 | 44378.84  | 49675.324 | NM_016234 | 7054.591  |
| NM_004885 | 581.403   | 719.346   | AL137631  | 10756.273 | 10352.622 | NM_001876 | 3045.092  |

|           |           |           |           |           |           |           |           |
|-----------|-----------|-----------|-----------|-----------|-----------|-----------|-----------|
| NM_005145 | 232.286   | 380.4     | NM_016057 | 9319.485  | 16391.453 | NM_016144 | 7699.188  |
| NM_012152 | 2471.441  | 3096.97   | NM_014677 | 2487.299  | 1781.2    | AL133099  | 14849.382 |
| AK024093  | 302.746   | 402.686   | NM_006855 | 639.276   | 991.579   | NM_016082 | 544.022   |
| NM_001940 | 1179.787  | 916.686   | NM_015599 | 2396.546  | 1572.132  | NM_000433 | 786.83    |
| U83115    | 811.226   | 788.07    | NM_018696 | 12142.21  | 13569.18  | NM_000190 | 2496.417  |
| NM_013364 | 2823.484  | 3289.012  | NM_000136 | 17320.672 | 16673.42  | X15667    | 22037.244 |
| NM_004676 | 327.405   | 399.251   | AL157456  | 1290.157  | 1655.432  | NM_017512 | 743.622   |
| NM_001994 | 1336.677  | 1862.484  | NM_000380 | 9918.095  | 10653.187 | NM_018661 | 790.74    |
| NM_016524 | 2360.473  | 1762.172  | NM_004628 | 3538.287  | 2716.937  | NM_001678 | 1197.987  |
| NM_007126 | 25254.721 | 25430.246 | NM_014876 | 1984.771  | 1994.911  | AK023078  | 6098.357  |
| AL137631  | 5428.718  | 5719.234  | NM_005406 | 6089.301  | 5486.785  | NM_002239 | 21065.648 |
| NM_016057 | 8768.55   | 12966.748 | NM_003328 | 4612.502  | 4697.524  | NM_002249 | 13338.071 |
| NM_014677 | 744.681   | 675.727   | X93921    | 3661.648  | 6533.448  | NM_015684 | 2289.984  |
| NM_006855 | 1876.447  | 1568.994  | AF073482  | 3446.269  | 3112.444  | NM_003945 | 18922.43  |
| AK022790  | 38387.215 | 29290.01  | NM_005990 | 1787.952  | 2947.792  | NM_004981 | 9269.299  |
| NM_004311 | 3364.524  | 2396.524  | NM_016276 | 19018.342 | 26997.586 | AK096507  | 500.148   |
| NM_005624 | 1179.286  | 1118.314  | NM_017762 | 2062.323  | 2229.473  | NM_016524 | 3423.051  |
| NM_001480 | 213.573   | 215.107   | NM_001863 | 57587.359 | 53344.586 | NM_007126 | 34592.906 |
| AF263462  | 1064.26   | 1186.6    | NM_000921 | 5246.642  | 6321.183  | AL137631  | 8774.216  |
| AB040962  | 470.827   | 452.832   | NM_000098 | 2659.504  | 2758.489  | NM_016057 | 9244.509  |
| NM_004833 | 155.568   | 899.109   | NM_000016 | 12553.108 | 18207.102 | NM_014677 | 2168.665  |
| NM_000942 | 13398.622 | 30557.947 | AK026913  | 3188.113  | 3035.174  | NM_006855 | 1003.56   |
| AK056773  | 3382.815  | 2869.415  | L10146    | 2729.031  | 3801.408  | NM_015599 | 569.109   |
| NM_002182 | 1526.832  | 2931.031  | NM_000685 | 5362.744  | 3420.507  | NM_018696 | 6318.128  |
| NM_016470 | 1374.393  | 1300.964  | AK025657  | 5534.946  | 16416.477 | NM_000136 | 9598.797  |
| AL365408  | 8421.419  | 8544.955  | AF142063  | 426.544   | 621.511   | AL157456  | 554.868   |
| NM_017762 | 2205.938  | 3010.87   | W42849    | 4578.192  | 3813.516  | NM_000380 | 4667.173  |
| NM_001863 | 28269.182 | 27806.754 | AI889961  | 5445.136  | 4167.135  | NM_004628 | 2762.73   |
| NM_000921 | 4898.797  | 6242.494  | AI360116  | 5095.39   | 5148.182  | NM_014876 | 823.636   |
| NM_000098 | 3622.766  | 2879.524  | NM_013983 | 2315.522  | 2481.092  | NM_005406 | 3898.473  |
| NM_000016 | 7137.041  | 12629.578 | AI572835  | 5076.288  | 7046.358  | NM_003328 | 3517.751  |
| AK026913  | 3609.67   | 3585.533  | R20392    | 14191.126 | 12100.35  | X93921    | 1713.881  |
| NM_016234 | 6028.401  | 5854.876  | AA486367  | 7931.267  | 6448.747  | AF073482  | 2866.244  |
| NM_001876 | 2826.434  | 4104.507  | N56684    | 1194.538  | 1535.874  | NM_005990 | 1803.463  |
| NM_016144 | 1996.205  | 2199.871  | M55153    | 1393.761  | 1545.285  | NM_016276 | 45450.371 |
| AL133099  | 1243.131  | 1160.948  | AK097322  | 1140.997  | 1270.459  | NM_017762 | 2936.63   |
| NM_016082 | 754.698   | 1400.162  | AL136131  | 15512.708 | 37230.148 | NM_001863 | 72422.461 |
| NM_000433 | 1746.136  | 1163.035  | NM_033357 | 1322.333  | 1395.57   | NM_000921 | 7239.137  |
| NM_000190 | 3046.889  | 4174.173  | AF335109  | 594.366   | 864.419   | NM_000098 | 2919.225  |
| X15667    | 4803.808  | 3303.641  | NM_003263 | 1099.948  | 1172.344  | NM_000016 | 9133.771  |
| NM_017512 | 521.865   | 1242.807  | U59911    | 2919.356  | 3772.632  | AK026913  | 6105.356  |
| NM_018661 | 307.689   | 746.95    | NM_002054 | 730.098   | 728.885   | AI889961  | 4359.399  |
| NM_001678 | 180.881   | 468.006   | AK026204  | 6723.587  | 5470.534  | NM_013983 | 425.311   |
| AK023078  | 766.805   | 1365.761  | NM_014635 | 5615.964  | 3359.995  | AK097322  | 554.767   |
| NM_002239 | 11873.281 | 11769.289 | NM_004145 | 9475.211  | 12827.47  | AL136131  | 13728.814 |
| NM_002249 | 7944.814  | 8990.626  | AK023196  | 2526.503  | 3324.067  | U59911    | 4643.82   |
| NM_015684 | 1357.255  | 1364.555  | NM_018728 | 4671.282  | 4867.932  | NM_002054 | 792.073   |
| NM_003945 | 5196.709  | 3487.141  | AK024014  | 9132.321  | 14553.318 | NM_004482 | 834.715   |
| NM_004981 | 2530.639  | 2741.184  | NM_000865 | 2764.316  | 3049.754  | AK026204  | 6417      |
| NM_000352 | 213.635   | 162.05    | NM_000867 | 1785.27   | 1363.575  | NM_014635 | 5343.37   |
| NM_015599 | 704.293   | 1187.539  | AF076642  | 1932.597  | 1714.62   | NM_004145 | 3820.802  |
| NM_018696 | 5737.4    | 6529.191  | NM_002386 | 4031.061  | 5184.328  | AK023196  | 962.38    |
| NM_000136 | 6154.792  | 6479.044  | NM_005314 | 2634.761  | 3845.12   | NM_018728 | 1352.529  |

|           |           |           |           |           |           |           |           |
|-----------|-----------|-----------|-----------|-----------|-----------|-----------|-----------|
| AL157456  | 988.799   | 963.335   | NM_004885 | 1395.536  | 2287.448  | AK024014  | 5006.843  |
| AL162056  | 728.582   | 863.511   | NM_005145 | 470.437   | 925.867   | NM_000865 | 1788.644  |
| NM_00038C | 1772.356  | 2329.799  | NM_012152 | 8292.599  | 10059.321 | NM_000867 | 3558.651  |
| NM_00462E | 903.932   | 1016.446  | AK024093  | 1893.93   | 2663.912  | AF076642  | 679.477   |
| NM_01487E | 1410.88   | 1246.375  | NM_00194C | 2281.429  | 2785.075  | NM_00238E | 3144.326  |
| NM_00540E | 2142.621  | 2578.53   | U83115    | 4843.32   | 3998.758  | NM_005314 | 2050.63   |
| NM_00332E | 722.218   | 389.113   | NM_001264 | 3396.581  | 3932.201  | NM_004885 | 1437.081  |
| X93921    | 1825.335  | 3872.806  | NM_013364 | 4504.158  | 5015.927  | NM_005145 | 357.696   |
| AF073482  | 252.101   | 363.537   | NM_01436E | 511.866   | 624.703   | NM_00194C | 2014.992  |
| NM_00599C | 2503.056  | 2935.292  | NM_00085C | 2319.86   | 2293.814  | U83115    | 4413.118  |
| NM_01627E | 13568.8   | 13728.677 | NM_00467E | 666.048   | 671.406   | NM_001264 | 5406.726  |
| NM_00467E | 591.626   | 660.982   | NM_007193 | 653.449   | 461.513   | NM_013364 | 9825.167  |
| NM_007193 | 449.311   | 1065.969  | NM_001994 | 5337.59   | 4872.64   | NM_01436E | 1208.38   |
| NM_001994 | 3541.552  | 3794.055  | J00129    | 17605.209 | 14059.135 | NM_00085C | 2061.915  |
| NM_013983 | 177.664   | 396.814   | NM_00332C | 3747.418  | 2810.094  | NM_00467E | 1710.376  |
| AL136131  | 2003.968  | 2690.087  | NM_016524 | 1849.446  | 1075.601  | NM_016524 | 2244.37   |
| NM_002982 | 1438.187  | 406.236   | NM_00712E | 51401.453 | 48873.434 | NM_00712E | 25762.738 |
| AK056773  | 6578.943  | 7971.457  | AL137631  | 15099.978 | 13160.649 | AL137631  | 7243.436  |
| NM_002182 | 5687.955  | 8353.749  | NM_016057 | 9348.039  | 15643.202 | NM_016057 | 6752.574  |
| NM_01647C | 3026.56   | 2317.107  | NM_014677 | 3352.98   | 2307.655  | NM_014677 | 2016.217  |
| AL365408  | 19507.613 | 23007.293 | NM_006855 | 932.118   | 1320.128  | NM_006855 | 776.185   |
| AK026204  | 5398.285  | 4914.122  | AK022790  | 61236.156 | 51503.32  | AK022790  | 60785.836 |
| NM_014635 | 4024.853  | 2423.525  | NM_004311 | 15169.252 | 8402.284  | NM_004311 | 8716.641  |
| NM_004145 | 7336.912  | 7153.54   | NM_005624 | 2899.345  | 4751.239  | NM_005624 | 2443.951  |
| AK023196  | 1323.381  | 1666.229  | NM_002302 | 1344.861  | 1271.868  | NM_002302 | 1442.95   |
| NM_01872E | 3790.045  | 5221.377  | AB020672  | 1033.914  | 1122.909  | AB020672  | 1014.245  |
| AK024014  | 6378.945  | 6301.693  | AK026958  | 326.957   | 577.576   | AK026958  | 874.172   |
| NM_000865 | 1169.643  | 1060.07   | NM_000579 | 946.478   | 787.071   | NM_000579 | 1575.171  |
| NM_000867 | 600.473   | 584.291   | AF263462  | 1617.153  | 1940.095  | NM_00148C | 486.914   |
| AF076642  | 605.98    | 1776.608  | AV697672  | 535.178   | 444.257   | AV697672  | 892.553   |
| NM_00238E | 1740.707  | 2761.866  | NM_000942 | 31531.457 | 45761.445 | NM_000942 | 18974.678 |
| NM_005314 | 794.253   | 1216.199  | NM_002982 | 617.791   | 1171.847  | NM_002982 | 1583.878  |
| NM_005145 | 532.566   | 510.243   | NM_00219C | 207.483   | 683.02    | NM_017762 | 1514.238  |
| NM_012152 | 6243.781  | 6686.365  | AK056773  | 4091.425  | 5621.515  | NM_001863 | 53402.508 |
| AK024093  | 1706.338  | 1463.363  | NM_002182 | 10809.455 | 16921.9   | NM_000921 | 4508.036  |
| NM_00194C | 2871.356  | 2120.342  | NM_01647C | 3371.605  | 2643.678  | NM_00009E | 2194.958  |
| U83115    | 1009.225  | 1158.199  | AL365408  | 41316.242 | 39349.609 | NM_00001E | 8877.8    |
| NM_013364 | 2806.034  | 2957.318  | NM_017762 | 3622.678  | 2327.898  | AK026913  | 4590.158  |
| NM_01436E | 40.64     | 683.678   | NM_001863 | 64021.02  | 55457.117 | NM_016234 | 8292.487  |
| NM_00223E | 38848.977 | 33693.078 | NM_000921 | 6333.554  | 5969.289  | NM_00187E | 3412.708  |
| NM_00224E | 34193.02  | 32942.102 | NM_00009E | 3293.711  | 3208.636  | NM_016144 | 8515.526  |
| NM_015684 | 4599.872  | 3603.789  | NM_00001E | 13763.519 | 20485.4   | AL133099  | 15422.114 |
| NM_003945 | 28080.994 | 21244.484 | AK026913  | 5266.768  | 4672.787  | NM_016082 | 1354.899  |
| NM_004981 | 5553.809  | 6461.097  | NM_016234 | 15227.936 | 10565.104 | NM_000433 | 1720.253  |
| AK096507  | 599.689   | 1356.39   | NM_00187E | 4537.326  | 5441.923  | NM_00019C | 2288.384  |
| NM_016524 | 1600.173  | 1279.047  | NM_016144 | 10991.887 | 10493.198 | X15667    | 14404.531 |
| NM_00712E | 27568.814 | 29737.053 | AL133099  | 22528.719 | 16876.275 | NM_017512 | 644.649   |
| AL137631  | 9929.126  | 8551.771  | NM_016082 | 1571.358  | 1510.411  | NM_018661 | 388.215   |
| NM_016057 | 11332.373 | 14690.686 | NM_000433 | 1358.214  | 2087.142  | NM_00167E | 1709.063  |
| NM_014677 | 1829.713  | 1431.411  | NM_00019C | 4673.324  | 5769.26   | AK023078  | 6939.75   |
| NM_006855 | 588.355   | 1088.797  | X15667    | 16132.833 | 14532.085 | NM_00223E | 25855.975 |
| AK022790  | 17539.416 | 11275.939 | NM_017512 | 1141.188  | 1519.162  | NM_00224E | 17415.434 |
| NM_004311 | 2671.885  | 1784.647  | NM_018661 | 780.217   | 786.919   | AK096507  | 287.192   |

|           |           |           |           |           |           |           |           |
|-----------|-----------|-----------|-----------|-----------|-----------|-----------|-----------|
| NM_005624 | 1509.641  | 1446.276  | NM_001678 | 862.742   | 817.348   | NM_004482 | 339.774   |
| AB020672  | 412.379   | 495.717   | AK023078  | 8204.595  | 7270.805  | NM_015598 | 1643.845  |
| NM_000578 | 456.004   | 455.998   | NM_002238 | 23555.225 | 35777.027 | AB037902  | 1147.356  |
| NM_001488 | 504.905   | 392.477   | NM_002248 | 27159.246 | 35155.27  | NM_018698 | 9041.076  |
| AF263462  | 1892.187  | 1810.527  | NM_015684 | 3008.777  | 3211.551  | NM_000138 | 13223.803 |
| AB040962  | 708.668   | 747.466   | NM_003948 | 26391.857 | 27171.996 | AL157456  | 1556.959  |
| AV697672  | 409.404   | 251.633   | NM_004981 | 6748.802  | 7158.925  | AL162056  | 347.147   |
| NM_000942 | 29838.723 | 39765.547 | AK096507  | 880.769   | 1105.875  | NM_000388 | 5688.547  |
| NM_005408 | 6094.142  | 5087.16   | NM_002054 | 1102.662  | 1092.15   | NM_004628 | 2916.785  |
| NM_003328 | 4126.405  | 3179.184  | NM_004482 | 485.318   | 1063.133  | NM_006502 | 2124.318  |
| X93921    | 3874.109  | 5463.786  | NM_015598 | 2168.256  | 1704.995  | NM_014878 | 479.167   |
| AF073482  | 3158.854  | 2765.327  | NM_018698 | 15474.885 | 17811.357 | NM_005408 | 3897.089  |
| NM_005998 | 4680.352  | 4891.083  | NM_000138 | 16109.498 | 16479.467 | NM_003328 | 4816.006  |
| NM_016278 | 28972.137 | 31830.24  | AL157456  | 1942.808  | 1825.401  | X93921    | 2620.414  |
| NM_017762 | 4015.201  | 4108.248  | NM_000388 | 11479.39  | 13715.431 | AF073482  | 2901.677  |
| NM_001863 | 67131.969 | 44610.355 | NM_004628 | 2572.637  | 2033.087  | NM_005998 | 2034.648  |
| NM_000921 | 7429.09   | 8188.501  | NM_014878 | 2281.487  | 2756.846  | NM_016278 | 37810.988 |
| NM_000098 | 3121.915  | 2851.858  | NM_005408 | 5895.003  | 6345.875  | NM_000858 | 2929.353  |
| NM_000018 | 9741.311  | 16076.582 | NM_003328 | 4738.534  | 3530.776  | NM_004678 | 1014.458  |
| AK026913  | 4378.452  | 3868.483  | X93921    | 3918.66   | 6489.445  | NM_001994 | 3559.651  |
| NM_016234 | 9464.62   | 9228.008  | AF073482  | 5244.359  | 3176.385  | J00129    | 7630.586  |
| NM_001878 | 3247.445  | 4151.188  | NM_005998 | 2896.468  | 4392.27   | AK097322  | 676.633   |
| NM_016144 | 6097.521  | 6703.094  | NM_016278 | 44446.809 | 43197.648 | AL136131  | 15734.604 |
| AL133099  | 4314.743  | 4909.313  | NM_000858 | 4517.877  | 4082.675  | NM_002982 | 2045.64   |
| NM_016082 | 1475.771  | 1841.94   | NM_004678 | 1138.149  | 1119.431  | AK056773  | 3316.862  |
| NM_000433 | 2920.953  | 2622.179  | NM_001994 | 9234.986  | 8967.146  | NM_002182 | 5753.696  |
| NM_000198 | 4245.722  | 5399.694  | J00129    | 20695.012 | 16586.699 | NM_016478 | 4347.229  |
| X15667    | 21392.949 | 7958.337  | NM_003328 | 2784.59   | 2451.489  | AL365408  | 23928.428 |
| NM_017512 | 625.94    | 1344.117  | L10146    | 2882.23   | 5463.139  | AK026204  | 8632.755  |
| NM_018661 | 708.691   | 649.756   | NM_000688 | 8150.187  | 5931.646  | NM_014638 | 5657.088  |
| NM_001678 | 949.65    | 732.398   | AK025657  | 5459.877  | 16139.928 | AK024014  | 5187.461  |
| AK023078  | 4343.855  | 5191.657  | W42849    | 4924.491  | 5692.33   | NM_000868 | 2049.737  |
| NM_014737 | 4434.538  | 3665.785  | AI889961  | 5953.889  | 4830.986  | NM_000867 | 3631.082  |
| NM_003488 | 3980.927  | 3964.626  | AI360116  | 4422.991  | 5407.555  | AF076642  | 1148.446  |
| NM_001454 | 71631.203 | 42132.492 | NM_013983 | 2165.42   | 2523.103  | NM_002388 | 3691.23   |
| NM_006558 | 298.528   | 745.658   | AI572835  | 6870.194  | 11249.569 | NM_005314 | 1863.551  |
| Z22780    | 541.014   | 677.789   | R20392    | 17927.529 | 16136.261 | NM_004888 | 1019.722  |
| NM_005797 | 401.307   | 466.264   | AA486367  | 9499.662  | 6704.854  | NM_005148 | 473.066   |
| NM_004824 | 2633.822  | 2236.586  | N56684    | 967.854   | 1491.276  | NM_012152 | 9618.082  |
| M17733    | 71444.414 | 46400.016 | M55153    | 1631.881  | 1699.969  | AK024093  | 2705.884  |
| U83191    | 865.855   | 978.471   | AK097322  | 514.851   | 485.664   | NM_001948 | 5519.781  |
| NM_013952 | 1885.721  | 1663.268  | AL136131  | 12781.438 | 25328.059 | U83115    | 4765.036  |
| NM_015598 | 1694.715  | 2312.697  | NM_033357 | 2234.671  | 1629.861  | NM_001264 | 5392.807  |
| AB037902  | 318.67    | 476.429   | AF335109  | 870.083   | 975.484   | NM_013364 | 10351.737 |
| NM_018698 | 10005.881 | 10393.508 | U59911    | 6038.384  | 5705.556  | NM_014368 | 1299.247  |
| NM_000138 | 13443.283 | 13301.832 | NM_002982 | 1294.303  | 1195.163  | NM_002238 | 25347.404 |
| AL162056  | 1128.108  | 1498.802  | NM_002198 | 1831.822  | 1982.024  | NM_002248 | 17326.467 |
| NM_000388 | 7522.532  | 6151.089  | AK056773  | 3891.779  | 5669.069  | NM_015684 | 3101.692  |
| NM_004628 | 2727.828  | 1694.678  | NM_002182 | 15776.872 | 22925.961 | NM_003948 | 19299.262 |
| AF085734  | 540.153   | 435.162   | NM_016478 | 4992.222  | 4476.612  | NM_004981 | 7098.654  |
| NM_014878 | 2620.022  | 2444.02   | AL365408  | 45285.629 | 42757.828 | AK096507  | 594.831   |
| AB032958  | 1391.497  | 993.026   | AK026204  | 10622.957 | 8764.063  | NM_016524 | 2242.199  |
| AK024427  | 4553.006  | 4470.174  | NM_014638 | 6003.087  | 3656.798  | NM_007128 | 29054.107 |

|           |           |           |           |           |           |           |           |
|-----------|-----------|-----------|-----------|-----------|-----------|-----------|-----------|
| NM_003006 | 1506.62   | 1215.343  | NM_004145 | 7331.633  | 9542.102  | NM_014677 | 1964.39   |
| AF272035  | 3761.164  | 1858.367  | AK023196  | 725.56    | 1660.637  | NM_006855 | 1047.588  |
| AY009133  | 592.295   | 493.415   | NM_018728 | 2371.754  | 2538.234  | AK022790  | 57315.828 |
| NM_013403 | 2625.809  | 2470.859  | AK024014  | 5664.897  | 8894.789  | NM_004311 | 8435.183  |
| NM_004123 | 494.661   | 382.418   | NM_000865 | 1412.003  | 2039.797  | NM_005624 | 2528.346  |
| NM_000206 | 810.522   | 921.269   | NM_000867 | 1137.12   | 1159.903  | NM_002302 | 1283.06   |
| AK024257  | 236.111   | 1008.075  | AF076642  | 1261.366  | 1475.14   | AB020672  | 897.383   |
| AF178930  | 1388.414  | 839.952   | NM_002386 | 7804.839  | 8595.497  | NM_000579 | 1851.176  |
| M74161    | 3662.015  | 2138.486  | NM_005314 | 2491.584  | 3219.347  | AF263462  | 2174.361  |
| NM_016542 | 3915.994  | 7809.661  | NM_004885 | 1355.104  | 1514.678  | AB040962  | 1089.181  |
| NM_000484 | 1802.069  | 1975.814  | NM_005145 | 290.75    | 1043.029  | AV697672  | 601.089   |
| NM_003855 | 544.631   | 324.498   | NM_012152 | 12319.267 | 13719.349 | NM_000942 | 20047.27  |
| S40369    | 19108.014 | 12668.706 | AK024093  | 2052.993  | 1936.36   | NM_005406 | 4535.344  |
| NM_015831 | 6460.459  | 4327.83   | NM_001940 | 3175.105  | 2579.007  | NM_003328 | 5381.904  |
| AK023154  | 3314.298  | 2593.66   | U83115    | 8082.813  | 4990.277  | X93921    | 2614.345  |
| Z36820    | 3079.052  | 4442.411  | NM_001264 | 9301.762  | 8101.729  | AF073482  | 3759.381  |
| NM_003967 | 6655.575  | 4558.671  | NM_013364 | 19057.115 | 14992.958 | NM_005990 | 1889.826  |
| NM_012451 | 2604.665  | 2056.435  | NM_014368 | 799.939   | 917.239   | NM_016276 | 38152.84  |
| NM_002510 | 4166.905  | 984.129   | NM_002239 | 39314.816 | 41914.355 | NM_017762 | 2284.9    |
| NM_006624 | 2798.198  | 3341.156  | NM_002249 | 40226.172 | 39445.422 | NM_000016 | 9777.913  |
| AF130079  | 446.956   | 342.029   | NM_015684 | 3678.235  | 3119.745  | AK026913  | 5664.552  |
| NM_017667 | 850.189   | 512.982   | NM_003945 | 21069.072 | 20229.584 | NM_016234 | 9668.907  |
| AK002211  | 2290.72   | 2117.043  | NM_004981 | 12124.517 | 12399.33  | NM_001876 | 3711.607  |
| NM_012127 | 1955.863  | 2308.899  | AK096507  | 1146.736  | 2001.493  | NM_016144 | 6901.175  |
| NM_014454 | 1889.703  | 1777.325  | NM_016524 | 2376.098  | 2626.785  | AL133099  | 14965.936 |
| NM_017489 | 1420.32   | 1291.183  | NM_007126 | 31093.924 | 30686.918 | NM_016082 | 668.718   |
| NM_002824 | 17798.613 | 14661.08  | AL137631  | 9437.87   | 8580.531  | NM_000433 | 2277.92   |
| NM_014673 | 2393.55   | 3220.309  | NM_016057 | 8334.962  | 14291.107 | NM_000190 | 3015.141  |
| AB002330  | 2364.908  | 3339.101  | NM_014677 | 2061.949  | 1542.091  | X15667    | 15317.563 |
| AL137509  | 16802.652 | 15013.727 | AK022790  | 53385.039 | 44917.129 | NM_017512 | 549.97    |
| NM_006538 | 3319.466  | 3617.033  | NM_004311 | 12043.707 | 6099.996  | NM_018661 | 860.658   |
| NM_019887 | 6748.939  | 7592.975  | NM_005624 | 2895.16   | 3841.392  | NM_001678 | 1248.876  |
| NM_004050 | 8243.531  | 9200.462  | NM_002302 | 2235.349  | 2655.111  | AK023078  | 5091.441  |
| NM_006024 | 18843.389 | 24352.885 | AB020672  | 494.832   | 425.856   | NM_014737 | 4567.238  |
| NM_020191 | 4791.264  | 4115.622  | AK026958  | 446.189   | 766.184   | NM_003488 | 3841.337  |
| NM_017434 | 5786.33   | 4981.387  | NM_000579 | 1924.244  | 1232.436  | NM_001454 | 63806.684 |
| NM_020182 | 1045.132  | 1316.363  | NM_001480 | 1433.241  | 1572.879  | NM_006558 | 306.769   |
| AL137669  | 3557.003  | 3029.331  | AF263462  | 2175.632  | 2471.195  | NM_005797 | 1553.124  |
| AJ275213  | 458.766   | 404.656   | AB040962  | 701.58    | 624.151   | NM_004824 | 1989.933  |
| NM_004793 | 3278.667  | 9398.349  | AV697672  | 443.161   | 503.65    | U83191    | 1240.106  |
| NM_004390 | 1357.298  | 1584.178  | NM_000942 | 25680.775 | 31830.352 | NM_013952 | 1613.978  |
| NM_014263 | 3276.729  | 4162.892  | NM_005406 | 4719.292  | 3868.945  | NM_015599 | 1149.609  |
| NM_020361 | 866.511   | 807.023   | NM_003328 | 4447.509  | 3684.742  | NM_018696 | 8050.185  |
| NM_015907 | 1025.757  | 986.685   | X93921    | 4528.801  | 7385.654  | NM_000136 | 13933.681 |
| NM_001912 | 3527.832  | 1667.911  | AF073482  | 5518.231  | 4289.698  | AL157456  | 3141.952  |
| NM_013267 | 1338.647  | 1649.451  | NM_005990 | 3990.411  | 6733.3    | AL162056  | 1271.269  |
| NM_002454 | 2788.749  | 2935.112  | NM_016276 | 55137.367 | 47035.82  | NM_014876 | 1476.698  |
| NM_001917 | 1092.889  | 1132.772  | NM_017762 | 3621.718  | 3540.013  | AB032958  | 1573.728  |
| NM_005956 | 19528.293 | 21263.705 | NM_000921 | 6965.128  | 6548.65   | AK024427  | 2883.343  |
| NM_003043 | 4352.171  | 2832.381  | NM_000098 | 3184.149  | 3191.555  | NM_003006 | 2285.533  |
| D87077    | 1580.421  | 1355.987  | NM_000016 | 11778.949 | 17433.953 | AF272035  | 2973.749  |
| NM_014308 | 775.989   | 511.35    | AK026913  | 4907.096  | 4100.688  | AY009133  | 436.399   |
| L07033    | 2239.626  | 1518.493  | NM_016234 | 8466.493  | 6513.607  | NM_000965 | 1107.328  |

|           |           |           |           |           |           |           |           |
|-----------|-----------|-----------|-----------|-----------|-----------|-----------|-----------|
| AK023934  | 1149.321  | 919.673   | NM_001876 | 3173.465  | 3627.157  | NM_013403 | 2977.373  |
| AK026341  | 2267.793  | 2249.222  | NM_016144 | 8584.767  | 9038.563  | NM_004123 | 1338.243  |
| NM_018943 | 4318.917  | 4418.128  | AL133099  | 14161.43  | 10212.721 | NM_000674 | 1027.455  |
| AJ292757  | 1252.056  | 1140.095  | NM_016082 | 1582.152  | 2678.676  | AB020671  | 647.074   |
| AK025239  | 316.591   | 1050.936  | NM_000190 | 6058.289  | 8356.029  | NM_000206 | 866.864   |
| U01922    | 1434.584  | 715.261   | X15667    | 15409.785 | 12189.697 | NM_018255 | 2579.664  |
| NM_003995 | 1256.047  | 1074.773  | NM_017512 | 1279.888  | 1517.845  | AK024257  | 618.086   |
| NM_004465 | 466.983   | 351.82    | NM_018661 | 773.003   | 1134.209  | NM_016232 | 986.34    |
| NM_003433 | 4983.279  | 4418.959  | NM_001675 | 1163.305  | 1533.418  | AF178930  | 1343.832  |
| NM_005221 | 2898.756  | 2975.577  | AK023078  | 6078.769  | 5504.197  | M74161    | 1819.436  |
| NM_005870 | 919.366   | 693.203   | NM_014737 | 9746.597  | 7334.94   | NM_016542 | 1853.665  |
| NM_018561 | 1207.762  | 2093.56   | NM_003485 | 6402.17   | 5902.241  | NM_000484 | 2266.762  |
| NM_001270 | 2268.759  | 3101.579  | NM_001454 | 59207.039 | 50693.078 | NM_003855 | 318.049   |
| NM_001952 | 6691.206  | 6846.793  | NM_006555 | 361.446   | 767.5     | S40369    | 4989.866  |
| NM_003223 | 4025.205  | 5546.868  | Z22780    | 935.273   | 966.096   | NM_015831 | 3650.145  |
| NM_006713 | 52393.496 | 43482.996 | NM_005797 | 1614.641  | 2072.992  | AK023154  | 3766.624  |
| NM_020201 | 2771.049  | 2966.056  | NM_004824 | 2484.258  | 2333.289  | NM_012451 | 2816.173  |
| AK023530  | 605.039   | 509.47    | U83191    | 431.81    | 728.941   | NM_002510 | 1112.043  |
| NM_016015 | 8351.946  | 8706.347  | NM_013952 | 3338.411  | 3307.335  | NM_006624 | 3100.176  |
| NM_012245 | 10223.438 | 8355.97   | NM_004482 | 264.768   | 386.867   | NM_017667 | 805.366   |
| NM_003977 | 15267.572 | 18815.334 | NM_015595 | 2490.675  | 1724.68   | AK002211  | 1336.019  |
| NM_005995 | 18228.633 | 33569.152 | AB037902  | 539.246   | 500.453   | NM_012127 | 3438.689  |
| U28424    | 2179.162  | 3010.156  | NM_018695 | 20677.76  | 22581.021 | NM_014454 | 1419.228  |
| BF541372  | 2589.8    | 2608.963  | AL157456  | 2795.186  | 2733.346  | NM_017485 | 2368.481  |
| AF092137  | 3813.871  | 4229.358  | AL162056  | 681.518   | 695.611   | NM_002824 | 25605.996 |
| NM_004623 | 2096.545  | 1836.812  | NM_000380 | 13383.755 | 14809.216 | NM_006835 | 9965.62   |
| NM_016551 | 2596.446  | 3633.655  | NM_004625 | 2238.639  | 1636.496  | NM_006023 | 9474.95   |
| AK024631  | 2084.26   | 2108.566  | NM_014875 | 2291.563  | 1742.957  | NM_014673 | 3029.287  |
| NM_004957 | 3516.687  | 3490.401  | AB032958  | 2019.031  | 2006.166  | AB002330  | 1597.668  |
| AL050028  | 5041.39   | 4761.806  | AK024427  | 1432.666  | 2051.7    | AL137509  | 16603.48  |
| NM_000371 | 284.693   | 364.121   | NM_003005 | 2123.193  | 1401.084  | NM_006535 | 2771.452  |
| BE732255  | 6048.405  | 5374.272  | AF272035  | 3954.966  | 2920.776  | NM_019887 | 4486.731  |
| NM_004955 | 1435.404  | 1806.942  | AY009133  | 370.288   | 914.299   | NM_004050 | 9230.346  |
| NM_003364 | 933.614   | 1028.391  | NM_000965 | 404.291   | 1182.481  | NM_006024 | 8287.669  |
| NM_017803 | 1088.878  | 1092.533  | NM_013403 | 5801.634  | 6215.3    | NM_020191 | 2111.411  |
| NM_015863 | 696.241   | 466.907   | NM_004123 | 558.64    | 635.654   | NM_017434 | 4817.689  |
| NM_005994 | 4546.929  | 4207.543  | NM_000674 | 418.263   | 660.396   | NM_020405 | 659.436   |
| NM_001571 | 5560.729  | 4281.416  | AB020671  | 614.186   | 762.814   | NM_020182 | 544.145   |
| AF126749  | 318.329   | 472.203   | NM_018255 | 2088.469  | 3949.262  | AL137669  | 3296.955  |
| NM_003405 | 1150.55   | 668.472   | AK024257  | 487.157   | 827.253   | AJ275213  | 1155.278  |
| NM_003450 | 1234.935  | 1254.573  | NM_016232 | 1236.906  | 1601.22   | NM_004793 | 2112.61   |
| AK021577  | 1485.332  | 1738.066  | AF178930  | 1573.129  | 871.159   | NM_004390 | 569.342   |
| AF147390  | 442.202   | 419.293   | M74161    | 1874.96   | 1843.347  | NM_014263 | 1072.107  |
| AF075019  | 1579.476  | 1367.97   | NM_016542 | 7886.202  | 7424.988  | NM_020361 | 936.434   |
| AK021498  | 2726.242  | 2738.921  | S40369    | 9545.289  | 11025.147 | AK026343  | 1977.186  |
| AF085874  | 2413.753  | 2082.503  | NM_015831 | 6677.88   | 4635.754  | NM_001912 | 1911.741  |
| AF147346  | 595.721   | 455.027   | AK023154  | 5588.507  | 4020.687  | NM_013267 | 1265.837  |
| AK026959  | 5657.432  | 2324.284  | Z36820    | 2544.5    | 2454.821  | NM_002454 | 843.086   |
| NM_019555 | 2134.152  | 1428.961  | NM_003967 | 7178.188  | 6145.697  | NM_001917 | 1491.734  |
| NM_004753 | 3115.2    | 3170.387  | NM_012451 | 3106.072  | 4395.753  | NM_005955 | 25023.465 |
| NM_015462 | 4253.429  | 4378.283  | NM_002510 | 532.55    | 644.094   | NM_003043 | 6045.845  |
| AF147377  | 1143.55   | 1125.074  | NM_006624 | 4285.576  | 3029.123  | D87077    | 2191.212  |
| AK026700  | 974.372   | 771.955   | NM_017667 | 907.067   | 525.888   | NM_014305 | 789.188   |

|            |           |           |           |           |           |           |           |
|------------|-----------|-----------|-----------|-----------|-----------|-----------|-----------|
| AF086332   | 5852.048  | 6277.04   | AK002211  | 4605.532  | 4541.7    | L07033    | 469.969   |
| AF086432   | 286.889   | 563.983   | NM_012127 | 4678.508  | 5544.662  | NM_005993 | 2561.183  |
| AJ404614   | 1205.637  | 1150.035  | NM_014454 | 1673.214  | 1499.253  | AK026341  | 502.85    |
| AK024535   | 6865.693  | 5211.35   | NM_017489 | 4403.51   | 3329.017  | NM_018943 | 4496.506  |
| AL359608   | 1877.928  | 1101.882  | NM_002824 | 34395.129 | 40371.211 | NM_003999 | 960.384   |
| NM_016496  | 23806.236 | 18774.365 | NM_006835 | 21771.791 | 31940.297 | NM_003433 | 4505.107  |
| AF088025   | 958.027   | 694.392   | NM_006023 | 27004.576 | 17414.771 | NM_005221 | 2121.448  |
| AF085934   | 1751.413  | 1380.737  | NM_014673 | 3425.964  | 5243.85   | NM_005870 | 356.77    |
| AF147423   | 455.979   | 279.758   | AB002330  | 3555.505  | 3856.214  | NM_018561 | 645.005   |
| AF075088   | 850.367   | 852.408   | AL137509  | 22835.08  | 23925.254 | NM_001270 | 1688.551  |
| AK023971   | 15550.118 | 14025.966 | NM_006536 | 3063.317  | 4102.295  | NM_001952 | 8162.353  |
| AK024738   | 1360.695  | 1147.757  | NM_019887 | 11015.914 | 10801.468 | NM_003223 | 3330.964  |
| AL133103   | 1116.017  | 740.141   | NM_004050 | 26891.689 | 34028.301 | NM_006713 | 48063.125 |
| BC015321   | 1150.997  | 563.254   | NM_006024 | 16362.508 | 15681.819 | NM_020201 | 3230.158  |
| AL157450   | 1343.767  | 925.324   | NM_020191 | 3451.002  | 2702.656  | U81557    | 263.429   |
| AL359594   | 1627.596  | 1571.893  | NM_017434 | 5080.765  | 6519.676  | AK023530  | 944.23    |
| AL137293   | 2399.952  | 1827.575  | NM_020405 | 2014.113  | 2440.261  | NM_016019 | 4956.04   |
| AL137458   | 1228.615  | 992.843   | AL137669  | 2832.614  | 2614.669  | NM_012245 | 8084.813  |
| AL157490   | 15654.406 | 11897.642 | AJ275213  | 452.358   | 486.139   | NM_001533 | 5307.21   |
| AL390167   | 4842.742  | 3696.139  | NM_004793 | 3975.267  | 5223.817  | NM_006929 | 12840.793 |
| AK023657   | 1489.826  | 1841.637  | NM_004390 | 703.085   | 1271.357  | NM_003977 | 8340.323  |
| NM_014332  | 854.721   | 891.085   | NM_014263 | 1661.175  | 2199.627  | NM_005998 | 13420.977 |
| AF075018   | 783.53    | 1042.604  | NM_020361 | 1124.078  | 1400.143  | U28424    | 1543.813  |
| AK024239   | 796.629   | 462.526   | NM_015907 | 373.559   | 806.392   | BF541372  | 2329.202  |
| AK021838   | 9983.309  | 9289.806  | NM_001912 | 1478.056  | 2086.799  | AF092137  | 3049.263  |
| AF083118   | 1744.151  | 1294.051  | NM_013267 | 2311.075  | 2587.281  | NM_004623 | 2159.3    |
| AF132602   | 226.051   | 549.287   | NM_002454 | 1941.45   | 3040.891  | NM_016551 | 2882.931  |
| AF089811   | 955.946   | 517.494   | NM_001917 | 4305.24   | 4335.005  | AK024631  | 1229.973  |
| AF147444   | 1162.062  | 926.476   | NM_005956 | 33625.063 | 34996.41  | AK026949  | 633.457   |
| NM_016566  | 371.602   | 475.858   | NM_003043 | 7755.786  | 9599.443  | NM_004957 | 1810.456  |
| AK021909   | 1409.107  | 1808.398  | D87077    | 2724.593  | 2458.831  | AL050028  | 3964.222  |
| AK022168   | 1403.766  | 1323.671  | L07033    | 1132.354  | 1260.183  | BE732255  | 4883.927  |
| AK022327   | 796.834   | 838.037   | AK000142  | 401.312   | 724.39    | NM_004955 | 777.174   |
| AK022061   | 465.6     | 483.211   | NM_005993 | 3998.579  | 4820.418  | NM_003364 | 848.063   |
| AK022201   | 680.538   | 678.939   | AK026341  | 1521.161  | 1115.045  | NM_017803 | 1132.983  |
| AK022353   | 2770.885  | 1956.759  | NM_018943 | 3658.971  | 3133.597  | NM_005994 | 6823.274  |
| AK026868   | 1161.726  | 1178.429  | AJ292757  | 489.553   | 364.258   | AB027508  | 8307.971  |
| AK022200   | 4703.204  | 3248.293  | U01922    | 383.956   | 515.261   | NM_016331 | 592.812   |
| AK024604   | 338.002   | 253.233   | NM_003999 | 1373.979  | 1786.325  | NM_014360 | 14262.411 |
| AK023396   | 1028.187  | 669.587   | NM_003433 | 6981.174  | 7919.554  | AB033053  | 635.891   |
| AF264625   | 1228.22   | 876.15    | NM_005221 | 3792.985  | 3168.19   | NM_007358 | 3027.197  |
| NM_018101  | 2261.197  | 2105.075  | NM_018561 | 1396.492  | 2124.344  | NM_001571 | 2787.45   |
| AF293366   | 1067.009  | 581.478   | NM_001270 | 5181.4    | 5433.382  | NM_018108 | 2815.612  |
| BF526704   | 1754.738  | 1970.977  | NM_001952 | 19291.305 | 19541.91  | NM_003408 | 2196.411  |
| AJ491695   | 4760.031  | 5199.396  | NM_003223 | 11752.049 | 10818.965 | NM_003450 | 1427.693  |
| AF052107   | 9186.661  | 6013.688  | NM_006713 | 63346.238 | 50956.586 | AK021577  | 975.674   |
| AK022430   | 2062.515  | 1779.84   | NM_020201 | 6556.424  | 6023.142  | AF147390  | 1387.917  |
| unknown (S | 787.953   | 714.618   | U81557    | 942.216   | 1218.202  | AF085879  | 420.751   |
| AK001022   | 3984.919  | 4062.172  | AK023530  | 1186.466  | 1198.738  | AF075019  | 2112.252  |
| AL049351   | 5710.456  | 5156.983  | NM_016019 | 11932.771 | 9618.377  | AF147388  | 837.042   |
| AK021826   | 4033.565  | 2791.726  | NM_012245 | 9780.378  | 8935.527  | AK021498  | 2904.817  |
| AK024541   | 960.261   | 622.902   | NM_003986 | 146.4     | 621.771   | AF085874  | 3275.323  |
| AK025341   | 529.477   | 872.284   | NM_001533 | 14964.197 | 11986.339 | AF147346  | 1185.422  |

|           |           |           |           |           |           |           |           |
|-----------|-----------|-----------|-----------|-----------|-----------|-----------|-----------|
| AK024138  | 3402.245  | 3806.892  | NM_006929 | 21157.904 | 27036.346 | AK026959  | 8384.3    |
| Y10505    | 2168.351  | 2756.512  | NM_003977 | 20952.219 | 20773.451 | NM_019556 | 3100.912  |
| U00946    | 5883.111  | 6385.338  | NM_005998 | 34534.137 | 32593.172 | NM_004753 | 3202.834  |
| NM_005615 | 3285.972  | 2539.142  | U28424    | 1690.577  | 1869.977  | NM_015462 | 2965.984  |
| Z34290    | 836.508   | 776.999   | BF541372  | 4137.994  | 2366.061  | AK026700  | 1143.368  |
| AF070642  | 15977.096 | 7837.956  | AF092137  | 2604.35   | 2919.675  | AF086242  | 1506.305  |
| AK027125  | 1819.472  | 2459.888  | NM_004623 | 2456.25   | 2131.031  | AF086370  | 1082.219  |
| AK025311  | 207.62    | 853.71    | NM_016551 | 4203.892  | 2910.441  | AF086332  | 11359.6   |
| D16918    | 1305.803  | 1211.665  | AK024631  | 2216.96   | 2059.39   | AJ404614  | 552.491   |
| D16467    | 1931.079  | 1843.297  | AK026949  | 747.047   | 689.873   | AF086347  | 3322.641  |
| AF090932  | 769.601   | 1499.508  | NM_004957 | 3491.569  | 2446.185  | AF086388  | 990.906   |
| AF166125  | 2662.841  | 2666.55   | AL050028  | 4765.098  | 4143.29   | AF086444  | 287.693   |
| AF225425  | 1891.602  | 1982.616  | NM_000371 | 1741.817  | 873.057   | AK001043  | 3171.657  |
| AK001036  | 4788.919  | 3587.692  | BE732255  | 8832.484  | 8079.143  | AK024535  | 8856.396  |
| AK024858  | 11113.271 | 9700.587  | NM_004955 | 2030.651  | 2311.413  | AL359608  | 1734.438  |
| Y16697    | 761.966   | 1113.016  | NM_003364 | 654.422   | 812.614   | NM_016498 | 7199.349  |
| NM_001049 | 3655.222  | 4435.5    | NM_017803 | 1684.581  | 1819.276  | AF088025  | 1291.029  |
| AK024554  | 1562.626  | 1118.163  | NM_015863 | 204.156   | 299.942   | AF085934  | 1177.637  |
| AF068294  | 1777.602  | 1489.353  | NM_005994 | 8693.947  | 9017.006  | AF147423  | 1281.112  |
| AK025909  | 2709.111  | 2638.767  | AB027508  | 12590.099 | 12976.374 | AF075088  | 710.406   |
| AK026138  | 2053.19   | 2137.173  | NM_016331 | 1259.369  | 1661.097  | AK023971  | 6162.587  |
| Z70706    | 808.185   | 818.302   | NM_014360 | 28633.33  | 19074.658 | AK024738  | 1278.467  |
| AK021434  | 10974.032 | 8140.104  | NM_018952 | 233.249   | 476.407   | AL133103  | 1895.79   |
| NM_016479 | 8742.96   | 5931.879  | AB033053  | 2763.45   | 1885.158  | BC015321  | 3359.783  |
| AK000933  | 8170.342  | 8887.37   | NM_007358 | 5148.975  | 6507.77   | AL157450  | 1660.142  |
| Y10205    | 1187.588  | 1033.874  | NM_001571 | 3906.7    | 2634.745  | AL359594  | 2137.311  |
| NM_014626 | 2443.043  | 1951.242  | AF126749  | 869.63    | 670.321   | AL137293  | 2389.086  |
| NM_013937 | 297.886   | 729.978   | NM_018108 | 3100.909  | 1363.373  | AL137458  | 2953.196  |
| AK025277  | 1053.763  | 1670.17   | NM_003408 | 1517.82   | 1254.522  | AL157490  | 26497.254 |
| AF086095  | 1424.159  | 1073.367  | NM_003450 | 912.398   | 1002.357  | AL390167  | 8672.478  |
| NM_018352 | 2481.425  | 1417.596  | AK021577  | 1979.512  | 1803.416  | AK023657  | 761.958   |
| AK026880  | 2072.318  | 2663.62   | AF147390  | 1479.219  | 868.6     | AF086068  | 1858.141  |
| AF086061  | 287.265   | 466.82    | AF075019  | 1731.267  | 1182.92   | AF075018  | 1515.752  |
| X79985    | 1222.749  | 1650.036  | AF147388  | 428.706   | 385.274   | AK021838  | 7767.687  |
| AL080092  | 7755.64   | 7717.084  | AK021498  | 3485.508  | 3009.996  | AF083118  | 3259.72   |
| AF075069  | 1023.739  | 1868.892  | AF085874  | 3093.673  | 3118.77   | AK000957  | 3068.144  |
| AK023981  | 1586.601  | 1662.091  | AF147346  | 1459.846  | 1231.078  | AF147444  | 1041.669  |
| AK025037  | 2135.032  | 1664.987  | AK026959  | 4530      | 4254.861  | NM_016566 | 1368.048  |
| AK021874  | 6314.198  | 4374.561  | NM_019556 | 1635.795  | 2858.846  | AK021909  | 3331.982  |
| AK021877  | 395.192   | 568.283   | NM_004753 | 6190.056  | 9232.999  | AK022043  | 1964.098  |
| AF009267  | 2574.138  | 1822.727  | NM_015462 | 5518.29   | 3580.961  | AK022168  | 2129.519  |
| AK027129  | 2598.056  | 2497.5    | AK026700  | 2210.52   | 1009.001  | AK022327  | 1075.199  |
| L19367    | 845.052   | 1212.961  | AF086370  | 1395.422  | 1310.434  | AK021959  | 703.658   |
| CY3Cy5    | 26010.635 | 1834.978  | AF086332  | 15084.082 | 18844.682 | AK022061  | 890.617   |
| BG696293  | 1752.298  | 1483.408  | AJ404614  | 1072.249  | 1358.363  | AK022201  | 1283.295  |
| BG113873  | 790.219   | 562.951   | AF086347  | 4354.757  | 4729.489  | AK022353  | 3780.109  |
| BC013135  | 17886.193 | 25341.236 | AK001043  | 4590.243  | 3101.543  | AK026868  | 1319.309  |
| AA281652  | 4548.297  | 4472.973  | AK024535  | 8631.632  | 5515.052  | AK022200  | 9324.364  |
| U31905    | 1308.249  | 1309.539  | AL359608  | 1888.202  | 1872.586  | AK023396  | 909.813   |
| X52479    | 1391.541  | 1591.06   | NM_016498 | 14915.432 | 15011.636 | NM_018101 | 1752.007  |
| AW408832  | 1919.085  | 2205.107  | AF088025  | 1976.643  | 1501.901  | AF293366  | 873.459   |
| AA486364  | 1146.684  | 1680.016  | AF085934  | 1851.07   | 1742.988  | BF526704  | 2416.203  |
| M15476    | 9081.259  | 8272.421  | AF147423  | 772.36    | 598.717   | AJ491695  | 4985.644  |



|           |           |           |           |           |           |           |           |
|-----------|-----------|-----------|-----------|-----------|-----------|-----------|-----------|
| U57456    | 744.482   | 718.677   | AF075088  | 1197.822  | 873.023   | AF052107  | 7816.813  |
| N70057    | 20930.662 | 10509.652 | AK023971  | 10782.91  | 9487.891  | AK025113  | 335.792   |
| NM_006497 | 4116.358  | 4459.896  | AK024738  | 1543.55   | 1655.011  | AK022430  | 2116.196  |
| NM_006892 | 1210.87   | 1305.931  | AL133103  | 2517.201  | 1969.326  | AK001022  | 1937.53   |
| SR1       | 38821.152 | 41752.023 | BC015321  | 3669.977  | 2357.265  | AL049351  | 6667.746  |
| SR3       | 2573.764  | 2085.485  | AL157450  | 3096.283  | 2636.61   | AL137508  | 858.991   |
| SR7       | 358.481   | 2894.246  | AL359594  | 3125.833  | 2988.281  | AK021826  | 4524.219  |
| CY3Cy5    | 32712.039 | 4146.12   | AL137293  | 4099.307  | 4859.741  | AK024138  | 2237.94   |
| AF254067  | 1197.057  | 892.244   | AL137458  | 2808.373  | 2434.845  | Y10505    | 1604.969  |
| NM_016363 | 1078.898  | 729.983   | AL157490  | 32096.879 | 30020.473 | AF056443  | 1105.652  |
| AY009090  | 1133.754  | 674.055   | AL390167  | 9449.526  | 7830.321  | U00946    | 5236.255  |
| NM_016509 | 1313.385  | 526.787   | AK023657  | 1486.701  | 1184.78   | NM_005615 | 5460.98   |
| AF041038  | 1532.767  | 1257.774  | AF086068  | 1331.571  | 1172.328  | Z34290    | 1048.351  |
| NM_004536 | 2013.559  | 1572.137  | AF086059  | 774.306   | 590.212   | AF070642  | 10138.755 |
| NM_014672 | 3367.884  | 3190.236  | AF075018  | 1405.774  | 1096.047  | AK027125  | 1881.432  |
| AB058719  | 871.06    | 1288.803  | AK024239  | 659.335   | 469.178   | AK025311  | 1009.817  |
| AK025935  | 517.987   | 581.43    | AK021838  | 9818.785  | 11025.735 | D16918    | 659.697   |
| AB032953  | 302.457   | 734.4     | AF083118  | 1203.952  | 1413.101  | D16467    | 574.75    |
| NM_006334 | 1279.15   | 834.409   | AF211977  | 1742.289  | 2107.386  | AF090932  | 925.19    |
| NM_004625 | 2914.478  | 3149.313  | AK000957  | 1364.07   | 869.621   | AF166125  | 766.228   |
| NM_007179 | 6390.384  | 2554.494  | AF089811  | 431.652   | 740.329   | AF225425  | 2951.014  |
| NM_001306 | 821.356   | 636.932   | AF147444  | 1834.954  | 1414.491  | AF064848  | 14685.021 |
| AF061034  | 2859.659  | 2531.5    | NM_016566 | 1023.982  | 616.293   | U61089    | 8867.41   |
| AK022746  | 2609.45   | 1740.314  | AK021909  | 2992.914  | 2088.614  | AK001036  | 2492.372  |
| BC034483  | 786.966   | 682.145   | AK022043  | 1278.021  | 830.867   | AK024858  | 9371.241  |
| NM_005227 | 1246.198  | 1345.384  | AK022168  | 1304.653  | 1120.338  | Y16697    | 1568.309  |
| NM_016454 | 11184.78  | 8514.593  | AK022327  | 1405.412  | 904.824   | NM_001049 | 3536.916  |
| NM_003469 | 1055.157  | 1005.47   | AK022061  | 917.185   | 960.767   | AK024554  | 2074.829  |
| NM_000859 | 1155.058  | 4040.923  | AK022201  | 2666.719  | 2330.201  | AF068294  | 2510.503  |
| NM_005480 | 541.556   | 789.485   | AK022353  | 3792.636  | 3638.648  | AK025909  | 1895.071  |
| NM_003273 | 1043.937  | 1770.763  | AK026868  | 1476.436  | 1238.979  | AK026138  | 2174.24   |
| AK026404  | 1410.678  | 1378.821  | AK022245  | 672.998   | 829.778   | AK021434  | 5618.048  |
| NM_017948 | 2711.246  | 2233.344  | AK022200  | 9463.092  | 7992.411  | NM_016479 | 9825.839  |
| NM_000392 | 1285.269  | 1317.729  | AK026967  | 228.285   | 407.02    | AK000933  | 5456.458  |
| AF082657  | 1216.667  | 1795.638  | AK023396  | 1200.324  | 847.515   | Y10205    | 715.902   |
| NM_018231 | 1287.19   | 1013.812  | AF264625  | 1426.134  | 1089.326  | NM_014626 | 1746.953  |
| NM_000583 | 931.721   | 1016.072  | NM_018101 | 2810.252  | 2254.21   | NM_013937 | 1801.333  |
| NM_004484 | 1371.492  | 3865.38   | AF293366  | 767.147   | 1470.519  | NM_018352 | 1421.103  |
| NM_018289 | 1679.429  | 1692.788  | BF526704  | 2023.803  | 2167.947  | AK026880  | 1170.629  |
| AB018260  | 1992.855  | 1627.108  | AJ491695  | 5428.437  | 7388.377  | X79985    | 856.961   |
| NM_014766 | 1331.818  | 1500.869  | AF052107  | 11175.14  | 11963.489 | AL080092  | 4844.463  |
| NM_016627 | 1217.656  | 1606.085  | AL133591  | 819.868   | 511.761   | NM_005422 | 1382.404  |
| NM_016121 | 857.139   | 1404.72   | AK022430  | 3135.215  | 3245.193  | AL137279  | 6549.381  |
| NM_014769 | 1045.099  | 1264.704  | D28354    | 320.124   | 292.135   | AK023981  | 1063.357  |
| AF222927  | 973.26    | 860.408   | AK001022  | 2361.181  | 3062.416  | AK025037  | 1106.122  |
| NM_014345 | 3179.654  | 3688.891  | AL049351  | 9297.248  | 10236.357 | AK021874  | 11770.29  |
| NM_018217 | 3146.113  | 3219.124  | AK021826  | 3842.948  | 3451.32   | AF009267  | 4403.172  |
| AF241831  | 801.915   | 1020.758  | AK024138  | 2548.228  | 1700.709  | AK027129  | 2153.606  |
| NM_003033 | 2252.754  | 1800.862  | Y10505    | 3145.252  | 3228.552  | CY3Cy5    | 26265.494 |
| U96113    | 960.634   | 797.66    | U00946    | 7907.654  | 7884.5    | BG696293  | 2578.067  |
| NM_002733 | 1089.698  | 892.057   | NM_005615 | 11383.308 | 13884.755 | AA777410  | 1196.189  |
| NM_016224 | 1703.961  | 1510.741  | Z34290    | 1242.37   | 1495.688  | BG113873  | 812.207   |
| AB046861  | 916.006   | 773.068   | AF070642  | 13042.579 | 9277.378  | BC013135  | 9420.124  |

|           |           |           |           |           |           |           |           |
|-----------|-----------|-----------|-----------|-----------|-----------|-----------|-----------|
| NM_00594C | 630.74    | 440.875   | AK027125  | 2414.171  | 3201.702  | AI625002  | 857.135   |
| AF061034  | 7567.325  | 6051.837  | D16918    | 2243.817  | 2493.848  | AA281652  | 1772.586  |
| X03655    | 1057.905  | 996.201   | D16467    | 3033.854  | 2655.466  | U31905    | 2253.951  |
| BG696293  | 1366.079  | 1701.401  | AF090932  | 1121.922  | 1422.308  | X52479    | 1705.174  |
| BC013135  | 5055.082  | 6710.378  | AK024858  | 15485.236 | 13320.299 | AW408832  | 4835.498  |
| AA281652  | 3163.29   | 3460.164  | Y16697    | 968.726   | 769.399   | AA486364  | 2360.275  |
| U31905    | 964.728   | 1197.211  | NM_00104C | 6341.981  | 8085.336  | M15476    | 27378.35  |
| AW408832  | 4833.464  | 4109.491  | AK024554  | 2552.966  | 1358.983  | U57456    | 1910.996  |
| AA486364  | 4005.601  | 5291.352  | AF068294  | 2743.357  | 3242.056  | N70057    | 41418.445 |
| M15476    | 16867.525 | 16442.748 | AK025909  | 4028.484  | 3379.904  | NM_006497 | 6501.452  |
| U57456    | 938.455   | 1319.848  | AK026138  | 2940.178  | 2113.371  | NM_006892 | 437.743   |
| N70057    | 53416.895 | 31556.223 | Z70706    | 1420.494  | 1395.546  | SR9       | 45304.531 |
| NM_006497 | 8133.076  | 6933.281  | NM_00054C | 619.328   | 1057.87   | CY3Cy5    | 19722.703 |
| NM_006892 | 1650.837  | 1722.007  | AK021434  | 12445.303 | 11025.288 | AF254067  | 2295.607  |
| AK000124  | 1112.697  | 1549.592  | NM_01647C | 16388.35  | 12514.488 | NM_016363 | 4007.385  |
| NM_00448C | 2396.43   | 1504.128  | AK000933  | 17221.551 | 12926.087 | AY009090  | 1253.613  |
| BC034483  | 1056.646  | 833.944   | Y10205    | 2856.118  | 1934.236  | NM_005592 | 854.098   |
| NM_016363 | 819.657   | 721.73    | NM_01462C | 3526.208  | 3289.611  | NM_01650C | 1004.301  |
| NM_002303 | 689.022   | 635.576   | NM_013937 | 654.397   | 744.845   | AF041038  | 2960.93   |
| AF041038  | 594.595   | 941.646   | AK025277  | 1991.645  | 2181.767  | NM_00453C | 2956.156  |
| NM_00453C | 2265.983  | 1561.59   | AF086095  | 1575.549  | 1389.975  | NM_014672 | 4633.754  |
| NM_014672 | 2186.598  | 1976.962  | NM_018352 | 1554.661  | 739.723   | AB058719  | 1675.575  |
| AB058719  | 561.862   | 619.195   | AK026880  | 1765.902  | 2009.336  | AK025935  | 795.914   |
| AB032953  | 370.354   | 530.173   | AF086061  | 1616.093  | 872.213   | AB032953  | 850.256   |
| NM_016441 | 1657.41   | 1205.623  | AL080092  | 7859.974  | 4630.691  | NM_016441 | 1875.198  |
| NM_006334 | 1369.653  | 971.4     | AK025037  | 1463.238  | 1160.074  | NM_006334 | 2092.851  |
| NM_00462C | 5789.732  | 3792.114  | AK021874  | 6341.191  | 7445.272  | NM_003474 | 1346.05   |
| NM_00717C | 12130.765 | 4684.208  | AK021877  | 1237.264  | 664.431   | NM_00462C | 6667.464  |
| NM_00130C | 1450.47   | 1070.184  | AF086384  | 60218.285 | 46456.145 | NM_00717C | 8492.253  |
| NM_018231 | 2365.274  | 2226.31   | M77818    | 6222.894  | 6709.911  | NM_00130C | 1431.753  |
| NM_000583 | 2469.114  | 2224.56   | AF009267  | 3068.479  | 3238.202  | AB046861  | 1164.737  |
| NM_002003 | 681.936   | 2167.427  | AK027129  | 3750.473  | 3781.421  | AF061034  | 9264.141  |
| AK022746  | 1293.995  | 1043.719  | NM_01569C | 5150.129  | 5280.491  | X03655    | 1544.357  |
| U96113    | 847.249   | 968.265   | CY3Cy5    | 23912.9   | 1670.205  | NM_005387 | 3818.986  |
| NM_002733 | 1533.651  | 1099.335  | BG696293  | 2117.531  | 3320.595  | NM_00684C | 1029.812  |
| M31008    | 665.8     | 447.825   | AA777410  | 409.216   | 562.418   | AL137938  | 8882.04   |
| NM_016224 | 1787.539  | 1444.461  | BC013135  | 12554.046 | 17678.018 | AF228704  | 1706      |
| NM_005227 | 512.021   | 639.838   | AA281652  | 5898.734  | 6188.616  | AK022746  | 4350.957  |
| NM_00028C | 3215.143  | 4899.462  | U31905    | 4198.576  | 4099.496  | NM_00656C | 4112.216  |
| NM_016454 | 8664.444  | 8710.507  | X52479    | 3408.107  | 3111.395  | NM_00644C | 2789.166  |
| NM_00346C | 1233.942  | 1312.552  | AW408832  | 8942.601  | 12626.856 | NM_004847 | 14248.427 |
| NM_00085C | 1451.331  | 4000.187  | AA486364  | 16296.916 | 20295.289 | NM_00225C | 2780.32   |
| NM_003273 | 610.053   | 974.059   | M15476    | 68002.867 | 54968.313 | BC034483  | 2634.549  |
| NM_000392 | 404.436   | 835.132   | U57456    | 3860.215  | 4753.387  | NM_00362C | 2936.347  |
| AF082657  | 1356.938  | 2126.384  | N70057    | 68863.195 | 56476.016 | AA586375  | 1132.247  |
| NM_006744 | 826.898   | 755.898   | NM_006497 | 19957.496 | 37236.035 | BE910339  | 29256.133 |
| NM_006497 | 3140.915  | 3667.037  | NM_006892 | 1127.58   | 1685.808  | U89715    | 393.159   |
| NM_006892 | 1335.027  | 1697.437  | SR9       | 30866.254 | 5614.014  | NM_005227 | 2743.811  |
| AK000124  | 689.487   | 1062.93   | CY3Cy5    | 22879.162 | 1145.681  | NM_00028C | 17188.984 |
| NM_00448C | 1105.141  | 1062.946  | NM_016363 | 3868.233  | 3814.208  | NM_016454 | 12680.61  |
| NM_014914 | 2197.503  | 3447.154  | AY009090  | 1082.635  | 1467.947  | NM_00346C | 4032.731  |
| NM_004484 | 1087.618  | 2759.913  | U81380    | 841.513   | 614.882   | NM_016433 | 338.259   |
| NM_01828C | 1147.443  | 1122.822  | NM_002303 | 839.177   | 623.906   | NM_00085C | 212.058   |

|           |           |           |           |           |           |           |           |
|-----------|-----------|-----------|-----------|-----------|-----------|-----------|-----------|
| AB018260  | 1189.046  | 967.838   | NM_016509 | 1357.308  | 1129.687  | NM_00548C | 539.493   |
| NM_014766 | 1097.535  | 1618.727  | NM_012296 | 3854.003  | 14711.309 | NM_003273 | 643.076   |
| NM_016627 | 1660.375  | 2264.042  | AF041038  | 5408.285  | 5094.098  | AK026404  | 1987.704  |
| NM_014769 | 1527.589  | 1174.574  | NM_004536 | 5785.967  | 4343.63   | NM_017948 | 7994.257  |
| AK026264  | 6159.585  | 7043.09   | NM_014672 | 4597.669  | 4018.031  | AF208536  | 1178.087  |
| AF222927  | 906.017   | 672.776   | AB058719  | 4455.141  | 4031.073  | AB037848  | 1166.354  |
| NM_014345 | 3031.064  | 3074.25   | AK025935  | 1778.311  | 1711.313  | AF082657  | 1167.511  |
| NM_018217 | 7306.437  | 6687.36   | AB032953  | 1253.107  | 1428.93   | NM_006744 | 2086.426  |
| AF241831  | 1664.602  | 1190.12   | NM_016441 | 2643.224  | 2547.71   | AF297659  | 1136.277  |
| NM_003033 | 4170.052  | 2371.373  | NM_006334 | 2693.666  | 2039.194  | NM_018231 | 2243.289  |
| NM_006334 | 937.185   | 844.16    | NM_003474 | 1273.61   | 1312.501  | NM_000583 | 3749.7    |
| NM_004625 | 1987.209  | 2256.492  | NM_004625 | 7924.952  | 7733.712  | NM_014914 | 1984.778  |
| NM_007179 | 5563.524  | 2731.27   | NM_001306 | 2147.438  | 2402.724  | NM_004484 | 1321.909  |
| NM_001306 | 645.218   | 775.89    | AB046861  | 1439.767  | 1700.825  | NM_018289 | 1853.498  |
| AB046861  | 382.478   | 562.509   | AF061034  | 19167.76  | 15872.737 | AB018260  | 1020.404  |
| AF061034  | 6877.679  | 6774.771  | X03655    | 1851.51   | 1169.264  | NM_014766 | 1213.964  |
| X03655    | 1149.376  | 841.893   | NM_005833 | 2183.291  | 2466.514  | NM_016627 | 1850.993  |
| BG696293  | 1892.788  | 2471.505  | NM_003100 | 6014.37   | 6189.614  | AF222927  | 896.78    |
| BG113873  | 869.416   | 858.859   | NM_006768 | 3964.332  | 3573.314  | NM_014345 | 2921.135  |
| BC013135  | 14721.926 | 18480.299 | NM_013322 | 14014.903 | 5280.634  | NM_018217 | 10227.694 |
| AA281652  | 4134.156  | 4277.417  | AB020627  | 2888.71   | 2123.532  | AF241831  | 2620.734  |
| BC013200  | 323.636   | 636.045   | NM_002003 | 1256.919  | 1230.308  | NM_003033 | 4201.601  |
| AW408832  | 2958.988  | 3185.191  | NM_005387 | 6736.548  | 5871      | U96113    | 1485.483  |
| AA486364  | 5158.042  | 5877.495  | AL137938  | 22874.262 | 34489.211 | NM_002733 | 1563.497  |
| M15476    | 30057.816 | 28765.65  | AF228704  | 2736.603  | 2399.296  | M31008    | 1150.333  |
| U57456    | 2415.933  | 2477.025  | NM_004215 | 8928.895  | 8105.33   | NM_006288 | 1614.172  |
| N70057    | 68954.477 | 48010.035 | AK022746  | 4260.682  | 2252.745  | NM_016224 | 3882.051  |
| AK022746  | 1635.917  | 1483.401  | NM_006568 | 7366.703  | 3979.939  | NM_00594C | 679.831   |
| BC034483  | 1785.993  | 1006.056  | NM_00644C | 4467.04   | 4246.348  | AF061034  | 14348.963 |
| AF254067  | 1836.542  | 2063.307  | NM_004847 | 27429.465 | 29789.609 | X03655    | 1649.428  |
| NM_016363 | 2646.695  | 1866.068  | NM_002255 | 2788.54   | 2596.452  | BG696293  | 1438.557  |
| AY009090  | 1254.523  | 1134.746  | BC034483  | 3820.388  | 2455.684  | AA777410  | 764.779   |
| U81380    | 1079.143  | 512.761   | NM_00362C | 4087.983  | 4163.117  | BG113873  | 539.971   |
| NM_002303 | 985.763   | 832.712   | AA586375  | 1872.711  | 1196.316  | BC013135  | 6406.111  |
| NM_004536 | 2357.919  | 1586.893  | BE910339  | 40616.809 | 39226.961 | AI625002  | 440.781   |
| NM_014672 | 3513.962  | 3132.588  | U89715    | 1211.849  | 1180.947  | H07899    | 90.33     |
| AB058719  | 2340.491  | 1386.727  | NM_005227 | 1543.901  | 2612.333  | AA281652  | 1720.809  |
| AK025935  | 911.544   | 1135.029  | NM_000286 | 14072.35  | 12716.166 | U31905    | 3122.813  |
| AB032953  | 775.804   | 738.299   | NM_016454 | 17316.371 | 15712.205 | BC013200  | 675.159   |
| AF082657  | 1178.233  | 2228.933  | NM_003469 | 4093.219  | 3843.683  | AW408832  | 5480.116  |
| NM_006744 | 1275.528  | 1322.073  | NM_000859 | 327.302   | 1461.447  | AA486364  | 5952.403  |
| AF297659  | 733.015   | 1208.326  | NM_00548C | 1810.181  | 923.979   | U57456    | 2641.765  |
| NM_018231 | 2746.218  | 2555.617  | AB034694  | 1156.719  | 754.093   | N70057    | 46285.973 |
| NM_000583 | 4179.69   | 3800.894  | NM_003273 | 793.319   | 2434.391  | NM_006497 | 8502.043  |
| AF222927  | 924.395   | 864.166   | AK026404  | 2224.178  | 1997.77   | NM_006892 | 1308.996  |
| NM_014345 | 4877.074  | 6100.667  | NM_017948 | 10837.714 | 9315.552  | AK000124  | 816.78    |
| NM_018217 | 9867.488  | 11552.871 | NM_000392 | 2623.19   | 2562.199  | NM_00448C | 2079.195  |
| AF241831  | 1999.988  | 1845.394  | AF208536  | 2231.856  | 1080.081  | U89715    | 452.238   |
| NM_003033 | 3777.129  | 3182.812  | AB037848  | 1412.128  | 1652.562  | AF254067  | 1654.39   |
| U96113    | 1551.671  | 1577.393  | AF082657  | 2069.362  | 2678.311  | NM_016363 | 3606.787  |
| NM_002733 | 4518.605  | 2307.568  | NM_006744 | 2973.908  | 3009.444  | AY009090  | 1017.371  |
| M31008    | 1200.965  | 1165.043  | AF297659  | 2353.58   | 1734.91   | NM_005592 | 632.804   |
| NM_006288 | 985.488   | 885.115   | NM_018231 | 3484.036  | 3355.706  | U81380    | 1818.168  |

|           |           |           |           |           |           |           |           |
|-----------|-----------|-----------|-----------|-----------|-----------|-----------|-----------|
| NM_000286 | 9290.58   | 10207.856 | NM_000583 | 5336.831  | 4579.339  | NM_002303 | 1903.312  |
| NM_016454 | 15887.794 | 13665.542 | NM_004254 | 3768.463  | 2908.622  | NM_016509 | 1633.13   |
| NM_003469 | 3417.148  | 2812.774  | AB046833  | 846.651   | 853.059   | AF041038  | 2937.894  |
| NM_000859 | 727.666   | 4054.706  | NM_014914 | 1589.344  | 3151.774  | NM_004536 | 3653.077  |
| AK026404  | 1590.329  | 1319.354  | NM_004484 | 775.698   | 3290.95   | NM_014672 | 5348.504  |
| NM_017948 | 3540.515  | 3277.979  | NM_018289 | 1422.866  | 1840.388  | AK025935  | 1314.317  |
| NM_000392 | 1957.147  | 1466.171  | AB018260  | 1778.877  | 1725.489  | AB032953  | 736.103   |
| NM_000267 | 3900.421  | 3153.058  | NM_014766 | 737.462   | 1353.23   | NM_016441 | 1424.522  |
| NM_016603 | 6291.535  | 4600.821  | NM_016627 | 3015.439  | 4374.308  | NM_006334 | 1897.743  |
| NM_004398 | 21050.016 | 36082.516 | NM_016121 | 1974.52   | 3215.172  | NM_003474 | 927.775   |
| NM_016181 | 2725.327  | 1015.294  | AK026264  | 8315.078  | 15230.967 | NM_004625 | 5314.374  |
| NM_014966 | 4526.448  | 6096.344  | AF222927  | 529.163   | 1111.349  | NM_007179 | 7621.6    |
| NM_014962 | 1229.7    | 1847.058  | NM_014345 | 2844.39   | 3324.755  | NM_001306 | 1365.838  |
| D87684    | 15380.985 | 10636.103 | NM_018217 | 10732.436 | 11310.598 | NM_018231 | 3121.984  |
| NM_006317 | 61656.527 | 44375.488 | AF241831  | 1656.066  | 2780.654  | NM_007163 | 943.215   |
| NM_001219 | 4919.758  | 6409.326  | NM_003033 | 3372.9    | 3287.594  | NM_000583 | 4633.998  |
| AK000124  | 1423.96   | 1861.102  | U96113    | 596.201   | 996.345   | NM_005387 | 4243.523  |
| NM_014914 | 5906.565  | 6969.387  | NM_002733 | 1630.997  | 1147.654  | AF228704  | 2486.054  |
| NM_004484 | 2086.268  | 4132.865  | M31008    | 1139.563  | 1060.296  | AK022746  | 3691.696  |
| NM_018289 | 2460.551  | 2301.36   | NM_006288 | 1091.619  | 1121.016  | NM_006568 | 3945.059  |
| AB018260  | 3397.112  | 2105.666  | NM_016224 | 6736.417  | 7646.174  | NM_006440 | 2465.349  |
| NM_014766 | 1906.555  | 2526.005  | AB046861  | 670.404   | 1007.772  | NM_004847 | 14349.997 |
| NM_016627 | 3777.668  | 4657.458  | AB028173  | 3369.371  | 4704.88   | NM_002255 | 2114.703  |
| NM_016121 | 1716.197  | 2436.715  | AF061034  | 17846.813 | 16616.85  | U96113    | 825.541   |
| NM_014769 | 2056.725  | 2119.317  | X03655    | 734.348   | 639.842   | NM_002733 | 1132.033  |
| NM_006349 | 20824.791 | 27630.404 | BG696293  | 1524.29   | 2353.711  | M31008    | 984.305   |
| AK026264  | 10935.264 | 11218.029 | BC013135  | 8381.62   | 17321.564 | NM_006288 | 967.585   |
| NM_004385 | 2124.142  | 2167.849  | AA281652  | 3086.671  | 4135.975  | NM_016224 | 3478.205  |
| NM_005876 | 28744.881 | 27779.715 | AW408832  | 3281.418  | 4823.874  | NM_005227 | 1718.149  |
| AF039697  | 916.562   | 668.994   | AA486364  | 5216.565  | 6439.297  | NM_000286 | 15856.537 |
| NM_004934 | 423.79    | 572.372   | U57456    | 2849.185  | 3901.469  | NM_016454 | 11388.511 |
| AF284436  | 735.551   | 709.69    | NM_006892 | 1545.369  | 1886.775  | NM_003469 | 3617.994  |
| NM_004445 | 1631.683  | 1255.274  | AK000124  | 1266.766  | 2361.611  | NM_000859 | 762.596   |
| U39657    | 11053.385 | 11661.237 | NM_004480 | 3129.598  | 2235.146  | NM_005480 | 700.39    |
| NM_016340 | 2515.707  | 2377.408  | BC034483  | 3461.937  | 2273.703  | AB034694  | 966.409   |
| NM_018373 | 1009.96   | 823.186   | NM_003620 | 2079.97   | 2545.032  | NM_003273 | 397.935   |
| NM_006449 | 4471.568  | 8523.876  | AA586375  | 1099.348  | 1312.399  | AK026404  | 2658.174  |
| BF216030  | 7560.597  | 6069.071  | BE910339  | 19186.271 | 21156.111 | NM_017948 | 7622.228  |
| NM_002757 | 2676.494  | 3013.03   | AF254067  | 855.107   | 861.986   | NM_000392 | 2324.937  |
| NM_003684 | 3415.556  | 3572.404  | NM_016363 | 2105.771  | 1923.152  | AF208536  | 1689.77   |
| NM_005657 | 2186.771  | 1279.571  | AY009090  | 837.876   | 1015.887  | AB037848  | 1502.774  |
| NM_017671 | 628.819   | 640.848   | U81380    | 700.838   | 654.13    | AF082657  | 999.58    |
| NM_018639 | 8998.35   | 5336.019  | NM_002303 | 1014.378  | 1068.802  | NM_006744 | 1436.219  |
| AF264628  | 251.477   | 682.486   | NM_016509 | 484.632   | 1047.066  | NM_006497 | 4921.555  |
| NM_001146 | 240.913   | 1025.155  | NM_012296 | 2547.266  | 11312.806 | NM_006892 | 1680.131  |
| NM_002663 | 778.514   | 672.138   | AF041038  | 1701.885  | 1705.696  | AK000124  | 657.186   |
| NM_006094 | 3876.253  | 3028.08   | NM_004536 | 2643.846  | 1892.81   | NM_004480 | 1725.034  |
| AF080158  | 2957.523  | 2449.46   | NM_014672 | 1829.336  | 2081.261  | NM_014914 | 2684.215  |
| AB037794  | 1073.177  | 794.534   | AK025935  | 721.173   | 1416.142  | NM_004484 | 1506.919  |
| NM_005935 | 2152.883  | 2440.809  | NM_006334 | 1850.879  | 1807.411  | NM_018289 | 1278.749  |
| NM_012415 | 1678.256  | 1853.816  | NM_003474 | 1311.126  | 1587.626  | AB018260  | 1807.813  |
| NM_004789 | 603.937   | 1378.717  | NM_004625 | 5942.231  | 6391.242  | NM_014766 | 2074.473  |
| AB011112  | 4212.59   | 5197.451  | NM_007179 | 18805.92  | 24152.865 | NM_016627 | 2734.007  |

|           |           |           |           |           |           |           |           |
|-----------|-----------|-----------|-----------|-----------|-----------|-----------|-----------|
| NM_018669 | 2242.202  | 2661.446  | NM_001306 | 2209.448  | 2073.396  | NM_016121 | 1707.476  |
| NM_002623 | 1766.992  | 2069.496  | AF297659  | 1131.827  | 1108.532  | NM_014769 | 3137.703  |
| NM_018844 | 6067.471  | 7404.689  | NM_018231 | 2649.73   | 2694.311  | NM_006349 | 15000.945 |
| AF279778  | 1251.168  | 1450.148  | NM_000583 | 3782.384  | 4085.381  | AK026264  | 12202.072 |
| NM_015477 | 5206.595  | 5903.666  | NM_004254 | 2712.762  | 2290.479  | AF222927  | 1182.394  |
| AK023212  | 3425.252  | 3848.875  | AY007135  | 31107.49  | 48717.766 | NM_014345 | 2872.785  |
| AL353943  | 1099.307  | 1302.007  | AF202889  | 55364.402 | 59907.059 | NM_018217 | 9071.247  |
| BE568801  | 899.723   | 1580.157  | NM_005833 | 2152.239  | 2171.131  | AF241831  | 2208.635  |
| AB002336  | 1225.2    | 651.595   | NM_003100 | 6719.394  | 5422.428  | NM_016441 | 790.287   |
| NM_013286 | 8607.546  | 7870.807  | NM_006768 | 4827.401  | 4261.899  | NM_006334 | 10854.403 |
| NM_006082 | 67079.938 | 60435.258 | NM_013322 | 14152.629 | 5694.823  | NM_003474 | 904.843   |
| NM_006633 | 2575.119  | 971.553   | AB020627  | 2223.944  | 1666.013  | NM_004625 | 4120.734  |
| NM_016262 | 188.999   | 2409.569  | NM_002003 | 589.087   | 649.16    | NM_007179 | 5058.296  |
| AB037858  | 1374.878  | 1048.041  | NM_005387 | 5522.357  | 5093.024  | NM_001306 | 933.752   |
| NM_005775 | 2074.389  | 1524.447  | AL137938  | 17522.018 | 27327.332 | AB046861  | 1008.396  |
| NM_003270 | 2085.293  | 1822.383  | AF228704  | 1350.805  | 1624.001  | AF061034  | 10757.248 |
| AL157437  | 16399.627 | 16416.914 | NM_004215 | 6532.351  | 6737.977  | X03655    | 1985.087  |
| AJ245539  | 705.88    | 642.135   | AK022746  | 4328.529  | 3359.972  | BG696293  | 2403.089  |
| NM_001490 | 3122.352  | 3893.878  | NM_006568 | 6505.13   | 5720.814  | BG113873  | 567.032   |
| NM_017740 | 3866.485  | 5164.855  | NM_006440 | 2660.879  | 3251.81   | BC013135  | 10762.22  |
| AB033052  | 4615.654  | 6489.4    | NM_004847 | 17047.002 | 16707.25  | AI625002  | 1381.798  |
| NM_018227 | 2751.086  | 2554.072  | NM_002255 | 2492.94   | 2432.267  | AA281652  | 1927.152  |
| AF050199  | 985.495   | 417.523   | AF151889  | 22461.4   | 19744.861 | U31905    | 2648.406  |
| NM_003340 | 24660.148 | 29117.924 | U96113    | 530.769   | 688.754   | X52479    | 2489.018  |
| U46752    | 1659.581  | 1644.763  | NM_002733 | 1271.048  | 721.988   | BC013200  | 903.432   |
| NM_002794 | 21569.559 | 18533.406 | M31008    | 797.955   | 904.776   | AW408832  | 5213.67   |
| BF244646  | 32965.141 | 37525.02  | NM_006288 | 1094.517  | 750.518   | AA486364  | 3525.229  |
| AK024030  | 2970.778  | 3091.164  | NM_016224 | 6186.665  | 7233.839  | M15476    | 33903.359 |
| AF275808  | 1630.155  | 847.781   | NM_005227 | 1893.105  | 3032.996  | U57456    | 1789.776  |
| AK024038  | 5030.658  | 7025.026  | NM_003469 | 3621.601  | 3697.006  | AK022746  | 2477.973  |
| NM_002055 | 1786.042  | 1639.128  | NM_000859 | 418.267   | 1857.798  | NM_006568 | 4943.24   |
| NM_005803 | 7775.026  | 8783.588  | NM_005480 | 2673.389  | 1416.589  | NM_002255 | 2072.741  |
| NM_015515 | 8164.209  | 5390.59   | AB034694  | 903.646   | 671.078   | BC034483  | 2637.202  |
| AK001579  | 11317.473 | 13893.692 | NM_003273 | 605.225   | 2280.306  | U89715    | 1089.718  |
| NM_002670 | 3095.951  | 3637.628  | AK026404  | 1984.458  | 1764.068  | AF254067  | 2511.628  |
| AF163302  | 3933.513  | 2303.818  | NM_017948 | 9046.996  | 7817.128  | NM_016363 | 4105.549  |
| NM_006408 | 1132.87   | 1442.788  | NM_000392 | 2356.178  | 1986.226  | AY009090  | 1431.543  |
| NM_002419 | 3574.259  | 2429.062  | AF208536  | 2113.095  | 1336.93   | NM_005592 | 679.74    |
| NM_001989 | 4502.373  | 4676.404  | AB037848  | 1737.977  | 1558.636  | U81380    | 1981.623  |
| NM_002653 | 11770.245 | 13949.479 | AF082657  | 1714.437  | 2433.504  | NM_002303 | 1038.707  |
| NM_005604 | 4618.495  | 1817.631  | NM_006744 | 2799.593  | 1780.836  | NM_016509 | 1114.789  |
| S69023    | 1908.658  | 2844.345  | NM_006497 | 6866.282  | 11587.629 | AF041038  | 2949.471  |
| NM_003454 | 4477.704  | 3124.404  | NM_006892 | 1001.809  | 1345.176  | NM_004536 | 3715.554  |
| NM_003418 | 13399.475 | 34386.902 | AK000124  | 1231.277  | 2039.774  | NM_014672 | 5771.378  |
| NM_017908 | 3047.251  | 1966.933  | NM_004480 | 3539.737  | 2357.015  | AB058719  | 3044.271  |
| NM_006885 | 784.798   | 1439.885  | NM_014914 | 1461.082  | 3271.983  | AK025935  | 666.237   |
| M25077    | 4386.153  | 4979.243  | NM_004484 | 1206.285  | 4090.499  | AF082657  | 1223.003  |
| NM_018702 | 4184.916  | 4121.01   | NM_018289 | 1898.79   | 1797.662  | NM_006744 | 1854.281  |
| M62843    | 503.517   | 632.486   | AB018260  | 2540.767  | 1885.865  | AF297659  | 1027.576  |
| NM_004593 | 1147.3    | 2384.269  | NM_014766 | 2670.432  | 3373.654  | NM_018231 | 2678.336  |
| NM_005778 | 11607.992 | 16455.566 | NM_016627 | 3426.112  | 5316.517  | NM_000583 | 3083.707  |
| NM_001032 | 66388.508 | 52732.676 | NM_016121 | 3069.017  | 3971.213  | AF228704  | 2062.826  |
| NM_018084 | 15903.589 | 23410.961 | NM_014769 | 3649.371  | 3837.574  | AF222927  | 1716.64   |

|           |           |           |           |           |           |           |           |
|-----------|-----------|-----------|-----------|-----------|-----------|-----------|-----------|
| NM_017840 | 17831.885 | 26556.967 | NM_006349 | 27476.99  | 35293.121 | NM_014345 | 3185.692  |
| AK001052  | 49316.02  | 44760.145 | AK026264  | 12934.068 | 21065.813 | NM_018217 | 9820.883  |
| NM_001415 | 46889.25  | 43682.484 | AF222927  | 1863.2    | 2662.49   | AF241831  | 2127.391  |
| NM_004564 | 1064.578  | 1196.002  | NM_014345 | 3812.591  | 5681.7    | NM_003033 | 3363.404  |
| NM_000968 | 64366.09  | 49084.18  | NM_018217 | 12979.235 | 12526.271 | U96113    | 1329.369  |
| AL355743  | 23297.566 | 5520.564  | AF241831  | 1704.82   | 2113.727  | NM_002733 | 1337.036  |
| L77571    | 1610.665  | 990.463   | NM_003033 | 3325.862  | 3095.636  | M31008    | 1008.287  |
| X81896    | 1132.963  | 907.875   | NM_016441 | 1772.775  | 1561.423  | NM_006288 | 2007.269  |
| AF070595  | 1707.452  | 1034.272  | NM_006334 | 1453.646  | 1353.956  | NM_016224 | 4074.829  |
| NM_002202 | 1256.535  | 1594.243  | NM_003474 | 606.899   | 802.338   | NM_005227 | 2047.46   |
| NM_006005 | 2365.655  | 2388.635  | NM_004625 | 3566.31   | 4249.827  | NM_000286 | 15897.753 |
| NM_002629 | 38872.023 | 42890.461 | NM_007179 | 11275.228 | 13200.804 | NM_016454 | 12583.1   |
| NM_014364 | 2035.659  | 2081.316  | NM_001306 | 1031.154  | 1603.655  | NM_003469 | 4714.164  |
| NM_001685 | 63042.922 | 44011.141 | AB046861  | 1224.948  | 1289.633  | NM_000859 | 215.7     |
| NM_006067 | 24943.518 | 29600.713 | AF061034  | 12581.204 | 13016.053 | NM_005480 | 579.288   |
| NM_000284 | 8214.01   | 6562.64   | X03655    | 1458.905  | 1276.472  | AB034694  | 340.431   |
| NM_004813 | 5615.221  | 5086.528  | BG696293  | 2961.397  | 4802.034  | NM_003273 | 528.608   |
| AK023008  | 2675.165  | 2862.348  | BG113873  | 478.066   | 754.746   | AK026404  | 2182.515  |
| NM_004689 | 3306.085  | 4795.551  | BC013135  | 15149.8   | 28967.318 | NM_017948 | 6870.864  |
| NM_006026 | 9759.763  | 10304.664 | AI625002  | 851.723   | 1173.903  | NM_000392 | 2855.045  |
| BG339855  | 775.636   | 919.212   | H07899    | 378.896   | 368.545   | NM_000267 | 1775.564  |
| AB040956  | 4317.12   | 3593.494  | AA281652  | 4553.495  | 5214.926  | NM_016603 | 4664.373  |
| NM_016587 | 1146.31   | 2143.561  | U31905    | 2308.347  | 2564.421  | NM_004398 | 19336.125 |
| NM_003516 | 62481.973 | 11881.396 | X52479    | 2379.312  | 2181.267  | NM_014966 | 2561.618  |
| NM_017953 | 1146.949  | 2199.359  | BC013200  | 401.694   | 1012.344  | NM_014962 | 1561.384  |
| Z11773    | 1789.268  | 2674.351  | AW408832  | 6562.852  | 9638.354  | D87684    | 12441.173 |
| NM_006914 | 496.581   | 803.246   | AA486364  | 7981.735  | 9405.266  | NM_006317 | 67435.148 |
| NM_003446 | 23959.316 | 31474.363 | M15476    | 45131.598 | 46101.773 | NM_001219 | 1411.343  |
| NM_001485 | 4071.465  | 4089.905  | U57456    | 2421.515  | 3243.884  | AK000124  | 696.919   |
| NM_002702 | 836.063   | 776.436   | N70057    | 60751.355 | 55062.051 | NM_004480 | 2269.066  |
| AK021510  | 1347.216  | 1144.116  | AK022746  | 2299.206  | 1309.292  | NM_014914 | 2207.2    |
| AK022711  | 3030.695  | 3105.567  | NM_006568 | 4402.248  | 3551.681  | NM_004484 | 1219.078  |
| AK024310  | 839.436   | 799.682   | NM_006440 | 2036.848  | 2477.47   | NM_018289 | 1640.839  |
| AL109688  | 2241.966  | 2328.777  | NM_004847 | 15963.626 | 13923.408 | AB018260  | 1148.03   |
| AF074981  | 1293.556  | 1092.151  | NM_002255 | 1763.834  | 1861.496  | NM_014766 | 1641.347  |
| AK025863  | 616.64    | 1292.265  | NM_003620 | 3282.74   | 3774.634  | NM_016627 | 2407.847  |
| D42044    | 2136.214  | 2792.691  | AA586375  | 1472.806  | 1616.159  | NM_016121 | 2159.331  |
| AK023009  | 491.218   | 470.691   | BE910339  | 36124.055 | 38570.461 | NM_014769 | 3493.115  |
| AK026149  | 2649.45   | 2995.498  | U89715    | 1140.553  | 970.326   | NM_006349 | 15872.452 |
| AF038185  | 4259.56   | 3365.031  | AF254067  | 2075.808  | 2892.727  | AK026264  | 14875.208 |
| AB027011  | 16183.16  | 15231.89  | NM_016363 | 4209.732  | 5058.45   | NM_004385 | 4093.398  |
| AK025305  | 3567.503  | 2884.084  | AY009090  | 1269.418  | 1724.066  | NM_005876 | 36937.867 |
| AF131788  | 763.965   | 715.522   | NM_005592 | 507.663   | 778.259   | AF039697  | 1855.814  |
| AL117415  | 9432.854  | 10586.493 | U81380    | 953.128   | 768.719   | AF284436  | 1158.976  |
| AK023616  | 632.122   | 909.291   | NM_002303 | 766.2     | 540.603   | NM_004445 | 1056.116  |
| AK025665  | 7808.951  | 9638.598  | NM_016509 | 505.88    | 859.775   | U39657    | 5613.036  |
| U92981    | 1536.058  | 3861.443  | NM_012296 | 3166.913  | 13028.2   | NM_016340 | 1347.041  |
| AL355694  | 1223.102  | 1352.987  | AF041038  | 3694.392  | 3459.055  | NM_018373 | 1059.776  |
| AL049257  | 5336.111  | 1726.736  | NM_004536 | 3559.527  | 3302.364  | NM_006449 | 2549.128  |
| AF191492  | 603.892   | 713.662   | NM_014672 | 3390.861  | 3637.485  | BF216030  | 9011.153  |
| BC037530  | 19617.059 | 20497.307 | AB058719  | 2790.886  | 2754.942  | NM_002757 | 972.537   |
| NM_014851 | 5383.022  | 4601.959  | AK025935  | 1025.06   | 1440.47   | NM_003684 | 2230.803  |
| AK022811  | 1606.129  | 1790.378  | AB032953  | 789.98    | 949.62    | NM_005657 | 1048.45   |

|           |           |           |           |           |           |           |           |
|-----------|-----------|-----------|-----------|-----------|-----------|-----------|-----------|
| AL117635  | 1105.781  | 1564.442  | AF208536  | 1994.487  | 1142.21   | NM_018639 | 2630.743  |
| AK025332  | 1939.042  | 2104.864  | AB037848  | 1016.504  | 1051.441  | NM_001146 | 787.99    |
| AB020735  | 977.403   | 1053.234  | AF082657  | 1555.22   | 2063.935  | NM_001715 | 2761.432  |
| AL109700  | 433.437   | 781.863   | NM_006744 | 1847.802  | 1278.291  | NM_004395 | 5608.545  |
| D17010    | 783.079   | 1050.91   | AF297659  | 1703.37   | 1655.875  | NM_002663 | 1278.706  |
| AJ011596  | 5467.974  | 4825.571  | NM_018231 | 4200.417  | 4726.118  | NM_006094 | 5356.654  |
| U17639    | 810.754   | 654.78    | NM_000583 | 3690.642  | 4211.637  | AF080158  | 1956.912  |
| AL049215  | 32729.402 | 33430.977 | NM_004254 | 3325.591  | 3220.058  | AB037794  | 1875.773  |
| X51779    | 2680.27   | 1943.624  | AB046833  | 698.902   | 838.431   | NM_005935 | 1328.244  |
| AL049254  | 1539.101  | 1327.898  | AY007135  | 20077.145 | 27311.01  | NM_012415 | 1548.752  |
| Z83954    | 4522.295  | 2789.844  | AF202889  | 57068.133 | 53561.582 | NM_014178 | 5389.05   |
| M74093    | 3093.364  | 3169.531  | NM_005833 | 2867.983  | 2903.359  | NM_001251 | 23402.469 |
| M28219    | 3533.805  | 3289.068  | NM_003100 | 8181.444  | 7006.136  | NM_004789 | 300.386   |
| M90754    | 326.827   | 890.047   | NM_006768 | 4847.283  | 5867.214  | AB011112  | 2162.806  |
| L17326    | 2123.384  | 3296.197  | NM_013322 | 16330.846 | 7938.97   | NM_018669 | 1191.394  |
| D17207    | 2337.982  | 3535.086  | AB020627  | 1462.298  | 1602.709  | NM_002623 | 1050.907  |
| D55640    | 1915.893  | 1870.694  | NM_002003 | 1497.064  | 1514.598  | NM_018844 | 1449.748  |
| AF085897  | 994.527   | 957.937   | NM_005387 | 8140.62   | 6480.626  | AF279778  | 378.716   |
| AF085822  | 1122.526  | 1160.977  | AL137938  | 22279.955 | 35257.309 | NM_015477 | 2721.661  |
| AK000024  | 8509.889  | 6993.802  | AF228704  | 1377.787  | 1695.505  | AK023212  | 2029.596  |
| AK026693  | 2768.493  | 2043.985  | NM_004215 | 6373.152  | 5240.527  | AL353943  | 1038.527  |
| NM_012285 | 1457.072  | 1150.223  | AF222927  | 536.99    | 793.908   | BE568801  | 607.315   |
| AK000090  | 615.303   | 664.914   | NM_014345 | 3312.837  | 3904.791  | AB002336  | 1038.379  |
| AK000794  | 3479.41   | 3969.118  | NM_018217 | 12382.101 | 12247.463 | NM_003127 | 939.008   |
| AK000950  | 2883.18   | 2528.369  | AF241831  | 2291.24   | 2068.914  | NM_013286 | 4878.24   |
| AK026812  | 1787.496  | 1786.7    | NM_003033 | 3109.8    | 2841.417  | NM_006082 | 67891.227 |
| AK000176  | 864.379   | 913.873   | U96113    | 1003.855  | 1055.151  | NM_006633 | 2562.032  |
| AK000831  | 2235.554  | 1840.195  | NM_002733 | 1376.541  | 1377.532  | NM_016262 | 273.486   |
| AK000981  | 927.511   | 755.894   | M31008    | 1521.87   | 1210.376  | AB011116  | 6091.902  |
| AK024615  | 1180.056  | 823.938   | NM_006288 | 1430.672  | 894.253   | AB037858  | 2212.382  |
| AK024912  | 769.436   | 1164.815  | NM_016224 | 6828.73   | 7886.524  | NM_000173 | 428.081   |
| AK024935  | 1409.973  | 1258.865  | NM_000286 | 10554.135 | 8559.541  | NM_005775 | 1423.773  |
| AK025107  | 418.476   | 756.884   | NM_016454 | 14468.709 | 12205.617 | NM_017639 | 1309.873  |
| L09099    | 1218.59   | 1365.769  | NM_003469 | 4034.435  | 2998.569  | NM_003270 | 1679.863  |
| NM_005421 | 4075.716  | 3221.29   | NM_005480 | 2959.604  | 2333.552  | AL157437  | 11442.328 |
| AK024580  | 26928.771 | 29520.563 | NM_003273 | 487.355   | 2411.402  | L25629    | 4840.926  |
| AL442093  | 12614.133 | 9215.826  | AK026404  | 2117.276  | 2132.286  | AJ245539  | 973.315   |
| AK024331  | 1552.938  | 2054.463  | NM_017948 | 12109.078 | 10180.558 | NM_001490 | 3289.814  |
| AK000543  | 7829.583  | 10506.652 | NM_000392 | 1152.841  | 1492.209  | NM_017740 | 1641.027  |
| D16906    | 5338.243  | 5810.779  | NM_000267 | 3681.818  | 3259.617  | AB033052  | 1868.173  |
| AK022335  | 1880.927  | 1573.371  | NM_016603 | 7264.634  | 3593.705  | NM_018227 | 1329.079  |
| AL110280  | 3031.35   | 2946.53   | NM_004398 | 42138.938 | 50063.898 | NM_003340 | 15795.04  |
| AK024235  | 701.738   | 1120.075  | NM_016181 | 845.013   | 684.713   | U46752    | 714.365   |
| NM_017458 | 2346.965  | 1196.676  | NM_014966 | 3394.475  | 4180.69   | NM_002794 | 17092.668 |
| AF086196  | 848.554   | 967.766   | NM_014962 | 1819.778  | 2148.426  | BF244646  | 16996.877 |
| NM_005542 | 15878.434 | 39264.313 | D87684    | 12027.98  | 9304.473  | AK024030  | 507.209   |
| X95095    | 2455.265  | 2622.377  | NM_001586 | 657.287   | 925.929   | AF275808  | 1276.57   |
| AF078528  | 20183.766 | 12053.939 | NM_006317 | 67029.289 | 52017.695 | AK024038  | 1458.825  |
| AF161411  | 2105.928  | 1700.516  | NM_001219 | 4833.111  | 5228.925  | NM_002055 | 2644.627  |
| AK000450  | 23816.221 | 18267.764 | AK000124  | 636.18    | 1304.745  | NM_005803 | 6552.146  |
| NM_018224 | 4552.218  | 6508.245  | NM_004480 | 2323.408  | 1956.329  | NM_015515 | 5322.923  |
| NM_019896 | 5725.659  | 5811.56   | NM_014914 | 2979.028  | 4377.57   | AK001579  | 15695.734 |
| J04118    | 664.169   | 839.194   | NM_004484 | 1689.719  | 4605.125  | NM_002670 | 3283.1    |

|           |           |           |           |           |           |           |           |
|-----------|-----------|-----------|-----------|-----------|-----------|-----------|-----------|
| U31734    | 49516.688 | 40902.629 | NM_018289 | 2611.195  | 2230.962  | AF163302  | 5356.633  |
| AF085885  | 3024.764  | 2678.549  | AB018260  | 2931.347  | 2385.719  | NM_006408 | 2839.486  |
| M24751    | 1965.781  | 1443.489  | NM_016627 | 3612.787  | 5886.2    | NM_002419 | 4912.357  |
| AK026569  | 83057.055 | 53173.723 | NM_016121 | 1510.552  | 2429.467  | NM_001989 | 3118.369  |
| AL049974  | 1899.964  | 4296.099  | NM_014769 | 4313.743  | 4948.739  | NM_002653 | 6169.769  |
| AF009319  | 4095.798  | 4039.638  | NM_006349 | 20957.721 | 20563.703 | NM_005604 | 11334.834 |
| AL365519  | 555.758   | 470.594   | AK026264  | 16939.023 | 19497.758 | S69023    | 1312.736  |
| NM_018465 | 6030.874  | 4972.5    | NM_004385 | 2036.898  | 3289.986  | NM_003924 | 1167.598  |
| Z36845    | 1284.46   | 1092.64   | NM_005876 | 44878.516 | 44993.719 | NM_003454 | 3918.215  |
| M73792    | 1190.457  | 873.384   | AF284436  | 866.149   | 851.868   | NM_003418 | 5820.919  |
| NM_016127 | 10050.259 | 9408.499  | NM_004445 | 1065.955  | 1239.753  | NM_017908 | 2232.493  |
| AF085939  | 1288.614  | 1456.553  | U39657    | 7938.388  | 9899.229  | M25077    | 2745.085  |
| NM_006792 | 31460.912 | 38986.895 | NM_016340 | 1983.148  | 2902.824  | NM_018702 | 1790.674  |
| Z36874    | 14590.067 | 36440.57  | NM_018373 | 1190.801  | 1397.677  | NM_004593 | 194.477   |
| AK095477  | 1794.362  | 2271.044  | NM_006449 | 4803.209  | 9448.077  | NM_005778 | 4291.928  |
| AK023326  | 777.154   | 748.479   | BF216030  | 10081.907 | 9494.735  | NM_001032 | 71518.367 |
| AK022462  | 796.863   | 983.709   | NM_002757 | 1743.462  | 1714.179  | NM_018084 | 6504.767  |
| NM_020530 | 1374.017  | 1096.726  | NM_001715 | 3042.449  | 4580.158  | AF164797  | 44082.582 |
| AK022418  | 2623.742  | 3481.501  | NM_004395 | 8784.935  | 11635.714 | NM_017840 | 16311.914 |
| AL137257  | 7047.957  | 6487.086  | NM_002663 | 1430.644  | 1349.793  | AK001052  | 17411.727 |
| AF086503  | 474.502   | 682.69    | NM_006094 | 6431.647  | 6567.363  | NM_001415 | 29971.223 |
| CY3Cy5    | 26128.791 | 2331.89   | AF080158  | 4450.818  | 2913.296  | NM_004564 | 3475.765  |
| AA778392  | 1951.295  | 2385.878  | AB037794  | 1843.882  | 1978.582  | NM_000968 | 53109.734 |
| AI478178  | 686.288   | 963.875   | NM_005935 | 1434.885  | 1642.265  | AL355743  | 21481.221 |
| AA101279  | 582.457   | 568.992   | NM_012415 | 2234.634  | 1172.92   | L77571    | 1666.765  |
| M19154    | 588.1     | 1426.946  | NM_014178 | 8179.699  | 10958.102 | X81896    | 741.222   |
| AA399410  | 5046.857  | 5313.521  | NM_001251 | 28378.828 | 28691.289 | AF070595  | 806.512   |
| AA137031  | 1901.506  | 1998.567  | NM_004789 | 875.873   | 785.948   | NM_002202 | 1158.759  |
| AA292226  | 2143.265  | 6455.284  | AB011112  | 3543.248  | 2889.837  | NM_006005 | 1590.961  |
| NM_000500 | 1353.511  | 1652.412  | NM_018669 | 2780.015  | 2174.708  | NM_002629 | 18801.557 |
| BC007031  | 5018.825  | 4863.899  | NM_002623 | 2097.144  | 3096.317  | NM_014364 | 1201.582  |
| AF129756  | 7557.576  | 7259.271  | NM_018844 | 3388.46   | 3893.924  | NM_001685 | 34788.242 |
| NM_002957 | 19728.719 | 19687.096 | AF279778  | 711.821   | 900.823   | NM_006067 | 8674.612  |
| BC036369  | 2903.938  | 2940.543  | NM_015477 | 8134.284  | 5786.128  | NM_000284 | 2554.425  |
| X12492    | 14982.778 | 14289.653 | NM_003127 | 605.793   | 816.812   | NM_004813 | 2101.726  |
| U93051    | 10015.091 | 13685.892 | NM_016262 | 598.251   | 4031.781  | AK023008  | 1401.453  |
| SR2       | 62545.145 | 48387.234 | AB011116  | 13661.674 | 12676.907 | NM_004689 | 1210.683  |
| SR4       | 27514.676 | 20749.949 | AB037858  | 2767.167  | 2228.577  | NM_006026 | 2741.069  |
| SR6       | 4292.942  | 2859.944  | NM_005775 | 1916.987  | 2300.162  | BG339855  | 827.332   |
| SR8       | 14312.692 | 32768.484 | NM_017639 | 1935.897  | 1284.031  | AB040956  | 3839.46   |
| SR10      | 53462.773 | 15728.084 | NM_003270 | 2357.118  | 1703.503  | NM_016587 | 567.386   |
| CY3Cy5    | 24648.457 | 1507.112  | AL157437  | 9793.517  | 10794.396 | NM_003516 | 76419.852 |
| NM_005682 | 1210.487  | 1374.342  | L25629    | 2169.978  | 3102.355  | NM_017953 | 642.453   |
| NM_002926 | 320.875   | 671.246   | NM_001490 | 3043.667  | 3487.423  | BC000124  | 11848.266 |
| NM_018697 | 739.738   | 1258.663  | NM_017740 | 3728.474  | 3740.302  | Z11773    | 435.966   |
| NM_014030 | 12981.406 | 12622.95  | AB033052  | 4115.572  | 4202.924  | NM_003446 | 15745.797 |
| NM_004224 | 1104.444  | 1286.925  | NM_018227 | 3093.669  | 2264.334  | NM_001485 | 5876.938  |
| NM_000254 | 1899.614  | 2700.317  | NM_003340 | 19064.123 | 25998.803 | NM_002702 | 1202.274  |
| Z21967    | 3059.8    | 2646.571  | AK024030  | 1258.076  | 2222.576  | AK023039  | 1844.508  |
| NM_003738 | 588.063   | 793.748   | AF275808  | 723.649   | 567.158   | AL109688  | 4171.431  |
| NM_016185 | 8656.272  | 9326.578  | AK024038  | 3022.466  | 3172.987  | AF074981  | 2220.552  |
| NM_012110 | 6157.047  | 5415.81   | NM_002055 | 3466.862  | 3323.155  | AK025863  | 401.125   |
| NM_005461 | 2593.585  | 779.37    | NM_005803 | 9096.414  | 11906.866 | D42044    | 364.821   |



|           |           |           |           |           |           |           |           |
|-----------|-----------|-----------|-----------|-----------|-----------|-----------|-----------|
| AF052693  | 5367.429  | 4671.289  | NM_015515 | 8150.747  | 5158.206  | AK026149  | 1586.762  |
| NM_001129 | 16839.563 | 19741.846 | AK001579  | 12779.4   | 13257.945 | AF038185  | 4400.947  |
| L09100    | 2496.637  | 2228.449  | NM_002670 | 6270.443  | 10563.642 | AB027011  | 14556.405 |
| NM_005472 | 2471.406  | 2486.823  | AF163302  | 5519.654  | 4988.354  | AL117415  | 10404.175 |
| NM_004313 | 877.172   | 1411.125  | NM_006408 | 4528.065  | 6415.118  | AK023616  | 850.934   |
| NM_013435 | 1100.704  | 1432.854  | NM_002419 | 7196.44   | 5757.924  | AK025665  | 2241.388  |
| NM_000132 | 16441.404 | 8793.721  | NM_001989 | 8108.055  | 9223.565  | AL355694  | 995.467   |
| NM_001727 | 3868.379  | 3509.594  | NM_002653 | 10173.577 | 12975.381 | AF191492  | 1091.58   |
| BG717460  | 7688.532  | 4301.635  | NM_005604 | 4460.677  | 3045.331  | BC037530  | 30064.342 |
| NM_004161 | 3439.917  | 6794.473  | S69023    | 2003.563  | 2428.08   | NM_014851 | 9456.133  |
| NM_001295 | 2418.096  | 960.081   | NM_003454 | 2760.379  | 2437.53   | AJ011596  | 5052.905  |
| NM_005161 | 385.039   | 854.079   | NM_003418 | 9303.138  | 16183.573 | U17639    | 1047.726  |
| AB037749  | 448.133   | 500.724   | NM_017908 | 2231.986  | 1879.588  | AL049215  | 27853.334 |
| NM_020347 | 442.399   | 778.177   | NM_006885 | 806.388   | 861.407   | X51779    | 2186.866  |
| NM_001462 | 987.09    | 818.754   | M25077    | 5985.828  | 3855.058  | X81001    | 642.608   |
| AF068286  | 291.526   | 340.702   | NM_004593 | 995.261   | 1053.591  | AL049254  | 1854.445  |
| AB040957  | 1976.042  | 1559.607  | NM_005778 | 10134.124 | 10273.368 | Z83954    | 5572.021  |
| NM_003110 | 1853.256  | 1618.878  | NM_001032 | 63160.273 | 59568.008 | M74093    | 4948.126  |
| NM_003612 | 1707.797  | 1326.517  | NM_018084 | 13852.044 | 17549.145 | M28219    | 2677.382  |
| NM_013230 | 1144.25   | 1493.215  | AF164797  | 60612.016 | 53793.949 | D17207    | 2737.488  |
| X72308    | 2926.876  | 2217.11   | NM_017840 | 22872.303 | 19383.996 | D55640    | 1867.499  |
| BC008376  | 17874.68  | 13276.325 | AK001052  | 23966.686 | 31381.74  | AF085897  | 1514.59   |
| AB041269  | 1234.561  | 1322.584  | NM_001415 | 48537     | 48567.715 | AF085822  | 858.74    |
| AK024908  | 4679.19   | 4226.425  | NM_004564 | 3304.377  | 3851.273  | AK026693  | 1082.42   |
| NM_018270 | 5038.863  | 6713.839  | NM_000968 | 61512.031 | 55217.816 | AK000794  | 3425.172  |
| NM_000260 | 42319.316 | 39755.645 | AL355743  | 12116.86  | 3928.045  | AK000950  | 1577.738  |
| NM_014160 | 4714.805  | 8142.841  | X81896    | 975.576   | 724.024   | AK026812  | 1063.22   |
| AB033049  | 25327.4   | 29363.137 | AF070595  | 1404.678  | 1063.187  | AK000176  | 789.123   |
| AB037815  | 2405.949  | 3692.499  | NM_002202 | 2325.031  | 2408.743  | AK000831  | 1691.404  |
| NM_003645 | 1492.271  | 3331.191  | NM_006005 | 2645.948  | 1649.333  | AK000981  | 621.053   |
| AF263613  | 3042.612  | 1966.624  | NM_002629 | 61682.547 | 44731.137 | AK024615  | 1131.016  |
| NM_017750 | 1371.533  | 951.016   | NM_014364 | 2722.329  | 2625.389  | AK025054  | 6962.888  |
| AK026196  | 1125.099  | 1598.175  | NM_001685 | 68473.672 | 45704.945 | AK024556  | 2196.017  |
| AL137668  | 808.482   | 724.807   | NM_006067 | 24050.84  | 17417.34  | S75762    | 440.742   |
| NM_013348 | 1540.955  | 1147.246  | NM_000284 | 4081.645  | 2918.254  | U50531    | 2525.724  |
| NM_004977 | 3339.731  | 2954.676  | NM_004813 | 4947.09   | 2842.604  | NM_005318 | 4372.096  |
| NM_004888 | 18851.99  | 16483.559 | AK023008  | 2011.052  | 3226.566  | L09099    | 710.446   |
| NM_012283 | 37201.91  | 40807.211 | NM_004689 | 4803.672  | 5571.164  | NM_005421 | 3057.322  |
| NM_004700 | 1914.567  | 2802.624  | NM_006026 | 12183.228 | 9407.723  | AK024580  | 17760.723 |
| NM_005881 | 984.312   | 746.615   | AB040956  | 3041.345  | 3179.285  | AL442093  | 7268.445  |
| L40519    | 1413.24   | 1301.926  | NM_016587 | 1176.791  | 1977.173  | AK024331  | 1881.952  |
| NM_004204 | 755.468   | 1071.675  | NM_003516 | 69047.516 | 12136.205 | AK024452  | 5219.087  |
| AK002181  | 805.49    | 1079.111  | NM_017953 | 2265.972  | 2509.888  | AJ249975  | 668.034   |
| AK025769  | 1715.835  | 2389.4    | BC000124  | 20157.885 | 16480.525 | AK021733  | 2776.177  |
| AW945166  | 729.37    | 709.549   | Z11773    | 531.684   | 1085.918  | NM_012449 | 846.365   |
| NM_005236 | 2257.814  | 2472.466  | NM_003446 | 27209.68  | 23241.666 | AK026683  | 1850.919  |
| NM_014225 | 26260.631 | 34865.488 | NM_001485 | 12529.471 | 14629.315 | D16906    | 4622.081  |
| AL133077  | 32313.09  | 39413.793 | AK021510  | 856.157   | 951.85    | AL079309  | 3302.617  |
| U06715    | 1350.538  | 1229.351  | AK022711  | 2215.999  | 1294.89   | AK022335  | 1355.205  |
| NM_013402 | 13500.39  | 13505.397 | AK024310  | 1061.941  | 898.869   | NM_017458 | 839.347   |
| NM_002662 | 1309.281  | 1365.778  | AL109688  | 4484.435  | 4943.195  | AF086196  | 1005.539  |
| NM_000132 | 6029.573  | 3723.844  | AF074981  | 1409.496  | 1373.837  | NM_005542 | 6662.607  |
| NM_001727 | 1398.73   | 1668.476  | AK025863  | 1152.823  | 1399.386  | X95095    | 2810.823  |

|           |           |           |           |           |           |           |           |
|-----------|-----------|-----------|-----------|-----------|-----------|-----------|-----------|
| NM_004076 | 1394.544  | 3192.504  | D42044    | 1714.474  | 2315.231  | AF078528  | 26992.23  |
| BG717460  | 6606.217  | 3318.165  | AK026149  | 2208.298  | 1315.141  | AF161411  | 1600.175  |
| AI478178  | 2637.156  | 2977.207  | AF038185  | 3596.989  | 3002.421  | AK000450  | 14591.276 |
| AA101279  | 476.491   | 1410.423  | AB027011  | 24955.824 | 20718.139 | NM_018224 | 6503.443  |
| M19154    | 2064.751  | 2791.047  | AF131788  | 254.698   | 693.689   | NM_019896 | 2377.572  |
| AA399410  | 6784.519  | 5681.025  | AL117415  | 8311.699  | 5974.884  | NM_018569 | 3976.146  |
| AA137031  | 2269.793  | 1605.815  | AK023616  | 1119.259  | 784.621   | J04118    | 1306.672  |
| AA292226  | 3001.454  | 6861.26   | AK025665  | 3612.565  | 4191.442  | AF085885  | 2137.866  |
| NM_00050C | 2079.649  | 1997.468  | BC037530  | 22330.723 | 24754.047 | AL365519  | 841.743   |
| BC007031  | 6283.624  | 4975.844  | NM_014851 | 6593.188  | 5877.322  | NM_018465 | 4600.705  |
| AF129756  | 8996.406  | 6646.548  | AL117635  | 2104.624  | 1133.28   | Z36845    | 1650.088  |
| BC036369  | 3201.032  | 2445.729  | AK025332  | 3551.991  | 2891.226  | M73792    | 655.604   |
| NM_01754C | 1297.194  | 974.046   | AB020735  | 1942.759  | 1204.671  | NM_016127 | 2075.004  |
| NM_01827C | 2663.764  | 4259.271  | D17010    | 1243.108  | 830.649   | NM_006792 | 16136.646 |
| NM_00026C | 15849.481 | 16649.146 | U17639    | 1986.281  | 1638.678  | Z36874    | 8007.323  |
| NM_01416C | 1889.811  | 3425.267  | AL049215  | 59093.09  | 50276.137 | AK095477  | 1076.297  |
| NM_01766E | 4786.508  | 3112.561  | X51779    | 3829.988  | 4076.975  | AK023326  | 866.711   |
| NM_005682 | 1754.472  | 2046.017  | X81001    | 1428.615  | 2106.666  | AK022462  | 1197.003  |
| NM_00292E | 881.521   | 1491.516  | AL049254  | 2217.067  | 1424.832  | NM_02053C | 1705.522  |
| NM_018697 | 982.378   | 1270.145  | Z83954    | 9041.905  | 5949.497  | AK022418  | 3322.018  |
| AF090116  | 402.44    | 329.932   | M74093    | 6043.479  | 3723.97   | AF279777  | 3134.658  |
| NM_01403C | 21289.084 | 17190.549 | M28219    | 3974.139  | 2816.521  | AK021748  | 26845.223 |
| NM_004224 | 1024.556  | 1410.734  | L17326    | 1614.061  | 1025.692  | AK021771  | 485.653   |
| NM_000254 | 4407.828  | 4934.315  | D17207    | 2071.798  | 3088.398  | AL137257  | 9312.909  |
| Z21967    | 6715.051  | 4775.637  | D55640    | 1542.536  | 1571.996  | AF086503  | 906.079   |
| NM_012110 | 8278.589  | 7159.092  | AF085897  | 1102.487  | 1073.401  | CY3Cy5    | 16242.238 |
| NM_005461 | 4177.494  | 1203.643  | AF085822  | 822.761   | 1079.166  | AA778392  | 8308.058  |
| NM_001129 | 21055.301 | 25074.176 | AK021551  | 1561.521  | 1859.255  | AI478178  | 1642.112  |
| L09100    | 2868.474  | 2874.519  | AK025117  | 1010.587  | 645.228   | AA101279  | 931.3     |
| NM_005472 | 2617.991  | 2333.443  | AK026693  | 2462.082  | 1919.853  | M19154    | 2477.051  |
| NM_004313 | 887.708   | 708.951   | NM_01228E | 1076.587  | 953.478   | AA399410  | 5726.693  |
| NM_01343E | 870.807   | 913.222   | AK000794  | 6255.138  | 5785.09   | AA137031  | 2671.991  |
| NM_004161 | 9975.097  | 11462.791 | AK000950  | 1544.024  | 1455.501  | AA292226  | 2545.328  |
| NM_00129E | 7910.29   | 1973.515  | AK000831  | 2561.359  | 1620.467  | NM_00050C | 949.351   |
| NM_005161 | 641.093   | 643.987   | AK024615  | 1056.897  | 920.664   | M29873    | 443.613   |
| NM_020347 | 519.28    | 762.98    | AK025054  | 4761.942  | 4170.729  | BC007031  | 8627.961  |
| NM_001462 | 1394.899  | 1086.232  | AK024556  | 2327.335  | 2377.299  | AF129756  | 10041.142 |
| NM_004072 | 631.07    | 500.81    | AK024728  | 1530.945  | 1657.724  | NM_002957 | 21262.076 |
| AF068286  | 487.259   | 365.041   | AK025325  | 3558.332  | 2242.851  | BC036369  | 2491.214  |
| AB040957  | 3414.323  | 1954.199  | U50531    | 2969.363  | 2682.396  | X12492    | 6872.404  |
| NM_00689C | 581.937   | 899.514   | NM_00531E | 20601.719 | 10657.969 | U93051    | 7907.294  |
| NM_003110 | 5172.679  | 5665.306  | AB015434  | 2899.56   | 1960.515  | SR6       | 4474.191  |
| NM_003612 | 3427.439  | 4039.974  | NM_005421 | 2693.021  | 2608.885  | SR8       | 12175.211 |
| NM_01323C | 2374.466  | 2699.615  | AK024580  | 31428.551 | 32182.432 | SR10      | 42898.859 |
| X72308    | 5265.924  | 3470.144  | AL442093  | 11930.096 | 8189.076  | CY3Cy5    | 14731.979 |
| NM_00540E | 1041.641  | 1090.025  | AK024331  | 2123.303  | 2426.046  | NM_00040E | 588.612   |
| AB041269  | 1355.344  | 950.829   | AK024452  | 3324.519  | 3687.624  | NM_005682 | 5522.947  |
| AK024908  | 4773.103  | 3294.187  | AK021733  | 1069.004  | 903.571   | NM_00292E | 841.043   |
| AL133077  | 24914.465 | 18520.463 | NM_01244E | 675.795   | 560.574   | NM_000233 | 406.896   |
| NM_013402 | 12517.092 | 13596.784 | AK000543  | 13309.44  | 9388.272  | NM_018697 | 880.949   |
| NM_002662 | 1264.275  | 956.585   | AK026683  | 4140.532  | 3822.615  | AF090116  | 631.12    |
| NM_004377 | 3048.165  | 2455.243  | D16906    | 7051.217  | 7198.12   | NM_01403C | 21790.787 |
| AB037815  | 4952.588  | 4841.641  | AJ012492  | 2276.961  | 1009.275  | NM_004224 | 3104.783  |

|           |           |           |           |           |           |           |           |
|-----------|-----------|-----------|-----------|-----------|-----------|-----------|-----------|
| NM_003645 | 2744.125  | 4840.774  | AL079309  | 6501.007  | 5161.883  | NM_000254 | 3290.989  |
| NM_01775C | 3641.82   | 2006.948  | AL110280  | 6926.116  | 8780.392  | Z21967    | 4433.365  |
| AK026196  | 2110.432  | 3719.008  | AF014457  | 806.212   | 754.198   | NM_016185 | 14093.931 |
| AL137668  | 800.715   | 1512.105  | NM_01745E | 2205.828  | 2351.61   | NM_012110 | 9700.923  |
| NM_01334E | 2296.357  | 1207.66   | AF086196  | 2046.937  | 2139.272  | NM_005461 | 4027.084  |
| NM_004977 | 4941.479  | 4064.989  | NM_005542 | 19069.807 | 37471.336 | AF052693  | 3520.636  |
| NM_012283 | 44219.398 | 39576.441 | X95095    | 2417.852  | 1744.028  | NM_001129 | 6412.785  |
| NM_00470C | 1603.937  | 1296.402  | AF078528  | 23092.934 | 12599.804 | L09100    | 1477.133  |
| NM_006755 | 3758.965  | 3296.175  | AF161411  | 3650.051  | 2643.35   | NM_005472 | 1462.283  |
| NM_005881 | 2321.617  | 1113.382  | AK000450  | 18989.156 | 14581.68  | NM_004313 | 165.51    |
| L40519    | 1720.995  | 1505.065  | NM_018224 | 12373.799 | 16530.129 | NM_013435 | 382.448   |
| NM_004204 | 1202.011  | 1357.451  | NM_019896 | 3485.467  | 3832.489  | NM_000132 | 8927.151  |
| AW945166  | 1213.267  | 2252.663  | NM_018569 | 4930.081  | 6035.369  | NM_001727 | 1957.275  |
| NM_001129 | 16934.426 | 15262.508 | J04118    | 341.163   | 542.827   | BG717460  | 5203.065  |
| L09100    | 1461.595  | 1198.542  | NM_00073C | 11984.1   | 9052.864  | NM_004161 | 4903.473  |
| NM_005472 | 1758.125  | 2108.54   | U31734    | 65149.598 | 49272.266 | NM_001295 | 10504.287 |
| NM_004313 | 478.204   | 767.426   | AF085885  | 6097.716  | 2779.477  | NM_005161 | 967.348   |
| NM_013435 | 544.486   | 714.412   | M24751    | 3116.824  | 1818.055  | AB037749  | 72.593    |
| NM_000132 | 17552.133 | 14221.544 | AK022953  | 1552.663  | 991.73    | NM_001462 | 1690.586  |
| NM_001727 | 2782.027  | 2849.771  | AF009319  | 6132.427  | 7136.255  | NM_004072 | 1000.259  |
| NM_004076 | 1915.219  | 3818.966  | NM_018465 | 7240.326  | 8340.931  | AF068286  | 200.954   |
| BG717460  | 8593.48   | 4635.081  | Z36845    | 2724.617  | 2450.909  | AB040957  | 2693.536  |
| AA778392  | 10438.931 | 10768.582 | NM_016127 | 2007.602  | 2885.195  | NM_003110 | 2783.18   |
| AI478178  | 2630.253  | 2474.444  | NM_006792 | 19194.799 | 11919.43  | NM_003612 | 2332.441  |
| AA101279  | 1026.357  | 844.542   | Z36874    | 29292.361 | 28177.422 | NM_01323C | 1277.338  |
| AA292226  | 4059.131  | 11734.73  | AK095477  | 3313.041  | 3523.866  | X72308    | 5860.964  |
| NM_00050C | 2206.788  | 3587.892  | AK023326  | 1614.376  | 1368.501  | NM_00540E | 696.944   |
| M29873    | 1040.214  | 647.847   | AK022462  | 3230.266  | 3510.701  | BC008376  | 22015.373 |
| J04449    | 451.702   | 374.437   | NM_02053C | 3914.826  | 4505.757  | AB041269  | 1632.389  |
| BC007031  | 6274.38   | 4999.291  | AK022418  | 1475.091  | 2803.632  | AK024908  | 3017.84   |
| NM_002957 | 19233.609 | 15950.33  | AF279777  | 1567.658  | 1315.212  | NM_01827C | 2507.449  |
| BC036369  | 2471.766  | 3026.455  | AK021748  | 41023.508 | 32892.949 | NM_00026C | 24756.666 |
| X12492    | 17963.98  | 14952.075 | AL137257  | 21775.502 | 15772.457 | NM_01416C | 1952.529  |
| X72308    | 3208.924  | 2153.124  | CY3Cy5    | 25014.098 | 1432.837  | AF230877  | 3907.424  |
| NM_00540E | 994.08    | 1210.68   | AA778392  | 22479.594 | 28291.701 | AB033049  | 24159.121 |
| BC008376  | 15622.623 | 10546.073 | AI478178  | 5413.552  | 6705.962  | NM_004377 | 2098.916  |
| AB041269  | 1085.116  | 1175.782  | AA101279  | 1617.361  | 2053.01   | AB037815  | 8710.932  |
| AK024908  | 3552.8    | 2650.602  | M19154    | 4877.133  | 7559.095  | NM_003645 | 2072.402  |
| NM_01827C | 4553.213  | 8130.316  | AA399410  | 13620.137 | 11482.253 | AF263613  | 2897.357  |
| NM_00026C | 21428.488 | 21896.313 | AA137031  | 3169.245  | 3719.864  | NM_000097 | 627.908   |
| NM_01416C | 4298.199  | 10364.437 | AA292226  | 6649.052  | 13971.066 | NM_01775C | 1552.579  |
| NM_01766E | 4913.616  | 3772.745  | NM_00050C | 4946.625  | 5356.607  | AK026196  | 1652.591  |
| AB033049  | 18692.246 | 17788.447 | M29873    | 1027.294  | 1160.765  | AL137668  | 587.105   |
| NM_005682 | 2503.846  | 1564.375  | J04449    | 539.6     | 858.931   | NM_01334E | 2348.983  |
| NM_002926 | 1708.209  | 1814.213  | BC007031  | 11136.919 | 11411.523 | NM_004977 | 5525.82   |
| NM_018697 | 1609.116  | 2528.571  | AF129756  | 16630.125 | 21817.723 | NM_00488E | 14134.874 |
| AF090116  | 558.188   | 552.334   | NM_002957 | 26720.166 | 35525.375 | NM_012283 | 26965.9   |
| NM_01403C | 25248.516 | 30048.469 | BC036369  | 4410.808  | 6197.423  | NM_00470C | 1451.106  |
| NM_004224 | 1780.945  | 2442.614  | X12492    | 15980.566 | 20505.885 | NM_007166 | 3566.505  |
| NM_000254 | 6053.177  | 12314.259 | U93051    | 12781.591 | 23883.436 | NM_002869 | 2192.74   |
| Z21967    | 5422.955  | 4498.611  | SR2       | 48075.867 | 46391.902 | NM_006755 | 3923.245  |
| NM_005461 | 4206.888  | 1426.315  | SR4       | 22911.893 | 28396.328 | NM_005881 | 322.662   |
| NM_01334E | 1479.658  | 1547.759  | SR6       | 4042.605  | 4988.819  | L40519    | 601.995   |

|           |           |           |           |           |           |           |           |
|-----------|-----------|-----------|-----------|-----------|-----------|-----------|-----------|
| NM_004977 | 3576.671  | 2845.489  | SR8       | 13389.182 | 30489.182 | NM_004204 | 635.438   |
| NM_004888 | 26385.691 | 22893.764 | SR10      | 39699.426 | 20170.889 | AK002181  | 2307.227  |
| NM_002251 | 556.824   | 1253.829  | CY3Cy5    | 17517.629 | 677.851   | NM_001641 | 10158.667 |
| NM_012283 | 28621.244 | 30565.566 | NM_000406 | 940.58    | 676.721   | BC015750  | 57837.926 |
| NM_004700 | 1133.165  | 1193.392  | NM_005682 | 4623.551  | 3700.116  | AK025769  | 1855.599  |
| NM_004161 | 12625.368 | 15594.261 | NM_002926 | 3254.328  | 3009.113  | AW945166  | 587.82    |
| NM_001295 | 10515.036 | 2266.582  | NM_000233 | 309.674   | 664.235   | NM_005236 | 1537.74   |
| NM_005161 | 766.748   | 764.549   | NM_018697 | 2700.043  | 3301.376  | NM_006384 | 7295.375  |
| AB037749  | 752.896   | 582.682   | AF090116  | 814.313   | 1166.313  | NM_013257 | 2153.288  |
| NM_020347 | 999.551   | 1230.699  | NM_014030 | 55258.863 | 54110.105 | NM_014225 | 13016.857 |
| NM_001462 | 2357.58   | 1421.38   | NM_004224 | 10789.131 | 11217.852 | AF163473  | 570.138   |
| NM_004072 | 1227.381  | 1870.872  | Z21967    | 10384.418 | 9444.289  | NM_006256 | 3229.127  |
| AF068286  | 817.051   | 1607.042  | NM_003738 | 945.024   | 907.523   | NM_002846 | 1312.599  |
| AB040957  | 3988.712  | 2782.546  | NM_016185 | 40838.758 | 31274.633 | NM_002837 | 2276.438  |
| NM_013230 | 2340.878  | 2941.334  | NM_012110 | 15229.92  | 16315.166 | AL133077  | 13612.814 |
| NM_014225 | 41414.18  | 40856.5   | NM_005461 | 1657.052  | 2102.535  | AK025211  | 2294.317  |
| U06715    | 1322.823  | 1366.986  | AF052693  | 6995.965  | 8938.571  | U06715    | 711.593   |
| NM_004377 | 3496.157  | 2625.417  | NM_001129 | 19491.363 | 32019.398 | NM_000132 | 8145.327  |
| AB037815  | 4273.599  | 4171.005  | L09100    | 1948.847  | 3178.346  | NM_001727 | 1362.405  |
| NM_003645 | 3148.208  | 8741.847  | NM_005472 | 1547.108  | 2304.939  | NM_004076 | 1420.085  |
| NM_017750 | 4479.246  | 3153.854  | NM_004313 | 982.34    | 992.844   | BG717460  | 4199.82   |
| AK026196  | 1632.129  | 2537.895  | NM_013435 | 1032.013  | 1262.348  | AI478178  | 2009.933  |
| AL137668  | 1117.433  | 976.752   | NM_004076 | 2752.681  | 5238.515  | AA101279  | 837.002   |
| NM_016444 | 1296.437  | 1511.19   | BG717460  | 9200.554  | 8546.478  | M19154    | 3014.685  |
| NM_017839 | 2717.185  | 2315.266  | NM_018086 | 23602.951 | 15288.036 | AA399410  | 6126.785  |
| NM_003707 | 5304.513  | 9258.229  | NM_004161 | 13253.063 | 12079.031 | AA137031  | 2756.789  |
| AL137718  | 937.168   | 1814.104  | NM_001295 | 9093.849  | 3283.246  | AA292226  | 2320.541  |
| NM_003460 | 3804.183  | 4803.759  | NM_005161 | 2328.686  | 2748.625  | NM_000500 | 1045.536  |
| NM_002904 | 22462.227 | 35736.887 | AB037749  | 746.338   | 965.48    | M29873    | 449.581   |
| NM_005686 | 5359.341  | 4799.614  | NM_020347 | 622.377   | 1064.427  | BC007031  | 7583.052  |
| NM_006767 | 1182.906  | 775.601   | NM_001462 | 4032.313  | 3797.213  | AF129756  | 10068.003 |
| NM_017540 | 1712.223  | 1491.629  | NM_004072 | 2371.122  | 2700.658  | NM_002957 | 17848.258 |
| NM_006755 | 11104.73  | 6226.003  | AF068286  | 569.748   | 735.869   | BC036369  | 2379.325  |
| NM_005881 | 3027.686  | 1170.849  | NM_006890 | 626.146   | 1135.167  | X12492    | 6872.815  |
| L40519    | 2751.32   | 2251.898  | NM_003110 | 7153.196  | 5281.512  | U93051    | 7449.364  |
| NM_004204 | 1399.49   | 1201.675  | NM_003612 | 3114.395  | 3264.88   | NM_017540 | 1219.521  |
| AK002181  | 1006.482  | 899.821   | NM_013230 | 3073.258  | 3498.146  | NM_018270 | 2972.167  |
| BC015750  | 71270.695 | 50952.102 | X72308    | 8631.779  | 10367.703 | NM_000260 | 24663.336 |
| AK025769  | 3848.997  | 7055.147  | NM_005408 | 748.755   | 1359.56   | NM_014160 | 1805.637  |
| AW945166  | 1837.255  | 1927.863  | BC008376  | 13214.066 | 12171.89  | NM_017668 | 2682.961  |
| NM_002589 | 6840.707  | 6738.444  | X87895    | 275.662   | 620.044   | NM_000406 | 764.827   |
| AF064846  | 1506.928  | 2301.175  | AB041269  | 2267.707  | 2167.804  | NM_005682 | 3987.444  |
| AL110227  | 1182.374  | 2381.945  | AK024908  | 6980.586  | 7438.346  | NM_002926 | 1234.445  |
| NM_001400 | 2180.431  | 1891.089  | NM_018270 | 10074.665 | 12298.759 | NM_018697 | 814.825   |
| AB011161  | 1643.282  | 1738.622  | AF230877  | 4889.182  | 7845.445  | NM_014030 | 28971.289 |
| NM_002944 | 1670.024  | 1849.543  | AB033049  | 69831.992 | 62475.164 | NM_004224 | 3086.604  |
| AF327354  | 2554.652  | 2029.997  | NM_004377 | 8068.058  | 4939.065  | NM_000254 | 3309.222  |
| NM_003961 | 58774.02  | 42615.926 | AB037815  | 19694.021 | 19132.242 | Z21967    | 5429.146  |
| AB014513  | 3015.482  | 2416.104  | NM_003645 | 8570.262  | 7364.939  | NM_003738 | 591.245   |
| NM_004747 | 1452.746  | 828.04    | AF263613  | 5159.077  | 2830.415  | NM_016185 | 13405.21  |
| AK024430  | 39002.078 | 34754.156 | NM_000097 | 2272.726  | 2263.93   | NM_012110 | 7922.893  |
| NM_002341 | 50832.121 | 7262.826  | NM_001509 | 1998.04   | 3361.014  | NM_005461 | 4176.076  |
| AL137651  | 2036.011  | 1766.358  | AK022878  | 10656.28  | 10744.726 | AF052693  | 3142.303  |

|           |           |           |           |           |           |           |           |
|-----------|-----------|-----------|-----------|-----------|-----------|-----------|-----------|
| NM_018945 | 4158.516  | 5084.479  | NM_018095 | 4379.408  | 4426.418  | NM_001129 | 6846.795  |
| AB029018  | 1063.535  | 3600.349  | AF217187  | 22261.514 | 30393.008 | L09100    | 1376.528  |
| NM_006650 | 2220.74   | 2466.392  | NM_017750 | 4341.516  | 2944.149  | NM_005472 | 991.433   |
| AK024436  | 7392.25   | 7269.439  | AK027122  | 16995.258 | 14397.344 | NM_004313 | 428.406   |
| NM_006648 | 2009.574  | 2080.127  | AK026196  | 3060.346  | 3271.985  | NM_007166 | 4544.769  |
| NM_000868 | 1104.31   | 895.751   | AL137668  | 966.673   | 715.246   | NM_004161 | 5012.796  |
| NM_004711 | 3230.839  | 2041.921  | NM_013348 | 3779.715  | 5389.306  | NM_001295 | 10398.403 |
| AF161361  | 904.317   | 1403.324  | NM_004977 | 7305.349  | 8580.242  | NM_005161 | 716.882   |
| NM_006463 | 13441.382 | 15317.16  | NM_004888 | 33166.637 | 39597.438 | NM_020347 | 264.652   |
| NM_001444 | 4903.348  | 6890.781  | NM_002251 | 919.068   | 1385.035  | NM_001462 | 1646.686  |
| AK027208  | 666.416   | 596.383   | NM_012283 | 64122.988 | 55735.488 | NM_004072 | 1031.27   |
| NM_016521 | 5474.28   | 5215.462  | NM_004700 | 2411.019  | 3815.344  | AF068286  | 277.054   |
| X98494    | 5409.124  | 4808.39   | NM_004162 | 14075.628 | 18845.803 | AB040957  | 2911.35   |
| NM_001240 | 2209.728  | 1864.048  | NM_006868 | 9509.051  | 12500.076 | NM_003110 | 2859.99   |
| NM_002709 | 10725.197 | 10478.118 | AB020706  | 5441.932  | 9500.77   | NM_003612 | 1822.208  |
| NM_001099 | 4644.573  | 3701.576  | NM_007166 | 6063.562  | 8768.297  | NM_013230 | 1264.319  |
| NM_006823 | 2084.339  | 2173.342  | NM_002869 | 4272.17   | 7253.524  | X72308    | 5019.284  |
| NM_016567 | 9074.819  | 9506.272  | NM_006755 | 7445.47   | 4143.381  | NM_005408 | 580.345   |
| NM_007031 | 1386.32   | 1280.274  | NM_005881 | 963.231   | 995.483   | BC008376  | 20141.916 |
| NM_002657 | 889.872   | 2687.37   | NM_005794 | 1544.555  | 2034.318  | AB041269  | 1576.158  |
| NM_004089 | 21175.727 | 28587.967 | L40519    | 921.081   | 682.195   | AK024908  | 2599.131  |
| NM_001350 | 11881.058 | 6571.177  | NM_004204 | 2576.316  | 1769.322  | NM_002837 | 2002.138  |
| NM_014809 | 2239.97   | 2192.474  | AK002181  | 3127.855  | 1796.926  | AL133077  | 11813.121 |
| NM_016074 | 37722.691 | 43787.926 | NM_001641 | 15786.539 | 19408.398 | AK025211  | 2157.792  |
| NM_003921 | 4317.826  | 3787.64   | BC015750  | 63553.891 | 57268.906 | U06715    | 709.863   |
| NM_004208 | 20310.354 | 32200.957 | AK025769  | 5824.352  | 6712.802  | NM_013402 | 4359.541  |
| NM_006336 | 487.694   | 480.5     | AW945166  | 1622.087  | 1399.219  | NM_002662 | 491.9     |
| NM_001843 | 1289.319  | 1030.884  | NM_005236 | 4438.54   | 4149.821  | NM_004377 | 2463.21   |
| NM_000419 | 1154.456  | 1094.076  | NM_006384 | 15867.709 | 11849.512 | AB037815  | 10451.423 |
| NM_017768 | 3133.23   | 3234.184  | NM_013257 | 3951.467  | 3336.572  | NM_003645 | 2866.384  |
| NM_002776 | 2066.144  | 3965.652  | AB044546  | 1875.868  | 1848.088  | AF263613  | 3439.636  |
| AK023398  | 2343.34   | 2598.471  | NM_014225 | 37847.598 | 50807.445 | NM_017750 | 1677.533  |
| NM_001907 | 227.455   | 434.815   | AF163473  | 1284.186  | 1496.766  | AK026196  | 1415.443  |
| NM_015711 | 56835.703 | 33299.582 | NM_006256 | 6386.35   | 6521.186  | AL137668  | 406.496   |
| NM_000050 | 1172.189  | 774.917   | NM_002846 | 2455.516  | 9634.237  | NM_013348 | 1982.198  |
| NM_000481 | 986.062   | 1197.39   | NM_002837 | 8902.301  | 6962.188  | NM_004977 | 4896.985  |
| AK025681  | 3271.065  | 3138.162  | AL133077  | 40210.473 | 45942.895 | NM_004888 | 13346.004 |
| NM_014905 | 8393.267  | 6326.828  | AK025211  | 4266.639  | 4871.055  | NM_012283 | 22466.27  |
| NM_012137 | 3256.314  | 4712.529  | U06715    | 1421.135  | 2247.681  | NM_004700 | 1054.515  |
| NM_004483 | 18342.021 | 35184.602 | NM_002662 | 1264.934  | 1833.478  | U93051    | 8728.002  |
| NM_001513 | 46316.898 | 42419.785 | NM_000132 | 19785.557 | 11173.564 | NM_017540 | 1111.946  |
| NM_001281 | 5210.538  | 3574.122  | NM_001727 | 4000.674  | 7128.868  | NM_006755 | 3798.546  |
| NM_016835 | 785.09    | 931.38    | NM_004076 | 3383.135  | 4866.064  | NM_005881 | 316.741   |
| NM_003981 | 17204.105 | 21155.143 | BG717460  | 6948.401  | 4086.583  | L40519    | 821.661   |
| AF070600  | 34852.438 | 44570.66  | AI478178  | 3996.138  | 3718.075  | NM_004204 | 982.797   |
| AB014522  | 11188.883 | 10049.724 | AA101279  | 1802.928  | 1086.949  | AK002181  | 2677.591  |
| NM_014875 | 5747.364  | 5578.143  | M19154    | 4980.974  | 4397.716  | NM_001641 | 8284.619  |
| AB033023  | 10007.686 | 12117.244 | AA399410  | 11701.328 | 8254.831  | AK025769  | 1614.234  |
| BC027895  | 1620.315  | 1593.474  | AA137031  | 2994.028  | 2938.989  | AW945166  | 643.211   |
| AF116238  | 2344.745  | 3600.759  | AA292226  | 5180.891  | 11205.282 | NM_005236 | 1920.648  |
| NM_006982 | 896.077   | 833.218   | NM_000500 | 4222.232  | 3484.227  | NM_006384 | 7020.478  |
| NM_016531 | 1788.226  | 1596.753  | M29873    | 691.163   | 582.487   | NM_014225 | 15500.739 |
| NM_003593 | 12958.505 | 8865.448  | J04449    | 535.081   | 670.557   | NM_006256 | 2868.469  |

|           |           |           |           |           |           |           |           |
|-----------|-----------|-----------|-----------|-----------|-----------|-----------|-----------|
| NM_014383 | 27677.922 | 22911.834 | BC007031  | 6536.678  | 8307.22   | NM_002846 | 1009.772  |
| NM_000244 | 2530.769  | 2870.419  | AF129756  | 13738.35  | 16384.59  | AF052693  | 3575.421  |
| NM_014285 | 2404.463  | 3744.85   | BC036369  | 3057.721  | 3725.861  | NM_001129 | 6668.855  |
| NM_004719 | 5815.046  | 5495.371  | X12492    | 11481.351 | 12609.475 | L09100    | 1591.014  |
| NM_018553 | 2344.096  | 4373.292  | U93051    | 10441.101 | 17094.375 | NM_005472 | 1677.833  |
| NM_004704 | 3575.965  | 6069.73   | NM_017540 | 1936.376  | 1984.019  | NM_004313 | 675.755   |
| NM_005455 | 7955.966  | 8330.149  | NM_018270 | 9370.54   | 10169.116 | NM_013435 | 576.67    |
| NM_014633 | 3370.001  | 2311.104  | NM_017668 | 4484.229  | 3572.931  | NM_000132 | 9590.869  |
| NM_001970 | 28759.566 | 37489.902 | NM_000406 | 716.307   | 887.23    | NM_001727 | 2191.711  |
| AK024054  | 6545.905  | 8733.947  | NM_005682 | 4472.762  | 3418.723  | NM_004076 | 1664.274  |
| NM_001969 | 1160.668  | 707.573   | NM_002926 | 2967.155  | 1982.386  | BG717460  | 4501.961  |
| NM_004116 | 4042.143  | 5010.844  | NM_000233 | 793.386   | 498.962   | AA778392  | 10128.976 |
| AK024508  | 7079.486  | 6459.56   | NM_018697 | 2117.448  | 1839.661  | AI478178  | 1824.177  |
| AK027213  | 5461.39   | 5485.278  | AF090116  | 1080.671  | 851.044   | AA101279  | 773.068   |
| AL096749  | 12999.177 | 11533.274 | NM_014030 | 44439.441 | 54124.25  | M19154    | 2306.381  |
| AK023620  | 2206.113  | 3798.942  | NM_004224 | 4327.52   | 4853.286  | AA137031  | 2867.723  |
| AF086189  | 3641.511  | 4161.049  | NM_000254 | 8695.962  | 11277.354 | AA292226  | 2025.837  |
| NM_014596 | 1666.485  | 2797.105  | Z21967    | 6889.178  | 7804.33   | NM_000500 | 1079.378  |
| NM_006703 | 16131.505 | 9450.297  | NM_003738 | 479.657   | 752.105   | BC007031  | 5470.867  |
| NM_004037 | 2760.745  | 1992.566  | NM_012110 | 8769.355  | 9270.512  | AF129756  | 8900.414  |
| NM_005116 | 3123.16   | 2298.231  | NM_005461 | 1268.328  | 1637.178  | NM_002957 | 13624.849 |
| NM_002766 | 1308.669  | 4050.075  | AF052693  | 4177.476  | 5874.936  | BC036369  | 1815.6    |
| AJ404857  | 1126.99   | 1995.068  | NM_001129 | 14626.049 | 17258.326 | X12492    | 6964.229  |
| AF254088  | 2222.09   | 2481.693  | L09100    | 2326.301  | 2371.11   | X72308    | 6523.598  |
| NM_001420 | 1751.364  | 1279.334  | NM_005472 | 1556.067  | 2083.647  | NM_005408 | 880.945   |
| NM_000248 | 1106.163  | 881.149   | NM_004313 | 947.311   | 889.355   | AB041269  | 2285.961  |
| AB031046  | 1119.533  | 1618.692  | NM_013435 | 831.019   | 1289.034  | AK024908  | 3635.857  |
| NM_002449 | 18088.1   | 19479.295 | NM_004162 | 20581.113 | 25974.748 | NM_018270 | 3674.107  |
| AK025388  | 884.862   | 701.864   | NM_006868 | 8671.066  | 8813.038  | NM_000260 | 32829.801 |
| NM_006147 | 2846.464  | 339.692   | AB020706  | 4207.039  | 6154.965  | NM_014160 | 1998.884  |
| AB006631  | 1452.975  | 741.395   | NM_007166 | 6000.207  | 6679.465  | NM_017668 | 2980.951  |
| AF291181  | 1698.49   | 1101.343  | NM_002869 | 3579.097  | 4241.976  | AB033049  | 30698.229 |
| NM_005741 | 3168.029  | 2152.24   | NM_018086 | 21148.154 | 15626.851 | NM_000406 | 613.418   |
| NM_000964 | 4258.96   | 2227.158  | NM_004161 | 14016.572 | 16197.884 | NM_005682 | 3614.282  |
| BF343886  | 1184.942  | 777.901   | NM_001295 | 9770.13   | 3512.848  | NM_002926 | 817.058   |
| NM_013263 | 5547.099  | 3615.089  | NM_005161 | 1996.223  | 2165.886  | NM_018697 | 951.645   |
| AL137407  | 2516.896  | 3232.622  | AB037749  | 683.44    | 559.561   | AF090116  | 570.753   |
| AF085839  | 687.644   | 784.91    | NM_020347 | 305.65    | 607.12    | NM_014030 | 23404.266 |
| NM_018178 | 8611.714  | 13109.355 | NM_001462 | 3390.367  | 2650.514  | NM_004224 | 2705.149  |
| AK025204  | 1929.495  | 1038.365  | NM_004072 | 1934.024  | 1316.953  | NM_000254 | 3040.418  |
| AK027256  | 1342.446  | 1396.708  | AF068286  | 490.236   | 880.612   | Z21967    | 4016.338  |
| NM_019000 | 433.561   | 623.905   | AB040957  | 6003.518  | 4319.517  | NM_016185 | 12029.051 |
| AF143330  | 2538.859  | 2007.46   | NM_006890 | 620.842   | 716.748   | NM_012110 | 6642.521  |
| AK025178  | 1130.655  | 1082.247  | NM_003110 | 6379.323  | 5346.363  | NM_005461 | 3938.545  |
| AF147359  | 966.823   | 939.65    | NM_003612 | 1789.979  | 2019.871  | NM_013348 | 2819.657  |
| NM_014835 | 7678.376  | 9324.796  | NM_013230 | 2149.753  | 3117.149  | NM_004977 | 7593.013  |
| AK001822  | 6261.211  | 7667.949  | X72308    | 4591.987  | 6023.869  | NM_002251 | 458.071   |
| AK026969  | 2607.353  | 2589.171  | NM_005408 | 617.393   | 827.934   | NM_012283 | 49962.59  |
| AF086287  | 2445.123  | 1853.297  | BC008376  | 14186.016 | 14797.636 | NM_004700 | 1639.796  |
| AF086356  | 497.647   | 728.43    | AB041269  | 1930.352  | 1849.339  | NM_004161 | 5218.528  |
| AF086409  | 1392.709  | 1002.005  | AK024908  | 5921.675  | 6745.958  | NM_001295 | 10544.446 |
| AK024268  | 2840.105  | 2255.309  | NM_002837 | 6078.036  | 4657.628  | NM_005161 | 951.75    |
| AF086295  | 2324.653  | 1494.006  | AL133077  | 35720.809 | 28282.998 | AB037749  | 541.832   |

|           |           |           |           |           |           |           |           |
|-----------|-----------|-----------|-----------|-----------|-----------|-----------|-----------|
| AF086344  | 5436.962  | 4281.869  | AK025211  | 3027.598  | 2841.243  | NM_020347 | 452.487   |
| AL110130  | 914.476   | 733.678   | U06715    | 1590.188  | 1598.09   | NM_001462 | 1827.744  |
| AF052116  | 793.501   | 392.552   | NM_002662 | 797.474   | 992.82    | NM_004072 | 962.127   |
| NM_018087 | 2060.656  | 3794.422  | NM_004377 | 7223.174  | 4742.921  | AB040957  | 2297.02   |
| AL360260  | 903.453   | 534.823   | AB037815  | 18106.793 | 20319.1   | NM_003110 | 2508.848  |
| AK023647  | 825.399   | 559.166   | NM_003645 | 10535.341 | 9492.472  | NM_003612 | 1437.681  |
| AL137366  | 1516.462  | 2584.596  | AF263613  | 5128.496  | 3813.056  | NM_013230 | 1251.827  |
| BC031635  | 2499.589  | 3957.604  | NM_000097 | 2281.926  | 3097.762  | NM_002837 | 2676.865  |
| AF085916  | 578.419   | 850.033   | NM_001509 | 1020.684  | 1873.368  | AK025211  | 2669.704  |
| AL359598  | 697.589   | 1195.94   | AK022878  | 5885.324  | 5145.87   | U06715    | 957.405   |
| AF085980  | 1538.039  | 1419.275  | NM_018099 | 4970.626  | 4219.716  | NM_013402 | 6095.443  |
| AF085927  | 1321.444  | 1315.089  | AF217187  | 19648.275 | 31101.939 | NM_002662 | 732.476   |
| AF085954  | 1425.847  | 1153.66   | NM_017750 | 2893.225  | 2696.019  | NM_004377 | 2452.867  |
| AL137541  | 384.709   | 526.718   | AK027122  | 15578.431 | 15993.084 | AB037815  | 11078.873 |
| AL161969  | 596.669   | 370.672   | AK026196  | 1822.258  | 2699.51   | NM_003645 | 3111.139  |
| AL442095  | 1481.646  | 1413.125  | AL137668  | 918.754   | 1239.697  | NM_017750 | 1738.756  |
| AL137378  | 2492.405  | 2986.382  | NM_013348 | 2926.947  | 3500.366  | AK026196  | 1172.941  |
| AL137609  | 47103.602 | 37170.406 | NM_004977 | 3994.537  | 5328.685  | AL137668  | 294.873   |
| AL353946  | 7438.138  | 5197.648  | NM_004888 | 32447.629 | 40922.02  | NM_017839 | 929.852   |
| X69081    | 9787.21   | 8763.574  | NM_012283 | 53057.926 | 56519.695 | AL137718  | 334.913   |
| NM_005714 | 1739.802  | 1112.998  | NM_004700 | 1917.73   | 3158.772  | NM_003460 | 7595.968  |
| AL359931  | 6951.144  | 4138.397  | U93051    | 11432.564 | 13806.587 | U94354    | 300.644   |
| AK000954  | 1979.374  | 2480.282  | NM_017540 | 1976.747  | 1333.76   | NM_002904 | 14018.469 |
| AK025800  | 3457.823  | 2848.24   | NM_006755 | 8069.996  | 4124.552  | NM_005686 | 5099.59   |
| AK022333  | 1163.516  | 805.512   | NM_005881 | 1170.081  | 1287.837  | NM_017540 | 1884.775  |
| NM_017808 | 414.475   | 582.749   | L40519    | 1702.151  | 838.455   | NM_006755 | 5267.053  |
| AF095854  | 1427.123  | 1581.423  | NM_004204 | 2275.635  | 1673.367  | NM_005881 | 590.94    |
| NM_014162 | 1467.933  | 1730.347  | AK002181  | 2375.441  | 1017.058  | NM_005794 | 288.935   |
| AF159093  | 2844.159  | 1961.643  | NM_001641 | 17050.867 | 26338.363 | L40519    | 1060.632  |
| AK021997  | 4223.505  | 3653.707  | AK025769  | 5431.765  | 7173.729  | NM_004204 | 958.395   |
| AK022125  | 1330.749  | 1452.013  | AW945166  | 1761.047  | 1564.159  | AK002181  | 1934.366  |
| AK022244  | 4652.721  | 4271.479  | NM_005236 | 4615.041  | 4809.096  | NM_001641 | 11652.616 |
| AK022381  | 8285.281  | 7530.287  | NM_006384 | 17145.248 | 13759.43  | BC015750  | 59673.754 |
| AK022012  | 2310.059  | 1868.403  | NM_013257 | 2965.825  | 2891.466  | AK025769  | 2082.072  |
| AK022286  | 3456.829  | 2116.662  | AB044546  | 2246.839  | 1930.367  | AW945166  | 670.499   |
| AK022613  | 4566.169  | 3198.904  | NM_014225 | 40524.074 | 54029.641 | NM_005236 | 2006.193  |
| AL359557  | 697.732   | 809.502   | AF163473  | 2066.751  | 2159.782  | NM_002589 | 4465.782  |
| AK027257  | 593.664   | 747.354   | NM_006256 | 6301.175  | 6894.196  | AF064846  | 941.11    |
| AK024582  | 1463.875  | 1000.575  | NM_002846 | 2345.873  | 11079.399 | AL110227  | 753.789   |
| NM_014367 | 1789.658  | 1844.025  | AF052693  | 5877.121  | 5782.547  | NM_001400 | 4678.374  |
| AK024901  | 668.409   | 4848.424  | NM_001129 | 16138.045 | 18966.592 | AB033281  | 1437.828  |
| NM_019073 | 2689.582  | 2119.111  | L09100    | 4260.301  | 5808.81   | NM_002882 | 4473.874  |
| AK025835  | 1650.98   | 2783.937  | NM_005472 | 2154.772  | 2613.442  | AB011161  | 1217.099  |
| NM_002365 | 898.017   | 1589.09   | NM_013435 | 1400.511  | 958.072   | NM_000827 | 597.502   |
| AF161441  | 3291.309  | 3155.446  | NM_000132 | 9500.929  | 4121.232  | NM_002944 | 1984.854  |
| AL137474  | 2906.159  | 1868.349  | NM_001727 | 861.64    | 2056.811  | AF327354  | 1160.612  |
| AK023484  | 548.539   | 434.049   | NM_004076 | 3209.099  | 3559.383  | AB014513  | 8051.338  |
| AK021572  | 1783.33   | 1748.74   | NM_007123 | 27396.004 | 32496.422 | NM_004747 | 1854.497  |
| AF119908  | 1444.958  | 1861.729  | BG717460  | 7555.402  | 4575.949  | AK024430  | 47542.445 |
| AK000653  | 9713.158  | 9630.521  | AA778392  | 12979.296 | 9547.829  | NM_002341 | 4656.862  |
| AK000908  | 1652.348  | 1324.505  | AI478178  | 3562.907  | 2379.034  | AL137651  | 2286.812  |
| Z70696    | 1407.843  | 883.159   | AA101279  | 892.068   | 803.474   | NM_018945 | 2314.061  |
| NM_005792 | 3932.673  | 7132.232  | M19154    | 4300.244  | 4794.953  | AB029018  | 569.004   |

|           |           |           |           |           |           |           |           |
|-----------|-----------|-----------|-----------|-----------|-----------|-----------|-----------|
| AF048847  | 6164.889  | 4476.437  | AA137031  | 1977.047  | 2259.205  | NM_00081E | 5155.387  |
| L37718    | 70069.625 | 47121.332 | AA292226  | 4014.416  | 11901.755 | NM_00665C | 2204.358  |
| AL137717  | 5075.381  | 2787.718  | NM_00050C | 3541.573  | 3992.126  | AK024436  | 4254.869  |
| AF035297  | 1396.866  | 1459.686  | M29873    | 738.882   | 816.269   | NM_00664E | 1043.016  |
| NM_01403E | 4773.904  | 3530.695  | J04449    | 647.021   | 688.286   | NM_00086E | 455.304   |
| S67154    | 4985.578  | 5402.544  | BC007031  | 4752.478  | 5785.811  | NM_004711 | 1781.389  |
| AK026181  | 5544.768  | 4180.509  | AF129756  | 15179.872 | 17060.5   | U63542    | 296.833   |
| AK021451  | 2085.938  | 2230.301  | BC036369  | 2664.157  | 3596.083  | AF161361  | 805.409   |
| AF086468  | 3039.785  | 3910.613  | X12492    | 13460.404 | 17314.781 | NM_006463 | 6943.791  |
| AK027239  | 2348.82   | 2292.607  | X72308    | 6334.627  | 6860.876  | NM_001444 | 2188.544  |
| AF005082  | 25462.615 | 28522.9   | NM_00540E | 1197.497  | 905.084   | AK027208  | 505.621   |
| AL117595  | 5852.757  | 3846.19   | AB041269  | 1862.391  | 1670.455  | NM_016521 | 2282.958  |
| AB028988  | 23208.887 | 22352.455 | AK024908  | 4109.855  | 3469.089  | X98494    | 7160.612  |
| AK023072  | 2527.338  | 2565.492  | NM_01827C | 6020.413  | 6581.579  | NM_00124C | 2603.917  |
| AF086105  | 3235.167  | 4163.875  | NM_00026C | 66638.266 | 60400.402 | NM_00270E | 5753.268  |
| Y10697    | 1128.824  | 942.481   | NM_01416C | 5398.819  | 8312.544  | NM_00109E | 1761.007  |
| AY007166  | 11185.351 | 8032.623  | AF230877  | 8317.614  | 15698.16  | NM_006823 | 737.492   |
| NM_004937 | 3075.269  | 2506.25   | NM_01766E | 3626.456  | 2781.614  | NM_007031 | 1253.5    |
| CY3Cy5    | 16629.436 | 1627.558  | AB033049  | 23737.326 | 18912.857 | NM_002657 | 489.881   |
| AI298884  | 15993.868 | 32208.51  | NM_00568E | 2690.562  | 1584.721  | NM_00408E | 8639.9    |
| D87845    | 2879.501  | 2574.771  | NM_00292E | 3394.106  | 2867.951  | NM_00135C | 7987.672  |
| X53279    | 803.068   | 868.676   | NM_018697 | 2061.793  | 2851.841  | NM_01480E | 406.843   |
| M83254    | 2794.724  | 3201.642  | NM_01403C | 30272.943 | 30516.115 | NM_016074 | 8855.507  |
| S56770    | 965.613   | 1125.563  | NM_004224 | 3535.725  | 6026.73   | NM_003921 | 2319.092  |
| AI193606  | 693.094   | 668.311   | NM_000254 | 9128.541  | 12414.227 | NM_00420E | 9096.471  |
| H58872    | 4886.615  | 17488.605 | Z21967    | 7177.967  | 7789.074  | NM_001843 | 1783.267  |
| J02938    | 1204.027  | 1442.55   | NM_00373E | 570.725   | 793.523   | NM_01776E | 1071.122  |
| J04543    | 8435.5    | 8157.731  | NM_01211C | 11233.262 | 11587.185 | NM_00277E | 1897.741  |
| S60415    | 753.123   | 1131.765  | NM_005461 | 1420.702  | 1716.365  | AK023398  | 1707.769  |
| AA456295  | 779.627   | 1134.938  | NM_01334E | 2172.606  | 2707.846  | NM_001907 | 328.66    |
| BE733577  | 3432.502  | 3665.394  | NM_004977 | 8143.302  | 8555.96   | NM_015711 | 63440.375 |
| AI817942  | 1019.103  | 1308.075  | NM_012283 | 38501.203 | 33427.211 | NM_00005C | 1527.378  |
| BG762340  | 3357.327  | 2913.631  | NM_00470C | 1560.279  | 2216.99   | NM_000481 | 798.062   |
| NM_00545E | 3136.798  | 2863.388  | NM_00416E | 11527.722 | 13417.279 | AK025681  | 653.964   |
| SR5       | 6972.915  | 6226.918  | NM_00686E | 7150.029  | 6753.085  | NM_01490E | 5569.212  |
| SR7       | 8759.435  | 41383.836 | AB020706  | 2663.117  | 2940.558  | NM_012137 | 2498.562  |
| SR9       | 40985.98  | 7893.766  | NM_00716E | 4868.952  | 5641.75   | NM_004483 | 6931.464  |
| CY3Cy5    | 19385.736 | 1371.753  | NM_01808E | 15967.515 | 10443.04  | NM_001281 | 2039.461  |
| NM_016453 | 2866.895  | 2671.695  | NM_004161 | 13738.375 | 11113.017 | NM_01683E | 593.579   |
| NM_017701 | 1115.139  | 1513.458  | NM_00129E | 9573.449  | 3260.696  | NM_003981 | 6549.005  |
| NM_01422E | 2084.622  | 2897.842  | NM_005161 | 724.862   | 1471.922  | U26596    | 4506.007  |
| AF142567  | 1272.877  | 1461.964  | AB037749  | 445.92    | 581.918   | AF070600  | 6230.747  |
| NM_01741C | 9130.192  | 15023.853 | NM_00146E | 1371.017  | 1687.1    | AB014522  | 3059.906  |
| AY009398  | 354.303   | 540.099   | NM_00407E | 2938.903  | 3172.071  | NM_01487E | 2384.394  |
| X99680    | 2711.665  | 4581.49   | AB040957  | 5559.683  | 3410.408  | AB033023  | 5532.589  |
| NM_00144E | 2727.68   | 2865.602  | NM_00311C | 6399.836  | 4942.999  | BC027895  | 332.19    |
| NM_01607E | 3758.449  | 4865.82   | NM_00361E | 2476.316  | 2894.541  | AF116238  | 1133.422  |
| AK026349  | 5288.241  | 5795.434  | NM_01323C | 2633.507  | 3315.011  | NM_00698E | 424.293   |
| NM_014733 | 1107.419  | 1043.182  | NM_013257 | 3644.458  | 2553.203  | AB033085  | 2654.006  |
| D12485    | 6571.262  | 2115.306  | AB044546  | 1217.93   | 1669.223  | AF024703  | 14750.89  |
| NM_00344E | 1894.64   | 2356.951  | NM_01422E | 36734.02  | 46505.918 | NM_016531 | 767.506   |
| NM_00247E | 2129.614  | 2345.984  | AF163473  | 984.723   | 955.704   | NM_003593 | 9123.174  |
| D28449    | 1705.776  | 1969.45   | NM_00625E | 7880.575  | 6298.179  | NM_014383 | 24029.955 |



|           |           |           |           |           |           |           |           |
|-----------|-----------|-----------|-----------|-----------|-----------|-----------|-----------|
| NM_003281 | 3544.241  | 1922.161  | NM_002846 | 4335.541  | 13120.174 | NM_000244 | 429.812   |
| AA460480  | 1002.212  | 1072.013  | NM_002837 | 3667.375  | 2234.704  | NM_014285 | 956.364   |
| S78774    | 4517.221  | 5180.475  | AL133077  | 34543.801 | 23569.229 | AF026816  | 8198.186  |
| NM_003059 | 816.423   | 648.182   | AK025211  | 2205.348  | 1745.682  | NM_004719 | 1954.7    |
| NM_004922 | 6043.163  | 6889.711  | U06715    | 1097.103  | 1127.424  | NM_018553 | 953.143   |
| NM_002871 | 817.704   | 1194.779  | NM_004377 | 6047.64   | 3462.413  | NM_004704 | 2170.331  |
| NM_006987 | 485.645   | 798.934   | AB037815  | 13442.98  | 11335.527 | NM_014633 | 1488.65   |
| NM_001282 | 4614.666  | 4426.2    | NM_003645 | 4252.563  | 4380.539  | NM_001970 | 6042.349  |
| U44105    | 788.447   | 733.038   | AF263613  | 3594.108  | 3872.671  | NM_006810 | 6116.625  |
| NM_016103 | 3276.595  | 2342.889  | NM_000097 | 1528.662  | 3722.119  | AK024054  | 1100.369  |
| AL133654  | 5447.653  | 4166.484  | NM_001509 | 725.697   | 2098.117  | NM_004116 | 1231.727  |
| AL137262  | 1307.989  | 1145.214  | AK022878  | 6957.743  | 7813.74   | AK024508  | 2498.775  |
| NM_020437 | 574.693   | 386.215   | NM_018099 | 2901.958  | 3080.851  | AK027213  | 2253.396  |
| X87888    | 702.093   | 959.569   | AF217187  | 16562.93  | 24162.16  | AL096749  | 11828.289 |
| NM_018643 | 2107.978  | 1822.725  | NM_017750 | 3627.771  | 2402.631  | AK023620  | 733.439   |
| M30142    | 4332.634  | 4436.703  | AK027122  | 12579.026 | 12306.354 | AF086189  | 3925.783  |
| NM_005018 | 1462.142  | 1418.902  | AK026196  | 1202.431  | 2280.985  | AL050055  | 2349.121  |
| NM_013378 | 8917.722  | 9617.725  | AL137668  | 1027.511  | 978.578   | NM_005009 | 2149.874  |
| NM_001085 | 1444.035  | 1750.104  | NM_016444 | 677.505   | 669.557   | NM_014596 | 425.025   |
| NM_006110 | 1580.133  | 1536.127  | NM_017839 | 2963.427  | 3517.32   | NM_006703 | 6836.145  |
| NM_002860 | 3529.632  | 5574.327  | NM_003707 | 9216.947  | 11568.873 | NM_004037 | 795.919   |
| NM_006169 | 4449.423  | 4174.397  | AL137718  | 1607.79   | 1601.455  | NM_005116 | 1080.131  |
| NM_001218 | 871.678   | 922.785   | NM_003460 | 8713.103  | 8997.716  | NM_002766 | 819.016   |
| NM_014183 | 13803.374 | 12806.313 | NM_002904 | 30689.359 | 28061.715 | AJ404857  | 327.877   |
| NM_018353 | 6097.688  | 6763.495  | NM_014189 | 4647.74   | 3554.997  | NM_000788 | 6940.346  |
| NM_001801 | 615.754   | 798.032   | NM_005686 | 5422.493  | 4209.257  | AF254088  | 1208.99   |
| NM_003560 | 19597.24  | 29463.236 | NM_006767 | 356.201   | 387.881   | NM_001420 | 1734.591  |
| NM_014403 | 3809.079  | 3535.972  | NM_017540 | 2107.248  | 1672.954  | NM_000248 | 1852.299  |
| AL050100  | 2190.222  | 1943.556  | NM_006755 | 9291.625  | 3786.048  | AB031046  | 2047.888  |
| NM_020139 | 1022.909  | 1097.95   | NM_005881 | 971.593   | 758.503   | NM_002449 | 18273.449 |
| NM_000748 | 14573.906 | 11237.152 | L40519    | 1367.61   | 740.829   | AK025388  | 643.126   |
| NM_000048 | 4377.307  | 4106.155  | NM_004204 | 900.017   | 1762.67   | NM_006147 | 2149.891  |
| U53531    | 1060.276  | 1061.428  | AK002181  | 1342.266  | 1122.824  | AB006631  | 969.812   |
| NM_004925 | 2445.073  | 3930.159  | NM_001641 | 10743.307 | 14319.764 | AF291181  | 577.582   |
| NM_003234 | 12867.013 | 20717.908 | BC015750  | 47908.102 | 45059.176 | NM_005741 | 2068.828  |
| NM_004858 | 2662.054  | 3564.065  | AK025769  | 4205.019  | 5191.791  | BF343886  | 497.328   |
| AB051826  | 1851.779  | 2344.451  | AW945166  | 1181.024  | 1332.699  | NM_013263 | 3331.157  |
| AK024964  | 246.225   | 323.691   | NM_005236 | 2843.102  | 3882.173  | AL137407  | 1307.778  |
| M20697    | 531.858   | 973.325   | NM_006384 | 11845.095 | 10396.716 | NM_018178 | 5152.849  |
| NM_015046 | 2744.373  | 2046.309  | NM_002589 | 4170.673  | 3945.637  | AK025204  | 1844.497  |
| NM_002014 | 4894.859  | 7963.548  | AF064846  | 1025.112  | 1337.034  | AK027256  | 668.212   |
| NM_002538 | 8894.67   | 7071.313  | AL110227  | 810.647   | 1667.31   | AL365406  | 373.141   |
| NM_016585 | 8426.33   | 7856.821  | NM_001400 | 5329.47   | 7152.792  | NM_019000 | 1076.478  |
| NM_006927 | 14686.651 | 10263.02  | AB033281  | 4032.563  | 5679.534  | AF143330  | 1033.482  |
| NM_014601 | 3408.779  | 3069.339  | NM_002882 | 24396.1   | 16787.713 | AK025178  | 2249.494  |
| NM_017761 | 12233.471 | 9944.98   | AB011161  | 640.84    | 1421.12   | AF147359  | 1520.252  |
| NM_006928 | 937.896   | 1097.187  | NM_002944 | 3020.906  | 2175.546  | NM_014835 | 14560.777 |
| AF237700  | 1350.282  | 1407.741  | AF327354  | 1758.155  | 1188.636  | AK001822  | 4603.117  |
| D38163    | 1093.535  | 953.12    | AB014513  | 12529.44  | 11270.147 | AK026969  | 604.102   |
| NM_004967 | 257.995   | 550.035   | NM_004747 | 1958.366  | 1340.8    | AF086287  | 3439.284  |
| D28449    | 1816.09   | 1966.056  | NM_002341 | 4433.844  | 6999.435  | AF086409  | 1062.28   |
| NM_003281 | 3185.815  | 1752.621  | AL137651  | 2016.825  | 2721.292  | AK024268  | 2301.963  |
| AA460480  | 1087.485  | 980.159   | NM_018945 | 2082.191  | 3601.834  | AF086295  | 1703.004  |

|           |           |           |           |           |           |            |           |
|-----------|-----------|-----------|-----------|-----------|-----------|------------|-----------|
| D87845    | 2717.547  | 2364.933  | AB029018  | 948.812   | 2403.425  | AF086344   | 3506.967  |
| X53279    | 621.614   | 653.084   | NM_00081E | 4458.2    | 4350.01   | AL110130   | 121.087   |
| M83254    | 2890.85   | 2749.567  | NM_00665C | 1435.728  | 1540.54   | AF052116   | 829.908   |
| S56770    | 1143.807  | 1435.022  | AK024436  | 2272.06   | 2730.787  | NM_018087  | 559.38    |
| AI193606  | 445.187   | 580.195   | NM_00664E | 733.914   | 1315.728  | AL360260   | 749.934   |
| H58872    | 4393.524  | 17044.629 | NM_004711 | 3292.809  | 4113.986  | AL137366   | 646.052   |
| J02938    | 713.883   | 869.682   | AF161361  | 1443.963  | 968.179   | AF085950   | 498.267   |
| J04543    | 8203.26   | 7215.656  | NM_00646E | 11427.137 | 9074.729  | AL359598   | 647.835   |
| S60415    | 697.209   | 871.962   | NM_001444 | 19569.986 | 8296.219  | AF085980   | 290.54    |
| AA456295  | 738.038   | 456.522   | AK027208  | 961.363   | 635.044   | AF085927   | 553.42    |
| BE733577  | 3400.499  | 3338.903  | NM_016521 | 6514.012  | 6539.828  | AF085954   | 5109.379  |
| AI817942  | 1388.806  | 982.482   | X98494    | 7777.524  | 6173.809  | AL137337   | 1350.259  |
| BG762340  | 4039.797  | 2978.862  | NM_00270E | 7008.633  | 6740.769  | AL161969   | 1051.763  |
| AA009484  | 340.997   | 613.513   | NM_00109E | 1488.815  | 1007.289  | AL442095   | 2960.641  |
| NM_00545E | 2818.438  | 2509.292  | NM_002657 | 782.457   | 1335.485  | AL137378   | 2425.576  |
| NM_006534 | 10001.678 | 5320.535  | NM_00135C | 15309.046 | 5932.7    | AL137609   | 16130.36  |
| NM_01618E | 589.379   | 832.492   | NM_01480E | 1439.701  | 1666.847  | AL353946   | 3982.98   |
| M30142    | 4944.785  | 4693.547  | NM_016074 | 33472.32  | 33773.656 | X69081     | 3134.874  |
| NM_00501E | 1364.408  | 1187.49   | NM_003921 | 3486.301  | 2828.889  | NM_005714  | 1123.001  |
| NM_01337E | 7872.451  | 9057.526  | NM_00420E | 13838.121 | 14632.176 | AL359931   | 12053.169 |
| NM_00108E | 1446.373  | 1944.033  | NM_00184E | 1456.589  | 2217.082  | AK000954   | 1244.956  |
| NM_01645E | 3026.501  | 3123.902  | NM_01776E | 4297.877  | 3784.363  | AK025800   | 1268.518  |
| NM_017701 | 1231.498  | 1058.42   | NM_00277E | 2871.601  | 3121.693  | AK022333   | 1383.88   |
| NM_01422E | 2647.652  | 2697.132  | AK023398  | 4228.904  | 4478.19   | AK023294   | 1197.969  |
| AF142567  | 1288.286  | 1340.718  | NM_00005C | 2088.437  | 1502.447  | AF095854   | 1642.88   |
| NM_005621 | 778.911   | 446.032   | NM_000481 | 1240.823  | 817.486   | NM_01416E  | 2072.371  |
| NM_01741C | 7139.963  | 9975.606  | AK025681  | 2109.123  | 2084.668  | AF113689   | 894.426   |
| X99680    | 6443.154  | 9434.209  | NM_01490E | 4686.724  | 4739.859  | AF159093   | 4240.63   |
| NM_00144E | 2174.179  | 2452.923  | NM_012137 | 4073.132  | 5254.705  | AF113679   | 941.747   |
| NM_01607E | 2863.467  | 4080.868  | NM_00448E | 26749.809 | 18010.559 | AK021997   | 5174.763  |
| D12485    | 6994.699  | 2470.344  | NM_00151E | 32958.441 | 29255.459 | AK022125   | 886.33    |
| AK023204  | 5094.826  | 5336.892  | NM_001281 | 2583.713  | 1272.068  | AK022244   | 5826.879  |
| NM_00344E | 2496.163  | 3156.611  | NM_003981 | 34384.723 | 20388.49  | AK022381   | 8119.895  |
| NM_00247E | 2189.509  | 2512.796  | U26596    | 14785.165 | 19813.568 | AK022012   | 1050.782  |
| NM_00485E | 2408.84   | 3218.497  | AF070600  | 31523.818 | 40299.84  | AK022286   | 2685.866  |
| S78774    | 5225.202  | 6284.124  | AB014522  | 7101.521  | 9905.998  | AK022613   | 5668.371  |
| NM_00305E | 1033.419  | 547.938   | NM_01487E | 10643.428 | 5885.247  | AK023843   | 257.744   |
| NM_00492E | 6060.195  | 7612.107  | AB033023  | 6860.978  | 6452.254  | AL359557   | 442.76    |
| NM_002871 | 1126.975  | 789.368   | BC027895  | 1271.631  | 865.531   | AK024582   | 536.726   |
| NM_006987 | 609.492   | 808.041   | AF116238  | 1368.499  | 1672.762  | AK024143   | 823.941   |
| NM_01683C | 4035.806  | 2921.838  | NM_00698E | 894.074   | 936.755   | NM_014367  | 1412.124  |
| U44105    | 867.57    | 779.835   | AB033085  | 2857.533  | 1954.314  | AK024901   | 276.64    |
| NM_01610E | 2092.988  | 1821.636  | AF024703  | 17107.785 | 16451.049 | NM_01907E  | 269.741   |
| AL133654  | 4513.506  | 3604.036  | NM_016531 | 1357.271  | 2220.446  | AK025835   | 152.973   |
| AL137262  | 1510.214  | 1277.429  | NM_00359E | 10501.048 | 6630.52   | NM_00236E  | 1912.313  |
| NM_01864E | 3024.905  | 2505.899  | NM_01438E | 48348.016 | 44521.484 | AF161441   | 2715.488  |
| NM_006927 | 15184.224 | 11614.012 | NM_000244 | 2842.95   | 2505.168  | unknown (E | 541.15    |
| NM_014601 | 4460.916  | 3685.729  | NM_01428E | 2622.59   | 2099.125  | AL137474   | 2290.309  |
| NM_00692E | 974.361   | 1414.443  | AF026816  | 16645.043 | 15089.318 | AL133023   | 380.339   |
| AF237700  | 1448.167  | 1203.531  | NM_00471E | 3230.948  | 2326.387  | AK023484   | 468.143   |
| NM_00286C | 3351.811  | 5995.141  | NM_01855E | 1571.575  | 1126.983  | AK021572   | 1475.782  |
| NM_00616E | 4278.337  | 3723.163  | NM_004704 | 3833.182  | 4343.238  | AK021631   | 475.485   |
| NM_00121E | 756.645   | 889.416   | NM_00545E | 7184.156  | 3661.058  | AF119908   | 1262.637  |

|           |           |           |           |           |           |           |           |
|-----------|-----------|-----------|-----------|-----------|-----------|-----------|-----------|
| NM_014183 | 16179.671 | 12340.062 | NM_014633 | 3738.617  | 2460.929  | U50539    | 536.62    |
| NM_018353 | 5351.539  | 5298.93   | NM_001970 | 25606.922 | 31789.652 | AK000653  | 7375.544  |
| NM_001801 | 542.104   | 695.042   | NM_006810 | 12657.282 | 10181.392 | X96660    | 2490.04   |
| NM_016373 | 779.401   | 433.046   | AK024054  | 4321.176  | 3841.098  | AK000993  | 458.737   |
| NM_003560 | 17857.303 | 21049.707 | NM_001969 | 679.156   | 560.54    | AK023519  | 346.351   |
| NM_014403 | 2910.86   | 2617.123  | NM_004116 | 2651.058  | 3241.29   | Z70696    | 1914.955  |
| AL050100  | 2173.83   | 1980.887  | AK024508  | 2029.13   | 2259.171  | NM_005792 | 1582.611  |
| NM_020139 | 1199.928  | 1273.896  | AK027213  | 2572.892  | 4840.312  | AF048847  | 3374.944  |
| NM_005456 | 3453.347  | 3206.472  | AL096749  | 14396.116 | 11059.921 | AL137717  | 1734.658  |
| NM_006534 | 13653.614 | 8748.352  | AK023620  | 3618.781  | 4317.316  | AF035297  | 517.435   |
| AB051826  | 1459.574  | 2118.495  | AF086189  | 4890.699  | 5101.214  | NM_014039 | 4793.221  |
| M20697    | 560.244   | 586.625   | AL050055  | 4057.984  | 5177.958  | S67154    | 2588.51   |
| NM_015046 | 2688.159  | 1971.619  | NM_005009 | 10017.171 | 11495.811 | AK026181  | 7094.452  |
| NM_002014 | 3784.443  | 5168.288  | NM_014596 | 3400.717  | 6791.517  | AK021451  | 1372.953  |
| NM_002538 | 7053.821  | 6570.848  | NM_006703 | 10166.138 | 7350.004  | AK001971  | 896.916   |
| NM_016585 | 5007.624  | 3964.116  | NM_004037 | 1265.922  | 1336.566  | AF086468  | 1392.679  |
| AK026349  | 6497.808  | 7117.494  | NM_005116 | 2139.324  | 1765.949  | AK027239  | 1636.69   |
| NM_014733 | 1710.233  | 2265.684  | NM_002766 | 1143.15   | 3166.924  | AF005082  | 12478.937 |
| D12485    | 6864.706  | 2345.589  | NM_000788 | 10186.281 | 8203.383  | AL117595  | 6035.531  |
| AK023204  | 5489.828  | 5570.628  | NM_001420 | 1445.143  | 1233.227  | AB028988  | 21452.107 |
| NM_003449 | 2563.541  | 3466.539  | NM_000248 | 4025.483  | 2425.619  | AK023072  | 1260.135  |
| NM_002478 | 2904.238  | 3289.082  | AB031046  | 3978.399  | 2647.331  | AF086105  | 6527.728  |
| D38163    | 1394.021  | 1596.376  | NM_002449 | 20092.152 | 14457.273 | AF251189  | 620.051   |
| D28449    | 1629.736  | 1507.25   | AK025388  | 891.843   | 533.842   | AF161429  | 4826.422  |
| NM_003281 | 3157.846  | 1541.922  | NM_006147 | 3652.763  | 454.795   | AK021495  | 5773.75   |
| AA460480  | 825.215   | 916.087   | AB006631  | 1094.163  | 1607.387  | AF067777  | 18303.906 |
| AI298884  | 12194.098 | 23333.303 | AF291181  | 571.439   | 740.293   | U17613    | 396.998   |
| D87845    | 2423.546  | 1749.745  | NM_005741 | 2456.424  | 3573.188  | AK027211  | 533.592   |
| X53279    | 726.771   | 965.313   | NM_000964 | 8603.928  | 8939.215  | AJ299406  | 992.163   |
| M83254    | 2585.773  | 2816.713  | BF343886  | 899.158   | 900.504   | Y10697    | 1316.287  |
| S56770    | 1213.18   | 1472.85   | NM_013263 | 5822.491  | 5241.972  | AY007166  | 7107.405  |
| AI193606  | 409.995   | 795.809   | AL137407  | 2057.849  | 1645.675  | NM_004937 | 2393.846  |
| H58872    | 3590.451  | 15247.248 | NM_018178 | 5301.281  | 8693.625  | L13197    | 1080.778  |
| J02938    | 676.836   | 905.166   | AK025204  | 1343.346  | 1387.267  | CY3Cy5    | 12347.082 |
| J04543    | 1345.891  | 922.235   | AF143330  | 1033.512  | 986.22    | AI298884  | 9063.835  |
| AA456295  | 298.489   | 753.227   | AK025178  | 4377.484  | 3625.4    | D87845    | 1804.987  |
| BE733577  | 2500.958  | 2828.27   | AF147359  | 782.207   | 1186.149  | X53279    | 415.806   |
| AI817942  | 648.701   | 795.19    | NM_014835 | 9560.784  | 8751.843  | M83254    | 2670.977  |
| X87888    | 429.766   | 332.659   | AK001822  | 4046.387  | 4314.885  | S56770    | 950.156   |
| NM_018643 | 2443.35   | 2229.493  | AK026969  | 2150.844  | 1225.956  | H58872    | 2350.856  |
| NM_016186 | 322.19    | 1035.386  | AF086287  | 2075.026  | 2135.096  | J02938    | 680.367   |
| M30142    | 4372.649  | 3254.758  | AK024268  | 2866.276  | 1681.079  | J04543    | 3459.163  |
| NM_005018 | 1401.458  | 1313.805  | AF086344  | 8106.333  | 6367.453  | S60415    | 412.158   |
| NM_013378 | 9004.249  | 8660.754  | AF086424  | 994.228   | 1245.198  | BE733577  | 4143.763  |
| NM_001085 | 1027.548  | 1092.789  | NM_018087 | 3006.019  | 4433.605  | AI817942  | 1042.944  |
| NM_006110 | 1232.871  | 737.719   | AL360260  | 514.31    | 753.12    | BG762340  | 3214.489  |
| NM_016453 | 3003.095  | 2126.565  | AF085916  | 630.716   | 553.791   | AA009484  | 600.55    |
| NM_017701 | 1021.193  | 1223.193  | AF085927  | 974.407   | 1271.798  | NM_016453 | 1321.817  |
| NM_014226 | 2520.053  | 2734.365  | AF085954  | 6864.022  | 6528.837  | NM_017701 | 710.587   |
| AF142567  | 1156.496  | 1199.729  | AL137337  | 2082.931  | 1802.741  | AF142567  | 1106.693  |
| NM_006202 | 39532.629 | 37450.629 | AL161969  | 879.739   | 732.471   | NM_005621 | 1175.078  |
| NM_017410 | 6067.641  | 9390.845  | AL442095  | 3280.976  | 3120.092  | AB040959  | 546.127   |
| NM_000748 | 19895.645 | 19166.939 | AL137378  | 1734.081  | 1385.261  | NM_003391 | 367.637   |

|           |           |           |           |           |           |           |           |
|-----------|-----------|-----------|-----------|-----------|-----------|-----------|-----------|
| NM_000048 | 4926.918  | 4969.003  | AL137609  | 31257.674 | 17461.885 | NM_001448 | 2752.929  |
| NM_004925 | 2987.659  | 6238.854  | AL353946  | 2881.486  | 1548.604  | NM_014733 | 1551.427  |
| NM_004858 | 2267.595  | 2406.125  | X69081    | 10369.715 | 6045.164  | D12485    | 2965.163  |
| S78774    | 5415.338  | 5364.297  | NM_005714 | 5188.881  | 3893.332  | D38163    | 678.408   |
| NM_004922 | 6045.87   | 6883.42   | AL359931  | 6695.997  | 3239.616  | S78774    | 5130.386  |
| NM_002871 | 936.435   | 674.812   | AK000954  | 2530.893  | 3439.179  | NM_003059 | 853.121   |
| BE873653  | 44559.898 | 44802.715 | AF086099  | 859.419   | 1293.138  | NM_004922 | 2924.719  |
| NM_006987 | 799.597   | 653.493   | AK025800  | 4663.434  | 4486.248  | NM_002871 | 457.604   |
| NM_001282 | 3028.684  | 1983.166  | AK022333  | 1242.558  | 1231.209  | NM_006987 | 635.596   |
| NM_016830 | 2070.744  | 943.232   | AK023294  | 1290.555  | 865.947   | NM_001282 | 2428.717  |
| U44105    | 385.204   | 565.447   | NM_017808 | 483.171   | 525.243   | U44105    | 960.081   |
| NM_016103 | 2066.794  | 1470.961  | NM_014162 | 1977.672  | 2130.861  | NM_016103 | 1441.398  |
| NM_002014 | 5131.461  | 9319.714  | AF159093  | 5274.873  | 4432.689  | AL137262  | 962.051   |
| NM_002538 | 11463.308 | 12274.682 | AF113679  | 2474.172  | 1702.184  | NM_020437 | 365.846   |
| NM_016585 | 10359.263 | 9516.165  | AK021997  | 3572.018  | 2128.419  | NM_001299 | 287.82    |
| NM_006927 | 16477.143 | 11748.859 | AK022125  | 874.059   | 953.47    | NM_004010 | 239.693   |
| NM_014601 | 3829.264  | 2971.1    | AK022244  | 8763.752  | 6241.2    | X87888    | 201.625   |
| NM_006928 | 882.117   | 1269.464  | AK022381  | 5582.628  | 3508.093  | NM_018643 | 1688.272  |
| AF237700  | 1368.135  | 701.283   | AK022012  | 1701.465  | 910.061   | NM_016186 | 317.629   |
| NM_002860 | 2986.813  | 4755.106  | AK022286  | 4889.029  | 2401.056  | M30142    | 2696.873  |
| NM_006169 | 4919.511  | 3206.981  | AK022613  | 9075.353  | 5199.163  | NM_005018 | 1301.882  |
| NM_001218 | 926.016   | 629.799   | AK023843  | 481.154   | 523.216   | NM_013378 | 3839.576  |
| NM_014183 | 14533.708 | 10736.699 | AL359557  | 2645.492  | 3053.842  | NM_002860 | 1765.881  |
| AB046780  | 13047.652 | 12205.852 | AK027257  | 567.662   | 686.122   | NM_006169 | 2925.697  |
| NM_018353 | 4962.486  | 3568.057  | AK024582  | 1775.344  | 1320.956  | NM_001218 | 641.165   |
| NM_001801 | 656.306   | 490.76    | AK024143  | 797.723   | 804.425   | NM_014183 | 8016.238  |
| NM_016373 | 671.976   | 334.18    | AK022099  | 549.608   | 700.348   | NM_018353 | 3615.928  |
| NM_003560 | 14943.114 | 16949.904 | NM_014367 | 2644.796  | 2205.797  | NM_003560 | 8556.438  |
| NM_014403 | 2776.29   | 3010.957  | NM_002365 | 2981.424  | 4010.159  | NM_014403 | 1795.711  |
| AL050100  | 2162.219  | 1887.719  | AF161441  | 4706.229  | 5470.244  | AL050100  | 865.343   |
| NM_020139 | 1281.283  | 1236.613  | AL137474  | 2013.717  | 1601.774  | NM_020139 | 655.564   |
| AL080207  | 1635.78   | 1719.158  | AK021572  | 1098.543  | 1781.625  | AL080207  | 290.827   |
| NM_017730 | 5108.282  | 4444.101  | AK021631  | 421.925   | 807.756   | NM_000748 | 7641.349  |
| AB051826  | 1672.786  | 1980.399  | AK026757  | 673.72    | 1192.759  | U53531    | 715.807   |
| M20697    | 975.428   | 1352.019  | AF116699  | 5875.407  | 4602.601  | NM_004925 | 1041.673  |
| NM_015046 | 3391.18   | 2856.022  | AF119908  | 1779.728  | 2667.208  | NM_003234 | 8305.424  |
| AF231022  | 17610.914 | 16368.791 | U50539    | 1070.673  | 993.64    | NM_004858 | 904.187   |
| NM_016327 | 3502.179  | 4456.552  | AK000653  | 7339.98   | 6582.089  | AB051826  | 629.94    |
| AF216381  | 7004.872  | 6558.685  | X96660    | 2145.365  | 2493.301  | NM_015046 | 2838.826  |
| L08442    | 221.152   | 754.353   | AK023519  | 661.569   | 784.729   | NM_002014 | 3557.664  |
| AB014593  | 1238.539  | 1714.318  | Z70696    | 2654.465  | 1361.734  | NM_006927 | 7265.799  |
| NM_006235 | 1470.164  | 1415.906  | NM_005792 | 9611.26   | 5806.106  | NM_014601 | 2405.799  |
| AK026353  | 2152.118  | 1922.427  | AF048847  | 5687.345  | 3753.581  | NM_017761 | 10518.398 |
| L24123    | 2838.44   | 2996.328  | AL137717  | 4540.801  | 1203.026  | NM_006928 | 247.333   |
| AF071111  | 717.511   | 634.064   | AF035297  | 742.33    | 863.969   | AF237700  | 461.571   |
| U00954    | 989.152   | 708.36    | NM_014039 | 2688.567  | 3037.027  | D38163    | 752.156   |
| NM_015942 | 3264.102  | 3167.511  | S67154    | 2536.93   | 5205.175  | D28449    | 820.275   |
| NM_017907 | 9129.437  | 5774.935  | AK026181  | 10133.407 | 12992.619 | NM_003281 | 1060.161  |
| NM_002044 | 9516.716  | 9085.228  | AK021451  | 3089.507  | 1538.112  | AA460480  | 672.294   |
| AJ272267  | 1423.142  | 1383.272  | AK001971  | 825.142   | 754.499   | AI298884  | 6667.378  |
| NM_002103 | 7789.801  | 4856.345  | AF086468  | 4100.24   | 2628.545  | D87845    | 1530.602  |
| NM_006665 | 2224.46   | 1852.161  | AK027239  | 3361.014  | 3051.85   | X53279    | 447.003   |
| NM_000270 | 6396.437  | 4823.701  | AF005082  | 42955.699 | 27466.346 | M83254    | 2164.322  |

|           |           |           |           |           |           |           |           |
|-----------|-----------|-----------|-----------|-----------|-----------|-----------|-----------|
| U89277    | 976.25    | 275.077   | AL117595  | 5607.772  | 5818.465  | S56770    | 916.6     |
| AK026670  | 1088.182  | 306.145   | AB028988  | 27154.254 | 31333.992 | AI193606  | 243.152   |
| NM_002876 | 3128.748  | 6406.767  | AK023072  | 3733.101  | 1426.857  | H58872    | 2416.095  |
| AK022332  | 1406.673  | 1170.989  | AF086105  | 13488.379 | 10676.353 | J02938    | 613.395   |
| NM_006465 | 1882.856  | 1028.234  | AK026600  | 1632.319  | 727.783   | J04543    | 2785.113  |
| NM_006765 | 5255.779  | 4323.501  | AF251189  | 961.376   | 640.282   | S60415    | 499.313   |
| NM_001189 | 1322.442  | 1536.239  | AK026733  | 832.452   | 765.999   | AA456295  | 504.262   |
| NM_006992 | 626.78    | 798.349   | AF161429  | 7313.917  | 3488.931  | BE733577  | 2284.116  |
| AL365370  | 2253.942  | 3796.533  | AK021495  | 5281.747  | 3725.107  | BG762340  | 1828.87   |
| AK022204  | 894.893   | 997.668   | AF067777  | 30418.539 | 29214.311 | NM_005456 | 1835.601  |
| AF086147  | 256.923   | 1000.029  | U17613    | 682.201   | 355.576   | NM_006534 | 6165.503  |
| AF085912  | 683.13    | 479.549   | AK027211  | 1625.549  | 865.207   | NM_016186 | 120.94    |
| AK001127  | 799.518   | 704.152   | Y10697    | 2390.098  | 1035.262  | M30142    | 2072.444  |
| U79256    | 7621.699  | 7771.391  | AY007166  | 7021.062  | 6730.964  | NM_005018 | 914.968   |
| AL832550  | 864.823   | 906.159   | NM_004937 | 1520.12   | 1680.124  | NM_013378 | 5073.65   |
| AK001731  | 1091.9    | 1103.25   | L13197    | 2095.832  | 2625.082  | NM_001085 | 1263.69   |
| AF052176  | 413.53    | 384.359   | AF056450  | 7498.037  | 8214.688  | NM_006110 | 488.988   |
| NM_001412 | 2231.975  | 2241.016  | CY3Cy5    | 13038.93  | 1306.613  | NM_016453 | 1153.745  |
| AF095771  | 802.784   | 1312.946  | AI298884  | 25723.422 | 24947.641 | NM_017701 | 769.51    |
| AF086154  | 652.617   | 2190.075  | D87845    | 2244.234  | 1534.254  | NM_014226 | 1395.924  |
| AF086205  | 1948.625  | 1483.63   | X53279    | 513.359   | 702.065   | AF142567  | 537.969   |
| AK024169  | 972.522   | 973.011   | M83254    | 4670.257  | 5353.206  | NM_006202 | 39117.469 |
| AF147395  | 1279.608  | 1120.622  | S56770    | 1712.64   | 1288.608  | NM_017410 | 3554.492  |
| AF085985  | 1081.671  | 726.886   | H58872    | 8229.352  | 8784.367  | AY009398  | 115.481   |
| AK026384  | 504.841   | 508.335   | J02938    | 941.208   | 887.649   | X99680    | 1418.991  |
| AK025217  | 856.789   | 655.732   | J04543    | 5608.217  | 3582.038  | NM_001448 | 1287.713  |
| AL137342  | 1900.639  | 1954.797  | AA456295  | 774.016   | 801.361   | NM_016072 | 843.217   |
| AF075105  | 2022.746  | 1795.952  | BE733577  | 4948.11   | 3242.914  | AK026349  | 680.559   |
| U03241    | 794.342   | 407.972   | AI817942  | 1231.267  | 929.223   | D12485    | 1364.406  |
| NM_005117 | 1497.103  | 1608.165  | BG762340  | 4098.262  | 2480.647  | AK023204  | 1686.093  |
| AJ007733  | 881.567   | 573.168   | NM_005456 | 2505.588  | 2301.35   | NM_003449 | 511.421   |
| AK021625  | 3354.458  | 3042.652  | NM_006534 | 8763.618  | 6086.561  | NM_002478 | 587.09    |
| AK021679  | 1446.109  | 1114.961  | SR9       | 15790.25  | 3274.655  | NM_003234 | 7608.604  |
| AK001380  | 3709.764  | 1572.762  | CY3Cy5    | 12433.155 | 1062.287  | NM_004858 | 764.325   |
| AK024938  | 489.218   | 438.078   | NM_016453 | 1394.21   | 1536.777  | S78774    | 3797.029  |
| AK025312  | 1566.445  | 1537.224  | NM_017701 | 1048.29   | 1293.214  | NM_004922 | 1944.88   |
| AK027205  | 757.527   | 433.964   | NM_014226 | 2746.581  | 3032.905  | NM_002871 | 285.602   |
| NM_018606 | 281.337   | 258.189   | AF142567  | 1528.224  | 1556.703  | NM_006987 | 530.322   |
| AK026493  | 761.681   | 515.286   | NM_017410 | 6420.219  | 9719.161  | NM_001282 | 1748.212  |
| AL049268  | 4866.38   | 2810.053  | AY009398  | 342.547   | 619.634   | NM_016830 | 484.252   |
| AK023304  | 750.696   | 384.098   | X99680    | 5151.091  | 9169.183  | NM_016103 | 448.972   |
| AK023963  | 8346.699  | 10116.316 | NM_001448 | 2424.091  | 2524.483  | AL133654  | 556.192   |
| AK022473  | 4403.22   | 3750.146  | NM_016072 | 4009.153  | 4045.855  | AL137262  | 297.319   |
| AK023810  | 900.067   | 946.823   | AK026349  | 4458.474  | 5678.948  | NM_018643 | 1588.615  |
| U80761    | 6569.604  | 5346.516  | NM_014733 | 1186.575  | 2055.08   | NM_006927 | 7581.074  |
| U61100    | 809.255   | 1218.404  | D12485    | 2164.549  | 3159.513  | NM_014601 | 2010.195  |
| NM_018582 | 715.396   | 873.599   | AK023204  | 5314.727  | 4509.258  | NM_017761 | 9488.152  |
| M21539    | 3393.071  | 5613.64   | NM_003449 | 1448.97   | 1621.369  | NM_006928 | 386.566   |
| AF130117  | 885.074   | 223.872   | NM_002478 | 1931.692  | 1668.032  | NM_002860 | 1178.104  |
| AK024125  | 567.868   | 600.862   | D38163    | 967.017   | 1375.806  | NM_006169 | 1823.608  |
| AK024761  | 6803.535  | 4904.827  | D28449    | 1691.568  | 2342.538  | NM_001218 | 212.94    |
| M55536    | 2785.306  | 4365.807  | NM_003281 | 1561.039  | 1221.785  | NM_014183 | 5822.71   |
| NM_014335 | 21148.607 | 12927.442 | AA460480  | 1062.846  | 1281.256  | NM_018353 | 1422.533  |

|           |           |           |           |           |           |           |           |
|-----------|-----------|-----------|-----------|-----------|-----------|-----------|-----------|
| AF086067  | 2265.986  | 2002.674  | S78774    | 5439.682  | 6848.116  | NM_00356C | 892.599   |
| AK024967  | 5199.401  | 5583.907  | NM_003059 | 1270.651  | 180.405   | NM_014403 | 239.934   |
| AK025102  | 2361.323  | 1844.43   | NM_004922 | 3965.53   | 5917.956  | AL050100  | 458.039   |
| AF086562  | 1160.581  | 1035.725  | NM_002871 | 874.444   | 769.632   | NM_00074E | 3387.559  |
| AJ011980  | 1370.417  | 755.805   | BE873653  | 51729.168 | 57328.004 | NM_00004E | 886.961   |
| NM_00270C | 9026.481  | 8765.168  | NM_006987 | 797.149   | 1153.921  | U53531    | 640.461   |
| AB002437  | 24751.467 | 25413.223 | NM_001282 | 3231.288  | 3413.472  | NM_00492E | 620.022   |
| AK023496  | 547.826   | 439.872   | U44105    | 1748.877  | 1410.237  | NM_00545E | 1564.677  |
| NM_006777 | 1921.223  | 2509.561  | NM_016103 | 3283.058  | 1623.258  | NM_006534 | 10687.804 |
| AK024969  | 5034.824  | 3039.905  | AL133654  | 3577.449  | 2376.638  | AB051826  | 424.34    |
| AK022250  | 1070.539  | 826.46    | AL137262  | 1300.316  | 959.295   | M20697    | 250.148   |
| NM_01236E | 1248.242  | 425.233   | NM_002077 | 668.028   | 2319.967  | NM_002014 | 2992.336  |
| AK025092  | 1968.029  | 1863.616  | NM_018643 | 1745.49   | 1375.726  | NM_00253E | 4573.341  |
| AF130047  | 821.347   | 610.96    | NM_01618E | 598.472   | 274.963   | NM_01658E | 8028.716  |
| Z83944    | 1441.715  | 1149.441  | M30142    | 1539.506  | 3145.191  | AK026349  | 4398.023  |
| AF085871  | 1238.705  | 872.096   | NM_00501E | 1172.953  | 1320.201  | NM_014733 | 908.778   |
| AF026564  | 1166.287  | 911.946   | NM_01337E | 5674.627  | 7771.813  | D12485    | 1986.633  |
| AB002308  | 825.053   | 1012.369  | NM_00108E | 1614.519  | 1460.016  | AK023204  | 1822.799  |
| NM_003324 | 4767.095  | 3561.464  | NM_006110 | 1301.563  | 951.261   | NM_00344E | 1412.606  |
| NM_012143 | 5596.332  | 4554.13   | NM_00286C | 6567.187  | 7014.336  | NM_00247E | 1507.484  |
| AF085892  | 2060.096  | 2053.829  | NM_00616E | 4624.779  | 7196.555  | D38163    | 864.933   |
| AF075114  | 4925.695  | 3880.429  | NM_00121E | 1072.746  | 1222.828  | D28449    | 452.003   |
| S82075    | 2090.423  | 3054.697  | NM_014183 | 17831.609 | 16497.002 | AA460480  | 628.921   |
| Z70766    | 586.136   | 681.849   | AB046780  | 14780.109 | 23469.648 | AI298884  | 2638.782  |
| AK000660  | 2606.897  | 5472.437  | NM_018353 | 9132.632  | 8245.551  | M83254    | 417.504   |
| NM_014711 | 1217.879  | 1224.507  | NM_001801 | 679.414   | 888.448   | S56770    | 698.163   |
| AK022015  | 1823.335  | 1434.117  | NM_016373 | 865.561   | 712.226   | AI193606  | 128.128   |
| D17234    | 674.226   | 964.942   | NM_00356C | 24555.533 | 31624.994 | H58872    | 468.122   |
| AK002208  | 613.927   | 1378.876  | NM_014403 | 3623.129  | 4031.508  | J02938    | 349.876   |
| D63135    | 1193.614  | 192.834   | AL050100  | 1756.383  | 2278.506  | J04543    | 1351.986  |
| CY3Cy5    | 14983.871 | 787.954   | NM_02013E | 1300.611  | 1755.396  | S60415    | 292.99    |
| H41522    | 6129.354  | 6171.128  | AL080207  | 722.7     | 936.223   | AA456295  | 273.232   |
| AA460291  | 14663.794 | 14245.364 | NM_00074E | 14560.174 | 20970.449 | BE733577  | 2131.299  |
| BI821333  | 8665.284  | 12486.855 | NM_00004E | 4929.122  | 6997.387  | BG762340  | 1130.584  |
| X51841    | 24470.949 | 24341.416 | NM_00492E | 4602.781  | 3684.643  | NM_018643 | 1377.914  |
| AF051344  | 19527.791 | 21373.381 | NM_00224E | 123.376   | 1069.71   | NM_01618E | 301.765   |
| BG506100  | 7750.28   | 10703.808 | NM_003234 | 14453.174 | 15512.577 | M30142    | 1900.409  |
| X53586    | 1909.048  | 3812.303  | NM_00485E | 1516.93   | 1762.245  | NM_01337E | 1308.101  |
| M17176    | 2379.334  | 2586.713  | AB051826  | 917.285   | 2017.081  | NM_00108E | 644.455   |
| M26576    | 3427.295  | 2106.75   | AK024964  | 1045.005  | 1365.03   | NM_006110 | 436.227   |
| M32972    | 6628.618  | 6500.701  | M20697    | 1033.02   | 1141.363  | NM_017701 | 211.705   |
| D11151    | 1073.731  | 1745.514  | NM_01504E | 4480.554  | 5304.67   | NM_01422E | 1099.856  |
| D89854    | 1333.105  | 1741.899  | NM_002014 | 4740.467  | 12386.541 | AF142567  | 401.603   |
| M13207    | 1067.371  | 1756.56   | NM_00253E | 11903.1   | 12570.33  | NM_005621 | 558.274   |
| X14885    | 1252.466  | 1444.493  | NM_01658E | 13355.783 | 16514.6   | NM_006202 | 35312.035 |
| M97815    | 2566.331  | 2886.357  | NM_006927 | 14235.91  | 6885.263  | AB040959  | 153.382   |
| NM_00632E | 5240.88   | 7940.094  | NM_014601 | 3657.74   | 4990.309  | NM_003391 | 33.292    |
| SR6       | 4594.878  | 3529.691  | NM_017761 | 15593.917 | 15022.694 | NM_01741C | 2929.805  |
| SR8       | 15193.035 | 38032.813 | NM_00692E | 365.883   | 1023.311  | X99680    | 2329.36   |
| SR10      | 51695.402 | 20221.432 | NM_000067 | 81.462    | 1272.024  | NM_00144E | 1387.277  |
| CY3Cy5    | 17167.738 | 825.766   | AF237700  | 1043.165  | 1617.779  | NM_016072 | 991.661   |
| NM_00318E | 4376.989  | 3969.91   | D38163    | 1465.67   | 1181.938  | NM_00074E | 9438.217  |
| NM_00711E | 986.186   | 501.718   | NM_004967 | 510.637   | 463.63    | NM_00004E | 2023.966  |

|           |           |           |           |           |           |           |           |
|-----------|-----------|-----------|-----------|-----------|-----------|-----------|-----------|
| U59431    | 3318.22   | 4365.572  | D28449    | 1516.912  | 1184.588  | U53531    | 586.603   |
| U49349    | 1152.581  | 2198.776  | NM_003281 | 1966.294  | 1462.244  | NM_004925 | 858.507   |
| NM_002364 | 1512.538  | 4402.904  | AA460480  | 1232.732  | 1316.782  | NM_003234 | 1841.302  |
| NM_003966 | 944.142   | 3381.315  | AI298884  | 27253.471 | 28060.16  | NM_004858 | 203.563   |
| AK000896  | 3947.942  | 7070.24   | D87845    | 2211.329  | 1293.474  | S78774    | 613.895   |
| AV682011  | 1066.34   | 1359.034  | X53279    | 597.421   | 678.342   | NM_004922 | 969.501   |
| NM_003872 | 1367.57   | 1226.687  | M83254    | 3539.58   | 2994.989  | NM_002871 | 33.498    |
| NM_020384 | 5471.433  | 4665.913  | S56770    | 1097.422  | 983.064   | BE873653  | 19114.605 |
| AK026074  | 1904.631  | 1945.759  | H58872    | 6474.777  | 11111.843 | NM_006987 | 134.243   |
| NM_003172 | 6150.074  | 3704.095  | J02938    | 651.353   | 699.785   | NM_001282 | 1584.729  |
| NM_004809 | 3487.556  | 2947.644  | J04543    | 6424.507  | 5017.354  | NM_016830 | 961.815   |
| AA903183  | 812.308   | 1174.85   | S60415    | 737.465   | 488.019   | NM_016103 | 267.645   |
| NM_004929 | 2840.929  | 3538.255  | AA456295  | 794.251   | 982.187   | AL133654  | 984.105   |
| AB020626  | 2001.117  | 2429.692  | BE733577  | 4519.445  | 5190.416  | AL137262  | 772.249   |
| NM_002036 | 9530.393  | 11628.7   | AI817942  | 1129.749  | 1694.322  | NM_002014 | 3542.49   |
| NM_012400 | 892.685   | 950.325   | BG762340  | 3121.928  | 2100.573  | NM_002538 | 4787.157  |
| AF019225  | 7015.082  | 6753.808  | AA009484  | 431.829   | 1447.601  | NM_016585 | 9425.472  |
| Z36803    | 14284.911 | 12718.716 | NM_005456 | 2537.218  | 2759.087  | NM_002013 | 6571.378  |
| AB011139  | 3100.174  | 2823.329  | AL133109  | 82.413    | 1627.275  | NM_006927 | 8268.609  |
| NM_006919 | 1646.506  | 1585.506  | NM_016186 | 428.626   | 626.917   | NM_014601 | 1648.223  |
| AK022625  | 4431.02   | 6124.717  | M30142    | 1595.545  | 1817.479  | NM_017761 | 2608.951  |
| NM_005425 | 717.676   | 650.182   | NM_005018 | 1511.053  | 1005.026  | NM_002860 | 155.479   |
| AK023084  | 8380.874  | 9439.93   | NM_013378 | 5536.357  | 5438.598  | NM_006169 | 525.49    |
| AL079287  | 3160.12   | 3360.331  | NM_001085 | 1674.23   | 938.202   | NM_014183 | 1621.622  |
| NM_003725 | 771.599   | 2181.28   | NM_006110 | 1208.348  | 570.664   | AB046780  | 3193.995  |
| BE899154  | 2384.993  | 3152.758  | NM_016453 | 1608.03   | 1000.559  | NM_018353 | 2433.821  |
| NM_004863 | 3151.004  | 3820.825  | NM_017701 | 995.602   | 804.2     | NM_001801 | 236.882   |
| NM_000385 | 5224.584  | 4117.096  | NM_014226 | 2265.279  | 1370.146  | NM_003560 | 2370.391  |
| NM_018448 | 5609.293  | 7127.143  | AF142567  | 910.402   | 1136.714  | NM_014403 | 942.539   |
| NM_001659 | 15270.15  | 17525.488 | NM_006202 | 42803.051 | 46146.523 | AL050100  | 595.032   |
| AB020663  | 9138.774  | 15179.048 | NM_017410 | 5679.409  | 7907.716  | NM_017730 | 1870.277  |
| AF297866  | 2051.238  | 1968.409  | X99680    | 4250.594  | 14621.251 | AF231022  | 16351.169 |
| NM_002864 | 1623.313  | 2589.075  | NM_001448 | 2175.171  | 2749.08   | NM_000297 | 70.233    |
| NM_003102 | 466.461   | 1099.416  | NM_016072 | 3725.074  | 4701.772  | NM_004382 | 130.207   |
| NM_017925 | 1209.35   | 2834.935  | AK026349  | 4465.584  | 7105.137  | NM_016327 | 1864.112  |
| AK022208  | 39303.445 | 36131.785 | D12485    | 2345.342  | 2370.816  | NM_006322 | 97.946    |
| NM_017890 | 2647.128  | 5109.486  | AK023204  | 6345.411  | 8816.082  | U66702    | 26482.227 |
| Z15114    | 4918.372  | 4858.168  | NM_003449 | 1373.218  | 2519.841  | AF216381  | 6917.625  |
| AB040812  | 19518.891 | 23735.891 | NM_002478 | 3194.333  | 4524.52   | NM_006618 | 133.091   |
| NM_000215 | 6889.338  | 5211.141  | NM_003234 | 11584.068 | 8291.437  | AB014593  | 527.393   |
| AK027148  | 18179.408 | 21162.146 | NM_004858 | 1296.502  | 1046.118  | AK074832  | 6583.323  |
| NM_005084 | 5388.316  | 8860.512  | S78774    | 3686.927  | 3701.396  | NM_006235 | 512.401   |
| NM_007283 | 995.374   | 1111.427  | NM_003059 | 963.354   | 132.54    | AK026353  | 742.948   |
| NM_006111 | 7617.75   | 4438.39   | NM_004922 | 2681.849  | 3067.997  | L24123    | 526.528   |
| AK026071  | 5569.995  | 9498.313  | NM_006987 | 501.522   | 613.723   | NM_001384 | 218.796   |
| NM_002309 | 663.787   | 622.772   | NM_001282 | 3134.504  | 2973.009  | U00954    | 813.233   |
| AK026074  | 1950.022  | 2952.554  | NM_016830 | 1225.517  | 1162.225  | NM_015942 | 229.968   |
| NM_003172 | 6790.396  | 4736.468  | U44105    | 903.529   | 610.492   | NM_017907 | 1623.837  |
| AA460291  | 12431.428 | 13077.097 | NM_016103 | 2698.25   | 1002.476  | NM_002044 | 1270.301  |
| BI821333  | 9825.021  | 17577.119 | AL133654  | 2672.108  | 2028.823  | AJ272267  | 61.964    |
| AF051344  | 12436.531 | 13538.361 | AL137262  | 1335.621  | 2127.904  | NM_002103 | 722.382   |
| BG506100  | 7918.261  | 9654.295  | NM_020437 | 414.735   | 904.015   | NM_006665 | 450.373   |
| X53586    | 1522.62   | 2730.387  | NM_004010 | 140.502   | 794.868   | NM_000270 | 704.043   |

|           |           |           |           |           |           |           |           |
|-----------|-----------|-----------|-----------|-----------|-----------|-----------|-----------|
| M17176    | 2926.338  | 2535.433  | NM_018643 | 2182.089  | 2558.031  | U89277    | 182.037   |
| M26576    | 3221.122  | 1906.572  | NM_006927 | 14900.291 | 8030.326  | NM_002876 | 422.433   |
| M32972    | 6684.257  | 6864.226  | NM_014601 | 2784.065  | 2355.948  | AK022332  | 672.661   |
| D11151    | 1036.656  | 1075.373  | NM_017761 | 14402.113 | 10252.505 | NM_006465 | 522.417   |
| D89854    | 1112.081  | 1194.792  | NM_006928 | 329.82    | 785.411   | NM_006769 | 2060.581  |
| M13207    | 1648.28   | 1810.88   | AF237700  | 773.192   | 450.26    | NM_006992 | 174.227   |
| X14885    | 586.274   | 1797.196  | NM_002860 | 4256.063  | 2634.951  | AL365370  | 3049.043  |
| M97815    | 1349.979  | 1360.787  | NM_006169 | 2538.587  | 1213.429  | AK022204  | 680.559   |
| NM_006325 | 2939.115  | 4861.462  | NM_001218 | 809.523   | 279.492   | AK001127  | 506.824   |
|           | 266.928   | 983.067   | NM_014183 | 11476.102 | 6535.215  | U79256    | 3616.257  |
| AF085893  | 1493.94   | 1240.941  | NM_018353 | 6767.081  | 5067.372  | AF086477  | 150.027   |
| NM_003201 | 5098.876  | 5377.014  | NM_001801 | 505.718   | 600.978   | NM_001412 | 767.465   |
| AB011139  | 2768.126  | 2551.029  | NM_016373 | 661.997   | 172.129   | AF095771  | 293.36    |
| NM_006919 | 1405.659  | 1693.804  | NM_003560 | 17790.723 | 17440.848 | AF086205  | 1485.563  |
| AK022625  | 8633.312  | 11698.829 | NM_014403 | 2358.107  | 1409.585  | AF147395  | 326.573   |
| U59431    | 1824.991  | 2585.796  | AL050100  | 1348.865  | 974.61    | AL137342  | 276.453   |
| U49349    | 2127.25   | 2626.698  | NM_020139 | 763.883   | 1070.003  | AF075105  | 613.61    |
| NM_020152 | 4107.487  | 3927.228  | AL080207  | 982.873   | 1041.978  | NM_005117 | 2132.564  |
| NM_013404 | 2744.427  | 2846.843  | NM_005688 | 94.177    | 259.76    | AK021625  | 2815.486  |
| AF300648  | 3878.243  | 3937.548  | NM_000748 | 15487.597 | 18028.549 | AK001380  | 637.162   |
| NM_006157 | 3206.142  | 3364.228  | NM_000048 | 4979.452  | 4617.465  | AK025312  | 136.366   |
| AK024443  | 56208.582 | 58096.746 | U53531    | 950.059   | 968.663   | NM_018606 | 178.597   |
| X06710    | 8705.055  | 4474.176  | NM_004925 | 5463.518  | 4414.971  | AK002042  | 215.803   |
| AK000896  | 1574.004  | 1935.035  | NM_005456 | 1517.807  | 1059.344  | AL049268  | 311.137   |
| NM_020384 | 4036.517  | 3320.585  | NM_006534 | 7369.378  | 3599.211  | AK023304  | 460.045   |
| NM_006058 | 15960.778 | 20547.188 | AB051826  | 862.84    | 1078.323  | AK023963  | 1698.313  |
| NM_006628 | 13446.183 | 12551.69  | M20697    | 549.152   | 2192.571  | AK022473  | 3083.479  |
| NM_000483 | 60636.406 | 38205.984 | NM_015046 | 2751.05   | 1063.711  | AK023810  | 498.249   |
| NM_018448 | 2753.916  | 1888.842  | NM_002014 | 4990.468  | 6167.101  | U80761    | 3346.362  |
| NM_001659 | 17343.285 | 14471.443 | NM_002538 | 9143.678  | 6641.763  | U61100    | 385.692   |
| AB020663  | 9026.29   | 13007.661 | NM_016585 | 12208.566 | 10711.916 | NM_018582 | 715.725   |
| AF297866  | 2033.01   | 1841.486  | AK026349  | 3867.319  | 3688.309  | M21539    | 444.759   |
| NM_002864 | 1799.725  | 2590.035  | D12485    | 1906.705  | 780.54    | AK024761  | 683.554   |
| NM_017817 | 10784.414 | 6862.875  | AK023204  | 4232.146  | 1931.436  | M55536    | 444.042   |
| NM_018184 | 17820.084 | 35850.48  | NM_003449 | 1140.615  | 787.154   | NM_014335 | 2780.829  |
| AB046823  | 1821.944  | 2956.778  | NM_002478 | 1434.501  | 913.591   | AK024967  | 1180.024  |
| NM_004929 | 1924.375  | 1564.458  | D38163    | 1029.872  | 88.006    | AK025102  | 1032.014  |
| NM_004662 | 2342.497  | 1902.462  | D28449    | 696.306   | 797.546   | AF086562  | 857.278   |
| NM_016639 | 48832.035 | 49027.734 | NM_003281 | 973.921   | 1144.743  | AJ011980  | 512.759   |
| U61739    | 14346.783 | 15043.046 | AA460480  | 953.385   | 1607.207  | AY007113  | 680.762   |
| AJ132089  | 7798.321  | 6674.701  | AI298884  | 18574.268 | 27898.842 | AF130083  | 7746.641  |
| U92819    | 29435.965 | 43675.035 | D87845    | 1769.513  | 2112.364  | NM_002700 | 12811.768 |
| AB020626  | 985.516   | 1159.336  | X53279    | 100.576   | 988.971   | AB002437  | 18785.137 |
| NM_002036 | 8092.551  | 8360.801  | M83254    | 2809.164  | 3465.966  | AK024013  | 490.453   |
| NM_012400 | 1256.235  | 898.107   | S56770    | 970.46    | 883.104   | NM_006777 | 235.66    |
| NM_005384 | 3672.32   | 3458.055  | H58872    | 6234.479  | 3213.62   | AK024969  | 768.454   |
| NM_006850 | 1033.286  | 1490.575  | J02938    | 787.375   | 2068.202  | AK022250  | 387.931   |
| AB013103  | 1306.088  | 1357.609  | J04543    | 2395.881  | 1055.027  | NM_012369 | 1155.975  |
| AF019225  | 7409.816  | 6485.251  | S60415    | 787.397   | 592.281   | AK025092  | 278.586   |
| Z36803    | 12320.608 | 11939.778 | AA456295  | 931.047   | 1100.826  | AF130047  | 443.136   |
| NM_013371 | 953.025   | 976.28    | BE733577  | 2877.383  | 2338.917  | Z83944    | 968.429   |
| NM_000707 | 14522.056 | 11013.266 | AI817942  | 755.704   | 1198.817  | AF085871  | 201.176   |
| NM_000215 | 8026.94   | 8524.801  | BG762340  | 2874.781  | 1517.803  | AF026564  | 1138.698  |



|           |           |           |           |           |           |           |           |
|-----------|-----------|-----------|-----------|-----------|-----------|-----------|-----------|
| AK027148  | 14856.784 | 13401.63  | NM_018643 | 1232.838  | 582.059   | X97301    | 867.2     |
| NM_005084 | 3499.647  | 2464.569  | M30142    | 864.762   | 624.99    | NM_019063 | 14164.207 |
| NM_007283 | 1180.126  | 1067.826  | NM_005018 | 2258.208  | 4727.171  | NM_014336 | 1048.037  |
| NM_006111 | 8677.335  | 6285.529  | NM_013378 | 6307.657  | 9309.193  | AB002308  | 463.972   |
| AK026071  | 3539.204  | 5554.231  | NM_001085 | 1558.06   | 1940.97   | NM_003324 | 1023.155  |
| BC012333  | 7264.174  | 8597.966  | NM_006110 | 1296.225  | 1467.003  | NM_012143 | 4209.39   |
| AF237952  | 2711.686  | 3471.184  | NM_016453 | 1816.807  | 2894.897  | AF075114  | 1884.229  |
| AL079287  | 7308.824  | 8230.321  | NM_017701 | 1073.542  | 1357.543  | AK022218  | 54975.184 |
| NM_014427 | 5340.374  | 5874.704  | NM_014226 | 2373.489  | 1964.784  | NM_007112 | 473.815   |
| AB046769  | 6020.397  | 6081.261  | AF142567  | 486.507   | 608.214   | S82075    | 504.067   |
| NM_015922 | 9168.682  | 15758.752 | NM_006202 | 45905.625 | 22363.885 | AK000660  | 330.577   |
| NM_020381 | 3081.125  | 4349.96   | NM_003391 | 415.365   | 522.586   | NM_014711 | 154.064   |
| NM_002957 | 10724.038 | 9413.597  | NM_017410 | 4343.007  | 6671.883  | AK022015  | 580.194   |
| NM_018106 | 7449.612  | 9001.21   | X99680    | 5439.868  | 10702.839 | D17234    | 901.341   |
| NM_003725 | 1129.609  | 1098.202  | NM_001448 | 1862.67   | 2122.141  | AK002208  | 2019.355  |
| BE899154  | 2544.618  | 3218.156  | NM_016072 | 4351.213  | 4487.047  | D63135    | 1133.698  |
| NM_004863 | 3733.663  | 3965.373  | NM_000748 | 12571.798 | 14558.515 | AB033083  | 2414.646  |
| AK024573  | 5586.915  | 4556.039  | NM_000048 | 3529.93   | 2955.554  | CY3Cy5    | 13332.427 |
| NM_002295 | 4585.941  | 4107.244  | AF104032  | 7364.76   | 12690.426 | H41522    | 6288.069  |
| D79998    | 56896.652 | 41922.25  | U53531    | 805.052   | 785.255   | BG506100  | 4648.113  |
| AB032963  | 3901.47   | 2642.206  | NM_004925 | 3648.149  | 2537.655  | X53586    | 495.424   |
| NM_000385 | 2312.967  | 1249.212  | NM_003234 | 8532.773  | 9244.002  | M17176    | 1718.095  |
| AF301013  | 7828.766  | 5120.343  | NM_004858 | 1816.035  | 2247.648  | M26576    | 1919.238  |
| NM_018992 | 65501.25  | 63026.996 | S78774    | 5181.635  | 10449.384 | M32972    | 2373.929  |
| U15688    | 8107.867  | 6296.987  | NM_003059 | 1082.949  | 406.278   | D89854    | 316.654   |
| NM_006325 | 3318.081  | 4530.37   | NM_004922 | 3450.315  | 6194.581  | M13207    | 815.247   |
| AF085893  | 1162.381  | 743.608   | NM_002871 | 653.414   | 282.976   | M97815    | 992.05    |
| NM_014305 | 2525.425  | 4934.185  | NM_001282 | 1943.609  | 586.568   | NM_006325 | 2009.019  |
| NM_012123 | 8211.944  | 7329.245  | NM_016830 | 1006.926  | 469.148   | SR6       | 3917.638  |
| U87972    | 2248.523  | 1863.067  | U44105    | 968.782   | 708.179   | SR8       | 12905.283 |
| NM_017925 | 2113.707  | 3295.201  | NM_016103 | 2807.579  | 1438.16   | SR10      | 39213.66  |
| AK022208  | 31082.783 | 17025.865 | AL133654  | 2789.574  | 1971.135  | CY3Cy5    | 12982.777 |
| NM_003171 | 4045.064  | 5138.871  | AL137262  | 1540.379  | 1406.309  | AK025588  | 2508.819  |
| NM_006437 | 8728.32   | 16618.965 | NM_002014 | 4867.837  | 7335.389  | NM_003188 | 2890.479  |
| NM_017890 | 1844.346  | 1632.34   | NM_002538 | 6918.507  | 5627.278  | NM_007118 | 699.767   |
| AK021654  | 3188.805  | 2112.87   | NM_016585 | 12691.924 | 13251.308 | NM_020152 | 2991.322  |
| NM_016481 | 2076.436  | 1362.068  | NM_006927 | 13742.091 | 10701.729 | NM_013404 | 1473.679  |
| NM_003925 | 17848.016 | 11874.223 | NM_014601 | 1743.083  | 2033.228  | AF300648  | 4786.247  |
| Z15114    | 4914.957  | 4981.731  | NM_017761 | 8564.061  | 9988.67   | NM_003966 | 873.898   |
| AB040812  | 19497.154 | 23303.766 | NM_006928 | 253.05    | 830.171   | AK024443  | 50995.41  |
| NM_006285 | 5981.551  | 6412.205  | AF237700  | 1065.456  | 1707.51   | X06710    | 3125.993  |
| AV682011  | 572.845   | 1287.882  | NM_002860 | 3115.007  | 4065.552  | AK000896  | 709.832   |
| NM_003872 | 681.51    | 871.779   | NM_006169 | 5020.843  | 5292.016  | NM_020384 | 2795.265  |
| NM_020384 | 4547.809  | 3512.673  | NM_001218 | 841.019   | 735.028   | NM_006058 | 8471.951  |
| NM_006058 | 16228.568 | 18808.17  | NM_014183 | 6329.271  | 2943.714  | NM_006628 | 10350.734 |
| NM_006628 | 11232.53  | 8856.44   | NM_018353 | 4329.86   | 1049.097  | AK026074  | 1880.569  |
| M97496    | 23526.08  | 22585.539 | NM_003560 | 21162.186 | 17193.912 | NM_003172 | 2996.404  |
| NM_002309 | 513.178   | 1553.487  | NM_014403 | 3013.088  | 2534.713  | NM_004809 | 2764.7    |
| AK026074  | 1511.085  | 1931.537  | AL050100  | 1932.409  | 1863.392  | NM_017817 | 7059.85   |
| NM_003172 | 5894.083  | 4633.116  | NM_020139 | 1413.624  | 1622.708  | NM_018184 | 12458.59  |
| NM_004809 | 4444.509  | 3396.168  | AL080207  | 908.853   | 617.865   | AB046823  | 1993.981  |
| H41522    | 6561.442  | 6662.259  | NM_017730 | 2710.201  | 2466.285  | NM_004929 | 2732.162  |
| AA460291  | 18562.299 | 19393.896 | AB051826  | 985.806   | 1421.938  | NM_016639 | 28072.398 |

|           |           |           |           |           |           |           |           |
|-----------|-----------|-----------|-----------|-----------|-----------|-----------|-----------|
| BI821333  | 10611.483 | 18023.959 | M20697    | 520.525   | 552.41    | U61739    | 7622.057  |
| X51841    | 23804.236 | 26422.92  | NM_015046 | 3458.88   | 3280.057  | AJ132089  | 1319.194  |
| AF051344  | 16160.597 | 18700.482 | AF231022  | 20392.758 | 19806.904 | U92819    | 16506.982 |
| BG506100  | 6570.004  | 8209.614  | NM_016327 | 4423.271  | 4264.778  | AB020626  | 525.033   |
| X53586    | 1149.112  | 1134.322  | NM_006322 | 1159.717  | 1531.851  | NM_002036 | 5124.251  |
| M17176    | 2836.173  | 2979.993  | U66702    | 27406.412 | 27738.887 | NM_012400 | 642.872   |
| M26576    | 3656.458  | 1908.443  | AF216381  | 7841.623  | 9879.671  | NM_005384 | 2996.845  |
| M32972    | 5969.396  | 5276.66   | AB014593  | 1206.064  | 1259.526  | NM_006850 | 436.775   |
| D11151    | 587.227   | 636.83    | AK074832  | 14291.126 | 13456.221 | AB013103  | 1212.061  |
| D89854    | 1196.078  | 1164.815  | AK026353  | 1880.951  | 2245.255  | AF019225  | 4083.452  |
| M13207    | 995.393   | 1508.396  | L24123    | 1869.296  | 3441.55   | Z36803    | 7402.961  |
| AB013103  | 1216.306  | 1530.279  | U00954    | 900.906   | 597.372   | NM_013371 | 676.2     |
| AF019225  | 4354.316  | 2849.115  | NM_015942 | 2581.096  | 1944.424  | NM_000707 | 9590.563  |
| Z36803    | 12123.999 | 9505.504  | NM_017907 | 4200.824  | 3259.309  | AF202092  | 6157.533  |
| NM_013371 | 979.225   | 670.177   | NM_002044 | 5055.522  | 3478.198  | NM_003201 | 3873.185  |
| NM_000707 | 14468.64  | 8437.463  | NM_002103 | 6216.35   | 5201.22   | AB011139  | 1357.552  |
| AF202092  | 7729.83   | 8623.838  | NM_006665 | 1675.381  | 2414.924  | NM_006919 | 1366.029  |
| NM_003201 | 5894.997  | 6338.835  | NM_000270 | 4101.386  | 6253.965  | AK022625  | 4828.11   |
| AB011139  | 2703.6    | 1974.902  | U89277    | 727.797   | 716.238   | NM_005425 | 783.751   |
| NM_006919 | 2276.672  | 2546.873  | NM_002876 | 3090.658  | 545.611   | AK023084  | 5273.782  |
| AK022625  | 8980.443  | 11171.803 | AK022332  | 1424.022  | 720.581   | BC012333  | 6158.915  |
| NM_005425 | 1278.502  | 1530.712  | NM_006465 | 1399.655  | 305.121   | AF237952  | 2692.661  |
| NM_003188 | 4797.644  | 4854.121  | NM_006769 | 6263.684  | 4682.734  | AL079287  | 3370.886  |
| NM_007118 | 604.56    | 937.516   | NM_001189 | 1301.062  | 1574.977  | NM_014427 | 5721.23   |
| U59431    | 4563.359  | 6079.415  | AF055009  | 16698.824 | 9628.589  | AB046769  | 5672.651  |
| U49349    | 1019.469  | 1311.051  | AL365370  | 2755.306  | 2283.722  | NM_015922 | 5998.202  |
| NM_020152 | 3349.175  | 3325.853  | AF086147  | 939.208   | 487.369   | NM_020381 | 1819.474  |
| NM_013404 | 2392.032  | 2833.507  | AL109716  | 398.018   | 458.901   | NM_002957 | 5000.716  |
| AF300648  | 2467.135  | 2292.368  | S83249    | 513.691   | 625.635   | NM_018106 | 4171.672  |
| NM_003966 | 343.728   | 548.269   | AF085912  | 355.986   | 1487.453  | NM_003725 | 1151.826  |
| AK024443  | 64854.527 | 63621.883 | AB028963  | 428.377   | 695.875   | BE899154  | 1527.43   |
| X06710    | 8403.441  | 4857.497  | AK001127  | 856.081   | 441.499   | NM_004863 | 2221.121  |
| AK000896  | 2138.029  | 3284.721  | U79256    | 9146.849  | 6356.094  | AK024573  | 2077.443  |
| D79998    | 58339.063 | 48653.789 | AF131798  | 584.118   | 466.515   | NM_002299 | 4016.947  |
| AB032963  | 2536.845  | 918.935   | AK001731  | 1145.648  | 923.444   | D79998    | 37269.176 |
| NM_000385 | 1904.245  | 1075.683  | AF052176  | 477.153   | 843.511   | AB032963  | 1764.424  |
| AF301013  | 6269.663  | 3163.162  | NM_001412 | 4854.447  | 2306.246  | NM_000385 | 1148.296  |
| NM_018992 | 65970.547 | 55645.617 | AF095771  | 699.026   | 494.349   | AF301013  | 5628.763  |
| U15688    | 5606.707  | 2576.353  | AF086154  | 518.154   | 1616.085  | U15688    | 4767.538  |
| NM_000483 | 62832.758 | 45624.531 | AF086205  | 2032.75   | 1458.32   | NM_018448 | 2934.377  |
| NM_018448 | 4718.303  | 5542.402  | AK024169  | 553.572   | 534.576   | NM_001659 | 12061.7   |
| NM_001659 | 16933.258 | 17052.744 | AF147395  | 726.915   | 279.004   | AB020663  | 5801.212  |
| AB020663  | 8723.92   | 14515.534 | AF087967  | 359.453   | 675.073   | AF297866  | 4132.794  |
| AF297866  | 2863.902  | 3841.369  | AF085985  | 1495.118  | 2521.838  | NM_002864 | 1748.445  |
| AB046823  | 1807.13   | 2204.6    | AK026384  | 464.667   | 720.3     | NM_014305 | 1904.271  |
| NM_004929 | 2776.69   | 2880.875  | AK025217  | 620.021   | 589.088   | NM_012123 | 9441.584  |
| NM_004662 | 2484.878  | 1799.154  | AL137342  | 2612.308  | 2185.448  | U87972    | 813.662   |
| NM_016639 | 28254.771 | 26523.896 | AF075105  | 2108.139  | 1869.244  | NM_017925 | 1129.873  |
| U61739    | 8256.149  | 7628.408  | U03241    | 1316.212  | 2995.911  | AK022208  | 51764.055 |
| AJ132089  | 1580.817  | 1204.511  | NM_005117 | 3102.244  | 3111.836  | NM_003171 | 2098.252  |
| U92819    | 26515.65  | 38038.508 | AK021625  | 4910.646  | 4580.767  | NM_017890 | 897.842   |
| AB020626  | 1372.545  | 1128.254  | AK021679  | 929.775   | 831.816   | AK021654  | 1654.422  |
| NM_002036 | 9425.097  | 9661.312  | AK001380  | 3680.894  | 778.267   | NM_016481 | 812.539   |

|           |           |           |           |           |           |           |           |
|-----------|-----------|-----------|-----------|-----------|-----------|-----------|-----------|
| NM_01240C | 1202.296  | 1237.128  | AL117553  | 500.485   | 819.925   | NM_00392E | 10611.079 |
| NM_005384 | 3840.039  | 4378.815  | AK025312  | 1090.337  | 2805.82   | Z15114    | 3330.77   |
| NM_00685C | 547.955   | 1399.281  | AK026493  | 656.117   | 682.606   | AB040812  | 7539.895  |
| Z15114    | 5208.846  | 4032.071  | AK023304  | 1245.734  | 1643.959  | NM_01762E | 459.084   |
| AB040812  | 19745.072 | 17605.986 | AK023963  | 4492.534  | 7898.824  | NM_00628E | 2987.571  |
| NM_00365E | 55490.723 | 46467.699 | AK022473  | 2377.491  | 2309.653  | NM_00134E | 1946.333  |
| NM_00134E | 2446.04   | 1128.619  | AK023810  | 1357.583  | 1261.516  | AK027148  | 7840.797  |
| NM_00021E | 5940.419  | 4906.967  | U80761    | 9349.492  | 11235.327 | NM_005084 | 2403.163  |
| AK027148  | 20699.082 | 23404.924 | U61100    | 718.517   | 818.149   | NM_007283 | 1302.685  |
| NM_005084 | 6581.149  | 7668.605  | NM_018582 | 1040.008  | 1066.79   | AK026074  | 743.323   |
| NM_007283 | 2111.322  | 3038.889  | M21539    | 5268.495  | 3418.937  | NM_003172 | 3220.729  |
| AF237952  | 2938.89   | 4359.636  | AF130117  | 1682.101  | 1992.586  | NM_00480E | 3144.067  |
| AL079287  | 4151.229  | 4966.184  | AK024761  | 4180.485  | 3719.659  | AA460291  | 3632.038  |
| NM_014427 | 6311.76   | 6956.713  | M55536    | 3381.188  | 5132.313  | BI821333  | 2461.76   |
| AB046769  | 5373.579  | 5064.032  | NM_01433E | 11341.321 | 8812.257  | X51841    | 13574.615 |
| NM_015922 | 5082.856  | 7908.349  | AF086067  | 2443.599  | 2400.733  | BG506100  | 2829.668  |
| NM_020381 | 5979.258  | 6636.281  | AK024967  | 4108.948  | 1811.436  | X53586    | 532.312   |
| NM_002957 | 11896.121 | 11161.061 | AK025102  | 2377.956  | 539.46    | M17176    | 1957.901  |
| NM_01810E | 6423.852  | 7218.535  | AF086562  | 1958.548  | 1585.385  | D89854    | 418.788   |
| NM_00372E | 1337.107  | 724.934   | AY007113  | 1720.892  | 1193.761  | M13207    | 792.662   |
| BE899154  | 2928.407  | 2430.514  | AF130083  | 23243.246 | 14897.326 | M97815    | 778.993   |
| NM_004863 | 3263.038  | 2817.582  | NM_00270C | 41497.227 | 37752.93  | NM_00632E | 2356.15   |
| AK024573  | 4797.413  | 4082.917  | AB002437  | 20558.396 | 23876.02  | NM_003201 | 2054.222  |
| NM_00229E | 4965.68   | 5201.675  | NM_006777 | 1719.819  | 4610.594  | AB011139  | 497.423   |
| NM_016222 | 4217.335  | 5431.589  | AK024969  | 2168.943  | 3090.381  | NM_00691E | 596.377   |
| AB037823  | 7872.022  | 6481.386  | AK022250  | 915.623   | 1311.137  | AK022625  | 3885.981  |
| NM_01538C | 15285.351 | 10937.962 | NM_01236E | 975.952   | 741.141   | NM_00542E | 758.141   |
| BE254485  | 1584.541  | 1831.162  | AK025092  | 2178.529  | 2516.091  | AK025588  | 2036.305  |
| NM_002732 | 1641.061  | 982.706   | Z83944    | 896.132   | 542.83    | NM_00318E | 1346.974  |
| AF085893  | 2254.602  | 2070.762  | AF085871  | 1190.436  | 1131.417  | U59431    | 2046.226  |
| NM_003102 | 614.263   | 828.248   | NM_019063 | 37739.488 | 20837.406 | U49349    | 603.909   |
| NM_01430E | 2471.057  | 4675.7    | NM_01433E | 2535.408  | 3386.111  | NM_020152 | 1543      |
| AJ276567  | 676.921   | 608.518   | AB002308  | 824.645   | 977.586   | NM_013404 | 1408.592  |
| NM_012123 | 10465.888 | 9166.452  | NM_003324 | 6022.976  | 3226.62   | AK024443  | 68244.977 |
| U87972    | 2154.14   | 1611.073  | NM_012143 | 7804.115  | 4793.894  | X06710    | 2153.332  |
| NM_01792E | 2993.517  | 3776.856  | NM_00665E | 856.551   | 1360.552  | AK000896  | 612.652   |
| AK022208  | 40317.488 | 32884.281 | AF085892  | 2566.91   | 2607.402  | NM_020384 | 3300.423  |
| NM_003171 | 4876.499  | 4073.13   | AF075114  | 11277.371 | 14731.304 | NM_00605E | 6719.813  |
| NM_006437 | 11307.107 | 18557.113 | AK022218  | 61400.805 | 54341.375 | NM_00662E | 7436.588  |
| NM_01789C | 1955.669  | 1547.043  | NM_007112 | 3190.863  | 4878.781  | M97496    | 17957.809 |
| AK021654  | 3749.147  | 2458.637  | S82075    | 1732.041  | 2207.321  | NM_01844E | 908.318   |
| NM_00392E | 16311.401 | 12094.325 | Z70766    | 659.532   | 205.232   | NM_00165E | 4658.96   |
| X99663    | 6227.993  | 4052.707  | AK000660  | 3608.129  | 1234.109  | AB020663  | 5312.957  |
| NM_016552 | 2520.822  | 4127.113  | NM_014711 | 2697.568  | 1246.845  | AF297866  | 1167.488  |
| AK025340  | 1205.639  | 569.259   | AK022015  | 2566.323  | 2129.479  | NM_002864 | 648.646   |
| NM_00356E | 4273.905  | 4599.746  | D17234    | 1078.107  | 284.226   | NM_017817 | 4605.167  |
| NM_004841 | 2252.897  | 3072.557  | AK002208  | 2968.307  | 3053.602  | NM_00492E | 1320.356  |
| NM_01844C | 11143.767 | 9728.187  | CY3Cy5    | 9861.003  | 596.92    | NM_004662 | 1493.792  |
| AK025470  | 790.958   | 1060.804  | H41522    | 5581.384  | 6560.513  | U61739    | 6757.483  |
| M35410    | 3482.192  | 4898.023  | AA460291  | 11821.937 | 14121.461 | AJ132089  | 1190.316  |
| AB023227  | 940.022   | 1558.719  | BI821333  | 10060.834 | 12985.572 | AB020626  | 402.975   |
| NM_00577E | 8708.616  | 20030.713 | X51841    | 48980.465 | 48161.539 | NM_00203E | 4429.857  |
| AK023071  | 7124.322  | 6727.687  | AF051344  | 6465.419  | 8674.447  | NM_01240C | 880.143   |

|           |           |           |           |           |           |           |           |
|-----------|-----------|-----------|-----------|-----------|-----------|-----------|-----------|
| NM_004041 | 3149.569  | 2563.894  | BG506100  | 5375.123  | 7213.223  | AB013103  | 694.918   |
| AK022888  | 4609.551  | 4856.71   | X53586    | 930.617   | 1550.442  | AF019225  | 3708.849  |
| AK024484  | 6542.057  | 8770.286  | M17176    | 2876.24   | 2554.437  | Z36803    | 7503.831  |
| NM_002632 | 929.643   | 362.244   | M26576    | 2187.56   | 2017.619  | NM_013371 | 1168.925  |
| NM_001406 | 1359.141  | 1028.121  | M32972    | 3358.289  | 4592.526  | NM_000707 | 9587.859  |
| NM_002292 | 4491.271  | 2757.608  | D11151    | 415.068   | 607.944   | AF202092  | 6143.116  |
| AF305200  | 554.012   | 635.675   | D89854    | 963.385   | 1457.187  | AK027148  | 3060.839  |
| AL570170  | 1613.414  | 2351.499  | M13207    | 1491.257  | 1658.396  | NM_005084 | 1184.114  |
| L40027    | 3062.208  | 2521.139  | X14885    | 1011.84   | 1597.583  | NM_007283 | 361.668   |
| NM_003718 | 34358.438 | 40955.164 | M97815    | 1193.285  | 1388.543  | NM_006111 | 2590.211  |
| NM_007062 | 1591.309  | 961.043   | NM_006325 | 5023.91   | 5663.857  | AK026071  | 2008.195  |
| NM_014180 | 19654.627 | 18675.355 | SR2       | 67810.422 | 69159.281 | BC012333  | 2738.624  |
| NM_017706 | 4043.273  | 3668.102  | SR4       | 16944.223 | 16946.91  | AF237952  | 967.913   |
| AF334406  | 2381.685  | 2280.637  | SR6       | 2724.476  | 2806.477  | AL079287  | 1645.177  |
| NM_017444 | 5972.711  | 6457.089  | SR8       | 10888.126 | 35248.766 | NM_014427 | 3065.15   |
| NM_018025 | 2356.103  | 3272.597  | SR10      | 29597.689 | 11714.768 | AB046769  | 3161.237  |
| NM_015995 | 8732.917  | 9530.245  | CY3Cy5    | 10788.275 | 622.657   | NM_020381 | 1373.608  |
| NM_003804 | 15024.184 | 11769.721 | AK025588  | 5255.402  | 5492.987  | NM_002957 | 5778.069  |
| NM_018453 | 4488.069  | 5390.14   | NM_003188 | 4068.796  | 4196.532  | BE899154  | 996.47    |
| NM_004708 | 61766.637 | 59262.773 | NM_007118 | 683.494   | 861.625   | D79998    | 31798.309 |
| NM_016001 | 8072.875  | 8068.789  | U59431    | 8226.069  | 9799.214  | AB032963  | 1084.961  |
| S49432    | 2010.386  | 2497.379  | U49349    | 1159.455  | 1187.456  | AF301013  | 1453.542  |
| D86984    | 1885.125  | 1840.85   | NM_020152 | 2626.716  | 3021.949  | NM_018992 | 58025.422 |
| NM_015955 | 1846.669  | 779.624   | NM_013404 | 2214.613  | 2994.002  | U15688    | 4440.004  |
| J03210    | 4496.768  | 1540.435  | AF300648  | 3240.078  | 3905.465  | NM_006325 | 1067.341  |
| NM_001905 | 14833.108 | 5240.583  | NM_006157 | 630.42    | 1063.041  | AF085893  | 530.789   |
| NM_012198 | 6022.403  | 3852.652  | AK024443  | 54494.352 | 57229.172 | NM_014305 | 844.165   |
| NM_003368 | 2765.624  | 3954.316  | X06710    | 3393.77   | 3334.769  | NM_012123 | 7119.366  |
| AB040886  | 1381.149  | 1546.756  | AK000896  | 1226.61   | 1980.155  | U87972    | 376.951   |
| AF217798  | 1860.778  | 2050.493  | NM_020384 | 3973.042  | 2664.77   | NM_017925 | 743.317   |
| AF161472  | 2918.789  | 2114.233  | NM_006058 | 15613.606 | 16062.233 | AK022208  | 54659.902 |
| AL133642  | 9227.579  | 5985.167  | AK026074  | 1388.18   | 2280.497  | NM_003171 | 1883.94   |
| AB011154  | 1741.502  | 1086.443  | NM_003172 | 6746.378  | 4934.199  | NM_006437 | 2399.739  |
| AF124432  | 7285.083  | 2757.846  | NM_004809 | 2588.875  | 3597.657  | NM_017890 | 371.248   |
| NM_006330 | 14454.77  | 11819.451 | AA903183  | 924.979   | 1290.461  | NM_003925 | 7467.555  |
| NM_015873 | 4867.764  | 4027.351  | NM_017817 | 8481.105  | 6021.618  | Z15114    | 2611.759  |
| NM_000377 | 6427.979  | 4427.173  | NM_018184 | 25157.773 | 36706.742 | AB040812  | 4315.82   |
| NM_006818 | 1617.231  | 1221.725  | AB046823  | 1857.767  | 1685.409  | NM_017625 | 884.262   |
| NM_016823 | 3347.164  | 3736.762  | NM_004929 | 1968.007  | 1691.384  | NM_006285 | 889.808   |
| NM_016494 | 24796.875 | 23034.375 | NM_004662 | 1432.366  | 1320.902  | AV682011  | 2527.512  |
| U09410    | 3042.962  | 1689.262  | NM_016639 | 42958.313 | 49232.234 | NM_020384 | 2195.008  |
| NM_001186 | 6403.3    | 5239.626  | U61739    | 9932.347  | 12427.897 | NM_006058 | 2211.526  |
| NM_004502 | 3825.688  | 2799.167  | AJ132089  | 1811.477  | 1647.297  | NM_006628 | 4754.078  |
| AF000560  | 8355.735  | 8778.568  | U92819    | 28278.873 | 49621.125 | M97496    | 10337.092 |
| NM_013282 | 3149.688  | 7848.98   | AB020626  | 986.013   | 1475.749  | NM_002309 | 2118.672  |
| NM_005777 | 10952.775 | 8705.035  | NM_002036 | 12687.646 | 17911.186 | NM_003172 | 1585.233  |
| NM_012345 | 2731.659  | 2634.592  | NM_012400 | 729.071   | 782.766   | NM_004809 | 2188.556  |
| NM_005826 | 17319.402 | 19508.385 | NM_005384 | 2366.296  | 2958.752  | H41522    | 3569.013  |
| NM_015001 | 6778.275  | 7321.854  | NM_006850 | 591.761   | 1123.022  | AA460291  | 2786.888  |
| NM_016107 | 4918.688  | 4441.176  | AB013103  | 1481.834  | 1038.517  | BI821333  | 2034.706  |
| NM_002567 | 25327.77  | 20797.686 | AF019225  | 5297.305  | 4786.846  | X51841    | 14181.683 |
| NM_001404 | 3485.284  | 2759.31   | Z36803    | 8716.684  | 7705.409  | AF051344  | 1429.335  |
| NM_001605 | 9806.782  | 32090.92  | NM_000707 | 10018.269 | 7912.357  | BG506100  | 720.654   |

|           |           |           |           |           |           |           |           |
|-----------|-----------|-----------|-----------|-----------|-----------|-----------|-----------|
| AF225422  | 8709.33   | 9722.532  | AB011139  | 1936.31   | 2349.783  | M26576    | 437.988   |
| AB040960  | 8773.08   | 9017.984  | NM_006919 | 2121.863  | 2231.737  | M32972    | 1431.085  |
| NM_015946 | 3957.559  | 2698.984  | AK022625  | 11384.439 | 21097.797 | D89854    | 716.856   |
| NM_006303 | 5032.69   | 7079.739  | NM_005425 | 676.534   | 802.165   | AB013103  | 443.326   |
| AL080219  | 5257.958  | 6966.269  | AK023084  | 5337.185  | 7113.835  | AF019225  | 2619.938  |
| NM_003001 | 1168.651  | 1372.878  | BC012333  | 8269.668  | 9708.321  | Z36803    | 6666.52   |
| NM_001985 | 4885.098  | 2758.315  | AF237952  | 5322.25   | 5161.04   | NM_013371 | 647.245   |
| NM_000102 | 1043.84   | 1415.562  | AL079287  | 3962.871  | 3933.726  | NM_000707 | 3621.169  |
| NM_002490 | 21091.004 | 16700.377 | NM_014427 | 6335.727  | 7222.815  | AF202092  | 2061.229  |
| BE563532  | 1281.015  | 2313.734  | AB046769  | 5445.999  | 5238.467  | NM_003201 | 1591.464  |
| NM_001916 | 7286.039  | 9158.393  | NM_015922 | 9232.718  | 13766.577 | NM_006919 | 740.609   |
| NM_002491 | 6332.601  | 1464.824  | NM_020381 | 2737.393  | 3265.314  | AK022625  | 4042.343  |
| NM_015425 | 3205.441  | 2944.122  | NM_002957 | 8108.312  | 9503.084  | NM_005425 | 960.364   |
| NM_015153 | 5979.042  | 6253.887  | NM_018106 | 6531.799  | 8874.234  | AK023084  | 2368.678  |
| AB032966  | 24434.18  | 31674.188 | NM_003725 | 931.434   | 711.964   | AK025588  | 1201.58   |
| M26747    | 5425.386  | 2135.834  | BE899154  | 2652.541  | 2546.592  | NM_003188 | 505.826   |
| NM_014820 | 7246.772  | 6441.661  | NM_004863 | 2094.556  | 2541.877  | U59431    | 564.685   |
| NM_005035 | 1388.082  | 1376.664  | AK024573  | 2908.708  | 3678.848  | NM_020152 | 840.574   |
| NM_019014 | 3956.363  | 4412.533  | NM_002299 | 4504.768  | 6855.432  | NM_013404 | 1163.599  |
| NM_002097 | 10568.551 | 9746.833  | D79998    | 47374.359 | 52383.313 | AF300648  | 2852.412  |
| X04706    | 3139.637  | 3021.339  | AB032963  | 4758.331  | 2691.28   | AK024443  | 61607.387 |
| NM_018039 | 1164.004  | 670.503   | NM_000385 | 2038.064  | 1769.923  | X06710    | 2666.173  |
| NM_006494 | 5774.562  | 4269.195  | AF301013  | 9785.592  | 4871.899  | D79998    | 34732.113 |
| X52343    | 4637.965  | 5016.366  | NM_018992 | 59214.047 | 58265.246 | AB032963  | 1263.185  |
| NM_005853 | 4114.889  | 10813.797 | U15688    | 5248.77   | 5278.465  | AF301013  | 1828.47   |
| X99681    | 945.69    | 1144.777  | NM_018448 | 6108.146  | 5729.571  | NM_018992 | 51804.566 |
| NM_014068 | 575.299   | 1039.945  | NM_001659 | 15129.062 | 18364.1   | U15688    | 3560.966  |
| NM_017814 | 7270.075  | 5988.024  | AB020663  | 17449.768 | 14735.122 | NM_000483 | 35092.828 |
| AF131811  | 4685.176  | 3928.325  | AF297866  | 2855.943  | 3448.924  | NM_018448 | 554.812   |
| AF293026  | 10358.208 | 10357.738 | NM_002864 | 2122.3    | 2375.649  | NM_001659 | 9517.174  |
| AF236158  | 3373.302  | 1505.232  | NM_003102 | 736.142   | 558.701   | AB020663  | 4385.996  |
| AF217986  | 9811.705  | 4507.089  | NM_014305 | 3193.666  | 4570.467  | AF297866  | 1127.978  |
| AK026320  | 1217.431  | 1124.668  | AF000416  | 937.758   | 832.246   | NM_002864 | 315.389   |
| AL137530  | 4902.638  | 3280.089  | AJ276567  | 376.097   | 381.102   | NM_017817 | 2209.16   |
| NM_015953 | 8010.062  | 7328.324  | NM_012123 | 15888.719 | 10106.997 | NM_018184 | 3107.034  |
| AF147310  | 1779.363  | 1655.698  | U87972    | 2220.158  | 2439.28   | NM_004662 | 654.63    |
| AK024775  | 5956.37   | 5802.296  | NM_017925 | 2359.651  | 2281.123  | NM_016639 | 26376.139 |
| AK025562  | 3199.344  | 1785.879  | AK022208  | 49067.852 | 43980.559 | U61739    | 4466.287  |
| AF088024  | 1620.349  | 1724.409  | NM_003171 | 5155.706  | 3562.948  | AJ132089  | 577.007   |
| AK025887  | 3526.885  | 2278.159  | NM_006437 | 9252.296  | 12778.102 | U92819    | 13960.836 |
| AB037719  | 4616.007  | 1728.815  | NM_017890 | 1901.462  | 1811.301  | AB020626  | 649.083   |
| AF086229  | 1990.275  | 375.084   | AK021654  | 2884.451  | 3143.554  | NM_002036 | 5398.718  |
| AK026143  | 1913.506  | 1208.082  | NM_016481 | 1184.301  | 858.988   | NM_012400 | 1358.118  |
| AL137578  | 548.728   | 610.726   | NM_003925 | 25022.523 | 16054.692 | NM_005384 | 1510.013  |
| AL110252  | 1392.181  | 640.546   | Z15114    | 5100.569  | 5709.605  | Z15114    | 2565.291  |
| AL050143  | 1385.568  | 1807.263  | AB040812  | 16501.59  | 16534.227 | AB040812  | 4410.509  |
| AL137616  | 2753.879  | 1268.382  | NM_017625 | 671.781   | 777.411   | NM_006285 | 1299.09   |
| AL109706  | 11742.37  | 9283.177  | NM_006285 | 5058.085  | 4959.053  | NM_001348 | 2244.344  |
| AK001118  | 1359.85   | 1065.572  | NM_003656 | 56169.691 | 58510.656 | NM_000215 | 1623.863  |
| AF035291  | 59245.113 | 46723.785 | NM_001348 | 3424.709  | 4072.12   | AK027148  | 3147.927  |
| AK026291  | 5748.967  | 5092.97   | AK027148  | 13811.791 | 16823.545 | NM_005084 | 820.198   |
| AK021924  | 477.56    | 605.484   | NM_005084 | 4527.767  | 5267.317  | NM_007283 | 607.654   |
| AL049285  | 2458.03   | 2957.765  | NM_007283 | 1295.734  | 1453.185  | NM_006111 | 3550.81   |

|            |           |           |           |           |           |           |           |
|------------|-----------|-----------|-----------|-----------|-----------|-----------|-----------|
| AL080106   | 774.812   | 587.577   | NM_006111 | 8860.23   | 8950.856  | AK026071  | 1728.509  |
| AL117520   | 719.313   | 932.912   | AK026071  | 5442.609  | 9951.456  | BC012333  | 1676.681  |
| AL049303   | 940.117   | 971.938   | AK026074  | 1287.776  | 1585.032  | AF237952  | 551.751   |
| AL080208   | 1721.67   | 1080.719  | NM_003172 | 7190.417  | 5914.197  | AL079287  | 210.587   |
| L35592     | 11037.038 | 7514.246  | NM_004809 | 3246.631  | 4495.155  | NM_014427 | 933.594   |
| NM_012079  | 849.495   | 596.936   | AA903183  | 1133.947  | 1404.501  | AB046769  | 2732.551  |
| AL360274   | 19873.818 | 12903.463 | H41522    | 5451.407  | 5784.573  | NM_015922 | 4695.117  |
| AK021858   | 469.877   | 1249.212  | AA460291  | 9200.663  | 10823.06  | NM_020381 | 842.87    |
| NM_014050  | 5519.903  | 6487.044  | BI821333  | 8537.007  | 11571.722 | NM_002957 | 3008.429  |
| AF085854   | 986.757   | 971.277   | X51841    | 44200.984 | 46154.313 | NM_018106 | 1414.107  |
| AF074997   | 1108.663  | 1096.136  | AF051344  | 4838.543  | 6531.188  | BE899154  | 774.047   |
| AF009289   | 3535.035  | 3543.876  | BG506100  | 5931.027  | 6363.812  | NM_004863 | 1496.849  |
| AF040247   | 1601.753  | 1552.845  | X53586    | 831.672   | 1151.977  | AK024573  | 1775.699  |
| AF056439   | 2173.683  | 1092.67   | M17176    | 2609.37   | 2301.104  | NM_002299 | 2133.192  |
| AF007835   | 1159.854  | 601.283   | M26576    | 2360.084  | 1756.485  | NM_015642 | 384.524   |
| AF009303   | 3680.622  | 3027.626  | D89854    | 1049.611  | 1315.344  | NM_004640 | 5925.504  |
| NM_004474  | 4013.855  | 5811.543  | M13207    | 729.246   | 1183.173  | NM_016222 | 4857.723  |
| AF056449   | 1461.618  | 1718.385  | X14885    | 831.281   | 1450.107  | NM_015380 | 679.307   |
| AK001033   | 1714.328  | 1701.199  | M97815    | 2291.882  | 3508.896  | AF085893  | 1070.634  |
| AK001781   | 610.288   | 582.24    | NM_006325 | 5949.615  | 7365.836  | NM_014305 | 707.516   |
| AK001082   | 3017.509  | 2533.723  | AF085893  | 1514.11   | 1621.946  | NM_012123 | 5724.85   |
| AK001871   | 860.247   | 530.976   | NM_003201 | 6506.661  | 6853.71   | U87972    | 430.19    |
| AK021521   | 1379.834  | 944.856   | AB011139  | 1975.594  | 2485.129  | NM_017925 | 911.995   |
| AK021743   | 3206.858  | 2595.048  | NM_006919 | 2140.765  | 3029.943  | AK022208  | 53185.691 |
| AK025152   | 2827.808  | 2516.319  | AK022625  | 14063.87  | 28783.002 | NM_003171 | 1640.572  |
| AK026699   | 1304.255  | 1306.341  | NM_005425 | 847.023   | 1070.726  | NM_006437 | 2323.388  |
| AK025589   | 2055.896  | 1687.765  | AK023084  | 7077.74   | 9058.808  | NM_017890 | 297.762   |
| NM_016633  | 19256.813 | 16480.203 | AK025588  | 4840.132  | 4655.759  | AK021654  | 920.067   |
| AK023250   | 5406.053  | 6650.154  | NM_003189 | 3451.067  | 3707.243  | NM_003925 | 3703.172  |
| AK024882   | 4379.762  | 4425.175  | NM_007118 | 381.863   | 857.466   | AF217974  | 4031.715  |
| NM_014062  | 11171.421 | 19039.477 | U59431    | 4285.574  | 5733.254  | NM_000889 | 1564.456  |
| NM_006304  | 28081.053 | 44557.512 | U49349    | 1245.703  | 1207.002  | NM_000595 | 3464.072  |
| X74804     | 1353.069  | 1018.817  | NM_020152 | 2667.473  | 3596.387  | X99663    | 797.993   |
| AF293367   | 3597.571  | 2940.456  | NM_013404 | 2089.561  | 2663.312  | NM_016552 | 668.844   |
| AF086231   | 4343.052  | 4160.294  | AF300648  | 3520.892  | 3556.445  | NM_003565 | 898.021   |
| AK001494   | 1153.073  | 1385.934  | NM_003966 | 433.022   | 775.32    | NM_004841 | 818.193   |
| AL133438   | 1793.059  | 1895.584  | AK024443  | 56019.355 | 58389.66  | NM_018440 | 2637.331  |
| unknown (S | 871.217   | 1203.503  | X06710    | 3590.454  | 3634.427  | M35410    | 966.527   |
| AK022310   | 1014.949  | 631.473   | AK000896  | 1944.496  | 2821.001  | NM_005776 | 2038.836  |
| AK021784   | 1309.933  | 1304.13   | NM_020384 | 4382.543  | 3802.74   | AK023071  | 2752.881  |
| AF230800   | 1572.359  | 1594.76   | NM_006059 | 18147.178 | 20900.164 | NM_004041 | 1130.254  |
| NM_018520  | 1235.395  | 1363.142  | NM_006629 | 19504.945 | 14045.541 | AK022888  | 613.553   |
| AK026647   | 2905.301  | 1128.389  | M97496    | 23495.564 | 24310.639 | AK024484  | 1887.301  |
| AK022152   | 1621.379  | 1354.19   | NM_018449 | 7249.347  | 8544.323  | NM_001953 | 42693.82  |
| NM_003534  | 61874.387 | 47378.637 | NM_001659 | 19130.246 | 30168.871 | NM_001406 | 1454.213  |
| L08437     | 2462.451  | 1994.09   | AB020663  | 20143.055 | 22553.504 | NM_002292 | 1922.416  |
| AK057143   | 9508.969  | 10438.375 | AF297866  | 3364.858  | 4193.76   | NM_000166 | 778.591   |
| NM_015594  | 18831.533 | 18244.41  | NM_002864 | 1499.768  | 2124.106  | AL570170  | 919.123   |
| AF056423   | 2916.022  | 2388.033  | NM_017817 | 8883.141  | 9867.285  | D56495    | 4266.123  |
| X04293     | 1075.363  | 1173.317  | NM_018184 | 25975.215 | 44775.148 | NM_014583 | 1421.269  |
| AK026475   | 1849.979  | 2619.436  | AB046823  | 1687.552  | 2557.119  | L40027    | 298.176   |
| K01884     | 1274.956  | 887.586   | NM_004929 | 2303.061  | 2782.801  | NM_003719 | 10196.113 |
| U00962     | 19751.473 | 17496.234 | NM_004662 | 1657.38   | 1570.675  | NM_007062 | 686.994   |

|           |           |           |           |           |           |           |           |
|-----------|-----------|-----------|-----------|-----------|-----------|-----------|-----------|
| NM_000522 | 4310.202  | 3325.093  | NM_016639 | 34098.141 | 46730.188 | NM_014180 | 10297.079 |
| AK026130  | 19757.734 | 16414.869 | U61739    | 6514.9    | 11029.588 | NM_017706 | 1110.865  |
| NM_012480 | 2779.02   | 2833.808  | AJ132089  | 1551.385  | 1774.433  | AF334406  | 588.553   |
| AK024144  | 7078.316  | 5094.224  | U92819    | 26157.389 | 38571.184 | NM_017444 | 2322.144  |
| Y08959    | 1475.812  | 1087.556  | AB020626  | 821.262   | 1384.607  | NM_015999 | 2567.482  |
| NM_005346 | 5023.4    | 5068.273  | NM_002036 | 11856.472 | 16439.254 | NM_003804 | 11232.699 |
| NM_005343 | 17696.822 | 15610.204 | NM_012400 | 1220.385  | 1091.302  | NM_018453 | 1727.043  |
| AJ008114  | 36735.086 | 41283.484 | NM_005384 | 2739.715  | 3266.093  | NM_004708 | 35589.098 |
| AF147432  | 4646.885  | 2589.805  | NM_006850 | 594.015   | 875.867   | NM_016001 | 4485.723  |
| AK024690  | 1420.25   | 1449.608  | AB013103  | 1983.281  | 1424.436  | NM_016108 | 1225.568  |
| BC005946  | 44944.781 | 46771.957 | AF019225  | 5155.675  | 5557.235  | S49432    | 728.883   |
| AK021893  | 2945.588  | 2010.167  | Z36803    | 11120.759 | 12434.554 | D86984    | 1352.47   |
| NM_001048 | 10219.747 | 10864.261 | NM_013371 | 1662.004  | 2448.944  | AK026904  | 470.391   |
| AK026497  | 5834.663  | 6003.663  | NM_000707 | 10921.996 | 8604.267  | J03210    | 641.141   |
| BE958139  | 1611.032  | 977.928   | AF202092  | 15119.827 | 14117.021 | NM_001909 | 3094.774  |
| AF085359  | 1159.43   | 778.09    | AK027148  | 16026.144 | 18951.107 | NM_003368 | 134.927   |
| AF086516  | 2836.644  | 4810.816  | NM_005084 | 4731.272  | 4800.584  | AB029020  | 540.558   |
| D86978    | 2427.267  | 5149.024  | NM_007283 | 1089.763  | 1085.083  | AK022759  | 538.242   |
| AL080060  | 6133.717  | 5773.49   | NM_006111 | 8196.525  | 6070.86   | NM_012333 | 1765.838  |
| NM_005267 | 2604.537  | 2695.344  | AK026071  | 5502      | 9065.772  | AF217798  | 676.939   |
| AF086017  | 967.983   | 1105.775  | BC012333  | 7336.487  | 8228.256  | AF161472  | 1114.133  |
| NM_005780 | 1645.999  | 442.724   | AF237952  | 4980.803  | 5013.95   | AL133642  | 3922.782  |
| AK024978  | 9104.864  | 6183.653  | AL079287  | 3632.563  | 4093.993  | AF124432  | 4434.079  |
| U12897    | 3692.223  | 2738.251  | NM_014427 | 5237.989  | 6660.215  | NM_006330 | 5125.269  |
| NM_020357 | 7095.211  | 4435.007  | AB046769  | 5058.161  | 5559.529  | NM_015873 | 2248.175  |
| AK026836  | 4279.319  | 1744.383  | NM_015922 | 8935.285  | 15419.311 | NM_000377 | 1711.816  |
| T59562    | 33063.77  | 19761.529 | NM_020381 | 2179.306  | 3422.502  | NM_006818 | 287.358   |
| NM_018219 | 2322.366  | 1429.589  | NM_002957 | 9917.182  | 10819.509 | NM_016823 | 789.319   |
| AK026368  | 1397.795  | 757.987   | NM_018106 | 9151.043  | 11614.47  | NM_003120 | 3826.629  |
| NM_014114 | 2836.528  | 3167.624  | NM_003725 | 1080.834  | 1096.566  | X52360    | 3429.975  |
| U62822    | 6678.214  | 4925.903  | BE899154  | 2604.73   | 3560.054  | NM_002636 | 22475.51  |
| CY3Cy5    | 24275.916 | 1434.86   | NM_004863 | 3397.386  | 3739.233  | NM_016494 | 7748.085  |
| U36798    | 520.449   | 1053.131  | AK024573  | 3639.015  | 5688.859  | U09410    | 1803.5    |
| AA220921  | 16249.155 | 10857.476 | NM_002299 | 6765.984  | 9089.312  | NM_020229 | 531.758   |
| U90065    | 733.138   | 718.494   | D79998    | 58759.996 | 57669.574 | NM_001186 | 4276.097  |
| AJ005898  | 7892.072  | 7415.642  | AB032963  | 5934.243  | 4313.453  | NM_005777 | 3285.452  |
| X57303    | 2296.043  | 6945.244  | NM_000385 | 2866.291  | 3249.135  | NM_012345 | 1235.055  |
| AA463224  | 1282.095  | 1318.118  | AF301013  | 13563.42  | 7976.82   | U94387    | 358.945   |
| BG248802  | 7324.202  | 9468.616  | NM_018992 | 62895.492 | 61113.887 | NM_005826 | 1932.876  |
| L19605    | 1822.851  | 1920.704  | U15688    | 4762.931  | 5366.791  | NM_015001 | 3246.503  |
| AA876532  | 2799.955  | 5463.345  | NM_006325 | 6702.502  | 6488.422  | NM_016107 | 1435.591  |
| S74349    | 1449.688  | 1899.105  | AF085893  | 2364.613  | 1754.773  | NM_002567 | 8341.07   |
| X07979    | 37626.742 | 38520.906 | NM_014305 | 3040.76   | 3954.324  | NM_001404 | 1868.256  |
| BG324670  | 480.701   | 1351.955  | NM_012123 | 15894.395 | 9033.532  | NM_001605 | 3120.306  |
| BG744224  | 12623.821 | 20359.516 | U87972    | 983.162   | 908.929   | AF225422  | 6031.042  |
| NM_006079 | 26556.164 | 45516.719 | NM_017925 | 1949.8    | 2489.955  | AB040960  | 2802.469  |
| NM_006696 | 2980.084  | 2606.818  | AK022208  | 47920.246 | 35562.535 | NM_015946 | 2104.806  |
| SR5       | 7245.582  | 7038.467  | NM_003171 | 5213.797  | 4114.476  | NM_006303 | 784.437   |
| AK002163  | 5161.932  | 3909.461  | NM_006437 | 9010.256  | 12594.821 | AL080219  | 1786.486  |
| NM_002287 | 11268.372 | 15527.108 | NM_017890 | 1315.668  | 2202.609  | AK024165  | 1525.573  |
| NM_012344 | 2062.963  | 2112.829  | AK021654  | 3099.932  | 3595.45   | NM_003001 | 1810.826  |
| AB036432  | 18596.645 | 18687.561 | NM_016481 | 1708.881  | 1564.567  | NM_002491 | 2193.956  |
| NM_014872 | 5147.356  | 5776.338  | NM_003925 | 27572.994 | 18466.193 | NM_015425 | 639.894   |

|           |           |           |           |           |           |            |           |
|-----------|-----------|-----------|-----------|-----------|-----------|------------|-----------|
| NM_003643 | 1060.353  | 1578.432  | Z15114    | 7919.611  | 7925.754  | NM_015153  | 600.196   |
| NM_003480 | 3230.869  | 2302.198  | AB040812  | 20897.707 | 25960.207 | AB032966   | 7659.429  |
| NM_000895 | 777.287   | 1205.346  | NM_006285 | 5747.789  | 5672.684  | NM_014820  | 1364.105  |
| NM_032951 | 3186.294  | 3893.96   | NM_003656 | 60842.273 | 57919.125 | NM_019014  | 1933.683  |
| NM_000503 | 6885.774  | 5830.753  | NM_001345 | 3221.301  | 3513.554  | NM_002097  | 6314.167  |
| NM_002405 | 2965.042  | 2967.921  | NM_020384 | 4899.054  | 3795.006  | X04706     | 4537.477  |
| AK000004  | 3070.315  | 2573.602  | NM_006055 | 17906.561 | 19380.805 | NM_006494  | 1694.196  |
| NM_012421 | 28720.51  | 37800.82  | AK026074  | 905.957   | 1217.393  | X52343     | 2236.704  |
| AB014601  | 1943.328  | 2084.277  | NM_003172 | 6132.748  | 3680.555  | NM_005853  | 2196.111  |
| AK001393  | 5052.517  | 5376.076  | NM_004809 | 2282.688  | 3381.818  | NM_014065  | 888.736   |
| NM_000023 | 6961.006  | 6710.928  | H41522    | 2706.652  | 2683.315  | NM_017814  | 2176.578  |
| AF022654  | 2639.41   | 992.12    | AA460291  | 5728.553  | 6677.935  | AF074996   | 1326.231  |
| AK022638  | 9028.568  | 7439.125  | BI821333  | 9178.382  | 11505.505 | AF131811   | 1908.193  |
| BG698409  | 2194.08   | 2793.706  | X51841    | 43089.363 | 39343.77  | AF293026   | 7049.639  |
| AF224741  | 1822.774  | 1579.943  | AF051344  | 5067.034  | 7936.925  | AL137530   | 1277.672  |
| NM_006594 | 3384.605  | 3454.692  | BG506100  | 5706.024  | 9863.09   | AK024775   | 910.576   |
| NM_004177 | 2082.902  | 1915.769  | X53586    | 1186.95   | 1205.296  | AF088024   | 625.738   |
| NM_012425 | 1714.946  | 1733.383  | M17176    | 3346.591  | 2679.938  | AK025887   | 5477.508  |
| NM_004871 | 5648.797  | 5072.584  | M26576    | 1347.036  | 1034.478  | AB037719   | 2731.675  |
| NM_005695 | 10109.848 | 8296.376  | M32972    | 3583.181  | 4410.522  | AF086229   | 1866.357  |
| AF202146  | 8980.694  | 5732.794  | D89854    | 1102.994  | 1159.379  | AK026143   | 995.023   |
| NM_006393 | 1871.604  | 2096.725  | M13207    | 524.848   | 792.632   | AL110252   | 655.009   |
| NM_014923 | 2620.349  | 3783.138  | M97815    | 1191.553  | 1263.83   | AL050143   | 494.16    |
| NM_005477 | 6355.021  | 7848.256  | AB013103  | 1823.413  | 1649.016  | AL137616   | 1441.943  |
| NM_004315 | 1019.819  | 792.701   | AF019225  | 3676.187  | 4063.919  | AL050012   | 699.307   |
| NM_002640 | 3101.94   | 1424.252  | Z36803    | 9005.756  | 9310.529  | AL109706   | 5608.308  |
| X03084    | 704.12    | 933.966   | NM_013371 | 1079.342  | 1375.201  | AK001118   | 991.57    |
| M15530    | 9030.148  | 8240.973  | NM_000707 | 10744.807 | 7533.842  | AK021924   | 635.883   |
| NM_001634 | 21229.553 | 19968.27  | AF202092  | 15261.791 | 13686.934 | AL049285   | 641.132   |
| NM_002267 | 7034.121  | 9058.021  | NM_003201 | 6349.976  | 5292.843  | L23851     | 1111.432  |
| NM_006412 | 10055.645 | 13975.544 | AB011139  | 1977.918  | 2090.509  | L35592     | 13233.334 |
| NM_003063 | 2459.39   | 3985      | NM_006915 | 1582.182  | 2035.212  | NM_012075  | 941.858   |
| NM_014041 | 39538.207 | 42118.52  | AK022625  | 6958.311  | 12754.191 | AL360274   | 20534.98  |
| NM_007165 | 2642.146  | 3838.094  | NM_005425 | 611.871   | 669.257   | AK021858   | 177.779   |
| NM_014313 | 764.639   | 850.989   | AK023084  | 5188.311  | 6829.257  | NM_014050  | 3787.466  |
| AK024966  | 2716.699  | 2631.441  | AK025588  | 3202.413  | 3417.683  | AF085854   | 660.29    |
| AF178941  | 21749.947 | 25909.918 | NM_003185 | 3346.774  | 3041.918  | AK027027   | 589.483   |
| NM_016033 | 9248.755  | 8646.732  | NM_007118 | 569.838   | 750.359   | NM_014911  | 632.772   |
| NM_017585 | 3539.481  | 3808.822  | U59431    | 3445.937  | 4736.775  | AF009289   | 505.05    |
| U61737    | 25424.422 | 33071.758 | U49349    | 1337.118  | 2127.065  | AK001082   | 3354.957  |
| X06389    | 1064.988  | 926.528   | NM_020152 | 2577.324  | 3246.792  | AK021521   | 979.132   |
| NM_000033 | 2545.333  | 2293.857  | NM_013404 | 1873.329  | 2015.172  | AK021743   | 4907.469  |
| AK022983  | 3375.166  | 1333.698  | AF300648  | 3666.662  | 3293.444  | AK025152   | 727.748   |
| NM_014865 | 9326.15   | 8039.653  | AK024443  | 65476.09  | 63809.973 | AK026699   | 964.91    |
| AL442089  | 12478.143 | 12887.29  | X06710    | 3984.458  | 2762.281  | AK025589   | 1372.245  |
| NM_001200 | 1267.712  | 2849.431  | AK000896  | 1346.72   | 1588.395  | NM_016633  | 16628.139 |
| AF128541  | 4043.005  | 3482.965  | D79998    | 34961.77  | 34398.859 | AK023250   | 3010.793  |
| AK026305  | 5279.498  | 5607.808  | AB032963  | 5695.928  | 4974.367  | AK024882   | 1255.772  |
| NM_002552 | 2611.507  | 2939.377  | NM_000385 | 2413.186  | 2319.842  | NM_014062  | 2522.824  |
| NM_014321 | 4162.931  | 6013.331  | AF301013  | 12656.017 | 5870.346  | NM_006304  | 11060.249 |
| AK022733  | 1819.304  | 1133.455  | NM_018992 | 62561.785 | 61081.719 | X74804     | 1369.876  |
| AB011132  | 6075.923  | 6619.165  | U15688    | 3345.809  | 2365.818  | unknown (5 | 488.567   |
| NM_020362 | 4958.419  | 4234.745  | NM_000483 | 65058.914 | 59274.223 | AK022310   | 312.219   |



|           |           |           |           |           |           |           |           |
|-----------|-----------|-----------|-----------|-----------|-----------|-----------|-----------|
| AB040937  | 4480.223  | 6931.8    | NM_01844E | 6769.471  | 5771.659  | AK021784  | 490.39    |
| AF275798  | 8175.612  | 11771.352 | NM_00165E | 19723.271 | 22670.186 | AF230800  | 880.949   |
| NM_005441 | 1961.894  | 2238.068  | AB020663  | 19449.109 | 14999.188 | NM_01852C | 476.602   |
| NM_01607E | 17362.164 | 15050.01  | AF297866  | 2096.13   | 1875.267  | AK026647  | 2396.007  |
| AK023108  | 1696.391  | 2348.65   | NM_002864 | 1907.391  | 1709.982  | AK022152  | 842.887   |
| AK026409  | 21421.121 | 24173.375 | NM_017817 | 6960.408  | 5047.142  | NM_003534 | 29132.85  |
| AF097025  | 6336.601  | 7374.856  | NM_018184 | 24716.83  | 37303.797 | L08437    | 1490.777  |
| Y11339    | 3715.839  | 3500.053  | AB046823  | 1617.138  | 1380.107  | AK057143  | 4403.76   |
| AB030176  | 1613.78   | 1265.177  | NM_00492E | 2128.219  | 2582.789  | NM_015594 | 13757.831 |
| AF022654  | 3335.07   | 1642.399  | NM_00466E | 1481.937  | 1565.829  | AF056423  | 1862.908  |
| NM_001143 | 1315.914  | 1168.321  | NM_01663E | 49430.625 | 54903.113 | U00956    | 427.471   |
| NM_00328E | 643.186   | 1078.651  | U61739    | 13158.56  | 16086.096 | X04293    | 1149.527  |
| AK022638  | 9948.524  | 9103.229  | AJ132089  | 1933.709  | 2347.474  | AK026475  | 478.082   |
| BG698409  | 2261.535  | 3047.453  | U92819    | 17499.154 | 16955.043 | NM_00052E | 1140.384  |
| U36798    | 953.505   | 1233.886  | AB020626  | 1050.461  | 1247.33   | AK026130  | 8864.483  |
| AA220921  | 16444.393 | 9303.508  | NM_00203E | 15699.979 | 18177.705 | NM_01248C | 1787.356  |
| N67770    | 1603.389  | 1212.595  | NM_01240C | 848.269   | 961.063   | AK024144  | 6517.417  |
| AJ005898  | 4524.617  | 3834.834  | NM_005384 | 2412.323  | 2299.772  | Y08959    | 2332.252  |
| X57303    | 1817.223  | 6001.153  | NM_00685C | 282.451   | 375.866   | NM_00534E | 4392.588  |
| AA463224  | 1686.213  | 1794.693  | Z15114    | 7019.393  | 6547.31   | NM_00534E | 13217.286 |
| BG248802  | 7149.566  | 9637.161  | AB040812  | 20938.625 | 21329.316 | AF196865  | 1045.363  |
| L19605    | 902.848   | 1137.911  | NM_01762E | 821.216   | 591.295   | AJ008114  | 33379.527 |
| AA876532  | 1028.776  | 2023.477  | NM_00628E | 5963.316  | 4442.073  | AJ008141  | 1885.894  |
| S74349    | 560.197   | 1270.326  | NM_00365E | 62527.438 | 58484.609 | AF147432  | 5063.81   |
| X07979    | 36704.02  | 41553.281 | NM_00134E | 3099.869  | 3086.221  | BC005946  | 50506.543 |
| BG324670  | 302.227   | 938.644   | NM_00021E | 8675.237  | 8756.567  | AK021893  | 2339.4    |
| NM_00669E | 5149.098  | 4085.105  | AK027148  | 13751.932 | 12650.533 | NM_00104E | 6189.937  |
| M15530    | 11591.933 | 12325.219 | NM_005084 | 5012.353  | 4679.227  | AK026497  | 1686.362  |
| NM_00048E | 607.306   | 827.807   | NM_00728E | 1386.167  | 1234.176  | BE958139  | 895.813   |
| NM_001877 | 2191.718  | 2466.862  | NM_006111 | 8955.09   | 6500.278  | AF085359  | 1586.065  |
| NM_014207 | 8512.507  | 11300.702 | AK026071  | 4476.211  | 7962.299  | AF086516  | 1716.063  |
| AF169158  | 483.922   | 1307.044  | BC012333  | 8396.956  | 9299.852  | AL080060  | 5653.779  |
| NM_012344 | 1964.329  | 2396.55   | AF237952  | 4779.89   | 4784.93   | NM_005267 | 1851.598  |
| NM_002351 | 1644.461  | 1566.268  | AL079287  | 3585.487  | 3778.271  | U80763    | 495.03    |
| NM_01438E | 1793.287  | 1443.846  | NM_014427 | 5976.207  | 6792.856  | AF086017  | 475.085   |
| NM_001704 | 1642.764  | 2141.16   | AB046769  | 4577.157  | 4861.907  | AK024978  | 9019.236  |
| AB036432  | 15178.641 | 15043.191 | NM_01592E | 10280.185 | 14017.822 | U12897    | 2198.519  |
| NM_01487E | 4788.624  | 7223.117  | NM_020381 | 3432.769  | 4159.067  | AJ227894  | 68.712    |
| NM_00364E | 913.598   | 1216.894  | NM_002957 | 12180.693 | 11961.104 | NM_020357 | 8063.893  |
| NM_00348C | 1612.772  | 1436.553  | NM_01810E | 6654.741  | 7370.355  | AK026836  | 5636.337  |
| NM_00089E | 435.998   | 1099.828  | BE899154  | 2595.542  | 2413.635  | T59562    | 37924.141 |
| NM_032951 | 3557.139  | 3413.462  | NM_00486E | 2617.487  | 1924.271  | NM_01821E | 1393.092  |
| NM_00050E | 6433.837  | 5215.299  | AK024573  | 3452.038  | 3407.096  | NM_014114 | 1547.374  |
| NM_00240E | 2362.758  | 2477.768  | NM_00229E | 5003.802  | 3953.699  | U62822    | 4745.191  |
| AK000004  | 2981.385  | 1972.082  | NM_00383C | 1912.732  | 1531.708  | CY3Cy5    | 22770.756 |
| NM_012421 | 30601.158 | 45759.039 | NM_00084E | 1144.284  | 901.595   | X57303    | 669.536   |
| AB014601  | 3336.153  | 3096.895  | NM_01564E | 1080.616  | 1104.606  | AA463224  | 561.749   |
| NM_014861 | 1267.751  | 1564.821  | NM_00464C | 17096.365 | 15149.391 | BG248802  | 1859.049  |
| NM_012434 | 2484.081  | 1821.063  | NM_002901 | 3323.785  | 6421.95   | L19605    | 815.808   |
| NM_005694 | 8741.754  | 10401.254 | NM_01622E | 5835.985  | 7050.933  | AA876532  | 2111.776  |
| AF224741  | 1666.499  | 1728.184  | AB037823  | 4197.646  | 4550.262  | S74349    | 871.652   |
| NM_006594 | 2828.103  | 3622.374  | NM_01538C | 9279.504  | 10441.182 | X07979    | 27972.234 |
| NM_004177 | 1690.044  | 1104.257  | BE254485  | 1060.913  | 1454.041  | BG324670  | 283.603   |

|           |           |           |           |           |           |           |           |
|-----------|-----------|-----------|-----------|-----------|-----------|-----------|-----------|
| NM_012429 | 1077.521  | 983.728   | NM_002732 | 1037.981  | 1078.195  | BG744224  | 4379.229  |
| NM_004871 | 5381.334  | 5491.233  | AF085893  | 3691.253  | 2652.633  | NM_006079 | 18166.195 |
| NM_005698 | 11664.771 | 10071.038 | NM_014305 | 1703.568  | 2755.769  | SR9       | 43719.863 |
| AF202146  | 7068.654  | 5087.219  | NM_012123 | 14560.313 | 9399.363  | CY3Cy5    | 15727.447 |
| NM_006393 | 1258.993  | 1355.632  | U87972    | 1785.19   | 1539.859  | AF169158  | 551.088   |
| NM_014923 | 792.455   | 1320.549  | NM_017925 | 1737.065  | 1890.112  | AB036432  | 4624.763  |
| NM_005477 | 7994.21   | 10750.622 | AK022208  | 51757.766 | 35614.563 | NM_014872 | 3685.868  |
| NM_007018 | 921.53    | 874.229   | NM_003171 | 4592.177  | 3102.282  | NM_003643 | 637.643   |
| NM_004318 | 1538.832  | 1214.39   | NM_006437 | 7705.117  | 8701.822  | NM_003480 | 2743.192  |
| L09089    | 682.855   | 455.116   | NM_017890 | 2029.58   | 1960.518  | NM_000899 | 368.209   |
| NM_002640 | 2997.831  | 1606.14   | AK021654  | 2048.297  | 2839.169  | NM_032951 | 1809.736  |
| Y11339    | 8031.118  | 10177.597 | NM_016481 | 1289.256  | 941.699   | NM_000503 | 10086.979 |
| AB030176  | 2282.444  | 1892.464  | NM_003925 | 23844.09  | 10088.982 | NM_002405 | 1360.167  |
| NM_003937 | 3474.334  | 6216.142  | AF217974  | 5375.005  | 5141.629  | AK000004  | 1416.534  |
| NM_002537 | 12684.276 | 9918.97   | NM_000888 | 3666.389  | 2938.679  | NM_012421 | 19763.959 |
| NM_003139 | 4478.183  | 7105.739  | NM_000595 | 7273.398  | 5753.375  | AB014601  | 1904.335  |
| NM_012316 | 4105.842  | 4460.302  | X99663    | 7339.669  | 6801.846  | AK022638  | 5389.454  |
| NM_004059 | 736.495   | 680.578   | NM_016552 | 6610.8    | 5196.553  | BG698409  | 1511.099  |
| NM_001634 | 21204.986 | 19151.268 | AK025340  | 1160.64   | 710.814   | AF224741  | 787.809   |
| NM_002267 | 5926.111  | 5302.788  | NM_003565 | 4766.015  | 3756.872  | NM_006594 | 1360.815  |
| NM_006412 | 8010.189  | 11350.338 | NM_004841 | 2834.791  | 3623.859  | NM_004177 | 1491.476  |
| NM_003063 | 3346.45   | 5247.316  | NM_004114 | 965.863   | 235.933   | NM_012429 | 1081.258  |
| NM_014041 | 13493.544 | 10036.773 | NM_018440 | 7966.236  | 7782.059  | NM_004871 | 4210.881  |
| NM_007169 | 2280.686  | 3580.352  | AK025470  | 462.663   | 665.439   | NM_005698 | 4089.752  |
| NM_014313 | 1283.926  | 995.473   | M35410    | 1427.771  | 2247.669  | AF202146  | 2927.4    |
| AK024966  | 2237.962  | 2202.35   | AB023227  | 724.06    | 647.991   | NM_006393 | 802.515   |
| AF178941  | 9597.42   | 9955.525  | NM_005776 | 9632.142  | 16214.871 | NM_014923 | 636.113   |
| NM_016033 | 5387.44   | 4219.854  | AK023071  | 5961.128  | 5768.724  | NM_005477 | 4507.882  |
| NM_017585 | 9416.133  | 9297.324  | NM_004041 | 873.772   | 1094.312  | NM_004318 | 1124.257  |
| U61737    | 36745.762 | 39937.859 | AK022888  | 3079.454  | 3354.881  | L09089    | 291.307   |
| X06389    | 1168.095  | 1032.83   | AK024484  | 6269.124  | 6325.045  | NM_002640 | 3489.742  |
| NM_000033 | 3118.714  | 2894.923  | NM_002632 | 940.845   | 832.501   | M15530    | 9991.772  |
| NM_006079 | 29198.176 | 41917.402 | NM_001406 | 1573.533  | 1476.407  | NM_001877 | 1469.256  |
| NM_006696 | 5521.213  | 4440.89   | NM_002292 | 6670.727  | 4889.888  | NM_014207 | 6210.941  |
| NM_018026 | 3546.5    | 4045.658  | NM_000166 | 1302.543  | 1372.269  | NM_001634 | 18175.326 |
| NM_001707 | 17445.723 | 23156.207 | AF305200  | 907.327   | 754.073   | NM_002267 | 3412.876  |
| AK022983  | 2665.635  | 800.907   | AL570170  | 1257.205  | 1174.448  | NM_014041 | 15816.077 |
| NM_014868 | 7776.029  | 6031.192  | D56495    | 3069.763  | 1441.223  | NM_007169 | 592.949   |
| AL442089  | 12013.725 | 10882.668 | NM_014583 | 1449.916  | 812.89    | NM_014313 | 501.9     |
| NM_001200 | 1349.594  | 2150.631  | NM_006613 | 6225.434  | 6460.187  | AK024966  | 1218.866  |
| AF128541  | 1087.408  | 1074.644  | NM_004638 | 13980.834 | 14419.023 | AF178941  | 7798.391  |
| AK026305  | 2357.185  | 2314.974  | L40027    | 2517.036  | 2052.459  | NM_016033 | 8504.214  |
| NM_002552 | 1545.24   | 2368.608  | NM_003718 | 29755.035 | 33006.723 | NM_017585 | 5786.627  |
| NM_014321 | 4130.531  | 6148.179  | NM_007062 | 1568.624  | 869.408   | U61737    | 16952.109 |
| AK022733  | 1948.672  | 1757.565  | NM_014180 | 31885.086 | 14855.751 | X06389    | 1435.647  |
| AB011132  | 5425.137  | 5695.743  | NM_017706 | 3508.062  | 1867.712  | NM_000033 | 2764.057  |
| NM_020362 | 4142.806  | 3380.5    | AF334406  | 575.401   | 892.649   | NM_014861 | 1103.915  |
| AB040937  | 2579.933  | 3439.678  | NM_017444 | 4422.494  | 3420.77   | NM_012434 | 1074.403  |
| AF275798  | 17245.018 | 22364.816 | NM_018025 | 2169.787  | 1619.509  | NM_005694 | 4463.005  |
| NM_005441 | 8751.636  | 9014.241  | NM_015999 | 6106.782  | 6407.201  | AK022983  | 1511.971  |
| NM_016079 | 27687.105 | 29547.9   | NM_003804 | 15117.79  | 16211.533 | NM_014868 | 2966.143  |
| AK023108  | 3205.964  | 3478.303  | NM_018453 | 3214.101  | 4048.561  | AF128541  | 3427.142  |
| AK026409  | 23382.742 | 24993.768 | NM_004708 | 47712.531 | 48106.23  | AK026305  | 637.363   |

|           |           |           |           |           |           |           |           |
|-----------|-----------|-----------|-----------|-----------|-----------|-----------|-----------|
| AF097025  | 9625.865  | 11328.237 | NM_016001 | 14850.18  | 8143.454  | NM_002552 | 567.265   |
| NM_002405 | 2726.764  | 3552.742  | AL137722  | 1052.11   | 1300.352  | NM_014321 | 2514.729  |
| AK000004  | 3226.088  | 2598.046  | S49432    | 3227.245  | 4608.625  | AK022733  | 976.081   |
| NM_012421 | 30347.551 | 43603.16  | D86984    | 2222.772  | 1630.759  | AB011132  | 2595.028  |
| AB014601  | 3308.303  | 2854.441  | AK026904  | 859.119   | 1363.389  | NM_020362 | 2782.872  |
| AK001393  | 6867.337  | 8249.855  | NM_001910 | 943.93    | 1245.719  | AB040937  | 3448.886  |
| NM_000023 | 8560.099  | 9027.766  | J03210    | 2308.101  | 1334.476  | AF275798  | 9154.363  |
| AF022654  | 2704.469  | 1320.8    | NM_001909 | 3715.86   | 3958.818  | NM_005441 | 5461.459  |
| NM_001143 | 1037.037  | 695.711   | NM_012198 | 2308.422  | 2381.089  | NM_016079 | 16366.262 |
| AK022638  | 9440.965  | 6952.776  | NM_003368 | 6004.46   | 2081.693  | AK023108  | 2788.874  |
| BG698409  | 2967.755  | 3612.664  | AB029020  | 2386.376  | 2762.331  | AK026409  | 16778.717 |
| AA220921  | 9188.146  | 6736.496  | AK022759  | 4369.837  | 3082.804  | AF097025  | 4636.394  |
| N67770    | 1393.782  | 1360.068  | NM_012333 | 11458.449 | 6506.98   | Y11339    | 5101.334  |
| AA486200  | 72679.695 | 54304.027 | AF217798  | 1104.466  | 1759.806  | AB030176  | 1187.86   |
| AJ005898  | 5235.477  | 5077.587  | AF161472  | 2103.347  | 2191.78   | NM_003937 | 2406.257  |
| X57303    | 2012.482  | 6734.722  | AL133642  | 6544.173  | 5910.284  | NM_002537 | 7183.937  |
| AA463224  | 1354.746  | 1499.872  | AB011154  | 1226.922  | 1064.984  | NM_003139 | 1514.62   |
| BG248802  | 8328.808  | 10353.555 | AF124432  | 6851.511  | 2799.058  | NM_012316 | 3024.366  |
| L19605    | 1747.316  | 2005.17   | NM_006330 | 13221.065 | 9650.235  | AF022654  | 1296.665  |
| AA876532  | 2697.817  | 5191.067  | NM_015873 | 8554.604  | 6870.332  | NM_001143 | 270.254   |
| S74349    | 1649.051  | 2100.972  | NM_000377 | 2241.353  | 1597.065  | AA220921  | 16870.266 |
| X07979    | 44113.414 | 45455.07  | NM_006818 | 1502.727  | 954.72    | AA486200  | 47657.859 |
| BG324670  | 484.758   | 1337.139  | NM_016823 | 2796.086  | 1788.1    | AJ005898  | 3558.84   |
| BG744224  | 12172.692 | 19455.588 | NM_003120 | 8260.133  | 5250.298  | X57303    | 903.774   |
| NM_005477 | 9230.994  | 11646.059 | X52360    | 3563.939  | 2454.42   | AA463224  | 993.751   |
| NM_007018 | 877.072   | 1351.073  | NM_002636 | 15879.844 | 14685.369 | BG248802  | 2806.293  |
| NM_004318 | 1701.979  | 2044.613  | NM_016494 | 14995.253 | 12425.008 | L19605    | 1053.705  |
| L09089    | 863.359   | 651.806   | U09410    | 4122.027  | 3041.3    | AA876532  | 1890.205  |
| NM_002640 | 4433.896  | 2410.534  | NM_001186 | 4204.518  | 2527.399  | S74349    | 1071.66   |
| M15530    | 10223.095 | 7795.123  | NM_004502 | 2681.473  | 2160.697  | X07979    | 24763.857 |
| NM_001877 | 1527.087  | 1718.316  | AF000560  | 4039.771  | 3792.27   | BG324670  | 232.907   |
| NM_014207 | 7973.508  | 9341.651  | NM_013282 | 13161.715 | 4539.07   | BG744224  | 4789.309  |
| AK002163  | 3064.838  | 2373.522  | NM_005777 | 14292.729 | 6352.05   | NM_018026 | 1917.289  |
| NM_002287 | 7791.824  | 10314.488 | NM_012345 | 2047.575  | 1640.171  | NM_001707 | 8082.299  |
| NM_012344 | 1628.738  | 1783.669  | NM_005826 | 12166.299 | 14629.727 | M15530    | 5936.429  |
| NM_002351 | 1498.98   | 1240.344  | NM_004592 | 3568.972  | 2703.586  | NM_001877 | 1193.58   |
| NM_014385 | 1972.776  | 1654.311  | NM_015001 | 10950.635 | 10941.087 | NM_014207 | 4444.506  |
| NM_001704 | 1696.461  | 1938.156  | NM_019027 | 2883.984  | 3126.203  | AK002163  | 3091.852  |
| AB036432  | 17783.191 | 17643.514 | NM_016107 | 2579.041  | 2802.722  | NM_002287 | 1945.005  |
| NM_014872 | 5429.138  | 8135.007  | NM_002567 | 37804.363 | 18819.672 | NM_012344 | 945.045   |
| NM_003643 | 754.846   | 753.936   | NM_001404 | 1972.486  | 1734.462  | NM_002351 | 1060.75   |
| NM_003480 | 2664.859  | 2114.264  | NM_001605 | 11168.233 | 26602.328 | NM_014385 | 1507.555  |
| NM_000899 | 965.109   | 1379.461  | AF225422  | 18555.672 | 11260.87  | NM_001704 | 1035.556  |
| NM_032951 | 4793.913  | 4769.892  | AB040960  | 8473.844  | 5568.243  | AB036432  | 5175.364  |
| NM_000503 | 8752.829  | 7703.653  | NM_015946 | 2542.219  | 1426.115  | NM_014872 | 4667.244  |
| NM_017585 | 10255.468 | 12216.453 | NM_006303 | 2904.164  | 2333.897  | NM_003643 | 795.634   |
| U61737    | 27726.676 | 38681.625 | AL080219  | 2895.832  | 3127.37   | NM_003480 | 3872.179  |
| X06389    | 1445.841  | 1420.802  | NM_003001 | 2073.55   | 807.542   | NM_000899 | 320.97    |
| NM_000033 | 3936.263  | 3598.798  | NM_001985 | 4451.793  | 1952.477  | NM_032951 | 2174.311  |
| NM_014861 | 822.769   | 1291.693  | NM_000102 | 1498.271  | 1994.715  | NM_000503 | 10701.633 |
| NM_012434 | 2910.244  | 1708.357  | NM_002490 | 11526.914 | 5658.821  | NM_002405 | 1676.398  |
| NM_005694 | 8280.757  | 8426.944  | NM_001916 | 2523.949  | 2840.86   | AK000004  | 1709.137  |
| AF224741  | 1821.617  | 1539.197  | NM_002491 | 4284.017  | 929.933   | NM_012421 | 19062.104 |

|           |           |           |           |           |           |           |           |
|-----------|-----------|-----------|-----------|-----------|-----------|-----------|-----------|
| NM_006594 | 2011.031  | 2257.806  | NM_015425 | 1244.195  | 1102.467  | AB014601  | 2232.816  |
| NM_004177 | 1360.844  | 669.569   | NM_015153 | 4578.465  | 4307.873  | AK001393  | 4553.354  |
| NM_012429 | 566.227   | 726.751   | AB032966  | 19052.023 | 21531.088 | NM_000023 | 6550.135  |
| NM_004871 | 5490.747  | 4642.164  | M26747    | 1721.882  | 1931.729  | NM_014861 | 698.729   |
| NM_005698 | 9447.968  | 7607.302  | NM_014820 | 2735.255  | 3873.074  | NM_012434 | 933.109   |
| AF202146  | 7190.198  | 5611.503  | NM_019014 | 5477.912  | 5137.107  | NM_005694 | 3572.842  |
| NM_006393 | 2050.336  | 1782.421  | NM_002097 | 14324.238 | 17082.641 | NM_006594 | 757.047   |
| NM_014923 | 2030.193  | 2376.685  | X04706    | 7507.271  | 6380.016  | NM_004177 | 362.771   |
| AF275798  | 22519.061 | 27541.545 | NM_006494 | 2971.615  | 3382.521  | NM_012429 | 916.364   |
| NM_005441 | 12775.409 | 14337.356 | X52343    | 2644.599  | 2975.96   | NM_004871 | 3796.165  |
| NM_016079 | 28774.779 | 28744.174 | NM_005853 | 6344.74   | 5479.841  | NM_005698 | 4842.642  |
| AK023108  | 3310.376  | 3311.146  | NM_017814 | 2123.279  | 2007.795  | AF202146  | 4758.713  |
| AK026409  | 28688.785 | 32734.973 | AF131811  | 1239.311  | 1072.661  | NM_006393 | 548.088   |
| AF097025  | 13288.731 | 14292.318 | AF293026  | 8721.228  | 5774.95   | NM_014923 | 672.02    |
| Y11339    | 9816.917  | 9036.95   | AF236158  | 3532.858  | 1553.058  | NM_005477 | 4358.873  |
| AB030176  | 1321.493  | 527.606   | AF217986  | 8456.58   | 3457.587  | NM_004318 | 994.889   |
| NM_003937 | 3127.593  | 5591.69   | AK026320  | 1312.32   | 939.926   | NM_002640 | 3701.786  |
| NM_002537 | 13284.701 | 10636.869 | AL137530  | 4299.899  | 2869.232  | Y11339    | 5420.77   |
| NM_003139 | 4285.482  | 5951.313  | NM_015953 | 4448.531  | 3293.502  | AB030176  | 871.046   |
| NM_012316 | 4704.825  | 5008.348  | AF147310  | 1130.649  | 1766.869  | NM_003937 | 1555.716  |
| NM_004059 | 644.697   | 642.455   | AK024775  | 4158.587  | 5914.897  | NM_002537 | 6089.861  |
| NM_001634 | 21843.924 | 20209.01  | AK025562  | 4620.286  | 4428.616  | NM_003139 | 1204.584  |
| NM_002267 | 6093.498  | 6104.79   | AF088024  | 1251.486  | 2327.261  | NM_012316 | 3356.48   |
| NM_006412 | 5232.607  | 7730.788  | AK025887  | 3172.56   | 2418.823  | NM_001634 | 15921.72  |
| NM_003063 | 4483.147  | 6987.312  | AB037719  | 2667.474  | 1757.043  | NM_002267 | 2134.003  |
| NM_014041 | 42113.688 | 41683.371 | AF086229  | 753.32    | 399.477   | NM_006412 | 4763.703  |
| NM_007169 | 3569.168  | 4218.381  | AK026143  | 1432.667  | 635.61    | NM_003063 | 1985.643  |
| AK024966  | 1669.976  | 1725.207  | AL050143  | 1514      | 2408.444  | NM_014041 | 21012.277 |
| AF178941  | 24560.238 | 27572.945 | AL137616  | 1334.282  | 823.353   | NM_007169 | 1236.331  |
| NM_016033 | 10368.219 | 8404.033  | AK021752  | 1574.543  | 872.982   | NM_014313 | 992.089   |
| NM_013439 | 24360.846 | 21290.803 | AL050012  | 1023.31   | 541.006   | NM_016033 | 9491.31   |
| NM_003406 | 32367.637 | 34291.266 | AL109706  | 9310.865  | 8080.997  | NM_017585 | 7272.369  |
| NM_018316 | 2979.693  | 2976.129  | AK001118  | 1208.947  | 884.215   | U61737    | 15546.934 |
| AB011180  | 3647.857  | 2708.105  | AF035291  | 60830.25  | 53056.336 | X06389    | 1367.823  |
| NM_007167 | 10354.357 | 10363.915 | AK026291  | 3841.905  | 2324.564  | NM_000033 | 2440.008  |
| NM_014832 | 2455.677  | 2795.605  | AL080106  | 951.418   | 956.78    | NM_018026 | 1357.672  |
| NM_003243 | 861.379   | 787.437   | AL117520  | 1086.565  | 952.193   | NM_001707 | 6441.127  |
| NM_002477 | 12931.534 | 16010.654 | AL049303  | 1021.089  | 945.185   | AK022983  | 1341.508  |
| NM_018026 | 3827.272  | 3958.224  | AL050059  | 457.881   | 775.93    | NM_014868 | 2149.362  |
| NM_001707 | 19897.205 | 26473.215 | AL080208  | 1771.014  | 1635.341  | AL442089  | 4118.585  |
| AK022983  | 3300.617  | 1083.512  | L23851    | 1432.494  | 1220.899  | NM_001200 | 636.943   |
| NM_014868 | 10136.444 | 8418.882  | L35592    | 12932.627 | 12727.24  | AF128541  | 4689.603  |
| AL442089  | 11838.721 | 11262.314 | NM_012079 | 1074.358  | 1071.278  | AK026305  | 1331.19   |
| NM_001200 | 1303.504  | 2268.159  | AL360274  | 11702.481 | 7403.222  | NM_002552 | 1554.453  |
| AF128541  | 3951.528  | 3465.183  | AK021858  | 316.549   | 815.643   | NM_014321 | 3777.093  |
| AK026305  | 5374.997  | 6195.214  | NM_014050 | 6401.013  | 6069.813  | AB040937  | 6591.44   |
| NM_002552 | 3426.729  | 3690.018  | AF085854  | 823.786   | 496.18    | AF275798  | 13229.538 |
| NM_014321 | 3268.48   | 4069.2    | AF074997  | 613.293   | 1054.491  | NM_005441 | 5573.877  |
| AK022733  | 1933.485  | 1222.034  | AK027027  | 2031.656  | 1894.409  | NM_016079 | 16785.766 |
| AB011132  | 4945.998  | 4913.904  | NM_014911 | 1176.538  | 762.042   | AK023108  | 1945.293  |
| NM_020362 | 5026.457  | 3657.627  | AF009289  | 1607.403  | 1226.492  | AK026409  | 17786.645 |
| AB040937  | 4036.551  | 6069.476  | AF040247  | 1256.542  | 824.484   | AF097025  | 4675.427  |
| NM_000095 | 2356.475  | 1559.03   | AF056439  | 2778.852  | 2032.409  | AK000004  | 875.498   |

|           |           |           |            |           |           |           |           |
|-----------|-----------|-----------|------------|-----------|-----------|-----------|-----------|
| AL137493  | 1432.908  | 1207.708  | AF007835   | 1171.878  | 780.265   | NM_012421 | 12520.755 |
| NM_001338 | 5298.626  | 7770.425  | AF009303   | 3838.971  | 2864.841  | AB014601  | 872.892   |
| NM_003637 | 936.947   | 1067.193  | NM_004474  | 4024.494  | 4040.057  | AK001393  | 3946.103  |
| BC035133  | 1319.476  | 1203.694  | AF056449   | 1036.986  | 561.923   | NM_000023 | 4063.102  |
| NM_004233 | 2387.395  | 2979.862  | AK001033   | 1405.046  | 1404.969  | AF022654  | 1526.021  |
| NM_001544 | 17567.656 | 18608.793 | AK001781   | 1038.633  | 992.383   | AK022638  | 3837.814  |
| X58531    | 1644.271  | 1255.8    | AK021463   | 739.678   | 952.042   | BG698409  | 1452.663  |
| AB011168  | 7159.097  | 5688.551  | AK001082   | 5962.421  | 8523.267  | U36798    | 319.004   |
| BE794262  | 3511.16   | 2896.113  | AK021743   | 6339.822  | 6501.239  | AA220921  | 20007.5   |
| NM_003212 | 15689.081 | 11286.355 | AK026699   | 1377.25   | 947.982   | AA486200  | 66088.32  |
| NM_006382 | 2212.802  | 2427.015  | AK025589   | 2285.329  | 1319.95   | AJ005898  | 3158.781  |
| NM_004811 | 2952.65   | 1425.245  | AK026378   | 1136.18   | 1155.528  | X57303    | 1037.796  |
| AK021910  | 62725.215 | 50513.473 | AK023250   | 5114.543  | 4704.844  | AA463224  | 508.304   |
| M62402    | 1241.702  | 1551.113  | AK024882   | 2030.204  | 1381.009  | BG248802  | 2626.268  |
| NM_004748 | 5007.726  | 5549.461  | NM_014062  | 8632.881  | 14774.957 | L19605    | 848.02    |
| NM_002668 | 25846.289 | 9554.821  | NM_006304  | 44637.418 | 41020.922 | AA876532  | 1860.156  |
| NM_001058 | 1897.422  | 1109.708  | X74804     | 1358.738  | 821.874   | S74349    | 983.463   |
| NM_014316 | 13484.839 | 8528.742  | AF293367   | 2532.329  | 1620.748  | X07979    | 24150.533 |
| NM_004054 | 7213.567  | 4669.899  | AF086231   | 3294.458  | 3234.002  | BG744224  | 4955.667  |
| NM_001138 | 3962.202  | 4056.719  | AK001494   | 1326.785  | 1543.6    | NM_005477 | 1872.231  |
| NM_004219 | 42058.453 | 43991.488 | AL133438   | 1604.698  | 2014.293  | NM_004318 | 619.097   |
| NM_003443 | 62635.418 | 45816.852 | unknown (9 | 1395.851  | 1246.785  | NM_002640 | 2842.293  |
| NM_002025 | 216.55    | 581.446   | AK022310   | 773.811   | 577.118   | M15530    | 5414.015  |
| AB015228  | 1789.072  | 2251.577  | AK021784   | 1256.456  | 690.55    | NM_001877 | 1143.169  |
| AL049685  | 5552.854  | 3116.732  | AF230800   | 1287.373  | 1024.525  | NM_014207 | 5897.585  |
| AK026800  | 9503.521  | 7805.404  | NM_018520  | 984.78    | 985.269   | AK002163  | 3929.413  |
| NM_001442 | 1770.242  | 1690.862  | AK026647   | 2267.587  | 1835.085  | NM_002287 | 4335.738  |
| NM_017775 | 5482.249  | 4971.854  | AK022152   | 2373.752  | 2095.158  | NM_012344 | 1416.229  |
| AK001958  | 1411.607  | 945.742   | L08437     | 3185.278  | 2334.077  | NM_002351 | 781.523   |
| AK025947  | 2897.002  | 2796.679  | AK057143   | 11349.713 | 6344.373  | NM_014385 | 1466.425  |
| AF217973  | 5428.346  | 6807.709  | NM_015594  | 27793.572 | 19538.736 | NM_001704 | 656.907   |
| NM_007033 | 10814.062 | 10516.588 | AF056423   | 2232.198  | 1465.42   | AB036432  | 6115.002  |
| AF226048  | 4180.12   | 5561.796  | X04293     | 1035.588  | 774.216   | NM_014872 | 5093.111  |
| NM_005573 | 5891.801  | 12248.984 | AK026475   | 1315.582  | 508.449   | NM_003643 | 913.6     |
| D50918    | 6982.174  | 7213.677  | K01884     | 1221.846  | 704.68    | NM_003480 | 3427.535  |
| U48734    | 20909.318 | 16659.301 | U00962     | 21689.158 | 19911.035 | NM_000899 | 539.536   |
| NM_006400 | 7334.902  | 5850.82   | NM_000522  | 5365.082  | 3722.113  | NM_032951 | 1694.283  |
| NM_003903 | 3792.024  | 5006.254  | AK026130   | 19494.586 | 27968.498 | NM_000503 | 10703.832 |
| NM_017955 | 2110.44   | 4250.022  | NM_012480  | 3386.556  | 5534.772  | NM_017585 | 2895.309  |
| NM_016060 | 2883.823  | 2189.393  | AK024144   | 9219.925  | 8644.269  | U61737    | 9976.705  |
| NM_002208 | 7607.711  | 6357.496  | Y08959     | 3597.181  | 3833.623  | Y10506    | 3782.375  |
| NM_007216 | 2937.646  | 2296.333  | NM_005346  | 12623.501 | 16668.25  | X06389    | 750.305   |
| AK023518  | 1764.805  | 1361.355  | NM_005343  | 24736.189 | 25749.859 | NM_000033 | 1698.361  |
| NM_000944 | 9018.303  | 6497.39   | AB032985   | 759.432   | 512.869   | NM_014861 | 543.185   |
| NM_012239 | 1750.789  | 2004.148  | AF116698   | 1447.953  | 1357.777  | NM_012434 | 751.428   |
| NM_012262 | 1187.773  | 1724.443  | AF196865   | 1170.54   | 896.046   | NM_005694 | 4492.45   |
| NM_013390 | 6521.439  | 7137.791  | AJ008114   | 41282.688 | 34715.582 | AF224741  | 597.082   |
| NM_002829 | 2166.341  | 2336.739  | AF147432   | 2082.143  | 1354.968  | NM_006594 | 1545.835  |
| NM_018137 | 453.544   | 1297.932  | AK024690   | 544.266   | 862.138   | NM_004177 | 775.263   |
| NM_006577 | 23659.063 | 31320.156 | NM_001048  | 8553.421  | 6865.872  | NM_012429 | 1813.887  |
| NM_004413 | 725.09    | 724.121   | AK026497   | 9035.352  | 4632.429  | NM_004871 | 4722.493  |
| NM_005317 | 1510.979  | 1804.456  | D86978     | 5471.862  | 4724.769  | NM_005698 | 5661.49   |
| AF120493  | 728.443   | 1032.803  | AL080060   | 12257.269 | 11302.872 | AF202146  | 5284.304  |

|           |           |           |           |           |           |           |           |
|-----------|-----------|-----------|-----------|-----------|-----------|-----------|-----------|
| U12597    | 2308.639  | 2192.634  | NM_005267 | 2836.225  | 3038.294  | NM_006393 | 661.922   |
| U28055    | 1715.323  | 761.457   | U80763    | 810.11    | 908.4     | NM_014923 | 690.422   |
| AB044343  | 5893.961  | 4897.503  | AF086017  | 930.76    | 1068.756  | NM_016079 | 5398.223  |
| NM_001285 | 892.928   | 596.02    | NM_005780 | 1081.284  | 821.034   | AK023108  | 721.879   |
| NM_018409 | 534.457   | 866.888   | AK024978  | 10327.513 | 10123.933 | AK026409  | 12576.703 |
| NM_014662 | 1237.672  | 769.507   | U12897    | 5561.691  | 3309.457  | AF097025  | 4706.742  |
| NM_005178 | 11704.35  | 6983.01   | AJ227894  | 1743.265  | 333.49    | Y11339    | 5312.547  |
| NM_017702 | 5258.409  | 3986.506  | NM_020357 | 24737.873 | 9944.065  | AB030176  | 749.1     |
| AB014516  | 10430.242 | 8820.207  | AK026836  | 12553.069 | 1534.202  | NM_003937 | 1057.785  |
| Z83950    | 1738.502  | 1561.031  | T59562    | 51355.996 | 36022.164 | NM_002537 | 5215.125  |
| AL080063  | 1212.663  | 1229.442  | NM_018219 | 2011.369  | 1550.704  | NM_003139 | 993.18    |
| NM_005625 | 21698.795 | 16570.924 | AK026368  | 534.108   | 408.502   | NM_012316 | 2415.01   |
| X15262    | 7452.445  | 8406.721  | U62822    | 4407.835  | 4963.896  | NM_001634 | 21442.736 |
| NM_005475 | 1055.643  | 487.775   | CY3Cy5    | 14271.67  | 1470.986  | NM_002267 | 2905.344  |
| AB040918  | 4686.611  | 3343.103  | AA220921  | 9159.835  | 8064.882  | NM_006412 | 4559.729  |
| NM_015859 | 1743.455  | 2288.171  | U90065    | 718.07    | 1677.961  | NM_003063 | 2570.534  |
| X60152    | 1808.283  | 1624.605  | AJ005898  | 5303.936  | 8700.578  | NM_014041 | 21870.791 |
| NM_002316 | 2848.16   | 5074.166  | X57303    | 2223.94   | 8896.036  | NM_007169 | 1884.033  |
| AL137589  | 2055.635  | 2177.423  | AA463224  | 1325.737  | 2120.123  | NM_014313 | 805.954   |
| NM_002502 | 2873.624  | 2819.277  | BG248802  | 5397.966  | 7761.469  | AK024966  | 3165.018  |
| AF226732  | 8647.008  | 7705.074  | L19605    | 2554.469  | 3213.254  | AF178941  | 11342.405 |
| NM_006312 | 10740.157 | 10632.599 | S74349    | 1007.709  | 1130.238  | NM_016033 | 7009.222  |
| NM_002805 | 1227.406  | 1062.022  | X07979    | 35989.219 | 26407.098 | NM_013439 | 5483.696  |
| NM_003662 | 2158.029  | 2645.033  | BG744224  | 9114.982  | 16056.967 | NM_003406 | 7524.528  |
| NM_002939 | 12887.23  | 16621.064 | NM_006079 | 28573.648 | 47712.695 | NM_018316 | 2626.741  |
| NM_015836 | 29855.654 | 38860.164 | NM_006696 | 4462.259  | 4041.136  | AB011180  | 1089.689  |
| NM_004713 | 2951.328  | 2309.181  | SR7       | 5156.371  | 34537.668 | NM_007167 | 3149.792  |
| NM_003769 | 1129.382  | 1173.567  | SR9       | 20649.797 | 4822.714  | NM_002477 | 4367.731  |
| NM_001698 | 14615.735 | 14883.222 | CY3Cy5    | 15015.289 | 1443.951  | NM_018026 | 1720.822  |
| AF086431  | 1589.581  | 1704.521  | AF169158  | 292.058   | 365.104   | NM_001707 | 6347.144  |
| NM_014188 | 55229.875 | 43208.625 | AK002163  | 4390.156  | 2550.197  | AK022983  | 1514.507  |
| AK026365  | 6564.076  | 3450.442  | NM_002287 | 13365.305 | 8431.996  | NM_014868 | 2689.691  |
| S70004    | 2118.725  | 1781.566  | NM_012344 | 2033.263  | 1757.715  | AL442089  | 6147.639  |
| AF105378  | 1397.375  | 1761.913  | NM_001704 | 2146.477  | 2281.938  | NM_001200 | 979.348   |
| NM_000167 | 4071.701  | 3239.939  | AB036432  | 10670.747 | 16005.811 | AB007964  | 181.073   |
| AY007125  | 5561.782  | 3864.132  | NM_014872 | 6606.272  | 9190.293  | AF128541  | 5551.92   |
| AB032987  | 2063.378  | 1936.201  | NM_003643 | 565.188   | 1446.561  | AK026305  | 2342.705  |
| NM_017567 | 8990.625  | 6976.412  | NM_032951 | 2871.776  | 2082.929  | NM_002552 | 1758.245  |
| NM_000691 | 2544.736  | 1969.314  | NM_000503 | 9922.784  | 8082.443  | NM_014321 | 4291.578  |
| NM_000305 | 1383.657  | 2003.288  | NM_002405 | 1187.278  | 1570.307  | AK022733  | 1260.909  |
| D86971    | 14356.156 | 14237.771 | AK000004  | 1696.591  | 1287.321  | AB011132  | 3955.324  |
| NM_003073 | 3275.279  | 8031.496  | NM_012421 | 24157.645 | 39838.309 | NM_020362 | 4375.789  |
| NM_014048 | 883.522   | 902.879   | AB014601  | 2359.038  | 3179.976  | AB040937  | 3558.594  |
| AF274863  | 1030.64   | 1142.057  | AF022654  | 2424.577  | 1460.111  | NM_000095 | 753.965   |
| AF319458  | 743.137   | 1040.367  | NM_001143 | 684.241   | 680.667   | NM_001338 | 2074.44   |
| AF024697  | 3011.103  | 2616.133  | AK022638  | 5522.363  | 5660.826  | BC035133  | 1004.824  |
| NM_018651 | 758.484   | 802.363   | BG698409  | 1545.909  | 2405.18   | NM_004233 | 822.208   |
| AF164156  | 709.528   | 793.886   | AF224741  | 409.622   | 519.456   | NM_001544 | 5439.556  |
| AK025281  | 1197.844  | 1801.549  | NM_006594 | 1688.377  | 1833.516  | X58531    | 1337.487  |
| D17018    | 1386.082  | 1333.655  | NM_004177 | 1181.103  | 892.089   | AB011168  | 4616.254  |
| AB046852  | 1166.096  | 736.156   | NM_012429 | 1630.171  | 1009.592  | BE794262  | 1610.865  |
| AF086167  | 1563.906  | 1431.239  | NM_004871 | 4757.125  | 3025.881  | NM_003212 | 10485.63  |
| AL109727  | 762.897   | 338.962   | NM_014923 | 970.112   | 1020.332  | NM_006382 | 1676.506  |

|           |           |           |           |           |           |           |           |
|-----------|-----------|-----------|-----------|-----------|-----------|-----------|-----------|
| AF085891  | 4373.423  | 4110.102  | NM_005477 | 7077.501  | 9170.118  | NM_004811 | 2211.773  |
| AF019618  | 1226.712  | 1439.49   | NM_00431E | 731.649   | 1287.975  | AK021910  | 29106.332 |
| AK025656  | 1864.224  | 1755.859  | NM_00264C | 2800.091  | 1798.563  | M62402    | 260.426   |
| AF138859  | 739.451   | 385.364   | M15530    | 10672.56  | 9557.6    | NM_00474E | 4337.38   |
| AF161414  | 4003.952  | 3211.037  | NM_00048E | 364.558   | 719.972   | NM_00266E | 12073.295 |
| AK025967  | 1068.762  | 1173.832  | NM_001877 | 1410.792  | 1570.578  | NM_00105E | 1238.013  |
| AL110177  | 1197.52   | 2901.431  | NM_014207 | 6366.558  | 6740.618  | NM_01431E | 11717.466 |
| NM_002763 | 8777.133  | 6217.491  | NM_001634 | 22019.443 | 16134.626 | NM_004054 | 9783.008  |
| AF070628  | 770.862   | 1055.455  | NM_014041 | 51889.996 | 28558.672 | NM_001138 | 4475.702  |
| NM_015434 | 3190.954  | 3454.187  | NM_00716E | 2923.763  | 2244.155  | NM_00421E | 8582.915  |
| NM_01405E | 1623.59   | 1383.263  | AK024966  | 2705.703  | 2063.473  | NM_003443 | 24483.975 |
| AK022098  | 1011.757  | 1137.999  | AF178941  | 18433.475 | 19893.148 | AK026800  | 4512.779  |
| AB040933  | 1529.48   | 1243.598  | NM_016033 | 8041.067  | 6903.406  | NM_001442 | 590.739   |
| AK021875  | 653.971   | 800.677   | NM_01758E | 8468.94   | 10152.948 | NM_01777E | 1775.654  |
| AK022072  | 481.973   | 922.422   | U61737    | 16687.635 | 23843.271 | AK001958  | 914.847   |
| AK026900  | 4630.257  | 3593.427  | Y10506    | 446.368   | 1101.913  | AK025947  | 1940.6    |
| AK025020  | 3874.12   | 2608.461  | X06389    | 1567.936  | 1610.213  | AF217973  | 3003.899  |
| AF086009  | 1232.159  | 704.508   | NM_000033 | 2466.498  | 2952.323  | NM_007033 | 6963.148  |
| AF086463  | 2637.703  | 2707.328  | NM_014861 | 1189.438  | 1392.04   | AF226048  | 2624.807  |
| AK024130  | 826.961   | 793.796   | NM_012434 | 1612.794  | 1293.748  | NM_005573 | 3844.377  |
| AK024598  | 1630.877  | 1851.692  | AK022983  | 1207.199  | 966.904   | D50918    | 2431.598  |
| AF087983  | 1623.909  | 1641.666  | NM_01486E | 4699.261  | 5548.646  | U48734    | 6394.813  |
| NM_020234 | 4096.775  | 5477.712  | AL442089  | 10158.181 | 10772.624 | NM_00640C | 5989.399  |
| U70772    | 710.658   | 506.194   | AF128541  | 4634.055  | 4354.29   | NM_003903 | 1692.667  |
| Z36825    | 6808.754  | 10818.029 | AK026305  | 1749.058  | 1832.694  | NM_01795E | 1127.968  |
| Z36846    | 488.861   | 890.221   | NM_002552 | 2251.759  | 2526.493  | NM_01606C | 2809.551  |
| AK023793  | 2999.974  | 3721.95   | NM_014321 | 9697.436  | 5047.823  | NM_00220E | 3160.599  |
| AK022185  | 927.885   | 627.291   | AK022733  | 2080.427  | 1525.001  | NM_00721E | 1265.411  |
| AK023286  | 3643.368  | 3594.939  | AB011132  | 4504.067  | 3997.042  | AK023518  | 1403.261  |
| AK021544  | 855.502   | 1079.871  | NM_020362 | 6172.625  | 3215.065  | NM_000944 | 1475.311  |
| AK022079  | 542.534   | 623.649   | AB040937  | 7987.041  | 5646.371  | NM_01339C | 1900.577  |
| AF116714  | 458.982   | 855.972   | AF275798  | 21358.682 | 24726.057 | NM_00282E | 1047.478  |
| NM_01405E | 2681.933  | 2235.281  | NM_005441 | 9483.119  | 11646.404 | J02783    | 57555.594 |
| AK026340  | 1319.305  | 1385.706  | NM_01607E | 15865.427 | 13881.223 | NM_006577 | 9671.552  |
| AK022686  | 8188.041  | 8073.975  | AK023108  | 2879.149  | 2838.442  | NM_005317 | 820.569   |
| AK023516  | 2070.178  | 1917.537  | AK026409  | 17956.252 | 24464.072 | AF120493  | 609.337   |
| AK023864  | 3111.548  | 3158.525  | AF097025  | 11401.019 | 9197.093  | U12597    | 763.967   |
| AK023017  | 7133.1    | 8238.139  | Y11339    | 6860.572  | 6848.123  | AB044343  | 7082.438  |
| AK023908  | 4822.711  | 6124.475  | AB030176  | 1590.236  | 1214.286  | NM_01840E | 747.857   |
| Z24724    | 6280.989  | 7738.984  | NM_003937 | 2361.542  | 4754.762  | NM_014662 | 1079.7    |
| AK022712  | 12983.515 | 10172.864 | NM_002537 | 9726.485  | 10423.414 | NM_00517E | 8470.225  |
| AK024132  | 2128.287  | 2119.378  | AF022654  | 2592.876  | 1076.114  | NM_017702 | 2403.632  |
| AK021863  | 21683.678 | 31258.916 | NM_001143 | 669.361   | 860.068   | AB014516  | 7677.815  |
| AK024208  | 1242.958  | 858.734   | AK022638  | 6022.943  | 6856.077  | Z83950    | 1025.493  |
| NM_005684 | 804.023   | 1121.971  | AA220921  | 9515.475  | 10674.1   | AL080063  | 1980.887  |
| AK022293  | 2388.138  | 1891.667  | N67770    | 730.383   | 988.555   | NM_01659C | 2143.191  |
| AL117439  | 1722.996  | 1602.55   | AA486200  | 58247.434 | 57728.676 | NM_00562E | 10250.331 |
| AL133065  | 1489.646  | 2363.033  | AJ005898  | 3754.304  | 4141.891  | X15262    | 3398.926  |
| NM_005297 | 6899.412  | 9941.277  | X57303    | 1600.078  | 3956.579  | AB040918  | 2126.461  |
| U80769    | 1099.328  | 1211.021  | AA463224  | 832.962   | 1089.402  | NM_00231E | 532.077   |
| AL137734  | 1474.655  | 1223.785  | BG248802  | 4515.515  | 4460.73   | AB023232  | 983.305   |
| AK023784  | 1738.454  | 2246.906  | L19605    | 1992.895  | 1866.201  | AL137589  | 915.596   |
| NM_003493 | 71124.797 | 52586.645 | AA876532  | 3282.468  | 4748.585  | NM_002502 | 1410.755  |

|           |           |           |           |           |           |           |           |
|-----------|-----------|-----------|-----------|-----------|-----------|-----------|-----------|
| AL133430  | 18385.623 | 16256.199 | S74349    | 1106.013  | 1769.129  | AF226732  | 4532.351  |
| AF070633  | 41983.895 | 42750.82  | X07979    | 30462.496 | 35266.953 | NM_006312 | 4837.685  |
| S51971    | 75334.273 | 58065.258 | BG324670  | 399.784   | 697.861   | NM_003662 | 1703.109  |
| NM_01837C | 1869.948  | 1105.1    | BG744224  | 7710.961  | 14236.912 | NM_00293E | 5018.402  |
| AF054996  | 6736.958  | 7752.846  | NM_00607E | 27162.969 | 40311.691 | NM_01583E | 15636.444 |
| AF090098  | 4468.97   | 3594.289  | NM_00669E | 4779.027  | 4450.417  | NM_004713 | 1531.284  |
| AF146694  | 4487.451  | 3386.65   | NM_01802E | 2497.229  | 3370.305  | NM_00376E | 684.498   |
| AK057104  | 2262.296  | 1266.807  | NM_001707 | 11451.101 | 18812.842 | NM_00169E | 7034.832  |
| AL133555  | 4444.703  | 3233.695  | M15530    | 9354.537  | 8189.637  | NM_000661 | 61905.555 |
| AK024979  | 21345.158 | 20834.502 | NM_001877 | 1404.873  | 1552.047  | NM_000973 | 72862.773 |
| AF233648  | 1886.072  | 2123.843  | NM_014207 | 6926.723  | 6234.511  | AF086431  | 621.108   |
| AK021781  | 719.46    | 798.564   | AK002163  | 4769.19   | 3217.36   | NM_01418E | 24414.471 |
| NM_018584 | 708.164   | 1465.39   | NM_002287 | 14172.229 | 8476.635  | AK026365  | 760.428   |
| AK026776  | 609.445   | 833.001   | NM_012344 | 2369.898  | 1691.569  | S70004    | 866.843   |
| AY007126  | 21445.098 | 27518.369 | NM_002351 | 1478.378  | 1635.178  | NM_000167 | 929.01    |
| AF085951  | 5780.986  | 3691.986  | NM_01438E | 1347.268  | 1389.494  | AY007125  | 2793.289  |
| AF087989  | 4476.433  | 4937.901  | NM_001704 | 1640.985  | 1805.51   | AB032987  | 1369.115  |
| Z70715    | 837.908   | 640.174   | AB036432  | 9557.375  | 8452.974  | NM_017567 | 4422.125  |
| NM_018182 | 4697.321  | 3186.243  | NM_014872 | 6050.918  | 5914.12   | NM_000691 | 1576.555  |
| U80771    | 7997.227  | 6443.545  | NM_003643 | 757.751   | 949.129   | NM_00030E | 812.531   |
| NM_00618E | 882.453   | 745.24    | NM_00348C | 2851.799  | 2445.246  | D86971    | 11344.858 |
| AJ272173  | 12789.551 | 10854.555 | NM_00089E | 661.778   | 1064.7    | NM_003073 | 1098.5    |
| Y17180    | 67626.445 | 53482.473 | NM_032951 | 2964.329  | 2886.976  | NM_01404E | 475.154   |
| NM_00564E | 3837.867  | 3177.242  | NM_000503 | 9623.721  | 7997.637  | AF274863  | 463.212   |
| NM_002037 | 994.859   | 1298.359  | NM_00240E | 1135.589  | 1818.827  | AF024697  | 2655.8    |
| NM_01634E | 1698.151  | 2299.467  | AK000004  | 1522.97   | 1742.601  | NM_018651 | 1031.619  |
| NM_020157 | 14147.368 | 17066.598 | NM_012421 | 23398.479 | 32248.029 | NM_005612 | 2277.259  |
| NM_01432C | 3359.929  | 2214.967  | AB014601  | 2432.974  | 2537.335  | D17018    | 1018.991  |
| AK025703  | 6202.528  | 4719.288  | AK001393  | 6413.651  | 6434.858  | AF085891  | 2983.942  |
| NM_01818E | 2600.294  | 1906.47   | NM_000023 | 5156.107  | 6319.156  | AF019618  | 922.426   |
| AK022598  | 4258.628  | 3711.061  | NM_005694 | 5139.546  | 5491.558  | AK025656  | 915.374   |
| AK024306  | 1704.501  | 1492.436  | AF224741  | 337.274   | 589.918   | AF161414  | 3047.973  |
| AK025862  | 16693.256 | 34806.145 | NM_006594 | 1800.491  | 1761.202  | AK025967  | 636.81    |
| AK026495  | 2413.18   | 3636.529  | NM_004177 | 1234.308  | 1313.299  | AL110177  | 590.318   |
| AK025052  | 1268.051  | 1399.241  | NM_01242E | 1100.634  | 1014.037  | NM_002763 | 6986.855  |
| NM_01438E | 1402.627  | 1263.521  | NM_004871 | 5744.411  | 4428.581  | AF070628  | 560.258   |
| NM_00254E | 970.059   | 832.886   | NM_00569E | 8166.72   | 4517.266  | NM_015434 | 1807.638  |
| U85044    | 1542.649  | 1162.58   | AF202146  | 5633.594  | 4082.195  | NM_01405E | 3185.711  |
| AF086090  | 1458.505  | 1511.131  | NM_006393 | 970.25    | 1445.4    | NM_018691 | 1293.217  |
| AK002173  | 37146.277 | 25611.322 | NM_014923 | 1050.429  | 1852.763  | AK001020  | 909.374   |
| NM_01774E | 2273.602  | 1852.657  | NM_005477 | 7367.157  | 9136.146  | AB040933  | 1136.283  |
| NM_02018E | 14432.04  | 14580.271 | NM_00431E | 1098.497  | 803.549   | AK026900  | 1066.257  |
| U88897    | 13613.946 | 12546.021 | L09089    | 483.542   | 637.479   | AK025020  | 1185.673  |
| AA927698  | 6501.748  | 4711.53   | NM_00264C | 2815.785  | 1608.963  | AF086009  | 656.785   |
| AI498426  | 1830.198  | 1841.539  | Y11339    | 9633.299  | 10420.436 | AF086463  | 1752.498  |
| BG824773  | 3689.627  | 1371.615  | AB030176  | 2595.291  | 3223.687  | AK024130  | 552.885   |
| D01038    | 27664.559 | 31275.463 | NM_003937 | 2936.367  | 7128.359  | AL137270  | 1120.897  |
| AB019205  | 2445.925  | 2504.086  | NM_002537 | 11272.626 | 10924.356 | AK024598  | 1052.574  |
| J05008    | 2863.537  | 2169.565  | NM_00313E | 1967.695  | 5058.06   | AF087983  | 739.416   |
| U11087    | 2908.362  | 1781.658  | NM_01231E | 3225.06   | 3703.243  | NM_020234 | 3156.086  |
| D50640    | 2675.374  | 3519.939  | NM_001634 | 22725.367 | 19194.795 | Z36825    | 3653.488  |
| D43747    | 778.404   | 791.695   | NM_002267 | 5748.793  | 5391.264  | U52838    | 1022.458  |
| M98776    | 1085.731  | 1112.483  | NM_006412 | 10790.214 | 8796.021  | AF086127  | 532.442   |



|           |           |           |           |           |           |           |           |
|-----------|-----------|-----------|-----------|-----------|-----------|-----------|-----------|
| AF009744  | 3563.209  | 2717.143  | NM_003063 | 4868.376  | 5268.17   | AF086157  | 2495.467  |
| NM_17214C | 5228.374  | 4689.458  | NM_014041 | 55532.473 | 33953.469 | AK023793  | 3256.765  |
| SR6       | 4907.579  | 3194.974  | NM_007169 | 3744.864  | 3673.865  | AK023286  | 2078.263  |
| SR8       | 18014.412 | 44715.223 | NM_014313 | 1070.019  | 893.306   | NM_01405E | 1345.815  |
| SR10      | 55887.5   | 30968.914 | AK024966  | 3253.737  | 3999.292  | AK026340  | 1487.613  |
| CY3Cy5    | 8088.021  | 438.482   | AF178941  | 18123.127 | 24153.994 | AK022686  | 11563.389 |
| NM_00096C | 1237.481  | 1214.1    | NM_016033 | 8803.015  | 7333.043  | AK023516  | 1920.142  |
| NM_005355 | 2070.082  | 1433.819  | NM_017585 | 8048.573  | 8349.703  | AK023864  | 5149.095  |
| NM_002511 | 1791.558  | 2068.376  | U61737    | 15545.461 | 19443.719 | AK024183  | 1010.215  |
| NM_000794 | 1188.361  | 1650.791  | X06389    | 1267.136  | 1424.206  | AK023017  | 7176.422  |
| AF295378  | 4700.671  | 3709.527  | NM_000033 | 3183.521  | 3006.927  | AK023908  | 5502.157  |
| NM_012445 | 24568.578 | 20643.336 | NM_006079 | 19293.006 | 30081.514 | AK024236  | 1059.419  |
| NM_018104 | 3965.721  | 3487.639  | NM_006696 | 4264.434  | 4402.865  | AK021863  | 9261.681  |
| U64564    | 1508.889  | 1456.058  | NM_018026 | 3179.333  | 4963.965  | NM_005684 | 591.63    |
| NM_00647C | 3269.655  | 1872.254  | NM_001707 | 14513.99  | 23684.352 | AK022293  | 1997.578  |
| NM_002855 | 2703.99   | 2400.538  | AK022983  | 1187.125  | 1605.899  | AL117439  | 1287.737  |
| AB038463  | 1508.212  | 1389.359  | NM_01486E | 5992.397  | 8329.802  | AL133065  | 521.386   |
| M30262    | 2121.324  | 2407.99   | AL442089  | 11880.374 | 16942.771 | NM_005297 | 4748.615  |
| NM_00546C | 1869.177  | 1768.374  | NM_00120C | 1389.455  | 3517.482  | U80769    | 1072.584  |
| AF160477  | 3068.242  | 2757.454  | AF128541  | 5911.538  | 6196.549  | AJ011377  | 736.563   |
| M12883    | 2522.767  | 3036.405  | AK026305  | 3445.296  | 4179.793  | AL137734  | 1099.116  |
| BG288747  | 1374.68   | 1391.522  | NM_002552 | 2358.366  | 3465.622  | AK023784  | 2311.228  |
| AI524814  | 3803.605  | 7052.239  | NM_014321 | 11542.969 | 6523.013  | AK026323  | 4997.827  |
| NM_001104 | 3807.509  | 2824.355  | AK022733  | 2157.046  | 1674.547  | AF070633  | 22113.129 |
| NM_002985 | 7562.588  | 9311.753  | AB011132  | 5698.39   | 5471.993  | AF054996  | 2923.839  |
| U88898    | 2826.27   | 3801.081  | NM_020362 | 6717.037  | 3681.492  | AF090098  | 796.003   |
| NM_020154 | 28786.109 | 35713.867 | AB040937  | 8895.572  | 6210.422  | AF146694  | 4179.203  |
| NM_004665 | 3002.638  | 3243.936  | AF275798  | 22907.938 | 23544.334 | AK057104  | 1569.138  |
| NM_00530C | 2485.364  | 3336.003  | NM_005441 | 9400.841  | 7837.152  | AL133555  | 1826.413  |
| NM_005091 | 955.015   | 755.374   | NM_016079 | 14220.604 | 9876.389  | AK024979  | 21901.066 |
| AF031167  | 562.285   | 1538.746  | AK023108  | 2687.802  | 2811.379  | AF233648  | 1463.805  |
| AF254069  | 2020.031  | 1459.519  | AK026409  | 19139.992 | 27239.598 | AK021781  | 486.247   |
| AL117600  | 11815.605 | 8361.169  | AF097025  | 10651.035 | 10206.88  | NM_018584 | 303.358   |
| NM_001712 | 1498.03   | 1234.247  | NM_002405 | 1020.944  | 1180.495  | AY007126  | 11660.345 |
| NM_004487 | 16245.332 | 8227.197  | AK000004  | 1443.444  | 2087.348  | AF085951  | 4225.682  |
| AB029000  | 9607.479  | 6055.377  | AK001393  | 3513.443  | 4186.978  | AF131787  | 1078.219  |
| AK026965  | 6500.522  | 4471.304  | AK022638  | 2990.378  | 4197.994  | AF087989  | 5872.711  |
| AK025859  | 9611.061  | 6056.461  | BG698409  | 1302.6    | 2937.197  | Z70715    | 1666.51   |
| AL117499  | 12168.999 | 13024.21  | U36798    | 677.325   | 1076.823  | NM_018182 | 7965.41   |
| AB007957  | 705.652   | 639.762   | AA220921  | 9018.751  | 12091.588 | U80771    | 5862.966  |
| AK000160  | 3378.588  | 2778.644  | N67770    | 1657.062  | 1803.3    | NM_00618E | 910.3     |
| AB040890  | 2121.499  | 2191.213  | U90065    | 712.029   | 1345.98   | AJ272173  | 17939.865 |
| AK024233  | 941.679   | 1324.978  | AJ005898  | 4005.803  | 6060.327  | NM_002037 | 618.631   |
| AK021870  | 1504.013  | 3052.665  | X57303    | 1811.816  | 7428.73   | NM_020157 | 12112.568 |
| U06680    | 3043.174  | 4614.356  | AA463224  | 769.941   | 1315.859  | NM_01432C | 1922.517  |
| NM_005123 | 921.223   | 1363.027  | BG248802  | 1436.806  | 2327.299  | AK025703  | 3740.933  |
| NM_015584 | 7626.05   | 8496.578  | L19605    | 1575.747  | 1956.072  | NM_018185 | 2783.968  |
| NM_01609E | 26439.143 | 20973.023 | AA876532  | 3605.444  | 5397.568  | AK022598  | 3276.904  |
| NM_006667 | 31993.77  | 19332.619 | S74349    | 995.416   | 1559.605  | AK024306  | 1321.056  |
| AK025125  | 7230.308  | 3717.892  | X07979    | 18966.783 | 21790.871 | NM_018322 | 5641.533  |
| NM_000815 | 1749.775  | 1520.977  | BG744224  | 8129.615  | 15975.716 | AK025862  | 12151.362 |
| NM_001293 | 1240.648  | 541.099   | NM_005477 | 8762.384  | 8768.06   | AK026495  | 1520.669  |
| AB023173  | 7328.222  | 3829.73   | NM_00431E | 891.81    | 842.962   | AK025052  | 1337.161  |

|           |           |           |           |           |           |           |           |
|-----------|-----------|-----------|-----------|-----------|-----------|-----------|-----------|
| AF156548  | 3020.81   | 2061.579  | NM_002640 | 3008.197  | 1310.782  | NM_014388 | 1081.117  |
| NM_000387 | 9570.088  | 5568.862  | M15530    | 4678.581  | 5260.344  | NM_002548 | 1193.441  |
| NM_004663 | 2278.992  | 1753.556  | NM_014207 | 7165.832  | 6798.058  | U85044    | 689.003   |
| NM_015310 | 2887.164  | 1708.552  | AK002163  | 5303.534  | 3142.031  | BC018880  | 925.897   |
| NM_016154 | 15250.18  | 12591.909 | NM_012344 | 2065.213  | 2213.186  | AF086090  | 1441.205  |
| AB002338  | 1706.089  | 1583.632  | NM_002351 | 1911.194  | 2735.798  | AK002173  | 25047.146 |
| NM_014070 | 1557.759  | 1577.118  | NM_014385 | 924.057   | 1615.366  | NM_017746 | 1702.318  |
| NM_016280 | 30801.342 | 32489.873 | NM_001704 | 1916.943  | 2443.058  | NM_020188 | 9676.748  |
| NM_016027 | 3021.104  | 2924.817  | AB036432  | 7574.398  | 10557.075 | U88897    | 7087.616  |
| NM_014297 | 9380.418  | 9026.576  | NM_014872 | 4278.077  | 6497.893  | CY3Cy5    | 5632.99   |
| NM_018156 | 14837.27  | 19640.141 | NM_003480 | 3418.785  | 3859.832  | BG617923  | 535.809   |
| X98266    | 1271.35   | 1525.85   | NM_000899 | 963.287   | 1209.405  | U37448    | 569.778   |
| U00930    | 9941.749  | 24217.779 | NM_032951 | 1828.445  | 2634.791  | AA927698  | 2753.139  |
| AK024958  | 636.443   | 1712.094  | NM_000503 | 11081.142 | 11412.493 | AI498426  | 712.963   |
| NM_014575 | 4454.48   | 3246.214  | NM_017585 | 11460.667 | 8721.323  | BG824773  | 1567.721  |
| NM_002439 | 4331.033  | 4144.276  | U61737    | 21525.689 | 27015.957 | D01038    | 11415.696 |
| AL117552  | 2267.208  | 1428.839  | X06389    | 1306.829  | 1073.742  | AB019205  | 1637.683  |
| NM_002692 | 10665.807 | 7588.501  | NM_000033 | 2154.871  | 2245.241  | J05008    | 1132.18   |
| AB023190  | 14307.107 | 11248.754 | NM_014861 | 1055.265  | 1015.19   | U11087    | 1393.368  |
| NM_007064 | 1264.763  | 860.724   | NM_012434 | 1403.098  | 677.275   | D50640    | 477.511   |
| NM_006281 | 2469.776  | 2493.053  | NM_005694 | 3622.135  | 2848.618  | D43747    | 467.414   |
| NM_002738 | 11361.784 | 6955.339  | AF224741  | 916.183   | 608.813   | M98776    | 676.225   |
| U23460    | 27894.16  | 20280.635 | NM_006594 | 2174.796  | 2450.073  | AF009744  | 1047.123  |
| NM_005356 | 1216.223  | 844.968   | NM_004177 | 1663.546  | 1220.366  | NM_172140 | 3598.495  |
| Z25434    | 2738.083  | 2178.072  | NM_012429 | 765.917   | 741.442   | SR6       | 3565.109  |
| NM_005884 | 11320.196 | 11367.033 | NM_004871 | 5637.583  | 5253.128  | SR8       | 13522.83  |
| NM_012399 | 12256.781 | 11204.6   | NM_005698 | 7048.141  | 5614.833  | SR10      | 48270.898 |
| AF229804  | 20744.256 | 19689.566 | AF202146  | 4924.322  | 4501.777  | CY3Cy5    | 5140.491  |
| U90552    | 9705.24   | 7802.918  | NM_006393 | 1878.408  | 2579.686  | NM_005311 | 485.768   |
| AF160477  | 3789.363  | 3980.712  | NM_014923 | 1142      | 2039.878  | NM_005905 | 1753.053  |
| M12883    | 2745.228  | 2668.056  | AF275798  | 23791.492 | 19113.496 | NM_000960 | 678.314   |
| BG288747  | 1208.112  | 1176.51   | NM_005441 | 4388.037  | 3105.837  | NM_005359 | 909.906   |
| U37448    | 1285.644  | 1401.787  | NM_016079 | 12587.642 | 9811.88   | NM_002511 | 908.867   |
| AA927698  | 7156.334  | 4510.009  | AK023108  | 3278.114  | 3458.571  | AF295378  | 1871.055  |
| AI498426  | 1894.369  | 1768.333  | AK026409  | 27361.66  | 34988.277 | NM_004085 | 3225.074  |
| BG824773  | 4110.161  | 1300.355  | AF097025  | 12635.054 | 8596.628  | NM_012445 | 11469.329 |
| D01038    | 25765.555 | 24592.92  | Y11339    | 5946.819  | 5047.375  | NM_018104 | 2625.049  |
| AB019205  | 3049.932  | 3889.051  | AB030176  | 1402.475  | 454.947   | NM_006080 | 576.414   |
| J05008    | 2437.392  | 2141.071  | NM_003937 | 1357.607  | 2727.406  | U64564    | 785.651   |
| U11087    | 2544.586  | 1149.583  | NM_002537 | 8438.93   | 6368.396  | NM_006470 | 1453.308  |
| D50640    | 1332.787  | 1539.491  | NM_003139 | 1424.545  | 2320.319  | NM_002855 | 1464.875  |
| D43747    | 909.488   | 1089.154  | NM_012316 | 3199.613  | 2525.346  | AB038463  | 784.684   |
| X99135    | 70106.141 | 58492.5   | NM_004059 | 756.098   | 394.306   | M30262    | 1509.642  |
| AF009744  | 3227.628  | 1723.522  | NM_001634 | 22912.74  | 14314.902 | NM_005460 | 833.346   |
| NM_172140 | 5304.465  | 3476.765  | NM_002267 | 6431.843  | 5010.124  | AF160477  | 1960.645  |
| AF086109  | 410.61    | 972.171   | NM_006412 | 7871.476  | 8398.008  | M12883    | 792.836   |
| AK025859  | 5821.595  | 4809.131  | NM_003063 | 5953.17   | 5636.988  | BG288747  | 1138.945  |
| AL117499  | 5787.066  | 7558.863  | NM_014041 | 56457.293 | 40289.387 | AI524814  | 2044.368  |
| AB007957  | 588.735   | 1048.155  | NM_007169 | 4340.561  | 5342.223  | AB024411  | 864.373   |
| AK000160  | 3570.056  | 3750.671  | NM_014313 | 1292.661  | 1209.192  | NM_002444 | 22055.117 |
| NM_005311 | 1634.333  | 4797.557  | AK024966  | 2774.848  | 3133.718  | NM_001104 | 2604.687  |
| NM_005905 | 2294.294  | 2417.832  | AF178941  | 11527.696 | 16408.764 | NM_002989 | 2679.55   |
| NM_000960 | 1460.909  | 1120.805  | NM_016033 | 8207.92   | 9059.344  | U88898    | 1899.786  |

|           |           |           |           |           |           |           |           |
|-----------|-----------|-----------|-----------|-----------|-----------|-----------|-----------|
| NM_00535  | 2855.939  | 2255.319  | NM_01343  | 12874.3   | 9853.028  | NM_020154 | 16212.454 |
| NM_002511 | 1550.335  | 1083.673  | AB011180  | 1840.052  | 1937.144  | NM_00466  | 2063.379  |
| AF295378  | 5690.303  | 3520.963  | NM_007167 | 4286.654  | 5576.808  | NM_00530  | 1141.669  |
| NM_00408  | 4255.518  | 5893.354  | NM_01483  | 1273.115  | 1165.997  | NM_00089  | 807.389   |
| NM_018104 | 3983.653  | 3204.875  | NM_002477 | 11628.881 | 15401.356 | NM_00069  | 19453.396 |
| NM_00608  | 1366.831  | 596.432   | NM_01802  | 2301.224  | 1987.053  | NM_005091 | 570.48    |
| NM_00442  | 5818.389  | 3568.383  | NM_001707 | 10082.217 | 10971.18  | NM_003204 | 2679.427  |
| U64564    | 1574.12   | 1002.953  | NM_01486  | 2750.458  | 2075.235  | AF254069  | 1527.633  |
| NM_00647  | 3778.2    | 3084.419  | AL442089  | 12090.558 | 9248.15   | AL117600  | 6712.474  |
| NM_00285  | 3431.519  | 4898.71   | AF128541  | 6299.294  | 6445.887  | NM_00171  | 555.477   |
| AB038463  | 1744.901  | 2233.412  | AK026305  | 3575.032  | 5542.435  | NM_004487 | 8426.25   |
| M30262    | 2305.875  | 2839.671  | NM_00255  | 1739.158  | 2612.915  | AB029000  | 7040.371  |
| NM_000387 | 12908.432 | 14022.115 | NM_014321 | 10431.487 | 6023.158  | AK026965  | 5398.828  |
| NM_00466  | 1708.447  | 2004.868  | AK022733  | 1821.74   | 1797.578  | AK025859  | 4859.761  |
| NM_01531  | 1587.718  | 1112.611  | AB011132  | 2965.468  | 3077.23   | AL117499  | 4967.812  |
| NM_016154 | 8800.899  | 7605.945  | NM_02036  | 4709.023  | 2389.508  | AB007957  | 304.697   |
| AB002338  | 1805.823  | 2367.634  | AB040937  | 5499.673  | 4699.008  | AK000160  | 3312.354  |
| AI524814  | 4386.838  | 7295.42   | NM_00009  | 2183.379  | 2046.957  | NM_00603  | 5699.491  |
| AB024411  | 1385.051  | 1507.098  | NM_00133  | 8042.682  | 9659.063  | NM_01478  | 1290.958  |
| NM_002444 | 57735.527 | 51315.211 | BC035133  | 1155.405  | 632.283   | NM_00215  | 460.982   |
| U88898    | 3131.61   | 5117.309  | NM_00423  | 784.768   | 1155.361  | AB040890  | 1356.583  |
| NM_020154 | 28165.74  | 31871.518 | NM_001544 | 5955.397  | 9589.456  | AK024233  | 984.926   |
| NM_00466  | 3737.302  | 4105.208  | AB011168  | 5129.842  | 3860.296  | AK021870  | 688.904   |
| NM_00530  | 2079.423  | 1767.397  | BE794262  | 2051.076  | 1354.66   | U06680    | 1824.312  |
| NM_00089  | 1215.582  | 1216.021  | NM_00321  | 9360.712  | 4891.958  | NM_00512  | 348.81    |
| NM_005091 | 833.889   | 552.064   | NM_00638  | 1213.455  | 1164.355  | NM_015584 | 3374.258  |
| AF031167  | 844.582   | 338.086   | AK021910  | 42268.613 | 38999.555 | NM_001697 | 16897.916 |
| NM_003204 | 4649.044  | 2147.026  | M62402    | 1400.577  | 1057.127  | NM_00206  | 1004.352  |
| AL117600  | 12148.642 | 12406.957 | NM_002547 | 2439.906  | 2586.69   | NM_006667 | 24315.803 |
| NM_00171  | 1406.571  | 1375.816  | NM_00474  | 4198.06   | 6099.26   | AK025125  | 3240.464  |
| NM_004487 | 18187.34  | 17753.293 | NM_00266  | 12663.584 | 12394.637 | NM_00081  | 873.87    |
| AB029000  | 11109.114 | 9583.927  | NM_00105  | 1101.757  | 1751.105  | NM_00129  | 533.254   |
| Z25434    | 5049.287  | 5993.936  | NM_01431  | 10978.093 | 7579.937  | AB023173  | 4501.627  |
| NM_005884 | 9601.656  | 13820.732 | NM_004054 | 5766.123  | 7567.5    | AF156548  | 1219.503  |
| NM_01239  | 3546.801  | 4210.565  | NM_001138 | 2707.949  | 3550.65   | NM_01531  | 1147.854  |
| AF229804  | 22073.648 | 21433.879 | NM_00421  | 59045.98  | 36750.152 | NM_016154 | 4715.526  |
| U90552    | 7112.167  | 7070.699  | NM_00344  | 45003.578 | 41497.34  | NM_00501  | 6728.876  |
| NM_00603  | 5952.034  | 5300.531  | AB015228  | 814.105   | 716.355   | AB002338  | 937.664   |
| NM_01478  | 2749.746  | 2624.244  | AL049685  | 3231.014  | 1327.373  | NM_00107  | 320.722   |
| NM_00215  | 942.929   | 856.517   | AK026800  | 2515.12   | 1231.312  | NM_01407  | 1174.616  |
| AB040890  | 2489.367  | 3236.863  | NM_01777  | 1752.933  | 2619.885  | NM_01628  | 12353.083 |
| AK024233  | 1544.294  | 1937.871  | AK025947  | 3022.134  | 1286.475  | NM_016027 | 2527.149  |
| AK021870  | 1982.94   | 4661.159  | AF217973  | 5668.969  | 4453.821  | NM_014297 | 3839.631  |
| U06680    | 2369.489  | 3502.054  | NM_00703  | 5676.699  | 3246.668  | NM_01815  | 9947.852  |
| NM_00512  | 1037.312  | 1705.097  | AF226048  | 1092.135  | 1026.742  | X98266    | 392.38    |
| NM_015584 | 6616.038  | 5568.522  | NM_00557  | 4191.202  | 1963.601  | U00930    | 3921.777  |
| NM_001697 | 36138.125 | 46075.133 | D50918    | 2333.73   | 2186.698  | AK024958  | 440.913   |
| NM_01609  | 26749.783 | 35132.262 | U48734    | 10370.873 | 5218.62   | NM_01457  | 1664.792  |
| NM_00206  | 1385.298  | 534.513   | NM_00640  | 3432.134  | 3733.175  | AL117552  | 694.897   |
| NM_006667 | 38600.129 | 26913.916 | NM_00390  | 2870.985  | 4783.717  | NM_00269  | 4344.821  |
| NM_00081  | 1534.495  | 1916.015  | NM_01795  | 2243.365  | 3233.271  | AB023190  | 14899.154 |
| NM_00129  | 954.913   | 1416.093  | NM_01606  | 2895.586  | 3426.645  | NM_007064 | 1341.796  |
| AB023173  | 7760.96   | 7795.956  | NM_00220  | 8617.882  | 4272.069  | NM_006281 | 1015.008  |

|           |           |           |           |           |           |           |           |
|-----------|-----------|-----------|-----------|-----------|-----------|-----------|-----------|
| AF156548  | 3307.333  | 3460.321  | NM_007216 | 2408.937  | 2000.231  | NM_002738 | 5104.805  |
| NM_17214C | 4720.362  | 5041.279  | AK023518  | 1134.977  | 748.938   | U23460    | 18354.236 |
| NM_001072 | 1005.14   | 1628.965  | NM_000944 | 5405.78   | 3361.211  | NM_005356 | 1688.54   |
| NM_01407C | 2858.612  | 2093.458  | NM_012239 | 950.601   | 664.373   | NM_005884 | 5369.716  |
| NM_01628C | 35938.367 | 31999.93  | NM_01339C | 4080.011  | 3195.649  | NM_012399 | 6377.275  |
| NM_016027 | 3880.845  | 3337.005  | NM_002829 | 1346.676  | 485.316   | AF229804  | 22383.09  |
| X98266    | 1164.526  | 884.214   | J02783    | 56672.004 | 53679.59  | AF151638  | 844.73    |
| U00930    | 10596.058 | 16028.246 | NM_006577 | 9310.137  | 8276.012  | U90552    | 7214.897  |
| AK024958  | 669.031   | 1165.915  | AB044343  | 2735.786  | 1664.561  | NM_00546C | 725.419   |
| NM_014575 | 4046.34   | 3287.042  | NM_014662 | 871.775   | 443.689   | AF160477  | 2311.898  |
| NM_002439 | 5859.221  | 7349.619  | NM_005178 | 9637.244  | 8857.145  | NM_003226 | 349.282   |
| AL117552  | 2307.47   | 1187.929  | NM_017702 | 1625.971  | 2476.533  | M12883    | 1150.655  |
| NM_002692 | 11457.609 | 5801.665  | NM_01659C | 1480.786  | 2530.327  | BG288747  | 868.314   |
| AB023190  | 21140.041 | 17380.787 | NM_005625 | 9881.04   | 16655.232 | BG617923  | 367.598   |
| NM_007064 | 1904.68   | 2518.751  | X15262    | 3745.406  | 4206.49   | U37448    | 419.656   |
| NM_006281 | 2320.211  | 3451.472  | AB040918  | 6302.015  | 3937.709  | AA927698  | 3039.707  |
| NM_002738 | 11566.216 | 15388.345 | NM_015859 | 989.361   | 1203.289  | AI498426  | 497.496   |
| NM_005356 | 1048.763  | 1554.414  | X60152    | 1069.442  | 679.965   | BG824773  | 1407.098  |
| NM_004429 | 5439.037  | 6438.4    | NM_002316 | 2048.646  | 3421.901  | D01038    | 8902.846  |
| U64564    | 1741.733  | 2280.074  | AB023232  | 2390.333  | 1459.949  | AB019205  | 1304.761  |
| NM_00647C | 3059.981  | 3672.232  | NM_002502 | 1532.909  | 1633.523  | J05008    | 1434.598  |
| NM_002855 | 4349.647  | 7248.057  | AF226732  | 4661.073  | 3820.946  | U11087    | 1345.811  |
| AB038463  | 1777.75   | 2564.119  | NM_006312 | 7608.625  | 5043.772  | D50640    | 485.365   |
| M30262    | 2900.693  | 4492.565  | NM_003662 | 1892.039  | 1303.607  | D43747    | 585.394   |
| NM_00546C | 1617.97   | 1734.176  | NM_001698 | 6076.353  | 9107.68   | M98776    | 972.57    |
| AF160477  | 4311.48   | 3950.029  | NM_000661 | 57574.594 | 56645.281 | X99135    | 39486.34  |
| NM_003226 | 749.285   | 1136.741  | NM_000973 | 60200.441 | 59447.672 | AK026965  | 11139.805 |
| M12883    | 3127.601  | 3356.245  | AF086431  | 1641.946  | 1330.222  | AK025859  | 5329.022  |
| BG288747  | 1632.792  | 1419.787  | NM_014188 | 24053.369 | 19143.049 | AL117499  | 5220.447  |
| BG617923  | 1345.377  | 1557.575  | AK026365  | 6611.342  | 2840.03   | NM_007054 | 810.486   |
| U37448    | 1632.732  | 1661.302  | S70004    | 1475.258  | 1674.588  | AB007957  | 489.992   |
| BG435851  | 107.494   | 1284.916  | NM_000167 | 2838.57   | 1409.147  | AK000160  | 3874.548  |
| AA927698  | 6885.337  | 3275.582  | AY007125  | 2147.807  | 1512.291  | NM_005311 | 620.871   |
| AI498426  | 1707.272  | 1459.281  | AB032987  | 1378.376  | 1047.267  | NM_005905 | 1441.267  |
| BG824773  | 2907.467  | 597.49    | NM_017567 | 5212.864  | 4887.088  | NM_00096C | 337.195   |
| D01038    | 27834.811 | 28639.512 | NM_000691 | 806.563   | 1090.731  | AF172932  | 44.829    |
| AB019205  | 2626.918  | 2214.371  | NM_000305 | 1122.734  | 955.878   | NM_005359 | 817.673   |
| J05008    | 3799.687  | 3106.214  | D86971    | 6750.668  | 4410.931  | NM_002511 | 601.652   |
| U11087    | 3114.469  | 2427.648  | NM_003073 | 2638.881  | 4534.23   | NM_000794 | 98.853    |
| D50640    | 2430.325  | 5009.207  | NM_005612 | 3616.767  | 3688.694  | AF295378  | 1867.092  |
| D43747    | 597.583   | 1818.98   | D17018    | 1243.589  | 1268.394  | NM_004085 | 4034.524  |
| M98776    | 1348.897  | 1862.656  | AF085891  | 5002.828  | 4151.126  | NM_012445 | 13321.946 |
| AF009744  | 2967.599  | 2964.202  | AF019618  | 929.718   | 651.995   | NM_018104 | 2737.068  |
| NM_003204 | 4332.027  | 4317.82   | AK025656  | 2477.359  | 1072.485  | NM_00608C | 811.006   |
| AF254069  | 1640.332  | 2254.818  | AF161414  | 1918.374  | 1470.814  | NM_004429 | 6013.246  |
| AL117600  | 6796.405  | 8602.044  | NM_002763 | 5942.088  | 4496.264  | U64564    | 1017.753  |
| NM_001712 | 622.152   | 999.556   | NM_018691 | 1422.624  | 1806.691  | NM_00647C | 1859.04   |
| NM_004487 | 14089.62  | 15542.835 | AK022098  | 1124.83   | 1021.293  | NM_002855 | 2004.882  |
| AB029000  | 7556.119  | 8083.253  | AK026900  | 1316.249  | 1072.38   | AB038463  | 655.06    |
| AK026965  | 15030.594 | 13928.408 | AK025020  | 3464.956  | 1480.636  | M30262    | 1822.65   |
| AK025859  | 9876.634  | 6892.341  | AF086463  | 1744.945  | 1249.883  | NM_000387 | 12862.179 |
| AL117499  | 12040.254 | 13296.529 | AK024598  | 1199.881  | 899.847   | NM_004663 | 1306.42   |
| NM_007054 | 814.788   | 1217.244  | NM_020234 | 3293.775  | 3101.656  | NM_01531C | 2038.749  |

|           |           |           |           |           |           |           |           |
|-----------|-----------|-----------|-----------|-----------|-----------|-----------|-----------|
| AB007957  | 1745.574  | 1336.198  | AF086157  | 1979.146  | 1903.327  | NM_016154 | 9135.988  |
| AK000160  | 4234.493  | 3997.687  | AK023793  | 4036.584  | 5330.884  | NM_005013 | 6557.942  |
| NM_005311 | 2413.174  | 4431.272  | AK023286  | 2870.935  | 2190.179  | AB002338  | 893.228   |
| NM_005905 | 1504.429  | 1135.193  | NM_014055 | 1503.181  | 1526.276  | AI524814  | 1855.941  |
| NM_005355 | 2087.995  | 888.203   | AK022686  | 7712.463  | 10717.236 | AB024411  | 1015.249  |
| AF295378  | 5717.21   | 6344.878  | AK023017  | 3735.498  | 4892.71   | NM_002444 | 22324.17  |
| NM_004085 | 5510.753  | 8339.622  | AK023908  | 2643.244  | 3580.422  | NM_001104 | 1889.516  |
| NM_018104 | 4211.932  | 5329.311  | AK024236  | 1094.117  | 1871.976  | NM_002985 | 2334.579  |
| NM_006080 | 1263.538  | 1440.472  | Z24724    | 4430.988  | 4727.221  | U88898    | 1572.154  |
| NM_006667 | 49439.813 | 50229.359 | AK022712  | 10132.967 | 7615.072  | NM_020154 | 16119.336 |
| AK025125  | 3492.608  | 3082.821  | AK021863  | 5526.62   | 8432.072  | NM_004665 | 2432.563  |
| NM_000815 | 1067.517  | 1500.874  | AL133065  | 690.584   | 1093.618  | NM_005300 | 1075.623  |
| AB023173  | 4238.74   | 4157.124  | NM_005297 | 5040.304  | 6267.331  | NM_000893 | 905.927   |
| AF156548  | 2064.592  | 2566.803  | U80769    | 1320.625  | 815.85    | NM_000695 | 21515.156 |
| NM_000387 | 13970.453 | 14083.725 | AL137734  | 627.266   | 1071.475  | NM_005091 | 518.22    |
| NM_004663 | 2299.948  | 2312.403  | AK023784  | 1003.924  | 1059.163  | AF031167  | 316.749   |
| NM_015310 | 3458.643  | 2497.776  | AK026323  | 2225.01   | 1640.755  | NM_003204 | 2918.186  |
| NM_016154 | 21349.732 | 25860.191 | NM_003493 | 64099.887 | 54185.648 | AF254069  | 1248.854  |
| NM_005013 | 14963.476 | 45538.402 | AL133430  | 5321.108  | 4610.388  | AL117600  | 7015.728  |
| AB002338  | 1653.165  | 1395.071  | AF070633  | 24009.525 | 18566.621 | NM_001712 | 402.871   |
| AI524814  | 5160.589  | 7432.745  | S51971    | 61310.004 | 50282     | NM_004487 | 9247.804  |
| AB024411  | 1120.167  | 1081.955  | AF054996  | 4253.163  | 3943.943  | AB029000  | 6612.846  |
| NM_002444 | 56520.414 | 49553.176 | AF090098  | 1453.71   | 1670.036  | Z25434    | 3862.983  |
| NM_001104 | 1453.65   | 755.519   | AF146694  | 2672.324  | 2308.654  | NM_005884 | 4246.641  |
| NM_002985 | 7023.839  | 6308.176  | AK057104  | 1441.968  | 376.076   | NM_012395 | 6906.675  |
| NM_020154 | 34729.523 | 47659.18  | AL133555  | 2475.186  | 1888.919  | AF229804  | 36979.605 |
| NM_004665 | 4457.87   | 5392.689  | AK024979  | 16347.784 | 14408.469 | AF151638  | 1212.293  |
| NM_005300 | 2965.866  | 3639.476  | AF233648  | 821.616   | 1019.257  | U90552    | 8730.092  |
| NM_000893 | 1456.663  | 1761.798  | AY007126  | 6584.02   | 11709.882 | NM_006032 | 5423.766  |
| NM_005091 | 832.783   | 1399.476  | AF085951  | 5845.951  | 6442.605  | NM_014785 | 1315.634  |
| AF031167  | 778.653   | 1148.281  | AF087989  | 1526.68   | 1367.868  | NM_002153 | 405.465   |
| AB023190  | 30320.43  | 41933.477 | Z70715    | 1018.877  | 792.404   | AB040890  | 1590.794  |
| NM_002735 | 2813.061  | 3494.208  | NM_018182 | 4473.737  | 3243.5    | AK024233  | 868.508   |
| U23460    | 49644.457 | 49044.992 | U80771    | 3405.099  | 1860.392  | AK021870  | 629.042   |
| NM_005355 | 1182.828  | 1691.791  | AJ272173  | 7542.855  | 6949.986  | U06680    | 1238.016  |
| Z25434    | 5845.99   | 5759.139  | Y17180    | 59185.16  | 58794.285 | NM_005123 | 194.282   |
| NM_005884 | 11178.736 | 16113.425 | NM_005645 | 2840.46   | 2923.197  | NM_015584 | 2841.686  |
| NM_012395 | 13513.921 | 14278.313 | NM_002037 | 612.29    | 798.569   | NM_001697 | 17692.145 |
| AF229804  | 44643.313 | 45458.41  | NM_016345 | 1407.487  | 1698.353  | NM_016095 | 9390.984  |
| AF151638  | 2588.409  | 2449.624  | NM_020157 | 24907.668 | 22240.537 | AB032525  | 667.256   |
| U90552    | 10559.733 | 7359.086  | X64991    | 1319.202  | 574.492   | NM_002063 | 1769.233  |
| NM_006032 | 5165.541  | 4116.71   | NM_014320 | 5422.172  | 3004.754  | NM_006667 | 29856.82  |
| NM_014785 | 2389.055  | 2356.372  | AK025703  | 5673.489  | 4317.916  | AK025125  | 3439.605  |
| NM_002153 | 711.736   | 681.216   | NM_018185 | 2345.058  | 1384.961  | NM_000815 | 792.264   |
| AB040890  | 3059.914  | 2301.879  | AK022598  | 2351.15   | 1705.006  | NM_001293 | 705.329   |
| AK024233  | 919.911   | 680.294   | AK024306  | 1054.236  | 746.926   | AB023173  | 4525.645  |
| AK021870  | 1590.585  | 2179.593  | NM_018322 | 4377.901  | 3829.313  | AF156548  | 1330.246  |
| NM_005123 | 864.08    | 1716.835  | AK025862  | 19128.996 | 24837.986 | NM_172140 | 3557.933  |
| NM_015584 | 8583.205  | 10849.95  | AK026495  | 1364.616  | 1039.864  | NM_001072 | 236.925   |
| NM_001697 | 45095.207 | 50090.133 | AK025052  | 1440.377  | 307.322   | NM_014070 | 1217.702  |
| NM_016095 | 27761.35  | 38252.133 | NM_014385 | 657.012   | 966.493   | NM_016280 | 12417.824 |
| NM_002063 | 1116.924  | 1469.744  | NM_002545 | 549.078   | 1176.95   | NM_016027 | 2367.131  |
| AK027241  | 2521.848  | 2770.584  | U85044    | 984.92    | 1930.79   | NM_014297 | 3954.762  |

|           |           |           |           |           |           |           |           |
|-----------|-----------|-----------|-----------|-----------|-----------|-----------|-----------|
| NM_006978 | 8447.872  | 10119.677 | BC018880  | 2678.909  | 1737.489  | NM_018156 | 7147.066  |
| NM_004561 | 563.272   | 812.597   | AF086090  | 1124.549  | 1106.185  | X98266    | 396.138   |
| AK024812  | 2614.626  | 3221.28   | AK002173  | 23408.734 | 14948.043 | U00930    | 3847.814  |
| M20642    | 1580.105  | 1206.039  | NM_017746 | 1804.338  | 891.243   | AK024958  | 400.434   |
| AK026412  | 2216.174  | 2060.584  | NM_020186 | 9784.069  | 7655.065  | NM_014575 | 1658.998  |
| X89669    | 3143.202  | 2890.146  | U88897    | 11444.896 | 7669.997  | NM_002439 | 3291.859  |
| NM_001072 | 1379.006  | 1180.511  | CY3Cy5    | 8119.228  | 591.732   | AL117552  | 1925.067  |
| NM_014070 | 1770.15   | 964.026   | BG617923  | 635.4     | 803.703   | NM_007064 | 1367.593  |
| NM_016280 | 33356.289 | 30118.924 | U37448    | 826.923   | 1162.787  | NM_006281 | 1139.132  |
| NM_016027 | 3193.031  | 2190.606  | AA927698  | 4660.105  | 4314.796  | NM_002738 | 4833.969  |
| NM_014297 | 10738.084 | 5981.889  | AI498426  | 767.484   | 1031.812  | U23460    | 29918.363 |
| X98266    | 1573.581  | 3075.004  | BG824773  | 1600.817  | 1069.857  | NM_005356 | 670.48    |
| U00930    | 12338.859 | 37339.898 | D01038    | 16815.006 | 23573.764 | NM_004429 | 4717.401  |
| AK024958  | 1060.208  | 2301.722  | AB019205  | 1915.782  | 2334.152  | U64564    | 1041.734  |
| NM_014575 | 5460.275  | 6755.904  | J05008    | 2136.813  | 2223.309  | NM_006470 | 1700.538  |
| NM_002439 | 5822.374  | 7640.079  | U11087    | 1914.801  | 1985.254  | NM_002855 | 2111.565  |
| AL117552  | 2719.435  | 2508.056  | D50640    | 1801.084  | 3693.035  | AB038463  | 718.048   |
| NM_002692 | 13452.3   | 13896.562 | D43747    | 760.424   | 941.006   | M30262    | 2473.606  |
| X55525    | 2246.693  | 2360.351  | M98776    | 1076.828  | 1429.962  | NM_005460 | 1095.13   |
| S74647    | 800.872   | 758.637   | X99135    | 62962.719 | 57707.93  | AF160477  | 2151.921  |
| NM_003506 | 810.599   | 1145.135  | AF009744  | 1635.467  | 1522.754  | NM_003226 | 321.625   |
| NM_018093 | 5996.014  | 7198.535  | NM_172140 | 4874.52   | 4613.91   | M12883    | 899.393   |
| NM_003389 | 2566.644  | 2678.349  | SR6       | 2784.787  | 1669.575  | BG288747  | 765.192   |
| NM_000430 | 1484.206  | 1855.432  | SR8       | 9770.06   | 19907.686 | BG617923  | 438.194   |
| AB033030  | 1725.713  | 1140.295  | SR10      | 40135.328 | 16624.609 | U37448    | 503.198   |
| NM_016656 | 2513.292  | 785.02    | CY3Cy5    | 5650.094  | 313.355   | BG435851  | 167.948   |
| NM_015963 | 3663.123  | 5314.521  | NM_005311 | 1559.492  | 4551.083  | AA927698  | 2722.448  |
| AB007871  | 3120.633  | 1813.934  | NM_005905 | 1416.396  | 2174.988  | AI498426  | 349.82    |
| NM_017813 | 3160.109  | 2048.665  | NM_000960 | 883.609   | 870.231   | BG824773  | 1626.815  |
| NM_003840 | 6287.579  | 2277.227  | NM_005359 | 1104.343  | 1454.38   | D01038    | 6472.346  |
| NM_018378 | 1116.421  | 684.106   | NM_002511 | 1539.397  | 2604.977  | AB019205  | 1700.292  |
| NM_018423 | 1753.823  | 747.449   | AF295378  | 2914.072  | 3403.368  | J05008    | 1472.13   |
| NM_001741 | 9686.29   | 6129.207  | AF320908  | 570.106   | 1036.004  | U11087    | 1401.453  |
| NM_000745 | 2550.218  | 2094.355  | NM_004085 | 4518.113  | 6917.203  | D50640    | 580.964   |
| AF116705  | 15896.598 | 20339.387 | NM_012445 | 28080.723 | 31595.406 | D43747    | 443.462   |
| NM_004460 | 1135.57   | 1195.223  | NM_018104 | 4018.048  | 4494.053  | M98776    | 740.686   |
| NM_006072 | 2290.965  | 5223.552  | NM_006080 | 832.024   | 1156.135  | X99135    | 42621.609 |
| BE794490  | 768.505   | 1439.517  | NM_004429 | 6777.404  | 7365.868  | AF009744  | 1208.822  |
| NM_003561 | 2509.668  | 2693.783  | U64564    | 1842.214  | 1953.348  | NM_003204 | 2758.048  |
| NM_002991 | 2984.268  | 2062.55   | NM_006470 | 1929.986  | 1876.464  | AF254069  | 1224.732  |
| NM_004071 | 3594.048  | 4191.256  | NM_002855 | 3876.771  | 5347.396  | AL117600  | 6717.239  |
| NM_001316 | 6739.472  | 11145.703 | AB038463  | 1237.822  | 1064.672  | NM_004487 | 12290.635 |
| AJ008149  | 4637.739  | 5035.177  | M30262    | 3210.064  | 2422.433  | AB029000  | 6536.083  |
| NM_012153 | 1122.04   | 1582.74   | NM_005460 | 1342.256  | 1071.014  | AK026965  | 12227.033 |
| NM_013241 | 5336.783  | 3553.928  | AF160477  | 2865.817  | 1754.981  | AK025859  | 5151.428  |
| NM_017988 | 64999.391 | 55781.629 | M12883    | 1109.632  | 974.179   | AL117499  | 5136.191  |
| NM_015535 | 845.037   | 460.084   | BG288747  | 1149.45   | 930.479   | NM_007054 | 880.482   |
| AF161362  | 9005.653  | 9437.872  | AI524814  | 4503.025  | 6656.159  | AK000160  | 3493.909  |
| NM_003928 | 65995.563 | 61145.531 | AB024411  | 996.662   | 1345.398  | NM_005311 | 587.054   |
| M57399    | 39117.059 | 19568.09  | NM_002444 | 46519.902 | 47266.582 | NM_005905 | 1190.838  |
| NM_015939 | 5273.377  | 3383.344  | NM_001104 | 2928.278  | 3159.291  | NM_016235 | 224.104   |
| AB046840  | 7170.375  | 3799.84   | NM_002989 | 4860.975  | 7150.318  | NM_000960 | 540.328   |
| AF174487  | 2185.973  | 1130.108  | U88898    | 2437.412  | 3644.154  | NM_005359 | 663.563   |

|           |           |           |           |           |           |           |           |
|-----------|-----------|-----------|-----------|-----------|-----------|-----------|-----------|
| NM_005041 | 1645.758  | 1182.52   | NM_020154 | 38021.605 | 36974.199 | NM_000794 | 329.853   |
| NM_006407 | 23108.754 | 16571.459 | NM_004665 | 2455.064  | 3230.884  | AF295378  | 1867.257  |
| NM_007373 | 5921.742  | 5690.49   | NM_005300 | 2089.041  | 2395.141  | NM_004085 | 4399.249  |
| M34572    | 1997.662  | 1684.015  | NM_000893 | 1099.991  | 1232.569  | NM_012445 | 13772.524 |
| NM_006263 | 22015.623 | 16924.33  | NM_000698 | 37393.27  | 42054.758 | NM_018104 | 2976.637  |
| NM_004791 | 951.686   | 1144.839  | AF031167  | 596.308   | 917.617   | NM_006667 | 34690.078 |
| Z36876    | 4030.293  | 3827.881  | NM_003204 | 3774.733  | 5268.652  | AK025125  | 3213.302  |
| NM_000892 | 1187.961  | 1480.903  | AF254069  | 2112.829  | 2025.673  | NM_000815 | 822.865   |
| NM_005046 | 538.29    | 938.317   | AL117600  | 11440.717 | 9173.59   | NM_001293 | 630.533   |
| AB029025  | 1359.813  | 3106.972  | NM_004487 | 18275.125 | 17893.414 | AB023173  | 4505.947  |
| NM_007100 | 33017.074 | 39394.328 | AB029000  | 7126.097  | 5824.595  | AF156548  | 1698.794  |
| NM_002954 | 65834.68  | 56711.926 | AK026965  | 7786.809  | 6909.773  | NM_000387 | 13534.566 |
| NM_003940 | 752.912   | 1264.621  | AK025859  | 8457.078  | 4184.883  | NM_004663 | 1066.872  |
| NM_016572 | 1460.89   | 878.393   | AL117499  | 10856.633 | 10657.195 | NM_015310 | 1280.47   |
| NM_000027 | 1835.81   | 1045.519  | AK000160  | 1876.828  | 1120.989  | NM_016154 | 7359.104  |
| NM_001824 | 1888.139  | 482.918   | NM_006032 | 5139.867  | 5837.012  | NM_005013 | 7016.033  |
| NM_017548 | 29783.043 | 16417.043 | NM_014788 | 1928.2    | 1707.583  | AB002338  | 1194.985  |
| AF134802  | 1222.011  | 945.417   | NM_002153 | 748.743   | 864.725   | AI524814  | 1903.669  |
| NM_018222 | 1734.08   | 809.621   | AB040890  | 1795.795  | 1624.84   | AB024411  | 852.018   |
| NM_005740 | 3510.781  | 4708.937  | AK024233  | 1323.44   | 1372.033  | NM_002444 | 22167.617 |
| NM_004308 | 16880.049 | 24057.801 | AK021870  | 1148.402  | 2256.657  | Z83802    | 151.759   |
| AF112366  | 2606.135  | 2484.995  | U06680    | 4130.646  | 4808.319  | NM_001104 | 1589.932  |
| NM_004274 | 1902.403  | 2553.872  | NM_005123 | 730.76    | 959.341   | NM_002989 | 1484.396  |
| AK024002  | 4032.285  | 4666.928  | NM_015584 | 7674.142  | 7065.203  | U88898    | 1633.809  |
| NM_020399 | 7147.933  | 10887.282 | NM_001697 | 43495.484 | 45820.117 | NM_020154 | 16218.003 |
| AB011117  | 2748.083  | 3016.193  | NM_016098 | 29291.854 | 23472.252 | NM_004665 | 1552.092  |
| AF060935  | 4604.358  | 4491.703  | NM_002063 | 1493.985  | 1216.266  | NM_005300 | 1022.197  |
| AK026886  | 1541.283  | 2457.966  | NM_006667 | 45861.102 | 47598.465 | NM_000893 | 636.158   |
| D83778    | 985.551   | 1475.598  | AK025125  | 6690.418  | 6070.539  | NM_000698 | 20847.07  |
| NM_004264 | 1541.142  | 1888.466  | NM_000815 | 1503.063  | 1314.26   | NM_005091 | 578.914   |
| AK024788  | 1407.568  | 1498.284  | NM_001293 | 1083.683  | 1195.823  | AB023190  | 24545.711 |
| NM_004473 | 784.49    | 720.642   | AB023173  | 5025.65   | 4481.073  | NM_007064 | 2106.641  |
| AK022696  | 3602.053  | 3076.546  | AF156548  | 1572.532  | 2392.444  | NM_006281 | 1116.828  |
| NM_001206 | 3109.651  | 3078.507  | NM_000387 | 13185.103 | 14301.058 | NM_002738 | 5710.559  |
| NM_005016 | 1976.719  | 1759.054  | NM_004663 | 2164.34   | 1931.887  | NM_005356 | 837.987   |
| NM_014469 | 2134.06   | 2797.501  | NM_015310 | 1821.367  | 1268.12   | Z25434    | 3945.305  |
| NM_014852 | 3110.548  | 1938.199  | NM_016154 | 11344.924 | 10433.056 | NM_005884 | 4221.04   |
| NM_000344 | 13289.334 | 10072.348 | NM_005013 | 57824.238 | 42804.441 | NM_012399 | 7292.793  |
| AF248650  | 3791.357  | 2470.459  | AB002338  | 1561.047  | 1088.616  | AF229804  | 30029.164 |
| S74678    | 35780.266 | 33873.359 | NM_001072 | 799.229   | 802.464   | AF151638  | 1287.966  |
| AF248651  | 1537.634  | 979.664   | NM_014070 | 1714.413  | 1444.215  | U90552    | 7733.795  |
| NM_001358 | 16767.797 | 16761.869 | NM_016280 | 21284.947 | 25215.309 | NM_006032 | 4524.017  |
| NM_004836 | 6412.869  | 6029.081  | NM_016027 | 3508.801  | 3112.347  | NM_014788 | 1332.461  |
| S79281    | 3486.069  | 11857.227 | NM_014297 | 11451.968 | 8584.835  | AB040890  | 1343.069  |
| AK025585  | 2811.191  | 6433.062  | NM_018156 | 16670.604 | 22392.91  | AK024233  | 895.684   |
| NM_001414 | 8529.107  | 10964.94  | X98266    | 1073.22   | 1589.836  | AK021870  | 1040.547  |
| D16891    | 2951.178  | 4380.445  | U00930    | 11889.107 | 16948.313 | U06680    | 1109.632  |
| NM_017760 | 6585.509  | 8473.573  | AK024958  | 797.819   | 724.919   | NM_017859 | 40.14     |
| NM_015936 | 6180.721  | 8492.037  | NM_014575 | 3217.111  | 2481.168  | NM_005123 | 318.502   |
| AL109698  | 1435.591  | 2401.785  | NM_002439 | 5325.703  | 6484.687  | NM_015584 | 3099.029  |
| AF217980  | 8575.204  | 8106.085  | AL117552  | 1968.628  | 1362.286  | NM_001697 | 18722.273 |
| AL117461  | 5131.413  | 5292.002  | NM_002692 | 12572.862 | 8752.993  | NM_002063 | 1754.368  |
| NM_016499 | 2379.95   | 3048.128  | AB023190  | 27205.084 | 35610.043 | AL137479  | 511.434   |

|           |           |           |           |           |           |           |           |
|-----------|-----------|-----------|-----------|-----------|-----------|-----------|-----------|
| AF104921  | 8647.536  | 10379.643 | NM_007064 | 2443.62   | 2123.118  | NM_004211 | 2806.2    |
| NM_000126 | 19244.293 | 20519.016 | NM_006281 | 1393.612  | 1732.9    | Y10776    | 1708.378  |
| AK022291  | 1050.902  | 681.745   | NM_002738 | 6849.133  | 9603.302  | AK027241  | 3314.77   |
| BF239974  | 4503.975  | 3328.439  | U23460    | 53747.961 | 43804.523 | NM_004561 | 358.497   |
| NM_000104 | 8504.015  | 1669.26   | NM_005356 | 1336.654  | 1062.712  | AK024812  | 1953.477  |
| NM_005015 | 21071.9   | 22103.412 | Z25434    | 3606.908  | 3779.398  | AK026412  | 1049.556  |
| NM_004255 | 68760.906 | 55590.488 | NM_005884 | 10630.779 | 10090.155 | X89669    | 3768.22   |
| NM_000265 | 33530.289 | 35994.238 | NM_012395 | 11310.268 | 10964.413 | NM_001072 | 261.582   |
| AF182288  | 2895.466  | 3613.853  | AF229804  | 35422.891 | 33027.996 | NM_014070 | 1696.593  |
| NM_004491 | 3867.111  | 1067.872  | AF151638  | 1539.393  | 1725.824  | NM_016280 | 14054.259 |
| AK026810  | 2880.215  | 2196.713  | U90552    | 8582.027  | 6525.977  | NM_016027 | 2336.153  |
| NM_015625 | 7485.914  | 5825.642  | NM_005460 | 1304.771  | 1116.945  | NM_014297 | 3601.938  |
| AF218032  | 3637.509  | 2072.117  | AF160477  | 2487.337  | 2266.165  | NM_018156 | 8762.506  |
| AK024407  | 1824.51   | 1526.39   | NM_003226 | 522.046   | 846.031   | X98266    | 599.857   |
| NM_004182 | 18702.904 | 17870.076 | M12883    | 1295.237  | 1686.151  | U00930    | 4845.97   |
| NM_018415 | 936.397   | 2073.894  | BG288747  | 1122.672  | 1284.857  | AK024958  | 574.507   |
| NM_014240 | 2405.61   | 1823.356  | BG617923  | 776.604   | 656.757   | NM_014575 | 1793.924  |
| BE379399  | 1342.864  | 4063.008  | U37448    | 1267.102  | 1344.123  | AL117552  | 898.938   |
| NM_015877 | 3302.585  | 4266.184  | AA927698  | 5725.92   | 4971.407  | NM_002692 | 5296.521  |
| AL117598  | 1986.477  | 1845.959  | AI498426  | 786.239   | 1059.343  | X55525    | 923.448   |
| AF085831  | 1791.924  | 1807.957  | BG824773  | 1515.687  | 1046.592  | NM_000242 | 519.839   |
| AL832149  | 3526.129  | 4502.235  | D01038    | 17696.447 | 23935.961 | AB040878  | 412.949   |
| AK022839  | 1420.401  | 1611.595  | AB019205  | 2235.245  | 2186.292  | S74647    | 1156.204  |
| NM_018350 | 1203.355  | 1535.258  | J05008    | 1717.458  | 1765.879  | NM_003506 | 1061.128  |
| AK025839  | 1737.429  | 452.714   | U11087    | 1714.264  | 1573.865  | NM_018093 | 4370.543  |
| NM_003946 | 1919.284  | 1784.086  | D50640    | 1367.82   | 2201.07   | NM_003012 | 180.636   |
| AB045292  | 4802.081  | 4560.66   | M98776    | 1297.877  | 1080.978  | NM_003385 | 990.185   |
| AK022998  | 2092.554  | 1693.454  | X99135    | 65360.926 | 56638.23  | NM_000430 | 663.785   |
| AK025699  | 21035.668 | 16603.453 | AF009744  | 1707.322  | 1824.231  | AB033030  | 1300.411  |
| AF147353  | 461.466   | 454.02    | NM_172140 | 4258.213  | 3762.753  | NM_016656 | 1401.056  |
| NM_018024 | 4853.912  | 3446.768  | AK026965  | 10571.503 | 10469.71  | NM_015963 | 295.991   |
| AK026783  | 1041.506  | 903.006   | AK025859  | 7555.035  | 5073.371  | AB007871  | 2439.683  |
| AK021814  | 1692.558  | 529.895   | AL117499  | 8695.631  | 10479.605 | NM_017813 | 1937.455  |
| AF088035  | 2397.716  | 3540.679  | NM_007054 | 531.494   | 722.998   | NM_003840 | 6083.82   |
| AF086251  | 987.639   | 727.186   | AK000160  | 2532.495  | 2873.128  | NM_018378 | 880.308   |
| NM_018092 | 3299.847  | 6314.175  | NM_005311 | 1435.782  | 4048.971  | NM_018423 | 778.292   |
| NM_005842 | 12614.027 | 16849.406 | NM_005905 | 1748.536  | 2576.871  | NM_001741 | 5879.929  |
| AF147419  | 3351.57   | 3328.746  | NM_016235 | 576.018   | 839.334   | AF116705  | 6055.208  |
| AK024280  | 1655.399  | 1573.214  | NM_000960 | 971.067   | 872.837   | NM_004460 | 565.987   |
| AF075036  | 1476.51   | 1836.47   | NM_005355 | 1188.862  | 1140.959  | NM_006072 | 1167.188  |
| NM_014797 | 4402.55   | 3045.392  | NM_002511 | 1855.512  | 2502.64   | BE794490  | 629.682   |
| AL831841  | 4939.191  | 4767.872  | AF295378  | 3000.013  | 2964.606  | NM_003561 | 2458.527  |
| AL110165  | 3995.961  | 3806.857  | NM_004085 | 4590.339  | 6104.112  | NM_002991 | 692.247   |
| AL117652  | 1268.153  | 882.487   | NM_012445 | 29336.789 | 27682.281 | NM_004071 | 1615.429  |
| AL050168  | 1529.233  | 819.717   | NM_018104 | 4310.081  | 3888.573  | NM_001316 | 2617.167  |
| AL122122  | 5964.469  | 2590.78   | NM_006080 | 674.273   | 421.855   | AJ008149  | 4956.847  |
| AK000122  | 6622.948  | 3984.919  | NM_004425 | 6880.708  | 6752.617  | NM_001192 | 687.87    |
| AK023159  | 2305.006  | 1945.635  | U64564    | 1336.997  | 1402.964  | NM_012153 | 456.371   |
| AK001091  | 3461.385  | 3652.012  | NM_006470 | 2236.324  | 1559.688  | NM_013241 | 2446.065  |
| AF086428  | 2682.185  | 1195.072  | NM_002855 | 3356.419  | 5186.854  | NM_017985 | 64260.199 |
| AK025310  | 1858.991  | 3030.384  | AB038463  | 1353.09   | 1393.29   | NM_015535 | 992.363   |
| AL049353  | 1942.983  | 2284.471  | M30262    | 2956.506  | 2735.24   | Z24725    | 137.792   |
| AF009313  | 2344.256  | 2728.323  | NM_000387 | 12550.521 | 15136.287 | AF161362  | 2366.042  |



|           |           |           |           |           |           |           |           |
|-----------|-----------|-----------|-----------|-----------|-----------|-----------|-----------|
| AF090887  | 1760.659  | 1648.84   | NM_004663 | 2272.759  | 1919.551  | NM_003928 | 67333.141 |
| AF009279  | 531.334   | 867.57    | NM_015310 | 1303.811  | 1665.416  | M57399    | 42756.594 |
| NM_015883 | 2968.287  | 2700.48   | NM_016154 | 12353.439 | 15676.109 | NM_015939 | 3340.972  |
| AF056429  | 1143.68   | 1335.706  | NM_005013 | 54019.516 | 49652.238 | AB046840  | 3786.091  |
| AF070547  | 2679.063  | 2898.136  | AB002338  | 1601.557  | 1755.101  | AF174487  | 1063.712  |
| AK001110  | 14442.702 | 11904.423 | AI524814  | 4819.751  | 7324.546  | NM_005041 | 237.659   |
| AK002184  | 1015.815  | 769.792   | AB024411  | 1454.187  | 1610.216  | AB002365  | 93.039    |
| AK021652  | 1066.907  | 887.531   | NM_002444 | 48776.672 | 48684.063 | NM_006407 | 7651.688  |
| AK021859  | 1205.921  | 933.944   | NM_001104 | 3482.977  | 4538.038  | NM_007373 | 2165.028  |
| AK025826  | 1489.78   | 1201.584  | NM_002989 | 6003.186  | 7342.331  | M34572    | 997.18    |
| AK026439  | 1743.89   | 2072.134  | U88898    | 2616.079  | 3267.48   | NM_006263 | 10259.025 |
| AK025278  | 1055.952  | 1030.499  | NM_020154 | 38134.016 | 31264.455 | NM_004791 | 920.411   |
| AY007163  | 10694.63  | 14070.021 | NM_004665 | 2124.297  | 2158.826  | Z36876    | 1881.504  |
| D17265    | 41818.781 | 44692.34  | NM_005300 | 1396.142  | 1538.816  | NM_000892 | 1192.636  |
| AF085827  | 885.971   | 1418.632  | NM_000893 | 1254.404  | 1106.107  | X75363    | 391.983   |
| Y08266    | 20751.668 | 24732.422 | NM_000698 | 41224.949 | 40965.684 | NM_005046 | 294.236   |
| AK002171  | 9550.955  | 7506.796  | NM_005091 | 528.333   | 307.983   | NM_001873 | 646.705   |
| AJ002572  | 3455.225  | 3217.784  | NM_003204 | 2707.25   | 2720.601  | AB029025  | 834.641   |
| AK026897  | 5781.562  | 5755.607  | AF254069  | 2184.508  | 1564.535  | NM_007100 | 13852.096 |
| AB037861  | 6820.676  | 6644.818  | AL117600  | 10537.167 | 9051.871  | NM_002954 | 68405.766 |
| AK021887  | 3363.763  | 4839.478  | NM_004487 | 15871.152 | 16334.556 | NM_003940 | 206.588   |
| AF086180  | 15279.313 | 12643.904 | AB029000  | 8129.437  | 6856.732  | NM_016572 | 627.463   |
| AK022135  | 1861.99   | 2294.388  | Z25434    | 4399.625  | 5402.942  | NM_000027 | 913.073   |
| AK022898  | 1866.698  | 2586.06   | NM_005884 | 11630.53  | 11733.23  | NM_001824 | 985.866   |
| NM_017559 | 5303.819  | 5938.81   | NM_012399 | 9772.43   | 9418.923  | NM_017548 | 25890.455 |
| NM_006683 | 484.793   | 1138.764  | AF229804  | 50172.988 | 51921.848 | AF134802  | 529.887   |
| AK022978  | 3184.886  | 2983.414  | AF151638  | 1333.325  | 1567.163  | NM_018222 | 403.086   |
| AK021447  | 4928.563  | 4898.882  | U90552    | 8374.954  | 8444.531  | NM_005740 | 1063.043  |
| AK025096  | 1446.529  | 1778.654  | NM_006032 | 7111.927  | 7891.689  | NM_004308 | 8049.297  |
| AF131774  | 2103.556  | 2502.974  | NM_014788 | 2557.281  | 2535.728  | AF112366  | 865.416   |
| AK025793  | 996.093   | 1409.833  | NM_002153 | 758.742   | 979.23    | NM_004274 | 1205.315  |
| AK000151  | 1768.956  | 1885.026  | AB040890  | 2025.7    | 1982.271  | AK024002  | 5689.075  |
| AL389942  | 1226.164  | 738.601   | AK024233  | 1495.322  | 1814.827  | NM_020399 | 4148.616  |
| D17052    | 1554.1    | 1860.248  | AK021870  | 1276.988  | 2346.117  | AB011117  | 944.074   |
| D28378    | 66415.219 | 59514.398 | U06680    | 4999.114  | 5400.856  | AF060935  | 1570.377  |
| M64700    | 1043.244  | 290.556   | NM_005123 | 652.471   | 1194.078  | AK026886  | 358.265   |
| L41143    | 7230.16   | 3858.909  | NM_015584 | 8141.226  | 6145.167  | D83778    | 512.707   |
| NM_005331 | 16283.019 | 17570.723 | NM_001697 | 43662.523 | 40012.215 | NM_004264 | 604.255   |
| NM_014111 | 2008.164  | 2123.937  | NM_016098 | 29154.949 | 19052.277 | AK024788  | 1025.089  |
| AJ008129  | 3035.262  | 3433.771  | NM_002063 | 1386.806  | 919.861   | AK022696  | 1846.716  |
| AJ008158  | 1066.373  | 1137.625  | NM_006667 | 41983.73  | 41591.801 | NM_001206 | 2040.708  |
| AF161451  | 9118.53   | 10656.298 | AK025125  | 7244.656  | 5046.623  | NM_005016 | 702.851   |
| X02067    | 37532.285 | 40689.293 | NM_000815 | 1263.985  | 1215.626  | NM_014469 | 581.219   |
| U92013    | 16111.596 | 17010.213 | NM_001293 | 1148.099  | 959.418   | NM_014852 | 1977.681  |
| AK023965  | 1735.99   | 2189.111  | AB023173  | 5160.819  | 5380.777  | NM_000344 | 5961.677  |
| AK026211  | 779.407   | 1511.1    | AF156548  | 1547.656  | 2401.512  | AF248650  | 1950.776  |
| X58968    | 2623.736  | 2760.113  | NM_172140 | 4518.989  | 3882.18   | AF248651  | 657.478   |
| U92020    | 6355.76   | 4745.154  |           | 90.902    | 2198.205  | NM_004836 | 3187.115  |
| AL117542  | 1363.194  | 1516.548  | AF086109  | 334.662   | 839.557   | AB037751  | 1239.337  |
| AL109712  | 12820.599 | 9184.264  | NM_001072 | 980.301   | 1180.238  | S79281    | 1138.598  |
| X04215    | 1555.58   | 1390.12   | NM_014070 | 2620.33   | 2298.812  | AK025585  | 1143.306  |
| NM_017782 | 2781.257  | 5689.208  | NM_016280 | 23074.516 | 29614.645 | NM_001414 | 2515.768  |
| NM_018149 | 3196.808  | 3294.935  | NM_016027 | 4231.558  | 3399.596  | D16891    | 960.408   |

|           |           |           |           |           |           |           |           |
|-----------|-----------|-----------|-----------|-----------|-----------|-----------|-----------|
| NM_01846E | 19621.951 | 14769.624 | NM_014297 | 11535.85  | 8848.29   | NM_01776C | 1987.387  |
| Z36814    | 1953.091  | 2307.686  | NM_01815E | 17758.41  | 23479.525 | NM_01593E | 2851.014  |
| D17045    | 6611.641  | 1337.147  | X98266    | 867.418   | 1216.63   | AL109698  | 1148.512  |
| AK000827  | 3202.72   | 2526.996  | U00930    | 10871.944 | 17843.918 | AF217980  | 7681.324  |
| NM_002503 | 33260.527 | 20275.393 | AK024958  | 643.222   | 939.434   | AL117461  | 722.851   |
| NM_00531E | 25643.477 | 4943.429  | NM_01457E | 2918.316  | 2081.864  | NM_01649E | 1664.432  |
| NM_01905E | 1120.261  | 547.245   | NM_00243E | 5256.278  | 5043.782  | AF104921  | 5671.873  |
| AK022351  | 2875.023  | 1265.396  | AL117552  | 1914.772  | 1192.35   | NM_00012E | 9322.679  |
| AK022059  | 1529.2    | 2161.89   | NM_002692 | 12320.224 | 7511.523  | BF239974  | 1284.47   |
| NM_020194 | 6323.958  | 7152.26   | AB023190  | 27029.611 | 33414.086 | NM_000104 | 7655.763  |
| AF038183  | 16968.521 | 24048.016 | NM_007064 | 1948.589  | 1367.125  | NM_00501E | 7381.542  |
| NM_017882 | 3169.332  | 5034.951  | NM_006281 | 1059.779  | 1284.169  | NM_00425E | 38713.207 |
| NM_003521 | 2660.486  | 1725.743  | NM_00273E | 6452.185  | 10240.793 | NM_00026E | 16363.777 |
| J03571    | 23932.072 | 23873.688 | U23460    | 33142.883 | 34344.512 | AF182288  | 1240.888  |
| T57791    | 4955.18   | 4064.65   | NM_00535E | 1176.795  | 1278.694  | NM_004491 | 1464.842  |
| X56134    | 2225.665  | 1541.685  | NM_00442E | 6886.599  | 7162.876  | AK026810  | 1209.684  |
| NM_00145E | 749.979   | 623.738   | U64564    | 1830.892  | 2136.367  | AF218032  | 2012.016  |
| BG685843  | 5198.376  | 10865.735 | NM_00647C | 1814.531  | 2065.78   | NM_017542 | 3209.967  |
| BI490011  | 3358.107  | 3381.108  | NM_00285E | 2500.219  | 4617.717  | AK024407  | 999.947   |
| AF035771  | 1262.265  | 1575.155  | AB038463  | 976.359   | 1113.389  | NM_004182 | 9098.61   |
| N20475    | 18256.248 | 9857.977  | M30262    | 2325.35   | 3037.252  | NM_01424C | 293.814   |
| BI199286  | 996.117   | 1192.564  | NM_00546C | 998.506   | 1186.115  | BE379399  | 398.752   |
| AA026626  | 1950.233  | 2973.704  | AF160477  | 3180.523  | 3263.02   | NM_015877 | 2326.685  |
| H61726    | 1542.184  | 1888.975  | NM_00322E | 824.305   | 746.877   | AL117598  | 2219.607  |
| NM_004774 | 3225.505  | 4274.389  | M12883    | 1397.893  | 2004.925  | AL109670  | 2466.229  |
| NM_005234 | 4599.553  | 5687.574  | BG288747  | 952.97    | 815.287   | AF085831  | 951.642   |
| SR5       | 6517.075  | 4762.037  | U37448    | 969.956   | 1282.756  | AL832149  | 1636.752  |
| AF212842  | 1848.319  | 5130.412  | AA927698  | 5757.749  | 4428.372  | AK022839  | 2878.6    |
| NM_018404 | 792.126   | 632.479   | AI498426  | 877.433   | 1016.03   | NM_01835C | 1526.438  |
| M27544    | 4931.056  | 4413.872  | D01038    | 17951.137 | 19939.156 | AK025839  | 1045.372  |
| NM_001118 | 1655.674  | 1513.653  | AB019205  | 2148.085  | 1868.132  | NM_00394E | 1515.839  |
| AL133097  | 5393.14   | 4393.781  | J05008    | 2107.474  | 1601.85   | AB045292  | 1875.084  |
| U90908    | 1598.971  | 1019.087  | U11087    | 2158.813  | 1469.417  | AK022998  | 748.65    |
| NM_00645E | 9795.65   | 9245.55   | D50640    | 1438.305  | 2241.692  | AK025699  | 14070.166 |
| NM_01445E | 642.799   | 895.702   | M98776    | 939.375   | 833.62    | AF147316  | 446.501   |
| NM_004093 | 1332.158  | 1231.944  | X99135    | 28737.543 | 37364.621 | NM_018024 | 3549.869  |
| NM_00144E | 4780.8    | 6653.952  | AF009744  | 2311.698  | 1612.639  | AK027173  | 1028.576  |
| AF086122  | 1350.546  | 2410.818  | NM_003204 | 2799.513  | 3639.319  | AK026783  | 461.377   |
| AK024397  | 12873.757 | 21544.498 | AF254069  | 2552.419  | 2275.462  | AF088040  | 564.687   |
| NM_018047 | 1671.116  | 1938.157  | AL117600  | 9337.161  | 11008.649 | AK021814  | 509.24    |
| NM_00128E | 1033.968  | 1004.21   | NM_004487 | 14187.478 | 17352.756 | AF088035  | 947.46    |
| NM_003564 | 2367.23   | 2488.297  | AB029000  | 7357.548  | 7500.793  | AF086251  | 1089.975  |
| S78203    | 2074.291  | 1966.364  | AK026965  | 14638.108 | 15330.982 | NM_018092 | 2266.253  |
| NM_006934 | 320.235   | 928.01    | AK025859  | 9359.202  | 6423.06   | NM_005842 | 3699.802  |
| NM_01620E | 15055.811 | 15239.264 | AL117499  | 10923.885 | 13354.67  | NM_003787 | 411.393   |
| NM_00563E | 17109.273 | 16397.1   | NM_007054 | 701.629   | 621.631   | AK024492  | 303.36    |
| NM_00723E | 5559.891  | 18634.521 | AK000160  | 3142.003  | 3894.356  | AF147419  | 3205.736  |
| NM_00726E | 6567.524  | 4058.425  | NM_005311 | 1847.639  | 4810.917  | AK024280  | 761.272   |
| AK026014  | 4011.271  | 2640.342  | NM_00590E | 1870.174  | 2093.539  | AF075036  | 418.57    |
| NM_00429E | 3929.606  | 4350.881  | NM_01623E | 813.062   | 1025.531  | NM_014797 | 4604.969  |
| NM_001232 | 1453.157  | 2529.872  | NM_00096C | 961.739   | 1028.128  | AK027139  | 222.562   |
| NM_007181 | 1213.638  | 1397.869  | NM_00535E | 1173.058  | 1346.541  | AL831841  | 2920.656  |
| NM_004997 | 18590.119 | 19992.502 | NM_002511 | 1474.434  | 1901.981  | AL110165  | 3517.388  |

|           |           |           |           |           |           |           |           |
|-----------|-----------|-----------|-----------|-----------|-----------|-----------|-----------|
| NM_005923 | 4626.696  | 3758.966  | AF295378  | 3163.818  | 2826.848  | AL117652  | 1689.793  |
| NM_003465 | 1401.486  | 1289.431  | NM_004085 | 3626.104  | 5460.296  | AL050263  | 196.379   |
| AF289028  | 1125.305  | 1372.576  | NM_012445 | 21214.939 | 19421.061 | AL050168  | 1768.478  |
| NM_005127 | 1041.416  | 1669.929  | NM_018104 | 2677.077  | 2981.994  | AL122122  | 6882.021  |
| NM_005567 | 4100.548  | 4269.628  | NM_006080 | 849.984   | 993.264   | AF131756  | 481.445   |
| NM_005216 | 10722.426 | 13104.943 | NM_006667 | 47297.453 | 54851.727 | AK000122  | 5215.098  |
| NM_006626 | 762.751   | 328.174   | AK025125  | 7502.82   | 10002.684 | AK023159  | 951.953   |
| NM_003965 | 1521.794  | 444.889   | NM_000815 | 1450.579  | 2293.362  | AK001091  | 2178.495  |
| NM_001492 | 1200.523  | 2927.032  | NM_001293 | 1208.926  | 1443.079  | U80775    | 263.723   |
| AB012643  | 19106.555 | 14458.646 | AB023173  | 6365.452  | 9209.595  | AF086428  | 1947.879  |
| AB023170  | 2418.851  | 1871.821  | AF156548  | 1714.456  | 3574.94   | AK025310  | 1223.788  |
| NM_014153 | 19744.799 | 20324.613 | NM_000387 | 15297.724 | 24460.139 | AL049353  | 1587.898  |
| NM_002296 | 19740.508 | 14302.881 | NM_004663 | 2412.135  | 2631.47   | NM_014896 | 159.175   |
| NM_000414 | 7890.582  | 6370.973  | NM_015310 | 1859.848  | 1987.586  | AF009269  | 1980.56   |
| NM_018845 | 7464.415  | 5392.478  | NM_016154 | 14697.938 | 20333.482 | AF009313  | 1847.723  |
| NM_005505 | 3717.135  | 6721.571  | NM_005013 | 58694.508 | 54697.133 | AF056420  | 286.161   |
| AK026964  | 441.876   | 808.67    | AB002338  | 1980.396  | 1776.882  | AF090887  | 1432.689  |
| NM_001134 | 2530.509  | 2008.51   | AI524814  | 5334.264  | 7642.467  | AF009279  | 672.748   |
| NM_016016 | 597.136   | 1258.754  | AB024411  | 1377.141  | 1152.709  | NM_015883 | 2261.443  |
| NM_020407 | 1171.486  | 900.154   | NM_002444 | 46809.152 | 47845.066 | AF056429  | 962.717   |
| AF118274  | 5553.196  | 3778.621  | Z83802    | 157.368   | 891.896   | AF070547  | 2052.575  |
| NM_018344 | 2656.471  | 1353.131  | NM_001104 | 3681.792  | 3662.408  | AK001110  | 13241.89  |
| NM_000079 | 8453.73   | 6673.937  | NM_002989 | 6753.755  | 7143.75   | AK021609  | 349.132   |
| NM_000083 | 913.485   | 1268.066  | U88898    | 2941.181  | 2610.502  | AK002184  | 836.482   |
| AL110245  | 3491.788  | 3127.204  | NM_020154 | 39308.609 | 30124.166 | AK021652  | 333.646   |
| NM_005628 | 12052.331 | 16215.771 | NM_004665 | 3032.584  | 2696.15   | AK021859  | 1072.19   |
| NM_016605 | 33560.086 | 24394.852 | NM_005300 | 2072.462  | 1679.412  | AK025826  | 556.359   |
| NM_004172 | 801.032   | 1001.208  | NM_000893 | 808.792   | 828.087   | AK026439  | 2785.655  |
| X74609    | 31967.279 | 29595.92  | NM_000698 | 22431.361 | 21806.27  | AK026792  | 258.47    |
| AB002316  | 1035.047  | 1071.335  | NM_005091 | 568.554   | 567.786   | AK025278  | 1761.436  |
| NM_018990 | 2498.167  | 422.356   | AF031167  | 961.575   | 530.293   | AK026466  | 530.192   |
| NM_013363 | 945.429   | 977.04    | AB023190  | 31310.553 | 51609.809 | AY007163  | 3633.983  |
| NM_000947 | 3888.774  | 3561.277  | NM_007064 | 3164.159  | 3731.87   | NM_006236 | 20826.4   |
| AL096750  | 27125.699 | 34279.289 | NM_006281 | 1152.669  | 1733.506  | AK023734  | 854.036   |
| NM_016061 | 12002.167 | 5331.42   | NM_002738 | 5298.621  | 10652.548 | D17265    | 29796.023 |
| NM_016062 | 23877.982 | 27081.895 | U23460    | 38656.234 | 37521.293 | AF085827  | 746.933   |
| NM_004153 | 2435.598  | 2570.785  | NM_005356 | 1557.046  | 1831.507  | Y08266    | 9261.012  |
| AK024740  | 1400.041  | 2113.729  | Z25434    | 4118.613  | 5606.619  | AK002171  | 4423.424  |
| AF078164  | 7136.816  | 8029.259  | NM_005884 | 13092.181 | 16029.528 | AJ002572  | 2194.745  |
| NM_019049 | 1354.338  | 1832.235  | NM_012399 | 13740.456 | 18323.316 | AK026897  | 3120.81   |
| AF130101  | 881.129   | 1345.021  | AF229804  | 62866.781 | 56929.84  | AB037861  | 4514.422  |
| NM_004656 | 4412.593  | 3668.279  | AF151638  | 1724.895  | 3290.777  | AF086180  | 6161.694  |
| AF071569  | 3230.656  | 2586.477  | U90552    | 6856.74   | 9640.918  | AK022135  | 1046.329  |
| NM_002269 | 3007.284  | 3565.614  | NM_006032 | 8736.141  | 11680.685 | AK022898  | 938.918   |
| J04948    | 2041.491  | 1579.723  | NM_014788 | 3101.147  | 3145.031  | NM_017559 | 12945.343 |
| NM_018043 | 980.239   | 981.116   | NM_002153 | 948.4     | 1607.131  | AL117592  | 341.475   |
| AK022564  | 62248.359 | 60563.555 | AB040890  | 1923.884  | 2796.07   | AK024897  | 671.071   |
| NM_003564 | 2385.12   | 3264.55   | AK024233  | 1579.003  | 1744.607  | NM_003547 | 695.711   |
| AK023414  | 628.121   | 987.278   | AK021870  | 1349.648  | 2506.885  | AL049980  | 1073.263  |
| AF317516  | 4987.314  | 5995.668  | U06680    | 5384.474  | 5094.027  | NM_006683 | 412.469   |
| NM_002581 | 1364.546  | 1457.376  | NM_005123 | 931.884   | 856.457   | AF070529  | 890.199   |
| AI417964  | 822.963   | 1194.662  | NM_015584 | 8749.736  | 5688.813  | AK022978  | 1468.708  |
| J03571    | 24371.256 | 26322.02  | NM_001697 | 44156.914 | 41670.66  | AK021447  | 2971.609  |

|           |           |           |           |           |           |           |           |
|-----------|-----------|-----------|-----------|-----------|-----------|-----------|-----------|
| T57791    | 5063.823  | 4142.46   | NM_01609E | 28601.742 | 17532.461 | AK02509E  | 444.717   |
| X56134    | 2500.811  | 2210.283  | NM_00206E | 1220.672  | 931.969   | L31955    | 273.679   |
| NM_00145E | 940.279   | 841.04    | AL137479  | 750.848   | 837.889   | AF131774  | 1706.789  |
| H44784    | 1023.711  | 873.423   | NM_004211 | 2150.442  | 2307.365  | AK025793  | 520.319   |
| AI421041  | 24000.807 | 28849.484 | Y10776    | 2701.103  | 1892.589  | AK000151  | 761.827   |
| BI759091  | 1930.491  | 2897.813  | AK027241  | 2680.179  | 2768.104  | AL389942  | 962.493   |
| BG685843  | 3910.042  | 6727.329  | NM_00697E | 6776.822  | 8952.068  | D17052    | 477.761   |
| BI490011  | 3197.066  | 2975.162  | NM_004561 | 581.883   | 831.018   | D28378    | 40842.305 |
| AF035771  | 1733.277  | 1984.976  | AK024812  | 2039.346  | 2909.875  | M64700    | 2030.387  |
| N20475    | 18310.201 | 8664.447  | M20642    | 844.948   | 460.775   | AF111846  | 253.183   |
| BI199286  | 1470.924  | 1353.298  | AK026412  | 1585.152  | 1386.613  | L41143    | 3164.558  |
| AA026626  | 2242.357  | 2720.86   | X89669    | 1614.577  | 1517.78   | NM_005331 | 8872.74   |
| H61726    | 2083.814  | 1703.788  | NM_00107E | 991.016   | 1680.455  | NM_014111 | 1682.055  |
| NM_004774 | 5187.609  | 6488.256  | NM_01407C | 2945.4    | 3560.086  | S85075    | 293.826   |
| NM_005234 | 5660.348  | 9667.863  | NM_01628C | 25764.926 | 41582.543 | AJ008129  | 1645.573  |
| NM_00521E | 11568.679 | 13940.908 | NM_016027 | 5036.036  | 5805.01   | AJ008158  | 620.279   |
| NM_00662E | 773.251   | 634.86    | NM_014297 | 9782.94   | 9546.274  | AF161451  | 7016.226  |
| NM_00396E | 1178.919  | 411.129   | NM_01815E | 24718.018 | 40363.457 | X02067    | 25701.617 |
| NM_004584 | 2819.218  | 1960.463  | X98266    | 1088.499  | 1559.413  | U92013    | 11281.225 |
| X15183    | 46497.715 | 48346.902 | U00930    | 14173.845 | 28182.43  | AK023965  | 1116.73   |
| AK023618  | 3993.263  | 3226.479  | AK024958  | 1118.245  | 1646.431  | AK026211  | 455.677   |
| AF212842  | 1114.732  | 4620.218  | NM_01457E | 3827.358  | 3628.056  | X58968    | 2573.156  |
| NM_018404 | 870.814   | 810.47    | NM_00243E | 3497.039  | 4063.497  | U92020    | 7984.373  |
| M27544    | 6623.729  | 6154.317  | AL117552  | 2159.27   | 1326.148  | AL117542  | 1095.719  |
| NM_00225E | 620.779   | 633.546   | NM_00269E | 12400.242 | 6753.291  | AL109712  | 16970.598 |
| NM_001118 | 1962.67   | 1699.929  | X55525    | 1164.239  | 1163.867  | X04215    | 722.513   |
| AL133097  | 8971.639  | 7349.577  | NM_00024E | 442.061   | 1070.447  | NM_01778E | 1583.413  |
| NM_001165 | 1895.611  | 1635.918  | AB040878  | 643.93    | 1070.332  | NM_01814E | 1890.708  |
| NM_001381 | 66669.938 | 59793.762 | S74647    | 1520.799  | 1726.792  | NM_01846E | 9472.949  |
| NM_00645E | 9296.929  | 8816.148  | NM_00350E | 743.525   | 1090.304  | Z36814    | 1634.437  |
| NM_01445E | 788.425   | 1194.692  | NM_01809E | 3139.982  | 4016.81   | D17045    | 2262.532  |
| NM_00409E | 1269.677  | 1765.572  | NM_00338E | 2386.767  | 1940.211  | AK000827  | 1303.378  |
| NM_00144E | 6067.366  | 7328.346  | AB033030  | 813.469   | 1569.216  | NM_00250E | 20872.6   |
| AF086122  | 2001.862  | 2274.167  | NM_01596E | 2229.401  | 2527.506  | NM_00531E | 16830.742 |
| AK024397  | 12579.828 | 21281.766 | AB007871  | 5785.521  | 7727.225  | NM_01905E | 523.515   |
| AF073931  | 1134.05   | 1494.924  | NM_01781E | 3750.63   | 4440.566  | AK022351  | 1254.262  |
| NM_018047 | 1617.081  | 1808.71   | NM_00384C | 7562.78   | 9734.149  | AK022059  | 442.36    |
| NM_00502E | 2258.324  | 1684.535  | NM_01837E | 935.925   | 1278.686  | NM_020194 | 3656.932  |
| NM_00128E | 1190.343  | 1660.275  | NM_01842E | 950.892   | 914.22    | AK026853  | 359.375   |
| NM_00008E | 1307.646  | 1832.948  | NM_001741 | 9644.281  | 16210.621 | AF038183  | 11700.867 |
| AL110245  | 2911.431  | 2549.021  | NM_00074E | 598.305   | 1186.377  | NM_01788E | 2176.805  |
| NM_00562E | 12054.236 | 16427.932 | AF116705  | 10733.937 | 16995.227 | NM_003521 | 1733.927  |
| NM_01660E | 34331.582 | 25067.957 | NM_00446C | 1085.525  | 2199.146  | CY3Cy5    | 8515.288  |
| NM_00417E | 947.966   | 797.705   | NM_00607E | 2089.147  | 2824.394  | J03571    | 8564.604  |
| S78203    | 2178.305  | 1818.17   | BE794490  | 1098.103  | 2356.088  | T57791    | 2096.122  |
| NM_01620E | 15144.915 | 18217.488 | NM_003561 | 1171.028  | 1778.793  | X56134    | 467.22    |
| NM_00163E | 678.09    | 909.256   | NM_004071 | 2751.799  | 3273.536  | AI421041  | 4226.29   |
| NM_00563E | 19368.785 | 20763.324 | NM_00131E | 11939.997 | 5814.692  | BG685843  | 791.984   |
| NM_00723E | 4868.342  | 17340.484 | AJ008149  | 9280.052  | 10078.542 | BI490011  | 727.133   |
| NM_00726E | 6267.731  | 3647.645  | NM_00119E | 550.671   | 375.942   | N20475    | 3582.246  |
| NM_01484E | 1617.124  | 1530.72   | NM_013241 | 3345.111  | 2283.019  | BI199286  | 227.28    |
| NM_00429E | 3385.819  | 3582.072  | NM_01798E | 51550.801 | 58166.777 | AA026626  | 822.14    |
| NM_00123E | 1621.421  | 2549.582  | NM_01553E | 768.896   | 243.797   | NM_004774 | 415.481   |

|           |           |           |           |           |           |           |           |
|-----------|-----------|-----------|-----------|-----------|-----------|-----------|-----------|
| NM_007181 | 1645.815  | 1643.84   | AF161362  | 3440.046  | 3704.317  | NM_005234 | 1136.703  |
| AB007857  | 1106.996  | 1083.165  | NM_015939 | 8931.865  | 6241.299  | SR9       | 24664.84  |
| NM_004997 | 17928.668 | 16052.283 | AB046840  | 5371.304  | 4896.632  | CY3Cy5    | 10277.889 |
| NM_005923 | 6709.706  | 4607.22   | AF174487  | 1829.285  | 1521.492  | AF212842  | 486.451   |
| NM_003465 | 1805.853  | 1545.58   | NM_006407 | 14352.66  | 11042.362 | M27544    | 1724.219  |
| AF289028  | 1101.841  | 1216.596  | NM_007373 | 4093.069  | 3931.135  | NM_001118 | 1092.263  |
| NM_005127 | 871.537   | 917.491   | M34572    | 473.21    | 1148.703  | AL133097  | 3418.011  |
| NM_005567 | 4673.673  | 7147.551  | NM_006263 | 22058.982 | 22856.494 | NM_001381 | 59006.082 |
| AF071569  | 3282.923  | 2234.453  | NM_004791 | 996.149   | 1327.203  | NM_006458 | 2110.088  |
| NM_002269 | 3033.173  | 3357.517  | Z36876    | 3087.837  | 1365.096  | NM_001449 | 1309.949  |
| J04948    | 1999.538  | 1647.18   | NM_000892 | 921.911   | 1506.774  | AF086122  | 847.354   |
| NM_018043 | 893.77    | 589.111   | NM_005046 | 326.454   | 850.92    | AK024397  | 2406.221  |
| AK022564  | 68403.453 | 60106.559 | NM_007100 | 22722.334 | 20215.74  | NM_018047 | 503.351   |
| NM_001492 | 869.748   | 2395.677  | NM_002954 | 62845.332 | 55317.527 | NM_005022 | 750.225   |
| AB012643  | 18941.242 | 15858.635 | NM_016572 | 275.757   | 1042.904  | NM_003564 | 929.671   |
| AB023170  | 3071.939  | 3087.232  | NM_000027 | 1047.954  | 898.244   | AF317516  | 1247.173  |
| NM_014153 | 21153.943 | 18991.383 | NM_001824 | 982.402   | 592.759   | NM_002581 | 516.569   |
| NM_002296 | 21511.205 | 16917.559 | NM_017548 | 23624.598 | 25012.207 | S78203    | 622.264   |
| NM_000414 | 9189.89   | 7136.472  | AF134802  | 1122.958  | 959.201   | NM_016208 | 3955.302  |
| NM_018845 | 2022.976  | 1405.425  | NM_018222 | 1709.564  | 1261.156  | NM_005638 | 5369.35   |
| NM_005505 | 4153.785  | 6716.659  | NM_005740 | 1417.511  | 1583.71   | NM_007235 | 1740.854  |
| AK026964  | 484.669   | 835.027   | NM_004308 | 14320.099 | 11085.885 | NM_007269 | 3085.34   |
| NM_001134 | 2738.931  | 2437.484  | AF112366  | 1676.734  | 1340.985  | AK026014  | 1477.772  |
| NM_016016 | 1705.459  | 4880.258  | NM_004274 | 1490.162  | 1695.634  | NM_004298 | 1498.384  |
| NM_020407 | 1497.455  | 1294.872  | AK024002  | 3297.935  | 2605.543  | NM_001232 | 297.869   |
| AF118274  | 4911.154  | 4440.015  | NM_020399 | 4651.57   | 3867.069  | AB007857  | 355.686   |
| NM_018344 | 2710.753  | 1493.469  | AB011117  | 1255.106  | 953.383   | NM_004997 | 5691.775  |
| NM_000079 | 8769.187  | 8004.392  | AF060935  | 1461.106  | 1122.238  | NM_005567 | 2489.08   |
| NM_004774 | 5515.651  | 6430.366  | D83778    | 607.665   | 925.605   | NM_005216 | 2879.091  |
| NM_005234 | 5034.558  | 6100.209  | NM_004264 | 1539.825  | 1232.095  | NM_003965 | 953.91    |
| AB002316  | 974.205   | 480.463   | AK024788  | 1509.278  | 1124.88   | NM_004584 | 2064.484  |
| NM_018990 | 3252.305  | 922.76    | AK022696  | 3299.086  | 2543.833  | X15183    | 37023.262 |
| NM_013363 | 996.662   | 1134.576  | NM_001206 | 1178.329  | 1635.889  | AK023618  | 1082.18   |
| NM_000947 | 958.773   | 667.555   | NM_005016 | 1185.827  | 1227.229  | NM_001492 | 364.415   |
| AL096750  | 21776.563 | 25192.619 | NM_014469 | 1746.456  | 3357.515  | AB012643  | 20682.248 |
| NM_016061 | 5776.808  | 2575.379  | NM_014852 | 3640.801  | 3466.764  | AB023170  | 1068.194  |
| NM_016062 | 25499.492 | 30099.398 | NM_000344 | 12718.56  | 17817.646 | NM_014153 | 8250.418  |
| NM_004153 | 2427.592  | 3389.758  | AF248650  | 2144.748  | 1930.397  | NM_002296 | 8723.847  |
| AK024740  | 1888.226  | 2210.24   | S74678    | 25286.586 | 26055.012 | NM_000414 | 2011.571  |
| AF078164  | 7897.031  | 9360.854  | NM_001358 | 23406.713 | 16077.374 | NM_018845 | 1762.403  |
| NM_019049 | 2219.712  | 3298.705  | NM_004836 | 6668.286  | 5842.896  | NM_005505 | 761.002   |
| NM_005447 | 779.965   | 484.891   | AB037751  | 3304.531  | 2321.906  | NM_001134 | 595.972   |
| NM_012413 | 394.641   | 515.23    | S79281    | 2272.665  | 2810.156  | NM_016016 | 158.005   |
| AF130101  | 873.973   | 792.935   | AK025585  | 1742.325  | 1739.172  | NM_020407 | 668.738   |
| NM_004656 | 4874.551  | 3815.589  | NM_001414 | 5198.532  | 3210.818  | AF118274  | 3324.639  |
| AF086122  | 2018.502  | 2573.942  | D16891    | 1361.199  | 1230.859  | NM_018344 | 1117.035  |
| AK024397  | 11273.161 | 13845.329 | NM_017760 | 1984.924  | 1899.51   | NM_000079 | 4221.676  |
| AF073931  | 895.336   | 855.557   | NM_015936 | 3062.758  | 3080.828  | NM_000083 | 813.002   |
| NM_018047 | 1801.351  | 1803      | AL109698  | 1340.84   | 1024.843  | AL110245  | 2721.949  |
| NM_005022 | 1588.742  | 1261.883  | AF217980  | 5428.016  | 5030.086  | NM_005628 | 5950.376  |
| NM_001288 | 1562.526  | 1814.616  | AL117461  | 2646.827  | 1474.571  | NM_016605 | 15133.362 |
| NM_003564 | 2557.635  | 3148.817  | NM_016499 | 2161.69   | 1850.79   | X74609    | 10760.998 |
| AK023414  | 572.134   | 745.174   | AF104921  | 13503.62  | 8875.016  | AB002316  | 770.656   |

|           |           |           |           |           |           |           |           |
|-----------|-----------|-----------|-----------|-----------|-----------|-----------|-----------|
| NM_002581 | 1491.596  | 1802.848  | NM_000126 | 22931.59  | 17316.041 | NM_01899C | 1895.203  |
| AI417964  | 1081.849  | 1456.099  | BF239974  | 1692.872  | 1650.657  | NM_013363 | 583.483   |
| J03571    | 9606.059  | 7068.994  | NM_000104 | 2080.014  | 564.432   | NM_000947 | 1954.619  |
| T57791    | 3119.848  | 1890.441  | NM_005015 | 10983.521 | 12092.761 | AL096750  | 8429.363  |
| X56134    | 1858.075  | 1431.017  | NM_004255 | 46995.414 | 36666.582 | NM_016061 | 4390.066  |
| NM_001456 | 1407.533  | 1883.683  | NM_000269 | 26902.611 | 29672.49  | NM_016062 | 9323.806  |
| H44784    | 976.544   | 898.939   | AF182288  | 1066.032  | 1887.223  | AF078164  | 829.519   |
| AI421041  | 24432.824 | 31946.406 | NM_004491 | 2802.564  | 1376.747  | NM_019049 | 398.95    |
| BI759091  | 2850.193  | 4231.507  | L14787    | 585.154   | 605.018   | AF130101  | 1242.209  |
| BG685843  | 4550.154  | 7283.705  | AK026810  | 2625.171  | 2204.113  | NM_004656 | 1829.83   |
| BI490011  | 4080.771  | 3261.248  | NM_015629 | 7401.731  | 5477.584  | AF071569  | 1404.188  |
| AF035771  | 1694.751  | 2100.557  | AF218032  | 4100      | 2938.964  | NM_002269 | 1299.12   |
| N20475    | 19838.299 | 10619.346 | NM_017542 | 8178.205  | 6854.451  | J04948    | 521.51    |
| BI199286  | 1216.146  | 1245.568  | NM_004182 | 9620.935  | 8951.471  | NM_018043 | 528.24    |
| AA026626  | 2701.838  | 3028.527  | NM_018419 | 1617.553  | 1591.185  | AK022564  | 44738.93  |
| H61726    | 2125.674  | 2091.111  | BE379399  | 947.156   | 815.989   | NM_003564 | 1108.873  |
| NM_004997 | 21549.27  | 21556.479 | NM_015877 | 1523.481  | 1719.188  | AF317516  | 1085.146  |
| NM_005923 | 6569.911  | 4005.887  | AL117598  | 1772.498  | 1211.747  | NM_002581 | 447.386   |
| NM_003465 | 1626.633  | 1397.546  | AL109670  | 2142.559  | 1835.888  | AI417964  | 367.238   |
| AF289028  | 900.344   | 960.892   | AF085831  | 1040.043  | 433.093   | J03571    | 9856.665  |
| NM_005567 | 4062.2    | 5241.717  | AL832149  | 4081.622  | 3324.505  | T57791    | 1844.858  |
| NM_005216 | 10471.271 | 14828.64  | AK022839  | 3576.004  | 2925.889  | AI421041  | 4674.068  |
| NM_006626 | 889.835   | 470.247   | NM_01835C | 1252.647  | 822.83    | BG685843  | 876.531   |
| NM_003965 | 1487.076  | 577.38    | AK025839  | 1570.463  | 501.82    | AF035771  | 735.662   |
| NM_004584 | 2803.854  | 1944.992  | NM_003946 | 1964.624  | 1776.86   | AA026626  | 901.862   |
| X15183    | 28252.363 | 27868.775 | AB045292  | 1738.229  | 1310.331  | H61726    | 642.533   |
| AK023618  | 2356.85   | 1651.821  | AK022998  | 1234.336  | 1176.921  | NM_004774 | 2071.007  |
| AF212842  | 358.69    | 5381.277  | AK025699  | 13227.485 | 12041.024 | NM_005234 | 1236.952  |
| M27544    | 5250.774  | 5030.285  | AF147316  | 739.002   | 568.065   | NM_005216 | 3051.213  |
| NM_002258 | 1361.977  | 1327.361  | NM_018024 | 6003.407  | 7169.591  | NM_004584 | 1470.061  |
| NM_001118 | 2181.488  | 2711.374  | AK026783  | 899.698   | 839.494   | AK023618  | 1663.846  |
| AL133097  | 10997.495 | 9879.614  | AK021814  | 1424.056  | 1141.882  | AF212842  | 363.108   |
| NM_001165 | 2654.647  | 2453.209  | AF088035  | 1879.898  | 1860.156  | M27544    | 1138.044  |
| U90908    | 785.248   | 760.708   | NM_018092 | 3885.564  | 2939.514  | NM_001118 | 902.005   |
| NM_006458 | 8745.553  | 7894.963  | NM_005842 | 7194.253  | 7120.739  | AL133097  | 1886.051  |
| NM_014459 | 757.972   | 912.814   | AF147419  | 2021.647  | 2006.797  | NM_001165 | 571.924   |
| NM_004093 | 1368.531  | 1323.583  | AK024280  | 840.883   | 995.199   | NM_001381 | 50738.832 |
| NM_001449 | 6876.054  | 8002.371  | NM_014797 | 3895.811  | 3729.625  | NM_004093 | 168.039   |
| NM_016016 | 2061.744  | 4726.804  | AL831841  | 4397.667  | 4333.542  | NM_001449 | 2199.817  |
| NM_020407 | 1568.977  | 1682.146  | AL110165  | 4746.817  | 3540.86   | AF086122  | 1097.167  |
| AF118274  | 4893.347  | 3995.287  | AL117652  | 1362.944  | 802.708   | AK024397  | 5869.517  |
| NM_018344 | 1693.54   | 749.937   | AL050168  | 1310.797  | 1595.154  | AF073931  | 788.253   |
| NM_000079 | 8370.145  | 8130.453  | AL117447  | 956.117   | 579.691   | NM_018047 | 667.28    |
| NM_000083 | 900.124   | 1402.192  | AL122122  | 4738.141  | 3749.964  | NM_005022 | 1117.859  |
| AL110245  | 2372.824  | 1659.483  | AK000122  | 6221.019  | 7017.948  | NM_000083 | 529.384   |
| NM_005628 | 7052.424  | 8829.867  | AK023159  | 4015.616  | 2699.435  | AL110245  | 2256.031  |
| NM_016605 | 24395.727 | 13122.221 | AK001091  | 2803.188  | 3017.679  | NM_005628 | 5322.21   |
| S78203    | 999.612   | 417.704   | AF086428  | 1280.43   | 1086.502  | NM_004172 | 428.743   |
| NM_016208 | 12456.91  | 13058.091 | AK025310  | 1313.423  | 1393.041  | S78203    | 637.375   |
| NM_001635 | 503.656   | 531.52    | AL049353  | 1300.352  | 923.743   | NM_016208 | 4062.236  |
| NM_005638 | 18205.285 | 19054.859 | NM_014896 | 546.255   | 672.618   | NM_005638 | 9434.875  |
| NM_007235 | 6328.595  | 23203.887 | AF009269  | 1391.542  | 1538.297  | NM_007235 | 1724.024  |
| NM_007269 | 7716.422  | 5491.811  | NM_015883 | 1741.506  | 1182.973  | NM_007269 | 2590.794  |

|           |           |           |           |           |           |           |           |
|-----------|-----------|-----------|-----------|-----------|-----------|-----------|-----------|
| NM_014845 | 2517.696  | 2013.156  | AF056429  | 882.378   | 743.81    | AK026014  | 709.201   |
| NM_004298 | 3556.04   | 3459.405  | AF070547  | 2146.315  | 2670.048  | NM_014845 | 576.34    |
| NM_001232 | 1602.26   | 2439.477  | AK001110  | 10386.7   | 9649.638  | NM_004298 | 1732.768  |
| NM_007181 | 1486.95   | 769.79    | AK021652  | 1650.519  | 1382.764  | NM_001232 | 969.889   |
| AB007857  | 972.922   | 1106.289  | AK021859  | 1974.384  | 1549.706  | AB007857  | 334.804   |
| NM_019049 | 2132.578  | 2499.2    | AK025826  | 1474.552  | 1411.752  | NM_004997 | 8512.686  |
| NM_005447 | 1131.165  | 1131.801  | AK026439  | 6153.6    | 4575.464  | NM_005923 | 2675.421  |
| AF130101  | 742.453   | 787.202   | AK025278  | 1793.843  | 1096.333  | NM_005567 | 3050.956  |
| NM_004656 | 3073.197  | 2071.966  | AY007163  | 2713.004  | 2614.071  | AF071569  | 1476.502  |
| AF071569  | 2178.424  | 1652.619  | NM_006236 | 36557.766 | 39535.988 | NM_002269 | 1380.26   |
| NM_002269 | 1973.703  | 2672.714  | AK023734  | 833.618   | 1173.673  | J04948    | 804.418   |
| J04948    | 1397.58   | 1185.206  | D17265    | 32099.648 | 22962.965 | NM_018043 | 513.039   |
| NM_018043 | 610.647   | 813.965   | AF085827  | 719.028   | 995.361   | AK022564  | 39360.094 |
| AK022564  | 70143.477 | 61561.945 | Y08266    | 7910.299  | 7792.301  | NM_001492 | 342.808   |
| NM_001492 | 695.263   | 1530.618  | AK002171  | 5963.596  | 3733.226  | AB012643  | 15120.688 |
| AB012643  | 13042.109 | 10016.785 | AJ002572  | 2806.28   | 2374.322  | AB023170  | 1077.026  |
| AB023170  | 2628.995  | 2297.113  | AK026897  | 5296.388  | 5212.039  | NM_014153 | 7956.384  |
| NM_014153 | 22708.074 | 22199.604 | AB037861  | 7329.238  | 8451.873  | NM_002296 | 9089.483  |
| NM_002296 | 22433.777 | 19427.191 | AK021887  | 2036.779  | 2292.439  | NM_000414 | 1715.348  |
| NM_000414 | 10150.991 | 9487.464  | AF086180  | 11687.373 | 11309.746 | NM_018845 | 1885.09   |
| AL133033  | 618.896   | 949.608   | AK022135  | 1912.753  | 1485.006  | NM_005505 | 877.881   |
| NM_018845 | 7905.229  | 6704.333  | AK022898  | 1109.976  | 1134.847  | NM_001134 | 808.475   |
| NM_005505 | 3865.179  | 6227.045  | NM_017559 | 6124.773  | 5429.455  | AK023497  | 731.609   |
| AK026964  | 512.904   | 881.687   | NM_003547 | 1593.087  | 816.152   | NM_016016 | 342.995   |
| NM_001134 | 3617.568  | 3106.723  | AL049980  | 2989.144  | 2303.883  | NM_020407 | 791.308   |
| NM_006695 | 1742.874  | 1094.446  | AF070529  | 1161.072  | 788.121   | AF118274  | 3830.297  |
| NM_004815 | 2179.987  | 2079.728  | AK022978  | 1675.027  | 1137.425  | NM_018344 | 1185.324  |
| AB046820  | 1276.992  | 1802.221  | AK021447  | 2114.072  | 2255.754  | NM_000079 | 4336.701  |
| AK025922  | 642.3     | 429.141   | AK025096  | 1024.777  | 797.606   | NM_004774 | 1497.165  |
| NM_006375 | 1138.228  | 898.534   | L31955    | 322.95    | 517.32    | NM_005234 | 1462.494  |
| AF123659  | 3306.58   | 3264.576  | AF131774  | 1118.008  | 938.469   | X74609    | 15369.659 |
| X74609    | 35988.23  | 39549.645 | AK025793  | 550.134   | 521.558   | AB002316  | 968.81    |
| AB002316  | 931.329   | 593.362   | AK000151  | 700.432   | 641.62    | NM_018990 | 1880.074  |
| NM_018990 | 3167.208  | 1290.011  | D17052    | 1478.68   | 1369.331  | NM_013363 | 346.595   |
| NM_013363 | 1300.937  | 1948.981  | D28378    | 44262.605 | 42569.66  | NM_000947 | 1988.054  |
| NM_000947 | 4942.452  | 5271.773  | M64700    | 1695.859  | 1074.94   | AL096750  | 11150.546 |
| AL096750  | 20789.355 | 36462.133 | AF111846  | 632.752   | 389.581   | NM_016061 | 4721.599  |
| NM_016061 | 11911.492 | 4780.557  | NM_001267 | 754.342   | 810.931   | NM_016062 | 2825.544  |
| NM_016062 | 21573.111 | 24576.408 | L41143    | 5419.144  | 3681.902  | NM_004153 | 818.684   |
| NM_004153 | 2334.451  | 3205.634  | NM_005331 | 19945.215 | 22652.539 | AK024740  | 719.655   |
| AK024740  | 1883.173  | 2276.579  | NM_014111 | 2260.434  | 2324.592  | AF078164  | 1106.486  |
| AF078164  | 7978.909  | 9734.997  | AJ008129  | 1886.316  | 1369.947  | NM_019049 | 642.13    |
| NM_003628 | 1267.184  | 1722.518  | AF161451  | 3114.527  | 1821.76   | NM_005447 | 2340.606  |
| NM_004648 | 3696.354  | 2416.479  | X02067    | 28706.203 | 11858.397 | NM_004656 | 1827.698  |
| AF029325  | 1737.146  | 1298.842  | U92013    | 18844.535 | 10199.544 | NM_005576 | 1427.421  |
| AF097021  | 694.115   | 505.695   | AK023965  | 2014.72   | 1857.967  | AF086122  | 1117.162  |
| NM_001365 | 1227.343  | 495.464   | AK026211  | 1085.616  | 1155.253  | AK024397  | 4658.117  |
| NM_000677 | 4952.106  | 4529.561  | X58968    | 2336.188  | 2505.873  | AF073931  | 790.16    |
| BF308728  | 1403.457  | 1563.521  | U92020    | 7357.653  | 3874.476  | NM_018047 | 541.21    |
| NM_013280 | 640.335   | 2232.657  | AL117542  | 1371.38   | 1377.979  | NM_005022 | 797.13    |
| NM_018315 | 15578.363 | 17419.793 | AL109712  | 11067.079 | 8888.929  | NM_001288 | 461.381   |
| AF051151  | 1134.482  | 1006.933  | X04215    | 662.647   | 928.856   | NM_003564 | 1380.905  |
| AF142421  | 6907.765  | 7886.471  | NM_017782 | 3253.792  | 3226.112  | AF317516  | 1090.992  |

|           |           |           |           |           |           |           |           |
|-----------|-----------|-----------|-----------|-----------|-----------|-----------|-----------|
| AB037836  | 9090.655  | 6098.007  | NM_018149 | 1897.181  | 1733.641  | NM_002581 | 465.487   |
| NM_014247 | 1858.687  | 1052.91   | NM_018468 | 16107.957 | 10970.478 | J03571    | 9002.72   |
| NM_018695 | 65956.563 | 58081.148 | Z36814    | 1299.801  | 895.708   | T57791    | 1523.068  |
| NM_006343 | 1268.665  | 1453.04   | D17045    | 849.999   | 366.44    | X56134    | 548.484   |
| NM_014786 | 1667.222  | 1895.521  | AK000827  | 2858.618  | 2954.641  | AI421041  | 5979.567  |
| NM_001423 | 1807.045  | 1376.02   | NM_002503 | 43115.793 | 40627.559 | BI759091  | 776.466   |
| NM_015716 | 6432.105  | 7859.119  | NM_005319 | 55199.391 | 3862.673  | BG685843  | 1490.745  |
| NM_003955 | 1188.343  | 742.785   | NM_019058 | 733.579   | 927.744   | BI490011  | 831.966   |
| NM_005739 | 697.493   | 488.809   | AK022351  | 9012.703  | 1432.87   | N20475    | 4277.463  |
| AB023166  | 1660.956  | 1504.655  | S74319    | 524.485   | 384.59    | BI199286  | 726.497   |
| AB028966  | 10609.321 | 9487.364  | AK022059  | 885.916   | 1228.047  | AA026626  | 975.678   |
| NM_005758 | 1897.407  | 2930.624  | NM_020194 | 6087.434  | 3515.847  | NM_004997 | 7375.491  |
| AF044774  | 1195.964  | 1069.449  | AF038183  | 10474.391 | 12586.793 | NM_005923 | 1950.74   |
| NM_005402 | 4095.424  | 3793.754  | NM_017882 | 1988.521  | 1281.027  | NM_003465 | 466.983   |
| AF055027  | 1392.081  | 1612.542  | NM_003521 | 3822.731  | 621.422   | NM_005567 | 3494.946  |
| U63541    | 876.97    | 865.189   | CY3Cy5    | 9484.159  | 596.413   | NM_005216 | 3408.879  |
| AF055006  | 7758.602  | 7900.265  | J03571    | 21367.064 | 17254.367 | NM_004584 | 1544.144  |
| NM_004935 | 2230.524  | 1975.487  | T57791    | 3513.514  | 3070.654  | AK023618  | 1647.947  |
| NM_006951 | 1676.135  | 1557.425  | X56134    | 1249.789  | 1180.768  | AF212842  | 428.932   |
| NM_001896 | 3851.505  | 4429.56   | NM_001456 | 1019.222  | 1280.416  | NM_018404 | 616.873   |
| NM_014023 | 1283.543  | 526.78    | H44784    | 383.424   | 974.605   | M27544    | 2295.522  |
| NM_002745 | 10902.632 | 7416.511  | AI421041  | 28563.848 | 26552.779 | NM_001118 | 978.754   |
| D26488    | 2927.255  | 2734.299  | BI759091  | 2351.828  | 4701.651  | AL133097  | 1261.012  |
| NM_001432 | 1585.321  | 1276.262  | BG685843  | 3050.241  | 8508.985  | NM_001165 | 410.582   |
| AB014554  | 2281.005  | 1728.177  | BI490011  | 2135.718  | 3475.121  | NM_001381 | 67154.43  |
| AF097431  | 8464.98   | 12001.805 | AF035771  | 898.186   | 1701.334  | NM_006458 | 2587.878  |
| NM_001978 | 427.527   | 801.674   | N20475    | 5117.427  | 7587.737  | NM_001387 | 669.002   |
| NM_002579 | 1113.6    | 1540.975  | BI199286  | 565.015   | 703.748   | NM_016016 | 265.952   |
| NM_004221 | 1225.007  | 1384.539  | AA026626  | 839.812   | 154.483   | NM_020407 | 991.474   |
| NM_003019 | 1320.927  | 985.139   | H61726    | 768.875   | 167.185   | AF118274  | 3231.166  |
| AL109790  | 1002.931  | 817.512   | NM_004774 | 4894.842  | 2323.818  | NM_018344 | 1145.645  |
| NM_006923 | 1683.773  | 1170.731  | SR5       | 4184.36   | 3990.127  | NM_000079 | 4314.4    |
| AF119889  | 13010.498 | 9708.035  | SR7       | 4472.646  | 32291.916 | NM_000083 | 614.214   |
| AK025645  | 2100.215  | 2073.522  | SR9       | 16302.93  | 3608.436  | AL110245  | 3003.246  |
| AK023266  | 1294.225  | 1227.455  | CY3Cy5    | 8961.954  | 937.801   | NM_005628 | 6430.444  |
| NM_006814 | 7268.247  | 7531.93   | AF212842  | 1209.282  | 3400.689  | NM_004172 | 362.922   |
| NM_005067 | 2505.104  | 4461.262  | NM_018404 | 482.039   | 667.297   | S78203    | 484.014   |
| AB007899  | 808.8     | 585.415   | M27544    | 3598.171  | 3909.984  | NM_016208 | 4938.856  |
| NM_002817 | 3640.597  | 2916.604  | NM_001118 | 1219.51   | 1478.029  | NM_005638 | 7481.259  |
| NM_002801 | 14069.631 | 9713.571  | AL133097  | 4583.973  | 7777.511  | NM_007235 | 1823.556  |
| BE905810  | 1175.105  | 1031.674  | NM_006458 | 4218.546  | 8833.191  | NM_007269 | 1242.726  |
| NM_014780 | 1963.86   | 2616.253  | NM_014459 | 343.111   | 1415.391  | NM_014845 | 582.052   |
| NM_018116 | 461.314   | 833.976   | NM_004093 | 887.015   | 822.283   | NM_004298 | 1609.506  |
| NM_016063 | 1810.366  | 2521.745  | NM_001449 | 3827.887  | 5264.681  | NM_019049 | 1007.653  |
| U82987    | 4172.956  | 3610.588  | AF086122  | 1734.135  | 497.581   | NM_004656 | 1430.989  |
| NM_005732 | 2634.173  | 3082.917  | AK024397  | 9326.074  | 4148.63   | AF071569  | 1847.634  |
| NM_014890 | 1146.525  | 929.414   | AF073931  | 1091.288  | 597.31    | NM_002269 | 1575.989  |
| AK056481  | 3714.282  | 3563.977  | NM_018047 | 883.415   | 934.901   | J04948    | 1245.925  |
| NM_005433 | 1043.948  | 1245.725  | NM_003564 | 1448.34   | 1862.83   | NM_018043 | 574.427   |
| L35035    | 2967.394  | 4121.252  | NM_002581 | 1073.558  | 1334.004  | AK022564  | 51964.422 |
| NM_007152 | 2392.094  | 3009.152  | AI417964  | 667.08    | 1347.732  | NM_001492 | 217.792   |
| NM_018293 | 1136.119  | 1082.359  | S78203    | 1995.079  | 1319.147  | AB012643  | 16658.766 |
| NM_001938 | 5257.555  | 4993.777  | NM_016208 | 12919.993 | 9031.544  | AB023170  | 1242.45   |



|           |           |           |           |           |           |           |           |
|-----------|-----------|-----------|-----------|-----------|-----------|-----------|-----------|
| AF230808  | 2971.162  | 2263.026  | NM_005638 | 20442.504 | 13856.271 | NM_014153 | 6628.57   |
| U18910    | 1069.016  | 867.235   | NM_007235 | 6521.655  | 15739.297 | NM_002296 | 8285.117  |
| NM_005238 | 8161.857  | 3669.839  | NM_007269 | 5107.297  | 6726.8    | NM_000414 | 2151.67   |
| AK075306  | 5247.77   | 4829.45   | AK026014  | 3889.047  | 4249.165  | NM_018845 | 1493.689  |
| AB037820  | 891.058   | 905.664   | NM_004298 | 4628.772  | 6135.947  | NM_005505 | 778.511   |
| NM_001280 | 8806.325  | 12568.715 | NM_001232 | 2298.901  | 3225.061  | NM_001134 | 2120.947  |
| AB019572  | 62619.328 | 63642.875 | NM_007181 | 845.444   | 1075.325  | NM_006695 | 1185.099  |
| NM_002948 | 59536.961 | 50842.492 | NM_004997 | 13769.492 | 9254.188  | NM_004815 | 665.865   |
| AF113008  | 2144.835  | 2573.495  | NM_005923 | 2392.262  | 974.784   | NM_004147 | 513.225   |
| NM_020217 | 3022.42   | 3649.661  | NM_003465 | 963.042   | 76.143    | AB037743  | 1998.106  |
| NM_018135 | 68609.328 | 66477.047 | NM_005567 | 5883.518  | 7724.008  | AB046820  | 1207.098  |
| AF205435  | 19932.25  | 19996.1   | NM_005216 | 6202.249  | 7058.354  | AK025922  | 424.273   |
| AF085983  | 1933.352  | 1682.35   | X15183    | 57992.414 | 57503.688 | NM_014646 | 284.64    |
| AF052105  | 850.803   | 1137.456  | AK023618  | 2598.233  | 2738.387  | NM_006375 | 612.656   |
| AK001204  | 6225.68   | 4932.167  | NM_001492 | 1417.761  | 2244.552  | AF123659  | 1727.798  |
| M15465    | 4748.422  | 3311.537  | AB012643  | 30399.756 | 24885.549 | X74609    | 15435.837 |
| J03866    | 4341.761  | 6380.083  | AB023170  | 1551.258  | 2056.299  | AB002316  | 1057.012  |
| AK022836  | 3894.904  | 3170.227  | NM_014153 | 13583.63  | 11176.486 | NM_018990 | 1784.451  |
| NM_012343 | 12999.978 | 10402.732 | NM_002296 | 29289.002 | 10481.358 | NM_013363 | 931.488   |
| NM_000397 | 840.636   | 889.145   | NM_000414 | 5818.099  | 6158.281  | NM_000947 | 782.277   |
| NM_002046 | 70162.125 | 62524.539 | NM_018845 | 3654.617  | 6534.564  | AL096750  | 10998.508 |
| AL157461  | 598.135   | 1214.103  | NM_005505 | 3671.163  | 5849.206  | NM_016061 | 2013.036  |
| BF217340  | 480.147   | 997.907   | AK026964  | 1374.883  | 1058.512  | NM_016062 | 5283.203  |
| NM_003078 | 1804.504  | 2907.728  | NM_001134 | 2357.885  | 3495.952  | NM_004153 | 890.848   |
| AL137703  | 1659.793  | 1496.94   | NM_016016 | 902.488   | 2435.697  | AK024740  | 878.273   |
| NM_001809 | 4223.447  | 7411.679  | NM_020407 | 820.351   | 227.687   | AF078164  | 2009.766  |
| AL117477  | 2007.989  | 2907.761  | AF118274  | 6428.09   | 3861.864  | NM_004648 | 1222.725  |
| NM_012107 | 4353.624  | 6265.536  | NM_018344 | 1813.194  | 1845.841  | AF029325  | 1543.056  |
| AB037760  | 2685.388  | 3079.687  | NM_000079 | 8469.007  | 9709.141  | AF097021  | 541.985   |
| NM_015680 | 4422.843  | 2382.052  | NM_000083 | 722.842   | 1177.447  | NM_001365 | 2481.965  |
| M22637    | 3540.323  | 7265.596  | AL110245  | 3921.284  | 3753.158  | NM_000677 | 4545.611  |
| NM_018364 | 6769.524  | 5102.745  | NM_005628 | 9558.549  | 12539.779 | BF308728  | 582.51    |
| NM_007022 | 5428.946  | 2382.579  | NM_016605 | 26662.199 | 26146.383 | NM_013280 | 360.141   |
| AL049943  | 13181.087 | 11360.01  | X74609    | 26655.469 | 21172.688 | NM_018315 | 7060.749  |
| AL137303  | 2075.234  | 2294.535  | AB002316  | 810.567   | 705.21    | AF051151  | 452.157   |
| AL161980  | 743.651   | 650.466   | NM_018990 | 1353.842  | 510.326   | AF142421  | 5301.729  |
| AB002449  | 1882.477  | 1530.539  | NM_013363 | 555.118   | 893.306   | M84131    | 371.489   |
| NM_016480 | 18509.266 | 14850.173 | NM_000947 | 5200.194  | 5845.006  | AB037836  | 3173.674  |
| AK001489  | 1559.855  | 2619.108  | AL096750  | 37055.461 | 51084.668 | NM_014247 | 716.055   |
| NM_015681 | 2255.846  | 2474.56   | NM_016061 | 8383.408  | 6368.006  | NM_018695 | 37784.207 |
| AF070582  | 2767.481  | 2616.812  | NM_016062 | 24952.982 | 36547.598 | NM_006343 | 358.731   |
| NM_006383 | 6859.684  | 5761.392  | NM_004153 | 2912.869  | 3496.841  | NM_015716 | 2151.445  |
| NM_015400 | 8344.172  | 10439.075 | AK024740  | 1678.719  | 2591.85   | AB023166  | 1019.504  |
| AL359561  | 804.446   | 985.776   | AF078164  | 8077.583  | 5922.634  | AB028966  | 7655.785  |
| AK026464  | 2126.238  | 1607.239  | NM_019049 | 3268.374  | 2193.861  | NM_005758 | 1099.922  |
| AK001362  | 1274.408  | 1699.59   | AF130101  | 848.544   | 1110.915  | AF044774  | 690.043   |
| AK022400  | 2352.436  | 2242.576  | NM_004656 | 3953.91   | 1823.572  | NM_005402 | 1956.363  |
| AF052100  | 1673.567  | 1695.752  | AF071569  | 2893.583  | 1993.759  | AF055027  | 640.686   |
| AL110235  | 4740.192  | 3230.349  | NM_002269 | 2484.128  | 2630.072  | U63541    | 1056.498  |
| U79245    | 1161.275  | 871.782   | J04948    | 1400.193  | 1460.599  | AB033045  | 1540.28   |
| AF086124  | 436.663   | 837.367   | NM_018043 | 897.511   | 1053.019  | AF055006  | 3156.548  |
| AK024820  | 616.032   | 475.936   | AK022564  | 66687.063 | 77363.891 | NM_004935 | 831.912   |
| AB033105  | 1588.873  | 1255.978  | NM_003564 | 1928.416  | 2013.833  | NM_006951 | 1151.796  |

|           |           |           |           |           |           |           |           |
|-----------|-----------|-----------|-----------|-----------|-----------|-----------|-----------|
| AF038192  | 779.212   | 511.434   | AK023414  | 310.858   | 1442.302  | NM_00189€ | 2128.56   |
| AJ001865  | 1166.564  | 1060.605  | AF317516  | 3086.042  | 3028.858  | NM_014023 | 889.553   |
| D61704    | 5368.823  | 6292.233  | NM_002581 | 1042.426  | 1169.754  | NM_002745 | 4022.401  |
| AJ227889  | 1474.831  | 1558.018  | AI417964  | 919.573   | 909.976   | D26488    | 2743.988  |
| Y12017    | 1215.859  | 1136.368  | X56134    | 1180.574  | 2059.003  | NM_001432 | 779.479   |
| X64989    | 1177.223  | 1241.88   | NM_00145€ | 681.027   | 1697.783  | AB014554  | 1027.097  |
| L34409    | 25216.66  | 26543.047 | AI421041  | 26130.195 | 22076.791 | AF097431  | 2340.231  |
| U12210    | 5476.336  | 6693.762  | BI759091  | 1796.678  | 2327.769  | NM_00197€ | 300.311   |
| Z83936    | 957.886   | 1097.035  | BG685843  | 2585.92   | 4498.059  | NM_004221 | 1090.214  |
| L08440    | 2952.712  | 4147.25   | BI490011  | 1622.624  | 1471.441  | NM_00301€ | 1277.455  |
| M73799    | 1914.015  | 1585.781  | N20475    | 3889.575  | 1993.79   | NM_006923 | 2408.685  |
| AF086119  | 1571.371  | 976.359   | AA026626  | 1510.003  | 1246.75   | AF119889  | 5684.522  |
| NM_003782 | 5701.097  | 1016.319  | H61726    | 957.924   | 494.735   | M90657    | 726.378   |
| AL442096  | 1374.573  | 2401.232  | NM_004774 | 5170.898  | 3556.369  | NM_00669€ | 1419.175  |
| NM_01779€ | 1470.493  | 1218.741  | NM_005234 | 4363.95   | 4470.881  | AK025645  | 1967.624  |
| AK000861  | 878.426   | 1105.425  | NM_00521€ | 8237.661  | 8471.896  | AK023266  | 706.81    |
| AK000023  | 1651.227  | 1857.721  | NM_003965 | 545.424   | 609.121   | NM_006814 | 3946.444  |
| AK000901  | 1112.324  | 1010.451  | NM_004584 | 2235.467  | 993.539   | NM_005067 | 1405.982  |
| AK024351  | 2053.293  | 1319.777  | NM_018404 | 631.679   | 1283.379  | AB007899  | 593.16    |
| AK025002  | 3234.376  | 2869.186  | M27544    | 3288.539  | 7850.161  | NM_002817 | 1497.767  |
| AK024011  | 1246.216  | 713.467   | NM_00225€ | 517.619   | 1166.844  | NM_002801 | 8989.542  |
| AL390145  | 1204.075  | 1633.116  | NM_001118 | 1504.996  | 2775.349  | BE905810  | 805.808   |
| AF119913  | 1679.639  | 751.858   | AL133097  | 4201.24   | 4809.692  | NM_01473€ | 3842.089  |
| NM_01834€ | 3139.891  | 1339.933  | NM_00645€ | 2880.167  | 1778.778  | NM_014167 | 1102.71   |
| AF049883  | 1129.449  | 1059.814  | NM_004093 | 757.719   | 467.69    | NM_016063 | 592.472   |
| L10148    | 4389.711  | 3095.185  | NM_00144€ | 4604.677  | 3843.068  | AK056481  | 617.475   |
| AK026247  | 1053.971  | 919.09    | AF086122  | 2562.623  | 1340.617  | NM_005433 | 735.359   |
| AK024893  | 845.315   | 251.199   | AK024397  | 12569.733 | 13136.796 | NM_018118 | 331.338   |
| AL110175  | 1136.523  | 1017.639  | AF073931  | 1181.955  | 927.586   | L35035    | 842.962   |
| AK027156  | 23423.447 | 24811.607 | NM_018047 | 795.681   | 1147.533  | NM_007152 | 1020.556  |
| AL157504  | 5430.058  | 4709.6    | NM_005022 | 1484.051  | 1693.865  | NM_018293 | 932.025   |
| AK023328  | 11260.102 | 9619.412  | NM_00128€ | 771.193   | 893.188   | NM_00193€ | 1382.633  |
| AJ012499  | 70122.266 | 61941.879 | NM_000083 | 845.508   | 1647.259  | AF230808  | 3230.854  |
| AK024900  | 3148.567  | 3613.334  | AL110245  | 5345.397  | 3928.814  | U18910    | 602.654   |
| AF119879  | 35609.234 | 38547.734 | NM_00562€ | 8766.339  | 9554.738  | NM_00523€ | 4458.331  |
| Y10482    | 16903.963 | 14097.69  | S78203    | 1623.222  | 2734.12   | AK075306  | 2761.527  |
| AF086244  | 2322.786  | 1660.21   | NM_01620€ | 13183.748 | 28642.652 | AB037820  | 1021.036  |
| AL161992  | 7403.359  | 5135.357  | NM_001635 | 381.649   | 891.895   | NM_00128€ | 4026.021  |
| AK023551  | 561.815   | 567.682   | NM_00563€ | 21584.977 | 27546.34  | AB019572  | 29285.104 |
| AK023910  | 2092.801  | 1249.044  | NM_007235 | 6289.605  | 14204.144 | NM_00294€ | 7019.946  |
| D16991    | 4445.415  | 3501.379  | NM_00726€ | 4588.085  | 2937.257  | NM_020217 | 614.691   |
| AK023538  | 1400.623  | 1358.093  | AK026014  | 3620.133  | 2372.08   | NM_018135 | 27097.225 |
| NM_01449€ | 279.271   | 610.716   | NM_014845 | 1208.637  | 1433.276  | AF205435  | 1711.585  |
| AK021555  | 835.807   | 838.351   | NM_00429€ | 4102.222  | 1147.83   | AF085983  | 1188.827  |
| AB046765  | 2278.056  | 2627.584  | NM_001232 | 2333.231  | 1032.595  | AF052105  | 503.608   |
| AF133333  | 4325.545  | 5543.673  | NM_007181 | 1069.324  | 287.887   | AK001204  | 3686.889  |
| NM_01836€ | 2971.183  | 2024.133  | AB007857  | 743.174   | 697.314   | M15465    | 4953.882  |
| NM_004881 | 12642.582 | 11421.587 | NM_004997 | 16498.326 | 11826.04  | J03866    | 1854.622  |
| U94903    | 1505.185  | 1063.58   | NM_005923 | 4289.161  | 2955.813  | AK022836  | 872.073   |
| NM_005155 | 12832.431 | 11248.408 | NM_003465 | 1021.816  | 622.122   | NM_012343 | 10952.797 |
| NM_019095 | 7998.41   | 9887.462  | NM_005567 | 7725.335  | 9235.132  | NM_00307€ | 376.532   |
| U80764    | 14694.455 | 15500.095 | AF071569  | 2735.633  | 1754.172  | AL137703  | 1055.166  |
| AB020684  | 6964.158  | 6822.824  | NM_00226€ | 3189.362  | 2451.928  | NM_00180€ | 2053.247  |

|           |           |           |           |           |           |           |           |
|-----------|-----------|-----------|-----------|-----------|-----------|-----------|-----------|
| AF077036  | 52840.75  | 54480.18  | J04948    | 1878.784  | 1448.843  | NM_012107 | 871.992   |
| NM_020421 | 1143.122  | 1440.072  | NM_018043 | 976.684   | 674.795   | AB037760  | 558.826   |
| D17094    | 2087.057  | 1482.342  | AK022564  | 59933.613 | 61672.309 | NM_01568C | 788.383   |
| L37690    | 9385.477  | 9731.711  | NM_001492 | 1487.532  | 2609.732  | M22637    | 712.227   |
| D61707    | 1140.894  | 972.078   | AB012643  | 22369.566 | 24272.428 | NM_018364 | 3475.689  |
| AK021610  | 3209.739  | 1918.965  | AB023170  | 1773.536  | 4339.28   | NM_00677E | 407.732   |
| Z36835    | 5524.903  | 6942.396  | NM_014153 | 15070.197 | 23194.273 | NM_007022 | 4121.919  |
| AK023767  | 7706.312  | 9391.057  | NM_002296 | 29911.566 | 15782.602 | AL049943  | 15995.116 |
| AF084516  | 794.303   | 1141.865  | NM_000414 | 3907.269  | 4957.456  | AL137303  | 734.932   |
| AL137554  | 684.375   | 917.069   | NM_018845 | 3331.51   | 3811.396  | AL355708  | 399.35    |
| AJ001907  | 1298.122  | 1414.916  | NM_005505 | 3933.119  | 1741.055  | AL161980  | 598.458   |
| M32220    | 7237.316  | 9053.527  | NM_001134 | 2563.369  | 2652.862  | AB002449  | 615.795   |
| D17188    | 9184.438  | 23912.822 | NM_016016 | 916.147   | 3369.046  | AK001489  | 249.915   |
| AJ001432  | 24068.092 | 35070.965 | NM_020407 | 1488.514  | 998.967   | NM_015681 | 2076.752  |
| NM_020435 | 14262.037 | 18613.498 | AF118274  | 8120.202  | 5109.409  | AF070582  | 1771.558  |
| AF052169  | 3208.307  | 2051.826  | NM_018344 | 1510.091  | 1317.074  | NM_006383 | 4608.793  |
| CY3Cy5    | 11492.229 | 581.514   | NM_000079 | 8007.171  | 5955.258  | NM_01540C | 6549.427  |
| BF942101  | 8124.891  | 4992.719  | NM_004774 | 2975.415  | 2562.687  | AL359561  | 1086.415  |
| BI825012  | 24868.162 | 26998.682 | NM_005234 | 2607.16   | 3105.641  | AK026464  | 1761.877  |
| M21574    | 1179.241  | 1163.054  | X74609    | 16004.958 | 19969.527 | AL110235  | 1301.528  |
| BM051302  | 1106.575  | 1799.823  | AB002316  | 895.917   | 981.921   | AB033105  | 829.802   |
| BE314182  | 28273.953 | 29504.635 | NM_01899C | 1139.207  | 723.459   | AJ001865  | 713.45    |
| AI808029  | 2457.634  | 2514.146  | NM_013363 | 656.045   | 1058.53   | X64982    | 914.871   |
| AK097395  | 13678.76  | 11510.345 | NM_000947 | 5121.289  | 4165.112  | D61704    | 7725.441  |
| M12783    | 2178.288  | 2675.192  | AL096750  | 43989.938 | 34826.051 | AJ227889  | 2034.705  |
| AK091535  | 3450.469  | 3058.532  | NM_016061 | 5758.461  | 1378.982  | Y12017    | 727.755   |
| AF085357  | 2256.741  | 3614.638  | NM_016062 | 25904.969 | 13495.502 | X64989    | 967.339   |
| AK092768  | 654.487   | 646.394   | NM_004153 | 3715.155  | 2101.097  | L34409    | 2962.071  |
| NM_003841 | 9827.073  | 12307.601 | AK024740  | 1946.492  | 1765.707  | U12210    | 1146.264  |
| SR8       | 12069.145 | 31513.074 | AF078164  | 9338.368  | 6411.819  | M73799    | 691.995   |
| CY3Cy5    | 10891.572 | 480.275   | NM_019049 | 3902.266  | 2684.833  | AF086119  | 1098.351  |
| NM_014322 | 2931.236  | 2694.974  | AF130101  | 907.016   | 364.947   | NM_003782 | 2610.01   |
| NM_004122 | 3166.512  | 3738.419  | NM_004656 | 4187.468  | 2093.67   | AL442096  | 1468.688  |
| NM_00292E | 8450.779  | 14667.391 | AF086122  | 2294.172  | 1338.308  | AK023299  | 994.378   |
| NM_00016C | 2993.104  | 2920.538  | AK024397  | 16048.057 | 20952.803 | NM_01822E | 1139.494  |
| NM_003301 | 1026.101  | 1382.31   | NM_003564 | 1586.171  | 1718.001  | NM_01779C | 1241.83   |
| NM_000955 | 1778.19   | 2154.966  | AF317516  | 1952.257  | 1890.779  | AK000861  | 756.79    |
| U27768    | 1564.488  | 2439.95   | NM_002581 | 1147.496  | 1433.488  | AK024351  | 1143.766  |
| AF305550  | 5240.682  | 4774.846  | AI417964  | 694.112   | 1078.99   | AK025002  | 2039.406  |
| S73288    | 750.453   | 743.736   | J03571    | 17025.951 | 15734.54  | AK024011  | 629.128   |
| NM_00619E | 2263.079  | 2286.607  | T57791    | 1724.834  | 1293.803  | AF119913  | 971.048   |
| NM_003812 | 1269.539  | 1463.478  | X56134    | 795.143   | 328.608   | NM_01834C | 663.586   |
| NM_000849 | 11987.943 | 7088.55   | AI421041  | 20007.441 | 11701.875 | AF049883  | 407.55    |
| NM_00467E | 2122.907  | 2377.479  | BI759091  | 2114.217  | 2787.681  | L10148    | 2042.418  |
| L10139    | 802.229   | 903.601   | BG685843  | 2571.416  | 4540.121  | AK026247  | 562.313   |
| AA478950  | 2495.886  | 2294.001  | BI490011  | 1552.463  | 1128.042  | AK024893  | 747.102   |
| AB029033  | 14073.757 | 12061.052 | AF035771  | 932.82    | 1296.747  | AL110175  | 1888.835  |
| AF091034  | 4435.073  | 3120.969  | N20475    | 3020.781  | 4557.882  | AK027156  | 4154.127  |
| NM_005301 | 32364.291 | 37749.441 | AA026626  | 1413.226  | 1697.969  | AL157504  | 501.996   |
| NM_004167 | 866.786   | 545.393   | NM_004997 | 18651.674 | 29777.104 | AK023328  | 1215.891  |
| NM_016653 | 2534.745  | 2758.738  | NM_005923 | 4544.51   | 4830.141  | AK026249  | 255.357   |
| AB035124  | 2271.557  | 3602.884  | NM_003465 | 886.865   | 1068.883  | AF119879  | 27223.543 |
| AF060170  | 1016.137  | 1275.7    | NM_005127 | 497.293   | 907.921   | Y10482    | 14488.169 |

|           |           |           |           |           |           |           |           |
|-----------|-----------|-----------|-----------|-----------|-----------|-----------|-----------|
| NM_016602 | 1355.102  | 1085.419  | NM_005567 | 10119.331 | 17821.08  | AF086244  | 1410.133  |
| NM_004409 | 12853.08  | 9968.152  | NM_005216 | 5817.332  | 8623.568  | AL161992  | 4780.348  |
| NM_000383 | 600.726   | 593.026   | NM_004584 | 2049.088  | 1480.084  | AK023551  | 689.54    |
| NM_004633 | 877.793   | 861.805   | X15183    | 51257.496 | 29137.051 | AK023910  | 2330.219  |
| X01394    | 45992.969 | 53708.977 | AK023618  | 2174.266  | 1806.548  | D16991    | 1154.186  |
| NM_000041 | 58100.672 | 53260.406 | AF212842  | 1178.853  | 1807.18   | AK023538  | 1245.809  |
| AB037752  | 7684.646  | 8608.447  | M27544    | 2255.883  | 1971.912  | X77485    | 23477.18  |
| AK024821  | 12690.333 | 8766.109  | AL133097  | 4351.654  | 5565.694  | AB046765  | 874.697   |
| NM_000224 | 4498.656  | 4235.378  | NM_001381 | 46194.957 | 47811.711 | AF133333  | 532.181   |
| NM_014328 | 5592.897  | 4718      | NM_006458 | 2424.313  | 2899.114  | NM_004881 | 11600.273 |
| NM_006414 | 6071.986  | 5688.675  | NM_014459 | 737.703   | 845.645   | U94903    | 2219.651  |
| NM_018479 | 12557.239 | 7963.267  | NM_001449 | 2434.85   | 2864.695  | NM_005155 | 5349.806  |
| NM_014362 | 5504.788  | 3358.91   | NM_016016 | 892.716   | 4252.435  | NM_019095 | 3035.898  |
| NM_018308 | 1979.939  | 1920.309  | NM_020407 | 1240.018  | 1324.464  | U80764    | 5130.615  |
| NM_001832 | 15265.596 | 14721.953 | AF118274  | 10572.474 | 12087.365 | AB020684  | 3525.365  |
| NM_017774 | 9396.819  | 8207.864  | NM_018344 | 1296.899  | 1036.097  | AF077036  | 30831.98  |
| AB037716  | 5104.993  | 4200.189  | NM_000079 | 8311.656  | 7382.114  | NM_020421 | 646.134   |
| NM_004827 | 1261.875  | 1364.647  | NM_000083 | 594.477   | 1598.43   | D17094    | 1925.129  |
| NM_001926 | 2177.249  | 1700.518  | AL110245  | 4234.94   | 4825.288  | L37690    | 11136.295 |
| NM_016297 | 4828.023  | 3894.829  | NM_005628 | 8799.482  | 14523.183 | D61707    | 1490.583  |
| AL137672  | 697.428   | 1193.641  | NM_016605 | 22917.932 | 24923.572 | AK021610  | 2021.342  |
| X64177    | 983.668   | 6304.526  | NM_004172 | 256.756   | 1171.442  | AK023767  | 4932.301  |
| NM_015994 | 4842.432  | 4203.152  | S78203    | 1630.153  | 1570.849  | AJ001907  | 232.317   |
| NM_002235 | 361.841   | 417.926   | NM_016208 | 6078.865  | 4237.849  | D17188    | 579.468   |
| NM_002241 | 809.658   | 613.348   | AK026014  | 4504.931  | 4041.529  | AJ001432  | 1571.376  |
| NM_014065 | 2680.996  | 2426.524  | NM_014845 | 1448.092  | 2515.846  | NM_020435 | 1634.711  |
| NM_005509 | 1216.482  | 1015.719  | NM_004298 | 5994.511  | 7180.638  | AF052169  | 896.261   |
| NM_152747 | 1554.263  | 2007.791  | NM_001232 | 1630.364  | 1597.08   | CY3Cy5    | 7711.917  |
| NM_017415 | 1610.954  | 1632.447  | AB007857  | 819.975   | 1313.555  | BF942101  | 1662.06   |
| NM_001667 | 20832.684 | 27674.146 | NM_001778 | 247.139   | 939.378   | BI825012  | 5515.733  |
| AB046834  | 1111.415  | 901.018   | NM_019049 | 2783.907  | 1913.719  | X03225    | 1304.508  |
| NM_000262 | 3911.92   | 2879.881  | NM_005447 | 522.52    | 453.102   | AK097395  | 4999.59   |
| NM_017831 | 2782.639  | 2948.741  | NM_004656 | 2526.16   | 1229.121  | M12783    | 788.34    |
| AK024393  | 1575.681  | 1352.636  | AF071569  | 2414.254  | 1487.637  | AK091535  | 937.753   |
| AF198444  | 312.415   | 789.025   | J04948    | 1326.968  | 879.843   | AF085357  | 699.855   |
| NM_006345 | 2460.417  | 2881.215  | NM_018043 | 1101.93   | 877.894   | AF296673  | 1482.484  |
| NM_006875 | 2154.15   | 1985.336  | AK022564  | 41448.316 | 45445.625 | NM_080824 | 680.382   |
| D87119    | 2901.61   | 3216.007  | NM_001492 | 816.966   | 1350.239  | SR6       | 2915.589  |
| AF264717  | 1163.255  | 1929.567  | AB012643  | 28358.838 | 24586.76  | SR8       | 9721.372  |
| NM_012260 | 6106.375  | 6929.587  | AB023170  | 1203.139  | 1201.958  | CY3Cy5    | 8924.313  |
| NM_001141 | 1259.917  | 1129.268  | NM_014153 | 10440.159 | 11765.982 | NM_014322 | 972.753   |
| NM_000018 | 9977.901  | 8072.814  | NM_002296 | 28434.947 | 22475.99  | NM_004122 | 688.889   |
| AB028992  | 647.811   | 845.904   | NM_000414 | 7383.924  | 12386.289 | NM_002928 | 1384.39   |
| L10139    | 989.903   | 1126.46   | NM_018845 | 3341.8    | 5631.429  | NM_000160 | 448.645   |
| NM_020470 | 7574.162  | 6721.813  | NM_005505 | 6523.523  | 10988.675 | NM_003301 | 537.535   |
| NM_006574 | 551.165   | 653.056   | NM_001134 | 1170.21   | 1441.397  | AF305550  | 1793.911  |
| AA478950  | 2430.688  | 2353.739  | NM_006695 | 1997.247  | 3263.666  | U66582    | 4477.15   |
| BF942101  | 10008.854 | 6640.595  | NM_004815 | 805.039   | 1301.612  | S73288    | 331.957   |
| M21574    | 1195.966  | 1468.733  | NM_004147 | 1003.25   | 950.03    | NM_006198 | 1423.624  |
| BM051302  | 1259.99   | 1832.415  | AB037743  | 1722.701  | 1265.471  | NM_003812 | 684.743   |
| AI971217  | 666.006   | 1284.789  | AB046820  | 1659.106  | 2342.409  | NM_000849 | 4783.638  |
| X03225    | 3283.815  | 3648.402  | NM_006375 | 897.895   | 577.468   | NM_004678 | 964.327   |
| AK097395  | 11075.597 | 8610.424  | X74609    | 26657.855 | 18331.213 | NM_000950 | 15030.834 |

|           |           |           |           |           |           |           |           |
|-----------|-----------|-----------|-----------|-----------|-----------|-----------|-----------|
| M12783    | 1898.349  | 2599.794  | AB002316  | 729.751   | 1197.902  | NM_005139 | 2046.125  |
| AK091535  | 3241.875  | 3165.866  | NM_013363 | 700.091   | 1076.118  | L10139    | 1019.473  |
| AF085357  | 2621.792  | 4050.573  | NM_000947 | 4919.635  | 4706.404  | NM_006574 | 166.301   |
| AF296673  | 593.736   | 725.66    | NM_016062 | 19524.498 | 22885.945 | AA478950  | 1071.206  |
| NM_080824 | 1856.744  | 1632.233  | NM_004153 | 4889.515  | 5247.065  | AB029033  | 1627.769  |
| NM_018002 | 2898.853  | 4681.744  | AK024740  | 1939.602  | 2967.55   | AF091034  | 1143.815  |
| AB002340  | 4871.306  | 3552.189  | AF078164  | 7332.22   | 6316.807  | NM_005301 | 6907.071  |
| NM_000224 | 4925.937  | 4968.991  | NM_003628 | 1418.263  | 1947.23   | NM_016653 | 613.625   |
| NM_014328 | 5850.58   | 5457.517  | NM_004648 | 1437.861  | 936.341   | AB035124  | 766.526   |
| NM_006414 | 6165.444  | 6747.495  | AF029325  | 1396.93   | 1188.316  | NM_016602 | 721.208   |
| NM_004122 | 3240.832  | 4637.046  | NM_005704 | 843.38    | 1602.391  | NM_004409 | 6935.028  |
| NM_002928 | 9347.273  | 22823.898 | NM_001365 | 1949.511  | 2032.637  | AK023397  | 626.958   |
| NM_000955 | 1141.456  | 1573.261  | NM_000677 | 2560.108  | 2198.573  | NM_001725 | 1001.624  |
| U27768    | 952.19    | 1421.648  | BF308728  | 1071.876  | 809.776   | NM_004079 | 29231.098 |
| NM_001742 | 217.779   | 918.765   | NM_013280 | 1019.076  | 1335.455  | NM_004633 | 438.652   |
| AF305550  | 3311.443  | 3241.244  | NM_018315 | 9457.23   | 8735.396  | X01394    | 12332.021 |
| U66582    | 13586.621 | 17977.76  | AF142421  | 5558.693  | 6029.713  | NM_000041 | 30526.041 |
| S73288    | 1135.634  | 955.372   | AB037836  | 3938.85   | 1525.373  | NM_002984 | 5308.15   |
| NM_003812 | 1546.368  | 1849.639  | NM_018695 | 45589.039 | 47472.426 | AB037752  | 3630.756  |
| NM_000849 | 8463.151  | 3652.386  | NM_006343 | 803.597   | 1125.535  | AK024821  | 11648.93  |
| NM_004678 | 2182.615  | 1719.213  | NM_015716 | 6263.517  | 10588.94  | NM_000224 | 3975.853  |
| NM_000950 | 18067.904 | 16475.191 | AB023166  | 1128.077  | 1061.806  | NM_014328 | 2125.189  |
| AK025772  | 4599.873  | 3759.614  | AB028966  | 9167.78   | 13515.374 | NM_006414 | 2375.661  |
| NM_005509 | 1545.909  | 1710.92   | NM_005758 | 5382.307  | 3759.534  | NM_018479 | 2402.251  |
| NM_152747 | 1494.386  | 2205.165  | AF044774  | 1055.853  | 1241.766  | NM_014362 | 1080.814  |
| NM_017415 | 2268.648  | 1942.109  | NM_005402 | 2850.752  | 2692.101  | NM_018308 | 425.365   |
| NM_001667 | 20806.648 | 29182.791 | AF055027  | 1039.73   | 1287.446  | AB037716  | 872.6     |
| AB046834  | 1035.635  | 1102.478  | U63541    | 2331.333  | 2184.858  | NM_016297 | 2170.924  |
| AB029033  | 13904.22  | 13327.21  | AB033045  | 1872.618  | 799.327   | NM_001752 | 1896.378  |
| AF091034  | 3928.187  | 3630.401  | AF055006  | 4766.413  | 4222.337  | AL137672  | 612.445   |
| NM_005301 | 24607.832 | 29890.98  | NM_004935 | 1741.917  | 607.193   | X64177    | 331.319   |
| AB035124  | 1445.675  | 2406.665  | NM_006951 | 1623.233  | 257.751   | NM_015994 | 2332.038  |
| AF060170  | 1399.103  | 1923.157  | NM_001896 | 1918.178  | 1708.346  | NM_002235 | 358.05    |
| NM_016602 | 543.224   | 971.828   | NM_002745 | 4525.366  | 3629.401  | NM_002248 | 714.774   |
| NM_001725 | 2023.833  | 1686.215  | D26488    | 2619.655  | 2115.871  | NM_012281 | 1518.172  |
| NM_004079 | 39672.688 | 16806.092 | AF097431  | 6361.72   | 7105.911  | AK025772  | 4120.214  |
| NM_002996 | 588.417   | 1508.645  | NM_001978 | 465.806   | 913.366   | NM_005509 | 857.026   |
| NM_000383 | 2010.688  | 2151.57   | NM_003019 | 1158.376  | 1093.443  | NM_152747 | 414.719   |
| NM_004633 | 1248.751  | 1623.733  | NM_006923 | 2231.95   | 2321.249  | NM_017415 | 870.398   |
| X01394    | 41469.441 | 47999.508 | AF119889  | 7049.597  | 7850.171  | NM_001667 | 8942.226  |
| NM_002984 | 5031.076  | 2067.564  | NM_006699 | 2319.186  | 2560.644  | AB046834  | 747.39    |
| AF264717  | 1490.122  | 2011.958  | NM_006814 | 3588.921  | 3794.877  | NM_000262 | 732.191   |
| NM_012260 | 6577.794  | 8748.513  | NM_005067 | 2036.123  | 2433.333  | NM_017831 | 720.81    |
| NM_001141 | 1715.121  | 1289.47   | NM_002817 | 3376.297  | 2422.704  | AK022537  | 3570.753  |
| NM_000018 | 11233.051 | 11399.078 | NM_002801 | 13237.673 | 5634.785  | AF064597  | 949.087   |
| AB028992  | 533.172   | 599.101   | BE905810  | 1150.172  | 525.738   | NM_006345 | 659.542   |
| NM_018479 | 12983.433 | 9768.074  | NM_014780 | 709.983   | 1425.257  | NM_006875 | 829.081   |
| NM_014362 | 4553.907  | 2914.773  | NM_014730 | 5538.819  | 7678.609  | D87119    | 1204.542  |
| NM_018308 | 2312.941  | 2371.167  | NM_014167 | 1006.752  | 1520.203  | NM_006556 | 4924.153  |
| NM_001832 | 12617.325 | 12819.047 | NM_016063 | 1579.073  | 1616.559  | AL133066  | 337.187   |
| NM_017774 | 9486.241  | 10881.574 | U82987    | 2423.831  | 2828.036  | AF264717  | 641.146   |
| AB037716  | 4646.626  | 4769.701  | NM_005732 | 1846.706  | 1440.48   | NM_012260 | 2012.211  |
| NM_004827 | 1019.092  | 1968.337  | AK056481  | 1858.476  | 1121.325  | NM_001141 | 1359.548  |

|           |           |           |           |           |           |           |           |
|-----------|-----------|-----------|-----------|-----------|-----------|-----------|-----------|
| NM_001926 | 1510.309  | 1666.651  | AF232000  | 40645.938 | 43661.754 | NM_000018 | 2476.254  |
| NM_016297 | 4669.685  | 5013.832  | L35035    | 1628.911  | 2133.295  | NM_02047C | 2898.991  |
| NM_001752 | 5778.192  | 9945.812  | NM_007152 | 1698.086  | 1753.968  | AA478950  | 1108.707  |
| AL137672  | 1097.856  | 1188.178  | NM_001938 | 2761.078  | 2633.649  | BI825012  | 8729.277  |
| X64177    | 410.512   | 4932.226  | AF230808  | 2580.319  | 1921.991  | M21574    | 198.683   |
| NM_015994 | 5209.463  | 3591.029  | NM_005238 | 4905.918  | 3120.47   | BM051302  | 460.898   |
| NM_014065 | 1947.479  | 1067.872  | AK075306  | 6436.858  | 5335.65   | BE314182  | 7185.331  |
| NM_001695 | 3473.144  | 2280.047  | AB037820  | 1020.001  | 883.651   | AI808029  | 924.488   |
| NM_002248 | 2143.201  | 2481.576  | NM_002948 | 38537.055 | 40858.301 | AI971217  | 652.249   |
| NM_012281 | 2809.581  | 2586.092  | AF113008  | 1322.262  | 1205.6    | X03225    | 2281.99   |
| NM_080824 | 1059.354  | 1109.952  | NM_020217 | 1784.278  | 2102.909  | AK097395  | 6395.663  |
| NM_015957 | 457.103   | 396.628   | NM_018135 | 28821.672 | 26402.92  | M12783    | 584.1     |
| NM_000262 | 3107.095  | 3024.011  | AF205435  | 8171.225  | 7002.595  | AK091535  | 689.576   |
| NM_017831 | 2340.029  | 2381.515  | L05093    | 49898.723 | 51302.531 | AF085357  | 786.971   |
| AK022537  | 7001.949  | 8141.547  | AF052105  | 1033.961  | 1196.649  | NM_003841 | 4413.051  |
| AF064597  | 1451.755  | 1446.868  | AK001204  | 2286.711  | 2695.038  | AF296673  | 543.037   |
| NM_006345 | 2128.616  | 2375.646  | M15465    | 3350.369  | 3355.967  | NM_080824 | 383.179   |
| NM_006875 | 1996.337  | 1713.767  | J03866    | 2928.626  | 2559.535  | NM_018002 | 839.46    |
| D87119    | 2426.14   | 1924.37   | AK022836  | 2076.64   | 992.419   | NM_000224 | 2114.946  |
| AL050040  | 1117.181  | 1532.674  | NM_012343 | 9435.252  | 5963.065  | NM_014328 | 1419.576  |
| NM_006556 | 6319.115  | 8882.064  | NM_002046 | 61247.785 | 56763.039 | NM_006414 | 2163.291  |
| AL133066  | 892.721   | 2097.373  | NM_003078 | 820.888   | 1520.372  | NM_014322 | 1423.745  |
| NM_000849 | 13391.287 | 9631.573  | AL137703  | 1314.981  | 559.399   | NM_004122 | 710.57    |
| NM_004678 | 2696.927  | 3029.04   | NM_001809 | 5869.165  | 4458.571  | NM_002928 | 4486.761  |
| NM_00095C | 30136.234 | 46521.219 | AL117477  | 1368.054  | 961.781   | NM_00016C | 630.688   |
| NM_005139 | 5979.706  | 8881.107  | NM_012107 | 3661.534  | 2962.755  | NM_003301 | 322.195   |
| L10139    | 1314.683  | 1260.943  | AB037760  | 1995.182  | 1550.881  | NM_00095E | 386.244   |
| NM_000039 | 66651.648 | 59514.047 | NM_01568C | 3213.208  | 2948.861  | U27768    | 489.93    |
| NM_02047C | 8542.92   | 9634.141  | M22637    | 1629.707  | 3127.401  | AF305550  | 2467.877  |
| BF942101  | 9916.753  | 6640.364  | NM_018364 | 5824.333  | 3709.629  | NM_006198 | 1331.18   |
| BI825012  | 22824.523 | 21856.051 | NM_007022 | 5031.394  | 2597.582  | NM_003812 | 588.286   |
| M21574    | 955.763   | 906.461   | AL049943  | 17751.811 | 22643.385 | NM_000849 | 4930.191  |
| BM051302  | 1215.545  | 1177.632  | AL137303  | 1047.771  | 1541.084  | NM_004678 | 674.94    |
| BE314182  | 24951.234 | 25589.838 | AB002449  | 1277.633  | 533.09    | NM_00095C | 11307.399 |
| AI808029  | 2742.24   | 1603.882  | NM_01648C | 11950.58  | 6418.211  | NM_000322 | 50602.84  |
| AI971217  | 1353.386  | 715.025   | AK001489  | 1135.762  | 1470.844  | AK025772  | 3221.317  |
| X03225    | 4735.851  | 5152.917  | NM_015681 | 2038.375  | 2245.393  | NM_005509 | 716.679   |
| AK097395  | 13070.786 | 7951.763  | AF070582  | 1132.034  | 454.963   | NM_001667 | 4782.456  |
| M12783    | 2183.641  | 2741.114  | NM_006383 | 2302.452  | 1851.191  | AB046834  | 697.975   |
| AK091535  | 2959.135  | 1797.442  | NM_01540C | 8450.355  | 7550.431  | AB029033  | 2693.01   |
| AF085357  | 1618.341  | 1794.941  | AL359561  | 823.231   | 838.486   | AF091034  | 2056.31   |
| NM_003841 | 14045.479 | 22935.994 | AF052100  | 1740.08   | 1194.988  | NM_005301 | 10170.407 |
| AF296673  | 779.99    | 2623.348  | AL110235  | 1966.193  | 1563.563  | NM_016653 | 563.2     |
| NM_004633 | 809.278   | 899.242   | AB033105  | 2186.873  | 1219.726  | AB035124  | 898.371   |
| X01394    | 53707.355 | 55132.176 | D61704    | 10255.081 | 8121.372  | AF060170  | 252.612   |
| NM_000041 | 67463.688 | 52545.695 | AJ227889  | 1610.128  | 1207.462  | NM_004409 | 8020.876  |
| NM_002984 | 8119.981  | 5671.987  | X64989    | 826.323   | 1136.566  | AK023397  | 905.49    |
| NM_018002 | 3112.204  | 4338.351  | L34409    | 12658.591 | 13353.036 | NM_004633 | 686.93    |
| AK024821  | 13894.438 | 11075.675 | U12210    | 2355.642  | 3235.336  | X01394    | 15313.522 |
| NM_006414 | 5932.768  | 6151.21   | L08440    | 5116.238  | 6041.754  | NM_000041 | 28670.186 |
| NM_014322 | 2598.191  | 1825.098  | M73799    | 1464.701  | 1279.188  | NM_002984 | 5258.945  |
| NM_004122 | 3339.34   | 3794.475  | AF086119  | 1309.372  | 1267.254  | AF317425  | 2302.362  |
| NM_002928 | 9370.032  | 15657.182 | NM_003782 | 1769.127  | 572.69    | AF264717  | 744.304   |

|           |           |           |           |           |           |           |           |
|-----------|-----------|-----------|-----------|-----------|-----------|-----------|-----------|
| NM_00016C | 2826.252  | 3722.508  | NM_01779C | 1158.838  | 474.162   | NM_00001E | 1077.711  |
| NM_003301 | 1190.467  | 937.305   | AK000901  | 1456.625  | 306.524   | NM_01847E | 4051.892  |
| NM_00095E | 1457.166  | 1399.596  | AK024351  | 1730.334  | 875.679   | NM_01436E | 2051.834  |
| U27768    | 1749.451  | 2265.331  | AK024867  | 1202.648  | 619.081   | NM_01830E | 869.451   |
| AF305550  | 4251.278  | 2400.652  | AK025002  | 2619.687  | 2412.358  | NM_00183E | 6822.795  |
| U66582    | 14425.11  | 16158.758 | NM_01834C | 1574.524  | 1247.845  | NM_017774 | 904.467   |
| S73288    | 660.188   | 864.604   | L10148    | 1524.831  | 1612.882  | AB037716  | 1062.304  |
| NM_00619E | 2854.831  | 2482.278  | AL110175  | 1847.061  | 1419.289  | NM_016297 | 2704.962  |
| NM_00381E | 1607.676  | 1437.015  | AK027156  | 12762.898 | 7735.379  | NM_00175E | 3224.766  |
| NM_00223E | 686.033   | 557.293   | AL157504  | 2518.165  | 2135.09   | BC003406  | 1115.41   |
| NM_002241 | 699.018   | 636.92    | AK023328  | 5931.537  | 3574.606  | AL137672  | 320.346   |
| NM_01406E | 2817.355  | 2771.059  | AJ012499  | 49758.43  | 47799.84  | X64177    | 409.9     |
| NM_00169E | 5517.855  | 5891.53   | AK024900  | 1593.998  | 972.476   | NM_015994 | 2125.137  |
| NM_00224E | 3532.405  | 4266.685  | AF119879  | 28643.42  | 26652.477 | NM_00223E | 300.01    |
| NM_012281 | 2160.063  | 2416.259  | Y10482    | 31235.84  | 20866.17  | NM_01406E | 1737.975  |
| AK025772  | 5044.209  | 2159.054  | AY007095  | 830.074   | 550.849   | NM_00169E | 2978.484  |
| NM_00550E | 2273.107  | 2014.077  | AF086244  | 1731.065  | 1503.93   | NM_00224E | 1044.058  |
| NM_01741E | 2209.437  | 2776.971  | AL161992  | 3773.574  | 1998.414  | NM_012281 | 1157.473  |
| NM_001667 | 19485.947 | 32361.012 | AK023910  | 1750.74   | 1376.947  | NM_00026E | 896.419   |
| AB046834  | 1028.107  | 837.304   | D16991    | 2625.979  | 1590.286  | NM_017831 | 1579.688  |
| AB029033  | 13693.035 | 13464.03  | AK023538  | 1342.249  | 939.067   | AK022537  | 3518.829  |
| AF091034  | 4507.613  | 3225.432  | AF075086  | 38150.473 | 27523.188 | AF064597  | 937.307   |
| NM_005301 | 32205.639 | 38075.988 | X77485    | 19756.531 | 23765.49  | NM_00634E | 387.996   |
| NM_004167 | 754.809   | 996.084   | AF133333  | 2626.865  | 2833.138  | NM_00687E | 799.001   |
| NM_01665E | 2612.784  | 3138.462  | NM_01836E | 1267.843  | 986.573   | D87119    | 1484.546  |
| AB035124  | 2210.215  | 3007.154  | NM_004881 | 20085.018 | 21378.207 | AL050040  | 752.062   |
| AF060170  | 914.676   | 750.615   | U94903    | 1854.32   | 1588.852  | NM_00655E | 4767.08   |
| NM_00440E | 10447.857 | 6206.417  | NM_00515E | 10114.959 | 15210.64  | AL133066  | 656.658   |
| AK023397  | 1160.785  | 1165.426  | NM_01909E | 5289.078  | 4576.494  | NM_00084E | 3747.797  |
| NM_00172E | 2247.774  | 1516.543  | U80764    | 12901.816 | 6063.618  | NM_00467E | 584.939   |
| NM_00407E | 40264.145 | 16550.363 | AB020684  | 5764.515  | 3140.017  | NM_00513E | 1673.708  |
| NM_00038E | 317.899   | 578.822   | AF077036  | 37769.953 | 26458.289 | NM_00032E | 33653.766 |
| NM_00687E | 2721.164  | 2282.627  | L37690    | 12168.378 | 10899.54  | NM_00003E | 27429.25  |
| D87119    | 4305.619  | 5696.283  | D61707    | 1027.009  | 550.791   | NM_02047C | 4199.481  |
| AB037769  | 310.792   | 466.157   | AK021610  | 1731.113  | 535.999   | AA478950  | 887.028   |
| AL050040  | 1428.734  | 1443.775  | Z36835    | 4352.302  | 3193.043  | BF942101  | 1050.096  |
| NM_00655E | 10462.855 | 16733.627 | L37703    | 15017.03  | 11852.423 | BI825012  | 11240.567 |
| AL133066  | 870.481   | 636.415   | AK023767  | 4349.731  | 4364.897  | M21574    | 379.726   |
| AF264717  | 1912.996  | 2903.678  | AL137554  | 853.254   | 807.998   | BM051302  | 568.253   |
| NM_01226C | 7349.398  | 9747.503  | M32220    | 2367.975  | 2028.751  | BE314182  | 7024.495  |
| NM_001141 | 1532.384  | 1252.622  | D17188    | 4758.971  | 4357.226  | AI808029  | 803.433   |
| NM_00001E | 8590.067  | 11767.895 | AJ001432  | 7042.426  | 7061.613  | X03225    | 2808.655  |
| AB028992  | 632.802   | 1146.715  | NM_02043E | 4257.984  | 3727.714  | AK097395  | 5133.455  |
| NM_01847E | 9719.197  | 6927.031  | AF052169  | 1014.38   | 1260.681  | M12783    | 712.252   |
| NM_01436E | 4856.853  | 2813.252  | CY3Cy5    | 7218.04   | 429.27    | AK091535  | 795.496   |
| NM_01830E | 2414.205  | 2690.385  | BF942101  | 2135.188  | 1923.909  | AF085357  | 725.2     |
| NM_00183E | 15818.253 | 16866.021 | BI825012  | 15836.543 | 14249.141 | NM_003841 | 4042.769  |
| NM_017774 | 9381.108  | 8189.143  | M21574    | 661.784   | 677.48    | X01394    | 12617.277 |
| AB037716  | 4737.141  | 3589.128  | BM051302  | 460.405   | 807.92    | NM_002984 | 5288.994  |
| NM_016297 | 4525.533  | 2853.553  | BE314182  | 11245.54  | 7946.587  | AF317425  | 1902.668  |
| NM_00175E | 5983.054  | 5200.629  | AI808029  | 1022.592  | 1104.287  | NM_01800E | 477.464   |
| AL137672  | 1220.211  | 1206.159  | AI971217  | 590.607   | 680.935   | AK024821  | 8664.263  |
| X64177    | 726.217   | 5404.399  | X03225    | 4199.077  | 4515.231  | AB002340  | 2535.79   |

|           |           |           |           |           |           |           |           |
|-----------|-----------|-----------|-----------|-----------|-----------|-----------|-----------|
| NM_015994 | 5475.406  | 3809.968  | AK097395  | 10660.415 | 11035.66  | NM_000224 | 3503.088  |
| NM_018476 | 15319.901 | 13177.813 | M12783    | 1866.178  | 3812.572  | NM_014328 | 1731.052  |
| AF220492  | 4934.256  | 7530.965  | AK091535  | 2049.941  | 2523.593  | NM_006414 | 2022.615  |
| X89671    | 1741.599  | 1712.518  | AF085357  | 1221.726  | 4061.905  | NM_014322 | 1166.401  |
| NM_014941 | 3647.34   | 5406.605  | NM_003841 | 26350.336 | 16272.728 | NM_004122 | 1226.539  |
| NM_018372 | 4485.468  | 8289.104  | AF296673  | 833.895   | 828.357   | NM_002928 | 5130.973  |
| NM_013253 | 6043.521  | 2223.519  | NM_080824 | 721.768   | 600.797   | NM_000160 | 994.512   |
| NM_005895 | 6179.124  | 5067.284  | SR2       | 46683.023 | 37876.531 | NM_003301 | 1479.543  |
| D82345    | 752.337   | 984.604   | SR4       | 16499.141 | 14065.005 | NM_000955 | 490.684   |
| NM_003814 | 1143.38   | 1594.29   | SR6       | 2107.646  | 1617.967  | U27768    | 534.593   |
| NM_002968 | 781.011   | 1008.126  | SR8       | 5793.818  | 14921.556 | AF305550  | 2040.782  |
| AB032956  | 796.685   | 989.324   | CY3Cy5    | 6106.847  | 426.274   | U66582    | 4851.755  |
| NM_000262 | 3119.045  | 2763.366  | NM_014322 | 2106.547  | 1489.315  | NM_006198 | 1301.777  |
| NM_017831 | 2483.103  | 2245.796  | NM_004122 | 1735.106  | 2110.144  | NM_003812 | 378.739   |
| AK024393  | 753.805   | 593.154   | NM_002928 | 8856.954  | 13690.176 | NM_014065 | 1960.666  |
| AK022537  | 6078.083  | 5505.069  | NM_000160 | 1427.267  | 1454.551  | NM_001695 | 2692.845  |
| AF116632  | 1775.376  | 1489.186  | NM_003301 | 717.441   | 902.169   | NM_002248 | 1125.354  |
| AF064597  | 1971.764  | 1561.708  | NM_000955 | 813.477   | 1007.391  | NM_012281 | 1574.208  |
| NM_006345 | 2107.184  | 2662.448  | U27768    | 670.588   | 880.884   | AK025772  | 4414.909  |
| NM_003259 | 24440.957 | 32627.084 | AF305550  | 3635.222  | 2291.963  | NM_005509 | 662.524   |
| AL080128  | 5497.514  | 7881.927  | U66582    | 7879.668  | 14607.119 | NM_152747 | 362.705   |
| AB037787  | 3177.073  | 4006.184  | S73288    | 630.223   | 1240.325  | NM_017415 | 1182.916  |
| AB033072  | 497.927   | 477.815   | NM_006198 | 2800.949  | 3283.425  | NM_001667 | 10488.711 |
| AB040892  | 3044.407  | 2004.068  | NM_003812 | 879.371   | 1149.374  | AB046834  | 978.744   |
| NM_018268 | 13809.575 | 18430.492 | NM_000849 | 7533.107  | 5880.933  | AB029033  | 3706.552  |
| AF230904  | 4812.606  | 8500.891  | NM_004678 | 1177.573  | 1177.554  | AF091034  | 2205.738  |
| NM_017596 | 2760.805  | 5633.197  | L10139    | 1336.601  | 1064.839  | NM_005301 | 10215.535 |
| AL157480  | 7078.042  | 4076.495  | AA478950  | 1664.922  | 2069.997  | NM_016653 | 1043.9    |
| NM_014386 | 1978.427  | 2581.078  | AB029033  | 5605.106  | 7289.609  | AB035124  | 945.331   |
| NM_018110 | 2570.491  | 2339.926  | AF091034  | 4084.052  | 2453.733  | NM_016602 | 642.325   |
| NM_006253 | 3401.076  | 3829.072  | NM_005301 | 17348.27  | 16736.441 | NM_004409 | 8563.922  |
| NM_003866 | 1481.036  | 1297.138  | NM_004167 | 459.544   | 550.327   | AK023397  | 920.58    |
| NM_018262 | 1375.864  | 1302.121  | NM_016653 | 2422.977  | 2021.023  | NM_001725 | 1002.122  |
| NM_006207 | 1935.298  | 1265.376  | AB035124  | 1959.518  | 2217.788  | NM_004079 | 26309.537 |
| NM_003220 | 1720.291  | 1944.44   | AF060170  | 472.604   | 861.943   | NM_006875 | 895.504   |
| AF009674  | 6780.826  | 3981.685  | NM_016602 | 765.159   | 854.702   | D87119    | 1558.853  |
| NM_000360 | 1735.247  | 1802.828  | NM_004409 | 10970.7   | 9353.152  | AL050040  | 640.668   |
| NM_000844 | 1692.247  | 1601.266  | AK023397  | 1736.077  | 2386.577  | NM_006556 | 5630.059  |
| NM_005510 | 6163.019  | 5219.967  | NM_001725 | 1816.906  | 1705.602  | AF264717  | 880.713   |
| Z36817    | 2293.968  | 1154.761  | NM_004079 | 23391.09  | 14606.533 | NM_012260 | 2387.795  |
| NM_014505 | 19219.875 | 16880.93  | NM_002996 | 562.601   | 1016.833  | NM_001141 | 1435.007  |
| NM_004209 | 6026.877  | 6685.21   | NM_000383 | 1070.857  | 1483.473  | NM_000018 | 2386.15   |
| NM_016162 | 3528.621  | 2158.678  | NM_004633 | 1923.919  | 3144.429  | NM_018479 | 4169.252  |
| AF130056  | 3229.087  | 2432.597  | X01394    | 35421.613 | 47933.215 | NM_014362 | 1166.879  |
| NM_002201 | 55431.617 | 53057.938 | NM_000041 | 33078.813 | 44787.285 | NM_018308 | 787.268   |
| AK025047  | 1318.954  | 1473.607  | AB037752  | 6765.935  | 5984.951  | NM_001832 | 5912.347  |
| NM_006806 | 897.025   | 2058.311  | AK024821  | 10961.666 | 8678.835  | NM_017774 | 2595.17   |
| NM_006763 | 3703.339  | 1478.435  | NM_006414 | 3756.017  | 3503.244  | AB037716  | 1106.034  |
| NM_006119 | 5007.903  | 4271.633  | NM_018479 | 13029.172 | 8106.875  | NM_016297 | 2213.192  |
| NM_004465 | 2100.991  | 1673.93   | NM_014362 | 5927.588  | 2471.857  | NM_001752 | 3611.671  |
| AK026927  | 2485.791  | 3054.133  | NM_018308 | 2085.131  | 2135.031  | AL137672  | 363.792   |
| NM_014059 | 9803.415  | 11066.322 | NM_001832 | 13611.614 | 16816.961 | X64177    | 427.2     |
| NM_001761 | 3649.939  | 2722.19   | NM_001926 | 1794.325  | 356.626   | NM_015994 | 2180.99   |



|           |           |           |           |           |           |           |           |
|-----------|-----------|-----------|-----------|-----------|-----------|-----------|-----------|
| BE884341  | 1984.918  | 2717.451  | NM_016297 | 4615.083  | 3606.592  | AF220492  | 2351.397  |
| AF231997  | 2388.818  | 1080.227  | NM_001752 | 8598.762  | 10293.66  | NM_014941 | 3057.39   |
| NM_007125 | 708.168   | 1151.146  | AL137672  | 769.492   | 1179.217  | NM_018372 | 2710.586  |
| NM_002598 | 6980.475  | 9513.571  | X64177    | 759.515   | 7575.545  | NM_013253 | 9580.663  |
| NM_020184 | 1491.021  | 1188.257  | NM_015994 | 4148.078  | 5493.743  | NM_005895 | 3398.27   |
| NM_005815 | 1365.838  | 1831.19   | NM_002235 | 359.107   | 688.582   | NM_003814 | 521.821   |
| NM_001229 | 1711.863  | 1347.956  | NM_002241 | 404.749   | 2002.525  | NM_015957 | 482.338   |
| NM_000250 | 1820.229  | 1101.534  | NM_014065 | 2430.982  | 2232.29   | NM_000262 | 1684.495  |
| NM_018147 | 14158.341 | 12033.09  | NM_001695 | 2401.642  | 3331.391  | NM_017831 | 987.47    |
| NM_018967 | 4945.563  | 5050.198  | NM_002248 | 2160.691  | 2179.303  | AK024393  | 3043.52   |
| NM_001850 | 1012.606  | 513.426   | NM_012281 | 2641.53   | 2455.078  | AK022537  | 3101.793  |
| NM_002160 | 1836.734  | 1313.737  | AK025772  | 4204.822  | 1502.392  | AF064597  | 864.202   |
| NM_005675 | 1136.554  | 1236.642  | NM_005509 | 1585.084  | 989.164   | NM_006345 | 565.71    |
| BC030636  | 1724.823  | 3079.628  | NM_152747 | 1018.746  | 1009.183  | AB037787  | 2450.629  |
| D21064    | 721.195   | 1011.46   | NM_017415 | 1021.593  | 795.603   | AB033072  | 880.708   |
| NM_002812 | 3869.664  | 5735.074  | NM_001667 | 20942.162 | 24100.141 | AB040892  | 3394.299  |
| NM_002079 | 3072.62   | 3782.4    | AB046834  | 740.027   | 701.479   | NM_018268 | 10886.976 |
| NM_002112 | 10346.788 | 7020.73   | NM_000262 | 2587.21   | 2151.979  | AF230904  | 2379.363  |
| NM_004121 | 4433.203  | 3268.498  | AK022537  | 7605.37   | 6183.47   | NM_017596 | 1204.079  |
| AY007092  | 3672.839  | 2321.79   | AF116632  | 629.004   | 510.796   | AL157480  | 3257.071  |
| NM_001902 | 542.07    | 620.446   | AF064597  | 1598.519  | 1322.245  | NM_014386 | 769.721   |
| AL137605  | 16794.246 | 19449.945 | NM_006345 | 2047.79   | 2962.288  | NM_018110 | 1483.921  |
| NM_016261 | 2049.508  | 1481.859  | NM_006875 | 1136.296  | 1806.334  | AF312678  | 598.045   |
| NM_006519 | 1200.725  | 762.562   | D87119    | 2216.111  | 3208.006  | NM_006253 | 1470.312  |
| NM_004607 | 39096.711 | 43816.941 | AL050040  | 971.609   | 1319.548  | NM_018262 | 363.596   |
| NM_007285 | 15811.709 | 11385.81  | NM_006556 | 11113.258 | 8696.753  | NM_006207 | 1134.179  |
| NM_016221 | 3532.951  | 4353.785  | AL133066  | 816.65    | 396.379   | NM_003220 | 336.251   |
| NM_018113 | 1597.891  | 778.547   | AF264717  | 1241.961  | 1389.556  | AF009674  | 2088.849  |
| NM_005187 | 2041.096  | 2149.113  | NM_012260 | 7585.835  | 6778.858  | NM_000360 | 440.947   |
| U73377    | 4999.029  | 4753.636  | NM_001141 | 1241.946  | 1291.672  | NM_000844 | 1035.645  |
| NM_002199 | 3468.783  | 2766.814  | NM_000018 | 5654.899  | 6586.493  | NM_005510 | 3457.569  |
| BC005219  | 5824.603  | 5266.684  | L10139    | 1183.96   | 1068      | Z36817    | 900.866   |
| NM_004268 | 966.321   | 921.076   | NM_020470 | 4539.446  | 5833.272  | NM_014505 | 9213.542  |
| NM_006662 | 12396.095 | 8368.174  | BE314182  | 10707.768 | 11444.148 | NM_004209 | 2345.783  |
| NM_004031 | 2212.389  | 1078.503  | AI808029  | 1389.016  | 1347.257  | NM_016162 | 986.9     |
| NM_004514 | 3481.097  | 3818.119  | AI971217  | 988.176   | 723.406   | AF130056  | 1505.828  |
| NM_006163 | 5152.747  | 2323.677  | X03225    | 4241.887  | 4513.043  | NM_002201 | 17904.262 |
| NM_006196 | 43510.801 | 48357.609 | AK097395  | 9675.642  | 10168.844 | AK025047  | 2031.319  |
| AV733560  | 2540.168  | 3390.687  | M12783    | 1402.493  | 1777.247  | NM_006806 | 451.22    |
| D17129    | 48116.637 | 51188.953 | AK091535  | 2145.188  | 2065.436  | NM_006763 | 1460.567  |
| NM_003091 | 13186.948 | 12352.522 | AF085357  | 3067.879  | 9135.206  | NM_006119 | 1619.891  |
| NM_004247 | 4328.736  | 3316.36   | AK092768  | 2981.704  | 4001.003  | NM_004465 | 792.86    |
| NM_017722 | 3045.414  | 2981.374  | NM_003841 | 32053.496 | 22710.535 | AK026927  | 662.959   |
| AL137730  | 4016.222  | 3474.045  | AF296673  | 739.357   | 602.664   | NM_014059 | 2413.308  |
| NM_004500 | 22008.033 | 21992.857 | NM_080824 | 626.505   | 632.539   | NM_001761 | 1118.814  |
| NM_003276 | 7822.08   | 4600.29   | NM_018002 | 2217.913  | 2570.009  | BE884341  | 1794.385  |
| AL137681  | 2153.378  | 1755.07   | AB002340  | 3161.794  | 3106.803  | AF231997  | 1178.172  |
| AK025694  | 61166.719 | 51843.313 | NM_000224 | 4779.577  | 4850.106  | NM_002598 | 1791.807  |
| NM_002157 | 45404.449 | 41743.535 | NM_000160 | 2275.246  | 4230.89   | NM_020184 | 425.802   |
| NM_004095 | 8333.949  | 19439.615 | NM_000955 | 902.557   | 1170.887  | NM_005815 | 803.686   |
| NM_014365 | 1319.76   | 1158.66   | U27768    | 764.276   | 1177.002  | NM_001229 | 615.033   |
| NM_005147 | 2048.254  | 2720.362  | AF305550  | 2336.514  | 1119.878  | NM_014916 | 389.786   |
| NM_014665 | 3821.56   | 4305.719  | U66582    | 7702.108  | 14138.829 | NM_000250 | 1526.667  |

|           |           |           |           |           |           |           |           |
|-----------|-----------|-----------|-----------|-----------|-----------|-----------|-----------|
| AK023609  | 1555.605  | 2265.025  | S73288    | 808.925   | 1049.611  | NM_018147 | 5521.811  |
| NM_018019 | 3081.502  | 2346.096  | NM_006198 | 2634.916  | 2281.184  | NM_018967 | 1465.205  |
| AK027220  | 1925.327  | 1612.24   | NM_003812 | 831.311   | 809.893   | NM_001850 | 788.903   |
| NM_018011 | 6302.688  | 5848.055  | NM_000849 | 7038.149  | 3823.989  | NM_002160 | 1567.707  |
| NM_000476 | 2557.339  | 1111.705  | NM_004678 | 1396.565  | 872.298   | NM_005588 | 443.218   |
| AF132733  | 4278.527  | 3771.013  | NM_000950 | 38148.441 | 32629.232 | BC030636  | 886.119   |
| NM_001071 | 3240.677  | 8645.955  | NM_005139 | 4393.289  | 4843.943  | NM_020365 | 1338.48   |
| AF202637  | 6121.827  | 10089.401 | AK025772  | 4834.509  | 1781.906  | NM_003982 | 1243.366  |
| AB033016  | 19874.652 | 10924.842 | NM_005509 | 1573.091  | 1199.378  | NM_002079 | 903.906   |
| D87452    | 1196.255  | 1223.006  | NM_152747 | 1502.935  | 1966.085  | NM_002112 | 2441.614  |
| AB037864  | 4196.573  | 3047.767  | NM_017415 | 1397.294  | 1649.767  | NM_004121 | 2332.994  |
| L26494    | 1337.636  | 1178.448  | NM_001667 | 23208.299 | 32939.926 | AY007092  | 1348.978  |
| AK024322  | 926.757   | 1014.017  | AB046834  | 2275.801  | 2313.511  | AL137605  | 8861.626  |
| BF382513  | 4692.757  | 4387.653  | NM_016653 | 2203.004  | 3794.381  | NM_016261 | 928.026   |
| AB020713  | 2882.318  | 5575.949  | AB035124  | 2025.616  | 1959.168  | NM_004607 | 24445.086 |
| AK025426  | 1224.485  | 1024.697  | AF060170  | 391.962   | 744.97    | NM_012076 | 405.714   |
| NM_016558 | 6648.503  | 4389.726  | NM_016602 | 725.325   | 654.157   | NM_007285 | 5655.286  |
| NM_007145 | 4772.945  | 7168.229  | NM_004409 | 10050.361 | 9275.529  | D14678    | 4706.796  |
| AL133112  | 544.828   | 947.066   | AK023397  | 1532.581  | 2359.823  | NM_016221 | 657.371   |
| AK002078  | 2184.43   | 2083.833  | NM_001725 | 1929.156  | 2033.323  | NM_005187 | 403.119   |
| AF085837  | 1929.862  | 1915.126  | NM_004079 | 22538.217 | 15023.437 | U73377    | 1337.596  |
| AK023165  | 1008.432  | 1178.802  | NM_000383 | 486.539   | 746.113   | NM_002199 | 1739.057  |
| NM_016115 | 3307.132  | 2232.08   | NM_004633 | 892.21    | 534.691   | BC005219  | 2132.285  |
| NM_014950 | 3400.839  | 3361.953  | X01394    | 36210.324 | 36259.051 | NM_004268 | 574.705   |
| AL080180  | 836.286   | 885.107   | NM_000041 | 36855.152 | 42594.121 | NM_001546 | 505.306   |
| X89067    | 851.325   | 1007.12   | NM_002984 | 4341.026  | 2728.956  | NM_004514 | 691.284   |
| AF086259  | 2640.718  | 5163.598  | AF264717  | 1876.717  | 2465.69   | NM_006163 | 2032.134  |
| AF086369  | 992.54    | 859.27    | NM_012260 | 7514.32   | 7038.718  | NM_001272 | 4639.497  |
| AF086328  | 1728.44   | 1590.008  | NM_001141 | 1295.074  | 1471.546  | AV733560  | 404.995   |
| AK024196  | 815.449   | 1126.259  | NM_000018 | 7179.88   | 9933.126  | D17129    | 18762.799 |
| AK023753  | 2803.942  | 1854.692  | AB028992  | 494.878   | 896.668   | NM_003091 | 3338.583  |
| AF086441  | 11330.165 | 10362.914 | AB037716  | 2268.798  | 4106.216  | NM_004247 | 521.141   |
| AK027255  | 1170.422  | 603.48    | NM_001926 | 1757.305  | 235.683   | NM_017722 | 405.324   |
| AK022487  | 1577.308  | 3923.398  | NM_016297 | 4332.03   | 4646.73   | AL137730  | 1461.394  |
| NM_014117 | 2520.558  | 2590.819  | NM_001752 | 7715.092  | 9801.841  | NM_004500 | 6148.539  |
| AF086087  | 3391.259  | 3188.375  | AL137672  | 958.122   | 934.125   | NM_003276 | 1530.097  |
| AK000671  | 26279.184 | 27610.551 | X64177    | 685.365   | 4416.963  | AL137681  | 253.56    |
| AK094020  | 1451.347  | 1144.628  | NM_015994 | 4198.882  | 3155.738  | AK025694  | 43661.414 |
| AL157489  | 994.011   | 792.801   | NM_014065 | 3148.818  | 1995.721  | NM_002157 | 30844.004 |
| AL390157  | 1476.769  | 851.817   | NM_001695 | 2506.89   | 2426.937  | NM_004095 | 3719.83   |
| AK021649  | 700.01    | 543.343   | NM_002248 | 1610.846  | 1407.708  | NM_005147 | 868.833   |
| AK024874  | 969.886   | 427.001   | NM_012281 | 1801.823  | 1126.5    | NM_014665 | 1147.454  |
| AK021847  | 708.633   | 893.523   | NM_015957 | 410.41    | 254.769   | AK023609  | 900.417   |
| AK023086  | 2238.379  | 2311.395  | AK024393  | 1288.741  | 2007.178  | NM_018019 | 1581.66   |
| AF241534  | 903.185   | 883.755   | AK022537  | 7574.764  | 4855.637  | AK027220  | 1706.958  |
| NM_017621 | 6776.217  | 5610.089  | AF064597  | 994.818   | 783.662   | NM_018011 | 3572.545  |
| AK023574  | 1502.932  | 1601.132  | NM_006345 | 1569.042  | 2062.84   | AF132733  | 1962.149  |
| AF083117  | 670.438   | 682.334   | NM_006875 | 1104.792  | 979.218   | NM_001071 | 680.455   |
| AF131767  | 4617.313  | 3453.942  | D87119    | 2358.6    | 2446.385  | NM_006187 | 353.552   |
| AF211976  | 499.895   | 458.676   | AL050040  | 704.701   | 562.794   | NM_020354 | 1855.847  |
| NM_013343 | 562.393   | 467.454   | NM_006556 | 10878.229 | 6357.401  | NM_000026 | 8290.651  |
| AF147424  | 717.131   | 220.537   | NM_000849 | 6286.115  | 3554.113  | AB037864  | 603.484   |
| AK022058  | 1294.454  | 764.206   | NM_004678 | 1721.473  | 1269.419  | L26494    | 648.861   |

|           |           |           |           |           |           |           |           |
|-----------|-----------|-----------|-----------|-----------|-----------|-----------|-----------|
| AK022196  | 1208.026  | 599.486   | NM_00095C | 22999.826 | 20307.113 | NM_00034E | 307.007   |
| AK022350  | 361.577   | 514.356   | NM_00513E | 2295.651  | 2124.844  | AK024322  | 213.295   |
| AK022429  | 628.036   | 387.889   | L10139    | 851.595   | 825.423   | BF382513  | 1596.634  |
| NM_01828C | 2165.599  | 2252.145  | NM_02047C | 5555.439  | 5476.961  | AB020713  | 903.158   |
| AK025763  | 738.966   | 457.4     | M21574    | 454.432   | 522.713   | AK025426  | 356.667   |
| AK024381  | 1342.546  | 1225.497  | BE314182  | 5515.465  | 4158.073  | NM_01655E | 1339.071  |
| AK026503  | 907.281   | 1397.838  | X03225    | 5250.688  | 3693.009  | NM_00714E | 1620.074  |
| AK026671  | 1232.178  | 1447.53   | AK097395  | 9391.778  | 7380.633  | AF085877  | 109.534   |
| AK025522  | 3273.17   | 7810.903  | M12783    | 1422.665  | 1246.277  | AK002078  | 2155.318  |
| AK025464  | 44565.645 | 40211.059 | AK091535  | 2654.353  | 1816.477  | AF085837  | 2841.416  |
| AL049962  | 1616.15   | 1635.523  | AF085357  | 1393.988  | 2384.01   | AK023165  | 627.177   |
| AL080151  | 2063.163  | 1527.684  | NM_003841 | 25925.227 | 11243.503 | NM_016115 | 2100.961  |
| AL050085  | 584.686   | 684.134   | AF296673  | 585.003   | 416.01    | NM_01495C | 951.62    |
| AK024243  | 580.114   | 699.245   | X01394    | 34423.363 | 40059.578 | AK027250  | 705.448   |
| AK021574  | 2089.128  | 1978.956  | NM_000041 | 24852.107 | 33406.145 | AF147376  | 824.151   |
| AF119911  | 9991.65   | 9665.97   | NM_002984 | 4272.546  | 4674.241  | AK027190  | 486.119   |
| AF116656  | 4070.239  | 4257.621  | AF317425  | 2434.786  | 1793.394  | AL360136  | 1435.813  |
| NM_00105C | 4584.328  | 3532.136  | NM_01800E | 1685.364  | 2453.316  | AF086259  | 1287.783  |
| AF132206  | 2231.143  | 1922.431  | AB002340  | 3112.402  | 2236.238  | AK023753  | 1190.624  |
| AJ001869  | 6350.582  | 5329.916  | NM_000224 | 3544.498  | 3566.511  | AF086441  | 3787.716  |
| AJ002969  | 864.958   | 569.971   | NM_00412E | 1821.309  | 2534.201  | AK027255  | 943.887   |
| NM_00529E | 1362.362  | 1025.01   | NM_00292E | 7207.973  | 9960.71   | AK022487  | 946.988   |
| NM_02021E | 2624.498  | 2344.63   | NM_00016C | 1150.904  | 1454.53   | NM_014117 | 801.03    |
| AK024326  | 618.119   | 674.105   | NM_003301 | 910.304   | 803.121   | AF086087  | 1320.893  |
| U61088    | 925.174   | 969.717   | U27768    | 904.237   | 1180.168  | AF085936  | 1135.548  |
| AF086467  | 1786.329  | 1611.71   | AF305550  | 1981.185  | 1197.492  | AF075091  | 662.163   |
| AL137345  | 1377.684  | 1350.775  | U66582    | 4963.016  | 5903.3    | AK000671  | 15767.362 |
| AK000967  | 2076.338  | 980.972   | NM_00619E | 1734.993  | 1139.487  | AL137637  | 562.169   |
| AK021583  | 1940.635  | 1435.472  | NM_002241 | 541.304   | 725.449   | AL359584  | 877.742   |
| AL137442  | 3099.845  | 2414.044  | NM_01406E | 3025.304  | 3720.076  | AL137285  | 748.456   |
| AL049281  | 1448.798  | 1353.679  | NM_00169E | 1840.071  | 2298.802  | AL137456  | 890.12    |
| AL050061  | 2367.426  | 1477.41   | NM_00224E | 1116.953  | 1353.411  | AL157489  | 417.871   |
| AL050206  | 1663.358  | 1006.418  | NM_012281 | 2011.748  | 2318.287  | AL390157  | 534.887   |
| AK026898  | 2632.149  | 5799.928  | AK025772  | 4852.398  | 2329.944  | AK023086  | 674.666   |
| NM_006637 | 597.72    | 985.501   | NM_00550E | 1065.849  | 1049.831  | AK023574  | 973.545   |
| AK022419  | 926.261   | 817.45    | NM_152747 | 1227.865  | 1739.603  | AF131767  | 5917.46   |
| AJ251832  | 1302.854  | 1952.679  | NM_01741E | 1631.749  | 1115.805  | AK021807  | 887.345   |
| NM_014624 | 70186.594 | 46827.711 | AB029033  | 6298.425  | 8055.528  | AK021907  | 1925.565  |
| AF086145  | 3023.715  | 1398.192  | AF091034  | 3720.049  | 1922.133  | AK022320  | 860.308   |
| Z70709    | 552.249   | 433.303   | NM_005301 | 20755.734 | 18596.107 | AK022058  | 583.1     |
| BC002538  | 3029.16   | 3868.605  | NM_01665E | 2515.446  | 1696.54   | AK022196  | 341.68    |
| AF147362  | 725.39    | 480.357   | AB035124  | 1702.996  | 1419.367  | AK026867  | 776.906   |
| S72917    | 1129.607  | 878.022   | NM_00440E | 10576.956 | 7188.101  | NM_01828C | 734.754   |
| AF076617  | 54202.648 | 50841.234 | AK023397  | 1751.47   | 1514.791  | AK024381  | 1129.757  |
| NM_01439E | 4782.903  | 4313.947  | NM_00172E | 2021.344  | 1465.116  | AK026503  | 623.596   |
| AK023291  | 6123.151  | 3694.477  | NM_00407E | 22535.777 | 10949.97  | AK026671  | 853.477   |
| CY3Cy5    | 13618.914 | 880.089   | NM_00687E | 978.824   | 1529.622  | AK025464  | 35652.84  |
| BG752013  | 1004.023  | 992.794   | D87119    | 2115.753  | 3562.76   | NM_02040E | 195.432   |
| X07696    | 5688.833  | 6788.674  | NM_00655E | 8356.628  | 7426.809  | AL080151  | 1284.322  |
| AA481015  | 1091.146  | 1248.006  | AF264717  | 1085.957  | 1609.749  | AL050085  | 607.636   |
| U04209    | 4956.051  | 3827.142  | NM_01226C | 4584.021  | 5931.106  | AK001308  | 254.798   |
| Z15108    | 1205.719  | 2587.794  | NM_001141 | 1150.097  | 1340.345  | AK024127  | 1039.409  |
| M55284    | 932.056   | 1191.053  | NM_00001E | 3703.463  | 5103.619  | AK024243  | 322.607   |

|           |           |           |           |           |           |           |           |
|-----------|-----------|-----------|-----------|-----------|-----------|-----------|-----------|
| AA001218  | 1163.15   | 1014.801  | NM_018479 | 12421.31  | 6883.431  | AK021574  | 931.458   |
| AA679391  | 1153.875  | 1792.645  | NM_014362 | 6478.458  | 2267.484  | AF119911  | 2923.132  |
| BG682146  | 7842.259  | 5911.799  | NM_018308 | 1673.609  | 1330.444  | AF116656  | 1735.205  |
| AA884709  | 572.988   | 1107.063  | NM_001832 | 6312.391  | 6589.479  | AJ002969  | 553.114   |
| NM_005060 | 3714.407  | 5213.347  | NM_017774 | 4112.537  | 3239.31   | AF070579  | 727.394   |
| NM_005437 | 8792.664  | 12487.236 | AB037716  | 2030.794  | 2394.764  | NM_005295 | 1047.809  |
| SR7       | 9138.919  | 44834.996 | NM_001926 | 1734.127  | 294.9     | NM_020213 | 1759.276  |
| SR9       | 36858.23  | 7477.456  | NM_016297 | 3044.043  | 1955.008  | D17267    | 1660.197  |
| CY3Cy5    | 14968.011 | 1325.943  | NM_001752 | 4907.449  | 4966.534  | AB040944  | 2729.05   |
| NM_003974 | 5559.116  | 2635.247  | AL137672  | 927.691   | 1009.819  | NM_018145 | 1401.242  |
| NM_006065 | 2017.387  | 2284.516  | X64177    | 509.078   | 3363.331  | AK024326  | 428.671   |
| NM_014339 | 55529.898 | 48072.234 | NM_015994 | 3775.482  | 2029.294  | U61088    | 512.396   |
| NM_001495 | 1505.23   | 1656.404  | NM_018476 | 20839.27  | 26563.721 | AF086467  | 1375.273  |
| NM_002288 | 1099.659  | 3337.365  | AF220492  | 6170.954  | 7723.673  | AL137345  | 790.709   |
| NM_004416 | 1104.464  | 1399.766  | NM_014941 | 2733.796  | 3773.658  | AK000967  | 741.288   |
| AB005216  | 579.716   | 880.538   | NM_018372 | 2958.208  | 5570.323  | AK021583  | 1185.485  |
| NM_000325 | 12888.365 | 12767.415 | NM_013253 | 4765.347  | 3505.293  | AL137442  | 1912.781  |
| AF015041  | 1394.407  | 1530.236  | NM_005895 | 4840.581  | 2992.433  | AL049281  | 823.559   |
| NM_002363 | 878.422   | 621.46    | D82345    | 1334.1    | 1656.515  | NM_001208 | 10344.799 |
| AK000184  | 2529.666  | 2166.667  | NM_003814 | 1082.374  | 1014.973  | AL050061  | 1374.488  |
| AF055020  | 7661.176  | 9568.784  | AB032956  | 364.026   | 517.082   | AL050206  | 386.906   |
| NM_006986 | 1637.803  | 1957.543  | NM_000262 | 2779.566  | 2318.169  | AK026898  | 1255.076  |
| AF272043  | 7308.5    | 4778.373  | NM_017831 | 910.287   | 1465.6    | NM_006637 | 479.517   |
| NM_002587 | 13513.493 | 14536.59  | AK022537  | 2973.754  | 1494.573  | AK022419  | 997.634   |
| NM_004868 | 4947.657  | 3612.041  | AF064597  | 1148.706  | 752.684   | AJ251832  | 1077.762  |
| AF130728  | 1406.094  | 1328.223  | NM_006345 | 775.556   | 736.888   | NM_014624 | 33140.703 |
| NM_004987 | 505.52    | 1113.705  | NM_003259 | 19487.279 | 38176.363 | AF086145  | 1509.288  |
| AA831963  | 1916.009  | 1161.231  | AL080128  | 5376.983  | 8142.165  | BC002538  | 1301.847  |
| NM_002414 | 19877.66  | 12064.749 | AB037787  | 2507.568  | 4598.201  | AK022355  | 362.054   |
| NM_000355 | 2814.166  | 2280.39   | AB040892  | 4451.273  | 3903.044  | NM_017836 | 2847.837  |
| AL133580  | 2364.978  | 2513.337  | NM_018268 | 20536.721 | 34200.223 | AK096584  | 21909.635 |
| NM_014666 | 8509.823  | 13287.309 | AF230904  | 5311.901  | 7154.692  | AL078636  | 865.681   |
| NM_005451 | 3687.546  | 4311.674  | NM_017596 | 1868.755  | 2178.61   | S72917    | 540.498   |
| NM_007172 | 2357.281  | 3599.686  | AL157480  | 4416.751  | 4012.891  | AF076617  | 50342.621 |
| NM_006152 | 3008.103  | 5110.467  | NM_014386 | 1375.385  | 1880.872  | M91159    | 307.721   |
| NM_002333 | 5132.311  | 6211.488  | NM_018110 | 2199.277  | 3041.811  | NM_014392 | 2350.301  |
| NM_003400 | 9528.372  | 11092.304 | AF312678  | 762.089   | 678.459   | AK023291  | 4035.336  |
| NM_006705 | 4871.988  | 5044.551  | NM_006253 | 3549.263  | 2649.831  | BF541820  | 315.744   |
| NM_014439 | 1249.466  | 1368.708  | NM_003866 | 654.221   | 1013.98   | CY3Cy5    | 14212.546 |
| NM_005582 | 1947.767  | 2173.548  | NM_018262 | 1390.433  | 1563.847  | M54894    | 275.784   |
| NM_012266 | 4954.463  | 4380.634  | NM_006207 | 1955.23   | 1808.747  | X07696    | 2133.777  |
| NM_004559 | 2573.146  | 2850.93   | NM_003220 | 917.022   | 1079.05   | AI925826  | 3645.366  |
| NM_014476 | 497.432   | 933.48    | AF009674  | 3956.666  | 4345.813  | U04209    | 2806.746  |
| NM_014278 | 2266.551  | 3210.319  | NM_000360 | 872.177   | 898.801   | AI393201  | 2114.835  |
| NM_005838 | 658.271   | 946.598   | NM_000844 | 1178.332  | 1322.626  | M55284    | 437.224   |
| NM_000734 | 3092.854  | 4280.607  | NM_005510 | 5015.521  | 3578.918  | AA001218  | 376.151   |
| NM_006583 | 76380.75  | 7541.962  | Z36817    | 100.96    | 654.389   | AA679391  | 654.48    |
| X82693    | 12860.75  | 11641.91  | NM_014505 | 24195.855 | 19636.295 | BG682146  | 3519.828  |
| NM_007176 | 6567.314  | 11590.136 | NM_004209 | 4633.504  | 3217.282  | NM_005060 | 1456.734  |
| NM_002722 | 2531.31   | 1866.165  | NM_016162 | 2493.364  | 1700.009  | SR9       | 36531.219 |
| M22538    | 12335.771 | 15618.469 | AF130056  | 1314.136  | 1171.051  | CY3Cy5    | 7180.18   |
| NM_006028 | 816.866   | 657.28    | NM_002201 | 34527.512 | 35350.379 | NM_003974 | 872.948   |
| NM_014904 | 1122.03   | 1163.732  | AK025047  | 2623.328  | 2969.543  | NM_006065 | 502.347   |

|           |           |           |           |           |           |           |           |
|-----------|-----------|-----------|-----------|-----------|-----------|-----------|-----------|
| AL137576  | 10652.059 | 11898.563 | NM_006806 | 1049.136  | 1645.047  | NM_014339 | 17654.111 |
| NM_018358 | 5805.896  | 6232.422  | NM_006763 | 2223.677  | 1699.122  | NM_001495 | 329.603   |
| NM_016321 | 578.354   | 1184.587  | NM_006119 | 2110.231  | 2978.89   | NM_004416 | 534.86    |
| NM_013356 | 904.639   | 789.716   | NM_004465 | 1418.797  | 1478.858  | NM_000628 | 6071.568  |
| AF131781  | 3806.884  | 5342.532  | AK026927  | 4041.537  | 2868.151  | NM_002363 | 460.305   |
| NM_006516 | 4319.699  | 17057.619 | NM_014059 | 4652.583  | 4722.392  | NM_006986 | 541.513   |
| NM_015865 | 1200.018  | 1352.196  | NM_001761 | 6418.237  | 4374.935  | AF272043  | 1724.045  |
| NM_003055 | 10895.613 | 10599.121 | BE884341  | 3328.917  | 4902.899  | NM_002587 | 5597.429  |
| NM_005075 | 1290.941  | 1319.737  | AF231997  | 1688.447  | 2360.808  | NM_002238 | 1423.585  |
| NM_006841 | 855.198   | 1302.69   | NM_002598 | 5534.739  | 9404.195  | NM_004868 | 1744.534  |
| NM_014824 | 1389.179  | 2155.321  | NM_020184 | 1330.526  | 1444.079  | AF130728  | 585.224   |
| NM_014504 | 2994.091  | 2416.366  | NM_005815 | 1959.682  | 3164.618  | AA831963  | 4292.887  |
| NM_014408 | 6724.489  | 6749.328  | NM_001229 | 1164.109  | 1731.443  | NM_002414 | 6207.065  |
| NM_014741 | 2295.882  | 2572.139  | NM_014916 | 863.861   | 877.925   | NM_000355 | 1204.987  |
| AF212247  | 4491.339  | 6228.496  | NM_000250 | 3305.922  | 3056.781  | AL133580  | 525.779   |
| AF161407  | 11912.722 | 15225.754 | NM_018147 | 12510.183 | 14467.089 | NM_014666 | 1580.001  |
| NM_014738 | 3205.865  | 3289.344  | NM_018967 | 3624.187  | 4696.998  | NM_005451 | 1227.419  |
| NM_016406 | 4734.123  | 3132.476  | NM_001850 | 1856.512  | 1905.269  | NM_007172 | 773.92    |
| NM_018080 | 5540.997  | 5537.026  | NM_002160 | 2436.55   | 1824.35   | NM_013333 | 7523.413  |
| AF174605  | 970.454   | 858.866   | BC030636  | 1934.909  | 1766.262  | NM_002333 | 1344.116  |
| NM_014453 | 16693.201 | 14226.033 | NM_002812 | 725.003   | 884.242   | NM_005582 | 969.867   |
| NM_005713 | 1665.297  | 2520.339  | NM_020365 | 1560.927  | 1938.361  | NM_012266 | 2302.008  |
| AK021951  | 707.039   | 1009.662  | NM_003982 | 1011.317  | 716.743   | NM_004559 | 1122.212  |
| AK023553  | 1267.969  | 1574.546  | NM_002079 | 3057.87   | 3976.062  | X56692    | 1851.876  |
| NM_014600 | 1228.847  | 1294.012  | NM_002112 | 3578.01   | 4362.563  | NM_014476 | 223.006   |
| NM_016733 | 1674.627  | 1645.74   | NM_004121 | 3106.695  | 3234.748  | NM_014278 | 723.866   |
| AF181994  | 2351.135  | 3442.945  | AY007092  | 1991.694  | 1241.463  | NM_000734 | 777.663   |
| NM_018962 | 1753.91   | 2158.906  | NM_001902 | 557.037   | 773.837   | NM_006583 | 64163.082 |
| AF125100  | 3166.145  | 3969.191  | AL137605  | 25283.332 | 36311.488 | X82693    | 5690.758  |
| NM_006114 | 6628.896  | 13375.377 | NM_016261 | 2764.576  | 3211.515  | NM_007176 | 1622.152  |
| AF130728  | 1157.088  | 1028.268  | NM_006519 | 1835.092  | 2129.841  | NM_002722 | 945.695   |
| NM_001289 | 21548.139 | 20519.191 | NM_004607 | 59150.816 | 53719.688 | NM_006028 | 753.531   |
| NM_001131 | 36253.363 | 46945.758 | NM_012076 | 1128.974  | 1238.417  | NM_014904 | 664.048   |
| AA831963  | 1077.577  | 604.516   | NM_007285 | 18206.984 | 15275.224 | AL137576  | 6330.906  |
| BG752013  | 1856.103  | 3002.257  | D14678    | 9638.384  | 9959.706  | NM_018358 | 2183.423  |
| H69204    | 1095.595  | 1533.578  | NM_016221 | 2537.603  | 3798.828  | NM_013356 | 718.041   |
| X07696    | 5883.401  | 6138.399  | NM_005187 | 1361.671  | 1679.543  | AF131781  | 1403.751  |
| AA481015  | 909.724   | 1035.844  | U73377    | 1634.354  | 1993.168  | NM_006516 | 1888.724  |
| AI925826  | 12462.628 | 13122.121 | NM_002199 | 1760.993  | 2630.483  | NM_003055 | 8930.048  |
| U04209    | 5686.261  | 4892.855  | BC005219  | 5030.76   | 4356.226  | NM_005075 | 427.298   |
| Z15108    | 1320.406  | 2473.576  | NM_004268 | 720.592   | 876.429   | NM_014824 | 427.448   |
| M55284    | 689.863   | 1193.235  | NM_006662 | 12760.445 | 19556.443 | NM_014504 | 816.762   |
| AA001218  | 1591.236  | 1037.323  | NM_004031 | 1166.911  | 1374.849  | NM_014408 | 2425.679  |
| AA679391  | 994.796   | 1868.513  | NM_004514 | 1084.559  | 1244.692  | AF212247  | 1928.906  |
| BG682146  | 8760.225  | 6104.604  | NM_006163 | 2501.235  | 1113.301  | AF161407  | 4899.408  |
| AA884709  | 725.407   | 1082.101  | NM_001272 | 9730.421  | 4026.896  | NM_014738 | 1677.815  |
| NM_005437 | 9637.677  | 11161.577 | NM_016303 | 357.186   | 731.733   | NM_016406 | 2512.092  |
| AK022417  | 3402.372  | 3573.022  | NM_006196 | 45402.504 | 48679.824 | NM_018080 | 3845.24   |
| U50534    | 2004.141  | 1943.663  | AV733560  | 648.198   | 639.203   | AF174605  | 408.37    |
| NM_014278 | 1487.642  | 2011.315  | D17129    | 30138.736 | 20772.123 | NM_014453 | 6394.707  |
| NM_005838 | 850.487   | 900.467   | NM_003091 | 7304.225  | 7035.019  | NM_005713 | 787.519   |
| NM_000734 | 3317.873  | 3508.425  | NM_004247 | 2216.656  | 2095.625  | AK023553  | 564.395   |
| NM_012331 | 3300.278  | 3854.854  | NM_017722 | 1351.967  | 1387.02   | NM_014600 | 899.21    |

|           |           |           |           |           |           |           |           |
|-----------|-----------|-----------|-----------|-----------|-----------|-----------|-----------|
| NM_006644 | 8166.582  | 4049.842  | AL137730  | 5229.218  | 6753.259  | NM_016733 | 621.048   |
| NM_006583 | 80817.742 | 9321.675  | NM_004500 | 33285.027 | 34700.992 | AF181994  | 1483.059  |
| NM_003974 | 5618.619  | 2490.599  | NM_003276 | 8376.582  | 5070.631  | NM_018962 | 879.182   |
| NM_006065 | 2393.042  | 2363.592  | AL137681  | 1288.76   | 1854.438  | AF125100  | 3077.403  |
| NM_014339 | 55555.945 | 50316.695 | AK025694  | 32468.648 | 36769.133 | NM_006114 | 3247.385  |
| NM_001495 | 1912.879  | 1867.423  | NM_002157 | 62678.699 | 53284.391 | NM_001289 | 6210.801  |
| NM_002288 | 923.283   | 2850.652  | NM_004095 | 11049.851 | 23782.598 | NM_001131 | 11507.857 |
| NM_004416 | 1093.356  | 943.626   | NM_005147 | 1333.329  | 2819.321  | AA831963  | 529.075   |
| NM_000628 | 18668.834 | 12322.604 | NM_014665 | 1120.933  | 2371.702  | X07696    | 2884.576  |
| NM_000325 | 12140.531 | 12273.777 | AK023609  | 1235.119  | 1351.051  | AI925826  | 3068.792  |
| AF015041  | 1981.164  | 1939.458  | NM_018019 | 2187.522  | 1608.164  | U04209    | 3413.883  |
| NM_002363 | 813.011   | 947.86    | AK027220  | 2275.892  | 2088.314  | Z15108    | 247.016   |
| AK000184  | 2583.22   | 2053.27   | NM_018011 | 4124.162  | 5049.246  | AA679391  | 444.273   |
| AF055020  | 7409.622  | 10039.716 | AK022132  | 593.425   | 901.466   | BG682146  | 3947.415  |
| NM_006986 | 1717.055  | 2055.682  | NM_000476 | 613.318   | 909.312   | NM_005060 | 2214.415  |
| NM_002587 | 16891.576 | 19557.619 | AF132733  | 4141.664  | 2460.028  | NM_005437 | 3588.47   |
| NM_002238 | 5110.03   | 1978.975  | NM_001071 | 7641.896  | 3705.737  | AK022417  | 2150.687  |
| NM_004868 | 4726.105  | 3679.104  | NM_006187 | 705.951   | 569.624   | U50534    | 1102.592  |
| NM_004669 | 6237.108  | 4130.024  | NM_020354 | 2288.614  | 1784.52   | NM_000734 | 1009.953  |
| NM_007028 | 6687.304  | 7181.862  | AF202637  | 3131.369  | 2511.964  | NM_012331 | 1043.565  |
| AF131781  | 3267.895  | 3468.868  | NM_000026 | 10566.468 | 8856.93   | NM_006644 | 2761.249  |
| NM_006516 | 3727.555  | 16044.033 | AB033016  | 13273.886 | 9432.748  | NM_006583 | 25540.916 |
| NM_015865 | 1000.166  | 857.071   | D87452    | 1455.395  | 1256.344  | NM_006065 | 542.269   |
| NM_003055 | 8266.42   | 7379.245  | AB037864  | 2523.347  | 2790.038  | NM_014339 | 15399.933 |
| NM_005075 | 1084.38   | 1362.105  | L26494    | 1500.317  | 1609.808  | NM_001495 | 375.334   |
| NM_006841 | 730.155   | 1260.291  | NM_000346 | 480.352   | 690.895   | NM_002288 | 265.478   |
| NM_002414 | 22764.195 | 13278.413 | AK024322  | 678.391   | 626.966   | NM_004416 | 828.953   |
| NM_000355 | 2661.988  | 1951.147  | BF382513  | 3769.815  | 5163.527  | NM_000325 | 9606.51   |
| AL133580  | 2364.375  | 3197.247  | AB020713  | 6988.27   | 8167.462  | AF015041  | 576.746   |
| NM_014666 | 8884.534  | 13237.646 | AK025426  | 1108.518  | 1744.677  | NM_002363 | 275.587   |
| NM_005451 | 3485.24   | 3959.65   | NM_016558 | 2543.252  | 2460.443  | AK000184  | 1794.102  |
| NM_007172 | 2441.876  | 3082.506  | NM_007145 | 5941.185  | 9030.498  | AF055020  | 2532.623  |
| NM_006152 | 2372.836  | 3789.036  | AL133112  | 518.411   | 653.47    | NM_006986 | 776.19    |
| NM_013333 | 21288.09  | 28064.547 | AK002078  | 1020.545  | 1277.326  | AF272043  | 1690.08   |
| NM_002333 | 4639.973  | 5549.377  | AF085837  | 2657.375  | 3782.5    | NM_002587 | 6715.781  |
| NM_003400 | 9791.947  | 11904.053 | AK023165  | 1067.647  | 1827.324  | NM_002238 | 1428.053  |
| NM_006705 | 5854.676  | 5484.005  | NM_016115 | 3934.684  | 2576.049  | NM_004868 | 1858.691  |
| NM_014439 | 1357.909  | 1218.949  | NM_014950 | 1225.645  | 1705.997  | NM_004669 | 2348.019  |
| NM_005582 | 2631.834  | 3100.768  | AL080180  | 980.965   | 1008.713  | NM_007028 | 3873.205  |
| NM_012266 | 4918.399  | 4593.292  | X89067    | 653.595   | 717.095   | AF131781  | 1016.411  |
| NM_004559 | 2635.836  | 3112.641  | AK027250  | 726.464   | 831.774   | NM_006516 | 315.179   |
| X56692    | 7057.268  | 8192.429  | AF147376  | 1563.99   | 1187.685  | NM_015865 | 702.276   |
| NM_014476 | 362.492   | 1269.331  | AK027190  | 1405.597  | 1238.733  | NM_003055 | 11454.227 |
| NM_014600 | 993.447   | 1341.719  | AL360136  | 1850.082  | 1166.819  | NM_002414 | 2870.179  |
| NM_016733 | 1634.294  | 1876.312  | AF086259  | 2069.516  | 1252.968  | NM_014666 | 3240.832  |
| AF181994  | 2503.663  | 3015.849  | AF086369  | 299.898   | 313.449   | NM_005451 | 1384.444  |
| NM_018962 | 1539.318  | 1619.942  | AF086328  | 2062.426  | 1924.96   | NM_007172 | 1266.66   |
| AF125100  | 3857.627  | 3755.825  | AK024196  | 1715.822  | 963.435   | NM_006152 | 498.194   |
| NM_006114 | 6261.429  | 11871.315 | AK001099  | 216.098   | 361.352   | NM_013333 | 10002.128 |
| X82693    | 14682.423 | 13315.583 | AK023753  | 2016.17   | 2359.734  | NM_002333 | 1622.229  |
| NM_007176 | 6349.938  | 11651.107 | AF086441  | 8097.875  | 9987.329  | NM_003400 | 5973.569  |
| NM_002722 | 2698.902  | 2091.687  | AK022487  | 3148.566  | 2472.762  | NM_006705 | 1675.372  |
| AF317058  | 534.199   | 827.613   | NM_014117 | 1391.032  | 1843.155  | NM_014439 | 806.229   |

|           |           |           |           |           |           |           |           |
|-----------|-----------|-----------|-----------|-----------|-----------|-----------|-----------|
| AK025965  | 607.704   | 405.772   | AF086087  | 4073.4    | 2823.667  | NM_005582 | 647.461   |
| M22538    | 13425.906 | 16910.316 | AF147422  | 693.519   | 469.587   | NM_012266 | 2584.936  |
| NM_006028 | 1113.424  | 1321.45   | AF075091  | 804.266   | 613.097   | NM_004559 | 1270.855  |
| NM_014904 | 837.375   | 1314.176  | AK000671  | 21785.777 | 23178.496 | X56692    | 1899.26   |
| AL137576  | 11406.377 | 12237.263 | AK094020  | 640.394   | 417.811   | NM_014600 | 642.384   |
| NM_018358 | 6898.66   | 6889.29   | AL137425  | 1067.903  | 870.31    | NM_016733 | 517.125   |
| NM_016321 | 882.462   | 1002.291  | AL359584  | 1612.297  | 975.73    | AF181994  | 1187.884  |
| NM_013356 | 458.565   | 1542.094  | AL137285  | 1072.205  | 734.029   | NM_018962 | 1167.56   |
| NM_005060 | 3223.497  | 3647.269  | AL137456  | 846.011   | 493.049   | AF125100  | 2014.418  |
| NM_005437 | 8516.506  | 10463.661 | AK021649  | 1298.659  | 269.985   | NM_006114 | 1549.591  |
| AK022417  | 3555.699  | 3223.773  | AK024874  | 1434.85   | 1175.899  | X82693    | 2535.199  |
| U50534    | 1838.237  | 1137.171  | AF086071  | 1413.335  | 1426.637  | NM_007176 | 1709.874  |
| NM_014824 | 1211.254  | 1890.03   | AK026035  | 34.186    | 318.756   | NM_002722 | 1124.256  |
| NM_014504 | 2435.589  | 1742.672  | AK023086  | 1304.558  | 1099.673  | AF317058  | 2139.495  |
| NM_014408 | 6680.013  | 6780.109  | NM_017621 | 2455.3    | 2238.882  | NM_006028 | 790.54    |
| NM_014741 | 2253      | 3055.793  | AK023574  | 2165.686  | 1838.437  | NM_014904 | 527.661   |
| AF212247  | 3851.709  | 5410.008  | AF083117  | 634.308   | 547.125   | AL137576  | 6841.228  |
| AF161407  | 12321.193 | 17415.242 | AF131767  | 5899.976  | 5962.78   | NM_018358 | 2259.198  |
| NM_014738 | 3451.246  | 3738.138  | AK021807  | 817.223   | 383.802   | NM_013356 | 584.667   |
| NM_016406 | 5397.7    | 3050.614  | AK021907  | 1049.016  | 688.846   | NM_005060 | 1416.252  |
| NM_018080 | 7035.262  | 7122.772  | AK022029  | 866.668   | 1028.521  | NM_005437 | 2403.303  |
| AF174605  | 913.943   | 879.399   | AK022167  | 1301.737  | 798.107   | AK022417  | 1405.081  |
| NM_014453 | 19218.363 | 16774.754 | AK022320  | 1045.585  | 659.294   | U50534    | 578.19    |
| NM_005713 | 1438.271  | 2060.569  | AK022058  | 1516.737  | 1458.666  | NM_014504 | 1126.05   |
| AK021951  | 653.47    | 768.322   | AK022196  | 996.479   | 815.733   | NM_014408 | 3837.465  |
| AK023553  | 1197.271  | 1666.839  | NM_018280 | 811.671   | 954.047   | NM_014741 | 805.77    |
| NM_002238 | 4690.389  | 1498.567  | AK026671  | 1614.235  | 811.885   | AF212247  | 2643.616  |
| NM_004868 | 4332.84   | 2917.096  | AK025522  | 7951.168  | 7984.569  | AF161407  | 5757.06   |
| NM_004669 | 5519.581  | 3795.301  | AK025464  | 51492.809 | 45604.125 | NM_014738 | 1502.782  |
| NM_007028 | 6842.881  | 7979.502  | AL049962  | 2234.338  | 1838.04   | NM_018080 | 3292.895  |
| AF130728  | 1500.354  | 1109.504  | NM_004988 | 3688.719  | 4227.288  | NM_014453 | 6347.682  |
| NM_001289 | 22475.85  | 18194.674 | AL080151  | 1993.24   | 1458.248  | NM_005713 | 753.053   |
| NM_001131 | 50365.73  | 56781.766 | AL050085  | 585.677   | 432.162   | AK023553  | 859.991   |
| AA831963  | 911.528   | 568.769   | AK001308  | 631.861   | 309.965   | AF272043  | 1257.317  |
| BG752013  | 1215.259  | 1047.74   | AK024127  | 975.012   | 841.051   | NM_002587 | 6654.196  |
| X07696    | 5599.009  | 6140.17   | AK021574  | 1104.473  | 762.583   | NM_002238 | 1116.483  |
| AA481015  | 967.646   | 1073.403  | AF119911  | 8777.182  | 8967.835  | NM_004868 | 1467.434  |
| AI925826  | 13274.231 | 13777.726 | AF116656  | 4299.712  | 2967.67   | NM_004669 | 1791.838  |
| U04209    | 6077.719  | 4738.021  | NM_001050 | 4036.862  | 3765.267  | NM_007028 | 2660.663  |
| Z15108    | 1462.031  | 2770.538  | AF132206  | 2768.258  | 1791.528  | NM_001289 | 4215.203  |
| M55284    | 839.236   | 858.697   | AJ002969  | 694.219   | 485.607   | NM_001131 | 10100.846 |
| AA001218  | 1556.198  | 1098.741  | NM_005295 | 1860.966  | 2089.853  | AA831963  | 979.606   |
| AA679391  | 1242.403  | 1863.723  | NM_020213 | 2834.457  | 3105.296  | BG752013  | 808.928   |
| BG682146  | 8607.036  | 6642.107  | D17267    | 5094.096  | 5130.395  | X07696    | 2477.302  |
| AA884709  | 850.107   | 1248.398  | AF200341  | 928.428   | 674.001   | AA481015  | 566.514   |
| NM_012266 | 4090.438  | 4209.142  | AJ238214  | 780.866   | 945.049   | AI925826  | 3558.513  |
| NM_004559 | 2599.432  | 2325.767  | AB040944  | 2017.786  | 1893.186  | U04209    | 3092.704  |
| X56692    | 5992.354  | 6956.827  | NM_018145 | 1225.865  | 1466.839  | AI393201  | 2002.966  |
| NM_014278 | 1573.416  | 2051.967  | AK024538  | 819.606   | 603.067   | M34664    | 12676.72  |
| NM_005838 | 646.126   | 778.326   | AF086467  | 910.45    | 587.061   | Z15108    | 451.879   |
| NM_000734 | 3323.133  | 2863.852  | AL137345  | 2013.801  | 951.814   | AA001218  | 500.391   |
| NM_012331 | 3321.746  | 3055.677  | AK000967  | 1957.656  | 1017.437  | BG682146  | 3913.076  |
| NM_006644 | 7835.34   | 3463.301  | AK021583  | 2628.734  | 1330.455  | NM_012266 | 1960.062  |

|           |           |           |           |           |           |           |           |
|-----------|-----------|-----------|-----------|-----------|-----------|-----------|-----------|
| NM_006583 | 79243.297 | 9398.876  | AL137442  | 2137.646  | 1357.124  | NM_004559 | 809.942   |
| NM_003974 | 5137.248  | 2562.804  | AL049281  | 1585.914  | 972.765   | X56692    | 2550.727  |
| NM_006065 | 2610.924  | 2835.776  | NM_001206 | 16561.879 | 13516.632 | NM_014278 | 809.414   |
| NM_014339 | 54158.582 | 49302.992 | AL050061  | 2918.099  | 1979.054  | NM_000734 | 498.937   |
| NM_001495 | 2192.989  | 2058.582  | AL050206  | 1102.958  | 479.278   | NM_012331 | 1490.674  |
| NM_002288 | 964.385   | 3205.084  | AK026898  | 7035.189  | 5629.539  | NM_006644 | 3669.016  |
| NM_004416 | 1174.123  | 1040.385  | NM_006637 | 1351.252  | 1258.039  | NM_006583 | 39804.086 |
| NM_000628 | 18820.832 | 12690.023 | AK022419  | 1421.035  | 1181.213  | NM_003974 | 1500.012  |
| AF015041  | 1815.618  | 2151.106  | AJ251832  | 1006.206  | 603.845   | NM_006065 | 1174.638  |
| NM_002363 | 998.964   | 835.317   | NM_013936 | 717.493   | 670.863   | NM_001495 | 773.806   |
| AK000184  | 2756.19   | 2320.207  | AF086145  | 1729.176  | 875.889   | NM_002288 | 590.553   |
| AF055020  | 8714.874  | 10830.99  | Z70709    | 724.411   | 607.894   | NM_004416 | 759.422   |
| NM_006986 | 1785.808  | 1998.31   | BC002538  | 3343.243  | 2750.963  | NM_000628 | 12388.426 |
| NM_014904 | 811.204   | 805.906   | AK022355  | 1041.41   | 1485.687  | NM_000325 | 8860.02   |
| AL137576  | 9554.565  | 8681.688  | NM_017836 | 3654.219  | 1937.788  | AF015041  | 716.066   |
| NM_018358 | 5557.621  | 5468.116  | AK096584  | 15979.796 | 11820.885 | AK000184  | 1564.143  |
| NM_016321 | 892.397   | 917.603   | Z29070    | 989.008   | 816.7     | AF055020  | 3842.905  |
| AF131781  | 3486.156  | 3852.037  | AL078636  | 1068.32   | 1299.846  | NM_006986 | 945.935   |
| NM_006516 | 3347.058  | 12248.283 | AK022382  | 852.331   | 1283.415  | NM_014904 | 408.56    |
| NM_015865 | 1230.682  | 973.486   | AF147362  | 730.912   | 455.072   | AL137576  | 4885.145  |
| NM_003055 | 10630.699 | 8686.146  | AF076617  | 54470.863 | 50140.5   | NM_018358 | 1858.927  |
| NM_005075 | 1264.047  | 1008.85   | M91159    | 632.52    | 578.334   | AF131781  | 1432.435  |
| NM_006841 | 848.154   | 1180.052  | AK025129  | 859.962   | 534.236   | NM_006516 | 1277.783  |
| NM_002414 | 22386.422 | 13253.105 | NM_014392 | 1828.281  | 1492.237  | NM_015865 | 727.952   |
| NM_000355 | 2582.402  | 2063.358  | AK023291  | 9569.111  | 3914.789  | NM_003055 | 7729.84   |
| AL133580  | 2361.61   | 3039.878  | BF541820  | 849.531   | 600.211   | NM_005075 | 704.43    |
| NM_014666 | 8577.905  | 12249.751 | CY3Cy5    | 8069.748  | 620.141   | NM_002414 | 9483.69   |
| NM_005451 | 3768.037  | 4682.737  | BG752013  | 510.41    | 687.894   | NM_000355 | 2121.027  |
| NM_007172 | 2301.295  | 3193.297  | X07696    | 3574.552  | 3398.405  | NM_014666 | 3602.909  |
| NM_006152 | 2791.642  | 4162.99   | AI925826  | 6922.541  | 6797.328  | NM_005451 | 1697.848  |
| NM_013333 | 21413.428 | 28421.051 | U04209    | 5851.662  | 3122.464  | NM_007172 | 1705.049  |
| NM_003400 | 10116.575 | 11753.631 | AA679391  | 817.415   | 1159.92   | NM_002333 | 1975.007  |
| NM_006705 | 5934.407  | 6226.497  | BG682146  | 4041.062  | 2404.904  | NM_003400 | 6335.198  |
| NM_014439 | 1430.089  | 1359.081  | NM_005060 | 2244.52   | 2456.813  | NM_006705 | 2181.635  |
| NM_005582 | 2496.101  | 2487.382  | SR9       | 14879.428 | 4034.149  | NM_014439 | 1087.775  |
| NM_014453 | 16693.209 | 12887.807 | CY3Cy5    | 7832.854  | 636.703   | NM_005582 | 1518.863  |
| NM_005713 | 1488.117  | 1424.96   | NM_003974 | 1388.31   | 1021.161  | AF174605  | 448.739   |
| AK021951  | 627.42    | 650.806   | NM_006065 | 2404.209  | 1581.527  | AL050107  | 369.381   |
| AK023553  | 1066.443  | 1325.755  | NM_014339 | 36199.527 | 33636.613 | NM_014453 | 6402.998  |
| NM_014600 | 1412.482  | 1051.507  | NM_001495 | 969.608   | 1188.198  | NM_005713 | 596.729   |
| NM_016733 | 1914.903  | 1795.177  | NM_002288 | 814.62    | 1887.043  | AK021951  | 650.05    |
| AF181994  | 2324.866  | 2700.493  | NM_004416 | 647.371   | 405.312   | AK023553  | 645.386   |
| NM_018962 | 1905.958  | 1855.645  | AF015041  | 1359.94   | 2041.363  | NM_014600 | 874.323   |
| AF125100  | 3037.732  | 2596.633  | NM_006986 | 827.933   | 1071.202  | NM_016733 | 759.514   |
| NM_006114 | 5412.294  | 10962.936 | AF272043  | 2372.912  | 2639.696  | AF181994  | 923.464   |
| X82693    | 16215.758 | 14996.916 | NM_002587 | 9963.891  | 14230.795 | NM_018962 | 858.504   |
| NM_007176 | 6679.968  | 12486.686 | NM_002238 | 990.324   | 1105.383  | AF125100  | 2298.232  |
| NM_002722 | 2774.378  | 2147.878  | NM_004868 | 2037.646  | 2067.318  | NM_006114 | 2000.39   |
| AK025965  | 696.958   | 570.084   | NM_007028 | 6102.979  | 6794.299  | X82693    | 3393.556  |
| M22538    | 14677.963 | 18663.854 | AF130728  | 1270.557  | 2474.428  | NM_007176 | 2750.792  |
| NM_006028 | 922.426   | 1017.47   | NM_004987 | 311.188   | 1459.725  | NM_002722 | 1110.78   |
| NM_012297 | 5380.384  | 6131.541  | NM_001289 | 15542.298 | 13543.049 | AF317058  | 593.591   |
| AB007925  | 37353.309 | 36465.039 | AA831963  | 610.59    | 477.637   | AK025965  | 714.708   |



|           |           |           |           |           |           |           |           |
|-----------|-----------|-----------|-----------|-----------|-----------|-----------|-----------|
| NM_01818C | 2303.215  | 1441.071  | NM_002414 | 14320.284 | 8883.283  | M22538    | 7177.091  |
| NM_000361 | 28203.422 | 8411.218  | NM_000355 | 1417.777  | 1775.424  | NM_00602E | 825.58    |
| NM_00247E | 40116.367 | 39525.895 | AL133580  | 1784.765  | 1261.819  | NM_012297 | 3361.71   |
| NM_00383E | 10425.586 | 10855.85  | NM_01466E | 7060.519  | 7784.903  | AB007925  | 13517.782 |
| NM_017987 | 669.928   | 775.698   | NM_005451 | 2068.57   | 1901.001  | NM_01818C | 1093.512  |
| NM_01820E | 548.954   | 620.647   | NM_00717E | 1587.736  | 1620.158  | NM_000361 | 16250.854 |
| NM_014244 | 1146.271  | 1706.013  | NM_00615E | 1711.582  | 1725.063  | NM_00247E | 20318.447 |
| AK022417  | 3326.872  | 2177.493  | NM_00233E | 3465.726  | 3886.949  | NM_00383E | 1987.618  |
| U50534    | 1887.953  | 1361.564  | NM_01443E | 1456.185  | 2665.228  | NM_017987 | 835.015   |
| NM_014824 | 1458.527  | 1921.89   | NM_01226E | 2885.848  | 2393.299  | NM_01820E | 555.046   |
| NM_014504 | 2846.144  | 2068.455  | NM_00455E | 1390.847  | 1254.752  | AK022417  | 1139.472  |
| NM_01440E | 6446.081  | 7646.848  | X56692    | 3346.148  | 5117.141  | U50534    | 908.763   |
| NM_014741 | 2812.709  | 3486.529  | AK024467  | 433.398   | 909.042   | NM_014824 | 498.443   |
| AF212247  | 5224.476  | 6927.443  | NM_01447E | 179.541   | 1430.222  | NM_014504 | 1412.999  |
| AF161407  | 11713.285 | 18263.004 | NM_00583E | 410.397   | 1458.101  | NM_01440E | 4062.75   |
| NM_01473E | 3293.835  | 3942.687  | NM_000734 | 1530.758  | 2906.52   | NM_014741 | 1257.033  |
| NM_01640E | 5515.35   | 3453.304  | NM_012331 | 2799.253  | 2744.112  | AF212247  | 3547.948  |
| NM_01808C | 7184.342  | 5981.363  | NM_00658E | 56587.621 | 5934.061  | AF161407  | 5124.199  |
| NM_007115 | 897.028   | 749.779   | X82693    | 8520.53   | 10434.362 | NM_01473E | 1426.949  |
| NM_00461E | 1063.139  | 1059.542  | NM_00717E | 5914.567  | 6120.623  | NM_01640E | 2594.044  |
| NM_00436C | 927.913   | 754.823   | NM_00272E | 1484.56   | 1286.803  | NM_01808C | 5284.066  |
| NM_003821 | 1410.203  | 1205.613  | M22538    | 15732.774 | 20035.354 | NM_00461E | 745.309   |
| NM_01769E | 2737.421  | 3388.766  | NM_00602E | 860.757   | 1280.745  | NM_00436C | 1265.619  |
| NM_00397E | 1687.539  | 1166.45   | NM_014904 | 818.627   | 676.132   | NM_003821 | 446.735   |
| NM_004834 | 5351.247  | 4482.094  | AL137576  | 7264.424  | 7820.298  | NM_01769E | 1171.11   |
| NM_00081E | 761.187   | 926.515   | NM_01835E | 2373.721  | 2275.788  | NM_00397E | 969.597   |
| AK024747  | 11272.269 | 12681.801 | NM_00305E | 7228.717  | 7752.146  | NM_004834 | 1862.822  |
| NM_00639C | 1722.956  | 1642.912  | NM_00507E | 440.791   | 1027.025  | AK024747  | 2881.68   |
| NM_00358C | 3235.041  | 4136.146  | NM_006841 | 366.634   | 879.503   | NM_00358C | 1608.036  |
| NM_00650E | 1103.672  | 1242.017  | NM_014824 | 933.381   | 1111.104  | NM_00650E | 767.549   |
| NM_00323E | 8571.171  | 7927.102  | NM_014504 | 2120.525  | 1271.147  | NM_00323E | 1711.592  |
| AB042562  | 1948.151  | 1482.395  | NM_01440E | 4670.009  | 2983.629  | AB042562  | 1227.344  |
| NM_01600E | 3577.613  | 3822.754  | NM_014741 | 1287.999  | 1419.037  | NM_01600E | 2635.106  |
| NM_00237E | 2409.821  | 4198.979  | AF212247  | 3616.588  | 5236.44   | NM_00237E | 526.849   |
| NM_001364 | 1204.901  | 1022.505  | AF161407  | 12694.945 | 22001.15  | NM_001364 | 1062.055  |
| NM_017431 | 1204.823  | 1075.731  | NM_01473E | 1704.359  | 2587.636  | NM_017431 | 1092.004  |
| NM_006097 | 11170.066 | 9432.462  | NM_01640E | 2264.848  | 2375.698  | NM_006113 | 1591.154  |
| NM_006113 | 3653.755  | 4739.897  | NM_01808C | 5671.046  | 6792.534  | NM_01531E | 1531.617  |
| NM_01531E | 5507.207  | 6605.211  | AF174605  | 554.124   | 355.733   | AK022287  | 380.137   |
| AK022287  | 3965.985  | 5556.128  | NM_01445E | 8055.647  | 8800.829  | NM_015897 | 905.903   |
| NM_015897 | 1621.23   | 1494.29   | NM_00571E | 777.184   | 1310.672  | NM_00543E | 1606.333  |
| NM_00543E | 2442.959  | 3400.177  | NM_01673E | 1433.702  | 993.712   | AF177473  | 13705.982 |
| AF177473  | 18623.814 | 15953.477 | AF181994  | 1937.7    | 2487.39   | NM_00054E | 2038.337  |
| NM_00054E | 4619.667  | 4920.983  | AF125100  | 2756.079  | 3070.264  | AB023223  | 867.638   |
| AB023223  | 1154.161  | 603.382   | NM_006114 | 5992.059  | 9899.072  | AB018257  | 1005.452  |
| AB018257  | 2746.719  | 2675.517  | AF130728  | 839.312   | 854.866   | NM_00270E | 10536.396 |
| NM_00270E | 19423.131 | 16206.476 | NM_00128E | 13514.432 | 8580.774  | AK001059  | 897.64    |
| AK001059  | 2186.445  | 2338.578  | BG752013  | 558.751   | 389.047   | NM_00728E | 5638.777  |
| NM_00728E | 5914.84   | 4256.481  | X07696    | 4097.247  | 3874.275  | AK025133  | 3137.875  |
| NM_01761C | 1118.946  | 1266.247  | AA481015  | 540.421   | 680.951   | NM_004087 | 1793.686  |
| AK025133  | 13153.121 | 23840.607 | AI925826  | 7716.18   | 8563.079  | NM_01870C | 1286.627  |
| AB020704  | 990.943   | 866.124   | Z15108    | 982.64    | 1541.481  | NM_000119 | 5178.665  |
| NM_020197 | 471.261   | 749.341   | AA001218  | 631.075   | 535.21    | AK027100  | 680.966   |

|           |           |           |           |           |           |           |           |
|-----------|-----------|-----------|-----------|-----------|-----------|-----------|-----------|
| NM_004087 | 3380.032  | 4435.947  | AA679391  | 900.004   | 1395.927  | NM_003622 | 2009.229  |
| NM_018700 | 2098.169  | 1626.275  | NM_005060 | 1801.304  | 1811.082  | NM_001774 | 7325.155  |
| NM_000119 | 11531.561 | 10642.604 | NM_005437 | 3056.148  | 5686.48   | AK021645  | 1418.717  |
| NM_001065 | 11159.009 | 10341.588 | U50534    | 894.483   | 1056.87   | NM_013335 | 2013.673  |
| AK027100  | 864.408   | 908.259   | NM_014275 | 1934.145  | 1183.518  | NM_001491 | 2637.7    |
| NM_003622 | 3741.896  | 1956.909  | NM_000734 | 1680.119  | 1805.568  | AK026541  | 4939.54   |
| NM_001774 | 21903.398 | 18432.953 | NM_006644 | 4586.237  | 1623.631  | NM_005895 | 10207.315 |
| NM_005023 | 472.665   | 363.561   | NM_006583 | 53256.555 | 4421.437  | D42055    | 13625.148 |
| AK021645  | 3311.42   | 2169.747  | NM_003974 | 1177.976  | 713.71    | AL137349  | 1143.128  |
| NM_013335 | 3012.796  | 2226.165  | NM_006065 | 2462.385  | 1382.044  | NM_003335 | 596.438   |
| NM_001491 | 3240.323  | 2912.296  | NM_014335 | 37899.07  | 30659.408 | NM_016475 | 19633.986 |
| AK026541  | 2519.442  | 2460.292  | NM_001495 | 1013.52   | 1196.979  | NM_020155 | 1644.533  |
| NM_005895 | 19766.547 | 14820.537 | NM_002285 | 1039.987  | 2533.16   | BE874471  | 2943.922  |
| D42055    | 20237.254 | 14547.08  | NM_000625 | 16040.989 | 12414.062 | NM_006121 | 1261.019  |
| AL137349  | 1806.237  | 1442.406  | NM_000325 | 9109.318  | 7345.63   | AK023520  | 5599.173  |
| NM_016475 | 32094.389 | 35375.766 | AF015041  | 1284.805  | 1182.408  | NM_004693 | 641.652   |
| NM_015902 | 1717.827  | 909.036   | NM_002363 | 521.885   | 466.847   | NM_007211 | 1699.47   |
| NM_020155 | 3920.83   | 2891.832  | AK000184  | 1390.069  | 1031.929  | NM_014955 | 4720.957  |
| BE874471  | 3565.995  | 2788.22   | AF055020  | 5636.127  | 10843.479 | AB014592  | 956.563   |
| NM_006121 | 2632.82   | 2481.132  | AF272043  | 2521.445  | 3030.376  | NM_016952 | 986.724   |
| AK023520  | 8001.979  | 5810.499  | NM_002235 | 914.997   | 995.255   | NM_001654 | 1689.81   |
| NM_004693 | 966.418   | 1159.639  | NM_004865 | 1597.073  | 1587.703  | NM_002517 | 389.507   |
| NM_007211 | 5480.349  | 6181.261  | AF131781  | 3235.672  | 1576.935  | NM_007147 | 3797.716  |
| AB011152  | 2103.755  | 1560.612  | NM_006515 | 6682.005  | 10816.589 | X65463    | 2926.987  |
| NM_014955 | 7395.506  | 7986.926  | NM_015865 | 1891.851  | 2090.498  | AK024418  | 1303.24   |
| AB014592  | 1041.648  | 1425.177  | NM_003055 | 7790.368  | 6786.921  | NM_003367 | 1797.171  |
| NM_016952 | 2043.99   | 1863.184  | NM_002414 | 14887.083 | 7473.479  | NM_005194 | 4825.083  |
| NM_001654 | 4495.637  | 6452.293  | NM_000355 | 1372.209  | 1504.834  | NM_014315 | 1012.505  |
| NM_014515 | 1269.421  | 892.69    | AL133580  | 2250.213  | 1655.516  | NM_012087 | 632.361   |
| NM_007147 | 5970.304  | 5030.967  | NM_014665 | 8453.186  | 9681.195  | AK026072  | 640.334   |
| X65463    | 5381.164  | 4795.877  | NM_005451 | 2481.26   | 2609.468  | NM_015675 | 2016.673  |
| AK024418  | 2028.542  | 1849.394  | NM_007172 | 1767.353  | 1742.324  | AF299118  | 23377.506 |
| NM_003367 | 4725.087  | 3871.758  | NM_006152 | 1963.574  | 2921.934  | AK025353  | 8745.467  |
| NM_005194 | 8192.804  | 8141.45   | NM_013333 | 21807.936 | 21492.631 | AK056896  | 24683.797 |
| AB002296  | 2633.357  | 2371.627  | NM_002333 | 4118.214  | 3396.14   | AF288207  | 7325.955  |
| NM_014315 | 3083.866  | 3020.094  | NM_003400 | 9498.669  | 7809.396  | NM_001001 | 31293.209 |
| NM_012087 | 1527.329  | 1379.076  | NM_006705 | 2690.421  | 2949.473  | NM_005715 | 2356.495  |
| AF165520  | 1705.115  | 1043.19   | AK024467  | 609.903   | 1118.647  | AK026992  | 1869.841  |
| NM_015675 | 3561.784  | 3186.817  | NM_014600 | 720.906   | 678.338   | AL137343  | 1106.707  |
| AF299118  | 60078.781 | 48222.352 | NM_016733 | 1697.739  | 676.595   | AK026414  | 5029.279  |
| AK025353  | 14520.747 | 15122.354 | AF181994  | 1854.194  | 1911.713  | D17297    | 871.864   |
| AK056896  | 40226.133 | 47202.836 | NM_018962 | 1555.976  | 1599.075  | NM_004074 | 4559.622  |
| AK022763  | 22540.32  | 25228.859 | AF125100  | 2935.112  | 2045.494  | NM_002625 | 12185.412 |
| NM_000975 | 61288.316 | 53338.125 | NM_006114 | 6485.926  | 5970.102  | NM_018435 | 3620.457  |
| NM_001000 | 68431.93  | 51994.184 | X82693    | 7676.755  | 7410.825  | AF157115  | 2252.552  |
| AF288207  | 11517.985 | 28312.373 | NM_007175 | 6612.033  | 6799.905  | AJ223353  | 5435.269  |
| NM_001001 | 60058.586 | 54130.016 | NM_002722 | 1674.934  | 1374.382  | NM_012241 | 2843.216  |
| NM_005715 | 2799.455  | 3318.828  | M22538    | 16244.636 | 13166.468 | NM_018485 | 1047.821  |
| AK026992  | 2806.614  | 2575.811  | NM_014904 | 775.626   | 861.56    | NM_005324 | 11469.874 |
| NM_004541 | 32658.031 | 38382.152 | AL137576  | 6324.218  | 6021.567  | AL080201  | 9123.449  |
| NM_006830 | 46297.492 | 39174.074 | NM_018355 | 1041.804  | 801.89    | NM_015363 | 1369.011  |
| AK026414  | 10893.637 | 6945.827  | NM_005060 | 900.074   | 749.737   | AB040941  | 1557.025  |
| D17297    | 824.155   | 653.132   | NM_005437 | 1653.866  | 2086.521  | AL137241  | 1306.439  |

|           |           |           |           |           |           |           |           |
|-----------|-----------|-----------|-----------|-----------|-----------|-----------|-----------|
| NM_002626 | 30361.691 | 25571.547 | AK022417  | 2791.612  | 2174.616  | AB037742  | 1400.649  |
| NM_018436 | 12824.354 | 10363.996 | U50534    | 951.176   | 614.781   | AF272375  | 633.797   |
| AF157115  | 4202.034  | 3260.32   | NM_014824 | 975.666   | 1162.703  | AK025078  | 604.936   |
| AJ223353  | 7624.249  | 5857.587  | NM_014504 | 2744.477  | 1313.74   | AK023754  | 367.65    |
| NM_012241 | 7364.834  | 6312.395  | NM_014406 | 5776.669  | 4746.969  | AK021689  | 730.091   |
| NM_018486 | 1655.161  | 2510.802  | NM_014741 | 1516.138  | 1606.129  | AK024737  | 411.227   |
| NM_005324 | 20753.85  | 18345.898 | AF212247  | 3362.598  | 3584.418  | AB007890  | 3884.48   |
| AL080201  | 13811.738 | 11894.223 | AF161407  | 11471.261 | 15549.003 | NM_020411 | 17860.088 |
| NM_015363 | 1739.991  | 1163.342  | NM_014736 | 1958.398  | 1672.633  | AF275800  | 656.223   |
| NM_001806 | 5283.974  | 7390.007  | NM_016406 | 2854.281  | 2137.984  | AL359605  | 1225.43   |
| AB040941  | 4596.62   | 4569.362  | AL050107  | 1121.813  | 1518.714  | AB020633  | 2188.032  |
| AL137241  | 1475.808  | 1243.931  | NM_005713 | 1031.524  | 1545.03   | AK025445  | 2072.202  |
| AB037742  | 2455.164  | 2156.756  | AK023553  | 1607.346  | 1449.311  | NM_017727 | 2640.918  |
| AF272375  | 1480.148  | 2311.492  | AF272043  | 2568.995  | 1668.141  | AK021714  | 987.576   |
| AK025078  | 988.313   | 1121.835  | NM_002587 | 10740.405 | 11784.423 | AK022972  | 1581.934  |
| AK021689  | 555.798   | 548.462   | NM_004866 | 1567.668  | 1352.315  | AK025996  | 1536.788  |
| AK024737  | 1138.65   | 1367.51   | NM_004666 | 1345.952  | 918.223   | AF088015  | 938.134   |
| AB007890  | 10867.646 | 5759.679  | NM_007026 | 4488.435  | 2145.846  | AF007132  | 572.86    |
| AF070591  | 1098.813  | 1328.912  | AF130728  | 1097.717  | 975.683   | AK026711  | 2041.035  |
| AF275800  | 1507.447  | 1642.852  | NM_001286 | 10422.764 | 5645.615  | NM_004866 | 1339.929  |
| AL359605  | 1989.302  | 1944.37   | NM_001131 | 15312.606 | 17490.525 | AF136408  | 979.838   |
| AB020633  | 4208.872  | 3164.019  | X07696    | 3227.87   | 2260.446  | AJ011595  | 934.766   |
| AK025445  | 10910.304 | 9140.45   | AA481015  | 697.303   | 406.346   | AJ002787  | 876.13    |
| NM_017727 | 9698.492  | 12466.325 | AI925826  | 5976.145  | 4643.086  | Z70764    | 1559.951  |
| NM_018316 | 2369.051  | 2782.281  | U04209    | 4093.71   | 1978.183  | M25785    | 591.378   |
| AL359559  | 939.597   | 983.911   | AI393201  | 4586.884  | 4759.875  | M73048    | 740.523   |
| AY008301  | 1105.645  | 1023.294  | M34664    | 47432.855 | 54272.078 | D16477    | 1287.981  |
| AK021714  | 805.072   | 1355.832  | AA884709  | 723.316   | 829.186   | AK000949  | 629.371   |
| NM_020314 | 4154.867  | 4079.725  | NM_012266 | 2002.217  | 1394.931  | AK024612  | 712.319   |
| AK022972  | 3652.079  | 3455.21   | NM_004556 | 1035.847  | 1044.131  | AK025051  | 815.045   |
| AK025996  | 3912.559  | 4582.002  | X56692    | 3361.744  | 4491.415  | AK024553  | 27412.691 |
| AF088015  | 847.066   | 1323.044  | NM_014476 | 828.656   | 300.881   | AK024930  | 717.458   |
| AF086168  | 468.165   | 665.077   | NM_000734 | 2273.66   | 2613.959  | AF143879  | 2225.63   |
| AF007132  | 779.859   | 783.899   | NM_012331 | 1910.407  | 1065.772  | AK024621  | 3773.047  |
| AK026711  | 5655.884  | 5147.449  | NM_006644 | 3406.062  | 802.775   | AL157449  | 16286.062 |
| NM_017864 | 4475.705  | 4394.354  | NM_006583 | 54540.648 | 5760.313  | AL117582  | 688.277   |
| NM_004866 | 5464.617  | 4395.752  | NM_003974 | 1296.086  | 1019.821  | AK025525  | 881.688   |
| AF136408  | 1991.767  | 1328.742  | NM_006065 | 1788.163  | 1215.179  | L09095    | 1233.976  |
| AL110203  | 769.546   | 633.411   | NM_014336 | 26834.793 | 22630.318 | NM_018233 | 1355.324  |
| AJ011602  | 842.422   | 886.255   | NM_001495 | 1032.541  | 907.108   | AK026860  | 4833.026  |
| AJ002787  | 5120.445  | 4175.745  | NM_002286 | 877.186   | 1522.814  | AK024211  | 741.259   |
| Z70764    | 1807.104  | 1414.37   | NM_000626 | 9753.837  | 4656.547  | NM_014896 | 582.243   |
| Z83948    | 1103.385  | 794.575   | AK000184  | 1064.277  | 1476.435  | AK023435  | 1128.459  |
| M25785    | 1513.365  | 1851.385  | AF055020  | 1918.536  | 3175.016  | AF086035  | 3406.687  |
| M32443    | 3133.901  | 2282.146  | NM_006986 | 980.942   | 694.012   | AK022159  | 2051.948  |
| D16908    | 826.582   | 823.303   | AL137576  | 5063.496  | 3480.333  | U25750    | 3731.693  |
| D16477    | 1358.467  | 1533.831  | NM_018356 | 1814.17   | 1937.926  | AK023691  | 1275.417  |
| AK022309  | 945.817   | 669.399   | AF131781  | 2666.892  | 681.128   | AK026744  | 2208.731  |
| AK000063  | 1589.372  | 1013.11   | NM_006516 | 4478.707  | 7807.964  | BC023536  | 4214.216  |
| AK000949  | 531.602   | 507.815   | NM_003055 | 8867.726  | 7093.391  | NM_001803 | 13042.701 |
| AK000974  | 1081.934  | 884.555   | NM_006841 | 494.969   | 640.686   | NM_006233 | 2387.316  |
| AK025051  | 860.011   | 545.023   | NM_002414 | 16915.041 | 8970.909  | AK021889  | 1546.677  |
| AK024553  | 28397.357 | 26505.621 | AL133580  | 2267.198  | 1474.999  | L23544    | 21783.781 |

|           |           |           |           |           |           |           |           |
|-----------|-----------|-----------|-----------|-----------|-----------|-----------|-----------|
| AK024930  | 965.088   | 1125.297  | NM_014666 | 7658.304  | 6976.762  | NM_019020 | 1498.405  |
| AF143879  | 4350.164  | 3838.118  | NM_005451 | 1435.55   | 1116.156  | NM_016474 | 1376.222  |
| AK024621  | 19387.238 | 21747.094 | NM_007172 | 1127.316  | 997.087   | NM_000910 | 762.51    |
| AL157449  | 28215.488 | 15950.986 | NM_006152 | 2075.228  | 2142.493  | AF086001  | 51983.68  |
| AL117582  | 1392.006  | 1487.61   | NM_006705 | 1420.287  | 2110.353  | AL117560  | 10032.351 |
| AK025525  | 1279.439  | 1079.015  | NM_014439 | 1103.668  | 1237.557  | M24749    | 2359.039  |
| NM_018233 | 13088.528 | 14348.928 | NM_005582 | 1372.534  | 1915.64   | NM_005831 | 25205.213 |
| AV740891  | 1267.854  | 1227.489  | AF174605  | 1194.094  | 1089.178  | NM_005850 | 54446.926 |
| AF143329  | 774.147   | 687.835   | NM_014453 | 4208.131  | 3861.687  | NM_000554 | 14078.396 |
| AF090916  | 1108.989  | 792.305   | NM_005713 | 871.227   | 1100.323  | AF009317  | 2016.48   |
| AK026860  | 8876.775  | 7426.829  | AF181994  | 668.988   | 760.888   | AK026583  | 1083.947  |
| NM_014896 | 645.121   | 657.426   | NM_018962 | 1285.239  | 1631.896  | AF218031  | 2570.395  |
| AK023435  | 1548.487  | 1076.567  | AF125100  | 1878.997  | 1335.592  | AF210650  | 1449      |
| AF086035  | 8954.791  | 10197.729 | NM_006114 | 3919.51   | 4176.661  | NM_018356 | 3386.162  |
| AK022159  | 4104.756  | 4152.206  | X82693    | 4396.916  | 4679.456  | AF085896  | 1695.15   |
| AF007136  | 759.985   | 622.104   | NM_007176 | 6762.5    | 7571.529  | AK001857  | 644.229   |
| U25750    | 8514.785  | 5813.423  | NM_002722 | 1168.635  | 956.702   | AK021525  | 224.495   |
| AK023691  | 5320.637  | 4710.675  | M22538    | 9785.789  | 7805.453  | AL133577  | 1953.932  |
| AK026744  | 3213.505  | 896.21    | NM_006028 | 1789.696  | 1922.885  | AF279773  | 416.94    |
| AK002105  | 1261.679  | 1052.475  | NM_012297 | 5653.168  | 4661.006  | AK025378  | 1947.367  |
| NM_005234 | 5966.895  | 6961.054  | AB007925  | 20930.506 | 26421.135 | NM_000479 | 1215.62   |
| BC023536  | 1793.438  | 1480.244  | NM_018180 | 1430.437  | 1152.935  | AF038199  | 2050.689  |
| NM_001803 | 41647.09  | 4339.883  | NM_000361 | 6267.074  | 2760.309  | CY3Cy5    | 4952.202  |
| NM_006233 | 6803.262  | 10555.31  | NM_002475 | 27356.051 | 18892.664 | BE908993  | 5531.136  |
| AK021889  | 508.949   | 838.518   | NM_003836 | 3406.707  | 3613.384  | AB012701  | 1876.384  |
| AK000992  | 929.422   | 982.995   | NM_014244 | 445.705   | 886.87    | M61156    | 680.984   |
| L23544    | 26254.838 | 23111.895 | AK022417  | 2816.829  | 2113.684  | R44005    | 1930.93   |
| NM_019020 | 2300.033  | 2527.552  | NM_014824 | 708.875   | 777.292   | AI942392  | 2542.917  |
| NM_016474 | 1992.549  | 1464.136  | NM_014504 | 1752.573  | 828.04    | M55040    | 682.494   |
| NM_000910 | 1692.854  | 1787.667  | NM_014408 | 3680.509  | 3164.092  | AW009739  | 1013.006  |
| AF086001  | 49315.367 | 41038.809 | NM_014741 | 1012.344  | 1225.448  | BC036805  | 1924.167  |
| AL117560  | 18721.002 | 19489.51  | AF212247  | 2473.239  | 3151.529  | Z74615    | 11194.976 |
| M24749    | 6492.422  | 7933.325  | AF161407  | 7974.881  | 14937.014 | X03884    | 4667.234  |
| NM_000554 | 33833.406 | 35929.371 | NM_014738 | 1398.209  | 2464.624  | U36759    | 6015.632  |
| AF009317  | 5780.498  | 5754.51   | NM_016406 | 2024.576  | 1638.897  | X91625    | 1240.803  |
| AK026583  | 1989.604  | 2432.641  | NM_018080 | 4189.081  | 4085.294  | AF004231  | 717.743   |
| AF218031  | 5278.101  | 4565.305  | NM_004616 | 995.564   | 551.086   | AF001862  | 2078.824  |
| AF210650  | 3348.557  | 3151.549  | NM_004360 | 1337.996  | 1119.502  | SR6       | 2694.641  |
| NM_018356 | 5922.495  | 4570.426  | NM_003821 | 1311.797  | 936.902   | CY3Cy5    | 3744.132  |
| AF085896  | 2021.801  | 1308.105  | NM_017692 | 3116.029  | 1290.259  | U87460    | 3525.054  |
| X74613    | 16098.639 | 14782.346 | NM_004834 | 2193.434  | 2040.422  | NM_003617 | 399.057   |
| AF075080  | 11360.823 | 9880.632  | AK024747  | 14109.288 | 6332.534  | NM_001841 | 528.176   |
| AL390183  | 819.764   | 795.072   | NM_006390 | 1692.296  | 554.846   | NM_002054 | 1889.253  |
| Y13897    | 2468.371  | 2143.384  | NM_003580 | 2290.376  | 2124.796  | AF300649  | 1031.572  |
| AK001857  | 1503.122  | 1579.935  | NM_003235 | 5870.195  | 5743.325  | NM_004125 | 551.082   |
| AF067801  | 415.045   | 846.921   | AB042562  | 1155.302  | 723.801   | NM_000823 | 6472.777  |
| AL133577  | 2299.078  | 3235.32   | NM_016009 | 1813.397  | 1537.812  | NM_004414 | 1757.64   |
| AK025378  | 1994.778  | 1748.073  | NM_002378 | 1059.721  | 1771.713  | NM_001139 | 1201.439  |
| NM_000479 | 1871.382  | 1633.269  | NM_017431 | 889.752   | 677.377   | NM_003772 | 790.268   |
| AF038199  | 4183.17   | 4846.529  | NM_006097 | 7592.408  | 7772.877  | NM_001541 | 2266.71   |
| CY3Cy5    | 13659.71  | 812.744   | NM_006113 | 2476.093  | 4083.972  | NM_005416 | 680.249   |
| BE908993  | 22081.852 | 22943.734 | NM_015313 | 2253.734  | 4563.519  | L09081    | 2016.214  |
| AB012701  | 3122.897  | 2863.969  | AK022287  | 2816.414  | 3620.787  | NM_000218 | 66913.172 |

|           |           |           |           |           |           |           |           |
|-----------|-----------|-----------|-----------|-----------|-----------|-----------|-----------|
| M61156    | 1520.421  | 1956.265  | NM_015897 | 1724.385  | 1036.757  | NM_016113 | 3663.636  |
| R44005    | 9769.674  | 4907.428  | NM_005436 | 2917.221  | 3974.825  | NM_014222 | 2587.849  |
| AI942392  | 8451.329  | 7166.244  | AF177473  | 20925.162 | 18979.746 | NM_000509 | 767.695   |
| M55040    | 1741.75   | 1494.589  | NM_000546 | 1765.598  | 2053.026  | X06182    | 3119.447  |
| AW009739  | 3993.729  | 4729.73   | AB018257  | 1008.078  | 524.581   | BF217496  | 3587.506  |
| BC036805  | 8282.732  | 14550.546 | NM_002708 | 13501.959 | 6163.777  | NM_004762 | 3158.223  |
| Z74615    | 44651.301 | 49342.457 | AK001059  | 770.953   | 939.211   | NM_006641 | 24103.953 |
| X03884    | 18531.354 | 11541.327 | NM_017610 | 551.74    | 444.744   | NM_000634 | 5795.904  |
| U36759    | 20841.678 | 4690.182  | AK025133  | 15838.771 | 22899.25  | NM_014679 | 12806.916 |
| X91625    | 4024.746  | 5217.49   | AB020704  | 525.406   | 457.111   | AB040969  | 1284.234  |
| AF090901  | 846.51    | 883.469   | NM_004087 | 3627.184  | 1248.546  | NM_003467 | 3117.254  |
| AF004231  | 2592.383  | 2073.222  | NM_000119 | 5878.301  | 4581.112  | NM_014936 | 303.406   |
| AF001862  | 5247.486  | 4372.218  | NM_001065 | 5597.838  | 6688.364  | NM_003943 | 1183.122  |
| NM_058197 | 583.435   | 937.978   | NM_016950 | 928.356   | 1932.051  | NM_019052 | 3460.269  |
| SR6       | 4867.652  | 3470.192  | NM_003622 | 1118.407  | 425.793   | NM_003202 | 153.999   |
| SR8       | 16342.273 | 41530.59  | NM_001774 | 7547.282  | 7487.972  | AF119902  | 516.724   |
| SR10      | 49682.324 | 18549.211 | AK021645  | 1771.014  | 1271.104  | X62468    | 421.007   |
| CY3Cy5    | 17151.656 | 1548.669  | NM_013339 | 929.623   | 987.07    | NM_003890 | 1573.222  |
| NM_004126 | 585.804   | 967.372   | NM_001491 | 2080.67   | 1304.322  | BF127978  | 3294.206  |
| U87460    | 9025.069  | 10283.687 | AK026541  | 1706.508  | 1387.275  | AF110801  | 627.431   |
| NM_003617 | 847.125   | 1061.159  | NM_005899 | 12679.159 | 11624.323 | NM_016579 | 5325.174  |
| NM_001841 | 742.188   | 758.288   | D42055    | 5632.522  | 2751.782  | AK022565  | 6924.723  |
| NM_002054 | 5030.389  | 5522.462  | AL137349  | 997.356   | 851.993   | AK023151  | 1470.511  |
| AF300649  | 2229.305  | 2352.198  | NM_003339 | 954.151   | 73.345    | AB033076  | 839.134   |
| NM_004125 | 2148.446  | 2837.359  | NM_016476 | 35683.77  | 21499.902 | AK022876  | 715.683   |
| NM_000823 | 6087.249  | 4819.529  | NM_015902 | 1361.894  | 920.973   | AF134894  | 3249.266  |
| NM_004414 | 3741.001  | 3201.552  | NM_020155 | 2064.163  | 2089.693  | NM_003938 | 3107.551  |
| NM_003772 | 1480.524  | 1894.816  | BE874471  | 3661.306  | 1215.568  | NM_014827 | 9978.874  |
| NM_001541 | 2260.521  | 2267.781  | NM_006121 | 1169.863  | 813.547   | NM_001441 | 1209.873  |
| NM_005416 | 3006.72   | 2320.614  | AK023520  | 4169.989  | 2261.689  | NM_018324 | 841.434   |
| NM_004670 | 1153.716  | 854.911   | NM_007211 | 2552.478  | 1773.468  | AF064255  | 14456.344 |
| L09081    | 8276.747  | 5351.771  | AB011152  | 854.874   | 749.893   | NM_016368 | 33549.301 |
| NM_000218 | 67397.094 | 51817.164 | NM_014956 | 3493.566  | 4250.416  | U08853    | 729.029   |
| NM_014222 | 6033.197  | 8172.193  | AB014592  | 491.988   | 731.875   | NM_004261 | 2080.923  |
| L14819    | 324.155   | 602.974   | NM_016952 | 1258.619  | 1852.493  | NM_016006 | 1600.756  |
| NM_000509 | 3257.742  | 4100.131  | NM_001654 | 2015.299  | 1704.63   | NM_016245 | 5190.224  |
| NM_004542 | 1766.03   | 2049.697  | NM_007147 | 8677.03   | 15966.356 | AF005632  | 1660.891  |
| AI742810  | 106.979   | 531.606   | X65463    | 3304.74   | 4719.012  | NM_000903 | 10322.451 |
| X06182    | 1899.645  | 1779.942  | AK024418  | 2203.358  | 2639.86   | NM_004493 | 3714.319  |
| BF217496  | 6738.702  | 8207.19   | NM_003367 | 1207.604  | 1822.052  | NM_004047 | 11454.234 |
| NM_004762 | 5777.98   | 3970.079  | NM_005194 | 5411.838  | 3110.705  | NM_004823 | 2089.488  |
| NM_006641 | 48045.809 | 50362.121 | AB002296  | 1708.365  | 1362.079  | Y17179    | 50627.656 |
| NM_000634 | 11998.95  | 14885.406 | NM_014315 | 2068.791  | 1799.288  | NM_000891 | 1171.552  |
| NM_014679 | 23090.563 | 27239.482 | AF165520  | 1078.11   | 724.237   | AF239613  | 1777.714  |
| AB040969  | 2882.878  | 2110.336  | AK026072  | 450.796   | 684.631   | AK026840  | 1745.096  |
| NM_003467 | 3518.906  | 4339.233  | NM_015679 | 1708.594  | 1558.926  | NM_000288 | 925.864   |
| NM_014936 | 1208.019  | 1449.953  | AF299118  | 38935.164 | 42256.172 | AK026317  | 3330.369  |
| NM_003943 | 2173.273  | 2426.905  | AK025353  | 6708.053  | 4967.992  | X82207    | 7442.801  |
| NM_019052 | 5810.318  | 6738.052  | AK056896  | 10386.484 | 6842.283  | NM_015044 | 1704.359  |
| NM_003890 | 2787.121  | 3798.447  | AK022763  | 10441.357 | 6263.651  | NM_000520 | 2874.887  |
| BF127978  | 3652.764  | 2638.434  | NM_000976 | 42947.344 | 48030.105 | NM_000289 | 449.613   |
| AF110801  | 585.156   | 291.635   | NM_001000 | 57685.063 | 61241.016 | NM_001500 | 282.949   |
| NM_016579 | 13843.944 | 12323.971 | AF288207  | 9767.696  | 19092.518 | NM_004388 | 1430.443  |

|           |           |           |           |           |           |           |           |
|-----------|-----------|-----------|-----------|-----------|-----------|-----------|-----------|
| AB018297  | 1316.132  | 757.065   | NM_001001 | 31150.719 | 37996.078 | AL110127  | 854.667   |
| AK023151  | 2529.381  | 4019.636  | NM_005715 | 3050.165  | 6458.146  | NM_002528 | 1205.806  |
| AB033076  | 1860.153  | 2648.443  | AK026992  | 2763.998  | 2715.394  | D38438    | 4679.175  |
| AK022876  | 1492.379  | 1950.526  | AL137343  | 758.427   | 474.445   | AV714945  | 378.28    |
| AF134894  | 6011.701  | 8743.989  | NM_004541 | 29936.852 | 34708.727 | AF007872  | 1663.119  |
| NM_003938 | 10137.49  | 10772.733 | NM_006830 | 50281.164 | 43419.418 | M30938    | 1650.828  |
| NM_014827 | 22576.658 | 26827.262 | AK026414  | 5858.377  | 7087.796  | NM_015148 | 617.145   |
| NM_001441 | 2450.144  | 2577.141  | D17297    | 587.425   | 527.342   | NM_004714 | 811.06    |
| NM_018324 | 1043.548  | 1471.864  | NM_004074 | 13859.078 | 13464.078 | NM_005401 | 739.658   |
| AF064255  | 38649.277 | 43969.344 | NM_002626 | 20088.75  | 28743.422 | NM_002497 | 2796.309  |
| NM_016368 | 47664.77  | 48159.313 | NM_018436 | 4282.711  | 6795.198  | AB025194  | 4638.114  |
| U08853    | 1953.356  | 2111.802  | AF157115  | 3249.076  | 6464.678  | NM_006238 | 684.902   |
| NM_004261 | 7297.454  | 14346.224 | AJ223353  | 5144.972  | 5871.445  | BC020863  | 515.867   |
| NM_016006 | 2588.418  | 2509.673  | NM_012241 | 3904.53   | 5991.285  | NM_017897 | 1494.168  |
| NM_016245 | 15374.629 | 20044.643 | NM_018486 | 954.856   | 1941.048  | NM_004265 | 1913.79   |
| AF005632  | 4457.63   | 6485.64   | NM_005324 | 19182.004 | 10203.584 | NM_002572 | 1044.084  |
| NM_000903 | 24449.955 | 20685.465 | AL080201  | 7046.458  | 3350.918  | L14819    | 463.666   |
| NM_004493 | 11702.854 | 13855.86  | NM_015363 | 1426.647  | 749.253   | NM_000508 | 996.977   |
| AF309489  | 1350.676  | 1821.82   | NM_001806 | 3087.803  | 3380.445  | NM_004542 | 543.704   |
| Y17179    | 71745.805 | 50905.656 | AB040941  | 2569.508  | 3015.235  | X06182    | 894.072   |
| NM_000891 | 2255.135  | 605.55    | AB037742  | 1071.752  | 994.292   | AB012701  | 1693.013  |
| AF239613  | 5062.077  | 6848.15   | AK023754  | 689.367   | 650.796   | M61156    | 627.519   |
| AK026840  | 3206.144  | 2848.522  | AK021689  | 454.612   | 849.758   | R44005    | 1751.296  |
| NM_000288 | 1779.414  | 2970.039  | AK024737  | 1384.201  | 1757.317  | AI942392  | 2637.107  |
| AK026317  | 11492.913 | 13713.117 | AB007890  | 8817.656  | 9167.028  | M55040    | 934.478   |
| X82207    | 15666.316 | 20652.836 | AF070591  | 1343.96   | 1910.921  | AW009739  | 1107.65   |
| NM_015044 | 4234.293  | 6687.472  | NM_020411 | 38274.32  | 42421.957 | BC036805  | 1964.005  |
| NM_002867 | 727.113   | 864.44    | AF275800  | 1462.557  | 2190.215  | Z74615    | 13128.197 |
| NM_000520 | 12632.639 | 6962.514  | AL359605  | 1335.485  | 2528.558  | X03884    | 4762.377  |
| NM_000288 | 1749.844  | 1630.739  | AB020633  | 2413.08   | 3445.66   | U36759    | 5942.042  |
| NM_001500 | 1019.525  | 2864.567  | AK025445  | 2884.382  | 6445.861  | X91625    | 1238.205  |
| NM_004388 | 2768.819  | 4475.925  | AL357200  | 1131.152  | 2019.238  | AF004231  | 913.657   |
| NM_020378 | 299.98    | 448.904   | NM_017727 | 7738.39   | 15475.703 | AF001862  | 1866.814  |
| AL110127  | 2000.254  | 2059.596  | NM_018318 | 1481.187  | 3620.656  | NM_058197 | 74.101    |
| AK001997  | 777.25    | 655.152   | AL359559  | 966.807   | 683.35    | NM_016044 | 274.953   |
| NM_002528 | 2367.375  | 3085.794  | AY008301  | 617.862   | 551.34    | AK023151  | 1141.984  |
| D38438    | 7692.79   | 6444.01   | AK024063  | 625.102   | 817.982   | AB033076  | 952.939   |
| AV714945  | 1567.613  | 1372.312  | NM_020314 | 3517.985  | 2716.416  | AK022876  | 705.999   |
| AF089897  | 638.92    | 773.048   | AK022972  | 2263.849  | 1269.377  | AF134894  | 2969.156  |
| M30938    | 7178.276  | 9775.181  | AK025996  | 1377.183  | 1235.714  | U87460    | 3230.699  |
| NM_015148 | 1328.609  | 1705.56   | AF088015  | 995.037   | 484.733   | NM_003617 | 605.195   |
| NM_004714 | 1047.492  | 970.229   | AF007132  | 439.182   | 421.501   | NM_001841 | 413.803   |
| NM_005401 | 1811.777  | 889.955   | AK026711  | 3763.656  | 3522.802  | NM_002054 | 1744.379  |
| NM_002497 | 7456.562  | 4136.108  | NM_017864 | 4378.738  | 4577.274  | AF300649  | 1177.638  |
| AB025194  | 7874.1    | 9102.549  | NM_004868 | 4243.228  | 4222.932  | NM_004125 | 997.54    |
| NM_006238 | 908.6     | 1017.534  | AJ002787  | 3339.499  | 6555.664  | NM_000823 | 6404.871  |
| BC020863  | 1017.748  | 1197.746  | Z70764    | 987.955   | 2162.25   | NM_004414 | 1977.804  |
| NM_017897 | 4040.482  | 4766.466  | AL049252  | 362.944   | 1017.639  | NM_003317 | 2889.967  |
| NM_004265 | 9032.309  | 31654.471 | Z83948    | 1287.949  | 1701.444  | NM_001139 | 1202.759  |
| NM_002572 | 3781.451  | 4925.92   | M25785    | 741.162   | 1413.129  | NM_004608 | 13583.398 |
| L14819    | 816.694   | 637.076   | M32443    | 2148.063  | 2334.043  | NM_003772 | 731.105   |
| NM_000508 | 2786.036  | 3427.464  | D55639    | 603.911   | 1055.015  | NM_001541 | 2155.665  |
| NM_004542 | 1281.32   | 1151.046  | D16477    | 1710.69   | 1908.531  | NM_005416 | 1098.469  |

|           |           |           |           |           |           |           |           |
|-----------|-----------|-----------|-----------|-----------|-----------|-----------|-----------|
| X06182    | 2266.798  | 1890.42   | AK024759  | 1049.932  | 908.534   | L09081    | 1547.472  |
| AB012701  | 3153.514  | 3063.556  | AK022309  | 864.335   | 1341.4    | NM_000218 | 62539.602 |
| M61156    | 1815.371  | 2313.664  | AK000063  | 705.513   | 1684.352  | NM_016113 | 3701.492  |
| R44005    | 12296.845 | 6852.922  | AK027068  | 414.743   | 1094.455  | NM_014222 | 2021.803  |
| AI942392  | 9092.438  | 7301.39   | AK000974  | 639.727   | 1492.308  | AK026840  | 1110.037  |
| M55040    | 2454.216  | 1814.832  | AK024553  | 8746.784  | 8581.569  | NM_000288 | 904.509   |
| AW009739  | 4325.911  | 5380.346  | AK024662  | 2532.36   | 1768.114  | AK026317  | 4463.402  |
| BC036805  | 10584.369 | 16862.613 | AK024930  | 1597.63   | 1303.821  | X82207    | 7502.914  |
| X03884    | 15043.153 | 9413.218  | AF143879  | 2835.675  | 2217.634  | NM_015044 | 1566.818  |
| U36759    | 20339.535 | 2785.909  | AK024621  | 8837.661  | 4812.245  | NM_002867 | 190.185   |
| X91625    | 3734.372  | 2531.979  | AL157449  | 20903.33  | 11803.568 | BF217496  | 4333.847  |
| AF090901  | 606.875   | 533.9     | AK025525  | 921.653   | 666.375   | NM_004762 | 3174.746  |
| AF004231  | 2122.913  | 1206.737  | NM_018233 | 9347.925  | 11603.726 | NM_006641 | 24887.756 |
| AF001862  | 4305.147  | 2978.612  | AV740891  | 1261.451  | 1046.722  | NM_000634 | 5632.408  |
| NM_058197 | 527.295   | 1048.76   | AF090916  | 889.871   | 982.939   | NM_014679 | 12117.77  |
| NM_016044 | 1339.441  | 2944.135  | AK023435  | 3082.823  | 1752.953  | AB040969  | 1147.854  |
| AK023151  | 2589.842  | 2970.853  | AF086035  | 6404.056  | 6507.77   | NM_003467 | 3006.455  |
| AB033076  | 1980.798  | 1584.167  | AK022159  | 3440.216  | 2419.208  | NM_003943 | 1074.747  |
| AK022876  | 1549.998  | 1884.054  | AF007136  | 638.158   | 480.974   | NM_019052 | 3721.251  |
| AF134894  | 4488.07   | 4610.177  | U25750    | 3081.592  | 2180.54   | NM_003202 | 311.118   |
| NM_003938 | 6790.255  | 8292.48   | AK023691  | 2173.432  | 1442.12   | AF119902  | 780.821   |
| NM_004126 | 832.143   | 597.649   | AK026744  | 1477.614  | 440.667   | NM_020525 | 1744.603  |
| U87460    | 10176.036 | 9887.01   | NM_005234 | 2778.849  | 2514.341  | NM_003890 | 1077.071  |
| NM_003617 | 1547.171  | 1296.893  | BC023536  | 1485.356  | 2429.095  | BF127978  | 3577.661  |
| NM_001841 | 1323.949  | 1510.005  | NM_001803 | 6699.938  | 7998.939  | NM_016579 | 4694.795  |
| NM_002054 | 5811.403  | 6197.967  | NM_006233 | 5903.887  | 14454.199 | AB018297  | 378.027   |
| AF300649  | 4003.362  | 3959.709  | AK021889  | 709.43    | 1302.397  | AK022565  | 5269.236  |
| NM_004125 | 1565.314  | 2195.434  | L23544    | 9717.5    | 4491.503  | AB025194  | 5064.885  |
| NM_004414 | 3972.877  | 3563.245  | NM_019020 | 1623.788  | 1636.954  | NM_006239 | 821.85    |
| NM_003317 | 7393.5    | 6970.931  | NM_016474 | 1234.169  | 623.793   | BC020863  | 506.008   |
| NM_001139 | 3278.88   | 2891.432  | NM_000910 | 1748.673  | 1035.161  | NM_017897 | 1604.469  |
| NM_004609 | 43181.617 | 46300.652 | AF086001  | 53054.125 | 41062.305 | NM_004265 | 2566.938  |
| NM_003772 | 1641.177  | 1316.44   | AL117560  | 27242.525 | 13931.885 | NM_002572 | 1495.432  |
| NM_001541 | 3133.402  | 2554.371  | M24749    | 7000.871  | 4794.79   | NM_001441 | 1116.831  |
| NM_005416 | 3286.956  | 3388.487  | NM_005831 | 53846.855 | 31690.979 | NM_018324 | 719.129   |
| NM_004670 | 1025.93   | 1036.708  | NM_005850 | 43339.879 | 37569.047 | AF064255  | 16276.257 |
| L09081    | 7530.673  | 10179.017 | NM_000554 | 48719.328 | 23124.516 | NM_016368 | 37957.738 |
| NM_014222 | 6409.393  | 8181.635  | AF009317  | 6966.917  | 4783.214  | U08853    | 1025.221  |
| AK026840  | 2719.62   | 2282.344  | AK026583  | 3587.139  | 1924.828  | NM_004261 | 2217.514  |
| NM_000288 | 2018.125  | 2477.573  | AF218031  | 2255.006  | 2547.733  | NM_016006 | 1797.96   |
| AK026317  | 14481.747 | 14745.383 | AF210650  | 3016.5    | 1944.455  | NM_016245 | 5264.576  |
| X82207    | 18648.807 | 21130.514 | NM_018356 | 3075.315  | 917.212   | AF005632  | 1902.165  |
| NM_015044 | 2831.089  | 3630.426  | AF085896  | 1330.784  | 367.619   | NM_000903 | 10338.226 |
| NM_002867 | 559.802   | 575.25    | X74613    | 23052.424 | 27967.84  | AF309489  | 662.047   |
| BF217496  | 4431.924  | 5689.068  | AF075080  | 9608.074  | 9935.537  | NM_004047 | 14249.572 |
| NM_004762 | 6365.603  | 3520.709  | AL390183  | 852.114   | 864.832   | NM_004823 | 2107.738  |
| NM_000634 | 12908.136 | 13913.957 | Y13897    | 1501.212  | 671.893   | Y17179    | 49205.258 |
| NM_014679 | 32202.586 | 38862.344 | AL133577  | 2402.127  | 2557.553  | NM_000891 | 1022.148  |
| AB040969  | 4276.286  | 2817.052  | NM_000479 | 929.988   | 577.577   | AF239613  | 1595.117  |
| NM_003467 | 4148.627  | 4612.836  | AF038199  | 3540.2    | 2029.947  | NM_058197 | 135.702   |
| NM_014936 | 1373.976  | 1159.908  | CY3Cy5    | 5995.786  | 452.958   | NM_016044 | 409.334   |
| NM_003943 | 2243.938  | 2290.926  | BE908993  | 8334.897  | 11313.421 | NM_000520 | 2927.808  |
| NM_019052 | 5211.21   | 4679.812  | AB012701  | 1516.599  | 1982.075  | NM_000289 | 604.154   |

|           |           |           |           |           |           |           |           |
|-----------|-----------|-----------|-----------|-----------|-----------|-----------|-----------|
| NM_003202 | 1000.682  | 593.659   | M61156    | 1164.939  | 1234.394  | NM_00150C | 462.977   |
| AF119902  | 1915.55   | 900.721   | R44005    | 2063.762  | 2345.695  | NM_00438E | 1683.425  |
| NM_02052E | 4064.751  | 4065.504  | AI942392  | 3426.948  | 3277.122  | NM_02037E | 421.389   |
| NM_00389C | 3587.452  | 6797.008  | M55040    | 765.195   | 748.186   | AL110127  | 1376.523  |
| BF127978  | 3181.954  | 2996.843  | AW009739  | 1185.742  | 2470.315  | NM_00252E | 1448.138  |
| AF110801  | 492.625   | 581.973   | X03884    | 6700.947  | 5368.079  | AF089897  | 308.179   |
| AB018297  | 1101.806  | 1877.09   | U36759    | 3171.244  | 2552.863  | AF007872  | 1799.362  |
| AK022565  | 19969.027 | 23089.006 | X91625    | 2571.951  | 2796.944  | M30938    | 1597.329  |
| AB025194  | 6555.844  | 6177.063  | AF090901  | 440.114   | 617.295   | NM_01514E | 411.319   |
| NM_00623E | 1364.112  | 1349.636  | AF004231  | 1447.647  | 1849.838  | NM_004714 | 758.984   |
| BC020863  | 973.317   | 1046.427  | AF001862  | 2610.238  | 2871.326  | NM_002497 | 2510.872  |
| NM_017897 | 3408.144  | 3703.112  | NM_058197 | 488.054   | 602.301   | NM_00541E | 776.224   |
| NM_00426E | 6165.141  | 17826.686 | SR6       | 1831.506  | 1783.186  | NM_00467C | 19.564    |
| NM_002572 | 3002.979  | 3883.867  | SR8       | 9695.59   | 26482.102 | L09081    | 1906.476  |
| NM_001441 | 2374.907  | 2413.473  | SR10      | 32309.094 | 10769.895 | NM_00021E | 57874.742 |
| NM_018324 | 1843.607  | 1580.285  | CY3Cy5    | 6583.279  | 564.479   | NM_016113 | 3997.273  |
| NM_01636E | 49895.836 | 50870.703 | U87460    | 4672.976  | 5831.867  | NM_014222 | 2315.573  |
| U08853    | 3290.964  | 3968.308  | NM_003617 | 754.336   | 826.567   | L14819    | 368.473   |
| NM_004261 | 10050.883 | 21665.742 | NM_001841 | 776.215   | 815.596   | NM_00050E | 793.39    |
| NM_01600E | 3076.125  | 2708.995  | NM_002054 | 2500.771  | 3922.585  | NM_004542 | 416.492   |
| NM_01624E | 14967.435 | 15926.076 | AF300649  | 1581.075  | 1758.806  | AI742810  | 37.74     |
| AF005632  | 5620.597  | 5140.355  | NM_00412E | 862.689   | 1147.757  | X06182    | 973.943   |
| NM_000903 | 25225.66  | 14099.405 | NM_000823 | 3276.322  | 3197.086  | BE908993  | 4789.136  |
| NM_004493 | 11437.834 | 7911.754  | NM_003317 | 5672.858  | 6922.162  | AB012701  | 1576.207  |
| AF309489  | 932.216   | 307.823   | NM_001139 | 2043.839  | 2577.545  | M61156    | 709.575   |
| NM_004047 | 32607.994 | 22915.232 | NM_00460E | 37749.605 | 53037.164 | R44005    | 1591.082  |
| NM_004823 | 4100.926  | 2743.533  | NM_003772 | 1102.78   | 1432.056  | AW009739  | 1248.453  |
| AB013889  | 371.73    | 537.36    | NM_001541 | 4264.792  | 6237.547  | BC036805  | 2027.286  |
| Y17179    | 70484.422 | 54396.719 | NM_00541E | 1257.989  | 1531.731  | Z74615    | 8683.416  |
| NM_000891 | 1843.452  | 1025.552  | L09081    | 4407.53   | 8272.159  | X03884    | 4115.538  |
| AF239613  | 5616.092  | 9596.572  | NM_00021E | 68340.781 | 60427.391 | U36759    | 5881.802  |
| NM_058197 | 517.508   | 634.411   | NM_016113 | 5154.077  | 7581.91   | X91625    | 1267.019  |
| SB        | 489.483   | 377.581   | NM_014222 | 3202.282  | 3853.946  | AF004231  | 606.052   |
| NM_016044 | 1108.169  | 1521.16   | NM_00050E | 1399.523  | 1856.441  | AF001862  | 1606.413  |
| NM_00052C | 7516.611  | 4916.475  | NM_004542 | 876.905   | 612.945   | NM_00389C | 1151.78   |
| NM_00028E | 2115.76   | 1828.002  | X06182    | 932.671   | 845.217   | BF127978  | 3890.431  |
| NM_00150C | 1147.598  | 3229.192  | BF217496  | 4330.488  | 4875.471  | NM_01657E | 5481.503  |
| NM_00438E | 3108.637  | 4404.271  | NM_004762 | 3854.047  | 2805.12   | AB018297  | 588.925   |
| NM_02037E | 870.216   | 813.237   | NM_006641 | 38667.766 | 43250.074 | AK022565  | 7191.051  |
| AL110127  | 2003.156  | 1962.005  | NM_000634 | 6055.32   | 6973.888  | AK023151  | 1170.176  |
| NM_00252E | 2526.424  | 1918.255  | NM_01467E | 15208.205 | 14918.232 | AB033076  | 733.089   |
| D38438    | 6952.229  | 4348.349  | AB040969  | 1812.001  | 1666.584  | AK022876  | 661.411   |
| AV714945  | 1075.457  | 712.099   | NM_003467 | 2978.508  | 2707.371  | AF134894  | 3256.133  |
| AF089897  | 839.946   | 361.6     | NM_01493E | 677.07    | 776.573   | NM_00393E | 3475.34   |
| AF007872  | 2869.127  | 1471.289  | NM_003943 | 1443.133  | 1311.464  | NM_014827 | 12166.745 |
| M30938    | 6295.789  | 4461.585  | NM_003202 | 663.579   | 873.251   | NM_00412E | 410.432   |
| NM_01514E | 994.719   | 2079.672  | AF119902  | 897.22    | 922.924   | U87460    | 3891.949  |
| NM_004714 | 1281.417  | 1339.592  | NM_02052E | 3907.255  | 7444.62   | NM_003617 | 668.218   |
| NM_005401 | 1443.21   | 1041.707  | X62468    | 715.834   | 466.676   | NM_001841 | 474.258   |
| NM_017677 | 242.885   | 444.47    | NM_00389C | 3028.996  | 5235.74   | AF300649  | 1096.642  |
| NM_002497 | 8024.882  | 10289.793 | BF127978  | 4405.56   | 4461.305  | NM_00412E | 632.495   |
| NM_00541E | 2941.275  | 2436.174  | AF110801  | 522.984   | 522.723   | NM_000823 | 4910.803  |
| NM_00467C | 1319.674  | 546.156   | NM_01657E | 11884.831 | 15485.902 | NM_004414 | 1875.535  |



|           |           |           |           |           |           |           |           |
|-----------|-----------|-----------|-----------|-----------|-----------|-----------|-----------|
| L09081    | 14280.981 | 12067.247 | AK022565  | 11503.595 | 10948.543 | NM_003317 | 2640.465  |
| NM_000218 | 70043.852 | 55143.961 | AK023151  | 1801.258  | 2260.566  | NM_001139 | 1153.835  |
| NM_016113 | 8612.657  | 10000.715 | AB033076  | 1482.898  | 1251.042  | NM_004609 | 12002.642 |
| NM_014222 | 4513.185  | 4595.783  | AK022876  | 834.333   | 1293.931  | NM_003772 | 1108.995  |
| L14819    | 422.719   | 352.441   | AF134894  | 4240.836  | 3667.259  | NM_001541 | 1508.484  |
| NM_000509 | 2495.381  | 3154.543  | NM_003938 | 4383.371  | 5422.992  | NM_004823 | 1871.894  |
| NM_004542 | 1693.468  | 1346.253  | NM_014827 | 17510.832 | 13038.465 | Y17179    | 48224.066 |
| X06182    | 3249.828  | 2617.828  | NM_001441 | 1097.188  | 851.149   | NM_000891 | 1092.917  |
| AB012701  | 5076.395  | 4366.745  | NM_018324 | 956.054   | 1179.355  | AF239613  | 1571.809  |
| M61156    | 3146.952  | 2946.6    | AF064255  | 15933.897 | 15125.288 | AK026840  | 1356.85   |
| R44005    | 15596.13  | 6901.419  | NM_016368 | 39506.559 | 37709.086 | NM_000288 | 891.804   |
| AI942392  | 9041.803  | 5266.44   | U08853    | 1235.637  | 1747.679  | AK026317  | 4360.251  |
| M55040    | 1709.366  | 867.921   | NM_004261 | 8486.07   | 14684.587 | X82207    | 8830.218  |
| AW009739  | 4314.649  | 3604.157  | NM_016006 | 1593.489  | 1564.424  | NM_015044 | 1607.534  |
| BC036805  | 8005.581  | 7387.244  | NM_016245 | 8992.955  | 15677.26  | BF217496  | 3558.508  |
| Z74615    | 33293.121 | 29527.82  | AF005632  | 1730.923  | 3000.171  | NM_004762 | 2836.669  |
| X03884    | 18508.168 | 13565.237 | NM_000903 | 12434.477 | 13036.55  | NM_006641 | 25855.99  |
| U36759    | 20882.262 | 4468.643  | NM_004493 | 15517.019 | 8963.072  | NM_000634 | 7328.935  |
| X91625    | 2704.814  | 3625.007  | NM_004047 | 25474.059 | 24020.307 | AB040969  | 1517.999  |
| AF090901  | 1038.007  | 1318.724  | NM_004823 | 2512.292  | 2701.169  | NM_003467 | 3470.364  |
| AF004231  | 1578.395  | 1745.055  | Y17179    | 61531.965 | 56359.301 | NM_003943 | 999.25    |
| AF001862  | 5655.688  | 7208.858  | NM_000891 | 956.982   | 833.712   | NM_019052 | 3281.219  |
| NM_003890 | 6471.876  | 7547.067  | NM_004974 | 244.992   | 558.293   | AF119902  | 507.472   |
| BF127978  | 5321.459  | 4356.742  | AF239613  | 6452.141  | 4450.199  | NM_020525 | 1888.932  |
| AF110801  | 673.56    | 677.532   | AK026840  | 2148.18   | 1512.031  | X62468    | 246.556   |
| NM_016579 | 20302.619 | 26625.059 | NM_000288 | 1331.47   | 1716.869  | NM_015148 | 628.371   |
| AB018297  | 1282.765  | 1203.257  | AK026317  | 8118.563  | 8087.373  | NM_004714 | 958.846   |
| AK022565  | 9658.506  | 8500.577  | X82207    | 10957.324 | 14834.322 | NM_005401 | 694.877   |
| AK023151  | 989.203   | 1020.37   | NM_015044 | 2859.886  | 2970.182  | NM_017677 | 252.741   |
| AB033076  | 1446.819  | 1317.312  | NM_000520 | 2618.425  | 2740.746  | NM_002497 | 2510.96   |
| AK022876  | 1828.073  | 1987.403  | NM_000289 | 725.847   | 693.682   | AB025194  | 5171.877  |
| AF134894  | 6288.087  | 6754.327  | NM_001500 | 675       | 1249.191  | NM_006239 | 701.767   |
| NM_003938 | 10513.848 | 8850.628  | NM_004388 | 1641.931  | 2324.115  | BC020863  | 504.889   |
| NM_004126 | 590.71    | 758.23    | NM_020379 | 340.994   | 300.766   | NM_017897 | 1637.202  |
| U87460    | 11343.647 | 10419.155 | AL110127  | 1409.821  | 1164.136  | NM_004265 | 2720.413  |
| NM_003617 | 1579.024  | 1571.336  | NM_002528 | 1537.45   | 1405.036  | NM_002572 | 1541.296  |
| NM_001841 | 1087.826  | 1144.069  | D38438    | 4403.805  | 5723.186  | NM_001441 | 1172.461  |
| NM_002054 | 5233.067  | 3590.883  | AV714945  | 806.118   | 836.294   | NM_018324 | 1070.769  |
| AF300649  | 2864.666  | 2280.964  | AF007872  | 1675.91   | 1664.137  | AF064255  | 17441.668 |
| NM_004125 | 1449.164  | 1299.031  | M30938    | 5808.246  | 3863.752  | NM_016368 | 37132.27  |
| NM_000823 | 4508.375  | 3204.53   | NM_015148 | 1235.089  | 1094.404  | U08853    | 1078.118  |
| NM_004414 | 3590.629  | 2364.089  | NM_004714 | 975.308   | 1291.56   | NM_004261 | 2582.615  |
| NM_003317 | 3926.504  | 5178.086  | NM_005401 | 542.282   | 897.299   | NM_016006 | 1620.104  |
| NM_001139 | 2891.859  | 3690.989  | NM_002497 | 9378.848  | 5146.336  | NM_016245 | 5227.533  |
| NM_004609 | 27122.959 | 36173.645 | AB025194  | 5213.828  | 5557.191  | AF005632  | 1609.655  |
| NM_003772 | 2298.555  | 2034.22   | NM_006239 | 775.62    | 934.544   | NM_000903 | 9861.248  |
| NM_001541 | 1706.896  | 1460.897  | BC020863  | 639.966   | 717.038   | NM_004493 | 3741.161  |
| NM_004823 | 4368.491  | 3153.997  | NM_017897 | 2274.575  | 2305.082  | NM_004047 | 14560.294 |
| Y17179    | 68408.609 | 48312.301 | NM_004265 | 5715.731  | 12470.219 | NM_006773 | 1637.1    |
| NM_000891 | 2435.072  | 1336.408  | NM_002572 | 2032.19   | 1960.317  | AK024439  | 1188.831  |
| AF239613  | 3491.68   | 5257.055  | NM_000509 | 1323.689  | 1806.724  | X89676    | 896.798   |
| AK026840  | 1026.037  | 485.11    | NM_004542 | 709.851   | 566.838   | Z32684    | 799.446   |
| NM_000288 | 1566.848  | 1799.493  | X06182    | 1218.792  | 1011.689  | NM_016512 | 501.914   |

|           |           |           |           |           |           |           |           |
|-----------|-----------|-----------|-----------|-----------|-----------|-----------|-----------|
| AK026317  | 19735.027 | 20197.045 | AB012701  | 1804.902  | 2036.296  | NM_01748E | 2281.97   |
| X82207    | 24736.404 | 37021.035 | M61156    | 1167.423  | 1269.686  | AY009400  | 154.657   |
| NM_015044 | 4847.528  | 6202.955  | R44005    | 1713.974  | 1585.807  | NM_00506E | 290.17    |
| NM_002867 | 747.444   | 714.283   | AI942392  | 3263.324  | 3260.64   | NM_016044 | 420.647   |
| BF217496  | 8086.487  | 7748.684  | M55040    | 824.785   | 880.246   | NM_00052C | 2977.914  |
| NM_004762 | 6598.073  | 3630.444  | AW009739  | 1713.852  | 2565.2    | NM_00028E | 647.67    |
| NM_006641 | 52949.531 | 47152.926 | BC036805  | 8007.39   | 7631.357  | NM_00150C | 367.403   |
| NM_000634 | 12488.796 | 11494.034 | Z74615    | 20770.611 | 27931.428 | NM_00438E | 1547.896  |
| NM_01467E | 31291.609 | 25080.336 | X03884    | 5778.794  | 4974.705  | AL110127  | 1095.485  |
| AB040969  | 4605.885  | 2224.102  | U36759    | 2965.676  | 2638.049  | NM_00252E | 1246.768  |
| NM_003467 | 4020.261  | 3138.56   | X91625    | 2439.789  | 2334.187  | D38438    | 2865.63   |
| NM_01493E | 1205.263  | 1101.71   | AF090901  | 454.045   | 713.029   | AV714945  | 590.469   |
| NM_003943 | 2619.289  | 2549.158  | AF004231  | 1436.267  | 1510.747  | AF007872  | 1664.268  |
| NM_019052 | 5804.426  | 6196.996  | AF001862  | 2649.453  | 2960.782  | M30938    | 1538.866  |
| NM_003202 | 1285.823  | 1197.532  | NM_016044 | 720.046   | 1532.134  | NM_01758E | 3147.688  |
| AF119902  | 1988.212  | 1238.541  | AK023151  | 1609.115  | 1543.521  | NM_00414E | 2625.272  |
| NM_02052E | 2955.471  | 3477.569  | AB033076  | 1366.816  | 1075.611  | X03168    | 589.766   |
| X62468    | 430.419   | 460.452   | AK022876  | 801.304   | 1171.654  | NM_00516E | 752.156   |
| NM_01514E | 1013.686  | 1271.891  | AF134894  | 3995.942  | 3526.759  | NM_017801 | 6871.872  |
| NM_004714 | 2280.607  | 1823.064  | NM_00393E | 3912.784  | 4952.239  | NM_00734E | 1815.541  |
| NM_005401 | 2059.281  | 1530.907  | U87460    | 5568.819  | 6307.309  | NM_016953 | 683.915   |
| NM_002497 | 6522.376  | 6677.48   | NM_003617 | 952.073   | 1421.706  | U65473    | 1609.306  |
| AB025194  | 8513.538  | 6960.067  | NM_001841 | 652.578   | 1116.178  | D63481    | 4380.828  |
| NM_00623E | 1045.992  | 1017.074  | NM_002054 | 2589.662  | 4572.553  | AK024422  | 1020.888  |
| BC020863  | 1049.733  | 1227.527  | AF300649  | 1522.902  | 1724.398  | NM_002673 | 2671.614  |
| NM_017897 | 4520.018  | 4584.037  | NM_00412E | 1049.112  | 1188.102  | NM_00387E | 1363.495  |
| NM_00426E | 9841.684  | 27515.104 | NM_000823 | 4139.487  | 4119.884  | AJ276310  | 679.601   |
| NM_002572 | 3507.808  | 3390.241  | NM_004414 | 1830.769  | 2458.874  | NM_01229E | 2229.316  |
| NM_001441 | 3000.93   | 2479.925  | NM_003317 | 5631.075  | 7271.227  | AL133666  | 640.916   |
| NM_018324 | 1585.96   | 1437.427  | NM_001139 | 1952.305  | 2557.703  | NM_000663 | 883.094   |
| AF064255  | 44360.762 | 39372.117 | NM_00460E | 34226.813 | 44994.75  | NM_00471C | 2543.864  |
| NM_01636E | 42048.871 | 41934.355 | NM_003772 | 1051.862  | 1233.475  | NM_00439E | 4132.183  |
| U08853    | 3884.053  | 3675.709  | NM_001541 | 4311.499  | 5159.642  | NM_01799E | 2209.33   |
| NM_004261 | 10427.487 | 15935.182 | NM_00541E | 1331.519  | 1190.849  | NM_01598E | 10172.793 |
| NM_01600E | 2824.291  | 1916.584  | NM_00467C | 564.929   | 498.709   | NM_001043 | 539.255   |
| NM_01624E | 15564.039 | 15168.318 | L09081    | 3768.752  | 7258.121  | NM_00477E | 3766.302  |
| AF005632  | 4925.711  | 5265.804  | NM_016113 | 3586.476  | 4099.352  | NM_019071 | 949.802   |
| NM_000903 | 23318.709 | 17018.568 | NM_014222 | 2848.659  | 3408.267  | AF113685  | 521.276   |
| NM_004493 | 11838.836 | 16433.195 | AK026840  | 1669.577  | 865.289   | NM_00547C | 927.945   |
| AF309489  | 525.95    | 817.942   | NM_00028E | 1295.636  | 1493.05   | AF142570  | 529.991   |
| NM_004047 | 36703.871 | 45990.426 | AK026317  | 7698.038  | 7243.191  | NM_00422E | 3554.133  |
| AF287303  | 847.966   | 719.244   | X82207    | 12125.816 | 14693.806 | NM_002873 | 1268.907  |
| NM_006773 | 2425.419  | 1875.178  | NM_015044 | 2335.059  | 2802.042  | NM_015571 | 2832.755  |
| AK024439  | 6680.592  | 6621.609  | NM_002867 | 430.804   | 366.244   | NM_004701 | 935.934   |
| X89676    | 1298.826  | 1221.435  | BF217496  | 4389.84   | 5104.641  | AK025554  | 784.578   |
| NM_012444 | 1240.19   | 572.697   | NM_004762 | 3997.592  | 2242.701  | BI824151  | 1173.901  |
| Z32684    | 1498.72   | 1613.026  | NM_006641 | 39356.117 | 47006.395 | AK021791  | 3452.277  |
| NM_016512 | 1102.619  | 678.145   | NM_000634 | 6376.459  | 7562.372  | NM_004052 | 1218.274  |
| NM_01748E | 4838.433  | 6215.821  | NM_01467E | 16526.666 | 17137.828 | NM_004394 | 4428.415  |
| AY009400  | 504.241   | 453.481   | AB040969  | 1885.202  | 2147.694  | NM_005727 | 9756.204  |
| NM_00506E | 1281.82   | 1495.716  | NM_003467 | 2869.252  | 2747.623  | AK027242  | 2377.689  |
| NM_016044 | 1713.84   | 2201.96   | NM_01493E | 812.457   | 842.241   | NM_00127E | 9660.723  |
| NM_00052C | 13801.893 | 6843.14   | NM_003943 | 1511.845  | 1541.618  | NM_00501C | 727.69    |

|           |           |           |           |           |           |           |           |
|-----------|-----------|-----------|-----------|-----------|-----------|-----------|-----------|
| NM_000289 | 2247.535  | 1735.917  | NM_019052 | 7255.429  | 4858.762  | NM_019055 | 531.454   |
| NM_001500 | 1216.843  | 2341.049  | NM_003202 | 995.034   | 658.789   | NM_020199 | 501.331   |
| NM_004388 | 3616.357  | 4053.655  | AF119902  | 725.596   | 871.396   | U96136    | 658.262   |
| NM_020379 | 593.033   | 424.896   | NM_020525 | 4502.259  | 6511.21   | AF201380  | 1061.423  |
| AL110127  | 2508.1    | 2074.109  | X62468    | 342.182   | 706.112   | NM_003619 | 562.013   |
| NM_002528 | 3630.995  | 3581.327  | NM_003890 | 2888.259  | 4962.436  | NM_012392 | 1886.13   |
| D38438    | 3514.927  | 3476.922  | BF127978  | 4131.243  | 4207.802  | NM_014833 | 8485.791  |
| AV714945  | 1017.697  | 1152.571  | AF110801  | 621.075   | 417.906   | NM_000045 | 396.354   |
| AF089897  | 640.298   | 619.192   | AB018297  | 622.361   | 757.193   | NM_003878 | 156.634   |
| AF007872  | 4083.732  | 4919.244  | AK022565  | 11452.271 | 8976.553  | AK024374  | 1314.217  |
| M30938    | 8861.177  | 11368.652 | AB025194  | 4693.66   | 4048.747  | NM_007101 | 650.32    |
| NM_017586 | 14941.845 | 16412.053 | BC020863  | 328.557   | 593.105   | NM_018234 | 1549.617  |
| NM_004148 | 7553.583  | 6509.16   | NM_017897 | 2440.162  | 1761.338  | AB033062  | 715.589   |
| X03168    | 1839.305  | 1756.501  | NM_004265 | 4460.547  | 11248.429 | NM_016437 | 3505.238  |
| NM_005168 | 1602.434  | 1747.231  | NM_002572 | 1825.82   | 1626.002  | NM_002720 | 3048.483  |
| NM_017801 | 15620.709 | 11123.478 | NM_001441 | 1092.912  | 1223.614  | AK024716  | 7556.334  |
| NM_007348 | 6055.613  | 6556.126  | NM_018324 | 711.281   | 664.613   | X67155    | 310.849   |
| NM_016953 | 1686.228  | 613.537   | AF064255  | 18940.924 | 19515.086 | NM_020380 | 2831.691  |
| U65473    | 4786.723  | 4237.48   | NM_016368 | 38678.848 | 39461.543 | NM_002890 | 17556.053 |
| D63481    | 12127.714 | 12244.787 | U08853    | 1463.813  | 2386.514  | NM_001330 | 23618.828 |
| AY009951  | 359.817   | 491.816   | NM_004261 | 9167.407  | 16677.713 | NM_015927 | 885.571   |
| AL157424  | 861.539   | 808.454   | NM_016006 | 1851.758  | 1934.895  | NM_014552 | 3471.426  |
| AK024422  | 1999.266  | 2530.218  | NM_016245 | 9894.029  | 14540.694 | NM_003072 | 3211.875  |
| NM_002673 | 5460.934  | 3778.95   | AF005632  | 2177.165  | 3212.467  | NM_001913 | 1385.477  |
| NM_003876 | 4933.972  | 3988.19   | NM_000903 | 13429.82  | 13942.807 | AB040931  | 1997.583  |
| AJ276310  | 801.409   | 512.41    | NM_004493 | 15188.75  | 8306.089  | NM_003599 | 879.141   |
| NM_012295 | 5563      | 5325.938  | NM_004047 | 25334.732 | 19916.422 | NM_015911 | 1459.916  |
| NM_015910 | 646.824   | 391.792   | NM_004823 | 2525.536  | 2342.157  | BC011826  | 1768.358  |
| NM_000222 | 546.934   | 288.057   | Y17179    | 62088.676 | 53737.445 | NM_017647 | 1389.893  |
| AL133666  | 1313.448  | 1015.982  | NM_000891 | 1173.849  | 719.954   | NM_012091 | 865.284   |
| NM_000663 | 2359.682  | 2064.039  | AF239613  | 6062.25   | 4259.61   | NM_012321 | 2579.47   |
| NM_004710 | 3527.753  | 4326.584  | NM_016044 | 586.429   | 920.136   | D13642    | 1909.827  |
| NM_004396 | 15407.038 | 19747.965 | NM_000520 | 2866.111  | 3682.732  | NM_004741 | 2808.753  |
| NM_017999 | 4261.144  | 4104.835  | NM_000289 | 619.459   | 537.425   | NM_018032 | 1427.933  |
| NM_015989 | 30008.033 | 39295.082 | NM_001500 | 582.174   | 1400.495  | NM_003675 | 1791.49   |
| NM_001043 | 1637.956  | 1958.362  | NM_004388 | 1533.91   | 2581.644  | NM_017518 | 794.58    |
| NM_004779 | 10354.737 | 8364.751  | AL110127  | 1733.5    | 1639.289  | NM_004117 | 1365.444  |
| NM_019071 | 3042.388  | 4214.769  | NM_002528 | 1865.057  | 1770.458  | NM_016594 | 933.407   |
| NM_014399 | 255.019   | 445.621   | D38438    | 3440.119  | 5057.136  | NM_030752 | 2018.099  |
| AF113685  | 608.016   | 1095.451  | AV714945  | 787.207   | 594.375   | D26068    | 9060.449  |
| NM_005470 | 2704.322  | 3331.156  | AF007872  | 1840.929  | 1559.993  | NM_018559 | 3428.287  |
| AF142570  | 1369.733  | 947.191   | M30938    | 5999.431  | 3469.133  | NM_017593 | 932.244   |
| NM_004225 | 12701.99  | 10601.774 | NM_015148 | 1108.078  | 1175.853  | NM_004282 | 6313.175  |
| NM_003862 | 1433.263  | 1229.322  | NM_004714 | 911.644   | 836.869   | AK025695  | 512.962   |
| NM_002873 | 3362.623  | 3352.468  | NM_005401 | 540.084   | 929.482   | AK025442  | 3365.094  |
| NM_015571 | 8082.421  | 8278.657  | NM_002497 | 9763.681  | 4713.386  | NM_002451 | 377.168   |
| NM_004701 | 3781.126  | 4588.745  | NM_005416 | 1082.269  | 900.309   | NM_013411 | 1274.569  |
| AK025554  | 2255.191  | 2517.706  | NM_004670 | 416.719   | 244.417   | NM_001248 | 419.02    |
| BI824151  | 3135.963  | 4251.625  | L09081    | 2898.284  | 4933.991  | NM_000180 | 3586.361  |
| AK021791  | 6288.552  | 2638.296  | NM_016113 | 3669.232  | 4939.138  | NM_000858 | 2300.2    |
| NM_004052 | 4071.278  | 9895.029  | NM_014222 | 3207.399  | 3808.972  | NM_017715 | 708.371   |
| NM_004394 | 12373.733 | 12526.544 | NM_000509 | 1023.504  | 1302.125  | AL117607  | 7255      |
| NM_005727 | 20085.129 | 14796.052 | NM_004542 | 747.63    | 558.025   | AB037774  | 605.251   |

|           |           |           |           |           |           |           |           |
|-----------|-----------|-----------|-----------|-----------|-----------|-----------|-----------|
| AK027242  | 3938.709  | 1908.371  | BE908993  | 6139.095  | 8384.013  | NM_00543E | 659.347   |
| NM_00127E | 27003.004 | 13021.547 | AB012701  | 1120.368  | 1272.621  | AK024361  | 1007.667  |
| M35675    | 648.485   | 657.622   | M61156    | 1055.442  | 1627.439  | NM_00435C | 678.676   |
| NM_00501C | 1490.399  | 1806.788  | R44005    | 1226.472  | 1345.883  | NM_018044 | 1152.258  |
| NM_01905E | 1202.514  | 2001.139  | AI942392  | 1813.733  | 1561.527  | NM_00450E | 110.971   |
| NM_02019E | 626.144   | 864.193   | M55040    | 693.301   | 725.89    | NM_001717 | 34.791    |
| U96136    | 1667.772  | 1606.872  | AW009739  | 1241.529  | 1700.846  | AF274347  | 1711.609  |
| AF188747  | 304.126   | 410.945   | BC036805  | 6576.449  | 5077.09   | NM_01855E | 1806.285  |
| NM_005941 | 963.559   | 1245.266  | Z74615    | 16937.127 | 20839.672 | AK023525  | 2467.309  |
| NM_015884 | 418.908   | 539.704   | X03884    | 7015.58   | 4493.149  | AF085829  | 566.716   |
| AF201380  | 2275.515  | 3341.879  | U36759    | 3408.36   | 2285.577  | AK021903  | 6967.484  |
| NM_00361E | 1669.829  | 4680.315  | X91625    | 1980.146  | 1492.568  | AL390143  | 1586.267  |
| NM_01239E | 4009.835  | 4145.207  | AF004231  | 1519.184  | 1424.174  | AL162075  | 1842.717  |
| NM_01483E | 19342.35  | 18463.207 | NM_00389C | 2371.602  | 2941.185  | AK021595  | 1023.6    |
| NM_00004E | 665.167   | 977.386   | BF127978  | 3454.725  | 2817.709  | AK021648  | 988.755   |
| NM_00387E | 1170.486  | 4965.634  | AB018297  | 744.694   | 498.758   | AF147358  | 18223.732 |
| NM_00483E | 885.798   | 1022.039  | AK022565  | 8396.077  | 7295.434  | NM_01841C | 506.554   |
| NM_005957 | 1075.129  | 882.9     | AK023151  | 1935.866  | 1709.855  | AF147404  | 448.958   |
| AK024374  | 1459.319  | 1032.575  | AB033076  | 811.319   | 695.537   | AF086314  | 402.427   |
| NM_007101 | 1527.951  | 859.097   | AK022876  | 990.476   | 1463.685  | NM_016364 | 1528.764  |
| NM_018234 | 4506.821  | 2975.368  | AF134894  | 3990.386  | 3439.727  | AF086419  | 2884.659  |
| AB033062  | 1993.227  | 1759.636  | NM_00393E | 4761.752  | 5905.629  | AF086461  | 512.337   |
| NM_016437 | 12891.625 | 14803.204 | NM_014827 | 15301.361 | 10027.67  | AL833296  | 572.395   |
| NM_00272C | 8583.361  | 4881.17   | NM_00412E | 592.906   | 631.74    | AL110240  | 1648.385  |
| AK024716  | 16717.164 | 13679.55  | U87460    | 5709.587  | 6469.868  | NM_01537E | 546.663   |
| X67155    | 1037.339  | 1000.325  | NM_003617 | 1091.527  | 1369.549  | AF085919  | 434.061   |
| NM_02038C | 4253.398  | 5532.557  | NM_001841 | 732.44    | 1034.018  | AF085933  | 624.43    |
| AL137519  | 1193.943  | 1381.867  | NM_002054 | 2670.657  | 4143.791  | AF147431  | 352.889   |
| NM_00289C | 26293.094 | 35464.027 | AF300649  | 2148.044  | 2125.545  | AK026422  | 2638.932  |
| NM_00133C | 27940.699 | 34940.816 | NM_00412E | 926.331   | 940.627   | AF085938  | 518.627   |
| NM_015927 | 1602.382  | 1943.23   | NM_00082E | 4074.889  | 3949.774  | AK022264  | 1172.275  |
| NM_00512E | 512.612   | 507.863   | NM_004414 | 1906.441  | 1901.912  | AL137331  | 1429.47   |
| NM_01455E | 5942.469  | 5144.4    | NM_003317 | 6474.057  | 6635.491  | AL162040  | 2674.507  |
| NM_00307E | 8650.966  | 10377.385 | NM_001139 | 2365.28   | 3058.531  | AL442084  | 643.039   |
| NM_00191E | 2563.346  | 3483.922  | NM_00460E | 36387.496 | 38133.434 | AL137371  | 8996.445  |
| AK025594  | 1088.835  | 1486.563  | NM_00377E | 947.329   | 1193.573  | AL137596  | 2578.239  |
| AB040931  | 4799.15   | 3875.056  | NM_001541 | 3671.882  | 3920.249  | AL353942  | 14020.771 |
| NM_00359E | 1756.937  | 1197.177  | NM_00482E | 1633.632  | 1272.038  | Z38010    | 5268.894  |
| NM_015911 | 2513.589  | 2132.175  | Y17179    | 62741.328 | 53117.492 | AF088003  | 393.182   |
| BC011826  | 4700.561  | 3832.047  | AF239613  | 4266.901  | 3319.142  | AK024713  | 467.105   |
| NM_017647 | 4099.987  | 3966.403  | AK026840  | 1673.93   | 976.089   | AK024204  | 356.281   |
| NM_012091 | 2982.372  | 1622.684  | NM_00028E | 1638.389  | 2485.766  | AK023737  | 199.683   |
| NM_012321 | 5349.37   | 4427.828  | AK026317  | 9210.188  | 9267.256  | NM_00660E | 1714.829  |
| D13642    | 3865.708  | 4832.541  | X82207    | 14244.974 | 17910.9   | AK023643  | 1233.518  |
| NM_004741 | 10466.121 | 11469.59  | NM_015044 | 2411.477  | 3628.538  | AL390159  | 771.779   |
| NM_01803E | 4816.39   | 3456.954  | NM_002867 | 499.819   | 503.564   | NM_014157 | 754.201   |
| NM_00367E | 6360.939  | 3689.903  | BF217496  | 5063.68   | 6114.089  | AF111851  | 4529.142  |
| NM_01751E | 2182.55   | 1584.301  | NM_00476E | 3399.682  | 2174.817  | AF152529  | 491.536   |
| NM_004117 | 4320.621  | 4902.947  | NM_006641 | 42587.254 | 49027.223 | AK021992  | 979.436   |
| NM_016594 | 2770.921  | 2017.524  | NM_000634 | 7511.288  | 8469.413  | AK022102  | 701.974   |
| NM_03075E | 7131.902  | 8675.308  | NM_01467E | 17697.66  | 16866.516 | AK022235  | 1164.416  |
| D26068    | 22585.184 | 35508.035 | AB040969  | 1861.476  | 1939.655  | AK022378  | 2571.498  |
| NM_01855E | 5137.189  | 6884.065  | NM_003467 | 3190.98   | 2599.548  | AK022274  | 572.446   |

|           |           |           |           |           |           |           |           |
|-----------|-----------|-----------|-----------|-----------|-----------|-----------|-----------|
| NM_017593 | 2287.223  | 2111.036  | NM_003943 | 1744.09   | 1452.963  | AK027174  | 543.13    |
| NM_004282 | 13384.695 | 19705.439 | NM_019052 | 7613.284  | 4493.81   | AL110173  | 636.426   |
| AK025695  | 1728.627  | 1413.395  | NM_003202 | 816.919   | 710.238   | AK024106  | 664.451   |
| AK025442  | 6435.729  | 6685.876  | AF119902  | 919.029   | 670.656   | AK025833  | 468.66    |
| AL050041  | 1493.243  | 1814.233  | NM_020525 | 3627.241  | 4521.255  | AK027254  | 1769.025  |
| NM_002451 | 1913.861  | 2581.775  | NM_015148 | 820.982   | 506.714   | AK021772  | 1207.762  |
| NM_013411 | 2113.998  | 1654.76   | NM_005401 | 396.255   | 841.639   | AK026297  | 239.809   |
| AB007956  | 740.052   | 490.641   | NM_002497 | 8116.576  | 3768.571  | AK054831  | 10313     |
| NM_020200 | 652.857   | 727.406   | AB025194  | 4793.318  | 5216.854  | AK021770  | 604.927   |
| NM_000180 | 6783.791  | 6182.553  | NM_006239 | 513.961   | 552.211   | AK027248  | 928.451   |
| NM_000858 | 7369.218  | 6755.367  | NM_017897 | 2060.216  | 1958.693  | AK022804  | 5292.253  |
| AF254087  | 2725.971  | 3923.115  | NM_004265 | 3158.04   | 9532.987  | AF009263  | 1647.399  |
| NM_017715 | 1663.216  | 1471.835  | NM_002572 | 1300.335  | 1477.95   | AF086329  | 3111.216  |
| NM_005438 | 1604.924  | 926.567   | NM_001441 | 1198.439  | 1296.67   | AK022857  | 347.356   |
| AK024361  | 2314.765  | 983.541   | AF064255  | 20852.82  | 20985.031 | AL110206  | 849.173   |
| NM_004350 | 1465.633  | 1176.163  | NM_016368 | 31881.135 | 31288.303 | NM_004821 | 1082.444  |
| NM_018044 | 3587.263  | 2903.188  | NM_004261 | 6858.959  | 11499.328 | AK024292  | 738.508   |
| NM_001717 | 423.34    | 372.108   | NM_016006 | 1491.867  | 1667.993  | AK026263  | 1277.012  |
| AF274347  | 3265.476  | 3346.476  | NM_016245 | 10300.127 | 13970.948 | U50526    | 530.519   |
| NM_018555 | 3336.409  | 3823.834  | AF005632  | 2567.459  | 4149.598  | S75105    | 1626.767  |
| AK023525  | 5583.991  | 4819.627  | NM_000903 | 13919.696 | 11720.441 | AF056455  | 10661.271 |
| AF085829  | 2152.474  | 1842.354  | NM_004493 | 13167.148 | 6337.415  | NM_018510 | 1656.266  |
| AF075029  | 473.823   | 559.513   | AF309489  | 619.847   | 729.238   | U50537    | 679.161   |
| AK021903  | 9410.448  | 7332.566  | NM_004047 | 18314.662 | 12545.807 | AV749548  | 298.54    |
| AL390143  | 3635.58   | 4365.309  | NM_006773 | 1281.512  | 627.963   | AK025719  | 495.845   |
| AL162075  | 4603.667  | 2500.385  | AK024439  | 3095.222  | 2429.26   | AF026943  | 3701.508  |
| AF147384  | 1127.991  | 1046.821  | X89676    | 721.237   | 722.975   | NM_020448 | 913.097   |
| AK021595  | 1494.309  | 1334.47   | Z32684    | 1385.906  | 1296.909  | NM_005419 | 4308.027  |
| AK021648  | 3532.114  | 3837.514  | NM_016512 | 533.778   | 383.066   | L31956    | 882.884   |
| AF147358  | 17469.203 | 12796.603 | NM_017488 | 2289.147  | 3470.795  | NM_003479 | 4823.747  |
| AL110290  | 709.412   | 404.505   | NM_005069 | 315.25    | 862.22    | AK022078  | 452.487   |
| NM_018410 | 2958.964  | 2894.368  | NM_016044 | 625.296   | 1000.85   | AF075101  | 332.237   |
| NM_016364 | 1818.594  | 658.076   | NM_000520 | 2531.058  | 3052.605  | AF130108  | 219.432   |
| AF086419  | 3837.618  | 3557.678  | NM_000289 | 906.992   | 981.372   | NM_020224 | 1654.844  |
| AF086461  | 1473.031  | 1648.131  | NM_004388 | 1106.998  | 1566.634  | U17617    | 458.278   |
| AF131795  | 451.677   | 642.009   | AL110127  | 1603.859  | 1915.949  | AK022952  | 2591.912  |
| AL833296  | 2546.906  | 3604.058  | NM_002528 | 1449.565  | 1138.269  | BF218888  | 705.191   |
| AL110240  | 5021.72   | 6652.624  | D38438    | 6523.96   | 6579.08   | AF086401  | 4859.387  |
| AF075081  | 272.208   | 562.649   | AV714945  | 749.947   | 841.639   | L23869    | 1078.296  |
| NM_015372 | 658.772   | 887.208   | AF007872  | 1269.944  | 994.874   | Z21853    | 1740.006  |
| AF085919  | 1150.912  | 1727.857  | M30938    | 4887.248  | 2742.984  | U80770    | 363.67    |
| AF085933  | 1948.673  | 1399.795  | NM_017586 | 4842.726  | 4898.452  | AB075846  | 428.331   |
| AF147431  | 859.811   | 940.005   | NM_004148 | 2243.517  | 2296.293  | NM_018342 | 1054.885  |
| AK026422  | 5905.451  | 8569.626  | X03168    | 1008.404  | 725.385   | BC020260  | 1220.597  |
| AK022264  | 1216.396  | 1352.341  | NM_005168 | 979.959   | 883.172   | D17156    | 1988.096  |
| AL137331  | 1766.614  | 1592.361  | NM_017801 | 4671.544  | 3427.594  | L04461    | 822.901   |
| AL162040  | 3250.997  | 2970.833  | NM_007348 | 2602.072  | 2265.951  | AK026938  | 8785.847  |
| AL442084  | 1278.749  | 2025.325  | U65473    | 2095.839  | 3969.335  | AK024373  | 11753.348 |
| AL137371  | 13086.676 | 12698.668 | D63481    | 9795.631  | 11599.57  | AK022343  | 8966.096  |
| AF088003  | 884.575   | 1187.181  | AK024422  | 518.536   | 1180.329  | AK026400  | 741.717   |
| AK024713  | 1426.329  | 447.102   | NM_002673 | 4609.42   | 1729.438  | U92989    | 1389.081  |
| AK024204  | 1222.378  | 1109.078  | NM_003876 | 2696.032  | 2134.906  | AF075102  | 2490.66   |
| AK023737  | 380.98    | 746.673   | NM_012295 | 2509.23   | 5148.16   | NM_018463 | 5046.909  |

|           |           |           |           |           |           |           |           |
|-----------|-----------|-----------|-----------|-----------|-----------|-----------|-----------|
| NM_006609 | 3556.697  | 3846.63   | AL133666  | 810.563   | 1182.627  | X74956    | 20551.129 |
| NM_014118 | 484.923   | 653.752   | NM_004710 | 2172.199  | 2626.048  | AF132197  | 58.936    |
| AK023643  | 1492.221  | 1379.987  | NM_004396 | 4926.727  | 5438.828  | AK025546  | 710.175   |
| AL390159  | 371.735   | 451.882   | NM_017999 | 1864.37   | 1554.883  | AL137487  | 1327.957  |
| AF095853  | 737.148   | 1919.783  | NM_015989 | 25499.943 | 28136.588 | AK023800  | 324.972   |
| NM_014157 | 1257.536  | 2008.977  | NM_001043 | 949.284   | 1051.741  | AF086120  | 125.475   |
| AF090933  | 622.211   | 743.594   | NM_004779 | 6014.899  | 4791.768  | AK024120  | 1932.579  |
| AF111851  | 4913.103  | 4763.046  | NM_019071 | 1632.761  | 1382.74   | CY3Cy5    | 13501.894 |
| AF152529  | 463.926   | 543.489   | AF113685  | 708.658   | 778.18    | BG568198  | 401.21    |
| AL360200  | 1059.627  | 1144.391  | NM_005470 | 907.931   | 1214.308  | M76559    | 777.54    |
| AK021992  | 844.07    | 959.016   | AF142570  | 560.937   | 851.92    | U11058    | 262.746   |
| AK022102  | 716.909   | 2354.645  | NM_004225 | 4153.805  | 3412.041  | AI222585  | 351.783   |
| AK022235  | 863.546   | 3163.009  | NM_002873 | 1564.239  | 1991.204  | AA411678  | 5808.106  |
| AK022378  | 3910.854  | 3808.624  | NM_015571 | 4975.479  | 5096.521  | AA862813  | 4143.895  |
| AK022009  | 800.387   | 683.448   | NM_004701 | 4346.592  | 2919.809  | AA398427  | 566.974   |
| AK022139  | 276.888   | 330.917   | AK025554  | 1152.057  | 1321.229  | T55728    | 1357.877  |
| AK022274  | 670.47    | 579.982   | BI824151  | 1528.461  | 1925.81   | H20856    | 1172.021  |
| AK022401  | 453.092   | 298.255   | AK021791  | 3195.384  | 1383.356  | N62586    | 1418.638  |
| AL110173  | 922.75    | 626.907   | NM_004052 | 974.418   | 3313.577  | AA242743  | 4485.49   |
| AK024106  | 1240.207  | 462.849   | NM_004394 | 10264.396 | 11287.144 | NM_004758 | 1695.222  |
| AK027254  | 1609.728  | 1813.741  | NM_005727 | 11884.808 | 13569.819 | NM_005163 | 1074.623  |
| AK021772  | 2339.068  | 2650.756  | AK027242  | 1900.609  | 1861.453  | SR5       | 1049.128  |
| AK026297  | 718.997   | 826.637   | NM_001279 | 22184.662 | 11851.798 | SR7       | 1307.66   |
| AK054831  | 19468.105 | 24274.967 | NM_005010 | 1603.441  | 1937.302  | SR9       | 4278.133  |
| AK021770  | 1311.268  | 1350.029  | NM_019055 | 1157.883  | 773.773   | CY3Cy5    | 11555.466 |
| AK027248  | 2792.658  | 2648.289  | U96136    | 446.146   | 538.382   | NM_016382 | 1806.096  |
| AF009263  | 2557.761  | 2631.725  | AF201380  | 1006.797  | 1213.91   | AK023117  | 684.392   |
| AF009283  | 1161.644  | 1881.373  | NM_003619 | 1361.126  | 1989.1    | NM_000855 | 533.402   |
| M15640    | 407.799   | 691.905   | NM_012392 | 2185.364  | 1569.315  | NM_005536 | 3633.502  |
| AF086329  | 7356.313  | 9148.827  | NM_014833 | 8166.362  | 7067.101  | NM_005077 | 785.995   |
| AK025799  | 527.722   | 567.546   | NM_000045 | 258.689   | 773.942   | NM_004423 | 4368.232  |
| AK022857  | 581.362   | 839.236   | NM_003878 | 2101.608  | 1822.218  | NM_001990 | 455.375   |
| AL110206  | 819.814   | 1181.503  | NM_005957 | 353.884   | 469.135   | NM_002141 | 792.077   |
| NM_004821 | 931.86    | 1235.996  | AK024374  | 975.004   | 538.889   | NM_003311 | 7326.565  |
| AK024292  | 951.321   | 1606.709  | NM_007101 | 526.979   | 759.771   | NM_003776 | 888.717   |
| AK026263  | 2039.852  | 2592.947  | NM_018234 | 3512.906  | 2056.508  | NM_007098 | 173.155   |
| U50526    | 1360.099  | 1140.17   | AB033062  | 1070.257  | 1253.965  | NM_015719 | 473.644   |
| S75105    | 3181.54   | 3724.524  | NM_016437 | 10981.316 | 10020.978 | NM_006129 | 973.995   |
| AF056455  | 12118.365 | 12112.468 | NM_002720 | 3905.624  | 2075.842  | NM_000582 | 1293.32   |
| AK024988  | 799.123   | 954.186   | AK024716  | 8270.031  | 7465.423  | NM_005593 | 614.962   |
| AK025719  | 753.785   | 733.858   | NM_020380 | 4727.455  | 2682.846  | BF338709  | 166.091   |
| AF026943  | 4244.702  | 2548.829  | NM_002890 | 32596.246 | 22385.037 | AF100756  | 3143.572  |
| NM_020448 | 1932.745  | 1745.239  | NM_001330 | 31083.252 | 25706.592 | NM_006825 | 2433.955  |
| NM_005419 | 6814.362  | 4569.772  | NM_015927 | 1575.25   | 1174.469  | NM_004862 | 1274.671  |
| L31956    | 803.098   | 554.978   | NM_014552 | 1830.212  | 1723.239  | NM_001661 | 612.38    |
| NM_003479 | 14369.926 | 11427.259 | NM_003072 | 5056.215  | 3094.785  | NM_014563 | 829.397   |
| AF075101  | 486.982   | 333.656   | NM_001913 | 1331.628  | 1145.434  | NM_020150 | 1721.335  |
| AF130108  | 1179.485  | 1618.087  | AB040931  | 1869.607  | 1243.71   | NM_007150 | 1256.809  |
| NM_020224 | 4821      | 5621.596  | NM_003599 | 514.497   | 620.848   | NM_006831 | 1015.001  |
| U17617    | 1052.686  | 1066.876  | NM_015911 | 1351.25   | 927.98    | AL162044  | 2414.022  |
| AK022952  | 5703.737  | 7099.933  | BC011826  | 2381.016  | 2098.776  | AK024004  | 252.391   |
| BF218888  | 908.126   | 1169.568  | NM_017647 | 3231.476  | 1433.881  | AK022365  | 465.777   |
| AF086401  | 5502.76   | 5170.473  | NM_012091 | 947.26    | 584.726   | BE892273  | 25272.174 |

|           |           |           |           |           |           |           |           |
|-----------|-----------|-----------|-----------|-----------|-----------|-----------|-----------|
| L23869    | 2539.49   | 2836.269  | NM_012321 | 2680.902  | 2730.698  | AF026929  | 554.052   |
| Z21853    | 3619.966  | 3325.234  | D13642    | 2690.705  | 2332.329  | NM_016734 | 960.173   |
| U80770    | 857.089   | 919.909   | NM_004741 | 5061.25   | 6639.417  | Y08147    | 722.642   |
| AB075846  | 808.53    | 766.812   | NM_018032 | 3018.169  | 2470.528  | D00174    | 1817.635  |
| NM_018342 | 1408.143  | 1282.076  | NM_003675 | 4135.833  | 4173.318  | AB000520  | 166.37    |
| BC020260  | 2253.196  | 1838.193  | NM_017518 | 1208.329  | 954.463   | NM_006907 | 136.723   |
| D17156    | 4375.639  | 4921.778  | NM_004117 | 5490.161  | 3594.415  | NM_002686 | 545.413   |
| L04461    | 1264.758  | 1234.961  | NM_016594 | 1461.427  | 975.158   | NM_006267 | 989.901   |
| AK026938  | 11180.108 | 11181.462 | NM_030752 | 4141.901  | 2179.825  | NM_002661 | 2504.667  |
| AK024373  | 12384.833 | 9769.521  | D26068    | 16665.996 | 17311.576 | NM_001263 | 424.875   |
| AK022343  | 8056.916  | 6812.344  | NM_018559 | 7191.734  | 7237.555  | AK023982  | 392.3     |
| AF075102  | 2334.7    | 1630.739  | NM_017593 | 1130.318  | 1501.604  | NM_018466 | 703.796   |
| NM_018463 | 4833.203  | 3889.813  | NM_004282 | 8763.532  | 6455.552  | AB014533  | 7484.751  |
| X74956    | 20819.588 | 14702.401 | AK025442  | 3672.53   | 3132.604  | M11427    | 316.173   |
| AF132197  | 632.928   | 1048.624  | AL050041  | 737.68    | 705.806   | NM_000744 | 551.262   |
| AK025546  | 858.73    | 837.91    | NM_002451 | 1016.284  | 844.407   | NM_003039 | 5754.63   |
| AL137487  | 2005.166  | 3042.002  | NM_013411 | 679.683   | 615.603   | NM_014509 | 440.202   |
| AK023800  | 431.863   | 783.233   | NM_020200 | 441.051   | 668.691   | NM_020372 | 2462.978  |
| AK024120  | 1804.368  | 1816.656  | NM_000180 | 5716.849  | 6927.152  | NM_016077 | 95.52     |
| CY3Cy5    | 17140.957 | 1716.328  | NM_000858 | 2979.18   | 2880.372  | NM_015537 | 884.875   |
| W96179    | 3400.508  | 3831.975  | AF254087  | 1085.169  | 867.336   | NM_016520 | 4898.104  |
| AW247841  | 13431.431 | 14577.457 | AL117607  | 5284.576  | 5202.164  | AB018353  | 607.977   |
| BG568198  | 864.69    | 950.825   | AB037774  | 646.732   | 876.123   | NM_007036 | 780.581   |
| M76559    | 4349.72   | 5574.183  | NM_005438 | 864.995   | 827.146   | NM_002617 | 659.067   |
| U11058    | 715.517   | 497.248   | AK024361  | 990.592   | 707.315   | NM_003313 | 6749.991  |
| AI222585  | 1013.339  | 1284.175  | NM_004350 | 900.542   | 1243.93   | AF090907  | 731.806   |
| AA411678  | 9419.146  | 6654.586  | NM_018044 | 1637.286  | 1232.033  | AK024476  | 2022.083  |
| AA862813  | 15175.445 | 22311.795 | AF274347  | 2869.872  | 2421.812  | X74794    | 1714.924  |
| AA398427  | 933.763   | 1630.247  | NM_018555 | 1740.611  | 1777.089  | AL050298  | 932.036   |
| T55728    | 5812.998  | 5748.913  | AK023525  | 3323.171  | 1627.576  | NM_007079 | 16530.877 |
| H20856    | 2689.171  | 2911.707  | AF085829  | 902.517   | 730.26    | M20696    | 1440.928  |
| N62586    | 3324.584  | 5596.386  | AK021903  | 4373.568  | 3569.755  | NM_002915 | 161.999   |
| AA242743  | 6693.776  | 8896.545  | AL390143  | 2136.954  | 2368.997  | NM_006736 | 744.997   |
| SR5       | 5888.575  | 5397.643  | AL162075  | 1731.088  | 1138.381  | NM_003640 | 524.241   |
| SR7       | 7832.896  | 44982.066 | AK021595  | 739.597   | 475.067   | NM_014444 | 1282.191  |
| SR9       | 34823.609 | 6099.992  | AK021648  | 1506.986  | 1347.644  | NM_012248 | 1524.79   |
| CY3Cy5    | 21354.52  | 2306.965  | AF147358  | 9700.052  | 7257.751  | NM_014393 | 567.187   |
| NM_016382 | 5837.869  | 2368.75   | NM_018410 | 1634.324  | 566.456   | NM_001355 | 1039.701  |
| AK023117  | 2549.581  | 3103.327  | AF086355  | 348.518   | 852.343   | AJ224741  | 161.041   |
| AL122046  | 630.125   | 992.008   | NM_016364 | 789.18    | 1013.36   | NM_004684 | 273.904   |
| AF119914  | 307.929   | 402.588   | AF086419  | 3846.698  | 3710.165  | BF338709  | 664.802   |
| NM_000855 | 2418.069  | 3212.102  | AF086461  | 649.021   | 469.602   | AF204171  | 387.387   |
| NM_005536 | 4800.457  | 3997.388  | AL833296  | 1550.793  | 1302.054  | W96179    | 708.424   |
| NM_005077 | 2822.899  | 2621.365  | AL110240  | 2352.951  | 1998.675  | AW247841  | 4405.493  |
| NM_004423 | 5812.296  | 5118.579  | AF085919  | 423.972   | 452.305   | BG568198  | 373.69    |
| NM_001990 | 687.945   | 614.682   | AF147431  | 684.661   | 307.221   | M76559    | 1161.685  |
| NM_002141 | 833.333   | 1252.82   | AK026422  | 4611.998  | 4480.516  | AI222585  | 643.338   |
| NM_003311 | 10065.156 | 9422.583  | AK022264  | 1158.971  | 948.587   | AA411678  | 6009.39   |
| NM_003776 | 2863.718  | 7431.243  | AL137331  | 779.624   | 546.267   | AA862813  | 3812.2    |
| NM_007098 | 787.457   | 3755.093  | AL162040  | 2060.915  | 1655.35   | AA398427  | 408.877   |
| NM_015719 | 1275.482  | 3571.263  | AL137371  | 6613.527  | 4086.112  | T55728    | 1037.949  |
| NM_012464 | 306.454   | 481.879   | AL137596  | 5163.564  | 3796.844  | H20856    | 955.911   |
| NM_006129 | 2738.239  | 4377.813  | AL353942  | 7364.906  | 6430.251  | N62586    | 1332.276  |

|           |           |           |           |           |           |           |           |
|-----------|-----------|-----------|-----------|-----------|-----------|-----------|-----------|
| NM_005593 | 2518.489  | 2093.346  | Z38010    | 7612.391  | 10171.977 | AA242743  | 2708.736  |
| AJ224741  | 703.37    | 866.326   | AK024713  | 624.546   | 260.428   | NM_004758 | 1265.542  |
| NM_004684 | 659.782   | 885.579   | AK023737  | 1022.772  | 509.001   | NM_015361 | 1466.952  |
| BF338709  | 1227.456  | 1128.523  | NM_006609 | 1532.205  | 837.356   | Y08147    | 1365.982  |
| AF204171  | 550.727   | 957.493   | NM_014157 | 852.109   | 795.604   | D00174    | 2155.191  |
| M18182    | 359.706   | 605.648   | AF111851  | 2635.533  | 2795.078  | AB000520  | 738.086   |
| AF100756  | 6813.32   | 10433.472 | AL360200  | 629.576   | 395.709   | NM_016382 | 1372.777  |
| NM_006825 | 8850.948  | 9560.596  | AK022378  | 3110.727  | 2853.622  | AK023117  | 816.705   |
| NM_004862 | 4702.691  | 4591.094  | AK027174  | 817.255   | 323.253   | NM_000855 | 1042.992  |
| NM_001661 | 1828.283  | 1493.3    | AL110173  | 536.588   | 673.371   | NM_005536 | 3416.912  |
| NM_014563 | 2997.712  | 2500.807  | AK024106  | 690.18    | 215.733   | NM_005077 | 1040.296  |
| NM_020150 | 3067.727  | 3490.111  | AK027254  | 1775.546  | 1624.995  | NM_004423 | 4762.568  |
| NM_007150 | 3704.427  | 3028.708  | AK021772  | 1780.781  | 1288.194  | NM_001990 | 458.97    |
| NM_006831 | 2240.674  | 2244.144  | AK054831  | 8505.712  | 4565.717  | NM_002141 | 505.295   |
| AL162044  | 5251.146  | 6205.797  | AK021770  | 652.921   | 926.873   | NM_003311 | 5738.167  |
| AK024004  | 699.523   | 888.67    | AK022804  | 5512.922  | 3113.344  | NM_003776 | 597.856   |
| AK022365  | 524.182   | 786.929   | AF009263  | 2341.512  | 2337.395  | NM_012464 | 131.44    |
| BE892273  | 52712.914 | 55483.398 | AF086329  | 3828.615  | 5006.371  | NM_000582 | 724.553   |
| AF026929  | 869.95    | 1064.134  | AL110206  | 1124.415  | 1029.152  | NM_005593 | 1241.599  |
| NM_016734 | 1262.546  | 1555.138  | NM_004821 | 1206.36   | 1125.287  | NM_004979 | 476.986   |
| AF035803  | 754.41    | 506.512   | AK024292  | 1498.004  | 1009.294  | NM_016077 | 1232.158  |
| Y08147    | 4685.434  | 5379.007  | AK026263  | 931.762   | 807.485   | AF100756  | 2704.26   |
| D00174    | 10621.829 | 11372.187 | AF056455  | 6632.285  | 4741.746  | NM_006825 | 3013.329  |
| AB000520  | 1855.067  | 2502.275  | NM_018510 | 670.486   | 360.884   | NM_004862 | 1473.9    |
| NM_006907 | 783.13    | 2158.607  | AF026943  | 2418.14   | 895.751   | NM_001661 | 651.682   |
| NM_002686 | 616.562   | 1178.582  | NM_005419 | 2395.274  | 2369.25   | NM_014563 | 891.305   |
| NM_006267 | 1585.383  | 1516.02   | NM_003479 | 5157.682  | 5528.467  | NM_020150 | 1894.538  |
| NM_002661 | 8502.943  | 10999.736 | AF130108  | 419.509   | 435.825   | NM_007150 | 967.637   |
| NM_001263 | 510.114   | 594.369   | NM_020224 | 3850.567  | 5810.885  | NM_006831 | 814.103   |
| AK023982  | 503.705   | 563.896   | U17617    | 1824.642  | 1653.761  | AL162044  | 1260.705  |
| NM_018466 | 2037.002  | 1217.535  | AK022952  | 2454.72   | 2158.773  | BE892273  | 4720.585  |
| Y11312    | 843.222   | 746.804   | BF218888  | 560.969   | 455.668   | AF026929  | 1443.965  |
| AB014533  | 5159.541  | 5031.066  | AF086401  | 4191.612  | 2249.526  | NM_014393 | 1383.044  |
| M11427    | 597.01    | 664.245   | L23869    | 1700.151  | 920.272   | NM_004223 | 3425.104  |
| NM_000744 | 604.86    | 874.743   | U80770    | 353.598   | 282.065   | NM_006813 | 344.296   |
| NM_003039 | 14748.161 | 10161.912 | AB075846  | 908.801   | 491.127   | NM_001355 | 3157.182  |
| NM_014509 | 1516.093  | 1443.434  | NM_018342 | 1190.693  | 624.877   | U63336    | 362.538   |
| U26662    | 543.343   | 641.164   | BC020260  | 1592.647  | 803.893   | NM_006907 | 185.264   |
| NM_020372 | 5498.547  | 6272.125  | D17156    | 4706.211  | 3642.986  | NM_002686 | 312.576   |
| NM_004979 | 1463.089  | 818.772   | L04461    | 341.164   | 362.818   | NM_006267 | 625.046   |
| NM_016077 | 3705.533  | 4826.86   | AK026938  | 8078.044  | 7143.981  | NM_002661 | 3674.107  |
| NM_015537 | 3970.51   | 4787.274  | AK024373  | 7381.39   | 5543.135  | NM_001263 | 327.946   |
| NM_016520 | 7229.584  | 5008.264  | AK022343  | 4696.829  | 3862.175  | AK023982  | 473.621   |
| AB018353  | 1757.656  | 2229.986  | AK026400  | 443.931   | 524.72    | NM_018466 | 758.296   |
| NM_007036 | 2019.635  | 1530.984  | U92989    | 3493.707  | 3682.84   | Y11312    | 445.568   |
| NM_002617 | 1592.205  | 1895.531  | AF075102  | 1532.402  | 943.765   | AB014533  | 4163.618  |
| NM_003313 | 11841.855 | 12592.053 | NM_018463 | 3753.615  | 3773.692  | NM_000744 | 650.987   |
| AF090907  | 1609.449  | 2110.475  | X74956    | 21684.963 | 17482.367 | NM_003039 | 767.662   |
| AK024476  | 3172.728  | 2730.065  | AK025546  | 480.459   | 393.829   | NM_020372 | 3215.56   |
| X74794    | 5677.265  | 6945.207  | AL137487  | 1011.867  | 1347.915  | NM_002635 | 36977.004 |
| AL050298  | 2460.939  | 2873.365  | AK024120  | 1599.445  | 981.434   | NM_004758 | 2298.082  |
| NM_002915 | 545.857   | 1266.783  | CY3Cy5    | 13712.998 | 1394.939  | NM_005163 | 920.788   |
| NM_006736 | 1294.755  | 925.443   | W96179    | 2120.132  | 1445.759  | NM_015361 | 3219.84   |



|           |           |           |           |           |           |           |           |
|-----------|-----------|-----------|-----------|-----------|-----------|-----------|-----------|
| NM_00364C | 1506.886  | 1164.514  | AW247841  | 7459.832  | 6991.042  | NM_00431C | 637.97    |
| NM_014444 | 3473.63   | 3793.698  | M76559    | 2056.159  | 2989.451  | NM_015537 | 1710.078  |
| NM_01224E | 7312.425  | 7388.217  | AI222585  | 975.99    | 548.912   | NM_01652C | 4552.161  |
| NM_014393 | 3407.35   | 2851.835  | AA411678  | 8397.825  | 5020.184  | AB018353  | 701.885   |
| NM_004223 | 9032.164  | 7228.261  | AA862813  | 18860.846 | 8920.561  | NM_00703E | 1131.218  |
| NM_006813 | 667.587   | 583.579   | AA398427  | 982.668   | 778.865   | NM_002617 | 759.087   |
| NM_001355 | 10494.71  | 12665.983 | T55728    | 2437.084  | 1356.642  | NM_003313 | 9613.117  |
| U63336    | 356.167   | 1139.841  | H20856    | 1774.004  | 435.563   | AF090907  | 952.93    |
| AJ224741  | 554.932   | 920.89    | N62586    | 2618.455  | 2285.357  | AK024476  | 2804.85   |
| NM_004684 | 680.081   | 565.891   | AA242743  | 5930.969  | 5965.022  | X74794    | 2167.188  |
| BF338709  | 1131.15   | 1159.737  | NM_00475E | 2456.85   | 1031.734  | AL050298  | 924.753   |
| AF204171  | 625.333   | 1020.353  | SR5       | 3915.601  | 4485.79   | NM_00707E | 20800     |
| M18182    | 478.646   | 1601.606  | SR7       | 6444.146  | 47329.242 | M20696    | 934.87    |
| W96179    | 3867.575  | 4599.288  | SR9       | 12895.971 | 2894.189  | NM_00673E | 454.927   |
| AW247841  | 15486.028 | 15877.627 | CY3Cy5    | 12635.042 | 1121.523  | NM_014444 | 1202.86   |
| BG568198  | 551.571   | 588.386   | NM_016382 | 1795.464  | 1044.211  | NM_01224E | 621.272   |
| M76559    | 4456.654  | 5675.862  | AK023117  | 1299.575  | 1530.425  | NM_01497C | 2542.019  |
| U03884    | 326.934   | 398.027   | AL122046  | 691.471   | 353.257   | NM_00709E | 200.407   |
| AI222585  | 1001.202  | 1455.148  | NM_000855 | 1485.874  | 2339.419  | NM_01571E | 417.286   |
| AA411678  | 11775.053 | 9155.207  | NM_00553E | 2180.59   | 1236.365  | NM_012464 | 109.817   |
| AA398427  | 986.798   | 1570.434  | NM_005077 | 1560.687  | 1410.638  | NM_00612E | 696.602   |
| T55728    | 5174.721  | 4415.855  | NM_004423 | 6166.581  | 5344.726  | NM_000582 | 1889.256  |
| H20856    | 2594.908  | 1672.345  | NM_00199C | 594.227   | 418.004   | NM_005593 | 1709.09   |
| N62586    | 3015.462  | 3383.509  | NM_002141 | 1103.88   | 1590.386  | AJ224741  | 312.713   |
| AA242743  | 6069.709  | 5336.435  | NM_003311 | 3509.293  | 2089.529  | NM_004684 | 313.205   |
| NM_00475E | 2845.503  | 1903.357  | NM_00377E | 1450.846  | 1651.292  | BF338709  | 807.192   |
| NM_005163 | 4729.059  | 5363.672  | NM_00709E | 715.278   | 1316.14   | AF204171  | 247.667   |
| NM_015361 | 4082.337  | 3601.191  | NM_01571E | 823.278   | 1934.473  | W96179    | 1097.897  |
| NM_00431C | 1260.934  | 1111.093  | NM_00612E | 1465.873  | 1948.836  | AW247841  | 4721.805  |
| AB023144  | 376.481   | 482.724   | NM_000582 | 3312.054  | 6940.059  | BG568198  | 685.237   |
| AF035803  | 705.039   | 599.813   | NM_005593 | 2023.471  | 2616.824  | M76559    | 1712.67   |
| Y08147    | 4871.597  | 6284.69   | NM_004684 | 768.1     | 982.521   | AI222585  | 765.618   |
| D00174    | 10678.089 | 15423.57  | BF338709  | 969.164   | 881.579   | AA411678  | 4580.5    |
| AB000520  | 1620.641  | 2358.155  | AF100756  | 5254.027  | 5846.532  | AA862813  | 2351.153  |
| NM_016382 | 6032.145  | 1985.55   | NM_00682E | 8681.55   | 7152.719  | T55728    | 489.588   |
| AK023117  | 2217.61   | 2613.343  | NM_004862 | 2033.266  | 1843.477  | H20856    | 621.504   |
| AL122046  | 458.156   | 792.866   | NM_001661 | 618.855   | 327.925   | N62586    | 1250.121  |
| NM_000855 | 1498.265  | 1627.277  | NM_014563 | 2147.848  | 1240.225  | AA242743  | 3077.893  |
| NM_00553E | 4711.973  | 3687.187  | NM_02015C | 2510.589  | 2119.098  | BE892273  | 18664.465 |
| NM_005077 | 2736.177  | 2432.886  | NM_00715C | 2662.062  | 1618.99   | AF026929  | 582.372   |
| NM_00199C | 660.71    | 839.155   | NM_006831 | 1883.535  | 991.592   | NM_016734 | 1188.825  |
| NM_002141 | 1200.639  | 1407.788  | AL162044  | 2950.638  | 2094.087  | M16006    | 202.013   |
| NM_001804 | 321.652   | 364.325   | BE892273  | 37843.148 | 38212.422 | AF035803  | 308.796   |
| NM_003311 | 9763.802  | 8017.621  | AF026929  | 819.732   | 465.127   | Y08147    | 2108.343  |
| NM_00377E | 2446.168  | 3529.705  | NM_016734 | 719.134   | 846.403   | D00174    | 4367.702  |
| NM_00709E | 631.407   | 2112.286  | AF035803  | 778.36    | 1291.224  | AB000520  | 778.729   |
| NM_01571E | 1134.317  | 3102.306  | Y08147    | 2542.201  | 4116.667  | NM_016382 | 1579.937  |
| NM_012464 | 535.596   | 648.926   | D00174    | 5417.13   | 6618.874  | AK023117  | 1274.087  |
| NM_00612E | 2661.671  | 3855.928  | AB000520  | 1236.632  | 1162.057  | AL122046  | 443.662   |
| NM_000582 | 3523.404  | 5250.566  | NM_006907 | 200.413   | 838.729   | NM_000855 | 1473.008  |
| NM_005593 | 2799.432  | 2798.883  | NM_00268E | 504.764   | 568.796   | NM_00553E | 2999.882  |
| NM_00497E | 1391.976  | 1207.766  | NM_006267 | 1079.131  | 1087.301  | NM_00199C | 607.643   |
| NM_004862 | 4617.173  | 4125.076  | NM_002661 | 5077.161  | 9849.8    | NM_002141 | 624.467   |

|           |           |           |           |           |           |           |           |
|-----------|-----------|-----------|-----------|-----------|-----------|-----------|-----------|
| NM_001661 | 1504.306  | 1188.375  | NM_001263 | 541.315   | 620.845   | NM_003311 | 5980.896  |
| NM_014563 | 3224.298  | 2693.222  | AK023982  | 315.25    | 505.909   | NM_003776 | 598.416   |
| NM_020150 | 3406.797  | 3434.176  | Y11312    | 901.199   | 412.102   | NM_000744 | 496.036   |
| NM_007150 | 4142.243  | 3061.611  | AB014533  | 7448.483  | 6674.216  | NM_003039 | 5048.517  |
| NM_006831 | 3165.194  | 2445.301  | NM_000744 | 611.276   | 384.602   | NM_014509 | 516.863   |
| AL162044  | 4819.5    | 4371.383  | NM_003039 | 8022.001  | 4469.498  | NM_020372 | 4442.786  |
| AK024004  | 717.488   | 556.548   | NM_014509 | 732.307   | 856.442   | NM_002635 | 38691.719 |
| AF026929  | 1228.715  | 1118.694  | NM_020372 | 4122.239  | 4620.507  | NM_004979 | 754.48    |
| NM_016734 | 1312.592  | 1339.602  | NM_004979 | 1138.71   | 1051.411  | NM_016077 | 1421.633  |
| NM_014393 | 3258.617  | 4222.277  | J04755    | 676.082   | 1386.686  | AF100756  | 3962.011  |
| NM_004223 | 9244.132  | 7699.895  | NM_016077 | 3140.982  | 3051.125  | NM_006825 | 4453.39   |
| NM_006813 | 658.154   | 487.674   | NM_015537 | 1470.029  | 2544.908  | NM_004862 | 1481.719  |
| NM_002686 | 527.12    | 705.765   | NM_016520 | 7687      | 5974.963  | NM_001661 | 2296.69   |
| NM_006267 | 1482.127  | 1448.624  | AB018353  | 1292.321  | 2127.588  | NM_020150 | 1661.04   |
| NM_002661 | 8708.048  | 11139.835 | NM_007036 | 1515.943  | 2365.02   | NM_007150 | 855.036   |
| AK023982  | 587.257   | 554.147   | NM_002617 | 701.569   | 1407.921  | NM_006831 | 573.85    |
| NM_018466 | 1974.422  | 1233.057  | NM_003313 | 10189.671 | 10052.929 | AL162044  | 1126.189  |
| Y11312    | 1049.009  | 484.407   | AF090907  | 776.475   | 619.612   | AK024004  | 876.182   |
| AB014533  | 5249.774  | 4323.514  | AK024476  | 3241.565  | 2314.011  | NM_006736 | 563.112   |
| M11427    | 540.492   | 330.534   | X74794    | 9040.176  | 5381.732  | NM_003640 | 740.832   |
| NM_000744 | 612.212   | 737.778   | AL050298  | 2821.506  | 1924.672  | NM_014444 | 1775.387  |
| NM_014509 | 1469.303  | 1512.604  | NM_007079 | 32092.082 | 26642.756 | NM_012248 | 2130.153  |
| U26662    | 656.661   | 527.983   | M20696    | 2811.359  | 2532.991  | NM_014970 | 2662.741  |
| NM_020372 | 5808.616  | 5571.622  | NM_006736 | 829.156   | 910.109   | NM_014393 | 1526.659  |
| NM_004758 | 3058.763  | 2804.847  | NM_003640 | 1836.913  | 1696.275  | NM_004223 | 4819.259  |
| NM_005163 | 4253.433  | 5244.019  | NM_014444 | 3050.507  | 2926.867  | NM_006813 | 517.236   |
| NM_015537 | 5019.431  | 7001.609  | NM_012248 | 5470.587  | 4117.171  | NM_001355 | 2930.968  |
| NM_016520 | 6541.905  | 3587.982  | NM_006813 | 573.609   | 1028.913  | U63336    | 295.733   |
| AB018353  | 1636.557  | 1665.641  | NM_001355 | 12235.297 | 11015.88  | NM_006907 | 114.544   |
| NM_007036 | 2097.167  | 1490.47   | U63336    | 377.068   | 1081.11   | NM_002686 | 567.039   |
| NM_002617 | 1609.478  | 1407.436  | AJ224741  | 168.198   | 620.698   | NM_006267 | 770.736   |
| NM_003313 | 11147.479 | 9565.995  | NM_004684 | 335.438   | 474.384   | NM_002661 | 4454.813  |
| AF090907  | 1917.051  | 1805.076  | BF338709  | 837.506   | 844.851   | AK023982  | 699.181   |
| AK024476  | 3205.24   | 2657.928  | AF204171  | 571.537   | 656.775   | Y11312    | 424.18    |
| X74794    | 7357.65   | 6537.552  | M18182    | 762.587   | 1051.24   | AB014533  | 5506.314  |
| AL050298  | 2808.509  | 2418.657  | W96179    | 2071.433  | 2329.782  | M11427    | 370.482   |
| NM_007079 | 29913.896 | 26946.875 | AW247841  | 7989.389  | 7109.804  | NM_004660 | 7111.257  |
| M20696    | 4443.764  | 3384.943  | M76559    | 2644.982  | 3242.699  | NM_006165 | 1753.189  |
| NM_002915 | 567.737   | 578.523   | U03884    | 591.911   | 227.495   | NM_016011 | 7471.703  |
| NM_006736 | 1520.768  | 753.341   | AI222585  | 940.851   | 769.27    | AL035307  | 1432.156  |
| NM_003640 | 1484.913  | 2033.815  | AA411678  | 6394.933  | 3760.468  | AK023772  | 548.834   |
| NM_014444 | 3733.705  | 7278.674  | AA862813  | 14335.509 | 6549.612  | NM_012234 | 2799.478  |
| NM_012248 | 8270.824  | 10363.436 | T55728    | 4098.31   | 2725.619  | NM_015361 | 5525.481  |
| NM_007098 | 812.336   | 3824.793  | H20856    | 2296.899  | 1427.126  | NM_004310 | 536.04    |
| NM_015719 | 1152.956  | 3007.016  | N62586    | 2866.01   | 3136.908  | NM_015537 | 1932.031  |
| NM_012464 | 432.511   | 354.696   | AA242743  | 6760.123  | 8017.863  | NM_016520 | 3169.627  |
| NM_006129 | 2343.198  | 4166.844  | NM_004758 | 2246.292  | 1278.29   | AB018353  | 809.155   |
| AJ224741  | 788.834   | 973.828   | NM_005163 | 4472.446  | 4534.476  | NM_007036 | 1078.271  |
| NM_004684 | 508.359   | 737.896   | NM_015361 | 8984.692  | 10998.257 | X74794    | 1608.875  |
| BF338709  | 909.756   | 706.166   | NM_004310 | 463.229   | 425.144   | AL050298  | 1084.928  |
| AF204171  | 579.82    | 730.787   | M16006    | 228.189   | 563.888   | NM_007079 | 20124.277 |
| W96179    | 3408      | 3480.159  | AF035803  | 428.756   | 634.968   | M20696    | 816.556   |
| AW247841  | 14499.966 | 13759.135 | Y08147    | 2308.333  | 3964.533  | NM_005203 | 559.768   |

|           |           |           |           |           |           |           |           |
|-----------|-----------|-----------|-----------|-----------|-----------|-----------|-----------|
| BG568198  | 1154.533  | 812.609   | D00174    | 2982.156  | 5283.696  | NM_006566 | 377.926   |
| M76559    | 5079.823  | 5970.078  | AB000520  | 914.463   | 1302.525  | AK026154  | 5609.759  |
| U03884    | 559.743   | 422.159   | NM_016382 | 2050.336  | 1766.313  | AL117546  | 25140.438 |
| AI222585  | 1059.235  | 1085.817  | AK023117  | 999.571   | 1875.357  | AK027073  | 872.845   |
| AA411678  | 11778.12  | 5933.814  | AL122046  | 916.031   | 1169.642  | NM_000384 | 480.352   |
| AA862813  | 19581.197 | 26627.789 | NM_000855 | 1416.292  | 1877.382  | AL157482  | 5905.123  |
| AA398427  | 1156.723  | 1971.288  | NM_005536 | 6675.056  | 4499.707  | NM_005428 | 1863      |
| T55728    | 5528.007  | 7078.985  | NM_005077 | 1306.352  | 1064.738  | NM_017974 | 586.826   |
| H20856    | 2714.39   | 2453.411  | NM_004423 | 5340.617  | 4694.501  | NM_003979 | 661.529   |
| N62586    | 2491.824  | 3428.818  | NM_002141 | 877.17    | 1560.571  | X14677    | 2299.174  |
| AA242743  | 6244.301  | 6557.071  | NM_003311 | 5723.624  | 8175.906  | NM_005863 | 2757.485  |
| AK022365  | 654.769   | 866.566   | NM_003776 | 1878.169  | 3210.089  | U17077    | 4111.214  |
| BE892273  | 62102.418 | 55024.395 | NM_007098 | 775.23    | 1735.532  | NM_000915 | 1118.815  |
| M16006    | 247.116   | 401.759   | NM_015719 | 946.825   | 1989.857  | AB026542  | 5119.417  |
| AF035803  | 645.957   | 602.842   | NM_012464 | 165.12    | 413.119   | NM_019846 | 1788.721  |
| Y08147    | 4122.096  | 4308.612  | NM_006129 | 1630.35   | 2637.917  | NM_002062 | 1841.694  |
| D00174    | 10394.896 | 9239.947  | NM_000582 | 3556.552  | 7884.39   | NM_014394 | 12208.332 |
| AB000520  | 1789.475  | 1873.619  | NM_005593 | 1853.562  | 2283.124  | NM_005243 | 4832.989  |
| NM_016382 | 4929.451  | 1414.547  | NM_004979 | 720.141   | 1074.097  | NM_006218 | 669.56    |
| AK023117  | 3106.464  | 3484.014  | NM_016077 | 2514.896  | 4962.381  | NM_018140 | 697.915   |
| AL122046  | 647.59    | 750.443   | AF100756  | 6435.469  | 12405.986 | NM_016948 | 1723.206  |
| NM_000855 | 2567.325  | 2479.363  | NM_006825 | 10079.301 | 14444.61  | NM_000142 | 416.658   |
| NM_005536 | 4441.066  | 3321.209  | NM_004862 | 1703.478  | 2939.806  | AF272372  | 9332.495  |
| NM_005077 | 2710.937  | 1729.969  | NM_001661 | 1263.438  | 992.584   | AK097045  | 755.053   |
| NM_004423 | 5802.56   | 4748.229  | NM_014563 | 1884.549  | 1330.972  | AB014548  | 1656.348  |
| NM_001990 | 598.508   | 913.235   | NM_020150 | 2497.637  | 4150.711  | NM_018256 | 2088.844  |
| NM_002141 | 1146.712  | 2126.662  | NM_007150 | 1965.683  | 2010.15   | AK025150  | 787.671   |
| NM_001804 | 394.059   | 538.085   | NM_006831 | 1408.555  | 1823.569  | AK024611  | 1515.531  |
| NM_003776 | 3077.417  | 5686.289  | AL162044  | 3370.344  | 5023.1    | BC010420  | 2038.01   |
| NM_000744 | 579.123   | 798.019   | AK024004  | 801.263   | 1594.112  | NM_012280 | 14008.982 |
| NM_003039 | 15647.51  | 9684.084  | BE892273  | 51859.965 | 63644.195 | NM_018172 | 761.035   |
| NM_014509 | 1185.957  | 1039.518  | AF026929  | 782.085   | 1216.833  | NM_003591 | 7798.962  |
| NM_004979 | 1462.042  | 1158.087  | NM_016734 | 961.885   | 1194.196  | AL080111  | 223.242   |
| NM_016077 | 3500.404  | 3626.361  | NM_014393 | 3079.842  | 2224.697  | NM_003550 | 2217.527  |
| AF100756  | 7387.926  | 8685.33   | NM_004223 | 6419.391  | 5284.554  | NM_014642 | 2352.916  |
| NM_006825 | 9805.136  | 10555.647 | NM_001355 | 8915.528  | 6452.652  | AB037821  | 550.944   |
| NM_004862 | 5145.106  | 3730.575  | U63336    | 512.772   | 646.469   | NM_003829 | 764.816   |
| NM_001661 | 1787.436  | 961.642   | NM_002686 | 422.876   | 379.055   | AL110168  | 297.58    |
| NM_014563 | 3615.745  | 2547.289  | NM_006267 | 1320.434  | 1140.1    | NM_014522 | 989.667   |
| NM_020150 | 3607.941  | 4061.986  | NM_002661 | 6212.755  | 8492.166  | NM_002831 | 6538.391  |
| NM_007150 | 4651.22   | 4472.702  | NM_001263 | 307.922   | 654.558   | AL833409  | 1935.246  |
| NM_006831 | 3797.358  | 4032.469  | NM_018466 | 1170.613  | 562.313   | NM_015966 | 678.131   |
| AK024004  | 624.649   | 836.262   | Y11312    | 782.702   | 933.584   | NM_016147 | 1099.28   |
| NM_006736 | 1546.525  | 897.539   | AB014533  | 8504.239  | 12280.021 | NM_002833 | 526.104   |
| NM_003640 | 1565.741  | 1316.917  | M11427    | 781.696   | 1457.943  | NM_016592 | 864.592   |
| NM_014444 | 3153.835  | 3242.431  | U26662    | 606.142   | 1285.902  | NM_018527 | 272.091   |
| NM_012248 | 7298.94   | 7745.932  | NM_020372 | 7406.59   | 15707.226 | NM_018326 | 3306.989  |
| NM_014393 | 3245.136  | 3098.533  | NM_004758 | 1228.92   | 344.695   | NM_001868 | 398.42    |
| NM_004223 | 10305.888 | 6928.833  | NM_005163 | 2096.608  | 1794.187  | NM_014773 | 230.78    |
| NM_006813 | 632.35    | 550.059   | NM_015361 | 6618.207  | 5566.575  | AF134707  | 556.28    |
| NM_001355 | 9922.246  | 9551.924  | NM_015537 | 1885.029  | 1680.408  | NM_001223 | 5633.756  |
| U63336    | 572.519   | 662.616   | NM_016520 | 7438.015  | 3347.539  | AK027167  | 1206.816  |
| NM_006907 | 1074.109  | 1263.308  | AB018353  | 1674.661  | 1357.456  | AK025265  | 2795.411  |

|           |           |           |           |           |           |           |           |
|-----------|-----------|-----------|-----------|-----------|-----------|-----------|-----------|
| NM_002686 | 469.848   | 479.811   | NM_007036 | 1568.909  | 1397.776  | NM_013279 | 89.027    |
| NM_006267 | 1978.439  | 1842.413  | NM_002617 | 1215.515  | 1196.426  | NM_018652 | 5644.16   |
| NM_002661 | 10485.173 | 13761.924 | NM_003313 | 12840.408 | 9657.007  | AK024460  | 1254.002  |
| NM_001263 | 546.88    | 688.648   | AF090907  | 1431.127  | 868.349   | NM_006606 | 2089.507  |
| AK023982  | 379.568   | 529.769   | AK024476  | 1666.869  | 1260.273  | X60155    | 1373.967  |
| NM_018466 | 2550.733  | 1020.997  | X74794    | 8821.408  | 6684.14   | NM_006442 | 10680.558 |
| Y11312    | 1193.222  | 990.579   | AL050298  | 3061.341  | 2436.649  | NM_003902 | 3483.252  |
| AB014533  | 5516.313  | 7777.256  | NM_007079 | 29295.678 | 32164.115 | NM_016427 | 5444.477  |
| M11427    | 640.314   | 669.606   | M20696    | 2127.721  | 4247.237  | U80741    | 1219.984  |
| AK022097  | 5627.307  | 2614.271  | NM_002915 | 424.906   | 790.743   | NM_014497 | 1114.563  |
| NM_016011 | 4642.598  | 3749.304  | NM_007096 | 901.044   | 1141.802  | AL133598  | 3060.561  |
| AL035307  | 1477.505  | 852.377   | NM_015719 | 926.881   | 2228.218  | NM_015511 | 1416.871  |
| AK023772  | 350.011   | 500.536   | NM_006129 | 1249.388  | 942.405   | NM_006625 | 790.494   |
| NM_012234 | 3999.844  | 4058.189  | NM_000582 | 1580.581  | 1921.203  | NM_004891 | 7451.061  |
| NM_015361 | 7680.723  | 6474.161  | BF338709  | 858.828   | 275.955   | AF086538  | 570.37    |
| NM_004310 | 609.853   | 506.918   | AF204171  | 548.872   | 321.918   | NM_013369 | 155.365   |
| NM_015537 | 5667.568  | 5131.269  | W96179    | 2117.671  | 1744.445  | AF075068  | 9765.43   |
| NM_016520 | 8170.993  | 4395.054  | AW247841  | 5282.377  | 3312.959  | AF086529  | 200.764   |
| AB018353  | 1764.915  | 1925.232  | BG568198  | 786.73    | 96.252    | AF086023  | 777.857   |
| NM_007036 | 2664.74   | 2019.95   | M76559    | 1792.321  | 2066.459  | AK022171  | 518.204   |
| NM_002617 | 2158.171  | 3641.288  | AI222585  | 1171.283  | 1202.068  | AK025913  | 460.124   |
| NM_003313 | 12456.39  | 11721.894 | AA411678  | 7896.25   | 7048.792  | AF147389  | 128.651   |
| AF090907  | 1825.049  | 1611.178  | AA862813  | 18184.922 | 15540.563 | AK021930  | 239.949   |
| AK024476  | 3225.908  | 2608.013  | H20856    | 2122.139  | 1696.91   | NM_016500 | 1175.115  |
| X74794    | 8022.563  | 9828.876  | N62586    | 3174.013  | 4138.197  | NM_018354 | 731.065   |
| AL050298  | 3356.419  | 4157.431  | AA242743  | 4124.618  | 5239.842  | AF087974  | 101.472   |
| NM_007079 | 29582.246 | 36224.098 | BE892273  | 36463.18  | 37763.594 | X78938    | 1136.639  |
| M20696    | 4630.906  | 5788.334  | NM_016734 | 688.104   | 532.04    | U84517    | 4162.088  |
| NM_002915 | 494.482   | 930.644   | Y08147    | 1688.084  | 1965.489  | AK025231  | 20707.521 |
| AK026015  | 560.141   | 913.845   | D00174    | 3260.294  | 2677.692  | AK025338  | 55.856    |
| NM_005203 | 573.728   | 523.516   | AB000520  | 1027.74   | 879.178   | NM_014099 | 2278.342  |
| NM_000384 | 772.725   | 672.515   | NM_016382 | 1755.388  | 489.919   | AL133050  | 595.776   |
| AB018325  | 5709.152  | 2935.343  | AK023117  | 1308.818  | 1108.892  | AK027233  | 854.433   |
| AL157482  | 5108.317  | 5870.901  | AL122046  | 141.784   | 1062.635  | AK023343  | 67.744    |
| NM_005428 | 3112.169  | 2551.308  | NM_000855 | 2254.568  | 3523.234  | AK022421  | 119.707   |
| NM_017974 | 1031.098  | 874.149   | NM_005536 | 5819.001  | 3872.134  | AK022452  | 1010.761  |
| NM_003979 | 931.731   | 558.165   | NM_005077 | 1891.174  | 2551.977  | AK023375  | 320.51    |
| X14677    | 3426.431  | 2594.783  | NM_004423 | 5360.015  | 6096.572  | AK023781  | 533.994   |
| NM_005863 | 7668.412  | 10222.68  | NM_001990 | 581.804   | 817.55    | AF085881  | 633.689   |
| U17077    | 2010.286  | 1546.321  | NM_002141 | 874.932   | 1729.73   | AK022737  | 6695.618  |
| NM_000915 | 2479.656  | 1954.333  | NM_003311 | 7004.114  | 8139.95   | Y11159    | 566.843   |
| NM_002344 | 682.64    | 611.251   | NM_003776 | 1197.515  | 2297.746  | AB020648  | 2034.208  |
| AK024475  | 776.937   | 1918.686  | NM_000744 | 525.721   | 612.301   | AK025798  | 6609.711  |
| AB026542  | 15572.991 | 13452.029 | NM_003039 | 7622.821  | 4643.17   | AF086173  | 603.656   |
| NM_019846 | 3416.085  | 3715.882  | NM_014509 | 676.32    | 709.907   | AK025164  | 285.748   |
| NM_014433 | 575.154   | 673.993   | U26662    | 778.073   | 632.09    | NM_018366 | 5850.58   |
| NM_002062 | 5772.461  | 7641.716  | NM_020372 | 2956.184  | 3385.623  | AB040290  | 1060.857  |
| NM_014394 | 30188.027 | 43368.484 | NM_002635 | 50738.715 | 37541.262 | NM_019848 | 5965.004  |
| NM_005243 | 13661.776 | 16805.059 | NM_004979 | 1206.583  | 730.063   | AK021497  | 1772.709  |
| NM_006218 | 1742.988  | 1351.598  | NM_016077 | 2472.238  | 1381.321  | AF124367  | 1056.033  |
| NM_018140 | 1670.901  | 3045.853  | AF100756  | 4968.623  | 6016.659  | AK000798  | 582.442   |
| AF272372  | 19222.816 | 21185.324 | NM_006825 | 11645.345 | 10322.902 | AK025615  | 921.933   |
| AK097045  | 1017.273  | 1166.783  | NM_004862 | 1502.784  | 1795.475  | AK023803  | 663.939   |

|           |           |           |           |           |           |           |           |
|-----------|-----------|-----------|-----------|-----------|-----------|-----------|-----------|
| AF161356  | 63713.809 | 58389.977 | NM_001661 | 1424.102  | 753.392   | AK025168  | 366.113   |
| AB014548  | 3250.868  | 3899.778  | NM_014563 | 2070.178  | 1730.722  | AL109678  | 1326.443  |
| NM_018256 | 2903.141  | 2954.405  | NM_020150 | 2886.219  | 3736.228  | AL137524  | 2293.136  |
| AK025150  | 643.906   | 359.329   | NM_007150 | 1695.87   | 1635.025  | AF218008  | 6186.548  |
| AK024611  | 8989.538  | 10248.62  | NM_006831 | 1931.315  | 1713.385  | M22404    | 27164.189 |
| BC010420  | 5186.709  | 3765.812  | AL162044  | 1923.487  | 2030.028  | AF052115  | 979.055   |
| NM_012280 | 20240.16  | 16481.604 | NM_006736 | 497.969   | 515.84    | NM_014019 | 8421.271  |
| NM_018172 | 1806.268  | 3130.755  | NM_014444 | 2333.031  | 2331.018  | Z70711    | 1391.037  |
| AK022040  | 1119.396  | 1107.565  | NM_012248 | 3696.681  | 3503.658  | AF116653  | 940.465   |
| AK022722  | 756.363   | 723.063   | NM_014970 | 3354.885  | 2076.187  | NM_012368 | 1479.2    |
| NM_003591 | 19677.313 | 22107.752 | NM_014393 | 1542.517  | 869.414   | AK025323  | 262.969   |
| AL080111  | 2445.499  | 2178.538  | NM_004223 | 5452.921  | 4329.596  | NM_013326 | 1447.405  |
| NM_003550 | 9254.125  | 8955.913  | NM_006813 | 633.092   | 180.365   | BC037322  | 706.07    |
| NM_014642 | 2519.821  | 4288.879  | NM_001355 | 10420.254 | 7334.247  | Y12022    | 267.528   |
| AB037821  | 439.3     | 1052.836  | NM_006267 | 1268.986  | 1639.784  | AK001375  | 461.799   |
| NM_003829 | 4745.743  | 3401.666  | NM_002661 | 3874.947  | 9014.88   | AL137559  | 1299.538  |
| AL110168  | 2655.68   | 2143.603  | NM_001263 | 607.165   | 684.354   | AK021493  | 1324.292  |
| NM_002831 | 25153.504 | 18952.961 | NM_018466 | 1475.691  | 788.428   | NM_006161 | 2970.025  |
| AL833409  | 3371.178  | 2801.832  | Y11312    | 860.88    | 652.817   | NM_006192 | 156.762   |
| NM_015966 | 961.46    | 625.715   | AB014533  | 8199.396  | 8288.804  | NM_012155 | 3434.278  |
| NM_016147 | 1898.954  | 2919.068  | AK022097  | 3186.155  | 3353.985  | AF144700  | 681.163   |
| NM_016592 | 1188.601  | 1297.26   | NM_002166 | 10448.781 | 9400.12   | AB046825  | 2301.994  |
| NM_018527 | 429.588   | 476.341   | NM_004660 | 7212.554  | 5661.636  | X64975    | 2530.098  |
| NM_018326 | 3741.115  | 1991.995  | NM_006165 | 2169.368  | 2630.617  | AF064876  | 371.439   |
| NM_014773 | 904.278   | 498.537   | NM_016011 | 2511.931  | 1954.592  | AL050297  | 1969.569  |
| AF134707  | 706.579   | 828.575   | AL035307  | 911.289   | 1543.323  | AK026966  | 708.379   |
| NM_001223 | 6709.907  | 2335.055  | AK023772  | 658.914   | 393.604   | AF147398  | 926.81    |
| BE730629  | 1268.421  | 1009.237  | NM_012234 | 4834.161  | 4157.963  | AF185573  | 781.427   |
| AK027167  | 2216.263  | 1997.661  | NM_015361 | 7506.067  | 8429.645  | AJ009817  | 513.239   |
| AK025265  | 3928.935  | 2567.99   | NM_015537 | 1804.112  | 1535.695  | AK025268  | 1463.85   |
| NM_013279 | 182.599   | 963.568   | NM_016520 | 5540.668  | 3030.259  | L43366    | 2756.404  |
| NM_018652 | 15378.814 | 14220.08  | AB018353  | 927.429   | 1236.024  | AK026124  | 6842.237  |
| AB011166  | 3216.492  | 2664.284  | AF090907  | 1405.484  | 1828.005  | NM_015509 | 521.888   |
| AK024460  | 3151.971  | 4202.821  | X74794    | 7903.221  | 6469.324  | AL110157  | 2940.47   |
| NM_006606 | 7310.709  | 6295.893  | AL050298  | 2822.688  | 2471.827  | L38712    | 4188.97   |
| S78570    | 278.246   | 243.717   | NM_007079 | 32034.414 | 33365.941 | NM_012131 | 1151.681  |
| NM_016265 | 1052.711  | 514.745   | M20696    | 1620.221  | 2015.925  | S41540    | 533.848   |
| NM_006442 | 19651.262 | 14565.038 | NM_002915 | 528.054   | 341.514   | CY3Cy5    | 2671.112  |
| NM_003902 | 11594.124 | 7434.978  | NM_006566 | 696.275   | 1002.878  | AI417481  | 375.496   |
| NM_016427 | 6140.73   | 3326.328  | AK026154  | 5029.382  | 4911.974  | BI906766  | 672.812   |
| NM_006706 | 358.783   | 423.219   | AL117546  | 13558.332 | 16143.737 | U60519    | 1825.537  |
| U80741    | 4512.358  | 4438.715  | AB018325  | 2512.509  | 1842.178  | AA282906  | 1881.662  |
| NM_014497 | 2869.919  | 1876.753  | AL157482  | 5354.227  | 5340.757  | L02870    | 3898.787  |
| AL133598  | 7782.427  | 5790.953  | NM_005428 | 3826.891  | 2378.997  | BG755482  | 3926.877  |
| NM_015511 | 4469.596  | 5633.095  | X14677    | 2080.828  | 1608.862  | AI480307  | 2362.417  |
| NM_006625 | 4468.719  | 5321.047  | NM_005863 | 4929.016  | 5912.867  | X51420    | 819.403   |
| NM_004891 | 24689.811 | 20260.285 | U17077    | 4530.057  | 6398.744  | D28235    | 485.756   |
| AF086538  | 803.272   | 331.244   | AK024475  | 554.134   | 1723.37   | X51757    | 257.165   |
| AK023353  | 410.087   | 849.977   | NM_014433 | 913.984   | 1028.983  | L24038    | 538.186   |
| NM_003935 | 669.388   | 474.872   | NM_002062 | 7029.548  | 11100.925 | NM_053056 | 830.786   |
| NM_002879 | 502.727   | 525.624   | NM_014394 | 33509.891 | 39105.547 | NM_006186 | 567.521   |
| NM_013369 | 861.687   | 419.478   | NM_005243 | 10839.73  | 5902.108  | NM_002751 | 543.546   |
| NM_003206 | 811.511   | 670.431   | NM_006218 | 1124.095  | 1023.435  | M55593    | 2326.027  |

|           |           |           |           |           |           |           |           |
|-----------|-----------|-----------|-----------|-----------|-----------|-----------|-----------|
| AF075068  | 19544.633 | 10157.757 | NM_018140 | 1565.373  | 2146.978  | NM_078467 | 2680.701  |
| S81893    | 2093.562  | 1764.473  | NM_016948 | 1688.92   | 1558.734  | CY3Cy5    | 4135.784  |
| NM_003663 | 1882.161  | 1618.779  | AF272372  | 12571.906 | 14185.742 | NM_016848 | 1593.306  |
| AK025785  | 620.717   | 1347.318  | AF161356  | 43150.789 | 41390.254 | NM_000514 | 2419.423  |
| AF038190  | 194.667   | 1271.688  | AB014548  | 4019.179  | 3800.775  | AL137432  | 2336.358  |
| AF143877  | 1280.911  | 1433.562  | NM_018256 | 2271.272  | 2388.633  | NM_000957 | 2164.796  |
| AF086474  | 190.077   | 759.65    | AK025150  | 544.18    | 515.794   | NM_019043 | 1224.743  |
| AF086529  | 363.857   | 438.64    | AK024611  | 4096.647  | 3955.421  | NM_003240 | 2081.694  |
| AF086023  | 3427.257  | 2329.781  | BC010420  | 2009.706  | 913.341   | NM_016564 | 18117.516 |
| AF131803  | 1040.264  | 1773.252  | NM_012280 | 8052.458  | 5281.414  | NM_000796 | 566.199   |
| AK024366  | 869.822   | 666.001   | NM_018172 | 1137.845  | 1152.319  | AF279656  | 393.424   |
| AK021930  | 624.737   | 195.448   | U03886    | 804.964   | 931.366   | AK021660  | 843.839   |
| NM_016500 | 2862.801  | 845.456   | AK022040  | 1105.364  | 785.69    | AB007933  | 12280.38  |
| NM_018354 | 2173.036  | 1901.012  | NM_003591 | 14442.135 | 17793.113 | NM_006702 | 2692.921  |
| AF087974  | 1438.728  | 1257.484  | NM_003829 | 1390.848  | 944.163   | NM_001396 | 1738.608  |
| NM_018004 | 2469.312  | 2315.115  | AL110168  | 2564.516  | 2826.524  | NM_016249 | 2559.702  |
| X78938    | 1023.153  | 821.154   | NM_002831 | 5707.294  | 7068.302  | NM_006181 | 620.787   |
| U84517    | 4161.015  | 4848.899  | AL833409  | 1849.293  | 2568.914  | NM_003796 | 608.151   |
| AK022379  | 410.116   | 565.589   | NM_015966 | 528.904   | 616.106   | NM_002973 | 981.009   |
| AK025231  | 44318.824 | 35701.754 | NM_016147 | 2163.772  | 2367.568  | NM_004436 | 21251.932 |
| AK025338  | 806.011   | 172.535   | NM_002833 | 983.212   | 941.73    | NM_006580 | 3022.615  |
| AK023462  | 983.087   | 383.228   | NM_016592 | 760.75    | 488.369   | NM_001305 | 2013.605  |
| AK001115  | 2734.791  | 1737.769  | NM_018326 | 1555.356  | 872.374   | NM_013442 | 7610.033  |
| NM_014095 | 2256.6    | 2987.339  | NM_001223 | 3531.526  | 1354.294  | BG611243  | 304.182   |
| AK027233  | 1085.98   | 1578.857  | BE730629  | 1871.975  | 1647.337  | AK023221  | 2579.809  |
| AK022452  | 615.378   | 653.661   | AK027167  | 2793.333  | 3598.263  | NM_003664 | 6176.065  |
| AK023781  | 917.725   | 2035.358  | AK025265  | 4403.239  | 4786.392  | NM_002426 | 1477.661  |
| AF085881  | 1227.61   | 1796.281  | NM_018652 | 10281.712 | 13074.346 | AK027182  | 825.953   |
| AK022737  | 9490.568  | 7082.801  | AB011166  | 3045.703  | 1016.282  | J03651    | 1190.676  |
| NM_003472 | 31815.475 | 18948.344 | AK024460  | 3620.43   | 2320.769  | U61738    | 2485.176  |
| U92980    | 1135.175  | 695.462   | NM_006606 | 3400.567  | 4114.57   | AJ132087  | 380.949   |
| AF133658  | 1613.157  | 711.593   | NM_016265 | 323.961   | 1193.976  | U92818    | 759.255   |
| AB048287  | 5401.634  | 3625.946  | NM_002095 | 262.553   | 754.535   | NM_000442 | 6422.233  |
| Y11159    | 709.384   | 456.805   | NM_006268 | 664.496   | 980.574   | NM_002934 | 11387.519 |
| AB020648  | 1303.461  | 1637.71   | NM_006442 | 28668.6   | 37691.719 | AK023011  | 3046.999  |
| AK025798  | 10378.418 | 16449.225 | NM_003902 | 8710.474  | 11857.204 | NM_016816 | 2290.861  |
| AF086173  | 414.665   | 863.036   | NM_005098 | 375.228   | 398.622   | L17325    | 686.327   |
| AK025164  | 621.096   | 520.423   | NM_016427 | 7041.604  | 3856.732  | NM_017716 | 454.89    |
| NM_018366 | 7424.579  | 5809.496  | U80741    | 1501.404  | 1083.26   | M58603    | 1945.556  |
| AB040290  | 794.598   | 747.534   | NM_014497 | 1543.534  | 834.363   | NM_003639 | 718.279   |
| NM_019848 | 4970.709  | 4182.125  | AL133598  | 3594.551  | 2725.137  | NM_000115 | 869.75    |
| AL359056  | 828.234   | 188.451   | NM_015511 | 3623.144  | 3282.358  | AF308801  | 1543.532  |
| AK021497  | 1425.892  | 1178.526  | NM_006625 | 1798.889  | 1654.624  | NM_007318 | 26799.426 |
| AF124367  | 317.21    | 687.033   | NM_004891 | 20738.262 | 10782.049 | NM_014874 | 401.772   |
| AK025615  | 2602.427  | 8497.128  | NM_002879 | 311.406   | 474.42    | NM_005765 | 24376.91  |
| AK023803  | 1127.235  | 1102.866  | AB018348  | 1485.357  | 1356.65   | NM_006324 | 4283.705  |
| AK026947  | 18024.721 | 19776.438 | NM_013369 | 847.365   | 1095.779  | NM_005469 | 2797.053  |
| U84526    | 5454.757  | 6299.284  | AF075068  | 13490.6   | 6583.046  | NM_016361 | 628.438   |
| L23401    | 1827.882  | 863.139   | NM_000738 | 340.131   | 581.251   | NM_003708 | 30177.652 |
| NM_018090 | 54972.129 | 49024.34  | AF086474  | 297.204   | 932.466   | NM_014349 | 5082.434  |
| AK022728  | 15241.187 | 9991.029  | AF086529  | 709.153   | 1336.359  | NM_004820 | 1343.897  |
| AL109678  | 1271.4    | 807.148   | AK024366  | 727.795   | 447.294   | NM_018210 | 963.803   |
| AL137524  | 1091.957  | 593.585   | AK022171  | 731.265   | 996.186   | NM_001096 | 1425.898  |

|           |           |           |           |           |           |           |           |
|-----------|-----------|-----------|-----------|-----------|-----------|-----------|-----------|
| AF218008  | 6612.639  | 7451.885  | AK025913  | 1019.887  | 529.048   | NM_016014 | 689.559   |
| M22404    | 11048.48  | 9790.063  | AK021930  | 845.871   | 276.014   | NM_017581 | 676.535   |
| AF052115  | 943.182   | 983.495   | NM_016500 | 1176.14   | 477.055   | AA488804  | 2787.379  |
| NM_014019 | 12136.96  | 11667.266 | NM_018354 | 841.926   | 758.642   | NM_001684 | 258.372   |
| Z70711    | 808.624   | 873.455   | AF087974  | 739.296   | 400.636   | NM_016318 | 6751.392  |
| AF116653  | 569.059   | 511.525   | NM_018004 | 921.544   | 1049.453  | NM_013309 | 333.819   |
| AK025323  | 1352.478  | 1441.274  | X78938    | 633.766   | 1960.872  | NM_019891 | 977.957   |
| NM_013326 | 3176.121  | 5130.177  | U47646    | 678.965   | 1020.11   | AF038186  | 1028.023  |
| BC037322  | 1763.515  | 1982.483  | AK025231  | 31098.35  | 33772.305 | NM_016277 | 1666.467  |
| Y12022    | 1071.67   | 1598.089  | AK025338  | 931.871   | 266.337   | NM_007247 | 1503.54   |
| AK001375  | 1091.131  | 634.061   | AK023462  | 802.642   | 544.816   | NM_006554 | 1644.216  |
| NM_019597 | 10592.609 | 5366.342  | AK001115  | 2471.297  | 1559.09   | X99962    | 2716.933  |
| AL137559  | 1616.213  | 1202.527  | NM_014099 | 3098.45   | 2969.703  | AK021492  | 364.304   |
| AF026944  | 2288.08   | 2079.829  | AK027233  | 535.63    | 663.962   | AK023794  | 7642.026  |
| AK021493  | 2217.091  | 2899.319  | AK022452  | 1389.277  | 2045.139  | NM_019885 | 1479.309  |
| NM_006161 | 5212.787  | 4868.253  | AK023375  | 584.716   | 1037.841  | AB033103  | 1045.107  |
| NM_012155 | 4666.445  | 3766.655  | AK024129  | 320.773   | 914.475   | AK024098  | 590.902   |
| AF144700  | 1304.558  | 1142.541  | AF085881  | 1532.212  | 902.247   | D42045    | 496.222   |
| NM_004105 | 2407.096  | 3035.306  | AK022737  | 3909.073  | 3123.52   | NM_014002 | 900.254   |
| AB046825  | 3036.748  | 2137.09   | NM_003472 | 24966.809 | 12991.319 | NM_004197 | 3496.809  |
| X64975    | 1124.376  | 654.317   | U92980    | 961.302   | 458.891   | NM_004073 | 968.836   |
| AL050297  | 1616.513  | 2027.28   | AF133658  | 1359.397  | 565.938   | NM_001278 | 740.892   |
| AK026966  | 878.528   | 973.837   | AB048287  | 4550.019  | 3831.753  | NM_019105 | 1228.008  |
| AF185573  | 480.293   | 471.672   | AB020648  | 1531.516  | 879.806   | NM_000294 | 1817.022  |
| AK025268  | 2589.382  | 2306.292  | AK025798  | 27070.201 | 15825.387 | AJ272212  | 1468.653  |
| AL833005  | 5571.422  | 4564.01   | NM_018366 | 5452.868  | 3249.596  | NM_001626 | 5784.475  |
| L43366    | 3063.788  | 3743.189  | AB040290  | 3054.366  | 248.855   | NM_005677 | 1397.11   |
| AK026124  | 5206.535  | 3658.379  | NM_019848 | 4223.063  | 3449.972  | AF229803  | 434.923   |
| NM_015509 | 1360.293  | 1294.765  | AF124367  | 378.442   | 565.198   | AF151810  | 961.01    |
| AL110157  | 9739.517  | 9454.443  | AK025615  | 4563.281  | 5903.742  | NM_002130 | 2525.601  |
| NM_002319 | 7741.994  | 4598.178  | AK023803  | 1127.499  | 701.182   | NM_001305 | 952.294   |
| L38712    | 8404.904  | 5353.297  | AK026947  | 16931.758 | 16438.752 | D17028    | 6874.033  |
| U84508    | 833.883   | 712.015   | U84526    | 6746.275  | 8496.604  | NM_013442 | 7215.613  |
| NM_017793 | 4203.101  | 3575.51   | L23401    | 2522.667  | 1967.458  | AI417481  | 774.049   |
| NM_012131 | 1783.307  | 3007.1    | NM_018090 | 62201.992 | 54406.855 | BI906766  | 670.395   |
| S41540    | 1128.311  | 1431.611  | AK022728  | 34145.496 | 25706.805 | U60519    | 1277.423  |
| CY3Cy5    | 5743.664  | 346.63    | AL109678  | 860.479   | 357.729   | AA282906  | 829.741   |
| AI417481  | 1151.229  | 1957.996  | AL137524  | 1676.987  | 1109.293  | L02870    | 1721.401  |
| BI906766  | 1300.276  | 2978.55   | AF218008  | 4171.367  | 2948.254  | BG755482  | 1623.592  |
| U60519    | 2230.806  | 2057.452  | M22404    | 35867.699 | 21245.996 | AI480307  | 1064.451  |
| AA282906  | 5175.93   | 4493.281  | AF052115  | 877.85    | 493.407   | X51420    | 478.615   |
| L02870    | 6379.239  | 5842.122  | NM_014019 | 8508.648  | 5212.606  | X51757    | 396.364   |
| BG755482  | 7867.979  | 6986.19   | Z70711    | 864.002   | 467.987   | L24038    | 357.987   |
| AI480307  | 2903.488  | 3479.626  | AF116653  | 665.86    | 190.892   | NM_053056 | 866.012   |
| X51420    | 3037.052  | 3327.777  | NM_013326 | 3599.157  | 3337.527  | NM_006186 | 273.147   |
| D28235    | 854.471   | 899.03    | BC037322  | 1961.704  | 987.503   | NM_002751 | 737.759   |
| X51757    | 883.534   | 889.681   | Y12022    | 1713.867  | 1566.115  | M55593    | 1748.799  |
| L24038    | 1303.431  | 1146.286  | AK001375  | 1202.127  | 1193.116  | NM_078467 | 1927.317  |
| NM_053056 | 2540.467  | 5095.056  | NM_019597 | 8435.53   | 5436.7    |           | 2729.652  |
| NM_006186 | 1239.818  | 1241.449  | AF026944  | 1405.1    | 772.268   | AK001883  | 8274.028  |
| NM_002751 | 2210.531  | 2377.743  | NM_006161 | 2997.929  | 3051.174  | NM_014629 | 259.721   |
| M55593    | 10132.352 | 7180.271  | NM_012155 | 4206.265  | 4334.272  | NM_007318 | 35680.516 |
| NM_078467 | 7250.623  | 8607.253  | AF144700  | 1659.865  | 1342.642  | NM_005765 | 19120.865 |

|           |           |           |           |           |           |           |           |
|-----------|-----------|-----------|-----------|-----------|-----------|-----------|-----------|
| SR2       | 64101.246 | 53409.289 | NM_004105 | 7471.459  | 5081.494  | NM_002762 | 396.679   |
| SR4       | 21085.238 | 24915.463 | AB046825  | 1333.927  | 1049.74   | NM_006324 | 3190.316  |
| SR6       | 3122.446  | 2684.972  | X64975    | 2255.17   | 1937.235  | NM_016848 | 1086.159  |
| SR8       | 10716.559 | 30544.949 | AF071509  | 63.381    | 3353.283  | NM_000514 | 927.24    |
| SR10      | 37258.684 | 12662.183 | AL050297  | 2141.267  | 2827.958  | AL137432  | 860.832   |
| CY3Cy5    | 4501.151  | 306.708   | AK026966  | 1501.598  | 806.946   | NM_000957 | 459.191   |
| NM_016848 | 5360.53   | 9092.294  | AK025268  | 1833.443  | 805.161   | NM_019043 | 262.828   |
| NM_000514 | 5230.157  | 8737.24   | AL833005  | 2526.857  | 1470.575  | NM_003240 | 503.121   |
| AL137432  | 3787.989  | 3015.348  | L43366    | 2354.439  | 1640.963  | NM_016564 | 9481.706  |
| NM_000957 | 2359.403  | 2390.643  | AK026124  | 4577.641  | 5985.092  | AF279656  | 483.973   |
| NM_019043 | 2283.48   | 1820.58   | NM_015509 | 1799.59   | 1729.97   | AK021660  | 384.115   |
| NM_003240 | 6550.994  | 6625.182  | AL110157  | 18022.898 | 18172.697 | AB007933  | 11204.392 |
| NM_016564 | 29775.213 | 35003.598 | NM_002319 | 4804.731  | 5050.42   | NM_006702 | 2248.234  |
| NM_000796 | 348.558   | 410.513   | S41540    | 2267.583  | 2147.803  | NM_001396 | 2114.517  |
| AF279656  | 1037.307  | 1162.568  | CY3Cy5    | 3790.297  | 299.203   | NM_014474 | 485.207   |
| AK021660  | 942.82    | 1503.016  | AI417481  | 491.889   | 469.401   | NM_016249 | 575.533   |
| AB007933  | 24289.352 | 35845.457 | BI906766  | 406.153   | 991.629   | NM_006181 | 601.737   |
| NM_006702 | 6412.392  | 3698.4    | U60519    | 1747.332  | 1209.125  | NM_003796 | 4905.319  |
| NM_001396 | 3978.392  | 3999.323  | AA282906  | 1261.952  | 2836.362  | NM_002973 | 914.961   |
| NM_014474 | 1709.997  | 2992.29   | L02870    | 5525.552  | 4965.992  | NM_004436 | 21145.021 |
| NM_016249 | 1493.316  | 1738.311  | BG755482  | 3464.443  | 3441.926  | NM_006580 | 3085.696  |
| NM_006181 | 1668.087  | 1565.057  | AI480307  | 3088.258  | 3085.764  | NM_016277 | 654.827   |
| NM_003796 | 10713.514 | 15406.398 | X51420    | 1601.991  | 1001.468  | NM_007247 | 1210.72   |
| NM_002973 | 3114.967  | 4865.156  | D28235    | 783.174   | 379.166   | NM_006554 | 301.049   |
| NM_004436 | 36872.414 | 38435.746 | X51757    | 611.503   | 158.259   | X99962    | 1620      |
| NM_006580 | 8981.346  | 11089.254 | L24038    | 610.492   | 824.844   | AK023221  | 2333.229  |
| NM_001305 | 3984.332  | 4988.966  | NM_053056 | 1953.305  | 3158.283  | NM_003664 | 4821.055  |
| NM_005082 | 1361.15   | 1167.277  | NM_006186 | 957.688   | 774.086   | NM_002426 | 747.56    |
| D17028    | 26606.551 | 18711.891 | NM_002751 | 1602.784  | 1754.961  | AK027182  | 397.851   |
| NM_013442 | 18813.256 | 24365.023 | M55593    | 5721.361  | 3594.467  | U61738    | 982.963   |
| BG611243  | 797.624   | 1533.171  | NM_078467 | 5441.2    | 3992.791  | U92818    | 693.192   |
| AK023221  | 4554.418  | 8249.768  | SR2       | 41985.113 | 31758.74  | NM_000442 | 5882.475  |
| NM_003664 | 8286.395  | 9848.387  | SR4       | 11895.451 | 7045.565  | NM_002934 | 12954.56  |
| NM_002426 | 2846.601  | 3752.13   | SR6       | 1515.542  | 950.111   | AK023011  | 2368.083  |
| AK027182  | 1266.026  | 1410.98   | SR8       | 7872.701  | 15908.145 | NM_016816 | 1133.556  |
| J03651    | 3733.644  | 3917.5    | SR10      | 20174.109 | 5186.214  | L17325    | 794.782   |
| U61738    | 3609.353  | 3605.258  | CY3Cy5    | 2585.889  | 155.241   | NM_017716 | 399.407   |
| AJ132087  | 800.75    | 1214.401  | NM_016848 | 2117.052  | 3331.946  | M58603    | 2557.297  |
| U92818    | 2018.367  | 2776.409  | NM_000514 | 2551.196  | 3553.681  | NM_003639 | 1201.703  |
| NM_000442 | 17456.24  | 12991.218 | AL137432  | 2619.454  | 1924.065  | NM_001549 | 1854.936  |
| NM_002934 | 34731.828 | 49493.555 | NM_000957 | 2112.563  | 1842.357  | NM_000115 | 1328.659  |
| AK023011  | 11252.49  | 15613.092 | NM_019043 | 1726.392  | 1736.478  | AF308801  | 1820.254  |
| NM_016816 | 3294.807  | 1589.233  | NM_003240 | 2342.262  | 2814.804  | AJ272212  | 862.332   |
| L17325    | 1974.25   | 1930.591  | NM_016564 | 23066.451 | 21667.494 | NM_001626 | 6054.566  |
| NM_017716 | 1285.885  | 1822.35   | AF279656  | 771.662   | 608.832   | NM_002130 | 3072.883  |
| M58603    | 4912.802  | 4119.719  | AK021660  | 504.776   | 586.918   | NM_005469 | 2625.923  |
| NM_003639 | 3357.925  | 3283.492  | AB007933  | 29009.652 | 33803.746 | NM_016361 | 319.756   |
| NM_001549 | 2837.556  | 2155.53   | NM_006702 | 5469.108  | 2828.052  | NM_003708 | 20956.332 |
| NM_000115 | 3860.343  | 4268.003  | NM_001396 | 5217.13   | 4333.942  | NM_014349 | 2419.768  |
| AF308801  | 4012.783  | 3026.417  | NM_014474 | 1161.071  | 1229.149  | NM_018210 | 339.098   |
| NM_007318 | 61719.578 | 51120.465 | NM_016249 | 1472.773  | 1572.268  | NM_001096 | 660.331   |
| NM_014874 | 2058.918  | 1710.26   | NM_006181 | 783.127   | 547.979   | NM_016014 | 705.768   |
| NM_005765 | 40658.895 | 21388.016 | NM_003796 | 8671.476  | 6377.955  | AA488804  | 1285.823  |



|           |           |           |           |           |           |           |           |
|-----------|-----------|-----------|-----------|-----------|-----------|-----------|-----------|
| NM_002762 | 1416.767  | 1070.633  | NM_002973 | 1923.215  | 1864.576  | NM_006539 | 440.508   |
| NM_006324 | 6419.749  | 6045.858  | NM_004436 | 55098.34  | 30112.828 | NM_001684 | 594.206   |
| NM_005469 | 6012.818  | 7450.597  | NM_006580 | 4512.614  | 3601.173  | NM_000808 | 566.086   |
| NM_016361 | 2005.263  | 3947.723  | NM_001305 | 1825.537  | 1551.715  | NM_016318 | 5576.532  |
| NM_003708 | 43310.387 | 44986.125 | NM_005082 | 512.691   | 436.794   | NM_078467 | 1907.854  |
| NM_014349 | 8637.298  | 8819.081  | D17028    | 11871.947 | 12278.171 | AK021492  | 401.121   |
| AB040895  | 414.515   | 671.306   | NM_013442 | 20860.162 | 12355.417 | AK023794  | 4793.103  |
| NM_004820 | 607.206   | 295.618   | BG611243  | 1044.635  | 933.774   | NM_019885 | 805.6     |
| NM_018210 | 2293.423  | 1986.068  | AK023221  | 4020.385  | 5148.466  | AB033103  | 481.056   |
| NM_001096 | 2715.485  | 6832.792  | NM_003664 | 7355.775  | 5086.351  | NM_002907 | 1034.25   |
| NM_016014 | 1238.007  | 1367.2    | NM_002426 | 1988.72   | 2132.231  | AK024098  | 418.647   |
| NM_000198 | 164.558   | 387.698   | AK027182  | 955.926   | 911.868   | AK022371  | 810.824   |
| NM_018327 | 1073.08   | 841.21    | J03651    | 1126.934  | 1637.43   | D42045    | 457.089   |
| NM_017581 | 2580.028  | 2699.705  | U61738    | 2624.095  | 2542.468  | AB007953  | 334.619   |
| AA488804  | 9006.979  | 11441.738 | AJ132087  | 533.976   | 453.545   | NM_014002 | 1016.087  |
| NM_006539 | 893.568   | 953.32    | U92818    | 1129.317  | 1529.838  | NM_004197 | 2530.892  |
| NM_001684 | 1407.993  | 1851.74   | NM_000442 | 8868.856  | 6412.385  | NM_004073 | 1975.67   |
| AB028977  | 343.361   | 564.142   | NM_002934 | 56191.445 | 36981.613 | NM_001278 | 1154.058  |
| NM_000808 | 695.211   | 911.196   | AK023011  | 11048.121 | 13468.546 | NM_019105 | 886.612   |
| NM_016318 | 4358.943  | 3235.031  | NM_016816 | 1578.393  | 1042.607  | NM_000294 | 1204.046  |
| NM_013309 | 504.194   | 762.52    | L17325    | 1472.423  | 1050.447  | NM_016249 | 1205.84   |
| NM_019891 | 2038.145  | 3650.765  | NM_017716 | 939.012   | 660.303   | NM_006181 | 668.329   |
| AF038186  | 1437.902  | 1952.376  | M58603    | 5061.178  | 2360.707  | NM_003796 | 1527.082  |
| NM_016277 | 2137.202  | 3293.563  | NM_003639 | 2984.27   | 1623.327  | NM_002973 | 352.201   |
| NM_007247 | 4096.081  | 3141.526  | NM_001549 | 1317.1    | 447.404   | NM_004436 | 10104.453 |
| NM_006554 | 4224.23   | 4066.293  | NM_000115 | 1869.513  | 1277.847  | D17028    | 7118.562  |
| X99962    | 6859.726  | 7397.409  | AF308801  | 3299.443  | 2162.803  | NM_013442 | 4612.241  |
| AK025587  | 661.692   | 923.874   | NM_007318 | 54925.109 | 56211.023 | BI906766  | 449.908   |
| AL050114  | 788.492   | 1432.133  | NM_014874 | 887.788   | 504.697   | U60519    | 1132.922  |
| AK021492  | 3515.38   | 2864.652  | NM_005765 | 31692.387 | 13726.659 | L02870    | 1723.474  |
| AK023794  | 21293.125 | 19436.695 | NM_002762 | 1164.638  | 906.719   | BG755482  | 2490.015  |
| NM_019885 | 2867.25   | 3040.146  | NM_006324 | 7429.401  | 4544.763  | AI480307  | 1147.489  |
| AB033103  | 1285.255  | 1423.862  | NM_005469 | 6003.685  | 6565.918  | X51420    | 647.91    |
| NM_002907 | 1998.421  | 873.537   | NM_016361 | 2356.42   | 2747.913  | X51757    | 301.638   |
| AK024098  | 681.256   | 999.796   | NM_003708 | 38515.246 | 43498.695 | L24038    | 1328.206  |
| AK001116  | 391.735   | 371.998   | NM_014349 | 6959.246  | 6205.341  | NM_053056 | 835.717   |
| AK022371  | 2025.505  | 1850.198  | AB040895  | 220.854   | 789.097   | NM_006186 | 493.909   |
| D42045    | 2006.692  | 2781.754  | NM_018210 | 2005.002  | 1378.08   | NM_002751 | 634.287   |
| AB007953  | 1909.085  | 2083.945  | NM_001096 | 1663.844  | 2680.817  | M55593    | 1763.969  |
| NM_014002 | 5555.272  | 6020.526  | NM_016014 | 1334.344  | 1346.964  | NM_017716 | 490.394   |
| NM_004197 | 6580.327  | 5319.184  | NM_018327 | 1267.404  | 991.362   | M58603    | 2309.501  |
| NM_004073 | 1168.969  | 1327.428  | NM_017581 | 1864.713  | 1149.25   | NM_003639 | 762.695   |
| NM_001278 | 2987.794  | 3235.105  | AA488804  | 7056.857  | 4245.502  | NM_000115 | 756.668   |
| NM_019105 | 2715.088  | 3473.745  | NM_006539 | 757.572   | 628.388   | AF308801  | 1908.625  |
| NM_000294 | 3573.088  | 3353.639  | NM_001684 | 929.363   | 1081.837  | NM_014874 | 373.681   |
| AJ272212  | 2166.234  | 2844.666  | AB028977  | 464.429   | 320.939   | NM_005765 | 12542.409 |
| NM_001626 | 19149.004 | 20964.891 | NM_000808 | 797.879   | 655.101   | NM_002762 | 304.311   |
| NM_005677 | 2475.183  | 2827.706  | NM_016318 | 11343.479 | 7821.468  | NM_006324 | 3267.929  |
| AF229803  | 1322.795  | 1902.755  | NM_019891 | 1201.892  | 989.053   | NM_016848 | 1470.113  |
| AF151810  | 521.551   | 519.084   | AF038186  | 1825.766  | 1053.922  | NM_000514 | 1748.952  |
| NM_002130 | 5631.331  | 23394.539 | NM_016277 | 4482.495  | 2545.488  | AL137432  | 1398.4    |
| NM_001305 | 4800.827  | 5249.763  | NM_007247 | 2668.577  | 1870.566  | NM_000957 | 834.086   |
| NM_005082 | 943.81    | 1743.813  | NM_006554 | 1807.727  | 1352.328  | NM_019043 | 813.271   |

|           |           |           |           |           |           |           |           |
|-----------|-----------|-----------|-----------|-----------|-----------|-----------|-----------|
| D17028    | 29021.945 | 19067.625 | X99962    | 4054.455  | 7925.952  | NM_003240 | 1771.997  |
| NM_013442 | 19639.467 | 27565.391 | AL050114  | 736.694   | 488.384   | NM_016564 | 6567.717  |
| BG611243  | 934.696   | 1789.67   | AK021492  | 1087.712  | 1558.339  | AF279656  | 328.543   |
| AI417481  | 428.496   | 2402.876  | AK023794  | 14591.826 | 14051.43  | AK021660  | 2146.829  |
| BI906766  | 1396.682  | 1575.672  | NM_019885 | 1750.792  | 1550.149  | NM_006702 | 3154.985  |
| U60519    | 2248.867  | 1568.655  | AB033103  | 954.906   | 1170.334  | NM_001396 | 1678.266  |
| AA282906  | 3704.358  | 3428.766  | NM_002907 | 1148.526  | 521.529   | NM_014474 | 533.236   |
| L02870    | 4755.827  | 3919.648  | AK024098  | 903.962   | 812.912   | NM_006539 | 441.555   |
| BG755482  | 8405.035  | 7417.181  | AK022371  | 2145.746  | 1378.184  | NM_001684 | 407.358   |
| AI480307  | 3233.76   | 4017.152  | D42045    | 1793.942  | 1194.447  | NM_000808 | 526.262   |
| X51420    | 3102.479  | 3490.79   | AB007953  | 1585.662  | 710.703   | NM_016318 | 9230.68   |
| D28235    | 922.89    | 750.264   | NM_014002 | 3495.434  | 2901.125  | NM_013309 | 611.881   |
| X51757    | 999.294   | 992.034   | NM_004197 | 8990.18   | 5952.795  | NM_019891 | 742.823   |
| L24038    | 1349.008  | 1285.054  | NM_004073 | 1323.489  | 1376.973  | AF038186  | 989.936   |
| NM_053056 | 2803.779  | 5508.97   | NM_001278 | 2147.015  | 1837.529  | NM_016277 | 534.605   |
| NM_006186 | 1433.719  | 1105.255  | NM_019105 | 3814.169  | 3070.468  | NM_007247 | 524.683   |
| NM_002751 | 2914.598  | 2855.988  | NM_000294 | 3927.737  | 2533.045  | NM_006554 | 354.206   |
| M55593    | 9798.87   | 8404.485  | AJ272212  | 1719.435  | 1433.676  | X99962    | 2259.873  |
| NM_078467 | 8662.552  | 7463.87   | NM_001626 | 23244.773 | 16582.838 | AK023221  | 3181.571  |
| AK001883  | 12866.907 | 10130.624 | NM_005677 | 2954.9    | 2644.158  | NM_003664 | 5902.828  |
| NM_014629 | 1471.731  | 2172.593  | AF229803  | 1199.91   | 903.773   | NM_002426 | 1083.914  |
| NM_007318 | 64546.473 | 49276.516 | AF151810  | 234.436   | 762.228   | AK027182  | 329.565   |
| NM_014874 | 1870.029  | 1873.713  | NM_002130 | 8147.637  | 20632.254 | J03651    | 928.612   |
| NM_005765 | 41992.977 | 20466.746 | NM_001305 | 1949.851  | 2952.427  | U61738    | 944.469   |
| NM_002762 | 1167.411  | 951.083   | NM_005082 | 408.455   | 747.449   | U92818    | 917.467   |
| NM_006324 | 7011.147  | 4475.361  | D17028    | 11701.909 | 14649.687 | NM_000442 | 6867.889  |
| NM_016848 | 5305.073  | 5757.9    | NM_013442 | 13668.483 | 11241.76  | AK023011  | 2746.306  |
| NM_000514 | 4199.513  | 4666.046  | BG611243  | 1092.798  | 1348.053  | NM_016816 | 3014.954  |
| AL137432  | 3590.967  | 2221.576  | BI906766  | 583.189   | 933.848   | L17325    | 713.016   |
| NM_000957 | 1961.624  | 1651.844  | U60519    | 2056.935  | 1353.762  | NM_014002 | 2156.459  |
| NM_019043 | 2189.03   | 2258.268  | AA282906  | 1281.734  | 2662.203  | NM_004197 | 6014.15   |
| NM_003240 | 7230.168  | 7981.06   | L02870    | 6934.574  | 5885.271  | NM_004073 | 1261.511  |
| NM_016564 | 31970.904 | 39105.453 | BG755482  | 5400.452  | 4174.02   | NM_001278 | 761.873   |
| NM_000796 | 396.689   | 630.549   | AI480307  | 3715.312  | 3109.396  | NM_019105 | 1482.371  |
| AF279656  | 1083.724  | 1510.241  | X51420    | 1905.738  | 866.066   | NM_000294 | 1532.141  |
| AK021660  | 812.876   | 1702.101  | D28235    | 933.023   | 474.832   | AJ272212  | 1426.923  |
| AB007933  | 26893.609 | 36243.035 | X51757    | 791.297   | 269.911   | NM_001626 | 11657.032 |
| NM_006702 | 7194.754  | 4083.432  | L24038    | 709.529   | 605.7     | NM_005677 | 608.522   |
| NM_001396 | 4951.356  | 7243.362  | NM_053056 | 2104.351  | 3404.191  | NM_002130 | 2563.597  |
| NM_014474 | 2205.74   | 3566.843  | NM_006186 | 948.988   | 690.922   | NM_005469 | 3839.117  |
| NM_016249 | 1519.026  | 1206.024  | NM_002751 | 1428.487  | 1243.779  | NM_016361 | 524.542   |
| NM_006181 | 1768.673  | 1043.725  | M55593    | 4425.063  | 2769.598  | NM_003708 | 15151.833 |
| NM_003796 | 8712.608  | 9428.527  | NM_078467 | 4970.233  | 3185.365  | NM_014349 | 4707.052  |
| NM_002973 | 3220.146  | 4653.724  | AK001883  | 21165.371 | 13044.292 | NM_004820 | 1433.635  |
| NM_004436 | 40786.328 | 41226.738 | NM_014629 | 1456.715  | 846.741   | NM_018210 | 1281.255  |
| NM_006580 | 9235.118  | 9533.496  | NM_007318 | 54696.789 | 57485.758 | NM_001096 | 915.691   |
| NM_019891 | 1427.411  | 1382.287  | NM_014874 | 806.249   | 802.468   | NM_016014 | 726.538   |
| AF038186  | 1354.823  | 2023.179  | NM_005765 | 36379.438 | 22474     | NM_000198 | 937.702   |
| NM_016277 | 2289.778  | 3256.078  | NM_002762 | 1102.403  | 1323.442  | NM_018327 | 458.744   |
| NM_007247 | 4112.888  | 3026.547  | NM_006324 | 8075.545  | 5943.962  | NM_017581 | 1548.188  |
| NM_006554 | 3807.606  | 3929.763  | NM_016848 | 2838.418  | 3749.497  | AA488804  | 3681.169  |
| X99962    | 6545.821  | 7043.414  | NM_000514 | 2762.601  | 4460.468  | L29496    | 1776.911  |
| AK023221  | 4229.927  | 4783.984  | AL137432  | 2674.272  | 1671.575  | NM_007002 | 5076.84   |

|           |           |           |           |           |           |           |           |
|-----------|-----------|-----------|-----------|-----------|-----------|-----------|-----------|
| NM_003664 | 5779.024  | 4310.296  | NM_000957 | 3304.32   | 2123.073  | NM_012121 | 1062.203  |
| NM_002426 | 2651.505  | 2425.802  | NM_019043 | 1611.64   | 1358.858  | NM_003255 | 4204.061  |
| AK027182  | 865.584   | 958.051   | NM_003240 | 3552.167  | 3191.6    | NM_014155 | 575.017   |
| J03651    | 3781.89   | 4602.779  | NM_016564 | 32332.711 | 24678.348 | AK026331  | 7144.718  |
| U61738    | 3106.189  | 3573.083  | NM_000796 | 430.776   | 281.203   | M30773    | 879.058   |
| AJ132087  | 1030.12   | 1783.808  | AF279656  | 1191.649  | 738.975   | NM_016338 | 1725.842  |
| U92818    | 2709.909  | 6239.471  | AK021660  | 598.674   | 462.577   | AF113699  | 11147.885 |
| NM_000442 | 20641.188 | 20543.828 | AB007933  | 44247.711 | 52514.727 | AK001883  | 10325.443 |
| NM_002934 | 33764.148 | 48378.137 | NM_006702 | 6186.841  | 2815.953  | NM_014629 | 292.465   |
| AK023011  | 12869.786 | 18522.807 | NM_001396 | 4782.979  | 3731.83   | AL050114  | 216.342   |
| NM_016816 | 3428.391  | 2467.753  | NM_014474 | 1177.452  | 1146.753  | AK021492  | 637.891   |
| L17325    | 1979.9    | 2618.569  | NM_016249 | 1297.303  | 911.843   | AK023794  | 6797.248  |
| NM_017716 | 1092.576  | 1573.666  | NM_006181 | 933.654   | 323.946   | NM_019885 | 1685.299  |
| M58603    | 4437.184  | 3828.994  | NM_003796 | 8562.486  | 6424.076  | AB033103  | 710.542   |
| NM_003639 | 3476.19   | 2744.414  | NM_002973 | 2204.038  | 1985.991  | NM_002907 | 1230.175  |
| NM_001549 | 2234.587  | 1028.667  | NM_004436 | 56386.207 | 27436.998 | AK024098  | 470.458   |
| NM_000115 | 2582.264  | 2407.973  | NM_006580 | 5432.09   | 3499.542  | AK022371  | 1348.477  |
| AF308801  | 4168.134  | 4367.673  | NM_019891 | 1019.584  | 1910.313  | AK022371  | 1348.477  |
| AJ272212  | 1887.325  | 2053.486  | AF038186  | 1621.523  | 1879.215  | D42045    | 1000.955  |
| NM_001626 | 22527.689 | 22476.477 | NM_016277 | 4649.478  | 4984.512  | AB007953  | 929.51    |
| NM_005677 | 2900.503  | 3888.35   | NM_007247 | 2984.056  | 3157.475  | NM_017820 | 492.429   |
| AF229803  | 1412.863  | 1698.774  | NM_006554 | 3144.694  | 2329.374  | NM_001849 | 2921.787  |
| AF151810  | 469.637   | 414.28    | X99962    | 4058.215  | 4725.309  | NM_003734 | 3035.977  |
| NM_002130 | 5057.09   | 21088.258 | AK023221  | 3665.975  | 4201.313  | NM_014935 | 2161.329  |
| NM_005469 | 6348.577  | 6588.838  | NM_003664 | 4220.97   | 3444.065  | X99660    | 7253.05   |
| NM_016361 | 1956.623  | 2856.286  | NM_002426 | 2317.424  | 2449.331  | X03635    | 1823.311  |
| NM_003708 | 39732.598 | 40888.184 | AK027182  | 813.378   | 750.28    | X97671    | 244.77    |
| NM_014349 | 7454.689  | 6615.82   | J03651    | 1717.51   | 1307.057  | NM_004351 | 1065.609  |
| AB040895  | 353.643   | 667.418   | U61738    | 4013.977  | 3247.894  | NM_004236 | 1627.563  |
| NM_004820 | 307.312   | 415.755   | AJ132087  | 744.468   | 671.999   | AB011093  | 1385.887  |
| NM_018210 | 2473.556  | 2379.547  | U92818    | 1357.4    | 1447.358  | NM_005618 | 413.874   |
| NM_001096 | 2933.198  | 11692.733 | NM_000442 | 13120.66  | 9226.13   | NM_020533 | 6076.382  |
| NM_016014 | 1460.284  | 2743.746  | NM_002934 | 55595.906 | 48087.863 | NM_001894 | 2399.346  |
| NM_000198 | 655.594   | 425.991   | AK023011  | 11232.667 | 11785.215 | NM_006620 | 2160.6    |
| NM_018327 | 1261.064  | 1077.617  | NM_016816 | 2094.992  | 1164.086  | NM_001397 | 1094.202  |
| NM_017581 | 2832.51   | 2691.376  | L17325    | 1457.042  | 1023.468  | NM_004772 | 2354.277  |
| AA488804  | 8921.306  | 12474.522 | NM_017716 | 769.844   | 397.189   | NM_003714 | 697.016   |
| NM_006539 | 884.125   | 823.218   | M58603    | 5585.566  | 2191.444  | NM_002189 | 1357.198  |
| NM_001684 | 1675.38   | 1401.825  | NM_003639 | 2599.108  | 1343.014  | NM_002881 | 796.591   |
| NM_000808 | 549.07    | 490.407   | NM_001549 | 1424.72   | 379.676   | NM_003666 | 1424.329  |
| NM_016318 | 9211.442  | 7758.761  | NM_000115 | 2128.74   | 1482.456  | NM_003288 | 1986.964  |
| NM_013309 | 593.374   | 510.051   | AF308801  | 2421.791  | 1615.197  | NM_018242 | 389.591   |
| NM_078467 | 8762.725  | 7557.176  | AJ272212  | 2350.57   | 3980.306  | M83822    | 561.811   |
| AK001883  | 12599.783 | 9644.118  | NM_001626 | 23826.535 | 37700.699 | NM_018434 | 547.362   |
| NM_014629 | 1095.534  | 1504.22   | NM_005677 | 3693.768  | 5875.789  | NM_003914 | 1127.817  |
| AK025587  | 231.702   | 355.118   | AF229803  | 1443.24   | 1816.206  | NM_020423 | 487.212   |
| AL050114  | 566.765   | 896.223   | AF151810  | 421.571   | 993.832   | AK021437  | 1770.276  |
| AK021492  | 3385.219  | 2907.418  | NM_002130 | 9440.399  | 29575.074 | NM_003831 | 5473.841  |
| AK023794  | 15047.473 | 10556.163 | NM_005469 | 6406.748  | 6716.041  | AB007965  | 3446.202  |
| NM_019885 | 3170.982  | 2964.642  | NM_016361 | 1465.043  | 1973.871  | NM_017649 | 1527.249  |
| NM_005328 | 53.29     | 446.572   | NM_003708 | 42172.102 | 50793.699 | NM_000066 | 392.002   |
| AB033103  | 1566.206  | 2470.522  | NM_014349 | 7315.148  | 5945.231  | NM_001196 | 2074.354  |
| NM_002907 | 2270.753  | 1983.284  | AB040895  | 526.616   | 552.968   | NM_016008 | 241.269   |
|           |           |           |           |           |           | NM_017744 | 1030.821  |

|           |           |           |           |           |           |           |           |
|-----------|-----------|-----------|-----------|-----------|-----------|-----------|-----------|
| AK024098  | 1014.597  | 1396.642  | NM_018210 | 2303.677  | 1392.969  | NM_001924 | 832.559   |
| AK001116  | 668.24    | 356.349   | NM_001096 | 1954.516  | 3369.934  | NM_017705 | 3847.661  |
| AK022371  | 2002.748  | 2575.385  | NM_016014 | 1601.732  | 1446.816  | AB002325  | 359.922   |
| D42045    | 2189.269  | 2942.64   | NM_000196 | 702.404   | 692.592   | NM_001796 | 913.504   |
| AB007953  | 2279.393  | 2082.207  | NM_018327 | 1711.656  | 1477.548  | NM_009587 | 3808.779  |
| NM_014002 | 6203.07   | 5546.167  | NM_006539 | 1169.994  | 820.081   | AL133566  | 2302.858  |
| NM_004197 | 6125.621  | 4668.385  | NM_000806 | 975.228   | 668.046   | M36118    | 2176.502  |
| NM_004073 | 1102.041  | 919.302   | NM_016316 | 13030.963 | 8630.349  | NM_003396 | 5259.113  |
| NM_001276 | 2618.057  | 2913.767  | NM_078467 | 6973.821  | 12271.769 | AJ295149  | 5741.72   |
| NM_019105 | 3508.364  | 3829.18   | AK001883  | 24383.732 | 32824.254 | NM_013436 | 504.835   |
| NM_000294 | 3766.509  | 3837.938  | NM_014629 | 1157.448  | 2471.119  | NM_005096 | 266.888   |
| NM_016249 | 1602.898  | 1620.26   | AK025587  | 106.831   | 981.717   | NM_014686 | 1740.245  |
| NM_006181 | 1664.594  | 1138.097  | AL050114  | 530.548   | 1430.25   | AL359623  | 319.269   |
| NM_003796 | 9741.636  | 11056.996 | AK021492  | 2338.5    | 4330.829  | AK026920  | 2237.816  |
| NM_002973 | 3190.119  | 3982.744  | AK023794  | 22431.91  | 31695.271 | AF250924  | 3588.082  |
| NM_004436 | 43205.426 | 43714.039 | NM_019885 | 2168.09   | 2651.042  | D86979    | 793.502   |
| NM_006580 | 9268.836  | 9404.133  | AB033103  | 1167.702  | 1866.474  | AF018081  | 2480.143  |
| NM_001305 | 3068.943  | 3603.1    | NM_002907 | 1264.197  | 593.468   | NM_020202 | 3525.961  |
| NM_005082 | 1034.086  | 1096.456  | AK024098  | 975.424   | 1280.602  | AK022889  | 2650.881  |
| D17028    | 23772.637 | 18408.775 | AK001116  | 449.05    | 831.076   | X52357    | 15215.179 |
| NM_013442 | 15242.052 | 17875.822 | AK022371  | 2101.123  | 1881.688  | NM_014233 | 2160.059  |
| BG611243  | 714.031   | 1651.764  | NM_004073 | 1388.513  | 1586.138  | NM_002137 | 12389.073 |
| AI417481  | 628.49    | 637.138   | NM_001276 | 2168.25   | 2933.588  | NM_002911 | 968.934   |
| BI906766  | 1259.531  | 1894.503  | NM_019105 | 5026.994  | 4751.168  | U94386    | 406.399   |
| U60519    | 2800.008  | 2413.458  | NM_000294 | 2433.175  | 1863.965  | NM_016000 | 6412.207  |
| AA282906  | 5384.487  | 6409.369  | NM_016249 | 2117.785  | 2824.643  | NM_006372 | 721.974   |
| L02870    | 7665.474  | 11623.447 | NM_006181 | 1327.154  | 2160.2    | NM_014150 | 838.227   |
| BG755482  | 8527.133  | 6017.375  | NM_003796 | 6989.157  | 9132.797  | NM_006805 | 6425.746  |
| AI480307  | 3481.884  | 3985.595  | NM_002973 | 1935.556  | 3546.132  | NM_004681 | 1697.209  |
| X51420    | 3091.902  | 2979.296  | NM_004436 | 56567.273 | 45623.805 | AB033096  | 2581.621  |
| D28235    | 637.273   | 620.154   | NM_006580 | 5090.832  | 6744.689  | NM_014886 | 1707.687  |
| X51757    | 1101.406  | 674.694   | NM_001305 | 1562.678  | 1912.635  | L31408    | 2719.815  |
| L24038    | 1518.243  | 1152.467  | D17028    | 8899.125  | 15393.147 | NM_001545 | 2046.814  |
| NM_053056 | 2304.021  | 4126.827  | NM_013442 | 25192.918 | 28443.996 | NM_004446 | 2659.103  |
| NM_006186 | 1285.456  | 992.28    | BG611243  | 987.813   | 1639.597  | AF070625  | 887.001   |
| NM_002751 | 2995.491  | 3009.598  | AI417481  | 567.018   | 836.781   | AL365512  | 513.645   |
| M55593    | 10160.002 | 6981.364  | BI906766  | 580.81    | 1403.487  | AK001740  | 1637.14   |
| NM_017716 | 1515.188  | 1864.37   | U60519    | 2125.266  | 1949.044  | NM_005916 | 465.854   |
| M58603    | 4687.531  | 4312.481  | L02870    | 10423.763 | 13287.915 | Y17175    | 22346.707 |
| NM_003639 | 3731.96   | 3051.75   | BG755482  | 4197.331  | 6647.517  | NM_004549 | 336.679   |
| NM_001549 | 2047.34   | 1398.942  | AI480307  | 4138.089  | 7273.416  | NM_005333 | 785.408   |
| NM_000115 | 2629.547  | 2685.415  | X51420    | 2033.923  | 2490.063  | NM_004553 | 3038.134  |
| AF308801  | 4514.775  | 4363.801  | D28235    | 1085.008  | 1465.753  | D63484    | 234.447   |
| NM_007316 | 61370.645 | 50082.043 | L24038    | 355.105   | 957.949   | AK026745  | 998.457   |
| NM_014874 | 1517.188  | 1426.624  | NM_053056 | 2178.453  | 5873.214  | AL157440  | 1006.431  |
| NM_005765 | 40341.699 | 16280.674 | NM_006186 | 1169.511  | 1875.507  | NM_016423 | 3610.356  |
| NM_002762 | 1259.144  | 1382.502  | NM_002751 | 858.528   | 1322.956  | AB040975  | 663.236   |
| NM_006324 | 7533.056  | 7020.963  | M55593    | 4812.833  | 4397.175  | NM_003166 | 6827.833  |
| NM_016846 | 5807.49   | 7436.885  | NM_017716 | 1215.687  | 2209.406  | NM_018286 | 7244.075  |
| NM_000514 | 4401.566  | 4943.641  | NM_000115 | 1385.111  | 1755.177  | NM_003146 | 838.604   |
| AL137432  | 3451.617  | 2536.5    | AF308801  | 3846.202  | 3304.277  | X52342    | 233.871   |
| NM_000957 | 2091.192  | 2921.223  | NM_007316 | 41726.75  | 44808.852 | NM_003131 | 1742.724  |
| NM_019043 | 2231.946  | 2269.808  | NM_014874 | 894.125   | 765.083   | NM_005236 | 903.258   |

|           |           |           |           |           |           |           |           |
|-----------|-----------|-----------|-----------|-----------|-----------|-----------|-----------|
| NM_003240 | 7981.471  | 7176.512  | NM_005765 | 33147.09  | 19638.793 | NM_018538 | 577.098   |
| NM_016564 | 33138.945 | 34591.777 | NM_002762 | 1147.992  | 1439.864  | AK026182  | 66966.438 |
| NM_000796 | 410.369   | 405.876   | NM_006324 | 5999.868  | 5386.688  | NM_016085 | 459.865   |
| AF279656  | 1215.946  | 1422.925  | NM_016848 | 4584.766  | 6914.041  | U00684    | 725.423   |
| AK021660  | 941.43    | 1134.103  | NM_000514 | 4121.185  | 6554.593  | NM_016459 | 2651.032  |
| AB007933  | 33285.906 | 38212.027 | AL137432  | 2794.665  | 2395.122  | AF086227  | 545.786   |
| NM_006702 | 7015.666  | 3718.727  | NM_000957 | 3754.548  | 4938.566  | AK026246  | 1215.708  |
| NM_001396 | 4914.206  | 4523.68   | NM_019043 | 2344.943  | 3236.774  | AF035281  | 811.288   |
| NM_014474 | 1805.178  | 2202.08   | NM_003240 | 3875.687  | 6982.896  | AL133446  | 379.555   |
| NM_006539 | 794.999   | 1026.207  | NM_016564 | 26698.998 | 33572.43  | U56251    | 845.812   |
| NM_001684 | 1665.075  | 1848.533  | NM_000796 | 621.608   | 1231.58   | AL050043  | 299.552   |
| AB028977  | 447.472   | 442.165   | AF279656  | 819.725   | 1136.472  | AL117571  | 426.303   |
| NM_000808 | 883.453   | 726.803   | AK021660  | 378.703   | 962.93    | AL359600  | 423.682   |
| NM_016318 | 8788.414  | 8052.875  | NM_006702 | 6457.727  | 5283.88   | AL360144  | 2126.718  |
| NM_013309 | 581.191   | 699.537   | NM_001396 | 6035.933  | 9132.32   | BC028617  | 2623.307  |
| NM_019891 | 1303.147  | 1597.152  | NM_014474 | 1489.061  | 2235.404  | NM_003740 | 821.391   |
| AF038186  | 1233.644  | 1492.54   | NM_006539 | 604.543   | 751.442   | AK021616  | 169.653   |
| NM_016277 | 2348.704  | 3607.001  | NM_001684 | 821.796   | 2919.892  | AK022933  | 514.686   |
| NM_007247 | 3701.488  | 2488.232  | NM_000808 | 1067.542  | 1265.806  | NM_014276 | 644.357   |
| NM_006554 | 3857.414  | 3686.933  | NM_016318 | 15921.241 | 14498.478 | AF003737  | 9770.877  |
| X99962    | 6654.528  | 7849.603  | NM_013309 | 714.174   | 723.009   | AF009296  | 295.125   |
| AK023221  | 3943.164  | 5476.252  | NM_019891 | 1122.182  | 1549.766  | AK001011  | 357.467   |
| NM_003664 | 6442.842  | 5256.115  | AF038186  | 1259.309  | 1009.061  | AK021690  | 834.552   |
| NM_002426 | 2849.274  | 2951.076  | NM_016277 | 4159.578  | 3579.222  | AK001840  | 820.28    |
| AK027182  | 1296.482  | 1622.096  | NM_007247 | 2473.112  | 2328.183  | AK025564  | 585.456   |
| J03651    | 4138.19   | 4531.205  | NM_006554 | 2771.643  | 1840.567  | AK026286  | 541.643   |
| U61738    | 4111.554  | 3865.621  | X99962    | 4360.771  | 4457.526  | NM_004192 | 334.152   |
| AJ132087  | 913.807   | 1044.292  | AK023221  | 3808.612  | 4201.519  | NM_006417 | 592.924   |
| U92818    | 2548.439  | 2926.818  | NM_003664 | 7530.453  | 5212.073  | NM_020317 | 805.06    |
| NM_000442 | 22947.217 | 14785.061 | NM_002426 | 1745.32   | 1956.576  | AK027025  | 589.633   |
| NM_002934 | 33204.527 | 43615.082 | AK027182  | 662.682   | 729.472   | AL137709  | 1135.788  |
| AK023011  | 13217.2   | 16511.059 | J03651    | 1843.115  | 2007.817  | AK023277  | 511.062   |
| NM_016816 | 3500.769  | 1427.418  | U61738    | 3772.69   | 3861.915  | AK000425  | 327.285   |
| L17325    | 1880.587  | 1879.606  | AJ132087  | 1004.708  | 972.103   | Z27200    | 698.441   |
| NM_014002 | 6416.212  | 6632.746  | U92818    | 1336.699  | 1559.686  | AF070571  | 1069.374  |
| NM_004073 | 1142.765  | 1269.613  | NM_000442 | 12043.961 | 9708.207  | AK023554  | 364.503   |
| NM_001278 | 2616.411  | 3628.766  | AK023011  | 8895.979  | 12927.775 | NM_003513 | 2038.833  |
| NM_019105 | 3068.475  | 3488.685  | NM_016816 | 1701.798  | 1444.157  | AF161427  | 50213.805 |
| NM_000294 | 3567.428  | 4086.493  | L17325    | 1838.587  | 1378.242  | AK021715  | 1227.926  |
| AJ272212  | 2299.578  | 2192.884  | NM_014002 | 2814.703  | 3796.977  | AK000315  | 1116.861  |
| NM_001626 | 21197.926 | 23844.801 | NM_004197 | 8968.616  | 9927.329  | NM_012404 | 1355.964  |
| NM_005677 | 2916.528  | 3310.366  | NM_004073 | 1360.896  | 1726.349  | AF130075  | 4059.335  |
| AF229803  | 1309.861  | 1187.468  | NM_001278 | 973.318   | 1542.674  | NM_005444 | 547.688   |
| AF151810  | 486.015   | 626.987   | NM_019105 | 4199.603  | 3949.428  | V00589    | 12875.401 |
| NM_002130 | 5294.397  | 22893.266 | NM_000294 | 3805.568  | 3692.103  | NM_018572 | 610.408   |
| NM_005469 | 6989.563  | 7512.638  | AJ272212  | 1615.641  | 2226.984  | AK000175  | 1533.36   |
| NM_016361 | 2202.191  | 3458.234  | NM_001626 | 19896.166 | 20909.057 | AL137736  | 1444.688  |
| NM_003708 | 31457.604 | 35378.27  | NM_005677 | 3634.619  | 3422.316  | AF143870  | 891.805   |
| NM_014349 | 10149.813 | 9194.488  | AF229803  | 1237.016  | 1211.711  | AK021897  | 527.926   |
| AB040895  | 444.585   | 606.72    | NM_002130 | 8389.844  | 17181.135 | AK001051  | 497.474   |
| NM_018210 | 2798.026  | 2037.379  | NM_005469 | 6446.614  | 5043.055  | AF086051  | 1754.178  |
| NM_001096 | 2820.082  | 6301.283  | NM_016361 | 2328.202  | 2373.2    | AK024356  | 893.825   |
| NM_016014 | 1646.454  | 1351.9    | NM_003708 | 34859.758 | 34800.41  | AL049370  | 560.365   |

|           |           |           |           |           |           |           |           |
|-----------|-----------|-----------|-----------|-----------|-----------|-----------|-----------|
| NM_018327 | 1661.212  | 1286.647  | NM_014349 | 10369.991 | 7521.606  | AL365410  | 268.51    |
| NM_017581 | 2982.858  | 2410.204  | AB040895  | 394.812   | 652.959   | D17082    | 2364.859  |
| AA488804  | 9910.524  | 12658.961 | NM_018210 | 2487.897  | 1636.775  | D17252    | 7098.324  |
| L29496    | 3499.875  | 3978.081  | NM_001096 | 2599.287  | 3403.531  | Z36823    | 2046.948  |
| NM_000928 | 452.784   | 1053.464  | NM_016014 | 1481.906  | 1116.216  | AF147387  | 278.515   |
| NM_007002 | 8057.686  | 8362.828  | NM_000198 | 439.716   | 402.615   | NM_012081 | 795.157   |
| NM_012121 | 1135.759  | 1348.814  | NM_018327 | 1369.099  | 1217.637  | AF085909  | 8917.314  |
| NM_003255 | 9879.488  | 4368.048  | NM_017581 | 2589.913  | 1602.068  | AF090888  | 1047.006  |
| NM_014155 | 1364.696  | 1947.822  | AA488804  | 6492.429  | 5675.071  | AK027193  | 745.363   |
| AK026331  | 9166.951  | 15428.491 | L29496    | 3566.277  | 3312.382  | AF086471  | 1733.984  |
| M30773    | 1429.721  | 1954.271  | NM_000928 | 537.149   | 749.462   | NM_018455 | 4108.207  |
| NM_016338 | 8629.008  | 7592.254  | NM_007002 | 6458.791  | 5961.727  | AF113018  | 955.511   |
| AF113699  | 16523.963 | 10917.788 | NM_012121 | 1233.942  | 2470.174  | AK021996  | 702.15    |
| AK001883  | 12402.34  | 8305.437  | NM_003255 | 7473.928  | 6400.258  | AL049337  | 607.841   |
| NM_014625 | 1238.71   | 1698.923  | NM_014155 | 1207.971  | 1000.215  | CY3Cy5    | 8132.932  |
| AL050114  | 969.001   | 1091.455  | AK026331  | 11530.07  | 15199.481 | AI660957  | 461.619   |
| AK021492  | 5222.392  | 4183.558  | M30773    | 1182.313  | 1246.531  | U13697    | 4732.631  |
| AK023794  | 21961.566 | 19249.141 | NM_016338 | 4233.584  | 5062.703  | U04270    | 1881.621  |
| NM_019885 | 3451.76   | 3107.198  | AF113699  | 19159.725 | 22753.006 | AA629719  | 42657.855 |
| AB033103  | 1628.642  | 2071.081  | AK001883  | 19109.563 | 13261.178 | BG181154  | 435.45    |
| NM_002907 | 2121.83   | 511.172   | NM_014625 | 1177.717  | 958.163   | AA843679  | 144.386   |
| AK024098  | 1238.543  | 1120.546  | AL050114  | 675.701   | 859.705   | NM_004957 | 1056.908  |
| AK001116  | 410.668   | 214.468   | AK021492  | 2257.306  | 2069.788  | SR9       | 23896.025 |
| AK022371  | 2166.55   | 1927.776  | AK023794  | 13694.216 | 11812.603 | CY3Cy5    | 6597.543  |
| D42045    | 2690.007  | 2542.037  | NM_019885 | 2426.653  | 1926.408  | NM_004380 | 1781.394  |
| AB007953  | 2208.296  | 1922.377  | AB033103  | 586.457   | 687.906   | NM_004119 | 542.19    |
| NM_017820 | 1066.503  | 944.106   | AK024098  | 1128.527  | 636.67    | AY007378  | 691.436   |
| NM_001845 | 8023.904  | 2625.023  | AK001116  | 428.719   | 265.877   | D26070    | 3009.17   |
| NM_003734 | 7921.884  | 10716.97  | AK022371  | 2264.093  | 1604.347  | NM_001642 | 10136.347 |
| NM_003247 | 404.496   | 300.523   | D42045    | 1093.475  | 723.284   | NM_001542 | 400.614   |
| NM_014935 | 3836.965  | 2808.404  | AB007953  | 1646.14   | 1394.294  | NM_000114 | 1419.061  |
| X99660    | 11484.38  | 12701.64  | NM_017820 | 732.316   | 1035.246  | NM_005156 | 446.279   |
| X03635    | 3486.495  | 5661.795  | NM_001845 | 1327.365  | 2134.424  | X98834    | 989.792   |
| X97671    | 198.084   | 417.821   | NM_003734 | 4575.874  | 6792.96   | NM_007035 | 4005.094  |
| NM_004351 | 2573.855  | 3007.302  | NM_014935 | 3528.603  | 4821.486  | AB019562  | 276.289   |
| NM_004236 | 7572.384  | 6679.455  | X99660    | 5496.093  | 6824.011  | AF036364  | 923.106   |
| AB011093  | 2596.212  | 2684.527  | X03635    | 3897.518  | 5795.236  | AK022847  | 926.184   |
| NM_004560 | 597.561   | 175.646   | X97671    | 288.651   | 478.43    | NM_020203 | 1980.172  |
| NM_005618 | 1298.727  | 4261.402  | NM_004351 | 5218.823  | 7367.425  | U20582    | 17031.271 |
| NM_020533 | 10695.127 | 6543.915  | NM_004236 | 5129.62   | 5220.081  | NM_000337 | 367.379   |
| NM_001894 | 5264.805  | 6663.107  | AB011093  | 3514.482  | 2247.083  | NM_002079 | 1200.815  |
| NM_000614 | 751.282   | 624.984   | NM_005618 | 594.879   | 2899.049  | NM_006808 | 4689.549  |
| AK022884  | 782.235   | 377.734   | NM_020533 | 5479.835  | 5164.319  | NM_006634 | 1224.942  |
| AF305072  | 321.182   | 480.938   | NM_001894 | 4669.776  | 5549.46   | NM_016465 | 428.947   |
| NM_006620 | 4504.389  | 3655.032  | AK022884  | 936.187   | 464.14    | NM_013399 | 867.42    |
| NM_001397 | 446.231   | 630.658   | NM_006620 | 7295.002  | 3408.44   | AL122120  | 476.156   |
| NM_005543 | 555.49    | 494.027   | Y08770    | 547.057   | 376.879   | NM_014684 | 207.054   |
| NM_004772 | 4284.739  | 7198.529  | NM_004772 | 4912.411  | 3951.876  | AK027247  | 545.598   |
| NM_003714 | 1482.404  | 3657.023  | NM_003714 | 2793.154  | 3857.731  | NM_002480 | 1314.458  |
| NM_004004 | 607.891   | 160.475   | AF024540  | 481.806   | 737.692   | NM_017571 | 1455.85   |
| AF024540  | 1032.127  | 1056.526  | NM_002189 | 2376.634  | 3909.046  | AB007946  | 115.593   |
| NM_002189 | 1879.022  | 1591.21   | U42977    | 1635.814  | 1875.816  | L03169    | 265.196   |
| U42977    | 2425.552  | 2488.812  | NM_002881 | 3071.467  | 3657.476  | NM_001928 | 32087.248 |

|           |           |           |           |           |           |           |           |
|-----------|-----------|-----------|-----------|-----------|-----------|-----------|-----------|
| NM_002881 | 4729.777  | 5671.834  | NM_003666 | 2043.694  | 2647.581  | NM_018965 | 3984.493  |
| NM_003666 | 3505.396  | 2375.095  | NM_003288 | 4340.742  | 3291.27   | NM_000185 | 2454.833  |
| NM_003288 | 6242.299  | 4995.185  | NM_018242 | 1270.066  | 1551.578  | Y00816    | 846.935   |
| NM_018242 | 694.78    | 657.382   | M83822    | 3148.29   | 1682.492  | NM_004512 | 1954.585  |
| M83822    | 2203.933  | 1755.985  | NM_018434 | 2152.236  | 2437.004  | NM_001055 | 4713.513  |
| NM_018434 | 5583.306  | 2052.133  | NM_003914 | 3946.17   | 2689.607  | NM_002271 | 25421.09  |
| NM_003914 | 2981.765  | 3548.884  | NM_020423 | 1303.858  | 863.021   | NM_018361 | 860.209   |
| NM_020423 | 929.966   | 549.899   | AK021437  | 1777.917  | 1419.67   | AB040966  | 761.396   |
| AK021437  | 2086.701  | 2291.371  | NM_003831 | 4991.388  | 4337.67   | NM_020132 | 843.688   |
| NM_003831 | 9383.587  | 7993.439  | AB007965  | 3169.741  | 3311.318  | NM_016467 | 826.728   |
| NM_001759 | 308.322   | 362.8     | NM_000066 | 551.956   | 873.043   | NM_007253 | 1187.995  |
| AB007965  | 5466.32   | 4260.957  | NM_001196 | 6262.076  | 5817.192  | NM_019106 | 627.881   |
| NM_017649 | 769.586   | 941.559   | NM_016008 | 521.865   | 743.973   | L08436    | 141.68    |
| NM_000066 | 860.056   | 933.023   | NM_017744 | 1243.766  | 1011.072  | NM_000558 | 1320.832  |
| NM_001196 | 5655.343  | 8524.432  | NM_001924 | 787.546   | 522.977   | NM_014170 | 373.37    |
| NM_016008 | 886.093   | 1523.79   | NM_017705 | 4954.625  | 2873.717  | AF116652  | 14740.975 |
| NM_017744 | 1660.494  | 1177.014  | NM_001796 | 5214.393  | 3740.998  | NM_018835 | 521.286   |
| NM_001924 | 1077.676  | 1504.731  | AB040880  | 709.32    | 795.354   | NM_003401 | 1694.488  |
| NM_017705 | 12713.125 | 9727.603  | NM_009587 | 8723.842  | 6792.512  | NM_004758 | 2178.048  |
| NM_001796 | 1956.326  | 1518.218  | AL133566  | 688.691   | 1057.893  | NM_002913 | 475.067   |
| AB040880  | 888.274   | 1151.334  | M36118    | 5278.582  | 8330.116  | NM_007370 | 580.373   |
| NM_009587 | 10957.403 | 10104.987 | NM_003399 | 9517.738  | 14855.251 | NM_001948 | 335.16    |
| AL133566  | 1389.172  | 1257.159  | NM_001097 | 465.304   | 718.561   | NM_001067 | 1123.658  |
| M36118    | 3901.472  | 4683.043  | NM_002630 | 946.391   | 912.136   | NM_014034 | 437.733   |
| NM_003399 | 11832.601 | 15532.022 | AJ295149  | 34245.309 | 39818.758 | NM_005335 | 13586.096 |
| NM_002630 | 1215.392  | 952.103   | NM_013438 | 2833.829  | 3264.702  | J04474    | 1397.465  |
| AJ295149  | 17473.916 | 20695.098 | NM_005099 | 3201.484  | 1992.394  | NM_003761 | 11955.86  |
| NM_013438 | 2610.89   | 3090.671  | NM_014688 | 2898.377  | 1903.718  | NM_004726 | 492.318   |
| NM_005099 | 6045.17   | 1971.008  | AL359623  | 429.595   | 415.084   | NM_014011 | 2292.48   |
| NM_014688 | 4499.771  | 3135.813  | AK026920  | 1630.875  | 1596.271  | AK025994  | 1110.264  |
| AB037784  | 638.214   | 465.066   | AL137255  | 1462.142  | 1074.659  | L29306    | 397.243   |
| AL359623  | 1609.925  | 1104.797  | NM_003370 | 10835.749 | 7453.943  | NM_013989 | 1644.74   |
| NM_006676 | 53.431    | 824.621   | AB037715  | 4860.673  | 2911.893  | NM_001738 | 1111.557  |
| AK026920  | 2690.997  | 2600.495  | AF250924  | 4446.466  | 3577.028  | U20582    | 14646.654 |
| AL137255  | 1670.428  | 1764.118  | D86979    | 613.027   | 310.841   | NM_002079 | 680.134   |
| NM_003370 | 13389.214 | 14467.31  | AB023230  | 1579.755  | 1035.952  | U13697    | 4126.037  |
| AB037715  | 2759.607  | 1594.762  | AF018081  | 7252.397  | 6632.793  | U04270    | 2350.876  |
| AF250924  | 7722.185  | 7144.983  | NM_020202 | 7196.295  | 5653.189  | AA629719  | 40117.859 |
| D86979    | 1380.788  | 677.479   | AK022889  | 5376.631  | 7025.198  | X02152    | 26134.602 |
| AB023230  | 1013.277  | 588.108   | X52357    | 41412.449 | 49016.031 | BG676364  | 1059.675  |
| AF018081  | 19254.756 | 16001.829 | AF211891  | 596.404   | 1284.566  | BG181154  | 450.655   |
| NM_020202 | 7687.172  | 9265.78   | NM_005641 | 1317.026  | 1069.275  | AA843679  | 313.847   |
| AK022889  | 9330.56   | 16195.602 | NM_001668 | 1787.877  | 1541.341  | NM_004957 | 875.001   |
| X52357    | 36854.785 | 37931.328 | AK025362  | 1626.218  | 1040.559  | NM_005252 | 1157.102  |
| AF211891  | 515.033   | 1373.454  | AK021776  | 1310.56   | 943.995   | AF090906  | 699.653   |
| NM_005641 | 1151.698  | 1187.924  | AK026042  | 471.814   | 587.966   | AB023219  | 1312.639  |
| NM_001668 | 4316.202  | 2765.289  | NM_014233 | 5756.791  | 6362.017  | NM_018965 | 2961.543  |
| AK025362  | 3139.207  | 1127.963  | NM_002137 | 52427.727 | 42337.961 | NM_000185 | 1188.999  |
| AK021776  | 3023.558  | 1835.524  | NM_002911 | 892.561   | 685.971   | Y00816    | 539.069   |
| AK026042  | 579.007   | 915.646   | U94386    | 998.859   | 675.326   | NM_004512 | 741.727   |
| NM_014233 | 10135.735 | 8978.743  | NM_016000 | 9943.94   | 7419.404  | NM_004380 | 1628.903  |
| NM_002137 | 29417.104 | 40458.215 | NM_006372 | 8421.132  | 4100.322  | U86813    | 642.539   |
| NM_002911 | 1616.299  | 1500.787  | NM_014150 | 1057.033  | 1008.503  | NM_004119 | 526.413   |

|           |           |           |           |           |           |           |           |
|-----------|-----------|-----------|-----------|-----------|-----------|-----------|-----------|
| U94386    | 942.284   | 952.645   | NM_006805 | 26877.385 | 29687.244 | AY007378  | 825.154   |
| NM_01600C | 7448.316  | 5013.778  | AF132027  | 9523.883  | 8283.909  | D26070    | 2019.224  |
| NM_006372 | 2763.715  | 4932.384  | NM_004681 | 2251.242  | 2576.395  | NM_001642 | 6342.868  |
| NM_01415C | 1519.843  | 1276.981  | AB033096  | 7455.185  | 3345.851  | NM_000501 | 7634.65   |
| NM_006805 | 11426.257 | 14467.387 | NM_014886 | 4020.175  | 490.629   | NM_000114 | 1330.792  |
| AF132027  | 15922.409 | 23513.563 | L31408    | 2022.066  | 1020.967  | NM_005156 | 359.185   |
| NM_004681 | 3293.179  | 2922.58   | NM_001545 | 2751.116  | 2392.979  | NM_015193 | 334.861   |
| AB033096  | 5773.355  | 5459.945  | NM_004446 | 3777.655  | 3687.305  | X98834    | 989.635   |
| NM_014886 | 4398.8    | 727.388   | AF070625  | 3918.803  | 5303.616  | NM_007035 | 3975.913  |
| L31408    | 8343.332  | 6425.915  | AL365512  | 1419.702  | 1466.696  | AB019562  | 537.28    |
| NM_001545 | 6371.084  | 5362.876  | AK001740  | 9229.984  | 8638.735  | AF036364  | 947.463   |
| NM_004446 | 7584.839  | 9325.207  | AF131793  | 1531.04   | 1631.254  | AK022847  | 1004.158  |
| AF070625  | 2862.143  | 2802.479  | NM_005918 | 11132.237 | 10202.531 | NM_006808 | 4266.931  |
| AL365512  | 1340.974  | 1508.818  | J02625    | 3348.239  | 2739.413  | NM_006634 | 1142.732  |
| AK001740  | 4179.842  | 3160.395  | Y17175    | 61498.879 | 59792.434 | NM_016465 | 536.814   |
| AF131793  | 979.559   | 784.162   | NM_004549 | 10869.146 | 9890.418  | NM_013399 | 666.331   |
| NM_005918 | 15569.53  | 15814.64  | NM_005333 | 7390.083  | 5349.702  | AL122120  | 594.084   |
| J02625    | 5349.888  | 5482.519  | AK026161  | 880.749   | 573.431   | NM_014684 | 256.934   |
| NM_004549 | 8574.288  | 10070.356 | NM_004553 | 13693.975 | 6794.052  | AK027247  | 570.988   |
| NM_005333 | 11626.924 | 10929.59  | D63484    | 1410.649  | 1192.064  | NM_00248C | 1641.931  |
| AK026161  | 1865.864  | 1231.514  | AK026745  | 2987.292  | 1654.692  | NM_017571 | 1496.238  |
| NM_004553 | 19967.404 | 20062.645 | AL157440  | 988.934   | 541.998   | L03169    | 615.073   |
| D63484    | 1753.63   | 1418.854  | NM_016423 | 5076.616  | 2671.129  | NM_014011 | 1702.597  |
| AK026745  | 3661.489  | 3526.405  | AB040975  | 2725.199  | 1711.273  | AK025994  | 823.432   |
| AL157440  | 2337.63   | 1822.29   | NM_005119 | 5004.539  | 2251.589  | NM_013989 | 1033.743  |
| NM_016423 | 6613.115  | 3438.378  | NM_003168 | 8379.983  | 4169.873  | NM_001738 | 650.847   |
| AB040975  | 1741.365  | 1476.217  | NM_018288 | 16374.012 | 6106.821  | NM_001055 | 4662.552  |
| NM_005119 | 4274.445  | 2764.345  | NM_003131 | 6338.384  | 5090.969  | NM_002271 | 19579.027 |
| NM_003168 | 12559.743 | 7382.849  | NM_013346 | 1395.295  | 1143.031  | NM_018361 | 842.664   |
| AK055844  | 1165.471  | 719.483   | NM_017851 | 514.444   | 1309.736  | AB040966  | 730.642   |
| NM_018288 | 14892.138 | 14632.083 | AK026182  | 49171.602 | 52555.012 | NM_020132 | 671.49    |
| NM_003146 | 1144.689  | 2534.407  | AK025603  | 1815.957  | 2017.448  | NM_016467 | 3513.985  |
| NM_003131 | 5875.962  | 8154.438  | NM_016085 | 8589.909  | 14047.414 | NM_007253 | 2081.78   |
| NM_005239 | 2273.41   | 1521.677  | AK025768  | 3850.444  | 5368.592  | NM_019106 | 640.711   |
| AB014526  | 346.244   | 292.666   | AL117502  | 3393.019  | 1863.051  | L08436    | 684.873   |
| NM_018538 | 3205.212  | 2271.724  | AK024637  | 700.779   | 493.056   | NM_000558 | 1913.787  |
| NM_013346 | 1333.289  | 897.036   | AK024108  | 1847.286  | 1198.216  | NM_01417C | 861.725   |
| AF131784  | 310.533   | 353.35    | AL110293  | 443.553   | 587.971   | AF116652  | 18274.359 |
| NM_017851 | 807.988   | 1102.817  | AL117454  | 29748.326 | 23293.025 | NM_000835 | 778.778   |
| AK026182  | 65503.625 | 54036.871 | AF272890  | 2863.174  | 2642.409  | NM_004957 | 931.179   |
| NM_016085 | 4467.546  | 6546.653  | U00684    | 1376.599  | 1036.933  | NM_005252 | 836.869   |
| AK025768  | 2054.568  | 3025.911  | NM_016459 | 2686.362  | 2589.208  | AF090906  | 592.921   |
| AL117502  | 3609.17   | 1670.145  | AF086227  | 656.425   | 665.747   | AB023219  | 1055.986  |
| AK001846  | 643.376   | 1073.728  | AK026246  | 1391.504  | 922.345   | NM_018835 | 464.102   |
| AF147300  | 253.534   | 569.541   | AF070524  | 920.36    | 1176.336  | NM_003401 | 1621.95   |
| AK024637  | 820.004   | 548.735   | AF035281  | 943.893   | 498.641   | NM_004758 | 2183.16   |
| AK024108  | 758.312   | 848.082   | AL133446  | 3535.056  | 6874.879  | NM_002913 | 457.691   |
| NM_013345 | 1067.572  | 696.28    | AF147406  | 725.362   | 985.981   | NM_00737C | 574.936   |
| AL117454  | 13377.147 | 10099.452 | NM_006553 | 151.538   | 948.535   | AK023471  | 1229.882  |
| AF272890  | 3200.087  | 3358.58   | U56251    | 1480.401  | 2212.429  | AF044578  | 724.262   |
| U00684    | 936.764   | 635.017   | AK024689  | 492.296   | 1088.992  | NM_001948 | 288.476   |
| NM_016459 | 4368.14   | 4331.5    | BC035667  | 1635.287  | 1384.324  | NM_001067 | 1783.755  |
| AF086227  | 1088.397  | 842.31    | AL049277  | 1868.578  | 1891.779  | NM_014034 | 347.849   |



|            |          |           |           |           |           |           |           |
|------------|----------|-----------|-----------|-----------|-----------|-----------|-----------|
| AK026246   | 2101.44  | 1557.529  | AL050043  | 1372.375  | 876.809   | NM_005335 | 14609.295 |
| AF070524   | 368.93   | 544.773   | AL080205  | 402.849   | 438.836   | J04474    | 1774.653  |
| AF035281   | 1344.326 | 945.412   | AL117571  | 2071.947  | 1504.173  | NM_003761 | 15948.681 |
| AK026304   | 494.486  | 344.887   | AF131814  | 2643.076  | 1237.297  | NM_004726 | 418.892   |
| AL133446   | 3796.364 | 2650.435  | AL359600  | 494.497   | 294.634   | X98834    | 765.467   |
| NM_006553  | 548.322  | 553.665   | AL360144  | 1709.62   | 1013.208  | NM_007035 | 3592.462  |
| U56251     | 669.678  | 1118.983  | BC028617  | 3004.58   | 898.371   | AB019562  | 431.514   |
| AK024689   | 579.498  | 579.91    | AL117653  | 551.433   | 257.274   | AF036364  | 1077.816  |
| BC035667   | 1081.022 | 546.047   | AF087999  | 530.12    | 448.329   | AK022847  | 898.825   |
| AL049277   | 1431.357 | 1244.875  | NM_003740 | 2492.951  | 2755.966  | NM_020203 | 1282.813  |
| AL080104   | 390.427  | 518.753   | AL050078  | 1793.336  | 2113.794  | U20582    | 15134.577 |
| AL117506   | 658.565  | 368.555   | AK021616  | 584.94    | 1566.692  | NM_002079 | 676.041   |
| AL049302   | 288.914  | 330.652   | NM_014276 | 6146.17   | 9871.874  | X75308    | 757.138   |
| AL050043   | 656.058  | 642.369   | AF035303  | 1123.022  | 1320.268  | U04270    | 2086.718  |
| AL117571   | 1911.531 | 1492.71   | AF056438  | 3343.878  | 5070.268  | AA629719  | 47108.523 |
| AF131814   | 1891.594 | 951.486   | AF003737  | 29822.441 | 43840.902 | AA927528  | 345.611   |
| AL360144   | 2546.431 | 1605.264  | AF009296  | 1064.51   | 1263.521  | X02152    | 30491.375 |
| BC028617   | 5172.67  | 2339.834  | AF041410  | 740.209   | 881.485   | BG676364  | 946.348   |
| AL117653   | 486.742  | 392.422   | AK001011  | 4046.315  | 3815.016  | AA843679  | 248.314   |
| AF087999   | 639.531  | 613.718   | AK021457  | 837.337   | 558.099   | NM_017571 | 1382.572  |
| NM_003740  | 1782.652 | 2424.631  | AK021690  | 1374.386  | 888.298   | L03169    | 512.429   |
| AL050078   | 752.276  | 622.04    | AK001840  | 1813.671  | 1396.398  | NM_001928 | 23507.471 |
| AK022933   | 464.474  | 488.057   | AK021486  | 1196.445  | 579.568   | NM_018965 | 3341.857  |
| NM_014276  | 2120.787 | 1925.873  | AK021740  | 788.272   | 494.65    | NM_000185 | 1624.978  |
| AF009288   | 689.741  | 777.479   | AK026694  | 528.967   | 458.447   | NM_002930 | 1217.198  |
| AF035303   | 220.378  | 404.658   | AK025564  | 862.068   | 1398.176  | NM_004380 | 2300.238  |
| AF056438   | 938.946  | 867.698   | NM_004192 | 1719.868  | 3274.762  | U86813    | 768.219   |
| AF003737   | 20901.73 | 20078.223 | AK024160  | 1697.318  | 2043.1    | NM_004119 | 570.035   |
| AF009296   | 1693.575 | 1286.2    | AK025077  | 2204.339  | 3221.123  | AY007378  | 607.261   |
| AK001011   | 1088.315 | 1903.552  | NM_020317 | 9464.281  | 13410.919 | D26070    | 1282.439  |
| AK021457   | 527.511  | 695.239   | AL080234  | 8815.949  | 10610.606 | NM_001642 | 9530.856  |
| AK021690   | 1209.678 | 742.809   | AK027025  | 1056.251  | 1645.364  | NM_003392 | 334.764   |
| AK001078   | 384.607  | 520.734   | AK021675  | 707.441   | 616.681   | NM_000501 | 7385.667  |
| AK001840   | 1323.624 | 1000.025  | AF212220  | 1158.805  | 2696.712  | NM_000114 | 1399.395  |
| AK025148   | 458.897  | 372.887   | Z27200    | 2424.103  | 3234.777  | NM_005156 | 579.579   |
| AK026238   | 370.812  | 546.92    | AF070571  | 3747.863  | 5166.176  | NM_000558 | 1181.648  |
| AK026694   | 898.108  | 645.912   | AK023554  | 1116.565  | 1372.962  | NM_004198 | 532.575   |
| AK025564   | 1099.369 | 911.211   | NM_003513 | 10411.85  | 8302.167  | NM_000835 | 1030.127  |
| AK026286   | 1083.838 | 849.669   | AK024844  | 1373.577  | 2148.919  | AK000271  | 358.564   |
| AK026731   | 550.07   | 640.309   | AL049437  | 1145.048  | 1516.697  | NM_006808 | 3523.744  |
| NM_004192  | 1440.691 | 1310.073  | AF161427  | 55261.777 | 59021.523 | NM_006634 | 806.903   |
| AK024160   | 936.701  | 653.732   | AK021715  | 12128.731 | 13667.802 | NM_016465 | 563.472   |
| AK025077   | 1433.903 | 1374.549  | AK000315  | 6708.319  | 9901.217  | NM_013399 | 1039.921  |
| NM_006417  | 2725.869 | 2380.14   | AK023248  | 1605.938  | 1838.333  | AL122120  | 794.461   |
| L43350     | 772.154  | 500.608   | NM_012404 | 21310.289 | 27624.311 | NM_014684 | 531.594   |
| NM_020317  | 6971.538 | 4684.449  | AF251190  | 1011.387  | 1178.531  | AK027247  | 719.324   |
| AL080234   | 3511.149 | 3574.47   | AF130075  | 18646.355 | 24292.9   | NM_002480 | 1694.676  |
| AK027025   | 996.084  | 769.288   | NM_005444 | 1949.661  | 2485.085  | NM_014034 | 595.449   |
| AK025105   | 615      | 665.843   | V00589    | 57310.773 | 57764.566 | NM_005335 | 12458.274 |
| AK021675   | 412.98   | 463.566   | AK000451  | 915.225   | 924.106   | NM_014011 | 1665.29   |
| AB002446   | 455.922  | 511.734   | AL390163  | 851.739   | 1365.419  | AK025994  | 955.127   |
| AF212220   | 834.67   | 1654.295  | NM_018572 | 1350.206  | 1298.824  | L29306    | 939.034   |
| unknown (S | 379.444  | 455.214   | AL109959  | 1072.105  | 1234.295  | NM_013989 | 1216.961  |

|           |           |           |           |           |           |           |           |
|-----------|-----------|-----------|-----------|-----------|-----------|-----------|-----------|
| AK025010  | 610.337   | 603.021   | AK021897  | 10609.228 | 7796.393  | NM_00173E | 1474.44   |
| AL137709  | 2545.906  | 1159.461  | AK001051  | 1971.479  | 1791.649  | NM_00227C | 496.835   |
| AK023277  | 774.275   | 719.062   | NM_018317 | 597.456   | 792.866   | NM_00105E | 8667.249  |
| AK000425  | 504.593   | 879.563   | AF086051  | 775.187   | 1252.63   | NM_002271 | 24186.221 |
| Z27200    | 1770.211  | 1886.299  | AK024356  | 2044.236  | 2171.936  | NM_018361 | 619.572   |
| AF070571  | 3807.747  | 3491.685  | AL049370  | 3529.782  | 5356.558  | AB040966  | 929.919   |
| AK023554  | 965.858   | 1094.511  | AL365410  | 12935.454 | 11884.219 | NM_02013Z | 1681.853  |
| NM_003513 | 4533.513  | 6256.082  | D17082    | 21030.791 | 24342.754 | NM_016467 | 5862.228  |
| AL079294  | 245.191   | 445.715   | D17252    | 55722.41  | 54938.797 | NM_007253 | 2352.035  |
| AK024844  | 540.381   | 864.158   | D16476    | 556.153   | 834.296   | NM_01910E | 1078.584  |
| AL049437  | 557.473   | 590.927   | NM_003673 | 2574.435  | 4916.349  | L08436    | 615.246   |
| AF161427  | 44353.547 | 38541.246 | AF086456  | 431.257   | 452.517   | NM_005607 | 1206.67   |
| AK021715  | 7530.557  | 5891.158  | Z36823    | 5031.656  | 7433.685  | NM_006761 | 10479.288 |
| AK000315  | 4186.953  | 3856.734  | AK022110  | 478.922   | 858.039   | NM_014897 | 1588.343  |
| AK023248  | 1499.12   | 1109.694  | AF147387  | 3091.131  | 10678.04  | NM_01439C | 3753.842  |
| NM_012404 | 14384.937 | 13709.107 | NM_012081 | 2622.527  | 3482.639  | X78924    | 2557.078  |
| AF251190  | 867.498   | 760.433   | AL137463  | 1166.558  | 2017.735  | NM_01325C | 807.714   |
| AF130075  | 4412.052  | 5873.592  | AF085909  | 20193.195 | 26764.055 | AF090906  | 836.273   |
| NM_005444 | 969.603   | 1235.042  | AF090888  | 22575.426 | 2570.181  | AB023219  | 1547.41   |
| V00589    | 16109.203 | 14850.237 | AK027193  | 1663.105  | 2703.934  | NM_01883E | 510.934   |
| AL390163  | 717.4     | 381.718   | AF086471  | 5412.78   | 5598.189  | NM_003401 | 1952.682  |
| NM_01857Z | 1343.553  | 1263.356  | CY3Cy5    | 6240.946  | 446.164   | NM_00475E | 2100.042  |
| AL109959  | 224.569   | 384.01    | U13697    | 4944.766  | 2621.208  | NM_00737C | 759.574   |
| AK000175  | 2175.747  | 1964.046  | U04270    | 3429.46   | 4795.367  | NM_006231 | 353.01    |
| AL137736  | 1790.709  | 1511.999  | Z34820    | 1814.971  | 2433.298  | AK023471  | 1936.875  |
| AF143870  | 988.859   | 357.088   | L02840    | 1234.883  | 1636.674  | AF044578  | 705.037   |
| AK021897  | 6621.484  | 7119.22   | AA629719  | 59711.477 | 60066.855 | NM_00194E | 434.881   |
| AK001051  | 1419.539  | 1076.577  | AA927528  | 1049.545  | 657.828   | NM_001067 | 1822.752  |
| NM_018317 | 381.37    | 396.378   | X02152    | 63819.633 | 58137.824 | AK025337  | 1390.51   |
| AF086051  | 1071.629  | 872.378   | BG676364  | 2220.633  | 1996.844  | NM_003573 | 748.289   |
| AK026434  | 555.123   | 213.581   | BG181154  | 675.45    | 407.55    | NM_00029E | 1683.463  |
| AK024356  | 989.201   | 1249.824  | AA843679  | 5100.185  | 1708.986  | NM_01230Z | 1375.052  |
| AL049370  | 805.331   | 962.17    | NM_004957 | 3174.131  | 2207.358  | NM_004112 | 1119.845  |
| AL365410  | 5651.303  | 6163.937  | NM_00525Z | 1498.335  | 1282.667  | AK025592  | 475.472   |
| D17082    | 13111.797 | 12862.107 | NM_00438C | 5524.979  | 6217.365  | NM_00463E | 3258.623  |
| D17252    | 27498.793 | 26593.561 | U86813    | 1205.296  | 1374.81   | AK023023  | 2556.709  |
| D16476    | 736.064   | 681.869   | NM_004119 | 1516.932  | 2940.558  | NM_015993 | 1077.413  |
| NM_003673 | 2315.857  | 1599.444  | AY007378  | 1368.979  | 1478.28   | NM_00265E | 697.63    |
| AF086456  | 960.94    | 2035.102  | D26070    | 6502.639  | 5329.793  | Z36776    | 2038.465  |
| Z36823    | 3316.864  | 3331.717  | NM_00164Z | 34430.004 | 42270.543 | AB029015  | 911.689   |
| AF147387  | 1275.961  | 1830.516  | NM_00154Z | 821.776   | 602.255   | NM_002067 | 7290.166  |
| NM_012081 | 2718.05   | 1253.316  | NM_00339Z | 1012.084  | 772.887   | NM_00105E | 66541.164 |
| AL137463  | 1062.428  | 709.465   | NM_000501 | 21939.24  | 24336.506 | NM_00615C | 1469.741  |
| AF085909  | 12011.6   | 11447.682 | NM_000114 | 2153.213  | 2444.261  | NM_003287 | 422.685   |
| AK027193  | 780.733   | 667.747   | NM_00515E | 920.846   | 1176.594  | NM_01232E | 4288.952  |
| AF086471  | 2935.693  | 2209.874  | NM_01519Z | 818.981   | 651.614   | NM_019607 | 1136.621  |
| NM_01845E | 3823.432  | 2842.5    | X98834    | 1785.314  | 1354.159  | NM_00189E | 1709.146  |
| AF113018  | 501.797   | 472.593   | NM_00703E | 5699.619  | 7903.303  | NM_01412E | 3273.159  |
| AK021996  | 1414.811  | 1014.817  | AB019562  | 926.048   | 1059.994  | D87455    | 970.276   |
| AL049337  | 2840.682  | 2126.037  | AF036364  | 1979.057  | 2957.612  | AF080577  | 867.263   |
| CY3Cy5    | 9918.716  | 768.739   | AK022847  | 2071.441  | 1850.622  | L22005    | 2209.827  |
| U13697    | 6040.597  | 3642.633  | L40992    | 815.837   | 805.919   | NM_012291 | 4448.54   |
| L02840    | 1443.803  | 1378.011  | U20582    | 20311.889 | 13208.017 | NM_01336E | 648.354   |

|           |           |           |           |           |           |           |           |
|-----------|-----------|-----------|-----------|-----------|-----------|-----------|-----------|
| BG569143  | 464.698   | 647.266   | NM_000337 | 785.236   | 805.074   | NM_003807 | 5446.079  |
| AA629719  | 66045.875 | 57580.555 | NM_002079 | 2395.529  | 2046.196  | NM_001790 | 461.282   |
| AA927528  | 903.507   | 1443.783  | NM_006808 | 15373.488 | 17205.629 | NM_018243 | 334.554   |
| X02152    | 49477.125 | 56408.215 | NM_006634 | 2076.788  | 2103.333  | NM_014939 | 1750.489  |
| BG676364  | 4085.377  | 6178.149  | NM_016465 | 951.453   | 1733.973  | Y17866    | 608.007   |
| BG181154  | 1035.138  | 1084.033  | NM_000328 | 498.16    | 376.764   | NM_003005 | 2788.521  |
| AA843679  | 1594.107  | 4628.864  | NM_013399 | 2652.097  | 2513.18   | NM_000873 | 604.522   |
| H68922    | 476.388   | 669.075   | NM_002410 | 744.524   | 614.842   | NM_002842 | 3330.243  |
| NM_004957 | 4039.344  | 5117.529  | AL122120  | 1484.692  | 924.641   | AF290204  | 159.346   |
| NM_005252 | 2618.19   | 2337.171  | NM_014684 | 1024.242  | 881.767   | AB033025  | 389.057   |
| SR7       | 7211.786  | 45562.785 | AK027247  | 821.839   | 552.787   | NM_004418 | 1055.884  |
| SR9       | 29524.639 | 5897.302  | NM_002480 | 3618.736  | 3088.535  | NM_000917 | 531.447   |
| CY3Cy5    | 13203.976 | 1059.318  | NM_017571 | 4840.024  | 1576.575  | NM_005389 | 2295.224  |
| NM_002930 | 163.749   | 400.735   | NM_001928 | 45957.656 | 50277.02  | NM_014445 | 7437.675  |
| U86813    | 619.3     | 603.385   | NM_006399 | 741.574   | 560.504   | AL832826  | 268.055   |
| D26070    | 6305.061  | 4775.183  | NM_018965 | 8952.82   | 3586.112  | NM_016123 | 647.404   |
| NM_001642 | 21655.211 | 24989.006 | NM_000185 | 5421.271  | 4125.96   | NM_000391 | 5376.671  |
| NM_003392 | 423.583   | 1091.091  | Y00816    | 761.766   | 698.523   | AF229179  | 285.545   |
| NM_015193 | 848.811   | 1178.555  | NM_004512 | 2171.126  | 2015.795  | NM_014771 | 1874.665  |
| NM_007035 | 8468.468  | 16216.646 | NM_001055 | 11085.021 | 10344.447 | NM_002275 | 1875.326  |
| AB019562  | 1127.766  | 1715.64   | NM_015878 | 406.116   | 364.332   | AK025215  | 2715.632  |
| NM_020203 | 4925.924  | 2891.742  | NM_002271 | 37113.285 | 34683.035 | BF569160  | 423.261   |
| L40992    | 715.924   | 1374.901  | NM_018361 | 2372.497  | 2655.158  | AK024625  | 828.08    |
| U20582    | 41955.219 | 28387.443 | AB040966  | 2069.528  | 2846.197  | NM_018131 | 523.993   |
| NM_000337 | 1334.652  | 2156.539  | NM_020132 | 3683.628  | 4144.797  | NM_014834 | 116.572   |
| NM_002079 | 3001.282  | 4930.2    | NM_016467 | 11716.599 | 9935.28   | NM_017636 | 13100.352 |
| NM_006808 | 14887.875 | 25790.395 | NM_007253 | 3741.788  | 2442.572  | NM_012468 | 598.282   |
| NM_016465 | 1729.724  | 2243.294  | NM_019106 | 1160.236  | 1258.986  | M27877    | 2242.966  |
| AL122120  | 2749.295  | 2030.563  | L08436    | 1182.299  | 1009.426  | D70836    | 24432.025 |
| NM_017571 | 5641.998  | 2871.042  | AB033002  | 460.299   | 260.713   | D16878    | 612.495   |
| AB007946  | 824.498   | 613.893   | NM_014170 | 1768.956  | 2786.726  | NM_014943 | 637.456   |
| NM_001928 | 55065.563 | 56780.695 | AF116652  | 39369.371 | 42591.938 | AK024392  | 555.569   |
| NM_006399 | 1057.437  | 730.602   | NM_000835 | 973.253   | 809.603   | NM_013260 | 5405.091  |
| NM_004512 | 4950.097  | 6964.117  | AK000271  | 871.588   | 620.207   | NM_018300 | 1256.709  |
| NM_001055 | 15062.736 | 15389.431 | NM_014148 | 596.578   | 385.35    | NM_018254 | 3339.613  |
| NM_015878 | 237.786   | 680.632   | NM_018835 | 1244.929  | 743.386   | NM_017745 | 836.867   |
| NM_002271 | 40310.227 | 47868.625 | NM_003401 | 2627.503  | 1923.426  | NM_018433 | 948.486   |
| NM_018361 | 2669.983  | 3495.064  | AL137724  | 560.205   | 910.337   | AJ001481  | 93.786    |
| NM_019893 | 1064.348  | 595.745   | NM_004758 | 3104.657  | 1131.875  | AK024810  | 4770.203  |
| AB040966  | 2849.355  | 4215.767  | NM_002913 | 996.201   | 1399.693  | AK022615  | 19292.744 |
| NM_020132 | 3601.946  | 5026.08   | AK022797  | 1526.975  | 791.962   | NM_004043 | 1749.816  |
| NM_016467 | 9789.735  | 11242.624 | NM_007370 | 2686.238  | 1627.611  | BM458096  | 3803.37   |
| NM_007253 | 4310.686  | 3264.542  | NM_006231 | 672.659   | 787.952   | NM_005626 | 3249.471  |
| NM_019106 | 1645.082  | 1795.37   | AK023471  | 2528.864  | 1240.66   | D29958    | 4146.457  |
| L08436    | 778.226   | 995.456   | AF044578  | 1603.848  | 999.697   | D17257    | 41804.414 |
| AB033002  | 421.981   | 406.302   | NM_001948 | 3213.482  | 979.053   | AK000724  | 921.913   |
| NM_000558 | 4284.679  | 5165.807  | NM_001067 | 11522.368 | 3782.791  | NM_003720 | 2048.74   |
| NM_014170 | 2235.1    | 3196.298  | NM_003761 | 49967.66  | 38223.859 | NM_003918 | 510.688   |
| AF116652  | 40013.48  | 50621.836 | NM_004726 | 553.445   | 895.868   | J03569    | 4339.971  |
| NM_000835 | 836.891   | 1321.151  | NM_014011 | 5262.609  | 6733.618  | NM_000687 | 4125.112  |
| AK000271  | 1014.173  | 809.382   | AK025994  | 2404.054  | 4913.605  | NM_018200 | 355.753   |
| NM_018835 | 668.1     | 784.153   | L29306    | 782.271   | 810.458   | NM_014838 | 462.779   |
| NM_003401 | 1813.875  | 1204.174  | NM_013989 | 2079.935  | 2555.054  | NM_007212 | 646.708   |

|           |           |           |           |           |           |           |           |
|-----------|-----------|-----------|-----------|-----------|-----------|-----------|-----------|
| AL137724  | 747.504   | 1210.144  | NM_001738 | 1685.336  | 1898.279  | AF005067  | 366.375   |
| NM_004758 | 1742.016  | 1178.634  | L40992    | 744.388   | 575.363   | NM_005710 | 4198.905  |
| NM_002913 | 1539.909  | 1816.411  | U20582    | 18403.645 | 12566.178 | AF252284  | 2537.638  |
| AK022797  | 750.678   | 777.408   | NM_000337 | 842.001   | 901.938   | NM_001530 | 610.525   |
| NM_007370 | 1759.827  | 1779.172  | NM_002079 | 2229.502  | 1798.677  | U80232    | 5589.376  |
| NM_006231 | 618.114   | 837.882   | AI660957  | 829.769   | 466.819   | AF086526  | 792.799   |
| AK023471  | 2584.882  | 1516.996  | U13697    | 5391.026  | 4841.316  | AK025788  | 443.341   |
| AF044578  | 1857.254  | 1826.04   | U04270    | 4000.078  | 6742.915  | AF086164  | 1045.594  |
| NM_001948 | 881.798   | 1857.632  | L02840    | 1147.318  | 795.101   | AK025577  | 716.915   |
| NM_001067 | 4717.336  | 5205.681  | BG569143  | 547.076   | 1223.637  | AK000216  | 1354.343  |
| NM_014034 | 1161.213  | 3023.794  | AA629719  | 62275.832 | 61499.973 | AK023440  | 970.911   |
| NM_005335 | 20991.023 | 11779.866 | AA927528  | 1058.155  | 1067.586  | AB033041  | 3634.643  |
| J04474    | 4827.305  | 7607.194  | AA843679  | 5486.178  | 3437.784  | NM_014894 | 25517.361 |
| NM_004726 | 392.539   | 693.895   | NM_004957 | 3581.011  | 5076.976  | AY007155  | 185.553   |
| NM_014011 | 5966.993  | 6736.228  | NM_005252 | 1701.23   | 3253.652  | AK027160  | 2730.94   |
| AK025994  | 2669.488  | 2214.807  | AF090906  | 986.288   | 1052.634  | U79264    | 1091.882  |
| L29306    | 1032.833  | 970.692   | AB023219  | 1546.579  | 1873.352  | NM_015698 | 5225.661  |
| NM_013988 | 2458.245  | 3613.479  | NM_018965 | 8746.632  | 2899.275  | AF070530  | 4851.768  |
| NM_001738 | 1348.629  | 1948.244  | NM_000185 | 5760.05   | 3424.337  | NM_006420 | 1096.123  |
| NM_002270 | 599.254   | 599.772   | Y00816    | 673.826   | 493.657   | AF131855  | 617.428   |
| NM_020203 | 4766.165  | 3535.1    | NM_004512 | 2232.907  | 1474.617  | AF086046  | 1308.918  |
| L40992    | 348.825   | 724.18    | NM_002930 | 253.734   | 2704.835  | AK024962  | 1560.541  |
| U20582    | 44673.246 | 22801.33  | NM_004380 | 6278.777  | 20895.621 | AK025135  | 8003.063  |
| NM_000337 | 825.503   | 957.36    | U86813    | 1123.36   | 1390.641  | NM_017926 | 678.971   |
| NM_002079 | 2605.081  | 3126.819  | NM_004119 | 1438.935  | 2507.065  | D38549    | 734.125   |
| U13697    | 6429.455  | 3373.061  | AY007378  | 1448.046  | 1210.974  | AK024184  | 988.358   |
| Z34820    | 481.684   | 566.179   | D26070    | 6751.568  | 4152.127  | U10510    | 2924.38   |
| L02840    | 1638.306  | 1399.775  | NM_001642 | 30624.951 | 22432.479 | Z36842    | 1225.918  |
| BG569143  | 489.041   | 573.009   | NM_001542 | 842.487   | 877.716   | AF086137  | 1099.11   |
| AA629719  | 67595.43  | 59587.387 | NM_003392 | 826.276   | 450.054   | AF086155  | 340.271   |
| AA927528  | 878.521   | 1027.71   | NM_000501 | 24738.959 | 42700.836 | AK001872  | 1793.351  |
| X02152    | 49183.285 | 57839.59  | NM_000114 | 2661.691  | 3753.011  | AF116677  | 375.931   |
| BG676364  | 3810.253  | 6026.178  | NM_005156 | 942.012   | 2322.741  | AK022010  | 353.612   |
| BG181154  | 1055.846  | 1339.765  | NM_015193 | 633.148   | 1166.341  | NM_014158 | 1835.214  |
| H68922    | 468.344   | 607.102   | X98834    | 2775.705  | 4972.328  | AK023835  | 795.802   |
| NM_004957 | 4021.081  | 4731.717  | NM_007035 | 5408.153  | 11574.657 | AK023906  | 1911.489  |
| NM_005252 | 2520.287  | 1947.335  | AB019562  | 629.999   | 2361.134  | NM_012408 | 1612.911  |
| AF090906  | 1347.893  | 1581.657  | AF036364  | 1430.96   | 2397.778  | AL050205  | 1096.226  |
| AB023219  | 2301.392  | 3367.732  | AK022847  | 1664.019  | 1566.658  | NM_005691 | 1271.665  |
| NM_001928 | 57885.621 | 53864.965 | AK000271  | 693.343   | 407.681   | AF251187  | 633.71    |
| NM_006398 | 891.112   | 817.673   | NM_005173 | 1580.671  | 931.044   | NM_006543 | 792.228   |
| NM_004512 | 4822.721  | 4868.142  | NM_001149 | 607.92    | 692.07    | AK023018  | 407.507   |
| U86813    | 699.645   | 553.626   | NM_006808 | 18279.6   | 18400.137 | AK022672  | 1173.176  |
| D26070    | 6471.784  | 5150.394  | NM_006634 | 1937.477  | 1024.281  | AK023870  | 949.316   |
| NM_001642 | 23701.484 | 29153.906 | NM_016465 | 988.445   | 1636.356  | AK021599  | 432.874   |
| NM_003392 | 596.931   | 1325.628  | NM_000328 | 511.903   | 530.531   | AK024263  | 421.351   |
| NM_015193 | 1207.403  | 1354.773  | NM_013398 | 2474.509  | 2579.714  | NM_006087 | 74353.383 |
| NM_007035 | 8625.749  | 16960.207 | NM_002410 | 579.511   | 795.609   | AK023564  | 621.328   |
| AB019562  | 1333.567  | 2180.401  | AL122120  | 1315.851  | 1233.948  | NM_003533 | 1510.88   |
| AF036364  | 2265.692  | 4194.018  | NM_014684 | 793.058   | 911.645   | AL157478  | 965.897   |
| AK000271  | 679.64    | 493.881   | AK027247  | 744.38    | 838.73    | AK023726  | 1086.605  |
| NM_006808 | 15656.84  | 24413.506 | NM_002480 | 3099.995  | 3647.184  | AK024906  | 607.859   |
| NM_016465 | 1624.266  | 1830.312  | NM_017571 | 4994.875  | 3706.808  | AF131836  | 1016.443  |

|           |           |           |           |           |           |           |           |
|-----------|-----------|-----------|-----------|-----------|-----------|-----------|-----------|
| NM_000328 | 684.144   | 477.752   | NM_014011 | 4771.658  | 4072.136  | AF275804  | 3112.993  |
| AL122120  | 2602.146  | 1926.787  | AK025994  | 2287.493  | 2187.24   | AL137488  | 973.108   |
| NM_017571 | 5576.671  | 3523.589  | L29306    | 739.718   | 832.628   | AL049447  | 17646.57  |
| AB007946  | 666.312   | 475.076   | NM_001738 | 822.076   | 631.087   | NM_020527 | 1616.89   |
| NM_014011 | 5544.664  | 5806.98   | NM_001055 | 13945.25  | 10282.621 | NM_005286 | 2506.805  |
| AK025994  | 2381.428  | 1871.968  | NM_015878 | 606.823   | 1012.948  | AK024365  | 2603.641  |
| L29306    | 634.888   | 649.998   | NM_002271 | 42859.641 | 46190.434 | AJ251759  | 777.363   |
| NM_013989 | 2231.169  | 2586.999  | NM_018361 | 2776.774  | 3832.675  | AK024371  | 498.573   |
| NM_001738 | 1182.674  | 1668.259  | NM_019893 | 605.31    | 787.58    | AB019569  | 71111.422 |
| NM_002270 | 408.422   | 480.716   | AB040966  | 1992.392  | 3279.479  | NM_001889 | 2200.281  |
| NM_001055 | 15876.301 | 13754.063 | NM_020132 | 3603.063  | 5679.09   | NM_004999 | 710.356   |
| NM_015878 | 425.252   | 786.595   | NM_016467 | 10170.828 | 11732.56  | X89668    | 5807.766  |
| NM_002271 | 40755.809 | 44320.734 | NM_007253 | 5190.716  | 3810.393  | NM_004458 | 1927.645  |
| NM_018361 | 2908.988  | 3106.49   | NM_019106 | 1201.686  | 1451.467  | NM_006901 | 747.148   |
| NM_019893 | 1167.724  | 816.019   | L08436    | 717.909   | 805.272   | NM_018530 | 3160.811  |
| AB040966  | 3199.503  | 5040.596  | NM_000558 | 2658.077  | 4793.084  | AK022855  | 2573.464  |
| NM_020132 | 3338.478  | 4077.614  | NM_014170 | 1323.655  | 2071.277  | AK023816  | 469.531   |
| NM_016467 | 9716.413  | 11321.531 | NM_000835 | 2648.796  | 4061.605  | AL050102  | 315.614   |
| NM_007253 | 3829.873  | 2881.656  | NM_004957 | 2483.51   | 2390.386  | AF305686  | 874.588   |
| NM_019106 | 1484.043  | 1746.898  | NM_005252 | 1484.398  | 2464.509  | AF085832  | 677.932   |
| L08436    | 826.039   | 1008.727  | AF090906  | 1261.19   | 695.886   | AK025981  | 524.514   |
| AB033002  | 459.737   | 898.014   | AB023219  | 2152.107  | 999.407   | AF086266  | 739.012   |
| NM_000558 | 3426.505  | 4162.854  | NM_014148 | 2163.408  | 2037.076  | AF086252  | 627.113   |
| NM_014170 | 2403.441  | 3447.639  | NM_018835 | 817.941   | 899.932   | AK026703  | 1889.982  |
| AF116652  | 42291.145 | 52510.398 | NM_003401 | 2729.784  | 2294.978  | NM_017866 | 2578.126  |
| NM_000835 | 898.534   | 1116.729  | AL137724  | 1037.403  | 1772.743  | NM_003536 | 2835.118  |
| NM_004957 | 4391.801  | 5095.211  | NM_004758 | 3868.994  | 2640.248  | AF116707  | 1415.03   |
| NM_005252 | 2570.993  | 2293.074  | NM_002913 | 1218.814  | 1714.488  | U90910    | 3882.45   |
| AF090906  | 1014.017  | 876.306   | AK022797  | 1792.051  | 1794.549  | CY3Cy5    | 2674.212  |
| AB023219  | 2497.492  | 2528.325  | NM_007370 | 3144.84   | 4473.488  | AA143087  | 5441.589  |
| NM_014148 | 472.288   | 439.651   | NM_006231 | 667.113   | 782.659   | U25804    | 3042.025  |
| NM_018835 | 939.166   | 1082.611  | AK023471  | 2663.482  | 1207.96   | BI870965  | 912.4     |
| NM_003401 | 2328.491  | 1846.665  | AF044578  | 1687.618  | 1346.163  | NM_001903 | 9069.425  |
| AL137724  | 846.956   | 1163.156  | NM_001948 | 2761.37   | 933.037   | BI835536  | 3256.167  |
| NM_004758 | 1875.861  | 907.072   | NM_001067 | 11499.962 | 4274.625  | BF205051  | 2291.021  |
| NM_002913 | 1179.176  | 1778.852  | NM_014034 | 2331.388  | 3446.625  | X02761    | 464.039   |
| AK022797  | 675.312   | 903.63    | NM_005335 | 18645.414 | 10738.556 | M91463    | 806.082   |
| NM_007370 | 1764.503  | 2061.669  | J04474    | 3691.093  | 6362.301  | J03060    | 4828.449  |
| NM_006231 | 718.58    | 985.082   | NM_003761 | 49154.207 | 52559.57  | NM_003743 | 785.456   |
| AK023471  | 2440.208  | 1456.426  | NM_004726 | 1163.888  | 2434.573  | AA829383  | 2068.431  |
| AF044578  | 1635.809  | 1765.995  | NM_015193 | 1066.691  | 1970.46   | AF012434  | 3751.588  |
| NM_001948 | 1196.71   | 1640.091  | X98834    | 1535.451  | 2220.163  | SR6       | 2745.661  |
| NM_001067 | 5152.578  | 6083.786  | NM_007035 | 5447.016  | 16044.924 | SR8       | 11179.791 |
| NM_014034 | 1256.173  | 3027.468  | AB019562  | 763.928   | 1336.616  | SR10      | 32568.428 |
| NM_005335 | 22178.346 | 14162.613 | AK022847  | 4516.472  | 2493.493  | CY3Cy5    | 3608.024  |
| J04474    | 4850.428  | 8074.187  | NM_020203 | 2039.468  | 816.612   | NM_005902 | 1834.718  |
| NM_004726 | 629.166   | 675.431   | U20582    | 10673.771 | 8943.362  | NM_002850 | 33916.234 |
| NM_015193 | 1040.267  | 1129.562  | NM_000337 | 607.392   | 1505.883  | NM_005903 | 626.212   |
| NM_007035 | 6898.251  | 10409.092 | U13697    | 4050.028  | 2686.842  | NM_000861 | 407.771   |
| AB019562  | 942.173   | 1415.083  | U04270    | 2514.302  | 5072.97   | NM_019062 | 315.506   |
| AF036364  | 2169.837  | 3008.444  | L02840    | 1375.082  | 883.724   | NM_003873 | 373.1     |
| L40992    | 558.514   | 411.534   | AA629719  | 64844.418 | 63173.516 | NM_000263 | 982.291   |
| U20582    | 49733.914 | 26155.773 | AA927528  | 773.004   | 784.869   | AF073519  | 1253.389  |

|           |           |           |           |           |           |           |           |
|-----------|-----------|-----------|-----------|-----------|-----------|-----------|-----------|
| NM_000337 | 1101.25   | 1155.471  | X02152    | 41828.898 | 44343.113 | AB001451  | 1102.517  |
| NM_002079 | 2719.201  | 2937.032  | BG676364  | 2132.93   | 3494.133  | NM_017583 | 1980.769  |
| U13697    | 6383.778  | 3676.92   | BG181154  | 626.391   | 864.833   | Y16132    | 2789.261  |
| Z34820    | 590.224   | 657.436   | AA843679  | 4093.411  | 4321.686  | NM_003225 | 371.947   |
| L02840    | 1658.574  | 1669.919  | H68922    | 1040.756  | 1608.028  | NM_000096 | 675.995   |
| BG569143  | 386.504   | 528.199   | NM_017571 | 2713.621  | 1761.444  | NM_019045 | 469.48    |
| AA629719  | 66010.68  | 59740.637 | NM_001928 | 23167.313 | 13572.141 | NM_006380 | 2274.736  |
| AA927528  | 862.44    | 1575.037  | NM_018965 | 9620.261  | 3154.606  | AB020710  | 1116.125  |
| X02152    | 52870.816 | 63786.52  | NM_000185 | 3818.677  | 4701.633  | NM_016174 | 2044.056  |
| BG676364  | 4666.224  | 8279.223  | NM_004380 | 3967.059  | 5814      | NM_020377 | 582.362   |
| BG181154  | 1258.798  | 1329.614  | U86813    | 918.252   | 909.204   | U88896    | 2046.447  |
| H68922    | 616.948   | 742.604   | NM_004119 | 1273.831  | 1720.74   | NM_005724 | 2083.781  |
| NM_017571 | 5727.793  | 2982.449  | AY007378  | 1178.065  | 1234.491  | X58794    | 6456.571  |
| AB007946  | 680.006   | 280.311   | D26070    | 5615.646  | 4459.141  | NM_001735 | 1395.751  |
| NM_006399 | 913.26    | 427.681   | NM_001642 | 26816.99  | 20386.732 | NM_002349 | 1712.776  |
| NM_004512 | 4536.002  | 4739.47   | NM_003392 | 693.239   | 487.121   | NM_005080 | 5912.965  |
| U86813    | 747.3     | 557.089   | NM_000501 | 13417.266 | 25263.123 | NM_004887 | 6900.812  |
| D26070    | 7164.981  | 6206.881  | NM_000114 | 1501.578  | 2872.727  | NM_006404 | 325.862   |
| NM_001642 | 18006.383 | 19624.229 | AB033002  | 335.312   | 1134.786  | NM_014795 | 2478.3    |
| NM_003392 | 441.918   | 1059.236  | NM_000558 | 3972.757  | 9450.097  | NM_002986 | 582.231   |
| AB033002  | 437.56    | 622.254   | NM_004198 | 645.794   | 1186.893  | M15330    | 2629.08   |
| NM_000558 | 4186.978  | 5233.77   | NM_014170 | 1088.252  | 1694.39   | NM_014396 | 1131.549  |
| NM_014170 | 2088.514  | 2298.336  | AF116652  | 36049.727 | 36020.473 | AK027201  | 1207.31   |
| AF116652  | 45013.887 | 47943.492 | NM_000835 | 1312.706  | 470.873   | NM_000489 | 3036.467  |
| NM_000835 | 953.292   | 832.24    | AK000271  | 881.159   | 402.034   | NM_014669 | 3579.426  |
| AK000271  | 1100.299  | 544.587   | NM_006634 | 1394.01   | 590.476   | NM_005652 | 1867.394  |
| NM_006808 | 14977.716 | 25269.49  | NM_016465 | 1617.46   | 1605.914  | AK026686  | 341.438   |
| NM_016465 | 1871.954  | 2492.594  | NM_013399 | 2006.706  | 2020.696  | AL133064  | 1722.989  |
| NM_000328 | 580.421   | 677.405   | AL122120  | 1657.968  | 2034.902  | NM_006227 | 1674.542  |
| AL122120  | 2595.739  | 2160.534  | NM_014684 | 700.17    | 884.988   | NM_002905 | 4004.748  |
| NM_014034 | 990.643   | 2768.397  | AK027247  | 528.875   | 755.311   | NM_000700 | 7362.347  |
| NM_005335 | 17665.508 | 8927.479  | NM_002480 | 1974.873  | 2272.247  | NM_019028 | 2503.413  |
| J04474    | 4251.325  | 5767.902  | NM_014034 | 1581.942  | 3864.049  | NM_000431 | 295.516   |
| NM_004726 | 459.336   | 483.368   | NM_005335 | 32078.369 | 25008.033 | NM_013421 | 477.832   |
| NM_014011 | 6052.269  | 5693.146  | J04474    | 3560.04   | 4450.901  | AB033118  | 455.797   |
| AK025994  | 2399.402  | 1574.33   | NM_014011 | 4559.669  | 1878.319  | NM_019606 | 1203.747  |
| L29306    | 728.122   | 506.545   | AK025994  | 1346.213  | 918.124   | NM_001690 | 4816.979  |
| NM_013989 | 2713.223  | 3129.303  | NM_013989 | 1894.283  | 1710.501  | AF034374  | 2726.124  |
| NM_001738 | 1275.778  | 1274.53   | NM_001738 | 1065.036  | 952.231   | NM_016118 | 2725.652  |
| NM_002270 | 407.471   | 501.887   | NM_001055 | 9054.251  | 7999.667  | NM_018674 | 6225.847  |
| NM_001055 | 16224.912 | 12756.041 | NM_018361 | 2053.243  | 1476.392  | NM_001683 | 11574.433 |
| NM_015878 | 516.205   | 810.795   | AB040966  | 1515.427  | 1742.652  | NM_001682 | 897.874   |
| NM_002271 | 44995.563 | 46673.078 | NM_020132 | 2531.823  | 3096.22   | NM_014405 | 961.967   |
| NM_018361 | 3048.462  | 3204.902  | NM_016467 | 7361.371  | 8880.426  | NM_000816 | 625.966   |
| NM_019893 | 1477.384  | 931.847   | NM_007253 | 3960.336  | 4236.22   | NM_014928 | 562.124   |
| AB040966  | 2889.945  | 4923.336  | NM_019106 | 760.261   | 903.388   | AK025130  | 2470.304  |
| NM_020132 | 3996.569  | 5133.063  | L08436    | 981.392   | 1129.998  | AK023232  | 786.494   |
| NM_016467 | 10399.024 | 10107.063 | NM_006761 | 29487.492 | 28449.752 | NM_018209 | 1373.493  |
| NM_007253 | 4026.061  | 3514.535  | NM_014897 | 1040.705  | 1197.67   | NM_006184 | 15472.321 |
| NM_019106 | 1484.744  | 1804.532  | NM_003453 | 3490.408  | 2823.892  | Z70701    | 8899.593  |
| L08436    | 1302.985  | 1222.084  | NM_014390 | 8035.397  | 8148.282  | AB040972  | 1907.619  |
| NM_005607 | 1850.512  | 1493.194  | X78924    | 8460.333  | 12611.934 | AF148505  | 943.508   |
| NM_006761 | 25362.344 | 36712.098 | NM_013250 | 486.148   | 199.316   | NM_018686 | 2953.023  |

|           |           |           |           |           |           |           |           |
|-----------|-----------|-----------|-----------|-----------|-----------|-----------|-----------|
| NM_014897 | 901.597   | 624.501   | AB023219  | 1386.392  | 854.165   | NM_017676 | 835.467   |
| NM_003453 | 5423.168  | 4590.083  | NM_014148 | 500.823   | 162.811   | NM_005431 | 854.714   |
| NM_014390 | 10788.903 | 12568.049 | NM_003401 | 2265.334  | 1432.734  | NM_002894 | 2124.502  |
| NM_018143 | 543.791   | 376.047   | AL137724  | 613.733   | 945.096   | NM_004629 | 2071.774  |
| X78924    | 7991.642  | 6479.149  | NM_004758 | 2425.586  | 534.278   | NM_004260 | 2997.137  |
| NM_013250 | 825.598   | 644.053   | NM_002913 | 779.905   | 968.454   | AL050067  | 2626.347  |
| AF090906  | 1149.812  | 927.966   | AK022797  | 980.904   | 482.762   | NM_004972 | 3283.012  |
| AB023219  | 2412.93   | 2339.237  | NM_007370 | 2032.491  | 1221.394  | NM_006251 | 2067.896  |
| NM_018835 | 1037.863  | 1356.805  | AK023471  | 1822.108  | 1263.253  | NM_004103 | 3775.039  |
| NM_003401 | 2388.037  | 2054.716  | AF044578  | 2450.802  | 2240.108  | NM_002314 | 2431.363  |
| AL137724  | 849.113   | 1105.797  | NM_001948 | 1978.437  | 774.278   | NM_001744 | 1404.624  |
| NM_004758 | 2181.793  | 831.14    | NM_001067 | 10729.267 | 4716.43   | NM_006296 | 1325.736  |
| NM_002913 | 1816.349  | 1732.488  | AK025337  | 645.597   | 1306.901  | Z25433    | 420.855   |
| AK022797  | 819.783   | 966.447   | AB028984  | 1004.56   | 910.253   | NM_005922 | 960.634   |
| NM_007370 | 1938.114  | 2475.137  | NM_005602 | 2919.755  | 2949.399  | NM_018638 | 1531.15   |
| NM_006231 | 702.738   | 876.988   | NM_003573 | 5996.639  | 6023      | AL137593  | 6026.826  |
| AK023471  | 3176.283  | 1699.258  | NM_000296 | 5995.53   | 4582.022  | NM_003915 | 842.754   |
| AF044578  | 1859.037  | 2276.49   | NM_012302 | 4818.055  | 2896.613  | NM_001150 | 1090.063  |
| NM_001948 | 1122.273  | 1977.907  | NM_017422 | 15884.307 | 19307.313 | NM_002856 | 1412.333  |
| NM_001067 | 4780.501  | 5095.369  | NM_006149 | 480.583   | 554.556   | NM_003225 | 334.921   |
| AF063936  | 504.536   | 762.131   | NM_004112 | 2342.177  | 1245.734  | NM_000096 | 669.427   |
| AK025337  | 906.867   | 1171.374  | AK025592  | 1508.947  | 2155.229  | AA143087  | 4966.471  |
| NM_005602 | 2517.083  | 2289.826  | NM_004635 | 13657.048 | 7510.542  | U25804    | 2977.628  |
| NM_003573 | 5619.269  | 5500.91   | AK023023  | 5631.597  | 6767.75   | BI870965  | 755.351   |
| NM_000296 | 4784.52   | 4712.778  | NM_015993 | 2576.52   | 2123.094  | NM_001903 | 8921.548  |
| NM_012302 | 4672.238  | 3850.656  | NM_002659 | 1774.65   | 1721.194  | BI835536  | 3204.252  |
| NM_017422 | 9615.44   | 6763.645  | Z36776    | 2441.291  | 2441.427  | BF205051  | 2343.134  |
| NM_006149 | 448.15    | 414.546   | AB029015  | 834.529   | 775.533   | M91463    | 734.348   |
| NM_005879 | 551.519   | 952.627   | NM_002067 | 19319.74  | 23965.945 | J03060    | 4367.787  |
| AF147790  | 736.076   | 978.671   | NM_001059 | 54235.719 | 59188.676 | X54156    | 261.986   |
| NM_018969 | 709.994   | 476.691   | NM_006150 | 3469.204  | 4246.708  | NM_003743 | 648.556   |
| NM_004112 | 2963.486  | 2847.035  | NM_020345 | 922.031   | 861.124   | AA829383  | 1976.979  |
| AY007233  | 641.449   | 534.977   | NM_003287 | 788.909   | 895.001   | AF012434  | 3524.943  |
| AK025592  | 2145.247  | 3050.128  | NM_012325 | 9749.084  | 7855.726  | NM_018124 | 1288.125  |
| NM_004635 | 8925.845  | 10582.441 | NM_014434 | 1337.911  | 1531.479  | NM_000489 | 3061.812  |
| AK023023  | 9413.037  | 8182.846  | NM_019607 | 2335.165  | 1410.208  | X98507    | 1145.694  |
| NM_015993 | 3728.826  | 4043.64   | U79260    | 15097.38  | 14867.677 | NM_016030 | 15911.983 |
| NM_002659 | 2208.411  | 2326.61   | NM_001895 | 3263.085  | 4844.958  | NM_014669 | 3225.384  |
| Z36776    | 3242.083  | 2849.903  | NM_006447 | 2860.182  | 1981.902  | NM_005652 | 1974.302  |
| AB029015  | 1292.66   | 1122.307  | NM_014129 | 8234.141  | 6592.548  | NM_005902 | 1841.555  |
| NM_002067 | 19988.627 | 33989.766 | D87455    | 1468.579  | 1051.814  | NM_002850 | 33589.035 |
| NM_001059 | 56275.008 | 57989.992 | AF080577  | 1171.057  | 347.324   | NM_004302 | 19.961    |
| NM_002430 | 548.835   | 358.914   | L22005    | 5616.254  | 5794.826  | NM_000861 | 525.04    |
| NM_006150 | 2707.088  | 2454.47   | NM_012291 | 5863.436  | 3730.499  | U77493    | 227.385   |
| NM_020345 | 700.111   | 942.152   | NM_013368 | 1080.282  | 782.116   | NM_000263 | 1070.82   |
| NM_003287 | 700.287   | 714.565   | NM_003807 | 12841.724 | 13195.039 | AF073519  | 1544.316  |
| NM_012325 | 7182.014  | 7571.909  | NM_004358 | 1758.84   | 972.003   | AB001451  | 1057.188  |
| NM_014434 | 1661.806  | 1732.088  | NM_001790 | 1911.589  | 865.53    | NM_017583 | 1677.836  |
| NM_019607 | 5825.562  | 4351.713  | NM_018243 | 1478.376  | 1603.228  | Y16132    | 2675.208  |
| U79260    | 7104.5    | 9938.089  | NM_014939 | 4881.546  | 3403.735  | NM_002521 | 327.151   |
| NM_001895 | 4433.367  | 5337.019  | Y17866    | 905.237   | 927.439   | NM_017875 | 294.675   |
| NM_006447 | 2699.965  | 2189.213  | AK024247  | 493.248   | 654.136   | AK023232  | 1097.501  |
| AF119851  | 828.694   | 697.72    | NM_003005 | 5659.81   | 4936.169  | NM_000271 | 3734.684  |

|           |           |           |           |           |           |           |           |
|-----------|-----------|-----------|-----------|-----------|-----------|-----------|-----------|
| NM_014129 | 6430.438  | 8751.584  | NM_000873 | 736.207   | 658.691   | NM_018209 | 1522.734  |
| D87455    | 2207.766  | 2386.334  | NM_002842 | 3415.881  | 2715.347  | NM_006184 | 13548.882 |
| AF080577  | 1799.251  | 1384.908  | AB033025  | 544.454   | 226.147   | AB018268  | 2323.021  |
| L22005    | 4919.394  | 5597.588  | NM_004418 | 1474.119  | 1190.363  | NM_019045 | 454.257   |
| NM_012291 | 9740.933  | 9436.917  | NM_000917 | 3186.123  | 4385.407  | NM_006380 | 1921.31   |
| NM_013368 | 2090.212  | 1432.569  | NM_005389 | 8411.303  | 4505.964  | AB020710  | 1169.719  |
| NM_003807 | 10720.604 | 9457.395  | NM_014445 | 13307.034 | 16239.266 | NM_016174 | 1930.196  |
| NM_004358 | 1633.538  | 1352.318  | AL832826  | 1019.785  | 838.585   | NM_020377 | 698.887   |
| NM_001790 | 1683.879  | 1566.796  | NM_016123 | 637.831   | 1351.339  | U88896    | 2121.856  |
| NM_018243 | 1776.427  | 2759.541  | NM_000391 | 6146.728  | 1199.38   | NM_005724 | 2292.559  |
| NM_014939 | 5405.932  | 3074.97   | NM_014771 | 5317.115  | 1954.183  | X58794    | 6836.363  |
| Y17866    | 716.511   | 764.687   | NM_002275 | 3156.896  | 1612.948  | NM_001735 | 1325.377  |
| NM_003005 | 5975.756  | 5422.26   | AK025215  | 2530.241  | 1916.068  | NM_002349 | 1483.549  |
| NM_000873 | 1257.779  | 1534.133  | BF569160  | 349.717   | 869.201   | NM_005080 | 6418.366  |
| NM_002842 | 2832.549  | 2310.918  | AK024625  | 2123.455  | 2811.081  | NM_004887 | 6325.377  |
| AF290204  | 175.835   | 471.628   | NM_018131 | 2865.287  | 1483.516  | NM_006404 | 280.382   |
| NM_012126 | 286.299   | 448.973   | NM_014834 | 381.378   | 723.253   | NM_014795 | 2651.671  |
| NM_004418 | 1119.557  | 1535.769  | NM_017636 | 14384.155 | 16824.125 | NM_002986 | 443.156   |
| NM_000917 | 3347.146  | 9761.583  | NM_012468 | 980.082   | 727.482   | M15330    | 3006.521  |
| NM_005389 | 7757.465  | 7510.465  | M27877    | 11365.222 | 7325.069  | Z25433    | 343.016   |
| NM_014445 | 22790.877 | 24481.58  | D70836    | 44065.336 | 24157.758 | NM_005922 | 895.923   |
| AL832826  | 1082.39   | 1124.847  | D16878    | 591.471   | 829.499   | NM_018638 | 1591.395  |
| NM_016123 | 1244.287  | 846.194   | NM_014943 | 1433.7    | 1468.927  | AL137593  | 6884.218  |
| AB048365  | 729.52    | 561.48    | NM_013260 | 744.211   | 757.682   | NM_003915 | 661.015   |
| NM_000391 | 14200.855 | 5055.009  | NM_005249 | 616.292   | 556.06    | NM_000382 | 1165.665  |
| NM_014771 | 5173.744  | 4817.624  | NM_004875 | 809.28    | 1050.855  | AL133064  | 1739.26   |
| NM_002275 | 3799.561  | 3616.419  | NM_018254 | 15549.483 | 6314.24   | NM_006227 | 1492.739  |
| AB032945  | 349.549   | 500.157   | NM_017745 | 2494.945  | 991.77    | NM_002905 | 3699.349  |
| AK025215  | 6968.958  | 7716.045  | NM_018433 | 1174.696  | 606.152   | NM_000700 | 6974.476  |
| BF569160  | 803.572   | 750.47    | AK024810  | 9054.086  | 4642.337  | NM_019028 | 2565.884  |
| AK024625  | 996.19    | 678.136   | AK022615  | 12746.778 | 8660.961  | NM_000431 | 226.694   |
| NM_018131 | 2205.616  | 1484.779  | NM_004043 | 2223.895  | 2081.44   | NM_013421 | 436.458   |
| NM_017636 | 32363.773 | 27040.805 | BM458096  | 6723.264  | 9444.174  | AB033118  | 535.536   |
| NM_012468 | 652.843   | 714.047   | NM_005626 | 7276.85   | 5593.297  | NM_019606 | 1173.025  |
| M27877    | 20354.32  | 19187.217 | D29958    | 6232.023  | 6436.585  | NM_001690 | 4671.815  |
| D70836    | 37627.387 | 29328.174 | NM_015971 | 5278.779  | 4697.795  | AF034374  | 3176.336  |
| D16878    | 636.777   | 911.28    | D17257    | 30581.699 | 27363.469 | NM_016118 | 2652.937  |
| NM_014943 | 2185.6    | 1402.897  | AK000724  | 3880.429  | 2097.048  | NM_018674 | 5994.147  |
| AK024392  | 1915.432  | 1596.839  | NM_003720 | 8463.213  | 7142.508  | NM_001683 | 10737.507 |
| NM_013260 | 1073.102  | 555.2     | AF097159  | 592.865   | 516.766   | NM_001682 | 977.227   |
| NM_018300 | 1107.71   | 694.648   | NM_003918 | 1623.648  | 425.216   | NM_014405 | 748.862   |
| NM_004875 | 1648.703  | 2597.929  | J03569    | 17081.996 | 16161.541 | AB037791  | 493.696   |
| NM_018254 | 7032.433  | 4606.866  | NM_003115 | 4835.065  | 2916.91   | NM_018124 | 1202.559  |
| NM_017745 | 2378.782  | 2383.511  | NM_000687 | 13235.896 | 6671.099  | Z70701    | 7886.035  |
| NM_018433 | 2231.053  | 2141.841  | NM_007212 | 1313.16   | 620.806   | AB040972  | 2023.949  |
| AB028451  | 673.261   | 578.92    | NM_005710 | 4879.707  | 3577.548  | AF148505  | 834.561   |
| AK024810  | 11858.476 | 12715.401 | AF252284  | 2051.598  | 1654.889  | BE260997  | 420.365   |
| AK022615  | 39675.168 | 43881.242 | NM_014930 | 780.092   | 523.9     | NM_018686 | 3060.042  |
| NM_004043 | 4505.421  | 5121.454  | NM_001530 | 795.796   | 763.506   | NM_017676 | 723.351   |
| BM458096  | 11094.266 | 10416.733 | U80232    | 8353.663  | 6667.781  | NM_005431 | 855.529   |
| NM_005626 | 7835.508  | 7209.321  | AK025788  | 1551.524  | 1011.009  | AB036063  | 951.226   |
| D29958    | 12632.143 | 14617.478 | AF086164  | 2120.3    | 818.238   | NM_002894 | 1994.045  |
| NM_015971 | 12948.375 | 12434.779 | AK025577  | 1463.307  | 1854.208  | NM_004629 | 2261.903  |



|           |           |           |           |           |           |           |           |
|-----------|-----------|-----------|-----------|-----------|-----------|-----------|-----------|
| D17257    | 61632.406 | 58309.898 | AK000216  | 3388.565  | 3075.739  | NM_00426C | 3175.182  |
| AK000724  | 2673.969  | 1777.083  | AK023440  | 731.754   | 274.433   | AL050067  | 2777.626  |
| NM_00372C | 5125.89   | 7078.89   | AB033041  | 8483.233  | 5501.462  | NM_004972 | 3264.047  |
| AF097159  | 485.645   | 786.61    | NM_014894 | 46275.574 | 53913.188 | NM_006251 | 2065.512  |
| NM_00391E | 1317.881  | 977.235   | AY007155  | 659.998   | 2905.837  | NM_004103 | 4109.002  |
| NM_004807 | 1040.623  | 1425.501  | AK027160  | 3316.074  | 3046.594  | NM_001744 | 1335.757  |
| J03569    | 40242.023 | 35586.879 | AL359211  | 772.506   | 145.019   | NM_00629E | 825.943   |
| NM_003115 | 2489.446  | 5221.084  | U79264    | 4100.235  | 2592.745  | AF073519  | 1267.448  |
| NM_000687 | 15188.173 | 15672.992 | NM_01569E | 7710.864  | 7602.718  | AB001451  | 913.359   |
| NM_01820C | 1112.691  | 964.366   | AF070530  | 10083.613 | 5499.03   | NM_017583 | 1641.637  |
| NM_01483E | 1331.448  | 1916.589  | AF086487  | 859.676   | 609.765   | Y16132    | 2317.641  |
| NM_007212 | 1526.771  | 1867.887  | NM_00642C | 1478.585  | 1145.696  | NM_016593 | 356.025   |
| AF005067  | 1731.444  | 1811.111  | AF131855  | 642.795   | 572.295   | NM_001150 | 990.03    |
| NM_00571C | 8117.243  | 5696.711  | AF086046  | 6299.492  | 3409.992  | NM_00285E | 1278.78   |
| AF252284  | 2473.365  | 1780.212  | AK025135  | 6896.998  | 2508.806  | NM_00009E | 571.875   |
| NM_01493C | 1194.036  | 880.773   | NM_01792E | 1393.387  | 2046.167  | AA143087  | 4597.88   |
| NM_00153C | 1579.276  | 1437.536  | AY007145  | 2704.078  | 3222.222  | U25804    | 3187.128  |
| U80232    | 12760.801 | 10527.643 | AK021573  | 852.659   | 1041.353  | BI870965  | 846.658   |
| AF086526  | 766.399   | 601.071   | D38549    | 1476.285  | 1188.273  | NM_001903 | 8533.35   |
| AK025788  | 1959.114  | 2277.883  | AK024780  | 985.389   | 1291.298  | BI835536  | 2874.469  |
| AF086164  | 1408.073  | 784.422   | AF085947  | 817.141   | 1456.305  | BF205051  | 2234.367  |
| AK025577  | 1703.685  | 1486.465  | AF086000  | 1004.694  | 1570.454  | X02761    | 464.716   |
| AK000216  | 2719.507  | 2193.992  | AL359591  | 922.516   | 405.821   | M91463    | 722.066   |
| AK023440  | 1053.971  | 850.207   | AK022389  | 426.847   | 944.321   | J03060    | 4508.817  |
| AB033041  | 7063.166  | 5216.515  | AK022123  | 801.24    | 1378.674  | NM_003743 | 733.309   |
| NM_014894 | 58957.441 | 51541.895 | AK024184  | 1378.585  | 1014.272  | AF012434  | 3384.726  |
| AY007155  | 228.477   | 1440.762  | U10510    | 7397.091  | 13711.907 | NM_01479E | 2064.865  |
| AK027160  | 4167.06   | 2811.917  | Z36818    | 1162.478  | 940.866   | NM_00298E | 471.798   |
| AF070526  | 787.319   | 639.903   | Z36842    | 1527.795  | 1431.441  | M15330    | 2536.155  |
| U79264    | 3889.662  | 3451.379  | AF086155  | 612.604   | 851.446   | NM_01439E | 978.976   |
| NM_01569E | 8018.356  | 7168.81   | AK025619  | 729.327   | 350.373   | AK027201  | 1488.275  |
| AF070530  | 12208.272 | 13964.268 | AF116677  | 645.943   | 324.133   | NM_00048E | 3493.018  |
| AF086487  | 744.575   | 434.426   | NM_01415E | 3329.793  | 1519.871  | X98507    | 762.295   |
| NM_00642C | 1898.645  | 1839.968  | AK021795  | 985.757   | 743.894   | NM_01603C | 14579.493 |
| AF131855  | 1225.096  | 1210.1    | AL162042  | 2391.441  | 9038.046  | NM_01466E | 3380.389  |
| AF086046  | 3469.084  | 3650.4    | AK026131  | 1489.222  | 2279.222  | NM_005652 | 2000.32   |
| AK024962  | 984.342   | 1072.519  | AK023312  | 940.145   | 1456.394  | NM_005902 | 1937.193  |
| AK022164  | 256.61    | 605.169   | AL133570  | 1330.986  | 1529.526  | NM_00285C | 32975.059 |
| AK025135  | 7883.524  | 3692.722  | AK026496  | 154.22    | 972.374   | NM_005903 | 450.684   |
| NM_01792E | 1658.206  | 2530.305  | AK021943  | 706.438   | 867.828   | NM_000861 | 345.221   |
| AY007145  | 1132.003  | 1174.41   | AK023473  | 655.794   | 383.334   | U77493    | 237.519   |
| AK021573  | 578.968   | 448.884   | AK023835  | 2009.733  | 1259.615  | NM_000263 | 1058.102  |
| D38549    | 2950.041  | 2688.807  | AK023012  | 1711.803  | 824.12    | NM_001683 | 7406.344  |
| AK024780  | 807.289   | 716.252   | AK023906  | 1875.644  | 1238.813  | NM_001682 | 896.464   |
| AF085947  | 776.142   | 635.543   | AK024234  | 620.246   | 428.842   | NM_01440E | 711.087   |
| AF086000  | 722.86    | 578.928   | NM_01240E | 3032.998  | 4099.758  | NM_00081E | 644.348   |
| AK022123  | 453.048   | 612.158   | AK021708  | 1259.907  | 991.098   | NM_01492E | 504.36    |
| AK024184  | 1121.326  | 429.341   | AL050205  | 5322.576  | 5031.575  | AK025130  | 2515.677  |
| U10510    | 5438.348  | 4326.818  | AK023947  | 922.018   | 648.312   | NM_01787E | 332.236   |
| Z36818    | 636.652   | 801.976   | NM_005691 | 2152.691  | 3169.307  | AK023232  | 812.051   |
| Z36842    | 1965.143  | 1636.298  | AK023814  | 1442.046  | 1695.769  | NM_000271 | 3961.445  |
| AF086137  | 954.603   | 797.122   | AF130063  | 942.108   | 1345.627  | NM_01820E | 1526.191  |
| AF086155  | 588.661   | 1448.79   | AF086528  | 680.303   | 883.522   | NM_006184 | 13523.643 |

|           |           |           |           |           |           |           |           |
|-----------|-----------|-----------|-----------|-----------|-----------|-----------|-----------|
| NM_01415  | 4322.613  | 1691.819  | AL162043  | 683.297   | 1151.818  | AB018268  | 2046.318  |
| AK021795  | 964.188   | 715.366   | AF251187  | 945.785   | 1166.052  | NM_01904  | 389.708   |
| AL162042  | 1068.58   | 2492.044  | NM_00654  | 1661.448  | 2243.96   | NM_00638  | 2044.241  |
| AK026131  | 1018.019  | 643.847   | AK023018  | 835.43    | 537.058   | AB020710  | 1243.838  |
| AK023312  | 1180.779  | 925.045   | AK022672  | 1139.927  | 690.438   | NM_016174 | 2087.296  |
| AK022483  | 728.275   | 246.257   | AK023870  | 1099.312  | 592.972   | NM_020377 | 789.868   |
| AL133570  | 1058.897  | 967.163   | AK021599  | 925.099   | 929.649   | U88896    | 2059.727  |
| AK022678  | 668.224   | 546.412   | AK024263  | 2142.242  | 3266.563  | AF116702  | 24510.615 |
| AK023473  | 249.139   | 389.105   | NM_01661  | 2411.482  | 2470.899  | NM_005724 | 1894.565  |
| AK023835  | 1422.012  | 1622.928  | AF086414  | 3334.177  | 4687.191  | X58794    | 6395.967  |
| AK023012  | 917.528   | 1221.51   | AJ012490  | 5342.27   | 11501.589 | NM_00173  | 1134.382  |
| AK023906  | 4231.661  | 5063.256  | U84516    | 18902.094 | 20353.27  | NM_004887 | 5549.592  |
| AK024234  | 549.018   | 420.51    | AL049270  | 1027.309  | 1955.864  | NM_00497  | 2897.973  |
| NM_01240  | 1774.262  | 1864.307  | U88834    | 4067.883  | 8774.051  | NM_006251 | 1808.983  |
| AK021708  | 505.95    | 492.519   | BC025324  | 1073.111  | 2326.158  | NM_00410  | 3295.397  |
| AL050205  | 4205.212  | 3493.837  | AK023564  | 1305.729  | 2990.247  | NM_002314 | 2065.781  |
| AK023947  | 321.559   | 495.175   | NM_00353  | 21029.059 | 2270.782  | NM_001744 | 1586.163  |
| NM_005691 | 1365.038  | 951.351   | AL157478  | 2004.562  | 2948.869  | NM_00629  | 1159.646  |
| AK023814  | 621.115   | 646.991   | AK023726  | 5258.678  | 11151.959 | Z25433    | 590.002   |
| AF130063  | 532.201   | 509.017   | AK024906  | 317.964   | 633.745   | NM_00592  | 887.994   |
| AL162043  | 562.501   | 440.176   | AF131836  | 2594.341  | 4219.759  | NM_01863  | 1512.775  |
| AF251187  | 689.619   | 579.288   | AF275804  | 21604.383 | 34834.484 | AL137593  | 7792.473  |
| NM_00654  | 1233.301  | 1040.497  | AL137488  | 2660.493  | 4952.433  | NM_00391  | 680.667   |
| AK023018  | 387.773   | 905.963   | AL049447  | 47147.246 | 49836.055 | NM_00038  | 844.163   |
| AK022672  | 1419.815  | 1143.919  | NM_020527 | 3438.198  | 5078.062  | AL133064  | 1628.297  |
| AK023870  | 1861.673  | 1455.758  | AB020637  | 803.099   | 728.956   | NM_006227 | 1543.133  |
| AK021599  | 850.503   | 1655.614  | NM_00528  | 5900.683  | 3853.412  | NM_00290  | 4101.984  |
| BC030975  | 539.226   | 562.317   | AK024365  | 5081.291  | 2090.469  | NM_00070  | 7340.262  |
| AK024263  | 1075.565  | 975.193   | AJ251759  | 1449.385  | 754.958   | NM_01902  | 2727.212  |
| NM_01661  | 2656.129  | 2093.097  | AK024371  | 2022.766  | 1731.909  | NM_000431 | 226.692   |
| AF086414  | 1576.512  | 1081.098  | AB019569  | 34230.461 | 32585.137 | NM_012474 | 1210.553  |
| AJ012490  | 4461.986  | 3953.473  | NM_00188  | 7154.552  | 8287.726  | AB033118  | 676.907   |
| U84516    | 16968.346 | 12093.339 | NM_00499  | 1751.964  | 2282.08   | NM_01960  | 1188.521  |
| AL049270  | 1557.466  | 1053.629  | X89668    | 26736.605 | 21613.379 | NM_00169  | 5337.194  |
| U88834    | 6426.912  | 4808.802  | NM_00445  | 5729.718  | 9486.769  | NM_018674 | 2181.253  |
| BC025324  | 1411.276  | 994.168   | NM_006901 | 1960.652  | 1810.609  | NM_00006  | 789.013   |
| AK023564  | 1936.373  | 1569.263  | NM_01853  | 10020.389 | 14334.765 | AB033046  | 2457.219  |
| NM_00353  | 2596.954  | 1027.937  | AK022855  | 7121.596  | 11288.908 | NM_01591  | 4124.17   |
| AL157478  | 586.14    | 545.778   | AL050102  | 1417.033  | 1682.625  | NM_01324  | 470.568   |
| AK023726  | 3342.4    | 2978.314  | AF305686  | 1807.927  | 3208.996  | AB029041  | 5754      |
| AK024906  | 831.213   | 656.208   | AF085832  | 1596.276  | 2195.268  | AK026642  | 1358.216  |
| AF131836  | 1486.373  | 1308.127  | AK025981  | 1336.091  | 2383.989  | AL359063  | 270.488   |
| AF275804  | 6811.954  | 16347.198 | AF113212  | 754.555   | 724.607   | AL079292  | 1103.148  |
| AL137488  | 1289.74   | 861.982   | AF086266  | 1138.027  | 1498.949  | X89667    | 1422.8    |
| AL049447  | 35653.113 | 33488.051 | AF086252  | 871.882   | 1268.724  | AB037791  | 457.644   |
| NM_020527 | 3356.504  | 2900.491  | AK026703  | 2860.311  | 7849.543  | NM_018124 | 1300.262  |
| NM_00528  | 4196.018  | 3694.033  | AK024367  | 459.672   | 1033.914  | Z70701    | 8549.002  |
| AK024365  | 5166.188  | 3613.321  | NM_01786  | 4936.771  | 5344.153  | AB040972  | 2060.648  |
| AJ251759  | 1168.258  | 871.968   | AJ131244  | 792.828   | 491.275   | AF148505  | 698.85    |
| AK024371  | 1539.125  | 2062.404  | NM_00353  | 4160.843  | 730.632   | NM_01868  | 3254.916  |
| NM_005454 | 1017.69   | 967.279   | AF116707  | 2012.819  | 1407.298  | NM_01767  | 1160.113  |
| AB019569  | 57509.141 | 55419.57  | U90910    | 8462.348  | 5009.216  | NM_005431 | 1114.835  |
| NM_00188  | 5791.304  | 4556.155  | AK025765  | 1009.95   | 747.394   | AB036063  | 1032.114  |

|           |           |           |           |           |           |           |           |
|-----------|-----------|-----------|-----------|-----------|-----------|-----------|-----------|
| NM_00499  | 1708.491  | 1144.044  | CY3Cy5    | 3100.953  | 720.809   | NM_002894 | 2279.913  |
| X89668    | 10619.153 | 8794.118  | AA143087  | 6868.328  | 5133.153  | AL050067  | 690.423   |
| NM_00445  | 5537.884  | 5591.139  | U25804    | 3371.972  | 2745.925  | AK024732  | 2854.199  |
| NM_006901 | 1155.056  | 1098.131  | BI870965  | 919.976   | 1116.367  | NM_015564 | 560.225   |
| NM_01853  | 4784.805  | 4240.361  | NM_00190  | 12442.855 | 6957.703  | AF160476  | 504.773   |
| AJ003145  | 475.311   | 442.135   | BI835536  | 6124.332  | 5710.331  | L22650    | 484.106   |
| AK022855  | 8919.069  | 7929.692  | BF205051  | 2464.356  | 2078.831  | AB014520  | 3805.796  |
| AL050102  | 904.409   | 750.193   | X02761    | 787.534   | 981.434   | AF161420  | 685.06    |
| AF305686  | 1253.41   | 1111.571  | M91463    | 997.149   | 870.326   | NM_004907 | 519.731   |
| AF085832  | 1065.096  | 915.038   | J03060    | 4433.379  | 2627.523  | NM_002891 | 402.618   |
| AK025981  | 1447.615  | 1148.197  | X54156    | 461.894   | 387.559   | X04526    | 2921.659  |
| AF113212  | 568.704   | 369.348   | NM_00374  | 1018.416  | 1139.069  | D26067    | 867.111   |
| AF086266  | 1361.584  | 935.61    | AA829383  | 3619.079  | 3581.387  | AF227924  | 2150.101  |
| AF086252  | 1404.114  | 874.814   | AF012434  | 8581.386  | 6935.499  | NM_00571  | 3746.405  |
| AK026703  | 3155.008  | 2101.16   | NM_033334 | 341.254   | 367.933   | NM_016087 | 355.549   |
| NM_01786  | 5210.273  | 4245.499  | SR2       | 40368.859 | 37230.391 | S59184    | 658.283   |
| AJ131244  | 579.854   | 666.205   | SR4       | 14055.549 | 12898.566 | NM_006661 | 1027.268  |
| NM_00353  | 1531.46   | 756.34    | SR6       | 2597.542  | 2094.582  | NM_00574  | 5809.458  |
| AF116707  | 2039.556  | 1368.711  | SR8       | 6002.904  | 17680.078 | U16126    | 371.008   |
| U90910    | 5569.961  | 5375.956  | SR10      | 26258.35  | 10287.684 | NM_00217  | 3402.794  |
| AK025765  | 1112.669  | 1006.259  | CY3Cy5    | 2697.437  | 236.087   | NM_00565  | 1360.735  |
| CY3Cy5    | 8497.112  | 508.396   | NM_01884  | 254.818   | 465.075   | NM_007314 | 892.99    |
| AA143087  | 20326.121 | 19519.299 | NM_00590  | 2293.452  | 2229.042  | NM_00660  | 2264.309  |
| U25804    | 8585.078  | 6320.872  | NM_00285  | 52680.07  | 51971.758 | AF297709  | 1264.151  |
| M91463    | 2427.345  | 2274.037  | NM_00590  | 810.783   | 570.455   | L77564    | 395.499   |
| U88317    | 752.256   | 577.948   | NM_000861 | 848.055   | 542.17    | NM_015384 | 2006.033  |
| J03060    | 12066.447 | 4124.46   | NM_000024 | 397.457   | 883.278   | AK023327  | 2130.567  |
| NM_00374  | 1971.604  | 1836.493  | AB037734  | 377.782   | 323.087   | D50914    | 578.381   |
| AA829383  | 7651.207  | 5916.65   | U77493    | 334.901   | 769.106   | NM_01589  | 210.153   |
| AF012434  | 14932.199 | 19747.025 | NM_01906  | 524.561   | 451.803   | NM_00230  | 25513.889 |
| NM_033334 | 774.296   | 898.135   | NM_00026  | 1753.665  | 2199.459  | AK025439  | 495.181   |
| SR8       | 13728.733 | 35593.414 | AF073519  | 2459.388  | 1952.581  | NM_001737 | 811.035   |
| SR10      | 46821.973 | 15520.731 | AB001451  | 1349.837  | 3288.444  | NM_01662  | 2684.766  |
| CY3Cy5    | 13737.86  | 853.172   | NM_01758  | 2949.107  | 4071.057  | NM_00721  | 1066.451  |
| NM_01884  | 317.083   | 745.529   | Y16132    | 6873.44   | 7045.635  | NM_019064 | 193.733   |
| U77493    | 896.346   | 1204.389  | NM_01659  | 1252.489  | 788.995   | AJ295148  | 278.552   |
| NM_01906  | 764.847   | 992.886   | NM_002521 | 695.367   | 587.963   | AF176701  | 327.818   |
| NM_00387  | 1424.002  | 955.212   | NM_001150 | 1925.614  | 2109.021  | NM_01630  | 293.555   |
| NM_00026  | 3504.492  | 3804.068  | NM_00285  | 1921.24   | 2660.504  | NM_00415  | 12372.363 |
| Y16132    | 12435.44  | 9471.753  | NM_00322  | 733.639   | 771.46    | NM_00324  | 311.46    |
| NM_01659  | 1333.554  | 1359.622  | NM_00009  | 1168.57   | 941.603   | AF301463  | 351.426   |
| NM_001150 | 3262.056  | 3538.792  | NM_00638  | 2936.5    | 1289.425  | NM_015984 | 620.312   |
| NM_00285  | 5161.22   | 4837.11   | AB020710  | 1228.745  | 768.22    | NM_006894 | 1227.182  |
| NM_00009  | 2693.51   | 2338.014  | NM_016174 | 2542.824  | 2851.16   | AK023031  | 1285.621  |
| NM_01904  | 1962.937  | 1846.345  | NM_020377 | 820.949   | 933.279   | NM_005717 | 14680.211 |
| NM_00638  | 4365.03   | 3205.454  | U88896    | 2564.744  | 2237.552  | NM_01209  | 454.534   |
| NM_016174 | 7022.597  | 8587.646  | AF116702  | 55010.098 | 39456.344 | AF177292  | 370.305   |
| NM_020377 | 1737.255  | 2416.463  | NM_005724 | 6437.719  | 5631.006  | NM_00308  | 1227.077  |
| NM_00173  | 3729.331  | 3816.102  | X58794    | 30437.818 | 41323.016 | NM_00408  | 439.737   |
| NM_00234  | 3755.522  | 3674.241  | NM_00173  | 2227.288  | 2043.959  | NM_01439  | 633.237   |
| NM_00508  | 15548.541 | 45521.117 | NM_00234  | 1576.969  | 1856.714  | NM_005934 | 991.395   |
| NM_004887 | 13493.629 | 12122.559 | NM_00508  | 12470.426 | 26166.25  | NM_00712  | 1754.8    |
| NM_006404 | 1793.916  | 1222.526  | NM_004887 | 9200.469  | 6862.154  | AY004253  | 1733.189  |

|           |           |           |           |           |           |           |           |
|-----------|-----------|-----------|-----------|-----------|-----------|-----------|-----------|
| NM_01439€ | 3515.494  | 2418.586  | NM_006404 | 564.06    | 566.406   | NM_00269€ | 431.078   |
| AK027201  | 3643.086  | 3039.911  | NM_01479€ | 3914.103  | 4134.573  | U88153    | 388.688   |
| NM_01466€ | 7063.132  | 8197.999  | NM_00298€ | 807.99    | 791.953   | X03910    | 2080.756  |
| AK026686  | 975.449   | 1512.436  | M15330    | 1428.386  | 1435.404  | NM_006924 | 4322.938  |
| AL133064  | 3335.109  | 3367.927  | NM_01439€ | 1812.646  | 2287.635  | NM_016024 | 1858.412  |
| NM_006227 | 5543.852  | 7120.663  | AK027201  | 2211.959  | 2218.595  | NM_018107 | 513.742   |
| NM_00290€ | 8525.907  | 7903.527  | NM_00048€ | 6758.863  | 9493.201  | NM_01227€ | 309.759   |
| NM_00070€ | 15240.647 | 4471.736  | X98507    | 1915.475  | 1837.142  | NM_018387 | 2526.781  |
| NM_01902€ | 11601.74  | 8956.992  | NM_01603€ | 36376.137 | 45840.664 | BF310673  | 686.572   |
| NM_000431 | 1522.331  | 3439.819  | NM_01466€ | 6060.958  | 6871.099  | R97012    | 12061.375 |
| NM_013421 | 1164.686  | 1395.438  | NM_00565€ | 3427.474  | 3708.426  | U77700    | 3596.635  |
| AB033118  | 3527.28   | 7378.73   | AK026686  | 474.167   | 484.558   | NM_006567 | 1731.448  |
| NM_00169€ | 11461.771 | 7208.041  | AL133064  | 1511.414  | 1188.173  | AF038554  | 7972.505  |
| AF034374  | 13252.396 | 15892.679 | NM_006227 | 2452.912  | 2346.4    | AF264621  | 1280.307  |
| NM_016118 | 6150.375  | 3634.558  | NM_00290€ | 4092.234  | 2589.354  | NM_00587€ | 4861.885  |
| NM_018674 | 13018.549 | 15377.396 | NM_00070€ | 2744.501  | 1541.036  | NM_004184 | 1206.488  |
| NM_01440€ | 2268.433  | 3115.586  | NM_01902€ | 2362.008  | 1972.687  | AK026571  | 597.457   |
| NM_01787€ | 1612.221  | 2211.92   | NM_000431 | 747.729   | 945.97    | AK024673  | 1670.657  |
| AK023232  | 1939.01   | 3454.807  | NM_012474 | 2148.83   | 2574.356  | AF131748  | 1056.501  |
| Z70701    | 20266.51  | 15823.427 | AB033118  | 1259.999  | 2963.344  | NM_00045€ | 865.511   |
| AB040972  | 3667.48   | 3316.298  | NM_01960€ | 1198.502  | 1243.297  | NM_00249€ | 1918.238  |
| AF148505  | 2022.729  | 1844.896  | NM_00169€ | 6151.975  | 3717.488  | NM_01624€ | 1018.861  |
| NM_01868€ | 5751.136  | 4939.116  | AF034374  | 4798.369  | 6774.458  | NM_01440€ | 18505.377 |
| NM_01767€ | 1619.017  | 2127.051  | NM_016118 | 2438.1    | 1572.873  | NM_00464€ | 1014.721  |
| NM_005431 | 2054.674  | 2510.091  | NM_018674 | 13765.667 | 12951.591 | NM_00654€ | 867.38    |
| AB036063  | 2421.321  | 2349.193  | NM_00168€ | 13280.006 | 14466.622 | NM_002811 | 3617.2    |
| NM_002894 | 4640.44   | 3931.207  | NM_00168€ | 1341.178  | 1146.339  | NM_02031€ | 1062.807  |
| NM_00462€ | 4979.875  | 6739.047  | NM_01440€ | 1799.697  | 1650.072  | NM_00580€ | 1031.223  |
| NM_00426€ | 8619.038  | 9272.101  | NM_00081€ | 1136.998  | 988.053   | AB002331  | 689.598   |
| AL050067  | 2431.102  | 2171.923  | NM_01492€ | 508.498   | 454.613   | NM_002504 | 470.579   |
| NM_006251 | 5724.854  | 7379.246  | AK025130  | 3890.217  | 3766.806  | AB046775  | 384.455   |
| NM_00410€ | 10737.729 | 9816.467  | NM_01787€ | 1090.67   | 843.782   | X74862    | 326.704   |
| NM_001744 | 3395.773  | 2543.333  | AK023232  | 1912.086  | 3088.672  | X65663    | 1167.256  |
| Z25433    | 2323.425  | 3955.204  | NM_000271 | 6004.628  | 8737.889  | NM_00318€ | 971.939   |
| NM_00592€ | 5479.234  | 11695.739 | NM_01820€ | 2870.515  | 2651.458  | NM_00445€ | 997.495   |
| NM_00115€ | 5139.235  | 5389.583  | Z70701    | 8428.308  | 5718.343  | NM_004284 | 3397.769  |
| NM_00285€ | 5428.294  | 5000.353  | AB040972  | 2432.049  | 1892.504  | NM_01224€ | 386.299   |
| NM_00322€ | 1144.58   | 1687.997  | AF148505  | 986.089   | 757.319   | AL122040  | 330.34    |
| NM_00009€ | 2627.448  | 1883.964  | BE260997  | 557.753   | 414.605   | AK023974  | 669.948   |
| AA143087  | 18322.691 | 15090.455 | NM_01868€ | 4364.806  | 2578.842  | AK023768  | 453.483   |
| U25804    | 8231.386  | 5436.442  | NM_01767€ | 929.386   | 597.649   | AF147335  | 498.517   |
| BI870965  | 2619.816  | 3690.834  | NM_005431 | 1279.447  | 1156.967  | NM_01632€ | 7152.964  |
| NM_00190€ | 19619.324 | 14783.857 | AB036063  | 843.49    | 976.878   | AK022216  | 1120.875  |
| BI835536  | 11194.187 | 12812.6   | NM_002894 | 2643.981  | 1603.644  | AK025812  | 1577.068  |
| BF205051  | 6596.666  | 5443.594  | NM_00462€ | 4045.763  | 2599.42   | AK022262  | 802.655   |
| X02761    | 2233.584  | 2685.754  | NM_00426€ | 2874.296  | 2573.521  | AF088039  | 33927.531 |
| M91463    | 2944.802  | 2868.692  | AL050067  | 1452.617  | 978.204   | AF086220  | 1163.198  |
| U88317    | 502.697   | 1087.53   | NM_00497€ | 3588.423  | 4195.646  | AK023941  | 955.666   |
| J03060    | 12382.092 | 4421.391  | NM_006251 | 3046.88   | 4018.741  | AL390083  | 4354.588  |
| X54156    | 563.601   | 1039.611  | NM_00410€ | 5191.554  | 4281.461  | AB020702  | 240.53    |
| AA829383  | 6967.035  | 4881.538  | NM_002314 | 3752.583  | 4777.27   | AL050227  | 372.295   |
| AF012434  | 12677.111 | 9895.421  | NM_001744 | 2444.634  | 2042.766  | NM_01220€ | 710.345   |
| NM_033334 | 1159.113  | 1337.463  | NM_00629€ | 2362.545  | 3251.428  | NM_01335€ | 618.742   |

|           |           |           |           |           |           |           |           |
|-----------|-----------|-----------|-----------|-----------|-----------|-----------|-----------|
| AB037791  | 1009.972  | 1355.665  | Z25433    | 1788.642  | 1979.318  | NM_003847 | 7038.763  |
| NM_018124 | 2626.432  | 4752.083  | NM_005922 | 4307.155  | 5930.284  | AK021973  | 387.676   |
| NM_000489 | 13006.909 | 19991.625 | NM_018638 | 2385.14   | 3126.715  | AL050116  | 3592.355  |
| X98507    | 4144.653  | 3852.271  | AL137593  | 9567.685  | 11728.903 | AL050165  | 36863.633 |
| NM_016030 | 66981.977 | 55488.43  | NM_001150 | 1254.126  | 1064.495  | AL117445  | 1020.934  |
| NM_014669 | 8953.243  | 8589.852  | NM_002856 | 1305.753  | 1547.472  | AL122113  | 2715.012  |
| NM_005652 | 9212.677  | 8741.674  | NM_003225 | 643.244   | 431.75    | AK024415  | 2301.778  |
| AK026686  | 970.691   | 819.984   | NM_000096 | 798.748   | 657.501   | AK025157  | 1369.447  |
| NM_018842 | 377.285   | 511.387   | AA143087  | 6197.951  | 5255.188  | AK022001  | 881.577   |
| NM_005903 | 1991.482  | 1858.655  | U25804    | 2743.927  | 2594.085  | AK022633  | 540.927   |
| NM_000861 | 2721.908  | 1696.587  | BI870965  | 1161.924  | 1134.773  | AK000079  | 1082.111  |
| NM_000024 | 755.397   | 1142.078  | NM_001903 | 10087.881 | 5860.018  | AJ227874  | 159.335   |
| AB037734  | 583.226   | 717.406   | BI835536  | 3608.352  | 3515.004  | AF009276  | 646.419   |
| U77493    | 734.304   | 1149.01   | BF205051  | 2591.089  | 2428.403  | AF056428  | 7593.924  |
| NM_003873 | 1583.997  | 881.973   | X02761    | 826.559   | 783.465   | AF069136  | 382.985   |
| NM_000263 | 2768.335  | 2624.727  | M91463    | 867.161   | 633.027   | AK021594  | 293.915   |
| AF073519  | 4192.973  | 3521.675  | J03060    | 3694.854  | 1933.936  | AK021635  | 499.473   |
| AB001451  | 4871.117  | 7599.047  | X54156    | 402.572   | 394.424   | AK025276  | 3660.856  |
| NM_017583 | 2592.298  | 4574.308  | NM_003743 | 948.787   | 781.142   | AK026027  | 73.511    |
| NM_017875 | 1051.463  | 1535.623  | AA829383  | 3559.506  | 3049.093  | AK026457  | 967.503   |
| AK023232  | 3021.99   | 4823.21   | AF012434  | 8652.101  | 7676.199  | AJ008131  | 5065.089  |
| NM_000271 | 11753.014 | 11302.615 | NM_033334 | 323.91    | 260.052   | AK024303  | 674.11    |
| NM_018209 | 4173.288  | 4223.484  | AB037791  | 674.839   | 635.687   | AL160131  | 1054.457  |
| AB018268  | 14522.988 | 12297.864 | NM_018124 | 4285.593  | 3155.183  | AF086045  | 453.237   |
| NM_019045 | 1470.71   | 1418.53   | NM_000489 | 7641.457  | 10571.2   | AK027028  | 1707.516  |
| NM_006380 | 4770.329  | 3532.98   | X98507    | 1380.058  | 1274.312  | AK027069  | 1730.053  |
| AB020710  | 2101.999  | 2452.796  | NM_016030 | 28096.176 | 32901.07  | AK026916  | 502.381   |
| Z83801    | 248.225   | 591.964   | NM_014669 | 4785.179  | 4993.499  | AK026914  | 2597.596  |
| NM_016174 | 6399.47   | 7130.343  | NM_005652 | 2910.096  | 2596.695  | AL137623  | 6409.63   |
| NM_020377 | 1165.744  | 1795.814  | NM_005902 | 1309.882  | 1429.089  | AK026485  | 238.77    |
| U88896    | 6729.329  | 8135.465  | NM_002850 | 51616.324 | 57039.316 | NM_003546 | 812.634   |
| NM_005724 | 10123.04  | 12003.597 | NM_005903 | 826.591   | 611.797   | AF118077  | 899.081   |
| NM_002349 | 2743.464  | 1852.818  | NM_000861 | 883.062   | 768.655   | AK025750  | 584.127   |
| NM_005080 | 13319.153 | 25909.633 | NM_000024 | 408.843   | 804.985   | AK025783  | 785.771   |
| NM_004887 | 12761.785 | 5952.119  | U77493    | 258.166   | 261.161   | AF113675  | 918.927   |
| NM_006404 | 1178.829  | 1031.335  | NM_019062 | 436.895   | 453.522   | AK024514  | 626.963   |
| Z25433    | 2050.105  | 2740.868  | NM_003873 | 555.39    | 462.291   | NM_020119 | 2020.893  |
| NM_005922 | 5635.068  | 8114.586  | NM_000263 | 1387.066  | 1797.247  | AL049417  | 5806.951  |
| NM_018638 | 4096.799  | 4582.771  | AF073519  | 2673.948  | 2171.024  | NM_005169 | 778.794   |
| AL137593  | 22374.516 | 22596.91  | AB001451  | 1397.484  | 3587.67   | AJ008128  | 13211.554 |
| NM_000382 | 2578.589  | 2606.896  | NM_017583 | 2840.41   | 4176.396  | AL449243  | 2352.393  |
| AL133064  | 2986.926  | 3027.745  | Y16132    | 7853.751  | 8720.973  | M12211    | 465.323   |
| NM_006227 | 5229.948  | 8443.24   | NM_016593 | 805.363   | 709.597   | AK026449  | 4076.849  |
| NM_002905 | 8172.064  | 9976.44   | NM_002521 | 577.33    | 619.17    | NM_014027 | 1272.859  |
| NM_019028 | 8970.495  | 7426.498  | NM_017875 | 779.658   | 1168.299  | AF116621  | 1289.918  |
| NM_000431 | 1775.1    | 3937.338  | AK023232  | 1679.16   | 2220.16   | AF086554  | 1436.299  |
| NM_013421 | 1388.536  | 1633.693  | NM_000271 | 4341.098  | 6011.224  | AL390136  | 10156.836 |
| AB033118  | 3231.886  | 6289.299  | NM_018209 | 1803.47   | 1990.969  | AK023156  | 425.601   |
| AF034374  | 5320.36   | 4524.157  | NM_006184 | 18462.064 | 12929.885 | AF086398  | 36112.121 |
| NM_016118 | 5415.225  | 1772.158  | AB018268  | 3471.275  | 3818.806  | AK023444  | 323.593   |
| NM_018674 | 4151.385  | 2922.07   | NM_019045 | 716.888   | 414.7     | NM_003180 | 858.357   |
| NM_001683 | 7566.673  | 6066.842  | NM_006380 | 2107.651  | 1124.714  | AF086406  | 4205.871  |
| NM_033334 | 539.897   | 522.386   | AB020710  | 1168.946  | 889.798   | D17216    | 1308.87   |

|           |           |           |           |           |           |           |           |
|-----------|-----------|-----------|-----------|-----------|-----------|-----------|-----------|
| AB037791  | 1859.834  | 1418.494  | NM_016174 | 2361.292  | 3273.198  | AK024942  | 1173.155  |
| NM_018124 | 4946.419  | 6751.477  | NM_020377 | 620.182   | 753.704   | AJ227873  | 8747.714  |
| Z70701    | 19849.238 | 16876.777 | U88896    | 2454.685  | 2255.522  | AK022886  | 1554.386  |
| AB040972  | 4854.859  | 4312.079  | NM_005724 | 5192.08   | 4671.134  | AK024665  | 1498.558  |
| BE260997  | 675.462   | 712.356   | X58794    | 24869.375 | 34742.789 | AK000691  | 693.015   |
| NM_017676 | 1771.228  | 2820.344  | NM_001735 | 1981.724  | 1526.8    | AK001448  | 504.274   |
| AK021764  | 931.736   | 752.048   | NM_002349 | 1649.703  | 1638.2    | AK026890  | 413.174   |
| NM_005431 | 1870.026  | 2210.28   | NM_005080 | 13614.245 | 27227.889 | AL049321  | 1904.725  |
| AB036063  | 2523.58   | 2195.933  | NM_004887 | 9112.729  | 7769.969  | CY3Cy5    | 4833.116  |
| NM_004629 | 3734.924  | 3663.875  | NM_006404 | 729.547   | 953.299   | W74254    | 591.636   |
| NM_004260 | 4320.06   | 2778.52   | NM_014795 | 3752.869  | 4765.693  | M58603    | 1895.94   |
| AL050067  | 1554.281  | 700.132   | NM_002986 | 855.962   | 943.599   | AA443286  | 493.537   |
| NM_004972 | 5728.861  | 3995.413  | M15330    | 1567.339  | 1471.261  | AB003334  | 4315.868  |
| NM_006251 | 6907.576  | 11255.642 | NM_014396 | 2053.308  | 1963.293  | AW276315  | 479.02    |
| AF073519  | 3669.816  | 3041.157  | AK027201  | 2693.412  | 2014.227  | AA490737  | 726.346   |
| AB001451  | 4269.464  | 4601.939  | Z25433    | 1605.653  | 2477.53   | AI878886  | 7634.297  |
| NM_017583 | 4969.729  | 5407.56   | NM_005922 | 2970.472  | 5267.866  | BG697179  | 1770.214  |
| Y16132    | 14066.102 | 14822.489 | NM_018638 | 1857.341  | 2467.844  | NM_002136 | 8996.211  |
| NM_016593 | 1825.156  | 2195.337  | AL137593  | 8287.444  | 9978.662  | BM012504  | 4458.972  |
| NM_002521 | 1105.999  | 1309.625  | NM_003915 | 1427.593  | 1451.944  | X72308    | 4583.125  |
| NM_001150 | 4108.319  | 3428.228  | NM_000382 | 1277.443  | 1308.944  | NM_003942 | 1073.59   |
| NM_002856 | 5609.845  | 4338.471  | AL133064  | 1004.243  | 820.564   | NM_004452 | 1090.959  |
| NM_003225 | 1190.027  | 1479.282  | NM_006227 | 1610.682  | 1874.852  | SR9       | 21834.08  |
| NM_000096 | 2341.626  | 1905.615  | NM_002905 | 2957.712  | 2349.14   | CY3Cy5    | 5184.686  |
| AA418251  | 394.551   | 552.865   | NM_000700 | 1923.902  | 1351.594  | NM_000591 | 1605.043  |
| U25804    | 8637.672  | 8825.499  | NM_019028 | 2464.144  | 2540.231  | NM_000565 | 9351.18   |
| BI870965  | 4085.825  | 5295.952  | NM_000431 | 664.888   | 1226.754  | AF253318  | 1679.837  |
| NM_001903 | 20749.076 | 12526.697 | AB033118  | 1611.984  | 3518.036  | AK024848  | 1734.565  |
| BI835536  | 12374.682 | 10646.597 | NM_019606 | 943.775   | 1349.641  | NM_006148 | 659.412   |
| X02761    | 766.179   | 486.406   | NM_001690 | 5059.244  | 2819.794  | AJ290954  | 7740.999  |
| M91463    | 1692      | 1011.301  | AF034374  | 4640.672  | 6564.789  | NM_002783 | 1494.741  |
| J03060    | 10851.22  | 2683.284  | NM_016118 | 3130.999  | 1675.248  | AK024396  | 2126.575  |
| X54156    | 720.688   | 1519.32   | NM_018674 | 13972.872 | 12578.055 | U58514    | 1124.542  |
| NM_003743 | 1565.355  | 1829.413  | NM_001683 | 14193.338 | 15642.808 | NM_000544 | 1248.316  |
| AF012434  | 12112.52  | 14937.19  | NM_001682 | 1390.878  | 1371.841  | NM_004644 | 1151.949  |
| NM_006404 | 1362.25   | 1131.292  | NM_014405 | 1629.234  | 1971.532  | AV681967  | 467.946   |
| NM_014795 | 5221.325  | 5249.085  | NM_000816 | 1197.754  | 1247.32   | NM_018250 | 465.488   |
| NM_002986 | 1346.359  | 1437.726  | NM_014928 | 723.252   | 721.398   | NM_016553 | 2537.517  |
| M15330    | 4327.46   | 1762.875  | AK025130  | 4579.211  | 3433.893  | AB023136  | 500.477   |
| NM_014396 | 3131.19   | 3347.98   | NM_033334 | 260.757   | 855.546   | NM_003795 | 24885.014 |
| AK027201  | 3903.108  | 3965.798  | NM_018124 | 3024.187  | 2628.598  | NM_014232 | 808.354   |
| NM_000489 | 13961.896 | 14225.938 | Z70701    | 10286.271 | 6399.323  | NM_005701 | 748.755   |
| X98507    | 4115.563  | 3371.976  | AB040972  | 2886.331  | 2465.961  | NM_001231 | 861.059   |
| NM_014669 | 9697.87   | 9397.258  | AF148505  | 1066.118  | 1003.255  | AF146759  | 966.311   |
| NM_005652 | 8704.913  | 8460.245  | NM_018686 | 3846.6    | 2743.322  | AB032993  | 3530.092  |
| AK026686  | 844.771   | 1534.723  | NM_017676 | 876.168   | 666.039   | NM_000854 | 2026.856  |
| NM_018842 | 775.537   | 1189.819  | NM_005431 | 1179.938  | 1451.211  | AL117423  | 2281.877  |
| NM_005902 | 4689.145  | 5569.017  | AB036063  | 1020.634  | 1317.976  | NM_002084 | 827.802   |
| NM_005903 | 1584.225  | 1036.929  | NM_002894 | 3037.168  | 1649.939  | NM_004750 | 1828.384  |
| NM_000861 | 2298.01   | 537.044   | NM_004629 | 4978.556  | 3075.529  | NM_007295 | 1508.581  |
| NM_000024 | 924.912   | 433.793   | NM_004260 | 4735.045  | 4732.244  | NM_003651 | 2151.329  |
| AB037734  | 1053.035  | 1126.437  | AL050067  | 1758.757  | 1535.061  | NM_003262 | 1052.643  |
| U77493    | 595.288   | 1563.993  | NM_004972 | 3912.003  | 5161.741  | AK022832  | 2670.661  |

|           |           |           |           |           |           |           |           |
|-----------|-----------|-----------|-----------|-----------|-----------|-----------|-----------|
| NM_000263 | 2187.189  | 3374.378  | NM_006251 | 3179.23   | 3675.692  | NM_014641 | 1246.088  |
| NM_001683 | 26306.143 | 41542.434 | NM_004103 | 6184.851  | 5772.814  | NM_004462 | 1088.252  |
| NM_001682 | 1737.699  | 1646.348  | NM_002314 | 4051.857  | 6182.978  | NM_000343 | 1258.171  |
| NM_014405 | 2373.311  | 2690.953  | NM_001744 | 2431.259  | 2159.79   | NM_019112 | 2258.991  |
| NM_000816 | 1300.053  | 1284.838  | NM_006296 | 2304.706  | 2817.531  | NM_012336 | 3750.762  |
| NM_014928 | 1580.267  | 1456.243  | NM_017583 | 2102.753  | 4152.385  | NM_016354 | 344.078   |
| AK025130  | 7082.96   | 5347.856  | Y16132    | 5420.134  | 7145.6    | NM_018155 | 1607.12   |
| NM_017875 | 901.146   | 1359.446  | NM_016593 | 748.159   | 959.176   | AL050358  | 1934.367  |
| AK023232  | 3433.88   | 3950.799  | NM_002521 | 649.77    | 765.099   | NM_004731 | 865.216   |
| NM_018209 | 4553.848  | 3632.071  | NM_001150 | 1579.088  | 1159.7    | NM_017885 | 100.565   |
| NM_006184 | 34138.895 | 33224.301 | NM_002856 | 1399.561  | 1863.08   | D80004    | 325.356   |
| AB018268  | 13711.227 | 13354.551 | NM_003225 | 604.209   | 630.077   | NM_000946 | 699.073   |
| NM_019045 | 1977.048  | 1775.986  | NM_000096 | 769.702   | 683.083   | NM_016070 | 809.866   |
| NM_006380 | 4379.158  | 2475.739  | AA143087  | 6353.941  | 6833.255  | NM_016390 | 611.481   |
| NM_016174 | 4039.145  | 4184.73   | U25804    | 2806.221  | 2756.342  | NM_016101 | 2886.286  |
| NM_020377 | 1052.742  | 653.271   | BI870965  | 888.522   | 1313.912  | NM_005859 | 14609.725 |
| U88896    | 3399.63   | 1764.515  | NM_001903 | 7742.437  | 5326.174  | AK025630  | 632.88    |
| AF116702  | 57255.785 | 46392.199 | BI835536  | 3119.88   | 2704.665  | AL365404  | 8961.967  |
| NM_005724 | 11931.703 | 15594.199 | BF205051  | 2028.696  | 1562.768  | AK022907  | 1506.907  |
| X58794    | 25316.186 | 51216.648 | X02761    | 551.028   | 735.561   | NM_014793 | 1596.17   |
| NM_001735 | 3167.044  | 3778.911  | M91463    | 1196.804  | 882.367   | NM_004245 | 731.634   |
| NM_002349 | 1052.485  | 1488.04   | J03060    | 4274.26   | 2820.705  | NM_003241 | 998.231   |
| NM_005080 | 13695.392 | 35053.328 | X54156    | 430.968   | 645.901   | NM_002685 | 348.269   |
| NM_004887 | 10107.207 | 10514.444 | NM_003743 | 897.427   | 879.588   | AF039023  | 821.527   |
| NM_004972 | 7563.66   | 6894.803  | AA829383  | 2275.343  | 1904.956  | NM_005511 | 2502.957  |
| NM_006251 | 5596.546  | 5006.775  | AF012434  | 7120.275  | 5011.863  | NM_014698 | 11110.733 |
| NM_004103 | 12944.095 | 9041.774  | NM_006404 | 463.428   | 1034.054  | NM_018475 | 1820.137  |
| NM_002314 | 7751.273  | 7851.013  | NM_014795 | 2716.208  | 7633.75   | AK024396  | 850.442   |
| NM_001744 | 3598.702  | 3063.273  | NM_002986 | 642.534   | 1003.574  | U58514    | 701.701   |
| NM_006296 | 3907.874  | 3649.196  | M15330    | 1217.77   | 1329.577  | M58603    | 2074.253  |
| Z25433    | 1950.257  | 2948.406  | NM_014396 | 1792.676  | 2058.098  | AB003334  | 4420.561  |
| NM_005922 | 5954.126  | 7477.881  | AK027201  | 1750.385  | 1652.037  | AW276315  | 309.288   |
| NM_018638 | 4131.682  | 3769.623  | NM_000489 | 4385.298  | 5306.404  | AA490737  | 457.917   |
| AL137593  | 20526.545 | 19062.996 | X98507    | 1275.041  | 945.589   | BM012504  | 3798.929  |
| NM_003915 | 2220.186  | 2679.633  | NM_016030 | 28405.709 | 34783.898 | AA664145  | 670.722   |
| NM_000382 | 2551.958  | 2458.124  | NM_014669 | 3168.079  | 3334.687  | T50790    | 844.981   |
| AL133064  | 3193.857  | 2615.711  | NM_005652 | 2828.418  | 3351.979  | R48168    | 13798.938 |
| NM_006227 | 5304.184  | 5922.545  | NM_005902 | 2055.674  | 2076.459  | NM_003942 | 580.607   |
| NM_002905 | 10319.998 | 8315.171  | NM_002850 | 56849.988 | 59258.441 | NM_004452 | 1005.084  |
| NM_000700 | 14680.478 | 4199.986  | NM_005903 | 727.74    | 724.677   | AB040954  | 2567.58   |
| NM_019028 | 5750.103  | 3727.58   | NM_000861 | 887.999   | 465.575   | NM_002081 | 1079.945  |
| NM_000431 | 2075.683  | 2781.523  | NM_000024 | 403.937   | 851.341   | NM_004750 | 712.728   |
| NM_013421 | 1168.985  | 299.496   | AB037734  | 418.869   | 325.273   | NM_007295 | 1390.561  |
| NM_012474 | 3432.202  | 5323.433  | U77493    | 557.819   | 1152.135  | AK023317  | 42.744    |
| NM_019606 | 3581.26   | 4537.862  | NM_019062 | 642.23    | 974.842   | NM_014012 | 393.425   |
| NM_001690 | 12731.058 | 10390.976 | NM_003873 | 634.866   | 623.841   | NM_000591 | 1191.157  |
| AF034374  | 3376.687  | 3892.824  | NM_014253 | 255.196   | 361.24    | AF253318  | 1488.572  |
| NM_016118 | 6194.061  | 3420.74   | NM_000263 | 2083.474  | 2151.664  | AK024848  | 1977.583  |
| NM_018674 | 5143.128  | 6868.241  | NM_001683 | 11428.063 | 16489.877 | U06699    | 2847.544  |
| NM_000068 | 3245.793  | 4017.894  | NM_001682 | 1140.229  | 1398.265  | NM_006148 | 744.857   |
| AB033046  | 6431.506  | 6163.606  | NM_014405 | 1952.343  | 2994.863  | AJ290954  | 12362.229 |
| NM_015918 | 9707.931  | 5219.584  | NM_000816 | 627.091   | 712.57    | AK025451  | 3122.893  |
| AK023228  | 825.6     | 1073.64   | NM_014928 | 599.663   | 917.423   | NM_002783 | 2355.731  |

|           |           |           |           |           |           |           |           |
|-----------|-----------|-----------|-----------|-----------|-----------|-----------|-----------|
| NM_013249 | 1226.099  | 1640.396  | AK025130  | 2085.871  | 2457.208  | NM_003038 | 91.053    |
| AB029041  | 19666.221 | 18091.779 | NM_017875 | 745.285   | 701.819   | NM_018155 | 1501.887  |
| AK026642  | 2162.25   | 2796.311  | AK023232  | 968.348   | 1231.925  | AL050358  | 1843.946  |
| AL359063  | 1019.698  | 1088.296  | NM_000271 | 5110.037  | 6673.125  | NM_004731 | 721.019   |
| AL079292  | 3051.849  | 3562.924  | NM_018209 | 1913.405  | 1817.329  | NM_000544 | 1231.886  |
| X89667    | 2807.685  | 1988.095  | NM_006184 | 22016.834 | 17722.994 | NM_004644 | 1243.45   |
| AB037791  | 1661.027  | 1141.044  | AB018268  | 3904.171  | 4712.059  | AV681967  | 378.765   |
| NM_018124 | 5944.183  | 6685.973  | NM_019045 | 480.084   | 287.16    | NM_018250 | 542.258   |
| Z70701    | 21863.465 | 14902.862 | NM_006380 | 2529.694  | 1000.028  | NM_016553 | 2696.025  |
| AB040972  | 5843.633  | 4233.378  | AB020710  | 981.121   | 967.358   | NM_003795 | 24467.652 |
| AF148505  | 2656.15   | 3640.642  | NM_016174 | 2398.118  | 3026.997  | NM_014232 | 1100.904  |
| BE260997  | 989.419   | 1293.76   | NM_020377 | 745.944   | 736.302   | NM_005701 | 1050.584  |
| NM_018686 | 7375.018  | 3493.459  | U88896    | 3069.564  | 3132.932  | NM_001231 | 752.065   |
| NM_017676 | 1988.354  | 1015.723  | AF116702  | 59161.531 | 45285.809 | NM_006819 | 13100.827 |
| AK021764  | 940.526   | 830.15    | NM_005724 | 7652.542  | 6522.639  | NM_014744 | 2951.53   |
| AB036063  | 2899.628  | 2712.594  | X58794    | 34680.93  | 45713.598 | AF146759  | 1363.55   |
| NM_002894 | 6131.75   | 7512.316  | NM_001735 | 2584.214  | 2565.988  | AB032993  | 2353.317  |
| NM_004629 | 4497.392  | 6967.094  | NM_002349 | 2177.537  | 2460.415  | NM_000854 | 1887.469  |
| NM_004260 | 4674.963  | 5617.074  | NM_005080 | 13815.148 | 26283.395 | AL117423  | 1721.657  |
| AL050067  | 1055.91   | 1290.463  | NM_004887 | 9771.878  | 7426.493  | NM_002685 | 1916.625  |
| AK024732  | 8311.841  | 2339.659  | NM_004972 | 4141.693  | 5770.166  | AF039023  | 835.359   |
| NM_015564 | 1160.868  | 1697.342  | NM_006251 | 1364.611  | 2115.602  | NM_005511 | 2791.253  |
| L22650    | 2029.219  | 1524.644  | NM_002314 | 1696.021  | 2959.565  | NM_014698 | 8257.055  |
| AB014520  | 23948.008 | 22548.525 | NM_001744 | 1925.317  | 2498.339  | NM_018475 | 1808.89   |
| AF161420  | 1719.252  | 1673.826  | NM_006296 | 2089.011  | 3649.386  | NM_003262 | 1468.774  |
| NM_004907 | 2031.621  | 1945.705  | Z25433    | 1734.58   | 1725.96   | AK022832  | 2321.067  |
| NM_002891 | 1347.53   | 1270.664  | NM_005922 | 3964.387  | 4335.494  | NM_014641 | 1232.569  |
| NM_001775 | 871.401   | 1210.71   | NM_018638 | 2159.215  | 2776.448  | NM_004462 | 1400.813  |
| X04526    | 13002.192 | 10560.275 | AL137593  | 8680.972  | 9244.088  | AB020664  | 1104.313  |
| D26067    | 2521.397  | 2288.656  | NM_003915 | 1332.103  | 1309.246  | NM_006640 | 1761.094  |
| AF227924  | 6144.609  | 3340.506  | NM_000382 | 1461.815  | 1216.234  | NM_000343 | 557.381   |
| NM_005716 | 12767.106 | 10856.35  | AL133064  | 1741.893  | 1664.985  | NM_019112 | 1432.431  |
| NM_006183 | 2551.203  | 2971.141  | NM_006227 | 2958.633  | 3573.018  | NM_012336 | 3043.547  |
| NM_016087 | 1104.574  | 1339.222  | NM_002905 | 5593.765  | 5019.396  | NM_020246 | 859.531   |
| S59184    | 2753.833  | 1715.472  | NM_000700 | 3701.086  | 2744.606  | NM_003942 | 913.823   |
| NM_006661 | 1943.674  | 1910.111  | NM_019028 | 3691.453  | 4155.661  | NM_004452 | 580.924   |
| NM_005746 | 13363.177 | 13320.508 | NM_000431 | 705.542   | 1325.667  | AB040954  | 1957.805  |
| NM_004588 | 624.956   | 1129.573  | NM_013421 | 705.614   | 865.428   | AB023139  | 1585.321  |
| U16126    | 393.668   | 1204.403  | NM_012474 | 2901.451  | 3583.199  | NM_017885 | 662.918   |
| NM_002172 | 7200.212  | 9414.183  | AB033118  | 2493.248  | 4514.339  | D80004    | 401.514   |
| NM_002614 | 650.573   | 809.056   | NM_019606 | 1604.403  | 2377.373  | X63966    | 37.601    |
| NM_005655 | 3664.953  | 1375.739  | NM_001690 | 8258.844  | 5129.282  | NM_000946 | 555.669   |
| AJ008144  | 595.257   | 515.308   | AF034374  | 4695.487  | 7327.395  | NM_016070 | 1082.049  |
| NM_007314 | 2636.249  | 2138.608  | NM_016118 | 3389.789  | 1960.159  | NM_016101 | 2909.84   |
| NM_006600 | 8632.579  | 9119.155  | NM_018674 | 13828.688 | 12618.641 | NM_005859 | 18044.691 |
| AF297709  | 3435.023  | 2294.7    | NM_000068 | 850.833   | 1569.166  | NM_014628 | 2377.254  |
| L77564    | 1022.403  | 991.522   | NM_013249 | 440.341   | 1085.956  | AK025630  | 1034.738  |
| NM_015384 | 4842.574  | 3229.068  | AB029041  | 7894.94   | 11303.11  | AL365404  | 8378.827  |
| AK023327  | 3653.975  | 2368.939  | AK026642  | 861.931   | 1665.189  | AK022907  | 2116.209  |
| AB046858  | 1654.865  | 878.943   | AL359063  | 483.897   | 225.025   | NM_014793 | 1516.464  |
| D50914    | 2709.261  | 4635.306  | AL079292  | 2668.047  | 1821.007  | NM_004245 | 636.029   |
| NM_002305 | 68143.953 | 53088.887 | X89667    | 1402.527  | 1389.565  | NM_003241 | 1927.017  |
| AK025439  | 3804.042  | 2685.643  | AB037791  | 675.892   | 464.432   | NM_000543 | 493.766   |



|           |           |           |           |           |           |           |           |
|-----------|-----------|-----------|-----------|-----------|-----------|-----------|-----------|
| NM_001737 | 1884.873  | 438.49    | NM_018124 | 2279.046  | 2484.994  | U06699    | 1837.411  |
| NM_007213 | 3211.512  | 1146.141  | Z70701    | 7926.491  | 6315.238  | AJ290954  | 9604.011  |
| NM_019064 | 494.029   | 619.594   | AB040972  | 3077.181  | 2422.921  | AK025451  | 1812.737  |
| NM_000094 | 1706.081  | 1752.436  | AF148505  | 746.246   | 818.996   | NM_002783 | 1410.662  |
| NM_000439 | 787.137   | 460.852   | BE260997  | 602.782   | 790.358   | X52005    | 3634.669  |
| AJ295148  | 967.67    | 1258.73   | NM_018686 | 5144.348  | 3641.182  | NM_001047 | 2090.387  |
| AF176701  | 1258.788  | 455.683   | NM_017676 | 1178.916  | 1000.133  | AK024396  | 903.811   |
| NM_016302 | 1894.897  | 2506.899  | NM_005431 | 1044.649  | 1311.152  | U58514    | 1087.771  |
| NM_004159 | 33016.363 | 34125.504 | AB036063  | 1178.374  | 1666.179  | M57627    | 1046.292  |
| NM_003249 | 1592.765  | 5623.377  | NM_002894 | 4979.724  | 3281.911  | W74254    | 540.65    |
| M21897    | 1170.37   | 908.571   | NM_004629 | 3564.308  | 2731.667  | M58603    | 1786.16   |
| AF301463  | 1736.066  | 1225.175  | NM_004260 | 5579.142  | 4833.143  | AA443286  | 425.83    |
| NM_015984 | 3533.417  | 3506.892  | AL050067  | 2294.593  | 1998.965  | AB003334  | 4381.173  |
| NM_006894 | 1816.605  | 2583.795  | AK024732  | 1409.565  | 1808.967  | AW276315  | 408.898   |
| AK023031  | 4146.443  | 3583.39   | AB014520  | 5503.867  | 7937.898  | AI878886  | 7267.882  |
| NM_005717 | 33338.023 | 12742.387 | AF161420  | 548.748   | 474.853   | BG697179  | 1771.997  |
| NM_003088 | 3909.525  | 7886.296  | NM_004907 | 672.762   | 1186.856  | NM_002136 | 10117.948 |
| AF043290  | 383.472   | 411.016   | NM_002891 | 517.388   | 462.11    | BM012504  | 5270.834  |
| NM_004082 | 2310.021  | 4363.43   | NM_001775 | 482.884   | 466.078   | AA664145  | 653.009   |
| NM_014398 | 640.827   | 1335.19   | BE083789  | 422.155   | 436.306   | X72308    | 5924.502  |
| NM_005934 | 3807.535  | 6009.128  | X04526    | 6158.628  | 4551.054  | T50790    | 309.117   |
| NM_007129 | 6657.477  | 10103.13  | D26067    | 730.524   | 763.241   | R48168    | 9489.64   |
| AY004253  | 8594.634  | 11421.785 | AF227924  | 2391.11   | 1500.294  | AB032993  | 3566.621  |
| NM_002698 | 1035.981  | 648.933   | NM_005716 | 4733.59   | 4763.193  | NM_000854 | 1267.462  |
| NM_002148 | 966.271   | 904.215   | NM_006183 | 555.787   | 743.215   | AL117423  | 1167.403  |
| AL137449  | 1228.704  | 591.48    | S59184    | 1481.516  | 1724.287  | NM_002084 | 1342.374  |
| U88153    | 1477.49   | 1064.411  | NM_006661 | 2989.609  | 2489.756  | D16892    | 9394.848  |
| X03910    | 7527.783  | 8205.726  | NM_005746 | 5102.318  | 6634.505  | NM_004750 | 822.948   |
| NM_018428 | 7552.917  | 6894.319  | NM_002172 | 14235.686 | 18549.07  | AK023317  | 8.003     |
| NM_006924 | 14186.804 | 20507.205 | AJ008144  | 295.803   | 889.355   | NM_003651 | 1140.378  |
| NM_012279 | 1116.817  | 985.705   | NM_007314 | 2178.257  | 3910.174  | NM_000591 | 1215.407  |
| NM_018387 | 6677.875  | 4713.567  | NM_006600 | 6137.314  | 4438.501  | NM_000565 | 8623.611  |
| BF310673  | 1793.488  | 1045.836  | AF297709  | 852.269   | 1331.871  | NM_002019 | 1621.462  |
| U77700    | 11851.393 | 21284.383 | NM_015384 | 3114.571  | 1458.583  | AF253318  | 1993.047  |
| NM_006567 | 5041.165  | 8026.922  | AK023327  | 838.392   | 724.179   | AK024848  | 1442.867  |
| AF038554  | 20383.801 | 18437.338 | AB046858  | 590.616   | 480.651   | NM_019112 | 1415.243  |
| AF264621  | 5016.675  | 7431.103  | D50914    | 927.746   | 1446.984  | NM_012336 | 3379.167  |
| NM_005875 | 11752.009 | 17596.375 | NM_015896 | 1112.083  | 1148.749  | NM_020161 | 374.198   |
| NM_004184 | 3136.247  | 6947.035  | NM_002305 | 38442.391 | 28245.346 | NM_020246 | 597.126   |
| AK026571  | 3552.713  | 2180.517  | AK025439  | 1124.832  | 562.374   | NM_016354 | 417.913   |
| AK024673  | 4390.507  | 5896.413  | NM_001737 | 2257.884  | 1026.337  | NM_003038 | 97.706    |
| AF070618  | 823.407   | 1109.805  | NM_016626 | 4122.718  | 3823.064  | NM_018155 | 1330.077  |
| AF131748  | 4075.951  | 3623.421  | NM_007213 | 785.47    | 265.366   | AL050358  | 1667.88   |
| NM_000456 | 3203.351  | 3002.638  | NM_019064 | 295.28    | 386.602   | NM_004731 | 1058.029  |
| NM_002496 | 8871.334  | 6093.841  | NM_000094 | 3222.598  | 3655.788  | NM_000544 | 1165.116  |
| NM_016243 | 3497.447  | 1385.835  | AJ295148  | 10331.587 | 3357.981  | NM_004644 | 1242.337  |
| NM_014402 | 49395.723 | 47824.637 | NM_016302 | 2257.246  | 2017.975  | AV681967  | 571.512   |
| NM_004649 | 5129.828  | 4687.138  | NM_003249 | 1882.609  | 2664.215  | NM_018250 | 426.846   |
| NM_006540 | 3906.638  | 2638.134  | M21897    | 333.437   | 296.32    | NM_016553 | 2610.823  |
| NM_017766 | 1485.929  | 1146.53   | AF301463  | 840.651   | 609.085   | AB023136  | 650.818   |
| NM_002811 | 11979.981 | 6786.515  | NM_015984 | 1501.97   | 1621.803  | NM_003795 | 25146.6   |
| NM_020310 | 3070.908  | 2054.232  | NM_006894 | 887.548   | 759.552   | NM_014232 | 692.676   |
| AK024444  | 1319.586  | 275.395   | AK023031  | 1382.463  | 1302.233  | NM_005701 | 721.505   |

|           |           |           |           |           |           |           |           |
|-----------|-----------|-----------|-----------|-----------|-----------|-----------|-----------|
| NM_005802 | 3703.853  | 1898.483  | NM_005717 | 17775.934 | 11813.094 | NM_006819 | 14841.117 |
| AB002331  | 2285.882  | 1885.689  | NM_012090 | 436.291   | 508.811   | NM_014744 | 523.046   |
| NM_002504 | 3167.045  | 5179.392  | BE793385  | 283.82    | 554.731   | AF146759  | 944.172   |
| AB046775  | 1878.282  | 1586.454  | NM_003088 | 1708.787  | 3991.442  | AL365404  | 5288.635  |
| X74862    | 843.739   | 1230.364  | NM_004082 | 1254.848  | 1674.129  | AK022907  | 721.328   |
| X65663    | 4429.086  | 6257.005  | NM_014398 | 1202.45   | 1603.328  | NM_014793 | 1244.17   |
| NM_003185 | 3612.652  | 6493.834  | NM_005934 | 5458.452  | 10873.227 | NM_004245 | 626.505   |
| NM_004456 | 2483.493  | 7063.734  | NM_007129 | 2546.652  | 3115.65   | NM_003241 | 1384.389  |
| NM_004284 | 13786.737 | 27405.648 | AY004253  | 2363.85   | 3241.145  | NM_002685 | 1677.259  |
| NM_012243 | 1956.195  | 2375.439  | NM_002698 | 430.617   | 353.041   | AK024504  | 618.105   |
| AK025743  | 1444.766  | 1659.626  | AL137449  | 673.019   | 392.038   | AF039023  | 735.147   |
| AL137466  | 740.06    | 954.307   | U88153    | 948.193   | 806.796   | NM_005511 | 465.862   |
| AL122040  | 1159.969  | 1011.949  | X03910    | 8473.434  | 8347.712  | NM_014698 | 8862.853  |
| AK023974  | 1836.01   | 1745.286  | NM_018428 | 5139.933  | 5298.898  | NM_018475 | 1769.792  |
| AK023768  | 1320.603  | 1699.222  | NM_006924 | 11406.249 | 9585.222  | NM_003262 | 1370.234  |
| AK000711  | 2083.631  | 1820.524  | NM_016024 | 3767.931  | 3210.052  | NM_020125 | 759.032   |
| BI768072  | 1033.418  | 798.744   | NM_018107 | 912.662   | 665.222   | AK022832  | 2150.185  |
| AK022216  | 5501.199  | 3946.022  | NM_012279 | 629.256   | 283.23    | NM_014641 | 1274.37   |
| AK025812  | 5043.14   | 3318.205  | NM_018387 | 3291.672  | 4449.123  | NM_004462 | 1363.191  |
| U00960    | 1409.811  | 820.402   | BF310673  | 364.817   | 492.389   | AB020664  | 1571.334  |
| AK022262  | 1919.869  | 882.442   | R97012    | 11650.938 | 17113.629 | NM_006640 | 1033.544  |
| AF088039  | 48081.066 | 36491.133 | U77700    | 10596.202 | 7320.367  | NM_000857 | 559.866   |
| AF086220  | 2274.116  | 2805.593  | NM_006567 | 4712.434  | 4256.19   | L20688    | 6245.035  |
| AK023941  | 814.282   | 1267.826  | AF038554  | 16866.141 | 9247.086  | X69111    | 2125.594  |
| AL390083  | 4985.454  | 4421.601  | AF264621  | 1210.549  | 2207.999  | AB037799  | 2181.804  |
| AB020702  | 806.637   | 911.254   | NM_005875 | 5349.778  | 4558.896  | AB007950  | 19529.609 |
| NM_013355 | 1676.489  | 1486.32   | NM_004184 | 1134.919  | 2549.986  | AL133111  | 346.748   |
| NM_003847 | 10280.098 | 9005.741  | AK026571  | 1218.818  | 1528.454  | AK025593  | 460.675   |
| NM_007197 | 384.032   | 446.489   | AK024673  | 2402.926  | 2701.542  | AB018304  | 1963.084  |
| AK021973  | 1214.786  | 832.363   | AF070618  | 895.06    | 363.233   | NM_007061 | 5947.262  |
| AL110155  | 1677.366  | 76.66     | AF131748  | 1112.183  | 1092.93   | AB040954  | 1565.998  |
| AL050165  | 50983.465 | 38273.934 | NM_000456 | 797.492   | 690.627   | NM_002081 | 481.677   |
| AL117445  | 1603.629  | 870.628   | NM_002496 | 1334.622  | 1205.513  | AB023139  | 1268.942  |
| AL122113  | 8222.851  | 4523.199  | NM_016243 | 1274.242  | 1169.881  | D80004    | 445.004   |
| AK024415  | 3991.583  | 2547.397  | NM_014402 | 46570.141 | 24295.537 | NM_000946 | 719.153   |
| AL049365  | 1285.719  | 1364.44   | NM_004649 | 1721.977  | 1637.166  | NM_016070 | 1168.364  |
| AK025132  | 1273.351  | 1341.818  | NM_006540 | 1688.12   | 1206.484  | NM_016101 | 2978.843  |
| AK025157  | 5716.755  | 6026.063  | NM_017766 | 637.293   | 438.418   | NM_005859 | 23916.191 |
| AK022001  | 1227.419  | 3148.04   | NM_002811 | 4887.585  | 2874.946  | NM_020313 | 417.873   |
| AK022633  | 431.527   | 951.161   | NM_020310 | 1217.382  | 1005.504  | NM_014628 | 2092.325  |
| AK027199  | 576.224   | 745.507   | NM_005802 | 1446.02   | 1027.351  | NM_014718 | 748.898   |
| AK000079  | 2791.749  | 4253.825  | AB002331  | 699.014   | 773.178   | AK024488  | 523.598   |
| AJ227874  | 616.235   | 690.356   | NM_002504 | 943.541   | 1319.42   | AK023249  | 33885.809 |
| AF009268  | 990.487   | 776.843   | AB046775  | 1337.63   | 1333.07   | NM_017442 | 3142.138  |
| AF009312  | 848.128   | 1221.729  | X74862    | 613.572   | 1248.822  | Z25436    | 1336.93   |
| AF009276  | 1478.616  | 1139.507  | X65663    | 2702.475  | 1665.021  | NM_005275 | 1720.831  |
| AF056428  | 20766.283 | 12755.944 | NM_003185 | 1985.756  | 2254.306  | NM_002005 | 13310.759 |
| AF069136  | 1005.82   | 510.208   | NM_004456 | 1530.998  | 1621.032  | NM_012324 | 1135.139  |
| AK021594  | 1203.796  | 649.746   | NM_004284 | 13632.351 | 13032.695 | AK000039  | 760.26    |
| AK002150  | 1367.481  | 510.583   | NM_012243 | 813.592   | 1791.81   | AL137352  | 1500.299  |
| AK021635  | 1626.505  | 525.98    | AK025743  | 1722.462  | 1950.355  | NM_014749 | 2532.557  |
| AK021856  | 1687.581  | 854.202   | AL137466  | 690.658   | 460.435   | NM_004489 | 2202.235  |
| AK025276  | 756.618   | 1135.979  | AK023974  | 887.395   | 650.698   | BI461699  | 744.02    |

|           |           |           |           |           |           |           |           |
|-----------|-----------|-----------|-----------|-----------|-----------|-----------|-----------|
| AK026027  | 250.815   | 522.763   | AK023768  | 1461.638  | 826.11    | AK090409  | 1165.153  |
| AK026457  | 792.073   | 744.399   | AK000711  | 854.532   | 582.545   | Y08267    | 1333.76   |
| AJ008131  | 17456.178 | 14726.48  | AK022216  | 1197.125  | 1081.307  | U80756    | 2474.406  |
| AF086338  | 897.345   | 1040.969  | AK025812  | 2183.964  | 2817.769  | NM_018161 | 857.485   |
| AK024303  | 1388.788  | 1862.607  | AK022262  | 792.787   | 800.941   | NM_005248 | 1234.256  |
| AL160131  | 2503.976  | 4470.02   | AF088039  | 30115.83  | 33775.211 | NM_004810 | 1226.133  |
| AF086045  | 2630.446  | 2896.46   | AF143888  | 382.577   | 330.03    | AL117629  | 886.182   |
| AK027028  | 3378.472  | 3137.478  | AK023941  | 1040.546  | 1351.811  | NM_002595 | 874.592   |
| AK027069  | 6094.625  | 6253.857  | AL390083  | 4330.72   | 4503.807  | AF174604  | 897.897   |
| AK026916  | 1804.47   | 1902.038  | NM_013355 | 710.365   | 1010.279  | AB002379  | 2892.045  |
| AK026914  | 3604.731  | 2845.734  | NM_003847 | 9259.047  | 9314.71   | AB046851  | 776.169   |
| Y11166    | 1299.927  | 1043.614  | AL110155  | 803.137   | 246.817   | NM_014548 | 850.635   |
| AK023515  | 2364.057  | 2386.533  | AL117638  | 401.7     | 83.836    | BC014152  | 35149.914 |
| AL137623  | 4272.236  | 3174.961  | AL117445  | 864.814   | 639.095   | NM_000226 | 1373.92   |
| NM_003546 | 2459.794  | 1653.001  | AL122113  | 5094.166  | 4987.376  | AB037779  | 29089.623 |
| AF118077  | 2652.479  | 2159.817  | AK024415  | 2256.706  | 2239.038  | NM_000393 | 937.798   |
| AL137625  | 660.366   | 693.93    | AL049365  | 424.984   | 849.041   | NM_000889 | 2677.815  |
| AK025750  | 1582.166  | 2742.38   | AK025132  | 636.854   | 606.51    | NM_003859 | 3860.213  |
| BF031253  | 843.508   | 690.609   | AK025157  | 2498.291  | 1862.842  | NM_000236 | 776.958   |
| AK025783  | 2716.968  | 1673.135  | AK022001  | 1520.82   | 1555.579  | NM_002903 | 22612.186 |
| AF113675  | 1187.842  | 933.966   | AK027199  | 261.688   | 338.862   | NM_012339 | 1261.168  |
| AK024514  | 1151.148  | 983.36    | AK000079  | 1551.366  | 1441.121  | NM_005787 | 5408.545  |
| NM_020119 | 4982.342  | 2051.583  | AF009276  | 834.461   | 518.663   | NM_002143 | 3239.284  |
| AL049417  | 15403.822 | 10932.264 | AF019616  | 271.079   | 396.007   | AF284421  | 7445.311  |
| AK023507  | 1254.246  | 638.172   | AF056428  | 7294.632  | 7313.406  | NM_006048 | 3481.55   |
| NM_005169 | 2718.502  | 1745.135  | AF069136  | 446.205   | 280.945   | NM_006360 | 15621.454 |
| NM_017929 | 1157.151  | 167.556   | AK002150  | 484.334   | 418.863   | NM_003968 | 704.206   |
| NM_018472 | 1326.746  | 1426.691  | AK021635  | 1077.03   | 517.774   | NM_003343 | 7792.667  |
| AJ008128  | 15127.085 | 12654.944 | AK021856  | 960.634   | 726.419   | NM_002789 | 24016.25  |
| AL449243  | 12048.304 | 11579.303 | AK026789  | 143.468   | 441.579   | NM_003470 | 1106.545  |
| AK026449  | 7968.842  | 5482.389  | AK025276  | 3459.64   | 4530.012  | AL080137  | 461.162   |
| NM_014027 | 3273.222  | 3521.172  | AK026027  | 84.544    | 525.124   | NM_017679 | 650.604   |
| AF116621  | 3761.471  | 3211.489  | AJ008131  | 6913.774  | 10734.812 | AF155103  | 512.341   |
| AF086554  | 2759.452  | 2367.53   | AF086338  | 444.961   | 492.767   | BC006359  | 525.755   |
| AL390136  | 19536.18  | 18886.854 | AK024303  | 536.343   | 878.943   | BC016062  | 4963.758  |
| AK023156  | 1178.831  | 453.712   | AL160131  | 5188.301  | 2913.808  | NM_002814 | 1532.041  |
| AF086398  | 63407.625 | 46548.418 | AF086045  | 2055.286  | 980.915   | NM_012250 | 671.681   |
| AK023444  | 950.456   | 947.011   | AK027028  | 2659.209  | 1277.911  | NM_006283 | 3368.28   |
| AK025953  | 989.322   | 820.666   | AK027069  | 2160.679  | 2034.281  | NM_002701 | 671.885   |
| NM_003180 | 1551.665  | 811.381   | AK026916  | 1025.805  | 854.769   | X97303    | 3026.541  |
| AF086406  | 11166.642 | 7259.421  | AK026914  | 1878.161  | 1100.423  | NM_017530 | 2416.461  |
| D17216    | 3584.927  | 2382.832  | Y11166    | 469.715   | 509.449   | AB029030  | 962.558   |
| AL137581  | 1397.121  | 832.551   | AK023515  | 1463.8    | 1653.817  | AL360183  | 782.969   |
| AK024942  | 1831.812  | 1061.381  | AL137623  | 10268.871 | 11238.379 | AK027046  | 1098.77   |
| AJ227873  | 19154.871 | 9892.438  | AK026485  | 397.482   | 414.16    | NM_003113 | 2502.945  |
| AK022886  | 5187.628  | 4089.982  | NM_003546 | 1437.292  | 963.675   | NM_016578 | 2256.287  |
| AK024665  | 7088.04   | 7826.95   | AF118077  | 1085.181  | 1350.453  | NM_014319 | 773.82    |
| AF147363  | 855.495   | 1263.256  | AK025750  | 2801.724  | 4418.741  | NM_004865 | 415.611   |
| AJ227880  | 499.385   | 651.349   | BF031253  | 633.263   | 974.705   | AB019566  | 52965.855 |
| AK000691  | 768.393   | 882.034   | AK025783  | 1264.791  | 910.805   | NM_000981 | 34784.703 |
| AK001448  | 987.162   | 1279.37   | AF113675  | 512.083   | 398.689   | NM_002047 | 3648.038  |
| AK026890  | 759.358   | 836.338   | AK024514  | 738.117   | 613.207   | NM_001031 | 55445.203 |
| AL049321  | 5987.874  | 6885.96   | NM_020119 | 1901.894  | 882.669   | NM_000999 | 79973.258 |

|           |           |           |           |           |           |           |          |
|-----------|-----------|-----------|-----------|-----------|-----------|-----------|----------|
| CY3Cy5    | 8056.934  | 621.577   | AL049417  | 8030.684  | 6645.567  | NM_000985 | 4327.9   |
| W74254    | 1454.818  | 1760.045  | NM_005169 | 1125.941  | 724.706   | BF130622  | 5428.224 |
| M58603    | 3962.87   | 2737.084  | NM_017929 | 385.637   | 282.444   | BU165106  | 714.859  |
| AA443286  | 1132.241  | 902.912   | NM_018472 | 1149.629  | 1168.085  | AF038202  | 375.048  |
| AB003334  | 6812.464  | 2546.892  | AJ008128  | 13523.93  | 12578.954 | AK025558  | 2689.675 |
| AW276315  | 652.386   | 993.492   | AL449243  | 4973.027  | 2916.091  | NM_001864 | 6772.889 |
| AA490737  | 2703.707  | 1961.36   | M12211    | 866.746   | 1357.839  | NM_003477 | 514.477  |
| AI878886  | 11155.834 | 24633.293 | AK026449  | 9118.416  | 7992.538  | NM_020382 | 685.312  |
| BG697179  | 5341.742  | 7580.35   | NM_014027 | 2960.146  | 3060.858  | NM_007192 | 1533.018 |
| NM_002136 | 36306.094 | 49428.398 | NM_020467 | 384.233   | 447.942   | AB002337  | 2494.996 |
| BM012504  | 7419.546  | 8646.786  | AF116621  | 1778.207  | 2001.089  | NM_003076 | 5600.51  |
| AA664145  | 2284.242  | 1895.084  | AF086554  | 1404.032  | 1165.755  | NM_006385 | 851.377  |
| X72308    | 26040.646 | 28409.23  | AL390136  | 8112.778  | 7681.305  | NM_002585 | 1505.292 |
| T50790    | 2006.397  | 3148.711  | AK023156  | 388.06    | 190.514   | AB029016  | 1250.931 |
| R48168    | 19102.77  | 14272.838 | AF086398  | 30377.16  | 24146.578 | AL049390  | 3213.592 |
| NM_003942 | 2379.805  | 3043.208  | AK024545  | 548.086   | 431.614   | AK000584  | 2169.552 |
| NM_004452 | 1995.266  | 1828.676  | AK025953  | 342.878   | 517.665   | AJ297363  | 875.59   |
| SR9       | 37079.797 | 9537.646  | NM_003180 | 1154.474  | 680.493   | AK026379  | 2548.513 |
| CY3Cy5    | 8468.863  | 588.031   | AF086406  | 7047.171  | 4499.418  | AK024278  | 5384.484 |
| NM_000418 | 1295.701  | 505.609   | D17216    | 1460.684  | 959.368   | NM_018022 | 1254.44  |
| NM_000591 | 2434.3    | 1466.245  | AL137581  | 1020.352  | 595.546   | NM_013242 | 655.757  |
| NM_000565 | 12578.76  | 5217.475  | AK024942  | 580.532   | 320.72    | NM_012066 | 8617.399 |
| AF253318  | 2302.509  | 1871.131  | AJ227873  | 3623.46   | 2027.414  | AF052168  | 3467.209 |
| AK024848  | 5573.055  | 6206.184  | AK022886  | 2046.797  | 1650.147  | AF070620  | 574.695  |
| NM_004852 | 537.962   | 681.172   | AK024665  | 4221.63   | 3020.052  | NM_020235 | 1233.68  |
| NM_000543 | 1753.296  | 1050.148  | AK000691  | 914.804   | 890.309   | AL109681  | 1109.354 |
| U06699    | 5816.455  | 7292.95   | AK001448  | 718.648   | 776.092   | AK024896  | 1727.423 |
| AJ290954  | 29518.09  | 4466.257  | AK026890  | 732.218   | 724.166   | AK023663  | 494.762  |
| AK024396  | 4880.876  | 2942.419  | AL049321  | 6220.552  | 4252.948  | NM_016930 | 609.789  |
| U58514    | 1599.484  | 1931.86   | CY3Cy5    | 4298.872  | 368.182   | AJ001861  | 540.444  |
| NM_000544 | 3735.992  | 2669.314  | W74254    | 1609.515  | 1185.47   | X64981    | 1009.77  |
| NM_004644 | 1029.554  | 540.554   | M58603    | 2887.978  | 1479.573  | X75692    | 1726.951 |
| AV681967  | 1143.558  | 1516.287  | AA443286  | 141.273   | 964.592   | Y10511    | 1362.549 |
| NM_018250 | 886.113   | 977.128   | AB003334  | 5755.628  | 1756.149  | AF018254  | 719.958  |
| NM_016553 | 5516.569  | 4833.995  | AW276315  | 661.459   | 818.078   | NM_016240 | 805.797  |
| NM_014232 | 1336.548  | 1631.379  | AA490737  | 931.805   | 848.182   | AK026459  | 602.465  |
| NM_005701 | 3348.13   | 2950.552  | AI878886  | 10392.886 | 14756.768 | AK025238  | 659.408  |
| NM_001231 | 661.325   | 1039.217  | BG697179  | 4088.285  | 3075.874  | AK026416  | 9212.416 |
| NM_014744 | 2107.067  | 2863.146  | NM_002136 | 20014.615 | 22189.059 | AK025797  | 1023.067 |
| AF146759  | 1562.864  | 1702.374  | BM012504  | 7058.758  | 5522.765  | AK000645  | 421.61   |
| AB032993  | 7162.448  | 4220.547  | AA664145  | 822.383   | 779.996   | AK024864  | 847.802  |
| NM_000854 | 5339.761  | 3394.329  | X72308    | 7675.22   | 6645.143  | AK024947  | 1155.251 |
| AL117423  | 4780.894  | 5582.637  | T50790    | 1029.788  | 1713.523  | AK024879  | 807.385  |
| NM_006140 | 1465.033  | 677.584   | R48168    | 16051.593 | 10072.16  | AK024606  | 7128.381 |
| NM_002084 | 2633.486  | 2236.954  | NM_003942 | 1802.999  | 1931.872  | NM_016417 | 6730.449 |
| NM_004750 | 1992.012  | 2680.047  | NM_004452 | 1590.494  | 1955.654  | AL080118  | 3195.88  |
| NM_007295 | 2755.911  | 2645.419  | SR9       | 10368.898 | 2194.802  | AL049378  | 4921.922 |
| NM_003651 | 6843.176  | 8897.687  | CY3Cy5    | 5876.943  | 433.509   | L09086    | 1766.463 |
| NM_003262 | 2882.933  | 2578.159  | NM_000591 | 1261.604  | 880.993   | AK021505  | 1043.959 |
| AK022832  | 4704.444  | 2086.691  | NM_000565 | 11168.026 | 5320.111  | AK021598  | 4616.153 |
| NM_014641 | 2592.659  | 2762.719  | AF253318  | 1791.585  | 1094.105  | NM_005973 | 6411.358 |
| NM_004462 | 5483.57   | 15201.909 | NM_017767 | 11550.631 | 8531.25   | X04547    | 1815.403 |
| AB020664  | 3513.81   | 3288.969  | AK024848  | 3265.906  | 2613.283  | AK025324  | 553.045  |

|           |           |           |           |           |           |           |           |
|-----------|-----------|-----------|-----------|-----------|-----------|-----------|-----------|
| NM_006640 | 5042.983  | 5287.798  | NM_000543 | 879.736   | 673.207   | AK025823  | 1440.548  |
| NM_000343 | 1169.268  | 940.302   | U06699    | 4567.525  | 5615.905  | AL359941  | 2929.788  |
| NM_019112 | 5566.716  | 5094.836  | NM_006148 | 828.413   | 739.49    | U52076    | 764.194   |
| NM_012336 | 11043.77  | 11349.367 | AJ290954  | 4976.346  | 3558.542  | AF035278  | 1288.769  |
| NM_020246 | 2893.393  | 1936.03   | AK025451  | 3961.761  | 2680.98   | AF086493  | 449.965   |
| NM_000084 | 2173.295  | 2209.598  | NM_002783 | 2265.842  | 2994.727  | AL050202  | 566.825   |
| NM_016354 | 2016.372  | 3955.553  | AK024396  | 2134.125  | 2112.762  | U32999    | 7992.105  |
| NM_003038 | 852.224   | 3401.816  | U58514    | 1284.113  | 1402.56   | U66052    | 8050.663  |
| NM_018155 | 3328.028  | 5778.104  | M57627    | 763.242   | 731.117   | AK023109  | 381.674   |
| AL050358  | 1424.302  | 1589.938  | NM_000544 | 2648.753  | 1719.727  | NM_005293 | 7507.454  |
| NM_004731 | 1557.61   | 1167.016  | NM_004644 | 673.607   | 476.609   | S50185    | 1115.417  |
| NM_017885 | 1782.88   | 813.5     | AV681967  | 768.747   | 971.194   | AF133332  | 868.245   |
| D80004    | 2069.667  | 4166.808  | NM_018250 | 484.127   | 622.838   | NM_001088 | 14003.473 |
| NM_000946 | 1327.528  | 1944.597  | NM_016553 | 6750.573  | 3095.532  | BC015991  | 1848.639  |
| NM_016070 | 1493.004  | 2253.861  | NM_003795 | 44828.137 | 18215.941 | U46214    | 3791.848  |
| NM_016390 | 1124.337  | 1461.366  | NM_014232 | 1269.16   | 954.113   | NM_000310 | 21521.871 |
| NM_016101 | 4450.837  | 6765.166  | NM_005701 | 1288.051  | 567.841   | AF161343  | 1461.238  |
| NM_005855 | 28817.51  | 25793.816 | NM_001231 | 553.062   | 498.154   | NM_004765 | 1773.453  |
| NM_014628 | 6545.722  | 4515.089  | NM_006819 | 23794.682 | 18094.854 | X75684    | 856.616   |
| AK025630  | 2285.594  | 1860.82   | NM_014744 | 1571.823  | 1717.815  | AF113701  | 2417.34   |
| AL365404  | 12877.352 | 9651.732  | AB032993  | 4722.548  | 2383.45   | Y11158    | 643.863   |
| AK022907  | 2191.679  | 2037.865  | NM_000854 | 2757.49   | 1472.388  | NM_006771 | 10969.734 |
| NM_014793 | 2794.317  | 2639.359  | AL117423  | 2870.438  | 2820.517  | L37702    | 6878.557  |
| NM_004245 | 1486.188  | 1458.264  | NM_002084 | 2972.675  | 3110.189  | AK022812  | 1103.503  |
| NM_003241 | 1777.234  | 1495.248  | NM_007295 | 3781.386  | 2707.92   | U79301    | 3543.679  |
| NM_002685 | 3274.08   | 4754.336  | NM_003651 | 4244.152  | 6186.442  | AK022260  | 5464.594  |
| AK024504  | 1912.254  | 2888.831  | NM_003262 | 2071.815  | 2049.698  | M32219    | 2538.977  |
| AF039023  | 2626.553  | 2430.817  | AK022832  | 3708.923  | 1335.538  | BC018868  | 1040.106  |
| NM_005511 | 5470.98   | 5444.899  | NM_014641 | 2389.001  | 1167.415  | AF007128  | 1515.551  |
| NM_014698 | 13281.371 | 11351.257 | NM_004462 | 4400.707  | 5032.668  | CY3Cy5    | 5245.326  |
| NM_018475 | 5691.178  | 5912.549  | AB020664  | 2625.431  | 1733.255  | AI351740  | 965.042   |
| X52005    | 21436.734 | 21259.438 | NM_006640 | 3394.653  | 3475.78   | AA444051  | 328.343   |
| AK024396  | 4484.909  | 2108.923  | NM_000343 | 715.46    | 757.627   | NM_007164 | 702.513   |
| U58514    | 1895.954  | 1696.223  | NM_019112 | 3285.589  | 2424.612  | BE783826  | 7840.188  |
| W74254    | 1842.635  | 1848.707  | NM_012336 | 7476.482  | 6556.045  | AF116606  | 5370.228  |
| M58603    | 3477.35   | 1932.317  | NM_016354 | 904.1     | 1284.195  | X98922    | 880.613   |
| AA443286  | 1092.167  | 1049.531  | NM_003038 | 3293.353  | 2659.986  | AK092872  | 608.46    |
| AB003334  | 7508.443  | 3889.472  | NM_018155 | 2829.463  | 4546.156  | SR6       | 2077.851  |
| AW276315  | 1311.11   | 2006.673  | AL050358  | 2268.133  | 2993.351  | SR8       | 7525.835  |
| AA490737  | 3540.973  | 3088.477  | NM_004731 | 2439.305  | 1960.543  | SR10      | 27382.625 |
| BG697179  | 6714.9    | 9209.983  | AB023139  | 1655.791  | 1013.202  | CY3Cy5    | 2552.903  |
| NM_002136 | 40283.051 | 55318.227 | NM_017885 | 552.216   | 299.623   | NM_002418 | 316.896   |
| BM012504  | 8499.117  | 9543.186  | D80004    | 1550.837  | 1859.862  | NM_002090 | 799.282   |
| AA664145  | 2407.077  | 2298.539  | NM_000946 | 2006.079  | 1624.309  | NM_004485 | 383.957   |
| T50790    | 2316.643  | 3564.239  | NM_016070 | 1095.129  | 748.081   | NM_013296 | 1029.845  |
| R48168    | 20334.197 | 13827.05  | NM_016390 | 950.595   | 686.509   | AL117478  | 530.593   |
| NM_003942 | 2766.114  | 4051.423  | NM_016101 | 6736.305  | 3996.685  | NM_005208 | 1098.021  |
| NM_004452 | 2203.721  | 2331.923  | NM_005859 | 32475.996 | 27957.838 | AK025687  | 532.02    |
| AB040954  | 5754.503  | 3586.69   | NM_020313 | 612.404   | 484.982   | AL137264  | 2275.131  |
| NM_002081 | 1891.307  | 1251.197  | NM_014628 | 4002.261  | 3541.961  | NM_002226 | 186.098   |
| NM_002084 | 2751.193  | 2077.603  | AK025630  | 1743.523  | 1407.639  | NM_004039 | 632.679   |
| D16892    | 18502.92  | 32441.736 | AL365404  | 14304.039 | 10266.29  | AB014558  | 781.582   |
| NM_004750 | 2065.273  | 1959.317  | AK022907  | 2290.336  | 2957.986  | NM_006287 | 533.995   |

|           |           |           |           |           |           |           |           |
|-----------|-----------|-----------|-----------|-----------|-----------|-----------|-----------|
| NM_007295 | 1470.653  | 1745.352  | NM_014793 | 2656.166  | 2018.455  | NM_000913 | 5956.037  |
| NM_003651 | 5478.702  | 7369.041  | NM_004245 | 1525.401  | 1719.881  | NM_001298 | 392.074   |
| NM_000418 | 1472.559  | 663.68    | AK024504  | 720.75    | 1272.757  | BG325046  | 368.485   |
| NM_013246 | 670.832   | 657.582   | AF039023  | 2223.379  | 1970.921  | AK026248  | 740.295   |
| NM_000591 | 2639.141  | 1821.875  | NM_005511 | 3817.284  | 3780.459  | NM_004578 | 1291.065  |
| AF253318  | 1546.745  | 1826.187  | NM_014698 | 12904.384 | 15539.64  | NM_017738 | 4160.919  |
| AK024848  | 6837.647  | 10620.709 | NM_018475 | 6364.88   | 5225.031  | NM_016557 | 477.151   |
| NM_000543 | 1617.059  | 1176.833  | X52005    | 11516.756 | 5395.007  | NM_000623 | 733.877   |
| U06699    | 8671.419  | 11256.107 | NM_001047 | 2165.327  | 2074.618  | NM_018467 | 2491.303  |
| AJ290954  | 31732.145 | 4659.233  | AK024396  | 985.081   | 891.308   | NM_006068 | 320.446   |
| AK025451  | 13135.312 | 6792.873  | U58514    | 793.961   | 699.678   | NM_002038 | 5947.863  |
| NM_002783 | 3267.806  | 2273.781  | M57627    | 465.843   | 283.882   | NM_005729 | 2718.092  |
| NM_000084 | 2104.338  | 1485.266  | W74254    | 2021.754  | 956.526   | NM_003747 | 641.169   |
| NM_016354 | 1004.539  | 1441      | M58603    | 3642.799  | 1521.984  | AB037744  | 1755.306  |
| NM_003038 | 643.965   | 1681.712  | AA443286  | 588.206   | 838.94    | AF141901  | 884.157   |
| NM_018155 | 2652.118  | 4417.455  | AB003334  | 7023.333  | 1807.933  | AL109708  | 534.348   |
| AL050358  | 1422.225  | 1358.522  | AA490737  | 1606.711  | 1145.181  | AF234532  | 920.437   |
| NM_004731 | 1512.484  | 1166.065  | AI878886  | 12171.502 | 15799.354 | NM_006117 | 2661.993  |
| NM_000544 | 3398.536  | 2114.162  | BG697179  | 5256.357  | 3792.595  | NM_002555 | 1194.017  |
| NM_004644 | 1061.07   | 1381.427  | NM_002136 | 25984.145 | 27939.65  | NM_000309 | 719.548   |
| AV681967  | 1603.277  | 2240.369  | BM012504  | 8161.864  | 5631.325  | NM_004528 | 9545.789  |
| NM_018250 | 1293.127  | 1263.469  | AA664145  | 1116.082  | 1104.878  | AK026381  | 3031.744  |
| NM_016553 | 6324.166  | 7066.351  | T70999    | 722.456   | 1203.602  | NM_002450 | 538.735   |
| AB023136  | 819.139   | 487.569   | T50790    | 1589.677  | 2429.332  | NM_016577 | 915.589   |
| NM_003795 | 52614.004 | 48526.246 | R48168    | 16035.604 | 11552.997 | AK023107  | 1498.762  |
| NM_014232 | 1679.32   | 1736.597  | NM_003942 | 1864.385  | 1988.436  | NM_006854 | 2047.106  |
| NM_005701 | 3904.669  | 3725.313  | NM_004452 | 1706.642  | 1859.12   | NM_004580 | 4561.726  |
| NM_006819 | 43592.684 | 44382.621 | AB040954  | 3336.936  | 2743.238  | NM_020387 | 12203.196 |
| NM_014744 | 2476.285  | 3331.86   | NM_002081 | 811.167   | 941.014   | NM_007246 | 602.009   |
| AF146759  | 1255.546  | 1369.494  | NM_002084 | 1405.74   | 850.015   | AF150735  | 926.723   |
| AB032993  | 7621.281  | 4187.087  | D16892    | 14649.717 | 14897.129 | NM_018183 | 822.514   |
| NM_000854 | 5278.666  | 3727.205  | NM_004750 | 1089.391  | 835.53    | NM_012382 | 528.412   |
| AL117423  | 4894.615  | 5295.33   | NM_007295 | 2085.022  | 928.981   | NM_002452 | 3979.14   |
| NM_006140 | 1382.512  | 860.493   | NM_003651 | 4012.965  | 3112.634  | NM_000314 | 3084.461  |
| NM_002685 | 2945.583  | 3213.077  | NM_000418 | 550.847   | 289.42    | AF305239  | 755.068   |
| AK024504  | 1329.764  | 1291.422  | NM_013246 | 460.763   | 316.749   | NM_002827 | 1640.967  |
| AF039023  | 2266.296  | 1710.663  | NM_018431 | 478.658   | 358.539   | NM_001946 | 1779.598  |
| NM_005511 | 3278.741  | 3513.081  | NM_000565 | 7249.396  | 3336.7    | BF035425  | 16952.912 |
| NM_014698 | 12139.775 | 9868.816  | NM_002019 | 757.792   | 766.464   | NM_000159 | 34180.402 |
| NM_018475 | 4694.728  | 5945.403  | AF253318  | 2625.008  | 1806.605  | NM_014638 | 1738.507  |
| NM_003262 | 3147.452  | 3390.146  | AK024848  | 3662.558  | 3849.646  | NM_000118 | 737.558   |
| NM_020125 | 1345.775  | 4250.357  | NM_003633 | 487.649   | 656.254   | NM_000913 | 3582.882  |
| AB028127  | 606.229   | 1069.853  | NM_000543 | 946.068   | 641.445   | BG325046  | 638.478   |
| AK022832  | 5528.885  | 2720.152  | U06699    | 5853.043  | 9706.503  | AI351740  | 1422.501  |
| NM_014641 | 2370.493  | 2758.348  | NM_006148 | 555.981   | 680.747   | AA444051  | 450.928   |
| NM_004462 | 6348.567  | 15470.333 | AJ290954  | 5554.993  | 4146.634  | NM_007164 | 1672.288  |
| AB020664  | 3043.599  | 3541.458  | AK025451  | 3485.013  | 2686.667  | BE783826  | 10861.949 |
| NM_006640 | 5722.406  | 5255.05   | NM_002783 | 2370.304  | 3328.228  | H07088    | 297.517   |
| NM_000343 | 1375.555  | 1842.817  | NM_000084 | 936.647   | 1087.585  | AI004656  | 621.849   |
| NM_019112 | 6142.183  | 5805.567  | NM_016354 | 971.446   | 1007.573  | BC020596  | 831.728   |
| NM_012336 | 11082.289 | 11245.146 | NM_003038 | 403.22    | 669.962   | X98922    | 1469.832  |
| NM_020161 | 684.632   | 742.429   | NM_018155 | 2015.004  | 2194.074  | AK098435  | 902.689   |
| NM_020246 | 3061.696  | 1891.141  | AL050358  | 1595.737  | 1612.201  | AK092872  | 858.179   |

|           |           |           |           |           |           |           |           |
|-----------|-----------|-----------|-----------|-----------|-----------|-----------|-----------|
| NM_003942 | 2567.235  | 3154.862  | NM_004731 | 1241.347  | 662.923   | M16801    | 782.411   |
| NM_004452 | 2230.576  | 2002.073  | NM_000544 | 3381.735  | 1543.469  | NM_145904 | 5758.828  |
| AB040954  | 4778.35   | 2715.909  | NM_004644 | 709.689   | 320.946   | NM_013334 | 1459.963  |
| NM_002081 | 1756.281  | 1028.702  | AV681967  | 1052.689  | 801.933   | AB037744  | 2081.806  |
| AB023139  | 4139.32   | 2309.895  | NM_018250 | 975.806   | 717.374   | AF141901  | 1040.932  |
| NM_017885 | 1982.171  | 1533.399  | NM_016553 | 8227.221  | 3420.064  | AF234532  | 1032.931  |
| D80004    | 2162.903  | 5130.938  | AB023136  | 444.69    | 334.98    | NM_002418 | 989.045   |
| NM_000946 | 1985.942  | 4129.814  | NM_003795 | 46360.168 | 19172.738 | NM_002090 | 509.081   |
| NM_016070 | 1520.365  | 1693.642  | NM_014232 | 1416.323  | 1046.083  | NM_004485 | 511.822   |
| NM_016390 | 1671.647  | 1665.066  | NM_005701 | 969.597   | 743.777   | NM_013296 | 1598.443  |
| NM_016101 | 4514.949  | 8333.482  | NM_001231 | 745.44    | 671.222   | AL117478  | 532.389   |
| NM_005859 | 33673.723 | 39195.707 | NM_006819 | 30947.514 | 30624.865 | NM_005307 | 429.048   |
| NM_014628 | 5748.899  | 4521.358  | NM_014744 | 1689.809  | 2694.607  | NM_005958 | 289.139   |
| AL365404  | 14809.346 | 15659.966 | AF146759  | 1583.026  | 1427.535  | AK025687  | 815.586   |
| AK022907  | 2647.149  | 5225.586  | AB032993  | 5665.806  | 3565.083  | AL137264  | 2771.721  |
| NM_004245 | 1620.562  | 1443.766  | NM_000854 | 2796.323  | 2528.108  | NM_002226 | 586.943   |
| NM_000543 | 1392.516  | 832.488   | AL117423  | 2748.863  | 3116.517  | X84370    | 3073.187  |
| U06699    | 8123.502  | 9464.761  | NM_006140 | 592.916   | 573.141   | NM_016577 | 1094.397  |
| AJ290954  | 25915.375 | 4269.285  | NM_002685 | 2519.11   | 2490.124  | AK023107  | 1771.792  |
| AK025451  | 10564.782 | 4907.956  | AK024504  | 845.505   | 908.683   | NM_006854 | 2105.494  |
| NM_002783 | 2742.161  | 2119.437  | AF039023  | 1679.921  | 1033.832  | NM_004580 | 3707.083  |
| X52005    | 21809.627 | 21461.287 | NM_005511 | 3410.091  | 2626.048  | NM_020387 | 12347.905 |
| NM_001047 | 5075.823  | 2890.881  | NM_014698 | 11111.565 | 9843.163  | NM_007246 | 595.674   |
| AK024396  | 4781.013  | 2597.341  | NM_018475 | 5381.344  | 2975.835  | AK026248  | 605.664   |
| U58514    | 2080.576  | 2184.223  | NM_003262 | 2573.344  | 2457.65   | NM_004578 | 986.789   |
| W74254    | 1951.637  | 2325.296  | AK022832  | 4914.75   | 1283.869  | NM_000647 | 1130.562  |
| M58603    | 4327.345  | 3479.632  | NM_014641 | 2796.642  | 1323.569  | NM_017738 | 6066.815  |
| AA443286  | 1264.177  | 1069.134  | NM_004462 | 5399.66   | 6415.396  | NM_016557 | 535.23    |
| AB003334  | 8308.537  | 4170.371  | AB020664  | 2443.521  | 2213.979  | NM_000623 | 1211.905  |
| AW276315  | 1232.914  | 2292.364  | NM_006640 | 4128.314  | 5339.759  | NM_018467 | 5392.546  |
| AA490737  | 3380.487  | 4003.993  | NM_000343 | 845.735   | 1289.685  | NM_002038 | 8323.763  |
| AI878886  | 11615.426 | 28618.707 | NM_019112 | 3314.784  | 4160.358  | NM_015493 | 573.489   |
| BG697179  | 7121.742  | 10139.959 | NM_012336 | 8137.977  | 8789.839  | NM_003747 | 584.147   |
| NM_002136 | 40482.945 | 56499.977 | NM_020161 | 744.604   | 731.73    | NM_002827 | 2393.359  |
| BM012504  | 9657.194  | 12920.868 | NM_020246 | 1411.199  | 1429.923  | NM_001946 | 1630.277  |
| AA664145  | 2569.973  | 3645.312  | NM_003942 | 1230.812  | 856.492   | BF035425  | 19400.652 |
| X72308    | 29179.232 | 34667.816 | NM_004452 | 1034.273  | 1016.484  | NM_001608 | 780.518   |
| T50790    | 2269.425  | 4147.566  | AB040954  | 3335.852  | 1724.097  | NM_000159 | 40259.133 |
| R48168    | 18065.141 | 15717.894 | AB023139  | 3002.997  | 1585.568  | NM_014638 | 1118.518  |
| AB032993  | 7124.818  | 3990.059  | NM_017885 | 1101.527  | 784.974   | NM_006117 | 2341.769  |
| NM_000854 | 5002.311  | 3774.775  | D80004    | 2112.094  | 2049.707  | NM_002225 | 1101.854  |
| AL117423  | 4289.361  | 4718.48   | X63966    | 1138.519  | 1209.333  | NM_015415 | 3928.188  |
| NM_006140 | 1268.656  | 694.989   | NM_000946 | 2492.05   | 2472.189  | NM_004897 | 545.303   |
| NM_002084 | 2706.691  | 1796.342  | NM_016070 | 1396.792  | 1198.266  | NM_002555 | 1288.18   |
| D16892    | 17998.293 | 26585.408 | NM_016390 | 1187.464  | 759.04    | NM_000309 | 1298.311  |
| NM_004750 | 1942.275  | 2140.601  | NM_016101 | 6107.354  | 5668.905  | AK026381  | 1088.584  |
| NM_007295 | 2952.962  | 2630.297  | NM_005859 | 40817.816 | 41166.594 | NM_002450 | 475.505   |
| NM_003651 | 8049.445  | 11296.813 | NM_020313 | 922.833   | 750.72    | NM_000705 | 1202.996  |
| NM_000418 | 1633.539  | 986.503   | NM_014628 | 3928.809  | 4540.325  | NM_004231 | 39196.734 |
| NM_013246 | 605.718   | 857.86    | AK025630  | 1696.022  | 1333.497  | NM_145904 | 5734.626  |
| NM_000591 | 2446.024  | 2016.931  | AK022907  | 2827.833  | 4522.186  | NM_013334 | 1870.004  |
| NM_000565 | 20775.141 | 10475.317 | NM_014793 | 3286.279  | 5388.676  | AF150735  | 2264.049  |
| AF253318  | 2267.355  | 2307.264  | NM_004245 | 1408.597  | 2446.072  | NM_018183 | 1123.098  |

|           |           |           |           |           |           |           |           |
|-----------|-----------|-----------|-----------|-----------|-----------|-----------|-----------|
| NM_017767 | 11788.132 | 12331.249 | NM_003241 | 1697.496  | 2273.543  | NM_002452 | 1622.99   |
| AK024848  | 8279.22   | 7777.53   | NM_000543 | 653.471   | 493.93    | NM_016440 | 5171.062  |
| NM_003633 | 343.149   | 1159.975  | U06699    | 3487.553  | 4871.405  | NM_000314 | 4279.848  |
| NM_000343 | 907.742   | 1253.875  | AJ290954  | 4646.622  | 2634.24   | AB002369  | 1216.7    |
| NM_019112 | 5012.89   | 3800.351  | AK025451  | 2609.561  | 1433.972  | AL137264  | 5291.817  |
| NM_012336 | 9401.044  | 9276.552  | NM_002783 | 1193.088  | 1172.614  | NM_002226 | 258.729   |
| NM_020161 | 831.727   | 665.139   | X52005    | 8007.969  | 3582.565  | X84370    | 1373.172  |
| NM_020246 | 2587.767  | 1696.445  | NM_001047 | 1999.894  | 1333.572  | NM_000913 | 4023.796  |
| NM_000084 | 1689.598  | 1288.595  | AK024396  | 1627.891  | 1170.854  | NM_001298 | 1070.481  |
| NM_016354 | 987.478   | 1030.557  | U58514    | 893.851   | 582.082   | BG325046  | 1760.274  |
| NM_003038 | 826.542   | 2274.412  | M57627    | 613.204   | 407.728   | AI351740  | 1901.399  |
| NM_018155 | 3746.637  | 6074.791  | W74254    | 1900.446  | 1140.78   | AA444051  | 652.508   |
| AL050358  | 1757.869  | 1583.506  | M58603    | 2745.736  | 1011.303  | NM_007164 | 1293.838  |
| NM_004731 | 1858.166  | 1359.21   | AA443286  | 721.057   | 911.575   | BE783826  | 12056.49  |
| NM_000544 | 4148.433  | 3193.499  | AB003334  | 6931.709  | 2014.341  | AI004656  | 233.423   |
| NM_004644 | 1255.322  | 810.977   | BG697179  | 6060.309  | 7235.052  | BC020596  | 1435.464  |
| AV681967  | 1796.728  | 2273.678  | NM_002136 | 23929.51  | 35277.594 | AF116606  | 17422.779 |
| NM_018250 | 1297.801  | 1637.424  | AA664145  | 1054.82   | 1779.319  | X98922    | 2123.168  |
| NM_016553 | 6436.72   | 6698.306  | T50790    | 1521.041  | 5128.764  | AK098435  | 1178.288  |
| NM_003795 | 56967.414 | 59643.359 | R48168    | 21354.148 | 19408     | AK092872  | 905.523   |
| NM_014232 | 1619.231  | 1705.688  | AB032993  | 3385.752  | 1658.366  | NM_002038 | 3901.616  |
| NM_005701 | 3998.662  | 3571.334  | NM_000854 | 1761.494  | 1289.242  | NM_005729 | 1073.843  |
| NM_001231 | 896.445   | 813.883   | AL117423  | 2231.237  | 2006.522  | NM_003747 | 731.214   |
| NM_006819 | 46086.113 | 43848.035 | NM_002084 | 1174.797  | 586.146   | AB037744  | 1546.344  |
| NM_014744 | 2381.23   | 3341.184  | D16892    | 15715.066 | 14606.264 | AF141901  | 892.759   |
| AF146759  | 1454.446  | 2186.162  | NM_004750 | 1445.435  | 1200.767  | AF234532  | 923.238   |
| AL365404  | 12938.988 | 9571.148  | NM_007295 | 3563.472  | 2084.439  | NM_004485 | 367.309   |
| AK022907  | 2146.633  | 2353.32   | NM_003651 | 2993.842  | 3739.368  | NM_013296 | 1064.687  |
| NM_014793 | 2456.69   | 1815.749  | NM_000418 | 430.828   | 304.469   | NM_005958 | 400.189   |
| NM_004245 | 1527.167  | 1145.222  | NM_000591 | 1443.459  | 1451.417  | AF225426  | 615.79    |
| NM_003241 | 1795.128  | 1549.465  | AK024848  | 4412.154  | 8042.052  | NM_005208 | 3464.391  |
| NM_002685 | 3087.419  | 2586.188  | NM_004852 | 501.244   | 1001.174  | AK025687  | 2287.163  |
| AK024504  | 1317.495  | 534.664   | NM_003633 | 541.322   | 832.814   | AF218941  | 305.41    |
| AF039023  | 3026.755  | 2509.713  | NM_019112 | 2103.756  | 1769.885  | NM_004978 | 479.895   |
| NM_005511 | 5296.614  | 4650.051  | NM_012336 | 5717.486  | 4786.406  | NM_004231 | 33772.91  |
| NM_014698 | 16685.92  | 14155.354 | NM_020246 | 1504.894  | 1099.537  | NM_016577 | 635.699   |
| NM_018475 | 5266.12   | 6278.593  | NM_016354 | 667.269   | 1154.169  | AK023107  | 1243.637  |
| NM_003262 | 3488.536  | 3260.524  | NM_003038 | 633.277   | 1236.511  | NM_006854 | 1690.533  |
| NM_020125 | 691.292   | 445.446   | NM_018155 | 4064.793  | 3569.657  | NM_004580 | 2083.383  |
| AB028127  | 611.85    | 713.995   | AL050358  | 2076.77   | 2180.466  | NM_020387 | 15346.092 |
| AK022832  | 5207.022  | 2583.369  | NM_004731 | 1453.955  | 771.3     | NM_007246 | 495.004   |
| NM_014641 | 2670.606  | 3926.25   | NM_000544 | 2929.029  | 2156.825  | AK026248  | 730.117   |
| NM_004462 | 6481.917  | 14696.167 | AV681967  | 802.966   | 1234.249  | NM_004578 | 2169.077  |
| AB020664  | 3049.171  | 5034.921  | NM_018250 | 1076.365  | 1022.285  | NM_000647 | 1487.339  |
| NM_006640 | 6076.141  | 6494.389  | NM_016553 | 8832.169  | 5257.584  | NM_017604 | 374.505   |
| NM_000857 | 1408.497  | 1343.063  | NM_006819 | 18498.996 | 25983.445 | NM_017738 | 4218.731  |
| L20688    | 27657.18  | 20086.76  | NM_014744 | 1924.193  | 4015.585  | NM_016557 | 484.689   |
| X69111    | 4914.387  | 3663.829  | AF146759  | 1618.822  | 2767.764  | NM_000623 | 1252.304  |
| AF252283  | 637.878   | 661.608   | AL365404  | 11917.277 | 14022.134 | AF161348  | 1371.566  |
| AB037799  | 2968.99   | 2545.566  | AK022907  | 2612.698  | 4115.519  | NM_018467 | 5770.449  |
| AB007950  | 10916.956 | 9031.114  | NM_014793 | 1979.391  | 2128.946  | NM_006068 | 833.734   |
| AK025593  | 713.328   | 951.217   | NM_003241 | 1027.324  | 934.249   | NM_016440 | 4604.705  |
| AB018304  | 2667.061  | 3014.623  | NM_002685 | 1986.218  | 1561.976  | NM_000314 | 1481.447  |



|           |           |           |           |           |           |           |           |
|-----------|-----------|-----------|-----------|-----------|-----------|-----------|-----------|
| NM_007061 | 15967.974 | 10768.784 | AF039023  | 900.479   | 495.566   | AF305239  | 331.407   |
| AB040954  | 3472.561  | 2952.703  | NM_005511 | 3234.065  | 3055.219  | NM_002827 | 1847.511  |
| NM_002081 | 1346.686  | 1336.172  | NM_014698 | 13767.841 | 15672.646 | NM_001946 | 1237.282  |
| AB023139  | 3207.594  | 2086.833  | NM_018475 | 3756.962  | 3083.101  | BF035425  | 16462.121 |
| NM_017885 | 1462.651  | 2084.784  | NM_003262 | 2150.831  | 2535.358  | NM_000159 | 40550.859 |
| D80004    | 1807.06   | 5305.75   | AK022832  | 3044.536  | 1331.571  | NM_014638 | 1864.723  |
| NM_000946 | 1867.552  | 3685.504  | NM_004462 | 3681.863  | 7787.735  | AF099740  | 600.064   |
| NM_016070 | 1597.526  | 2130.797  | NM_006640 | 2625.233  | 4689.545  | NM_006117 | 3235.764  |
| NM_016390 | 1516.029  | 1901.305  | NM_000857 | 788.475   | 976.432   | NM_002225 | 1223.846  |
| NM_016101 | 4801.666  | 6521.138  | L20688    | 21549.111 | 12066.908 | NM_015415 | 4002.01   |
| NM_005859 | 35579.797 | 36454.719 | X69111    | 3093.629  | 2538.54   | NM_002555 | 1177.1    |
| NM_020313 | 1043.913  | 739.211   | AB037799  | 2914.265  | 2801.823  | NM_004528 | 7872.368  |
| NM_014628 | 5799.762  | 4920.239  | AB007950  | 11932.993 | 10581.878 | AK026381  | 4124.527  |
| AK025630  | 2570.578  | 2364.625  | AK025593  | 882.647   | 553.258   | NM_002450 | 1472.294  |
| NM_014718 | 1444.423  | 1003.341  | AB018304  | 1889.573  | 2265.118  | NM_001686 | 244.68    |
| NM_000632 | 1943.076  | 658.909   | NM_007061 | 12588.815 | 10066.641 | D26362    | 394.875   |
| AK024488  | 1521.394  | 1159.757  | AB040954  | 3288.801  | 2305.115  | AY009402  | 1563.182  |
| AK023249  | 64531.473 | 47227.516 | AB023139  | 2283.005  | 1339.261  | NM_012443 | 496.818   |
| NM_017442 | 6730.817  | 4374.658  | NM_017885 | 552.241   | 353.928   | NM_007009 | 967.738   |
| NM_000743 | 1042.104  | 835.419   | D80004    | 1531.882  | 2110.935  | NM_002584 | 462.974   |
| NM_007218 | 1077.463  | 1174.077  | X63966    | 536.384   | 935.64    | NM_013334 | 2480.152  |
| Z25436    | 2119.82   | 1635.548  | NM_016070 | 1537.181  | 1461.345  | AF150735  | 1846.591  |
| NM_005275 | 6124.778  | 5285.741  | NM_016390 | 1003.954  | 972.906   | NM_018183 | 1146.25   |
| NM_003844 | 13279.803 | 9228.054  | NM_020313 | 351.753   | 863.476   | NM_012382 | 332.649   |
| NM_002005 | 24703.236 | 22498.432 | NM_014628 | 3139.246  | 3856.827  | NM_002452 | 5102.969  |
| NM_012324 | 2552.539  | 3730.669  | AK025630  | 1418.184  | 1182.093  | NM_012304 | 525.621   |
| AK000039  | 1422.439  | 1245.416  | NM_014718 | 786.394   | 1026.023  | AF196976  | 2708.598  |
| AL137352  | 1598.097  | 1384.718  | AK023249  | 15020.343 | 10817.69  | NM_003161 | 529.86    |
| NM_014749 | 3029.324  | 2252.769  | NM_017442 | 3149.495  | 3116.613  | NM_014496 | 459.414   |
| NM_004489 | 3433.026  | 4162.333  | NM_007218 | 614.703   | 574.16    | NM_016215 | 7324.779  |
| BI461699  | 833.597   | 1382.103  | NM_005275 | 3562.129  | 2262.223  | AK026919  | 1019.065  |
| AK090409  | 3649.35   | 850.934   | NM_002005 | 21633.049 | 22362.727 | NM_001501 | 1952.984  |
| AF172264  | 2029.047  | 4301.363  | NM_012324 | 1592.806  | 1990.303  | NM_006176 | 21002.521 |
| Y08267    | 1503.692  | 1591.475  | AK000039  | 1367.219  | 1491.516  | AL137459  | 1042.041  |
| U80756    | 8511.39   | 7590.838  | BI461699  | 706.304   | 728.727   | AB037812  | 2234.558  |
| NM_018161 | 1996.355  | 2000.128  | AK090409  | 1256.24   | 494.463   | AB007932  | 2532.338  |
| NM_005248 | 1763.191  | 1339.504  | AF172264  | 1072.255  | 1675.63   | NM_003978 | 1652.225  |
| NM_004810 | 1663.497  | 952.783   | Y08267    | 1284.271  | 1678.087  | NM_002561 | 2705.566  |
| AL117629  | 2156.726  | 2467.513  | U80756    | 7798.371  | 7492.904  | NM_006103 | 18251.861 |
| NM_002595 | 1006.05   | 1266.626  | NM_018161 | 1201.765  | 1471.448  | NM_000805 | 887.562   |
| NM_015726 | 2092.648  | 1584.984  | NM_005248 | 1154.928  | 862.971   | AL359933  | 2755.659  |
| AF174604  | 1865.026  | 1541.789  | AL117629  | 2572.812  | 2482.768  | NM_001302 | 197.529   |
| AB002379  | 3919.964  | 3948.516  | NM_002595 | 625.724   | 965.494   | M17783    | 3481.352  |
| AF113223  | 1009.074  | 595.083   | NM_015726 | 1147.598  | 1088.879  | NM_018590 | 1167.439  |
| AB046851  | 3913.464  | 1676.88   | AF174604  | 1883.61   | 1683.583  | NM_003178 | 456.62    |
| NM_018174 | 2079.17   | 1027.219  | AB002379  | 6165.666  | 6463.649  | NM_012437 | 2816.376  |
| NM_014548 | 3241.475  | 3912.959  | AB046851  | 1827.185  | 1681.207  | AF090944  | 347.677   |
| NM_004437 | 1128.963  | 874.576   | NM_018174 | 884.214   | 446.902   | AF116712  | 445.49    |
| AK025875  | 1589.257  | 2710.617  | NM_014548 | 1534.642  | 2109.625  | AF116626  | 803.305   |
| BC014152  | 45795.148 | 58843.758 | BC014152  | 28739.572 | 34283.891 | NM_001760 | 10820.282 |
| NM_012418 | 644.857   | 1067.17   | NM_012418 | 637.45    | 769.806   | NM_002527 | 723.88    |
| NM_000226 | 701.578   | 945.608   | NM_000393 | 1102.193  | 1008.358  | NM_005890 | 973.787   |
| AB037779  | 32284.939 | 34041.461 | NM_000889 | 1556.516  | 1486.161  | AF149785  | 1504.046  |

|           |           |           |           |           |           |           |           |
|-----------|-----------|-----------|-----------|-----------|-----------|-----------|-----------|
| NM_000655 | 833.695   | 1126.221  | NM_003859 | 7938.753  | 9296.109  | NM_012068 | 5287.639  |
| NM_000393 | 1776.588  | 2424.686  | NM_000236 | 1509.236  | 1789.003  | NM_004064 | 3787.265  |
| NM_000889 | 2173.783  | 2339.705  | NM_002903 | 26846.229 | 33891.848 | NM_001256 | 1235.324  |
| NM_003859 | 9337.326  | 10156.009 | NM_012339 | 2275.783  | 3414.973  | NM_020205 | 567.325   |
| NM_000236 | 2344.334  | 1511.342  | NM_005787 | 17405.023 | 22290.377 | AK024815  | 440.112   |
| NM_002903 | 31270.643 | 21238.189 | NM_002143 | 2263.618  | 2749.941  | NM_001227 | 283.034   |
| NM_012339 | 2041.521  | 1702.62   | NM_006360 | 13076.476 | 15580.08  | NM_001191 | 1467.714  |
| NM_005787 | 15573.624 | 19152.098 | NM_003968 | 2656.741  | 2645.231  | U15174    | 324.492   |
| NM_002143 | 4441.121  | 3074.146  | NM_002786 | 917.663   | 2331.964  | NM_013342 | 1665.91   |
| AF284421  | 8819.6    | 6533.04   | NM_003343 | 11439.078 | 9290.813  | AB040917  | 580.559   |
| NM_006048 | 4713.2    | 2667.708  | NM_002789 | 30157.02  | 20314.184 | AL110261  | 3894.536  |
| NM_003968 | 7961.138  | 5898.604  | NM_003470 | 3199.251  | 3002.576  | AK021786  | 90.082    |
| NM_002786 | 1216.427  | 2713.15   | AL080137  | 877.708   | 1414.141  | NM_004279 | 1788.546  |
| NM_003343 | 13517.411 | 12148.994 | NM_017679 | 1179.32   | 1415.928  | NM_004851 | 393.115   |
| NM_002789 | 38917.586 | 39820.645 | NM_017704 | 605.149   | 904.49    | NM_001908 | 1852.137  |
| NM_003470 | 4777.618  | 7289.707  | BC016062  | 11244.549 | 12978.6   | NM_000285 | 1417.141  |
| AL080137  | 1167.472  | 1802.532  | NM_012250 | 507.487   | 1690.196  | AL117452  | 2094.674  |
| NM_017679 | 2211.018  | 2489.533  | NM_006283 | 5328.625  | 4227.326  | NM_012230 | 539.295   |
| AF155103  | 820.05    | 1068.641  | NM_002701 | 1114.641  | 1482.71   | NM_014038 | 548.816   |
| NM_017704 | 1757.547  | 2855.971  | NM_005693 | 412.281   | 199.418   | NM_002061 | 1460.629  |
| BC006359  | 2565.084  | 1857.84   | X97303    | 6458.541  | 4866.106  | AF169974  | 1770.281  |
| AK026127  | 615.793   | 1153.245  | NM_017530 | 4222.609  | 5112.403  | NM_004522 | 307.868   |
| BC016062  | 11963.048 | 18221.402 | AB029030  | 1085.002  | 604.239   | NM_005733 | 357.073   |
| NM_002814 | 3050.531  | 5453.717  | AL360183  | 1377.985  | 1226.77   | NM_018138 | 1134.01   |
| NM_012250 | 638.246   | 1228.752  | AK027046  | 998.648   | 1186.763  | NM_019619 | 1385.348  |
| NM_006283 | 5240.683  | 5671.262  | NM_003113 | 2413.262  | 2988.14   | NM_005886 | 5183.901  |
| NM_002701 | 539.997   | 649.486   | NM_016578 | 4265.561  | 6193.611  | NM_005966 | 471.316   |
| NM_005693 | 801.611   | 684.199   | NM_003822 | 755.181   | 864.988   | NM_003156 | 407.147   |
| X97303    | 7841.391  | 5268.627  | NM_015832 | 5243.806  | 6799.733  | NM_013310 | 800.167   |
| NM_017530 | 3475.196  | 4062.294  | NM_014319 | 1548.451  | 2955.792  | NM_005762 | 1451.616  |
| AL360183  | 1329.461  | 1872.165  | NM_004865 | 1021.858  | 1971.109  | NM_014643 | 1650.477  |
| AK027046  | 1421.811  | 1902.222  | AB019566  | 51733.719 | 49376.668 | NM_005653 | 964.106   |
| NM_003113 | 5644.463  | 3790.723  | NM_000981 | 39533.793 | 44622.094 | NM_003440 | 592.601   |
| NM_015832 | 7531.733  | 8336.569  | NM_002047 | 5252.534  | 13016.392 | NM_004698 | 1713.863  |
| NM_014319 | 1488.974  | 2852.44   | NM_001031 | 55662.574 | 50844.191 | NM_004516 | 946.809   |
| NM_004865 | 1952.377  | 2718.911  | NM_007208 | 6933.544  | 10200.664 | NM_006513 | 375.962   |
| NM_002047 | 10045.066 | 29406.289 | NM_000985 | 6929.254  | 19560.576 | NM_003685 | 4365.309  |
| NM_001031 | 76641.953 | 68783.539 | BF130622  | 11226.392 | 16104.664 | NM_006295 | 1855.975  |
| NM_007208 | 10621.479 | 20331.82  | BU165106  | 4110.057  | 2810.178  | NM_001540 | 909.451   |
| BF130622  | 17433.121 | 22735.873 | AF038202  | 963.741   | 522.806   | NM_012111 | 2111.407  |
| BU165106  | 2546.738  | 2652.503  | AK025558  | 2268.057  | 2830.056  | NM_004470 | 1212.897  |
| AF038202  | 1706.413  | 2045.633  | NM_001864 | 9383.419  | 7313.012  | NM_001418 | 363.624   |
| AB040925  | 507.735   | 750.583   | NM_003477 | 3338.097  | 2577.245  | NM_003756 | 16504.027 |
| AK024355  | 837.828   | 1011.673  | NM_002654 | 22963.508 | 13338.474 | AL049680  | 974.639   |
| NM_001864 | 24240.127 | 28624.209 | NM_020382 | 1975.499  | 2562.491  | NM_003715 | 3008.643  |
| NM_003477 | 8383.462  | 12749.316 | NM_007192 | 6784.509  | 3920.306  | BF036874  | 902.145   |
| NM_002654 | 45074.051 | 36443.934 | AB002337  | 10531.823 | 9622.019  | BE888487  | 475.457   |
| NM_020382 | 1928.366  | 3084.466  | NM_014933 | 3541.26   | 4402.167  | AF182419  | 1634.976  |
| NM_018267 | 1328.126  | 1897.074  | NM_003076 | 16786.215 | 12674.642 | NM_005375 | 2170.932  |
| NM_007192 | 7076.463  | 9187.989  | NM_006385 | 2194.983  | 2203.729  | NM_005985 | 3189.236  |
| AB002337  | 11942.002 | 12328.793 | AK024250  | 2108.749  | 2483.365  | NM_015906 | 3112.571  |
| NM_014933 | 5215.021  | 10709.019 | NM_003456 | 2176.567  | 6738.618  | AK023759  | 2619.449  |
| NM_003076 | 29590.098 | 26561.148 | AB029016  | 2165.448  | 3359.108  | L25270    | 6791.391  |

|           |           |           |           |           |           |           |           |
|-----------|-----------|-----------|-----------|-----------|-----------|-----------|-----------|
| NM_006385 | 2014.946  | 1574.447  | AK000445  | 1085.426  | 1726.185  | AB033111  | 339.204   |
| AK024250  | 1329.998  | 2843.995  | AL049390  | 3315.48   | 1970.268  | AF229246  | 965.128   |
| NM_003456 | 2105.103  | 3952.25   | AK000584  | 3039.656  | 2933.299  | S64709    | 1560.352  |
| NM_002585 | 3779.51   | 3363.479  | AJ297363  | 759.948   | 741.231   | NM_01848E | 885.711   |
| AB029016  | 3796.641  | 4295.412  | AK026379  | 2231.728  | 1517.951  | NM_003071 | 3390.304  |
| AK000445  | 1208.196  | 1882.989  | AK022965  | 1727.947  | 643.196   | AK021494  | 925.341   |
| AL049390  | 3188.77   | 2924.328  | AK024278  | 8197.901  | 4603.138  | AF075023  | 688.332   |
| AK000584  | 4568.754  | 7473.424  | NM_018022 | 1508.835  | 885.104   | AL360160  | 14175.023 |
| AJ297363  | 1706.778  | 2557.677  | AB056722  | 2719.21   | 4875.748  | AK001092  | 31094.598 |
| AK024278  | 16343.962 | 11314.759 | NM_013242 | 2785.359  | 2062.062  | AK023427  | 367.652   |
| AK026982  | 2117.227  | 1693.546  | NM_012066 | 14342.819 | 12211.39  | AF147345  | 334.591   |
| NM_018022 | 3975.253  | 3719.754  | AF052168  | 7141.122  | 6701.303  | AF147373  | 5353.823  |
| AB056722  | 3198.258  | 6751.018  | NM_014650 | 945.953   | 1169.042  | AF086253  | 733.504   |
| NM_013242 | 2294.722  | 6136.253  | AK022632  | 2381.187  | 1299.164  | AF086337  | 208.495   |
| AK023198  | 1172.818  | 984.18    | AK021554  | 3887.159  | 4400.85   | AF086303  | 571.206   |
| NM_012066 | 8968.863  | 10158.671 | NM_020235 | 2204.594  | 2547.406  | AF086434  | 1041.466  |
| AF052168  | 3806.031  | 5008.586  | AK000532  | 863.235   | 1065.438  | AK022063  | 4352.262  |
| NM_014650 | 1431.864  | 1416.105  | AL109681  | 1064.037  | 1367.275  | AF086345  | 1888.746  |
| AK022632  | 5575.35   | 5216.152  | AL162039  | 3265.373  | 1993.717  | AF086464  | 1797.908  |
| AK021554  | 2298.162  | 2238.596  | AK024896  | 1564.535  | 1859.341  | AL049278  | 1307.804  |
| AF070620  | 852.664   | 956.22    | AK023663  | 1560.581  | 640.755   | AL117519  | 867.306   |
| NM_020235 | 2089.361  | 3314.208  | AB007928  | 1273.316  | 633.857   | NM_005060 | 475.235   |
| AK000532  | 1165.069  | 1579.984  | D83543    | 939.837   | 890.381   | AF085935  | 699.852   |
| AL109681  | 572.232   | 799.071   | NM_016930 | 1870.479  | 1389.775  | AL035369  | 683.989   |
| AL162039  | 4113.859  | 4310.793  | AJ001861  | 739.772   | 784.425   | AF075097  | 1551.114  |
| AK024896  | 4502.576  | 4164.278  | X64981    | 1914.487  | 1347.947  | AL133075  | 8302.381  |
| AL353952  | 638.835   | 955.997   | X75692    | 2997.74   | 2500.913  | AL137630  | 926.76    |
| AK024059  | 649.431   | 1106.311  | X64988    | 719.975   | 732.707   | AL137277  | 8613.683  |
| AK023663  | 3411.76   | 3200.888  | Y10511    | 2691.401  | 2363.275  | BC023609  | 814.294   |
| AB007928  | 1179.599  | 1416.756  | AF018254  | 1559.546  | 1414.317  | AK025100  | 685.145   |
| AK023645  | 1816.182  | 1827.863  | NM_016240 | 929.746   | 1628.381  | AF086395  | 666.587   |
| D83543    | 2507.322  | 2706.083  | AK026459  | 701.023   | 1343.103  | AF086049  | 3100.999  |
| NM_016930 | 2344.265  | 3558.979  | AK025238  | 974.97    | 496.166   | AF088020  | 633.994   |
| AJ001861  | 1068.823  | 1540.022  | AK026416  | 12164.17  | 12461.168 | AF114263  | 796.751   |
| NM_00518E | 559.763   | 1048.351  | AK000019  | 629.051   | 717.476   | AK026142  | 2032.386  |
| X64981    | 1833.096  | 2135.451  | AK000645  | 504.857   | 639.512   | AF161369  | 4910.015  |
| X75692    | 9613.939  | 8116.226  | AK024947  | 2013.236  | 2430.106  | AK027176  | 1512.429  |
| X64988    | 680.281   | 676.913   | AK024606  | 7557.926  | 8484.538  | AF073328  | 313.801   |
| Y10511    | 5823.281  | 7531.781  | NM_016417 | 13403.617 | 14230.581 | Y12019    | 3060.816  |
| AF018254  | 2015.59   | 1871.367  | NM_01910E | 1245.17   | 1693.738  | AL137326  | 730.519   |
| NM_016240 | 1524.138  | 2319.553  | AL080118  | 2726.322  | 3849.181  | AK022301  | 1297.688  |
| AK026459  | 829.917   | 1061.931  | AL049378  | 5051.017  | 6338.299  | AK021948  | 954.849   |
| AK025238  | 1302.682  | 622.251   | L09086    | 565.671   | 729.805   | AK022054  | 635.588   |
| AK026416  | 12298.217 | 17097.004 | AK021505  | 3407.752  | 4948.728  | AK022191  | 463.024   |
| AK025797  | 681.704   | 1121.463  | AK021598  | 4695.053  | 3889.326  | AK022341  | 702.921   |
| AK000853  | 411.324   | 851.061   | AJ012498  | 627.266   | 629.334   | AK026861  | 560.743   |
| AK000019  | 966.93    | 1316.476  | NM_005973 | 11020.022 | 10396.621 | AK021642  | 2406.943  |
| AK024864  | 2443.237  | 2456.626  | X04547    | 2084.914  | 4247.306  | AK022455  | 930.291   |
| AK024947  | 2382.393  | 2608.766  | AK025823  | 2142.463  | 2963.596  | AK021987  | 1122.898  |
| AK024606  | 3305.13   | 2854.67   | AK026691  | 809.496   | 1349.377  | AK026905  | 2171.723  |
| NM_016417 | 4632.512  | 10908.544 | AL359941  | 4225.873  | 6121.779  | AK023449  | 852.029   |
| NM_01910E | 1552.881  | 1347.767  | U52076    | 1637.384  | 2086.556  | AK026704  | 1600.001  |
| AL080118  | 3824.423  | 4751.617  | AF035278  | 2857.455  | 3480.678  | NM_000134 | 965.171   |

|           |           |           |           |           |           |            |           |
|-----------|-----------|-----------|-----------|-----------|-----------|------------|-----------|
| AL049378  | 4704.227  | 4896.629  | AL050202  | 1366.525  | 2743.995  | NM_00663E  | 721.961   |
| L09086    | 1330.63   | 1479.297  | U32999    | 12715.214 | 18475.813 | X14675     | 718.81    |
| AK021505  | 1342.938  | 2130.691  | U66052    | 10636.31  | 15421.29  | AF071170   | 675.114   |
| AK021598  | 6119.8    | 2889.798  | AK024156  | 1264.209  | 2580.26   | AK025259   | 1223.876  |
| AJ012498  | 860.52    | 1566.927  | AF086288  | 1457.911  | 2447.424  | NM_018304  | 3864.626  |
| NM_005973 | 5330.662  | 7378.221  | AF119866  | 383.355   | 606.576   | unknown (S | 328.774   |
| X04547    | 3664.127  | 4604.573  | NM_016944 | 742.112   | 1124.425  | AK023264   | 773.24    |
| AK025823  | 1826.068  | 2475.958  | AK023109  | 1563.791  | 2186.117  | AK024457   | 6774.405  |
| AK026691  | 838.605   | 1312.002  | NM_005293 | 41936.918 | 47686.609 | AL389977   | 2124.863  |
| AL359941  | 2495.72   | 2603.452  | S50185    | 1436.104  | 2470.929  | AK026894   | 970.684   |
| U52076    | 1582.992  | 1307.046  | AF133332  | 1310.545  | 2000.613  | AK026372   | 831.528   |
| AF035278  | 1592.304  | 1748.039  | NM_00108E | 10509.185 | 12004.45  | NM_01418E  | 2202.438  |
| AL050202  | 1055.023  | 1069.327  | BC015991  | 5120.047  | 4143.931  | AF056442   | 1162.002  |
| U32999    | 9849.769  | 6737.715  | U94902    | 765.818   | 824.558   | AK024752   | 15449.459 |
| U66052    | 5497.644  | 3884.527  | U46214    | 8526.635  | 7865.688  | BG117194   | 625.946   |
| AK024156  | 1055.221  | 742.3     | NM_00031C | 37299.098 | 47121.016 | AK024181   | 1131.06   |
| AF086288  | 950.3     | 536.184   | AF161343  | 4855.558  | 6721.22   | AF131859   | 1591.706  |
| AK023109  | 646.084   | 837.349   | NM_004765 | 5500.189  | 5028.016  | AK001864   | 930.933   |
| NM_005293 | 5082.603  | 4572.72   | AK022246  | 1115.7    | 1120.325  | AK023632   | 984.623   |
| AF133332  | 1609.827  | 1357.594  | X75684    | 2584.924  | 2667.24   | AF086118   | 3104.189  |
| AK022805  | 370.624   | 631.107   | D17200    | 627.532   | 922.976   | NM_01413E  | 1337.798  |
| NM_00108E | 7576.487  | 6964.696  | AF113701  | 6943.753  | 12104.876 | AK025044   | 538.672   |
| BC015991  | 3028.111  | 4243.896  | Y11158    | 1062.026  | 1597.664  | AF230317   | 405.099   |
| U94902    | 681.793   | 785.916   | NM_006771 | 8572.875  | 8122.531  | AK023806   | 2034.896  |
| U46214    | 4685.053  | 5260.092  | L37702    | 16022.404 | 17782.164 | AF088068   | 834.916   |
| NM_00031C | 57175.77  | 46099.195 | AK022812  | 1480.367  | 2751.945  | Y16696     | 19509.695 |
| AF161343  | 3191.401  | 3423.418  | U79301    | 6444.42   | 10996.24  | AK026094   | 1365.267  |
| NM_004765 | 3765.31   | 2930.61   | AK022260  | 10832.068 | 14663.853 | AF022793   | 81.473    |
| AK022246  | 1013.354  | 655.857   | M32219    | 7778.548  | 13865.556 | AF086027   | 656.67    |
| X75684    | 1928.283  | 1173.128  | BC018868  | 1196.041  | 2670.322  | NM_001207  | 63036.738 |
| AF113701  | 8837.513  | 7216.805  | AF086174  | 796.881   | 1245.591  | AK022199   | 647.001   |
| Y11158    | 801.021   | 804.676   | AF007128  | 4122.165  | 7521.917  | NM_006211  | 322.35    |
| NM_006771 | 8790.457  | 6330.547  | CY3Cy5    | 6452.793  | 609.308   | NM_003524  | 6679.87   |
| L37702    | 10063.484 | 7128.199  | AI351740  | 2348.924  | 2727.895  | NM_005913  | 370.247   |
| AK022812  | 1586.657  | 618.109   | AA444051  | 801.688   | 835.546   | S39891     | 330.611   |
| U79301    | 2323.536  | 1867.361  | NM_007164 | 6549.961  | 4637.264  | AF278605   | 5890.157  |
| AK022260  | 7337.117  | 4315.598  | BE783826  | 21563.221 | 20702.822 | NM_006497  | 2560.386  |
| M32219    | 5312.613  | 6417.673  | X04827    | 1480.49   | 1685.468  | AL133599   | 2883.636  |
| AF086174  | 974.016   | 621.003   | H07088    | 2205.575  | 4943.272  | AK022380   | 727.638   |
| AF007128  | 2758.459  | 3633.839  | AI004656  | 1000.493  | 1437.009  | NM_016472  | 1053.903  |
| CY3Cy5    | 7801.041  | 492.386   | BC020596  | 2298.784  | 1980.848  | AF086064   | 726.283   |
| AI351740  | 31297.311 | 4598.006  | AF116606  | 44301.254 | 49271.898 | AK023042   | 1180.062  |
| AA444051  | 2950.604  | 1473.663  | X98922    | 5411.178  | 2788.215  | AK026429   | 760.463   |
| NM_007164 | 4810.145  | 3147.575  | AK098435  | 3142.733  | 3954.059  | AK021880   | 823.101   |
| BE783826  | 24183.574 | 20222.662 | AK092872  | 2794.686  | 3335.1    | AK024107   | 697.211   |
| X04827    | 2024.039  | 1872.807  | AF230496  | 434.41    | 1302.066  | CY3Cy5     | 3161.628  |
| H07088    | 2572.771  | 1138.08   | M16801    | 866.006   | 1249.792  | BG534366   | 1195.529  |
| AI004656  | 2469.844  | 1485.429  | NM_145904 | 14070.217 | 30325.34  | BG698522   | 4506.529  |
| BC020596  | 2861.375  | 2636.04   | SR2       | 46363.004 | 49651.867 | AA152346   | 820.084   |
| AF116606  | 56626.672 | 49138.051 | SR4       | 12024.128 | 10958.416 | L15189     | 434.724   |
| X98922    | 5566.319  | 2682.032  | SR6       | 1675.71   | 2202.475  | AB023420   | 4212.579  |
| AK098435  | 3633.435  | 5346.513  | SR8       | 6471.881  | 18200.729 | AF022912   | 1625.828  |
| AK092872  | 3861.831  | 5486.961  | SR10      | 18725.164 | 6288.369  | AA477428   | 2993.379  |

|           |           |           |           |           |           |           |           |
|-----------|-----------|-----------|-----------|-----------|-----------|-----------|-----------|
| AF230496  | 632.779   | 753.463   | CY3Cy5    | 4798.14   | 289.312   | AA156342  | 367.402   |
| M16801    | 1014.6    | 479.094   | NM_00241E | 1052.507  | 961.853   | R45594    | 1187.454  |
| NM_145904 | 22080.389 | 33680.297 | NM_00209C | 796.049   | 1169.359  | H46425    | 1089.673  |
| SR2       | 64219     | 47751.863 | NM_00448E | 1578.242  | 1421.238  | AI355949  | 256.77    |
| SR4       | 21998.814 | 12541.436 | NM_01329E | 4351.133  | 3536.603  | AA278152  | 1102.915  |
| SR6       | 2953.039  | 1934.195  | AL117478  | 685.513   | 857.536   | H75530    | 776.694   |
| SR8       | 10601.898 | 17053.346 | NM_005307 | 940.235   | 1175.6    | NM_00417E | 985.963   |
| SR10      | 35668.223 | 7601.672  | NM_00595E | 1757.169  | 5105.714  | NM_00454E | 5547.335  |
| CY3Cy5    | 5562.336  | 294.616   | NM_01343E | 711.679   | 1273.059  | SR5       | 4040.199  |
| NM_00241E | 878.836   | 1011.262  | AF225426  | 604.807   | 774.701   | SR7       | 5137.769  |
| NM_00209C | 179.576   | 301.281   | NM_00520E | 6319.105  | 10205.654 | SR9       | 10569.757 |
| NM_00448E | 1064.453  | 1295.438  | AK025687  | 8699.08   | 13833.595 | CY3Cy5    | 2970.77   |
| NM_01329E | 6946.573  | 6871.952  | AF218941  | 1134.101  | 1175.919  | NM_00131E | 2860.621  |
| AL117478  | 1693.252  | 1483.543  | AL137264  | 9966.191  | 13299.381 | AF286095  | 1285.611  |
| NM_005307 | 1434.873  | 1192.451  | NM_00222E | 1045.685  | 3315.379  | NM_00087E | 921.384   |
| NM_00595E | 1621.384  | 2008.934  | NM_00050E | 645.017   | 1230.172  | S66407    | 583.027   |
| NM_01343E | 878.673   | 852.236   | AB014558  | 935.018   | 975.045   | NM_00425E | 7140.937  |
| AF225426  | 992.976   | 1162.301  | NM_00091E | 8404.939  | 4041.185  | NM_001981 | 906.283   |
| NM_00520E | 6400.457  | 5367.423  | NM_00129E | 450.815   | 514.895   | NM_00158E | 21535.805 |
| NM_000421 | 539.742   | 790.143   | BG325046  | 1067.241  | 1217.709  | AK026108  | 1777.746  |
| AK025687  | 6952.584  | 10740.028 | AK026248  | 1580.8    | 1787.898  | NM_00637E | 1298.731  |
| AF218941  | 2485.992  | 1815.374  | NM_00457E | 4342.19   | 3969.476  | BF571428  | 715.119   |
| AL137264  | 10999.763 | 8023.761  | NM_000647 | 5465.794  | 1273.338  | AB037723  | 1299.752  |
| NM_00222E | 1053.513  | 1492.826  | AB046793  | 151.657   | 1430.378  | NM_00624E | 951.617   |
| X84370    | 7129.375  | 6361.899  | NM_017604 | 1835.627  | 1223.693  | U58096    | 6425.75   |
| NM_00403E | 3783.489  | 1583.421  | NM_01773E | 9803.72   | 8353.895  | NM_01232E | 604.891   |
| NM_00050E | 525.454   | 411.817   | NM_016557 | 727.764   | 608.476   | NM_01394E | 382.967   |
| AB014558  | 1094.229  | 1241.83   | NM_00062E | 2645.02   | 2686.541  | NM_00163E | 668.934   |
| NM_006287 | 424.283   | 613.369   | NM_002704 | 537.684   | 674.244   | AF182404  | 841.797   |
| NM_000118 | 1522.016  | 230.145   | U16752    | 882.307   | 927.547   | NM_00655E | 1173.538  |
| NM_00091E | 26782.311 | 7792.816  | M30134    | 549.071   | 523.493   | NM_014521 | 277.054   |
| NM_00129E | 899.884   | 633.81    | NM_00203E | 6235.908  | 3873.824  | NM_00244E | 329.873   |
| BG325046  | 953.458   | 1311.782  | NM_003747 | 1394.743  | 2319.637  | NM_01780E | 396.178   |
| AK026248  | 2107.33   | 2437.48   | AB037744  | 2826.023  | 3339.585  | AK023202  | 741.177   |
| NM_00457E | 5113.42   | 3423.634  | AF141901  | 1125.016  | 754.334   | D63877    | 957.824   |
| NM_000647 | 4826.359  | 1158.609  | NM_00700E | 465.48    | 480.367   | AF131760  | 481.064   |
| NM_017604 | 1676.016  | 959.818   | AL109708  | 1232.634  | 743.82    | NM_01869E | 726.098   |
| NM_01773E | 8047.905  | 6357.058  | L29143    | 602.751   | 432.892   | NM_006461 | 271.9     |
| NM_016557 | 1043.68   | 750.986   | AF234532  | 2068.463  | 1565.357  | NM_018201 | 1239.542  |
| NM_00062E | 4028      | 3140.351  | AF099740  | 1405.171  | 1108.383  | NM_01443E | 866.027   |
| AF161348  | 3572.89   | 2316.407  | NM_006117 | 8035.636  | 8306.025  | NM_01488C | 1181.497  |
| NM_018467 | 13003.709 | 8585.752  | NM_00222E | 2882.476  | 2752.15   | NM_003764 | 2490.361  |
| NM_00606E | 1656.733  | 1017.301  | NM_00622E | 923.241   | 1582.711  | NM_00679E | 7343.972  |
| U16752    | 1334.104  | 1116.573  | NM_01541E | 12011.898 | 13197.575 | NM_00153E | 3069.725  |
| M30134    | 1021.521  | 888.838   | NM_004897 | 1489.21   | 1520.067  | X97261    | 2547.951  |
| NM_00203E | 14785.633 | 3911.842  | NM_00255E | 1603.734  | 1823.777  | NM_00146E | 186.373   |
| NM_00572E | 12015.415 | 13934     | NM_00030E | 1374.537  | 1394.84   | D87666    | 49929.52  |
| NM_01549E | 2134.327  | 1688.996  | NM_00245C | 1680.607  | 12210.298 | AF149304  | 434.679   |
| NM_003747 | 1423.183  | 1391.466  | NM_00168E | 717.752   | 827.205   | NM_01209E | 2590.821  |
| AB037744  | 3259.542  | 3070.861  | NM_00070E | 1293.986  | 1134.669  | X73079    | 11734.042 |
| AF141901  | 1545.206  | 1215.417  | NM_016577 | 657.09    | 684.607   | AF264781  | 596.107   |
| NM_00700E | 650.166   | 532.619   | AK023107  | 5154.606  | 4115.789  | AK022823  | 222.682   |
| AL109708  | 1277.952  | 860.569   | NM_006854 | 8409.992  | 11481.036 | AK024215  | 6056.996  |

|           |           |           |           |           |           |           |           |
|-----------|-----------|-----------|-----------|-----------|-----------|-----------|-----------|
| L29143    | 867.626   | 771.869   | NM_004580 | 14574.608 | 7948.947  | AB044661  | 809.098   |
| AF234532  | 2663.794  | 2412.654  | NM_007246 | 1441.22   | 1120.105  | NM_000606 | 3865.512  |
| AF099740  | 1869.87   | 1118.877  | AF150735  | 2899.942  | 2240.616  | NM_016124 | 3897.937  |
| NM_006117 | 5317.745  | 6878.219  | NM_018183 | 1721.257  | 910.664   | U53530    | 1199.019  |
| NM_002225 | 2367.55   | 2217.329  | NM_012382 | 2059.521  | 2034.64   | NM_006598 | 864.099   |
| NM_006229 | 725.097   | 545.918   | NM_012304 | 808.511   | 615.546   | NM_015948 | 1780.968  |
| NM_015415 | 14219.311 | 12292.014 | NM_016440 | 10683.382 | 9357.01   | NM_003054 | 1563.543  |
| NM_004897 | 1433.77   | 1195.811  | NM_007194 | 2796.333  | 2464.645  | NM_002219 | 1966.705  |
| NM_002555 | 3528.46   | 2315.851  | NM_000314 | 7847.302  | 6680.065  | NM_002826 | 4743.576  |
| AF225418  | 338.989   | 264.958   | S74620    | 1188.499  | 841.87    | AF159141  | 1117.009  |
| NM_000309 | 1546.585  | 1243.015  | AF305239  | 1428.138  | 1154.275  | NM_002420 | 445.184   |
| NM_004528 | 27458.855 | 28287.15  | NM_002827 | 4080.126  | 3927.559  | NM_016458 | 9108.331  |
| AK026381  | 16825.814 | 11956.505 | NM_001946 | 3516.83   | 977.091   | AK022233  | 621.253   |
| NM_002450 | 2052.476  | 8464.272  | BF035425  | 42344.875 | 47194.188 | AK026410  | 2240.248  |
| NM_001686 | 938.375   | 1188.419  | NM_014638 | 1778.397  | 1319.129  | NM_014637 | 556.844   |
| NM_004978 | 221.2     | 326.379   | NM_006287 | 547.072   | 1233.9    | NM_013379 | 3934.182  |
| NM_000705 | 772.283   | 820.419   | NM_000118 | 628.42    | 389.189   | AF113208  | 3070.559  |
| NM_004231 | 57365.559 | 45354.941 | NM_000913 | 8348.735  | 5290.417  | NM_006153 | 932.545   |
| NM_016577 | 705.596   | 567.198   | NM_001298 | 427.098   | 712.996   | NM_012164 | 540.568   |
| AK023107  | 5239.101  | 5881.243  | BG325046  | 1130.437  | 1685.11   | AK026010  | 390.294   |
| NM_006854 | 7041.7    | 11276.437 | AI351740  | 2580.08   | 2473.096  | NM_004721 | 375.413   |
| NM_004580 | 12599.229 | 9788.643  | AA444051  | 1046.169  | 743.566   | NM_018079 | 515.401   |
| NM_007246 | 1570.27   | 1670.32   | NM_007164 | 5532.651  | 2817.732  | NM_004760 | 1455.195  |
| AF150735  | 3563.796  | 3152.438  | BE783826  | 17920.916 | 14013.101 | NM_006752 | 1881.856  |
| NM_018183 | 2129.786  | 1665.019  | X04827    | 1565.822  | 1426.503  | NM_006809 | 1529.488  |
| NM_012382 | 1952.805  | 2158.19   | H07088    | 648.058   | 573.092   | NM_013943 | 294.195   |
| BF038366  | 1369.014  | 1481.191  | AI004656  | 1284.76   | 1532.655  | NM_001639 | 561.545   |
| NM_002452 | 6861.012  | 7819.139  | BC008428  | 208.988   | 2790.299  | BG534366  | 844.033   |
| NM_012304 | 1026.253  | 662.534   | BC020596  | 3142.331  | 4391.109  | BG698522  | 3509.956  |
| NM_016440 | 18261.639 | 12099.446 | AF116606  | 45198.996 | 43281.348 | AA152346  | 476.788   |
| NM_007194 | 1718.231  | 2081.856  | X98922    | 5802.876  | 2306.747  | L15189    | 502.752   |
| NM_000314 | 8405.496  | 4742.301  | AK098435  | 2527.142  | 2657.325  | AB023420  | 3707.117  |
| AB002369  | 1973.886  | 965.464   | AK092872  | 2168.559  | 1906.634  | AF022912  | 1266.176  |
| S74620    | 765.315   | 682.039   | M16801    | 1004.316  | 583.985   | AA477428  | 3413.25   |
| AF305239  | 1972.447  | 1071.456  | NM_145904 | 17175.393 | 17768.877 | AA156342  | 322.326   |
| NM_002827 | 5395.381  | 4115.129  | NM_013334 | 4742.201  | 3174.45   | R45594    | 1265.258  |
| NM_001946 | 5036.299  | 1728.028  | AB037744  | 2813.07   | 3538.377  | H46425    | 880.607   |
| BF035425  | 18796.691 | 16858.883 | AF141901  | 880.586   | 1004.447  | AA278152  | 916.758   |
| NM_001608 | 442.773   | 387.513   | NM_007008 | 545.307   | 635.123   | H75530    | 468.641   |
| NM_014638 | 2573.943  | 2071.173  | AL109708  | 1581.67   | 742.597   | NM_004176 | 1205.171  |
| NM_006287 | 511.485   | 802.508   | L29143    | 641.443   | 605.089   | NM_004548 | 7564.736  |
| NM_000118 | 1499.084  | 508.385   | AF234532  | 2108.158  | 1951.143  | AK000554  | 947.375   |
| NM_000913 | 28306.275 | 9368.476  | NM_002418 | 656.09    | 461.752   | NM_006472 | 32204.113 |
| NM_001298 | 942.86    | 784.534   | NM_004485 | 1494.467  | 776.192   | NM_001538 | 3648.867  |
| BG325046  | 1186.323  | 1430.572  | NM_013296 | 4989.51   | 2784.407  | X97261    | 2218.439  |
| AI351740  | 35880.742 | 9748.951  | AL117478  | 788.933   | 1067.557  | D87666    | 44965.324 |
| AA444051  | 2963.402  | 1539.739  | NM_005307 | 1676.238  | 2443.772  | NM_001315 | 2563.297  |
| NM_007164 | 5614.696  | 4430.646  | NM_005958 | 965.206   | 1441.836  | AF286095  | 573.021   |
| BE783826  | 31393.08  | 24745.166 | NM_013436 | 609.251   | 835.73    | NM_000878 | 325.631   |
| X04827    | 2386.871  | 2143.858  | AF225426  | 891.292   | 847.756   | NM_004258 | 6386.754  |
| H07088    | 3393.75   | 2038.408  | NM_005208 | 5256.904  | 5182.774  | NM_001981 | 1045.939  |
| AI004656  | 2709.223  | 2360.245  | AF218941  | 1277.188  | 1075.648  | NM_001585 | 16375.514 |
| BC020596  | 3491.681  | 2992.167  | AL137264  | 8165.737  | 9213.621  | AK026108  | 1533.804  |

|           |           |           |           |           |           |           |           |
|-----------|-----------|-----------|-----------|-----------|-----------|-----------|-----------|
| AF116606  | 56035.477 | 51145.816 | NM_002226 | 956.676   | 1479.397  | NM_006379 | 916.663   |
| X98922    | 6077.551  | 2277.668  | X84370    | 5363.129  | 5861.795  | BF571428  | 354.749   |
| AK098435  | 3174.485  | 2879.006  | NM_004039 | 1398.683  | 597.019   | AB037723  | 907.516   |
| AK092872  | 4119.505  | 4597.444  | NM_000508 | 945.392   | 564.875   | NM_006246 | 904.237   |
| AF230496  | 708.972   | 844.116   | AB014558  | 831.315   | 773.531   | U58096    | 7920.453  |
| M16801    | 884.124   | 782.383   | NM_016577 | 668.307   | 887.503   | NM_016929 | 2342.79   |
| NM_145904 | 24802.189 | 37169.965 | AK023107  | 5120.169  | 5633.91   | NM_012323 | 898.283   |
| NM_013334 | 4004.676  | 4414.21   | NM_006854 | 9024.5    | 18731.184 | NM_015948 | 1938.041  |
| AB037744  | 3710.799  | 4468.216  | NM_004580 | 16666.654 | 13091.748 | NM_003054 | 1061.946  |
| AF141901  | 1715.152  | 1584.662  | NM_020387 | 36036.566 | 26419.207 | NM_002219 | 1647.844  |
| NM_007008 | 677.67    | 719.137   | NM_007246 | 1547.219  | 1655.103  | AF182404  | 1050.803  |
| AL109708  | 1633.04   | 1010.998  | AK026248  | 1596.243  | 973.149   | NM_006555 | 966.074   |
| L29143    | 989.562   | 827.325   | NM_004578 | 3609.026  | 2226.955  | NM_014521 | 226.261   |
| AF234532  | 2669.961  | 2653.493  | NM_000647 | 5519.01   | 721.246   | NM_002445 | 254.727   |
| NM_002418 | 713.278   | 820.802   | NM_017604 | 2205.156  | 806.347   | NM_017809 | 381.115   |
| NM_004485 | 1108.026  | 911.327   | NM_017738 | 8205.392  | 7908.239  | AK023202  | 533.466   |
| NM_013296 | 7602.838  | 6923.914  | NM_016557 | 1505.6    | 1882.57   | D63877    | 795.862   |
| AL117478  | 1704.449  | 1729.693  | NM_000623 | 2202.682  | 2823.969  | AF131760  | 514.451   |
| NM_005307 | 1702.244  | 1298.51   | NM_018301 | 510.131   | 1138.749  | NM_018698 | 464.646   |
| NM_005958 | 1981.854  | 3013.363  | AF161348  | 2566.37   | 2262.904  | NM_006461 | 197.455   |
| NM_013436 | 1007.987  | 1404.673  | NM_018467 | 5923.079  | 5086.552  | NM_018201 | 736.321   |
| AF225426  | 923.039   | 851.325   | U16752    | 989.394   | 1110.924  | NM_014438 | 457.723   |
| NM_005208 | 9154.869  | 7301.015  | M30134    | 504.961   | 445.235   | NM_014880 | 936.559   |
| NM_000421 | 654.079   | 608.642   | NM_002038 | 5926.123  | 2686.575  | NM_003764 | 2510.227  |
| AK025687  | 10154.587 | 13287.807 | NM_005729 | 13943.635 | 11142.11  | NM_006793 | 8859.471  |
| AF218941  | 2555.358  | 1517.76   | NM_015493 | 1466.749  | 1018.308  | NM_018079 | 439.086   |
| AL137264  | 12040.732 | 8033.514  | NM_003747 | 1384.745  | 1276.912  | NM_004760 | 831.816   |
| NM_002226 | 1132.819  | 1887.788  | NM_002827 | 4357.469  | 5510.572  | NM_006752 | 1342.929  |
| X84370    | 6991.475  | 5704.396  | NM_001946 | 3532.35   | 1969.33   | NM_006809 | 1280.83   |
| NM_004039 | 3735.486  | 1651.016  | BF035425  | 44744.078 | 60155.973 | AF264781  | 629.043   |
| NM_000508 | 727.078   | 571.42    | NM_001608 | 563.329   | 179.539   | AK022823  | 266.307   |
| AB014558  | 1408.404  | 1663.633  | NM_000159 | 53316.504 | 56426.652 | AK024215  | 4848.345  |
| NM_016577 | 684.016   | 710.211   | NM_014638 | 1764.466  | 1684.048  | AB044661  | 775.811   |
| AK023107  | 6074.547  | 6009.878  | AF099740  | 1225.337  | 935.98    | NM_000606 | 3732.338  |
| NM_006854 | 8510.743  | 14713.922 | NM_006117 | 7537.856  | 4293.282  | NM_016124 | 4139.316  |
| NM_004580 | 13826.308 | 10735.61  | NM_002225 | 2956.41   | 1615.151  | NM_019079 | 332.628   |
| NM_020387 | 26929.613 | 24701.35  | NM_006229 | 807.269   | 678.924   | U53530    | 1066.83   |
| NM_007246 | 1544.282  | 1485.712  | NM_015415 | 15321.849 | 12281.339 | NM_006598 | 1256.032  |
| AK026248  | 2396.745  | 2098.696  | NM_004897 | 1264.559  | 1643.629  | NM_004176 | 1046.376  |
| NM_004578 | 4665.522  | 3457.541  | NM_002555 | 2522.678  | 3611.044  | NM_004548 | 5494.5    |
| NM_000647 | 5016      | 907.677   | NM_000309 | 1538.463  | 1496.807  | AK000554  | 728.665   |
| AB046793  | 534.043   | 451.849   | NM_004528 | 24703.168 | 37840.391 | NM_002826 | 3965.887  |
| NM_017604 | 2152.367  | 1081.837  | AK026381  | 12575.94  | 15727.242 | AF159141  | 814.526   |
| NM_017738 | 10063.722 | 8823.438  | NM_002450 | 1264.564  | 8281.172  | NM_002420 | 1115.813  |
| NM_016557 | 1234.213  | 1155.773  | NM_001686 | 661.032   | 927.451   | NM_016458 | 10779.253 |
| NM_000623 | 4797.546  | 4006.39   | NM_004978 | 862.172   | 1322.75   | AK022233  | 614.54    |
| AF161348  | 3702.447  | 2754.225  | NM_000705 | 810.586   | 629.022   | AL137713  | 148.859   |
| NM_018467 | 14345.685 | 10683.009 | NM_004231 | 61348.844 | 52425.941 | AK026410  | 2411.071  |
| NM_006068 | 2146.052  | 1208.733  | NM_145904 | 6582.902  | 7756.347  | NM_014637 | 634.591   |
| NM_002704 | 599.775   | 430.905   | NM_013334 | 4796.478  | 4133.191  | NM_013379 | 3791.231  |
| U16752    | 1205.747  | 928.338   | AF150735  | 3574.282  | 3625.083  | AF113208  | 2812.064  |
| NM_002038 | 13975.23  | 3966.915  | NM_018183 | 1358.397  | 1364.925  | NM_006153 | 969.402   |
| NM_005729 | 11861.087 | 14236.783 | NM_012382 | 2472.255  | 3649.387  | NM_012164 | 734.992   |

|           |           |           |           |           |           |           |           |
|-----------|-----------|-----------|-----------|-----------|-----------|-----------|-----------|
| NM_015493 | 2702.302  | 1891.568  | NM_002452 | 18068.172 | 8477.859  | AK026010  | 485.052   |
| NM_003747 | 1327.492  | 1348.33   | NM_012304 | 971.58    | 677.265   | NM_004721 | 369.543   |
| NM_002827 | 6488.824  | 6076.017  | NM_016440 | 10669.048 | 8168.471  | AB011156  | 199.374   |
| NM_001946 | 5623.314  | 1830.071  | NM_007194 | 1798.306  | 1315.269  | NM_006246 | 871.876   |
| BF035425  | 21253.117 | 24257.848 | NM_000314 | 5344.124  | 3323.471  | U58096    | 7610.143  |
| NM_000159 | 54536.047 | 46572     | AB002369  | 1474.639  | 936.045   | NM_012323 | 829.68    |
| NM_014638 | 2421.57   | 2018.073  | S74620    | 791.719   | 467.965   | NM_006942 | 417.181   |
| AF099740  | 1803.028  | 1037.489  | AF305239  | 1192.377  | 998.312   | NM_013943 | 661.221   |
| NM_006117 | 5699.75   | 7136.526  | AL137264  | 7069.891  | 9273.359  | NM_001639 | 614.785   |
| NM_002225 | 2171.75   | 2436.967  | NM_002226 | 742.954   | 1313.4    | H39560    | 387.635   |
| NM_006229 | 872.498   | 593.077   | X84370    | 4690.42   | 8081.919  | BG534366  | 946.374   |
| NM_015415 | 15784.042 | 17953.945 | NM_004039 | 1277.036  | 1130.44   | BG698522  | 4212.326  |
| NM_000309 | 1368.475  | 1249.914  | NM_000508 | 671.399   | 714.245   | AA152346  | 801.496   |
| NM_004528 | 29640.295 | 33211.77  | AB014558  | 687.17    | 532.707   | L15189    | 453.013   |
| AK026381  | 18100.557 | 12778.174 | NM_000118 | 464.629   | 276.767   | AB023420  | 3498.54   |
| NM_002450 | 2080.043  | 7380.206  | NM_000913 | 3437.503  | 1591.236  | AF022912  | 1079.618  |
| NM_001686 | 1211.872  | 1020.737  | BG325046  | 1478.063  | 1730.87   | AA477428  | 3198.844  |
| NM_000705 | 859.352   | 729.05    | AI351740  | 1266.881  | 1565.832  | AA156342  | 283.547   |
| NM_004231 | 60433.301 | 50535.598 | AA444051  | 1187.138  | 1640.258  | R45594    | 1116.581  |
| NM_021969 | 362.241   | 412.364   | NM_007164 | 2966.653  | 5610.537  | H46425    | 1269.99   |
| NM_013334 | 4252.889  | 3569.649  | BE783826  | 10041.823 | 13188.017 | AA278152  | 955.868   |
| NM_012382 | 1945.334  | 2398.039  | H07088    | 1196.981  | 1949.188  | H75530    | 851.571   |
| BF038366  | 1000.858  | 741.8     | AI004656  | 1084.348  | 1263.495  | NM_003764 | 2015.936  |
| NM_002452 | 5927.034  | 6815.207  | BC020596  | 1268.756  | 1039.528  | NM_004829 | 447.822   |
| NM_012304 | 714.558   | 545.03    | AF116606  | 17155.355 | 12206.338 | NM_006793 | 8061.889  |
| NM_016440 | 18872.604 | 12588.922 | X98922    | 4100.609  | 1464.748  | NM_001538 | 3165.599  |
| NM_007194 | 1671.217  | 2061.587  | AK098435  | 2039.958  | 1449.537  | X97261    | 2075.68   |
| AB002369  | 1625.207  | 1486.944  | AK092872  | 1752.346  | 1818.557  | D87666    | 52455.875 |
| S74620    | 679.67    | 952.103   | AF230496  | 647.952   | 548.684   | NM_001315 | 2695.069  |
| AF305239  | 2206.312  | 1996.838  | NM_002038 | 5867.309  | 3460.515  | AF286095  | 897.299   |
| NM_002226 | 1203.417  | 2512.426  | NM_005729 | 10094.037 | 12163.758 | NM_000878 | 827.253   |
| X84370    | 7559.106  | 7544.536  | NM_015493 | 1714.154  | 1662.679  | NM_004258 | 4747.775  |
| NM_004039 | 4248.474  | 3298.527  | NM_003747 | 1235.889  | 1490.224  | NM_001981 | 1014.011  |
| NM_000508 | 316.037   | 595.713   | AB037744  | 2605.951  | 2250.531  | NM_001585 | 20153.705 |
| AB014558  | 1438.184  | 1336.61   | AF141901  | 548.113   | 255.983   | AK026108  | 1875.627  |
| NM_006287 | 749.288   | 632.909   | AL109708  | 869.693   | 405.86    | NM_006379 | 1404.065  |
| NM_000118 | 1428.211  | 517.97    | L29143    | 554.558   | 340.839   | BF571428  | 942.557   |
| NM_000913 | 25342.137 | 8641.922  | AF234532  | 1770.716  | 1732.71   | AB037723  | 1310.523  |
| AA444051  | 3220.193  | 2200.738  | NM_004485 | 1195.544  | 1673.573  | NM_000606 | 4112.854  |
| NM_007164 | 2738.921  | 2011.879  | NM_013296 | 3569.988  | 3494.382  | NM_016124 | 3510.684  |
| BE783826  | 10448.788 | 8818.773  | NM_005958 | 1108.461  | 1212.042  | NM_019079 | 869.036   |
| H07088    | 3372.401  | 1872.882  | NM_013436 | 556.069   | 700.326   | U53530    | 1309.652  |
| AI004656  | 2807.281  | 2506.424  | NM_005208 | 9685.051  | 7298      | NM_006598 | 1020.366  |
| BC020596  | 3695.201  | 4412.435  | NM_000421 | 592.238   | 556.491   | NM_015948 | 1721.21   |
| AF116606  | 58764.461 | 49741.438 | AK025687  | 6336.729  | 7254.708  | NM_003054 | 1631.111  |
| X98922    | 7142.86   | 4401.67   | AF218941  | 1308.642  | 803.263   | NM_003042 | 1264.384  |
| AK092872  | 5330.928  | 7417.074  | NM_000705 | 829.745   | 1022.789  | NM_004790 | 320.429   |
| AF230496  | 907.955   | 1232.547  | NM_004231 | 37668.816 | 39260.219 | NM_002219 | 1876.496  |
| M16801    | 1083.249  | 1441.306  | NM_016577 | 686.908   | 453.254   | AF182404  | 1230.511  |
| M30134    | 968.831   | 728.579   | AK023107  | 3598.202  | 2726.8    | NM_000804 | 415.238   |
| NM_000880 | 679.184   | 678.535   | NM_006854 | 7937.554  | 12065.918 | NM_006555 | 1227.861  |
| NM_002038 | 12838.128 | 4015.73   | NM_004580 | 14022.177 | 8071.629  | NM_014521 | 757.975   |
| NM_005729 | 12067.401 | 17969.734 | NM_020387 | 39382.902 | 27599.793 | NM_002445 | 340.103   |



|           |           |           |           |           |           |           |           |
|-----------|-----------|-----------|-----------|-----------|-----------|-----------|-----------|
| NM_015493 | 2547.071  | 2403.293  | NM_007246 | 1656.886  | 1893.526  | NM_017809 | 368.552   |
| NM_003747 | 1226.4    | 1383.732  | AK026248  | 1237.463  | 1883.645  | AK023202  | 751.306   |
| AB037744  | 3450.385  | 3813.813  | NM_004578 | 8299.859  | 10185.738 | D63877    | 1023.446  |
| AF141901  | 1363.606  | 1414.95   | NM_000647 | 6418.46   | 2102.807  | AF131760  | 715.984   |
| NM_004485 | 1944.352  | 2207.571  | NM_017604 | 1930.517  | 1387.546  | NM_018698 | 826.223   |
| NM_013296 | 8702.319  | 11821.684 | NM_017738 | 9225.829  | 10460.129 | NM_018201 | 1549.942  |
| AL117478  | 2058.813  | 3552.428  | NM_016557 | 1341.724  | 1818.632  | NM_014438 | 999.092   |
| NM_005307 | 2143.767  | 3271.802  | NM_000623 | 2905.813  | 3776.859  | NM_014880 | 1409.779  |
| NM_005958 | 1990.198  | 4612.667  | AF161348  | 2760.108  | 1679.051  | NM_006153 | 1130.736  |
| NM_013436 | 969.45    | 1896.663  | NM_018467 | 11989.871 | 8090.478  | NM_004721 | 427.394   |
| AF225426  | 1133.071  | 2120.347  | NM_006068 | 2079.456  | 1640.245  | AB011156  | 231.26    |
| NM_005208 | 9030.754  | 9761.769  | NM_002704 | 589.067   | 397.853   | NM_018079 | 435.957   |
| NM_000421 | 692.764   | 1204.792  | U16752    | 1029.788  | 689.25    | NM_004760 | 990.981   |
| AK025687  | 11439.934 | 22716.334 | NM_016440 | 15688.143 | 14987.77  | NM_006752 | 1738.412  |
| AF218941  | 2866.969  | 2185.018  | NM_007194 | 2482.283  | 2408.463  | NM_017837 | 346.426   |
| NM_004978 | 388.143   | 594.537   | NM_000314 | 4507.438  | 4457.657  | NM_006809 | 1561.444  |
| AF004711  | 253.024   | 415.09    | AB002369  | 1440.619  | 926.436   | AF149304  | 548.731   |
| NM_000705 | 1099.735  | 943.824   | S74620    | 1033.585  | 597.625   | NM_012095 | 3019.802  |
| NM_004231 | 52191.164 | 49899.68  | AF305239  | 1485.137  | 1335.526  | X73079    | 14482.347 |
| NM_016577 | 606.928   | 592.549   | NM_002827 | 2617.704  | 2541.084  | NM_019091 | 433.604   |
| AK023107  | 5945.677  | 6129.104  | NM_001946 | 2841.134  | 1134.492  | L07518    | 318.63    |
| NM_004578 | 5972.106  | 6568.705  | BF035425  | 18665.357 | 21889.6   | AF264781  | 974.675   |
| NM_000647 | 6030.406  | 2007.58   | NM_000159 | 38602.996 | 40603.375 | AK022823  | 417.064   |
| NM_017738 | 10180.446 | 12104.938 | NM_014638 | 1791.337  | 2033.396  | NM_002456 | 338.612   |
| NM_016557 | 1347.853  | 1472.621  | AF099740  | 631.83    | 739.46    | AK024215  | 7287.617  |
| NM_000623 | 5651.345  | 6666.976  | NM_006117 | 6775.92   | 9235.44   | AB044661  | 1138.327  |
| AF161348  | 4619.183  | 4874.018  | NM_002225 | 2551.547  | 3366.583  | NM_015376 | 2744.453  |
| NM_018467 | 14792.777 | 14466.844 | NM_015415 | 3887.795  | 4855.152  | NM_004941 | 1458.131  |
| NM_006068 | 2525.713  | 2593.185  | NM_004897 | 978.871   | 904.387   | AF151831  | 1465.282  |
| NM_002704 | 588.211   | 760.474   | NM_002555 | 1618.165  | 2983.728  | AB011121  | 99.91     |
| U16752    | 1543.908  | 2003.18   | NM_000309 | 1488.947  | 1060.718  | AF083255  | 2542.284  |
| NM_016440 | 21532.17  | 16521.395 | NM_004528 | 13456.938 | 14480.045 | AK022605  | 984.507   |
| NM_007194 | 1832.201  | 2247.086  | AK026381  | 15805.029 | 14311.416 | AK000554  | 1319.598  |
| NM_000314 | 9394.496  | 6303.581  | NM_002450 | 1352.555  | 7564.671  | NM_006472 | 30862.174 |
| AB002369  | 2224.06   | 2014.974  | NM_001686 | 896.543   | 565.932   | NM_002826 | 4978.554  |
| S74620    | 594.872   | 833.536   | AB011106  | 1109.13   | 1197.768  | AF159141  | 902.829   |
| AF305239  | 1917.774  | 1762.672  | D26362    | 2514.775  | 2824.75   | NM_002420 | 699.218   |
| NM_002827 | 7954.663  | 8942.732  | NM_013452 | 1307.388  | 2012.943  | NM_016458 | 12580.5   |
| NM_001946 | 6945.509  | 3261.875  | NM_018451 | 1219.042  | 622.654   | AK022233  | 715.055   |
| NM_004897 | 1416.371  | 2082.313  | NM_007009 | 598.05    | 187.723   | AK026410  | 3333.423  |
| NM_002555 | 4400.422  | 3858.457  | NM_002584 | 1540.675  | 1642.724  | NM_014637 | 430.803   |
| AF225418  | 313.421   | 783.166   | NM_013334 | 3463.879  | 4097.197  | NM_013379 | 6165.736  |
| NM_000309 | 1886.622  | 2504.215  | AL137675  | 3100.811  | 1619.231  | AF113208  | 3599.296  |
| NM_004528 | 33926.258 | 43919     | AF150735  | 2339.655  | 2563.182  | NM_004062 | 550.894   |
| AK026381  | 19595.813 | 19316.691 | NM_018183 | 1333.909  | 1424.312  | NM_005883 | 675.981   |
| NM_002450 | 2364.96   | 12393.401 | NM_012382 | 1648.162  | 2070.991  | NM_004449 | 740.899   |
| NM_001686 | 1049.967  | 1667.081  | NM_002452 | 9895.694  | 3137.781  | NM_014442 | 1128.749  |
| NM_014723 | 939.353   | 1118.278  | AF196976  | 6850.313  | 8036.698  | AB002313  | 462.607   |
| AB011106  | 1931.4    | 2230.365  | NM_014496 | 882.36    | 1282.981  | AB011167  | 398.994   |
| D26362    | 3982.61   | 7156.773  | NM_016215 | 9649.004  | 8950.531  | NM_005409 | 286.227   |
| NM_013452 | 2147.723  | 2877.785  | AK026919  | 2328.573  | 1424.72   | NM_000208 | 839.106   |
| AL133073  | 222.017   | 702.019   | NM_001501 | 3702.056  | 2991.542  | NM_002188 | 11569.936 |
| AY009402  | 3085.288  | 3814.999  | NM_006176 | 19399.199 | 14638.807 | AK027119  | 5273.731  |

|           |           |           |           |           |           |           |           |
|-----------|-----------|-----------|-----------|-----------|-----------|-----------|-----------|
| NM_018451 | 995.291   | 1767.448  | AL137459  | 1530.318  | 1164.591  | AB037727  | 5615.996  |
| AF150735  | 4000.142  | 5060.726  | AB007932  | 1179.964  | 1389.514  | NM_005426 | 2237.399  |
| NM_018183 | 2153.405  | 2323.615  | AF219257  | 20253.063 | 26661.398 | NM_004763 | 334.732   |
| NM_012382 | 2154.699  | 4181.226  | NM_003978 | 903.256   | 797.632   | NM_014063 | 2765.047  |
| BF038366  | 875.596   | 1116.403  | NM_002561 | 4025.499  | 4355.623  | D86964    | 2616.918  |
| NM_002452 | 6476.879  | 12483.134 | NM_006103 | 19557.758 | 16697.959 | AL049801  | 971.821   |
| NM_012304 | 787.239   | 737.713   | NM_000805 | 1522.427  | 1206.64   | NM_016395 | 3343.294  |
| AF245505  | 1246.386  | 1597.171  | AL359933  | 14868.153 | 11647.889 | NM_003152 | 415.465   |
| AB037776  | 741.284   | 1167.499  | M17783    | 8419.27   | 4971.116  | NM_006342 | 449.075   |
| AF196976  | 7384.327  | 7330.057  | NM_018590 | 2393.341  | 1977.677  | NM_016396 | 1517.502  |
| AL050379  | 1177.353  | 1521.393  | NM_003178 | 1292.744  | 762.973   | NM_005689 | 564.622   |
| NM_003161 | 2046.976  | 2668.443  | NM_012437 | 3160.247  | 2749.608  | AF086546  | 492.346   |
| NM_014496 | 539.741   | 939.374   | AF090944  | 1148.558  | 1268.195  | AK022860  | 1317.078  |
| NM_016215 | 21531.793 | 23464.203 | NM_002607 | 842.455   | 1827.889  | X60188    | 6401.638  |
| AK026919  | 1404.676  | 840.154   | AF116626  | 1384.286  | 1311.504  | NM_005977 | 594.355   |
| AL137459  | 1951.55   | 1797.137  | NM_001760 | 21457.594 | 16520.313 | NM_006265 | 1909.656  |
| AB037812  | 511.214   | 771.628   | NM_002527 | 1262.618  | 733.316   | NM_003126 | 443.799   |
| AB007932  | 2593.416  | 2351.058  | NM_007065 | 37221.762 | 18619.27  | NM_006059 | 693.549   |
| NM_002561 | 2963.461  | 3519.267  | AF149785  | 1896.213  | 1414.708  | M13452    | 3418.014  |
| NM_006103 | 30465.141 | 36783.93  | NM_012068 | 3524.39   | 7813.296  | NM_016114 | 352.967   |
| NM_006206 | 379.812   | 641.573   | NM_004064 | 2315.849  | 3078.76   | AY007114  | 509.089   |
| NM_000805 | 780.038   | 949.95    | NM_001256 | 1798.081  | 1875.306  | NM_006011 | 339.711   |
| AL359933  | 14953.386 | 15173.422 | NM_014704 | 4074.069  | 4138.111  | L00635    | 438.322   |
| NM_001302 | 956.919   | 1436.908  | NM_001191 | 2166.956  | 3078.26   | NM_015601 | 490.363   |
| M17783    | 8457.038  | 7963.998  | NM_013342 | 3362.123  | 1581.661  | NM_001780 | 17510.018 |
| NM_018590 | 4649.071  | 9000.553  | NM_014344 | 579.145   | 519.275   | AJ277442  | 626.28    |
| NM_003178 | 1775.868  | 1772.335  | AB040917  | 681.831   | 481.088   | AF089088  | 755.736   |
| NM_012437 | 6054.592  | 9510.447  | AL110261  | 4872.85   | 3265.498  | D78514    | 1247.398  |
| NM_004744 | 191.932   | 528.113   | AK021786  | 684.302   | 436.805   | AK021665  | 187.262   |
| AF090944  | 977.784   | 893.019   | NM_005932 | 631.502   | 1778.35   | NM_002787 | 8715.895  |
| NM_002607 | 1264.589  | 1477.455  | NM_004279 | 3547.083  | 2805.904  | U95006    | 2479.934  |
| NM_018189 | 47.483    | 934.191   | NM_001908 | 2868.319  | 1763.445  | NM_003347 | 5303.167  |
| AF116712  | 400.605   | 828.046   | NM_000285 | 2545.031  | 1671.974  | AF273051  | 328.072   |
| AF116626  | 3305.4    | 4995.471  | NM_005911 | 18943.504 | 20129.586 | NM_014516 | 2589.646  |
| NM_001760 | 38529.352 | 43012.246 | NM_014038 | 3107.442  | 6292.362  | AK000643  | 47296.359 |
| NM_002527 | 1229.772  | 1609.553  | NM_002061 | 1716.511  | 1037.348  | NM_018421 | 2219.317  |
| NM_005890 | 3151.859  | 2049.9    | AF169974  | 1675.788  | 1457.743  | NM_020127 | 418.323   |
| NM_020205 | 1013.805  | 1529.949  | NM_005733 | 2195.77   | 596.796   | NM_015623 | 3094.355  |
| AK024815  | 674.348   | 589.983   | NM_018138 | 1172.093  | 1123.778  | AB045116  | 1464.157  |
| NM_001227 | 1070.135  | 1029.868  | NM_019619 | 2089.593  | 2441.178  | L49054    | 418.189   |
| NM_001191 | 3766.038  | 5087.336  | AF183411  | 1298.369  | 1539.857  | NM_001675 | 267.691   |
| U15174    | 1230.785  | 1424.316  | BF244591  | 1289.545  | 887.646   | NM_003422 | 1178.032  |
| NM_013342 | 4335.557  | 2672.966  | NM_005886 | 13629.397 | 9485.929  | NM_001451 | 324.581   |
| NM_014344 | 860.033   | 1483.36   | NM_005966 | 928.664   | 713.328   | NM_014779 | 533.735   |
| AB040917  | 1011.752  | 1121.334  | NM_003156 | 1171.079  | 918.137   | NM_002943 | 1481.62   |
| AL110261  | 8142.967  | 9567.586  | NM_013310 | 2378.968  | 2292.177  | AL133649  | 466.051   |
| AA203539  | 420.347   | 1427.395  | BC004958  | 816.934   | 815.5     | NM_015846 | 2178.992  |
| AK021786  | 840.451   | 1254.833  | NM_005762 | 4896.324  | 6109.265  | NM_015972 | 2830.536  |
| NM_005932 | 1096.407  | 1651.9    | NM_014643 | 1307.78   | 930.791   | NM_016132 | 698.781   |
| M26663    | 354.948   | 425.175   | NM_005653 | 1899.79   | 1254.599  | NM_018006 | 509.688   |
| NM_004279 | 8022.975  | 10245.986 | NM_014553 | 1043.76   | 975.101   | NM_016090 | 447.832   |
| NM_004851 | 1515.589  | 823.764   | NM_003440 | 1976.263  | 1222.38   | NM_001013 | 15015.116 |
| NM_001908 | 2271.048  | 3415.243  | NM_004698 | 10447.317 | 5868.353  | AK024040  | 1137.552  |

|           |           |           |           |           |           |           |           |
|-----------|-----------|-----------|-----------|-----------|-----------|-----------|-----------|
| NM_000285 | 6497.04   | 4645.445  | NM_004516 | 5078.5    | 5617.09   | NM_005061 | 1443.987  |
| NM_005911 | 18213.707 | 27846.533 | NM_006513 | 396.296   | 736.69    | AF182417  | 18831.072 |
| NM_002061 | 5372.779  | 5538.327  | NM_003685 | 17609.754 | 8622.058  | AL137354  | 7128.888  |
| AF169974  | 2943.047  | 3741.937  | NM_006295 | 8432.718  | 7736.659  | NM_001023 | 50525.676 |
| NM_004522 | 1039.069  | 951.022   | NM_001540 | 710.975   | 1521.014  | AK021571  | 3324.5    |
| NM_005733 | 2142.117  | 3005.303  | NM_012111 | 10763.193 | 12321.698 | AY007128  | 225.368   |
| NM_018138 | 2301.558  | 3460.908  | NM_004470 | 10465.371 | 9831.376  | AF052149  | 629.474   |
| NM_019619 | 3976.561  | 6737.275  | NM_001418 | 1595.87   | 2047.757  | AL137512  | 1439.064  |
| AF183411  | 2707.732  | 4919.977  | NM_003756 | 15145.074 | 13058.337 | NM_005036 | 232.279   |
| BF244591  | 1510.243  | 2156.744  | AL049680  | 876.646   | 1377.211  | NM_002541 | 631.923   |
| NM_005886 | 8148.385  | 12535.476 | AL133660  | 1381.631  | 1929.298  | NM_000056 | 752.726   |
| U63785    | 1295.324  | 1924.567  | AK001595  | 1644.471  | 1781.398  | NM_016311 | 3196.758  |
| NM_005966 | 1579.111  | 3009.656  | NM_018015 | 950.202   | 1374.357  | NM_002300 | 53089.926 |
| NM_003156 | 1927.406  | 2516.379  | NM_003715 | 3052.755  | 3917.215  | NM_000290 | 770.454   |
| NM_003108 | 548.585   | 1038.526  | BF036874  | 1807.432  | 1733.701  | NM_016538 | 1889.114  |
| NM_013310 | 5139.834  | 4820.414  | AF182419  | 3535.593  | 2274.513  | AK023275  | 2689.815  |
| BC004958  | 1449.312  | 2321.63   | NM_007016 | 1033.503  | 1005.133  | AJ223352  | 8959.946  |
| NM_005762 | 5838.549  | 12728.772 | NM_002703 | 2521.695  | 2650.969  | NM_012238 | 1126.715  |
| NM_006473 | 1132.361  | 1254.887  | NM_005985 | 5740.793  | 8334.318  | NM_016539 | 5612.426  |
| NM_014643 | 3878.926  | 4611.15   | NM_015906 | 3558.943  | 3334.599  | NM_006807 | 1286.636  |
| NM_005653 | 2675.791  | 2764.026  | AK023759  | 2191.562  | 1076.907  | U07132    | 1493.209  |
| NM_014553 | 1021.323  | 1436.381  | L25270    | 13141.714 | 12918.388 | AL035301  | 475.527   |
| NM_003440 | 2009.739  | 2987.245  | AB033111  | 690.596   | 1325.114  | NM_017687 | 425.574   |
| NM_004698 | 10097.347 | 16140.538 | AJ276316  | 1596.703  | 1969.335  | NM_017975 | 593.269   |
| U41387    | 16184.714 | 33458.191 | AF229246  | 14074.052 | 28873.32  | AK025036  | 887.755   |
| NM_004516 | 6173.082  | 11931.418 | S64709    | 3072.99   | 4445.381  | AK024843  | 2372.953  |
| NM_006513 | 1349.728  | 2300.945  | NM_003071 | 9067.94   | 8374.541  | AF074994  | 294.275   |
| NM_003685 | 16291.615 | 27097.4   | AK021494  | 3022.691  | 3700.809  | NM_017670 | 1107.487  |
| NM_002486 | 488.36    | 1203.157  | AF075023  | 1088.512  | 2039.844  | AK021468  | 863.866   |
| NM_006295 | 9547.38   | 17468.627 | AL360160  | 37673.617 | 46859.941 | NM_004366 | 1397.375  |
| NM_001540 | 3744.23   | 5103.998  | AK001092  | 48997.527 | 54220.648 | AK026168  | 355.925   |
| NM_012111 | 10708.555 | 12356.925 | AK023427  | 1202.198  | 1773.085  | AJ296152  | 4459.512  |
| NM_004470 | 15533.395 | 15767.488 | NM_014144 | 1677.158  | 1900.722  | AK001067  | 705.638   |
| NM_001418 | 5220.309  | 7243.317  | AF147345  | 836.139   | 1076.343  | AK027088  | 6106.726  |
| NM_003756 | 36467.52  | 28203.871 | AF147373  | 4051.3    | 4099.785  | AB037721  | 2406.483  |
| AL049680  | 1806.633  | 3288.211  | AF086303  | 471.986   | 628.714   | AK027120  | 3977.534  |
| AL133660  | 729.948   | 584.863   | AF086434  | 2565.238  | 2831.98   | AB029001  | 413.581   |
| AK001595  | 1445.206  | 2196.9    | AK022063  | 4873.697  | 3805.746  | AB006624  | 731.732   |
| NM_018015 | 582.886   | 922.365   | AF086345  | 3949.934  | 4643.548  | AL109717  | 225.451   |
| NM_003715 | 6799.212  | 9313.112  | AF086464  | 822.829   | 995.818   | AK025473  | 486.894   |
| M94065    | 970.717   | 2178.551  | AL049278  | 1133.425  | 1184.422  | AF146693  | 262.869   |
| BF036874  | 1573.678  | 2849.811  | AK025063  | 467.508   | 843.648   | AF271070  | 2832.388  |
| BE888487  | 754.956   | 986.702   | NM_005060 | 1253.395  | 973.19    | NM_014903 | 1284.229  |
| AF182419  | 2270.91   | 2302.315  | AL035369  | 2527.603  | 1972.262  | AK055959  | 342.239   |
| NM_004293 | 397.734   | 733.483   | AF075097  | 9439.942  | 7607.346  | AK021705  | 635.729   |
| NM_004450 | 61.477    | 185.941   | AK022801  | 770.616   | 612.745   | NM_016141 | 4293.566  |
| NM_007016 | 948.901   | 1629.749  | AL133075  | 12870.131 | 9888.339  | AL109702  | 456.594   |
| NM_002703 | 3674.499  | 6012.71   | AL137630  | 4362.297  | 4033.043  | AK025624  | 2098.262  |
| NM_005375 | 3060.513  | 17758.283 | AL137277  | 11459.081 | 11981.914 | AK026684  | 348.917   |
| NM_005985 | 5598.372  | 6245.073  | BC023609  | 1507.717  | 1488.47   | AL110125  | 2854.374  |
| NM_015906 | 4297.979  | 5274.605  | AK025100  | 2404.446  | 4645.939  | AK022764  | 197.674   |
| AK023759  | 1870.778  | 2423.91   | AF086395  | 2029.735  | 1557.579  | AJ011594  | 654.496   |
| L25270    | 15383.646 | 13171.545 | AF086049  | 2388.778  | 3126.585  | X89744    | 658.643   |

|           |           |           |           |           |           |           |           |
|-----------|-----------|-----------|-----------|-----------|-----------|-----------|-----------|
| AB033111  | 652.4     | 866.581   | AF085834  | 415.742   | 938.785   | AJ011600  | 580.007   |
| AJ276316  | 2385.24   | 1136.034  | AF161369  | 8936.875  | 9618.189  | AJ002785  | 674.286   |
| AF229246  | 9128.798  | 5901.86   | AK027176  | 3498.053  | 3516.5    | Z70716    | 429.274   |
| S64709    | 3013.728  | 2766.213  | AF073328  | 673.606   | 872.634   | L32606    | 632.56    |
| NM_018488 | 1303.549  | 749.236   | AF211968  | 397.764   | 200.45    | AK091125  | 413.215   |
| NM_003071 | 7349.808  | 4597.289  | Y12019    | 5355.46   | 7966.991  | D16904    | 776.743   |
| AK021494  | 2340.995  | 3309.595  | AK021898  | 1798.161  | 1438.229  | M93056    | 5427.528  |
| AK022117  | 340.156   | 618.052   | AK022024  | 1474.93   | 1249.565  | D16474    | 4693.977  |
| AF075023  | 1442.109  | 1686.119  | AK022301  | 1381.08   | 1076.243  | AL080072  | 253.797   |
| AL360160  | 19918.51  | 20570.168 | AK021948  | 1111.085  | 734.384   | AL049280  | 933.719   |
| AK001092  | 29283.91  | 37294.32  | AK022054  | 1600.97   | 1236.136  | AK025212  | 5051.971  |
| AK023427  | 669.01    | 738.208   | AK026861  | 1064.832  | 1053.378  | AK023424  | 331.731   |
| NM_014144 | 2870.358  | 2758.026  | AK021642  | 6660.673  | 11545.217 | AL157503  | 1019.007  |
| AF147345  | 1477.644  | 1632.927  | AK021987  | 969.15    | 2538.727  | AK000786  | 964.051   |
| AF147373  | 7774.936  | 5483.142  | AK026905  | 3723.904  | 3544.06   | AK021458  | 860.926   |
| AF086253  | 1357.132  | 862.179   | AK026704  | 1816.356  | 1745.034  | NM_017674 | 862.122   |
| AF086303  | 814.32    | 510.704   | NM_000134 | 457.381   | 1144.189  | AK000966  | 158.029   |
| AF086434  | 1539.163  | 786.498   | NM_006638 | 1619.162  | 2248.816  | AK024525  | 1566.53   |
| AK022063  | 5264.326  | 2131.695  | X14675    | 977.298   | 1655.226  | AK024544  | 559.539   |
| AF086345  | 3943.452  | 2980.257  | AF071170  | 2041.968  | 1610.332  | AK024629  | 168.504   |
| AF086464  | 1196.204  | 700.935   | AK025259  | 804.819   | 864.411   | AK001880  | 1449.175  |
| AL049278  | 2506.2    | 1563.78   | NM_018304 | 5852.689  | 3600.141  | AF156166  | 2911.215  |
| AL117519  | 607.057   | 400.867   | AK024457  | 6220.073  | 7293.686  | NM_014373 | 4484.487  |
| AK025063  | 971.544   | 953.675   | AL389977  | 874.702   | 1200.193  | NM_014206 | 5877.161  |
| AF075108  | 318.532   | 443.907   | AK026372  | 899.353   | 1029.558  | NM_001651 | 1670.777  |
| NM_005060 | 1035.151  | 999.63    | AL109684  | 791.181   | 823.656   | L32786    | 1985.075  |
| AF085935  | 730.021   | 983.145   | NM_014186 | 5463.508  | 4796.911  | U03239    | 138.273   |
| AL035369  | 1716.7    | 2283.871  | AF056442  | 1085.796  | 1064.609  | AL355720  | 1115.351  |
| AF075094  | 449.903   | 559.342   | AK024752  | 51291.078 | 38785.129 | AK002023  | 1852.211  |
| AF075097  | 8321.033  | 5882.751  | BG117194  | 1194.675  | 1030.017  | NM_016464 | 406.802   |
| AK022801  | 966.575   | 681.082   | AF131859  | 1808.055  | 2131.365  | L40402    | 1063.377  |
| AL133075  | 10023.124 | 7970.478  | AK023632  | 1090.084  | 1304.769  | AK022422  | 913.519   |
| AL137692  | 472.256   | 392.79    | AF086118  | 6485.652  | 9450.129  | AK022474  | 11923.434 |
| AL137630  | 4055.769  | 2732.684  | NM_014138 | 1152.753  | 563.14    | AK022392  | 830.862   |
| AK055236  | 436.205   | 417.144   | AK025044  | 1183.646  | 923.657   | AK025949  | 427.352   |
| AL137277  | 6832.933  | 4207.99   | AK023806  | 2305.406  | 1986.862  | Y10259    | 569.09    |
| AL137447  | 980.385   | 725.6     | Y16696    | 16516.621 | 12195.661 | AK021725  | 665.293   |
| AL157467  | 611.591   | 438.362   | AK026094  | 1384.759  | 989.163   | NM_002408 | 1734.222  |
| BC023609  | 1744.84   | 1089.417  | AF161344  | 13258.046 | 12069.652 | AK024282  | 1387.498  |
| AK025100  | 1726.672  | 1896.415  | NM_001207 | 60411.273 | 54262.102 | AF085838  | 672.157   |
| AF086395  | 472.766   | 670.385   | AK022199  | 1646.544  | 2609.12   | NM_018277 | 658.173   |
| AF086049  | 1984.602  | 1563.263  | NM_006211 | 1078.689  | 741.958   | AF086335  | 1249.243  |
| AF114263  | 440.053   | 512.796   | NM_003524 | 37496.164 | 6964.394  | AB011118  | 3253.569  |
| AK026142  | 4523.051  | 3992.055  | AK021438  | 1245.568  | 1498.271  | S66666    | 285.247   |
| AF161369  | 2195.679  | 1815.024  | NM_005913 | 1067.564  | 1533.77   | AK021476  | 893.508   |
| AK027176  | 2568.131  | 1808.258  | S39891    | 979.689   | 1866.445  | NM_018630 | 606.436   |
| AF211968  | 591.227   | 550.59    | AK021624  | 1568.853  | 2568.016  | AF086175  | 463.887   |
| Y12019    | 5207.349  | 3894.564  | AF278605  | 11714.521 | 11441.598 | AK002196  | 368.043   |
| AL137326  | 558.848   | 675.297   | NM_006497 | 6002.482  | 6585.607  | AK024182  | 472.434   |
| AK021898  | 1765.059  | 1563.902  | AL133599  | 1783.141  | 1004.271  | NM_006913 | 4880.625  |
| AK022024  | 3944.685  | 2312.521  | NM_016472 | 2293.346  | 1255.398  | NM_000498 | 1960.831  |
| AK022301  | 1835.405  | 1166.007  | AF086064  | 1003.418  | 686.947   | AL049955  | 2813.12   |
| AK021948  | 1111.139  | 982.487   | AK023042  | 5527.902  | 3479.535  | AF155654  | 1744.614  |

|           |           |           |           |           |           |           |           |
|-----------|-----------|-----------|-----------|-----------|-----------|-----------|-----------|
| AK022341  | 838.263   | 648.273   | AK026429  | 831.243   | 447.657   | AK000028  | 1218.012  |
| AK021642  | 4556.628  | 3736.093  | NM_016550 | 2360.096  | 3193.978  | NM_013320 | 16994.807 |
| AK022455  | 707.241   | 534.401   | AK024813  | 6991.651  | 6172.825  | AJ245902  | 231.148   |
| AK021987  | 1253.577  | 1046.741  | AJ227909  | 34987.207 | 25677.043 | AL050039  | 505.797   |
| AK026905  | 1577.615  | 1142.909  | AK021880  | 501.948   | 684.958   | H09474    | 930.872   |
| AK023449  | 699.446   | 441.838   | CY3Cy5    | 7269.828  | 588.116   | AB002368  | 4693.874  |
| AK026704  | 2502.297  | 995.293   | BG534366  | 1043.974  | 1125.657  | AL360263  | 19378.711 |
| NM_006638 | 3132.461  | 2280.835  | BG698522  | 9778.82   | 12815.04  | Z36780    | 968.064   |
| X14675    | 1702.65   | 951.023   | AA152346  | 1183.934  | 1650.051  | AK022403  | 1733.476  |
| AF071170  | 2090.703  | 3273.945  | L15189    | 2916.938  | 5140.419  | AK022955  | 441.846   |
| AF075075  | 715.335   | 730.486   | AB023420  | 10122.553 | 17425.217 | BC035855  | 435.876   |
| AK025259  | 2587.093  | 1500.767  | AF022912  | 3237.508  | 2505.329  | AL137408  | 2957.97   |
| NM_018304 | 7247.745  | 4630.978  | AA477428  | 13451.25  | 13910.421 | AF054995  | 1438.449  |
| AK024457  | 3347.317  | 2643.412  | AA156342  | 947.533   | 1506.692  | AL080176  | 524.199   |
| AK026894  | 1106.66   | 1022.867  | R45594    | 8339.082  | 18470.527 | AK023627  | 326.281   |
| AK026372  | 868.599   | 662.761   | H46425    | 1949.984  | 3486.877  | CY3Cy5    | 1817.937  |
| AL109684  | 741.95    | 681.298   | AI355949  | 485.884   | 836.75    | BI759406  | 2400.432  |
| NM_014186 | 6053.298  | 4520.262  | AA278152  | 7221.125  | 8427.098  | R76099    | 211.809   |
| AF056442  | 818.327   | 1058.662  | H75530    | 1540.043  | 2829.914  | S74445    | 543.269   |
| AK024752  | 40834.141 | 32412.824 | NM_004176 | 4928.221  | 5459.143  | BI763360  | 461.51    |
| BG117194  | 1988.381  | 1944.072  | SR5       | 3298.918  | 1378.904  | D25538    | 644.777   |
| AF131859  | 4844.276  | 6298.53   | SR7       | 4735.903  | 12413.958 | NM_000360 | 6422.582  |
| AK001864  | 432.271   | 604.939   | SR9       | 12299.999 | 888.593   | D49950    | 1525.759  |
| AK023632  | 415.165   | 853.141   | CY3Cy5    | 5067.647  | 388.404   | NM_001849 | 1001.665  |
| AF086118  | 4438.039  | 3690.1    | NM_001315 | 6034.678  | 6274.261  | X03635    | 595.59    |
| NM_014138 | 2171.551  | 970.897   | AF286095  | 1418.855  | 968.517   | BC011847  | 40155.199 |
| AK025044  | 543.252   | 626.746   | NM_000878 | 1328.999  | 1855.223  | X03348    | 616.085   |
| AK023806  | 2483.237  | 1956.004  | S66407    | 1592.572  | 3467.133  | AF353674  | 943.387   |
| Y16696    | 23046.641 | 14867.237 | NM_016523 | 404.753   | 863.082   | BC002645  | 1066.807  |
| AK026094  | 2820.53   | 1355.722  | NM_004258 | 55891.32  | 73083.781 | NM_021138 | 534.492   |
| AF161344  | 5830.587  | 4462.689  | NM_001981 | 3321.55   | 4875.135  | BC002792  | 355.007   |
| AF086027  | 915.688   | 599.329   | NM_014654 | 524.51    | 1361.705  | NM_021005 | 360.713   |
| NM_001207 | 61804.48  | 49007.816 | NM_001585 | 52351.359 | 67548.945 | SR6       | 1672.214  |
| AK022154  | 387.128   | 331.132   | AK026108  | 6666.694  | 16661.582 | SR8       | 6248.196  |
| AK022199  | 956.741   | 912.749   | NM_006379 | 3227.212  | 4181.061  | SR10      | 20105.223 |
| NM_006211 | 558.821   | 674.947   | BF571428  | 2386.577  | 4086.451  | NM_003834 | 1694.34   |
| NM_003524 | 17932.201 | 5762.456  | AB037723  | 4127.584  | 7537.517  | NM_005959 | 885.456   |
| AK021438  | 1966.005  | 1471.506  | NM_006246 | 2946.546  | 3732.084  | NM_003381 | 286.77    |
| NM_005913 | 784.763   | 1016.578  | NM_004316 | 601.326   | 999.558   | NM_005756 | 208.958   |
| AK022315  | 1485.27   | 1645.602  | U58096    | 37012.266 | 30556.449 | NM_003702 | 3739.948  |
| S39891    | 863.307   | 1212.709  | NM_012323 | 1145.932  | 675.404   | NM_000369 | 247.342   |
| R17536    | 658.566   | 659.701   | NM_013943 | 913.531   | 563.26    | NM_016351 | 392.088   |
| AK021624  | 454.383   | 674.354   | NM_001639 | 2306.173  | 2411.479  | NM_004405 | 556.125   |
| AF278605  | 8532.856  | 5922.013  | AF182404  | 2843.747  | 2606.277  | NM_001988 | 3623.331  |
| NM_006497 | 13357.264 | 9180.966  | NM_000804 | 595.225   | 877.671   | NM_006060 | 291.887   |
| AL133599  | 1283.47   | 774.79    | NM_006555 | 1821.744  | 1812.608  | NM_005667 | 972.691   |
| AK022380  | 706.922   | 332.371   | NM_014521 | 884.344   | 980.343   | NM_006308 | 806.831   |
| NM_016472 | 1301.505  | 1156.924  | NM_002445 | 1184.215  | 2072.579  | NM_000060 | 567.314   |
| AF086064  | 910.886   | 688.185   | NM_017809 | 1220.118  | 1625.383  | NM_009589 | 556.378   |
| AK023042  | 3047.961  | 3277.134  | AK023202  | 1403.776  | 3115.225  | L09080    | 444.545   |
| AK026429  | 817.452   | 489.742   | D63877    | 4275.384  | 6367.109  | NM_007326 | 1067.421  |
| NM_016550 | 1983.567  | 2544.621  | AF131760  | 2205.797  | 2059.51   | NM_001886 | 1547.62   |
| AK024813  | 6171.631  | 3873.442  | NM_018698 | 1741.125  | 2644.446  | NM_005622 | 709.452   |

|           |           |           |           |           |           |           |           |
|-----------|-----------|-----------|-----------|-----------|-----------|-----------|-----------|
| AJ227909  | 30625.271 | 15956.307 | NM_006461 | 1207.969  | 1517.24   | NM_01805E | 667.425   |
| AK021880  | 834.409   | 616.939   | NM_018201 | 3665.582  | 4125.155  | NM_00454E | 3008.356  |
| AK024107  | 346.786   | 456.543   | NM_01443E | 963.947   | 1463.925  | NM_001122 | 1982.579  |
| CY3Cy5    | 8468.345  | 628.076   | NM_01488C | 2489.772  | 3089.487  | NM_004591 | 533.17    |
| BG534366  | 6699.071  | 910.028   | NM_003764 | 4203.933  | 2720.151  | AL133027  | 380.556   |
| BG698522  | 11789.892 | 8018.136  | NM_00482E | 638.204   | 1001.495  | AB037732  | 990.716   |
| AA152346  | 1886.516  | 736.684   | NM_00679E | 26086.313 | 21449.088 | NM_005767 | 244.344   |
| L15189    | 1654.213  | 2217.819  | NM_00153E | 6782.785  | 3574.958  | NM_001837 | 365.217   |
| AB023420  | 12709.309 | 8925.451  | X97261    | 2829.675  | 3737.51   | NM_00183E | 48232.992 |
| AF022912  | 4482.663  | 2075.542  | D87666    | 56543.449 | 32097.682 | BC016029  | 371.906   |
| AA477428  | 9523.867  | 8736.502  | AF149304  | 947.907   | 789.947   | M27487    | 370.769   |
| AA156342  | 2235.615  | 1374.528  | NM_01209E | 7830.168  | 8433.842  | NM_00228E | 19160.053 |
| R45594    | 4637.181  | 9572.202  | X73079    | 19611.83  | 16581.625 | NM_002164 | 440.952   |
| H46425    | 2993.081  | 1930.008  | NM_019091 | 1046.516  | 337.564   | NM_003811 | 3230.39   |
| AI355949  | 850.517   | 622.645   | L07518    | 769.803   | 1199.781  | NM_002981 | 3641.01   |
| AA278152  | 4009.553  | 5981.21   | AF264781  | 1861.999  | 2718.338  | NM_001244 | 666.017   |
| H75530    | 2249.008  | 1876.579  | NM_00245E | 470.162   | 847.198   | NM_01613E | 8236.507  |
| NM_00417E | 5987.815  | 6134.395  | AK024215  | 19597.703 | 16602.975 | AL117468  | 996.303   |
| NM_00454E | 20264.717 | 16451.689 | AB044661  | 3008.469  | 4314.387  | NM_01961E | 748.385   |
| SR5       | 5782.047  | 3638.621  | NM_00060E | 6873.271  | 9490.315  | NM_00538E | 374.383   |
| SR7       | 8225.489  | 40044.844 | NM_016124 | 6483.562  | 7784.26   | AK027086  | 1137.349  |
| SR9       | 33510.695 | 4761.033  | NM_01907E | 1236.775  | 2265.008  | AB032997  | 431.333   |
| CY3Cy5    | 11280.465 | 596.107   | U53530    | 1884.571  | 2546      | AL096857  | 1027.371  |
| NM_00131E | 8602.509  | 7206.939  | NM_00659E | 1287.045  | 1703.691  | AF073770  | 687.974   |
| AF286095  | 1787.627  | 1317.907  | NM_01594E | 3610.495  | 1452.429  | AL359401  | 1023.944  |
| NM_00087E | 848.199   | 967.742   | NM_003054 | 2308.955  | 470.484   | NM_01221E | 965.721   |
| S66407    | 1744.674  | 1523.326  | NM_00221E | 7136.449  | 7981.626  | NM_01657E | 3050.314  |
| NM_01652E | 480.214   | 327.008   | NM_00282E | 6749.42   | 5974.744  | NM_00130E | 1486.944  |
| NM_00425E | 36433.266 | 39423.23  | AF159141  | 3000.126  | 4072.256  | M21304    | 1664.994  |
| NM_001981 | 3118.761  | 2699.771  | NM_01645E | 29131.857 | 32813.742 | AB040896  | 1090.983  |
| NM_014654 | 1353.273  | 993.397   | AK022233  | 2961.376  | 4289.007  | NM_001107 | 913.777   |
| NM_00158E | 49311.945 | 41362.508 | AK026410  | 8029.693  | 18010.84  | AF084645  | 207.573   |
| AK026108  | 7962.314  | 6521.802  | NM_014637 | 1940.912  | 3809.163  | AF151851  | 1898.187  |
| NM_00637E | 3299.9    | 2902.264  | NM_01337E | 13879.723 | 27562.031 | NM_00363E | 1360.176  |
| BF571428  | 3155.664  | 3474.555  | AF113208  | 8560.966  | 10332.304 | NM_002234 | 677.154   |
| AB037723  | 6425.939  | 4793.533  | NM_00615E | 3775.783  | 8471.357  | NM_000701 | 636.473   |
| NM_00624E | 2597.386  | 2681.462  | NM_012164 | 1619.183  | 3126.935  | AB022696  | 1193.284  |
| U58096    | 25322.818 | 17411.607 | AK026010  | 592.157   | 1174.105  | AF137372  | 1342.405  |
| NM_01232E | 1894.867  | 1172.011  | NM_004721 | 577.01    | 459.397   | AF220417  | 228.936   |
| NM_01394E | 1834.225  | 1462.259  | AB011156  | 718.063   | 442.658   | NM_00207E | 846.925   |
| NM_00163E | 2922.774  | 5606.169  | NM_01807E | 862.267   | 434.386   | Z70705    | 343.336   |
| H39560    | 617.47    | 575.119   | NM_00476C | 2811.755  | 853.959   | NM_002611 | 386.388   |
| AF182404  | 3650.005  | 3006.353  | NM_00675E | 1735.081  | 1084.625  | AL133602  | 590.492   |
| NM_000804 | 597.326   | 920.734   | NM_00680E | 5486.01   | 3065.469  | AF037219  | 555.848   |
| NM_00655E | 3239.566  | 2125.912  | NM_01394E | 2032.245  | 2835.64   | NM_000251 | 1062.144  |
| NM_014521 | 781.684   | 1074.968  | NM_00163E | 2217.84   | 3893.277  | NM_00603E | 1107.31   |
| NM_00244E | 1196.767  | 1144.862  | H39560    | 504.603   | 569.183   | AB011133  | 1468.389  |
| NM_01780E | 967.27    | 821.802   | BG534366  | 922.817   | 426.124   | NM_01757E | 13593.037 |
| AK023202  | 1871.152  | 1410.989  | BG698522  | 10159.269 | 6808.473  | NM_018444 | 1142.495  |
| D63877    | 3872.88   | 2736.346  | AA152346  | 1342.493  | 789.022   | NM_00025E | 961.913   |
| AF131760  | 2966.068  | 1295.739  | L15189    | 3177.893  | 4192.179  | NM_006947 | 2816.489  |
| NM_01869E | 1842.557  | 1476.855  | AF022912  | 4230.628  | 5114.098  | NM_017917 | 2807.547  |
| NM_006461 | 1201.219  | 875.72    | AA477428  | 16879.838 | 22239.311 | NM_00409C | 2122.298  |

|           |           |           |           |           |           |           |          |
|-----------|-----------|-----------|-----------|-----------|-----------|-----------|----------|
| NM_018201 | 5256.429  | 2829.228  | AA156342  | 1221.908  | 2697.316  | NM_014634 | 2670.61  |
| NM_014438 | 1380.837  | 962.81    | R45594    | 9345.152  | 22420.154 | BC031485  | 538.866  |
| NM_014880 | 3200.148  | 2377.138  | H46425    | 1545.056  | 1911.625  | NM_005622 | 481.65   |
| NM_003764 | 6778.218  | 2685.133  | AI355949  | 497.539   | 456.039   | NM_018058 | 637.647  |
| NM_004829 | 1014.112  | 968.68    | AA278152  | 6047.971  | 2886.036  | NM_004548 | 2725.022 |
| NM_006793 | 26010.824 | 33505.707 | H75530    | 966.567   | 463.407   | X69079    | 6377.074 |
| NM_001538 | 5532.219  | 3306.066  | NM_004176 | 3626.618  | 968.597   | BI759406  | 2670.398 |
| X97261    | 4483.407  | 15790.087 | NM_004548 | 16320.114 | 4398.598  | R76099    | 369.893  |
| NM_001468 | 514.496   | 710.966   | AK000554  | 2765.83   | 1915.882  | S74445    | 743.102  |
| D87666    | 68644.172 | 59152.18  | NM_006472 | 15608.134 | 2147.529  | BI763360  | 600.993  |
| AF149304  | 747.603   | 772.732   | NM_001538 | 9850.176  | 7867.903  | D25538    | 763.158  |
| NM_012095 | 7128.967  | 9152.499  | X97261    | 3034.397  | 13774.487 | NM_000360 | 7390.465 |
| X73079    | 28380.365 | 22436.412 | NM_001468 | 383.861   | 1360.48   | D49950    | 1626.805 |
| NM_019091 | 622.53    | 694.763   | NM_005410 | 359.111   | 452.252   | NM_001849 | 1133.819 |
| L07518    | 614.522   | 405.439   | D87666    | 62550.891 | 50047.793 | X03635    | 626.482  |
| AF264781  | 2137.542  | 1335.187  | NM_001315 | 6644.934  | 6312.938  | BC011847  | 46050.52 |
| AK022823  | 977.468   | 281.676   | AF286095  | 1530.348  | 1262.139  | X03348    | 755.9    |
| NM_002456 | 531.322   | 715.333   | NM_000878 | 1434.455  | 1302.286  | AF353674  | 1926.792 |
| AK024215  | 14501.672 | 10266.252 | NM_016523 | 744.173   | 1215.54   | BC002645  | 1083.044 |
| AB044661  | 3679.114  | 2689.655  | NM_004258 | 59197.695 | 78199.875 | NM_021138 | 635.577  |
| NM_000606 | 12973.792 | 8334.487  | NM_001981 | 4934.38   | 10853.305 | NM_021005 | 373.577  |
| NM_016124 | 8204.353  | 6603.136  | NM_014654 | 842.522   | 1801.917  | NM_017423 | 1133.612 |
| NM_019079 | 574.289   | 567.484   | NM_001585 | 52738.543 | 58028.238 | NM_019613 | 765.204  |
| U53530    | 2859.885  | 2729.071  | AK026108  | 5620.473  | 8020.835  | NM_005382 | 397.937  |
| NM_006598 | 1994.149  | 2119.902  | NM_006379 | 2866.224  | 1762.566  | AK027086  | 1265.553 |
| NM_015948 | 4534.108  | 3907.755  | BF571428  | 2365.651  | 1544.99   | AB032997  | 292.559  |
| NM_003054 | 3281.958  | 2435.963  | AB037723  | 3318.718  | 1587.979  | AL096857  | 908.046  |
| NM_002219 | 8278.825  | 13783.622 | NM_006246 | 2608.635  | 928.646   | AB040104  | 215.822  |
| NM_002826 | 10445.361 | 6001.33   | NM_004316 | 397.264   | 331.323   | NM_003834 | 2306.575 |
| AF159141  | 2728.805  | 2629.495  | U58096    | 31520.775 | 11562.321 | NM_005959 | 964.711  |
| NM_002420 | 939.636   | 703.193   | NM_016929 | 3941.582  | 2930.491  | NM_003381 | 461.23   |
| NM_016458 | 17873.781 | 13552.447 | NM_012323 | 869.873   | 749.802   | NM_003702 | 3720.904 |
| AK022233  | 1990.808  | 2501.721  | NM_015948 | 4581.272  | 5783.825  | NM_000369 | 321.302  |
| AK026410  | 7429.887  | 6912.98   | NM_003054 | 3500.385  | 3308.209  | NM_016351 | 454.75   |
| NM_014637 | 2568.342  | 2197.532  | NM_002219 | 8017.122  | 11681.599 | NM_001988 | 3069.987 |
| NM_013379 | 19219.439 | 15435.216 | AF182404  | 2938.521  | 2008.381  | NM_006060 | 441.237  |
| AF113208  | 5708.476  | 3506.638  | NM_000804 | 541.298   | 874.783   | NM_005667 | 1212.776 |
| NM_006153 | 3301.001  | 3723.365  | NM_006555 | 2029.751  | 1383.009  | NM_006308 | 700.721  |
| NM_012164 | 1346.919  | 1562.7    | NM_014521 | 865.289   | 761.833   | NM_000060 | 717.924  |
| AK026010  | 1890.246  | 1010.324  | NM_002445 | 1184.583  | 1500.341  | NM_009589 | 762.187  |
| NM_004721 | 540.557   | 518.67    | NM_017809 | 1612.237  | 1279.151  | L09080    | 668.703  |
| AB011156  | 1186.472  | 1541.333  | AK023202  | 1692.236  | 2054.411  | NM_007326 | 1077.899 |
| NM_018079 | 1179.309  | 1408.582  | D63877    | 4563.98   | 4936.718  | AF137372  | 1307.61  |
| NM_004760 | 2074.883  | 2585.642  | AF131760  | 2201.08   | 1410.854  | AF220417  | 262.858  |
| NM_006752 | 7134.957  | 6797.941  | NM_018698 | 1867.261  | 1580.272  | D83782    | 2318.57  |
| NM_004428 | 754.478   | 540.923   | NM_006461 | 1288.718  | 730.895   | NM_002078 | 1020.129 |
| NM_006809 | 4621.91   | 4657.101  | NM_018201 | 3658.031  | 1568.337  | NM_000287 | 1180.124 |
| NM_006942 | 743.178   | 506.66    | NM_014438 | 1198.83   | 478.619   | NM_001656 | 600.473  |
| NM_018199 | 451.37    | 473.434   | NM_014880 | 2304.309  | 1188.256  | AF091033  | 396.217  |
| NM_013943 | 1835.49   | 1409.734  | NM_003764 | 3905.542  | 1014.139  | NM_001122 | 2240.209 |
| NM_001639 | 2855.33   | 5051.762  | NM_004829 | 561.27    | 695.327   | NM_004591 | 623.357  |
| H39560    | 524.353   | 489.956   | NM_006793 | 26275.535 | 16819.385 | NM_006274 | 144.02   |
| BG534366  | 7194.605  | 999.174   | NM_018079 | 752.087   | 512.879   | AL133027  | 492.649  |

|           |           |           |           |           |           |           |           |
|-----------|-----------|-----------|-----------|-----------|-----------|-----------|-----------|
| BG698522  | 13389.35  | 9411.091  | NM_00476C | 3540.497  | 2362.63   | AB037732  | 1070.605  |
| AA152346  | 2206.543  | 921.324   | NM_006752 | 3631.117  | 4735.007  | NM_001837 | 277.755   |
| L15189    | 1812.332  | 2879.57   | NM_006809 | 6097.257  | 5514.171  | M27487    | 271.871   |
| AB023420  | 13449.806 | 11339.058 | AF149304  | 915.196   | 822.299   | NM_003811 | 3032.273  |
| AF022912  | 4937.291  | 2278.223  | NM_012095 | 7665.93   | 6953.715  | NM_002981 | 2852.533  |
| AA477428  | 11169.853 | 10135.222 | X73079    | 21375.445 | 17101.967 | NM_001244 | 653.207   |
| AA156342  | 2481.428  | 1589.977  | NM_019091 | 1008.226  | 368.356   | NM_00409C | 2245.923  |
| R45594    | 4840.803  | 12314.693 | AF264781  | 1713.083  | 383.684   | NM_014634 | 3139.022  |
| H46425    | 3025.031  | 2483.168  | NM_016142 | 984.127   | 846.898   | NM_001919 | 2219.642  |
| AI355949  | 866.193   | 1108.858  | AK024215  | 16410.75  | 4018.009  | BC031485  | 479.589   |
| AA278152  | 5395.679  | 9013.549  | AB044661  | 2807.616  | 1817.436  | NM_004092 | 2673.896  |
| H75530    | 2936.66   | 3255.942  | NM_000606 | 7964.471  | 3911.202  | X15624    | 960.407   |
| NM_004176 | 6180.937  | 8303.133  | NM_016124 | 7697.201  | 3818.146  | AF073770  | 1010.418  |
| NM_004548 | 21663.33  | 29396.725 | NM_019079 | 734.626   | 531.578   | AL359401  | 1339.003  |
| AK000554  | 2768.958  | 4574.888  | U53530    | 2175.697  | 2090.359  | NM_012213 | 938.054   |
| NM_006472 | 42196.621 | 7519.91   | NM_006598 | 1987.196  | 1681.593  | NM_016573 | 3941.686  |
| NM_001538 | 4746.49   | 3308.215  | NM_004176 | 1882.002  | 1174.598  | NM_001303 | 1846.394  |
| X97261    | 4925.009  | 17670.611 | NM_004548 | 15737.763 | 9874.666  | M21304    | 1277.741  |
| NM_00541C | 350.935   | 525.102   | AK000554  | 3185.69   | 2134.455  | NM_001979 | 243.482   |
| D87666    | 70106.016 | 50758.898 | NM_006472 | 19615.59  | 4034.601  | AB040896  | 1067.541  |
| NM_001315 | 9704.261  | 7118.853  | NM_002826 | 6993.881  | 4611.474  | NM_005176 | 378.63    |
| AF286095  | 2178.232  | 1431.752  | AF159141  | 2609.017  | 2840.884  | NM_003636 | 1306.189  |
| NM_000878 | 1097.013  | 1002.82   | NM_00242C | 659.533   | 447.48    | NM_002234 | 520.202   |
| S66407    | 2088.648  | 2197.832  | NM_016458 | 26562.934 | 17947.568 | NM_000701 | 640.126   |
| NM_016523 | 722.59    | 657.757   | AK022233  | 2177.611  | 1519.931  | AB022696  | 1047.674  |
| NM_001981 | 4278.917  | 4745.229  | AK026410  | 5625.509  | 3991.692  | NM_014379 | 175.227   |
| NM_014654 | 1637.248  | 1990.839  | NM_014637 | 1637.034  | 1400.1    | NM_021005 | 305.088   |
| NM_001585 | 60613.773 | 56835.574 | NM_013379 | 12592.92  | 9054.189  | NM_001523 | 447.224   |
| AK026108  | 5735.737  | 9625.645  | AF113208  | 7271.095  | 3336.183  | NM_017423 | 869.142   |
| NM_006379 | 4669.99   | 6476.622  | NM_006153 | 2882.378  | 2402.475  | Z70705    | 461.929   |
| BF571428  | 3195.235  | 5154.225  | NM_012164 | 1080.623  | 601.48    | NM_002611 | 400.07    |
| AB037723  | 7373.723  | 11063.303 | AK026010  | 717.283   | 551.419   | NM_017417 | 237.007   |
| NM_006246 | 3495.801  | 5983.551  | NM_004721 | 676.433   | 441.411   | AL133602  | 680.263   |
| NM_004316 | 455.167   | 1207.908  | AB011156  | 1518.998  | 1137.344  | AF037219  | 610.43    |
| U58096    | 28452.9   | 38815.898 | NM_006246 | 2074.31   | 1600.644  | NM_000251 | 672.242   |
| NM_016929 | 10599.846 | 7246.008  | U58096    | 37144.766 | 17859.26  | NM_006038 | 1049.26   |
| NM_012323 | 1533.751  | 1964.259  | NM_016929 | 3065.8    | 3206.826  | AB011133  | 1579.09   |
| NM_015948 | 4680.945  | 5092.318  | NM_012323 | 881.754   | 1027.306  | NM_017572 | 13985.922 |
| NM_003054 | 2743.934  | 1915.685  | NM_013943 | 672.92    | 728.673   | NM_018444 | 1372.253  |
| NM_002219 | 8133.841  | 14115.458 | NM_001639 | 1224.843  | 1635.653  | NM_000252 | 992.249   |
| AF182404  | 3899.947  | 3263.839  | BG534366  | 972.529   | 463.4     | NM_006947 | 3349.858  |
| NM_000804 | 503.969   | 1413.929  | BG698522  | 8736.138  | 8211.881  | NM_017917 | 4061.003  |
| NM_006555 | 3956.369  | 3457.468  | AA152346  | 902.657   | 619.385   | NM_00006C | 632.884   |
| NM_014521 | 1205.097  | 2090.237  | L15189    | 2645.78   | 1856.777  | NM_009589 | 645.274   |
| NM_002445 | 1673.933  | 2487.911  | AB023420  | 8608.741  | 4902.517  | L09080    | 755.231   |
| NM_017809 | 1355.37   | 2190.276  | AF022912  | 2406.051  | 1415.092  | NM_007326 | 1723.638  |
| D63877    | 5527.603  | 7680.172  | AA477428  | 11870.401 | 6101.949  | AK023080  | 178.373   |
| AF131760  | 3930.664  | 2965.028  | AA156342  | 924.968   | 702.536   | NM_001886 | 1968.714  |
| NM_018698 | 2598.728  | 3934.151  | R45594    | 7746.738  | 8949.636  | NM_004467 | 185.963   |
| NM_006461 | 1441.635  | 2369.741  | AI143386  | 1856.94   | 1754.674  | NM_005622 | 664.441   |
| NM_018201 | 5890.353  | 5817.903  | H46425    | 2043.481  | 1849.355  | NM_018058 | 732.03    |
| NM_014438 | 1381.479  | 2075.235  | AI355949  | 548.685   | 494.965   | NM_004548 | 3513.72   |
| NM_004829 | 1048.358  | 1617.685  | AA278152  | 6798.998  | 3642.505  | X69079    | 6937.785  |



|           |           |           |           |           |           |           |          |
|-----------|-----------|-----------|-----------|-----------|-----------|-----------|----------|
| NM_006793 | 24886.758 | 47225.582 | H75530    | 1600.73   | 1170.476  | BI759406  | 2849.904 |
| NM_018079 | 925.967   | 1459.224  | NM_003764 | 4185.551  | 1531.971  | R76099    | 285.336  |
| NM_004760 | 1641.832  | 3338.788  | NM_001538 | 7925.589  | 8107.592  | S74445    | 727.919  |
| NM_006752 | 6459.543  | 9786.53   | X97261    | 2275.366  | 7085.445  | BI763360  | 619.161  |
| NM_004428 | 544.794   | 692.677   | NM_001468 | 518.331   | 608.496   | D25538    | 737.867  |
| NM_006809 | 4456.995  | 6203.536  | D87666    | 41870.539 | 24794.182 | NM_000360 | 8359.117 |
| AF149304  | 1066.925  | 1537.633  | NM_001315 | 5463.792  | 5876.667  | D49950    | 2058.67  |
| NM_012095 | 9792.924  | 14549.892 | S66407    | 923.944   | 834.69    | X03635    | 874.528  |
| NM_016438 | 370.138   | 1208.56   | NM_004258 | 20644.961 | 22127.318 | BC011847  | 44377.91 |
| X73079    | 35190.273 | 46321.543 | NM_001981 | 2952.065  | 2921.397  | X03348    | 952.37   |
| NM_019091 | 723.349   | 1743.42   | NM_001585 | 33659.332 | 29008.684 | AF353674  | 1367.144 |
| L07518    | 1332.284  | 1070.121  | AK026108  | 3317.225  | 4927.738  | BC002645  | 1624.102 |
| AF264781  | 2891.329  | 3565.084  | NM_006379 | 2591.357  | 1552.705  | NM_021138 | 1012.731 |
| AK022823  | 1484.602  | 822.032   | BF571428  | 2084.609  | 1845.104  | BC002792  | 585.158  |
| NM_002456 | 604.622   | 1925.534  | AB037723  | 2377.987  | 2379.48   | NM_002981 | 2022.134 |
| AK024215  | 16746.607 | 22362.678 | NM_000606 | 4135.917  | 2665.355  | NM_001244 | 808.933  |
| NM_016124 | 9785.295  | 14945.481 | NM_016124 | 3280.676  | 2894.349  | NM_012275 | 224.471  |
| NM_019079 | 933.981   | 1267.949  | NM_019079 | 824.738   | 584.93    | NM_016139 | 9712.832 |
| U53530    | 3146.514  | 4574.425  | U53530    | 2498.151  | 2897.084  | AL117468  | 1486.248 |
| NM_006598 | 2327.487  | 3165.318  | NM_015948 | 2815.756  | 3497.645  | NM_019613 | 1137.099 |
| NM_004176 | 6682.695  | 11814.964 | NM_003054 | 3314.255  | 2811.038  | NM_005382 | 561.322  |
| NM_004548 | 21406.926 | 37112.52  | NM_002219 | 7472.813  | 12190.172 | AK027086  | 1666.268 |
| AK000554  | 2575.095  | 3589.296  | AF182404  | 1648.06   | 1114.107  | AB032997  | 514.015  |
| NM_006472 | 36867.984 | 6114.241  | NM_000804 | 479.623   | 706.957   | AL096857  | 1200.002 |
| NM_002826 | 13244.849 | 9513.632  | NM_006555 | 2023.449  | 1678.477  | X07203    | 190.016  |
| AF159141  | 3266.172  | 6010.364  | NM_014521 | 777.125   | 1011.317  | AB040104  | 163.131  |
| NM_002420 | 981.883   | 1107.281  | NM_002445 | 1092.445  | 896.502   | NM_003834 | 2102.705 |
| NM_016458 | 20179.967 | 33216.176 | AK023202  | 1523.353  | 1319.846  | NM_005959 | 1089.529 |
| AK022233  | 2250.87   | 5380.558  | D63877    | 4006.998  | 3578.302  | NM_003381 | 383.349  |
| AL137713  | 450.431   | 474.491   | AF131760  | 2222.313  | 1174.098  | NM_003702 | 3755.376 |
| AK026410  | 7850.852  | 12919.16  | NM_018698 | 1546.251  | 1581.223  | NM_000369 | 332.134  |
| NM_014637 | 3132.334  | 5132.589  | NM_006461 | 1114.003  | 603.521   | NM_016351 | 335.433  |
| NM_013379 | 19031.15  | 33039.477 | NM_014438 | 936.026   | 641.313   | NM_004405 | 518.74   |
| AF113208  | 6630.982  | 7856.928  | NM_014880 | 2329.871  | 1948.571  | NM_001988 | 3001.88  |
| NM_006153 | 3519.289  | 6745.285  | NM_006153 | 4107.73   | 4092.135  | NM_006060 | 521.377  |
| NM_012164 | 1713.511  | 2660.687  | AK026010  | 732.602   | 1136.368  | NM_005667 | 1191.971 |
| AK026010  | 2249.5    | 1661.97   | NM_006809 | 4209.152  | 2781.99   | NM_006308 | 887.171  |
| NM_004721 | 554.654   | 1062.328  | AF149304  | 744.91    | 911.731   | NM_002234 | 812.659  |
| AB011156  | 1007.747  | 1988.481  | NM_012095 | 7216.418  | 6963.723  | NM_003471 | 61.261   |
| NM_006246 | 2968.303  | 5384.481  | X73079    | 23222.357 | 18487.617 | NM_000701 | 886.491  |
| NM_004316 | 464.875   | 1082.477  | L07518    | 654.844   | 413.181   | AB022696  | 2169.893 |
| NM_014446 | 352.867   | 642.782   | AF264781  | 1532.924  | 725.74    | NM_002233 | 222.285  |
| U58096    | 26392.666 | 32676.197 | AK022823  | 275.703   | 178.315   | AF137372  | 1669.942 |
| NM_016929 | 11067.213 | 7668.755  | AK024215  | 18405.537 | 6758.516  | AF220417  | 290.104  |
| NM_012323 | 1946.272  | 1895.916  | NM_015376 | 2151.846  | 663.704   | D83782    | 2835.653 |
| NM_006942 | 661.015   | 737.105   | NM_001176 | 1297.881  | 1015.728  | NM_002078 | 885.077  |
| NM_018199 | 345.456   | 912.674   | AF083255  | 6638.733  | 4053.094  | NM_000287 | 1470.569 |
| NM_013943 | 2225.317  | 3240.386  | NM_006472 | 13657.698 | 2917.703  | NM_001656 | 625.482  |
| NM_001639 | 3168.973  | 8760.524  | NM_016458 | 20238.492 | 25469.914 | NM_001122 | 1954.763 |
| H39560    | 784.785   | 1198.848  | AK022233  | 2302.767  | 2587.014  | NM_004591 | 573.662  |
| BG534366  | 8248.761  | 1646.492  | AK026410  | 6412.514  | 6535.168  | AL133027  | 422.565  |
| BG698522  | 15097.447 | 16954.229 | NM_014637 | 1260.175  | 1492.422  | AB037732  | 1113.075 |
| AA152346  | 2301.859  | 1724.582  | NM_013379 | 10742.114 | 9526.683  | NM_001837 | 216.25   |

|           |           |           |           |           |           |           |           |
|-----------|-----------|-----------|-----------|-----------|-----------|-----------|-----------|
| L15189    | 2191.466  | 4915.421  | AF113208  | 6621.079  | 3564.931  | NM_001839 | 47218.246 |
| AB023420  | 14281.961 | 22068.949 | AF019382  | 1249.442  | 790.64    | BC016029  | 306.206   |
| BI822179  | 617.057   | 795.786   | BC012757  | 3186.875  | 1533.998  | M27487    | 440.427   |
| AF022912  | 4950.412  | 4682.506  | NM_004062 | 555.772   | 1046.741  | NM_002286 | 14536.314 |
| AA477428  | 11601.084 | 17857.631 | NM_020039 | 2486.605  | 2256.949  | NM_003811 | 3448.464  |
| AA156342  | 2295.161  | 3224.866  | NM_014442 | 3254.629  | 3573.593  | AB011133  | 2005.682  |
| R45594    | 4859.019  | 23070.943 | AB002313  | 667.075   | 1036.678  | NM_017572 | 15097.262 |
| AI143386  | 450.211   | 730.878   | AB011167  | 922.587   | 1259.249  | NM_018444 | 1474.157  |
| H46425    | 3318.88   | 4310.098  | NM_000208 | 2884.665  | 2925.907  | NM_000252 | 1232.861  |
| AI355949  | 868.456   | 1592.621  | NM_002188 | 36720.816 | 39762.195 | NM_006947 | 3019.531  |
| AA278152  | 4569.851  | 10559.135 | AK027119  | 13724.375 | 12519.469 | NM_017917 | 2708.792  |
| H75530    | 2773.51   | 4150.626  | AB037727  | 29652.068 | 37275.871 | NM_004090 | 2243.489  |
| NM_003764 | 7376.792  | 5343.261  | NM_005426 | 4552.475  | 2407.046  | NM_014634 | 3231.9    |
| NM_004829 | 1001.747  | 1644.711  | NM_004763 | 725.801   | 343.443   | NM_001919 | 2536.832  |
| NM_006793 | 25999.209 | 45062.863 | NM_014063 | 7040.676  | 6473.679  | BC031485  | 398.397   |
| NM_001538 | 5702.242  | 5324.679  | D86964    | 8823.189  | 2756.487  | NM_004092 | 2420.142  |
| X97261    | 4865.916  | 23302.795 | AL049801  | 1448.442  | 1444.732  | X15624    | 745.751   |
| NM_001468 | 748.566   | 770.09    | NM_016395 | 5947.893  | 2884.377  | AF073770  | 808.177   |
| NM_005410 | 570.951   | 687.502   | NM_003152 | 1023.669  | 659.75    | AL359401  | 1213.782  |
| D87666    | 68925.789 | 57743.551 | NM_014727 | 4556.353  | 3941.933  | NM_012213 | 779.818   |
| NM_001315 | 10633.524 | 12028.594 | NM_006342 | 2463.365  | 1391.584  | NM_016573 | 3312.029  |
| AF286095  | 2275.727  | 2222.113  | NM_005552 | 17982.281 | 26936.848 | NM_001303 | 1985.913  |
| NM_000878 | 1199.334  | 1811.442  | AL109786  | 643.374   | 1204.824  | M21304    | 1471.443  |
| S66407    | 2410.664  | 3608.74   | AK026479  | 2418.418  | 2361.397  | AB040896  | 1069.408  |
| NM_016523 | 773.767   | 901.764   | NM_005977 | 650.922   | 727.44    | NM_001107 | 1048.887  |
| NM_001981 | 4157.631  | 5801.689  | NM_006265 | 6445.377  | 6065.466  | AF084645  | 163.015   |
| NM_014654 | 1377.584  | 2450.971  | NM_003126 | 390.603   | 312.972   | AF151851  | 1496.31   |
| NM_001585 | 49451.293 | 57251.578 | NM_006059 | 1713.517  | 1644.673  | NM_005176 | 333.58    |
| AK026108  | 7513.007  | 11662.679 | NM_000347 | 4369.12   | 5568.417  | NM_003636 | 1602.108  |
| NM_006379 | 4339.129  | 5393.406  | M13452    | 6565.099  | 4322.867  | AF040723  | 3754.613  |
| BF571428  | 3782.974  | 5293.077  | AF082075  | 382.336   | 414.097   | NM_015527 | 389.089   |
| AB037723  | 6749.397  | 9244.532  | NM_016114 | 2119.865  | 1322.845  | X89675    | 717.015   |
| NM_000606 | 14990.739 | 17330.461 | AY007114  | 935.561   | 665.156   | NM_012189 | 309.965   |
| NM_016124 | 7623.102  | 10190.652 | AB000895  | 1064.052  | 1011.988  | NM_005798 | 3285.614  |
| NM_019079 | 820.957   | 1008.801  | X80031    | 437.857   | 667.881   | NM_004216 | 1298.983  |
| U53530    | 2961.664  | 3629.374  | AK022178  | 1100.162  | 1014.3    | NM_016289 | 10439.748 |
| NM_006598 | 2111.725  | 2620.195  | NM_006011 | 1062.644  | 1080.887  | NM_001464 | 338.62    |
| NM_015948 | 4318.746  | 6751.802  | AJ277442  | 1096.304  | 1126.128  | NM_002051 | 436.237   |
| NM_003054 | 3643.77   | 3753.409  | NM_004569 | 2388.792  | 1643.358  | NM_001523 | 476.318   |
| NM_003042 | 617.233   | 827.062   | AF089088  | 730.873   | 775.951   | NM_017423 | 757.106   |
| NM_004790 | 651.664   | 782.381   | L07557    | 924.757   | 1377.511  | Z70705    | 440.627   |
| NM_002219 | 9511.238  | 22337.486 | NM_002796 | 40628.219 | 38175.938 | AL133602  | 528.405   |
| AF182404  | 4497.006  | 4640.722  | AK021665  | 776.587   | 837.471   | AF037219  | 547.711   |
| NM_000804 | 626.574   | 1184.218  | NM_013366 | 535.259   | 469.558   | NM_000251 | 802.869   |
| NM_006555 | 3988.573  | 4474.563  | NM_002787 | 16183.655 | 10103.715 | NM_006038 | 731.722   |
| NM_014521 | 1279.193  | 2535.26   | U95006    | 9577.553  | 3844.788  | U87223    | 864.436   |
| NM_002445 | 1263.901  | 1750.697  | NM_003347 | 7970.432  | 6067.915  | NM_000093 | 245.285   |
| NM_017809 | 1037.902  | 1598.042  | AF273051  | 1095.56   | 890.261   | NM_001779 | 1434.177  |
| D63877    | 4985.102  | 6219.775  | NM_014516 | 7416.313  | 8636.287  | NM_016484 | 894.884   |
| AF131760  | 3320.058  | 2813.184  | AK000643  | 36841.547 | 42364.785 | AK026114  | 335.323   |
| NM_018698 | 2288.334  | 3287.618  | NM_018421 | 3326.314  | 2306.514  | NM_014683 | 200.924   |
| NM_006461 | 1066.131  | 2083.459  | AB014574  | 44409.391 | 50356.914 | AK021536  | 2458.009  |
| NM_018201 | 6219.283  | 6451.462  | NM_020127 | 910.177   | 756.899   | NM_002600 | 1283.637  |

|           |           |           |           |           |           |           |           |
|-----------|-----------|-----------|-----------|-----------|-----------|-----------|-----------|
| NM_01443E | 1641.868  | 2267.222  | NM_015623 | 6461.391  | 4287.813  | NM_00364E | 10133.54  |
| NM_01488C | 4022.013  | 4502.692  | AB045116  | 2008.365  | 1583.305  | NM_006663 | 488.738   |
| NM_006153 | 3751.624  | 6257.32   | L49054    | 904.917   | 414.278   | NM_006092 | 383.566   |
| NM_012164 | 1299.468  | 2125.291  | NM_003422 | 2092.372  | 1219.314  | NM_012424 | 655.522   |
| AK026010  | 1831.036  | 1544.099  | NM_014779 | 1224.543  | 878.433   | NM_00244E | 243.794   |
| NM_004721 | 480.304   | 840.17    | NM_002943 | 4223.924  | 4715.896  | NM_006651 | 686.628   |
| AB011156  | 1005.781  | 1837.462  | AL133649  | 1090.018  | 1241.968  | NM_00533E | 1833.025  |
| NM_01807E | 627.105   | 1385.335  | NM_006454 | 2323.863  | 2444.599  | NM_00141E | 1179.199  |
| NM_00476C | 1955.446  | 4090.796  | NM_01584E | 3549.743  | 2976.466  | AF119817  | 3723.34   |
| NM_006752 | 7370.936  | 10915.115 | NM_015972 | 7506.695  | 8869.713  | AL035306  | 827.888   |
| NM_00442E | 532.655   | 937.183   | NM_016132 | 1350.638  | 1682.777  | NM_00132E | 4569.625  |
| NM_00680E | 4839.352  | 6515.712  | NM_01800E | 1867.225  | 1728.632  | NM_00574E | 1819.494  |
| AF149304  | 1379.413  | 1797.758  | NM_01609C | 983.735   | 766.202   | NM_00423C | 3508.084  |
| NM_01209E | 9309.655  | 14082.476 | NM_001013 | 32316.258 | 45536.793 | NM_014503 | 317.086   |
| NM_01643E | 647.336   | 896.494   | AK024040  | 3159.545  | 3971.01   | NM_01465E | 490.454   |
| X73079    | 38449.875 | 46246.238 | NM_005061 | 2782.941  | 3880.862  | NM_00439E | 1023.41   |
| NM_019091 | 907.938   | 2009.161  | NM_000997 | 52747.648 | 61575.285 | NM_006337 | 1081.062  |
| L07518    | 1188.983  | 1750.872  | AF182417  | 35774.293 | 28765.252 | NM_004507 | 1741.636  |
| AF264781  | 2390.537  | 3115.715  | AL137354  | 12749.675 | 11911.205 | NM_00271C | 2391.098  |
| AK022823  | 1360.164  | 897.784   | NM_001023 | 56363.285 | 60971.633 | NM_01406C | 712.461   |
| NM_00245E | 381.636   | 1719.961  | AK021571  | 5529.85   | 4305.378  | NM_00474E | 1449.926  |
| AK024215  | 17368.385 | 18413.928 | AF052149  | 1188.512  | 1169.062  | BQ446064  | 294.389   |
| AB044661  | 4193.171  | 5377.204  | AL137512  | 1616.563  | 1280.488  | NM_00544E | 313.368   |
| NM_01537E | 4036.665  | 2600.187  | NM_002541 | 2305.017  | 1763.635  | NM_00387E | 1923.137  |
| NM_00117E | 909.786   | 1829.112  | NM_00005E | 2754.687  | 2776.997  | NM_016052 | 2688.323  |
| NM_013341 | 463.536   | 1551.331  | NM_016311 | 10206.899 | 6694.505  | NM_00671E | 310.006   |
| NM_00406E | 254.99    | 1062.752  | NM_001867 | 34438.422 | 30936.736 | NM_005427 | 393.624   |
| NM_004941 | 4990.207  | 4576.664  | NM_00230C | 44475.813 | 43572.137 | NM_00177E | 477.951   |
| AF151831  | 3694.452  | 4792.626  | NM_00029C | 1215.241  | 1703.907  | NM_001903 | 8123.901  |
| AB011121  | 513.318   | 1515.076  | NM_01653E | 6040.521  | 4172.278  | NM_001874 | 1764.375  |
| AF083255  | 8158.664  | 11575.415 | AK023275  | 8509.954  | 6282.048  | NM_005857 | 11142.358 |
| AK022605  | 1294.851  | 1750.978  | AJ223352  | 32193.582 | 3552.048  | NM_00242E | 484.036   |
| AK000554  | 3203.125  | 4471.916  | NM_01223E | 1706.743  | 1442.258  | AK027037  | 522.398   |
| NM_006472 | 42877.164 | 7190.851  | NM_01653E | 15177.587 | 2383.987  | NM_00387E | 1838.58   |
| NM_00282E | 14604.283 | 11888.805 | NM_006807 | 6238.23   | 4464.883  | NM_000274 | 1633.648  |
| AF159141  | 4604.917  | 7579.422  | NM_006532 | 2140.355  | 3732.469  | NM_000281 | 1623.469  |
| NM_00242C | 1116.035  | 1568.161  | U07132    | 2989.64   | 4596.541  | AK001295  | 728.473   |
| NM_01645E | 22270.822 | 35317.488 | AK025036  | 718.558   | 383.567   | NM_006031 | 569.659   |
| AK022233  | 2035.121  | 4217.179  | AK024843  | 8940.524  | 5821.891  | NM_00271E | 1267.114  |
| AL137713  | 466.5     | 543.397   | NM_01767C | 4351.523  | 5402.202  | NM_00102C | 48296.406 |
| AK026410  | 6987.716  | 9441.161  | AK021468  | 1004.227  | 1321.881  | AB020660  | 959.16    |
| NM_014637 | 2962.075  | 4121.244  | BC033020  | 1191.777  | 1314.058  | NM_00665E | 2944.978  |
| NM_01337E | 22518.516 | 19584.727 | NM_00436E | 8191      | 10318.34  | NM_018051 | 204.146   |
| AF113208  | 6526.536  | 3951.899  | AK026168  | 1046.273  | 1131.765  | NM_015371 | 494.798   |
| AF019382  | 1340.506  | 1650.613  | AJ296152  | 15838.751 | 11334.18  | AB040915  | 471.491   |
| BC012757  | 2171.89   | 3151.618  | AK001067  | 1299.069  | 932.784   | AF147791  | 530.401   |
| M96686    | 419.588   | 1061.365  | AK027088  | 13691.034 | 6687.87   | NM_006481 | 532.877   |
| NM_004062 | 1735.438  | 2616.554  | AB037721  | 9384.484  | 9798.134  | NM_00391C | 4161.033  |
| NM_005883 | 1078.725  | 1764.608  | AK027120  | 11339.155 | 8274.508  | AB007913  | 610.73    |
| NM_00444E | 2138.796  | 2947.179  | AB029001  | 1896.011  | 2724.875  | NM_00669E | 999.636   |
| NM_014591 | 3870.857  | 5320.105  | AB006624  | 3081.488  | 3709.101  | NM_00459E | 1762.779  |
| NM_014592 | 1462.32   | 3065.325  | AL109717  | 1298.119  | 1634.043  | NM_006037 | 2361.854  |
| NM_00194E | 4759.552  | 3775.373  | AK025473  | 735.248   | 609.191   | NM_015871 | 1348.541  |

|           |           |           |           |           |           |           |           |
|-----------|-----------|-----------|-----------|-----------|-----------|-----------|-----------|
| NM_02003E | 3108.86   | 3306.307  | AF146693  | 869.84    | 901.819   | NM_019037 | 2098.744  |
| NM_006653 | 778.848   | 2219.648  | AF271070  | 13782.745 | 21978.453 | NM_015891 | 679.256   |
| NM_014442 | 3759.281  | 5133.818  | NM_014903 | 1096.447  | 1662.064  | NM_00506E | 3222.785  |
| AB002313  | 3543.745  | 4483.215  | AK055959  | 993.461   | 571.15    | NM_00308E | 851.139   |
| AB011167  | 1740.751  | 2948.393  | AK021705  | 5743.064  | 8104.995  | NM_01759C | 470.483   |
| NM_00540E | 1168.929  | 1472.048  | NM_016141 | 12452.808 | 18595.961 | AB011145  | 1822.155  |
| NM_00020E | 4870.224  | 4915.037  | AK025624  | 14833.791 | 9693.108  | NM_00375C | 7570.499  |
| NM_00218E | 31472.1   | 26588.064 | AL110125  | 8644.441  | 9187.924  | M92422    | 586.93    |
| AK027119  | 17826.867 | 12196.183 | AK022764  | 853.805   | 666.15    | AK021888  | 741.032   |
| AB037727  | 31023.211 | 25605.029 | X89744    | 409.319   | 522.883   | AK022848  | 1054.965  |
| NM_00542E | 6936.393  | 2974.915  | AJ011600  | 1724.35   | 2502.302  | NM_01815E | 3547.441  |
| NM_004763 | 889.572   | 558.475   | AJ002785  | 1286.483  | 1503.013  | NM_00081E | 1010.47   |
| NM_014063 | 8599.819  | 5166.217  | Z70716    | 1128.824  | 1087.244  | NM_017424 | 934.053   |
| D86964    | 8559.227  | 3640.333  | AL049251  | 904.541   | 668.805   | NM_001522 | 1052.455  |
| AL049801  | 2631.217  | 1998.321  | Z83945    | 1152.463  | 1561.91   | NM_000883 | 688.68    |
| NM_01639E | 8062.521  | 4845.624  | L32606    | 823.005   | 1130.498  | AL390142  | 613.775   |
| NM_003152 | 1332.681  | 762.794   | L05148    | 895.981   | 683.894   | NM_00656E | 520.228   |
| NM_014727 | 4233.185  | 5672.885  | AK091125  | 1146.408  | 1290.684  | AB007930  | 3635.959  |
| BE885010  | 745.797   | 1341.833  | D16904    | 922.848   | 1036.835  | AJ005273  | 950.467   |
| NM_006342 | 1419.527  | 3001.271  | M93056    | 10271.466 | 16317.302 | AK021892  | 1149.298  |
| NM_01639E | 5202.177  | 8920.952  | D16474    | 12098.453 | 14103.152 | NM_003437 | 533.78    |
| NM_00568E | 1359.684  | 1561.653  | AL080072  | 540.322   | 1158.177  | NM_018337 | 2397.722  |
| AF086546  | 297.984   | 816.28    | AK024898  | 456.255   | 553.686   | AA193295  | 4722.325  |
| NM_005552 | 14863.598 | 23125.854 | AL049280  | 2922.334  | 3665.908  | NM_01804E | 1037.393  |
| NM_006717 | 2334.962  | 2762.804  | AK025212  | 14345.22  | 10188.532 | NM_014803 | 685.597   |
| AL109786  | 803.379   | 2060.279  | AB021925  | 578.04    | 767.267   | AK024956  | 280.609   |
| AK026479  | 4791.851  | 5426.748  | AL157503  | 3498.998  | 2524.219  | AF147386  | 1094.09   |
| AK022860  | 7168.239  | 5596.711  | AK000053  | 565.126   | 542.786   | AF273052  | 3095.177  |
| X60188    | 30234.936 | 24120.906 | AK000786  | 2516.598  | 2042.023  | NM_017943 | 1630.733  |
| NM_005977 | 2135.767  | 2454.723  | AK000935  | 582.437   | 466.174   | AK025682  | 213.911   |
| NM_002747 | 530.646   | 357.211   | AK021458  | 2406.416  | 2798.199  | NM_01647E | 3914.424  |
| NM_00626E | 7369.669  | 5211.481  | NM_017674 | 4522.908  | 4429.484  | AL389986  | 2024.644  |
| NM_00312E | 613.734   | 514.041   | AK000966  | 609.7     | 426.71    | AF142409  | 1671.42   |
| NM_00605E | 1998.516  | 1074.756  | AK024525  | 5471.736  | 6585.476  | AF086279  | 291.931   |
| NM_000347 | 2886.468  | 2462.664  | AK024909  | 973.992   | 981.21    | AF088052  | 448.795   |
| M13452    | 15229.832 | 4466.911  | AK024544  | 1638.987  | 3130.508  | AF086342  | 248.057   |
| NM_016114 | 2092.256  | 1584.125  | AK025097  | 552.74    | 982.18    | AF086451  | 233.122   |
| AY007114  | 1416.662  | 1067.888  | AK001880  | 5921.846  | 6357.465  | AF086387  | 239.053   |
| AF086604  | 552.004   | 696.136   | AF156166  | 6557.001  | 7570.479  | AB037756  | 384.524   |
| AB000895  | 938.907   | 783.031   | NM_01420E | 20015.766 | 8697.544  | AK001853  | 836.389   |
| X80031    | 461.913   | 642.054   | NM_001651 | 5082.65   | 6247.224  | AK025071  | 373.076   |
| AK022178  | 1374.735  | 1594.219  | L32786    | 3884.429  | 3539.967  | NM_01537C | 825.706   |
| NM_006011 | 268.666   | 1088.025  | U03239    | 688.311   | 413.215   | AF085989  | 196.929   |
| L00635    | 1090.97   | 1064.973  | AL355720  | 4290.126  | 3870.084  | AL360139  | 33997.324 |
| NM_015601 | 1608.492  | 1463.127  | AK002023  | 5795.007  | 5726.501  | AF075110  | 2403.25   |
| NM_00178C | 47677.719 | 22633.977 | AF150156  | 632.406   | 809.639   | AL137494  | 2266.674  |
| AJ277442  | 835.122   | 813.331   | NM_016464 | 1028.428  | 899.81    | AL162037  | 3234.878  |
| NM_00456E | 3927.781  | 2226.928  | L40402    | 3558.112  | 3446.938  | AL390150  | 365.173   |
| AF089088  | 942.544   | 929.569   | AF086216  | 440.443   | 387.659   | NM_002761 | 375.03    |
| L07557    | 1423.594  | 1287.556  | AK022422  | 1036.581  | 2177.581  | AF086063  | 249.503   |
| D78514    | 3589.502  | 2581.329  | AK023485  | 1278.441  | 1715.041  | AL833393  | 349.535   |
| AK021665  | 697.734   | 310.198   | AK022474  | 23478.465 | 23102.041 | AF088005  | 332.554   |
| NM_01336E | 1037.417  | 525.874   | AK022392  | 3092.2    | 7064.669  | AF086096  | 1054.397  |

|           |           |           |           |           |           |           |           |
|-----------|-----------|-----------|-----------|-----------|-----------|-----------|-----------|
| NM_002787 | 22952.744 | 13374.955 | AL117451  | 1379.911  | 2738.925  | NM_017933 | 887.318   |
| U95006    | 5153.501  | 4537.696  | NM_002405 | 4157.066  | 3053.467  | NM_017815 | 3938.655  |
| NM_003347 | 16053.064 | 7487.161  | AK024282  | 1838.857  | 1418.686  | AK024653  | 4050.953  |
| AF273051  | 1191.477  | 737.512   | AF085838  | 2444.277  | 1575.199  | AF103907  | 1664.379  |
| NM_014516 | 7649.322  | 5642.386  | NM_018277 | 2095.691  | 3140.001  | AF094508  | 194.609   |
| AK021868  | 832.437   | 476.483   | AF014455  | 817.671   | 741.559   | AF161351  | 1084.69   |
| AK000643  | 64438.953 | 59298.762 | AF086335  | 4220.753  | 2905.161  | AF111782  | 629.335   |
| NM_018421 | 6179.812  | 4072.595  | AL355741  | 409.699   | 508.116   | AK022093  | 1649.283  |
| AB014574  | 37566.801 | 34855.535 | AB011118  | 20373.91  | 25864.633 | AK022232  | 234.976   |
| NM_020127 | 1452.268  | 1612.57   | S66666    | 527.285   | 376.609   | AK022376  | 307.425   |
| NM_015623 | 10905.285 | 10530.879 | AK021476  | 1770.692  | 1805.61   | AK022005  | 432.266   |
| AB045116  | 1658.242  | 1173.616  | NM_018630 | 2046.538  | 2295.132  | AK022137  | 376.415   |
| L49054    | 701.407   | 782.294   | AF086175  | 568.899   | 712.473   | AK022272  | 409.73    |
| NM_001675 | 650.043   | 998.876   | AK002196  | 418.16    | 495.017   | AK027155  | 929.828   |
| NM_003422 | 3127.961  | 2190.284  | NM_004576 | 1045.049  | 1359.398  | AF221846  | 297.215   |
| NM_001451 | 636.798   | 608.941   | AF040097  | 1249.896  | 1195.477  | AK024528  | 2082.93   |
| NM_014779 | 1029.279  | 800.909   | AK024182  | 985.505   | 1616.541  | AK000016  | 333.786   |
| NM_002943 | 4125.249  | 1849.085  | NM_006913 | 11828.612 | 13331.919 | AL080209  | 870.283   |
| AL133649  | 1262.541  | 912.173   | NM_000495 | 5988.07   | 10278.486 | NM_016255 | 536.315   |
| NM_015846 | 4787.803  | 2788.606  | AF088044  | 528.189   | 531.906   | NM_014315 | 708.304   |
| NM_015972 | 7586.724  | 6525.988  | AK000028  | 3103.102  | 2530.962  | AK056674  | 501.229   |
| NM_016132 | 1430.635  | 1258.201  | NM_013320 | 59150.035 | 47889.578 | AK022042  | 661.491   |
| NM_018006 | 1844.122  | 1413.422  | AL050039  | 870.482   | 890.671   | AL117588  | 287.435   |
| NM_016090 | 2281.814  | 1513.46   | AF087987  | 715.851   | 654.764   | BE895529  | 956.357   |
| NM_001013 | 46432.426 | 46640.645 | AK021723  | 321.493   | 328.434   | AK000964  | 313.341   |
| AK024040  | 4820.897  | 4142.151  | H09474    | 2429.506  | 2826.898  | AL117536  | 245.654   |
| NM_005061 | 4816.542  | 3996.945  | AB002368  | 10503.929 | 9411.988  | NM_017751 | 963.604   |
| NM_000997 | 64037.73  | 58564.293 | AL360263  | 57744.766 | 45829.426 | NM_003771 | 736.721   |
| AF182417  | 48635.34  | 41213.957 | Z36780    | 2199.048  | 2372.776  | NM_017860 | 2565.955  |
| AL137354  | 20725.27  | 16841.58  | AK022403  | 3462.474  | 2371.45   | X91195    | 7821.132  |
| NM_001023 | 63105.254 | 58783.215 | AK022955  | 2838.777  | 2890.032  | AF086190  | 541.523   |
| AK021571  | 9315.231  | 7153.525  | AK021760  | 520.352   | 437.552   | NM_006143 | 244.307   |
| AF052149  | 2221.132  | 1489.449  | BC035855  | 3299.088  | 3121.296  | AL050035  | 866.1     |
| AL137512  | 879.639   | 647.024   | AL137408  | 12939.19  | 16878.953 | AK024449  | 7271.073  |
| NM_005036 | 456.08    | 519.309   | AF054995  | 1333.744  | 1321.701  | AF279780  | 24669.453 |
| NM_002541 | 2466.139  | 1243.525  | AL080176  | 1783.061  | 2382.663  | AK022510  | 640.523   |
| NM_000056 | 3138.25   | 2456.104  | AK023627  | 1383.348  | 2111.799  | AK023878  | 363.386   |
| NM_016311 | 8016.564  | 5090.187  | CY3Cy5    | 3654.868  | 399.015   | AJ131609  | 1125.402  |
| NM_001867 | 50928.742 | 41413.883 | BI759406  | 2565.736  | 3050.71   | BC019280  | 1411.04   |
| NM_002300 | 66696.984 | 52930     | S74445    | 743.067   | 822.729   | AF086498  | 268.466   |
| NM_000290 | 3013.093  | 2352.867  | BI763360  | 799.659   | 834.351   | AF079567  | 402.593   |
| NM_016535 | 4822.232  | 3815.173  | D25538    | 1116.076  | 1227.563  | AK022177  | 231.336   |
| AK023275  | 7142.835  | 5400.143  | NM_000360 | 5894.031  | 10373.501 | AF086466  | 674.438   |
| AJ223352  | 16173.339 | 3842.212  | D49950    | 2511.588  | 4243.462  | AB007962  | 4195.457  |
| NM_012235 | 2340.813  | 2363.979  | NM_001845 | 624.674   | 678.184   | AF005081  | 400.181   |
| NM_016535 | 12583.982 | 3606.037  | X03635    | 1549.718  | 1966.332  | AK026438  | 288.834   |
| NM_006807 | 6097.19   | 6349.937  | BC011847  | 60323.297 | 69375.656 | AK021546  | 402.006   |
| L16464    | 567.654   | 407.567   | X03348    | 1408.954  | 1499.867  | AL050186  | 3784.146  |
| NM_006532 | 2441.56   | 1999.186  | AF353674  | 4476.725  | 3246.803  | AK021918  | 873.296   |
| U07132    | 4188.182  | 3386.521  | BC002645  | 1853.878  | 2375.502  | AK021669  | 2648.563  |
| NM_003436 | 854.687   | 825.45    | NM_021135 | 1419.791  | 1804.053  | AL080113  | 12429.149 |
| AL035301  | 784.556   | 1244.546  | BC002792  | 506.076   | 762.197   | AL050083  | 489.789   |
| NM_017687 | 1976.307  | 2505.711  | NM_021005 | 1037.59   | 1680.276  | AK022766  | 328.311   |

|           |           |           |           |           |           |           |           |
|-----------|-----------|-----------|-----------|-----------|-----------|-----------|-----------|
| NM_017975 | 1135.99   | 1334.436  | SR6       | 1918.737  | 2036.982  | AL049422  | 1492.345  |
| AK025036  | 1513.398  | 1060.832  | SR8       | 5216.167  | 16648.1   | AK023526  | 685.223   |
| AK024843  | 5385.404  | 5369.922  | SR10      | 17022.139 | 6718.836  | AK025602  | 1778.284  |
| NM_01767C | 4286.923  | 2998.605  | CY3Cy5    | 3545.936  | 383.703   | AK026309  | 676.453   |
| AK021468  | 1227.768  | 738.699   | X07203    | 382.38    | 295.477   | AL137486  | 1113.512  |
| BC033020  | 1115.407  | 955.692   | NM_003834 | 2604.518  | 2274.013  | AL110162  | 238.719   |
| NM_004366 | 5815.008  | 4522.35   | NM_005959 | 1393.456  | 1714.044  | AK022681  | 7510.954  |
| AK026168  | 1791.692  | 1860.877  | NM_003381 | 803.358   | 742.863   | CY3Cy5    | 7364.71   |
| AJ296152  | 13802.346 | 9345.356  | NM_005756 | 526.716   | 608.375   | AI299075  | 1202.945  |
| AK001067  | 2315.753  | 1618.7    | NM_003702 | 7851.856  | 8661.764  | M59979    | 493.96    |
| AK027088  | 13709.298 | 6088.978  | NM_000369 | 358.034   | 570.943   | AB011098  | 866.451   |
| AB037721  | 6193.046  | 5396.625  | NM_016351 | 727.038   | 511.359   | AA609759  | 1311.082  |
| AK027120  | 18596.754 | 5609.214  | NM_004405 | 937.585   | 903.335   | AI364483  | 6195.79   |
| AB029001  | 2037.596  | 1782.939  | NM_001988 | 4324.512  | 4687.192  | AA456001  | 4546.248  |
| AB006624  | 2796.59   | 2892.617  | NM_00606C | 728.378   | 1194.054  | AA176581  | 360.038   |
| AL109717  | 1182.947  | 1028.8    | NM_005667 | 1641.021  | 1448.097  | BI818232  | 313.254   |
| AK025473  | 1128.195  | 1095.982  | NM_006308 | 790.893   | 799.321   | AA451686  | 1821.333  |
| AF146693  | 716.122   | 742.166   | NM_00006C | 1220.897  | 761.275   | AA934644  | 136.378   |
| AF271070  | 8354.562  | 9391.924  | NM_009589 | 741.627   | 677.242   | SR7       | 6272.099  |
| NM_014903 | 1754.862  | 1592.397  | L09080    | 1280.274  | 1668.237  | SR9       | 18087.555 |
| AK055959  | 1198.235  | 577.162   | NM_007326 | 3136.622  | 3642.148  | CY3Cy5    | 5844.976  |
| AK021705  | 1948.75   | 4129.188  | NM_001886 | 3717.18   | 5270.832  |           | 264.368   |
| NM_016141 | 9497.424  | 7446.486  | NM_004467 | 445.797   | 607.537   | NM_019555 | 703.49    |
| AL109702  | 1091.285  | 938.772   | NM_005622 | 1278.649  | 878.787   | NM_012096 | 3550.717  |
| AK025624  | 7588.13   | 10652.887 | NM_018058 | 2573.371  | 5153.625  | L12052    | 514.815   |
| AK026684  | 519.204   | 492.516   | NM_004548 | 5054      | 4683.276  | AB028976  | 2453.313  |
| AL110125  | 5921.637  | 4500.948  | X69079    | 11822.582 | 16181.964 | NM_004626 | 423.104   |
| AJ011600  | 1841.425  | 1334.415  | AF091033  | 582.766   | 394.297   | NM_001899 | 169.933   |
| AJ002785  | 1017.99   | 822.118   | NM_001122 | 4634.8    | 5924.638  | NM_004305 | 13680.284 |
| Z70716    | 720.499   | 516.643   | NM_004591 | 1279.307  | 1011.132  | NM_006089 | 903.233   |
| AL049251  | 1088.096  | 873.882   | AL133027  | 654.536   | 610.539   | AF072506  | 752.055   |
| L32606    | 645.603   | 538.241   | AB037732  | 1440.959  | 1032.67   | NM_005992 | 473.552   |
| AK091125  | 960.323   | 997.081   | M27487    | 502.791   | 708.189   | NM_003144 | 18201.26  |
| D16904    | 1092.125  | 458.986   | NM_002286 | 43663.047 | 47815.91  | NM_000908 | 776.996   |
| M93056    | 14158.729 | 6278.396  | NM_002164 | 446.488   | 679.478   | AB011102  | 1125.752  |
| D16474    | 5619.941  | 3524.285  | NM_003811 | 4257.635  | 4832.628  | D63480    | 588.495   |
| AL080072  | 845.437   | 776.139   | NM_002981 | 3743.474  | 3633.549  | NM_002969 | 1942.102  |
| AL049280  | 1311.222  | 829.2     | NM_001244 | 1294.243  | 1441.378  | NM_006475 | 480.568   |
| AK025212  | 12751.928 | 7106.354  | NM_012275 | 418.247   | 234.706   | NM_00462C | 451.16    |
| AB021925  | 628.498   | 491.713   | NM_006137 | 349.534   | 288.618   | AF087940  | 2313.535  |
| AL157503  | 2445.179  | 1562.517  | NM_016139 | 27906.207 | 21074.738 | AJ277587  | 1259.183  |
| AK000053  | 569.109   | 349.865   | AL117468  | 2177.437  | 2900.67   | D87432    | 1208.744  |
| AK000786  | 1801.152  | 927.058   | NM_019613 | 1830.404  | 1980.495  | AK023749  | 709.981   |
| AK021458  | 2595.76   | 1983.418  | NM_005382 | 546.811   | 658.122   | NM_002337 | 1317.024  |
| NM_017674 | 4535.181  | 2901.931  | AK027086  | 2870.098  | 2649.498  | NM_013245 | 631.339   |
| AK000966  | 529.11    | 496.023   | AB032997  | 842.339   | 825.078   | NM_006423 | 1643.192  |
| AK024525  | 3608.704  | 2436.516  | AL096857  | 1849.129  | 2343.094  | NM_004766 | 951.782   |
| AK024909  | 594.437   | 446.103   | AF073770  | 1292.798  | 833.096   | NM_005819 | 5261.015  |
| AK024544  | 1340.179  | 975.279   | AL359401  | 4714.815  | 3999.349  | AK024722  | 487.45    |
| AK001880  | 3141.765  | 2852.663  | NM_012213 | 1908.65   | 1398.55   | AK025520  | 1556.845  |
| AF156166  | 5029.53   | 3612.033  | NM_016573 | 2661.449  | 1759.87   | NM_004892 | 7783.701  |
| NM_014373 | 10987.201 | 23866.777 | NM_001303 | 2846.786  | 2158.556  | NM_014597 | 2778.415  |
| NM_014206 | 15931.219 | 18343.623 | M21304    | 1047.452  | 596.409   | NM_017896 | 2479.397  |

|           |           |           |           |           |           |           |          |
|-----------|-----------|-----------|-----------|-----------|-----------|-----------|----------|
| NM_001651 | 3474.798  | 2931.379  | AB040896  | 1989.871  | 1315.427  | AB002374  | 1108.321 |
| L32786    | 2776.344  | 2052.917  | AF151851  | 4072.548  | 4410.271  | U17327    | 495.299  |
| AL355720  | 2687.603  | 2324.5    | NM_003636 | 1474.241  | 2992.441  | M87790    | 7088.42  |
| AK002023  | 2203.023  | 1597.104  | NM_002234 | 1086.072  | 1564.352  | NM_001768 | 786.718  |
| NM_016464 | 759.267   | 483.787   | NM_000701 | 1701.892  | 1450.288  | NM_000029 | 3534.767 |
| L40402    | 1502.005  | 924.104   | AB022696  | 2308.108  | 2472.477  | NM_000715 | 510.42   |
| AK022422  | 981.358   | 482.215   | AF137372  | 3317.384  | 4087.733  | AF035802  | 2284.768 |
| AK023485  | 691.698   | 595.051   | AF220417  | 536.045   | 1130.326  | Y08145    | 655.147  |
| AK022474  | 21866.09  | 14217.354 | D83782    | 3512.624  | 4895.792  | M26123    | 1116.013 |
| AK022392  | 2472.706  | 1792      | NM_002078 | 1684.557  | 2172.101  | NM_013328 | 5086.94  |
| AK025949  | 1377.14   | 1561.789  | NM_000287 | 3192.277  | 3784.525  | NM_000790 | 115.081  |
| Y10259    | 1717.333  | 1686.753  | NM_001656 | 1127.395  | 1125.922  | NM_002660 | 2035.513 |
| AK021725  | 1936.288  | 1252.358  | Z70705    | 755.845   | 673.198   | NM_015900 | 464.375  |
| NM_002408 | 3861.931  | 3212.972  | NM_002611 | 790.52    | 910.292   | NM_003706 | 1654.469 |
| AK024282  | 1725.224  | 1311.839  | NM_017417 | 651.681   | 364.009   | NM_005218 | 886.365  |
| AF085838  | 1692.133  | 1579.118  | AL133602  | 603.934   | 511.656   | AL122071  | 767.471  |
| NM_018277 | 1058.93   | 751.34    | AF037219  | 1797.917  | 1366.48   | AB033054  | 6070.418 |
| AF014455  | 547.38    | 519.239   | AK026075  | 301.384   | 354.127   | NM_016122 | 382.303  |
| AF086335  | 2596.733  | 1542.12   | NM_000251 | 2394.865  | 2308.673  | NM_016583 | 326.755  |
| AB011118  | 10159.931 | 8234.167  | NM_006038 | 1972.224  | 1753.712  | AF153330  | 474.1    |
| AK021476  | 1984.251  | 1500.207  | AB011133  | 1423.884  | 1586.279  | NM_004770 | 85.247   |
| NM_018630 | 2419.339  | 1900.05   | NM_017572 | 20429.85  | 15290.239 | D87446    | 2938.688 |
| AF086175  | 874.9     | 574.369   | NM_018444 | 1663.893  | 1542.218  | BF540935  | 3031.855 |
| NM_004576 | 914.363   | 819.381   | NM_000252 | 1920.682  | 2253.552  | NM_004466 | 938.154  |
| AK024182  | 1381.951  | 1099.292  | NM_006947 | 6908.637  | 6259.568  | NM_007081 | 1110.491 |
| NM_006913 | 9768.675  | 6472.048  | NM_017917 | 4100.351  | 2613.649  | AB032964  | 1347.518 |
| NM_000498 | 6068.069  | 3406.309  | NM_004090 | 5979.005  | 4703.085  | BE733605  | 1000.3   |
| AL049955  | 13677.826 | 11995.475 | NM_014634 | 6826.618  | 8308.114  | NM_003334 | 7385.715 |
| AF155654  | 4574.417  | 5086.109  | NM_001919 | 6292.208  | 10137.356 | NM_002693 | 714.606  |
| AK000028  | 2430.302  | 2099.164  | BC031485  | 1165.822  | 2239.453  | NM_003671 | 714.988  |
| NM_013320 | 47865.098 | 41711.938 | NM_004092 | 6524.172  | 5323.312  | AK026000  | 1010.787 |
| AL050039  | 498.673   | 413.059   | X15624    | 1834.977  | 1502.614  | NM_017833 | 1507.139 |
| AF087987  | 555.726   | 486.556   | NM_004467 | 441.838   | 507.063   | NM_006675 | 1828.852 |
| H09474    | 1433.498  | 1041.891  | NM_005622 | 1034.226  | 646.005   | NM_003022 | 3434.61  |
| AB002368  | 10934.334 | 6620.869  | NM_018058 | 2039.004  | 3364.908  | NM_004873 | 1042.667 |
| AL360263  | 44607.523 | 31036.781 | NM_004548 | 4688.792  | 2952.234  | NM_019842 | 602.208  |
| Z36780    | 1857.412  | 1779.535  | X69079    | 12178.838 | 9806.488  | NM_002951 | 4378.377 |
| AK022403  | 1995.454  | 787.786   | BI759406  | 2753.926  | 2120.677  | NM_002317 | 771.197  |
| AK022955  | 1525.004  | 2618.656  | R76099    | 426.071   | 391.854   | NM_000320 | 2168.399 |
| BC035855  | 1125.136  | 549.174   | S74445    | 815.199   | 669.163   | NM_003136 | 3219.847 |
| AL137408  | 7924.261  | 6084.598  | BI763360  | 940.865   | 917.714   | NM_004620 | 559.268  |
| AF054995  | 1783.459  | 1006.826  | D25538    | 1265.249  | 947.15    | AF087940  | 2424.612 |
| AL080176  | 2839.951  | 2204.527  | NM_000360 | 5718.271  | 5120.926  | AJ277587  | 1404.048 |
| AK023627  | 877.609   | 966.33    | D49950    | 2730.415  | 3815.296  | D87432    | 1520.061 |
| CY3Cy5    | 10571.648 | 608.153   | NM_001849 | 757.719   | 923.646   | Y18483    | 176.504  |
| BI759406  | 16525.232 | 8748.855  | X03635    | 1530.305  | 2164.538  | AI299075  | 899.485  |
| R76099    | 1475.262  | 1996.511  | X03348    | 1679.776  | 2026.506  | M59979    | 520.823  |
| S74445    | 1652.77   | 1802.284  | AF353674  | 5143.235  | 3416.83   | AB011098  | 549.644  |
| BI763360  | 1760.186  | 2182.978  | BC002645  | 2062.311  | 2120.69   | AA609759  | 1248.166 |
| D25538    | 4090.144  | 2567.21   | NM_021138 | 1919.306  | 1887.055  | AA029418  | 5441.275 |
| NM_000360 | 24514     | 11910.345 | BC002792  | 662.228   | 843.276   | L20815    | 2581.276 |
| D49950    | 5001.415  | 7708.801  | NM_021005 | 1097.519  | 1743.353  | AI364483  | 6259.122 |
| NM_001849 | 7684.974  | 2122.844  | NM_001523 | 672.065   | 569.007   | AA456001  | 3501.949 |

|           |           |           |           |           |           |           |           |
|-----------|-----------|-----------|-----------|-----------|-----------|-----------|-----------|
| X03635    | 4517.532  | 5446.471  | NM_017423 | 1106.266  | 1191.703  | AA451686  | 1236.332  |
| X03348    | 2510.806  | 3927.764  | NM_019613 | 1750.81   | 1918.276  | NM_003822 | 509.343   |
| NM_021138 | 4287.705  | 4064      | NM_005382 | 652.351   | 600.833   | NM_004412 | 1517.857  |
| BC002792  | 1724.058  | 1362.745  | AK027086  | 2289.528  | 1785.352  | NM_002050 | 658.309   |
| NM_021005 | 1816.87   | 3771.212  | AB032997  | 782.893   | 652.455   | NM_007097 | 2651.677  |
| SB        | 371.013   | 1113.557  | AL096857  | 1473.482  | 1543.315  | NM_000029 | 3931.307  |
| SR6       | 3631.163  | 4198.699  | NM_003834 | 2849.987  | 3203.768  | NM_000715 | 349.409   |
| X07203    | 547.322   | 631.056   | NM_005959 | 1668.669  | 2480.179  | AF035802  | 2202.975  |
| AB040104  | 632.396   | 792.393   | NM_003381 | 796.631   | 2383.638  | Y08145    | 564.429   |
| NM_003834 | 5164.703  | 4736.124  | NM_005756 | 610.879   | 830.113   | M26123    | 1686.077  |
| NM_005959 | 5347.428  | 5436.25   | NM_003702 | 7780.95   | 8206.618  | NM_001838 | 472.179   |
| NM_003381 | 1374.466  | 1985.849  | NM_000369 | 483.002   | 566.854   | NM_012096 | 3470.471  |
| NM_005756 | 1070.958  | 1516.369  | NM_004405 | 938.195   | 890.714   | NM_003905 | 4516.06   |
| NM_003702 | 16334.748 | 20159.484 | NM_001988 | 4330.607  | 3945.604  | L12052    | 487.739   |
| NM_000369 | 984.397   | 1310.151  | NM_006060 | 821.594   | 1153.836  | AB028976  | 1704.057  |
| NM_016351 | 1141.921  | 1090.542  | NM_005667 | 1946.526  | 1691.035  | AK026337  | 771.889   |
| NM_004405 | 1420.343  | 1737.72   | NM_006308 | 873.213   | 916.461   | NM_015869 | 1773.452  |
| NM_006060 | 2057.145  | 3434.03   | NM_000060 | 1341.538  | 1051.751  | NM_004305 | 11270.682 |
| NM_005667 | 3602.458  | 2997.009  | NM_009589 | 860.487   | 879.503   | NM_006089 | 552.391   |
| NM_006308 | 1977.844  | 1983.385  | L09080    | 1719.251  | 2308.243  | NM_005992 | 196.324   |
| NM_000060 | 2236.384  | 1259.638  | NM_007326 | 4183.032  | 5090.825  | NM_003144 | 16880.732 |
| NM_009589 | 2928.547  | 1150.496  | NM_001886 | 3786.933  | 5029.557  | NM_000908 | 689.429   |
| L09080    | 4247.723  | 4712.181  | AF137372  | 2800.352  | 2983.626  | AB011102  | 1529.459  |
| NM_007326 | 7600.233  | 9973.547  | AF220417  | 483.558   | 960.72    | D63480    | 1077.105  |
| NM_001886 | 7487.486  | 10031.963 | D83782    | 3699.194  | 4206.509  | NM_002969 | 1326.504  |
| NM_004467 | 547.47    | 940.079   | NM_002078 | 1243.757  | 1248.768  | AK023749  | 740.364   |
| NM_004548 | 15352.914 | 10761.298 | NM_000287 | 2257.937  | 2122.714  | NM_002337 | 1231.266  |
| AF091033  | 948.211   | 761.899   | NM_001656 | 953.617   | 974.509   | NM_013245 | 290.889   |
| NM_001122 | 7635.19   | 7467.724  | AF091033  | 487.099   | 352.197   | NM_006423 | 1237.154  |
| NM_004591 | 3109.758  | 2200.306  | NM_001122 | 4533.709  | 4420.771  | NM_004766 | 679.199   |
| NM_006274 | 420.258   | 638.643   | NM_004591 | 1509.906  | 1602.453  | NM_005819 | 3267.407  |
| AL133027  | 1403.688  | 1078.18   | AL133027  | 783.812   | 1080.292  | AK025520  | 1747.285  |
| AB037732  | 2481.27   | 2489.734  | AB037732  | 1698.563  | 1884.647  | NM_004892 | 6118.171  |
| NM_005767 | 805.156   | 693.178   | NM_001837 | 549.762   | 380.241   | NM_014597 | 3510.743  |
| NM_001837 | 877.128   | 1159.263  | M27487    | 430.627   | 618.803   | NM_017896 | 1963.961  |
| NM_001839 | 71471.469 | 66703.891 | NM_003811 | 5037.289  | 5671.991  | AB002374  | 811.519   |
| BC016029  | 1446.827  | 1271.192  | NM_002981 | 4417.965  | 4096.792  | M87790    | 9918.829  |
| M27487    | 1111.519  | 1054.308  | NM_001244 | 1414.436  | 1521.046  | NM_001768 | 1917.353  |
| NM_003811 | 10400.959 | 8640.598  | NM_016139 | 29780.283 | 24602.141 | NM_002951 | 6046.684  |
| NM_002981 | 7558.07   | 6366.869  | AL117468  | 2007.181  | 2528.189  | NM_002317 | 1102.267  |
| NM_001244 | 3400.973  | 2404.726  | NM_004090 | 6008.521  | 4817.731  | NM_000320 | 1676.733  |
| NM_012275 | 768.217   | 572.856   | NM_014634 | 7207.888  | 15090.72  | NM_003136 | 3852.315  |
| NM_006137 | 1206.541  | 1439.332  | NM_001919 | 6689.77   | 11542.409 | NM_013328 | 8689.906  |
| NM_016139 | 42800.367 | 58531.652 | BC031485  | 1051.629  | 2043.733  | NM_000790 | 222.372   |
| AL117468  | 4048.379  | 5142.338  | NM_004092 | 4846.558  | 4408.934  | NM_002660 | 1443.948  |
| NM_019613 | 3036.219  | 4478.788  | X15624    | 1477.955  | 1024.316  | NM_015900 | 474.641   |
| NM_005382 | 1188.35   | 1776.166  | AF073770  | 1158.923  | 930.438   | NM_003706 | 1322.722  |
| AK027086  | 5769.945  | 5265.097  | AL359401  | 4729.933  | 3433.05   | NM_005218 | 663.122   |
| AB032997  | 1543.844  | 2284.396  | NM_012213 | 1894.503  | 1438.262  | AL122071  | 310.408   |
| AL096857  | 3541.271  | 4538.776  | NM_016573 | 2837.757  | 2119.527  | AB033054  | 4406.286  |
| AF073770  | 2235.858  | 1471.553  | NM_001303 | 4026.849  | 4264.268  | NM_016122 | 138.779   |
| AL359401  | 3736.265  | 6762.336  | M21304    | 1351.392  | 1011.307  | NM_016583 | 836.472   |
| NM_012213 | 2843.256  | 3152.876  | NM_001979 | 452.012   | 507.842   | AF153330  | 723.566   |



|           |           |           |           |           |           |           |           |
|-----------|-----------|-----------|-----------|-----------|-----------|-----------|-----------|
| NM_016573 | 9253.125  | 5064.465  | AB040896  | 1975.909  | 1479.06   | NM_001652 | 308.993   |
| NM_001303 | 7302.462  | 10150.868 | AF084645  | 499.994   | 380.128   | NM_004412 | 1617.149  |
| M21304    | 3247.268  | 3002.937  | NM_003636 | 1623.754  | 3275.117  | NM_002050 | 810.344   |
| NM_001979 | 821.679   | 1357.577  | NM_002234 | 1160.179  | 1613.296  | NM_007097 | 3663.153  |
| AB040896  | 2812.939  | 4016.969  | NM_000701 | 1999.841  | 1537.326  | D87446    | 3385.691  |
| NM_001107 | 2367.697  | 3599.764  | AB022696  | 3401.203  | 3840.336  | BF540935  | 3370.876  |
| AF084645  | 595.179   | 1146.681  | NM_021005 | 959.605   | 1532.998  | NM_004466 | 857.443   |
| NM_005176 | 909.543   | 1108.042  | NM_001523 | 629.749   | 573.919   | NM_007081 | 968.831   |
| NM_003636 | 5842.18   | 6987.608  | NM_017423 | 1095.231  | 653.069   | AB032964  | 1245.793  |
| NM_000701 | 3647.418  | 2287.48   | Z70705    | 625.239   | 455.044   | BE733605  | 820.282   |
| AB022696  | 6190.305  | 6773.032  | NM_002611 | 850.453   | 560.293   | NM_003334 | 7190.541  |
| AF137372  | 4636.96   | 6070.746  | NM_017417 | 745.356   | 573.891   | NM_002693 | 598.832   |
| AF220417  | 1057.193  | 1945.447  | AL133602  | 908.783   | 884.28    | NM_003671 | 302.625   |
| D83782    | 6915.961  | 8417.883  | AF037219  | 1790.218  | 1634.613  | AK026000  | 913.676   |
| NM_002078 | 2366.677  | 3859.972  | AK026075  | 261.539   | 553.851   | NM_017833 | 1387.555  |
| NM_000287 | 4037.049  | 6263.457  | NM_000251 | 2525.092  | 2463.992  | NM_006675 | 1428.751  |
| NM_001656 | 1966.307  | 2782.52   | NM_006038 | 1835.291  | 1744.504  | NM_003022 | 1095.235  |
| Z70705    | 1173.814  | 1349.791  | AB011133  | 1866.864  | 1695.386  | NM_004873 | 1325.863  |
| NM_002611 | 2004.972  | 2186.157  | NM_017572 | 23384.518 | 20819.875 | NM_019842 | 637.85    |
| NM_017417 | 1384.207  | 1973.523  | NM_018444 | 1958.13   | 1671.308  | NM_005992 | 385.788   |
| AL133602  | 1886.135  | 2106.43   | NM_000252 | 1561.923  | 2565.282  | NM_003144 | 18935.648 |
| AF037219  | 3122.613  | 5512.854  | NM_006947 | 7125.027  | 7404.102  | NM_000908 | 545.165   |
| AK026075  | 519.146   | 1521.52   | NM_017917 | 3642.423  | 2235.823  | AB011102  | 1756.414  |
| NM_000251 | 3006.104  | 5467.85   | NM_000060 | 947.392   | 472.437   | D63480    | 796.969   |
| NM_006038 | 2994.056  | 3621.095  | NM_009589 | 741.305   | 637.595   | NM_002969 | 1203.949  |
| NM_017572 | 33047.445 | 24328.725 | L09080    | 2137.047  | 3041.951  | NM_006475 | 464.049   |
| NM_018444 | 3211.294  | 2399.933  | NM_007326 | 3746.448  | 5512.951  | NM_004620 | 573.83    |
| NM_000252 | 3071.68   | 5024.25   | NM_001886 | 3357.983  | 3412.101  | AF087940  | 2069.474  |
| NM_006947 | 8118.402  | 15646.033 | NM_005622 | 893.882   | 597.746   | AJ277587  | 1431.147  |
| NM_017917 | 5747.195  | 4637.739  | NM_018058 | 2142.378  | 5265.172  | D87432    | 1113.274  |
| NM_004090 | 8595.855  | 11570.806 | NM_004548 | 2488.016  | 2444.958  | Y18483    | 233.499   |
| NM_014634 | 12452.58  | 15425.168 | X69079    | 17386.498 | 18005.23  | AI565117  | 62506.117 |
| NM_001919 | 12715.852 | 20075.891 | BI759406  | 3519.867  | 3069.578  | AI299075  | 647.687   |
| BC031485  | 1848.506  | 4044.176  | R76099    | 342.812   | 340.223   | AB011098  | 617.605   |
| NM_004092 | 9677.745  | 13022.486 | S74445    | 859.6     | 721.472   | AA609759  | 826.938   |
| X15624    | 2662.018  | 2860.671  | BI763360  | 659.297   | 777.287   | AA029418  | 3841.193  |
| NM_004467 | 895.569   | 1250.819  | D25538    | 771.594   | 387.387   | L20815    | 2879.384  |
| NM_005622 | 1782.326  | 1710.56   | NM_000360 | 6421.885  | 4451.779  | AI364483  | 5348.17   |
| NM_004548 | 15462.381 | 11941.452 | D49950    | 2923.742  | 3324.424  | AA456001  | 3232.516  |
| BI759406  | 18170.035 | 12575.808 | X03635    | 1360.163  | 2386.277  | AA451686  | 1519.319  |
| R76099    | 1603.107  | 2495.579  | BC011847  | 56060.492 | 67643.438 | M87790    | 12664.607 |
| S74445    | 1994.604  | 2512.542  | X03348    | 1042.607  | 1495.91   | NM_001768 | 2361.649  |
| BI763360  | 2784.464  | 3726.254  | AF353674  | 4097.83   | 2657.104  | NM_000029 | 4890.409  |
| D25538    | 5193.826  | 3569.378  | BC002645  | 928.552   | 1347.446  | NM_000715 | 519.248   |
| NM_000360 | 27091.057 | 12217.12  | NM_021138 | 672.047   | 1020.409  | AF035802  | 2520.261  |
| D49950    | 5683.738  | 8781.226  | NM_002981 | 3690.631  | 2815.088  | M26123    | 1579.693  |
| NM_001849 | 9207.093  | 2350.781  | NM_001244 | 1548.527  | 1786.605  | NM_012096 | 3204.741  |
| X03635    | 5629.894  | 5214.179  | NM_012275 | 410.022   | 445.305   | NM_003905 | 3489.692  |
| X03348    | 2666.891  | 2473.217  | NM_006137 | 499.083   | 895.001   | L12052    | 396.858   |
| AF353674  | 6353.693  | 5555.464  | NM_016139 | 27126.598 | 27793.213 | AB028976  | 1522.101  |
| BC002645  | 4087.802  | 5537.573  | AL117468  | 2310.323  | 2205.234  | AK026337  | 630.372   |
| NM_021138 | 4713.984  | 5971.993  | NM_019613 | 1450.026  | 1408.052  | NM_015869 | 1703.222  |
| BC002792  | 1390.089  | 2195.766  | AK027086  | 1796.355  | 1785.87   | NM_004626 | 473.056   |

|           |           |           |           |           |           |           |           |
|-----------|-----------|-----------|-----------|-----------|-----------|-----------|-----------|
| NM_021005 | 1896.066  | 4252.281  | AB032997  | 725.937   | 678.675   | NM_001895 | 378.168   |
| SB        | 810.331   | 855.822   | NM_003834 | 2376.817  | 3157.58   | NM_004305 | 4793.552  |
| NM_001523 | 1419.482  | 1181.898  | NM_005955 | 1252.149  | 1319.323  | NM_006085 | 608.69    |
| NM_017423 | 1691.878  | 1848.446  | NM_003381 | 816.324   | 789.098   | AB033054  | 5035.512  |
| NM_019613 | 2882.53   | 4604.828  | NM_005756 | 705.007   | 739.189   | NM_016122 | 190.711   |
| NM_005382 | 1363.35   | 2424.492  | NM_003702 | 4668.266  | 4586.77   | AF153330  | 567.217   |
| AB032997  | 1557.235  | 2123.764  | NM_016351 | 819.436   | 756.088   | NM_001652 | 513.24    |
| AB002351  | 331.161   | 1092.908  | NM_004405 | 1192.773  | 1089.554  | AK023749  | 695.166   |
| X07203    | 820.892   | 1215.24   | NM_001985 | 4922.969  | 4894.343  | NM_002337 | 807.184   |
| AB040104  | 760.191   | 1092.92   | NM_006060 | 723.13    | 1499.114  | NM_013245 | 221.039   |
| NM_003834 | 5895.218  | 6498.857  | NM_005667 | 1805.661  | 1539.608  | NM_006423 | 1028.647  |
| NM_005955 | 5987.593  | 6768.453  | NM_006305 | 675.164   | 841.621   | NM_004766 | 409.066   |
| NM_003381 | 1358.364  | 2621.616  | NM_002234 | 1282.557  | 1191.622  | NM_005815 | 2329.833  |
| NM_005756 | 1402.585  | 1811.252  | NM_000701 | 1961.772  | 2669.336  | AK025520  | 1551.119  |
| NM_003702 | 19514.82  | 25162.594 | AF137372  | 2856.055  | 2121.411  | NM_004892 | 7330.439  |
| NM_000365 | 976.612   | 1160.543  | AF220417  | 535.5     | 759.873   | NM_014597 | 2944.243  |
| NM_004405 | 1498.488  | 1282.7    | D83782    | 3846.74   | 3596.863  | NM_017896 | 1306.681  |
| NM_001985 | 9825.357  | 6346.904  | NM_002075 | 1263.837  | 1382.094  | AB002374  | 750.317   |
| NM_006060 | 1750.295  | 3460.678  | NM_000287 | 2958.441  | 2853.362  | U17327    | 365.209   |
| NM_005667 | 2895.203  | 2791.916  | NM_001656 | 1191.194  | 1270.382  | NM_017833 | 1352.771  |
| NM_006305 | 2092.315  | 2310.671  | AF091033  | 631.139   | 598.335   | NM_006675 | 1586.117  |
| NM_000060 | 2447.697  | 1590.529  | NM_001122 | 5125.805  | 6042.463  | NM_003022 | 3394.732  |
| NM_009585 | 2971.157  | 1582.094  | NM_004591 | 1562.071  | 1747.022  | NM_004873 | 1538.387  |
| L09080    | 4078.989  | 5420.203  | AL133027  | 845.644   | 797.121   | NM_019842 | 542.583   |
| NM_007326 | 8028.566  | 11033.708 | AB037732  | 1630.421  | 1563.878  | NM_002951 | 6424.138  |
| NM_001886 | 6907.544  | 9597.321  | BC016029  | 524.613   | 342.563   | NM_002317 | 772.81    |
| AF137372  | 5360.749  | 6003.083  | M27487    | 581.233   | 688.259   | NM_000320 | 1682.528  |
| AF220417  | 1310.897  | 3064.996  | NM_003811 | 4957.963  | 4995.232  | NM_003136 | 3974.15   |
| D83782    | 8433.65   | 9867.274  | AB011133  | 750.336   | 472.22    | NM_013325 | 7550.416  |
| NM_002075 | 2815.295  | 3885.166  | NM_017572 | 13754.115 | 12921.535 | NM_000790 | 353.77    |
| NM_000287 | 4484.525  | 6524.817  | NM_018444 | 1919.816  | 2109.239  | NM_002660 | 1632.432  |
| NM_001656 | 2479.851  | 2802.259  | NM_006947 | 6889.623  | 8792.757  | NM_015900 | 485.983   |
| AF091033  | 954.028   | 1471.496  | NM_017917 | 2693.396  | 1917.238  | NM_003706 | 2268.494  |
| NM_001122 | 7931.582  | 11321.943 | NM_004090 | 1267.294  | 710.937   | AF182218  | 276.488   |
| NM_004591 | 4177.982  | 3873.731  | NM_014634 | 3684.876  | 4610.917  | NM_005215 | 449.576   |
| NM_006274 | 419.016   | 811.177   | NM_001915 | 5963.594  | 7968.088  | AL122071  | 793.966   |
| AL133027  | 1472.601  | 1763.654  | BC031485  | 824.476   | 1420.142  | NM_014913 | 13526.112 |
| AB037732  | 2697.457  | 2804.514  | NM_004092 | 5391.008  | 4411.148  | NM_005864 | 12246.635 |
| NM_005767 | 868.372   | 966.628   | X15624    | 1354.504  | 1446.503  | NM_012341 | 1344.874  |
| NM_001837 | 959.358   | 1036.308  | AF073770  | 976.45    | 1010.258  | NM_003256 | 7179.053  |
| NM_001835 | 70047.625 | 66840.992 | AL359401  | 5013.114  | 4658.415  | D87450    | 1904.317  |
| BC016029  | 1413.385  | 793.641   | NM_012213 | 1756.853  | 1550.721  | NM_017797 | 3156.417  |
| M27487    | 1140.062  | 1017.843  | NM_016573 | 1641.096  | 1175.329  | AK021919  | 454.668   |
| NM_002164 | 1185.221  | 1370.645  | NM_001303 | 1726.281  | 1297.047  | AF000562  | 851.249   |
| NM_003811 | 11308.282 | 9413.645  | M21304    | 1348.517  | 851.432   | AK025713  | 1591.172  |
| NM_002981 | 7316.965  | 7046.306  | AB040896  | 2246.351  | 1603.735  | NM_018100 | 146.49    |
| NM_001244 | 3434.782  | 3548.056  | NM_003636 | 1661.63   | 3518.568  | NM_002050 | 829.855   |
| NM_012275 | 930.696   | 1021.491  | AF040723  | 2274.754  | 2227.003  | NM_007097 | 3909.515  |
| NM_006137 | 1039.042  | 1396.099  | NM_015527 | 1648.093  | 1299.323  | D87446    | 3355.76   |
| NM_016135 | 45573.324 | 58412.008 | NM_012185 | 563.209   | 830.484   | BF540935  | 3261.674  |
| AL117468  | 3716.907  | 4612.044  | NM_005795 | 7113.471  | 7371.41   | NM_004466 | 1130.674  |
| NM_004090 | 9161.803  | 12052.012 | NM_004216 | 1997.237  | 940.403   | NM_007081 | 909.711   |
| NM_014634 | 13006.195 | 15175.527 | NM_016285 | 22358.27  | 17604.395 | AB032964  | 1219.203  |

|           |           |           |           |           |           |           |           |
|-----------|-----------|-----------|-----------|-----------|-----------|-----------|-----------|
| NM_00191  | 14269.915 | 23446.895 | NM_002051 | 1130.462  | 978.601   | BE733605  | 649.132   |
| BC031485  | 1919.519  | 4700.867  | NM_017423 | 1115.013  | 891.511   | NM_003334 | 9157.531  |
| NM_004092 | 10184.332 | 12852.344 | NM_002611 | 1010.122  | 800.993   | NM_002693 | 715.032   |
| X15624    | 3062.495  | 3350.996  | AL133602  | 931.885   | 843.613   | AK026000  | 709.424   |
| AF073770  | 2873.619  | 2889.111  | AF037219  | 1877.017  | 2066.174  | NM_005814 | 1426.139  |
| AL359401  | 4372.578  | 10052.563 | NM_000251 | 2590.341  | 2343.308  | NM_016279 | 619.9     |
| NM_012213 | 2995.609  | 3524.412  | NM_006038 | 1644.56   | 2305.156  | NM_000211 | 7859.865  |
| NM_016573 | 10187.012 | 5948.82   | U87223    | 3405.781  | 2620.239  | AB037830  | 1195.791  |
| NM_001303 | 7418.019  | 8660.459  | NM_000093 | 678.282   | 977.701   | NM_015685 | 1685.485  |
| M21304    | 3253.249  | 2562.854  | NM_001779 | 1520.98   | 1261.027  | NM_004357 | 9220.721  |
| NM_001979 | 927.078   | 1050.286  | NM_016484 | 1563.307  | 1039.989  | X03324    | 1489.455  |
| AB040896  | 2514.851  | 3306.673  | AK026114  | 410.55    | 303.081   | NM_014934 | 215.797   |
| NM_001107 | 2127.143  | 2688.941  | AK021536  | 2106.84   | 3158.824  | NM_015385 | 606.666   |
| AF084645  | 810.94    | 841.091   | NM_002600 | 1505.703  | 1548.546  | NM_003690 | 777.993   |
| NM_005176 | 801.098   | 1081.599  | NM_003646 | 16257.971 | 8726.242  | NM_000876 | 4325.362  |
| NM_003636 | 5803.412  | 6878.306  | NM_006663 | 1133.139  | 643.89    | NM_014214 | 3076.175  |
| NM_002234 | 1805.799  | 2422.549  | NM_002446 | 710.275   | 1081.228  | NM_002752 | 707.044   |
| NM_000701 | 3852.572  | 3836.571  | NM_000863 | 647.141   | 1049.056  | NM_013281 | 1215.063  |
| AB022696  | 5795.248  | 6171.863  | NM_006651 | 2024.122  | 2370.612  | Y11306    | 517.48    |
| NM_014379 | 423.511   | 504.421   | NM_005336 | 4319.008  | 7678.361  | X85106    | 1199.98   |
| NM_001523 | 1481.773  | 1153.257  | NM_001419 | 3762.057  | 4095.938  | NM_003931 | 1127.916  |
| NM_017423 | 2196.708  | 1900.727  | AF119817  | 9730.35   | 11212.184 | NM_012479 | 17316.174 |
| Z70705    | 1360.528  | 1616.775  | AL035306  | 1282.086  | 1439.401  | AF250226  | 3051.344  |
| NM_002611 | 1630.893  | 1896.183  | NM_001328 | 17646.023 | 19388.826 | NM_003217 | 9983.995  |
| NM_017417 | 1289.829  | 1675.432  | NM_005749 | 3702.908  | 2717.288  | AL157475  | 2495.241  |
| AL133602  | 1641.416  | 2109.433  | NM_004230 | 4370.552  | 2969.023  | NM_006069 | 10534.771 |
| AF037219  | 2918.296  | 4320.132  | AK024372  | 551.298   | 814.87    | NM_006534 | 4393.106  |
| AK026075  | 544.297   | 1195.554  | NM_014503 | 719.518   | 531.258   | NM_017601 | 913.334   |
| NM_000251 | 2477.165  | 3219.046  | NM_014659 | 1050.489  | 857.4     | AF110265  | 3372.63   |
| NM_006038 | 3168.789  | 3922.248  | NM_004399 | 3121.308  | 1561.597  | AF272371  | 56833.871 |
| AB011133  | 3992.575  | 3819.31   | NM_006337 | 2298.1    | 2419.33   | AK021848  | 460.442   |
| NM_018444 | 2957.868  | 3379.371  | NM_004507 | 2146.095  | 1878.255  | NM_003704 | 644.936   |
| NM_000252 | 2303.493  | 4531.003  | NM_002710 | 4539.852  | 8193.065  | AK023140  | 556.122   |
| NM_006947 | 7978.969  | 14766.281 | NM_014060 | 1164.494  | 1051.871  | AF084362  | 809.219   |
| NM_017917 | 5926.692  | 4859.733  | NM_004749 | 6863.314  | 6908.95   | NM_001553 | 1999.146  |
| NM_009589 | 2992.148  | 1864.145  | BQ446064  | 846.337   | 892.158   | NM_014173 | 7970.345  |
| L09080    | 4603.793  | 5555.525  | AF274571  | 879.14    | 783.624   | NM_001731 | 13767.86  |
| NM_007326 | 8001.733  | 11072.007 | NM_005449 | 687.087   | 635.751   | AL137506  | 1360.374  |
| AK023080  | 292.626   | 665.924   | NM_003879 | 3405.763  | 3047.877  | AK022961  | 2394.551  |
| NM_001886 | 8302.178  | 11441.797 | NM_016052 | 6182.01   | 3181.856  | NM_007375 | 2132.66   |
| NM_004467 | 778.289   | 1164.238  | NM_006718 | 852.687   | 1397.99   | NM_014371 | 1103.808  |
| NM_005622 | 1815.304  | 1472.99   | NM_005427 | 618.42    | 780.327   | AF290512  | 4889.073  |
| NM_018058 | 3396.07   | 7882.158  | NM_001776 | 1116.557  | 1384.591  | NM_006716 | 1880.955  |
| NM_004548 | 15678.827 | 10105.314 | NM_001903 | 7692.891  | 4822.203  | AB002323  | 852.116   |
| X69079    | 33739.355 | 44951.738 | NM_001874 | 2540.596  | 2205.33   | AK022241  | 1704.062  |
| BI759406  | 17814.924 | 12435.314 | NM_001869 | 400.323   | 687.152   | AK022587  | 1493.705  |
| R76099    | 1643.733  | 1982.86   | NM_005857 | 13138.021 | 6089.104  | NM_005512 | 811.692   |
| S74445    | 2107.092  | 1803.078  | AK027037  | 1251.448  | 1241.511  | NM_005506 | 1224.351  |
| BI763360  | 2572.324  | 2273.713  | NM_003875 | 3111.262  | 5281.746  | AL137404  | 36516.09  |
| D25538    | 4944.123  | 2602.615  | AF191687  | 348.072   | 845.349   | NM_017732 | 1324.252  |
| NM_000360 | 28817.676 | 7978.401  | NM_000274 | 6466.316  | 3854.536  | NM_002851 | 1916.087  |
| D49950    | 5949.127  | 8302.521  | NM_000170 | 575.78    | 799.387   | NM_002071 | 610.272   |
| NM_001849 | 8797.265  | 2555.509  | NM_000281 | 4220.749  | 3485.972  | NM_005339 | 10256.269 |

|           |           |           |           |           |           |           |           |
|-----------|-----------|-----------|-----------|-----------|-----------|-----------|-----------|
| AF353674  | 6214.515  | 8260.789  | AK001295  | 3860.937  | 2460.735  | NM_001906 | 1115.456  |
| BC002645  | 3684.962  | 4736.712  | NM_006031 | 2142.212  | 1403.68   | NM_004142 | 512.511   |
| NM_021138 | 4475.33   | 4732.854  | NM_002715 | 5204.483  | 3098.157  | AF108138  | 983.283   |
| BC002792  | 1496.534  | 2059.693  | NM_001020 | 52803.691 | 65008.109 | BF340302  | 7009.533  |
| NM_002981 | 7500.461  | 7321.173  | AB020660  | 3308.914  | 2038.304  | NM_002276 | 2180.918  |
| NM_001244 | 3642.052  | 3959.389  | NM_006659 | 15426.506 | 21021.613 | AL133087  | 980.232   |
| NM_012275 | 821.519   | 1157.247  | NM_018051 | 939.225   | 1240.693  | NM_018010 | 343.493   |
| NM_006137 | 958.584   | 1804.04   | NM_015371 | 2566.016  | 4495.844  | NM_002274 | 2982.482  |
| NM_016139 | 50287.996 | 54494.824 | AB040915  | 623.434   | 910.14    | AL080200  | 236.211   |
| AL117468  | 4849.564  | 6687.8    | AF147791  | 680.595   | 519.591   | BF337874  | 1015.184  |
| NM_019613 | 3665.127  | 4739.351  | NM_006481 | 824.939   | 700.393   | NM_003475 | 8401.364  |
| NM_005382 | 1370.59   | 2423.225  | NM_003910 | 10557.345 | 7603.928  | NM_000243 | 1565.337  |
| AK027086  | 6716.663  | 6014.02   | AB007913  | 666.912   | 1064.233  | NM_004383 | 354.983   |
| AB032997  | 1795.583  | 2023.367  | NM_006696 | 3002.958  | 2110.499  | NM_012256 | 13288.167 |
| AL096857  | 4068.584  | 4389.423  | NM_004599 | 3351.564  | 4390.525  | NM_006006 | 280.265   |
| AB002351  | 729.883   | 768.477   | NM_006037 | 8336.472  | 5577.007  | NM_016325 | 1272.358  |
| X07203    | 725.188   | 995.901   | NM_015871 | 2642.353  | 3467.272  | NM_001604 | 788.587   |
| AB040104  | 810.144   | 914.081   | NM_019037 | 5176.049  | 7394.626  | NM_017656 | 1003.035  |
| NM_003834 | 5996.57   | 5359.429  | NM_015891 | 1748.516  | 1078.388  | X16282    | 2563.086  |
| NM_005959 | 5937.791  | 5165.041  | NM_005066 | 15588.232 | 13384.52  | AK022519  | 741.194   |
| NM_003381 | 1742.39   | 2113.077  | NM_003089 | 2176.106  | 2055.39   | NM_014415 | 768.015   |
| NM_005756 | 1178.743  | 1311.023  | NM_003753 | 4290.696  | 7465.366  | S75264    | 7467.038  |
| NM_003702 | 18441.934 | 28035.963 | NM_006223 | 288.527   | 531.406   | AF027513  | 648.282   |
| NM_000369 | 820.57    | 1466.419  | NM_017590 | 926.509   | 573.772   | NM_001379 | 256.556   |
| NM_004405 | 1581.645  | 1859.429  | AB011145  | 4226.069  | 4469.791  | NM_018664 | 280.211   |
| NM_001988 | 8653.062  | 10296.492 | NM_003750 | 19829.9   | 17446.373 | BC006428  | 893.263   |
| NM_006060 | 1634.605  | 3401.741  | M92422    | 1179.088  | 815.109   | NM_003926 | 2807.118  |
| NM_005667 | 3130.281  | 3044.391  | NM_017868 | 1389.072  | 1668.825  | AF085356  | 571.628   |
| NM_006308 | 1724.106  | 1937.64   | AK021888  | 1443.875  | 906.631   | NM_016047 | 9896.713  |
| NM_002234 | 2172.526  | 3058.707  | AK022848  | 1368.587  | 1342.394  | NM_001499 | 3353.33   |
| NM_000701 | 4344.735  | 5099.503  | AK055302  | 619.035   | 971.547   | BF030165  | 3565.17   |
| AB022696  | 8604.977  | 10086.79  | AL049957  | 456.525   | 737.593   | NM_016732 | 3689.407  |
| AF137372  | 4685.881  | 3473.849  | NM_004212 | 685.244   | 1049.162  | NM_014763 | 1139.895  |
| AF220417  | 1149.999  | 1492.273  | NM_018159 | 5188.752  | 6559.899  | AF086534  | 532.928   |
| D83782    | 7273.125  | 5024.61   | NM_000819 | 2001.674  | 1757.315  | AF070617  | 960.119   |
| NM_002078 | 2559.89   | 2315.646  | NM_002513 | 1864.233  | 1422.528  | NM_014918 | 3329.84   |
| NM_000287 | 4246.345  | 3971.154  | NM_017424 | 1153.614  | 843.653   | NM_000152 | 4127.217  |
| NM_001656 | 2610.824  | 2032.292  | NM_001522 | 4163.27   | 5215.605  | D17222    | 8407.98   |
| AF091033  | 897.169   | 844.685   | NM_000883 | 1328.256  | 1080.785  | NM_000154 | 722.685   |
| NM_001122 | 8019.873  | 8159.86   | AF254086  | 1380.632  | 1896.846  | NM_000671 | 543.823   |
| NM_004591 | 3120.447  | 2536.271  | AL390142  | 1032.911  | 450.996   | NM_006297 | 2906.971  |
| NM_006274 | 420.748   | 841.601   | NM_006565 | 1588.65   | 1318.785  | X85325    | 29810.102 |
| AL133027  | 1776.1    | 1275.844  | AB007930  | 10387.442 | 5874.559  | AF318366  | 2408.667  |
| AB037732  | 2727.645  | 2285.13   | AJ005273  | 2150.912  | 1515.359  | AF182423  | 246.702   |
| NM_005767 | 768.376   | 875.4     | AK021892  | 2069.216  | 1469.939  | D26018    | 799.758   |
| NM_001837 | 886.64    | 1157.183  | NM_017637 | 398.084   | 87.113    | AB037863  | 551.188   |
| NM_001839 | 71905.617 | 70951.773 | NM_003437 | 1424.529  | 1345.139  | NM_007237 | 807.54    |
| BC016029  | 1606.355  | 981.998   | NM_018337 | 6676.143  | 6093.019  | NM_004608 | 837.691   |
| M27487    | 762.643   | 1485.155  | AA193295  | 18496.121 | 12536.69  | NM_018257 | 1476.481  |
| NM_002286 | 71325.484 | 62846.504 | NM_018045 | 2944.008  | 2297.261  | NM_005919 | 1492.342  |
| NM_002164 | 920.322   | 1311.975  | NM_014803 | 1383.644  | 1344.07   | AF085931  | 486.708   |
| NM_003811 | 8615.771  | 7240.998  | AK024956  | 735.474   | 769.708   | AL137254  | 1515.481  |
| AB011133  | 3855.715  | 2928.667  | AF147386  | 1058.689  | 794.125   | AK026359  | 516.881   |

|           |           |           |           |           |           |           |           |
|-----------|-----------|-----------|-----------|-----------|-----------|-----------|-----------|
| NM_017572 | 31792.316 | 23808.928 | AF273052  | 7614.435  | 5061.67   | AF085884  | 1701.208  |
| NM_018444 | 2820.587  | 2076.01   | NM_017943 | 4711.974  | 2669.187  | S81522    | 959.179   |
| NM_000252 | 2433.231  | 3049.694  | AF147383  | 1018.167  | 1306.068  | S94541    | 1401.362  |
| NM_006947 | 7416.182  | 6977.294  | AK025682  | 989.414   | 1203.276  | L36587    | 3674.573  |
| NM_017917 | 5201.849  | 2008.818  | NM_016478 | 10003.521 | 6727.594  | AK024228  | 992.602   |
| NM_004090 | 9504.009  | 5656.7    | AL389986  | 3311.494  | 2666.296  | NM_016647 | 253.65    |
| NM_014634 | 13387.715 | 7573.678  | AF142409  | 2111.179  | 1308.657  | AK024695  | 987.984   |
| NM_001919 | 15726.425 | 12927.974 | AF086279  | 502.437   | 150.971   | NM_018659 | 180.019   |
| BC031485  | 1820.695  | 2504.183  | AF088052  | 1352.423  | 1009.423  | AF038174  | 1921.365  |
| NM_004092 | 9415.462  | 6189.236  | AF086342  | 635.225   | 689.529   | NM_013243 | 1557.421  |
| X15624    | 2896.532  | 1866.379  | AF086387  | 625.218   | 419.072   | AF070632  | 340.863   |
| AF073770  | 2491.28   | 1398.419  | AF086443  | 411.19    | 479.254   | AF161359  | 339.243   |
| AL359401  | 4222.589  | 5003.184  | AB037756  | 1508.958  | 2326.512  | AL365520  | 911.981   |
| NM_012213 | 2944.805  | 2084.873  | AK001853  | 2821.84   | 2540.005  | AL359338  | 1037.509  |
| NM_016573 | 10300.272 | 3995.225  | AK025071  | 705.444   | 758.869   | AK023623  | 671.25    |
| NM_001303 | 7593.321  | 5582.472  | AF075082  | 693.525   | 609.44    | AK021539  | 2188.947  |
| M21304    | 3880.541  | 2396.513  | NM_015370 | 1171.76   | 1148.357  | AK026738  | 1165.112  |
| NM_001979 | 811.154   | 1011.058  | AF085917  | 638.567   | 1010.54   | AL157491  | 356.679   |
| AB040896  | 2852.914  | 3756.031  | AL360139  | 28673.018 | 28819.879 | NM_005266 | 1973.348  |
| NM_001107 | 1969.44   | 3176.876  | AF075110  | 2213.236  | 1445.563  | AK024681  | 908.836   |
| AF084645  | 470.841   | 989.479   | AL137323  | 904.536   | 675.724   | AF085990  | 1098.295  |
| AF151851  | 7159.929  | 9370.907  | AL137494  | 4493.873  | 4720.375  | NM_014907 | 4172.877  |
| NM_005176 | 657.635   | 1047.528  | AL162037  | 7191.144  | 5377.081  | AB007977  | 3179.451  |
| NM_003636 | 4215.015  | 5506.838  | AL390150  | 1669.697  | 1286.31   | NM_014221 | 1126.426  |
| AF040723  | 13877.771 | 8476.51   | AL137359  | 201.296   | 457.976   | U84515    | 1125.524  |
| NM_015527 | 3167.138  | 2037.974  | NM_002761 | 674.302   | 518.398   | AF086143  | 1771.456  |
| X89675    | 1695.41   | 1360.97   | AF086063  | 552.271   | 398.883   | AK022239  | 518.081   |
| NM_012189 | 741.54    | 442.937   | AF086098  | 732.402   | 400.468   | AK024674  | 763.857   |
| NM_005798 | 9414.482  | 6287.625  | AF086076  | 1055.794  | 522.006   | AK024244  | 1973.108  |
| NM_004216 | 3808.341  | 2237.263  | AL833393  | 1234.344  | 1319.178  | AK023812  | 357.637   |
| NM_016289 | 33637.602 | 22125.945 | AF088005  | 813.513   | 1348.618  | AL390084  | 1569.03   |
| NM_001464 | 670       | 844.483   | AF086096  | 1934.265  | 2259.045  | AK023565  | 402.899   |
| NM_002051 | 1450.957  | 1541.199  | AL390132  | 664.558   | 542.35    | AK021479  | 668.26    |
| NM_001523 | 1434.327  | 740.725   | NM_017933 | 3638.198  | 3391.806  | NM_003835 | 907.924   |
| NM_017423 | 2069.584  | 1258.915  | NM_017819 | 8815.018  | 6190.848  | AK000245  | 1925.244  |
| Z70705    | 1724.717  | 1544.201  | AK024653  | 5315.993  | 5268.753  | AF118072  | 358.18    |
| NM_002611 | 1520.145  | 1464.193  | AF103907  | 951.289   | 1000.164  | AK024112  | 481.957   |
| NM_017417 | 1290.732  | 869.509   | AF257098  | 1671.423  | 1641.499  | AF085900  | 16872.764 |
| AL133602  | 1957.496  | 1862.939  | NM_014130 | 351.686   | 375.762   | AK022420  | 125.408   |
| AF037219  | 2849.838  | 5785.546  | AF111782  | 690.98    | 561.885   | AK023254  | 806.427   |
| AK026075  | 297.211   | 1370.603  | AK021991  | 444.23    | 375.404   | AK023945  | 2685.805  |
| NM_000251 | 2065.007  | 3647.983  | AK022093  | 4596.223  | 4056.518  | AK022446  | 642.496   |
| NM_006038 | 3025.381  | 3989.905  | AK022232  | 598.881   | 532.017   | AK023352  | 575.99    |
| U87223    | 3555.422  | 2460.507  | AK022376  | 695.375   | 612.693   | AK023773  | 725.807   |
| NM_000093 | 710.359   | 582.001   | AK022005  | 871.834   | 933.011   | AF116709  | 655.736   |
| NM_001779 | 4880.323  | 2420.654  | AK022137  | 714.565   | 714.828   | AK025533  | 592.857   |
| AB033059  | 660.038   | 552.042   | AK022272  | 1070.995  | 1425.899  | AK021911  | 3411.001  |
| NM_016484 | 3029.179  | 2292.039  | AK027155  | 2907.188  | 2294.629  | D17225    | 339.482   |
| AK026114  | 866.092   | 186.546   | AF221846  | 521.634   | 642.505   | AF147430  | 616.799   |
| NM_014452 | 1518.935  | 1337.589  | AK027219  | 422.172   | 541.231   | AK025766  | 1049.574  |
| AK021536  | 4180.341  | 5710.613  | AK024528  | 6021.33   | 8453.565  | U35875    | 14500.527 |
| NM_002600 | 4240.384  | 3782.809  | AK000016  | 441.353   | 723.393   | AK021857  | 13360.983 |
| NM_003646 | 28778.172 | 17278.494 | NM_014318 | 1282.775  | 1461.216  | AK022257  | 1311.909  |

|           |           |           |           |           |           |            |           |
|-----------|-----------|-----------|-----------|-----------|-----------|------------|-----------|
| NM_006663 | 1932.837  | 2241.912  | AK056674  | 1402.833  | 945.388   | BE887356   | 49774.871 |
| NM_006092 | 1222.768  | 1504.393  | AK022042  | 917.21    | 846.366   | X84369     | 266.589   |
| NM_012424 | 1491.719  | 978.59    | AL117588  | 582.614   | 505.021   | AK001074   | 552.27    |
| NM_002446 | 1664.367  | 939.372   | NM_017706 | 633.288   | 452.12    | AK023329   | 1280.617  |
| NM_000863 | 978.581   | 1980.308  | BE895529  | 1373.159  | 1599.928  | AK021773   | 1507.129  |
| NM_006651 | 3317.065  | 3993.927  | AL117536  | 749.795   | 870.578   | AK027074   | 1027.933  |
| NM_005336 | 6558.677  | 13296.949 | NM_017751 | 3743.461  | 2345.624  | AL365456   | 512.599   |
| NM_001419 | 5661.889  | 9624.34   | X91195    | 45173.547 | 47048.191 | NM_018038  | 549.565   |
| AF119817  | 18295.48  | 24060.996 | AF086190  | 939.765   | 1079.329  | U84522     | 2683.329  |
| AL035306  | 1924.223  | 2509.407  | AL050035  | 1529.007  | 1704.737  | AK021694   | 385.542   |
| NM_001328 | 22504.934 | 20217.664 | AK024449  | 7676.189  | 2400.986  | AF086013   | 421.041   |
| NM_005749 | 5699.281  | 3170.627  | AL357201  | 504.634   | 315.447   | U84505     | 3776.045  |
| NM_004230 | 6077.191  | 3896.92   | AF279780  | 44445.352 | 32089.947 | X81005     | 817.01    |
| NM_014503 | 960.419   | 652.675   | AK022510  | 1495.572  | 1185.187  | AL049265   | 1257.105  |
| NM_014659 | 1783.328  | 1199.877  | AK023878  | 816.654   | 468.563   | AL049430   | 1051.519  |
| NM_004399 | 4306.993  | 2515.15   | AK021851  | 528.268   | 369.447   | AB015349   | 536.652   |
| NM_006337 | 4736.237  | 4657.131  | AJ131609  | 1724.939  | 1380.187  | AL079274   | 9977.944  |
| NM_004507 | 5190.009  | 3110.24   | BC019280  | 3446.531  | 4724.235  | AL137398   | 1134.175  |
| NM_002710 | 12959.191 | 18448.783 | AF086498  | 537.592   | 476.456   | Y12021     | 468.099   |
| NM_014060 | 4950.104  | 3626.262  | AK000687  | 499.172   | 575.794   | NM_013300  | 8333.104  |
| NM_004749 | 5303.414  | 7432.465  | L77565    | 405.203   | 145.706   | AK026039   | 3363.776  |
| BQ446064  | 990.537   | 1447.532  | AF079567  | 508.279   | 358.986   | AF108756   | 8740.058  |
| AF302502  | 667.96    | 504.94    | AK022177  | 918.998   | 882.053   | NM_004075  | 3603.843  |
| AF274571  | 1321.688  | 1515.147  | AK023852  | 625.95    | 420.613   | NM_001887  | 1437.864  |
| NM_005449 | 1142.452  | 1589.093  | AF086466  | 1565.196  | 1042.633  | NM_006533  | 3458.637  |
| NM_003879 | 6003.169  | 3666.208  | AB007962  | 8447.389  | 6075.919  | AK026747   | 2246.929  |
| NM_016052 | 6925.993  | 3423.861  | AF005081  | 925.389   | 622.117   | AL110150   | 8896.046  |
| NM_006718 | 1387.447  | 1722.777  | AK026438  | 1276.951  | 991.967   | NM_001998  | 5200.031  |
| NM_005427 | 1458.217  | 1257.906  | AK021546  | 863.825   | 520.237   | X87825     | 3654.837  |
| NM_016312 | 660.242   | 1142.229  | AL050186  | 9876.037  | 12802.405 | NM_000914  | 187.954   |
| NM_001776 | 1694.27   | 2320.372  | AK021918  | 2001.495  | 2727.4    | AK001285   | 11517.559 |
| NM_001903 | 16839.256 | 13280.079 | AK021669  | 3636.952  | 2972.874  | D17215     | 2853.637  |
| NM_001874 | 5151.11   | 3224.645  | AL080113  | 42272.395 | 24599.242 | BE781513   | 443.985   |
| NM_005857 | 30862.254 | 12389.106 | AL050083  | 1610.396  | 1540.262  | NM_015714  | 11940.517 |
| NM_002429 | 1852.123  | 790.463   | AK022766  | 468.002   | 296.186   | AK075564   | 423.088   |
| AK027037  | 2406.948  | 1948.92   | AL049422  | 4977.598  | 3713.459  | AK026219   | 889.187   |
| NM_003875 | 6558.653  | 9359.069  | AL133089  | 522.738   | 689.692   | D28446     | 1296.717  |
| AF191687  | 1163.885  | 2269.898  | AK023526  | 2458.533  | 2438.201  | AK024756   | 794.325   |
| NM_003046 | 488.715   | 706.396   | BE266129  | 1006.326  | 779.203   | NM_017911  | 616.857   |
| NM_000274 | 8513.946  | 6891.746  | AK025602  | 4523.353  | 4872.623  | AJ224168   | 1010.226  |
| NM_000170 | 1160.013  | 1232.471  | AK026309  | 2685.643  | 2458.276  | AF147325   | 71261.227 |
| NM_000281 | 6633.006  | 7080.222  | AL137486  | 4816.311  | 5013.41   | NM_018497  | 383.323   |
| AK001295  | 3076.193  | 4557.704  | AL110162  | 786.285   | 801.55    | NM_003774  | 409.503   |
| NM_006031 | 2009.682  | 2007.024  | AK022681  | 12260.648 | 10131.86  | D87466     | 4096.244  |
| NM_002715 | 5275.734  | 3815.121  | CY3Cy5    | 5223.58   | 354.423   | CY3Cy5     | 3436.288  |
| NM_001020 | 65718.82  | 57369.598 | Y18483    | 414.83    | 381.485   | AA608568   | 569.017   |
| AB020660  | 3452.876  | 2355      | AI299075  | 2159.311  | 2173.89   | BG831301   | 9551.188  |
| NM_006659 | 24593.551 | 39430.465 | M59979    | 493.023   | 483.997   | AA478647   | 2045.398  |
| NM_018051 | 1166.237  | 2838.324  | AB011098  | 999.998   | 672.462   | AW058501   | 364.544   |
| NM_015371 | 4143.892  | 6601.634  | AA609759  | 1240.335  | 622.579   | M81379     | 447.722   |
| AB040915  | 1684.506  | 1966.214  | AA029418  | 4480.186  | 2822.041  | ID 2623896 | 1340.34   |
| AF147791  | 713.72    | 747.73    | L20815    | 3020.06   | 2256.529  | ID 2602214 | 1850.61   |
| NM_006481 | 1831.643  | 1433.446  | AI364483  | 7772.163  | 8133.079  | ID 2071279 | 3596.425  |

|           |           |           |           |           |           |           |           |
|-----------|-----------|-----------|-----------|-----------|-----------|-----------|-----------|
| AB011115  | 375.949   | 559.177   | AA456001  | 5947.354  | 5828.243  | L10709    | 150.471   |
| NM_00391C | 12330.56  | 10769.523 | AA451686  | 1843.844  | 3425.245  | NM_14565E | 1181.598  |
| AB007913  | 1775.884  | 1599.855  | AA934644  | 282.466   | 163.254   | SR8       | 5997.794  |
| NM_00669E | 4300.414  | 2715.865  | NM_003822 | 947.869   | 913.285   | SR10      | 24567.346 |
| NM_00459E | 8536.32   | 10022.615 | NM_004412 | 2921.833  | 2613.385  | CY3Cy5    | 1875.635  |
| NM_006037 | 9050.924  | 10229.263 | SR5       | 4361.303  | 5426.767  | NM_01772E | 460.82    |
| NM_015871 | 3985.507  | 4441.89   | SR7       | 5164.917  | 45093.488 | NM_00525E | 1085.563  |
| NM_019037 | 7086.194  | 5666.047  | SR9       | 16422.705 | 3592.635  | NM_00284C | 190.285   |
| NM_015891 | 4021.989  | 2892.051  | CY3Cy5    | 7279.886  | 693.186   | NM_006174 | 88.264    |
| NM_006802 | 897.023   | 710.32    | NM_01955E | 529.963   | 372.693   | NM_01585C | 3376.874  |
| AB037778  | 1203.921  | 692.442   | NM_01209E | 5370.452  | 4397.789  | NM_01468E | 52868.465 |
| NM_00506E | 15423.109 | 31971.615 | L12052    | 1182.17   | 1345.181  | NM_01633E | 1810.641  |
| NM_00308E | 5822.412  | 3849.58   | AB028976  | 3543.746  | 3787.565  | NM_00651C | 2977.97   |
| NM_003753 | 15058.632 | 13200.698 | AK026337  | 846.584   | 608.452   | NM_003141 | 1619.31   |
| NM_01759C | 1815.194  | 1094.259  | NM_01586E | 1482.221  | 959.356   | NM_02024E | 1691.804  |
| AB011145  | 8707.883  | 7814.405  | NM_00462E | 678.076   | 625.786   | NM_00717E | 640.935   |
| NM_00375C | 32926.219 | 47404.578 | NM_00189E | 481.986   | 274.083   | AJ011497  | 1978.214  |
| M92422    | 3062.561  | 4665.644  | NM_00430E | 19103.006 | 21179.738 | AF215923  | 324.323   |
| NM_01786E | 1897.79   | 3181.199  | NM_00608E | 1909.952  | 1499.819  | U66621    | 2000.196  |
| AK021888  | 1834.938  | 740.38    | AF072506  | 392.194   | 342.769   | NM_00572C | 5331.144  |
| AK022848  | 5710.082  | 3310.427  | NM_005992 | 472.193   | 1844.385  | BC011987  | 3152.904  |
| NM_01815E | 17292.123 | 16162.206 | NM_003144 | 42917.254 | 47378.73  | NM_00410E | 15206.124 |
| NM_00081E | 4577.898  | 4536.841  | NM_00090E | 981.86    | 847.976   | NM_00348E | 1065.902  |
| NM_002513 | 2755.914  | 2540.51   | AB011102  | 3799.652  | 4932.546  | NM_00503E | 577.115   |
| NM_017424 | 2398.489  | 1090.144  | D63480    | 1365.861  | 1914.834  | L03418    | 670.816   |
| NM_001522 | 4752.433  | 6110.851  | NM_00296E | 1998.841  | 3392.602  | NM_00241E | 1819.767  |
| NM_000883 | 2485.435  | 2392.777  | NM_00462C | 921.923   | 1587.76   | NM_00091E | 1539.655  |
| AF254086  | 1938.235  | 2527.921  | AF087940  | 4968.407  | 5979.066  | NM_018663 | 435.146   |
| AL390142  | 1931.099  | 1438.114  | AJ277587  | 2577.094  | 2725.02   | NM_145904 | 1913.087  |
| NM_00656E | 1675.009  | 1828.517  | D87432    | 3748.131  | 6908.401  | NM_00679E | 2916.683  |
| AB007930  | 10487.734 | 10111.854 | AK023749  | 664.539   | 434.335   | NM_00070E | 412.035   |
| AJ005273  | 2569.489  | 1905.208  | NM_002337 | 3484.95   | 1976.172  | NM_015941 | 902.044   |
| AK021892  | 3598.989  | 1531.09   | NM_01324E | 699.175   | 1124.831  | NM_00365E | 728.429   |
| NM_003121 | 838.345   | 180.338   | NM_006423 | 4162.532  | 2819.619  | NM_001732 | 1074.424  |
| NM_003437 | 2232.729  | 1221.596  | NM_00476E | 1460.309  | 1442.38   | NM_01869C | 3412.564  |
| NM_018337 | 7804.281  | 5402.77   | NM_00581E | 6209.203  | 5283.571  | NM_00086C | 708.978   |
| AA193295  | 17012.016 | 31458.721 | AK025520  | 1929.191  | 798.06    | AB037798  | 818.68    |
| NM_01804E | 4524.349  | 5056.345  | NM_004892 | 12472.825 | 5059.41   | AF277719  | 529.866   |
| NM_014803 | 1788.876  | 1360.525  | NM_014597 | 7767.065  | 5000.544  | NM_000791 | 716.189   |
| AK024956  | 623.04    | 572.816   | NM_01789E | 4574.707  | 3463.845  | NM_003681 | 809.257   |
| AF147386  | 2509.263  | 1608.528  | AB002374  | 1603.543  | 1167.826  | NM_00480C | 1246.538  |
| AF273052  | 8132.845  | 6612.959  | U17327    | 781.965   | 600.521   | AB037738  | 350.192   |
| NM_017943 | 5527.772  | 5201.63   | M87790    | 15650.65  | 15044.578 | NM_000807 | 1221.494  |
| AF147383  | 591.738   | 1217.199  | NM_00176E | 2551.246  | 2289.289  | NM_01490E | 1703.306  |
| AK025682  | 1416.018  | 2517.153  | NM_00002E | 6954.191  | 10038.586 | NM_01570C | 2503.945  |
| NM_01647E | 8530.196  | 5286.581  | NM_00071E | 679.208   | 1133.901  | NM_019087 | 1664.855  |
| AL389986  | 4892.015  | 3764.275  | AF035802  | 5154.414  | 10214.599 | S76984    | 4571.22   |
| AF142409  | 6504.592  | 1817.089  | Y08145    | 617.609   | 823.604   | NM_01449E | 61045.902 |
| AF088052  | 1462.318  | 1031.642  | M26123    | 720.685   | 766.833   | NM_014081 | 530.199   |
| AF086342  | 928.608   | 562.837   | NM_00183E | 392.942   | 524.066   | NM_005651 | 629.074   |
| AF086451  | 646.816   | 140.589   | NM_01332E | 18328.074 | 12983.622 | AK023337  | 1553.425  |
| AF086387  | 725.886   | 457.979   | NM_00266C | 1942.761  | 1970.97   | NM_01327E | 3985.761  |
| AL389941  | 933.951   | 415.688   | NM_01590C | 691.387   | 634.184   | NM_01432E | 377.439   |

|           |           |           |           |           |           |            |           |
|-----------|-----------|-----------|-----------|-----------|-----------|------------|-----------|
| AB037756  | 2583.118  | 1788.339  | NM_003706 | 932.091   | 646.836   | NM_000455  | 723.654   |
| AK001853  | 3482.965  | 3976.963  | NM_005218 | 4810.85   | 5643.159  | NM_014791  | 3436.32   |
| AK025071  | 962.4     | 983.465   | AL122071  | 476.706   | 493.22    | NM_003318  | 656.444   |
| NM_015370 | 2796.471  | 1863.414  | AB033054  | 6743.947  | 8399.426  | NM_004362  | 968.82    |
| AF085917  | 1053.625  | 865.414   | NM_016122 | 810.702   | 784.903   | NM_000182  | 1974.433  |
| AF085989  | 768.845   | 1152.07   | AF153330  | 839.597   | 1028.841  | AK023384   | 683.473   |
| AL360139  | 58541.367 | 41666.094 | NM_001652 | 527.396   | 649.938   | NM_016026  | 922.377   |
| AF075110  | 6857.542  | 2137.713  | AF116695  | 175.677   | 1045.955  | AJ011497   | 2005.659  |
| AL137323  | 1289.58   | 1295.39   | D87446    | 5156.331  | 3484.866  | NM_003018  | 978.538   |
| AL137494  | 5895.851  | 4145.6    | BF540935  | 2477.104  | 2939.212  | NM_000336  | 444.55    |
| AL162037  | 8950.796  | 5289.132  | NM_004466 | 785.851   | 338.215   | W61100     | 35104.695 |
| AL390150  | 1415.271  | 1862.441  | NM_007081 | 2961.976  | 1806.3    | AA608568   | 253.812   |
| NM_002761 | 1004.568  | 814.412   | AB032964  | 2042.424  | 1602.9    | BG831301   | 9156.138  |
| AF086063  | 793.733   | 532.887   | BE733605  | 1861.074  | 1364.636  | AA478647   | 1383.329  |
| AF086098  | 756.234   | 609.073   | NM_003334 | 4857.767  | 5141.188  | ID 2623896 | 1106.163  |
| AF086076  | 814.543   | 492.342   | NM_002693 | 1212.109  | 1655.326  | ID 2602214 | 1136.189  |
| AL833393  | 1431.882  | 947.046   | NM_003671 | 848.528   | 717.22    | AI928195   | 622.474   |
| AF088005  | 1749.517  | 993.295   | AK026000  | 1647.277  | 1461.366  | AA458922   | 940.891   |
| AF086096  | 5694.117  | 2955.972  | NM_017833 | 2028.825  | 2900.844  | NM_145659  | 1107.482  |
| AL390132  | 948.809   | 299.742   | NM_006675 | 3254.478  | 3112.983  | NM_021957  | 312.84    |
| NM_017933 | 3763.014  | 1444.579  | NM_003022 | 9678.708  | 9317.457  | NM_001719  | 1788.829  |
| NM_017819 | 11335.539 | 8805.38   | NM_004873 | 2925      | 3191.997  | NM_145904  | 1314.321  |
| AK024653  | 16470.512 | 12936.931 | NM_019842 | 1223.499  | 1700.032  | NM_006796  | 3012.946  |
| AF103907  | 2943.891  | 1786.553  | NM_002951 | 16869.188 | 20838.406 | NM_003655  | 854.635   |
| AF161351  | 2703.65   | 1873.356  | NM_002317 | 1629.709  | 1914.61   | NM_014837  | 1176.396  |
| AF257098  | 918.144   | 420.758   | NM_000320 | 4396.868  | 7663.017  | NM_005259  | 732.136   |
| AF111782  | 2426.521  | 1825.695  | NM_003136 | 7888.335  | 6291.065  | NM_015850  | 2613.883  |
| AF151530  | 946.843   | 1080.435  | NM_006475 | 526.244   | 702.114   | NM_014686  | 45930.625 |
| AK021991  | 376.286   | 604.044   | NM_004620 | 804.179   | 1456.17   | NM_016339  | 993.922   |
| AK022093  | 5427.61   | 4279.056  | AF087940  | 4689.611  | 5689.588  | NM_002487  | 373.637   |
| AK022376  | 749.964   | 406.449   | AJ277587  | 2529.906  | 2564.674  | NM_006510  | 2239.518  |
| AK022005  | 1046.621  | 811.589   | D87432    | 3534.426  | 6030.513  | NM_003141  | 938.003   |
| AK022137  | 926.649   | 365       | Y18483    | 614.991   | 652.146   | NM_020245  | 1527.106  |
| AK022272  | 1195.482  | 795.238   | AI565117  | 62507.059 | 58323.5   | NM_007175  | 458.953   |
| AK027155  | 2442.595  | 1630.621  | AI299075  | 1715.399  | 1388.747  | NM_015700  | 1976.234  |
| AF221846  | 804.991   | 290.541   | AB011098  | 652.308   | 747.35    | NM_019087  | 734.42    |
| AK027219  | 706.908   | 475.681   | AA609759  | 1622.366  | 1049.828  | U66621     | 2248.773  |
| AK024528  | 7683.698  | 3284.825  | AA029418  | 5374.517  | 3715.615  | NM_005720  | 5723.783  |
| AK000016  | 1442.957  | 1168.881  | L20815    | 3792.919  | 3219.747  | AJ132086   | 351.184   |
| AK023367  | 889.544   | 1558.704  | AI364483  | 9333.996  | 11797.926 | U92816     | 6667.392  |
| AL080209  | 2276.716  | 1762.692  | AA456001  | 6467.477  | 7923.08   | BC011987   | 3341.407  |
| NM_016255 | 2254.311  | 1551.464  | AA176581  | 358.816   | 254.167   | NM_004106  | 14242.948 |
| NM_014318 | 1826.714  | 1185.414  | BI818232  | 363.335   | 540.96    | NM_003485  | 1164.403  |
| AK056674  | 1302.789  | 780.424   | AA451686  | 2114.421  | 4114.657  | L03418     | 756.78    |
| AK022042  | 1414.111  | 672.225   | AA934644  | 369       | 258.294   | NM_002415  | 10529.668 |
| AL117588  | 820.95    | 255.448   | NM_003822 | 1192.9    | 1311.489  | NM_006332  | 2176.106  |
| BE895529  | 2286.271  | 1666.453  | NM_004412 | 2928.941  | 2971.414  | NM_000916  | 1025.033  |
| AK000964  | 1051.411  | 866.121   | NM_002050 | 1386.987  | 2806.172  | NM_018663  | 469.32    |
| AL117536  | 1285.886  | 1040.968  | NM_007097 | 7308.175  | 5808.38   | NM_014791  | 2022.442  |
| NM_017751 | 3579.885  | 2795.502  | NM_000029 | 5411.964  | 8669.97   | NM_003318  | 497.46    |
| NM_003771 | 1717.047  | 1504.751  | NM_000715 | 1120.999  | 1127.611  | NM_004362  | 1142.699  |
| NM_017860 | 6277.814  | 5621.139  | AF035802  | 4631.564  | 7185.297  | NM_000182  | 1518.663  |
| X91195    | 32256.746 | 43690.133 | Y08145    | 877.405   | 1227.392  | AK023384   | 1858.37   |



|           |           |           |           |           |           |            |           |
|-----------|-----------|-----------|-----------|-----------|-----------|------------|-----------|
| AL050035  | 2374.897  | 1673.306  | M26123    | 947.64    | 1102.859  | NM_016026  | 623.001   |
| AK024449  | 17303.877 | 3271.162  | NM_001836 | 634.937   | 417.141   | AK025111   | 421.959   |
| AF279780  | 48064.223 | 36169.855 | NM_019555 | 674.065   | 706.361   | NM_001732  | 1276.708  |
| AK022510  | 1796.508  | 1644.335  | NM_012096 | 5732.494  | 6223.234  | NM_018690  | 4089.315  |
| AK023878  | 661.715   | 444.087   | NM_003905 | 17017.885 | 12883.671 | NM_000860  | 797.398   |
| AJ131609  | 2877.133  | 1337.561  | L12052    | 1265.336  | 2004.349  | AB037798   | 946.718   |
| BC019280  | 3563.153  | 2312.132  | AB028976  | 4046.588  | 5689.822  | AF272663   | 4902.067  |
| AF086498  | 1378.437  | 531.585   | AK026337  | 1626.711  | 2147.021  | NM_012190  | 341.717   |
| AK000687  | 689.733   | 693.262   | NM_015869 | 1603.749  | 1346.027  | NM_003681  | 6878.836  |
| AF079567  | 834.353   | 322.828   | AB031038  | 405.214   | 578.72    | NM_004800  | 5494.952  |
| AK022177  | 1049.023  | 689.38    | NM_004626 | 852.801   | 1018.714  | NM_014954  | 9811.941  |
| AF086466  | 1691.767  | 1512.387  | NM_001899 | 462.3     | 780.521   | NM_000807  | 383.249   |
| AB007962  | 14034.326 | 11217.362 | NM_004305 | 20710.959 | 28633.803 | NM_014909  | 1623.422  |
| AF005081  | 1396.992  | 1327.989  | NM_006089 | 2188.576  | 2225.887  | NM_145659  | 1146.608  |
| AK026438  | 1594.271  | 865.315   | AF072506  | 539.845   | 384.361   | NM_001719  | 1657.033  |
| AK021546  | 1386.874  | 400.525   | NM_005992 | 607.773   | 2584.352  | AF308802   | 515.737   |
| AL050186  | 13008.185 | 8676.498  | NM_003144 | 48820.859 | 60992.129 | S76984     | 5054.709  |
| AK021918  | 3454.113  | 3067.173  | NM_000908 | 1100.815  | 778.866   | NM_014495  | 60723.504 |
| AK021669  | 4769.91   | 3065.775  | AB011102  | 3751.872  | 4566.911  | AK023699   | 583.311   |
| AL080113  | 33628.188 | 35782.176 | D63480    | 1317.393  | 2103.49   | NM_007195  | 733.218   |
| AL050083  | 1583.224  | 1333.527  | NM_002969 | 2297.215  | 3307.163  | AK023337   | 1942.62   |
| AK022766  | 956.178   | 821.129   | AK023749  | 1096.996  | 917.075   | NM_013275  | 1718.947  |
| AL049422  | 6252.224  | 7766.61   | NM_002337 | 3085.421  | 3337.351  | NM_019011  | 1486.762  |
| AL133089  | 902.296   | 869.536   | NM_013245 | 722.417   | 1857.666  | AF459094   | 1241.362  |
| AK023526  | 3543.68   | 3598.624  | NM_006423 | 4683.915  | 4522.807  | NM_003157  | 1018.126  |
| BE266129  | 1256.139  | 979.25    | NM_004766 | 844.187   | 1069.212  | NM_014326  | 1479.007  |
| AK025602  | 7138.909  | 3969.271  | NM_005819 | 8902.282  | 13447.522 | NM_015981  | 2116.475  |
| AK026309  | 2493.741  | 1529.669  | AK025520  | 2652.89   | 2025.231  | NM_000455  | 2110.237  |
| AL137486  | 5245.539  | 2967.347  | NM_004892 | 18000.818 | 16598.197 | AK026235   | 366.571   |
| AL110162  | 1075.854  | 688.843   | NM_014597 | 9919.051  | 14789.532 | NM_006510  | 2731.05   |
| AK022681  | 12994.389 | 7302.468  | NM_017896 | 5266.212  | 6405.455  | NM_003141  | 1353.955  |
| CY3Cy5    | 9204.773  | 646.125   | AB002374  | 1924.18   | 2084.709  | NM_020245  | 1350.111  |
| Y18483    | 545.711   | 531.955   | U17327    | 834.039   | 674.348   | NM_007175  | 414.552   |
| AI299075  | 3187.049  | 3824.674  | AB040938  | 358.067   | 480.958   | AJ011497   | 2081.177  |
| M59979    | 1027.807  | 703.742   | M87790    | 17237.113 | 17229.727 | NM_000336  | 755.633   |
| AB011098  | 1344.274  | 1408.173  | NM_001768 | 3051.323  | 3138.139  | W61100     | 35594.059 |
| AA609759  | 2468.138  | 1012.766  | NM_002951 | 12310.555 | 10974.343 | AA608568   | 1462.781  |
| AA029418  | 5141.194  | 5288.035  | NM_002317 | 1096.09   | 835.361   | BG831301   | 9489.231  |
| L20815    | 4445.694  | 3731.997  | NM_000320 | 2837.666  | 2102.156  | AA478647   | 1241.625  |
| AI364483  | 10777.529 | 13940.564 | NM_003136 | 5397.061  | 3462.974  | ID 2623896 | 973.903   |
| AA456001  | 10745.388 | 10591.721 | NM_013328 | 18598.752 | 13224.217 | ID 2602214 | 976.502   |
| AA176581  | 219.13    | 628.735   | NM_000790 | 275.506   | 293.203   | ID 2071279 | 4615.912  |
| BI818232  | 186.286   | 633.31    | NM_002660 | 2528.566  | 2589.067  | AA482489   | 4025.374  |
| AA451686  | 3582.536  | 5408.018  | NM_015900 | 1722.245  | 2598.076  | AA458922   | 1489.056  |
| AA934644  | 452.321   | 774.944   | NM_003706 | 1468.73   | 1402.971  | NM_002415  | 9675.589  |
| NM_003822 | 1318.092  | 2232.814  | AF182218  | 617.772   | 882.252   | NM_006332  | 2071.557  |
| NM_004412 | 3763.004  | 4398.996  | NM_005218 | 6635.951  | 12580.242 | NM_000916  | 1409.864  |
| SR5       | 4588.694  | 6651.932  | AL122071  | 1272.928  | 1466.327  | NM_018663  | 478.161   |
| SR7       | 6988.633  | 57228.336 | AB033054  | 6635.028  | 13427.896 | NM_145904  | 1545.275  |
| SR9       | 28850.57  | 6686.911  | NM_016122 | 1103.729  | 1861.026  | NM_006796  | 3737.421  |
| CY3Cy5    | 8904.736  | 1028.971  | NM_016583 | 855.998   | 1242.52   | NM_000706  | 562.711   |
| NM_019555 | 542.603   | 355.357   | AF153330  | 1577.921  | 2702.003  | NM_015941  | 1027.443  |
| NM_012096 | 4320.616  | 6084.703  | NM_001652 | 885.853   | 767.943   | NM_003655  | 2251.357  |

|           |           |           |           |           |           |           |           |
|-----------|-----------|-----------|-----------|-----------|-----------|-----------|-----------|
| L12052    | 987.019   | 2183.016  | NM_003822 | 912.459   | 656.362   | NM_014837 | 1180.614  |
| AB028976  | 3844.538  | 5990.346  | NM_004412 | 3130.412  | 1947.383  | NM_005259 | 438.356   |
| AK026337  | 791.587   | 594.22    | NM_002050 | 1281.91   | 1513.399  | NM_006174 | 3047.308  |
| NM_015869 | 2126.672  | 1908.604  | NM_007097 | 6503.974  | 3729.984  | NM_015850 | 1496.946  |
| AB031038  | 379.933   | 882.68    | D87446    | 4954.7    | 2978.021  | NM_002838 | 2213.254  |
| NM_004626 | 889.834   | 1456.088  | BF540935  | 2759.454  | 2168.27   | AK027377  | 1274.376  |
| NM_001899 | 449.217   | 750.271   | NM_004466 | 646.393   | 696.198   | NM_014686 | 37807.09  |
| NM_006089 | 741.511   | 1429.552  | NM_007081 | 1723.4    | 848.941   | NM_013340 | 5270.149  |
| AF072506  | 577.106   | 688.081   | AB032964  | 2230.226  | 2059.094  | NM_014954 | 17694.279 |
| NM_005992 | 380.981   | 2584.681  | BE733605  | 2243.598  | 1712.348  | NM_014909 | 2366.053  |
| NM_003144 | 25178.357 | 51754.344 | NM_003334 | 13341.987 | 15038.278 | NM_015700 | 2051.252  |
| NM_000908 | 2432.965  | 1321.473  | NM_002693 | 1572.478  | 1953.957  | NM_019087 | 1151.429  |
| AB011102  | 2714.664  | 5246.237  | NM_003671 | 1123.372  | 1014.49   | U66621    | 628.044   |
| NM_006475 | 1162.977  | 1852.689  | AK026000  | 1835.228  | 2379.318  | NM_005720 | 1440.06   |
| NM_004620 | 807.649   | 1636.269  | NM_017833 | 2960.612  | 4314.611  | U61736    | 2680.434  |
| AF087940  | 5352.279  | 4866.851  | NM_006675 | 4121.453  | 3970.637  | U92816    | 4063.51   |
| AJ277587  | 4729.451  | 3467.958  | NM_003022 | 11220.123 | 13706.678 | BC011987  | 576.183   |
| D87432    | 3710.141  | 6197.702  | NM_004873 | 4065.005  | 6652.693  | NM_004106 | 4571.691  |
| AK023749  | 615.282   | 609.312   | NM_019842 | 2281.469  | 3961.368  | L03418    | 1077.035  |
| NM_002337 | 2767.552  | 3855.381  | NM_005992 | 344.025   | 1720.956  | NM_003157 | 1990.859  |
| NM_013245 | 1131.226  | 2265.92   | NM_003144 | 37076.254 | 37816.992 | NM_004938 | 601.975   |
| NM_006423 | 5741.032  | 3802.078  | NM_000908 | 974.265   | 441.374   | NM_004448 | 802.362   |
| NM_004766 | 2508.369  | 2602.415  | AB011102  | 3424.297  | 3429.697  | NM_015981 | 1648.733  |
| NM_005819 | 9211.188  | 9348.241  | D63480    | 1275.57   | 1279.64   | NM_000455 | 1551.335  |
| AK025520  | 2710.12   | 1999.915  | NM_002969 | 1975.783  | 2134.223  | NM_014791 | 2558.347  |
| NM_004892 | 10561.14  | 6536.573  | NM_006475 | 354.925   | 401.464   | NM_003318 | 618.694   |
| NM_014597 | 8820.029  | 9678.218  | NM_004620 | 425.42    | 544.931   | NM_004362 | 3451.653  |
| NM_017896 | 6684.201  | 7176.331  | AF087940  | 4458.705  | 3198.423  | NM_000182 | 1938.767  |
| U17327    | 1497.282  | 1282.284  | AJ277587  | 2045.254  | 1209.853  | NM_016026 | 514.812   |
| M87790    | 24210.061 | 24466.793 | D87432    | 3174.779  | 3856.031  | NM_018690 | 915.137   |
| NM_001768 | 2166.3    | 1784.852  | Y18483    | 804.115   | 856.434   | AF272663  | 1688.672  |
| NM_000029 | 5294.713  | 7193.213  | AI565117  | 61217.871 | 58203.852 | NM_003681 | 570.513   |
| NM_000715 | 575.435   | 795.307   | AI299075  | 1881.175  | 2133.593  | NM_004800 | 866.706   |
| AF035802  | 4188.477  | 6616.857  | M59979    | 585.984   | 414.9     | NM_004952 | 760.85    |
| Y08145    | 697.395   | 667.745   | AB011098  | 1025.105  | 881.823   | NM_020414 | 486.182   |
| NM_001838 | 665.702   | 669.724   | AA609759  | 1422.086  | 1127.748  | AB037730  | 1101.097  |
| NM_013328 | 8402.168  | 15661.477 | AA029418  | 5866.103  | 5192.761  | NM_001357 | 3540.158  |
| NM_002660 | 1628.845  | 1824.059  | L20815    | 4129.611  | 4094.736  | NM_003893 | 854.964   |
| NM_015900 | 525.104   | 695.787   | AI364483  | 14836.901 | 20492.723 | AB037816  | 839.365   |
| NM_003706 | 1363.163  | 737.794   | AA456001  | 6931.074  | 8444.988  | NM_001719 | 3512.098  |
| NM_005218 | 1336.839  | 6942.41   | AA176581  | 701.037   | 1040.548  | S76984    | 545.064   |
| AB033054  | 6401.419  | 10028.748 | BI818232  | 409.325   | 1161.83   | NM_014495 | 57817.559 |
| NM_016122 | 528.659   | 1280.699  | AA451686  | 1935.992  | 4327.195  | AK023337  | 949.228   |
| NM_016583 | 458.662   | 442.596   | M87790    | 11155.072 | 7770.915  | NM_013275 | 761.827   |
| AF153330  | 963.725   | 1548.795  | NM_001768 | 1920.107  | 1541.187  | AB037842  | 2706.061  |
| NM_001652 | 794.05    | 1550.578  | NM_000029 | 5160.375  | 4245.011  | NM_019011 | 1146.382  |
| NM_002976 | 4901.988  | 5334.253  | AF035802  | 3271.611  | 3057.07   | NM_002544 | 852.484   |
| M81768    | 503.009   | 448.459   | Y08145    | 702.932   | 653.926   | AB011542  | 677.889   |
| D87446    | 2747.019  | 2366.916  | M26123    | 652.895   | 345.933   | NM_001853 | 2404.429  |
| BF540935  | 1278.754  | 1692.764  | NM_019555 | 674.774   | 613.289   | U41737    | 479.524   |
| NM_004466 | 396.821   | 443.602   | NM_012096 | 5402.696  | 4589.02   | NM_005799 | 399.71    |
| NM_007081 | 1657.73   | 1869.051  | NM_003905 | 17166.002 | 10082.275 | NM_005927 | 2175.878  |
| AB032964  | 1962.562  | 2704.871  | L12052    | 1135.311  | 1393.189  | AB028983  | 1584.01   |

|           |           |           |           |           |           |           |           |
|-----------|-----------|-----------|-----------|-----------|-----------|-----------|-----------|
| BE733605  | 1864.103  | 2229.681  | AB028976  | 3331.572  | 5277.591  | AB037800  | 914.015   |
| NM_003334 | 11644.128 | 12043.195 | AK026337  | 660.453   | 761.449   | NM_018660 | 2064.293  |
| NM_002693 | 1339.174  | 1783.932  | NM_015869 | 1666.963  | 1519.048  | NM_003394 | 2395.869  |
| NM_003671 | 669.796   | 985.965   | AB031038  | 382.603   | 379.18    | NM_003870 | 582.689   |
| AK026000  | 1481.816  | 1769.328  | NM_004626 | 789.818   | 1217.415  | NM_014887 | 521.344   |
| NM_017833 | 1406.218  | 1250.599  | NM_001899 | 513.573   | 1025.215  | NM_018556 | 2877.423  |
| NM_006675 | 3702.686  | 4058.052  | NM_004305 | 29214.924 | 40496.555 | AF052211  | 1299.489  |
| NM_003022 | 12880.585 | 13087.12  | NM_006089 | 2573.554  | 2654.272  | NM_005600 | 1981.254  |
| NM_004873 | 2566.664  | 2904.09   | AF072506  | 473.55    | 527.033   | NM_005967 | 1753.079  |
| NM_019842 | 940.42    | 1082.77   | AB033054  | 3816.273  | 5723.913  | NM_014223 | 887.203   |
| NM_002951 | 8771.216  | 11899.941 | NM_016122 | 536.593   | 675.611   | NM_000633 | 8488.582  |
| NM_002317 | 1085.301  | 1059.42   | AF153330  | 953.12    | 729.005   | NM_019011 | 1890.527  |
| NM_000320 | 5135.161  | 4534.891  | NM_001652 | 378.02    | 452.086   | NM_004879 | 613.966   |
| NM_017921 | 531.198   | 374.962   | AK023749  | 742.82    | 569.092   | NM_004475 | 989.015   |
| NM_003136 | 5616.519  | 5067.671  | NM_002337 | 3193.234  | 2375.622  | NM_001627 | 664.373   |
| NM_004620 | 640.174   | 1187.035  | NM_013245 | 521.89    | 1112.586  | NM_001336 | 1233.916  |
| AF087940  | 3973.439  | 5198.032  | NM_006423 | 4085.9    | 2771.479  | AB050716  | 837.543   |
| AJ277587  | 3289.999  | 2637.647  | NM_004766 | 1250.664  | 1737.797  | X77690    | 1806.298  |
| D87432    | 3741.595  | 6284.803  | NM_005819 | 7860.865  | 9062.311  | NM_006536 | 617.27    |
| Y18483    | 548.873   | 1196.413  | AK025520  | 2469.547  | 1473.845  | NM_002422 | 416.833   |
| AI565117  | 67312.867 | 63159.465 | NM_004892 | 15993.98  | 10215.892 | NM_006690 | 898.264   |
| AI299075  | 2604.94   | 3722.041  | NM_014597 | 6123.525  | 6980.837  | AF218022  | 718.237   |
| M59979    | 939.8     | 482.381   | NM_017896 | 5167.373  | 5797.341  | NM_000268 | 5593.07   |
| AB011098  | 1325.745  | 1277.947  | AB002374  | 2163.107  | 2277.044  | M30493    | 4064.413  |
| AA609759  | 2398.003  | 1330.562  | U17327    | 983.447   | 1288.659  | NM_004343 | 1302.848  |
| AA029418  | 5104.627  | 4757.305  | NM_017833 | 1637.792  | 2141.914  | X52355    | 1650.062  |
| L20815    | 5039.664  | 4622.399  | NM_006675 | 2664.858  | 2710.229  | NM_006963 | 1260.632  |
| AI364483  | 11698.308 | 15580.538 | NM_003022 | 9184.105  | 7178.541  | U66561    | 1367.502  |
| AA456001  | 14371.791 | 12627.276 | NM_004873 | 2700.193  | 2244.607  | NM_002200 | 1065.188  |
| BI818232  | 273.529   | 587.736   | NM_019842 | 1067.876  | 994.574   | AF017433  | 573.918   |
| AA451686  | 3326.401  | 4609.667  | NM_002951 | 11842.304 | 9082.339  | AF130111  | 470.991   |
| NM_003822 | 964.929   | 1195.467  | NM_002317 | 1250.066  | 839.512   | NM_016307 | 1418.139  |
| NM_004412 | 3749.823  | 3948.053  | NM_000320 | 3310.89   | 2547.126  | U94384    | 1336.932  |
| NM_002050 | 1133.61   | 2702.194  | NM_013328 | 20934.287 | 15785.418 | NM_020528 | 845.918   |
| NM_007097 | 9796.331  | 7637.197  | NM_002660 | 1984.969  | 2235.663  | NM_007040 | 2449.031  |
| NM_000029 | 4430.386  | 4133.27   | NM_003706 | 947.08    | 904.538   | NM_003321 | 2520.57   |
| Y08145    | 582.594   | 893.494   | AF182218  | 1677.715  | 6900.577  | U18937    | 492.214   |
| M26123    | 1163.962  | 898.756   | NM_005218 | 6039.685  | 11728.465 | AJ420488  | 56541.871 |
| NM_001838 | 465.154   | 560.272   | AL122071  | 657.067   | 1350.938  | AK022180  | 4390.145  |
| NM_012096 | 4220.418  | 4811.244  | NM_014913 | 10888.586 | 5531.26   | AK025437  | 356.909   |
| NM_003905 | 7476.746  | 9524.435  | NM_005864 | 10786.641 | 4819.862  | NM_004168 | 3341.52   |
| L12052    | 744.002   | 1561.39   | NM_012341 | 3119.392  | 2640.513  | AF161353  | 2238.184  |
| AB028976  | 3052.754  | 4314.213  | NM_003256 | 14887.64  | 11561.569 | NM_000764 | 702.044   |
| AK026337  | 856.397   | 756.976   | D87450    | 2315.079  | 1640.736  | NM_004146 | 5983.071  |
| NM_015869 | 2259.4    | 1947.722  | NM_017797 | 5362.195  | 5366.48   | NM_003002 | 2394.671  |
| AB031038  | 244.974   | 524.334   | AK021919  | 472.685   | 562.984   | D42047    | 337.958   |
| NM_004626 | 892.975   | 1365.158  | AF000562  | 1639.67   | 1237.349  | AB009282  | 2833.438  |
| NM_001899 | 484       | 805.304   | AK025713  | 1309.639  | 1512.172  | NM_005004 | 10364.883 |
| NM_004305 | 24045.279 | 29269.32  | NM_018100 | 410.859   | 396.298   | NM_003670 | 488.517   |
| NM_006089 | 626.693   | 1342.604  | NM_002050 | 1533.437  | 1920.041  | NM_002823 | 17439.807 |
| AF072506  | 566.222   | 390.563   | NM_007097 | 5563.82   | 2928.316  | NM_017916 | 706.254   |
| NM_005992 | 551.198   | 2666.662  | D87446    | 5960.33   | 4372.479  | NM_001805 | 1002.125  |
| NM_003144 | 24929.332 | 54476.484 | BF540935  | 4964.717  | 4343.403  | X52341    | 26890.932 |

|           |           |           |           |           |           |           |           |
|-----------|-----------|-----------|-----------|-----------|-----------|-----------|-----------|
| NM_000908 | 2111.755  | 773.077   | NM_004466 | 882.736   | 770.682   | NM_003082 | 761.145   |
| AB011102  | 2729.911  | 4793.75   | NM_007081 | 2814.549  | 1935.2    | AL833249  | 1162.299  |
| D63480    | 1646.436  | 3117.112  | AB032964  | 1713.313  | 2279.234  | AK021894  | 1605.597  |
| NM_002969 | 2014.462  | 2989.991  | BE733605  | 1599.637  | 1867.821  | NM_020424 | 1273.706  |
| M81768    | 402.742   | 711.087   | NM_003334 | 19057.039 | 26714.135 | AF438313  | 826.215   |
| AK023749  | 674.201   | 649.604   | NM_002693 | 1893.122  | 3363.475  | AB033009  | 12638.812 |
| NM_002337 | 2722.822  | 3060.143  | NM_003671 | 1125.575  | 1362.231  | AF147320  | 1175.673  |
| NM_013245 | 1034.038  | 1640.193  | AK026000  | 2000.192  | 4033.536  | AF086191  | 730.23    |
| NM_006423 | 4906.957  | 2495.308  | NM_005814 | 1953.081  | 1571.506  | AF143880  | 3114.008  |
| NM_004766 | 2301.96   | 2591.083  | NM_016279 | 573.48    | 491.809   | AL133052  | 368.998   |
| NM_005819 | 8660.235  | 8211.105  | NM_000211 | 8293.68   | 9973.854  | AB037824  | 1058.113  |
| AK025520  | 2609.414  | 1811.874  | AB037830  | 1744.396  | 1039.484  | AF361494  | 950.263   |
| NM_004892 | 10103.407 | 6530.486  | NM_015685 | 3154.803  | 4616.816  | AF147408  | 502.248   |
| NM_014597 | 8509.884  | 10199.981 | NM_004357 | 13213.165 | 13251.879 | AK027222  | 3144.058  |
| NM_017896 | 6614.974  | 6453.748  | X03324    | 2639.916  | 1572.729  | AL050042  | 2566.477  |
| AB002374  | 2159.208  | 2196.785  | AF130988  | 560.061   | 529.308   | L23402    | 1038.907  |
| U17327    | 1174.136  | 979.458   | NM_014934 | 947.262   | 648.01    | AB037850  | 479.506   |
| M87790    | 23743.27  | 25021.582 | NM_015385 | 958.893   | 484.843   | AK002197  | 1406.507  |
| NM_001768 | 2060.895  | 2170.131  | NM_003690 | 1517.829  | 1692.402  | AF087996  | 3193.621  |
| NM_002951 | 5859.506  | 5647.361  | NM_000876 | 6369.264  | 7153.813  | AK021710  | 1230.267  |
| NM_002317 | 755.551   | 888.686   | NM_014214 | 4625.585  | 2862.136  | AL137446  | 297.127   |
| NM_000320 | 4588.826  | 3981.665  | NM_002752 | 1073.756  | 1427.412  | AB025286  | 577.867   |
| NM_003136 | 4399.551  | 3870.064  | NM_013281 | 1581.981  | 1863.005  | AF056437  | 949.687   |
| NM_013328 | 11914.846 | 19941.33  | Y11306    | 746.575   | 1361.077  | AB032364  | 437.943   |
| NM_000790 | 339.687   | 299.045   | NM_016112 | 632.008   | 688.931   | AF009295  | 723.236   |
| NM_002660 | 1420.578  | 1324.604  | X85106    | 1207.391  | 1218.735  | NM_005029 | 1276.677  |
| NM_015900 | 646.615   | 638.708   | NM_003931 | 1850.335  | 1568.1    | AF056447  | 2816.814  |
| NM_003706 | 1976.225  | 854.304   | NM_012479 | 25859.643 | 23635.359 | AK001010  | 1672.964  |
| AF182218  | 236.477   | 454.315   | AF250226  | 8426.231  | 10089.087 | NM_018076 | 476.604   |
| NM_005218 | 935.435   | 4699.687  | AL157475  | 2312.821  | 1534.139  | AK021442  | 441.746   |
| AL122071  | 309.553   | 589.409   | NM_006069 | 13119.464 | 10505.843 | AK021482  | 1497.95   |
| AB033054  | 6082.8    | 8774.527  | NM_006534 | 3849.695  | 2775.038  | AK025317  | 1305.52   |
| NM_016122 | 690.641   | 1139.057  | NM_017601 | 1688.215  | 1200.367  | AK025177  | 294.539   |
| AF153330  | 735.619   | 845.3     | AF110265  | 8471.018  | 4054.079  | AK026725  | 2096.158  |
| NM_001652 | 788.693   | 956.789   | AF272371  | 51971.48  | 48990.254 | AK023454  | 1944.525  |
| NM_003822 | 887.452   | 527.141   | AK021848  | 820.856   | 368.683   | L23207    | 1211.661  |
| NM_004412 | 1535.326  | 1631.64   | NM_003704 | 2006.377  | 1058.964  | NM_018062 | 726.637   |
| NM_002050 | 960.919   | 1955.875  | AK023140  | 1935.408  | 958.801   | NM_007128 | 6839.809  |
| NM_007097 | 8848.093  | 7127.622  | AF084362  | 646.025   | 611.01    | AB002442  | 35.913    |
| D87446    | 4333.781  | 3867.04   | NM_001553 | 2324.855  | 1696.181  | NM_018627 | 426.826   |
| BF540935  | 1235.063  | 996.62    | NM_014173 | 16493.223 | 7209.667  | AK022210  | 720.495   |
| NM_004466 | 431.947   | 237.381   | NM_001731 | 15404.315 | 10575.321 | AL080085  | 2434.169  |
| NM_007081 | 1560.498  | 1674.996  | AL137506  | 1461.255  | 1177.581  | AK022307  | 574.893   |
| AB032964  | 1789.156  | 2287.968  | AK022961  | 1496.127  | 2617.698  | AF132201  | 534.811   |
| BE733605  | 1923.177  | 2033.785  | NM_007375 | 6382.21   | 5008.567  | NM_005172 | 2044.601  |
| NM_003334 | 11457.147 | 11275.73  | NM_014371 | 2598.201  | 3247.652  | AK025192  | 13850.719 |
| NM_002693 | 1209.972  | 1984.902  | AF290512  | 8399.766  | 11572.591 | NM_012403 | 1831.791  |
| NM_003671 | 600.314   | 747.295   | NM_006716 | 6269.684  | 4408.696  | AK023251  | 815.643   |
| AK026000  | 1552.463  | 3256.699  | AB002323  | 1273.66   | 2303.797  | NM_006158 | 2398.9    |
| NM_017833 | 1214.21   | 751.867   | AK022241  | 4568.591  | 5748.478  | NM_017633 | 2389.815  |
| NM_006675 | 2849.17   | 3460.909  | AK022587  | 9748.396  | 6051.245  | AF086186  | 2692.006  |
| NM_003022 | 4841.832  | 4557.613  | NM_005512 | 786.285   | 838.77    | NM_017802 | 699.686   |
| NM_004873 | 2934.906  | 4040.01   | NM_005506 | 2295.253  | 2726.487  | AF086234  | 1786.936  |

|           |           |           |           |           |           |           |           |
|-----------|-----------|-----------|-----------|-----------|-----------|-----------|-----------|
| NM_019842 | 1151.589  | 1787.76   | NM_005723 | 689.476   | 649.264   | AK023680  | 495.796   |
| NM_003144 | 22901.189 | 50086.398 | NM_020185 | 1237.429  | 697.564   | AF144056  | 880.513   |
| D63480    | 1419.552  | 2662.271  | NM_002832 | 21783.061 | 12651.141 | AL137480  | 6453.239  |
| NM_002965 | 1987.017  | 2158.85   | NM_017732 | 3469.519  | 1937.951  | D16473    | 1146.947  |
| NM_006475 | 553.376   | 451.872   | NM_002851 | 1513.689  | 559.459   | AB028968  | 758.845   |
| NM_004620 | 744.667   | 709.646   | NM_005339 | 9967.811  | 5764.159  | AF195764  | 5606.198  |
| AF087940  | 4861.415  | 2956.431  | NM_001906 | 1521.896  | 963.721   | S82164    | 414.911   |
| AJ277587  | 4120.28   | 2103.849  | NM_004142 | 628.47    | 494.499   | AK022838  | 2073.063  |
| D87432    | 2896.573  | 3664.605  | AF108138  | 2004.46   | 729.275   | AA700390  | 753.044   |
| Y18483    | 579.279   | 442.224   | BF340302  | 5908.716  | 3653.244  | Y18474    | 924.558   |
| AI565117  | 64842.445 | 57381.879 | AK024210  | 876.117   | 683.222   | AA436163  | 265.849   |
| AI299075  | 2861.511  | 3539.177  | NM_002276 | 3990.26   | 4245.125  | BI907981  | 312.059   |
| M59979    | 933.252   | 538.447   | AL133087  | 1279.423  | 1598.179  | BI603841  | 1868.304  |
| AB011098  | 1159.59   | 1434.489  | NM_018010 | 670.447   | 903.479   | BG696638  | 550.803   |
| AA609759  | 1546.117  | 799.791   | NM_002274 | 7382.554  | 12335.68  | M19888    | 413.624   |
| AA029418  | 4535.476  | 3956.009  | AL080200  | 682.499   | 954.905   | Y08136    | 692.251   |
| L20815    | 4182.006  | 3491.007  | BF337874  | 2963.46   | 5171.885  | AA156863  | 1698.868  |
| AI364483  | 10882.909 | 11504.032 | NM_003475 | 22216.234 | 26611.086 | BI915199  | 338.818   |
| AA456001  | 11783.471 | 10294.601 | NM_000243 | 4757.046  | 5986.039  | R82957    | 31787.254 |
| BI818232  | 384.609   | 293.662   | NM_004383 | 4061.14   | 6921.751  | BI830442  | 362.563   |
| AA451686  | 4109.592  | 5528.68   | NM_012256 | 18867.609 | 30116.322 | AA398951  | 743.552   |
| AA934644  | 410.177   | 611.748   | NM_006006 | 678.542   | 1804.299  | NM_004102 | 1262.523  |
| M87790    | 27885.439 | 26142.855 | NM_016325 | 1296.797  | 1270.67   | NM_004544 | 1809.619  |
| NM_001768 | 2720.046  | 2148.795  | NM_001604 | 1184.733  | 1124.341  | SR9       | 15618.216 |
| NM_000029 | 6931.049  | 6195.442  | NM_017656 | 1329.701  | 1589.964  | CY3Cy5    | 3538.617  |
| NM_000715 | 699.917   | 441.985   | X16282    | 6389.655  | 4472.322  | NM_001561 | 275.193   |
| AF035802  | 2908.373  | 2873.853  | AK022519  | 925.702   | 491.681   | NM_005160 | 589.432   |
| Y08145    | 416.805   | 317.536   | NM_014415 | 976.131   | 719.413   | X78817    | 5151.48   |
| M26123    | 1136.436  | 801.415   | S75264    | 11550.708 | 11649.037 | AB023135  | 430.968   |
| NM_001838 | 341.056   | 475.196   | AF027513  | 1733.622  | 797.067   | AY009401  | 650.36    |
| NM_019555 | 843.668   | 631.954   | NM_001379 | 1985.186  | 1110.72   | AF294628  | 187.079   |
| NM_012096 | 4166.894  | 4749.584  | NM_018664 | 1209.062  | 1962.324  | NM_001991 | 739.487   |
| NM_003905 | 7852.428  | 11427.586 | BC006428  | 2149.336  | 1638.877  | NM_000193 | 510.15    |
| L12052    | 981.92    | 2001.728  | NM_003926 | 7670.916  | 5437.326  | AF053952  | 2108.468  |
| AB028976  | 2300.155  | 3530.142  | NM_016047 | 13434.557 | 12235.772 | NM_003213 | 1914.39   |
| AK026337  | 750.378   | 644.304   | NM_001499 | 4249.628  | 4321.055  | NM_014044 | 973.262   |
| NM_015865 | 1692.669  | 1305.013  | BF030165  | 5211.408  | 5904.186  | NM_000900 | 1160.718  |
| NM_004626 | 701.971   | 1126.166  | NM_016732 | 11366.66  | 13380.212 | AK023684  | 2199.852  |
| NM_001895 | 407.275   | 706.682   | NM_014763 | 4583.938  | 4694.402  | NM_015057 | 60.088    |
| NM_006085 | 686.057   | 1576.307  | AF086534  | 450.624   | 646.078   | AF303398  | 4721.545  |
| AF072506  | 325.743   | 863.423   | AF070617  | 1552.334  | 2213.402  | NM_014810 | 1375.725  |
| AB033054  | 5135.503  | 6102.003  | NM_014918 | 8221.626  | 10078.785 | NM_004738 | 639.57    |
| NM_016122 | 882.285   | 1047.537  | NM_000152 | 3234.391  | 5614.948  | NM_007357 | 1449.908  |
| AF153330  | 874.233   | 1003.051  | D17222    | 9018.771  | 15590.047 | NM_003763 | 2019.128  |
| NM_001652 | 495.994   | 570.235   | NM_000154 | 1717.331  | 2807.028  | AK023448  | 489.252   |
| M81768    | 396.01    | 157.554   | NM_003549 | 270.138   | 252.349   | Y18213    | 528.81    |
| AK023749  | 639.62    | 667.527   | NM_000671 | 1166.77   | 1085.038  | NM_003283 | 866.161   |
| NM_002337 | 3065.673  | 3457.977  | NM_006297 | 5456.986  | 10408.688 | AF249898  | 883.767   |
| NM_013245 | 1359.373  | 2060.131  | X85325    | 34733.121 | 23489.842 | M69181    | 1003.947  |
| NM_006423 | 4568.202  | 3070.577  | AF318366  | 2753.384  | 2817.557  | NM_001311 | 351.748   |
| NM_004766 | 680.074   | 719.784   | D26018    | 2484.584  | 1415.549  | NM_017798 | 2352.017  |
| NM_005815 | 7802.333  | 7308.841  | AB037863  | 1068.441  | 656.576   | NM_012410 | 1419.799  |
| AK025520  | 2843.824  | 1688.45   | BC000363  | 522.396   | 490.507   | NM_001111 | 4061.721  |

|           |           |           |           |           |           |           |           |
|-----------|-----------|-----------|-----------|-----------|-----------|-----------|-----------|
| NM_004892 | 6854.505  | 4196.977  | NM_007237 | 1111.572  | 522.08    | NM_001611 | 522.429   |
| NM_014597 | 8012.412  | 7984.516  | NM_004608 | 1141.315  | 825.285   | AB018310  | 798.335   |
| AB002374  | 3208.04   | 3554.037  | NM_018257 | 6325.159  | 6186.866  | NM_015379 | 28236.838 |
| U17327    | 1344.524  | 1459.663  | NM_005919 | 1807.45   | 2098.51   | NM_002355 | 2279.849  |
| NM_017833 | 1721.917  | 1205.656  | AF086112  | 464.375   | 445.42    | AK026608  | 526.378   |
| NM_006675 | 3763.482  | 4265.512  | AL137254  | 1292.889  | 1177.429  | NM_020389 | 137.375   |
| NM_003022 | 8574.805  | 8439.684  | AK026359  | 576.002   | 617.797   | AB046836  | 479.66    |
| NM_004873 | 3084.783  | 3331.509  | AF085884  | 1690.351  | 2514.273  | AJ224166  | 279.204   |
| NM_019842 | 1188.529  | 1322.388  | AF085895  | 193.517   | 949.543   | AK026098  | 843.178   |
| NM_002951 | 11508.187 | 12794.712 | AL109711  | 434.775   | 605.214   | NM_012381 | 529.127   |
| NM_002317 | 1003.327  | 844.275   | S81522    | 2670.094  | 3828.403  | M20702    | 638.644   |
| NM_000320 | 4943.121  | 3214.11   | AF075070  | 448.685   | 905.377   | NM_006397 | 2413.143  |
| NM_003136 | 4623.414  | 3639.955  | S94541    | 1935.062  | 4050.179  | D83776    | 647.968   |
| NM_013328 | 11490.775 | 18222.211 | L36587    | 10446.534 | 22233.344 | NM_004088 | 404.324   |
| NM_000790 | 394.706   | 406.075   | AK024228  | 2509.523  | 5165.598  | NM_000138 | 1016.437  |
| NM_002660 | 1389.16   | 1738.712  | NM_016647 | 482.125   | 1420.048  | NM_018163 | 327.428   |
| NM_003706 | 1561.826  | 1230.483  | AK024695  | 1734.793  | 1529.181  | AK026362  | 1735.326  |
| AF182218  | 257.4     | 536.667   | AF038174  | 2564.646  | 2691.11   | NM_004968 | 1747.908  |
| NM_005218 | 1228.68   | 8117.37   | AF070632  | 823.202   | 1034.702  | NM_005908 | 661.523   |
| AL122071  | 666.133   | 568.737   | AF161359  | 759.413   | 935.856   | NM_004785 | 500.536   |
| NM_014913 | 14921.029 | 7274.917  | AL365520  | 2059.15   | 2147.653  | NM_002428 | 665.311   |
| NM_005864 | 24083.852 | 7399.835  | AL359338  | 2557.444  | 1527.539  | NM_014674 | 704.368   |
| NM_012341 | 2564.102  | 3121.744  | AK023623  | 2526.868  | 2485.367  | NM_018271 | 1223.87   |
| NM_003256 | 12846.977 | 14190.919 | AK021539  | 3098.283  | 3572.723  | NM_014652 | 362.59    |
| D87450    | 2957.032  | 2151.407  | AK021819  | 492.312   | 502.508   | AL133020  | 1743.014  |
| NM_017797 | 4733.477  | 5174.307  | AK026738  | 1484.481  | 1312.119  | NM_014044 | 1081.807  |
| AK021919  | 815.712   | 827.741   | AK025011  | 334.466   | 259.34    | NM_000900 | 911.531   |
| AF000562  | 1557.867  | 1145.515  | NM_005266 | 3191.16   | 3235.263  | AK023684  | 877.52    |
| AK025713  | 2035.668  | 1549.021  | AF085998  | 1133.51   | 1038.112  | Y18474    | 1092.107  |
| NM_002050 | 1237.509  | 1437.135  | AB030240  | 476.443   | 668.569   | AA436163  | 671.017   |
| NM_007097 | 9724.384  | 6791.074  | AK024681  | 859.84    | 1436.441  | BI907981  | 417.757   |
| D87446    | 4107.313  | 3466.556  | AF085990  | 1018.236  | 1091.975  | BI603841  | 1928.722  |
| BF540935  | 1635.762  | 1587.162  | NM_014907 | 5915.357  | 6914.639  | BG696638  | 685.281   |
| NM_004466 | 468.785   | 525.96    | AB007977  | 5327.718  | 11588.06  | M19888    | 567.664   |
| NM_007081 | 1298.745  | 1546.702  | NM_014221 | 2262.589  | 2393.092  | Y08136    | 805.43    |
| AB032964  | 1752.274  | 2024.376  | U58663    | 610.458   | 885.283   | AA156863  | 1708.722  |
| BE733605  | 1941.173  | 1448.547  | U84515    | 1210.494  | 1845.196  | BI915199  | 496.259   |
| NM_003334 | 8748.024  | 8313.005  | U92021    | 670.691   | 605.255   | R82957    | 24080.387 |
| NM_002693 | 1317.438  | 2005.669  | AF086106  | 457.838   | 177.017   | AA398951  | 642.224   |
| NM_003671 | 793.295   | 1082.702  | AF086143  | 5440.12   | 5767.165  | AI218732  | 611.23    |
| AK026000  | 1409.845  | 2198.771  | AK022364  | 417.809   | 381.254   | NM_004102 | 1636.375  |
| NM_005814 | 1194.138  | 672.08    | AK024244  | 3328.501  | 3370.565  | NM_004544 | 2334.979  |
| NM_000211 | 20745.428 | 12721.666 | AK023812  | 598.945   | 806.196   | NM_018890 | 11066.624 |
| AB037830  | 1511.637  | 1474.75   | AL390084  | 1703.178  | 1811.453  | NM_002652 | 600.571   |
| NM_015685 | 2086.043  | 1681.185  | AK023565  | 701.173   | 500.728   | NM_001311 | 403.237   |
| X03324    | 2844.454  | 2106.809  | AK021479  | 1075.704  | 1122.502  | NM_017798 | 1469.98   |
| NM_014934 | 364.872   | 561.132   | NM_003835 | 1877.424  | 1767.318  | NM_012410 | 308.303   |
| NM_003690 | 1690.024  | 1996.545  | AK000245  | 3086.831  | 2003.642  | AJ133439  | 484.783   |
| NM_000876 | 5323.644  | 3977.448  | AK024112  | 452.485   | 365.49    | NM_014395 | 1341.392  |
| NM_014214 | 3658.582  | 2248.352  | AF085900  | 19296.371 | 13677.987 | NM_005160 | 754.679   |
| NM_005232 | 265.107   | 473.899   | AK026195  | 565.954   | 525.805   | X78817    | 5363.939  |
| NM_002752 | 1443.741  | 2151.029  | AK022420  | 727.171   | 1173.501  | AB023135  | 624.008   |
| NM_013281 | 746.745   | 790.31    | AK023254  | 1199.168  | 1392.392  | AY009401  | 528.99    |

|           |           |           |           |           |           |           |           |
|-----------|-----------|-----------|-----------|-----------|-----------|-----------|-----------|
| Y11306    | 438.19    | 700.824   | AK023748  | 539.911   | 822.775   | NM_001991 | 614.124   |
| NM_016112 | 453.465   | 454.513   | AK023945  | 4737.462  | 8070.309  | NM_000193 | 513.502   |
| X85106    | 664.112   | 464.105   | AK022446  | 1462.165  | 2592.533  | NM_002448 | 1394.676  |
| NM_003931 | 1455.438  | 1297.639  | AK023352  | 676.567   | 1397.834  | AF053952  | 4507.471  |
| NM_012479 | 25328.17  | 24311.154 | AK023773  | 1100.74   | 1624.464  | NM_003213 | 2436.3    |
| AF250226  | 8880.346  | 9594.242  | AK024123  | 598.586   | 835.2     | BF184738  | 383.613   |
| NM_003217 | 21348.803 | 20655.354 | AF116709  | 1016.502  | 1332.666  | NM_015057 | 451.242   |
| AL157475  | 2908.26   | 2423.53   | AK025533  | 608.731   | 635.892   | AF303398  | 3813.873  |
| NM_006069 | 11775.337 | 9535.801  | AK021911  | 4033.004  | 4099.488  | NM_014810 | 1282.164  |
| NM_006534 | 5400.008  | 2525.287  | AF147430  | 932.327   | 1037.518  | NM_004738 | 762.045   |
| NM_017601 | 1810.745  | 1329.186  | AK025766  | 4654.792  | 4040.277  | NM_007357 | 812.994   |
| AF110265  | 8060.915  | 6351.178  | U35875    | 26833.119 | 25904.004 | NM_003763 | 1680.441  |
| AK021848  | 999.929   | 895.535   | AK021857  | 30588.391 | 25981.813 | AK023448  | 524.546   |
| NM_003704 | 1354.33   | 929.808   | AK022257  | 1825.058  | 1743.155  | Y18213    | 647.515   |
| AK023140  | 841.132   | 404.984   | BE887356  | 56633.16  | 49212.547 | NM_003283 | 611.231   |
| AF084362  | 306.791   | 381.684   | X84369    | 764.697   | 755.627   | AF249898  | 1655.277  |
| NM_001553 | 2289.631  | 2382.94   | AK023329  | 2160.56   | 1618.644  | M69181    | 1488.766  |
| NM_014173 | 14658.141 | 9183.592  | AK021773  | 4183.541  | 3669.853  | NM_002428 | 399.314   |
| NM_001731 | 16773.281 | 9289.323  | AK027074  | 2786.107  | 2077.976  | NM_014674 | 654.453   |
| AL137506  | 714.073   | 903.496   | AL365456  | 741.141   | 820.14    | NM_018271 | 1142.057  |
| AK022961  | 2913.276  | 2523.037  | NM_018038 | 967.413   | 672.493   | NM_000547 | 321.692   |
| NM_007375 | 3773.772  | 3967.224  | AK025048  | 491.005   | 263.776   | AL133020  | 1221.78   |
| NM_014371 | 2210.624  | 1818.765  | U84522    | 1186.847  | 704.806   | NM_001611 | 670.945   |
| AF290512  | 3975.598  | 4018.882  | AK021694  | 2334.387  | 1340.912  | AB018310  | 529.961   |
| NM_006716 | 3523.66   | 3435.874  | AF086013  | 940.49    | 726.147   | NM_015379 | 21576.387 |
| AB002323  | 1101.198  | 1066.647  | U84505    | 1704.722  | 1762.386  | AF144638  | 20187.424 |
| AK022241  | 1274.632  | 1516.079  | X81005    | 1283.3    | 1234.012  | NM_000742 | 516.669   |
| AK022587  | 2828.606  | 4137.441  | AL049265  | 1801.639  | 805.316   | NM_002355 | 2676.315  |
| NM_005512 | 464.152   | 515.906   | AL137635  | 556.474   | 356.957   | AK026608  | 556.068   |
| NM_005506 | 1314.577  | 1062.289  | AL049430  | 1632.097  | 924.506   | NM_004102 | 1082.462  |
| NM_005723 | 339.235   | 605.914   | AB015349  | 555.033   | 199.503   | NM_004544 | 1887.014  |
| AL137404  | 50930.414 | 49858.703 | AL079274  | 14157.487 | 16371.779 | NM_018890 | 9144.327  |
| NM_020185 | 1115.689  | 648.392   | AL137398  | 2119.65   | 1420.017  | NM_016204 | 531.9     |
| NM_002832 | 20486.584 | 19396.023 | Y12021    | 743.891   | 714.414   | AB046836  | 505.885   |
| NM_017732 | 4239.841  | 3308.823  | NM_013300 | 7457.523  | 7494.703  | AJ224166  | 318.636   |
| NM_002851 | 1852.59   | 1227.886  | AK026039  | 3090.574  | 1936.794  | AK026098  | 869.511   |
| NM_002071 | 524.948   | 717.32    | AF108756  | 7010.747  | 4606.21   | NM_012381 | 333.277   |
| NM_005339 | 11432.899 | 7078.656  | AF086394  | 618.514   | 401       | NM_006397 | 1696.363  |
| NM_001906 | 2767.569  | 2261.344  | NM_004075 | 4109.705  | 3388.713  | D83776    | 415.679   |
| NM_004142 | 511.228   | 377.712   | NM_001887 | 3186.543  | 1667.479  | NM_004088 | 402.433   |
| AF108138  | 989.057   | 849.656   | NM_006533 | 3701.002  | 2597.055  | NM_000138 | 911.747   |
| BF340302  | 2855.158  | 2075.024  | AK026747  | 3943.011  | 2671.052  | NM_018163 | 447.286   |
| AK024210  | 1107.1    | 1135.07   | AL110150  | 4267.315  | 4572.371  | AK026362  | 1557.004  |
| NM_002276 | 1825.961  | 2217.01   | NM_001998 | 5800.33   | 5351.458  | NM_004968 | 1920.08   |
| AL133087  | 1227.293  | 1005.018  | X87825    | 4342.085  | 2548.875  | NM_005908 | 696.701   |
| NM_018010 | 383.29    | 486.469   | NM_000914 | 419.355   | 274.612   | NM_004785 | 649.397   |
| NM_002274 | 4985.192  | 4275.222  | AK001285  | 13366.614 | 7885.519  | NM_000193 | 630.956   |
| AL080200  | 372.221   | 525.403   | D17215    | 7681.253  | 4900.754  | NM_002448 | 488.794   |
| BF337874  | 1403.808  | 1526.82   | BE781513  | 1047.847  | 1248.784  | AF053952  | 3471.78   |
| NM_003475 | 9669.272  | 9402.503  | NM_015714 | 26653.746 | 23846.168 | NM_003213 | 1078.868  |
| NM_000243 | 4570.841  | 3361.438  | AK075564  | 472.354   | 542.209   | BF184738  | 494.172   |
| NM_004383 | 5859.662  | 10892.744 | AK026219  | 1262.858  | 1159.604  | NM_014044 | 713.337   |
| NM_012256 | 5680.779  | 3478.679  | D28446    | 1317.467  | 1426.58   | NM_000900 | 1136.037  |

|           |           |           |            |           |           |           |           |
|-----------|-----------|-----------|------------|-----------|-----------|-----------|-----------|
| NM_006006 | 355.453   | 893.634   | AK024756   | 917.577   | 519.706   | AK023684  | 2120.483  |
| NM_016325 | 1699.184  | 867.249   | NM_017911  | 1144.727  | 916.833   | NM_000232 | 313.388   |
| NM_001604 | 1057.551  | 791.476   | AJ224168   | 777.64    | 1546.545  | AA700390  | 2363.438  |
| NM_017656 | 1659.712  | 1009.424  | AF147325   | 52789.805 | 51795.012 | Y18474    | 689.457   |
| X16282    | 6575.108  | 4240.17   | NM_014425  | 561.546   | 638.791   | BI603841  | 1523.996  |
| AK022519  | 1010.031  | 472.992   | NM_018497  | 407.764   | 257.714   | BG696638  | 389.23    |
| NM_014415 | 1388.431  | 978.727   | D87466     | 8437.27   | 6524.996  | M19888    | 317.226   |
| S75264    | 7311.906  | 6793.082  | CY3Cy5     | 4234.252  | 291.164   | Y08136    | 649.16    |
| AF027513  | 1152.288  | 945.105   | AA608568   | 5530.151  | 3774.57   | AA156863  | 1363.644  |
| NM_001375 | 1270.287  | 1357.864  | BG831301   | 20768.668 | 20375.334 | BI915199  | 311.578   |
| NM_018664 | 639.572   | 2131.035  | M14764     | 668.57    | 1232.108  | R82957    | 28159.443 |
| BC006428  | 2925.712  | 2314.832  | AA478647   | 3771.35   | 3485.016  | AA398951  | 862.796   |
| NM_005034 | 573.765   | 500.115   | M35999     | 967.001   | 1256.169  | AI218732  | 748.263   |
| NM_003926 | 3186.142  | 3528.579  | AW058501   | 716.529   | 771.761   | AF249898  | 1093.508  |
| NM_016047 | 20923.787 | 18302.984 | M81379     | 498.604   | 794.829   | M69181    | 1824.452  |
| NM_001495 | 4615.94   | 3084.288  | ID 2623896 | 4514.98   | 3553.592  | AK027224  | 458.522   |
| BF030165  | 10108.949 | 9613.382  | ID 2602214 | 3240.584  | 3603.253  | NM_001311 | 459.965   |
| NM_016732 | 4637.503  | 5028.867  | ID 2071279 | 8190.31   | 3008.176  | NM_017795 | 2762.639  |
| NM_014763 | 8604.029  | 10697.397 | L10709     | 1645.115  | 2502.473  | NM_012410 | 1400.259  |
| AF086534  | 480.219   | 272.764   | N35489     | 844.372   | 346.254   | NM_001111 | 3903.382  |
| AF070617  | 1903.056  | 1003.934  | AI928195   | 1138.739  | 479.742   | NM_018045 | 1489.562  |
| NM_014915 | 3684.391  | 4011.601  | AA458922   | 6574.172  | 3803.654  | AJ133439  | 83.851    |
| NM_000152 | 5670.163  | 3186.532  | NM_145655  | 2495.374  | 1140.009  | NM_014395 | 891.098   |
| D17222    | 16226.036 | 14003.781 | NM_021957  | 657.643   | 560.382   | NM_005160 | 539.48    |
| NM_000154 | 1734.922  | 1377.283  | SR2        | 62404.316 | 53851.336 | X78817    | 5161.998  |
| NM_000671 | 1343.004  | 1397.605  | SR4        | 18584.443 | 13201.322 | AY009401  | 532.679   |
| NM_006297 | 5614.271  | 6470.999  | SR6        | 2466.464  | 1840.459  | NM_001991 | 504.575   |
| X85325    | 44561.41  | 32911.887 | SR8        | 8749.182  | 21528.332 | NM_000742 | 425.932   |
| AF318366  | 4491.431  | 4574.102  | SR10       | 32123.332 | 6753.171  | NM_002355 | 1396.408  |
| AF182423  | 577.585   | 590.037   | CY3Cy5     | 2891.914  | 197.223   | AJ252011  | 63.476    |
| D26018    | 1288.942  | 1514.395  | NM_017725  | 1401.356  | 904.893   | NM_015057 | 300.398   |
| NM_007237 | 1221.365  | 685.705   | NM_005255  | 2790.177  | 2448.528  | AF303398  | 3711.921  |
| NM_004605 | 778.292   | 727.987   | NM_006174  | 742.582   | 731.027   | NM_014810 | 1301.732  |
| NM_018257 | 3244.603  | 3253.557  | NM_015850  | 5013.696  | 8481.031  | NM_004735 | 647.458   |
| NM_005915 | 1366.042  | 1526.394  | NM_004864  | 347.944   | 1756.813  | NM_007357 | 1271.998  |
| AF086112  | 563.874   | 372.071   | NM_002835  | 3922.019  | 4118.82   | NM_003763 | 1795.45   |
| AL137254  | 1165.2    | 764.608   | AK027377   | 678.344   | 1005.699  | AK023448  | 400.035   |
| AK026359  | 596.497   | 343.923   | NM_014685  | 60755.184 | 56037.23  | Y18213    | 645.604   |
| AF085884  | 1643.856  | 1131.927  | NM_016335  | 592.548   | 486.912   | NM_003283 | 884.147   |
| S81522    | 2439.187  | 3104.736  | NM_002487  | 1282.789  | 1009.995  | NM_018163 | 374.791   |
| S94541    | 746       | 753.707   | NM_005462  | 703.93    | 552.605   | AK026362  | 1904.824  |
| L36587    | 4624.907  | 9861.122  | NM_012315  | 1183.545  | 920.648   | NM_004965 | 1785.405  |
| NM_016647 | 337.195   | 886.433   | NM_006510  | 8384.064  | 6186.167  | NM_005905 | 690.082   |
| AK024695  | 1183.421  | 1014.677  | NM_003141  | 2196.571  | 2239.207  | NM_004785 | 371.054   |
| NM_018655 | 316.257   | 335.311   | NM_020245  | 5222.702  | 3460.679  | NM_002425 | 706.101   |
| AF038174  | 1165.239  | 1384.692  | NM_007175  | 1662.293  | 1803.547  | NM_014674 | 1551.988  |
| NM_013243 | 688.066   | 547.338   | AB046381   | 756.862   | 400.699   | NM_018271 | 1587.518  |
| AF161359  | 1070.929  | 1151.198  | AJ011497   | 4124.911  | 3617.542  | NM_014652 | 343.319   |
| AL365520  | 845.592   | 990.97    | NM_000335  | 1301.427  | 963.957   | AL133020  | 1851.063  |
| AL359338  | 1148.19   | 1347.537  | W61100     | 60161.602 | 56553.539 | BU565263  | 55452.309 |
| AK023623  | 1621.198  | 1455.641  | AF215923   | 1235.354  | 1651.601  | NM_005025 | 930.476   |
| AK021539  | 4310.679  | 3494.553  | U66621     | 5133.671  | 5723.585  | NM_001611 | 455.304   |
| AK021819  | 582.712   | 538.833   | NM_005720  | 15605.04  | 13264.314 | AB018310  | 686.068   |



|           |           |          |           |           |           |           |           |
|-----------|-----------|----------|-----------|-----------|-----------|-----------|-----------|
| AK026738  | 781.889   | 961.092  | AB040936  | 4027.512  | 3951.494  | NM_015379 | 25265.588 |
| AL157491  | 384.088   | 361.482  | AJ132086  | 1273.015  | 2093.059  | AF144638  | 19426.213 |
| NM_005266 | 1397.008  | 772.126  | U92816    | 10524.803 | 12814.587 | NM_001777 | 1483.347  |
| AF085998  | 894.718   | 963.688  | BC011987  | 16389.299 | 17416.73  | U79457    | 444.683   |
| AK024681  | 705.645   | 617.524  | NM_004106 | 29893.063 | 28506.818 | NM_014347 | 1800.871  |
| AF085990  | 575.118   | 391.45   | NM_003485 | 3235.565  | 1945.008  | NM_001296 | 601.753   |
| NM_014907 | 7082.151  | 8037.54  | NM_005038 | 4456.567  | 1999.156  | NM_004344 | 1088.004  |
| AB007977  | 3168.721  | 5077.136 | L03418    | 2342.504  | 2630.081  | AB046786  | 460.152   |
| NM_014221 | 1393.608  | 942.198  | NM_002415 | 61553.883 | 58853.836 | NM_016620 | 4778.913  |
| U84515    | 985.429   | 708.585  | NM_006332 | 2976.7    | 1260.836  | NM_018890 | 12293.863 |
| AF086143  | 3201.513  | 4269.305 | NM_000916 | 3177.91   | 2386.519  | NM_016204 | 590.091   |
| AK022239  | 872.05    | 779.337  | NM_018663 | 4461.153  | 3060.031  | AB046836  | 619.759   |
| AK024674  | 492.605   | 293.966  | NM_145904 | 7117.793  | 7238.502  | NM_017816 | 1034.311  |
| AK024244  | 2654.713  | 1900.282 | NM_006796 | 10678.033 | 7785.683  | AJ224166  | 458.783   |
| AK023812  | 464.366   | 467.983  | NM_000706 | 1179.786  | 1093.497  | AK026098  | 886.961   |
| AL390084  | 1031.325  | 675.1    | NM_015941 | 1320.071  | 660.846   | NM_012381 | 480.814   |
| AK021479  | 880.226   | 495.456  | NM_003655 | 3953.317  | 3493.529  | M20702    | 186.313   |
| NM_003835 | 1182.702  | 767.797  | NM_014837 | 3364.573  | 1826.487  | NM_006397 | 2259.13   |
| AK000245  | 1414.717  | 1197.751 | AK025111  | 1056.221  | 808.708   | D83776    | 663.269   |
| AF118072  | 610.504   | 627.571  | NM_001732 | 2031.436  | 1859.162  | NM_004088 | 516.055   |
| AF085900  | 9073.166  | 7797.03  | NM_018690 | 9658.208  | 6010.811  | NM_002180 | 453.184   |
| AK022420  | 563.754   | 873.968  | NM_000860 | 1695.674  | 1265.44   | NM_000138 | 883.284   |
| AK023254  | 534.425   | 368.165  | AB037798  | 2888.349  | 1510.625  | BC032460  | 2954.847  |
| AK023945  | 5286.084  | 4785.319 | AF272663  | 14507.307 | 15755.526 | NM_014071 | 2118.501  |
| AK022446  | 645.197   | 586.987  | NM_012190 | 1034.79   | 1206.816  | AK024404  | 830.615   |
| AK023352  | 381.536   | 392.093  | AF277719  | 1187.675  | 1028.604  | NM_000213 | 9869.062  |
| AK023773  | 676.815   | 573.478  | NM_000791 | 1786.137  | 1715.874  | BE906107  | 6295.25   |
| AF116709  | 737.916   | 961.095  | NM_003681 | 1657.862  | 1903.84   | NM_015516 | 954.142   |
| AK025533  | 669.933   | 963.448  | NM_004800 | 12804.52  | 5323.055  | NM_005211 | 745.425   |
| AK021911  | 5559.984  | 4466.453 | AB037738  | 330.519   | 538.91    | NM_004857 | 2768.396  |
| D17225    | 397.803   | 355.428  | NM_014954 | 30606.596 | 36722.18  | NM_003253 | 444.562   |
| AF147430  | 1292.513  | 1240.354 | NM_014909 | 4746.583  | 4484.229  | NM_013285 | 1105.871  |
| AK025766  | 2993.477  | 4489.84  | X91148    | 2370.665  | 4309.396  | NM_002872 | 1387.369  |
| U35875    | 13629.4   | 8865.018 | NM_015700 | 9642.293  | 7246.897  | NM_000490 | 470.64    |
| AK021857  | 16598.365 | 15253.1  | NM_019087 | 3392.641  | 2721.419  | NM_004839 | 825.035   |
| AK022257  | 1554.89   | 896.35   | NM_016322 | 640.736   | 551.334   | NM_012193 | 702.3     |
| BE887356  | 30160.186 | 22627.76 | NM_005072 | 791.978   | 737.955   | NM_003405 | 1297.349  |
| X84369    | 480.979   | 814.414  | AF308802  | 1109.608  | 1256.796  | NM_004720 | 1688.933  |
| AK023329  | 2268.967  | 2666.126 | S76984    | 14463.538 | 10393.449 | NM_001057 | 915.579   |
| AK021773  | 1368.283  | 902.782  | NM_014495 | 64917.172 | 63591.93  | AF272381  | 570.686   |
| AK027074  | 1904.675  | 1944.353 | NM_014081 | 1331.278  | 901.736   | NM_004524 | 312.539   |
| AL365456  | 549.867   | 640.493  | NM_005651 | 626.389   | 631.591   | NM_006315 | 767.327   |
| NM_018038 | 415.032   | 582.416  | NM_007195 | 4403.159  | 2861.719  | NM_018401 | 401.459   |
| U84522    | 2469.095  | 2097.951 | AK023337  | 4101.755  | 2787.55   | NM_005163 | 351.907   |
| AK021694  | 860.016   | 867.741  | NM_013275 | 8218.128  | 5636.039  | NM_007273 | 7481.993  |
| AF086013  | 453.155   | 442.139  | AB037842  | 485.501   | 255.153   | BE894943  | 265.503   |
| U84505    | 3295.591  | 2900.984 | NM_019011 | 2286.183  | 1339.986  | NM_016422 | 639.901   |
| X81005    | 950.264   | 668.997  | AF459094  | 5889.809  | 3910.611  | NM_017878 | 1716.517  |
| AL049265  | 2178.753  | 747.276  | NM_003157 | 2103.067  | 1759.649  | NM_004494 | 28156.459 |
| AL137635  | 454.797   | 386.247  | NM_004938 | 2175.052  | 1844.496  | NM_005643 | 8525.613  |
| AL049430  | 2173.364  | 1737.34  | NM_014326 | 890.992   | 639.391   | NM_003592 | 777.922   |
| AK021461  | 481.168   | 442.177  | NM_004448 | 719.03    | 781.323   | NM_014953 | 1143.998  |
| AB015349  | 396.69    | 455.263  | NM_015981 | 1700.516  | 1365.469  | NM_016195 | 1375.873  |

|            |           |           |            |           |           |           |           |
|------------|-----------|-----------|------------|-----------|-----------|-----------|-----------|
| AL079274   | 10075.622 | 11868.826 | NM_000455  | 3716.861  | 3846.443  | NM_004404 | 1246.392  |
| AL137398   | 1379.72   | 1798.376  | NM_014791  | 9917.912  | 6460.549  | NM_002960 | 2540.038  |
| Y12021     | 818.91    | 839.405   | NM_003318  | 2586.005  | 1912.315  | NM_006790 | 439.29    |
| BC016172   | 287.01    | 229.764   | NM_004362  | 5958.992  | 12320.63  | AL117522  | 3081.614  |
| AF127771   | 641.676   | 356.651   | NM_000182  | 18494.846 | 20345.279 | NM_019061 | 920.61    |
| NM_013300  | 6391.267  | 8887.142  | AK023384   | 1471.729  | 2125.278  | AB033007  | 1538.94   |
| AK026039   | 4660.255  | 3382.527  | NM_016026  | 4598.117  | 5583.799  | NM_003781 | 467.807   |
| AF108756   | 11179.442 | 8624.02   | AJ011497   | 3212.134  | 2998.085  | NM_000504 | 243.495   |
| NM_004075  | 3022.637  | 2272.294  | NM_003018  | 750.523   | 659.381   | NM_004716 | 4915.652  |
| NM_001887  | 2419.402  | 1444.541  | NM_000336  | 1022.913  | 1910.383  | D29810    | 1120.49   |
| NM_006533  | 2470.868  | 926.788   | W61100     | 65053.695 | 62830.242 | NM_000128 | 1000.403  |
| AK026747   | 3206.671  | 2743.387  | AA608568   | 5029.347  | 5210.761  | AB002384  | 799.95    |
| AL110150   | 3414.435  | 3532.93   | BG831301   | 26920.146 | 33033.426 | NM_018437 | 314.592   |
| NM_001998  | 3364.158  | 2068.361  | M14764     | 664.025   | 608.512   | NM_000422 | 667.86    |
| X87825     | 2773.482  | 1946.152  | AA478647   | 3792.85   | 2475.579  | AK023164  | 631.938   |
| AK001285   | 13154.12  | 10821.95  | M35999     | 564.568   | 725.367   | NM_005379 | 661.861   |
| D17215     | 5825.333  | 2507.878  | AW058501   | 799.606   | 599.584   | AK027121  | 1270.606  |
| BE781513   | 525.75    | 567.77    | M81379     | 459.265   | 605.275   | NM_017433 | 446.006   |
| NM_015714  | 14499.872 | 12976.137 | ID 2623896 | 5854.747  | 2278.625  | AL117661  | 900.659   |
| AK075564   | 896.032   | 1098.157  | ID 2602214 | 4619.893  | 3551.438  | X64643    | 863.24    |
| AK026219   | 628.994   | 629.098   | ID 2071279 | 9691.29   | 7570.867  | NM_005380 | 1351.476  |
| D28446     | 1242.603  | 1690.519  | L10709     | 2328.099  | 4448.189  | D70835    | 19794.053 |
| AK024756   | 1465.097  | 1245.981  | N35489     | 1089.652  | 620.051   | NM_001518 | 3186.246  |
| NM_017911  | 986.886   | 1022.367  | AI928195   | 1395.173  | 931.978   | NM_003412 | 9151.063  |
| AJ224168   | 1958.808  | 2329.457  | AA458922   | 6279.289  | 4880.267  | NM_018336 | 577.811   |
| S69873     | 659.307   | 550.547   | NM_145659  | 2375.684  | 2185.721  | AK022668  | 978.527   |
| AF147325   | 59950.75  | 46736.508 | NM_021957  | 803.605   | 781.732   | AW975132  | 1551.358  |
| NM_003774  | 803.725   | 743.277   | NM_001719  | 4729.016  | 6160.595  | NM_006051 | 2789.729  |
| D87466     | 5920.494  | 5110.349  | AL080062   | 726.907   | 1203.755  | NM_018427 | 1053.089  |
| CY3Cy5     | 4833.014  | 387.031   | NM_145904  | 6693.208  | 6786.266  | NM_014663 | 774.995   |
| AA608568   | 2163.438  | 5135.141  | NM_006796  | 9891.448  | 8949.811  | AF007217  | 478.038   |
| BG831301   | 29846.021 | 39616.16  | NM_000706  | 1273.934  | 1117.154  | AB037753  | 633.345   |
| AA478647   | 4471.488  | 4474.958  | NM_015941  | 1682.582  | 1272.564  | NM_004674 | 464.145   |
| M35999     | 778.189   | 815.704   | NM_003655  | 4873.911  | 7246.276  | AB037801  | 2439.749  |
| AW058501   | 801.272   | 595.468   | NM_014837  | 4061.187  | 5968.433  | AL080159  | 5402.618  |
| ID 2602214 | 2595.43   | 2114.572  | NM_017729  | 1386.733  | 1530.851  | NM_017823 | 12387.595 |
| ID 2071279 | 6701.537  | 3441.678  | NM_005259  | 3398.65   | 4553.755  | U30828    | 1441.129  |
| L10709     | 1569.279  | 2935.936  | NM_002840  | 560.881   | 1348.707  | AF085886  | 20743.602 |
| N35489     | 1146.704  | 1184.542  | NM_006174  | 637.307   | 529.737   | AK023828  | 1733.437  |
| AI928195   | 953.584   | 1181.418  | NM_015850  | 6420.221  | 4599.159  | NM_014612 | 2894.469  |
| AA482489   | 331.997   | 327.812   | NM_004864  | 636.28    | 985.746   | AK021815  | 541.701   |
| AA458922   | 5197.805  | 7005.12   | NM_002838  | 3690.113  | 2189.422  | NM_016641 | 570.199   |
| NM_145659  | 2049.385  | 1974.878  | NM_014686  | 60046.324 | 56468.695 | AB018010  | 262.264   |
| NM_021957  | 831.922   | 573.966   | BF528358   | 740.039   | 664.2     | NM_014610 | 2922.258  |
| SR2        | 60576.039 | 50706.863 | NM_016339  | 532.307   | 460.519   | NM_000689 | 377.873   |
| SR4        | 18263.395 | 15376.378 | NM_013340  | 483.006   | 345.223   | NM_006621 | 1904.599  |
| SR6        | 2607.518  | 1802.57   | NM_005462  | 761.845   | 1059.829  | BF347398  | 935.174   |
| SR8        | 9397.512  | 19721.684 | NM_012319  | 1157.952  | 1820.864  | AK026762  | 676.685   |
| SR10       | 31072.107 | 8622.205  | NM_006510  | 8718.11   | 8555.334  | L48516    | 873.598   |
| CY3Cy5     | 3464.12   | 265.301   | NM_003141  | 2160.036  | 1784.818  | NM_016648 | 3364      |
| NM_017729  | 1410.095  | 1638.003  | NM_020245  | 4808.806  | 3273.647  | AF083930  | 585.596   |
| NM_005259  | 2264.49   | 2838.462  | NM_007175  | 1643.852  | 1815.929  | AF086152  | 1023.752  |
| NM_015850  | 4169.109  | 4298.899  | X91148     | 699.715   | 735.983   | AL157505  | 1276.63   |

|           |           |           |           |           |           |           |          |
|-----------|-----------|-----------|-----------|-----------|-----------|-----------|----------|
| NM_004864 | 745.851   | 1592.82   | NM_01570C | 10047.034 | 7017.952  | NM_00719C | 1545.317 |
| NM_00283E | 5087.739  | 3553.962  | NM_019087 | 3632.887  | 2527.787  | AF043897  | 914.441  |
| BF528358  | 1361.644  | 695.597   | NM_01632Z | 921.511   | 1014.212  | U79246    | 486.622  |
| NM_002487 | 740.853   | 477.944   | NM_00507Z | 914.454   | 1086.777  | AF052140  | 482.874  |
| NM_01334C | 507.258   | 590.784   | AF215923  | 1090.916  | 2200.847  | AF052127  | 2956.793 |
| NM_00546Z | 1055.053  | 1219.98   | U66621    | 8650.881  | 16206.189 | AK024261  | 396.871  |
| NM_01231E | 1507.951  | 2386.663  | NM_00572C | 15560.395 | 19327.279 | AF052150  | 375.749  |
| AK026235  | 350.706   | 895.294   | AB040936  | 632.339   | 473.568   | AF086481  | 720.424  |
| NM_00651C | 8286.21   | 8644.878  | U61736    | 736.606   | 614.421   | AK022441  | 70.043   |
| NM_003141 | 2763.558  | 1903.467  | AJ132086  | 1233.246  | 1402.166  | AK022158  | 440.447  |
| NM_02024E | 4664.552  | 3600.339  | U92816    | 13686.551 | 13805.627 | NM_016947 | 9290.073 |
| NM_00717E | 1387.925  | 1433.964  | BC011987  | 19959.361 | 21079.389 | AL359940  | 544.254  |
| AB046381  | 578.472   | 573.164   | NM_00410E | 31716.779 | 27143.428 | NM_01828E | 144.714  |
| AJ011497  | 2695.736  | 1354.813  | NM_00348E | 3970.059  | 3263.697  | AK024925  | 5162.412 |
| NM_00301E | 697.541   | 599.197   | NM_00503E | 4993.222  | 2313.982  | AL049460  | 3098.358 |
| NM_00033E | 987.607   | 934.718   | L03418    | 2722.622  | 5996.019  | AK022396  | 812.794  |
| AF215923  | 2176.93   | 2144.734  | M95923    | 1620.652  | 1491.964  | AF075113  | 233.461  |
| U66621    | 6804.727  | 6067.77   | NM_00241E | 58616.035 | 57672.027 | AF086037  | 484.663  |
| NM_00572C | 24516.227 | 23080.084 | NM_00633Z | 2378.526  | 727.32    | AK022892  | 1196.349 |
| AB023161  | 740.269   | 920.822   | NM_00091E | 3217.819  | 2991.059  | Z36807    | 3508.989 |
| U61736    | 914.961   | 1098.569  | NM_01866Z | 5071.633  | 5402.178  | NM_01793E | 800.482  |
| AJ132086  | 1540.882  | 1931.798  | NM_014791 | 11169.338 | 7327.254  | AK021837  | 1159.563 |
| U92816    | 9100.495  | 7792.957  | NM_00331E | 2806.337  | 2290.115  | AK002088  | 5587.215 |
| NM_00410E | 44569.535 | 19630.24  | NM_00436Z | 5130.966  | 7426.557  | AK026765  | 290.465  |
| NM_00348E | 3420.083  | 2439.531  | NM_00018Z | 21179.465 | 17475.424 | AL080191  | 1966.625 |
| NM_00503E | 3599.306  | 2165.672  | AK023384  | 1899.321  | 2132.673  | AK021639  | 3789.665 |
| L03418    | 10731.816 | 6760.226  | NM_01602E | 5457.827  | 6291.9    | AK023189  | 259.324  |
| M95923    | 1135.04   | 894.325   | AK025111  | 1036.499  | 1109.059  | AK023464  | 696.877  |
| NM_00241E | 42194.996 | 50933.617 | NM_00173Z | 2358.571  | 3043.436  | AK024157  | 377.447  |
| NM_00633Z | 8460.369  | 850.684   | NM_01869C | 10302.845 | 8868.618  | AK023563  | 191.374  |
| NM_00091E | 2268.673  | 2088.559  | NM_00086C | 2404.272  | 2310.188  | AK023905  | 785.355  |
| NM_01866Z | 1863.759  | 3530.458  | AB037798  | 3207.456  | 2590.581  | AK024231  | 2801.664 |
| NM_145904 | 9100.386  | 12969.078 | NM_00078C | 613.057   | 525.52    | L07394    | 2005.449 |
| NM_00679E | 6097.946  | 5497.793  | AF272663  | 16933.697 | 15479.521 | AK056133  | 480.756  |
| NM_00070E | 1330.856  | 1099.037  | NM_01219C | 1317.552  | 1326.241  | NM_01784E | 2491.383 |
| NM_015941 | 3025.158  | 1495.926  | AB033015  | 659.068   | 632.4     | AF130080  | 553.506  |
| NM_00365E | 3484.598  | 4813.882  | AF277719  | 1255.501  | 1317.167  | AK026006  | 559.773  |
| AK025111  | 922.599   | 830.241   | NM_000791 | 2076.369  | 2664.853  | NM_01908E | 8364.656 |
| NM_00173Z | 1115.672  | 1098.66   | NM_003681 | 2000.415  | 3286.143  | AL122072  | 1606.094 |
| NM_01869C | 10194.403 | 6533.144  | NM_00480C | 15865.927 | 12140.447 | AK026221  | 411.262  |
| AB037798  | 2529.054  | 2297.32   | AB037738  | 447.618   | 655.729   | AK026403  | 540.219  |
| NM_00078C | 733.288   | 750.197   | NM_004677 | 266.568   | 262.911   | AL359058  | 442.751  |
| AF272663  | 3624.641  | 4052.79   | NM_014954 | 34865.258 | 30764.063 | AK026237  | 992.5    |
| NM_01219C | 1574.971  | 1349.7    | NM_01490E | 6202.637  | 5699.736  | AK026655  | 60.155   |
| NM_000791 | 2574.484  | 2328.342  | NM_14565E | 3085.476  | 4157.77   | AF129926  | 318.283  |
| NM_003681 | 3412.584  | 3097.592  | NM_021957 | 1670.014  | 1630.693  | AK025822  | 841.769  |
| NM_00480C | 13617.337 | 9413.665  | NM_00171E | 6712.651  | 11953.095 | AL360140  | 918.709  |
| AB037738  | 530.478   | 486.049   | AL080062  | 1166.943  | 1999.321  | AF201937  | 4430.159 |
| NM_014954 | 17865.879 | 20077.225 | AF308802  | 1648.868  | 2244.933  | AL390128  | 1148.376 |
| NM_01490E | 2950.967  | 2957.649  | S76984    | 16748.305 | 16771.264 | AL157429  | 2286.668 |
| X91148    | 766.266   | 625.641   | NM_01449E | 62594.375 | 79620.547 | NM_012071 | 6859.522 |
| NM_01570C | 7039.197  | 6367.274  | NM_014081 | 1760.277  | 2107.166  | AF055018  | 5143.447 |
| NM_019087 | 4905.946  | 2900.807  | NM_005651 | 1596.891  | 1895.09   | AF070599  | 2964.538 |

|            |           |           |            |           |           |            |           |
|------------|-----------|-----------|------------|-----------|-----------|------------|-----------|
| NM_016322  | 757.898   | 658.2     | NM_007195  | 2146.321  | 2848.195  | NM_00545C  | 472.723   |
| NM_005072  | 935.298   | 654.033   | AK023337   | 5352.496  | 7659.483  | NM_005525  | 308.368   |
| AF308802   | 1647.472  | 953.256   | NM_013275  | 12784.601 | 19716.785 | AK001918   | 788.062   |
| S76984     | 17288.811 | 11315.447 | AB037842   | 1317.373  | 1534.697  | NM_018635  | 7481.144  |
| NM_014495  | 61979.199 | 53765.676 | U92074     | 407.373   | 194.022   | AF086048   | 2429.446  |
| NM_014081  | 1233.493  | 1371.6    | NM_019011  | 2997.062  | 3517.672  | L15616     | 1511.972  |
| NM_005651  | 831.559   | 782.173   | AF459094   | 6982.997  | 6526.461  | AB019565   | 7494.343  |
| AK023699   | 391.21    | 574.446   | NM_003157  | 2507.922  | 3209.529  | D16914     | 29417.4   |
| NM_005418  | 1007.94   | 627.484   | NM_004938  | 2498.083  | 1557.436  | Y10529     | 1060.096  |
| NM_007195  | 1196.969  | 1622.559  | NM_014326  | 850.14    | 902.529   | NM_000833  | 737.721   |
| AK023337   | 3310.339  | 3781.094  | NM_000455  | 4730.092  | 7301.226  | NM_000283  | 784.251   |
| NM_013275  | 8735.285  | 7384.268  | NM_012319  | 1704.177  | 2175.849  | NM_01246C  | 461.847   |
| AB037842   | 758.15    | 637.509   | AK026235   | 914.784   | 1140.622  | NM_012118  | 1536.663  |
| NM_019011  | 1972.927  | 2034.202  | NM_00651C  | 12540.11  | 19536.701 | AK001133   | 335.116   |
| AF459094   | 3106.703  | 3844.117  | NM_003141  | 4067.135  | 5431.682  | AK024092   | 621.639   |
| NM_003157  | 1638.615  | 1844.085  | NM_020245  | 6718.874  | 7342.352  | AK002044   | 1298.404  |
| NM_004938  | 1810.715  | 1581.064  | NM_007175  | 2250.708  | 2600.656  | U90904     | 2266.782  |
| NM_014326  | 736.261   | 749.059   | AB046381   | 1834.636  | 1686.76   | AF088053   | 1284.415  |
| NM_004448  | 580.687   | 448.145   | AJ011497   | 5085.68   | 5986.329  | AL133662   | 740.877   |
| NM_015981  | 1344.949  | 1147.957  | NM_003018  | 1596.632  | 1516.747  | U90903     | 367.148   |
| NM_000455  | 3207.718  | 3850.467  | NM_000336  | 1998.913  | 1894.835  | AF278760   | 412.409   |
| NM_014791  | 3975.104  | 4335.079  | W61100     | 65080.543 | 64202.008 | X58061     | 471.759   |
| NM_003318  | 1518.222  | 1265.833  | AA608568   | 5560.356  | 5827.228  | AB032954   | 1241.928  |
| NM_004362  | 2090.79   | 2323.429  | BG831301   | 29778.439 | 43435.297 | NM_006003  | 6445.37   |
| NM_000182  | 10588.939 | 17133.117 | M14764     | 827.063   | 932.859   | AL110197   | 1575.364  |
| AK023384   | 1288.229  | 1268.496  | AA478647   | 5040.902  | 5167.16   | AF085995   | 1011.655  |
| NM_016026  | 2655.256  | 4051.567  | M35999     | 617.212   | 1788.353  | CY3Cy5     | 1021.732  |
| AB046381   | 657.076   | 754.979   | AW058501   | 1253.838  | 776.785   | AA029300   | 777.271   |
| AJ011497   | 3313.015  | 2089.546  | M81379     | 658.099   | 1106.482  | BG708842   | 6457.041  |
| NM_003018  | 883.681   | 708.595   | ID 2623896 | 5381.57   | 4671.706  | M19723     | 12630.061 |
| NM_000336  | 1165.111  | 1120.298  | ID 2602214 | 4515.443  | 4863.672  | X06256     | 1162.402  |
| AA608568   | 2416.597  | 4785.143  | ID 2071279 | 9345.849  | 5309.954  | AA709271   | 298.222   |
| BG831301   | 29568.217 | 36807.16  | L10709     | 2156.645  | 4648.457  | M34057     | 564.434   |
| M14764     | 1051.589  | 937.278   | N35489     | 1500.117  | 1028.935  | ID 1984668 | 1366.779  |
| AA478647   | 5033.393  | 3943.886  | AA482489   | 412.85    | 1018.782  | H-430185 N | 649.671   |
| M35999     | 852.047   | 987.343   | AA458922   | 6942.585  | 10576.076 | D16583     | 898.887   |
| AW058501   | 611.397   | 665.095   | M95923     | 1593.593  | 1690.738  | H44051     | 220.806   |
| M81379     | 749.562   | 598.983   | NM_002415  | 64458.797 | 58374.109 | AA831880   | 302.301   |
| ID 2623896 | 3693.413  | 3094.219  | NM_006332  | 2646.577  | 1152.645  | T64880     | 742.756   |
| ID 2602214 | 2902.013  | 2161.514  | NM_000916  | 3428.398  | 3853.149  | NM_020967  | 337.265   |
| ID 2071279 | 6296.968  | 3475.268  | NM_018663  | 4879.802  | 3151.492  | SR2        | 44832.039 |
| L10709     | 1817.605  | 2944.147  | NM_145904  | 6614.422  | 8364.388  | SR4        | 10166.1   |
| N35489     | 1099.999  | 974.979   | NM_006796  | 11777.988 | 10791.885 | SR6        | 1586.566  |
| AI928195   | 905.326   | 920.958   | NM_000706  | 1761.192  | 1652.772  | SR8        | 6147.218  |
| AA482489   | 468.167   | 542.831   | NM_015941  | 1943.458  | 1831.688  | SR10       | 19499.734 |
| AA458922   | 5523.035  | 7360.198  | NM_003655  | 4107.05   | 5019.029  | CY3Cy5     | 2365.354  |
| NM_145655  | 2328.293  | 2285.626  | NM_014837  | 3717.052  | 3735.054  | NM_005027  | 846.739   |
| NM_021957  | 801.706   | 838.775   | NM_017729  | 1636.555  | 1319.466  | NM_004612  | 1296.946  |
| NM_001719  | 3668.389  | 3715.224  | NM_005259  | 3632.851  | 4464.628  | NM_005608  | 435.477   |
| AL080062   | 858.481   | 1206.936  | NM_006174  | 1376.472  | 1193.143  | NM_001106  | 333.288   |
| NM_145904  | 9299.994  | 14504.688 | NM_01585C  | 6070.193  | 7986.856  | NM_015583  | 394.922   |
| NM_006796  | 6337.648  | 6037.457  | NM_004864  | 1171.124  | 1623.067  | NM_01849C  | 444.516   |
| NM_000706  | 1538.689  | 1215.698  | NM_002838  | 4929.192  | 4618.627  | NM_006245  | 1628.296  |

|           |           |           |           |           |           |           |           |
|-----------|-----------|-----------|-----------|-----------|-----------|-----------|-----------|
| NM_015941 | 3325.459  | 1843.415  | NM_016339 | 1071.853  | 1062.472  | NM_005103 | 879.626   |
| NM_014837 | 2219.606  | 2563.208  | NM_013340 | 697.205   | 1047.015  | NM_004822 | 324.945   |
| NM_017729 | 1410.65   | 1369.607  | NM_005462 | 1106.419  | 1634.006  | AK022349  | 1264.923  |
| NM_005259 | 2085.533  | 2378.616  | NM_014954 | 28278.906 | 38226     | NM_004973 | 730.55    |
| NM_002840 | 550.053   | 2256.678  | NM_000807 | 3236.944  | 3993.391  | NM_007245 | 590.839   |
| NM_006174 | 686.804   | 520.062   | NM_014909 | 5746.779  | 6752.778  | NM_001890 | 482.104   |
| NM_015850 | 4700.755  | 4243.75   | X91148    | 819.013   | 970.486   | NM_001286 | 276.736   |
| NM_004864 | 564.812   | 1030.288  | NM_015700 | 10518.838 | 12123.184 | NM_014648 | 275.669   |
| NM_002838 | 4226.907  | 2342.417  | NM_019087 | 3379.099  | 2890.93   | NM_000951 | 646.156   |
| NM_014686 | 54767.156 | 46588.711 | NM_016322 | 859.036   | 1019.509  | X52599    | 387.744   |
| BF528358  | 874.773   | 776.317   | NM_005072 | 848.753   | 743.144   | AK000158  | 2598.04   |
| NM_016339 | 539.758   | 484.229   | AF215923  | 1231.169  | 1410.344  | NM_005769 | 319.522   |
| NM_002487 | 651.412   | 677.996   | U66621    | 3331.733  | 3788.094  | AK024500  | 3545.254  |
| NM_013340 | 576.011   | 582.377   | NM_005720 | 16681.73  | 18950.611 | NM_002564 | 3003.116  |
| NM_005462 | 1573.871  | 1453.369  | AB040936  | 916.149   | 614.49    | NM_000963 | 1035.683  |
| NM_012319 | 1283.105  | 2057.358  | U61736    | 968.497   | 830.482   | NM_013308 | 1222.921  |
| AK026235  | 451.882   | 1606.003  | NM_005038 | 4881.228  | 3443.559  | AF027302  | 1177.567  |
| NM_006510 | 8201.362  | 8587.646  | L03418    | 2913.352  | 9082.956  | NM_002852 | 1490.451  |
| NM_003141 | 2485.716  | 1979.007  | NM_003157 | 2739.399  | 3108.237  | NM_001817 | 1154.011  |
| NM_020245 | 4545.678  | 3705.197  | NM_004938 | 2680.06   | 2367.798  | AF063611  | 1014.278  |
| NM_007175 | 1281.459  | 1725.876  | NM_014326 | 1227.084  | 1066.994  | NM_006039 | 446.276   |
| X91148    | 809.61    | 794.035   | NM_004448 | 886.887   | 1387.413  | NM_002089 | 313.917   |
| NM_015700 | 8187.465  | 6354.896  | NM_015981 | 2452.641  | 2994.97   | NM_014656 | 1114.305  |
| NM_019087 | 4610.667  | 2932.887  | NM_000455 | 4387.445  | 4947.53   | NM_002076 | 1163.626  |
| NM_016322 | 641.84    | 1006.591  | NM_014791 | 10978.752 | 9404.854  | X05299    | 1546.777  |
| NM_005072 | 784.465   | 929.941   | NM_003318 | 2860.642  | 2629.799  | BM468475  | 453.958   |
| AF215923  | 2163.371  | 2246.52   | NM_004362 | 3525.558  | 6022.874  | NM_000318 | 1104.666  |
| U66621    | 7194.963  | 7161.922  | NM_000182 | 19053.775 | 19626.426 | NM_002060 | 1008.65   |
| NM_005720 | 24520.82  | 23603.898 | AK023384  | 1903.608  | 1947.627  | AK001230  | 620.324   |
| AB023161  | 271.447   | 373.327   | NM_016026 | 4309.117  | 4573.42   | NM_014680 | 2419.172  |
| U61736    | 654.424   | 525.503   | AK025111  | 749.669   | 698.965   | NM_006224 | 12849.474 |
| AJ132086  | 1237.984  | 1293.318  | NM_001732 | 2320.704  | 1351.076  | AL137300  | 1757.532  |
| U92816    | 11250.62  | 8788.943  | NM_018690 | 10583.595 | 6586.604  | NM_000229 | 1553.498  |
| BC011987  | 12595.655 | 19390.914 | NM_000860 | 5538.373  | 4647.045  | NM_006995 | 10064.951 |
| NM_004106 | 41627.801 | 21210.172 | AB037798  | 2705.308  | 2888.687  | NM_003129 | 2180.745  |
| NM_003485 | 3364.547  | 2552.574  | NM_000780 | 528.193   | 484.786   | NM_001956 | 822.14    |
| NM_005038 | 3856.887  | 2647.809  | NM_004800 | 15641.509 | 18555     | AB033064  | 552.178   |
| L03418    | 10279.32  | 6363.715  | AB037738  | 1024.607  | 1683.368  | AK022317  | 1850.763  |
| M95923    | 1194.998  | 1054.219  | NM_004952 | 2173.212  | 2371.239  | NM_018396 | 1724.029  |
| NM_002415 | 38897.641 | 51822.219 | NM_020414 | 2071.335  | 2774.764  | NM_003124 | 1980.846  |
| NM_006332 | 8594.703  | 910.255   | AB037730  | 3628.219  | 4084.369  | NM_006886 | 34703.824 |
| NM_000916 | 2168.704  | 2263.404  | NM_001357 | 15516.695 | 10494.129 | NM_004531 | 1006.964  |
| NM_018663 | 1685.224  | 3563.731  | NM_003893 | 2178.166  | 1866.636  | AL133581  | 434.674   |
| NM_014791 | 4663.341  | 7120.203  | AB037816  | 1747.661  | 2716.876  | NM_002558 | 897.737   |
| NM_003318 | 1739.577  | 1537.275  | NM_014380 | 709.44    | 710.841   | NM_005031 | 734.712   |
| NM_004362 | 3100.434  | 3487.654  | NM_001719 | 5756.278  | 6433.995  | AB040920  | 485.7     |
| NM_000182 | 11987.026 | 20628.246 | AL080062  | 760.413   | 1155.591  | NM_004842 | 356.646   |
| AK023384  | 1573.726  | 1385.44   | S76984    | 14230.497 | 8421.502  | NM_015720 | 860.449   |
| NM_016026 | 3012.241  | 5643.629  | NM_014495 | 59640.07  | 59123.441 | AB007915  | 257.326   |
| AK025111  | 940.482   | 749.974   | NM_014081 | 1227.455  | 1160.923  | NM_018229 | 323.756   |
| NM_001732 | 1213.88   | 930.661   | NM_005651 | 685.049   | 925.419   | NM_006325 | 1101.115  |
| NM_018690 | 10412.939 | 7659.675  | AF459094  | 5662.36   | 6523.84   | AY009127  | 5419.727  |
| NM_000860 | 1285.223  | 800.84    | NM_002544 | 2738.906  | 3937.841  | NM_014869 | 1241.095  |

|           |           |           |           |           |           |            |           |
|-----------|-----------|-----------|-----------|-----------|-----------|------------|-----------|
| AB037798  | 3221.34   | 2366.964  | AB011542  | 2625.411  | 1268.791  | NM_00670E  | 3520.176  |
| NM_00078C | 693.553   | 585.36    | NM_001853 | 5267.384  | 6417.494  | AB037835   | 488.378   |
| AF272663  | 4776.239  | 4877.458  | U41737    | 909.868   | 1603.017  | NM_01622E  | 328.54    |
| NM_01219C | 1368.261  | 1101.241  | NM_00579E | 1143.317  | 1363.936  | NM_000157  | 3291.588  |
| AB033015  | 1829.542  | 1734.677  | X99661    | 1392.815  | 1641      | NM_000712  | 2070.976  |
| AF277719  | 2038.062  | 2108.277  | NM_005927 | 6908.711  | 7268.368  | NM_01808E  | 665.198   |
| NM_000791 | 2453.977  | 2558.411  | AB028983  | 4824.476  | 4956.041  | BC013695   | 6529.251  |
| NM_003681 | 4055.479  | 3894.985  | AB037800  | 1779.779  | 2226.458  | AK023035   | 532.924   |
| NM_00480C | 12663.244 | 10327.443 | AK026377  | 358.484   | 320.526   | NM_01484E  | 979.339   |
| AB037738  | 417.681   | 645.509   | NM_01866C | 4525.867  | 4416.31   | AB011164   | 1906.118  |
| NM_004677 | 327.514   | 660.229   | NM_003394 | 6438.021  | 4274.856  | M24750     | 308.242   |
| NM_014954 | 16616.238 | 18179.557 | NM_006747 | 1159.091  | 629.42    | NM_00596E  | 357.734   |
| NM_000807 | 668.927   | 775.422   | NM_00708E | 1772.219  | 907.439   | NM_00274C  | 1204.573  |
| NM_01490E | 2778.502  | 2921.991  | NM_00387C | 12858.639 | 8460.204  | AL117482   | 802.678   |
| NM_14565E | 2264.011  | 2476.981  | AK024507  | 1586.358  | 1635.553  | NM_00654E  | 3599.358  |
| NM_021957 | 908.784   | 655.62    | NM_001243 | 2494.724  | 2133.95   | AB018324   | 2015.744  |
| NM_00171E | 4734.574  | 4605.919  | AK025997  | 2150.733  | 2056.473  | NM_002742  | 11487.578 |
| AL080062  | 897.987   | 1646.769  | NM_00547E | 2017.899  | 2174.382  | Z25431     | 565.687   |
| AF308802  | 1813.307  | 1170.076  | NM_005824 | 1182.329  | 1029.25   | NM_005627  | 559.187   |
| S76984    | 17157.689 | 11531.032 | AF052211  | 2851.112  | 3855.924  | M64497     | 315.41    |
| NM_01449E | 61245.652 | 53460.086 | NM_00523E | 502.018   | 520.896   | NM_007274  | 813.621   |
| NM_014081 | 813.82    | 644.434   | NM_00560C | 4187.523  | 4787.981  | NM_00335E  | 2260.739  |
| NM_005651 | 827.082   | 588.688   | NM_005967 | 5549.446  | 7997.083  | NM_01464E  | 352.816   |
| NM_00541E | 918.577   | 195.228   | NM_01331E | 569.922   | 471.846   | NM_005073  | 224.265   |
| NM_00719E | 944.23    | 1298.238  | AB014566  | 983.521   | 1247.148  | NM_000951  | 566.968   |
| AK023337  | 3283.766  | 3587.986  | NM_01567E | 1072.943  | 1104.121  | X52599     | 374.688   |
| NM_01327E | 8119.884  | 8077.96   | NM_014223 | 3166.588  | 3034.874  | AA029300   | 839.357   |
| AB037842  | 692.643   | 792.533   | NM_016194 | 1976.185  | 1526.751  | BG708842   | 6827.944  |
| U92074    | 274.707   | 255.405   | AL050385  | 739.466   | 730.169   | M19723     | 12125.125 |
| NM_019011 | 2014.966  | 2101.35   | NM_007027 | 4172.557  | 2363.511  | X06256     | 1223.878  |
| AF459094  | 3023.274  | 3933.999  | NM_000633 | 39793.68  | 43389.629 | AA709271   | 241.038   |
| NM_003157 | 1768.999  | 1901.048  | AB037855  | 1604.622  | 1866.88   | M34057     | 400.586   |
| NM_00493E | 1820.778  | 1641.086  | AK024524  | 6095.801  | 6100.301  | ID 1984668 | 1214.031  |
| NM_01432E | 807.58    | 632.474   | NM_000562 | 6537.734  | 3982.03   | ID 1832579 | 319.288   |
| NM_00444E | 583.826   | 401.035   | NM_020353 | 2322.31   | 2079.695  | H-430185 N | 488.909   |
| NM_015981 | 1238.23   | 1441.99   | NM_00487E | 17213.803 | 11863.563 | D16583     | 781.375   |
| NM_00045E | 3466.315  | 4292.873  | AB020694  | 3709.965  | 2462.624  | AA481547   | 396.546   |
| NM_01231E | 1295.133  | 1894.556  | NM_016071 | 2862.306  | 3793.868  | AA831880   | 269.1     |
| AK026235  | 434.691   | 862.561   | NM_00447E | 10936.37  | 5354.157  | T64880     | 587.097   |
| NM_00651C | 9062.846  | 11616.211 | NM_00122E | 1992.379  | 1657.218  | NM_020967  | 307.67    |
| NM_003141 | 2981.713  | 2761.713  | NM_00133E | 3008.573  | 1911.074  | NM_001071  | 1509.447  |
| NM_02024E | 5381.036  | 6112.308  | AB050716  | 2325.064  | 1470.698  | AB028990   | 327.438   |
| NM_00717E | 1838.846  | 2049.011  | X77690    | 4115.226  | 3221.196  | X05299     | 1583.161  |
| AB046381  | 792.487   | 651.309   | NM_00653E | 1343.636  | 1563.731  | BM468475   | 701.006   |
| AJ011497  | 3463.014  | 2744.792  | NM_002422 | 1192.724  | 1160.05   | NM_00031E  | 1029.265  |
| NM_00301E | 967.312   | 1354.797  | NM_00669C | 3955.69   | 5424.995  | NM_00206C  | 1658.491  |
| NM_00033E | 960.927   | 936.03    | AF218022  | 2975.753  | 2833.964  | AK001230   | 581.51    |
| W61100    | 40116.836 | 48712.172 | NM_00334E | 3746.397  | 1857.582  | NM_01468C  | 1686.806  |
| AA608568  | 1835.758  | 4204.06   | AL137663  | 1510.299  | 1756.537  | NM_005027  | 981.659   |
| BG831301  | 35560.715 | 43699.906 | AB006198  | 7583.609  | 6594.123  | NM_004612  | 1204.353  |
| M14764    | 1001.548  | 884.81    | AF264765  | 3739.486  | 4000.182  | NM_00560E  | 417.546   |
| AA478647  | 4646.786  | 3987.912  | NM_015322 | 5441.531  | 4456.716  | NM_00110E  | 322.129   |
| M35999    | 1159.498  | 974.846   | NM_016607 | 2897.768  | 2938.11   | NM_015583  | 240.979   |

|            |           |           |           |           |           |           |           |
|------------|-----------|-----------|-----------|-----------|-----------|-----------|-----------|
| AW058501   | 508.731   | 795.562   | NM_003275 | 903.688   | 1058.441  | NM_01849C | 529.312   |
| M81379     | 668.401   | 631.562   | NM_00026E | 8602.284  | 8502.837  | NM_006245 | 1319.193  |
| ID 2623896 | 4117.295  | 3547.342  | NM_004343 | 20990.965 | 39738.031 | NM_005103 | 964.906   |
| ID 2602214 | 2838.991  | 2911.167  | X52355    | 6373.517  | 6830.226  | NM_004822 | 280.921   |
| ID 2071279 | 6300.916  | 3740.978  | NM_006963 | 5019.35   | 12764.512 | AK022349  | 1119.334  |
| L10709     | 1577.879  | 3849.375  | NM_000307 | 612.13    | 1111.642  | NM_00575C | 226.401   |
| N35489     | 1036.869  | 1128.67   | U66561    | 5775.28   | 4756.773  | NM_004973 | 819.423   |
| AI928195   | 1023.423  | 1550.434  | NM_00030E | 3213.568  | 4160.55   | NM_007245 | 577.503   |
| AA482489   | 370.463   | 877.929   | NM_00220C | 3865.771  | 2679.05   | NM_00189C | 506.102   |
| AA458922   | 5214.977  | 9281.627  | AF017433  | 2213.215  | 2131.507  | NM_00128E | 505.422   |
| M95923     | 1319.366  | 1277.924  | AF130111  | 1894.376  | 2228.965  | AB007915  | 315.964   |
| NM_002415  | 45510.23  | 53172.777 | NM_016307 | 5359.796  | 5821.401  | AB033070  | 305.19    |
| NM_006332  | 10204.708 | 1056.887  | AB028449  | 2456.399  | 2373.585  | NM_018229 | 415.377   |
| NM_00200C  | 374.259   | 262.387   | NM_004697 | 2263.848  | 2077.059  | NM_006325 | 1383.299  |
| NM_00091E  | 2341.876  | 2688.722  | AF131776  | 3279.97   | 4511.841  | AY009127  | 4663.824  |
| NM_018663  | 2388.498  | 5000.194  | NM_02052E | 4064.753  | 4431.26   | NM_01486E | 865.112   |
| NM_00679E  | 6489.519  | 7617.664  | NM_00704C | 25197.088 | 29216.006 | AK000158  | 2353.932  |
| NM_00070E  | 1466.561  | 1328.8    | NM_014483 | 6742.938  | 7114.935  | NM_00576E | 319.19    |
| NM_015941  | 3443.597  | 1833.243  | AK024249  | 1573.502  | 1399.848  | AK024500  | 3670.375  |
| NM_003655  | 4215.808  | 5930.048  | NM_02039C | 2867.789  | 2863.442  | NM_002564 | 3121.985  |
| NM_014837  | 2547.911  | 2294.892  | NM_003321 | 19458.16  | 17115.4   | NM_000963 | 1222.147  |
| NM_017729  | 1139.891  | 1225.034  | U18937    | 7213.447  | 7977.035  | NM_01330E | 1122.068  |
| NM_00525E  | 2399.345  | 2399.264  | U01925    | 1154.047  | 1158.644  | AF027302  | 1157.836  |
| NM_00284C  | 696.737   | 2290.164  | AJ420488  | 60535.523 | 63876.605 | NM_002852 | 1161.132  |
| NM_006174  | 421.773   | 688.79    | AK001384  | 1615.838  | 1030.699  | NM_001817 | 1190.536  |
| NM_01585C  | 5056.821  | 5464.49   | AK025437  | 4985.716  | 3879.621  | AF063611  | 726.809   |
| NM_004864  | 538.484   | 1141.962  | AK074164  | 1235.691  | 1113.609  | NM_00603E | 332.041   |
| NM_00283E  | 4389.115  | 2837.359  | NM_00416E | 13677.646 | 8646.84   | NM_00208E | 350.339   |
| NM_01468E  | 57088.016 | 49400.262 | AF161353  | 9531.195  | 7834.381  | NM_01465E | 1115.631  |
| BF528358   | 1224.348  | 997.411   | NM_000764 | 2538.85   | 4416.349  | NM_00207E | 1936.845  |
| NM_01633E  | 512.416   | 431.113   | NM_00414E | 22380.896 | 20007.549 | Z25431    | 649.174   |
| NM_002487  | 652.463   | 800.317   | NM_003002 | 17688.773 | 12449.24  | NM_005627 | 530.148   |
| NM_01334C  | 594.341   | 1158.872  | D42047    | 3031.801  | 2692.853  | M64497    | 236.883   |
| NM_005462  | 1161.908  | 1156.081  | AB009282  | 10071.811 | 10373.451 | NM_007274 | 843.91    |
| S82769     | 525.758   | 458.837   | NM_005004 | 60636.766 | 40500.5   | NM_00335E | 2832.671  |
| NM_014954  | 21275.783 | 27502.143 | NM_00367C | 6360.867  | 7671.368  | AF238315  | 177.679   |
| NM_000807  | 771.388   | 662.914   | NM_01463E | 3345.091  | 5125.941  | NM_006224 | 13873.613 |
| NM_01570C  | 7930.265  | 9204.811  | NM_006392 | 1279.571  | 2056.529  | AL137300  | 1477.437  |
| NM_019087  | 5734.911  | 4313.122  | NM_014717 | 1619.09   | 2026.364  | NM_000229 | 1681.357  |
| NM_016322  | 539.211   | 740.274   | NM_017922 | 1650.514  | 1393.122  | NM_00699E | 9545.401  |
| NM_005072  | 959.876   | 980.778   | NM_002823 | 62980.094 | 59425.523 | NM_00312E | 2487.251  |
| AF215923   | 1981.598  | 2511.476  | NM_00180E | 3883.765  | 3310.167  | NM_00195E | 601.567   |
| U66621     | 7288.842  | 6613.884  | AK022360  | 1453.298  | 1874.572  | AB033064  | 412.817   |
| NM_00572C  | 25023.83  | 24811.701 | AK095694  | 1529.99   | 2257.448  | AK022317  | 1751.775  |
| AB040936   | 632.975   | 620.9     | X52341    | 39623.465 | 38955.102 | NM_01839E | 1961.244  |
| U61736     | 660.018   | 621.529   | NM_003082 | 5823.011  | 3799.1    | NM_003124 | 1740.871  |
| AJ132086   | 1524.281  | 1478.65   | AK024551  | 1547.601  | 988.777   | NM_00688E | 33920.566 |
| U92816     | 12440.372 | 10335.179 | AL833249  | 6668.222  | 4751.553  | NM_004531 | 1082.924  |
| BC011987   | 14005.944 | 22876.066 | NM_018374 | 3212.669  | 2912.544  | AL133581  | 599.778   |
| NM_00410E  | 41338.629 | 23413.359 | AF131852  | 531.315   | 594.891   | NM_00255E | 1067.732  |
| NM_00348E  | 4218.151  | 3974.559  | AK021894  | 4083.138  | 2900.857  | NM_005031 | 698.42    |
| NM_00503E  | 3759.226  | 3402.928  | NM_020424 | 2611.053  | 2584.286  | AB040920  | 645.944   |
| L03418     | 10914.534 | 7908.957  | AF438313  | 2161.213  | 1834.404  | NM_004842 | 374.771   |

|           |           |           |           |           |           |            |           |
|-----------|-----------|-----------|-----------|-----------|-----------|------------|-----------|
| NM_003157 | 2038.224  | 2136.831  | NM_017815 | 625.207   | 275.547   | AK024639   | 1577.034  |
| NM_004938 | 1800.724  | 1822.609  | AF147341  | 934.125   | 964.174   | NM_020967  | 359.394   |
| NM_014326 | 943.722   | 958.783   | AB033009  | 26669.221 | 19135.762 | NM_001071  | 1473.319  |
| NM_004448 | 705.242   | 904.864   | AL137761  | 1357.084  | 864.663   | AB028990   | 395.017   |
| NM_003318 | 1782.754  | 2116.817  | AK022086  | 1096.895  | 1009.352  | NM_006708  | 3706.533  |
| NM_004362 | 2639.993  | 4419.046  | AF147320  | 4338.195  | 3845.438  | AB037835   | 490.202   |
| NM_000182 | 11407.298 | 18368.137 | AK027024  | 605.69    | 573.988   | NM_016228  | 322.879   |
| AK023384  | 1512.423  | 1544.225  | AK022138  | 1657.042  | 1165.936  | NM_000157  | 3642.397  |
| NM_016026 | 3613.233  | 5784.096  | AF086191  | 7396.607  | 4031.993  | NM_000712  | 2146.995  |
| AK025111  | 1057.549  | 800.164   | NM_017638 | 8378.562  | 5753.961  | NM_018088  | 803.11    |
| NM_001732 | 1297.397  | 935.259   | AL133052  | 4700.818  | 2203.474  | AK023035   | 375.363   |
| NM_018690 | 10703.787 | 7672.664  | AB037824  | 4209.206  | 2596.285  | NM_014846  | 984.541   |
| NM_000860 | 1301.277  | 983.904   | X92110    | 519.87    | 1166.44   | AB011164   | 2329.658  |
| AB037798  | 2857.538  | 2539.222  | AF147408  | 2061.018  | 1272.473  | M24750     | 322.12    |
| NM_000780 | 663.91    | 821.883   | AK027222  | 8710.733  | 10595.72  | NM_005965  | 399.308   |
| AF272663  | 5608.494  | 5961.01   | AF085868  | 1248.96   | 1294.159  | NM_002740  | 1324.021  |
| NM_012190 | 1502.354  | 1506.992  | AF075049  | 2415.951  | 2465.095  | AL117482   | 949.25    |
| AB033015  | 474.559   | 504.162   | AK054767  | 959.717   | 883.218   | NM_006549  | 4674.256  |
| AF277719  | 1954.277  | 1694.39   | AL080086  | 1054.371  | 842.955   | NM_004973  | 790.429   |
| NM_000791 | 2556.095  | 2822.461  | AL049301  | 1919.085  | 1435.156  | NM_007245  | 614.239   |
| NM_003681 | 3835.461  | 4227.334  | AL050042  | 7321.496  | 3680.914  | NM_001890  | 619.532   |
| NM_004800 | 13550.798 | 11816.938 | AL080195  | 1612.427  | 777.831   | NM_001286  | 425.626   |
| NM_004952 | 1794.954  | 2139.72   | AL117570  | 816.055   | 409.831   | NM_014648  | 282.08    |
| NM_020414 | 2279.894  | 2684.31   | NM_018469 | 1811.589  | 1302.222  | NM_019604  | 202.003   |
| AB037730  | 3268.813  | 3882.876  | NM_014867 | 8458.278  | 7218.894  | NM_000951  | 652.454   |
| AB037816  | 1939.354  | 2799.007  | AB037850  | 2181.66   | 2088.532  | X52599     | 405.134   |
| NM_014380 | 258.746   | 766.625   | AK002197  | 3241.506  | 1739.143  | AA029300   | 673.984   |
| NM_001719 | 4961.566  | 5547.285  | AK021710  | 4564.54   | 2736.965  | BG708842   | 6337.042  |
| AL080062  | 983.559   | 1344.452  | NM_007017 | 7145.638  | 11351.29  | M19723     | 12235.179 |
| AF308802  | 1892.636  | 1341.876  | AL137446  | 5573.064  | 11411.641 | AA709271   | 310.888   |
| S76984    | 16487.832 | 10639.743 | AB025286  | 5201.399  | 9241.903  | M34057     | 916.318   |
| NM_014495 | 58249.754 | 50534.902 | AF009286  | 3958.076  | 4808.925  | ID 1984668 | 1460.926  |
| NM_014081 | 1046.978  | 883.922   | AF056437  | 1817.166  | 2577.655  | ID 1832579 | 292.034   |
| NM_005651 | 837.295   | 961.215   | AB032364  | 1297.931  | 1701.979  | H-430185 N | 449.042   |
| NM_005418 | 907.119   | 262.062   | AF009295  | 1717.49   | 2032.928  | D16583     | 579.775   |
| NM_007195 | 991.959   | 1710.479  | NM_005029 | 4029.933  | 5528.62   | H44051     | 266.226   |
| AK023337  | 3759.836  | 4356.825  | AF056447  | 3157.817  | 4269.37   | AA481547   | 448.287   |
| NM_013275 | 11837.923 | 14092.146 | AK001010  | 3350.077  | 4649.693  | NM_006039  | 433.32    |
| AB037842  | 481.417   | 855.323   | AK001076  | 3047.452  | 3801.272  | NM_002089  | 350.627   |
| NM_019011 | 2036.119  | 2452.894  | AK021482  | 9749.459  | 9027.359  | NM_014656  | 1607.137  |
| AF459094  | 3616.197  | 4273.28   | AK021730  | 781.062   | 521.803   | NM_002076  | 1251.526  |
| NM_002544 | 978.33    | 1555.533  | AK025126  | 1499.542  | 827.824   | X05299     | 1679.369  |
| AB011542  | 1724.48   | 938.388   | AK025317  | 8127.211  | 7073.447  | BM468475   | 444.262   |
| NM_001853 | 3861.146  | 2604.236  | AK026725  | 4439.27   | 3927.121  | NM_000318  | 987.579   |
| U41737    | 640.863   | 641.647   | AJ008118  | 67440.055 | 63036.418 | NM_002060  | 1672.75   |
| NM_005799 | 634.037   | 866.601   | AK000939  | 1807.883  | 2215.296  | AK001230   | 628.602   |
| AB028983  | 1724.357  | 2357.415  | NM_005523 | 1572.606  | 3501.326  | NM_014680  | 1707.019  |
| AB037800  | 1443.654  | 1695.76   | AK024512  | 4713.387  | 6496.472  | NM_005027  | 830.078   |
| AK026377  | 456.531   | 414.998   | AK023454  | 3808.58   | 5463.472  | NM_004612  | 1201.924  |
| NM_018660 | 2043.497  | 4713.015  | L23207    | 3743.973  | 4790.31   | NM_005608  | 409.767   |
| NM_003394 | 4955.176  | 3191.848  | NM_018062 | 2851.27   | 3218.198  | NM_015583  | 461.431   |
| NM_006747 | 1759.747  | 981.442   | NM_007128 | 20501.533 | 30210.684 | NM_018490  | 484.599   |
| NM_007086 | 759.869   | 1477.358  | NM_007160 | 697.75    | 1139.547  | NM_006245  | 1703.208  |



|           |           |           |           |           |           |           |           |
|-----------|-----------|-----------|-----------|-----------|-----------|-----------|-----------|
| NM_00387C | 11685.759 | 6748.179  | AL157458  | 947.488   | 1495.261  | NM_005103 | 1080.372  |
| AK024507  | 715.832   | 546.728   | NM_015377 | 1253.826  | 1587.066  | AK022349  | 2360.518  |
| NM_001243 | 2739.276  | 2549.514  | AL137531  | 2282.608  | 2527.484  | NM_005031 | 963.747   |
| AK025997  | 1537.721  | 1830.134  | AL080085  | 7542.157  | 9056.946  | AB040920  | 580.07    |
| NM_005546 | 505.758   | 553.003   | AK022106  | 1143.614  | 2219.022  | NM_00072C | 296.933   |
| NM_014887 | 4140.17   | 4455.337  | AF086519  | 1682.086  | 1520.189  | NM_004842 | 438.504   |
| NM_00259C | 1241.013  | 1114.559  | AF055012  | 3428.785  | 3124.094  | AK024639  | 1354.67   |
| NM_018556 | 5556.591  | 5949.028  | AK022307  | 5618.972  | 5327.163  | NM_01572C | 1382.952  |
| NM_005824 | 952.067   | 1011.973  | U00950    | 536.844   | 764.184   | NM_018229 | 1664.687  |
| AF052211  | 3006.316  | 2743.352  | AF085997  | 696.973   | 729.625   | NM_006325 | 1527.406  |
| NM_005235 | 301.86    | 596.641   | NM_005172 | 5712.647  | 7578.116  | AY009127  | 4951.752  |
| NM_00560C | 3675.891  | 3652.619  | AK025192  | 23027.814 | 36208.426 | NM_014869 | 1040.613  |
| NM_005967 | 3464.71   | 5278.029  | AK022611  | 14596.424 | 8588.427  | AK000158  | 2093.597  |
| AK025950  | 300.158   | 573.649   | NM_006158 | 21417.805 | 25355.428 | NM_005769 | 402.26    |
| NM_014223 | 2267.279  | 1851.27   | NM_006346 | 2892.576  | 4979.53   | AK024500  | 3876.045  |
| NM_016194 | 2493.205  | 2047.794  | AK025240  | 4928.459  | 8530.207  | NM_002564 | 3519.921  |
| AL050385  | 885.686   | 770.423   | NM_005377 | 764.56    | 1107.269  | NM_001884 | 100.781   |
| NM_007027 | 2422.332  | 2301.731  | NM_017633 | 39030.648 | 29342.166 | NM_000963 | 1237.253  |
| NM_000633 | 13705.507 | 12140.127 | AF086186  | 28787.443 | 37403.492 | NM_013308 | 1064.057  |
| AB037855  | 1038.032  | 1343.381  | NM_017802 | 5719.398  | 5363.098  | AF027302  | 1308.621  |
| AK024524  | 4556.385  | 6240.913  | AF155194  | 652.943   | 524.747   | NM_002852 | 1584.811  |
| NM_000562 | 3215.486  | 2816.624  | AK023667  | 1523.236  | 2243.211  | AF063611  | 1173.438  |
| NM_019011 | 6674.723  | 7028.579  | AJ008137  | 22037.344 | 31025.426 | NM_00274C | 925.471   |
| NM_004879 | 14552.737 | 12642.678 | AF085841  | 2161.412  | 2808.351  | AL117482  | 1220.917  |
| AB020694  | 2948.499  | 2264.829  | AL049232  | 812.716   | 1877.915  | NM_006549 | 5651.911  |
| NM_016071 | 1468.636  | 3120.514  | U92026    | 1882.062  | 1531.248  | AB018324  | 2273.663  |
| AL050131  | 763.897   | 644.351   | AF086234  | 48842.387 | 29621.9   | NM_002742 | 23680.211 |
| NM_004475 | 8805.046  | 5984.891  | AK023680  | 6278.31   | 4098.756  | Z25431    | 753.329   |
| NM_001627 | 4343.745  | 9015.037  | AF009324  | 5623.247  | 5436.091  | NM_005627 | 642.302   |
| NM_001226 | 1624.092  | 1363.145  | AF144056  | 953.935   | 921.449   | M64497    | 260.638   |
| NM_001336 | 2086.968  | 823.334   | AK022112  | 600.099   | 748.7     | NM_007274 | 938.235   |
| AB050716  | 1799.192  | 1385.321  | AL137480  | 15564.367 | 16041.878 | NM_003356 | 2956.184  |
| NM_005658 | 805.163   | 375.696   | AK022182  | 1071.559  | 1384.646  | AF238315  | 223.229   |
| NM_002422 | 820.817   | 841.492   | D16473    | 2192.753  | 2193.221  | NM_006224 | 13324.246 |
| NM_00669C | 1181.57   | 2020.575  | AB028968  | 2017.991  | 2383.13   | AL137300  | 1537.087  |
| AF218022  | 2927.621  | 2257.242  | AK001202  | 1070.251  | 768.218   | NM_000229 | 1364.078  |
| NM_003348 | 1894.356  | 1772.69   | AF195764  | 54987.766 | 50116.055 | NM_006995 | 9403.812  |
| AB006198  | 6319.626  | 6926.06   | AF055029  | 1465.144  | 960.535   | NM_003129 | 2565.176  |
| U72518    | 2275.05   | 2006.379  | S82164    | 2752.784  | 2633.885  | NM_001956 | 814.176   |
| AF264765  | 715.299   | 450.952   | AK024394  | 1895.528  | 1569.403  | AB033064  | 445.624   |
| NM_015322 | 3420.36   | 4334.917  | AF147374  | 2120.432  | 1831.824  | AK022317  | 2266.069  |
| NM_016607 | 3593.394  | 3396.048  | AF130091  | 911.64    | 802.304   | NM_003124 | 1842.86   |
| NM_003275 | 456.326   | 943.884   | L43338    | 29663.492 | 20319.848 | NM_006886 | 40508.563 |
| NM_000268 | 16512.221 | 15732.017 | AJ227866  | 38496.168 | 27155.105 | NM_004531 | 1208.697  |
| M30493    | 16743.375 | 18311.34  | AF458223  | 6678.578  | 3586.803  | NM_002558 | 1426.177  |
| AJ008160  | 729.19    | 608.775   | AK026822  | 1034.825  | 572.809   | NM_003586 | 1263.779  |
| NM_004343 | 13403.974 | 37668.063 | AK022838  | 15962.549 | 24289.092 | NM_000922 | 343.247   |
| X52355    | 3716.64   | 4413.08   | NM_003509 | 2222.976  | 1743.728  | NM_013232 | 2144.891  |
| NM_006963 | 2892.208  | 11735.312 | CY3Cy5    | 10639.422 | 761.848   | NM_017993 | 367.249   |
| U66561    | 3214.289  | 7117.098  | U76368    | 357.798   | 3209.522  | NM_000362 | 1119.606  |
| NM_000306 | 2107.117  | 2942.741  | AA700390  | 7761.647  | 9751.467  | NM_014429 | 698.848   |
| NM_00220C | 3482.473  | 2469.437  | Y18474    | 960.61    | 835.216   | AK000770  | 563.271   |
| AF017433  | 1843.21   | 1691.487  | AA436163  | 540.683   | 1441.288  | NM_00237C | 3163.039  |

|           |           |           |           |           |           |           |           |
|-----------|-----------|-----------|-----------|-----------|-----------|-----------|-----------|
| AF130111  | 2821.06   | 3304.682  | BI907981  | 1193.058  | 1376.244  | NM_015670 | 453.781   |
| NM_016307 | 1312.841  | 893.17    | BI603841  | 4427.359  | 3852.788  | NM_014709 | 325.867   |
| AB028449  | 2386.211  | 2173.11   | BG696638  | 4939.815  | 6974.237  | AB028990  | 417.814   |
| NM_004697 | 1817.539  | 1432.348  | M19888    | 816.927   | 1233.89   | AK002089  | 239.602   |
| U94384    | 374.68    | 324.617   | Y08136    | 1102.58   | 647.988   | NM_006708 | 4867.114  |
| AF131776  | 2272.406  | 1919.925  | AA156863  | 5074.914  | 3780.13   | AB037835  | 661.507   |
| NM_020528 | 3155.511  | 4010.113  | BI915199  | 1774.485  | 1433.216  | NM_016228 | 352.461   |
| NM_007040 | 19216.162 | 18262.795 | R82957    | 60452.254 | 54045.504 | NM_000157 | 4038.683  |
| NM_014483 | 7256.475  | 7275.058  | BI830442  | 1003.03   | 718.361   | NM_000712 | 2466.083  |
| AK024249  | 1496.468  | 1044.608  | AA398951  | 4490.753  | 3588.853  | NM_018088 | 893.943   |
| AF239156  | 5019.416  | 5616.573  | AI218732  | 1552.954  | 1543.115  | AK023035  | 463.788   |
| NM_020390 | 1220.848  | 1512.851  | NM_004102 | 3814.25   | 4200.712  | NM_014846 | 1122.658  |
| NM_003321 | 14736.854 | 15491.33  | NM_004544 | 4476.985  | 4080.829  | M24750    | 574.648   |
| U18937    | 9273.117  | 10460.618 | SR9       | 11500.161 | 1742.203  | AB046776  | 430.044   |
| U01925    | 789.23    | 948.692   | CY3Cy5    | 16419.463 | 1448.362  | NM_002687 | 2699.494  |
| AF268872  | 1357.048  | 1864.45   | NM_018049 | 5624.291  | 3644.5    | NM_000627 | 1084.042  |
| AK022180  | 19215.193 | 22817.41  | AJ133439  | 696.715   | 729.64    | NM_000038 | 546.287   |
| AK001384  | 884.764   | 779.341   | NM_014395 | 1744.935  | 867.55    | NM_000825 | 416.174   |
| AK025437  | 2945.929  | 2860.788  | NM_001561 | 1277.42   | 1816.864  | NM_004334 | 452.965   |
| AK074164  | 838.844   | 1144.303  | NM_005160 | 2023.028  | 1263.72   | NM_003886 | 1049.047  |
| NM_004168 | 10037.831 | 11537.782 | NM_000596 | 478.369   | 629.915   | NM_005843 | 709.615   |
| AF161353  | 5853.095  | 6561.142  | X78817    | 17417.764 | 22628.826 | NM_003854 | 254.751   |
| NM_000764 | 1381.881  | 2343.09   | AB023135  | 1613.153  | 952.96    | NM_001252 | 3927.461  |
| NM_004146 | 13687.793 | 14094.726 | AY009401  | 1577.629  | 805.819   | AF053712  | 540.97    |
| NM_003002 | 12103.727 | 11081.666 | AF294628  | 730.657   | 838.82    | NM_003947 | 266.07    |
| D42047    | 1748.203  | 1307.475  | NM_001991 | 936.119   | 716.839   | NM_002821 | 5105.761  |
| AB009282  | 6495.483  | 6457.64   | NM_000193 | 1341.411  | 1491.367  | M96652    | 3103.729  |
| NM_005004 | 35263.77  | 30400.248 | BC014586  | 697.421   | 977.504   | NM_018059 | 339.253   |
| NM_003670 | 5134.975  | 4866.675  | NM_002448 | 1300.693  | 1116.806  | NM_000939 | 15554.411 |
| NM_014639 | 2117.136  | 1761.634  | AF053952  | 33933.027 | 27028.773 | NM_005183 | 303.646   |
| NM_006392 | 1556.981  | 2197.518  | NM_003213 | 5952.568  | 7341.283  | NM_006514 | 858.506   |
| NM_014717 | 998.01    | 824.998   | BF184738  | 901.748   | 621.243   | AF065164  | 1039.589  |
| NM_017922 | 1222.672  | 1278.784  | NM_014044 | 3390.937  | 2163.766  | AB028991  | 1578.587  |
| NM_002823 | 61708.461 | 55567.707 | NM_000900 | 2130.433  | 1545.348  | AF263547  | 1041.707  |
| NM_017916 | 9385.324  | 10782.011 | AK023684  | 4828.508  | 2025.836  | AJ008143  | 2920.075  |
| NM_001805 | 6625.071  | 5436.814  | NM_000232 | 899.45    | 598.283   | NM_007144 | 537.453   |
| AK022360  | 2200.441  | 1529.128  | NM_015057 | 631.004   | 1253.731  | NM_005093 | 300.555   |
| AK095694  | 798.259   | 1424.204  | AF303398  | 10896.922 | 9456.405  | NM_004424 | 1873.39   |
| NM_003082 | 3432.389  | 5359.363  | NM_014810 | 3459.566  | 2086.458  | AL133117  | 719.847   |
| AL133632  | 2766.997  | 2721.761  | NM_004738 | 2116.247  | 1672.029  | AF070586  | 1730.356  |
| AK024551  | 785.545   | 590.627   | NM_007357 | 4021.009  | 5929.889  | NM_014412 | 451.802   |
| AL833249  | 2942.592  | 3267.728  | NM_003763 | 6451.544  | 5822.154  | NM_013303 | 819.849   |
| NM_018374 | 3109.369  | 3101.353  | AK023448  | 919.138   | 1002.002  | NM_012227 | 1117.96   |
| AF131852  | 279.05    | 579.653   | Y18213    | 1847.171  | 1451.025  | NM_006101 | 345.982   |
| AK021894  | 2308.222  | 2292.406  | NM_003283 | 2190.318  | 1721.241  | NM_001237 | 574.24    |
| NM_020424 | 1930.788  | 2516.787  | AF249898  | 6194.746  | 5580.522  | NM_002507 | 506.264   |
| AF438313  | 2775.605  | 2197.651  | M69181    | 5210.976  | 5517.519  | NM_015962 | 902.98    |
| NM_017815 | 402.482   | 321.909   | AK027224  | 473.459   | 348.555   | NM_016145 | 801.581   |
| AB033009  | 19230.684 | 13846.982 | L09078    | 627.063   | 330.602   | NM_016078 | 1663.839  |
| AL137761  | 482.729   | 470.553   | NM_002652 | 572.058   | 428.095   | NM_003798 | 155.522   |
| AK022086  | 595.134   | 389.507   | NM_001311 | 2192.398  | 795.363   | NM_004401 | 705.924   |
| AF147320  | 2519.141  | 1891.085  | NM_017798 | 9597.208  | 2934.193  | NM_001849 | 3680.086  |
| AK027024  | 521.641   | 579.557   | NM_012410 | 2358.056  | 958.706   | AF255910  | 470.756   |

|           |           |           |           |           |           |           |           |
|-----------|-----------|-----------|-----------|-----------|-----------|-----------|-----------|
| AK022339  | 835.397   | 630.204   | NM_001111 | 5550.653  | 3135.207  | NM_000425 | 448.544   |
| AK022138  | 1491.257  | 1145.07   | BU565263  | 64849.453 | 72676.539 | NM_016146 | 1814.806  |
| AF086191  | 3225.322  | 2704.171  | NM_005028 | 2287.314  | 2837.35   | AK024343  | 486.618   |
| NM_017638 | 5363.49   | 3723.789  | NM_001611 | 926.415   | 1179.603  | NM_001936 | 241.201   |
| AL133052  | 1608.052  | 1532.69   | AB018310  | 2333.835  | 3420.464  | NM_002569 | 282.243   |
| AB037824  | 2150.496  | 1931.849  | NM_020133 | 287.708   | 792.396   | D42084    | 706.005   |
| AF361494  | 2470.371  | 819.287   | NM_015379 | 24750.166 | 18618.443 | NM_001734 | 311.037   |
| AK022810  | 1116.816  | 1168.093  | NM_000742 | 1290.608  | 941.911   | NM_014693 | 342.535   |
| NM_005110 | 420.843   | 343.002   | NM_002355 | 11140.239 | 7183.225  | AB007916  | 2706.694  |
| AF147408  | 2023.679  | 1809.57   | AK026608  | 1401.043  | 947.747   | AF049140  | 591.017   |
| AK027222  | 3505.778  | 3803.852  | AB046836  | 1082.732  | 841.335   | AL136794  | 236.218   |
| AF085868  | 406.553   | 473.613   | NM_017816 | 5920.056  | 5660.438  | BC035601  | 8118.996  |
| AK054767  | 767.637   | 578.074   | AJ224166  | 1210.707  | 1597.543  | NM_001458 | 485.526   |
| AL049301  | 785.759   | 529.743   | AK026098  | 2336.839  | 2631.524  | NM_020388 | 2425.752  |
| AL050042  | 3873.578  | 2868.983  | NM_012381 | 1224.725  | 2324.649  | NM_004202 | 8840.605  |
| AL117570  | 487.973   | 289.702   | M20702    | 698.725   | 396.726   | AB046829  | 716.204   |
| NM_018469 | 1305.583  | 1385.431  | NM_006397 | 13417.953 | 15264.585 | NM_003379 | 4004.622  |
| NM_014867 | 3904.361  | 7803.693  | D83776    | 1901.976  | 2120.426  | NM_004521 | 2894.586  |
| AL359932  | 632.735   | 612.042   | NM_004088 | 2256.506  | 4381.934  | AF229162  | 837.776   |
| AB037850  | 2236.397  | 2312.942  | NM_000138 | 2470.109  | 1813.718  | U02309    | 10218.057 |
| AK002197  | 2356.264  | 2129.62   | NM_018163 | 1270.782  | 1056.885  | NM_005257 | 1938.447  |
| AF087996  | 1966.092  | 1808.821  | AK026362  | 3585.893  | 3328.424  | AF011573  | 1987.882  |
| AK021710  | 3030.596  | 3232.176  | NM_004968 | 3468.852  | 3524.587  | NM_002145 | 616.024   |
| BC033114  | 325.165   | 597.339   | NM_005908 | 2058.337  | 2233.203  | NM_003923 | 152.037   |
| NM_007017 | 886.337   | 1239.825  | NM_004785 | 2657.488  | 2423.906  | NM_014213 | 1319.179  |
| AL137446  | 1961.336  | 2495.635  | NM_002428 | 2151.127  | 1528.87   | NM_000168 | 541.84    |
| AB025286  | 909.912   | 1084.65   | NM_014674 | 1875.352  | 2066.153  | NM_000545 | 1424.438  |
| AF009286  | 1403.615  | 1513.694  | NM_018271 | 1524.456  | 527.551   | NM_002136 | 9263.544  |
| NM_015880 | 570.463   | 611.278   | NM_014652 | 2202.211  | 970.258   | AK025571  | 421.628   |
| AF056437  | 1194.699  | 1236.41   | AL133020  | 5763.058  | 4345.058  | NM_004940 | 258.49    |
| AB032364  | 597.444   | 582.167   | NM_014044 | 2954.392  | 3377.35   | NM_014463 | 11155.426 |
| AF009295  | 669.095   | 609.416   | NM_000900 | 1993.345  | 1943.519  | NM_005520 | 3721.261  |
| NM_005029 | 2316.715  | 2454.717  | AK023684  | 4953.053  | 3774.007  | AK023265  | 419.718   |
| AF056447  | 1885.171  | 1281.376  | NM_000232 | 1209.305  | 1773.3    | NM_018723 | 208.549   |
| AK001010  | 1476.645  | 1261.847  | AA700390  | 7458.155  | 8863.561  | AB029009  | 748.406   |
| NM_018076 | 783.02    | 865.32    | Y18474    | 1072.901  | 665.335   | AF112207  | 1044.099  |
| AK021442  | 896.351   | 761.282   | AA436163  | 577.137   | 1540.081  | AJ420488  | 53892.086 |
| AK001076  | 1196.014  | 1008.03   | BI907981  | 1002.057  | 1681.454  | NM_005594 | 5611.424  |
| AK001820  | 563.73    | 590.805   | BI603841  | 4405.187  | 4306.269  | NM_004461 | 31773.504 |
| AK021482  | 6085.494  | 5088.479  | BG696638  | 5443.143  | 6993.289  | NM_018473 | 2499.33   |
| AK021730  | 700       | 774.033   | M19888    | 867.399   | 1221.833  | BF106121  | 407.093   |
| AK025317  | 8115.398  | 7121.919  | Y08136    | 1192.021  | 1002.931  | AK022590  | 967.499   |
| AK026119  | 811.374   | 980.497   | AA156863  | 4797.19   | 3697.644  | AK023719  | 1398.859  |
| AK025177  | 336.814   | 509.986   | BI915199  | 2174.512  | 1717.174  | AK025590  | 309.607   |
| AK026725  | 2373.465  | 2231.923  | R82957    | 60819.621 | 61644.906 | AY007149  | 1629.421  |
| AJ008118  | 58104.117 | 48132.254 | BI830442  | 1140.105  | 1061.593  | M12078    | 191.847   |
| AK000939  | 461.181   | 321.374   | AA398951  | 4487.129  | 3665.399  | NM_004550 | 4079.383  |
| NM_005523 | 1104.161  | 1913.182  | AI218732  | 1542.12   | 1262.153  | NM_000785 | 433.714   |
| AK024512  | 2208.036  | 3242.697  | NM_004102 | 4056.768  | 2288.635  | NM_004110 | 2681.162  |
| AK023454  | 2449.401  | 2166.67   | NM_004544 | 4508.6    | 1673.701  | NM_013387 | 10593.423 |
| L23207    | 861.362   | 1033.836  | NM_018890 | 30497.426 | 13831.927 | NM_005262 | 1503.707  |
| NM_018062 | 1007.865  | 881.288   | NM_016204 | 828.011   | 432.905   | NM_005757 | 190.474   |
| NM_007128 | 5550.346  | 5632.344  | NM_002652 | 521.328   | 594.193   | NM_016483 | 337.339   |

|           |           |           |           |           |           |           |          |
|-----------|-----------|-----------|-----------|-----------|-----------|-----------|----------|
| NM_00716C | 441.734   | 371.332   | NM_001311 | 2131.672  | 1395.195  | NM_00506E | 1502.957 |
| NM_018627 | 543.455   | 683.707   | NM_01779E | 10677.762 | 4682.42   | NM_018223 | 980.692  |
| AL157458  | 359.412   | 308.923   | NM_01241C | 2578.247  | 2516.974  | NM_006693 | 1898.73  |
| NM_015377 | 611.901   | 645.527   | NM_001111 | 6672.148  | 7268.062  | NM_001722 | 496.379  |
| AL137531  | 1300.642  | 921.199   | NM_01804E | 6266.611  | 5736.306  | NM_003297 | 393.753  |
| AL080085  | 4204.518  | 4093.524  | AJ133439  | 627.837   | 738.111   | NM_01826E | 4179.42  |
| AF086519  | 742.908   | 906.329   | NM_01439E | 1450.332  | 593.275   | AK024633  | 739.106  |
| AF055012  | 2579.708  | 2564.62   | NM_001561 | 1312.919  | 2432.844  | NM_001453 | 1424.713 |
| AK022307  | 2545.705  | 2140.557  | NM_00516C | 1487.436  | 1439.786  | NM_01207E | 1027.254 |
| U00950    | 434.471   | 304.343   | NM_00059E | 388.524   | 568.614   | AB004851  | 289.017  |
| AF085997  | 293.784   | 377.266   | X78817    | 16649.434 | 24560.396 | NM_013381 | 300.473  |
| NM_00517Z | 1033.246  | 808.37    | AB023135  | 1154.559  | 679.345   | AK023911  | 1007.195 |
| AK025192  | 4382.533  | 3523.451  | AY009401  | 1801.086  | 2169.151  | NM_001283 | 979.235  |
| NM_012403 | 1768.978  | 2000.281  | AF294628  | 770.409   | 1070.293  | AL110237  | 428.335  |
| AK023251  | 291.386   | 523.279   | AK026960  | 445.93    | 384.285   | D87470    | 266.594  |
| AK022611  | 4581.682  | 3822.764  | NM_001991 | 1192.73   | 585.456   | AF147307  | 2145.417 |
| NM_00615E | 9139.605  | 7028.3    | NM_000193 | 1757.152  | 1277.14   | AK001829  | 653.458  |
| NM_00634E | 1482.681  | 1653.052  | NM_00244E | 1018.82   | 468.629   | NM_01652E | 1253.547 |
| AK025240  | 2606.624  | 3487.837  | AF053952  | 31242.99  | 20900.922 | AK024931  | 5244.149 |
| NM_017633 | 14745.185 | 13350.167 | NM_003213 | 5785.625  | 4785.639  | AL109715  | 274.963  |
| AF086186  | 11542.134 | 13426.522 | BF184738  | 680.869   | 190.873   | AF086181  | 350.708  |
| NM_01780Z | 2193.323  | 3838.471  | NM_015057 | 650.023   | 1413.54   | AK021540  | 262.879  |
| AK023667  | 667.323   | 676.59    | AF303398  | 8847.1    | 9888.446  | D86985    | 326.628  |
| AJ008137  | 9328.746  | 8242.139  | NM_01481C | 3344.507  | 2155.476  | AK022258  | 349.244  |
| AF085841  | 771.884   | 676.249   | NM_00473E | 1819.743  | 1511.323  | AK000930  | 197.137  |
| AL049232  | 436.18    | 294.607   | NM_007357 | 3555.066  | 4631.51   | AF088043  | 326.099  |
| U92026    | 555.687   | 747.365   | NM_003763 | 5863.257  | 6461.508  | AF131799  | 463.534  |
| AF086234  | 20593.674 | 23420.414 | AK023448  | 1155.06   | 1015.691  | AK000455  | 535.461  |
| AK023680  | 4383.854  | 3099.113  | Y18213    | 1733.674  | 1316.306  | NM_00523C | 391.465  |
| AF009324  | 2571.848  | 2465.801  | NM_003283 | 1995.587  | 1144.512  | AL365407  | 734.137  |
| AF019226  | 3421.213  | 2206.159  | AF249898  | 6069.951  | 3587.459  | AK000840  | 2723.548 |
| AK022112  | 500.384   | 425.221   | M69181    | 5467.567  | 2694.599  | AL162073  | 362.919  |
| AL137480  | 11990.632 | 11509.716 | AK027224  | 556.091   | 282.073   | AL390160  | 333.018  |
| AK022182  | 862.925   | 587.448   | NM_00242E | 1922.485  | 2872      | AJ006835  | 823.179  |
| D16473    | 1353.836  | 1738.132  | NM_014674 | 1929.528  | 2750.587  | AF085890  | 150.08   |
| AB028968  | 1056.911  | 1107.98   | NM_018271 | 1795.664  | 856.231   | AL110138  | 347.949  |
| AK001202  | 581.145   | 412.643   | NM_000547 | 288.636   | 629.78    | AL110248  | 144.021  |
| AF195764  | 31971.664 | 31522.234 | NM_01465Z | 2342.042  | 2165.016  | AL122039  | 434.693  |
| AF055029  | 592.302   | 625.535   | AL133020  | 7064.091  | 7347.861  | AF070577  | 2345.826 |
| S82164    | 1053.084  | 835.64    | BU565263  | 59999.168 | 67976.727 | AL157484  | 5031.021 |
| AK024394  | 1691.641  | 1517.774  | NM_00502E | 2098.094  | 3233.216  | AK024850  | 1796.622 |
| AF147374  | 2317.593  | 1181.747  | NM_001611 | 937.899   | 1137.819  | Y09836    | 420.863  |
| AF130091  | 732.343   | 300.529   | M59979    | 495.301   | 651.706   | AL137597  | 9196.654 |
| L43338    | 6639.422  | 8182.788  | AB018310  | 2076.031  | 4479.546  | AF086044  | 379.059  |
| AJ227866  | 13851.486 | 10472.289 | NM_020133 | 257.183   | 551.022   | NM_01492E | 387.917  |
| AF458223  | 7342.999  | 4394.686  | NM_01537E | 24024.105 | 17049.965 | AF131790  | 373.303  |
| AK026822  | 613.158   | 355.896   | NM_00487E | 528.313   | 885.488   | AJ011378  | 211.136  |
| NM_018587 | 226.405   | 211.903   | NM_00074Z | 921.396   | 406.367   | AF009266  | 615.506  |
| AK022838  | 5684.009  | 6308.229  | NM_00235E | 10374.893 | 7480.898  | AF009310  | 401.1    |
| NM_00350E | 885.122   | 1066.125  | AK026608  | 1233.62   | 1470.419  | AF060168  | 1016.854 |
| CY3Cy5    | 10611.97  | 827.062   | NM_01889C | 36829.215 | 31527.154 | AF009275  | 506.937  |
| AA700390  | 5710.947  | 4682.583  | NM_016204 | 1289.212  | 1785.906  | AF015251  | 330.643  |
| Y18474    | 2437.632  | 596.136   | AB046836  | 1594.614  | 1835.852  | AF056426  | 407.974  |

|           |           |           |           |           |           |            |           |
|-----------|-----------|-----------|-----------|-----------|-----------|------------|-----------|
| AA436163  | 543.68    | 1596.785  | NM_017816 | 5418.043  | 6403.714  | AF064850   | 488.873   |
| BI907981  | 1074.195  | 1321.536  | AJ224166  | 1291.907  | 2436.415  | AK001096   | 439.999   |
| BI603841  | 4579.847  | 3637.233  | AK026098  | 1666.148  | 1585.327  | NM_018329  | 1228.719  |
| BG696638  | 1213.518  | 5939.545  | NM_012381 | 1178.968  | 1938.514  | AK021565   | 415.143   |
| M19888    | 1102.133  | 1738.424  | NM_006397 | 13610.031 | 13939.769 | AK021778   | 332.25    |
| Y08136    | 1543.98   | 892.309   | D83776    | 1993.674  | 2316.749  | AK001150   | 3933.554  |
| AA156863  | 4656.866  | 3843.211  | NM_004088 | 2191.117  | 3204.264  | AK002123   | 432.992   |
| BI915199  | 1212.797  | 1391.21   | NM_000138 | 2638.108  | 1373.383  | AK021633   | 875.794   |
| R82957    | 55888.684 | 58002.039 | NM_018163 | 1263.614  | 851.658   | AK025194   | 203.916   |
| BI830442  | 1098.225  | 712.74    | AK026362  | 3317.153  | 1500.647  | AK025659   | 388.699   |
| AA398951  | 2165.113  | 3359.418  | NM_004968 | 3528.217  | 2986.977  | AK026788   | 612.133   |
| AI218732  | 2115.952  | 1505.648  | NM_005908 | 1840.643  | 2340.287  | AK025272   | 360.828   |
| NM_004102 | 6904      | 5159.797  | NM_004785 | 3363.682  | 5557.853  | AK026824   | 229.16    |
| NM_004544 | 6628.805  | 4001.942  | AK024079  | 153.673   | 1171.381  | AJ008130   | 4137.523  |
| SR5       | 4571.9    | 2656.411  | NM_000193 | 2157.668  | 4156.005  | AF086502   | 1156.167  |
| SR7       | 6090.305  | 35788.668 | AF053952  | 25151.486 | 27894.447 | L39924     | 419.532   |
| SR9       | 26864.256 | 3218.426  | NM_003213 | 3454.742  | 7508.708  | U52054     | 975.496   |
| CY3Cy5    | 10148.499 | 870.215   | NM_014044 | 3962.963  | 6390.479  | AK023325   | 1211.898  |
| NM_018049 | 4996.238  | 5668.164  | NM_000900 | 954.649   | 1398.933  | NM_017985  | 683.644   |
| AJ133439  | 618.191   | 538.609   | AK023684  | 5893.141  | 5863.168  | AK025866   | 854.525   |
| NM_014395 | 2027.163  | 593.894   | NM_000232 | 1082.591  | 1808.089  | AF088058   | 901.795   |
| NM_001561 | 640.413   | 501.146   | AA700390  | 6805.494  | 5481.636  | NM_000513  | 612.833   |
| NM_005160 | 1545.736  | 1469.08   | Y18474    | 663.911   | 422.635   | Y11165     | 744.423   |
| NM_000596 | 858.008   | 238.03    | BI907981  | 935.28    | 2098.67   | unknown (S | 78.903    |
| X78817    | 19089.061 | 19286.611 | BI603841  | 2808.655  | 3534.698  | U92992     | 32.945    |
| AB023135  | 951.144   | 732.936   | BG696638  | 4031.534  | 5159.563  | BC028422   | 411.316   |
| AY009401  | 1272.444  | 876.26    | Y08136    | 838.522   | 462.173   | NM_013244  | 133.483   |
| AF294628  | 569.542   | 561.192   | AA156863  | 4544.772  | 2029.142  | AK024413   | 443.877   |
| AK026960  | 526.199   | 604.029   | BI915199  | 1834.096  | 597.376   | AK022247   | 782.738   |
| NM_001991 | 1192.939  | 594.686   | R82957    | 42044.824 | 26645.359 | AK001453   | 380.986   |
| NM_000193 | 2293.049  | 1861.254  | BI830442  | 955.882   | 1328.832  | AB007972   | 1179.315  |
| BC014586  | 807.843   | 443.826   | AA398951  | 5062.258  | 8314.416  | AL390144   | 894.046   |
| NM_002448 | 1185.567  | 1018.692  | AI218732  | 1208.297  | 1507.352  | AK024017   | 935.896   |
| AF053952  | 21059.318 | 16977.379 | AF249898  | 2445.984  | 2919.703  | X56196     | 355.576   |
| BF184738  | 1206.399  | 867.006   | NM_002652 | 1084.383  | 1577.267  | D17220     | 2490.472  |
| NM_014044 | 3748.943  | 1995.019  | NM_001311 | 2174.833  | 2213.865  | D28363     | 16822.063 |
| NM_000900 | 4567.07   | 1870.801  | NM_017798 | 6011.352  | 4393      | AB011171   | 1621.65   |
| AK023684  | 6219.608  | 3994.978  | NM_012410 | 1873.564  | 2052.454  | AF090099   | 232.067   |
| NM_000232 | 1126.37   | 1059.182  | NM_001111 | 7511.796  | 9174.055  | AK023606   | 192.181   |
| J05070    | 1054.81   | 242.975   | NM_018049 | 4544.771  | 3902.934  | AF189251   | 293.818   |
| NM_015057 | 758.729   | 1021.045  | AJ133439  | 581.509   | 707.317   | NM_005322  | 2201.009  |
| AF303398  | 8485.243  | 6121.629  | NM_014395 | 1210.951  | 299.567   | AK024465   | 670.192   |
| NM_014810 | 3507.244  | 1846.547  | NM_005160 | 1625.843  | 1271.776  | AF075119   | 340.804   |
| NM_004738 | 2201.288  | 1267.509  | AB023135  | 1432.577  | 620.813   | AK021478   | 730.375   |
| NM_007357 | 2905.177  | 3781.22   | AY009401  | 922.63    | 239.131   | AF131782   | 3348.986  |
| NM_003763 | 5976.304  | 3784.656  | NM_001991 | 967.541   | 862.445   | NM_014210  | 9881.718  |
| AK023448  | 1825.093  | 1312.148  | NM_002355 | 12913.388 | 14734.948 | AK021603   | 598.145   |
| Y18213    | 3348.392  | 1940.929  | AK026608  | 1169.42   | 1559.206  | AL110136   | 1488.719  |
| NM_003283 | 3438.232  | 2259.15   | AF303398  | 8206.069  | 7074.113  | AF075095   | 178.172   |
| AF249898  | 11698.441 | 5968.71   | NM_004738 | 1816.228  | 935.881   | AK002203   | 275.69    |
| M69181    | 12642.876 | 6401.052  | NM_007357 | 2836.404  | 2214.284  | AK026469   | 2300.932  |
| AK027224  | 855.118   | 131.715   | NM_003763 | 4912.26   | 2645.849  | D16935     | 1256.368  |
| L09078    | 696.747   | 407.026   | AK023448  | 935.078   | 557.144   | AK027019   | 146.519   |

|           |           |           |           |           |           |           |           |
|-----------|-----------|-----------|-----------|-----------|-----------|-----------|-----------|
| NM_002652 | 1027.884  | 771.382   | Y18213    | 1797.426  | 979.589   | U52835    | 4043.108  |
| NM_001311 | 2438.033  | 1169.557  | NM_003283 | 2104.679  | 738.361   | NM_000756 | 1092.46   |
| NM_017798 | 6629.536  | 4645.5    | NM_018163 | 1266.137  | 1650.8    | AK022148  | 501.651   |
| NM_012410 | 4889.425  | 2512.428  | AK026362  | 3237.961  | 2680.196  | Z36811    | 22218.977 |
| NM_001111 | 9663.522  | 6576.362  | NM_004968 | 3705.1    | 2655.648  | K03200    | 5452.932  |
| BU565263  | 64950.328 | 67225.664 | NM_005908 | 873.926   | 1304.999  | U17629    | 2769.731  |
| NM_005028 | 2406.949  | 2232.042  | NM_004785 | 3255.533  | 5675.153  | NM_020428 | 601.245   |
| NM_001611 | 1092.758  | 639.422   | NM_002428 | 1518.559  | 1951.953  | U79265    | 949.056   |
| M59979    | 660.977   | 298.047   | NM_014674 | 1783.019  | 4994.62   | AK022868  | 1801.598  |
| AB018310  | 1713.64   | 1848.408  | NM_018271 | 1601.505  | 2061.371  | NM_003530 | 900.122   |
| NM_020133 | 635.461   | 177.313   | NM_014652 | 1407.021  | 1265.116  | AJ227871  | 816.244   |
| NM_004878 | 353.845   | 440.108   | AL133020  | 5882.058  | 9118.053  | AK025344  | 1796.164  |
| AF144638  | 52511.871 | 51626.078 | NM_005028 | 1893.616  | 3358.958  | D28589    | 3944.871  |
| NM_000742 | 1057.092  | 610.757   | NM_001611 | 1120.449  | 944.156   | AF301223  | 318.212   |
| NM_002355 | 8569.641  | 6192.587  | AB018310  | 934.417   | 1229.436  | NM_017867 | 3240.915  |
| AK026608  | 1167.934  | 786.411   | NM_015378 | 11990.463 | 4572.158  | U92820    | 3481.205  |
| AB046836  | 1031.038  | 900.557   | NM_004878 | 510.894   | 823.153   | NM_017937 | 947.547   |
| NM_017816 | 2274.882  | 4424.585  | AF144638  | 60939.332 | 56504.652 | AL360266  | 911.389   |
| AJ224166  | 792.083   | 1124.969  | NM_001777 | 14619.996 | 8691.688  | AL160132  | 7068.999  |
| AK026098  | 2104.794  | 1922.898  | U79457    | 1994.389  | 1189.558  | NM_019557 | 2694.977  |
| NM_012381 | 813.602   | 1302.144  | NM_014347 | 5597.17   | 6802.548  | CY3Cy5    | 4458.755  |
| M20702    | 618.107   | 481.966   | NM_001296 | 6378.619  | 12133.793 | AA150828  | 1406.85   |
| D83776    | 1432.121  | 1101.062  | NM_004344 | 5977.479  | 6270.315  | H90764    | 371.016   |
| NM_004088 | 1674.637  | 1716.589  | NM_000757 | 466.616   | 1042.23   | AI859208  | 1651.52   |
| NM_002180 | 1037.31   | 1134.688  | AB046786  | 1786.375  | 1896.087  | H64379    | 4015.351  |
| NM_000138 | 3527.286  | 2093.647  | NM_016620 | 14096.982 | 15020.144 | BE208258  | 41129.227 |
| NM_018163 | 1613.332  | 1105.457  | NM_018890 | 12336.699 | 8679.565  | T72202    | 472.577   |
| AK026362  | 5064.969  | 2190.511  | NM_016204 | 1480.221  | 1699.152  | BI831922  | 662.505   |
| NM_004968 | 3721.364  | 2252.952  | AJ224166  | 1064.708  | 1443.301  | M69238    | 1534.072  |
| NM_005908 | 2100.565  | 1347.899  | AK026098  | 1447.795  | 1086.378  | M80244    | 558.6     |
| NM_004785 | 3366.354  | 2765.165  | NM_012381 | 1023.836  | 1032.298  | AA599158  | 1776.595  |
| NM_002428 | 1870.142  | 1738.808  | NM_006397 | 10988.948 | 9064.323  | BE294756  | 320.226   |
| NM_014674 | 2688.508  | 3274.071  | D83776    | 976.751   | 1025.62   | SR5       | 4652.843  |
| NM_018271 | 1234.1    | 857.435   | NM_004088 | 1969.685  | 2076.635  | CY3Cy5    | 5162.028  |
| NM_000547 | 456.818   | 505.091   | NM_002180 | 921.813   | 918.335   | NM_001560 | 4027.328  |
| NM_014652 | 1602.479  | 1486.471  | NM_000138 | 2757.089  | 1282.758  | NM_001783 | 6747.401  |
| AL133020  | 4662.636  | 4758.561  | AB011541  | 1189.4    | 1159.406  | J03171    | 1543.659  |
| NM_014044 | 3944.57   | 4462.201  | NM_014071 | 3265.052  | 3238.237  | NM_005856 | 1071.589  |
| NM_000900 | 4458.2    | 3008.959  | AK024404  | 1898.468  | 822.491   | NM_004323 | 10857.117 |
| AK023684  | 5833.431  | 4285.074  | NM_000213 | 30681.865 | 25679.293 | NM_005312 | 472.551   |
| NM_000232 | 1248.492  | 1259.947  | BE906107  | 7070.302  | 7824.069  | NM_001711 | 882.769   |
| J05070    | 1161.906  | 306.174   | NM_015516 | 2800.659  | 2686.716  | NM_004210 | 10332.429 |
| AA700390  | 5693.992  | 4119.326  | NM_005211 | 905.998   | 1253.869  | NM_020140 | 1816.612  |
| Y18474    | 2378.293  | 657.874   | NM_004857 | 9924.104  | 12621.336 | NM_001962 | 549.862   |
| AA436163  | 644.978   | 1837.505  | NM_003253 | 1342.069  | 1493.086  | NM_002500 | 743.724   |
| BI907981  | 1159.1    | 1236.198  | NM_013285 | 2597.277  | 3100.091  | AK026232  | 725.869   |
| BI603841  | 5064.002  | 3930.945  | NM_002872 | 5562.922  | 5298.245  | NM_014892 | 12624.892 |
| BG696638  | 1125.224  | 4621.628  | NM_000490 | 1603.923  | 961.187   | AK023827  | 2419.454  |
| M19888    | 1422.249  | 1618.264  | NM_004839 | 1273.153  | 1094.581  | NM_001117 | 277.665   |
| Y08136    | 1979.206  | 883.583   | NM_012193 | 1377.025  | 1623.742  | NM_000231 | 1560.654  |
| AA156863  | 4641.083  | 4356.975  | NM_003405 | 4187.947  | 1820.408  | L07517    | 447.79    |
| BI915199  | 1587.065  | 1573.895  | NM_004720 | 3656.656  | 1529.116  | AK022451  | 1766.502  |
| R82957    | 56552.691 | 54611.93  | NM_001057 | 1045.607  | 302.319   | NM_014359 | 64419.184 |

|           |           |           |           |           |           |           |           |
|-----------|-----------|-----------|-----------|-----------|-----------|-----------|-----------|
| BI830442  | 1106.572  | 993.196   | AF272381  | 4537.33   | 5344.566  | BM918441  | 2000.97   |
| AA398951  | 2308.771  | 2755.018  | NM_006315 | 1141.332  | 1305.672  | NM_001045 | 7108.142  |
| AI218732  | 2223.949  | 1883.613  | NM_005163 | 1255.416  | 1167.064  | NM_005697 | 3030.573  |
| NM_004102 | 4642.274  | 3730.364  | NM_007273 | 25045.346 | 27973.527 | NM_003095 | 2705.638  |
| NM_004544 | 7240.777  | 4227.524  | BE894943  | 756.345   | 1305.462  | NM_004781 | 309.945   |
| NM_016204 | 615.758   | 677.406   | NM_016422 | 1114.228  | 1615.417  | NM_018303 | 1191.045  |
| NM_002652 | 810.505   | 761.327   | NM_017875 | 2193.039  | 2074.51   | NM_014755 | 2214.07   |
| NM_001311 | 3050.453  | 3091.921  | NM_004494 | 48672.832 | 54201.426 | NM_005124 | 809.016   |
| NM_017795 | 6337.663  | 5266.626  | AL049687  | 794.671   | 794.008   | AK000947  | 1372.511  |
| NM_000354 | 375.359   | 383.783   | NM_005643 | 19783.379 | 19847.078 | L08240    | 712.866   |
| NM_012410 | 4522.743  | 2681.895  | NM_003592 | 2166.079  | 2842.025  | NM_017952 | 732.722   |
| NM_001111 | 8941.461  | 7756.345  | NM_014953 | 1701.837  | 1230.221  | NM_016081 | 10551.657 |
| NM_018045 | 4892.046  | 5422.161  | AF179995  | 593.796   | 784.979   | NM_006385 | 490.001   |
| AJ133439  | 676.065   | 575.443   | NM_016195 | 6079.406  | 1363.756  | M30818    | 1044.24   |
| NM_014395 | 2151.609  | 613.438   | NM_004523 | 803.646   | 330.049   | NM_000163 | 435.809   |
| NM_001561 | 703.782   | 579.478   | NM_004404 | 3531.658  | 1702.121  | NM_003325 | 31417.303 |
| NM_005160 | 1450.031  | 1144.803  | NM_002960 | 4082.799  | 2929.84   | NM_003295 | 20876.15  |
| X78817    | 20547.258 | 18709.441 | NM_006790 | 1370.17   | 818.58    | NM_014330 | 16615.756 |
| AB023135  | 1069.172  | 592.04    | AL117522  | 8942.222  | 14389.069 | NM_007214 | 3769.864  |
| NM_003393 | 1187.983  | 960.638   | NM_019061 | 1459.622  | 1863.344  | NM_000311 | 1303.777  |
| AY009401  | 1774.159  | 1126.795  | AB033007  | 4972.873  | 5966.686  | NM_017905 | 1162.428  |
| AF294628  | 471.97    | 573.497   | NM_003781 | 662.159   | 855.133   | NM_006335 | 2802.006  |
| AK026960  | 659.499   | 583.912   | NM_003130 | 545.26    | 853.391   | NM_000786 | 1945.812  |
| NM_001991 | 1335.438  | 571.271   | NM_004716 | 17636.148 | 22382.68  | AL133561  | 1071.259  |
| NM_000193 | 2365.609  | 2088.749  | D29810    | 1670.122  | 2422.671  | NM_017731 | 240.664   |
| BC014586  | 718.048   | 547.471   | NM_000125 | 1227.339  | 1311.574  | AB040891  | 1246.159  |
| NM_002445 | 1202.2    | 1016.623  | AB002384  | 1772.757  | 2901.413  | AB037780  | 365.548   |
| AF053952  | 24271.822 | 24492.477 | NM_018437 | 783.95    | 893.83    | NM_005845 | 3898.126  |
| BF184738  | 1189.829  | 1064.969  | AK023164  | 1009.701  | 722.867   | NM_016205 | 4228.902  |
| NM_015057 | 830.997   | 863.987   | NM_005375 | 1406.418  | 1103.826  | NM_018964 | 3412.449  |
| AF303398  | 7836.442  | 5345.252  | AK027121  | 3029.948  | 1317.747  | NM_000080 | 1104.257  |
| NM_014810 | 2762.534  | 1348.861  | NM_017433 | 2241.267  | 1513.403  | NM_001825 | 382.369   |
| NM_004735 | 2008.346  | 1099.465  | AL117661  | 2582.238  | 936.651   | NM_007256 | 433.269   |
| NM_007357 | 3283.269  | 3440.517  | X64643    | 1775.109  | 1238.55   | AF283645  | 768.125   |
| NM_003763 | 6444.079  | 3956.72   | NM_005380 | 5587.928  | 9202.91   | NM_016575 | 1708.967  |
| AK023448  | 1696.177  | 1395.074  | NM_002697 | 893.377   | 1154.184  | NM_003897 | 628.495   |
| Y18213    | 3007.691  | 1914.821  | NM_001515 | 4652.591  | 5862.737  | NM_014165 | 2828.812  |
| NM_003283 | 3231.446  | 2190.711  | NM_003412 | 26241.346 | 30437.928 | AL442085  | 2418.827  |
| AF249898  | 10097.333 | 6687.807  | NM_018336 | 844.99    | 607.973   | NM_013313 | 2483.676  |
| M69181    | 8698.229  | 4584.322  | AK022668  | 2956.391  | 3284.47   | NM_014736 | 2538.327  |
| AK027224  | 849.663   | 219.317   | AW975132  | 3270.735  | 4394.745  | AK023886  | 848.738   |
| L09078    | 735.072   | 1020.074  | NM_006051 | 2951.064  | 4011.452  | NM_002553 | 593.863   |
| NM_002425 | 1488.027  | 2279.204  | NM_018427 | 3626.1    | 3857.07   | AJ404615  | 916.755   |
| NM_014674 | 3168.902  | 6563.905  | AB037814  | 578.511   | 543.19    | NM_016053 | 6392.162  |
| NM_018271 | 1262.132  | 1130.74   | NM_014663 | 3387.873  | 8229.803  | AB007869  | 2638.476  |
| NM_014652 | 1738.681  | 1659.442  | AB037753  | 3591.742  | 2964.278  | AB046844  | 509.284   |
| AL133020  | 4334.935  | 5229.55   | NM_004674 | 1425.314  | 1587.191  | NM_000302 | 613.313   |
| BU565263  | 62245.758 | 61751.141 | AB037801  | 5384.456  | 2983.024  | NM_013235 | 8371.854  |
| NM_005025 | 2432.015  | 1995.165  | AL080159  | 15532.939 | 13730.596 | NM_016015 | 2120.108  |
| NM_001611 | 1168.479  | 537.31    | NM_017823 | 20942.629 | 16703.25  | NM_020120 | 942.636   |
| M59979    | 645.141   | 166.133   | U30828    | 6929.207  | 2842.752  | AK022900  | 729.355   |
| AB018310  | 1584.075  | 1639.57   | AF085886  | 29941.33  | 56699.426 | AB023216  | 494.115   |
| NM_015375 | 41111.773 | 12095.516 | AK023828  | 9507.843  | 15817.244 | NM_002266 | 8667.38   |

|           |           |           |           |           |           |           |           |
|-----------|-----------|-----------|-----------|-----------|-----------|-----------|-----------|
| NM_004878 | 495.863   | 316.762   | NM_014612 | 13130.33  | 16889.615 | NM_01440C | 3659.761  |
| AF144638  | 38112.289 | 38969.707 | AK021815  | 889.695   | 846.191   | AL157492  | 790.679   |
| NM_005502 | 571.666   | 487.818   | NM_016641 | 2655.335  | 3119.006  | AL353957  | 2963.442  |
| NM_000742 | 1143.627  | 789.679   | AB018010  | 1145.991  | 1561.148  | NM_000231 | 1356.414  |
| NM_002355 | 8893.68   | 7914.975  | NM_01461C | 8022.934  | 8144.076  | L07517    | 399.999   |
| AK026608  | 1409.079  | 1602.818  | NM_000689 | 587.107   | 1390.523  | AK022451  | 1110.819  |
| NM_004102 | 4643.376  | 5199.299  | NM_006621 | 2296.077  | 4195.78   | BM918441  | 1348.433  |
| NM_004544 | 7180.119  | 7754.694  | BF347398  | 3424.481  | 6362.5    | AA150828  | 1007.604  |
| NM_016204 | 766.145   | 781.379   | AK026762  | 1463.168  | 3625.378  | H90764    | 370.443   |
| AB046836  | 1051.313  | 690.264   | L48516    | 1292.917  | 900.678   | AI859208  | 1613.019  |
| NM_017816 | 2475.266  | 3732.52   | NM_01664E | 6450.002  | 2239.965  | H64379    | 4355.477  |
| AJ224166  | 930.106   | 1053.789  | AF083930  | 1286.462  | 682.948   | T72202    | 489.044   |
| AK026098  | 1962.484  | 1758.742  | NM_005986 | 457.37    | 456.592   | BI831922  | 666.39    |
| NM_012381 | 673.35    | 916.156   | NM_003426 | 723.704   | 1346.417  | M69238    | 1426.119  |
| NM_006397 | 6489.331  | 5949.052  | AK027159  | 1000.159  | 1072.025  | AA664180  | 632.771   |
| D83776    | 1346.709  | 1167.751  | AF086152  | 13335.742 | 14112.65  | M80244    | 751.105   |
| NM_00408E | 1742.661  | 2383.681  | U78519    | 1605.077  | 1275.794  | AK026092  | 1636.492  |
| NM_00218C | 1055.513  | 1059.425  | AK026872  | 1514.202  | 997.473   | AK001175  | 1380.211  |
| NM_00013E | 2335.415  | 2132.562  | AL157505  | 1227.405  | 1886.442  | NM_003329 | 27836.158 |
| NM_018163 | 1213.513  | 1201.426  | NM_00719C | 4523.224  | 5882.637  | NM_003299 | 15451.63  |
| AK026362  | 4428.406  | 2484.322  | AF043897  | 745.738   | 1087.705  | NM_007034 | 232.414   |
| NM_00496E | 3960.494  | 3384.878  | U79246    | 1444.551  | 1254.886  | NM_00156C | 4241.173  |
| NM_00590E | 1726.729  | 1577.435  | NM_018836 | 705.626   | 820.604   | NM_001783 | 6276.504  |
| NM_004785 | 3287.193  | 3952.044  | AF052127  | 4240.627  | 3044.721  | J03171    | 1547.922  |
| AK024079  | 372.609   | 321.756   | AF086481  | 722.166   | 1050.878  | NM_005856 | 1376.902  |
| NM_000193 | 2601.194  | 3219.04   | AK024885  | 873.532   | 1666.835  | NM_00231C | 375.112   |
| BC014586  | 693.835   | 1126.408  | AK022441  | 1250.779  | 1360.515  | NM_005312 | 447.532   |
| NM_00244E | 1172.951  | 1346.271  | NM_016947 | 38431.668 | 41983.98  | NM_001711 | 1065.805  |
| AF053952  | 27146.344 | 35419.051 | AL359940  | 1606.801  | 2352.932  | NM_00421C | 9378.896  |
| BF184738  | 1124.426  | 966.973   | NM_018286 | 460.668   | 1077.261  | NM_02014C | 1735.748  |
| NM_014044 | 3844.984  | 3972.969  | AK024925  | 22863.768 | 29128.484 | NM_014892 | 11719.82  |
| NM_00090C | 4862.684  | 2541.892  | AK022039  | 623.813   | 963.987   | AK023827  | 2466.724  |
| AK023684  | 5849.107  | 4528.707  | AL049460  | 7420.038  | 7132.167  | NM_001117 | 267.19    |
| NM_000232 | 1327.028  | 1229.127  | AK022396  | 2621.093  | 2983.426  | NM_001829 | 335.299   |
| J05070    | 987.913   | 341.915   | AF075113  | 818.623   | 745.041   | NM_007256 | 597.373   |
| U76368    | 389.232   | 388.039   | AF086037  | 731.302   | 818.866   | NM_000339 | 260.852   |
| AA700390  | 6159.841  | 4379.763  | AK022892  | 7092.208  | 4139.461  | AF283645  | 891.883   |
| Y18474    | 2410.417  | 527.817   | Z36807    | 13113.214 | 10146.291 | NM_016575 | 1181.614  |
| AA436163  | 517.254   | 1247.179  | U52836    | 1016.627  | 1664.499  | NM_018557 | 247.665   |
| BI907981  | 1179.585  | 1098.587  | NM_017939 | 2137.304  | 2498.573  | NM_001045 | 6998.486  |
| BI603841  | 4575.94   | 3151.383  | AK021837  | 2697.613  | 3998.833  | NM_005697 | 3046.064  |
| BG696638  | 1324.891  | 6613.289  | AK002088  | 14246.906 | 13607.94  | NM_003099 | 2655.565  |
| M19888    | 1545.642  | 2099.771  | X98206    | 594.087   | 448.783   | NM_004781 | 343.233   |
| Y08136    | 1564.761  | 969.44    | AK022193  | 1505.919  | 2916.915  | NM_018303 | 1194.391  |
| AA156863  | 4364.371  | 5606.315  | AK000106  | 532.845   | 661.862   | NM_01475E | 1798.924  |
| BI915199  | 1503.389  | 1791.56   | AK022370  | 1095.52   | 789.301   | NM_005124 | 715.484   |
| R82957    | 54776.141 | 57730.828 | AK026765  | 791.965   | 727.347   | AK000947  | 1178.122  |
| BI830442  | 984.255   | 1455.579  | AL117530  | 914.458   | 906.672   | L08240    | 763.164   |
| AA398951  | 2240.091  | 5132.866  | AL080191  | 3136.873  | 2949.687  | NM_016081 | 2736.885  |
| AI218732  | 2293.455  | 2691.666  | AK021639  | 12731.024 | 7651.761  | NM_000163 | 314.874   |
| AF249898  | 9996.631  | 9590.115  | AK023189  | 1037.802  | 804.232   | NM_001125 | 415.513   |
| M69181    | 12700.527 | 11723.054 | AK023872  | 762.698   | 962.32    | AB023216  | 431.091   |
| AK027224  | 586.054   | 320.52    | AF306347  | 560.47    | 550.828   | NM_002266 | 10034.711 |



|           |           |           |           |           |           |           |           |
|-----------|-----------|-----------|-----------|-----------|-----------|-----------|-----------|
| NM_002652 | 830.937   | 809.006   | AK023464  | 736.701   | 697.137   | NM_01440C | 3163.931  |
| NM_001311 | 3118.973  | 2620.531  | AK024157  | 1000.076  | 1319.073  | AL157492  | 822.606   |
| NM_01779E | 6612.084  | 5768.815  | AK023563  | 535.896   | 769.357   | AL353957  | 2507.901  |
| NM_01241C | 4421.375  | 2581.184  | AK023905  | 3006.622  | 5046.405  | NM_007214 | 4301.596  |
| NM_001111 | 9243.714  | 6487.727  | AK024231  | 4094.328  | 4832.791  | NM_000311 | 1287.434  |
| NM_01804E | 5769.488  | 5525.361  | NM_01694C | 2466.814  | 4425.841  | NM_01790E | 1087.327  |
| AJ133439  | 859.429   | 567.157   | AK025757  | 2672.58   | 3112.154  | NM_00633E | 2826.138  |
| NM_01439E | 1924.35   | 342.144   | L07394    | 9794.921  | 11781.26  | NM_00078E | 1672.087  |
| NM_001561 | 529.404   | 633.134   | AK056133  | 1137.538  | 896.685   | AL133561  | 1014.354  |
| NM_00516C | 1641.251  | 1196.704  | NM_01784E | 3529.868  | 1744.615  | NM_017731 | 430.611   |
| NM_00059E | 786.435   | 554.545   | AF130080  | 1171.904  | 627.289   | AB040891  | 1201.467  |
| X78817    | 17804.256 | 18893.436 | NM_01908E | 19055.258 | 16165.754 | NM_01620E | 3328.422  |
| AB023135  | 1078.865  | 775.605   | AL122072  | 4001.377  | 3411.503  | AK075415  | 575.755   |
| AY009401  | 1647.702  | 1015.289  | AK026221  | 798.115   | 636.106   | NM_002711 | 297.243   |
| AF294628  | 476.561   | 616.194   | AK026403  | 995.742   | 801.098   | AK026092  | 2104.591  |
| AK026960  | 620.104   | 1006.984  | AK022980  | 776.204   | 1155.81   | AK001175  | 1532.052  |
| NM_001991 | 1832.071  | 1151.162  | AL359058  | 989.554   | 1809.122  | NM_003897 | 529.993   |
| NM_005502 | 402.824   | 719.093   | AK026237  | 2129.176  | 2738.869  | NM_01416E | 2972.097  |
| NM_000742 | 1142.666  | 1165.172  | AK023687  | 913.063   | 1290.041  | AL442085  | 2733.695  |
| NM_00235E | 8898.805  | 9774.453  | NM_00527E | 410.445   | 740.761   | NM_013313 | 2243.21   |
| AK026608  | 1237.1    | 1450.826  | AF129926  | 1283.432  | 1666.325  | NM_01473E | 2237.549  |
| NM_015057 | 647.777   | 1099.646  | AK025822  | 1980.77   | 1824.56   | AK023886  | 899.306   |
| AF303398  | 8925.568  | 7724.68   | AL360140  | 1986.674  | 2272.561  | NM_002553 | 521.134   |
| NM_01481C | 3264.289  | 1748.132  | AF201937  | 22569.34  | 24931.922 | NM_016053 | 4741.345  |
| NM_00473E | 2371.037  | 1633.854  | AL390128  | 2739.243  | 2576.918  | AB007869  | 957.567   |
| NM_007357 | 3082.096  | 5172.203  | AL157429  | 10193.898 | 7958.019  | AB046844  | 678.326   |
| NM_003763 | 6010.81   | 4751.789  | NM_012071 | 22828.213 | 10216.343 | NM_000302 | 780.121   |
| AK023448  | 1787.833  | 1899.416  | AF055018  | 4136.96   | 2682.755  | AK022900  | 881.395   |
| Y18213    | 2989.63   | 3372.852  | AF070599  | 3565.179  | 2130.398  | NM_001962 | 494.975   |
| NM_003283 | 3432.379  | 3906.536  | NM_00545C | 936.388   | 511.255   | NM_00250C | 823.506   |
| NM_018163 | 1520.565  | 3569.635  | AK023600  | 863.684   | 486.459   | AK026232  | 1018.436  |
| AK026362  | 5220.09   | 5206.476  | Z83952    | 603.414   | 665.381   | NM_014892 | 16097.589 |
| NM_00496E | 3808.571  | 4523.933  | NM_00521C | 534.503   | 644.938   | AK023827  | 2605.579  |
| NM_00590E | 2518.174  | 2340.033  | NM_00552E | 1602.584  | 2063.465  | NM_001117 | 379.558   |
| NM_00478E | 3489.245  | 4931.224  | NM_00528E | 4470.879  | 6609.493  | NM_000231 | 1670.608  |
| AK024079  | 605.249   | 410.186   | AK001918  | 1398.037  | 1868.443  | L07517    | 602.931   |
| NM_00242E | 2104.573  | 2766.244  | NM_01863E | 29319.295 | 48463.055 | AK022451  | 1333.5    |
| NM_014674 | 3101.998  | 5363.782  | AF086048  | 4591.267  | 5796.758  | BM918441  | 1248      |
| NM_018271 | 1601.8    | 1097.731  | L15616    | 2280.74   | 3917.576  | AA425102  | 578.875   |
| NM_000547 | 521.959   | 396.824   | AB019565  | 13956.675 | 14817.126 | AA150828  | 950.369   |
| NM_014652 | 1710.781  | 1521.773  | Y10529    | 962.144   | 2396.175  | H90764    | 452.417   |
| AL133020  | 4435.992  | 5216.848  | NM_000833 | 4985.266  | 7305.759  | AI859208  | 1548.838  |
| NM_004152 | 489.081   | 284.592   | NM_000283 | 2263.322  | 5039.659  | H64379    | 4551.325  |
| BU565263  | 62968.152 | 60641.68  | NM_01246C | 1163.733  | 4727.404  | BI833114  | 2488.682  |
| NM_00502E | 2639.108  | 2034.18   | NM_01211E | 4734.363  | 5815.962  | T72202    | 827.008   |
| NM_001611 | 1217.393  | 702.088   | AK001133  | 551.739   | 1258.372  | BI831922  | 763.884   |
| M59979    | 778.521   | 253.482   | AK024092  | 2967.926  | 3517.357  | M69238    | 2660.066  |
| AB018310  | 1795.161  | 3184.823  | AK002044  | 3848.122  | 4580.372  | BE294756  | 252.76    |
| NM_020133 | 590.692   | 310.675   | AK022206  | 942.208   | 514.021   | NM_016081 | 7042.39   |
| NM_01537E | 41037.953 | 16876.537 | U90904    | 8556.322  | 4994.581  | NM_00638E | 849.056   |
| NM_00487E | 558.036   | 587.325   | AF088053  | 2619.488  | 2255.062  | M30818    | 1586.331  |
| AF144638  | 53639.516 | 59443.848 | AL133662  | 1399.443  | 1160.913  | NM_000163 | 420.013   |
| BF028822  | 723.1     | 621.386   | U90903    | 833.762   | 769.113   | NM_00575E | 374.12    |

|           |           |           |            |           |           |           |           |
|-----------|-----------|-----------|------------|-----------|-----------|-----------|-----------|
| NM_001777 | 17972.607 | 12604.886 | AF278760   | 1787.179  | 1216.167  | NM_003329 | 33987.172 |
| U79457    | 5847.159  | 10100.072 | X58061     | 888.741   | 857.1     | NM_003299 | 28132.402 |
| AB037832  | 555.565   | 357.457   | AB032954   | 1274.522  | 1708.645  | NM_005261 | 244.693   |
| NM_014347 | 6889.628  | 9244.953  | NM_006003  | 9713.712  | 16806.072 | NM_001560 | 5549.822  |
| NM_001296 | 6449.239  | 12361.19  | AL110197   | 2548.188  | 3849.835  | NM_001783 | 8291.221  |
| NM_004344 | 4476.684  | 6966.633  | AF085995   | 1060.529  | 1094.724  | J03171    | 1994.3    |
| AF085972  | 380.733   | 376.654   | CY3Cy5     | 2981.564  | 295.391   | NM_005856 | 1189.922  |
| NM_000757 | 558.901   | 633.197   | AA029300   | 2608.091  | 2230.269  | NM_005312 | 294.28    |
| AB046786  | 1533.348  | 1339.86   | BG708842   | 21227.633 | 24424.078 | NM_001711 | 810.724   |
| NM_016620 | 11578.587 | 12538.333 | M19723     | 44137.109 | 50889.27  | NM_004210 | 11036.93  |
| NM_018890 | 28436.443 | 20935.607 | X06256     | 3215.741  | 2752.051  | NM_020140 | 1680.275  |
| NM_016204 | 879.575   | 890.879   | AA709271   | 649.709   | 586.811   | AK075415  | 483.256   |
| AB046836  | 1192.859  | 1100.433  | M34057     | 1145.086  | 767.114   | AK025616  | 421.221   |
| NM_017816 | 2514.219  | 4195.03   | ID 1984668 | 3667.762  | 969.822   | NM_018964 | 4551.885  |
| AJ224166  | 1035.774  | 1088.463  | ID 1832579 | 770.528   | 694.6     | NM_000080 | 1667.503  |
| AK026098  | 2075.929  | 2184.926  | H-430185 N | 1002.245  | 1075.966  | NM_001829 | 637.223   |
| NM_012381 | 670.683   | 1529.66   | D16583     | 2830.737  | 2684.34   | NM_007256 | 739.763   |
| M20702    | 553.37    | 565.078   | H44051     | 614.48    | 428.554   | NM_000339 | 378.276   |
| NM_006397 | 7147.911  | 8957.219  | AA481547   | 1198.734  | 1281.369  | AF283645  | 939.939   |
| D83776    | 1426.173  | 1633.69   | AA831880   | 631.372   | 708.258   | NM_016575 | 1480.904  |
| NM_004088 | 2055.266  | 4139.596  | T64880     | 759.995   | 690.782   | NM_018557 | 268.615   |
| NM_002180 | 1168.925  | 1488.136  | NM_020967  | 932.338   | 842.382   | NM_001045 | 12598.368 |
| NM_000138 | 2877.822  | 3177.648  | NM_001071  | 13797.586 | 5029.108  | NM_005697 | 4074.371  |
| AB011541  | 1890.611  | 3525.93   | SR2        | 52288.508 | 38052.781 | NM_003099 | 3100.354  |
| BC032460  | 11221.03  | 8684.04   | SR4        | 13735.705 | 9451.795  | NM_004781 | 336.487   |
| NM_014071 | 2335.161  | 2609.743  | SR6        | 2143.587  | 1629.392  | NM_005124 | 2104.071  |
| AK024404  | 4346.165  | 1942.123  | SR8        | 6986.397  | 17209.588 | AK000947  | 1877.247  |
| NM_006329 | 640.555   | 1609.353  | SR10       | 24103.375 | 7417.54   | NM_017952 | 590.537   |
| NM_005166 | 482.662   | 580.181   | CY3Cy5     | 1803.3    | 227.131   | NM_002940 | 655.176   |
| NM_000213 | 11211.179 | 8609.602  | NM_005027  | 1851.599  | 1995.496  | AB046844  | 463.292   |
| BE906107  | 13103.967 | 12684.824 | NM_004612  | 1156.358  | 1672.122  | NM_000302 | 1066.548  |
| NM_015516 | 2548.023  | 2963.661  | NM_005608  | 1499.362  | 1574.7    | NM_013235 | 11840.375 |
| AB033065  | 1296.066  | 798.98    | NM_001106  | 611.195   | 809.919   | NM_016015 | 2596.785  |
| NM_005211 | 3392.267  | 526.434   | NM_015583  | 723.131   | 744.459   | NM_020120 | 1491.124  |
| NM_004857 | 5197.308  | 4712.63   | NM_018490  | 1273.261  | 1116.966  | AK022900  | 890.967   |
| NM_012108 | 480.457   | 555.881   | NM_006245  | 3262.026  | 1472.966  | NM_001125 | 649.146   |
| NM_003253 | 1017.852  | 448.616   | NM_004352  | 156.8     | 490.06    | AB023216  | 603.74    |
| NM_013285 | 2678.153  | 3238.611  | NM_005103  | 4011.266  | 2098.93   | NM_002266 | 12126.491 |
| NM_002872 | 13076.199 | 16794.777 | AK022349   | 946.292   | 506.134   | NM_014400 | 4440.824  |
| NM_000490 | 939.274   | 850.734   | NM_005750  | 397.139   | 229.545   | AL157492  | 964.772   |
| NM_004839 | 1318.193  | 1060.776  | NM_004973  | 1496.705  | 1209.455  | AL353957  | 2848.395  |
| NM_012193 | 1575.285  | 1790.883  | NM_007245  | 1447.023  | 1642.772  | NM_007214 | 4303.165  |
| NM_003405 | 9139.513  | 10510.108 | NM_001890  | 1003.773  | 661.241   | NM_000311 | 1300.78   |
| NM_004720 | 6027.874  | 6372.845  | NM_001286  | 722.281   | 1000.625  | NM_017909 | 1627.683  |
| NM_001057 | 1909.487  | 1433.438  | NM_005073  | 499.187   | 422.993   | NM_006335 | 3219.341  |
| NM_005561 | 8596.38   | 11561.579 | NM_000951  | 1678.917  | 1143.344  | NM_000786 | 1709.719  |
| AF272381  | 6097.563  | 10015.161 | X52599     | 589.05    | 958.589   | NM_005845 | 3319.322  |
| NM_004524 | 2307.247  | 2990.911  | AK000158   | 4424.667  | 5879.6    | NM_016209 | 3404.134  |
| NM_006315 | 2109.18   | 2989.471  | NM_005769  | 1121.684  | 1602.587  | NM_002029 | 533.481   |
| NM_018401 | 1440.437  | 1264.598  | AK024500   | 8505.69   | 5267.388  | AK002114  | 1006.27   |
| NM_005163 | 2550.818  | 3471.352  | NM_002564  | 8054.767  | 4784.271  | AL390184  | 687.971   |
| NM_007273 | 24907.797 | 33489.551 | NM_000963  | 4133.282  | 3333.058  | NM_018699 | 685.661   |
| BE894943  | 773.235   | 990.049   | NM_013308  | 4936.343  | 3615.119  | NM_018048 | 73.908    |

|           |           |           |           |           |           |           |           |
|-----------|-----------|-----------|-----------|-----------|-----------|-----------|-----------|
| AF085994  | 423.31    | 201.682   | AF027302  | 2851.283  | 1429.349  | AK026318  | 525.814   |
| NM_016422 | 1456.932  | 2099.257  | NM_002852 | 3274.356  | 2274.934  | AF291673  | 925.647   |
| NM_017878 | 3542.861  | 3067.437  | NM_001817 | 2786.147  | 2080.351  | NM_004365 | 3719.508  |
| NM_004494 | 60627.258 | 57841.512 | AF063611  | 1119.776  | 842.379   | NM_016355 | 1306.931  |
| AL049687  | 1081.23   | 899.052   | NM_006039 | 887.489   | 1502.627  | AJ296290  | 569.922   |
| NM_005643 | 13693.636 | 13080.867 | NM_002089 | 556.201   | 629.161   | AK026092  | 1989.512  |
| NM_003592 | 2320.402  | 2049.307  | NM_014656 | 5172.622  | 3249.023  | AK001175  | 1400.72   |
| NM_014953 | 2605.81   | 1590.51   | NM_002076 | 2578.268  | 1930.654  | NM_003897 | 1191.388  |
| AF179995  | 424.35    | 857.79    | X05299    | 5627.375  | 2269.6    | NM_014165 | 3118.762  |
| NM_016195 | 3874.999  | 2264.343  | BM468475  | 986.448   | 779.194   | AL442085  | 2891.924  |
| NM_004523 | 828.857   | 1075.669  | NM_000318 | 1973.385  | 1941.693  | NM_013313 | 1955.991  |
| NM_004404 | 5230.615  | 6655.505  | NM_002060 | 3735.531  | 4947.533  | NM_014736 | 2481.181  |
| NM_002960 | 3501.268  | 3113.629  | AK001230  | 1001.439  | 1356.006  | AK023886  | 1076.498  |
| AB046788  | 575.096   | 438.108   | NM_014680 | 6535.416  | 4234.502  | NM_002553 | 570.226   |
| NM_006790 | 1229.391  | 1518.008  | NM_006224 | 32994.445 | 19707.955 | AJ404615  | 816.105   |
| AL117522  | 8448.99   | 11817.739 | AL137300  | 3963.065  | 5080.977  | NM_016053 | 5549.667  |
| NM_006572 | 8615.349  | 9162.087  | NM_000229 | 2397.381  | 2584.469  | AB007869  | 1905.505  |
| NM_004784 | 554.898   | 495.756   | NM_006995 | 19635.666 | 22666.494 | M64108    | 5110.599  |
| NM_019061 | 2824.537  | 3250.299  | NM_003129 | 6950.453  | 10773.708 | NM_014767 | 520.1     |
| AB033007  | 2558.632  | 3396.642  | NM_001956 | 1966.656  | 2158      | Y17867    | 2944.623  |
| NM_003781 | 882.343   | 1139.923  | AB033064  | 1466.239  | 1704.732  | M92642    | 1221.528  |
| NM_001304 | 935.203   | 832.297   | AK022317  | 3568.502  | 2376.305  | NM_018071 | 1355.939  |
| NM_003130 | 338.648   | 855.536   | NM_018396 | 4231.463  | 3080.012  | NM_004333 | 2181.809  |
| NM_004716 | 17222.256 | 18551.354 | NM_003124 | 2879.586  | 1386.073  | M31520    | 63699.227 |
| D29810    | 3241.574  | 3112.614  | NM_006886 | 56208.84  | 21880.363 | NM_002020 | 6803.532  |
| NM_000128 | 1252.37   | 1380.399  | NM_004531 | 1638.938  | 608.746   | AL050137  | 608.568   |
| AB002384  | 1610.753  | 1710.489  | AL133581  | 815.105   | 434.731   | AK024423  | 1375.523  |
| NM_018437 | 516.13    | 1369.242  | NM_002558 | 2046.548  | 2643.121  | NM_005043 | 8632.504  |
| NM_000422 | 2248.748  | 647.656   | NM_005031 | 2185.292  | 2276.565  | NM_005979 | 10876.096 |
| AK023164  | 1112.453  | 1293.665  | AB040920  | 828.257   | 476.328   | NM_006282 | 5940.441  |
| NM_005379 | 1524.975  | 2184.512  | NM_004842 | 807.318   | 916.768   | NM_020321 | 374.609   |
| AK027121  | 2270.958  | 2192.106  | AK024639  | 2618.117  | 2035.58   | NM_015920 | 8904.646  |
| NM_017433 | 1067.091  | 1565.713  | NM_015720 | 3422.912  | 4464.965  | AB011113  | 1093.829  |
| AL117661  | 2264.895  | 2113.032  | AB007915  | 595.53    | 661.849   | NM_004115 | 619.956   |
| X64643    | 2915.326  | 2335.344  | AB033070  | 473.49    | 849.58    | NM_018287 | 580.385   |
| NM_005380 | 9994.524  | 13775.818 | NM_018229 | 810.433   | 1065.228  | NM_001955 | 2786.474  |
| NM_005269 | 383.217   | 466.781   | NM_006325 | 5141.344  | 5103.326  | AF016004  | 730.507   |
| D70835    | 39891.148 | 39639.785 | AY009127  | 9562.598  | 8170.983  | NM_003567 | 2767.594  |
| NM_002697 | 2271.382  | 2618.292  | NM_014869 | 1511.349  | 1673.471  | NM_007315 | 5288.529  |
| NM_001518 | 10722.242 | 8777.333  | NM_006708 | 19323.748 | 15809.535 | L20686    | 4502.872  |
| NM_003412 | 8765.973  | 9870.295  | AB037835  | 1248.087  | 1124.693  | AK023362  | 835.174   |
| NM_018336 | 1004.915  | 1055.25   | NM_016228 | 528.538   | 685.941   | S72604    | 15293.099 |
| AK022668  | 3451.229  | 3036.051  | NM_000157 | 4988.473  | 3860.403  | NM_017984 | 591.071   |
| AW975132  | 2519.213  | 2153.581  | NM_000712 | 7458.416  | 9452.484  | NM_002460 | 364.225   |
| NM_006051 | 4043.206  | 3258.631  | NM_018088 | 955.533   | 760.81    | NM_002675 | 836.782   |
| NM_018427 | 1966.698  | 1787.83   | BC013695  | 7284.698  | 10139.655 | NM_012432 | 15211.688 |
| AB037814  | 507.508   | 568.159   | NM_007205 | 380.611   | 258.551   | NM_005007 | 7281.109  |
| NM_014663 | 3043.527  | 9169.954  | AK023035  | 1454.293  | 663.776   | AK024996  | 1260.5    |
| AF007217  | 1111.864  | 1152.737  | NM_014846 | 2128.052  | 975.192   | NM_012290 | 1284.913  |
| AB037753  | 4545.39   | 6715.941  | AB011164  | 2913.19   | 1079.238  | NM_002431 | 198.505   |
| NM_004674 | 2493.542  | 1929.599  | M24750    | 920.114   | 591.427   | NM_001827 | 7508.618  |
| AB037801  | 6629.629  | 5190.949  | NM_005965 | 1014.794  | 572.195   | NM_020466 | 3044.899  |
| AL080159  | 12554.75  | 10126.253 | NM_002740 | 2373.594  | 1600.919  | NM_002853 | 1407.761  |

|           |           |           |            |           |           |           |           |
|-----------|-----------|-----------|------------|-----------|-----------|-----------|-----------|
| NM_017823 | 43478.289 | 45509.371 | AL117482   | 1295.742  | 1090.044  | NM_012307 | 15149.271 |
| U55185    | 1218.094  | 1664.126  | NM_006549  | 13292.105 | 12498.785 | NM_002540 | 344.064   |
| U30828    | 8266.796  | 9139.687  | AB018324   | 6460.465  | 4081.328  | NM_006371 | 576.475   |
| AF085886  | 53057.348 | 58818.047 | NM_002742  | 43085.32  | 42541.945 | NM_018834 | 320.413   |
| AK023828  | 5071.613  | 4863.799  | Z25431     | 2951.497  | 3247.553  | AK026882  | 675.983   |
| AK022664  | 486.425   | 785.972   | NM_005627  | 2856.432  | 3975.214  | NM_004574 | 540.263   |
| AL080223  | 2144.933  | 3371.768  | M64497     | 1540.034  | 1893.486  | NM_004848 | 4935.218  |
| AK001630  | 2047.507  | 1347.574  | NM_007274  | 3896.423  | 5043.681  | NM_001944 | 645.794   |
| NM_014612 | 6721.172  | 10849.682 | NM_003356  | 4522.341  | 4556.246  | NM_014813 | 464.673   |
| AF079098  | 762.781   | 755.68    | AF238315   | 412.037   | 559.929   | AF014459  | 3210.274  |
| AK021815  | 1164.685  | 1026.986  | NM_019604  | 715.285   | 995.182   | AK024601  | 2682.71   |
| NM_001543 | 737.79    | 760.177   | NM_005073  | 565.858   | 1146.267  | S68069    | 5924.762  |
| NM_016641 | 3395.545  | 4104.395  | NM_000951  | 1938.048  | 3361.319  | AB011095  | 2549.022  |
| AB018010  | 733.78    | 889.358   | X52599     | 838.136   | 1525.421  | NM_001503 | 700.133   |
| NM_014610 | 7267.734  | 10963.929 | AA029300   | 3382.303  | 5549.578  | NM_006302 | 1396.261  |
| NM_000689 | 724.602   | 698.057   | BG708842   | 22653.207 | 40818.047 | AJ224875  | 1453.272  |
| NM_006621 | 5496.59   | 6584.456  | M19723     | 44870.422 | 57923.445 | NM_002149 | 1763.148  |
| BF347398  | 1663.079  | 2800.46   | X06256     | 3224.855  | 2579.61   | AF043324  | 1206.815  |
| AK026762  | 1193.036  | 1709.967  | AA709271   | 568.376   | 662.112   | AK024172  | 400.511   |
| AF078844  | 1171.247  | 877.652   | M34057     | 1014.578  | 527.715   | NM_014814 | 2003.223  |
| NM_004412 | 497.971   | 541.965   | ID 1984668 | 2957.026  | 382.28    | NM_002797 | 7417.105  |
| L48516    | 2055.474  | 1922.713  | ID 1832579 | 711.938   | 462.947   | NM_016129 | 267.164   |
| NM_016648 | 5524.687  | 3244.277  | H-430185 N | 887.309   | 643.264   | NM_002809 | 1349.608  |
| AF083930  | 1668.845  | 1804.82   | D16583     | 2808.564  | 2533.711  | NM_017912 | 18013.682 |
| NM_003426 | 498.475   | 901.038   | H44051     | 404.77    | 352.36    | NM_000423 | 2994.402  |
| NM_014862 | 636.83    | 586.915   | AA481547   | 1120.075  | 1102.218  | AB046838  | 863.926   |
| AK027159  | 1545.966  | 1290.329  | AA831880   | 485.798   | 500.098   | AK026339  | 1557.905  |
| AF075112  | 525.78    | 1102.387  | T64880     | 1016.435  | 1017.104  | X98411    | 3123.324  |
| AK001796  | 1072.153  | 2940.115  | NM_020967  | 949.079   | 696.099   | AF116658  | 6903.327  |
| AF086152  | 5171.93   | 7331.368  | NM_001071  | 15382.346 | 6618.561  | NM_014865 | 3534.262  |
| U78519    | 1322.59   | 1756.435  | AB028990   | 664.634   | 466.896   | AB032977  | 9487.941  |
| AK026872  | 1511.654  | 1517.093  | X05299     | 5168.978  | 3553.556  | AK001725  | 1196.087  |
| AL157505  | 1002.193  | 1278.499  | BM468475   | 1453.394  | 3082.712  | NM_003036 | 1001.181  |
| NM_007190 | 8688.909  | 12573.463 | NM_000318  | 2242.168  | 5344.131  | NM_020529 | 4485.278  |
| AF043897  | 1378.146  | 1333.563  | NM_002060  | 4998.23   | 17661.678 | NM_020395 | 1341.346  |
| U79246    | 1990.202  | 1927.138  | AK001230   | 1370.992  | 3363.409  | NM_003425 | 959.424   |
| AF052140  | 781.067   | 715.264   | NM_014680  | 6794.528  | 11921.334 | NM_013388 | 2765.753  |
| NM_018836 | 500.977   | 724.367   | NM_005027  | 1844.342  | 4313.903  | AF038951  | 6732.109  |
| AF007147  | 803.36    | 829.045   | NM_004612  | 1130.574  | 1610.98   | NM_006492 | 572.51    |
| AF052127  | 3224.716  | 3194.527  | NM_005608  | 1537.836  | 1151.895  | AK021811  | 644.042   |
| AK024261  | 630.858   | 637.981   | NM_001106  | 568.602   | 794.903   | NM_003428 | 1655.842  |
| AF052150  | 518.548   | 563.564   | NM_015583  | 955.423   | 882.119   | AF055030  | 744.759   |
| AF086481  | 915.3     | 779.905   | NM_018490  | 1187.915  | 905.895   | AK000589  | 861.487   |
| AL355689  | 319.995   | 610.824   | NM_006245  | 3087.926  | 1353.814  | X53281    | 4618.522  |
| AK024885  | 1220.584  | 2349.691  | NM_005103  | 4130.717  | 2026.285  | BC012782  | 1061.205  |
| AK022441  | 1147.997  | 1057.774  | NM_004822  | 618.191   | 615.683   | AF132026  | 31159.426 |
| AK026208  | 2153.815  | 2899.167  | AK022349   | 1075.801  | 524.739   | AL050353  | 470.18    |
| NM_016947 | 53088.504 | 57837.02  | NM_005750  | 488.969   | 321.938   | AB037788  | 1849.878  |
| AY007136  | 467.423   | 810.644   | NM_004973  | 1695.011  | 1365.977  | NM_004587 | 2574.352  |
| AL359940  | 2456.736  | 3100.332  | NM_007245  | 1659.445  | 2844.64   | NM_000975 | 62794.117 |
| NM_018286 | 611.299   | 1574.028  | NM_001890  | 997.976   | 778.985   | AF147412  | 14699.853 |
| AF085961  | 374.768   | 706.711   | NM_001286  | 991.34    | 1631.839  | AK024570  | 4955.689  |
| AK024925  | 7906.906  | 9182.646  | AB007915   | 728.709   | 1367.239  | AF161401  | 3967.906  |

|           |           |           |           |           |           |           |           |
|-----------|-----------|-----------|-----------|-----------|-----------|-----------|-----------|
| AL049460  | 4209.817  | 5991.062  | AB033070  | 1051.391  | 2695.682  | NM_00099C | 1473.64   |
| AK022396  | 1044.554  | 1690.379  | NM_01822C | 1076.177  | 2353.545  | NM_01474C | 1152.593  |
| AF075113  | 435.58    | 872.274   | NM_00632E | 5187.7    | 7764.054  | NM_01595E | 2017.781  |
| AF086037  | 473.397   | 518.443   | AY009127  | 9658.87   | 10497.782 | AF075008  | 2858.75   |
| AK022892  | 4202.211  | 3806.921  | NM_01486C | 1499.98   | 1717.892  | NM_006504 | 4530.09   |
| U50536    | 449.34    | 410.638   | AK000158  | 4625.875  | 4679.369  | AF070538  | 868.719   |
| Z36807    | 15719.894 | 14763.72  | NM_00576C | 1047.404  | 1766.52   | AL137430  | 636.218   |
| U20896    | 300.118   | 586.657   | AK024500  | 9633.875  | 8436.423  | NM_00069E | 1484.37   |
| U52836    | 575.918   | 597.753   | NM_002564 | 8504.701  | 11309.228 | NM_00248E | 6585.414  |
| AK021837  | 1992.178  | 2374.826  | NM_00096C | 3710.839  | 2101.848  | NM_00400C | 7179.213  |
| AK002088  | 8189.762  | 8522.171  | NM_01330E | 4440.821  | 3961.115  | NM_00018E | 248.532   |
| X98206    | 425.832   | 910.737   | AF027302  | 2869.019  | 1553.577  | BF244401  | 1953.078  |
| AK000106  | 979.421   | 1447.229  | NM_00285C | 2813.127  | 2305.717  | NM_00471E | 5630.499  |
| AK022370  | 1829.242  | 1856.454  | NM_001817 | 2688.945  | 2002.161  | AL359585  | 986.922   |
| AL117530  | 861.055   | 762.484   | AF063611  | 1320.202  | 1048.3    | AB046850  | 762.408   |
| AL080191  | 2379.32   | 3006.131  | NM_00603C | 1156.404  | 1685.207  | NM_014801 | 3373.44   |
| AK021639  | 10064.175 | 11234.631 | NM_00208C | 656.362   | 700.005   | NM_00364C | 2965.467  |
| AK023189  | 443.533   | 875.463   | NM_01465E | 5474.945  | 4570.543  | AB027013  | 2028.18   |
| AK023464  | 462.912   | 697.725   | NM_00207E | 2621.031  | 2005.685  | BC032686  | 1572.548  |
| AK024157  | 579.119   | 722.175   | Z25431    | 3020.976  | 3168.758  | BF185480  | 1663.168  |
| AK022963  | 505.703   | 702.102   | NM_005627 | 3257.35   | 4832.343  | NM_00212E | 1901.069  |
| AK023563  | 641.261   | 1059.46   | M64497    | 1312.924  | 2623.795  | NM_003074 | 1830.497  |
| AK024231  | 2882.668  | 2875.064  | NM_007274 | 3844.644  | 5074.588  | AL360195  | 651.343   |
| NM_01694C | 1612.336  | 1896.829  | NM_00335E | 4246.364  | 3480.915  | U14383    | 727.893   |
| AK025757  | 1527.978  | 1941.565  | AF238315  | 371.245   | 616.454   | NM_01781C | 597.302   |
| Y16713    | 729.049   | 979.248   | NM_006224 | 30316.525 | 20864.895 | NM_003181 | 54581.375 |
| L07394    | 6637.897  | 8101.536  | AL137300  | 4019.73   | 4403.182  | NM_004451 | 1357.382  |
| AK056133  | 966.43    | 991.63    | NM_00022C | 2097.641  | 2544.826  | NM_004364 | 22396.855 |
| NM_01784E | 5136.371  | 3895.72   | NM_00699E | 21519.492 | 36504.98  | AK023505  | 2948.032  |
| AF130080  | 1097.645  | 824.145   | NM_00312C | 6800      | 14270.103 | AB037851  | 3268.56   |
| AK026006  | 1203.178  | 970.822   | NM_00195E | 2145.833  | 3542.209  | AL050389  | 2100.592  |
| NM_01908C | 8078.784  | 9167.205  | AB033064  | 1322.195  | 1890.743  | AK024684  | 1584.763  |
| AF147440  | 379.046   | 1225.276  | AK022317  | 3158.729  | 1282.61   | NM_01494E | 3096.174  |
| AL122072  | 2206.546  | 2447.749  | NM_01839E | 3853.977  | 2227.046  | AK001546  | 809.879   |
| AK026221  | 701.604   | 782.682   | NM_003124 | 2727.678  | 1810.88   | NM_006537 | 5326.013  |
| Y13870    | 682.946   | 939.748   | NM_00688E | 57390.188 | 33993.41  | AF007155  | 3333.013  |
| AK026403  | 974.281   | 1515.234  | NM_004531 | 1872.756  | 729.522   | AL049282  | 3326.473  |
| AK022980  | 963.02    | 865.738   | AL133581  | 699.505   | 657.776   | AK021443  | 1419.425  |
| AL359058  | 1428.83   | 2207.368  | NM_00255E | 2108.303  | 3266.958  | AF070569  | 1025.161  |
| AK026237  | 2702.562  | 3813.19   | NM_005031 | 2072.852  | 2569.037  | NM_02023C | 1311.165  |
| AK023687  | 932.56    | 1796.565  | AB040920  | 898.745   | 583.544   | AF143873  | 404.6     |
| NM_01763C | 1131.912  | 1452.255  | NM_00484C | 828.609   | 1072.383  | AL355732  | 877.576   |
| AK026655  | 898.749   | 1123.872  | AK024639  | 3230.819  | 3162.085  | NM_01796E | 996.368   |
| AF129926  | 1493.095  | 1693.193  | NM_01572C | 3318.46   | 4987.555  | AF143327  | 1448.052  |
| AK025822  | 2779.069  | 1931.325  | NM_020967 | 863.756   | 732.867   | AL049990  | 717.671   |
| AL360140  | 1132.867  | 1115.034  | NM_001071 | 13425.072 | 4637.22   | AF131843  | 973.267   |
| AF201937  | 20702.563 | 31711.424 | AB028990  | 571.624   | 263.963   | AK026653  | 596.028   |
| AL390128  | 1490.744  | 1712.533  | NM_00670E | 17938.354 | 9596.3    | NM_020231 | 767.981   |
| AL157429  | 4833.87   | 7547.237  | AB037835  | 1244.921  | 1316.434  | AL133118  | 1031.79   |
| NM_012071 | 20923.662 | 31567.924 | NM_01622E | 492.75    | 794.144   | AK023571  | 2886.727  |
| AF055018  | 4664.564  | 5174.038  | NM_000157 | 4955.517  | 3227.012  | AF052148  | 412.472   |
| AF070599  | 1737.949  | 1734.38   | NM_00071C | 7362.692  | 8850.303  | NM_00170C | 2217.5    |
| NM_00545C | 1462.807  | 1629.571  | BC013695  | 6463.339  | 3678.579  | AK026657  | 285.769   |

|            |           |           |            |           |           |           |           |
|------------|-----------|-----------|------------|-----------|-----------|-----------|-----------|
| AK023600   | 756.121   | 724.314   | AK023035   | 1554.759  | 810.169   | NM_01805C | 265.997   |
| NM_005525  | 602.777   | 1993.552  | NM_014846  | 2000.034  | 1573.346  | AF087991  | 3678.274  |
| NM_005285  | 2346.11   | 3044.35   | AB011164   | 2598.832  | 1454.748  | Y12839    | 743.304   |
| AK001918   | 993.064   | 1043.029  | M24750     | 1180.049  | 865.794   | AJ001876  | 570.535   |
| AF086048   | 2715.557  | 3124.162  | NM_005965  | 862.65    | 811.344   | AJ227884  | 925.859   |
| L15616     | 3027.995  | 5658.069  | NM_00274C  | 2592.543  | 2245.801  | X64986    | 1470.915  |
| AB019565   | 9142.929  | 9634.237  | AL117482   | 1648.23   | 1189.282  | L38282    | 8045.148  |
| D16914     | 60695.566 | 57867.426 | NM_006549  | 15672.907 | 17019.465 | NM_01805C | 658.242   |
| AA084879   | 535.357   | 802.605   | AB018324   | 6979.907  | 6308.495  | L25446    | 1397.748  |
| NM_000833  | 2094.313  | 2065.792  | NM_002742  | 41927.25  | 53824.184 | NM_01900E | 1383.194  |
| NM_000283  | 932.525   | 1582.931  | NM_00575C  | 582.455   | 298.522   | L42354    | 332.53    |
| NM_01246C  | 1362.317  | 2518.51   | NM_004973  | 1644.458  | 1029.581  | M20838    | 427.922   |
| X64980     | 344.778   | 595.777   | NM_007245  | 1393.228  | 1313.251  | AK002095  | 1111.068  |
| NM_012118  | 2244.909  | 2322.148  | NM_00189C  | 952.952   | 441.075   | AK000821  | 1574.643  |
| AK001133   | 219.198   | 1020.013  | NM_001286  | 714.133   | 688.36    | AK024526  | 6897.375  |
| AK024092   | 1429.905  | 1586.975  | NM_01464E  | 352.103   | 138.981   | AK000848  | 716.852   |
| AK002044   | 2941.677  | 6112.597  | NM_005073  | 471.702   | 337.328   | AK023307  | 583.335   |
| AK022206   | 589.515   | 498.322   | NM_000951  | 1403.671  | 848.266   | NM_01761E | 3402.788  |
| U90904     | 6711.604  | 7270.465  | X52599     | 772.32    | 814.306   | AK024315  | 1966.749  |
| AF088053   | 1896.554  | 2105.231  | AA029300   | 2779.993  | 3874.472  | AK024945  | 1485.113  |
| AL133662   | 1397.927  | 625.009   | M19723     | 46952.742 | 30273.084 | AK024579  | 7418.787  |
| U90903     | 1128.861  | 1212.542  | X06256     | 2839.446  | 1254.792  | AK024877  | 377.208   |
| AF278760   | 1490.351  | 2264.296  | AA709271   | 581.426   | 706.488   | AK024998  | 587.756   |
| X58061     | 1947.754  | 4416.89   | M34057     | 891.876   | 561.274   | S75708    | 8549.436  |
| NM_006003  | 16442.252 | 24968.23  | ID 1984668 | 3828.243  | 662.549   | U79291    | 3085.287  |
| AL110197   | 5243.213  | 4345.444  | ID 1832579 | 666.244   | 853.464   | D17172    | 1786.096  |
| AF085995   | 1350.027  | 1371.827  | H-430185 N | 1177.493  | 1107.919  | AJ227859  | 580.756   |
| CY3Cy5     | 4582.06   | 199.935   | D16583     | 3147.003  | 3017.175  | NM_018544 | 926.816   |
| AA029300   | 3489.848  | 3361.526  | H44051     | 473.23    | 625.512   | L10141    | 444.94    |
| X06256     | 5131.2    | 5570.962  | AA481547   | 1390.599  | 1506.342  | AB020699  | 3966.625  |
| AA709271   | 912.059   | 1269.863  | AA831880   | 642.003   | 627.465   | AF086269  | 1773.849  |
| M34057     | 2603.917  | 2353.595  | T64880     | 1278.329  | 1337.113  | U90437    | 1291.694  |
| ID 1984668 | 5949.609  | 1762.941  | NM_006039  | 1007.041  | 945.672   | S71604    | 343.645   |
| ID 1832579 | 1535.788  | 1797.847  | NM_002089  | 639.833   | 327.157   | AK000842  | 11066.368 |
| H-430185 N | 2267.563  | 2789.28   | NM_01465E  | 6108.896  | 2253.008  | AK023386  | 7508.736  |
| H44051     | 1348.412  | 1744.115  | NM_00207E  | 2409.96   | 1013.203  | NM_007053 | 16775.086 |
| AA481547   | 4665.234  | 6222.818  | X05299     | 4011.664  | 1079.416  | AK022153  | 1585.895  |
| AA831880   | 1018.442  | 1605.142  | BM468475   | 751.519   | 304.567   | AK022789  | 1545.04   |
| T64880     | 2615.735  | 1894.337  | NM_00031E  | 1853.701  | 932.335   | AK023756  | 670.049   |
| NM_020967  | 1881.09   | 1479.271  | NM_00206C  | 3804.175  | 2975.499  | NM_001126 | 1823.676  |
| NM_001071  | 5348.565  | 5621.217  | AK001230   | 1222.552  | 1170.884  | AK023673  | 781.371   |
| SR2        | 60941.008 | 43200.676 | NM_01468C  | 5774.19   | 4413.799  | NM_018252 | 409.165   |
| SR4        | 22205.719 | 11630.736 | NM_005027  | 1901.829  | 2186.138  | NM_01800C | 37679.406 |
| SR6        | 3393.675  | 1733.303  | NM_004612  | 1182.52   | 1130.315  | AF164963  | 1195.596  |
| SR8        | 4187.234  | 6915.772  | NM_00560E  | 1191.131  | 715.291   | AF124366  | 9964.05   |
| SR10       | 28615.076 | 4274.824  | NM_001106  | 351.359   | 562.144   | AF130112  | 892.288   |
| CY3Cy5     | 3914.683  | 246.113   | NM_015583  | 638.941   | 585.217   | NM_000551 | 2436.694  |
| NM_005027  | 2820.933  | 3025.006  | NM_01849C  | 1365.2    | 1186.098  | AL365518  | 1493.379  |
| NM_004612  | 3182.827  | 1743.765  | NM_006245  | 4132.258  | 2069.993  | AF086257  | 1769.655  |
| NM_00560E  | 3492.397  | 2355.457  | NM_005103  | 5114.088  | 3207.755  | AF075056  | 608.689   |
| NM_001106  | 1114.757  | 1139.418  | NM_004822  | 585.651   | 817.223   | AC119751  | 1615.214  |
| NM_015583  | 1213.688  | 1253.368  | AK022349   | 1162.055  | 642.266   | U00928    | 691.293   |
| NM_01849C  | 3055.315  | 3322.873  | NM_005031  | 2496.962  | 1895.371  | NM_01905E | 2266.422  |

|           |           |           |           |           |           |           |           |
|-----------|-----------|-----------|-----------|-----------|-----------|-----------|-----------|
| NM_006245 | 5248.242  | 3567.729  | AB040920  | 746.628   | 387.471   | AF279783  | 3302.816  |
| NM_004822 | 1239.36   | 2154.653  | NM_000720 | 537.921   | 383.997   | AF182422  | 1848.88   |
| NM_007245 | 2453.723  | 2507.793  | AK024639  | 2466.794  | 1767.997  | NM_016943 | 425.606   |
| NM_001890 | 1474.379  | 1034.719  | NM_015720 | 3695.544  | 3261.514  | AF070602  | 1082.077  |
| NM_001286 | 1397.888  | 1751.53   | AB007915  | 617.815   | 335.988   | BE393290  | 752.807   |
| NM_019604 | 418.629   | 294.06    | AB033070  | 698.763   | 573.979   | NM_017622 | 953.626   |
| NM_005073 | 765.597   | 522.604   | NM_018229 | 733.746   | 636.349   | AF133331  | 1202.113  |
| NM_000951 | 2329.416  | 1548.483  | NM_006325 | 4164.165  | 2133.183  | AK022289  | 298.828   |
| X52599    | 1056.408  | 708.697   | AY009127  | 8224.902  | 3439.645  | L34408    | 338.548   |
| AK000158  | 5834.315  | 4300.524  | NM_014869 | 1590.837  | 1019.298  | AF161403  | 5514.963  |
| NM_005769 | 1217.254  | 2385.851  | AK000158  | 4999.313  | 8104.29   | NM_020183 | 1129.672  |
| AK024500  | 15673.916 | 8331.104  | NM_005769 | 1172.148  | 1650.651  | NM_018029 | 507.931   |
| NM_002564 | 9410.384  | 8812.5    | AK024500  | 8505.136  | 3868.282  | AL389954  | 622.816   |
| Z83806    | 711.966   | 559.447   | NM_002564 | 7341.93   | 5404.335  | NM_019852 | 1249.072  |
| NM_000963 | 5545.135  | 7682.596  | NM_000963 | 2668.661  | 2713.446  | NM_006118 | 6355.754  |
| NM_013308 | 8996.367  | 7642.162  | NM_013308 | 4781.719  | 4883.253  | AK026225  | 9983.408  |
| AF027302  | 4003.276  | 3745.566  | AF027302  | 3344.619  | 2115.852  | AL050032  | 6841.828  |
| NM_002852 | 4507.46   | 5396.923  | NM_002852 | 2136.051  | 2528.822  | AF009304  | 757.243   |
| NM_001817 | 4631.969  | 4969.551  | NM_001817 | 3073.697  | 2679.876  | AF086177  | 3482.78   |
| AF063611  | 2212.326  | 2348.393  | AF063611  | 1487.662  | 1093.138  | NM_018949 | 2138.139  |
| NM_014656 | 7397.728  | 4308.869  | NM_005965 | 702.145   | 543.151   | AK021593  | 969.169   |
| NM_002076 | 4701.709  | 2645.805  | NM_002740 | 2530.605  | 1877.376  | Z36847    | 157.511   |
| X05299    | 5171.124  | 2867.697  | AL117482  | 1712.572  | 1140.389  | D17187    | 985.736   |
| BM468475  | 1059.146  | 630.393   | NM_006549 | 10645.004 | 12026.468 | AJ243672  | 983.539   |
| NM_000318 | 2758.829  | 1817.925  | AB018324  | 3138.744  | 3007.44   | AL122087  | 760.687   |
| NM_002060 | 10130.614 | 5120.703  | NM_002742 | 50142.09  | 50399.57  | D17169    | 5611.808  |
| AK001230  | 2357.904  | 1806.527  | Z25431    | 1323.708  | 1337.775  | NM_017924 | 5761.802  |
| NM_014680 | 8207.43   | 4128.385  | NM_005627 | 2619.328  | 2456.458  | NM_017546 | 1802.766  |
| NM_000229 | 4134.382  | 4039.952  | M64497    | 1342.025  | 1376.892  | AJ001889  | 754.442   |
| NM_006995 | 33551.215 | 25546.195 | NM_007274 | 3040.009  | 2207.531  | AL137400  | 823.535   |
| NM_003129 | 9107.491  | 12338.423 | NM_003356 | 5546.552  | 2622.813  | NM_006511 | 416.566   |
| NM_001956 | 3563.796  | 2737.122  | AF238315  | 456.43    | 239.67    | AF007142  | 647.801   |
| AB033064  | 1688.979  | 1784.462  | NM_006224 | 30790.121 | 13136.695 | AF119853  | 10648.851 |
| AK022317  | 5489.744  | 3790.831  | AL137300  | 2522.882  | 2649.965  | CY3Cy5    | 2835.071  |
| NM_018396 | 5806.24   | 7195.271  | NM_000229 | 2029.039  | 1369.162  | NM_005987 | 55000.43  |
| NM_003124 | 5815.585  | 3596.61   | NM_006995 | 15740.856 | 5292.153  | X87838    | 135.932   |
| NM_004531 | 3705.408  | 1629.068  | NM_003129 | 6814.322  | 5557.43   | SR4       | 5251.805  |
| AL133581  | 2394.184  | 1352.978  | NM_001956 | 1962.928  | 1571.413  | SR6       | 855.324   |
| NM_002558 | 4427.019  | 5946.744  | AB033064  | 1464.616  | 1385.484  | SR8       | 3791.315  |
| NM_000720 | 998.236   | 1827.172  | AK022317  | 3674.642  | 2630.377  | SR10      | 16012.649 |
| NM_004842 | 1271.369  | 993.342   | NM_018396 | 4965.654  | 4709.335  | CY3Cy5    | 3619.86   |
| AK024639  | 3699.518  | 2839.872  | NM_003124 | 3343.532  | 2788.028  | NM_003775 | 487.262   |
| NM_015720 | 7806.192  | 4965.522  | NM_006886 | 54556.73  | 41536.887 | NM_002082 | 1861.088  |
| AB007915  | 832.45    | 851.163   | NM_004531 | 2241.071  | 953.687   | AF155657  | 818.748   |
| AB033070  | 1676.747  | 1471.88   | AL133581  | 789.975   | 794.183   | NM_016099 | 3097.716  |
| NM_018229 | 1589.805  | 955.068   | NM_002558 | 2188.724  | 4066.374  | M62896    | 2545.827  |
| NM_006325 | 4960.543  | 4560.237  | NM_003586 | 2058.231  | 2103.132  | NM_017736 | 544.924   |
| AY009127  | 16966.094 | 8481.454  | NM_000922 | 762.369   | 2581.487  | L08441    | 1203.013  |
| NM_014869 | 2926.59   | 1256.971  | NM_013232 | 2854.426  | 5409.417  | AL137764  | 14670.822 |
| NM_006708 | 16792.568 | 19356.627 | NM_017993 | 1129.441  | 2477.386  | NM_001660 | 5922.965  |
| AB037835  | 1723.71   | 1500.249  | NM_000362 | 2103.736  | 6686.748  | NM_002018 | 1151.128  |
| NM_016228 | 786.311   | 591.334   | NM_014429 | 2001.501  | 2760.467  | NM_000410 | 943.827   |
| NM_000157 | 8499.174  | 3018.243  | AK000770  | 1652.422  | 1301.187  | U72882    | 3167.1    |

|            |           |           |           |           |           |           |          |
|------------|-----------|-----------|-----------|-----------|-----------|-----------|----------|
| NM_000712  | 4790.578  | 7348.628  | NM_002370 | 7141.182  | 3097.159  | NM_014337 | 759.318  |
| NM_018088  | 1770.907  | 1112.573  | NM_015670 | 825.656   | 904.667   | NM_007161 | 4338.996 |
| NM_014846  | 2984.696  | 3648.221  | NM_014709 | 322.738   | 272.5     | NM_003641 | 237.81   |
| AB011164   | 6092.215  | 3763.501  | AB028990  | 542.077   | 168.055   | AK026448  | 890.288  |
| M24750     | 1368.574  | 1715.731  | NM_006708 | 11784.03  | 6494.348  | AK057418  | 2150.042 |
| NM_005965  | 1299.671  | 1948.919  | AB037835  | 1188.324  | 1613.738  | AF148646  | 849.651  |
| AL117482   | 2853.861  | 2611.856  | NM_000157 | 4683.489  | 1472.216  | AB023201  | 579.267  |
| NM_006549  | 26631.229 | 18793.166 | NM_000712 | 5718.821  | 4173.056  | NM_000072 | 2154.346 |
| AB018324   | 8840.671  | 5989.944  | NM_018088 | 1032.538  | 445.716   | NM_000697 | 840.033  |
| NM_002742  | 50391.973 | 46955.992 | BC013695  | 7951.441  | 9911.89   | NM_000017 | 2338.126 |
| Z25431     | 3470.616  | 3886.222  | AK023035  | 1489.073  | 1201.694  | NM_018346 | 610.362  |
| NM_005627  | 3437.677  | 2995.294  | NM_014846 | 1590.4    | 1422.215  | NM_000140 | 645.928  |
| M64497     | 1161.38   | 2072.74   | AB011164  | 2709.236  | 2225.009  | NM_005125 | 686.899  |
| NM_007274  | 9450.735  | 7168.798  | M24750    | 1036.714  | 1262.987  | NM_015926 | 2515.099 |
| NM_003356  | 5058.49   | 3507.035  | AB046776  | 1095.925  | 3148.833  | NM_018658 | 1838.548 |
| AF238315   | 559.997   | 534.121   | AF217289  | 305.07    | 1557.53   | NM_001183 | 564.401  |
| NM_014648  | 949.782   | 411.299   | NM_002687 | 7993.407  | 18637.434 | AK021597  | 775.601  |
| NM_019604  | 505.645   | 498.64    | NM_000627 | 1773.949  | 3416.228  | NM_005737 | 7489.336 |
| NM_005073  | 946.03    | 932.53    | NM_000038 | 1134.341  | 1178.913  | NM_000014 | 907.219  |
| NM_000951  | 2361.761  | 2127.063  | NM_000825 | 815.243   | 1208.19   | NM_006803 | 202.778  |
| X52599     | 1315.933  | 1507.244  | NM_004334 | 1487.486  | 1886.792  | NM_002533 | 195.793  |
| AA029300   | 3446.473  | 3437.271  | NM_003886 | 1037.4    | 1074.623  | AF182814  | 382.27   |
| BG708842   | 55387.422 | 55278.496 | NM_005843 | 702.135   | 595.998   | NM_001517 | 1325.971 |
| M19723     | 61595.723 | 64889.23  | NM_003854 | 944.378   | 282.276   | NM_005053 | 493.702  |
| AA709271   | 1684.5    | 2425.461  | NM_001252 | 7219.032  | 3195.715  | NM_003384 | 138.824  |
| M34057     | 2419.266  | 2266.457  | AF053712  | 717.67    | 466.213   | M29551    | 399.677  |
| ID 1984668 | 6049.327  | 2826.552  | NM_003947 | 585.907   | 321.197   | NM_002929 | 232.341  |
| ID 1832579 | 1589.297  | 2042.296  | NM_002821 | 10000.25  | 6160.543  | AB026436  | 809.916  |
| H-430185 N | 2611.741  | 2642.107  | L41690    | 1553.138  | 703.558   | NM_016029 | 892.79   |
| D16583     | 8398.769  | 6704.238  | NM_018059 | 498.061   | 282.569   | AK024562  | 1014.783 |
| H44051     | 2068.042  | 1513.939  | NM_000939 | 38508.898 | 37060.922 | NM_014066 | 305.675  |
| AA481547   | 4542.942  | 3172.746  | NM_005183 | 406.116   | 380.397   | NM_004573 | 417.519  |
| AA831880   | 1305.898  | 928.547   | NM_006514 | 1180.037  | 1819.965  | L08441    | 505.925  |
| T64880     | 2542.168  | 1381.432  | AF065164  | 1612.394  | 2688.447  | R45026    | 567.487  |
| NM_020967  | 1534.553  | 1420.573  | AB028991  | 2299.996  | 4724.641  | AA496452  | 401.829  |
| NM_001071  | 5898.642  | 7649.262  | AF263547  | 3196.236  | 6849.068  | X67594    | 218.884  |
| AB028990   | 1995.498  | 568.767   | AJ008143  | 4336.168  | 10033.091 | X87838    | 540.687  |
| X05299     | 5882.304  | 4282.645  | NM_007144 | 1097.387  | 2213.778  | NM_015001 | 638.091  |
| BM468475   | 1466.485  | 1171.533  | NM_005093 | 408.874   | 1213.45   | NM_000169 | 1598.905 |
| NM_000318  | 3155.013  | 3150.388  | NM_004424 | 4345.076  | 10738.682 | AK057418  | 4960.83  |
| NM_002060  | 11145.026 | 7992.286  | AL133117  | 2930.637  | 2901.668  | NM_007260 | 970.661  |
| AK001230   | 2525.77   | 2845.416  | AF070586  | 5245.654  | 6334.103  | AF148646  | 1213.297 |
| NM_014680  | 8632.218  | 7083.536  | NM_014412 | 693.144   | 389.282   | AB023201  | 478.398  |
| NM_005027  | 3594.765  | 3155.152  | NM_013303 | 2075.601  | 770.94    | AF155657  | 1183.604 |
| NM_004612  | 3312.428  | 2029.41   | NM_012227 | 2442.081  | 1142.595  | NM_006056 | 366.376  |
| NM_005608  | 3988.802  | 3182.507  | NM_006101 | 1338.424  | 177.378   | AF045229  | 174.674  |
| NM_001106  | 973.246   | 1410.94   | NM_001237 | 3130.129  | 918.5     | NM_001840 | 145.093  |
| NM_015583  | 1457.81   | 1774.707  | NM_002507 | 1406.328  | 568.088   | NM_016099 | 1952.255 |
| NM_018490  | 3022.109  | 4430.436  | NM_015962 | 1416.158  | 951.983   | NM_001155 | 1462.28  |
| NM_004778  | 438.533   | 586.259   | NM_016145 | 1065.019  | 214.78    | M62896    | 4764.6   |
| NM_006245  | 5553.334  | 4311.95   | NM_016078 | 1500.177  | 1184.29   | NM_017736 | 1008.33  |
| NM_005103  | 3468.183  | 3132.372  | NM_004401 | 1301.609  | 636.965   | NM_000390 | 42.153   |
| NM_004822  | 1304.759  | 1159.516  | NM_001849 | 11380.911 | 9604.241  | AK021597  | 1268.994 |



|           |           |           |           |           |           |           |           |
|-----------|-----------|-----------|-----------|-----------|-----------|-----------|-----------|
| AK022349  | 2094.815  | 609.78    | AF255910  | 1085.224  | 1313.864  | NM_005737 | 12630.239 |
| NM_005750 | 969.949   | 278.708   | NM_016146 | 3191.605  | 2537.148  | NM_000014 | 412.716   |
| NM_004973 | 2623.885  | 1600.468  | AK024343  | 1199.343  | 1854.27   | NM_002533 | 125.97    |
| NM_007245 | 2501.026  | 2910.646  | NM_001936 | 791.494   | 1591.071  | AL137764  | 10270.781 |
| NM_001890 | 1922.388  | 1043.688  | NM_002569 | 432.332   | 1463.235  | NM_002018 | 1347.943  |
| NM_001286 | 1874.193  | 1655.11   | D42084    | 2243.613  | 5629.922  | AF161383  | 163.919   |
| AB007915  | 1363.395  | 1543.086  | NM_001734 | 458.654   | 955.437   | NM_000410 | 2692.287  |
| AB033070  | 1532.927  | 1556.508  | NM_014693 | 386.274   | 1218.7    | AF224266  | 340.551   |
| NM_018229 | 1674.928  | 1831.978  | AB007896  | 549.07    | 1216.448  | U72882    | 5344.763  |
| NM_006325 | 4323.586  | 6817.825  | AB007916  | 6886.634  | 7680.007  | NM_014337 | 2777.378  |
| AY009127  | 15509.427 | 12101.937 | NM_002874 | 431.216   | 728.941   | NM_014387 | 473.604   |
| NM_014869 | 3269.592  | 2686.351  | AF049140  | 1543.974  | 373.662   | NM_003641 | 1602.479  |
| NM_003929 | 1144.503  | 196.385   | BC035601  | 23082.602 | 9156.028  | NM_012463 | 457.254   |
| AK000158  | 5565.986  | 5300.96   | NM_020388 | 5700.587  | 3950.758  | L29140    | 6971.157  |
| NM_005769 | 1280.921  | 2787.791  | NM_004202 | 33224.691 | 26678.789 | AK026448  | 1038.864  |
| AK024500  | 16753.004 | 10450.65  | AB046829  | 777.735   | 541.354   | AB026436  | 1649.966  |
| NM_002564 | 11383.684 | 12992.605 | NM_016445 | 443.444   | 566.034   | NM_016029 | 1480.081  |
| NM_000963 | 5938.57   | 9097.544  | NM_003379 | 9204.894  | 8052.583  | AK024562  | 920.869   |
| NM_013308 | 10713.527 | 15556.508 | NM_004521 | 4066.221  | 2933.887  | NM_014066 | 130.56    |
| AF027302  | 4713.317  | 4596.526  | AF229162  | 1473.195  | 1471.035  | NM_004573 | 372.681   |
| NM_002852 | 4384.387  | 3561.069  | U02309    | 16731.449 | 17962.475 | NM_000072 | 810.469   |
| NM_001817 | 4442.001  | 3119.354  | NM_005257 | 9619.608  | 26792.955 | NM_000697 | 592.308   |
| AF063611  | 2190.046  | 1446.198  | AF011573  | 6119.045  | 13763.456 | NM_000017 | 2223.181  |
| NM_006039 | 3059.375  | 2442.982  | NM_002145 | 1728.043  | 4644.122  | NM_018346 | 182.735   |
| NM_002089 | 870.686   | 503.584   | NM_003923 | 457.511   | 1730.945  | AB011182  | 96.14     |
| NM_014656 | 7251.742  | 4557.265  | NM_004831 | 698.964   | 1965.15   | NM_000140 | 768.582   |
| NM_002076 | 4778.807  | 2365.048  | NM_014213 | 3674.406  | 6809.536  | NM_005125 | 189.487   |
| Z25431    | 3396.206  | 5272.476  | NM_000168 | 1805.558  | 5400.948  | NM_015926 | 4862.405  |
| NM_005627 | 3611.92   | 4921.863  | AF294629  | 6177.842  | 7297.508  | X03757    | 767.601   |
| M64497    | 1300.015  | 2985.533  | NM_000545 | 6386.014  | 11731.819 | NM_001183 | 2885.207  |
| NM_007274 | 10451.877 | 14933.22  | NM_002136 | 26714.283 | 30381.799 | NM_000890 | 890.699   |
| NM_003356 | 5483.81   | 5943.287  | AK025571  | 926.198   | 719.456   | NM_004976 | 1702.254  |
| AF238315  | 839.122   | 1225.766  | NM_014463 | 30562.4   | 7922.545  | NM_033199 | 660.875   |
| NM_006224 | 43526.266 | 44233.641 | NM_005520 | 11652.037 | 4636.299  | NM_015001 | 678.962   |
| AL137300  | 7777.854  | 11628.817 | AK023265  | 467.4     | 162.755   | NM_000169 | 1569.359  |
| NM_000229 | 4578.913  | 4681.414  | AB029009  | 1183.431  | 707.012   | NM_000107 | 59.06     |
| NM_006995 | 30282.848 | 30625.982 | AF112207  | 633.107   | 310.252   | NM_001517 | 1822.663  |
| NM_003129 | 9943.542  | 17489.535 | AJ420488  | 44133.461 | 58795.121 | NM_005053 | 404.726   |
| NM_001956 | 4411.951  | 5153.384  | NM_005594 | 20420.205 | 15498.406 | D86974    | 424.17    |
| AB033064  | 2134.741  | 2800.415  | NM_004461 | 20794.277 | 23780.537 | NM_018283 | 416.362   |
| AK022317  | 5905.229  | 4860.177  | NM_018473 | 3398.495  | 3417.501  | NM_001983 | 443.4     |
| NM_018396 | 6218.323  | 8725.244  | AK022590  | 1632.213  | 2035.071  | Y12337    | 1243.003  |
| NM_003124 | 5621.921  | 4814.814  | AK023719  | 5772.73   | 13833.869 | M29551    | 3469.178  |
| NM_006886 | 61085.094 | 58483.242 | AF035317  | 294.633   | 755.832   | AF148950  | 558.366   |
| NM_004531 | 3455.54   | 1293.401  | AK025590  | 853.902   | 2733.107  | NM_001155 | 2144.098  |
| AL133581  | 2044.04   | 953.438   | AY007149  | 4918.235  | 6006.057  | M62896    | 8201.268  |
| NM_002558 | 4182.927  | 4798.708  | M12078    | 1017.76   | 2648.116  | NM_017736 | 1201.257  |
| NM_005031 | 3633.83   | 3374.219  | NM_004550 | 9091.098  | 15307.51  | AF263523  | 514.584   |
| AB040920  | 1325.158  | 655.386   | NM_000785 | 1172.032  | 1358.659  | L08441    | 303.505   |
| NM_004842 | 1340.631  | 1066.155  | NM_004110 | 8155.555  | 14341.378 | R45026    | 336.585   |
| AK024639  | 3749.245  | 3150.19   | NM_013387 | 34569.742 | 27852.475 | AA496452  | 568.89    |
| NM_015720 | 6460.05   | 4849.444  | NM_005262 | 5612.366  | 3551.238  | X67594    | 788.796   |
| NM_020967 | 1669.394  | 1964.168  | NM_020128 | 472.537   | 299.517   | AB000734  | 1314.136  |

|            |           |           |           |           |           |           |           |
|------------|-----------|-----------|-----------|-----------|-----------|-----------|-----------|
| NM_001071  | 5983.948  | 9701.163  | NM_005068 | 2716.447  | 1154.465  | NM_000862 | 1143.359  |
| AB028990   | 1870.844  | 1022.732  | NM_018223 | 2574.558  | 1191.433  | NM_005987 | 56006.602 |
| NM_006708  | 16560.314 | 25918.473 | NM_006693 | 7308.315  | 3351.286  | X87838    | 387.857   |
| AB037835   | 1998.918  | 1988.515  | NM_001722 | 708.491   | 785.273   | NM_007161 | 27126.959 |
| NM_000712  | 5528.431  | 10186.776 | AB046802  | 1498.704  | 1370.952  | NM_014387 | 609.665   |
| NM_018088  | 1848.936  | 1491.299  | NM_003297 | 665.48    | 879.686   | NM_003641 | 2650.074  |
| NM_007205  | 853.546   | 1384.639  | NM_006940 | 333.335   | 223.033   | NM_012463 | 673.796   |
| AK023035   | 1448.175  | 2087.444  | NM_018269 | 13785.004 | 6804.625  | L29140    | 9743.771  |
| NM_014846  | 2615.14   | 2436.599  | AK024633  | 2559.951  | 2451.53   | AK026448  | 1413.787  |
| AB011164   | 5325.489  | 2403.277  | NM_001453 | 4673.545  | 6224.435  | AK057418  | 3339.943  |
| M24750     | 1312.208  | 1182.961  | NM_012075 | 1598.779  | 3182.603  | AF148646  | 547.244   |
| NM_005965  | 1401.209  | 940.739   | AB004851  | 1307.884  | 2046.489  | AB023201  | 188.441   |
| NM_002740  | 3221.798  | 2107.607  | NM_013381 | 860.083   | 1570.932  | NM_003775 | 225.037   |
| AL117482   | 2759.991  | 1551.265  | AK023911  | 4186.682  | 10430.248 | NM_002082 | 1391.307  |
| NM_006549  | 28712.086 | 22000.449 | NM_001283 | 2614.055  | 5506.505  | AF155657  | 1173.936  |
| AB018324   | 10726.708 | 7346.204  | AL110237  | 1205.951  | 2479.482  | NM_006056 | 1401.091  |
| NM_002742  | 44008.324 | 37525.875 | D87470    | 1393.658  | 2789.959  | AF045229  | 1796.012  |
| NM_005750  | 809.847   | 716.621   | AF147307  | 3968.436  | 7905.561  | NM_016099 | 9581.869  |
| NM_004973  | 2517.187  | 3155.827  | AK001829  | 1719.309  | 2213.741  | NM_000228 | 445.274   |
| NM_007245  | 2182.588  | 5336.748  | NM_016525 | 3375.357  | 4835.42   | NM_018658 | 7725.333  |
| NM_001890  | 1951.908  | 2003.292  | AK024931  | 8319.629  | 3524.468  | NM_005136 | 606.908   |
| NM_001286  | 1882.678  | 2660.645  | AL109715  | 342.013   | 330.314   | AK094513  | 463.744   |
| NM_014648  | 740.742   | 565.416   | AF086181  | 658.696   | 128.838   | NM_001183 | 4132.512  |
| NM_019604  | 595.469   | 596.23    | AK021540  | 373.01    | 83.602    | NM_000890 | 1514.166  |
| AA029300   | 3777.103  | 4657.618  | D86985    | 440.659   | 237.292   | NM_004976 | 3050.29   |
| BG708842   | 57848.703 | 60946.391 | AK022258  | 739.365   | 577.427   | AK021597  | 782.126   |
| M19723     | 60227.773 | 62832.91  | AF088043  | 397.407   | 314.684   | AL137764  | 2917.46   |
| AA709271   | 1435.956  | 2083.296  | AF131799  | 698.809   | 721.184   | NM_001660 | 523.546   |
| M34057     | 2135.659  | 1422.544  | AK000455  | 647.779   | 934.363   | NM_002018 | 3887.139  |
| ID 1984668 | 5905.275  | 1288.969  | NM_005230 | 750.259   | 799.873   | AF161383  | 789.232   |
| ID 1832579 | 1124.75   | 1186.37   | AL365407  | 2584.383  | 5201.967  | NM_000410 | 6774.379  |
| H-430185 N | 2252.222  | 1619.029  | AK022407  | 252.608   | 1107.462  | AF224266  | 1016.305  |
| D16583     | 7709.203  | 4017.727  | AK000840  | 9048.453  | 17804.977 | U72882    | 5496.858  |
| H44051     | 1464.288  | 854.584   | AL162073  | 1414.273  | 3002.646  | NM_014337 | 2078.977  |
| AA481547   | 4859.274  | 3089.927  | AL390160  | 1157.755  | 2073.84   | NM_003384 | 1310.092  |
| AA831880   | 903.218   | 922.237   | AJ006835  | 2817.158  | 5311.695  | Y12337    | 1419.148  |
| T64880     | 2499.815  | 1067.181  | AL110138  | 1011.857  | 1473.514  | M29551    | 4371.313  |
| NM_006039  | 2488.905  | 3148.306  | AL122039  | 706.997   | 498.342   | NM_002929 | 804.877   |
| NM_002089  | 926.259   | 758.133   | AF070577  | 4835.162  | 3109.026  | BC028375  | 506.819   |
| NM_004590  | 366.556   | 1172.54   | AL157484  | 6901      | 1914.941  | AB026436  | 896.686   |
| NM_014656  | 7727.011  | 6583.274  | AK024850  | 1665.822  | 747.094   | NM_000017 | 737.991   |
| NM_002076  | 4937.591  | 4345.804  | Y09836    | 794.748   | 1761.535  | NM_018346 | 455.031   |
| X05299     | 6526.563  | 4942.268  | AL137597  | 31109.098 | 5765.217  | AL122054  | 621.953   |
| BM468475   | 1982.908  | 2407.919  | AK022144  | 372.961   | 329.487   | AB011182  | 1111.824  |
| NM_004612  | 3946.95   | 4502.643  | AF086044  | 730.858   | 887.004   | NM_000140 | 2021.845  |
| NM_005608  | 3968.027  | 4818.088  | NM_014926 | 676.035   | 682.948   | NM_005125 | 1302.63   |
| NM_001106  | 1225.493  | 1813.195  | AJ011378  | 1174.337  | 3048.326  | NM_020038 | 443.844   |
| NM_015583  | 1452.08   | 1521.315  | AF009266  | 1321.318  | 2200.416  | NM_016246 | 409.243   |
| NM_018490  | 2624.206  | 2317.734  | AF009310  | 1260.414  | 2282.789  | NM_015926 | 6271.73   |
| NM_006245  | 5363.574  | 3135.844  | AF054991  | 418.963   | 976.419   | X03757    | 415.966   |
| NM_005103  | 3408.458  | 3253.61   | AF060168  | 2306.732  | 4130.323  | NM_002902 | 2206.68   |
| NM_004822  | 1525.265  | 1012.365  | AF009275  | 964.459   | 2017.475  | NM_020248 | 10899.129 |
| AK022349   | 1951.79   | 486.723   | AF015251  | 1008.826  | 1564.876  | X89670    | 1575.101  |

|           |           |           |           |           |           |           |           |
|-----------|-----------|-----------|-----------|-----------|-----------|-----------|-----------|
| NM_005031 | 3181.384  | 4124.474  | AF056426  | 1078.705  | 2846.456  | NM_004053 | 1519.091  |
| AB040920  | 1459.71   | 993.518   | AF064850  | 544.658   | 1346.351  | NM_001489 | 628.884   |
| NM_000720 | 1696.02   | 2929.136  | AK001096  | 487.647   | 832.539   | NM_000169 | 573.936   |
| NM_004842 | 1333.348  | 2874.46   | NM_018329 | 1342.238  | 1070.437  | AL157445  | 1284.82   |
| AK024639  | 3710.255  | 4955.704  | AK021565  | 804.121   | 488.955   | NM_001517 | 5094.077  |
| NM_015720 | 8268.621  | 8235.423  | AK001150  | 4087.868  | 1885.914  | NM_005053 | 1819.36   |
| AB007915  | 1502.234  | 1114.328  | AK002123  | 399.637   | 265.344   | D86974    | 879.731   |
| AB033070  | 1471.14   | 1596.516  | AK021633  | 1386.625  | 1593.281  | NM_018283 | 603.289   |
| NM_018229 | 2115.12   | 2173.73   | AK025659  | 658.325   | 993.611   | NM_001983 | 702.519   |
| NM_005769 | 1362.285  | 3184.877  | AK026788  | 1224.501  | 1196.499  | NM_001793 | 8798.411  |
| AK024500  | 18847.818 | 15109.059 | AK026824  | 458.402   | 693.492   | NM_001943 | 1104.892  |
| NM_002564 | 11775.29  | 9682.537  | AJ008130  | 20588.549 | 44021.652 | NM_004927 | 1881.551  |
| NM_001884 | 149.288   | 287.365   | NM_003669 | 513.408   | 1084.879  | NM_001459 | 1400.11   |
| NM_000963 | 5819.825  | 7071.575  | AF086502  | 2905.502  | 6092.34   | NM_015513 | 4243.614  |
| NM_013308 | 9210.652  | 6934.551  | L39924    | 1510.628  | 2438.191  | NM_006219 | 2397.035  |
| AF027302  | 4317.883  | 2800.871  | U52054    | 9592.027  | 6843.867  | NM_004443 | 2971.073  |
| NM_002852 | 3936.071  | 3533.67   | D17226    | 329.834   | 1081.502  | AF272036  | 2361.031  |
| NM_001817 | 4185.763  | 3236.716  | AK023325  | 1833.973  | 4824.922  | NM_005148 | 540.304   |
| AF063611  | 2083.781  | 1069.834  | NM_017985 | 2095.448  | 4231.097  | NM_004746 | 457.682   |
| NM_005965 | 1476.661  | 1722.678  | AK025866  | 2433.135  | 5761.689  | AF146019  | 803.763   |
| NM_002740 | 3487.751  | 5942.333  | AF088058  | 2413.511  | 4704.845  | Z36782    | 722.659   |
| AL117482  | 3972.754  | 5633.774  | NM_000513 | 2020.837  | 2635.962  | NM_003490 | 6222.606  |
| NM_006549 | 30936.766 | 46693.039 | Y11165    | 1922.505  | 1972.366  | AF210651  | 271.452   |
| AB018324  | 10461.234 | 13106.07  | AL137445  | 318.248   | 376.344   | AF090942  | 382.999   |
| NM_002742 | 54052.363 | 55866.297 | BC028422  | 633.774   | 662.17    | AF508940  | 2193.373  |
| Z25431    | 4444.877  | 5944.76   | AK022219  | 623.698   | 721.142   | NM_005429 | 520.928   |
| NM_005627 | 4459.955  | 6373.385  | NM_013244 | 346.722   | 872.94    | M25753    | 2209.406  |
| M64497    | 1249.055  | 3783.765  | NM_003545 | 242.027   | 724.144   | NM_004203 | 1154.369  |
| NM_007274 | 9513.819  | 10539.937 | AK024413  | 630.483   | 1695.204  | NM_006410 | 888.475   |
| NM_003356 | 5053.647  | 6312.575  | AL137752  | 294.999   | 806.994   | NM_014977 | 20516.182 |
| NM_000229 | 4164.641  | 4319.023  | AK022247  | 1751.352  | 2342.76   | AK026325  | 942.027   |
| NM_006995 | 36726.531 | 38739.801 | AK001453  | 1833.378  | 4354.709  | U83857    | 695.268   |
| NM_003129 | 10964.258 | 19285.451 | AB007972  | 3688.273  | 8524.262  | NM_001230 | 1033.753  |
| NM_001956 | 3839.24   | 3209.376  | AL390144  | 2766.083  | 6231.83   | AB011539  | 563.043   |
| AB033064  | 1821.21   | 1656.218  | AK024017  | 1691.597  | 4373.498  | U37028    | 765.462   |
| AK022317  | 5364.446  | 3762.052  | X56196    | 909.41    | 2345.218  | AB014597  | 901.541   |
| NM_018396 | 5549.295  | 6222.53   | D17220    | 6182.894  | 8063.438  | AK024313  | 2687.786  |
| NM_003124 | 5868.189  | 3452.208  | D28363    | 36719.77  | 50134.066 | NM_003891 | 1692.005  |
| NM_006886 | 65023.602 | 54590.809 | AB011171  | 2940.164  | 2583.577  | NM_002022 | 2385.995  |
| NM_004531 | 3351.602  | 1256.206  | AF189251  | 367.163   | 301.697   | AK023167  | 80.746    |
| AL133581  | 2103.31   | 931.454   | NM_005322 | 5063.542  | 1477      | NM_016510 | 492.171   |
| NM_002558 | 4097.598  | 4271.563  | AK024465  | 1082.61   | 1287.127  | NM_014270 | 682.998   |
| NM_003586 | 2212.92   | 1675.234  | AF075119  | 597.972   | 364.207   | NM_000071 | 346.233   |
| NM_000922 | 2029.631  | 4234.383  | AK021478  | 1609.378  | 1174.683  | NM_006843 | 674.125   |
| NM_013232 | 8783.019  | 12758.059 | AF131782  | 2907.655  | 2155.709  | NM_004321 | 1360.477  |
| NM_017993 | 1914.905  | 3076.645  | NM_014210 | 6049.904  | 3565.239  | AF311212  | 1101.669  |
| NM_000362 | 4493.628  | 12064.352 | AK021603  | 2150.427  | 2045.53   | NM_006915 | 474.765   |
| NM_014429 | 2490.323  | 2044.251  | AL110136  | 3155.846  | 1288.615  | NM_006035 | 618.318   |
| AK000770  | 2227.618  | 2889.473  | AK002203  | 739.81    | 1676.373  | NM_006086 | 1389.094  |
| NM_002370 | 10094.241 | 12832.784 | AK026469  | 4217.286  | 7929.914  | NM_004520 | 1155.373  |
| NM_015670 | 1673.492  | 2470.376  | D16935    | 5366.064  | 7959.326  | AK027118  | 452.015   |
| NM_014709 | 1221.888  | 1636.583  | AK027019  | 1080.572  | 2086.224  | AK022882  | 3315.515  |
| AB028990  | 2431.766  | 1313.105  | U92019    | 928.988   | 1472.433  | NM_006105 | 747.805   |

|           |           |           |           |           |           |           |           |
|-----------|-----------|-----------|-----------|-----------|-----------|-----------|-----------|
| AK002089  | 923.894   | 2134.387  | U52835    | 4961.744  | 6951.687  | NM_000474 | 1018.68   |
| AB037835  | 1706.318  | 2446.333  | NM_000756 | 3283.477  | 5057.781  | NM_016264 | 838.095   |
| NM_016228 | 761.907   | 1269.707  | AK022148  | 1232.242  | 1803.462  | NM_006079 | 12192.15  |
| NM_000157 | 10846.027 | 4341.225  | Z36811    | 50496.023 | 66345.555 | AB037837  | 595.909   |
| NM_000712 | 5277.448  | 7506.2    | K03200    | 7045.312  | 6827.838  | NM_014595 | 2787.435  |
| NM_018088 | 1702.371  | 818.613   | U17629    | 4215.723  | 4791.598  | NM_014789 | 698.034   |
| BC013695  | 13163.924 | 13268.963 | NM_020428 | 1690.63   | 993.297   | AB046784  | 228.746   |
| AK023035  | 1281.678  | 1192.892  | U79265    | 1807.164  | 900.415   | X52402    | 2016.419  |
| NM_014846 | 2704.544  | 2645.893  | AK022868  | 3162.609  | 984.108   | NM_014156 | 25165.857 |
| AB011164  | 5881.049  | 2682.929  | NM_003530 | 791.889   | 163.346   | NM_003137 | 489.17    |
| M24750    | 1219.053  | 1096.627  | AK025344  | 1530.59   | 515.308   | NM_006938 | 878.208   |
| AB046776  | 1132.157  | 1446.465  | D28589    | 11550.585 | 3503.244  | AF176085  | 593.662   |
| AF217289  | 465.711   | 847.364   | AF301223  | 589.032   | 383.095   | NM_006985 | 1517.269  |
| NM_002687 | 7499.561  | 14161.322 | NM_017867 | 5702.301  | 2726.611  | NM_003757 | 4597.972  |
| NM_000627 | 2051.438  | 3225.89   | U92820    | 7758.455  | 7088.194  | AK025561  | 374.797   |
| NM_000038 | 1734.139  | 1055.829  | NM_017937 | 1626.662  | 1525.405  | NM_018602 | 4937.451  |
| NM_000825 | 698.349   | 1134.572  | AL360266  | 1791.965  | 1422.864  | NM_004096 | 730.656   |
| NM_001963 | 231.071   | 590.961   | AL160132  | 22874.635 | 19922.492 | NM_017629 | 1098.693  |
| NM_004334 | 1757.825  | 2116.797  | NM_019557 | 4726.482  | 3087.535  | AL049681  | 321.137   |
| S62027    | 221.916   | 1071.244  | CY3Cy5    | 3100.417  | 256.538   | AF052181  | 609.855   |
| NM_003886 | 3753.146  | 4906.701  | AA150828  | 1464.365  | 997.436   | AL050074  | 8291.583  |
| NM_005843 | 2500.863  | 3179.787  | H90764    | 344.936   | 399.333   | AK026436  | 714.169   |
| NM_003854 | 1735.568  | 2104.5    | AI859208  | 510.59    | 297.628   | NM_018061 | 1042.398  |
| AF053712  | 1004.677  | 1242.143  | H64379    | 5164.505  | 4948.676  | AK023059  | 748.993   |
| NM_003947 | 743.921   | 952.623   | BE208258  | 55342.504 | 28039.404 | NM_003551 | 738.988   |
| NM_002821 | 23181.467 | 19129.818 | T72202    | 409.257   | 448.369   | AF305210  | 665.696   |
| M96652    | 9900.281  | 7585.942  | BI831922  | 1982.878  | 1650.926  | AK021900  | 674.524   |
| L41690    | 3839.428  | 1852.131  | M69238    | 2731.251  | 2462.601  | NM_002764 | 1073.247  |
| NM_018059 | 1395.372  | 644.579   | M80244    | 423.659   | 462.159   | AF024702  | 1012.563  |
| NM_000939 | 52961.418 | 40396.055 | AA599158  | 6904.327  | 10386.114 | NM_005962 | 928.791   |
| NM_006514 | 5466.796  | 3431.598  | BE294756  | 395.047   | 487.803   | X74864    | 661.698   |
| AF065164  | 6704.45   | 4810.364  | NM_001073 | 325.843   | 435.844   | AK026804  | 1196.276  |
| AB028991  | 5056.841  | 5941.318  | NM_002711 | 687.424   | 440.486   | NM_016170 | 5488.501  |
| AF263547  | 3505.192  | 6341.948  | SR5       | 3464.422  | 3855.801  | NM_006166 | 550.895   |
| AJ008143  | 11050.917 | 12233.565 | SR7       | 2699.338  | 28142.225 | S72620    | 7088.684  |
| NM_007144 | 1419.952  | 1624.245  | SR9       | 8830.304  | 2209.428  | NM_005263 | 3194.434  |
| NM_005093 | 681.172   | 712.045   | CY3Cy5    | 6394.71   | 570.904   | AB033022  | 1729.136  |
| NM_004424 | 5486.439  | 4928.205  | NM_001560 | 5438.122  | 2753.698  | AF147397  | 771.432   |
| AL133117  | 2724.304  | 2905.576  | NM_001783 | 8441.319  | 9641.166  | AK027158  | 1015.86   |
| AB033040  | 514.9     | 759.946   | J03171    | 1032.801  | 983.414   | AF085836  | 3273.802  |
| AF070586  | 5302.923  | 5476.058  | NM_005856 | 811.745   | 537.985   | AL049449  | 1223.356  |
| NM_014412 | 2233.081  | 2215.64   | NM_004323 | 12333.56  | 10566.909 | AL359654  | 472.359   |
| NM_013303 | 3216.693  | 3517.97   | NM_005312 | 530.194   | 567.088   | AK024224  | 574.759   |
| NM_012227 | 5123.445  | 5956.678  | NM_001711 | 1066.098  | 940.618   | NM_015362 | 917.067   |
| NM_006101 | 2158.68   | 1679.938  | NM_004210 | 14119.083 | 8513.167  | AF086254  | 498.384   |
| NM_001237 | 1819.2    | 4748.923  | NM_020140 | 2469.171  | 2219.9    | AF086261  | 528.127   |
| NM_002507 | 2031.046  | 2290.939  | NM_001962 | 652.07    | 692.344   | AF086367  | 385.843   |
| NM_015962 | 1693.434  | 2052.512  | NM_002500 | 1847.917  | 1977.515  | U79295    | 543.885   |
| NM_016145 | 2317.1    | 998.741   | AK026232  | 1291.025  | 2055.598  | AK002107  | 489.121   |
| NM_016078 | 6204.824  | 3939.167  | NM_014892 | 9143.652  | 6750.7    | NM_003596 | 1013.282  |
| NM_004401 | 2262.783  | 1003.727  | AK023827  | 3480.056  | 4145.544  | NM_018838 | 1810.026  |
| NM_001849 | 9013.511  | 3366.614  | NM_001117 | 614.745   | 697.638   | AF075083  | 745.103   |
| AF255910  | 1645.839  | 1497.502  | NM_000231 | 2645.208  | 2666.033  | AK021454  | 596.309   |

|           |           |           |           |           |           |           |          |
|-----------|-----------|-----------|-----------|-----------|-----------|-----------|----------|
| NM_016146 | 3771.744  | 2005.879  | L07517    | 666.364   | 1076.178  | AK022069  | 1961.277 |
| AK024343  | 2026.993  | 2273.518  | BM918441  | 2428.532  | 3494.529  | AL137457  | 1579.493 |
| NM_002566 | 1475.251  | 1287.05   | NM_001045 | 8678.984  | 7343.711  | AF085944  | 2279.653 |
| D42084    | 3111.902  | 3624.926  | NM_005697 | 4589.972  | 2770.496  | AL133038  | 332.724  |
| NM_001734 | 885.136   | 773.693   | NM_003096 | 4019.787  | 2560.958  | AL359574  | 1171.695 |
| NM_014693 | 864.017   | 1047.75   | NM_004781 | 704.565   | 502.548   | AL133569  | 1995.822 |
| AB007896  | 1171.613  | 1715.655  | NM_018303 | 1655.335  | 891.265   | AL109719  | 1156.586 |
| AB007916  | 9044.482  | 7838.112  | NM_014758 | 2087.527  | 1547.802  | U92022    | 969.004  |
| NM_002874 | 491.485   | 678.367   | NM_005124 | 1077.1    | 1224.892  | AF085842  | 299.91   |
| AF049140  | 1815.178  | 2149.656  | AK000947  | 2258.028  | 1818.38   | AK023882  | 539.631  |
| AL136794  | 970.312   | 1266.696  | L08240    | 659.13    | 343.851   | AK026750  | 1521.072 |
| BC035601  | 40533.238 | 42532.375 | NM_017952 | 1563.539  | 983.002   | AF072164  | 1028.751 |
| NM_001458 | 1780.011  | 1535.874  | NM_002940 | 2166.929  | 1423.583  | NM_018610 | 765.047  |
| NM_020388 | 7414.905  | 4537.815  | NM_016081 | 10201.824 | 11276.313 | AF181286  | 282.326  |
| NM_004202 | 48708.496 | 27073.713 | NM_006389 | 1906.037  | 2361.549  | AF083122  | 692.226  |
| AB046829  | 1484.505  | 688.212   | M30818    | 530.871   | 424.697   | AF147317  | 1689.329 |
| NM_003379 | 26581.871 | 24511.063 | NM_000163 | 1084.532  | 1661.764  | AF232216  | 694.795  |
| NM_004521 | 8298.367  | 5097.2    | NM_005755 | 290.205   | 709.276   | NM_017773 | 1825.002 |
| AF229162  | 2708.372  | 2024.807  | NM_003329 | 55198.34  | 59967.219 | AK021940  | 513.902  |
| U02309    | 36270.895 | 35058.152 | NM_003299 | 43551.871 | 60909.094 | AK022189  | 651.166  |
| NM_005257 | 7196.464  | 18414.873 | NM_014330 | 22176.025 | 35779.543 | AL162033  | 1482.909 |
| AF011573  | 8102.108  | 8516.611  | NM_007214 | 6025.687  | 7337.96   | NM_005001 | 3413.558 |
| NM_002145 | 2070.648  | 2520.751  | NM_000311 | 1186.435  | 1350.658  | AK024175  | 1823.093 |
| NM_003923 | 457.27    | 813.099   | NM_017909 | 1460.905  | 1061.531  | NM_000510 | 579.276  |
| NM_004831 | 981.652   | 1762.054  | NM_006335 | 6046.618  | 5267.182  | NM_017787 | 1035.573 |
| NM_014213 | 4397.854  | 4392.354  | NM_000786 | 3901.579  | 5013.343  | NM_020315 | 779.459  |
| NM_000168 | 2533.779  | 4350.914  | AL133561  | 2083.296  | 1301.774  | AK001910  | 668.895  |
| AF294629  | 4565.192  | 4794.945  | AB040891  | 1690.134  | 1552.642  | AK024241  | 419.508  |
| NM_000545 | 5688.56   | 7274.297  | AB037780  | 1226.078  | 659.8     | AK025061  | 1052.823 |
| NM_002136 | 33672.602 | 51180.25  | NM_005845 | 6554.972  | 4751.807  | AF088067  | 6378.75  |
| AK025571  | 1281.437  | 1062.956  | NM_016209 | 8955.818  | 4681.499  | AK022213  | 722.725  |
| NM_014463 | 25306.598 | 29119.783 | AK075415  | 629.071   | 593.586   | AF056441  | 2837.915 |
| NM_005520 | 16106.001 | 22677.338 | NM_018964 | 3860.315  | 3588.093  | AK024142  | 251.444  |
| AK023265  | 1909.143  | 2307.108  | NM_000080 | 1688.517  | 1998.834  | Y10509    | 821.02   |
| NM_018723 | 946.989   | 1369.488  | NM_001829 | 731.711   | 743.85    | AK024389  | 5418.969 |
| AB029009  | 2577.443  | 3464.879  | NM_007256 | 675.745   | 890.56    | AK026793  | 831.473  |
| AF112207  | 3384.112  | 1629.233  | NM_000339 | 408.243   | 469.638   | NM_001672 | 731.694  |
| AJ420488  | 67302.102 | 69730.125 | AF283645  | 1701.773  | 1736.168  | AJ276253  | 8129.755 |
| NM_005594 | 18431.006 | 11435.521 | NM_016575 | 2404.445  | 4604.093  | AF147314  | 2089.212 |
| NM_004461 | 58497.504 | 51134.375 | NM_003897 | 1070.039  | 810.798   | NM_018980 | 1366.729 |
| NM_018473 | 4548.955  | 4048.566  | NM_014165 | 4495.971  | 4856.878  | U48696    | 395.287  |
| BF106121  | 931.4     | 672.015   | AL442085  | 2086.125  | 1821.206  | AF230316  | 1558.633 |
| AK022590  | 1743.718  | 1331.487  | NM_013313 | 2589.108  | 1317.552  | AK024515  | 1762.605 |
| AK023719  | 5386.271  | 6772.242  | NM_014736 | 5884.34   | 2598.287  | AF085862  | 1148.125 |
| AK025590  | 924.145   | 1976.413  | AK023886  | 1254.623  | 569.249   | AL049271  | 6636.753 |
| AY007149  | 4126.26   | 4053.133  | NM_002553 | 983.946   | 940.18    | AK023079  | 7075.451 |
| NM_004550 | 15195.84  | 12840.048 | AJ404615  | 1210.538  | 1641.656  | NM_019609 | 804.12   |
| NM_004110 | 6957.813  | 5467.5    | NM_016053 | 11020.515 | 8349.774  | AK026198  | 1730.664 |
| NM_013387 | 39860.555 | 43830.406 | AB007869  | 4319.6    | 3207.421  | AF183570  | 312.263  |
| NM_005262 | 6153.307  | 7310.265  | AB046844  | 443.584   | 549.572   | NM_005497 | 8064.218 |
| NM_005757 | 311.15    | 1666.675  | NM_000302 | 1430.606  | 1499.24   | AK024048  | 1170.907 |
| NM_020128 | 882.586   | 1009.617  | NM_013235 | 18340.404 | 16841.686 | AB033093  | 423.231  |
| NM_005068 | 3485.46   | 3556.956  | NM_016015 | 4228.696  | 3686.802  | NM_005912 | 440.386  |

|           |           |          |           |           |           |           |           |
|-----------|-----------|----------|-----------|-----------|-----------|-----------|-----------|
| NM_018223 | 3868.42   | 7234.396 | NM_020120 | 1319.526  | 2089.399  | NM_005909 | 8415.048  |
| NM_006693 | 7610.927  | 12582.43 | AK022900  | 880.212   | 957.155   | AF085991  | 382.232   |
| NM_001722 | 1546.494  | 1418.775 | NM_001125 | 430.69    | 349.438   | NM_020427 | 1873.386  |
| AB046802  | 1910.525  | 2586.512 | AB023216  | 671.746   | 1048.607  | AK023173  | 8750.141  |
| NM_003297 | 752.128   | 980.14   | NM_002266 | 19011.607 | 19960.15  | U79275    | 904.747   |
| NM_018269 | 12246.366 | 8612.354 | NM_014400 | 3862.995  | 6986.378  | AF007193  | 2636.822  |
| AK024633  | 1883.717  | 2386.761 | AL157492  | 886.938   | 1000.854  | AK022367  | 720.377   |
| NM_001453 | 3680.285  | 6215.726 | AL353957  | 3206.962  | 4254.683  | CY3Cy5    | 6349.935  |
| NM_012075 | 2583.33   | 1912.93  | NM_000231 | 2198.55   | 1115.91   | K02765    | 287.017   |
| AB004851  | 896.632   | 1495.238 | L07517    | 568.023   | 427.739   | BG539651  | 12331.414 |
| NM_013381 | 677.68    | 929.415  | AK022451  | 1469.285  | 1129.958  | N52646    | 9339.459  |
| AK023911  | 1864.71   | 1792.124 | BM918441  | 2140.27   | 1604.315  | AW160671  | 21953.869 |
| NM_001283 | 4974.279  | 5940.465 | AA425102  | 194.525   | 369.01    | BI870529  | 3640.842  |
| AF147307  | 8313.949  | 6866.8   | AA150828  | 1545.163  | 772.159   | AA702698  | 947.144   |
| AK001829  | 2280.689  | 2106.446 | AI859208  | 430.921   | 216.824   | AI681514  | 553.849   |
| NM_016525 | 3682.166  | 4305.941 | H64379    | 5843.807  | 4624.724  | NM_001300 | 3656.215  |
| AL109715  | 755.778   | 860.029  | BI831922  | 1631.375  | 1583.766  | BG748827  | 1664.837  |
| AF086181  | 1068.347  | 674.994  | M69238    | 2291.908  | 2056.717  | AA952897  | 908.907   |
| D86985    | 639.768   | 557.484  | AA664180  | 858.247   | 574.374   | BG760342  | 1493.207  |
| AF131799  | 702.688   | 702.397  | NM_001073 | 331.686   | 568.879   | AA703141  | 427.19    |
| AK000455  | 1137.552  | 876.673  | NM_002711 | 591.064   | 387.164   | AI122630  | 2225.569  |
| NM_005230 | 1592.899  | 499.665  | AK026092  | 3094.522  | 4294.046  | NM_002103 | 8695.65   |
| AL365407  | 2058.195  | 3075.245 | AK001175  | 2139.696  | 2851.628  | NM_003379 | 3400.182  |
| AK022407  | 334.216   | 621.306  | NM_003329 | 51896.199 | 25907.625 | SR9       | 18319.563 |
| AK000840  | 4251.336  | 4652.078 | NM_003299 | 29746.049 | 27942.346 | CY3Cy5    | 10157.966 |
| AL162073  | 1249.061  | 1311.994 | NM_007034 | 401.948   | 378.755   | NM_012428 | 512.542   |
| AL390160  | 1146.82   | 1264.701 | NM_001560 | 4619.596  | 2103.005  | NM_001728 | 316.843   |
| AJ006835  | 3348.862  | 4878.492 | NM_001783 | 8878.457  | 6972.938  | NM_003824 | 2316.319  |
| AL110138  | 709.35    | 1206.229 | J03171    | 1134.685  | 968.472   | NM_000686 | 972.874   |
| AL122039  | 1039.688  | 1191.878 | NM_005856 | 849.596   | 627.99    | NM_012452 | 2358.027  |
| AF070577  | 6896.808  | 7459.717 | NM_005312 | 572.309   | 955.597   | AF229166  | 713.36    |
| AL157484  | 12294.102 | 6454.946 | NM_001711 | 1162.105  | 942.249   | NM_005137 | 1698.383  |
| AK024850  | 1650.88   | 1209.646 | NM_004210 | 12568.823 | 10477.412 | NM_006764 | 1661.923  |
| Y09836    | 1114.658  | 2370.35  | NM_020140 | 2174.375  | 1836.612  | NM_001386 | 1024.922  |
| AL137597  | 25285.879 | 6228.04  | NM_001962 | 670.039   | 942.957   | NM_001163 | 695.665   |
| AF086044  | 1073.442  | 853.483  | NM_002500 | 2413.604  | 2899.764  | NM_005878 | 1378.743  |
| NM_014926 | 1015.24   | 587.844  | AK026232  | 1710.138  | 2672.211  | AB006713  | 139.341   |
| AF131790  | 874.376   | 468.585  | NM_014892 | 10106.469 | 7747.729  | AF308602  | 1183.935  |
| AJ011378  | 818.669   | 1568.527 | AK023827  | 4437.889  | 5771.581  | AB011089  | 440.002   |
| AF009266  | 947.345   | 1111.547 | NM_001117 | 518.527   | 841.216   | NM_001312 | 195.329   |
| AF009310  | 843.996   | 1206.583 | NM_001829 | 501.434   | 276.567   | AF007192  | 409.15    |
| AF054991  | 549.752   | 512.735  | NM_007256 | 507.735   | 393.463   | NM_001276 | 4389.91   |
| AF060168  | 1908.079  | 2055.039 | AF283645  | 1551.79   | 970.568   | NM_012286 | 824.473   |
| AF009275  | 1241.053  | 1497.813 | NM_016575 | 1758.651  | 2008.423  | NM_002195 | 1210.249  |
| AF015251  | 1129.738  | 1130.824 | NM_001045 | 9151.337  | 6276.848  | D84294    | 1203.093  |
| AF056426  | 2601.904  | 2551.777 | NM_005697 | 4335.927  | 2605.233  | NM_003056 | 371.078   |
| AK001096  | 349.38    | 511.489  | NM_003099 | 3967.995  | 2057.09   | NM_016226 | 1319.332  |
| NM_018329 | 1662.2    | 2271.897 | NM_004781 | 608.057   | 545.08    | AF052155  | 273.854   |
| AK021565  | 1876.629  | 2566.35  | NM_018303 | 1830.94   | 1199.139  | AF060902  | 1059.11   |
| AK021778  | 475.608   | 717.73   | NM_014758 | 2610.595  | 2105.775  | AF121858  | 3057.641  |
| AK001150  | 4926.469  | 4406.174 | NM_005124 | 1242.366  | 1958.558  | NM_013437 | 683.328   |
| AK021633  | 1758.378  | 1709.567 | AK000947  | 1970.168  | 2023.881  | AK025966  | 1374.068  |
| AK025659  | 928.545   | 1032.215 | L08240    | 683.243   | 818.898   | NM_018725 | 539.137   |

|            |           |           |           |           |           |           |           |
|------------|-----------|-----------|-----------|-----------|-----------|-----------|-----------|
| AK026788   | 1536.499  | 1018.378  | NM_017952 | 1657.046  | 1528.298  | NM_003081 | 5302.734  |
| AK026824   | 835.564   | 495.766   | NM_002940 | 2251.603  | 1733.362  | NM_016495 | 502.501   |
| L39924     | 2072.985  | 2350.859  | NM_016081 | 11208.961 | 16871.107 | D50402    | 11946.541 |
| U52054     | 3261.313  | 5362.124  | NM_006389 | 2310.671  | 3264.753  | M73547    | 1894.88   |
| D17226     | 127.824   | 470.313   | M30818    | 541.42    | 735.115   | NM_003687 | 615.333   |
| AK023325   | 2244.8    | 3069.319  | NM_000163 | 1576.812  | 2017.913  | NM_004134 | 1116.338  |
| NM_017985  | 1380.508  | 1957.81   | NM_005755 | 366.886   | 899.942   | NM_004048 | 445.811   |
| AK025866   | 2953.919  | 5162.369  | NM_001125 | 403.458   | 281.321   | BE548044  | 307.051   |
| AF088058   | 2315.719  | 3814.146  | AB023216  | 623.036   | 433.437   | NM_001179 | 2213.186  |
| NM_000513  | 1479.096  | 3294.979  | NM_002266 | 17235.459 | 9652.544  | NM_005313 | 5258.636  |
| Y11165     | 2197.765  | 2411.67   | NM_014400 | 4945.617  | 4410.821  | NM_017765 | 3813.066  |
| unknown (S | 3057.166  | 789.77    | AL157492  | 761.985   | 543.269   | AB040967  | 234.683   |
| BC028422   | 810.277   | 660.747   | AL353957  | 2489.347  | 1911.472  | NM_014721 | 488.816   |
| AK022219   | 696.212   | 526.377   | NM_007214 | 6347.084  | 6975.713  | AK026352  | 1077.895  |
| AK022247   | 1104.486  | 1323.876  | NM_000311 | 1466.364  | 1429.8    | AL137705  | 761.55    |
| AK001453   | 2039.653  | 2780.495  | NM_017909 | 1429.441  | 1270.661  | NM_014848 | 347.769   |
| AB007972   | 2727.609  | 2863.435  | NM_006335 | 6185.222  | 4709.411  | BF217766  | 1391.792  |
| AL390144   | 3184      | 4026.812  | NM_000786 | 3646.756  | 4125.478  | NM_000184 | 666.538   |
| AK024017   | 2115.315  | 2485.183  | AL133561  | 2018.952  | 1493.771  | NM_016180 | 304.172   |
| X56196     | 666.129   | 1336.268  | NM_017731 | 490.822   | 407.749   | NM_005827 | 494.419   |
| D17220     | 7077.625  | 8035.432  | AB040891  | 1656.793  | 2000.705  | NM_003053 | 1068.907  |
| D28363     | 42732.113 | 51879.137 | AB037780  | 1314.047  | 1203.096  | NM_006672 | 4857.034  |
| AB011171   | 3619.448  | 2965.29   | NM_005845 | 7074.491  | 7158.135  | NM_018261 | 62.685    |
| AF090099   | 490.277   | 1067.739  | NM_016209 | 9987.802  | 6876.561  | AL050288  | 6399.088  |
| NM_005322  | 3400.744  | 3784.097  | AK075415  | 692.167   | 1368.423  | NM_005040 | 745.716   |
| AK024465   | 1342.24   | 1871.241  | NM_018964 | 5213.06   | 5047.312  | NM_016391 | 2208.642  |
| AF075119   | 857.565   | 625.349   | NM_000080 | 1752      | 2263.317  | AF075033  | 1127.698  |
| AK021478   | 2128.188  | 1747.172  | AK026092  | 2246.824  | 1764.526  | D50911    | 2651.43   |
| AF131782   | 3340.719  | 1292.733  | AK001175  | 1426.209  | 1378.904  | AB011104  | 643.282   |
| NM_014210  | 24806.664 | 4139.246  | NM_003897 | 1092.315  | 821.618   | AK024069  | 2557.306  |
| AK021603   | 1254.838  | 1044.87   | NM_014165 | 4316.741  | 4829.909  | NM_004582 | 2500.654  |
| AL110136   | 3290.483  | 1535.575  | AL442085  | 1811.313  | 1811.8    | NM_015640 | 2883.133  |
| D16935     | 4537.349  | 6707.649  | NM_013313 | 1907.795  | 1744.394  | NM_000821 | 3880.401  |
| AK027019   | 1772.821  | 2020.899  | NM_014736 | 6139.864  | 2892.406  | NM_020121 | 373.839   |
| U92019     | 1798.414  | 1756.27   | AK023886  | 1295.037  | 1250.519  | NM_003145 | 10439.753 |
| U52835     | 6885.57   | 4327.898  | NM_002553 | 922.509   | 1274.85   | NM_001632 | 791.976   |
| NM_000756  | 3760.264  | 4122.727  | AJ404615  | 1478.671  | 1915.465  | NM_012264 | 364.883   |
| AK022148   | 645.222   | 585.215   | NM_016053 | 11920.039 | 15195.573 | AF311312  | 1324.427  |
| Z36811     | 55526.938 | 56853.156 | AB007869  | 5297.529  | 4849.59   | NM_014915 | 960.486   |
| K03200     | 7945.924  | 9679.055  | AB046844  | 535.75    | 696.021   | NM_012286 | 410.133   |
| U17629     | 4307.858  | 6922.057  | NM_000302 | 1599.867  | 1838.039  | NM_002195 | 500.567   |
| NM_020428  | 2341.755  | 2912.501  | NM_013235 | 20043.402 | 22275.768 | M65134    | 413.86    |
| U79265     | 3850.214  | 5292.139  | NM_016015 | 4189.646  | 4229.638  | BG539651  | 4667.767  |
| AK022868   | 5096.237  | 6293.417  | NM_020120 | 1367.378  | 2189.725  | N52646    | 2209.651  |
| AJ227871   | 2921.64   | 1102.089  | AK022900  | 897.773   | 1729.46   | AW160671  | 5645.821  |
| AK025344   | 2639.488  | 1869.368  | NM_001962 | 636.017   | 306.426   | BI870529  | 647.165   |
| D28589     | 10970.324 | 8571.802  | NM_002500 | 821.898   | 663.684   | NM_001300 | 355.734   |
| AF301223   | 751.1     | 713.281   | AK026232  | 944.876   | 789.459   | BG748827  | 329.52    |
| NM_017867  | 5477.722  | 3697.134  | NM_014892 | 6151.465  | 2815.317  | AI122630  | 511.556   |
| U92820     | 9201.924  | 6759.066  | AK023827  | 2848.366  | 2433.229  | NM_002103 | 4217.199  |
| NM_017937  | 2190.354  | 1916.325  | NM_000231 | 1862.963  | 828.143   | NM_003379 | 1123.175  |
| AL360266   | 2227.495  | 1529.026  | L07517    | 709.822   | 615.649   | NM_006589 | 570.025   |
| AL160132   | 22780.486 | 21825.859 | AK022451  | 1276.885  | 1641.818  | NM_005955 | 728.831   |

|           |           |           |           |           |           |           |          |
|-----------|-----------|-----------|-----------|-----------|-----------|-----------|----------|
| NM_019557 | 5199.241  | 3439.576  | BM918441  | 1772.688  | 1335.661  | NM_012428 | 226.235  |
| CY3Cy5    | 5673.26   | 519.337   | AA150828  | 1567.098  | 1199.923  | NM_005565 | 431.067  |
| AA425102  | 729.99    | 253.113   | H64379    | 7086.891  | 8726.364  | NM_003824 | 475.161  |
| AA150828  | 2023.106  | 1484.552  | BI831922  | 1231.072  | 1591.332  | NM_000686 | 255.877  |
| H90764    | 445.205   | 432.395   | M69238    | 2409.765  | 2802.699  | NM_012452 | 398.426  |
| AI859208  | 1355.901  | 502.566   | AA664180  | 993.194   | 1004.472  | NM_001276 | 2505.135 |
| T72202    | 1653.638  | 841.124   | M80244    | 442.372   | 509.766   | NM_016157 | 778.83   |
| BI831922  | 2042.205  | 2331.007  | NM_016081 | 5480.705  | 5031.54   | NM_005827 | 389.209  |
| AA599158  | 6299.205  | 12843.386 | NM_006389 | 1536.458  | 1444.7    | NM_003053 | 1234.586 |
| BE294756  | 500.776   | 625.931   | M30818    | 389.582   | 280.984   | NM_006672 | 1892.184 |
| NM_002711 | 843.899   | 628.697   | NM_000163 | 1100.046  | 666.244   | NM_003056 | 414.401  |
| SR5       | 4742.558  | 3690.129  | NM_003329 | 39787.313 | 19952.846 | NM_016226 | 450.729  |
| SR7       | 6020.931  | 32843.758 | NM_003299 | 23459.256 | 25228.596 | NM_005085 | 216.764  |
| SR9       | 26900.166 | 3386.175  | NM_001560 | 4166.576  | 2254.365  | AF060902  | 214.985  |
| CY3Cy5    | 6502.559  | 484.569   | NM_001783 | 12463.737 | 12412.818 | AF121858  | 543.508  |
| NM_001560 | 11085.903 | 2492.186  | J03171    | 1221.3    | 1259.61   | NM_003081 | 2799.07  |
| NM_001783 | 9241.199  | 5694.239  | NM_005856 | 837.375   | 704.119   | D50402    | 9410.364 |
| J03171    | 1887.423  | 1299.483  | NM_005312 | 482.691   | 898.448   | M73547    | 1035.279 |
| NM_005856 | 1107.01   | 751.539   | NM_001711 | 826.201   | 955.177   | NM_003687 | 503.109  |
| NM_004323 | 18925.115 | 12985.081 | NM_004210 | 6261      | 5525.898  | NM_003145 | 3217.352 |
| NM_005312 | 1250.435  | 1210.355  | NM_020140 | 1763.895  | 2067.317  | NM_012264 | 4.834    |
| NM_001711 | 1050.387  | 1092.463  | NM_007029 | 286.913   | 544.311   | AF311312  | 716.47   |
| NM_004210 | 19110.061 | 11554.59  | NM_018964 | 2627.614  | 1816.41   | NM_005313 | 3863.71  |
| NM_020140 | 3243.387  | 2952.094  | NM_000080 | 1589.949  | 1037.247  | NM_017765 | 4755.928 |
| NM_001962 | 468.025   | 483.471   | NM_007256 | 366.523   | 429.84    | AB040967  | 247.811  |
| NM_002500 | 2478.82   | 2402.999  | AF283645  | 1363.503  | 835.483   | AL137705  | 528.889  |
| AK026232  | 2047.95   | 2075.111  | NM_016575 | 1863.626  | 1779.853  | NM_014848 | 273.724  |
| NM_014892 | 35961.328 | 5899.068  | NM_018557 | 257.611   | 186.991   | BF217766  | 227.99   |
| AK023827  | 2606.475  | 1816.708  | NM_001045 | 13142.245 | 13056.522 | NM_000184 | 1478.33  |
| NM_000231 | 3125.994  | 2441.406  | NM_005697 | 5775.247  | 4553.584  | NM_002103 | 4316.051 |
| L07517    | 685.087   | 772.307   | NM_003099 | 4237.291  | 3056.625  | NM_003379 | 510.986  |
| BM918441  | 5577.077  | 4249.546  | NM_004781 | 671.846   | 598.898   | NM_006589 | 234.076  |
| NM_001045 | 9562.82   | 7034.471  | NM_018303 | 1822.792  | 1613.684  | NM_018261 | 1488.263 |
| NM_005697 | 11870.394 | 4096.016  | NM_014758 | 2466.121  | 2781.685  | AL050288  | 5700.544 |
| NM_003099 | 5530.475  | 2640.708  | NM_005124 | 1326.703  | 2333.484  | NM_016391 | 598.511  |
| NM_004781 | 1102.662  | 781.842   | AK000947  | 2038.649  | 2741.522  | AF075033  | 277.306  |
| NM_018303 | 1810.067  | 1306.339  | L08240    | 784.182   | 892.469   | D50911    | 558.748  |
| NM_014758 | 2372.945  | 1535.716  | NM_002940 | 2145.697  | 2480.03   | AB011104  | 232.431  |
| NM_005124 | 1238.507  | 1784.484  | NM_000302 | 1229.07   | 950.472   | AK024069  | 1260.548 |
| AK000947  | 3340.737  | 3403.76   | NM_013235 | 19720.719 | 11795.461 | NM_004582 | 1807.953 |
| L08240    | 662.068   | 734.754   | NM_016015 | 3352.017  | 2479.737  | NM_015640 | 2308.267 |
| NM_017952 | 1271.103  | 1465.343  | NM_020120 | 1284.508  | 1116.417  | AF233450  | 248.152  |
| NM_016081 | 19244.822 | 15820.454 | AK022900  | 739.862   | 771.671   | NM_000821 | 6886.799 |
| NM_006389 | 2341.806  | 5200.164  | NM_001125 | 690.307   | 224.863   | AF308602  | 250.523  |
| M30818    | 805.008   | 404.921   | AB023216  | 599.088   | 384.437   | NM_001276 | 434.784  |
| NM_000163 | 901.858   | 808.617   | NM_002266 | 11677.892 | 9456.938  | NM_016157 | 370.065  |
| NM_005755 | 1089.222  | 913.737   | NM_014400 | 2103.038  | 2382.765  | NM_014915 | 700.042  |
| NM_003329 | 51929.238 | 49198.582 | AL353957  | 1921.196  | 1774.108  | NM_012286 | 200.817  |
| NM_003299 | 47193.164 | 57981.324 | NM_007214 | 3463.051  | 5082.577  | K02765    | 244.492  |
| NM_007034 | 557.736   | 615.493   | NM_000311 | 1564.384  | 1915.725  | BG539651  | 3896.25  |
| NM_007214 | 8809.25   | 8512.303  | NM_017909 | 1444.53   | 1766.183  | N52646    | 2583.24  |
| NM_000311 | 2273.141  | 1925.173  | NM_006335 | 5401.905  | 8030.753  | AW160671  | 5181.405 |
| NM_017909 | 2045.107  | 1756.169  | NM_000786 | 3675.343  | 6197.195  | BI870529  | 667.14   |



|           |           |           |           |           |           |           |           |
|-----------|-----------|-----------|-----------|-----------|-----------|-----------|-----------|
| NM_006335 | 6640.469  | 6785.674  | AL133561  | 2085.14   | 2159.972  | AA702698  | 189.393   |
| NM_000786 | 9689.341  | 6455.37   | AB040891  | 1763.549  | 2870.24   | NM_00130C | 1454.938  |
| AL133561  | 2894.273  | 1735.159  | AB037780  | 1579.194  | 1277.098  | BG748827  | 768.224   |
| AB040891  | 2240.662  | 2313.17   | NM_005845 | 3017.427  | 3712.069  | BG760342  | 821.634   |
| AB037780  | 793.147   | 950.384   | NM_016209 | 11170.185 | 10039.439 | AI122630  | 1445.571  |
| NM_005845 | 8824.054  | 8125.08   | AK002114  | 1478.545  | 1105.107  | NM_003081 | 3164.917  |
| NM_016209 | 8586.115  | 6950.197  | AL390184  | 754.926   | 684.339   | NM_016495 | 1032.07   |
| AK075415  | 521.42    | 868.342   | AK026318  | 805.545   | 736.286   | D50402    | 8141.029  |
| NM_018964 | 3532.734  | 3088.629  | NM_004365 | 5834.797  | 5968.966  | M73547    | 269.303   |
| NM_00008C | 1646.049  | 2107.424  | NM_016355 | 1369.446  | 1361.245  | NM_004134 | 453.478   |
| NM_001825 | 824.346   | 898.026   | AJ296290  | 701.638   | 478.045   | NM_005955 | 318.653   |
| AF283645  | 1643.465  | 1646.464  | AK026092  | 2975.655  | 3594.433  | NM_012428 | 175.227   |
| NM_016575 | 2200.007  | 2649.845  | AK001175  | 1395.858  | 1324.163  | NM_001728 | 676.171   |
| NM_003897 | 1777.452  | 1296.533  | NM_003897 | 766.515   | 1117.288  | NM_005565 | 463.843   |
| NM_014165 | 4427.596  | 3669.606  | NM_014165 | 2901.103  | 5136.236  | NM_003824 | 676.824   |
| AL442085  | 3869.985  | 2332.247  | AL442085  | 2802.029  | 3910.965  | NM_000686 | 470.493   |
| NM_013313 | 3459.148  | 1798.794  | NM_013313 | 1873.446  | 1942.005  | NM_012452 | 1018.934  |
| NM_014736 | 6539.963  | 4898.758  | NM_014736 | 4632.272  | 3436.145  | AF229166  | 244.148   |
| AK023886  | 1387.943  | 977.839   | AK023886  | 847.885   | 1281.462  | NM_005137 | 925.472   |
| NM_002553 | 1154.244  | 1259.581  | NM_002553 | 484.267   | 1053.114  | NM_006764 | 1103.797  |
| AJ404615  | 2197.125  | 2396.043  | AJ404615  | 957.021   | 2266.113  | NM_001386 | 540.598   |
| NM_016053 | 10307.375 | 10140.194 | NM_016053 | 5679.658  | 7950.252  | NM_001163 | 520.767   |
| AB007869  | 3245.155  | 2594.026  | AB007869  | 3241.108  | 3940.036  | NM_005878 | 774.764   |
| AB046844  | 746.087   | 876.212   | M64108    | 2699.732  | 1653.852  | NM_020346 | 5.508     |
| NM_000302 | 2219.661  | 1820.477  | Y17867    | 1488.83   | 1439.499  | NM_000184 | 1303.679  |
| NM_013235 | 20226.836 | 20499.207 | M92642    | 1009.881  | 840.916   | NM_005827 | 390.621   |
| NM_016015 | 3417.145  | 3035.745  | NM_018071 | 791.12    | 890.93    | NM_003053 | 707.1     |
| AK022900  | 1057.47   | 853.593   | NM_004333 | 1173.435  | 1046.806  | NM_003044 | 345.828   |
| NM_001125 | 1118.995  | 883.012   | M31520    | 52686.289 | 58009.531 | NM_006672 | 2985.367  |
| AB023216  | 1051.115  | 1247.155  | NM_00202C | 3710.506  | 3851.337  | M31659    | 276.972   |
| NM_002266 | 22256.863 | 22251.361 | AL050137  | 841.796   | 702.923   | NM_003056 | 461.58    |
| NM_01440C | 6870.081  | 8324.201  | NM_005043 | 17365.031 | 18102.576 | NM_016226 | 855.678   |
| AL157492  | 1062.015  | 1250.141  | NM_005979 | 10099.665 | 6954.415  | AF052155  | 577.183   |
| AL353957  | 3651.847  | 3037.256  | NM_006282 | 3699.777  | 1740.99   | NM_005085 | 448.803   |
| NM_000231 | 2890.26   | 1773.309  | NM_01592C | 11779.251 | 9620.79   | AF060902  | 690.043   |
| L07517    | 1172.412  | 880.07    | AB011113  | 1511.662  | 2250.237  | AF121858  | 1099.89   |
| AK022451  | 2820.856  | 2105.312  | NM_004115 | 1133.127  | 1266.415  | NM_013437 | 263.52    |
| BM918441  | 5668.719  | 3094.825  | NM_018287 | 783.623   | 758.466   | AK025966  | 969.814   |
| AA425102  | 437.729   | 212.251   | NM_001955 | 4052.962  | 4565.583  | NM_01444C | 302.936   |
| AA150828  | 2028.687  | 1162.823  | AF016004  | 2014.078  | 11138.802 | AK024069  | 272.319   |
| H90764    | 312.775   | 607.456   | NM_003567 | 4373.064  | 7000.911  | NM_004582 | 317.263   |
| AI859208  | 1402.22   | 661.793   | NM_007315 | 3254.495  | 3014.032  | NM_01564C | 522.825   |
| H64379    | 8032.65   | 7130.381  | L20686    | 6864.323  | 8383.851  | NM_000821 | 4808.759  |
| T72202    | 1625.104  | 1308.138  | NM_000304 | 557.552   | 708.833   | NM_003145 | 3367.859  |
| BI831922  | 2031.282  | 2731.944  | S72604    | 11386.901 | 9375.641  | AF311312  | 412.338   |
| M69238    | 5432.184  | 5123.559  | NM_017984 | 332.711   | 431.826   | NM_005313 | 11881.358 |
| AA664180  | 1396.682  | 1249.288  | NM_002675 | 495.83    | 669.055   | NM_017765 | 5719.891  |
| NM_002711 | 871.735   | 843.664   | NM_012432 | 12953.792 | 15845.468 | AB040967  | 694.596   |
| AK026092  | 3264.839  | 2563.484  | NM_005007 | 4849.206  | 4191.451  | AK026352  | 462.113   |
| AK001175  | 2581.509  | 1934.947  | AK024996  | 2313.222  | 1432.728  | AL137705  | 1954.751  |
| NM_003325 | 53195.082 | 36190.656 | NM_01229C | 1737.064  | 1240.27   | NM_007262 | 1466.617  |
| NM_003295 | 49423.277 | 39906.039 | NM_002431 | 880.135   | 1152.837  | NM_002571 | 175.298   |
| NM_00156C | 10832.852 | 3173.828  | NM_001827 | 17610.422 | 9783.099  | NM_004935 | 230.642   |

|           |           |           |           |           |           |           |           |
|-----------|-----------|-----------|-----------|-----------|-----------|-----------|-----------|
| NM_001783 | 8437.703  | 7245.34   | NM_020466 | 2709.276  | 1857.74   | NM_001425 | 1393.852  |
| J03171    | 2185.808  | 1444.909  | NM_002853 | 1788.683  | 1441.533  | NM_014158 | 1064.029  |
| NM_005856 | 1071.831  | 721.552   | NM_003174 | 646.454   | 394.708   | NM_006589 | 230.196   |
| NM_005312 | 1302.053  | 1810.486  | NM_012307 | 12133.75  | 13623.754 | AB007875  | 301.602   |
| NM_001711 | 1304.843  | 1675.671  | NM_006371 | 1021.359  | 1303.232  | AL050288  | 13937.994 |
| NM_004210 | 17281.721 | 16677.057 | NM_018834 | 756.832   | 704.996   | NM_005040 | 641.336   |
| NM_020140 | 3585.901  | 3874.546  | AK026882  | 1024.121  | 1719.658  | NM_016391 | 2233.831  |
| NM_001962 | 750.766   | 776.457   | NM_004574 | 913.526   | 1415.295  | AF075033  | 997.815   |
| NM_002500 | 1478.141  | 1586.759  | NM_004848 | 5014.508  | 2258.397  | D50911    | 2346.36   |
| AK026232  | 2634.651  | 2765.583  | AF014459  | 2940.155  | 2741.823  | AB011104  | 709.97    |
| NM_014892 | 37538.133 | 7852.858  | AK024601  | 2736.245  | 2615.935  | NM_000552 | 1737.029  |
| AK023827  | 3440.139  | 4154.89   | S68069    | 2368.336  | 1834.126  | NM_003809 | 56.554    |
| NM_001117 | 772.302   | 580.598   | NM_001503 | 762.72    | 465.479   | AK000860  | 1556.672  |
| NM_001829 | 539.864   | 813.54    | NM_006302 | 1306.133  | 1481.996  | NM_016190 | 17125.795 |
| AF283645  | 1490.91   | 846.884   | AJ224875  | 2343.954  | 1757.117  | AL137579  | 1955.729  |
| NM_016575 | 1842.757  | 1571.144  | NM_002149 | 2526.635  | 2359.093  | AF255342  | 1913.133  |
| NM_001045 | 7560.654  | 5222.554  | AF043324  | 1679.335  | 1751.393  | NM_003300 | 1959.356  |
| NM_005697 | 12313.01  | 6725.253  | AK024172  | 672.875   | 551.34    | AK026682  | 1145.269  |
| NM_003099 | 5931.876  | 3803.94   | NM_014814 | 2468.408  | 1424.138  | NM_017720 | 18336.221 |
| NM_004781 | 1077.338  | 1220.711  | NM_002797 | 7240.278  | 6005.187  | NM_004655 | 835.567   |
| NM_018303 | 1894.156  | 1703.511  | AK024318  | 471.157   | 408.09    | NM_003942 | 461.105   |
| NM_014758 | 2695.01   | 2446.8    | NM_016129 | 1991.007  | 1965.306  | NM_006471 | 4082.755  |
| NM_005124 | 1692.391  | 2536.798  | NM_002809 | 3236.601  | 2671.313  | NM_004165 | 3513.544  |
| AK000947  | 3741.443  | 5502.238  | NM_017912 | 17714.66  | 13915.52  | NM_000368 | 712.915   |
| NM_002940 | 1339.517  | 1694.042  | NM_000423 | 2163.756  | 2796.044  | NM_016586 | 570.846   |
| NM_016081 | 17926.242 | 14692.318 | AB046838  | 873.86    | 1417.207  | NM_002866 | 1824.826  |
| NM_006389 | 2457.087  | 6405.46   | AK026339  | 1775.895  | 934.261   | NM_003860 | 755.865   |
| M30818    | 1263.875  | 1342.458  | X98411    | 4847.517  | 4118.088  | NM_005414 | 437.444   |
| NM_000163 | 1055.141  | 1309.043  | AF116658  | 3139.98   | 2416.499  | NM_004468 | 4276.693  |
| NM_005755 | 1515.226  | 1586.271  | NM_014865 | 11112.284 | 12330.373 | NM_016031 | 1930.745  |
| AB023216  | 1002.27   | 488.656   | AB032977  | 8554.328  | 10774.93  | NM_004804 | 149.314   |
| NM_002266 | 21486.211 | 13547.113 | AK001725  | 486.571   | 648.983   | M92439    | 1155.887  |
| NM_014400 | 6279.629  | 3896.476  | NM_003036 | 1062.865  | 2796.348  | AL117665  | 343.029   |
| AL157492  | 856.335   | 564.822   | NM_020529 | 2507.605  | 1921.06   | NM_001262 | 1111.133  |
| AL353957  | 2883.6    | 1675.913  | NM_020395 | 988.715   | 1313.87   | BE873030  | 1585.739  |
| NM_007214 | 8680.305  | 8381.713  | NM_003425 | 980.069   | 508.871   | BC006990  | 1720.388  |
| NM_000311 | 2378.071  | 1841.052  | NM_013388 | 6965.337  | 3837.002  | NM_002277 | 1984.23   |
| NM_017909 | 2407.175  | 2468.927  | AF038951  | 4799.438  | 3946.72   | NM_019114 | 602.178   |
| NM_006335 | 6981.715  | 9273.226  | NM_006492 | 430.965   | 701.988   | M33552    | 1743.788  |
| NM_000786 | 9830.019  | 11292.912 | AK021811  | 775.794   | 633.337   | AJ252060  | 375.6     |
| AL133561  | 2845.635  | 2906.367  | NM_003428 | 1928.891  | 2042.088  | NM_006403 | 3977.311  |
| AB040891  | 1974.602  | 4477.44   | AF055030  | 1498.448  | 1568.318  | NM_018977 | 549.885   |
| AB037780  | 717.653   | 1156.219  | AK000589  | 1176.161  | 765.775   | AJ001402  | 669.597   |
| NM_005845 | 9732.753  | 10587.603 | X53281    | 17601.775 | 19649.768 | NM_004540 | 414.648   |
| NM_016209 | 8750.587  | 6563.838  | BC012782  | 1188.643  | 1060.143  | NM_000235 | 1399.841  |
| AK075415  | 762.952   | 927.806   | AF132026  | 39951.836 | 39518.629 | AF068236  | 6801.794  |
| AK025616  | 411.591   | 760.015   | AL050353  | 551.566   | 786.917   | L25628    | 515.253   |
| NM_018964 | 4011.831  | 4572.577  | AB037788  | 4765.762  | 4683.363  | M37033    | 470.939   |
| NM_000080 | 1480.788  | 2255.357  | NM_004587 | 3910.195  | 4163.861  | AK000336  | 633.883   |
| NM_002711 | 671.589   | 501.408   | AK024570  | 5512.985  | 9753.155  | NM_002795 | 4311.528  |
| AK026092  | 2992.873  | 1176.746  | AF161401  | 5733.049  | 6146.245  | AB033066  | 407.208   |
| AK001175  | 2444.658  | 1262.713  | NM_000990 | 3690.217  | 7816.067  | NM_017640 | 1087.666  |
| NM_003897 | 1907.825  | 1962.135  | NM_014740 | 2938.067  | 4465.104  | NM_019088 | 1872.515  |

|           |           |           |           |           |           |           |           |
|-----------|-----------|-----------|-----------|-----------|-----------|-----------|-----------|
| NM_014165 | 4919.046  | 6749.118  | NM_015956 | 3416.914  | 4078.854  | AB002373  | 581.331   |
| AL442085  | 4320.261  | 4179.75   | AF075008  | 2480.527  | 1140.615  | NM_016350 | 7665.334  |
| NM_013313 | 3875.552  | 3140.25   | NM_006504 | 4384.921  | 3439.62   | AK024167  | 715.929   |
| NM_014736 | 6309.581  | 7284.277  | AF070538  | 686.445   | 571.896   | NM_005026 | 1571.001  |
| AJ404615  | 2343.525  | 3680.236  | AL137430  | 382.009   | 522.285   | AF213356  | 727.622   |
| NM_016053 | 10707.649 | 13929.71  | NM_000696 | 4137.276  | 3195.741  | BC035716  | 505.663   |
| AB007869  | 2464.997  | 1857.768  | NM_002486 | 11307.685 | 7666.237  | NM_018014 | 600.816   |
| AB046844  | 803.919   | 922.082   | NM_004003 | 10437.038 | 10013.051 | NM_002359 | 2244.977  |
| NM_000302 | 2931.25   | 2800.672  | NM_000186 | 393.468   | 490.122   | AF230809  | 153.997   |
| AK022900  | 1165.828  | 1689.483  | BF244401  | 3149.135  | 2886.124  | NM_017894 | 9217.963  |
| NM_001962 | 341.076   | 635.182   | NM_004716 | 13825.239 | 14184.206 | NM_002624 | 18984.773 |
| NM_002500 | 1697.872  | 1282.27   | AL359585  | 2922.389  | 1928.832  | AF006199  | 622.643   |
| AK026232  | 2333.042  | 1854.635  | NM_014801 | 3683.235  | 4533.016  | NM_004554 | 2001.203  |
| NM_014892 | 34997.477 | 4470.875  | NM_003642 | 6591.148  | 2852.749  | NM_018119 | 263.307   |
| AK023827  | 3294.351  | 2341.838  | AB027013  | 3836.774  | 4953.29   | AL162035  | 491.024   |
| NM_001117 | 661.771   | 350.422   | BF185480  | 2597.515  | 1889.088  | NM_006692 | 1296.513  |
| NM_000231 | 3065.927  | 1867.054  | NM_002126 | 7329.892  | 6345.559  | NM_003084 | 281.184   |
| L07517    | 1264.888  | 1380.156  | NM_007105 | 242.837   | 612.444   | NM_002582 | 3125.869  |
| AK022451  | 2715.987  | 2569.568  | NM_003074 | 1654.306  | 1782.212  | NM_001009 | 55052.609 |
| AA425102  | 598.896   | 297.825   | AL360195  | 1427.703  | 2715.652  | D17289    | 2104.123  |
| AA150828  | 2042.633  | 2070.65   | U14383    | 426.154   | 408.327   | NM_002949 | 4994.518  |
| H90764    | 473.258   | 726.145   | NM_017810 | 999.776   | 1449.16   | NM_014230 | 1527.568  |
| AI859208  | 1544.465  | 1083.335  | NM_003181 | 36665.73  | 44649.824 | NM_017746 | 1996.028  |
| H64379    | 10376.301 | 15360.493 | NM_004451 | 1083.675  | 7157.244  | NM_014901 | 714.234   |
| BE208258  | 47809.137 | 54655.875 | NM_004364 | 20947.191 | 21978.063 | AK000005  | 250.067   |
| T72202    | 1667.009  | 1469.907  | AK023505  | 2087.776  | 1429.206  | NM_000106 | 588.38    |
| BI831922  | 2183.521  | 3424.056  | AB037851  | 2695.781  | 3328.869  | NM_016931 | 650.27    |
| NM_016081 | 18086.023 | 9212.45   | AL050389  | 1464.554  | 1598.675  | NM_004373 | 2096.119  |
| NM_006389 | 2289.038  | 3243.384  | AK024684  | 1938.274  | 1324.43   | NM_005566 | 4567.232  |
| M30818    | 606.734   | 333.219   | NM_014945 | 3939.654  | 2814.381  | NM_000162 | 646.703   |
| NM_000163 | 616.59    | 620.322   | AK001546  | 2179.36   | 950.654   | NM_016287 | 2161.127  |
| NM_005755 | 1243.315  | 746.517   | NM_006537 | 3433.872  | 4162.823  | NM_003864 | 1598.417  |
| NM_003329 | 53358.254 | 37588.266 | AF007155  | 5751.706  | 6817.13   | NM_006824 | 4635.02   |
| NM_003299 | 47893.719 | 45160.945 | AL049282  | 4906.867  | 4740.558  | NM_002107 | 366.609   |
| NM_007034 | 551.014   | 643.494   | AK021443  | 2695.287  | 987.502   | NM_002694 | 1665.938  |
| NM_001560 | 11311.283 | 6076.218  | NM_020233 | 1029.12   | 1441.992  | NM_004454 | 598.051   |
| NM_001783 | 10233.323 | 12675.578 | AF143873  | 1233.575  | 1522.523  | NM_012482 | 2188.517  |
| J03171    | 2189.212  | 2629.483  | AL355732  | 1257.246  | 2164.441  | AF217227  | 583.997   |
| NM_005856 | 1468.125  | 3381.756  | NM_017966 | 1419.211  | 1497.008  | AK024141  | 1835.93   |
| NM_004323 | 19820.035 | 26495.732 | AF143327  | 1200.165  | 1077.579  | U13706    | 457.709   |
| NM_005312 | 1532.818  | 2063.735  | AL049990  | 547.214   | 503.591   | NM_002813 | 3399.998  |
| NM_018964 | 3614.378  | 2308.115  | AF131843  | 833.157   | 1059.985  | AK022745  | 371.532   |
| NM_000080 | 1694.177  | 1202.048  | NM_020231 | 601.084   | 709.352   | NM_005086 | 10617.739 |
| NM_001829 | 668.598   | 485.535   | AL133118  | 1234.461  | 1042.965  | AK024644  | 432.804   |
| NM_000339 | 318.356   | 636.9     | AK023571  | 2225.307  | 2209.772  | AF064254  | 586.82    |
| AF283645  | 1758.503  | 1671.689  | NM_001702 | 1658.245  | 2407.923  | AL137360  | 2705.029  |
| NM_016575 | 2106.876  | 2630.771  | NM_018050 | 1161.061  | 238.823   | AF143331  | 693.548   |
| NM_001045 | 12291.984 | 12883.943 | AF087991  | 9897.099  | 7790.344  | AK000819  | 787.822   |
| NM_005697 | 15482.18  | 14224.182 | Y12839    | 879.29    | 1000.911  | AF201941  | 315.725   |
| NM_018303 | 2222.952  | 2321.247  | AJ227884  | 1039.544  | 1189.566  | AF026941  | 1426.27   |
| NM_014756 | 3270.91   | 2503.296  | X64986    | 1595.772  | 2299.206  | NM_007070 | 1468.964  |
| AB046844  | 616.788   | 648.074   | L38282    | 4573.417  | 4130.644  | AL133019  | 2290.311  |
| NM_000302 | 2220.25   | 1306.755  | NM_018056 | 1250.242  | 1200.1    | AK026192  | 354.824   |

|           |           |           |           |           |           |           |           |
|-----------|-----------|-----------|-----------|-----------|-----------|-----------|-----------|
| NM_013235 | 22217.6   | 14837.368 | L25446    | 629.957   | 323.543   | NM_014895 | 799.977   |
| NM_016015 | 3308.526  | 1968.184  | NM_019005 | 1197.656  | 1324.51   | AK024883  | 1889.974  |
| NM_020120 | 1632.274  | 1200.208  | M20838    | 585.348   | 933.856   | AF217989  | 878.115   |
| AK022900  | 1102.983  | 695.721   | AK022738  | 922.549   | 703.771   | NM_017654 | 767.13    |
| NM_001125 | 681.953   | 334.663   | AK002095  | 685.93    | 872.077   | AK000776  | 557.054   |
| AB023216  | 1004.76   | 1019.193  | AK000821  | 1623.474  | 1494.826  | AJ002784  | 326.3     |
| NM_002266 | 25189.721 | 22575.855 | AK024526  | 8150.323  | 10107.939 | U17621    | 782.634   |
| NM_014400 | 6981.945  | 9835.11   | AK000848  | 1630.27   | 1447.129  | AL049239  | 1168.297  |
| AL157492  | 880.949   | 923.127   | AK023307  | 654.203   | 839.405   | NM_013285 | 1151.23   |
| AL353957  | 3646.423  | 3657.848  | NM_017615 | 2685.904  | 2962.017  | M60721    | 6305.787  |
| NM_007214 | 8564.282  | 13895.78  | NM_017845 | 307.078   | 333.651   | L39061    | 1030.294  |
| NM_000311 | 1910.747  | 2684.292  | AK024315  | 2105.782  | 2203.084  | AF071508  | 2114.54   |
| NM_017905 | 2458.109  | 5460.38   | AK024945  | 2058.868  | 2195.836  | L07265    | 11046.657 |
| AL133561  | 3016.78   | 2704.345  | AK024579  | 7804.398  | 8172.838  | D16472    | 2047.796  |
| NM_017731 | 631.158   | 743.603   | S75708    | 10882.742 | 8368.704  | AL157459  | 312.291   |
| NM_016205 | 9113.767  | 11541.296 | U79291    | 6491.349  | 4318.049  | AL353954  | 185.307   |
| AK002114  | 1353.979  | 1193.902  | D17172    | 6812.975  | 6094.159  | AL133573  | 2493.725  |
| AL390184  | 488.537   | 321.356   | AJ227859  | 563.391   | 655.202   | NM_017955 | 303.707   |
| NM_018695 | 633.213   | 616.093   | NM_018544 | 976.536   | 743.318   | AK000958  | 370.245   |
| AK026318  | 958.839   | 637.22    | AK022670  | 400.997   | 323.96    | AK024523  | 430.855   |
| AF291673  | 1106.09   | 993.402   | AB020699  | 3651.283  | 3260.92   | AK024600  | 696.274   |
| NM_004365 | 6126.235  | 6532.881  | AF086269  | 2303.834  | 1527.329  | AK024543  | 907.969   |
| NM_016355 | 2045.081  | 2508.108  | U90437    | 2476.444  | 1778.176  | AK024624  | 11185.021 |
| AJ296290  | 1772.839  | 1730.338  | AK000842  | 7156.749  | 8120.206  | AK025090  | 1283.756  |
| AK026092  | 3626.82   | 2972.848  | AK023386  | 6189.412  | 8239.234  | AF321617  | 429.703   |
| AK001175  | 2832.312  | 2371.92   | NM_007053 | 12135.291 | 10977.793 | AF086208  | 721.092   |
| NM_003897 | 1959.569  | 3083.715  | AK022153  | 1945.549  | 2668.57   | AK023335  | 2520.001  |
| AL442085  | 5099.083  | 6542.939  | AK022789  | 845.131   | 2284.431  | AK023187  | 726.413   |
| NM_013313 | 3627.964  | 3145.771  | AK023756  | 722.08    | 804.588   | AK022231  | 485.694   |
| NM_014736 | 7002.978  | 7127.957  | AJ012497  | 66.667    | 681.953   | NM_019033 | 733.056   |
| AK023886  | 1662.293  | 2387.798  | NM_001126 | 4632.819  | 5907.191  | AL133101  | 498.749   |
| NM_002553 | 1315.272  | 2090.711  | AK023673  | 1639.586  | 3082.169  | AK024602  | 17562.824 |
| AJ404615  | 2714.21   | 3741.726  | NM_018252 | 1223.725  | 3401.308  | NM_000485 | 999.95    |
| NM_016053 | 11217.229 | 15677.224 | AF164963  | 1278.203  | 2325.063  | NM_018542 | 578.132   |
| AB007869  | 3407.306  | 4031.365  | AF124366  | 7318.597  | 9357.605  | AK025503  | 334.024   |
| M64108    | 1755.318  | 1140.432  | AF130112  | 1424.626  | 2360.888  | AK024225  | 4117.544  |
| Y17867    | 1562.826  | 831.325   | NM_000551 | 2353.746  | 3698.028  | AF086334  | 380.299   |
| M92642    | 1126.766  | 706.571   | AL365518  | 2140.207  | 2040.622  | AF075035  | 2971.57   |
| NM_018071 | 1888.098  | 1132.285  | AF086257  | 5434.882  | 5374.104  | BC024924  | 2165.758  |
| NM_004333 | 4097.176  | 2261.538  | AF075056  | 372.779   | 616.052   | NM_017905 | 2617.659  |
| M31520    | 60589.324 | 60999.539 | AC119751  | 1313.187  | 1175.919  | AL110286  | 3535.024  |
| NM_002020 | 7556.06   | 5752.477  | NM_019055 | 2494.218  | 2111.412  | AL162066  | 4946.469  |
| AL050137  | 639.603   | 537.259   | AF279783  | 2844.174  | 2825.536  | NM_016095 | 3417.984  |
| AK024423  | 2957.349  | 2827.935  | AF182422  | 2851.633  | 2892.874  | U79290    | 492.463   |
| NM_005043 | 15395.12  | 17089.367 | NM_016943 | 567.241   | 581.85    | X98114    | 598.455   |
| NM_005975 | 14342.758 | 9787.149  | AF070602  | 1749.868  | 3096.31   | NM_014040 | 580.75    |
| NM_006282 | 7882.165  | 4917.853  | BE393290  | 897.9     | 829.897   | AK000799  | 1471.642  |
| NM_015920 | 17368.277 | 19925.967 | NM_017622 | 997.062   | 749.595   | NM_015582 | 7483.519  |
| AB011113  | 1930.505  | 2998.919  | AF133331  | 1268.78   | 1672.117  | AK027091  | 1494.778  |
| NM_004115 | 1344.43   | 2273.007  | AK022289  | 604.409   | 599.155   | NM_001525 | 676.725   |
| NM_018287 | 2172.293  | 2352.584  | L34408    | 622.817   | 2447.98   | AK023536  | 667.948   |
| NM_001955 | 3677.841  | 4488.751  | AF161403  | 8544.198  | 11924.636 | AK026561  | 2582.452  |
| AF016004  | 1750.401  | 5569.664  | NM_020183 | 2837.962  | 4385.773  | AK027114  | 56881.684 |

|           |           |           |           |           |           |           |           |
|-----------|-----------|-----------|-----------|-----------|-----------|-----------|-----------|
| NM_003567 | 4132.098  | 6116.569  | NM_018029 | 1061.593  | 1531.639  | NM_016298 | 834.889   |
| NM_007315 | 6065.314  | 3018.382  | AL389954  | 1632.402  | 2338.131  | AK002146  | 266.791   |
| L20686    | 3247.483  | 3837.208  | NM_019852 | 3442.127  | 5277.014  | NM_003159 | 353.911   |
| NM_000304 | 766.306   | 1128.154  | AK026225  | 43236.434 | 51929.738 | NM_015492 | 2955.595  |
| AK023362  | 723.146   | 661.675   | AL050032  | 3445.012  | 7739.183  | AF132204  | 2557.879  |
| S72604    | 14625.806 | 8275.059  | AF009304  | 1731.595  | 1864.338  | AK022874  | 1440.496  |
| NM_002675 | 1283.277  | 931.397   | AF086177  | 11937.11  | 21971.43  | AA454646  | 1204.211  |
| NM_012432 | 15533.045 | 9140.97   | NM_018949 | 8039.138  | 8891.514  | U18087    | 12058.724 |
| NM_005007 | 17689.195 | 5493.863  | AK021593  | 1576.483  | 2314.704  | U66349    | 460.954   |
| AK024996  | 2773.517  | 1533.821  | D17187    | 1260.031  | 1201.402  | AA057156  | 1150.122  |
| NM_012290 | 3746.842  | 3596.8    | AJ243672  | 2414.636  | 2500.304  | U19487    | 458.005   |
| NM_002431 | 1169.441  | 3459.307  | D17169    | 6771.281  | 18002.748 | AF531423  | 668.73    |
| NM_001827 | 14054.653 | 30124.955 | NM_017924 | 8887.981  | 4728.763  | X76555    | 726.703   |
| NM_020466 | 3931.129  | 4741.091  | S81578    | 940.108   | 975.673   | NM_005432 | 1240.035  |
| AL079280  | 530.821   | 752.108   | NM_017546 | 2554.733  | 2723.351  | L10386    | 1506.439  |
| NM_002853 | 3184.679  | 5270.644  | AJ001889  | 1742.05   | 1734.406  | AF061812  | 869.52    |
| NM_003174 | 941.185   | 1002.814  | AF086210  | 696.858   | 831.828   | AL136756  | 629.598   |
| NM_012307 | 15701.986 | 15701.73  | AL137400  | 1192.279  | 888.615   | NM_012469 | 1811.468  |
| NM_002540 | 1078.25   | 1687.768  | AF007142  | 1981.926  | 1572.997  | SR10      | 23475.793 |
| NM_006371 | 2395.433  | 3940.969  | AF119853  | 9440.729  | 9318.181  | CY3Cy5    | 7704.532  |
| NM_018834 | 817.86    | 1206.066  | CY3Cy5    | 7530.93   | 552.506   | NM_005308 | 497.177   |
| AK026882  | 975.193   | 1162.321  | AI248827  | 1406.031  | 1792.136  | NM_000911 | 492.233   |
| NM_004574 | 936.032   | 1073.743  | R45026    | 2145.056  | 3511.706  | NM_007227 | 372.414   |
| NM_004848 | 8552.724  | 2446.507  | BI768063  | 762.962   | 1032.234  | NM_007023 | 504.608   |
| NM_001944 | 763.601   | 1268.464  | BG386057  | 689.629   | 976.642   | NM_014461 | 369.067   |
| NM_014813 | 604.493   | 901.207   | AI970239  | 3502.755  | 3601.165  | NM_003865 | 579.75    |
| AF014459  | 3450.012  | 2974.269  | AA496452  | 4840.094  | 4101.238  | AB015330  | 746.175   |
| AK024601  | 2863.816  | 2138.893  | X67594    | 3585.422  | 4180.055  | NM_001455 | 2038.225  |
| S68069    | 8366.667  | 2505.556  | NM_015869 | 880.924   | 748.957   | L09071    | 470.996   |
| AB011095  | 1289.269  | 508.487   | NM_001631 | 430.598   | 450.727   | NM_003322 | 262.333   |
| NM_001503 | 664.942   | 462.494   | AB000734  | 3492.863  | 2004.168  | NM_006363 | 2322.552  |
| NM_006302 | 2545.177  | 1470.754  | NM_005987 | 66410.688 | 64570.641 | AL049667  | 1977.683  |
| AJ224875  | 2733.804  | 1758.064  | X87838    | 3286.152  | 2048.521  | NM_000334 | 393.822   |
| NM_002149 | 6894.931  | 4553.152  | NM_033199 | 1061.132  | 444.887   | NM_020400 | 369.974   |
| AF043324  | 3554.607  | 3307.604  | NM_015001 | 1155.342  | 686.633   | NM_001504 | 529.441   |
| AK024172  | 780.64    | 1037.105  | SR2       | 63297.355 | 43818.605 | D50926    | 1099.062  |
| NM_014814 | 6681.131  | 5357.174  | SR4       | 17124.16  | 10864.351 | BF205683  | 1065.724  |
| NM_002797 | 13930.937 | 12546.441 | SR6       | 2666.35   | 1692.698  | NM_001548 | 774.592   |
| AK024318  | 982.804   | 1832.266  | SR8       | 8931.805  | 20618.979 | NM_000758 | 4857.782  |
| NM_016129 | 1134.198  | 3824.904  | SR10      | 30071.697 | 8270.334  | M17017    | 2200.271  |
| NM_000423 | 6260.091  | 7486.176  | CY3Cy5    | 5174.961  | 452.362   | NM_002990 | 993.469   |
| AB046838  | 1729.343  | 3264.324  | X00094    | 965.98    | 1422.154  | NM_002432 | 8723.027  |
| AK026339  | 2542.702  | 2671.207  | NM_003775 | 1804.454  | 1841.196  | AB033037  | 545.418   |
| X98411    | 5626.659  | 9399.019  | NM_002082 | 11888.099 | 20413.988 | L40400    | 1149.349  |
| AF116658  | 11620.589 | 4887.285  | NM_002922 | 552.213   | 957.496   | AK025688  | 943.117   |
| NM_014865 | 5888.688  | 8089.812  | AF155657  | 21155.619 | 19171.311 | NM_014448 | 675.981   |
| AB032977  | 8941.817  | 10302.248 | NM_006056 | 4227.542  | 5494.746  | S56138    | 747.469   |
| AK001725  | 1136.546  | 1824.827  | AF045229  | 7847.683  | 10413.864 | AK023860  | 996.471   |
| NM_003036 | 3050.327  | 4071.406  | NM_001840 | 5172.07   | 7194.317  | NM_000031 | 493.102   |
| NM_020529 | 7171.713  | 3872.863  | AK025099  | 2149.698  | 2860.023  | NM_002085 | 12376.293 |
| NM_020395 | 1604.219  | 1121.467  | NM_000394 | 500.022   | 320.312   | NM_016286 | 1015.819  |
| NM_003425 | 1481.6    | 867.775   | NM_000228 | 1497.208  | 1436.174  | NM_001567 | 605.911   |
| NM_013388 | 5101.378  | 3236.128  | NM_000830 | 689.244   | 1425.602  | NM_004905 | 3004.083  |

|           |           |           |           |           |           |           |           |
|-----------|-----------|-----------|-----------|-----------|-----------|-----------|-----------|
| AF038951  | 10462.509 | 3996.875  | NM_005209 | 566.767   | 409.114   | AF217971  | 1449.827  |
| NM_006492 | 1414.648  | 1405.959  | AF148950  | 959.386   | 808.437   | NM_001925 | 711.495   |
| AK021811  | 1448.857  | 839.231   | NM_001155 | 6572.141  | 5002.365  | AF245517  | 257.064   |
| NM_003428 | 1593.232  | 1847.739  | M62896    | 18421.102 | 16313.366 | AF286370  | 253.89    |
| AF055030  | 1546.658  | 1921.74   | NM_017736 | 2531.564  | 1966.079  | AK026180  | 469.636   |
| AK000589  | 1499.119  | 1271.48   | NM_000390 | 494.277   | 1156.243  | NM_003916 | 5410.723  |
| X53281    | 9749.349  | 9871.222  | NM_000313 | 459.217   | 758.648   | NM_002870 | 8100.172  |
| BC012782  | 2398.763  | 1945.703  | AF263523  | 2974.523  | 1961.826  | NM_001478 | 5508.028  |
| AF132026  | 51113.871 | 55935.289 | L08441    | 14605.021 | 8609      | AF135422  | 638.562   |
| AB037788  | 8810.294  | 10999.206 | AA641953  | 1454.004  | 1709.321  | NM_004479 | 5460.129  |
| AK024570  | 10093.079 | 17350.428 | AL137764  | 32875.273 | 35247.395 | AF070587  | 520.507   |
| AF161401  | 7165.321  | 7849.691  | NM_001660 | 23840.873 | 28960.301 | NM_016819 | 680.332   |
| NM_000990 | 10214.768 | 22011.912 | NM_000710 | 615.477   | 550.155   | NM_012222 | 502.418   |
| NM_014740 | 3431.83   | 4849.621  | NM_000752 | 2155.387  | 2177.208  | NM_005002 | 457.551   |
| NM_015956 | 6802.646  | 9126.668  | AB040945  | 795.601   | 807.742   | NM_006596 | 1086.575  |
| AF075008  | 3371.383  | 1066.645  | NM_002018 | 12708.46  | 19137.998 | AK023214  | 2313.323  |
| NM_006504 | 9471.168  | 3048.193  | NM_002377 | 1308.414  | 1338.404  | NM_001469 | 1485.435  |
| AF070538  | 479.893   | 285.881   | NM_006018 | 709.64    | 791.944   | NM_003600 | 1577.24   |
| AL137430  | 556.961   | 322.106   | AF161383  | 4214.374  | 4146.483  | NM_017490 | 701.027   |
| NM_000696 | 3472.365  | 1938.377  | AF224266  | 2844.763  | 3703.052  | AK026727  | 709.22    |
| NM_002488 | 17850.031 | 6824.513  | U72882    | 18005.873 | 15664.76  | NM_006247 | 1434.583  |
| NM_004003 | 10148.905 | 5370.12   | NM_014337 | 11108.72  | 8199.921  | AB032983  | 312.044   |
| NM_000188 | 824.838   | 950.32    | NM_007161 | 54732.836 | 37187.973 | NM_018281 | 2117.039  |
| BF244401  | 4105.946  | 3515.395  | NM_014387 | 2835.872  | 1950.356  | NM_014049 | 1595.124  |
| NM_004718 | 20012.383 | 28163.494 | NM_003641 | 4400.005  | 4122.794  | NM_005396 | 227.498   |
| AL359585  | 1887.556  | 2383.876  | NM_012463 | 1528.396  | 1039.237  | BC036375  | 2366.363  |
| AB046850  | 2410.56   | 2888.799  | L29140    | 25165.68  | 19614.049 | BI912037  | 495.263   |
| NM_014801 | 2503.919  | 2829.688  | AK026448  | 2757.244  | 1847.106  | AA454646  | 934.521   |
| NM_003642 | 5728.049  | 6717.986  | AK057418  | 8014.756  | 6652.806  | U18087    | 13017.604 |
| AB027013  | 1824.767  | 3610.642  | L37199    | 591.665   | 766.934   | U66349    | 348.159   |
| BC032686  | 853.236   | 700.23    | AF148646  | 5068.068  | 4906.806  | AA057156  | 1007.421  |
| BF185480  | 3383.887  | 3884.683  | NM_000072 | 4228.529  | 2189.604  | U19487    | 502.6     |
| NM_002128 | 11413.744 | 25885.018 | NM_000697 | 2217.082  | 3009.462  | AF166327  | 4151.261  |
| NM_003074 | 3490.088  | 5034.521  | NM_000017 | 9178.529  | 7823.992  | AF260739  | 503.186   |
| AL360195  | 1384.215  | 1964.347  | NM_000237 | 2483.171  | 2249.316  | AF531423  | 659.009   |
| U14383    | 779.846   | 772.92    | NM_018346 | 3465.892  | 4439.588  | X76555    | 586.365   |
| NM_017810 | 812.635   | 1289.383  | AL122054  | 3902.355  | 4752.519  | NM_005432 | 1008.547  |
| NM_003181 | 58410.992 | 57621.668 | AB011182  | 4889.442  | 7038.08   | L10386    | 1188.742  |
| NM_004451 | 2801.661  | 2510.61   | AB023151  | 546.078   | 527.669   | AF061812  | 718.185   |
| NM_004364 | 37217.961 | 43357.48  | NM_000140 | 12283.511 | 18609.289 | AL136756  | 445.148   |
| AK023505  | 2594.044  | 1140.801  | NM_005125 | 6320.504  | 14625.366 | NM_012469 | 1687.922  |
| AB037851  | 2494.393  | 1333.356  | NM_020038 | 2283.458  | 2671.914  | NM_134260 | 6202.44   |
| AL050389  | 2226.786  | 1130.069  | NM_016246 | 1721.754  | 2609.557  | AK025688  | 725.929   |
| AK024684  | 1662.682  | 685.69    | NM_015926 | 18119.078 | 14354.72  | Z36819    | 7524.253  |
| NM_014945 | 6657.342  | 3472.696  | X03757    | 4267.22   | 3552.876  | NM_014448 | 985.118   |
| AK001546  | 2947.474  | 2109.326  | NM_005136 | 639.234   | 696.223   | AL080157  | 342.377   |
| NM_006537 | 7482.242  | 6572.576  | AK094513  | 477.566   | 496.374   | NM_005308 | 659.253   |
| AF007155  | 5778.932  | 8281.634  | NM_001183 | 12181.322 | 8280.804  | NM_000911 | 65.149    |
| AK023055  | 686.699   | 938.796   | NM_000890 | 2700.51   | 2627.405  | NM_007023 | 349.808   |
| AL049282  | 5090.316  | 6766.764  | NM_004976 | 8029.04   | 7690.103  | NM_005873 | 5189.508  |
| AK021443  | 1385.65   | 1832.276  | AK021597  | 5251.038  | 10321.832 | NM_004624 | 717.172   |
| AF070569  | 1486.53   | 932.863   | NM_005737 | 20655.961 | 18587.127 | NM_003865 | 381.479   |
| NM_020233 | 1813.281  | 2701.843  | NM_006803 | 941.865   | 1065.087  | AB015330  | 667.855   |

|           |           |           |           |           |           |           |           |
|-----------|-----------|-----------|-----------|-----------|-----------|-----------|-----------|
| AF143873  | 498.135   | 1076.493  | AF235022  | 1078.965  | 1300.012  | NM_001455 | 1828.822  |
| AL355732  | 2497.758  | 3468.535  | AF182814  | 1717.447  | 2364.544  | AK026180  | 177.455   |
| NM_017966 | 2594.344  | 4119.345  | NM_005329 | 1013.421  | 1022.423  | NM_013365 | 666.507   |
| AF143327  | 1107.416  | 2175.588  | NM_000107 | 2060.326  | 2034.295  | NM_005817 | 5304.775  |
| AL049991  | 314.964   | 672.469   | AL157445  | 2715.136  | 2481.327  | NM_003916 | 3788.558  |
| AL049990  | 760.831   | 1207.258  | NM_001517 | 19562.299 | 26277.998 | NM_002870 | 10366.55  |
| AF131843  | 1042.714  | 1255.025  | NM_005053 | 6483.134  | 10302.912 | NM_006363 | 2645.856  |
| AK026653  | 878.331   | 1178.942  | D86974    | 4397.597  | 5060.823  | AL049667  | 1997.495  |
| NM_020231 | 1212.958  | 1688.315  | NM_018283 | 2093.455  | 1807.968  | NM_000334 | 459.741   |
| AL133118  | 1568.042  | 1131.609  | NM_001983 | 1448.783  | 3763.48   | NM_001504 | 382.978   |
| AK023571  | 1560.452  | 704.986   | NM_004993 | 653.585   | 441.109   | D50926    | 1076.12   |
| NM_001702 | 5674.341  | 2216.836  | Y12337    | 2711.634  | 2005.002  | BF205683  | 755.063   |
| AK026657  | 528.215   | 569.006   | M29551    | 9152.781  | 9535.641  | NM_001548 | 1015.913  |
| AF087991  | 7637.803  | 6660.074  | NM_002929 | 1647.774  | 858.313   | NM_000758 | 6710.085  |
| Y12839    | 648.159   | 1152.537  | BC028375  | 998.755   | 835.542   | M17017    | 2449.364  |
| X64979    | 197.86    | 1139.003  | AB026436  | 2500.395  | 2164.61   | NM_002990 | 1114.987  |
| AJ001876  | 587.994   | 1003.239  | NM_016029 | 4260.213  | 3207.805  | NM_002432 | 8603.521  |
| AJ227884  | 1569.014  | 2733.826  | AK024562  | 1251.396  | 1248.425  | NM_012420 | 340.812   |
| X75693    | 1351.349  | 2299.41   | NM_004573 | 1104.719  | 1489.083  | AB033037  | 501.66    |
| X64986    | 3101.876  | 4097.181  | NM_000313 | 487.989   | 1002.322  | L40400    | 1000.955  |
| L38282    | 6044.438  | 5871.901  | NM_001498 | 68399.93  | 67349.672 | NM_006247 | 954.375   |
| NM_018056 | 1948.022  | 2495.598  | AF263523  | 2371.525  | 2052.29   | AB032983  | 275.784   |
| NM_019008 | 1945.273  | 1806.843  | L08441    | 13322.036 | 10294.393 | NM_018281 | 2000.812  |
| M20838    | 1079.593  | 1131.27   | AA641953  | 1668.401  | 2278.458  | NM_004457 | 1348.128  |
| AK022738  | 537.19    | 707.002   | BI768063  | 987.509   | 948.735   | NM_014049 | 998.804   |
| AK002095  | 662.648   | 296.741   | BG386057  | 648.141   | 803.636   | NM_004315 | 7932.131  |
| AK000821  | 2634.721  | 4072.769  | AI970239  | 3792.372  | 3909.272  | NM_020166 | 1474.801  |
| AK024526  | 11556.601 | 17905.438 | AA496452  | 5123.578  | 4784.358  | S56138    | 170.29    |
| AK000848  | 1251.032  | 1829.889  | X67594    | 4238.056  | 6158.233  | AK023860  | 923.811   |
| AK023307  | 630.26    | 1490.717  | BC008837  | 563.818   | 493.482   | NM_000031 | 726.901   |
| NM_017618 | 3409.261  | 2844.311  | NM_015869 | 817.833   | 1048.772  | NM_002085 | 13870.782 |
| AK024315  | 3695.864  | 4113.059  | NM_001631 | 403.536   | 401.645   | NM_016286 | 1037.664  |
| AK024945  | 2110.231  | 1770.066  | AB000734  | 3322.111  | 1723.352  | NM_001567 | 743.933   |
| AK024579  | 5173.892  | 5801.566  | NM_005987 | 63081.43  | 60016.422 | NM_004905 | 3441.446  |
| S75708    | 8942.253  | 4765.96   | X87838    | 3015.97   | 2777.335  | AF217971  | 1500.958  |
| U79291    | 5720.883  | 3314.229  | NM_033199 | 1133.176  | 681.882   | NM_001925 | 771.466   |
| D17172    | 5004.336  | 3102.25   | NM_015001 | 1459.172  | 1147.404  | AF245517  | 269.599   |
| AJ227859  | 525.212   | 273.385   | NM_000169 | 5218.07   | 4278.623  | NM_001694 | 34917.566 |
| NM_018544 | 1096.911  | 320.731   | AK057418  | 8819.853  | 8469.156  | NM_000217 | 262.209   |
| AB020699  | 5590.545  | 5491.782  | L37199    | 744.079   | 2229.495  | NM_012469 | 1448.507  |
| AF086269  | 2058.833  | 1475.203  | NM_007260 | 1766.182  | 2136.023  | NM_134260 | 4937.146  |
| U90437    | 3248.184  | 3431.965  | AF148646  | 5754.352  | 6148.348  | NM_001478 | 9509.532  |
| S71604    | 868.004   | 915.342   | AL110218  | 1370.973  | 1749.652  | NM_002612 | 248.374   |
| AK000842  | 11250.355 | 8833.56   | NM_003775 | 2061.96   | 2325.556  | AF135422  | 748.714   |
| AK023386  | 5610.977  | 5403.323  | NM_002082 | 13584.78  | 19547.996 | NM_004479 | 6451.017  |
| NM_007053 | 24930.543 | 19262.963 | NM_002922 | 403.657   | 556.79    | AF070587  | 692.628   |
| AK022153  | 1146.052  | 860.68    | AF155657  | 20412.967 | 14458.592 | BE250526  | 274.01    |
| AK022789  | 768.471   | 855.27    | NM_006056 | 4321.278  | 7967.184  | NM_016819 | 644.562   |
| AK023756  | 957.364   | 821.76    | AF045229  | 7346.323  | 9931.824  | NM_012222 | 682.774   |
| NM_001126 | 3565.924  | 2076.15   | NM_001840 | 4062.356  | 4724.35   | NM_005002 | 469.149   |
| AK023673  | 1497.209  | 598.914   | AK025099  | 1727.034  | 1500.178  | NM_006596 | 1296.878  |
| NM_018252 | 745.178   | 826.686   | NM_016099 | 24468.961 | 19014.061 | AK023214  | 3477.566  |
| NM_018000 | 51184.848 | 26511.967 | NM_000228 | 1507.091  | 936.71    | NM_001469 | 2090.129  |

|           |           |           |           |           |           |           |           |
|-----------|-----------|-----------|-----------|-----------|-----------|-----------|-----------|
| AF124366  | 11882.655 | 6830.249  | NM_000830 | 465.075   | 932.7     | NM_003600 | 1323.658  |
| AF130112  | 697.375   | 1226.96   | NM_005200 | 540.775   | 528.777   | NM_017490 | 635.327   |
| NM_000551 | 4248.531  | 4957.479  | AF148950  | 1111.528  | 909.714   | NM_002710 | 885.861   |
| AL365518  | 4645.875  | 2571.324  | NM_001155 | 5875.519  | 5798.938  | AK026727  | 624.919   |
| AF086257  | 5147.501  | 4065.51   | M62896    | 18285.508 | 23947.82  | NM_002830 | 259.629   |
| AF075056  | 473.887   | 1015.201  | NM_017730 | 1978.074  | 3113.561  | L09071    | 398.077   |
| AC119751  | 1440.137  | 1449.826  | NM_000390 | 637.201   | 850.778   | NM_003320 | 167.169   |
| U00928    | 668.808   | 1146.252  | AK021597  | 4908.258  | 11902.162 | BC036375  | 2930.645  |
| NM_019050 | 2508.208  | 2598.988  | NM_005737 | 22715.656 | 20596.514 | BI912037  | 586.315   |
| AF279783  | 4415.5    | 5194.24   | NM_006800 | 870.691   | 1161.314  | AA454646  | 1192.99   |
| AF182422  | 4236.579  | 7310.068  | NM_002530 | 1695.791  | 2192.865  | U18087    | 11083.145 |
| NM_016940 | 474.98    | 926.759   | AF235022  | 1068.637  | 925.722   | U66349    | 461.913   |
| AF070602  | 826.795   | 1161.631  | AL137764  | 36903.887 | 43486.777 | AA057156  | 689.403   |
| BE393290  | 992.588   | 919.953   | NM_001660 | 25955.801 | 29794.602 | U19487    | 364.684   |
| NM_017620 | 1415.563  | 984.933   | NM_000710 | 538.051   | 622.98    | AF166327  | 4336.405  |
| AF133331  | 2316.79   | 2288.406  | NM_000750 | 2333.207  | 2142.817  | AF260739  | 553.64    |
| AK022289  | 537.424   | 1074.889  | AB040945  | 748.546   | 727.303   | AF531423  | 748.575   |
| AF161403  | 10203.115 | 8186.07   | NM_002010 | 10272.26  | 11136.915 | X76555    | 342.249   |
| NM_020180 | 2246.042  | 2565.009  | NM_002377 | 1200.872  | 1111.17   | NM_005430 | 848.051   |
| NM_018020 | 430.285   | 263.48    | NM_006010 | 654.066   | 463.44    | L10386    | 1017.75   |
| AL389954  | 885.446   | 406.089   | AF161383  | 3518.818  | 2411.04   | AF061812  | 430.586   |
| NM_019850 | 1564.85   | 1171.367  | NM_000410 | 15701.702 | 11392.262 | AL136756  | 440.141   |
| NM_006118 | 5079.26   | 2248.764  | AF224266  | 2245.348  | 2066.32   | NM_002990 | 885.007   |
| AK026225  | 19529.371 | 10666.281 | U72882    | 14131.616 | 10380.187 | NM_002430 | 6740.01   |
| AL050032  | 2302.193  | 1622.091  | NM_014337 | 9202.415  | 7163.454  | AB033037  | 430.963   |
| AF009304  | 684.731   | 745.699   | NM_014387 | 2664.415  | 2160.68   | L40400    | 727.924   |
| AF086177  | 7850.564  | 8470.961  | NM_003641 | 4142.163  | 4766.981  | AK025688  | 639.092   |
| NM_018940 | 1155.626  | 883.097   | NM_012460 | 1374.516  | 1405.766  | Z36819    | 8390.571  |
| D17187    | 1701.075  | 2194.405  | L29140    | 24292.035 | 26986.211 | NM_014440 | 892.01    |
| AJ243672  | 907.747   | 1407.354  | AK026448  | 2855.216  | 2903.489  | AL080157  | 425.482   |
| AL122087  | 814.231   | 673.487   | AB026436  | 2428.111  | 3011.129  | NM_005300 | 592.329   |
| D17169    | 7826.848  | 26597.088 | NM_016020 | 5198.714  | 4634.95   | NM_005870 | 6195.478  |
| NM_017920 | 9287.221  | 5594.333  | AK024562  | 1693.952  | 1867.021  | NM_004620 | 773.63    |
| S81578    | 1469.965  | 1468.095  | NM_014060 | 1639.826  | 1412.375  | NM_003860 | 665.087   |
| NM_017540 | 3690.949  | 4091.729  | NM_004570 | 1520.765  | 2456.837  | AB015330  | 439.271   |
| AL137400  | 541.723   | 280.588   | NM_000070 | 4241.647  | 2409.785  | NM_001450 | 1654.028  |
| NM_006511 | 507.18    | 267.174   | NM_000697 | 2261.325  | 2937.079  | NM_004980 | 480.591   |
| AF007142  | 1631.961  | 1580.061  | NM_000017 | 10487.693 | 9852.106  | NM_001690 | 46410.48  |
| AF119853  | 6734.347  | 5016.002  | NM_000237 | 2097.784  | 2019.272  | AF286370  | 220.387   |
| CY3Cy5    | 5597.433  | 388.48    | NM_018340 | 3926.75   | 5561.412  | NM_000217 | 225.86    |
| AI248827  | 1807.08   | 1203.527  | AL122054  | 3644.775  | 3065.447  | AK026180  | 377.345   |
| R45026    | 2153.924  | 2526.884  | AB011182  | 4513.252  | 4978.736  | NM_013360 | 772.027   |
| BI768063  | 1009.29   | 794.308   | AB023151  | 569.675   | 429.405   | NM_005817 | 5531.91   |
| BG386057  | 802.262   | 631.227   | NM_000140 | 9695.226  | 9746.001  | NM_003910 | 3578.23   |
| AI970239  | 2938.719  | 2145.616  | NM_005120 | 4112.386  | 4697.501  | NM_002870 | 11128.627 |
| AA496452  | 16475.527 | 4649.021  | NM_020030 | 1382.595  | 772.033   | NM_006360 | 2692.037  |
| X67594    | 4314.582  | 3568.873  | NM_016240 | 1334.08   | 1165.758  | NM_020410 | 267.372   |
| BC008837  | 1073.463  | 840.452   | NM_015920 | 16226.974 | 8853.633  | AL049667  | 1751.586  |
| NM_015860 | 1247.86   | 1253.007  | X03757    | 3268.15   | 2544.442  | NM_000334 | 433.424   |
| AB000734  | 2992.508  | 1937.819  | NM_005130 | 564.959   | 766.221   | NM_020400 | 427.302   |
| NM_005987 | 66299.68  | 68379.156 | AK094513  | 652.152   | 754.093   | NM_001500 | 459.629   |
| X87838    | 5859.743  | 5023.285  | NM_001180 | 11930.29  | 11604.732 | D50926    | 1241.509  |
| NM_033190 | 826.819   | 582.189   | NM_000890 | 2629.762  | 3768.476  | BF205683  | 1147.359  |



|           |           |           |           |           |           |           |           |
|-----------|-----------|-----------|-----------|-----------|-----------|-----------|-----------|
| NM_015001 | 1188.096  | 1311.701  | NM_004976 | 8538.378  | 8876.258  | NM_001548 | 949.654   |
| SR2       | 57862.223 | 55532.348 | NM_033199 | 1247.71   | 1281.435  | NM_000758 | 6069.662  |
| SR4       | 19690.186 | 16731.059 | NM_015001 | 1356.245  | 1422.304  | M17017    | 2875.542  |
| SR6       | 2656.94   | 2160.876  | NM_000169 | 6669.939  | 4890.456  | NM_003600 | 2250.693  |
| SR8       | 9973.623  | 22846.113 | AF182814  | 2618.509  | 2680.279  | NM_017490 | 1060.391  |
| SR10      | 35912.188 | 12482.885 | NM_005329 | 1322.811  | 1253.789  | NM_002718 | 1085.376  |
| CY3Cy5    | 6419.076  | 450.381   | NM_000107 | 1706.694  | 1551.546  | AK026727  | 928.225   |
| X00094    | 685.517   | 696.761   | AL157445  | 2157.617  | 1853.667  | NM_002830 | 147.182   |
| NM_003775 | 1140.835  | 909.671   | NM_001517 | 14258.54  | 14219.478 | NM_006247 | 1162.91   |
| NM_002082 | 6797.135  | 6701.58   | NM_005053 | 5015.926  | 4503.545  | AB032983  | 429.098   |
| AF155657  | 27606.271 | 13258.622 | D86974    | 3509.401  | 3138.458  | NM_018281 | 2597.859  |
| NM_006056 | 4576.435  | 3810.772  | NM_018283 | 1674.95   | 1024.617  | NM_004457 | 1796.934  |
| AF045229  | 17815.146 | 7217.355  | NM_001983 | 1538.979  | 2244.254  | NM_014049 | 1290.764  |
| NM_001840 | 4994.28   | 7313.992  | NM_004993 | 479.275   | 299.271   | NM_004315 | 8511.1    |
| AK025099  | 3154.813  | 2100.216  | NM_003384 | 4809.249  | 4001.465  | NM_020166 | 1664.145  |
| NM_016099 | 21009.871 | 19304.381 | Y12337    | 2546.655  | 2443.368  | AK023860  | 944.737   |
| NM_000228 | 980.662   | 1681.428  | M29551    | 9803.748  | 15850.378 | NM_000031 | 713.795   |
| NM_000830 | 1204.161  | 1605.574  | NM_002929 | 2141.314  | 3651.225  | NM_002085 | 14564.238 |
| AF148950  | 788.803   | 512.394   | BC028375  | 893.068   | 1025.592  | NM_016286 | 1505.504  |
| NM_001155 | 7279.245  | 8316.614  | NM_005209 | 691.992   | 1187.335  | NM_001567 | 810.847   |
| M62896    | 14328.873 | 13272.583 | AF148950  | 1042.459  | 826.925   | NM_004905 | 3841.731  |
| NM_017736 | 3733.185  | 2464.369  | NM_001155 | 6393.438  | 7552.357  | AF217971  | 1512.341  |
| NM_000313 | 625.924   | 900.24    | M62896    | 19970.289 | 28353.191 | NM_001925 | 684.729   |
| AF263523  | 2231.839  | 2455.484  | NM_017736 | 2378.513  | 3241.505  | AF245517  | 250.597   |
| L08441    | 14963.244 | 20366.852 | NM_000390 | 455.68    | 576.582   | X78926    | 5198.074  |
| AA641953  | 1444.365  | 3244.347  | NM_000313 | 373.301   | 892.563   | AJ278110  | 391.971   |
| AL137764  | 39639.043 | 26995.055 | NM_001498 | 68357.195 | 64890.371 | NM_014237 | 832.105   |
| NM_001660 | 14318.833 | 15717.324 | AF263523  | 2567.761  | 2123.267  | NM_020396 | 302.491   |
| NM_000710 | 517.678   | 516.452   | L08441    | 13949.692 | 9039.388  | AF029900  | 2784.829  |
| NM_000752 | 1979.94   | 1366.99   | AA641953  | 1300.438  | 1960.621  | NM_003325 | 1339.507  |
| AB040945  | 793.733   | 647.595   | AI248827  | 708.194   | 715.985   | NM_016178 | 1641.514  |
| NM_002018 | 5922.13   | 4216.875  | R45026    | 1683.214  | 2194.787  | AK022639  | 525.742   |
| NM_002377 | 1965.247  | 1331.561  | BI768063  | 448.785   | 452.885   | D31766    | 1551.582  |
| NM_006018 | 865.239   | 596.008   | BG386057  | 422.269   | 385.672   | NM_001478 | 10536.584 |
| AF161383  | 3327.157  | 3393.896  | AI970239  | 3094.608  | 2822.021  | NM_002612 | 244.482   |
| NM_000410 | 18350.186 | 14796.706 | AA496452  | 4230.337  | 2935.231  | AF135422  | 781.338   |
| AF224266  | 2097.716  | 2373.983  | X67594    | 3336.511  | 2547.994  | NM_004479 | 6979.797  |
| U72882    | 15196.314 | 11187.834 | BC008837  | 377.657   | 287.377   | AF070587  | 635.775   |
| NM_014337 | 10314.265 | 7884.993  | NM_015869 | 801.942   | 1114.529  | BE250526  | 320.041   |
| NM_007161 | 68896.906 | 53416.723 | NM_001631 | 448.031   | 274.673   | NM_016819 | 764.571   |
| NM_014387 | 1781.172  | 2125.475  | AB000734  | 3380.021  | 2508.571  | NM_012222 | 697.534   |
| NM_003641 | 4954.502  | 4213.817  | NM_005987 | 63970.488 | 65644.602 | NM_005002 | 535.696   |
| NM_012463 | 1142.156  | 1164.581  | X87838    | 2602.051  | 2838.608  | NM_006596 | 1018.46   |
| L29140    | 26401.627 | 25424.682 | NM_014387 | 2694.071  | 2437.698  | AK023214  | 3359.421  |
| AK026448  | 1840.334  | 1524.452  | NM_003641 | 4598.791  | 5898.522  | NM_001469 | 2265.964  |
| AK057418  | 6245.054  | 6249.362  | NM_012463 | 1500.271  | 1909.282  | S67789    | 395.925   |
| L37199    | 541.515   | 1296.708  | L29140    | 32410.66  | 50424.238 | AK022689  | 1273.44   |
| AF148646  | 5897.317  | 7363.605  | AK026448  | 2734.525  | 2717.257  | NM_004195 | 4769.025  |
| AL110218  | 1241.466  | 1614.599  | AK057418  | 9750.895  | 10333.748 | NM_004705 | 326.234   |
| AB023201  | 4812.886  | 7726.295  | L37199    | 585.058   | 1939.503  | NM_020190 | 7697.765  |
| NM_000072 | 6092.161  | 1786.182  | NM_007260 | 1468.201  | 1590.315  | AK024003  | 426.029   |
| NM_000697 | 1505.981  | 1664.79   | AF148646  | 5146.4    | 5007.548  | NM_014357 | 1100.922  |
| NM_000017 | 5195.338  | 4047.184  | AL110218  | 1348.728  | 1647.08   | NM_000121 | 2675.492  |

|           |           |           |           |           |           |           |           |
|-----------|-----------|-----------|-----------|-----------|-----------|-----------|-----------|
| NM_000237 | 1795.264  | 1833.594  | AB023201  | 5050.512  | 5782.91   | NM_002091 | 405.257   |
| NM_018346 | 2656.81   | 3261.359  | X00094    | 1876.52   | 1116.868  | AB033092  | 1193.128  |
| AL122054  | 4210.068  | 2849.334  | NM_003775 | 1958.583  | 1797.621  | NM_003023 | 523.528   |
| AB011182  | 4566.115  | 4712.729  | NM_002082 | 13294.144 | 13505.473 | BC035030  | 999.624   |
| AB023151  | 627.884   | 611.32    | AF155657  | 18841.043 | 10589.607 | NM_005340 | 13520.726 |
| NM_000140 | 5625.093  | 5579.639  | NM_006056 | 2199.346  | 1557.547  | NM_016201 | 249.148   |
| NM_005125 | 4468.624  | 3743.784  | AF045229  | 6121.127  | 4216.751  | NM_000864 | 2106.163  |
| NM_020038 | 668.275   | 478.084   | NM_001840 | 2374.852  | 2144.632  | NM_017977 | 586.479   |
| NM_016246 | 1746.857  | 1464.779  | AK025099  | 1640.388  | 1334.774  | AF147727  | 1072.351  |
| NM_015926 | 8349.462  | 6548.167  | NM_016095 | 25993.617 | 19680.264 | NM_006751 | 639.917   |
| X03757    | 2959.76   | 3245.918  | NM_000228 | 1437.21   | 1875.529  | AB037834  | 6948.32   |
| NM_005136 | 559.298   | 659.465   | NM_005136 | 1062.029  | 1326.202  | NM_013344 | 23.044    |
| NM_001183 | 17036.721 | 18686.93  | AK094513  | 821.657   | 855.462   | NM_014052 | 6953.728  |
| NM_000890 | 1618.343  | 1697.663  | NM_001183 | 13053.803 | 13986.461 | NM_002777 | 3894.973  |
| NM_004976 | 12977.218 | 13630.188 | NM_000890 | 3441.724  | 5274.461  | AF202635  | 530.99    |
| AK021597  | 4075.722  | 14744.84  | NM_004976 | 9280.615  | 12143.428 | NM_014125 | 254.093   |
| NM_005737 | 19625.988 | 22227.746 | AK021597  | 4710.676  | 14077.579 | NM_017904 | 355.815   |
| NM_000014 | 390.512   | 725.685   | NM_005737 | 15819.862 | 14900.779 | NM_013367 | 1714.599  |
| NM_006803 | 933.701   | 1392.741  | NM_000014 | 865.836   | 1187.176  | NM_000321 | 3200.022  |
| NM_002533 | 1713.443  | 2587.711  | NM_006803 | 975.797   | 1112.406  | NM_006341 | 3093.611  |
| AF235022  | 1764.851  | 1306.4    | NM_002533 | 1566.155  | 2339.14   | NM_001709 | 748.531   |
| AF182814  | 3699.423  | 2984.138  | AF235022  | 953.031   | 966.71    | NM_006191 | 869.051   |
| NM_005329 | 894.911   | 715.428   | AL137764  | 33139.223 | 35150.75  | NM_004336 | 278.3     |
| NM_000107 | 1241.604  | 994.658   | NM_001660 | 22794.926 | 22275.58  | NM_015949 | 901.267   |
| AL157445  | 1367.162  | 846.393   | NM_000710 | 513.43    | 408.207   | NM_013979 | 536.545   |
| NM_001517 | 12510.867 | 9011.357  | NM_000752 | 2141.148  | 1478.632  | NM_003790 | 1444.855  |
| NM_005053 | 2865.048  | 2372.297  | AB040945  | 644.552   | 488.746   | NM_000494 | 563.085   |
| D86974    | 2371.608  | 2089.945  | NM_002018 | 9387.992  | 5225.945  | NM_016023 | 170.707   |
| NM_018283 | 1442.305  | 1295.541  | NM_002377 | 930.472   | 464.131   | NM_003722 | 3877.108  |
| NM_001983 | 2716.016  | 4270.975  | NM_006018 | 574.913   | 524.079   | AF085883  | 361.928   |
| NM_004993 | 815.856   | 404.026   | AF161383  | 3042.787  | 2175.365  | NM_016571 | 674.68    |
| Y12337    | 1644.061  | 1697.754  | NM_000410 | 14119.942 | 13371.698 | NM_016446 | 1176.408  |
| M29551    | 14594.04  | 13451.165 | AF224266  | 2738.156  | 5161.696  | NM_001870 | 152.736   |
| NM_002929 | 1863.821  | 1630.518  | U72882    | 15581.934 | 15749.836 | AJ271216  | 177.095   |
| BC028375  | 1072.027  | 1092.208  | NM_014337 | 8767.871  | 7870.961  | U23028    | 892.517   |
| AB026436  | 2579.006  | 2503.106  | NM_003384 | 6010.404  | 5585.205  | NM_000817 | 6868.275  |
| NM_016029 | 6965.307  | 5840.378  | Y12337    | 3364.866  | 3876.276  | AF113132  | 2044.643  |
| AK024562  | 1617.559  | 1735.106  | M29551    | 7533.837  | 12613.74  | NM_006571 | 2331.343  |
| NM_014066 | 2214.194  | 2225.725  | NM_002929 | 2029.694  | 1814.005  | AK022680  | 432.518   |
| NM_004573 | 1498.67   | 1599.823  | BC028375  | 1009.025  | 868.052   | NM_018946 | 3026.362  |
| NM_000313 | 523.494   | 809.788   | AB026436  | 2543.044  | 3011.537  | NM_016359 | 1794.735  |
| NM_001498 | 65552.602 | 59444.801 | NM_016029 | 4092.429  | 4036.604  | NM_001069 | 43208.809 |
| AF263523  | 2299.109  | 2534.867  | AK024562  | 1393.997  | 1624.263  | NM_004156 | 1827.01   |
| L08441    | 15479.307 | 18152.318 | NM_014066 | 1870.449  | 1243.686  | AK000561  | 333.018   |
| AA641953  | 1536.309  | 2928.002  | NM_004573 | 1585.18   | 2102.801  | AB051449  | 3330.577  |
| AI248827  | 2087.951  | 1236.687  | NM_000072 | 4287.836  | 1928.361  | BC009187  | 5542.002  |
| R45026    | 2346.812  | 2401.196  | NM_000017 | 7426.999  | 6526.391  | AL133617  | 310.899   |
| BI768063  | 1133.113  | 736.028   | NM_000237 | 1446.053  | 1042.959  | NM_016485 | 2130.396  |
| BG386057  | 875.391   | 428.915   | NM_018346 | 2594.556  | 3177.885  | NM_002615 | 6183.055  |
| AI970239  | 2342.257  | 1806.359  | AB011182  | 1461.044  | 1187.679  | AF090894  | 443.172   |
| AA496452  | 16918.332 | 5144.124  | AB023151  | 495.944   | 404.94    | NM_006167 | 335.445   |
| X67594    | 6023.441  | 5537.69   | NM_000140 | 11579.313 | 10416.716 | NM_016357 | 961.5     |
| BC008837  | 690.435   | 628.78    | NM_005125 | 4982.333  | 5235.939  | NM_014500 | 2331.44   |

|           |           |           |           |           |           |           |           |
|-----------|-----------|-----------|-----------|-----------|-----------|-----------|-----------|
| NM_015869 | 942.274   | 1308.067  | NM_020038 | 2064.15   | 1634.131  | AK023792  | 173.629   |
| NM_001631 | 559.934   | 603.539   | NM_016246 | 1306.104  | 1695.531  | NM_020149 | 1050.454  |
| AB000734  | 3636.628  | 2811.743  | NM_015926 | 18447.721 | 16274.026 | NM_006237 | 411.323   |
| NM_005987 | 65338     | 65345.715 | X03757    | 1714.077  | 1784.591  | NM_001271 | 1005.21   |
| X87838    | 6585.05   | 7200.971  | NM_002902 | 5385.28   | 5256.568  | NM_003683 | 445.136   |
| NM_033199 | 887.578   | 850.236   | NM_020248 | 32508.016 | 32012.906 | AF039019  | 1707.473  |
| NM_015001 | 1551.073  | 1960.308  | X89670    | 2705.464  | 2281.176  | NM_012255 | 3306.606  |
| NM_000169 | 8681.273  | 4834.617  | NM_001726 | 277.575   | 512.219   | NM_018196 | 413.551   |
| AK057418  | 7476.975  | 6902.617  | NM_004053 | 4838.076  | 6075.621  | NM_004818 | 949.789   |
| L37199    | 934.289   | 1175.843  | NM_001489 | 2723.533  | 2109.325  | J04205    | 1830.604  |
| NM_007260 | 2679.931  | 2503.493  | NM_020374 | 2347.843  | 1877.996  | D38491    | 2329.857  |
| AF148646  | 5998.418  | 6355.249  | NM_014922 | 1891.56   | 2242.01   | AK026835  | 427.564   |
| AL110218  | 1273.444  | 1647.528  | NM_000169 | 7308.118  | 5078.796  | NM_002819 | 2611.216  |
| AB023201  | 4431.765  | 5501.517  | AF182814  | 2281.261  | 2006.64   | NM_003090 | 8688.193  |
| X00094    | 950.36    | 738.942   | NM_000107 | 1383.354  | 1030.009  | NM_013264 | 1314.808  |
| NM_003775 | 1500.773  | 1183.301  | NM_001517 | 11180.121 | 9190.856  | NM_003315 | 4239.743  |
| NM_002082 | 7272.035  | 6953.836  | NM_005053 | 2693.803  | 2906.157  | NM_005570 | 1972.404  |
| AF155657  | 26960.703 | 13601.604 | D86974    | 1988.006  | 2574.445  | NM_000086 | 2744.954  |
| NM_006056 | 5212.743  | 4403.377  | NM_018283 | 1622.648  | 1291.641  | NM_003752 | 829.416   |
| AF045229  | 17717.695 | 8135.039  | NM_001983 | 944.369   | 2114.193  | NM_003932 | 2098.337  |
| NM_001840 | 5513.712  | 8793.417  | NM_004993 | 602.508   | 564.556   | NM_006429 | 4430.476  |
| AK025099  | 3131.854  | 2546.027  | NM_001793 | 13684.864 | 13289.489 | NM_003307 | 12846.018 |
| NM_016099 | 21257.578 | 21704.512 | NM_001943 | 3065.689  | 4317.984  | AF070565  | 606.176   |
| NM_000394 | 699.117   | 310.657   | NM_004927 | 5215.104  | 5338.597  | AK021644  | 538.893   |
| NM_000228 | 1042.134  | 1944.797  | NM_001459 | 1364.864  | 1814.903  | NM_015944 | 258.612   |
| NM_000830 | 1229.307  | 1842.219  | NM_015513 | 7961.115  | 10210.473 | NM_002064 | 1515.246  |
| NM_005209 | 633.228   | 728.748   | NM_006219 | 3624.217  | 5436.256  | NM_015523 | 897.934   |
| AF148950  | 807.108   | 911.106   | NM_004443 | 5608.362  | 5717.918  | NM_015960 | 1397.336  |
| NM_017736 | 3373.251  | 2795.335  | NM_001932 | 598.485   | 851.886   | NM_006085 | 855.002   |
| NM_000390 | 590.82    | 717.244   | NM_002964 | 31481.012 | 23301.785 | NM_000907 | 604.099   |
| AK021597  | 4313.734  | 15817.164 | NM_015626 | 2701.541  | 2664.889  | AF254085  | 1018.643  |
| NM_005737 | 17854.217 | 18002.297 | NM_004899 | 2584.897  | 3550.488  | NM_001987 | 754.079   |
| NM_000014 | 627.857   | 439.461   | AB006628  | 9581.226  | 7715.356  | AF244088  | 688.107   |
| NM_006803 | 932.345   | 1247.043  | AF272036  | 5479.649  | 3170.26   | AK025434  | 286.747   |
| NM_002533 | 1897.419  | 2182.065  | AF231023  | 790.665   | 566.064   | AK000435  | 274.613   |
| AF235022  | 1689.502  | 954.002   | NM_005148 | 985.422   | 853.734   | AK000569  | 603.813   |
| NM_001660 | 16079.352 | 18360.621 | NM_004746 | 1072.244  | 589.997   | NM_006049 | 839.495   |
| NM_000710 | 602.468   | 634.173   | AF146019  | 2220.208  | 2318.53   | BC016698  | 5928.549  |
| NM_000752 | 1888.589  | 1462.706  | Z36782    | 3266.951  | 3894.735  | AK025576  | 1109.466  |
| AB040945  | 919.715   | 586.762   | NM_003490 | 28797.164 | 22216.73  | AF147385  | 490.628   |
| NM_002018 | 6101.164  | 4617.773  | AF210651  | 671.77    | 673.075   | AL442086  | 1652.788  |
| NM_002377 | 1601.242  | 1151.094  | AF090942  | 817.77    | 827.752   | AF147313  | 4013.762  |
| NM_006018 | 903.363   | 684.798   | AF508940  | 5775.288  | 4509.888  | AF147382  | 10117.975 |
| AF161383  | 3409.344  | 3758.875  | NM_005429 | 5411.298  | 3273.918  | AK021833  | 353.792   |
| NM_000410 | 17659.219 | 15685.318 | NM_020237 | 595.008   | 643.841   | AF143867  | 592.237   |
| AF224266  | 2287.389  | 2343.098  | M25753    | 6735.512  | 4506.667  | AK025889  | 2389.364  |
| U72882    | 15699.707 | 13835.397 | NM_003883 | 660.554   | 973.573   | NM_014715 | 412.56    |
| NM_014337 | 9982.519  | 9622.803  | NM_014929 | 2666.616  | 2898.17   | AF086448  | 1275.634  |
| NM_014387 | 1823.564  | 3341.602  | NM_004203 | 15337.606 | 12529.874 | AB019391  | 249.346   |
| AK026448  | 2034.712  | 2056.894  | NM_001951 | 1723.63   | 1996.229  | AF086386  | 378.905   |
| AB026436  | 2962.603  | 3025.54   | NM_002391 | 1584.65   | 2225.887  | AF086413  | 258.01    |
| NM_016029 | 7502.532  | 5447.515  | NM_006682 | 1606.353  | 1731.706  | AF086457  | 936.828   |
| AK024562  | 1505.101  | 1498.779  | NM_006410 | 4334.965  | 1899.943  | AK025469  | 676.061   |

|           |           |           |           |           |           |            |          |
|-----------|-----------|-----------|-----------|-----------|-----------|------------|----------|
| NM_014066 | 2074.484  | 1710.396  | NM_014977 | 56018.105 | 53708.191 | NM_020239  | 6622.759 |
| NM_004573 | 2198.51   | 1521.787  | AK026325  | 3919.822  | 2033.443  | AF070581   | 446.155  |
| NM_000697 | 1872.793  | 1859.476  | U83857    | 1232.287  | 1382.129  | AK024187   | 591.996  |
| NM_000017 | 6184.455  | 4371.415  | NM_001230 | 2303.953  | 1200.23   | AF075079   | 417.173  |
| NM_000237 | 1677.279  | 1513.661  | AK025662  | 2620.745  | 990.298   | AK022479   | 480.274  |
| NM_018346 | 2817.965  | 3570.433  | AB011539  | 2368.124  | 1931.316  | AK023572   | 343.913  |
| AL122054  | 3853.385  | 2986.7    | U37028    | 3387.487  | 4688.733  | AF086004   | 5247.757 |
| AB011182  | 3670.622  | 3759.119  | AB014597  | 2417.752  | 1490.012  | AK056111   | 648.794  |
| AB023151  | 884.281   | 575.937   | AK024313  | 9371.829  | 10030.938 | Y13807     | 1412.128 |
| NM_000140 | 4684.139  | 5132.398  | NM_003891 | 2155.805  | 2508.938  | AK023038   | 356.354  |
| NM_005125 | 4243.762  | 3235.095  | NM_002022 | 1217.448  | 1038.307  | AF086074   | 543.563  |
| NM_020038 | 881.085   | 603.938   | NM_015524 | 1382.216  | 1324.149  | AK023964   | 979.025  |
| NM_016246 | 2097.962  | 1889.307  | NM_001673 | 1052.156  | 3111.532  | AF086084   | 636.495  |
| NM_015926 | 10561.499 | 8435.851  | AK023167  | 816.48    | 559.578   | AF085853   | 310.585  |
| X03757    | 4107.624  | 4762.919  | NM_016510 | 1732.858  | 2375.213  | AK027112   | 2040.392 |
| NM_005136 | 576.567   | 724.655   | NM_000071 | 4840.479  | 5257.058  | AL049314   | 833.67   |
| AK094513  | 609.123   | 941.823   | NM_006843 | 5487.018  | 4670.293  | AF093016   | 4195.144 |
| NM_001183 | 15938.469 | 23505.109 | NM_004321 | 5214.608  | 3804.997  | AF161345   | 1263.35  |
| NM_000890 | 1368.018  | 1652.801  | AF311212  | 5257.234  | 4110.048  | -          | 460.364  |
| NM_004976 | 11513.479 | 11908.797 | NM_006915 | 1984.929  | 969.84    | AF090925   | 472.871  |
| NM_033199 | 1445.369  | 1516.573  | NM_006035 | 2203.544  | 1489.144  | AF100637   | 201.008  |
| NM_015001 | 1707.323  | 2177.901  | NM_006086 | 8154.96   | 6914.137  | NM_014163  | 3502.253 |
| NM_000169 | 10380.271 | 5053.985  | NM_004520 | 7067.705  | 3557.931  | AK022362   | 1025.036 |
| NM_000699 | 817.001   | 158.3     | AK027118  | 3301.546  | 2997.616  | AK022004   | 1112.158 |
| AF182814  | 3191.7    | 2338.942  | AK022882  | 22346.168 | 9398.092  | AK022136   | 307.318  |
| NM_005329 | 860.108   | 693.732   | NM_006105 | 3207.757  | 2298.695  | AK022390   | 734.667  |
| NM_000107 | 849.418   | 540.663   | NM_005981 | 2297.608  | 1217.189  | AK027134   | 312.787  |
| AL157445  | 1232.847  | 976.566   | NM_000474 | 5102.705  | 8148.79   | AF264622   | 232.18   |
| NM_001517 | 12511.847 | 9236.436  | NM_016264 | 849.969   | 1208.887  | AK027203   | 137.829  |
| NM_005053 | 3280.069  | 2729.473  | NM_006079 | 30449.379 | 38808.473 | AK021793   | 1087.88  |
| D86974    | 2758.496  | 2380.343  | AB037837  | 1561.041  | 1362.74   | AK022255   | 1480.06  |
| NM_018283 | 1583.826  | 1386.51   | NM_014595 | 8632.013  | 10870.341 | AK023730   | 244.853  |
| NM_001983 | 2961.362  | 4796.14   | NM_014789 | 1320.497  | 1668.107  | AF161360   | 458.653  |
| NM_004993 | 1106.553  | 1317.713  | AB046784  | 1285.345  | 1372.145  | AK021720   | 2336.656 |
| NM_003384 | 2636.912  | 4868.138  | X52402    | 6671.691  | 6728.453  | NM_016497  | 9570.649 |
| Y12337    | 2204.149  | 2390.827  | AL133663  | 1272.293  | 1856.681  | AF009261   | 342.39   |
| M29551    | 13942.643 | 14537.791 | NM_004992 | 2630.307  | 2347.342  | unknown (S | 157.371  |
| NM_002929 | 1621.809  | 1520.64   | NM_014462 | 3007.094  | 3070.564  | AB037792   | 1086.698 |
| BC028375  | 843.795   | 932.792   | NM_014156 | 59033.949 | 60497.266 | AK022480   | 364.312  |
| NM_005209 | 1928.572  | 6643.624  | NM_003137 | 10379.024 | 8258.654  | AK024158   | 498.282  |
| AF148950  | 853.856   | 599.875   | NM_006938 | 16369.101 | 14688.645 | AL080082   | 763.734  |
| NM_001155 | 7643.274  | 10623.956 | NM_020158 | 1809.8    | 1660.224  | AK021623   | 974.876  |
| M62896    | 13030.585 | 13883.637 | AF176085  | 2203.308  | 1251.824  | AK023733   | 395.537  |
| NM_017736 | 4209.11   | 3297.532  | NM_006985 | 6206.563  | 3757.075  | U79242     | 288.998  |
| NM_000390 | 565.943   | 436.036   | AF265228  | 1560.03   | 1093.145  | AF056452   | 176.614  |
| NM_000313 | 733.714   | 826.976   | NM_003757 | 13368.89  | 9955.555  | AF119901   | 1952.604 |
| NM_001498 | 63055.84  | 59951.285 | AK025561  | 2838.427  | 1497.438  | AK001936   | 518.862  |
| AF263523  | 2357.832  | 2439.295  | NM_018602 | 21874.23  | 16798.988 | NM_003770  | 37543.43 |
| L08441    | 14961.69  | 15874.824 | NM_004096 | 4475.466  | 3739.432  | AK001395   | 2145.608 |
| AA641953  | 1400.654  | 2591.545  | NM_017629 | 7064.776  | 4407.85   | S57803     | 2161.5   |
| AI248827  | 2027.669  | 1422.586  | AL049681  | 812.063   | 632.938   | AF131822   | 726.105  |
| R45026    | 1833.255  | 1696.083  | AF052181  | 1326.9    | 1379.252  | AK023131   | 1086.819 |
| BI768063  | 923.886   | 949.799   | AL050074  | 9355.861  | 8093.49   | AL360138   | 344.45   |

|           |           |           |           |           |           |           |           |
|-----------|-----------|-----------|-----------|-----------|-----------|-----------|-----------|
| BG386057  | 778.574   | 806.07    | AK026436  | 1147.688  | 1048.542  | U61096    | 327.144   |
| AI970239  | 2575.7    | 2024.119  | NM_018061 | 2789.886  | 2997.555  | AF085865  | 3493.83   |
| AA496452  | 16535.469 | 5704.472  | AK023059  | 565.126   | 378.378   | AK025521  | 590.263   |
| X67594    | 6298.132  | 5964.865  | NM_003551 | 1011.956  | 1142.469  | NM_001053 | 13625.133 |
| AF363393  | 440.444   | 472.271   | AF305210  | 1020.82   | 1026.365  | Z70694    | 2066.195  |
| BC008837  | 592.918   | 543.183   | AK021900  | 2210.982  | 3223.603  | NM_015421 | 1912.573  |
| NM_015865 | 916.246   | 1127.936  | NM_002764 | 5604.001  | 5770.536  | AF086081  | 1258.365  |
| NM_001631 | 553.036   | 926.127   | NM_019857 | 645.226   | 1171.918  | NM_018111 | 331.409   |
| AB000734  | 3181.339  | 2939.729  | NM_015455 | 9811.844  | 8768.173  | L23867    | 415.685   |
| NM_005987 | 63553.434 | 65848.227 | AF024702  | 9101.047  | 8809.267  | AB020968  | 549.893   |
| X87838    | 5558.029  | 6191.746  | NM_001964 | 1873.836  | 1192.813  | AL138690  | 505.841   |
| NM_014387 | 1738.276  | 2555.911  | NM_005962 | 3821.749  | 5577.271  | AK000394  | 258.251   |
| NM_003641 | 5532.666  | 6183.667  | X74864    | 2679.06   | 1633.066  | NM_013941 | 430.628   |
| NM_012463 | 877.901   | 1967.236  | AK026804  | 2507.484  | 1726.378  | AF074989  | 270.737   |
| L29140    | 20636.807 | 21303.561 | NM_016170 | 11026.606 | 7910.268  | AK001107  | 1013.042  |
| AK026448  | 1902.816  | 1570.693  | NM_006166 | 1069      | 582.822   | AF147393  | 364.642   |
| AK057418  | 7035.066  | 6228.06   | S72620    | 33881.398 | 27700.301 | AL080112  | 2680.542  |
| L37199    | 567.029   | 916.978   | NM_016831 | 625.813   | 689.181   | AK022299  | 175.433   |
| NM_007260 | 2720.72   | 2007.384  | NM_005263 | 18492.086 | 13555.372 | AF147361  | 1043.901  |
| AF148646  | 6796.243  | 5660.67   | AB033022  | 7333.933  | 4995.647  | AL133086  | 602.133   |
| AL110218  | 1319.824  | 1494.723  | AF147397  | 1433.649  | 1032.366  | NM_012151 | 12830.672 |
| AB023201  | 4752.982  | 6864.212  | AK027158  | 1621.508  | 1558.767  | AF087994  | 851.102   |
| X00094    | 898.049   | 763.048   | AF085836  | 6220.278  | 8847.566  | AJ227912  | 474.924   |
| NM_003775 | 1386.542  | 1223.738  | AL049449  | 1247.708  | 1274.919  | NM_018195 | 877.458   |
| NM_002082 | 7801.991  | 7722.671  | AL359654  | 1374.352  | 2025.194  | AK025532  | 949.962   |
| NM_002922 | 642.292   | 596.138   | AK024224  | 3122.113  | 2335.736  | AK021789  | 236.927   |
| AF155657  | 25612.111 | 13868.34  | NM_015362 | 5779.642  | 7674.613  | NM_003522 | 449.348   |
| NM_006056 | 4868.088  | 4423.285  | AF147344  | 1156.692  | 1733.321  | BF217847  | 628.864   |
| AF045229  | 17930.092 | 8026.992  | AF147371  | 1659.057  | 1516.901  | NM_005320 | 877.803   |
| NM_001840 | 4655.206  | 8505.686  | AK023745  | 1087.15   | 1083.664  | CY3Cy5    | 5219.045  |
| AK025099  | 2935.185  | 2603.665  | NM_018982 | 2724.408  | 2462.32   | BI830936  | 251.131   |
| NM_016095 | 24028.088 | 25773.705 | AF086254  | 2939.779  | 1951.437  | U79292    | 6332.677  |
| NM_000394 | 831.783   | 1215.718  | AF086324  | 566.189   | 587.513   | BI830753  | 468.486   |
| NM_000228 | 1202.533  | 2187.089  | AF086261  | 910.287   | 593.469   | X68314    | 704.285   |
| NM_000830 | 1077.767  | 1977.269  | AF086367  | 2448.438  | 1611.41   | X71973    | 12493.446 |
| NM_005136 | 583.172   | 647.853   | AF086437  | 1166.589  | 711.381   | T49651    | 11399.018 |
| AK094513  | 599.746   | 769.684   | AK025088  | 5977.989  | 3839.866  | N51014    | 1426.947  |
| NM_001183 | 15366.856 | 21256.813 | U79295    | 1438.146  | 954.502   | BE392471  | 7890.705  |
| NM_000890 | 1151.43   | 1455.889  | AK002107  | 637.347   | 401.567   | AI802950  | 1678.887  |
| NM_004976 | 11832.347 | 10783.808 | NM_003596 | 3855.311  | 3236.839  | AA682423  | 281.012   |
| AK021597  | 4436.284  | 12602.468 | NM_018835 | 4110.391  | 3934.144  | AL043686  | 5524.466  |
| NM_005737 | 20294.111 | 16528.268 | AF075083  | 1378.099  | 1809.189  | AA490172  | 340.429   |
| NM_000014 | 593.325   | 641.567   | AK021454  | 1475.953  | 1380.757  | AA775212  | 933.633   |
| NM_006803 | 1086.525  | 1089.435  | AK022069  | 2619.979  | 2781.569  | NM_000945 | 754.217   |
| NM_002533 | 1627.524  | 1936.286  | AL137457  | 3160.186  | 2295.337  | NM_002574 | 19422.908 |
| AF235022  | 1516.142  | 1066.255  | AF085913  | 346.611   | 327.989   | SR5       | 4164.865  |
| AL137764  | 38074.586 | 27222.676 | AF085944  | 2758.747  | 2582.923  | SR7       | 4512.959  |
| NM_001660 | 16384.17  | 18770.563 | AL133038  | 1010.369  | 1657.306  | SR9       | 16863.754 |
| NM_000710 | 584.15    | 634.498   | AL137414  | 1585.568  | 2419.945  | CY3Cy5    | 5554.325  |
| NM_000752 | 2046.093  | 1594.883  | AL137624  | 1743.003  | 1104.569  | NM_003371 | 5569.193  |
| AB040945  | 1016.458  | 711.206   | AL359574  | 4765.492  | 4598.746  | AK023114  | 2343.698  |
| NM_002018 | 6769.709  | 5475.71   | AL133569  | 6974.972  | 4755.308  | NM_003678 | 2645.374  |
| NM_002377 | 1603.163  | 1182.016  | AL137435  | 540.597   | 566.396   | NM_014271 | 353.961   |

|           |           |           |           |           |           |           |           |
|-----------|-----------|-----------|-----------|-----------|-----------|-----------|-----------|
| AF161383  | 3002.936  | 3655.417  | AL157463  | 612.733   | 376.311   | NM_012301 | 312.758   |
| NM_000410 | 17656.688 | 16658.682 | AL359604  | 1242.879  | 978.168   | NM_014419 | 2668.729  |
| AF224266  | 2367.856  | 2755.791  | AK027189  | 1182.257  | 839.931   | NM_014938 | 1207.808  |
| U72882    | 17942.346 | 15618.396 | AF088014  | 2171.945  | 1044.005  | AF049460  | 261.591   |
| NM_014337 | 10119.398 | 9181.679  | AL109719  | 2722.13   | 1758.193  | AK026066  | 610.263   |
| Y12337    | 1733.101  | 2044.81   | AF086093  | 429.519   | 200.549   | NM_005244 | 2054.364  |
| M29551    | 17738.643 | 20008.762 | U92022    | 1352.09   | 1249.346  | NM_005270 | 476.158   |
| AB023148  | 403.541   | 649.228   | NM_003650 | 2119.7    | 3979.179  | NM_014815 | 460.256   |
| NM_002929 | 1661.068  | 2106.209  | AK022119  | 9621.706  | 5950.702  | NM_007221 | 1767.974  |
| BC028375  | 1082.379  | 1059.61   | AL157488  | 301.391   | 313.664   | X54163    | 8591.949  |
| AB026436  | 2329.078  | 2209.44   | NM_016644 | 1866.86   | 852.402   | AK025395  | 421.761   |
| NM_016029 | 7414.184  | 4829.07   | AF085842  | 857.16    | 388.225   | NM_000388 | 405.536   |
| AK024562  | 1774.955  | 1459.055  | AK023882  | 793.477   | 877.179   | NM_002469 | 361.909   |
| NM_014066 | 2333.729  | 1818.078  | AK026750  | 1925.312  | 1702.121  | NM_014668 | 777.566   |
| NM_004573 | 2270.264  | 2125.421  | AF072164  | 1892.255  | 2531.604  | NM_004722 | 863.91    |
| NM_000072 | 6240.335  | 1856.538  | NM_018610 | 1109.889  | 1105.191  | NM_014425 | 391.786   |
| NM_000697 | 2351.28   | 2054.991  | AK025234  | 459.95    | 381.983   | NM_012133 | 969.707   |
| NM_000017 | 6011.07   | 5587.478  | AF083122  | 1277.709  | 1587.174  | NM_017954 | 444.043   |
| NM_000237 | 1814.748  | 1730.387  | AF147317  | 2280.022  | 2763.292  | NM_006612 | 1012.253  |
| NM_018346 | 3544.787  | 3991.943  | AF232216  | 1303.889  | 1756.7    | NM_016451 | 701.262   |
| AL122054  | 4091.563  | 3273.663  | NM_017773 | 7282.329  | 8300.96   | NM_007351 | 4761.308  |
| AB011182  | 4489.611  | 5059.085  | AK021885  | 457.505   | 748.408   | AK026266  | 2068.957  |
| AB023151  | 886.493   | 681.271   | AK022018  | 415.949   | 462.044   | NM_007124 | 905.966   |
| NM_000140 | 7170.096  | 8460.771  | AK022161  | 559.188   | 395.279   | NM_003176 | 816.591   |
| NM_005125 | 5195.906  | 4548.929  | AK022296  | 972.221   | 601.196   | NM_000723 | 480.594   |
| NM_020038 | 680.283   | 824.703   | AK021940  | 2383.387  | 1335.867  | AL096751  | 1826.04   |
| NM_016246 | 1940.429  | 2026.49   | AK022189  | 2262.695  | 2938.814  | AF026920  | 1551.594  |
| NM_015926 | 10473.111 | 9762.323  | AK022338  | 1285.936  | 1703.064  | NM_004931 | 3257.798  |
| X03757    | 4199.471  | 4307.894  | AK026856  | 1254.887  | 1605.187  | NM_000607 | 7319.376  |
| NM_020248 | 11492.122 | 14064.56  | AL162033  | 6213.588  | 6811.623  | AB011099  | 505.899   |
| X89670    | 934.982   | 908.82    | AK023770  | 419.135   | 1075.714  | NM_002575 | 868.628   |
| NM_001726 | 552.832   | 1222.666  | AK026893  | 466.227   | 499.553   | NM_004244 | 2474.518  |
| NM_004053 | 4343.642  | 6438.521  | AK026761  | 753.515   | 499.142   | AK001500  | 550.423   |
| NM_001489 | 1952.629  | 1667.407  | NM_005001 | 11958.813 | 10731.508 | NM_006774 | 386.993   |
| M20259    | 616.336   | 286.084   | AK024175  | 5567.689  | 4246.318  | NM_020129 | 689.462   |
| NM_020374 | 2112.816  | 1874.923  | NM_000510 | 1469.327  | 1589.138  | Y16521    | 1896.508  |
| NM_014922 | 1293.238  | 1228.843  | NM_017787 | 2332.416  | 2445.26   | NM_003167 | 208.868   |
| NM_000169 | 11004.798 | 6112.335  | NM_020315 | 5614.805  | 4932.958  | AL050371  | 2528.345  |
| BE799167  | 391.759   | 374.481   | AK001910  | 2758.304  | 2758.047  | NM_002651 | 3777.376  |
| AF182814  | 3668.655  | 3549.559  | AK023892  | 1754.609  | 1653.697  | NM_002413 | 6290.678  |
| NM_005329 | 1233.171  | 944.142   | AF124368  | 1767.499  | 2761.317  | NM_017577 | 528.953   |
| NM_000107 | 1191.553  | 1222.462  | AF265210  | 10369.609 | 10001.431 | NM_001757 | 4751.3    |
| AL157445  | 1648.001  | 1320.399  | AK024241  | 2006.557  | 1862.792  | NM_001647 | 1377.239  |
| NM_001517 | 14254.411 | 13156.558 | AK025061  | 2401.979  | 2465.693  | NM_018158 | 922.574   |
| NM_005053 | 3775.855  | 3695.715  | AF088067  | 13709.322 | 14593.522 | NM_016301 | 2275.978  |
| D86974    | 2040.616  | 2074.825  | AK022213  | 704.274   | 898.734   | AK021975  | 322.763   |
| NM_018283 | 1435.7    | 1439.942  | AF056441  | 4552.074  | 4645.527  | AB032952  | 18858.533 |
| NM_001983 | 3178.598  | 5217.907  | AK024142  | 3296.038  | 7916.975  | NM_002522 | 14394.162 |
| NM_004993 | 662.775   | 422.002   | Y10509    | 4264.125  | 5963.917  | AB032970  | 291.339   |
| NM_004927 | 5310.657  | 6316.106  | AK024389  | 10453.868 | 11742.802 | NM_002978 | 991.119   |
| NM_001459 | 1713.328  | 1308.857  | AK026793  | 3139.296  | 5095.038  | S83549    | 175.399   |
| NM_015513 | 4706.508  | 4268.009  | NM_001672 | 1768.567  | 1958.457  | AB040879  | 1045.227  |
| NM_006219 | 11079.56  | 9819.912  | AJ276253  | 22523.732 | 20465.555 | AL049935  | 1189.662  |

|           |           |           |           |           |           |           |           |
|-----------|-----------|-----------|-----------|-----------|-----------|-----------|-----------|
| NM_004443 | 4399.397  | 3558.716  | AF147314  | 4015.538  | 5922.553  | AB033043  | 5444.169  |
| NM_001932 | 253.572   | 681.344   | NM_018980 | 8943.314  | 11220.782 | NM_014995 | 1280.831  |
| NM_002964 | 47751.621 | 19756.209 | AF086201  | 1846.282  | 1584.923  | AK025220  | 568.674   |
| AF311862  | 46367.293 | 44576.41  | AK024712  | 1393.138  | 1482.86   | NM_016308 | 3455.022  |
| NM_003215 | 427.87    | 742.267   | U48696    | 1370.736  | 2204.674  | D42046    | 2891.507  |
| NM_016447 | 623.017   | 1206.884  | AF230316  | 10682.936 | 12444.24  | NM_001033 | 707.157   |
| NM_015626 | 4321.988  | 3988.673  | K00629    | 1240.626  | 971.497   | NM_004526 | 2616.764  |
| NM_004895 | 3735.743  | 3949.815  | NM_004485 | 823.598   | 752.22    | NM_002526 | 4437.127  |
| AB006628  | 9856.948  | 7872.306  | AK024515  | 8547.487  | 13277.19  | NM_020135 | 834.083   |
| AF272036  | 7329.319  | 5953.59   | AF085862  | 6215.056  | 8068.594  | NM_018518 | 1308.584  |
| AF231023  | 1435.117  | 1133.438  | NM_017995 | 1286.71   | 1921.152  | AK023149  | 691.401   |
| NM_005148 | 2411.587  | 2534.485  | AL049271  | 20959.744 | 24563.998 | AK023168  | 1814.804  |
| NM_004746 | 1037.999  | 984.291   | AK023079  | 25940.07  | 33499.02  | NM_006646 | 1448.019  |
| AF146019  | 4582.117  | 4705.571  | NM_019605 | 1938.422  | 2311.57   | NM_004742 | 820.947   |
| Z36782    | 6943.309  | 8431.608  | AK026198  | 4051.07   | 6338.689  | NM_014753 | 678.931   |
| M70435    | 422.396   | 535.562   | AF183570  | 1555.876  | 876.647   | NM_006585 | 8052.96   |
| NM_003490 | 9771.666  | 10741.523 | NM_005497 | 34851.516 | 31125.418 | NM_014331 | 1580.49   |
| AF508940  | 4588.989  | 5675.676  | AK024048  | 2688.319  | 2753.187  | NM_006795 | 4022.024  |
| NM_005425 | 3229.745  | 5376.579  | AB033093  | 1537.475  | 3357.705  | AF070568  | 795.113   |
| NM_020237 | 1143.371  | 842.579   | NM_005912 | 1102.327  | 1147.506  | NM_000240 | 2079.307  |
| AF130051  | 574.937   | 531.574   | NM_005905 | 33723.375 | 48556.645 | AK055733  | 6393.117  |
| M25753    | 9642.783  | 8122.516  | AK055991  | 682.357   | 923.583   | AF298880  | 3692.083  |
| NM_003883 | 1783.494  | 1682.641  | AF113697  | 882.6     | 391.491   | AK025395  | 439.618   |
| NM_014925 | 2149.235  | 2015.672  | AK022326  | 1934.285  | 1805.646  | NM_000388 | 488.477   |
| NM_004203 | 6664.665  | 6306.401  | AF085991  | 2041.888  | 3025.304  | NM_002465 | 386.91    |
| NM_001951 | 2542.32   | 2412.743  | AF075007  | 423.729   | 2759.744  | BI830936  | 127.303   |
| NM_002391 | 999.875   | 1171.02   | NM_005683 | 700.794   | 1420.564  | U79292    | 7643.316  |
| NM_007066 | 2459.001  | 2660.189  | NM_020427 | 14489.927 | 20681.465 | AA947915  | 215.718   |
| NM_003674 | 18126.098 | 18104.363 | AJ011601  | 506.35    | 531.973   | BI830753  | 358.878   |
| NM_001197 | 1853.837  | 5030.371  | AF085920  | 2382.781  | 2993.071  | X68314    | 660.333   |
| NM_006682 | 602.009   | 1089.03   | AK023173  | 33122.492 | 43930.977 | X71973    | 11348.173 |
| NM_006410 | 4982.272  | 1956.567  | AK025225  | 1223.903  | 1922.867  | T49651    | 10419.68  |
| NM_014977 | 31676.303 | 35274.305 | U79275    | 7322.48   | 12556.034 | N51014    | 1310.098  |
| AK026325  | 2869.345  | 3184.01   | AJ227908  | 1043.123  | 1352.473  | BE392471  | 6974.007  |
| U83857    | 906.022   | 1136.874  | AF007193  | 3932.166  | 4014.1    | AI802950  | 1713.931  |
| NM_001230 | 2446.796  | 1792.451  | AK022367  | 1519.034  | 1577.576  | AI741278  | 137.243   |
| AK025662  | 1008.671  | 1286.61   | BC028589  | 1727.48   | 2392.024  | AA682423  | 224.381   |
| NM_000201 | 1158.742  | 457.725   | CY3Cy5    | 9105.427  | 288.884   | AL043686  | 6220.774  |
| AB011539  | 1208.254  | 1110.746  | K02765    | 4070.56   | 3901.675  | AA490172  | 492.397   |
| U37028    | 1711.006  | 1325.599  | M65134    | 1782.305  | 1494.302  | AA775212  | 1000.675  |
| AB014597  | 2622.225  | 2384.971  | BG539651  | 19716.145 | 8074.039  | NM_000945 | 819.083   |
| AJ001495  | 989.54    | 89.314    | N52646    | 31046.338 | 18255.98  | AB011174  | 898.355   |
| S81361    | 503.387   | 365.293   | AW160671  | 58563.113 | 34245.434 | NM_000607 | 10163.629 |
| AK024313  | 5277.771  | 4020.939  | BI870529  | 15239.892 | 3384.136  | NM_002575 | 878.889   |
| NM_003891 | 3050.793  | 2761.871  | AA702698  | 1038.966  | 1137.617  | NM_004244 | 2703.148  |
| NM_015524 | 3178.04   | 2746.417  | AI681514  | 805.847   | 579.167   | NM_003371 | 6886.6    |
| NM_001673 | 2886.93   | 8416.881  | NM_001300 | 1460.309  | 952.081   | AK023114  | 2643.226  |
| AK023167  | 1024.62   | 944.188   | BG748827  | 3639.458  | 2916.541  | NM_003678 | 2565.256  |
| NM_016510 | 2017.115  | 2723.186  | AA952897  | 1273.381  | 1021.893  | NM_012301 | 186.252   |
| NM_014270 | 2652.346  | 2452.845  | BG760342  | 3802.219  | 1549.714  | NM_014415 | 2303.908  |
| NM_000071 | 3772.036  | 7336.178  | AA703141  | 673.168   | 506.117   | NM_014938 | 896.861   |
| NM_006843 | 3799.763  | 3499.358  | AA195244  | 716.924   | 509.726   | AF049460  | 563.584   |
| NM_004321 | 2321.553  | 2258.374  | AI122630  | 8184.523  | 12384.906 | NM_000441 | 472.316   |

|           |           |           |           |           |           |           |           |
|-----------|-----------|-----------|-----------|-----------|-----------|-----------|-----------|
| AF311212  | 6223.228  | 8115.152  | NM_002103 | 31796.818 | 46952.813 | AK026066  | 995.366   |
| NM_006915 | 2340.922  | 2220.247  | NM_003379 | 9202.011  | 10991.455 | NM_005244 | 3258.063  |
| NM_006035 | 2451.352  | 2666.682  | SR1       | 60668.711 | 62028.496 | NM_014815 | 558.213   |
| NM_006086 | 6781.334  | 7314.049  | SR3       | 57400.379 | 61972.836 | NM_005443 | 651.422   |
| NM_004520 | 5426.479  | 6138.09   | SR5       | 5249.578  | 6920.522  | NM_007221 | 2062.874  |
| AK027118  | 3114.013  | 3507.71   | SR7       | 5878.329  | 54011.266 | X54163    | 8915.71   |
| AK022882  | 15455.442 | 13261.032 | SR9       | 20859.682 | 6356.109  | NM_002978 | 1045.089  |
| NM_006105 | 1813.995  | 1916.718  | CY3Cy5    | 10655.791 | 744.659   | NM_014668 | 1034.487  |
| NM_005981 | 3193.34   | 1683.259  | NM_012428 | 5562.021  | 3280.112  | NM_004722 | 1337.464  |
| NM_000474 | 2489.687  | 5844.268  | NM_013269 | 961.854   | 720.909   | NM_014425 | 858.391   |
| NM_016264 | 876.937   | 855.072   | NM_001728 | 9910.792  | 8402.144  | NM_012133 | 1517.718  |
| NM_006079 | 25798.162 | 37816.738 | NM_005565 | 7476.54   | 7221.395  | NM_017954 | 602.78    |
| AB037837  | 1203.099  | 1236.51   | NM_003824 | 6501.897  | 3439.633  | NM_006612 | 1117.608  |
| NM_014595 | 5049.539  | 5087.407  | NM_000686 | 1593.17   | 1255.883  | NM_016451 | 641.414   |
| NM_014789 | 1110.44   | 1161.455  | NM_012452 | 8977.825  | 4111.913  | NM_004287 | 408.425   |
| AB046784  | 1724.129  | 809.765   | AF229166  | 751.786   | 383.704   | NM_007351 | 4522.76   |
| X52402    | 2865.419  | 2467.875  | NM_005137 | 2648.291  | 1469.087  | AK026266  | 2065.698  |
| AL133663  | 914.734   | 913.952   | NM_006764 | 3263.547  | 1551.659  | NM_007124 | 1334.18   |
| NM_004992 | 1794.069  | 1776.552  | NM_001386 | 4952.367  | 2032.651  | NM_000364 | 343.846   |
| NM_014462 | 2180.406  | 2071.603  | NM_001163 | 1516.816  | 778.562   | AF026920  | 1651.391  |
| NM_014156 | 54042.703 | 56223.297 | NM_005878 | 2638.824  | 1259.379  | NM_004931 | 3257.887  |
| NM_003137 | 8488.967  | 9020.529  | AF308602  | 2002.811  | 1377.054  | NM_006795 | 3846.256  |
| NM_006938 | 17213.469 | 29511.404 | AB011089  | 1309.812  | 1944.64   | AF070568  | 1266.99   |
| NM_004515 | 413.838   | 543.793   | AF007192  | 699.95    | 1370.116  | NM_000277 | 654.699   |
| NM_020158 | 2098.5    | 5820.045  | NM_001276 | 8331.479  | 11223.772 | NM_000240 | 2097.245  |
| AF176085  | 4193.56   | 4648.154  | NM_016157 | 2113.887  | 1884.058  | AK055733  | 7828.104  |
| NM_006985 | 7821.674  | 7485.503  | NM_014915 | 31003.711 | 26431.225 | AF298880  | 5148.176  |
| AF265228  | 2459.035  | 1271.576  | NM_012286 | 1943.55   | 2500.558  | AK001500  | 833.303   |
| NM_003757 | 19911.836 | 20864.113 | NM_002195 | 5541.789  | 5220.36   | NM_006774 | 580.874   |
| AK025561  | 1770.582  | 1500.906  | D84294    | 3086.44   | 3011.116  | NM_020129 | 1079.341  |
| NM_018602 | 18034.965 | 21529.646 | M31659    | 1513.74   | 1123.371  | Y16521    | 2789.174  |
| NM_004096 | 5704.027  | 4344.547  | NM_003056 | 7275.696  | 10237.206 | AL050371  | 2588.93   |
| NM_017629 | 5254.649  | 5224.358  | NM_016226 | 14695.757 | 8199.785  | NM_002651 | 2567.441  |
| AL049681  | 1599.725  | 1790.902  | AK024311  | 1260.585  | 3853.954  | NM_002413 | 6572.092  |
| NM_006584 | 292.342   | 640.149   | AF052155  | 3386.109  | 3746.433  | NM_017577 | 366.936   |
| AF052181  | 1046.985  | 1102.032  | NM_005085 | 1951.796  | 1969.688  | NM_001757 | 4611.966  |
| AL050074  | 5184.93   | 3786.324  | AF060902  | 2236.659  | 1701.652  | NM_018158 | 836.306   |
| AK026436  | 997.422   | 781.936   | AF121858  | 4902.991  | 4592.683  | NM_016301 | 1984.868  |
| NM_018061 | 1953.14   | 2147.823  | NM_013437 | 1088.865  | 935.397   | AB032952  | 17421.787 |
| AK023059  | 1442.241  | 993.684   | AK025966  | 3220.017  | 2494.389  | NM_002522 | 14581.956 |
| NM_003551 | 2148.418  | 2003.013  | NM_018725 | 907.222   | 463.716   | NM_000945 | 1221.957  |
| AK021900  | 3932.787  | 3839.391  | NM_003081 | 16242.298 | 8889.525  | NM_002574 | 20681.959 |
| NM_002764 | 5499.099  | 5997.45   | NM_016495 | 1584.896  | 943.314   |           | 423.516   |
| NM_019857 | 1031.148  | 1086.474  | D50402    | 34258.809 | 33854.254 | AB011174  | 1157.449  |
| NM_015455 | 19632.771 | 20368.902 | M73547    | 6745.116  | 7942.085  | AB043635  | 794.179   |
| AF024702  | 5936.746  | 6680.777  | NM_003687 | 1505.248  | 1796.178  | AB040879  | 1428.791  |
| NM_001964 | 1550.073  | 2654.906  | NM_004134 | 4266.503  | 4237.506  | AL049935  | 1413.609  |
| NM_005962 | 7069.825  | 12257.504 | NM_005955 | 5190.777  | 4208.863  | AB033043  | 5553.797  |
| X74864    | 1969.668  | 1937.588  | NM_004048 | 593.779   | 853.079   | NM_014999 | 1090.431  |
| AK026804  | 1428.746  | 1193.521  | NM_001179 | 464.101   | 419.904   | AK025220  | 609.409   |
| NM_016170 | 7556.481  | 5742.513  | NM_005313 | 61519.938 | 53085.738 | NM_016308 | 3688.979  |
| NM_002114 | 644.323   | 539.121   | NM_017765 | 25624.254 | 26256.383 | D42046    | 3080.774  |
| NM_006166 | 1087.076  | 1315.714  | NM_000428 | 783.973   | 992.01    | NM_001033 | 593.941   |



|           |           |           |           |           |           |           |           |
|-----------|-----------|-----------|-----------|-----------|-----------|-----------|-----------|
| S72620    | 26370.096 | 32785.348 | AB040967  | 9126.197  | 8726.985  | NM_004526 | 2462.823  |
| NM_005263 | 7867.021  | 16241.188 | NM_003578 | 582.777   | 710.189   | NM_002526 | 3477.438  |
| AB033022  | 5543.483  | 5635.848  | NM_014721 | 2258.553  | 1136.502  | NM_020135 | 828.161   |
| AF147397  | 1216.926  | 853.971   | AK026352  | 1790.305  | 3118.74   | NM_018518 | 1302.573  |
| AK027158  | 1365.25   | 1088.622  | AL137705  | 3234.168  | 4041.998  | NM_006646 | 1348.452  |
| AF085836  | 3604.11   | 3656.396  | U41898    | 541.273   | 553.751   | NM_014753 | 645.592   |
| AL049449  | 807.98    | 447.728   | AF169257  | 738.457   | 215.407   | NM_006585 | 8086.54   |
| AL359654  | 720.443   | 487.304   | NM_014848 | 870.172   | 662.017   | NM_014331 | 1358.268  |
| AK024224  | 1155.106  | 1383.766  | BF217766  | 732.223   | 619.486   | AF054589  | 97.318    |
| NM_015362 | 3936.736  | 4263.713  | NM_000184 | 2564.563  | 2348.057  | NM_005270 | 227.881   |
| AF147344  | 600.763   | 698.853   | NM_016180 | 942.171   | 980.871   | NM_014815 | 366.118   |
| AF147371  | 979.785   | 1092.714  | NM_000112 | 797.641   | 1362.054  | NM_005443 | 375.172   |
| NM_018982 | 3375.497  | 3126.113  | NM_005827 | 5640.832  | 9198.629  | NM_007221 | 1763.083  |
| AF086254  | 4006.857  | 5112.521  | NM_003053 | 8181.663  | 5340.613  | X54163    | 8865.719  |
| AF086294  | 349.394   | 590.337   | NM_003044 | 2127.056  | 3276.595  | AK025395  | 374.256   |
| AF086324  | 697.643   | 635.558   | NM_006672 | 12623.186 | 18042.58  | NM_000388 | 379.202   |
| AF086261  | 1031.157  | 928.605   | AB007875  | 802.584   | 1260.584  | NM_002469 | 361.197   |
| AF086367  | 1822.568  | 2296.963  | NM_018261 | 844.594   | 1066.621  | BI830936  | 340.42    |
| AF086437  | 931.773   | 1137.087  | NM_014796 | 389.588   | 1373.391  | U79292    | 5956.792  |
| AK025088  | 2286.549  | 2293.1    | AL050288  | 38893.621 | 28223.174 | X68314    | 552.193   |
| U79295    | 1150.145  | 1146.785  | NM_005040 | 4440.2    | 4411.216  | X71973    | 9862.696  |
| AK002107  | 744.36    | 419.381   | NM_016391 | 14015.683 | 13732.989 | T49651    | 9292.485  |
| NM_003596 | 4098.774  | 2881.083  | AF075033  | 3769.516  | 3780.855  | N51014    | 1228.295  |
| NM_018838 | 2917.159  | 3068.704  | D50911    | 9996.079  | 8397.993  | AL043686  | 5123.859  |
| AF075083  | 518.762   | 365.471   | AB011104  | 1445.7    | 1353.953  | AA490172  | 397.779   |
| AK021454  | 1275.807  | 1129.69   | AK024069  | 4890.791  | 6498.046  | AA775212  | 1015.85   |
| AK022069  | 1439.027  | 1063.484  | NM_004582 | 8021.75   | 8358.863  | NM_000723 | 545.257   |
| AL137457  | 733.249   | 569.079   | NM_015640 | 12456.525 | 12019.353 | AL096751  | 2017.501  |
| AF085944  | 2276.479  | 1338.74   | AF233450  | 691.946   | 658.247   | NM_000364 | 303.486   |
| AL133038  | 981.492   | 664.749   | NM_016233 | 1562.317  | 2206.452  | AF026920  | 2274.073  |
| AL137414  | 1045.822  | 1112.647  | NM_000821 | 19436.777 | 26108.895 | NM_004931 | 4422.927  |
| AL359574  | 2383.659  | 2807.648  | NM_020121 | 953.254   | 1453.537  | NM_000607 | 11864.848 |
| AL133569  | 3197.381  | 3036.991  | NM_003145 | 33024.098 | 57285.285 | AF090409  | 95.832    |
| AL157463  | 770.012   | 636.716   | NM_001632 | 1948.588  | 2439.595  | NM_002575 | 919.628   |
| AF088014  | 1431.329  | 1466.454  | AF311312  | 3413.012  | 3466.916  | NM_004244 | 3087.399  |
| AL109719  | 982.01    | 1002.649  | NM_014915 | 24167.377 | 17267.35  | NM_003371 | 6288.336  |
| U92022    | 1753.808  | 2336.9    | NM_012286 | 1970.531  | 1618.389  | AK023114  | 2611.6    |
| NM_003650 | 10898.462 | 14749.487 | NM_002195 | 5303.367  | 4579.937  | NM_003678 | 2187.532  |
| AK022119  | 3023.773  | 1820.131  | D84294    | 3352.006  | 2111.08   | NM_012301 | 334.552   |
| AL157488  | 655.626   | 752.282   | X59770    | 364.406   | 1299.145  | NM_005631 | 353.237   |
| NM_016644 | 1192.14   | 1101.512  | K02765    | 3271.441  | 3244.582  | NM_014419 | 2537.942  |
| AF085842  | 614.408   | 667.8     | M65134    | 1195.135  | 1265.549  | NM_014938 | 1118.617  |
| AK026750  | 907.9     | 936.126   | BG539651  | 17236.537 | 10943.924 | AF049460  | 299.6     |
| AF072164  | 1013.202  | 1188.003  | N52646    | 34000.012 | 29818.371 | AK026066  | 602.972   |
| NM_018610 | 893.651   | 1147.845  | AW160671  | 56741.914 | 52951.234 | NM_005244 | 2350.972  |
| AF147317  | 877.329   | 699.223   | BI870529  | 15106.133 | 5776.803  | NM_018158 | 1267.901  |
| AF232216  | 436.262   | 553.22    | AA702698  | 1070.173  | 1246.539  | NM_016301 | 2658.092  |
| NM_017773 | 2437.359  | 2339.411  | AI681514  | 1679.179  | 2050.665  | AK021975  | 509.658   |
| AK022018  | 461.069   | 504.166   | NM_001300 | 1696.877  | 1963.646  | AB032952  | 17912.023 |
| AK022161  | 1206.512  | 2512.512  | BG748827  | 4219.492  | 5001.68   | NM_002522 | 20487.467 |
| AK022296  | 788.345   | 2384.095  | AA952897  | 1252.016  | 1472.412  | NM_002978 | 1155.204  |
| AK022338  | 744.554   | 646.105   | BG760342  | 3943.843  | 2041.747  | NM_014668 | 791.527   |
| AK026856  | 1162.625  | 687.593   | AA703141  | 837.115   | 967.399   | NM_004722 | 1029.2    |

|            |           |           |           |           |           |           |          |
|------------|-----------|-----------|-----------|-----------|-----------|-----------|----------|
| AL162033   | 1929.09   | 1743.32   | NM_002103 | 28114.109 | 49146.441 | NM_014425 | 379.338  |
| NM_005001  | 9174.189  | 9551.451  | NM_003379 | 8790.958  | 12921.019 | NM_012133 | 989.441  |
| AK024175   | 3442.779  | 3295.387  | NM_006589 | 3969.324  | 8401.059  | NM_017954 | 540.296  |
| NM_000510  | 696.575   | 860.922   | NM_004134 | 3718.308  | 4146.695  | NM_006612 | 1016.291 |
| NM_017787  | 2841.38   | 1669.278  | NM_005955 | 6512.463  | 5181.105  | NM_016451 | 507.884  |
| NM_020315  | 2682.021  | 5828.4    | NM_004048 | 981.97    | 870.025   | NM_007351 | 4237.113 |
| unknown (S | 554.978   | 961.908   | NM_006017 | 61.682    | 896.655   | AK026266  | 2076.854 |
| AK001910   | 1258.867  | 2302.505  | NM_012428 | 4995.408  | 3116.557  | NM_007124 | 891.876  |
| AK023892   | 683.888   | 809.051   | NM_001728 | 11406.165 | 11460.311 | NM_003176 | 809.494  |
| AF124368   | 675.693   | 875.389   | NM_005565 | 7754.228  | 10691.854 | AK023168  | 1986.644 |
| AF265210   | 4731.792  | 5648.18   | NM_003824 | 7226.65   | 5288.776  | NM_006646 | 1546.626 |
| AK024241   | 783.969   | 981.413   | NM_000686 | 1881.899  | 2263.428  | NM_004742 | 821.685  |
| AK025061   | 1363.701  | 1066.344  | NM_012452 | 10153.763 | 12508.327 | NM_014753 | 792.623  |
| AF088067   | 5706.601  | 4181.22   | AF229166  | 1189.347  | 1437.877  | NM_006585 | 9279.102 |
| AF056441   | 1174.98   | 1034.706  | NM_005137 | 2727.517  | 2770.442  | NM_014331 | 2046.576 |
| Y10509     | 313.153   | 531.649   | NM_006764 | 2851.261  | 1954.979  | NM_006795 | 3401.322 |
| AK024389   | 4377.357  | 4334.528  | NM_001386 | 5302.854  | 2993.226  | AF070568  | 857.574  |
| AK026793   | 1517.432  | 1504.519  | NM_001163 | 1549.46   | 1222.421  | NM_000240 | 2049.084 |
| NM_001672  | 477.357   | 774.34    | NM_005878 | 3541.951  | 3901.717  | AK055733  | 7242.338 |
| AJ276253   | 19282.008 | 15386.036 | AB011089  | 1254.63   | 2050.175  | AF298880  | 4526.974 |
| AF147314   | 2609.673  | 1605.452  | NM_001312 | 667.728   | 1235.892  | AK001500  | 637.317  |
| NM_018980  | 3048.098  | 3696.852  | AF007192  | 610.772   | 1529.999  | NM_006774 | 310.202  |
| AF086201   | 1582.596  | 1726.584  | NM_001276 | 7199.888  | 10204.303 | NM_020129 | 971.267  |
| AK024712   | 809.263   | 539.024   | NM_016157 | 1724.101  | 1336.748  | Y16521    | 2166.539 |
| U48696     | 524.97    | 590.98    | NM_000112 | 603.415   | 859.491   | AL050371  | 2722.962 |
| AF230316   | 8079.441  | 7359.64   | NM_005827 | 6390.653  | 7006.247  | NM_002651 | 3200.076 |
| AK024515   | 2581.706  | 2656.329  | NM_003053 | 10409.637 | 6102.196  | NM_002413 | 7007.415 |
| AF085862   | 5549.108  | 7710.146  | NM_003044 | 2681.158  | 4214.267  | NM_017577 | 394.982  |
| AK023079   | 25857.072 | 34620.879 | NM_006672 | 14662.265 | 16419.078 | NM_001757 | 5088.479 |
| NM_019609  | 1306.49   | 1834.154  | NM_000338 | 197.079   | 1338.579  | NM_001647 | 1807.68  |
| AK026198   | 1880.138  | 2420.769  | M31659    | 1589.031  | 1160.478  | NM_006228 | 615.781  |
| AF183570   | 817.683   | 354.912   | NM_016226 | 15374.148 | 8142.462  | NM_003768 | 895.984  |
| NM_005497  | 7856.852  | 6101.578  | AK024311  | 733.929   | 901.033   | NM_018393 | 703.084  |
| AK024048   | 2305.844  | 2404.542  | AF052155  | 4725.246  | 5827.147  | BF032535  | 1696.209 |
| AB033093   | 878.942   | 1089.777  | NM_005085 | 2281.914  | 2870.262  | NM_018332 | 1288.033 |
| NM_005912  | 809.491   | 600.96    | AF060902  | 2432.107  | 2464.526  | NM_005096 | 3674.724 |
| NM_005909  | 14407.004 | 23842.117 | AF121858  | 5012.345  | 7120.843  | NM_006760 | 806.308  |
| AK021879   | 1043.677  | 2867.765  | NM_013437 | 857.433   | 1307.864  | NM_012289 | 2138.291 |
| AK055991   | 678.454   | 1112.976  | NM_017681 | 615.273   | 385.635   | AB037775  | 382.174  |
| AF113697   | 517.039   | 757.615   | AK025966  | 3442.343  | 3405.492  | L27560    | 660.706  |
| AK022326   | 1032.731  | 1002.703  | NM_018725 | 706.514   | 1019.532  | AB011174  | 1199.673 |
| AF085991   | 922.771   | 1164.142  | D50402    | 23771.789 | 31557.707 | AB040879  | 951.278  |
| NM_005683  | 717.324   | 1011.667  | M73547    | 7098.909  | 10556.039 | AL049935  | 1075.696 |
| NM_020427  | 8287.736  | 10404.937 | AF181722  | 962.094   | 702.22    | AB033043  | 5386.59  |
| AF085920   | 1402.342  | 1387.444  | NM_003687 | 1829.648  | 1792.709  | NM_014999 | 1118.099 |
| AK023173   | 8638.144  | 8295.396  | NM_020121 | 953.486   | 1087.929  | AK025220  | 683.786  |
| AK025225   | 464.655   | 784.635   | NM_003145 | 32574.283 | 48504.762 | NM_016308 | 4151.287 |
| AF007193   | 1749.441  | 1932.729  | NM_001632 | 2218.655  | 1990.289  | D42046    | 3415.616 |
| AK022367   | 846.868   | 940.336   | AF311312  | 3267.231  | 2359.546  | NM_001033 | 537.601  |
| BC028589   | 2701.592  | 2853.416  | NM_017765 | 26722.746 | 25670.594 | NM_004526 | 3152.034 |
| CY3Cy5     | 9350.045  | 588.801   | NM_000428 | 844.631   | 820.565   | NM_002526 | 6287.774 |
| K02765     | 4305.071  | 2450.394  | AB040967  | 8609.33   | 7960.631  | NM_020135 | 909.509  |
| M65134     | 884.671   | 1086.733  | NM_003578 | 469.301   | 790.725   | NM_018518 | 1436.775 |

|           |           |           |           |           |           |           |           |
|-----------|-----------|-----------|-----------|-----------|-----------|-----------|-----------|
| BG539651  | 34855.703 | 12225.099 | NM_014721 | 2347.799  | 1372.667  | AK023149  | 641.765   |
| N52646    | 20683.5   | 16931.123 | AK026352  | 1894.441  | 3011.62   | NM_00643E | 2152.006  |
| AW160671  | 56519.152 | 49194.34  | AL137705  | 2058.736  | 2558.566  | NM_00184E | 849.686   |
| BI870529  | 11667.118 | 8565.8    | U41898    | 934.788   | 900.01    | AK024697  | 311.186   |
| AA702698  | 1988.616  | 1591.968  | AF169257  | 1367.856  | 1197.338  | NM_00646C | 2155.141  |
| AI681514  | 954.801   | 1055.011  | NM_01484E | 1161.28   | 1043.721  | L34156    | 383.957   |
| NM_00130C | 4164.436  | 1493.107  | BF217766  | 818.282   | 895.615   | NM_00374E | 4112.916  |
| BG748827  | 9184.733  | 15427.985 | NM_000184 | 2566.438  | 2229.254  | NM_003557 | 1440.753  |
| AA952897  | 2419.353  | 2719.616  | NM_01618C | 729.117   | 408.211   | NM_001257 | 10076.92  |
| BG760342  | 3843.225  | 2807.132  | NM_00210E | 26204.01  | 30915.855 | NM_00179E | 749.023   |
| AA703141  | 680.234   | 659.157   | NM_00337E | 7450.131  | 7427.277  | D85245    | 8211.584  |
| AI122630  | 5560.4    | 7208.769  | NM_00658E | 3086.351  | 4992.275  | NM_00094E | 1822.77   |
| NM_00210E | 28047.768 | 31775.98  | AB007875  | 842.151   | 1753.723  | NM_00465E | 1511.256  |
| NM_00337E | 9908.037  | 8680.044  | NM_018261 | 1253.254  | 1116.619  | NM_00125C | 5228.685  |
| SR1       | 73938.523 | 66152.758 | NM_01479E | 343.484   | 486.233   | AF298812  | 663.28    |
| SR3       | 56558.977 | 41055.137 | AL050288  | 36551.793 | 30930.818 | NM_00496E | 993.93    |
| SR5       | 6058.627  | 3903.081  | NM_00504C | 4107.122  | 4147.648  | AJ249900  | 566.524   |
| SR7       | 7791.333  | 40864.57  | NM_016391 | 12795.067 | 13383.416 | AK022581  | 762.719   |
| SR9       | 31979.973 | 4133.466  | AF075033  | 3694.724  | 3082.079  | NM_018054 | 1154.034  |
| CY3Cy5    | 10540.347 | 652.613   | D50911    | 10816.401 | 7868.85   | NM_00095E | 2583.662  |
| NM_01242E | 4564.695  | 3153.864  | AB007921  | 94.191    | 278.731   | NM_013271 | 5959.637  |
| NM_00172E | 15822.344 | 18640.078 | AB011104  | 1555.874  | 1540.387  | NM_004157 | 1282.089  |
| NM_00556E | 6334.326  | 9273.621  | AK024069  | 4160.425  | 6245.008  | NM_000684 | 657.191   |
| NM_003824 | 5449.777  | 4524.648  | NM_01623E | 1354.333  | 1491.2    | NM_01591E | 8719.83   |
| NM_00068E | 1512.294  | 1428.749  | NM_000821 | 19445.531 | 14051.108 | NM_005157 | 3274.727  |
| NM_01245E | 7647.351  | 5894.626  | AF308602  | 941.259   | 925.24    | NM_007354 | 749.661   |
| AF229166  | 999.308   | 989.564   | AB011089  | 1061.712  | 1149.072  | U67037    | 3078.985  |
| NM_005137 | 3516.797  | 3056.844  | AF007192  | 793.315   | 1113.869  | NM_00496C | 5459.964  |
| NM_006764 | 3283.489  | 2867.632  | NM_00127E | 5920.062  | 6585.887  | AF272370  | 3477.793  |
| NM_00138E | 1635.545  | 1310.914  | NM_016157 | 1586.037  | 1102.791  | AF130050  | 1878.018  |
| NM_001163 | 1365.508  | 1440.881  | NM_01491E | 23111.768 | 21671.766 | NM_012197 | 2968.589  |
| NM_00587E | 1965.867  | 1643.075  | NM_01228E | 1542.01   | 1993.563  | AK024016  | 644.681   |
| AF308602  | 3319.832  | 2426.169  | NM_00219E | 5598.03   | 4402.922  | NM_003581 | 2236.551  |
| AB011089  | 1562.685  | 1248.982  | D84294    | 2958.401  | 2287.005  | NM_00288E | 176.814   |
| AF007192  | 1238.921  | 1504.519  | X59770    | 819.168   | 1075.854  | NM_012407 | 947.296   |
| NM_00127E | 11364.071 | 12980.635 | K02765    | 3225.265  | 3080.923  | NM_00718E | 892.085   |
| NM_016157 | 1351.057  | 687.639   | M65134    | 1668.126  | 2048.271  | NM_007044 | 444.251   |
| NM_01491E | 28382.07  | 24537.535 | BG539651  | 16500.656 | 10014.045 | AF294326  | 1055.075  |
| NM_01228E | 2115.91   | 1632.215  | N52646    | 30133.377 | 27460.172 | NM_01467E | 506.915   |
| NM_00219E | 3608.273  | 3882.257  | AW160671  | 55510.105 | 43936.328 | NM_01785E | 2476.863  |
| D84294    | 3082.332  | 3596.349  | BI870529  | 15281.174 | 8664.375  | NM_016097 | 4525.547  |
| M31659    | 4598.581  | 1382.753  | AA702698  | 1104.223  | 1555.475  | AB046800  | 4023.901  |
| NM_00305E | 3682.216  | 7642.887  | AI681514  | 919.646   | 1424.858  | NM_00216E | 1788.615  |
| NM_01622E | 11762.314 | 7568.718  | NM_00130C | 1784.09   | 1914.131  | NM_01545E | 1698.969  |
| AK024311  | 1254.29   | 949.243   | BG748827  | 3931.736  | 6857.841  | D13540    | 1595.392  |
| AF052155  | 5241.275  | 5724      | AA952897  | 1338.42   | 1783.349  | NM_01657C | 3438.398  |
| NM_00508E | 1555.829  | 1181.538  | BG760342  | 3584.71   | 3115.246  | AF209198  | 641.513   |
| AF060902  | 2182.037  | 1638.202  | AA703141  | 661.884   | 765.691   | M69012    | 28075.748 |
| AF121858  | 5247.595  | 5581.009  | AI122630  | 6631.778  | 5342.378  | NM_00693E | 7688.046  |
| NM_013437 | 896.625   | 1203.827  | NM_003081 | 18120.619 | 23535.91  | NM_001327 | 2620.103  |
| AK025966  | 2311.216  | 2269.695  | NM_01649E | 1407.648  | 1515.259  | AF321182  | 187.561   |
| NM_01872E | 919.913   | 838.761   | D50402    | 36157.898 | 36224.465 | NM_00006E | 1198.531  |
| NM_003081 | 23200.178 | 16148.848 | M73547    | 5007.35   | 5614.011  | NM_01838E | 656.785   |

|           |           |           |           |           |           |           |           |
|-----------|-----------|-----------|-----------|-----------|-----------|-----------|-----------|
| NM_016495 | 2326.234  | 2678.528  | NM_003687 | 1508.609  | 1371.579  | AB033026  | 1970.731  |
| D50402    | 23925.176 | 17347.16  | NM_004134 | 2026.671  | 1794.56   | AF104914  | 4239.625  |
| M73547    | 7842.408  | 6313.549  | NM_005955 | 6559.55   | 6644.499  | NM_014716 | 1986.68   |
| NM_003687 | 1637.493  | 1137.599  | NM_012428 | 4461.589  | 2972.701  | NM_002278 | 250.257   |
| NM_004134 | 2970.066  | 3477.636  | NM_001728 | 10466.563 | 9778.786  | AK023845  | 1237.687  |
| NM_005955 | 2939.45   | 2015.134  | NM_005565 | 6005.109  | 7911.643  | NM_002638 | 3413.13   |
| NM_004048 | 1229.272  | 553.645   | NM_003824 | 6546.755  | 4527.691  | NM_005808 | 3680.835  |
| BE548044  | 504.831   | 215.64    | NM_000686 | 1500.826  | 1694.981  | NM_006401 | 6085.882  |
| NM_017765 | 10601.806 | 8526.608  | NM_012452 | 9488.906  | 8076.761  | D31763    | 1514.329  |
| NM_000428 | 1041.938  | 1034.35   | AF229166  | 1012.389  | 1350.636  | NM_018169 | 2805.712  |
| AB040967  | 5409.604  | 9572.234  | NM_005137 | 3371.093  | 3245.373  | AK021452  | 3652.179  |
| NM_014721 | 2162.497  | 1600.124  | NM_006764 | 2831.029  | 2571.867  | NM_004506 | 454.068   |
| AK026352  | 837.295   | 1264.525  | NM_001386 | 5696.62   | 3476.545  | S74529    | 21310.645 |
| AL137705  | 4904.464  | 4031.219  | NM_001163 | 1399.641  | 1112.767  | NM_020227 | 448.429   |
| U41898    | 591.212   | 534.735   | NM_005878 | 2728.348  | 2138.914  | NM_005933 | 762.742   |
| AF169257  | 428.885   | 378.796   | NM_014848 | 617.05    | 684.289   | NM_005596 | 226.714   |
| NM_014848 | 620.327   | 348.205   | BF217766  | 553.419   | 673.244   | NM_001421 | 300.791   |
| BF217766  | 558.697   | 764.361   | NM_000184 | 1299.567  | 1316.727  | M73837    | 618.758   |
| NM_000184 | 2285.221  | 2093.588  | NM_016180 | 855.836   | 496.427   | U69127    | 7244.937  |
| NM_016180 | 673.469   | 610.609   | NM_000112 | 528.963   | 487.44    | NM_005839 | 1951.175  |
| NM_000112 | 1323.062  | 950.183   | NM_005827 | 3237.365  | 4439.181  | AK023379  | 441.783   |
| NM_005827 | 3615.875  | 5570.979  | NM_003053 | 6745.16   | 4492.842  | AK021904  | 2419.353  |
| NM_006672 | 10150.914 | 7381.596  | NM_003044 | 1737.492  | 2528.435  | -         | 542.451   |
| AB007875  | 1246.848  | 1451.909  | NM_006672 | 13527.718 | 14081.493 | AL049705  | 3004.259  |
| AL050288  | 37273.852 | 28071.709 | M31659    | 1711.466  | 1099.722  | AK022294  | 2062.642  |
| NM_005040 | 4908.479  | 4071.448  | NM_003056 | 7252.438  | 10673.252 | AF086507  | 736.211   |
| NM_016391 | 12186.573 | 12794.882 | NM_016226 | 14675.118 | 9224.707  | U79289    | 1948.04   |
| AF075033  | 3739.295  | 3672.956  | AK024311  | 326.629   | 554.513   | NM_014028 | 2194.897  |
| D50911    | 11489.913 | 11306.534 | AF052155  | 2717.626  | 2482.815  | NM_000402 | 540.216   |
| AB011104  | 1665.186  | 1447.01   | NM_005085 | 2203.752  | 2459.335  | NM_000690 | 2738.517  |
| AK024069  | 5583.42   | 5074.618  | AF060902  | 2492.315  | 1904.173  | NM_000155 | 1835.021  |
| NM_004582 | 6219.832  | 7122.148  | AF121858  | 3601.488  | 5343.988  | NM_000181 | 2846.878  |
| NM_015640 | 8068.365  | 8658.853  | NM_013437 | 1306.011  | 1449.677  | NM_014121 | 377.787   |
| AF233450  | 1005.929  | 844.007   | AK025966  | 1605.966  | 1467.958  | NM_006730 | 1413.517  |
| NM_016233 | 1075.517  | 873.296   | NM_014440 | 573.802   | 419.675   | NM_005644 | 1578.016  |
| NM_000821 | 15081.944 | 10734.176 | AK024069  | 4346.127  | 8106.927  | NM_018442 | 797.927   |
| NM_020121 | 1135.49   | 856.138   | NM_004582 | 7456.842  | 11135.119 | AF182416  | 1354.292  |
| NM_012264 | 1132.424  | 1155.941  | NM_015640 | 12492.711 | 14265.742 | NM_005999 | 5400.211  |
| AF311312  | 3474.296  | 3056.333  | AF233450  | 316.88    | 602.825   | NM_006015 | 347.272   |
| NM_014915 | 28895.053 | 38179.367 | NM_016233 | 1373.875  | 1503.438  | NM_004634 | 1183.55   |
| NM_012286 | 2024.918  | 2054.484  | NM_000821 | 23135.188 | 19816.412 | NM_002017 | 1462.828  |
| NM_002195 | 3853.51   | 4083.297  | NM_020121 | 1014.017  | 1163.325  | NM_017523 | 2867.833  |
| D84294    | 3236.779  | 3832.192  | NM_003145 | 20058.17  | 30893.607 | NM_002382 | 14610.552 |
| X59770    | 548.416   | 565.321   | NM_001632 | 2187.113  | 1528.518  | NM_002158 | 539.055   |
| K02765    | 4089.974  | 3353.537  | NM_012264 | 1177.298  | 1197.031  | U13223    | 3689.276  |
| M65134    | 1016.708  | 1457.848  | AF311312  | 4012.07   | 2934.667  | NM_016270 | 1591.804  |
| BG539651  | 33926.254 | 11970.851 | NM_001179 | 463.912   | 472.319   | NM_015721 | 1247.716  |
| N52646    | 20575.406 | 20195.115 | NM_017765 | 27765.107 | 34797.535 | AF086298  | 1079.611  |
| BI870529  | 10774.263 | 8899.466  | NM_000428 | 896.033   | 948.732   | AK027238  | 1028.967  |
| AA702698  | 1762.771  | 1391.279  | AB040967  | 9773.75   | 7673.133  | AK000032  | 688.469   |
| AI681514  | 1162.972  | 1354.04   | NM_003578 | 710.855   | 862.245   | AK025758  | 365.348   |
| NM_001300 | 4351.209  | 1515.629  | NM_014721 | 1293.252  | 1005.941  | S94540    | 22346.391 |
| BG748827  | 8826.699  | 8708.677  | AK026352  | 2064.056  | 3169.186  | U79297    | 81.942    |

|           |           |           |           |           |           |           |           |
|-----------|-----------|-----------|-----------|-----------|-----------|-----------|-----------|
| AA952897  | 2109.821  | 2300.272  | AL137705  | 2205.29   | 3788.085  | AK002164  | 952.239   |
| BG760342  | 3630.373  | 2684.054  | U41898    | 786.955   | 598.736   | AF052122  | 4675.469  |
| AA703141  | 729.869   | 649.175   | NM_007262 | 17660.346 | 9617.418  | NM_001310 | 466.719   |
| AA195244  | 476.359   | 303.442   | NM_014783 | 11689.472 | 8003.931  | AK026924  | 3835.042  |
| AI122630  | 5412.237  | 7523.534  | NM_014053 | 1278.925  | 1091.332  | AL122047  | 1899.189  |
| NM_002103 | 29253.227 | 37331.676 | NM_002571 | 1218.946  | 792.082   | AF052091  | 1338.805  |
| NM_003379 | 10291.354 | 11989.496 | NM_004939 | 2127.546  | 3351.156  | AK024447  | 15777.141 |
| NM_006589 | 3099.711  | 5083.273  | NM_001425 | 9599.438  | 13141.669 | AF052145  | 1855.258  |
| NM_002191 | 673.303   | 507.367   | NM_015710 | 912.306   | 779.394   | AF086458  | 547.218   |
| NM_004134 | 3005.321  | 3819.642  | NM_014158 | 4604.009  | 3579.862  | AF086548  | 7933.611  |
| NM_005955 | 3555.07   | 2645.691  | AK021591  | 1459.028  | 1577.714  | AK024350  | 186.794   |
| NM_004048 | 1192.254  | 781.087   | NM_014675 | 1197.841  | 1185.498  | AK023717  | 1848.044  |
| NM_012428 | 4109.116  | 3175.424  | NM_006589 | 3288.881  | 5288.641  | AK023727  | 420.227   |
| NM_013269 | 1081.565  | 560.133   | AB007875  | 931.193   | 1391.271  | AK025271  | 320.288   |
| NM_001728 | 16972.459 | 20618.492 | NM_014796 | 587.033   | 571.315   | AF086204  | 2900.189  |
| NM_003824 | 5308.818  | 4504.514  | AL050288  | 36372.43  | 28227.574 | NM_007021 | 605.865   |
| NM_000686 | 1488.842  | 1396.972  | NM_005040 | 2836.698  | 2606.49   | AK026283  | 359.801   |
| NM_012452 | 8745.656  | 6886.873  | NM_016391 | 14187.425 | 13285.195 | AK023065  | 489.563   |
| AF229166  | 1273.793  | 791.877   | AF075033  | 3537.131  | 2787.302  | AK000103  | 1078.45   |
| NM_005137 | 3251.365  | 2200.209  | D50911    | 12372.358 | 9638.125  | AF085959  | 702.613   |
| NM_006764 | 3533.725  | 2877.318  | AB011104  | 1321.959  | 1480.48   | AF075107  | 793.994   |
| NM_001386 | 1129.028  | 877.899   | NM_003248 | 2101.101  | 1242.402  | AK023104  | 855.014   |
| NM_001163 | 1577.142  | 1402.914  | NM_000552 | 3921.54   | 3829.476  | AK026923  | 1623.064  |
| NM_005878 | 2011.713  | 1912.729  | NM_003809 | 724.401   | 1045.701  | Y11177    | 669.611   |
| AF308602  | 3599.836  | 2463.128  | AK000860  | 6453.168  | 6566.292  | U61091    | 328.963   |
| AB011089  | 1436.447  | 1401.157  | NM_014961 | 811.981   | 821.992   | AK021691  | 5574.465  |
| AF007192  | 1158.668  | 1211.146  | NM_020145 | 2006.587  | 2296.219  | AK022037  | 328.564   |
| NM_001276 | 13164.153 | 16512.016 | AK021529  | 4002.085  | 5084.416  | AK000141  | 2336.179  |
| NM_016157 | 1369.174  | 890.634   | AB037845  | 3605.322  | 3809.423  | AL137758  | 847.064   |
| NM_005827 | 5131.917  | 6042.947  | NM_005980 | 1174.517  | 2862.316  | AK025786  | 1134.026  |
| NM_003053 | 4080.07   | 3175.14   | NM_016190 | 55021.094 | 54046.258 | AK024188  | 1554.172  |
| NM_003044 | 1131.252  | 1492.819  | AL137579  | 6590.198  | 7857.955  | AK026820  | 568.128   |
| NM_006672 | 9734.34   | 8405.473  | NM_012383 | 9396.658  | 5386.752  | AK001716  | 1314.342  |
| M31659    | 4861.051  | 1619.155  | AJ271684  | 2711.844  | 1868.466  | AF113683  | 317.559   |
| NM_003056 | 3478.865  | 7120.515  | AF255342  | 9629.058  | 10265.809 | NM_014095 | 424.57    |
| NM_016226 | 11662.561 | 8866.853  | NM_003300 | 5376.982  | 5884.394  | AK026821  | 1331.341  |
| AK024311  | 1366.747  | 1248.01   | AK026682  | 2158.916  | 1777.397  | AK026280  | 10376.639 |
| AF052155  | 5115.369  | 5364.908  | NM_017720 | 58167.371 | 60242.449 | AF113017  | 6164.102  |
| NM_005085 | 1715.936  | 1696.656  | NM_004655 | 3755.425  | 2334.258  | AL080232  | 10141.826 |
| AF060902  | 2376.879  | 1977.685  | NM_003942 | 2665.64   | 2339.48   | AK001120  | 3002.888  |
| AF121858  | 5291.308  | 5172.389  | NM_006471 | 13482.189 | 13426.257 | AF264629  | 321.025   |
| NM_013437 | 874.947   | 1016.461  | NM_004165 | 5024.97   | 3444.026  | AK022416  | 415.892   |
| AK025966  | 2340.039  | 2303.289  | NM_000368 | 1480.236  | 1224.964  | AK023224  | 1453.726  |
| NM_018725 | 1071.34   | 832.387   | NM_016586 | 1374.542  | 1202.024  | AK023731  | 2743.601  |
| NM_003081 | 26307.25  | 21956.061 | NM_004140 | 842.301   | 827.637   | AK022442  | 799.225   |
| NM_016495 | 1860.146  | 1719.918  | NM_002866 | 9759.529  | 14472.39  | AK023336  | 800.772   |
| D50402    | 28968.26  | 23580.555 | NM_003860 | 3856.801  | 3745.464  | AK026873  | 1724.333  |
| M73547    | 7724.425  | 6734.584  | NM_005414 | 870.082   | 655.379   | AK026394  | 1700.578  |
| NM_003687 | 1809.253  | 1289.464  | NM_004468 | 17192.314 | 16455.473 | NM_005448 | 1286.074  |
| NM_020121 | 917.776   | 801.588   | NM_016031 | 10484.533 | 16465.801 | AK025943  | 8120.238  |
| NM_003145 | 29356.822 | 35676.629 | NM_004804 | 827.29    | 902.374   | BG106479  | 562.533   |
| NM_001632 | 1874.623  | 1637.756  | M92439    | 8605.727  | 16049.646 | AF130069  | 15528.858 |
| NM_012264 | 1304.781  | 1207.279  | AL117665  | 3252.897  | 3249.626  | AL109669  | 1414.4    |

|           |           |           |           |           |           |           |           |
|-----------|-----------|-----------|-----------|-----------|-----------|-----------|-----------|
| AF311312  | 2906.513  | 3056.644  | AF263541  | 683.254   | 1682.705  | AB037766  | 1218.355  |
| NM_001179 | 643.311   | 703.031   | NM_001262 | 6933.022  | 4305.971  | AK026995  | 390.568   |
| NM_005313 | 33740.191 | 46427.227 | BE873030  | 4971.166  | 3833.293  | AL133091  | 991.085   |
| NM_017765 | 16431.545 | 14757.024 | NM_002440 | 718.993   | 810.405   | BF842915  | 461.862   |
| NM_000428 | 917.285   | 836.649   | NM_003625 | 1134.88   | 609.031   | AF086212  | 949.512   |
| AB040967  | 5799.601  | 9530.84   | BC006990  | 2805.981  | 4139.604  | X82545    | 2975.881  |
| NM_014721 | 1933.493  | 1755.024  | NM_002277 | 4833.162  | 4965.191  | AK024632  | 3954.959  |
| AK026352  | 972.542   | 1251.413  | NM_019114 | 1580.329  | 2100.061  | NM_018474 | 3802.111  |
| AL137705  | 5164.784  | 4185.495  | M33552    | 4512.919  | 3646.167  | AK024937  | 510.327   |
| U41898    | 752.609   | 705.52    | AJ252060  | 1622.245  | 2301.085  | D17178    | 559.953   |
| AF169257  | 651.649   | 713.141   | NM_006403 | 4510.365  | 3625.338  | AK022094  | 3200.884  |
| NM_014848 | 897.903   | 601.609   | NM_018977 | 1083.2    | 800.808   | AK026695  | 779.114   |
| BF217766  | 779.427   | 821.06    | AJ001402  | 2060.482  | 4462.858  | AK022220  | 356.463   |
| NM_000184 | 2812.833  | 2195.475  | NM_004540 | 1559.146  | 2828.073  | AL137539  | 348.482   |
| NM_002103 | 26970.291 | 35162.527 | NM_000235 | 3493.496  | 3123.654  | U84520    | 5640.208  |
| NM_003379 | 10697.997 | 11404.219 | AF068236  | 52257.914 | 50410.012 | AL133616  | 1623.852  |
| NM_006589 | 3075.501  | 5475.695  | L25628    | 2527.592  | 2951.281  | AK026382  | 1280.654  |
| AB007875  | 1078.34   | 1224.373  | M37033    | 3525.275  | 2455.158  | AK091169  | 2834.448  |
| NM_018261 | 1352.93   | 996.018   | NM_007171 | 3189.401  | 3157.931  | NM_014745 | 32963.055 |
| AL050288  | 37620.598 | 28514.373 | NM_004278 | 1123.384  | 910.422   | AF086026  | 10487.732 |
| NM_005040 | 5260.422  | 4208.21   | NM_005632 | 1708.882  | 2081.101  | AL133011  | 985.398   |
| NM_016391 | 13173.457 | 10540.741 | AK021499  | 1473.22   | 1088.86   | NM_016300 | 487.063   |
| AF075033  | 3486.252  | 2582.96   | AK000336  | 2484.545  | 2461.993  | NM_015607 | 9945.103  |
| D50911    | 12232.81  | 10567.039 | NM_002795 | 29152.92  | 18332.363 | AK026955  | 669.712   |
| AB011104  | 1797.573  | 1763.943  | NM_006292 | 1912.012  | 3192.996  | AL110202  | 10067.212 |
| NM_015640 | 9126.537  | 12925.084 | AB007948  | 1786.542  | 1222.727  | AK021980  | 429.133   |
| AF233450  | 1089.728  | 957.35    | AB033066  | 843.805   | 905.967   | S46402    | 474.098   |
| NM_016233 | 1581.673  | 1405.984  | AF126028  | 2948.705  | 3391.681  | Z83940    | 1087.292  |
| NM_000821 | 15861.717 | 12413.838 | NM_007019 | 8092.912  | 2988.484  | NM_005800 | 877.484   |
| AF308602  | 3831.352  | 2741.572  | NM_007075 | 873.564   | 868.683   | AF019617  | 9264.351  |
| AB011089  | 1592.926  | 1827.73   | NM_017640 | 1735.756  | 1193.052  | AL137305  | 4948.106  |
| AF007192  | 1362.007  | 1556.169  | NM_017721 | 2391.396  | 1542.395  | NM_005290 | 691.862   |
| NM_001276 | 11851.777 | 14915.133 | NM_019088 | 4708.205  | 5760.88   | AK025802  | 391.275   |
| NM_016157 | 1864.156  | 1341.136  | AB002373  | 1708.525  | 1813.098  | AF085973  | 347.546   |
| NM_014915 | 28476.785 | 38935.34  | NM_016350 | 28784.906 | 38467.934 | NM_018013 | 2735.847  |
| NM_012286 | 2493      | 2521.336  | AK024167  | 2113.487  | 3349.338  | AK022517  | 1454.401  |
| NM_002195 | 4022.243  | 4852.696  | AK025308  | 689.671   | 1373.248  | NM_000329 | 17998.725 |
| D84294    | 3788.388  | 4296.341  | NM_005026 | 5421.328  | 7158.83   | NM_001182 | 12718.063 |
| K02765    | 5627.78   | 3861.776  | AF213356  | 1583.437  | 1652.497  | NM_000333 | 2485.038  |
| M65134    | 958.448   | 1385.237  | BC035716  | 2667.212  | 2803.255  | NM_000172 | 2844.462  |
| BG539651  | 34765.164 | 11022.384 | NM_018014 | 1408.709  | 961.111   | NM_002297 | 4346.277  |
| N52646    | 21862.084 | 16734.674 | NM_002359 | 17832.793 | 21246.096 | AB040968  | 14233.547 |
| AW160671  | 53737.047 | 47849.82  | AF230809  | 2266.492  | 2732.635  | X85323    | 1694.185  |
| BI870529  | 11070.136 | 8079.104  | NM_017894 | 44440.48  | 43982.305 | U17615    | 3907.994  |
| AA702698  | 1935.057  | 1590.467  | NM_006509 | 1145.265  | 1673.948  | NM_005303 | 2735.068  |
| AI681514  | 1062.675  | 1076.323  | AK025447  | 1383.284  | 1446.328  | NM_016126 | 3281.164  |
| NM_001300 | 4371.156  | 1837.623  | NM_002624 | 51380.363 | 50606.25  | U84119    | 517.604   |
| BG748827  | 8680.241  | 12986.499 | NM_004554 | 10649.426 | 25492.842 | NM_003608 | 734.06    |
| BG760342  | 3625.526  | 2843.468  | NM_018119 | 1258.384  | 1829.609  | AF302079  | 7561.898  |
| AA703141  | 1081.727  | 978.979   | AL162035  | 2987.198  | 2470.239  | NM_002550 | 832.272   |
| AI122630  | 5646.528  | 8142.829  | NM_006692 | 3350.943  | 2867.018  | NM_000692 | 1188.042  |
| NM_003081 | 28947.166 | 26485.787 | NM_003084 | 1657.273  | 1895.172  | AF086062  | 1099.545  |
| NM_016495 | 1741.335  | 2103.023  | NM_002582 | 8854.74   | 9948.727  | AF000268  | 660.783   |

|           |           |           |           |           |           |            |           |
|-----------|-----------|-----------|-----------|-----------|-----------|------------|-----------|
| D50402    | 25399.82  | 24163.059 | NM_001009 | 57866.867 | 55422.051 | L47668     | 21636.309 |
| M73547    | 8020.624  | 7745.82   | NM_001026 | 68366.055 | 74395.773 | NM_017920  | 2106.718  |
| NM_003687 | 1879.391  | 1736.294  | NM_001011 | 57355.457 | 56556.219 | D25274     | 3401.834  |
| NM_004134 | 2863.503  | 4234.612  | D17289    | 1446.958  | 4073.097  | CY3Cy5     | 2829.55   |
| NM_005955 | 4290.347  | 4766.331  | NM_014230 | 4020.504  | 10423.937 | D50373     | 522.926   |
| NM_004048 | 1331.941  | 1386.852  | NM_017748 | 6520.297  | 6992.881  | AA488757   | 6915.681  |
| BE548044  | 585.881   | 484.668   | AK025374  | 1422.961  | 964.968   | AA205399   | 103.778   |
| NM_012428 | 3965.58   | 3388.121  | NM_014901 | 5592.47   | 5219.297  | AI394286   | 2982.875  |
| NM_013269 | 924.547   | 288.75    | AK000005  | 6744.487  | 7369.256  | ID 1867426 | 2192.29   |
| NM_001728 | 16591.748 | 17881.148 | AF086790  | 1403      | 1062.848  | NM_022552  | 904.612   |
| NM_005565 | 6937.43   | 9322.029  | U28480    | 632.173   | 767.487   | NM_014389  | 2132.159  |
| NM_003824 | 5554.312  | 4226.828  | NM_000108 | 9375.625  | 7355.236  | SR2        | 36685.824 |
| NM_000686 | 1615.663  | 1567.897  | NM_018128 | 1557.053  | 1419.138  | SR4        | 5602.892  |
| NM_012452 | 7044.998  | 5637.8    | NM_016931 | 10975.135 | 13305.711 | SR6        | 636.346   |
| AF229166  | 1154.419  | 942.356   | NM_004373 | 12828.152 | 10115.414 | SR8        | 3584.447  |
| NM_005137 | 4554.646  | 4313.417  | NM_005566 | 57171.184 | 53466.789 | SR10       | 11587.086 |
| NM_006764 | 2892.317  | 2894.355  | NM_000162 | 5364.495  | 5794.56   | CY3Cy5     | 2518.694  |
| NM_001386 | 1341.451  | 1440.338  | AK027067  | 647.876   | 415.845   | NM_005811  | 2631.809  |
| NM_001163 | 1749.584  | 1529.8    | NM_016287 | 6644.221  | 6187.125  | NM_005764  | 1197.92   |
| NM_005878 | 3108.707  | 2996.79   | AK021661  | 1823.053  | 79.63     | NM_016362  | 1374.634  |
| AF169257  | 335.237   | 859.955   | NM_003864 | 6315.205  | 5739.018  | NM_004214  | 2552.276  |
| NM_014848 | 606.265   | 815.173   | NM_006824 | 21039.566 | 15050.916 | NM_004329  | 6080.214  |
| BF217766  | 733.142   | 870.789   | NM_002107 | 2292.193  | 1963.228  | NM_002836  | 676.937   |
| NM_000184 | 2869.646  | 3272.069  | NM_002694 | 9208.104  | 6802.811  | NM_020167  | 1001.406  |
| NM_016180 | 820.476   | 964.921   | NM_004454 | 1455.4    | 1731.996  | AL049963   | 884.911   |
| NM_000112 | 1130.57   | 749.293   | NM_012482 | 3548.677  | 2821.065  | NM_016058  | 2798.638  |
| NM_005827 | 4947.365  | 5976.111  | AF217227  | 777.181   | 993.9     | AK022603   | 534.72    |
| NM_003053 | 5567.27   | 3679.416  | AK024141  | 4005.711  | 5537.284  | AK025612   | 1878.424  |
| NM_003044 | 1141.891  | 1243.998  | NM_002813 | 11286.015 | 14419.802 | NM_012268  | 761.536   |
| NM_006672 | 10095.07  | 7873.528  | AK022745  | 2299.938  | 2150.741  | NM_004736  | 600.903   |
| M31659    | 4531.251  | 1481.112  | AL049450  | 2668.897  | 2379.25   | NM_006895  | 498.074   |
| NM_003056 | 3986.77   | 7678.932  | AK022011  | 877.024   | 1023.353  | NM_006459  | 2608.65   |
| NM_016226 | 12775.271 | 9028.33   | NM_005086 | 52363.781 | 45587.953 | NM_003827  | 2881.034  |
| AK024311  | 1178.222  | 1007.317  | NM_007238 | 2822.514  | 1860.963  | NM_004583  | 297.648   |
| AF052155  | 5126.918  | 5466.01   | NM_017606 | 3863.795  | 5142.702  | NM_001103  | 704.733   |
| NM_005085 | 1667.374  | 1431.911  | AK024644  | 9745.186  | 10418.977 | AF228710   | 10920.598 |
| AF060902  | 1895.042  | 1623.846  | AB019573  | 1359.567  | 1928.547  | NM_018399  | 450.079   |
| AF121858  | 4279.982  | 5030.627  | U68494    | 936.366   | 1710.098  | AY007131   | 15304.121 |
| AK025966  | 2729.227  | 3014.773  | AF064254  | 893.653   | 765.575   | U61735     | 2550.29   |
| NM_018725 | 1030.911  | 789.486   | AL137360  | 7010.036  | 5493.093  | NM_001144  | 436.541   |
| AK024069  | 6075.563  | 6658.367  | AF143331  | 1403.67   | 1407.04   | AK023766   | 691.609   |
| NM_004582 | 6520.22   | 9429.7    | AK000819  | 1568.287  | 2303.402  | NM_001897  | 755.161   |
| NM_015640 | 7668.41   | 11111.394 | AF201941  | 1363.334  | 1544.111  | AB033109   | 300.253   |
| AF233450  | 770.728   | 1124.151  | AF143325  | 631.594   | 442.523   | NM_002053  | 2908.053  |
| NM_016233 | 1571.432  | 1936.028  | AF026941  | 1614.722  | 1470.123  | NM_002438  | 560.078   |
| NM_000821 | 20976.117 | 19262.252 | NM_007070 | 6226.747  | 4202.335  | NM_002563  | 1197.746  |
| NM_020121 | 823.354   | 1132.247  | AL133019  | 3439.064  | 3031.372  | NM_000054  | 1080.818  |
| NM_003145 | 30787.887 | 40569.129 | AK026192  | 678.534   | 564.449   | NM_014713  | 2233.105  |
| NM_001632 | 1902.215  | 2353.37   | NM_014895 | 1892.412  | 2206.03   | NM_001812  | 856.837   |
| NM_012264 | 1270.684  | 1086.915  | AK024883  | 4868.237  | 3091.688  | NM_006033  | 4985.871  |
| AF311312  | 3166.193  | 2688.779  | AF217989  | 1608.652  | 1406.218  | NM_004837  | 3831.237  |
| NM_001179 | 407.431   | 667.054   | NM_017654 | 1359.368  | 839.521   | NM_000370  | 1740.155  |
| NM_005313 | 34586.438 | 44361.457 | L77561    | 681.471   | 273.856   | BE865893   | 3624.585  |

|           |           |           |           |           |           |            |           |
|-----------|-----------|-----------|-----------|-----------|-----------|------------|-----------|
| NM_017765 | 11515.249 | 10172.801 | AL109696  | 1442.81   | 990.639   | NM_003123  | 53018.273 |
| NM_000428 | 598.96    | 815.694   | AK022190  | 2052.592  | 1926.361  | AY005822   | 1283.051  |
| AB040967  | 6001.274  | 8704.965  | AJ011593  | 1903.761  | 1515.625  | NM_018129  | 13504.658 |
| NM_014721 | 2036.581  | 1831.387  | AJ227907  | 839.415   | 516.787   | AF289022   | 1047.102  |
| AL137705  | 6079.345  | 4700.799  | X89743    | 994.192   | 811.412   | NM_016025  | 763.524   |
| NM_007262 | 17124.076 | 16149.65  | U17621    | 1377.484  | 857.904   | NM_000746  | 998.752   |
| NM_014783 | 4272.42   | 6220.337  | AL049239  | 3633.113  | 3444.211  | NM_006030  | 421.847   |
| NM_014053 | 2553.516  | 2689.181  | NM_013286 | 2405.853  | 2833.483  | NM_020410  | 1003.664  |
| NM_002571 | 1170.977  | 793.523   | M60721    | 9778.416  | 11229.233 | NM_000453  | 780.368   |
| NM_004939 | 2655.789  | 4110.819  | L39061    | 2547.823  | 1985.005  | J03077     | 3035.363  |
| NM_001425 | 23126.041 | 20136.852 | AF071508  | 3477.585  | 3303.615  | J03048     | 1792.825  |
| NM_015710 | 674.861   | 939.475   | L07265    | 29070.113 | 33200.113 | NM_002868  | 706.51    |
| NM_014158 | 7311.179  | 5311.228  | D16472    | 8606.443  | 9826.961  | AK024100   | 990.002   |
| AK021591  | 1000.346  | 1517.695  | AF085823  | 648.785   | 997.394   | NM_005135  | 629.371   |
| NM_014675 | 1333.033  | 1196.666  | AK022467  | 518.308   | 676.367   | NM_000317  | 5913.521  |
| NM_006589 | 3304.489  | 5240.808  | AL157459  | 1244.708  | 943.924   | NM_018376  | 1696.896  |
| AB007875  | 1644.945  | 1289.075  | AB020654  | 208.034   | 390.214   | NM_017615  | 442.96    |
| NM_018261 | 1429.513  | 940.183   | AL353954  | 1190.23   | 900.402   | NM_017438  | 1188.573  |
| NM_014796 | 611.328   | 268.386   | NM_017630 | 1523.009  | 1499.407  | U59209     | 800.53    |
| AL050288  | 39588.352 | 32993.918 | AK000778  | 1775.982  | 1837.454  | NM_020195  | 2708.833  |
| D50911    | 12369.924 | 14639.292 | AK000932  | 652.438   | 727.959   | AK023824   | 2015.016  |
| AB011104  | 1905.529  | 2111.69   | AL133573  | 4470.482  | 4998.153  | AL133069   | 670.389   |
| NM_003248 | 785.81    | 1594.324  | AK000115  | 541.627   | 568.768   | AK024126   | 613.901   |
| NM_001078 | 2160.248  | 1732.525  | NM_017959 | 532.988   | 436.193   | NM_002744  | 585.534   |
| NM_000552 | 8802.668  | 7642.231  | AK000958  | 1941.686  | 2717.401  | NM_015917  | 959.549   |
| NM_003809 | 550.296   | 798.799   | AK024523  | 1068.358  | 1029.065  | NM_005109  | 1910.675  |
| AK000860  | 10703.267 | 6684.102  | AK024600  | 2101.096  | 2544.882  | NM_002730  | 598.317   |
| NM_014961 | 1088.11   | 916.798   | AK024543  | 2108.789  | 2046.966  | NM_004828  | 663.612   |
| NM_020145 | 2014.067  | 1698.982  | AK024624  | 19847.146 | 22587.031 | AB011540   | 12074.98  |
| AK021529  | 3672.497  | 3016.372  | AK025090  | 1806.805  | 2064.038  | NM_000040  | 3665.593  |
| AB037845  | 3411.086  | 3285.412  | NM_014152 | 819.776   | 581.764   | NM_004631  | 800.502   |
| NM_005980 | 1009.55   | 2863.576  | AF086473  | 814.826   | 215.329   | NM_003296  | 593.801   |
| NM_016190 | 39240.125 | 39323.336 | D87682    | 634.094   | 455.622   | NM_004736  | 1450.964  |
| AL137579  | 5757.527  | 6201.536  | AF321617  | 2791.837  | 3862.493  | NM_006895  | 932.261   |
| NM_012383 | 12910.199 | 5226.834  | AF086208  | 4204.916  | 4844.756  | D50373     | 749.726   |
| AJ271684  | 1551.302  | 966.385   | AK023335  | 6792.143  | 5234.46   | AA488757   | 8341.961  |
| AF255342  | 5083.859  | 4111.934  | AK023187  | 939.974   | 918.959   | AI394286   | 1410.139  |
| NM_003300 | 4567.001  | 4104.056  | AK022231  | 1515.543  | 1732.826  | M25322     | 1154.821  |
| AK026682  | 3764.574  | 2332.906  | NM_019033 | 1805.172  | 2790.82   | ID 1867426 | 1222.464  |
| NM_000368 | 1086.266  | 1148.749  | AL133101  | 1728.475  | 2534.72   | NM_022552  | 849.591   |
| NM_016586 | 1422.508  | 1185.96   | AK024602  | 34900.391 | 34911.559 | NM_014389  | 2222.134  |
| NM_002866 | 7320.825  | 6554.293  | NM_018507 | 586.77    | 596.839   | NM_001718  | 676.932   |
| NM_003860 | 1477.54   | 1318.258  | NM_000485 | 8466.984  | 9549.964  | AF116659   | 1365.712  |
| NM_005414 | 1490.128  | 1040.431  | NM_018542 | 1098.103  | 1037.312  | D79991     | 570.929   |
| NM_004468 | 7633.458  | 5894.202  | AK025503  | 2864.994  | 1697.522  | AK022425   | 356.083   |
| NM_016031 | 15136.262 | 14895.912 | AF130073  | 2210.078  | 1769.594  | NM_000054  | 2060.625  |
| NM_004804 | 1597.216  | 1534.366  | AK024225  | 16649.988 | 11429.354 | NM_001812  | 1200.769  |
| M92439    | 8253.424  | 10089.448 | AF086334  | 1559.201  | 1493.896  | NM_014785  | 462.398   |
| AL117665  | 3533.754  | 3962.395  | AL137602  | 669.322   | 871.957   | NM_005811  | 2725.543  |
| AF263541  | 753.417   | 2125.955  | AF075035  | 46795.133 | 42308.09  | NM_005764  | 865.336   |
| NM_001262 | 9936.471  | 7350.8    | AL110180  | 1245.77   | 1793.025  | NM_016362  | 472.804   |
| BE873030  | 2267.112  | 2313.882  | U00949    | 1309.681  | 1549.288  | NM_004214  | 722.625   |
| NM_002440 | 1011.888  | 957.515   | BC024924  | 4261.04   | 6526.55   | NM_016058  | 2451.754  |



|           |           |           |           |           |           |           |           |
|-----------|-----------|-----------|-----------|-----------|-----------|-----------|-----------|
| NM_003625 | 1021.148  | 1089.847  | NM_017906 | 7360.844  | 5886.409  | NM_004896 | 922.653   |
| BC006990  | 5875.154  | 4063.891  | AL110286  | 3761.8    | 4464.997  | NM_003976 | 566.537   |
| NM_019114 | 3143.369  | 3917.45   | AF086374  | 1366.62   | 1521.544  | NM_017688 | 261.366   |
| M33552    | 6309.822  | 5881.166  | AL162066  | 20538.391 | 26862.533 | AK025612  | 3126.713  |
| AJ252060  | 1564.293  | 2377.095  | NM_016096 | 18637.549 | 15626.996 | NM_012268 | 1343.112  |
| AJ001402  | 798.032   | 1271.693  | U79290    | 1493.8    | 1376.141  | NM_012203 | 415.447   |
| NM_004540 | 456.67    | 1091.216  | X98114    | 554.565   | 521.666   | AL157469  | 220.4     |
| NM_000235 | 7885.346  | 3450.164  | NM_014040 | 4521.484  | 6339.426  | NM_002868 | 991.253   |
| AF068236  | 21984.613 | 20811.242 | AK000799  | 4128.745  | 3106.779  | AK024100  | 1537.967  |
| L25628    | 5966.926  | 2908.915  | NM_015582 | 17248.777 | 14906.78  | NM_005135 | 1083.364  |
| M37033    | 6595.883  | 1920.858  | AK027091  | 3137.15   | 1179.865  | NM_003827 | 2882.377  |
| NM_007171 | 2476.502  | 2689.62   | NM_001526 | 1172.829  | 1526.002  | NM_004583 | 629.484   |
| NM_004278 | 1224.421  | 1461.377  | U31738    | 1529.088  | 560.22    | NM_001103 | 457.864   |
| NM_005632 | 1306.371  | 1309.142  | AF179890  | 4424.589  | 2377.281  | NM_018399 | 1131.504  |
| AK021499  | 1721.667  | 1407.252  | AK023536  | 5105.992  | 3698.8    | NM_001144 | 405.786   |
| AK000336  | 2999.194  | 2851.055  | AK026561  | 4011.571  | 4459.908  | AB033109  | 1001.407  |
| NM_002795 | 20997.611 | 14928.573 | AK021568  | 8779.343  | 7419.398  | NM_002053 | 4818.606  |
| NM_006292 | 3613.322  | 3754.67   | AF088054  | 511.802   | 714.209   | NM_006889 | 664.528   |
| AB007948  | 1726.119  | 1678.618  | AK023881  | 2495.034  | 2948.622  | NM_002438 | 788.754   |
| AB033066  | 1306.594  | 918.021   | AK027114  | 41043.707 | 44198.043 | NM_014589 | 632.404   |
| AF126028  | 2484.044  | 2258.487  | NM_016298 | 1072.925  | 786.022   | NM_000759 | 669.073   |
| NM_007019 | 4026.793  | 2871.161  | AK002146  | 1513.022  | 1918.822  | AK023334  | 601.545   |
| NM_007075 | 836.674   | 772.43    | NM_003159 | 2038.634  | 1575.739  | NM_002563 | 2660.488  |
| NM_017721 | 2684.555  | 2202.827  | AF086256  | 2871.812  | 6583.947  | NM_002437 | 559.908   |
| NM_019088 | 5342.673  | 8634.068  | NM_015492 | 7040.304  | 8883.907  | AK023573  | 845.881   |
| AB002373  | 1424.925  | 2064.897  | AF132204  | 4039.555  | 4875.14   | NM_002730 | 2040.412  |
| NM_005026 | 3625.779  | 4802.282  | AK022874  | 4038.621  | 4097.006  | NM_004828 | 1429.243  |
| AF213356  | 4058.39   | 2871.634  | CY3Cy5    | 6771.159  | 688.654   | AB011540  | 11848.975 |
| BC035716  | 2324.4    | 1628.961  | BI912037  | 1539.139  | 1936.435  | NM_000040 | 3622.587  |
| NM_018014 | 1927.983  | 800.013   | AA454646  | 1822.543  | 3632.228  | NM_004631 | 1241.902  |
| NM_002359 | 11663.319 | 11374.983 | U18087    | 43917.422 | 57685.617 | NM_006033 | 5324.624  |
| AF230809  | 1441.586  | 1824.424  | U66349    | 1208.839  | 1531.624  | NM_004837 | 4053.677  |
| NM_017894 | 34701.27  | 34884.141 | AA057156  | 1488.377  | 2625.06   | NM_000370 | 649.803   |
| NM_006509 | 1312.952  | 1544.822  | U19487    | 1219.612  | 3298.844  | NM_003123 | 42293.047 |
| AK025447  | 946.707   | 1320.136  | AF166327  | 12075.406 | 14166.576 | NM_018129 | 6528.181  |
| NM_002624 | 25548.215 | 28690.678 | AF260739  | 1672.785  | 1965.52   | AF289022  | 768.801   |
| AF006199  | 1946.299  | 1504.271  | AF531423  | 1933.727  | 1280.111  | AB002326  | 146.434   |
| NM_004554 | 4429.698  | 4868.938  | X76555    | 848.743   | 328.798   | NM_016025 | 933.354   |
| NM_018119 | 1281.918  | 2132.644  | NM_005432 | 1896.238  | 568.607   | NM_013319 | 902.432   |
| AL162035  | 1681.926  | 2507.407  | L10386    | 1625.444  | 926.823   | NM_000746 | 1046.729  |
| NM_006692 | 1840.752  | 1290.272  | AF061812  | 3323.362  | 2034.182  | NM_000722 | 442.269   |
| NM_003084 | 1251.987  | 1925.712  | AL136756  | 1156.718  | 1393.541  | NM_006030 | 482.054   |
| NM_002582 | 4670.021  | 5230.59   | NM_012469 | 3648.63   | 1830.242  | NM_020410 | 1284.734  |
| NM_002138 | 696.524   | 872.853   | NM_134260 | 10903.402 | 4959.576  | AF000143  | 5806.177  |
| NM_017748 | 3029.051  | 2851.082  | SR2       | 34233.75  | 17135.992 | NM_014211 | 249.933   |
| AK025374  | 1183.35   | 1197.901  | SR4       | 10499.536 | 6597.065  | NM_000814 | 1039.821  |
| NM_014901 | 5527.547  | 5906.829  | SR6       | 2669.059  | 1084.64   | NM_000453 | 1831.896  |
| AK000005  | 6536.333  | 7429.949  | SR8       | 4544.145  | 10322.495 | NM_022552 | 2330.841  |
| AF086790  | 902.653   | 1049.981  | SR10      | 17238.322 | 4080.241  | NM_014389 | 3730.862  |
| U28480    | 518.426   | 402.448   | CY3Cy5    | 2856.516  | 227.309   | AF116659  | 2232.747  |
| NM_000108 | 11418.558 | 10826.828 | AL080157  | 837.943   | 1814.055  | NM_000317 | 7540.551  |
| NM_018128 | 2071.052  | 2460.272  | NM_005308 | 1813.021  | 2971.117  | NM_018376 | 1659.041  |
| NM_016931 | 11239.775 | 8076.599  | NM_000911 | 361.533   | 918.096   | NM_017615 | 277.414   |

|           |           |           |           |           |           |             |          |
|-----------|-----------|-----------|-----------|-----------|-----------|-------------|----------|
| NM_004373 | 26441.791 | 25070.139 | NM_007227 | 535.154   | 1161.533  | NM_017438   | 455.239  |
| NM_005566 | 42350.219 | 50655.375 | NM_007023 | 639.512   | 1722.401  | BC002753    | 477.959  |
| NM_000162 | 2136.933  | 2023.589  | NM_005873 | 12575.885 | 20141.18  | AK023824    | 949.446  |
| AK027067  | 643.454   | 628.755   | NM_004624 | 2184.191  | 3976.434  | AL133069    | 757.778  |
| NM_016287 | 4958.751  | 4632.683  | NM_014461 | 410.748   | 561.645   | AK026055    | 1469.906 |
| AK021661  | 826.824   | 472.036   | NM_003865 | 1479.048  | 1711.505  | AK024126    | 362.785  |
| NM_003864 | 3854.79   | 3298.295  | AB015330  | 2670.612  | 2201.365  | NM_001516   | 847.763  |
| NM_006824 | 9845.465  | 13519.746 | NM_001455 | 2527.253  | 1618.537  | NM_002744   | 989.545  |
| NM_002107 | 723.685   | 848.831   | NM_003322 | 585.272   | 122.359   | NM_015917   | 1519.413 |
| NM_002694 | 9412.987  | 8632.331  | BC036375  | 9157.332  | 9016.451  | NM_020397   | 320.196  |
| NM_004454 | 2231.197  | 2739.091  | NM_006363 | 6858.526  | 11558.959 | NM_000061   | 1475.505 |
| NM_000966 | 691.924   | 496.65    | NM_020415 | 1135.325  | 2441.427  | AB046859    | 5400.329 |
| NM_012482 | 4167.029  | 4478.024  | NM_014879 | 342.281   | 857.231   | NM_005109   | 2810.639 |
| NM_002813 | 4923.818  | 4526.394  | AL049667  | 4030.329  | 8291.667  | NM_013372   | 170.351  |
| NM_001198 | 860.254   | 349.429   | NM_000334 | 1808.465  | 3212.171  | NM_003976   | 1561.517 |
| AK022745  | 1747.017  | 3123.085  | NM_020400 | 1110.584  | 1735.152  | NM_017688   | 462.612  |
| AL049450  | 4020.284  | 3763.1    | NM_001504 | 1469.405  | 2742.979  | AK025612    | 3611.552 |
| AK023481  | 700.758   | 869.91    | D50926    | 2737.006  | 3936.924  | NM_012268   | 1930.926 |
| NM_005086 | 24686.189 | 32253.475 | BF205683  | 2465.163  | 3102.135  | NM_012203   | 734.038  |
| NM_007238 | 2801.721  | 2101.943  | NM_000758 | 8677.275  | 3486.828  | NM_004736   | 1150.003 |
| NM_017606 | 1254.294  | 4748.855  | M17017    | 937.99    | 318.096   | NM_006895   | 812.221  |
| AK024644  | 6564.555  | 5921.581  | NM_002990 | 1326.191  | 574.457   | NM_006459   | 1195.028 |
| AB019573  | 844.984   | 891.463   | NM_002432 | 15542.294 | 7434.277  | AA488757    | 2863.026 |
| U68494    | 991.732   | 1465.88   | AB033037  | 986.714   | 436.143   | AI394286    | 780.318  |
| AF064254  | 1134.086  | 1165.168  | L40400    | 2383.594  | 1387.458  | M25322      | 1864.403 |
| AL137360  | 6375.42   | 5116.583  | AK025688  | 1526.134  | 761.497   | AA436187    | 513.856  |
| AF143331  | 589.783   | 951.504   | Z36819    | 19835.834 | 13361.314 | H-L 27586 I | 663.49   |
| AK000819  | 589.733   | 806.673   | NM_014448 | 2402.822  | 1483.835  | ID 1867426  | 3192.368 |
| AF201941  | 962.306   | 2108.408  | NM_004315 | 6274.896  | 11014.02  | W99328      | 328.236  |
| AF026941  | 1044.988  | 1199.081  | NM_020166 | 3663.806  | 6517.555  | H08563      | 494.569  |
| NM_007070 | 2678.669  | 3855.466  | AK023860  | 2258.466  | 4346.794  | BE735403    | 445.737  |
| AL133019  | 4786.343  | 5839.33   | NM_000031 | 1984.307  | 3903.639  | NM_002438   | 1439.897 |
| NM_014895 | 2241.068  | 1932.64   | NM_002085 | 36009.711 | 46917.754 | NM_014589   | 1128.037 |
| AK024883  | 3899.895  | 3324.851  | AK026061  | 569.955   | 1017.869  | NM_000759   | 1602.611 |
| AF217989  | 2023.025  | 1624.972  | NM_016286 | 6053.889  | 9490.248  | AK023334    | 1119.319 |
| NM_017654 | 1925.902  | 867.744   | NM_001567 | 2230.123  | 3884.146  | NM_002563   | 3575.12  |
| AL109696  | 1327.397  | 1528.519  | AF217971  | 3412.946  | 1763.9    | NM_002437   | 1007.65  |
| AK022190  | 1192.79   | 910.753   | NM_001925 | 10616.523 | 723.264   | D79991      | 426.132  |
| AJ011593  | 1376.84   | 1567.113  | AF245517  | 809.897   | 459.444   | AK022425    | 310.507  |
| AJ227907  | 512.846   | 579.592   | NM_004982 | 922.532   | 1528.602  | NM_000054   | 2207.033 |
| X89743    | 753.673   | 575.265   | AF286370  | 440.972   | 280.149   | NM_014713   | 1061.488 |
| U17621    | 1020.799  | 827.228   | AK026180  | 637.804   | 380.385   | NM_001812   | 457.46   |
| AL049239  | 2565.563  | 2685.111  | NM_013365 | 2187.097  | 1381.444  | NM_005811   | 990.309  |
| NM_013288 | 1723.7    | 1703.193  | NM_005817 | 14834.25  | 8366.233  | NM_005764   | 469.282  |
| M60721    | 12800.874 | 10471.717 | NM_003916 | 5844.168  | 4311.106  | NM_016362   | 326.539  |
| L39061    | 2564.572  | 2139.561  | NM_002870 | 19306.719 | 15096.181 | NM_004214   | 1847.79  |
| AF071508  | 2481.508  | 2383.703  | NM_001478 | 32406.336 | 50932.535 | NM_004329   | 5271.308 |
| L07265    | 14974.783 | 13342.261 | NM_002612 | 466.984   | 730.417   | NM_002836   | 1285.674 |
| L19369    | 865.703   | 465.649   | AF135422  | 2257.653  | 4643.263  | NM_020167   | 1461.04  |
| D16472    | 2464.584  | 3779.81   | NM_004479 | 13836.145 | 25410.742 | AL049963    | 1548.859 |
| AL157459  | 1025.06   | 1850.111  | AF070587  | 1511.168  | 1938.218  | NM_016058   | 6978.878 |
| AL353954  | 629.458   | 620.065   | BE250526  | 702.596   | 1461.265  | NM_014005   | 752.726  |
| NM_017630 | 864.391   | 1332.043  | NM_016819 | 2062.506  | 2470.181  | AK022603    | 1597.106 |

|           |           |           |           |           |           |           |           |
|-----------|-----------|-----------|-----------|-----------|-----------|-----------|-----------|
| AK000778  | 1003.646  | 857.321   | NM_005002 | 1262.692  | 694.788   | NM_004896 | 1440.47   |
| AK000932  | 560.434   | 588.463   | NM_006596 | 3457.379  | 1384.641  | NM_006030 | 1157.302  |
| AL133573  | 6004.969  | 5445.509  | AK023214  | 4729.623  | 2973.017  | NM_020410 | 3017.758  |
| NM_017959 | 909.487   | 915.336   | NM_001469 | 7611.857  | 3889.959  | AF000143  | 9595.562  |
| AK000958  | 856.45    | 1086.163  | NM_003600 | 3733.51   | 3002.2    | NM_014211 | 430.78    |
| AK024523  | 489.912   | 931.858   | NM_017490 | 2040.864  | 1915.034  | NM_000814 | 1209.059  |
| AK024600  | 1430.22   | 1738.002  | AK026727  | 1483.388  | 784.473   | NM_000453 | 2723.677  |
| AK025038  | 1206.08   | 2544.314  | NM_002830 | 569.251   | 188.67    | J03077    | 10511.847 |
| AK024543  | 1912.477  | 2185.5    | NM_006247 | 4799.115  | 1897.783  | J03048    | 5634.043  |
| AK024624  | 21162.172 | 17363.887 | AB032983  | 823.569   | 483.768   | AL157469  | 802.336   |
| AK025090  | 1286.508  | 966.845   | NM_018281 | 4664.489  | 3864.299  | NM_002868 | 309.567   |
| NM_014152 | 432.675   | 504.899   | NM_004457 | 3962.841  | 2881.465  | AK024100  | 873.382   |
| AF086473  | 793.607   | 944.14    | NM_014049 | 4092.764  | 1533.076  | NM_005135 | 366.462   |
| D87682    | 1022.439  | 1326.137  | BC036375  | 10526.417 | 25802.486 | NM_003827 | 1728.8    |
| AF321617  | 2447.232  | 3074.044  | BI912037  | 1453.47   | 1785.324  | AF228710  | 6798.115  |
| AF223389  | 726.14    | 912.341   | AA454646  | 1834.419  | 3232.648  | NM_018399 | 306.666   |
| AV710479  | 508.282   | 490.189   | U18087    | 39602.934 | 39973.777 | AY007131  | 15376.561 |
| NM_000682 | 420.281   | 677.546   | AA057156  | 1361.753  | 1020.283  | U61735    | 687.52    |
| AF086208  | 1583.629  | 2093.867  | U19487    | 1059.979  | 1481.571  | AK023766  | 799.187   |
| AK023335  | 3300.176  | 3093.517  | AF166327  | 10547.87  | 8499.334  | NM_001897 | 661.845   |
| AK023187  | 1270.363  | 881.732   | AF260739  | 1096.017  | 883.814   | NM_002053 | 7761.083  |
| AK022231  | 640.923   | 617.919   | AF531423  | 1925.615  | 1823.55   | NM_006889 | 738.33    |
| NM_019033 | 601.4     | 733.418   | X76555    | 729.045   | 630.829   | NM_002744 | 1948.685  |
| AL133101  | 968.599   | 856.346   | NM_005432 | 1981.609  | 1070.766  | NM_015917 | 4151.937  |
| AK024602  | 15466.671 | 14887.36  | L10386    | 1911.157  | 1654.946  | NM_020397 | 508.34    |
| NM_000485 | 7095.797  | 9583.968  | AF061812  | 4456.84   | 3478.819  | NM_000061 | 1849.299  |
| NM_018542 | 659.379   | 688.089   | AL136756  | 1030.902  | 813.741   | AB046859  | 5830.186  |
| AK025503  | 1496.594  | 1457.341  | NM_012469 | 4043.811  | 2516.605  | NM_005109 | 4059.656  |
| AF130073  | 1280.27   | 1638.431  | NM_134260 | 11003.149 | 6182.906  | AK023573  | 876.793   |
| AK024225  | 20277.139 | 19564.059 | AK025688  | 1470.377  | 1630.534  | NM_002730 | 2424.586  |
| AF086334  | 1035.596  | 1609.947  | Z36819    | 20895.641 | 24081.125 | NM_004828 | 1380      |
| AL137602  | 1118.05   | 1081.499  | NM_001195 | 492.625   | 462.01    | AB011540  | 8175.532  |
| AF075035  | 2308.227  | 2629.759  | NM_014448 | 3630.27   | 4383.568  | NM_000040 | 2394.058  |
| AL110180  | 2635.953  | 3219.793  | AL080157  | 1446.923  | 2275.472  | NM_004631 | 619.834   |
| BC024924  | 4723.104  | 8141.112  | NM_005100 | 1236.246  | 632.325   | NM_006033 | 3548.918  |
| AL110286  | 3638.887  | 4748.718  | NM_005308 | 1577.389  | 1509.519  | NM_000370 | 361.681   |
| AF086374  | 843.176   | 1328.699  | NM_007227 | 668.371   | 808.567   | BE865893  | 3093.106  |
| AL162066  | 9971.985  | 13220.392 | NM_007023 | 630.196   | 685.33    | NM_003123 | 52197.82  |
| NM_016096 | 13089.626 | 13588.146 | NM_005873 | 11023.968 | 9483.717  | AY005822  | 1100.374  |
| U79290    | 1557.541  | 1837.928  | NM_004624 | 1719.3    | 1762.444  | NM_018129 | 7310.915  |
| X98114    | 460.18    | 551.209   | NM_003865 | 1067.995  | 968.223   | AF289022  | 579.755   |
| NM_014040 | 4795.383  | 4397.756  | AB015330  | 2728.618  | 2562.2    | NM_016025 | 375.935   |
| AK000799  | 3495.305  | 4668.464  | NM_001455 | 2733.114  | 2453.025  | NM_013319 | 832.302   |
| NM_015582 | 14502.735 | 12683.951 | L09071    | 567.976   | 331.246   | NM_000746 | 1117.975  |
| AK027091  | 4220.994  | 2132.781  | NM_003322 | 655.283   | 604.394   | NM_000722 | 366.302   |
| NM_001526 | 1783.085  | 1654.27   | AK026180  | 1126.459  | 1814.413  | NM_018655 | 475.716   |
| U31738    | 1165.484  | 1251.469  | NM_003916 | 5177.003  | 4611.36   | NM_005663 | 578.973   |
| AF179890  | 5000.441  | 3799.723  | NM_002870 | 28149.691 | 23848.588 | X89960    | 423.498   |
| AK023536  | 4425.822  | 5198.154  | NM_006363 | 5975.946  | 4376.14   | NM_005773 | 1414.362  |
| AK026561  | 1395.369  | 2108.612  | NM_020415 | 1080.814  | 916.173   | NM_017644 | 2538.748  |
| AK021568  | 3463.135  | 4173.792  | AL049667  | 3350.905  | 2982.533  | NM_002482 | 537.739   |
| Z36838    | 379.478   | 1192.142  | NM_000334 | 1630.588  | 1381.781  | AF116659  | 2192.068  |
| AF043467  | 492.896   | 1400.912  | NM_020400 | 1164.73   | 812.45    | U59209    | 566.822   |

|           |           |           |           |           |           |           |           |
|-----------|-----------|-----------|-----------|-----------|-----------|-----------|-----------|
| AF088054  | 834.456   | 909.724   | NM_001504 | 1253.136  | 1027.613  | NM_020195 | 2300.493  |
| AK023881  | 1881.951  | 2758.931  | D50926    | 2331.511  | 1804.845  | AK023824  | 567.744   |
| AB007970  | 959.79    | 1278.822  | BF205683  | 2154.168  | 1856.689  | AL133069  | 347.247   |
| NM_003155 | 1349.026  | 1779.859  | NM_001548 | 727.937   | 111.424   | AK026055  | 1851.373  |
| AK023494  | 737.302   | 756.928   | NM_000758 | 10499.798 | 5574.2    | AK024126  | 621.647   |
| AF086256  | 1124.641  | 826.827   | M17017    | 944.169   | 617.682   | NM_001516 | 513.162   |
| NM_015492 | 7139.234  | 5538.95   | NM_002990 | 1563.939  | 657.311   | NM_019086 | 2123.155  |
| NM_006933 | 400.39    | 642.494   | NM_002432 | 17342.309 | 7759.363  | NM_006670 | 471.577   |
| AF132204  | 2068.607  | 1775.119  | AB033037  | 966.286   | 661.981   | NM_012425 | 1687.782  |
| AK022874  | 4371.036  | 3507.693  | L40400    | 2783.112  | 1942.949  | NM_005816 | 436.407   |
| CY3Cy5    | 9882.42   | 547.986   | NM_006247 | 4359.777  | 3066.881  | NM_002750 | 2621.288  |
| BI912037  | 2371.095  | 2227.35   | AB032983  | 968.676   | 978.079   | NM_000081 | 532.711   |
| AA454646  | 4284.534  | 4129.663  | NM_018281 | 5985.498  | 8816.551  | AK024134  | 3099.859  |
| U18087    | 40125.875 | 40970.156 | NM_004457 | 3569.543  | 4258.059  | NM_003014 | 1204.706  |
| U66349    | 1821.504  | 1429.892  | NM_014049 | 3802.062  | 1911.41   | NM_018558 | 619.691   |
| AA057156  | 5821.285  | 2142.19   | NM_005396 | 431.472   | 623.844   | NM_001566 | 270.617   |
| U19487    | 2152.951  | 3063.519  | NM_004315 | 6223.326  | 9632.909  | NM_013401 | 903.6     |
| AF166327  | 15808.681 | 19108.934 | NM_020166 | 4215.496  | 3757.417  | NM_018238 | 2800.43   |
| AF260739  | 1645.839  | 2164.645  | S56138    | 439.221   | 277.217   | NM_006858 | 2885.447  |
| AF531423  | 2805.377  | 3344.891  | AK023860  | 1925.135  | 1901.579  | NM_001405 | 5734.992  |
| X76555    | 1568.751  | 1581.918  | NM_000031 | 1805.121  | 1688.214  | NM_003880 | 746.17    |
| NM_005432 | 2593.316  | 2845.216  | NM_002085 | 26335.076 | 15715.916 | AF131778  | 1518.252  |
| L10386    | 6203.888  | 6384.419  | NM_016286 | 6380.847  | 5056.425  | NM_001562 | 3673.949  |
| AF061812  | 5714.208  | 7684.634  | NM_001567 | 2080.92   | 2275.535  | NM_013278 | 1379.257  |
| AL136756  | 2121.604  | 2260.626  | NM_004905 | 14965.765 | 9716.7    | NM_003487 | 1297.733  |
| NM_012469 | 7071.868  | 5703.801  | AF217971  | 3577.309  | 1505.257  | NM_006887 | 8340.422  |
| NM_134260 | 16556.025 | 11490.184 | NM_001925 | 12638.6   | 680.05    | NM_006477 | 1058.652  |
| SR6       | 3451.989  | 1806.589  | AF245517  | 694.679   | 497.953   | NM_002880 | 1224.735  |
| SR8       | 11300.793 | 22219.396 | NM_004982 | 674.367   | 456.607   | NM_000678 | 3974.463  |
| SR10      | 38541.438 | 8491.004  | NM_001694 | 63033.258 | 40694.523 | NM_001066 | 1745.077  |
| CY3Cy5    | 5538.396  | 312.169   | AF286370  | 593.739   | 419.879   | NM_004657 | 1196.544  |
| AL080157  | 1467.927  | 1323.464  | NM_000217 | 737.44    | 234.462   | NM_006291 | 5051.503  |
| NM_005308 | 2074.976  | 1765.908  | NM_012469 | 1570.138  | 1554.28   | NM_018170 | 1886.921  |
| NM_000911 | 543.373   | 859.646   | NM_134260 | 5413.198  | 3896.191  | NM_003867 | 1678.707  |
| NM_007227 | 1071.458  | 964.553   | NM_001478 | 35434.594 | 52939.008 | AB014541  | 6567.346  |
| NM_007023 | 899.377   | 1416.888  | AF135422  | 2576.779  | 2310.875  | NM_002583 | 1055.178  |
| NM_014461 | 536.087   | 820.013   | NM_004479 | 14033.138 | 14761.696 | NM_006570 | 8914.903  |
| NM_003865 | 1527.82   | 2424.034  | AF070587  | 1571.629  | 870.121   | NM_020348 | 685.883   |
| AB015330  | 7132.894  | 9255.492  | NM_016819 | 2007.109  | 1403.852  | NM_006034 | 6861.419  |
| NM_001455 | 5069.154  | 5885.795  | NM_012222 | 2084.698  | 2648.111  | X56807    | 2082.048  |
| L09071    | 1125.297  | 708.536   | NM_005002 | 1580.639  | 896.708   | NM_000092 | 1547.455  |
| NM_003322 | 1096.39   | 587.822   | NM_006596 | 3633.303  | 1777.304  | AF174600  | 2194.355  |
| BC036375  | 11666.335 | 13481.314 | AK023214  | 4478.167  | 2264.623  | AK001003  | 402.067   |
| NM_006363 | 6270.655  | 6993.587  | NM_001469 | 8899.62   | 3959.621  | NM_002800 | 19124.275 |
| NM_020415 | 1515.769  | 1403.414  | NM_003600 | 4149.049  | 2565.953  | NM_018384 | 6719.518  |
| NM_014879 | 733.019   | 416.169   | NM_017490 | 2059.454  | 2006.607  | NM_001872 | 404.817   |
| AL049667  | 8660.645  | 5629.254  | NM_002718 | 1168.029  | 752.262   | AF282617  | 1044.235  |
| NM_000334 | 1814.2    | 2335.593  | AK026727  | 1919.281  | 1231.46   | AF157323  | 2366.398  |
| NM_020400 | 1441.379  | 1073.819  | NM_002830 | 492.144   | 242.413   | NM_006025 | 309.862   |
| NM_001504 | 2287.197  | 1495.354  | L09071    | 472.729   | 769.319   | NM_005877 | 3517.119  |
| D50926    | 3875.986  | 3443.564  | BC036375  | 9252.175  | 21492.41  | NM_017752 | 800.754   |
| BF205683  | 2867.589  | 2661.079  | BI912037  | 1220.497  | 1259.207  | D26069    | 4427.678  |
| NM_001565 | 307.697   | 611.989   | AA454646  | 1706.063  | 1988.715  | BF107577  | 10416.355 |

|           |           |           |           |           |           |           |           |
|-----------|-----------|-----------|-----------|-----------|-----------|-----------|-----------|
| NM_001548 | 1622.78   | 1850.938  | AF166327  | 6742.805  | 4575.388  | NM_005837 | 3270.076  |
| NM_000758 | 30316.443 | 18905.492 | AF260739  | 1342.117  | 706.874   | NM_016625 | 2612.441  |
| M17017    | 1997.097  | 1336.95   | AF531423  | 2002.06   | 1230.661  | AK025934  | 647.518   |
| AB033037  | 1023.783  | 768.915   | X76555    | 778.812   | 525.405   | AJ008154  | 626.286   |
| L40400    | 2706.241  | 2351.421  | NM_005432 | 1573.57   | 820.157   | NM_006856 | 1898.771  |
| AK025688  | 1578.524  | 1420.521  | L10386    | 2110.189  | 2424.817  | X52350    | 53278.789 |
| Z36819    | 22438.924 | 22728.736 | AF061812  | 3401.321  | 3035.823  | AF071554  | 718.935   |
| NM_001195 | 517.517   | 526.949   | NM_002990 | 1474.729  | 1033.403  | U90919    | 985.314   |
| NM_014448 | 3824.366  | 1816.956  | NM_002432 | 19986.496 | 11437.232 | NM_006177 | 666.101   |
| NM_004315 | 13395.275 | 12034.326 | Z36819    | 13218.045 | 18108.861 | AL137286  | 3671.064  |
| NM_020166 | 4788.071  | 5273.836  | NM_014448 | 1551.801  | 1203.822  | NM_016358 | 9154.327  |
| S56138    | 297.463   | 556.686   | NM_000911 | 391.242   | 425.013   | AK025762  | 241.788   |
| AK023860  | 2155.502  | 2073.566  | NM_007023 | 647.057   | 878.876   | NM_016275 | 3628.312  |
| NM_000031 | 3208.351  | 3313.946  | NM_005873 | 10616.321 | 5932.637  | NM_000986 | 64533.109 |
| NM_016286 | 6645.607  | 9057.976  | NM_004624 | 1811.701  | 1404.962  | AK026760  | 13518.652 |
| NM_001567 | 3364.73   | 4283.953  | NM_003865 | 1109.987  | 804.584   | NM_014772 | 742.568   |
| NM_004905 | 10554.259 | 15512.522 | AB015330  | 1718.023  | 1151.448  | AK025248  | 757.732   |
| AF217971  | 3803.071  | 3570.478  | NM_001455 | 3494.516  | 2872.36   | NM_004280 | 3888.236  |
| NM_001925 | 3381.602  | 2669.552  | NM_001694 | 41621.215 | 43850.98  | AF110399  | 805.988   |
| AF245517  | 1331.906  | 2030.552  | AF286370  | 1087.19   | 1973.008  | AK027094  | 671.24    |
| NM_004982 | 956.38    | 1023.757  | NM_013365 | 1355.378  | 2037.912  | AL359596  | 515.077   |
| AF286370  | 826.548   | 539.979   | NM_005817 | 8566.577  | 8732.97   | U79249    | 710.145   |
| NM_000217 | 681.677   | 614.874   | NM_003916 | 5222.604  | 6579.458  | AK022114  | 333.139   |
| AK026180  | 883.57    | 785.95    | NM_002870 | 29331.484 | 28487.76  | AL133585  | 392.348   |
| NM_013365 | 3181.236  | 2716.522  | NM_006363 | 5489.369  | 3603.493  | NM_002631 | 2852.893  |
| NM_005817 | 17126.748 | 11227.681 | NM_020415 | 1208.333  | 1037.418  | NM_000775 | 306.169   |
| NM_003916 | 15140.797 | 5867.003  | AL049667  | 3860.102  | 3573.034  | BF217864  | 7411.026  |
| NM_002870 | 38877.977 | 23444.922 | NM_000334 | 1141.332  | 1438.911  | NM_005917 | 2557.876  |
| NM_001478 | 30455.586 | 34204.246 | NM_020400 | 1094.237  | 481.83    | NM_007052 | 861.128   |
| NM_002612 | 655.767   | 430.695   | D50926    | 2643.193  | 1831.85   | BC017044  | 596.934   |
| AF135422  | 2638.478  | 3006.16   | BF205683  | 1973.217  | 1143.941  | AB002299  | 130.217   |
| NM_004479 | 15174.207 | 16759.605 | NM_001548 | 707.488   | 121.281   | AK024113  | 267.371   |
| AF070587  | 2434.913  | 2070.011  | NM_000758 | 11383.494 | 8008.318  | L40410    | 3151.35   |
| BE250526  | 947.321   | 913.43    | NM_003600 | 4336.402  | 5184.452  | NM_007055 | 738.024   |
| NM_016819 | 2663.401  | 2756.972  | NM_017490 | 2039.83   | 2314.631  | NM_016652 | 396.202   |
| NM_012222 | 2319.029  | 3701.735  | NM_002718 | 1524.109  | 1467.795  | NM_016310 | 1635.087  |
| NM_005002 | 1645.455  | 3396.243  | AK026727  | 1759.467  | 2355.409  | AK021562  | 635.056   |
| NM_006596 | 3541.696  | 8022.65   | NM_002830 | 455.664   | 525.867   | BC006560  | 519.153   |
| AK023214  | 6346.739  | 8961.421  | NM_006247 | 3059.62   | 4294.8    | NM_006298 | 283.062   |
| NM_001469 | 9046.975  | 16265.554 | NM_018281 | 7193.59   | 15004.878 | AF060938  | 19166.186 |
| NM_003600 | 5655.098  | 6439.214  | NM_004457 | 2713.467  | 3477.039  | NM_001973 | 2193.913  |
| NM_017490 | 3905.781  | 3841.786  | NM_014049 | 2881.343  | 1904.529  | NM_014468 | 742.083   |
| AK026727  | 1831.632  | 1524.985  | NM_005396 | 702.112   | 967.724   | AL050015  | 1008.02   |
| NM_002830 | 719.993   | 472.601   | NM_004315 | 6535.438  | 7383.379  | AY007117  | 2405.156  |
| NM_006247 | 4650.578  | 3993.096  | NM_020166 | 3298.729  | 3037.258  | AF039698  | 1005.496  |
| AB032983  | 860.262   | 649.184   | AK023860  | 1542.196  | 2981.358  | AB046828  | 1593.114  |
| NM_018281 | 9879.087  | 8163.173  | NM_000031 | 1209.798  | 1791.832  | AF144487  | 624.814   |
| NM_004457 | 4743.975  | 3577.331  | NM_002085 | 27889.879 | 20626.24  | AL137532  | 3616.75   |
| NM_014049 | 4011.197  | 2208.412  | NM_016286 | 6407.397  | 4451.179  | AK025419  | 999.965   |
| NM_005396 | 793.638   | 289.737   | NM_004905 | 15624.242 | 9425.046  | NM_013259 | 1413.826  |
| BC036375  | 11430.336 | 18315.695 | AF217971  | 2252.76   | 951.467   | NM_004913 | 1696.806  |
| BI912037  | 2084.597  | 2298.913  | NM_001925 | 12082.326 | 949.851   | AK026838  | 1675.17   |
| AA454646  | 4821.052  | 5474.014  | X78926    | 13318.591 | 6258.814  | AK022443  | 459.688   |

|           |           |           |           |           |           |           |           |
|-----------|-----------|-----------|-----------|-----------|-----------|-----------|-----------|
| U18087    | 40291.801 | 46135.078 | AJ278110  | 1139.207  | 1014.949  | AK023371  | 1942.413  |
| U66349    | 2276.505  | 2124.127  | NM_014237 | 2562.289  | 3399.871  | AK025015  | 1648.128  |
| AA057156  | 5744.906  | 3475.362  | NM_020396 | 811.747   | 1071.004  | AF086187  | 534.078   |
| U19487    | 2974.36   | 4860.396  | AF029900  | 3178.384  | 3400.936  | AF305836  | 35093.332 |
| AF166327  | 16818.309 | 25286.229 | NM_003325 | 3187.02   | 5756.591  | AL109784  | 506.345   |
| AF531423  | 2616.393  | 3410.155  | NM_016178 | 4042.857  | 3952.396  | AL137383  | 240.212   |
| X76555    | 1524.281  | 1225.798  | D31766    | 1607.382  | 3830.163  | AL035295  | 1227.101  |
| NM_005432 | 2834.046  | 2671.177  | NM_001478 | 30877.186 | 33526.098 | NM_018302 | 1371.422  |
| L10386    | 5734.97   | 4936.475  | AF135422  | 1835.8    | 2543.291  | AK027252  | 4433.26   |
| AF061812  | 6113.171  | 5503.43   | NM_004479 | 7556.986  | 11832.007 | AF165527  | 2087.063  |
| AL136756  | 2674.069  | 1883.31   | BE250526  | 760.621   | 504.117   | AL110133  | 9480.472  |
| NM_012469 | 8258.786  | 6909.364  | NM_016819 | 2106.904  | 1318.293  | AL050053  | 378.102   |
| NM_134260 | 16632.766 | 12907.529 | NM_012222 | 1659.562  | 3210.826  | AK000529  | 1094.478  |
| AK025688  | 1595.571  | 1789.758  | NM_005002 | 1069.419  | 946.516   | AK027243  | 456.719   |
| Z36819    | 22898.121 | 30352.459 | NM_006596 | 2924.597  | 1739.26   | AL110176  | 29.36     |
| NM_001195 | 409.251   | 652.282   | AK023214  | 4512.771  | 3280.177  | AF147415  | 1264.428  |
| NM_014448 | 4375.534  | 3523.541  | NM_001469 | 7295.885  | 4603.359  | AL049273  | 249.085   |
| AL080157  | 2479.527  | 3640.422  | NM_001851 | 3500.192  | 1718.34   | NM_017535 | 7271.944  |
| NM_005100 | 632.634   | 1533.963  | S67789    | 774.854   | 663.908   | NM_003887 | 1036.908  |
| NM_005308 | 2226.369  | 2274.249  | AK022689  | 1726.474  | 1764.558  | NM_004267 | 6402.819  |
| NM_000911 | 535.851   | 1215.864  | NM_016227 | 358.258   | 710.086   | AK026687  | 1132.627  |
| NM_007227 | 860.253   | 1796.556  | NM_004195 | 8029.063  | 14547.4   | AL117444  | 668.292   |
| NM_007023 | 1189.267  | 2422.071  | NM_004705 | 836.728   | 1866.284  | NM_017994 | 3639.708  |
| NM_014461 | 990.146   | 1293.198  | AK024003  | 621.314   | 1110.807  | AK021693  | 1095.404  |
| NM_003865 | 1431.697  | 1636.49   | NM_014357 | 1060.875  | 1398.354  | AB023177  | 2380.22   |
| AB015330  | 7480.999  | 8401.522  | NM_000121 | 5205.747  | 6035.949  | Y11609    | 2452.243  |
| NM_001455 | 4938.521  | 4528.853  | NM_002091 | 3645.046  | 4281.992  | NM_012122 | 4150.308  |
| L09071    | 1480.216  | 954.525   | AB033092  | 2063.095  | 2914.12   | AF009285  | 9941.98   |
| NM_003322 | 1090.439  | 653.128   | NM_003023 | 885.652   | 2236.344  | NM_012125 | 4545.307  |
| AK026180  | 917.218   | 991.497   | BC035030  | 2780.507  | 4791.121  | AB032363  | 577.739   |
| NM_013365 | 3331.738  | 3543.652  | NM_005340 | 13707.835 | 8539.252  | AF009294  | 1388.082  |
| NM_005817 | 16804.299 | 16560.908 | NM_016201 | 726.734   | 885.079   | AK021435  | 661.026   |
| NM_003916 | 13183.858 | 8435.467  | NM_000864 | 3791.86   | 2619.436  | AK001060  | 820.371   |
| NM_002870 | 46588.887 | 48037.445 | NM_017977 | 1994.854  | 1434.292  | AK021480  | 533.827   |
| NM_006363 | 6136.307  | 9105.821  | NM_006751 | 1920.875  | 1745.479  | AK025112  | 2029.725  |
| NM_020415 | 1572.804  | 1829.055  | AB037834  | 14465.046 | 5130.553  | AK025297  | 276.676   |
| NM_014879 | 732.173   | 555.326   | NM_003569 | 732.736   | 441.349   | AK026079  | 499.013   |
| AL049667  | 8565.963  | 6419.196  | NM_014052 | 21675.615 | 14483.699 | AK025173  | 5354.326  |
| NM_000334 | 1855.803  | 2536.989  | NM_002777 | 55114.531 | 46237.496 | AK025430  | 709.879   |
| NM_001504 | 1987.52   | 2170.725  | AF202635  | 1843.539  | 1729.425  | AF117338  | 3443.039  |
| D50926    | 4216.522  | 5902.125  | NM_014125 | 593.539   | 622.126   | AK025567  | 1932.283  |
| BF205683  | 2994.287  | 3079.135  | NM_017904 | 892.111   | 1056.001  | NM_019102 | 558.308   |
| NM_001565 | 578.394   | 450.803   | NM_013367 | 2406.197  | 1408.461  | U56857    | 3298.31   |
| NM_001548 | 1218.635  | 418.308   | NM_000321 | 5729.063  | 5169.833  | BE905682  | 291.469   |
| NM_000758 | 29377.959 | 10698.529 | NM_006341 | 4434.246  | 4825.93   | AF086421  | 12620.415 |
| M17017    | 1752.926  | 975.206   | NM_001709 | 2216.209  | 1552.735  | AF161522  | 1148.534  |
| NM_002990 | 3194.575  | 1557.763  | NM_006191 | 2191.49   | 1581.246  | AF086028  | 4865.856  |
| NM_002432 | 16485.844 | 10209.604 | NM_001800 | 2982.184  | 699.912   | U46119    | 822.286   |
| AB033037  | 1421.153  | 991.561   | NM_004336 | 2869.745  | 2787.028  | AK023445  | 379.923   |
| L40400    | 2837.574  | 2337.609  | NM_015949 | 1653.591  | 3637.145  | AK023489  | 386.087   |
| NM_006247 | 4365.5    | 4566.425  | NM_013979 | 2142.841  | 4929.977  | AK021561  | 3551.22   |
| AB032983  | 934.229   | 944.256   | NM_003790 | 2164.805  | 4038.76   | AK025222  | 264.892   |
| NM_018281 | 10936.612 | 12505.587 | NM_000494 | 1249.239  | 1391.572  | NM_003531 | 1248.459  |

|           |           |           |           |           |           |           |           |
|-----------|-----------|-----------|-----------|-----------|-----------|-----------|-----------|
| NM_004457 | 5121.657  | 5358.259  | NM_003722 | 8084.318  | 7731.813  | NM_017799 | 693.789   |
| NM_014049 | 3773.173  | 2905.701  | NM_014430 | 670.843   | 227.989   | NM_003510 | 749.73    |
| NM_005396 | 597.663   | 1059.874  | AF085883  | 1683.636  | 687.39    | NM_003538 | 658.072   |
| AK023860  | 2421.094  | 2659.519  | NM_016571 | 1382.198  | 1572.793  | AL137403  | 1507.923  |
| NM_000031 | 2926.205  | 3772.663  | NM_016446 | 2721.737  | 1951.984  | AL049348  | 230.397   |
| NM_002085 | 46247.516 | 53574.18  | NM_002516 | 526.547   | 932.484   | NM_018534 | 1013.075  |
| AK026061  | 1463.643  | 1474.667  | NM_001870 | 386.081   | 576.119   | NM_005170 | 626.363   |
| NM_016286 | 6282.431  | 10890.432 | U23028    | 2191.465  | 2292.475  | S96437    | 1049.97   |
| NM_001567 | 3721.991  | 5742.355  | NM_000817 | 7086.544  | 6907.965  | NM_015176 | 1104.323  |
| NM_004905 | 11415.675 | 19360.008 | AF113132  | 2208.761  | 6768.018  | AL353939  | 968.888   |
| AF217971  | 4085.894  | 2986.22   | NM_006571 | 2195.266  | 2808.826  | AL117573  | 2050.596  |
| NM_001925 | 2418.09   | 1004.885  | NM_001875 | 245.184   | 523.819   | NM_001646 | 6049.886  |
| AF245517  | 1062.67   | 1009.285  | AK022680  | 701.29    | 1017.83   | AL137327  | 534.951   |
| NM_004982 | 1202.717  | 904.703   | NM_018946 | 3436.961  | 10593.961 | AF358454  | 1174.603  |
| AF286370  | 837.076   | 735.002   | NM_016359 | 10118.762 | 8247.841  | AL137634  | 900.937   |
| NM_000217 | 758.681   | 606.791   | NM_004156 | 3588.816  | 2600.078  | AK024863  | 1127.494  |
| NM_012469 | 8003.325  | 7613.841  | AB051449  | 8801.403  | 10571.653 | AJ008135  | 47868.379 |
| NM_134260 | 17211.877 | 15509.396 | BC009187  | 11528.375 | 6429.042  | AK026908  | 3454.881  |
| NM_002612 | 662.901   | 722.417   | AL133617  | 1280.326  | 538.847   | AL050068  | 600.283   |
| NM_004479 | 16638.871 | 17070.527 | NM_016485 | 4933.071  | 3236.112  | AF009323  | 282.481   |
| NM_002610 | 375.398   | 1125.863  | NM_002615 | 8941.378  | 7740.667  | U52829    | 362.293   |
| BE250526  | 840.137   | 1092.716  | AF090894  | 716.712   | 400.013   | AK001526  | 2476.084  |
| NM_016819 | 2566.509  | 3062.458  | NM_016357 | 4529.038  | 3876.749  | AF086183  | 494.028   |
| NM_012222 | 2210.674  | 3186.748  | NM_014500 | 9022.464  | 12118.954 | AK000525  | 536.036   |
| NM_005002 | 1590.447  | 1922.871  | AK023792  | 415.122   | 558.199   | AL137434  | 691.187   |
| NM_006596 | 2668.361  | 3023.238  | NM_020149 | 2559.316  | 2644.293  | Z36795    | 1092.3    |
| AK023214  | 5812.75   | 4470.521  | NM_006237 | 1028.451  | 1599.754  | U55186    | 264.439   |
| NM_001469 | 8380.23   | 9331.346  | NM_001271 | 3731.615  | 4024.875  | AL080216  | 770.842   |
| NM_003600 | 6357.587  | 5250.117  | NM_003683 | 1750.861  | 2801.725  | D17046    | 1560.391  |
| NM_017490 | 4376.732  | 3164.761  | AF039019  | 3921.545  | 2951.758  | NM_017645 | 2920.783  |
| AK026727  | 1885.98   | 1738.61   | NM_012255 | 5677.806  | 6972.789  | AF157562  | 2047.802  |
| NM_002830 | 687.873   | 307.469   | NM_018196 | 944.692   | 1086.502  | AK021958  | 1956.369  |
| L09071    | 1435.993  | 1012.541  | NM_004818 | 4103.818  | 2275.201  | AF113674  | 1457.924  |
| NM_003322 | 947.328   | 1207.236  | J04205    | 4644.424  | 5173.993  | NM_003511 | 323.968   |
| BC036375  | 12207.048 | 30323.174 | D38491    | 2753.894  | 1829.746  | CY3Cy5    | 5304.298  |
| BI912037  | 2350.83   | 2864.218  | AK026835  | 1202.763  | 1895.594  | H97792    | 776.205   |
| U18087    | 40239.695 | 42913.898 | NM_002819 | 6354.767  | 8505.89   | M13509    | 2192.1    |
| U66349    | 1900.531  | 1463.529  | NM_013264 | 3512.673  | 2145.362  | X04076    | 488.816   |
| AA057156  | 5804.67   | 2923.51   | NM_003315 | 9674.163  | 6063.357  | AA485362  | 1891.622  |
| U19487    | 2065.15   | 2428.097  | NM_005570 | 3988.645  | 5063.954  | AJ222801  | 961.439   |
| AF166327  | 16789.338 | 15667.912 | NM_000086 | 4691.745  | 2349.03   | W72207    | 3374.554  |
| AF260739  | 2414.955  | 1961.111  | NM_003752 | 2788.68   | 1547.111  | AI690184  | 10212.309 |
| AF531423  | 2446.418  | 2662.058  | NM_003932 | 6668.578  | 5055.325  | AA927490  | 1075.321  |
| X76555    | 1441.798  | 933.916   | NM_016491 | 12367.478 | 8786.094  | NM_001824 | 43341.18  |
| NM_005432 | 2772.304  | 2074.643  | NM_006429 | 12837.983 | 11179.984 | NM_002964 | 7470.905  |
| L10386    | 6306.335  | 5292.476  | NM_003307 | 9866.295  | 7068.022  | SR5       | 3971.651  |
| AF061812  | 4111.613  | 4165.035  | AF070565  | 1128.87   | 1387.206  | SR7       | 5728.904  |
| AL136756  | 2552.159  | 1850.935  | AK021644  | 1380.029  | 1240.537  | SR9       | 20600.225 |
| NM_002990 | 3326.337  | 1957.592  | NM_015944 | 453.52    | 1114.478  | CY3Cy5    | 5278.134  |
| NM_002432 | 15848.075 | 12585.761 | NM_002064 | 1225.172  | 1365.05   | AF028823  | 2204.899  |
| AB033037  | 1077.614  | 1200.103  | NM_015523 | 2530.897  | 3612.953  | NM_004295 | 2505.74   |
| L40400    | 2644.813  | 3891.258  | NM_015960 | 2467.554  | 4320.375  | NM_002087 | 836.429   |
| AK025688  | 1667.616  | 2136.159  | NM_006085 | 1111.096  | 1047.548  | M60499    | 532.393   |

|           |           |           |           |           |           |           |           |
|-----------|-----------|-----------|-----------|-----------|-----------|-----------|-----------|
| NM_001195 | 655.976   | 1380.802  | NM_000907 | 2759.813  | 2122.344  | NM_003833 | 11685.501 |
| NM_014448 | 4956.985  | 4954.575  | AF254085  | 2291.754  | 2131.792  | AK000868  | 1964.312  |
| AL080157  | 1986.766  | 1954.338  | NM_001987 | 1653.689  | 2789.215  | NM_001233 | 1591.724  |
| NM_005308 | 2066.909  | 1998.168  | AF244088  | 2026.789  | 2624.622  | NM_001234 | 2071.162  |
| NM_000911 | 489.157   | 750.997   | NM_007136 | 1201.678  | 947.671   | BF679789  | 2291.238  |
| NM_007227 | 815.232   | 1123.208  | AK025434  | 1056.06   | 505.216   | NM_001127 | 800.465   |
| NM_007023 | 843.588   | 1294.072  | AK000569  | 2009.086  | 1922.364  | NM_003917 | 4697.086  |
| NM_005873 | 16545.615 | 10686.154 | NM_006049 | 1877.628  | 861.249   | NM_006750 | 1710.86   |
| NM_004624 | 2373.168  | 2545.642  | NM_017661 | 604.301   | 859.463   | NM_020164 | 387.297   |
| NM_014461 | 706       | 492.324   | BC016698  | 6820.54   | 4906.037  | NM_014267 | 345.523   |
| NM_003865 | 1188.458  | 1088.471  | AK027185  | 1306.265  | 1092.446  | NM_020469 | 650.879   |
| AB015330  | 7342.259  | 6367.239  | AK025576  | 1527.469  | 1702.182  | NM_014734 | 1207.566  |
| NM_001455 | 4600.787  | 4363.951  | AF147385  | 310.231   | 750.591   | NM_002289 | 405.255   |
| NM_004982 | 1027.45   | 1114.537  | AL442086  | 3014.241  | 3637.994  | AK026408  | 1450.782  |
| NM_001694 | 65563.891 | 54541.828 | AK026784  | 449.722   | 557.946   | NM_005025 | 539.866   |
| AF286370  | 885.692   | 1251.696  | BC034819  | 3573.737  | 3933.186  | M74782    | 829.422   |
| NM_000217 | 795.108   | 902.039   | AF147313  | 11961.19  | 18882.799 | AY026461  | 2053.697  |
| AK026180  | 1100.414  | 1410.515  | AF147382  | 18813.123 | 30622.066 | AK025708  | 975.54    |
| NM_005817 | 16466.268 | 17356.752 | AK001957  | 4172.325  | 3868.521  | NM_000405 | 768.731   |
| NM_003916 | 14169.123 | 9708.687  | AK021833  | 2191.683  | 1574.216  | NM_005564 | 24150.643 |
| NM_002870 | 48642.402 | 53668.352 | AF143867  | 531.655   | 549.618   | NM_004508 | 656.992   |
| NM_006363 | 6467.901  | 6925.482  | AK025889  | 4419.688  | 4083.508  | NM_006405 | 1787.518  |
| NM_020415 | 1324.657  | 1421.119  | NM_014715 | 607.202   | 1093.157  | AL137619  | 1139.27   |
| AL049667  | 9082.075  | 5221.635  | AF086448  | 4001.567  | 1513.111  | NM_004300 | 1421.172  |
| NM_000334 | 1975.292  | 2367.709  | AF086386  | 1094.066  | 789.802   | AK001913  | 512.108   |
| NM_020400 | 1411.005  | 853.699   | AF086413  | 560.238   | 190.637   | NM_004292 | 677.635   |
| NM_001504 | 1886.476  | 1340.878  | AF086457  | 1132.579  | 682.903   | NM_015484 | 2382.061  |
| D50926    | 3771.463  | 2821.91   | AK025469  | 1049.836  | 519.867   | NM_018046 | 465.956   |
| BF205683  | 3048.443  | 1791.876  | NM_020239 | 10270.239 | 7848.771  | NM_013316 | 1389.272  |
| NM_001565 | 723.543   | 223.762   | AF070581  | 960.678   | 936.037   | M20701    | 2155.17   |
| NM_001548 | 1234.717  | 417.625   | AK024187  | 677.835   | 331.876   | NM_013284 | 461.783   |
| NM_000758 | 30452.443 | 10836.791 | AF075079  | 469.05    | 561.242   | NM_012387 | 1529.097  |
| M17017    | 1778.49   | 929.552   | AK022479  | 1011.121  | 1201.828  | NM_014735 | 646.447   |
| NM_003600 | 7561.925  | 6806.212  | AK023572  | 773.457   | 957.489   | NM_004252 | 2176.017  |
| NM_017490 | 4565.903  | 4010.309  | AF086004  | 10085.837 | 16931.381 | AF172929  | 3040.456  |
| NM_002718 | 2082.052  | 1890.546  | AF147433  | 707.678   | 998.007   | NM_006398 | 2874.076  |
| AK026727  | 2618.409  | 2672.546  | AF086006  | 530.949   | 801.09    | AK025655  | 1001.543  |
| NM_002830 | 644.027   | 693.718   | AL137318  | 1256.894  | 1216.234  | NM_003833 | 7501.465  |
| NM_006247 | 5414.887  | 8122.387  | AL137482  | 866.938   | 924.507   | AK000868  | 609.179   |
| AB032983  | 907.077   | 1019.669  | AL162011  | 18668.523 | 16687.018 | NM_001234 | 3144.013  |
| NM_018281 | 11623.014 | 15582.001 | AL390177  | 629.634   | 1125.188  | BF679789  | 1993.681  |
| NM_005396 | 789.08    | 933.837   | AL137678  | 416.159   | 605.059   | H97792    | 1016.442  |
| NM_004315 | 13568.281 | 13148.761 | AK056111  | 1033.767  | 1095.057  | L33404    | 398.89    |
| NM_020166 | 5015.905  | 6594.017  | AL162055  | 281.445   | 503.635   | M13509    | 2134.336  |
| S56138    | 573.568   | 622.238   | Y13807    | 1998.378  | 1835.929  | X04076    | 1059.387  |
| AK023860  | 2460.014  | 2241.484  | AF086074  | 1996.022  | 1454.258  | AA485362  | 1952.801  |
| NM_000031 | 3019.408  | 3092.47   | AK023964  | 2871.819  | 1513.766  | AJ222801  | 675.664   |
| NM_002085 | 45101.785 | 34308.766 | AK027112  | 4236.935  | 6276.759  | W72207    | 2090.2    |
| AK026061  | 659.223   | 490.059   | AL049314  | 1778.341  | 2803.083  | AI690184  | 10039.557 |
| NM_016286 | 6428.658  | 7388.055  | AF093016  | 8348.396  | 14003.952 | AA927490  | 1700.248  |
| NM_001567 | 3467.494  | 3513.393  | AF161345  | 2289.479  | 2717.65   | NM_001824 | 57235.801 |
| NM_004905 | 10354.967 | 12020.701 | -         | 840.737   | 1247.768  | NM_002964 | 25276.852 |
| AF217971  | 4149.248  | 2546.076  | AF090925  | 1047.762  | 1147.663  | NM_005052 | 2322.287  |



|           |           |           |           |           |           |           |           |
|-----------|-----------|-----------|-----------|-----------|-----------|-----------|-----------|
| NM_001925 | 2475.608  | 1073.528  | AF100637  | 734.929   | 1297.343  | NM_014734 | 1599.751  |
| AF245517  | 1084.026  | 1100.596  | NM_014163 | 9481.811  | 19534.795 | AK026408  | 659.695   |
| X78926    | 16031.326 | 6981.492  | NM_014137 | 550.325   | 520.91    | M74782    | 1165.978  |
| AJ278110  | 1168.342  | 1015.317  | AK021974  | 1796.427  | 1941.892  | NM_017818 | 1055.896  |
| NM_014237 | 5006.317  | 3902.33   | AK022068  | 2386.694  | 3045.341  | AF028823  | 1363.463  |
| NM_020396 | 575.145   | 636.885   | AK022229  | 1809.17   | 2596.722  | NM_004295 | 2707.956  |
| AF029900  | 4019.557  | 4422.038  | AK022362  | 2636.004  | 3032.228  | NM_002087 | 939.388   |
| NM_003325 | 3174.888  | 4934.728  | AK022004  | 3335.344  | 3177.723  | NM_013441 | 491.139   |
| NM_016178 | 4978.782  | 4924.547  | AK022136  | 500.886   | 502.257   | M60499    | 1984.463  |
| AK022639  | 2102.636  | 2756.885  | AK022390  | 1802.516  | 1563.732  | NM_003917 | 2088.618  |
| AF135422  | 2742.092  | 3298.534  | AK027134  | 759.741   | 903.671   | NM_006750 | 1169.979  |
| NM_004475 | 17227.074 | 16220.949 | AK024168  | 660.918   | 438.539   | NM_014267 | 2168.342  |
| NM_002610 | 546.568   | 797.256   | AF222857  | 494.658   | 260.409   | U30872    | 160.429   |
| AF070587  | 2094.121  | 1148.732  | AF264622  | 723.198   | 424.644   | NM_002635 | 1009.392  |
| BE250526  | 1045.399  | 933.077   | AK021793  | 2672.662  | 1775.23   | NM_006398 | 3581.138  |
| NM_016815 | 2435.022  | 1977.681  | AK022255  | 2881.897  | 1867.984  | AK025655  | 855.87    |
| NM_012222 | 4638.815  | 4606.677  | AK023730  | 580.265   | 1163.456  | NM_004056 | 4461.047  |
| NM_005002 | 1592.25   | 1602.983  | AF161360  | 1442.86   | 3280.213  | AY026461  | 1096.311  |
| NM_006596 | 3077.736  | 3195.226  | AK021720  | 2322.653  | 2996.004  | NM_005564 | 21069.555 |
| AK023214  | 6126.334  | 5042.332  | NM_016497 | 28881.316 | 18602.254 | NM_004508 | 641.085   |
| NM_001465 | 8169.249  | 8252.903  | AK000617  | 311.687   | 421.047   | NM_006405 | 4310.555  |
| BC036368  | 568.491   | 730.325   | AF009261  | 805.275   | 1204.091  | NM_006745 | 599.469   |
| NM_001851 | 7030.968  | 2930.25   | AF086264  | 366.301   | 499.921   | NM_000324 | 717.234   |
| S67789    | 742.506   | 837.385   | NM_018840 | 1239.637  | 2125.608  | AL137619  | 1544.678  |
| AK022689  | 3165.613  | 3488.315  | AB037792  | 2175.181  | 1642.988  | NM_002964 | 20914.809 |
| NM_016227 | 456.67    | 923.315   | AK022480  | 854.132   | 509.684   | NM_005052 | 1884.953  |
| NM_004195 | 13852.684 | 18759.379 | AK024158  | 958.81    | 469.68    | AK001913  | 224.378   |
| NM_004705 | 1318.393  | 2331.021  | AL080082  | 3102.598  | 1718.706  | NM_015484 | 684.602   |
| NM_020190 | 13779.622 | 14588.674 | AK021623  | 2446.471  | 1500.019  | NM_013316 | 693.317   |
| NM_014357 | 1997.404  | 3408.133  | U79242    | 718.075   | 1747.689  | M20701    | 2742.912  |
| AB033092  | 3980.335  | 3874.298  | AF056452  | 351.819   | 1373.452  | NM_013284 | 742.526   |
| M89957    | 693.317   | 670.063   | AF119901  | 3169.637  | 5189.165  | NM_006735 | 226.413   |
| NM_003023 | 1872.975  | 1416.059  | AK001936  | 1798.078  | 2138.849  | NM_013274 | 1454.657  |
| BC035030  | 3272.519  | 3249.255  | NM_003770 | 58918.672 | 54167.715 | AL050187  | 1027.503  |
| NM_005340 | 30493.021 | 17725.998 | AK001395  | 4450.51   | 7395.386  | NM_012387 | 5672.975  |
| NM_016201 | 1415.604  | 1125.127  | S57803    | 3420.341  | 5628.988  | NM_014735 | 1487.597  |
| NM_000864 | 4074.34   | 3413.008  | AF131822  | 1004.944  | 1351.568  | NM_004252 | 5792.312  |
| NM_017977 | 2353.354  | 1839.347  | AK023131  | 2042.394  | 2743.759  | AF172929  | 6913.075  |
| AF147727  | 1906.07   | 1783.646  | AF085865  | 4651.161  | 5042.683  | M60499    | 3032.011  |
| NM_006751 | 3103.711  | 3127.226  | AK025521  | 1423.45   | 1220.243  | NM_001614 | 68164.938 |
| AB037834  | 16892.254 | 5562.107  | NM_001053 | 40178.293 | 42181.738 | NM_003833 | 2309.06   |
| NM_003565 | 1116.961  | 781.284   | Z70694    | 3078.414  | 2790.309  | AK000868  | 667.453   |
| NM_013344 | 420.066   | 1749.528  | L77602    | 479.146   | 731.281   | BF679789  | 355.159   |
| NM_014052 | 19578.852 | 17543.594 | NM_015421 | 4843.862  | 3993.724  | M13509    | 863.843   |
| NM_002777 | 19231.814 | 51191.262 | AF086081  | 3139.061  | 2914.854  | X04076    | 239.913   |
| AF202635  | 1498.25   | 1940.81   | NM_018634 | 555.157   | 349.504   | AA485362  | 2887.239  |
| NM_014125 | 325.067   | 684.042   | NM_018111 | 578.109   | 511.68    | AJ222801  | 2398.759  |
| NM_017904 | 554.113   | 686.027   | L23867    | 1025.669  | 2223.048  | BI772354  | 866.601   |
| NM_013367 | 5625.931  | 5272.581  | AB020968  | 1489.57   | 2030.319  | AA733033  | 457.928   |
| NM_001800 | 2018.777  | 2196.196  | AL138690  | 1482.247  | 2173.736  | AA927490  | 2339.252  |
| NM_004336 | 1993.074  | 4513.469  | AK000394  | 652.758   | 1296.755  | U30872    | 113.324   |
| NM_015945 | 2587.507  | 2211.937  | NM_013941 | 1097.131  | 1589.974  | NM_020465 | 1159.281  |
| NM_013975 | 1784.389  | 1960.169  | AF074989  | 2433.525  | 4426.404  | NM_002635 | 503.861   |

|           |           |           |           |           |           |           |           |
|-----------|-----------|-----------|-----------|-----------|-----------|-----------|-----------|
| NM_00379C | 3823.682  | 3400.865  | AK001107  | 2234.992  | 2116.587  | NM_014734 | 844.412   |
| NM_000494 | 2780.321  | 2289.105  | AF147393  | 798.624   | 1257.943  | AF028823  | 1018.822  |
| NM_016023 | 904.004   | 575.742   | AL080112  | 2799.482  | 3342.745  | NM_004295 | 8424.364  |
| NM_003722 | 17552.764 | 11083.898 | AK022299  | 151.609   | 960.955   | NM_014585 | 333.209   |
| NM_01443C | 746.72    | 413.423   | AL137325  | 517.891   | 299.891   | NM_013441 | 634.383   |
| NM_000495 | 1005.029  | 1051.548  | AF147361  | 1948.989  | 2025.877  | NM_014421 | 641.667   |
| AF085883  | 1565.509  | 1009.009  | AL133086  | 1240.497  | 1175.842  | NM_006745 | 446.926   |
| NM_016571 | 2353.901  | 2184.307  | NM_012151 | 41586.055 | 38968.164 | NM_000324 | 485.823   |
| NM_016446 | 3396.451  | 2160.535  | AF087994  | 2048.473  | 1294.11   | AL137619  | 1519.192  |
| NM_002516 | 1388.032  | 1637.387  | AJ227912  | 612.207   | 486.085   | NM_001127 | 544.224   |
| NM_00187C | 747.936   | 863.768   | NM_018195 | 2658.969  | 1450.196  | NM_01243C | 320.737   |
| AJ271216  | 932.314   | 961.851   | AK025532  | 2434.681  | 4540.968  | NM_003917 | 3672.838  |
| U23028    | 3937.127  | 5449.322  | AK021789  | 448.19    | 449.429   | NM_007077 | 302.068   |
| NM_006571 | 6638.338  | 6177.347  | NM_003522 | 1392.133  | 477.629   | NM_002956 | 699.22    |
| NM_001875 | 591.199   | 1026.292  | BF217847  | 1004.715  | 889.27    | NM_00675C | 4364.546  |
| AK022680  | 1179.351  | 1276.121  | NM_00532C | 8464.547  | 1617.544  | NM_020164 | 1152.47   |
| NM_018946 | 7364.811  | 7586.228  | CY3Cy5    | 3507.972  | 229.526   | AK023521  | 1400.696  |
| NM_016355 | 6937.956  | 4241.273  | BI830936  | 676.914   | 520.361   | NM_014267 | 3712.774  |
| NM_001065 | 68822.875 | 59803.129 | U79292    | 6078.315  | 5366.846  | AL050187  | 653.682   |
| NM_004156 | 4087.305  | 3760.511  | BI830753  | 423.38    | 668.93    | NM_012387 | 4614.408  |
| AK000561  | 1080.934  | 1037.11   | X68314    | 1083.043  | 1064.801  | NM_014735 | 1920.546  |
| AB051449  | 17189.395 | 14036.004 | X71973    | 30437.734 | 22005.9   | NM_004252 | 6588.942  |
| BC009187  | 13581.741 | 7064.414  | T49651    | 11857.138 | 5347.487  | AF172929  | 4405.523  |
| AL133617  | 740.789   | 721.121   | N51014    | 2284.797  | 2589.471  | NM_006395 | 3333.92   |
| NM_016485 | 4881.258  | 4018.372  | BE392471  | 10292.612 | 12509.005 | AY026461  | 1731.384  |
| NM_002615 | 18755.059 | 10774.981 | AI802950  | 1859.875  | 2075.317  | AK025708  | 5547.737  |
| AF090894  | 758.554   | 387.853   | AI741278  | 437.746   | 701.568   | NM_000405 | 4228.633  |
| NM_006167 | 446.798   | 802.845   | AA682423  | 445.046   | 608.692   | NM_005564 | 32556.361 |
| NM_016357 | 2849.688  | 4408.268  | AL043686  | 6349.736  | 8325.931  | NM_004505 | 1047.967  |
| NM_01450C | 6181.153  | 11947.879 | AA490172  | 1125.959  | 1481.585  | NM_006405 | 6913.448  |
| AK023792  | 734.231   | 899.635   | AA775212  | 2401.463  | 4736.704  | AJ245946  | 341.809   |
| NM_020145 | 2152.344  | 3013.729  | SR9       | 11023.321 | 4006.448  | NM_00239C | 1235.975  |
| NM_006237 | 881.79    | 1024.732  | CY3Cy5    | 5302.918  | 442.539   | NM_006142 | 729.693   |
| NM_001271 | 5585.486  | 4637.333  | NM_003371 | 7402.723  | 7321.76   | AK001064  | 3083.514  |
| NM_003683 | 1665.13   | 2866.597  | AK023114  | 3996.852  | 1809.487  | AB029031  | 349.753   |
| AF039019  | 5872.559  | 6482.571  | NM_003675 | 2689.909  | 1693.724  | NM_001294 | 1126.884  |
| NM_012255 | 8799.951  | 10395.747 | NM_014271 | 305.466   | 142.186   | NM_014241 | 1362.661  |
| NM_018196 | 1737.94   | 2089.825  | NM_012301 | 874.459   | 418.124   | AL122083  | 522.115   |
| NM_004815 | 3960.375  | 4136.819  | NM_014415 | 4525.708  | 3033.183  | NM_005052 | 869.573   |
| J04205    | 7322.645  | 9824.243  | NM_014935 | 2393.382  | 1834.693  | AK001913  | 457.259   |
| D38491    | 7739.573  | 3641.668  | AF049460  | 506.535   | 295.145   | NM_004292 | 324.894   |
| AK026835  | 2089.7    | 2686.873  | NM_000441 | 253.947   | 154.464   | NM_015484 | 996.114   |
| NM_002815 | 9761.732  | 14281.695 | AK026066  | 1212.239  | 981.037   | NM_013316 | 1018.009  |
| NM_00309C | 40583.488 | 36740.945 | NM_005244 | 6029.066  | 4935.197  | M20701    | 10899.371 |
| NM_013264 | 4650.76   | 3687.961  | AF054589  | 393.389   | 378.861   | NM_002912 | 473.192   |
| NM_003315 | 11940.565 | 9403.876  | NM_00527C | 577.032   | 867.295   | NM_013284 | 1332.979  |
| NM_00557C | 5724.146  | 7516.167  | NM_014815 | 818.298   | 1656.973  | NM_006735 | 324.791   |
| NM_000086 | 11467.532 | 3345.715  | NM_007221 | 4114.39   | 4259.686  | NM_013274 | 1760.752  |
| NM_003752 | 2825.273  | 2635.291  | X54163    | 17590.207 | 15432.909 | AK024955  | 16400.818 |
| NM_003932 | 10060.672 | 9557.498  | AK025395  | 578.781   | 692.588   | AF169693  | 1107.872  |
| NM_016491 | 12434.849 | 10064.659 | X58377    | 697.306   | 1068.692  | L23206    | 2674.102  |
| NM_006425 | 11963.693 | 14695.698 | NM_002465 | 713.227   | 1226.827  | NM_012192 | 1119.241  |
| NM_003307 | 25197.428 | 6823.449  | AI673575  | 339.591   | 964.577   | NM_006293 | 658.038   |

|           |           |           |           |           |           |           |           |
|-----------|-----------|-----------|-----------|-----------|-----------|-----------|-----------|
| AF070565  | 1200.349  | 1570.759  | NM_014668 | 816.163   | 900.652   | NM_007229 | 1345.276  |
| NM_002064 | 2653.823  | 975.406   | NM_004722 | 1563.233  | 1166.788  | AB011105  | 382.8     |
| NM_015523 | 3870.167  | 5201.63   | NM_014425 | 423.519   | 416.232   | NM_004814 | 733.304   |
| NM_015960 | 4731.088  | 6196.583  | NM_012133 | 1502.404  | 1166.85   | D86976    | 3956.716  |
| NM_006085 | 3560.3    | 2484.117  | NM_017954 | 349.944   | 452.928   | AF307080  | 561.859   |
| NM_000907 | 4125.938  | 6745.965  | NM_006612 | 1283.939  | 1204.118  | NM_006496 | 3893.586  |
| AF254085  | 3217.644  | 3134.11   | NM_016451 | 576.31    | 1018.263  | NM_004826 | 788.831   |
| AK023541  | 366.624   | 453.7     | NM_007351 | 8829.31   | 6636.675  | NM_003182 | 416.46    |
| NM_001987 | 2652.208  | 1846.437  | AK026266  | 5225.625  | 3754.319  | BE904126  | 26460.43  |
| AF244088  | 2407.733  | 2120.482  | NM_007124 | 2277.121  | 1745.263  | AF272380  | 14378.735 |
| NM_007136 | 1060.906  | 1116.204  | NM_003176 | 1460.485  | 1452.863  | NM_004431 | 4818.928  |
| AK025434  | 884.108   | 832.253   | NM_000723 | 741.531   | 614.384   | NM_002012 | 614.01    |
| AJ251845  | 577.966   | 591.5     | AL096751  | 3534.764  | 2952.333  | NM_002070 | 25072.717 |
| AK000435  | 1473.217  | 1104.654  | NM_000364 | 494.199   | 412.788   | AF227969  | 509.482   |
| AK000569  | 2138.631  | 1713.489  | AF026920  | 2698.753  | 2634.317  | AF116657  | 458.549   |
| NM_006049 | 2565.55   | 1187.47   | NM_004931 | 4529.608  | 3114.927  | NM_003944 | 3142.864  |
| NM_017661 | 1126.377  | 1337.434  | NM_000607 | 16981.549 | 14959.396 | NM_016120 | 7213.156  |
| BC016698  | 7679.114  | 5379.966  | NM_002575 | 2205.47   | 4888.294  | NM_002393 | 2831.914  |
| AK027185  | 1332.579  | 1961.921  | NM_004244 | 3473.731  | 3535.677  | NM_002669 | 430.637   |
| AK025576  | 2108.807  | 2759.307  | AK001500  | 722.625   | 389.864   | AB014600  | 626.289   |
| BC034819  | 3791.197  | 4075.631  | NM_006774 | 479.471   | 429.748   | X98260    | 1364.484  |
| AF147313  | 8350.434  | 10814.254 | NM_020129 | 652.582   | 612.399   | NM_007217 | 1846.282  |
| AF147382  | 26343.234 | 29940.102 | Y16521    | 2540.41   | 2020.261  | NM_003803 | 1201.303  |
| AK001957  | 5226.458  | 4427.657  | AL050371  | 3021.099  | 2147.944  | NM_001937 | 3669.752  |
| AK000850  | 1629.467  | 1681.808  | NM_002651 | 6034.165  | 3336.282  | AK024778  | 409.943   |
| AK021833  | 1333.663  | 2876.292  | NM_002413 | 8165.875  | 6074.294  | AK021608  | 2157.354  |
| AF143867  | 981.923   | 1425.155  | NM_017577 | 550.06    | 388.888   | NM_004297 | 1580.806  |
| AK025889  | 6627.848  | 5005.903  | NM_001757 | 5121.011  | 2122.41   | NM_006044 | 5725.816  |
| NM_014715 | 1394.066  | 1518.96   | NM_001647 | 2198.645  | 3220.298  | AK025498  | 494.732   |
| AF086448  | 3172.101  | 2136.544  | NM_018158 | 1199.123  | 937.604   | NM_001395 | 7517.755  |
| AF086386  | 1136.002  | 1059.848  | NM_016301 | 5379.096  | 5227.536  | NM_002068 | 564.432   |
| AF086413  | 346.596   | 532.226   | AK021975  | 414.83    | 731.082   | NM_013338 | 353.719   |
| AF086457  | 1680.718  | 1227.995  | AB032952  | 25091.223 | 25658.311 | NM_014671 | 1128.876  |
| AK025469  | 1299.854  | 893.179   | NM_002522 | 22107.297 | 27464.51  | NM_001814 | 539.11    |
| NM_020239 | 14009.007 | 9224.044  | NM_002978 | 2289.449  | 2445.115  | NM_002151 | 492.918   |
| AF070581  | 1137.553  | 909.341   | S83549    | 171.814   | 282.118   | AK025322  | 2826.685  |
| AK024187  | 1018.137  | 634.469   | AB040879  | 1915.685  | 895.249   | AL122100  | 873.764   |
| AF075079  | 247.819   | 1888.159  | AL049935  | 1212.019  | 1114.415  | NM_005310 | 825.777   |
| AK022479  | 1377.243  | 1580.327  | AB033043  | 4110.22   | 4003.378  | NM_014423 | 2762.223  |
| AF086004  | 8006.369  | 7998.957  | NM_014999 | 1379.849  | 1247.865  | NM_018083 | 673.31    |
| AF147433  | 1369.97   | 3131.659  | AK025220  | 772.141   | 703.989   | AL110188  | 5265.839  |
| AF085978  | 488.008   | 792.78    | NM_016308 | 11203.623 | 7414.361  | D70834    | 20096.943 |
| AF085930  | 1164.827  | 1080.07   | D42046    | 3712.447  | 2057.691  | NM_000970 | 63963.816 |
| AF086006  | 1808.868  | 2820.239  | NM_001033 | 2351.785  | 2116.759  | AK000102  | 517.692   |
| AL137318  | 1543.915  | 1473.041  | NM_004526 | 16183.14  | 7103.545  | AB040916  | 893.366   |
| AL137482  | 1021.509  | 1537.274  | NM_002526 | 8151.623  | 7745.251  | AF038362  | 672.991   |
| AL162011  | 16053.386 | 17221.146 | NM_020135 | 1974.026  | 1799.256  | NM_005195 | 1552.231  |
| AL390177  | 747.462   | 1006.13   | NM_018518 | 3027.589  | 2735.888  | NM_005481 | 916.162   |
| AL137678  | 695.341   | 674.906   | AK023149  | 1413.311  | 1135.263  | NM_004715 | 362.152   |
| AK056111  | 1112.057  | 910.376   | AK023168  | 2131.625  | 1919.08   | L40392    | 115.31    |
| Y13807    | 1786.064  | 1392.893  | NM_006646 | 941.247   | 687.414   | NM_003017 | 805.56    |
| AK023038  | 644.721   | 771.039   | NM_004742 | 1178.957  | 1462.333  | NM_020366 | 755.306   |
| AK026206  | 1414.39   | 1062.951  | NM_014753 | 1076.715  | 1922.741  | NM_020141 | 4554.047  |

|           |           |           |           |           |           |           |           |
|-----------|-----------|-----------|-----------|-----------|-----------|-----------|-----------|
| AF086074  | 1915.116  | 1322.488  | NM_006585 | 20079.771 | 33190.383 | NM_006482 | 546.287   |
| AK023964  | 2223.139  | 1626.573  | NM_014331 | 2772.78   | 3054.993  | NM_003635 | 636.562   |
| AF086084  | 1266.027  | 949.325   | NM_006795 | 11017.888 | 14998.741 | NM_003689 | 10662.032 |
| AK000156  | 695.801   | 416.132   | AF070568  | 1432.419  | 1801.853  | NM_004427 | 2584.413  |
| AL050184  | 704.058   | 607.412   | NM_000277 | 285.018   | 329.313   | NM_004965 | 9671.308  |
| AF085853  | 844.553   | 610.472   | NM_000240 | 3638.075  | 6352.524  | AF312393  | 25060.125 |
| AK027112  | 4778.193  | 4347.273  | AK055733  | 10401.461 | 12609.399 | AF272898  | 1962.084  |
| AL049314  | 1682.263  | 1450.219  | AF298880  | 10514.321 | 12682.786 | AB032951  | 5697.525  |
| AF093016  | 9896.252  | 9057.768  | AK025395  | 367.296   | 225.037   | NM_003417 | 823.067   |
| AF161345  | 1770.675  | 1798.573  | NM_000385 | 468.64    | 376.011   | NM_005149 | 2455.968  |
| -         | 1520.54   | 2712.256  | X58377    | 371.504   | 355.627   | AK024073  | 460.361   |
| AF090925  | 1007.719  | 1333.564  | NM_002469 | 428.381   | 344.731   | AK022223  | 607.433   |
| AF100637  | 1154.31   | 1532.445  | BI830936  | 775.541   | 572.894   | NM_005887 | 810.732   |
| NM_014163 | 6046.074  | 6846.657  | U79292    | 6819.577  | 6239.464  | AK024921  | 586.89    |
| AK021659  | 731.223   | 909.181   | BI830753  | 372.435   | 413.249   | AL110232  | 559.378   |
| NM_014137 | 880.419   | 1122.815  | X68314    | 1089.959  | 896.391   | AK026103  | 1298.267  |
| AK021974  | 1634.481  | 1632.652  | X71973    | 24499.748 | 15033.057 | NM_016353 | 10227.798 |
| AK022068  | 1302.022  | 997.669   | T49651    | 9264.308  | 2653.631  | AL080280  | 1952.24   |
| AK022229  | 1372.552  | 1144.534  | N51014    | 1813.997  | 1190.627  | AF007143  | 462.615   |
| AK022362  | 2253.58   | 1994.063  | BE392471  | 7710.908  | 7035.197  | AF147417  | 507.26    |
| AK022004  | 3160.833  | 2510.112  | AI802950  | 1592.355  | 1598.483  | AK023656  | 616.279   |
| AK022136  | 593.022   | 473.276   | AA682423  | 386.14    | 569.701   | AF086485  | 1518.552  |
| AK022390  | 1225.47   | 1763.367  | AL043686  | 5996.917  | 5592.995  | AF086511  | 923.243   |
| AK027134  | 1398.894  | 1159.033  | AA490172  | 1060.822  | 1196.392  | AK022989  | 1488.956  |
| AK024168  | 811.512   | 651.063   | AA775212  | 2013.451  | 3123.704  | AK001604  | 4931.59   |
| AF222857  | 343.532   | 314.861   | NM_000945 | 1283.375  | 1884.356  | AK021619  | 348.376   |
| AF264622  | 673.478   | 692.141   | NM_002574 | 42134.398 | 25962.766 | AF131762  | 6069.515  |
| AK021793  | 2719.857  | 2002.241  | AB011174  | 1308.372  | 2466.311  | AY007089  | 967.263   |
| AK022255  | 2730.713  | 1950.593  | NM_000607 | 10195.891 | 8169.844  | AK021816  | 4613.794  |
| AF161360  | 1024.86   | 1269.057  | NM_002575 | 1499.592  | 3251.201  | D43770    | 2606.058  |
| AK021720  | 2741.246  | 2030.938  | NM_004244 | 3299.775  | 2091.54   | U15553    | 3329.756  |
| NM_016497 | 21685.412 | 16692.908 | NM_003371 | 7459.123  | 8627.934  | Z36829    | 886.512   |
| AK000617  | 385.886   | 945.462   | AK023114  | 3910.528  | 2184.956  | AK024734  | 1997.65   |
| AF009261  | 974.939   | 1150.929  | NM_003675 | 2619.692  | 1910.29   | NM_017741 | 1452.894  |
| AB037792  | 1892.089  | 1510.722  | NM_012301 | 1222.624  | 776.271   | AK000144  | 1153.866  |
| AK022480  | 809.721   | 635.426   | NM_014419 | 3753.502  | 3049.319  | AK022275  | 510.854   |
| AK024158  | 1208.612  | 971.511   | NM_014935 | 2044.807  | 1821.684  | AL122088  | 446.802   |
| AL080082  | 3205.749  | 2025.149  | AF049460  | 443.903   | 508.778   | AL137518  | 636.084   |
| AK021623  | 2195.158  | 1604.159  | NM_000441 | 334.721   | 313.981   | AK023437  | 799.645   |
| AK023733  | 831.093   | 261.503   | AK026066  | 1242.013  | 1317.325  | AK024147  | 657.014   |
| U79242    | 590.755   | 796.887   | NM_005244 | 6444.708  | 6668.035  | AK022897  | 887.3     |
| AF056452  | 436.646   | 1193.336  | AF054589  | 421.673   | 415.365   | AK023556  | 439.187   |
| AF119901  | 3009.619  | 3841.058  | NM_005270 | 617.344   | 910.542   | AK023898  | 3296.278  |
| AK001936  | 2000.259  | 3213.018  | NM_014815 | 896.936   | 1556.299  | NM_019040 | 6703.941  |
| NM_003770 | 34997.855 | 41022.977 | NM_007221 | 3768.136  | 4984.999  | NM_005975 | 1849.496  |
| AK001395  | 7067.643  | 8368.498  | X54163    | 15157.355 | 15701.41  | Y16711    | 1411.501  |
| S57803    | 4644.503  | 4656.837  | NM_018607 | 162.91    | 138.033   | AJ272179  | 2323.749  |
| AF131822  | 1153.26   | 1389.327  | NM_002975 | 1423.001  | 1246.616  | AJ007015  | 2232.601  |
| AK023131  | 2018.333  | 2191.218  | NM_014665 | 842.129   | 1239.85   | AK026279  | 532.674   |
| AJ276248  | 1088.341  | 912.912   | NM_004722 | 1959.709  | 1326.929  | AF130094  | 2061.536  |
| U61096    | 632.349   | 398.35    | NM_014425 | 629.674   | 442.994   | AK026673  | 465.903   |
| AF085865  | 4887.486  | 4705.568  | NM_012133 | 1513.133  | 1200.002  | NM_005452 | 566.027   |
| X78261    | 653.626   | 455.539   | NM_017954 | 450.613   | 292.609   | AF170935  | 1608.687  |

|           |           |           |           |           |           |            |           |
|-----------|-----------|-----------|-----------|-----------|-----------|------------|-----------|
| AK025521  | 1685.046  | 2037.691  | NM_006612 | 1107.036  | 1012.434  | AJ227899   | 797.216   |
| NM_001053 | 42941.871 | 46431.375 | NM_016451 | 695.813   | 735.137   | AL359607   | 1415.907  |
| Z70694    | 3709.141  | 3350.48   | NM_007351 | 7504.331  | 7502.091  | AF161371   | 4919.042  |
| L77602    | 682.014   | 624.624   | AK026266  | 4270.896  | 3923.766  | AK022464   | 890.395   |
| NM_015421 | 6414.673  | 5819.905  | NM_007124 | 2511.763  | 2490.883  | AF086230   | 1470.602  |
| AF086081  | 4761.163  | 4524.987  | NM_003176 | 1783.114  | 1905.561  | AK023408   | 1062.551  |
| NM_018634 | 580.862   | 523.396   | NM_000723 | 845.195   | 1049.268  | U84509     | 2305.219  |
| NM_018111 | 681.058   | 556.342   | AL096751  | 3884.994  | 4909.904  | AK002036   | 3638.121  |
| L23867    | 941.802   | 873.648   | NM_000364 | 430.504   | 531.831   | U84512     | 532.487   |
| AB020968  | 1258.667  | 1620.983  | AF026920  | 3086.61   | 4011.887  | AF043469   | 462.045   |
| AL138690  | 1323.242  | 1987.206  | NM_004931 | 4059.164  | 5187.885  | AK022008   | 592.229   |
| NM_013941 | 952.959   | 1568.209  | NM_006795 | 5712.333  | 5412.688  | AL080188   | 516.694   |
| AF074989  | 749.355   | 1811.544  | AF070568  | 1117.761  | 641.02    | T99941     | 1353.252  |
| AK001107  | 1411.303  | 948.193   | NM_000240 | 2190.237  | 2271.69   | AF113678   | 874.417   |
| AF147393  | 603.416   | 738.912   | AK055733  | 8423.557  | 7073.154  | AL137313   | 60835.141 |
| AL080112  | 2844.177  | 2807.777  | AF298880  | 8101.562  | 5577.64   | AB002363   | 2690.15   |
| AK022299  | 261.735   | 903.369   | AK001500  | 829.337   | 648.584   | NM_005284  | 2456.793  |
| AL137325  | 1187.041  | 1078.441  | NM_006774 | 362.542   | 307.94    | AF086351   | 2602.061  |
| AF147361  | 1763.284  | 2477.318  | NM_020129 | 736.743   | 448.755   | D83199     | 18376.996 |
| AL133086  | 1160.132  | 1193.038  | Y16521    | 2755.166  | 2508.641  | AK025957   | 353.476   |
| NM_012151 | 42536.602 | 47836.402 | AL050371  | 3058.637  | 2341.632  | Y16708     | 625.66    |
| AF087994  | 2142.09   | 1856.019  | NM_002651 | 6649.929  | 4431.938  | AL157453   | 3535.146  |
| AJ227912  | 1001.438  | 435.061   | NM_002413 | 9541.02   | 6557.132  | NM_019098  | 2631.355  |
| NM_018195 | 2048.87   | 1890.116  | NM_001757 | 5564.381  | 3158.273  | AK022212   | 21310.559 |
| AK025532  | 2083.807  | 2581.942  | NM_001647 | 2612.628  | 4946.453  | X64974     | 1563.019  |
| NM_003522 | 873.248   | 622.115   | NM_018158 | 1510.963  | 1453.321  | NM_000834  | 1720.292  |
| BF217847  | 1576.871  | 1237.841  | NM_016301 | 6099.204  | 6469.129  | NM_006485  | 25021.727 |
| NM_005320 | 2517.519  | 1436.87   | AK021975  | 386.078   | 726.568   | AK022398   | 1048.153  |
| CY3Cy5    | 9241.004  | 777.841   | AB032952  | 29433.334 | 30714.602 | AK001143   | 827.02    |
| BI830936  | 513.377   | 427.46    | NM_002522 | 24135.18  | 32143.83  | AK022205   | 568.334   |
| U79292    | 8979.702  | 4976.771  | NM_000945 | 713.869   | 654.518   | AK026799   | 2359.784  |
| BI830753  | 678.448   | 706.064   | NM_002574 | 19213.436 | 7684.479  | AK022549   | 291.852   |
| X68314    | 814.048   | 585.801   | AB011174  | 1032.688  | 1009.643  | AK021640   | 11448.906 |
| X71973    | 40432.25  | 34645.348 | AB040879  | 2022.334  | 978.447   | NM_016565  | 29651.502 |
| T49651    | 20090.316 | 4224.059  | AL049935  | 1437.272  | 1446.022  | CY3Cy5     | 2358.85   |
| N51014    | 4195.293  | 2691.609  | AB033043  | 5854.719  | 6228.142  | BF310427   | 975.557   |
| BE392471  | 22462.502 | 14712.921 | NM_014999 | 1517.759  | 911.215   | N94424     | 373.5     |
| AI802950  | 2404.487  | 2098.699  | AK025220  | 888.413   | 875.542   | AA045192   | 1538.879  |
| AI741278  | 310.517   | 632.889   | NM_016308 | 12179.459 | 7650.825  | M92642     | 495.438   |
| AA682423  | 584.501   | 548.509   | D42046    | 3852.5    | 2160.536  | H-U 44385  | 3174.147  |
| AL043686  | 7022.678  | 5969.105  | NM_001033 | 2357.963  | 1640.855  | ID 1654970 | 1067.05   |
| AA490172  | 1046.029  | 1086.069  | NM_004526 | 16860.42  | 8207.18   | ID 2531132 | 1608.987  |
| AA775212  | 3568.281  | 4333.189  | NM_002526 | 11079.29  | 11242.994 | AA485665   | 305.626   |
| NM_000945 | 1526.276  | 2337.09   | NM_020135 | 2134.719  | 2316.695  | BF125928   | 4541.954  |
| NM_002574 | 32131.598 | 27849.779 | NM_018518 | 3297.938  | 4023.521  | BG571026   | 1582.961  |
| SR5       | 4648.697  | 4526.973  | AK023149  | 1532.642  | 1547.079  | AA489017   | 1053.199  |
| SR7       | 6706.184  | 41303.527 | AK023168  | 2438.219  | 3315.352  | NM_012245  | 5819.848  |
| SR9       | 26587.037 | 3382.875  | NM_006646 | 1160.402  | 1328.518  | NM_133263  | 944.799   |
| CY3Cy5    | 7303.488  | 615.497   | NM_004742 | 1870.249  | 2284.375  | SR4        | 9428.834  |
| NM_003371 | 14439.987 | 10197.443 | NM_014753 | 1154.402  | 2178.358  | SR6        | 1828.601  |
| AK023114  | 5435.563  | 1857.356  | NM_006585 | 18815.096 | 32115.537 | SR8        | 6955.18   |
| NM_003678 | 4414.271  | 2603.911  | NM_014331 | 2522.335  | 2978.438  | SR10       | 23121.938 |
| NM_014271 | 423.761   | 166.423   | NM_014815 | 425.972   | 285.276   | CY3Cy5     | 1275.424  |

|           |           |           |           |           |           |           |          |
|-----------|-----------|-----------|-----------|-----------|-----------|-----------|----------|
| NM_012301 | 783.084   | 531.383   | NM_007221 | 2581.265  | 2257.917  | NM_017450 | 587.552  |
| NM_005631 | 368.202   | 581.362   | X54163    | 6095.382  | 4932.321  | NM_002023 | 570.089  |
| NM_014419 | 4235.487  | 4452.076  | AK025395  | 433.676   | 503.122   | NM_002839 | 330.583  |
| NM_014938 | 2474.727  | 2335.327  | NM_000388 | 455.809   | 284.158   | AF190500  | 432.699  |
| AF049460  | 667.754   | 761.787   | X58377    | 397.664   | 228.453   | NM_001616 | 307.813  |
| AK026066  | 1540.959  | 1527.842  | NM_002469 | 466.18    | 348.245   | NM_005904 | 374.674  |
| NM_005244 | 3981.23   | 4531.592  | BI830936  | 745.421   | 471.114   | NM_005273 | 5358.835 |
| AF054589  | 292.405   | 684.805   | U79292    | 9334.808  | 8703.544  | NM_000524 | 204.818  |
| NM_005270 | 628.283   | 1053.323  | BI830753  | 306.114   | 259.368   | NM_006576 | 788.342  |
| NM_005443 | 516.312   | 569.749   | X68314    | 1282.608  | 1162.956  | NM_018645 | 207.241  |
| X54163    | 29458.18  | 16007.725 | X71973    | 13151.591 | 10335.404 | AB035266  | 1754.968 |
| AK025395  | 857.237   | 829.754   | T49651    | 7250.567  | 2584.56   | NM_003744 | 735.443  |
| NM_000388 | 983.218   | 1285.165  | N51014    | 1321.459  | 1286.596  | NM_006378 | 495.051  |
| X58377    | 406.908   | 646.622   | BE392471  | 3917.874  | 3636.27   | NM_018132 | 1637.949 |
| NM_002469 | 572.308   | 701.577   | AI802950  | 1126.047  | 1220.031  | NM_018207 | 503.106  |
| AI673575  | 715.51    | 522.469   | AL043686  | 4508.249  | 4287.265  | NM_000345 | 3206.736 |
| NM_014668 | 946.503   | 753.302   | AA490172  | 701.692   | 1086.199  | AB029021  | 1764.04  |
| NM_004722 | 1663.534  | 1015.636  | AA775212  | 1327.262  | 2486.835  | NM_002101 | 6683.849 |
| NM_014425 | 1009.277  | 544.638   | NM_000723 | 875.044   | 485.609   | NM_005423 | 233.793  |
| NM_012133 | 1567.734  | 1101.678  | AF026920  | 1935.845  | 1818.858  | Z36789    | 1654.119 |
| NM_017954 | 936.702   | 395.446   | NM_004931 | 2302.07   | 1434.897  | J02874    | 1517.61  |
| NM_006612 | 2376.787  | 2130.551  | NM_000607 | 9493.266  | 9804.595  | AF070525  | 1802.846 |
| NM_016451 | 2120.621  | 2481.231  | AB011099  | 161.424   | 288.909   | NM_001177 | 392.323  |
| NM_007351 | 13912.229 | 13144.86  | NM_002575 | 2118.856  | 3296.684  | NM_014447 | 724.809  |
| AK026266  | 7985.834  | 11803.885 | NM_004244 | 1842.21   | 1200.87   | NM_002356 | 169.862  |
| NM_007124 | 4064.782  | 4379.703  | NM_003371 | 8703.877  | 10432.344 | NM_006691 | 556.518  |
| NM_003176 | 3338.927  | 3318.382  | AK023114  | 3773.048  | 2447.566  | NM_001505 | 300.211  |
| NM_000723 | 1476.645  | 1604.567  | NM_003678 | 2344.944  | 2719.747  | NM_003710 | 844.185  |
| AL096751  | 3923.029  | 4795.506  | NM_012301 | 1517.267  | 1306.167  | Z83805    | 285.759  |
| NM_000364 | 663.561   | 745.504   | NM_014419 | 3400.603  | 3698.824  | NM_004666 | 566.916  |
| AF026920  | 4484.805  | 5402.927  | NM_014938 | 1269.646  | 1286.877  | NM_003614 | 763.853  |
| NM_004931 | 5904.534  | 4632.419  | AK026066  | 1019.75   | 1092.453  | NM_014257 | 1732.856 |
| NM_000607 | 18687.463 | 17266.617 | NM_005244 | 4168.602  | 4702.784  | NM_001140 | 411.89   |
| AB011099  | 404.758   | 563.463   | NM_018158 | 913.219   | 710.826   | NM_004843 | 1464.263 |
| NM_002575 | 1370.067  | 5028.74   | NM_016301 | 3275.109  | 2583.482  | AK022845  | 455.475  |
| NM_004244 | 4837.762  | 3819.165  | AB032952  | 12928.269 | 9945.631  | NM_003004 | 297.95   |
| AK001500  | 1211.153  | 1343.564  | NM_002522 | 8400.803  | 10167.04  | S77835    | 318.87   |
| NM_006774 | 592.369   | 440.639   | NM_018607 | 244.6     | 105.21    | NM_002985 | 2001.64  |
| NM_020129 | 894.656   | 619.864   | NM_002978 | 2860.944  | 1997.216  | AB018347  | 1609.281 |
| Y16521    | 3306.635  | 1617.783  | NM_014668 | 1085.315  | 1305.388  | NM_003284 | 636.963  |
| NM_003167 | 293.672   | 796.809   | NM_004722 | 2314.403  | 1685.286  | NM_018152 | 219.122  |
| AL050371  | 3163.606  | 4214.385  | NM_012133 | 1174.052  | 1203.941  | NM_000319 | 474.545  |
| NM_002651 | 8787.94   | 5710.958  | NM_017954 | 502.311   | 643.014   | NM_003257 | 258.555  |
| NM_002413 | 12073.255 | 10551.009 | NM_016451 | 382.536   | 947.658   | NM_012461 | 2879.67  |
| NM_017577 | 766.962   | 985.113   | NM_007351 | 5587.612  | 6466.307  | AK001379  | 456.167  |
| NM_001757 | 6598.626  | 3564.018  | AK026266  | 2615.165  | 3000.588  | NM_007072 | 1216.262 |
| NM_001647 | 2896.932  | 5204.961  | NM_007124 | 1746.056  | 1971.948  | NM_012320 | 5927.88  |
| NM_018158 | 2605.038  | 3094.51   | NM_003176 | 1344.25   | 1741.123  | NM_018208 | 1624.986 |
| NM_016301 | 7448.687  | 8646.641  | AK023168  | 1331.181  | 1120.713  | NM_015929 | 2580.809 |
| AK021975  | 667.537   | 858.55    | NM_006646 | 652.9     | 581.261   | U90653    | 1023.825 |
| AB032952  | 22911.486 | 23513.615 | NM_004742 | 1366.908  | 1058.125  | NM_000196 | 229.533  |
| NM_002522 | 13135.146 | 16685.041 | NM_014753 | 978.929   | 963.363   | NM_018339 | 984.237  |
| NM_018607 | 467.8     | 388.644   | NM_006585 | 11454.556 | 16206.851 | NM_006745 | 4738.652 |

|           |           |           |           |           |           |             |          |
|-----------|-----------|-----------|-----------|-----------|-----------|-------------|----------|
| NM_002978 | 3673.824  | 2749.88   | NM_014331 | 1811.131  | 1671.172  | NM_000275   | 285.059  |
| AB040879  | 1576.381  | 2810.903  | NM_006795 | 5735.518  | 6124.443  | AK000037    | 458.188  |
| AL049935  | 2575.428  | 1531.716  | AF070568  | 1448.629  | 1144.567  | NM_014760   | 706.168  |
| AB033043  | 5180.207  | 3569.094  | NM_000240 | 2902.231  | 2929.401  | NM_018398   | 1834.05  |
| NM_014995 | 1966.347  | 1094.373  | AK055733  | 7181.355  | 6287.53   | NM_002560   | 2640.894 |
| AK025220  | 1627.783  | 1262.45   | AF298880  | 7703.224  | 6202.164  | NM_014404   | 772.736  |
| NM_016308 | 12298.853 | 24753.768 | NM_020129 | 570.962   | 570.994   | NM_018713   | 436.16   |
| D42046    | 4924.679  | 4936.777  | Y16521    | 3573.87   | 4125.932  | NM_015947   | 2170.612 |
| NM_001033 | 1869.625  | 4475.89   | AL050371  | 3333.822  | 3388.332  | NM_002042   | 7207.892 |
| NM_004526 | 5149.091  | 12946.809 | NM_002651 | 5587.929  | 5248.747  | AB028944    | 320.347  |
| NM_002526 | 6157.457  | 7495.912  | NM_002413 | 7750.027  | 9383.063  | AJ006268    | 387.568  |
| NM_020135 | 2225.871  | 2971.491  | NM_001757 | 3846.099  | 2491.162  | M74089      | 1062.136 |
| NM_018518 | 2660.931  | 3610.934  | NM_001647 | 1722.101  | 4158.837  | AF190864    | 2000.759 |
| AK023149  | 1136.124  | 2392.784  | NM_006228 | 305.368   | 215.617   | NM_002779   | 1671.26  |
| AK023168  | 2707.369  | 3954.409  | NM_003768 | 2689.678  | 2538.868  | L40397      | 5587.295 |
| NM_006646 | 911.553   | 931.958   | BF032535  | 1975.461  | 1775.051  | NM_020198   | 1678.319 |
| NM_004742 | 754.52    | 724.026   | NM_018332 | 1229.655  | 1079.223  | NM_000025   | 6834.156 |
| NM_014753 | 1761.906  | 2564.811  | NM_005096 | 6765.628  | 8024.593  | D38521      | 1260.556 |
| NM_006585 | 19380.99  | 36200.539 | NM_006760 | 696.479   | 495.249   | NM_000403   | 1616.252 |
| NM_014331 | 4422.02   | 3136.49   | NM_012289 | 3869.305  | 3064.358  | NM_018127   | 3685.604 |
| NM_006795 | 5338.843  | 5511.807  | AB037775  | 1308.469  | 1189.502  | AB020677    | 1838.959 |
| AF070568  | 2719.926  | 2074.864  | L27560    | 1248.545  | 1526.237  | AB033097    | 1081.762 |
| NM_000277 | 466.378   | 684.222   | AB011174  | 852.567   | 972.113   | NM_000135   | 654.781  |
| NM_000240 | 2510.267  | 2629.269  | AB040879  | 1841.206  | 1756.293  | AJ223948    | 1413.975 |
| AK055733  | 13986.043 | 13914.971 | AL049935  | 1091.119  | 1224.397  | NM_016218   | 484.336  |
| AF298880  | 5634.525  | 7628.662  | AB033043  | 6450.461  | 10222.025 | AK022947    | 670.487  |
| AK025395  | 1073.092  | 1977.024  | NM_014995 | 1267.082  | 1245.415  | AL050029    | 791.214  |
| NM_000388 | 1016.738  | 1208.322  | AK025220  | 931.163   | 1308.145  | NM_005204   | 736.758  |
| NM_002465 | 725.021   | 470.043   | NM_016308 | 10028.541 | 10646.225 | NM_016203   | 487.757  |
| BI830936  | 679.176   | 905.328   | D42046    | 2861.615  | 3382.697  | NM_002759   | 7697.583 |
| U79292    | 10892.624 | 12763.479 | NM_001033 | 1789.697  | 2495.094  | NM_007271   | 792.072  |
| AA947915  | 298.662   | 411.201   | NM_004526 | 13389.099 | 8752.089  | NM_006255   | 735.541  |
| BI830753  | 709.547   | 1252.08   | NM_002526 | 9166.299  | 15266.676 | BE392143    | 733.906  |
| X68314    | 893.777   | 1228.014  | NM_020135 | 1700.474  | 2406.767  | NM_005813   | 612.124  |
| X71973    | 39575.32  | 41682.867 | NM_018518 | 2822.731  | 3803.184  | AB037718    | 865.911  |
| T49651    | 18312.131 | 4674.458  | AK023149  | 994.143   | 1368.868  | NM_003909   | 4242.09  |
| N51014    | 4017.815  | 2899.577  | NM_006438 | 1310.571  | 955.177   | NM_001277   | 3822.137 |
| BE392471  | 22768.125 | 16405.68  | NM_001845 | 552.504   | 220.517   | NM_003659   | 2241.874 |
| AI802950  | 2476.162  | 2325.165  | AK024697  | 296.379   | 565.017   | AB029021    | 2523.041 |
| AI741278  | 568.518   | 625.6     | NM_006460 | 1785.194  | 892.031   | NM_002101   | 5934.101 |
| AA682423  | 470.756   | 517.643   | L34156    | 213.03    | 172.759   | NM_005423   | 302.168  |
| AL043686  | 4914.392  | 4824.759  | NM_003749 | 8030.239  | 10389.499 | Z36789      | 1297.536 |
| AA490172  | 923.836   | 1152.046  | NM_003557 | 2476.72   | 2482.087  | J02874      | 1556.694 |
| AA775212  | 3629.443  | 3965.206  | NM_001257 | 7819.931  | 8155.486  | BF310427    | 1032.226 |
| NM_000945 | 987.138   | 1418.039  | D85245    | 7681.955  | 6966.842  | AA045192    | 1321.593 |
| NM_002574 | 31210.916 | 27543.398 | NM_000943 | 1626.709  | 924.473   | H45617      | 73.196   |
| AB011174  | 1078.873  | 1324.968  | NM_004658 | 1822.372  | 2155.508  | M92642      | 475.296  |
| NM_000607 | 23055.205 | 31053.531 | NM_001250 | 7326.267  | 7087.728  | H-U 44385 I | 3143.803 |
| AB011099  | 320.604   | 461.551   | AF298812  | 959.379   | 1256.109  | ID 1654970  | 914.391  |
| NM_002575 | 1528.643  | 3788.835  | NM_004969 | 1267.453  | 1174.544  | ID 2531132  | 1113.92  |
| NM_004244 | 5224.279  | 3283.389  | AJ249900  | 483.682   | 480.366   | ID 4365538  | 187.344  |
| NM_003371 | 16500.08  | 15330.213 | AK022581  | 1857.991  | 3651.585  | AA485665    | 315.069  |
| NM_001164 | 228.875   | 241.948   | NM_018054 | 1472.609  | 1468.212  | BF125928    | 4425.146 |

|           |           |           |           |           |           |           |           |
|-----------|-----------|-----------|-----------|-----------|-----------|-----------|-----------|
| AK023114  | 5378.066  | 3814.891  | NM_006186 | 1230.766  | 1875.146  | BG571026  | 1242.583  |
| NM_003678 | 4586.318  | 4976.315  | NM_000958 | 3424.538  | 3908.544  | AA489017  | 1002.817  |
| NM_014271 | 415.218   | 180.419   | NM_001401 | 1022.448  | 1114.635  | NM_012245 | 5062.02   |
| NM_012301 | 880.949   | 1044.418  | NM_013271 | 16928.326 | 21734.012 | NM_133263 | 936.122   |
| NM_000680 | 363.2     | 266.602   | NM_004157 | 3653.484  | 4192.807  | NM_003284 | 701.425   |
| NM_014419 | 4366.616  | 4373.241  | NM_000684 | 757.22    | 1329.496  | NM_018152 | 267.87    |
| NM_014938 | 2774.031  | 2668.656  | NM_015913 | 7792.514  | 3928.452  | NM_000319 | 538.373   |
| AF049460  | 845.453   | 1068.39   | NM_005157 | 2547.048  | 2070.863  | NM_003257 | 465.593   |
| NM_000441 | 981.475   | 891.996   | NM_007354 | 278.201   | 292.908   | NM_012461 | 2551.812  |
| AK026066  | 1978.439  | 2012.325  | U67037    | 1858.38   | 1830.624  | NM_002023 | 644.856   |
| NM_005244 | 2951.869  | 3371.46   | NM_004960 | 6876.832  | 7185.62   | NM_002839 | 322.748   |
| NM_005270 | 665.02    | 1251.727  | AF272370  | 4458.792  | 5001.15   | AF190500  | 332.843   |
| NM_014815 | 1340.967  | 1940.248  | AF130050  | 2781.264  | 1901.298  | NM_001616 | 315.769   |
| NM_005443 | 644.509   | 553.345   | NM_012197 | 4332.167  | 2220.547  | NM_005273 | 5506.072  |
| NM_007221 | 4104.39   | 4255.37   | AK024016  | 1381.868  | 1217.773  | NM_006576 | 609.275   |
| X54163    | 30583.555 | 20799.193 | NM_003581 | 2874.404  | 4090.115  | AB035266  | 1547.742  |
| NM_018607 | 542.666   | 294.581   | NM_012407 | 781.873   | 599.508   | NM_003744 | 678.791   |
| NM_002978 | 3114.204  | 1750.359  | NM_007186 | 984.227   | 1173.991  | NM_006378 | 567.626   |
| NM_014668 | 928.387   | 1041.616  | NM_007044 | 1199.351  | 1555.661  | NM_018132 | 1528.565  |
| NM_004722 | 1854.766  | 2194.867  | AF294326  | 3408.43   | 3202.39   | NM_018207 | 478.512   |
| NM_014425 | 1010.471  | 1091.747  | NM_014678 | 1190.781  | 1842.755  | NM_000345 | 2949.279  |
| NM_012133 | 1929.854  | 1757.871  | NM_012317 | 44545.016 | 46505.016 | NM_001862 | 23821.521 |
| NM_017954 | 973.968   | 591.951   | NM_017853 | 2072.83   | 2399.583  | NM_006531 | 278.706   |
| NM_006612 | 2268.896  | 1968.086  | NM_016097 | 8082.722  | 9634.076  | M74089    | 1845.882  |
| NM_016451 | 2082.46   | 2193.363  | AB035301  | 170.005   | 118.072   | AF190864  | 2093.792  |
| NM_007351 | 13007.849 | 14813.945 | AB046800  | 5419.37   | 8999.457  | NM_002779 | 2209.09   |
| AK026266  | 7908.05   | 8764.596  | NM_002162 | 2645.771  | 3639.072  | NM_020198 | 2423.697  |
| NM_007124 | 3836.016  | 4223.165  | NM_015458 | 1332.048  | 1365.852  | AA098879  | 260.965   |
| NM_003176 | 2370.095  | 2189.98   | D13540    | 3145.597  | 2284.546  | NM_001177 | 699.615   |
| NM_000723 | 1330.421  | 1094.369  | NM_016570 | 5190.642  | 4032.219  | NM_014447 | 939.289   |
| AL096751  | 3486.181  | 3677.613  | AF209198  | 279.251   | 498.816   | NM_002356 | 117.075   |
| NM_000364 | 855.449   | 758.5     | M69012    | 20966.627 | 17148.52  | NM_006691 | 1019.394  |
| AF026920  | 4099.122  | 4190.876  | NM_006936 | 9423.841  | 7008.35   | NM_001505 | 412.967   |
| NM_004931 | 6070.43   | 4479.33   | NM_001327 | 4021.963  | 4133      | NM_003710 | 874.428   |
| NM_006795 | 8663.912  | 15199.439 | NM_003652 | 327.214   | 324.941   | Z83805    | 283.672   |
| AF070568  | 2920.441  | 2021.991  | NM_000063 | 1066.329  | 884.332   | NM_004666 | 657.622   |
| NM_000277 | 334.968   | 183.877   | NM_018389 | 807.663   | 528.482   | NM_003614 | 558.526   |
| NM_000240 | 2890.232  | 2274.707  | AB033026  | 1844.116  | 1107.585  | NM_014257 | 1304.099  |
| AK055733  | 15383.218 | 10448.794 | AF104914  | 9243.479  | 12681.579 | NM_001140 | 441.674   |
| AF298880  | 6132.68   | 5776.463  | NM_014716 | 2420.163  | 3805.881  | NM_004843 | 1284.921  |
| AK001500  | 1355.24   | 850.945   | AB002354  | 199.476   | 514.368   | NM_003004 | 310.698   |
| NM_006774 | 546.962   | 526.936   | AK023845  | 1100.878  | 2126.376  | S77835    | 305.584   |
| NM_020129 | 848.42    | 880.901   | NM_002638 | 5645.854  | 8863.312  | NM_002985 | 2190.307  |
| Y16521    | 3318.607  | 2012.473  | NM_005808 | 3652.948  | 4299.099  | AB018347  | 1642.004  |
| AL050371  | 3161.606  | 2931.551  | NM_006401 | 13464.253 | 27906.814 | AB033073  | 1104.328  |
| NM_002651 | 8429.083  | 6024.514  | D31763    | 2185.4    | 1250.697  | AB037718  | 1486.83   |
| NM_001757 | 6158.817  | 2855.155  | NM_018169 | 1884.323  | 1889.963  | AL389994  | 363.956   |
| NM_001647 | 2656.784  | 3803.841  | AK021452  | 5228.821  | 3375.803  | NM_001277 | 5323.918  |
| NM_018158 | 2048.651  | 1295.285  | NM_004506 | 1034.422  | 793.07    | NM_003659 | 2750.736  |
| NM_016301 | 6477.535  | 6737.96   | S74529    | 46976.313 | 37071.699 | NM_007072 | 1416.829  |
| AK021975  | 613.372   | 710.852   | NM_020227 | 578.186   | 424.021   | NM_012320 | 6172.183  |
| AB032952  | 22314     | 17087.262 | NM_005933 | 679.574   | 444.235   | NM_018208 | 1817.03   |
| NM_002522 | 13878.012 | 14227.911 | M73837    | 2318.659  | 789.408   | NM_015929 | 2961.6    |



|           |           |           |           |           |           |            |           |
|-----------|-----------|-----------|-----------|-----------|-----------|------------|-----------|
| NM_000945 | 2314.191  | 5258.762  | U69127    | 13644.734 | 13341.463 | U90653     | 1040.442  |
| AB011174  | 1299.738  | 1157.163  | NM_005839 | 4028.844  | 2860.253  | NM_000196  | 258.291   |
| AB040879  | 1528.765  | 1191.827  | AK023379  | 835.958   | 1009.661  | NM_018339  | 857.031   |
| AL049935  | 2877.841  | 2420.784  | NM_006076 | 332.969   | 696.807   | NM_006745  | 4735.823  |
| AB033043  | 4911.453  | 4538.971  | AK021904  | 3764.574  | 6643.225  | NM_000275  | 345.207   |
| NM_014999 | 1954.228  | 1504.156  | -         | 502.362   | 725.049   | AK000037   | 364.225   |
| AK025220  | 1525.394  | 1351.837  | AL049705  | 4666.535  | 5560.727  | NM_014760  | 745.348   |
| NM_016308 | 11406.866 | 12410.973 | AK022294  | 1788.63   | 1478.187  | NM_018398  | 683.642   |
| D42046    | 3952.705  | 2701.722  | AF086507  | 454.721   | 313.273   | NM_002560  | 3391.47   |
| NM_001033 | 1724.103  | 3148.05   | U79289    | 1178.789  | 872.504   | NM_014404  | 710.877   |
| NM_004526 | 5192.989  | 16061.183 | NM_014028 | 1686.238  | 1425.784  | NM_018713  | 381.947   |
| NM_018518 | 2749.755  | 3659.347  | NM_000402 | 942.366   | 558.625   | NM_015947  | 2223.285  |
| AK023149  | 843.422   | 1236.414  | NM_000690 | 5096.995  | 4496.104  | NM_002042  | 5732.496  |
| AK023168  | 2672.883  | 1807.682  | NM_000155 | 3567.063  | 3385.217  | AB028944   | 287.655   |
| NM_006646 | 802.632   | 902.096   | NM_000181 | 6783.382  | 4948.261  | AJ006268   | 401.867   |
| NM_004742 | 672.217   | 721.26    | NM_000667 | 124.508   | 188.773   | NM_133263  | 951.3     |
| NM_014753 | 1763.552  | 2089.51   | NM_014121 | 562.512   | 742.215   | NM_000025  | 6632.178  |
| NM_006585 | 19070.676 | 28228.527 | NM_005644 | 1325.142  | 1018.01   | D38521     | 1188.219  |
| NM_014331 | 4380.856  | 3388.278  | NM_018442 | 1139.068  | 1791.057  | NM_000403  | 1800.828  |
| AF054589  | 455.633   | 1247.046  | AF182416  | 1324.525  | 1431.258  | NM_018127  | 3788.627  |
| NM_014815 | 1588.25   | 3128.41   | NM_005999 | 7395.526  | 6077.962  | AB020677   | 2113.541  |
| NM_005443 | 760.188   | 443.071   | NM_006015 | 458.899   | 531.979   | AB033097   | 1027.867  |
| NM_007221 | 4598.54   | 4107.033  | NM_004634 | 1384.598  | 1513.376  | NM_000135  | 657.198   |
| X54163    | 34665.219 | 17524.273 | NM_002017 | 2419.69   | 4057.325  | AJ223948   | 971.997   |
| AK025395  | 916.303   | 769.552   | NM_017523 | 3733.367  | 6640.549  | NM_016218  | 338.539   |
| NM_000388 | 1113.598  | 1005.579  | NM_002382 | 21781.469 | 24086.66  | AK022947   | 736.02    |
| X58377    | 683.394   | 728.429   | NM_002158 | 580.36    | 1001.832  | AL050029   | 599.94    |
| NM_002469 | 727.012   | 814.681   | U13223    | 4772.586  | 7649.336  | NM_005204  | 700.395   |
| AI673575  | 255.905   | 312.212   | NM_016270 | 1346.784  | 2246.483  | NM_016203  | 376.229   |
| BI830936  | 758.783   | 917.07    | AK001357  | 584.207   | 723.865   | NM_002759  | 7908.297  |
| U79292    | 10532.239 | 10306.465 | NM_015721 | 1436.815  | 1080.464  | NM_007271  | 841.71    |
| AA947915  | 478.528   | 601.906   | AF086298  | 481.022   | 269.363   | NM_006255  | 801.476   |
| BI830753  | 684.343   | 856.66    | AK027238  | 593.522   | 519.727   | BE392143   | 927.035   |
| X68314    | 906.235   | 870.421   | AK000032  | 681.28    | 396.988   | NM_018207  | 595.684   |
| X71973    | 38619.227 | 48965.316 | AL360201  | 570.228   | 300.91    | NM_000345  | 4908.476  |
| T49651    | 18757.371 | 5594.31   | S94540    | 20245.791 | 19897.256 | NM_001862  | 25816.727 |
| N51014    | 4192.623  | 3240.379  | AK002164  | 487.687   | 287.785   | NM_006531  | 273.429   |
| BE392471  | 12634.749 | 7361.045  | AF052122  | 4704.689  | 6116.966  | AB029021   | 3042.225  |
| AI802950  | 1739.433  | 1531.836  | NM_001310 | 745.181   | 1170.294  | NM_002101  | 6516.63   |
| AA682423  | 718.924   | 845.335   | AK026924  | 2142.01   | 2949.147  | NM_005423  | 176.4     |
| AL043686  | 6455.603  | 5158.807  | AL122047  | 5812.472  | 5257.446  | Z36789     | 1474.24   |
| AA490172  | 974.716   | 885.985   | AF052091  | 1437.833  | 1893.424  | J02874     | 1933.489  |
| AA775212  | 3416.198  | 2955.688  | AK024447  | 32068.896 | 39203.324 | BF310427   | 792.099   |
| NM_000723 | 1792.648  | 3598.1    | AF052145  | 1797.432  | 2618.347  | N94424     | 377.704   |
| AL096751  | 4939.041  | 8968.311  | AF086458  | 892.098   | 2277.144  | AA045192   | 1387.54   |
| NM_000364 | 834.486   | 650.56    | AF086548  | 4759.262  | 5645.591  | AI521645   | 246.8     |
| AF026920  | 5479.355  | 3601.453  | AK023717  | 1041.427  | 2244.833  | H-U 44385  | 2623.788  |
| NM_004931 | 6520.758  | 3240.717  | AK023727  | 334.238   | 160.334   | ID 1654970 | 1000.609  |
| NM_000607 | 23902.355 | 20123.834 | AK025271  | 253.133   | 195.842   | ID 2531132 | 1296.654  |
| AB011099  | 283.788   | 250.827   | AF086204  | 2394.749  | 1559.826  | AA485665   | 351.363   |
| AF090409  | 253.867   | 315.137   | AK022076  | 225.72    | 198.605   | BF125928   | 4881.001  |
| NM_002575 | 1606.447  | 5094.833  | AK023065  | 241.467   | 134.598   | BG571026   | 1064.113  |
| NM_004244 | 5157.531  | 4663.76   | AK000103  | 928.94    | 692.458   | AA489017   | 1054.075  |

|           |           |           |           |           |           |           |          |
|-----------|-----------|-----------|-----------|-----------|-----------|-----------|----------|
| NM_003371 | 13872     | 15216.779 | AF085959  | 675.879   | 426.525   | AK022845  | 296.63   |
| NM_001164 | 269.755   | 539.378   | AF075107  | 689.158   | 444.942   | S77835    | 311.982  |
| AK023114  | 5800.504  | 4309.996  | AK026923  | 1183.147  | 896.108   | NM_002985 | 1820.372 |
| NM_003678 | 4500.786  | 4099.335  | Y11177    | 598.7     | 1143.024  | AB018347  | 2405.204 |
| NM_012301 | 1120.311  | 918.102   | AK021691  | 5610.202  | 7338.151  | AB033073  | 1923.923 |
| NM_000680 | 249.558   | 335.515   | AK023595  | 432.404   | 634.33    | NM_003284 | 786.399  |
| NM_014419 | 2863.031  | 2799.625  | AK022037  | 133.87    | 98.792    | NM_018152 | 262.255  |
| NM_014938 | 2453.895  | 2113.051  | AK000141  | 1425.674  | 1140.439  | NM_000319 | 660.664  |
| AF049460  | 610.653   | 654.535   | AL137758  | 1028.227  | 985.296   | NM_012461 | 2814.231 |
| NM_000441 | 295.719   | 289.087   | AK025786  | 593.612   | 292.097   | AK001379  | 457.73   |
| AK026066  | 1622.341  | 1279.911  | AK024188  | 1293.33   | 917.779   | NM_017450 | 539.458  |
| NM_005244 | 2998.573  | 3294.563  | AK024379  | 263.113   | 160.892   | NM_002023 | 353.16   |
| NM_018158 | 2719.47   | 1998.879  | AK026820  | 620.667   | 378.529   | NM_002839 | 384.882  |
| NM_016301 | 8300.179  | 10297.22  | AK001716  | 1155.187  | 1420.077  | AF190500  | 342.013  |
| AK021975  | 835.453   | 1105.542  | AK026821  | 1273.701  | 855.502   | NM_005904 | 333.882  |
| AB032952  | 27876.598 | 27245.406 | AK026280  | 8681.064  | 6787.601  | NM_005273 | 5417.201 |
| NM_002522 | 16421.549 | 14435.018 | AF113017  | 4597.588  | 5423.503  | NM_000524 | 399.311  |
| NM_018607 | 525.788   | 284.402   | AL080232  | 5018.684  | 5523.963  | NM_006576 | 676.696  |
| NM_002978 | 3553.067  | 2829.185  | AK001120  | 4442.874  | 5223.19   | AB035266  | 1413.243 |
| NM_014668 | 1131.159  | 1748.188  | AF264629  | 232.321   | 281.009   | NM_003744 | 704.843  |
| NM_004722 | 1901.625  | 2516.667  | AK023224  | 2004.639  | 2046.589  | NM_006378 | 495.826  |
| NM_014425 | 1293.554  | 1227.847  | AK023731  | 3655.052  | 2952.801  | NM_014404 | 1011.921 |
| NM_012133 | 2030.418  | 1968.457  | AK023929  | 220.768   | 230.786   | NM_018713 | 637.955  |
| NM_017954 | 1001.683  | 701.448   | AK022442  | 844.85    | 940.143   | NM_015947 | 2774.193 |
| NM_006612 | 2268.795  | 2021.464  | AK026873  | 1323.008  | 818.792   | AB028944  | 154.648  |
| NM_016451 | 1705.754  | 1787.948  | AK026394  | 995.845   | 994.02    | AJ006268  | 457.679  |
| NM_007351 | 13197.628 | 13176.014 | NM_005445 | 597.796   | 434.014   | M74089    | 1269.695 |
| AK026266  | 7368.329  | 6977.415  | AK025943  | 8449.062  | 6867.327  | AF190864  | 2381.208 |
| NM_007124 | 4168.922  | 3727.762  | AF130069  | 12226.369 | 11897.774 | NM_002779 | 2769.972 |
| NM_003176 | 3035.424  | 2293.569  | AL109669  | 841.424   | 942.575   | L40397    | 7969.309 |
| AK023168  | 3100.715  | 2393.361  | AB037766  | 1558.492  | 1066.209  | NM_020198 | 2629.199 |
| NM_006646 | 1064.488  | 797.498   | AL133091  | 821.04    | 824.837   | AA098879  | 204.816  |
| NM_004742 | 925.518   | 660.947   | AF086212  | 609.359   | 422.566   | AF070525  | 1917.19  |
| NM_014753 | 2333.643  | 3348.909  | X82545    | 2413.233  | 3086.514  | NM_001177 | 436.158  |
| NM_006585 | 21476.693 | 35054.863 | AK024632  | 3604.062  | 3806.889  | NM_014447 | 805.472  |
| NM_014331 | 5003.655  | 4041.697  | NM_018474 | 4682.394  | 6614.15   | NM_002356 | 214.212  |
| NM_006795 | 10984.259 | 9883.912  | AK024937  | 458.652   | 492.384   | NM_006691 | 741.002  |
| AF070568  | 3123.022  | 1119.86   | AK022094  | 3087.785  | 3357.783  | NM_001505 | 298.685  |
| NM_000277 | 311.137   | 150.97    | AK026695  | 839.595   | 1188.069  | NM_003710 | 687.319  |
| NM_000240 | 3418.644  | 3531.141  | U84520    | 3472.473  | 3004.366  | Z83805    | 254.071  |
| AK055733  | 14971.596 | 14686.022 | Z11853    | 411.018   | 332.609   | NM_004666 | 537.875  |
| AF298880  | 6721.075  | 8911.342  | AL133616  | 3797.545  | 4306.945  | NM_003614 | 530.134  |
| AK001500  | 1279.674  | 856.51    | AK026382  | 2846.448  | 2340.476  | NM_014257 | 1304.301 |
| NM_006774 | 736.44    | 578.7     | AK091169  | 1934.524  | 1559.512  | NM_001140 | 417.012  |
| NM_020129 | 977.082   | 1222.412  | NM_014745 | 30383.484 | 28575.553 | NM_004843 | 1520.431 |
| Y16521    | 3571.282  | 3018.158  | AF086026  | 8285.938  | 9632.221  | NM_005204 | 845.357  |
| NM_003167 | 335.161   | 123.44    | AL133011  | 762.689   | 759.681   | NM_016203 | 368.416  |
| NM_002651 | 9132.648  | 5716.906  | NM_015607 | 7877.35   | 7517.302  | NM_002759 | 8967.599 |
| NM_002413 | 13237.698 | 10903.204 | AK026955  | 712.195   | 1192.1    | NM_006255 | 931.792  |
| NM_017577 | 797.918   | 578.166   | AL110202  | 7869.542  | 7682.529  | BE392143  | 1042.166 |
| NM_001757 | 5758.551  | 2345.262  | S46402    | 803.988   | 792.333   | NM_005813 | 824.71   |
| NM_001647 | 2833.916  | 3849.592  | Z83940    | 565.339   | 509.231   | AB037718  | 1947.989 |
| NM_006228 | 939.214   | 488.001   | NM_005800 | 1490.098  | 1435.287  | AL389994  | 401.643  |

|           |           |           |             |           |           |           |          |
|-----------|-----------|-----------|-------------|-----------|-----------|-----------|----------|
| NM_003768 | 3109.777  | 2952.129  | AF019617    | 8527.721  | 9815.737  | NM_003909 | 3643.406 |
| BF032535  | 3330.025  | 3717.926  | AL137305    | 4845.625  | 5109.61   | NM_001277 | 5256.678 |
| NM_018332 | 3811.135  | 5381.892  | NM_005290   | 577.76    | 566.661   | NM_003659 | 2994.66  |
| NM_005096 | 11068.672 | 14103.614 | AF085973    | 358.922   | 477.228   | NM_007072 | 1482.142 |
| NM_006760 | 1133.789  | 1027.662  | NM_018013   | 2108.257  | 4392.51   | NM_012320 | 5441.497 |
| NM_012289 | 4802.292  | 2828.038  | AK022517    | 1410.8    | 767.735   | NM_018208 | 1860.302 |
| AB037775  | 1140.811  | 623.117   | NM_000329   | 8913.264  | 5616.551  | NM_015929 | 2843.852 |
| L27560    | 2064.999  | 1613.622  | NM_001182   | 11464.549 | 9241.338  | U90653    | 1086.411 |
| AB011174  | 1198.085  | 1376.645  | NM_000333   | 1758.659  | 1486.388  | NM_000196 | 240.236  |
| AB040879  | 1657.296  | 1577.07   | NM_000172   | 4859.122  | 5603.509  | NM_018339 | 974.446  |
| AL049935  | 3406.532  | 3882.409  | NM_002297   | 5511.392  | 6244.223  | NM_006745 | 5411.624 |
| AB033043  | 6149.236  | 6083.391  | AB040968    | 19426.531 | 18169.225 | NM_000275 | 304.591  |
| NM_014999 | 2102.621  | 1872.343  | X85323      | 1688.109  | 1370.453  | AK000037  | 397.958  |
| AK025220  | 1769.59   | 2229.272  | U17615      | 3837.171  | 3607.65   | NM_014760 | 647.616  |
| NM_016308 | 10839.012 | 12599.765 | NM_005303   | 6145.163  | 7441.1    | NM_018398 | 637.088  |
| D42046    | 4174.285  | 2512.95   | NM_016126   | 12823.354 | 8759.011  | NM_002560 | 3141.229 |
| NM_004526 | 5273.429  | 12759.532 | U84119      | 1003.546  | 809.319   | NM_000787 | 252.729  |
| NM_002526 | 6537.051  | 7722.642  | NM_003608   | 1140.19   | 997.056   | U57962    | 4058.954 |
| NM_020135 | 2050.955  | 2438.625  | AF302079    | 14139.981 | 12155.993 | NM_016176 | 2454.916 |
| NM_018518 | 2808.089  | 3154.347  | AJ224167    | 295.513   | 428.99    | NM_005574 | 5187.03  |
| AK023149  | 1141.368  | 1331.828  | NM_002550   | 696.169   | 904.355   | NM_017895 | 3747.189 |
| NM_006438 | 1412.592  | 837.864   | NM_000692   | 1509.23   | 1818.848  | NM_004610 | 1008.193 |
| NM_001845 | 1946.17   | 1013.334  | AF086062    | 2220.735  | 2061.034  | NM_001612 | 297.701  |
| AK024697  | 974.178   | 2873.789  | AF000268    | 684.221   | 1117.46   | AK027002  | 1147.179 |
| NM_006460 | 5502.655  | 5764.308  | L47668      | 37831.895 | 38763.012 | AB025254  | 1910.605 |
| L34156    | 601.187   | 640.101   | NM_017920   | 3534.214  | 6344.272  | NM_000025 | 6783.147 |
| NM_003749 | 8318.493  | 12373.083 | AK025345    | 542.785   | 1329.33   | D38521    | 1099.961 |
| NM_003557 | 2472.306  | 1389.142  | D25274      | 9768.525  | 10565.833 | NM_000403 | 1589.981 |
| NM_001257 | 15269.746 | 8659.626  | CY3Cy5      | 3539.001  | 209.204   | NM_018127 | 3765.492 |
| D85245    | 10019.202 | 7330.262  | D50373      | 1291.458  | 1045.98   | AB020677  | 1987.125 |
| NM_000943 | 4448.292  | 1763.631  | AA488757    | 11910.061 | 8336.974  | AB033097  | 1045.125 |
| NM_004658 | 2097.668  | 1818.056  | H07071      | 2135.867  | 1314.217  | NM_000135 | 598.595  |
| NM_001250 | 9666.541  | 6475.122  | M25322      | 4174.598  | 2019.352  | AJ223948  | 964.414  |
| AF298812  | 1502.645  | 1649.194  | AA436187    | 1021.792  | 257.837   | NM_016218 | 365.579  |
| NM_004969 | 2091.344  | 1942.35   | H-L 27586 I | 1601.251  | 765.301   | AK022947  | 712.651  |
| AJ249900  | 739.397   | 670.475   | ID 214180   | 1387.228  | 632.704   | AL050029  | 746.72   |
| AK022581  | 2521.324  | 4765.803  | ID 1867426  | 11781.963 | 6805.146  | NM_004063 | 348.341  |
| NM_018054 | 2559.923  | 3202.59   | ID 396450   | 774.98    | 604.323   | AB040976  | 1795.046 |
| NM_006186 | 1059.435  | 752.891   | W99328      | 1434.848  | 1281.542  | NM_018641 | 556.701  |
| NM_000958 | 2475.398  | 2235.806  | AI434176    | 765.843   | 500.307   | NM_002221 | 325.328  |
| NM_001401 | 1097.049  | 1149.277  | H08563      | 1217.624  | 1131.967  | NM_002371 | 133.71   |
| NM_013271 | 13103.512 | 10539.259 | BE735403    | 2173.212  | 4028.997  | NM_002562 | 60.246   |
| NM_004157 | 3798.745  | 4689.809  | NM_022552   | 4089.376  | 4865.207  | AK024502  | 1319.784 |
| NM_000684 | 1269.893  | 1699.957  | NM_014389   | 8965.407  | 10227.973 | NM_001124 | 342.954  |
| NM_015913 | 16506.504 | 16881.893 | SR2         | 47936.422 | 48249.926 | NM_004586 | 1346.001 |
| NM_005157 | 5774.898  | 7392.774  | SR4         | 20357.646 | 20089.988 | NM_004844 | 5439.142 |
| NM_007354 | 902.643   | 1377.884  | SR6         | 1863.524  | 1873.436  | NM_013447 | 1787.786 |
| U67037    | 3547.752  | 5130.68   | SR8         | 8899.065  | 30479.631 | NM_000051 | 1572.842 |
| NM_004960 | 14694.562 | 37572.91  | SR10        | 33938.707 | 14345.743 | NM_004180 | 1739.987 |
| AF272370  | 5190.358  | 8799.026  | CY3Cy5      | 4300.269  | 314.779   | NM_004786 | 17100.51 |
| AF130050  | 4674.096  | 3931.709  | NM_005811   | 5475.247  | 6465.265  | AF302109  | 1235.289 |
| AK023045  | 422.818   | 281.706   | NM_005764   | 1318.233  | 1469.488  | AL117485  | 3768.394 |
| NM_012197 | 4214.041  | 2112.865  | NM_004329   | 7267.714  | 5903.78   | NM_003505 | 271.291  |

|           |           |           |           |           |           |           |           |
|-----------|-----------|-----------|-----------|-----------|-----------|-----------|-----------|
| AK024016  | 1862.426  | 2004.5    | NM_002836 | 3105.48   | 2605.29   | NM_007191 | 541.647   |
| NM_003581 | 4246.626  | 6682.756  | NM_020167 | 3419.604  | 2272.082  | AL109667  | 368.356   |
| NM_002888 | 310.713   | 301.998   | AL049963  | 17022.258 | 10604.471 | NM_000840 | 490.348   |
| NM_012407 | 1299.191  | 1211.7    | NM_016058 | 40585.727 | 18429.305 | NM_004476 | 271.219   |
| AF302505  | 565.459   | 248.756   | NM_014005 | 3201.375  | 2824.634  | NM_003155 | 176.362   |
| NM_007186 | 1366.47   | 1342.565  | NM_004636 | 1495.916  | 1964.168  | AF205437  | 1032.228  |
| NM_007044 | 1786.675  | 2829.448  | AK022603  | 1432.92   | 917.68    | AF034102  | 3429.065  |
| AF294326  | 5109.408  | 7790.874  | NM_004896 | 13213.539 | 7913.509  | AJ008142  | 6827.939  |
| NM_014678 | 2348.442  | 4432.411  | NM_013372 | 840.026   | 634.054   | NM_001343 | 2235.732  |
| NM_012317 | 56606.84  | 56010.891 | NM_003976 | 4881.622  | 4668.542  | NM_007275 | 3517.528  |
| NM_017853 | 1779.585  | 1191.68   | NM_017688 | 1389.499  | 1915.328  | NM_019025 | 10871.044 |
| NM_016097 | 7856.145  | 9174.453  | AK025612  | 7313.273  | 9813.467  | NM_018461 | 1318.187  |
| AB035301  | 621.487   | 659.694   | NM_012268 | 5324.298  | 10168.18  | AF235023  | 585.223   |
| AB046800  | 4062.599  | 4051.289  | NM_012203 | 1008.365  | 1295.468  | NM_006910 | 1804.466  |
| NM_002162 | 3909.125  | 3348.281  | NM_003296 | 474.705   | 803.458   | AF162667  | 1085.896  |
| NM_015458 | 3060.573  | 3898.333  | NM_004736 | 3036.184  | 3489.669  | AB046847  | 1166.61   |
| D13540    | 5764.792  | 7602.015  | NM_006895 | 815.495   | 1012.683  | NM_000447 | 1223.806  |
| NM_016570 | 7690.476  | 12306.637 | NM_006459 | 8591.949  | 14458.708 | NM_006354 | 2491.501  |
| AF209198  | 1531.774  | 2296.188  | AA427949  | 304.096   | 681.644   | AF303378  | 1481.963  |
| L09247    | 959.297   | 1004.835  | NM_003827 | 6610.155  | 3454.01   | NM_016037 | 2028.718  |
| NM_006936 | 14074.008 | 10099.322 | NM_004583 | 622.671   | 645.25    | NM_000417 | 1168.55   |
| NM_001327 | 5760.253  | 4392.591  | NM_001103 | 1112.143  | 972.268   | NM_020356 | 433.671   |
| AF321182  | 390.346   | 293.842   | AF228710  | 13587.009 | 9835.513  | AF152527  | 257.129   |
| NM_003652 | 716.065   | 667.76    | NM_018399 | 884.184   | 657.783   | NM_018235 | 13711.381 |
| NM_000063 | 1514.804  | 930.53    | AY007131  | 34225.641 | 38545.863 | NM_012104 | 6045.416  |
| NM_018389 | 1157.385  | 831.324   | U61735    | 4481.05   | 4259.058  | NM_006144 | 264.612   |
| AB033026  | 1273.979  | 1198.406  | NM_001144 | 1973.406  | 3025.771  | AL136549  | 324.379   |
| AF104914  | 8889.475  | 14425.283 | AK023766  | 5859.685  | 5645.55   | NM_012168 | 191.246   |
| NM_014716 | 3028.096  | 2348.81   | NM_001897 | 2690.094  | 2489.74   | NM_002216 | 154.663   |
| AB002354  | 449.558   | 97.129    | NM_003853 | 1537.378  | 2140.202  | NM_007038 | 562.855   |
| AK023845  | 1988.798  | 1763.324  | AB033109  | 2981.568  | 2314.872  | AF311324  | 430.813   |
| NM_002638 | 3388.889  | 3740.145  | NM_002053 | 17846.734 | 19005.955 | AK001647  | 109.756   |
| NM_016487 | 872.956   | 905.628   | NM_006889 | 2547.333  | 2208.706  | NM_001461 | 317.413   |
| NM_005808 | 6349.145  | 5733.202  | NM_002438 | 2419.531  | 2914.595  | AF061556  | 470.68    |
| NM_006401 | 9606.318  | 24368.133 | NM_014589 | 4314.734  | 5040.862  | AL162049  | 370.166   |
| AF269249  | 855.364   | 1015.867  | NM_000759 | 2594.921  | 2683.314  | NM_005032 | 348.572   |
| D31763    | 3002.572  | 1848.741  | AK023334  | 2070.115  | 2465.808  | NM_004160 | 1391.203  |
| NM_018169 | 8544.561  | 4408.165  | NM_002563 | 7922.418  | 8085.78   | AL109677  | 360.639   |
| NM_004506 | 1554.984  | 1058.779  | NM_002437 | 1791.666  | 2074.066  | NM_003941 | 12249.761 |
| S74529    | 34495.125 | 30344.299 | D79991    | 1618.996  | 2061.84   | AF177909  | 506.983   |
| NM_020227 | 453.588   | 272.782   | AK022425  | 769.277   | 804.973   | NM_002664 | 1997.834  |
| NM_005933 | 844.306   | 587.867   | NM_000054 | 8775.238  | 13633.639 | AB018271  | 1856.342  |
| NM_001421 | 916.514   | 955.338   | NM_014713 | 6712.646  | 7160.308  | AL137665  | 1433.879  |
| M73837    | 1027.771  | 1104.444  | NM_001812 | 2387.358  | 2008.741  | U36561    | 66337     |
| U69127    | 21612.174 | 21504.895 | NM_014785 | 1093.964  | 1401.795  | NM_005634 | 291.284   |
| NM_005839 | 4086.755  | 3610.454  | NM_006033 | 7221.233  | 5645.151  | NM_017757 | 1323.845  |
| AK023379  | 1091.595  | 954.035   | NM_004837 | 5267.44   | 4983.22   | NM_002146 | 4208.389  |
| NM_006076 | 344.369   | 252.663   | NM_000370 | 2199.4    | 1563.266  | AB007892  | 743.856   |
| AK021904  | 8129.031  | 8189.883  | BE865893  | 4746.661  | 3364.879  | AB037748  | 228.162   |
| -         | 1245.114  | 1263.981  | NM_003123 | 66801.313 | 53670.859 | AB002306  | 348.504   |
| NM_014370 | 38.152    | 2477.207  | AY005822  | 4006.009  | 2927.34   | NM_001300 | 2356.212  |
| NM_018292 | 607.438   | 569.76    | NM_018129 | 26097.611 | 32300.008 | NM_012472 | 367.96    |
| AL049705  | 6136.917  | 5147.623  | AF289022  | 2988.221  | 2223.133  | NM_018187 | 2039.7    |

|           |           |           |             |           |           |           |           |
|-----------|-----------|-----------|-------------|-----------|-----------|-----------|-----------|
| AK022294  | 1188.721  | 2042.52   | AB002326    | 578.1     | 626.997   | NM_003016 | 3688.901  |
| AF086507  | 1194.786  | 821.014   | M17252      | 635.875   | 899.754   | NM_005463 | 6024.385  |
| U79289    | 1920.881  | 1111.056  | NM_016025   | 3645.042  | 2726.826  | NM_001325 | 1066.67   |
| NM_014028 | 3514.116  | 3290.422  | NM_013319   | 2397.89   | 2014.823  | NM_018282 | 4627.384  |
| NM_000402 | 1823.761  | 2285.884  | NM_000746   | 2321.992  | 1719.301  | AF114818  | 834.432   |
| NM_004273 | 454.96    | 492.211   | NM_000722   | 1502.874  | 1847.229  | AK025106  | 1278.039  |
| NM_000690 | 5985.986  | 3966.71   | NM_006030   | 1914.953  | 2510.821  | NM_020144 | 943.832   |
| NM_000155 | 5057.772  | 3089.045  | NM_020410   | 7632.745  | 7083.759  | NM_003908 | 18869.676 |
| NM_000181 | 8990.541  | 5697.645  | AF000143    | 17451.766 | 27811.414 | BE893142  | 559.748   |
| NM_014121 | 667.027   | 493.622   | NM_014211   | 792.229   | 1041.121  | NM_003103 | 721.841   |
| NM_006730 | 2875.122  | 2380.875  | NM_000814   | 2344.973  | 3083.248  | NM_015340 | 1222.087  |
| NM_005644 | 3995.529  | 3032.49   | NM_000453   | 3733.82   | 3724.394  | NM_006451 | 502.506   |
| NM_018442 | 2210.544  | 2983.155  | J03077      | 11714.068 | 10866.992 | NM_002094 | 257.888   |
| AF182416  | 3160.656  | 3794.002  | J03048      | 11290.033 | 14489.63  | NM_002937 | 265.104   |
| NM_005995 | 13734.002 | 11475.649 | AL157469    | 624.661   | 930.407   | AL137476  | 3159.152  |
| NM_006015 | 852.716   | 652.417   | NM_002868   | 3115.104  | 6382.006  | AF052174  | 560.08    |
| NM_004634 | 1788.292  | 1724.802  | AK024100    | 3529.657  | 5559.685  | AF070590  | 385.818   |
| NM_002017 | 4271.745  | 4321.377  | NM_005135   | 1623.036  | 1748.128  | NM_000761 | 9089.052  |
| NM_017523 | 5811.943  | 6093.618  | NM_000317   | 7744.767  | 6511.586  | NM_020142 | 953.122   |
| NM_002382 | 11382.954 | 12929.911 | NM_018376   | 6253.497  | 3977.75   | NM_000774 | 868.759   |
| NM_002158 | 640.128   | 678.14    | NM_017438   | 1781.93   | 1129.333  | NM_017781 | 19535.197 |
| U13223    | 5331.527  | 6343.682  | U59209      | 1312.412  | 931.16    | NM_006004 | 34770.98  |
| NM_016270 | 3417.306  | 1633.796  | NM_020195   | 4005.093  | 1591.061  | NM_004894 | 4953.881  |
| AK001357  | 1852      | 2769.479  | AK023824    | 5394.398  | 4532.228  | AB028960  | 297.896   |
| NM_015721 | 1579.183  | 2286.855  | AL133069    | 4553.348  | 2742.519  | NM_005648 | 9821.603  |
| AF086298  | 1233.069  | 1545.429  | AL117574    | 1040.438  | 745.393   | AK000689  | 250.767   |
| AK027238  | 1197.007  | 1445.989  | AK026055    | 5386.532  | 3853.526  | NM_006943 | 1780.655  |
| AK000032  | 495.861   | 824.853   | AK024126    | 1741.88   | 1383.662  | NM_006741 | 1633.035  |
| AK025758  | 1157.596  | 1529.408  | NM_001516   | 4656.553  | 5040.725  | NM_014166 | 2075.576  |
| AL360201  | 470.687   | 153.841   | NM_002744   | 4347.877  | 7934.4    | AL117606  | 1780.316  |
| S94540    | 12841.553 | 10435.038 | NM_015917   | 8015.867  | 7691.067  | NM_012330 | 635.362   |
| U79297    | 219.096   | 779.816   | NM_020397   | 728.902   | 1365.252  | AF294278  | 415.21    |
| AK002164  | 2689.309  | 668.175   | NM_000061   | 4099.125  | 5841.94   | NM_018211 | 720.723   |
| AF052122  | 10715.845 | 8359.677  | AB046859    | 16036.423 | 21327.709 | NM_014520 | 883.42    |
| NM_001310 | 1682.924  | 1904.81   | NM_005109   | 7422.109  | 8427.247  | AL117508  | 180.386   |
| AK026924  | 5779.651  | 5721.911  | AK023573    | 3301.822  | 5171.148  | NM_002616 | 547.311   |
| AL122047  | 4802.353  | 7010.519  | NM_002730   | 5919.278  | 4355.772  | AF052497  | 245.87    |
| AF052091  | 1102.673  | 736.047   | NM_004828   | 3121.493  | 3976.352  | AK026375  | 240.355   |
| AK024447  | 33188.848 | 43141.781 | AB011540    | 34399.539 | 46485.273 | U85992    | 464.716   |
| AF052145  | 937.39    | 1190.975  | NM_000040   | 11089.544 | 15246.58  | AL110152  | 281.466   |
| AF086458  | 1219.038  | 1756.874  | NM_004631   | 4290.133  | 5612.212  | AF131745  | 61.039    |
| AF086548  | 3115.36   | 2803.473  | NM_003296   | 588.808   | 911.925   | AL117565  | 1804.116  |
| AK024350  | 440.556   | 1126.512  | NM_004736   | 2312.064  | 2238.688  | AF147305  | 225.401   |
| AK023717  | 1237.282  | 1392.028  | NM_006895   | 1073.177  | 1478.249  | AK022109  | 794.008   |
| AK023727  | 832.332   | 1151.77   | NM_006459   | 6343.523  | 8435.109  | AK022103  | 296.347   |
| AK025271  | 635.065   | 857.76    | AA427949    | 245.314   | 418.546   | AK021527  | 271.738   |
| AF086204  | 3852.428  | 5616.927  | D50373      | 2233.819  | 1512.933  | AF143882  | 375.246   |
| NM_007021 | 851.964   | 1495.542  | AA488757    | 13948.57  | 14851.439 | U00953    | 483.303   |
| AK026283  | 382.424   | 581.506   | AA205399    | 498.697   | 142.136   | AF086176  | 569.552   |
| AK022076  | 515.86    | 682.281   | AI394286    | 2051.932  | 2115.344  | NM_017742 | 440.279   |
| AK023065  | 288.346   | 710.35    | AA436187    | 1220.614  | 725.016   | NM_005108 | 624.073   |
| NM_017678 | 329.102   | 140.649   | H-L 27586 I | 1708.412  | 907.086   | AK022292  | 847.263   |
| AK021570  | 829.204   | 604.488   | ID 214180   | 1273.91   | 917.358   | AB051436  | 599.799   |

|           |           |           |            |           |           |           |          |
|-----------|-----------|-----------|------------|-----------|-----------|-----------|----------|
| AL360204  | 403.073   | 225.011   | ID 1867426 | 9330.295  | 10850.99  | AK026482  | 2721.353 |
| AK000103  | 1303.168  | 797.524   | ID 396450  | 469.571   | 570.662   | AL137473  | 555.618  |
| AF085959  | 679.838   | 496.049   | W99328     | 1135.292  | 1508.048  | AJ001873  | 1598.458 |
| AF075107  | 674.997   | 521.083   | AI434176   | 593.38    | 619.107   | AB026054  | 223.603  |
| AK023104  | 753.272   | 700.307   | H08563     | 1229.768  | 1361.281  | AK022604  | 273.655  |
| AK022181  | 302.852   | 270.982   | BE735403   | 2190.369  | 3551.897  | U66048    | 660.49   |
| AK026923  | 2326.082  | 1883.403  | NM_022552  | 4059.594  | 4356.67   | AK023401  | 1413.539 |
| Y11177    | 598.642   | 976.405   | NM_014389  | 9882.047  | 11638.898 | AK001865  | 179.015  |
| U61091    | 422.603   | 663.583   | NM_001718  | 665.218   | 748.533   | AK024035  | 6809.811 |
| AK021691  | 8112.244  | 8331.831  | AF116659   | 3589.829  | 4513.768  | AL049331  | 253.919  |
| AK023595  | 369.749   | 452.646   | D79991     | 1043.911  | 1628.802  | AL050079  | 1027.4   |
| AK022037  | 238.314   | 672.416   | AK022425   | 685.838   | 365.724   | AL080233  | 1992.613 |
| AK000141  | 2799.501  | 2521.419  | NM_000054  | 5771.195  | 7106.889  | AL050132  | 272.933  |
| AL137758  | 1655.701  | 1669.475  | NM_014713  | 5965.967  | 4758.093  | AL117663  | 1365.714 |
| AK023865  | 219.413   | 560.669   | NM_001812  | 1797.953  | 1506.378  | NM_014293 | 1043.051 |
| AK025786  | 1344.302  | 1459.741  | NM_014785  | 855.826   | 1101.387  | AK024432  | 625.838  |
| AK024188  | 1193.574  | 1185.003  | NM_005811  | 5294.551  | 4180.847  | AF088001  | 402.091  |
| AK024379  | 464.244   | 769.234   | NM_005764  | 1217.173  | 683.328   | NM_018067 | 1659.524 |
| AK026820  | 834.683   | 587.583   | NM_004214  | 8321.989  | 5324.338  | NM_018956 | 2946.346 |
| AK001716  | 1544.679  | 1146.934  | NM_004329  | 7546.913  | 7983.915  | NM_014787 | 809.171  |
| AK026821  | 826.206   | 571.031   | NM_002836  | 3122.544  | 2953.85   | AL122109  | 684.579  |
| AK026280  | 5541.516  | 3712.075  | NM_020167  | 3193.101  | 1825.329  | AF074988  | 1052.857 |
| AF113017  | 2772.072  | 3129.754  | AL049963   | 14749.883 | 11768.966 | AK024946  | 619.07   |
| AL080232  | 5411.205  | 4935.055  | NM_016058  | 34293.848 | 20166.535 | AK001432  | 843.111  |
| AK001120  | 3176.534  | 4250.017  | NM_014005  | 2492.717  | 3097.246  | AL133568  | 927.321  |
| AK022416  | 439.172   | 764.728   | NM_004636  | 1312.257  | 2655.399  | AF009265  | 513.081  |
| AK023224  | 2286.653  | 1112.782  | AK022603   | 1215.454  | 1334.562  | AF009309  | 955.062  |
| AK023731  | 1575.286  | 1422.241  | NM_004896  | 12852.561 | 6316.234  | NM_002360 | 985.451  |
| AK022442  | 936.762   | 855.899   | NM_013372  | 222.014   | 850.855   | AF009274  | 188.508  |
| AK023336  | 1106.101  | 1228.658  | NM_003976  | 5541.951  | 5193.777  | AF009322  | 551.682  |
| AK023771  | 586.967   | 829.794   | NM_017688  | 1687.184  | 2306.077  | AF056425  | 1170.237 |
| AK024099  | 271.432   | 452.978   | AK025612   | 9143.944  | 11962.573 | AF090893  | 430.842  |
| AK026873  | 3005.152  | 2436.9    | NM_012268  | 5416.027  | 10446.402 | NM_018033 | 3562.886 |
| AK026394  | 2808.636  | 3728.398  | NM_012203  | 1288.805  | 1428.277  | AK001945  | 606.729  |
| NM_005448 | 1274.857  | 1122.596  | J03077     | 10041.334 | 8009.817  | AK021541  | 654.987  |
| AK025943  | 14860.941 | 11944.227 | J03048     | 10468.502 | 11382.126 | AK021766  | 435.845  |
| BG106479  | 1208.474  | 949.336   | AL157469   | 588.834   | 611.271   | AK001147  | 343.948  |
| AF130069  | 14932.526 | 13923.129 | NM_002868  | 2114.867  | 4166.803  | AK021630  | 995.609  |
| AL109669  | 1084.472  | 1229.268  | AK024100   | 2620.584  | 2937.47   | AK021831  | 701.633  |
| AB037766  | 1581.058  | 1514.907  | NM_005135  | 1173.759  | 1319.075  | AK025650  | 2740.871 |
| AK026995  | 407.831   | 315.503   | NM_003827  | 6487.284  | 5423.428  | AK026401  | 912.492  |
| AL133091  | 1070.878  | 502.294   | NM_004583  | 641.08    | 596.947   | AK026773  | 487.401  |
| X82545    | 3760.67   | 2923.053  | NM_001103  | 729.638   | 494.078   | AK025893  | 119.896  |
| AK024632  | 4843.171  | 4100.505  | AF228710   | 17680.713 | 13584.524 | AF086158  | 771.716  |
| NM_018474 | 5704.588  | 5150.595  | NM_018399  | 683.371   | 573.468   | AF086050  | 387.526  |
| AK024937  | 910.215   | 803.794   | U61735     | 3750.864  | 3611.041  | AF147375  | 715.47   |
| D17178    | 803.501   | 781.958   | NM_001144  | 1382.166  | 2283.655  | X51524    | 9331.598 |
| AK022094  | 3492.242  | 4159.708  | AK023766   | 5492.338  | 4649.065  | AK025759  | 735.154  |
| AK026695  | 1332.934  | 2431.795  | NM_001897  | 2408.91   | 3025.22   | AK024105  | 155.015  |
| AK022220  | 553.57    | 681.598   | NM_003853  | 1084.477  | 2496.485  | AJ238556  | 270.225  |
| AL137539  | 497.656   | 644.675   | AB033109   | 2737.521  | 3231.11   | AK021516  | 988.399  |
| U84520    | 3020.989  | 3993.941  | NM_002053  | 18483.176 | 25181.82  | Z70699    | 346.794  |
| AL133616  | 2388.799  | 5141.858  | NM_006889  | 2539.022  | 2219.515  | AL049919  | 245.343  |

|           |           |           |           |           |           |           |           |
|-----------|-----------|-----------|-----------|-----------|-----------|-----------|-----------|
| AK026382  | 2223.354  | 2623.179  | NM_00243E | 2310.906  | 2250.598  | NM_00689E | 565.076   |
| AK091169  | 3328.996  | 3962.593  | NM_01458E | 4861.218  | 5864.835  | AK023429  | 277.711   |
| NM_01474E | 36526.441 | 31091.066 | NM_00075E | 2465.548  | 2926.958  | AK022276  | 377.546   |
| AF086026  | 6465.881  | 7691.823  | AK023334  | 2118.091  | 2619.411  | AK026881  | 235.473   |
| AL133011  | 639.983   | 308.323   | NM_00256E | 7908.589  | 8693.917  | AL133653  | 328.052   |
| NM_01630C | 609.893   | 317.417   | NM_002437 | 2248.293  | 2185.799  | AK023774  | 357.699   |
| NM_015607 | 23352.482 | 16512.668 | AK023573  | 2907.685  | 2974.24   | AL049377  | 562.601   |
| AK026955  | 1137.292  | 1281.65   | NM_00273C | 5655.911  | 3459.801  | NM_003544 | 6143.386  |
| AL110202  | 11687.581 | 10117.501 | NM_00482E | 2803.6    | 2329.914  | U17640    | 568.401   |
| AK021980  | 665.174   | 942.512   | AB011540  | 24165.088 | 29608.814 | AK001187  | 910.672   |
| S46402    | 1163.027  | 1148.693  | NM_00004C | 6832.353  | 7701.565  | NM_00352E | 10582.916 |
| AF075048  | 430.14    | 486.394   | NM_004631 | 3336.558  | 3590.16   | AF056436  | 846.066   |
| Z83940    | 943.454   | 1076.392  | NM_00603E | 6414.042  | 10755.237 | AB023191  | 683.322   |
| NM_00580C | 1381.157  | 1438.7    | NM_004837 | 5510.888  | 5844.37   | AK027212  | 2034.237  |
| AF019617  | 6402.726  | 4701.053  | BE865893  | 4728.748  | 3943.709  | X56197    | 350.405   |
| AL137305  | 7641.526  | 4978.021  | NM_00312E | 60593.555 | 50180.844 | NM_00519E | 2343.23   |
| NM_00529C | 686.285   | 782.474   | NM_01812E | 20158.543 | 31223.275 | U90905    | 933.569   |
| AK025802  | 609.795   | 1169.505  | AF289022  | 2097.909  | 2058.857  | AF161422  | 899.299   |
| AF085973  | 762.052   | 724.18    | NM_01602E | 3160.913  | 2984.537  | AL137384  | 1156.594  |
| NM_00543C | 440.972   | 919.697   | NM_01331E | 2107.453  | 2447.651  | AF070619  | 1018.657  |
| NM_01801E | 2485.22   | 5156.629  | NM_00074E | 2070.216  | 2236.629  | NM_005321 | 1822.78   |
| NM_00032E | 23703.693 | 27248.299 | NM_00072E | 1636.703  | 2213.579  | AF073520  | 514.309   |
| NM_001182 | 5651.09   | 7138.855  | NM_00603C | 2081.573  | 2825.882  | NM_01401E | 2199.595  |
| AF143328  | 263.054   | 408.575   | NM_02041C | 8171.253  | 8708.227  | AK026839  | 272.136   |
| NM_00033E | 2149.142  | 3434.949  | AF000143  | 17135.498 | 26792     | Z34278    | 292.632   |
| NM_00017E | 2646.166  | 4344.603  | NM_014211 | 649.848   | 1051.543  | AK024973  | 476.348   |
| NM_002297 | 3357.871  | 3648.016  | NM_000814 | 1958.584  | 2136.223  | AJ008123  | 2975.94   |
| AB040968  | 10414.9   | 10430.364 | NM_00045E | 3126.802  | 2827.052  | AJ008156  | 649.859   |
| X85323    | 892.563   | 924.689   | NM_02255E | 3586.086  | 2739.733  | AF147321  | 265.818   |
| U17615    | 1803.286  | 1050.48   | NM_01438E | 2741.769  | 2750.052  | AF161437  | 2211.684  |
| NM_00530E | 4542.888  | 4035.295  | NM_00171E | 490.208   | 240.44    | AK001039  | 1505.822  |
| NM_01612E | 5963.37   | 7285.375  | AF116659  | 2400.488  | 2096.045  | AK026465  | 578.069   |
| NM_00360E | 1564.928  | 1450.574  | NM_000317 | 7114.31   | 8918.938  | AK024321  | 404.445   |
| AF302079  | 13871.793 | 14299.798 | NM_01837E | 6342.51   | 4650.153  | AK001582  | 228.499   |
| AJ224167  | 608.774   | 734.156   | NM_01743E | 2030.058  | 1352.878  | U52834    | 534.499   |
| NM_00255C | 657.036   | 696.021   | U59209    | 1630.395  | 741.765   | AJ227898  | 164.146   |
| NM_00069E | 1526.293  | 1176.419  | NM_02019E | 2043.551  | 1252.23   | NM_00353E | 452.033   |
| AF086062  | 1387.024  | 1104.101  | AK023824  | 4636.752  | 6247.534  | NM_01786E | 1828.796  |
| AF000268  | 550.289   | 713.916   | AL133069  | 4002.071  | 4356.689  | U17627    | 537.127   |
| L47668    | 30243.254 | 43629.199 | AL117574  | 1702.626  | 2509.248  | AF075100  | 471.337   |
| NM_01792C | 3438.173  | 6565.573  | AK026055  | 5472.474  | 5243.141  | AF203447  | 3934.994  |
| AK025345  | 868.501   | 1469.745  | AK024126  | 1511.487  | 1908.272  | NM_01850E | 533.085   |
| D25274    | 9087.843  | 12394.79  | NM_00151E | 4748.417  | 6559.924  | AL080066  | 3968.801  |
| CY3Cy5    | 3532.368  | 226.478   | NM_002744 | 5401.145  | 9358.909  | AJ227870  | 397.488   |
| D50373    | 780.524   | 929.514   | NM_015917 | 8684.924  | 9357.874  | AL137620  | 396.709   |
| AA488757  | 11651.696 | 12827.815 | NM_020397 | 977.415   | 1277.355  | NM_005294 | 815.028   |
| AI394286  | 3372.945  | 2451.102  | NM_000061 | 3833.25   | 4525.792  | AK026879  | 216.657   |
| H07071    | 4635.206  | 5214.938  | AB046859  | 13062.382 | 14612.647 | AK024362  | 475.677   |
| M25322    | 4272.697  | 3414.895  | NM_00510E | 6669.674  | 5957.436  | AF118068  | 694.663   |
| W99328    | 1312.752  | 1804.746  | NM_00397E | 4359.957  | 3094.237  | NM_004164 | 241.095   |
| AI434176  | 606.897   | 720.66    | NM_01768E | 1792.676  | 2205.671  | NM_01901E | 3913.232  |
| NM_01438E | 9582.191  | 9330.855  | AK025612  | 3940.682  | 4250.204  | M87931    | 717.582   |
| CY3Cy5    | 5912.625  | 430.984   | NM_01226E | 2730.41   | 3966.239  | CY3Cy5    | 3823.47   |

|           |           |           |            |           |           |           |           |
|-----------|-----------|-----------|------------|-----------|-----------|-----------|-----------|
| NM_005811 | 5127.837  | 3778.819  | NM_012203  | 912.886   | 955.071   | L35594    | 714.992   |
| NM_005764 | 1420.771  | 1402.836  | NM_003296  | 563.029   | 364.324   | BE790116  | 1801.167  |
| NM_016362 | 1949.071  | 1645.457  | NM_004736  | 2559.5    | 2331.558  | AI922341  | 946.103   |
| NM_004214 | 6209.226  | 6366.289  | NM_006459  | 5570.442  | 9320.177  | AA410517  | 851.792   |
| NM_004329 | 9477.61   | 10940.656 | AA427949   | 1681.457  | 1236.751  | M12824    | 1957.309  |
| NM_002836 | 4002.911  | 4249.566  | D50373     | 3562.739  | 3675.155  | W60100    | 1670.091  |
| NM_017688 | 2165.171  | 3083.832  | AA488757   | 11759.96  | 12410.043 | M24898    | 607.469   |
| NM_012203 | 809.441   | 846.778   | AI394286   | 1614.696  | 2123.534  | U72508    | 271.747   |
| NM_003296 | 475.74    | 727.752   | H07071     | 2677.697  | 2846.193  | AA457153  | 1085.073  |
| NM_004736 | 3399.185  | 4456.182  | M25322     | 3617.057  | 4103.642  | AA283122  | 1576.112  |
| NM_006895 | 963.576   | 1072.947  | ID 1867426 | 10967.49  | 8890.2    | AA868504  | 387.577   |
| NM_006459 | 4518.437  | 8914.159  | ID 396450  | 806.813   | 1101.583  | AA877845  | 3816.969  |
| NM_003827 | 6395.185  | 5253.805  | W99328     | 1029.194  | 1362.835  | AA664241  | 22364.541 |
| NM_004583 | 647.08    | 756.3     | AI434176   | 416.942   | 650.953   | AI016456  | 1307.917  |
| NM_001103 | 560.14    | 584.493   | BE735403   | 1873.735  | 2018.924  | NM_000588 | 19023.934 |
| AF228710  | 22022.871 | 17561.271 | NM_002438  | 1705.476  | 1514.857  | SR5       | 4956.642  |
| NM_018399 | 642.975   | 459.624   | NM_014589  | 3796.754  | 3246.434  | SR7       | 5547.771  |
| AY007131  | 29965.486 | 36390.348 | NM_000759  | 2048.457  | 2202.589  | SR9       | 10762.717 |
| U61735    | 4627.101  | 4210.884  | AK023334   | 1678.579  | 1164.506  | CY3Cy5    | 4807.451  |
| NM_001144 | 2067.016  | 2881.707  | NM_002563  | 7049.302  | 5058.757  | NM_005810 | 4718.293  |
| AK023766  | 6767.306  | 7034.351  | NM_002437  | 1918.867  | 1551.268  | M28170    | 3300.123  |
| AK023334  | 2031.7    | 3117.331  | D79991     | 1452.383  | 1162.304  | AK026223  | 2828.734  |
| D79991    | 1593.171  | 1956.969  | NM_001812  | 1365.602  | 888.081   | NM_000874 | 1446.324  |
| AK022425  | 814.714   | 662.722   | NM_014785  | 825.946   | 852.396   | NM_005854 | 981.063   |
| NM_000054 | 5207.782  | 8891.663  | NM_005811  | 5949.594  | 6131.875  | AB007863  | 9317.914  |
| NM_006033 | 5490.267  | 6936.048  | NM_005764  | 1320.787  | 1824.788  | AK024456  | 1707.039  |
| NM_004837 | 6183.679  | 4983.455  | NM_016362  | 3923.431  | 5763.74   | NM_017789 | 884.164   |
| NM_000370 | 2160.976  | 1649.995  | NM_004214  | 5575.684  | 4894.939  | D31887    | 499.321   |
| BE865893  | 3113.853  | 2858.817  | NM_004329  | 8421.328  | 7080.563  | NM_002313 | 953.018   |
| NM_003123 | 56772.953 | 45237.414 | NM_002836  | 2426.87   | 1843.107  | NM_004459 | 491.086   |
| AY005822  | 3833.08   | 4699.373  | NM_004896  | 9164.611  | 3756.247  | NM_005503 | 1363.894  |
| NM_018129 | 14689.418 | 17428.139 | NM_006030  | 2150.131  | 1844.642  | NM_001502 | 1589.691  |
| AF289022  | 2748.089  | 2721.172  | NM_020410  | 6802.326  | 5895.807  | NM_005721 | 259.793   |
| AB002326  | 658.596   | 761.463   | AF000143   | 16452.967 | 26158.334 | AF284223  | 4189.425  |
| NM_013319 | 1578.413  | 2048.25   | NM_000814  | 1070.285  | 1392.565  | BE743838  | 1688.359  |
| J03077    | 23121.949 | 14783.124 | NM_000453  | 3270.881  | 2539.171  | AF273046  | 8493.677  |
| J03048    | 13086.831 | 11713.541 | J03077     | 11244.919 | 8777.011  | NM_001081 | 460.477   |
| NM_005135 | 1632.76   | 1960.628  | J03048     | 6449.471  | 8006.796  | NM_002483 | 534.998   |
| NM_000317 | 15133.669 | 6432.709  | AL157469   | 534.419   | 565.344   | BF002026  | 423.54    |
| NM_018376 | 4816.689  | 3770.532  | NM_002868  | 2526.741  | 4931.084  | NM_004171 | 1128.026  |
| NM_017438 | 1978.975  | 1497.431  | AK024100   | 3411.811  | 3834.148  | NM_014037 | 4280.584  |
| U59209    | 1658.18   | 1663.702  | NM_005135  | 1584.718  | 1530.995  | NM_004866 | 3526.272  |
| NM_020195 | 4062.993  | 2458.177  | NM_003827  | 6684.938  | 5080.965  | NM_018688 | 794.305   |
| AK023824  | 2817.998  | 3184.284  | NM_004583  | 807.348   | 941.183   | AK056652  | 1128.003  |
| AL133069  | 2746.427  | 3399.339  | NM_001103  | 839.99    | 884.972   | NM_015839 | 751.942   |
| AK026055  | 6225.729  | 6494.013  | AF228710   | 19902.025 | 23023.762 | AL137438  | 574.555   |
| AK024126  | 899.1     | 1514.797  | NM_018399  | 1028.369  | 914.676   | NM_017957 | 2619.305  |
| NM_001516 | 3144.222  | 4368.376  | AY007131   | 37416.828 | 39668.82  | NM_003024 | 1516.126  |
| NM_002744 | 2049.533  | 3560.551  | U61735     | 3999.852  | 2934.62   | NM_013248 | 898.655   |
| NM_015917 | 8169.374  | 6341.883  | NM_001144  | 729.856   | 973.997   | NM_000034 | 69127.781 |
| NM_002730 | 6735.669  | 4232.333  | AK023766   | 5556.8    | 4367.953  | AK022230  | 2301.307  |
| NM_000040 | 4621.951  | 6616.42   | NM_003853  | 1383.223  | 2195.155  | AK022147  | 5679.994  |
| NM_004631 | 3201.59   | 5133.937  | AB033109   | 2630.175  | 2167.983  | L25664    | 1296.378  |



|             |           |           |           |           |           |           |           |
|-------------|-----------|-----------|-----------|-----------|-----------|-----------|-----------|
| NM_004736   | 3009.095  | 2763.983  | NM_002053 | 19159.846 | 22290.063 | NM_014940 | 1885.826  |
| NM_006895   | 1089.696  | 801.655   | NM_006889 | 3684.539  | 3877.118  | NM_006900 | 2225.691  |
| NM_006455   | 5287.509  | 7581.706  | NM_002744 | 3517.451  | 5853.275  | AJ289111  | 1749.592  |
| D50373      | 1483.497  | 2852.404  | NM_015917 | 7037.084  | 6488.188  | NM_016356 | 4461.526  |
| AA488757    | 10519.111 | 10670.476 | NM_020397 | 779.772   | 1037.455  | NM_006406 | 5690.104  |
| AI394286    | 3309.356  | 2714.488  | NM_000061 | 4422.203  | 6056.639  | AF216292  | 6423.86   |
| H07071      | 1649.181  | 1655.327  | AB046859  | 12023.358 | 12774.976 | NM_000952 | 707.315   |
| M25322      | 3932.41   | 3175.863  | NM_005109 | 6449.927  | 6202.576  | NM_014584 | 1233.862  |
| AA436187    | 1596.684  | 535.09    | AK023573  | 2151.773  | 2584.052  | M30627    | 1198.739  |
| H-L 27586 I | 2051.601  | 2468.192  | NM_002730 | 5923.837  | 3495.261  | NM_016649 | 1114.405  |
| ID 214180   | 1279.7    | 1287.541  | NM_004828 | 2189.102  | 1773.693  | AK090536  | 7129.381  |
| ID 1867426  | 9105.167  | 5890.574  | AB011540  | 21055.289 | 21915.977 | D63477    | 606.959   |
| ID 396450   | 702.959   | 583.675   | NM_000040 | 8054.165  | 10827.938 | NM_020243 | 9127.267  |
| W99328      | 1662.929  | 1682.177  | NM_004631 | 3940.185  | 4662.171  | NM_014051 | 3380.734  |
| AI434176    | 618.87    | 649.328   | NM_006033 | 7975.593  | 8447.595  | AK025398  | 5035.232  |
| H08563      | 754.159   | 500.044   | NM_004837 | 3713.774  | 3991.949  | AB037750  | 732.6     |
| NM_022552   | 5237.079  | 3968.005  | NM_000370 | 1415.492  | 1336.057  | AK023056  | 745.405   |
| NM_014385   | 11793.51  | 11817.853 | BE865893  | 7103.117  | 6366.91   | NM_001120 | 11780.801 |
|             | 978.745   | 215.575   | NM_003123 | 39657.723 | 34473.457 | NM_017888 | 551.233   |
| AF116659    | 2282.175  | 2433.973  | AY005822  | 2753.29   | 3438.765  | NM_004915 | 1698.186  |
| D79991      | 1326.389  | 1533.944  | NM_018129 | 16150.821 | 26358.721 | AK022207  | 1046.393  |
| AK022425    | 637.209   | 420.185   | AF289022  | 2950.043  | 2960.691  | AV708752  | 2957.215  |
| NM_000054   | 5284.244  | 6707.92   | M17252    | 665.463   | 702.313   | AF119885  | 2243.779  |
| NM_014713   | 7260.682  | 3488.624  | NM_016025 | 2209.478  | 1646.323  | NM_004996 | 1827.427  |
| NM_001812   | 1783.941  | 1221.562  | NM_013319 | 2292.822  | 1960.532  | NM_005971 | 1773.689  |
| NM_014785   | 1658.255  | 1778.719  | NM_000746 | 2310.595  | 1849.2    | NM_017435 | 316.258   |
| AK025175    | 805.688   | 831.397   | NM_000722 | 1535.907  | 1888.784  | NM_013386 | 1373.897  |
| NM_005811   | 4892.268  | 7120.264  | NM_018655 | 1057.457  | 1074.264  | NM_006517 | 255.222   |
| NM_005764   | 1304.447  | 1349.199  | NM_005663 | 802.585   | 980.354   | AK026680  | 1515.188  |
| NM_016362   | 1217.173  | 1306.789  | X89960    | 698.719   | 1160.747  | NM_012436 | 54461.594 |
| NM_004214   | 5624.74   | 4918.83   | NM_006550 | 932.723   | 1385.192  | AK001299  | 12637.194 |
| NM_004329   | 7768.638  | 7031.396  | NM_005773 | 1481.196  | 1183.854  | AB014559  | 7742.322  |
| NM_002836   | 3886.294  | 4050.881  | NM_017644 | 2164.628  | 2576.745  | NM_016489 | 3037.405  |
| NM_020167   | 2364.053  | 1988.327  | NM_002482 | 1042.504  | 672.154   | NM_005033 | 1516.77   |
| AL049963    | 7645.56   | 9043.04   | AF116659  | 3150.407  | 3053.958  | NM_015932 | 47696.402 |
| NM_016058   | 22835.273 | 16332.371 | NM_000317 | 4236.203  | 4809.792  | NM_017949 | 646.529   |
| NM_014005   | 2721.067  | 2435.391  | NM_018376 | 6662.968  | 4473.805  | AK022169  | 851.602   |
| NM_004636   | 1789.765  | 2326.822  | NM_017438 | 1693.666  | 1526.915  | AF015592  | 619.062   |
| AK022603    | 1474.439  | 1152.739  | NM_020195 | 4649.649  | 3595.84   | AK026795  | 1417.284  |
| NM_004896   | 9205.982  | 6774.534  | AK023824  | 5462.705  | 7204.229  | NM_016399 | 858.183   |
| NM_003976   | 3386.333  | 4179.204  | AL133069  | 3479.234  | 4061.594  | NM_016617 | 1971.48   |
| NM_017688   | 1515.762  | 1846.691  | AL117574  | 666.252   | 640.399   | NM_002027 | 3520.945  |
| AK025612    | 5152.616  | 6405.613  | AK026055  | 2066.921  | 1598.906  | AL162078  | 1694.498  |
| NM_012268   | 5021.511  | 7329.158  | AK024126  | 818.808   | 589.11    | NM_013382 | 9406.682  |
| NM_012203   | 654.463   | 820.185   | NM_001516 | 4364.148  | 4350.634  | AB002314  | 892.56    |
| J03077      | 21998.916 | 11588.154 | NM_019086 | 1383.281  | 1614.221  | NM_014622 | 675.083   |
| J03048      | 12470.717 | 10466.979 | NM_012425 | 1717.515  | 1838.759  | AB011114  | 11461.349 |
| AL157469    | 1410.556  | 1200.745  | NM_005816 | 986.395   | 1454.87   | D11466    | 4405.449  |
| NM_002868   | 2865.022  | 4639.246  | NM_002750 | 2856.402  | 2882.554  | NM_014056 | 6743.825  |
| AK024100    | 1832.254  | 2386.976  | NM_000081 | 1332.656  | 2633.536  | D31885    | 9187.317  |
| NM_005135   | 1654.002  | 1257.775  | AK024134  | 2660.56   | 2548.253  | BE743838  | 1928.604  |
| NM_003827   | 6754.434  | 5715.223  | NM_003014 | 1758.042  | 1275.709  | AF273046  | 8390.68   |
| NM_004583   | 786.544   | 1416.726  | NM_001974 | 900.541   | 1007.948  | NM_001081 | 934.486   |

|           |           |           |           |           |           |           |           |
|-----------|-----------|-----------|-----------|-----------|-----------|-----------|-----------|
| NM_001103 | 704.335   | 629.004   | NM_013957 | 2085.401  | 1309.39   | NM_002483 | 1129.041  |
| AF228710  | 20571.266 | 17331.037 | NM_002468 | 4918.905  | 2974.286  | BF002026  | 494.564   |
| NM_018398 | 613.29    | 515.957   | NM_003028 | 1045.772  | 1382.191  | L35594    | 941.983   |
| AY007131  | 24975.896 | 27710.977 | NM_001566 | 864.611   | 769.979   | BE790116  | 2073.011  |
| U61735    | 5218.327  | 4729.57   | NM_016541 | 1899.531  | 2319.785  | AI922341  | 923.375   |
| NM_001144 | 2122.494  | 2819.511  | NM_018548 | 4113.146  | 5538.338  | AA410517  | 756.337   |
| AK023766  | 6483.692  | 6347.526  | NM_013401 | 3381.05   | 2946.973  | M12824    | 1392.478  |
| NM_001897 | 2470.997  | 2811.105  | NM_018238 | 4047.804  | 3220.906  | W60100    | 1274.703  |
| NM_003853 | 1532.491  | 1818.701  | NM_006858 | 7564.556  | 9859.712  | U72508    | 188.59    |
| AB033109  | 4673.456  | 6754.624  | NM_001405 | 9835.308  | 9749.866  | AA457153  | 934.79    |
| NM_002053 | 14091.244 | 19446.992 | NM_003880 | 978.296   | 1216.973  | AA283122  | 1665.854  |
| NM_006888 | 1985.292  | 1542.201  | AF131778  | 2226.104  | 1839.08   | AA868504  | 357.79    |
| NM_002438 | 2891.529  | 2005.318  | NM_001562 | 4721.729  | 6211.852  | AA877845  | 3707.463  |
| NM_014588 | 1806.506  | 1758.897  | NM_013278 | 1207.993  | 1286.122  | AA664241  | 17576.66  |
| NM_000758 | 1579.535  | 1494.386  | NM_003487 | 2146.462  | 1706.265  | AI016456  | 1072.637  |
| AK023334  | 1914.922  | 1576.672  | NM_006887 | 5065.061  | 4141.581  | NM_006408 | 1817.916  |
| NM_002563 | 7738.228  | 8559.636  | NM_006477 | 1392.594  | 1506.552  | AF216292  | 7259.269  |
| NM_002437 | 1531.878  | 1627.598  | NM_002880 | 2370.346  | 2128.262  | NM_000952 | 941.209   |
| AK023573  | 2725.035  | 2759.845  | NM_000678 | 8124.855  | 8742.692  | NM_005894 | 389.039   |
| NM_002730 | 6123.205  | 2533.462  | NM_001066 | 1849.407  | 1423.942  | NM_014584 | 1844.561  |
| NM_004828 | 2774.484  | 2930.825  | NM_004657 | 2243.519  | 2138.681  | M30627    | 1086.885  |
| AB011540  | 15099.979 | 13390.095 | NM_006291 | 5127.202  | 3164.171  | NM_005810 | 7617.995  |
| NM_000040 | 4554.677  | 3928.862  | NM_018170 | 2367.375  | 2865.71   | M28170    | 4237.348  |
| NM_004631 | 3306.333  | 3263.179  | NM_003867 | 1815.963  | 1227.89   | NM_001558 | 585.403   |
| NM_006033 | 4670.978  | 4001.55   | NM_003173 | 5736.704  | 5083.603  | AK026223  | 2518.137  |
| NM_004837 | 4541.829  | 3519.967  | NM_005030 | 4355.286  | 3366.758  | NM_000874 | 1353.678  |
| NM_000370 | 2575.687  | 2164.224  | NM_017584 | 1996.031  | 2040.987  | NM_005854 | 804.813   |
| BE865893  | 2504.124  | 2526.626  | NM_020358 | 1965.827  | 2028.372  | AB007863  | 7458.694  |
| NM_003123 | 54468.621 | 48019.098 | AB014541  | 16646.691 | 15889.438 | AK024456  | 1307.641  |
| AY005822  | 3724.255  | 4276.864  | NM_002583 | 3877.961  | 6201.03   | NM_017788 | 611.937   |
| NM_018128 | 16764.854 | 19821.311 | NM_006570 | 22171.051 | 16114.697 | D31887    | 543.924   |
| AF289022  | 3222.352  | 2839.425  | NM_006034 | 19109.324 | 18633.068 | NM_002313 | 702.969   |
| AB002326  | 505.458   | 451.051   | NM_005201 | 30126.756 | 25118.609 | NM_004458 | 617.266   |
| M17252    | 579.339   | 456.991   | X56807    | 2253.919  | 2512.247  | NM_005503 | 1645.042  |
| NM_016028 | 4940.199  | 2804.594  | NM_000092 | 1168.607  | 1093.555  | NM_001502 | 1535.157  |
| NM_013318 | 2005.568  | 2604.821  | AF174600  | 5075.003  | 3564.449  | AF284223  | 835.375   |
| NM_000746 | 2729.762  | 4283.413  | AK001003  | 1462.309  | 2477.462  | NM_005971 | 1977.484  |
| NM_000722 | 1139.721  | 1059.986  | NM_002800 | 28697.75  | 20141.697 | NM_017438 | 308.884   |
| NM_006030 | 1464.216  | 1581.823  | NM_018384 | 9590.391  | 8766.906  | NM_013386 | 1987.607  |
| NM_020410 | 5061.85   | 5917.745  | AF282617  | 1002.222  | 989.35    | NM_006517 | 387.675   |
| AF000143  | 12867.06  | 13647.363 | AF157323  | 3997.266  | 2850.774  | NM_004171 | 1512.193  |
| NM_014211 | 429.677   | 619.853   | NM_006028 | 665.672   | 557.346   | NM_014037 | 5326.406  |
| NM_000814 | 812.348   | 888.655   | NM_005877 | 7882.05   | 6495.25   | NM_004866 | 3053.801  |
| NM_000453 | 2517.167  | 2188.26   | NM_003338 | 2589.475  | 1952.131  | NM_018688 | 1087.127  |
| NM_022552 | 5231.645  | 2890.029  | NM_013396 | 1085.494  | 963.229   | AK056652  | 1229.677  |
| NM_014388 | 11786.449 | 9149.27   | NM_017752 | 1982.721  | 1898.476  | NM_015838 | 905.512   |
| NM_001718 | 1209.132  | 1043.05   | D26069    | 4830.763  | 4201.165  | AL137438  | 435.743   |
| AF116659  | 2815.805  | 1820.146  | BF107577  | 13473.399 | 17036.137 | NM_017957 | 2392.311  |
| NM_000317 | 16338.073 | 6565.464  | NM_005837 | 7271.701  | 6107.897  | NM_003024 | 1138.684  |
| NM_018376 | 5221.739  | 4078.353  | NM_016628 | 5578.833  | 5053.384  | NM_013248 | 583.624   |
| NM_017438 | 2522.261  | 1978.362  | AF237772  | 10598.763 | 11961.596 | NM_000034 | 62940.879 |
| U59209    | 2085.146  | 2132.803  | AJ008154  | 999.684   | 1431.894  | AK022230  | 1721.915  |
| NM_020198 | 4346.906  | 2485.411  | NM_006856 | 4643.556  | 3687.9    | AK022147  | 5608.205  |

|           |           |           |           |           |           |           |           |
|-----------|-----------|-----------|-----------|-----------|-----------|-----------|-----------|
| AK023824  | 3314.161  | 3510.884  | X52350    | 37792.496 | 34521.961 | L25664    | 1586.137  |
| AL133069  | 2714.427  | 3189.394  | AF071554  | 1473.575  | 1285.729  | NM_014940 | 1819.303  |
| AK026055  | 5835.563  | 6345.891  | U90919    | 1296.795  | 1505.144  | NM_006900 | 764.012   |
| NM_001516 | 2901.977  | 3897.932  | NM_006177 | 1491.661  | 1592.5    | AJ289111  | 409.646   |
| NM_002744 | 2730.539  | 4859.514  | NM_016275 | 11083.729 | 8821.416  | NM_016356 | 1686.144  |
| NM_015917 | 8686.466  | 7357.416  | NM_020418 | 3363.488  | 4465.773  | NM_014043 | 2831.114  |
| NM_020397 | 917.239   | 989.311   | NM_013293 | 1995.551  | 1286.326  | NM_014622 | 1167.021  |
| NM_000061 | 4049.519  | 4090.172  | AF315592  | 5371.751  | 4404.595  | AB011114  | 19509.645 |
| AB046859  | 11077.854 | 9227.339  | AF095844  | 1377.902  | 959.283   | D11466    | 7461.421  |
| NM_005109 | 4262.772  | 4397.582  | NM_015833 | 1340.502  | 1670.499  | NM_016649 | 1130.46   |
| NM_013372 | 596.46    | 579.87    | NM_000986 | 58429.59  | 53439.969 | AK090536  | 5907.185  |
| NM_003976 | 3543.404  | 2975.819  | AK026760  | 17596.137 | 18964.764 | NM_020243 | 8466.577  |
| NM_017688 | 1731.994  | 1426.534  | NM_014772 | 1208.878  | 1447.142  | NM_014051 | 3510.67   |
| AK025612  | 5831.311  | 4528.902  | AK025248  | 1150.199  | 843.883   | AK025398  | 4107.772  |
| NM_012268 | 6146.353  | 6405.944  | NM_004539 | 5212.491  | 7701.479  | AB037750  | 513.897   |
| NM_012203 | 1487.556  | 1428.486  | NM_004280 | 6575.935  | 8336.416  | AK023056  | 785.506   |
| NM_003296 | 677.558   | 629.854   | AK027094  | 1194.546  | 1527.619  | NM_001120 | 10765.645 |
| NM_004736 | 3409.418  | 3687.051  | U79249    | 689.241   | 778.46    | NM_017888 | 705.922   |
| NM_006895 | 1291.832  | 1121.318  | AK022114  | 956.267   | 559.76    | NM_004915 | 1293.799  |
| NM_006459 | 6133.008  | 8975.683  | AL133585  | 1204.517  | 1131.788  | AK022207  | 764.831   |
| D50373    | 953.572   | 1301.638  | NM_002631 | 4156.797  | 6022.736  | AV708752  | 810.625   |
| AA488757  | 11137.889 | 9398.784  | NM_005917 | 10671.342 | 14638.182 | AF119885  | 561.532   |
| AI394286  | 3627.58   | 2630.304  | NM_020196 | 901.286   | 1163.765  | NM_004996 | 534.42    |
| H07071    | 4397.753  | 4323.965  | AK024113  | 731.887   | 819.991   | NM_000588 | 19870.641 |
| M25322    | 5487.759  | 4427.868  | L40410    | 2424.029  | 2784.602  | NM_000710 | 380.818   |
| AA436187  | 1457.386  | 457.005   | NM_007055 | 1723.264  | 1353.522  | AK026281  | 538.651   |
| W99328    | 1767.238  | 1750.075  | NM_016652 | 913.911   | 556.688   | AK026680  | 1440.282  |
| AI434176  | 439.67    | 857.195   | NM_016310 | 5937.978  | 5813.594  | NM_012436 | 53299.125 |
| H08563    | 588.426   | 820.379   | AK021562  | 569.584   | 393.748   | AK001299  | 10674.715 |
| BE735403  | 1644.208  | 1781.509  | AF060938  | 12272.969 | 8985.932  | AB014559  | 6928.686  |
| NM_002438 | 3075.875  | 1817.064  | NM_001973 | 3760.087  | 3322.1    | NM_016489 | 2765.227  |
| NM_014589 | 2067.253  | 1669.847  | NM_014468 | 1642.85   | 1580.424  | NM_005033 | 1599.926  |
| NM_000759 | 2183.233  | 1912.238  | AL050015  | 1396.631  | 1131.283  | NM_015932 | 46380.516 |
| AK023334  | 2037.249  | 1610.745  | AY007117  | 2656.034  | 1857.001  | NM_017949 | 667.758   |
| NM_002563 | 8915.365  | 7499.145  | AF039698  | 2260.802  | 2805.81   | AK022169  | 863.187   |
| NM_002437 | 2222.639  | 1946.782  | AB046828  | 1514.311  | 2073.81   | AF015592  | 552.783   |
| D79991    | 1651.021  | 1922.134  | NM_013259 | 6800.682  | 6603.522  | AK026795  | 1237.247  |
| AK022425  | 598.861   | 434.455   | NM_018375 | 19757.82  | 13205.815 | NM_016399 | 857.535   |
| NM_000054 | 7237.969  | 8003.372  | NM_004913 | 1323.428  | 514.119   | NM_016617 | 1523.217  |
| NM_014713 | 7952.263  | 4060.41   | AK026838  | 1312.298  | 1597.799  | NM_002027 | 2747.2    |
| NM_001812 | 2255.684  | 1615.846  | AK022443  | 978.535   | 1014.829  | AL162078  | 1620.531  |
| NM_014785 | 1443.77   | 1264.727  | AK023371  | 2549.464  | 2700.729  | NM_013382 | 8220.181  |
| NM_005811 | 6137.481  | 5828.117  | AK025015  | 2943.847  | 1683.387  | AB002314  | 1128.74   |
| NM_005764 | 1667.654  | 1628.212  | AF086187  | 578.482   | 906.117   | NM_005503 | 1324.625  |
| NM_016362 | 2387.071  | 2366.989  | AF305836  | 37655.965 | 35860.133 | NM_001502 | 1124.895  |
| NM_004214 | 5767.865  | 5728.057  | AL137383  | 577.609   | 665.107   | AF284223  | 3942.738  |
| NM_004329 | 9563.241  | 10788.196 | AL035295  | 2114.609  | 3016.456  | AF176012  | 2535.014  |
| NM_016058 | 23493.77  | 16998.652 | NM_018302 | 1448.223  | 1429.366  | BE743838  | 1458.087  |
| NM_014005 | 2445.73   | 2071.888  | AK027252  | 6411.177  | 4897.636  | AF273046  | 6328.185  |
| NM_004636 | 2042.949  | 2315.074  | AF165527  | 2773.542  | 2808.85   | NM_001081 | 563.561   |
| AK022603  | 1832.89   | 1815.259  | NM_014092 | 605.147   | 558.333   | NM_002483 | 735.54    |
| NM_004896 | 7129.747  | 5583.619  | AL110133  | 11909.047 | 11030.555 | BF002026  | 617.162   |
| NM_006030 | 1628.495  | 1676.974  | AK000529  | 2908.063  | 4289.396  | L35594    | 644.469   |

|           |           |           |           |           |           |           |          |
|-----------|-----------|-----------|-----------|-----------|-----------|-----------|----------|
| NM_02041C | 4818.88   | 4927.104  | AK027243  | 2516.569  | 3231.176  | BE790116  | 1699.679 |
| AF000143  | 16098.219 | 16723.924 | AL110176  | 558.991   | 565.813   | AI922341  | 667.065  |
| NM_014211 | 572.612   | 492.382   | AF147415  | 1118.015  | 1162.095  | AA410517  | 655.74   |
| NM_000814 | 1243.107  | 1046.972  | AL049273  | 786.387   | 963.957   | M12824    | 1315.693 |
| NM_000453 | 3284.682  | 2641.122  | AL049984  | 1068.756  | 1033.205  | W60100    | 1337.12  |
| J03077    | 24683.057 | 12625.383 | AK098474  | 1077.014  | 911.654   | M24898    | 362.447  |
| J03048    | 14520.001 | 10352.863 | AL117475  | 4040.49   | 3161.532  | U72508    | 155.653  |
| AL157469  | 551.123   | 352.397   | NM_017535 | 7041.256  | 6316.163  | AA457153  | 1047.844 |
| NM_002868 | 3264.437  | 4633.176  | NM_003887 | 1779.602  | 1765.872  | AA283122  | 1415.086 |
| AK024100  | 2211.071  | 3505.663  | NM_004267 | 11234.568 | 6893.932  | AA868504  | 259.481  |
| NM_005135 | 1921.452  | 1842.553  | AL357212  | 835.891   | 870.556   | AA877845  | 2474.072 |
| NM_003827 | 6764.112  | 7109.329  | AK026687  | 2645.615  | 4156.672  | AA664241  | 18840.49 |
| NM_004583 | 1039.94   | 1322.918  | AL117444  | 286.4     | 632.441   | AI016456  | 658.845  |
| NM_001103 | 680.698   | 550.065   | NM_017994 | 7262.299  | 7513.65   | NM_01494C | 1756.669 |
| AF228710  | 23542.891 | 27639.381 | AK021693  | 2887.601  | 1820.193  | NM_005783 | 371.776  |
| AY007131  | 32124.379 | 45441.977 | AB023177  | 4825.638  | 3738.659  | NM_00690C | 1823.903 |
| NM_001897 | 1992.003  | 3098.718  | Y11609    | 2381.907  | 2630.646  | AJ289111  | 1599.572 |
| NM_003853 | 1231.954  | 1502.805  | AJ278482  | 871.43    | 801.421   | NM_016356 | 2837.471 |
| AB033109  | 2740.224  | 2588.038  | NM_012122 | 3755.472  | 5128.9    | NM_006406 | 1415.047 |
| NM_002053 | 15088.995 | 21017.074 | AF009285  | 20547.104 | 22766.061 | AF216292  | 5812.295 |
| NM_006889 | 2009.899  | 1553.468  | NM_012125 | 5176.809  | 7611.341  | NM_000952 | 719.892  |
| NM_002744 | 2495.102  | 3137.212  | AF056435  | 902.919   | 1396.944  | NM_005894 | 410.52   |
| NM_015917 | 8822.086  | 5730.035  | AB032363  | 910.662   | 738.176   | NM_014584 | 1464.282 |
| NM_020397 | 1279.848  | 829.867   | AF009294  | 1568.614  | 2509.306  | M30627    | 986.087  |
| NM_000061 | 5486.337  | 5885.613  | NM_001524 | 1710.566  | 1325.776  | NM_00581C | 4110.035 |
| AB046859  | 16035.637 | 10868.33  | AF056445  | 440.075   | 661.2     | M28170    | 3599.675 |
| NM_005109 | 5911.613  | 5147.341  | AK000998  | 1019.363  | 810.813   | AK026223  | 2142.362 |
| AK023573  | 3576.748  | 3378.736  | AK001225  | 625.448   | 534.902   | NM_000874 | 1082.072 |
| NM_00273C | 6652.391  | 2708.75   | AK021435  | 727.166   | 585.182   | NM_005854 | 920.374  |
| NM_004828 | 2739.488  | 3489.12   | AK021684  | 2538.804  | 2641.916  | AB007863  | 9223.194 |
| AB011540  | 15467.554 | 14654.983 | AK001060  | 571.933   | 679.564   | AK024456  | 1072.701 |
| NM_00004C | 4134.548  | 5087.55   | AK021480  | 821.65    | 951.132   | NM_002313 | 182.057  |
| NM_004631 | 3003.68   | 4096.979  | AK025112  | 1974.451  | 1596.248  | NM_004915 | 1658.888 |
| NM_006033 | 5221.69   | 5130.729  | AK026079  | 468.465   | 470.123   | AK022207  | 1384.883 |
| NM_004837 | 6529.112  | 6911.877  | AK026675  | 1676.594  | 1826.945  | AV708752  | 4014.066 |
| NM_00037C | 2897.11   | 2921.828  | AK025173  | 5815.519  | 6738.918  | AF119885  | 2939.373 |
| BE865893  | 4208.059  | 4029.56   | AK025430  | 650.45    | 1098.502  | NM_00075C | 364.571  |
| NM_003123 | 64252.465 | 56609.531 | AK026722  | 995.09    | 684.591   | NM_004996 | 2113.708 |
| AY005822  | 4338.787  | 5695.683  | AF117338  | 5800.068  | 6557.867  | NM_005971 | 1692.215 |
| NM_018129 | 13578.615 | 22212.928 | AK025567  | 4463.973  | 4045.177  | NM_017435 | 337.022  |
| NM_016025 | 3542.505  | 2445.433  | NM_019102 | 1034.315  | 1672.169  | NM_013386 | 1762.937 |
| NM_013319 | 1970.934  | 2870.465  | U56857    | 10703.142 | 14597.879 | NM_006517 | 427.139  |
| NM_000746 | 1557.038  | 1525.165  | L43349    | 1029.964  | 2049.772  | NM_004171 | 1251.304 |
| NM_000722 | 1162.277  | 1347.171  | BE905682  | 527.066   | 707.755   | NM_014037 | 4790.346 |
| NM_016116 | 797.923   | 403.753   | AF086421  | 6463.956  | 3114.779  | NM_004866 | 2567.445 |
| NM_018655 | 1236.551  | 1117.048  | AK001612  | 2059.771  | 1235.326  | NM_018688 | 672.981  |
| NM_005663 | 1100.732  | 1332.617  | AF161522  | 2178.007  | 2126.164  | AK056652  | 1083.858 |
| X89960    | 1092.364  | 1110.333  | AF086028  | 28329.229 | 18004.555 | NM_015839 | 611.532  |
| NM_00655C | 399.268   | 347.457   | AK025365  | 1184.346  | 1271.972  | AL137438  | 562.337  |
| NM_005773 | 1498.63   | 1073.748  | AK023445  | 246.412   | 567.971   | NM_017957 | 2882.731 |
| NM_017644 | 6174.297  | 4082.471  | AK023489  | 1857.36   | 1483.294  | NM_003024 | 1098.54  |
| NM_002482 | 1050.07   | 1987.805  | AK021561  | 6394.232  | 7584.547  | NM_013248 | 327.995  |
| NM_001718 | 1026.46   | 1226.381  | AL050145  | 250.868   | 442.531   | AK022147  | 6207.333 |

|           |           |           |           |           |           |           |           |
|-----------|-----------|-----------|-----------|-----------|-----------|-----------|-----------|
| AF116659  | 3106.515  | 2498.457  | NM_003531 | 2594.148  | 2244.756  | L25664    | 1491.747  |
| NM_000317 | 17562.537 | 8946.773  | L08434    | 791.103   | 299.534   | NM_002027 | 3778.676  |
| NM_018376 | 5775.936  | 5477.586  | NM_017796 | 1328.884  | 1543.216  | AL162078  | 1735.305  |
| NM_017615 | 456.8     | 522.133   | NM_003510 | 1472      | 1026.073  | NM_013382 | 10437.931 |
| NM_017438 | 2893.568  | 2401.287  | AL137403  | 3201.61   | 3747.037  | AB002314  | 1310.652  |
| U59209    | 2221.872  | 2651.384  | AL049348  | 1160.641  | 1466.13   | NM_014043 | 2787.76   |
| NM_020195 | 4361.244  | 2933.637  | NM_018534 | 972.186   | 1232.743  | NM_014622 | 595.253   |
| AK023824  | 1339.255  | 2633.887  | AB037847  | 1643.083  | 2158.296  | AB011114  | 15216.573 |
| AL133069  | 3725.126  | 4069.064  | NM_005170 | 1990.841  | 2337.152  | D11466    | 5929.366  |
| AL117574  | 499.782   | 867.899   | S96437    | 2889.039  | 2340.252  | NM_014056 | 9071.145  |
| AK026055  | 2647.71   | 2620.468  | NM_015176 | 1945.009  | 2067.27   | D31885    | 10146.153 |
| AK024126  | 887.463   | 1305.296  | AL353939  | 1941.451  | 1905.307  | NM_016649 | 1071.037  |
| NM_001516 | 2929.956  | 3503.858  | AL117573  | 2747.246  | 3418.921  | AK090536  | 5707.705  |
| NM_019086 | 2999.343  | 2034.203  | AL080186  | 1288.255  | 1556.396  | NM_020243 | 8426.716  |
| NM_006670 | 1936.435  | 1912.708  | NM_005306 | 58419.133 | 52857.516 | NM_014051 | 3121.315  |
| NM_012425 | 3895.696  | 3762.412  | NM_001646 | 14615.505 | 16974.592 | AK025398  | 4442.976  |
| NM_002750 | 3724.706  | 2870.889  | AL137327  | 965.898   | 728.083   | AB037750  | 532.969   |
| NM_000081 | 1838.418  | 2595.625  | AF358454  | 3255.279  | 2608.223  | AK023056  | 807.455   |
| AK024134  | 7220.367  | 4772.813  | AK026090  | 2861.306  | 2302.277  | NM_001120 | 9301.838  |
| NM_003014 | 1287.267  | 679.096   | AF070637  | 1253.671  | 1551.654  | NM_017888 | 437.22    |
| NM_018558 | 1015.524  | 927.397   | AL137634  | 1298.203  | 1460.721  | NM_003150 | 1526.007  |
| NM_001974 | 2504.441  | 2255.838  | AK024863  | 4270.424  | 4454.247  | NM_014784 | 3423.891  |
| NM_013957 | 2498.764  | 1237.558  | AJ008135  | 62132.355 | 53509.09  | AK026383  | 1808.797  |
| NM_002468 | 8817.307  | 3123.957  | AK026908  | 9907.735  | 12142.099 | AB014594  | 724.604   |
| NM_003028 | 1289.763  | 1737.69   | U92025    | 685.461   | 536.636   | M94547    | 978.116   |
| NM_001566 | 1079.092  | 958.085   | AB046766  | 1047.02   | 1174.087  | NM_005087 | 4515.699  |
| NM_016541 | 2012.12   | 2346.393  | AF009323  | 989.264   | 1548.354  | NM_012098 | 950.605   |
| NM_018548 | 5930.197  | 7626.906  | U52829    | 844.991   | 550.56    | NM_018095 | 2644.244  |
| NM_013401 | 2321.481  | 2806.755  | AK001526  | 5362.21   | 3608.277  | AB023164  | 1734.517  |
| NM_018238 | 2807.617  | 2918.092  | AF086183  | 1590.568  | 1012.594  | AK026281  | 865.578   |
| NM_006858 | 2792.176  | 3392.868  | AK000525  | 1548.967  | 1046.683  | AK026680  | 1647.886  |
| NM_001405 | 1922.748  | 2308.927  | AL137434  | 1761.089  | 1511.073  | NM_012436 | 54187.258 |
| NM_003880 | 518.24    | 805.054   | Z36795    | 2079.195  | 2054.897  | AK001299  | 10664.062 |
| AF131778  | 1537.38   | 1568.972  | U55186    | 3262.746  | 3255.369  | AB014559  | 7783.668  |
| NM_001562 | 6185.323  | 6155.092  | AL080216  | 3356.623  | 4240.002  | NM_016489 | 2670.599  |
| NM_013278 | 1200.624  | 1394.714  | NM_019897 | 967.134   | 1755.091  | NM_005033 | 1426.687  |
| NM_003487 | 2198.307  | 1175.533  | AF038188  | 18332.221 | 16972.846 | NM_015932 | 46744.984 |
| NM_006887 | 23191.73  | 8452.63   | D17046    | 2744.247  | 2239.086  | NM_017949 | 684.977   |
| NM_006477 | 1744.529  | 1211.027  | NM_017645 | 13271.809 | 10718.334 | AK022169  | 699.476   |
| NM_002880 | 4403.805  | 3806.428  | AJ227864  | 801.2     | 375.747   | AF015592  | 466.456   |
| NM_000678 | 6158.917  | 4123.981  | AF157562  | 6796.906  | 5767.304  | AK026795  | 1012.028  |
| NM_001066 | 6318.677  | 2838.878  | AK021958  | 9458.765  | 6328.92   | NM_016399 | 514.595   |
| NM_004657 | 2015.238  | 1908.85   | M31164    | 1521.011  | 1592.082  | NM_016617 | 1601.921  |
| NM_006291 | 8009.612  | 3205.285  | AF113674  | 10158.859 | 8154.21   | NM_002338 | 3201.992  |
| NM_018170 | 3568.757  | 3898.465  | NM_003511 | 2437.075  | 2440.917  | AL117666  | 789.818   |
| NM_003867 | 1303.428  | 816.015   | CY3Cy5    | 10144.208 | 822.576   | Y17865    | 735.602   |
| AL162062  | 638.418   | 298.497   | H97792    | 2388.696  | 2664.94   | NM_005825 | 6357.024  |
| NM_003173 | 3588.656  | 4206.974  | L33404    | 761.706   | 922.49    | NM_002756 | 1097.537  |
| NM_005030 | 3831.686  | 4369.623  | M13509    | 2922.138  | 2326.981  | AJ000414  | 1096.6    |
| NM_002583 | 3836.237  | 8122.311  | X04076    | 5556.41   | 5302.331  | AK025674  | 5638.266  |
| NM_006570 | 9164.168  | 8362.474  | W95082    | 699.307   | 1164.72   | AF007194  | 4805.563  |
| NM_006034 | 3745.429  | 3561.796  | AA485362  | 3765.009  | 2512.101  | NM_019069 | 968.153   |
| NM_005201 | 13776.388 | 11888.392 | AJ222801  | 3882.74   | 3210      | NM_004761 | 4400.261  |

|           |           |           |           |           |           |           |           |
|-----------|-----------|-----------|-----------|-----------|-----------|-----------|-----------|
| X56807    | 2725.81   | 1810.464  | W72207    | 26914.004 | 44234.664 | U79458    | 2433.388  |
| NM_00009Z | 1178.541  | 587.634   | BI772354  | 2507.456  | 2054.878  | NM_01492C | 569.607   |
| AF174600  | 5278.927  | 2918.157  | AA733033  | 1079.438  | 1241.005  | NM_00296I | 48049.566 |
| AK001003  | 881.692   | 1502.959  | AA583574  | 2450.54   | 3492.116  | NM_01829E | 494.364   |
| NM_00280C | 28975.84  | 10840.197 | AI690184  | 52149.84  | 52316.266 | NM_00067E | 3151.823  |
| NM_018384 | 8108.389  | 7676.617  | AA927490  | 3032.737  | 2592.942  | NM_00576E | 658.232   |
| AF282617  | 1148.4    | 909.755   | NM_001824 | 69663.18  | 66488.617 | AL133022  | 290.93    |
| AF157323  | 6828.025  | 2915.352  | SR5       | 5491.106  | 5321.494  | NM_00395Z | 560.966   |
| NM_00602E | 463.969   | 573.244   | SR7       | 6668.427  | 50028.605 | NM_00630I | 603.482   |
| NM_005877 | 7268.805  | 7104.643  | SR9       | 25630.305 | 8311.688  | AL049925  | 818.016   |
| NM_00333E | 1945.303  | 2281.741  | CY3Cy5    | 10341.14  | 775.789   | NM_01221E | 1069.085  |
| NM_01339E | 1450.177  | 1481.845  | NM_01781E | 1960.162  | 3030.285  | X72887    | 3581.093  |
| NM_01775Z | 1538.616  | 1999.735  | NM_02043Z | 879.479   | 748.615   | Y10483    | 3102.036  |
| D26069    | 9116.977  | 8429.68   | AF028823  | 5223.919  | 3844.169  | NM_006784 | 615.6     |
| BF107577  | 15553.055 | 14054.336 | NM_00429E | 18943.682 | 29625.914 | NM_01787E | 1038.453  |
| NM_005837 | 1542.827  | 1829.254  | NM_002087 | 2927.896  | 2249.793  | NM_001087 | 17494.002 |
| NM_01662E | 1904.741  | 1238.68   | NM_01458E | 582.409   | 982.082   | NM_00372I | 3539.833  |
| NM_01749Z | 630.886   | 631.072   | AF200815  | 1108.927  | 1269.76   | NM_00143I | 3080.651  |
| NM_00613E | 1763.319  | 1481.03   | NM_01344I | 2567.453  | 1858.116  | NM_000427 | 743.509   |
| AF237772  | 15426.375 | 16115.987 | NM_01442I | 1117.188  | 1265.567  | NM_00250E | 1579.796  |
| AK025934  | 941.209   | 1173.722  | NM_01768C | 688.098   | 626.793   | NM_01434Z | 1190.27   |
| AJ008154  | 1252.66   | 1382.148  | NM_01246E | 578.108   | 501.26    | D25303    | 757.061   |
| NM_00685E | 3583.877  | 2037.144  | M60499    | 3564.699  | 2507.82   | AB043007  | 7606.508  |
| X52350    | 61038.52  | 48197.023 | NM_00383Z | 23013.055 | 19547.406 | NM_00486I | 966.838   |
| AF071554  | 1008.59   | 837.713   | AK000868  | 4227.158  | 4793.044  | AF022913  | 744.529   |
| U90919    | 1897.239  | 1464.842  | NM_00123Z | 2365.091  | 4105.405  | NM_00002E | 859.871   |
| NM_006177 | 1386.391  | 1078.106  | NM_001234 | 4438.522  | 4126.69   | NM_00138Z | 4115.201  |
| AL137286  | 6923.612  | 4083.955  | BF679789  | 4429.431  | 5888.562  | M93718    | 1361.285  |
| NM_01635E | 10412.659 | 6445.917  | AB007859  | 1093.303  | 906.652   | NM_00538E | 1217.48   |
| NM_01627E | 8846.391  | 8631.77   | NM_001127 | 3473.022  | 2055.189  | AK023807  | 2255.755  |
| NM_02041E | 1660.032  | 1448.623  | NM_01243C | 2268.397  | 1730.632  | NM_01818E | 3805.853  |
| NM_01329Z | 2781.093  | 2388.212  | NM_003917 | 15600.364 | 27663.33  | AK024273  | 1497.37   |
| AF315592  | 6689.517  | 4869.679  | NM_007077 | 1602.169  | 1494.588  | X59417    | 8274.294  |
| AF095844  | 3071.068  | 1447.165  | NM_00295E | 1330.657  | 1252.125  | NM_00565E | 13503.658 |
| NM_01583Z | 1809.468  | 1283.273  | AB018739  | 1173.261  | 1019.152  | D28476    | 4065.853  |
| NM_00098E | 64434.02  | 62680.414 | NM_00675C | 13578.245 | 11414.278 | NM_01626Z | 837.972   |
| AK026760  | 17033.047 | 18683.73  | NM_020164 | 3533.151  | 2889.201  | NM_00333E | 7894.561  |
| NM_01477Z | 1441.954  | 1596.657  | AK023521  | 4296.67   | 3417.613  | AB002376  | 703.67    |
| AK025248  | 809.324   | 595.255   | NM_014267 | 17442.189 | 12716.968 | NM_01824E | 345.327   |
| NM_00453E | 3629.682  | 3040.865  | NM_00148I | 564.823   | 597.032   | NM_00555E | 1373.841  |
| NM_00642E | 4068.768  | 2761.664  | U30872    | 2079.459  | 1208.972  | NM_01663I | 310.931   |
| NM_00428C | 3619.215  | 5555.633  | NM_02046E | 3051.731  | 3803.059  | AK022730  | 217.134   |
| AF110399  | 1457.626  | 1571.226  | NM_014734 | 2849.693  | 3101.804  | AF064839  | 5275.059  |
| AK027094  | 1548.595  | 1915.022  | NM_00228E | 872.957   | 752.825   | NM_00543E | 1129.25   |
| AK022114  | 1283.179  | 1351.321  | AK026408  | 2483.582  | 1633.741  | AB037810  | 388.204   |
| AL133585  | 1535.151  | 1554.38   | NM_00502E | 1003.495  | 1189.387  | NM_00659Z | 714.359   |
| NM_00263I | 8622.695  | 7429.148  | NM_006307 | 670.487   | 756.839   | NM_00037E | 6576.085  |
| NM_00077E | 367.204   | 783.977   | M74782    | 1290.117  | 2096.216  | NM_00047E | 2112.123  |
| BF217864  | 7710.649  | 5641.748  | NM_00105E | 1039.438  | 1296.061  | M61872    | 9743.215  |
| NM_005917 | 15159.873 | 22333.883 | AY026461  | 3827.806  | 3130.395  | AK027089  | 572.394   |
| BC017044  | 551.35    | 759.508   | AK025708  | 3926.883  | 1955.451  | NM_006284 | 3767.507  |
| AV758498  | 1109.846  | 1149.875  | NM_00040E | 1266.814  | 1092.622  | U18909    | 1292.391  |
| NM_02019E | 1767.5    | 1944.755  | NM_005564 | 57078.637 | 46340.5   | NM_00348E | 1249.751  |

|           |           |           |           |           |           |           |           |
|-----------|-----------|-----------|-----------|-----------|-----------|-----------|-----------|
| AK024113  | 437.39    | 704.813   | NM_00450E | 2272.225  | 2700.469  | NM_01658E | 5645.509  |
| NM_018657 | 912.877   | 1030.309  | NM_00640E | 14267.902 | 18383.35  | NM_003597 | 736.113   |
| L40410    | 6591.13   | 5464.999  | NM_00674E | 1191.169  | 1045.028  | NM_00256E | 7585.521  |
| NM_00705E | 1021.077  | 1089.894  | NM_004694 | 481.237   | 523.677   | NM_006561 | 465.786   |
| NM_01665E | 714.099   | 740.883   | NM_000324 | 878.633   | 688.84    | AK025200  | 3315.228  |
| NM_01631C | 1729.153  | 2542.716  | AL137619  | 3476.243  | 3163.487  | NM_00138E | 1764.003  |
| AK021562  | 1178.931  | 829.252   | NM_00361E | 1013.207  | 822.013   | NM_00601E | 1679.238  |
| BC006560  | 545.503   | 560.679   | NM_00430C | 5428.27   | 3364.909  | NM_01404E | 2958.464  |
| AF060938  | 18475.166 | 14016.608 | NM_00005E | 512.85    | 239.237   | L34071    | 1215.29   |
| NM_00197E | 3940.282  | 3312.665  | AF319476  | 1526.06   | 1600.677  | AK025201  | 1299.666  |
| NM_01446E | 4347.925  | 3842.688  | AK001913  | 3211.921  | 5146.42   | AK021927  | 658.468   |
| AL050015  | 1754.151  | 745.457   | NM_017737 | 432.25    | 506.354   | AK022995  | 1552.391  |
| AY007117  | 4971.244  | 2248.195  | NM_00429E | 1072.882  | 871.419   | NM_00606E | 6066.335  |
| AF039698  | 1902.717  | 2098.169  | NM_015484 | 3492.381  | 2492.701  | NM_00516E | 101.662   |
| AB046828  | 2433.054  | 2558.318  | NM_01804E | 1763.099  | 1155.281  | NM_00211E | 14601.947 |
| AF144487  | 902.13    | 914.045   | NM_01331E | 2476.031  | 2564.057  | AK023162  | 442.373   |
| AL137532  | 3932.787  | 3092.407  | NM_00291E | 1981.956  | 1269.283  | NM_00639E | 573.107   |
| AK025419  | 2735.672  | 3618.965  | NM_013284 | 2195.583  | 2437.797  | NM_01864E | 692.741   |
| NM_01741E | 489.743   | 1111.19   | NM_00673E | 3077.093  | 1617.191  | NM_01344E | 2065.429  |
| NM_01325E | 5230.521  | 5602.49   | NM_013274 | 3691.702  | 3252.376  | NM_004537 | 341.35    |
| NM_01837E | 3625.053  | 3190.919  | AL050187  | 3209.077  | 2790.469  | NM_02022E | 428.928   |
| NM_00491E | 2400.283  | 626.825   | NM_007127 | 401.796   | 979.343   | NM_01786E | 2011.755  |
| AK026838  | 1921.857  | 1612.211  | NM_012387 | 11125.491 | 10647.695 | NM_003427 | 1204.395  |
| AK022443  | 797.637   | 989.856   | NM_01473E | 1479.649  | 1423.626  | NM_00592C | 941.289   |
| AK023371  | 1933.797  | 1891.886  | NM_00425E | 13027.285 | 12812.543 | Y09321    | 308.297   |
| AK025015  | 3082.568  | 2923.478  | AF172929  | 8159.156  | 4124.938  | AK001499  | 1598.286  |
| AF086187  | 2412.343  | 2885.802  | NM_00639E | 9525.898  | 11992.526 | AK023568  | 1363.775  |
| AF305836  | 44137.539 | 45985.504 | AK025655  | 1785.606  | 2069.109  | AK021728  | 560.572   |
| AL035295  | 1068.888  | 786.591   | NM_00136E | 585.587   | 695.329   | AK026852  | 1526.182  |
| NM_01830E | 1695.993  | 1504.777  | NM_00383E | 20382.516 | 21532.465 | AL110257  | 11223.435 |
| AK027252  | 3112.689  | 2159.648  | AK000868  | 3936.994  | 5843.602  | AB013384  | 1103.865  |
| AF165527  | 3826.484  | 3991.065  | NM_00123E | 2990.956  | 4803.884  | AK024824  | 834.682   |
| NM_01409E | 1109.253  | 722.261   | NM_001234 | 4153.19   | 3154.492  | AK025569  | 1852.116  |
| AL110133  | 7858.877  | 6048.591  | BF679789  | 4466.213  | 4422.667  | AK023060  | 1150.557  |
| AL050053  | 524.227   | 217.246   | H97792    | 2055.377  | 1739.824  | NM_01487C | 551.529   |
| AK000529  | 1560.063  | 1045.446  | L33404    | 725.707   | 877.178   | AK021917  | 1002.299  |
| AK027243  | 857.052   | 888.739   | AA485362  | 3604.808  | 2874.466  | AF052146  | 19686.361 |
| AF147415  | 1366.98   | 1443.905  | AJ222801  | 3499.635  | 4015.554  | NM_00487C | 999.192   |
| AK098474  | 742.922   | 413.051   | W72207    | 26253.045 | 42628.051 | AF143872  | 13806.219 |
| AL117475  | 2264.792  | 1510.767  | BI772354  | 2659.506  | 2033.208  | AF143326  | 996.528   |
| NM_01753E | 4789.904  | 3587.597  | AA733033  | 1008.572  | 1116.404  | AL049229  | 1489.653  |
| AL080161  | 369.93    | 441.279   | AA583574  | 1869.657  | 1368.182  | AK026146  | 3685.582  |
| NM_003887 | 1362.415  | 1255.549  | AI690184  | 33067.957 | 36828.617 | AK023152  | 1389.207  |
| NM_004267 | 8050.496  | 7159.557  | T48692    | 677.602   | 1077.276  | AL389937  | 2429.862  |
| AK026687  | 646.245   | 996.643   | AA927490  | 2776.287  | 2459.802  | AK022628  | 20179.781 |
| NM_017994 | 3321.882  | 3856.547  | NM_001824 | 69518.242 | 67210.117 | AK021737  | 1359.291  |
| AK021693  | 1582.763  | 1729.845  | NM_002964 | 25181.041 | 2083.34   | AL357454  | 1436.1    |
| AB023177  | 3918.427  | 4240.108  | NM_00505E | 9695.44   | 11155.455 | AK026295  | 1142.981  |
| Y11609    | 2207.11   | 3408.791  | BF038439  | 341.241   | 470.835   | AK022346  | 576.62    |
| AJ278482  | 653.692   | 791.111   | NM_014734 | 2436.486  | 2873.455  | AK025007  | 968.136   |
| NM_01212E | 6795.235  | 5797.832  | NM_00228E | 637.176   | 910.92    | NM_01648E | 4279.374  |
| AF009285  | 9397.498  | 4521.078  | AK026408  | 2687.761  | 2727.689  | AK026490  | 13225.765 |
| NM_01212E | 3719.101  | 2028.248  | NM_00502E | 928.893   | 1047.414  | AJ227861  | 2414.54   |

|           |           |           |           |           |           |           |           |
|-----------|-----------|-----------|-----------|-----------|-----------|-----------|-----------|
| AF056435  | 306.327   | 542.417   | NM_006307 | 560.458   | 449.159   | AJ001020  | 1815.481  |
| AF009294  | 3220.654  | 3390.658  | M74782    | 1107.823  | 1664.565  | NM_005553 | 475.843   |
| NM_001524 | 1380.075  | 959.245   | NM_017818 | 1964.992  | 1436.255  | AJ001875  | 1604.158  |
| AK000998  | 1152.215  | 1118.637  | AF028823  | 5986.785  | 6223.27   | X64985    | 787.766   |
| AK021435  | 388.574   | 462.825   | NM_004295 | 23237.963 | 45158.254 | Y16183    | 397.077   |
| AK021684  | 2164.826  | 2124.099  | NM_002087 | 5573.495  | 4599.093  | NM_007220 | 582.612   |
| AK001060  | 857.356   | 881.008   | NM_014585 | 480.809   | 1252.153  | NM_017777 | 783.161   |
| AK021480  | 495.787   | 425.999   | AF200815  | 1157.291  | 1221.244  | AK021989  | 922.359   |
| AK025112  | 2076.258  | 1893.051  | NM_014564 | 237.217   | 937.141   | AK022298  | 1444.143  |
| AK025173  | 3358.78   | 3076.699  | NM_013441 | 2398.182  | 1918.137  | AJ277441  | 19172.564 |
| AK025430  | 1199.812  | 1660.952  | NM_014421 | 1175.599  | 1351.794  | NM_006057 | 1414.701  |
| AF117338  | 2528.491  | 3572.004  | NM_017680 | 656.946   | 662.487   | AK024242  | 2470.524  |
| AK025567  | 2430.965  | 2594.246  | NM_012465 | 545.799   | 667.744   | AK024559  | 413.531   |
| NM_019102 | 717.269   | 865.488   | M60499    | 3254.485  | 2792.524  | AK024851  | 651.734   |
| U56857    | 3868.678  | 2500.519  | NM_004300 | 4824.848  | 2350.928  | AK024943  | 1546.783  |
| AF086421  | 8363.707  | 2547.161  | NM_000052 | 502.659   | 313.068   | AK024410  | 500.807   |
| AK001612  | 1216.824  | 1518.894  | NM_000085 | 905.359   | 484.403   | AK024577  | 660.129   |
| AF161522  | 2208.025  | 2248.325  | AB007859  | 1069.553  | 1402.958  | AL359943  | 18329.461 |
| AF086028  | 4540.044  | 4320.764  | NM_006754 | 708.491   | 838.04    | NM_000534 | 1234.995  |
| AK025365  | 689.377   | 801.799   | NM_001127 | 3989.319  | 2815.96   | L10140    | 978.585   |
| AK021561  | 4070.287  | 4247.785  | NM_012430 | 2298.621  | 2520.79   | AL133447  | 309.249   |
| AL050145  | 3415.774  | 1704.634  | NM_003917 | 16835.064 | 22690.52  | AB037853  | 25230.611 |
| NM_003531 | 1872.015  | 1904.944  | NM_007077 | 1837.3    | 2131.75   | D28450    | 16183.926 |
| NM_017795 | 746.87    | 1436.661  | NM_002956 | 1379.003  | 1470.096  | AK056222  | 1015.885  |
| NM_003510 | 874.443   | 760.749   | AB018739  | 1219.753  | 1006.422  | AK002028  | 8070.717  |
| AL137403  | 2306.315  | 1654.059  | NM_006750 | 14174.827 | 12479.5   | AL050127  | 1413.509  |
| AL049348  | 530.457   | 1287.174  | NM_020164 | 3177.132  | 2708.084  | AK024805  | 8322.466  |
| NM_018534 | 786.998   | 744.923   | AK023521  | 3719.121  | 3389.33   | AK001423  | 1768.709  |
| AB037847  | 1403.899  | 1444.788  | NM_014267 | 15620.601 | 12141.488 | AK024090  | 9583.666  |
| NM_005170 | 1841.559  | 1901.709  | NM_001481 | 563.49    | 642.388   | AL133574  | 2038.187  |
| S96437    | 1243.437  | 1052.016  | U30872    | 1711.074  | 959.292   | AK021936  | 910.924   |
| NM_015176 | 1916.147  | 1806.592  | NM_002639 | 1691.52   | 1378.032  | AF147339  | 24636.523 |
| AL353939  | 1513.715  | 1235.112  | NM_006395 | 10646.807 | 15371.331 | AL390181  | 8688.964  |
| AL117573  | 3364.165  | 2365.339  | L11285    | 798.365   | 449.962   | NM_017914 | 16976.127 |
| NM_005306 | 31268.09  | 29733.654 | AK025655  | 1563.268  | 1617.951  | NM_006350 | 372.207   |
| NM_001646 | 6879.36   | 6513.863  | NM_001362 | 834.952   | 519.745   | AK024953  | 11938.438 |
| AL137327  | 871.903   | 938.813   | NM_001056 | 1051.159  | 1602.491  | AK024276  | 5276.299  |
| AF358454  | 3824.125  | 2953.299  | AY026461  | 3709.542  | 4317.022  | S83374    | 3040.636  |
| AK026090  | 1214.953  | 1176.016  | AK025708  | 4701.722  | 2990.901  | AL161979  | 507.074   |
| AF070637  | 398.972   | 306.926   | NM_000405 | 1867.193  | 3094.971  | AK025784  | 7271.931  |
| AL137634  | 1455.384  | 1822.62   | NM_005564 | 58746.609 | 49613.324 | U07199    | 952.524   |
| AK024863  | 3897.695  | 3492.215  | NM_004508 | 2390.085  | 2707.724  | AK023713  | 683.995   |
| AJ008135  | 42768.988 | 41772.07  | NM_006405 | 15527.629 | 20630.406 | X81445    | 1105.361  |
| AK026908  | 3716.895  | 3772.783  | AJ245946  | 651.826   | 480.576   | U95091    | 573.806   |
| AL050068  | 529.333   | 885.203   | NM_006749 | 1455.082  | 972.774   | NM_017900 | 11736.164 |
| AB046766  | 956.972   | 831.41    | NM_000324 | 817.386   | 1056.066  | S50182    | 834.145   |
| AF009323  | 613.42    | 833.57    | AL137619  | 2863.798  | 4046.683  | AL360145  | 1079.279  |
| AF086183  | 1010.49   | 720.894   | NM_001824 | 69680.063 | 62452.063 | NM_001178 | 831.719   |
| AK000525  | 858.735   | 701.385   | NM_002964 | 21814.547 | 1948.83   | AK023696  | 2786.303  |
| AL137434  | 1062.644  | 839.722   | NM_005052 | 10002.743 | 14561.93  | NM_000704 | 914.88    |
| Z36795    | 2113.375  | 1799.224  | BF038439  | 1263.136  | 1322.91   | NM_019605 | 1625.965  |
| AL080216  | 1435.818  | 1662.863  | AF319476  | 1282.454  | 1103.212  | Z49090    | 10741.28  |
| AF038188  | 7775.613  | 7549.038  | AK001913  | 3028.614  | 4954.401  | AK021592  | 8281.936  |



|           |           |           |           |           |           |           |           |
|-----------|-----------|-----------|-----------|-----------|-----------|-----------|-----------|
| D17046    | 1087.616  | 1262.768  | NM_004292 | 1364.641  | 1343.703  | AK025467  | 471.296   |
| NM_017645 | 2370.539  | 2915.954  | NM_015484 | 3839.72   | 4629.541  | AK026593  | 1582.786  |
| AF157562  | 3884.766  | 3886.083  | NM_018046 | 3092.913  | 2625.11   | L37700    | 860.493   |
| AK021958  | 4319.751  | 4560.347  | NM_013316 | 3238.448  | 3706.282  | NM_017665 | 2527.149  |
| M31164    | 1072.52   | 1336.287  | M20701    | 15991.25  | 13600.413 | AB007976  | 134.118   |
| AF113674  | 7560.827  | 7869.621  | NM_002912 | 2264.011  | 2498.05   | AK024819  | 755.278   |
| NM_003511 | 698.434   | 1242.619  | NM_013284 | 2746.015  | 2907.181  | AF052106  | 2203.406  |
| CY3Cy5    | 15205.203 | 1535.144  | NM_006739 | 1825.368  | 899.969   | AK022391  | 1850.443  |
| H97792    | 2807.632  | 2343.887  | NM_013274 | 3910.661  | 3593.165  | NM_016125 | 648.727   |
| L33404    | 871.694   | 973.121   | AL050187  | 3045.464  | 3123.802  | CY3Cy5    | 3975.97   |
| M13509    | 3066.548  | 2322.916  | NM_012387 | 12124.55  | 10344.946 | R72122    | 3346.895  |
| X04076    | 6219.782  | 9175.126  | NM_014735 | 1517.038  | 1847.138  | Z35309    | 748.008   |
| W95082    | 976.913   | 608.409   | NM_004252 | 13940.689 | 16116.521 | AA700005  | 8643.679  |
| AA485362  | 3835.937  | 3741.604  | AF172929  | 8586.145  | 5216      | AA292025  | 1485.254  |
| AJ222801  | 4422.427  | 5024.767  | AB033028  | 1095.008  | 1615.816  | AA437226  | 2186.659  |
| AA733033  | 2677.256  | 2107.016  | NM_003833 | 12858.684 | 11642.923 | R36143    | 1675.776  |
| AA583574  | 1495.751  | 1877.47   | AK000868  | 4434.072  | 4506.415  | XM_056359 | 768.587   |
| AI690184  | 58342.863 | 56074.133 | NM_001233 | 2551.681  | 3261.271  | D10353/NM | 3254.731  |
| T48692    | 550.404   | 934.184   | NM_001234 | 3917.607  | 3746.655  | M15042    | 1219.972  |
| AA927490  | 5603.872  | 4136.497  | BF679789  | 5319.11   | 7701.09   | AK056843  | 1475.624  |
| SR5       | 6242.477  | 5185.88   | H97792    | 2583.152  | 3369.27   | U49928    | 4882.645  |
| SR7       | 8971.678  | 47755.703 | L33404    | 1151.195  | 2129.156  | AK096645  | 10498.826 |
| SR9       | 33566.438 | 5376.819  | M13509    | 3169.903  | 2858.412  | NM_019884 | 2413.784  |
| CY3Cy5    | 13978.122 | 926.368   | X04076    | 5874.62   | 6745.248  | SR2       | 52360.742 |
| NM_001767 | 662.036   | 719.964   | AA485362  | 4460.29   | 3660.525  | SR4       | 12394.733 |
| AF028823  | 7844.792  | 4409.757  | AJ222801  | 4771.704  | 3988.596  | SR6       | 1730.167  |
| NM_002087 | 18175.943 | 7498.938  | W72207    | 25340.166 | 41491.074 | SR8       | 6851.815  |
| AB023154  | 507.54    | 488.394   | BI772354  | 2496.268  | 2705.804  | SR10      | 23018.709 |
| NM_014585 | 500.482   | 1766.194  | AA733033  | 997.673   | 1035.822  | CY3Cy5    | 3783.836  |
| AF200815  | 760.329   | 981.829   | AA583574  | 1779.7    | 1504.714  | NM_005291 | 5008.068  |
| NM_013441 | 1774.349  | 1920.741  | AI690184  | 46386.117 | 51143.82  | NM_005855 | 1678.418  |
| NM_014421 | 1267.679  | 1201.509  | T48692    | 466.288   | 443.374   | NM_002923 | 1300.473  |
| AB033028  | 348.149   | 532.499   | AA927490  | 2962.657  | 2697.68   | NM_006794 | 1217.419  |
| NM_012465 | 691.497   | 923.557   | U30872    | 1806.825  | 609.149   | NM_018653 | 1475.319  |
| NM_000366 | 1136.426  | 887.838   | NM_014734 | 1609.305  | 1210.121  | NM_005388 | 2911.919  |
| NM_003833 | 42230.762 | 26154.738 | NM_002289 | 735.619   | 753.092   | NM_014486 | 910.241   |
| AK000868  | 5816.709  | 3870.547  | AK026408  | 2748.994  | 2080.887  | NM_003025 | 3453.432  |
| NM_001233 | 4052.057  | 6492.758  | NM_005025 | 765.914   | 1231.534  | U52051    | 435.699   |
| NM_014382 | 1165.472  | 1195.26   | NM_006307 | 261.404   | 771.051   | NM_020179 | 1669.168  |
| NM_006754 | 512.671   | 586.101   | M74782    | 1115.619  | 2505.353  | NM_004306 | 24837.068 |
| NM_001127 | 4304.43   | 3409.25   | NM_017818 | 1120.614  | 1231.172  | NM_006786 | 274.912   |
| NM_012430 | 2018.956  | 2339.533  | NM_001767 | 510.233   | 323.012   | NM_006205 | 701.32    |
| NM_007077 | 1632.061  | 2004.96   | AF028823  | 5030.943  | 4212.945  | NM_004034 | 3178.347  |
| NM_002956 | 2327.239  | 1674.234  | NM_004295 | 25153.363 | 31429.639 | NM_000130 | 1895.695  |
| AB018739  | 1165.185  | 1242.49   | NM_002087 | 5911.182  | 5025.037  | AI492087  | 2182.105  |
| NM_006750 | 18195.215 | 21401.18  | NM_014585 | 605.246   | 1021.282  | NM_004193 | 1378.714  |
| NM_020164 | 5718.339  | 6255.248  | AF200815  | 1090.446  | 981.182   | NM_002803 | 4299.822  |
| AK023521  | 5802.656  | 5453.778  | NM_013441 | 2297.552  | 1737.785  | NM_005508 | 651.364   |
| NM_014267 | 12404.89  | 15738.341 | NM_014421 | 1179.177  | 1351.247  | NM_006788 | 464.174   |
| NM_001481 | 927.132   | 711.955   | NM_006749 | 1034.274  | 929.332   | NM_016568 | 598.188   |
| U30872    | 1775.382  | 1877.191  | NM_005639 | 2267.555  | 3014.072  | NM_002987 | 393.838   |
| AF111783  | 549.99    | 473.337   | NM_000324 | 1099.177  | 938.766   | NM_014774 | 1834.456  |
| NM_020469 | 5125.879  | 6043.871  | AL137619  | 3451.369  | 3756.213  | NM_014143 | 2731.928  |

|           |           |           |           |           |           |           |           |
|-----------|-----------|-----------|-----------|-----------|-----------|-----------|-----------|
| NM_014734 | 3515.351  | 3272.215  | NM_00430C | 5438.668  | 6490.544  | NM_006112 | 15924.854 |
| NM_00228E | 1122.7    | 959.28    | AB007859  | 903.388   | 847.219   | M12807    | 2081.9    |
| AK026408  | 2608.564  | 2126.468  | NM_001127 | 2704.673  | 2320.687  | NM_00176E | 1384.586  |
| NM_00502E | 1263.036  | 1888.506  | NM_01243C | 1943.669  | 1869.773  | NM_003361 | 1561.564  |
| M74782    | 3160.36   | 4871.298  | NM_003917 | 14619.112 | 18819.426 | NM_01209E | 1028.437  |
| NM_00105E | 1617.693  | 2033.197  | NM_007077 | 2192.006  | 2171.735  | NM_018684 | 5295.162  |
| AY026461  | 5399.631  | 8489.302  | NM_00295E | 1674.814  | 1651.987  | NM_01798E | 582.814   |
| NM_00040E | 969.334   | 1271.926  | AB018739  | 1273.057  | 1020.654  | AF116909  | 440.615   |
| NM_005564 | 51361.277 | 51566.242 | NM_00675C | 15551.597 | 14887.876 | BE906724  | 423.896   |
| NM_00450E | 2555.905  | 2096.206  | NM_020164 | 3195.12   | 3247.562  | NM_00228E | 805.428   |
| NM_00640E | 8619.17   | 9556.037  | AK023521  | 3784.882  | 3338.769  | AJ276095  | 709.388   |
| AJ245946  | 616.625   | 613.984   | NM_014267 | 15311.874 | 12981.812 | NM_00481E | 838.44    |
| NM_00674E | 1082.169  | 937.718   | AL050187  | 3899.857  | 3995.704  | NM_007184 | 1164.551  |
| NM_000324 | 1179.694  | 965.711   | NM_007127 | 924.732   | 1033.388  | AF231916  | 3425.107  |
| AL137619  | 3120.206  | 3012.568  | NM_012387 | 5743.805  | 5866.289  | NM_003501 | 1570.403  |
| NM_00361E | 496.966   | 571.974   | NM_00425E | 16937.309 | 16927.783 | AK022654  | 18310.311 |
| NM_00430C | 5442.907  | 5837.298  | AF172929  | 8979.791  | 5159.019  | BC002905  | 2088.697  |
| NM_00553E | 829.395   | 1466.92   | NM_00639E | 12981.369 | 15024.016 | NM_018091 | 2288.431  |
| AK001913  | 3465.574  | 6733.359  | AK025655  | 1811.367  | 2357.815  | NM_001108 | 15681.032 |
| NM_01804E | 1820.837  | 3038.791  | NM_00105E | 1266.73   | 1608.966  | NM_001637 | 1027.309  |
| NM_01331E | 2431.984  | 2471.68   | AY026461  | 4817.318  | 4088.494  | NM_01663C | 7719.918  |
| M20701    | 6736.288  | 6443.284  | AK025708  | 5530.214  | 3450.661  | NM_014291 | 3343.955  |
| NM_00291E | 830.152   | 1331.985  | NM_00040E | 2374.957  | 2317.135  | NM_014631 | 1036.737  |
| NM_013284 | 2645.143  | 2847.417  | NM_005564 | 62508.934 | 54736.73  | NM_00108E | 5303.482  |
| NM_00673E | 1535.942  | 2892.854  | NM_00450E | 1878.615  | 2324.115  | NM_00012C | 2116.114  |
| NM_013274 | 3523.61   | 4166.193  | NM_00640E | 17971.498 | 23752.848 | AF172327  | 10509.514 |
| AL050187  | 2056.745  | 2325.529  | AJ245946  | 681.517   | 629.791   | NM_00167E | 4041.193  |
| NM_012387 | 11799.291 | 11582.134 | NM_00239C | 2697.488  | 2067.37   | NM_00686C | 2158.162  |
| NM_00639E | 5946.033  | 13131.663 | NM_00614E | 1261.397  | 960.44    | NM_004794 | 1619.349  |
| AK025655  | 1703.669  | 2488.379  | NM_01491C | 14814.529 | 14606.115 | NM_00428E | 525.694   |
| NM_00136E | 750.974   | 652.591   | AK001064  | 5495.54   | 5172.656  | NM_00416E | 2399.179  |
| NM_00405E | 551.649   | 528.583   | AB029031  | 2216.591  | 3144.159  | AK026308  | 905.424   |
| NM_00383E | 40900.453 | 31465.123 | NM_001294 | 3708.778  | 2931.152  | NM_013337 | 730.187   |
| AK000868  | 6155.072  | 3946.352  | NM_014241 | 10423.092 | 7150.234  | NM_00689E | 1061.135  |
| NM_00123E | 3963.066  | 5959.548  | AF302786  | 3300.334  | 2672.441  | NM_01220C | 826.019   |
| L33404    | 925.076   | 2587.389  | AL122083  | 5774.298  | 5602.933  | NM_001724 | 2461.9    |
| M13509    | 2753.779  | 2406.926  | NM_00505E | 10623.526 | 11915.201 | NM_00015C | 1369.162  |
| X04076    | 5526.675  | 7317.142  | BF038439  | 910.333   | 822.185   | NM_00621E | 675.461   |
| W95082    | 782.541   | 597.455   | AF319476  | 1309.526  | 1186.765  | AK022872  | 2020.803  |
| AA485362  | 4932.149  | 4416.111  | AK001913  | 2708.859  | 3466.653  | AK024272  | 5773.939  |
| AJ222801  | 5668.812  | 4459.55   | NM_017737 | 410.374   | 900.82    | NM_016381 | 786.689   |
| W72207    | 24108.59  | 44802.672 | NM_00429E | 1538.672  | 1495.318  | AL591715  | 802.244   |
| BI772354  | 3678.565  | 2675.721  | NM_015484 | 4384.833  | 4682.94   | NM_01804E | 2271.787  |
| AA733033  | 2709.822  | 1780.899  | NM_01804E | 1441.344  | 1124.72   | BE741525  | 561.165   |
| AA583574  | 2336.62   | 2295.746  | NM_01331E | 3808.347  | 5303.783  | BF030555  | 21390.758 |
| AI690184  | 55057.758 | 54561.391 | M20701    | 16140.99  | 15989.226 | NM_01243E | 3930.031  |
| NM_014734 | 2769.708  | 2594.989  | NM_00291E | 1656.735  | 1459.705  | NM_00560E | 1257.329  |
| NM_00228E | 976.97    | 925.666   | NM_013284 | 1790.849  | 1922.235  | NM_00257E | 800.158   |
| AK026408  | 2538.363  | 2929.48   | NM_00673E | 1580.282  | 745.766   | NM_00358E | 2626.694  |
| NM_00502E | 1120.793  | 2307.577  | NM_013274 | 4938.617  | 6267.767  | AF169351  | 4894.322  |
| NM_01781E | 1978.591  | 2563.229  | AK024955  | 33678.285 | 40649.965 | M14200    | 24399.805 |
| NM_02043E | 474.098   | 622.459   | NM_01658C | 1601.458  | 1907.714  | NM_00028E | 1655.771  |
| AF028823  | 8495.854  | 4301.623  | AF169693  | 1769.787  | 1808.192  | NM_00053E | 1598.414  |

|           |           |           |           |           |           |           |           |
|-----------|-----------|-----------|-----------|-----------|-----------|-----------|-----------|
| NM_004295 | 17901.645 | 19195.441 | L23206    | 6233.105  | 7086.863  | NM_016341 | 905.071   |
| NM_002087 | 18324.699 | 6053.173  | NM_012192 | 3463.617  | 3594.939  | NM_004034 | 2962.413  |
| NM_014585 | 437.905   | 1228.924  | NM_006293 | 3597.886  | 3052.056  | NM_000130 | 2361.537  |
| AF200815  | 600.693   | 749.216   | NM_007229 | 5263.152  | 5771.724  | AI492087  | 3343.814  |
| NM_013441 | 2166.089  | 1847.933  | AB011105  | 3188.532  | 4746.447  | Z35309    | 926.648   |
| NM_012465 | 1228.92   | 1447.123  | NM_002213 | 958.957   | 1054.921  | AA700005  | 7543.125  |
| M60499    | 7755.263  | 3798.253  | NM_018970 | 1516.926  | 1228.804  | AA292025  | 1438.422  |
| NM_000366 | 1028.627  | 642.545   | NM_004814 | 6682.064  | 6630.204  | AA437226  | 1939.604  |
| NM_003040 | 345.128   | 1532.76   | D86976    | 23143.408 | 21989.453 | R36143    | 851.754   |
| NM_004300 | 2200.085  | 2131.254  | AF307080  | 1953.108  | 2303.083  | XM_056359 | 469.19    |
| NM_014382 | 149.584   | 1095.567  | NM_004057 | 2923.555  | 2979.321  | D10353/NM | 3526.875  |
| AB007859  | 1119.739  | 1359.253  | K03175    | 1086.984  | 836.136   | M15042    | 1202.357  |
| NM_006754 | 567.78    | 391.581   | NM_003015 | 998.016   | 1113.906  | AK056843  | 1778.023  |
| NM_001127 | 4723.787  | 4740.928  | NM_006496 | 18043.637 | 10497.568 | U49928    | 6761.532  |
| NM_012430 | 2023.746  | 2223.468  | NM_004826 | 1677.718  | 1438.724  | AK096645  | 12563.898 |
| NM_003917 | 16390.533 | 16228.655 | NM_002072 | 919.388   | 1247.054  | AK092859  | 476.715   |
| NM_007077 | 1416.137  | 1524.661  | BE904126  | 50814.715 | 51100.957 | NM_019884 | 2031.432  |
| NM_002956 | 1977.911  | 1362.215  | AF272380  | 42347.898 | 44904.336 | NM_018291 | 967.605   |
| AB018739  | 1329.331  | 1126.941  | NM_004431 | 12472.91  | 15351.397 | BE906724  | 563.806   |
| NM_006750 | 17884.598 | 14940.565 | NM_002012 | 1493.585  | 1785.035  | NM_002283 | 1917.319  |
| NM_020164 | 5363.188  | 5273.521  | NM_002070 | 42864.996 | 28783.576 | AJ276095  | 4062.331  |
| AK023521  | 5468.185  | 5134.299  | AF227969  | 2801.836  | 3947.598  | NM_004819 | 988.451   |
| NM_014267 | 11498.787 | 16595.771 | AF116657  | 1196.229  | 1787.836  | NM_005291 | 7435.538  |
| NM_001481 | 999.92    | 1435.034  | NM_004102 | 907.978   | 819.419   | NM_005855 | 1722.765  |
| U30872    | 1455.712  | 2157.493  | NM_003944 | 39083.023 | 48321.652 | NM_002923 | 900.091   |
| AF111783  | 499.274   | 693.234   | NM_016120 | 59946.309 | 53297.379 | NM_006794 | 1694.206  |
| NM_002639 | 1820.39   | 1147.745  | NM_002893 | 1200.163  | 1569.821  | NM_018653 | 1690.84   |
| NM_006398 | 4119.634  | 11532.995 | NM_002393 | 6136.067  | 7334.185  | NM_005388 | 2824.747  |
| AK025655  | 1433.652  | 2145.377  | NM_002669 | 3250.063  | 2834.749  | NM_007232 | 15422.729 |
| NM_001056 | 1691.912  | 2224.081  | AB014600  | 3716.172  | 3726.903  | NM_003027 | 729.032   |
| AY026461  | 3113.663  | 2838.42   | NM_018312 | 2701.783  | 2750.893  | NM_016257 | 411.307   |
| AK025708  | 3833.091  | 3781.942  | U05255    | 589.187   | 634.745   | NM_002717 | 2867.083  |
| NM_000405 | 1355.604  | 1206.825  | X98260    | 3012.913  | 5035.396  | NM_012114 | 531.626   |
| NM_005564 | 53293.844 | 52394.746 | NM_007217 | 7461.295  | 5930.238  | NM_003025 | 4655.439  |
| NM_004508 | 2764.403  | 2336.736  | NM_014777 | 10995.672 | 9489.496  | NM_020179 | 698.092   |
| NM_006405 | 11356.447 | 11829.125 | NM_001102 | 3591.227  | 2469.375  | NM_004306 | 8958.456  |
| AJ245946  | 962.806   | 714.316   | NM_003803 | 2930.866  | 3380.308  | NM_006786 | 272.636   |
| NM_006749 | 1441.456  | 1803.443  | NM_002818 | 40958.727 | 29590.578 | NM_006205 | 535.791   |
| NM_005639 | 419.254   | 1213.762  | NM_001937 | 7182.267  | 6906.04   | NM_006860 | 2049.22   |
| NM_004694 | 782.898   | 614.919   | AK024778  | 1181.864  | 1025.188  | NM_004794 | 2379.177  |
| NM_000324 | 835.464   | 612.065   | AK021608  | 1907.535  | 1036.516  | NM_004283 | 666.724   |
| AL137619  | 2828.068  | 1896.549  | NM_004297 | 1368.844  | 1233.312  | NM_004163 | 7315.396  |
| NM_001824 | 70562.07  | 66864.898 | NM_006044 | 8275.45   | 7244.895  | AK026308  | 1221.295  |
| NM_002964 | 24402.238 | 2090.287  | AK025498  | 2133.107  | 2896.475  | NM_013337 | 1007.932  |
| NM_005052 | 5401.947  | 7325.491  | NM_002068 | 2781.508  | 4121      | NM_004193 | 1326.516  |
| AF319476  | 3301.043  | 2664.582  | NM_013338 | 1362.633  | 2095.192  | NM_002803 | 4612.675  |
| AK001913  | 737.627   | 995.435   | NM_014671 | 6020.602  | 5681.841  | NM_005508 | 722.474   |
| NM_004292 | 885.069   | 607.45    | NM_001814 | 4788.337  | 7929.138  | NM_006788 | 725.048   |
| NM_015484 | 4397.242  | 4298.756  | NM_018439 | 704.178   | 882.623   | NM_016568 | 595.728   |
| NM_018046 | 1693.184  | 1973.371  | NM_005656 | 1766.834  | 1831.999  | AB033102  | 5741.733  |
| NM_013316 | 2055.304  | 1854.568  | NM_006012 | 5039.513  | 4605.858  | NM_014774 | 1766.12   |
| M20701    | 6407.967  | 5151.014  | NM_002151 | 1770.4    | 1879.403  | NM_014143 | 3014.79   |
| NM_002912 | 1063.096  | 1244.771  | NM_014889 | 1672.019  | 1597.769  | M55646    | 14264.941 |

|           |           |           |           |           |           |           |           |
|-----------|-----------|-----------|-----------|-----------|-----------|-----------|-----------|
| NM_013284 | 2737.252  | 2521.654  | AF173935  | 1048.311  | 864.779   | NM_006112 | 21974.102 |
| NM_006739 | 1561.97   | 2701.616  | AK025322  | 10455.002 | 11857.775 | M12807    | 2337.583  |
| NM_013274 | 4000.57   | 4343.74   | NM_017887 | 4952.377  | 4595.926  | NM_001765 | 1006.55   |
| AL050187  | 2733.853  | 3301.724  | NM_017650 | 625.321   | 708.607   | NM_003361 | 833.154   |
| NM_007127 | 194.041   | 1520.129  | NM_000526 | 2708.086  | 3295.12   | NM_012099 | 257.551   |
| NM_012387 | 11740     | 12551.962 | AF007152  | 2336.612  | 1795.383  | NM_018684 | 2637.817  |
| NM_014735 | 1598.455  | 1517.279  | NM_017575 | 751.946   | 798.95    | NM_017983 | 599.062   |
| NM_004252 | 12330.276 | 13362.716 | AL122100  | 1573.5    | 1448.429  | AF169351  | 5738.821  |
| AF172929  | 18691.998 | 4508.421  | NM_005310 | 743.168   | 563.203   | M14200    | 33455.492 |
| NM_012465 | 603.394   | 799.76    | NM_014423 | 5400.933  | 5775.804  | NM_000282 | 2606.025  |
| M60499    | 5543.22   | 3066.666  | NM_018083 | 1144.149  | 1721.805  | NM_000532 | 3680.079  |
| NM_000366 | 507.286   | 436.925   | AL110188  | 9948.252  | 11078.956 | NM_016341 | 806.898   |
| NM_003833 | 30770.098 | 20237.756 | D70834    | 32539.057 | 33837.438 | AF231916  | 4038.094  |
| AK000868  | 6017.153  | 4142.741  | AK000102  | 765.475   | 1370.165  | NM_003501 | 1771.406  |
| NM_001233 | 2299.088  | 3629.966  | AB040916  | 3229.318  | 3034.599  | AK022654  | 22272.094 |
| NM_001234 | 2423.657  | 1457.88   | AF283771  | 565.183   | 884.409   | BC002905  | 4154.601  |
| BF679789  | 1887.618  | 1517.287  | NM_005587 | 2040.048  | 3806.042  | NM_018091 | 3042.398  |
| H97792    | 2236.341  | 2075.788  | AF038362  | 2051.637  | 2918.038  | NM_001108 | 17402.867 |
| L33404    | 1087.353  | 924.957   | NM_005195 | 13181.625 | 15565.979 | NM_001637 | 1007.219  |
| M13509    | 2863.883  | 2451.117  | NM_004715 | 3338.087  | 4822.604  | NM_016630 | 7520.722  |
| X04076    | 5922.872  | 7280.829  | L40392    | 2554.887  | 2217.285  | NM_014291 | 2093.277  |
| W95082    | 1068.46   | 485.182   | BF541482  | 554.595   | 611.665   | NM_014631 | 799.307   |
| AA485362  | 4872.383  | 3855.053  | NM_001007 | 62986.535 | 59745.598 | NM_001089 | 6753.298  |
| AJ222801  | 6951.711  | 5624.697  | NM_003017 | 3243.753  | 2227.181  | NM_000120 | 2740.537  |
| W72207    | 25012.02  | 47107.547 | NM_020366 | 2646.58   | 2971.276  | AF172327  | 11000.541 |
| BI772354  | 3910.469  | 3113.55   | NM_020141 | 3127.891  | 3194.733  | NM_001676 | 5813.728  |
| AA733033  | 2825.421  | 2055.391  | NM_003635 | 1729.175  | 1870.919  | NM_001679 | 2521.672  |
| AA583574  | 2801.243  | 4906.275  | NM_000662 | 3936.316  | 3978.313  | NM_004046 | 40365.129 |
| AI690184  | 59727.23  | 54609.031 | NM_000292 | 1481.713  | 1131.891  | NM_019884 | 1375.195  |
| T48692    | 433.778   | 378.629   | NM_003689 | 35364.129 | 37836.887 | NM_018291 | 3535.973  |
| AA927490  | 5608.094  | 3354.112  | NM_016173 | 1007.18   | 1323.044  | NM_005530 | 1099.675  |
| NM_001481 | 796.742   | 981.71    | NM_002875 | 2834.743  | 2108.797  | NM_006899 | 1892.933  |
| U30872    | 1113.125  | 1603.473  | NM_004427 | 8478.491  | 7359.269  | NM_012200 | 1184.534  |
| AF111783  | 414.788   | 581.079   | U90549    | 4173.193  | 3374.112  | NM_001724 | 1548.406  |
| NM_002639 | 1728.604  | 1198.416  | NM_013240 | 9605.599  | 7986.738  | NM_000150 | 3141.86   |
| NM_014734 | 1293.381  | 1282.007  | NM_015874 | 25858.193 | 18056.125 | AB023152  | 915.224   |
| NM_002289 | 452.511   | 690.465   | NM_004965 | 57747.141 | 43335.813 | NM_006212 | 664.119   |
| AK026408  | 1572.963  | 1426.12   | AF312393  | 36102.992 | 30232.158 | AK022872  | 2199.406  |
| NM_006307 | 322.278   | 381.752   | AF272898  | 4481.145  | 5051.848  | AK024272  | 5650.949  |
| M74782    | 845.521   | 741.371   | AB037817  | 646.488   | 942.208   | NM_016381 | 845.833   |
| NM_017818 | 1924.676  | 2151.362  | AB032951  | 9578.295  | 9560.203  | AL591715  | 622.206   |
| NM_020433 | 903.098   | 883.756   | NM_003417 | 1543.884  | 1277.948  | NM_018042 | 2730.856  |
| NM_001767 | 757.006   | 625.453   | NM_005149 | 7138.813  | 8353.918  | BE741525  | 761.84    |
| AF028823  | 10228.434 | 5920.422  | AK024073  | 1136.693  | 968.574   | BF030555  | 14599.337 |
| NM_004295 | 20714.002 | 24626.057 | NM_005887 | 2827.24   | 4306.87   | NM_012433 | 2050.385  |
| NM_002087 | 19180.98  | 6153.814  | AK024921  | 815.18    | 496.301   | NM_003582 | 607.606   |
| NM_014585 | 751.063   | 1916.996  | AL110232  | 1467.775  | 664.406   | NM_020179 | 1318.558  |
| AF200815  | 915.474   | 1586.91   | AK026103  | 2046.168  | 1542.292  | NM_004306 | 22663.871 |
| NM_013441 | 2362.371  | 2398.96   | NM_016353 | 19190.963 | 19841.896 | NM_001153 | 380.075   |
| NM_014421 | 1239.354  | 988.276   | AK022567  | 1139.944  | 1401.937  | NM_006786 | 550.626   |
| NM_006749 | 694.974   | 993.764   | S77357    | 1390.999  | 2331.748  | NM_006205 | 676.552   |
| NM_004694 | 426.35    | 598.14    | AK023450  | 919.237   | 886.047   | NM_004034 | 4019.208  |
| NM_000324 | 721.799   | 571.895   | AL080280  | 10552.644 | 11084.039 | NM_000130 | 3693.435  |

|           |           |           |           |          |           |           |           |
|-----------|-----------|-----------|-----------|----------|-----------|-----------|-----------|
| AL137619  | 1743.11   | 1848.744  | AB028947  | 2583.9   | 2124.555  | AF193756  | 498.621   |
| NM_00430C | 1405.26   | 1086.02   | AF035314  | 1713.816 | 2006.266  | AI492087  | 4149.748  |
| AB007859  | 1419.16   | 1044.138  | NM_018036 | 1220.93  | 1255.073  | R72122    | 3431.515  |
| NM_006754 | 707.306   | 752.443   | AF052087  | 1361.725 | 832.737   | Z35309    | 899.553   |
| NM_001127 | 4817.579  | 3554.428  | AF007143  | 1667.705 | 2112.556  | AA700005  | 6769.022  |
| NM_01243C | 2138.598  | 2674.839  | AK023656  | 1037.198 | 687.227   | AA292025  | 1525.666  |
| NM_003917 | 18825.908 | 19118.98  | AF086511  | 4553.514 | 5727.358  | AA437226  | 2533.369  |
| NM_007077 | 2280.231  | 2545.905  | AK022989  | 6204.534 | 6315.433  | R36143    | 980.763   |
| NM_002956 | 2487.369  | 2093.719  | AK001604  | 4260.555 | 3878.573  | XM_056359 | 970.816   |
| AB018739  | 1425.101  | 1320.385  | AK021619  | 521.477  | 808.837   | D10353/NM | 3952.746  |
| NM_00675C | 19449.061 | 21515.027 | AK022347  | 416.635  | 573.053   | M15042    | 1538.554  |
| NM_014267 | 11503.344 | 14547.272 | AK025872  | 842.586  | 941.556   | U49928    | 710.073   |
| AL050187  | 2438.838  | 2629.441  | AF131762  | 12672.47 | 14663.984 | AK096645  | 2152.147  |
| NM_012387 | 9717.854  | 10509.79  | AY007089  | 2542.161 | 5962.764  | M12807    | 1464.528  |
| NM_014735 | 1417.212  | 1305.901  | AK021816  | 7265.411 | 10438.394 | NM_001765 | 1061.223  |
| NM_004252 | 10828.091 | 13127.99  | AK024018  | 467.87   | 589.924   | NM_003361 | 819.005   |
| AF172929  | 14129.674 | 4843.6    | D43770    | 7539.327 | 6992.505  | NM_012095 | 1318.709  |
| NM_006398 | 3724.055  | 6718.653  | AF085960  | 620.068  | 745.848   | NM_018684 | 5794.634  |
| AK025655  | 949.962   | 1204.28   | AK021519  | 2101.424 | 2369.1    | NM_017983 | 705.705   |
| NM_001362 | 572.415   | 452.395   | NM_014254 | 2253.454 | 2388.732  | AF116909  | 588.717   |
| NM_001056 | 347.731   | 539.991   | AF086036  | 880.896  | 517.286   | BE906724  | 843.171   |
| AY026461  | 4489.062  | 4391.764  | AF086010  | 445.086  | 413.923   | NM_002283 | 2833.802  |
| AK025708  | 3253.539  | 2642.305  | U09197    | 2758.587 | 1831.555  | AJ276095  | 6294.047  |
| NM_000405 | 1484.492  | 1255.112  | U50529    | 1782.629 | 740.701   | NM_004815 | 1417.448  |
| NM_005564 | 59874.887 | 53969.543 | U66050    | 549.74   | 470.236   | NM_007184 | 1984.994  |
| AJ245946  | 728.851   | 673.476   | Z36800    | 1187.748 | 833.545   | NM_005291 | 8052.339  |
| NM_00239C | 3545.682  | 1792.199  | U15553    | 8482.959 | 7604.439  | NM_002923 | 865.838   |
| NM_006142 | 1451.524  | 1069.053  | Z36829    | 1472.698 | 1316.213  | NM_006794 | 1083.192  |
| NM_01491C | 4704.422  | 4747.126  | AK024734  | 1931.601 | 1975.825  | NM_018653 | 1839.107  |
| AK001064  | 5744.291  | 6190.024  | NM_017741 | 986.882  | 662.73    | NM_005388 | 3073.122  |
| AB029031  | 4071.836  | 5672.239  | AK000144  | 1210.338 | 1093.094  | NM_007232 | 19728.723 |
| NM_001294 | 1577.846  | 1671.733  | AK022275  | 937.375  | 1390.494  | NM_003027 | 432.07    |
| NM_014241 | 1516.343  | 2064.383  | AK000942  | 578.765  | 602.843   | NM_002717 | 864.891   |
| AF302786  | 2336.559  | 1374.273  | NM_016345 | 586.851  | 741.976   | NM_003025 | 351.455   |
| AL122083  | 3196.466  | 3291.669  | AL117533  | 4692.132 | 4458.307  | NM_001675 | 7264.269  |
| NM_005052 | 14434.406 | 15220.649 | AK026036  | 1303.914 | 1325.767  | NM_004046 | 63777.48  |
| AK001913  | 2592.67   | 3441.795  | AK023422  | 2552.267 | 3936.295  | NM_004983 | 952.433   |
| NM_017737 | 580.094   | 1168.071  | AK022796  | 2336.132 | 2636.134  | NM_00686C | 3184.337  |
| NM_004292 | 1958.013  | 1968.656  | AK095193  | 2250.713 | 2911.266  | NM_004794 | 2743.057  |
| NM_015484 | 5260.419  | 4816.604  | AK025081  | 1946.106 | 2578.497  | NM_004283 | 940.687   |
| NM_018046 | 1890.653  | 2228.776  | AL122088  | 3280.3   | 2715.536  | NM_004163 | 11881.939 |
| NM_013316 | 3290.574  | 3010.73   | AF116633  | 644.878  | 578.623   | AK026308  | 2110.01   |
| M20701    | 13122.625 | 11536.26  | AF119912  | 874.281  | 729.557   | NM_013337 | 968.69    |
| NM_002912 | 1218.921  | 1344.932  | AL137518  | 2733.81  | 2281.538  | NM_004193 | 1440.354  |
| NM_013284 | 3545.343  | 3886.196  | AK022556  | 599.823  | 466.81    | NM_002803 | 5505.885  |
| NM_006735 | 1673.37   | 2958.672  | AK023437  | 3503.742 | 2607.941  | NM_005508 | 755.979   |
| NM_013274 | 4577.739  | 4849.268  | AK024147  | 673.49   | 752.261   | NM_006788 | 934.852   |
| AL157500  | 462.293   | 497.453   | AK022897  | 2279.775 | 2071.975  | NM_016568 | 814.847   |
| AK024955  | 18814.107 | 20475.369 | AK023556  | 1921.662 | 1716.253  | AB033102  | 6866.769  |
| NM_01658C | 1155.285  | 1155.349  | AK023898  | 7552.781 | 7889.4    | NM_014774 | 823.534   |
| AF169693  | 1065.963  | 726.985   | NM_01904C | 5904.98  | 8104.553  | NM_014143 | 1343.791  |
| L23206    | 4714.364  | 4792.164  | NM_005978 | 2718.304 | 2949.529  | M55646    | 6393.192  |
| NM_012192 | 1792.375  | 1877.604  | Y16711    | 1297.952 | 1519.771  | NM_006112 | 10101.011 |

|           |           |           |           |           |           |           |           |
|-----------|-----------|-----------|-----------|-----------|-----------|-----------|-----------|
| NM_006293 | 953.326   | 902.415   | AJ272179  | 2597.409  | 5981.142  | BE741525  | 77.414    |
| NM_007229 | 3006.751  | 3256.992  | AJ007015  | 1339.602  | 1442.672  | BF030555  | 19392.004 |
| AB011105  | 2474.083  | 2393.5    | AL049317  | 1740.558  | 1972.021  | NM_012433 | 2930.148  |
| NM_002213 | 450.849   | 632.654   | AL050090  | 1827.654  | 2143.352  | NM_005605 | 1127.214  |
| NM_018970 | 989.314   | 1036.539  | AF086309  | 1182.283  | 1381.194  | NM_002576 | 721.917   |
| NM_004814 | 512.589   | 947.319   | AF238870  | 3075.85   | 2516.902  | NM_003582 | 1336.116  |
| D86976    | 24721.313 | 20557.523 | AK026279  | 4387.202  | 4779.606  | AF169351  | 7315.459  |
| AF307080  | 3356.257  | 2394.734  | AF130094  | 17940.158 | 14675.302 | M14200    | 39570.27  |
| NM_004057 | 3049.148  | 2516.198  | AK026673  | 1881.627  | 1985.241  | NM_000282 | 4424.563  |
| NM_018971 | 510.981   | 500.397   | NM_005452 | 4796.804  | 4762.648  | NM_000532 | 4531.407  |
| K03175    | 1061.366  | 891.433   | AF170935  | 15022.978 | 18369.596 | NM_016341 | 834.021   |
| NM_003015 | 1270.01   | 1209.598  | AK025218  | 1510.358  | 1166.712  | AF231916  | 4205.908  |
| NM_006496 | 19118.76  | 16712.584 | AJ227899  | 2163.665  | 1968.996  | NM_003501 | 2022.888  |
| NM_000828 | 1119.942  | 997.932   | AL359607  | 1964.108  | 1910.016  | AK022654  | 25111.41  |
| NM_004826 | 1325.827  | 1146.65   | AF161371  | 17197.406 | 8447.667  | BC002905  | 4228.106  |
| NM_013314 | 797.217   | 640.505   | AK022464  | 1844.69   | 2026.199  | NM_018091 | 3274.072  |
| NM_002072 | 1727.382  | 1334.351  | AF086230  | 2813.332  | 3292.206  | NM_001108 | 18924.189 |
| NM_003182 | 928.756   | 727.212   | AK023408  | 3307.873  | 2320.767  | NM_001637 | 973.437   |
| BE904126  | 16693.221 | 16213.907 | U84509    | 3887.448  | 4259.596  | NM_016630 | 8683.441  |
| AF272380  | 29606.648 | 29424.082 | AK002036  | 4693.574  | 3286.791  | NM_014291 | 3037.893  |
| NM_004431 | 6766.953  | 6563.556  | U84512    | 1015.226  | 1556.176  | NM_001089 | 4147.417  |
| NM_002012 | 1048.292  | 1211.398  | AK025775  | 9171.71   | 5951.588  | NM_000120 | 1168.856  |
| NM_002070 | 48910.637 | 39547.598 | AB046791  | 1527.076  | 1742.442  | AF172327  | 4314.79   |
| AF227969  | 2019.088  | 3079.816  | AF043469  | 772.776   | 1878.472  | NM_001676 | 1774.603  |
| AF116657  | 632.733   | 1187.769  | AL109671  | 2017.942  | 1754.653  | AB018338  | 13674.06  |
| NM_004102 | 749.599   | 589.715   | NM_012375 | 788.89    | 688.586   | NM_004923 | 554.719   |
| NM_003944 | 19035.102 | 20271.123 | AK022008  | 3705.547  | 3513.909  | NM_003971 | 1119.792  |
| NM_016120 | 23780.557 | 34684.176 | NM_018186 | 738.896   | 1409.224  | NM_005822 | 488.095   |
| NM_002893 | 1215.991  | 1404.703  | AJ132194  | 395.922   | 715.496   | U81002    | 767.563   |
| NM_002393 | 7436.794  | 6944.704  | AL080188  | 3847.899  | 4212.015  | NM_016299 | 6091.45   |
| NM_002669 | 3619.168  | 3959.939  | T99941    | 8214.691  | 8957.252  | NM_014185 | 3457.753  |
| AB014600  | 3119.535  | 3083.994  | AF113678  | 3354.815  | 3232.584  | L38517    | 5681.067  |
| NM_018312 | 2183.979  | 1822.888  | AL137313  | 58673.832 | 55442.004 | NM_018291 | 4060.658  |
| X98259    | 648.058   | 700.966   | Z83951    | 569.375   | 531.876   | NM_005530 | 1227.999  |
| U05255    | 677.093   | 746.853   | AB002363  | 10211.225 | 6707.325  | NM_006899 | 1615.981  |
| X98260    | 4662.321  | 6501.634  | NM_005284 | 6105.522  | 5946.446  | NM_012200 | 1082.008  |
| NM_007217 | 7360.715  | 6241.827  | AF086351  | 4685.511  | 3425.604  | NM_001724 | 1856.131  |
| NM_014777 | 6531.575  | 6619.034  | D83199    | 35068.41  | 24988.777 | NM_000150 | 1976.724  |
| NM_001102 | 12506.808 | 9076.64   | AK025957  | 864.865   | 794.319   | AB023152  | 1407.082  |
| NM_003803 | 1387.844  | 955.024   | Y16708    | 1101.993  | 1276.756  | NM_006212 | 1101.496  |
| NM_002818 | 59083.785 | 59561.211 | AL157453  | 4957.878  | 3494.639  | AK022872  | 2669.233  |
| NM_001937 | 9224.896  | 8157.135  | NM_019096 | 8645.744  | 8664.516  | AK024272  | 10911.577 |
| AK024778  | 1182.218  | 1270.336  | AK022212  | 51350.641 | 47570.484 | NM_016381 | 1175.265  |
| AK021608  | 4025.656  | 2838.192  | X64974    | 3395.44   | 3026.291  | NM_014944 | 1283.311  |
| NM_004297 | 1401.552  | 1571.427  | NM_000834 | 5028.679  | 4353.801  | AF200348  | 731.828   |
| NM_006044 | 5435.458  | 5073.438  | NM_006485 | 38457.535 | 53714.355 | J03756    | 347.505   |
| AK025498  | 1021.92   | 1091.725  | NM_012459 | 1895.111  | 1533.625  | NM_002650 | 628.04    |
| NM_001395 | 5024.36   | 5518.511  | NM_012360 | 1292.074  | 1105.652  | NM_003260 | 10718.629 |
| NM_002068 | 2143.269  | 3706.53   | AL137268  | 5940.309  | 6406.224  | AK024071  | 1271.177  |
| NM_013338 | 698.813   | 868.101   | AK001130  | 608.863   | 340.048   | AF056490  | 748.075   |
| NM_014671 | 1614.606  | 1389.17   | AK022398  | 2389.925  | 2106.027  | NM_005539 | 736.326   |
| NM_001814 | 4071.916  | 3011.669  | AK024109  | 3078.834  | 3896.258  | BF341504  | 539.951   |
| NM_018439 | 1123.023  | 1129.8    | AF088048  | 964.288   | 873.001   | NM_005541 | 4145.639  |

|           |           |           |            |           |           |           |           |
|-----------|-----------|-----------|------------|-----------|-----------|-----------|-----------|
| NM_005656 | 1133.352  | 1143.078  | AK001143   | 5299.351  | 3391.385  | AB002319  | 936.998   |
| NM_006012 | 5348.885  | 4916.854  | AK001701   | 5697.026  | 2626.795  | AF039942  | 829.071   |
| NM_002151 | 1137.535  | 1218.492  | AK022205   | 1011.961  | 980.326   | NM_004421 | 1109.865  |
| NM_014889 | 1425.35   | 1683.367  | AB007978   | 774.919   | 415.89    | NM_018654 | 820.2     |
| AF173935  | 1066.081  | 934.367   | AF217970   | 1392.182  | 1246.236  | AB046863  | 7000.977  |
| AK025322  | 9090.92   | 8654.94   | AF086297   | 2246.49   | 1784.153  | M62403    | 19468.303 |
| NM_017887 | 5110.967  | 4459.927  | AK025455   | 2509.052  | 2322.404  | NM_017883 | 1125.79   |
| NM_000526 | 1366.491  | 1214.776  | AK026799   | 11684.902 | 12961.689 | AK025131  | 2061.784  |
| AF007152  | 3807.13   | 2188.208  | NM_014860  | 1445.125  | 955.015   | NM_000754 | 12348.934 |
| NM_017575 | 476.425   | 432.298   | AK022549   | 1064.466  | 1159.863  | NM_014619 | 812.006   |
| AL122100  | 632.854   | 594.79    | NM_018157  | 916.679   | 846.201   | NM_005629 | 2241.354  |
| NM_018083 | 956.063   | 1737.377  | Z70714     | 6753.621  | 5328.526  | J04621    | 1146.295  |
| AL110188  | 4880.785  | 5431.93   | AK021640   | 23492.004 | 16144.041 | NM_000718 | 365.502   |
| D70834    | 12785.599 | 9091.597  | NM_016565  | 59115.484 | 49932.254 | NM_000161 | 783.218   |
| NM_000970 | 66868.938 | 55802.957 | CY3Cy5     | 3961.717  | 354.398   | NM_002634 | 2511.798  |
| AK000102  | 884.608   | 667.999   | BF310427   | 2073.884  | 3368.969  | NM_017749 | 938.84    |
| AB040916  | 748.176   | 825.376   | N94424     | 657.029   | 1278.082  | NM_001972 | 17196.537 |
| NM_005587 | 802.146   | 654.056   | AA045192   | 2227.917  | 2253.709  | NM_002006 | 4361.851  |
| AF038362  | 2843.876  | 2095.732  | AI521645   | 873.048   | 655.159   | NM_007111 | 475.471   |
| NM_005195 | 19029.908 | 22322.746 | M92642     | 1198.674  | 1932.523  | NM_007109 | 510.905   |
| NM_005481 | 738.536   | 1088.347  | AA464532   | 291.236   | 497.312   | AK023404  | 6946.982  |
| NM_004715 | 3701.587  | 4300.161  | H-U 44385  | 8473.389  | 11909.562 | NM_001789 | 458.824   |
| L40392    | 2834.917  | 2295.977  | ID 1654970 | 3286.323  | 4504.061  | NM_016004 | 1791.788  |
| NM_001007 | 62946.16  | 57572.027 | ID 2531132 | 2965.666  | 3343.925  | NM_002655 | 565.62    |
| NM_003017 | 5776.426  | 7884.907  | ID 4365538 | 373.629   | 836.735   | AB028955  | 10918.783 |
| NM_020366 | 3312.054  | 4183.388  | AA485665   | 383.967   | 298.696   | U66879    | 7609.919  |
| NM_020141 | 3287.19   | 2842.89   | BF125928   | 7257.252  | 7829.361  | NM_016022 | 7341.92   |
| NM_003779 | 891.787   | 721.279   | BG571026   | 2368.695  | 1460.15   | NM_004874 | 1381.545  |
| NM_003635 | 712.016   | 518.69    | AA489017   | 2403.6    | 2029.53   | NM_014204 | 2464.897  |
| NM_000292 | 525.482   | 435.183   | NM_012245  | 11442.631 | 7704.282  | S70385    | 3083.237  |
| NM_003689 | 39873.723 | 34866.641 | NM_133263  | 1650.849  | 892.115   | M34671    | 492.895   |
| NM_016173 | 646.048   | 1037.481  | SR2        | 37476.055 | 21554.707 | NM_018509 | 893.341   |
| NM_002875 | 1809.847  | 4693.007  | SR4        | 11228.39  | 6580.585  | NM_001748 | 3425.358  |
| NM_004427 | 6797.107  | 4915.769  | SR6        | 1617.559  | 1003.428  | NM_001109 | 865.554   |
| U90549    | 6576.856  | 3960.767  | SR8        | 5891.553  | 9776.749  | AF176706  | 1073.31   |
| NM_013240 | 7207.576  | 7112.356  | SR10       | 21460.824 | 4616.978  | NM_014484 | 380.656   |
| NM_015874 | 26461.238 | 19396.152 | CY3Cy5     | 2631.339  | 230.142   | NM_001086 | 493.865   |
| NM_004965 | 40314.984 | 44116.531 | NM_017450  | 2200.232  | 5361.033  | NM_014670 | 1627.281  |
| AF312393  | 40839.672 | 41455.219 | NM_002023  | 687.55    | 967.079   | NM_019048 | 2774.349  |
| AF272898  | 6172.351  | 6411.312  | NM_002839  | 745.853   | 1021.217  | NM_001040 | 546.757   |
| AB037817  | 789.939   | 670.259   | AF190500   | 781.703   | 1147.995  | AF279698  | 2710.088  |
| AB032951  | 6197.911  | 5167.553  | NM_001616  | 373.598   | 404.153   | NM_019849 | 2589.191  |
| NM_003417 | 1377.891  | 1252.61   | NM_005904  | 607.514   | 664.496   | NM_000049 | 396.796   |
| NM_005149 | 7090.434  | 6568.942  | NM_005273  | 11470.964 | 12120.6   | AB032996  | 18603.359 |
| AK024073  | 969.004   | 1156.242  | NM_000524  | 424.016   | 404.534   | AB040881  | 1406.158  |
| AK022223  | 711.417   | 817.338   | NM_006576  | 1551.27   | 1631.397  | AY007121  | 1291.908  |
| NM_005887 | 936.038   | 2414.878  | NM_018645  | 295.072   | 719.547   | NM_003372 | 4458.464  |
| AK026103  | 1969.733  | 1684.305  | AB035266   | 2179.253  | 2087.17   | NM_003980 | 556.472   |
| NM_016353 | 5609.706  | 4211.542  | NM_003744  | 989.56    | 1380.904  | NM_007317 | 1154.83   |
| AK022567  | 516.677   | 352.987   | NM_006378  | 1275.429  | 958.834   | AB037826  | 12343.688 |
| S77357    | 660.325   | 511.185   | NM_018132  | 3973.569  | 1683.528  | AK021466  | 1725.175  |
| AK023450  | 1129.14   | 668.707   | NM_018207  | 1143.819  | 500.423   | Z36796    | 63958.125 |
| AL080280  | 4194.86   | 3442.906  | NM_000345  | 7793.116  | 6146.206  | NM_006443 | 3315.238  |

|           |          |          |           |           |           |           |           |
|-----------|----------|----------|-----------|-----------|-----------|-----------|-----------|
| AB028947  | 2014.781 | 1617.825 | NM_006531 | 1288.019  | 1339.411  | NM_004959 | 524.969   |
| AF035314  | 1513.454 | 1362.115 | AB029021  | 5725.997  | 6265.437  | AK026022  | 8206.953  |
| NM_018036 | 1278.345 | 1174.663 | NM_002101 | 20503.244 | 10833.639 | NM_003199 | 861.072   |
| AF052087  | 1028.417 | 1276.865 | NM_005423 | 594.632   | 276.869   | NM_002938 | 2510.099  |
| AF007143  | 1581.857 | 1847.393 | Z36789    | 1194.83   | 481.029   | AK023652  | 4455.944  |
| AF147417  | 1191.704 | 1034.057 | J02874    | 2650.772  | 2078.205  | AF099032  | 385.89    |
| AK023656  | 2049.386 | 1241.187 | AF070525  | 3908.298  | 6738.598  | NM_003070 | 3372.105  |
| AF086511  | 1684.501 | 1723.058 | NM_001177 | 2336.16   | 6562.924  | AL122101  | 2243.982  |
| AK022989  | 2956.006 | 2583.332 | NM_014447 | 1028.211  | 1820.552  | NM_004780 | 1339.4    |
| AK001604  | 5119.369 | 4755.415 | NM_002356 | 590.069   | 884.711   | NM_016216 | 3258.921  |
| AK021619  | 559.514  | 693.841  | NM_006691 | 1183.157  | 1429.353  | AK001649  | 1185.422  |
| AK025872  | 633.003  | 231.111  | NM_001505 | 696.226   | 725.446   | NM_016638 | 2880.786  |
| AF131762  | 4601.886 | 7413.921 | NM_003710 | 1725.766  | 1690.094  | AB018274  | 2480.459  |
| AY007089  | 2079.657 | 4060.316 | Z83805    | 645.075   | 871.135   | NM_005871 | 2578.403  |
| AK021816  | 5396.837 | 5152.58  | NM_004666 | 1338.096  | 1762.84   | NM_007042 | 839       |
| D43770    | 254.047  | 461.652  | NM_003614 | 943.586   | 1438.975  | NM_016333 | 6646.12   |
| NM_014254 | 1451.486 | 1889.873 | NM_014257 | 2553.959  | 2405.739  | BE875028  | 2292.632  |
| AF086036  | 662.803  | 704.363  | NM_004843 | 1308.412  | 1158.639  | AK000511  | 2797.928  |
| AF086010  | 349.726  | 400.225  | AK022845  | 1017.735  | 582.408   | AF121255  | 1862.523  |
| U09197    | 2044.601 | 1300.322 | NM_002985 | 3770.252  | 3039.726  | NM_005494 | 3567.413  |
| U50529    | 1845.498 | 713.586  | AB018347  | 3528.554  | 2782.333  | NM_017946 | 492.71    |
| Z36800    | 505.168  | 605.767  | NM_003284 | 1321.141  | 948.94    | NM_004953 | 1061.193  |
| U15553    | 4273.341 | 4440.985 | NM_018152 | 853.116   | 560.81    | AL049682  | 361.716   |
| U52831    | 503.61   | 579.414  | NM_000319 | 923.903   | 854.304   | NM_005528 | 1161.598  |
| Z36829    | 1128.08  | 1032.165 | NM_003257 | 351.423   | 195.645   | NM_007006 | 8729.992  |
| AK024734  | 3522.974 | 3701.413 | NM_012461 | 3896.545  | 1552.893  | AL137346  | 1059.403  |
| NM_017741 | 1095.622 | 790.18   | AK001379  | 1620.715  | 507.855   | NM_017756 | 15273.804 |
| AK000144  | 682.631  | 844.762  | NM_007072 | 2131.333  | 3283.087  | NM_005793 | 2403.509  |
| AK022275  | 672.685  | 735.081  | NM_015929 | 4652.528  | 6580.217  | NM_004901 | 677.418   |
| AL122088  | 763.219  | 522.016  | U90653    | 2604.837  | 3133.462  | NM_006721 | 10660.128 |
| AF116633  | 437.474  | 314.626  | NM_000196 | 434.991   | 761.124   | NM_016282 | 2428.051  |
| AF119912  | 546.843  | 612.872  | NM_018339 | 2172.239  | 2038.84   | NM_002765 | 568.81    |
| AL137518  | 1102.951 | 1092.802 | NM_006745 | 13163.205 | 23089.926 | NM_001905 | 845.804   |
| AK022556  | 419.212  | 652.997  | NM_014760 | 1517.153  | 1411.785  | AF292100  | 3740.146  |
| AK023437  | 1699.634 | 1780.453 | NM_018398 | 834.958   | 756.621   | NM_003434 | 13293.691 |
| AK024147  | 1468.131 | 2476.156 | NM_002560 | 8747.264  | 8267.866  | NM_005654 | 375.539   |
| AK022897  | 1561.195 | 1818.458 | NM_014404 | 1328.073  | 1338.28   | AF024698  | 60687.066 |
| AK023898  | 6736.543 | 6280.905 | NM_018713 | 658.175   | 577.1     | BE904617  | 18393.879 |
| NM_019040 | 5313.422 | 6960.697 | NM_015947 | 3135.941  | 2284.542  | AK024495  | 511.382   |
| NM_005978 | 1668.084 | 1092.723 | NM_002042 | 18398.225 | 20180.414 | AF024694  | 1844.796  |
| Y16711    | 1217.794 | 1032.08  | AB028944  | 482.548   | 303.513   | AF091081  | 3329.728  |
| AJ272179  | 2790.177 | 3464.931 | AJ006268  | 726.918   | 369.163   | AK001758  | 1455.955  |
| AJ007015  | 1924.727 | 810.467  | M74089    | 1958.773  | 1831.869  | U90842    | 605.989   |
| AL049317  | 984.237  | 795.976  | AF190864  | 5674.366  | 3019.321  | AF086325  | 4131.67   |
| AK026279  | 1637.949 | 1234.095 | NM_002779 | 3769.158  | 2068.968  | NM_004928 | 101.399   |
| AF130094  | 2024.98  | 1610.286 | L40397    | 11575.802 | 7044.318  | AF147401  | 1053.749  |
| AK026673  | 505.791  | 395.785  | NM_020198 | 4520.106  | 3685.804  | AF075022  | 1494.636  |
| NM_005452 | 2298.983 | 2335.962 | AA098879  | 429.971   | 358.754   | AF075060  | 5608.268  |
| AF170935  | 6705.145 | 7762.279 | NM_000025 | 13995.979 | 15840.628 | AB002438  | 358.318   |
| AK025218  | 692.017  | 786.054  | D38521    | 3576.84   | 4107.675  | AF147436  | 1021.378  |
| AJ227899  | 1737.652 | 1658.38  | NM_000403 | 3659.698  | 4099.924  | AK021441  | 366.038   |
| AL359607  | 1366.153 | 1100.286 | NM_018127 | 8986.006  | 13828.978 | AK026018  | 544.428   |
| AF086230  | 1233.813 | 1721.927 | AB020677  | 4707.044  | 6313.315  | AF085846  | 1663.545  |



|            |           |           |            |           |           |           |           |
|------------|-----------|-----------|------------|-----------|-----------|-----------|-----------|
| AK023408   | 2341.335  | 2013.401  | AB033097   | 2267.441  | 2962.283  | AK023901  | 5217.92   |
| U84509     | 2976.682  | 2971.781  | NM_000135  | 1072.036  | 1620.825  | AL109705  | 663.783   |
| AK002036   | 6863.77   | 5405.167  | NM_016218  | 496.681   | 525.306   | AF147392  | 575.558   |
| U84512     | 562.818   | 336.251   | AK022947   | 1346.798  | 1017.331  | AF088057  | 2999.315  |
| AK025775   | 1444.935  | 1159.257  | AL050029   | 1615.133  | 1159.148  | AF086255  | 7094.643  |
| NM_012375  | 480.455   | 303.288   | NM_005204  | 1834.422  | 1414.45   | AK022660  | 539.812   |
| AK022008   | 664.361   | 526.758   | NM_016203  | 542.3     | 406.157   | AF088051  | 931.414   |
| NM_018186  | 327.935   | 753.527   | NM_002759  | 4413.307  | 2465.093  | AK023883  | 312.885   |
| AL080188   | 2608.301  | 2180.646  | NM_007271  | 1657.419  | 1028.051  | AF086260  | 334.045   |
| T99941     | 4093.261  | 4309.593  | NM_006255  | 2906.104  | 1812.913  | AF086366  | 828.24    |
| AF113678   | 3133.228  | 2329.876  | BE392143   | 2793.314  | 2085.855  | AF086360  | 5717.734  |
| AL137313   | 55794.754 | 57521.906 | NM_005813  | 2355.271  | 1428.595  | AF087993  | 1399.159  |
| Z83951     | 654.864   | 809.175   | AB037718   | 2957.264  | 2672.668  | AF035282  | 760.765   |
| AB002363   | 9043.541  | 9044.516  | AL389994   | 880.157   | 499.82    | AK021966  | 1303.022  |
| NM_005284  | 3977.729  | 3832.402  | NM_003909  | 5590.782  | 3137.44   | AB018292  | 5770.698  |
| AF086351   | 7034.296  | 2727.401  | NM_001277  | 5861.045  | 4211.253  | AF085971  | 851.577   |
| D83199     | 28493.586 | 27310.678 | NM_003659  | 4836.28   | 3393.296  | AF147302  | 1172.521  |
| AK025957   | 1017.777  | 1055.566  | AB029021   | 9235.87   | 14463.692 | AF085929  | 2423.807  |
| Y16708     | 1986.566  | 2978.707  | NM_002101  | 19910.928 | 22022.592 | AK001126  | 2477.274  |
| NM_019098  | 5816.551  | 6009.987  | NM_005423  | 528.354   | 635.728   | AF085976  | 1362.183  |
| AK022212   | 28736.104 | 28884.176 | Z36789     | 1433.718  | 1099.703  | AF075104  | 4731.903  |
| X64974     | 2583.672  | 1928.059  | J02874     | 3461.28   | 5268.386  | AK021724  | 609.28    |
| NM_000834  | 4866.345  | 4360.202  | BF310427   | 1882.405  | 2645.9    | AL133025  | 664.257   |
| NM_006485  | 10903.397 | 12065.24  | N94424     | 645.527   | 908.596   | AL137402  | 12862.012 |
| NM_012455  | 528.044   | 315.915   | AA045192   | 1835.433  | 2250.901  | AL137617  | 2725.46   |
| AL137268   | 1088.458  | 890.958   | M92642     | 806.537   | 1135.091  | AL359568  | 25094.631 |
| AK024109   | 1138.731  | 1133.463  | H-U 44385  | 6894.588  | 7590.128  | AL133564  | 7542.113  |
| AK001143   | 2380.349  | 1364.689  | ID 1654970 | 2882.125  | 3473.349  | AL137428  | 935.008   |
| AK001701   | 1950.107  | 1047.723  | ID 2531132 | 3690.251  | 3336.819  | AL157462  | 1014.433  |
| AK022205   | 606.568   | 437.722   | AA485665   | 684.522   | 422.507   | AL359602  | 5033.911  |
| AB007978   | 552.102   | 716.478   | BF125928   | 4177.057  | 3695.161  | NM_018190 | 12709.61  |
| AF217970   | 1301.187  | 1352.209  | BG571026   | 2107.17   | 1152.681  | AK026794  | 745.345   |
| AF086297   | 1463.86   | 1469.826  | AA489017   | 2192.752  | 1917.731  | AF086089  | 705.905   |
| AK025455   | 1728.955  | 2158.051  | NM_012245  | 12059.484 | 8539.666  | AK022259  | 44080.809 |
| AK026799   | 11852.86  | 15361.967 | NM_133263  | 1798.038  | 1435.706  | AK022461  | 479.185   |
| NM_014860  | 1381.99   | 1203.765  | AF125392   | 32.967    | 1032.572  | NM_016010 | 937.486   |
| AK022549   | 907.156   | 1320.058  | NM_003284  | 2363.851  | 3716.979  | AF161442  | 516.804   |
| NM_018157  | 1054.8    | 816.572   | NM_018152  | 859.791   | 1063.331  | AK023783  | 459.891   |
| Z70714     | 5418.653  | 5146.956  | NM_000319  | 1176.884  | 2050.096  | AF070647  | 6475.648  |
| AK021640   | 9171.17   | 8822.698  | NM_012461  | 3440.231  | 2866.684  | AF116649  | 1091.429  |
| CY3Cy5     | 8214.242  | 408.793   | AK001379   | 1457.441  | 1160.74   | AF174394  | 4312.653  |
| BF310427   | 3889.52   | 3740.041  | NM_002023  | 698.786   | 951.275   | AF144054  | 365.735   |
| N94424     | 1217.4    | 885.021   | NM_002839  | 919.013   | 895.565   | AK025924  | 558.247   |
| AA045192   | 2865.421  | 2414.65   | AF190500   | 696.54    | 721.947   | AK021876  | 13480.588 |
| AI521645   | 587.715   | 585.807   | NM_005904  | 642.774   | 631.985   | AK022017  | 1278.662  |
| M92642     | 2863.75   | 2370.497  | NM_005273  | 8730.068  | 7190.292  | AK022160  | 3029.32   |
| H-U 44385  | 13045.558 | 23991.705 | NM_000524  | 321.316   | 260.601   | AK022295  | 797.681   |
| ID 1654970 | 4618.687  | 8515.911  | NM_006576  | 1587.284  | 1208.921  | AK021935  | 2158.474  |
| ID 2531132 | 5249.565  | 9063.959  | NM_018645  | 262.638   | 461.821   | AK022187  | 5605.509  |
| AA485665   | 1142.682  | 1305.608  | AB035266   | 2425.941  | 1862.189  | AK022337  | 2548.547  |
| BF125928   | 16020.61  | 15755.162 | NM_003744  | 1163.956  | 1197.102  | AK026847  | 561.099   |
| BG571026   | 3663.126  | 3163.136  | NM_006378  | 1370.949  | 877.5     | AK023048  | 1878.077  |
| AA489017   | 5265.35   | 4464.188  | NM_018132  | 4373.535  | 2095.379  | NM_017863 | 1783.439  |

|           |           |           |           |           |           |           |           |
|-----------|-----------|-----------|-----------|-----------|-----------|-----------|-----------|
| NM_012245 | 20083.871 | 17872.879 | NM_018207 | 913.686   | 427.449   | AL359560  | 581.613   |
| NM_133263 | 2692.685  | 2131.505  | NM_000345 | 8990.464  | 7101.686  | AK026891  | 2694.135  |
| SR4       | 25444.057 | 17434.098 | NM_001862 | 55385.875 | 35644.617 | AL137562  | 1846.182  |
| SR6       | 3441.499  | 2403.125  | NM_006531 | 1034.714  | 809.82    | M90355    | 35794.789 |
| SR8       | 12262.396 | 23202.563 | M74089    | 2000.811  | 3451.465  | AK022495  | 1346.253  |
| SR10      | 42518.77  | 9693.431  | AF190864  | 5833.463  | 5188.549  | AK026373  | 8067.916  |
| CY3Cy5    | 5969.18   | 318.573   | NM_002779 | 4659.821  | 5162.244  | AK021581  | 443.13    |
| NM_017450 | 2316.203  | 2918.74   | L40397    | 10798.614 | 12834.483 | AK021744  | 865.036   |
| NM_002023 | 1330.079  | 1172.967  | NM_020198 | 6227.393  | 8993.188  | NM_018430 | 3939.17   |
| NM_002839 | 912.776   | 920.599   | AA098879  | 831.099   | 922.913   | AL110200  | 892.133   |
| AF190500  | 1346.188  | 1132.394  | NM_001177 | 2193.694  | 4383.821  | AL133640  | 2345.021  |
| NM_001616 | 783.807   | 791.52    | NM_014447 | 1282.134  | 1595.157  | AJ012502  | 4112.353  |
| NM_005904 | 982.365   | 1119.275  | NM_002356 | 484.483   | 549.131   | AK021722  | 179.815   |
| NM_005273 | 16680.893 | 14192.526 | NM_006691 | 1134.255  | 1124.847  | AF147445  | 910.345   |
| NM_000524 | 660.874   | 456.597   | NM_001505 | 726.942   | 1620.503  | Y10508    | 10515.204 |
| NM_006576 | 1826.514  | 1729.594  | NM_003710 | 1067.169  | 939.753   | NM_005182 | 37571.922 |
| NM_018645 | 518.943   | 1637.032  | Z83805    | 371.603   | 348.433   | D17074    | 330.294   |
| AB035266  | 5079.965  | 6562.103  | NM_004666 | 1577.831  | 1565.484  | AF039944  | 4290.017  |
| NM_006378 | 2007.861  | 1759.876  | NM_003614 | 982.428   | 796.934   | AJ276252  | 546.338   |
| NM_018132 | 3207.153  | 3576.835  | NM_014257 | 3362.09   | 1689.878  | AK021716  | 10526.855 |
| NM_018207 | 1467.107  | 956.29    | NM_001140 | 731.704   | 231.704   | AK025035  | 11972.944 |
| NM_000345 | 17678.689 | 15234.139 | NM_004843 | 2049.443  | 1437.677  | AK002085  | 2326.82   |
| AB029021  | 13702.389 | 10609.076 | AK022845  | 1036.848  | 590.727   | AF086200  | 376.187   |
| NM_002101 | 24110.559 | 23602.398 | NM_003004 | 621.49    | 392.609   | AL133618  | 2791.687  |
| NM_005423 | 601.952   | 560.81    | S77835    | 375.114   | 271.98    | AF230314  | 1569.789  |
| Z36789    | 11357.452 | 1603.934  | NM_002985 | 4316.014  | 3375.278  | AK001086  | 708.41    |
| J02874    | 6309.7    | 4198.761  | AB018347  | 3153.593  | 2957.307  | AJ131610  | 9052.927  |
| NM_001177 | 2635.525  | 5221.128  | AB033073  | 2652.938  | 2588.489  | S50207    | 2708.071  |
| NM_014447 | 2209.374  | 2087.59   | NM_005813 | 2413.114  | 2641.768  | AF119872  | 8167.347  |
| NM_002356 | 571.421   | 699.847   | AB037718  | 4287.891  | 5610.312  | X99687    | 820.386   |
| NM_006691 | 1432.818  | 1420.957  | AL389994  | 816.013   | 1185.314  | AK023255  | 12253.94  |
| NM_001505 | 796.727   | 745.794   | NM_003909 | 4548.12   | 4912.626  | NM_002622 | 13102.09  |
| NM_003710 | 2558.198  | 1972.611  | NM_001277 | 7951.377  | 8645.733  | AK024185  | 790.336   |
| Z83805    | 742.878   | 699.544   | NM_003659 | 4148.182  | 4399.582  | AK026101  | 3691.399  |
| NM_004666 | 1922.833  | 2989.592  | NM_007072 | 1929.515  | 1801.126  | AK022194  | 18217.609 |
| NM_003614 | 2585.746  | 1718.036  | NM_012320 | 5397.57   | 3834.172  | AF085963  | 1679.859  |
| NM_014257 | 4695.658  | 5506.352  | NM_018208 | 2282.365  | 2464.035  | AF131851  | 391.837   |
| NM_001140 | 1350.105  | 1313.481  | NM_015929 | 4093.668  | 4001.354  | AK021436  | 1807.989  |
| AK022845  | 912.437   | 1242.684  | U90653    | 2367.208  | 2327.674  | U58664    | 1042.347  |
| NM_003004 | 892.36    | 548.442   | NM_000196 | 455.147   | 245.913   | AL137569  | 1845.573  |
| S77835    | 696.112   | 770.576   | NM_018339 | 1384.579  | 1025.863  | AK021920  | 6810.457  |
| NM_002985 | 8697.687  | 6538.808  | NM_006745 | 13033.646 | 13128.674 | AL049415  | 1286.596  |
| AB018347  | 5686.992  | 4396.633  | NM_000275 | 471.638   | 458.528   | AK022375  | 1043.659  |
| NM_003284 | 1924.755  | 1922.838  | AK000037  | 872.051   | 665.215   | NM_003378 | 23022.645 |
| NM_018152 | 1018.928  | 970.297   | NM_014760 | 1912.082  | 995.254   | AL110194  | 2149.006  |
| NM_000319 | 1879.781  | 1892.138  | NM_018398 | 1482.454  | 1062.286  | AF138860  | 455.776   |
| NM_003257 | 626.535   | 725.815   | NM_002560 | 10011.142 | 7693.611  | NM_006687 | 766.739   |
| NM_012461 | 5193.204  | 2796.858  | NM_014404 | 1479.204  | 1174.162  | NM_013301 | 682.689   |
| AK001379  | 2025.98   | 1159.527  | NM_018713 | 722.471   | 435.647   | NM_017673 | 1278.858  |
| NM_007072 | 2874.284  | 2704.913  | NM_015947 | 3088.424  | 2601.479  | AB046857  | 271.071   |
| NM_012320 | 7353.979  | 4418.426  | NM_002042 | 18374.354 | 21506.061 | AK024408  | 9674.707  |
| NM_018208 | 2713.841  | 2356.217  | AB028944  | 541.719   | 411.788   | AF086307  | 4296.9    |
| NM_015929 | 5382.543  | 6356.701  | AJ006268  | 660.379   | 835.896   | L19364    | 749.783   |

|            |           |           |            |           |           |           |           |
|------------|-----------|-----------|------------|-----------|-----------|-----------|-----------|
| U90653     | 2707.921  | 2931.707  | NM_012245  | 15450.179 | 19721.045 | NM_00539C | 1233.163  |
| NM_00019E  | 855.625   | 780.368   | NM_133263  | 759.974   | 1095.397  | CY3Cy5    | 6224.71   |
| NM_018339  | 2675.846  | 2108.749  | NM_000025  | 12669.249 | 11355.139 | L07738    | 1499.162  |
| NM_006745  | 12901.385 | 20790.271 | D38521     | 2994.826  | 2237.372  | Z48054    | 430.477   |
| NM_000275  | 676.724   | 699.511   | NM_000403  | 3324.572  | 2780.527  | H90415    | 1420.933  |
| AK000037   | 1424.353  | 1161.93   | NM_018127  | 6622.127  | 6103.777  | AA676470  | 12089.575 |
| NM_01476C  | 2447.894  | 2645.893  | AB020677   | 4691.641  | 5206.143  | M38258    | 524.702   |
| NM_01839E  | 1286.56   | 1590.025  | AB033097   | 2112.439  | 1795.715  | U78045    | 976.826   |
| NM_014404  | 1526.949  | 2043.537  | NM_000135  | 1410.968  | 1072.242  | AA878561  | 43815.773 |
| NM_018713  | 833.413   | 833.557   | AJ223948   | 3552.654  | 2198.904  | NM_000941 | 339.952   |
| NM_015947  | 4554.133  | 5189.36   | NM_01621E  | 836.489   | 632.584   | SR1       | 65772.023 |
| NM_002042  | 24924.941 | 28856.631 | AK022947   | 1574.739  | 1051.281  | SR3       | 48405.289 |
| AB028944   | 702.347   | 929.784   | AL050029   | 1495.141  | 1487.008  | SR5       | 3366.006  |
| AJ006268   | 1250.888  | 1101.909  | AL049966   | 307.942   | 384.651   | SR7       | 3231.649  |
| AF190864   | 7276.943  | 5377.948  | NM_005204  | 2167.736  | 1486.632  | SR9       | 17774.355 |
| NM_002779  | 6793.515  | 5583.561  | NM_016203  | 645.219   | 430.042   | CY3Cy5    | 6847.429  |
| L40397     | 12564.554 | 11987.395 | NM_002759  | 5331.657  | 2476.813  | U62858    | 1082.303  |
| NM_02019E  | 5867.476  | 5375.079  | NM_007271  | 1947.343  | 1379.953  | NM_014432 | 1209.856  |
| AA098879   | 570.007   | 700.968   | NM_006255  | 2995.905  | 1931.458  | NM_00155E | 2554.383  |
| NM_000025  | 11821.765 | 8110.066  | BE392143   | 3000.456  | 2490.176  | NM_00253C | 799.226   |
| D38521     | 3335.386  | 2511.859  | NM_018132  | 4340.351  | 3251.798  | NM_001321 | 904.708   |
| NM_000403  | 4668.583  | 3301.267  | NM_018207  | 1201.911  | 939.717   | AB018264  | 1897.9    |
| NM_018127  | 8403.558  | 9589.498  | NM_000345  | 11170.546 | 14096.959 | U92544    | 1934.699  |
| AB020677   | 5166.298  | 7687.985  | NM_006531  | 1337.44   | 1961.313  | NM_019644 | 791.069   |
| AB033097   | 2951.688  | 2356.221  | AB029021   | 4154.015  | 6641.27   | NM_006791 | 930.097   |
| NM_000135  | 1525.315  | 1642.977  | NM_002101  | 19296.383 | 15388.067 | AJ278348  | 3156.641  |
| AJ223948   | 2934.256  | 3698.762  | Z36789     | 1038.034  | 724.332   | AI285199  | 1113.439  |
| NM_01621E  | 1222.507  | 1173.054  | J02874     | 1949.461  | 2715.002  | NM_01673C | 7865.513  |
| AK022947   | 1976.949  | 2127.876  | BF310427   | 1201.724  | 1471.408  | AL035297  | 734.751   |
| AL050029   | 1798.62   | 2527.871  | AA045192   | 1359.649  | 1108.652  | NM_00440E | 1549.415  |
| NM_005204  | 2523.677  | 2399.63   | M92642     | 628.446   | 569.392   | AJ131244  | 952.093   |
| NM_016203  | 1352.084  | 796.244   | H-U 44385  | 6937.782  | 5654.231  | NM_002532 | 1295.332  |
| NM_002759  | 8185.252  | 4667.144  | ID 1654970 | 2859.19   | 2871.64   | NM_001745 | 1281.328  |
| NM_007271  | 2856.778  | 2117.235  | ID 2531132 | 2119.74   | 1883.43   | NM_003825 | 1092.04   |
| NM_006255  | 3251.059  | 4258.755  | ID 4365538 | 340.023   | 207.644   | AK025006  | 775.163   |
| BE392143   | 3732.396  | 4002.474  | BF125928   | 5039.352  | 4675.085  | AF218014  | 1873.595  |
| NM_005813  | 2238.094  | 2517.507  | BG571026   | 1023.201  | 379.855   | NM_00667E | 1021.855  |
| AB037718   | 4081.063  | 4341.648  | AA489017   | 1662.441  | 1497.283  | AY007729  | 14109.869 |
| AL389994   | 1461.75   | 1545.232  | AK022845   | 976.464   | 1134.26   | AF159092  | 979.22    |
| NM_003909  | 6823.825  | 5802.775  | NM_003004  | 608.156   | 722.388   | BC007318  | 797.507   |
| NM_001277  | 9553.214  | 8395.218  | S77835     | 427.569   | 709.157   | M36693    | 1902.586  |
| NM_003659  | 6288.005  | 5297.099  | NM_002985  | 3453.678  | 5838.142  | NM_016292 | 1445.606  |
| AB029021   | 23990.008 | 17611.225 | AB033073   | 3744.329  | 4750.461  | NM_002601 | 2122.682  |
| NM_002101  | 22549.994 | 22614.012 | NM_003284  | 1653.102  | 1969.646  | NM_00589E | 1515.992  |
| NM_005423  | 662.198   | 691.672   | NM_018152  | 598.004   | 466.648   | NM_00288E | 3768.525  |
| Z36789     | 10227.971 | 1694.731  | NM_000319  | 967.517   | 1223.921  | AF078866  | 376.514   |
| J02874     | 5821.592  | 4327.341  | NM_012461  | 2017.271  | 1039.204  | BF311880  | 618.754   |
| BF310427   | 4121.949  | 4312.894  | AK001379   | 1153.622  | 1001.805  | NM_00136C | 1225.073  |
| N94424     | 1133.641  | 907.93    | NM_01745C  | 1801.064  | 2097.339  | AK026656  | 999.062   |
| M92642     | 2830.339  | 2759.231  | NM_002023  | 652.314   | 566.411   | AJ276207  | 338.958   |
| H-U 44385  | 13034.716 | 15923.253 | NM_002839  | 636.024   | 499.207   | AB011131  | 4747.237  |
| ID 1654970 | 5061.289  | 9512.136  | AF190500   | 567.774   | 648.642   | NM_000751 | 1443.591  |
| ID 2531132 | 5937.297  | 8433.029  | NM_00161E  | 389.497   | 271.243   | NM_001042 | 761.386   |

|            |           |           |           |           |           |           |           |
|------------|-----------|-----------|-----------|-----------|-----------|-----------|-----------|
| ID 4365538 | 646.195   | 762.197   | NM_005904 | 495.503   | 541.749   | NM_012229 | 1220.358  |
| AA485665   | 1091.721  | 909.961   | NM_005273 | 8262.105  | 5524.681  | NM_005071 | 440.889   |
| BF125928   | 16179.479 | 16553.732 | NM_006576 | 1592.506  | 1028.55   | AB023147  | 4932.576  |
| BG571026   | 4124.997  | 3416.296  | NM_018645 | 420.232   | 545.579   | NM_016615 | 7473.904  |
| AA489017   | 5255.368  | 4875.063  | AB035266  | 2585.369  | 2206.311  | NM_005630 | 1528.838  |
| NM_012245  | 25580.377 | 25813.717 | NM_003744 | 1429.179  | 1441.33   | NM_012201 | 11526.261 |
| NM_133263  | 2982.688  | 2083.444  | NM_006378 | 1545.56   | 838.788   | AB046774  | 826.683   |
| NM_003284  | 2227.897  | 2197.613  | NM_014404 | 1797.813  | 2803.326  | AK022385  | 3865.61   |
| NM_018152  | 1204.138  | 939.415   | NM_018713 | 837.494   | 1454.166  | AK024584  | 551.046   |
| NM_000319  | 1642.554  | 1793.116  | NM_015947 | 3771.683  | 5053.345  | NM_003504 | 364.009   |
| NM_012461  | 5038.144  | 3107.3    | NM_002042 | 36962.598 | 52570.996 | NM_013298 | 1619.16   |
| AK001379   | 2413.818  | 1227.189  | AB028944  | 471.568   | 759.365   | NM_007267 | 2504.802  |
| NM_017450  | 2367.468  | 3194.391  | AJ006268  | 513.216   | 589.612   | AK022830  | 242.414   |
| NM_002023  | 1743.138  | 1453.127  | M74089    | 1909.996  | 2306.312  | Z36816    | 1207.748  |
| NM_002839  | 819.028   | 1419.922  | AF190864  | 5736.299  | 4928.623  | NM_005865 | 986.637   |
| AF190500   | 1385.245  | 1037.887  | NM_002779 | 5089.521  | 5111.931  | NM_006413 | 377.146   |
| NM_001616  | 683.174   | 614.572   | L40397    | 10422.725 | 10199.268 | NM_002950 | 2406.829  |
| NM_005904  | 868.827   | 695.823   | NM_020198 | 5420.981  | 6528.101  | NM_002318 | 2339.623  |
| NM_005273  | 16109.042 | 14042.672 | AA098879  | 537.706   | 1061.73   | NM_003134 | 30296.168 |
| NM_000524  | 834.934   | 303.232   | AF070525  | 2866.363  | 4419.113  | NM_004314 | 2627.785  |
| NM_006576  | 1651.704  | 1679.721  | NM_001177 | 2148.789  | 3302.34   | NM_018247 | 2402.347  |
| NM_018645  | 493.224   | 1342.475  | NM_014447 | 1205.964  | 1304.612  | NM_017979 | 3509.161  |
| AB035266   | 3879.818  | 4422.998  | NM_002356 | 547.684   | 434.796   | NM_006791 | 476.716   |
| NM_003744  | 3193.382  | 2392.087  | NM_006691 | 1169.674  | 896.946   | AJ278348  | 2232.709  |
| NM_006378  | 2016.93   | 1497.634  | NM_001505 | 712.153   | 489.826   | AI285199  | 728.088   |
| NM_018132  | 3292.975  | 3196.587  | NM_003710 | 1734.163  | 1122.755  | L07738    | 1496.349  |
| NM_018207  | 1598.535  | 1047.615  | Z83805    | 518.575   | 449.9     | H90415    | 1467.971  |
| NM_000345  | 19051.025 | 18571.785 | NM_004666 | 1224.874  | 1370.624  | AA676470  | 12465.85  |
| NM_006531  | 1314.411  | 1807.686  | NM_003614 | 734.12    | 565.781   | AA457155  | 3297.17   |
| AF190864   | 6484.155  | 4944.635  | NM_014257 | 3103.902  | 1482.483  | U78045    | 949.976   |
| NM_002779  | 6724.977  | 5663.114  | NM_001140 | 492.308   | 291.997   | AA878561  | 39744.406 |
| L40397     | 10870.083 | 10888.995 | NM_016059 | 211.661   | 246.52    | BF688309  | 544.653   |
| NM_020198  | 5758.725  | 6125.039  | NM_004843 | 1984.725  | 1617.373  | AI538525  | 1700.058  |
| NM_001177  | 2440.294  | 6104.023  | NM_005204 | 2197.209  | 2939.031  | NM_000941 | 1017.094  |
| NM_014447  | 2273.369  | 1908.041  | NM_002759 | 4017.231  | 3285.37   | AF222980  | 3479.099  |
| NM_002356  | 652.833   | 884.036   | NM_007271 | 1246.156  | 1584.889  | AK026758  | 973.357   |
| NM_006691  | 1145.026  | 928.947   | NM_006255 | 2928.356  | 2626.238  | BC007318  | 750.013   |
| NM_001505  | 663.679   | 761.146   | BE392143  | 3189.238  | 4321.106  | NM_016292 | 161.023   |
| NM_003710  | 2868.46   | 1822.399  | NM_005813 | 1540.311  | 1690.142  | NM_002601 | 672.106   |
| Z83805     | 618.46    | 631.593   | AB037718  | 2783.54   | 3286.303  | NM_014432 | 1346.298  |
| NM_004666  | 1838.468  | 2375.103  | NM_003909 | 4241.885  | 3701.712  | NM_001558 | 520.425   |
| NM_003614  | 3013.757  | 2276.01   | NM_001277 | 4030.102  | 4504.95   | U96173    | 984.36    |
| NM_014257  | 5451.009  | 5547.296  | NM_003659 | 2641.83   | 2646.21   | NM_001321 | 1808.743  |
| NM_001140  | 1006.649  | 549.331   | NM_007072 | 941.812   | 798.642   | AB018264  | 4107.255  |
| NM_004843  | 5770.45   | 2448.631  | NM_012320 | 5044.107  | 2950.657  | U92544    | 2178.168  |
| NM_003004  | 859.953   | 724.614   | NM_018208 | 1464.06   | 1172.997  | NM_012229 | 350.644   |
| S77835     | 673.342   | 741.797   | NM_015929 | 2991.414  | 3293.268  | AB023147  | 2014.052  |
| NM_002985  | 9096.549  | 7080.59   | U90653    | 3353.822  | 2558.537  | NM_016615 | 848.337   |
| AB033073   | 5733.831  | 4987.561  | NM_018339 | 2003.792  | 1262.717  | AK023106  | 202.188   |
| NM_005813  | 2248.927  | 1968.714  | NM_006745 | 11851.833 | 11480.003 | NM_016730 | 6872.157  |
| AB037718   | 3820.828  | 4224.46   | NM_000275 | 712.884   | 667.447   | AL035297  | 723.95    |
| AL389994   | 1211.68   | 1423.751  | AK000037  | 813.473   | 633.671   | NM_004408 | 3669.115  |
| NM_003909  | 6146.916  | 5923.182  | NM_014760 | 1897.38   | 1169.569  | NM_012388 | 498.67    |

|            |           |           |           |           |           |           |           |
|------------|-----------|-----------|-----------|-----------|-----------|-----------|-----------|
| NM_001277  | 9608.95   | 9092.34   | NM_01839E | 1431.989  | 1449.315  | NM_01619Z | 235.448   |
| NM_00365E  | 6782.494  | 8829.522  | NM_00256C | 10439.953 | 8021.215  | BE878426  | 49747.09  |
| NM_01232C  | 7286.049  | 4616.052  | NM_000787 | 678.569   | 708.579   | AK025006  | 6046.682  |
| NM_01820E  | 3567.889  | 3214.738  | U57962    | 3158.705  | 3738.531  | AF218014  | 3915.894  |
| U90653     | 2630.271  | 2750.334  | NM_01617E | 4130.458  | 4112.038  | NM_00667E | 1520.887  |
| NM_00019E  | 667.843   | 676.191   | NM_005574 | 11803.251 | 12289.122 | AY007729  | 16730.938 |
| NM_01833E  | 2755.292  | 2071.614  | NM_01789E | 5536.087  | 3891.166  | NM_003134 | 9902.438  |
| NM_00674E  | 12816.593 | 19726.256 | NM_00461C | 1644.088  | 3126.316  | NM_004314 | 3243.345  |
| NM_00027E  | 775.897   | 1026.093  | NM_00161Z | 891.809   | 944.833   | NM_018247 | 455.576   |
| AK000037   | 1733.391  | 1355.357  | AK027002  | 1346.504  | 2019.752  | NM_01797E | 735.626   |
| NM_01839E  | 1489.278  | 1312.601  | AB025254  | 1940.008  | 2521.228  | NM_00589E | 1379.565  |
| NM_00256C  | 17160.746 | 16163.401 | NM_004081 | 813.306   | 1285.149  | NM_00288E | 2196.637  |
| NM_014404  | 1818.524  | 1787.208  | NM_00002E | 10820.334 | 8530.903  | BF311880  | 2686.798  |
| NM_01871Z  | 606.224   | 966.628   | D38521    | 2486.802  | 1499.105  | NM_00136C | 124.275   |
| NM_015947  | 5071.617  | 5109.581  | NM_00040Z | 3184.408  | 2525.99   | AK026656  | 2346.386  |
| AB028944   | 711.659   | 841.394   | NM_018127 | 3963.521  | 2717.333  | AJ276207  | 3249.925  |
| AJ006268   | 1236.144  | 1212.939  | AB020677  | 4317.32   | 4067.214  | AB011131  | 12964.33  |
| NM_01224E  | 27746.158 | 23558.127 | AB033097  | 1943.845  | 1556.183  | NM_000751 | 6285.412  |
| NM_13326Z  | 2488.765  | 2209.085  | NM_00013E | 1367.261  | 1311.455  | NM_01484E | 2563.374  |
| D38521     | 3040.704  | 2746.263  | AJ223948  | 2185.424  | 1727.998  | NM_00104Z | 7199.088  |
| NM_00040Z  | 4444.879  | 3582.67   | AK022947  | 1122.825  | 832.381   | NM_020041 | 246.128   |
| NM_018127  | 9952.886  | 10439.558 | AL050029  | 1159.096  | 975.583   | NM_000941 | 322.132   |
| AB020677   | 5802.868  | 8532.504  | NM_00406Z | 638.771   | 1078.785  | AF222980  | 666.444   |
| AB033097   | 2642.659  | 2252.757  | AB040976  | 2729.64   | 4702.246  | NM_012201 | 650.311   |
| NM_00013E  | 1553.573  | 1581.25   | NM_018641 | 1287.44   | 2996.23   | AK022385  | 10426.338 |
| AJ223948   | 3203.721  | 3759.305  | U49089    | 510.655   | 714.999   | NM_00277E | 635.508   |
| NM_01621E  | 1209.074  | 1173.58   | NM_002221 | 974.811   | 1266.169  | AK024584  | 1408.248  |
| AK022947   | 2020.959  | 2354.418  | AK024502  | 4900.514  | 4275.655  | NM_003504 | 582.774   |
| AL050029   | 1976.405  | 2286.607  | NM_001124 | 448.518   | 1077.396  | NM_01329E | 3177.91   |
| AL049966   | 494.657   | 639.511   | NM_00458E | 1225.452  | 776.026   | NM_007267 | 1252.632  |
| NM_005204  | 2826.51   | 2774.486  | NM_004844 | 6831.333  | 3805.357  | NM_00586E | 4079.742  |
| NM_01620Z  | 1410.615  | 1088.76   | NM_013447 | 2598.633  | 2098.667  | NM_00641Z | 2816.594  |
| NM_00275E  | 8571.269  | 5108.313  | NM_000051 | 2371.676  | 1418.114  | AK025542  | 1162.305  |
| NM_00625E  | 3364.577  | 4602.488  | NM_00570E | 413.779   | 506.606   | NM_00276E | 2507.023  |
| BE392143   | 3494.225  | 3877.24   | NM_00418C | 2924.3    | 3335.578  | NM_003691 | 738.537   |
| NM_01813Z  | 2814.957  | 2334.75   | NM_00478E | 22999.268 | 18630.578 | NM_00295C | 7091.108  |
| NM_018207  | 1648.133  | 1230.173  | AF302109  | 4042.144  | 2511.384  | NM_00231E | 3584.819  |
| NM_00034E  | 19023.797 | 22648.732 | AL117485  | 5876.299  | 5045.439  | NM_001321 | 382.734   |
| NM_006531  | 1463.85   | 2114.51   | NM_007191 | 1020.34   | 1127.76   | AB018264  | 392.125   |
| AB029021   | 17836.512 | 15065.014 | AL109667  | 787.711   | 958.985   | U92544    | 525.44    |
| NM_00542Z  | 737.279   | 876.495   | NM_00084C | 884.838   | 527.3     | NM_006791 | 387.467   |
| Z36789     | 10818.688 | 2040.83   | NM_001094 | 237.769   | 277.551   | AJ278348  | 1408.034  |
| J02874     | 6316.381  | 5131.778  | NM_00447E | 343.213   | 282.006   | NM_01587Z | 281.691   |
| BF310427   | 3863.923  | 4116.738  | AF034102  | 4445.345  | 3814.181  | AI285199  | 1632.258  |
| N94424     | 1471.508  | 1454.452  | AJ008142  | 11571.876 | 12454.021 | L07738    | 1626.633  |
| AA045192   | 3169.14   | 2601.193  | AL035289  | 256.201   | 401.836   | AA676470  | 9815.918  |
| H45617     | 444.696   | 477.142   | NM_00134Z | 2372.621  | 1440.822  | M38258    | 493.514   |
| M92642     | 2751.368  | 2075.17   | NM_00727E | 5259.711  | 5780.969  | AA457155  | 9596.864  |
| H-U 44385  | 13247.18  | 15677.239 | NM_01902E | 10835.145 | 11818.569 | BM014365  | 460.197   |
| ID 1654970 | 6155.772  | 10143.62  | NM_018461 | 2136.881  | 3949.282  | H91842    | 429.142   |
| ID 2531132 | 6554.165  | 8845.842  | AF235023  | 3028.444  | 1821.968  | U78045    | 2466.542  |
| ID 4365538 | 718.348   | 610.234   | NM_00691C | 2718.274  | 2348.504  | AA878561  | 64325.344 |
| AA485665   | 1146.208  | 1031.098  | AF162667  | 1511.271  | 1432.023  | BF688309  | 757.401   |

|           |           |           |           |           |           |           |           |
|-----------|-----------|-----------|-----------|-----------|-----------|-----------|-----------|
| BF125928  | 16979.414 | 16079.301 | AB046847  | 1501.381  | 1995.801  | AI538525  | 1351.518  |
| BG571026  | 3971.573  | 3044.372  | NM_000447 | 1342.927  | 2113.8    | NM_003825 | 1103.102  |
| AA489017  | 5594.545  | 4515.79   | NM_006354 | 4463.027  | 3806.922  | AK025006  | 1371.482  |
| AK022845  | 1082.344  | 1026.292  | AF303378  | 3464.711  | 3386.485  | AF218014  | 750.023   |
| NM_003004 | 755.477   | 492.561   | NM_016037 | 3990.582  | 2513.24   | NM_006678 | 296.865   |
| S77835    | 642.639   | 488.858   | NM_000043 | 365.609   | 321.837   | AY007729  | 3424.925  |
| NM_002985 | 9303.632  | 7682.657  | NM_000417 | 1152.168  | 1203.431  | BC007318  | 412.758   |
| AB033073  | 5514.939  | 5581.68   | NM_020356 | 849.866   | 492.76    | M36693    | 1153.197  |
| NM_003284 | 2354.881  | 2390.012  | NM_018235 | 25586.631 | 32301.232 | NM_016292 | 2471.089  |
| NM_018152 | 955.252   | 1182.218  | NM_012104 | 9679.313  | 13975.526 | NM_002601 | 2416.44   |
| NM_000319 | 1754.786  | 1980.347  | NM_006144 | 667.895   | 879.706   | U62858    | 996.719   |
| NM_003257 | 817.649   | 865.913   | AL136549  | 1192.105  | 1864.742  | NM_014432 | 800.239   |
| NM_012461 | 4829.308  | 2994.578  | NM_007038 | 1374.889  | 1890.85   | NM_001558 | 2745.263  |
| AK001379  | 1841.858  | 1960.346  | AF311324  | 1966.586  | 2607.069  | NM_006953 | 812.118   |
| NM_017450 | 2624.134  | 3340.417  | AF124433  | 447.733   | 272.351   | U96173    | 1934.757  |
| NM_002023 | 1246.677  | 924.705   | AF061556  | 699.468   | 820.667   | NM_018941 | 903.232   |
| NM_002839 | 943.796   | 1053.109  | AL162049  | 728.132   | 952.115   | BE730585  | 424.58    |
| AF190500  | 1138.312  | 1333.562  | AF036144  | 357.332   | 316.028   | NM_001980 | 233.878   |
| NM_001616 | 683.095   | 608.429   | NM_005032 | 928.847   | 636.019   | NM_000751 | 1649.998  |
| NM_005904 | 1191.418  | 1041.809  | NM_004160 | 3519.898  | 3345.883  | NM_014849 | 814.919   |
| NM_005273 | 16327.187 | 12976.556 | NM_003941 | 17502.521 | 13998.544 | NM_001042 | 4806.197  |
| NM_000524 | 626.944   | 558.411   | AF177909  | 661.997   | 396.45    | AB023147  | 3379.985  |
| NM_006576 | 2053.112  | 1903.924  | NM_002664 | 2203.882  | 1731.925  | NM_016615 | 7136.973  |
| NM_018645 | 651.847   | 1230.096  | AB018271  | 3187.597  | 1195.786  | NM_005630 | 2464.393  |
| AB035266  | 4539.323  | 5049.452  | AL137665  | 1326.777  | 1119.114  | AK023106  | 388.474   |
| NM_003744 | 2843.603  | 2324.895  | U36561    | 43312.133 | 50745.305 | NM_016730 | 19378.738 |
| NM_006378 | 1927.654  | 1481.715  | NM_005634 | 849.337   | 1640.128  | AL035297  | 426.438   |
| NM_014404 | 1647.356  | 1495.957  | NM_017757 | 4221.237  | 5278.415  | NM_004408 | 1771.642  |
| NM_018713 | 755.685   | 661.56    | NM_002146 | 13031.136 | 18154.664 | AJ131244  | 625.093   |
| NM_015947 | 5114.5    | 4841.608  | AB007892  | 1073.677  | 1290.634  | NM_002532 | 791.757   |
| NM_002042 | 28504.73  | 35629.625 | AB037748  | 474.755   | 561.799   | NM_012388 | 936.038   |
| AB028944  | 760.168   | 1196.838  | AB002306  | 584.799   | 1268.696  | NM_001671 | 482.728   |
| AJ006268  | 1098.528  | 1359.618  | NM_001300 | 1086.426  | 1052.691  | NM_019843 | 1270.315  |
| AF190864  | 6693.878  | 5738.954  | NM_003016 | 21801.652 | 20143.99  | NM_016192 | 2174.316  |
| NM_002779 | 7666.422  | 6643.105  | NM_005463 | 17311.25  | 24526.041 | BE878426  | 57058.582 |
| L40397    | 14475.776 | 20213.166 | NM_001325 | 1889.915  | 2221.501  | NM_001745 | 8162.906  |
| NM_020198 | 6595.617  | 8023.424  | NM_018282 | 6891.602  | 7693.638  | AK025542  | 355.165   |
| AA098879  | 574.987   | 987.493   | BC019932  | 902.4     | 984.35    | AF207547  | 338.922   |
| NM_001177 | 2738.839  | 6446.677  | AK025106  | 1952.095  | 1370.457  | NM_002768 | 557.32    |
| NM_014447 | 2156.776  | 2130.319  | NM_020144 | 1172.4    | 861.918   | NM_003691 | 298.049   |
| NM_002356 | 639.767   | 702.208   | NM_003908 | 25095.102 | 24857.34  | NM_002950 | 1395.631  |
| NM_006691 | 1731.206  | 1291.405  | BE893142  | 1513.247  | 1587.778  | NM_002318 | 1362.899  |
| NM_001505 | 807.853   | 917.256   | NM_003103 | 2324.304  | 2379.203  | NM_003134 | 20963.447 |
| NM_003710 | 2880.394  | 1717.87   | NM_015340 | 2445.356  | 2206.227  | NM_004314 | 3853.336  |
| Z83805    | 750.305   | 614.238   | NM_006451 | 2042.366  | 1262.921  | NM_018247 | 1566.648  |
| NM_004666 | 2101.364  | 2632.129  | NM_002094 | 803.012   | 455.869   | NM_017979 | 4320.159  |
| NM_003614 | 2708.907  | 2235.613  | NM_003191 | 2076.17   | 1963.534  | NM_005898 | 1564.635  |
| NM_014257 | 5805.613  | 5538.464  | AL137476  | 5878.317  | 6708.136  | NM_002889 | 14087.534 |
| NM_001140 | 1192.881  | 829.466   | AF052174  | 1107.932  | 1763.716  | BF311880  | 1078.025  |
| NM_004843 | 5700.118  | 2795.708  | AF070590  | 1007.727  | 720.659   | NM_001360 | 1154.028  |
| NM_005204 | 2816.96   | 2079.375  | NM_000761 | 21455.268 | 23687.604 | AK026656  | 4342.785  |
| NM_016203 | 1196.313  | 770.071   | NM_020142 | 1895.406  | 2840.692  | AJ276207  | 3077.678  |
| NM_002759 | 7935.149  | 4185.665  | NM_017781 | 19500.566 | 26654.803 | AB011131  | 12111.865 |

|           |           |           |           |           |           |           |           |
|-----------|-----------|-----------|-----------|-----------|-----------|-----------|-----------|
| NM_007271 | 2517.598  | 1946.536  | NM_006004 | 43087.855 | 45674.477 | AF164794  | 1284.85   |
| NM_006255 | 3320.243  | 4768.166  | NM_004894 | 16344.728 | 14459.058 | AK023648  | 1328.968  |
| BE392143  | 3788.625  | 5453.263  | AB028960  | 670.893   | 1030.622  | NM_000412 | 634.3     |
| NM_005813 | 2097.671  | 2906.973  | NM_005648 | 21060.154 | 17988.852 | AF222980  | 3740.847  |
| AB037718  | 4988.375  | 6343.458  | NM_006943 | 4866.278  | 7008.229  | AK026758  | 1324.472  |
| NM_003909 | 6450.631  | 7048.155  | NM_006741 | 2576.27   | 2328.961  | NM_012201 | 472.965   |
| NM_001277 | 11065.737 | 14407.244 | NM_014166 | 4741.258  | 2876.675  | AK022385  | 10654.108 |
| NM_003659 | 6325.802  | 6941.52   | AL117606  | 3663.895  | 3313.935  | NM_003504 | 254.572   |
| NM_012320 | 7403.968  | 4713.259  | NM_012330 | 939.275   | 784.288   | NM_013298 | 1025.141  |
| NM_018208 | 3917.263  | 3714.226  | AF294278  | 1114.576  | 1709.01   | NM_007267 | 2315.025  |
| U90653    | 3722.698  | 4446.063  | NM_018211 | 1002.881  | 908.013   | AK022830  | 243.002   |
| NM_000196 | 823.721   | 713.712   | NM_014520 | 2529.206  | 2007.441  | Z36816    | 566.607   |
| NM_006745 | 14466.673 | 22978.867 | NM_002616 | 749.858   | 934.637   | NM_005865 | 3840.397  |
| NM_000275 | 860.605   | 1095.833  | AK025712  | 5658.237  | 5027.421  | NM_006413 | 2693.516  |
| NM_018398 | 1685.673  | 1634.087  | AF052497  | 339.457   | 778.56    | NM_014216 | 8906.72   |
| NM_002560 | 19643.906 | 20704.891 | AK026375  | 778.64    | 1240.018  | NM_019074 | 622.148   |
| NM_000787 | 1356.055  | 886.342   | U85992    | 825.36    | 671.756   | NM_018494 | 18603.281 |
| U57962    | 6549.196  | 4549.619  | AL110152  | 799.408   | 851.55    | NM_001115 | 1131.578  |
| NM_016176 | 8177.548  | 7743.313  | AF131745  | 210.72    | 698.443   | NM_014921 | 177.21    |
| NM_005574 | 20816.25  | 20732.566 | AL117565  | 2013.174  | 2324.522  | NM_016581 | 29298.078 |
| NM_017895 | 10968.485 | 8888.774  | AF147305  | 289.2     | 392.924   | AJ238243  | 2668.487  |
| NM_004610 | 2504.077  | 2636.584  | AK022109  | 1423.387  | 2043.748  | NM_002751 | 729.058   |
| NM_001612 | 3452.784  | 2499.745  | NM_007030 | 844.899   | 1407.399  | NM_004291 | 937.893   |
| AK027002  | 1598.677  | 2094.835  | AF143882  | 587.72    | 1019.165  | NM_003816 | 1744.438  |
| AB025254  | 4262.325  | 6687.657  | U00953    | 697.281   | 529.836   | NM_004912 | 1929.864  |
| NM_004081 | 2224.354  | 2339.463  | AF086176  | 682.978   | 614.812   | U79304    | 6465.508  |
| NM_000025 | 12871.746 | 9522.383  | AF086232  | 286.502   | 222.81    | NM_016267 | 2977.695  |
| D38521    | 3896.678  | 3198.527  | NM_017742 | 519.898   | 464.143   | NM_004671 | 4149.138  |
| NM_000403 | 5789.85   | 4992.783  | NM_005108 | 993.338   | 925.083   | NM_005180 | 1223.371  |
| NM_018127 | 9252.074  | 10243.531 | AK022292  | 1748.739  | 1919.201  | NM_006526 | 356.178   |
| AB020677  | 6463.385  | 8206.883  | AB051436  | 1065.792  | 1030.022  | NM_007045 | 287.024   |
| AB033097  | 4024.875  | 3004.825  | AK026482  | 5922.318  | 4500.207  | NM_003627 | 528.842   |
| NM_000135 | 2174.022  | 2079.479  | AJ001873  | 3360.378  | 3778.076  | NM_012145 | 799.118   |
| AJ223948  | 3629.314  | 4556.198  | AB026054  | 384.075   | 769.098   | AF225416  | 982.79    |
| NM_016218 | 1347.96   | 1282.539  | AK022604  | 1102.878  | 1935.158  | NM_002093 | 1648.234  |
| AK022947  | 2309.394  | 2143.175  | U66048    | 1555.513  | 2311.92   | AB042555  | 1072.882  |
| AL050029  | 2400.962  | 2443.46   | AL080095  | 292.974   | 744.64    | NM_001729 | 180.561   |
| NM_004063 | 1477.503  | 665.308   | AK023401  | 4138.214  | 2227.677  | NM_003843 | 1695.588  |
| AB040976  | 3596.046  | 4150.983  | AK001865  | 970.414   | 955.348   | X73502    | 1062.568  |
| NM_018641 | 2176.512  | 5598.089  | AK024035  | 14122.272 | 11363.334 | NM_020445 | 49474.828 |
| NM_002221 | 2705.376  | 3834.27   | AL050079  | 2211.628  | 3279.86   | NM_016376 | 5093.615  |
| NM_002371 | 432.261   | 813.875   | AL080233  | 2040.337  | 2694.967  | AB046848  | 3258.015  |
| NM_002562 | 495.269   | 673.918   | AL117663  | 1102.049  | 1065.643  | AL133057  | 2091.424  |
| AK024502  | 9272.161  | 8663.359  | NM_014293 | 3252.205  | 4292.64   | U04845    | 4332.728  |
| NM_001124 | 618.508   | 2357.069  | AK024432  | 1575.383  | 1792.201  | NM_018103 | 4725.477  |
| NM_004586 | 3474.526  | 3336.086  | NM_018067 | 2604.02   | 1695.862  | AK026302  | 726.906   |
| NM_004844 | 15642.737 | 7521.868  | NM_018956 | 5508.505  | 4784.445  | NM_012214 | 1240.602  |
| NM_013447 | 6153.981  | 2707.819  | NM_014787 | 1425.251  | 897.348   | AF049656  | 3517.39   |
| NM_000051 | 4065.101  | 3056.823  | AL122109  | 2036.007  | 1096.254  | NM_016598 | 1015.555  |
| NM_005709 | 1039.586  | 400.076   | AF074988  | 1023.603  | 588.157   | BE874867  | 23526.133 |
| NM_004180 | 5503.61   | 5136.374  | AK024946  | 1840.474  | 620.562   | AL136719  | 1062.505  |
| NM_004786 | 38960.898 | 35435.668 | AK001432  | 2068.887  | 3907.036  | NM_014109 | 1815.003  |
| AF302109  | 5023.998  | 6059.966  | AL133568  | 3636.058  | 6084.927  | NM_012160 | 498.894   |

|           |           |           |           |           |           |           |           |
|-----------|-----------|-----------|-----------|-----------|-----------|-----------|-----------|
| AL117485  | 10107.419 | 8143.024  | AF009265  | 1591.064  | 2297.616  | NM_006357 | 50342.332 |
| NM_003505 | 918.077   | 748.934   | AF009309  | 3434.167  | 4148.438  | NM_014248 | 8487.434  |
| NM_007191 | 1588.94   | 1735.888  | AF054830  | 978.873   | 1251.185  | AK027070  | 291.757   |
| AL109667  | 1341.385  | 1319.18   | NM_002360 | 2523.309  | 3217.976  | NM_003341 | 1138.022  |
| NM_000840 | 1229.111  | 1334.79   | AF009322  | 815.251   | 1038.666  | NM_006249 | 770.732   |
| NM_004476 | 683.906   | 376.655   | AF056425  | 2390.061  | 3674.122  | NM_018318 | 264.941   |
| AF205437  | 3582.134  | 1138.167  | AF090893  | 948.029   | 1109.276  | AB020640  | 830.24    |
| AF034102  | 11465.876 | 7873.927  | NM_018033 | 8452.198  | 10593.062 | D29954    | 2708.19   |
| AJ008142  | 15604.402 | 14091.397 | AK001147  | 482.566   | 779.346   | AF007131  | 479.031   |
| AL035289  | 516.376   | 764.183   | AK021630  | 1056.436  | 1336.558  | NM_006839 | 780.579   |
| NM_001343 | 6468.535  | 4717.369  | AK021831  | 1223.609  | 1644.562  | NM_005851 | 211.18    |
| NM_007275 | 11496.174 | 17598.83  | AK025650  | 4262.743  | 3647.633  | X74497    | 487.868   |
| NM_019025 | 25091.219 | 27431.605 | AK026401  | 1584.443  | 1688.641  | AF222749  | 2236.952  |
| NM_018461 | 5993.666  | 7269.263  | AK026773  | 1744.795  | 1505.511  | NM_002229 | 1420.314  |
| AF235023  | 2714.854  | 2907.311  | AK025252  | 115.675   | 83.036    | S69027    | 940.223   |
| NM_006910 | 3369.509  | 4461.8    | AK025893  | 418.63    | 237.149   | NM_012119 | 1228.446  |
| AF162667  | 3560.865  | 3581.785  | AK026452  | 164.999   | 145.345   | X99631    | 8516.757  |
| AB046847  | 2788.207  | 3051.676  | AF086158  | 3401.587  | 3543.152  | NM_001730 | 947.502   |
| NM_000447 | 3052.387  | 2645.481  | AF086050  | 2725.981  | 2788.656  | AK026290  | 1030.762  |
| NM_006354 | 8558.47   | 9165.42   | AF147375  | 2366.845  | 2633.98   | AB014589  | 834.388   |
| AF303378  | 6174.149  | 7685.946  | X51524    | 14546.916 | 14180.642 | U37146    | 2003.978  |
| NM_016037 | 7000.078  | 6671.5    | AK025759  | 3172.069  | 2673.703  | NM_000991 | 66143.984 |
| NM_000043 | 876.016   | 745.322   | AK024105  | 560.327   | 1071.867  | NM_016034 | 575.97    |
| NM_016140 | 1221.094  | 660.941   | AJ238556  | 876.258   | 1120.651  | X69150    | 45747.023 |
| NM_015965 | 815.884   | 584.527   | AK021516  | 2405.92   | 3666.253  | NM_001025 | 56963.078 |
| NM_000417 | 3841.622  | 3491.894  | Z70699    | 543.692   | 930.692   | NM_016067 | 6145.837  |
| NM_020356 | 1466.016  | 1506.916  | NM_006898 | 4640.698  | 5862.979  | NM_018285 | 336.837   |
| NM_018235 | 25917.525 | 24371.93  | AK023429  | 497.734   | 521.121   | AK025245  | 535.831   |
| NM_002424 | 729.297   | 680.989   | AK022276  | 862.713   | 645.691   | AK025496  | 2526.67   |
| NM_012104 | 11812.207 | 10532.885 | AL133653  | 575.588   | 540.38    | NM_005205 | 27894.459 |
| NM_006144 | 881.717   | 1016.644  | AK023774  | 640.056   | 522.135   | NM_001966 | 557.907   |
| AL136549  | 1689.709  | 1754.983  | AL049377  | 1162.972  | 771.095   | NM_016138 | 941.395   |
| NM_012168 | 837.12    | 1423.212  | NM_003544 | 40744.438 | 41790.609 | Z36833    | 13752.457 |
| NM_002216 | 354.266   | 582.946   | U17640    | 923.355   | 1328.575  | NM_014355 | 935.057   |
| NM_007038 | 2885.87   | 2885.414  | AK001187  | 2540.447  | 2494.14   | M21191    | 8642.224  |
| AF311324  | 1517.446  | 3460.148  | NM_003529 | 41612.414 | 32958.273 | AF072810  | 446.062   |
| AF124433  | 1426.385  | 1205.516  | AF056436  | 1764.465  | 2496.674  | AF174482  | 1373.582  |
| AK001647  | 578.242   | 611.863   | AB023191  | 965.857   | 1067.083  | NM_003528 | 1239.302  |
| NM_001461 | 1006.275  | 1375.339  | AK027212  | 4621.769  | 4262.513  | D85131    | 1260.794  |
| AF061556  | 1414.313  | 1226.647  | X56197    | 557.659   | 553.313   | NM_002163 | 2523.922  |
| AL162049  | 1888.426  | 2250.933  | NM_005199 | 7246.375  | 6272.404  | AL079289  | 230.956   |
| AF036144  | 830.831   | 533.333   | U90905    | 1221.769  | 1104.243  | NM_018484 | 411.155   |
| NM_005032 | 928.233   | 1001.598  | AF161422  | 1442.582  | 1255.478  | NM_017594 | 1407.005  |
| NM_004160 | 5189.356  | 6626.162  | AF070619  | 1772.814  | 2151.931  | AK027237  | 919.43    |
| AL109677  | 1372.418  | 1122.1    | NM_020153 | 333.34    | 762.217   | AK027104  | 822.494   |
| NM_003941 | 33477.539 | 32122.338 | NM_005321 | 6675.429  | 4886.871  | AL133090  | 3812.665  |
| AF177909  | 1564.732  | 1562.225  | AF073520  | 1361.554  | 1221.111  | AF085867  | 944.332   |
| NM_002664 | 6255.814  | 8311.569  | AF143885  | 361.194   | 178.432   | AK026158  | 469.718   |
| AB018271  | 5255.884  | 3343.022  | NM_014015 | 7927.974  | 7998.683  | AF086510  | 1018.302  |
| AL137665  | 3936.786  | 4059.132  | AK026839  | 265.492   | 252.296   | Z36779    | 1347.302  |
| NM_016434 | 1847.174  | 1673.544  | Z34278    | 532.005   | 492.833   | NM_018422 | 525.61    |
| NM_005634 | 2089.438  | 3412.386  | AJ008123  | 3951.352  | 3759.424  | NM_002816 | 701.955   |
| NM_017757 | 4712.843  | 4484.438  | AJ008156  | 1013.392  | 740.352   | NM_017822 | 537.245   |



|           |           |           |           |           |           |           |           |
|-----------|-----------|-----------|-----------|-----------|-----------|-----------|-----------|
| NM_002146 | 17907.383 | 18271.154 | AF147321  | 648.118   | 402.438   | AL110104  | 4276.347  |
| AB007892  | 2420.458  | 2331.665  | AF161437  | 4815.266  | 2716.752  | AK027056  | 889.651   |
| AB037748  | 1761.581  | 1910.195  | AK001039  | 5118.355  | 6154.311  | AK024294  | 664.52    |
| AB002306  | 1604.982  | 2956.277  | AK026465  | 1438.293  | 1982.635  | AF052172  | 5182.076  |
| NM_001300 | 5055.965  | 2271.328  | AK024321  | 511.965   | 833.335   | AB014573  | 1367.587  |
| NM_012472 | 888.644   | 807.095   | U52834    | 879.434   | 582.321   | AK091109  | 3564.061  |
| NM_018187 | 7327.88   | 16787.414 | AJ227898  | 481.29    | 454.408   | NM_014967 | 1348.146  |
| NM_005463 | 21496.354 | 20444.559 | NM_003532 | 1030.195  | 966.818   | AK022915  | 610.046   |
| NM_001325 | 3214.223  | 3590.193  | NM_017869 | 5026.132  | 5786.267  | AF131834  | 467.913   |
| NM_018282 | 14819.068 | 16598.068 | AF075100  | 669.385   | 899.951   | AL355711  | 546.059   |
| BC019932  | 2817.618  | 3352.104  | AF203447  | 7918.339  | 9913.084  | AK025851  | 1304.202  |
| AF114818  | 3267.508  | 3578.479  | NM_018502 | 1080.072  | 1680.118  | AJ011409  | 2443.125  |
| AK025106  | 3533.4    | 2713.32   | AL080066  | 9819.172  | 6630.881  | AJ227906  | 1824.57   |
| NM_020144 | 4633.521  | 5514.673  | AJ227870  | 1445.034  | 1587.157  | AJ011598  | 212.236   |
| NM_003908 | 44828.91  | 53298.707 | AL137620  | 736.512   | 437.545   | U17633    | 2257.584  |
| BE893142  | 2161.9    | 2305.666  | NM_005294 | 2072.623  | 1990.186  | AF283776  | 668.17    |
| NM_003103 | 6207.415  | 5816.339  | AF085826  | 1034.283  | 840.189   | L10123    | 12982.324 |
| NM_015340 | 5356.551  | 6409.699  | AK024362  | 1059.871  | 817.617   | D16877    | 1482.037  |
| NM_006451 | 1955.349  | 3629.53   | AF118068  | 3346.551  | 1515.982  | AL109781  | 929.864   |
| NM_002094 | 750.16    | 1407.329  | NM_019018 | 6024.292  | 4540.05   | AK021895  | 1436.431  |
| NM_002937 | 702.582   | 648.529   | M87931    | 973.7     | 638.406   | AK000454  | 4638.784  |
| AL137476  | 7462.287  | 7672.974  | CY3Cy5    | 2976.948  | 223.969   | AK000036  | 1337.862  |
| AF052174  | 1941.189  | 2499.488  | BE790116  | 6950.78   | 3839.873  | AK000769  | 532.736   |
| AF070590  | 1499.263  | 1209.558  | AI922341  | 2117.613  | 1911.091  | AK000114  | 759.879   |
| NM_000761 | 45014.488 | 41166.719 | AA410517  | 640.012   | 391.625   | AK000952  | 4504.25   |
| NM_020142 | 2926.375  | 4265.949  | M12824    | 2207.022  | 1658.69   | AK024520  | 705.567   |
| NM_000774 | 3196.578  | 6661.93   | W60100    | 1477.145  | 702.147   | AK024592  | 1566.857  |
| NM_004894 | 19257.109 | 18072.523 | M24898    | 784.158   | 602.09    | AK024904  | 2217.261  |
| AB028960  | 989.929   | 976.411   | AA457153  | 2755.289  | 2809.371  | AK000152  | 507.405   |
| NM_005648 | 25395.891 | 21485.994 | AA283122  | 3148.408  | 3029.372  | AK024300  | 705.5     |
| AK000689  | 865.047   | 194.513   | AA868504  | 1713.656  | 1643.499  | L09092    | 734.078   |
| NM_006943 | 9158.825  | 14617.428 | AA877845  | 7435.175  | 5283.142  | NM_012129 | 810.983   |
| NM_006741 | 7031.691  | 7293.993  | AA664241  | 34304.52  | 32215.238 | AK024881  | 458.12    |
| NM_014166 | 7261.416  | 5483.538  | AI016456  | 1054.894  | 931.094   | AK025716  | 1745.113  |
| AL117606  | 5578.324  | 7418.827  | NM_000588 | 23932.387 | 16129.283 | AF086202  | 1697.48   |
| NM_012330 | 2043.299  | 1976.64   | SR5       | 3589.069  | 4065.469  | AK023270  | 1044.092  |
| AF294278  | 2044.935  | 1779.494  | SR7       | 4167.655  | 44769.785 | AF085979  | 8005.104  |
| NM_018211 | 2368.938  | 1870.417  | SR9       | 12280.611 | 3156.341  | NM_017806 | 6743.398  |
| NM_014520 | 3744.512  | 4475.676  | CY3Cy5    | 7565.508  | 1001.062  | L04552    | 2412.695  |
| NM_002616 | 1105.154  | 1611.794  | NM_005810 | 5278.674  | 3908.751  | AK023447  | 2535.328  |
| AK025712  | 11407.691 | 10083.002 | M28170    | 5515.245  | 4228.02   | AK001937  | 38576.586 |
| AK026375  | 1650.563  | 2383.205  | AK026223  | 3248.476  | 2451.893  | AL365517  | 1318.737  |
| U85992    | 971.782   | 1064.392  | NM_000874 | 1913.142  | 790.586   | AK021988  | 4877.359  |
| AL110152  | 720.79    | 1344.301  | NM_005854 | 1426.2    | 1253.543  | AF086494  | 5534.618  |
| AL117565  | 5526.112  | 5882.679  | AB007863  | 19931.631 | 17352.537 | BI769977  | 861.691   |
| AF147305  | 1141.767  | 2563.773  | AK024456  | 2890.231  | 2419.779  | AK024913  | 478.813   |
| NM_007030 | 1003.885  | 611.05    | NM_017789 | 984.777   | 779.817   | AB007961  | 2739.84   |
| AK021527  | 713.757   | 690.586   | D31887    | 1346.182  | 2935.942  | NM_005547 | 3805.733  |
| AF143882  | 1144.874  | 1146.43   | NM_002313 | 1441.87   | 1168.873  | S81973    | 1258.071  |
| U00953    | 1313.786  | 1152.736  | NM_004459 | 785.075   | 643.979   | AF119862  | 2967.739  |
| AF086176  | 1018.93   | 1141.472  | NM_005503 | 3094.073  | 1710.345  | U17628    | 1817.389  |
| AF086232  | 579.933   | 444.38    | NM_001502 | 2270.669  | 1794.694  | AF119867  | 4505.428  |
| NM_017742 | 1615.19   | 959.011   | NM_005721 | 563.194   | 534.492   | AL357205  | 3069.372  |

|           |           |           |           |           |           |           |           |
|-----------|-----------|-----------|-----------|-----------|-----------|-----------|-----------|
| NM_00510E | 1737.812  | 1786.614  | AF284223  | 14686.813 | 16700.514 | AK026708  | 2209.111  |
| AK022292  | 4392.018  | 4043.504  | AF176012  | 3207.465  | 2923.663  | NM_017903 | 5487.842  |
| AB051436  | 1905.499  | 2228.312  | BE743838  | 4100.961  | 4019.893  | NM_018074 | 936.756   |
| AK026482  | 10467.783 | 10247.326 | AF273046  | 8028.349  | 5231.521  | NM_00090E | 1488.366  |
| AL137473  | 2741.482  | 2125.365  | NM_001081 | 1580.568  | 1697.676  | AK024828  | 1022.469  |
| AJ001873  | 8030.991  | 9576.964  | NM_002483 | 1529.806  | 2383.913  | AF009315  | 1335.983  |
| AK022604  | 742.461   | 2312.158  | BF002026  | 995.92    | 1467.011  | NM_019013 | 777.239   |
| U66048    | 1534.693  | 1478.752  | NM_004171 | 1102.896  | 1157.542  | NM_006783 | 730.117   |
| AK023401  | 2970.357  | 2246.579  | NM_014037 | 5451.091  | 3501.613  | L37711    | 770.786   |
| AK001865  | 764.475   | 1217.725  | NM_00486E | 6996.127  | 7450.606  | S70313    | 5150.478  |
| AK024035  | 14193.572 | 12541.286 | NM_01868E | 1630.285  | 1331.524  | NM_02018E | 1999.069  |
| AL080233  | 2741.368  | 4080.209  | AK056652  | 2394.269  | 3106.533  | AK022424  | 424.857   |
| AL050132  | 335.535   | 499.265   | NM_01583E | 452.396   | 456.793   | AF090947  | 1804.926  |
| AL117663  | 1814.565  | 1988.148  | AL137438  | 1403.495  | 994.805   | X58162    | 4759.978  |
| NM_014293 | 3222.007  | 3509.149  | NM_017957 | 3485.447  | 3326.206  | CY3Cy5    | 5494.104  |
| AK024432  | 1833.305  | 2589.741  | NM_003024 | 1711.823  | 1059.002  | L35251    | 2440.272  |
| AL137513  | 1137.204  | 1214.644  | NM_01324E | 1690.389  | 1589.841  | BE910395  | 444.379   |
| AF088001  | 1210.5    | 606.489   | NM_000034 | 65939.258 | 66924.359 | N46828    | 856.397   |
| NM_018067 | 5300.975  | 3743.563  | AK022230  | 2915.813  | 2813.276  | BI908302  | 17010.693 |
| NM_01895E | 10027.1   | 10422.847 | AK022147  | 8434.661  | 6834.086  | AA460969  | 1365.265  |
| NM_014787 | 2074.071  | 2122.092  | L25664    | 2300.894  | 2473.816  | BG695859  | 864.005   |
| AL122109  | 2404.157  | 1353.993  | NM_01494C | 4756.986  | 2150.779  | M85079    | 1902.024  |
| AF074988  | 1769.284  | 1285.316  | NM_005783 | 619.712   | 613.137   | AA457671  | 1240.229  |
| AK024946  | 2336.152  | 1471.367  | NM_00690C | 2516.053  | 2749.931  | X07437    | 3552.873  |
| AL133568  | 3824.983  | 7030.138  | AJ289111  | 3620.968  | 2480.268  | AE006466  | 1045.153  |
| AF009265  | 1712.106  | 1991.703  | NM_01635E | 9019.256  | 9595.116  | BC008737  | 17253.377 |
| AF009309  | 1432.86   | 1857.615  | NM_00640E | 8384.636  | 3392.751  | BC011655  | 535       |
| NM_00236C | 2088.89   | 2857.36   | AF216292  | 12245.984 | 26312.555 | BC002396  | 1365.806  |
| AF009322  | 685.695   | 1205.74   | NM_000952 | 1159.48   | 1267.365  | NM_02209E | 862.835   |
| AF056425  | 2422.41   | 3256.453  | NM_005894 | 638.434   | 1237.952  | SR2       | 52680.051 |
| AK001945  | 1095.427  | 1179.785  | NM_014584 | 2301.013  | 3238.587  | SR4       | 11360.539 |
| AK021541  | 763.355   | 804.625   | M30627    | 1026.281  | 986.369   | SR6       | 1709.761  |
| AK021766  | 707.258   | 393.98    | NM_01664E | 1569.341  | 1710.093  | SR8       | 8091.939  |
| AK001147  | 484.234   | 547.932   | AK090536  | 11013.084 | 6578.111  | SR10      | 26472.348 |
| AK021630  | 1679.116  | 1896.629  | D63477    | 614.831   | 253.387   | CY3Cy5    | 1985.115  |
| AK021831  | 1325.497  | 1589.041  | NM_020243 | 12074.046 | 11159.401 | NM_02037C | 1332.368  |
| AK025650  | 4409.47   | 3839.355  | NM_014051 | 4913.129  | 2042.851  | NM_004767 | 518.014   |
| AK026401  | 1584.893  | 1377.663  | AK025398  | 9652.528  | 7106.389  | BF310159  | 2009.977  |
| AK026773  | 1794.616  | 2016.431  | AB037750  | 1335.711  | 1725.062  | NM_00031E | 176.748   |
| AK025893  | 558.1     | 430.771   | AK023056  | 1018.204  | 1016.516  | NM_01898E | 501.304   |
| X51524    | 10473.799 | 7744.483  | NM_00112C | 25735.467 | 17978.59  | AB044934  | 274.066   |
| AK025759  | 2967.528  | 3647.879  | NM_01788E | 1620.131  | 1115.131  | U27655    | 1662.055  |
| AJ238556  | 832.999   | 1100.597  | NM_00491E | 2387.217  | 2037.097  | NM_000852 | 804.655   |
| AK021516  | 2537.252  | 4347.035  | AK022207  | 1428.281  | 1299.796  | AW797282  | 341.731   |
| Z70699    | 969.079   | 1695.377  | AV708752  | 4413.571  | 3229.51   | NM_002402 | 205.338   |
| NM_00689E | 1564.929  | 1478.243  | AF119885  | 2810.051  | 2262.208  | L09070    | 1206.689  |
| AK023429  | 680.008   | 735.142   | NM_00075C | 680.96    | 605.357   | NM_000062 | 1888.308  |
| AK022276  | 1059.097  | 1028.478  | NM_00499E | 2387.714  | 2026.971  | NM_00959C | 1024.048  |
| AK026881  | 367.572   | 389.589   | NM_005971 | 2412.791  | 2503.881  | AL133037  | 667.143   |
| AL133653  | 978.306   | 922.288   | NM_01743E | 343.669   | 1342.512  | NM_02035C | 2510.728  |
| AK023774  | 972.502   | 508.281   | NM_01338E | 5447.236  | 4551.313  | NM_00035C | 560.576   |
| AL049377  | 1047.941  | 1074.95   | NM_006517 | 1863.519  | 3767.978  | X91103    | 3995.228  |
| U17640    | 1414.441  | 2009.892  | AK026680  | 2446.417  | 2750.254  | AA419164  | 696.567   |

|           |           |           |           |           |           |           |           |
|-----------|-----------|-----------|-----------|-----------|-----------|-----------|-----------|
| AK001187  | 2468.193  | 3585.624  | NM_012436 | 51147.129 | 48166.297 | AL117235  | 507.665   |
| NM_003529 | 38050.516 | 41578.641 | AK001299  | 11964.836 | 11755.803 | NM_014822 | 1759.589  |
| X56197    | 963.393   | 1335.592  | AB014559  | 10058.42  | 8901.555  | NM_005296 | 1702.17   |
| NM_005199 | 7392.939  | 8221.238  | NM_016489 | 2979.159  | 3029.404  | NM_001337 | 3205.927  |
| U90905    | 1912.903  | 2402.413  | NM_005033 | 2650.292  | 2371.207  | NM_003611 | 2683.352  |
| AF161422  | 2661.892  | 2308.955  | NM_015932 | 58592.492 | 42520.508 | AB014538  | 792.317   |
| AL137384  | 1936.166  | 883.488   | NM_017949 | 980.212   | 436.696   | NM_006209 | 1049.64   |
| AF070619  | 2033.445  | 2176.6    | AK022169  | 814.167   | 736.68    | NM_002621 | 1206.041  |
| NM_020153 | 369.129   | 702.25    | AF015592  | 1451.542  | 966.95    | NM_005385 | 2771.508  |
| NM_005321 | 5860.774  | 7035.694  | AK026795  | 2400.72   | 1590.125  | AF208232  | 2321.919  |
| AF073520  | 1428.165  | 1218.935  | NM_016399 | 2540.601  | 1845.084  | NM_002988 | 1770.47   |
| NM_014015 | 4986.466  | 6455.133  | NM_016617 | 5208.023  | 4906.964  | NM_004186 | 691.426   |
| Z34278    | 1055.246  | 753.131   | NM_002027 | 4929.378  | 5677.766  | NM_016258 | 1128.632  |
| AK024973  | 1106.555  | 697.656   | AL162078  | 2990.672  | 3334.034  | AF203032  | 2786.778  |
| AJ008123  | 7458.45   | 7027.558  | NM_013382 | 11992.071 | 10869.706 | AB014542  | 4021.767  |
| AJ008156  | 1225.23   | 1255.516  | AB002314  | 1380.311  | 1021.063  | Y10518    | 16991.254 |
| AF147321  | 715.716   | 513.86    | NM_014622 | 1033.144  | 952.383   | AF155135  | 3474.276  |
| AF161437  | 4908.443  | 4469.653  | AB011114  | 38155.977 | 31159.482 | NM_014790 | 1206.021  |
| AK026465  | 1440.552  | 2436.743  | D11466    | 13351.98  | 17824.666 | NM_003571 | 1648.213  |
| AK024321  | 387.59    | 1003.506  | NM_014056 | 20430.586 | 11144.669 | AB032965  | 14652.808 |
| M34428    | 830.983   | 1390.204  | D31885    | 17623.201 | 18065.363 | AF133424  | 795.943   |
| NM_003532 | 715.626   | 1799.268  | BE743838  | 3166.046  | 2063.875  | NM_005003 | 5708.099  |
| NM_017869 | 6435.208  | 8331.892  | AF273046  | 5001.69   | 2242.654  | AF084560  | 2857.636  |
| AF075100  | 959.386   | 663.057   | NM_001081 | 1238.266  | 775.765   | NM_015715 | 434.806   |
| AF203447  | 7826.264  | 9638.887  | NM_002483 | 1308.456  | 1104.388  | NM_000032 | 1870.792  |
| NM_018502 | 1286.32   | 1668.932  | BF002026  | 648.324   | 604.156   | NM_002083 | 941.312   |
| AL080066  | 10766.504 | 10452.646 | L35594    | 662.943   | 638.025   | NM_002035 | 1219.42   |
| AJ227870  | 1592.014  | 2174.129  | BE790116  | 6660.761  | 4513.576  | AK023510  | 1158.775  |
| AL137620  | 682.74    | 840.391   | AI922341  | 2099.04   | 1888.097  | NM_004345 | 934.939   |
| NM_005294 | 2557.844  | 2311.325  | M12824    | 2367.621  | 1590.315  | AF257081  | 1104.331  |
| AF085826  | 1040.397  | 1587.382  | W60100    | 1667.752  | 620.223   | NM_006528 | 536.154   |
| AK024362  | 1229.919  | 960.819   | M24898    | 597.4     | 630.3     | NM_001688 | 15107.167 |
| AF118068  | 2972.048  | 3261.946  | U72508    | 615.844   | 1053.715  | NM_002232 | 298.582   |
| NM_004164 | 794.354   | 490.563   | AA457153  | 3053.818  | 2489.654  | NM_016106 | 1788.396  |
| NM_019018 | 9026.546  | 6165.792  | AA283122  | 3935.98   | 3671.517  | NM_014570 | 1118.427  |
| M87931    | 1486.154  | 1244.851  | AA868504  | 1996.573  | 1827.89   | NM_014747 | 1509.72   |
| CY3Cy5    | 7384.436  | 362.964   | AA877845  | 7009.958  | 4508.048  | Y19240    | 2039.014  |
| L35594    | 1143.71   | 1197.936  | AA664241  | 52305.66  | 44812.844 | AF091029  | 2192.539  |
| BE790116  | 6986.636  | 9727.245  | AI016456  | 1606.723  | 1839.077  | X97074    | 3092.035  |
| AI922341  | 3918.851  | 3346.294  | AK026281  | 681.171   | 812.026   | NM_002625 | 681.539   |
| AA410517  | 1033.817  | 907.401   | NM_006406 | 7120.211  | 2415.463  | NM_004135 | 1586.312  |
| M12824    | 2986.11   | 2412.053  | AF216292  | 8680.588  | 14171.688 | NM_000203 | 450.84    |
| W60100    | 3187.469  | 1354.398  | NM_000952 | 751.849   | 786.931   | NM_013443 | 1525.614  |
| M24898    | 979.604   | 757.328   | NM_005894 | 571.057   | 752.861   | NM_000925 | 2402.151  |
| U72508    | 726.732   | 1220.797  | NM_014584 | 1973.045  | 2106.365  | NM_000465 | 432.147   |
| AA457153  | 3006.364  | 4247.546  | M30627    | 771.904   | 407.606   | NM_006712 | 51109.719 |
| AA283122  | 4975.375  | 4669.85   | NM_005810 | 6620.857  | 6015.281  | NM_006240 | 1221.703  |
| AA868504  | 1544.407  | 3654.944  | M28170    | 7286.149  | 5417.942  | NM_007026 | 1290.557  |
| AA877845  | 10110.804 | 9886.822  | NM_001555 | 470.306   | 435.738   | M37712    | 5298.228  |
| AI016456  | 1666.148  | 1815.525  | AK026223  | 3819.566  | 2831.873  | NM_002648 | 418.545   |
| NM_000588 | 36065.777 | 29101.359 | NM_000874 | 2063.234  | 750.389   | AF070670  | 1725.24   |
| SR5       | 5574.203  | 7719.639  | NM_005854 | 1399.65   | 1279.244  | NM_016156 | 2083.997  |
| SR7       | 8785.015  | 53823.48  | AB007863  | 23908.293 | 20341.289 | NM_016528 | 664.303   |

|           |           |           |           |           |           |           |           |
|-----------|-----------|-----------|-----------|-----------|-----------|-----------|-----------|
| SR9       | 38302.109 | 10675.161 | AK024456  | 2936.425  | 2657.914  | NM_015974 | 949.381   |
| CY3Cy5    | 11491.451 | 835.571   | NM_017789 | 1074.625  | 1013.761  | NM_014384 | 705.412   |
| NM_005810 | 9978.502  | 8751.479  | D31887    | 1231.037  | 2733.55   | NM_002573 | 1409.009  |
| M28170    | 5704.705  | 4076.604  | NM_002313 | 1324.113  | 1334.009  | AL133037  | 689.002   |
| AK026223  | 6329.406  | 5904.787  | NM_004459 | 919.623   | 1013.075  | NM_020350 | 2404.368  |
| NM_000874 | 3813.442  | 2090.658  | NM_005503 | 4170.182  | 2269.616  | NM_000350 | 682.477   |
| NM_005854 | 1461.952  | 1266.516  | NM_001502 | 2429.492  | 2893.139  | X91103    | 5098.114  |
| AB007863  | 29110.541 | 27877.088 | NM_005721 | 647.834   | 742.904   | AA419164  | 862.2     |
| AK024456  | 3696.128  | 3136.542  | AF284223  | 16423.064 | 23752.48  | BI908302  | 14677.978 |
| NM_017789 | 1460.874  | 1242.227  | AF176012  | 3783.99   | 3167.665  | AA457671  | 1113.146  |
| D31887    | 2438.306  | 7633.347  | NM_005971 | 2291.693  | 1804.685  | NM_000641 | 1265.499  |
| NM_002313 | 1764.462  | 1784.883  | NM_017435 | 330.652   | 942.113   | AE006466  | 1102.031  |
| NM_004459 | 1849.055  | 2573.242  | NM_013386 | 4922.006  | 3322.103  | BC008737  | 14852.288 |
| NM_001502 | 2114.933  | 2162.137  | NM_006517 | 1027.544  | 1470.05   | BC011655  | 757.506   |
| NM_005721 | 835.58    | 1018.116  | NM_004171 | 1490.108  | 1686.989  | BC002396  | 1399.914  |
| AF284223  | 8541.997  | 19314.961 | NM_014037 | 7712.248  | 5608.02   | NM_022095 | 1164.78   |
| BE743838  | 5951.298  | 8871.918  | NM_004866 | 8355.479  | 8145.309  | AF112219  | 6525.95   |
| AF273046  | 12090.448 | 7697.462  | NM_018688 | 1727.176  | 1292.141  | NM_000521 | 249.819   |
| NM_001081 | 3339.029  | 4785.67   | AK056652  | 2680.917  | 3259.055  | NM_014640 | 320.021   |
| NM_002483 | 2451.677  | 3604.545  | AL137438  | 1386.912  | 1126.101  | Y10518    | 26447.816 |
| BF002026  | 1084.111  | 1854.998  | NM_017957 | 4245.792  | 3909.842  | AF155135  | 4268.116  |
| NM_004171 | 1942.775  | 1286.848  | NM_003024 | 1976.058  | 1437.358  | NM_014790 | 1119.729  |
| NM_014037 | 7806.756  | 4792.938  | NM_013248 | 2136.823  | 2197.684  | NM_003571 | 2540.462  |
| NM_004866 | 8932.326  | 9969.994  | NM_000034 | 64735.219 | 64693.938 | BF310159  | 2373.831  |
| NM_018688 | 2347.461  | 2104.718  | AK022230  | 3919.624  | 3454.596  | NM_018986 | 607.172   |
| AK056652  | 3154.506  | 4116.873  | AK022147  | 9010.21   | 7467.069  | AB044934  | 115.283   |
| NM_015839 | 714.472   | 1166.726  | L25664    | 2746.431  | 3383.338  | U27655    | 1230.588  |
| AL137438  | 1703.791  | 2186.031  | NM_014940 | 5442.183  | 2863.274  | NM_003360 | 609.896   |
| NM_017957 | 4772.544  | 5689.354  | NM_005783 | 654.598   | 847.487   | Z21965    | 8447.467  |
| NM_003024 | 2977.824  | 2009.777  | NM_006900 | 3063.916  | 4940.712  | NM_012427 | 481.922   |
| NM_013248 | 2204.935  | 2724.654  | AJ289111  | 3977.359  | 6577.169  | AF131857  | 2988.319  |
| NM_000034 | 68399.055 | 65005.297 | NM_016356 | 10367.234 | 17842.207 | NM_000852 | 782.586   |
| AK022230  | 4091.385  | 3863.345  | NM_014043 | 3533.768  | 1409.012  | NM_000399 | 264.501   |
| AK022147  | 8899.133  | 8207.936  | NM_014622 | 887.015   | 501.049   | NM_002402 | 198.344   |
| L25664    | 2672.855  | 3139.383  | AB011114  | 34648.426 | 24686.17  | L09070    | 1187.511  |
| NM_014940 | 4679.397  | 4792.01   | D11466    | 12468.757 | 13549.328 | NM_000062 | 2409.735  |
| NM_005783 | 981.503   | 837.548   | NM_014056 | 18580.516 | 8064.981  | NM_009590 | 1299.012  |
| NM_006900 | 2240.303  | 2219.943  | D31885    | 15121.553 | 12899.756 | NM_016106 | 2858.164  |
| AJ289111  | 4632.093  | 4838.872  | NM_016649 | 1841.328  | 2215.675  | NM_014570 | 1149.356  |
| NM_016356 | 6219.426  | 4767.657  | AK090536  | 13348.486 | 9397.272  | NM_014747 | 1961.984  |
| NM_006406 | 5560.901  | 8956.793  | D63477    | 975.464   | 430.646   | Y19240    | 1833.484  |
| AF216292  | 12632.957 | 43845.246 | NM_020243 | 14955.521 | 10789.53  | AF091029  | 3785.034  |
| NM_000952 | 978.306   | 1077.764  | NM_014051 | 5927.329  | 2371.046  | X97074    | 7693.712  |
| NM_005894 | 1205.231  | 1270.438  | AK025398  | 11100.976 | 8611.759  | NM_001337 | 3596.446  |
| NM_014584 | 2724.223  | 4644.247  | AB037750  | 1544.367  | 1775.09   | NM_003611 | 2599.556  |
| M30627    | 685.278   | 851.91    | AK023056  | 1189.337  | 1137.324  | AB014538  | 763.784   |
| NM_016649 | 2780.306  | 3389.135  | NM_001120 | 28843.541 | 24272.938 | NM_006209 | 1215.467  |
| AK090536  | 12380.211 | 7646.196  | NM_017888 | 2032.793  | 2343.803  | AK025118  | 1409.261  |
| D63477    | 1700.939  | 779.021   | NM_004915 | 3434.35   | 4944.601  | NM_000727 | 2434.495  |
| NM_020243 | 15238.095 | 19391.33  | AK022207  | 1857.922  | 2388.244  | NM_002621 | 1180.341  |
| NM_014051 | 6093.118  | 4057.804  | AV708752  | 3890.078  | 4660.937  | NM_005385 | 5052.871  |
| AK025398  | 13753.509 | 15998.948 | AF119885  | 3418.728  | 3898.324  | NM_018985 | 572.729   |
| AB037750  | 984.299   | 1917.771  | NM_000750 | 803.912   | 1416.34   | NM_006074 | 5674.033  |

|           |           |           |           |           |           |           |           |
|-----------|-----------|-----------|-----------|-----------|-----------|-----------|-----------|
| AK023056  | 1372.105  | 1205.804  | NM_004996 | 2427.925  | 3400.044  | AF208232  | 2756.246  |
| NM_017888 | 2040.199  | 1996.974  | NM_000588 | 14527.467 | 8475.683  | NM_002988 | 1992.77   |
| NM_004915 | 1626.175  | 1603.674  | AK026680  | 3856.812  | 4095.098  | NM_004186 | 758.52    |
| AK022207  | 1479.222  | 1443.762  | NM_012436 | 60713.285 | 60941.258 | NM_016258 | 1391.226  |
| AV708752  | 5058.432  | 5371.032  | AK001299  | 23029.455 | 18466.873 | AF203032  | 3411.931  |
| AF119885  | 3864.674  | 3184.459  | AB014559  | 16417.172 | 12149.786 | AB014542  | 4106.386  |
| NM_000750 | 1205.488  | 854.38    | NM_016489 | 4129.065  | 3615.572  | AF070670  | 1853.067  |
| NM_004996 | 3120.507  | 2300.566  | NM_005033 | 3026.74   | 2918.786  | NM_016156 | 2171.64   |
| NM_005971 | 3207.292  | 3426.031  | NM_015932 | 60924.16  | 45518.344 | NM_016528 | 710.99    |
| NM_017435 | 419.939   | 2398.434  | NM_017949 | 1138.975  | 530.027   | NM_015974 | 789.96    |
| NM_013386 | 4461.012  | 6167.82   | AK022169  | 1110.526  | 955.2     | NM_014384 | 563.018   |
| NM_006517 | 913.447   | 2804.174  | AF015592  | 1582.534  | 1799.507  | AF133424  | 1389.559  |
| AK026680  | 4631.151  | 4406.804  | AK026795  | 2439.901  | 2859.23   | NM_005003 | 5630.626  |
| NM_012436 | 62563.691 | 52705.992 | NM_016399 | 2810.001  | 3449.063  | AF084560  | 3056.12   |
| NM_016489 | 4685.518  | 7264.385  | NM_016617 | 5518.957  | 6715.666  | NM_015715 | 796.824   |
| NM_005033 | 2931.404  | 4789.948  | NM_002027 | 3756.888  | 6027.438  | NM_000032 | 1857.066  |
| NM_015932 | 62154.711 | 58954.5   | AL162078  | 3638.905  | 6128.796  | NM_002083 | 1039.824  |
| NM_017949 | 838.492   | 1016.554  | NM_000919 | 288.158   | 1169.15   | NM_002035 | 1647.368  |
| AK022169  | 975.012   | 972.34    | NM_013382 | 15309.393 | 24104.432 | BF342908  | 899.401   |
| AF015592  | 1284.586  | 2536.109  | NM_005503 | 3736.097  | 1568.407  | AK023510  | 1398.873  |
| AK026795  | 1865.286  | 1867.4    | NM_001502 | 1532.241  | 1763.853  | NM_004345 | 1569.088  |
| NM_016617 | 6130.98   | 6923.521  | NM_005721 | 771.775   | 760.579   | NM_000702 | 9440.985  |
| NM_002027 | 7365.372  | 8570.582  | AF284223  | 11217.722 | 16589.119 | X71490    | 6419.377  |
| AL162078  | 2932.53   | 2698.663  | AF176012  | 2790.991  | 2344.865  | AF257081  | 1064.609  |
| NM_013382 | 10543.903 | 10965.215 | BE743838  | 3743.413  | 2346.376  | NM_001688 | 16547.16  |
| AB002314  | 1190.436  | 848.696   | AF273046  | 5990.775  | 3367.253  | NM_000219 | 298.804   |
| NM_014043 | 5260.472  | 3607.678  | NM_001081 | 1258.39   | 782.513   | NM_002232 | 203.602   |
| NM_014622 | 1177.952  | 1316.683  | NM_002483 | 1098.486  | 970.614   | NM_022095 | 1147.134  |
| AB011114  | 41834.133 | 56700.992 | BF002026  | 1023.146  | 980.566   | AF112219  | 6199.124  |
| D11466    | 15999.879 | 28098.57  | L35594    | 924.42    | 903.521   | NM_002625 | 397.566   |
| NM_014056 | 14148.355 | 15230.998 | BE790116  | 6013.873  | 4234.028  | NM_004135 | 1676.664  |
| D31885    | 25541.654 | 21992.637 | AI922341  | 2588.091  | 2283.28   | NM_013443 | 1343.913  |
| BE743838  | 5896.361  | 3257.509  | AA410517  | 703.69    | 505.468   | NM_000925 | 2698.456  |
| AF273046  | 10427.531 | 5041.672  | M12824    | 1747.55   | 2754.79   | NM_000465 | 403.302   |
| NM_001081 | 2955.424  | 1578.852  | W60100    | 1898.259  | 1115.439  | AF116685  | 318.185   |
| NM_002483 | 2655.625  | 1890.113  | U72508    | 660.067   | 1649.609  | NM_000123 | 1218.352  |
| BF002026  | 1496.071  | 1132.969  | AA457153  | 2235.824  | 3615.249  | AL137501  | 1217.596  |
| L35594    | 1372.712  | 1103.748  | AA283122  | 4755.087  | 9509.337  | BE858979  | 2264.664  |
| BE790116  | 6932.806  | 8046.738  | AA868504  | 2374.411  | 5517.213  | NM_000122 | 888.38    |
| AI922341  | 4370.701  | 4056.104  | AI016456  | 1601.685  | 2763.181  | NM_003985 | 319.487   |
| AA410517  | 906.581   | 676.577   | NM_014940 | 4330.341  | 2090.961  | NM_006712 | 52174.465 |
| M12824    | 4011.797  | 3690.206  | NM_005783 | 565.337   | 526.624   | NM_006240 | 1479.888  |
| W60100    | 3417.463  | 1642.21   | NM_006900 | 2743.203  | 3348.479  | NM_007026 | 1475.588  |
| M24898    | 2036.407  | 2763.068  | AJ289111  | 2877.44   | 2490.112  | M37712    | 6311.33   |
| U72508    | 1431.211  | 2507.274  | NM_016356 | 8186.875  | 7497.755  | NM_002648 | 635.51    |
| AA457153  | 2844.13   | 4568.463  | NM_006406 | 5221.965  | 2180.177  | AW797282  | 348.031   |
| AA283122  | 5808.41   | 7004.442  | AF216292  | 5516.227  | 10823.109 | NM_002402 | 121.008   |
| AA868504  | 1843.44   | 4319.251  | NM_014584 | 2419.258  | 1790.01   | L09070    | 1395.416  |
| AA877845  | 10294.521 | 9793.012  | M30627    | 1043.471  | 571.24    | NM_000062 | 2197.454  |
| AA664241  | 50252.266 | 49242.242 | NM_005810 | 9196.791  | 9838.48   | NM_017877 | 998.599   |
| AI016456  | 1930.913  | 1692.357  | M28170    | 5086.646  | 4522.871  | NM_009590 | 1514.499  |
| NM_000588 | 33533.262 | 35403.074 | AK026223  | 3666.208  | 6562.74   | AL133037  | 721.92    |
| NM_000710 | 534.213   | 1155.068  | NM_000874 | 2639.749  | 2395.327  | NM_020350 | 2565.628  |

|           |           |           |           |           |           |           |           |
|-----------|-----------|-----------|-----------|-----------|-----------|-----------|-----------|
| AK026281  | 480.642   | 894.483   | NM_005854 | 1578.24   | 2215.939  | NM_00035C | 688.927   |
| NM_00640E | 5511.916  | 4797.274  | AK024456  | 2237.396  | 4668.399  | X91103    | 4733.665  |
| AF216292  | 13565.599 | 23477.375 | D31887    | 901.134   | 4595.706  | AA419164  | 970.675   |
| NM_00095Z | 1140.77   | 552.711   | NM_00445E | 809.811   | 1088.33   | L35251    | 1899.078  |
| NM_005894 | 1300.042  | 688.923   | NM_00491E | 2674.317  | 3081.782  | BE910395  | 582.93    |
| NM_014584 | 3562.754  | 2355.701  | AV708752  | 2279.626  | 1689.436  | N46828    | 814.984   |
| M30627    | 1008.343  | 544.611   | AF119885  | 2052.916  | 2064.002  | BI908302  | 14648.925 |
| NM_00581C | 10477.557 | 9451.05   | NM_00075C | 856.428   | 832.143   | AA460969  | 1096.627  |
| M28170    | 5808.717  | 4311.704  | NM_00499E | 1618.594  | 1522.273  | BG695859  | 788.761   |
| NM_00155E | 781.499   | 526.707   | NM_005971 | 2242.656  | 1434.193  | M85079    | 1977.889  |
| AK026223  | 5990.905  | 5280.973  | NM_01338E | 4849.533  | 2405.91   | AA457671  | 1083.446  |
| NM_000874 | 3711.54   | 2150.633  | NM_006517 | 923.772   | 2290.17   | X07437    | 3477.824  |
| AK024456  | 3541.856  | 4745.072  | NM_004171 | 3278.753  | 5776.278  | NM_000641 | 1516.205  |
| NM_01778E | 1445.894  | 1402.776  | NM_014037 | 6358.885  | 6641.043  | AE006466  | 902       |
| D31887    | 1958.607  | 4137.686  | NM_00486E | 6013.333  | 11277.614 | BC008737  | 17396.014 |
| NM_00618C | 472.11    | 448.164   | NM_01868E | 1430.97   | 2821.49   | BC011655  | 795.283   |
| NM_00231Z | 1855.786  | 2033.465  | AK056652  | 3016.168  | 6397.487  | BC002396  | 1889.422  |
| NM_00445E | 1497.168  | 1197.291  | NM_01583E | 620.697   | 635.279   | AF208232  | 2921.797  |
| NM_00550Z | 2911.74   | 3346.958  | AL137438  | 1196.816  | 1444.762  | NM_00298E | 2884.876  |
| NM_00150Z | 2169.371  | 2590.153  | NM_003024 | 2359.573  | 3121.702  | NM_00418E | 1031.479  |
| NM_005721 | 906.735   | 1314.013  | NM_01324E | 2087.717  | 3607.539  | NM_01625E | 1454.942  |
| AF284223  | 8004.255  | 28812.455 | NM_000034 | 58334.773 | 67069.164 | AF203032  | 3652.031  |
| AF176012  | 5103.166  | 4755.324  | AK022230  | 3699.108  | 6841.427  | AB014542  | 6115.024  |
| NM_005971 | 3197.692  | 2265.533  | AK022147  | 7388.141  | 10149.611 | NM_01464C | 453.411   |
| NM_01743E | 367.176   | 867.618   | L25664    | 2654.22   | 4139.164  | Y10518    | 25687.205 |
| NM_01338E | 5572.881  | 3986.464  | NM_002027 | 4156.856  | 5448.399  | AF155135  | 3976.181  |
| NM_006517 | 996.349   | 1962.709  | AL162078  | 2135.252  | 2797.313  | NM_01479C | 1534.119  |
| NM_004171 | 1903.235  | 1645.424  | NM_01338Z | 6449.011  | 6100.274  | NM_003571 | 3337.648  |
| NM_014037 | 8524.967  | 4717.06   | AB002314  | 1039.083  | 974.921   | AB032965  | 21105.004 |
| NM_00486E | 9922.577  | 12087.481 | NM_01404Z | 3183.16   | 1386.271  | NM_02037C | 1295.768  |
| NM_01868E | 2416.645  | 2066.753  | AB011114  | 23767.453 | 13984.784 | NM_004767 | 658.675   |
| AK056652  | 3365.278  | 4924.584  | D11466    | 5765.96   | 6363.274  | BF310159  | 1900.833  |
| NM_01583E | 710.372   | 697.503   | NM_01405E | 15551.694 | 8749.844  | NM_00031E | 297.604   |
| NM_003024 | 2917.096  | 2736.803  | D31885    | 16229.523 | 27612.635 | U27655    | 1313.551  |
| NM_01324E | 1939.641  | 3722.316  | NM_01664E | 2446.272  | 6748.871  | NM_00336C | 719.256   |
| NM_000034 | 68334.086 | 70711.008 | NM_02024Z | 12412.869 | 14517.53  | Z21965    | 8699.279  |
| AK022230  | 4295.42   | 4527.036  | NM_014051 | 5119.052  | 2686.184  | NM_012427 | 409.206   |
| AK022147  | 9058.603  | 8478.985  | AK025398  | 5834.147  | 5402.108  | AF131857  | 3282.208  |
| L25664    | 2449.427  | 2098.525  | AB037750  | 1143.898  | 2149.572  | NM_00085Z | 962.218   |
| NM_01494C | 4318.918  | 4522.417  | AK023056  | 797.883   | 1274.295  | NM_00039E | 226.321   |
| NM_00578Z | 1076.152  | 1484.977  | NM_01788E | 1609.463  | 2004.387  | AF257081  | 1352.668  |
| AK000851  | 593.306   | 562.648   | NM_00315C | 1849.871  | 1937.165  | NM_00168E | 15828.478 |
| NM_00690C | 2343.24   | 2778.557  | NM_014784 | 2872.352  | 2605.984  | NM_003631 | 162.728   |
| AJ289111  | 5042.004  | 7628.577  | AK026383  | 2359.367  | 4056.025  | NM_00223Z | 347.349   |
| NM_01635E | 6835.505  | 7664.083  | AB014594  | 2159.222  | 4063.287  | NM_01610E | 2107.454  |
| NM_01404Z | 5621.329  | 1849.162  | M94547    | 1209.737  | 1513.6    | NM_01457C | 1414.679  |
| NM_01462Z | 1394.506  | 791.307   | NM_005087 | 5791.734  | 5262.294  | NM_014747 | 2050.568  |
| AB011114  | 43039.715 | 38034.477 | NM_01209E | 2252.006  | 1800.832  | Y19240    | 2307.006  |
| D11466    | 17683.902 | 18298.008 | NM_01809E | 2552.004  | 461.821   | AF091029  | 4331.733  |
| NM_01405E | 16220.067 | 10903.815 | AB023164  | 2062.668  | 2566.419  | X97074    | 7587.103  |
| D31885    | 26587.24  | 19628.867 | AK026680  | 3409.54   | 6112.842  | AL117235  | 581.365   |
| NM_01664E | 2581.698  | 3554.211  | AK001299  | 26182.92  | 28671.947 | NM_01482Z | 1745.224  |
| AK090536  | 14374.779 | 15704.972 | AB014559  | 17141.84  | 16228.536 | NM_00529E | 1976.729  |

|           |           |           |           |           |           |           |           |
|-----------|-----------|-----------|-----------|-----------|-----------|-----------|-----------|
| D63477    | 2078.17   | 1539.433  | NM_016489 | 3870.546  | 5140.094  | NM_001337 | 2928.36   |
| NM_020243 | 14396.656 | 18830.283 | NM_005033 | 2642.275  | 2761.739  | NM_003611 | 2964.466  |
| NM_014051 | 6263.169  | 4186.152  | NM_015932 | 48803.656 | 50453.867 | AB014538  | 691.363   |
| AK025398  | 13650.479 | 14436.024 | AK022169  | 1108.393  | 1538.714  | NM_006209 | 1027.429  |
| AK027082  | 451.293   | 1208.128  | AF015592  | 1525.603  | 1750.875  | AK025118  | 1736.454  |
| AB037750  | 1084.313  | 4760.416  | AK026795  | 1625.033  | 1572.5    | NM_000727 | 2757.189  |
| AK023056  | 1211.385  | 1513.009  | NM_016617 | 2776.106  | 5107.773  | NM_002621 | 1200.1    |
| NM_001120 | 30255.074 | 42941.57  | NM_002338 | 2642.877  | 2784.616  | NM_005385 | 5332.914  |
| NM_017888 | 1963.834  | 1425.993  | Y17865    | 1968.723  | 3120.685  | NM_018985 | 688.061   |
| NM_004915 | 1817.652  | 2607.86   | NM_005825 | 6047.066  | 5225.455  | NM_006074 | 4519.01   |
| AK022207  | 1556.822  | 1560.753  | NM_002756 | 1294.244  | 877.046   | NM_006712 | 55822.887 |
| AV708752  | 1895.283  | 2489.356  | AJ000414  | 968.676   | 478.576   | NM_006240 | 2442.563  |
| AF119885  | 3525.208  | 4096.102  | AK025674  | 9305.849  | 14271.185 | NM_007026 | 2253.117  |
| NM_000750 | 1213.184  | 1320.486  | AF007194  | 7505.706  | 6055.363  | M37712    | 6848.392  |
| NM_004996 | 3328.1    | 3819.593  | NM_019069 | 930.294   | 1057.877  | NM_002648 | 688.81    |
| NM_000710 | 619.608   | 1010.559  | NM_004761 | 3224.304  | 2118.411  | AF070670  | 2341.54   |
| AK026281  | 597.254   | 1380.723  | Z25424    | 858.502   | 916.716   | NM_016156 | 2795.812  |
| U23862    | 470.591   | 707.276   | U79458    | 4667.717  | 4621.981  | NM_016528 | 896.955   |
| AK026680  | 6115.938  | 9639.035  | NM_002961 | 37435.715 | 20348.631 | NM_015974 | 983.675   |
| NM_012436 | 67560.984 | 66833.664 | NM_000676 | 4188.253  | 4415.842  | NM_014384 | 581.564   |
| AK001299  | 24966.373 | 29611.568 | NM_004127 | 45427.527 | 53349.359 | NM_002573 | 1571.555  |
| AB014559  | 14265.794 | 19678.588 | NM_013324 | 2790.023  | 3823.027  | AF133424  | 2185.317  |
| NM_016489 | 9070.087  | 11460.233 | NM_006301 | 793.193   | 1413.797  | NM_005003 | 6462.392  |
| NM_005033 | 3659.137  | 4598.967  | AL049925  | 1466.191  | 1234.815  | AF084560  | 3122.364  |
| NM_015932 | 67296.781 | 65175.641 | NM_012219 | 1662.016  | 2510.825  | NM_015715 | 422.877   |
| NM_017949 | 943.092   | 1589.126  | X72887    | 2214.166  | 1319.428  | NM_000032 | 1727.975  |
| AK022169  | 1210.224  | 1644.576  | Y10483    | 3096.283  | 1453.211  | NM_002083 | 734.503   |
| AF015592  | 1277.583  | 2380.63   | NM_001087 | 31806.865 | 27350.248 | NM_002035 | 1269.199  |
| AK026795  | 2007.162  | 3156.693  | NM_003721 | 6614.785  | 5026.009  | NM_014900 | 488.823   |
| NM_016399 | 2731.74   | 3557.408  | NM_001431 | 3252.691  | 3495.899  | BF342908  | 572.237   |
| NM_016617 | 6200.385  | 5467.368  | NM_000174 | 39192.324 | 43181.211 | AK023510  | 1164.917  |
| NM_002027 | 7895.481  | 8984.576  | NM_002508 | 2247.114  | 1495.217  | NM_004345 | 1424.063  |
| AL162078  | 3034.134  | 3325.443  | NM_014343 | 2072.178  | 2260.421  | NM_000702 | 10024.639 |
| NM_000919 | 299.428   | 834.514   | AF022913  | 1213.444  | 1564.897  | X71490    | 6244.517  |
| NM_013382 | 11511.533 | 13403.268 | NM_001382 | 5209.61   | 4183.78   | NM_014273 | 5406.6    |
| AB002314  | 1324.649  | 1552.143  | M93718    | 1460.86   | 2065.616  | AF039442  | 1238.15   |
| NM_001502 | 2555.722  | 3585.29   | NM_005386 | 1182.72   | 596.012   | NM_004680 | 575.276   |
| NM_005721 | 1293.757  | 1617.685  | AK023807  | 2330.615  | 1320.323  | AF104260  | 274.041   |
| AF284223  | 10121.238 | 40706.543 | NM_018188 | 3672.937  | 3050.621  | NM_005671 | 5275.649  |
| AF176012  | 6711.288  | 6590.436  | AK024273  | 1236.669  | 777.04    | NM_017409 | 674.746   |
| BE743838  | 6922.114  | 8500.079  | X59417    | 9902.63   | 7291.097  | NM_019625 | 2727.78   |
| AF273046  | 12938.87  | 8572.788  | NM_016263 | 1121.204  | 1549.382  | NM_006729 | 855.713   |
| NM_001081 | 3516.718  | 4643.166  | NM_003335 | 13452.28  | 16280.307 | NM_006071 | 735.223   |
| NM_002483 | 3144.737  | 3959.219  | AB002376  | 1440.367  | 1372.883  | NM_012236 | 5140.257  |
| BF002026  | 1683.118  | 2706.602  | AB015617  | 7836.866  | 11111.683 | AF112219  | 6693.895  |
| L35594    | 4930.461  | 7703.774  | NM_005439 | 4189.498  | 3470.006  | NM_000521 | 479.626   |
| BE790116  | 7978.941  | 9825.728  | AB037810  | 783.551   | 2125.309  | NM_002625 | 337.831   |
| AI922341  | 4640.449  | 7439.076  | NM_000475 | 1889.482  | 1895.8    | NM_004135 | 2231.619  |
| AA410517  | 1032.241  | 775.737   | M61872    | 6668.735  | 5995.97   | NM_013443 | 1591.233  |
| M12824    | 3977.058  | 3290.626  | AK027089  | 284.533   | 943.514   | NM_000925 | 2507.97   |
| W60100    | 3217.847  | 1530.689  | NM_006284 | 3121.714  | 1032.185  | NM_000465 | 654.995   |
| M24898    | 1023.887  | 1405.149  | U18909    | 1403.249  | 1055.499  | NM_000123 | 1332.504  |
| U72508    | 736.832   | 964.982   | NM_003489 | 2116.726  | 1845.835  | AL137501  | 502.805   |

|           |           |           |           |           |           |           |           |
|-----------|-----------|-----------|-----------|-----------|-----------|-----------|-----------|
| AA457153  | 2834.347  | 4499.346  | NM_016586 | 8127.923  | 7414.998  | BE858979  | 2232.797  |
| AA283122  | 5581.639  | 7567.278  | NM_003597 | 1064.782  | 1670.148  | NM_000122 | 1112.107  |
| AA868504  | 1763.814  | 4507.936  | NM_002566 | 14855.957 | 21816.951 | U87223    | 914.257   |
| AA877845  | 9605.972  | 11917.788 | NM_006561 | 1800.686  | 2403.707  | X91348    | 12713.937 |
| AA664241  | 58453.129 | 60532.793 | NM_017521 | 1052.326  | 834.01    | Z36505    | 430.998   |
| AI016456  | 1543.335  | 2133.628  | AK025200  | 4735.225  | 4988.666  | NM_001854 | 573.306   |
| NM_014940 | 5613.971  | 6453.452  | NM_001383 | 1879.404  | 2031.367  | NM_017913 | 732.449   |
| NM_005783 | 1282.71   | 1693.924  | NM_001029 | 28654.633 | 20430.479 | NM_002755 | 5572.677  |
| AK000851  | 677.888   | 1311.562  | NM_005006 | 15401.021 | 18132.771 | AK024799  | 27807.441 |
| NM_006900 | 2659.06   | 4510.245  | NM_014046 | 4582.9    | 7624.808  | NM_000924 | 3609.372  |
| AJ289111  | 5668.304  | 10322.733 | L34071    | 1486.063  | 4541.932  | NM_003330 | 1503.485  |
| NM_016356 | 10808.064 | 13640.917 | AK022995  | 1216.352  | 1331.641  | NM_003647 | 521.738   |
| NM_006406 | 6317.105  | 12670.044 | NM_006066 | 8213.091  | 5140.351  | NM_001699 | 15812.005 |
| AF216292  | 14190.764 | 49617.813 | NM_005136 | 11753.111 | 9433.503  | AK023019  | 95.402    |
| NM_000952 | 1418.134  | 1723.285  | NM_002115 | 23273.182 | 23477.943 | NM_147171 | 1761.935  |
| NM_005894 | 996.109   | 1523.651  | AK023162  | 1626.775  | 1732.763  | AF238083  | 6294.249  |
| NM_014584 | 3126.35   | 3399.24   | NM_006396 | 1467.344  | 1931.801  | NM_016386 | 1452.005  |
| M30627    | 1108.553  | 991.936   | NM_013449 | 2276.297  | 2418.607  | AB046783  | 209.798   |
| NM_005810 | 10806.69  | 8480.756  | NM_017865 | 3391.006  | 1643.379  | NM_000845 | 638.852   |
| M28170    | 6442.799  | 5367.57   | NM_003427 | 1295.903  | 1804.746  | NM_004604 | 30689.063 |
| NM_001555 | 856.166   | 572.756   | NM_005920 | 2399.513  | 3630.358  | NM_014965 | 1640.685  |
| AK026223  | 5888.93   | 3795.02   | AK001499  | 1601.001  | 1751.483  | NM_004882 | 3471.259  |
| NM_000874 | 3439.932  | 1265.561  | AK023568  | 1229.264  | 1190.737  | AL390148  | 4605.986  |
| NM_005854 | 1726.177  | 1709.029  | AK026852  | 1582.311  | 1414.761  | AK024055  | 1395.121  |
| AB007863  | 26715.527 | 17893.521 | AL110257  | 17792.465 | 9077.37   | U10485    | 291.217   |
| AK024456  | 3944.867  | 5570.993  | AB013384  | 1166.732  | 860.426   | AK025326  | 7611.079  |
| NM_017789 | 1579.171  | 2272.214  | AK024270  | 1476.234  | 1121.425  | NM_017964 | 1550.946  |
| D31887    | 2073.845  | 5258.645  | AK025569  | 2755.834  | 2405.448  | NM_016426 | 1002.725  |
| NM_002313 | 1643.409  | 2324.74   | AK023060  | 1488.476  | 1956.862  | NM_004083 | 1844.361  |
| NM_004459 | 1315.833  | 1479.744  | AK021917  | 988.759   | 1492.244  | NM_016039 | 4754.982  |
| NM_004915 | 2588.528  | 4053.904  | AF052146  | 29218.771 | 43404.668 | NM_001184 | 642.893   |
| AK022207  | 1886.551  | 2988.528  | NM_004870 | 1875.885  | 2723.582  | NM_015530 | 2195.869  |
| AV708752  | 6275.447  | 9983.497  | AF143872  | 15489.544 | 23011.461 | NM_016236 | 1328.16   |
| AF119885  | 4335.696  | 5712.508  | AF143326  | 1901.436  | 2504.792  | NM_001756 | 1175.91   |
| NM_000750 | 1260.046  | 1275.558  | AL049229  | 2923.561  | 2036.973  | BE546276  | 629.371   |
| NM_004996 | 4411.567  | 3763.262  | AK026146  | 3422.68   | 3616.196  | NM_004725 | 1515.392  |
| NM_005971 | 3639.231  | 3013.445  | AK023152  | 2625.505  | 2018.653  | NM_015997 | 1635.189  |
| NM_017435 | 386.599   | 1232.86   | AK000155  | 2039.757  | 1807.741  | NM_001167 | 5783.517  |
| NM_013386 | 5215.289  | 3879.29   | AL389937  | 3723.37   | 4886.341  | NM_012115 | 1070.568  |
| NM_006517 | 1512.762  | 2373.831  | AK022628  | 19719.664 | 17242.662 | NM_004933 | 11050.544 |
| NM_004171 | 2182.752  | 2351.077  | AK021737  | 2217.477  | 2064.994  | M96577    | 1342.386  |
| AK056652  | 3206.265  | 5321.379  | AL357454  | 999.675   | 826.121   | NM_013256 | 8969.335  |
| NM_015839 | 614.06    | 666.604   | AK026295  | 2975.763  | 2949.913  | NM_003842 | 838.044   |
| AL137438  | 1539.006  | 1676.996  | AK025007  | 731.743   | 586.204   | NM_016184 | 841.478   |
| NM_017957 | 4039.973  | 3348.126  | NM_016486 | 4469.677  | 2729.438  | L11238    | 2768.276  |
| NM_003024 | 3348.911  | 2243.657  | AK026490  | 14895.349 | 11508.337 | AK025684  | 474.992   |
| NM_013246 | 2072.526  | 4138.473  | AJ227861  | 2266.02   | 2477.935  | NM_012205 | 1099.334  |
| NM_000034 | 68120.406 | 69753.359 | AJ001875  | 2664.441  | 4546.301  | K02046    | 1105.959  |
| AK022230  | 4109.375  | 5785.097  | X64985    | 894.367   | 1108.147  | AL110151  | 1058.69   |
| AK022147  | 10435.171 | 11126.451 | NM_017777 | 807.479   | 951.155   | AK024841  | 438.31    |
| L25664    | 1408.195  | 2582.825  | AK021989  | 1078.582  | 1068.229  | NM_004995 | 1843.354  |
| NM_002027 | 8570.846  | 6896.207  | AK022298  | 1370.297  | 1711.89   | AK023320  | 1015.889  |
| AL162078  | 2994.308  | 2215.351  | AJ277441  | 27902.469 | 37749.566 | NM_000386 | 1208.143  |



|           |           |           |           |           |           |           |           |
|-----------|-----------|-----------|-----------|-----------|-----------|-----------|-----------|
| NM_000919 | 536.245   | 539.246   | AK024242  | 3826.504  | 5345.766  | NM_007231 | 781.046   |
| NM_013382 | 12755.686 | 12036.578 | AK024943  | 1013.262  | 733.215   | NM_001190 | 2052.824  |
| AB002314  | 1360.214  | 1390.533  | AL359943  | 18059.492 | 10183.003 | NM_005271 | 2977.114  |
| NM_014043 | 5520.19   | 2501.424  | NM_000534 | 2590.826  | 1893.116  | NM_015654 | 4252.71   |
| NM_014622 | 1320.175  | 745.435   | AB037853  | 25968.031 | 40668.137 | NM_012244 | 1005.158  |
| AB011114  | 43218.656 | 35940.145 | AK056222  | 909.464   | 2164.161  | NM_004341 | 329.308   |
| D11466    | 17897.879 | 14697.082 | AK002028  | 12337.88  | 14357.531 | AB082521  | 4967.186  |
| NM_014056 | 15164.913 | 11518.861 | AL050127  | 1842.554  | 2024.668  | AL050182  | 528.618   |
| D31885    | 28748.205 | 18980.756 | AK024805  | 5995.49   | 4983.567  | NM_020040 | 370.122   |
| NM_016649 | 2607.577  | 3430.924  | AK001423  | 1316.968  | 1630.544  | NM_002374 | 574.36    |
| D63477    | 1929.798  | 3039.926  | AK024090  | 16408.58  | 11740.106 | AK026940  | 1129.853  |
| NM_014051 | 5807.096  | 3510.697  | AL133574  | 1997.923  | 1707.497  | AF155117  | 1122.145  |
| AK025398  | 12032.142 | 11117.729 | AK021936  | 1158.06   | 919.768   | NM_004411 | 727.33    |
| AB037750  | 1534.483  | 2295.979  | AF147339  | 23321.043 | 16069.855 | NM_015938 | 2530.707  |
| AK023056  | 1296.272  | 1674.538  | AL390181  | 10325.171 | 6037.874  | NM_000740 | 324.398   |
| NM_001120 | 33077.867 | 50350.238 | NM_017914 | 19294.563 | 20123.121 | NM_004143 | 739.834   |
| NM_017888 | 2495.261  | 3892.133  | AK024953  | 17783.176 | 6617.113  | NM_016328 | 5780.801  |
| NM_003150 | 3414.205  | 2107.387  | S83374    | 3514.202  | 5352.613  | NM_017544 | 11286.554 |
| NM_014784 | 4449.433  | 3059.679  | AK025784  | 9546.26   | 12099.846 | NM_003153 | 344.239   |
| AK026383  | 4438.076  | 6235.832  | U07199    | 2483.627  | 4035.154  | NM_016285 | 2045.504  |
| AK023821  | 361.275   | 877.463   | X81445    | 1629.46   | 2568.617  | NM_014707 | 240.323   |
| AB014594  | 3043.139  | 4182.582  | NM_017900 | 17568.781 | 22404.721 | AF025771  | 1304.065  |
| M94547    | 1794.479  | 1599.664  | AL360145  | 1047.287  | 1055.615  | AB033110  | 653.401   |
| NM_005087 | 11780.739 | 10902.824 | NM_001178 | 1190.061  | 623.715   | NM_005083 | 6841.645  |
| NM_012098 | 1809.504  | 1524.391  | AK023696  | 3587.849  | 2081.925  | NM_007187 | 6447.796  |
| NM_018095 | 2969.722  | 1276.913  | NM_019605 | 1049.805  | 1130.962  | NM_001828 | 84.436    |
| AB023164  | 2686.497  | 1836.639  | Z49090    | 4994.882  | 8137.956  | NM_018983 | 1437.736  |
| AK026680  | 5530.776  | 4543.314  | AK021592  | 6560.143  | 8128.973  | NM_003096 | 1392.985  |
| NM_016489 | 4377.343  | 5644.099  | AK025467  | 3389.659  | 4481.726  | NM_007279 | 1269.234  |
| NM_005033 | 2658.653  | 3398.23   | AK026593  | 3805.313  | 3023.358  | BE390833  | 10158.368 |
| NM_015932 | 60446.82  | 52414.66  | L37700    | 1626.075  | 2025.482  | NM_004730 | 2990.602  |
| NM_017949 | 1046.406  | 610.073   | NM_017665 | 3388.925  | 2615.142  | NM_000801 | 1230.584  |
| AK022169  | 1170.311  | 1087.261  | AK024819  | 2006.49   | 1379.742  | NM_006115 | 12600.883 |
| AF015592  | 1341.667  | 1243.297  | AF052106  | 4494.488  | 12280.269 | NM_005801 | 1205.79   |
| AK026795  | 1940.034  | 1873.308  | AK022391  | 1002.44   | 962.161   | NM_018198 | 755.623   |
| NM_016399 | 3107.826  | 4368.724  | NM_016125 | 1219.477  | 2728.561  | NM_001539 | 11861.197 |
| NM_016617 | 6203.821  | 7998.458  | CY3Cy5    | 7825.088  | 528.301   | NM_003613 | 499.556   |
| NM_002338 | 3717.36   | 2115.658  | R72122    | 3463.488  | 4181.734  | NM_016616 | 598.215   |
| AL117666  | 721.879   | 722.101   | AA292025  | 1921.194  | 553.781   | NM_000022 | 734.544   |
| Y17865    | 1342.274  | 1420.8    | AA437226  | 1201.752  | 1700.387  | NM_016576 | 1087.894  |
| NM_005825 | 13782.229 | 10390.938 | R36143    | 1699.476  | 1461.5    | NM_004213 | 619.285   |
| NM_002756 | 4226.673  | 2335.682  | XM_056359 | 1005.578  | 616.644   | NM_000480 | 979.224   |
| U79299    | 942.04    | 781.848   | D10353/NM | 8426.195  | 5813.196  | AF254084  | 8548.484  |
| AJ000414  | 2930.871  | 1102.953  | M15042    | 2996.08   | 3197.509  | AK022648  | 900.541   |
| AK025674  | 10160.896 | 6790.488  | AK056843  | 3334.288  | 4287.8    | AB048791  | 1542.654  |
| AF007194  | 6635.223  | 4187.987  | U49928    | 14332.654 | 19548.586 | NM_003107 | 338.181   |
| NM_019069 | 2030.879  | 1557.135  | AK096645  | 21520.662 | 15939.714 | NM_006874 | 2041.589  |
| NM_004761 | 9812.785  | 3789.768  | AK092859  | 711.077   | 1207.96   | AB046777  | 3140.078  |
| Z25424    | 2181.807  | 1550.658  | NM_019884 | 3758.909  | 3863.853  | AJ251844  | 1446.127  |
| NM_000676 | 6522.626  | 4962.2    | SR2       | 67123.828 | 64265.109 | D16815    | 694.643   |
| NM_004127 | 68150.781 | 65576.227 | SR4       | 19725.117 | 25696.176 | NM_001880 | 1101.302  |
| NM_013324 | 7858.325  | 6553.508  | SR6       | 2755.973  | 2687.725  | AB028943  | 988.422   |
| AL133022  | 879.25    | 718.339   | SR8       | 8357.43   | 28609.686 | NM_006194 | 636.193   |

|           |           |           |           |           |           |           |           |
|-----------|-----------|-----------|-----------|-----------|-----------|-----------|-----------|
| NM_003953 | 840.25    | 1167.114  | SR10      | 31750.547 | 12076.82  | AK001603  | 2102.28   |
| NM_006301 | 726.376   | 831.646   | CY3Cy5    | 8800.748  | 500.51    | U71601    | 1614.827  |
| AF222694  | 445.404   | 536.688   | NM_005291 | 16360.327 | 17112.025 | AF075031  | 679.5     |
| AL049925  | 1404.552  | 1260.634  | NM_002923 | 1213.825  | 2104.497  | AF075062  | 2257.271  |
| NM_012219 | 1775.804  | 2962.04   | NM_018653 | 2333.623  | 3887.177  | NM_004188 | 816.475   |
| X72887    | 2994.065  | 1819.895  | NM_005388 | 5161.582  | 4487.417  | AF147381  | 1900.238  |
| NM_004529 | 738.139   | 879.154   | NM_007232 | 24376.789 | 19788.434 | AB002452  | 617.136   |
| NM_000127 | 1332.021  | 1134.31   | NM_003027 | 813.867   | 452.285   | D17085    | 356.828   |
| Y10483    | 6795.509  | 4418.02   | NM_016257 | 639.134   | 572.021   | AK026376  | 1346.662  |
| NM_006784 | 1568.026  | 1219.496  | NM_002717 | 5465.265  | 3870.459  | AF088061  | 1154.442  |
| NM_017876 | 2270.375  | 1213.85   | NM_012114 | 425.426   | 342.635   | AF086286  | 1320.562  |
| NM_001087 | 48803.215 | 36851.891 | NM_014486 | 551.721   | 730.243   | AF086376  | 682.281   |
| AK025352  | 392.107   | 657.003   | NM_003025 | 12427.67  | 13816.369 | AK022997  | 2733.526  |
| NM_003721 | 11922.157 | 9061.221  | U52051    | 963.172   | 869.978   | NM_017617 | 1317.829  |
| NM_004724 | 1183.142  | 1411.127  | NM_020179 | 5006.343  | 4630.845  | AF131830  | 1499.285  |
| NM_001431 | 7171.417  | 10093.811 | NM_001153 | 726.808   | 992.445   | NM_014811 | 517.335   |
| NM_000381 | 734.287   | 890.53    | NM_006786 | 795.398   | 1771.783  | AK026026  | 4860.854  |
| NM_000427 | 2787.621  | 1305.346  | NM_006205 | 2389.065  | 2685.708  | AF085941  | 3249.431  |
| NM_014924 | 669.663   | 623.186   | NM_004034 | 5879.011  | 6746.589  | Z69892    | 662.953   |
| NM_006946 | 628.379   | 839.993   | NM_000130 | 4269.142  | 5549.282  | AK023590  | 422.646   |
| NM_000174 | 54731.098 | 55500.262 | AF193756  | 919.81    | 822.02    | AF087961  | 869.013   |
| NM_002508 | 3588.634  | 3055.319  | NM_004193 | 1966.708  | 1600.398  | AL137309  | 1167.407  |
| NM_014343 | 4175.058  | 4371.789  | NM_002803 | 10071.574 | 7016.15   | AL137475  | 854.976   |
| D25303    | 1584.713  | 1485.142  | NM_005508 | 1659.84   | 1488.32   | AL161956  | 3896.252  |
| AB043007  | 14042.09  | 15438.128 | AK025039  | 2816.312  | 5077.115  | AL390176  | 1707.605  |
| NM_004861 | 1558.491  | 797.279   | NM_016568 | 1236.133  | 790.657   | AL137356  | 834.103   |
| AF022913  | 1580.941  | 2733.464  | AB033102  | 12710.712 | 13779.503 | AL137547  | 764.273   |
| NM_000028 | 1225.872  | 1039.61   | NM_014774 | 4174.231  | 3213.504  | AK021994  | 922.622   |
| NM_001382 | 6749.085  | 4544.048  | NM_014143 | 6038.293  | 4801.493  | Z70763    | 517.585   |
| M93718    | 2455.18   | 2283.168  | M55646    | 20364.043 | 17748.57  | AK023802  | 3051.338  |
| NM_005386 | 1301.615  | 1069.417  | NM_006112 | 29551.689 | 28062.559 | AF086103  | 574.015   |
| AK023807  | 4705.405  | 3614.822  | M12807    | 2255.268  | 1469.788  | AK023158  | 347.633   |
| NM_018188 | 6608.322  | 4620.581  | NM_001765 | 2219.897  | 2396.754  | AK000580  | 390.513   |
| AK024273  | 1543.641  | 887.644   | NM_003361 | 2521.289  | 3515.211  | AF085852  | 877.499   |
| X59417    | 15308.787 | 11557.736 | NM_018684 | 19156.58  | 16602.391 | AK000787  | 899.751   |
| D28476    | 9533.075  | 5157.944  | NM_017983 | 1059.859  | 2049.929  | AF090885  | 3328.917  |
| NM_016263 | 1676.928  | 1695.89   | AF116909  | 1834.958  | 1882.031  | AF161342  | 379.672   |
| NM_003335 | 16769.428 | 23701.615 | BE906724  | 1428.537  | 2320.566  | NM_014082 | 523.971   |
| AB002376  | 3352.437  | 3536.056  | NM_002283 | 6181.834  | 8413.521  | AF100636  | 1189.003  |
| NM_018249 | 858.842   | 641.083   | AJ276095  | 17508.76  | 17802.574 | AF161366  | 372.626   |
| NM_005558 | 2165.542  | 2015.967  | NM_004819 | 2715.624  | 5156.321  | AK022197  | 673.086   |
| NM_016631 | 1156.572  | 1323.154  | AF231916  | 4012.429  | 3661.367  | AK021970  | 632.311   |
| AB015617  | 19916.219 | 17031.133 | NM_003501 | 3424.421  | 3039.157  | AK022066  | 41314.793 |
| AK022730  | 1568.099  | 2304.88   | AK022654  | 30143.025 | 37692.172 | AK022224  | 1210.661  |
| NM_002256 | 6120.061  | 9119.91   | BC002905  | 4433.929  | 4445.553  | AK022359  | 886.475   |
| NM_005439 | 6732.623  | 5507.368  | NM_018091 | 5169.226  | 5663.183  | AK022000  | 1005.192  |
| AB037810  | 873.832   | 485.82    | NM_001108 | 13460.219 | 3443.891  | AK022129  | 1730.669  |
| NM_000376 | 4916.699  | 2740.935  | NM_001637 | 932.355   | 761.934   | AK022263  | 4619.262  |
| NM_000475 | 3535.149  | 2866.295  | NM_016630 | 10561.083 | 7956.389  | AK022384  | 592.888   |
| M61872    | 14808.974 | 11549.245 | NM_014291 | 6328.409  | 6038.851  | AL117437  | 462.121   |
| AK027089  | 912.367   | 1812.619  | NM_014631 | 1070.412  | 666.879   | AK027198  | 502.265   |
| NM_006284 | 10164.36  | 3542.183  | NM_001089 | 5863.722  | 4549.515  | NM_006160 | 6202.28   |
| U18909    | 1624.007  | 1079.183  | NM_000120 | 5441.292  | 4374.071  | NM_000529 | 754.962   |

|           |           |           |           |           |           |           |           |
|-----------|-----------|-----------|-----------|-----------|-----------|-----------|-----------|
| NM_003489 | 1945.662  | 1041.231  | AF172327  | 22513.307 | 21277.135 | AF009259  | 742.117   |
| NM_016589 | 8011.764  | 5104.007  | NM_001676 | 7236.18   | 9198.66   | AF009260  | 1582.234  |
| NM_003597 | 1411.903  | 1343.422  | NM_001679 | 13414.427 | 15684.229 | NM_003079 | 270.467   |
| NM_006561 | 4189.153  | 3457.17   | NM_004046 | 64399.633 | 67549.695 | NM_017902 | 804.339   |
| NM_017521 | 693.811   | 593.131   | NM_004983 | 1791.842  | 1815.141  | AK021981  | 198.836   |
| AK025200  | 4294.059  | 5827.912  | U09384    | 767.914   | 344.733   | AL359567  | 341.431   |
| NM_001383 | 5438.454  | 4370.878  | NM_006860 | 4824.261  | 6470.722  | NM_017726 | 957.128   |
| NM_001029 | 45913.016 | 49760.902 | NM_004794 | 5979.9    | 12980.034 | AK026716  | 517.818   |
| NM_005008 | 25105.762 | 22941.865 | NM_004283 | 1399.827  | 1679.556  | AL049325  | 2806.656  |
| NM_016304 | 29406.17  | 30494.898 | NM_004163 | 30919.08  | 31071.57  | AK024154  | 12444.863 |
| NM_014046 | 11109.064 | 10781.624 | AK026308  | 2096.157  | 2307.906  | AF086341  | 792.875   |
| L34071    | 4804.272  | 7095.659  | NM_013337 | 1799.965  | 2235.98   | AK026672  | 2054.191  |
| AK025201  | 3785.296  | 3577.474  | NM_006899 | 3541.958  | 1659.017  | S83282    | 9403.152  |
| AK022995  | 1634.461  | 1590.37   | NM_012200 | 2151.677  | 1443.938  | AK024164  | 29482.881 |
| NM_006066 | 10678.536 | 6372.854  | NM_001724 | 2979.123  | 1663.076  | AF052130  | 2333.402  |
| NM_005165 | 810.905   | 1668.839  | NM_000150 | 1567.665  | 2897.772  | AF130090  | 4858.806  |
| NM_005138 | 28482.621 | 14120.77  | AB023152  | 1245.352  | 558.134   | AL096727  | 646.541   |
| NM_002115 | 36690.5   | 23852.447 | NM_006212 | 1082.629  | 1135.681  | AL080110  | 681.884   |
| AK023162  | 1887.531  | 1582.88   | AK022872  | 3609.864  | 3106.557  | NM_020425 | 238.237   |
| NM_006396 | 2223.027  | 2377.325  | AK024272  | 9360.516  | 4775.441  | AK024076  | 1051.13   |
| NM_018649 | 1559.199  | 1665.24   | NM_016381 | 2132.116  | 1621.587  | M87940    | 1647.196  |
| NM_013449 | 3199.262  | 3090.85   | AL591715  | 717.192   | 705.043   | L77588    | 816.201   |
| NM_004537 | 628.802   | 844.441   | NM_018042 | 4250.574  | 8663.408  | AF086304  | 13112.143 |
| NM_020226 | 1644.939  | 1428.724  | BE741525  | 1012.421  | 752.982   | U61094    | 284.918   |
| NM_017865 | 4515.539  | 2826.888  | BF030555  | 39090.41  | 44624.898 | AB032976  | 765.997   |
| NM_003427 | 2408.826  | 2052.946  | NM_012433 | 6237.27   | 6301.539  | AF301222  | 6092.331  |
| NM_005920 | 3374.8    | 4315.131  | NM_005605 | 1959.81   | 2726.158  | AJ131606  | 261.482   |
| Y09321    | 744.205   | 851.644   | NM_002576 | 1252.682  | 1158.66   | AF215981  | 2029.469  |
| AK001499  | 2936.492  | 2222.277  | NM_003582 | 4461.632  | 2219.703  | NM_000732 | 8115.772  |
| AK023568  | 948.165   | 1254.553  | AF169351  | 10281.456 | 10609.195 | AF130044  | 1044.779  |
| AK021728  | 734.579   | 596.33    | M14200    | 65100.883 | 58592.973 | AF116709  | 175.231   |
| AK026852  | 1660.67   | 1343.175  | NM_000282 | 3933.997  | 4173.31   | NM_013939 | 631.391   |
| AK021629  | 1186.538  | 1234.382  | NM_000532 | 10665.975 | 12239.15  | AB038651  | 1081.716  |
| AL110257  | 35504.707 | 34737.652 | NM_016341 | 1478.77   | 1507.151  | AL359603  | 619.992   |
| AB013384  | 2713.366  | 1708.495  | NM_004034 | 5290.888  | 3795.271  | X84838    | 214.923   |
| AK024824  | 1889.822  | 1434.52   | NM_000130 | 2738.213  | 2003.915  | NM_013940 | 633.119   |
| AK024270  | 2945.978  | 1484.554  | AF193756  | 1494.679  | 1390.125  | AL117643  | 799.31    |
| AK025569  | 3429.851  | 2214.697  | NM_004183 | 637.828   | 158.947   | AF075063  | 217.655   |
| AK023060  | 1234.732  | 1037.468  | R72122    | 3265.706  | 2021.427  | AF069135  | 3140.154  |
| NM_014870 | 1406.721  | 1520.934  | Z35309    | 2659.802  | 1820.16   | AK026524  | 677.858   |
| AK021917  | 873.815   | 803.513   | AA700005  | 11209.129 | 2197.042  | AB011157  | 1969.19   |
| AF052146  | 39501.176 | 31508.824 | AA292025  | 2311.779  | 1006.271  | U17632    | 5046.991  |
| NM_004870 | 2213.056  | 2787.675  | AA437226  | 1333.817  | 913.479   | AK026764  | 1465.736  |
| AF143872  | 16929.252 | 21345.758 | R36143    | 1891.84   | 2005.877  | AF113700  | 1730.026  |
| AF143326  | 2506.255  | 2580.894  | XM_056359 | 1267.996  | 741.836   | NM_017835 | 3242.804  |
| AL049229  | 3731.325  | 2840.728  | D10353/NM | 8170.774  | 7331.006  | NM_018347 | 1559.804  |
| NM_018306 | 48128.371 | 41116.543 | M15042    | 2955.742  | 2484.636  | AK024986  | 197.501   |
| AK026146  | 4931.699  | 4864.935  | AK056843  | 3183.238  | 3618.394  | AK026730  | 214.06    |
| AK023152  | 4678.573  | 3790.137  | U49928    | 12056.679 | 14982.48  | AK024739  | 1044.444  |
| AK000155  | 2393.127  | 2178.164  | AK096645  | 21521.768 | 15382.327 | AK098681  | 812.225   |
| AL389937  | 3540.589  | 2866.738  | AK092859  | 568.816   | 913.926   | AK026772  | 985.106   |
| AK022628  | 36651.715 | 31856.135 | NM_019884 | 3941.928  | 3816.328  | NM_014260 | 5560.247  |
| AK021737  | 4303.795  | 3513.423  | NM_018291 | 4717.576  | 5938.703  | AK026458  | 343.664   |

|           |           |           |           |           |           |           |           |
|-----------|-----------|-----------|-----------|-----------|-----------|-----------|-----------|
| AL357454  | 950.934   | 735.695   | NM_005530 | 2923.943  | 2747.706  | AK022266  | 654.537   |
| AK026295  | 4235.776  | 8864.74   | AF116909  | 2068.273  | 1464.697  | CY3Cy5    | 4950.081  |
| AK022346  | 720.619   | 799.13    | BE906724  | 1266.17   | 1194.616  | M23254    | 6898.893  |
| AK025007  | 1686.721  | 2256.527  | NM_002283 | 3347.131  | 3439.741  | R28062    | 646.668   |
| NM_016486 | 7384.045  | 8432.027  | AJ276095  | 13293.409 | 7943.125  | AI627464  | 1625.039  |
| AK026490  | 25091.717 | 23510.369 | NM_007184 | 4967.872  | 2208.689  | BI756258  | 1622.073  |
| AJ227861  | 2325.679  | 1719.777  | NM_005291 | 19204.975 | 21277.84  | J04599    | 854.574   |
| AJ001020  | 806.528   | 352.146   | NM_002923 | 846.154   | 1402.839  | AA608557  | 3099.919  |
| AJ001875  | 2943.996  | 2365.108  | NM_006794 | 1749.259  | 1631.321  | AL050095  | 1560.875  |
| X64985    | 680.71    | 561.045   | NM_018653 | 2284.04   | 4192.754  | U03272    | 569.493   |
| Y16183    | 351.91    | 332.69    | NM_005386 | 6008.842  | 5157.059  | NM_000664 | 521.096   |
| L13433    | 3023.716  | 2670.671  | NM_007232 | 26087.754 | 26500.178 | SR5       | 5530.164  |
| NM_007220 | 1118.91   | 937.1     | NM_003027 | 678.966   | 622.365   | SR7       | 6154.896  |
| NM_017777 | 1438.693  | 1432.755  | NM_002717 | 4824.609  | 3871.653  | SR9       | 19534.346 |
| AK021989  | 987.949   | 937.807   | NM_012114 | 568.4     | 596.924   | CY3Cy5    | 8025.041  |
| AK022298  | 1701.479  | 1132.516  | NM_014486 | 456.61    | 329.685   | AB006627  | 1129.4    |
| AJ277441  | 25004.457 | 17807.422 | NM_003025 | 11863.314 | 13890.957 | NM_000416 | 3609.744  |
| NM_006057 | 1108.787  | 775.835   | U52051    | 639.457   | 1038.423  | NM_002965 | 29479.922 |
| AK024242  | 8758.036  | 8305.313  | NM_020179 | 4195.828  | 4627.401  | AB007883  | 2083.35   |
| AK024559  | 627.031   | 642.448   | NM_004306 | 52460.18  | 56563.738 | AK093780  | 2599.999  |
| AK024851  | 985.388   | 1002.855  | NM_001153 | 856.714   | 1120.246  | NM_007037 | 16791.451 |
| AK024943  | 1082.451  | 1084.291  | NM_006786 | 878.34    | 1835.428  | NM_001649 | 2977.421  |
| AK024995  | 410.796   | 761.323   | NM_006205 | 1285.487  | 1304.71   | NM_005492 | 999.89    |
| AL359943  | 33056.363 | 38325.387 | NM_006860 | 4655.411  | 5084.189  | AF038196  | 1194.236  |
| NM_000534 | 2812.201  | 6086.747  | NM_004794 | 5096.314  | 10389.795 | NM_004859 | 4018.88   |
| L10140    | 1407.965  | 1190.354  | NM_004283 | 1275.03   | 1379.709  | NM_016352 | 876.903   |
| AL133447  | 1119.902  | 1265.429  | NM_004163 | 19758.262 | 19500.586 | NM_000070 | 1616.768  |
| AB037853  | 19697.865 | 18262.182 | AK026308  | 2324.673  | 2633.363  | NM_001202 | 639.984   |
| D28450    | 27463.717 | 23578.254 | NM_013337 | 2950.009  | 2895.188  | AB037804  | 1349.034  |
| AK056222  | 1794.613  | 1323.774  | NM_004193 | 2395.045  | 2795.835  | U34249    | 425.252   |
| AK002028  | 21631.367 | 21142.414 | NM_002803 | 10890.467 | 10952.08  | NM_003289 | 15250.303 |
| AL050127  | 1706.57   | 1774.189  | NM_005506 | 1977.306  | 2159.81   | AI200114  | 646.37    |
| AK024805  | 11080.243 | 8147.304  | NM_018485 | 586.315   | 801.272   | NM_006323 | 2986.883  |
| AK001423  | 1131.944  | 886.068   | NM_006786 | 1318.949  | 1033.77   | NM_016466 | 820.377   |
| AJ012496  | 563.877   | 468.121   | NM_016566 | 982.32    | 734.156   | NM_001493 | 5746.808  |
| AK024090  | 19210.043 | 27237.959 | AB033102  | 10720.954 | 13446.126 | NM_014426 | 1238.263  |
| AL133574  | 2153.864  | 2602.318  | NM_014774 | 4159.255  | 4043.236  | NM_006816 | 12004.352 |
| AK021936  | 844.82    | 1562.936  | NM_014143 | 5539.536  | 5047.817  | NM_000258 | 4482.548  |
| AF147339  | 34772.145 | 37564.027 | M55646    | 19320.037 | 18475.955 | AB033055  | 1729.023  |
| AL390181  | 21239     | 21607.418 | NM_006112 | 30404.383 | 29811.352 | AF311287  | 1223.472  |
| NM_017914 | 24416.613 | 23851.045 | M12807    | 2226.553  | 1462.536  | NM_014781 | 1715.235  |
| AK024953  | 19149.918 | 5120.853  | NM_001765 | 1880.098  | 2100.465  | X87896    | 919.28    |
| AK024276  | 5162.677  | 4090.736  | NM_003361 | 2421.274  | 3127.129  | M88310    | 1662.183  |
| S83374    | 2673.779  | 1270.559  | NM_012099 | 3114.638  | 3139.18   | NM_000042 | 1666.949  |
| AK025784  | 15181.128 | 10455.489 | NM_018684 | 19227.021 | 15706.555 | NM_005024 | 440.156   |
| U07199    | 2316.188  | 2234.729  | NM_017983 | 920.766   | 1427.068  | NM_016335 | 815.716   |
| AK023713  | 1085.431  | 1194.84   | AF169351  | 10703.543 | 8209.313  | NM_003165 | 2181.964  |
| X81445    | 1209.324  | 1400.776  | M14200    | 62740.473 | 46445.563 | NM_003906 | 9117.858  |
| U95091    | 1234.698  | 1328.177  | NM_000282 | 3358.71   | 2750.004  | AL359590  | 14151.095 |
| NM_017900 | 24882.836 | 23465.941 | NM_000532 | 11405.68  | 15092.531 | NM_002861 | 3754.38   |
| S50182    | 2736.767  | 2129.421  | NM_016341 | 1741.467  | 1564.914  | NM_003080 | 3906.94   |
| AL360145  | 1492.579  | 1001.915  | AF231916  | 5988.774  | 7995.747  | NM_004042 | 641.982   |
| Y12016    | 995.542   | 674.368   | NM_003501 | 4531.247  | 5188.192  | NM_002645 | 1334.232  |

|           |           |           |           |           |           |           |           |
|-----------|-----------|-----------|-----------|-----------|-----------|-----------|-----------|
| NM_001178 | 1651.459  | 1245.829  | AK022654  | 39327.156 | 56177.32  | AB033027  | 2430.419  |
| AK023696  | 6061.231  | 6118.612  | BC002905  | 6470.381  | 6347.592  | AK021805  | 2586.858  |
| NM_000704 | 1586.967  | 2245.027  | NM_018091 | 6736.83   | 7631.166  | AB014550  | 700.062   |
| NM_015987 | 2012.454  | 2055.41   | NM_001108 | 14803.969 | 4200.372  | AF320294  | 2614.193  |
| NM_019605 | 3027.591  | 3531.734  | NM_001637 | 1094.147  | 881.477   | AF161436  | 4463.722  |
| NM_015365 | 515.751   | 1041.714  | NM_016630 | 10752.804 | 7874.176  | NM_020402 | 5262.921  |
| Z49090    | 5789.822  | 5191.013  | NM_014291 | 5260.687  | 5719.22   | NM_004295 | 904.55    |
| AK021592  | 6338.352  | 5284.129  | NM_014631 | 1311.369  | 797.859   | NM_001171 | 1307.84   |
| AK025467  | 1988.135  | 2478.655  | NM_001085 | 5781.046  | 5972.721  | NM_002250 | 1335.488  |
| AK026593  | 4372.486  | 2731.908  | NM_000120 | 5556.62   | 5332.937  | AF132734  | 3352.214  |
| L37700    | 1181.876  | 729.178   | AF172327  | 23972.031 | 20787.568 | NM_018375 | 2767.38   |
| NM_017665 | 4515.953  | 2879.248  | NM_001676 | 7007.447  | 6294.766  | NM_016403 | 10532.709 |
| AK024819  | 592.03    | 207.888   | NM_004515 | 551.658   | 603.858   | NM_015603 | 1785.374  |
| AF052106  | 4960.235  | 3836.581  | NM_001675 | 16395.668 | 15410.499 | AK021788  | 921.469   |
| AK000441  | 963.341   | 506.461   | NM_004046 | 65334.672 | 59982.637 | NM_001921 | 1384.792  |
| AK022391  | 2481.901  | 2175.453  | NM_004983 | 1616.78   | 2398.983  | NM_006230 | 2866.902  |
| NM_016125 | 2054.306  | 2019.243  | U09384    | 885.953   | 753.043   | NM_014695 | 8202.865  |
| CY3Cy5    | 9479.354  | 608.52    | NM_019884 | 3623.542  | 3241.361  | NM_013400 | 2737.771  |
| R72122    | 4126.468  | 4273.313  | NM_018291 | 4818.037  | 4202.47   | AK026257  | 1427.352  |
| Z35309    | 1655.695  | 2547.634  | NM_005530 | 3105.598  | 2724.286  | AK023836  | 2460.366  |
| X04571    | 521.498   | 534.125   | NM_006895 | 3973.714  | 3890.924  | NM_018105 | 874.54    |
| AA700005  | 13615.232 | 2541.371  | NM_012200 | 2555.531  | 2270.012  | AJ299442  | 1938.076  |
| AA292025  | 3996.042  | 1292.265  | NM_001724 | 3015.637  | 1673.761  | NM_000125 | 686.458   |
| AA437226  | 5766.42   | 2500.594  | NM_000150 | 2402.306  | 1982.163  | NM_003762 | 1432.745  |
| R36143    | 2617.364  | 2118.962  | AB023152  | 1271.118  | 797.165   | NM_018446 | 1003.47   |
| XM_056359 | 1197.576  | 1377.834  | NM_006212 | 1263.988  | 1370.247  | NM_000187 | 441.922   |
| D10353/NM | 10482.504 | 12042.555 | AK022872  | 3788.509  | 3713.878  | NM_014465 | 1127.166  |
| M15042    | 5825.379  | 7129.361  | AK024272  | 9099.138  | 5497.716  | D87292    | 6555.121  |
| AK096645  | 17041.174 | 16928.941 | NM_016381 | 2240.935  | 1885.503  | NM_005495 | 811.354   |
| AK092859  | 1012.267  | 1645.714  | AL591715  | 797.027   | 1085.683  | NM_001202 | 496.8     |
| NM_019884 | 6859.641  | 9123.835  | NM_018042 | 5624.858  | 12767.148 | AB037804  | 1258.072  |
| SR6       | 2909.656  | 2036.654  | BE741525  | 1077.807  | 951.404   | U34249    | 718.845   |
| SR8       | 6385.68   | 13865.225 | BF030555  | 45068.078 | 55920.457 | NM_003285 | 22031.178 |
| SR10      | 35214.277 | 9402.342  | NM_012433 | 6709.903  | 7259.198  | AI200114  | 1707.203  |
| CY3Cy5    | 6412.086  | 411.59    | NM_005605 | 2328.926  | 2958.201  | M23254    | 10381.265 |
| NM_005291 | 16184.505 | 19448.197 | NM_002576 | 1264.345  | 1363.605  | BE618539  | 1191.735  |
| AF253316  | 315.125   | 860.316   | NM_003582 | 4661.896  | 2637.43   | R28062    | 991.342   |
| NM_005855 | 904.696   | 682.016   | U52051    | 791.614   | 694.585   | AI627464  | 1726.36   |
| NM_002923 | 1493.323  | 965.086   | NM_020175 | 4428.353  | 3345.004  | BI756258  | 1604.036  |
| NM_006794 | 1825.773  | 1425.547  | NM_004306 | 48160.676 | 43791.688 | AF110020  | 192.352   |
| NM_018653 | 5498.026  | 6212.078  | NM_001153 | 1209.429  | 1145.032  | AA608557  | 3587.252  |
| NM_005385 | 3246.959  | 3498.615  | NM_006786 | 925.519   | 1263.211  | AL050095  | 1573.141  |
| NM_003027 | 839.247   | 712.831   | NM_006205 | 1605.131  | 1937.21   | U03272    | 647.2     |
| NM_016257 | 404.872   | 875.764   | NM_004034 | 6169.787  | 6822.092  | NM_000495 | 577.129   |
| NM_003025 | 16335.108 | 22210.473 | NM_000130 | 4891.77   | 5735.89   | NM_000664 | 482.932   |
| U52051    | 624.059   | 814.787   | AF193756  | 857.736   | 962.217   | AF075085  | 20952.793 |
| NM_020175 | 9079.987  | 7107.73   | NM_004183 | 2011.072  | 913.239   | NM_005892 | 2799.177  |
| NM_001153 | 704.417   | 1330.908  | AI492087  | 14392.584 | 17614.738 | NM_000042 | 1746.813  |
| NM_006786 | 1121.092  | 2467.11   | R72122    | 3375.569  | 2537.392  | NM_005024 | 857.669   |
| NM_006205 | 2030.485  | 1851.188  | Z35309    | 3093.984  | 2352.526  | NM_014805 | 593.708   |
| NM_004034 | 5154.074  | 5109.298  | X04571    | 473.016   | 829.406   | AB006627  | 2043.162  |
| NM_000130 | 2522.085  | 2363.517  | AA700005  | 12205.077 | 2430.991  | NM_000416 | 4379.104  |
| AF193756  | 855.033   | 847.624   | AA292025  | 2144.503  | 1374.029  | NM_003382 | 721.545   |

|           |           |           |           |           |           |           |           |
|-----------|-----------|-----------|-----------|-----------|-----------|-----------|-----------|
| NM_004193 | 1930.497  | 2901.854  | AA437226  | 1467.925  | 1213.491  | NM_002965 | 31602.527 |
| NM_002803 | 9882.524  | 9845.47   | R36143    | 1792.603  | 2197.878  | AB007883  | 3210.469  |
| NM_005508 | 1705.318  | 2301.92   | XM_056359 | 863.62    | 1113.345  | AK093780  | 2026.313  |
| NM_006788 | 899.013   | 960.049   | D10353/NM | 8433.703  | 8471.644  | AY009397  | 60000.488 |
| NM_016568 | 1151.312  | 1993.219  | M15042    | 3495.37   | 4716.311  | NM_007037 | 15202.628 |
| NM_014774 | 3921.713  | 4348.429  | AK096645  | 23492.908 | 16827.387 | NM_001649 | 2883.426  |
| NM_014143 | 7380.83   | 8580.221  | AK092859  | 877.94    | 1352.849  | NM_005492 | 1073.488  |
| NM_006112 | 28303.25  | 27423.447 | M12807    | 2328.76   | 1271.978  | AF038196  | 1350.442  |
| M12807    | 5149.786  | 2031.101  | NM_001765 | 2212.094  | 1978.731  | NM_004859 | 5615.904  |
| NM_001765 | 921.39    | 1041.179  | NM_003361 | 2241.872  | 3154.305  | NM_016352 | 593.79    |
| NM_003361 | 1744.936  | 3263.507  | NM_012099 | 3274.667  | 2840.206  | NM_005014 | 972.443   |
| NM_018684 | 11421.489 | 13095.941 | NM_018684 | 17537.533 | 11423.237 | NM_006944 | 521.94    |
| NM_017983 | 1340.286  | 1490.003  | NM_017983 | 1260.299  | 1433.172  | NM_004407 | 433.844   |
| AF116909  | 1689.653  | 2168.68   | AF116909  | 1821.992  | 1825.497  | NM_000070 | 2571.702  |
| BE906724  | 1575.739  | 1941.03   | BE906724  | 1426.829  | 2014.163  | NM_002250 | 1884.862  |
| NM_002283 | 3959.34   | 3628.313  | NM_002283 | 6010.4    | 8777.076  | NM_006323 | 3423.857  |
| AJ276095  | 6713.871  | 8779.207  | AJ276095  | 16942.734 | 15672.706 | NM_016466 | 951.372   |
| NM_004819 | 2693.551  | 3692.163  | NM_004819 | 2594.388  | 3285.146  | NM_001493 | 4177.467  |
| AF231916  | 2044.212  | 2259.719  | NM_007184 | 5103.028  | 2583.722  | NM_014841 | 743.576   |
| NM_003501 | 3297.148  | 3934.285  | NM_005291 | 21298.398 | 24486.324 | NM_014426 | 950.787   |
| AK022654  | 37342.297 | 37619.555 | NM_005855 | 557.598   | 694.621   | NM_006816 | 15844.442 |
| BC002905  | 5323.787  | 6149.689  | NM_002923 | 1465.616  | 2147.708  | AK026518  | 16749.814 |
| NM_018091 | 5400.791  | 6062.177  | NM_006794 | 1509.561  | 1949.548  | NM_000258 | 4041.813  |
| NM_001108 | 19353.32  | 2598.655  | NM_018653 | 2835.57   | 6376.19   | AB033055  | 1678.558  |
| NM_001637 | 1090.144  | 744.758   | NM_005388 | 5097.464  | 6462.096  | AF311287  | 1188.706  |
| NM_016630 | 11211.341 | 7015.232  | NM_007232 | 28844.037 | 35286.043 | NM_003098 | 520.314   |
| NM_014291 | 4372.532  | 6129.065  | NM_003027 | 732.163   | 1019.232  | NM_014781 | 2004.862  |
| NM_014631 | 1424.507  | 980.158   | NM_016257 | 953.513   | 1390.948  | X87896    | 919.133   |
| NM_001089 | 6079.842  | 6781.044  | NM_002717 | 5181.487  | 5500.707  | M88310    | 1732.916  |
| NM_000120 | 5312.125  | 4574.535  | NM_012114 | 856.282   | 647.49    | NM_018446 | 1581.615  |
| AF172327  | 24196.539 | 23534.547 | NM_003025 | 8579.649  | 10311.133 | NM_000187 | 646.397   |
| NM_001676 | 4338.311  | 4007.23   | NM_001679 | 16794.711 | 12114.727 | NM_014465 | 1344.173  |
| NM_004519 | 1846.696  | 2500.073  | NM_004046 | 65214.09  | 61717.289 | D87292    | 6471.914  |
| NM_001679 | 17536.711 | 14036.168 | NM_004983 | 2620.729  | 2279.275  | NM_005498 | 851.001   |
| NM_006860 | 9084.732  | 8173.674  | U09384    | 907.638   | 669.578   | NM_003165 | 2267.798  |
| NM_004794 | 3308.749  | 10507.963 | NM_006860 | 5688.258  | 8498.851  | NM_003906 | 9126.9    |
| NM_004283 | 2129.036  | 2397.049  | NM_004794 | 6970.813  | 14795.342 | AL359590  | 11723.729 |
| NM_004163 | 5324.805  | 4659.113  | NM_004283 | 1659.556  | 2317.744  | NM_002861 | 3214.286  |
| AK026308  | 2379.703  | 1965.17   | NM_004163 | 31907.332 | 26661.123 | NM_003080 | 5542.317  |
| NM_013337 | 1726.219  | 2583.761  | AK026308  | 1932.029  | 1772.214  | NM_002645 | 1441.164  |
| NM_006899 | 4612.205  | 5348.377  | NM_013337 | 2175.596  | 2079.914  | AB033027  | 2751.655  |
| NM_012200 | 2141.156  | 3067.444  | NM_004193 | 2288.585  | 2228.955  | AK021805  | 3451.678  |
| NM_001724 | 2180.965  | 1916.922  | NM_002803 | 10530.801 | 9617.619  | AB014550  | 1133.873  |
| NM_000150 | 846.901   | 1078.933  | NM_005508 | 1114.048  | 1254.64   | AF320294  | 3196.416  |
| AB023152  | 2170.86   | 894.912   | NM_006788 | 1053.058  | 1008.416  | AF161436  | 4189.96   |
| NM_006212 | 1344.863  | 1154.557  | AK025039  | 715.329   | 929.459   | NM_020402 | 5026.074  |
| AK022872  | 3784.205  | 3654.605  | NM_016568 | 1186.948  | 971.679   | NM_004299 | 1009.644  |
| AK024272  | 6438.949  | 4576.799  | AB033102  | 11032.342 | 18938.248 | NM_001171 | 1806.662  |
| NM_016381 | 1884.32   | 3212.624  | NM_014774 | 4342.496  | 4701.229  | NM_000664 | 624.779   |
| AL591715  | 2421.321  | 902.166   | NM_014143 | 6093.912  | 6643.495  | AF075085  | 23718.207 |
| NM_018042 | 2716.941  | 2759.514  | M55646    | 22518.508 | 30734.006 | NM_005892 | 2678.904  |
| BE741525  | 2588.956  | 1460.763  | NM_006112 | 29387.762 | 30581.078 | NM_006478 | 783.148   |
| BF030555  | 26204.516 | 19464.24  | NM_000879 | 587.048   | 841.169   | AF132734  | 4100.067  |

|           |           |           |           |           |           |           |           |
|-----------|-----------|-----------|-----------|-----------|-----------|-----------|-----------|
| NM_012433 | 6462.942  | 6149.193  | BE741525  | 1144.148  | 2547.094  | NM_018379 | 2492.223  |
| NM_002576 | 1640.141  | 2268.979  | BF030555  | 29546.221 | 26094.395 | NM_016403 | 10332.759 |
| AF057354  | 314.144   | 1140.732  | NM_012433 | 6223.173  | 5627.639  | NM_015603 | 1411.124  |
| AF169351  | 8976.134  | 7723.515  | NM_005605 | 2865.779  | 2661.249  | AK021788  | 731.665   |
| M14200    | 65900.094 | 55189.98  | NM_002576 | 2096.435  | 1376.496  | NM_001921 | 1592.576  |
| NM_000282 | 3297.853  | 2712.66   | NM_003582 | 3374.773  | 3303.142  | NM_006230 | 3047.272  |
| NM_000532 | 5474.446  | 8155.348  | NM_000282 | 4621.833  | 4821.302  | NM_014699 | 11615.355 |
| NM_016341 | 628.473   | 1113.127  | NM_000532 | 12423.549 | 13239.767 | NM_013400 | 3407.371  |
| NM_004034 | 5776.062  | 5599.475  | NM_016341 | 1948.318  | 1484.984  | AK026257  | 1457.727  |
| NM_000130 | 5696.463  | 7523.508  | AF231916  | 5183.814  | 7428.997  | AK023836  | 3662.109  |
| AF193756  | 723.495   | 1188.357  | NM_003501 | 3757.345  | 4259.105  | NM_018109 | 1303.53   |
| AI492087  | 9898.455  | 18848.076 | AK022654  | 26456.797 | 31959.914 | AJ299442  | 2790.624  |
| R72122    | 5372.383  | 4079.443  | BC002905  | 7671.914  | 7217.742  | NM_000129 | 765.453   |
| Z35309    | 2146.326  | 2772.527  | NM_018091 | 6119.931  | 7227.236  | NM_003762 | 2257.697  |
| X04571    | 554.834   | 529.56    | NM_001108 | 15622.595 | 4639.121  | NM_004859 | 5730.397  |
| AA700005  | 16952.023 | 3217.909  | NM_016630 | 10522.646 | 9961.813  | NM_016352 | 929.007   |
| AA292025  | 4497.135  | 1309.204  | NM_014291 | 6738.9    | 10035.461 | NM_005014 | 317.495   |
| AA437226  | 5771.124  | 1333.849  | NM_014631 | 1172.509  | 1178.267  | NM_000070 | 2355.827  |
| R36143    | 2683.219  | 1986.378  | NM_001089 | 7183.014  | 8539.335  | NM_001202 | 785.077   |
| XM_056359 | 1100.892  | 1124.821  | NM_000120 | 6268.262  | 6474.369  | AB037804  | 1715.606  |
| M15042    | 6076.229  | 7968.061  | AF172327  | 29484.6   | 34985.023 | U34249    | 772.304   |
| AK056843  | 5207.46   | 6110.434  | NM_001676 | 7405.334  | 8213.346  | NM_003289 | 24409.199 |
| AK092859  | 1614.007  | 2292.437  | AB018338  | 28285.498 | 25304.076 | AI200114  | 1090.466  |
| NM_019884 | 6080.375  | 7954.994  | D80010    | 546.147   | 371.584   | M23254    | 9868.49   |
| AF116909  | 1737.893  | 2896.719  | NM_004923 | 1664.406  | 1345.127  | BE618539  | 1313.17   |
| BE906724  | 1750.996  | 2731.253  | NM_003971 | 1567.783  | 1682.158  | R28062    | 932.011   |
| NM_002283 | 10589.912 | 12863.718 | L38517    | 11125.365 | 10075.752 | U38545    | 311.082   |
| AJ276095  | 10782.786 | 16889.818 | NM_018291 | 5077.289  | 6400.811  | AI627464  | 1856.13   |
| NM_007184 | 3815.921  | 3651.237  | NM_005530 | 3935.248  | 3485.648  | J04599    | 730.872   |
| NM_005291 | 19676.383 | 20517.285 | NM_006899 | 5499.779  | 4165.803  | AF110020  | 606.925   |
| NM_005855 | 705.813   | 520.252   | NM_012200 | 2543.537  | 1775.981  | AA608557  | 4843.42   |
| NM_002923 | 2188.29   | 1649.157  | NM_001724 | 3620.257  | 1385.106  | AL050095  | 2764.193  |
| NM_006794 | 2113.243  | 2881.147  | NM_000150 | 4042.998  | 4736.042  | U03272    | 827.645   |
| NM_018653 | 6689.796  | 8157.135  | NM_006212 | 1185.274  | 1026.778  | NM_003098 | 866.785   |
| NM_003027 | 1140.762  | 1077.01   | AK022872  | 4353.376  | 4273.383  | NM_014781 | 1593.99   |
| NM_016257 | 377.173   | 695.903   | AK024272  | 11927.005 | 7737.605  | X87896    | 687.414   |
| NM_003025 | 19934.824 | 22940.107 | NM_016381 | 2938.363  | 3652.581  | M88310    | 2579.034  |
| NM_020179 | 11655.461 | 7958.937  | NM_018042 | 5306.349  | 11200.658 | D16856    | 631.627   |
| NM_004306 | 59298.238 | 50025.473 | NM_014944 | 5331.014  | 7021.265  | NM_000042 | 1711.825  |
| NM_001153 | 579.62    | 1091.703  | AF200348  | 2320.107  | 2506.312  | AF035787  | 432.526   |
| NM_006786 | 952.989   | 2174.304  | J03756    | 1898.814  | 2177.466  | NM_005024 | 628.146   |
| NM_006860 | 7821.19   | 9106.508  | NM_002650 | 1826.682  | 1568.235  | NM_003403 | 202.148   |
| NM_004794 | 3295.723  | 12836.271 | NM_005539 | 1317.881  | 1956.423  | NM_014808 | 950.7     |
| NM_004283 | 2491.726  | 3146.656  | BF341504  | 924.722   | 806.698   | AB006627  | 2089.342  |
| NM_004163 | 13036.876 | 11264.187 | NM_005541 | 10708.573 | 13529.703 | NM_000416 | 4786.216  |
| AK026308  | 2097.974  | 1969.55   | AB002319  | 1042.652  | 1388.448  | NM_003382 | 688.766   |
| NM_004193 | 2143.884  | 2316.304  | AF039942  | 1900.997  | 2680.988  | NM_002965 | 40336.141 |
| NM_002803 | 10444.342 | 8028.869  | NM_004421 | 1101.09   | 1413.267  | AB007883  | 4436.313  |
| NM_005508 | 2241.268  | 3003.285  | NM_018654 | 871.561   | 439.564   | AK093780  | 2350.055  |
| NM_006788 | 1054.75   | 1538.683  | AB046863  | 8719.573  | 10345.129 | AY009397  | 66362.008 |
| NM_016568 | 1511.726  | 1638.94   | M62403    | 17709.945 | 12036.749 | NM_001649 | 3315.254  |
| AB033102  | 16620.887 | 19300.43  | NM_017883 | 1967.443  | 2572.79   | NM_005492 | 1421.398  |
| NM_018684 | 9838.795  | 11115.76  | AK025131  | 3144.076  | 3006.928  | AF038196  | 1391.751  |

|           |           |           |           |           |           |           |           |
|-----------|-----------|-----------|-----------|-----------|-----------|-----------|-----------|
| AF057354  | 474.722   | 848.87    | NM_000754 | 26641.52  | 27709.629 | AF320294  | 3689.641  |
| AF169351  | 8959.256  | 10300.322 | NM_014619 | 2998.197  | 3368.171  | AF320293  | 491.964   |
| M14200    | 66846.945 | 57198.551 | NM_005629 | 8661.117  | 13139.488 | AF161436  | 4948.55   |
| NM_000282 | 3903.806  | 2391.587  | J04621    | 1620.829  | 1690.821  | NM_020402 | 4579.75   |
| NM_000532 | 6714.658  | 8665.611  | NM_000718 | 2347.714  | 2442.102  | NM_004299 | 1397.54   |
| NM_016341 | 1084.976  | 1281.246  | NM_000161 | 5204.414  | 7131.623  | NM_001171 | 2089.136  |
| AF231916  | 2596.86   | 2202.234  | NM_002634 | 5972.041  | 4925.709  | NM_002250 | 2551.609  |
| NM_003501 | 3993.135  | 5347.559  | NM_017749 | 3532.263  | 2166.408  | NM_006323 | 3264.129  |
| NM_018091 | 5998.333  | 5999.358  | NM_001972 | 60556.883 | 55938.117 | NM_016466 | 657.097   |
| NM_001108 | 19440.492 | 3871.97   | NM_007109 | 1470.034  | 1430.367  | NM_001493 | 4913.081  |
| NM_001637 | 1346.766  | 922.424   | AK023404  | 19303.064 | 20462.961 | NM_014841 | 568.272   |
| NM_016630 | 10673.529 | 8158.698  | NM_001789 | 1251.686  | 1654.479  | NM_014426 | 1293.212  |
| NM_014291 | 4992.379  | 8313.152  | NM_016004 | 3566.645  | 3387.308  | NM_006816 | 14017.521 |
| AF172327  | 22780.465 | 28296.961 | NM_002655 | 868.552   | 1138.872  | NM_000258 | 4384.959  |
| U09384    | 494.107   | 1088.817  | AB028955  | 17766.893 | 25834.029 | AB033055  | 1848.871  |
| NM_019884 | 5631.671  | 7423.821  | U66879    | 15774.402 | 18461.131 | AF311287  | 1513.244  |
| NM_018291 | 3613.062  | 2890.781  | NM_016022 | 15007.457 | 14790.567 | AJ299442  | 3572.293  |
| NM_005530 | 3203.928  | 2280.589  | NM_004874 | 2433.317  | 1846.265  | NM_000129 | 870.689   |
| NM_006899 | 4977.581  | 5344.821  | NM_014204 | 2591.049  | 2753.204  | NM_003762 | 2621.925  |
| NM_012200 | 2149.435  | 1925.209  | S70385    | 4284.124  | 12139.788 | NM_018446 | 1437.175  |
| NM_001724 | 2431.746  | 1481.907  | M34671    | 2079.19   | 1531.484  | NM_000187 | 578.179   |
| NM_000150 | 741.234   | 592.925   | NM_001941 | 1716.787  | 1481.084  | NM_014465 | 2118.001  |
| AB023152  | 2171.237  | 860.103   | AL050199  | 622.535   | 613.893   | D87292    | 7507.614  |
| NM_006212 | 1613.408  | 1725.895  | NM_001109 | 2132.915  | 1598.64   | NM_005498 | 1136.228  |
| AK022872  | 3814.206  | 4207.126  | AF176706  | 986.766   | 1624.059  | NM_016335 | 837.441   |
| AK024272  | 7185.048  | 6078.665  | NM_019048 | 7775.366  | 6207.568  | NM_003165 | 2145.638  |
| NM_016381 | 1504.313  | 2571.743  | NM_001040 | 757.366   | 1309.023  | NM_003906 | 10643.71  |
| NM_005605 | 2113.23   | 1872.232  | AF279698  | 3176.387  | 3481.568  | AL359590  | 14429.472 |
| NM_002576 | 1403.751  | 1644.622  | NM_019849 | 3554.248  | 3235.271  | NM_002861 | 3039.398  |
| NM_003582 | 3568.884  | 2691.346  | NM_000049 | 1047.761  | 939.457   | NM_003080 | 4627.447  |
| NM_020179 | 2308.484  | 2852.459  | AB032996  | 25523.563 | 33369.414 | NM_002645 | 1615.764  |
| NM_004306 | 55572.414 | 36755.727 | AB040881  | 3727.353  | 3096.595  | AB033027  | 3117.395  |
| NM_001153 | 665.338   | 944.043   | AY007121  | 1136.947  | 962.26    | AK021805  | 2783.566  |
| NM_006786 | 1199.958  | 1783.583  | NM_003372 | 12034.462 | 8502.809  | AB014550  | 990.108   |
| NM_006205 | 2619.081  | 2561.037  | NM_007317 | 6126.423  | 4070.681  | NM_006826 | 2254.349  |
| NM_004034 | 6084.231  | 6576.686  | AB037826  | 38127.672 | 39495.234 | AB007973  | 3487.469  |
| NM_000130 | 6859.004  | 7597.014  | NM_002938 | 5194.179  | 6903.969  | M96843    | 12600.646 |
| AF193756  | 828.099   | 1164.603  | AK023652  | 4596.725  | 5284.032  | NM_017791 | 2059.34   |
| AI492087  | 9736.978  | 19474.713 | NM_016216 | 9059.993  | 7366.879  | NM_005882 | 1892.894  |
| R72122    | 5433.558  | 3222.554  | AK001649  | 1114.306  | 1043.467  | BC012304  | 3399.065  |
| Z35309    | 2705.618  | 2273.272  | NM_016638 | 12393.52  | 13932.258 | AB046815  | 1032.806  |
| X04571    | 754.587   | 793.729   | AB018274  | 4882.035  | 4986.526  | AF075085  | 23831.068 |
| AA700005  | 16783.873 | 3359.945  | NM_005871 | 5681.647  | 4383.236  | NM_005892 | 4248.438  |
| AA292025  | 4742.111  | 1764.431  | NM_007042 | 1629.048  | 989.969   | NM_006478 | 1017.806  |
| AK056843  | 5837.234  | 7518.553  | NM_016333 | 13289.018 | 6786.1    | AF132734  | 4293.917  |
| U49928    | 30261.832 | 30804.338 | BE875028  | 3315.737  | 2716.982  | NM_018379 | 2751.657  |
| AK096645  | 23588.434 | 21860.508 | AK000511  | 4651.644  | 3778.019  | NM_016403 | 10799.608 |
| AK092859  | 1525.299  | 1967.577  | AF121255  | 1625.765  | 3088.073  | NM_015603 | 1293.334  |
| M12807    | 6674.301  | 3788.656  | NM_005494 | 5528.994  | 3402.517  | AK021788  | 983.897   |
| NM_001765 | 1414.464  | 1013.63   | NM_017946 | 929.724   | 1184.276  | NM_001921 | 1763.418  |
| NM_003361 | 1203.964  | 1536.165  | NM_004953 | 1836.62   | 2184.796  | NM_006230 | 3483.083  |
| NM_012099 | 2211.006  | 2216.76   | AL049682  | 1280.398  | 1321.619  | NM_014699 | 12357.457 |
| NM_018684 | 10633.167 | 9339.259  | NM_005528 | 6296.836  | 6729.224  | NM_013400 | 2800.951  |



|           |           |           |           |           |           |           |           |
|-----------|-----------|-----------|-----------|-----------|-----------|-----------|-----------|
| NM_017983 | 1549.933  | 2289.613  | NM_007006 | 10585.135 | 8604.56   | AK026257  | 1711.753  |
| AF116909  | 1680.041  | 2028.586  | AL137346  | 1972.104  | 1262.931  | AK023836  | 3608.228  |
| BE906724  | 1986.493  | 2535.908  | NM_006721 | 21528.246 | 21456.385 | NM_018109 | 1106.624  |
| NM_002283 | 11832.097 | 11085.516 | NM_002765 | 2068.073  | 1217.298  | NM_005076 | 8545.291  |
| AJ276095  | 11495.799 | 18930.477 | NM_001905 | 3691.547  | 3120.748  | AF253321  | 1226.806  |
| NM_004819 | 3234.181  | 4692.198  | AF292100  | 2273.942  | 2112.83   | U80735    | 688.237   |
| NM_007184 | 3884.937  | 3607.62   | NM_003434 | 24106.951 | 16680.143 | NM_016522 | 1018.77   |
| NM_005291 | 20571.16  | 18834.125 | NM_005654 | 1044.085  | 1161.49   | NM_002224 | 1565.52   |
| NM_005855 | 676.997   | 461.864   | AF024698  | 67228.219 | 63949.039 | X07979    | 20127.535 |
| NM_002923 | 1940.453  | 1228.585  | BE904617  | 26199.012 | 25592.631 | L13857    | 2267.156  |
| NM_016257 | 631.919   | 894.219   | AK024495  | 577.754   | 1172.003  | NM_018098 | 3816.853  |
| NM_002717 | 6080.883  | 6661.646  | AF024694  | 3158.953  | 5237.629  | AF286164  | 509.693   |
| NM_003025 | 23041.059 | 24929.85  | AF091081  | 6136.365  | 5550.762  | AF146277  | 5487.182  |
| NM_000220 | 889.446   | 1193.172  | AK001758  | 2545.958  | 2341.981  | AF055033  | 11032.75  |
| NM_001679 | 13004.486 | 8916.093  | AF086325  | 3479.541  | 3028.786  | NM_017700 | 1281.715  |
| NM_004046 | 65311.813 | 63122.016 | NM_004925 | 911.706   | 905.701   | M37191    | 8218.726  |
| NM_004983 | 1081.95   | 1716.85   | AF147401  | 2328.206  | 3135.783  | NM_003404 | 16914.291 |
| U09384    | 608.667   | 815.544   | AF075022  | 2294.831  | 2468.125  | NM_001114 | 985.218   |
| NM_006860 | 9484.57   | 7772.134  | AF075060  | 8540.197  | 3826.4    | X82240    | 1004.693  |
| NM_004794 | 3859.422  | 11749.563 | AB002438  | 1084.715  | 1471.157  | NM_013995 | 7564.389  |
| NM_004283 | 2842.002  | 3675.738  | AF147436  | 1986.593  | 1677.905  | NM_004455 | 459.677   |
| NM_004163 | 22116.971 | 26094.621 | AK021441  | 1892.216  | 1733.058  | NM_006010 | 2046.957  |
| AK026308  | 2157.398  | 1936.104  | AK026018  | 1961.938  | 1980.487  | K03191    | 1157.972  |
| NM_013337 | 2050.98   | 2485.038  | AF085846  | 4836.933  | 3767.992  | NM_005079 | 4053.803  |
| NM_004193 | 2365.959  | 3281.527  | AK023901  | 11019.246 | 10546.579 | NM_005192 | 14344.646 |
| NM_002803 | 9833.106  | 6439.816  | AL109705  | 1297.159  | 1114.832  | NM_015032 | 2607.256  |
| NM_005508 | 1890.792  | 2161.249  | AF147392  | 856.983   | 900.349   | AK022956  | 2458.889  |
| NM_006788 | 1273.637  | 740.62    | AF088057  | 2715.404  | 2562.951  | AK023121  | 640.699   |
| NM_014774 | 4279.465  | 5423.459  | AF086255  | 13757.357 | 14670.691 | NM_014104 | 17397.482 |
| NM_014143 | 8828.698  | 10973.311 | AK022660  | 1044.965  | 985.583   | NM_002392 | 347.26    |
| M55646    | 19008.221 | 18988.311 | AF088051  | 3034.381  | 3395.352  | NM_002749 | 40378.109 |
| NM_006112 | 29633.422 | 38895.961 | AF086366  | 1331.015  | 1375.785  | NM_018216 | 2416.125  |
| BF030555  | 11869.882 | 8471.304  | AF086360  | 4980.944  | 4524.706  | AL137747  | 5042.51   |
| NM_012433 | 6703.845  | 5238.977  | AF087993  | 3422.415  | 3056.433  | NM_014755 | 4570.048  |
| NM_005605 | 1987.038  | 3119.602  | AF035282  | 1552.464  | 1635.522  | AF077188  | 7029.256  |
| NM_002576 | 1528.124  | 1657.437  | AK021966  | 3472.227  | 4074.478  | NM_012446 | 541.001   |
| NM_003582 | 2102.636  | 1478.443  | AB018292  | 8860.098  | 9707.479  | NM_018338 | 822.571   |
| NM_000282 | 4516.544  | 3774.533  | AF085971  | 1683.202  | 829.803   | NM_018685 | 6418.248  |
| NM_000532 | 8340.912  | 11207.901 | AF147302  | 1332.937  | 1671.278  | NM_006984 | 1414.616  |
| NM_016341 | 1346.308  | 1221.792  | AF085929  | 2946.986  | 3739.63   | AF231919  | 450.437   |
| AF231916  | 2856.896  | 2495.011  | AK001126  | 2849.814  | 2594.077  | AL133644  | 11329.137 |
| NM_003501 | 3611.843  | 4302.209  | AF085976  | 2479.145  | 1841.201  | NM_002706 | 1577.32   |
| AK022654  | 51902.422 | 49200.887 | AF075104  | 7958.235  | 8314.508  | NM_019023 | 63036.27  |
| BC002905  | 6774.913  | 5345.914  | AL133025  | 821.886   | 798.163   | NM_004420 | 1226.163  |
| NM_018091 | 5873.388  | 5713.565  | AL137402  | 10180.777 | 8603.132  | NM_002970 | 830.537   |
| NM_001108 | 20740.752 | 3074.107  | AL137617  | 2553.702  | 1972.068  | NM_005499 | 8401.78   |
| NM_014631 | 1699.859  | 1219.466  | AL359568  | 36374.168 | 28619.715 | NM_015387 | 2180.111  |
| NM_001089 | 6666.95   | 7802.372  | AL133564  | 10376.779 | 10466.31  | NM_001733 | 4961.899  |
| NM_000120 | 5925.444  | 6241.919  | AL137428  | 548.043   | 494.148   | NM_017825 | 3336.949  |
| AF172327  | 26549.35  | 37329.547 | AL157462  | 1856.719  | 1616.472  | NM_014035 | 2304.837  |
| NM_001676 | 4726.018  | 5104.152  | AL359602  | 9300.469  | 7744.122  | NM_020122 | 5669.41   |
| AB018338  | 3912.723  | 2252.364  | NM_018190 | 27106.781 | 24931.576 | NM_013432 | 6857.177  |
| NM_004923 | 1416.353  | 1540.737  | AK022259  | 36713.766 | 39813.484 | NM_002298 | 17969.326 |

|           |           |           |            |           |           |           |           |
|-----------|-----------|-----------|------------|-----------|-----------|-----------|-----------|
| NM_003971 | 2817.783  | 2343.741  | AK022461   | 1048.632  | 1097.976  | NM_005479 | 6256.631  |
| AK026973  | 1129.339  | 448.277   | NM_016010  | 2608.399  | 2430.004  | NM_005730 | 17018.637 |
| U81002    | 3045.031  | 3090.473  | AF161442   | 1156.681  | 1349.767  | AL133572  | 2497.417  |
| NM_016299 | 5916.073  | 6366.786  | AK023783   | 915.243   | 824.678   | U52096    | 4302.147  |
| NM_018291 | 3857.528  | 3933.297  | AF070647   | 18361.037 | 16775.549 | AB013897  | 683.063   |
| NM_005530 | 3205.841  | 2942.336  | AF116649   | 2070.69   | 2049.57   | NM_005526 | 18927.781 |
| NM_006899 | 4693.332  | 4214.87   | AF174394   | 6133.071  | 5125.799  | AK001669  | 2744.504  |
| NM_001724 | 2084.725  | 1623.056  | AF083121   | 610.078   | 856.207   | NM_006195 | 2297.776  |
| NM_000150 | 1028.726  | 1146.335  | AF230315   | 621.429   | 416.397   | NM_006190 | 4623.997  |
| AB023152  | 2259.153  | 709.906   | AK025924   | 1171.708  | 974.234   | NM_006368 | 1566.045  |
| NM_006212 | 1461.038  | 1165.726  | AK021876   | 14343.358 | 14337.696 | NM_001618 | 4132.963  |
| AK022872  | 3887.729  | 4125.867  | AK022017   | 1492.751  | 1581.396  | BC000401  | 2496.191  |
| AL591715  | 917.969   | 999.595   | AK022160   | 3429.871  | 3497.55   | NM_006425 | 2966.334  |
| NM_018042 | 3536.03   | 4576.934  | AK022295   | 2563.866  | 2244.538  | BF344046  | 1062.263  |
| NM_014944 | 1652.922  | 1682.164  | AK021935   | 2239.533  | 2165.118  | AF432218  | 4644.4    |
| AF200348  | 1006.056  | 838.986   | AK022187   | 3316.033  | 3842.792  | NM_004286 | 865.04    |
| NM_002650 | 1856.585  | 1448.161  | AK022337   | 4713.187  | 6194.268  | AK025082  | 1679.587  |
| NM_003260 | 3724.148  | 3575.467  | AK023048   | 1279.716  | 1043.191  | AB040901  | 629.939   |
| AK024071  | 2990.127  | 1821.584  | NM_017863  | 757.25    | 830.764   | AL137406  | 1381.154  |
| AF056490  | 1047.725  | 1100.302  | AL359560   | 293.106   | 594.345   | NM_012253 | 1398.117  |
| NM_005539 | 1784.817  | 2424.922  | AK026891   | 3458.718  | 4984.077  | NM_006876 | 836.511   |
| NM_005541 | 12411.521 | 9440.458  | AL137562   | 3538.804  | 3164.03   | NM_000293 | 477.018   |
| NM_004421 | 2030.398  | 2564.472  | M90355     | 60733.051 | 55466.273 | AF153821  | 3139.237  |
| NM_018654 | 3343.793  | 1559.822  | AK022495   | 3351.029  | 3401.914  | NM_013370 | 889.968   |
| AB046863  | 7883.834  | 6932.263  | AK021632   | 1088.563  | 791.711   | NM_001374 | 340.517   |
| M62403    | 21304.865 | 14608.857 | AK026373   | 18614.326 | 11236.072 | NM_003310 | 1504.654  |
| NM_017883 | 5008.912  | 6125.763  | AK021581   | 2074.764  | 1140.025  | AK024461  | 968.819   |
| AK025131  | 2569.716  | 2641.282  | unknown (9 | 1315.592  | 1154.127  | AF027147  | 9892.655  |
| NM_000754 | 27978.178 | 26799.26  | AK021744   | 1821.235  | 1382.12   | M62399    | 1164.725  |
| NM_014619 | 821.227   | 1065.86   | NM_018430  | 7291.708  | 8572.557  | NM_002357 | 687.001   |
| NM_005629 | 6777.01   | 15218.512 | AL110200   | 2036.691  | 2153.038  | U71600    | 972.073   |
| J04621    | 2297.665  | 2499.602  | AL133640   | 3240.966  | 3718.534  | NM_004472 | 1665.463  |
| NM_000718 | 2586.569  | 1765.267  | AJ012502   | 11083.612 | 7611.784  | AB037862  | 3034.778  |
| NM_000161 | 4374.923  | 4684.33   | AK024170   | 784.822   | 1062.995  | AK023887  | 1163.318  |
| NM_002634 | 5685.157  | 7119.067  | AK021722   | 3250.98   | 2856.434  | AF088022  | 2808.274  |
| NM_017749 | 2395.896  | 1850.459  | NM_000681  | 1388.93   | 1092.033  | AK026537  | 1953.755  |
| NM_001972 | 47983.887 | 45741.945 | AF147445   | 4018.886  | 2985.723  | NM_015485 | 1790.873  |
| NM_002006 | 11759.663 | 9480.224  | Y10508     | 23964.998 | 23029.367 | AF147411  | 625.575   |
| NM_007111 | 2738.231  | 4329.802  | NM_005182  | 61820.262 | 51152.469 | NM_002666 | 1113.07   |
| NM_004702 | 462.203   | 975.716   | D17074     | 1283.816  | 1279.007  | AF202145  | 1737.963  |
| AK023404  | 4401.887  | 3591.718  | AF039944   | 10788.225 | 13430.667 | NM_018052 | 17364.455 |
| NM_001789 | 861.601   | 1652.545  | AJ276252   | 1206.389  | 764.1     | AK022386  | 2673.092  |
| NM_016004 | 3495.868  | 5151.789  | AK021716   | 13200.079 | 10843.059 | NM_002767 | 1408.027  |
| AB028955  | 9826.782  | 11323.168 | AK025035   | 16571.313 | 13317.105 | AF131846  | 12314.233 |
| U66879    | 9265.394  | 7707.736  | AK002085   | 5941.208  | 4416.549  | NM_013393 | 3858.175  |
| NM_016022 | 16833.84  | 16418.404 | AF086200   | 1208.467  | 1417.349  | AK025072  | 505.072   |
| NM_004874 | 2941.654  | 2545.988  | AL133618   | 7395.532  | 13455.013 | AK022410  | 566.057   |
| NM_014204 | 2813.564  | 3209.173  | AF230314   | 2201.752  | 3155.447  | L10378    | 5071.19   |
| S70385    | 6059.924  | 22963.029 | AK001086   | 1267.767  | 1338.122  | AJ227860  | 559.57    |
| NM_018509 | 5718.826  | 10753.277 | AJ131610   | 8637.743  | 7106.033  | AL157448  | 1250.105  |
| NM_004086 | 2791.334  | 1272.494  | S50207     | 777.983   | 587.307   | AF026942  | 1638.977  |
| AL050199  | 615.101   | 644.089   | AF119872   | 13219.52  | 13783.086 | AJ276429  | 3020.281  |
| NM_001748 | 15983.673 | 2736.78   | X99687     | 1416.117  | 1031.824  | AL117657  | 486.549   |

|           |           |           |           |           |           |           |           |
|-----------|-----------|-----------|-----------|-----------|-----------|-----------|-----------|
| NM_001109 | 1520.5    | 315.871   | AI275123  | 982.663   | 1243.474  | AK023589  | 522.497   |
| AF176706  | 1992.481  | 1596.061  | AK023255  | 34565.598 | 34444.063 | AK021590  | 4531.805  |
| NM_014484 | 992.233   | 885.753   | NM_015417 | 1332.491  | 944.358   | AB002441  | 1014.955  |
| NM_001086 | 1155.603  | 1126.781  | AK026101  | 9353.44   | 7522.858  | AK021643  | 833.688   |
| NM_014670 | 2163.326  | 1963.201  | AK022194  | 31822.984 | 28928.684 | AK000872  | 1715.685  |
| NM_019048 | 3724.447  | 3697.408  | AF085963  | 2962.952  | 3085.883  | AK027147  | 4104.936  |
| NM_001040 | 860.354   | 986.504   | AF131851  | 913.714   | 713.609   | AL109713  | 720.953   |
| AF279698  | 2848.646  | 2452.415  | AK021436  | 2828.452  | 2951.31   | AK026084  | 677.658   |
| NM_019849 | 2380.927  | 1519.461  | U58664    | 2200.425  | 2457.703  | AK022415  | 17828.664 |
| AB032996  | 35783.582 | 27824.549 | AF085937  | 1061.223  | 841.778   | AL137368  | 710.053   |
| AB040881  | 2821.84   | 2623.592  | AL137569  | 6604.258  | 7889.569  | AK021932  | 1466.509  |
| AY007121  | 1511.402  | 1027.964  | AK021920  | 7488.475  | 5262.616  | AK026787  | 3720.775  |
| NM_003372 | 7334.81   | 6015.326  | AL049415  | 2674.161  | 2157.123  | AK023542  | 1793.521  |
| NM_007317 | 2513.427  | 5175.945  | AK022375  | 1792.357  | 1507.045  | AK021845  | 5211.268  |
| AB037826  | 22033.859 | 37766.219 | AI065056  | 439.111   | 753.527   | NM_018592 | 650.087   |
| AK021466  | 1685.712  | 2288.458  | NM_003378 | 50583.402 | 55058.816 | NM_018503 | 48311.191 |
| Z36796    | 69404.781 | 62810.953 | AL110194  | 10864.799 | 9744.177  | NM_016449 | 11895.448 |
| NM_006443 | 14856.888 | 28380.92  | AF138860  | 780.591   | 1166.593  | AL049670  | 2728.703  |
| AK026022  | 18625.729 | 14262.488 | NM_006687 | 1940.591  | 2928.84   | NM_018512 | 18205.914 |
| NM_003199 | 933.512   | 1107.158  | NM_013301 | 1023.945  | 1302.609  | NM_018568 | 750.419   |
| NM_002938 | 2700.264  | 2419.147  | NM_017673 | 1976.782  | 1984.866  | AK022412  | 699.313   |
| AK023652  | 2147.091  | 1365.867  | AB046857  | 1039.666  | 1186.433  | AK023073  | 10366.052 |
| AF099032  | 1510.401  | 912.267   | AK024408  | 21420.465 | 24763.213 | AK023697  | 849.127   |
| NM_003070 | 4542.319  | 3712.113  | AJ227905  | 1045.9    | 1209.385  | AK023922  | 1706.886  |
| AL122101  | 1663.415  | 1410.485  | NM_005390 | 3629.082  | 3166.569  | AK022438  | 1670.112  |
| NM_004780 | 3915.487  | 2435.033  | CY3Cy5    | 8027.777  | 617.651   | AK023764  | 1218.888  |
| NM_016216 | 3096.749  | 2199.118  | L07738    | 1733.269  | 1270.812  | AK024082  | 670.327   |
| AK001649  | 1131.727  | 566.011   | Z48054    | 703.906   | 575.773   | Z27405    | 24560.318 |
| NM_016638 | 6891.73   | 5877.454  | H90415    | 3748.718  | 2409.523  | AK023412  | 2426.068  |
| AB018274  | 6461.067  | 6777.972  | AA676470  | 17303.969 | 13846.256 | NM_014617 | 16957.92  |
| NM_005871 | 4957.178  | 3495.198  | M38258    | 713.057   | 707.283   | AK074682  | 6326.542  |
| NM_007042 | 2146.983  | 1475.395  | AA457155  | 23659.313 | 28103.371 | AK024513  | 1815.549  |
| NM_016333 | 10069.963 | 4822.381  | BM014365  | 1035.006  | 1097.933  | BC036692  | 2594.642  |
| BE875028  | 2388.396  | 1700.594  | H91842    | 861.941   | 926.573   | AJ009640  | 3734.951  |
| AK000511  | 2952.496  | 2096.474  | U78045    | 2809.579  | 2412.266  | Y11163    | 709.535   |
| AF121255  | 3365.772  | 4365.019  | AA878561  | 62056.785 | 58037.074 | AF147340  | 1524.773  |
| NM_005494 | 4489.152  | 2230.339  | BF688309  | 992.628   | 946.09    | AF035308  | 5775.528  |
| NM_004953 | 5053.49   | 5378.9    | AI538525  | 2553.116  | 3107.772  | NM_014054 | 940.816   |
| NM_012199 | 1393.41   | 3186.034  | NM_000623 | 631.071   | 433.694   | AK021840  | 19257.438 |
| AL049682  | 1116.977  | 1422.033  | NM_000941 | 1698.241  | 1821.643  | AF003738  | 727.257   |
| NM_005528 | 4646.295  | 3470.783  | SR1       | 58348.77  | 51438.141 | AF086480  | 1465.586  |
| NM_007006 | 15284.146 | 10995.949 | SR3       | 36393.875 | 32940.199 | AK000806  | 57579.012 |
| AL137346  | 5066.345  | 1265.03   | SR5       | 4429.444  | 2899.268  | NM_016471 | 4056.088  |
| NM_017756 | 2812.998  | 2593.044  | SR7       | 3247.339  | 25039.52  | NM_005364 | 8421.74   |
| NM_005793 | 5495.025  | 3535.688  | SR9       | 11755.147 | 2198.236  | AK023482  | 5436.877  |
| NM_004901 | 842.298   | 865.331   | CY3Cy5    | 7501.171  | 371.04    | AF087964  | 274.799   |
| U77088    | 1456.063  | 1335.351  | U62858    | 2810.367  | 4177.466  | AL157423  | 816.068   |
| NM_006721 | 16756.734 | 10202.813 | AF035121  | 718.341   | 779.142   | AK023176  | 1349.472  |
| NM_016282 | 3184.304  | 2195.15   | NM_014432 | 1603.293  | 1496.245  | AL161991  | 10659.725 |
| NM_002765 | 1606.158  | 2077.065  | NM_001558 | 1136.351  | 989.529   | D17032    | 3597.67   |
| NM_001905 | 2973.199  | 3821.925  | NM_006953 | 2289.715  | 1298.339  | AL137292  | 923.25    |
| AF292100  | 3902.967  | 2550.371  | NM_002530 | 605.482   | 606.745   | NM_017941 | 1383.275  |
| NM_003434 | 27307.932 | 18882.678 | U96173    | 3008.403  | 2961.71   | BE900527  | 1616.394  |

|           |           |           |           |           |           |             |           |
|-----------|-----------|-----------|-----------|-----------|-----------|-------------|-----------|
| AF024698  | 64516.473 | 57008.613 | NM_018941 | 1354.589  | 1320.667  | D28384      | 55942.16  |
| BE904617  | 16201.372 | 13674.825 | NM_020241 | 632.615   | 853.481   | AF118079    | 12821.379 |
| AF024694  | 1815.661  | 2227.405  | BE730585  | 990.95    | 1729.678  | AF277572    | 1812.801  |
| AF091081  | 3959.347  | 2917.965  | NM_001980 | 640.829   | 862.199   | AL365413    | 7334.248  |
| AK001758  | 3355.165  | 3070.034  | NM_005954 | 832.224   | 978.237   | NM_005258   | 3254.055  |
| U90842    | 517.132   | 747.648   | NM_012471 | 507.935   | 498.539   | NM_000440   | 5671.709  |
| AK025076  | 924.673   | 1167.352  | NM_001321 | 4143.797  | 4070.418  | NM_001297   | 1851.524  |
| AF086325  | 1982.338  | 1845.967  | AB018264  | 4830.969  | 3833.532  | NM_004403   | 3401.462  |
| NM_004928 | 761.627   | 528.223   | NM_006911 | 750.927   | 633.711   | X64993      | 749.953   |
| AJ001904  | 1370.305  | 911.426   | U92544    | 5964.636  | 4582.225  | NM_004434   | 6615.454  |
| AF075022  | 1135.298  | 854.131   | NM_019644 | 1106.344  | 1021.5    | NM_006268   | 534.372   |
| AF075060  | 4409.364  | 1313.952  | NM_006791 | 3557.058  | 2735.332  | NM_016230   | 4240.341  |
| AF147436  | 1069.702  | 1081.959  | AJ278348  | 8996.454  | 7088.837  | NM_001083   | 1376.401  |
| AK021441  | 756.748   | 941.748   | NM_015872 | 683.044   | 501.894   | AK023966    | 3197.861  |
| AK026018  | 1027.065  | 1309.12   | AI285199  | 2526.377  | 1917.442  | AK025702    | 1440.546  |
| AF085846  | 2269.256  | 3178.11   | AK023106  | 1670.398  | 2416.999  | NM_018958   | 1742.302  |
| AK023901  | 5035.869  | 3933.415  | NM_016730 | 48147.074 | 48760.965 | AK022038    | 1159.184  |
| AL109705  | 1123.99   | 873.221   | AL035297  | 1678.582  | 1572.74   | AL137389    | 833.055   |
| AF147392  | 767.032   | 825.868   | NM_004408 | 8878.375  | 4126.404  | AF085866    | 1448.019  |
| AF088057  | 4277.832  | 3111.929  | AJ131244  | 1090.836  | 1609.464  | CY3Cy5      | 3862.079  |
| AF086255  | 10243.505 | 9130.539  | NM_002532 | 5800.063  | 5422.462  | AA397813    | 6829.548  |
| AK022660  | 621.276   | 390.148   | NM_012388 | 4298.438  | 4213.798  | W68291      | 5003.474  |
| AF088051  | 1966.876  | 1361.191  | NM_016651 | 578.787   | 681.924   | N64384      | 1445.624  |
| AF086366  | 656.141   | 719.061   | NM_001671 | 806.346   | 1172.005  | H-X 53655 I | 666.04    |
| AF086360  | 3967.321  | 3123.446  | NM_019843 | 3157.844  | 3356.434  | H-U 05770 I | 6133.605  |
| AF087993  | 2391.085  | 2389.037  | NM_016192 | 5343.363  | 5102.351  | H-M 65199   | 3068.638  |
| AF035282  | 2305.841  | 2149.312  | BE878426  | 55068.461 | 53110.93  | H-M 32315   | 1654.948  |
| AK021966  | 2795.061  | 4348.184  | NM_001745 | 7470.967  | 8749.489  | H-V00536M   | 665.371   |
| AB018292  | 11089.139 | 8515.889  | NM_003825 | 8394.422  | 10685.143 | H-D85429M   | 2384.487  |
| AF085971  | 606.858   | 555.289   | AK025006  | 14675.794 | 12898.87  | BF439832    | 2302.933  |
| AF147302  | 1071.292  | 646.513   | AF218014  | 10348.004 | 12239.454 | BG819162    | 726.322   |
| AF085929  | 1553.835  | 1563.299  | NM_006678 | 2360.72   | 2921.422  | NM_017532   | 3707.818  |
| AK001126  | 1627.017  | 1497.736  | AY007729  | 34622.414 | 28420.842 | SR2         | 65863     |
| AF085976  | 3519.479  | 2523.57   | NM_014424 | 472.556   | 493.412   | SR4         | 16702.756 |
| AF075104  | 6461.59   | 7128.525  | AF159092  | 1182.518  | 917.071   | SR6         | 2293.495  |
| AL133025  | 769.717   | 754.098   | BC007318  | 1778.56   | 1901.884  | SR8         | 8451.405  |
| AL137402  | 13716.987 | 12986.742 | M36693    | 1925.67   | 1569.585  | SR10        | 24852.822 |
| AL137617  | 2316.858  | 2104.144  | NM_016292 | 5977.526  | 8835.007  | CY3Cy5      | 3069.653  |
| AL359568  | 23912.443 | 16141.537 | NM_002601 | 2732.053  | 1810.718  | NM_004447   | 1479.563  |
| AL133564  | 4618.708  | 3658.88   | NM_005898 | 8062.706  | 10825.872 | NM_001204   | 885.538   |
| AL137428  | 876.125   | 686.493   | NM_002889 | 42990.113 | 48854.316 | NM_012116   | 1574.842  |
| AL157462  | 1212.724  | 860.428   | AF078866  | 1464.612  | 1251.523  | NM_000020   | 2030.378  |
| AL359602  | 4469.328  | 3411.443  | BF311880  | 11393.357 | 6959.458  | NM_000956   | 129.668   |
| NM_018190 | 20545.9   | 16683.693 | NM_000078 | 702.509   | 478.838   | NM_002442   | 1113.361  |
| AK026794  | 954.643   | 1276.249  | NM_016075 | 518.104   | 806.338   | AB033091    | 9580.711  |
| AK022259  | 58133.191 | 53661.719 | NM_001360 | 3984.12   | 11914.945 | NM_004557   | 2910.454  |
| AK022461  | 764.534   | 1059.532  | AK026656  | 5341.768  | 6272.361  | NM_014757   | 2965.079  |
| NM_016010 | 1666.448  | 1856.809  | AJ276207  | 6264.185  | 7084.153  | NM_017893   | 502.767   |
| AF070647  | 13728.902 | 10315.056 | AB011131  | 13089.159 | 9153.239  | NM_001584   | 896.053   |
| AF116649  | 915.113   | 328.261   | NM_000751 | 8318.963  | 7237.28   | NM_012258   | 15568.848 |
| AF174394  | 3200.871  | 3255.737  | NM_014849 | 4036.073  | 3212.155  | AF272357    | 1149.02   |
| AF144054  | 691.242   | 718.379   | NM_001042 | 7810.909  | 6189.197  | NM_016372   | 18899.316 |
| AK021876  | 9275.226  | 7082.333  | NM_012229 | 2246.698  | 3285.944  | AB020705    | 803.708   |

|           |           |           |           |           |           |             |           |
|-----------|-----------|-----------|-----------|-----------|-----------|-------------|-----------|
| AK022017  | 796.586   | 439.404   | NM_005071 | 933.021   | 860.19    | NM_00298C   | 593.735   |
| AK022160  | 2568.97   | 2066.206  | AB023147  | 13455.451 | 12141.246 | NM_01588E   | 648.827   |
| AK021935  | 1630.59   | 1067.559  | NM_016615 | 8908.412  | 11051.819 | BG491613    | 2782.94   |
| AK022187  | 4329.319  | 3880.497  | NM_00563C | 2410.455  | 2035.735  | NM_00272E   | 948.54    |
| AK022337  | 1485.525  | 1428.846  | NM_012201 | 1509.424  | 1869.258  | NM_00045C   | 641.082   |
| AK026847  | 658.669   | 800.214   | AK022385  | 15202.019 | 21386.678 | NM_00044E   | 501.931   |
| AK023048  | 972.028   | 920.579   | NM_002775 | 1615.688  | 2347.545  | NM_004513   | 10504.171 |
| AK026891  | 810.964   | 1078.439  | AK024584  | 3450.569  | 3055.439  | NM_00170E   | 9541.979  |
| AL137562  | 2627.919  | 2152.704  | NM_003504 | 10709.529 | 5723.106  | NM_017735   | 1526.265  |
| M90355    | 61607.746 | 48859.223 | NM_01329E | 6146.438  | 4207.679  | AB033044    | 2253.413  |
| AK022495  | 2052.885  | 1608.352  | NM_007267 | 2372.283  | 3768.935  | AB014564    | 335.185   |
| AK021632  | 847.89    | 523.608   | Z36816    | 1308.099  | 1048.99   | NM_02023C   | 1118.139  |
| AK026373  | 14621.923 | 10259.916 | NM_005865 | 3664.26   | 5245.852  | NM_006762   | 35239.285 |
| AK021581  | 1102.349  | 1245.009  | NM_006413 | 9017.132  | 8313.657  | NM_01643C   | 956.529   |
| AK021744  | 875.855   | 754.723   | NM_017684 | 610.596   | 577.258   | BE382905    | 733.154   |
| NM_01843C | 3227.977  | 3242.911  | AK025542  | 2528.962  | 2408.926  | AK022558    | 1762.727  |
| AL110200  | 689.487   | 907.219   | AF207547  | 1093.241  | 1062.766  | NM_000809   | 288.523   |
| AL133640  | 818.878   | 743.325   | NM_00276E | 4863.669  | 5547.958  | NM_000824   | 515.114   |
| AJ012502  | 8844.486  | 5875.256  | NM_003691 | 1926.905  | 2006.074  | AK023915    | 3682.955  |
| AK021722  | 927.33    | 1411.816  | NM_00295C | 16162.409 | 17560.678 | AK026842    | 489.438   |
| AF147445  | 2254.66   | 2287.893  | NM_00231E | 2549.227  | 2471.586  | NM_002395   | 1453.272  |
| Y10508    | 12387.255 | 15582.683 | NM_001433 | 695.019   | 568.819   | NM_016271   | 2472.911  |
| NM_005182 | 41463.371 | 45989.809 | NM_003134 | 60490.738 | 47172.895 | NM_016619   | 1879.635  |
| D17074    | 1013.056  | 1729.788  | NM_004314 | 4629.459  | 3920.926  | NM_014481   | 469.098   |
| AF039944  | 10083.714 | 15313.693 | NM_018247 | 11809.783 | 6624.801  | U22172      | 1854.586  |
| AJ276252  | 929.953   | 512.641   | NM_017979 | 5239.469  | 5172.8    | AB032960    | 1487.086  |
| AK021716  | 6306.56   | 4579.885  | NM_019644 | 1129.439  | 1097.745  | NM_014264   | 2112.711  |
| AK025035  | 8903.815  | 7086.623  | NM_006791 | 2844.557  | 2259.881  | AF020089    | 1479.622  |
| AK002085  | 2705.317  | 2948.95   | AJ278348  | 3692.043  | 3847.9    | NM_006257   | 1282.291  |
| AL133618  | 2117.805  | 3081.184  | L07738    | 2472.928  | 3039.224  | NM_016281   | 7036.163  |
| AJ131610  | 5117.413  | 4664.231  | Z48054    | 635.497   | 1472.217  | NM_004734   | 11856.504 |
| S50207    | 1082.29   | 1066.891  | H90415    | 4483.1    | 2116.915  | AK024793    | 1979.305  |
| AF119872  | 7405.628  | 7807.354  | AA676470  | 20756.613 | 15447.924 | AF208291    | 1400.093  |
| AK023255  | 24402.504 | 32478.617 | M38258    | 716.194   | 671.878   | NM_01588E   | 815.499   |
| NM_002622 | 12552.756 | 10615.104 | AA457155  | 24578.043 | 26571.383 | NM_004262   | 297.575   |
| AK026101  | 6069.201  | 3586.919  | BM014365  | 906.119   | 876.69    | AA397813    | 8359.952  |
| AK022194  | 16064.05  | 8813.479  | H91842    | 667.115   | 548.924   | W47350      | 735.958   |
| AF085963  | 1396.544  | 1245.023  | U78045    | 3180.699  | 2946.203  | AF097935    | 281.856   |
| AK021436  | 1621.264  | 1282.502  | AA878561  | 61978.949 | 58704.098 | W68291      | 4524.104  |
| U58664    | 1202.557  | 990.452   | BF688309  | 1220.699  | 958.07    | N64384      | 1618.506  |
| AF085937  | 1752.658  | 1229.4    | AI538525  | 2383.109  | 2856.895  | H-X 53655 I | 625.274   |
| AL137569  | 2617.395  | 2252.033  | NM_000623 | 842.539   | 461.397   | H-U 05770 I | 6102.083  |
| AK021920  | 4294.699  | 3253.092  | NM_000941 | 1691.691  | 1949.209  | H-M 65199   | 4202.009  |
| AK022375  | 1402.372  | 882.775   | AF222980  | 2731.64   | 2251.345  | H-M 32315   | 2449.946  |
| NM_00337E | 27125.48  | 39766.359 | AK026758  | 2431.779  | 2044.785  | H-V00536M   | 844.994   |
| AL110194  | 3823.835  | 5703.589  | NM_014424 | 573.774   | 1068.448  | H-D85429M   | 2907.786  |
| AF138860  | 810.463   | 409.852   | AF159092  | 1138.914  | 1659.15   | BF439832    | 2927.766  |
| NM_006687 | 1250.909  | 1097.134  | BC007318  | 1677.059  | 2270.021  | BG819162    | 1312.621  |
| NM_013301 | 705.606   | 1279.69   | NM_002601 | 3222.92   | 2210.833  | NM_017532   | 3662.737  |
| NM_017673 | 1522.78   | 1030.994  | U62858    | 3112.372  | 6963.656  | M38449      | 2211.559  |
| AB046857  | 830.748   | 968.249   | AF035121  | 240.598   | 450.359   | AB033044    | 2483.593  |
| AK024408  | 8991.08   | 7439.645  | NM_014432 | 1815.163  | 1808.822  | AB014564    | 612.604   |
| AF086307  | 7431.139  | 6976.148  | NM_00155E | 1166.368  | 945.112   | NM_02023C   | 1107.762  |

|           |           |           |           |           |           |           |           |
|-----------|-----------|-----------|-----------|-----------|-----------|-----------|-----------|
| NM_00539C | 1387.666  | 1274.15   | NM_006953 | 2231.875  | 1447.404  | NM_006352 | 685.734   |
| CY3Cy5    | 9724.2    | 624.408   | NM_00253C | 465.949   | 383.629   | NM_01643C | 562.83    |
| L07738    | 2891.217  | 1734.54   | U96173    | 2808.203  | 2696.303  | NM_004447 | 1679.968  |
| Z48054    | 831.552   | 230.227   | NM_018941 | 910.814   | 909.907   | NM_001204 | 1189.371  |
| H90415    | 884.284   | 738.537   | NM_020241 | 464.055   | 512.419   | BF131321  | 558.155   |
| AA676470  | 3401.089  | 2090.575  | BE730585  | 578.109   | 565.528   | NM_012116 | 1937.804  |
| AA457155  | 2239.57   | 2879.969  | NM_00198C | 643.793   | 996.769   | NM_00002C | 2629.425  |
| BM014365  | 887.758   | 589.377   | NM_005954 | 1026.157  | 966.725   | NM_000956 | 170.962   |
| H91842    | 1131.943  | 657.681   | NM_001321 | 4520.083  | 4529.721  | NM_002442 | 1099.3    |
| U78045    | 1225.5    | 772.14    | AB018264  | 5351.548  | 5409.812  | AB033091  | 9937.376  |
| AA878561  | 62794.809 | 56940.133 | NM_006911 | 612.205   | 571.914   | NM_004557 | 4369.802  |
| BF688309  | 2071.495  | 2451.845  | U92544    | 6194.018  | 4685.532  | NM_014757 | 3893.108  |
| AI538525  | 4135.309  | 3973.074  | NM_012229 | 2244.03   | 5011.457  | NM_017893 | 564.798   |
| NM_000623 | 742.171   | 818.33    | NM_005071 | 1290.772  | 3172.146  | NM_001584 | 1084.871  |
| NM_000941 | 4257.237  | 3011.15   | AB023147  | 6524.313  | 6969.733  | AF272357  | 1148.208  |
| SR1       | 63854.883 | 60037.434 | NM_016615 | 10609.81  | 13717.116 | NM_016372 | 17880.9   |
| SR3       | 52346.992 | 55027.824 | NM_00563C | 1953.078  | 2119.124  | AB020705  | 700.295   |
| SR5       | 6580.773  | 4958.384  | AK023106  | 995.57    | 1481.077  | NM_014333 | 864.241   |
| SR7       | 8883.358  | 41029.551 | NM_01673C | 53721.277 | 49200.16  | NM_00045C | 726.391   |
| SR9       | 38097.91  | 5283.333  | AL035297  | 1969.804  | 1787.845  | NM_000448 | 474.572   |
| CY3Cy5    | 11516.084 | 520.288   | NM_004408 | 9894.406  | 4180.309  | NM_004513 | 11658.451 |
| U62858    | 3996.183  | 3153.964  | AJ131244  | 858.314   | 1404.328  | NM_001708 | 9120.7    |
| AF035121  | 133.878   | 354.632   | NM_002532 | 6001.555  | 5574.943  | AF208291  | 1124.191  |
| NM_014432 | 2263.907  | 1658.839  | NM_012388 | 4695.242  | 4257.936  | NM_002335 | 68.203    |
| NM_001558 | 1884.12   | 316.69    | NM_016651 | 641.106   | 727.339   | BE382905  | 752.225   |
| NM_006953 | 1287.168  | 755.468   | NM_019843 | 3353.814  | 3427.188  | NM_001701 | 211.172   |
| NM_00253C | 655.871   | 528.849   | NM_016192 | 5800.652  | 5095.171  | AK022558  | 1755.311  |
| U96173    | 931.402   | 889.281   | BE878426  | 56331.426 | 50853.492 | NM_000824 | 739.448   |
| BE730585  | 637.556   | 1012.042  | NM_001745 | 7572.255  | 9335.343  | NM_017532 | 2536.161  |
| NM_005954 | 1940.312  | 1996.209  | NM_003825 | 8258.595  | 9214.396  | M38449    | 1910.721  |
| NM_012471 | 688.104   | 619.82    | AK025006  | 14505.721 | 14704.044 | AK026842  | 804.03    |
| NM_001321 | 5546.145  | 5944.087  | AF218014  | 9436.078  | 10791.926 | NM_002395 | 1827.062  |
| AB018264  | 7248.584  | 5771.802  | NM_006678 | 3035.803  | 4296.088  | NM_004255 | 376.049   |
| NM_006911 | 1316.417  | 1549.931  | AY007729  | 34375.027 | 26963.943 | NM_016271 | 3149.838  |
| U92544    | 2689.284  | 2757.271  | NM_001433 | 290.973   | 617.747   | NM_016619 | 1656.183  |
| NM_019644 | 1431.568  | 1009.647  | NM_003134 | 54319.547 | 47862.156 | NM_014481 | 529.683   |
| NM_006791 | 3929.895  | 3562.776  | NM_004314 | 4138.268  | 3776.305  | U22172    | 2447.466  |
| AJ278348  | 13484.986 | 11246.09  | NM_018247 | 7398.295  | 4412.154  | NM_016281 | 6357.779  |
| NM_015872 | 750.985   | 748.461   | NM_005898 | 8732.599  | 11873.67  | NM_004734 | 10848.032 |
| AI285199  | 4239.429  | 2849.618  | NM_002889 | 48060.578 | 48310.309 | AK024793  | 1705.2    |
| AK023106  | 1684.759  | 1521.138  | AF078866  | 987.059   | 684.169   | NM_012255 | 19490.314 |
| NM_01673C | 22755.109 | 23683.975 | NM_000078 | 775.224   | 458.496   | AF272357  | 1883.495  |
| AL035297  | 1650.919  | 1675.561  | NM_00136C | 4284.527  | 10108.675 | NM_016372 | 16851.471 |
| NM_004408 | 8100.833  | 3432.598  | AK026656  | 7187.984  | 6448.05   | AB020705  | 662.139   |
| AJ131244  | 1485.519  | 1256.092  | AJ276207  | 5505.015  | 4631.384  | NM_00298C | 489.081   |
| NM_002532 | 1896.282  | 2646.678  | AB011131  | 13857.741 | 9251.612  | NM_015886 | 626.783   |
| NM_012388 | 2542.295  | 1680.277  | NM_000751 | 10402.535 | 9965.369  | BG491613  | 2919.561  |
| NM_019843 | 945.794   | 785.345   | NM_014849 | 1883.974  | 1443.846  | AA397813  | 8778.548  |
| NM_016192 | 2223.56   | 1511.591  | NM_001042 | 3510.777  | 2784.734  | W47350    | 770.087   |
| BE878426  | 38828.961 | 36493.848 | NM_000623 | 1106.701  | 1654.623  | AF097935  | 103.83    |
| NM_001745 | 5952.451  | 5657.004  | NM_000941 | 838.487   | 842.587   | W68291    | 5860.417  |
| NM_003825 | 9160.162  | 9721.26   | AF222980  | 2489.605  | 2135.754  | N64384    | 2146.981  |
| AK025006  | 9452.057  | 17914.092 | AK026758  | 2308.508  | 2164.475  | H-D85429M | 1994.862  |

|           |           |           |           |           |           |           |           |
|-----------|-----------|-----------|-----------|-----------|-----------|-----------|-----------|
| AF218014  | 10912.072 | 12992.727 | NM_012201 | 715.248   | 617.74    | BF439832  | 2000.254  |
| NM_006678 | 3181.159  | 3785.392  | AB046774  | 776.381   | 622.018   | BG819162  | 977.361   |
| AY007729  | 26191.037 | 30726.523 | AK022385  | 23041.816 | 22416.982 | NM_002728 | 1043.682  |
| NM_014424 | 1236.245  | 950.216   | NM_002775 | 958.046   | 885.012   | NM_000450 | 639.778   |
| AF159092  | 1523.032  | 1324.68   | AK024584  | 2910.574  | 2331.552  | NM_004513 | 7509.377  |
| BC007318  | 2456.504  | 1891.257  | NM_003504 | 11351.56  | 5193.277  | NM_001708 | 7524.794  |
| M36693    | 4900.217  | 2594.993  | NM_013298 | 5119.534  | 3825.721  | NM_017735 | 1186.08   |
| NM_016292 | 4423.603  | 11191.385 | NM_007267 | 2133.534  | 2838.186  | AB033044  | 1898.757  |
| NM_002601 | 5474.241  | 2450.921  | AK022830  | 340.769   | 782.723   | AB014564  | 430.13    |
| NM_005898 | 8881.063  | 10680.13  | Z36816    | 956.218   | 496.117   | NM_020230 | 1026.226  |
| NM_002888 | 30925.74  | 35016.734 | NM_005865 | 5070.895  | 4610.537  | NM_006352 | 448.518   |
| AF078866  | 1751.8    | 1959.532  | NM_006413 | 8340.92   | 5166.405  | NM_016430 | 622.01    |
| BF311880  | 1183.404  | 1106.758  | AK025542  | 1616.813  | 1630.238  | NM_004447 | 1469.434  |
| NM_000078 | 909.537   | 376.988   | AF207547  | 990.056   | 915.979   | NM_001204 | 1106.383  |
| NM_016075 | 989.886   | 225.926   | NM_002768 | 3510.152  | 4503.938  | BF131321  | 777.511   |
| NM_001360 | 1733.15   | 5614.216  | NM_003691 | 1003.387  | 1335.208  | NM_012116 | 2630.843  |
| AK026656  | 1726.791  | 2061.58   | NM_002950 | 9324.524  | 10431.146 | NM_000020 | 3642.439  |
| AJ276207  | 3800.436  | 4430.428  | NM_002318 | 2106.398  | 1979.433  | NM_017893 | 545.283   |
| AB011131  | 7106.799  | 5075.68   | NM_001321 | 3360.17   | 2976.702  | NM_001584 | 858.376   |
| NM_000748 | 409.755   | 685.504   | AB018264  | 4709.089  | 4889.58   | NM_000808 | 417.478   |
| NM_000751 | 10246.876 | 8880.177  | U92544    | 3979.158  | 2920.637  | NM_014264 | 2557.649  |
| NM_014848 | 2887.472  | 2369.788  | NM_019644 | 837.263   | 756.952   | AF020089  | 1605.666  |
| NM_020041 | 959.941   | 467.81    | NM_006791 | 1846.642  | 1574.035  | NM_006257 | 1242.743  |
| NM_012228 | 3664.052  | 5051.399  | AJ278348  | 8765.729  | 7586.115  | NM_016281 | 5871.111  |
| NM_005071 | 891.345   | 1257.781  | L07738    | 2126.127  | 1258.244  | NM_004734 | 10054.491 |
| AB023147  | 17323.154 | 14823.092 | H90415    | 2714.211  | 1551.83   | AK024793  | 1284.208  |
| NM_016615 | 12691.278 | 12118.321 | AA676470  | 12793.067 | 11187.832 | AF208291  | 1424.108  |
| NM_005630 | 2199.671  | 2150.757  | AA457155  | 16241.664 | 16671.869 | NM_001701 | 506.625   |
| NM_012201 | 2717.813  | 2148.886  | U78045    | 2014.24   | 1845.797  | AK022558  | 1997.928  |
| AB046774  | 1553.372  | 564.769   | AA878561  | 56964.832 | 52882.965 | AK026842  | 193.248   |
| AK022385  | 15862.644 | 13687.842 | BF688309  | 1271.311  | 966.806   | NM_004258 | 877.44    |
| NM_002775 | 288.271   | 896.126   | AI538525  | 1554.054  | 2055.451  | NM_016271 | 3233.327  |
| AK024584  | 1850.992  | 1670.114  | NM_003825 | 5974.524  | 7809.358  | NM_016618 | 1952.678  |
| NM_003504 | 807.052   | 2187.3    | AK025006  | 11877.183 | 13406.413 | NM_014481 | 569.516   |
| NM_013298 | 1644.723  | 1181.576  | AF218014  | 9225.645  | 10518.665 | AB032960  | 1828.6    |
| NM_007267 | 2199.58   | 1559.528  | NM_006678 | 2880.737  | 4221.088  | NM_017675 | 1209.713  |
| Z36816    | 1085.223  | 938.922   | AY007729  | 26556.672 | 24264.799 | NM_015991 | 500.224   |
| NM_005865 | 2146.007  | 1630.04   | AF159092  | 926.382   | 987.692   | NM_002342 | 2516.439  |
| NM_006413 | 2247.095  | 2016.452  | BC007318  | 1224.664  | 1320.78   | NM_002184 | 1776.245  |
| AK025542  | 1908.865  | 2134.691  | M36693    | 1870.854  | 1863.255  | NM_014883 | 888.41    |
| AF207547  | 895.401   | 916.176   | NM_016292 | 4451.332  | 7480.075  | NM_003657 | 285.745   |
| NM_002768 | 3804.411  | 3725.238  | NM_002601 | 2362.309  | 1592.921  | AL049296  | 1750.433  |
| NM_003691 | 2368.89   | 2670.403  | U62858    | 3372.633  | 5248.628  | NM_014471 | 19740.984 |
| NM_002950 | 15612.679 | 25587.305 | NM_014432 | 1722.712  | 1385.839  | NM_004397 | 1600.483  |
| NM_002318 | 4127.561  | 3045.736  | NM_001558 | 1302.066  | 1110.797  | NM_020238 | 482.94    |
| NM_003134 | 56665.969 | 53995.379 | NM_006953 | 2258.323  | 1503.809  | D49356    | 303.926   |
| NM_004314 | 4498.057  | 3974.599  | U96173    | 3292.473  | 2922.665  | NM_018578 | 911.695   |
| NM_018247 | 6844.538  | 7604.555  | NM_018941 | 1006.549  | 1057.275  | NM_006201 | 1375.643  |
| NM_017978 | 7437.737  | 5694.88   | NM_001980 | 485.341   | 539.866   | NM_007110 | 1761.646  |
| NM_019644 | 1426.493  | 1277.233  | NM_000751 | 3941.055  | 4182.458  | U50383    | 3120.073  |
| NM_006791 | 3081.3    | 3032.509  | NM_014848 | 2761.735  | 2715.135  | AK025085  | 2423.569  |
| AJ278348  | 11449.824 | 9918.319  | NM_001042 | 5254.523  | 4851.007  | NM_006290 | 886.882   |
| NM_015872 | 834.265   | 772.001   | NM_012228 | 1686.951  | 3135.511  | NM_003680 | 22049.105 |

|           |           |           |           |           |           |           |           |
|-----------|-----------|-----------|-----------|-----------|-----------|-----------|-----------|
| AI285199  | 3120.64   | 2625.569  | NM_005071 | 1043.536  | 1161.83   | AF118124  | 16535.617 |
| AA757170  | 777.509   | 787.95    | AB023147  | 8642.272  | 9566.6    | AK026068  | 1498.963  |
| L07738    | 3339.13   | 2142.493  | NM_016615 | 9674.661  | 12016.931 | J04974    | 15335.221 |
| Z48054    | 931.325   | 774.699   | NM_005630 | 1746.721  | 1522.259  | NM_007058 | 1712.163  |
| H90415    | 1854.867  | 2311.75   | AK023106  | 1027.024  | 1229.458  | NM_000396 | 11025.547 |
| AA676470  | 12250.577 | 9838.251  | NM_016730 | 27607.627 | 31641.824 | NM_001528 | 1723.143  |
| M38258    | 1223.951  | 630.79    | AL035297  | 1447.539  | 1255.293  | NM_007014 | 636.755   |
| AA457155  | 26221.568 | 27361.732 | NM_004408 | 5805.611  | 3422.331  | AL096740  | 940.829   |
| BM014365  | 1203.953  | 1138.555  | AJ131244  | 836.481   | 1100.751  | AF191545  | 593.311   |
| H91842    | 879.868   | 796.223   | NM_002532 | 4395.247  | 4222.986  | NM_014554 | 807.395   |
| U78045    | 3494.36   | 3291.932  | NM_012388 | 3171.241  | 3417.652  | AL137484  | 1146.414  |
| AA878561  | 59705.219 | 57849.867 | NM_019843 | 2106.885  | 2148.999  | AK023968  | 810.134   |
| BF688309  | 990.469   | 924.658   | NM_016192 | 2810.165  | 2868.685  | NM_004652 | 506.231   |
| AI538525  | 4296.733  | 5957.667  | BE878426  | 38972.375 | 38960.352 | NM_006102 | 234.748   |
| NM_000623 | 1300.634  | 1893.915  | NM_001745 | 5325.357  | 6486.095  | AK025425  | 12729.922 |
| NM_000941 | 3939.422  | 3687.193  | AK025542  | 3490.703  | 3509.73   | AK025974  | 14296.887 |
| AF222980  | 3971.657  | 3048.371  | AF207547  | 1331.349  | 1290.874  | NM_001747 | 5629.437  |
| AK026758  | 1499.241  | 1267.174  | NM_002768 | 6015.875  | 8291.542  | NM_001148 | 6598.507  |
| NM_014424 | 1128.142  | 1020.908  | NM_003691 | 1167.276  | 1435.51   | AF242522  | 1598.998  |
| AF159092  | 1380.077  | 1088.96   | NM_002950 | 9191.252  | 10891.228 | NM_004024 | 1160.286  |
| BC007318  | 2391.185  | 1762.629  | NM_002318 | 1692.155  | 1891.644  | X52345    | 9478.768  |
| M36693    | 5205.949  | 3183.161  | NM_003134 | 32067.563 | 26467.785 | NM_006965 | 1647.947  |
| NM_016292 | 3671.685  | 9552.559  | NM_004314 | 2231.759  | 2104.431  | AF027142  | 40203.996 |
| NM_002601 | 3195.842  | 2137.036  | NM_018247 | 7321.962  | 3976.834  | S67970    | 789.796   |
| U62858    | 3973.494  | 2871.065  | NM_017979 | 3538.745  | 3983.644  | AF221520  | 2129.713  |
| AF035121  | 396.843   | 616.873   | NM_005898 | 5680.681  | 8326.457  | NM_006941 | 11833.955 |
| NM_014432 | 2228.606  | 2096.021  | NM_002889 | 25596.184 | 32679.145 | AB037852  | 168.822   |
| NM_001558 | 2539.717  | 832.01    | AF078866  | 1127.958  | 997.791   | NM_004349 | 1885.599  |
| NM_006953 | 1364.93   | 1428.834  | BF311880  | 8312.81   | 5322.213  | NM_002092 | 3737.669  |
| NM_002530 | 717.481   | 629.921   | NM_016075 | 414.785   | 795.94    | NM_018077 | 604.864   |
| U96173    | 3350.885  | 3808.163  | NM_001360 | 2531.84   | 6044.907  | NM_016839 | 14832.047 |
| NM_018941 | 2200.422  | 1754.64   | AK026656  | 5022.778  | 5144.235  | NM_005968 | 55384.359 |
| NM_020241 | 511.558   | 663.912   | AJ276207  | 3361.742  | 3052.266  | AK021416  | 4040.093  |
| BE730585  | 861.167   | 891.597   | AB011131  | 10672.812 | 7498.847  | NM_018471 | 6934.05   |
| NM_001980 | 1095.476  | 1270.288  | AF164794  | 6070.662  | 4821.563  | NM_003819 | 1302.461  |
| NM_005954 | 1881.016  | 2498.759  | AB020656  | 434.805   | 873.295   | NM_016183 | 2539.992  |
| NM_012471 | 775.41    | 689.812   | AK023648  | 4297.036  | 4069.325  | NM_004872 | 3213.417  |
| NM_001321 | 4710.717  | 4791.813  | NM_000412 | 1461.077  | 1669.273  | NM_001958 | 29641.205 |
| AB018264  | 7018.909  | 6863.448  | AF077033  | 2089.837  | 2005.928  | NM_015904 | 3405.809  |
| NM_006911 | 1368.979  | 1333.238  | NM_004991 | 898.871   | 910.483   | NM_001960 | 26109.881 |
| U92544    | 3308.692  | 3465.367  | AF222980  | 2257.711  | 1935.421  | NM_018122 | 1957.761  |
| NM_012229 | 2702.74   | 4100.869  | AK026758  | 1924.125  | 2328.179  | AF035318  | 1218.887  |
| NM_005071 | 774.493   | 1056.42   | NM_012201 | 1163.357  | 1210.082  | NM_015456 | 1881.312  |
| AB023147  | 16104.18  | 13329.328 | AB046774  | 970.215   | 1042.778  | AK025056  | 2258.149  |
| NM_016615 | 11395.935 | 12844.009 | AK022385  | 14421.166 | 17088.965 | AF140710  | 6610.026  |
| NM_005630 | 1907.346  | 2482.532  | NM_002775 | 1340.012  | 1739.384  | NM_012088 | 5562.95   |
| AK023106  | 2527.6    | 3334.835  | AK024584  | 3055.859  | 3349.347  | NM_017947 | 347.086   |
| NM_016730 | 26796.699 | 35492.844 | NM_003504 | 8460.561  | 4861.692  | NM_002494 | 3407.029  |
| AL035297  | 1303.042  | 1500.349  | NM_005865 | 5430.021  | 6397.813  | M58510    | 2917.776  |
| NM_004408 | 6204.889  | 3897.664  | NM_006413 | 5471.346  | 4146.604  | NM_000782 | 1498.259  |
| AJ131244  | 1273.698  | 1733.431  | AL049689  | 1025.711  | 542.631   | BE396003  | 639.854   |
| NM_002532 | 3215.527  | 5608.886  | NM_000216 | 1226.851  | 941.056   | AK023300  | 1342.064  |
| NM_012388 | 4641.041  | 5803.435  | AF135960  | 992.229   | 1393.572  | NM_018082 | 1923.388  |



|           |           |           |           |           |           |           |           |
|-----------|-----------|-----------|-----------|-----------|-----------|-----------|-----------|
| NM_016651 | 498.192   | 791.704   | NM_014216 | 15259.728 | 12521.425 | NM_003904 | 598.99    |
| NM_001671 | 1027.616  | 668.867   | NM_003010 | 910.686   | 729.706   | NM_006234 | 13288.388 |
| NM_019843 | 3042.449  | 4361.068  | NM_006871 | 921.586   | 829.089   | AK026387  | 875.025   |
| NM_016192 | 8308.432  | 8145.761  | NM_019074 | 1611.714  | 2098.53   | AB028987  | 3156.412  |
| BE878426  | 53532.738 | 53834.652 | NM_018494 | 23654.098 | 33723.117 | NM_003594 | 959.472   |
| NM_003825 | 9632.058  | 12281.947 | NM_001115 | 1244.382  | 1073.373  | NM_005521 | 3239.247  |
| AK025006  | 9263.678  | 19391.342 | NM_014921 | 334.246   | 755.238   | AF164438  | 9047.592  |
| AF218014  | 10360.003 | 12329.037 | NM_016581 | 39908.945 | 42588.402 | AK022284  | 1208.262  |
| NM_006678 | 3917.436  | 4759.706  | NM_007183 | 590.249   | 701.783   | AF060937  | 618.761   |
| AY007729  | 26416.729 | 25854.648 | AJ238243  | 8510.939  | 10714.157 | AB040893  | 2171.467  |
| NM_001433 | 604.053   | 454.873   | NM_002751 | 2354.96   | 3264.732  | AK025844  | 2655.355  |
| NM_003134 | 48395.113 | 44476.91  | NM_003816 | 3165.729  | 3143.273  | AL137727  | 915.44    |
| NM_004314 | 3994.384  | 3958.96   | NM_004912 | 3238.473  | 3181.503  | L17327    | 405.122   |
| NM_018247 | 5556.699  | 6206.089  | U79304    | 18232.852 | 16753.727 | AF074986  | 910.754   |
| NM_017979 | 7436.388  | 6430.935  | NM_016267 | 5739.463  | 6913.972  | AF075004  | 572.633   |
| NM_005898 | 9256.966  | 12260.096 | NM_004671 | 6227.538  | 6722.544  | AL049240  | 1618.458  |
| NM_002888 | 29987.479 | 42766.051 | NM_005180 | 8322.024  | 7444.106  | U80773    | 1400.863  |
| AF078866  | 1722.193  | 3021.498  | NM_006526 | 1094.792  | 1211.679  | AK021745  | 1356.172  |
| BF311880  | 2154.273  | 2522.376  | U35622    | 352.523   | 936.337   | L38937    | 3838.672  |
| NM_000078 | 1049.076  | 881.051   | NM_007045 | 981.429   | 1240.829  | AK024327  | 576.235   |
| NM_016075 | 1151.062  | 985.07    | NM_003627 | 1943.964  | 2964.114  | AK021700  | 468.001   |
| NM_001360 | 5514.069  | 14128.858 | NM_012145 | 14817.086 | 9289.703  | AK000801  | 956.28    |
| AJ276207  | 7222.438  | 7853.952  | AF225416  | 4052.56   | 2618.932  | D85433    | 1696.042  |
| NM_014849 | 3651.704  | 3738.553  | NM_002093 | 2601.162  | 2331.699  | AF086184  | 3876.486  |
| NM_001042 | 10576.362 | 8414.564  | AB042555  | 3932.965  | 4574.172  | NM_018275 | 4314.735  |
| NM_020041 | 593.158   | 771.504   | NM_001729 | 863.03    | 615.751   | AL049266  | 958.499   |
| NM_000623 | 955.782   | 577.971   | NM_017763 | 760.964   | 953.916   | AK021560  | 813.109   |
| NM_000941 | 3492.844  | 2330.943  | NM_013975 | 1282.606  | 1328.145  | AF088045  | 248.481   |
| AF222980  | 3049.159  | 1859.721  | NM_003843 | 5000.267  | 6562.553  | AF007149  | 515       |
| AK026758  | 1395.225  | 1150.177  | X73502    | 3551.443  | 3279.811  | NM_014705 | 518.478   |
| NM_012201 | 3195.358  | 2289.339  | NM_020445 | 35013.922 | 41264.613 | AK001469  | 417.837   |
| AB046774  | 1689.056  | 1702.623  | NM_016376 | 5913.027  | 6660.448  | AK021627  | 569.888   |
| AK022385  | 16971.531 | 17530.168 | AB046848  | 5366.893  | 7753.203  | AF085859  | 13324.872 |
| NM_007267 | 4456.563  | 3215.883  | AL133057  | 4613.674  | 4402.858  | AK026307  | 2337.567  |
| AK022830  | 322.963   | 635.222   | U04845    | 3967.394  | 3538.227  | AF075047  | 601.245   |
| Z36816    | 2211.435  | 2214.906  | NM_018103 | 4742.187  | 5479.465  | AL049975  | 2841.439  |
| NM_017684 | 1466.101  | 1639.71   | AK026302  | 2345.68   | 2224.818  | AL080067  | 1402.962  |
| AK025542  | 2296.682  | 3645.982  | NM_012214 | 1206.621  | 1248.96   | AL117464  | 3498.521  |
| NM_003691 | 4691.674  | 5201.563  | AF049656  | 20127.912 | 21320.52  | AL157477  | 1301.304  |
| NM_002950 | 15705.351 | 26098.158 | NM_016598 | 2877.878  | 2911.083  | AB002318  | 239.122   |
| NM_002318 | 4691.227  | 3367.008  | BE874867  | 36924.965 | 34974.16  | AL357535  | 1980.67   |
| NM_005954 | 2216.825  | 1900.818  | AL136719  | 1212.052  | 1402.431  | AK023725  | 389.775   |
| NM_012471 | 829.525   | 235.998   | NM_014109 | 4423.53   | 3483.232  | AK022936  | 1025.427  |
| NM_001321 | 4504.801  | 4200.283  | NM_012160 | 633.753   | 820.326   | AK024385  | 3256.422  |
| AB018264  | 7739.276  | 6384.651  | NM_014248 | 32559.711 | 26981.6   | NM_017709 | 1178.844  |
| NM_006911 | 1311.481  | 880.422   | NM_017785 | 736.433   | 768.543   | AF049615  | 1236.563  |
| U92544    | 3027.715  | 2791.947  | AB020640  | 2170.267  | 2495.118  | NM_014358 | 7847.728  |
| NM_019644 | 1292.565  | 762.531   | D29954    | 5339.215  | 5379.061  | AF009282  | 4221.841  |
| NM_006791 | 3617.173  | 3431.314  | AF007131  | 1495.174  | 1983.293  | AF024704  | 4282.014  |
| AJ278348  | 13442.804 | 12044.561 | NM_006839 | 1238.339  | 1271.486  | AF056431  | 1193.99   |
| H90415    | 2948.382  | 2717.81   | NM_000223 | 656.004   | 647.542   | NM_016412 | 1130.22   |
| AA676470  | 23178.662 | 19961.727 | NM_005851 | 455.808   | 887.404   | AF009293  | 1416.305  |
| M38258    | 1850.581  | 1585.27   | AF119256  | 1409.828  | 977.078   | NM_004158 | 72018.648 |

|           |           |           |           |           |           |           |           |
|-----------|-----------|-----------|-----------|-----------|-----------|-----------|-----------|
| AA457155  | 28217.293 | 28865.592 | X74497    | 1568.102  | 1553.852  | AF056444  | 5049.432  |
| BM014365  | 1342.674  | 2509.573  | U10072    | 774.227   | 857.169   | AK000989  | 1235.289  |
| U78045    | 6328.086  | 4983.122  | NM_002229 | 717.848   | 808.159   | AK002210  | 1732.634  |
| AA878561  | 59193.469 | 61363.313 | S69027    | 1768.983  | 1933.592  | AK001057  | 593.321   |
| BF688309  | 990.068   | 1266.824  | NM_012119 | 2658.803  | 3251.469  | AK021471  | 680.758   |
| AI538525  | 4311.892  | 5277.371  | X99631    | 13354.654 | 16490.125 | AK021709  | 1075.986  |
| NM_003825 | 8971.098  | 7890.237  | NM_001730 | 2348.887  | 3280.09   | AK025109  | 1261.612  |
| AK025006  | 10089.346 | 14111.925 | AB014589  | 1156.976  | 1138.403  | AK026057  | 350.592   |
| AF218014  | 10915.998 | 10478.421 | U37146    | 8478.923  | 14135.23  | AK026267  | 440.991   |
| NM_006678 | 3884.227  | 3636.385  | NM_012086 | 707.596   | 1715.917  | AK026713  | 706.94    |
| AY007729  | 26440.379 | 21759.27  | NM_000991 | 57452.805 | 56482.539 | AJ008117  | 8251.636  |
| NM_014424 | 1359.257  | 795.653   | NM_016034 | 4170.056  | 11138.16  | AJ008147  | 16704.064 |
| AF159092  | 1702.913  | 1303.286  | NM_016067 | 18376.631 | 24527.482 | AK024369  | 2420.683  |
| AF035121  | 362.496   | 953.384   | NM_018285 | 2004.65   | 7254.756  | L43345    | 765.945   |
| NM_014432 | 3557.123  | 3871.145  | AK022393  | 1938.529  | 6427.341  | AF180297  | 3529.258  |
| NM_001558 | 5285.253  | 941.387   | AK025245  | 579.13    | 507.398   | AK023245  | 3803.346  |
| NM_006953 | 1744.247  | 1659.428  | AK025496  | 4679.414  | 5303.596  | AF147303  | 959.867   |
| NM_002530 | 817.376   | 463.929   | NM_005205 | 52061.715 | 44377.512 | AF086224  | 569.257   |
| U96173    | 3717.511  | 3946.325  | NM_001966 | 744.946   | 1129.917  | S56365    | 66889.781 |
| NM_018941 | 1842.743  | 1887.845  | NM_016138 | 1101.233  | 973.306   | AF186017  | 452.392   |
| NM_020241 | 799.38    | 512.71    | Z36833    | 22257.414 | 22166.037 | AK023607  | 1445.993  |
| BE730585  | 1190.522  | 1231.642  | NM_014355 | 1100.338  | 923.154   | AL049997  | 1544.773  |
| NM_001980 | 1746.91   | 1601.696  | M21191    | 11340.582 | 12156.26  | AK024118  | 304.8     |
| NM_000751 | 13224.339 | 11085.941 | AF072810  | 1062.045  | 766.627   | AK024509  | 1616.356  |
| NM_014849 | 4037.979  | 3023.027  | AF174482  | 16104.095 | 25270.354 | AL050185  | 458.213   |
| NM_001042 | 10222.291 | 7255.845  | NM_003528 | 5168.059  | 2335.958  | NM_017847 | 3031.568  |
| NM_012229 | 3702.938  | 4034.067  | NM_017769 | 1422.959  | 955.257   | AL049675  | 2989.875  |
| NM_005071 | 1220.358  | 1170.464  | D85131    | 3624.967  | 4186.408  | AL050151  | 664.923   |
| NM_004408 | 11041.759 | 5806.99   | D30612    | 2209.19   | 2727.221  | NM_003537 | 12731.158 |
| AJ131244  | 2177.387  | 2204.49   | NM_002163 | 5715.789  | 8035.221  | AF056419  | 20349.379 |
| NM_002532 | 4486.432  | 7875.594  | U52097    | 12414.074 | 13288.876 | AF074983  | 1289.633  |
| NM_012388 | 4358.696  | 4488.652  | NM_003416 | 1077.924  | 1950.605  | AK024177  | 2122.241  |
| NM_016651 | 772.19    | 603.045   | AK027237  | 793.778   | 411.798   | AK024827  | 5934.278  |
| NM_001671 | 1090.567  | 882.359   | AK027104  | 1234.218  | 1427.447  | AK021952  | 864.839   |
| NM_019843 | 3126.524  | 3782.808  | AL133090  | 8146.508  | 7418.938  | K01564    | 1523.309  |
| NM_016192 | 6827.024  | 6570.428  | AF085867  | 2515.751  | 1905.663  | AB023175  | 582.755   |
| BE878426  | 50451.371 | 50028.352 | AK026158  | 1861.937  | 2629.666  | AL359563  | 652.619   |
| NM_001745 | 14600.895 | 11954.873 | AF086510  | 1934.18   | 1627.315  | AF085984  | 271.797   |
| AK025542  | 1925.509  | 1703.528  | Z36779    | 1309.829  | 1323.682  | AF086478  | 489.291   |
| AF207547  | 911.777   | 968.224   | NM_002816 | 2948.65   | 1815.353  | AF086022  | 405.098   |
| NM_002768 | 4166.896  | 3945.028  | NM_017822 | 3957.419  | 4050.158  | AK021514  | 8479.668  |
| NM_003691 | 2918.649  | 2789.61   | AK026844  | 2152.481  | 2209.301  | AJ008134  | 880.439   |
| NM_002950 | 14908.34  | 18397.77  | AK026735  | 1906.901  | 2193.558  | L33808    | 29519.441 |
| NM_002318 | 4289.3    | 2913.556  | AL110104  | 18772.449 | 14985.865 | D31886    | 775.444   |
| NM_001433 | 439.192   | 438.987   | AF240633  | 1060.916  | 750.983   | U92024    | 1202.144  |
| NM_003134 | 48195.539 | 41900.406 | AK027056  | 2429.773  | 2702.192  | AK023330  | 2530.928  |
| NM_004314 | 5139.702  | 4100.375  | AK024294  | 1012.747  | 1222.24   | AF075071  | 1985.44   |
| NM_018247 | 6734.019  | 7130.813  | AK091109  | 9457.668  | 10461.811 | AF147428  | 794.008   |
| NM_017979 | 11292.301 | 9240.86   | NM_014967 | 2238.448  | 1534.693  | AF001892  | 497.375   |
| NM_005898 | 11344.246 | 17070.32  | AK022915  | 1741.135  | 1599.196  | X93500    | 1584.55   |
| NM_002889 | 42875.895 | 42055.66  | AF131834  | 589.251   | 462.511   | U79271    | 1440.025  |
| AF078866  | 2551.339  | 3896.14   | AL355711  | 786.868   | 959.673   | NM_019888 | 581.393   |
| BF311880  | 3080.04   | 3370.404  | AK025851  | 1329.935  | 869.295   | AK024609  | 1665.139  |

|           |           |           |           |           |           |           |           |
|-----------|-----------|-----------|-----------|-----------|-----------|-----------|-----------|
| NM_000078 | 1492.507  | 1234.819  | AJ011409  | 3525.644  | 4447.485  | AK023660  | 396.753   |
| NM_016075 | 1485.272  | 1584.932  | AJ227906  | 1712.801  | 1712.851  | NM_018120 | 1377.284  |
| NM_001360 | 4184.196  | 10921.239 | U17633    | 698.81    | 1142.402  | AK026874  | 636.407   |
| AK026656  | 9472.567  | 12432.666 | L10404    | 919.572   | 786.864   | AK024178  | 664.199   |
| AJ276207  | 8287.512  | 8152.407  | AF283776  | 6659.819  | 5939.292  | D17217    | 1090.508  |
| AB011131  | 16728.646 | 10628.159 | L10123    | 21236.125 | 17594.73  | AF088033  | 2040.638  |
| AF164794  | 12825.771 | 5736.955  | D16877    | 2530.266  | 2629.771  | NM_020422 | 754.933   |
| AB020656  | 1173.4    | 682.943   | AL109781  | 2893.341  | 3099.616  | AJ227897  | 851.887   |
| AK023648  | 3644.838  | 3072.367  | AK021895  | 1684.496  | 2400.578  | AK023628  | 236.507   |
| NM_000412 | 1879.296  | 1420.609  | AK000036  | 1317.481  | 1193.664  | AY007156  | 617.081   |
| AF077033  | 3980.834  | 2715.274  | AK022252  | 814.693   | 904.263   | AF086408  | 14339.777 |
| NM_017786 | 1422.816  | 4908.006  | AK000114  | 1545.288  | 1240.039  | AK023979  | 1838.199  |
| NM_004991 | 967.797   | 925.869   | AK000952  | 5928.174  | 6119.625  | CY3Cy5    | 16489.723 |
| AF222980  | 4157.423  | 2721.804  | AK024520  | 1640.832  | 1344.357  | U13738    | 618.559   |
| AK026758  | 3696.616  | 3348.742  | AK024592  | 2866.009  | 2738.218  | AF068236  | 33965.719 |
| NM_012201 | 3865.271  | 2665.491  | AK024904  | 1628.583  | 1408.357  | H94487    | 2623.815  |
| AB046774  | 1775.672  | 1403.4    | AK025030  | 880.273   | 771.787   | BG681747  | 4048.359  |
| AK022385  | 22657.943 | 25926.316 | AK024542  | 2271.425  | 2183.118  | H63077    | 8655.526  |
| NM_002775 | 420.353   | 1937.699  | AB050477  | 1026.173  | 1097.939  | AA679352  | 4081.539  |
| AK024584  | 3486.621  | 4406.579  | AK000152  | 852.596   | 1185.18   | AA437291  | 952.391   |
| NM_003504 | 1804.827  | 5892.638  | AK024300  | 951.34    | 883.42    | X04503    | 2505.058  |
| NM_013298 | 5331.878  | 4843.541  | NM_012129 | 680.533   | 1334.475  | D45917    | 2783.081  |
| NM_007267 | 4575.517  | 3874.213  | AK025716  | 1118.28   | 955.398   | X52001    | 2799.167  |
| AK022830  | 491.553   | 837.148   | AF086202  | 8400.778  | 7344.385  | BI823872  | 1472.85   |
| Z36816    | 2251.969  | 2448.753  | AK022352  | 502.457   | 593.898   | AA430552  | 2502.562  |
| NM_005865 | 5506.279  | 5361.283  | AK023270  | 3639.507  | 3590.354  | X66142    | 986.229   |
| NM_006413 | 6012.102  | 5112.923  | AF085979  | 12603.921 | 9782.415  | R45054    | 1578.919  |
| NM_017684 | 1361.152  | 1359.448  | AK023112  | 2174.469  | 1685.102  | NM_000905 | 6425.088  |
| AL049689  | 3721.428  | 878.476   | NM_017806 | 26292.961 | 48876.488 | SR5       | 3237.756  |
| AF135960  | 1157.058  | 958.958   | L04552    | 302.365   | 1363.083  | SR7       | 4820.661  |
| NM_014216 | 22250.02  | 13406.508 | AL365517  | 2702.478  | 3053.544  | SR9       | 12213.247 |
| NM_003010 | 1327.85   | 1138.04   | AK021988  | 9739.58   | 8543.903  | CY3Cy5    | 14782.69  |
| NM_006871 | 946.154   | 952.499   | AF086494  | 13183.045 | 9961.91   | AF312769  | 1102.629  |
| NM_019074 | 3438.778  | 2793.986  | BI769977  | 1382.324  | 1090.5    | AB020668  | 1200.471  |
| NM_018494 | 43829.676 | 49167.227 | AL137567  | 834.482   | 1133.124  | NM_006203 | 8506.194  |
| AK000006  | 461.093   | 720.148   | AK024913  | 1551.369  | 2820.352  | NM_013261 | 621.694   |
| NM_001115 | 2115.433  | 2114.978  | AB007961  | 3390.96   | 3182.327  | AF309553  | 2098.457  |
| NM_014921 | 1099.245  | 1328.345  | NM_005547 | 2841.645  | 1636.219  | NM_003605 | 877.387   |
| NM_016581 | 53803.91  | 54064.457 | S81973    | 423.452   | 757.065   | NM_003993 | 2337.088  |
| NM_013255 | 3445.031  | 3176.076  | AF119862  | 8302.821  | 6303.501  | NM_005586 | 2181.213  |
| NM_007183 | 757.964   | 1288.393  | U17628    | 2029.389  | 1498.455  | NM_012242 | 735.085   |
| AJ238243  | 15418.447 | 12421.796 | AF119867  | 7403.253  | 7208.094  | NM_006896 | 1007.93   |
| J05046    | 21779.889 | 19094.5   | AL357205  | 6372.013  | 9683.887  | NM_001130 | 39044.688 |
| NM_012318 | 1635.328  | 1601.354  | AF124819  | 564.642   | 506.145   | NM_002975 | 5975.348  |
| NM_002751 | 3489.809  | 3330.112  | D17091    | 817.581   | 805.127   | AK023511  | 1435.084  |
| NM_004291 | 3092.924  | 2527.63   | AL133074  | 2035.138  | 1538.47   | NM_014375 | 10536.922 |
| NM_003816 | 5103.169  | 4878.192  | AF086318  | 11390.168 | 11567.524 | NM_017812 | 1983.094  |
| NM_004912 | 4342.039  | 5031.593  | NM_018121 | 2345.125  | 1241.532  | J03260    | 536.741   |
| U79304    | 14280.371 | 11870.383 | NM_014191 | 603.597   | 769.417   | AB014514  | 1850.119  |
| NM_016267 | 4896.544  | 4718.664  | AK026708  | 3166.901  | 4144.304  | NM_002865 | 2539.568  |
| NM_004671 | 4075.855  | 4096.439  | NM_017903 | 8180.147  | 5990.409  | NM_003566 | 1666.324  |
| U35622    | 633.512   | 1020.599  | NM_000909 | 2747.316  | 2732.213  | NM_003731 | 3479.518  |
| NM_007045 | 1164.762  | 1844.773  | U31737    | 475.167   | 413.192   | NM_005446 | 2045.43   |

|           |           |           |           |           |           |           |           |
|-----------|-----------|-----------|-----------|-----------|-----------|-----------|-----------|
| NM_003627 | 2045.136  | 2548.732  | AK024828  | 1759.436  | 1017.118  | NM_013292 | 1308.105  |
| NM_012145 | 7008.183  | 9081.419  | AF009315  | 2497.448  | 2407.778  | NM_002387 | 501.538   |
| AF305779  | 1051.85   | 906.506   | NM_019013 | 1230.064  | 1745.192  | NM_000069 | 257.505   |
| NM_002093 | 5474.017  | 4323.89   | NM_006783 | 1507.045  | 1451.388  | L08902    | 557.301   |
| AB042555  | 6263.294  | 7450.236  | L37711    | 1475.104  | 1529.243  | J02639    | 1870.327  |
| NM_017763 | 2006.787  | 2996.939  | S70313    | 12245.002 | 20308.422 | NM_007263 | 2872.893  |
| NM_013975 | 2792.695  | 2836.05   | AK021607  | 1453.764  | 952.58    | AF206020  | 2954.82   |
| NM_003843 | 8685.951  | 7105.974  | AK025860  | 716.78    | 1003.774  | NM_014410 | 1636.413  |
| NM_012216 | 1105.806  | 1547.539  | L09268    | 874.741   | 462.878   | NM_002150 | 3017.265  |
| NM_005338 | 2714.814  | 1264.95   | NM_020186 | 5857.374  | 6747.413  | NM_004595 | 3382.966  |
| X73502    | 5917.308  | 4542.24   | AK022424  | 686.38    | 316.271   | NM_020178 | 486.37    |
| NM_020445 | 55269.695 | 54197.867 | AF090947  | 3274.714  | 3870.08   | NM_002264 | 506.339   |
| AB046848  | 5602.495  | 5848.144  | AJ272196  | 6906.71   | 5897.474  | NM_014754 | 6939.074  |
| AL133057  | 10094.108 | 8233.989  | AF116662  | 770.558   | 873.208   | D49387    | 1661.672  |
| U04845    | 16719.461 | 15244.681 | X58162    | 21858.07  | 13391.714 | AF050146  | 3584.069  |
| NM_018103 | 9696.373  | 8890.586  | AK022825  | 1349.482  | 1077.588  | NM_000116 | 1794.604  |
| AK026302  | 6425.386  | 7547.503  | CY3Cy5    | 6348.761  | 401.338   | NM_006698 | 8229.927  |
| NM_012214 | 3077.361  | 1634.469  | L35251    | 4245.52   | 2963.757  | NM_006804 | 6145.921  |
| AF049656  | 18457.273 | 18141.121 | BE910395  | 869.956   | 1037.921  | NM_015969 | 4632.976  |
| NM_000312 | 1400.614  | 1876.771  | N46828    | 1850.35   | 2486.888  | NM_003051 | 1822.538  |
| NM_003963 | 841.245   | 541.183   | BI908302  | 23006.994 | 12474.267 | NM_145342 | 3124.425  |
| NM_016598 | 2585.29   | 2248.423  | AA460969  | 2201.366  | 1580.532  | AJ278917  | 5285.739  |
| BE874867  | 36318.305 | 28687.941 | BG695859  | 724.316   | 966.058   | AK025641  | 20131.834 |
| NM_012160 | 1277.185  | 1608.837  | M85079    | 4529.771  | 3844.173  | NM_001720 | 2117.656  |
| NM_006357 | 55975.031 | 53072.543 | AA457671  | 4195.632  | 9973.602  | NM_018390 | 893.683   |
| NM_014248 | 23229.746 | 32777.27  | X07437    | 4746.448  | 4834.8    | AB037724  | 4864.668  |
| AK027070  | 1245.197  | 2481.774  | NM_000641 | 1758.542  | 1995.382  | AK025086  | 1460.065  |
| AF129533  | 647.154   | 930.389   | AE006466  | 2160.37   | 1824.741  | AK026151  | 7300.254  |
| NM_003341 | 10524.476 | 8229.531  | BC008737  | 31147.377 | 36020.586 | NM_014140 | 3947.522  |
| NM_017785 | 1879.773  | 858.845   | BC011655  | 1401.358  | 1646.457  | NM_002916 | 570.375   |
| NM_006249 | 4569.021  | 3609.658  | BC002396  | 3133.357  | 2447.358  | M20700    | 1909.722  |
| NM_018318 | 1215.658  | 1135.031  | NM_022095 | 2200.321  | 586.762   | NM_001034 | 1443.785  |
| AB020640  | 3157.565  | 4651.363  | SR2       | 38123.371 | 26066.029 | NM_002689 | 889.893   |
| D29954    | 16437.297 | 19784.195 | SR4       | 11820.906 | 8173.727  | NM_017686 | 2106.407  |
| AF007131  | 2221.83   | 3877.696  | SR6       | 1533.208  | 949.075   | BC006287  | 713.744   |
| NM_005851 | 895.302   | 1807.976  | SR8       | 4212.802  | 8755.12   | AB023198  | 1567.55   |
| AF119256  | 936.641   | 1550.859  | SR10      | 16462.139 | 4260.486  | AF304163  | 16205.645 |
| X74497    | 1400.772  | 531.838   | CY3Cy5    | 4063.357  | 198.392   | NM_005231 | 1381.854  |
| U10072    | 1918.21   | 1736.751  | NM_020370 | 709.67    | 750.445   | NM_005412 | 2015.917  |
| AF222749  | 14291.989 | 14050.529 | NM_004767 | 997.236   | 1005.721  | NM_012113 | 1742.854  |
| NM_003410 | 3820.949  | 2178.193  | BF310159  | 3899.069  | 2835.3    | NM_002725 | 583.304   |
| NM_007146 | 2626.079  | 1374.272  | NM_000316 | 471.675   | 485.212   | NM_014375 | 15227.425 |
| NM_002229 | 1071.721  | 644.483   | NM_018986 | 835.49    | 1098.109  | NM_017812 | 3728.126  |
| S69027    | 3320.7    | 2669.038  | AB044934  | 411.014   | 401.93    | AF204173  | 635.997   |
| NM_012119 | 2116.641  | 3997.146  | U27655    | 2898.504  | 3267.428  | J03260    | 1073.319  |
| X99631    | 18360.535 | 15332.52  | NM_003360 | 1323.123  | 910.974   | AF068236  | 31437.848 |
| NM_001730 | 1257.656  | 1558.928  | Z21965    | 24470.949 | 24798.387 | H94487    | 2492.739  |
| AB014589  | 1191.702  | 1507.41   | NM_012427 | 640.93    | 954.466   | BG681747  | 3526.323  |
| AF248649  | 860.247   | 588.349   | AF131857  | 7340.92   | 5920.555  | H63077    | 7549.334  |
| U37146    | 17577.42  | 22484.324 | NM_000852 | 5172.205  | 4687.375  | AA679352  | 3423.238  |
| NM_012086 | 1645.08   | 2947.176  | NM_000399 | 570.534   | 587.271   | X52001    | 727.491   |
| NM_000991 | 58665.176 | 51745.586 | AW797282  | 663.544   | 302.211   | BI823872  | 193.939   |
| NM_016034 | 6664.325  | 18367.098 | NM_002402 | 567.994   | 1824.163  | AA430552  | 1079.074  |

|           |           |           |           |           |           |           |           |
|-----------|-----------|-----------|-----------|-----------|-----------|-----------|-----------|
| NM_001016 | 848.919   | 2656.518  | L09070    | 902.247   | 599.718   | R45054    | 1552.907  |
| AK022393  | 4158.152  | 13476.141 | NM_000062 | 8059.228  | 3406.288  | NM_000905 | 5644.495  |
| AK025496  | 3039.081  | 2932.611  | NM_017877 | 450.412   | 378.733   | AL117398  | 3403.916  |
| NM_005205 | 56171.852 | 43837.969 | NM_009590 | 1921.165  | 2264.464  | AY007158  | 60932.621 |
| NM_001966 | 813.36    | 996.112   | AL133037  | 928.255   | 739.831   | M58050    | 1844.581  |
| NM_016138 | 1469.164  | 1218.513  | NM_020350 | 5644.359  | 2307.433  | NM_007263 | 3185.566  |
| Z36833    | 55283.684 | 46797.047 | NM_000350 | 776.303   | 901.195   | AF206020  | 3957.066  |
| NM_014355 | 1533.745  | 1323.084  | X91103    | 7128.851  | 4368.333  | NM_014410 | 2405.642  |
| M21191    | 28393.398 | 35197.039 | AA419164  | 2343.62   | 2195.865  | AF312769  | 1087.252  |
| AF072810  | 1650.705  | 1129.998  | AL117235  | 821.037   | 1306.141  | AB020668  | 881.427   |
| L19778    | 942.869   | 1110.986  | NM_014822 | 3057.511  | 5947.618  | NM_006203 | 8436.487  |
| AF174482  | 9565.658  | 12988.173 | NM_005296 | 3072.757  | 2259.093  | NM_003605 | 919.423   |
| NM_003528 | 5714.742  | 1201.058  | NM_001337 | 1302.953  | 606.498   | NM_003993 | 366.442   |
| NM_017765 | 895.595   | 906.19    | NM_003611 | 6200.338  | 5596.849  | NM_005586 | 1520.905  |
| D85131    | 9823.138  | 19656.564 | AB014538  | 1538.948  | 2177.467  | NM_012242 | 829.197   |
| D30612    | 3155.517  | 3802.699  | NM_004154 | 977.562   | 275.89    | NM_006896 | 1095.857  |
| U52097    | 17143.838 | 14226.942 | NM_006209 | 1060.796  | 1188.542  | NM_001130 | 39145.613 |
| NM_003416 | 2415.963  | 3493.017  | AK025118  | 5170.565  | 4436.171  | NM_002975 | 5819.126  |
| NM_017594 | 906.256   | 920.47    | NM_000727 | 3070.045  | 2406.99   | AK023511  | 1507.77   |
| AK027237  | 916.597   | 365.382   | NM_002621 | 869.374   | 274.161   | NM_014556 | 1150.325  |
| AK027104  | 1241.888  | 780.5     | NM_005385 | 7646.989  | 8410.994  | AK025886  | 392.14    |
| AL133090  | 15826.625 | 10465.659 | NM_018985 | 1183.947  | 1742.923  | AB014514  | 1958.141  |
| AF085867  | 3364.35   | 1859.245  | NM_006074 | 13163.532 | 13844.912 | NM_003566 | 1668.123  |
| AK026158  | 1124.898  | 933.683   | AF208232  | 3881.299  | 3164.288  | NM_007159 | 4223.74   |
| NM_002816 | 1691.245  | 1597.915  | NM_002988 | 3224.943  | 2786.398  | NM_003731 | 2266.157  |
| NM_017822 | 6388.98   | 7231.287  | NM_004186 | 1129.487  | 999.761   | NM_005446 | 1105.528  |
| AK026844  | 2190.677  | 2338.541  | NM_016258 | 2483.563  | 2273.701  | NM_013292 | 1306.313  |
| AK026735  | 4329.401  | 4519.35   | AF203032  | 4600.211  | 4192.303  | NM_002387 | 1314.702  |
| AL110104  | 16527.094 | 16241.056 | AB014542  | 9064.623  | 10472.307 | NM_000069 | 571.1     |
| AF240633  | 1821.469  | 1881.501  | Y10518    | 34388.457 | 31187.363 | NM_005231 | 1497.37   |
| AK027056  | 9993.32   | 7670.6    | AF155135  | 6754.922  | 3833.177  | AF064729  | 863.572   |
| AK024294  | 1588.947  | 1871.792  | NM_014790 | 1431.691  | 913.98    | NM_005412 | 3646.421  |
| AL110126  | 2748.612  | 2653.283  | NM_003571 | 3476.516  | 4115.321  | NM_012113 | 4317.27   |
| AF052172  | 20187.834 | 14727.95  | AB032965  | 26237.629 | 18099.482 | NM_002150 | 3919.745  |
| AB014573  | 5204.414  | 4138.415  | AF133424  | 2428.648  | 2729.588  | NM_004595 | 3466.25   |
| AK025418  | 861.763   | 703.231   | NM_005003 | 14769.204 | 18797.992 | NM_020178 | 594.001   |
| AK091109  | 9283.187  | 6205.427  | AF084560  | 5296.756  | 5899.268  | D49387    | 1983.172  |
| NM_014967 | 2582.702  | 1353.721  | NM_015715 | 1054.516  | 2590.695  | AF050146  | 4130.349  |
| AK022915  | 1240.643  | 1747.616  | NM_000032 | 2281.577  | 3089.473  | NM_006804 | 6146.491  |
| AF131834  | 789.383   | 694.615   | NM_002083 | 1319.895  | 1119.26   | NM_015969 | 3522.461  |
| AL355711  | 806.058   | 693.808   | NM_002035 | 2944.793  | 2794.156  | NM_003051 | 3225.728  |
| AK025851  | 1034.838  | 463.592   | NM_014900 | 625.345   | 780.856   | NM_145342 | 6456.696  |
| AJ011409  | 6622.988  | 5251.222  | BF342908  | 1399.611  | 1328.982  | AJ278917  | 7340.011  |
| U17633    | 658.135   | 1502.545  | AF118073  | 412.364   | 748.901   | AK025641  | 17313.926 |
| L10404    | 1984.94   | 3330.432  | AK023510  | 1909.84   | 2170.456  | NM_000905 | 8945.422  |
| L10123    | 23108.006 | 21271.332 | NM_004345 | 1733.072  | 2186.76   | AL117398  | 5418.301  |
| AF071507  | 764.762   | 1240.337  | NM_000702 | 16668.781 | 17828.092 | NM_001720 | 2975.934  |
| D16877    | 2828.977  | 2689.549  | X71490    | 13416.148 | 8415.884  | NM_018390 | 863.611   |
| AL049992  | 329.351   | 950.829   | AF257081  | 2140.57   | 1585.74   | NM_017686 | 1993.454  |
| AL109781  | 4127.889  | 3511.073  | NM_001688 | 47145.086 | 27661.891 | AK000800  | 859.545   |
| AK021895  | 1011.609  | 704.292   | NM_003631 | 422.724   | 181.706   | NM_018154 | 712.263   |
| AK000036  | 2121.781  | 3805.147  | NM_000219 | 403.118   | 593.74    | BC006287  | 2625.815  |
| AK022252  | 2354.016  | 2058.205  | NM_002232 | 464.792   | 619.645   | AB023198  | 1448.449  |

|           |           |           |           |           |           |           |           |
|-----------|-----------|-----------|-----------|-----------|-----------|-----------|-----------|
| AK000114  | 2611.01   | 2580.206  | NM_016106 | 3186.392  | 2738.044  | AF304163  | 15312.471 |
| AK000952  | 4094.155  | 4063.929  | NM_014570 | 1559.452  | 2568.349  | NM_006896 | 1114.876  |
| AK024592  | 3819.071  | 3815.249  | NM_014747 | 3361.19   | 2705.768  | NM_001130 | 52937.824 |
| AK024904  | 3022.694  | 3028.134  | Y19240    | 3293.537  | 2286.239  | NM_002975 | 8331.887  |
| AK024542  | 3559.923  | 3065.939  | AF091029  | 4165.462  | 4232.357  | AK023511  | 2930.932  |
| AK024623  | 589.926   | 855.663   | X97074    | 6746.117  | 5904.451  | NM_014556 | 2326.149  |
| AB050477  | 1604.544  | 2025.369  | NM_004135 | 2612.241  | 3108.134  | NM_002725 | 1694.673  |
| AK000152  | 580.342   | 803.286   | NM_000203 | 643.394   | 588.224   | NM_014375 | 18481.617 |
| AK024300  | 1127.184  | 1169.348  | NM_013443 | 2064.004  | 1526.867  | NM_017812 | 4543.023  |
| L09092    | 1416.23   | 875.726   | NM_000925 | 5614.473  | 6664.419  | AA437291  | 576.564   |
| NM_012132 | 2730.24   | 5877.051  | NM_000465 | 2559.629  | 1642.491  | X04503    | 1915.25   |
| AK025716  | 1259.458  | 1815.183  | NM_000123 | 3220.371  | 3859.058  | D45917    | 2290.22   |
| AF086202  | 10246.997 | 9723.675  | AL137501  | 681.601   | 585.916   | X52001    | 2288.207  |
| AK022352  | 946.928   | 1119.747  | BE858979  | 1583.975  | 2005.579  | BI823872  | 528.157   |
| AK023270  | 2423.185  | 2686.638  | NM_000122 | 1986.677  | 1227.558  | AA430552  | 2158.748  |
| AF085979  | 27460.326 | 24871.531 | NM_006712 | 57190.742 | 60242.066 | X66142    | 727.249   |
| AK023112  | 2657.63   | 1878.503  | NM_006240 | 1763.313  | 1458.055  | R45054    | 1135.699  |
| NM_017806 | 19834.262 | 19181.764 | NM_007026 | 2056.705  | 1584.181  | NM_002387 | 1558.728  |
| AK001937  | 27765.787 | 25676.066 | M37712    | 9746.317  | 4872.875  | NM_000069 | 649.691   |
| AL365517  | 696.186   | 904.903   | NM_002648 | 669.853   | 572.164   | L08902    | 1040.566  |
| AK021988  | 5953.393  | 4261.135  | AF070670  | 3053.34   | 2297.53   | J02639    | 4000.302  |
| AF086494  | 11246.383 | 8062.447  | NM_016156 | 3269.695  | 2944.021  | M58050    | 4874.293  |
| BI769977  | 1064.213  | 728.863   | NM_016528 | 1736.721  | 756.287   | NM_007263 | 3579.48   |
| AL137567  | 633.362   | 262.767   | NM_015974 | 1559.803  | 1036.68   | AF206020  | 4328.598  |
| AK024913  | 1653.384  | 2689.357  | NM_014384 | 1212.652  | 853.024   | AF305835  | 595.438   |
| NM_005547 | 3905.539  | 3584.752  | NM_002573 | 3067.604  | 1429.307  | AB020668  | 1300.561  |
| U00942    | 583.503   | 678.235   | AL133037  | 928.928   | 1338.761  | NM_006203 | 9255.291  |
| AF119862  | 8320.145  | 6609.697  | NM_020350 | 5265.35   | 4174.803  | NM_013261 | 480.01    |
| U17628    | 2708.237  | 2476.1    | NM_000350 | 996.41    | 1873.349  | AF309553  | 1548.654  |
| AF119867  | 3363.104  | 3183.022  | X91103    | 9583.872  | 10955.635 | NM_003605 | 774.711   |
| AL357205  | 9777.558  | 15874.375 | AA419164  | 2549.56   | 3634.984  | NM_000100 | 11723.27  |
| AL133074  | 3525.599  | 1792.797  | BE910395  | 1084.557  | 1502.118  | NM_001900 | 69844.234 |
| AF086318  | 10905.71  | 9551.094  | N46828    | 1856.291  | 2829.064  | NM_003993 | 946.484   |
| AF088012  | 1615.264  | 1882.139  | BI908302  | 31748.422 | 19984.07  | NM_018961 | 740.857   |
| NM_018121 | 2124.916  | 1732.086  | AA460969  | 2293.628  | 1952.925  | NM_005586 | 2541.191  |
| AK026708  | 1913.294  | 1355.139  | BG695859  | 959.575   | 984.632   | NM_012242 | 626.994   |
| NM_017903 | 4449.504  | 2946.236  | M85079    | 4682.286  | 4480.814  | NM_003051 | 4072.359  |
| NM_018074 | 1188.246  | 1627.818  | AA457671  | 4039.344  | 9751.276  | NM_145342 | 9013.387  |
| NM_000909 | 2209.098  | 2363.374  | X07437    | 4625.034  | 3901.462  | AJ278917  | 12559.489 |
| U31737    | 1820.064  | 1668.876  | NM_000641 | 2526.432  | 1841.048  | AK025641  | 28094.807 |
| AK024828  | 1273.082  | 1064.698  | AE006466  | 3013.647  | 2402.537  | AK025886  | 550.614   |
| AF009315  | 1157.054  | 1168.056  | BC011655  | 1515.387  | 1980.678  | AB014514  | 1624.46   |
| NM_019013 | 1689.259  | 1709.089  | BC002396  | 2895.097  | 2229.427  | NM_002865 | 2461.867  |
| NM_006783 | 667.712   | 781.617   | NM_022095 | 2098.116  | 621.217   | NM_007159 | 6358.411  |
| L37711    | 682.739   | 605.677   | AF112219  | 11882.493 | 11450.363 | NM_003731 | 3722.988  |
| S70313    | 9332.254  | 9814.637  | NM_014640 | 435.799   | 626.367   | NM_005446 | 2144.746  |
| AK021607  | 868.327   | 1530.381  | Y10518    | 51728.215 | 56924.66  | NM_013292 | 1875.9    |
| L09268    | 1032.264  | 782.206   | AF155135  | 7563.821  | 7369.642  | AK000800  | 1856.91   |
| NM_020186 | 4470.041  | 6496.442  | NM_014790 | 1564.102  | 1212.669  | NM_018154 | 1287.968  |
| AF090947  | 2372.232  | 2335.978  | NM_003571 | 5081.675  | 8072.809  | BC006287  | 4100.479  |
| X58162    | 6328.781  | 5904.658  | NM_020370 | 615.722   | 541.594   | AB023198  | 3124.528  |
| AA460969  | 4755.486  | 4746.999  | NM_004767 | 843.917   | 1016.289  | AF304163  | 21674.076 |
| BG695859  | 3318.943  | 1828.953  | BF310159  | 5311.596  | 5554.271  | NM_005231 | 1922.961  |

|           |           |           |           |           |           |           |           |
|-----------|-----------|-----------|-----------|-----------|-----------|-----------|-----------|
| M85079    | 9838.737  | 7879.346  | NM_000316 | 301.605   | 412.744   | AF064729  | 1361.764  |
| AA457671  | 5192.261  | 15231.69  | NM_018986 | 653.947   | 693.285   | NM_005412 | 3624.786  |
| X07437    | 9445.526  | 10161.734 | AB044934  | 394.264   | 942.366   | NM_002150 | 5216.446  |
| NM_000641 | 3131.522  | 2794.029  | U27655    | 2809.632  | 3058.093  | NM_004595 | 3003.152  |
| AE006466  | 4327.412  | 4563.235  | NM_003360 | 1215.114  | 1087.872  | NM_020178 | 744.074   |
| BC008737  | 55425.133 | 55209.219 | Z21965    | 23231.414 | 20348.613 | NM_002264 | 802.158   |
| BC011655  | 3171.973  | 4013.272  | NM_012427 | 843.119   | 534.603   | NM_014754 | 5149.667  |
| BC002396  | 5845.498  | 4910.446  | NM_000852 | 6656.365  | 5841.646  | NM_006698 | 7094.341  |
| NM_022095 | 2580.287  | 1309.169  | NM_000399 | 476.43    | 573.877   | NM_006804 | 8501.905  |
| SR2       | 61888.586 | 57231.391 | AW797282  | 493.065   | 459.121   | NM_015969 | 5551.539  |
| SR4       | 25414     | 21741.193 | NM_002402 | 517.347   | 2086.991  | NM_004517 | 1401.218  |
| SR6       | 3936.931  | 2503.074  | L09070    | 955.098   | 807.776   | AI017418  | 764.358   |
| SR8       | 12668.122 | 31287.217 | NM_000062 | 8259.388  | 3619.229  | NM_000679 | 2335.143  |
| SR10      | 42049.176 | 13639.142 | NM_009590 | 2156.714  | 2065.163  | AF218006  | 20202.539 |
| CY3Cy5    | 9588.236  | 373.082   | NM_016106 | 3020.891  | 4271.175  | AK026935  | 13337.706 |
| AB044934  | 1291.48   | 1332.184  | NM_014570 | 1635.802  | 3714.211  | NM_020162 | 3755.108  |
| U27655    | 5154.425  | 4877.68   | NM_014747 | 4103.189  | 4403.878  | AK027124  | 28293.932 |
| NM_003360 | 1530.255  | 1496.153  | Y19240    | 3583.236  | 3928.986  | M31212    | 25285.152 |
| Z21965    | 36771.281 | 43765.184 | AF091029  | 5882.154  | 8233.481  | AL117398  | 5924.092  |
| NM_012427 | 871.522   | 1009.542  | X97074    | 17036.432 | 21618.381 | AY007158  | 64345.324 |
| AF131857  | 14486.777 | 12644.285 | AL117235  | 731.586   | 1601.58   | NM_001720 | 4606.671  |
| NM_000852 | 5194.56   | 11770.27  | NM_014822 | 2513.078  | 5523.638  | NM_018390 | 732.408   |
| NM_000399 | 751.866   | 1017.058  | NM_005296 | 3306.015  | 2849.675  | AB037724  | 5392.304  |
| AW797282  | 681.219   | 583.294   | NM_001337 | 1080.866  | 312.668   | AK025086  | 1251.345  |
| NM_002402 | 681.11    | 3629.082  | NM_003611 | 6068.806  | 6685.868  | AK026151  | 7477.424  |
| L09070    | 2017.142  | 2004.985  | AB014538  | 1848.078  | 3132.104  | NM_014140 | 1820.223  |
| NM_000062 | 10633.64  | 7447.402  | NM_004154 | 1126.234  | 359.253   | NM_002916 | 513.689   |
| NM_017877 | 1108.089  | 593.622   | NM_006209 | 1004.731  | 1003.558  | NM_001034 | 1332.09   |
| NM_009590 | 3894.931  | 4246.688  | AK025118  | 4969.201  | 3658.812  | NM_002689 | 991.217   |
| AL133037  | 1031.902  | 1352.786  | NM_000727 | 2641.417  | 1440.249  | NM_017686 | 2340.856  |
| NM_020350 | 8993.689  | 5620.136  | NM_002621 | 1018.017  | 159.499   | AL096734  | 450.132   |
| NM_000350 | 1692.966  | 1794.959  | NM_005385 | 6564.422  | 4785.582  | NM_016645 | 1397.901  |
| X91103    | 12167.14  | 10230.513 | NM_018985 | 1706.276  | 1929.551  | L14723    | 22377.52  |
| AL117235  | 1459.761  | 1832.683  | NM_006074 | 15171.167 | 16921.105 | AK024462  | 10797.075 |
| NM_006209 | 1790.399  | 1728.235  | AF208232  | 3994.762  | 2888.274  | NM_005711 | 1103.887  |
| AK025118  | 5108.529  | 6135.139  | NM_002988 | 3623.89   | 2808.031  | NM_002206 | 2378.348  |
| NM_000727 | 4827.128  | 3881.13   | NM_004186 | 1032.658  | 839.408   | NM_003815 | 1755.525  |
| NM_002621 | 4344.122  | 769.714   | NM_016258 | 2846.861  | 2668.383  | NM_001430 | 4877.442  |
| NM_005385 | 9167.386  | 8643.684  | AF203032  | 4465.411  | 3249.687  | AB010098  | 1183.674  |
| NM_018985 | 2213.726  | 3532.852  | AB014542  | 9038.937  | 9527.492  | NM_018028 | 660.565   |
| NM_006074 | 18032.322 | 27973.928 | AF070670  | 4657.398  | 6326.461  | AF249267  | 46682.895 |
| AF208232  | 7929.144  | 3438.049  | NM_016156 | 3348.19   | 3273.501  | X84939    | 2615.577  |
| NM_002988 | 6239.342  | 4972.672  | NM_016528 | 1698.483  | 1338.279  | NM_018320 | 9415.787  |
| NM_004186 | 1645.516  | 1534.706  | NM_015974 | 1743.579  | 2020.396  | NM_016056 | 2768.017  |
| NM_016258 | 4338.906  | 4105.979  | NM_014384 | 1405.824  | 1304.998  | M65066    | 5749.611  |
| AF203032  | 6477.151  | 5530.609  | NM_002573 | 2385.688  | 2030.298  | NM_016951 | 1851.379  |
| AB014542  | 15853.775 | 19010.305 | AF133424  | 2303.731  | 2399.791  | NM_013251 | 1188.7    |
| NM_014640 | 770.125   | 791.51    | NM_005003 | 16075.186 | 21511.365 | NM_006099 | 2078.858  |
| Y10518    | 51940.406 | 55993.145 | AF084560  | 5099.087  | 5787.671  | AF272379  | 361.891   |
| AF155135  | 10351.164 | 9041.619  | NM_015715 | 937.46    | 2242.542  | NM_012326 | 1013.265  |
| NM_014790 | 2087.311  | 1698.941  | NM_000032 | 3292.314  | 4534.667  | NM_003085 | 13042.695 |
| NM_003571 | 7290.95   | 9177.315  | NM_002083 | 1822.943  | 2321.256  | NM_016084 | 7118.661  |
| AF133424  | 2842.437  | 3042.154  | NM_002035 | 2558.294  | 3201.553  | AF095289  | 3980.32   |

|           |           |           |           |           |           |           |           |
|-----------|-----------|-----------|-----------|-----------|-----------|-----------|-----------|
| NM_005003 | 20682.141 | 24030.721 | NM_01490C | 898.902   | 836.87    | NM_005537 | 3071.201  |
| AF084560  | 5857.079  | 4500.891  | BF342908  | 1269.3    | 937.778   | NM_019003 | 1060.905  |
| NM_015715 | 993.603   | 4027.047  | AK023510  | 2072.307  | 1779.895  | NM_015935 | 3359.042  |
| NM_000032 | 3814.092  | 4464.886  | NM_004345 | 1680.251  | 1272.114  | AF182412  | 685.769   |
| NM_002083 | 1540.843  | 2648.435  | NM_000702 | 23289.072 | 18850.553 | U03106    | 3692.064  |
| NM_002035 | 4503.275  | 4241.159  | X71490    | 14052.669 | 8286.431  | NM_000075 | 4314.417  |
| NM_01490C | 1074.919  | 1017.689  | AF257081  | 1799.379  | 1438.435  | NM_006845 | 8715.607  |
| BF342908  | 1406.299  | 1328.943  | NM_001685 | 50507.48  | 23967.385 | NM_004945 | 2215.868  |
| AF118073  | 619.473   | 552.854   | NM_003631 | 630.945   | 132.895   | NM_020242 | 199.377   |
| AK023510  | 2603.802  | 3071.885  | NM_000219 | 595.067   | 405.352   | NM_001785 | 4565.311  |
| NM_004345 | 2827.804  | 1981.759  | NM_002232 | 516.052   | 516.216   | NM_007175 | 47249.387 |
| NM_000702 | 23079.211 | 26151.969 | NM_022095 | 1214.971  | 578.598   | NM_002209 | 1706.518  |
| X71490    | 18599.285 | 12817.792 | AF112219  | 12241.158 | 15915.675 | NM_002291 | 500.705   |
| AF257081  | 2486.252  | 1556.129  | NM_000521 | 518.443   | 263.14    | AL137477  | 4501.221  |
| NM_003631 | 384.728   | 629.298   | NM_002625 | 428.207   | 553.651   | AK024961  | 3434.289  |
| NM_000219 | 675.894   | 750.085   | NM_004135 | 2767.777  | 3910.06   | NM_016065 | 2483.278  |
| NM_002232 | 503.362   | 835.626   | NM_013443 | 2533.986  | 2180.098  | NM_003595 | 423.386   |
| NM_016106 | 3730.704  | 3733.727  | NM_000925 | 5837.264  | 10916.756 | NM_002409 | 1946.276  |
| NM_01457C | 3660.752  | 4095.629  | NM_000465 | 2881.562  | 1792.292  | NM_004994 | 7187.696  |
| NM_014747 | 4973.683  | 5479.102  | NM_000123 | 3371.36   | 3172.745  | NM_00661C | 3808.956  |
| Y19240    | 4356.034  | 4870.737  | AL137501  | 678.983   | 563.218   | NM_003791 | 3873.627  |
| AF091029  | 8507.392  | 8328.815  | BE858979  | 1429.569  | 999.145   | NM_018017 | 2233.469  |
| X97074    | 12337.869 | 12933.227 | NM_000122 | 2122.411  | 1129.466  | AK001296  | 7380.234  |
| NM_002625 | 548.688   | 570.789   | NM_006712 | 59262.125 | 57471.957 | NM_018365 | 1228.642  |
| NM_004135 | 7433.851  | 5661.41   | NM_00624C | 1287.254  | 941.733   | NM_006585 | 2976.795  |
| NM_000203 | 1397.583  | 613.85    | NM_007025 | 2422.968  | 2028.174  | AK025709  | 600.699   |
| NM_013443 | 3621.015  | 2735.076  | M37712    | 11072.957 | 4654.205  | NM_019015 | 12057.271 |
| NM_000925 | 8573.517  | 10764.395 | NM_002645 | 780.008   | 448.801   | NM_012261 | 5276.941  |
| NM_000465 | 1093.476  | 2120.031  | NM_002402 | 212.322   | 1876.364  | NM_015555 | 1548.303  |
| NM_000123 | 3890.542  | 4132.712  | L09070    | 988.369   | 1305.527  | NM_018415 | 1207.308  |
| AL137501  | 612.513   | 1229.054  | NM_000062 | 7947.582  | 4795.567  | NM_004605 | 2364.273  |
| BE858979  | 2314.527  | 1568.702  | NM_00959C | 1338.454  | 2024.374  | D70833    | 94382.25  |
| NM_000122 | 2873.62   | 1937.173  | NM_02035C | 5219.971  | 3974.137  | NM_016621 | 979.303   |
| NM_006712 | 65707.805 | 56913.863 | X91103    | 10158.819 | 10259.497 | AK026265  | 1596.458  |
| NM_007025 | 3392.12   | 2841.214  | AA419164  | 1574.793  | 2791.248  | NM_006465 | 148.984   |
| M37712    | 10582.76  | 6867.739  | L35251    | 3164.802  | 2722.19   | NM_005681 | 1728.714  |
| NM_002645 | 1456.223  | 875.224   | BE910395  | 1036.8    | 1283.41   | NM_015155 | 1114.096  |
| AF070670  | 4960.127  | 4712.989  | BI908302  | 28858.182 | 14368.279 | AF233453  | 1775.617  |
| NM_016155 | 4929.07   | 4388.165  | AA460969  | 1407.176  | 1003.888  | D87454    | 1287.744  |
| NM_016525 | 1984.366  | 2021.06   | BG695859  | 994.35    | 839.024   | NM_00702C | 304.715   |
| NM_015974 | 2169.036  | 2450.716  | M85079    | 3712.406  | 2092.238  | NM_000713 | 4862.839  |
| NM_014384 | 1832.277  | 1880.126  | AA457671  | 3350.756  | 5941.307  | NM_016055 | 3986.942  |
| NM_002573 | 3623.011  | 3550.113  | X07437    | 3367.232  | 2632.886  | NM_013291 | 1358.14   |
| AL133037  | 1187.355  | 1560.934  | NM_000641 | 1765.434  | 1077.502  | NM_002935 | 2007.625  |
| NM_02035C | 10342.987 | 8686.597  | AE006466  | 1410.73   | 1201.165  | NM_014161 | 1160.225  |
| NM_00035C | 1830.719  | 2082.734  | BC008737  | 18901.689 | 19736.225 | BF312817  | 1555.387  |
| X91103    | 12208.52  | 12535.711 | BC011655  | 1058.163  | 1263.69   | AF086491  | 5342.492  |
| AA419164  | 2844.229  | 6186.746  | BC002396  | 3205.43   | 1966.293  | NM_014855 | 817.005   |
| L35251    | 5131.987  | 3531.6    | AF208232  | 5047.536  | 6273.616  | NM_003492 | 2063.382  |
| BE910395  | 2445.203  | 2496.147  | NM_002985 | 5440.238  | 5494.795  | NM_00378C | 27569.414 |
| N46828    | 3634.171  | 3459.047  | NM_004185 | 1504.602  | 1638.781  | NM_000195 | 13058.284 |
| BI908302  | 47712.074 | 34330.805 | NM_016255 | 2797.751  | 3813.849  | NM_003775 | 49804.273 |
| AA460969  | 4800.602  | 3801.524  | AF203032  | 4243.896  | 5409.766  | NM_001041 | 3136.887  |



|           |           |           |           |           |           |           |           |
|-----------|-----------|-----------|-----------|-----------|-----------|-----------|-----------|
| BG695859  | 3554.342  | 1366.1    | AB014542  | 14767.341 | 21089.803 | AK021445  | 1407.536  |
| M85079    | 10416.862 | 6986.129  | AF155135  | 8167.92   | 8523.109  | NM_017934 | 3806.092  |
| AA457671  | 5515.494  | 12578.596 | NM_014790 | 1167.274  | 1205.338  | NM_014168 | 7859.738  |
| X07437    | 9977.103  | 7934.042  | NM_004767 | 1185.628  | 1138.653  | AF211971  | 1624.032  |
| NM_000641 | 3316.551  | 2265.865  | BF310159  | 2675.33   | 2021.781  | NM_002931 | 781.999   |
| AE006466  | 4671.93   | 3969.442  | NM_018986 | 787.619   | 795.618   | NM_013448 | 35369.383 |
| BC011655  | 3349.43   | 4155.697  | U27655    | 3000.933  | 2810.395  | X65232    | 19415.889 |
| BC002396  | 6209.89   | 4664.29   | NM_003360 | 1067.148  | 778.825   | U17630    | 599.527   |
| NM_022095 | 2642.432  | 1391.023  | Z21965    | 17158.846 | 17029.416 | M33782    | 852.902   |
|           | 93.914    | 390.388   | NM_012427 | 509.998   | 512.704   | NM_017755 | 2343.671  |
| AF112219  | 15813.642 | 16875.992 | AF131857  | 9476.448  | 5805.576  | NM_015696 | 3743.848  |
| NM_000521 | 908.725   | 172.555   | NM_000852 | 4757.428  | 3272.942  | AK022551  | 1490.887  |
| NM_014640 | 755.006   | 855.436   | AF257081  | 2156.03   | 2091.78   | AF085968  | 2086.946  |
| Y10518    | 56756.66  | 56305.996 | NM_001688 | 49524.605 | 49992.996 | AB011136  | 1738.214  |
| AF155135  | 10324.751 | 9603.751  | NM_000219 | 481.982   | 913.511   | AF085898  | 3303.23   |
| NM_014790 | 1781.398  | 1758.882  | NM_002232 | 486.99    | 748.951   | AK023269  | 340.242   |
| NM_003571 | 8228.822  | 11197.864 | NM_016106 | 2681.479  | 3236.91   | AF070564  | 8164.931  |
| AB032965  | 51302.297 | 52435.82  | NM_014570 | 1842.989  | 3969.83   | AK021439  | 18082.775 |
| NM_020370 | 2369.97   | 772.339   | NM_014747 | 2755.531  | 3759.33   | AF052099  | 1590.552  |
| NM_004767 | 1118.925  | 1318.197  | Y19240    | 2320.039  | 3017.571  | AF070543  | 841.337   |
| BF310159  | 7648.609  | 7523.082  | AF091029  | 7564.323  | 12469.983 | NM_014778 | 1941.589  |
| NM_000316 | 575.059   | 735.55    | X97074    | 23835.539 | 31585.523 | AK001171  | 6606.284  |
| NM_018986 | 2082.72   | 1913.809  | AL117235  | 1039.104  | 1396.023  | AK026273  | 29231.578 |
| AB044934  | 955.778   | 947.88    | NM_014822 | 3292.918  | 5370.714  | NM_020250 | 16082.166 |
| U27655    | 5283.604  | 3985.95   | NM_005296 | 4091.834  | 2924.597  | AF055007  | 1306.786  |
| NM_003360 | 1531.505  | 1275.663  | NM_001337 | 1124.708  | 368.891   | NM_012337 | 2006.662  |
| Z21965    | 38170.102 | 38446.586 | NM_003611 | 6748.321  | 6221.041  | AL389879  | 5496.768  |
| NM_012427 | 972.387   | 784.977   | AB014538  | 1299.672  | 1402.921  | NM_016111 | 12202.718 |
| NM_000852 | 5040.738  | 11696.102 | NM_004154 | 1078.644  | 283.919   | AF085958  | 43984.727 |
| NM_000399 | 724.065   | 1071.073  | NM_006209 | 975.225   | 1014.843  | AF086021  | 1957.106  |
| AW797282  | 789.093   | 716.199   | AK025118  | 5422.643  | 3844.571  | NM_017976 | 1930.547  |
| NM_002402 | 607.854   | 3594.083  | NM_000727 | 2794.184  | 1930.004  | U63828    | 2457.842  |
| L09070    | 2023.061  | 2065.692  | NM_002621 | 1116.927  | 237.976   | Z36794    | 1486.88   |
| NM_000062 | 10991.879 | 10168.506 | NM_005385 | 8017.182  | 5568.307  | Z36828    | 5753.275  |
| NM_017877 | 937.589   | 497.144   | NM_018985 | 1681.528  | 1525.624  | AF086121  | 2310.539  |
| NM_009590 | 3571.966  | 3972.828  | NM_006074 | 8034.317  | 8642.628  | AB033100  | 4644.196  |
| NM_016106 | 3779.2    | 4317.475  | NM_006712 | 45099.328 | 51403.012 | AF162715  | 895.733   |
| NM_014570 | 3362.387  | 4815.796  | NM_006240 | 2494.892  | 4653.57   | AL390138  | 2448.87   |
| NM_014747 | 5017.405  | 5847.825  | NM_007026 | 2642.509  | 3592.423  | AL137290  | 6821.381  |
| Y19240    | 4511.878  | 5157.297  | M37712    | 10827.738 | 8320.559  | AK021606  | 958.194   |
| AF091029  | 9589.795  | 10079.078 | NM_002648 | 1026.388  | 1329.206  | NM_014124 | 40304.848 |
| X97074    | 20218.301 | 21696.998 | AF070670  | 3046.14   | 3691.516  | AK024139  | 1141.227  |
| AL117235  | 1379.533  | 1531.985  | NM_016156 | 2211.434  | 2853.199  | AK024206  | 12538.604 |
| NM_014822 | 3952.709  | 8238.408  | NM_016528 | 1028.669  | 1121.646  | NM_006262 | 1249.907  |
| NM_005296 | 5665.426  | 5685.94   | NM_015974 | 1385.242  | 1768.202  | AK026598  | 5879.667  |
| NM_001337 | 4741.465  | 1040.638  | NM_014384 | 1683.426  | 1969.165  | AK023602  | 1426.555  |
| NM_003611 | 8425.18   | 7280.526  | NM_002573 | 1569.656  | 1290.701  | NM_018097 | 6723.072  |
| AB014538  | 2024.472  | 2785.322  | AF133424  | 1361.086  | 1400.708  | AF130043  | 1863.164  |
| NM_004154 | 1411.567  | 537.644   | NM_005003 | 10565.008 | 12784.852 | Y11167    | 1172.085  |
| NM_006209 | 1839.969  | 1396.54   | AF084560  | 4101.716  | 5219.06   | AK026813  | 1646.817  |
| AK025118  | 5027.98   | 5721.22   | NM_015715 | 690.867   | 1589.791  | AK027225  | 1905.709  |
| NM_000727 | 4339.562  | 3137.514  | NM_000032 | 1518.509  | 1758.224  | AK023083  | 5340.033  |
| NM_002621 | 4512.467  | 639.87    | NM_002083 | 1229.669  | 1004.245  | AF116622  | 853.52    |

|           |           |           |           |           |           |             |           |
|-----------|-----------|-----------|-----------|-----------|-----------|-------------|-----------|
| NM_005385 | 8289.211  | 8021.872  | NM_002035 | 2024.932  | 2112.49   | NM_018150   | 3533.978  |
| NM_018985 | 1718.277  | 3062.938  | BF342908  | 1205.232  | 1036.007  | AK026494    | 1093.67   |
| AF208232  | 7524.846  | 4292.064  | AK023510  | 2053.817  | 1549.14   | AK022067    | 635.02    |
| NM_002985 | 6332.915  | 4821.75   | NM_004345 | 1289.245  | 1037.914  | AK023508    | 908.687   |
| NM_004186 | 1530.744  | 1839.303  | NM_000702 | 9229.357  | 8589.724  | AK025840    | 1874.418  |
| NM_016255 | 3978.464  | 4610.951  | X71490    | 14173.069 | 7059.004  | BC024009    | 2571.548  |
| AF203032  | 6400.851  | 6664.969  | NM_014273 | 11756.253 | 14571.794 | AF128543    | 6380.047  |
| AB014542  | 15917.052 | 17879.256 | AF039442  | 659.002   | 979.835   | NM_004185   | 1376.343  |
| AF070670  | 5423.273  | 5748.254  | NM_004680 | 1461.773  | 3214.85   | U84510      | 3323.881  |
| NM_016156 | 4353.251  | 5096.542  | NM_005671 | 6363.258  | 4307.91   | S83198      | 17315.953 |
| NM_016525 | 2107.706  | 2100.073  | NM_017405 | 950.23    | 950.601   | AF052119    | 33089.293 |
| NM_015974 | 2380.62   | 3195.199  | NM_019625 | 3341.544  | 5199.28   | X94290      | 5251.554  |
| NM_014384 | 1968.747  | 1905.506  | NM_006725 | 1593.065  | 2321.05   | AK026685    | 41701.75  |
| NM_002573 | 3812.032  | 3507.814  | NM_006071 | 717.694   | 606.952   | AF090927    | 21204.568 |
| AF133424  | 2781.232  | 3171.806  | NM_012236 | 8558.573  | 11727.071 | AL137642    | 2367.526  |
| NM_005003 | 20233.539 | 27735.488 | AF112219  | 11647.357 | 19554.891 | AL133619    | 2405.278  |
| AF084560  | 5887.167  | 6195.805  | NM_004135 | 2026.236  | 2390.656  | AK025902    | 2003.745  |
| NM_015715 | 988.05    | 3480.648  | NM_013443 | 1577.203  | 1170.408  | NM_005181   | 2730.171  |
| NM_000032 | 3759.295  | 3338.777  | NM_000925 | 4427.153  | 4070.456  | AF143676    | 1847.24   |
| NM_002083 | 1505.36   | 1215.017  | NM_000465 | 1824.171  | 1093.354  | U66044      | 6331.305  |
| NM_002035 | 4467.9    | 3783.263  | NM_000123 | 2224.239  | 2018.514  | AA203665    | 1076.466  |
| NM_014900 | 1126.733  | 712.332   | BE858979  | 1769.478  | 1038.585  | U95646      | 2799.729  |
| BF342908  | 1108.855  | 929.94    | X91348    | 19425.182 | 27717.354 | Y16705      | 2308.147  |
| AF118073  | 533.406   | 510.746   | Z36505    | 951.272   | 1903.064  | AF279775    | 5324.361  |
| AK023510  | 2790.33   | 2988.937  | NM_001854 | 1192.315  | 1731.391  | NM_001821   | 3411.702  |
| NM_004345 | 2688.784  | 1899.805  | NM_017913 | 757.978   | 1013.603  | NM_005647   | 1840.344  |
| NM_000702 | 22977.752 | 27801.572 | NM_002755 | 5463.614  | 6438.486  | X64978      | 8170.517  |
| AF257081  | 2716.971  | 2030.621  | AK024799  | 35329.402 | 41571.828 | NM_000912   | 15760.45  |
| NM_001685 | 54411.703 | 53582.105 | NM_000924 | 3459.59   | 3651.314  | NM_002345   | 750.94    |
| NM_003631 | 426.913   | 721.04    | NM_003330 | 3351.06   | 4492.176  | U57971      | 1212.792  |
| NM_000215 | 613.599   | 842.699   | NM_003647 | 823.024   | 811.797   | X89673      | 1890.793  |
| NM_002232 | 414.907   | 895.334   | NM_001695 | 35471.645 | 33853.992 | AK024593    | 1463.823  |
| NM_022095 | 2511.188  | 1639.749  | NM_018351 | 268.649   | 492.798   | Z83934      | 2224.391  |
| AF112219  | 16253.828 | 20040.611 | NM_147171 | 3611.771  | 2608.888  | NM_018355   | 1172.883  |
| NM_000521 | 1141.614  | 183.497   | AF238083  | 9494.24   | 8445.462  | AK022020    | 3417.946  |
| NM_002625 | 293.076   | 704.651   | NM_016385 | 1329.94   | 1274.694  | AK000263    | 3255.933  |
| NM_004135 | 7351.286  | 6961.027  | AB046783  | 1045.886  | 974.814   | AL049452    | 1146.286  |
| NM_000203 | 1379.341  | 912.467   | NM_000845 | 827.61    | 861.055   | AF070559    | 867.297   |
| NM_013443 | 3325.992  | 2525.317  | NM_004604 | 32393.174 | 35103.07  | D42043      | 5220.636  |
| NM_000925 | 8549      | 9549.31   | NM_014965 | 2375.558  | 2007.809  | CY3Cy5      | 3210.202  |
| NM_000465 | 1160.844  | 1955.668  | NM_004882 | 10756.503 | 10076.479 | BG744154    | 56278.926 |
| NM_000123 | 3512.42   | 3915.775  | AL390148  | 7039.428  | 6891.083  | Z11694      | 5066.792  |
| AL137501  | 965.5     | 792.678   | AK024055  | 1179.433  | 781.983   | BF983177    | 587.995   |
| BE858979  | 1715.874  | 1348.827  | AK025326  | 14017.852 | 23823.932 | Z26317      | 914.352   |
| NM_000122 | 3038.34   | 1784.169  | NM_013376 | 905.292   | 776.936   | X16983      | 5742.117  |
| NM_006712 | 64119.715 | 57778.238 | NM_017964 | 2065.397  | 2099.567  | X56160      | 2443.986  |
| NM_006240 | 2230.14   | 1842.023  | NM_016272 | 282.516   | 512.586   | BG679991    | 1084.88   |
| NM_007026 | 3130.604  | 3416.656  | NM_016425 | 1563.164  | 1909.567  | H-Y 00097 I | 2252.607  |
| M37712    | 11237.124 | 7379.948  | NM_004083 | 4086.785  | 4275.425  | H-M 59964   | 847.9     |
| NM_002645 | 1187.553  | 1067.613  | NM_016035 | 8372.511  | 13084.062 | H-Y 00711 I | 64094.363 |
| AW797282  | 810.649   | 911.712   | NM_001184 | 1632.343  | 1353.595  | H-X 16707 I | 2101.718  |
| NM_002402 | 623.081   | 4313.936  | NM_015530 | 4835.407  | 5797.714  | AL038354    | 18121.324 |
| L09070    | 2301.319  | 2619.45   | NM_016235 | 5147.079  | 5123.176  | R14607      | 831.835   |

|           |           |           |           |           |           |           |           |
|-----------|-----------|-----------|-----------|-----------|-----------|-----------|-----------|
| NM_000062 | 10915.558 | 9297.098  | NM_001758 | 1257.436  | 2573.064  | NM_021976 | 1756.949  |
| NM_017877 | 1138.369  | 631.988   | BE546276  | 1407.922  | 950.131   | SR2       | 63516.164 |
| NM_009590 | 3866.194  | 5567.447  | NM_004725 | 5416.588  | 4063.24   | SR4       | 15470.851 |
| AL133037  | 4463.992  | 5520.261  | NM_015997 | 3371.585  | 4594.456  | SR6       | 2841.547  |
| NM_020350 | 8865.964  | 7896.158  | NM_001167 | 5521.391  | 4869.949  | SR8       | 9779.574  |
| NM_000350 | 2608.754  | 3288.194  | NM_012115 | 2388.699  | 2442.94   | SR10      | 36523.289 |
| X91103    | 11566.349 | 12178.902 | NM_004933 | 13833.09  | 13014.96  | CY3Cy5    | 2265.564  |
| AA419164  | 2916.83   | 5486.549  | M96577    | 8624.394  | 5403.773  | NM_001284 | 13403.338 |
| L35251    | 5127.918  | 3210.803  | NM_013258 | 16376.664 | 15804.474 | NM_003242 | 2845.933  |
| BE910395  | 2477.442  | 2269.823  | NM_003842 | 704.857   | 862.97    | NM_002849 | 319.243   |
| N46828    | 4006.203  | 3721.852  | NM_016184 | 649.753   | 819.216   | U31099    | 780.223   |
| BI908302  | 46092.371 | 29569.053 | L11238    | 3702.026  | 2472.53   | NM_001105 | 2262.63   |
| AA460969  | 4774.226  | 3148.221  | NM_012205 | 2483.3    | 2464.291  | NM_005585 | 382.429   |
| BG695859  | 3945.982  | 1502.025  | K02046    | 1563.849  | 715.61    | NM_002075 | 2150.063  |
| M85079    | 10137.343 | 7546.072  | AK024841  | 633.877   | 1902.126  | Y08756    | 8764.497  |
| AA457671  | 5607.115  | 13622.822 | NM_002217 | 437.057   | 826.509   | NM_005563 | 1974.88   |
| X07437    | 11792.774 | 10377.688 | NM_004995 | 1487.937  | 2052.083  | NM_006439 | 556.193   |
| NM_000641 | 3651.806  | 2790.403  | NM_000386 | 2272.566  | 4231.619  | NM_005102 | 1717.349  |
| AE006466  | 4907.66   | 5104.789  | NM_007231 | 523.659   | 596.164   | NM_004518 | 716.333   |
| BC011655  | 3136.152  | 4205.004  | NM_001190 | 2181.403  | 3364.354  | NM_002719 | 1564.468  |
| BC002396  | 5809.794  | 5941.135  | NM_005271 | 3696.031  | 7014.955  | AV752086  | 694.58    |
| AF208232  | 8323.807  | 5829.396  | NM_015654 | 4990.265  | 4861.545  | NM_016102 | 3179.589  |
| NM_002988 | 7538.707  | 7825.31   | NM_012244 | 1392.777  | 1254.202  | NM_004376 | 1262.849  |
| NM_004186 | 1756.955  | 2227.212  | NM_004341 | 654.132   | 1043.477  | NM_005603 | 6870.236  |
| NM_016258 | 4704.077  | 5267.756  | AB082521  | 5364.008  | 5554.643  | NM_001061 | 404.286   |
| AF203032  | 7039.464  | 7450.143  | AL050182  | 752.385   | 604.641   | AB011100  | 552.909   |
| AB014542  | 18414.305 | 25971.336 | NM_002374 | 750.429   | 1264.964  | U61741    | 627.56    |
| NM_014640 | 1300.883  | 1748.453  | AK026940  | 1236.923  | 1211.62   | NM_012402 | 1556.31   |
| Y10518    | 55133.488 | 53160.527 | AF155117  | 1686.822  | 1645.091  | M76676    | 1096.793  |
| AF155135  | 11453.681 | 11568.125 | AB014527  | 544.32    | 562.453   | NM_003857 | 351.051   |
| NM_014790 | 2070.877  | 2227.685  | NM_004411 | 1343.498  | 612.805   | AL137690  | 900.284   |
| NM_003571 | 8583.297  | 12300.437 | NM_015938 | 4132.933  | 3554.851  | Z83804    | 1637.216  |
| AB032965  | 53398.93  | 54855.445 | AK025985  | 12008.062 | 31258.111 | NM_004386 | 1256.726  |
| NM_020370 | 2606.286  | 817.607   | NM_013256 | 1310.893  | 1596.399  | U67784    | 838.092   |
| NM_004767 | 1016.622  | 1076.443  | NM_004143 | 800.405   | 912.196   | NM_007366 | 1504.077  |
| BF310159  | 7388.099  | 6593.789  | X66087    | 503.911   | 604.472   | NM_000592 | 879.267   |
| NM_000316 | 452.006   | 504.424   | NM_016328 | 4264.506  | 5903.568  | NM_016584 | 5682.479  |
| NM_018986 | 2031.72   | 2294.148  | NM_017544 | 11627.475 | 17158.318 | NM_001815 | 1753.875  |
| AB044934  | 873.979   | 977.454   | NM_003153 | 391.235   | 629.062   | NM_000064 | 6331.359  |
| U27655    | 5139.879  | 4590.879  | NM_016285 | 366.799   | 927.545   | NM_003264 | 2425.634  |
| NM_003360 | 1699.98   | 1651.829  | NM_014707 | 111.502   | 588.679   | NM_006725 | 1595.347  |
| Z21965    | 41915.074 | 44496.852 | AF025771  | 2274.334  | 2496.64   | NM_003326 | 942.703   |
| NM_012427 | 834       | 884.436   | NM_018215 | 888.294   | 611.784   | NM_004568 | 13555.936 |
| NM_000852 | 5006.453  | 11840.812 | AB033110  | 917.391   | 1023.817  | NM_000202 | 693.122   |
| NM_000399 | 796.557   | 1024.904  | NM_005083 | 13174.841 | 13535.82  | NM_005496 | 4192.988  |
| AF257081  | 2987.861  | 2962.949  | NM_007187 | 11462.165 | 7080.515  | NM_016608 | 606.427   |
| NM_001688 | 56888.359 | 54595.055 | NM_018983 | 5691.545  | 4894.757  | NM_004817 | 901.688   |
| NM_000219 | 673.767   | 920.466   | NM_003096 | 6830.867  | 3591.76   | NM_018975 | 5248.371  |
| NM_002232 | 515.141   | 916.371   | NM_007279 | 2265.518  | 2197.503  | AB023215  | 4178.127  |
| NM_016106 | 3778.834  | 5146.766  | BE390833  | 9134.2    | 7397.849  | NM_018073 | 762.871   |
| NM_014570 | 3201.958  | 4690.323  | NM_004730 | 10189.365 | 6322.458  | AL137529  | 952.129   |
| NM_014747 | 5103.713  | 7010.891  | NM_000801 | 1884.855  | 1765.079  | NM_012332 | 1244.591  |
| Y19240    | 5102.556  | 6531.715  | NM_006115 | 19088.26  | 20798.58  | AK026648  | 646.753   |

|           |           |           |           |          |           |             |           |
|-----------|-----------|-----------|-----------|----------|-----------|-------------|-----------|
| AF091029  | 10257.325 | 10529.43  | NM_005801 | 1180.76  | 936.155   | NM_000497   | 670.81    |
| X97074    | 21858.756 | 26220.855 | NM_01819E | 1060.831 | 1082.385  | NM_017421   | 457.536   |
| AL117235  | 1640.181  | 1427.314  | NM_00153E | 16503.41 | 9270.514  | AK025977    | 9512.968  |
| NM_014822 | 3711.829  | 7021.046  | AK027232  | 2984.043 | 4651.869  | AK023130    | 3489.417  |
| NM_00529E | 5289.204  | 4645.354  | AK091117  | 635.339  | 597.307   | NM_000273   | 1047.963  |
| NM_001337 | 4397.374  | 637.917   | NM_003613 | 454.839  | 1131.013  | NM_00289E   | 7508.357  |
| NM_003611 | 8455.532  | 8629.194  | NM_000022 | 1899.031 | 3292.098  | NM_00048E   | 1717.833  |
| AB014538  | 2461.728  | 3104.831  | NM_01657E | 1782.779 | 1988.642  | BE876237    | 1128.499  |
| NM_004154 | 1705.001  | 608.747   | NM_004213 | 1299.593 | 1091.45   | NM_005397   | 322.607   |
| NM_00620E | 2051.153  | 1781.534  | NM_00090E | 1031.582 | 1087.167  | NM_00080E   | 1811.401  |
| AK025118  | 5394.596  | 6449.14   | NM_00048C | 3097.44  | 2219.608  | NM_00632C   | 400.824   |
| NM_000727 | 4776.553  | 3560.665  | AF254084  | 11279.47 | 9010.905  | AB014511    | 2007.004  |
| NM_002621 | 4662.581  | 524.224   | AK022648  | 1152.772 | 725.369   | NM_014252   | 1867.973  |
| NM_01898E | 1860.906  | 3561.766  | AK022976  | 933.073  | 1065.845  | NM_001662   | 2675.518  |
| NM_006074 | 18450.98  | 30744.354 | AB048791  | 2529.104 | 2382.175  | NM_016131   | 4639.476  |
| NM_006712 | 67482.453 | 63318.941 | NM_003107 | 585.846  | 700.284   | NM_006822   | 992.709   |
| NM_00624C | 4858.335  | 3799.973  | NM_006874 | 3247.254 | 1564.865  | NM_012142   | 7902.949  |
| NM_00702E | 3826.284  | 4079.064  | AB046777  | 9469.265 | 3795.538  | NM_01642E   | 1257.987  |
| M37712    | 12551.364 | 9143.772  | AJ251844  | 3096.792 | 4338.058  | NM_018264   | 467.14    |
| NM_00264E | 1424.629  | 1318.014  | NM_00188C | 1683.67  | 1842.242  | NM_01458C   | 703.802   |
| AF070670  | 6965.275  | 6916.795  | AB028943  | 2291.086 | 1941.235  | NM_000153   | 603.475   |
| NM_01615E | 5030.575  | 5424.38   | NM_006194 | 799.208  | 735.715   | NM_002033   | 1160.246  |
| NM_01652E | 2632.484  | 2260.062  | AK001603  | 4600.245 | 4545.315  | AK091794    | 570.775   |
| NM_015974 | 2619.553  | 3646.632  | U71601    | 1706.783 | 1098.038  | NM_004111   | 1419.579  |
| NM_014384 | 2167.388  | 2240.51   | AF042838  | 3523.7   | 7546.177  | AF085966    | 1350.189  |
| NM_002573 | 4429.208  | 3859.117  | AL137511  | 427.027  | 785.587   | NM_00531E   | 1140.474  |
| AF133424  | 3277.297  | 2954.959  | AF075031  | 717.552  | 705.364   | NM_01631E   | 1438.289  |
| NM_005003 | 22634.855 | 26639.893 | AF075062  | 3115.998 | 5546.776  | NM_00336E   | 4655.215  |
| AF084560  | 6617.744  | 5674.028  | NM_00418E | 594.297  | 1109.854  | NM_000057   | 1031.478  |
| NM_01571E | 1099.543  | 3397.561  | AF147381  | 1849.159 | 1907.178  | NM_018343   | 928.996   |
| NM_000032 | 4344.502  | 4312.589  | AB002452  | 746.713  | 977.61    | AK095793    | 1335.758  |
| NM_002083 | 1729.848  | 1878.216  | NM_01484C | 434.819  | 446.749   | NM_003177   | 1992.745  |
| NM_00203E | 4848.479  | 4438.305  | AF088075  | 707.516  | 572.966   | NM_01771E   | 550.583   |
| NM_01490C | 1224.643  | 1070.727  | AK026376  | 1261.704 | 857.749   | AF064078    | 873.428   |
| BF342908  | 1217.944  | 1286.154  | AF088061  | 2096.941 | 2309.272  | AL049688    | 616.748   |
| AF118073  | 481.101   | 836.845   | AF086286  | 2627.337 | 1917.034  | NM_002737   | 1508.62   |
| AK023510  | 2830.925  | 3083.875  | AF086376  | 1018.03  | 719.502   | Z25427      | 1027.129  |
| NM_00434E | 3053.47   | 2447.931  | AK022997  | 3369.326 | 1820.966  | NM_004672   | 3581.244  |
| NM_000702 | 25703.152 | 30721.135 | NM_017617 | 2298.572 | 1814.323  | NM_001353   | 1062.449  |
| X71490    | 19572.553 | 13331.28  | AF131830  | 1030.283 | 650.222   | NM_006214   | 1364.033  |
| NM_014273 | 16998.373 | 16279.058 | NM_014811 | 428.85   | 517.115   | AJ010228    | 3397.648  |
| AF039442  | 2090.436  | 2147.847  | AF147426  | 1132.049 | 1753.425  | NM_00519E   | 4005.929  |
| NM_00468C | 1429.816  | 1535.48   | BC019667  | 6764.416 | 13466.024 | NM_00684E   | 66402.266 |
| AF104260  | 793.739   | 845.127   | AK026026  | 6169.123 | 8967.715  | NM_005603   | 11266.681 |
| NM_005671 | 8212.314  | 5177.531  | AF085941  | 4332.324 | 4310.975  | NM_001061   | 450.475   |
| NM_01740E | 1569.518  | 799.583   | Z69892    | 1408.172 | 1529.488  | AI075338    | 463.895   |
| NM_01962E | 4788.077  | 5011.056  | AF085977  | 418.372  | 798.684   | Z11694      | 4295.263  |
| NM_00672E | 3940.753  | 4097.845  | AF087961  | 1023.876 | 936.92    | BF983177    | 519.153   |
| NM_006071 | 1056.998  | 1129.752  | AL137309  | 1105.913 | 1205.464  | Z26317      | 1059.992  |
| NM_01223E | 8425.785  | 15017.434 | AL137475  | 960.663  | 1275.109  | X16983      | 7685.042  |
| AF112219  | 16701.35  | 17896.424 | AL161956  | 2637.036 | 2153.665  | X56160      | 2207.797  |
| NM_000521 | 1247.035  | 334.95    | AL390176  | 1299.332 | 1117.47   | BG679991    | 967.363   |
| NM_00262E | 715.644   | 506.742   | AL137356  | 718.475  | 1110.663  | H-Y 00097 I | 2616.459  |

|           |           |           |           |           |           |             |           |
|-----------|-----------|-----------|-----------|-----------|-----------|-------------|-----------|
| NM_004135 | 8023.534  | 5488.984  | AL137547  | 1095.675  | 932.568   | H-M 59964   | 842.901   |
| NM_000203 | 1330.456  | 575.752   | AK021994  | 1240.25   | 1034.537  | H-Y 00711 I | 62140.789 |
| NM_013443 | 3957.554  | 2620.695  | AK023802  | 5149.789  | 5556.238  | H-X 16707 I | 2048.789  |
| NM_000925 | 8917.593  | 10804.344 | AF086103  | 583.49    | 575.478   | R14607      | 789.658   |
| NM_000465 | 1644.628  | 2335.408  | AK023158  | 356.62    | 559.216   | NM_021976   | 2492.497  |
| NM_000123 | 4282.667  | 4313.896  | AK000580  | 447.033   | 224.044   | NM_005718   | 4948.347  |
| AL137501  | 791.95    | 660.937   | AF085852  | 1913.468  | 1460.491  | NM_005496   | 1949.717  |
| BE858979  | 2285.315  | 1974.863  | AK023952  | 1791.578  | 2003.653  | NM_016608   | 852.598   |
| NM_000122 | 3141.496  | 2074.197  | AK000787  | 1703.839  | 1677.016  | NM_002858   | 1591.391  |
| U87223    | 2092.851  | 1919.593  | AF090885  | 8312.935  | 8346.271  | NM_004817   | 421.997   |
| X91348    | 27589.924 | 28040.408 | NM_016646 | 544.865   | 550.764   | NM_018975   | 4328.692  |
| Z36505    | 1235.233  | 2769.325  | NM_014082 | 869.65    | 1414.538  | NM_001284   | 16355.886 |
| NM_001854 | 1627.128  | 1887.579  | AF100636  | 742.835   | 805.229   | NM_003242   | 2448.729  |
| NM_017913 | 1539.46   | 1479.68   | AF161366  | 371.172   | 425.291   | U31099      | 656.332   |
| NM_002755 | 9849.442  | 7344.301  | AK022197  | 958.891   | 1759.531  | NM_001105   | 2483.724  |
| AK024799  | 31716.451 | 33094.91  | AF090940  | 322.901   | 646.807   | NM_005585   | 444.01    |
| NM_000924 | 8807.769  | 7216.825  | AK021970  | 743.578   | 487.186   | NM_002075   | 2922.205  |
| NM_003330 | 5283.663  | 7659.332  | AK022066  | 36154.605 | 33178.449 | Y08756      | 9166.012  |
| NM_002481 | 564.811   | 682.763   | AK022224  | 1174.395  | 1224.083  | NM_005563   | 2079.91   |
| NM_003647 | 1269.809  | 1608.151  | AK022359  | 1045.654  | 906.405   | AY007090    | 330.79    |
| NM_001699 | 34494.578 | 34467.824 | AK022000  | 862.867   | 691.344   | NM_004518   | 303.897   |
| NM_018351 | 570.959   | 629.453   | AK022129  | 1301.088  | 1023.988  | NM_002719   | 1745.689  |
| NM_147171 | 3951.739  | 2835.266  | AK022263  | 6978.822  | 7254.426  | AV752086    | 638.834   |
| AF238083  | 10754.059 | 6555.485  | AK022384  | 585.36    | 297.284   | NM_016102   | 3988.823  |
| NM_002962 | 951.793   | 601.447   | AK027198  | 1013.438  | 1053.657  | NM_004376   | 1609.827  |
| NM_016388 | 2964.141  | 2689.592  | AK000257  | 936.953   | 1252.155  | NM_000272   | 271.842   |
| AB046783  | 703.532   | 853.444   | NM_006160 | 9678.685  | 8812.249  | NM_014252   | 1327.58   |
| NM_000845 | 1676.69   | 1140.611  | NM_000529 | 1649.359  | 1989.664  | NM_001662   | 2066.629  |
| NM_004604 | 63967.777 | 57974.969 | AL110159  | 700.285   | 502.819   | NM_016131   | 3459.829  |
| NM_014965 | 5329.915  | 4740.442  | AF009259  | 1241.171  | 1412.621  | NM_006822   | 1406.647  |
| NM_004882 | 18935.059 | 16434.125 | AF009260  | 1040.165  | 946.758   | NM_012142   | 6660.459  |
| AL390148  | 10919.497 | 8984.316  | NM_003079 | 2054.959  | 1134.324  | NM_016429   | 976.47    |
| AK024055  | 5553.852  | 4012.567  | NM_017902 | 1988.064  | 1527.651  | NM_006834   | 2219.043  |
| U10485    | 1040.184  | 991.783   | AL359567  | 796.237   | 1201.273  | AB011100    | 687.553   |
| AK025326  | 10361.909 | 9822.723  | NM_017726 | 1198.104  | 1295.153  | U61741      | 808.075   |
| NM_013376 | 2289.257  | 1233.181  | AK026716  | 882.595   | 523.779   | NM_012402   | 1204.717  |
| NM_017964 | 3091.574  | 3553.387  | AL049325  | 11226.755 | 10224.613 | M76676      | 1064.152  |
| NM_016272 | 527.629   | 421.009   | AK024154  | 13746.802 | 13199.561 | NM_003857   | 513.572   |
| NM_016428 | 1347.741  | 1341.71   | AF086341  | 1337.577  | 1121.237  | AL137690    | 963.911   |
| NM_004083 | 15480.76  | 13527.798 | AK026672  | 1533.914  | 1533.376  | Z83804      | 1819.563  |
| NM_016039 | 14621.631 | 13983.74  | S83282    | 56042.16  | 53426.063 | NM_004386   | 1133.197  |
| NM_001184 | 2645.9    | 2083.963  | AK024164  | 32418.238 | 35143.758 | U67784      | 964.294   |
| NM_015530 | 6897.391  | 9855.897  | AF052130  | 3774.959  | 6073.222  | NM_007366   | 1247.78   |
| NM_016238 | 5458.61   | 4989.289  | AF130090  | 11447.655 | 11300.055 | NM_000592   | 839.049   |
| NM_001758 | 2885.318  | 4496.195  | AL096727  | 1615.609  | 2590.9    | NM_016584   | 4333.247  |
| BE546276  | 1270.185  | 1113.12   | AL080110  | 2072.123  | 2778.711  | NM_001815   | 1485.1    |
| NM_004725 | 5233.093  | 6416.298  | NM_020425 | 990.673   | 1301.014  | NM_000064   | 4837.956  |
| NM_015997 | 5843.267  | 5642.157  | AK024076  | 1808.197  | 2483.258  | NM_003264   | 2564.5    |
| NM_001167 | 10348.711 | 7989.698  | M87940    | 3820.83   | 3319.589  | NM_006725   | 2273.769  |
| NM_012115 | 3376.574  | 4311.676  | L77588    | 924.514   | 1219.191  | NM_003326   | 1307.19   |
| NM_004933 | 40301.313 | 37701.098 | AF086304  | 10577.453 | 9594.083  | NM_004568   | 15880.086 |
| M96577    | 3281.915  | 7031.448  | U61094    | 529.896   | 1218.64   | NM_000202   | 941.128   |
| NM_013258 | 34182.656 | 34154.625 | AB032976  | 520.5     | 823.061   | Z25427      | 738.187   |

|           |           |           |           |           |           |           |           |
|-----------|-----------|-----------|-----------|-----------|-----------|-----------|-----------|
| NM_003842 | 2648.37   | 2184.959  | AF301222  | 15567.63  | 14602.262 | NM_004672 | 2339.904  |
| NM_016184 | 1565.479  | 2009.187  | AF215981  | 6426.595  | 8664.446  | NM_001353 | 1225.51   |
| L11238    | 8631.969  | 7866.923  | NM_000732 | 20326.836 | 17216.598 | NM_006214 | 1168.493  |
| AK025684  | 1186.371  | 1120.147  | AF130044  | 1981.248  | 1700.253  | AJ010228  | 4326.601  |
| NM_012205 | 6751.776  | 6527.867  | NM_013939 | 1444.935  | 1352.908  | NM_005198 | 3380.42   |
| K02046    | 5557.148  | 2656.212  | AB038651  | 2364.334  | 2908.195  | NM_018073 | 820.555   |
| AL110151  | 2239.813  | 1814.136  | AL359603  | 1844.46   | 1706.68   | AL137529  | 1790.036  |
| AK024841  | 2851.189  | 2649.647  | X84838    | 860.392   | 592.712   | NM_012332 | 1228.942  |
| NM_004995 | 5273.236  | 3484.626  | NM_013940 | 1408.098  | 1995.39   | NM_000497 | 720.328   |
| NM_000386 | 4331.531  | 6053.276  | AL117643  | 1997.369  | 2304.172  | NM_017421 | 520.124   |
| NM_007231 | 479.462   | 639.532   | AF075063  | 1143.804  | 1843.607  | AK025977  | 11144.189 |
| NM_001190 | 2695.262  | 3862.308  | AF069135  | 7238.377  | 7173.348  | AK023130  | 3440.083  |
| NM_005271 | 8177.524  | 8715.952  | AK026524  | 2617.271  | 1490.688  | NM_000273 | 745.543   |
| NM_015654 | 8191.006  | 7606.062  | AB011157  | 5652.231  | 4820.041  | NM_002899 | 6804.974  |
| NM_012244 | 1886.271  | 2293.674  | U17632    | 3822.169  | 2278.366  | NM_000486 | 1496.672  |
| NM_004341 | 846.142   | 1671.281  | AK026764  | 2964.928  | 2919.965  | BE876237  | 1038.105  |
| AB082521  | 8310.136  | 6506.328  | AF113700  | 3012.45   | 3847.085  | NM_005397 | 218.951   |
| AL050182  | 1491.236  | 1448.015  | NM_017835 | 10171.133 | 9411.294  | NM_000806 | 1986.488  |
| NM_020040 | 1095.48   | 1156.687  | NM_018347 | 3504.648  | 2583.988  | NM_006320 | 514.646   |
| NM_002374 | 1181.913  | 2189.593  | AF086223  | 533.877   | 479.805   | AB014511  | 1693.692  |
| AK026940  | 2263.479  | 2616.839  | AK024986  | 836.17    | 980.824   | NM_021976 | 1529.054  |
| AF155117  | 3479.57   | 4461.644  | AK026730  | 736.653   | 525.211   | NM_005718 | 3755.987  |
| AB014527  | 702.969   | 885.006   | AK024739  | 1930.109  | 1802.801  | NM_018264 | 755.522   |
| NM_004411 | 1869.98   | 1903.778  | AK098681  | 1769.705  | 1769.483  | NM_014580 | 1005.949  |
| NM_015938 | 5931.499  | 7469.695  | AK026772  | 1907.893  | 1925.874  | NM_000153 | 469.063   |
| NM_000740 | 856.332   | 735.975   | NM_014260 | 15850.102 | 12682.858 | NM_002033 | 893.611   |
| NM_017843 | 474.718   | 477.382   | AK026458  | 745.501   | 434.647   | AK091794  | 779.19    |
| AK025985  | 4351.723  | 8886.935  | AK022266  | 535.924   | 317.456   | NM_004111 | 1652.589  |
| NM_013256 | 1912.707  | 2434.448  | CY3Cy5    | 9338.118  | 692.322   | AF085966  | 1221.895  |
| NM_004143 | 1389.314  | 1770.293  | M74220    | 738.143   | 656.418   | NM_005316 | 1135.767  |
| X66087    | 569.375   | 709.345   | M23254    | 9008.295  | 5934.568  | NM_016316 | 1470.129  |
| NM_016328 | 7810.996  | 9145.738  | BE618539  | 1836.608  | 1447.946  | NM_003369 | 4232.904  |
| NM_017544 | 15362.32  | 16832.85  | R28062    | 2782.432  | 2441.141  | NM_000057 | 874.063   |
| NM_003153 | 1816.763  | 1485.233  | U38545    | 329.543   | 1060.401  | NM_018343 | 1020.25   |
| NM_016285 | 1116.509  | 1584.725  | AI627464  | 3023.91   | 2574.389  | AK095793  | 1217.186  |
| NM_014707 | 588.703   | 1182.93   | BI756258  | 1948.48   | 1931.878  | NM_003177 | 2022.493  |
| AF025771  | 2019.51   | 3176.027  | J04599    | 1199.908  | 1763.037  | NM_017719 | 489.41    |
| NM_018215 | 985.06    | 988.38    | AF110020  | 1452.825  | 1420.418  | AF064078  | 573.565   |
| AB033110  | 881.188   | 914.658   | AA608557  | 9102.965  | 7451.638  | AL049688  | 654.734   |
| NM_005083 | 17337.314 | 13409.523 | AL050095  | 4101.565  | 4780.306  | NM_002737 | 1346.681  |
| NM_007187 | 11683.348 | 9095.68   | U03272    | 1143.158  | 2527.396  | NM_002719 | 1127.846  |
| NM_018983 | 5503.575  | 8778.048  | NM_000664 | 984.736   | 1714.286  | AV752086  | 538.332   |
| NM_003096 | 7604.566  | 6345.521  | SR5       | 3384.567  | 3478.575  | NM_016102 | 5254.964  |
| NM_007279 | 4889.695  | 4903.973  | SR7       | 4395.573  | 31314.439 | NM_004376 | 980.96    |
| BE390833  | 27740.336 | 20607.318 | SR9       | 12115.985 | 2144.371  | NM_006848 | 65276.352 |
| NM_004730 | 13452.962 | 15155.512 | CY3Cy5    | 6809.41   | 578.588   | NM_005603 | 15372.629 |
| NM_000801 | 3733.439  | 3657.481  | NM_014808 | 1513.467  | 2017.3    | NM_001061 | 615.849   |
| NM_006115 | 30771.307 | 29938.832 | AB006627  | 3540.033  | 6930.202  | AI075338  | 717.946   |
| NM_005801 | 3539.055  | 3766.659  | NM_000416 | 3623.873  | 3441.712  | BG744154  | 54569.539 |
| NM_018198 | 2176.156  | 2822.533  | NM_003382 | 589.469   | 1193.169  | Z11694    | 5621.16   |
| NM_001539 | 17375.623 | 18008.375 | NM_002965 | 42127.391 | 4972.046  | BF983177  | 612.822   |
| AK027232  | 2676.493  | 3266.558  | AB007883  | 5347.144  | 6204.362  | Z26317    | 892.401   |
| NM_012204 | 1066.647  | 1108.215  | AK093780  | 5584.367  | 5588.358  | X16983    | 5714.553  |

|           |           |           |           |           |           |             |           |
|-----------|-----------|-----------|-----------|-----------|-----------|-------------|-----------|
| AK091117  | 1743.444  | 1496.421  | NM_007037 | 26130.842 | 29821.715 | X56160      | 2107.737  |
| NM_003613 | 1122.022  | 1655.456  | NM_001649 | 3850.794  | 2019.209  | BG679991    | 927.764   |
| NM_016616 | 238.256   | 612.749   | NM_005492 | 4026.588  | 5958.939  | H-Y 00097 I | 2131.576  |
| NM_000022 | 2599.645  | 4993.816  | AF038196  | 2156.535  | 4291.75   | H-M 59964   | 765.029   |
| NM_016576 | 4579.148  | 5878.376  | NM_004859 | 9721.228  | 15300.369 | H-Y 00711 I | 63991.809 |
| NM_004213 | 1664.08   | 2547.791  | NM_016352 | 1562.46   | 2309.572  | H-X 16707 I | 1772.113  |
| NM_001929 | 53282.129 | 47484.914 | NM_006944 | 941.688   | 723.048   | AL038354    | 18727.129 |
| NM_000906 | 1801.104  | 1579.457  | NM_000070 | 4928.485  | 5590.976  | R14607      | 640.28    |
| NM_000480 | 3187.088  | 2577.868  | NM_001202 | 1775.12   | 1232.944  | NM_000064   | 4818.564  |
| AF254084  | 23438.529 | 20093.375 | AB037804  | 1306.739  | 892.765   | NM_003264   | 1772.154  |
| AK022648  | 1422.082  | 1121.518  | U34249    | 829.778   | 1219.398  | NM_006725   | 2851.583  |
| AK022976  | 1296.669  | 1281.357  | NM_006323 | 7083.229  | 5592.539  | NM_003326   | 1061.465  |
| AB048791  | 3186.004  | 3029.917  | NM_016466 | 1863.894  | 1860.53   | NM_004568   | 11240.859 |
| NM_003107 | 761.016   | 838.365   | NM_001493 | 7350.102  | 7695.041  | NM_000202   | 847.811   |
| NM_006874 | 6135.167  | 3584.586  | NM_014841 | 946.892   | 904.805   | NM_005496   | 4126.258  |
| AB046777  | 8303.139  | 5569.814  | NM_014426 | 1821.307  | 4191.817  | NM_016608   | 1042.934  |
| AJ251844  | 3355.304  | 3989.018  | NM_006816 | 34348.824 | 37197.57  | NM_002858   | 2974.301  |
| D16815    | 1061.879  | 1223.776  | NM_000258 | 15240.388 | 11841.588 | NM_004817   | 764.311   |
| NM_001880 | 2735.844  | 2929.134  | AB033055  | 5941.189  | 4439.609  | NM_018975   | 4904.014  |
| AB028943  | 1910.314  | 2257.289  | AF311287  | 3927.205  | 5637.551  | AB023215    | 6608.537  |
| NM_006194 | 587.44    | 835.522   | NM_003098 | 760.581   | 973.216   | NM_001284   | 17883.557 |
| AK001603  | 3598.526  | 3769.668  | NM_014781 | 2599.423  | 2337.709  | NM_003242   | 3513.872  |
| U71601    | 2644.217  | 2140.401  | BU629989  | 292.856   | 503.434   | U31099      | 580.497   |
| AF042838  | 4710.691  | 4987.58   | X87896    | 778.427   | 1170.058  | NM_001105   | 2625.301  |
| AL137511  | 926.65    | 758.255   | M88310    | 1717.433  | 1544.548  | NM_005585   | 321.385   |
| X91221    | 771.124   | 390.428   | NM_000042 | 2474.748  | 2414.854  | NM_002075   | 1443.106  |
| AF075031  | 1035.472  | 806.434   | NM_003403 | 504.523   | 963.068   | Y08756      | 6425.374  |
| AF075062  | 5563.375  | 8371.795  | NM_016335 | 1552.761  | 2042.188  | NM_005563   | 2039.9    |
| NM_004188 | 936.916   | 1154.084  | NM_003165 | 4178.054  | 3408.612  | AY007090    | 357.103   |
| AF147381  | 4237.384  | 4962.802  | NM_003906 | 11239.603 | 11803.722 | NM_006439   | 471.104   |
| AB002452  | 687.212   | 655.381   | AL359590  | 19211.533 | 20138.621 | NM_005102   | 2068.418  |
| AK027101  | 21131.396 | 21481.158 | NM_002861 | 6667.219  | 7679.04   | NM_004518   | 375.776   |
| AF010236  | 635.663   | 720.305   | NM_003080 | 5151.532  | 5530.753  | NM_005397   | 192.348   |
| AK024358  | 857.147   | 372.825   | NM_002645 | 2487.122  | 2393.742  | NM_000806   | 2846.193  |
| NM_014840 | 891.042   | 639.792   | AB033027  | 2817.283  | 2121.923  | NM_006320   | 419.684   |
| D17085    | 545.793   | 509.614   | AK021805  | 6733.935  | 10147.753 | AB014511    | 1529.688  |
| AF088075  | 863.096   | 717.529   | AB014550  | 2827.012  | 4062.727  | NM_014252   | 1658.705  |
| AK026376  | 1745.492  | 1262.488  | AF320294  | 3969.874  | 4269.328  | NM_001662   | 2875.335  |
| AF088061  | 4457.703  | 3539.764  | AF161436  | 5323.287  | 6227.155  | NM_016131   | 5460.854  |
| AF086286  | 3119.594  | 3065.603  | NM_020402 | 5316.3    | 4903.439  | NM_006822   | 1440.809  |
| AF086376  | 1498.651  | 1787.861  | NM_004299 | 1510.429  | 2558.923  | NM_012142   | 7829.347  |
| AF086410  | 687.046   | 731.285   | NM_001171 | 2207.758  | 1388.747  | NM_016429   | 1211.087  |
| AK022997  | 5428.79   | 5123.703  | NM_002250 | 2556.065  | 2517.598  | NM_006834   | 2330.072  |
| NM_017617 | 4589.552  | 2768.857  | NM_006478 | 845.837   | 464.528   | AB011100    | 719.865   |
| AF131830  | 1741.025  | 1626.987  | AF132734  | 9935.63   | 6781.327  | U61741      | 937.959   |
| NM_014811 | 947.667   | 1252.498  | NM_018379 | 2840.926  | 1823.029  | NM_012402   | 1321.906  |
| AF147426  | 1046.867  | 1307.673  | NM_016403 | 14412.999 | 12284.252 | M76676      | 1020.74   |
| BC019667  | 10750.389 | 21878.861 | NM_015603 | 1182.277  | 1560.73   | NM_003857   | 549.014   |
| AK026026  | 12717.768 | 17503.076 | AK021788  | 747.128   | 620.225   | AL137690    | 822.781   |
| AF085941  | 8353.783  | 10363.833 | NM_001921 | 4515.402  | 5652.71   | Z83804      | 1781.793  |
| Z69892    | 1983.414  | 2596.799  | NM_006230 | 4439.486  | 9604.709  | NM_004386   | 1093.923  |
| AF087961  | 1234.61   | 1162.742  | NM_014699 | 7828.353  | 10118.308 | U67784      | 1050.891  |
| AL137309  | 1873.861  | 1899.518  | NM_013400 | 5810.2    | 7643.957  | NM_007366   | 1468.807  |

|           |           |           |           |           |           |           |           |
|-----------|-----------|-----------|-----------|-----------|-----------|-----------|-----------|
| AL137475  | 1203.527  | 1468.674  | AK026257  | 1702.618  | 2197.205  | NM_000592 | 843.867   |
| AL161956  | 5038.5    | 3789.268  | AK023836  | 4276.649  | 4417.096  | NM_016584 | 4306.958  |
| AL390176  | 2918.366  | 2473.969  | NM_018109 | 2011.436  | 2647.531  | NM_001815 | 1343.233  |
| AL137356  | 1286.781  | 959.392   | AJ299442  | 4378.448  | 5554.167  | AK095793  | 1139.878  |
| AL137547  | 1476.443  | 1040.374  | NM_000129 | 712.948   | 1393.946  | NM_003177 | 2072.417  |
| AK021994  | 1913.522  | 1291.072  | NM_003762 | 3346.994  | 3548.737  | NM_017719 | 563.544   |
| Z70763    | 1256.498  | 909.389   | NM_018446 | 3996.667  | 3766.68   | AF064078  | 934.211   |
| AK023802  | 7016.448  | 7201.987  | NM_000187 | 770.527   | 786.101   | AL049688  | 860.686   |
| AF086103  | 606.938   | 606.765   | NM_014465 | 2285.425  | 3276.702  | NM_002737 | 1986.056  |
| AK023158  | 408.568   | 1102.151  | D87292    | 11057.79  | 5817.64   | Z25427    | 1118.176  |
| AF085852  | 3406.411  | 3734.227  | NM_005498 | 1525.033  | 1734.999  | NM_004672 | 3583.476  |
| AK023952  | 1674.973  | 1568.926  | NM_001202 | 1196.93   | 703.172   | NM_001353 | 2158.54   |
| AK000787  | 1506.697  | 1489.708  | AB037804  | 1448.659  | 948.891   | NM_006214 | 1459.825  |
| AF090885  | 9618.099  | 11281.404 | U34249    | 1044.954  | 1084.434  | AJ010228  | 5204.268  |
| AF161342  | 956.661   | 709.996   | NM_003289 | 50122.75  | 50002.363 | NM_005198 | 4068.269  |
| NM_016646 | 620.475   | 1011.513  | AI200114  | 1649.37   | 1832.319  | NM_018073 | 997.89    |
| NM_014082 | 984.392   | 1245.397  | M74220    | 710.762   | 703.241   | AL137529  | 1645.214  |
| AF100636  | 1735.516  | 1531.08   | M23254    | 9025.204  | 8466.95   | NM_012332 | 1566.306  |
| AF161366  | 692.166   | 562.979   | BE618539  | 1364.711  | 1560.089  | AK026648  | 575.597   |
| AK022197  | 1557.125  | 2994.642  | R28062    | 2340.229  | 2728.949  | NM_000497 | 584.461   |
| AF090940  | 496.338   | 667.455   | U38545    | 497.884   | 1453.88   | NM_017421 | 503.535   |
| AK021970  | 1127.787  | 816.569   | AI627464  | 3557.234  | 3390.99   | AK025977  | 9253.561  |
| AK022066  | 63582.891 | 57943.102 | BI756258  | 2442.872  | 2686.886  | AK023130  | 3794.425  |
| AK022224  | 2061.56   | 1786.026  | J04599    | 1220.844  | 1514.007  | NM_000273 | 738.56    |
| AK022359  | 1147.516  | 1221.572  | AF110020  | 1884.988  | 1321.642  | NM_002899 | 6768.806  |
| AK022000  | 1114.647  | 1177.738  | AA608557  | 8007.228  | 5546.291  | NM_000486 | 1923.278  |
| AK022129  | 2244.212  | 2028.481  | AL050095  | 4010.387  | 3832.306  | BE876237  | 1028.582  |
| AK022263  | 7622.084  | 6837.114  | U03272    | 1053.733  | 1899.658  | NM_014750 | 911.448   |
| AK022384  | 777.488   | 961.742   | NM_000498 | 689.628   | 842.392   | NM_015912 | 409.209   |
| AK027097  | 567.362   | 445.114   | AF075085  | 37341.566 | 25784.277 | NM_000460 | 372.678   |
| AK024613  | 234.386   | 417.422   | NM_005892 | 14251.067 | 6088.01   | AB002339  | 1730.412  |
| AL117437  | 735.397   | 417.554   | NM_000042 | 2001.767  | 1588.573  | NM_005104 | 4638.369  |
| AK027198  | 2663.663  | 2325.67   | NM_005024 | 1475.665  | 2002.975  | NM_006888 | 10278.438 |
| AK000257  | 1122.912  | 1113.261  | NM_003403 | 408.452   | 941.068   | AL137423  | 1914.269  |
| NM_006160 | 7723.785  | 7231.026  | NM_014808 | 1729.807  | 2303.534  | AB018322  | 843.034   |
| NM_000529 | 1230.086  | 834.909   | AB006627  | 2614.43   | 3112.076  | NM_007068 | 11467.087 |
| AL110159  | 776.542   | 835.386   | NM_000416 | 2942.87   | 2061.105  | NM_005718 | 4660.729  |
| AF009259  | 1202.766  | 1188.915  | NM_003382 | 432.416   | 1303.858  | NM_018264 | 857.518   |
| AF009260  | 1808.52   | 1983.699  | NM_002965 | 44246.383 | 9763.742  | NM_014580 | 1049.56   |
| NM_003079 | 2154.289  | 1922.665  | AB007883  | 4971.132  | 8673.463  | AB028998  | 451.051   |
| NM_017902 | 2302.276  | 2524.996  | AK093780  | 5354.714  | 4616.616  | NM_000153 | 918.273   |
| AK021981  | 462.473   | 468.231   | AY009397  | 62966.453 | 61649.109 | NM_002033 | 1293.786  |
| AL359567  | 1187.662  | 1782.718  | NM_007037 | 28548.598 | 30162.43  | NM_004111 | 1427.315  |
| NM_017726 | 2810.681  | 3466.779  | NM_001649 | 3265.708  | 1698.666  | AF085966  | 1328.616  |
| AK026716  | 994.807   | 650.818   | NM_005492 | 3120.726  | 3168.218  | NM_005316 | 1062.395  |
| AL049325  | 9526.574  | 14169.707 | AF038196  | 1895.338  | 4400.792  | NM_016316 | 1437.163  |
| AK024154  | 14747.387 | 12707.667 | NM_016352 | 1763.159  | 3131.829  | NM_003369 | 5109.037  |
| AF086341  | 1608.051  | 1527.107  | NM_005014 | 579.304   | 481.764   | NM_000057 | 1231.501  |
| AK026672  | 2652.342  | 2298.921  | NM_006944 | 989.629   | 1019.114  | NM_018343 | 1467.456  |
| S83282    | 36405.738 | 54163.438 | NM_004407 | 603.245   | 773.635   | X15880    | 56497.551 |
| AK024164  | 27292.744 | 30605.707 | NM_000070 | 7089.135  | 7144.123  | AL137461  | 636.787   |
| AF052130  | 4840.708  | 6204.473  | NM_002250 | 3607.791  | 2301.746  | AF114264  | 1829.717  |
| AF130090  | 13842.588 | 15106.859 | NM_006323 | 5291.428  | 5106.788  | NM_005545 | 562.813   |



|           |           |           |           |           |           |           |           |
|-----------|-----------|-----------|-----------|-----------|-----------|-----------|-----------|
| AL096727  | 1282.078  | 1727.148  | NM_016466 | 950.702   | 906.278   | NM_018972 | 1174.002  |
| AL080110  | 1721.887  | 3070.181  | NM_001493 | 5459.465  | 5996.075  | AB037828  | 788.745   |
| NM_020425 | 1230.295  | 1901.717  | NM_014841 | 747.187   | 1102.7    | AB023210  | 615.148   |
| AK024076  | 2902.36   | 3030.67   | NM_014426 | 1760.787  | 5070.88   | AB037786  | 3687.969  |
| M87940    | 3231.373  | 3378.472  | NM_006816 | 31734.74  | 42157.25  | NM_003648 | 4311.978  |
| L77588    | 1993.78   | 2277.387  | AK026518  | 40945.098 | 40267.23  | AB037735  | 1311.841  |
| AF086304  | 17380.414 | 15855.307 | NM_000258 | 11287.617 | 9870.728  | AK002177  | 3626.412  |
| U61094    | 530.323   | 1587.864  | AB033055  | 5462.588  | 4747.542  | AK024429  | 2390.504  |
| AB032976  | 1898.043  | 2455.931  | AF311287  | 3781.733  | 5140.243  | NM_003496 | 61847.719 |
| AF301222  | 13146.511 | 15676.801 | NM_003098 | 869.045   | 1270.492  | AB000509  | 796.062   |
| AK025114  | 373.279   | 993.528   | NM_014781 | 2827.157  | 3527.696  | AB018314  | 1603.342  |
| AF215981  | 6305.743  | 7905.796  | BU629989  | 407.247   | 500.345   | NM_004378 | 1515.171  |
| NM_000732 | 18309.33  | 20053.045 | X87896    | 1334.278  | 1373.219  | AJ238899  | 755.595   |
| AF130044  | 1237.346  | 1576.338  | M88310    | 2339.953  | 2184.771  | NM_018037 | 488.705   |
| AF087980  | 572.01    | 836.516   | NM_018446 | 3983.448  | 2697.898  | NM_001110 | 2555.142  |
| NM_013938 | 1008.482  | 856.68    | NM_000187 | 919.162   | 630.932   | NM_003222 | 2427.976  |
| AB038651  | 2139.54   | 3269.681  | NM_014465 | 2230.444  | 1574.135  | NM_000841 | 4470.901  |
| AL359603  | 1490.201  | 1936.433  | D87292    | 7861.26   | 3488.441  | NM_000735 | 285.993   |
| X84838    | 725.303   | 787.616   | NM_005498 | 1203.969  | 1531.451  | NM_001245 | 2600.231  |
| NM_013940 | 1091.809  | 1048.547  | NM_016335 | 1457.731  | 2372.374  | NM_003672 | 12129.577 |
| AL117643  | 1541.117  | 1285.522  | NM_003165 | 2918.128  | 2808.258  | NM_002574 | 29677.141 |
| AF075063  | 642.027   | 1302.531  | NM_003906 | 7274.335  | 6749.289  | AJ008139  | 3082.422  |
| AF069135  | 3166.635  | 3164.868  | AL359590  | 24376.951 | 28958.246 | NM_004326 | 1862.604  |
| AK026524  | 3295.73   | 3046.458  | NM_002861 | 5693.453  | 8296.628  | NM_000882 | 271.782   |
| AB011157  | 4903.413  | 5389.357  | NM_003080 | 5035.251  | 4164.249  | NM_004577 | 759.027   |
| U17632    | 4974.519  | 2570.942  | NM_013268 | 632.99    | 581.849   | NM_015507 | 701.738   |
| AK026764  | 2515.161  | 2465.296  | NM_002645 | 2237.737  | 2730.005  | AF007157  | 14548.307 |
| AF113700  | 2918.665  | 3717.868  | AB033027  | 3157.014  | 2502.895  | D38553    | 2556.304  |
| NM_017835 | 7167.86   | 9468.349  | AK021805  | 6406.311  | 11629.746 | NM_006170 | 1767.559  |
| NM_018347 | 2423.118  | 2109.33   | AB014550  | 3076.076  | 4683.242  | NM_014298 | 6352.054  |
| AK024986  | 1219.297  | 1161.181  | AF320294  | 4515.399  | 4332.89   | AK001581  | 576.814   |
| AK026730  | 714.813   | 754.941   | AF320293  | 584.015   | 619.833   | NM_005862 | 1136.417  |
| AK024739  | 1886.181  | 1410.254  | AF161436  | 5351.527  | 4622.637  | NM_000548 | 3507.2    |
| AK098681  | 1460.028  | 1383.299  | NM_020402 | 5814.82   | 4579.005  | AK022541  | 4121.123  |
| AK026772  | 1728.093  | 1749.91   | NM_004298 | 2211.667  | 3349.305  | AB002297  | 1326.63   |
| NM_014260 | 13716.219 | 15839.262 | NM_001171 | 2608.442  | 1645.819  | NM_005020 | 11781.997 |
| AK026458  | 556.167   | 815.725   | NM_000498 | 611.863   | 405.319   | NM_014077 | 1830.378  |
| AK022266  | 928.601   | 779.552   | NM_000664 | 685.807   | 1214.62   | NM_018412 | 402.776   |
| CY3Cy5    | 12390.299 | 708.662   | AF075085  | 21570.711 | 16962.156 | NM_012328 | 1808.956  |
| M23254    | 25559.924 | 10618.868 | NM_005892 | 10040.089 | 4723.125  | M14087    | 20484.535 |
| BE618539  | 2600.242  | 1760.335  | NM_006478 | 990.107   | 1062.64   | AJ272324  | 517.992   |
| R28062    | 2897.118  | 5367.965  | AF132734  | 6285.897  | 5078.229  | NM_000885 | 2048.924  |
| U38545    | 738.415   | 1085.096  | NM_018379 | 1987.529  | 1140.965  | M59040    | 1204.298  |
| AI627464  | 4382.543  | 3592.38   | NM_016403 | 11664.369 | 10401.084 | NM_017582 | 12693.036 |
| BI756258  | 2801.568  | 2822.35   | NM_001921 | 4530.867  | 8952.724  | NM_015238 | 317.695   |
| AA608557  | 10910.937 | 5487.37   | NM_006230 | 3785.878  | 6293.466  | AK026962  | 1191.426  |
| AL050095  | 6454.044  | 4455.854  | NM_014698 | 6884.508  | 5648.913  | X04366    | 1379.224  |
| U03272    | 2369.759  | 2048.184  | NM_013400 | 4721.463  | 4859.55   | NM_000505 | 39712.344 |
| NM_000498 | 1190.777  | 567.678   | AK026257  | 1663.002  | 1555.535  | NM_000666 | 1942.707  |
| NM_000664 | 1328.864  | 3252.321  | AK023836  | 4294.876  | 4568.872  | NM_003481 | 1505.221  |
| SR5       | 5806.082  | 5014.977  | NM_018108 | 2331.325  | 3938.592  | AB046814  | 558.596   |
| CY3Cy5    | 9969.259  | 520.957   | AJ299442  | 2535.395  | 4405.787  | NM_017778 | 177.764   |
| NM_014808 | 1621.497  | 1995.509  | NM_000128 | 907.945   | 1451.853  | NM_017664 | 2296.513  |

|           |           |           |           |           |           |           |           |
|-----------|-----------|-----------|-----------|-----------|-----------|-----------|-----------|
| AB006627  | 2642.18   | 4875.239  | NM_003762 | 3534.523  | 3672.179  | AK025523  | 234.085   |
| NM_000416 | 7500.631  | 4110.823  | NM_004859 | 6253.137  | 6119.212  | NM_007059 | 4547.027  |
| NM_003382 | 944.32    | 1330.215  | NM_016352 | 1122.585  | 693.932   | NM_006870 | 1078.716  |
| NM_002965 | 47322.164 | 8023.081  | NM_005014 | 621.456   | 403.307   | NM_007359 | 2680.944  |
| AB007883  | 4967.14   | 5722.441  | NM_000070 | 3627.688  | 2893.537  | NM_013327 | 932.75    |
| NM_006391 | 350.287   | 533.299   | NM_001202 | 1265.36   | 1625.069  | AF303888  | 4036.993  |
| NM_007037 | 36503.414 | 39599.238 | U34249    | 786.947   | 940.1     | NM_000077 | 768.9     |
| NM_001649 | 2855.815  | 1113.527  | NM_003289 | 21830.43  | 21817.797 | NM_007084 | 721.728   |
| NM_005492 | 9149.972  | 4161.185  | AI200114  | 1531.381  | 1986.629  | M97191    | 18945.709 |
| AF038196  | 2898.026  | 2803.454  | M23254    | 7954.043  | 6766.984  | AK023015  | 342.729   |
| NM_004859 | 13237.101 | 9884.163  | BE618539  | 1472.64   | 1681.117  | NM_003457 | 8655.395  |
| NM_016352 | 1608.815  | 1307.232  | R28062    | 2234.642  | 2206.478  | NM_012391 | 1674.908  |
| NM_005014 | 904.621   | 785.698   | AI627464  | 1680.404  | 969.663   | NM_005254 | 324.903   |
| NM_006944 | 562.552   | 787.293   | BI756258  | 1092.392  | 1463.831  | NM_005611 | 189.587   |
| NM_004407 | 1099.576  | 1313.649  | J04599    | 1157.109  | 1280.522  | AF141655  | 1374.424  |
| NM_000070 | 4560.445  | 4110.694  | AF110020  | 923.612   | 709.549   | NM_007345 | 903.812   |
| NM_001202 | 1687.595  | 1389.823  | AA608557  | 9353.659  | 6463.26   | NM_004830 | 497.553   |
| AB037804  | 2206.143  | 1425.402  | AL050095  | 3214.73   | 3983.658  | AF132362  | 51280.75  |
| U34249    | 2506.68   | 1661.66   | U03272    | 882.62    | 1810.057  | NM_007007 | 4772.926  |
| NM_006323 | 9897.024  | 10406.706 | NM_014781 | 2848.145  | 2126.042  | NM_006386 | 1389.46   |
| NM_016466 | 2653.188  | 2642.386  | X87896    | 966.902   | 1236.616  | NM_006559 | 7440.617  |
| NM_001493 | 7145.844  | 8277.207  | M88310    | 1580.986  | 923.373   | NM_004501 | 20977.986 |
| NM_003716 | 544.039   | 430.657   | NM_000042 | 1242.483  | 1015.733  | NM_004966 | 5198.94   |
| NM_014841 | 1406.557  | 1059.94   | NM_005024 | 1018.727  | 1668.447  | NM_006700 | 1444.646  |
| NM_014426 | 2866.854  | 5274.051  | NM_014808 | 742.382   | 825.791   | NM_006445 | 4918.025  |
| NM_006816 | 41451.414 | 52742.371 | AB006627  | 2316.67   | 3535.466  | NM_012109 | 4391.411  |
| NM_000258 | 24552.4   | 20029.73  | NM_000416 | 2323.636  | 1824.483  | AF019633  | 640.721   |
| AB033055  | 9012.124  | 7036.336  | NM_003382 | 426.461   | 1195.777  | AB002361  | 2755.081  |
| AF311287  | 6659.756  | 3455.427  | NM_002965 | 37746.008 | 7205.292  | NM_018060 | 2538.885  |
| NM_003098 | 1286.6    | 805.156   | AK093780  | 4867.88   | 3354.757  | NM_014239 | 1249.348  |
| NM_014781 | 3882.31   | 2926.182  | AY009397  | 40926.332 | 41951.609 | NM_017662 | 1802.201  |
| BU629989  | 984.112   | 920.665   | NM_001649 | 2939.549  | 1365.39   | U88837    | 659.424   |
| X87896    | 1990.811  | 1828.474  | NM_005492 | 2979.226  | 3410.415  | NM_017446 | 5142.047  |
| M88310    | 3215.574  | 2756.543  | AF038196  | 1942.777  | 3355.279  | AK001478  | 2461.11   |
| D16856    | 1145.241  | 458.871   | AF320294  | 3908.192  | 2566.621  | AK025697  | 1615.404  |
| NM_000042 | 2811.695  | 2425.206  | AF161436  | 5291.004  | 4285.491  | AK021734  | 1170.392  |
| AF035787  | 724.054   | 710.364   | NM_020402 | 4610.796  | 3268.899  | AF075028  | 405.172   |
| NM_003403 | 1856.455  | 1380.819  | NM_004299 | 1737.054  | 2807.716  | D00265    | 5560.57   |
| NM_016335 | 1089.375  | 1455.352  | NM_001171 | 1321.429  | 719.154   | NM_004552 | 10143.189 |
| NM_003165 | 5678.518  | 7229.911  | NM_002250 | 3011.503  | 3079.683  | NM_000143 | 715.528   |
| NM_003906 | 19565.805 | 22111.232 | NM_006323 | 4167.254  | 3897.206  | NM_006294 | 28049.074 |
| AL359590  | 25659.85  | 33873.648 | NM_016466 | 1070.93   | 1296.617  | AL137294  | 485.515   |
| NM_002861 | 6903.66   | 11839.46  | NM_014841 | 713.185   | 958.768   | NM_003743 | 885.682   |
| NM_003080 | 6201.667  | 5935.014  | NM_014426 | 1491.824  | 3236.292  | AB037797  | 1426.487  |
| NM_002645 | 2881.095  | 2621.217  | NM_006816 | 16766.912 | 20169.578 | NM_001520 | 523.479   |
| AB033027  | 3964.82   | 2921.376  | NM_000258 | 14363.301 | 14220.35  | NM_017870 | 1081.005  |
| AK021805  | 6882.395  | 8348.907  | AB033055  | 3352.33   | 3117.189  | AL133633  | 597.847   |
| AB014550  | 1782.876  | 1595.384  | AF311287  | 4534.061  | 5994.357  | NM_012252 | 1222.398  |
| AF320294  | 3727.526  | 1900.529  | AJ299442  | 2569.595  | 2452.798  | AK026817  | 1347.51   |
| AF320293  | 934.916   | 358.753   | NM_003762 | 2302.884  | 1942.089  | AL157442  | 16649.422 |
| AF161436  | 4436.728  | 4291.586  | NM_018446 | 2619.895  | 2279.319  | AB011148  | 1583.772  |
| NM_020402 | 5749.964  | 4016.682  | NM_000187 | 661.791   | 602.49    | AL389938  | 22958.715 |
| NM_004299 | 3098.137  | 3766.011  | NM_014465 | 2330.923  | 1634.14   | NM_001949 | 16537.887 |

|           |           |           |           |           |           |           |           |
|-----------|-----------|-----------|-----------|-----------|-----------|-----------|-----------|
| NM_001171 | 3304.58   | 1585.57   | D87292    | 7771.022  | 4380.816  | NM_003507 | 694.717   |
| NM_002250 | 6348.496  | 4540.045  | NM_005498 | 1216.822  | 2094.909  | AK026591  | 697.103   |
| NM_006478 | 1026.618  | 762.837   | NM_016335 | 1851.595  | 2980.595  | AK001889  | 2603.893  |
| AF132734  | 11661.563 | 16609.943 | AL359590  | 18422.199 | 17465.9   | AK025726  | 1557.67   |
| NM_018379 | 4432.295  | 3143.622  | NM_002861 | 6491.782  | 7807.819  | AJ227869  | 936.094   |
| NM_016403 | 18844.277 | 22131.896 | NM_003080 | 6273.044  | 5702.15   | AK026790  | 267.893   |
| NM_015603 | 1589.98   | 1802.754  | NM_013268 | 738.067   | 581.405   | AL117613  | 4782.183  |
| AK021788  | 719.177   | 622.076   | NM_002645 | 2273.656  | 2143.131  | AL137753  | 1497.117  |
| NM_001921 | 4444.285  | 6847.361  | AB033027  | 3355.431  | 3428.202  | AK021785  | 622.274   |
| NM_006230 | 3955.429  | 12339.126 | AK021805  | 4954.701  | 8741.888  | AF147370  | 322.629   |
| NM_014699 | 9225.254  | 8744.1    | AB014550  | 2211.271  | 2922.062  | AL110262  | 6651.212  |
| NM_013400 | 7326.442  | 9137.915  | NM_006826 | 9439.354  | 4622.266  | AK025627  | 8959.593  |
| AK026257  | 2896.663  | 2546.894  | AB007973  | 2470.301  | 1796.881  | AF216077  | 1880.83   |
| AK023836  | 8159.526  | 6817.937  | M96843    | 13290.973 | 9774.975  | AF086238  | 776.408   |
| NM_018109 | 2204.312  | 2493.325  | NM_017791 | 2236.824  | 1819.5    | AK021612  | 10472.497 |
| AJ299442  | 4640.568  | 2982.481  | NM_005882 | 5528.597  | 3514.633  | AF147342  | 806.301   |
| NM_000129 | 1222.523  | 1343.795  | BC012304  | 4104.695  | 4175.644  | AF088031  | 127.294   |
| NM_003762 | 5688.495  | 4751.505  | AB046815  | 3388.916  | 3292.19   | AK002025  | 16883.848 |
| NM_018446 | 5163.82   | 5251.245  | AF075085  | 23873.957 | 23925.623 | AK026299  | 654.793   |
| NM_000187 | 885.852   | 880.409   | NM_005892 | 15851.787 | 7797.399  | NM_017794 | 519.374   |
| NM_014465 | 1616.079  | 1367.058  | NM_006478 | 967.37    | 926.867   | AK025170  | 1643.851  |
| D87292    | 12933.015 | 6701.262  | AF132734  | 6399.549  | 7606.306  | AB033031  | 1180.562  |
| NM_005498 | 1400.05   | 1960.691  | NM_016403 | 12688.276 | 12190.228 | AF085872  | 8895.118  |
| NM_001202 | 2028.03   | 1751.47   | NM_015603 | 1233.448  | 1045.571  | AK022538  | 8311.251  |
| AB037804  | 2257.205  | 1643.053  | NM_001921 | 3067.036  | 3240.979  | AL360257  | 1471.43   |
| U34249    | 2545.567  | 2642.602  | NM_006230 | 4333.749  | 6656.596  | AK022342  | 968.094   |
| NM_003289 | 56891.664 | 53787.645 | NM_014699 | 15028.068 | 15630.309 | AF147420  | 1939.542  |
| AI200114  | 1298.41   | 1921.993  | NM_013400 | 4489.806  | 4216.352  | AL049312  | 1607.321  |
| M23254    | 24872.85  | 7773.811  | AK026257  | 2206.034  | 1974.099  | AL050072  | 2596.622  |
| BE618539  | 2593.255  | 1780.735  | AK023836  | 5417.621  | 5119.519  | AL117590  | 604.412   |
| R28062    | 3013.316  | 5406.873  | NM_018109 | 2113.161  | 2359.128  | AL049357  | 3025.397  |
| U38545    | 812.8     | 1018.172  | NM_002945 | 615.108   | 5527.87   | AL050129  | 720.746   |
| AI627464  | 3821.136  | 3656.021  | NM_005076 | 10090.775 | 7980.62   | AL110223  | 716.068   |
| BI756258  | 2893.675  | 3171.146  | AF253321  | 1254.645  | 924.753   | AL117659  | 460.561   |
| J04599    | 1616.396  | 866.76    | U80735    | 1612.607  | 1390.079  | AK027180  | 1480.131  |
| AA608557  | 10553.198 | 7979.356  | NM_017850 | 1795.159  | 1243.47   | AK026802  | 566.296   |
| AL050095  | 6643.07   | 5984.063  | NM_016522 | 1484.761  | 788.502   | NM_004544 | 2281.881  |
| U03272    | 2292.217  | 2004.497  | NM_002224 | 1498.321  | 1490.072  | AF086041  | 398.85    |
| NM_000498 | 1089.692  | 880.68    | X07979    | 29689.189 | 40115.906 | Y15167    | 333.344   |
| NM_000664 | 1753.996  | 3695.073  | AF146277  | 4041.332  | 4597.297  | AL133080  | 1524.107  |
| AF075085  | 35499.957 | 36566.766 | AF055033  | 25994.164 | 34350.563 | NM_017792 | 562.272   |
| NM_005892 | 4610.172  | 3314.654  | M37191    | 13728.762 | 15994.893 | AK025213  | 2034.884  |
| D16856    | 1050.08   | 812.482   | NM_005242 | 305.685   | 511.013   | NM_014949 | 849.363   |
| NM_000042 | 3099.993  | 3988.574  | NM_003020 | 762.361   | 745.376   | AL080221  | 581.039   |
| AF035787  | 784.883   | 980.047   | NM_003404 | 51429.324 | 35779.492 | AL137370  | 422.694   |
| NM_005024 | 1740.009  | 3846.98   | NM_001114 | 1660.486  | 1621.473  | AF009262  | 3078.706  |
| NM_003403 | 1446.209  | 1418.333  | X82240    | 916.435   | 576.432   | AF009306  | 510.79    |
| NM_014808 | 1806.509  | 1625.813  | NM_013995 | 17531.625 | 10771.114 | AF050198  | 866.129   |
| AB006627  | 3064.542  | 4383.502  | NM_006010 | 5857.872  | 8483.064  | AK024346  | 1116.38   |
| NM_000416 | 6562.044  | 3569.505  | K03191    | 2015.012  | 1684.994  | AF009320  | 351.452   |
| NM_003382 | 758.281   | 1091.099  | NM_005079 | 5870.894  | 3765.91   | AF056422  | 1236.571  |
| NM_002965 | 43186.938 | 8862.276  | NM_005192 | 18519.107 | 6554.841  | AF090892  | 1181.198  |
| AB007883  | 5292.068  | 5871.46   | NM_015032 | 4895.789  | 2443.677  | AK001089  | 409.645   |

|           |           |           |           |           |           |           |           |
|-----------|-----------|-----------|-----------|-----------|-----------|-----------|-----------|
| AK093780  | 7895.666  | 5048.887  | AK022956  | 1314.44   | 1813.919  | AK001919  | 1100.003  |
| AY009397  | 70504.242 | 62512.141 | NM_002749 | 47361.617 | 45622.973 | AK021535  | 1092.089  |
| NM_007037 | 39083.988 | 31345.689 | NM_018216 | 3382.556  | 2466.618  | AK021753  | 4261.525  |
| NM_001649 | 2889.156  | 1278.088  | AL137747  | 5269.058  | 5503.057  | AK001139  | 2958.834  |
| NM_005492 | 9659.579  | 6919.138  | NM_014755 | 6678.089  | 4597.219  | AK002090  | 1188.075  |
| AF038196  | 2956.644  | 3738.806  | AF077188  | 12063.67  | 16864.695 | AK021822  | 780.5     |
| NM_004859 | 15602.547 | 15278.891 | NM_012446 | 821.5     | 1582.355  | AK025246  | 4150.531  |
| NM_016352 | 1577.936  | 2037.694  | NM_018685 | 13202.641 | 11884.345 | AK025847  | 2395.081  |
| NM_005014 | 954.803   | 895.88    | NM_006984 | 2322.356  | 1697.425  | AK026816  | 653.253   |
| NM_006944 | 882.188   | 947.503   | AL133644  | 21057.145 | 13197.492 | NM_014174 | 1320.075  |
| NM_004407 | 1080.822  | 1042.114  | NM_002706 | 2498.09   | 1957.55   | AF147337  | 3159.719  |
| NM_000070 | 4331.881  | 4560.952  | NM_019023 | 44469.992 | 39538.73  | AK025203  | 51970.438 |
| NM_002250 | 6009.598  | 5180.333  | NM_005499 | 12356.75  | 11972.854 | AK026981  | 1606.233  |
| S81591    | 430.778   | 910.964   | NM_015387 | 2824.745  | 2635.662  | AK023819  | 446.452   |
| NM_006323 | 8642.896  | 9466.015  | NM_001733 | 11381.638 | 5020.804  | AL133656  | 2191.156  |
| NM_016466 | 2779.919  | 1996.959  | NM_017825 | 5081.497  | 4910.553  | AL050037  | 5030.045  |
| NM_001493 | 7094.168  | 7304.669  | NM_014035 | 2467.597  | 3209.286  | NM_001417 | 15200.188 |
| NM_014841 | 1294.321  | 1085.537  | NM_020122 | 8166.008  | 10525.203 | AK022236  | 1856.501  |
| NM_014426 | 2609.317  | 2872.081  | NM_013432 | 6339.627  | 10121.309 | AK000618  | 770.336   |
| NM_006816 | 41182.828 | 35563.438 | NM_002299 | 38222.355 | 36135.188 | AK024773  | 1050.551  |
| AK026518  | 57751.527 | 50466.645 | AK027130  | 537.943   | 662.26    | AL390180  | 1163.753  |
| NM_000258 | 23563.9   | 19970.146 | AL133572  | 3418.788  | 2132.89   | X60484    | 1400.024  |
| AB033055  | 9261.625  | 7997.069  | AK022500  | 1899.646  | 1394.671  | AF055019  | 1213.152  |
| AF311287  | 6432.042  | 5049.952  | U52096    | 5515.463  | 3606.745  | NM_003525 | 17271.98  |
| NM_003098 | 1331.627  | 1187.35   | AB013897  | 971.522   | 320.926   | AF056432  | 821.279   |
| NM_014781 | 3929.59   | 3407.016  | NM_005526 | 21762.105 | 20801.447 | AK001987  | 18466.693 |
| BU629989  | 1113.188  | 1332.79   | AK001669  | 3932.799  | 4490.095  | NM_013332 | 765.992   |
| X87896    | 2466.416  | 3017.487  | NM_006195 | 6540.771  | 7218.105  | X56199    | 3097.94   |
| M88310    | 3083.86   | 2840.283  | NM_006190 | 10298.334 | 11492.879 | NM_005193 | 1557.675  |
| NM_018446 | 5689.485  | 4675.872  | NM_006368 | 3164.921  | 4794.608  | AL162006  | 1466.356  |
| NM_000187 | 999.848   | 1106.53   | NM_004133 | 933.623   | 1312.507  | NM_017971 | 22062.578 |
| NM_014465 | 2358.477  | 2813.481  | NM_001618 | 7861.024  | 6777.902  | AF090097  | 2717.988  |
| D87292    | 13594.514 | 9095.934  | BC000401  | 6120.086  | 6478.017  | AF054998  | 395.64    |
| NM_005498 | 1842.51   | 3352.411  | NM_006425 | 3069.37   | 2546.858  | AF116620  | 6876.795  |
| NM_016335 | 1293.444  | 2658.045  | BF344046  | 3075.218  | 2647.952  | AF293335  | 28340.672 |
| NM_003165 | 6075.953  | 6848.856  | AF432218  | 5271.683  | 5268.484  | AL080065  | 334.061   |
| NM_003906 | 22109.107 | 16889.213 | NM_004286 | 1310.133  | 2289.917  | AK024431  | 5378.233  |
| AL359590  | 26975.041 | 34918.223 | AK025082  | 1543.731  | 970.045   | AF116635  | 194.672   |
| NM_002861 | 7006.127  | 11843.15  | AB040901  | 1488.358  | 986.961   | X96644    | 2231.942  |
| NM_003080 | 5901.009  | 4870.605  | AL137406  | 1676.186  | 1640.421  | Z34281    | 11143.567 |
| NM_004042 | 446.355   | 375.68    | NM_000293 | 510.069   | 877.581   | NM_018678 | 46947.984 |
| NM_013268 | 967.275   | 454.518   | AF153821  | 2598.219  | 2270.302  | AJ008122  | 15766.579 |
| NM_002645 | 2386.39   | 1628.063  | NM_013370 | 1171.849  | 1291.468  | AK022667  | 11721.582 |
| AB033027  | 4038.706  | 3334.427  | NM_003310 | 2913.175  | 2223.016  | AK026667  | 362.031   |
| AK021805  | 7584.554  | 8370.887  | AK024461  | 1816.754  | 1582.503  | AF113211  | 1901.31   |
| AB014550  | 1807.909  | 1847.342  | NM_017635 | 898.307   | 1217.32   | AL117568  | 220.932   |
| AF320294  | 3938.917  | 3133.813  | X62534    | 1464.314  | 957.582   | NM_000843 | 487.528   |
| AF320293  | 661.961   | 733.651   | AF027147  | 15866.474 | 21028.418 | NM_018391 | 1170.937  |
| AF161436  | 4568.747  | 4635.725  | M62399    | 1837.719  | 2054.62   | U90917    | 564.713   |
| NM_020402 | 5470.177  | 3807.521  | U71600    | 1383.025  | 1181.556  | AK022140  | 1525.732  |
| NM_004299 | 2784.359  | 4699.308  | NM_004472 | 1247.899  | 1577.844  | AK023372  | 20821.98  |
| NM_001171 | 3126.009  | 2064.851  | AB037862  | 2988.317  | 3561.904  | AF086527  | 496.229   |
| NM_000498 | 1125.828  | 1013.714  | AF088022  | 6990.991  | 8245.037  | U21072    | 2773.302  |

|           |           |           |           |           |           |           |           |
|-----------|-----------|-----------|-----------|-----------|-----------|-----------|-----------|
| NM_000664 | 1565.868  | 2743.591  | AK026537  | 1366.518  | 748.697   | AK024377  | 710.452   |
| AF075085  | 39391.711 | 46528.203 | NM_015485 | 3884.815  | 2384.35   | AK023557  | 393.322   |
| NM_005892 | 6786.023  | 6418.132  | NM_002666 | 2246.811  | 2269.882  | AK027107  | 1249.906  |
| NM_006478 | 1137.758  | 1077.345  | AF202145  | 2116.875  | 1604.329  | AB040887  | 1974.666  |
| AF132734  | 10982.18  | 14053.834 | AK026155  | 1625.471  | 1148.961  | AK025196  | 3600.537  |
| NM_018379 | 4680.441  | 3429.319  | NM_018052 | 22987.445 | 26904.691 | AK024800  | 524.082   |
| NM_016403 | 19330.029 | 15919.353 | AK022386  | 3830.051  | 4287.677  | AK000401  | 699.614   |
| NM_015603 | 1768.874  | 1513.756  | NM_002767 | 2905.95   | 2338.857  | AF305068  | 685.915   |
| AK021788  | 609.788   | 625.398   | AF131846  | 15575.919 | 18027.262 | D17231    | 12912.37  |
| NM_001921 | 3929.666  | 4296.833  | AF088069  | 1253.499  | 1385.18   | AF531295  | 865.288   |
| NM_006230 | 3168.408  | 8159.985  | AF086551  | 782.038   | 1059.006  | CY3Cy5    | 8414.049  |
| NM_014699 | 8858.833  | 4442.198  | NM_013393 | 5654.156  | 3967.834  | BF974315  | 1207.755  |
| NM_013400 | 6699.677  | 5782.881  | AK025072  | 1116.621  | 1049.106  | AI652705  | 5103.12   |
| AK026257  | 2816.873  | 2323.859  | AK022410  | 1209.499  | 848.183   | AA973397  | 904.364   |
| AK023836  | 8790.104  | 7055.273  | L10378    | 11314.402 | 6948.779  | AA569974  | 2194.018  |
| NM_018109 | 2111.501  | 2689.864  | AJ227860  | 949.303   | 521.68    | AA923615  | 3026.598  |
| AJ299442  | 4795.233  | 5978.679  | AL157448  | 1155.448  | 603.662   | AA446028  | 653.389   |
| AB040897  | 518.433   | 591.424   | AF026942  | 1379.178  | 1036.603  | M80583    | 604.666   |
| NM_000129 | 1047.588  | 2314.117  | AJ276429  | 3169.204  | 2579.316  | AW009565  | 2145.178  |
| NM_003762 | 6327.784  | 5786.96   | AL117657  | 645.764   | 1209.045  | X07767    | 2122.788  |
| NM_004859 | 15707.66  | 17420.248 | AK021590  | 2577.44   | 1995.265  | AF252284  | 3441.888  |
| NM_016352 | 1930.254  | 1965.386  | AK023998  | 1288.743  | 730.277   | SR1       | 77142.258 |
| NM_005014 | 958.321   | 1241.078  | AK000872  | 1244.694  | 1436.454  | SR3       | 43971.738 |
| NM_006944 | 929.728   | 961.018   | AK027147  | 6397.485  | 7574.983  | SR5       | 4947.256  |
| NM_004407 | 951.613   | 1675.036  | AK022415  | 36204.121 | 27057.021 | SR7       | 5218.679  |
| NM_000070 | 5809.569  | 7696.568  | AK026787  | 3850.128  | 3921.646  | SR9       | 17181.963 |
| NM_001202 | 2142.208  | 1928.652  | AK023542  | 1407.733  | 933.621   | CY3Cy5    | 10947.727 |
| AB037804  | 2346.585  | 2210.083  | AK021845  | 7439.029  | 6786.554  | M33197    | 67809.398 |
| U34249    | 2881.193  | 2793.005  | NM_018503 | 24549.252 | 25907.684 | NM_007264 | 15293.585 |
| NM_003289 | 61849.676 | 55237.422 | NM_016449 | 14781.812 | 14649.926 | NM_002262 | 674.153   |
| AI200114  | 1864.833  | 2292.779  | AL049670  | 2608.045  | 2023.274  | NM_016511 | 10654.029 |
| M23254    | 22126.715 | 7196.854  | NM_018512 | 7951.892  | 7123.175  | NM_003559 | 1034.305  |
| BE618539  | 2620.932  | 1828.134  | AK022412  | 2214.624  | 1942.868  | M55337    | 843.771   |
| R28062    | 2799.5    | 2597.558  | AK023073  | 7234.563  | 8972.614  | M33197    | 59308.805 |
| U38545    | 680.799   | 671.349   | AK023922  | 1141.962  | 1001.99   | NM_013229 | 1466.914  |
| AI627464  | 3956.939  | 3332.39   | AK022438  | 1579.567  | 1581.564  | NM_016533 | 13210.516 |
| BI756258  | 2870.968  | 2755.404  | AK023764  | 1338.351  | 1584.27   | NM_014751 | 2419.837  |
| AA608557  | 10841.811 | 7694.756  | AK024082  | 1102.062  | 1231.045  | NM_002347 | 15407.851 |
| AL050095  | 7789.11   | 6961.304  | Z27405    | 24328.08  | 21923.867 | AB046807  | 2134.869  |
| U03272    | 2547.938  | 2288.738  | AK023412  | 1740.367  | 1192.653  | M33197    | 47277.18  |
| NM_003098 | 1489.874  | 2419.349  | NM_014617 | 19431.338 | 16596.105 | NM_014623 | 6623.428  |
| NM_014781 | 4086.97   | 5896.542  | AK074682  | 3233.362  | 1841.94   | NM_007244 | 1786.444  |
| BU629989  | 1111.908  | 1642.113  | X74605    | 1470.329  | 844.707   | M30629    | 2072.756  |
| X87896    | 2847.622  | 3169.646  | AK024513  | 2075.626  | 1486.078  | AF193873  | 2180.098  |
| M88310    | 3518      | 4065.08   | BC036692  | 3165.018  | 2409.078  | NM_002628 | 1170.331  |
| D16856    | 1211.225  | 532.433   | AJ009640  | 3488.117  | 1786.002  | AA190729  | 986.029   |
| NM_000042 | 2802.295  | 3141.181  | AF147340  | 737.267   | 544.72    | NM_004170 | 841.018   |
| AF035787  | 681.015   | 811.042   | AF035308  | 6191.045  | 6279.62   | NM_018057 | 2004.124  |
| NM_005024 | 1974.589  | 3985.711  | NM_014054 | 2012.794  | 1849.213  | M33197    | 67192.867 |
| NM_003403 | 1592.341  | 1576.022  | AK021840  | 23177.316 | 20250.264 | NM_015717 | 864.931   |
| NM_014808 | 1460.867  | 1710.971  | AF086480  | 2077.097  | 3707.65   | NM_015925 | 1099.175  |
| AB006627  | 3275.123  | 4843.142  | AK000806  | 71633.734 | 60793.527 | NM_003665 | 1032.074  |
| NM_000416 | 6114.903  | 1704.555  | NM_001145 | 1046.989  | 1401.751  | AF220217  | 628.55    |

|           |           |           |             |           |           |           |           |
|-----------|-----------|-----------|-------------|-----------|-----------|-----------|-----------|
| NM_003382 | 710.735   | 663.062   | NM_005364   | 5943.89   | 6497.85   | NM_013323 | 6599.161  |
| NM_002965 | 43842.672 | 6168.853  | AK023482    | 6309.351  | 4982.775  | NM_017426 | 960.847   |
| AB007883  | 5659.445  | 6330.827  | AL161991    | 18005.969 | 13408.968 | M33197    | 653.693   |
| NM_007037 | 42663.379 | 43861.289 | D17032      | 15057.536 | 12825.254 | NM_000853 | 1104.151  |
| NM_001649 | 2784.236  | 1591.789  | AL137292    | 1047.329  | 799.12    | AF016903  | 12982.173 |
| NM_005492 | 10548.813 | 7119.76   | NM_017941   | 3578.978  | 3346.073  | NM_015675 | 3149.204  |
| AF038196  | 3108.848  | 3967.837  | AF301016    | 935.258   | 763.741   | AK022267  | 678.656   |
| AF320294  | 4181.041  | 4587.939  | BE900527    | 3155.895  | 2980.673  | NM_016040 | 379.269   |
| AF320293  | 894.855   | 1028.808  | D28384      | 52441.758 | 48124.152 | M33197    | 45093.289 |
| AF161436  | 5234.087  | 6218.77   | AF118079    | 33526.223 | 29131.734 | AF031136  | 20602.98  |
| NM_020402 | 7310.193  | 5600.916  | AF277572    | 1617.752  | 1653.457  | NM_006597 | 11113.776 |
| NM_004299 | 3298.557  | 5521.221  | AL365413    | 6718.3    | 6023.631  | NM_012483 | 2956.661  |
| NM_001171 | 3801.436  | 2380.132  | NM_005258   | 12372.802 | 21763.061 | NM_003498 | 1999.848  |
| NM_002250 | 6289.483  | 4754.038  | NM_000440   | 7851.718  | 12559.825 | AB023420  | 4516.036  |
| S81591    | 462.159   | 629.014   | NM_006269   | 1377.651  | 2278.181  | NM_007342 | 3011.128  |
| NM_006323 | 8729.541  | 6096.718  | NM_016230   | 6451.796  | 5536.281  | NM_005672 | 551.392   |
| NM_016466 | 2853.757  | 1862.141  | NM_001083   | 2989.793  | 4171.424  | D25217    | 1936.65   |
| NM_001493 | 6952.246  | 6287.213  | AK023966    | 8523.161  | 7961.552  | NM_006351 | 2541.665  |
| NM_014841 | 1463.37   | 1506.579  | AK025702    | 2731.635  | 2191.243  | M33197    | 35981.309 |
| NM_014426 | 2735.726  | 5036.363  | NM_018958   | 1504.19   | 1398.567  | NM_004683 | 4565.392  |
| NM_006816 | 46348.305 | 53837.602 | AL050200    | 668.831   | 823.45    | AK023226  | 1743.629  |
| AK026518  | 61496.41  | 56370.949 | AF085866    | 2037.141  | 2776.533  | M33197    | 34824.551 |
| NM_000258 | 26172.203 | 23130.379 | NM_006106   | 687.413   | 1015.542  | NM_001467 | 929.497   |
| AB033055  | 10426.853 | 9113.392  | CY3Cy5      | 5437.076  | 397.717   | NM_018066 | 9579.703  |
| AF311287  | 7304.775  | 6201.877  | AA397813    | 38582.477 | 28651.492 | NM_006931 | 1043.715  |
| AJ299442  | 4891.579  | 7283.31   | W47350      | 1002.485  | 783.39    | NM_020344 | 3063.07   |
| AB040897  | 555.167   | 750.161   | W68291      | 6495.888  | 9161.104  | NM_005050 | 1166.556  |
| NM_000129 | 1452.065  | 2391.559  | N64384      | 1419.554  | 1527.739  | M33197    | 55198.086 |
| NM_003762 | 6871.761  | 8078.445  | H-X 53655 I | 1883.603  | 1677.857  | NM_018976 | 4415.471  |
| NM_018446 | 5607.063  | 5131.803  | H-U 05770 I | 9771.186  | 4302.344  | NM_003355 | 977.06    |
| NM_000187 | 943.115   | 1432.446  | H-M 65199   | 7556.184  | 6720.952  | NM_004558 | 2210.306  |
| NM_014465 | 1668.03   | 1995.97   | H-M 32315   | 3986.272  | 2782.167  | AL079296  | 1695.73   |
| D87292    | 11735.688 | 5816.965  | H-V00536M   | 1238.977  | 1511.043  | NM_014770 | 1007.097  |
| NM_005498 | 1884      | 2503.765  | H-D85429M   | 5926.694  | 3649.739  | M33197    | 58751.871 |
| NM_016335 | 1239.876  | 942.279   | BF439832    | 1718.253  | 2329.77   | AK023103  | 1780.415  |
| NM_003165 | 5664.098  | 4689.283  | BG819162    | 1635.497  | 1705.902  | NM_017858 | 1948.95   |
| NM_003906 | 24988.328 | 18149.734 | NM_017532   | 6937.33   | 6338.027  | NM_019059 | 20882.252 |
| AL359590  | 18518.754 | 22263.281 | SR8         | 8289.598  | 29210.865 | X56789    | 1294.339  |
| NM_002861 | 6274.278  | 11791.047 | SR10        | 30469.285 | 10973.075 | AK001069  | 18891.369 |
| NM_003080 | 6783.745  | 8136.082  | CY3Cy5      | 6084.091  | 350.372   | M33197    | 56792.145 |
| NM_013268 | 896.854   | 827.209   | NM_004447   | 4984.756  | 4523.411  | NM_000935 | 977.221   |
| NM_002645 | 2464.779  | 2286.042  | NM_001204   | 1469.791  | 1315.365  | NM_000359 | 3864.489  |
| AB033027  | 4381.844  | 3276.71   | BF131321    | 1191.354  | 1556.496  | NM_006395 | 2793.394  |
| AK021805  | 3952.53   | 5503.69   | NM_012116   | 2390.713  | 3131.278  | NM_014306 | 1714.949  |
| AB014550  | 1475.464  | 1621.194  | NM_000020   | 3259.673  | 2911.321  | NM_001084 | 1344.328  |
| NM_006826 | 8023.146  | 15447.664 | NM_000956   | 451.747   | 1023.54   | NM_018622 | 3285.819  |
| AB007973  | 5767.691  | 7932.794  | NM_002442   | 2321.47   | 1737.704  | M33197    | 45094.281 |
| NM_002999 | 1119.743  | 1674.215  | AB033091    | 10916.397 | 8258.575  | NM_005867 | 2105.007  |
| M96843    | 12822.479 | 12047.135 | NM_004557   | 7853.652  | 9844.242  | AK026031  | 2618.461  |
| NM_017791 | 3097      | 3433.108  | NM_001584   | 1967.423  | 1990.275  | NM_016468 | 1775.608  |
| NM_005882 | 8389.428  | 9433.91   | NM_012259   | 57551.313 | 60527.594 | BE539299  | 566.776   |
| BC012304  | 5458.831  | 6530.178  | AF272357    | 2566.073  | 2607.768  | NM_002628 | 2005.907  |
| AB046815  | 5645.219  | 3988.566  | AB020705    | 1979.648  | 1611.688  | AA190729  | 765.776   |

|           |           |           |           |           |           |           |           |
|-----------|-----------|-----------|-----------|-----------|-----------|-----------|-----------|
| AF075085  | 37062.555 | 43997.117 | NM_004262 | 248.333   | 812.521   | BF974315  | 737.991   |
| NM_005892 | 8755.255  | 8123.502  | BG491613  | 14382.253 | 9993.363  | AI652705  | 3868.437  |
| NM_006478 | 984.069   | 564.686   | AL096732  | 796.627   | 1172.921  | AA973397  | 941.525   |
| AF132734  | 11758.838 | 10780.389 | AB006423  | 1593.504  | 1126.073  | AA569974  | 2272.76   |
| NM_018379 | 4219.794  | 2099.738  | NM_005719 | 63184.398 | 58454.793 | AA446028  | 351.412   |
| NM_016403 | 21137.395 | 16339.004 | NM_006093 | 5200.555  | 6096.41   | M80583    | 441.83    |
| NM_015603 | 1604.79   | 1532.175  | NM_002728 | 1820.595  | 1509.892  | AW009565  | 1765.114  |
| AK021788  | 1410.523  | 1099.047  | NM_000450 | 674.365   | 665.854   | X07767    | 1847.088  |
| NM_001921 | 5000.602  | 8771.18   | NM_000448 | 948.952   | 1084.28   | AF252284  | 3482.122  |
| NM_014699 | 11732.396 | 12532.221 | NM_001708 | 19715.041 | 18843.088 | M33197    | 2900.696  |
| NM_013400 | 8083.337  | 8337.462  | NM_017735 | 2879.523  | 3559.4    | AL050139  | 2601.425  |
| AK026257  | 3254.962  | 2508.564  | AB014564  | 1278.166  | 2286.294  | NM_012483 | 6193.014  |
| AK023836  | 9144.64   | 7419.738  | NM_006762 | 56827.141 | 57285.727 | NM_003498 | 2497.762  |
| NM_018109 | 2325.63   | 3087.988  | NM_016430 | 957.653   | 1317.83   | AB023420  | 5825.478  |
| NM_005076 | 11874.969 | 13835.171 | NM_003742 | 4345.996  | 5334.353  | M33197    | 56239.285 |
| AF253321  | 2652.963  | 3302.349  | NM_005094 | 3568.233  | 2728.368  | NM_007264 | 10443.069 |
| U80735    | 2117.984  | 3426.942  | NM_002335 | 235.415   | 499.334   | NM_016511 | 5840.375  |
| NM_017850 | 1900.702  | 2562.301  | BE382905  | 1156.469  | 903.76    | NM_003559 | 1063.813  |
| NM_016522 | 1763.878  | 1970.273  | NM_002152 | 8809.624  | 11355.093 | M55337    | 1129.451  |
| NM_002224 | 2628.024  | 2386.629  | NM_001701 | 801.914   | 1010.588  | M33197    | 47694.566 |
| X07979    | 41623.625 | 45012.234 | AK022558  | 3346.123  | 4042.365  | NM_013229 | 937.378   |
| NM_003874 | 517.484   | 491.893   | NM_006476 | 52879.301 | 40746.84  | NM_016533 | 5968.219  |
| NM_000082 | 935.679   | 1002.939  | NM_015697 | 5840.223  | 4876.037  | NM_014751 | 1211.234  |
| L13857    | 2418.947  | 2276.552  | NM_032943 | 2343.773  | 2059.644  | NM_002347 | 12031.379 |
| NM_018098 | 4987.37   | 3269.895  | NM_007177 | 27141.348 | 19322.545 | AB046807  | 2130.317  |
| AF286164  | 842.279   | 560.737   | NM_000809 | 1226.723  | 1311.681  | M33197    | 52496.289 |
| AF146277  | 5804.787  | 5361.963  | AB018258  | 1434.069  | 1254.326  | NM_014623 | 7972.67   |
| NM_002559 | 468.112   | 704.297   | AL359592  | 1644.744  | 1686.804  | NM_007244 | 1141.789  |
| AF055033  | 22963.027 | 21639.113 | NM_006078 | 11369.424 | 12532.633 | M30629    | 1297.28   |
| NM_017700 | 1866.34   | 2694.885  | NM_014251 | 2173.978  | 2698.981  | M33197    | 61912.879 |
| NM_003020 | 1113.084  | 1231.586  | AK022750  | 6846.746  | 7196.94   | NM_018976 | 5812.241  |
| NM_003404 | 42009.598 | 37451.121 | NM_001091 | 1324.175  | 1680.787  | NM_003355 | 1315.526  |
| NM_001114 | 3533.45   | 2084.271  | AK023915  | 5886.521  | 4989.85   | NM_005074 | 996.854   |
| X82240    | 2211.932  | 2862.857  | AB051453  | 3364.237  | 2063.086  | NM_018057 | 1358.873  |
| NM_013999 | 14944.219 | 18162.863 | AK026842  | 1163.401  | 651.747   | M33197    | 54143.145 |
| NM_004455 | 1029.196  | 1226.123  | NM_002395 | 1903.282  | 3313.224  | NM_015717 | 410.727   |
| NM_006010 | 4852.685  | 17049.621 | AB023203  | 5146.926  | 3923.957  | NM_015925 | 1113.254  |
| K03191    | 2895.842  | 3705.41   | NM_014963 | 2614.38   | 2199.812  | NM_003665 | 651.708   |
| NM_005079 | 13114.328 | 14915.542 | NM_004259 | 866.766   | 935.027   | NM_013323 | 2843.638  |
| NM_005192 | 16032.503 | 15206.409 | NM_016271 | 3887.539  | 4374.862  | NM_017426 | 597.115   |
| NM_004585 | 904.124   | 812.798   | NM_016619 | 5112.142  | 3595.713  | M33197    | 616.888   |
| NM_015032 | 5785.946  | 5129.882  | NM_014481 | 1274.039  | 940.026   | NM_000853 | 589.631   |
| AK022956  | 3707.162  | 3583.597  | U22172    | 3235.293  | 3199.833  | NM_006820 | 1795.495  |
| AK023121  | 1347.019  | 1513.364  | AB032960  | 1771.127  | 2146.324  | AF016903  | 11018.588 |
| NM_014104 | 44824.469 | 43266.219 | NM_014264 | 6251.478  | 4959.94   | NM_015675 | 2759.43   |
| NM_002392 | 1186.358  | 690.545   | AF020089  | 2321.456  | 3099.569  | AK022267  | 843.989   |
| NM_002749 | 56106.457 | 49623.938 | NM_006257 | 3684.192  | 2624.852  | NM_016040 | 547.796   |
| NM_018216 | 4482.446  | 3469.313  | NM_016281 | 12690.158 | 12886.99  | M33197    | 48642.609 |
| NM_003390 | 545.229   | 912.021   | NM_004734 | 19722.096 | 23799.914 | AF031136  | 10813.73  |
| AL137747  | 4675.215  | 3937.55   | AK024793  | 2225.263  | 2239.086  | NM_015983 | 770.791   |
| NM_014755 | 4970.203  | 5889.697  | AF208291  | 2778.327  | 2251.162  | NM_018622 | 4467.999  |
| AF077188  | 11498.547 | 15105.338 | NM_004877 | 51594.027 | 53091.172 | M33197    | 60899.125 |
| NM_012446 | 1296.667  | 2930.849  | L10284    | 51169.227 | 57022.141 | NM_005867 | 3313.286  |

|           |           |           |             |           |           |           |           |
|-----------|-----------|-----------|-------------|-----------|-----------|-----------|-----------|
| NM_01833E | 1555.004  | 1202.239  | NM_00027E   | 1445.673  | 2145.134  | AK026031  | 5295.991  |
| NM_01868E | 26436.529 | 37825.98  | NM_00001E   | 69124.313 | 66089.109 | NM_01646E | 2284.622  |
| NM_006984 | 2231.43   | 1926.544  | AK023701    | 1394.074  | 1623.252  | NM_00734E | 2741.258  |
| AF231919  | 1119.044  | 1253.393  | NM_01588E   | 1380.749  | 1718.644  | D25217    | 1816.509  |
| Y11718    | 381.654   | 747.528   | NM_02035E   | 518.703   | 440.292   | NM_006351 | 2496.58   |
| AL133644  | 10335.678 | 11014.207 | NM_00426E   | 807.852   | 481.167   | M33197    | 32076.605 |
| NM_00270E | 3786.282  | 4329.668  | BG491613    | 13204.28  | 9585.164  | NM_00468E | 1960.38   |
| NM_01902E | 66903.516 | 56953.719 | AA397813    | 36150.496 | 25595.795 | M33197    | 31566.893 |
| NM_00442E | 2182.566  | 1426.041  | W47350      | 1049.496  | 1026.797  | NM_00146E | 1212.087  |
| NM_00297E | 1432.723  | 1245.758  | W68291      | 7362.488  | 11053.774 | NM_01806E | 6796.547  |
| NM_00549E | 14163.366 | 21117.117 | N64384      | 1819.778  | 1673.307  | NM_006931 | 1011.823  |
| NM_01538E | 3945.522  | 2919.105  | H-X 53655 I | 2190.318  | 1474.947  | NM_020344 | 2556.675  |
| NM_00173E | 5384.88   | 3792.466  | H-U 05770 I | 11037.434 | 5584.176  | AF119868  | 914.439   |
| NM_00506E | 651.644   | 1024.282  | H-M 65199   | 9221.668  | 11704.541 | NM_00505E | 802.265   |
| NM_01782E | 11220.077 | 11597.623 | H-M 32315   | 4351.545  | 3665.764  | AF252284  | 4554.262  |
| NM_01403E | 3355.496  | 4262.86   | H-V00536M   | 2327.366  | 1966.719  | M33197    | 4109.184  |
| NM_02012E | 12662.112 | 13673.482 | H-D85429M   | 5813.694  | 6160.282  | AL050139  | 3307.528  |
| NM_01343E | 17710.789 | 25758.477 | BF439832    | 2375.427  | 3055.093  | NM_00455E | 2622.344  |
| AB020716  | 1240.741  | 1243.633  | BG819162    | 1831.842  | 1422.223  | AL079296  | 2530.192  |
| NM_00229E | 52027.207 | 55846.125 | NM_01753E   | 5724.263  | 5114.313  | NM_01477E | 1041.775  |
| AK027130  | 867.68    | 885.738   | M38449      | 4675.284  | 4080.566  | M33197    | 61099.883 |
| NM_00547E | 14570.07  | 14940.141 | AK02549E    | 1594.186  | 929.765   | AK023103  | 1809.37   |
| NM_00573E | 40403.551 | 43986.941 | AB033044    | 4422.052  | 5577.385  | NM_01785E | 1266.832  |
| NM_00539E | 1090.445  | 1126.72   | AB014564    | 714.611   | 1071.242  | NM_01905E | 25347.67  |
| AL133572  | 5758.711  | 6929.524  | NM_02023E   | 2566.968  | 3570.591  | NM_00035E | 2255.897  |
| AK022500  | 2236.872  | 1874.76   | NM_00635E   | 1258.952  | 2091.072  | NM_00639E | 3803.549  |
| BC021298  | 798.488   | 899.95    | NM_01643E   | 983.021   | 1723.622  | NM_01430E | 2004.808  |
| U52096    | 6204.195  | 5127.432  | NM_00444E   | 4261.001  | 4087.638  | NM_001084 | 1271.604  |
| AB013897  | 1596.616  | 1999.477  | NM_001204   | 1678.976  | 1458.57   | M33197    | 57867.547 |
| NM_00552E | 22934.826 | 25322.463 | BF131321    | 1052.3    | 1204.96   | NM_01462E | 8547.859  |
| AK001669  | 3763.59   | 3391.493  | NM_01211E   | 2494.01   | 2026.172  | NM_007244 | 3474.801  |
| NM_00619E | 5443.513  | 6954.049  | NM_00002E   | 4094.077  | 3334.417  | M30629    | 3593.2    |
| NM_00619E | 7851.877  | 7676.851  | NM_00095E   | 941.371   | 899.705   | AF193873  | 3869.477  |
| NM_00636E | 2737.867  | 1952.585  | NM_00244E   | 2587.677  | 3075.817  | NM_00262E | 2027.615  |
| NM_00413E | 628.616   | 565.485   | AB033091    | 12838.358 | 11254.33  | BF974315  | 772.321   |
| NM_00161E | 9926.952  | 8801.716  | NM_00455E   | 8860.15   | 11650.684 | AI652705  | 3216.36   |
| BC000401  | 6706.391  | 8285.809  | NM_01475E   | 4365.133  | 3885.669  | AA569974  | 1570.256  |
| NM_00642E | 5182.424  | 4601.515  | NM_01789E   | 647.31    | 825.076   | AA923615  | 2338.197  |
| BF344046  | 2214.695  | 2147.453  | NM_001584   | 2082.997  | 1811.451  | AA446028  | 448.188   |
| AF432218  | 10991.416 | 9993.532  | NM_01225E   | 52974.918 | 57997.754 | M80583    | 353.404   |
| NM_00428E | 3852.855  | 5195.479  | AF272357    | 2107.271  | 2058.496  | X07767    | 1920.928  |
| AK025082  | 2545.986  | 1576.048  | NM_01637E   | 48758.473 | 58791.984 | AF016903  | 15804.516 |
| AF086535  | 1161.483  | 953.647   | AB020705    | 2262.456  | 1747.284  | NM_01567E | 4325.604  |
| AB040901  | 1239.023  | 1112.44   | NM_01433E   | 701.504   | 640.516   | NM_01604E | 672.538   |
| AL137406  | 2966.385  | 3695.942  | NM_00298E   | 1887.052  | 2047.256  | M33197    | 53625.582 |
| NM_01225E | 3891.534  | 3217.028  | NM_00048E   | 687.959   | 830.42    | AF031136  | 31362.449 |
| NM_00687E | 1567.793  | 1183.278  | NM_016274   | 2562.277  | 2194.724  | U90878    | 731.619   |
| NM_00029E | 1490.949  | 3072.058  | U53532      | 580.017   | 741.777   | NM_00659E | 11776.045 |
| AF153821  | 2895.329  | 1839.038  | NM_00571E   | 66084.602 | 61671.254 | NM_01248E | 4796.196  |
| NM_01337E | 1894.422  | 1183.797  | NM_00241E   | 646.214   | 681.737   | NM_00349E | 2360.658  |
| NM_001374 | 895.357   | 624.984   | NM_00272E   | 1486.315  | 938.38    | AB023420  | 5507.821  |
| NM_00331E | 2738.945  | 3627.614  | NM_00045E   | 661.012   | 631.333   | NM_016511 | 4072.298  |
| AK024461  | 2518.746  | 2359.414  | NM_00044E   | 719.013   | 853.441   | M33197    | 56057.023 |



|           |           |           |             |           |           |           |           |
|-----------|-----------|-----------|-------------|-----------|-----------|-----------|-----------|
| AK025485  | 597.447   | 609.733   | NM_004513   | 11786.824 | 11576.167 | NM_013229 | 1348.721  |
| NM_017635 | 2137.354  | 2012.413  | NM_001708   | 19768.838 | 24203.789 | NM_016533 | 1769.255  |
| X62534    | 1015.34   | 926.945   | NM_017735   | 2936.968  | 3073.39   | NM_014751 | 820.302   |
| AF027147  | 20604.215 | 26028.672 | AF208291    | 2411.35   | 2033.061  | NM_002347 | 9684.199  |
| M62399    | 3517.477  | 2915.437  | NM_000276   | 755.054   | 1281.872  | AB046807  | 1398.871  |
| NM_002357 | 936.808   | 1054.62   | AK023701    | 1339.797  | 2073.282  | NM_018066 | 12765.26  |
| U71600    | 1439.67   | 1644.789  | NM_003742   | 5099.329  | 5443.58   | NM_006931 | 1738.775  |
| NM_004472 | 1361.511  | 1475.817  | NM_005094   | 4014.601  | 4522.491  | NM_020344 | 4675.097  |
| AB037862  | 5748.614  | 4365.897  | BE382905    | 1654.333  | 2200.709  | NM_005050 | 1581.213  |
| AF085924  | 449.322   | 691.218   | NM_002152   | 7791.278  | 10231.527 | M33197    | 64362.934 |
| AK023887  | 1131.625  | 1209.321  | AK022558    | 3396.659  | 4138.78   | NM_018976 | 6236.272  |
| AF088022  | 16417.109 | 15723.725 | NM_000809   | 775.747   | 779.82    | NM_003355 | 1150.736  |
| AK026537  | 3552.652  | 2192.321  | AB018258    | 688.686   | 728.136   | NM_005074 | 639.21    |
| NM_015485 | 2744.813  | 3671.79   | AL359592    | 1277.173  | 1221.381  | NM_018057 | 1187.433  |
| AF147411  | 600.555   | 773.29    | NM_006078   | 10871.607 | 10586.955 | M33197    | 59398.336 |
| NM_002666 | 4775.474  | 4461.458  | NM_000824   | 608.955   | 522.549   | NM_015925 | 995.676   |
| AF202145  | 3302.858  | 2157.097  | NM_017532   | 6379.626  | 5454.141  | AF220217  | 485.331   |
| AK026155  | 3304.974  | 3018.258  | AK025495    | 2095.501  | 1156.945  | NM_013323 | 2249.143  |
| NM_018052 | 30461.035 | 35700.082 | NM_001091   | 2164.856  | 2928.958  | NM_017426 | 553.846   |
| AF143322  | 977.143   | 779.176   | AK023915    | 7432.195  | 6942.398  | M33197    | 549.116   |
| AK022386  | 4889.806  | 4568.023  | AB051453    | 3606.53   | 2109.198  | M33197    | 71324.422 |
| NM_002767 | 4763.784  | 5767.248  | AK026842    | 1147.052  | 571.962   | NM_000359 | 6268.719  |
| AF131846  | 12160.71  | 12211.643 | NM_002395   | 2101.173  | 2743.785  | NM_006395 | 3971.697  |
| AF088069  | 2327.038  | 3110.322  | AB023203    | 1420.77   | 721.414   | NM_014306 | 2602.345  |
| AF086551  | 1079.66   | 1549.301  | NM_014963   | 3559.784  | 4046.857  | NM_001084 | 2653.491  |
| NM_013393 | 5334.081  | 5724.013  | NM_004259   | 566.493   | 897.976   | NM_015983 | 1065.243  |
| AK025072  | 1946.809  | 2685.622  | NM_016271   | 3484.317  | 4913.317  | NM_018622 | 4701.648  |
| AK022410  | 1159.012  | 1886.157  | NM_016619   | 4497.145  | 4615.247  | M33197    | 57073.063 |
| AF086541  | 637.62    | 670.116   | NM_014481   | 1175.446  | 1089.167  | NM_005867 | 3040.277  |
| L10378    | 10379.965 | 13595.088 | U22172      | 3017.353  | 3750.274  | AK026031  | 5004.213  |
| AK022179  | 1486.902  | 1125.911  | AB032960    | 1682.858  | 1790.836  | NM_016468 | 1643.996  |
| AK022173  | 428.168   | 595.118   | NM_014264   | 6018.754  | 4595.609  | NM_007342 | 2040.26   |
| AJ227860  | 1196.398  | 1275.875  | AF020089    | 2206.952  | 2453.733  | D25217    | 1026.851  |
| AL157448  | 1399.18   | 1302.496  | NM_006257   | 3407.497  | 3028.383  | NM_006351 | 2299.711  |
| AF026942  | 1522.556  | 1839.256  | NM_016281   | 10112.826 | 7954.786  | M33197    | 34022.098 |
| AJ276429  | 2732.721  | 1807.653  | NM_004734   | 19374.588 | 23442.574 | NM_004683 | 1614.535  |
| AL117657  | 794.014   | 1212.523  | AK024793    | 2465.564  | 2239.906  | AK023226  | 639.934   |
| AK023589  | 913.09    | 543.563   | AF272357    | 2514.647  | 2624.691  | M33197    | 35549.215 |
| AK021590  | 3649.087  | 3057.982  | NM_016372   | 41228.082 | 53006.934 | NM_004688 | 15044.755 |
| AB002441  | 1052.609  | 904.538   | NM_015886   | 1527.246  | 1457.618  | AB037725  | 957.106   |
| AK023998  | 599.717   | 1015.971  | NM_020358   | 575.977   | 613.364   | M33197    | 37655.414 |
| AK021643  | 1118.911  | 971.833   | NM_007102   | 61426.078 | 58898.27  | NM_004860 | 2503.078  |
| X65706    | 294.096   | 1974.962  | BG491613    | 13466.737 | 7577.288  | AF217190  | 5155.562  |
| AK027147  | 6024.261  | 6152.306  | AA397813    | 38434.504 | 27591.797 | AB028981  | 17284.377 |
| AK022415  | 21479.881 | 26250.268 | W47350      | 1527.173  | 1112.241  | NM_006800 | 1897.821  |
| AL137368  | 879.811   | 1028.369  | AI160964    | 582.355   | 803.162   | NM_002476 | 1514.741  |
| AK021932  | 1816.273  | 2461.728  | W68291      | 7027.538  | 12720.793 | NM_002729 | 5599.401  |
| AK026787  | 5683.024  | 8396.427  | N64384      | 1810.817  | 2359.958  | M33197    | 4467.76   |
| AK023542  | 1814.991  | 1989.625  | H-X 53655 I | 2148.303  | 1835.228  | AL050139  | 2773.479  |
| AK000203  | 871.619   | 1068.328  | H-U 05770 I | 10797.379 | 5446.141  | NM_004558 | 1971.215  |
| AK021845  | 6330.653  | 7615.419  | H-M 65199   | 9058.693  | 9503.115  | AL079296  | 1633.79   |
| AK022434  | 734.029   | 515.283   | H-M 32315   | 3524.004  | 2850.189  | NM_014770 | 1049.053  |
| NM_018592 | 1680.703  | 1815.057  | H-V00536M   | 1446.184  | 1651.788  | M33197    | 60080.703 |

|           |           |           |           |           |           |           |           |
|-----------|-----------|-----------|-----------|-----------|-----------|-----------|-----------|
| NM_018503 | 31122.148 | 24928.951 | H-D85429M | 5281.675  | 3591.902  | AK023103  | 1903.406  |
| NM_016449 | 21441.729 | 17093.16  | BF439832  | 1558.693  | 1751.054  | NM_017858 | 1243.012  |
| AL049670  | 4437.97   | 4708.547  | BG819162  | 2016.635  | 1804.794  | NM_019059 | 25052.35  |
| NM_018512 | 17148.574 | 14165.611 | NM_002728 | 2004.689  | 1505.211  | NM_004132 | 5692.609  |
| NM_018568 | 895.614   | 814.384   | NM_000450 | 814.327   | 748.301   | NM_014844 | 2278.573  |
| AK022412  | 2563.091  | 3092.275  | NM_000448 | 709.166   | 1079.198  | M33197    | 59745.07  |
| AK023073  | 4979.006  | 6124.35   | AB014564  | 1209.887  | 1276.433  | NM_018492 | 544.063   |
| AK023697  | 1125.355  | 588.66    | NM_020230 | 2435.734  | 2562.205  | NM_001346 | 2079.477  |
| AK023922  | 1674.13   | 1403.645  | NM_006762 | 55519.598 | 54279.602 | NM_003149 | 1106.988  |
| AK024082  | 1251.548  | 1310.148  | NM_006352 | 1174.085  | 1293.769  | NM_003377 | 3208.07   |
| NM_003948 | 852.446   | 767.613   | NM_016430 | 902.64    | 1207.638  | NM_002220 | 3412.836  |
| Z27405    | 25168.039 | 27650.334 | NM_004447 | 4538.061  | 3886.417  | D38169    | 1266.172  |
| AK023412  | 1755.623  | 2343.764  | NM_001204 | 1741.751  | 1709.405  | M33197    | 35972.105 |
| NM_014617 | 28411.42  | 35988.934 | BF131321  | 1512.876  | 1462.858  | NM_002447 | 4722.137  |
| AK074682  | 4438.957  | 5447.715  | NM_012116 | 2438.688  | 2556.738  | NM_014145 | 5413.601  |
| X74605    | 1297.61   | 1276.756  | NM_000020 | 4760.89   | 5327.013  | NM_002223 | 2407.054  |
| AK024513  | 1454.109  | 1517.059  | NM_000956 | 1184.547  | 1928.982  | M33197    | 60361.66  |
| BC036692  | 3051.214  | 2823.605  | NM_002442 | 2185.528  | 2119.343  | NM_005490 | 1743.613  |
| AJ009640  | 4940.97   | 4006.24   | AB033091  | 11268.905 | 10076.141 | NM_003151 | 1696.748  |
| Y11163    | 705.621   | 498.793   | NM_017893 | 634.088   | 630.581   | NM_004324 | 1616.111  |
| AF147340  | 792.421   | 846.975   | NM_001584 | 1831.234  | 1447.158  | NM_005614 | 6494.34   |
| AF035308  | 7074.479  | 8733.428  | NM_000809 | 895.2     | 796.266   | NM_004556 | 3860.047  |
| NM_014054 | 2802.773  | 4417.196  | NM_005953 | 5579.943  | 18468.316 | D90075    | 1501.361  |
| AK021840  | 30869.273 | 31580.738 | NM_014264 | 6204.884  | 5821.183  | M33197    | 55681.703 |
| AK022228  | 2235.824  | 1456.908  | AF020089  | 2946.147  | 2713.99   | NM_014857 | 630.644   |
| AK022031  | 656.69    | 487.015   | NM_006257 | 3432.21   | 2613.5    | AK021702  | 1312.011  |
| AF086480  | 2250.473  | 3646.937  | NM_016281 | 11704.48  | 10704.833 | NM_016448 | 577.787   |
| AK000806  | 50480.789 | 47961.902 | AF208291  | 2827.356  | 2374.759  | M33197    | 47010.309 |
| NM_016471 | 3394.884  | 5163.996  | NM_002335 | 391.454   | 396.268   | NM_004415 | 1393.433  |
| Z11852    | 687.015   | 570.063   | BE382905  | 1044.941  | 1441.478  | NM_007278 | 10851.033 |
| NM_001145 | 703.911   | 929.167   | NM_001701 | 710.25    | 871.881   | NM_005219 | 3329.577  |
| NM_005364 | 11431.231 | 13131.936 | AK022558  | 3422.753  | 5509.427  | NM_004723 | 2455.733  |
| AK023482  | 5185.338  | 4029.819  | M38449    | 4612.212  | 3159.018  | M33197    | 36566.496 |
| AK022798  | 637.365   | 648.674   | AK026842  | 1088.385  | 747.699   | M33197    | 52851.605 |
| AL157423  | 870.723   | 1018.685  | NM_002395 | 1652.791  | 3624.252  | NM_016219 | 4840.666  |
| AK023176  | 1959.949  | 1124.275  | NM_004259 | 804.572   | 1020.75   | AK025605  | 1867.252  |
| AL161991  | 16522.221 | 17062.578 | NM_016271 | 5145.438  | 8022.356  | NM_003783 | 887.757   |
| D17032    | 14228.551 | 20171.377 | NM_016619 | 4991.099  | 4721.389  | NM_007000 | 5990.292  |
| AL137292  | 820.975   | 1334.918  | NM_014481 | 1458.725  | 1151.244  | M23161    | 3936.21   |
| NM_017941 | 1842.939  | 2019.905  | U22172    | 3858.768  | 4160.241  | NM_006100 | 806.251   |
| BE900527  | 1816.953  | 1700      | AB032960  | 2077.838  | 2622.071  | NM_003197 | 2540.994  |
| D28384    | 65476.059 | 54475.793 | NM_017675 | 3080.574  | 2430.657  | D29012    | 2385.62   |
| AF118079  | 24988.475 | 22851.139 | NM_015991 | 1568.025  | 1413.553  | NM_017414 | 1741.43   |
| AF277572  | 1543.039  | 1668.977  | NM_006654 | 1659.193  | 2246.958  | NM_012179 | 14594.944 |
| AL365413  | 6971.943  | 6748.932  | NM_002342 | 1473.325  | 2362.624  | M33197    | 29983.406 |
| NM_005258 | 6383.721  | 8402.859  | NM_002184 | 1428.692  | 1364.219  | AL442083  | 1709.856  |
| NM_000440 | 5686.813  | 7339.874  | NM_014883 | 2136.468  | 1800.506  | D63487    | 3492.808  |
| NM_001297 | 4730.029  | 5485.707  | NM_003657 | 1231.253  | 958.58    | AK097791  | 2449.628  |
| NM_004403 | 6131.831  | 7298.334  | NM_000588 | 782.665   | 996.214   | AK022705  | 3846.952  |
| X64993    | 1491.973  | 1114.802  | AL049296  | 3716.396  | 5441.56   | NM_020163 | 1527.522  |
| NM_004434 | 8363.806  | 9716.591  | NM_014471 | 24323.377 | 27227.166 | NM_006608 | 2950.715  |
| NM_006269 | 660.382   | 680.873   | NM_004397 | 3328.606  | 2931.785  | M34356    | 1255.541  |
| NM_016230 | 4598.45   | 1837.949  | NM_020238 | 3053.14   | 3962.405  | AJ133115  | 5258.191  |

|             |           |           |           |           |           |           |           |
|-------------|-----------|-----------|-----------|-----------|-----------|-----------|-----------|
| NM_001083   | 1655.442  | 1114.155  | D49356    | 1228.758  | 1271.497  | X51630    | 4551.542  |
| AK023966    | 5903.657  | 5419.024  | NM_018579 | 734.592   | 1151.357  | NM_005056 | 1370.277  |
| AK025702    | 3123.229  | 2199.973  | NM_006201 | 1003.582  | 1295.249  | AF208502  | 9531.044  |
| NM_018958   | 1902.589  | 1284.959  | NM_007110 | 1501.948  | 1004.513  | M33197    | 52624.285 |
| AK022038    | 1257.755  | 1287.232  | U50383    | 6525.188  | 7859.333  | AF264750  | 7161.52   |
| AK025119    | 586.291   | 943.911   | AK025085  | 6705.011  | 6648.019  | NM_006980 | 878.479   |
| AJ224170    | 1031.66   | 849.26    | NM_006290 | 1655.295  | 2110.533  | AK023904  | 1214.861  |
| AF085866    | 3284.882  | 3783.7    | AK022290  | 2718.191  | 2058.278  | NM_017956 | 5008.192  |
| CY3Cy5      | 5010.735  | 242.975   | NM_003680 | 38370.465 | 54776.449 | NM_017826 | 754.301   |
| AA397813    | 15563.443 | 25856.523 | AF118124  | 41262.352 | 36717.539 | NM_016496 | 1668.573  |
| W47350      | 1475.752  | 1082.745  | NM_004849 | 14229.346 | 10774.861 | NM_014309 | 2589.321  |
| W68291      | 28521.145 | 25242.746 | AL137527  | 7327.926  | 6703.881  | M33197    | 16960.801 |
| N64384      | 3897.912  | 2276.742  | AK026068  | 2003.116  | 887.962   | NM_004094 | 919.968   |
| H-X 53655 I | 1782.101  | 1404.749  | J04974    | 22451.783 | 26248.416 | NM_020236 | 2632.872  |
| H-U 05770 I | 17514.486 | 6723.496  | NM_007058 | 5275.402  | 4862.179  | AK027059  | 1480.12   |
| H-M 65199   | 12771.915 | 9674.922  | NM_000396 | 6189      | 531.222   | AF038182  | 818.095   |
| H-M 32315   | 7602.874  | 4079.121  | NM_001528 | 4616.272  | 3795.181  | NM_016475 | 1963.484  |
| BF439832    | 3550.461  | 2481.125  | NM_007014 | 2612.279  | 2726.65   | NM_001865 | 41852.559 |
| BG819162    | 1786.086  | 1448.897  | AL096740  | 1219.358  | 951.116   | NM_006441 | 5325.543  |
| NM_017532   | 4692.026  | 3534.563  | AF191545  | 814.709   | 824.532   | NM_001918 | 1751.302  |
| SR6         | 3381.157  | 3082.086  | NM_014554 | 1420.293  | 2114.451  | NM_018245 | 3019.617  |
| SR8         | 11487.257 | 19457.18  | AL137484  | 2908.403  | 3158.468  | M33197    | 46293.695 |
| SR10        | 38664.215 | 10060.062 | AK023968  | 967.9     | 941.359   | NM_012117 | 4128.649  |
| CY3Cy5      | 5416.91   | 326.786   | NM_004652 | 872.865   | 707.587   | D17130    | 61341.992 |
| NM_004447   | 4972.44   | 3799.104  | AK025425  | 23191.438 | 28807.676 | X76302    | 2659.092  |
| NM_001204   | 1944.188  | 1609.27   | AK025974  | 24568.143 | 32966.789 | AK026276  | 939.753   |
| BF131321    | 810.597   | 1088.856  | NM_001747 | 11471.004 | 17998.469 | M33197    | 49914.816 |
| NM_012116   | 3278.733  | 3341.391  | NM_001148 | 16728.176 | 11053.28  | X52354    | 906.321   |
| NM_000020   | 6212.821  | 5910.78   | AF242522  | 4269.81   | 3669.59   | NM_005413 | 1863.788  |
| NM_000956   | 2531.369  | 5925.887  | NM_004024 | 1601.819  | 1740.882  | NM_002315 | 2136.322  |
| NM_002442   | 3208.192  | 4207.682  | X52345    | 14306.005 | 20334.545 | AK024191  | 2421.884  |
| AB033091    | 10169.111 | 8318.414  | NM_006965 | 4300.342  | 6818.901  | D83781    | 333.336   |
| NM_004557   | 7418.993  | 9475.234  | AF027142  | 55713.641 | 53650.949 | AL832699  | 2805.908  |
| NM_014757   | 4272.186  | 2947.457  | S67970    | 1471.374  | 1255.1    | NM_012191 | 812.519   |
| NM_001584   | 2376.827  | 1710.541  | AF221520  | 4495.025  | 5249.815  | M33197    | 44635.254 |
| NM_012259   | 33808.617 | 34629.652 | NM_006941 | 35652.078 | 45315.859 | NM_018139 | 957.192   |
| AF272357    | 3586.878  | 1853.939  | AB037852  | 1368.154  | 1635.628  | NM_014805 | 3744.592  |
| AB020705    | 1482.974  | 981.832   | NM_005360 | 2564.259  | 2095.741  | AF052120  | 1900.288  |
| NM_002980   | 1804.255  | 2538.569  | NM_004349 | 3193.576  | 3120.909  | NM_014871 | 681.674   |
| NM_015886   | 1654.268  | 1739.551  | NM_002092 | 5424.639  | 5384.546  | M33197    | 54042.855 |
| BG491613    | 8665.414  | 8522.25   | AK021416  | 2238.922  | 1785.229  | AL137552  | 1334.249  |
| NM_004251   | 6613.911  | 3963.423  | NM_018471 | 13353.983 | 13791.357 | AK024522  | 1499.763  |
| BF337921    | 2866.824  | 2033.907  | NM_003819 | 8196.24   | 23865.393 | NM_007198 | 3076.227  |
| U53532      | 2307.451  | 2504.184  | NM_016183 | 3481.764  | 3381.588  | NM_014958 | 716.671   |
| NM_012484   | 5633.059  | 4732.45   | NM_004872 | 6106.345  | 5272.93   | M33197    | 55903.637 |
| AL096732    | 1822.395  | 1878.205  | NM_001958 | 54330.754 | 55976.691 | AK023220  | 1805.247  |
| AB006423    | 1574.525  | 1833.945  | NM_015904 | 11450.363 | 6758.732  | AK024566  | 2262.164  |
| NM_005719   | 71535.07  | 61885.141 | NM_001960 | 46581.207 | 52314.555 | AK025683  | 1421.08   |
| NM_003462   | 13678.914 | 28072.75  | NM_018122 | 5557.532  | 4438.797  | M33197    | 69959.117 |
| NM_006093   | 5296.608  | 6701.226  | AF035318  | 1857.862  | 1311.808  | AK024981  | 11811.557 |
| NM_000139   | 2079.986  | 2564.074  | NM_015456 | 5689.174  | 5502.318  | AK027246  | 748.23    |
| NM_006664   | 5944.295  | 7614.368  | AK025056  | 4978.039  | 2379.333  | U80766    | 1852.674  |
| NM_002728   | 1264.312  | 746.031   | AF140710  | 9618.793  | 6786.16   | AK001638  | 1581.732  |

|             |           |           |           |           |           |           |           |
|-------------|-----------|-----------|-----------|-----------|-----------|-----------|-----------|
| NM_00045C   | 677.154   | 321.744   | NM_01208E | 17276.061 | 16783.283 | AF161386  | 5001.608  |
| NM_00170E   | 22435.354 | 19811.758 | NM_017947 | 1114.842  | 990.942   | AL365369  | 1572.258  |
| NM_01773E   | 2366.601  | 2954.682  | NM_002494 | 10180.224 | 10171.481 | AK025454  | 2240.094  |
| AB033044    | 5861.932  | 5240.13   | M58510    | 5805.346  | 6345.795  | M33197    | 43162.434 |
| AB014564    | 1000.847  | 1168.541  | NM_003904 | 1977.787  | 4905.977  | X05826    | 4527.85   |
| NM_02023C   | 2225.773  | 3202.299  | NM_006234 | 33794.371 | 18059.969 | AJ001872  | 2628.2    |
| NM_00676E   | 67760.5   | 65615.586 | AK026387  | 1147.779  | 1011.733  | AJ227882  | 921.148   |
| NM_01643C   | 998.193   | 1351.023  | AB028987  | 6932.715  | 6205.813  | L33811    | 1162.283  |
| NM_00374E   | 4020.217  | 2538.67   | NM_003594 | 1604.17   | 1287.084  | NM_00559E | 3980.623  |
| NM_005094   | 2925.927  | 2662.434  | NM_005521 | 4484.005  | 3942.027  | Y10515    | 986.082   |
| NM_00233E   | 337.114   | 546.081   | AF164438  | 14971.425 | 15852.212 | M87942    | 1137.718  |
| BE382905    | 1497.704  | 2237.753  | AK022284  | 3207.102  | 1536.293  | AK023636  | 5080.799  |
| NM_00215E   | 6195.204  | 8242.838  | AB040893  | 3990.037  | 3720.11   | D25272    | 2562.503  |
| NM_001701   | 906.383   | 536.62    | AK025844  | 1415.493  | 1331.168  | M33197    | 60086.328 |
| AK022558    | 4133.144  | 6196.944  | AL137727  | 1766.318  | 1593.347  | NM_02016E | 2080.924  |
| AK023787    | 4663.922  | 3420.834  | L17327    | 653.96    | 439.67    | AB037771  | 712.006   |
| NM_00213E   | 2828.788  | 2834.28   | AF074986  | 1655.884  | 1147.2    | AK025931  | 46430.492 |
| NM_015697   | 2167.882  | 3756.866  | AF075004  | 492.471   | 506.942   | M33197    | 768.769   |
| AF086489    | 621.644   | 1045.542  | AL049240  | 5235.704  | 4075.257  | AK021972  | 1229.448  |
| NM_007177   | 11475.554 | 8620.688  | U80773    | 2727.317  | 2224.619  | M33197    | 63585.008 |
| NM_00080E   | 916.32    | 469.464   | AK021745  | 3281.785  | 2177.494  | AK001083  | 873.447   |
| NM_000824   | 515.056   | 475.313   | L38937    | 8087.217  | 6910.308  | AK000185  | 886.462   |
| NM_00595E   | 2578.264  | 15905.688 | U90907    | 1362.754  | 1151.828  | NM_01796E | 881.313   |
| AK023915    | 4472.431  | 4391.036  | AK024327  | 1518.406  | 1697.286  | AK000865  | 1150.288  |
| AB051453    | 3213.313  | 2380.452  | AK000801  | 3075.663  | 2501.357  | M33197    | 55161.691 |
| AK026842    | 1215.211  | 712.177   | D85433    | 5235.939  | 4584.811  | AK024779  | 2194.537  |
| NM_00239E   | 4350.827  | 4615.47   | AF086184  | 12368.506 | 14581.697 | AK024940  | 1313.375  |
| AB023203    | 2655.604  | 4176.626  | NM_01827E | 8022.168  | 9523.368  | AK024406  | 1537.253  |
| NM_00425E   | 1430.542  | 1162.592  | AF088045  | 825.716   | 1138.49   | AK024568  | 15819.253 |
| NM_016271   | 3704.675  | 5400.593  | AF007149  | 988.206   | 980.562   | AK024873  | 1104.867  |
| NM_01661E   | 2983.45   | 4066.179  | NM_01470E | 588.262   | 807.57    | AK024994  | 886.764   |
| NM_014481   | 1173.465  | 2145.297  | AK001469  | 1128.76   | 943.534   | NM_018381 | 1035.37   |
| U22172      | 2092.818  | 2053.137  | AK021627  | 1725.821  | 1436.749  | M33197    | 39148.859 |
| AB032960    | 1925.034  | 1610.806  | AF085859  | 7230.949  | 3847.62   | AK026277  | 3270.928  |
| NM_014264   | 4785.883  | 4033.821  | AF085888  | 506.178   | 377.093   | U10509    | 1569.576  |
| AF020089    | 2227.04   | 1602.368  | AJ420504  | 1264.961  | 873.167   | NM_00716E | 27360.756 |
| NM_006257   | 3141.219  | 2538.782  | AK026307  | 5444.269  | 5100.64   | NM_01401E | 2303.791  |
| NM_016281   | 7502.159  | 6136.766  | AF075047  | 1188.873  | 817.537   | AF147318  | 1291.445  |
| NM_004734   | 13309.706 | 17153.537 | AF147403  | 380.012   | 806.521   | M33197    | 62938.512 |
| AK024793    | 1871.7    | 1164.635  | AL049260  | 1122.344  | 1506.852  | AL137556  | 1093.779  |
| AF208291    | 888.373   | 806.225   | AL049975  | 2467.657  | 3042.694  | NM_01469E | 10838.524 |
| NM_004877   | 47298.34  | 44243.898 | AL080160  | 1463.751  | 1346.588  | AL359055  | 2157.212  |
| NM_01588E   | 1843.956  | 1214.364  | L23849    | 1995.041  | 1694.077  | NM_01490E | 2194.107  |
| NM_00426E   | 752.23    | 916.84    | AL157477  | 3274.22   | 4834.346  | AF086125  | 1554.859  |
| BG491613    | 8941.777  | 9726.384  | AK022083  | 470.325   | 407.082   | U67847    | 1044.706  |
| AA397813    | 14451.421 | 29905.029 | AL049951  | 1267.785  | 1296.222  | AL137321  | 4055.794  |
| W47350      | 1917.844  | 1648.597  | AK024963  | 1760.17   | 1025.578  | M33197    | 50621.672 |
| AF097935    | 2700.087  | 1015.26   | AK023725  | 1060.241  | 967.913   | AK024207  | 1798.017  |
| AI160964    | 978.625   | 924.406   | AK022936  | 2841.312  | 2936.165  | AK021843  | 1345.967  |
| N64384      | 3945.009  | 3099.73   | AK024385  | 4683.341  | 6448.607  | AF075025  | 6029.636  |
| H-X 53655 I | 1451.855  | 1447.29   | NM_01770E | 1685.205  | 1433.167  | AF116623  | 1694.978  |
| H-U 05770 I | 16319.359 | 5439.348  | NM_01435E | 16453.063 | 15947.583 | AF088008  | 1281.626  |
| H-M 65199   | 12956.397 | 10365.069 | AF009282  | 8113.158  | 8614.769  | AK023528  | 1754.646  |

|           |           |           |           |           |           |           |           |
|-----------|-----------|-----------|-----------|-----------|-----------|-----------|-----------|
| H-M 32315 | 6447.735  | 2893.578  | AF024704  | 10400.633 | 16739.727 | M33197    | 49145.031 |
| H-V00536M | 2716.252  | 1807.229  | AF056431  | 2199.631  | 1891.936  | AF147349  | 2311.792  |
| H-D85429M | 4323.911  | 5083.703  | NM_016412 | 3262.811  | 3133.488  | AL050346  | 15233.12  |
| BF439832  | 3522.495  | 3077.98   | AF009293  | 2806.757  | 2502.891  | AK001520  | 2652.404  |
| BG819162  | 1724.977  | 1256.819  | NM_004155 | 62820.297 | 58179.176 | D90070    | 3255.406  |
| NM_017532 | 4200.924  | 4162.149  | AF056444  | 8057.823  | 10071.305 | M33197    | 26412.588 |
| M38449    | 6525.359  | 5306.736  | AK000989  | 2474.541  | 1830.113  | AK025807  | 962.988   |
| AB033044  | 5077.307  | 4544.422  | NM_018065 | 641.485   | 400.979   | M33197    | 67885.281 |
| AB014564  | 956.234   | 1988.78   | AK002210  | 5163.531  | 3784.412  | AK025266  | 3259.71   |
| NM_02023C | 2423.4    | 3433.941  | AK021677  | 1858.128  | 1823.86   | AK001843  | 2983.822  |
| NM_006352 | 1836.584  | 2412.255  | AK001057  | 1756.705  | 1430.819  | AK000548  | 32162.293 |
| NM_01643C | 1240.606  | 1682.205  | AK001808  | 661.303   | 646.253   | NM_00392C | 11774.064 |
| NM_004447 | 4544.224  | 5938.514  | AK021471  | 1486.818  | 1634.162  | NM_004787 | 16536.26  |
| NM_001204 | 1899.998  | 1768.503  | AK021709  | 1323.66   | 1397.471  | AF087984  | 2546.722  |
| BF131321  | 1342.743  | 962.196   | AK025109  | 2500.525  | 2515.408  | M33197    | 56732.609 |
| NM_01654C | 1231.799  | 790.061   | AK026057  | 3714.813  | 3926.366  | AK022273  | 3331.618  |
| NM_00002C | 5990.502  | 5910.438  | AK025167  | 289.276   | 416.476   | NM_015882 | 969.32    |
| NM_000956 | 407.613   | 681.861   | AK026713  | 1006.166  | 1083.427  | AK021650  | 2801.044  |
| NM_002442 | 3045.928  | 2132.217  | AJ008117  | 16822.471 | 16158.183 | AL050210  | 2611.76   |
| AB033091  | 10104.107 | 5847.687  | AJ008147  | 30245.969 | 27553.609 | L37699    | 2279.987  |
| NM_004557 | 7595.278  | 7285.554  | AK024369  | 3106.105  | 2772.211  | M33197    | 49106.234 |
| NM_014757 | 4278.3    | 3038.038  | L43345    | 1389.436  | 650.234   | AL050173  | 2064.81   |
| NM_001584 | 2004.552  | 2097.447  | AF180297  | 7435.694  | 6762.459  | D80002    | 1483.725  |
| NM_012255 | 28252.055 | 39047.359 | AK023245  | 9966.44   | 9811.767  | U17637    | 7405.178  |
| AF272357  | 2690.093  | 2575.855  | AF147303  | 2160.137  | 1900.042  | AK023174  | 704.043   |
| NM_016372 | 26129.26  | 40936.496 | AF086224  | 689.857   | 1224.674  | NM_003548 | 2715.764  |
| AB020705  | 1610.186  | 1681.054  | S56365    | 59817.078 | 54378.578 | M33197    | 41818.691 |
| NM_00298C | 2108.173  | 2317.034  | AF186017  | 628.339   | 722.945   | NM_018272 | 11170.982 |
| NM_000482 | 709.234   | 349.16    | AK023607  | 2088.093  | 1712.771  | CY3Cy5    | 9195.453  |
| NM_005953 | 4277.857  | 21101.523 | AL049997  | 5915.945  | 5475.178  | R19938    | 3037.494  |
| NM_016274 | 4017.338  | 2267.698  | AK024118  | 1030.972  | 990.913   | N94487    | 8835.379  |
| NM_014946 | 1017.988  | 854.593   | X89657    | 877.933   | 1006.376  | AI886795  | 691.626   |
| NM_014251 | 3064.934  | 3644.738  | AK024509  | 2523.597  | 2004.875  | D10495    | 1373.724  |
| AK022750  | 4704.756  | 4532.321  | AL050185  | 768.929   | 689.33    | BF344679  | 2463.709  |
| U53532    | 1994.039  | 2194.146  | NM_017847 | 3962.852  | 3830.249  | M14156    | 1037.797  |
| NM_012484 | 5518.16   | 4843.011  | AL049675  | 5049.642  | 4652.26   | AK094237  | 1338.317  |
| AL096732  | 1785.91   | 1783.949  | AL050151  | 643.124   | 1087.367  | NM_006981 | 745.509   |
| AB006423  | 1502.599  | 1944.607  | AK021549  | 565.284   | 507.243   | SR2       | 56985.305 |
| AJ132084  | 457.465   | 582.938   | NM_003537 | 42149.883 | 30581.928 | SR4       | 13964.639 |
| NM_005719 | 65633.914 | 53831.371 | AF056419  | 29189.848 | 27864.314 | SR6       | 2322.502  |
| NM_002728 | 1426.176  | 1238.99   | AF074983  | 1759.972  | 3514.416  | SR8       | 6208.959  |
| NM_00045C | 706.61    | 1096.152  | AK021862  | 1113.229  | 904.063   | SR10      | 12106.86  |
| NM_000448 | 568.114   | 697.778   | AK024827  | 13260.367 | 10019.894 | CY3Cy5    | 4720.464  |
| NM_004513 | 7687.583  | 7085.855  | AK021952  | 2442.621  | 2202.085  | M33197    | 50171.59  |
| NM_001708 | 22005.779 | 25498.182 | K01564    | 1613.774  | 2055.968  | NM_007369 | 348.684   |
| NM_017735 | 2258.578  | 2749.118  | AB023175  | 1084.322  | 1975.496  | NM_014776 | 1535.257  |
| AF208291  | 1235.999  | 986.814   | AL359563  | 1084.777  | 1190.233  | NM_00648C | 7789.235  |
| NM_004877 | 48272.551 | 49342.203 | NM_005304 | 1048.406  | 1046.717  | NM_007223 | 13266.448 |
| L10284    | 53665.289 | 59343.523 | NM_014477 | 2590.483  | 3896.359  | NM_000145 | 597.777   |
| AK023701  | 927.048   | 1104.782  | AF086478  | 4128.183  | 2231.979  | AF030107  | 696.493   |
| NM_003742 | 4025.335  | 4059.411  | AF086022  | 3143.147  | 3642.292  | NM_000871 | 631.717   |
| NM_005094 | 3788.841  | 3127.693  | AK021514  | 49025.711 | 45834.34  | M33197    | 43415.148 |
| NM_002335 | 345.207   | 1187.573  | AJ008134  | 6672.504  | 9168.016  | AF086924  | 17744.686 |

|           |           |           |           |           |           |           |           |
|-----------|-----------|-----------|-----------|-----------|-----------|-----------|-----------|
| BE382905  | 1226.465  | 1414.552  | S71486    | 2023.328  | 1908.718  | AB058740  | 1269.206  |
| NM_002152 | 6632.56   | 8774.368  | L33808    | 27510.445 | 22853.064 | NM_003385 | 692.961   |
| NM_001701 | 1366.517  | 357.926   | D31886    | 2535.426  | 2864.966  | M33197    | 45203.422 |
| AK022558  | 3343.313  | 5073.28   | U92024    | 1628.985  | 1097.535  | NM_001154 | 1980.495  |
| AK023787  | 4436.11   | 2119.502  | AK023330  | 4418.528  | 3494.707  | NM_001819 | 2408.061  |
| NM_007177 | 11671.386 | 11968.083 | AF075071  | 3165.891  | 2027.006  | NM_015725 | 2346.177  |
| NM_000809 | 726.714   | 615.776   | AF147428  | 776.186   | 829.065   | R61452    | 678.794   |
| NM_000824 | 321.541   | 538.93    | AF001892  | 1467.554  | 4480.1    | NM_012455 | 1871.779  |
| NM_017532 | 4627.242  | 3227.644  | U79271    | 3006.818  | 2879.63   | NM_002806 | 5536.964  |
| M38449    | 6012.261  | 6017.678  | NM_019885 | 1396.039  | 1326.15   | M33197    | 47173.199 |
| AK025495  | 2687.589  | 1074.967  | AK024609  | 7318.296  | 7452.425  | NM_001716 | 357.891   |
| AK023915  | 4549.36   | 5028.518  | AK023660  | 829.298   | 620.835   | NM_006073 | 422.757   |
| AB051453  | 3556.613  | 2972.21   | NM_018120 | 10604.355 | 13449.763 | NM_006564 | 1511.345  |
| AK026842  | 1265.615  | 654.828   | AK026874  | 4672.298  | 5266.09   | NM_004802 | 792.062   |
| NM_002395 | 3733.421  | 4287.972  | AK024178  | 1095.915  | 985.048   | M33197    | 40781.656 |
| NM_004255 | 1076.81   | 1230.028  | D17217    | 2031.299  | 2083.008  | NM_000074 | 2416.771  |
| NM_016271 | 3175.241  | 3020.253  | AF088033  | 3566.075  | 3910.625  | BF434335  | 13324.901 |
| NM_014481 | 1944.204  | 1607.213  | NM_020422 | 1300.549  | 1350.457  | M57627    | 1031.595  |
| U22172    | 1652.596  | 1861.218  | AJ227897  | 1067.851  | 818.407   | NM_002993 | 1029.564  |
| AB032960  | 1504.889  | 1757.161  | AK023628  | 847.142   | 406.118   | AK026946  | 924.61    |
| NM_014264 | 4428.32   | 5720.433  | AY007156  | 2442.588  | 1949.19   | M33197    | 34036.836 |
| AF020089  | 1817.555  | 1911.231  | AF086408  | 38377.613 | 39554.75  | NM_003192 | 1683.195  |
| NM_006257 | 3300.057  | 3279.666  | AK023979  | 2451.584  | 4356.546  | NM_018449 | 1161.949  |
| NM_016281 | 8253.507  | 7757.561  | CY3Cy5    | 18264.688 | 2009.891  | D79994    | 408.889   |
| NM_004734 | 13489.72  | 16152.862 | U13738    | 745.498   | 485.219   | NM_014458 | 2720.418  |
| AK024793  | 2111.83   | 1657.083  | BG681747  | 7989.219  | 23833.146 | AF235049  | 2561.289  |
| NM_012255 | 36025.633 | 41645.676 | H63077    | 4112.397  | 2437.344  | NM_005164 | 607.199   |
| AF272357  | 3344.134  | 3442.64   | AA679352  | 11008.508 | 20414.553 | NM_001995 | 815.757   |
| NM_016372 | 39673.156 | 51111.262 | AA437291  | 895.466   | 922.456   | NM_000183 | 3726.195  |
| AB020705  | 1218.078  | 1709.409  | X04503    | 4757.973  | 5183.343  | AY004175  | 874.823   |
| NM_002980 | 2077.587  | 2457.949  | D45917    | 3181.424  | 2101.896  | M33197    | 17673.828 |
| NM_015886 | 1979.653  | 1879.513  | X52001    | 3351.671  | 3869.307  | NM_012327 | 1646.484  |
| NM_020358 | 468.792   | 671.803   | BI823872  | 5764.403  | 6094.597  | NM_000904 | 1275.024  |
| NM_004262 | 1032.29   | 1359.285  | AA430552  | 3817.271  | 4843.831  | NM_016048 | 272.031   |
| NM_007102 | 60985.156 | 55920.949 | X66142    | 1205.564  | 1819.08   | NM_000375 | 2818.285  |
| BG491613  | 8561.784  | 9460.632  | NM_005913 | 575.562   | 397.037   | NM_000265 | 8372.957  |
| AA397813  | 15462.981 | 32898.07  | R45054    | 3140.831  | 2753.702  | M33197    | 26332.385 |
| AF097935  | 1028.677  | 331.008   | NM_000620 | 986.816   | 763.639   | AF279890  | 873.189   |
| AI160964  | 572.076   | 324.551   | NM_000905 | 9889.301  | 6570.277  | NM_002236 | 776.846   |
| W68291    | 28059.344 | 25890.799 | SR9       | 13901.394 | 2803.567  | NM_012069 | 2371.796  |
| N64384    | 4119.042  | 2560.149  | CY3Cy5    | 20341.352 | 1806.776  | NM_001689 | 4556.45   |
| H-X 53655 | 1385.989  | 1662.187  | AF312769  | 1111.206  | 1200.814  | NM_016601 | 760.322   |
| H-U 05770 | 14780.995 | 5773.646  | AB020668  | 1584.691  | 2064.268  | NM_017905 | 2235.791  |
| H-M 65199 | 12752.455 | 14213.317 | NM_003558 | 539.98    | 687.775   | M33197    | 58687.418 |
| H-M 32315 | 6422.024  | 4639.294  | AF309553  | 4441.832  | 3554.51   | NM_006815 | 4013.015  |
| H-V00536M | 2460.314  | 2692.254  | NM_003605 | 1418.137  | 2668.723  | NM_001663 | 977.338   |
| H-D85429M | 4535.241  | 4852.22   | NM_006139 | 1074.642  | 1131.058  | NM_004218 | 2883.844  |
| BF439832  | 3426.178  | 3147.89   | NM_000100 | 30922.51  | 26633.172 | NM_016530 | 1401.936  |
| BG819162  | 1595.655  | 2012.672  | NM_003993 | 2162.852  | 3068.315  | NM_014804 | 593.817   |
| NM_002728 | 1828.075  | 1531.143  | NM_018961 | 1192.138  | 1397.655  | L40520    | 1029.54   |
| NM_000450 | 769.747   | 726.116   | NM_005586 | 3842.998  | 4399.478  | NM_002633 | 369.811   |
| NM_000448 | 559.999   | 629.653   | NM_012242 | 1389.002  | 1850.575  | M33197    | 26361.941 |
| NM_004513 | 7147.088  | 6673.547  | NM_006896 | 1346.726  | 954.128   | NM_002878 | 735.877   |

|           |           |           |           |           |           |           |           |
|-----------|-----------|-----------|-----------|-----------|-----------|-----------|-----------|
| NM_001708 | 21334.955 | 23443.432 | NM_001130 | 62837.16  | 61550.891 | NM_017723 | 1369.786  |
| NM_017735 | 2326.317  | 2777.699  | NM_002975 | 18813.99  | 20963.537 | AK022922  | 696.069   |
| AB033044  | 5745.706  | 6518.1    | AK023511  | 3822.545  | 3215.151  | NM_006462 | 1192.166  |
| AB014564  | 1031.383  | 1487.376  | NM_014375 | 26302.717 | 25675.031 | AK024750  | 1249.64   |
| NM_020230 | 2361.748  | 3421.963  | NM_017812 | 11701.216 | 14621.834 | NM_000400 | 5648.246  |
| NM_006762 | 57577.781 | 53917.301 | AF204173  | 1528.9    | 1364.151  | M33197    | 10351.763 |
| NM_006352 | 2096.535  | 3012.71   | J03260    | 2615.587  | 2863.296  | NM_002613 | 1822.634  |
| NM_016430 | 1492.764  | 2552.994  | NM_002865 | 3840.476  | 3735.812  | NM_004419 | 1054.298  |
| NM_012116 | 3632.364  | 3139.076  | NM_003566 | 1965.96   | 1383.348  | U47635    | 1231.367  |
| NM_000020 | 5953.962  | 5512.499  | NM_003731 | 11018.264 | 9930.312  | NM_018650 | 1249.812  |
| NM_000956 | 337.436   | 895.437   | NM_005446 | 5366.45   | 5140.018  | AK026945  | 1160.235  |
| NM_002442 | 2747.385  | 3299.032  | NM_013292 | 4082.34   | 3761.662  | NM_002828 | 709.821   |
| AB033091  | 8533.745  | 8621.824  | NM_002387 | 2249.166  | 2067.822  | NM_014369 | 1136.771  |
| NM_004557 | 6776.662  | 8492.273  | NM_000069 | 1240.905  | 1415.031  | M33197    | 58783.949 |
| NM_014757 | 4266.718  | 3606.694  | AB023217  | 785.369   | 854.537   | NM_001398 | 5464.71   |
| NM_017893 | 624.634   | 686.848   | L08902    | 1297.739  | 740.532   | AB050049  | 1760.827  |
| NM_001584 | 1958.901  | 2376.539  | J02639    | 3157.382  | 3548.692  | J05125    | 316.509   |
| AB018258  | 609.319   | 1388.813  | AF206020  | 4752.913  | 4291.441  | NM_001993 | 354.108   |
| AL359592  | 1158.022  | 1273.024  | NM_014410 | 2970.969  | 3111.692  | NM_015725 | 429.685   |
| NM_006078 | 8898.945  | 9618.604  | AF305835  | 1057.132  | 563.759   | R61452    | 564.138   |
| NM_000824 | 705.854   | 510.424   | NM_002150 | 5915.228  | 7039.83   | N94487    | 7278.568  |
| NM_005953 | 2720.142  | 18630.047 | NM_004595 | 5811.512  | 6412.038  | AI886795  | 960.586   |
| NM_016274 | 3750.527  | 1574.548  | NM_002264 | 599.345   | 773.312   | D10495    | 857.016   |
| NM_014946 | 929.602   | 985.277   | NM_014754 | 17648.338 | 13986.231 | BG743223  | 1172.088  |
| NM_005719 | 64816.238 | 58129.727 | D49387    | 1862.655  | 1765.869  | M14156    | 427.378   |
| NM_014264 | 5636.557  | 5652.066  | AF050146  | 5791.438  | 5081.933  | U86961    | 1459.646  |
| AF020089  | 2169.068  | 2165.122  | NM_000116 | 3079.263  | 4075.624  | NM_005191 | 986.716   |
| NM_006257 | 3769.401  | 3073.048  | NM_006698 | 11213.578 | 11145.791 | AK094237  | 1389.952  |
| NM_016281 | 8514.081  | 8490.473  | NM_006804 | 10939.809 | 13098.197 | AK056794  | 444.598   |
| NM_004734 | 16559.094 | 17194.711 | NM_015969 | 9598.078  | 6335.831  | L07592    | 1078.394  |
| AK024793  | 2174.988  | 1470.641  | NM_003051 | 4366.467  | 4795.007  | NM_006981 | 863.99    |
| AF208291  | 1492.165  | 1287.184  | NM_145342 | 6541.389  | 7563.678  | M33197    | 54155.203 |
| L10284    | 50698.305 | 55064.598 | AJ278917  | 19638.117 | 21307.451 | AK027244  | 489.715   |
| NM_000276 | 1443.416  | 2196.81   | AK025641  | 45238.086 | 51751.34  | NM_018449 | 2386.341  |
| NM_000019 | 55538.891 | 52878.684 | AB040457  | 490.195   | 680.899   | NM_014458 | 1721.284  |
| NM_002335 | 1594.578  | 1221.349  | AK025886  | 1552.928  | 1929.822  | M33197    | 47915.223 |
| NM_001701 | 785.949   | 743.355   | NM_003058 | 755.25    | 381.413   | NM_014776 | 1399.991  |
| AK022558  | 3900.691  | 6701.518  | NM_001720 | 5943.255  | 9133.082  | NM_006480 | 5384.03   |
| NM_006476 | 47068.574 | 47305.844 | NM_018390 | 1764.538  | 1936.188  | NM_007223 | 3377.958  |
| NM_000737 | 3454.982  | 4023.401  | AB037724  | 6507.888  | 6223.402  | NM_000871 | 466.744   |
| NM_001290 | 1022.389  | 701.707   | AK025086  | 1848.644  | 1618.804  | M33197    | 58021.133 |
| AL079273  | 3087.493  | 3797.781  | AK026151  | 9147.461  | 7781.37   | NM_018968 | 344.289   |
| NM_005045 | 562.745   | 432.142   | NM_014140 | 2633.767  | 2015.381  | NM_004392 | 354.752   |
| AK026129  | 1567.084  | 1418.193  | NM_002916 | 1834.71   | 1943.683  | M33197    | 57980.254 |
| AK024200  | 415.963   | 823.059   | M20700    | 2955.58   | 2562.997  | NM_001154 | 4168.285  |
| NM_003713 | 4040.008  | 5062.765  | NM_001034 | 2960.799  | 2801.993  | NM_001819 | 2616.002  |
| M38449    | 7055.429  | 5314.03   | NM_002689 | 1709.367  | 1517.93   | M33197    | 46808.969 |
| AK023915  | 5492.006  | 5526.847  | NM_017686 | 2648.23   | 1656.273  | NM_006815 | 4367.648  |
| AB051453  | 3755.485  | 2064.166  | AK000800  | 1934.235  | 3404.563  | NM_001663 | 1339.396  |
| NM_004259 | 846.991   | 1043.758  | NM_018154 | 3811.233  | 2815.58   | NM_004218 | 2293.8    |
| NM_016271 | 3259.803  | 5053.794  | NM_005358 | 888.207   | 1195.774  | NM_014804 | 224.879   |
| NM_016619 | 3427.793  | 4361.638  | BC006287  | 6043.837  | 4589.497  | NM_012455 | 1239.133  |
| NM_014481 | 1268.12   | 1803.422  | AB023198  | 6228.516  | 4280.115  | NM_002806 | 2871.116  |

|           |           |           |           |           |           |           |           |
|-----------|-----------|-----------|-----------|-----------|-----------|-----------|-----------|
| U22172    | 1858.948  | 2482.321  | AF304163  | 17674.678 | 10160.833 | M33197    | 44687.512 |
| AB032960  | 1831.066  | 1987.738  | NM_005231 | 4537.883  | 5186.717  | NM_006564 | 3004.204  |
| NM_017675 | 1413.375  | 1297.232  | AF064729  | 1577.865  | 1717.853  | BF434335  | 17454.027 |
| NM_015991 | 1264.068  | 789.509   | NM_005412 | 7357.372  | 14812.204 | M57627    | 834.674   |
| NM_005562 | 1409.991  | 1558.483  | NM_012113 | 3068.402  | 3813.936  | NM_002993 | 601.797   |
| NM_005233 | 928.988   | 1383.577  | NM_002725 | 2532.247  | 2319.407  | AK026946  | 761.307   |
| NM_002966 | 1076.73   | 964.919   | NM_017812 | 8821.725  | 9127.548  | M33197    | 49456.777 |
| NM_014285 | 2377.257  | 1664.182  | AF204173  | 1014.501  | 823.828   | NM_003192 | 2510.16   |
| D13631    | 3231.809  | 1353.908  | J03260    | 2372.154  | 2217.435  | NM_002828 | 593.956   |
| NM_003712 | 3779.548  | 4381.775  | U13738    | 979.735   | 770.813   | M33197    | 7929.589  |
| NM_002184 | 1625.034  | 1456.262  | AF068236  | 63712.891 | 57889.891 | NM_001398 | 549.716   |
| NM_014883 | 1837.7    | 1978.97   | H94487    | 2573.604  | 2554.345  | AB050049  | 658.951   |
| NM_017805 | 3550.167  | 6217.943  | H63077    | 3625.034  | 2522.976  | M33197    | 23874.342 |
| U56387    | 1021.626  | 1155.687  | AA679352  | 11308.73  | 16657.371 | NM_000904 | 490.401   |
| NM_003657 | 971.427   | 1287.509  | AA437291  | 659.542   | 659.957   | NM_016048 | 288.354   |
| AL049296  | 3592.228  | 5706.896  | X04503    | 5228.829  | 4783.299  | NM_000375 | 3503.354  |
| NM_014471 | 31614.613 | 33552.672 | D45917    | 4188.215  | 2545.584  | AF279890  | 2027.572  |
| NM_004397 | 1530.741  | 1476.163  | X52001    | 3887.332  | 4448.098  | NM_002236 | 933.336   |
| NM_020238 | 1775.115  | 1717.385  | BI823872  | 5597.54   | 5934.703  | NM_012069 | 2658.437  |
| D49356    | 1122.494  | 1109.286  | AA430552  | 2306.359  | 2065.147  | NM_001689 | 16718.537 |
| NM_018579 | 2351.427  | 3640.713  | X66142    | 1503.54   | 1650.152  | NM_016601 | 914.487   |
| NM_006201 | 2679.211  | 4001.865  | NM_005913 | 542.637   | 571.151   | NM_017905 | 4842.778  |
| NM_007110 | 3526.748  | 2546.261  | R45054    | 3293.327  | 2669.014  | NM_006981 | 610.697   |
| NM_001255 | 16857.854 | 13159.252 | NM_000620 | 525.585   | 681.549   | M33197    | 29973.268 |
| U50383    | 7144.531  | 8150.134  |           | 1465.572  | 1685.23   | L40520    | 537.973   |
| AK025085  | 5341.629  | 5397.013  | AL117398  | 6911.561  | 7605.72   | NM_002633 | 395.024   |
| NM_006290 | 1928.262  | 2079.911  | AY007158  | 60495.594 | 60479.43  | NM_002878 | 1719.818  |
| AK022290  | 2962.621  | 1577.258  | M58050    | 3564.514  | 6639.958  | NM_002412 | 409.503   |
| NM_003680 | 22882.178 | 42307.969 | AF206020  | 2234.268  | 1558.032  | NM_000400 | 14801.199 |
| AF118124  | 30834.115 | 32280.023 | NM_014410 | 1970.647  | 1584.546  | NM_004419 | 697.508   |
| NM_004849 | 7920.16   | 7588.949  | AF305835  | 895.729   | 696.652   | U47635    | 1118.078  |
| AL137527  | 5129.321  | 5646.681  | AF312769  | 1286.344  | 1490.429  | NM_018650 | 1106.091  |
| AK026068  | 1705.973  | 733.763   | AB020668  | 1842.088  | 2465.476  | AK026945  | 3124.583  |
| J04974    | 10204.34  | 10577.669 | NM_013261 | 761.27    | 287.707   | M33197    | 50088.551 |
| NM_007058 | 5436.178  | 6990.704  | AF309553  | 4600.085  | 3138.544  | NM_001154 | 1995.024  |
| NM_000396 | 20817.654 | 1504.82   | NM_003605 | 1268.539  | 2230.393  | NM_001819 | 703.286   |
| NM_001528 | 2216.987  | 1809.529  | NM_000100 | 32849.254 | 25293.865 | NM_016938 | 316.501   |
| NM_007014 | 2129.773  | 2677.11   | NM_001900 | 65152.559 | 65983.125 | NM_001993 | 217.974   |
| AL096740  | 1190.161  | 1006.476  | NM_003993 | 2257.236  | 2513.822  | AI886795  | 1132.823  |
| AF191545  | 888.929   | 838.207   | NM_018961 | 1127.606  | 1125.793  | D10495    | 1511.285  |
| NM_014554 | 2219.632  | 2518.294  | NM_005586 | 3468.544  | 3522.129  | BF344679  | 2286.967  |
| AL137484  | 1913.303  | 2009.701  | NM_012242 | 1625.697  | 1993.844  | M36634    | 1562.766  |
| AK023968  | 1447.644  | 1187.67   | NM_006896 | 1483.097  | 1565.701  | U87939    | 858.226   |
| NM_004652 | 1653.088  | 1313.868  | NM_002975 | 17773.383 | 20428.58  | AK094237  | 864.68    |
| NM_006102 | 1170.505  | 1126.971  | AK023511  | 3859.494  | 2855.833  | L07592    | 702.131   |
| AK025425  | 19805.621 | 18003.178 | NM_014556 | 2812.549  | 3017.168  | BF434335  | 12923.291 |
| AK025974  | 15528.28  | 19175.688 | NM_001038 | 563.856   | 354.338   | M33197    | 12467.472 |
| NM_005781 | 3999.263  | 4727.351  | AK025886  | 781.711   | 984.635   | NM_003192 | 607.587   |
| BC036740  | 13306.984 | 16827.344 | AB014514  | 3149.679  | 3185.341  | NM_018449 | 1030.547  |
| NM_001747 | 27294.643 | 20651.672 | NM_002865 | 3731.478  | 3211.173  | AF086129  | 633.061   |
| NM_001148 | 11996.102 | 14539.725 | NM_003566 | 1749.95   | 1078.596  | NM_007369 | 615.791   |
| AF242522  | 3773.242  | 4786.188  | NM_007159 | 16974.557 | 13009.66  | NM_007223 | 27589.605 |
| NM_004024 | 2666.999  | 3653.371  | NM_003731 | 9258.703  | 6999.349  | NM_000145 | 1541.354  |



|           |           |           |           |           |           |           |           |
|-----------|-----------|-----------|-----------|-----------|-----------|-----------|-----------|
| X52345    | 20890.227 | 20049.295 | NM_005446 | 4882.823  | 4814.942  | AF086924  | 15924.739 |
| NM_006965 | 4912.589  | 6921.004  | NM_013292 | 3147.312  | 3002.797  | AB058740  | 2895.355  |
| AF027142  | 56002.59  | 51916.297 | NM_002387 | 2178.889  | 1607.958  | AF279890  | 1366.206  |
| NM_006941 | 34866.965 | 37307.934 | NM_000069 | 1140.753  | 1078.989  | NM_002236 | 594.769   |
| AB037852  | 622.675   | 906.739   | AB023217  | 574.26    | 1402.68   | NM_012069 | 1367.515  |
| NM_005360 | 1368.977  | 1154.223  | L08902    | 1310.547  | 867.978   | NM_001689 | 4860.276  |
| NM_004349 | 2784.996  | 4021.377  | NM_005231 | 5799.239  | 9559.336  | NM_016601 | 935.866   |
| NM_002092 | 7840.648  | 9582.035  | AF064729  | 2021.116  | 2622.93   | NM_017905 | 945.601   |
| NM_018077 | 1378.908  | 1996.484  | NM_005412 | 6054.641  | 12035.407 | M33197    | 24528.746 |
| NM_016839 | 19321.189 | 21591.473 | NM_012113 | 2282.403  | 2568.125  | NM_006815 | 1591.598  |
| NM_005968 | 59039.836 | 55162.266 | NM_002150 | 4579.919  | 6417.013  | NM_016530 | 973.36    |
| AK021416  | 2832.618  | 1019.822  | NM_004595 | 5848.674  | 7739.061  | NM_014804 | 1187.872  |
| NM_018471 | 8420.273  | 9681.372  | NM_002264 | 737.33    | 890.493   | NM_012455 | 2584.463  |
| NM_003819 | 8871.139  | 28191.051 | NM_014754 | 18323.709 | 12638.867 | NM_002806 | 4072.74   |
| NM_006560 | 2506.854  | 3042.611  | D49387    | 2064.373  | 2292.545  | NM_002030 | 980.976   |
| NM_016183 | 3187.759  | 3298.757  | AF050146  | 5562.504  | 5088.381  | NM_006073 | 683.642   |
| NM_004872 | 9250.81   | 6792.694  | NM_000116 | 3086.068  | 3432.754  | NM_006564 | 3562.232  |
| NM_015904 | 7025.937  | 7875.47   | NM_006698 | 10922.038 | 7523.598  | NM_004802 | 692.78    |
| NM_001960 | 51640.113 | 50249.609 | NM_006804 | 11311.691 | 11592.602 | M33197    | 43652.516 |
| NM_018122 | 2958.454  | 5039.303  | NM_015969 | 8728.429  | 6099.498  | NM_000074 | 1524.098  |
| AF035318  | 1629.833  | 1878.688  | NM_003051 | 4082.591  | 4154.929  | M33197    | 45143.02  |
| NM_015456 | 5835.929  | 5743.793  | NM_001133 | 2550.508  | 6457.018  | NM_002613 | 1210.376  |
| AK025056  | 3642.173  | 2229.758  | NM_145342 | 7819.274  | 9070.74   | NM_004419 | 429.493   |
| AF140710  | 4698.033  | 3750.74   | AJ278917  | 19125.516 | 18542.555 | NM_018650 | 441.237   |
| NM_017947 | 1301.21   | 1127.186  | AK025641  | 48174.195 | 50068.023 | AK026945  | 786.429   |
| NM_002494 | 6933.336  | 7010.211  | NM_000905 | 6939.641  | 5169.487  | NM_002828 | 891.475   |
| M58510    | 5046.241  | 6343.949  | AL117398  | 5599.143  | 4890.4    | NM_001398 | 1542.702  |
| NM_000782 | 1723.072  | 1694.444  | AY007158  | 59342.801 | 60810.695 | NM_005164 | 725.525   |
| BE396003  | 1322.1    | 1401.315  | NM_001720 | 5251.481  | 10105.106 | NM_001995 | 1072.427  |
| AK023300  | 2300.094  | 1752.41   | NM_018390 | 1904.333  | 2447.434  | NM_000183 | 2571.448  |
| NM_018082 | 2714.544  | 1957.676  | AB037724  | 6276.263  | 6889.695  | AY004175  | 3600.701  |
| NM_003904 | 1989.653  | 3819.291  | AK025086  | 1895.032  | 1705.191  | M33197    | 47200.641 |
| NM_006234 | 24082.168 | 11628.778 | AK026151  | 9837.199  | 7725.691  | NM_012327 | 2692.945  |
| AB028987  | 4870.45   | 4403.99   | NM_014140 | 3085.332  | 2862.469  | NM_000375 | 3831.204  |
| NM_003594 | 1896.149  | 1560.638  | NM_002916 | 1753.684  | 1997.768  | NM_000265 | 5548.266  |
| AF164438  | 13122.739 | 12351.623 | M20700    | 3424.948  | 3773.553  | NM_018849 | 1968.929  |
| AK022284  | 1295.979  | 1148.922  | NM_001034 | 5496.828  | 5470.6    | M33197    | 10397.313 |
| AF060937  | 708.479   | 980.537   | NM_002689 | 2567.533  | 2981.184  | AF015910  | 49187.824 |
| AB040893  | 2624.701  | 3367.506  | NM_017686 | 2508.888  | 1755.989  | BC009993  | 748.291   |
| AK025844  | 2109.019  | 2022.72   | AK000800  | 1515.309  | 2397.529  | M33197    | 31286.117 |
| AL137727  | 1908.591  | 2075.639  | NM_018154 | 3780.183  | 2085.952  | NM_003031 | 999.316   |
| L17327    | 579.444   | 588.074   | BC006287  | 6082.647  | 4169.114  | NM_003008 | 458.789   |
| AF074986  | 1076.414  | 888.204   | AB023198  | 8624.645  | 6508.634  | NM_004100 | 1032.212  |
| AL049240  | 2692.213  | 2561.457  | AF304163  | 22785.396 | 14890.12  | M33197    | 34840.016 |
| U80773    | 2207.74   | 2398.741  | NM_001130 | 63450.715 | 60647.727 | L40520    | 1174.68   |
| AK021745  | 1429.503  | 1485.558  | NM_002975 | 7487.274  | 9402.231  | NM_002633 | 359.044   |
| L38937    | 5788.287  | 5536.557  | AK023511  | 2034.025  | 1646.214  | M33197    | 36232.16  |
| U90907    | 785.471   | 439.701   | NM_014556 | 1656.558  | 1568.253  | NM_002878 | 2148.181  |
| AK021700  | 705.033   | 527.876   | NM_017812 | 8927.188  | 10531.837 | NM_017723 | 1351.703  |
| AK000801  | 2641.814  | 2456.301  | AF204173  | 1365.036  | 1458.525  | AK022922  | 473.18    |
| D85433    | 4863.49   | 3764.383  | J03260    | 2062.931  | 2199.787  | NM_006462 | 1156.656  |
| AF086184  | 12698.32  | 12392.576 | AF068236  | 31036.408 | 31919.928 | AK024750  | 1338.141  |
| NM_018275 | 5408.82   | 5474.162  | H63077    | 2859.524  | 1890.275  | NM_000400 | 7160.256  |

|           |           |           |           |           |           |           |           |
|-----------|-----------|-----------|-----------|-----------|-----------|-----------|-----------|
| AL049266  | 1571.867  | 2318.643  | AA679352  | 7437.961  | 11966.496 | NM_015885 | 1486.563  |
| AK021560  | 613.471   | 872.029   | AA437291  | 715.164   | 843.837   | AK027157  | 571.334   |
| AF088045  | 596.008   | 986.905   | X04503    | 2736.636  | 3362.335  | NM_015889 | 30180.635 |
| AF007149  | 904.232   | 1520.459  | D45917    | 2136.2    | 1354.846  | NM_000212 | 1112.434  |
| AK001469  | 967.445   | 1123.265  | X52001    | 2723.832  | 3313.309  | M33197    | 17358.57  |
| AK021627  | 1121.23   | 1548.082  | BI823872  | 2479.362  | 2640.935  | NM_004276 | 463.657   |
| NM_019596 | 481.374   | 466.703   | AA430552  | 5505.086  | 4747.067  | NM_002332 | 890.756   |
| AF085859  | 8133.888  | 3339.896  | NM_005913 | 609.363   | 844.187   | NM_002859 | 625.504   |
| AK026307  | 1321.516  | 1023.329  | NM_002387 | 1490.457  | 1339.357  | NM_005246 | 852.516   |
| AF147403  | 1328.316  | 2488.987  | NM_000069 | 1184.308  | 1687.037  | NM_017651 | 732.498   |
| AL049260  | 706.386   | 655.665   | L08902    | 842.911   | 669.346   | NM_003881 | 233.453   |
| AL049975  | 3800.45   | 3507.659  | NM_007263 | 4462.411  | 5859.434  | AK000354  | 1952.124  |
| AL080067  | 1292.429  | 1422.086  | AF206020  | 4351.383  | 3250.268  | NM_014882 | 773.201   |
| AL117464  | 5700.055  | 4707.447  | NM_014410 | 1639.226  | 1619.136  | NM_000836 | 236.453   |
| AL080160  | 794.76    | 780.295   | AF312769  | 1378.605  | 1588.64   | M33197    | 47150.32  |
| AL157477  | 3323.84   | 3834.693  | AB020668  | 1819.624  | 2875.856  | AK024474  | 919.28    |
| AK022083  | 301.037   | 520.844   | AF309553  | 1780.012  | 1559.487  | NM_017901 | 556.147   |
| AB002318  | 1121.574  | 2235.002  | NM_003605 | 729.59    | 1369.349  | NM_017589 | 1338.324  |
| AL357535  | 3422.405  | 3087.713  | NM_006139 | 916.112   | 1024.923  | M33197    | 26843.096 |
| AL049951  | 1206.532  | 1754.441  | NM_000100 | 20738.377 | 15479.824 | AF263537  | 2548.706  |
| AK024963  | 1098.161  | 1213.137  | NM_001900 | 36623.527 | 36260.242 | M33197    | 56624.281 |
| AK023725  | 956.525   | 936.074   | NM_003993 | 1527.033  | 1473.933  | NM_013374 | 11000.877 |
| AK022936  | 2766.689  | 3489.038  | NM_018961 | 1600.619  | 2510.544  | NM_003252 | 658.213   |
| AK024385  | 2269.418  | 2417.298  | NM_005586 | 1836.143  | 2120.664  | NM_001228 | 947.824   |
| NM_017709 | 1244.665  | 1262.955  | NM_003051 | 3368.744  | 4251.558  | NM_016561 | 2137.858  |
| AF049615  | 741.353   | 667.192   | NM_001133 | 541.48    | 739.911   | NM_001225 | 1338.016  |
| NM_014358 | 14512.249 | 14213.77  | NM_145342 | 5895.053  | 8280.09   | NM_014245 | 2992.622  |
| AF009282  | 4270.931  | 4157.839  | AJ278917  | 10719.547 | 12545.491 | M33197    | 21785.229 |
| AF024704  | 5696.967  | 6614.012  | AK025641  | 53460.859 | 54482.836 | AL110226  | 60332.148 |
| AF056431  | 1810.861  | 1478.005  | AK025886  | 1305.922  | 1530.194  | X69636    | 335.772   |
| NM_018065 | 819.116   | 725.678   | AB014514  | 4017.768  | 4352.671  | M33197    | 20024.363 |
| AK002210  | 4004.548  | 3092.202  | NM_002865 | 2523.662  | 2571.753  | NM_002108 | 886.388   |
| AK021677  | 2611.844  | 1331.668  | NM_007159 | 19554.609 | 16163.15  | M33197    | 31937.48  |
| AK001057  | 991.034   | 991.488   | NM_003731 | 11824.214 | 9297.954  | NM_018464 | 23175.115 |
| AK021471  | 1076.175  | 968.579   | NM_005446 | 3879.18   | 3715.128  | D43948    | 386.825   |
| AK021709  | 955.024   | 963.573   | NM_013292 | 3158.351  | 2891.97   | NM_012310 | 1663.136  |
| AK025109  | 2626.137  | 2756.389  | AK000800  | 1319.273  | 2049.037  | BF382116  | 1697.47   |
| AK026057  | 3038.623  | 3426.446  | NM_018154 | 2746.834  | 1873.124  | NM_003193 | 1308.342  |
| AJ008117  | 13324.047 | 13525.9   | BC006287  | 3024.828  | 2772.438  | AK055825  | 67296.633 |
| AJ008147  | 24640.654 | 23148.576 | AB023198  | 6214.18   | 4446.348  | M33197    | 13633.178 |
| AK024369  | 2895.871  | 2531.665  | AF304163  | 11692.587 | 6973.262  | M33197    | 29300.301 |
| L43345    | 963.775   | 977.239   | NM_005231 | 2569.93   | 3604.265  | NM_000124 | 484.15    |
| AF180297  | 6385.115  | 5121.679  | AF064729  | 1503.329  | 1328.594  | NM_017996 | 542.939   |
| AK023607  | 2861.335  | 1877.54   | NM_005412 | 4729.049  | 10951.903 | NM_014517 | 275.405   |
| AL049997  | 6327.792  | 7286.235  | NM_012113 | 1859.4    | 1929.261  | NM_006107 | 2039.692  |
| AK024118  | 489.809   | 1126.374  | NM_002150 | 4339.806  | 5572.445  | AF288288  | 6523.347  |
| X89657    | 358.311   | 772.942   | NM_004595 | 3752.981  | 3084.014  | NM_017646 | 1371.632  |
| AK024509  | 1840.845  | 1809.947  | NM_020178 | 770.086   | 552.671   | M33197    | 34508.73  |
| NM_017847 | 3271.216  | 3411.656  | NM_002264 | 893.007   | 1114.224  | NM_003760 | 566.951   |
| AL049675  | 1958.518  | 1897.131  | NM_014754 | 8710.032  | 8233.029  | AL080080  | 775.069   |
| AL050151  | 1236.273  | 1245.352  | D49387    | 1468.535  | 2269.424  | AF090945  | 1098.584  |
| NM_003537 | 30814.82  | 28094.648 | AF050146  | 1717.74   | 1984.421  | M33197    | 19798.359 |
| AF056419  | 26960.188 | 26001.785 | NM_000116 | 3271.108  | 4464.179  | NM_001161 | 509.636   |

|           |           |           |           |           |           |           |           |
|-----------|-----------|-----------|-----------|-----------|-----------|-----------|-----------|
| K01564    | 1745.077  | 1527.068  | NM_00669E | 6707.578  | 5989.339  | NM_000221 | 2262.053  |
| AB023175  | 1350.058  | 1186.014  | NM_006804 | 6109.158  | 8302.729  | H75678    | 1149.95   |
| AL359563  | 741.225   | 1403.424  | NM_01596E | 6916.939  | 6321.569  | NM_006452 | 1797.141  |
| NM_005304 | 888.916   | 958.299   | NM_004517 | 2846.383  | 2531.292  | AB002359  | 967.711   |
| NM_014477 | 1131.073  | 1291.436  | AI017418  | 1374.669  | 1366.051  | M33197    | 635.969   |
| AF086478  | 2169.073  | 2856.282  | NM_00067E | 3268.371  | 3515.035  | AB007864  | 620.108   |
| AF086022  | 1875.249  | 1948.65   | AF218006  | 31635.531 | 44620.387 | NM_00219E | 1041.203  |
| AK021514  | 43519.711 | 44810.398 | AK026935  | 11620.489 | 13377.518 | AF024693  | 410.986   |
| AJ008134  | 2950.387  | 3738.452  | NM_020162 | 2253.369  | 2152.474  | AK025905  | 608.199   |
| S71486    | 1669.547  | 1573.846  | AK027124  | 28504.746 | 34945.777 | AL121733  | 744.01    |
| L33808    | 17187.391 | 15864.643 | M31212    | 44477.508 | 31730.084 | M33197    | 8387.711  |
| D31886    | 2150.283  | 2667.605  | AL117398  | 5675.008  | 6868.031  | NM_01416E | 1055.74   |
| U92024    | 620.018   | 561.787   | AY007158  | 39690.957 | 43796.324 | NM_004964 | 2477.318  |
| AK023330  | 3592.367  | 3052.298  | NM_00172C | 2636.182  | 3802.198  | AF075016  | 636.393   |
| AF075071  | 2275.684  | 1897.048  | NM_01839C | 1265.411  | 1229.304  | AF147437  | 832.126   |
| AF001892  | 1718.659  | 1583.529  | AB037724  | 4046.35   | 4624.302  | M33197    | 26869.494 |
| U79271    | 2327.033  | 2511.011  | AK025086  | 2160.025  | 3352.488  | AL137269  | 1243.707  |
| NM_01988E | 1080.829  | 915.87    | AK026151  | 4742.958  | 5507.691  | AK021983  | 1431.447  |
| AK024609  | 6116.374  | 5379.596  | NM_01414C | 1919.109  | 1513.95   | Y11681    | 5504.429  |
| NM_01812C | 6567.035  | 6538.05   | NM_00291E | 869.176   | 867.593   | AL110135  | 19683.029 |
| AK026874  | 5612.815  | 3700.949  | M20700    | 1863.198  | 1824.946  | NM_006993 | 1178.383  |
| D17217    | 1203.343  | 1779.48   | NM_001034 | 3874.502  | 5312.966  | NM_00233E | 394.766   |
| AF088033  | 2260.066  | 2074.157  | AL096734  | 899.699   | 1045.923  | M33197    | 29440.775 |
| NM_020422 | 2295.621  | 2251.975  | NM_01664E | 1682.495  | 2086.908  | AF086429  | 466.237   |
| AJ227897  | 635.487   | 579.217   | L14723    | 18410.656 | 15611.774 | AF086439  | 464.121   |
| AY007156  | 2500.723  | 2258.299  | AK024462  | 13851.175 | 14488.493 | M33197    | 26197.979 |
| AF086408  | 35546.617 | 43002.863 | NM_00220E | 1785.121  | 1560.615  | M33197    | 45265.289 |
| AK023979  | 1846.243  | 1876.203  | NM_007074 | 705.123   | 592.618   | AF144233  | 3139.352  |
| CY3Cy5    | 20356.041 | 1379.164  | NM_00223C | 800.234   | 730.002   | AF085975  | 770.54    |
| AF068236  | 50692.535 | 58225.152 | NM_00381E | 2306.685  | 3164.8    | M33197    | 30166.623 |
| AA679352  | 6883.449  | 20501.465 | NM_00143C | 3507.281  | 1441.979  | AL137611  | 1939.201  |
| X04503    | 3605.414  | 2842.588  | AB010098  | 643.721   | 588.937   | AL359566  | 8342.124  |
| D45917    | 5211.122  | 2757.673  | U17989    | 794.683   | 973.678   | AL133110  | 620.798   |
| X52001    | 4860.156  | 3869.696  | NM_01802E | 888.454   | 1223.466  | AL137427  | 1342.982  |
| BI823872  | 4925.946  | 10378.447 | AF249267  | 41233.336 | 42856.863 | AL157460  | 7267.257  |
| AA430552  | 4870.642  | 4653.3    | NM_004113 | 759.896   | 1011.76   | M33197    | 33383.09  |
| X66142    | 3181.568  | 3058.401  | X84939    | 1227.253  | 1455.12   | AK022035  | 4205.038  |
| R45054    | 5210.056  | 4300.288  | NM_01832C | 7276.271  | 6173.12   | M33197    | 17534.77  |
| NM_00062C | 869.924   | 1017.527  | NM_00206E | 1829.634  | 1693.375  | AK022141  | 1141.743  |
| NM_00090E | 11598.055 | 8621.165  | NM_01605E | 9121.829  | 11806.054 | AK023942  | 42080.258 |
| SR5       | 6115.973  | 5719.57   | NM_016951 | 1366.641  | 2441.711  | M33197    | 15225.055 |
| CY3Cy5    | 22965.719 | 1470.566  | NM_013251 | 1412.709  | 1142.864  | AK027207  | 572.336   |
| AF312769  | 1419.885  | 1357.576  | NM_00609E | 2602.703  | 3223.133  | AF143323  | 1544.099  |
| AB020668  | 2288.176  | 1504.437  | AF272379  | 1870.059  | 1621.081  | AJ227892  | 5401.558  |
| NM_006203 | 7712.496  | 9839.218  | NM_00308E | 16970.488 | 21384.078 | M33197    | 32649.635 |
| NM_00360E | 3236.118  | 4319.421  | NM_016084 | 7997.516  | 4896.237  | AK022013  | 959.438   |
| NM_003993 | 4321.344  | 3585.815  | AF095289  | 7967.946  | 4485.502  | AK022155  | 1925.057  |
| NM_018961 | 1687.353  | 1313.058  | NM_005537 | 2529.238  | 2014.035  | AK022288  | 307.403   |
| NM_00558E | 5530.333  | 5046.204  | NM_019003 | 2340.782  | 1963.078  | M33197    | 30901.295 |
| NM_012242 | 2322.62   | 3820.655  | NM_01593E | 4177.075  | 5484.965  | AK022084  | 1364.955  |
| NM_00689E | 1704.864  | 1617.893  | AF182412  | 927.183   | 808.594   | D17152    | 17035.77  |
| NM_00113C | 54135.844 | 58592.891 | AK027200  | 1428.705  | 1253.309  | AK024464  | 14972.259 |
| NM_00297E | 19181.566 | 42643.273 | S78372    | 980.613   | 1183.812  | AK026748  | 676.347   |

|           |           |           |           |           |           |           |           |
|-----------|-----------|-----------|-----------|-----------|-----------|-----------|-----------|
| AK023511  | 6242.003  | 6899.299  | U03106    | 3941.425  | 5289.13   | M33197    | 52826.508 |
| NM_002725 | 804.474   | 1062.389  | NM_000075 | 7893.448  | 6970.765  | AK021682  | 7693.584  |
| NM_014375 | 14539.718 | 16501.277 | NM_006845 | 11474.206 | 13999.733 | AJ012500  | 1972.122  |
| AF204173  | 2140.49   | 1122.08   | NM_004945 | 1856.399  | 1164.493  | AF085833  | 681.502   |
| J03260    | 3404.812  | 3102.178  | NM_020242 | 1173.605  | 596.064   | L19368    | 908.811   |
| AB014514  | 1516.481  | 1349.757  | NM_001785 | 9275.912  | 7856.588  | U00944    | 1104.19   |
| NM_003731 | 14540.226 | 10592.836 | NM_007175 | 37260.555 | 39270.406 | X57566    | 1646.499  |
| NM_005446 | 8996.042  | 6278.839  | NM_002209 | 1395.885  | 1389.245  | M33197    | 22967.365 |
| NM_013292 | 6995.36   | 5135.571  | AL137477  | 4718.038  | 4466.866  | NM_018616 | 565.072   |
| NM_002387 | 4263.112  | 3600.077  | AK024961  | 3199.893  | 4284.208  | AK023809  | 537.839   |
| NM_000065 | 1476.111  | 1538.468  | NM_016065 | 3077.398  | 2231.284  | M87943    | 68083.141 |
| AB023217  | 1121.113  | 855.7     | NM_014256 | 1212.141  | 1155.889  | U28131    | 48913.805 |
| D45864    | 13854.923 | 35057.711 | NM_015967 | 577.869   | 1868.383  | AY007106  | 2297.371  |
| NM_002150 | 3163.047  | 2636.661  | NM_002409 | 1085.273  | 1007.555  | M33197    | 55014.063 |
| NM_004595 | 4261.829  | 4833.586  | NM_004994 | 11123.021 | 9536.198  | AL049299  | 431.921   |
| NM_020175 | 628.163   | 727.455   | NM_006610 | 9714.632  | 12909.255 | NM_006085 | 39062.32  |
| NM_002264 | 875.109   | 868.319   | NM_003791 | 4655.708  | 4596.413  | NM_018265 | 1142.628  |
| NM_014754 | 8168.53   | 9862.181  | NM_018017 | 3751.193  | 3206.219  | AF130086  | 612.639   |
| D49387    | 1535.949  | 1894.216  | AK001296  | 6918.715  | 6471.613  | AK023858  | 2171.399  |
| AF050146  | 4148.699  | 5434.526  | AK000173  | 695.605   | 765.945   | M33197    | 18459.543 |
| NM_000116 | 2650.157  | 5121.175  | NM_018365 | 1510.761  | 2042.717  | AF250920  | 622.952   |
| NM_006695 | 10115.758 | 8881.993  | NM_006585 | 8081.27   | 9679.469  | NM_017733 | 1140.683  |
| NM_006804 | 13829.278 | 10941.967 | AJ272180  | 1320.596  | 1318.832  | NM_014042 | 524.839   |
| NM_015965 | 6454.379  | 5619.186  | AK025709  | 748.207   | 819.713   | M33197    | 61177.555 |
| NM_003051 | 4520.387  | 4414.744  | NM_019016 | 10876.499 | 14127.061 | AF317550  | 511.366   |
| NM_145342 | 7514.954  | 5832.804  | NM_012261 | 7350.09   | 7610.307  | NM_003543 | 1354.078  |
| AJ278917  | 15642.258 | 13462.866 | NM_015556 | 1827.663  | 1924.376  | AK025416  | 621.779   |
| NM_001720 | 3304.43   | 5048.563  | NM_016621 | 873.66    | 1326.756  | AK022165  | 549.834   |
| NM_018390 | 1463.031  | 2171.946  | AK022643  | 653.291   | 577.729   | M33197    | 35829.27  |
| AB037724  | 5321.091  | 5363.117  | AB046808  | 1333.97   | 850.777   | AK022372  | 663.957   |
| AK026151  | 5722.112  | 4225.409  | NM_006466 | 1242.852  | 895.207   | NM_015916 | 1436.234  |
| NM_014140 | 2578.403  | 2027.403  | NM_005681 | 3908.406  | 3948.563  | NM_003520 | 930.976   |
| NM_002916 | 1321.234  | 2213.582  | NM_015156 | 4041.53   | 3651.751  | AL137380  | 944.605   |
| M20700    | 3267.631  | 3482.485  | NM_012384 | 4030.117  | 2121.856  | M33197    | 43840.375 |
| NM_001034 | 2512.906  | 6067.604  | NM_004653 | 2086.081  | 1596.543  | AL137658  | 11994.148 |
| NM_002685 | 2614.132  | 3729.485  | AF233453  | 3607.318  | 2397.976  | D16888    | 1465.689  |
| NM_017686 | 3274.107  | 2418.152  | D87454    | 5456.535  | 3782.176  | U79277    | 405.692   |
| AK000800  | 2413.636  | 2896.536  | NM_007020 | 919.761   | 1501.184  | AF068298  | 732.987   |
| NM_018154 | 1673.418  | 2422.321  | NM_000713 | 5405.243  | 5636.737  | Z70770    | 1541.453  |
| BC006287  | 4395.711  | 4691.839  | NM_016055 | 5334.712  | 5295.127  | AJ227900  | 1270.614  |
| AB023198  | 6930.353  | 5826.666  | NM_013291 | 3062.49   | 2753.923  | M33197    | 47929.227 |
| NM_002725 | 846.219   | 1046.834  | NM_002936 | 2399.228  | 4130.494  | CY3Cy5    | 7312.647  |
| NM_014375 | 13734.815 | 11861.953 | NM_014161 | 1290.105  | 1618.083  | AI417775  | 652.263   |
| NM_017812 | 8422.724  | 11664.981 | BF312817  | 1283.343  | 3398.562  | BI762229  | 2989.426  |
| AF204173  | 2255.052  | 1161.752  | AF086491  | 5117.54   | 4407.11   | BG618320  | 3070.795  |
| J03260    | 3028.55   | 3311.193  | NM_014856 | 682.731   | 797.815   | Y00787    | 4388.423  |
| U13738    | 1097.195  | 841.298   | NM_003492 | 1047.238  | 888.699   | NM_007276 | 1021.342  |
| AF068236  | 54934.813 | 56087.52  | NM_003780 | 34608.746 | 33445.238 | N34462    | 2688.874  |
| H94487    | 2069.898  | 1687.756  | AK023263  | 2412.465  | 2130.99   | AI658778  | 2030.379  |
| BG681747  | 5654.145  | 24150.146 | NM_004622 | 2924.886  | 1031.915  | L19067    | 1483.375  |
| AA437291  | 820.949   | 1055.638  | AK021445  | 1843.859  | 1622.405  | Z48482    | 903.967   |
| X04503    | 5233.679  | 5462.568  | NM_017934 | 10937.02  | 8089.805  | BI823365  | 427.502   |
| D45917    | 7143.762  | 4061.945  | NM_014165 | 18690.727 | 20080.908 | X06318    | 1363.374  |

|           |           |           |           |           |           |           |           |
|-----------|-----------|-----------|-----------|-----------|-----------|-----------|-----------|
| X52001    | 9878.536  | 8706.176  | AF211971  | 2475.588  | 1862.894  | AL834159  | 3510.097  |
| BI823872  | 3400.706  | 9185.514  | NM_002931 | 816.11    | 906.154   | NM_000164 | 8240.414  |
| AA430552  | 2095.034  | 1915.924  | NM_013448 | 31782.506 | 38913.164 | SR5       | 4559.109  |
| X66142    | 2774.558  | 2217.867  | X65232    | 18000.561 | 26307.832 | SR7       | 4548.603  |
| R45054    | 6957.025  | 5997.673  | U17630    | 832.738   | 1049.695  | SR9       | 5184.828  |
| NM_00062C | 601.305   | 1345.341  | NM_002196 | 925.191   | 1213.118  | CY3Cy5    | 8856.928  |
| AL117398  | 5598.252  | 6126.515  | NM_017755 | 4338.439  | 4761.792  | NM_000207 | 577.882   |
| AF206020  | 3728.315  | 2679.097  | NM_015696 | 2904.956  | 2469.609  | NM_006314 | 2401.065  |
| NM_01441C | 3847.637  | 3291.655  | AK022551  | 1854.892  | 1441.524  | NM_001782 | 604.872   |
| AF305835  | 887.3     | 478.483   | AF085968  | 1808.131  | 2594.023  | NM_002754 | 927.358   |
| AF312769  | 1045.524  | 892.712   | AB011136  | 725.927   | 1011.095  | NM_000797 | 2690.19   |
| AB020668  | 2604.516  | 2442.089  | AF085898  | 3815.33   | 3563.802  | NM_014927 | 217.21    |
| NM_006203 | 14348.891 | 18699.656 | AL161960  | 4028.966  | 1867.799  | NM_016293 | 5723.079  |
| NM_013261 | 931.213   | 779.845   | AL049964  | 2724.611  | 1646.299  | AF217525  | 956.028   |
| NM_003605 | 4386.523  | 5961.818  | AK023269  | 2840.721  | 2059.703  | AL080148  | 3968.753  |
| NM_018961 | 1196.291  | 1422.793  | AF070564  | 4276.939  | 4055.877  | NM_018487 | 795.211   |
| NM_012242 | 2174.479  | 3719.612  | AK021439  | 22866.221 | 15002.088 | NM_020134 | 1506.797  |
| NM_006896 | 1351.618  | 908.832   | AF052099  | 1809.193  | 1474.216  | NM_014061 | 608.375   |
| NM_002975 | 18300.242 | 35186.188 | AL110111  | 1921.769  | 2470.438  | BC034395  | 562.239   |
| AK023511  | 5726.882  | 5679.125  | AF070543  | 806.626   | 985.473   | NM_000348 | 2518.978  |
| NM_014556 | 2295.262  | 2345.919  | NM_014778 | 2454.681  | 2626.277  | NM_005059 | 261.731   |
| AK025886  | 2748.058  | 2278.82   | AK001171  | 10442.374 | 8311.727  | NM_00495C | 1335.791  |
| NM_003058 | 956.677   | 524.652   | AK026273  | 13555.98  | 13298.146 | NM_000724 | 1315.789  |
| AB014514  | 3485.375  | 4183.325  | NM_02025C | 17275.412 | 19853.033 | NM_002557 | 1265.715  |
| NM_003566 | 2409.419  | 2209.031  | AF055007  | 1243.992  | 1516.497  | BE728156  | 541.69    |
| NM_007159 | 22930.43  | 28873.277 | NM_012337 | 1225.602  | 1057.377  | AK021489  | 13847.626 |
| NM_003731 | 12091.676 | 12955.987 | AL389879  | 3562.661  | 3911.464  | NM_003895 | 647.075   |
| NM_013292 | 7763.762  | 7004.12   | AK022869  | 1957.212  | 2190.316  | NM_004317 | 1642.318  |
| NM_002387 | 4624.081  | 3601.164  | NM_016111 | 6160.325  | 7541.255  | NM_014645 | 1670.59   |
| NM_000069 | 1731.88   | 1672.449  | AF085958  | 45867.086 | 38078.758 | NM_014708 | 2778.716  |
| AB023217  | 1259.517  | 1261.078  | AF086021  | 1689.101  | 1771.907  | NM_003693 | 869.666   |
| L08902    | 725.087   | 667.549   | AK024472  | 1137.929  | 827.065   | NM_000356 | 10379.937 |
| J02639    | 3641.022  | 2701.699  | NM_017976 | 2921.116  | 2322.156  | NM_018134 | 16494.336 |
| NM_005231 | 3637.815  | 5741.475  | U06700    | 1270.429  | 1529.368  | NM_013247 | 6200.043  |
| AF064729  | 2354.475  | 1903.404  | U63828    | 2397.961  | 2446.459  | NM_00677C | 3836.331  |
| NM_005412 | 8898.887  | 20741.148 | Z36794    | 657.964   | 1059.518  | NM_004703 | 1665.232  |
| NM_012113 | 2512.635  | 2632.564  | Z36828    | 6214.042  | 4770.67   | NM_001512 | 748.503   |
| NM_00215C | 6803.823  | 4227.728  | AF086121  | 7735.151  | 4847.521  | NM_014706 | 2664.081  |
| NM_004595 | 5172.564  | 6098.016  | AF086140  | 890.678   | 811.67    | AJ001348  | 432.607   |
| NM_020178 | 1028.409  | 976.462   | AK026915  | 2100.776  | 1407.64   | AB033006  | 2365.942  |
| NM_002264 | 1536.34   | 1790.957  | AL110259  | 1690.41   | 1040.206  | AF020314  | 2221.585  |
| NM_014754 | 11129.2   | 15332.439 | AB033100  | 4928.093  | 4160.594  | NM_016332 | 5751.027  |
| NM_000116 | 2575.211  | 3444.478  | AL390138  | 2108.535  | 2136.207  | NM_012105 | 805.637   |
| NM_006698 | 9968.586  | 7123.898  | AL137290  | 6701.301  | 6421.805  | S82470    | 1170.872  |
| NM_006804 | 14869.181 | 14034.663 | NM_014124 | 36949.004 | 30655.789 | AB028982  | 2400.004  |
| NM_015969 | 6808.606  | 6680.313  | AK001551  | 1627.56   | 1573.98   | NM_002004 | 2017.381  |
| AL353933  | 290.807   | 579.664   | AK024714  | 880.982   | 827.522   | NM_005121 | 571.793   |
| NM_003051 | 4611.969  | 5492.635  | AK022363  | 1246.414  | 952.1     | NM_001643 | 9615.989  |
| NM_145342 | 7552.224  | 5983.952  | AK023395  | 6399.561  | 3960.539  | NM_020221 | 939.797   |
| AJ278917  | 8720.561  | 7838.153  | AK023818  | 4663.773  | 7188.593  | NM_000747 | 1313.489  |
| NM_00062C | 636.099   | 1052.694  | AK024139  | 1194.588  | 1411.791  | NM_005415 | 1073.814  |
| NM_000905 | 11044.922 | 6928.993  | AK023895  | 1044.294  | 927.552   | AJ275973  | 6849.976  |
| AL117398  | 5894.713  | 6094.105  | AK024206  | 10434.247 | 8012.48   | NM_006493 | 1172.417  |

|           |           |           |           |           |           |           |           |
|-----------|-----------|-----------|-----------|-----------|-----------|-----------|-----------|
| NM_00172C | 6461.92   | 8903.723  | NM_006262 | 1430.343  | 1171.994  | U76362    | 2906.731  |
| NM_01839C | 1534.371  | 2558.531  | AK026598  | 5660.407  | 4272.542  | AF040248  | 368.959   |
| AB037724  | 6017.669  | 5569.571  | AK023602  | 1961.476  | 1390.301  | NM_01422E | 380.454   |
| AK026151  | 5334.535  | 6034.34   | NM_018097 | 10602.876 | 7367.254  | AL832292  | 447.492   |
| M20700    | 2897.316  | 2655.018  | Y11167    | 1002.601  | 997.833   | NM_00304E | 2219.604  |
| NM_001034 | 2582.257  | 5452.513  | AK026813  | 1460.793  | 1330.685  | NM_00261E | 1227.044  |
| NM_00268E | 2083.327  | 2074.307  | AK027225  | 962.259   | 437.364   | L27479    | 796.872   |
| NM_01768E | 2687.314  | 1949.691  | AK023083  | 3196.603  | 2681.067  | NM_002193 | 792.357   |
| AL096734  | 542.401   | 773.03    | NM_00532E | 47450.336 | 1515.205  | NM_00138E | 2731.093  |
| AK000800  | 2451.541  | 3720.964  | NM_01815C | 4726.429  | 5432.797  | X76770    | 2342.434  |
| NM_018154 | 1639.178  | 2259.086  | AK026494  | 2030.47   | 3092.692  | AB037808  | 688.063   |
| BC006287  | 4240.332  | 5224.871  | AK022067  | 660.894   | 598.015   | NM_01603E | 1204.1    |
| AB023198  | 8164.739  | 7640.273  | AK023508  | 1748.36   | 2032.199  | Z36821    | 5469.124  |
| NM_00689E | 1322.06   | 1158.19   | AK025840  | 1733.815  | 1767.68   | AF289485  | 1717.214  |
| NM_00113C | 49343.637 | 48075.703 | BC024009  | 2549.956  | 2989.765  | AF130092  | 1041.405  |
| NM_00297E | 15513.509 | 31572.332 | U84510    | 9643.537  | 8715.295  | NM_01609E | 770.242   |
| AK023511  | 4094.666  | 4230.378  | S83198    | 19306.91  | 18225.869 | AK024794  | 1043.534  |
| NM_01455E | 2934.956  | 2906.526  | AF052119  | 27440.693 | 27784.969 | NM_019853 | 1367.771  |
| NM_00272E | 977.583   | 1078.043  | X94290    | 2218.461  | 1653.337  | NM_017992 | 2413.775  |
| NM_01437E | 18054.965 | 16435.662 | AK026685  | 16184     | 15320.005 | NM_00725E | 1187.314  |
| NM_017812 | 9796.69   | 14798.474 | AF090927  | 33257.156 | 35280.543 | NM_00366E | 1577.275  |
| AF204173  | 2670.467  | 1913.315  | AL137642  | 2047.467  | 1723.401  | NM_013384 | 11528.833 |
| U13738    | 1960.903  | 1874.923  | AL133619  | 4315.563  | 4214.105  | NM_001187 | 707.967   |
| H63077    | 12428.393 | 3056.383  | AL157496  | 549.405   | 685.397   | NM_018241 | 949.031   |
| AA679352  | 9982.246  | 24672.07  | AK025902  | 4363.604  | 2977.51   | NM_005834 | 1148.273  |
| AA437291  | 969.888   | 916.398   | AL353949  | 694.63    | 484.468   | NM_000724 | 1300.151  |
| X04503    | 4582.186  | 4862.668  | NM_005181 | 1720.494  | 2043.048  | NM_002557 | 2371.459  |
| D45917    | 5849.495  | 4165.052  | AF026945  | 940.771   | 763.262   | BE728156  | 338.357   |
| X52001    | 5650.908  | 6697.173  | AF143676  | 2392.606  | 1805.797  | Y10802    | 333.921   |
| BI823872  | 4769.459  | 12356.682 | U66044    | 12767.978 | 13613.008 | BI762229  | 2331.946  |
| AA430552  | 4383.927  | 4428.438  | NM_005247 | 56127.109 | 53807.949 | BG618320  | 2692.088  |
| X66142    | 3515.051  | 2911.426  | AA203665  | 5776.117  | 9098.2    | Y00787    | 4373.376  |
| NM_005913 | 794.505   | 920.769   | U95646    | 1880.546  | 968.613   | NM_00727E | 837.268   |
| R45054    | 7125.034  | 7275.467  | Y16705    | 2704.511  | 2428.296  | N34462    | 2714.869  |
| NM_002387 | 4685.699  | 4311.429  | AF279775  | 6976.923  | 6293.771  | AI658778  | 1923.466  |
| NM_00006E | 1376.882  | 1547.022  | NM_001821 | 3655.978  | 3774.096  | L19067    | 930.628   |
| AB023217  | 902.994   | 797.558   | NM_00234E | 1485.15   | 1823.595  | W60413    | 798.584   |
| L08902    | 983.99    | 1009.906  | U57971    | 1421.778  | 1904.558  | BI823365  | 515.668   |
| M58050    | 5406.258  | 7117.104  | X89673    | 1879.829  | 2026.238  | X06318    | 384.656   |
| NM_007263 | 12888.055 | 23185.326 | AK024593  | 1778.912  | 1848.292  | AL834159  | 1662.157  |
| AF206020  | 4858.3    | 4018.244  | Z83934    | 1423.566  | 996.374   | NM_000164 | 8834.262  |
| NM_01441C | 4985.463  | 4443.775  | NM_01835E | 2628.231  | 2488.193  | NM_016217 | 17779.387 |
| AB020668  | 2235.393  | 2745.297  | AK022020  | 3778.285  | 2638.03   | AK025971  | 3387.003  |
| NM_013261 | 1044.691  | 1048.429  | AF147399  | 589.86    | 792.124   | NM_014007 | 1170.6    |
| AF309553  | 6644.591  | 7101.161  | U17634    | 1066.986  | 1442.812  | AB033006  | 3893.881  |
| NM_00360E | 5490.633  | 5750.508  | AK000263  | 9177.69   | 8166.739  | AF020314  | 2509.547  |
| NM_00010C | 34045.273 | 32130.229 | NM_017447 | 1431.857  | 1392.022  | NM_016332 | 5909.033  |
| NM_00190C | 69785.305 | 65941.234 | BF345435  | 1299.471  | 575.069   | AK023936  | 296.712   |
| NM_003993 | 4684.259  | 5359.006  | NM_016622 | 2807.45   | 2274.593  | NM_006457 | 723.513   |
| NM_018961 | 2111.6    | 2387.58   | AK026976  | 1087.282  | 1609.14   | NM_003682 | 610.182   |
| NM_00558E | 5405.194  | 6671.484  | AF070559  | 3313.854  | 4283.828  | NM_000207 | 795.52    |
| NM_012242 | 2671.28   | 4124.541  | D42043    | 7621.325  | 7333.556  | NM_002531 | 526.33    |
| NM_003051 | 4354.738  | 4854.866  | CY3Cy5    | 4735.938  | 310.291   | NM_006314 | 2900.87   |

|           |           |           |             |           |           |           |           |
|-----------|-----------|-----------|-------------|-----------|-----------|-----------|-----------|
| NM_145342 | 6576.978  | 5679.46   | BG744154    | 61060.188 | 59057.297 | NM_001782 | 590.19    |
| AJ278917  | 12602.913 | 12028.078 | Z11694      | 8805.086  | 9058.597  | NM_002754 | 730.815   |
| AK025886  | 1750.428  | 1740.986  | BF983177    | 1259.95   | 1559.231  | NM_000797 | 2835.764  |
| NM_003058 | 937.118   | 911.386   | Z26317      | 1981.732  | 2127.623  | NM_014927 | 425.115   |
| AB014514  | 4110.152  | 5918.963  | X16983      | 11221.994 | 14799.939 | NM_016293 | 7071.683  |
| NM_002865 | 4526.74   | 4644.513  | X56160      | 4703.151  | 3958.901  | AF217525  | 238.565   |
| NM_003566 | 2694.375  | 1960.207  | BG679991    | 1424.564  | 1201.582  | AL080148  | 1468.056  |
| AK026315  | 1002.91   | 606.136   | H-Y 00097 I | 2941.661  | 3209.719  | NM_018487 | 359.66    |
| NM_007155 | 27146.982 | 30026.4   | H-M 59964   | 1408.004  | 1328.677  | BC034395  | 362.678   |
| NM_003731 | 15198.053 | 19942.004 | H-Y 00711 I | 59941.063 | 61655.434 | NM_000348 | 1958.93   |
| NM_005446 | 7480.374  | 8647.507  | H-X 16707 I | 3473.593  | 2813.019  | NM_005055 | 213.963   |
| NM_013292 | 6068.22   | 6249.079  | AL038354    | 37577.215 | 40933.832 | NM_004950 | 1227.655  |
| AK000800  | 2539.539  | 3153.038  | R14607      | 1377.08   | 2301.418  | NM_006493 | 1845.311  |
| NM_018154 | 2079.307  | 2729.119  | NM_021976   | 3722.549  | 3443.865  | U76362    | 4632.901  |
| BC006287  | 4158.573  | 5048.484  | SR2         | 51284.727 | 43465.688 | AF040248  | 582.585   |
| AB023198  | 6321.896  | 6539.057  | SR4         | 12795.804 | 9824.512  | NM_014228 | 568.344   |
| NM_005231 | 3613.618  | 6381.319  | SR6         | 1822.651  | 1493.874  | AL832292  | 585.402   |
| AF064729  | 1956.592  | 1960.174  | SR8         | 5743.269  | 12543.813 | NM_003045 | 3847.141  |
| NM_005412 | 9072.457  | 23711.459 | SR10        | 27264.619 | 7010.378  | NM_005662 | 17613.174 |
| NM_012113 | 2769.908  | 3272.506  | CY3Cy5      | 2145.335  | 93.648    | NM_003060 | 265.169   |
| NM_002150 | 5983.696  | 4732.318  | NM_001284   | 49331.285 | 58389.301 | AK021489  | 14793.573 |
| NM_004595 | 5287.009  | 6826.89   | NM_003242   | 7533.399  | 9435.193  | NM_004525 | 375.92    |
| NM_020178 | 1080.867  | 1297.887  | NM_002849   | 428.131   | 594.677   | NM_003895 | 751.594   |
| NM_002264 | 1501.424  | 2596.195  | U31099      | 915.983   | 960.227   | NM_004317 | 2055.629  |
| NM_014754 | 12288.473 | 20580.502 | NM_001105   | 3188.221  | 2925.809  | NM_014645 | 1519.631  |
| D49387    | 1973.028  | 1961.95   | NM_005585   | 746.257   | 1023.252  | NM_014708 | 3069.027  |
| AF050146  | 4771.985  | 4835.863  | NM_002075   | 3951.317  | 4084.168  | NM_003693 | 915.224   |
| NM_000116 | 3503.647  | 5024.803  | Y08756      | 16360.678 | 19190.973 | NM_000356 | 12484.659 |
| NM_006698 | 12350.585 | 8635.383  | NM_005563   | 15233.521 | 5495.389  | NM_018134 | 8471.807  |
| NM_006804 | 16414.193 | 15929.121 | AY007090    | 653.409   | 801.165   | NM_013247 | 2013.214  |
| NM_015965 | 6731.167  | 8686.885  | NM_006439   | 697.927   | 450.749   | NM_006770 | 1470.82   |
| AL353933  | 206.656   | 570.509   | NM_005102   | 4325.644  | 2311.764  | NM_004703 | 531.601   |
| NM_004517 | 4890.352  | 4347.497  | NM_004518   | 1449.484  | 896.037   | NM_001512 | 1192.428  |
| AI017418  | 907.833   | 835.279   | NM_006501   | 424.896   | 451.009   | NM_014706 | 1871.858  |
| NM_000675 | 1167.766  | 1076.22   | NM_002719   | 2597.921  | 3040.817  | AJ001348  | 532.892   |
| AF218006  | 39704.145 | 49149.855 | AV752086    | 1542.57   | 1306.609  | NM_007255 | 1720.594  |
| AK026935  | 12139.284 | 10641.829 | NM_016102   | 7050.344  | 6216.731  | NM_003668 | 2442.023  |
| NM_020162 | 5225.952  | 4303.55   | NM_004376   | 2827.063  | 1628.117  | NM_013384 | 23340.998 |
| AK027124  | 48974.598 | 50821.051 | NM_005603   | 20415.578 | 18745.801 | NM_001187 | 1016.455  |
| M31212    | 53520.027 | 58653.383 | NM_001061   | 535.128   | 545.549   | NM_018241 | 1474.277  |
| AL117398  | 6099.662  | 6140.511  | NM_006834   | 3509.193  | 4261.174  | NM_005834 | 2023.168  |
| AY007158  | 61597.887 | 58599.051 | AB011100    | 1694.122  | 2836.17   | AF000381  | 5053.9    |
| NM_001720 | 6461.702  | 8379.357  | U61741      | 998.214   | 1217.783  | NM_018075 | 221.617   |
| NM_018390 | 2185.112  | 3283.062  | NM_012402   | 2692.393  | 3489.826  | NM_012105 | 903.022   |
| AB037724  | 6598.616  | 8460.456  | M76676      | 2058.164  | 2477.684  | S82470    | 1363.23   |
| AK025086  | 2329.645  | 2536.69   | NM_003857   | 910.441   | 1511.042  | AB028982  | 2846.091  |
| AK026151  | 7626.589  | 6945.137  | AL137690    | 967.53    | 652.191   | NM_002004 | 2051.191  |
| NM_014140 | 2896.584  | 2792.278  | Z83804      | 2940.122  | 2405.997  | NM_001643 | 5273.971  |
| NM_002916 | 1236.242  | 2416.815  | NM_004386   | 1843.553  | 2545.705  | NM_020221 | 402.086   |
| M20700    | 3859.868  | 3569.469  | U67784      | 1140.909  | 1212.392  | NM_000747 | 1245.658  |
| NM_001034 | 2798.611  | 6447.485  | NM_007366   | 2380.404  | 1487.514  | NM_005415 | 400.048   |
| NM_002685 | 2549.374  | 2916.402  | NM_000592   | 1273.203  | 858.074   | AL137708  | 408.937   |
| NM_017686 | 2715.846  | 2054.06   | NM_016584   | 10936.534 | 11982.846 | AJ275973  | 12732.588 |

|           |           |           |           |           |           |           |           |
|-----------|-----------|-----------|-----------|-----------|-----------|-----------|-----------|
| AL096734  | 542.682   | 914.81    | NM_001815 | 2433.262  | 1686.126  | AL834159  | 4561.159  |
| NM_016645 | 2344.653  | 2882.943  | NM_000064 | 8895.917  | 7341.554  | NM_000164 | 16536.508 |
| L14723    | 12312.71  | 9859.079  | NM_003264 | 3067.643  | 2570.047  | NM_016217 | 28080.834 |
| AK024462  | 14525.4   | 10047.21  | NM_006725 | 2751.827  | 2357.035  | AK025971  | 5202.964  |
| NM_002206 | 2035.574  | 1464.339  | NM_003326 | 1680.888  | 1417.793  | NM_002618 | 1919.716  |
| NM_007074 | 708.436   | 422.431   | NM_004568 | 32438.951 | 25747.006 | L27479    | 647.093   |
| NM_002230 | 1162.995  | 934.657   | NM_000202 | 1152.407  | 1172.432  | NM_002193 | 1145.617  |
| NM_003815 | 3954.444  | 4005.055  | NM_005496 | 12835.422 | 7848.421  | NM_001388 | 3111.496  |
| NM_001430 | 7966.417  | 2319.375  | NM_016608 | 1265.695  | 742.042   | X76770    | 2669.928  |
| AB010098  | 899.2     | 886.879   | NM_004817 | 1066.436  | 1073.815  | AB037808  | 554.502   |
| U17989    | 1073.95   | 1119.259  | NM_018975 | 11759.446 | 8036.105  | NM_016038 | 1387.576  |
| AL137595  | 755.611   | 1067.006  | AB023215  | 8595.033  | 7508.806  | Z36821    | 6706.333  |
| NM_018028 | 1257.551  | 1662.578  | NM_018073 | 1686.379  | 1885.615  | AF289485  | 863.508   |
| AF249267  | 49251.605 | 48825.375 | AL137529  | 2050.014  | 2151.776  | AF130092  | 457.932   |
| NM_004113 | 692.411   | 1209.725  | NM_012332 | 1720.68   | 2034.701  | NM_016095 | 250.944   |
| X84939    | 4713.095  | 5746.008  | AK026648  | 863.764   | 976.886   | AK024794  | 534.705   |
| NM_018320 | 21933.045 | 14895.126 | NM_000497 | 1324.241  | 1491.504  | NM_019853 | 2468.359  |
| NM_002069 | 3126.331  | 2868.729  | NM_017421 | 721.101   | 979.329   | NM_017992 | 1260.063  |
| NM_016056 | 8060.648  | 16457.27  | AK025977  | 16506.641 | 20080.605 | NM_014061 | 912.748   |
| AF188492  | 760.508   | 595.696   | AK023130  | 8812.507  | 6812.542  | BC034395  | 683.329   |
| M65066    | 16024.142 | 16804.387 | NM_000273 | 1023.597  | 903.987   | NM_002479 | 755.426   |
| NM_016951 | 4433.16   | 4642.915  | NM_002899 | 10245.111 | 9712.682  | NM_000348 | 4417.313  |
| NM_013251 | 1129.518  | 1359.023  | NM_000486 | 1763.318  | 1552.001  | NM_005059 | 508.876   |
| NM_006099 | 2795.142  | 3702.995  | BE876237  | 1616.444  | 1462.58   | NM_004950 | 2103.677  |
| AF272379  | 2748.973  | 2507.253  | NM_005397 | 686.341   | 906.584   | NM_000724 | 1750.206  |
| NM_012326 | 815.607   | 1358.415  | NM_000806 | 6665.602  | 7550.332  | NM_000553 | 294.837   |
| NM_003085 | 14162.797 | 12823.269 | NM_006320 | 1054.353  | 1113.862  | NM_002557 | 2017.318  |
| NM_016084 | 16659.145 | 10927.384 | AB014511  | 3838.55   | 4039.47   | AI417775  | 532.55    |
| AF095289  | 10009.794 | 11593.638 | NM_014252 | 4441.057  | 3587.268  | BI762229  | 3076.189  |
| NM_005537 | 4326.212  | 3255.143  | NM_001662 | 8052.347  | 5779.023  | BG618320  | 4303.102  |
| NM_019003 | 3132.985  | 2744.04   | NM_016131 | 7423.512  | 5507.91   | Y00787    | 1114.348  |
| NM_015935 | 4405.75   | 4154.945  | NM_006822 | 1283.807  | 1414.88   | NM_007276 | 77.626    |
| AF182412  | 1943.725  | 1837.436  | NM_012142 | 12201.668 | 6936.086  | N34462    | 1025.373  |
| AK027200  | 1822.003  | 1599.099  | NM_016429 | 2327.339  | 1070.822  | AI658778  | 185.373   |
| U03106    | 10656.938 | 9712.563  | NM_018264 | 1771.616  | 2085.694  | L19067    | 803.636   |
| NM_000075 | 12832.914 | 15395.377 | NM_014580 | 973.481   | 1369.109  | Z48482    | 461.681   |
| NM_006845 | 14321.657 | 10815.6   | AB028998  | 495.981   | 614.05    | W60413    | 619.676   |
| NM_014885 | 669.946   | 987.291   | NM_000153 | 914.589   | 724.76    | BI823365  | 587.364   |
| M73239    | 584.178   | 1305.493  | NM_002033 | 4576.285  | 5980.657  | X06318    | 1673.385  |
| NM_004945 | 7046.364  | 5158.451  | NM_004111 | 2767.276  | 4493.9    | NM_004703 | 722.31    |
| NM_020242 | 1183.498  | 2236.363  | AF085966  | 2432.149  | 4599.488  | NM_001512 | 1544.105  |
| NM_001788 | 18126.646 | 13243.576 | NM_005316 | 1724.285  | 1874.616  | NM_014706 | 3610.665  |
| NM_007178 | 59749.617 | 56426.855 | NM_016316 | 3672.542  | 2944.167  | AK023172  | 359.786   |
| NM_002209 | 3251.878  | 3245.88   | NM_003369 | 8324.172  | 9218.933  | AJ001348  | 704.356   |
| NM_002291 | 782.65    | 714.795   | NM_000057 | 3121.199  | 1956.492  | NM_014007 | 1394.086  |
| AL137477  | 11093.499 | 7956.279  | NM_018343 | 2089.074  | 3146.768  | AB033006  | 3559.099  |
| AF284580  | 1146.942  | 921.091   | AK095793  | 2180.858  | 1292.686  | AF020314  | 2742.967  |
| AK024961  | 7049.838  | 8684.385  | NM_003177 | 4171.825  | 3022.526  | NM_016332 | 6017.121  |
| NM_016068 | 6167.966  | 3988.761  | NM_017719 | 796.981   | 889.933   | AK023936  | 385.127   |
| NM_014256 | 2378.324  | 2234.486  | AF064078  | 917.913   | 908.768   | NM_006457 | 844.292   |
| NM_015967 | 1658.617  | 3518.735  | AL049688  | 1060.676  | 1462.187  | NM_003682 | 552.277   |
| NM_012237 | 1008.22   | 630.285   | NM_002737 | 2061.018  | 1640.441  | NM_006314 | 3174.057  |
| NM_003595 | 1065.873  | 907.228   | Z25427    | 1974.802  | 2062.879  | NM_001782 | 332.958   |



|           |           |           |             |           |           |           |           |
|-----------|-----------|-----------|-------------|-----------|-----------|-----------|-----------|
| NM_002409 | 682.816   | 1140.064  | NM_004672   | 7492.5    | 6767.402  | NM_000797 | 328.838   |
| NM_004994 | 16874.498 | 14858.087 | NM_001353   | 2336.079  | 2154.663  | NM_016293 | 3490.882  |
| NM_006610 | 12572.427 | 11565.35  | NM_006214   | 3673.682  | 2539.499  | AL080148  | 1077.978  |
| NM_003791 | 4837.61   | 5782.595  | AJ010228    | 5349.922  | 3140.778  | NM_020134 | 823.139   |
| NM_018017 | 6102.86   | 6719.876  | NM_005198   | 3145.905  | 2621.121  | NM_000747 | 2868.253  |
| AK001296  | 7639.505  | 11002.627 | NM_006061   | 450.009   | 1158.768  | NM_005415 | 1495.066  |
| AK000173  | 693.628   | 583.626   | NM_005603   | 32316.406 | 57120.375 | AJ275973  | 20311.115 |
| NM_018365 | 2729.418  | 3643.103  | NM_001061   | 1011.949  | 1121.828  | NM_006493 | 2052.088  |
| NM_006586 | 18946.979 | 20489.068 | AI075338    | 783.466   | 877.856   | U76362    | 4903.032  |
| AJ272180  | 2040.885  | 2508.86   | Z11694      | 8719.536  | 8866.91   | AF040248  | 503.917   |
| AK025709  | 2136.854  | 1791.418  | BF983177    | 1421.967  | 1757.443  | NM_014228 | 443.994   |
| NM_019016 | 15001.488 | 13714.96  | Z26317      | 2345.769  | 2552.093  | AL832292  | 434.82    |
| NM_012261 | 11568.5   | 12106.146 | X16983      | 15301.111 | 19612.365 | NM_003045 | 2732.936  |
| NM_015556 | 4433.2    | 5259.029  | X56160      | 4390.175  | 3510.94   | NM_005662 | 18939.809 |
| NM_018416 | 2640.011  | 2083.583  | BG679991    | 1358.304  | 981.986   | NM_004525 | 769.536   |
| NM_004606 | 4922.765  | 6206.269  | H-Y 00097 I | 2736.421  | 3434.826  | NM_003895 | 661.166   |
| D70833    | 68283.844 | 53621.316 | H-M 59964   | 1636.44   | 1213.983  | NM_004317 | 568.043   |
| NM_016621 | 2117.745  | 1550.156  | H-Y 00711 I | 58741.301 | 57501.277 | NM_014645 | 233.931   |
| AB046808  | 2274.907  | 2045.69   | H-X 16707 I | 3383.95   | 2868.458  | NM_014708 | 669.282   |
| AK026265  | 2671.243  | 2536.575  | R14607      | 1594.374  | 3173.818  | NM_003693 | 564.171   |
| NM_006466 | 944.46    | 944.527   | W84867      | 434.263   | 493.798   | NM_000356 | 7142.143  |
| NM_005681 | 1993.897  | 1642.53   | NM_021976   | 3736.94   | 2924.767  | NM_018134 | 12440.926 |
| NM_015156 | 5740.638  | 5034.418  | NM_005718   | 14423.132 | 8667.846  | NM_013247 | 429.727   |
| NM_012384 | 4301.87   | 3211.883  | NM_005496   | 14883.673 | 11884.928 | NM_006770 | 2650.27   |
| NM_004653 | 3507.098  | 2603.927  | NM_002858   | 6311.622  | 6668.659  | BE394704  | 559       |
| AF233453  | 6172.407  | 4743.778  | NM_004817   | 1046.352  | 1054.349  | AK024794  | 889.354   |
| D87454    | 10136.809 | 11070.982 | NM_018975   | 12524.803 | 13024.654 | NM_019853 | 4016.532  |
| NM_007020 | 3160.492  | 4227.896  | NM_001284   | 47987.102 | 41039.184 | NM_017992 | 4158.561  |
| NM_000713 | 10345.229 | 6903.626  | NM_003242   | 9128.149  | 9911.75   | NM_003668 | 3104.971  |
| NM_016055 | 4268.163  | 3467.959  | NM_002849   | 817.669   | 669.891   | NM_013384 | 25742.111 |
| NM_013291 | 9181.024  | 9297.913  | U31099      | 903.93    | 1061.268  | NM_001187 | 886.648   |
| NM_002936 | 6130.903  | 12941.669 | NM_001105   | 3954.672  | 2978.131  | NM_018241 | 1414.449  |
| NM_014161 | 3782.889  | 3742.616  | NM_005585   | 501.453   | 921.048   | NM_005834 | 1873.292  |
| BF312817  | 1922.896  | 4994.892  | NM_002075   | 3175.928  | 3286.288  | AF000381  | 4505.065  |
| AF086491  | 4325.08   | 3186.21   | Y08756      | 17555.305 | 17505.883 | NM_012105 | 1010.926  |
| NM_014856 | 1529.456  | 1432.669  | NM_005563   | 15458.672 | 5498.131  | AB028982  | 852.341   |
| NM_003492 | 1731.699  | 1203.088  | AY007090    | 776.581   | 600.884   | NM_002004 | 1409.721  |
| NM_003780 | 30685.441 | 25944.652 | NM_006439   | 709.645   | 675.055   | NM_001643 | 6812.915  |
| NM_000199 | 17924.584 | 11127.479 | NM_004518   | 1589.156  | 1051.785  | NM_019096 | 1476.001  |
| NM_003778 | 63720.238 | 54343.781 | NM_002719   | 2680.324  | 3099.455  | NM_014725 | 1464.786  |
| AK023263  | 2980.458  | 2464.898  | AV752086    | 1310.443  | 1052.226  | NM_006892 | 769.072   |
| NM_004622 | 2321.081  | 1804.826  | NM_016102   | 6835.496  | 6058.864  | NM_018309 | 1915.32   |
| AK021445  | 1620.477  | 1146.467  | NM_004376   | 2782.266  | 1738.64   | NM_017658 | 2029.906  |
| NM_017934 | 7999.01   | 6492.894  | NM_014252   | 5787.724  | 5676.118  | NM_016643 | 631.468   |
| NM_014168 | 42215.238 | 38830.52  | NM_001662   | 7838.71   | 7638.081  | NM_006779 | 4839.466  |
| AF211971  | 6899.218  | 6444.463  | NM_016131   | 8288.442  | 8271.319  | NM_016217 | 18201.016 |
| NM_002931 | 3507.476  | 2957.008  | NM_006822   | 1590.943  | 2128.121  | AK025971  | 4936.946  |
| NM_013448 | 31005.916 | 35360.875 | NM_012142   | 13728.117 | 10410.959 | NM_002618 | 1824.985  |
| X65232    | 32337.988 | 32786.723 | NM_016429   | 2632.845  | 1778.845  | L27479    | 467.442   |
| U12767    | 800.621   | 296.668   | NM_006834   | 3718.461  | 4164.575  | NM_002193 | 891.743   |
| U17630    | 918.332   | 1014.851  | AB011100    | 2171.315  | 3198.132  | NM_001388 | 2805.439  |
| M33782    | 1918.738  | 1593.615  | U61741      | 1553.913  | 1499.086  | X76770    | 2723.494  |
| NM_002196 | 1221.909  | 1077.74   | NM_012402   | 3292.282  | 4012.859  | AB037808  | 273.125   |

|           |           |           |           |           |           |           |           |
|-----------|-----------|-----------|-----------|-----------|-----------|-----------|-----------|
| NM_017755 | 5344.988  | 6229.276  | M76676    | 2176.627  | 2801.47   | NM_016038 | 589.69    |
| NM_015696 | 3391.208  | 3464.146  | NM_003857 | 1198.329  | 1152.193  | Z36821    | 4359.372  |
| AK022551  | 2289.875  | 1954.778  | AL137690  | 913.984   | 486.169   | AF289485  | 1025.959  |
| AF085968  | 4815.147  | 3162.831  | Z83804    | 3265.043  | 2210.72   | AF130092  | 567.494   |
| AK023665  | 715.181   | 625.818   | NM_004386 | 2402.682  | 2408.061  | NM_016095 | 228.79    |
| AB011136  | 1748.365  | 1945.969  | U67784    | 1328.807  | 1474.415  | AF300612  | 25955.059 |
| AF085898  | 4897.115  | 3948.059  | NM_007366 | 2690.735  | 2063.436  | AB014557  | 886.098   |
| AL161960  | 7486.894  | 4875.895  | NM_000592 | 1120.837  | 702.115   | NM_005578 | 7385.544  |
| AL049964  | 3200.447  | 2991.974  | NM_016584 | 11615.859 | 12547.324 | NM_003653 | 2620.164  |
| AK023269  | 1834.311  | 2598.185  | NM_001815 | 2485.015  | 1970.824  | NM_018457 | 10141.592 |
| AF070564  | 6827.223  | 6360.252  | NM_000064 | 8381.896  | 7649.052  | NM_002953 | 8794.727  |
| AK021439  | 13451.947 | 13956.991 | NM_003264 | 3044.689  | 2807.131  | NM_002187 | 1034.655  |
| AF052099  | 2962.197  | 2360.752  | NM_006725 | 2827.052  | 2695.175  | NM_014246 | 5339.54   |
| AL110111  | 6176.54   | 4561.058  | NM_003326 | 1785.908  | 1337.847  | NM_014859 | 1025.256  |
| AF070543  | 1520.465  | 1691.719  | NM_004568 | 34380.91  | 22007.869 | AF311912  | 409.403   |
| AF086509  | 513.811   | 621.44    | NM_000202 | 1036.905  | 886.963   | NM_001116 | 394.697   |
| NM_014778 | 3129.458  | 2996.701  | Z25427    | 1964.829  | 3047.819  | BC035395  | 1334.256  |
| AK001171  | 16173.479 | 12518.962 | NM_004672 | 7502.01   | 8219.693  | NM_001703 | 5778.948  |
| AK026273  | 11552.576 | 8968.057  | NM_001353 | 2988.391  | 4112.792  | NM_020126 | 2060.542  |
| NM_020250 | 14345.895 | 11336.353 | NM_006214 | 2808.68   | 3301.228  | NM_013982 | 5518.195  |
| AF055007  | 977.589   | 1942.645  | AJ010228  | 6533.84   | 6888.849  | NM_005049 | 1198.026  |
| NM_012337 | 1651.995  | 1558.553  | NM_005198 | 4258.417  | 4510.171  | NM_003882 | 738.893   |
| AL389879  | 11272.613 | 9689.406  | AK021426  | 523.761   | 504.532   | NM_004630 | 2227.349  |
| AK022869  | 2681.666  | 2891.16   | NM_018073 | 2051.887  | 2393.587  | AK023001  | 1428.081  |
| NM_016111 | 12719.139 | 10566.417 | AL137529  | 2276.406  | 2696.794  | NM_014826 | 576.916   |
| AF085958  | 62116.73  | 52129.191 | NM_012332 | 2329.422  | 3255.005  | U01147    | 906.207   |
| AF086021  | 3954.745  | 4239.736  | AK026648  | 1178.277  | 1364.593  | NM_004040 | 3027.656  |
| AK024472  | 5635.836  | 1706.905  | NM_000497 | 1250.865  | 1376.581  | NM_006116 | 925.405   |
| AF087981  | 524.115   | 731.578   | NM_017421 | 909.565   | 817.058   | NM_005456 | 2398.186  |
| NM_017976 | 5096.001  | 3497.176  | AK025977  | 17155.285 | 17068.232 | NM_001324 | 1389.839  |
| U06700    | 1622.097  | 1090.252  | AK023130  | 8663.832  | 5696.104  | AB037795  | 1415.178  |
| U63828    | 3105.971  | 2976.846  | NM_000273 | 1147.876  | 1077.472  | AK022975  | 890.898   |
| Z36794    | 1118.709  | 801.112   | NM_002899 | 9301.116  | 8732.184  | NM_015344 | 1078.298  |
| Z36828    | 12856.33  | 9311.773  | NM_000486 | 1336.189  | 1774.767  | NM_004288 | 1516.624  |
| AF086121  | 12634.351 | 9666.555  | BE876237  | 1726.739  | 1540      | AL122055  | 5679.253  |
| AF086140  | 1304.695  | 951.985   | NM_005397 | 643.286   | 768.546   | NM_005132 | 12974.289 |
| AK026915  | 1747.098  | 1155.327  | NM_000806 | 6339.738  | 6720.098  | X07695    | 1085.178  |
| AL110259  | 1095.968  | 917.913   | NM_006320 | 1133.982  | 1147.726  | D87458    | 1853.92   |
| AB033100  | 9507.046  | 9246.504  | AB014511  | 3212.515  | 3093.608  | AK021750  | 1907.807  |
| AL390138  | 2995.132  | 2597.306  | NM_021976 | 3753.442  | 4337.414  | NM_003626 | 616.796   |
| AL137290  | 10651.357 | 8917.428  | NM_005718 | 13762.34  | 12196.21  | AK023594  | 1832.455  |
| AK021606  | 1100.533  | 692.429   | NM_018264 | 2050.854  | 1910.842  | AB010099  | 8329.887  |
| NM_014124 | 39313.355 | 36851.461 | NM_014580 | 1404.877  | 1184.679  | AB039920  | 2574.823  |
| AF119888  | 692.803   | 659.905   | AB028998  | 515.925   | 1134.517  | NM_004190 | 1026.223  |
| AK001551  | 1941.865  | 1799.585  | AK025389  | 478.296   | 612.387   | NM_014275 | 1183.538  |
| AK001825  | 1909.562  | 1455.571  | NM_000153 | 1126.884  | 1240.2    | NM_000409 | 1900.173  |
| AK024714  | 1418.058  | 838.108   | NM_002033 | 4900.522  | 5449.979  | NM_017807 | 443.534   |
| AK022363  | 1891.263  | 1146.768  | AK091794  | 821.614   | 451.715   | NM_014746 | 391.22    |
| AK022485  | 748.391   | 807.699   | NM_004111 | 2875.586  | 3629.858  | NM_002788 | 34747.332 |
| AK023395  | 2413.207  | 2476.481  | AF085966  | 2028.041  | 3848.207  | NM_000462 | 2497.732  |
| AK023818  | 8291.011  | 9637.656  | NM_005316 | 1532.948  | 1826.973  | NM_003336 | 6237.822  |
| AK023895  | 1616.44   | 1176.377  | NM_016316 | 3692.137  | 2964.78   | NM_005805 | 9252.037  |
| AK024206  | 9762.969  | 8239.711  | NM_003369 | 8648.55   | 8421.904  | NM_003900 | 4642.412  |

|           |           |           |             |           |           |           |           |
|-----------|-----------|-----------|-------------|-----------|-----------|-----------|-----------|
| NM_006262 | 3946.415  | 3344.709  | NM_000057   | 3415.103  | 2130.863  | NM_003337 | 1663.181  |
| AK026598  | 3533.741  | 3004.258  | NM_018343   | 2225.08   | 3354.406  | AF298152  | 2671.724  |
| AK023602  | 1971.869  | 1469.489  | AK095793    | 2211.424  | 1192.119  | AF117233  | 2216.66   |
| NM_018097 | 22551.824 | 22452.268 | NM_003177   | 3925.811  | 2881.979  | NM_001723 | 1104.213  |
| AF130043  | 1151.71   | 1151.506  | NM_017719   | 528.7     | 869.027   | M94362    | 1779.839  |
| Y11167    | 1152.871  | 1022.996  | AF064078    | 842.14    | 915.757   | AK024707  | 696.463   |
| AK026813  | 975.025   | 557.042   | AL049688    | 1112.91   | 1050.172  | AK022909  | 990.258   |
| AK027225  | 1071.144  | 843.756   | NM_002737   | 2232.813  | 1165.674  | NM_005531 | 1330.954  |
| AK023083  | 4086.523  | 3173.462  | NM_002719   | 3661.049  | 5725.453  | NM_005760 | 5808.403  |
| AF116622  | 999.915   | 589.898   | AB035356    | 389.839   | 583.198   | NM_014212 | 637.207   |
| NM_005325 | 6649.894  | 1142.987  | NM_016102   | 9443.566  | 18429.967 | NM_007265 | 1313.737  |
| AF217967  | 1373.69   | 1297.471  | NM_004376   | 2389.08   | 2683.398  | AK023639  | 2780.259  |
| NM_018150 | 7889.021  | 6826.791  | NM_001061   | 1396.605  | 1924.29   | AL137700  | 513.396   |
| NM_017918 | 616.35    | 704.654   | AI075338    | 788.205   | 1248.37   | NM_004904 | 493.12    |
| NM_017855 | 30168.568 | 33614.113 | Z11694      | 4346.68   | 4246.758  | NM_003083 | 1861.511  |
| AB007954  | 2137.653  | 2233.605  | BF983177    | 919.421   | 1187.288  | NM_006789 | 2272.43   |
| AK026494  | 2631.376  | 4498.715  | Z26317      | 2397.201  | 2580.446  | NM_000982 | 579.359   |
| AK023508  | 1867.942  | 2072.828  | X16983      | 11673.352 | 15173.724 | NM_001024 | 57368.523 |
| AK025840  | 3926.526  | 3703.253  | X56160      | 4030.89   | 3320.626  | NM_012423 | 10001.064 |
| BC024009  | 2327.981  | 2059.264  | H-Y 00097 I | 3071.423  | 3371.129  | AK026367  | 10052.132 |
| AF128543  | 7757.979  | 8633.355  | H-M 59964   | 1216.886  | 1005.652  | AK026491  | 1525.143  |
| NM_004189 | 2303.744  | 2343.838  | H-Y 00711 I | 49981.75  | 46484.023 | NM_001015 | 61879.977 |
| U84510    | 6939.326  | 6237.449  | H-X 16707 I | 2044.919  | 1981.996  | AL110170  | 1339.65   |
| S83198    | 12534.647 | 12503.658 | AL038354    | 39580.926 | 42177.574 | NM_000920 | 945.927   |
| AF052119  | 23695.932 | 22352.082 | R14607      | 1133.577  | 1366.1    | NM_016049 | 1822.601  |
| X94290    | 3303.966  | 3106.177  | NM_000064   | 12026.74  | 12105.862 | NM_013311 | 1456.839  |
| AK026685  | 21501.133 | 22066.447 | NM_003264   | 3559.861  | 3873.469  | NM_000291 | 24009.133 |
| AF090927  | 23800.643 | 33200.18  | NM_006725   | 4238.344  | 4797.402  | NM_018081 | 2394.801  |
| AL137642  | 1933.701  | 1981.426  | NM_003326   | 1682.19   | 2129.002  | NM_014649 | 1264.565  |
| AL133619  | 1991.316  | 2035.63   | NM_004568   | 19243.346 | 18874.465 | AL117488  | 2347.535  |
| AK025902  | 4664.665  | 4036.753  | NM_000202   | 1216.897  | 1398.043  | NM_012240 | 931.146   |
| AL353949  | 933.497   | 1021.92   | NM_005496   | 8311.061  | 6597.538  | NM_019005 | 2083.036  |
| NM_005181 | 3149.184  | 3492.329  | NM_001284   | 46615.508 | 37648.621 | NM_004739 | 3441.167  |
| AF026945  | 594.294   | 1041.515  | NM_003242   | 9347.536  | 10158.661 | NM_005341 | 899.922   |
| AF143676  | 3437.795  | 4142.253  | NM_002849   | 558.936   | 577.612   | AF181999  | 567.44    |
| U66044    | 9450.109  | 10083.086 | U31099      | 993.383   | 962.802   | NM_001934 | 823.323   |
| NM_005247 | 34282.848 | 42184.055 | NM_001105   | 4166.29   | 3088.908  | AB011090  | 704.441   |
| NM_005283 | 2010.865  | 1627.226  | NM_005585   | 628.863   | 767.786   | AK022677  | 1929.385  |
| AL122089  | 2038.413  | 2442.968  | NM_002075   | 3367.537  | 2857.901  | AL137645  | 10822.542 |
| AA203665  | 2340.504  | 4309.037  | Y08756      | 17656.916 | 17322.662 | AK026141  | 1553.896  |
| U95646    | 4332.249  | 3457.378  | NM_005563   | 12145.393 | 4506.19   | AK022894  | 2284.694  |
| Y16705    | 1909.835  | 2215.881  | NM_006439   | 666.182   | 499.603   | AF217993  | 9676.853  |
| AF279775  | 5149.336  | 5461.407  | NM_005102   | 4651.02   | 2572.647  | AF131823  | 633.345   |
| NM_001821 | 4251.876  | 4116.854  | NM_004518   | 1385.383  | 830.59    | AK026324  | 8472.449  |
| NM_005647 | 1021.181  | 1451.883  | NM_006501   | 468.539   | 444.869   | AK025253  | 504.835   |
| X64978    | 7664.897  | 5877.326  | NM_005397   | 695.196   | 969.158   | AK022049  | 380.38    |
| NM_000912 | 24457.57  | 26041.738 | NM_000806   | 8065.123  | 11751.731 | AF086517  | 6204.005  |
| NM_002345 | 963.824   | 851.405   | NM_006320   | 1088.309  | 1205.694  | AK025740  | 1969.798  |
| U57971    | 1267.83   | 1916.528  | AB014511    | 3933.525  | 4550.876  | AK025346  | 4790.462  |
| X89673    | 1633.348  | 1748.628  | NM_014252   | 5426.495  | 4827.099  | AK022583  | 2416.517  |
| AK024593  | 2291.769  | 2190.371  | NM_001662   | 8247.367  | 8498.244  | AL137534  | 66985.125 |
| Z83934    | 1297.061  | 1264.608  | NM_016131   | 8419.958  | 9709.152  | AF052121  | 2477.807  |
| NM_018359 | 3651.749  | 4276.46   | NM_006834   | 3278.306  | 4303.844  | AL359062  | 1522.75   |

|             |           |           |           |           |           |            |           |
|-------------|-----------|-----------|-----------|-----------|-----------|------------|-----------|
| AK022020    | 5964.7    | 3559.027  | AB011100  | 1660.549  | 2757.282  | AK022192   | 1079.783  |
| AK000263    | 7953.345  | 8118.168  | U61741    | 1388.647  | 1510.847  | NM_019099  | 22247.438 |
| Y13895      | 1511.977  | 987.542   | NM_012402 | 3014.948  | 3852.676  | AJ227904   | 653.468   |
| NM_017447   | 1961.751  | 1804.188  | M76676    | 2131.532  | 2826.634  | Y12020     | 16682.932 |
| AL049452    | 1405.68   | 1381.568  | NM_003857 | 1376.398  | 1247.318  | V00539     | 925.369   |
| NM_016622   | 3206.836  | 3284.054  | AL137690  | 1125.337  | 741.592   | AJ001905   | 1198.88   |
| AK026976    | 1965.257  | 2171.184  | Z83804    | 4267.811  | 2875.697  | U17635     | 2952.129  |
| AF070559    | 3608.276  | 6094.896  | NM_004386 | 2220.629  | 2516.249  | AL049930   | 1114.411  |
| D42043      | 7906.304  | 7490.145  | U67784    | 1547.397  | 1316.368  | Z83946     | 1475.198  |
| CY3Cy5      | 6604.152  | 269.494   | NM_007366 | 2644.316  | 1620.552  | D55638     | 1157.75   |
| Z11694      | 21070.221 | 15695.893 | NM_000592 | 1355.862  | 842.568   | D55644     | 875.042   |
| X16983      | 11941.941 | 10776     | NM_016584 | 12286.156 | 11226.97  | AK024152   | 654.691   |
| X56160      | 3932.052  | 2669.078  | NM_001815 | 2186.22   | 1370.448  | AK021821   | 311.025   |
| BG679991    | 1420.022  | 1294.243  | AK095793  | 2607.214  | 1657.381  | AL049328   | 1465.872  |
| H-Y 00097 I | 5034.382  | 4086.821  | NM_003177 | 4916.671  | 4378.441  | AK000030   | 1760.354  |
| H-M 59964   | 2742.985  | 1994.16   | NM_017719 | 770.12    | 1492.61   | NM_017932  | 755.097   |
| H-Y 00711 I | 73120.063 | 62668.055 | AL049688  | 668.232   | 1364.737  | AK000910   | 3115.252  |
| H-X 16707 I | 2962.261  | 2830.658  | NM_002737 | 3083.548  | 3302.725  | AF252280   | 6355.502  |
| AL038354    | 35807.809 | 52649.945 | Z25427    | 771.577   | 1286.44   | AK000107   | 1324.771  |
| R14607      | 2509.558  | 2951.462  | NM_004672 | 3885.829  | 4718.592  | AK000795   | 878.764   |
| W84867      | 965.281   | 879.814   | NM_001353 | 3352.783  | 4787.864  | AK000951   | 926.854   |
| NM_021976   | 6617.875  | 7791.833  | NM_006214 | 4211.152  | 5131.701  | AK024586   | 764.936   |
| SR6         | 4140.005  | 2639.431  | NM_005196 | 3320.696  | 3975.265  | AK024889   | 2247.508  |
| SR10        | 45804.977 | 12451.135 | NM_018073 | 1133.667  | 1966.427  | AK024914   | 2146.309  |
| CY3Cy5      | 4967.409  | 175.263   | AL137529  | 3076.94   | 3243.018  | U17636     | 25900.994 |
| NM_001284   | 35978.504 | 47993.203 | NM_012332 | 1825.295  | 2176.155  | NM_018546  | 1924.376  |
| U31099      | 1289.408  | 1244.274  | NM_000497 | 1429.617  | 1332.206  | U52699     | 12011.776 |
| NM_002075   | 5231.644  | 3706.635  | NM_017421 | 1195.942  | 1400.525  | S71613     | 533.864   |
| Y08756      | 17543.381 | 17131.953 | AK025977  | 19832.266 | 19521.227 | AJ011910   | 19348.5   |
| NM_005563   | 5760.544  | 7173.301  | AK023130  | 5728.417  | 3846.042  | AK024378   | 434.061   |
| AY007090    | 979.256   | 970.732   | NM_000273 | 1062.434  | 1354.643  | NM_014026  | 1342.919  |
| NM_005102   | 5006.241  | 4162.356  | NM_002899 | 10263.455 | 8210.375  | D61703     | 3192.516  |
| NM_004518   | 1666.967  | 1200.115  | NM_000486 | 1573.714  | 1723.171  | unknown (S | 802.397   |
| NM_002719   | 5513.057  | 4984.747  | BE876237  | 1446.08   | 1158.506  | NM_01445C  | 1025.844  |
| AB035356    | 1426.791  | 1166.59   | NM_01475C | 2161.886  | 1390.156  | L37198     | 5769.038  |
| AV752086    | 2342.738  | 2093.047  | NM_015912 | 1197.397  | 1543.556  | U67822     | 594.417   |
| NM_016102   | 10775.119 | 9840.138  | NM_00046C | 2255.812  | 2328.879  | AK021921   | 663.248   |
| NM_004376   | 3679.461  | 2935.594  | AB002339  | 1509.332  | 1194.036  | AK025431   | 1386.568  |
| NM_005603   | 30793.537 | 31963.748 | NM_005104 | 5334.991  | 6484.317  | AK023662   | 563.023   |
| NM_001061   | 816.071   | 812.869   | NM_006886 | 21296.439 | 20214.852 | AF086274   | 10319.371 |
| AI075338    | 781.521   | 736.714   | AL137423  | 1396.099  | 3594.792  | AK023682   | 1260.894  |
| NM_006834   | 3886.764  | 4242.587  | AB018322  | 1043.782  | 1256.036  | AK024024   | 1983.62   |
| AB011100    | 1722.04   | 2631.236  | NM_007066 | 15344.971 | 18334.26  | AF000991   | 956.77    |
| U61741      | 1757.15   | 1940.924  | NM_005718 | 5803.943  | 5245.535  | AK000685   | 10534.066 |
| NM_012402   | 4273.143  | 4308.002  | NM_018264 | 1371.332  | 1210.044  | D28381     | 12726.374 |
| M76676      | 3140.211  | 3206.648  | NM_01458C | 1206.974  | 1094.575  | BE706519   | 813.497   |
| NM_003857   | 1442.335  | 1896.174  | NM_000153 | 1025.563  | 1088.987  | AF130064   | 13930.695 |
| AL137690    | 1420.844  | 815.634   | NM_002033 | 4390.579  | 5213.74   | U17624     | 457.588   |
| Z83804      | 2540.822  | 1879.44   | AK091794  | 933.93    | 411.677   | AK025184   | 376.939   |
| NM_004386   | 4062.882  | 3992.426  | NM_004111 | 997.245   | 1296.126  | D16988     | 18614.525 |
| U67784      | 1478.253  | 1325.079  | AF085966  | 1430.218  | 2449.208  | AL359334   | 3821.357  |
| NM_007366   | 2614.573  | 1908.949  | NM_005316 | 1664.913  | 1883.531  | AK027095   | 860.096   |
| NM_000592   | 1121.727  | 833.833   | NM_016316 | 2769.486  | 2267.398  | AF062097   | 906.726   |

|           |           |           |           |           |           |           |           |
|-----------|-----------|-----------|-----------|-----------|-----------|-----------|-----------|
| NM_000064 | 11203.808 | 6835.321  | NM_003369 | 9538.215  | 8707.4    | D17093    | 8067.026  |
| NM_003264 | 6044.399  | 3460.115  | NM_000057 | 3922.443  | 1733.144  | AK022784  | 521.227   |
| NM_006725 | 3857.217  | 2875.981  | NM_018343 | 2624.205  | 2284.595  | AL117521  | 4749.667  |
| NM_003326 | 2626.528  | 1795.535  | X15880    | 42491.27  | 51459.164 | NM_000731 | 746.863   |
| NM_004568 | 33117.156 | 31536.17  | AL137461  | 1234.58   | 2032.811  | AK021913  | 8978.367  |
| NM_000202 | 2214.688  | 1624.902  | AF114264  | 3212.857  | 6244.008  | AL137489  | 12108.231 |
| NM_005496 | 10103.08  | 12421.908 | NM_018972 | 2146.094  | 2546.645  | AF009311  | 3178.333  |
| NM_016608 | 1190.873  | 754.217   | AB023210  | 879.344   | 748.343   | S73397    | 581.686   |
| NM_004817 | 1191.933  | 1290.625  | AB037786  | 4924.012  | 4064.957  | AK023939  | 319.531   |
| NM_018975 | 10453.291 | 12239.896 | NM_003648 | 9714.379  | 10070.421 | AL050219  | 852.857   |
| AB023215  | 9734.902  | 8883.189  | AB037735  | 994.214   | 735.85    | AK024433  | 3503.03   |
| NM_018073 | 1474.979  | 1379.099  | AK002177  | 4579.033  | 6099.656  | U82321    | 1216.634  |
| AL137529  | 3032.614  | 2917.91   | AK024429  | 4431.784  | 4458.059  | AK023856  | 1114.767  |
| NM_012332 | 3490      | 2631.357  | NM_003496 | 42514.988 | 46327.383 | AL050376  | 742.415   |
| AK026648  | 1225.813  | 1539.781  | AB000509  | 951.028   | 876.213   | AL359652  | 1845.771  |
| NM_000497 | 2225.705  | 2401.267  | AB018314  | 1264.673  | 1295.479  | AK022423  | 1547.719  |
| NM_017421 | 1474.148  | 1717.509  | NM_004378 | 1153.772  | 802.549   | NM_002958 | 4419.653  |
| AK025977  | 17741.668 | 17286.32  | NM_001110 | 1728.631  | 2488.974  | AK000899  | 23496.902 |
| AK023130  | 10457.28  | 9446.028  | NM_003222 | 455.435   | 917.59    | CY3Cy5    | 9999.609  |
| NM_000273 | 832.865   | 902.714   | NM_000841 | 6893.418  | 6585.356  | AW300857  | 5678.903  |
| NM_002898 | 10111.723 | 7290.161  | NM_001245 | 2160.115  | 1293.98   | H85962    | 7924.78   |
| NM_000486 | 3028.059  | 3092.927  | NM_003672 | 47632.348 | 51576.773 | BG742446  | 922.038   |
| BE876237  | 2473.935  | 2040.968  | NM_002574 | 51458.391 | 48503.418 | AA864554  | 27287.617 |
| NM_005397 | 720.609   | 1009.818  | AJ008139  | 3117.505  | 2814.871  | X66945    | 2440.31   |
| NM_000806 | 8331.202  | 8288.447  | NM_004326 | 2696.888  | 2582.421  | X12830    | 9659.023  |
| NM_006320 | 1833.582  | 1859.132  | NM_004577 | 1380.886  | 1502.194  | U00482    | 1057.705  |
| AB014511  | 5400.753  | 5013.798  | AF007157  | 16444.77  | 19959.328 | Z80998    | 232.291   |
| NM_014252 | 4526.373  | 5671.51   | D38553    | 5481.281  | 4005.312  | K01904    | 1998.802  |
| NM_001662 | 10600.677 | 9534.852  | NM_006170 | 1859.263  | 1530.385  | BE538886  | 695.632   |
| NM_016131 | 9464.529  | 8556.024  | NM_014298 | 8593.523  | 7949.071  | NM_002228 | 866.254   |
| NM_006822 | 1876.493  | 2015.36   | AK001581  | 1008.325  | 1080.007  | M57650    | 4449.351  |
| NM_012142 | 13302.115 | 9285.662  | NM_005862 | 1237.356  | 1836.829  | M21302    | 1606.207  |
| NM_016429 | 2233.271  | 1889.132  | NM_000548 | 4510.506  | 4859.457  | NM_016346 | 2150.963  |
| NM_018264 | 1960.495  | 2460.375  | AK022541  | 4919.961  | 4119.707  | SR2       | 64274.355 |
| NM_014580 | 1205.13   | 913.511   | AB002297  | 3829.617  | 3250.559  | SR4       | 17175.809 |
| AB028998  | 2194.67   | 2195.705  | NM_005020 | 26889.834 | 29670.395 | SR6       | 2679.716  |
| NM_000153 | 1572.746  | 1178.318  | NM_014077 | 3713.225  | 2567.012  | SR8       | 8928.186  |
| NM_002033 | 3548.455  | 6872.448  | NM_018412 | 1577.059  | 833.437   | SR10      | 32064.311 |
| AK091794  | 960.214   | 796.092   | NM_012329 | 3151.055  | 3564.33   | CY3Cy5    | 5845.892  |
| NM_004111 | 3022.533  | 4690.254  | M14087    | 43057.07  | 27837.064 | NM_001525 | 6697.19   |
| AF085966  | 3734.851  | 5100.127  | AJ272324  | 898.837   | 546.507   | NM_006055 | 1378.663  |
| NM_005316 | 2097.378  | 2224.572  | NM_000885 | 4012.605  | 5052.735  | NM_004296 | 566.028   |
| NM_016316 | 2514.506  | 3495.661  | M59040    | 1329.65   | 1789.523  | NM_005048 | 975.484   |
| NM_003369 | 8256.235  | 8245.661  | NM_017582 | 19602.506 | 15851.941 | NM_005972 | 589.367   |
| NM_000057 | 1905.923  | 3210.952  | NM_015239 | 1154.96   | 1164.829  | NM_001060 | 1355.48   |
| NM_018343 | 4343.788  | 4863.765  | AK026962  | 3527.613  | 3895.697  | NM_018841 | 457.583   |
| NM_003177 | 5343.644  | 4366.225  | X04366    | 2095.102  | 2333.933  | NM_005226 | 301.288   |
| NM_017719 | 1317.457  | 1376.905  | NM_000505 | 27578.512 | 28858.994 | AL133105  | 1224.881  |
| AF064078  | 1523.225  | 1223.684  | NM_000666 | 2459.256  | 2619.747  | AK022859  | 1178.406  |
| AL049688  | 1594.503  | 1593.885  | NM_003481 | 1573.154  | 1222.771  | NM_000214 | 646.463   |
| NM_002737 | 2996.283  | 1533.902  | AB046814  | 1138.1    | 909.579   | NM_014864 | 3675.837  |
| Z25427    | 3015.507  | 2502.462  | NM_017664 | 2113.195  | 2061.626  | NM_003728 | 9016.854  |
| NM_001353 | 2465.138  | 3008.668  | NM_007059 | 4235.434  | 1994.011  | NM_014352 | 4009.854  |

|             |           |           |           |           |           |           |           |
|-------------|-----------|-----------|-----------|-----------|-----------|-----------|-----------|
| NM_006214   | 3965.951  | 3811.888  | NM_00687C | 5031.858  | 3780.592  | NM_012481 | 704.231   |
| AJ010228    | 6918.411  | 5574.969  | NM_00735E | 4460.843  | 4773.893  | L09102    | 14991.961 |
| NM_00519E   | 5391.799  | 3619.69   | L13283    | 987.186   | 649.269   | U68488    | 973.082   |
| NM_00684E   | 70356.633 | 57119.762 | NM_013327 | 1307.292  | 1520.133  | NM_01228Z | 440.39    |
| NM_001061   | 1252.046  | 1462.726  | AF303888  | 3939.983  | 2528.697  | NM_00671C | 673.623   |
| AI075338    | 1211.175  | 985.241   | NM_007084 | 1471.41   | 1600.444  | NM_00332Z | 3923.695  |
| Z11694      | 21820.811 | 16466.482 | M97191    | 27459.254 | 31757.652 | BG685310  | 659.319   |
| BF983177    | 2401.957  | 1938.96   | AK023015  | 847.276   | 1308.885  | NM_01866E | 2180.42   |
| Z26317      | 3526.055  | 4306.048  | NM_003457 | 16101.681 | 23715.996 | NM_004227 | 1312.003  |
| X16983      | 10791.016 | 13367.124 | NM_012391 | 2639.731  | 2682.777  | NM_00528Z | 1252.296  |
| X56160      | 3849.2    | 3190.111  | NM_005254 | 618.122   | 1704.698  | NM_00173E | 520.979   |
| BG679991    | 1675.97   | 1358.67   | NM_005611 | 535.271   | 725.368   | AB028949  | 606.003   |
| H-Y 00097 I | 4614.48   | 4481.896  | AF141655  | 2302.532  | 2388.766  | AL137580  | 744.994   |
| H-M 59964   | 2933.316  | 2570.517  | NM_00734E | 2410.503  | 1354.227  | NM_004101 | 784.579   |
| H-X 16707 I | 3283.995  | 3214.987  | NM_00483C | 1289.83   | 1619.63   | NM_00299E | 23996.859 |
| R14607      | 2018.194  | 2462.273  | AF132362  | 50079.613 | 52751.035 | NM_01597E | 2675.552  |
| NM_00571E   | 16664.076 | 15881.81  | NM_007007 | 7328.659  | 9687.229  | NM_00381C | 4229.785  |
| NM_00549E   | 8951.869  | 11842.576 | NM_00638E | 1447.163  | 1573.015  | NM_016171 | 68045.438 |
| NM_004817   | 1298.777  | 1473.472  | NM_00655E | 9488.038  | 12970.211 | NM_01444Z | 1243.843  |
| NM_01897E   | 10462.571 | 13969.214 | NM_004501 | 27447.102 | 27266.281 | NM_00521Z | 3517.229  |
| NM_001284   | 34626.402 | 42753.039 | NM_00496E | 5067.176  | 6735.115  | M14584    | 381.309   |
| NM_00324Z   | 9313.82   | 8811.246  | NM_00670C | 1048.533  | 1441.654  | NM_00641E | 604.744   |
| U31099      | 1008.417  | 682.541   | NM_00644E | 9566.271  | 7064.705  | AF035035  | 938.277   |
| NM_001105   | 4487.573  | 2650.36   | NM_01210E | 4471.814  | 6388.735  | AB020676  | 305.508   |
| NM_00558E   | 573.792   | 1285.512  | AF019633  | 853.024   | 1051.953  | AK024715  | 824.694   |
| NM_00207E   | 4017.411  | 3433.936  | AB002361  | 7095.056  | 6661.38   | NM_01494Z | 608.707   |
| Y08756      | 13277.139 | 14493.949 | NM_01806C | 4542.536  | 4226.334  | NM_01836C | 902.609   |
| AY007090    | 901.444   | 1139.707  | NM_01423E | 1542.964  | 1491.342  | AK022489  | 36.917    |
| NM_00643E   | 644.071   | 462.289   | NM_01766Z | 1198.429  | 1211.361  | AL365415  | 428.133   |
| NM_00451E   | 667.843   | 941.22    | NM_01744E | 6129.216  | 5318.771  | L29147    | 5178.531  |
| NM_006501   | 610.01    | 494.684   | AK001478  | 5572.942  | 6309.908  | NM_02022E | 3153.233  |
| NM_00271E   | 4945.337  | 5350.027  | AK025697  | 3614.791  | 2716.025  | AK024685  | 418.412   |
| AB035356    | 642.755   | 470.217   | AK021734  | 844.782   | 1144.823  | NM_00367E | 9161.035  |
| AV752086    | 1802.329  | 1513.311  | D00265    | 18738.695 | 19430.25  | AF113007  | 661.807   |
| NM_01610Z   | 9255.759  | 9005.485  | NM_00455Z | 25605.252 | 16553.953 | NM_00068E | 1435.154  |
| NM_00437E   | 3184.04   | 2751.636  | NM_00014Z | 1991.498  | 2166.988  | U39573    | 1345.292  |
| NM_00027Z   | 568.535   | 553.619   | NM_006294 | 34747.785 | 32808.961 | D82061    | 1528.032  |
| NM_01425Z   | 3840.61   | 5200.299  | AL137294  | 845.909   | 1931.102  | AJ293009  | 1465.048  |
| NM_00166Z   | 11380.742 | 10915.248 | NM_00374Z | 717.712   | 786.932   | NM_000374 | 2779.781  |
| NM_016131   | 8224.646  | 10060.108 | AB037797  | 715.25    | 350.504   | NM_00050Z | 7197.577  |
| NM_00682Z   | 2309.019  | 2167.46   | NM_00152C | 1109.396  | 728.344   | NM_00135E | 16968.404 |
| NM_01214Z   | 13648.978 | 9721.062  | NM_01787C | 961.349   | 849.915   | NM_00517E | 14943.764 |
| NM_01642E   | 2346.854  | 2126.929  | AL133633  | 854.585   | 870.206   | NM_00169E | 8602.518  |
| NM_006834   | 3872.299  | 4495.573  | NM_01225Z | 1408.216  | 642.8     | NM_00497E | 3719.26   |
| AB011100    | 1890.205  | 2590.459  | AK026817  | 1588.055  | 1525.005  | D87445    | 4193.856  |
| U61741      | 1608.967  | 1280.753  | AL15744Z  | 10972.846 | 7422.732  | NM_00023E | 1883.732  |
| NM_01240Z   | 3440.295  | 3763.35   | AB011148  | 1187.383  | 1231.059  | NM_002247 | 334.477   |
| M76676      | 2690.707  | 3000.106  | AL389938  | 22769.006 | 18059.182 | NM_00498C | 5367.456  |
| NM_003857   | 1279.996  | 1827.536  | NM_00194E | 14084.975 | 13910.25  | AB011094  | 6613.443  |
| AL137690    | 1418.374  | 801.274   | NM_003507 | 936.003   | 791.808   | NM_003224 | 882.332   |
| Z83804      | 3951.813  | 2903.75   | AK026591  | 480.917   | 658.997   | NM_00165E | 48180.375 |
| NM_00438E   | 3049.271  | 3026.637  | AK001889  | 1279.053  | 1129.908  | NM_00682Z | 12085.169 |
| U67784      | 1099.727  | 1193.871  | AK025726  | 3577.127  | 5779.581  | AK021761  | 5206.396  |

|           |           |           |           |           |           |           |           |
|-----------|-----------|-----------|-----------|-----------|-----------|-----------|-----------|
| NM_007366 | 2544.262  | 2056.96   | AJ227869  | 969.073   | 2126.387  | AK024536  | 931.169   |
| NM_000592 | 1132.636  | 1147.555  | AL117613  | 8394.21   | 7331.247  | NM_001483 | 515.967   |
| NM_016584 | 13086.695 | 14584.754 | AL137753  | 2768.55   | 2992.642  | NM_018973 | 2713.582  |
| NM_001815 | 3243.576  | 3152.657  | AK021785  | 762.573   | 746.823   | NM_002591 | 6496.449  |
| NM_000064 | 13333.765 | 10861.803 | AL110262  | 8530.757  | 10589.037 | NM_020216 | 1731.193  |
| NM_003264 | 5477.425  | 3674.609  | AK025627  | 11169.169 | 11526.058 | AK021860  | 1137.812  |
| NM_006725 | 2778.986  | 2474.676  | AF216077  | 1273.503  | 1524.285  | AB046816  | 6389.114  |
| NM_003326 | 1598.658  | 1522.718  | AK021612  | 15963.915 | 14987.93  | AL137266  | 1095.376  |
| NM_004568 | 32834.121 | 37449.172 | AK002025  | 37967.426 | 24059.703 | NM_016457 | 930.87    |
| NM_000202 | 2153.235  | 1301.311  | AK026299  | 1106.75   | 879.844   | NM_005057 | 574.912   |
| Z25427    | 2757.339  | 2672.767  | AK025170  | 2725.669  | 1625.762  | AF143321  | 761.671   |
| NM_004672 | 9466.498  | 9963.325  | AB033031  | 1024.996  | 1047.759  | AB046842  | 1589.65   |
| NM_001353 | 3250.774  | 4420.804  | AF085872  | 13458.072 | 12919.051 | NM_004850 | 1184.347  |
| NM_006214 | 3916.968  | 4617.272  | AK022538  | 7976.72   | 11024.784 | NM_002822 | 2166.891  |
| AJ010228  | 10261.063 | 8399.543  | AF147420  | 1402.355  | 1297.734  | BF306955  | 1556.305  |
| NM_005198 | 7227.764  | 4585.522  | AL049312  | 1105.391  | 1135.908  | NM_001394 | 4392.023  |
| NM_018073 | 1418.06   | 1393.857  | AL050072  | 2923.192  | 3071.808  | NM_018441 | 4618.429  |
| AL137529  | 2160.464  | 2045.702  | AL080225  | 530.646   | 460.078   | NM_000778 | 3201.458  |
| NM_012332 | 3178.326  | 2109.253  | AL117590  | 875.412   | 865.982   | NM_001609 | 1077.472  |
| AK026648  | 1287.44   | 1178.059  | AL049357  | 2711.976  | 4167.737  | BE733234  | 556.804   |
| NM_000497 | 1909.38   | 2527.542  | AL050129  | 801.662   | 761.301   | NM_012282 | 446.439   |
| NM_017421 | 1223.923  | 1394.888  | AK027180  | 3927.658  | 4354.518  | NM_003323 | 853.36    |
| AK025977  | 15420.471 | 15720.026 | AK026802  | 599.032   | 824.927   | BG685310  | 370.842   |
| AK023130  | 8401.522  | 8568.285  | NM_004544 | 7671.054  | 9548.196  | AW300857  | 5205.049  |
| NM_000273 | 937.473   | 915.882   | AL133080  | 2724.247  | 2280.102  | H85962    | 7755.771  |
| NM_002899 | 11597.852 | 10488.183 | NM_017792 | 1696.764  | 1631.123  | BG742446  | 690.598   |
| NM_000486 | 2321.116  | 2369.258  | AK025213  | 3620.171  | 2909.709  | AA864554  | 28585.582 |
| BE876237  | 1804.705  | 1613.172  | NM_014949 | 1450.621  | 1456.315  | X66945    | 2246.331  |
| NM_005397 | 592.533   | 1053.839  | AL080221  | 1037.402  | 708.211   | X12830    | 8271.29   |
| NM_000806 | 5698.188  | 6334.889  | AL137370  | 493.479   | 889.662   | U00482    | 791.041   |
| NM_006320 | 1649.58   | 2274.637  | AF009262  | 3858.063  | 3615.474  | K01904    | 2439.195  |
| AB014511  | 4275.663  | 4707.873  | AF009306  | 666.232   | 487.563   | BE538886  | 1144.65   |
| NM_021976 | 6737.749  | 6945.756  | AF050198  | 1454.469  | 1270.032  | NM_002228 | 1018.044  |
| NM_005718 | 17075.842 | 18836.504 | AK024346  | 1308.221  | 1577.74   | M57650    | 3802.6    |
| NM_018264 | 2085.994  | 2663.214  | AF056422  | 610.067   | 1037.283  | M21302    | 1411.187  |
| NM_014580 | 1382.927  | 1074.783  | AF090892  | 1266.547  | 1060.823  | NM_016346 | 2001.215  |
| AB028998  | 1548.618  | 1301.086  | AK001089  | 278.666   | 857.375   | AK024865  | 565.332   |
| NM_000153 | 1617.287  | 1077.427  | AK021535  | 756.926   | 1079.405  | U90942    | 18061.504 |
| NM_002033 | 3152.719  | 6243.701  | AK021753  | 4007.655  | 4494.696  | NM_014942 | 642.364   |
| AK091794  | 1045.263  | 366.248   | AK001139  | 2963.541  | 3187.981  | AL365415  | 291.179   |
| NM_004111 | 2529.195  | 3715.664  | AK002090  | 931.064   | 977.353   | L29147    | 10951.624 |
| AF085966  | 3357.204  | 4654.196  | AK021822  | 683.987   | 605.141   | NM_001525 | 7875.149  |
| NM_005316 | 2216.005  | 2211.504  | AK025246  | 4594.938  | 4243.468  | NM_006055 | 1830.126  |
| NM_016316 | 2766.994  | 3461.25   | AK025847  | 3918.543  | 2956.69   | NM_004296 | 695.145   |
| NM_003369 | 7678.799  | 8094.326  | AK000944  | 488.901   | 949.508   | NM_005048 | 809.049   |
| NM_000057 | 1453.538  | 2426.625  | NM_014174 | 6348.213  | 6319.631  | NM_005972 | 562.649   |
| NM_018343 | 2746.689  | 4507.053  | AF147337  | 4319.851  | 3248.795  | NM_001060 | 907.456   |
| AK095793  | 1789.297  | 1309.274  | AK025203  | 59853.375 | 57239.059 | NM_018841 | 532.101   |
| NM_003177 | 4550.202  | 4192.502  | AK026981  | 3601.893  | 5437.515  | AK022859  | 1083.275  |
| NM_017719 | 907.136   | 1234.831  | NM_006394 | 753.79    | 717.029   | NM_000214 | 652.296   |
| AF064078  | 1347.154  | 1188.895  | AK023819  | 1118.907  | 1217.287  | NM_014864 | 4020.551  |
| AL049688  | 1250.687  | 1273.259  | AL133656  | 1507.38   | 1425.519  | NM_003728 | 5373.791  |
| NM_002737 | 2392.654  | 1443.901  | AL050037  | 8673.306  | 8768.207  | NM_014352 | 2904.113  |

|             |           |           |           |           |           |           |           |
|-------------|-----------|-----------|-----------|-----------|-----------|-----------|-----------|
| NM_002719   | 5030.376  | 5178.407  | NM_001417 | 18637.898 | 31011.137 | NM_012481 | 502.073   |
| AB035356    | 418.75    | 496.69    | AK022236  | 3693.067  | 3197.937  | L09102    | 10040.264 |
| AV752086    | 1914.096  | 2602.16   | AK000073  | 897.601   | 906.042   | U68488    | 972.422   |
| NM_016102   | 11763.114 | 14346.659 | AK000618  | 912.225   | 872.428   | NM_000675 | 483.254   |
| NM_004376   | 3425.88   | 3502.584  | AK024773  | 836.465   | 604.518   | NM_016247 | 2875.566  |
| NM_000272   | 778.99    | 498.823   | AL390180  | 1400.099  | 1059.4    | AB011094  | 3164.17   |
| NM_006848   | 70612.109 | 57134.242 | X60484    | 983.631   | 1657.537  | NM_003224 | 984.25    |
| NM_005603   | 34782.52  | 40877.199 | AF055019  | 3396.534  | 3271.488  | NM_001658 | 48071     |
| NM_001061   | 1451.737  | 1464.68   | NM_003525 | 48254.613 | 7183.905  | NM_006827 | 5588.801  |
| AI075338    | 1362.177  | 1321.879  | AK000229  | 1406.255  | 1343.014  | AK021761  | 3397.519  |
| Z11694      | 19074.449 | 15113.472 | AF056432  | 1002.036  | 1951.129  | AK024536  | 1238.119  |
| BF983177    | 1885.304  | 1697.648  | AK001987  | 30805.336 | 51578.797 | NM_018668 | 3176.226  |
| Z26317      | 3180.169  | 3357.996  | NM_013332 | 2067.281  | 2825.646  | NM_004227 | 665.26    |
| X16983      | 13333.717 | 15102.981 | X56199    | 5697.147  | 5325.577  | NM_005282 | 1561.484  |
| X56160      | 3690.662  | 3096.343  | NM_005193 | 3033.98   | 3982.844  | AB028949  | 469.844   |
| BG679991    | 1222.207  | 1061.477  | AL162006  | 1604.922  | 1253.384  | AL137580  | 531.664   |
| H-Y 00097 I | 4279.851  | 3811.218  | NM_017971 | 42033.059 | 37242.129 | NM_004101 | 514.403   |
| H-M 59964   | 3098.786  | 2627.884  | AF090097  | 3914.837  | 3441.138  | NM_002995 | 25213.98  |
| H-Y 00711 I | 68100.305 | 61772.078 | AF054998  | 627.811   | 647.087   | AB033114  | 803.277   |
| H-X 16707 I | 3005.224  | 3259.22   | AF116620  | 7937.319  | 13491.902 | NM_015978 | 2804.339  |
| R14607      | 1285.968  | 1690.828  | AF293335  | 49607.215 | 47603.582 | NM_003810 | 3882.118  |
| W84867      | 347.828   | 722.904   | AK024431  | 6313.019  | 5616.005  | NM_004908 | 675.883   |
| NM_000064   | 13431.462 | 10529.32  | AF116635  | 510.064   | 366.85    | NM_014443 | 1141.743  |
| NM_003264   | 5877.547  | 4196.974  | X96644    | 2543.988  | 4333.114  | NM_005212 | 3197.402  |
| NM_006725   | 4066.489  | 4799.699  | Z34281    | 17306.412 | 15428.65  | NM_006419 | 453.579   |
| NM_003326   | 1915.89   | 2339.591  | NM_018678 | 55443.18  | 50201.422 | AF035035  | 665.488   |
| NM_004568   | 34540.469 | 41375.469 | AJ008122  | 30634.348 | 27869.105 | AB020676  | 176.923   |
| NM_000202   | 2036.902  | 2026.773  | AK022667  | 21216.752 | 8640.924  | AK024715  | 794.686   |
| NM_005496   | 9182.732  | 14876.407 | AK026667  | 825.035   | 538.761   | BF306955  | 1101.197  |
| NM_016608   | 1215.467  | 1700.696  | AF113211  | 1797.973  | 1876.777  | NM_001394 | 3843.927  |
| NM_002858   | 9255.069  | 9123.545  | AL117568  | 1994.746  | 1930.038  | NM_018441 | 2166.523  |
| NM_004817   | 1965.83   | 1777.243  | NM_000843 | 799.939   | 1108.857  | NM_000778 | 1075.942  |
| NM_018975   | 10388.128 | 13440.047 | S71805    | 663.909   | 1190.957  | NM_001609 | 1355.23   |
| NM_001284   | 35345.832 | 42718.219 | NM_018391 | 2324.761  | 2135.708  | BE733234  | 569.592   |
| NM_003242   | 6873.892  | 6025.76   | U90917    | 1296.545  | 1661.187  | NM_020228 | 4682.95   |
| U31099      | 909.522   | 781.223   | AK022140  | 2786.409  | 7289.57   | AK024685  | 1234.274  |
| NM_001105   | 3813.515  | 2222.093  | AK023372  | 34067.715 | 46212.414 | NM_003676 | 6610.52   |
| NM_005585   | 759.372   | 1289.466  | AF086527  | 615.475   | 631.148   | AF113007  | 1057.29   |
| NM_002075   | 2109.852  | 1812.818  | U21072    | 3871.419  | 2731.542  | NM_000688 | 2459.947  |
| Y08756      | 8527.442  | 8195.546  | AK024377  | 872.814   | 904.577   | U39573    | 1572.547  |
| NM_005563   | 4935.966  | 7188.72   | AK025621  | 568.55    | 533.329   | D82061    | 1176.854  |
| AY007090    | 931.446   | 764.637   | AK023557  | 1187.178  | 1095.404  | AJ293009  | 1339.31   |
| NM_006439   | 429.057   | 499.734   | AK027107  | 1783.656  | 963.256   | NM_000374 | 2613.439  |
| NM_004518   | 497.177   | 696.599   | AB040887  | 3155.462  | 3336.234  | NM_000502 | 6914.753  |
| NM_006501   | 944.042   | 412.691   | AK025196  | 4876.725  | 4752.548  | NM_001359 | 11910.17  |
| NM_005397   | 841.927   | 1598.069  | AK024800  | 790.016   | 604.946   | NM_001696 | 7819.855  |
| NM_000806   | 9532.477  | 13037.589 | AK000401  | 1297.849  | 1084.806  | NM_004975 | 3405.869  |
| NM_006320   | 1807.373  | 2503.246  | AF305068  | 1607.409  | 1209.167  | D87445    | 3701.046  |
| AB014511    | 4695.053  | 6110.908  | D17231    | 32352.674 | 20485.371 | NM_000238 | 1633.87   |
| NM_014252   | 4322.367  | 5948.476  | AF531295  | 1737.744  | 1226.531  | NM_002247 | 233.611   |
| NM_001662   | 7835.241  | 8745.63   | CY3Cy5    | 9672.396  | 800.797   | NM_004980 | 2930.182  |
| NM_016131   | 9173.302  | 10341.091 | BF974315  | 3302.82   | 4275.893  | NM_016346 | 1858.668  |
| NM_006822   | 1906.876  | 2362.343  | T74985    | 669.852   | 870.105   | AK024865  | 272.712   |



|           |           |           |           |           |           |           |           |
|-----------|-----------|-----------|-----------|-----------|-----------|-----------|-----------|
| NM_012142 | 13555.637 | 10248.291 | AI652705  | 5869.846  | 4143.191  | NM_001483 | 500.792   |
| NM_016429 | 2122.249  | 2237.29   | AA973397  | 1450.652  | 735.879   | NM_018973 | 3223.902  |
| NM_006834 | 3562.645  | 4249.982  | AA569974  | 3431.036  | 3946.536  | NM_002591 | 5798.063  |
| AB011100  | 1453.926  | 2311.911  | AA923615  | 861.592   | 643.881   | NM_020216 | 3899.258  |
| U61741    | 1296.406  | 1333.183  | AA446028  | 1305.137  | 1400.91   | AK021860  | 1455.84   |
| NM_012402 | 3427.969  | 3187.137  | M80583    | 1850.911  | 1492.108  | AB046816  | 554.696   |
| M76676    | 2291.19   | 2787.72   | AW009565  | 6617.831  | 3958.63   | AL137266  | 1192.482  |
| NM_003857 | 999.157   | 1533.636  | X07767    | 4244.524  | 3068.587  | NM_016457 | 954.186   |
| AL137690  | 1228.578  | 869.444   | AF252284  | 3538.265  | 3678.25   | NM_005057 | 543.886   |
| Z83804    | 3997.361  | 3084.775  | BU727558  | 1238.746  | 1598.597  | AF143321  | 564.145   |
| NM_004386 | 2080.803  | 2158.24   | SR1       | 55953.508 | 61825.746 | AB046842  | 1429.273  |
| U67784    | 1035.46   | 1145.135  | SR3       | 35784.898 | 39507.168 | NM_004850 | 868.454   |
| NM_007366 | 2545.59   | 2265.688  | SR5       | 4647.003  | 5268.665  | NM_002822 | 2521.8    |
| NM_000592 | 1155.551  | 977.792   | SR7       | 3774.538  | 36646.898 | NM_014352 | 3074.345  |
| NM_016584 | 6204.771  | 6660.289  | SR9       | 9425.571  | 2758.546  | NM_012481 | 748.157   |
| NM_001815 | 1304.969  | 1662.242  | CY3Cy5    | 12259.628 | 1112.874  | L09102    | 11141.345 |
| AK095793  | 2251.777  | 1949.841  | NM_007264 | 15870.273 | 11277.258 | U68488    | 786.875   |
| NM_003177 | 6218.334  | 4767.702  | NM_016511 | 17112.76  | 16927.445 | NM_016247 | 4125.453  |
| NM_017719 | 874.904   | 1613.339  | NM_003559 | 2382.177  | 1970.371  | NM_012282 | 311.635   |
| AF064078  | 1522.625  | 1629.654  | M55337    | 1644.633  | 783.107   | NM_003323 | 4028.088  |
| AL049688  | 1920.743  | 1920.567  | M33197    | 65409.176 | 67109.344 | BG685310  | 468.369   |
| NM_002737 | 3143.441  | 2467.017  | NM_013229 | 1579.157  | 958.93    | AW300857  | 6618.902  |
| Z25427    | 3230.149  | 2982.585  | NM_016533 | 35200.613 | 40993.332 | H85962    | 7955.723  |
| NM_004672 | 8306.925  | 9327.688  | NM_014751 | 9065.097  | 10941.893 | BG742446  | 651.707   |
| NM_001353 | 3042.603  | 4051.214  | NM_002347 | 30847.863 | 29669.896 | AA864554  | 28921.26  |
| NM_006214 | 4600.263  | 5005.872  | AB046807  | 2053.407  | 1776.962  | X66945    | 2128.577  |
| AJ010228  | 9305.585  | 8946.377  | M33197    | 66063.469 | 70894.078 | X12830    | 9617.412  |
| NM_005198 | 6387.16   | 4620.393  | NM_014623 | 10002.923 | 5430.879  | U00482    | 795.247   |
| AK021426  | 622.97    | 675.425   | NM_007244 | 7692.896  | 8596.778  | Z80998    | 580.875   |
| NM_018073 | 1509.687  | 1076.486  | M30629    | 3438.47   | 3909.993  | K01904    | 2202.201  |
| AL137529  | 2291.289  | 1918.156  | BE539299  | 886.351   | 1014.433  | BE538886  | 791.679   |
| NM_012332 | 2935.502  | 2392.417  | AF193873  | 8710.245  | 8594.751  | NM_002228 | 964.286   |
| AK026648  | 1073.537  | 1142.419  | NM_002628 | 2961.502  | 4380.792  | M57650    | 2344.799  |
| NM_000497 | 1516.464  | 1444.758  | M23575    | 1092.703  | 1655.865  | BC023978  | 240.972   |
| NM_017421 | 1586.742  | 1341.4    | AA190729  | 1123.722  | 1680.477  | M21302    | 1272.898  |
| AK025977  | 11132.095 | 11032.604 | NM_004170 | 1257.617  | 1304.723  | NM_005212 | 3621.22   |
| AK023130  | 7614.139  | 8058.612  | M33197    | 66554.859 | 64189.328 | M14584    | 304.95    |
| NM_000273 | 537.14    | 637.006   | NM_015717 | 1916.426  | 1840.118  | AF035035  | 587.833   |
| NM_002899 | 6261.252  | 5159.008  | NM_015925 | 1408.739  | 1162.763  | U90942    | 27754.203 |
| NM_000486 | 1123.906  | 1287.178  | NM_003665 | 1376.031  | 1018.154  | NM_018360 | 762.332   |
| BE876237  | 1939.866  | 1800.965  | AF220217  | 811.746   | 666.151   | AL365415  | 733.716   |
| NM_000838 | 584.524   | 489.81    | NM_013323 | 11028.813 | 7926.412  | NM_006055 | 2167.268  |
| NM_014750 | 2265.187  | 2972.941  | NM_017426 | 2213.806  | 1509.406  | NM_004296 | 903.306   |
| NM_015912 | 863.478   | 1388.829  | M33197    | 1972.639  | 1245.596  | NM_005048 | 1165.399  |
| NM_000460 | 2665.572  | 3069.918  | NM_000853 | 2397.129  | 2753.921  | NM_005972 | 839.383   |
| AB002339  | 3710.337  | 2874.1    | AF016903  | 35189.102 | 33295.887 | NM_001060 | 1341.206  |
| NM_005104 | 10433.271 | 13230.482 | NM_015675 | 5879.75   | 7312.297  | NM_018841 | 385.766   |
| NM_006888 | 28905.154 | 28063.15  | AK022267  | 919.093   | 815.039   | NM_005226 | 537.599   |
| AL137423  | 3355.25   | 4574.132  | NM_016040 | 975.674   | 1938.191  | AL133105  | 1425.514  |
| AB018322  | 1988.525  | 2369.833  | M33197    | 66279.289 | 65944.055 | AK022859  | 1019.519  |
| NM_007068 | 7627.686  | 8294.229  | AF031136  | 57388.719 | 61383.336 | NM_000214 | 613.984   |
| NM_005718 | 16096.424 | 18198.219 | U90878    | 948.987   | 1140.838  | NM_014864 | 3826.839  |
| NM_018264 | 2154.843  | 2641.584  | NM_006597 | 20994.355 | 48134.125 | NM_003728 | 4403.69   |

|           |           |           |           |           |           |           |           |
|-----------|-----------|-----------|-----------|-----------|-----------|-----------|-----------|
| NM_01458C | 1018.006  | 712.532   | NM_00732C | 697.622   | 1298.124  | NM_00497E | 4478.533  |
| AB028998  | 1845.304  | 1287.728  | NM_01248C | 12201.464 | 13677.074 | D87445    | 3444.343  |
| NM_00015C | 1549.509  | 1205.885  | NM_00349E | 2676.806  | 4188.778  | NM_00023E | 2818.9    |
| NM_00203C | 3043.721  | 6313.914  | AB023420  | 10294.651 | 10921.982 | NM_002247 | 339.57    |
| AK091794  | 1012.839  | 596.165   | NM_00734C | 4180.453  | 3644.852  | NM_00498C | 2571.744  |
| NM_004111 | 1516.426  | 2248.345  | D25217    | 6634.646  | 8688.419  | AB011094  | 2819.041  |
| AF085966  | 3688.626  | 5236.125  | NM_006351 | 3596.36   | 3331.242  | NM_003224 | 486.621   |
| NM_00531E | 2437.957  | 2395.284  | M33197    | 59506.035 | 47020.805 | NM_00165E | 59028.82  |
| NM_01631E | 2268.301  | 3349.033  | NM_00468C | 8020.515  | 8273.711  | NM_006827 | 11743.134 |
| NM_00336E | 5761.084  | 6320.711  | M33197    | 61454.73  | 61666.234 | AK021761  | 5510.839  |
| NM_000057 | 1553.77   | 2436.162  | NM_001467 | 2378.589  | 2438.915  | AK024536  | 1580.957  |
| NM_01834C | 2948.251  | 3948.329  | NM_01806E | 31230.27  | 32489.525 | NM_01866E | 2899.357  |
| X15880    | 68257.648 | 51674.934 | NM_006931 | 3658.769  | 5350.451  | NM_004227 | 492.165   |
| AL137461  | 2373.594  | 4071.349  | NM_020344 | 8852.849  | 7567.451  | NM_00528C | 1481.976  |
| AF114264  | 1489.463  | 2417.788  | AF119868  | 839.911   | 953.66    | NM_00173E | 958.278   |
| NM_017514 | 570.624   | 571.308   | NM_00505C | 2656.049  | 3510.474  | AB028949  | 658.694   |
| NM_01897C | 1961.836  | 2824.735  | M33197    | 57797.535 | 61751.164 | AL137580  | 1056.57   |
| AB037828  | 349.781   | 645.354   | NM_01897E | 5736.004  | 11976.162 | NM_004101 | 645.708   |
| AB023210  | 1233.575  | 1365.653  | NM_00335E | 3219.54   | 6409.898  | NM_00299E | 22565.688 |
| AB037786  | 3388.251  | 3000.458  | NM_005074 | 1527.78   | 2061.685  | AB033114  | 202.826   |
| NM_00364E | 7058.038  | 8881.992  | NM_01327C | 799.311   | 828.312   | NM_01597E | 2455.382  |
| AB037735  | 1237.413  | 1078.315  | NM_00455E | 2938.112  | 2695.014  | NM_00381C | 3483.557  |
| AK002177  | 3151.996  | 3517.785  | AL079296  | 1523.437  | 1005.886  | NM_016171 | 66684.383 |
| AK024429  | 3701.83   | 1532.927  | NM_01477C | 3108.406  | 1748.608  | NM_01444C | 1068.533  |
| NM_00349E | 50633.914 | 43681.613 | M33197    | 64378.555 | 60316.164 | NM_016457 | 497.376   |
| AB000509  | 1142.834  | 1236.456  | AK023103  | 2543.898  | 1692.779  | AF143321  | 850.758   |
| AB018314  | 1707.457  | 1485.092  | NM_01785E | 2994.784  | 1463.221  | AB046842  | 1205.616  |
| NM_00437E | 1422.702  | 1181.238  | NM_01905E | 38859.754 | 46553.461 | NM_00485C | 1001.527  |
| AJ238899  | 978.909   | 838.22    | D80008    | 1600.857  | 1061.976  | NM_00282C | 2570.421  |
| NM_018037 | 874.072   | 1092.935  | X56789    | 1506.941  | 1590.661  | BF306955  | 962.251   |
| NM_001110 | 9319.206  | 5930.839  | AK001069  | 54423.598 | 58518.68  | NM_001394 | 3323.889  |
| NM_00322C | 2874.402  | 786.839   | M33197    | 61873.598 | 61888.492 | NM_018441 | 6018.024  |
| NM_000841 | 2394.507  | 2471.065  | NM_00093E | 1703.127  | 1928.256  | NM_00077E | 2682.714  |
| NM_00124E | 2817.841  | 2185.122  | NM_00035E | 15656.359 | 15724.357 | NM_00160E | 735.408   |
| NM_00367C | 31582.832 | 32285.807 | NM_00639E | 6048.963  | 6797.576  | BE733234  | 651.979   |
| NM_002574 | 42715.125 | 44728.883 | NM_01430E | 3758.574  | 5665.107  | NM_02022E | 4725.478  |
| AJ008139  | 6612.041  | 5606.698  | NM_001084 | 3496.842  | 4358.976  | AK024685  | 1092.236  |
| NM_00432E | 3200.134  | 2778.88   | NM_01598C | 2711.27   | 2897.062  | NM_00367E | 8178.938  |
| NM_00088C | 816.1     | 932.39    | NM_01862C | 6767.987  | 6266.389  | AF113007  | 1141.715  |
| NM_004577 | 3196.657  | 4632.326  | M33197    | 62051.105 | 65360.734 | NM_00068E | 2880.947  |
| NM_015507 | 484.179   | 979.189   | NM_005867 | 5051.746  | 8082.474  | U39573    | 1716.399  |
| AF007157  | 16561.318 | 19409.188 | AK026031  | 10977.915 | 18324.672 | D82061    | 1224.323  |
| D38553    | 2914.074  | 3615.299  | NM_01646E | 5266.564  | 6944.09   | AJ293009  | 1595.106  |
| NM_00617C | 2680.814  | 3224.8    | BE539299  | 770.73    | 347.162   | NM_000374 | 2603.171  |
| NM_01429E | 20374.299 | 16263.454 | NM_00262E | 1884.885  | 1426.54   | NM_00050C | 4477.733  |
| AK001581  | 997.513   | 1734.84   | M23575    | 1129.932  | 885.508   | NM_00135E | 9343.835  |
| NM_00586C | 2618.988  | 1932.131  | AA190729  | 1491.524  | 1042.798  | NM_00517E | 17029.004 |
| NM_00054E | 3546.74   | 3322.209  | BF974315  | 2969.543  | 2649.931  | NM_00169E | 9146.069  |
| AK022541  | 10817.989 | 14271.021 | T74985    | 791.016   | 667.716   | AF190900  | 777.166   |
| AB002297  | 3512.292  | 3572.607  | AI652705  | 5394.818  | 3134.173  | NM_020404 | 7467.027  |
| NM_00502C | 19231.922 | 17388.428 | AA973397  | 1057.907  | 801.169   | BE972401  | 2872.782  |
| NM_014077 | 5989.944  | 6171.034  | AA569974  | 3065.779  | 3686.06   | U56725    | 795.881   |
| NM_01841C | 1223.247  | 2227.87   | AA923615  | 1055.601  | 1006.012  | NM_01742E | 503.629   |

|           |           |           |           |           |           |           |           |
|-----------|-----------|-----------|-----------|-----------|-----------|-----------|-----------|
| NM_012325 | 2949.008  | 2720.991  | AA446028  | 1500.167  | 1811.497  | AB007922  | 684.588   |
| M14087    | 48221.645 | 40962.949 | M80583    | 2002.711  | 2207.706  | NM_015982 | 1880.829  |
| AJ272324  | 1658.502  | 1129.861  | AW009565  | 7493.562  | 4393.564  | NM_003746 | 2524.29   |
| NM_000885 | 2357.385  | 3363.978  | X07767    | 4090.33   | 2939.398  | NM_002910 | 29336.043 |
| M59040    | 2118.162  | 1717.192  | AF252284  | 4268.175  | 4755.287  | AC096970  | 15936.716 |
| NM_017582 | 21657.508 | 15205.396 | BU727558  | 1346.47   | 1881.851  | NM_001483 | 1012.302  |
| NM_015235 | 1057.208  | 998.978   | M33197    | 6257      | 6443.517  | NM_018973 | 4370.809  |
| AK026962  | 3572.803  | 3607.753  | AL050139  | 3434.72   | 5299.063  | NM_002591 | 7780.157  |
| X04366    | 4764.511  | 3900.632  | U90878    | 1261.524  | 962.018   | AL049334  | 307.164   |
| NM_000505 | 43270.375 | 41680.887 | NM_012483 | 14258.167 | 10363.098 | NM_020216 | 4166.656  |
| NM_018656 | 506.904   | 637.935   | NM_003495 | 4035.537  | 2658.114  | AK021860  | 1190.192  |
| NM_000666 | 5796.631  | 6039.68   | AB023420  | 10373.798 | 6937.384  | AK000119  | 731.419   |
| NM_003481 | 2246.326  | 1816.545  | M33197    | 65183.953 | 63616.961 | AB046816  | 346.113   |
| AB046814  | 775.644   | 1185.64   | NM_007264 | 15011.913 | 9573.911  | AL137266  | 1167.508  |
| NM_017664 | 4301.8    | 4011.115  | NM_016511 | 16203.691 | 13797.986 | U95031    | 518.266   |
| AK025523  | 395.35    | 568.703   | NM_003555 | 2049.108  | 1577.482  | NM_014285 | 1002.889  |
| NM_007055 | 7142.197  | 2464.542  | M55337    | 1485.103  | 1138.967  | NM_017703 | 2903.049  |
| NM_006870 | 3846.345  | 4693.326  | M33197    | 66114.227 | 64792.648 | NM_015320 | 2549.924  |
| NM_007355 | 4384.365  | 4518.164  | NM_013225 | 1811.19   | 1388.433  | NM_004055 | 1214.647  |
| L13283    | 908.762   | 746.064   | NM_016533 | 35775.906 | 45801.949 | NM_014726 | 7727.996  |
| NM_013327 | 2540.18   | 3849.391  | NM_014751 | 8747.882  | 13243.665 | AJ297349  | 1086.924  |
| AF303888  | 7833.312  | 4875.96   | NM_002347 | 29094.129 | 31394.061 | NM_005825 | 2784.047  |
| NM_000077 | 914.719   | 633.384   | AB046807  | 2083.857  | 2850.398  | NM_001615 | 2433.113  |
| NM_007084 | 1723.654  | 1341.927  | M33197    | 66125.258 | 67082.531 | NM_006595 | 1697.817  |
| M97191    | 20571.152 | 19837.83  | NM_014623 | 11007.22  | 7955.047  | NM_004463 | 750.717   |
| AK023015  | 571.521   | 1461.479  | NM_007244 | 8410.831  | 11938.093 | U43586    | 409.623   |
| NM_003457 | 13334.732 | 13343.762 | M30629    | 2983.397  | 4127.301  | NM_006271 | 2910.512  |
| NM_012391 | 3981.695  | 3351.952  | M33197    | 65205.559 | 61763.164 | NM_018647 | 138.358   |
| NM_005254 | 1450.577  | 4143.841  | NM_018976 | 5778.673  | 7125.962  | NM_003026 | 1195.049  |
| NM_005611 | 1204.991  | 2276.629  | NM_003355 | 4093.404  | 4702.273  | NM_000721 | 21853.383 |
| AF141655  | 1339.299  | 1672.292  | NM_005074 | 1708.616  | 1560.572  | NM_003933 | 1320.894  |
| NM_007345 | 2028.717  | 1729.656  | NM_013272 | 975.548   | 600.295   | NM_005095 | 2623.418  |
| NM_004830 | 778.258   | 1431.373  | NM_004170 | 1725.741  | 1529.29   | NM_003163 | 1681.373  |
| NM_007007 | 6875.651  | 8017.257  | NM_018057 | 2194.643  | 1644.955  | NM_019057 | 4561.99   |
| NM_006386 | 1740.279  | 1368.847  | NM_015717 | 2027.545  | 2013.212  | NM_016205 | 1123.271  |
| NM_006555 | 13987.82  | 16320.654 | NM_015925 | 1497.14   | 1431.688  | NM_005755 | 590.018   |
| NM_004501 | 36079.184 | 40397.66  | NM_003665 | 1265.702  | 1113.243  | AF149724  | 577.71    |
| NM_004966 | 11354.58  | 14307.184 | AF220217  | 759.731   | 826.828   | BC020745  | 388.279   |
| NM_006700 | 2396.29   | 1972.69   | NM_013323 | 13601.179 | 11737.583 | NM_006367 | 43427.977 |
| NM_006445 | 8896.388  | 12026.097 | NM_017426 | 1911.213  | 1531.152  | NM_006732 | 27972.029 |
| NM_012105 | 7044.981  | 6625.925  | M33197    | 1612.201  | 1290.42   | NM_004354 | 1890.177  |
| AF019633  | 1116.723  | 1509.676  | NM_000853 | 1900.549  | 3002.617  | NM_004661 | 743.351   |
| AB002361  | 2251.949  | 1731.344  | AF016903  | 35135.68  | 43113.59  | AF217504  | 805.035   |
| NM_018060 | 5403.985  | 5586.428  | NM_015675 | 6298.591  | 12247.144 | AK027102  | 2426.393  |
| NM_014235 | 3081.999  | 3816.352  | AK022267  | 864.055   | 1152.091  | AL109714  | 327.948   |
| NM_017662 | 2282.64   | 2983.737  | NM_016040 | 1129.121  | 3318.726  | NM_004632 | 1679.197  |
| U88837    | 1251.205  | 1648.113  | NM_015983 | 2690.012  | 1923.984  | NM_017915 | 4430.325  |
| NM_017446 | 6994.922  | 12475.012 | NM_018622 | 6052.988  | 3215.261  | NM_014456 | 1503.249  |
| AK001478  | 6597.424  | 8073.248  | M33197    | 61947.969 | 60778.438 | NM_004740 | 3091.266  |
| AK025697  | 3884.045  | 4234.639  | NM_005867 | 6728.04   | 5458.225  | NM_003805 | 1365.649  |
| AK021734  | 1271.179  | 1026.905  | AK026031  | 12690.227 | 10600.93  | NM_019886 | 2520.236  |
| AF075028  | 461.887   | 512.958   | NM_016465 | 4993.082  | 4300.151  | NM_003275 | 25443.754 |
| BF245026  | 752.97    | 944.983   | NM_007342 | 4073.455  | 4066.182  | AK021957  | 19031.086 |

|           |           |           |           |           |           |           |           |
|-----------|-----------|-----------|-----------|-----------|-----------|-----------|-----------|
| D00265    | 21625.051 | 36153.723 | NM_005672 | 770.918   | 566.447   | NM_016623 | 3454.036  |
| NM_000779 | 594.799   | 762.434   | NM_006351 | 3662.499  | 3837.04   | NM_001334 | 4436.481  |
| NM_004552 | 26610.453 | 36175.922 | M33197    | 58961.367 | 53569.965 | NM_004771 | 917.85    |
| NM_000143 | 2061.843  | 4329.759  | NM_004683 | 7546.399  | 10313.727 | AL365514  | 639.193   |
| AF317889  | 667.648   | 528.522   | M33197    | 57615.934 | 59728.633 | NM_018299 | 777.299   |
| AL137294  | 913.796   | 1756.948  | NM_001467 | 2101.899  | 2306.273  | NM_005504 | 1735.661  |
| NM_003743 | 1449.653  | 1049.514  | NM_018066 | 32820.652 | 47050.754 | NM_000110 | 1414.12   |
| AB037797  | 1403.42   | 350.149   | NM_006931 | 4233.558  | 8080.341  | NM_016002 | 7910.359  |
| NM_001520 | 1286.018  | 1195.153  | NM_020344 | 6672.52   | 8114.722  | NM_014549 | 639.947   |
| NM_017870 | 422.891   | 812.209   | AF119868  | 718.412   | 1023.284  | NM_000531 | 545.941   |
| AL133633  | 1306.271  | 1446.932  | NM_005050 | 1473.615  | 2541.515  | NM_017832 | 3040.125  |
| NM_012252 | 1320.279  | 1476.507  | AF252284  | 3220.03   | 2252.379  | NM_001713 | 1527.6    |
| AK026817  | 957.284   | 1152.916  | BU727558  | 1658.795  | 1342.643  | NM_015367 | 3809.375  |
| AL157442  | 21015.309 | 16421.033 | M33197    | 9545.035  | 5947.083  | NM_014498 | 3608.169  |
| AB011148  | 1834.386  | 1808.144  | AL050139  | 3627.015  | 3585.198  | NM_002375 | 4045.235  |
| AL389938  | 8446.067  | 7307.945  | NM_002593 | 804.451   | 719.332   | NM_001813 | 1325.86   |
| NM_001949 | 35984.02  | 43762.605 | NM_004558 | 4493.201  | 4526.409  | NM_007234 | 3103.321  |
| NM_003507 | 1419.525  | 1120.836  | AL079296  | 1584.591  | 1061.662  | NM_014567 | 1405.13   |
| AK026591  | 583.827   | 677.869   | NM_014770 | 4778.191  | 3253.903  | NM_017842 | 815.181   |
| AK001889  | 4236.316  | 3444.552  | M33197    | 60104.203 | 62261.426 | AB037809  | 983.408   |
| AK025726  | 2752.362  | 2140.811  | AK023103  | 2507.451  | 2076.64   | AB011129  | 528.216   |
| AJ227869  | 1666.363  | 2285.645  | NM_017858 | 3084.173  | 1695.302  | NM_014391 | 1922.156  |
| AK026189  | 526.247   | 610.792   | NM_019059 | 37891.539 | 48159.566 | NM_004270 | 1532.576  |
| AK026790  | 936.236   | 397.882   | D80008    | 1223.531  | 900.628   | NM_012082 | 162.84    |
| AL117613  | 7753.385  | 8520.391  | X56789    | 1469.25   | 1721.266  | NM_001537 | 1174.381  |
| AL137753  | 4021.4    | 4291.982  | AK001069  | 52802.891 | 59646.504 | U80743    | 578.144   |
| AK021785  | 334.915   | 976.599   | M33197    | 57873.039 | 61730.391 | NM_001352 | 1382.746  |
| AL110262  | 7843.938  | 8192.878  | NM_000935 | 2036.912  | 2278.25   | NM_006527 | 1731.343  |
| AK025627  | 5849.479  | 6127.106  | NM_000359 | 9194.56   | 13560.387 | NM_007363 | 8957.26   |
| U00945    | 669.121   | 264.272   | NM_001084 | 2576.621  | 3470.213  | NM_003093 | 21315.881 |
| AF216077  | 814.254   | 708.057   | M33197    | 63652.992 | 63567.281 | U05589    | 1028.256  |
| AK021612  | 4243.487  | 3865.254  | NM_014623 | 10096.418 | 4242.3    | NM_014473 | 3307.65   |
| AK002025  | 31287.426 | 36444.543 | NM_007244 | 11291.127 | 9046.955  | NM_003095 | 45587.82  |
| AK026299  | 1661.835  | 1723.608  | M30629    | 3307.023  | 3037.846  | NM_016389 | 897.013   |
| NM_017794 | 1177.028  | 1277.137  | AF193873  | 8339.135  | 5095.237  | NM_002295 | 52855.492 |
| AK025170  | 1110.844  | 793.801   | NM_002628 | 2444.189  | 2006.128  | NM_001762 | 3228.986  |
| AB033031  | 2295.386  | 2295.656  | M23575    | 1125.7    | 869.457   | NM_003755 | 572.301   |
| AF085872  | 8593.682  | 7098.498  | BF974315  | 2718.004  | 3220.865  | BE258640  | 4062.76   |
| AK022538  | 8953.774  | 7707.708  | AI652705  | 5444.099  | 3876.855  | NM_003314 | 1284.878  |
| AL360257  | 1317.661  | 1098.506  | AA973397  | 1012.271  | 752.868   | U79273    | 838.723   |
| AK022342  | 866.098   | 802.154   | AA569974  | 3350.766  | 4715.61   | AK022050  | 8703.193  |
| AF147420  | 1346.641  | 1446.127  | AA923615  | 821.341   | 874.497   | NM_002512 | 29396.607 |
| AL049312  | 1961.451  | 2055.04   | AA446028  | 1251.16   | 1602.791  | NM_001246 | 749.165   |
| AL050072  | 2083.413  | 2779.574  | M80583    | 2127.517  | 2204.147  | AL365411  | 950.534   |
| AL117590  | 340.455   | 862.548   | AW009565  | 7795.466  | 6860.361  | NM_016066 | 1765.611  |
| AL049357  | 2471.851  | 2835.818  | AI570478  | 201.94    | 1314.894  | NM_001249 | 753.903   |
| AL110223  | 694.302   | 443.148   | X07767    | 3255.42   | 2271.378  | NM_000036 | 181.622   |
| AK027180  | 4438.146  | 7555.303  | AF016903  | 27436.41  | 24266     | AF254082  | 10177.255 |
| NM_004544 | 7544.137  | 10607.97  | NM_015675 | 5860.161  | 5029.325  | AF205718  | 2851.346  |
| AF086041  | 623.671   | 444.644   | NM_016040 | 1241.769  | 1934.893  | AY004252  | 1008.507  |
| Y15167    | 767.11    | 787.441   | M33197    | 65161.676 | 63152.465 | NM_006261 | 2926.339  |
| AL133080  | 3163.979  | 2315.646  | AF031136  | 42076.168 | 40460.523 | AF169796  | 1284.689  |
| NM_017792 | 2024.689  | 1775.707  | NM_006597 | 22259.891 | 29659.109 | AK026157  | 584.744   |

|           |           |           |           |           |           |           |           |
|-----------|-----------|-----------|-----------|-----------|-----------|-----------|-----------|
| AK025213  | 5247.849  | 3614.685  | NM_012483 | 9004.149  | 8482.057  | AK001814  | 1781.098  |
| NM_014945 | 2313.688  | 3192.145  | NM_003495 | 4250.132  | 3304.77   | NM_007222 | 1004.423  |
| AL080221  | 1738.858  | 2299.626  | AB023420  | 9673.908  | 9740.598  | NM_003435 | 773.42    |
| AL137370  | 833.564   | 1050.625  | NM_016511 | 18517.922 | 19604.732 | NM_016291 | 1045.013  |
| AF009262  | 7440.175  | 7506.146  | NM_003555 | 1326.339  | 1566.755  | NM_005937 | 16193.929 |
| AF009306  | 890.103   | 989.904   | M55337    | 1433.84   | 1372.776  | AK001503  | 976.976   |
| AF050198  | 1681.362  | 1233.538  | M33197    | 71354.445 | 64290.34  | AK022880  | 1610.143  |
| AK024346  | 3126.551  | 2581.701  | NM_013225 | 1534.825  | 2133.994  | NM_003601 | 4481.026  |
| AF056422  | 1074.204  | 1269.794  | NM_016533 | 5152.593  | 10647.642 | AK001228  | 1852.914  |
| AF090892  | 873.078   | 1363.975  | NM_014751 | 1252.416  | 1743.179  | AK026778  | 848.339   |
| AK001919  | 969.521   | 958.227   | NM_002347 | 13876.493 | 15535.047 | AF074987  | 484.166   |
| AK021535  | 1214.212  | 1224.57   | NM_018065 | 23085.996 | 21785.658 | AK001058  | 25951.166 |
| AK021753  | 2796.852  | 2295.057  | NM_006931 | 3687.413  | 3293.851  | AF086283  | 1032.025  |
| AK001139  | 1221.092  | 1405.736  | NM_020344 | 7956.449  | 6080.406  | AF088047  | 881.906   |
| AK002090  | 1214.341  | 1341.34   | NM_005050 | 2656.493  | 2302.132  | AF086281  | 826.923   |
| AK021822  | 997.455   | 874.244   | M33197    | 62512.164 | 60365.492 | AF086372  | 308.066   |
| AK025246  | 2923.035  | 2676.564  | NM_018975 | 4810.757  | 6340.458  | AF086393  | 1024.651  |
| AK025847  | 835.455   | 951.539   | NM_003355 | 4050.536  | 5170.776  | AF086453  | 656.535   |
| AK026442  | 1399.453  | 810.477   | NM_005074 | 1355.16   | 2060.277  | AF070621  | 4449.59   |
| NM_014174 | 5535.607  | 5820.831  | NM_013272 | 864.924   | 967.784   | NM_020240 | 767.11    |
| AF147337  | 5732.653  | 4233.565  | NM_004170 | 1315.406  | 1754.168  | AK023678  | 3918.659  |
| AK025203  | 42480.027 | 41236.375 | NM_018057 | 1830.733  | 2037.55   | AF052090  | 3019.881  |
| AK026981  | 2400.483  | 2624.357  | M33197    | 65894.969 | 63682.609 | AF086007  | 32928.484 |
| NM_006394 | 623.741   | 551.766   | NM_015717 | 2021.224  | 2354.529  | AK000803  | 915.875   |
| AL133656  | 1896.241  | 1889.934  | NM_015925 | 1388.619  | 1620.147  | AK022374  | 625.125   |
| AL050037  | 9039.583  | 8776.059  | NM_003665 | 1438.078  | 1341.152  | AF085926  | 7195.904  |
| NM_001417 | 32128.922 | 34611.273 | AF220217  | 826.61    | 870.96    | AF085948  | 480.367   |
| AK022236  | 2666.62   | 3455.52   | NM_013323 | 11993.309 | 12600.237 | AL137307  | 859.245   |
| AK000618  | 381.041   | 598.887   | NM_017425 | 1301.879  | 1742.262  | AL137468  | 9419.638  |
| X60484    | 1634.261  | 1300.568  | M33197    | 1798.769  | 1594.687  | AL162007  | 21660.121 |
| AF055019  | 2274.678  | 1675.471  | M33197    | 50616.082 | 45598.879 | AL390137  | 3254.233  |
| NM_003525 | 19979.506 | 7535.681  | NM_000935 | 1621.394  | 966.865   | AL137542  | 690.631   |
| AK000229  | 1080.458  | 805.418   | NM_000355 | 14741.726 | 10627.937 | AL162045  | 1697.66   |
| AF056432  | 1516.884  | 2228.45   | NM_006395 | 5623.479  | 4274.941  | X92185    | 542.266   |
| AK001987  | 24871.121 | 36460.508 | NM_014305 | 3426.016  | 4031.285  | AK022437  | 7062.956  |
| NM_013332 | 1087.167  | 2184.103  | NM_001084 | 3213.513  | 2458.563  | AF086102  | 715.875   |
| X56199    | 2994.374  | 2261.411  | NM_015983 | 2297.703  | 1554.541  | AF116682  | 9686.35   |
| NM_005193 | 2338.244  | 1847.109  | NM_018622 | 5447.266  | 2986.725  | AL137259  | 1752.943  |
| AL162006  | 1768.218  | 1703.136  | M33197    | 64768.734 | 60269.242 | AL122107  | 2704.16   |
| NM_017971 | 15047.221 | 13806.542 | NM_005867 | 2797.318  | 2682.903  | AF075021  | 707.17    |
| AF090097  | 2109.928  | 1892.548  | AK026031  | 12577.719 | 13344.901 | AK025140  | 15178.933 |
| AF116620  | 10339.977 | 12559.586 | NM_016465 | 4884.896  | 5156.717  | AK023394  | 607.324   |
| AF293335  | 17230.402 | 15250.993 | NM_007342 | 3001.725  | 3317.19   | AF090093  | 1456.411  |
| AK024431  | 5975.908  | 3456.657  | NM_005672 | 871.825   | 868.711   | AF161340  | 4598.543  |
| AF116635  | 502.022   | 593.395   | D25217    | 4399.478  | 7241.768  | AF242771  | 1812.966  |
| X96644    | 5087.377  | 4409.603  | NM_006351 | 3231.997  | 4072.584  | NM_018562 | 1561.434  |
| Z34281    | 6306.939  | 6709.045  | M33197    | 43644.402 | 34019.93  | AF098666  | 417.72    |
| NM_018675 | 14308.75  | 13955.182 | NM_004683 | 9056.115  | 12629.056 | AF161365  | 378.108   |
| AJ008122  | 8985.9    | 9173.622  | M33197    | 62083.867 | 63005.727 | AF290544  | 503.022   |
| AK022667  | 20084.533 | 16090.36  | NM_004685 | 14820.323 | 7236.354  | AK021969  | 1424.899  |
| AK026667  | 330.435   | 938.327   | AB037725  | 932.177   | 669.988   | AK022065  | 867.368   |
| AF113211  | 1801.033  | 1550.593  | M33197    | 57764     | 44162.57  | AK022221  | 3907.104  |
| AL117568  | 1210.547  | 1864.765  | NM_017715 | 978.926   | 222.693   | AK022356  | 1687.856  |

|           |           |           |           |           |           |           |           |
|-----------|-----------|-----------|-----------|-----------|-----------|-----------|-----------|
| NM_000843 | 785.85    | 636.571   | NM_004860 | 3730.99   | 2815.382  | AK021998  | 4186.621  |
| S71805    | 787.344   | 1225.183  | AF217190  | 6663.052  | 3091.919  | AK022126  | 2215.924  |
| NM_018391 | 2196.899  | 2109.533  | AB028981  | 40800.938 | 43708.051 | AK022256  | 1284.061  |
| U90917    | 993.349   | 659.64    | NM_006800 | 3020.99   | 3429.553  | AK022383  | 1075.288  |
| AK022140  | 1897.655  | 2066.686  | NM_002476 | 1268.028  | 1627.56   | AK027041  | 1024.342  |
| AK023372  | 30877.457 | 31231.236 | NM_002729 | 5157.955  | 4892.878  | AK022064  | 477.187   |
| U21072    | 3324.45   | 2672.466  | M33197    | 6364.313  | 5049.4    | AK024332  | 561.637   |
| AK024377  | 1006.87   | 768.944   | AL050139  | 4421.308  | 9454.426  | NM_005355 | 9161.057  |
| AK023557  | 796.712   | 1224.158  | NM_002593 | 697.148   | 1203.521  | AK027195  | 202.958   |
| AK027107  | 872.472   | 403.047   | NM_004558 | 2853.362  | 4882.342  | AF035306  | 1604.355  |
| AB040887  | 2918.98   | 3040.499  | AL079296  | 1493.372  | 1237.585  | AK091662  | 1024.468  |
| AK025196  | 1125.234  | 1234.016  | NM_014770 | 5328.797  | 4685.933  | NM_003954 | 1693.282  |
| AJ227879  | 364.097   | 766.988   | M33197    | 58399.961 | 60882.621 | NM_016348 | 513.108   |
| AK024800  | 746.841   | 592.1     | AK023103  | 2703.224  | 3450.411  | AK023877  | 780.136   |
| AK000401  | 1693.108  | 1515.631  | NM_017858 | 3361.333  | 2011.428  | AK023640  | 530.392   |
| AF305068  | 619.991   | 706.59    | NM_019059 | 34502.527 | 56939.625 | unknown ( | 658.233   |
| D17231    | 28539.352 | 35806.922 | D80008    | 910.771   | 1015.67   | AK024213  | 12233.387 |
| AF531295  | 847.481   | 1048.439  | AK001069  | 18982.305 | 19264.455 | AK025093  | 521.322   |
| CY3Cy5    | 9576.376  | 575.328   | NM_004132 | 4199.304  | 3020.163  | AK022184  | 686.357   |
| BF974315  | 3841.717  | 6251.976  | NM_014844 | 3305.069  | 2509.985  | AB007959  | 524.138   |
| T74985    | 921.658   | 948.735   | M33197    | 61325.695 | 58789.23  | AK026002  | 585.09    |
| AI652705  | 7253.945  | 5470.866  | NM_018492 | 2276.591  | 1254.51   | AK024153  | 596.943   |
| AA973397  | 2108.701  | 1538.477  | NM_001346 | 2240.649  | 2130.835  | Y10516    | 1871.193  |
| AA569974  | 9305.087  | 7003.673  | NM_003149 | 1989.631  | 1343.472  | AF056451  | 2114.116  |
| AA923615  | 3172.341  | 858.479   | NM_003377 | 5239.344  | 5363.129  | AF015039  | 2175.607  |
| AA446028  | 1579.857  | 2265.238  | NM_002220 | 4570.387  | 4066.026  | U50528    | 1554.002  |
| M80583    | 1653.078  | 2367.855  | AB033034  | 1325.989  | 1253.864  | AB020632  | 649.128   |
| AW009565  | 4912.97   | 5721.337  | D38169    | 2027.634  | 3924.046  | NM_018614 | 11796.553 |
| AW451878  | 1362.075  | 1385.368  | M33197    | 38972.402 | 37033.156 | AL117549  | 820.437   |
| X07767    | 5845.301  | 4361.335  | NM_002447 | 9525.549  | 7305.267  | NM_005222 | 12436.261 |
| X65293    | 843.574   | 735.279   | NM_014145 | 8189.653  | 7575.06   | BC024308  | 4210.1    |
| AF252284  | 5854.596  | 5520.227  | NM_014141 | 7146.971  | 8802.813  | NM_000538 | 1490.985  |
| BU727558  | 3104.714  | 3794.567  | NM_002223 | 2599.662  | 3689.878  | AK001838  | 68022.016 |
| SR5       | 5486.068  | 4976.684  | M33197    | 58534.238 | 55732.965 | NM_018295 | 946.814   |
| SR7       | 7174.383  | 46282.707 | NM_005490 | 6939.573  | 12284.307 | AF070574  | 439.561   |
| SR9       | 34019.336 | 8824.912  | NM_003151 | 1589.122  | 2101.07   | AF086262  | 2139.314  |
| CY3Cy5    | 12601.71  | 689.329   | NM_006811 | 5253.79   | 6901.957  | AF086292  | 9357.943  |
| M33197    | 66172.164 | 70758.516 | NM_005601 | 1445.501  | 2330.933  | AK023769  | 640.323   |
| NM_002262 | 851.903   | 639.461   | NM_016151 | 4550.67   | 7028.021  | AK024342  | 13558.698 |
| NM_016511 | 27605.689 | 32052.428 | NM_004324 | 1072.686  | 751.754   | AL137712  | 4768.236  |
| NM_003559 | 3386.58   | 3468.611  | NM_005614 | 5608.701  | 5101.837  | AL137606  | 1137.527  |
| NM_002185 | 680.436   | 420.614   | NM_004556 | 4357.363  | 2495.547  | AK023839  | 427.212   |
| M55337    | 1451.375  | 1059.191  | D90075    | 2232.147  | 3149.665  | L77599    | 10278.251 |
| NM_013229 | 2216.377  | 1913.018  | M33197    | 60681.574 | 55743.352 | AK021673  | 8767.994  |
| NM_014751 | 9845.743  | 10914.521 | NM_014857 | 989.27    | 634.229   | AB014543  | 483.646   |
| NM_002347 | 37349.551 | 39732.051 | AK023827  | 3867.117  | 3780.188  | NM_018445 | 3653.844  |
| AB046807  | 4806.493  | 5955.15   | AK021702  | 1163.802  | 967.691   | AK022743  | 1456.552  |
| NM_018176 | 1973.506  | 2022.83   | NM_016448 | 3107.623  | 2593.843  | NM_014627 | 5030.596  |
| NM_014623 | 17261.535 | 7516.15   | M33197    | 38941.863 | 31174.188 | NM_013938 | 10397.961 |
| M30629    | 7287.595  | 7031.963  | NM_004415 | 8514.218  | 6641.385  | NM_013986 | 54780.645 |
| BE539299  | 1213.043  | 1255.513  | NM_007278 | 11358.352 | 8217.575  | U55055    | 853.264   |
| AF193873  | 6903.092  | 6948.315  | NM_005219 | 17261.346 | 17928.859 | AK022186  | 687.169   |
| M23575    | 1024.386  | 1680.319  | NM_004723 | 5717.66   | 10544.064 | AK021485  | 528.5     |

|           |           |           |           |           |           |           |           |
|-----------|-----------|-----------|-----------|-----------|-----------|-----------|-----------|
| AA190729  | 2329.899  | 1961.899  | M33197    | 49090.207 | 53215.348 | AB018319  | 954.612   |
| NM_00417C | 1302.607  | 1250.048  | NM_018413 | 1987.542  | 4500.75   | AK001101  | 2485.172  |
| NM_018057 | 2184.464  | 2006.777  | AB018299  | 6039.622  | 7015.728  | BM973473  | 1819.557  |
| NM_015717 | 1994.915  | 2370.263  | NM_005245 | 3490.475  | 5048.242  | AK021637  | 2294.523  |
| NM_015925 | 1559.041  | 1168.913  | M33197    | 61902.781 | 58907.715 | AK021658  | 1128.057  |
| NM_003665 | 2008.203  | 1697.474  | NM_016219 | 6475.215  | 6029.908  | D61705    | 415.855   |
| AF220217  | 1323.957  | 1263.03   | NM_004751 | 902.362   | 658.89    | U17631    | 2075.272  |
| NM_013323 | 23177.92  | 17175.205 | AK025605  | 2247.129  | 2132.617  | AL137723  | 1887.598  |
| NM_014937 | 913.872   | 837.444   | NM_003783 | 983.618   | 983.24    | AK000774  | 338.492   |
| M33197    | 3955.145  | 4117.786  | NM_00700C | 5700.827  | 4186.836  | AK024046  | 1156.556  |
| AF016903  | 34239.578 | 33779.605 | M23161    | 5368.899  | 3796.073  | NM_017931 | 3997.975  |
| NM_015675 | 9347.194  | 10155.742 | NM_003197 | 7001.618  | 4241.015  | AK022793  | 1330.522  |
| AK022267  | 1208.982  | 1086.074  | AF176705  | 1344.793  | 1745.823  | AJ227910  | 959.41    |
| M33197    | 62860.227 | 62754.84  | D29012    | 8832.402  | 6997.691  | AF001893  | 1901.528  |
| AF031136  | 54306.43  | 58904.488 | NM_017414 | 785.865   | 813.62    | X04236    | 10964.743 |
| U90878    | 3033.412  | 4243.957  | NM_012179 | 16627.285 | 13046.779 | AK093746  | 13532.623 |
| NM_006597 | 21261.555 | 43012.391 | NM_002793 | 2460.239  | 3435.75   | D16875    | 1089.401  |
| NM_003498 | 4518.156  | 4963.787  | NM_004788 | 1026.305  | 1126.58   | AK027171  | 929.496   |
| AB023420  | 12560.352 | 13259.457 | M33197    | 42201.109 | 38838.762 | AK021945  | 1768.742  |
| NM_007342 | 4266.794  | 4455.922  | AL442083  | 2847.444  | 2606.924  | L23545    | 425.491   |
| NM_005672 | 674.458   | 682.324   | D63487    | 1421.426  | 2044.723  | CY3Cy5    | 10107.514 |
| D25217    | 4076.554  | 12224.18  | AK097791  | 5707.693  | 7454.771  | U13022    | 926.094   |
| NM_006351 | 3654.222  | 4669.413  | AK022705  | 4411.463  | 5507.554  | R23251    | 5839.299  |
| M33197    | 61411.816 | 49059.715 | NM_016404 | 3245.516  | 3181.348  | BG763477  | 13935.587 |
| NM_004683 | 13563.53  | 12990.643 | L03426    | 2073.963  | 2039.032  | AA702640  | 1433.444  |
| AK023226  | 1179.075  | 481.979   | M33197    | 56714.359 | 57036.184 | T68583    | 2796.179  |
| M33197    | 61039.922 | 61424.461 | NM_020163 | 1742.067  | 3233.084  | AA481944  | 13256.552 |
| NM_001467 | 3115.216  | 4021.588  | NM_006608 | 5760.02   | 5452.256  | X14390    | 581.675   |
| NM_018066 | 28348.43  | 34063.664 | NM_000457 | 1515.096  | 1496.16   | AF038440  | 1020.065  |
| NM_006931 | 4160.348  | 4827.387  | M34356    | 2193.613  | 2099.534  | M31158    | 464.204   |
| NM_020344 | 8037.993  | 7897.505  | AJ133115  | 5163.361  | 3736.689  | H00742    | 2256.497  |
| AF119868  | 960.817   | 974.803   | X51630    | 8859.071  | 6471.425  | D42108    | 874.194   |
| NM_00505C | 4680.213  | 6229.845  | NM_005056 | 2792.126  | 2444.691  | BG700922  | 468.96    |
| AJ133127  | 846.448   | 1046.504  | NM_001965 | 814.875   | 1116.3    | AI366068  | 4370.859  |
| M33197    | 62969.441 | 63121.824 | AF208502  | 11533.837 | 9514.092  | AF080158  | 1958.391  |
| NM_018976 | 7965.578  | 9783.767  | M33197    | 53170.133 | 55743.883 | BM664556  | 1032.483  |
| NM_003355 | 4102.887  | 7111.689  | AF264750  | 16759.51  | 14513.713 | SR5       | 5948.392  |
| NM_004558 | 4530.123  | 3431.156  | NM_00698C | 1694.549  | 1378.777  | SR9       | 23722.479 |
| AL079296  | 1659.097  | 1035.285  | AK023904  | 3064.054  | 2735.219  | CY3Cy5    | 18450.266 |
| NM_01477C | 2507.127  | 2058.229  | NM_017956 | 7211.978  | 7196.184  | M33197    | 71628.156 |
| AB037737  | 688.133   | 944.949   | NM_016496 | 1574.916  | 1506.807  | NM_007024 | 3186.98   |
| M33197    | 64880.473 | 65132.781 | NM_014309 | 3240.181  | 4361.448  | NM_013231 | 1833.623  |
| AK023103  | 3816.813  | 3263.828  | M33197    | 30922.727 | 28461.775 | NM_012106 | 1815.479  |
| NM_017858 | 1978.612  | 2375.588  | NM_004094 | 1750.856  | 2738.124  | NM_006254 | 2627.155  |
| NM_019059 | 40148.609 | 59513.988 | NM_020236 | 3690.559  | 2016.893  | X95425    | 1329.751  |
| D80008    | 814.525   | 1470.437  | AK027059  | 3368.64   | 4798.795  | NM_004422 | 1276.081  |
| X56789    | 1850.238  | 1709.349  | AF151109  | 12064.169 | 18090.492 | NM_016562 | 909.144   |
| AK001069  | 55272.98  | 59430.801 | NM_015414 | 56203.68  | 67011.742 | M33197    | 60285.391 |
| M33197    | 60036.09  | 60535.063 | L34070    | 1864.689  | 5642.084  | NM_004895 | 9493.487  |
| NM_000935 | 1218.457  | 1336.767  | NM_016475 | 3635.598  | 2847.48   | U59748    | 745.393   |
| NM_000359 | 15878.809 | 14932.823 | NM_001865 | 58817.121 | 49362.352 | NM_014303 | 6805.652  |
| NM_006395 | 7198.013  | 6449.54   | NM_006441 | 5570.947  | 4025.309  | M33197    | 57516.441 |
| NM_014306 | 5296.72   | 6089.69   | NM_001918 | 2011.794  | 2258.91   | M95610    | 11155.735 |

|           |           |           |           |           |           |           |           |
|-----------|-----------|-----------|-----------|-----------|-----------|-----------|-----------|
| NM_001084 | 5919.909  | 6585.156  | NM_018245 | 3387.56   | 3753.38   | L02922    | 7203.637  |
| NM_015983 | 4272.523  | 4750.278  | M33197    | 39655.07  | 38133.348 | NM_001797 | 1740.986  |
| NM_018622 | 8861.523  | 4928.758  | AF252390  | 1040.501  | 1096.059  | NM_014579 | 1650.269  |
| M33197    | 61697.527 | 60431.102 | NM_012117 | 5530.66   | 2682.706  | NM_012139 | 2309.631  |
| NM_005867 | 6402.245  | 6070.04   | D17130    | 50628.02  | 51031.465 | AF121856  | 3064.617  |
| BE539299  | 1005.607  | 819.536   | X76302    | 5280.839  | 4588.512  | NM_006421 | 1533.462  |
| AF193873  | 6971.892  | 5506.181  | AK026276  | 1293.531  | 1062.898  | NM_017457 | 16481.584 |
| NM_002628 | 3868.264  | 2538.677  | M33197    | 48494.527 | 46490.191 | NM_003765 | 6381.866  |
| M23575    | 1122.345  | 1264.888  | X52354    | 1610.902  | 1851.385  | NM_018202 | 6114.116  |
| AA190729  | 2347.72   | 1757.246  | NM_005413 | 1497.463  | 1964.012  | AB023197  | 1646.715  |
| BF974315  | 3768.774  | 5912.721  | AK024191  | 1237.181  | 1650.174  | NM_022173 | 3046.937  |
| T74985    | 922.939   | 861.716   | D83781    | 644.522   | 1185.397  | AB040970  | 1731.764  |
| AI652705  | 7304.247  | 6546.812  | AL832699  | 6264.256  | 2709.758  | NM_018330 | 1430.873  |
| AA973397  | 2978.453  | 2348.262  | NM_012191 | 1347.793  | 1256.602  | M33197    | 36381.273 |
| AA569974  | 8416.455  | 6494.76   | M33197    | 42027.93  | 34432.457 | U50342    | 2484.181  |
| AA923615  | 3212.821  | 959.888   | AK000757  | 1476.285  | 752.901   | NM_000295 | 1436.447  |
| AA446028  | 1676.114  | 2464.755  | NM_018139 | 1622.262  | 1281.589  | U80018    | 557.118   |
| M80583    | 1593.477  | 2333.548  | NM_014805 | 4903.42   | 3969.37   | NM_000717 | 1110.68   |
| AW009565  | 4807.271  | 5328.272  | AF052120  | 2833.259  | 2898.398  | M33197    | 70919.688 |
| H18633    | 872.664   | 935.94    | NM_014871 | 1890.885  | 2558.598  | NM_004845 | 1888.15   |
| X07767    | 6454.25   | 4538.89   | AK026754  | 1059.38   | 892.411   | NM_007107 | 4231.145  |
| X65293    | 738.088   | 682.558   | M33197    | 58118.504 | 55121.371 | NM_000047 | 7221.155  |
| AF252284  | 6093.569  | 5792.248  | AL137552  | 2952.322  | 2828.8    | M68874    | 1813.428  |
| BU727558  | 2562.517  | 2544.06   | AK025794  | 4151.253  | 2757.418  | NM_006319 | 2977.122  |
| U90878    | 3247.72   | 2799.598  | AF131835  | 848.48    | 333.266   | NM_018226 | 1308.813  |
| NM_006597 | 21390.854 | 31604.443 | AK024522  | 963.588   | 1097.38   | Z36813    | 2060.018  |
| NM_012483 | 20398.719 | 18184.225 | NM_007199 | 5053.801  | 6588.2    | NM_006660 | 3898.719  |
| NM_003498 | 5645.264  | 4523.25   | NM_014958 | 627.932   | 1151.307  | NM_004727 | 567.686   |
| AB023420  | 13532.39  | 11998.217 | M33197    | 59548.938 | 56711.559 | NM_004045 | 5872.854  |
| M33197    | 66608.586 | 67469.086 | AK023220  | 797.806   | 1441.925  | NM_001440 | 17050.053 |
| NM_007264 | 21584.418 | 20891.439 | AK024566  | 985.964   | 1432.711  | NM_001201 | 772.681   |
| NM_002262 | 1063.91   | 877.205   | M33197    | 45671.914 | 42344.93  | NM_016618 | 1185.113  |
| NM_016511 | 28267.627 | 40369.156 | AK024981  | 9057.674  | 6492.079  | AB014568  | 21995.348 |
| NM_003559 | 3164.238  | 3141.402  | AK027246  | 1092.841  | 983.876   | NM_012249 | 1222.98   |
| NM_002185 | 569.374   | 524.404   | U80766    | 3316.97   | 3308.772  | AK022546  | 5329.539  |
| M55337    | 1385.442  | 1314.722  | AK001638  | 1826.755  | 1315.718  | NM_014067 | 3400.823  |
| M33197    | 68293.078 | 61981.461 | AF161386  | 5675.883  | 6665.705  | NM_002914 | 2124.867  |
| NM_013229 | 2306.373  | 2084.172  | AL365369  | 2082.916  | 1710.64   | NM_020385 | 889.765   |
| NM_016533 | 57175.75  | 58507.102 | AK025454  | 3584.8    | 3715.979  | NM_006541 | 1025.747  |
| NM_014751 | 9399.134  | 12541.498 | M33197    | 42249.125 | 36692.172 | M33197    | 63553.602 |
| NM_002347 | 33424.273 | 37222.926 | X05826    | 7940.148  | 6318.686  | NM_005705 | 6718.154  |
| AB046807  | 3079.487  | 2769.894  | Y11608    | 933.37    | 1499.912  | NM_004328 | 590.582   |
| NM_018176 | 503.025   | 1152.437  | X76386    | 533.649   | 738.187   | NM_004581 | 2315.739  |
| M33197    | 63496.656 | 61089.82  | AJ001872  | 6493.108  | 11045.366 | NM_006817 | 6109.269  |
| NM_014623 | 18294.361 | 8349.978  | AJ227882  | 774.961   | 673.536   | NM_015921 | 16182.414 |
| M33197    | 62828.777 | 60961.879 | M33197    | 49671.445 | 46462.969 | AB040900  | 4141.841  |
| NM_018976 | 8329.611  | 8559.026  | L33811    | 895.552   | 420.916   | NM_001482 | 1224.438  |
| NM_003355 | 4480.134  | 6260.1    | L77559    | 446.417   | 713.715   | NM_001797 | 1607.857  |
| NM_005074 | 2198.541  | 2010.788  | NM_005598 | 2899.864  | 2688.677  | NM_003154 | 2478.86   |
| NM_013272 | 1259.358  | 1294.122  | Y10515    | 933.165   | 1365.196  | AK023459  | 1537.738  |
| NM_004170 | 2194.193  | 2298.026  | AK023636  | 5707.949  | 7010.287  | BI762154  | 1041.445  |
| NM_018057 | 2755.954  | 2515.648  | D25272    | 2658.783  | 4585.177  | U13022    | 1040.202  |
| M33197    | 67037.656 | 66247     | M33197    | 41311.055 | 42823.488 | R23251    | 4908.805  |



|           |           |           |           |           |           |           |           |
|-----------|-----------|-----------|-----------|-----------|-----------|-----------|-----------|
| NM_015717 | 1702.621  | 3053.656  | AK025931  | 60282.973 | 58539.223 | BG763477  | 12157.689 |
| NM_015925 | 1893.809  | 1892.36   | M33197    | 1098.859  | 617.41    | AA702640  | 1324.735  |
| NM_003665 | 2401.343  | 2539.868  | AK021972  | 2866.263  | 2888.779  | T68583    | 1873.341  |
| AF220217  | 1450.226  | 1455.691  | M33197    | 60121.148 | 56695.711 | AA481944  | 11164.729 |
| NM_013323 | 23644.869 | 20402.385 | AK001083  | 1819.345  | 1591.784  | H00742    | 1509.486  |
| NM_014937 | 972.955   | 876.703   | AK000185  | 1956.143  | 2425.69   | D42108    | 652.068   |
| NM_017426 | 2292.585  | 2941.221  | NM_017962 | 1278.161  | 1507.263  | AI366068  | 4917.858  |
| M33197    | 4197.964  | 4440.312  | AK000865  | 1338.04   | 959.677   | AF080158  | 2667.9    |
| NM_000853 | 4376.062  | 4291.637  | M33197    | 61902.438 | 56199.297 | BM664556  | 918.121   |
| AF016903  | 36367.492 | 31359.943 | AK024779  | 1958.027  | 2157.306  | NM_000295 | 1740.134  |
| NM_015675 | 9878.887  | 8105.322  | AK024940  | 1223.084  | 1607.835  | AF103795  | 819.249   |
| AK022267  | 1700.887  | 1012.145  | AK024406  | 1990.032  | 1680.308  | M33197    | 66690.773 |
| NM_016040 | 2170.98   | 3675.194  | AK024568  | 22380.508 | 30627.898 | NM_007024 | 3552.53   |
| NM_015983 | 3164.943  | 2235.057  | M33197    | 45348.359 | 42895.324 | NM_013231 | 2189.935  |
| NM_018622 | 9288.995  | 3677.57   | AK026277  | 7748.48   | 5591.025  | NM_012106 | 1677.469  |
| M33197    | 66606.266 | 62145.125 | U10509    | 2481.079  | 2144.74   | NM_006254 | 2450.207  |
| NM_005867 | 7952.267  | 7573.166  | NM_007165 | 51631.223 | 47623.582 | X95425    | 1190.394  |
| AK026031  | 15534.604 | 13630.156 | NM_014018 | 5313.806  | 3037.656  | NM_004422 | 874.417   |
| NM_016468 | 6115.225  | 5364.144  | AF147318  | 1414.244  | 1233.497  | M33197    | 50071.285 |
| NM_007342 | 4524.148  | 5979.909  | M33197    | 58050.066 | 60264.445 | AY009399  | 4189.269  |
| NM_005672 | 905.732   | 1132.669  | AL137556  | 2325.005  | 3247.08   | NM_004895 | 6679.017  |
| D25217    | 4138.484  | 18750.646 | NM_014696 | 13997.971 | 18845.219 | U59748    | 1528.741  |
| NM_006351 | 3986.756  | 6775.788  | AL359055  | 2835.259  | 2688.826  | NM_014303 | 8040.579  |
| M33197    | 62717.805 | 60027.074 | NM_014908 | 2762.89   | 2312.344  | M33197    | 57959.102 |
| NM_000103 | 401.923   | 804.367   | AF086125  | 1400.393  | 1500.641  | M95610    | 11076.021 |
| NM_004683 | 13062.01  | 18247.676 | AK023547  | 1323.729  | 788.418   | L02922    | 6624.26   |
| AK023226  | 1230.901  | 600.899   | U67847    | 1374.156  | 2027.147  | M33197    | 5437.963  |
| M33197    | 55301.422 | 59931.488 | AL137321  | 5670.615  | 5035.985  | NM_004045 | 6348.449  |
| NM_001467 | 2904.519  | 3233.674  | M33197    | 58050.785 | 52586.031 | NM_001891 | 1836.846  |
| NM_018066 | 29499.59  | 29618.66  | AK024207  | 3232.313  | 2694.257  | NM_012139 | 2519.147  |
| NM_006931 | 4093.897  | 4587.433  | AK021843  | 1599.079  | 1196.303  | AF121856  | 2779.479  |
| NM_020344 | 8192.271  | 7344.038  | AF075025  | 6174.862  | 4514.697  | NM_006421 | 1372.979  |
| AF119868  | 748.697   | 885.554   | AF116623  | 1434.383  | 1079.041  | NM_017457 | 11797.591 |
| AF252284  | 5156.988  | 3641.561  | AF088008  | 2474.578  | 3144.055  | NM_003765 | 4887.767  |
| BU727558  | 2422.553  | 2108.133  | AK023528  | 2339.755  | 2917.597  | M33197    | 24280.133 |
| AL050139  | 5232.336  | 5089.625  | AK023043  | 1323.453  | 1194.82   | NM_018202 | 5391.1    |
| NM_002593 | 766.71    | 732.405   | AL050346  | 24766.164 | 25319.947 | AB023197  | 1208.281  |
| NM_004558 | 5541.529  | 6681.458  | AK001520  | 4624.122  | 5339.9    | NM_022173 | 2231.862  |
| AL079296  | 2106.217  | 2585.186  | D90070    | 4313.211  | 6686.104  | AB040970  | 784.089   |
| NM_014770 | 3059.733  | 3241.131  | Y12235    | 530.486   | 682.549   | AB023222  | 683.318   |
| AB037737  | 716.123   | 1039.105  | M33197    | 49928.352 | 49179.797 | M33197    | 34027.965 |
| M33197    | 64138.137 | 64399.223 | AF086179  | 811.836   | 1408.293  | NM_015921 | 21898.428 |
| AK023103  | 4300.879  | 4581.5    | AK025807  | 1484.086  | 1965.73   | AB040900  | 6228.132  |
| NM_017858 | 2004.93   | 2255.715  | M33197    | 57296.75  | 55401.059 | NM_001482 | 1111.009  |
| NM_019059 | 41299.094 | 61643.418 | AK025266  | 6066.344  | 4415.952  | U80018    | 892.764   |
| D80008    | 1532.056  | 2537.583  | AK001843  | 5127.542  | 3885.045  | NM_000717 | 1172.855  |
| X56789    | 1480.885  | 1631.004  | AK000548  | 55663.648 | 37674.004 | M33197    | 46003.391 |
| AK001069  | 48615.141 | 51162.168 | NM_003920 | 19720.309 | 15985.413 | NM_004845 | 1870.062  |
| M33197    | 63413.535 | 63650.313 | NM_004787 | 24298.473 | 20380.938 | NM_007107 | 3976.919  |
| NM_000935 | 1807.844  | 2075.991  | AF087984  | 5655.544  | 4154.08   | NM_000047 | 5660.494  |
| NM_000359 | 18189.328 | 18755.271 | AF009302  | 646.875   | 732.1     | M68874    | 1207.771  |
| NM_006395 | 7110.036  | 6920.763  | M33197    | 58362.02  | 57127.102 | NM_006319 | 2262.359  |
| NM_014306 | 5331.43   | 6962.61   | AK022273  | 5815.2    | 5534.511  | NM_018226 | 770.71    |

|           |           |           |           |           |           |           |           |
|-----------|-----------|-----------|-----------|-----------|-----------|-----------|-----------|
| NM_018176 | 641.456   | 540.866   | NM_015882 | 1454.535  | 1381.114  | Z36813    | 3298.889  |
| NM_003508 | 878.144   | 888.672   | AK024271  | 2025.239  | 1929.087  | NM_006685 | 48358.719 |
| M33197    | 66662.57  | 67801.82  | AK021650  | 8598.769  | 9485.795  | AF080158  | 2271.901  |
| NM_014623 | 17372.441 | 7436.954  | AL050210  | 4256.14   | 4730.328  | BM664556  | 1674.165  |
| M30629    | 7766.849  | 7675.999  | M33197    | 39162.004 | 40748.715 | M33197    | 63539.246 |
| BE539299  | 1179.734  | 1273.408  | AL050173  | 2463.754  | 2346.153  | NM_016545 | 1260.825  |
| AF193873  | 7320.941  | 7607.851  | D80002    | 2574.39   | 3913.605  | NM_001440 | 14157.823 |
| NM_002628 | 4923.664  | 4674.875  | U17637    | 9418.601  | 19052.984 | NM_001201 | 740.21    |
| M23575    | 1248.173  | 1886.594  | AF207831  | 1561.451  | 2070.063  | NM_016618 | 1305.382  |
| AA190729  | 2377.316  | 2566.993  | AK023174  | 850.809   | 1487.924  | AB014568  | 20794.254 |
| BF974315  | 3830.273  | 6922.356  | NM_003548 | 4825.505  | 2848.556  | NM_012249 | 1137.74   |
| T74985    | 1396.548  | 1310.487  | M33197    | 53095.977 | 55395.879 | AK022546  | 3466.406  |
| AA115901  | 135.631   | 1691.548  | NM_018272 | 7633.653  | 7668.115  | NM_014067 | 2820.288  |
| AI652705  | 7133.127  | 5932.184  | CY3Cy5    | 10697.495 | 477.266   | NM_002914 | 1465.477  |
| AA973397  | 2218.024  | 1453.247  | R19938    | 5824.526  | 4248.432  | NM_020385 | 867.452   |
| AA569974  | 7874.556  | 7669.5    | N94487    | 15819.457 | 11754.115 | NM_006541 | 677.589   |
| AA923615  | 3560.596  | 799.191   | AI886795  | 4534.543  | 3542.977  | M33197    | 61505.184 |
| AA446028  | 1455.464  | 2358.623  | D10495    | 3906.186  | 4199.929  | NM_005705 | 6956.831  |
| M80583    | 1725.38   | 1971.91   | M36634    | 1197.58   | 1671.766  | NM_004328 | 567.434   |
| AW009565  | 5220.93   | 4978.569  | AK094237  | 3150.327  | 2638.535  | NM_004581 | 3820.931  |
| H18633    | 1957.096  | 2001.547  | L07592    | 1374.953  | 2639.246  | NM_006817 | 7958.273  |
| X07767    | 6442.251  | 4559.149  | NM_006981 | 1720.831  | 2135.431  | NM_007108 | 1873.444  |
| AF016903  | 31345.588 | 28096.758 | SR2       | 53241.465 | 58467.887 | M33197    | 65364.477 |
| NM_015675 | 9549.807  | 9175.956  | SR4       | 15890.243 | 13665.353 | M95610    | 14439.125 |
| AK022267  | 1099.949  | 1265.801  | SR6       | 2340.192  | 2294.817  | NM_003118 | 7755.955  |
| NM_016040 | 1742.763  | 2974.809  | SR8       | 8592.926  | 27884.018 | L02922    | 9901.28   |
| U90878    | 3431.134  | 4588.941  | SR10      | 31586.914 | 11476.591 | NM_001797 | 1933.999  |
| NM_006597 | 21658.654 | 43147.18  | CY3Cy5    | 10216.868 | 594.742   | NM_003154 | 4305.051  |
| NM_007329 | 562.922   | 1301.71   | M33197    | 60659.82  | 59401.852 | NM_004235 | 1152.795  |
| NM_012483 | 22225.008 | 31163.936 | NM_007369 | 1631.826  | 1578.478  | AK023459  | 1336.497  |
| NM_003498 | 5685.562  | 6521.592  | NM_014776 | 4256.004  | 2757.875  | U13022    | 456.672   |
| AB023420  | 15142.323 | 16684.607 | NM_006480 | 40158.762 | 50137.707 | R23251    | 2610.519  |
| NM_002262 | 1076.395  | 604.031   | NM_007223 | 39271.172 | 50538.602 | BG763477  | 8455.154  |
| NM_016511 | 29230.391 | 35380.762 | AF030107  | 2013.658  | 2381.332  | AA702640  | 781.472   |
| NM_003559 | 2852.097  | 3279.411  | NM_000871 | 2348.974  | 3195.974  | T68583    | 2014.557  |
| NM_002185 | 744.163   | 608.55    | M33197    | 58222.402 | 59346.672 | AA481944  | 11987.115 |
| M55337    | 1632.679  | 1191.475  | AB058740  | 10105.023 | 9143.737  | AI366068  | 5016.435  |
| M33197    | 63968.668 | 61976.441 | NM_004392 | 1138.845  | 896.064   | N57553    | 383.253   |
| NM_013229 | 2263.8    | 1846.528  | M33197    | 63323.555 | 62326.594 | AB040970  | 2706.24   |
| NM_016533 | 57088.543 | 59136.199 | NM_001154 | 9466.642  | 5761.526  | NM_018330 | 2315.581  |
| NM_014751 | 8669.698  | 9147.289  | NM_001819 | 3569.979  | 2724.207  | M33197    | 47307.078 |
| NM_002347 | 38654.922 | 45302.172 | NM_016938 | 954.711   | 2852.607  | U50342    | 1926.334  |
| AB046807  | 3341.175  | 3493.319  | BF575833  | 786.677   | 1203.679  | NM_000295 | 1970.766  |
| NM_018066 | 27551.963 | 30670.576 | NM_015725 | 9689.639  | 11411.376 | M33197    | 45507.805 |
| NM_006931 | 4261.436  | 5194.17   | R61452    | 1677.803  | 2175.185  | NM_007024 | 2419.548  |
| NM_020344 | 7661.963  | 7298.926  | NM_012455 | 5943.664  | 4207.269  | NM_013231 | 1451.182  |
| AF119868  | 947.298   | 1075.112  | NM_002806 | 12821.17  | 9863.988  | NM_012106 | 1677.394  |
| NM_005050 | 4549.861  | 4756.826  | M33197    | 62279.723 | 60010.117 | NM_006254 | 1828.711  |
| AJ133127  | 1027.785  | 1077.125  | NM_001716 | 1442.58   | 1628.219  | X95425    | 1995.692  |
| M33197    | 62871.922 | 61373.008 | NM_006073 | 849.216   | 1043.745  | NM_004422 | 1086.506  |
| NM_018976 | 9149.55   | 12408.613 | BF434335  | 32835.715 | 29003.094 | NM_016562 | 1009.459  |
| NM_003355 | 4690.617  | 8106.362  | M57627    | 1304.488  | 2083.101  | M33197    | 32301.107 |
| NM_005074 | 2338.804  | 2359.758  | NM_002993 | 2806.902  | 4871.517  | AY009399  | 3077.192  |

|           |           |           |           |           |           |           |           |
|-----------|-----------|-----------|-----------|-----------|-----------|-----------|-----------|
| NM_013272 | 1375.992  | 1547.84   | AK026946  | 1697.837  | 1710.514  | U59748    | 902.832   |
| NM_004170 | 2065.931  | 2409.121  | NM_014458 | 8020.396  | 9451.172  | NM_014303 | 7401.574  |
| NM_018057 | 2910.239  | 2721.234  | L10333    | 1628.426  | 1433.71   | NM_006660 | 4927.554  |
| M33197    | 66837.891 | 66794.484 | AF235049  | 6425.676  | 6686.167  | NM_004727 | 663.529   |
| NM_015717 | 1915.864  | 2474.875  | NM_005164 | 912.074   | 409.763   | NM_000558 | 1152.103  |
| NM_015925 | 2033.45   | 1609.528  | NM_001995 | 1927.246  | 1765.645  | NM_006685 | 56664.055 |
| NM_003665 | 2490.717  | 2157.647  | NM_000183 | 14224.42  | 14102.459 | M33197    | 6741.369  |
| AF220217  | 1289.905  | 1486.191  | AY004175  | 1459.188  | 1524.707  | NM_004045 | 5945.224  |
| NM_013323 | 23485.051 | 21528.842 | M33197    | 57785.223 | 59135.867 | NM_001891 | 1350.113  |
| NM_014937 | 871.656   | 1482.538  | NM_012327 | 4681.79   | 3818.846  | NM_012138 | 2460.225  |
| NM_017426 | 2602.78   | 3415.608  | AF279890  | 4296.649  | 5003.568  | AF121856  | 2205.786  |
| M33197    | 3766.531  | 4518.505  | NM_002236 | 2294.875  | 3132.058  | NM_006421 | 947.65    |
| NM_000853 | 3325.385  | 2887.398  | NM_012069 | 7203.209  | 6657.013  | NM_017457 | 11976.486 |
| M33197    | 63710.027 | 61093.582 | NM_001689 | 54941.586 | 55360.676 | NM_003765 | 4421.69   |
| NM_000935 | 1164.995  | 1159.575  | NM_016601 | 2243.165  | 1728.645  | NM_003922 | 1581.608  |
| NM_000358 | 15809.749 | 12458.064 | NM_017905 | 8973.042  | 13406.046 | M33197    | 11537.017 |
| NM_006395 | 7072.101  | 5635.997  | M33197    | 59534.352 | 57898.668 | NM_018202 | 4251.058  |
| NM_014306 | 4843.394  | 5445.737  | NM_004218 | 9518.686  | 9231.32   | AB023197  | 893.468   |
| NM_001084 | 6599.017  | 7445.626  | NM_014804 | 2290.361  | 2134.292  | NM_022173 | 1932.799  |
| NM_015983 | 4287.84   | 4150.059  | L40520    | 3646.749  | 2725.175  | M33197    | 70550.313 |
| NM_018622 | 10552.078 | 5556.407  | NM_002633 | 5299.044  | 8120.102  | NM_005705 | 6860.61   |
| M33197    | 64233.914 | 65185.766 | M33197    | 54740.645 | 56255.398 | NM_004328 | 1108.768  |
| NM_005867 | 8507.255  | 7782.347  | M33197    | 58351.668 | 58056.156 | NM_004581 | 3391.294  |
| AK026031  | 21439.004 | 16437.785 | NM_002613 | 4922.733  | 4114.84   | NM_006817 | 11034.774 |
| NM_016468 | 6763.458  | 5443.208  | NM_004419 | 2599.888  | 3320.775  | NM_007108 | 3055.234  |
| NM_007342 | 4471.946  | 4951.9    | U47635    | 3640.81   | 2669.75   | NM_015921 | 22459.842 |
| NM_005672 | 1011.12   | 1002.161  | NM_018650 | 3278.683  | 2768.007  | AB040900  | 7540.617  |
| D25217    | 4500.528  | 18244.91  | AK026945  | 11764.906 | 27822.016 | NM_000717 | 903.814   |
| NM_006351 | 4595.951  | 7473.411  | NM_002828 | 1909.113  | 2112.533  | M33197    | 60189.246 |
| M33197    | 64564.148 | 62124.77  | NM_014369 | 2418.043  | 1930.724  | NM_004845 | 1577.257  |
| NM_004683 | 12960.435 | 15786.134 | J05125    | 1091.108  | 1108.852  | NM_007107 | 2150.915  |
| M33197    | 56688.059 | 59099.203 | NM_001993 | 772.248   | 1022.562  | NM_000047 | 2885.899  |
| NM_001467 | 2634.396  | 3395.795  | BF575833  | 538.187   | 944.915   | M68874    | 1224.444  |
| NM_004688 | 16599.85  | 8960.104  | NM_015725 | 6957.211  | 8120.748  | NM_006319 | 1355.219  |
| AB037725  | 1265.538  | 1258.932  | R61452    | 1178.631  | 1017.731  | NM_018226 | 906.482   |
| M33197    | 53463.289 | 51001.645 | R19938    | 7195.608  | 5323.992  | Z36813    | 1653.18   |
| NM_004860 | 4311.648  | 3712.113  | N94487    | 14498.473 | 12064.531 | AB018327  | 1259.137  |
| AF217190  | 7161.883  | 3057.966  | AI886795  | 3885.073  | 4494.265  | AF303889  | 1117.366  |
| AB028981  | 49754.75  | 43709.715 | M36634    | 1359.953  | 1846.683  | M33197    | 38478.316 |
| NM_006800 | 5601.653  | 3880.961  | U87939    | 2374.225  | 1916.716  | AK022649  | 2438.778  |
| NM_002476 | 1227.727  | 703.362   | U86961    | 2666.606  | 1879.803  | NM_016507 | 7155.964  |
| NM_002729 | 10121.365 | 4694.143  | AK094237  | 2976.959  | 2694.167  | NM_002024 | 5008.355  |
| M33197    | 11019.946 | 7754.665  | L07592    | 853.949   | 1778.618  | NM_002743 | 2171.752  |
| AL050139  | 6375.055  | 5839.43   | NM_006981 | 1166.464  | 945.691   | AF173358  | 9580.114  |
| NM_002593 | 1047.53   | 888.336   | M33197    | 57156.504 | 59859.918 | NM_016366 | 1758.864  |
| NM_004558 | 6451.263  | 6741.453  | AK027244  | 1618.577  | 2129.888  | M33197    | 34024.699 |
| AL079296  | 1931.02   | 1793.174  | NM_018449 | 6582.203  | 5711.532  | NM_016545 | 487.28    |
| NM_014770 | 3024.598  | 3279.761  | AF086129  | 1013.433  | 1708.802  | NM_001440 | 2816.219  |
| AB037737  | 910.203   | 1188.02   | D79994    | 1736.87   | 1382.715  | NM_016618 | 883.934   |
| M33197    | 59784.492 | 61259.348 | NM_014458 | 3089.056  | 4144.274  | AB014568  | 20169.906 |
| AK023103  | 3576.632  | 3424.333  | AF235049  | 4305.086  | 5005.987  | AK022238  | 4779.622  |
| NM_017858 | 2350.749  | 2359.598  | M33197    | 56244.934 | 57088.488 | NM_012249 | 998.852   |
| NM_019059 | 40932.152 | 61643.406 | NM_007369 | 1706.997  | 1820.471  | AK022546  | 2405.406  |

|           |           |           |           |           |           |           |           |
|-----------|-----------|-----------|-----------|-----------|-----------|-----------|-----------|
| NM_013347 | 1071.371  | 1176.287  | AF030107  | 2720.612  | 2593.732  | NM_014067 | 1575.81   |
| D80008    | 2701.165  | 2797.173  | NM_000871 | 2815.456  | 1664.37   | NM_002914 | 1110.474  |
| X56789    | 1548.964  | 1678.374  | M33197    | 60811.496 | 59062.129 | NM_020385 | 583.592   |
| AK001069  | 52134.18  | 59335.496 | NM_018968 | 1444.364  | 1685.933  | NM_006541 | 1093.482  |
| NM_004132 | 6174.695  | 4089.794  | AF086924  | 51026.746 | 58073.418 | NM_018179 | 1340.309  |
| NM_014844 | 4074.938  | 3241.215  | NM_000264 | 554.645   | 603.978   | NM_006197 | 2889.153  |
| M33197    | 63756.93  | 53368.945 | AB058740  | 9520.576  | 8513.524  | M29273    | 5949.721  |
| NM_018492 | 1080.309  | 3046.171  | NM_003385 | 461.755   | 670.973   | M33197    | 32912.652 |
| NM_001346 | 2270.42   | 1701.309  | NM_004392 | 1058.965  | 867.001   | NM_004854 | 4261.311  |
| NM_003149 | 2172.241  | 2100.475  | M33197    | 57727.77  | 59875.418 | AJ245418  | 10566.719 |
| NM_003377 | 10100.469 | 10706.896 | NM_001154 | 10171.768 | 6663.638  | NM_006377 | 1843.925  |
| NM_002220 | 4994.285  | 5485.13   | NM_001819 | 4664.418  | 3762.85   | AK026427  | 960.571   |
| AB033034  | 2134.288  | 2048.222  | NM_016938 | 802.862   | 618.199   | NM_002436 | 493.234   |
| D38169    | 5757.674  | 6120.081  | M33197    | 55970.008 | 54284.406 | NM_018362 | 685.322   |
| M33197    | 59415.934 | 61299.883 | NM_006815 | 18303.271 | 21971.467 | M33197    | 25832.693 |
| NM_018171 | 1007.825  | 1000.057  | NM_001663 | 4042.705  | 5752.065  | AF192403  | 1868.72   |
| NM_002447 | 24951.334 | 15650.679 | NM_004218 | 7893.959  | 6216.963  | NM_002186 | 5129.523  |
| NM_014145 | 11721.416 | 13224.801 | NM_016530 | 1634.222  | 1140.995  | NM_006182 | 1033.714  |
| NM_014141 | 7868.677  | 7271.001  | NM_014804 | 1286.874  | 914.788   | AL137543  | 1291.692  |
| NM_002223 | 3652.134  | 3556.605  | NM_012455 | 2386.008  | 1739.688  | NM_004444 | 2084.607  |
| M33197    | 63737.523 | 57147.336 | NM_002806 | 9171.812  | 7504.278  | AK024533  | 8090.987  |
| NM_005490 | 8395.188  | 8398.235  | M33197    | 66835.188 | 65572.516 | NM_002736 | 6645.95   |
| NM_003151 | 3270.528  | 3735.271  | NM_001716 | 1462.583  | 2166.854  | NM_004246 | 1616.245  |
| NM_006811 | 6617.546  | 6078.065  | NM_002030 | 635.078   | 1159.097  | NM_004961 | 374.284   |
| NM_005601 | 5219.459  | 4607.118  | NM_006073 | 693.903   | 798.405   | NM_002285 | 4133.927  |
| NM_016151 | 20576.541 | 20325.242 | NM_006564 | 6591.101  | 7937.336  | NM_006694 | 2295.904  |
| NM_004324 | 1351.116  | 1207.678  | NM_004802 | 1969.269  | 1656.798  | NM_014467 | 1630.531  |
| NM_005614 | 7653.809  | 10805.311 | M33197    | 57095.113 | 55370.836 | NM_003087 | 4750.178  |
| AK026270  | 925.888   | 1665.4    | NM_002983 | 1132.081  | 953.801   | NM_001630 | 2505.163  |
| NM_004556 | 5125.544  | 4517.075  | NM_000074 | 7699.224  | 8272.027  | M33197    | 62039.961 |
| D90075    | 5938.786  | 10202.599 | BF434335  | 32043.883 | 27782.525 | NM_002031 | 608.492   |
| M33197    | 61511.703 | 62681.082 | M57627    | 758.018   | 626.689   | NM_004712 | 2550.3    |
| NM_014857 | 1766.748  | 1517.667  | NM_002993 | 1637.414  | 2975.127  | AL157428  | 397.078   |
| AK023827  | 7796.964  | 8345.458  | AK026946  | 1828.574  | 2135.999  | M33197    | 17738.688 |
| AK021702  | 2925.192  | 3899.135  | M33197    | 58128.059 | 57933.195 | NM_005858 | 1169.239  |
| NM_003885 | 2445.751  | 2721.52   | NM_003192 | 7731.175  | 6981.973  | NM_014931 | 501.518   |
| NM_016448 | 2298.134  | 5165.339  | NM_002828 | 960.376   | 1358.437  | NM_002484 | 602.568   |
| NM_003936 | 1585.837  | 1735.655  | NM_014369 | 2113.457  | 1558.635  | M33197    | 24859.521 |
| M33197    | 45648.98  | 45631.59  | M33197    | 57490.391 | 59360.727 | AK025941  | 626.552   |
| NM_002688 | 2114.692  | 2537.399  | NM_001398 | 10562.546 | 15145.64  | M33197    | 31261.184 |
| NM_004415 | 4662.052  | 4050.813  | AB050049  | 4227.785  | 4213.562  | NM_002848 | 637.907   |
| NM_007278 | 27790.973 | 15163.865 | J05125    | 468.92    | 576.55    | NM_015914 | 1094.253  |
| NM_005219 | 12248.145 | 15332.784 | NM_000183 | 6426.885  | 6799.829  | AF059531  | 12481.521 |
| NM_004723 | 9575.889  | 15353.591 | AY004175  | 1411.412  | 1186.066  | NM_002707 | 4316.097  |
| M33197    | 58349.691 | 59324.898 | M33197    | 60332.273 | 60737.156 | AF029777  | 1090.432  |
| NM_018413 | 3970.611  | 5365.149  | NM_012327 | 4303.195  | 3377.541  | AK026884  | 2740.49   |
| AB018299  | 54305.598 | 59606.883 | NM_000904 | 1483.502  | 1027.04   | NM_002594 | 1296.813  |
| NM_005245 | 9489.948  | 8613.456  | NM_016048 | 1661.305  | 1445.075  | NM_001159 | 791.34    |
| M33197    | 63563.922 | 58950.512 | NM_000375 | 11989.735 | 10307.248 | NM_031407 | 662.409   |
| NM_016219 | 10144.049 | 10628.409 | NM_000265 | 20013.723 | 6538.27   | NM_002218 | 3629.681  |
| NM_004751 | 1017.107  | 1317.803  | NM_018849 | 6022.677  | 5555.797  | M33197    | 40680.793 |
| AK025605  | 3238.061  | 3885.823  | M33197    | 57194.523 | 57528.563 | AK000410  | 15054.271 |
| NM_003783 | 918.285   | 1157.952  | AF279890  | 4605.063  | 4503.044  | D87440    | 961.264   |

|           |           |           |           |           |           |           |           |
|-----------|-----------|-----------|-----------|-----------|-----------|-----------|-----------|
| NM_00700C | 6626.544  | 6958.983  | NM_00223C | 2133.329  | 3318.316  | AK000332  | 6807.382  |
| M23161    | 10169.568 | 13626.227 | NM_01206C | 8425.043  | 8670.878  | M33197    | 32329.072 |
| NM_00610C | 2366.098  | 1392.051  | NM_00168C | 54394.594 | 56503.035 | NM_00289C | 1829.5    |
| NM_003197 | 6523.157  | 7156.687  | NM_016601 | 2430.03   | 2021.027  | NM_013351 | 24436.891 |
| AF176705  | 4723.817  | 5246.73   | NM_01790C | 10252.229 | 15780.178 | NM_01234C | 7261.686  |
| D29012    | 10953.604 | 10725.848 | NM_006981 | 1068.007  | 1181.185  | NM_006022 | 1596.366  |
| NM_017414 | 1038.629  | 1173.078  | M33197    | 54896.699 | 58333.09  | AK025110  | 799.115   |
| NM_01217C | 23128.234 | 25167.467 | AK027244  | 1098.565  | 1261.034  | X52339    | 29924.953 |
| NM_00279C | 6185.345  | 6211.85   | L40520    | 2503      | 1727.206  | M33197    | 52638.914 |
| NM_00478C | 2838.896  | 2590.826  | NM_00263C | 4289.233  | 7881.441  | AB046830  | 1605.625  |
| M33197    | 65012.93  | 60999.414 | M33197    | 55343.703 | 55475.105 | NM_00712C | 2757.169  |
| AL442083  | 4365.845  | 3849.077  | NM_00287C | 2240.803  | 2364.037  | NM_01620C | 2660.295  |
| D63487    | 5822.125  | 7141.319  | NM_01772C | 5448.212  | 3679.708  | NM_01247C | 1152.718  |
| AK097791  | 8606.349  | 8211.94   | AK022922  | 3493.394  | 2184.112  | M33197    | 22624.5   |
| NM_020367 | 978.291   | 916.223   | NM_00646C | 5900.248  | 5321.756  | NM_003407 | 1454.348  |
| AK022705  | 5288.921  | 3588.125  | AK024750  | 5919.192  | 7909.872  | NM_00720C | 16594.004 |
| NM_016404 | 6749.196  | 6438.102  | NM_00040C | 19476.568 | 16979.17  | NM_00372C | 676.036   |
| L03426    | 2587.146  | 2588.265  | M33197    | 57109.355 | 54340.699 | L05096    | 2764.601  |
| NM_02016C | 1728.432  | 2503.386  | NM_00261C | 4923.699  | 4008.768  | BC015899  | 1516.705  |
| NM_00660C | 3914.671  | 3798.674  | NM_00441C | 1338.81   | 2010.984  | NM_01798C | 13827.926 |
| NM_000457 | 1226.687  | 1182.376  | U47635    | 3767.249  | 3134.089  | AK023629  | 796.166   |
| M34356    | 2185.181  | 3230.01   | NM_01865C | 2894.763  | 2718.463  | AK024846  | 1261.445  |
| AJ133115  | 6406.184  | 5437.865  | AK026945  | 10116.85  | 27217.613 | AK001451  | 3777.405  |
| X51630    | 8089.083  | 9611.65   | NM_00181C | 1388.772  | 885.525   | M33197    | 24996.916 |
| NM_00505C | 3046.817  | 2386.122  | NM_01572C | 2393.899  | 2808.152  | NM_00718C | 941.752   |
| NM_00196C | 2490.453  | 1541.623  | R61452    | 1491.627  | 1353.804  | NM_00560C | 2073.286  |
| AF208502  | 15335.657 | 14662.581 | N94487    | 13230.28  | 10979.619 | NM_00547C | 1638.543  |
| M33197    | 59729.938 | 56151.84  | AI886795  | 4528.111  | 2945.969  | NM_00566C | 1450.668  |
| AF264750  | 16843.316 | 16226.914 | D10495    | 4266.891  | 3347.592  | AK023902  | 723.612   |
| NM_00698C | 1858.448  | 1546.12   | BF344679  | 6370.993  | 2087.512  | AB006622  | 461.402   |
| AK023904  | 4697.034  | 4604.829  | M36634    | 1569.961  | 1019.932  | M33197    | 15154.926 |
| NM_01795C | 7169.9    | 6464.752  | M14156    | 4908.282  | 6094.686  | AK097041  | 1219.169  |
| NM_01649C | 3822.207  | 2244.849  | U87939    | 2310.278  | 1347      | AF068744  | 18467.918 |
| NM_01430C | 5628.117  | 5571.421  | U86961    | 1529.161  | 1756.549  | AK000762  | 1711.314  |
| M33197    | 45649.914 | 55273.832 | AK094237  | 2844.556  | 3414.54   | NM_004571 | 675.04    |
| NM_004094 | 2031.118  | 2763.632  | L07592    | 974.741   | 1465.215  | AJ345030  | 2241.184  |
| NM_02023C | 8035.329  | 3050.942  | BF434335  | 12251.475 | 8799.19   | AK023631  | 577.288   |
| AK027059  | 9513.329  | 9672.741  | AK026946  | 1274.422  | 1520.501  | AK023472  | 9695.656  |
| AF151109  | 15388.885 | 17264.26  | M33197    | 59741.777 | 56250.969 | AK021796  | 987.047   |
| L34070    | 7211.455  | 9842.022  | NM_00319C | 5969.67   | 4373.401  | AL109729  | 1027.125  |
| AF038182  | 887.187   | 1359.066  | NM_01844C | 2424.947  | 1247.668  | AF007146  | 869.595   |
| NM_01647C | 2534.459  | 3240.029  | D79994    | 1286.789  | 815.869   | M33197    | 27418.74  |
| NM_001151 | 1470.826  | 1262.291  | NM_01445C | 3709.176  | 3444.198  | S79912    | 12935.704 |
| NM_00191C | 4233.028  | 2521.17   | M33197    | 59028.801 | 58389.094 | AK026892  | 1306.284  |
| NM_01824C | 6617.268  | 5636.182  | NM_00736C | 1146.069  | 897.651   | S83275    | 20607.861 |
| AF252390  | 1326.394  | 771.514   | NM_01477C | 3744.599  | 2496.317  | AL117427  | 4112.209  |
| NM_012117 | 8617.206  | 5435.705  | NM_00648C | 23851.607 | 30450.736 | M33197    | 45270.039 |
| AK026276  | 1480.195  | 1183.456  | NM_00722C | 28991.445 | 32495.707 | AF052118  | 3772.223  |
| M33197    | 64964.238 | 61537.41  | AF030107  | 1676.652  | 1558.682  | AK025166  | 2067.485  |
| X52354    | 1721.593  | 2102.024  | NM_000871 | 1742.03   | 1044.041  | AL359586  | 505.266   |
| NM_00541C | 1432.154  | 1454.251  | M33197    | 64282.531 | 62650.477 | AF035290  | 667.39    |
| NM_00231C | 1847.307  | 2123.825  | NM_01896C | 1692.33   | 1954.867  | M33197    | 48532.102 |
| AK024191  | 1299.876  | 1567.185  | AB058740  | 9866.36   | 10328.926 | AK023288  | 272.435   |

|            |           |           |           |           |           |           |           |
|------------|-----------|-----------|-----------|-----------|-----------|-----------|-----------|
| D83781     | 609.126   | 1618.748  | AF279890  | 1972.2    | 2338.445  | M33197    | 67318.305 |
| AL832699   | 3883.585  | 3814.735  | NM_001689 | 36047.883 | 33491.371 | AK022428  | 1133.212  |
| NM_012191  | 1498.453  | 1551.729  | NM_017905 | 1960.811  | 2889.107  | AK000788  | 1422.716  |
| NM_014805  | 5200.485  | 3302.782  | M33197    | 59973.75  | 56654.145 | AK023457  | 2016.492  |
| AF052120   | 4030.86   | 3103.232  | NM_006815 | 16368.66  | 20368.783 | AK025089  | 3910.692  |
| AK026754   | 967.086   | 1184.444  | NM_001663 | 2710.046  | 3298.653  | M33197    | 29808.281 |
| M33197     | 62282.09  | 58404.266 | NM_004218 | 7157.563  | 5315.897  | AF085996  | 1371.847  |
| AL137552   | 1531.61   | 1418.627  | NM_016530 | 1102.157  | 1106.854  | AK001279  | 1038.309  |
| AK025794   | 4055.383  | 2653.231  | NM_014804 | 1337.927  | 957.11    | AF086407  | 650.122   |
| AK024522   | 1299.498  | 1329.504  | NM_012455 | 5051.84   | 3749.882  | AK001567  | 1493.339  |
| NM_007198  | 4831.966  | 6173.593  | NM_002806 | 13219.43  | 9261.2    | M33197    | 13853.754 |
| M33197     | 57423.453 | 56873.941 | M33197    | 52138.879 | 52368.102 | U52839    | 2508.215  |
| AK023220   | 1113.168  | 1094.694  | NM_001716 | 1150.876  | 1259.572  | U58667    | 845.708   |
| AK024566   | 1165.686  | 951.165   | NM_006564 | 6513.437  | 7173.481  | M33197    | 35715.203 |
| M33197     | 65851.945 | 66871.828 | NM_004802 | 1763.255  | 1589.404  | AK026984  | 10839.329 |
| AK024981   | 13475.325 | 12681.812 | NM_002983 | 1480.407  | 1082.187  | AK022088  | 1113.421  |
| AK027246   | 628.717   | 1374.337  | NM_000074 | 8070.172  | 10433.441 | NM_013391 | 1006.832  |
| U80766     | 4290.883  | 4464.179  | NM_020393 | 818.817   | 802.666   | M33197    | 58825.668 |
| AK001638   | 2092.808  | 1602.587  | M33197    | 58272.23  | 55761.238 | AL157466  | 1547.716  |
| AF161386   | 3906.425  | 8211.95   | NM_002613 | 2961.747  | 2404.372  | AL389981  | 956.617   |
| AJ001872   | 3134.931  | 3422.16   | U47635    | 2517.401  | 1984.497  | AK024336  | 1258.749  |
| AJ227882   | 983.257   | 726.904   | NM_018650 | 2046.366  | 1817.233  | M33197    | 42556.602 |
| M33197     | 64564.145 | 59756.742 | AK026945  | 6064.724  | 13142.472 | NM_018603 | 1301.987  |
| NM_005598  | 1845.339  | 1684.108  | NM_014369 | 1684.507  | 1425.562  | AK026453  | 1085.107  |
| Y10515     | 643.932   | 773.618   | M33197    | 53025.512 | 52512.547 | AK025673  | 895.715   |
| M87942     | 881.481   | 1040.836  | NM_001398 | 6748.516  | 9334.714  | M33197    | 25439.156 |
| AK023636   | 6801.767  | 8627.538  | AB050049  | 4051.297  | 3649.769  | AK022431  | 761.72    |
| D25272     | 3919.933  | 4314.695  | NM_001995 | 1851.506  | 1599.773  | AK023305  | 49286.809 |
| M33197     | 64130.977 | 63780.625 | NM_000183 | 10294.956 | 9840.979  | AK023763  | 1560.246  |
| NM_020168  | 1618.169  | 1801.033  | AY004175  | 1831.611  | 1488.203  | AK022729  | 2176.671  |
| AK025931   | 52287.867 | 51339.516 | M33197    | 51333.914 | 48689.785 | NM_006168 | 10940.534 |
| M33197     | 987.271   | 1064.375  | NM_012327 | 5858.016  | 4480.998  | AL050374  | 2404.041  |
| AK021972   | 2023.693  | 2574.891  | NM_000904 | 1241.696  | 889.891   | M33197    | 62593.398 |
| AK022361   | 1042.912  | 927.869   | NM_016048 | 2268.51   | 2021.526  | M28639    | 1643.771  |
| AK000185   | 1556.757  | 1811.117  | NM_000375 | 11394.39  | 11596.256 | AL122073  | 1047.984  |
| NM_017962  | 1033.672  | 811.413   | NM_000265 | 11948.164 | 4404.583  | AF116655  | 501.257   |
| AK027227   | 429.371   | 588.221   | NM_018849 | 6120.318  | 6092.121  | AJ243222  | 429.122   |
| NM_017834  | 1127.238  | 1301.828  | M33197    | 22090.846 | 19082.773 | AK026132  | 430.376   |
| AK000865   | 1252.844  | 983.958   | AF015910  | 25006.92  | 28299.344 | Y11162    | 755.412   |
| M33197     | 65709.797 | 63271.453 | BC009993  | 1998.155  | 3068.742  | M33197    | 31326.418 |
| AK024779   | 1559.305  | 1235.752  | M33197    | 50302.957 | 49737.383 | AF070584  | 610.128   |
| AK024940   | 786.924   | 927.58    | NM_003031 | 2420.313  | 2048.62   | M33197    | 19973.799 |
| AK024406   | 1145.255  | 1113.476  | M33197    | 45356.328 | 44951.254 | AK000903  | 5968.854  |
| AK024568   | 12899.986 | 14249.215 | AK027244  | 903.136   | 1640.005  | AK023938  | 496.786   |
| NM_018381  | 1280.47   | 659.904   | L40520    | 1676.584  | 1586.645  | AK026896  | 613.888   |
| M33197     | 66158.352 | 69697.383 | NM_002633 | 2938.08   | 4824.492  | AL110169  | 278.126   |
| AK026277   | 5699.027  | 7769.126  | M33197    | 44904.586 | 42990.875 | L13743    | 1209.197  |
| U10509     | 3060.869  | 2987.187  | NM_002878 | 3778.308  | 3670.762  | U84519    | 1522.113  |
| AF147318   | 1629.768  | 1267.17   | NM_017723 | 3546.756  | 2972.43   | Z11849    | 3146.558  |
| unknown (S | 775.927   | 646.527   | AK022922  | 1352.327  | 1070.225  | M33197    | 23449.412 |
| M33197     | 61940.145 | 61098.992 | NM_006462 | 5247.124  | 4694.263  | AF052103  | 660.512   |
| AL137556   | 1323.099  | 1841.28   | AK024750  | 5075.892  | 4852.902  | AK024842  | 936.439   |
| NM_014696  | 9455.219  | 9378.957  | NM_000400 | 27507.113 | 28583.781 | M33197    | 44602.102 |

|           |           |           |           |           |           |           |           |
|-----------|-----------|-----------|-----------|-----------|-----------|-----------|-----------|
| AL359055  | 1859.486  | 1759.241  | NM_015885 | 5572.001  | 4226.566  | D17203    | 8678.45   |
| NM_014908 | 2665.108  | 2257.497  | NM_015889 | 43914.375 | 47840.641 | NM_003251 | 1054.707  |
| AF086125  | 1556.224  | 1549.965  | M33197    | 42841.563 | 36889.992 | M33197    | 49907.258 |
| AK023547  | 1268.473  | 1209.898  | NM_004276 | 982.89    | 1459.188  | AY007143  | 3244.264  |
| U67847    | 1475.674  | 2237.325  | NM_002332 | 6211.622  | 4743.794  | L15557    | 578.969   |
| AL137321  | 6117.421  | 5897.021  | NM_002859 | 822.28    | 742.179   | M33197    | 67422.109 |
| M33197    | 63325.605 | 61845.094 | AF161339  | 8561.932  | 2859.206  | NM_001563 | 13982.275 |
| AK024207  | 3453.407  | 2817.918  | M33197    | 47222.277 | 46979.629 | NM_000266 | 1181.693  |
| AK021843  | 2025.913  | 1745.723  | AL137662  | 363.614   | 403.339   | NM_017429 | 1290.664  |
| AF075025  | 6863.438  | 3355.237  | AK000354  | 3075.394  | 4337.14   | NM_003104 | 2772.625  |
| AF116623  | 940.272   | 559.076   | NM_014882 | 1207.327  | 653.664   | NM_014581 | 837.732   |
| AF088008  | 2083.932  | 1424.286  | NM_000836 | 655.943   | 629.362   | M33197    | 46869.59  |
| AK023528  | 1949.98   | 1892.959  | M33197    | 58189.176 | 57623     | AK024448  | 1925.099  |
| M33197    | 62976.641 | 55952.496 | NM_001510 | 1188.149  | 1040.47   | NM_014406 | 1421.558  |
| AF147349  | 6635.11   | 5602.486  | AK024474  | 4190.727  | 5335.063  | S68954    | 900.708   |
| AL050346  | 19168.146 | 15876.13  | NM_017901 | 1573.51   | 2128.433  | S81335    | 2016.428  |
| AK001520  | 8709.381  | 6165.773  | NM_004272 | 1300.975  | 1327.56   | M33197    | 5727.963  |
| D90070    | 4585.614  | 3966.292  | NM_017589 | 559.943   | 628.388   | NM_003353 | 21118.291 |
| Y12235    | 1088.711  | 1032.159  | NM_000358 | 2380.735  | 2150.846  | X82127    | 24119.99  |
| M33197    | 46381.637 | 39022.922 | NM_001930 | 4356.201  | 8893.203  | NM_018296 | 869.254   |
| AF086179  | 1291.884  | 1388.302  | NM_001564 | 1650.995  | 1222.026  | NM_005752 | 647.9     |
| AK025807  | 2256.447  | 2475.014  | M33197    | 59749.801 | 56661.496 | M33197    | 52324.879 |
| M33197    | 64164.918 | 56610.496 | AF263537  | 20989.881 | 15153.839 | AA418907  | 962.719   |
| AK025266  | 3823.003  | 3397.698  | NM_015895 | 3784.571  | 1791.996  | M65291    | 290.253   |
| AK001843  | 4228.707  | 3365.161  | NM_004675 | 832.532   | 962.617   | AA115473  | 2680.703  |
| AK000548  | 48370.988 | 40937.949 | M33197    | 50243.16  | 46124.129 | AA872397  | 3819.851  |
| NM_003920 | 10933.566 | 10492.182 | NM_013374 | 30217.367 | 31206.893 | M24283    | 505.837   |
| NM_004787 | 19414.656 | 18052.701 | NM_003252 | 4763.974  | 8175.077  | AA709414  | 903.435   |
| AF087984  | 4254.383  | 4872.706  | NM_001228 | 2032.434  | 1618.852  | NM_000939 | 4629.085  |
| M33197    | 62512.688 | 57102.348 | AK026607  | 476.24    | 1085.018  | NM_004295 | 6628.879  |
| AK022273  | 5424.895  | 3773.966  | NM_016561 | 8501.3    | 12243.974 | U75898    | 1036.544  |
| NM_015882 | 1150.014  | 1127.392  | NM_001225 | 3172.094  | 4272.977  | M29039    | 660.574   |
| AK024271  | 1329.057  | 1125.401  | NM_014245 | 10476.606 | 14238.255 | M59815    | 378.56    |
| AK021650  | 3860.587  | 4217.293  | M33197    | 58649.16  | 58626.801 | NM_006917 | 384.057   |
| AL050210  | 5106.696  | 4155.46   | AL110226  | 58800.629 | 62421.031 | SR2       | 29391.367 |
| L37699    | 1952.245  | 1479.491  | AB046822  | 1114.278  | 544.304   | SR4       | 8019.331  |
| M33197    | 64752.988 | 60301.297 | NM_000308 | 3765.98   | 1066.526  | SR6       | 425.102   |
| AL050173  | 3010.205  | 2253.689  | M33197    | 37095.762 | 33042.5   | SR8       | 2581.332  |
| D80002    | 1541.569  | 2350.891  | NM_004173 | 3827.603  | 6029.556  | SR10      | 7490.607  |
| U17637    | 4354.724  | 6720.526  | NM_013974 | 2704.748  | 3704.731  | CY3Cy5    | 8821.6    |
| AF207831  | 881.031   | 1157.648  | NM_017547 | 2634.035  | 1341.44   | NM_004799 | 16402.404 |
| AK023174  | 1021.224  | 974.724   | NM_003983 | 2224.892  | 2804.128  | NM_006733 | 509.956   |
| NM_003548 | 6024.681  | 1973.822  | AK023708  | 1005.081  | 746.382   | NM_014047 | 8733.637  |
| M33197    | 55619.16  | 56130.582 | NM_002108 | 1105.231  | 1584.458  | AK022901  | 799.461   |
| NM_018272 | 8902.238  | 4213.322  | M33197    | 61881.949 | 60448.148 | M33197    | 29761.311 |
| CY3Cy5    | 11740.269 | 577.191   | NM_018464 | 17557.143 | 20769.291 | AF037332  | 521.329   |
| R19938    | 8099.689  | 5142.687  | D43948    | 2061.031  | 2157.476  | NM_014571 | 198.113   |
| N94487    | 20562.346 | 13981.641 | NM_012310 | 5379.261  | 5763.601  | AB040912  | 1706.563  |
| AI886795  | 6069.876  | 4708.184  | BE410824  | 1002.907  | 838.97    | NM_003871 | 268.721   |
| D10495    | 8847.892  | 7954.512  | BF382116  | 11589.876 | 7001.617  | NM_006243 | 422.774   |
| BF344679  | 11376.491 | 4340.907  | NM_003193 | 6479.23   | 5335.995  | M33197    | 27021.043 |
| BG743223  | 1569.127  | 963.803   | AK055825  | 57684.559 | 61372.18  | AJ011129  | 372.963   |
| M36634    | 1516.561  | 1298.778  | M33197    | 56498.18  | 60057.645 | NM_006387 | 886.855   |

|           |           |           |           |           |           |           |           |
|-----------|-----------|-----------|-----------|-----------|-----------|-----------|-----------|
| M14156    | 6842.813  | 7461.922  | AF113216  | 1659.163  | 1670.564  | NM_00564€ | 1212.859  |
| U87939    | 2012.017  | 2322.281  | NM_005197 | 2998.285  | 3296.865  | NM_00663€ | 1359.969  |
| U86961    | 2255.407  | 2016.419  | AL137421  | 3996.296  | 5855.612  | BI767871  | 2204.694  |
| U47924    | 932.298   | 560.311   | M33197    | 41623.121 | 40596.895 | M33197    | 56244.43  |
| AK094237  | 4861.661  | 5419.378  | NM_007241 | 2005.766  | 868.682   | AB037831  | 804.025   |
| L07592    | 2869.39   | 3707.499  | NM_000124 | 1220.292  | 717.707   | NM_01210€ | 4904.16   |
| NM_006981 | 1722.726  | 1852.331  | NM_01799€ | 847.424   | 1166.488  | AL122077  | 11807.525 |
| SR2       | 54466.57  | 57348.605 | NM_014517 | 630.804   | 697.418   | NM_01463€ | 1063.293  |
| SR4       | 23727.938 | 23772.148 | NM_00426€ | 1600.22   | 1221.132  | NM_01694€ | 852.832   |
| SR6       | 3489.72   | 3222.398  | M33197    | 37519.387 | 36870.898 | M33197    | 38735.418 |
| SR8       | 11149.363 | 33647.059 | NM_006107 | 7516.772  | 6091.563  | NM_00725€ | 1298.849  |
| SR10      | 39091.73  | 15537.019 | AF288288  | 25963.217 | 29296.443 | NM_01840€ | 186.022   |
| CY3Cy5    | 8878.053  | 508.361   | NM_01764€ | 3311.735  | 4622.906  | NM_01800€ | 623.842   |
| M33197    | 58653.469 | 58903.773 | NM_00309€ | 8081.92   | 8110.72   | AK075081  | 1192.373  |
| NM_00736€ | 1579.72   | 1610.868  | M33197    | 54777.281 | 55602.855 | NM_00089€ | 1148.185  |
| NM_01477€ | 4155.958  | 2511.717  | NM_005861 | 2035.422  | 3515.988  | NM_00382€ | 10716.048 |
| NM_00648€ | 38000.102 | 35642.77  | NM_01884€ | 746.055   | 1176.437  | NM_01591€ | 468.402   |
| NM_00722€ | 53031.434 | 55137.004 | NM_00376€ | 1428.536  | 3400.318  | M33197    | 12291.98  |
| NM_00014€ | 1588.955  | 1744.199  | AB037759  | 970.78    | 1102.705  | NM_00618€ | 2700.539  |
| AF030107  | 1940.28   | 1992.677  | AK025998  | 1757.992  | 3031.758  | NM_01480€ | 1541.029  |
| NM_000871 | 2278.343  | 2348.796  | AL080080  | 3906.898  | 5530.764  | NM_001557 | 1888.944  |
| M33197    | 60065.578 | 60978.992 | NM_01848€ | 2314.788  | 2025.086  | AF147311  | 1327.482  |
| NM_01896€ | 1334.81   | 1458.965  | NM_01788€ | 2395.191  | 2189.773  | NM_002131 | 6945.099  |
| NM_000264 | 1090.169  | 882.459   | M33197    | 30630.254 | 27413.824 | NM_017927 | 1665.751  |
| AB058740  | 14829.903 | 13127.221 | NM_001161 | 2801.302  | 1880.682  | NM_020151 | 9015.203  |
| NM_00338€ | 857.683   | 991.403   | NM_004044 | 3243.437  | 3801.461  | NM_005891 | 8409.839  |
| NM_00188€ | 642.771   | 654.42    | NM_000221 | 3475.939  | 4997.204  | NM_00164€ | 16623.861 |
| NM_00439€ | 1151.376  | 1116.251  | NM_00645€ | 2031.932  | 2480.768  | NM_00395€ | 2347.069  |
| NM_001154 | 11627.846 | 8978.095  | AB002359  | 1706.789  | 1539.883  | M33197    | 65203.895 |
| NM_00181€ | 2641.899  | 2663.548  | M33197    | 2139.333  | 1720.66   | NM_00350€ | 2424.835  |
| NM_01693€ | 824.945   | 927.972   | AB007864  | 837.348   | 1021.763  | NM_014317 | 1209.31   |
| NM_00199€ | 819.872   | 1103.317  | NM_00219€ | 4965.669  | 4877.2    | L09234    | 486.109   |
| BF575833  | 657.416   | 958.317   | AF024693  | 1232.071  | 1464.214  | NM_017881 | 2093.208  |
| NM_00017€ | 958.433   | 784.233   | AK025905  | 722.432   | 761.482   | M33197    | 46064.246 |
| NM_01572€ | 10616.602 | 18018.379 | AL121733  | 1538.913  | 1937.686  | NM_017634 | 1364.958  |
| R61452    | 2360.141  | 3404.933  | BE958072  | 825.957   | 1545.914  | NM_00081€ | 506.929   |
| NM_01245€ | 4864.945  | 3808.668  | M33197    | 25826.553 | 24721.277 | NM_01889€ | 616.708   |
| NM_00280€ | 11540.815 | 8709.032  | NM_01448€ | 1531.179  | 1093.59   | AJ300465  | 1253.95   |
| M33197    | 55770.332 | 57671.828 | NM_01416€ | 6249.476  | 5549.04   | NM_00081€ | 889.358   |
| NM_00171€ | 2532.239  | 2514.064  | NM_004964 | 22359.396 | 11678.707 | M33197    | 37712.719 |
| NM_00607€ | 1040.511  | 1447.298  | AL117497  | 1143.79   | 856.966   | U92978    | 1497.449  |
| NM_004951 | 1990.363  | 466.878   | AF075016  | 734.479   | 489.139   | NM_00573€ | 230.682   |
| NM_006564 | 9979.199  | 9868.286  | M33197    | 58857.527 | 53118.484 | NM_01448€ | 903.739   |
| NM_00480€ | 2004.149  | 2148.849  | AF147360  | 1006.224  | 813.998   | NM_01338€ | 9419.759  |
| M33197    | 62647.137 | 61456.414 | AL137269  | 3042.564  | 3759.933  | AB014567  | 374.561   |
| NM_000074 | 10172.527 | 9404.32   | AK021983  | 2041.829  | 1915.747  | NM_00532€ | 12077.702 |
| NM_02039€ | 954.366   | 703.48    | Y11681    | 7887.987  | 7375.489  | NM_00728€ | 145.982   |
| BF434335  | 39959.871 | 37002.297 | AL110135  | 15863.775 | 16580.01  | NM_01406€ | 1258.012  |
| M57627    | 594.634   | 670.196   | NM_00699€ | 5819.096  | 9773.468  | AB035130  | 2002.939  |
| NM_00299€ | 2311.135  | 3648.745  | NM_00233€ | 915.394   | 1011.527  | NM_00335€ | 1418.483  |
| M33197    | 58400.242 | 58742.215 | M33197    | 35628.73  | 35029.828 | M33197    | 25859.5   |
| NM_00319€ | 7560.817  | 7472.986  | AF086316  | 418.367   | 661.24    | NM_01791€ | 123.361   |
| NM_01844€ | 4339.441  | 5164.504  | AF086429  | 1171.603  | 2113.063  | NM_00357€ | 567.699   |



|           |           |           |           |           |           |             |           |
|-----------|-----------|-----------|-----------|-----------|-----------|-------------|-----------|
| AF086129  | 1047.88   | 1675.296  | NM_01906C | 1034.006  | 885.286   | AL049283    | 624.139   |
| D79994    | 1363.551  | 2016.481  | AF086302  | 1003.476  | 816.304   | M33197      | 31590.357 |
| NM_01445E | 5345.668  | 6022.332  | AF086439  | 4842.696  | 4092.928  | NM_002401   | 16259.926 |
| AF235049  | 2100.442  | 2554.16   | M33197    | 56160.426 | 54973.797 | NM_002227   | 621.977   |
| NM_005164 | 849.18    | 454.622   | AF038171  | 1529.04   | 1400.696  | NM_00719E   | 1253.118  |
| NM_00199E | 3514.13   | 3510.416  | AF052160  | 995.01    | 1259.379  | AB014530    | 1651.867  |
| NM_000183 | 11792.337 | 14678.289 | AK026512  | 2714.361  | 1863.35   | M33197      | 49794.191 |
| AY004175  | 4181.25   | 3989.154  | M33197    | 44291.945 | 42007.91  | NM_00598E   | 2935.417  |
| M33197    | 64271.281 | 59111.477 | AF144233  | 3349.997  | 2410.989  | AB014607    | 4626.375  |
| NM_012327 | 4420.958  | 4654.464  | AF085975  | 1423.594  | 1328.808  | AF134401    | 1568.513  |
| NM_000904 | 3239.088  | 1810.711  | M33197    | 49074.688 | 43691.73  | NM_006387   | 2749.066  |
| NM_01604E | 1369.244  | 2085.643  | AL137390  | 2642.528  | 2227.951  | NM_00564E   | 2594.288  |
| NM_00037E | 8138.731  | 9066.513  | AL137611  | 5083.944  | 4182.145  | NM_00663E   | 2970.217  |
| NM_00026E | 28725.934 | 8815.262  | AL359566  | 23838.332 | 21681.338 | NM_00169Z   | 541.646   |
| NM_01884E | 10471.881 | 10521.568 | AL137427  | 1831.926  | 2169.498  | BI767871    | 4328.407  |
| M33197    | 56267.504 | 57263.961 | AL157460  | 3385.227  | 3429.382  | M65291      | 472.902   |
| AF279890  | 4399.209  | 4424.055  | AL359595  | 1778.577  | 1690.222  | AA115473    | 418.782   |
| NM_00223E | 2200.628  | 2737.451  | M33197    | 55277.145 | 53142.996 | AA872397    | 963.182   |
| NM_01206E | 4803.203  | 3998.312  | AK026718  | 1607.191  | 1220.141  | AA709414    | 1703.866  |
| NM_016601 | 1145.869  | 1235.96   | AK022035  | 12143.094 | 11756.641 | D12676      | 782.099   |
| NM_01790E | 9709.629  | 13037.926 | M33197    | 58947.414 | 55835.438 | BC012593    | 85.933    |
| M33197    | 61759.199 | 65531.809 | NM_004337 | 1496.673  | 1615.516  | NM_00093E   | 4328.468  |
| NM_00681E | 17746.746 | 33508.867 | AK022141  | 857.062   | 635.464   | NM_00429E   | 4994.666  |
| NM_00166E | 5672.874  | 7279.314  | AK023942  | 22192.068 | 21394.111 | H-X 02812 I | 471.92    |
| NM_00421E | 8360.022  | 8811.491  | M33197    | 60036.57  | 58101.09  | U75898      | 413.128   |
| NM_01653C | 2742.905  | 2377.568  | AJ227892  | 8317.918  | 7969.674  |             | 57.55     |
| NM_014804 | 1390.621  | 1489.148  | M33197    | 62070.984 | 58582.223 |             | 180.135   |
| L40520    | 5527.433  | 5458.065  | AK022288  | 2872.482  | 2948.355  | AB011146    | 1408.231  |
| NM_00263E | 4832.039  | 9178.613  | AK021916  | 1665.812  | 1585.664  | NM_00618E   | 7937.979  |
| NM_00627E | 1859.268  | 1922.842  | AK024201  | 1084.519  | 760.735   | NM_01480C   | 1599.35   |
| U11036    | 871.724   | 961.188   | AK022174  | 1298.219  | 1074.436  | NM_001557   | 2223.184  |
| M33197    | 54429.164 | 57226.512 | AK022331  | 554.975   | 789.623   | AF147311    | 2551.952  |
| NM_00287E | 4561.159  | 4952.134  | M33197    | 59886.719 | 55902.637 | NM_002131   | 14788.91  |
| NM_01772E | 5472.906  | 4784.861  | AK026878  | 1800.374  | 1494.473  | NM_017927   | 2793.746  |
| AK022922  | 2641.998  | 2370.685  | AK000777  | 651.997   | 571.12    | M33197      | 59950.68  |
| NM_00646E | 7151.177  | 6254.854  | AK021589  | 1763.674  | 1383.032  | NM_00120E   | 404.705   |
| AK024750  | 5076.362  | 4163.214  | D17152    | 10180.449 | 6753.835  | NM_00479E   | 7394.943  |
| NM_00040C | 21055     | 21043.773 | AK024464  | 4550.539  | 4921.905  | NM_014047   | 2053.461  |
| M33197    | 55059.766 | 57445.418 | AK025423  | 967.696   | 423.174   | AK022901    | 1474.834  |
| NM_00261E | 3823.206  | 3032.557  | AF009272  | 655.25    | 760.516   | NM_00150E   | 462.351   |
| NM_00441E | 3636.497  | 4067.001  | AL080134  | 899.406   | 870.296   | M33197      | 36949.063 |
| NM_01865C | 1878.4    | 1940.962  | AL049846  | 2116.285  | 1830.825  | AF037332    | 311.2     |
| AK026945  | 10738.577 | 37313.23  | AK024161  | 1510.284  | 1152.633  | AB040912    | 1094.485  |
| NM_00282E | 1448.057  | 2140.939  | AK021682  | 18406.178 | 24757.832 | NM_003871   | 638.656   |
| NM_01436E | 3837.793  | 3910.105  | AJ012500  | 1501.075  | 1347.266  | NM_00624E   | 1974.957  |
| M33197    | 60977.172 | 58795.301 | AF085833  | 619.326   | 811.103   | NM_00725E   | 706.755   |
| NM_00139E | 15802.371 | 28703.775 | U00944    | 972.582   | 407.828   | M33197      | 57266.09  |
| AB050049  | 5318.748  | 7216.91   | BC035058  | 1059.158  | 1036.336  | AJ011129    | 4564.714  |
| J05125    | 1671.481  | 1904.928  | X57566    | 3071.931  | 1743.484  | AF282874    | 1282.728  |
| NM_00199E | 3417.699  | 3492.947  | M33197    | 59456.563 | 56110.441 | NM_00103E   | 1170.749  |
| BF575833  | 863.747   | 875.682   | NM_01861E | 4792.847  | 4207.383  | M33197      | 58687.063 |
| NM_00017E | 1349.563  | 1044.356  | AK023809  | 1375.396  | 2032.463  | U92978      | 2339.658  |
| NM_01572E | 11060.403 | 13865.82  | AL360137  | 1767.286  | 1158.253  | NM_00573E   | 376.79    |

|           |           |           |           |           |           |           |           |
|-----------|-----------|-----------|-----------|-----------|-----------|-----------|-----------|
| R61452    | 2094.826  | 2367.169  | U28131    | 55442.086 | 55442.496 | NM_01448E | 932.708   |
| R19938    | 7999.53   | 5620.078  | AY007106  | 7685.217  | 8551.849  | NM_01338E | 8625.829  |
| AI886795  | 6429.207  | 5846.318  | M33197    | 57078.121 | 53103.262 | AB014567  | 488.846   |
| D10495    | 8787.099  | 7647.103  | AL049299  | 1186.11   | 1221.688  | AK022817  | 1240.747  |
| BF344679  | 11528.634 | 4423.768  | NM_00608E | 55562.332 | 53209.953 | NM_018034 | 806.386   |
| M36634    | 1386.349  | 1078.75   | NM_01826E | 3308.457  | 1594.057  | M33197    | 24194.072 |
| M14156    | 8595.724  | 8090.38   | M33197    | 60043.332 | 54694.297 | AB037831  | 2173.242  |
| U87939    | 1636.794  | 2032.806  | AF250920  | 3455.024  | 5080.442  | NM_012103 | 1522.165  |
| U86961    | 1867.237  | 1702.155  | NM_017733 | 3731.745  | 2630.275  | AL122077  | 4115.403  |
| NM_005191 | 554.549   | 695.603   | NM_014042 | 7569.348  | 4554.317  | NM_014632 | 549.348   |
| AK094237  | 3960.4    | 4305.113  | M33197    | 58784.672 | 55481.93  | M33197    | 40243.563 |
| L07592    | 2739.933  | 3824.024  | AF317550  | 566.466   | 748.086   | NM_00725E | 931.713   |
| NM_006981 | 1739.857  | 1934.984  | NM_003543 | 2769.531  | 424.271   | NM_018402 | 230.708   |
| AK027244  | 3234.004  | 4303.5    | AF090883  | 1072.132  | 1407.643  | NM_01800E | 461.966   |
| NM_01844E | 4298.052  | 5154.27   | U23860    | 1797.215  | 1288.016  | AK075081  | 3083.509  |
| D79994    | 1934.799  | 1723.042  | M33197    | 52428.5   | 48464.469 | NM_00089E | 2850.187  |
| NM_01445E | 5957.132  | 5658.197  | AL049263  | 954.136   | 1268.061  | NM_00382C | 25184.73  |
| AF235049  | 3433.458  | 4005.53   | AK022372  | 4825.164  | 3804.123  | NM_01591E | 4287.243  |
| NM_00736E | 1200.756  | 1343.031  | AJ227863  | 1554.107  | 919.418   | M33197    | 47796.332 |
| NM_01477E | 4164.14   | 2710.675  | NM_01591E | 4343.519  | 2280.755  | NM_01651E | 4127.422  |
| NM_00648C | 41833.492 | 46683.867 | NM_00352C | 1130.129  | 430.276   | AB002301  | 801.724   |
| NM_007223 | 46208.293 | 45460.121 | AL137380  | 3117.787  | 2292.565  | AB014530  | 4622.782  |
| NM_00014E | 1542.766  | 1296.685  | M33197    | 59855.441 | 56573.25  | M33197    | 65582.578 |
| AF030107  | 2043.475  | 1437.486  | AL137658  | 26092.986 | 26531.854 | NM_00598E | 4648.414  |
| NM_000871 | 2324.957  | 1843.459  | D16888    | 9000.358  | 6719.127  | AB014607  | 5265.519  |
| M33197    | 63110.574 | 59590.305 | U79277    | 1005.102  | 782.695   | AF134401  | 915.574   |
| NM_01896E | 1647.56   | 1674.942  | AF068298  | 5015.923  | 4405.878  | NM_020151 | 7410.248  |
| AF086924  | 51237.473 | 55543.172 | Z70770    | 3289.503  | 3821.034  | NM_005891 | 1466.74   |
| NM_000264 | 737.016   | 1045.762  | AJ227900  | 6133.691  | 5535.658  | NM_00164E | 1896.823  |
| AB058740  | 13538.272 | 11490.812 | AK023242  | 995.642   | 1572.652  | NM_00395E | 488.467   |
| NM_00338E | 835.272   | 854.959   | M33197    | 58896.434 | 56693.746 | M33197    | 39007.137 |
| NM_00188E | 542.158   | 565.336   | CY3Cy5    | 13197.038 | 1013.567  | NM_00350C | 454.122   |
| NM_004392 | 1120.418  | 1462.837  | Y10802    | 874.284   | 771.523   | L09234    | 321.872   |
| M33197    | 64509.176 | 60432.844 | BI762229  | 2363.418  | 1710.051  | NM_017881 | 1624.555  |
| NM_001154 | 13562.943 | 12981.855 | BG618320  | 4601.089  | 4569.417  | M33197    | 62961.293 |
| NM_01693E | 721.343   | 971.859   | Y00787    | 2229.945  | 2089.575  | NM_017634 | 3812.769  |
| M33197    | 58425.32  | 56526.668 | NM_00727E | 1773.511  | 1911.181  | NM_000813 | 1151.086  |
| NM_00681E | 14207.981 | 22556.293 | N34462    | 5261.336  | 4051.358  | NM_01889E | 1810.688  |
| NM_001663 | 5639.04   | 5519.455  | AI658778  | 1793.711  | 2110.284  | AJ300465  | 4957.674  |
| NM_00421E | 9271.191  | 7485.836  | L19067    | 2501.293  | 2543.541  | X86400    | 679.822   |
| NM_01653C | 2458.464  | 1764.002  | Z48482    | 1126.584  | 1483.11   | NM_00081C | 5677.332  |
| NM_014804 | 1626.43   | 1270.15   | W60413    | 1805.371  | 1213.374  | AF069307  | 2508.709  |
| NM_01245E | 5099.741  | 4227.162  | BI823365  | 1690.053  | 1756.055  | NM_006917 | 671.716   |
| NM_00280E | 11501.52  | 9168.61   | X06318    | 3621.729  | 5281.519  | M33197    | 260.331   |
| M33197    | 66223.016 | 67637.148 | AL834159  | 4382.288  | 4316.323  | AB011146  | 1404.843  |
| NM_00171E | 1342.463  | 1530.888  | SR5       | 4343.617  | 5440.75   | NM_00532E | 1950.328  |
| NM_006073 | 863.102   | 621.871   | SR7       | 5357.888  | 45926.328 | NM_00335E | 245.91    |
| NM_004951 | 1732.907  | 286.66    | SR9       | 18487.195 | 3226.016  | M33197    | 6471.008  |
| NM_006564 | 10313.676 | 9917.131  | CY3Cy5    | 11332.286 | 711.073   | AF119917  | 156.598   |
| NM_004802 | 2053.576  | 2042.422  | NM_001782 | 850.241   | 810.33    | AK021513  | 854.472   |
| M33197    | 61166.613 | 61306.859 | NM_000797 | 3106.49   | 5132.536  | NM_00357E | 1286.604  |
| NM_002983 | 7661.244  | 1521.16   | AL080148  | 15050.057 | 9343.05   | AL049283  | 653.499   |
| NM_000074 | 9685.478  | 13095.573 | NM_006731 | 512.118   | 836.013   | M33197    | 45525.699 |

|           |           |           |           |           |           |             |           |
|-----------|-----------|-----------|-----------|-----------|-----------|-------------|-----------|
| NM_020393 | 837.264   | 608.549   | NM_018487 | 833.042   | 612.917   | NM_002401   | 38654.805 |
| BF434335  | 39328.125 | 41381     | NM_020134 | 1457.679  | 1878.789  | NM_001274   | 1277.422  |
| NM_002993 | 1801.506  | 3238.096  | NM_014061 | 1125.608  | 914.686   | NM_003913   | 1333.704  |
| AK026946  | 2705.646  | 3818.97   | BC034395  | 1045.254  | 944.343   | NM_002227   | 3014.522  |
| M33197    | 59639.332 | 59124.824 | NM_002479 | 527.379   | 516.914   | NM_007199   | 4743.956  |
| NM_003192 | 9325.306  | 8988.064  | NM_000348 | 6820.954  | 8524.288  | NM_006243   | 2809.762  |
| NM_002828 | 1667.306  | 1979.204  | NM_005059 | 510.396   | 802.203   | NM_007252   | 374.448   |
| NM_014369 | 4187.61   | 3205.645  | NM_004950 | 848.59    | 1268.466  | M33197      | 58178.188 |
| M33197    | 60755.055 | 60969.254 | NM_000724 | 2659.795  | 2435.274  | AJ011129    | 2368.626  |
| NM_001398 | 18154.395 | 24250.438 | NM_002557 | 3234.139  | 3643.584  | AF282874    | 403.881   |
| AB050049  | 5543.39   | 5854.345  | NM_004477 | 186.66    | 417.085   | NM_001039   | 408.45    |
| J05125    | 929.302   | 939.145   | NM_004317 | 4722.408  | 3487.269  | NM_006387   | 2081.031  |
| NM_001995 | 2707.36   | 2681.832  | NM_014645 | 2188.436  | 1424.719  | NM_005646   | 1133.167  |
| NM_000183 | 13639.119 | 17722.336 | NM_014708 | 3430.424  | 3235.169  | NM_001692   | 198.125   |
| AY004175  | 3568.965  | 2614.267  | NM_003693 | 1626.047  | 1063.689  | BI767871    | 1099.161  |
| M33197    | 58008.797 | 56168.52  | NM_018134 | 35113.352 | 31270.896 | AA115473    | 411.47    |
| NM_012327 | 3531.523  | 4148.862  | NM_013247 | 8120.161  | 2912.887  | AA872397    | 507.935   |
| NM_000904 | 2795.271  | 1094.7    | NM_006770 | 3524.477  | 2662.395  | AA709414    | 2494.057  |
| NM_016048 | 1266.83   | 1944.139  | BE394704  | 573.32    | 858.183   | D12676      | 2576.918  |
| NM_000375 | 9035.89   | 10746.206 | NM_004703 | 2248.143  | 2262.666  | BC012593    | 264.668   |
| NM_000265 | 29992.295 | 7748.109  | NM_001512 | 1353.883  | 1115.961  | NM_000939   | 7199.353  |
| NM_018849 | 7562.652  | 7422.76   | NM_014706 | 8882.042  | 6506.059  | NM_004295   | 7252.463  |
| M33197    | 55971.313 | 58301.566 | AF139768  | 422.648   | 441.596   | H-X 02812 I | 1249.131  |
| AF279890  | 4392.432  | 4669.417  | AJ001348  | 589.138   | 486.806   | U75898      | 2395.629  |
| NM_002236 | 2589.7    | 3336.21   | NM_014007 | 1073.524  | 997.286   | M29039      | 1008.959  |
| NM_012069 | 3944.017  | 4323.41   | AB033006  | 4407.039  | 2973.897  | M59815      | 1629.62   |
| NM_001689 | 46550.117 | 57991.965 | AF020314  | 7731.69   | 9184.873  | AK075081    | 2763.541  |
| NM_016601 | 1400.509  | 2116.115  | NM_016332 | 9873.978  | 5133.633  | NM_000895   | 3193.1    |
| NM_006981 | 1895.652  | 1956.491  | AK023936  | 579.414   | 529.399   | NM_003820   | 22615.01  |
| AK027244  | 3016.521  | 3835.224  | NM_006457 | 1079.602  | 915.349   | NM_015915   | 1650.735  |
| L40520    | 5269.523  | 5594.554  | NM_018075 | 425.722   | 483.01    | M33197      | 44822.609 |
| NM_002633 | 2359.989  | 8274.631  | S82470    | 2288.598  | 1729.226  | NM_016518   | 3526.994  |
| M33197    | 56497.305 | 55661.309 | AB020695  | 516.179   | 543.748   | NM_006185   | 4421.768  |
| NM_002878 | 4732.276  | 4786.229  | AB028982  | 2728.162  | 2318.71   | AF147311    | 1134.361  |
| NM_017723 | 5290.591  | 4109.492  | NM_002004 | 3741.537  | 3365.208  | NM_002131   | 10000.269 |
| AK022922  | 2794.268  | 2491.168  | NM_005121 | 899.526   | 803.011   | NM_017927   | 682.484   |
| NM_006462 | 6811.86   | 8060.055  | NM_001643 | 16215.11  | 17656.371 | M33197      | 17115.281 |
| AK024750  | 5645.244  | 5716.7    | NM_020221 | 1532.772  | 1228.161  | NM_004799   | 7903.729  |
| NM_000400 | 20530.117 | 23618.701 | NM_000747 | 1466.28   | 1116.934  | NM_006733   | 532.558   |
| M33197    | 58306.23  | 57286.934 | NM_005415 | 2167.043  | 2158.553  | NM_002039   | 289.588   |
| NM_002613 | 3550.187  | 3467.941  | AL137708  | 469.206   | 288.073   | NM_014047   | 9905.499  |
| NM_004419 | 3656.632  | 4291.182  | AJ275973  | 14346.257 | 15436.137 | AK022901    | 2754.223  |
| U47635    | 3229      | 3919.087  | NM_006493 | 2373.186  | 2155.477  | NM_001508   | 473.691   |
| NM_018650 | 2781.751  | 3414.308  | U76362    | 3840.45   | 3629.127  | M33197      | 60269.949 |
| NM_001888 | 1071.746  | 642.558   | AF040248  | 828.138   | 882.367   | AF037332    | 1022.32   |
| M33197    | 62430.902 | 61418.746 | NM_002618 | 2122.264  | 2605.202  | AB040912    | 6813.239  |
| NM_001154 | 11169.657 | 8700.995  | NM_001388 | 5445.981  | 5914.321  | NM_003871   | 496.595   |
| NM_016938 | 969.731   | 702.02    | X76770    | 4242.628  | 3868.26   | NM_000813   | 1233.405  |
| NM_001993 | 1197.726  | 1068.691  | AB037808  | 1117.156  | 1032.24   | NM_018896   | 1391.859  |
| BF575833  | 982.979   | 1086.249  | NM_016038 | 2521.909  | 2793.594  | AJ300465    | 3078.391  |
| NM_000175 | 1209.906  | 441.363   | Z36821    | 6374.577  | 7128.785  | X86400      | 398.871   |
| NM_015725 | 11671.218 | 13442.105 | AF289485  | 2965.449  | 2946.339  | NM_000810   | 2788.389  |
| R61452    | 2120.605  | 2171.221  | AF130092  | 1526.671  | 1761.373  | AF069307    | 1449.902  |

|           |           |           |           |           |           |           |           |
|-----------|-----------|-----------|-----------|-----------|-----------|-----------|-----------|
| R19938    | 7461.534  | 6083.972  | NM_016095 | 3850.937  | 2494.438  | M33197    | 34788.395 |
| N94487    | 20736.879 | 19266.445 | AK024794  | 1356.967  | 1005.066  | U92978    | 943.657   |
| AI886795  | 6066.262  | 5918.258  | NM_019853 | 5897.511  | 5152.652  | NM_014488 | 396.359   |
| D10495    | 8266.5    | 7437.359  | NM_017992 | 8058.413  | 7207.593  | NM_013389 | 5707.576  |
| BF344679  | 10633.76  | 3992.739  | BF851643  | 641.311   | 423.933   | NM_018034 | 3374.696  |
| BG743223  | 732.167   | 648.122   | AK023061  | 597.38    | 433.987   | M33197    | 54671.719 |
| M36634    | 1547.779  | 1307.98   | NM_007255 | 2669.302  | 2120.892  | AB037831  | 1030.681  |
| M14156    | 9243.499  | 10570.235 | NM_003668 | 6413.783  | 5838.667  | NM_012103 | 4457.125  |
| U87939    | 1554.211  | 1888.142  | NM_013384 | 47796.871 | 48080.984 | AL122077  | 18440.561 |
| U86961    | 1789.329  | 1819.825  | NM_000724 | 2952.401  | 2916.315  | NM_014632 | 1364.473  |
| NM_005191 | 706.549   | 598.571   | NM_000553 | 741.434   | 327.105   | NM_006422 | 786.836   |
| AK094237  | 4860.449  | 6128.205  | NM_002557 | 3694.563  | 4748.634  | BE789195  | 1111.897  |
| L07592    | 2983.47   | 3852.847  | NM_004477 | 413.576   | 324.995   | NM_016946 | 1885.361  |
| BF434335  | 42033.215 | 33805.926 | BE728156  | 1091.198  | 723.097   | M33197    | 57647.133 |
| M57627    | 863.556   | 609.897   | Y10802    | 718.059   | 894.654   | NM_007259 | 2389.853  |
| NM_002993 | 2210.311  | 2525.095  | BI762229  | 3287.963  | 2750.407  | NM_018402 | 602.639   |
| AK026946  | 2575.6    | 2337.315  | BG618320  | 6498.357  | 7173.802  | NM_018009 | 969.414   |
| M33197    | 60540.844 | 55074.668 | Y00787    | 2664.086  | 2178.75   | M33197    | 47573.32  |
| NM_003192 | 8006.816  | 6238.362  | NM_007276 | 1982.04   | 2585.175  | NM_002401 | 27249.879 |
| NM_018449 | 4718.931  | 4678.569  | N34462    | 4294.963  | 3413.997  | NM_001274 | 1214.569  |
| AF086129  | 1611.844  | 2393.062  | AI658778  | 1255.98   | 1259.84   | NM_002227 | 2844.436  |
| D79994    | 1641.656  | 1660.13   | L19067    | 2245.976  | 2577.034  | NM_007199 | 1813.134  |
| NM_014458 | 7529.443  | 7102.296  | Z48482    | 1089.215  | 1435.849  | AB014530  | 778.751   |
| AF235049  | 3978.506  | 4808.358  | W60413    | 2184.922  | 1973.993  | M33197    | 30755.646 |
| M33197    | 61292.691 | 56841.492 | BI823365  | 1793.562  | 2269.411  | NM_005989 | 1517.063  |
| NM_007369 | 1223.011  | 1659.214  | X06318    | 3692.753  | 5500.084  | AB014607  | 2691.263  |
| NM_014776 | 3750.124  | 3065.466  | AL834159  | 5152.526  | 4107.014  | NM_020151 | 7046.32   |
| NM_006480 | 36236.527 | 42077.078 | NM_000164 | 33039.672 | 26432.715 | NM_005891 | 7338.966  |
| NM_007223 | 50550.66  | 57548.113 | NM_014007 | 1325.113  | 1140.629  | NM_001645 | 13739.261 |
| NM_000145 | 1582.11   | 1497.082  | AB033006  | 4809.463  | 3672.375  | NM_003956 | 2737.695  |
| AF030107  | 2179.772  | 1780.35   | AF020314  | 8884.774  | 10748.227 | M33197    | 60711.48  |
| NM_000871 | 1915.404  | 1878.317  | NM_016332 | 13521.297 | 7659.192  | NM_003500 | 2728.519  |
| M33197    | 61141.906 | 58597.441 | AK023936  | 820.506   | 583.157   | NM_014317 | 1918.074  |
| NM_018968 | 1720.331  | 1763.106  | NM_006457 | 837.363   | 989.642   | L09234    | 3559.993  |
| NM_000264 | 892.844   | 1330.436  | NM_003682 | 495.761   | 627.708   | NM_000059 | 1452.342  |
| AB058740  | 14244.828 | 15403.974 | NM_006314 | 8411.374  | 10944.561 | AK026740  | 1307.557  |
| NM_003385 | 800.144   | 1083.029  | NM_001782 | 1086.765  | 1016.873  | NM_017881 | 4854.025  |
| AF279890  | 5364.866  | 4915.593  | NM_002754 | 768.095   | 573.897   | M33197    | 64723.164 |
| NM_002236 | 3096.771  | 3055.557  | NM_000797 | 2635.201  | 3351.371  | NM_017634 | 4297.522  |
| NM_012069 | 5779.436  | 4384.642  | NM_014927 | 399.955   | 469.84    | NM_017743 | 645.128   |
| NM_001689 | 44653.523 | 53421.809 | NM_016293 | 3226.084  | 3404.145  | NM_000300 | 4694.65   |
| NM_016601 | 1964.393  | 1816.511  | AF217525  | 332.747   | 376.779   | M33197    | 57392.133 |
| NM_017905 | 16586.742 | 16502.449 | AL080148  | 18488.223 | 13754.616 | AV756917  | 1725.259  |
| M33197    | 60349.672 | 58734.672 | NM_006731 | 496.167   | 928.608   | NM_018380 | 4868.372  |
| NM_006815 | 19574.318 | 30425.951 | NM_018487 | 603.512   | 464.264   | AK001442  | 753.749   |
| NM_001663 | 5680.007  | 6187.931  | NM_020134 | 1140.434  | 1635.173  | NM_012070 | 423.146   |
| NM_004218 | 9124.779  | 7843.605  | NM_014061 | 1103.992  | 1085.528  | AF183423  | 615.887   |
| NM_016530 | 2958.806  | 2034.984  | BC034395  | 960.073   | 1390.311  | AB011146  | 624.607   |
| NM_014804 | 1607.5    | 1692.983  | NM_002479 | 747.794   | 827.183   | NM_005326 | 12236.571 |
| NM_012455 | 5731.808  | 5076.742  | NM_006493 | 2209.219  | 1877.946  | NM_014069 | 1297.212  |
| NM_002806 | 10570.931 | 10189.331 | U76362    | 4904.937  | 5410.753  | AB035130  | 4501.445  |
| M33197    | 62754.43  | 59922.809 | AF040248  | 1064.431  | 789.834   | NM_003359 | 1418.301  |
| NM_001716 | 1265.286  | 1408.694  | NM_014228 | 605.987   | 798.066   | M33197    | 26426.561 |

|           |           |           |           |           |           |           |           |
|-----------|-----------|-----------|-----------|-----------|-----------|-----------|-----------|
| NM_00203C | 764.618   | 596.399   | AL832292  | 1191.341  | 2925.513  | AF119917  | 835.671   |
| NM_006073 | 719.589   | 756.417   | NM_003045 | 4604.268  | 7791.407  | AK021834  | 609.81    |
| NM_004951 | 1691.353  | 437.802   | NM_005662 | 42884.965 | 29342.113 | NM_017915 | 720.614   |
| NM_006564 | 9921.913  | 9723.837  | NM_00306C | 537.618   | 658.277   | AL050097  | 1305.186  |
| NM_004802 | 1868.133  | 1688.787  | AK021489  | 28099.188 | 25083.018 | AK021513  | 1007.087  |
| NM_002983 | 7699.411  | 1459.212  | NM_004525 | 564.832   | 346.451   | NM_003579 | 1207.102  |
| NM_000074 | 8482.371  | 11866.08  | NM_003895 | 729.028   | 844.777   | AL049283  | 961.459   |
| NM_020393 | 870.264   | 727.899   | NM_004317 | 5053.868  | 3279.822  | NM_002214 | 974.511   |
| M33197    | 57507.867 | 53513.648 | NM_014645 | 1582.386  | 1369.364  | AF005258  | 1077.532  |
| NM_002613 | 4205.916  | 3337.479  | NM_014708 | 3193.49   | 2774.172  | NM_000887 | 1560.956  |
| NM_004419 | 4582.254  | 4754.636  | NM_003693 | 462.986   | 582.654   | AF277292  | 773.085   |
| U47635    | 3288.465  | 3324.462  | NM_000356 | 19021.396 | 23761.266 | M33197    | 49985.832 |
| NM_01865C | 2829.887  | 2910.844  | NM_018134 | 37285.242 | 38589.617 | X99659    | 34835.906 |
| AK026945  | 13171.837 | 37225.246 | NM_013247 | 6798.52   | 2261.756  | NM_015416 | 596.922   |
| NM_002828 | 2327.833  | 2631.425  | NM_00677C | 3095.147  | 2665.946  | NM_002731 | 352.859   |
| NM_014369 | 4138.216  | 3005.816  | BE394704  | 304.909   | 713.73    | NM_003899 | 1554.525  |
| M33197    | 61172.734 | 57930.84  | NM_004703 | 1965.176  | 2196.157  | X99662    | 2371.157  |
| NM_001398 | 22351.51  | 31741.453 | NM_001512 | 1347.504  | 1369.616  | NM_003473 | 21290.791 |
| J05125    | 1487.958  | 1014.534  | NM_014706 | 8342.81   | 4938.353  | M33197    | 58221.516 |
| NM_005164 | 1066.207  | 1171.469  | NM_007255 | 2860.226  | 1917.992  | NM_017753 | 1344.339  |
| NM_001995 | 2464.426  | 2536.413  | NM_003668 | 6650.803  | 5818.972  | NM_012453 | 662.615   |
| NM_000183 | 12335.9   | 15579.299 | NM_013384 | 41093.563 | 42091.164 | NM_006016 | 40405.965 |
| AY004175  | 2317.533  | 2161.354  | NM_001187 | 1016.568  | 984.238   | NM_001242 | 3186.935  |
| M33197    | 62966.699 | 62176.184 | NM_018241 | 1650.368  | 1607.463  | NM_001882 | 1144.575  |
| NM_012327 | 4217.143  | 4581.825  | NM_005834 | 2630.464  | 1901.694  | NM_014891 | 4059.141  |
| NM_000904 | 2480.859  | 1350.535  | AF000381  | 4800.08   | 3932.926  | NM_013392 | 15272.633 |
| NM_016048 | 1378.96   | 2066.796  | NM_018075 | 440.074   | 275.073   | M33197    | 64935.164 |
| NM_000375 | 8132.082  | 9570.049  | NM_012105 | 741.976   | 1021.05   | NM_002175 | 533.841   |
| NM_000265 | 29709.338 | 8294.263  | NM_000197 | 600.352   | 673.142   | NM_003236 | 1819.113  |
| NM_018849 | 9936.8    | 9308.624  | S82470    | 1780.225  | 1511.031  | NM_003458 | 1791.047  |
| M33197    | 55161.34  | 57715.023 | AB028982  | 2007.694  | 2034.586  | AF052692  | 1531.78   |
| M16796    | 557.093   | 524.74    | NM_002004 | 3802.584  | 3792.755  | NM_00282C | 1738.336  |
| AF015910  | 40467.313 | 41964.496 | NM_005121 | 564.903   | 527.796   | NM_005228 | 1439.601  |
| BC009993  | 1775.761  | 2280.432  | NM_001643 | 15441.854 | 13037.537 | NM_002354 | 1321.961  |
| M33197    | 55207.637 | 55415.031 | NM_020221 | 860.839   | 1033.969  | NM_000179 | 290.111   |
| NM_016824 | 1093.698  | 994.645   | NM_000747 | 1860.634  | 2149.659  | AF062739  | 482.571   |
| NM_003031 | 4120.447  | 3796.726  | NM_005415 | 1570.577  | 1314.443  | NM_006602 | 781.288   |
| X89674    | 746.335   | 958.194   | AJ275973  | 17893.785 | 20045.732 | M33197    | 29306.439 |
| NM_00717C | 1103.33   | 1173.734  | AL834159  | 5280.313  | 3778.371  | AL079314  | 1023.578  |
| NM_003008 | 2324.623  | 2267.744  | NM_000164 | 33367.68  | 23557.715 | NM_00126C | 869.87    |
| AK027244  | 2864.344  | 3563.114  | NM_016217 | 14555.18  | 12779.429 | NM_00195C | 1139.38   |
| L40520    | 4601.683  | 4405.626  | AK025971  | 5601.107  | 4948.233  | AK026364  | 830.266   |
| NM_002633 | 1796.647  | 7002.646  | NM_002618 | 1826.197  | 2183.542  | NM_018117 | 204.568   |
| U11036    | 1301.277  | 922.406   | L27479    | 811.874   | 562.064   | NM_006286 | 434.233   |
| M33197    | 51849.184 | 53467.254 | NM_002193 | 1142.314  | 915.073   | M33197    | 47090.836 |
| NM_002878 | 4489.404  | 5445.9    | NM_001388 | 3864.881  | 4540.276  | NM_004331 | 4220.655  |
| NM_017723 | 4678.106  | 3549.075  | X76770    | 3514.888  | 4059.429  | NM_015996 | 649.634   |
| AK022922  | 2842.299  | 2170.761  | AB037808  | 484.284   | 671.868   | NM_015703 | 10163.987 |
| NM_006462 | 7960.522  | 8326.149  | NM_016038 | 2717.267  | 2847.867  | AB018337  | 1325.06   |
| AK024750  | 5589.5    | 5117.332  | AF090911  | 263.068   | 305.448   | NM_014489 | 377.868   |
| NM_00040C | 21437.279 | 23528     | Z36821    | 4937.416  | 6024.024  | AK025273  | 1900.651  |
| NM_015885 | 4119.394  | 4369.303  | AF289485  | 1641.062  | 1743.597  | M33197    | 47970.582 |
| AK027157  | 909.234   | 530.854   | AF130092  | 1282.266  | 1958.042  | NM_001794 | 792.691   |

|          |           |           |          |           |           |          |           |
|----------|-----------|-----------|----------|-----------|-----------|----------|-----------|
| NM_01588 | 61446.34  | 58163.859 | NM_01609 | 3980.108  | 2744.147  | NM_00220 | 4604.739  |
| M33197   | 63978.227 | 57691.746 | AK02479  | 969.839   | 572.109   | M33197   | 50589.281 |
| NM_00427 | 2420.521  | 2011.571  | NM_01985 | 3840.001  | 2912.549  | NM_00013 | 769.898   |
| NM_00233 | 9168.215  | 7613.475  | NM_01799 | 5013.083  | 3699.059  | NM_00183 | 354.86    |
| NM_00285 | 3436.807  | 3210.774  | NM_00540 | 388.108   | 396.11    | NM_00191 | 1918.701  |
| NM_00524 | 4907.665  | 3893.56   | AK02306  | 469.671   | 511.973   | NM_00053 | 242.3     |
| NM_01765 | 715.376   | 1382.842  | NM_01406 | 1107.441  | 843.37    | NM_00650 | 784.785   |
| AF161339 | 15814.458 | 5440.453  | BC03439  | 834.967   | 1015.776  | NM_00396 | 301.529   |
| M33197   | 55749.629 | 57623.797 | NM_00247 | 697.888   | 641.842   | NM_00465 | 448.597   |
| AK000354 | 5617.612  | 6217.771  | NM_00034 | 5713.635  | 5230.143  | M33197   | 51436.996 |
| NM_01488 | 1769.214  | 468.332   | NM_00505 | 523.071   | 439.244   | NM_01756 | 12297.025 |
| NM_00083 | 1686.26   | 1689.543  | NM_00495 | 2320.14   | 2229.852  | NM_00145 | 1246.657  |
| M33197   | 55205.102 | 54638.582 | NM_00072 | 2488.9    | 2497.709  | NM_00290 | 696.375   |
| NM_00151 | 669.703   | 544.646   | NM_00255 | 2496.057  | 3306.852  | AK02448  | 2107.181  |
| AK024474 | 5067.549  | 4994.552  | BE72815  | 482.618   | 722.583   | Y13871   | 18980.088 |
| NM_00686 | 671.5     | 857.296   | Y10802   | 518.67    | 617.954   | NM_01213 | 1225.901  |
| NM_01790 | 2213.133  | 2908.522  | AI41777  | 755.681   | 635.37    | AL13772  | 4726.444  |
| NM_00427 | 1499.701  | 2627.909  | BI76222  | 3380.886  | 2661.251  | M33197   | 47689.063 |
| NM_01758 | 1107.082  | 1194.109  | BG61832  | 4754.021  | 4706.009  | AJ00815  | 9400.484  |
| AK02358  | 1128.708  | 1008.105  | M28983   | 861.43    | 561.343   | AK02419  | 808.941   |
| NM_00035 | 2917.419  | 2455.903  | Y00787   | 2378.383  | 2301.31   | AK02309  | 568.988   |
| NM_00193 | 6042.474  | 7088.587  | NM_00727 | 2143.699  | 2573.47   | M33197   | 17806.074 |
| AK02527  | 1463.69   | 906.878   | N34462   | 4403.789  | 3805.715  | NM_00409 | 889.756   |
| NM_00156 | 1843.498  | 2169.279  | AI65877  | 1209.356  | 1704.123  | X74070   | 69708.633 |
| M33197   | 59432.305 | 57539.32  | L19067   | 1627.875  | 1765.988  | AF02721  | 732.492   |
| AF263537 | 46652.434 | 32318.35  | Z48482   | 837.162   | 1212.15   | NM_00633 | 1133.309  |
| NM_01589 | 4034.018  | 6343.055  | W60413   | 1162.743  | 1127.45   | M33197   | 28419.539 |
| NM_00467 | 606.92    | 1506.664  | BI82336  | 667.029   | 992.898   | NM_00289 | 2351.255  |
| NM_00018 | 690.165   | 975.314   | X06318   | 3397.143  | 5732.09   | AK02274  | 2102.602  |
| AL05005  | 1079.162  | 618.467   | NM_00470 | 1186.936  | 1110.435  | BF03140  | 1941.585  |
| NM_00469 | 1150.777  | 1320.115  | NM_00151 | 1365.233  | 1111.099  | U94388   | 822.19    |
| M33197   | 57605.879 | 57863.594 | NM_01470 | 5602.111  | 2817.801  | NM_01232 | 1123.692  |
| NM_01337 | 24888.619 | 25468.219 | AJ00134  | 859.576   | 1004.153  | M33197   | 28411.9   |
| NM_00325 | 4998.213  | 8165.194  | NM_01400 | 983.857   | 1139.824  | NM_00488 | 5961.791  |
| NM_00122 | 2179.779  | 1461.936  | AB03300  | 3295.725  | 2362.373  | AK02531  | 1937.642  |
| AK02660  | 1488.102  | 1313.096  | AF02031  | 7871.587  | 10048.824 | NM_00210 | 1475.277  |
| NM_01656 | 18768.32  | 19023.34  | NM_01633 | 9769.5    | 5430.382  | NM_00098 | 66057.133 |
| NM_00122 | 6387.955  | 4608.518  | NM_00645 | 812.984   | 736.371   | NM_00245 | 3541.689  |
| NM_01424 | 24822.326 | 26616.32  | NM_00368 | 760.395   | 768.073   | AK00078  | 16178.381 |
| M33197   | 60825.367 | 59257.188 | NM_00020 | 1127.524  | 1189.434  | AK02672  | 583.671   |
| AL11022  | 60682.785 | 65967.781 | NM_00253 | 1401.267  | 2928.859  | AK02302  | 1342.763  |
| AB04682  | 1681.672  | 941.906   | NM_00631 | 3000.14   | 3279.994  | AB00234  | 26669.563 |
| M33197   | 1983.372  | 1254.716  | NM_00178 | 1052.512  | 824.216   | M33197   | 11791.819 |
| NM_00030 | 8545.213  | 3459.08   | NM_00079 | 1997.442  | 3103.093  | AK02604  | 830.707   |
| X69636   | 2952.079  | 2708.445  | NM_01492 | 548.85    | 346.658   | NM_00500 | 1569.49   |
| M33197   | 60842.426 | 60683.531 | NM_01629 | 6645.653  | 11209.833 | AK02703  | 358.891   |
| NM_00417 | 27255.652 | 21044.266 | AF21752  | 543.245   | 469.625   | NM_00300 | 1212.522  |
| NM_01397 | 4549.667  | 5322.422  | AL08014  | 16580.492 | 12855.588 | NM_00249 | 4320.655  |
| NM_01754 | 2489.229  | 2604.278  | NM_00673 | 458.437   | 825.569   | M33197   | 24418.684 |
| NM_00398 | 6527.69   | 7545.119  | NM_02013 | 791.614   | 1129.25   | NM_01628 | 306.993   |
| AK02370  | 1872.519  | 1522.245  | NM_02022 | 756.943   | 750.573   | NM_01459 | 1262.468  |
| NM_00210 | 2185.553  | 2936.245  | NM_00074 | 1065.976  | 466.385   | NM_00683 | 2897.487  |
| M33197   | 58424.527 | 57070.848 | NM_00541 | 1624.354  | 1539.403  | NM_01225 | 444.392   |

|           |           |           |           |           |           |           |           |
|-----------|-----------|-----------|-----------|-----------|-----------|-----------|-----------|
| NM_018464 | 27016.893 | 18241.914 | AJ275973  | 7984.583  | 6652.078  | U37690    | 15774.582 |
| D43948    | 1877.945  | 1766.189  | NM_006493 | 1304.279  | 1192.527  | NM_00512C | 433.992   |
| NM_01231C | 8278.382  | 7993.336  | U76362    | 2098.249  | 1369.405  | AB029012  | 15091.008 |
| BE410824  | 673.203   | 741.763   | AF040248  | 912.45    | 401.872   | M33197    | 34539.984 |
| BF382116  | 10171.212 | 11665.005 | NM_01422E | 1237.147  | 923.161   | AJ010278  | 1114.866  |
| NM_003193 | 8014.183  | 9171.713  | AL832292  | 697.201   | 1918.845  | NM_00629E | 1723.228  |
| AK055825  | 59628.813 | 62846.914 | NM_00304E | 3846.281  | 5357.319  | AF060936  | 6024.93   |
| M33197    | 55884.445 | 58906.684 | NM_005662 | 39626.598 | 24673.916 | NM_00556E | 518.553   |
| AF113216  | 1467.11   | 1382.786  | AK021489  | 23368.547 | 25002.838 | AL050088  | 3094.815  |
| NM_005197 | 8200.533  | 5995.852  | NM_00452E | 641.856   | 731.505   | AK001561  | 2917.716  |
| AL137421  | 34737.102 | 53728.734 | NM_00389E | 576.969   | 548.646   | AB007880  | 574.093   |
| M33197    | 53966.797 | 54375.371 | NM_004317 | 5963.993  | 4032.996  | AK024950  | 626.826   |
| NM_007241 | 1797.544  | 868.215   | NM_01464E | 2568.716  | 1911.776  | M33197    | 37519.496 |
| NM_01799E | 3581.858  | 4208.416  | NM_01470E | 4505.169  | 3174.374  | NM_01414E | 1726.328  |
| NM_014517 | 3282.281  | 3256.219  | NM_003693 | 765.886   | 567.51    | NM_018843 | 1353.289  |
| NM_00546E | 1513.329  | 1081.72   | NM_00035E | 15062.273 | 22436.715 | AK024275  | 409.078   |
| NM_00426E | 1312.28   | 1317.289  | NM_018134 | 39064.371 | 40447.746 | M33197    | 39369.785 |
| NM_00340E | 1008.549  | 706.469   | BE394704  | 648.36    | 620.892   | AL109782  | 2659.652  |
| D31765    | 1615.645  | 1345.723  | AK024794  | 733.062   | 719.551   | AF086225  | 625.927   |
| NM_006107 | 8045.889  | 5687.951  | NM_019853 | 5993.406  | 4704.843  | NM_005844 | 7253.139  |
| NM_00417E | 1379.171  | 1520.469  | NM_017992 | 8083.399  | 6745.111  | AK024941  | 2357.161  |
| AF288288  | 11762.882 | 10148.469 | NM_00540C | 489.861   | 535.901   | AF056434  | 1185.19   |
| NM_01764E | 4141.706  | 6291.501  | NM_00725E | 2278.13   | 1807.818  | AF086199  | 1065.044  |
| AL050368  | 1236.455  | 1479.389  | NM_00366E | 5836.605  | 5627.2    | AK025489  | 1072.187  |
| NM_003092 | 10195.47  | 9453.795  | NM_013384 | 18814.035 | 18912.014 | AB075853  | 451.674   |
| M33197    | 59253.445 | 58954.055 | NM_018241 | 1212.701  | 1437.466  | AL390152  | 2447.784  |
| NM_005861 | 4076.796  | 3005.484  | NM_005834 | 2240.235  | 2330.058  | M33197    | 53169.465 |
| NM_01884E | 1904.638  | 2827.403  | AF000381  | 2850.81   | 2130.278  | NM_01812E | 559.491   |
| NM_00376C | 3180.943  | 4840.037  | NM_01807E | 424.882   | 490.661   | AK024506  | 977.388   |
| AB037759  | 1803.533  | 1134.672  | NM_01210E | 1017.124  | 1434.396  | NM_01417E | 657.678   |
| AK025998  | 1627.7    | 2529.029  | S82470    | 2155.209  | 2016.892  | AF086326  | 3703.885  |
| AL080080  | 5708.195  | 8884.195  | AB028982  | 2211.708  | 1914.448  | M33197    | 23341.273 |
| NM_018482 | 2302.805  | 1681.122  | NM_002004 | 3503.638  | 3409.621  | AL117528  | 413.984   |
| NM_01788C | 2760.054  | 1832.649  | NM_001643 | 16973.811 | 15908.696 | M33197    | 26948.908 |
| AF090945  | 4911.098  | 3460.562  | AK021818  | 544.348   | 465.412   | AK025948  | 567.299   |
| M33197    | 60916.797 | 56093.559 | NM_01909E | 5071.182  | 4515.342  | AK000674  | 523.93    |
| NM_001161 | 5593.858  | 6612.824  | NM_01472E | 2443.541  | 2221.406  | AJ238555  | 993.069   |
| NM_004044 | 5311.995  | 8426.411  | NM_006892 | 1266.595  | 1353.556  | L23850    | 558.789   |
| NM_000221 | 17369.646 | 20273.938 | NM_019117 | 554.759   | 671.648   | M33197    | 29649.246 |
| H75678    | 856.713   | 1212.62   | NM_01830E | 1606.947  | 1656.778  | AK025869  | 6493.229  |
| NM_00253E | 1211.521  | 425.021   | NM_01765E | 2603.982  | 2697.311  | AK023961  | 1275.819  |
| AB002359  | 2123.815  | 2727.109  | NM_01867E | 9940.67   | 9213.611  | M33197    | 16435.666 |
| M33197    | 2965.15   | 3053.169  | NM_016643 | 741.366   | 644.415   | AF056430  | 762.642   |
| AB007864  | 1566.016  | 1039.162  | NM_00677E | 4897.023  | 4166.248  | NM_01490E | 376.917   |
| NM_00219E | 2844.652  | 2490.963  | NM_016217 | 16154.179 | 13503.332 | AF009291  | 760.1     |
| AF024693  | 1206.111  | 879.656   | AK025971  | 5623.472  | 5172.246  | AF056440  | 835.791   |
| AK025905  | 1700.385  | 1356.964  | NM_00261E | 2080.201  | 3402.247  | M33197    | 38434.918 |
| AL121733  | 1120.133  | 1029.42   | L27479    | 1439.885  | 1345.013  | NM_01805E | 2087.715  |
| BE958072  | 1071.136  | 975.418   | NM_002193 | 1750.882  | 1733.059  | AK002199  | 1827.84   |
| M33197    | 44456.672 | 49580.469 | NM_00138E | 5830.602  | 6904.201  | AK021662  | 562.803   |
| NM_017532 | 622.915   | 460.524   | X76770    | 5288.571  | 5495.056  | AK001038  | 399.445   |
| NM_01448C | 2336.217  | 2395.847  | AB037808  | 1247.28   | 1428.115  | AK001802  | 471.486   |
| NM_00593E | 908.436   | 620.607   | NM_01603E | 1637.663  | 1542.081  | AK021469  | 492.03    |

|           |           |           |           |           |           |           |           |
|-----------|-----------|-----------|-----------|-----------|-----------|-----------|-----------|
| NM_014169 | 4021.793  | 5411.163  | Z36821    | 3202.421  | 4417.045  | AK021706  | 2643.692  |
| NM_004964 | 16530.896 | 13149.757 | AF289485  | 2942.622  | 2719.607  | M33197    | 39308.512 |
| AL117497  | 2239.024  | 1693.436  | AF130092  | 789.298   | 1562.034  | AK026052  | 814.793   |
| AF147437  | 2351.514  | 1905.83   | NM_016095 | 5088.04   | 3832.552  | AK025161  | 958.143   |
| M33197    | 53594.555 | 55510.504 | AF300612  | 60729.223 | 51776.781 | AK025387  | 597.211   |
| AF147360  | 1019.059  | 704.307   | AB014557  | 928.872   | 826.425   | AK026259  | 50223.336 |
| AL137269  | 3442.357  | 3993.484  | NM_005578 | 2619.605  | 1318.167  | AK026701  | 553.375   |
| AK021983  | 1711.061  | 1774.747  | NM_003653 | 5359.619  | 4536.962  | AJ008115  | 16944.232 |
| Y11681    | 8113.908  | 7554.265  | NM_018457 | 14959.361 | 17142.893 | M33197    | 28057.953 |
| AL110135  | 34058.988 | 31575.293 | NM_002953 | 7412.37   | 5600.88   | AK022970  | 549.457   |
| NM_006993 | 2579.133  | 7237.648  | NM_002187 | 809.025   | 693.697   | AF086222  | 268.736   |
| NM_002336 | 772.161   | 969.559   | NM_014246 | 8674.107  | 8190.665  | AF086415  | 826.592   |
| M33197    | 56209.383 | 58013.184 | NM_014859 | 773.213   | 938.78    | M33197    | 29168.295 |
| AF086316  | 684.367   | 468.415   | NM_001116 | 694.137   | 475.053   | AK024470  | 3115.1    |
| AF086429  | 831.756   | 1239.016  | BC035395  | 2234.123  | 2071.779  | NM_017935 | 675.131   |
| NM_01906C | 490.1     | 509.703   | NM_001703 | 6519.51   | 6831.014  | NM_004226 | 1179.87   |
| AF086302  | 616.287   | 689.057   | NM_020126 | 2737.545  | 2592.823  | AL137436  | 517.986   |
| AF086439  | 1155.556  | 1777.554  | NM_013982 | 1279.684  | 656.603   | AK023400  | 747.254   |
| M33197    | 53685.789 | 56579.641 | NM_005049 | 951.841   | 843.653   | NM_006432 | 6495.256  |
| AF038171  | 677.934   | 904.896   | NM_003882 | 677.734   | 709.584   | AF025441  | 1020.389  |
| AF052160  | 685.841   | 948.199   | NM_00463C | 6493.998  | 7032.203  | U62823    | 736.977   |
| AK026512  | 1687.037  | 1399.367  | AK023001  | 6313.566  | 6464.396  | NM_003535 | 16620.354 |
| M33197    | 63378.445 | 58011.301 | NM_014826 | 6551.739  | 6690.912  | AK026768  | 657.608   |
| AF085969  | 1390.473  | 781.237   | AF201947  | 1740.12   | 583.382   | M33197    | 30211.838 |
| AF144233  | 4056.488  | 2896.583  | U01147    | 1999.317  | 1622.273  | AK000852  | 4201.75   |
| AF085975  | 2285.883  | 1982.267  | NM_00404C | 10654.72  | 10773.492 | AF251188  | 1198.81   |
| AF075103  | 854.332   | 744.664   | NM_006116 | 2607.21   | 3360.331  | AK026418  | 1428.804  |
| M33197    | 56517.137 | 56572.375 | NM_005456 | 2948.699  | 3301.259  | AF086194  | 20094.621 |
| AL137390  | 2113.691  | 1846.326  | NM_003587 | 18642.279 | 25060.66  | AK026811  | 1356.835  |
| AL137611  | 6458.899  | 5367.368  | X90978    | 995.915   | 1123.766  | M33197    | 24782.189 |
| AL359566  | 31223.482 | 27832.838 | BF219403  | 21085.512 | 23921.51  | AK023633  | 704.222   |
| AL137427  | 2423.544  | 2281.136  | NM_016119 | 1093.37   | 1226.066  | NM_006179 | 739.489   |
| AL157460  | 7170.632  | 5825.739  | AK075450  | 1258.229  | 1271.364  | AL360165  | 546.677   |
| AL359595  | 676.05    | 511.134   | AF178983  | 4326.717  | 6712.839  | M33197    | 22885.512 |
| M33197    | 56465.75  | 56620.699 | NM_001324 | 3550.739  | 2433.118  | AJ008132  | 2353.401  |
| AK026718  | 1457.939  | 1387.049  | AB037795  | 2586.555  | 1725.489  | NM_005281 | 7066.13   |
| AK022035  | 11989.357 | 9996.417  | D43949    | 2124.668  | 2987.141  | NM_005549 | 6773.947  |
| M33197    | 57884.676 | 57550.945 | AF111849  | 15925.962 | 18558.117 | M33197    | 47327.684 |
| NM_004337 | 1040.916  | 1365.934  | NM_015344 | 2309.242  | 1848.02   | U12129    | 605.879   |
| AK022141  | 1619.655  | 1112.14   | NM_004288 | 1223.936  | 749.269   | S81242    | 23846.291 |
| AK023942  | 37438.289 | 33901.848 | AL122055  | 12015.341 | 8504.023  | AF230801  | 699.402   |
| M33197    | 52114.938 | 50766.348 | NM_005132 | 16102.355 | 17963.141 | AF075072  | 712.135   |
| NM_020351 | 1575.644  | 1931.875  | X07695    | 732.782   | 842.768   | M33197    | 40220.043 |
| AK027207  | 1525.905  | 1515.261  | D87458    | 2326.467  | 1493.856  | NM_002509 | 1641.996  |
| AF083120  | 753.916   | 1003.027  | AK021750  | 5868.56   | 3239.991  | AK026706  | 591.494   |
| AJ227892  | 8397.459  | 7374.162  | NM_003626 | 925.1     | 1060.29   | AB007936  | 24379.367 |
| M33197    | 58768.137 | 56421.875 | AK023594  | 5024.086  | 5532.364  | D28391    | 7442.333  |
| AK022013  | 1403.172  | 1521.267  | AB032989  | 462.209   | 899.609   | M33197    | 15076.759 |
| AK022155  | 3227.01   | 3749.942  | AB010099  | 8074.903  | 9306.208  | AK026859  | 495.881   |
| AK022288  | 836.816   | 1065.05   | AB039920  | 5913.167  | 6543.238  | D86961    | 634.235   |
| AK021916  | 879.577   | 774.62    | AB046782  | 1599.933  | 1049.922  | AJ227896  | 8855.422  |
| AK024201  | 1529.48   | 1473.629  | NM_00419C | 9247.666  | 8866.349  | L32841    | 2150.335  |
| AK022174  | 659.302   | 785.254   | NM_014275 | 2917.996  | 4055.7    | M33197    | 17640.77  |



|           |           |           |           |           |           |           |           |
|-----------|-----------|-----------|-----------|-----------|-----------|-----------|-----------|
| AK022331  | 526.119   | 865.692   | NM_000409 | 3851.637  | 5615.623  | AF131770  | 397.372   |
| M33197    | 59576.965 | 55475.563 | AF208005  | 1255.061  | 1676.823  | CY3Cy5    | 9119.482  |
| AK026878  | 946.091   | 883.815   | NM_002231 | 2935.588  | 3125.063  | AI298534  | 941.677   |
| AK021589  | 1040.544  | 1210.881  | NM_020474 | 4075.535  | 4110.787  | R71691    | 553.663   |
| D17152    | 17986.855 | 8573.942  | NM_002643 | 1197.44   | 1506.433  | AW167715  | 2407.074  |
| AK024464  | 12415.328 | 10349.568 | NM_017807 | 1026.925  | 1424.927  | AA424735  | 1303.461  |
| AK023638  | 1121.087  | 1081.845  | NM_014746 | 613.308   | 754.367   | U78294    | 1481.613  |
| M33197    | 736.398   | 746.595   | NM_002788 | 39334.285 | 32108.459 | BI760394  | 1261.59   |
| AK025423  | 2338.335  | 2379.206  | NM_000462 | 2555.15   | 2835.139  | AA555216  | 294.995   |
| M33197    | 59343.738 | 58204.832 | NM_003336 | 9264.305  | 5430.912  | U09117    | 3925.354  |
| AL049846  | 1451.364  | 1238.013  | NM_005805 | 8280.192  | 10162.034 | M21054    | 309.629   |
| AK024161  | 1329.207  | 903.552   | NM_004181 | 634.643   | 534.773   | M18468    | 397.383   |
| AK021682  | 21189.361 | 24907.881 | NM_003900 | 2399.342  | 3122.287  | AA164741  | 4165.863  |
| AJ012500  | 1853.751  | 1804.776  | NM_003337 | 1732.44   | 1020.809  | AK054960  | 2822.786  |
| U00944    | 1004.479  | 1373.519  | AF298152  | 2501.748  | 1277.435  | L15344    | 723.377   |
| BC035058  | 1036.579  | 1768.916  | AF117233  | 2874.766  | 3304.838  | SR3       | 42800.77  |
| X57566    | 4287.18   | 3643.102  | NM_015848 | 620.297   | 620.579   | SR5       | 4002.382  |
| M33197    | 63046.621 | 62180.316 | NM_001723 | 853.791   | 623.757   | SR7       | 4206.914  |
| NM_018616 | 5629.109  | 6556.653  | NM_016018 | 1208.219  | 910.72    | SR9       | 14758.721 |
| AK023809  | 1545.071  | 2006.828  | M94362    | 19686.061 | 17315.17  | CY3Cy5    | 7751.562  |
| M87943    | 60969.758 | 58895.668 | AK024707  | 1356.689  | 812.599   | NM_014586 | 940.147   |
| AL360137  | 1066.994  | 1382.681  | NM_014255 | 3670.848  | 2059.558  | NM_014366 | 2947.849  |
| U28131    | 59749.949 | 60094.262 | AK022909  | 2188.778  | 2028.92   | NM_000923 | 897.571   |
| AY007106  | 7156.763  | 9890.957  | NM_006530 | 5102.402  | 4344.648  | NM_006453 | 431.266   |
| M33197    | 61305.297 | 60036.813 | AB033024  | 1837.557  | 1662.906  | NM_018096 | 167.495   |
| NM_006088 | 49088.348 | 50789.164 | NM_018942 | 2429.706  | 3240.257  | AL390078  | 533.657   |
| NM_018265 | 2714.252  | 1305.533  | NM_005531 | 1112.537  | 1389.999  | NM_004036 | 624.225   |
| AF130086  | 2396.561  | 2224.237  | NM_006977 | 1302.527  | 1244.189  | NM_015986 | 1124.334  |
| AK023858  | 7039.318  | 4840.68   | NM_005522 | 1053.614  | 897.824   | NM_006546 | 217.268   |
| M33197    | 50039.578 | 55612.531 | NM_005760 | 9746.549  | 11600.965 | NM_014959 | 612.471   |
| AF250920  | 3876.271  | 4895.46   | NM_014212 | 1112.791  | 787.472   | NM_003992 | 746.704   |
| NM_017733 | 3617.85   | 2952.825  | NM_007265 | 2202.068  | 2786.765  | AF279265  | 2472.721  |
| NM_014042 | 3581.631  | 3506.86   | AK023639  | 4539.371  | 3409.546  | NM_005213 | 6316.026  |
| M33197    | 61651.809 | 57856.355 | AL137700  | 595.423   | 899.858   | NM_002379 | 2633.657  |
| AF317550  | 855.388   | 921.204   | NM_004904 | 461.488   | 558.956   | AB007929  | 4895.937  |
| NM_003543 | 1472.338  | 582.828   | NM_003083 | 4163.898  | 4718.548  | NM_004579 | 1316.656  |
| AK025416  | 859.393   | 649.488   | NM_006789 | 3103.635  | 3644.829  | L12347    | 1595.034  |
| AF090883  | 767.514   | 997.58    | NM_000982 | 1351.318  | 1503.539  | NM_001622 | 1847.792  |
| M33197    | 62064.199 | 56155.941 | NM_001024 | 58302.859 | 54148.02  | Z36788    | 903.677   |
| AK022372  | 4045.76   | 3596.115  | NM_016093 | 57221.465 | 56341.719 | NM_018477 | 1026.654  |
| AJ227863  | 1436.825  | 1571.988  | NM_012423 | 30067.873 | 34285.07  | U20536    | 432.912   |
| NM_015916 | 3878.779  | 2045.557  | AK026367  | 19837.725 | 23979.322 | NM_004853 | 2120.856  |
| NM_003520 | 797.672   | 717.819   | AK026491  | 2727.771  | 5958.254  | NM_001494 | 4274.605  |
| AL137380  | 3345.97   | 3197.262  | AK021747  | 1148.644  | 1224.277  | NM_017707 | 429.135   |
| M33197    | 58678.992 | 54266.867 | AK025640  | 6139.684  | 6434.665  | NM_004603 | 3422.532  |
| AL137658  | 20331.148 | 16368.068 | AL137685  | 429.575   | 635.849   | AK022849  | 621.788   |
| D16888    | 5480.577  | 5243.944  | NM_016049 | 4852.128  | 6715.1    | AF040964  | 870.212   |
| U79277    | 1010.719  | 352.741   | NM_013311 | 4992.865  | 6938.986  | NM_001939 | 913.087   |
| AF068298  | 3301.827  | 2751.092  | NM_000291 | 32088     | 36650.441 | AB014599  | 943.382   |
| Z70770    | 2790.525  | 2321.606  | NM_018081 | 2184.447  | 2874.804  | NM_005832 | 375.826   |
| AJ227900  | 4931.229  | 3971.685  | NM_014649 | 4368.915  | 2785.163  | AW407841  | 354.341   |
| AK023242  | 754.991   | 970.353   | AL117488  | 1656.927  | 1872.638  | AF264014  | 2723.084  |
| M33197    | 62514.629 | 58713.242 | NM_012240 | 1251.473  | 1526.369  | NM_001831 | 375.517   |

|           |           |           |           |           |           |           |           |
|-----------|-----------|-----------|-----------|-----------|-----------|-----------|-----------|
| CY3Cy5    | 11345.963 | 896.554   | NM_019005 | 2811.088  | 3716.816  | NM_000137 | 4478.075  |
| BI762229  | 3368.431  | 4251.548  | NM_004739 | 8051.573  | 9016.095  | NM_012102 | 2473.931  |
| BG618320  | 8429.116  | 7823.468  | AV752216  | 1213.549  | 966.59    | NM_005017 | 10293.499 |
| Y00787    | 3431.974  | 2895.582  | NM_005341 | 870.903   | 1469.068  | AF163572  | 4247.825  |
| NM_007276 | 2143.727  | 4052.8    | AF181999  | 1041.298  | 855.098   | NM_000897 | 1761.165  |
| N34462    | 8795.987  | 7554.535  | NM_001934 | 3471.079  | 3753.975  | NM_000487 | 738.383   |
| AI658778  | 3972.249  | 4374.36   | AB011090  | 2262.076  | 1908.087  | NM_006411 | 10409.631 |
| L19067    | 3892.448  | 4393.889  | AL355722  | 225.632   | 466.383   | NM_014182 | 1855.227  |
| Z48482    | 885.218   | 1490.349  | NM_006545 | 25691.488 | 30945.545 | AK024382  | 602.386   |
| W60413    | 2024.168  | 2048.259  | NM_016534 | 1661.954  | 2037.554  | NM_001170 | 369.923   |
| BI823365  | 2246.894  | 2576.296  | AB021923  | 960.1     | 1096.522  | NM_004696 | 163.587   |
| X06318    | 8452.609  | 8059.601  | NM_016456 | 40191.438 | 46357.395 | AB043997  | 901.001   |
| AL834159  | 7167.812  | 4987.036  | AF035288  | 903.835   | 827.275   | AF097645  | 1085.67   |
| NM_000164 | 28121.691 | 29477.822 | AL137645  | 21586.336 | 25257.953 | NM_001773 | 1798.871  |
| SR5       | 6529.328  | 5899.001  | AK026141  | 2406.073  | 2508.423  | Z70704    | 2387.064  |
| SR7       | 9620.552  | 51954.723 | AK022894  | 4261.644  | 2952.924  | NM_014363 | 1368.656  |
| SR9       | 38524.512 | 7184.815  | AF217993  | 11561.646 | 7710.137  | NM_000557 | 3921.777  |
| CY3Cy5    | 12246.294 | 916.444   | AK024267  | 395.856   | 429.972   | NM_003239 | 301.018   |
| NM_003682 | 877.945   | 1130.557  | AF131823  | 731.57    | 1046.182  | NM_001375 | 2361.857  |
| NM_000207 | 985.229   | 1025.19   | AK026324  | 6125.935  | 5271.469  | NM_002312 | 1646.61   |
| NM_006314 | 8664.332  | 11983.561 | AK025253  | 1477.838  | 1160.642  | M20699    | 682.424   |
| NM_001782 | 943.412   | 777.4     | AF131777  | 525.531   | 552.663   | NM_004774 | 4414.453  |
| NM_002754 | 1270.669  | 793.451   | AK025004  | 2285.744  | 2443.244  | NM_016937 | 4690.962  |
| NM_000797 | 2158.887  | 2737.567  | AL136818  | 1529.978  | 1647.983  | NM_002690 | 929.695   |
| NM_016293 | 9730.464  | 14882.528 | AF146798  | 1141.676  | 1578.027  | NM_016508 | 113.332   |
| AL080148  | 14555.111 | 15683.981 | AF086517  | 12814.75  | 11996.884 | NM_006456 | 897.904   |
| NM_006731 | 731.619   | 1500.391  | AK025740  | 15908.982 | 13334.079 | AK026062  | 1048.723  |
| NM_018487 | 1063.111  | 722.244   | AK000311  | 2448.212  | 2667.129  | AF047002  | 1197.897  |
| NM_020134 | 1359.709  | 2170.074  | AK025346  | 52211.992 | 49189.906 | AL050082  | 887.762   |
| NM_014061 | 2201.716  | 2062.099  | AK022583  | 6497.911  | 5124.415  | NM_006623 | 10063.51  |
| BC034395  | 1741.818  | 1713.081  | AL137534  | 57103.219 | 51938.371 | NM_016588 | 877.417   |
| NM_002479 | 904.741   | 739.769   | AF052121  | 2552.969  | 4126.083  | NM_003135 | 1978.225  |
| NM_000348 | 20772.145 | 17412.344 | AL359062  | 1433.972  | 1957.096  | L12347    | 3458.21   |
| NM_004950 | 5623.103  | 5656.647  | AK026869  | 791.747   | 1154.888  | NM_001622 | 3320.753  |
| NM_000724 | 2851.321  | 3223.199  | AK023150  | 483.823   | 885.206   | Z36788    | 1747.998  |
| NM_004477 | 768.814   | 292.912   | AK022192  | 980.658   | 1501.129  | NM_018477 | 2312.861  |
| BE728156  | 766.398   | 430.427   | NM_019099 | 44619.246 | 46915.992 | U20536    | 531.799   |
| NM_005662 | 20792.785 | 22380.191 | AJ227904  | 470.757   | 377.647   | AI298534  | 1165.739  |
| NM_003060 | 2293.953  | 1627.022  | Y12020    | 31994.439 | 39275.367 | R71691    | 461.316   |
| AK021489  | 24563.264 | 26358.658 | AJ011597  | 490.971   | 544.498   | AW167715  | 2518.167  |
| NM_003895 | 1629.611  | 1283.767  | AJ001905  | 2419.182  | 2072.422  | AA424735  | 1033.019  |
| NM_004317 | 5081.119  | 6210.935  | U17635    | 3299.096  | 2795.474  | U78294    | 1688.063  |
| NM_014645 | 1591.938  | 1755.478  | AL049930  | 1338.55   | 1105.527  | BI760394  | 1708.249  |
| NM_014708 | 2566.494  | 3545.106  | Z83946    | 809.664   | 560.335   | AA555216  | 430.769   |
| NM_003693 | 1632.121  | 1558.616  | D55638    | 894.704   | 939.04    | U09117    | 3190.426  |
| NM_000356 | 17512.697 | 23371.846 | L23870    | 716.07    | 675.1     | H66070    | 468.01    |
| NM_018134 | 24942.809 | 34704.492 | D55644    | 467.511   | 738.513   | AA164741  | 1111.889  |
| NM_013247 | 9224.438  | 4689.542  | Z97017    | 671.517   | 763.022   | AI189375  | 116.129   |
| NM_006770 | 6243.663  | 3475.172  | L19362    | 782.462   | 727.974   | AI978885  | 394.17    |
| BE394704  | 926.984   | 1188.169  | L33807    | 2234.123  | 1647.455  | L15344    | 336.093   |
| NM_004703 | 2252.559  | 2633.329  | AK024152  | 577.261   | 317.417   | NM_001665 | 4754.916  |
| NM_001512 | 1264.065  | 1188.37   | AL049328  | 1110.781  | 1674.616  | NM_001879 | 2318.092  |
| NM_014706 | 5172.816  | 6947.455  | AK021415  | 661.101   | 671.493   | NM_004155 | 543.293   |

|           |           |           |           |           |           |           |           |
|-----------|-----------|-----------|-----------|-----------|-----------|-----------|-----------|
| AK023172  | 546.139   | 787.749   | AK000030  | 1640.544  | 1273.469  | NM_001831 | 674.104   |
| AJ001348  | 1234.24   | 1163.357  | NM_017932 | 536.637   | 569.237   | NM_014586 | 1295.34   |
| NM_014007 | 2151.064  | 2224.399  | AK000910  | 4626.773  | 5181.8    | NM_014366 | 3651.522  |
| AB033006  | 4134.348  | 3572.07   | AF252280  | 18642.611 | 21732.803 | NM_000923 | 691.712   |
| AF020314  | 8469.172  | 16369.19  | AK000107  | 1103.576  | 800.582   | NM_006453 | 416.867   |
| AK023936  | 593.769   | 483.415   | AK000795  | 525.563   | 371.33    | NM_018096 | 460.478   |
| NM_006457 | 1447.237  | 1238.015  | AK000951  | 1137.16   | 820.434   | AL390078  | 546.683   |
| AF000381  | 4508.624  | 4510.733  | AK024518  | 4795.958  | 3963.399  | NM_004036 | 557.483   |
| NM_018075 | 556.679   | 590.043   | AK024586  | 627.789   | 604.443   | NM_015986 | 878.218   |
| NM_012105 | 987.013   | 1097.668  | AK025017  | 4388.148  | 4349.164  | NM_014959 | 344.283   |
| S82470    | 4761.74   | 2825.833  | AK024534  | 978.549   | 789.859   | NM_003992 | 272.205   |
| NM_000434 | 187.335   | 639.866   | AK024616  | 546.47    | 363.177   | AF279265  | 663.281   |
| AB028982  | 1946.908  | 2008.001  | AK024914  | 5211.986  | 5122.809  | NM_005213 | 11266.135 |
| NM_002004 | 6245.574  | 6432.355  | AK025055  | 145.842   | 341.457   | NM_002997 | 780.923   |
| NM_005121 | 1029.008  | 1213.917  | BC030949  | 2077.53   | 1952.976  | NM_002379 | 1373.311  |
| NM_001643 | 19893.555 | 25809.715 | AF116615  | 987.124   | 811.939   | AB007929  | 1710.416  |
| NM_020221 | 1427.044  | 1462.824  | U17636    | 47426.566 | 47680.055 | NM_004579 | 1184.516  |
| NM_000747 | 2876.182  | 2765.061  | NM_018546 | 3484.245  | 4773.813  | AA203126  | 998.092   |
| NM_005415 | 3100.415  | 4100.715  | U52699    | 17277.52  | 27426.783 | AB043997  | 2798.309  |
| AL137708  | 657.672   | 408.375   | S71613    | 1014.529  | 1306.334  | NM_004853 | 1871.679  |
| AJ275973  | 21282.273 | 26341.664 | AJ011910  | 16252.316 | 17074.178 | NM_001494 | 4168.32   |
| NM_006493 | 3151.493  | 2824.585  | AK024378  | 595.589   | 950.973   | NM_017707 | 981.192   |
| U76362    | 4213.474  | 3741.132  | NM_014026 | 1867.715  | 1978.551  | NM_004206 | 968.799   |
| AF040248  | 1313.438  | 1272.833  | D61703    | 7141.615  | 10682.025 | Y08991    | 321.287   |
| NM_014228 | 957.245   | 908.643   | AF086198  | 12437.242 | 10057.586 | NM_004603 | 1516.092  |
| AL832292  | 905.832   | 2766.708  | AL137382  | 52078.16  | 48271.336 | AK022849  | 330.695   |
| NM_003045 | 3429.863  | 7083.337  | AK024599  | 3044.482  | 1953.781  | AF040964  | 731.499   |
| NM_002618 | 1735.761  | 1972.459  | NM_018012 | 658.288   | 660.836   | AK023527  | 609.008   |
| L27479    | 473.003   | 693.217   | AK024928  | 532.89    | 595.015   | AB014599  | 1063.029  |
| NM_002193 | 1215.134  | 1565.881  | NM_014450 | 881.964   | 778.551   | NM_004393 | 741.338   |
| NM_001388 | 5179.407  | 6208.965  | NM_017991 | 905.574   | 859.967   | U15197    | 64.826    |
| X76770    | 6179.767  | 5396.156  | L37198    | 4079.793  | 2852.802  | NM_006623 | 19680.303 |
| AB037808  | 1520.806  | 1757.809  | U67822    | 825.961   | 995.042   | NM_016588 | 1429.777  |
| NM_016038 | 4082.409  | 4421.47   | AK021921  | 549.698   | 469.37    | NM_003135 | 2997.49   |
| Z36821    | 4555.166  | 5678.739  | AK025431  | 1777.717  | 910.571   | NM_000137 | 3051.721  |
| AF289485  | 3993.554  | 4480.749  | AK023662  | 507.032   | 835.115   | NM_012102 | 2148.51   |
| AF130092  | 1171.364  | 1673.22   | AF086274  | 21737.465 | 25282.137 | NM_005017 | 8225.229  |
| NM_016095 | 1451.713  | 4766.646  | AK023682  | 1360.645  | 1743.219  | AF163572  | 5706.086  |
| AK024794  | 2037.47   | 1704.79   | AK024024  | 1434.761  | 1981.818  | NM_000897 | 2371.636  |
| NM_019853 | 6739.903  | 7133.769  | AF000991  | 774.941   | 1215.371  | NM_000487 | 1163.55   |
| NM_017992 | 7677.041  | 8220.482  | AK000685  | 15027.334 | 25634.568 | NM_006411 | 7795.042  |
| NM_005400 | 841.77    | 471.031   | BE706519  | 1523.214  | 1274.002  | NM_014182 | 1332.177  |
| BF851643  | 346.068   | 481.165   | AF130064  | 26822.406 | 27033.328 | AB040884  | 284.767   |
| AK023061  | 541.892   | 845.373   | U17624    | 924.474   | 1109.163  | AK024382  | 511.619   |
| NM_007255 | 2540.899  | 3290.594  | AK025184  | 791.092   | 794.904   | NM_001170 | 1965.127  |
| NM_003668 | 4587.381  | 8802.494  | D16988    | 42078.91  | 48268.805 | AL137716  | 545.684   |
| NM_013384 | 57991.242 | 56334.23  | AK001959  | 4898.465  | 4814.568  | AK054960  | 6362.878  |
| NM_001187 | 1197.495  | 1117.415  | U36217    | 1222.076  | 1174.635  | L15344    | 917.763   |
| NM_018241 | 2171.82   | 2036.061  | AL389880  | 929.203   | 1268.461  | NM_001665 | 6833.115  |
| NM_005834 | 4577.775  | 5071.322  | AL157452  | 2052.471  | 1405.282  | AF097645  | 910.789   |
| NM_000724 | 2810.804  | 3107.671  | AK024155  | 22998.525 | 16410.162 | NM_001773 | 1035.72   |
| NM_002557 | 4686.906  | 5867.012  | AL359334  | 13541.918 | 8552.089  | Z70704    | 1864.397  |
| NM_004477 | 718.17    | 538.657   | AK027095  | 1853.707  | 1042.616  | NM_014363 | 825.184   |

|           |           |           |           |           |           |           |          |
|-----------|-----------|-----------|-----------|-----------|-----------|-----------|----------|
| BE728156  | 595.047   | 402.804   | AF062097  | 1398.14   | 1365.792  | NM_000557 | 5083.54  |
| BI762229  | 3428.976  | 4334.054  | NM_019847 | 809.513   | 907.103   | NM_003239 | 452.795  |
| BG618320  | 8962.17   | 7619.067  | D17093    | 27581.461 | 18499.002 | NM_001375 | 3691.512 |
| Y00787    | 3181.115  | 2740.314  | AK022784  | 598.257   | 434.601   | NM_002312 | 2316.299 |
| NM_007276 | 1949.738  | 4252.11   | AL117521  | 3640.271  | 2611.074  | M20699    | 689.071  |
| N34462    | 8902.654  | 7464.382  | AK021913  | 5893.685  | 7690.373  | NM_004774 | 2135.833 |
| AI658778  | 4277.506  | 3739.386  | AL137489  | 11037.135 | 14084.574 | NM_016937 | 2956.789 |
| L19067    | 3899.58   | 4384.986  | AF009311  | 3757.811  | 4538.963  | NM_002690 | 1884.034 |
| Z48482    | 1031.231  | 1453.888  | S73397    | 1059.629  | 1177.779  | NM_012328 | 1077.356 |
| W60413    | 1917.658  | 1645.415  | AL050219  | 672.454   | 1125.497  | NM_007341 | 423.718  |
| BI823365  | 2204.157  | 2149.224  | U82321    | 1590.38   | 1552.419  | NM_016508 | 833.77   |
| X06318    | 7561.462  | 7874.511  | AK023856  | 1102.832  | 799.864   | NM_006456 | 2061.448 |
| AL834159  | 6533.822  | 6314.033  | AL050376  | 1649.887  | 871.374   | AK026062  | 499.238  |
| NM_000164 | 31317.148 | 39815.152 | AL359652  | 1691.074  | 1651.6    | AF047002  | 2335.612 |
| NM_016217 | 15002.922 | 11189.88  | AK022423  | 2090.493  | 1913.241  | NM_002997 | 792.937  |
| AK025971  | 8119.606  | 6908.919  | AF088021  | 5729.67   | 5277.864  | NM_002379 | 4659.141 |
| NM_014007 | 2020.525  | 1614.765  | BF509267  | 3764.052  | 3997.834  | AB007929  | 5574.306 |
| AB033006  | 3746.065  | 3121.537  | NM_002455 | 6374.706  | 4800.478  | NM_004579 | 2461.446 |
| AF020314  | 7886.182  | 14328.416 | AK026728  | 579.411   | 431.623   | AA203126  | 1340.334 |
| NM_016332 | 17919.693 | 11587.69  | NM_002959 | 15963.121 | 16365.505 | L12347    | 2574.332 |
| AK023936  | 395.427   | 559.352   | AB046773  | 231.536   | 728.079   | NM_001622 | 2821.195 |
| NM_006457 | 1314.275  | 1486.845  | AK000899  | 21825.809 | 16575.652 | Z36788    | 1075.713 |
| NM_003682 | 977.704   | 894.885   | AK023377  | 291.011   | 415.838   | NM_018477 | 2211.951 |
| NM_006314 | 8750.022  | 10330.042 | CY3Cy5    | 8999.593  | 631.889   | U20536    | 279.425  |
| NM_001782 | 1104.754  | 1000.08   | AW300857  | 8143.958  | 11040.604 | AI298534  | 1328.492 |
| NM_002754 | 985.531   | 803.194   | H85962    | 13099.112 | 20771.279 | R71691    | 588.477  |
| NM_000797 | 2190.796  | 2481.314  | BG742446  | 875.501   | 955.746   | AA424735  | 1066.081 |
| NM_014927 | 457.358   | 435.895   | AA864554  | 33174.324 | 5582.935  | U78294    | 1657.069 |
| NM_016293 | 9150.79   | 12586.423 | X66945    | 2617.275  | 1923.847  | BI760394  | 806.939  |
| AL080148  | 12982.184 | 12564.423 | AI160703  | 463.911   | 482.903   | U09117    | 2745.911 |
| NM_006731 | 819.636   | 877.257   | X12830    | 16225.804 | 9816.95   | M21054    | 353.643  |
| NM_018487 | 1086.963  | 372.242   | U00482    | 1712.82   | 1414.183  | M18468    | 597.786  |
| NM_020134 | 1122.179  | 1630.996  | Z80998    | 766.447   | 518.839   | H66070    | 2852.93  |
| NM_014061 | 1738.264  | 1642.739  | K01904    | 4681.471  | 14019.563 | AA164741  | 2416.413 |
| BC034395  | 1382.313  | 1636.849  | BE538886  | 1484.26   | 1012.057  | AB014599  | 1481.486 |
| NM_002479 | 848.598   | 942.518   | NM_002228 | 569.305   | 750.806   | NM_004393 | 309.881  |
| NM_000348 | 16885.951 | 15746.203 | M57650    | 5713.302  | 6865.893  | NM_005832 | 631.78   |
| NM_005059 | 1079.22   | 992.957   | BC023978  | 295.48    | 510.691   | AW407841  | 591.864  |
| NM_004950 | 4850.371  | 4830.488  | M21302    | 2904.932  | 3177.932  | U15197    | 478.672  |
| NM_006493 | 2989.448  | 2044.702  | NM_016346 | 3165.443  | 2879.477  | NM_001879 | 2130.681 |
| U76362    | 3761.261  | 3177.337  | SR2       | 43654.789 | 34728.891 | AF264014  | 3587.143 |
| AF040248  | 1024.204  | 996.148   | SR4       | 12306.47  | 8823.721  | L09098    | 374.496  |
| NM_014228 | 787.897   | 968.742   | SR6       | 1915.443  | 1212.461  | NM_001831 | 571.781  |
| AL832292  | 1079.651  | 4123.583  | SR8       | 6925.38   | 16743.322 | NM_014586 | 1220.623 |
| NM_003045 | 3532.672  | 7566.731  | SR10      | 16393.695 | 4198.526  | NM_014366 | 4170.278 |
| NM_003060 | 1177.372  | 1122.354  | CY3Cy5    | 5162.896  | 173.153   | NM_000923 | 676.39   |
| AK021489  | 24238.926 | 27857.918 | NM_001525 | 16410.932 | 15777.52  | NM_006453 | 349.531  |
| NM_004525 | 483.233   | 729.63    | NM_006055 | 2999.712  | 3701.224  | NM_018096 | 174.711  |
| NM_003895 | 1540.777  | 848.543   | NM_004296 | 728.994   | 843.103   | NM_004036 | 432.043  |
| NM_004317 | 5064.027  | 5635.351  | NM_005048 | 755.682   | 710.885   | NM_015986 | 854.495  |
| NM_014645 | 1576.102  | 1810.84   | NM_005972 | 662.018   | 784.066   | NM_006546 | 389.661  |
| NM_014708 | 2987.224  | 3319.555  | NM_001060 | 2330.611  | 2368.792  | NM_003992 | 528.441  |
| NM_003693 | 1820.057  | 1524.042  | NM_018841 | 607.861   | 888.618   | AF279265  | 717.753  |

|           |           |           |           |           |           |           |           |
|-----------|-----------|-----------|-----------|-----------|-----------|-----------|-----------|
| NM_000356 | 17473.545 | 22414.865 | NM_005226 | 663.86    | 522.951   | NM_005213 | 1833.606  |
| NM_018134 | 24600.094 | 28545.889 | AL133105  | 2086.113  | 1951.091  | AK024382  | 650.079   |
| NM_013247 | 8166.167  | 3698.848  | AK022859  | 1164.196  | 1114.91   | NM_001170 | 2146.376  |
| NM_006770 | 6039.835  | 2886.248  | NM_000214 | 4440.97   | 4718.079  | AL137716  | 1650.671  |
| BE394704  | 864.401   | 1101.765  | NM_014864 | 5163.481  | 5110.672  | NM_004696 | 895.775   |
| NM_004703 | 2267.234  | 2279.47   | NM_003728 | 12368.725 | 15062.396 | NM_014342 | 1066.849  |
| NM_001512 | 1312.392  | 1488.132  | NM_014352 | 10174.725 | 10031.974 | NM_000452 | 25.425    |
| NM_014706 | 5206.457  | 6282.535  | NM_012481 | 2135.759  | 2263.724  | NM_003057 | 519.991   |
| AK023172  | 820.18    | 808.456   | L09102    | 20260.154 | 24756.822 | AB043997  | 1833.562  |
| AJ001348  | 989.682   | 881.694   | U68488    | 1403.067  | 1003.549  | NM_004853 | 2580.307  |
| NM_007255 | 2114.416  | 2443.013  | NM_000675 | 453.304   | 621.408   | NM_001494 | 6221.529  |
| NM_003668 | 4396.453  | 7103.782  | NM_016247 | 4762.194  | 3744.458  | NM_017707 | 140.629   |
| NM_013384 | 52048.215 | 49388.051 | NM_012282 | 685.212   | 581.034   | NM_004206 | 967.813   |
| NM_001187 | 1235.394  | 1014.045  | NM_003323 | 8162.755  | 6059.657  | NM_004603 | 2046.4    |
| NM_018241 | 2184.058  | 2515.941  | BG685310  | 1762.044  | 943.185   | AK022849  | 377.064   |
| NM_005834 | 4677.504  | 5307.751  | NM_018668 | 6154.069  | 5474.909  | AF040964  | 727.812   |
| NM_018075 | 1301.218  | 928.558   | NM_004227 | 735.066   | 969.874   | NM_001939 | 673.085   |
| NM_012105 | 1031.659  | 1273.637  | NM_005282 | 2379.787  | 2205.204  | NM_003279 | 1805.991  |
| S82470    | 4708.723  | 2810.681  | NM_001736 | 534.732   | 603.252   | NM_012328 | 1317.024  |
| AB028982  | 1654.432  | 1569.001  | AB028949  | 884.867   | 1173.595  | NM_007341 | 522.922   |
| NM_002004 | 6279.113  | 6468.354  | AL137580  | 442.39    | 619.136   | NM_016508 | 1677.091  |
| NM_005121 | 805.009   | 830.405   | NM_004101 | 981.682   | 753.188   | NM_006456 | 8205.786  |
| NM_001643 | 18193.244 | 18470.625 | NM_002995 | 35557.148 | 34202.703 | AK026062  | 5268.513  |
| NM_020221 | 1330.146  | 1390.87   | NM_015978 | 2965.209  | 2652.538  | AF047002  | 6784.116  |
| NM_000747 | 2839.333  | 3114.121  | NM_003810 | 3472.115  | 3006.729  | AL050082  | 1720.869  |
| NM_005415 | 3170.642  | 4138.332  | NM_005212 | 4965.026  | 4949.537  | NM_006623 | 19599.303 |
| AL137708  | 544.917   | 567.283   | M14584    | 751.644   | 419.697   | NM_016588 | 1724.603  |
| AJ275973  | 22281.957 | 23827.963 | NM_006419 | 1382.663  | 1428.149  | NM_003135 | 2933.45   |
| AL834159  | 6664.359  | 5475.911  | AB020676  | 882.043   | 879.014   | NM_000137 | 2834.022  |
| NM_000164 | 25181.391 | 26237.27  | AK024715  | 1195.723  | 997.882   | NM_012102 | 3433.948  |
| NM_016217 | 13394.462 | 10960.298 | U90942    | 53157.586 | 60381.859 | NM_005017 | 14756.249 |
| AK025971  | 7872.825  | 7026.859  | NM_014942 | 573.706   | 433.559   | AF163572  | 6539.724  |
| NM_002618 | 2128.307  | 2641.449  | NM_018360 | 1680.486  | 1256.041  | NM_000897 | 3180.199  |
| L27479    | 1717.208  | 1129.137  | AL365415  | 752.642   | 584.733   | NM_006411 | 8400.931  |
| NM_002193 | 1296.53   | 1546.016  | L29147    | 11734.384 | 13866.258 | NM_014182 | 1172.681  |
| NM_001388 | 5362.886  | 6146.547  | NM_020228 | 5437.33   | 7071.475  | NM_000492 | 812.117   |
| X76770    | 5658.559  | 5232.518  | AK024685  | 1566.193  | 2141.567  | AJ272057  | 2236.314  |
| AB037808  | 1475.995  | 2043.911  | NM_003676 | 12450.339 | 13340.118 | AK024216  | 7421.518  |
| NM_016038 | 4395.937  | 4540.772  | AF113007  | 2380.651  | 1324.313  | Y16752    | 3923.71   |
| Z36821    | 5084.822  | 5710.809  | NM_000688 | 4539.258  | 4747.572  | NM_014694 | 788.192   |
| AF289485  | 4048.371  | 3655.118  | U39573    | 1290.418  | 1597.568  | NM_020156 | 933.807   |
| AF130092  | 1349.19   | 1631.743  | D82061    | 2310.93   | 3205.401  | NM_014830 | 1009.778  |
| NM_016095 | 1333.408  | 3817.88   | AJ293009  | 1972.159  | 2093.104  | AF355402  | 1323.706  |
| AK024794  | 1916.912  | 1559.587  | NM_000374 | 3879.457  | 2963.727  | AK000407  | 2964.292  |
| NM_019853 | 6983.348  | 5943.335  | NM_000502 | 11729.128 | 10208.254 | AK026164  | 244.274   |
| NM_017992 | 7840.692  | 9400.788  | NM_001359 | 32563.664 | 28984.547 | NM_001665 | 5613.822  |
| NM_005400 | 1138.54   | 1009.626  | NM_005175 | 46396.871 | 40140.289 | AF097645  | 1035.87   |
| BF851643  | 541.941   | 638.713   | NM_001696 | 14967.716 | 15965.887 | NM_001773 | 1482.644  |
| AK023061  | 834.118   | 1053.009  | NM_004975 | 6574.854  | 8748.703  | Z70704    | 2345.507  |
| NM_014061 | 1687.559  | 1544.686  | NM_002245 | 649.148   | 561.664   | NM_014363 | 1541.461  |
| BC034395  | 1414.359  | 1491.356  | D87445    | 9860.851  | 7453.359  | NM_000557 | 5991.786  |
| NM_002479 | 765.495   | 685.967   | NM_000238 | 3282.236  | 3404.926  | NM_003239 | 786.269   |
| NM_000348 | 15757.643 | 13772.944 | NM_002247 | 947.214   | 780.29    | NM_001375 | 3102.48   |

|          |           |           |           |           |           |           |           |
|----------|-----------|-----------|-----------|-----------|-----------|-----------|-----------|
| NM_00505 | 1097.036  | 1234.432  | NM_00498  | 11268.865 | 15129.514 | NM_00231  | 2585.269  |
| NM_00495 | 5269.834  | 4938.043  | AB011094  | 12865.055 | 10973.782 | M20699    | 402.974   |
| NM_00072 | 3024.712  | 3653.454  | NM_00322  | 1522.069  | 1276.794  | NM_00477  | 2591.802  |
| NM_00055 | 700.152   | 149.647   | NM_00165  | 61886.414 | 61601.629 | NM_01693  | 2049.02   |
| NM_00255 | 5426.589  | 6861.112  | NM_00682  | 15951.322 | 12026.284 | NM_01823  | 859.829   |
| NM_00447 | 605.399   | 393.488   | AK021761  | 5944.063  | 4360.888  | U88892    | 1802.479  |
| Y10802   | 729.251   | 696.981   | AK024536  | 1245.922  | 752.998   | AK023755  | 603.258   |
| BI762229 | 3762.258  | 4547.862  | NM_00148  | 1808.71   | 1668.941  | NM_012211 | 1901.488  |
| BG618320 | 9283.949  | 8209.078  | NM_01897  | 10600.52  | 10604.183 | AB040877  | 1450.13   |
| Y00787   | 3550.793  | 3103.152  | NM_002591 | 9026.07   | 13502.825 | AK026737  | 975.748   |
| NM_00727 | 2195.423  | 4194.907  | NM_02021  | 12992.176 | 5894.313  | NM_00628  | 2968.156  |
| N34462   | 9747.084  | 8161.411  | AK021860  | 1864.715  | 1953.473  | NM_01906  | 2796.272  |
| AI658778 | 4886.157  | 4140.124  | AK000119  | 495.823   | 223.702   | AF251025  | 593.351   |
| L19067   | 4005.485  | 3737.849  | AB046816  | 979.891   | 979.74    | NM_01567  | 1631.407  |
| Z48482   | 1227.634  | 1396.356  | AL137266  | 3291.995  | 3228.495  | NM_00177  | 6366.261  |
| W60413   | 2094.956  | 1839.096  | NM_01645  | 1533.238  | 1538.838  | AL162032  | 312.938   |
| BI823365 | 2151.151  | 2439.09   | NM_00505  | 1295.184  | 1372.807  | AF161341  | 10106.092 |
| X06318   | 7312.48   | 9013.382  | AF143321  | 1188.599  | 937.403   | AJ249902  | 829.347   |
| NM_00470 | 2319.365  | 2411.521  | AB046842  | 1902.233  | 1621.952  | NM_00438  | 1641.222  |
| NM_00151 | 1420.962  | 1265.908  | NM_00485  | 2770.03   | 1723.203  | L05500    | 1520.833  |
| NM_01470 | 4987.563  | 6497.593  | NM_00282  | 4947.307  | 3162.326  | NM_01230  | 9373.193  |
| AK023172 | 607.776   | 649.79    | BF306955  | 1722.364  | 1542.079  | AF222903  | 1218.732  |
| AJ001348 | 1147.097  | 1287.971  | NM_00139  | 11098.749 | 6345.793  | L10374    | 1908.49   |
| NM_01400 | 2306.663  | 1799.02   | NM_01844  | 9791.337  | 5974.819  | AB016902  | 1949.063  |
| AB033006 | 4607.174  | 3895.648  | NM_00077  | 8836.205  | 8149.973  | AF272378  | 16615.1   |
| AF020314 | 8946.539  | 15185.029 | NM_00160  | 1204.829  | 594.33    | NM_00024  | 1945.7    |
| NM_01633 | 22016.553 | 13644.803 | BE733234  | 903.495   | 384.008   | NM_01431  | 385.662   |
| AK023936 | 573.025   | 804.361   | NM_01228  | 745.479   | 1028.481  | AF095288  | 4030.651  |
| NM_00645 | 1469.945  | 1672.459  | NM_00671  | 469.674   | 498.668   | AK025116  | 847.795   |
| NM_00368 | 1024.767  | 913.941   | NM_00332  | 6495.278  | 8431.009  | AF130114  | 549.228   |
| NM_00020 | 1217.262  | 1285.215  | BG685310  | 1592.646  | 1522.422  | AK026271  | 3633.8    |
| NM_00253 | 1248.995  | 4330.135  | AW300857  | 10779.586 | 16341.849 | NM_00179  | 3888.201  |
| NM_00631 | 9937.077  | 11816.694 | H85962    | 15398.986 | 26130.473 | AF090895  | 1545.293  |
| NM_00178 | 1110.374  | 848.911   | BG742446  | 1574.621  | 1457.781  | NM_00561  | 748.336   |
| NM_00275 | 1251.756  | 502.549   | AA864554  | 38367.656 | 5876.8    | AL133651  | 1473.895  |
| NM_00079 | 2531.047  | 2450.116  | X66945    | 3210.132  | 3652.3    | AB014532  | 8245.235  |
| NM_01492 | 345.645   | 539.035   | AI160703  | 451.111   | 1206.909  | NM_00347  | 1632.195  |
| NM_01629 | 10574.539 | 13347.679 | X12830    | 17882.514 | 14065.069 | NM_01623  | 1957.916  |
| AL080148 | 15243.798 | 15242.087 | U00482    | 2469.337  | 2565.217  | NM_00492  | 6526.751  |
| NM_00673 | 908.442   | 1157.974  | Z80998    | 527.3     | 586.589   | NM_00179  | 1104.387  |
| NM_01848 | 1100.504  | 904.455   | K01904    | 5343.755  | 17179.957 | NM_00121  | 4469.3    |
| NM_02013 | 1127.119  | 1837.513  | BE538886  | 1569.748  | 1194.597  | AB033050  | 734.059   |
| NM_02022 | 1352.498  | 1234.656  | NM_00222  | 887.485   | 702.417   | NM_00435  | 910.835   |
| NM_00074 | 2712.247  | 2491.351  | M57650    | 6623.202  | 6108.938  | BC015022  | 603.932   |
| NM_00541 | 2892.981  | 3699.034  | BC023978  | 544.201   | 787.325   | NM_00669  | 3094.159  |
| AL137708 | 652.915   | 698.223   | M21302    | 3145.521  | 3192.046  | M19182    | 1069.479  |
| AJ275973 | 22864.016 | 22957.602 | NM_01634  | 3559.282  | 2707.947  | AK025707  | 1019.807  |
| NM_00649 | 2967.374  | 2273.712  | AK024865  | 948.307   | 394.803   | NM_00240  | 21980.863 |
| U76362   | 3945.445  | 3377.174  | NM_00721  | 750.131   | 370.397   | U87169    | 1122.454  |
| AF040248 | 1034.864  | 1195.339  | U90942    | 43057.871 | 59109.5   | NM_00207  | 487.964   |
| NM_01422 | 749.633   | 940.515   | NM_01494  | 485.832   | 734.132   | AF117222  | 478.062   |
| AL832292 | 1167.025  | 3705.307  | NM_01836  | 1739.156  | 2439.48   | NM_00193  | 9123.954  |
| NM_00304 | 3614.427  | 7355.989  | AK022489  | 433.876   | 633.968   | AF090327  | 585.49    |

|           |           |           |           |           |           |           |           |
|-----------|-----------|-----------|-----------|-----------|-----------|-----------|-----------|
| NM_005662 | 26706.25  | 30018.158 | AL365415  | 636.502   | 1079.707  | NM_003291 | 4656.303  |
| NM_003060 | 542.669   | 636.345   | L29147    | 10887.255 | 24851.408 | AK022950  | 769.873   |
| AK021489  | 25226.357 | 28453.107 | NM_001525 | 18235.012 | 19986.629 | S75755    | 1747.569  |
| NM_004525 | 576.638   | 718.62    | NM_006055 | 3652.733  | 4570.805  | AF176518  | 661.785   |
| NM_003895 | 1216.741  | 855.437   | NM_004296 | 1366.552  | 1953.407  | AB014576  | 6185.602  |
| NM_004317 | 5255.709  | 5433.699  | NM_005048 | 935.868   | 1488.055  | NM_019044 | 2563.427  |
| NM_014645 | 1624.13   | 1465.115  | NM_005972 | 908.295   | 978.636   | AK000145  | 1181.862  |
| NM_014708 | 3466.817  | 4204.549  | NM_001060 | 3010.719  | 3887.859  | AF174601  | 1299.777  |
| NM_003693 | 1929.484  | 1597.661  | NM_018841 | 974.28    | 1435.647  | AF279865  | 620.652   |
| NM_000356 | 19350.143 | 23336.324 | NM_005226 | 581.644   | 737.009   | NM_014700 | 606.057   |
| NM_018134 | 30168.174 | 33017.082 | AL133105  | 2684.215  | 3541.048  | NM_014714 | 155.015   |
| NM_013247 | 9085.445  | 4987.854  | AK022859  | 1534.499  | 1724.829  | NM_005687 | 333.407   |
| NM_006770 | 6084.453  | 3242.513  | NM_014464 | 72.457    | 461.165   | NM_005983 | 593.496   |
| BE394704  | 1130.287  | 1099.5    | NM_000214 | 679.358   | 643.224   | NM_017652 | 8983.797  |
| AK024794  | 1852.81   | 1463.675  | NM_014864 | 6081.492  | 5293.279  | X59268    | 2354.704  |
| NM_019853 | 7028.236  | 6975.387  | NM_003728 | 10657.85  | 12333.433 | D70832    | 35960.313 |
| NM_017992 | 7368.573  | 8040.651  | NM_014352 | 8929.698  | 9014.181  | NM_001429 | 4657.1    |
| NM_005400 | 974.366   | 684.404   | NM_012481 | 1979.993  | 2133.943  | M61870    | 1426.685  |
| BF851643  | 465.82    | 527.498   | L09102    | 17340.453 | 17421.164 | AK026980  | 991.678   |
| AK023061  | 584.541   | 963.188   | U68488    | 1329.486  | 735.01    | AJ277915  | 81.978    |
| NM_007255 | 2002.463  | 2156.771  | NM_016247 | 4270.535  | 2417.357  | NM_020368 | 893.597   |
| NM_003668 | 4924.132  | 8079.624  | AB011094  | 8179.155  | 9264.354  | AF024708  | 11213.257 |
| NM_013384 | 53447.84  | 49646.402 | NM_003224 | 1040.143  | 1424.312  | NM_006467 | 1265.848  |
| NM_001187 | 1290.468  | 1119.416  | NM_006827 | 16863.998 | 26083.113 | NM_017566 | 1224.553  |
| NM_018241 | 2176.098  | 2023.775  | AK021761  | 5918.196  | 8552.853  | NM_006582 | 160.277   |
| NM_005834 | 4588.858  | 4644.434  | AK024536  | 1372.894  | 1713.486  | AB033019  | 7225.243  |
| AF000381  | 4925.129  | 4935.623  | NM_018668 | 7340.33   | 6306.423  | NM_014764 | 1828.608  |
| NM_018075 | 665.952   | 750.195   | NM_004227 | 717.83    | 949.934   | NM_018078 | 1207.874  |
| NM_012105 | 1229.462  | 1333.116  | NM_005282 | 2577.379  | 2561.277  | NM_016050 | 177.825   |
| S82470    | 4671.475  | 3113.229  | NM_001736 | 879.193   | 898.017   | NM_007080 | 2282.027  |
| AB028982  | 2048.289  | 2102.057  | AB028949  | 1254.553  | 1551.333  | AK026912  | 572.113   |
| NM_002004 | 6541.04   | 6709.052  | AL137580  | 1036.014  | 893.041   | AK023531  | 1266.035  |
| NM_005121 | 989.143   | 1006.853  | NM_004101 | 1285.231  | 1044.536  | AB011128  | 4918.437  |
| NM_001643 | 21506.064 | 23642.828 | NM_002995 | 41581.043 | 49349.879 | AK026742  | 311.208   |
| NM_019096 | 8610.858  | 6477.546  | AB033114  | 499.678   | 826.625   | AK025074  | 2569.42   |
| NM_014725 | 3110.75   | 2788.302  | NM_015978 | 3228.209  | 3158.564  | NM_000303 | 5539.597  |
| NM_006892 | 2540.9    | 2353.996  | NM_003810 | 3403.923  | 3140.953  | NM_006242 | 1204.668  |
| NM_019117 | 806.004   | 880.518   | NM_004908 | 742.798   | 403.995   | X78712    | 434.62    |
| NM_018309 | 2177.419  | 1930.577  | NM_014443 | 2257.405  | 2686.235  | NM_001497 | 374.472   |
| NM_017658 | 3776.034  | 3685.938  | NM_005212 | 4348.466  | 3851.335  | NM_004130 | 1965.329  |
| NM_018679 | 7723.968  | 8880.029  | M14584    | 720.835   | 476.566   | NM_006348 | 471.292   |
| NM_016643 | 866.914   | 820.996   | NM_006419 | 1144.734  | 897.864   | AF067972  | 7451.328  |
| NM_006779 | 5125.627  | 4508.768  | AB020676  | 588.474   | 516.615   | NM_004958 | 278.434   |
| NM_016217 | 16420.768 | 12217.996 | AK024715  | 1211.545  | 652.035   | D87076    | 425.122   |
| AK025971  | 7334.366  | 6587.427  | BF306955  | 853.775   | 1180.281  | NM_014149 | 679.383   |
| NM_002618 | 2753.416  | 2751.573  | NM_001394 | 8169.397  | 7446.308  | AB020635  | 1354.713  |
| L27479    | 953.059   | 839.695   | NM_000778 | 6223.492  | 13111.803 | NM_006515 | 439.634   |
| NM_002193 | 1277.632  | 1232.457  | NM_001609 | 1306.367  | 1878.558  | NM_005224 | 873.241   |
| NM_001388 | 5643.775  | 6680.674  | BE733234  | 593.111   | 788.406   | NM_012144 | 4222.344  |
| X76770    | 5983.626  | 4884.646  | NM_020228 | 6405.619  | 7287.229  | X65231    | 30534.131 |
| AB037808  | 1992.711  | 1815.457  | AK024685  | 2457.443  | 3087.16   | NM_002908 | 887.118   |
| NM_016038 | 4784.009  | 5146.766  | NM_003676 | 13934.355 | 13715.191 | AF205632  | 1360.872  |
| Z36821    | 5966.333  | 5774.812  | AF113007  | 2571.973  | 1554.605  | NM_005378 | 10337.493 |

|           |           |           |           |           |           |           |           |
|-----------|-----------|-----------|-----------|-----------|-----------|-----------|-----------|
| AF289485  | 5148.658  | 4298.424  | NM_00068E | 5290.084  | 5851.684  | NM_002397 | 1296.035  |
| AF130092  | 1451.024  | 1645.889  | U39573    | 1785.242  | 2023.331  | AF000672  | 333.354   |
| NM_01609E | 1639.412  | 4426.56   | D82061    | 2987.741  | 3231.192  | AK002195  | 1079.629  |
| AF300612  | 60409.883 | 48172.879 | AJ293009  | 2321.503  | 2982.332  | AF086128  | 361.208   |
| AB014557  | 1296.207  | 863.166   | NM_000374 | 4557.6    | 5785.558  | AK023831  | 869.977   |
| NM_00557E | 7137.692  | 3378.106  | NM_00050E | 12032.378 | 12200.465 | AK022850  | 1257.984  |
| NM_00365E | 5852.977  | 8101.125  | NM_00135E | 30108.623 | 25102.77  | NM_01649C | 1559.422  |
| NM_018457 | 16018.942 | 15344.313 | NM_00169E | 13052.121 | 10060.205 | AK024341  | 223.605   |
| NM_00295E | 16042.24  | 11670.893 | NM_00497E | 5442.771  | 4927.954  | AF038193  | 1932.482  |
| NM_002187 | 1179.18   | 979.677   | D87445    | 9375.029  | 6043.203  | AL137498  | 1381.704  |
| NM_01424E | 5661.401  | 7833.652  | NM_00023E | 3358.807  | 2736.638  | AK024289  | 742.047   |
| NM_01485E | 912.875   | 1258.899  | NM_002247 | 717.017   | 605.656   | S66168    | 5381.488  |
| NM_001116 | 520.983   | 1390.901  | NM_00498C | 9276.565  | 10385.497 | AF131837  | 152.517   |
| BC035395  | 6533.089  | 7396.569  | AK024865  | 570.698   | 745.524   | NM_003851 | 12525.11  |
| NM_00170E | 10487.021 | 9373.168  | NM_00148E | 2199.853  | 1282.014  | AK024150  | 2126.167  |
| NM_02012E | 6416.722  | 5334.74   | NM_01897E | 12374.557 | 11971.998 | AF070536  | 1922.579  |
| NM_01398E | 13039.487 | 6812.393  | NM_002591 | 12240.617 | 17400.447 | AK022297  | 855.755   |
| NM_00504E | 1642.157  | 2516.35   | NM_02021E | 14309.965 | 6570.645  | U79300    | 1233.796  |
| NM_00388E | 766.958   | 844.696   | AK021860  | 1574.699  | 1583.692  | AK025151  | 10131.08  |
| NM_00463C | 5386.241  | 8642.532  | AB046816  | 1187.072  | 679.451   | AK025550  | 1713.221  |
| AK023001  | 7568.669  | 8194.264  | AL137266  | 3732.553  | 2541.869  | AF088076  | 8120.962  |
| NM_01482E | 8136.972  | 7625.67   | NM_016457 | 1719.876  | 1045.163  | AF086543  | 775.812   |
| AF201947  | 854.275   | 636.308   | NM_005057 | 1269.967  | 874.759   | AB046797  | 823.115   |
| U01147    | 4173.706  | 3206.35   | AF143321  | 1240.252  | 606.604   | AK002098  | 625.376   |
| NM_00404C | 11502.974 | 10287.633 | AB046842  | 1785.418  | 1014.303  | AF026526  | 901.122   |
| NM_006116 | 2943.615  | 3289.678  | NM_00485C | 2743.966  | 1586.906  | AK026207  | 1733.133  |
| NM_00545E | 5128.38   | 2617.1    | NM_00282E | 5263.776  | 2570.103  | NM_020181 | 280.856   |
| NM_003587 | 16265.893 | 15673.169 | NM_01435E | 1062.159  | 2084.751  | AK024984  | 13742.521 |
| X90978    | 908.266   | 1182.734  | L09102    | 4368.966  | 5886.073  | AK000276  | 432.256   |
| BF219403  | 17228.494 | 17184.412 | NM_016247 | 3113.141  | 3435.81   | AL110236  | 546.156   |
| NM_016119 | 2669.389  | 1504.633  | NM_00332E | 6687.893  | 8555.254  | AF085955  | 1040.884  |
| AK075450  | 1857.188  | 1681.159  | BG685310  | 1798.328  | 1121.573  | AF075106  | 1986.878  |
| AF178983  | 3929.199  | 4297.514  | AW300857  | 9497.475  | 10304.278 | AK023339  | 817.818   |
| NM_001324 | 4859.97   | 4726.372  | H85962    | 18396.076 | 26729.73  | AF085981  | 768.703   |
| AL122055  | 9423.436  | 10087.755 | BG742446  | 997.148   | 996.995   | AF086008  | 2984.93   |
| NM_00513E | 27843.254 | 27891.82  | AA864554  | 21161.662 | 3682.886  | AF087970  | 946.869   |
| X07695    | 735.158   | 602.407   | X66945    | 1721.223  | 1359.777  | AF086029  | 783.407   |
| D87458    | 1123.506  | 1044.864  | X12830    | 13289.085 | 7192.027  | U63332    | 965.83    |
| AK021750  | 5726.215  | 3112.229  | U00482    | 1503.915  | 1029.709  | U52050    | 551.215   |
| NM_00362E | 1711.13   | 2486.068  | K01904    | 5378.252  | 12031.289 | U73799    | 638.869   |
| AK023594  | 7197.949  | 5886.255  | BE538886  | 1282.505  | 531.491   | AK021668  | 9657.267  |
| AB032989  | 634.241   | 602.901   | M57650    | 3951.678  | 3126.423  | AF086148  | 1906.835  |
| AB010099  | 19076.662 | 17654.768 | NM_00521E | 1873.083  | 2174.166  | AK021942  | 7676.978  |
| AB039920  | 7400.707  | 8413.319  | NM_00641E | 1065.654  | 1785.419  | NM_014127 | 554.825   |
| AB046782  | 3204.393  | 3313.074  | AF035035  | 469.516   | 360.317   | AL360187  | 909.599   |
| NM_00419C | 12316.531 | 11385.261 | NM_01836C | 1436.815  | 2045.46   | AK021878  | 107.183   |
| NM_01427E | 4749.318  | 4713.747  | AL365415  | 701.712   | 752.482   | AK021817  | 1087.313  |
| NM_00040E | 3062.696  | 3072.122  | L29147    | 10495.243 | 16988.643 | AL080103  | 462.283   |
| AF208005  | 1085.557  | 1243.488  | NM_00152E | 22159.354 | 21282.061 | AK023217  | 578.424   |
| NM_002231 | 10339.928 | 8899.733  | NM_00605E | 3732.941  | 4640.988  | AF090902  | 3553.458  |
| NM_020474 | 10121.927 | 11277.443 | NM_00429E | 1051.353  | 1328.783  | AF119887  | 7015.033  |
| NM_00264E | 2160.708  | 2355.944  | NM_00597E | 734.466   | 734.629   | AK091038  | 772.265   |
| NM_017807 | 1840.211  | 3335.43   | NM_00106C | 2205.56   | 2373.659  | AK024193  | 902.174   |



|           |           |           |           |           |           |           |           |
|-----------|-----------|-----------|-----------|-----------|-----------|-----------|-----------|
| NM_000462 | 3156.418  | 3898.962  | NM_018841 | 981.6     | 1060.378  | NM_018578 | 912.022   |
| NM_003900 | 14297.727 | 14146.764 | AL133105  | 1846.696  | 1868.921  | NM_018543 | 489.628   |
| NM_003337 | 3534.187  | 3010.009  | AK022859  | 1309.482  | 989.418   | AK024438  | 11521.306 |
| AF298152  | 4242.876  | 3017.412  | NM_014864 | 3628.207  | 2639.759  | AF161337  | 695.479   |
| AF117233  | 3585.572  | 3481.78   | NM_003728 | 5894.379  | 6026.784  | AK022482  | 440.896   |
| NM_015848 | 691.491   | 689.339   | D87445    | 4992.523  | 5075.835  | AK023382  | 646.682   |
| NM_001723 | 1864.899  | 1614.982  | NM_000238 | 800.607   | 1176.899  | AK023811  | 525.111   |
| NM_016018 | 3649.255  | 2698.139  | NM_002247 | 743.212   | 1242.622  | AK024135  | 736.82    |
| M94362    | 16871.828 | 17250.943 | NM_003224 | 1353.408  | 1725.764  | AK022803  | 2095.554  |
| AK024707  | 2241.304  | 2129.376  | NM_001658 | 51692.16  | 50943.586 | AK023869  | 458.432   |
| NM_014255 | 4855.043  | 2359.637  | NM_006827 | 18362.869 | 19819.791 | NM_006188 | 603.993   |
| AK022909  | 1924.429  | 2711.317  | AK021761  | 7967.069  | 8366.53   | AJ272177  | 736.258   |
| NM_006530 | 3696.704  | 6585.139  | AK024536  | 1673.548  | 1851.615  | AK026402  | 5223.592  |
| AB033024  | 2447.225  | 1481.766  | NM_018668 | 8395.506  | 8000.436  | AF111846  | 713.434   |
| NM_018942 | 4380.64   | 3589.984  | NM_004227 | 901.008   | 1387.825  | M11948    | 68966.891 |
| NM_005531 | 1765.765  | 570.068   | NM_005282 | 1304.052  | 1484.49   | Z36850    | 504.16    |
| AF217226  | 6775.359  | 4761.822  | AB028949  | 999.096   | 1604.529  | AK024618  | 847.731   |
| AL359578  | 682.887   | 337.053   | AL137580  | 848.581   | 815.934   | AL049969  | 471.01    |
| NM_005522 | 1009.34   | 299.218   | NM_004101 | 729.809   | 982.652   | NM_005220 | 786.775   |
| NM_005760 | 7035.404  | 6419.548  | NM_002995 | 22482.373 | 21965.219 | NM_018618 | 552.552   |
| NM_007265 | 2283.428  | 3150.327  | NM_015978 | 2332.717  | 2176.394  | AK026366  | 16240.142 |
| AK023639  | 5381.125  | 5568.419  | NM_003810 | 2883.771  | 2289.833  | AK024229  | 12214.403 |
| AL137700  | 1109.374  | 1896.438  | AB046842  | 813.737   | 1060.683  | AK021467  | 1754.894  |
| NM_004904 | 891.376   | 1022.748  | NM_004850 | 1053.551  | 1080.277  | NM_020371 | 633.71    |
| NM_003083 | 3247.986  | 3290.236  | NM_001394 | 8441.577  | 6151.83   | AK022498  | 573.052   |
| NM_006788 | 6576.911  | 6354.768  | NM_018441 | 7671.083  | 6975.52   | U84506    | 2054.132  |
| NM_000982 | 4415.602  | 5279.465  | NM_000778 | 4193.579  | 5679.461  | AB002444  | 1538.283  |
| NM_012423 | 72051.664 | 65497.566 | NM_001608 | 1038.068  | 581.63    | AB002344  | 1959.061  |
| AK026367  | 33502.047 | 38887.41  | NM_020228 | 5469.756  | 6817.201  | NM_006828 | 655.372   |
| AK026491  | 12304.188 | 19882.346 | AK024685  | 2411.923  | 4069.256  | NM_017668 | 3831.219  |
| NM_001015 | 67901.445 | 59467.836 | NM_003676 | 14501.674 | 19244.334 | AF147379  | 27769.043 |
| AL110170  | 17459.18  | 49990.68  | AF113007  | 2252.636  | 1544.219  | AK023760  | 1106.074  |
| AK021747  | 996.843   | 1090.034  | NM_000688 | 4494.303  | 4887.375  | X98415    | 49107.613 |
| AK025640  | 9268.677  | 7883.661  | U39573    | 1607.389  | 1592.985  | AK024205  | 1033.455  |
| NM_019101 | 776.734   | 1100.952  | D82061    | 2061.712  | 1858.481  | AF086034  | 5079.95   |
| NM_000920 | 940.157   | 1916.072  | AJ293009  | 2376.427  | 2479.63   | AK000174  | 585.12    |
| NM_020375 | 2104.526  | 1200.371  | NM_000374 | 3324.71   | 2633.157  | AF130071  | 1091.749  |
| NM_016048 | 4951.803  | 7373.393  | NM_000502 | 7084.391  | 5864.93   | AL390170  | 78.308    |
| NM_013311 | 4054.126  | 7613.27   | NM_001358 | 23589.684 | 18200.137 | AK022887  | 630.052   |
| NM_000291 | 32746.051 | 45373.828 | NM_001696 | 15253.604 | 9016.183  | AK000745  | 6621.667  |
| AL117488  | 2560.2    | 2333.481  | AF190900  | 3394.734  | 3918.001  | NM_005298 | 152.25    |
| NM_012240 | 1566.766  | 1503.948  | NM_020404 | 1301.022  | 3082.526  | NM_015901 | 572.053   |
| NM_019005 | 2769.754  | 5251.427  | BE972401  | 3713.55   | 4397.358  | Z83935    | 918.41    |
| NM_004738 | 7252.658  | 8863.78   | NM_017425 | 632.167   | 1029.676  | AF093744  | 568.909   |
| AV752216  | 2186.776  | 1408.146  | NM_003746 | 5344.508  | 17522.541 | NM_018687 | 4611.813  |
| AF181999  | 1527.318  | 1213.978  | NM_002910 | 26397.383 | 32221.705 | M57417    | 20071.984 |
| NM_001934 | 3744.912  | 4121.006  | AC096970  | 19525.875 | 27025.566 | NM_020524 | 11361.47  |
| AB011090  | 2271.085  | 2584.285  | NM_001483 | 1969.118  | 2024.658  | X64977    | 620.649   |
| NM_000208 | 1725.78   | 1435.863  | NM_018973 | 10073.852 | 9210.922  | AF064851  | 909.572   |
| NM_018682 | 6478.341  | 8169.054  | NM_002591 | 9918.848  | 12514.499 | NM_002602 | 941.558   |
| NM_016534 | 2322.352  | 1933.718  | NM_020216 | 6614.15   | 2510.809  | NM_016238 | 652.889   |
| AB021923  | 400.537   | 775.508   | AL137266  | 2239.214  | 1376.602  | NM_003383 | 96.286    |
| AK024240  | 1248.12   | 821.08    | NM_014288 | 2461.829  | 4947.951  | D17271    | 650.093   |

|           |           |           |           |           |           |           |           |
|-----------|-----------|-----------|-----------|-----------|-----------|-----------|-----------|
| NM_016456 | 35963.527 | 35139.988 | NM_017703 | 5401.231  | 4039.941  | AF282264  | 990.681   |
| AK022677  | 3911.597  | 3421.417  | NM_014726 | 9718.35   | 8875.877  | AF086322  | 911.813   |
| AF035288  | 733.377   | 788.235   | AJ297349  | 1250.411  | 1568.335  | Z70717    | 693.414   |
| AL137645  | 8369.105  | 7608.673  | NM_005828 | 5071.098  | 4042.082  | AK024736  | 516.36    |
| AK026141  | 1330.974  | 1735.683  | NM_001619 | 2788.166  | 2835.444  | X79308    | 578.65    |
| AK022894  | 2509.604  | 2156.956  | NM_006599 | 3366.276  | 3701.957  | AF086476  | 781.132   |
| AF131823  | 450.665   | 907.897   | NM_004463 | 775.66    | 1023.436  | NM_017660 | 1995.95   |
| AK026324  | 9891.956  | 9430.39   | U43586    | 651.873   | 854.702   | AB011151  | 4251.995  |
| AK025253  | 1023.618  | 1159.757  | NM_006271 | 6561.28   | 7946.616  | U92995    | 992.32    |
| AK025004  | 3206.874  | 3931.587  | NM_018647 | 1163.083  | 583.241   | Z70769    | 385.788   |
| AL136818  | 1112.268  | 1142.928  | NM_003026 | 857.944   | 500.392   | AL137555  | 830.703   |
| AF146798  | 2092.177  | 2246.272  | NM_000721 | 32075.611 | 26851.789 | CY3Cy5    | 5667.698  |
| AK022049  | 554.763   | 403.079   | NM_003933 | 2133.215  | 1967.467  | X00588    | 592.052   |
| AF086517  | 12823.56  | 9588.942  | NM_005095 | 2939.262  | 2293.229  | AI359037  | 742.423   |
| AK025740  | 16756.555 | 14205.253 | NM_003163 | 8336.445  | 7537.368  | X15998    | 1279.47   |
| AK000311  | 5003.429  | 5217.273  | NM_019057 | 5664.536  | 6641.767  | NM_001883 | 1563.766  |
| AK025346  | 54460.574 | 46190.535 | NM_002677 | 1635.391  | 1322.401  | NM_004628 | 1230.806  |
| AK022583  | 5715.908  | 4971.984  | NM_016205 | 927.893   | 750.509   | L31785    | 629.55    |
| AF052121  | 2926.559  | 2794.149  | NM_006367 | 45500.527 | 40647.758 | H-M 69043 | 4322.83   |
| AL359062  | 2287.48   | 2386.048  | NM_006732 | 12412.473 | 10651.711 | AF077374  | 792.562   |
| AK026869  | 1394.848  | 1453.566  | NM_004354 | 1195.473  | 1101.358  | U43901    | 338.718   |
| AK022192  | 526.571   | 547.16    | NM_004661 | 1257.28   | 1289.774  | X59065    | 118.085   |
| NM_019095 | 46693.832 | 46109.781 | NM_001610 | 1617.371  | 2161.442  | M59828    | 1577.677  |
| Y12020    | 18263.338 | 19259.617 | NM_001241 | 938.996   | 1250.727  | NM_016134 | 836.318   |
| AJ001905  | 1360.613  | 1627.861  | AF217504  | 1514.173  | 1933.146  | SR2       | 57528.684 |
| U17635    | 2445.228  | 2264.927  | AK027102  | 3921.482  | 4345.977  | SR4       | 16700.674 |
| AL049930  | 714.004   | 728.206   | AL109714  | 461.189   | 530.898   | SR6       | 2021.473  |
| Z83946    | 976.193   | 792.802   | NM_004632 | 2357.227  | 2115.589  | SR8       | 9258.458  |
| D55638    | 526.072   | 501.907   | NM_017919 | 2725.06   | 2068.341  | SR10      | 30643.201 |
| L23870    | 654.047   | 734.056   | NM_014456 | 4241.7    | 2559.043  | CY3Cy5    | 5137.288  |
| D55644    | 958.824   | 538.034   | NM_004740 | 6466.948  | 3632.231  | NM_000612 | 1251.827  |
| D16951    | 1017.526  | 1059.287  | NM_003805 | 2030.869  | 1238.942  | NM_004257 | 6371.147  |
| L19362    | 1579.11   | 1297.562  | NM_019886 | 3819.685  | 2787.606  | NM_000683 | 1259.145  |
| L33807    | 1762.787  | 2067.398  | NM_003278 | 42098.297 | 38450.688 | NM_005901 | 1882.758  |
| AB007975  | 596.665   | 724.339   | AK021957  | 25048.34  | 19112.68  | NM_004248 | 761.069   |
| AL049328  | 935.624   | 1167.737  | NM_016623 | 4997.718  | 4583.236  | NM_000959 | 383.514   |
| AK000030  | 1251.124  | 1088.345  | NM_004771 | 1476.735  | 1450.331  | NM_001313 | 1821.416  |
| NM_017932 | 834.208   | 777.227   | NM_018299 | 780.935   | 862.571   | NM_019066 | 425.312   |
| AK000910  | 2553.97   | 2529.659  | NM_005504 | 1297.034  | 3457.455  | NM_000435 | 1353.209  |
| AF252280  | 9549.864  | 12258.82  | AF234654  | 617.689   | 744.525   | NM_001842 | 6230.025  |
| AK000107  | 2714.248  | 2360.486  | NM_000110 | 3120.431  | 2792.904  | AB017169  | 561.19    |
| AK000951  | 505.758   | 860.971   | NM_016002 | 5051.839  | 8125.376  | AL080170  | 893.315   |
| AK024518  | 9351.415  | 10549.921 | NM_014549 | 506.319   | 652.018   | AB039903  | 1673.208  |
| AK024586  | 709.864   | 564.469   | NM_000531 | 928.079   | 1027.455  | NM_000542 | 6705.652  |
| AK025017  | 3157.889  | 3134.204  | NM_017832 | 8840.027  | 6445.809  | NM_006851 | 1244.63   |
| AK024534  | 932.731   | 733.583   | NM_001713 | 2745.838  | 2899.272  | AK001560  | 304.164   |
| AK024914  | 3465.809  | 4042.089  | NM_015367 | 3532.952  | 3522.147  | AB001328  | 1013.192  |
| BC030949  | 3732.895  | 3305.358  | NM_014498 | 4350.538  | 4250.654  | NM_000948 | 53.883    |
| AF116615  | 2091.723  | 1619.134  | NM_002375 | 7060.173  | 7694.06   | H99588    | 2242.169  |
| U17636    | 52139.922 | 49601.926 | NM_001813 | 2794.171  | 927.788   | AK022600  | 1006.333  |
| NM_018546 | 4618.096  | 4218.743  | AF055016  | 2595.98   | 1616.574  | AK023142  | 508.341   |
| U52699    | 16031.405 | 14843.7   | NM_007234 | 10974.257 | 5327.163  | U61740    | 3684.792  |
| S71613    | 635.738   | 986.198   | Y16704    | 51334.012 | 48767.527 | NM_006409 | 32718.76  |

|           |           |           |           |           |           |           |           |
|-----------|-----------|-----------|-----------|-----------|-----------|-----------|-----------|
| AJ011910  | 15966.864 | 11036.09  | NM_014567 | 2508.919  | 2123.967  | AB049054  | 1462.447  |
| AK024378  | 932.976   | 1183.56   | NM_017842 | 1622.78   | 903.094   | NM_015071 | 1100.402  |
| NM_014026 | 2175.429  | 3798.501  | AB037809  | 1832.788  | 1891.439  | AF027205  | 6526.678  |
| D61703    | 10635.846 | 14231.71  | AB011129  | 1076.25   | 1237.262  | AF075012  | 1234.633  |
| AF086198  | 13865.867 | 14727.462 | NM_014391 | 2487.485  | 3454.097  | NM_001570 | 1022.221  |
| AL137382  | 45082.074 | 38618.473 | NM_004270 | 1406.107  | 887.381   | NM_015658 | 393.235   |
| AK024599  | 7709.667  | 5802.43   | NM_001537 | 5218.859  | 4275.026  | NM_000589 | 320.113   |
| AK024928  | 535.083   | 353.466   | NM_001352 | 1867.149  | 2181.552  | NM_016546 | 5610.126  |
| NM_014450 | 1690.506  | 1094.525  | D15050    | 733.614   | 838.813   | AF309653  | 1773.308  |
| NM_017991 | 868.746   | 774.842   | NM_006527 | 4882.615  | 6589.396  | NM_002620 | 8449.771  |
| L37198    | 3396.344  | 3132.186  | NM_006627 | 3484.264  | 3599.72   | S79267    | 1179.35   |
| U67822    | 791.23    | 829.522   | NM_007363 | 26171.148 | 27007.029 | NM_003784 | 14728.858 |
| AK021921  | 567.229   | 437.188   | NM_003093 | 49138.57  | 49369.688 | NM_000195 | 8766.024  |
| AK025431  | 2358.931  | 1166.213  | NM_014473 | 9204.91   | 12818.93  | NM_005445 | 6487.873  |
| AK023662  | 995.475   | 994.037   | NM_003095 | 44993.715 | 46315.668 | NM_014899 | 1220.744  |
| AF086274  | 25801.371 | 23827.871 | NM_016389 | 1588.077  | 1548.801  | NM_003630 | 1270.686  |
| AK023682  | 1428.566  | 1210.194  | NM_002295 | 44438.43  | 46241.84  | NM_000046 | 1244.046  |
| AK024024  | 2250.453  | 1621.709  | NM_001762 | 7073.475  | 7441.015  | NM_003219 | 219.283   |
| AF000991  | 957.997   | 754.594   | NM_016306 | 16477.066 | 10644.004 | NM_006709 | 1065.417  |
| AK000685  | 13686.965 | 15403.047 | NM_003755 | 1051.2    | 615.504   | NM_004910 | 875.654   |
| D28381    | 28424.531 | 14411.785 | NM_013238 | 3406.849  | 3539.938  | AB013452  | 624.549   |
| BE706519  | 959.674   | 768.764   | BE258640  | 10826.524 | 8590.766  | M93107    | 2077.923  |
| AF130064  | 23759.371 | 23467.4   | NM_003314 | 5095.84   | 3416.381  | BC001479  | 2903.805  |
| U17624    | 456.698   | 593.298   | U79273    | 1038.462  | 1363.263  | NM_002461 | 8767.209  |
| D16988    | 16710.648 | 11172.698 | AK022050  | 1680.582  | 2058.296  | NM_005771 | 3818.833  |
| AK001959  | 4471.843  | 3859.515  | NM_002512 | 42716.305 | 46712.484 | NM_016032 | 5616.341  |
| U36217    | 1377.393  | 1694.25   | AL365411  | 1475.796  | 1323.177  | NM_001687 | 5417.803  |
| AL389880  | 1399.184  | 1586.651  | NM_016066 | 2686.274  | 2731.425  | AK026374  | 1274.736  |
| AL157452  | 4829.56   | 3289.092  | AF254082  | 16296.35  | 19966.459 | NM_001169 | 1084.782  |
| AK024155  | 22858.273 | 20733.746 | AF205718  | 1517.184  | 2503.646  | AK024648  | 4332.464  |
| AL359334  | 13838.646 | 14604.961 | NM_003420 | 771.706   | 1111.58   | NM_000719 | 469.386   |
| AK027095  | 1570.13   | 1409.255  | AY004252  | 574.315   | 668.455   | NM_003459 | 10150.01  |
| AF062097  | 1234.452  | 1355.561  | AK027045  | 1008.009  | 797.309   | NM_000171 | 957.906   |
| D17093    | 15495.671 | 15355.058 | AF169796  | 1310.83   | 1749.842  | AL354615  | 475.931   |
| AK022784  | 816.924   | 611.917   | AK001814  | 2514.45   | 1606.134  | NM_013349 | 19253.604 |
| AL117521  | 3497.26   | 3221.994  | NM_007222 | 1450.151  | 1500.626  | NM_003705 | 1503.079  |
| AK021913  | 5367.494  | 4255.415  | NM_003435 | 1799.108  | 1280.299  | NM_006861 | 869.862   |
| AL137489  | 12000.301 | 9964.919  | NM_016291 | 2392.179  | 2136.664  | NM_005829 | 987.753   |
| AF009311  | 2646.283  | 2510.762  | NM_005937 | 34596.387 | 31064.131 | NM_000466 | 696.047   |
| S73397    | 816.147   | 909.257   | AK023259  | 2285.351  | 2458.391  | NM_015908 | 8498.192  |
| AK023939  | 537.329   | 326.749   | AK001503  | 1694.459  | 2198.973  | NM_000896 | 625.868   |
| AL050219  | 588.641   | 525.133   | AF085894  | 554.372   | 1191.838  | AB040672  | 3395.714  |
| AK024433  | 2869.059  | 2288.679  | AK022880  | 1091.416  | 1660.47   | NM_002192 | 1664.331  |
| U82321    | 906.024   | 800.218   | NM_003601 | 14642.754 | 13162.961 | S94539    | 20491.117 |
| AL050376  | 1197.207  | 818.396   | AK001228  | 2295.329  | 3550.813  | NM_006402 | 1354.231  |
| AL359652  | 983.37    | 479.962   | AF074987  | 2360.906  | 2994.728  | NM_005785 | 1441.629  |
| AK022423  | 1060.674  | 774.003   | AK001058  | 7126.704  | 9442.49   | NM_018248 | 1418.694  |
| AF088021  | 1969.211  | 1498.036  | AK026239  | 1629.699  | 1392.758  | AK001695  | 7588.463  |
| BF509267  | 4789.501  | 4533.7    | AF086283  | 605.585   | 512.443   | NM_017886 | 3738.863  |
| NM_002455 | 6598.191  | 6306.577  | AF086393  | 1891.015  | 1155.535  | NM_006252 | 1485.053  |
| NM_002959 | 17469.916 | 19960.744 | AF070621  | 3792.446  | 2482.303  | NM_001721 | 549.222   |
| AK000899  | 21120.68  | 13645.735 | NM_020240 | 1373.908  | 860.669   | NM_014397 | 3878.047  |
| CY3Cy5    | 11754.541 | 677.616   | AK023678  | 6975.041  | 2714.101  | AB023182  | 1258.349  |

|           |           |           |           |           |           |           |           |
|-----------|-----------|-----------|-----------|-----------|-----------|-----------|-----------|
| AW300857  | 26420.484 | 33604.707 | AF052090  | 3156.104  | 2057.331  | NM_003607 | 778.892   |
| H85962    | 27028.742 | 33169.262 | AK023718  | 3918.151  | 3673.795  | NM_006575 | 987.709   |
| BG742446  | 1936.423  | 1856.223  | AF075089  | 8413.038  | 8974.545  | NM_013254 | 2191.404  |
| AA864554  | 48223.66  | 8445.877  | AF086007  | 33847.523 | 37463.691 | NM_000437 | 4324.967  |
| X66945    | 4182.321  | 2971.101  | AK000803  | 1672.737  | 1696.528  | AB046819  | 1821.273  |
| AI160703  | 1217.093  | 875.344   | AF085926  | 2197.854  | 3067.066  | NM_006090 | 2093.267  |
| X12830    | 21635.09  | 14038.049 | AF085948  | 570.222   | 807.653   | NM_002900 | 784.963   |
| U00482    | 2485.612  | 2727.369  | AL137307  | 2282.696  | 2092.753  | NM_006851 | 934.638   |
| Z80998    | 692.119   | 892.039   | AL137468  | 4576.007  | 5364.725  | AK001560  | 438.41    |
| K01904    | 7257.769  | 19804.334 | AL162007  | 21673.029 | 20804.213 | AB001328  | 408.716   |
| BE538886  | 1692.03   | 1345.449  | AL390137  | 1891.78   | 3280.717  | X00588    | 485.187   |
| NM_002225 | 1848.846  | 927.904   | AL137340  | 877.096   | 443.98    | M76482    | 695.107   |
| M57650    | 6695.458  | 6783.725  | AL162045  | 1555.694  | 1271.722  | X17519    | 127.734   |
| M21302    | 1611.997  | 1712.88   | X92185    | 980.774   | 755.385   | NM_001883 | 1698.897  |
| NM_016346 | 2547.292  | 2849.482  | AK022437  | 14313.796 | 13400.001 | NM_004625 | 1963.381  |
| SR6       | 3071.456  | 2968.656  | AB042410  | 934.309   | 535.696   | L31785    | 552.026   |
| SR8       | 11362.584 | 32043.473 | AF086102  | 1273.109  | 1441.963  | H-M 69043 | 3730.656  |
| SR10      | 39358.391 | 14370.8   | AF116682  | 19324.77  | 12417.048 | U43901    | 274.342   |
| CY3Cy5    | 11802.204 | 862.569   | AL137259  | 3180.26   | 2067.11   | M59828    | 2326.692  |
| NM_001525 | 21854.924 | 20765.459 | AL122107  | 3341.611  | 2376.398  | NM_016134 | 744.596   |
| NM_006055 | 4901.526  | 5270.955  | AF075021  | 1176.665  | 507.353   | AJ010482  | 833.617   |
| NM_004296 | 1605.883  | 1792.991  | AK025140  | 16857.162 | 5522.959  | NM_005445 | 4511.322  |
| NM_005048 | 1219.82   | 1076.029  | AK026628  | 494.016   | 485.846   | NM_014895 | 681.997   |
| NM_005972 | 1272.051  | 1254.667  | AK023394  | 2525.785  | 1681.837  | NM_000046 | 532.444   |
| NM_001060 | 2856.575  | 4074.42   | AF090093  | 11150.679 | 10239.482 | NM_006705 | 742.734   |
| NM_018841 | 1425.358  | 1498.701  | AF161340  | 2524.05   | 3033.354  | NM_000612 | 1405.042  |
| NM_005226 | 631.29    | 682.521   | AF242771  | 1143.478  | 821.101   | NM_004257 | 4929.127  |
| AL133105  | 2566.051  | 3037.334  | NM_018562 | 8184.652  | 8851.456  | NM_000683 | 1642.932  |
| AK022859  | 1531.12   | 1577.916  | AF098666  | 499.956   | 456.9     | NM_003625 | 705.923   |
| NM_000214 | 1044.892  | 752.793   | AK021969  | 2356.317  | 1983.488  | NM_005901 | 1995.105  |
| NM_014864 | 6772.026  | 7174.689  | AK022065  | 1803.455  | 1795.481  | NM_004248 | 1277.39   |
| NM_003728 | 9249.081  | 9271.782  | AK022221  | 2441.049  | 2577.789  | NM_000955 | 229.433   |
| NM_014352 | 4698.656  | 5952.338  | AK022356  | 1345.686  | 1266.426  | NM_001313 | 3041.682  |
| NM_012481 | 1395.877  | 1648.389  | AK021998  | 2581.296  | 2002.252  | NM_004796 | 316.646   |
| L09102    | 14250.98  | 14262.796 | AK022126  | 1210.407  | 1064.997  | NM_000435 | 1554.331  |
| U68488    | 2224.177  | 1241.728  | AK022383  | 666.713   | 724.828   | NM_001842 | 9376.36   |
| NM_016247 | 3608.174  | 3110.671  | AK027041  | 1996.44   | 2839.545  | AB017169  | 193.529   |
| NM_012282 | 716.232   | 1081.793  | AK022064  | 1157.646  | 1213.022  | AL080170  | 961.074   |
| NM_006710 | 877.241   | 715.203   | NM_005355 | 32576.367 | 29734.68  | AB039903  | 1288.563  |
| NM_003323 | 8440.887  | 11182.329 | AK027195  | 659.12    | 447.437   | NM_000542 | 2503.719  |
| BG685310  | 1405.476  | 2288.532  | AF035306  | 2833.033  | 3379.969  | NM_014625 | 121.182   |
| NM_018668 | 7519.494  | 6403.578  | AK091662  | 787.351   | 859.288   | NM_003705 | 1299.15   |
| NM_004227 | 1158.135  | 1345.359  | AB038318  | 532.931   | 760.316   | NM_006861 | 472.611   |
| NM_005282 | 3423.064  | 3170.148  | NM_003954 | 938.579   | 1044.938  | NM_005825 | 312.023   |
| NM_001736 | 1503.971  | 1457.047  | AK023877  | 376.128   | 781.45    | NM_000466 | 614.956   |
| AB028949  | 1169.633  | 2215.138  | AK024213  | 30412.051 | 21937.971 | NM_015908 | 6178.929  |
| AL137580  | 1293.042  | 1087.1    | AK025093  | 723.491   | 564.858   | AK022600  | 1264.102  |
| NM_004101 | 1449.743  | 820.717   | AK022184  | 3006.504  | 2609.147  | AK023142  | 634.792   |
| NM_002995 | 49575.438 | 47487.082 | AB007959  | 1259.85   | 933.547   | U61740    | 2708.624  |
| AB033114  | 527.866   | 468.209   | AK024153  | 1427.236  | 1869.714  | NM_006405 | 51057.816 |
| NM_015978 | 2680.906  | 2701.754  | Y10516    | 4223.615  | 3805.927  | AB049054  | 852.689   |
| NM_003810 | 4322.211  | 3233.954  | AF056451  | 2419.438  | 3733.218  | NM_015071 | 1579.356  |
| NM_004908 | 638.99    | 753.7     | AF015039  | 4754.13   | 6618.5    | NM_013227 | 759.838   |

|           |           |           |           |           |           |           |           |
|-----------|-----------|-----------|-----------|-----------|-----------|-----------|-----------|
| NM_016171 | 71056.844 | 67814.172 | U50528    | 1175.17   | 981.138   | Z83803    | 603.76    |
| NM_014443 | 4331.696  | 3751.101  | AB020632  | 1086.111  | 1597.39   | AF027205  | 4571.947  |
| NM_005212 | 5280.535  | 4769.315  | NM_018614 | 32105.729 | 31012.547 | AF075012  | 1668.01   |
| NM_006419 | 1026.209  | 2011.288  | AL117549  | 1241.966  | 1571.74   | NM_001570 | 1114.776  |
| AB020676  | 301.606   | 1228.578  | NM_005222 | 3083.161  | 2867.454  | NM_015658 | 281.06    |
| AK024715  | 1357.18   | 1295.633  | BC024308  | 7545.892  | 13152.617 | NM_000589 | 564.49    |
| NM_014942 | 726.984   | 573.244   | NM_000538 | 2379.318  | 2841.942  | NM_016546 | 7794.983  |
| NM_018360 | 1446.217  | 2140.57   | AK001838  | 58331.891 | 57140.395 | AF309653  | 2280.738  |
| AL365415  | 806.452   | 1289.664  | NM_018295 | 831.02    | 1221.275  | NM_002620 | 4555.94   |
| L29147    | 4226.251  | 4654.983  | AF070574  | 593.106   | 790.226   | S79267    | 780.896   |
| NM_020228 | 4819.15   | 4711.419  | AF086262  | 3387.583  | 5032.859  | NM_001816 | 775.964   |
| AK024685  | 1341.313  | 2172.235  | AF086292  | 2644.2    | 3789.711  | NM_003784 | 15209.99  |
| NM_003676 | 14514.356 | 14546.265 | AK023769  | 689.526   | 1092.609  | NM_000195 | 4142.981  |
| AF113007  | 3399.13   | 1942.677  | AK024342  | 4963.467  | 6277.037  | NM_006575 | 476.043   |
| NM_000688 | 6431.306  | 7252.572  | AL137712  | 1527.41   | 1904.33   | NM_013254 | 987.207   |
| U39573    | 1724.179  | 1508.012  | AL137606  | 1240.292  | 1028.988  | NM_000437 | 1258.506  |
| D82061    | 2155.186  | 2330.073  | L77599    | 27148.15  | 24877.428 | AB046819  | 1219.577  |
| AJ293009  | 2278.441  | 2445.646  | AK021673  | 20453.412 | 13989.596 | NM_006090 | 566.358   |
| NM_000374 | 3013.909  | 2930.16   | AB014543  | 1494.957  | 1629.943  | NM_002900 | 1577.853  |
| NM_000502 | 6949.771  | 7227.665  | NM_018445 | 7125.781  | 5647.257  | BC001479  | 1930.514  |
| NM_001359 | 22800.049 | 18471.535 | AK022743  | 8075.09   | 6011.528  | NM_002461 | 9974.391  |
| NM_005175 | 30989.898 | 41938.109 | NM_014627 | 2406.612  | 1710.536  | NM_005771 | 7094.934  |
| NM_001696 | 16255.38  | 14034.494 | NM_013938 | 17289.029 | 18400.742 | AB032986  | 12304.206 |
| NM_004975 | 5519.417  | 4152.706  | NM_013986 | 58395.664 | 55656.98  | NM_017528 | 13532.829 |
| NM_002245 | 728.669   | 432.561   | U55055    | 2286.848  | 2256.472  | NM_016032 | 8217.178  |
| D87445    | 11083.69  | 10216.143 | AK022186  | 597.415   | 544.162   | NM_014324 | 57551.961 |
| NM_000238 | 3934.244  | 4242.626  | AB018319  | 1500.818  | 1770.501  | NM_001687 | 4493.888  |
| NM_002247 | 783.673   | 1095.62   | AK001101  | 3806.56   | 4270.74   | AK026374  | 1509.792  |
| NM_004980 | 11505.522 | 12884.491 | BM973473  | 1644.315  | 1953.827  | NM_001169 | 813.829   |
| NM_003224 | 1817.446  | 1634.401  | AK021637  | 1238      | 911.977   | AK024648  | 6925.008  |
| NM_006827 | 15844.949 | 17786.855 | AK021658  | 1129.087  | 284.259   | NM_000719 | 768.827   |
| AK021761  | 7310.155  | 6015.566  | D61705    | 549.351   | 587.815   | NM_003459 | 7081.703  |
| AK024536  | 947.26    | 807.973   | U17631    | 1153.287  | 1062.562  | AB032526  | 321.64    |
| NM_001483 | 3363.004  | 3591.228  | AL137723  | 5655.653  | 4548.909  | NM_000171 | 466.889   |
| NM_018973 | 9415.702  | 15910.673 | AK000774  | 222.008   | 642.823   | AL354615  | 442.809   |
| NM_002591 | 8563.501  | 10236.013 | AK024046  | 2731.783  | 3899.853  | NM_013349 | 15458.952 |
| NM_020216 | 8624.031  | 6562.802  | NM_017931 | 2753.144  | 3305.214  | AJ010482  | 1087.874  |
| AK021860  | 1653.219  | 1402.585  | AK022793  | 1497.872  | 1853.145  | NM_000896 | 705.913   |
| AB046816  | 935.425   | 1137.089  | AJ227910  | 2052.766  | 2009.453  | AB040672  | 2757.083  |
| AL137266  | 2610.043  | 4304.935  | AF001893  | 2239.573  | 2276.486  | NM_002192 | 1029.542  |
| NM_016457 | 1434.367  | 1050.142  | X04236    | 13284.87  | 12359.535 | NM_005491 | 2125.374  |
| NM_005057 | 1407.203  | 1423.667  | AK093746  | 23915.848 | 19553.313 | NM_003869 | 1978.029  |
| AF143321  | 661.529   | 665.212   | D16875    | 1633.533  | 2137.786  | X63417    | 3326.78   |
| AB046842  | 1406.702  | 1681.983  | AK027171  | 1704.935  | 1002.852  | S94539    | 28529.672 |
| NM_004850 | 2124.366  | 2045.908  | AK021945  | 4283.97   | 2728.357  | NM_006402 | 1385.074  |
| NM_002822 | 3801.691  | 3650.02   | L23545    | 1481.044  | 935.169   | NM_005785 | 1381.961  |
| BF306955  | 1445.567  | 1365.878  | CY3Cy5    | 11195.832 | 1107.802  | NM_018248 | 1560.242  |
| NM_001394 | 11772.406 | 9666.651  | U13022    | 1845.667  | 1256.565  | AK001695  | 7075.462  |
| NM_000778 | 9504.134  | 14496.214 | R23251    | 20109.076 | 23096.531 | NM_017886 | 3383.982  |
| NM_001609 | 1663.328  | 1516.86   | BG763477  | 10086.781 | 1716.636  | NM_006252 | 879.16    |
| BE733234  | 1114.13   | 1010.751  | AA702640  | 2285.742  | 2291.818  | NM_001721 | 269.308   |
| NM_001157 | 733.914   | 632.645   | T68583    | 3427.258  | 3935.943  | NM_014397 | 4120.344  |
| NM_012282 | 790.841   | 1248.195  | AA481944  | 26516.736 | 41436.434 | AB023182  | 1561.259  |

|           |           |           |           |           |           |           |           |
|-----------|-----------|-----------|-----------|-----------|-----------|-----------|-----------|
| NM_006710 | 1242.364  | 566.784   | X14390    | 1411.364  | 1271.305  | NM_003607 | 630.304   |
| NM_003323 | 10228.861 | 12105.49  | AF038440  | 1071.898  | 1032.126  | AL080170  | 1610.747  |
| BG685310  | 1612.983  | 2222.364  | M31158    | 879.415   | 1388.502  | AB039903  | 989.059   |
| H85962    | 27782.832 | 38980.293 | H00742    | 2757.001  | 2835.58   | NM_000542 | 5899.88   |
| BG742446  | 1486.813  | 1970.728  | D42108    | 2042.073  | 2956.844  | NM_006851 | 804.193   |
| AA864554  | 45809.379 | 7807.973  | BG700922  | 1121.599  | 1632.82   | H99588    | 1805.328  |
| X66945    | 4216.725  | 3066.012  | AI366068  | 16625.898 | 29216.295 | X00588    | 984.287   |
| AI160703  | 996.936   | 895.025   | N57553    | 401.734   | 989.499   | AI359037  | 840.758   |
| X12830    | 19081.707 | 12240.489 | AF080158  | 3083.053  | 2931.776  | J04513    | 568.519   |
| U00482    | 1886.095  | 2279.558  | SR5       | 3538.389  | 4509.598  | X15998    | 2771.038  |
| Z80998    | 621.225   | 581.155   | SR7       | 3510.198  | 31888.787 | NM_001883 | 2524.874  |
| K01904    | 6466.631  | 20195.561 | SR9       | 12930.77  | 3058.197  | NM_004628 | 1454.565  |
| BE538886  | 2012.076  | 1745.71   | CY3Cy5    | 14761.507 | 1882.552  | L31785    | 766.331   |
| NM_002228 | 2066.498  | 942.091   | M33197    | 65682.078 | 66707.406 | H-M 69043 | 5670.876  |
| M57650    | 9775.428  | 10010.027 | NM_007024 | 9630.672  | 5836.203  | AF077374  | 747.415   |
| BC023978  | 703.691   | 871.387   | NM_013231 | 3473.958  | 3371.034  | U43901    | 287.47    |
| M21302    | 3090.08   | 3653.52   | NM_012106 | 3579.496  | 2901.333  | M59828    | 1504.724  |
| NM_016346 | 4803.164  | 4536.606  | NM_006254 | 4290.872  | 4044.231  | AF309653  | 815.718   |
| AK024865  | 942.834   | 714.103   | X95425    | 2171.956  | 2118.661  | NM_002620 | 4310.567  |
| NM_007210 | 756.966   | 587.39    | NM_004422 | 2002.738  | 2027.949  | S79267    | 665.523   |
| NM_014942 | 716.251   | 682.497   | NM_016562 | 1000.298  | 1085.457  | NM_001816 | 499.394   |
| NM_018360 | 2489.181  | 3167.977  | M33197    | 65559.703 | 70399.32  | NM_003784 | 6936.03   |
| AL365415  | 971.704   | 1103.479  | NM_004895 | 11601.246 | 12866.79  | NM_000195 | 8059.394  |
| NM_001525 | 20193.158 | 21928.777 | U59748    | 1570.996  | 2759.5    | NM_005445 | 3245.068  |
| NM_006055 | 4367.649  | 5372.238  | L32537    | 1179.242  | 1378.078  | NM_014895 | 806.489   |
| NM_004296 | 1106.748  | 1454.325  | NM_014303 | 26764.822 | 26053.596 | NM_000046 | 948.397   |
| NM_005048 | 869.907   | 1064.183  | NM_014863 | 612.558   | 875.589   | NM_003215 | 671.763   |
| NM_005972 | 992.401   | 1236.738  | NM_003118 | 9921.363  | 7676.949  | NM_006705 | 1561.847  |
| NM_001060 | 3052.773  | 3292.362  | L02922    | 16344.53  | 22573.742 | NM_000612 | 3536.901  |
| NM_018841 | 1035.147  | 1384.705  | NM_001797 | 2601.488  | 4465.736  | NM_004257 | 8322.909  |
| NM_005226 | 505.643   | 752.534   | NM_003154 | 3921.633  | 4299.536  | NM_000683 | 2249.893  |
| AL133105  | 2395.042  | 3270.11   | NM_004235 | 1241.906  | 1540.996  | NM_003625 | 1064.666  |
| AK022859  | 1485.343  | 1651.427  | AK023459  | 1946.585  | 3638.513  | NM_005901 | 3351.76   |
| NM_000214 | 547.083   | 567.885   | BI762154  | 1242.593  | 1193.386  | NM_004248 | 1617.946  |
| NM_003728 | 10046.136 | 10776.174 | NM_012135 | 3758.91   | 3271.284  | NM_001313 | 2862.358  |
| NM_014352 | 5917.245  | 7363.972  | AF121856  | 2689.581  | 2091.904  | NM_004796 | 203.639   |
| NM_012481 | 2360.292  | 2644.575  | NM_006421 | 2926.055  | 2217.282  | NM_000435 | 788.18    |
| L09102    | 25026.225 | 28230.109 | NM_017457 | 16140.858 | 16169.224 | NM_001842 | 4977.309  |
| U68488    | 2378.043  | 1589.938  | NM_003765 | 10101.268 | 6897.862  | NM_003455 | 6738.899  |
| NM_000675 | 1022.238  | 547.622   | NM_018202 | 13244.468 | 12126.994 | NM_000171 | 174.597   |
| NM_016247 | 5834.848  | 4504.245  | AB023197  | 3928.876  | 4219.958  | AL354615  | 336.31    |
| NM_003224 | 2021.786  | 1985.786  | NM_022173 | 5799.107  | 6910.098  | NM_013345 | 15455.496 |
| NM_006827 | 19023.602 | 20308.494 | AB040970  | 3874.216  | 3342.686  | NM_003705 | 614.308   |
| AK021761  | 11076.052 | 8659.067  | NM_018330 | 3590.863  | 3329.936  | NM_006861 | 612.317   |
| AK024536  | 1413.131  | 1400.092  | AB023222  | 996.436   | 930.308   | NM_000466 | 477.04    |
| NM_018668 | 6363.666  | 6374.895  | M33197    | 65458.852 | 63917.66  | NM_015908 | 5788.605  |
| NM_004227 | 995.427   | 1140.124  | U50342    | 3027.682  | 3197.717  | AK022600  | 1734.206  |
| NM_005282 | 2902.333  | 3180.851  | NM_000295 | 1308.329  | 1634.638  | AK023142  | 653.751   |
| NM_001736 | 975.828   | 1301.979  | AF103795  | 734.238   | 978.626   | U61740    | 5669.854  |
| AB028949  | 1184.711  | 2240.037  | NM_006215 | 761.332   | 866.951   | NM_006405 | 56206.523 |
| AL137580  | 1019.21   | 975.91    | U80018    | 740.936   | 616.635   | AB049054  | 2459.843  |
| NM_004101 | 1259.731  | 958.52    | NM_000717 | 1740.519  | 1344.858  | NM_015071 | 1390.349  |
| NM_002995 | 40503.785 | 41673.898 | M33197    | 64867.254 | 64540.418 | NM_013227 | 518.103   |

|           |           |           |           |           |           |           |           |
|-----------|-----------|-----------|-----------|-----------|-----------|-----------|-----------|
| NM_015978 | 2763.116  | 2543.663  | NM_004845 | 2851.938  | 2527.587  | Z83803    | 767.805   |
| NM_003810 | 4664.875  | 3297.985  | NM_007107 | 6961.201  | 9327.974  | AF027205  | 6641.644  |
| NM_004908 | 766.799   | 650.715   | NM_000047 | 10350.877 | 13539.289 | AF075012  | 1686.471  |
| NM_014443 | 3258.48   | 2990.596  | M68874    | 2872.085  | 1840.504  | NM_001570 | 1037.005  |
| NM_005212 | 3982.876  | 3654.901  | NM_006319 | 4929.924  | 3274.556  | NM_015658 | 292.429   |
| NM_006419 | 985.919   | 1844.524  | NM_018226 | 5011.312  | 5865.361  | NM_000589 | 524.806   |
| AB020676  | 742.987   | 937.191   | Z36813    | 4463.092  | 7127.361  | NM_016546 | 4201.195  |
| AK024715  | 1317.613  | 1000.957  | NM_006660 | 6465.192  | 7503.425  | NM_017886 | 337.979   |
| BF306955  | 1697.002  | 1539.589  | NM_001486 | 1262.489  | 1525.905  | NM_006252 | 954.364   |
| NM_001394 | 13679.913 | 11417.909 | NM_004727 | 1289.007  | 1504.741  | NM_014397 | 2252.593  |
| NM_000778 | 9188.519  | 13678.012 | NM_000559 | 674.579   | 505.433   | AB023182  | 734.714   |
| NM_001609 | 1485.854  | 1412.548  | NM_006685 | 56566.902 | 62754.527 | NM_003607 | 620.414   |
| BE733234  | 842.428   | 875.253   | M33197    | 9934.178  | 9780.255  | NM_006575 | 488.114   |
| NM_020228 | 3785.95   | 3892.126  | NM_004045 | 9614.189  | 8016.23   | NM_013254 | 1684.639  |
| AK024685  | 1495.111  | 2267.329  | NM_001891 | 4404.037  | 3783.755  | AB046819  | 2572.003  |
| NM_003676 | 13389.52  | 13696.613 | NM_001440 | 24138.326 | 14771.396 | NM_006090 | 1748.386  |
| AF113007  | 3054.026  | 1746.96   | NM_016618 | 1666.158  | 1390.578  | NM_002900 | 2793.615  |
| NM_000688 | 5912.016  | 7622.693  | AB014568  | 22419.955 | 17750.527 | NM_004910 | 1359.382  |
| U39573    | 1695.115  | 1757.479  | NM_012249 | 2397.104  | 2644.156  | AB013452  | 777.461   |
| D82061    | 1829.279  | 2279.019  | AK022546  | 7659.153  | 7079.802  | M93107    | 3874.745  |
| AJ293009  | 2245.612  | 2002.975  | NM_014067 | 10126.932 | 9676.086  | BC001479  | 5806.609  |
| NM_000374 | 3057.118  | 2537.221  | NM_002914 | 4394.301  | 3698.205  | NM_002461 | 12340.617 |
| NM_000502 | 7033.405  | 6350.873  | NM_020385 | 1687.37   | 2258.162  | NM_005771 | 8214.276  |
| NM_001359 | 27669.717 | 20404.961 | NM_014877 | 439.019   | 497.182   | AB032986  | 16026.635 |
| NM_001696 | 15200.03  | 11422.946 | NM_006541 | 1562.808  | 1524.724  | NM_016032 | 9406.628  |
| NM_004975 | 4122.052  | 2847.817  | M33197    | 64320.484 | 64651.512 | NM_014324 | 53291.668 |
| NM_002245 | 958.704   | 155.56    | NM_005705 | 10706.464 | 10130.313 | NM_001687 | 4774.076  |
| D87445    | 10168.344 | 9732.301  | NM_004328 | 1037.478  | 2741.98   | AK026374  | 1270.499  |
| NM_000238 | 4589.77   | 4945.353  | NM_004581 | 3988.216  | 5251.963  | NM_001169 | 864.463   |
| NM_002247 | 744.737   | 1259.91   | NM_006817 | 23475.037 | 19865.779 | AK024648  | 6585.627  |
| NM_004980 | 12077.474 | 12534.254 | NM_007108 | 9697.857  | 10619.16  | AB037761  | 899.117   |
| NM_016346 | 4882.273  | 4876.353  | NM_015921 | 40079.633 | 42957.867 | NM_014008 | 17416.473 |
| AK024865  | 976.448   | 605.243   | AB040900  | 10474.58  | 12582.021 | NM_014731 | 2451.74   |
| NM_007210 | 757.925   | 585.787   | NM_001482 | 1185.485  | 1867.126  | AF035191  | 2565.155  |
| NM_001483 | 2924.007  | 2986.527  | NM_001797 | 2125.292  | 2032.648  | NM_004058 | 708.291   |
| NM_018973 | 9853.392  | 17727.984 | NM_003154 | 3201.923  | 2158.216  | NM_004527 | 669.655   |
| NM_002591 | 8155.218  | 10842.761 | NM_004235 | 1022.529  | 797.708   | AK026717  | 703.135   |
| AL049334  | 446.851   | 619.789   | AK023459  | 2232.887  | 2160.609  | AJ010482  | 491.148   |
| NM_020216 | 7577.083  | 6218.7    | BI762154  | 876.141   | 541.03    | NM_000896 | 481.398   |
| AK021860  | 1979.279  | 1481.592  | U13022    | 1763.196  | 1042.322  | AB040672  | 2838.687  |
| AB046816  | 921.507   | 1060.615  | R23251    | 19703.572 | 18284.795 | NM_002192 | 2482.208  |
| AL137266  | 3065.864  | 3422.004  | BG763477  | 10454.426 | 1364.049  | NM_005491 | 3533.222  |
| NM_016457 | 1442.84   | 1114.539  | AA702640  | 2712.143  | 2352.673  | NM_003869 | 3373.43   |
| NM_005057 | 1480.157  | 1307.802  | T68583    | 4615.292  | 4559.27   | X63417    | 2191.524  |
| AF143321  | 1003.83   | 634.339   | X14390    | 1624.075  | 1261.042  | NM_006402 | 1374.108  |
| AB046842  | 1637.876  | 1354.251  | AF038440  | 1243.565  | 1309.892  | NM_005785 | 1408.275  |
| NM_004850 | 2102.021  | 2196.733  | M31158    | 952.103   | 1993.339  | NM_018248 | 1875.754  |
| NM_002822 | 3870.54   | 3629.271  | H00742    | 2652.325  | 2670.179  | AK001695  | 8578.659  |
| NM_014352 | 6793.897  | 8931.389  | D42108    | 1969.535  | 2959.287  | AB040898  | 416.91    |
| NM_012481 | 2095.317  | 2305.235  | BG700922  | 942.264   | 1022.772  | AB031547  | 1405.241  |
| L09102    | 29441.104 | 33062.891 | AI366068  | 15835.167 | 24671.807 | NM_003970 | 361.927   |
| U68488    | 2594.764  | 1493.035  | N57553    | 588.379   | 876.972   | AK022496  | 218.97    |
| NM_000675 | 1412.451  | 899.859   | AF080158  | 2747.57   | 2476.124  | AB042636  | 392.134   |

|           |           |           |           |           |           |           |           |
|-----------|-----------|-----------|-----------|-----------|-----------|-----------|-----------|
| NM_016247 | 5576.093  | 5319.343  | BM664556  | 2000.433  | 1771.392  | NM_002883 | 561.441   |
| NM_012282 | 836.693   | 949.633   | M33197    | 64697.602 | 68225.688 | NM_01615C | 3325.49   |
| NM_00671C | 1178.935  | 815.13    | NM_000295 | 1295.921  | 1061.599  | U57058    | 882.16    |
| NM_003323 | 8961.102  | 12269.949 | AF103795  | 1194.737  | 784.323   | AL137452  | 855.585   |
| BG685310  | 1828.75   | 2719.49   | NM_006215 | 907.332   | 519.769   | NM_004312 | 23731.092 |
| AW300857  | 22783.455 | 35152.906 | M33197    | 65301.555 | 66174.617 | NM_001347 | 2614.167  |
| H85962    | 23643.021 | 37986.602 | NM_007024 | 10689.698 | 6464.147  | AK024549  | 21284.111 |
| BG742446  | 1689.151  | 2108.445  | NM_013231 | 3995.363  | 4027.765  | NM_006338 | 7574.288  |
| AA864554  | 42321.918 | 8075.88   | NM_012106 | 4070.492  | 3666.584  | NM_007164 | 7249.774  |
| X66945    | 4134.422  | 3176.826  | X95425    | 3211.882  | 3969.138  | NM_000261 | 325.361   |
| AI160703  | 1159.752  | 1081.214  | NM_004422 | 2384.732  | 3353.804  | NM_00257C | 725.521   |
| X12830    | 20816.666 | 12467.96  | NM_016562 | 1571.681  | 1558.612  | NM_003183 | 1057.22   |
| U00482    | 2264.696  | 2026.811  | M33197    | 69259.719 | 63297.523 | NM_003585 | 517.647   |
| Z80998    | 587.645   | 709.538   | AY009399  | 6800.847  | 10133.442 | NM_019851 | 2604.855  |
| K01904    | 6583.703  | 18011.074 | NM_004895 | 12801.919 | 11868.667 | NM_003238 | 928.491   |
| BE538886  | 1930.955  | 1800.39   | U59748    | 1569.719  | 2553.625  | NM_001363 | 626.131   |
| NM_002228 | 1867.633  | 978.839   | L32537    | 1016.453  | 759.627   | NM_005706 | 792.328   |
| M57650    | 11387.105 | 11128.204 | NM_014303 | 28878.84  | 31523.004 | NM_001261 | 1693.287  |
| BC023978  | 742.547   | 882.183   | AF130062  | 1665.357  | 1823.543  | NM_007219 | 2100.457  |
| M21302    | 2799.864  | 3198.778  | NM_003118 | 3697.227  | 2846.07   | AK026854  | 1066.686  |
| NM_005212 | 4926.17   | 5871.768  | L02922    | 3633.182  | 5891.275  | NM_002506 | 1059.939  |
| M14584    | 637.526   | 697.367   | M33197    | 14390.452 | 9109.705  | NM_004906 | 727.582   |
| NM_006419 | 1270.059  | 1969.759  | NM_004045 | 12583.084 | 6096.809  | NM_012447 | 9632.097  |
| AF035035  | 760.921   | 438.426   | NM_001891 | 3832.223  | 2088.666  | NM_006366 | 8601.557  |
| AB020676  | 877.613   | 1297.264  | NM_012139 | 6630.816  | 6610.35   | AK027013  | 12646.937 |
| AK024715  | 1358.751  | 1565.824  | AF121856  | 3008.951  | 2958.792  | NM_001344 | 13034.245 |
| NM_014942 | 2315.937  | 1981.361  | NM_006421 | 3621.566  | 3243.331  | NM_018294 | 2019.428  |
| NM_01836C | 2309.915  | 2839.583  | NM_017457 | 16414.168 | 21815.764 | AL389934  | 3662.462  |
| AK022489  | 591.608   | 505.402   | NM_003765 | 11531.555 | 11679.7   | AB006746  | 525.914   |
| AL365415  | 1177.547  | 1374.766  | M33197    | 55461.453 | 53130.445 | NM_006498 | 1261.681  |
| L29147    | 24822.295 | 36701.805 | NM_018202 | 10419.189 | 8134.595  | AB023233  | 537.75    |
| NM_001525 | 22630.76  | 27746.914 | AB023197  | 3241.387  | 2710.582  | AL133071  | 327.632   |
| NM_006055 | 5289.885  | 7526.635  | NM_022173 | 5591.535  | 6496.923  | NM_004369 | 1246.923  |
| NM_004296 | 1293.22   | 1759.125  | AB040970  | 3112.793  | 3793.574  | NM_01813C | 570.324   |
| NM_005048 | 997.146   | 945.57    | NM_01833C | 5091.229  | 5401.591  | AB006630  | 61.778    |
| NM_005972 | 918.839   | 1127.228  | M33197    | 43895.266 | 35170.824 | NM_016155 | 571.872   |
| NM_00106C | 2979.64   | 3622.019  | U50342    | 756.677   | 901.452   | NM_001224 | 3144.581  |
| NM_018841 | 1334.594  | 1393.893  | NM_015921 | 48097.563 | 32868.672 | NM_017811 | 2952.452  |
| NM_005226 | 489.78    | 707.172   | AB040900  | 15529.57  | 11007.288 | NM_005101 | 37966.211 |
| AL133105  | 2535.881  | 2627.087  | NM_001482 | 1429.036  | 1206.93   | AF130060  | 22299.375 |
| AK022859  | 1343.366  | 1190.944  | U80018    | 1125.416  | 855.006   | NM_000177 | 2619.879  |
| NM_000214 | 901.393   | 781.846   | NM_000717 | 2604.173  | 2021.839  | NM_003387 | 7271.604  |
| NM_003728 | 10399.604 | 9716.45   | M33197    | 65104.09  | 64366.66  | U60665    | 918.767   |
| NM_004975 | 5481.298  | 3946.983  | NM_004845 | 3929.439  | 4338.452  | NM_005507 | 13638.18  |
| NM_002245 | 539.5     | 680.449   | NM_007107 | 7564.821  | 13127.414 | AL080133  | 2872.228  |
| D87445    | 11383.39  | 10894.835 | NM_000047 | 16891.416 | 35802.961 | NM_006912 | 2969.07   |
| NM_000238 | 4839.251  | 5549.952  | M68874    | 3281.932  | 2949.839  | X12534    | 287.002   |
| NM_002247 | 1214.876  | 1390.695  | NM_006319 | 4418.774  | 2971.338  | NM_018951 | 681.917   |
| NM_00498C | 15510.163 | 16972.514 | NM_018226 | 4329.524  | 4011.319  | NM_014323 | 2070.093  |
| NM_003224 | 1825.668  | 2105.521  | Z36813    | 4607.557  | 5928.515  | NM_003205 | 751.371   |
| NM_001658 | 64888.668 | 56430.922 | NM_00666C | 6703.851  | 7169.483  | AB002324  | 1598.736  |
| NM_006827 | 18441.279 | 19421.176 | NM_004727 | 681.019   | 849.275   | AL359938  | 399.3     |
| AK021761  | 11329.964 | 8916.466  | NM_006685 | 39957.473 | 49928.504 | AK026231  | 370.373   |



|           |           |           |           |           |           |           |           |
|-----------|-----------|-----------|-----------|-----------|-----------|-----------|-----------|
| AK024536  | 1703.453  | 1682.503  | AF080158  | 3241.964  | 1775.828  | NM_002140 | 6973.025  |
| NM_018668 | 7861.761  | 8064.645  | BM664556  | 1922.051  | 1067.543  | NM_020143 | 1625.434  |
| NM_004227 | 1209.732  | 1585.102  | M33197    | 42965.961 | 37997.516 | NM_012469 | 1344.378  |
| NM_005282 | 3140.893  | 3694.153  | NM_016545 | 1659.962  | 1440.652  | NM_005131 | 888.451   |
| NM_001736 | 1017.752  | 1202.192  | NM_001440 | 25309.449 | 16335.739 | NM_007056 | 524.055   |
| AB028949  | 1122.129  | 2076.784  | NM_001201 | 874.034   | 858.433   | AF083383  | 558.746   |
| AL137580  | 996.249   | 985.606   | NM_016618 | 2121.385  | 2149.181  | NM_006925 | 1558.295  |
| NM_004101 | 1363.898  | 933.172   | AB014568  | 29711.301 | 28273.951 | NM_004890 | 48373.609 |
| NM_002995 | 42634.535 | 43962.324 | NM_012249 | 3452.548  | 4637.698  | AK023181  | 1224.637  |
| NM_015978 | 2153.517  | 2235.909  | AK022546  | 8835.355  | 9307.934  | NM_004294 | 983.381   |
| NM_003810 | 4406.635  | 3067.687  | NM_014067 | 11761.023 | 11806.34  | NM_005051 | 13675.374 |
| NM_004908 | 634.68    | 764.073   | NM_002914 | 4147.782  | 3176.721  | AF264627  | 15191.63  |
| NM_014443 | 3882.045  | 3471.288  | NM_020385 | 1418.305  | 1551.375  | NM_018142 | 238.91    |
| NM_016457 | 2028.243  | 1113.402  | NM_006541 | 1455.701  | 1212.728  | AL109695  | 4327.904  |
| NM_005057 | 1304.144  | 1405.397  | M33197    | 65608.773 | 67646.789 | NM_002168 | 468.923   |
| AF143321  | 976.759   | 946.826   | NM_005705 | 8496.466  | 7995.747  | NM_004453 | 1037.71   |
| AB046842  | 1878.444  | 1725.414  | NM_004328 | 672.125   | 1697.333  | NM_016229 | 2153.557  |
| NM_004850 | 2073.169  | 2015.582  | NM_004581 | 2353.369  | 2427.848  | NM_018244 | 544.323   |
| NM_002822 | 4493.592  | 4292.118  | NM_006817 | 17575.492 | 12737.354 | NM_002492 | 25232.543 |
| BF306955  | 2008.427  | 1898.561  | NM_007108 | 7067.47   | 9796.944  | NM_005642 | 4218.964  |
| NM_001394 | 15310.387 | 14773.285 | M33197    | 61627.867 | 61471.918 | NM_018105 | 1034.204  |
| NM_018441 | 10288.837 | 9413.28   | M95610    | 19785.621 | 18135.148 | AK023452  | 2433.891  |
| NM_000778 | 9835.729  | 16412.588 | NM_003118 | 11138.245 | 4665.019  | AF155065  | 487.735   |
| NM_001609 | 1631      | 1662.108  | L02922    | 16396.893 | 15836.978 | NM_000332 | 834.342   |
| BE733234  | 968.733   | 862.521   | NM_001797 | 2743.243  | 2448.95   | AK022215  | 2698.795  |
| NM_020228 | 3703.184  | 3869.635  | NM_003154 | 3365.194  | 2736.601  | NM_001527 | 7846.482  |
| AK024685  | 1553.05   | 2156.091  | NM_004235 | 1376.612  | 1122.208  | AK025269  | 3782.125  |
| NM_003676 | 13454.933 | 14806.925 | AK023459  | 2152.301  | 2651.675  | NM_001438 | 497.014   |
| AF113007  | 2973.788  | 1778.124  | U13022    | 2142.985  | 1410.894  | AB040971  | 870.537   |
| NM_000688 | 5829.682  | 6412.008  | BG763477  | 10206.199 | 1433.806  | NM_006562 | 2015.884  |
| U39573    | 1461.32   | 1533.836  | AA702640  | 2612.495  | 2747.04   | AK024254  | 535.022   |
| D82061    | 2629.624  | 2552.028  | T68583    | 2837.484  | 2920.84   | NM_018456 | 242.968   |
| AJ293009  | 2072.684  | 2206.985  | AA481944  | 26423.266 | 31607.164 | NM_018996 | 743.159   |
| NM_000374 | 3064.815  | 2811.041  | X14390    | 984.01    | 659.468   | AL137304  | 1601.147  |
| NM_000502 | 6546.836  | 5912.333  | M31158    | 637.599   | 1126.336  | NM_018279 | 1085.184  |
| NM_001359 | 28057.906 | 20911.896 | H00742    | 2259.104  | 2200.159  | AK026883  | 1118.267  |
| NM_005175 | 36504.742 | 42501.383 | D42108    | 930.847   | 1631.541  | NM_014350 | 5703.176  |
| NM_001696 | 16245.384 | 12777.916 | AI366068  | 11820.465 | 16655.584 | U00925    | 2871.905  |
| AF190900  | 5632.234  | 4869.245  | AB040970  | 4615.098  | 2807.96   | AL390185  | 1724.323  |
| NM_020404 | 10179.86  | 10121.163 | NM_018330 | 4230.842  | 2521.224  | AF086235  | 1185.627  |
| BE972401  | 7623.33   | 6145.037  | M33197    | 72833.742 | 64320.008 | AF143886  | 1496.59   |
| NM_017425 | 1122.07   | 1195.8    | U50342    | 3436.786  | 2418.414  | AK025053  | 675.945   |
| AB007922  | 991.691   | 826.774   | NM_000295 | 1672.517  | 806.698   | AK025975  | 1595.441  |
| NM_015982 | 1809.701  | 1788.437  | AF103795  | 1081.54   | 858.637   | NM_014664 | 2479.02   |
| NM_003746 | 14322.043 | 31816.605 | NM_013231 | 3723.644  | 7003.293  | AL109788  | 813.159   |
| NM_002910 | 31300.822 | 34138.059 | NM_012106 | 3149.023  | 3647.968  | NM_014952 | 60477.117 |
| AC096970  | 17691.605 | 22309.367 | NM_006254 | 3482.959  | 3704.384  | AL137566  | 710.561   |
| AK024865  | 1032.311  | 1001.345  | NM_004422 | 1959.386  | 1889.111  | AF087962  | 2664.818  |
| NM_007210 | 1095.538  | 717.152   | NM_016562 | 979.343   | 1066.992  | AL050197  | 1517.919  |
| NM_001483 | 3237.019  | 3476.751  | M33197    | 44387.402 | 35588.324 | AF085870  | 3223.793  |
| NM_018973 | 9101.848  | 14777.144 | AY009399  | 2518.748  | 3125.143  | AL117580  | 5252.312  |
| NM_002591 | 6644.804  | 7494.259  | U59748    | 1597.281  | 2813.36   | AL110190  | 1698.838  |
| NM_020216 | 7399.889  | 6174.399  | L32537    | 1454.521  | 2426.355  | AL117656  | 1204.48   |

|           |           |           |           |           |           |           |           |
|-----------|-----------|-----------|-----------|-----------|-----------|-----------|-----------|
| AK021860  | 2722.447  | 1799.938  | NM_014303 | 19977.477 | 21509.738 | AJ001893  | 647.178   |
| AB046816  | 1123.542  | 967.356   | NM_006660 | 7634.058  | 5189.143  | NM_014819 | 5663.172  |
| AL137266  | 3413.367  | 4600.779  | NM_000559 | 737.199   | 962.61    | AF086040  | 696.084   |
| U95031    | 576.957   | 543.021   | NM_006685 | 57687.816 | 50448.535 | AB032988  | 672.047   |
| NM_014288 | 2034.291  | 5439.129  | M33197    | 15593.984 | 10060.55  | AK023559  | 2996.076  |
| AF035300  | 923.275   | 911.955   | NM_004045 | 13039.035 | 7566.14   | AL049233  | 4562.774  |
| NM_017703 | 8128.896  | 7520.396  | NM_001891 | 4675.919  | 3375.452  | NM_017696 | 2372.175  |
| NM_015320 | 1946.684  | 1893.973  | NM_012139 | 5034.776  | 5759.17   | AL050166  | 3476.181  |
| NM_014726 | 19184.09  | 14439.739 | AF121856  | 2155.356  | 2008.582  | AK026705  | 1289.769  |
| AJ297349  | 3488.602  | 5527.909  | NM_006421 | 2984.071  | 2271.549  | NM_003602 | 573.281   |
| NM_005828 | 7096.389  | 8749.821  | NM_017457 | 14613.088 | 15588.605 | AF009258  | 3723.659  |
| NM_001619 | 2413.963  | 2518.59   | NM_003765 | 7281.729  | 5778.817  | AF009305  | 1307.227  |
| NM_006599 | 2269.311  | 2233.993  | NM_018202 | 5549.938  | 4187.659  | NM_006193 | 459.735   |
| NM_004463 | 611.385   | 896.611   | AB023197  | 1549.762  | 1317.709  | AF009270  | 1068.067  |
| U43586    | 774.786   | 832.004   | NM_022173 | 4554.073  | 7649.585  | AF009318  | 956.431   |
| NM_006271 | 8183.848  | 8007.44   | NM_004328 | 1185.881  | 2123.947  | AF056421  | 494.743   |
| NM_018647 | 931.041   | 1183.423  | NM_004581 | 4737.984  | 4363.672  | AK001085  | 251.622   |
| NM_003026 | 672.505   | 698.554   | NM_006817 | 31188.531 | 21594.145 | AK001906  | 1799.989  |
| NM_003933 | 2074.388  | 1493.635  | NM_007108 | 8490.756  | 6649.675  | AK021528  | 932.195   |
| NM_018640 | 657.484   | 882.622   | NM_015921 | 32915.301 | 27456.115 | AK021746  | 8643.633  |
| NM_005095 | 3945.566  | 4261.766  | AB040900  | 12329.18  | 12814.278 | AK001136  | 1820.899  |
| NM_000055 | 627.772   | 544.109   | NM_001482 | 1483.825  | 1783.923  | AK021617  | 482.822   |
| NM_003163 | 7452.136  | 6500.505  | U80018    | 1105.896  | 1277.161  | AK021810  | 1183.59   |
| NM_019057 | 3302.765  | 3177.449  | NM_000717 | 1679.641  | 1588.995  | AK025190  | 137.817   |
| NM_002677 | 1274.829  | 1031.544  | M33197    | 49024.16  | 45859.152 | AK025214  | 981.987   |
| NM_016205 | 2200.857  | 2082.836  | NM_004845 | 2549.684  | 2896.171  | AK025846  | 3011.957  |
| NM_005759 | 1547.53   | 1282.812  | NM_007107 | 4819.696  | 6484.308  | AK026805  | 3068.122  |
| AF149724  | 1496.705  | 1545.307  | NM_000047 | 9399.679  | 12607.876 | AL389983  | 610.411   |
| BC020745  | 1108.235  | 1016.263  | M68874    | 2454.825  | 2004.117  | AJ008159  | 438.934   |
| NM_006367 | 65996.766 | 55845.656 | NM_006319 | 3539.193  | 3941.83   | AK000995  | 397.063   |
| NM_006732 | 44677.488 | 37935.219 | NM_018226 | 4024.129  | 4901.569  | U00959    | 848.806   |
| NM_004354 | 3034.936  | 2328.703  | Z36813    | 2887.428  | 4971.264  | NM_014578 | 6147.527  |
| NM_004661 | 2300.125  | 3067.052  | AB018327  | 1534.526  | 1359.641  | AF147306  | 1182.659  |
| NM_001610 | 2632.957  | 2361.007  | AF303889  | 1347.075  | 511.525   | AF086267  | 3013.814  |
| NM_001241 | 1484.851  | 1488.214  | M33197    | 46960.117 | 45549.594 | X74606    | 350.817   |
| AF217504  | 2450.291  | 2437.848  | AK022649  | 2749.279  | 2251.62   | NM_012183 | 2287.618  |
| AK027102  | 7816.75   | 7782.947  | NM_016507 | 7256.288  | 6482.569  | AK001938  | 192.809   |
| AL109714  | 648.231   | 746.146   | NM_002024 | 6180.58   | 4943.378  | NM_018225 | 8487.575  |
| NM_004632 | 2406.286  | 3596.91   | NM_002743 | 4151.882  | 6134.571  | AK025534  | 669.464   |
| NM_017919 | 4566.261  | 4007.352  | AF173358  | 19992.941 | 15331.678 | AK022577  | 183.298   |
| NM_014456 | 6024.602  | 5218.916  | NM_016366 | 3407.226  | 4984.875  | AF091526  | 1171.818  |
| NM_004740 | 7907.677  | 5194.35   | M33197    | 44917.129 | 42753.203 | AK022170  | 564.577   |
| NM_019886 | 5156.958  | 4584.473  | NM_016545 | 1591.086  | 1834.047  | M60749    | 380.427   |
| NM_016623 | 9415.704  | 7556.008  | NM_001440 | 16389.699 | 15259.388 | X79986    | 528.013   |
| NM_001334 | 4835.023  | 5707.286  | NM_016618 | 1693.439  | 1880.366  | NM_003523 | 11574.099 |
| NM_004771 | 1068.884  | 1459.946  | AB014568  | 27504.68  | 23299.729 | X01448    | 444.296   |
| AL365514  | 1259.505  | 1321.564  | NM_012249 | 2165.822  | 3320.013  | NM_016503 | 2528.36   |
| NM_018299 | 1829.795  | 1917.728  | AK022546  | 5147.07   | 4983.404  | AK056351  | 18449.248 |
| NM_002104 | 1082.36   | 1453.127  | NM_014067 | 6204.08   | 6746.686  | NM_014690 | 1794.858  |
| NM_005504 | 4635.809  | 7457.58   | NM_002914 | 3141.483  | 3484.661  | AF086490  | 299.307   |
| AF234654  | 1894.033  | 1999.07   | NM_020385 | 1171.53   | 1923.267  | AF131738  | 18609.145 |
| NM_000110 | 6464.387  | 5854.564  | NM_014877 | 1151.425  | 1897.26   | AK021666  | 2406.053  |
| NM_016002 | 28185.848 | 29152.723 | NM_006197 | 4547.914  | 2447.824  | AK024081  | 468.689   |

|           |           |           |           |           |           |           |           |
|-----------|-----------|-----------|-----------|-----------|-----------|-----------|-----------|
| NM_014549 | 1646.512  | 1381.898  | M29273    | 4029.362  | 2617.311  | AK024825  | 812.068   |
| NM_000531 | 670.866   | 531.873   | M33197    | 57211.957 | 50589.418 | AF086317  | 1897.054  |
| NM_017832 | 6889.411  | 8367.533  | NM_004854 | 6965.604  | 6616.564  | U16850    | 2278.615  |
| NM_001713 | 2144.946  | 2237.402  | AJ245418  | 11864.597 | 10030.177 | AL390178  | 2743.876  |
| NM_015367 | 6473.015  | 5891.827  | NM_006377 | 3546.679  | 3166.114  | Z36806    | 505.697   |
| NM_014498 | 4775.834  | 4044.578  | NM_002436 | 2639.614  | 3184.625  | NM_005368 | 672.42    |
| NM_002375 | 9459.337  | 10455.833 | NM_018362 | 3110.869  | 3052.382  | NM_018618 | 795.017   |
| NM_000988 | 67092.766 | 57502.309 | M33197    | 46330.008 | 45639.289 | AJ008121  | 11048.535 |
| NM_001813 | 3019.497  | 2765.748  | NM_002186 | 4310.077  | 4432.755  | AJ008153  | 1452.466  |
| AF055016  | 4495.109  | 4847.35   | NM_006182 | 1328.48   | 1199.267  | AK023739  | 1511.105  |
| AB037809  | 2007.303  | 1498.825  | AL137543  | 2937.021  | 2644.153  | NM_005830 | 3952.528  |
| AB011129  | 1454.697  | 1209.462  | NM_004444 | 10591.253 | 13028.954 | AL389876  | 142.376   |
| NM_014391 | 4589.282  | 4765.803  | NM_001957 | 1874.583  | 1307.892  | AK022120  | 1590.131  |
| NM_004270 | 2673.346  | 1884.338  | AK024533  | 19142.916 | 29611.494 | Z70762    | 185.122   |
| NM_012082 | 668.229   | 692.769   | NM_002736 | 8438.046  | 6606.715  | BF037206  | 882.909   |
| NM_001537 | 4475.242  | 3879.542  | NM_002285 | 3649.561  | 1435.702  | AK021474  | 18613.855 |
| U80743    | 1491.965  | 1846.836  | NM_006694 | 8836.132  | 7568.032  | AK023642  | 374.77    |
| NM_001352 | 4212.268  | 4230.405  | NM_003087 | 4258.832  | 3500.09   | U52827    | 1999.891  |
| D15050    | 1096.925  | 1027.864  | NM_001630 | 3745.835  | 4300.213  | AL049466  | 5598.899  |
| NM_006527 | 3859.401  | 5860.494  | M33197    | 51228.348 | 47431.75  | AB037802  | 953.091   |
| NM_006627 | 3594.939  | 3224.286  | AF305081  | 2829.278  | 2365.177  | U17623    | 136.545   |
| NM_007363 | 21687.525 | 24603.291 | NM_004712 | 6672.867  | 7675.151  | AL137450  | 3205.838  |
| NM_003093 | 35482.602 | 45374.742 | AF118078  | 882.664   | 738.506   | AK023058  | 1821.362  |
| U05589    | 990.734   | 935.967   | AL157428  | 1156.865  | 755.987   | NM_012064 | 5127.892  |
| NM_014473 | 6434.331  | 8721.918  | M33197    | 41728.68  | 42350.418 | AK001460  | 1469.853  |
| NM_003095 | 53090.887 | 53521.199 | NM_005858 | 5042.6    | 3989.056  | AK092508  | 2683.596  |
| NM_016388 | 1772.937  | 1818.162  | AK025163  | 2044.622  | 1416.887  | AK027111  | 34286.012 |
| NM_002295 | 60833.734 | 55935.379 | NM_014931 | 1210.648  | 1807.322  | NM_003518 | 2958.477  |
| NM_003133 | 23319.602 | 24023.689 | NM_014487 | 1372.934  | 1931.411  |           |           |
| NM_001762 | 10187.225 | 12320.112 | NM_018070 | 2286.527  | 3311.785  |           |           |
| NM_016306 | 16119.552 | 18299.412 | NM_002484 | 3420.855  | 4884.356  |           |           |
| NM_003755 | 1229.44   | 1217.682  | AL162052  | 789.385   | 1239.608  |           |           |
| NM_013238 | 6628.551  | 7167.101  | AK025941  | 1242.432  | 2149.044  |           |           |
| BE258640  | 21652.793 | 20489.096 | M33197    | 53088.277 | 43893.75  |           |           |
| NM_003314 | 6227.404  | 8206.029  | NM_015914 | 807.889   | 710.648   |           |           |
| AL355730  | 648.117   | 851.591   | AF059531  | 8565.195  | 4842.596  |           |           |
| U79273    | 1863.955  | 1707.978  | NM_002707 | 10576.34  | 7422.547  |           |           |
| AK022050  | 4978      | 3765.316  | AK026884  | 11944.192 | 10255.438 |           |           |
| NM_002512 | 56837.461 | 51642.426 | S82198    | 2510.942  | 2224.635  |           |           |
| NM_001246 | 573.917   | 590.048   | NM_002594 | 2688.493  | 3440.789  |           |           |
| AL365411  | 3279.953  | 4195.743  | NM_031407 | 2408.735  | 2215.571  |           |           |
| NM_016066 | 3247.372  | 4161.175  | M33197    | 59586.434 | 59832.883 |           |           |
| NM_001249 | 961.523   | 1028.204  | AK000410  | 30311.768 | 41029.719 |           |           |
| AK024677  | 865.162   | 1176.34   | NM_020193 | 1302.152  | 1296.551  |           |           |
| NM_000036 | 1129.634  | 1909.176  | NM_005619 | 2148.577  | 2225.619  |           |           |
| AF254082  | 23254.777 | 24698.725 | D87440    | 1757.247  | 1985.917  |           |           |
| AF205718  | 6131.714  | 7003.091  | M33197    | 46840.313 | 49543.074 |           |           |
| NM_003420 | 752.488   | 852.866   | NM_016260 | 751.418   | 558.937   |           |           |
| AY004252  | 1030.438  | 990.454   | NM_002895 | 2686.515  | 2084.784  |           |           |
| NM_006261 | 1991.605  | 1787.809  | NM_013351 | 44691.887 | 33613.254 |           |           |
| AK027045  | 1342.863  | 1125.267  | NM_012340 | 8175.646  | 8598.756  |           |           |
| AF169796  | 1691.043  | 1949.759  | NM_006022 | 1609.904  | 1779.622  |           |           |
| AK001814  | 4788.225  | 4559.717  | AK025110  | 2596.097  | 2040.194  |           |           |

|           |           |           |           |           |           |
|-----------|-----------|-----------|-----------|-----------|-----------|
| NM_007222 | 1744.435  | 2430.113  | X52339    | 53325.875 | 42279.875 |
| NM_003435 | 2669.068  | 3248.159  | M33197    | 59983.281 | 59273.074 |
| NM_016291 | 3858.206  | 3610.425  | AB046830  | 4558.523  | 2514.699  |
| NM_005937 | 48553.23  | 53846.695 | NM_007122 | 3852.199  | 2585.708  |
| AK023259  | 1602.83   | 2072.956  | NM_001488 | 771.849   | 693.587   |
| AK001503  | 1637.844  | 1591.619  | NM_016202 | 12636.178 | 10017.406 |
| AK022880  | 2447.471  | 2339.964  | NM_012476 | 1905.433  | 1286.192  |
| NM_003601 | 9413.354  | 12283.847 | NM_016604 | 934.032   | 441.875   |
| AF086375  | 217.302   | 563.341   | M33197    | 39655.836 | 38141.637 |
| AK001228  | 3853.308  | 5002.807  | NM_006276 | 2113.44   | 2121.452  |
| AK026778  | 1910.472  | 1852.023  | NM_003407 | 3781.746  | 4489.559  |
| AF074987  | 3406.98   | 3582.978  | NM_007209 | 41366.762 | 44450.121 |
| AK001058  | 24392.213 | 20953.057 | NM_003729 | 1646.255  | 3523.374  |
| AK026239  | 1820.566  | 1570.68   | L05096    | 8837.79   | 9528.237  |
| AF086283  | 987.986   | 883.175   | BC015899  | 2028.454  | 3821.717  |
| AF088047  | 680.404   | 763.573   | NM_017986 | 19793.475 | 22407.516 |
| AF086281  | 1509.244  | 1082.376  | AK023629  | 1051.855  | 1133.157  |
| AF086372  | 820.603   | 994.295   | AK024846  | 2118.277  | 3176.43   |
| AF086393  | 878.463   | 1748.143  | AK001451  | 5379.213  | 5328.696  |
| AF086453  | 693.055   | 811.471   | M33197    | 49437.133 | 51900.957 |
| AF070621  | 7385.217  | 6903.344  | NM_007180 | 2050.754  | 3286.149  |
| NM_020240 | 2077.862  | 2491.548  | NM_005609 | 1112.125  | 1409.156  |
| AK023678  | 26557.971 | 9391.723  | NM_005476 | 6084.544  | 10262.14  |
| AF052090  | 4646.966  | 4246.406  | NM_005660 | 5117.84   | 5347.391  |
| AK023718  | 3854.174  | 3849.389  | AK023902  | 1889.839  | 2286.253  |
| AF075089  | 4451.098  | 3799.273  | AB011173  | 3163.199  | 4183.31   |
| AF241255  | 738.764   | 691.587   | AB023195  | 923.83    | 641.07    |
| AF086007  | 65052.117 | 52567.711 | U43431    | 1974.408  | 1650.49   |
| AK000803  | 2572.243  | 2762.776  | AB006622  | 1520.41   | 1360.251  |
| AK022374  | 806.201   | 837.584   | M33197    | 37519.777 | 27212.906 |
| AF085926  | 12228.615 | 10704.673 | AK097041  | 2624.566  | 2945.177  |
| AF085948  | 867.136   | 401.063   | AF068744  | 34756.914 | 46626.215 |
| AL137307  | 3302.944  | 3474.316  | NM_004497 | 460.659   | 303.176   |
| AL137468  | 9378.406  | 8119.654  | AK000762  | 2345.287  | 3114.187  |
| AL162007  | 34520.66  | 33495.98  | NM_004571 | 1135.253  | 1378.785  |
| AL390137  | 13734.323 | 16167.663 | AJ345030  | 4001.503  | 2125.016  |
| AL137340  | 1149.716  | 1075.012  | AK023472  | 14882.224 | 12092.689 |
| AL137542  | 867.68    | 699.08    | AK021796  | 828.582   | 839.891   |
| AL162045  | 1381.552  | 1171.702  | AL109729  | 731.124   | 685.393   |
| X92185    | 400.798   | 637.884   | AF007146  | 1054.332  | 927.44    |
| AK022437  | 13254.598 | 12737.233 | M33197    | 59841.473 | 60895.965 |
| AF086102  | 759.423   | 1251.906  | S79912    | 41399.105 | 54857.926 |
| AF116682  | 18874.971 | 20265.359 | AL110283  | 1475.981  | 1202.049  |
| AL137259  | 3007.042  | 2491.662  | AK026892  | 5596.032  | 3607.536  |
| AL122107  | 5464.917  | 4481.671  | S83275    | 32884.625 | 41399.852 |
| AF075021  | 933.819   | 801.167   | AL117427  | 7711.396  | 11997.955 |
| AK025140  | 19701.252 | 11394.723 | M33197    | 58722.488 | 62736.891 |
| AK023394  | 2364.575  | 2229.1    | AF052118  | 13936.889 | 17696.715 |
| AF090093  | 13064.052 | 11987.721 | AK025166  | 7640.168  | 7843.75   |
| AF161340  | 4969.903  | 4384.729  | AL359586  | 1483.249  | 1458.395  |
| AF242771  | 1166.49   | 886.274   | AF147421  | 767.384   | 764.623   |
| NM_018562 | 10048.636 | 9184.04   | AF035290  | 1710.001  | 1075.004  |
| AF098666  | 881.377   | 799.291   | AK023216  | 1329.716  | 1003.855  |

|           |           |           |           |           |           |
|-----------|-----------|-----------|-----------|-----------|-----------|
| AF161365  | 520.253   | 352.304   | M33197    | 54259.371 | 56675.695 |
| AK021969  | 1564.204  | 1861.032  | AF086547  | 492.12    | 812.777   |
| AK022065  | 2541.772  | 2080.532  | AK023288  | 1631.578  | 2295.069  |
| AK022221  | 5879.459  | 5362.273  | AK022198  | 1029.167  | 1066.977  |
| AK022356  | 1692.243  | 1286.222  | M33197    | 63655.223 | 60225.074 |
| AK021998  | 2725.408  | 1820.968  | AK022428  | 1277.563  | 639.702   |
| AK022126  | 2541.845  | 2607.173  | AK000788  | 849.155   | 987.506   |
| AK022256  | 1204.501  | 925.354   | AK023457  | 4271.935  | 1433.532  |
| AK022383  | 1861.146  | 1540.928  | AK025089  | 6450.685  | 4354.405  |
| AK027041  | 2490.211  | 3507.557  | AK023298  | 962.019   | 555.223   |
| AK022064  | 537.781   | 575.604   | AK021431  | 926.701   | 703.06    |
| AK024332  | 765.971   | 766.648   | M33197    | 59825.949 | 56695.273 |
| NM_005355 | 24967.025 | 21686.279 | AF085996  | 4588.521  | 4880.27   |
| AK000937  | 1036.048  | 1193.332  | AK001279  | 3350.824  | 2348.248  |
| AF035306  | 2547.28   | 2572.684  | AF086407  | 1360.662  | 1193.107  |
| AK091662  | 807.133   | 861.872   | AF085949  | 981.304   | 843.449   |
| NM_003954 | 2325.197  | 1717.492  | AK001567  | 1926.011  | 1843.242  |
| NM_016348 | 1615.105  | 1389.103  | AL109707  | 1108.784  | 813.637   |
| AK023877  | 908.574   | 651.528   | M33197    | 48840.523 | 41039.41  |
| AK023640  | 641.558   | 393.982   | U52839    | 1274.239  | 1071.574  |
| AK024213  | 23923.039 | 24597.234 | U58667    | 1207.754  | 1385.876  |
| AK025093  | 811.567   | 622.254   | M33197    | 55467.379 | 57090.676 |
| AK022184  | 1925.111  | 2266.467  | AK026984  | 22235.439 | 27644.232 |
| AB007959  | 1191.455  | 925.082   | AK022088  | 1484.626  | 1069.713  |
| AK024153  | 1528.78   | 1385.884  | NM_013391 | 1483.369  | 841.204   |
| Y10516    | 4576.893  | 4489.602  | M33197    | 60735.336 | 57339.477 |
| AF056451  | 1626.626  | 1689.519  | AL157466  | 2864.663  | 1957.05   |
| AF015039  | 4335.774  | 6014.769  | AL389981  | 1417.054  | 1003.335  |
| U50528    | 1716.474  | 1443.885  | AK024336  | 2564.897  | 1852.757  |
| AB020632  | 1706.093  | 2121.938  | AK023862  | 811.864   | 985.991   |
| NM_018614 | 35070.988 | 36482.355 | NM_018621 | 2224.498  | 1730.673  |
| AL117549  | 1359.677  | 1578.3    | AK022016  | 1850.332  | 1988.295  |
| NM_005222 | 6833.154  | 4704.018  | AK021628  | 1516.058  | 1343.036  |
| BC024308  | 8178.475  | 10389.656 | M33197    | 61560.883 | 58181.551 |
| NM_000538 | 2757.693  | 3346.797  | NM_018603 | 1041.208  | 1003.601  |
| AK001838  | 66163.953 | 53186.715 | AK022118  | 1909.6    | 924.962   |
| NM_018295 | 1330.75   | 1840.914  | AK026453  | 6258.276  | 5217.214  |
| AF070574  | 800.039   | 885.505   | AK025673  | 2371.94   | 1290.437  |
| AF086262  | 3366.992  | 5026.771  | M33197    | 56593.77  | 40819.27  |
| AF086292  | 5061.602  | 4504.032  | AK023635  | 690.656   | 780.467   |
| AK023769  | 893.915   | 533.825   | AK022431  | 1221.975  | 1503.544  |
| AK024342  | 15632.055 | 15003.579 | AK023305  | 58796.086 | 57891.891 |
| AL137712  | 5506.478  | 5110.129  | AK023763  | 5065.526  | 7951.22   |
| AL137606  | 616.362   | 552.552   | AK023967  | 625.591   | 1562.257  |
| L77599    | 42171.227 | 39652.539 | AK022729  | 3013.297  | 2552.848  |
| AK021673  | 19278.729 | 15684.264 | NM_006168 | 18355.184 | 14296.407 |
| AB014543  | 1363.006  | 1782.733  | AL050374  | 3512.754  | 3292.099  |
| NM_018445 | 8183.259  | 7636.657  | M33197    | 60797.559 | 58388.004 |
| AK022743  | 6075      | 5548.007  | M28639    | 4865.423  | 3971.711  |
| NM_014627 | 3403.086  | 1893.291  | AL122073  | 14387.726 | 16420.9   |
| NM_013938 | 14241.68  | 12190.657 | AF116655  | 3751.982  | 4155.057  |
| NM_013986 | 61826.676 | 52191.539 | AJ243222  | 2405.918  | 2124.329  |
| U55055    | 1188.443  | 1510.776  | AK026132  | 3954.556  | 3774.516  |

|           |           |           |           |           |           |
|-----------|-----------|-----------|-----------|-----------|-----------|
| AB018319  | 2091.763  | 2474.073  | Y11162    | 1150.612  | 1312.892  |
| AK001101  | 3823.87   | 2785.128  | M33197    | 59879.281 | 56890.75  |
| BM973473  | 1506.511  | 1529.174  | AF070584  | 1961.435  | 1786.756  |
| AK021637  | 1537.691  | 1334.046  | AF075006  | 751.703   | 562.248   |
| AK021658  | 1026.047  | 626.597   | M33197    | 57206.879 | 55065.48  |
| U17631    | 1885.143  | 2005.259  | AK000903  | 31993.822 | 24140.627 |
| AL137723  | 3311.114  | 2836.565  | AK023938  | 1132.732  | 1281.256  |
| AK000774  | 228.772   | 562.315   | AK026896  | 1101.254  | 1306.764  |
| AK024046  | 2641.869  | 2555.901  | AL110169  | 1023.244  | 1343.121  |
| NM_017931 | 3335.485  | 3434.131  | L13743    | 3059.51   | 2830.93   |
| AK022793  | 1615.636  | 1261.894  | U84519    | 2251.504  | 1797.246  |
| AJ227910  | 1916.244  | 1451.608  | Z11849    | 5754.771  | 4517.997  |
| AF001893  | 3015.381  | 1592.049  | AJ002788  | 2246.178  | 2748.698  |
| X04236    | 15590.51  | 15065.023 | U84527    | 490.336   | 735.409   |
| AK093746  | 19639.748 | 15774.76  | M33197    | 61166.063 | 64433.074 |
| D16875    | 3451.072  | 2626.604  | AF052103  | 3966.501  | 4419.884  |
| AK027171  | 1606.282  | 1302.995  | AF075050  | 872.022   | 993.178   |
| AK021945  | 3219.069  | 3334.278  | AK024842  | 1782.667  | 1789.868  |
| L23545    | 1273.527  | 1419.673  | NM_018382 | 1609.534  | 1116.893  |
| CY3Cy5    | 15748.012 | 1126.465  | M33197    | 60410.883 | 65182.469 |
| U13022    | 1943.862  | 1756.303  | D17203    | 50643.477 | 56014.711 |
| R23251    | 12317.798 | 22146.695 | NM_006495 | 3892.49   | 5651.585  |
| BG763477  | 22819.486 | 1824.411  | AK022101  | 692.488   | 991.78    |
| AA702640  | 4114.086  | 4012.677  | NM_003251 | 596.814   | 980.456   |
| T68583    | 5564.913  | 6081.232  | AB046772  | 788.151   | 639.13    |
| AA481944  | 48455.883 | 59470.77  | M33197    | 60533.863 | 59576.938 |
| X14390    | 1408.867  | 1881.118  | AL442080  | 839.431   | 956.999   |
| AF038440  | 1270.423  | 1096.234  | AY007143  | 10845.652 | 19975.148 |
| M31158    | 968.667   | 1521.828  | L15557    | 1633.566  | 2347.476  |
| H00742    | 3866.195  | 3971.947  | M33197    | 62519.035 | 60010.305 |
| D42108    | 2801.811  | 3166.533  | NM_001563 | 14695.783 | 11229.087 |
| BG700922  | 1352.467  | 1251.197  | NM_000266 | 1680.153  | 1289.956  |
| AI366068  | 7944.35   | 26998.012 | X89666    | 5119.041  | 4474.083  |
| N57553    | 1269.584  | 1507.458  | NM_017429 | 555.318   | 486.865   |
| AF080158  | 4265.896  | 4548.239  | NM_003104 | 5630.058  | 5234.672  |
| BM664556  | 3242.055  | 4033.003  | NM_014581 | 3984.298  | 4482.249  |
| SR5       | 5904.499  | 5970.424  | NM_000896 | 878.274   | 1139.294  |
| SR7       | 7982.34   | 47066.789 | M33197    | 59825.309 | 61030.254 |
| SR9       | 36035.617 | 6185.776  | AK024448  | 5022.795  | 4472.749  |
| CY3Cy5    | 15208.24  | 1478.214  | NM_014406 | 3604.991  | 3526.37   |
| M33197    | 68281.844 | 69710.711 | Z11801    | 2230.285  | 2704.95   |
| NM_007024 | 5326.374  | 4503.1    | AK027253  | 868.731   | 780.856   |
| NM_013231 | 3918.992  | 4066.624  | S68954    | 2213.258  | 7550.614  |
| NM_012106 | 4839.524  | 4548.495  | S81335    | 3476.009  | 3856.824  |
| NM_006254 | 8410.49   | 7410.393  | AF052109  | 2014.951  | 3046.868  |
| X95425    | 3246.185  | 3096.794  | M33197    | 27965.451 | 32962.156 |
| NM_004422 | 2633.294  | 3418.725  | NM_003353 | 12926.372 | 15026.928 |
| NM_016562 | 2232.473  | 2570.706  | X82127    | 11143.488 | 13173.575 |
| M33197    | 56270.906 | 59882.82  | AL122044  | 662.166   | 1312.949  |
| U59748    | 1655.498  | 2359.249  | NM_018296 | 1136.537  | 1204.82   |
| L32537    | 1024.892  | 1048.809  | NM_005752 | 2355.017  | 2880.133  |
| M95610    | 28481.621 | 21602.176 | M33197    | 59671.996 | 60671.945 |
| L02922    | 34645.113 | 33068.629 | CY3Cy5    | 10623.802 | 1191.564  |

|           |           |           |             |           |           |
|-----------|-----------|-----------|-------------|-----------|-----------|
| NM_001797 | 3747.38   | 2651.993  | AA418907    | 997.674   | 1289.83   |
| NM_003154 | 3452.483  | 3489.896  | AA115473    | 1884.558  | 3219.384  |
| NM_004235 | 1370.01   | 1276.266  | AA872397    | 3902.392  | 5373.719  |
| AK023459  | 2669.327  | 3579.787  | AA709414    | 4262.899  | 2248.575  |
| NM_012135 | 5185.766  | 6283.114  | D12676      | 2304.087  | 1738.959  |
| AF121856  | 4867.7    | 3442.862  | BC012593    | 619.018   | 539.221   |
| NM_006421 | 3293.976  | 3753.229  | NM_000935   | 15249.802 | 13583.888 |
| NM_017457 | 19997.215 | 19975.871 | NM_004295   | 13991.183 | 18781.674 |
| NM_003765 | 15211.452 | 12146.554 | H-X 02812 I | 1902.506  | 1563.246  |
| NM_005868 | 541.634   | 958.739   | U75898      | 1813.185  | 2108.702  |
| AB023197  | 5566.97   | 4725.723  | M29039      | 1232.081  | 1007.149  |
| NM_022173 | 7305.838  | 7574.153  | M59815      | 947.327   | 787.854   |
| NM_018330 | 4504.338  | 4305.379  | NM_006917   | 1298.644  | 1535.865  |
| AB023222  | 1788.56   | 2171.833  | SR2         | 55713.188 | 61563.852 |
| M33197    | 54167.578 | 59492.313 | SR4         | 12947.596 | 12729.48  |
| U50342    | 4117.753  | 3457.544  | SR6         | 1825.682  | 1893.373  |
| NM_000295 | 1739.699  | 1020.097  | SR8         | 6809.484  | 22386.727 |
| AF026932  | 939.765   | 667.66    | SR10        | 18256.113 | 6495.114  |
| AF103795  | 1106.97   | 1293.89   | CY3Cy5      | 8962.729  | 638.438   |
| NM_006215 | 1106.49   | 1209.6    | NM_001203   | 1216.025  | 1026.811  |
| U80018    | 903.096   | 783.447   | NM_004795   | 12003.846 | 13402.546 |
| NM_000717 | 2587.341  | 2100.648  | NM_006733   | 972.483   | 1078.92   |
| M33197    | 66478.914 | 62449.711 | NM_014047   | 11686.804 | 8194.156  |
| NM_004845 | 2551.777  | 2295.682  | AK022901    | 1825.453  | 1694.553  |
| NM_007107 | 6793.363  | 10943.879 | M33197      | 62143.227 | 62212.645 |
| NM_000047 | 7912.161  | 11096.192 | AF037332    | 2255.189  | 2101.286  |
| M68874    | 2734.545  | 2417.957  | NM_006052   | 724.533   | 605.152   |
| NM_006315 | 7781.12   | 5442.836  | AB040912    | 4280.854  | 4653.776  |
| NM_018226 | 5551.696  | 6578.292  | NM_003871   | 932.621   | 1300.589  |
| NM_004605 | 1057.224  | 1179.287  | NM_006243   | 3682.371  | 6132.752  |
| Z36813    | 4041.414  | 5435.777  | NM_007252   | 357.749   | 412.739   |
| NM_006660 | 6531.234  | 7385.577  | M33197      | 56020.848 | 60884.172 |
| NM_001486 | 850.36    | 676.668   | AJ011129    | 3398.117  | 4105.073  |
| NM_004727 | 478.667   | 813.141   | AF282874    | 481.848   | 564.715   |
| NM_000555 | 1589.661  | 1572.348  | NM_001035   | 510.761   | 648.383   |
| M33197    | 15397.023 | 12600.897 | NM_006387   | 5925.891  | 4211.272  |
| NM_004045 | 9070.741  | 7702.878  | NM_005646   | 2169.949  | 2997.625  |
| NM_001891 | 2912.537  | 2558.791  | NM_006635   | 3420.579  | 3745.466  |
| NM_001440 | 24033.951 | 18467.426 | NM_001692   | 495.206   | 787.694   |
| NM_001201 | 838.367   | 773.318   | BI767871    | 3594.076  | 3902.842  |
| NM_016618 | 2274.862  | 1945.558  | AK022817    | 1136.104  | 1399.095  |
| AB014568  | 21330.658 | 22117.063 | M33197      | 58584.672 | 59604.793 |
| NM_012245 | 3284.759  | 4723.966  | AB037831    | 1394.182  | 1403.15   |
| NM_020385 | 1710.109  | 2212.705  | NM_012103   | 7796.599  | 8876.659  |
| NM_014877 | 940.359   | 787.225   | AL122077    | 10439.065 | 10604.312 |
| NM_006541 | 1210.382  | 1144.953  | NM_014632   | 861.44    | 747.496   |
| NM_004328 | 1004.211  | 2362.633  | NM_006422   | 1223.691  | 1000.981  |
| NM_004581 | 4243.775  | 4829.359  | BE789195    | 1043.639  | 639.714   |
| NM_006817 | 17836.121 | 24973.484 | NM_016946   | 1976.878  | 1857.143  |
| NM_015921 | 36017.668 | 45913.68  | M33197      | 59353.961 | 60163.023 |
| AB040900  | 14648.285 | 18621.537 | NM_007255   | 3324.489  | 1607.075  |
| NM_001080 | 530.093   | 784.658   | NM_018402   | 1068.451  | 776.725   |
| NM_001482 | 1081.842  | 1443.04   | NM_018005   | 485.352   | 512.059   |

|           |           |           |           |           |           |
|-----------|-----------|-----------|-----------|-----------|-----------|
| NM_001797 | 4531.679  | 2503.111  | AK075081  | 2909.305  | 3109.908  |
| NM_003154 | 3222.536  | 2642.814  | NM_000895 | 3674.415  | 6529.567  |
| NM_004235 | 1303.738  | 1472.664  | NM_003820 | 32743.938 | 41318.688 |
| AK023459  | 2366.662  | 3188.989  | NM_015915 | 3361.847  | 3384.964  |
| BI762154  | 1147.997  | 954.3     | M33197    | 66219.789 | 67368.492 |
| U13022    | 1943.596  | 1825.319  | NM_016518 | 3596.436  | 3826.147  |
| AA702640  | 3342.924  | 3570.879  | NM_006185 | 7805.08   | 11416.738 |
| T68583    | 4991.135  | 5795.75   | NM_014800 | 1557.988  | 1320.259  |
| X14390    | 1178.423  | 1294.379  | NM_001557 | 2203.837  | 1635.075  |
| AF038440  | 1100.52   | 1120.761  | AF147311  | 2671.287  | 3243.006  |
| M31158    | 741.608   | 1196.857  | NM_002131 | 31524.943 | 47386.016 |
| H00742    | 3499.993  | 2728.103  | NM_017927 | 2547.906  | 3273.83   |
| D42108    | 2557.828  | 2998.068  | NM_020151 | 3332.051  | 3413.331  |
| BG700922  | 1213.96   | 1163.917  | NM_005891 | 17555.895 | 29807.799 |
| AI366068  | 7527.568  | 24306.549 | NM_001645 | 3720.878  | 1430.342  |
| N57553    | 1847.545  | 1763.799  | NM_003956 | 886.427   | 1133.908  |
| AF080158  | 3706.082  | 3475.557  | M33197    | 55211.035 | 57264.766 |
| BM664556  | 2470.488  | 2187.296  | NM_003500 | 2849.949  | 2045.749  |
| NM_016545 | 1545.479  | 1792.154  | NM_014317 | 2846.847  | 1976.314  |
| NM_000295 | 2095.07   | 1150.134  | L09234    | 6092.864  | 5881.532  |
| NM_000716 | 394.79    | 403.763   | NM_000059 | 1918.861  | 979.079   |
| AF026932  | 826.121   | 669.599   | AK026740  | 1104.487  | 934.208   |
| AF103795  | 985.963   | 927.551   | NM_017881 | 4287.768  | 4206.509  |
| NM_006215 | 941.09    | 967.199   | M33197    | 57419.539 | 58998.586 |
| NM_013231 | 2549.993  | 3650.555  | NM_017634 | 5421.744  | 3329.308  |
| NM_012106 | 4731.937  | 4654.271  | NM_000813 | 1118.509  | 951.319   |
| X95425    | 2575.435  | 2985.746  | NM_018896 | 1548.731  | 2069.356  |
| NM_004422 | 2148.912  | 1966.218  | AJ300465  | 2205.58   | 2096.114  |
| NM_016562 | 1004.912  | 995.177   | X86400    | 1296.099  | 1183.353  |
| M33197    | 59232.113 | 58493.488 | NM_000810 | 2091.502  | 1788.12   |
| AY009399  | 18420.43  | 13450.571 | AF069307  | 2429.719  | 2080.847  |
| NM_004895 | 13315.71  | 11904.875 | M33197    | 59743.586 | 59090.406 |
| U59748    | 1873.279  | 2781.45   | U92978    | 3360.278  | 2722.461  |
| L32537    | 917.397   | 947.097   | NM_005738 | 736.454   | 841.397   |
| NM_014303 | 11101.485 | 17316.375 | NM_014488 | 1045.531  | 1191.125  |
| M95610    | 37161.535 | 34461.57  | NM_013389 | 6136.528  | 5302.899  |
| L02922    | 29872.9   | 30148.625 | AB014567  | 940.668   | 569.769   |
| M33197    | 15342.2   | 10611.915 | NM_005326 | 5950.852  | 7006.849  |
| NM_004045 | 10028.784 | 7791.752  | NM_014069 | 765.672   | 808.356   |
| NM_001891 | 1880.628  | 1532.139  | AB035130  | 1645.827  | 1211.02   |
| NM_012139 | 4814.283  | 6612.84   | NM_003359 | 1076.232  | 768.251   |
| AF121856  | 4327.429  | 3473.267  | M33197    | 32646.33  | 23714.959 |
| NM_006421 | 3042.912  | 3073.635  | AF119917  | 386.537   | 549.574   |
| NM_017457 | 17166.697 | 17239.332 | NM_017915 | 718.253   | 454.061   |
| NM_003765 | 13863.079 | 9513.498  | AL050097  | 486.33    | 1490.395  |
| NM_005868 | 494.329   | 802.671   | NM_003579 | 1523.808  | 974.582   |
| M33197    | 53287.852 | 60419.453 | AL049283  | 858.477   | 936.811   |
| NM_018202 | 15759.063 | 16944.445 | M33197    | 57419.57  | 56585.324 |
| AB023197  | 5012.451  | 5395.314  | NM_002401 | 32846.445 | 35877.395 |
| NM_022173 | 7394.629  | 7558.579  | NM_001274 | 2367.579  | 1584.232  |
| AB040970  | 5424.623  | 4140.258  | NM_003913 | 1194.64   | 1019.806  |
| NM_018330 | 5124.98   | 3664.636  | NM_002227 | 2861.158  | 2806.149  |
| AB033088  | 1471.515  | 1370.769  | NM_007199 | 2230.485  | 2044.671  |



|           |           |           |             |           |           |
|-----------|-----------|-----------|-------------|-----------|-----------|
| M33197    | 67666.016 | 68069.656 | AB002301    | 437.239   | 677.742   |
| U50342    | 3468.971  | 3922.686  | AB014530    | 4894.507  | 5837.875  |
| NM_015921 | 34082.719 | 35817.035 | M33197      | 57693.668 | 58932.066 |
| AB040900  | 13661.522 | 16137.14  | NM_005989   | 3485.245  | 3608.385  |
| NM_001080 | 619.046   | 783.753   | AB014607    | 3484.066  | 3015.997  |
| NM_001482 | 1184.213  | 1153.755  | AF134401    | 1336.148  | 1331.094  |
| U80018    | 1081.983  | 1009.775  | NM_006387   | 3783.114  | 2941.383  |
| NM_000717 | 1608.097  | 1938.949  | NM_005646   | 2026.212  | 2435.801  |
| M33197    | 68100.375 | 66712.789 | NM_006639   | 3150.716  | 3249.218  |
| NM_004845 | 2004.356  | 2156.145  | NM_001692   | 666.21    | 806.175   |
| NM_007107 | 6549.1    | 9857.137  | BI767871    | 3640.85   | 2663.858  |
| NM_000047 | 7188.203  | 9620.872  | AA418907    | 1145.741  | 803.914   |
| M68874    | 2648.825  | 2029.203  | AA115473    | 2542.117  | 2766.781  |
| NM_006319 | 7074.828  | 4079.413  | AA872397    | 3700.992  | 3285.813  |
| NM_018226 | 5235.607  | 5722.026  | AA709414    | 3007.585  | 1632.352  |
| NM_004605 | 1204.666  | 1223.299  | D12676      | 2107.197  | 1677.475  |
| Z36813    | 4045.619  | 5770.321  | BC012593    | 495.696   | 551.87    |
| NM_006660 | 7348.93   | 6697.703  | NM_000939   | 11703.167 | 11569.09  |
| NM_001486 | 635.152   | 651.911   | NM_004295   | 14919.079 | 21693.91  |
| NM_004727 | 1053.615  | 1117.336  | H-X 02812 I | 2049.169  | 2001.928  |
| NM_000559 | 721.286   | 796.588   | U75898      | 3479.045  | 4237.055  |
| AF080158  | 3745.153  | 2630.925  | M29039      | 1232.4    | 1323.542  |
| BM664556  | 2960.896  | 2428.263  | M59815      | 924.037   | 995.806   |
| NM_016545 | 1712.858  | 1881.957  | NM_006917   | 508.833   | 578.88    |
| NM_001440 | 21666.73  | 20835.82  | M33197      | 718.04    | 685.383   |
| NM_001201 | 820.682   | 728.266   | AB011146    | 2005.245  | 1549.019  |
| NM_016618 | 2781.563  | 2748.777  | NM_006185   | 7247.638  | 10762.67  |
| AB014568  | 17549.367 | 16588.688 | NM_014800   | 1658.246  | 1091.794  |
| NM_012249 | 2904.013  | 3479.011  | NM_001557   | 2225.723  | 1583.127  |
| AK022546  | 5328.421  | 5081.328  | AF147311    | 2489.596  | 2766.27   |
| NM_014067 | 4904.44   | 5250.941  | NM_002131   | 29141.998 | 33861.371 |
| NM_002914 | 2912.404  | 3017.616  | NM_017927   | 1840.375  | 1593.892  |
| NM_020385 | 1777.776  | 2208.223  | M33197      | 61147.316 | 61776.195 |
| NM_014877 | 876.163   | 863.142   | NM_001203   | 2109.302  | 2077.697  |
| NM_006541 | 1128.379  | 1229.301  | NM_004799   | 16659.039 | 13960.313 |
| M33197    | 67970.484 | 67886.188 | NM_006733   | 891.422   | 1005.717  |
| NM_005705 | 8823.913  | 6413.547  | NM_014047   | 12062.704 | 8805.671  |
| NM_004328 | 1128.844  | 2820.522  | AK022901    | 1930.302  | 1891.854  |
| NM_004581 | 4990.04   | 4939.349  | M33197      | 60350.164 | 59486.293 |
| NM_006817 | 18250.053 | 26121.9   | AF037332    | 2007.166  | 1984.709  |
| M33197    | 68463.102 | 64547.57  | NM_006052   | 527.19    | 678.433   |
| M95610    | 29106.66  | 21580.508 | AB040912    | 3685.276  | 3667.015  |
| L02922    | 30491.504 | 21890.15  | NM_003871   | 632.834   | 760.23    |
| NM_001797 | 3166.369  | 1732.172  | NM_006243   | 3089.349  | 4201.814  |
| NM_003154 | 2487      | 2297.722  | M33197      | 58278.172 | 60202.047 |
| NM_004235 | 1185.647  | 1119.883  | AJ011129    | 2488.5    | 2880.408  |
| AK023459  | 2303.051  | 3027.502  | AF282874    | 985.442   | 957.761   |
| BI762154  | 800.643   | 845.151   | NM_001039   | 1127.593  | 1073.364  |
| U13022    | 1572.996  | 1448.061  | M33197      | 56647.453 | 57544.613 |
| BG763477  | 21133.592 | 1707.941  | U92978      | 4962.152  | 4484.966  |
| AA702640  | 3376.754  | 3347.957  | NM_005738   | 654.838   | 760.444   |
| T68583    | 4082.699  | 4564.555  | NM_014488   | 791.894   | 511.774   |
| AA481944  | 43382.652 | 53398.867 | NM_013389   | 7689.015  | 5475.652  |

|           |           |           |           |           |           |
|-----------|-----------|-----------|-----------|-----------|-----------|
| X14390    | 830.394   | 1423.075  | AB014567  | 745.025   | 689.688   |
| AF038440  | 995.644   | 1018.692  | AK022817  | 1344.849  | 1454.904  |
| M31158    | 854.558   | 1498.509  | NM_018034 | 5233.139  | 4193.727  |
| H00742    | 3522.082  | 2470.47   | M33197    | 57969.621 | 58718.824 |
| D42108    | 2999.695  | 3209.006  | AB037831  | 1566.249  | 2524.099  |
| BG700922  | 1200.6    | 1183.99   | NM_012103 | 9373.234  | 10640.218 |
| AI366068  | 8238.707  | 25044.98  | AL122077  | 13767.568 | 15426.714 |
| N57553    | 1030.396  | 973.347   | NM_014632 | 880.415   | 941.442   |
| AB040970  | 6514.966  | 5118.706  | NM_006422 | 990.144   | 1133.468  |
| NM_01833C | 5421.665  | 4259.402  | BE789195  | 804.633   | 461.625   |
| AB023222  | 1574.345  | 1479.558  | NM_016946 | 1574.896  | 1497.596  |
| AB033088  | 1485.451  | 1427.596  | M33197    | 66009.25  | 72935.344 |
| M33197    | 65400     | 61145.578 | NM_007259 | 3979.106  | 2511.113  |
| U50342    | 3625.045  | 3715.99   | NM_018402 | 1398.876  | 1441.956  |
| NM_000295 | 2015.3    | 1294.777  | NM_018009 | 383.773   | 508.664   |
| AF026932  | 847.882   | 656.473   | AK075081  | 2001.292  | 2181.1    |
| AF103795  | 1071.613  | 1349.243  | NM_000895 | 2684.644  | 4736.931  |
| NM_006215 | 1001.547  | 1029.713  | NM_00382C | 19613.766 | 21355.994 |
| NM_007024 | 3913.365  | 3746.83   | NM_015915 | 2019.24   | 2051.278  |
| NM_013231 | 2599.594  | 2883.189  | M33197    | 56550.047 | 60534.441 |
| NM_012106 | 3870.759  | 3362.127  | NM_016518 | 5168.102  | 4359.61   |
| NM_006254 | 6424.691  | 7529.569  | AB002301  | 1129.852  | 1227.57   |
| X95425    | 2393.494  | 2660.466  | AB014530  | 8569.948  | 7959.771  |
| NM_004422 | 1628.817  | 1907.062  | M33197    | 59379.051 | 58393.488 |
| NM_016562 | 1178.894  | 1032.692  | NM_005989 | 3253.443  | 2940.41   |
| M33197    | 64943.656 | 60236.043 | AB014607  | 5141.01   | 4166.263  |
| AY009399  | 18256.105 | 13649.62  | AF134401  | 1576.491  | 1676.103  |
| U59748    | 2085.199  | 3036.933  | NM_020151 | 10417.679 | 7407.274  |
| L32537    | 1077.407  | 1020.889  | NM_005891 | 19378.77  | 26842.43  |
| NM_014303 | 12892.141 | 20108.004 | NM_001645 | 4914.471  | 1704.614  |
| NM_00666C | 7373.878  | 7271.555  | NM_003956 | 1536.304  | 1366.105  |
| NM_004727 | 1261.117  | 1088.615  | M33197    | 59975.977 | 59624.453 |
| NM_006685 | 28115.861 | 29096.492 | NM_00350C | 3180.188  | 2871.42   |
| M33197    | 15637.088 | 13982.852 | NM_014317 | 3137.196  | 2344.886  |
| NM_004045 | 10732.221 | 10946.623 | L09234    | 5950.831  | 4560.049  |
| NM_001891 | 1827.238  | 1339.162  | NM_000059 | 1688.457  | 939.337   |
| NM_012139 | 4244.924  | 5351.344  | AK026740  | 1085.202  | 1170.053  |
| AF121856  | 4265.452  | 3239.911  | NM_017881 | 3681.342  | 4815.588  |
| NM_006421 | 2736.58   | 3362.125  | M33197    | 58959.785 | 56551.023 |
| NM_017457 | 18398.906 | 19471.32  | NM_017634 | 4597.49   | 3412.346  |
| NM_003765 | 14217.627 | 10016.061 | NM_000813 | 1045.516  | 1039.672  |
| NM_005868 | 598.364   | 819.704   | NM_018896 | 887.792   | 1214.189  |
| NM_018202 | 16566.572 | 14662.932 | AJ300465  | 1061.076  | 910.783   |
| AB023197  | 5609.539  | 4880.509  | X86400    | 1464.642  | 1439.102  |
| NM_022173 | 7550.104  | 8569.7    | NM_00081C | 1642.193  | 1576.266  |
| M33197    | 68580.453 | 63231.289 | AF069307  | 2990.027  | 2723.776  |
| NM_005705 | 6038.074  | 5000.933  | NM_006917 | 1039.038  | 1125.908  |
| NM_004328 | 1060.07   | 2389.212  | AB011146  | 1478.469  | 971.93    |
| NM_004581 | 4337.114  | 4853.443  | NM_005326 | 12690.662 | 11630.665 |
| NM_006817 | 19149.512 | 26111.465 | NM_014069 | 784.063   | 1034.203  |
| NM_007108 | 15138.224 | 15626.449 | AB035130  | 1578.917  | 1417.474  |
| NM_015921 | 34739.797 | 49973.645 | NM_003359 | 1050.545  | 1154.406  |
| AB040900  | 15996.067 | 20085.922 | M33197    | 31662.281 | 30973.148 |

|           |           |           |             |           |           |
|-----------|-----------|-----------|-------------|-----------|-----------|
| NM_001080 | 711.622   | 833.958   | AF119917    | 343.785   | 706.677   |
| NM_001482 | 1202.98   | 1323.181  | NM_017915   | 960.216   | 882.212   |
| U80018    | 1237.385  | 1182.339  | AL050097    | 849.727   | 903.755   |
| NM_000717 | 1690.953  | 2539.286  | AK021513    | 808.856   | 899.365   |
| M33197    | 61672.773 | 58740.074 | NM_003579   | 1379.501  | 1417.312  |
| NM_004845 | 1908.434  | 2178.193  | AL049283    | 817.486   | 852.638   |
| NM_007107 | 6428.221  | 10931.971 | M33197      | 43869.129 | 48376.406 |
| NM_000047 | 9269.653  | 12421.63  | NM_002401   | 10928.337 | 10096.141 |
| M68874    | 3012.75   | 2117.768  | NM_001274   | 1090.211  | 994.155   |
| NM_006319 | 8166.846  | 4241.721  | NM_003913   | 1350.824  | 867.35    |
| NM_018226 | 5987.465  | 6729.429  | NM_002227   | 2148.339  | 2182.151  |
| NM_004605 | 1236.898  | 1299.095  | NM_007199   | 2077.075  | 2712.84   |
| Z36813    | 4817.221  | 5359.522  | NM_006243   | 3875.841  | 5307.877  |
| AB018327  | 2463.384  | 2350.69   | AF282874    | 635.67    | 1763.938  |
| AF303889  | 1319.209  | 870.985   | NM_001039   | 552.528   | 620.415   |
| M33197    | 64493.07  | 62125.016 | NM_006387   | 3730.357  | 2475.323  |
| AK022649  | 7720.934  | 6844.522  | NM_005646   | 1987.449  | 1916.822  |
| NM_016507 | 3458.408  | 3112.428  | NM_006639   | 3353.265  | 3417.999  |
| NM_002024 | 6756.133  | 3399.017  | NM_001692   | 748.158   | 608.949   |
| NM_002743 | 8208.619  | 9491.342  | BI767871    | 3801.724  | 2998.26   |
| AF173358  | 8598.754  | 11079.766 | AA418907    | 1278.339  | 1347.845  |
| NM_016366 | 1614.787  | 1776.283  | AA115473    | 2502.113  | 3441.347  |
| M33197    | 62354.777 | 59725.223 | AA872397    | 3842.583  | 4777.875  |
| NM_016545 | 1941.8    | 2309.702  | AA709414    | 1990.594  | 1179.587  |
| NM_001440 | 21011.068 | 26232.381 | D12676      | 1310.843  | 1476.594  |
| NM_001201 | 686.311   | 449.627   | BC012593    | 514.153   | 525.509   |
| NM_016618 | 2775.796  | 3367.465  | NM_000939   | 5074.294  | 6384.447  |
| AB014568  | 15887.292 | 14534.583 | NM_004295   | 4769.605  | 6134.517  |
| NM_012249 | 3915.969  | 5808.942  | H-X 02812 I | 1452.887  | 1232.683  |
| AK022546  | 7234.114  | 5191.918  | U75898      | 644.326   | 1203.845  |
| NM_014067 | 10059.443 | 8391.077  | M59815      | 728.018   | 1148.393  |
| NM_002914 | 3711.741  | 3292.162  | AK075081    | 2777.085  | 2695.979  |
| NM_020385 | 1876.284  | 1749.289  | NM_000895   | 3356.596  | 5258.671  |
| NM_014877 | 1028.461  | 881.004   | M33197      | 41622.566 | 42024.277 |
| NM_006541 | 1136.607  | 1408.134  | NM_016518   | 2392.397  | 2041.536  |
| NM_018179 | 1653.563  | 1080.469  | NM_006185   | 7383.835  | 7870.676  |
| NM_006197 | 6732.783  | 4559.62   | NM_014800   | 1272.495  | 1232.043  |
| NM_014181 | 644.809   | 922.403   | NM_001557   | 1400.168  | 804.262   |
| M29273    | 2670.902  | 1968.616  | AF147311    | 2092.137  | 2425.373  |
| M33197    | 65205.496 | 58388.645 | NM_002131   | 31354.969 | 41391.211 |
| NM_004854 | 2453.745  | 2512.826  | NM_017927   | 2141.376  | 2513.228  |
| AJ245418  | 6472.964  | 5193.536  | M33197      | 45055.52  | 37996.738 |
| NM_006377 | 4653.735  | 3671.735  | NM_001203   | 1204.594  | 1047.885  |
| AK026427  | 932.984   | 879.985   | NM_004799   | 11966.254 | 11117.889 |
| NM_002436 | 3774.509  | 2562.508  | NM_006733   | 1427.238  | 1430.274  |
| NM_018362 | 3111.065  | 2973.244  | NM_014047   | 8140.991  | 8691.887  |
| M33197    | 63989.387 | 61192.383 | AK022901    | 832.96    | 939.371   |
| NM_004755 | 1646.551  | 1197.971  | M33197      | 29589.023 | 30263.936 |
| NM_002186 | 3605.581  | 3365.907  | AF037332    | 1884.113  | 1983.489  |
| NM_006182 | 1263.22   | 1431.157  | NM_014571   | 746.127   | 1027.826  |
| AL137543  | 5168.321  | 4423.96   | NM_006052   | 629.353   | 672.026   |
| NM_004444 | 8717.115  | 8184.275  | AB040912    | 4140.097  | 4599.857  |
| M33197    | 1416.637  | 973.125   | NM_003871   | 653.958   | 973.038   |

|           |           |           |           |           |           |
|-----------|-----------|-----------|-----------|-----------|-----------|
| NM_001957 | 2577.496  | 2287.048  | NM_000813 | 957.466   | 859.627   |
| AK024533  | 13623.765 | 13072.705 | NM_018896 | 2586.628  | 2452.797  |
| NM_002736 | 21963.48  | 19331.279 | NM_000810 | 3286.929  | 3152.642  |
| NM_004246 | 6198.188  | 5903.306  | AF069307  | 2454.525  | 2086.118  |
| NM_002285 | 5250.616  | 3866.031  | M33197    | 60484.875 | 57930.785 |
| NM_006694 | 17067.049 | 28782.51  | U92978    | 3636.915  | 3467.31   |
| NM_005207 | 1843.539  | 2001.247  | NM_005738 | 885.837   | 629.743   |
| NM_014467 | 845.573   | 900.281   | NM_014488 | 1095.44   | 923.813   |
| NM_003087 | 2407.778  | 2091.99   | NM_013389 | 7833.088  | 5908.887  |
| NM_001630 | 2927.61   | 3091.09   | AB014567  | 664.21    | 751.153   |
| M33197    | 63339.957 | 62402.934 | NM_018034 | 5756.802  | 6217.826  |
| NM_002031 | 896.518   | 969.863   | M33197    | 45614.855 | 44129.816 |
| AF305081  | 3419.437  | 4526.988  | AB037831  | 1056.076  | 1310.949  |
| NM_004712 | 10672.781 | 11997.117 | NM_012103 | 3397.503  | 4622.681  |
| AF118078  | 2548.754  | 2132.674  | AL122077  | 9840.684  | 13739.355 |
| NM_020169 | 630.49    | 664.922   | NM_006422 | 869.113   | 978.027   |
| AL157428  | 976.783   | 1160.203  | BE789195  | 573.157   | 732.951   |
| M33197    | 56049.887 | 58178.32  | NM_016946 | 2359.628  | 2546.651  |
| BE904175  | 478.93    | 729.21    | M33197    | 50673.914 | 58181.77  |
| NM_005858 | 3126.257  | 3081.788  | NM_007259 | 5011.472  | 3127.615  |
| AK025163  | 1630.925  | 2139.013  | NM_018402 | 1013.219  | 562.403   |
| NM_014931 | 3010.484  | 5429.584  | NM_018009 | 805.058   | 816.514   |
| NM_014487 | 1562.067  | 2331.239  | M33197    | 55379.953 | 54656.43  |
| NM_018070 | 4322.622  | 3902.458  | NM_002401 | 36637.379 | 39712.809 |
| NM_002484 | 4596.719  | 4020.289  | NM_001274 | 4135.177  | 3390.894  |
| M33197    | 65312.094 | 63222.484 | NM_003913 | 1302.139  | 1512.131  |
| NM_018240 | 61369.922 | 67575.164 | NM_002227 | 2090.027  | 1452.342  |
| AL162052  | 688.005   | 833.031   | NM_007199 | 1567.731  | 1909.996  |
| AK025941  | 1929.314  | 3792.564  | AB002301  | 814.579   | 2166.45   |
| M33197    | 64368.898 | 59035.73  | AB014530  | 6183.72   | 5560.821  |
| NM_015914 | 2109.453  | 2582.532  | M33197    | 60385.09  | 57474.754 |
| AF059531  | 5369.382  | 5620.578  | NM_005989 | 5495.976  | 5555.505  |
| NM_002707 | 8306.396  | 14202.759 | AB014607  | 4942.525  | 4554.266  |
| AF029777  | 1155.222  | 1278.167  | AF134401  | 1391.832  | 1421.936  |
| NM_003352 | 1570.134  | 1633.596  | NM_020151 | 9897.564  | 9355.441  |
| AK026884  | 11388.485 | 12060.86  | NM_005891 | 18883.551 | 32696.492 |
| S82198    | 2159.272  | 2029.38   | NM_001645 | 4284.221  | 2111.479  |
| NM_002594 | 2927.426  | 3586.575  | NM_003956 | 1182.552  | 1032.501  |
| NM_031407 | 2971.281  | 4873.842  | M33197    | 60936.684 | 57319.996 |
| M33197    | 58242.219 | 56902.27  | NM_003500 | 3045.503  | 3417.688  |
| AK000410  | 41344.199 | 58006.375 | NM_014317 | 1648.567  | 1623.691  |
| NM_020193 | 1658.603  | 1384.571  | L09234    | 4714.364  | 6254.568  |
| D86982    | 701.669   | 402.394   | NM_000059 | 1627.555  | 1650.532  |
| NM_005619 | 5779.195  | 2964.431  | AK026740  | 1480.083  | 2112.162  |
| D87440    | 2734.912  | 2563.628  | NM_017881 | 3680.878  | 5545.651  |
| AK000332  | 15801.99  | 17400.168 | M33197    | 58432.566 | 56848.863 |
| AL080156  | 3123.126  | 1840.571  | NM_017634 | 6355.287  | 4780.296  |
| M33197    | 61975.27  | 60244.648 | NM_017743 | 1436.955  | 1316.531  |
| NM_006738 | 837.911   | 1840.64   | NM_000300 | 2670.751  | 2367.909  |
| NM_002895 | 901.88    | 1130.373  | M33197    | 60879.656 | 58556.879 |
| NM_013351 | 20536.713 | 16543.473 | AV756917  | 2381.28   | 2141.312  |
| NM_012340 | 4213.148  | 3902.075  | NM_018380 | 13845.017 | 20974.352 |
| NM_006022 | 1227.74   | 1132.268  | AK001442  | 1329.443  | 1207.064  |

|           |           |           |           |           |           |
|-----------|-----------|-----------|-----------|-----------|-----------|
| AK025110  | 2233.541  | 2304.379  | NM_012070 | 2313.623  | 2047.393  |
| X52339    | 44665.02  | 45606.609 | NM_019038 | 1270.611  | 838.751   |
| M33197    | 59587.352 | 58280.289 | AF183423  | 1155.082  | 2368.883  |
| AB046830  | 3792.865  | 3518.092  | AB011146  | 903.381   | 964.915   |
| NM_007122 | 3449.277  | 2742.057  | NM_005326 | 9291.757  | 8798.571  |
| NM_001488 | 978.117   | 807.624   | NM_014069 | 606.73    | 1019.216  |
| NM_016202 | 5499.027  | 5403.941  | AB035130  | 1753.681  | 1754.398  |
| NM_012476 | 1272.806  | 1110.487  | NM_003359 | 1401.485  | 1685.783  |
| NM_016604 | 2591.901  | 2045.334  | M33197    | 41617.816 | 48659.996 |
| M33197    | 66620.422 | 63286.926 | AF119917  | 1607.613  | 2159.594  |
| NM_006276 | 2437.372  | 2890.724  | NM_017915 | 750.454   | 1066.378  |
| NM_003407 | 8906.12   | 4717.645  | AL050097  | 1141.235  | 1601.594  |
| NM_007209 | 63620.711 | 61962.137 | NM_003579 | 1171.966  | 1615.706  |
| NM_003729 | 4626.261  | 7054.995  | AL049283  | 1129.263  | 1501.652  |
| L05096    | 10278.823 | 11144.872 | NM_002214 | 3156.379  | 3589.393  |
| BC015899  | 5332.223  | 8983.316  | NM_000887 | 1606.135  | 2061.304  |
| NM_017986 | 3390.295  | 3337.433  | AF277292  | 1042.382  | 1022.021  |
| AK023629  | 698.484   | 633.939   | M33197    | 42006.574 | 38613.262 |
| AK024846  | 1335.08   | 2187.337  | X99659    | 56573.621 | 53279.129 |
| AK001451  | 4665.892  | 4768.996  | NM_015416 | 2349.067  | 3107.961  |
| M33197    | 41082.641 | 48011.57  | NM_003899 | 1737.727  | 1602.947  |
| NM_007180 | 1393.778  | 1419.405  | X99662    | 1590.249  | 2205.676  |
| NM_005609 | 695.038   | 766.082   | NM_003473 | 29831.816 | 33644.52  |
| NM_005476 | 2996.983  | 5313.585  | NM_014325 | 1261.618  | 1177.796  |
| NM_005660 | 2424.707  | 2560.675  | M33197    | 53663.59  | 50815.293 |
| AK023902  | 1961.547  | 2341.417  | NM_006016 | 42756.543 | 47158.988 |
| NM_005223 | 521.823   | 517.135   | NM_001242 | 1447.738  | 2882.486  |
| AB011173  | 1644.28   | 4458.246  | NM_014891 | 7571.596  | 9492.823  |
| AB023195  | 1174.527  | 1494.254  | NM_013392 | 11160.741 | 17715.615 |
| U43431    | 1702.253  | 2859.766  | NM_003236 | 768.426   | 1522.09   |
| AB006622  | 1580.97   | 1381.015  | NM_003458 | 792.093   | 800.06    |
| M33197    | 60014.281 | 58193.176 | AF052692  | 638.296   | 1476.028  |
| AK097041  | 4643.419  | 4303.681  | NM_002820 | 471.532   | 507.815   |
| AF068744  | 35578.91  | 35736.082 | NM_005228 | 3535.764  | 2747.467  |
| AK000762  | 2015.686  | 2321.712  | NM_002354 | 2750.867  | 2268.744  |
| NM_004571 | 899.87    | 1185.898  | NM_000179 | 1208.493  | 969.866   |
| AJ345030  | 1926.941  | 1531.746  | AF062739  | 2896.8    | 3880.389  |
| AK023472  | 10051.649 | 8982.626  | NM_006602 | 2618.874  | 2176.804  |
| AL109729  | 936.092   | 989.113   | M33197    | 55739.855 | 50857.121 |
| AF007146  | 634.442   | 762.292   | AL079314  | 2701.454  | 4554.811  |
| M33197    | 60856.789 | 58130.406 | NM_001260 | 1063.334  | 1412.164  |
| S79912    | 4238.943  | 4448.945  | NM_001950 | 2406.064  | 2712.905  |
| AL110283  | 1249.531  | 1474.692  | AK026364  | 865.858   | 942.693   |
| AK026892  | 3343.926  | 2001.59   | NM_018117 | 513.373   | 706.755   |
| S83275    | 3438.816  | 3366.028  | M33197    | 48694.41  | 51651.656 |
| AL117427  | 3753.229  | 3871.376  | NM_004331 | 3835.513  | 6843.167  |
| M33197    | 64926.016 | 57897.422 | BE886648  | 639.509   | 614.28    |
| AF052118  | 11469.45  | 11893.528 | AB018337  | 1666.512  | 3138.991  |
| AK025166  | 5575.317  | 5687.205  | NM_014489 | 1785.733  | 2604.436  |
| AL359586  | 2456.902  | 1634.583  | AK025273  | 2410.076  | 4180.305  |
| AF147421  | 888.976   | 773.46    | M33197    | 52316.957 | 55306.012 |
| AF035290  | 1817.462  | 1209.237  | NM_002205 | 3006.61   | 4502.99   |
| AK023216  | 1834.063  | 1450.854  | M33197    | 57896.582 | 59306.199 |

|           |           |           |           |           |           |
|-----------|-----------|-----------|-----------|-----------|-----------|
| M33197    | 55968.484 | 56806.98  | NM_000131 | 1403.31   | 1093.981  |
| AK023288  | 1086.631  | 1413.863  | NM_001836 | 978.679   | 956.424   |
| AK022198  | 822.677   | 770.287   | NM_001911 | 18211.979 | 19328.264 |
| M33197    | 62965.184 | 54077.453 | NM_000537 | 1000.871  | 858.318   |
| AK023457  | 2195.834  | 2131.89   | AB020698  | 1134.988  | 394.717   |
| AK025089  | 4170.124  | 4761.842  | NM_003969 | 1499.472  | 1425.071  |
| AK023298  | 831.824   | 761.634   | NM_004651 | 1533.664  | 1051.778  |
| AK021431  | 955.619   | 770.654   | M33197    | 47190.852 | 53168.672 |
| M33197    | 65339.332 | 57944.855 | NM_017569 | 7673.718  | 10824.641 |
| AF085996  | 831.529   | 1329.247  | NM_001456 | 790.276   | 834.739   |
| AK001279  | 2195.068  | 2263.974  | NM_002906 | 1350.533  | 2179.087  |
| AF086407  | 492.919   | 564.102   | AK024480  | 1640.763  | 2606.538  |
| AF085949  | 759.161   | 808.262   | Y13871    | 7387.478  | 11789.854 |
| AK001567  | 1863.34   | 2042.302  | AK024149  | 2403.017  | 2350.351  |
| AL109707  | 1178.033  | 1006.975  | AK023094  | 2213.695  | 1531.552  |
| M33197    | 47417.09  | 51795.996 | M33197    | 51782.031 | 43239.742 |
| U52839    | 3928.4    | 4456.205  | NM_004091 | 2897.979  | 2560.641  |
| U58667    | 993.854   | 646.375   | X74070    | 61170.664 | 56186.41  |
| M33197    | 52456.758 | 51814.289 | NM_006333 | 3497.626  | 1883.9    |
| AK026984  | 19916.402 | 22747.67  | M33197    | 54586.043 | 51113.707 |
| NM_013391 | 740.873   | 794.47    | NM_002898 | 5330.633  | 4585.309  |
| M33197    | 63695.148 | 56652.273 | AK022749  | 5958.124  | 5898.579  |
| AL157466  | 2490.454  | 3157.122  | BF031409  | 5743.514  | 4810.479  |
| AK024336  | 1829.255  | 1592.517  | NM_007043 | 1929.417  | 1437.616  |
| AK023862  | 743.631   | 726.334   | BE378791  | 773.522   | 1196.563  |
| NM_018621 | 1895.091  | 1684.566  | U94388    | 964.029   | 1388.88   |
| AK022016  | 862.267   | 603.611   | NM_012322 | 3852.914  | 3272.047  |
| AK021628  | 537.537   | 524.325   | M33197    | 34446.332 | 35316.902 |
| M33197    | 59914.742 | 55660.602 | NM_004889 | 24044.139 | 17987.477 |
| AK022118  | 1543.167  | 1604.777  | AK025314  | 1116.636  | 1620.277  |
| AK026453  | 6195.997  | 6749.271  | NM_002109 | 3188.625  | 4170.924  |
| AK025673  | 1168.176  | 796.859   | AK023027  | 4660.933  | 4095.343  |
| M33197    | 56911.34  | 56693.934 | AB002348  | 51250.254 | 41792.977 |
| AK022431  | 1102.746  | 993.559   | M33197    | 18547.064 | 12887.828 |
| AK023305  | 42465.926 | 42165.496 | AK026043  | 4572.692  | 1999.901  |
| AK023763  | 2497.377  | 2724.533  | NM_005006 | 5086.523  | 2758.774  |
| AK023967  | 557.293   | 735.81    | AK027033  | 1578.68   | 1833.314  |
| AK022729  | 2404.277  | 2239.704  | NM_000106 | 1922.99   | 2226.306  |
| NM_006168 | 6132.611  | 5386.359  | NM_003000 | 6299.784  | 4577.995  |
| AL050374  | 1401.14   | 2213.218  | NM_002495 | 16958.078 | 15483.151 |
| M33197    | 63869.258 | 60213.332 | M33197    | 32799.961 | 28387.813 |
| M28639    | 4707.133  | 4548.217  | NM_016284 | 1420.69   | 1291.922  |
| AL122073  | 23463.578 | 18237.863 | NM_014593 | 2487.257  | 1486.192  |
| AF116655  | 6241.804  | 4495.243  | NM_006833 | 9750.594  | 5575.829  |
| AJ243222  | 843.021   | 846.092   | NM_012257 | 1029.209  | 964.255   |
| AK026132  | 2247.46   | 4466.153  | U37690    | 32178.656 | 18677.83  |
| Y11162    | 974.592   | 945.231   | NM_005120 | 939.873   | 710.012   |
| M33197    | 60084.879 | 58149.691 | AB029012  | 4156.517  | 4258.182  |
| AF070584  | 1927.742  | 1661.303  | M33197    | 28991.775 | 20737.801 |
| AF165185  | 570.347   | 622.88    | AJ010278  | 1299.269  | 922.057   |
| AF075006  | 1118.658  | 760.365   | NM_006299 | 1496.505  | 2721.351  |
| M33197    | 59307.871 | 53545.117 | NM_018167 | 763.657   | 886.451   |
| AK000903  | 30093.693 | 23384.168 | AL050088  | 6157.813  | 5418.161  |

|             |           |           |           |           |           |
|-------------|-----------|-----------|-----------|-----------|-----------|
| AK023938    | 1185.57   | 1016.285  | AK024939  | 2776.194  | 2703.22   |
| AL110169    | 1155.628  | 783.864   | AK001561  | 7699.406  | 6680.627  |
| L13743      | 1309.605  | 1602.597  | AB007880  | 1381.592  | 1251.544  |
| Z11849      | 5036.361  | 5495.893  | AK024950  | 1443.514  | 1817.088  |
| AJ002788    | 2908.572  | 4120.736  | M33197    | 60560.906 | 57430.641 |
| M33197      | 64051.969 | 58406.305 | NM_014146 | 6472.655  | 7289.424  |
| AF075050    | 916.497   | 833.805   | AF147356  | 652.661   | 895.726   |
| AK024842    | 1447.942  | 1272.643  | NM_018843 | 5731.811  | 3735.372  |
| NM_018382   | 1846.305  | 1123.601  | AK024275  | 1187.09   | 797.924   |
| M33197      | 62417.531 | 58087.117 | M33197    | 57236.262 | 54725.977 |
| D17203      | 37609.992 | 48748.699 | AL109782  | 6581.131  | 4306.767  |
| NM_006495   | 6481.626  | 5088.365  | AF086225  | 1434.246  | 1121.093  |
| AK022101    | 1516.074  | 1381.607  | NM_005844 | 5190.843  | 4123.726  |
| NM_003251   | 3611.418  | 3341.767  | AK024941  | 4024.091  | 2750.885  |
| AF086203    | 1193.688  | 1010.469  | AF056434  | 1135.58   | 1600.284  |
| AB046772    | 1790.78   | 1292.578  | AF086199  | 733.537   | 640.283   |
| M33197      | 62029.813 | 56806.449 | M33197    | 23343.488 | 17388.125 |
| AL442080    | 973.416   | 657.881   | AK025489  | 1796.496  | 1091.31   |
| AY007143    | 7891.578  | 9507.521  | AB075853  | 1241.042  | 1032.18   |
| L15557      | 1672.634  | 1403.275  | AL390152  | 6154.462  | 5567.787  |
| M33197      | 66678.508 | 57167.973 | M33197    | 58999.547 | 53167.27  |
| NM_001563   | 11437.822 | 10173.064 | NM_018126 | 1320.031  | 2302.047  |
| NM_000266   | 826.456   | 888.605   | NM_014799 | 611.619   | 997.888   |
| X89666      | 3782.712  | 3401.115  | AK024506  | 3400.707  | 2899.759  |
| NM_003104   | 4754.292  | 8037.5    | NM_014179 | 1140.471  | 1562.205  |
| NM_014581   | 1397.748  | 1086.465  | AF086326  | 2218.275  | 1395.746  |
| M33197      | 64015.602 | 54965.094 | AF147409  | 937.451   | 772.485   |
| AK024448    | 2269.725  | 2887.822  | M33197    | 61326.051 | 55496.684 |
| NM_014406   | 2237.505  | 2344.871  | AL080057  | 1496.771  | 1466.498  |
| Z11801      | 1357.507  | 1605.234  | AL117528  | 1428.174  | 1198.852  |
| S68954      | 2352.37   | 7651.145  | M33197    | 60897.52  | 51518.617 |
| S81335      | 2673.377  | 2211.262  | AK025948  | 1921.469  | 1395.52   |
| AF052109    | 910.782   | 1496.203  | AK000674  | 796.302   | 699.575   |
| M33197      | 34940.828 | 34685.695 | AJ238555  | 1097.144  | 773.574   |
| NM_003353   | 44643.063 | 40806.082 | L23850    | 900.426   | 614.742   |
| X82127      | 32348.811 | 39446.844 | AL353948  | 19769.928 | 18082.93  |
| AL122044    | 2317.827  | 1998.591  | AL122043  | 1151.402  | 1085.593  |
| NM_018296   | 1741.279  | 1139.208  | M33197    | 58397.102 | 52972.988 |
| NM_005752   | 1408.282  | 1087.531  | AK025869  | 12751.062 | 10310.496 |
| M33197      | 63381.582 | 59412.883 | AK023961  | 1477.913  | 1116.925  |
| CY3Cy5      | 6815.26   | 300.559   | AK022806  | 763.618   | 366.689   |
| AA418907    | 1897.681  | 1816.809  | M33197    | 58668.754 | 50379.625 |
| M65291      | 1630.968  | 1998.604  | AF056430  | 1326.432  | 1555.493  |
| AA115473    | 4741.766  | 5772.671  | NM_014906 | 1242.69   | 1257.58   |
| AA872397    | 12157.907 | 14444.791 | AF009291  | 1575.591  | 1043.014  |
| M24283      | 1209.865  | 990.128   | M33197    | 52214.422 | 44841.539 |
| AA709414    | 4763.286  | 5006.854  | NM_018055 | 2852.115  | 3391.466  |
| D12676      | 5536.752  | 5062.516  | AK002199  | 2377.855  | 1856.392  |
| BC012593    | 390.939   | 1418.962  | AK021662  | 1573.323  | 1565.29   |
| NM_000939   | 39025.301 | 51335.223 | AK001038  | 969.225   | 574.155   |
| NM_004295   | 15781.417 | 20496.34  | AK001802  | 1372.324  | 1214.204  |
| H-X 02812 I | 5376.988  | 3957.678  | AK021469  | 3639.583  | 2432.042  |
| U75898      | 3509.274  | 4021.166  | AK021706  | 4292.636  | 3362.399  |

|                  |           |           |                  |           |           |
|------------------|-----------|-----------|------------------|-----------|-----------|
| <b>M29039</b>    | 2370.448  | 1789.427  | <b>M33197</b>    | 60473.078 | 52030.555 |
| <b>M59815</b>    | 1100.258  | 1048.393  | <b>AK026052</b>  | 922.69    | 892.679   |
| <b>M33210</b>    | 512.497   | 596.542   | <b>AK026601</b>  | 619.22    | 472.618   |
| <b>NM_006917</b> | 1237.954  | 1222.907  | <b>AK025387</b>  | 793.823   | 592.816   |
| <b>SR2</b>       | 58331.891 | 60913.23  | <b>AK026259</b>  | 55992.309 | 54581.707 |
| <b>SR4</b>       | 22480.547 | 19373.945 | <b>AJ008115</b>  | 33830.152 | 26901.604 |
| <b>SR6</b>       | 3423.034  | 2656.55   | <b>AF083125</b>  | 556.935   | 816.51    |
| <b>SR8</b>       | 10944.159 | 27604.535 | <b>U72851</b>    | 870.753   | 932.701   |
| <b>SR10</b>      | 39697.039 | 13023.758 | <b>AL049241</b>  | 584.868   | 554.632   |
| <b>CY3Cy5</b>    | 8873.073  | 523.337   | <b>M33197</b>    | 57811.688 | 52224.543 |
| <b>M33197</b>    | 61123.371 | 62435.355 | <b>X51526</b>    | 490.157   | 442.343   |
| <b>NM_001203</b> | 2487.578  | 2409.511  | <b>AK022970</b>  | 1288.708  | 1240.238  |
| <b>NM_004799</b> | 28425.27  | 25819.33  | <b>AK026212</b>  | 556.407   | 863.057   |
| <b>NM_006733</b> | 959.625   | 1015.282  | <b>M33197</b>    | 59149.648 | 55646.016 |
| <b>NM_014047</b> | 17989.773 | 17243.211 | <b>AK024470</b>  | 1951.46   | 2123.159  |
| <b>AK022901</b>  | 2133.358  | 2380.516  | <b>NM_017935</b> | 841.395   | 1646.742  |
| <b>NM_001508</b> | 778.075   | 689.319   | <b>NM_004226</b> | 1235.801  | 1434.491  |
| <b>M33197</b>    | 59915.691 | 60881.645 | <b>AL137436</b>  | 1106.085  | 731.352   |
| <b>AF037332</b>  | 4250.651  | 4763.416  | <b>AK023400</b>  | 1372.665  | 1039.812  |
| <b>NM_014571</b> | 600.693   | 918.004   | <b>NM_006432</b> | 10889.647 | 9456.708  |
| <b>NM_006052</b> | 1000.737  | 1247.517  | <b>AF025441</b>  | 2693.021  | 1908.045  |
| <b>AB040912</b>  | 5770.233  | 5945.878  | <b>U62823</b>    | 4260.512  | 2984.534  |
| <b>NM_003871</b> | 784.762   | 792.922   | <b>NM_003535</b> | 42580.758 | 35776.383 |
| <b>NM_006243</b> | 4558.22   | 5096.045  | <b>AK026768</b>  | 2140.678  | 2522.384  |
| <b>AJ011129</b>  | 9885.762  | 6132.97   | <b>M33197</b>    | 58426.148 | 58140.719 |
| <b>AF282874</b>  | 1013.27   | 587.443   | <b>AK000852</b>  | 12642.396 | 17072.43  |
| <b>NM_001039</b> | 1384.756  | 1430.638  | <b>AF251188</b>  | 1061.288  | 859.495   |
| <b>NM_006387</b> | 4140.733  | 4685.14   | <b>AK026418</b>  | 2196.887  | 988.163   |
| <b>NM_005646</b> | 5287.417  | 5143.74   | <b>AF086194</b>  | 17514.102 | 9448.511  |
| <b>NM_006639</b> | 5440.13   | 5967.67   | <b>AK026811</b>  | 773.724   | 616.079   |
| <b>NM_001692</b> | 1015.281  | 1086.179  | <b>M33197</b>    | 53457.43  | 49613.664 |
| <b>BI767871</b>  | 6497.335  | 4902.33   | <b>AK023633</b>  | 1235.272  | 1608.225  |
| <b>AK022817</b>  | 2150.545  | 1996.286  | <b>NM_005372</b> | 669.763   | 625.075   |
| <b>NM_018034</b> | 6255.071  | 6839.291  | <b>NM_006179</b> | 1394.867  | 2126.738  |
| <b>M33197</b>    | 60841.512 | 59919.18  | <b>AL360165</b>  | 2101.269  | 2811.697  |
| <b>AB037831</b>  | 1491.676  | 1834.675  | <b>M33197</b>    | 61057.977 | 57456.156 |
| <b>NM_012103</b> | 9175.985  | 15524.365 | <b>AJ008132</b>  | 5998.841  | 6317.063  |
| <b>AL122077</b>  | 11558.72  | 15292.146 | <b>NM_005281</b> | 8915.431  | 6601.213  |
| <b>NM_014632</b> | 1844.754  | 1261.007  | <b>NM_005549</b> | 3962.264  | 3659.192  |
| <b>NM_006422</b> | 1599.909  | 1856.596  | <b>M33197</b>    | 57008.145 | 53713.387 |
| <b>BE789195</b>  | 739.637   | 711.35    | <b>U12129</b>    | 4054.556  | 4526.659  |
| <b>NM_016946</b> | 5960.625  | 4440.625  | <b>S81242</b>    | 46603.746 | 53955.699 |
| <b>M33197</b>    | 57588.492 | 61385.813 | <b>AF230801</b>  | 1874.305  | 1917.544  |
| <b>NM_007259</b> | 5279.528  | 3771.646  | <b>AF075072</b>  | 1153.357  | 2023.96   |
| <b>NM_018402</b> | 902.249   | 1031.458  | <b>M33197</b>    | 50780.961 | 47224.953 |
| <b>NM_018009</b> | 1782.461  | 1860.077  | <b>NM_002509</b> | 1436.169  | 1311.523  |
| <b>AK075081</b>  | 2961.389  | 2907.301  | <b>AF110136</b>  | 691.642   | 817.322   |
| <b>NM_000895</b> | 6569.743  | 6817.9    | <b>AK026706</b>  | 517.6     | 568.614   |
| <b>NM_003820</b> | 47612.434 | 50246.039 | <b>AB007936</b>  | 28849.662 | 35470.445 |
| <b>M33197</b>    | 59626.98  | 61576.914 | <b>D28391</b>    | 11751.743 | 15022.224 |
| <b>NM_016518</b> | 7729.926  | 6316.962  | <b>M33197</b>    | 41785.137 | 49853.648 |
| <b>NM_006185</b> | 20592.883 | 21604.018 | <b>AJ227885</b>  | 625.422   | 770.671   |
| <b>NM_014800</b> | 2561.822  | 1643.968  | <b>AF086086</b>  | 562.319   | 943.822   |



|           |           |           |           |           |           |
|-----------|-----------|-----------|-----------|-----------|-----------|
| NM_001557 | 2540.386  | 1546.923  | AK026859  | 823.801   | 1387.65   |
| AF147311  | 4877.406  | 5810.203  | D86961    | 1597.694  | 1720.43   |
| NM_002131 | 31608.311 | 60231.613 | AJ227896  | 7498.706  | 11354.666 |
| NM_017927 | 4105.669  | 3805.483  | L32841    | 4721.601  | 6640.177  |
| NM_020151 | 12024.657 | 11260.767 | AK025371  | 1091.714  | 788.302   |
| NM_001645 | 21502.143 | 2830.477  | M33197    | 56526.141 | 57237.465 |
| NM_003956 | 2475.597  | 2372.419  | AF131770  | 981.097   | 926.907   |
| M33197    | 56990.453 | 58184.508 | CY3Cy5    | 12708.499 | 989.627   |
| NM_003500 | 4001.683  | 4601.795  | AI298534  | 823.451   | 710.621   |
| NM_014317 | 1908.026  | 3212.38   | AW167715  | 1554.798  | 720.806   |
| L09234    | 8977.593  | 9430.592  | AA424735  | 1132.742  | 845.799   |
| NM_000059 | 1007.466  | 1263.431  | U78294    | 1002.223  | 574.735   |
| AK026740  | 1316.559  | 1061.033  | BI760394  | 1232.836  | 1079.984  |
| NM_017881 | 4386.463  | 4520.856  | AA555216  | 739.992   | 480.675   |
| M33197    | 57927.68  | 59353.98  | U09117    | 9423.295  | 12030.233 |
| NM_017634 | 4019.508  | 4794.689  | M21054    | 546.005   | 922.677   |
| NM_000813 | 931.624   | 883.103   | M18468    | 1400.183  | 1807.229  |
| NM_018896 | 1817.343  | 2000.774  | H66070    | 12115.404 | 9485.537  |
| AJ300465  | 2997.627  | 2352.751  | AA164741  | 5005.545  | 3726.979  |
| X86400    | 1473.404  | 1282.715  | AI189375  | 1549.582  | 1400.825  |
| NM_000810 | 4302.129  | 3016.885  | AI978885  | 4926.821  | 3828.29   |
| AF069307  | 2855.184  | 2882.25   | AK054960  | 11944.033 | 11717.224 |
| M33197    | 58006.305 | 58672.207 | L15344    | 2235.74   | 2258.614  |
| U92978    | 4189.973  | 4359.501  | SR1       | 69193.813 | 58633.805 |
| NM_005738 | 630.315   | 916.698   | SR3       | 53038.664 | 44708.074 |
| NM_014488 | 1920.99   | 2074.634  | SR5       | 5587.183  | 4255.558  |
| NM_013389 | 12434.262 | 8051.813  | SR7       | 5642.766  | 40409.66  |
| AB014567  | 794.013   | 921.964   | SR9       | 18183.373 | 2880.493  |
| NM_014069 | 1063.624  | 1139.39   | CY3Cy5    | 10259.693 | 516.418   |
| AB035130  | 1379.151  | 1327.794  | NM_014586 | 1511.289  | 1261.874  |
| NM_003359 | 1867.267  | 2293.734  | NM_014366 | 5181.056  | 7284.217  |
| M33197    | 43178.719 | 50360.648 | NM_000923 | 577.106   | 580.192   |
| AF119917  | 784.469   | 692.511   | NM_006453 | 1649.461  | 2888.684  |
| NM_017915 | 1042.298  | 1068.185  | NM_018096 | 721.609   | 1641.67   |
| AL050097  | 481.59    | 568.019   | AL390078  | 543.464   | 612.632   |
| NM_003579 | 1764.407  | 2014.128  | NM_004036 | 937.861   | 694.472   |
| AL049283  | 1288.31   | 1727.536  | NM_015986 | 1176.798  | 691.746   |
| M33197    | 65577.25  | 68132.695 | NM_006546 | 674.216   | 626.677   |
| NM_002401 | 31796.98  | 34206.992 | NM_014959 | 1756.113  | 1712.485  |
| NM_001274 | 2414.123  | 1839.845  | NM_003992 | 1817.028  | 2596.037  |
| NM_003913 | 977.197   | 883.318   | AF279265  | 2418.403  | 3410.017  |
| NM_002227 | 4310.136  | 2862.024  | NM_007350 | 627.547   | 144.38    |
| NM_007199 | 4118.42   | 3048.131  | NM_005213 | 22989.559 | 44749.035 |
| AB002301  | 935.537   | 587.208   | AB040914  | 729.151   | 807.464   |
| AB014530  | 6600.537  | 7900.155  | NM_002379 | 7330.874  | 6617.713  |
| M33197    | 57832.75  | 57833.82  | AB007929  | 13820.851 | 8060.315  |
| NM_005989 | 5501.389  | 5021.884  | NM_004579 | 4168.895  | 2998.48   |
| AB014607  | 6969.415  | 5535.072  | AA203126  | 2176.938  | 2392.718  |
| AF134401  | 1274.289  | 2148.081  | L12347    | 3813.037  | 5166.334  |
| NM_006387 | 4132.228  | 5963.038  | NM_001622 | 4102.652  | 3186.162  |
| NM_005646 | 5695.317  | 5345.624  | Z36788    | 1355.604  | 1179.096  |
| NM_006639 | 3540.47   | 2797.527  | NM_018477 | 2273.86   | 3385.996  |
| NM_001692 | 1320.631  | 1968.166  | U20536    | 1476.998  | 745.287   |

|             |           |           |           |           |           |
|-------------|-----------|-----------|-----------|-----------|-----------|
| BI767871    | 3940.181  | 3734.715  | NM_004853 | 1926.762  | 2361.236  |
| AA418907    | 1575.438  | 1941.853  | NM_001494 | 2186.983  | 2750.238  |
| AA115473    | 4473.584  | 5251.52   | NM_004206 | 1376.259  | 1204.602  |
| AA872397    | 9525.483  | 11739.872 | NM_004603 | 5407.614  | 7142.691  |
| M24283      | 1015.163  | 745.506   | AK022849  | 2281.53   | 1515.966  |
| AA709414    | 4106.76   | 3821.121  | AF040964  | 2889.959  | 2689.832  |
| D12676      | 4617.977  | 3784.133  | NM_001939 | 3242.392  | 2639.104  |
| BC012593    | 401.701   | 983.815   | NM_003279 | 4169.586  | 3887.865  |
| NM_000939   | 54128.445 | 59456.477 | AB014599  | 2788.44   | 2358.568  |
| NM_004295   | 29065.002 | 35392.605 | NM_004393 | 456.656   | 427.443   |
| H-X 02812 I | 4924.514  | 3627.904  | AB018345  | 1463.237  | 1035.46   |
| U75898      | 7946.22   | 7596.197  | NM_005832 | 1358.029  | 1326.357  |
| M29039      | 2396.617  | 1797.459  | AW407841  | 836.271   | 543.915   |
| M59815      | 1231.069  | 1103.815  | NM_001879 | 4495.418  | 2977.909  |
| NM_006917   | 1655.752  | 1717.056  | AF264014  | 7586.978  | 6098.361  |
| M33197      | 1039.446  | 1405.584  | L09098    | 272.949   | 529.285   |
| AB011146    | 2641.651  | 3459.358  | NM_000137 | 3647.02   | 4569.03   |
| NM_006185   | 13285.751 | 16575.752 | NM_012102 | 4291.654  | 4031.8    |
| NM_014800   | 2843.033  | 2555.287  | NM_005017 | 13901.497 | 15483.976 |
| NM_001557   | 2924.016  | 2340.346  | AF163572  | 6822.849  | 9086.671  |
| AF147311    | 5191.425  | 5814.806  | NM_000897 | 2713.128  | 2679.971  |
| NM_002131   | 29545.463 | 56020.434 | NM_000487 | 1200.334  | 1413.03   |
| NM_014047   | 17144.463 | 26524.826 | NM_006411 | 14102.486 | 17158.395 |
| AK022901    | 2946.953  | 4873.91   | NM_014182 | 2426.575  | 1299.562  |
| NM_001508   | 1318.645  | 1439.088  | NM_000492 | 5379.342  | 5595.556  |
| M33197      | 57348.727 | 59152.496 | NM_012089 | 1093.507  | 275.333   |
| AF037332    | 5273.97   | 8158.133  | NM_001170 | 933.59    | 1197.693  |
| NM_014571   | 1531.974  | 1916.214  | AL137716  | 753.76    | 610.303   |
| NM_006052   | 1968.033  | 1811.361  | NM_004696 | 451.452   | 882.315   |
| AB040912    | 26699.707 | 36994.531 | NM_014342 | 2151.289  | 1883.834  |
| NM_003871   | 2358.174  | 3272.685  | AF097645  | 581.739   | 546.924   |
| NM_006243   | 4771.648  | 8236.616  | NM_001773 | 754.657   | 877.011   |
| NM_007252   | 897.075   | 905.406   | Z70704    | 1106.592  | 1454.149  |
| AJ011129    | 13121.29  | 15034.438 | NM_014363 | 1427.786  | 1704.729  |
| AF282874    | 673.988   | 800.059   | NM_000557 | 3039.765  | 3569.941  |
| NM_001039   | 1643.376  | 2045.398  | NM_003239 | 802.624   | 2374.186  |
| M33197      | 60120.102 | 57362.281 | NM_001375 | 2728.84   | 3352.432  |
| U92978      | 4058.336  | 4024.12   | NM_002312 | 1601.35   | 1715.536  |
| NM_005738   | 833.361   | 926.642   | M20699    | 1024.411  | 1035.718  |
| NM_014488   | 1998.043  | 3208.161  | NM_004774 | 7764.959  | 4681.439  |
| NM_013389   | 10252.502 | 8920.154  | NM_016937 | 5074.573  | 3275.494  |
| NM_018034   | 6792.025  | 9512.396  | NM_002690 | 2438.051  | 2034.042  |
| M33197      | 59478.648 | 60265.07  | NM_012328 | 1549.737  | 4953.834  |
| AB037831    | 1584.448  | 1782.732  | NM_007341 | 506.932   | 726.659   |
| AL122077    | 17674.713 | 20537.178 | NM_016508 | 1043.214  | 1612.228  |
| NM_014632   | 1712.903  | 1401.817  | NM_006456 | 957.538   | 1438.308  |
| NM_006422   | 1241.064  | 1387.091  | AK026062  | 9957.271  | 17369.244 |
| BE789195    | 1858.982  | 1417.072  | AF047002  | 20363.469 | 16057.504 |
| NM_016946   | 5839.641  | 3989.149  | AL050082  | 1756.286  | 1330.894  |
| M33197      | 61663.703 | 63511.473 | NM_006623 | 19220.6   | 37509.859 |
| NM_007259   | 6011.922  | 3179.811  | NM_016588 | 1306.498  | 1406.572  |
| NM_018402   | 1068.122  | 854.562   | L12347    | 2810.39   | 3991.211  |
| NM_018009   | 2108.352  | 1598.123  | NM_001622 | 3938.721  | 3547.899  |

|           |           |           |           |           |           |
|-----------|-----------|-----------|-----------|-----------|-----------|
| AK075081  | 3597.934  | 3111.482  | Z36788    | 1133.332  | 1103.5    |
| NM_000895 | 6291.952  | 6076.962  | NM_018477 | 2762.085  | 3007.759  |
| NM_015915 | 11444.172 | 10926.229 | U20536    | 1465.966  | 944.35    |
| NM_016518 | 8329.222  | 8007.962  | AI298534  | 1070.916  | 1194.112  |
| AB002301  | 652.887   | 896.698   | R71691    | 895.599   | 691.948   |
| AB014530  | 4622.705  | 6602.083  | AW167715  | 2009.649  | 1181.807  |
| M33197    | 56307.492 | 56039.273 | AA424735  | 1416.883  | 1647.929  |
| NM_005985 | 4798.596  | 4924.865  | U78294    | 1138.5    | 1341.392  |
| AB014607  | 4555.458  | 4149.023  | AA171613  | 626.382   | 675.484   |
| AF134401  | 1327.503  | 2283.867  | BI760394  | 780.915   | 914.355   |
| NM_020151 | 11451.036 | 13221.16  | AA555216  | 673.144   | 599.182   |
| NM_005891 | 17710.219 | 40136.691 | U09117    | 1775.355  | 1659.339  |
| NM_001645 | 23847.422 | 3035.18   | M21054    | 481.89    | 632.99    |
| NM_003956 | 2997.789  | 2610.01   | M18468    | 1012.651  | 952.825   |
| NM_003500 | 4247.405  | 5065.571  | H66070    | 933.345   | 787.298   |
| NM_014317 | 2381.881  | 2995.358  | AA164741  | 3966.948  | 2518.083  |
| L09234    | 8830.11   | 9026.881  | AI978885  | 1214.346  | 783.556   |
| NM_000055 | 1449.605  | 1455.857  | AK054960  | 6315.035  | 7623.368  |
| AK026740  | 1343.237  | 1133.618  | NM_001665 | 11241.705 | 8355.024  |
| NM_017881 | 7119.261  | 6637.633  | NM_001879 | 3512.11   | 2115.671  |
| M33197    | 60838.094 | 57211.465 | AF264014  | 7655.968  | 5447.637  |
| NM_017634 | 4692.09   | 5061.638  | L09098    | 678.722   | 420.269   |
| NM_000813 | 1362.933  | 1193.516  | NM_004155 | 1007.627  | 358.653   |
| NM_018896 | 2265.145  | 2431.858  | NM_001831 | 976.951   | 1026.825  |
| AJ300465  | 4090.084  | 3272.083  | NM_014586 | 4430.021  | 2840.415  |
| X86400    | 1812.843  | 1798.175  | NM_014366 | 7908.16   | 9144.704  |
| AF069307  | 2946.511  | 3994.585  | NM_000923 | 621.904   | 776.854   |
| NM_006917 | 1057.847  | 974.266   | NM_006453 | 489.975   | 1059.456  |
| M33197    | 884.633   | 753.876   | NM_018096 | 447.031   | 890.285   |
| AB011146  | 2162.359  | 2211.885  | NM_004036 | 748.139   | 1090.325  |
| NM_005326 | 15476.412 | 16079.049 | NM_015986 | 755.288   | 474.663   |
| NM_014065 | 1843.589  | 2023.501  | NM_006546 | 571.751   | 827.96    |
| AB035130  | 3814.487  | 3207.171  | NM_014959 | 996.726   | 808.67    |
| NM_003355 | 2072.495  | 1890.07   | NM_003992 | 782.802   | 1108.336  |
| M33197    | 45279.715 | 48076.461 | AF279265  | 1161.233  | 2280.894  |
| AF119917  | 582.114   | 862.546   | NM_005213 | 21186.904 | 40442.656 |
| AK021834  | 748.696   | 465.622   | Z50169    | 698.02    | 584.303   |
| NM_017915 | 980.01    | 1079.438  | AB043997  | 2227.4    | 1970.039  |
| AL050097  | 597.868   | 742.251   | NM_004853 | 4671.711  | 4097.619  |
| AK021513  | 903.612   | 715.79    | NM_001494 | 9599.129  | 11714.643 |
| NM_003575 | 2081.861  | 2410.645  | NM_004206 | 1779.42   | 1720.049  |
| AL049283  | 1948.403  | 2084.522  | NM_004603 | 2517.455  | 3463.485  |
| M33197    | 57547.656 | 56706.824 | AK022849  | 790.585   | 846.579   |
| NM_002401 | 44992.809 | 47312.246 | AF040964  | 2513.549  | 1611.809  |
| NM_001274 | 2013.109  | 2106.019  | NM_001939 | 1501.947  | 1510.927  |
| NM_003913 | 1044.952  | 787.75    | NM_003279 | 2622.826  | 3071.04   |
| NM_002227 | 3136.518  | 1994.957  | AB018345  | 363.084   | 645.087   |
| NM_007195 | 3634.75   | 3429.488  | NM_005832 | 768.663   | 977.868   |
| NM_006243 | 5151.249  | 5389.77   | AW407841  | 939.089   | 1352.964  |
| M33197    | 63364.277 | 59937.348 | AL050082  | 1289.275  | 1480.08   |
| AJ011129  | 11113.226 | 6685.001  | NM_006623 | 14641.292 | 35431.508 |
| AF282874  | 746.534   | 1094.866  | NM_000137 | 5565.78   | 8131.226  |
| NM_001035 | 1558.667  | 1764.88   | NM_012102 | 5431.332  | 4863.625  |

|            |           |           |           |           |           |
|------------|-----------|-----------|-----------|-----------|-----------|
| NM_006387  | 3979.139  | 4835.829  | NM_005017 | 15775.099 | 17511.992 |
| NM_005646  | 5275.582  | 4859.509  | AF163572  | 9806.97   | 11258.103 |
| NM_006639  | 4958.894  | 4543.986  | NM_000897 | 3812.299  | 3497.872  |
| NM_001692  | 1244.458  | 1227.332  | NM_000487 | 1059.652  | 1026.384  |
| BI767871   | 7010.18   | 5528.711  | NM_006411 | 8596.61   | 8494.093  |
| AA418907   | 3333.139  | 3345.186  | NM_014182 | 2697.139  | 1503.543  |
| M65291     | 859.137   | 789.735   | AB040884  | 638.236   | 722.892   |
| AA115473   | 5695.381  | 6331.909  | NM_000492 | 6130.261  | 6803.581  |
| AA872397   | 12479.003 | 13086.03  | NM_012089 | 1472.626  | 993.656   |
| M24283     | 1392.523  | 588.286   | NM_001170 | 1200.95   | 1313.453  |
| AA709414   | 5180.68   | 4741.853  | AL137716  | 1106.368  | 1000.511  |
| D12676     | 6485.433  | 4959.982  | NM_004696 | 807.093   | 1854.611  |
| BC012593   | 679.34    | 1268.525  | AK054960  | 9728.216  | 11602.676 |
| NM_000939  | 52281.898 | 55109.543 | L15344    | 2338.11   | 2822.329  |
| H-X 028121 | 5299.775  | 3306.23   | AF097645  | 1195.716  | 758.819   |
| U75898     | 8350.014  | 8460.354  | NM_001773 | 1334.471  | 1655.401  |
| M29039     | 2616.165  | 2136.555  | Z70704    | 1939.322  | 2200.128  |
| M59815     | 1928.594  | 1795.664  | NM_014363 | 1604.827  | 1576.614  |
| M33210     | 909.962   | 735.592   | NM_000557 | 4024.084  | 4592.197  |
| AK075081   | 2879.185  | 2762.204  | NM_003239 | 321.612   | 608.78    |
| NM_000895  | 6019.956  | 6675.455  | NM_001375 | 4048.569  | 3891.252  |
| NM_003820  | 43830.48  | 45662.414 | NM_002312 | 2031.599  | 1687.512  |
| NM_015915  | 5193.424  | 4718.247  | M20699    | 1105.714  | 912.18    |
| M33197     | 63867.41  | 61235.004 | NM_004774 | 7372.109  | 3936.308  |
| NM_016518  | 8074.079  | 8364.812  | NM_016937 | 3605.874  | 2022.693  |
| NM_006185  | 17091.861 | 21047.051 | NM_002690 | 2594.767  | 2597.042  |
| NM_014800  | 3492.761  | 3262.815  | NM_016508 | 1411.707  | 2079.469  |
| NM_001557  | 2405.967  | 1788.403  | NM_006456 | 6483.973  | 10435.775 |
| AF147311   | 5754.209  | 5812.073  | AK026062  | 10992.085 | 26818.523 |
| NM_017927  | 4700.231  | 3970.249  | AB040914  | 867.067   | 908.311   |
| M33197     | 64742.699 | 62490.363 | NM_002997 | 3630.047  | 4655.379  |
| NM_001203  | 3194.14   | 2951.796  | NM_002379 | 8257.64   | 9153.576  |
| NM_004799  | 39323.77  | 41397.355 | L12347    | 4280.926  | 7733.161  |
| NM_006733  | 856.197   | 1145.369  | NM_001622 | 4359.205  | 3745.096  |
| NM_014047  | 21176.441 | 17023.305 | Z36788    | 1533.49   | 1322.245  |
| AK022901   | 3224.926  | 2895.163  | NM_018477 | 2334.143  | 3512.029  |
| NM_001508  | 1390.919  | 746.291   | U20536    | 1439.949  | 1171.409  |
| NM_014571  | 1244.847  | 1177.82   | AI298534  | 735.352   | 1265.303  |
| NM_006052  | 1768.732  | 1534.214  | R71691    | 398.591   | 415.13    |
| AB040912   | 31717.502 | 20943.762 | AW167715  | 2409.917  | 1772.324  |
| NM_003871  | 2559.794  | 2954.985  | AA424735  | 1545.395  | 1766.786  |
| NM_000813  | 1123.458  | 987.225   | U78294    | 1234.023  | 1118.522  |
| NM_018896  | 1812.76   | 1700.832  | AA171613  | 827.865   | 594.14    |
| AJ300465   | 1840.59   | 1597.527  | BI760394  | 1578.926  | 1883.104  |
| X86400     | 1553.509  | 1521.997  | AA555216  | 400.631   | 882.371   |
| NM_000810  | 2919.664  | 2327.434  | U09117    | 3390.068  | 4874.838  |
| AF069307   | 2508.022  | 3909.313  | M21054    | 523.073   | 298.024   |
| M33197     | 58983.453 | 56406.445 | H66070    | 3765.227  | 3001.241  |
| U92978     | 3817.401  | 3880.031  | AA164741  | 5028.797  | 4384.433  |
| NM_005738  | 557.082   | 576.518   | AI189375  | 1423.005  | 1852.635  |
| NM_014488  | 1920.157  | 1793.234  | AB014599  | 2154.116  | 1669.645  |
| AB014567   | 729.581   | 888.414   | NM_004393 | 648.901   | 776.072   |
| AK022817   | 2217.013  | 2196.163  | AB018345  | 455.619   | 604.103   |

|           |           |           |           |           |           |
|-----------|-----------|-----------|-----------|-----------|-----------|
| NM_018034 | 9040.547  | 10942.401 | NM_005832 | 1044.622  | 813.019   |
| M33197    | 62258.555 | 62104.953 | AW407841  | 1046.052  | 1035.099  |
| AB037831  | 1817.634  | 1786.815  | U15197    | 571.598   | 1132.182  |
| NM_012103 | 10349.43  | 15939.831 | NM_001879 | 3600.216  | 2235.587  |
| NM_006422 | 1710.505  | 1577.044  | AF264014  | 7826.179  | 5989.922  |
| BE789195  | 2011.953  | 1366.466  | L09098    | 727.871   | 355.925   |
| NM_016946 | 6329.903  | 4110.011  | NM_001831 | 595.22    | 631.794   |
| M33197    | 58741.68  | 60250.449 | NM_014586 | 3010.67   | 2966.393  |
| NM_007259 | 6377.94   | 4129.566  | NM_014366 | 5361.878  | 9270.879  |
| NM_018402 | 1566.67   | 4133.38   | NM_000923 | 453.741   | 557.985   |
| NM_018009 | 1745.167  | 1740.986  | NM_006453 | 835.937   | 1436.566  |
| M33197    | 53466.426 | 51823.313 | NM_018096 | 774.763   | 996.449   |
| NM_002401 | 38280.719 | 40170.57  | AL390078  | 923.268   | 828.231   |
| NM_001274 | 2029.2    | 2067.704  | NM_004036 | 1518.666  | 1567.389  |
| NM_003913 | 849.317   | 941.44    | NM_015986 | 1197.311  | 1234.725  |
| NM_002227 | 3522.547  | 2710.598  | NM_006546 | 627.119   | 843.274   |
| NM_007199 | 2265.143  | 3025.118  | AK024382  | 409.559   | 470.978   |
| AB002301  | 823.53    | 769.403   | NM_001170 | 2322.962  | 2859.295  |
| AB014530  | 8812.889  | 10461.614 | NM_004696 | 1054.324  | 927.016   |
| M33197    | 58741.105 | 56217.762 | NM_014342 | 1897.429  | 1596.901  |
| NM_005989 | 6860.798  | 6318.507  | Z50169    | 582.41    | 463.845   |
| AB014607  | 8820.591  | 7293.661  | AB043997  | 993.256   | 941.102   |
| AF134401  | 1535.317  | 2540.812  | NM_004853 | 4212.142  | 4207.753  |
| NM_020151 | 12954.812 | 11985.063 | NM_001494 | 8126.475  | 10476.188 |
| NM_005891 | 17408.414 | 34686.387 | NM_017707 | 469.61    | 508.39    |
| NM_001645 | 22123.693 | 2644.717  | NM_004206 | 1806.586  | 2067.938  |
| NM_003956 | 4080.389  | 2467.938  | NM_015888 | 340.046   | 404.468   |
| M33197    | 56727.566 | 53260.711 | NM_004603 | 2819.243  | 4143.583  |
| NM_014317 | 2666.145  | 3932.361  | AK022849  | 1183.411  | 1404.099  |
| L09234    | 9683.501  | 8216.087  | NM_012328 | 1435.191  | 5505.298  |
| NM_000059 | 1700.021  | 1273.473  | NM_006456 | 5804.557  | 8512.515  |
| AK026740  | 1898.656  | 1383.328  | AK026062  | 7911.391  | 14805.007 |
| NM_017881 | 7121.71   | 6404.332  | AF047002  | 18983.236 | 15599.188 |
| M33197    | 61132.043 | 58178.652 | AL050082  | 1542.258  | 1122.051  |
| NM_017634 | 4342.354  | 5052.593  | NM_006623 | 14203.912 | 31631.621 |
| NM_017743 | 1829.008  | 1785.94   | NM_016588 | 2062.462  | 1956.644  |
| NM_000300 | 5034.912  | 3780.61   | NM_003135 | 4065.146  | 3835.047  |
| M33197    | 58459.266 | 57748.246 | NM_000137 | 3774.489  | 4328.808  |
| AV756917  | 3943.417  | 4905.605  | NM_012102 | 5012.63   | 4096.821  |
| NM_018380 | 13528.58  | 14098.363 | NM_005017 | 12560.117 | 12385.337 |
| AK001442  | 1867.826  | 1693.306  | AF163572  | 7796.025  | 8223.137  |
| NM_012070 | 2605.791  | 2822.712  | NM_000897 | 3335.25   | 3012.75   |
| NM_019038 | 1578.29   | 1586.749  | NM_000487 | 854.153   | 591.157   |
| AF183423  | 3130.302  | 4755.353  | NM_006411 | 6984.025  | 7211.737  |
| M33197    | 1159.303  | 828.703   | NM_014182 | 2171.637  | 1210.481  |
| AB011146  | 3060.363  | 2277.78   | AK024216  | 6143.737  | 5587.769  |
| NM_005326 | 17616.07  | 14219.371 | Y16752    | 2190.345  | 2835.169  |
| NM_014069 | 1965.339  | 1583.476  | NM_014694 | 511.641   | 972.111   |
| AB035130  | 4788.732  | 3871.827  | NM_020156 | 1306.45   | 1457.964  |
| NM_003359 | 2057.325  | 2072.05   | NM_014830 | 866.284   | 1866.334  |
| M33197    | 47822.293 | 46240.887 | AF355402  | 1232.588  | 1995.856  |
| AF119917  | 839.072   | 924.714   | AK000407  | 3348.058  | 3657.84   |
| NM_017915 | 1027.325  | 1153.269  | AK026164  | 726.851   | 751.213   |

|           |           |           |           |           |           |
|-----------|-----------|-----------|-----------|-----------|-----------|
| AL050097  | 627.174   | 869.615   | NM_001665 | 11185.247 | 9494.792  |
| AK021513  | 715.319   | 602.78    | NM_001773 | 583.72    | 636.573   |
| NM_003579 | 2073.154  | 2509.521  | Z70704    | 1211.79   | 1377.639  |
| AL049283  | 2005.544  | 2264.467  | NM_014363 | 1257.659  | 898.038   |
| NM_002214 | 1384.823  | 955.192   | NM_000557 | 3236.314  | 2902.062  |
| AF005258  | 1500.502  | 1192.171  | NM_001375 | 3808.2    | 2643.44   |
| NM_000887 | 3153.839  | 1340.843  | NM_002312 | 1634.598  | 1061.679  |
| AF277292  | 711.849   | 617.81    | M20699    | 927.486   | 793.502   |
| M33197    | 62980.281 | 57298.434 | NM_004774 | 1191.298  | 934.113   |
| X99659    | 50051.949 | 53005.824 | NM_016937 | 2250.948  | 1744.992  |
| NM_015416 | 4141.41   | 4576.429  | NM_018239 | 1294.489  | 1065.535  |
| NM_003899 | 10410.237 | 8548.31   | AB040927  | 338.821   | 728.555   |
| X99662    | 14727.528 | 8063.602  | AK026737  | 1689.666  | 1559.811  |
| NM_003473 | 45293.949 | 44368.988 | NM_006289 | 2749.837  | 2778.896  |
| NM_014325 | 3238.621  | 2325.579  | NM_019067 | 4598.482  | 3099.174  |
| M33197    | 59332.609 | 57638.43  | AF251025  | 683.265   | 807.48    |
| NM_012453 | 858.122   | 664.941   | NM_015677 | 2371.549  | 2699.624  |
| NM_006016 | 49927.496 | 45571.848 | NM_001772 | 5582.595  | 6521.604  |
| NM_001242 | 3586.608  | 3501.428  | AL162032  | 352.436   | 454.631   |
| NM_001882 | 1116.915  | 862.778   | AB011087  | 1125.067  | 1640.95   |
| NM_014891 | 5617.629  | 7650.532  | AF161341  | 6210.723  | 7308.042  |
| NM_013392 | 11281.335 | 9139.813  | AJ249902  | 654.476   | 944.448   |
| M33197    | 57231.746 | 53383.395 | NM_004384 | 1985.86   | 2008.839  |
| NM_003236 | 1165.903  | 1198.9    | L05500    | 4683.137  | 3640.055  |
| NM_003458 | 1375.811  | 998.753   | NM_012306 | 4661.883  | 3802.707  |
| AF052692  | 1884.025  | 2072.868  | AF222903  | 2312.895  | 1617.168  |
| NM_002820 | 1159.331  | 1281.654  | AF130114  | 450.653   | 700.712   |
| NM_005228 | 1858.227  | 1800.397  | AK026271  | 6550.168  | 4658.393  |
| NM_002354 | 2599.422  | 2155.423  | NM_001799 | 6605.899  | 5452.954  |
| NM_000179 | 895.705   | 1489.467  | AF090895  | 2033.486  | 1398.246  |
| AF062739  | 3733.496  | 3109.131  | NM_005610 | 1657.222  | 1697.709  |
| NM_006602 | 2362.866  | 3442.304  | AL133651  | 1379.906  | 1303.012  |
| M33197    | 56512.551 | 56105.43  | AB014532  | 6018.346  | 6139.079  |
| AL079314  | 4333.918  | 7232.022  | NM_003478 | 3811.816  | 1849.979  |
| NM_001260 | 1914.977  | 2068.822  | BE275227  | 269.881   | 410.367   |
| AK026364  | 2707.968  | 2428.771  | NM_016237 | 6624.77   | 6133.043  |
| NM_018117 | 1075.944  | 1487.298  | NM_004924 | 12501.916 | 9515.248  |
| NM_006999 | 800.03    | 763.019   | NM_001798 | 1988.08   | 1258.482  |
| NM_006286 | 422.24    | 623.694   | NM_001211 | 3758.94   | 2360.963  |
| M33197    | 57718.586 | 56611.121 | AF146760  | 372.933   | 450.175   |
| NM_004331 | 7201.049  | 6300.38   | NM_006505 | 683.483   | 433.081   |
| NM_015996 | 511.378   | 606.249   | AB033050  | 1227.894  | 1605.952  |
| NM_015703 | 12503.42  | 10527.908 | NM_004356 | 10519.654 | 9636.752  |
| AB018337  | 1958.338  | 1938.925  | NM_006697 | 2463.508  | 2137.509  |
| NM_014489 | 673.237   | 849.697   | AF090327  | 693.239   | 1047.393  |
| AK025273  | 3565.819  | 4448.462  | NM_003291 | 6257.366  | 3985.032  |
| M33197    | 53121.207 | 56403.418 | AK022950  | 544.582   | 742.384   |
| NM_001794 | 1092.902  | 781.47    | S75755    | 2218.389  | 2101.512  |
| NM_002205 | 5544.971  | 5947.637  | AF176518  | 651.486   | 823.986   |
| M33197    | 62367.07  | 56747.66  | AB014576  | 11890.077 | 11560.692 |
| NM_000131 | 853.184   | 739.713   | NM_019044 | 5037.105  | 5936.985  |
| NM_001836 | 672.197   | 915.47    | AK000145  | 713.862   | 617.36    |
| NM_001911 | 6308.165  | 39729.402 | AF174601  | 1457.874  | 1603.501  |

|           |           |           |           |           |           |
|-----------|-----------|-----------|-----------|-----------|-----------|
| NM_000537 | 588.126   | 643.182   | AF279865  | 680.826   | 502.14    |
| NM_006503 | 1718.051  | 1513.004  | NM_005687 | 2490.587  | 2969.321  |
| AB002321  | 444.802   | 619.584   | NM_005983 | 4318.98   | 3917.067  |
| M33197    | 1214.014  | 1485.59   | NM_017652 | 3742.757  | 3914.496  |
| AB020698  | 1469.544  | 1459.237  | X59268    | 3734.798  | 4728.502  |
| U68382    | 7315.128  | 4522.693  | AF024708  | 14066.626 | 20452.266 |
| NM_003969 | 2998.201  | 3314.242  | NM_006467 | 2331.508  | 2724.354  |
| NM_004651 | 2782.906  | 2355.196  | NM_017566 | 2801.48   | 2586.228  |
| NM_003363 | 1356.914  | 885.058   | NM_006582 | 663.374   | 738.914   |
| M33197    | 60084.219 | 53918.207 | NM_006162 | 782.26    | 1005.55   |
| NM_017569 | 10008.006 | 9317.979  | NM_014764 | 4302.553  | 4049.207  |
| NM_001456 | 861.961   | 814.38    | NM_018078 | 896.774   | 1421.337  |
| NM_002906 | 1293.268  | 1651.863  | NM_007080 | 8163.485  | 6190.02   |
| AK024480  | 2388.289  | 2717.133  | AK026912  | 1766.894  | 2633.157  |
| Y13871    | 18939.449 | 21486.156 | AK023531  | 7432.854  | 9115.853  |
| NM_012134 | 991.313   | 804.305   | AB011128  | 5516.675  | 7354.425  |
| AL137725  | 9445.559  | 9852.469  | AK026742  | 321.645   | 543.43    |
| M33197    | 62414.133 | 59670.965 | AK025074  | 3836.361  | 4738.478  |
| AJ008151  | 32340.414 | 36062.598 | NM_000303 | 5454.872  | 6920.979  |
| AK024149  | 1040.963  | 1453.274  | NM_006242 | 1463.918  | 1876.029  |
| AK023094  | 524.584   | 524.098   | AF067972  | 12803.811 | 9982.654  |
| M33197    | 55257.258 | 54519.613 | NM_004958 | 544.974   | 931.844   |
| NM_004091 | 1816.021  | 2442.861  | AB020635  | 2022.709  | 2486.441  |
| X74070    | 53619.613 | 50650.848 | NM_006515 | 808.016   | 808.314   |
| AF027219  | 1549.847  | 1563.552  | NM_005224 | 996.001   | 1267.757  |
| NM_006333 | 4971.382  | 5103.487  | NM_012144 | 4026.38   | 4667.098  |
| M33197    | 54571.578 | 56360.773 | X65231    | 51288.613 | 45531.465 |
| NM_002898 | 18805.127 | 15684.195 | NM_002908 | 1103.139  | 812.425   |
| AK022749  | 8028.85   | 9589.37   | NM_005378 | 19268.742 | 19272.5   |
| BF031409  | 6938.164  | 7312.599  | NM_002397 | 3900.838  | 4276.839  |
| NM_007043 | 2192.928  | 2067.842  | AF000672  | 1224.492  | 1297.443  |
| BE378791  | 590.951   | 606.836   | AK002195  | 1190.881  | 1034.028  |
| U94388    | 1329.656  | 1169.205  | AF086128  | 782.135   | 777.579   |
| NM_012322 | 2938.295  | 4646.603  | AK023831  | 534.152   | 861.57    |
| M33197    | 49490.719 | 54015.414 | AK022850  | 2247.655  | 2218.284  |
| NM_004889 | 35648.16  | 47341.098 | NM_016490 | 1833.642  | 3011.535  |
| AK025314  | 2170.941  | 3172.385  | AF038193  | 1375.192  | 1549.478  |
| NM_002109 | 3690.392  | 4606.955  | AK024289  | 1707.292  | 3017.219  |
| NM_000984 | 60631.84  | 63425.648 | S66168    | 6006.349  | 7487.711  |
| NM_002453 | 10595.65  | 11966.847 | AF131837  | 462.417   | 455.771   |
| AK000780  | 46425.492 | 54573.98  | NM_003851 | 22746.416 | 30989.244 |
| AK026721  | 1379.004  | 2395.32   | AK024150  | 3339.114  | 2876.269  |
| AK023027  | 3056.113  | 3917.132  | AF070536  | 2256.054  | 2060.523  |
| AK025598  | 1046.529  | 787.106   | AK022297  | 919.023   | 917.887   |
| AB002348  | 37775.227 | 43211.844 | U79300    | 1030.046  | 1597.688  |
| M33197    | 36194.496 | 37817.043 | AK025151  | 11833.728 | 9605.37   |
| AK026043  | 2516.243  | 3630.872  | AK025550  | 2543.251  | 2530.544  |
| NM_005006 | 6511.775  | 6388.916  | AF088076  | 6931.196  | 6704.223  |
| AK027033  | 3369.923  | 3619.88   | AF086543  | 1721.294  | 1864.668  |
| NM_000106 | 3361.964  | 2914.413  | AB046797  | 1745.407  | 1306.017  |
| NM_003000 | 13310.85  | 11763.863 | AK002098  | 5052.878  | 2175.365  |
| NM_002495 | 17660.736 | 19264.543 | AK025156  | 14091.54  | 8654.606  |
| M33197    | 57342.664 | 51792.66  | AK022116  | 8090.611  | 5440.801  |

|           |           |           |           |           |           |
|-----------|-----------|-----------|-----------|-----------|-----------|
| NM_016284 | 3775.652  | 3981.409  | AF026526  | 1102.336  | 961.249   |
| NM_014593 | 3859.668  | 3353.868  | AK026207  | 4234.756  | 4267.77   |
| NM_006833 | 10803.192 | 9688.667  | AK024984  | 17919.824 | 25289.758 |
| NM_012257 | 2454.312  | 1574.282  | AL110236  | 694.638   | 750.239   |
| U37690    | 29091.309 | 22795.576 | AF085955  | 1084.574  | 1082.052  |
| NM_005120 | 1341.686  | 1103.136  | AF075106  | 4305.918  | 3767.87   |
| AB029012  | 26354.104 | 26796.963 | AK023339  | 2824.944  | 2769.263  |
| M33197    | 59189.367 | 60204.504 | AF085981  | 685.096   | 616.672   |
| AJ010278  | 2160.368  | 967.913   | AF086008  | 1956.271  | 2312.841  |
| NM_006295 | 2093.204  | 2543.719  | AF087970  | 1315.857  | 1692.305  |
| AF060936  | 9805.401  | 10807.7   | AF086029  | 1010.978  | 1068.547  |
| NM_005568 | 990.359   | 1085.838  | AF075115  | 830.654   | 440.383   |
| NM_018167 | 1188.305  | 1185.044  | U05597    | 1098.689  | 1606.765  |
| AL050088  | 3666.309  | 4048.061  | U50524    | 668.906   | 745.254   |
| AK024939  | 3840.716  | 3159.029  | U52050    | 571.064   | 604.456   |
| AK001561  | 4098.772  | 4364.85   | U73799    | 2603.694  | 2278.49   |
| AB007880  | 3318.507  | 3117.303  | AK021668  | 28152.66  | 21314.609 |
| AK024950  | 1140.116  | 1038.614  | AF086148  | 19693.004 | 16959.262 |
| M33197    | 59940.043 | 56119.477 | AJ245433  | 11158.454 | 8061.231  |
| NM_014146 | 14813.466 | 12838.716 | AK021942  | 24949.855 | 13556.938 |
| AF147356  | 1018.599  | 733.549   | NM_014127 | 1401.716  | 927.583   |
| NM_018843 | 5942.049  | 6952.976  | AL360187  | 1079.14   | 913.685   |
| AK096204  | 646.813   | 620.927   | AK021878  | 1377.288  | 920.894   |
| AK024275  | 1074.164  | 1034.72   | AK021817  | 3467.836  | 2709.281  |
| M33197    | 59875.77  | 56379.035 | AL080103  | 940.282   | 1089.703  |
| AL109782  | 8969.449  | 9253.174  | AK023217  | 1263.057  | 1462.625  |
| AF086225  | 1679.739  | 1291.962  | AK021883  | 985.394   | 853.309   |
| NM_005844 | 8030.876  | 8079.412  | AF090902  | 3192.302  | 2341.195  |
| AK024941  | 5330.687  | 6281.748  | AF119887  | 11204.35  | 9708.313  |
| AF056434  | 1099.004  | 1609.187  | AK091038  | 1047.495  | 1249.3    |
| M33197    | 29461.57  | 36485.805 | AK024193  | 1259.819  | 1621.64   |
| AK025489  | 2129.904  | 2112.948  | NM_018578 | 814.914   | 830.678   |
| AL390152  | 4100.751  | 6107.11   | NM_018543 | 694.839   | 624.686   |
| M33197    | 62876.66  | 56255.316 | AK024438  | 19600.008 | 17186.293 |
| NM_018126 | 2094.175  | 1375.282  | AK022482  | 949.642   | 1423.573  |
| AK024506  | 3037.534  | 3419.576  | AK023811  | 460.464   | 440.878   |
| NM_014175 | 701.578   | 654.121   | AK024135  | 564.667   | 475.401   |
| AF086326  | 10831.688 | 5481.632  | AK022803  | 2406.494  | 2598.583  |
| M33197    | 64179.375 | 58478.949 | AK023517  | 1738.478  | 1688.311  |
| AL080057  | 1618.23   | 1616.135  | AK023869  | 4405.923  | 3363.564  |
| AL117528  | 1350.334  | 1475.041  | NM_017728 | 1107.567  | 1133.665  |
| M33197    | 61970.836 | 56726.023 | U80772    | 1030.285  | 466.444   |
| AK025948  | 2161.848  | 1876.015  | NM_006189 | 1264      | 748.934   |
| AK000674  | 1193.339  | 805.126   | AJ272177  | 1773.69   | 908.111   |
| AJ238555  | 848.677   | 1089.203  | AK026402  | 20707.912 | 11589.13  |
| L23850    | 476.499   | 580.444   | AF111846  | 1447.142  | 966.468   |
| AL353948  | 13899.52  | 14750.007 | AK024618  | 2525.05   | 2480.725  |
| M33197    | 47855.73  | 36671.867 | AL049969  | 1683.585  | 1017.102  |
| AK025869  | 9206.931  | 10201.954 | NM_005220 | 886.535   | 960.584   |
| M33197    | 46306.805 | 42369.984 | AK000208  | 478.705   | 336.239   |
| AF056430  | 2441.229  | 2261.132  | AK026366  | 43374.621 | 28514.896 |
| NM_014906 | 745.39    | 1381.986  | AK024229  | 14514.304 | 11244.457 |
| AF009291  | 2806.511  | 2353.344  | AK021467  | 10505.706 | 12373.349 |



|           |           |           |           |           |           |
|-----------|-----------|-----------|-----------|-----------|-----------|
| AF056440  | 1580.513  | 1996.973  | NM_020371 | 2628.308  | 2461.568  |
| M33197    | 60245.141 | 55993.203 | U84506    | 2365.392  | 1461.774  |
| NM_018055 | 7319.113  | 5517.45   | U21556    | 61649.453 | 44227.691 |
| AK002199  | 3199.356  | 2514.358  | AB002444  | 2150.064  | 926.176   |
| AK021662  | 2680.27   | 3538.433  | AB002344  | 2203.862  | 1693.764  |
| AK001038  | 794.389   | 1075.951  | BF210352  | 1707.826  | 1133.875  |
| AK001802  | 2123.836  | 1785.498  | NM_006829 | 2052.009  | 1393.892  |
| AK021469  | 3042.144  | 2940.49   | AK023760  | 7265.875  | 5253.23   |
| AK021706  | 4947.73   | 4360.55   | X98415    | 66398.188 | 45888.441 |
| M33197    | 60736.914 | 57299.887 | AK024205  | 3407.405  | 2476.138  |
| AK026052  | 692.302   | 1150.297  | AF086034  | 21506.416 | 10778.456 |
| AK025387  | 1468.572  | 1807.792  | AK000174  | 1089.226  | 708.561   |
| AK026259  | 44748.227 | 42933.73  | AF130071  | 1253.485  | 1296.096  |
| AJ008115  | 22917.877 | 19480.568 | AK022887  | 1194.706  | 991.403   |
| AF083125  | 963.329   | 877.618   | AK000745  | 23443.207 | 11956.512 |
| M33197    | 57125.223 | 53127.137 | NM_005299 | 360.571   | 459.427   |
| AK022970  | 1422.062  | 1151.499  | NM_015901 | 1476.345  | 997.436   |
| AK026212  | 1141.752  | 1192.944  | Z83935    | 1700.727  | 1223.65   |
| AF086222  | 778.291   | 949.88    | AF093744  | 1069.628  | 647.239   |
| AF086415  | 5116.981  | 5135.548  | NM_018687 | 10143.909 | 9916.602  |
| M33197    | 38137.676 | 30981.076 | NM_020524 | 11637.839 | 7283.705  |
| AK024470  | 2549.302  | 2602.143  | NM_001999 | 2935.48   | 1496.371  |
| NM_017935 | 897.458   | 2112.781  | X64977    | 1827.658  | 802.304   |
| NM_004226 | 2372.144  | 4220.612  | AF064851  | 1794.042  | 1074.078  |
| AL137436  | 934.859   | 1530.326  | NM_002602 | 19887.756 | 13354.549 |
| AK023400  | 772.161   | 753.025   | NM_016239 | 1567.649  | 1560.452  |
| NM_006432 | 15014.293 | 13329.493 | D17271    | 5631.068  | 6714.5    |
| AF025441  | 1682.191  | 1445.595  | X91648    | 2687.021  | 1390.737  |
| U62823    | 4433.326  | 3710.985  | AK026658  | 1007.691  | 655.929   |
| NM_003535 | 26722.572 | 21278.996 | AF282264  | 11708.527 | 8596.649  |
| AK026768  | 2033.259  | 2367.517  | AF086322  | 1996.415  | 1213.572  |
| M33197    | 60615.098 | 54499.012 | Z70717    | 1010.737  | 1006.227  |
| AK000852  | 23247.512 | 21403.715 | AK024736  | 1794.074  | 1095.045  |
| AF251188  | 5134.387  | 5348.919  | X79308    | 1818.244  | 1976.297  |
| AK026418  | 8224.133  | 7984.007  | AF086476  | 762.281   | 528.556   |
| AF086194  | 40202.004 | 31136.494 | NM_017660 | 5664.137  | 3661.421  |
| AK026811  | 3493.63   | 3144.007  | AB011151  | 12233.935 | 11553.043 |
| M33197    | 58024.695 | 54725.402 | U92995    | 2957.864  | 2004.891  |
| AK023633  | 1975.359  | 1931.563  | NM_007106 | 1696.78   | 2167.607  |
| NM_006179 | 2250.686  | 1681.485  | CY3Cy5    | 6313.484  | 380.151   |
| AJ008132  | 5302.743  | 8164.458  | X00588    | 2040.544  | 2079.784  |
| NM_005281 | 6149.243  | 8772.293  | AI359037  | 7510.555  | 4567.858  |
| NM_005549 | 3617.994  | 4492.521  | BI754285  | 895.862   | 1217.33   |
| M33197    | 59161.781 | 52291.324 | X15998    | 818.392   | 1107.425  |
| U12129    | 2134.309  | 3162.734  | M76482    | 412.871   | 761.956   |
| S81242    | 48740.109 | 49460.867 | NM_001883 | 861.672   | 1004.147  |
| AF230801  | 1300.917  | 1416.522  | NM_004628 | 1212.125  | 1486.373  |
| AF075072  | 2198.312  | 2213.586  | L31785    | 491.828   | 972.189   |
| M33197    | 61461.574 | 54508.242 | H-M 69043 | 4179.196  | 2938.308  |
| NM_002509 | 3604.871  | 5216.209  | AF077374  | 662.659   | 960.615   |
| U38442    | 2085.703  | 2762.121  | U43901    | 510.919   | 563.415   |
| AF110136  | 1631.452  | 1299.894  | M59828    | 1269.767  | 1629.688  |
| AK026706  | 6250.305  | 4613.311  | NM_016134 | 1115.779  | 1637.579  |

|           |           |           |           |           |           |
|-----------|-----------|-----------|-----------|-----------|-----------|
| AB007936  | 36830.098 | 36150.563 | SR2       | 55557.797 | 53365.707 |
| M33197    | 39048.953 | 44128.242 | SR4       | 13930.548 | 11704.778 |
| AJ227885  | 774.999   | 811.361   | SR6       | 2084.905  | 1595.866  |
| AK026859  | 1179.685  | 845.3     | SR8       | 7375.101  | 18380.93  |
| AJ227896  | 5445.4    | 7442.953  | SR10      | 26380.359 | 8096.976  |
| AK025371  | 545.531   | 886.266   | CY3Cy5    | 3566.21   | 190.562   |
| M33197    | 57334.148 | 57270.82  | NM_000612 | 4637.458  | 4113.03   |
| AF131770  | 2373.842  | 2600.399  | NM_004257 | 10938.018 | 15350.56  |
| CY3Cy5    | 8365.482  | 496.618   | NM_000683 | 2222.291  | 1792.063  |
| AW167715  | 3094.125  | 1957.309  | NM_003629 | 1612.692  | 2003.381  |
| AA424735  | 2131.778  | 2486.192  | NM_005901 | 3240.087  | 6201.918  |
| U78294    | 1096.14   | 923.469   | NM_004248 | 632.423   | 1405.248  |
| AA171613  | 443.989   | 363.962   | NM_001313 | 1264.42   | 1183.984  |
| BI760394  | 1324.299  | 843.683   | NM_004796 | 113.596   | 1030.893  |
| AA555216  | 581.004   | 736.689   | NM_000435 | 336.258   | 757.565   |
| U09117    | 15586.529 | 13502.813 | NM_001842 | 3235.186  | 4360.461  |
| M21054    | 543.723   | 695.104   | AL080170  | 1355.808  | 1663.193  |
| M18468    | 1043.83   | 1258.944  | AB039903  | 2883.265  | 2371.934  |
| H66070    | 17504.307 | 14958.294 | NM_000542 | 4176.106  | 3729.974  |
| AA164741  | 27701.705 | 3753.951  | NM_014625 | 824.038   | 465.441   |
| AI189375  | 971.688   | 1075.292  | NM_006851 | 1046.524  | 358.808   |
| AI978885  | 3343.882  | 3560.644  | AK001560  | 1089.023  | 797.671   |
| AK054960  | 11941.41  | 13243.414 | AB001328  | 865.838   | 990.203   |
| L15344    | 1560.046  | 1935.568  | NM_000948 | 284.675   | 626.961   |
| SR5       | 5683.401  | 5348.762  | H99588    | 4611.45   | 1812.214  |
| SR7       | 8415.623  | 40151.266 | AK022600  | 2007.411  | 2767.815  |
| SR9       | 35183.344 | 5621.889  | AK023142  | 1528.318  | 1338.006  |
| CY3Cy5    | 10968.081 | 850.182   | U61740    | 7959.622  | 9536.17   |
| NM_014586 | 4570.806  | 4938.299  | NM_006409 | 52396.531 | 56891.191 |
| NM_014366 | 3718.264  | 4512.734  | AB049054  | 2826.64   | 2869.384  |
| NM_000923 | 1019.055  | 872.045   | NM_015071 | 1471.937  | 1444.637  |
| NM_006453 | 804.281   | 1215.158  | NM_013227 | 1080.553  | 1371.473  |
| NM_018096 | 250.984   | 986.691   | Z83803    | 2946.746  | 3594.381  |
| AL390078  | 1358.04   | 1010.291  | AF027205  | 6966.299  | 12844.636 |
| NM_004036 | 1441.024  | 1335.353  | AF075012  | 1440.767  | 1414.288  |
| NM_015986 | 846.935   | 325.422   | NM_001570 | 1460.683  | 1587.326  |
| NM_006546 | 650.149   | 502.33    | NM_000589 | 1625.893  | 2886.109  |
| NM_014959 | 2476.143  | 1817.224  | NM_016546 | 13048.509 | 14723.242 |
| NM_003992 | 3925.296  | 4278.329  | AF309653  | 2311.601  | 9758.617  |
| AF279265  | 3002.056  | 2996.388  | NM_002620 | 4905.885  | 5422.783  |
| NM_007350 | 192.348   | 463.235   | S79267    | 612.384   | 647.751   |
| NM_005213 | 22723.584 | 37005.547 | NM_001816 | 867.604   | 768.15    |
| AB040914  | 725.503   | 771.444   | NM_003784 | 27317.328 | 26226.053 |
| NM_002997 | 3231.892  | 3575.537  | NM_000195 | 7864.182  | 6913.43   |
| NM_002379 | 10638.221 | 9824.645  | NM_005445 | 9093.113  | 4401.253  |
| AB007929  | 9754.786  | 8322.844  | NM_014899 | 1597.397  | 1447.191  |
| NM_004579 | 6048.489  | 5476.027  | NM_003630 | 3003.07   | 2688.111  |
| AA203126  | 3632.474  | 4172.244  | NM_000046 | 3363.967  | 2392.406  |
| L12347    | 4330.128  | 4592.563  | NM_003219 | 1024.213  | 985.466   |
| NM_001622 | 6252.074  | 5248.166  | NM_006709 | 3557.8    | 2652.988  |
| Z36788    | 1953.529  | 1902.251  | NM_004910 | 1827.813  | 1903.01   |
| NM_018477 | 3595.995  | 4588.116  | AB013452  | 740.048   | 617.771   |
| U20536    | 1881.877  | 1600.247  | M93107    | 5114.781  | 4539.671  |

|           |           |           |           |           |           |
|-----------|-----------|-----------|-----------|-----------|-----------|
| NM_004853 | 5381.439  | 4704.854  | BC001479  | 5521.208  | 6515.619  |
| NM_001494 | 13659.9   | 13993.266 | NM_002461 | 17647.15  | 19593.244 |
| NM_017707 | 525.768   | 547.353   | NM_005771 | 10387.282 | 7721.768  |
| NM_004206 | 1903.909  | 1493.694  | AB032986  | 26803.398 | 30689.58  |
| NM_004603 | 5826.691  | 7592.222  | NM_017528 | 26117.605 | 34034.637 |
| AK022849  | 1171.07   | 1358.048  | NM_016032 | 8705.314  | 12771.283 |
| AF040964  | 3306.154  | 3049.453  | NM_001169 | 1010.714  | 1389.982  |
| NM_001939 | 4659.25   | 4141.124  | AK024648  | 10801.905 | 12307.167 |
| NM_003279 | 9501.113  | 6966.255  | NM_000719 | 560.087   | 652.21    |
| AB014599  | 3144.942  | 2114.629  | NM_003459 | 5530.525  | 6441.979  |
| NM_004393 | 382.509   | 164.461   | NM_000171 | 714.985   | 703.339   |
| NM_005832 | 585.242   | 518.662   | AL354615  | 1044.334  | 880.411   |
| AW407841  | 1414.922  | 1585.517  | NM_013349 | 15281.254 | 15758.828 |
| U15197    | 540.517   | 632.363   | NM_003705 | 1730.821  | 2026.434  |
| NM_001879 | 3150.342  | 3012.341  | NM_006861 | 2435.359  | 1333.548  |
| AF264014  | 8401.859  | 11286.059 | NM_005829 | 2348.521  | 1733.208  |
| L09098    | 240.3     | 758.673   | NM_000466 | 1439.069  | 942.843   |
| NM_004155 | 580.625   | 755.28    | NM_015908 | 19848.695 | 8644.253  |
| NM_001831 | 942.464   | 1232.593  | NM_000896 | 766.3     | 906.486   |
| NM_000137 | 4742.754  | 3780.402  | AB040672  | 3576.698  | 4681.74   |
| NM_012102 | 6303.914  | 5692.524  | NM_002192 | 2701.486  | 2242.683  |
| NM_005017 | 17188.201 | 17504.432 | NM_005491 | 4849.726  | 5396.305  |
| AF163572  | 10119.928 | 8517.023  | NM_003869 | 3258.092  | 2776.325  |
| NM_000897 | 4786.09   | 4445.646  | X63417    | 7570.917  | 8483.664  |
| NM_000487 | 921.956   | 539.049   | S94539    | 30867.326 | 33438.297 |
| NM_006411 | 15405.806 | 12547.193 | NM_006402 | 1885.984  | 1660.693  |
| NM_014182 | 4628.937  | 2371.49   | NM_005785 | 1831.356  | 3041.237  |
| NM_000492 | 8198.467  | 11606.438 | NM_018248 | 3515.821  | 3223.376  |
| NM_012089 | 1188.12   | 1047.382  | AK001695  | 8751.555  | 8134.465  |
| NM_001170 | 1534.848  | 1222.451  | NM_017886 | 3141.152  | 2746.277  |
| NM_004696 | 453.642   | 603.753   | NM_006252 | 703.913   | 1343.016  |
| NM_014342 | 1796.339  | 1909.642  | NM_014397 | 3554.457  | 4086.273  |
| Z50169    | 773.159   | 1134.134  | AB023182  | 1200.84   | 937.264   |
| AB043997  | 1770.82   | 1499.049  | NM_003607 | 1021.047  | 956.579   |
| AF097645  | 931.471   | 626.526   | NM_006575 | 1462.902  | 2019.817  |
| NM_001773 | 2502.563  | 1970.324  | NM_013254 | 2542.223  | 2206.5    |
| Z70704    | 3078.887  | 2109.462  | NM_000437 | 10410.827 | 7711.027  |
| NM_014363 | 1660.766  | 1434.4    | AB046819  | 6352.254  | 5271.965  |
| NM_000557 | 6844.474  | 5545.473  | NM_006090 | 3013.411  | 2690.549  |
| NM_003239 | 497.845   | 481.478   | NM_002900 | 6264.217  | 5700.337  |
| NM_001375 | 5111.183  | 3415.041  | AK001560  | 876.69    | 673.111   |
| NM_002312 | 3470.413  | 2150.27   | AB001328  | 692.005   | 1252.135  |
| M20699    | 876.461   | 868.842   | NM_000948 | 340.835   | 209.704   |
| NM_004774 | 4730.822  | 3633.965  | H99588    | 3604.474  | 2303.674  |
| NM_016937 | 2675.198  | 2294.513  | X00588    | 1411.033  | 1848.768  |
| NM_002690 | 2960.825  | 1662.208  | AI359037  | 9147.791  | 5003.774  |
| NM_012328 | 1221.24   | 3912.064  | BI754285  | 674.373   | 936.493   |
| NM_006456 | 2268.139  | 2273.362  | X15998    | 4115.246  | 5605.392  |
| AK026062  | 7404.426  | 12683.506 | M76482    | 777.883   | 763.386   |
| AF047002  | 14690.142 | 17524.887 | H-M 69043 | 3703.017  | 2510.168  |
| AL050082  | 2072.549  | 1433.92   | AF077374  | 881.474   | 1115.093  |
| NM_006623 | 12379.616 | 37609.43  | U43901    | 601.516   | 703.053   |
| NM_016588 | 2200.094  | 1667.164  | X59065    | 911.488   | 802.991   |

|           |           |           |           |           |           |
|-----------|-----------|-----------|-----------|-----------|-----------|
| NM_003135 | 6106.949  | 5485.112  | M59828    | 2173.799  | 3055.502  |
| L12347    | 7971.753  | 8504.528  | SB        | 427.077   | 571.41    |
| NM_018477 | 3408.369  | 4576.466  | NM_016134 | 1063.691  | 1125.97   |
| L15344    | 2580.89   | 3747.104  | AJ010482  | 1762.957  | 1374.174  |
|           | 676.911   | 380.698   | NM_005445 | 9677.951  | 3048.379  |
|           | 544.05    | 609.891   | NM_014899 | 809.649   | 1074.343  |
| NM_014470 | 743.582   | 684.3     | NM_003630 | 1182.936  | 2417.887  |
| NM_001665 | 11429.452 | 15180.538 | NM_000046 | 2413.451  | 2398.504  |
| NM_001879 | 6236.259  | 6668.656  | NM_003219 | 961.989   | 1439.55   |
| AF264014  | 9005.56   | 10701.3   | NM_006709 | 3035.98   | 3386.83   |
| NM_004155 | 673.296   | 719.993   | NM_000612 | 5888.673  | 4858.727  |
| NM_001831 | 1515.407  | 1641.398  | NM_004257 | 14666.992 | 17934.053 |
| NM_000923 | 723.283   | 519.693   | NM_000683 | 2344.028  | 2122.51   |
| AL390078  | 1117.744  | 1119.162  | NM_003629 | 1989.641  | 2669.434  |
| NM_004036 | 1464.182  | 1966.72   | NM_005901 | 3902.928  | 6010.888  |
| NM_006546 | 439.091   | 844.693   | NM_004248 | 2147.215  | 2261.055  |
| NM_014959 | 2722.866  | 1955.629  | NM_000959 | 549.067   | 629.517   |
| NM_003992 | 4604.488  | 4506.386  | NM_001313 | 1180.728  | 1066.295  |
| AF279265  | 2208.357  | 2368.86   | NM_004796 | 400.08    | 678.674   |
| NM_005213 | 25253.965 | 39532.754 | NM_000435 | 1228.783  | 2143.335  |
| AB040914  | 1678.299  | 2106.34   | NM_001842 | 16848.275 | 23533.91  |
| NM_002997 | 5841.912  | 6316.854  | AB017169  | 605.244   | 386.386   |
| NM_002379 | 13491.61  | 13449.013 | AL080170  | 2329.472  | 1223.918  |
| AB007929  | 12639.102 | 10971.114 | AB039903  | 3734.588  | 2368.236  |
| NM_004579 | 5193.001  | 3535.78   | NM_000542 | 11434.229 | 7967.781  |
| AA203126  | 3472.036  | 4834.272  | NM_003705 | 856.383   | 744.708   |
| Z50169    | 1100.544  | 746.332   | NM_006861 | 1274.575  | 807.262   |
| AB043997  | 1887.541  | 1536.043  | NM_005829 | 1775.731  | 2614.415  |
| NM_004853 | 5208.309  | 4329.398  | NM_000466 | 1143.76   | 1169.304  |
| NM_004206 | 1534.294  | 827.117   | NM_015908 | 15590.805 | 9560.847  |
| NM_004603 | 8709.931  | 11858.519 | AK022600  | 4458.859  | 5038.033  |
| AK022849  | 1719.051  | 1791.704  | AK023142  | 1712.535  | 1518.651  |
| AF040964  | 3977.331  | 3912.15   | U61740    | 6597.717  | 7473.654  |
| NM_001939 | 1713.767  | 1517.198  | NM_006409 | 54574.461 | 57318.168 |
| NM_003279 | 13935.928 | 13182.922 | AB049054  | 2771.564  | 3106.357  |
| AB014599  | 6036.132  | 4421.547  | NM_015071 | 2725.094  | 2702.751  |
| NM_004393 | 1244.986  | 1037.598  | NM_013227 | 1304.983  | 1917.178  |
| AB018345  | 762.381   | 842.926   | Z83803    | 1074.71   | 881.685   |
| NM_005832 | 722.657   | 1007.517  | AF027205  | 11616.08  | 15329.768 |
| AW407841  | 2110.667  | 2205.421  | AF075012  | 1878.87   | 1858.335  |
| U15197    | 800.106   | 964.178   | NM_001570 | 1739.473  | 1590.065  |
| AL050082  | 1879.856  | 1485.924  | NM_015658 | 770.963   | 584.29    |
| NM_006623 | 19822.699 | 37225.418 | NM_000589 | 1901.538  | 1821.187  |
| NM_016588 | 2197.803  | 1461.321  | NM_016546 | 15147.652 | 13364.105 |
| NM_003135 | 6616.837  | 6653.516  | AF309653  | 3291.441  | 7550.323  |
| NM_000137 | 4134.187  | 5112.423  | NM_002620 | 13571.078 | 13308.502 |
| NM_012102 | 5576.287  | 5960.435  | S79267    | 1121.629  | 649.551   |
| NM_005017 | 17038.055 | 18353.844 | NM_001816 | 1433.769  | 691.679   |
| AF163572  | 12186.756 | 10907.488 | NM_003784 | 36779.16  | 23490.088 |
| NM_000897 | 1813.489  | 742.252   | NM_000195 | 19426.197 | 14392.737 |
| NM_006411 | 19608.986 | 18153.234 | NM_006575 | 898.725   | 893.176   |
| NM_014182 | 5628.26   | 2774.671  | NM_013254 | 2739.88   | 3075.629  |
| NM_000492 | 4017.625  | 5284.074  | NM_000437 | 9786.226  | 8863.614  |

|           |           |           |           |           |           |
|-----------|-----------|-----------|-----------|-----------|-----------|
| NM_01208  | 1361.697  | 1502.082  | AB046819  | 6637.182  | 6248.309  |
| NM_001170 | 3897.844  | 4276.645  | NM_006090 | 3172.709  | 3899.358  |
| AL137716  | 815.099   | 662.023   | NM_002900 | 6931.777  | 9594.726  |
| NM_004696 | 1115.016  | 1203.115  | NM_004910 | 1738.595  | 2450.535  |
| NM_014342 | 1352.149  | 1779.189  | AB013452  | 671.322   | 764.388   |
| AK054960  | 17395.705 | 16295.674 | M93107    | 6244.344  | 4943.287  |
| L15344    | 2102.11   | 2385.846  | BC001479  | 8308.075  | 8919.291  |
| NM_001665 | 10880.296 | 10584.467 | NM_002461 | 22426.955 | 22862.498 |
| AF097645  | 478.144   | 339.224   | NM_005771 | 14409.27  | 11149.948 |
| NM_001773 | 1040.54   | 1165.864  | AB032986  | 33183.625 | 35321.664 |
| Z70704    | 2029.683  | 1653.964  | NM_017528 | 30325.709 | 35444.441 |
| NM_014363 | 841.618   | 823.794   | NM_016032 | 10187.951 | 11295.367 |
| NM_000557 | 4490.872  | 4712.207  | NM_014324 | 57218.535 | 59732.082 |
| NM_001375 | 3592.475  | 3030.636  | NM_001687 | 20687.457 | 19487.59  |
| NM_002312 | 2723.316  | 1674.515  | AK026374  | 2773.057  | 2259.101  |
| M20699    | 404.374   | 656.576   | NM_001169 | 1736.058  | 1833.467  |
| NM_004774 | 4548.6    | 2799.094  | AK024648  | 11352.018 | 12311.424 |
| NM_016937 | 2932.892  | 3061.772  | NM_000719 | 758.574   | 452.74    |
| NM_002690 | 2004.343  | 1391.055  | NM_003459 | 7311.014  | 6960.257  |
| NM_012328 | 1443.483  | 4828.952  | NM_000171 | 1362.172  | 1753.065  |
| NM_007341 | 1002.643  | 1166.925  | AL354615  | 1623.512  | 724.005   |
| NM_016508 | 1309.316  | 1590.949  | NM_013349 | 35417.84  | 25522.229 |
| NM_006456 | 7992.524  | 9083.871  | NM_016134 | 1093.556  | 1488.967  |
| AK026062  | 5433.341  | 8600.7    | AJ010482  | 1530.644  | 1814.295  |
| AF047002  | 15237.62  | 17844.572 | NM_000896 | 1185.396  | 1058.681  |
| AB040914  | 2196.804  | 2241.569  | AB040672  | 4325.229  | 6557.629  |
| NM_002997 | 9256.79   | 8041.154  | NM_002192 | 2984.804  | 2353.158  |
| NM_002379 | 10122.097 | 8116.971  | NM_005491 | 5629.298  | 5506.835  |
| NM_004579 | 5344.369  | 3203.313  | NM_003869 | 4723.355  | 5100.837  |
| L12347    | 2788.766  | 1928.681  | X63417    | 9688.394  | 9078.105  |
| NM_001622 | 4528.527  | 4909.499  | S94539    | 31053.322 | 32378.387 |
| Z36788    | 1764.42   | 1514.421  | NM_006402 | 1954.523  | 1657.099  |
| NM_018477 | 2549.802  | 2638.777  | NM_005785 | 1704.507  | 2889.451  |
| U20536    | 1194.784  | 1037.321  | NM_018248 | 3753.365  | 2901.491  |
| AI298534  | 1231.076  | 1271.965  | AK001695  | 11706.171 | 8080.217  |
| AW167715  | 2138.614  | 998.673   | NM_017886 | 5568.328  | 3364.452  |
| AA424735  | 1599.025  | 1635.34   | NM_006252 | 2351.851  | 2302.633  |
| U78294    | 1110.192  | 986.016   | NM_001721 | 533.478   | 504.196   |
| BI760394  | 2239.13   | 2321.954  | NM_014397 | 5177.402  | 4533.235  |
| AA555216  | 730.822   | 852.794   | AB023182  | 1757.34   | 883.047   |
| U09117    | 14912.147 | 12701.494 | NM_003607 | 1511.631  | 583.607   |
| M21054    | 500.006   | 507       | AB017169  | 503.782   | 1005.461  |
| M18468    | 1214.702  | 1213.925  | AL080170  | 1642.198  | 1704.938  |
| H66070    | 19880.674 | 14600.778 | AB039903  | 3801.853  | 3575.422  |
| AA164741  | 25925.152 | 3293.682  | NM_000542 | 11470.406 | 12670.451 |
| AI189375  | 1214.731  | 1691.308  | NM_014625 | 458.145   | 489.03    |
| AB014599  | 4915.895  | 3167.306  | NM_006851 | 1207.358  | 863.215   |
| NM_004393 | 1696.286  | 1088.722  | AK001560  | 1385.101  | 1393.619  |
| AW407841  | 2394.421  | 2216.681  | H99588    | 4301.395  | 3087.66   |
| U15197    | 702.651   | 809.356   | X00588    | 2268.317  | 2924.938  |
| NM_001879 | 4444.088  | 3472.851  | AI359037  | 9563.555  | 5008.668  |
| AF264014  | 8340.005  | 9190.252  | J04513    | 624.277   | 181.29    |
| L09098    | 379.485   | 733.211   | BI754285  | 882.6     | 926.573   |

|           |           |           |           |           |           |
|-----------|-----------|-----------|-----------|-----------|-----------|
| NM_000923 | 693.578   | 524.275   | X15998    | 4511.185  | 4501.953  |
| NM_006453 | 670.208   | 1349.848  | M76482    | 940.918   | 501.804   |
| NM_018096 | 220.643   | 1058.709  | NM_001883 | 4325.103  | 2473.508  |
| AL390078  | 1376.147  | 1676.445  | NM_004628 | 2267.313  | 1742.014  |
| NM_004036 | 1988.658  | 2272.934  | L31785    | 722.074   | 835.847   |
| NM_015986 | 1565.953  | 777.37    | H-M 69043 | 4422.405  | 2340.019  |
| NM_006546 | 324.831   | 747.309   | AF077374  | 1356.845  | 1051.892  |
| NM_014959 | 3386.293  | 2600.877  | U43901    | 664.206   | 622.311   |
| NM_003992 | 4331.437  | 5561.193  | X59065    | 861.177   | 584.468   |
| AF279265  | 2921.933  | 4010.543  | M59828    | 4305.936  | 3027.817  |
| AK024382  | 276.831   | 320.585   | NM_002620 | 12976.058 | 18061.455 |
| NM_001170 | 4760.05   | 4234.263  | NM_001816 | 881.386   | 622.685   |
| NM_004696 | 1805.642  | 1871.763  | NM_003784 | 32080.715 | 30318.713 |
| NM_017694 | 696.263   | 1261.955  | NM_000195 | 20885.559 | 25091.895 |
| NM_001494 | 11502.785 | 18430.623 | NM_005445 | 13952.029 | 6644.397  |
| NM_017707 | 777.842   | 791.796   | NM_014899 | 1495.875  | 1899.284  |
| NM_004206 | 2052.77   | 2056      | NM_003630 | 2899.231  | 4296.088  |
| Y08991    | 354.724   | 431.455   | NM_000046 | 3613.448  | 3224.819  |
| NM_004603 | 8033.984  | 14281.424 | NM_003219 | 973.012   | 1351.602  |
| AK022849  | 2006.452  | 3105.519  | NM_006709 | 3810.485  | 4307.999  |
| AF040964  | 4055.646  | 6303.221  | NM_000612 | 6187.145  | 5664.887  |
| NM_012328 | 1679.245  | 5569.336  | NM_004257 | 16647.504 | 20151.666 |
| NM_007341 | 1177.38   | 1145.568  | NM_000683 | 2154.568  | 1687.626  |
| NM_016508 | 1985.262  | 1815.159  | NM_003629 | 2237.836  | 2034.019  |
| NM_006456 | 14778.655 | 12332.843 | NM_005901 | 3833.52   | 6276.429  |
| NM_016588 | 1392.97   | 420.912   | NM_004248 | 1654.94   | 2094.695  |
| NM_003135 | 6158.335  | 5881.851  | NM_001313 | 1615.226  | 897.427   |
| NM_000137 | 5327.874  | 5819.309  | NM_004796 | 402.836   | 521.274   |
| NM_012102 | 4954.163  | 5677.059  | NM_000435 | 3766.604  | 3145.277  |
| NM_005017 | 17991.127 | 17249.559 | NM_001842 | 19342.02  | 17749.01  |
| AF163572  | 19606.701 | 18174.506 | AB032526  | 584.029   | 376.191   |
| NM_000897 | 6846.103  | 6999.651  | NM_000171 | 1744.908  | 2532.806  |
| NM_000487 | 1760.396  | 1003.67   | AL354615  | 1068.722  | 880.205   |
| NM_006411 | 22545.834 | 20789.316 | NM_013349 | 36661.336 | 38986.063 |
| NM_014182 | 5067.265  | 2485.642  | NM_003705 | 2762.921  | 2779.878  |
| AB040884  | 876.751   | 651.85    | NM_006861 | 2519.917  | 1599.165  |
| NM_000492 | 7919.619  | 12141.399 | NM_005829 | 2082.947  | 1820.188  |
| NM_012089 | 1617.574  | 1976.054  | NM_000466 | 1211.551  | 1535.786  |
| AJ272057  | 9310.288  | 9325.928  | NM_015908 | 20515.086 | 12900.662 |
| NM_004402 | 911.099   | 718.192   | AK022600  | 4724.902  | 5531.377  |
| AK024216  | 15652.352 | 12931.325 | AK023142  | 1828.472  | 1393.793  |
| NM_020156 | 819.314   | 1213.678  | U61740    | 10287.746 | 11158.941 |
| NM_014830 | 2281.238  | 2526.665  | NM_006409 | 55633.281 | 55127.918 |
| AF355402  | 3764.46   | 3072.273  | AB049054  | 3983.939  | 3103.017  |
| NM_001665 | 12204.993 | 11161.27  | NM_015071 | 1873.841  | 1187.861  |
| AF097645  | 966.623   | 551.012   | NM_013227 | 1848.294  | 2031.628  |
| NM_001773 | 735.815   | 828.565   | Z83803    | 706.919   | 1017.022  |
| Z70704    | 2256.628  | 2141.922  | AF027205  | 8931.013  | 9375.177  |
| NM_014363 | 1584.643  | 1477.103  | AF075012  | 2132.027  | 1999.601  |
| NM_000557 | 4512.864  | 4236.858  | NM_001570 | 1014.778  | 820.401   |
| NM_003239 | 414.484   | 672.16    | NM_015658 | 659.623   | 311.054   |
| NM_001375 | 6678.747  | 5742.242  | NM_000589 | 1021.015  | 1224.218  |
| NM_002312 | 4275.808  | 3102.695  | NM_016546 | 9716.654  | 6323.169  |

|           |           |           |           |           |           |
|-----------|-----------|-----------|-----------|-----------|-----------|
| M20699    | 1368.545  | 1518.048  | NM_017886 | 5424.427  | 6150.498  |
| NM_004774 | 4436.534  | 4014.073  | NM_001721 | 836.999   | 921.046   |
| NM_016937 | 3449.644  | 3654.322  | NM_014397 | 6048.459  | 6813.189  |
| NM_002690 | 4191.445  | 2821.668  | AB023182  | 1706.537  | 1514.514  |
| AB033086  | 668.406   | 438.589   | NM_003607 | 1081.807  | 1264.585  |
| NM_018239 | 1936.509  | 1164.599  | NM_006575 | 1431.313  | 1876.969  |
| U88892    | 2127.653  | 1516.638  | NM_013254 | 3218.817  | 2935.517  |
| AK023755  | 932.912   | 1175.694  | NM_000437 | 10636.002 | 10109.367 |
| NM_005725 | 962.585   | 678.196   | AB046819  | 6193.063  | 6427.094  |
| NM_012211 | 1447.27   | 1081.341  | NM_006090 | 3951.398  | 6297.895  |
| AB040877  | 3631.134  | 3360.087  | NM_002900 | 5124.563  | 6746.926  |
| AB040927  | 921.331   | 982.537   | NM_004910 | 1878.339  | 2099.206  |
| AK026737  | 1691.794  | 1445.476  | M93107    | 6588.909  | 5914.057  |
| NM_006289 | 7668.622  | 6988.724  | BC001479  | 7700.375  | 7323.862  |
| NM_019067 | 4133.508  | 3297.957  | NM_002461 | 22562.969 | 20998.994 |
| AF251025  | 857.831   | 864.384   | NM_005771 | 13641.61  | 8083.889  |
| NM_015677 | 3433.632  | 3810.476  | AB032986  | 32575.359 | 31304.58  |
| NM_001772 | 10004.6   | 9273.937  | NM_017528 | 33059.148 | 36092.051 |
| AL162032  | 76.864    | 520.613   | NM_016032 | 9460.153  | 9223.335  |
| AB011087  | 1268.341  | 1349.363  | NM_014324 | 53372.848 | 52765.625 |
| AF161341  | 5541.261  | 4487.401  | NM_001687 | 14080.574 | 11641.408 |
| AJ249902  | 1291.86   | 1286.355  | AK026374  | 3674.395  | 2825.574  |
| NM_004384 | 3038.807  | 3225.62   | NM_001169 | 2049.463  | 1494.344  |
| L05500    | 4875.814  | 4701.512  | AK024648  | 11859.41  | 8250.839  |
| NM_012306 | 10129.902 | 9649.852  | NM_000795 | 1217.045  | 1699.134  |
| AF222903  | 3324.529  | 3676.665  | NM_014139 | 452.641   | 1027.826  |
| NM_006226 | 4439.464  | 4068.346  | AB037761  | 14843.042 | 17486.225 |
| L10374    | 10450.942 | 10272.927 | NM_014008 | 50906.504 | 55379.504 |
| AB016902  | 3030.979  | 2562.299  | NM_014731 | 12317.563 | 9516.7    |
| AF272378  | 55674.609 | 45172.73  | AF035191  | 8299.071  | 7519.874  |
| NM_000249 | 7102.936  | 6891.961  | NM_004058 | 1659.301  | 1841.06   |
| NM_005860 | 7661.05   | 1578.499  | NM_004527 | 1225.209  | 1721.941  |
| AF095288  | 10799.555 | 9435.816  | NM_012062 | 9625.944  | 11557.185 |
| AK025116  | 884.649   | 990.86    | AK026717  | 1044.351  | 1231.197  |
| AF130114  | 188.937   | 1040.333  | AJ010482  | 1157.447  | 1052.566  |
| AK026271  | 6130.846  | 7770.228  | NM_000896 | 841.878   | 1183.201  |
| NM_001799 | 5760.53   | 5033.075  | AB040672  | 3495.066  | 5385.108  |
| AF090895  | 2468.464  | 1849.784  | NM_002192 | 4071.478  | 3210.295  |
| NM_005610 | 3449.299  | 3375.48   | NM_005491 | 4608.84   | 4851.836  |
| AL133651  | 1190.895  | 1208.266  | NM_003869 | 6200.832  | 6233.94   |
| AB014532  | 7784.937  | 6259.231  | X63417    | 5968.64   | 6014.525  |
| NM_003478 | 3461.722  | 3432.789  | S94539    | 22148.143 | 21246.551 |
| BE275227  | 301.145   | 420.27    | NM_006402 | 2118.35   | 936.589   |
| NM_016237 | 5412.188  | 8419.304  | NM_005785 | 1561.891  | 2127.439  |
| NM_004924 | 10602.584 | 8336.914  | NM_018248 | 4132.006  | 2292.111  |
| NM_001798 | 1512.765  | 2005.342  | AK001695  | 10127.793 | 4860.087  |
| NM_001211 | 2962.839  | 2777.514  | AB040898  | 2298.889  | 4514.982  |
| NM_006505 | 846.418   | 657.762   | AB031547  | 1971.185  | 3704.241  |
| AB033050  | 2151.902  | 1600.476  | NM_003970 | 1363.685  | 1712.534  |
| NM_004356 | 9395.548  | 11488.87  | AK022496  | 1001.795  | 1605.981  |
| NM_001855 | 534.772   | 610.297   | AB042636  | 1469.995  | 1911.7    |
| BC015022  | 4880.648  | 5139.705  | AB033035  | 681.493   | 1115.561  |
| NM_006697 | 6057.729  | 5366.056  | NM_002883 | 3781.152  | 4100.635  |

|           |           |           |           |           |           |
|-----------|-----------|-----------|-----------|-----------|-----------|
| M19182    | 1517.269  | 1453.359  | NM_019012 | 528.928   | 728.568   |
| AK025707  | 1357.215  | 1815.668  | NM_000141 | 702.693   | 811.452   |
| NM_002073 | 1431.81   | 1727.458  | NM_016150 | 4651.309  | 5556.265  |
| AF117222  | 930.922   | 1164.42   | NM_002674 | 189.247   | 652.878   |
| NM_001745 | 403.676   | 706.242   | U57058    | 1998.47   | 1709.064  |
| AF090327  | 755.979   | 810.703   | AL137452  | 1842.146  | 1678.113  |
| NM_003291 | 8406.565  | 8720.947  | NM_004312 | 24377.713 | 28554.984 |
| AK022950  | 1840.072  | 2019.082  | NM_001347 | 2270.473  | 2056.721  |
| S75755    | 2179.991  | 1585.682  | AK024549  | 28489.604 | 27487.227 |
| AF176518  | 435.335   | 949.016   | NM_006335 | 8139.755  | 9965.487  |
| AB014576  | 11144.797 | 10572.587 | NM_007164 | 6175.864  | 5492.614  |
| NM_019044 | 3795.298  | 4347.214  | NM_000261 | 1233.688  | 942.595   |
| AK000145  | 1021.682  | 630.199   | NM_002606 | 1924.665  | 3149.934  |
| AF174601  | 1698.561  | 1800.156  | NM_002570 | 1641.15   | 1545.414  |
| AF279865  | 642.558   | 567.059   | NM_003183 | 2536.743  | 1812.529  |
| NM_014700 | 763.919   | 810.117   | NM_001657 | 355.652   | 514.3     |
| NM_005687 | 2369.26   | 5389.717  | NM_003585 | 822.672   | 586.814   |
| NM_005983 | 2144.228  | 4143.579  | NM_019851 | 3233.569  | 2370.465  |
| NM_017652 | 12854.021 | 9460.266  | NM_003235 | 1630.606  | 1730.136  |
| X59268    | 4604.023  | 4588.826  | NM_018367 | 823.971   | 1058.229  |
| D70832    | 56737.383 | 46302.426 | NM_001363 | 7447.679  | 10299.871 |
| NM_001425 | 12608.325 | 9034.764  | NM_014096 | 13387.112 | 10905.267 |
| M61870    | 2386.784  | 1913.58   | NM_005706 | 2580.828  | 3034.751  |
| AK026980  | 1433.235  | 914.982   | NM_001261 | 5518.773  | 5657.563  |
| NM_006467 | 1657.122  | 2335.108  | NM_001977 | 1508.88   | 1357.94   |
| NM_017566 | 1858.22   | 1858.825  | NM_007219 | 6679.501  | 11574.508 |
| NM_006582 | 1770.765  | 1591.413  | AK026854  | 2984.47   | 3567.494  |
| AB033019  | 6237.934  | 4919.471  | NM_001269 | 2386.189  | 2636.147  |
| NM_001452 | 359.593   | 1030.75   | NM_002506 | 1576.426  | 1804.374  |
| NM_006162 | 784.277   | 942.209   | NM_004906 | 1518.946  | 1798.695  |
| NM_014764 | 8541.656  | 7190.222  | NM_012447 | 14370.117 | 14611.16  |
| NM_018078 | 837.741   | 1547.04   | NM_006366 | 9361.733  | 10255.582 |
| NM_016013 | 298.471   | 880.99    | AK027013  | 46022.395 | 45246.414 |
| NM_016050 | 436.905   | 639.535   | NM_001344 | 20960.139 | 17001.477 |
| NM_007080 | 2895.758  | 3612.49   | NM_018294 | 2737.777  | 3368.719  |
| AK026912  | 3383.417  | 5372.976  | AL389934  | 4273.673  | 4100.345  |
| AK023531  | 2858.054  | 6288.833  | NM_004330 | 7344.973  | 6410.289  |
| AB011128  | 8899.175  | 7713.188  | AF151802  | 9319.734  | 6710.201  |
| AK026742  | 464.131   | 622.384   | AB006746  | 1624.219  | 1399.161  |
| AK025074  | 4001.861  | 5218.097  | NM_006495 | 6286.797  | 5069.796  |
| NM_000303 | 4240.406  | 3413.083  | AB023233  | 1179.732  | 1099.353  |
| NM_006242 | 734.648   | 1178.186  | NM_004369 | 3354.751  | 2880.546  |
| X78712    | 732.559   | 904.933   | NM_018130 | 6749.002  | 8009.22   |
| NM_004130 | 7562.302  | 4124.006  | AF085878  | 841.736   | 749.342   |
| NM_006345 | 1074.66   | 874.121   | AB006630  | 2172.279  | 3052.253  |
| AF067972  | 13089.388 | 10195.472 | NM_016155 | 1665.696  | 1684.089  |
| NM_004955 | 847.671   | 788.783   | NM_001224 | 11640.443 | 16208.067 |
| D87076    | 1217.604  | 2173.805  | NM_017811 | 5545.684  | 8017.431  |
| NM_014145 | 1712.292  | 2576.707  | NM_001569 | 2734.823  | 4090.718  |
| AB020635  | 1624.527  | 1465.5    | AK023284  | 939.493   | 1854.712  |
| NM_006515 | 598.16    | 995.204   | AK026530  | 1096.197  | 1187.226  |
| NM_005224 | 1480.094  | 1660.911  | NM_005101 | 7938.992  | 3547.448  |
| NM_012144 | 5219.516  | 5707.661  | AF130060  | 26753.463 | 38509.191 |



|            |           |           |           |           |           |
|------------|-----------|-----------|-----------|-----------|-----------|
| X65231     | 58632.023 | 49573.543 | NM_007057 | 20950.865 | 17664.807 |
| NM_002908  | 1709.609  | 1700.322  | NM_000177 | 3598.594  | 4720.214  |
| AF205632   | 1431.583  | 1313.275  | NM_003387 | 6181.749  | 5743.881  |
| NM_005378  | 7802.375  | 9071.24   | U60665    | 1955.622  | 1801.504  |
| NM_002397  | 6458.08   | 5135.032  | NM_005507 | 29407.297 | 23594.754 |
| AF000672   | 1055.26   | 1068.896  | AL080133  | 3690.503  | 2933.512  |
| AL137498   | 2805.773  | 3009.1    | AY014403  | 1397.136  | 633.695   |
| AK024289   | 2453.501  | 2378.412  | NM_006912 | 4669.384  | 2856.893  |
| S66168     | 10023.065 | 9930.764  | X12534    | 1003.895  | 688.641   |
| AF131837   | 478.185   | 428.522   | NM_003112 | 489.032   | 859.605   |
| NM_003851  | 21212.457 | 22455.58  | NM_018951 | 4982.13   | 9912.029  |
| U79244     | 358.174   | 532.744   | NM_014323 | 9003.227  | 10616.9   |
| AK024150   | 1218.887  | 1411.021  | NM_003205 | 3384.221  | 5427.185  |
| AF070536   | 2170.853  | 1894.669  | AB002324  | 2741.574  | 4679.722  |
| AK022297   | 578.579   | 1724.514  | NM_002165 | 692.754   | 1166.424  |
| U79300     | 886.375   | 1686.353  | AK026231  | 2458.45   | 2208.534  |
| AK025151   | 8324.146  | 7979.558  | NM_002140 | 14410.239 | 17809.98  |
| AK025550   | 3992.364  | 4627.876  | NM_020143 | 4301.678  | 3328.453  |
| AF088076   | 11271.522 | 13908.501 | NM_012469 | 3348.289  | 3352.849  |
| AF086543   | 1034.963  | 1364.814  | NM_005131 | 2929.793  | 2525.846  |
| AB046797   | 1393.657  | 1615.042  | NM_007056 | 1182.922  | 1083.765  |
| AK002098   | 2065.209  | 2009.17   | AF083383  | 1429.596  | 943.166   |
| AK024984   | 5351.04   | 4078.986  | NM_006925 | 3549.618  | 4147.009  |
| AF075106   | 4467.776  | 4171.637  | NM_004890 | 55735.074 | 53488.926 |
| AK023339   | 1985.229  | 3215.124  | AK023181  | 2798.06   | 2028.26   |
| AF085981   | 403.772   | 776.108   | NM_004294 | 3417.195  | 2406.215  |
| AF086008   | 2671.172  | 2245.291  | NM_005051 | 23118.676 | 14439.889 |
| AF087970   | 843.633   | 825.546   | NM_001968 | 21753.047 | 16857.965 |
| AF086029   | 887.544   | 687.568   | D17259    | 59448.547 | 60052.875 |
| AF075115   | 529.342   | 321.63    | AF264627  | 38175.32  | 40002.5   |
| U05597     | 536.248   | 913.858   | AL133053  | 491.622   | 787.74    |
| U50524     | 592.223   | 324.353   | NM_018142 | 5203.792  | 10000.069 |
| U10515     | 547.25    | 832.495   | NM_017653 | 1793.71   | 2754.782  |
| U52050     | 1261.352  | 1029.882  | AL109695  | 11694.424 | 14651.468 |
| U73799     | 1753.804  | 1870.23   | NM_002168 | 1706.611  | 2134.661  |
| AK021668   | 24359.736 | 23493.529 | NM_004453 | 848.662   | 543.165   |
| AF086148   | 13749.873 | 13846.399 | NM_016229 | 7783.437  | 16836.859 |
| AJ245433   | 8825.347  | 5425.742  | NM_018244 | 2157.872  | 2170.943  |
| AK021942   | 18572.83  | 16272.509 | NM_002492 | 22466.783 | 22294.041 |
| NM_014127  | 547.928   | 646.602   | AB046855  | 797.866   | 525.039   |
| AK021817   | 1909.634  | 1502.154  | NM_005642 | 3694.808  | 4511.822  |
| AK021883   | 779.062   | 671.793   | NM_018105 | 2490.507  | 1804.196  |
| NM_018578  | 298.761   | 1347.485  | AK023452  | 3920.397  | 6279.537  |
| AK024438   | 9688.229  | 8095.701  | AF155065  | 510.745   | 455.326   |
| AK023382   | 474.262   | 554.08    | NM_000332 | 2432.474  | 1140.84   |
| AK023811   | 516.143   | 429.763   | AK022215  | 5796.096  | 3545.663  |
| AK024135   | 701.784   | 540.526   | U90305    | 990.206   | 699.879   |
| NM_017728  | 1030.886  | 1390.804  | NM_001527 | 17802.979 | 13110.592 |
| U80772     | 286.562   | 1073.505  | AK025269  | 6529.556  | 4958.626  |
| NM_006189  | 1085.407  | 1699.49   | AB040971  | 1156.881  | 1086.317  |
| AJ272177   | 1428.337  | 1971.071  | NM_006562 | 4005.838  | 3937.503  |
| AK026402   | 17345.109 | 21761.887 | AK024254  | 773.737   | 945.636   |
| unknown (S | 670.649   | 346.359   | NM_018456 | 2712.688  | 3574.889  |

|           |           |           |           |           |           |
|-----------|-----------|-----------|-----------|-----------|-----------|
| unknown ( | 570.222   | 228.574   | NM_019021 | 592.051   | 614.03    |
| NM_015373 | 646.568   | 393.797   | NM_018996 | 425.142   | 481.495   |
| NM_014566 | 827.926   | 558.701   | AL137304  | 2404      | 1547.145  |
| unknown ( | 558.841   | 302.733   | AL049274  | 457.845   | 564.973   |
| U84506    | 1287.436  | 1446.819  | NM_018279 | 1803.716  | 854.836   |
| U21556    | 56560.48  | 47469.113 | AF147369  | 672.919   | 759.991   |
| AB002444  | 1910.915  | 1742.669  | AK026883  | 1697.911  | 1207.849  |
| AB002344  | 4599.852  | 4207.918  | NM_014350 | 13544.506 | 11675.828 |
| BF210352  | 2141.937  | 2720.201  | U00925    | 8091.978  | 6839.08   |
| AK024205  | 3373.084  | 2750.66   | AL390185  | 3435.569  | 3061.42   |
| AF086034  | 23165.936 | 14041.651 | AF086235  | 3085.953  | 3071.45   |
| AK000174  | 1446.402  | 1874.73   | AF143886  | 1889.904  | 1655.301  |
| AF130071  | 681.344   | 410.141   | AK025975  | 2700.095  | 2621.68   |
| AK000745  | 15514.798 | 9630.684  | AK025583  | 18384.316 | 11312.697 |
| NM_005299 | 289.305   | 500.831   | NM_014664 | 3150.4    | 1762.756  |
| Z83935    | 1089.061  | 987.704   | AL109788  | 1766.08   | 1292.592  |
| NM_018687 | 9565.34   | 8000.954  | NM_014952 | 57406.684 | 47323.078 |
| M57417    | 14288.738 | 11199.987 | AB037765  | 711.698   | 671.227   |
| NM_020524 | 11911.01  | 8903.962  | AL050197  | 1790.23   | 1460.683  |
| NM_001999 | 4238.129  | 4152.646  | AF085870  | 5468.933  | 8172.088  |
| X64977    | 884.153   | 535.575   | AL117580  | 7416.189  | 7475.994  |
| AF064851  | 1230.065  | 728.204   | AL110190  | 5063.429  | 4609.151  |
| NM_002602 | 6811.707  | 7273.034  | AL117656  | 1479.466  | 1127.635  |
| NM_016239 | 951.34    | 1118.864  | AJ001893  | 1830.427  | 1590.818  |
| NM_003383 | 2061.559  | 5890.326  | NM_014819 | 8186.398  | 12282.192 |
| D17271    | 5415.915  | 11007.329 | NM_017609 | 955.206   | 463.892   |
| X91648    | 1133.313  | 943.381   | AF086040  | 2003.456  | 1878.664  |
| AK026658  | 675.866   | 402.306   | AB032988  | 1805.953  | 1223.787  |
| AF282264  | 6005.082  | 5636.01   | AK023559  | 9480.44   | 6545.431  |
| AF086322  | 1605.603  | 1168.524  | AB037859  | 42279.262 | 39330.164 |
| Z70717    | 1202.814  | 1332.726  | AL049233  | 2966.938  | 1912.916  |
| AK024736  | 1115.115  | 1309.061  | NM_017696 | 2819.279  | 2193.399  |
| X79308    | 2784.598  | 2675.967  | AL050166  | 6393.999  | 2806.725  |
| AF086476  | 458.973   | 655.568   | NM_006193 | 1493.057  | 1353.591  |
| NM_017660 | 3776.701  | 5406.781  | AF056454  | 507.765   | 712.998   |
| AB011151  | 4169.454  | 4471.441  | AF009270  | 1798.088  | 1927.089  |
| U92995    | 2405.068  | 2792.22   | AF009318  | 2034.699  | 1872.12   |
| Z70769    | 1421.214  | 1188.792  | AF056421  | 643.902   | 609.809   |
| NM_007106 | 2931.819  | 2550.409  | AK001085  | 841.957   | 939.574   |
| AL137555  | 3259.234  | 2575.06   | AK001906  | 2837.776  | 2709.981  |
| AL133017  | 915.49    | 1907.215  | AK021746  | 7160.187  | 4532.329  |
| CY3Cy5    | 10234.073 | 495.987   | AK001136  | 3151.665  | 2606.292  |
| X00588    | 3435.549  | 2777.821  | AK021810  | 945.422   | 704.81    |
| AI359037  | 3068.093  | 5951.987  | AK025595  | 485.243   | 398.924   |
| J04513    | 481.455   | 567.883   | AK026743  | 409.619   | 353.541   |
| BI754285  | 957.169   | 1053.653  | AK025214  | 1736.028  | 1136.048  |
| X15998    | 3231.599  | 5237.941  | AK025846  | 2101.727  | 1751.955  |
| M76482    | 762.05    | 610.083   | AK026805  | 7387.971  | 5469.772  |
| NM_001883 | 3865.433  | 2475.493  | AL389983  | 5787.264  | 8598.229  |
| NM_004628 | 2227.453  | 1450.544  | AJ008159  | 787.044   | 844.036   |
| L31785    | 612.718   | 972.829   | AK000995  | 3139.688  | 3467.243  |
| H-M 69043 | 7946.048  | 3991.916  | U00959    | 1698.828  | 3650.74   |
| AF077374  | 1437.412  | 1914.516  | NM_014578 | 13269.036 | 21950.217 |

|           |           |           |           |           |           |
|-----------|-----------|-----------|-----------|-----------|-----------|
| U43901    | 861.741   | 651.04    | AF086267  | 4529.775  | 4565.924  |
| X59065    | 580.225   | 587.318   | X74606    | 663.941   | 673.601   |
| M59828    | 3863.616  | 4087.414  | NM_012183 | 3827.14   | 3833.062  |
| NM_016134 | 2756.957  | 2282.627  | AK026785  | 1145.954  | 1223.738  |
| SR2       | 61702.305 | 50639.086 | AK001938  | 614.076   | 776.211   |
| SR4       | 22374.734 | 22797.256 | NM_018225 | 21188.732 | 19640.76  |
| SR6       | 3378.661  | 2580.795  | AK025534  | 1826.08   | 1654.929  |
| SR8       | 11436.462 | 30533.854 | AK022577  | 631.743   | 371.699   |
| SR10      | 41347.734 | 13273.364 | AF091526  | 2278.042  | 2004.254  |
|           | 83.842    | 362.385   | AK022170  | 513.831   | 471.651   |
| CY3Cy5    | 6633.979  | 252.97    | M60749    | 2002.705  | 2702.861  |
| NM_000612 | 7950.179  | 7140.992  | AF056424  | 378.877   | 379.584   |
| NM_004257 | 21130.199 | 22045.4   | X79986    | 3920.729  | 4003.389  |
| NM_000683 | 2160.957  | 1946.463  | NM_003523 | 43675.578 | 15268.777 |
| NM_003629 | 3038.816  | 2652.996  | X01448    | 511.141   | 910.209   |
| NM_005901 | 4984.854  | 6215.881  | AK056351  | 27139.092 | 20051.752 |
| NM_004248 | 1705.093  | 1881.128  | NM_014690 | 5682.837  | 4714.402  |
| NM_000959 | 510.604   | 434.727   | NM_017698 | 4641.802  | 3181.889  |
| NM_001313 | 1352.193  | 879.147   | AF086490  | 1005.21   | 973.258   |
| NM_004796 | 545.888   | 1013.624  | AF131738  | 40680.094 | 42829.145 |
| NM_000435 | 2012.479  | 3460.217  | AK021666  | 3735.835  | 4306.03   |
| NM_001842 | 18161.418 | 19387.758 | AK024081  | 964.775   | 1091.878  |
| NM_007281 | 1153.474  | 1479.136  | AK024825  | 1775.485  | 1333.23   |
| AB017169  | 503.418   | 765.589   | AF086317  | 7048.691  | 7050.619  |
| AL080170  | 2649.899  | 2385.176  | U16850    | 7772.081  | 5429.165  |
| AB039903  | 5891.952  | 4811.331  | AL390178  | 2405.987  | 2694.526  |
| NM_000542 | 11308.329 | 10093.057 | AF147326  | 940.772   | 890.381   |
| NM_014625 | 112.746   | 562.142   | Z36806    | 1115.277  | 1509.674  |
| AK001560  | 1892.191  | 1855.362  | NM_005368 | 717.332   | 752.117   |
| AB001328  | 1154.641  | 1203.862  | NM_018618 | 1680.303  | 1158.431  |
| NM_000948 | 429.409   | 823.66    | AJ008121  | 27201.031 | 22296.732 |
| H99588    | 5890.848  | 3448.5    | AJ008153  | 2422      | 2611.009  |
| AK022600  | 2832.632  | 3531.715  | AK023739  | 2118.756  | 1774.753  |
| AK023142  | 1829.829  | 1673.991  | NM_005830 | 7130.897  | 4916.58   |
| U61740    | 18522.967 | 19126.926 | NM_001507 | 699.321   | 1107.874  |
| NM_006409 | 52439.766 | 46979.16  | X92108    | 444.02    | 644.398   |
| AB049054  | 5071.586  | 4476.713  | AL389876  | 1904.193  | 3728.914  |
| NM_015071 | 1437.217  | 1182.053  | AK022120  | 2942.703  | 5555.118  |
| NM_013227 | 1961.008  | 1895.323  | Z70762    | 1012.774  | 1384.214  |
| Z83803    | 745.973   | 980.302   | BF037206  | 1418.781  | 2597.516  |
| AF027205  | 19422.113 | 18832.398 | AK021474  | 21085.828 | 27931.623 |
| AF075012  | 1793.178  | 1736.342  | AK023642  | 1349.863  | 1307.938  |
| NM_001570 | 1595.487  | 1217.863  | U52827    | 2951.595  | 3112.719  |
| NM_015658 | 631.687   | 650.33    | AL049466  | 17419.725 | 12717.112 |
| NM_000589 | 1558.431  | 2995.815  | AB037802  | 1971.384  | 1841.989  |
| NM_016546 | 21265.045 | 20000.086 | U17623    | 757.502   | 1438.406  |
| AF309653  | 4810.791  | 9247.342  | AL137450  | 3631.807  | 5377.477  |
| NM_002620 | 15636.8   | 12718.268 | AK023058  | 3996.852  | 4229.838  |
| S79267    | 860.634   | 766.982   | AJ227878  | 918.614   | 283.736   |
| NM_001816 | 794.417   | 864.765   | NM_012064 | 10525.508 | 11161.198 |
| NM_003784 | 31071.529 | 32607.088 | AK001460  | 1325.221  | 856.852   |
| NM_000195 | 19854.367 | 16506.379 | AK092508  | 4802.083  | 4464.019  |
| NM_005445 | 10134.671 | 8172.046  | AK027111  | 51620.707 | 46379.434 |

|           |           |           |          |         |         |
|-----------|-----------|-----------|----------|---------|---------|
| NM_01489  | 2606.859  | 2751.657  | NM_00351 | 4677.43 | 956.125 |
| NM_00363  | 4241.591  | 5548.384  |          |         |         |
| NM_00004  | 4473.677  | 4696.163  |          |         |         |
| NM_00321  | 1225.76   | 2048.386  |          |         |         |
| NM_00670  | 3947.724  | 3436.772  |          |         |         |
| NM_00491  | 3467.906  | 2470.969  |          |         |         |
| AB013452  | 1787.106  | 758.139   |          |         |         |
| M93107    | 6478.553  | 5760.629  |          |         |         |
| BC001479  | 9271.063  | 9608.483  |          |         |         |
| NM_002461 | 26381.33  | 24428.473 |          |         |         |
| NM_005771 | 19982.885 | 11642.751 |          |         |         |
| AB032986  | 33954.691 | 35359.23  |          |         |         |
| NM_01752  | 29219.76  | 31396.021 |          |         |         |
| NM_01603  | 8271.141  | 8014.866  |          |         |         |
| NM_01432  | 54961.484 | 47735.004 |          |         |         |
| NM_001687 | 15786.763 | 24471.387 |          |         |         |
| AK026374  | 3367.117  | 3249.76   |          |         |         |
| NM_001169 | 1732.081  | 1716.671  |          |         |         |
| AK024648  | 7491.741  | 11318.121 |          |         |         |
| NM_00089  | 838.288   | 1116.628  |          |         |         |
| NM_005491 | 5799.183  | 7231.168  |          |         |         |
| NM_00386  | 5386.971  | 8011.373  |          |         |         |
| NM_00640  | 1855.872  | 2162.051  |          |         |         |
| NM_00578  | 2925.942  | 5218.723  |          |         |         |
| NM_01824  | 2081.892  | 4110.475  |          |         |         |
| AK001695  | 9520.387  | 12255.911 |          |         |         |
| NM_00609  | 4995.274  | 4777.734  |          |         |         |
| NM_00290  | 10976.786 | 10442.674 |          |         |         |
| NM_006851 | 2379.361  | 1184.669  |          |         |         |
| AB001328  | 1120.744  | 1433.375  |          |         |         |
| NM_00094  | 377.809   | 512.347   |          |         |         |
| H99588    | 4636.856  | 3240.887  |          |         |         |
| X00588    | 2342.283  | 2403.345  |          |         |         |
| AI359037  | 2882.757  | 5180.533  |          |         |         |
| J04513    | 556.158   | 465.173   |          |         |         |
| BI754285  | 935.102   | 1061.615  |          |         |         |
| X15998    | 3628.979  | 4002.659  |          |         |         |
| M76482    | 327.979   | 694.785   |          |         |         |
| NM_00188  | 4121.758  | 3236.874  |          |         |         |
| NM_00462  | 2661.413  | 1926.732  |          |         |         |
| L31785    | 955.117   | 1071.788  |          |         |         |
| H-M 69043 | 8812.219  | 3494.024  |          |         |         |
| AF077374  | 1438.967  | 1678.713  |          |         |         |
| U43901    | 583.475   | 677.929   |          |         |         |
| X59065    | 796.031   | 754.485   |          |         |         |
| M59828    | 6560.682  | 5999.126  |          |         |         |
| NM_01613  | 2528.798  | 1726.199  |          |         |         |
| AJ010482  | 2876.901  | 2794.805  |          |         |         |
| NM_00544  | 9181.358  | 6426.987  |          |         |         |
| NM_01489  | 2652.429  | 3237.848  |          |         |         |
| NM_00363  | 3199.238  | 4575.295  |          |         |         |
| NM_00004  | 3322.708  | 3126.509  |          |         |         |
| NM_00321  | 1001.807  | 1812.472  |          |         |         |

|           |           |           |
|-----------|-----------|-----------|
| NM_006709 | 4072.594  | 4087.231  |
| NM_000612 | 8605.169  | 7657.287  |
| NM_004257 | 23940.523 | 26296.117 |
| NM_000683 | 1994.763  | 1715.171  |
| NM_003629 | 3445.153  | 2991.18   |
| NM_005901 | 4720.435  | 5388.599  |
| NM_004248 | 2386.865  | 1961.092  |
| NM_000959 | 345.137   | 360.904   |
| NM_001313 | 1392.911  | 720.781   |
| NM_004796 | 619.703   | 1135.184  |
| NM_000435 | 3515.184  | 4651.003  |
| NM_001842 | 30603.713 | 32215.035 |
| AB017169  | 984.349   | 1246.955  |
| AL080170  | 2864.69   | 2630.385  |
| AB039903  | 6103.171  | 6372.413  |
| NM_000542 | 9880.063  | 10380.574 |
| NM_003705 | 4440.71   | 4049.162  |
| NM_006861 | 2241.153  | 2077.131  |
| NM_005829 | 2168.067  | 2569.581  |
| NM_000466 | 1208.085  | 1412.48   |
| NM_015908 | 10913.06  | 11280.085 |
| AK022600  | 3291.16   | 4069.628  |
| AK023142  | 1318.303  | 1652.082  |
| U61740    | 23379.838 | 22103.055 |
| NM_006409 | 55213.188 | 40930.676 |
| AB049054  | 5358.495  | 5129.26   |
| NM_015071 | 1843.264  | 1365.053  |
| NM_013227 | 1724.914  | 1802.607  |
| Z83803    | 1274.271  | 807.22    |
| AF027205  | 20430.271 | 16689.137 |
| AF075012  | 2195.427  | 1734.171  |
| NM_001570 | 2300.428  | 1513.687  |
| NM_015658 | 612.76    | 823.629   |
| NM_000589 | 1934.698  | 3266.92   |
| NM_016546 | 21144.756 | 17682.525 |
| AF309653  | 4591.865  | 10455.114 |
| NM_002620 | 14421.404 | 13457.662 |
| S79267    | 1271.413  | 1031.119  |
| NM_001816 | 1243.462  | 1158.76   |
| NM_003784 | 34081.066 | 41329.93  |
| NM_000195 | 19569.828 | 19588.852 |
| NM_006575 | 1286.158  | 1399.856  |
| NM_013254 | 4275.776  | 3503.34   |
| NM_000437 | 8825.652  | 11889.154 |
| AB046819  | 6092.57   | 6477.025  |
| NM_006090 | 4843.177  | 4674.323  |
| NM_002900 | 13850.851 | 11781.87  |
| NM_004910 | 2095.442  | 1993.1    |
| AB013452  | 1212.529  | 655.581   |
| M93107    | 7066.029  | 6563.414  |
| BC001479  | 9378.835  | 8354.189  |
| NM_002461 | 31230.592 | 28409.383 |
| NM_005771 | 20138.117 | 12096.652 |

|           |           |           |
|-----------|-----------|-----------|
| AB032986  | 37660.035 | 40535.59  |
| NM_017528 | 30165.633 | 34232.801 |
| NM_016032 | 9723.941  | 8535.465  |
| NM_014324 | 53025.563 | 43386.344 |
| NM_001687 | 17695.885 | 23843.895 |
| AK026374  | 2704.755  | 2612.416  |
| NM_001169 | 1982.102  | 1956.032  |
| AK024648  | 6332.84   | 9692.585  |
| NM_000719 | 955.144   | 597.857   |
| NM_003459 | 5789.874  | 4695.776  |
| AB032526  | 837.302   | 150.082   |
| NM_000171 | 3279.939  | 2636.479  |
| AL354615  | 1469.423  | 1555.822  |
| NM_013349 | 37893.883 | 39635.977 |
| NM_016134 | 2573.165  | 2028.112  |
| AJ010482  | 1656.222  | 2071.986  |
| NM_000896 | 792.715   | 540.722   |
| AB040672  | 3435.384  | 3772.652  |
| NM_002192 | 6287.227  | 4674      |
| NM_005491 | 5742.567  | 5202.081  |
| NM_003869 | 5424.453  | 6181.39   |
| X63417    | 6695.065  | 8376.512  |
| S94539    | 15756.651 | 14238.979 |
| NM_006402 | 2153.982  | 1752.367  |
| NM_005785 | 2549.77   | 4422.511  |
| NM_018248 | 1998.182  | 3235.993  |
| AK001695  | 8618.382  | 7781.94   |
| NM_017886 | 6317.976  | 5434.325  |
| NM_006252 | 1577.578  | 2456.469  |
| NM_001721 | 727.423   | 737.498   |
| NM_014397 | 7612.536  | 7694.688  |
| AB023182  | 2582.745  | 1746.744  |
| NM_003607 | 1053.529  | 1376.757  |
| NM_007281 | 303.993   | 196.182   |
| AB017169  | 792.496   | 722.168   |
| AL080170  | 2246.827  | 2164.496  |
| AB039903  | 4025.455  | 5070.22   |
| NM_000542 | 12646.206 | 14169.073 |
| NM_006851 | 2063.835  | 650.968   |
| AK001560  | 1977.286  | 1800.221  |
| H99588    | 4917.622  | 3606.976  |
| H-M 69043 | 8880.951  | 6554.522  |
| AF077374  | 1856.684  | 2663.581  |
| U43901    | 1005.161  | 1535.115  |
| X59065    | 849.634   | 1141.199  |
| M59828    | 5211.081  | 7536.321  |
| NM_000683 | 1139.926  | 1343.801  |
| NM_005901 | 4817.17   | 5682.381  |
| NM_004248 | 1979.016  | 1937.365  |
| NM_000959 | 462.515   | 325.977   |
| NM_001313 | 1184.571  | 883.185   |
| NM_002362 | 297.014   | 427.337   |
| NM_004796 | 584.661   | 909.339   |

|           |           |           |
|-----------|-----------|-----------|
| NM_000435 | 1723.895  | 2433.871  |
| NM_001842 | 24526.697 | 27059.303 |
| NM_000171 | 777.759   | 1206.282  |
| AL354615  | 868.558   | 1274.75   |
| NM_013349 | 34643.727 | 37751.176 |
| NM_003705 | 2956.86   | 2294.14   |
| NM_006861 | 1903.738  | 1632.656  |
| NM_005829 | 1709.034  | 1837.013  |
| NM_000466 | 1831.74   | 1730.972  |
| NM_015908 | 9112.26   | 9313.745  |
| AK022600  | 4126.532  | 5723.313  |
| AK023142  | 1902.485  | 1522.496  |
| U61740    | 20888.752 | 24509.186 |
| NM_006409 | 56340.512 | 43046.25  |
| AB049054  | 5707.961  | 5761.285  |
| NM_015071 | 1892.74   | 1078.271  |
| NM_013227 | 1748.891  | 1586.802  |
| Z83803    | 1701.28   | 1560.835  |
| AF027205  | 21404.541 | 18658.736 |
| AF075012  | 2958.661  | 2237.123  |
| NM_001570 | 2277.827  | 1718.421  |
| NM_015658 | 621.936   | 593.986   |
| NM_000589 | 1763.139  | 3129.342  |
| NM_016546 | 23538.031 | 25935.238 |
| NM_017886 | 5656.14   | 3358.195  |
| NM_006252 | 1975.254  | 1588.098  |
| NM_001721 | 549.348   | 310.848   |
| NM_014397 | 5708.011  | 5703.146  |
| AB023182  | 1724.397  | 923.722   |
| NM_003607 | 1139.063  | 977.472   |
| NM_006575 | 975.759   | 1156.563  |
| NM_013254 | 3702.423  | 2514.981  |
| NM_000437 | 9108.152  | 10206.536 |
| AB046819  | 6645.463  | 6402.45   |
| NM_006090 | 4504.932  | 4117.432  |
| NM_002900 | 13724.016 | 11418.778 |
| NM_004910 | 2309.08   | 1724.598  |
| AB013452  | 1690.831  | 1006.128  |
| M93107    | 7415.107  | 6178.763  |
| BC001479  | 8990.297  | 9312.855  |
| NM_002461 | 32547.848 | 32003.434 |
| NM_005771 | 25387.754 | 12634.918 |
| AB032986  | 39500     | 38064.156 |
| NM_017528 | 36995.254 | 36546.223 |
| NM_016032 | 10765.07  | 9985.204  |
| NM_014324 | 59831.762 | 45051.711 |
| NM_001687 | 20313.639 | 25445.248 |
| AK026374  | 3705.165  | 2747.638  |
| NM_001169 | 2127.706  | 2033.54   |
| AK024648  | 7152.124  | 11685.327 |
| NM_000795 | 687       | 550.62    |
| AB037761  | 11394.98  | 11365.773 |
| NM_014008 | 48600.219 | 43320.555 |

|           |           |           |
|-----------|-----------|-----------|
| NM_014731 | 12247.534 | 6883.012  |
| AF035191  | 6178.244  | 7974.848  |
| NM_004058 | 1675.472  | 1064.22   |
| NM_004527 | 1258.41   | 1094.422  |
| NM_012062 | 7711.368  | 7656.714  |
| AK026717  | 771.568   | 808.513   |
| AJ010482  | 1509.906  | 1745.632  |
| NM_000896 | 683.507   | 619.208   |
| AB040672  | 5012.209  | 5715.996  |
| NM_002192 | 4745.163  | 4334.548  |
| NM_005491 | 5823.63   | 5281.203  |
| NM_003869 | 5765.809  | 5194.265  |
| X63417    | 8097.143  | 8922.313  |
| S94539    | 24562.986 | 23214.455 |
| NM_006402 | 1917.906  | 1963.975  |
| NM_005785 | 3364.502  | 4423.38   |
| NM_018248 | 2538.79   | 2910.15   |
| AK001695  | 10729.202 | 10841.286 |
| AB040898  | 910.742   | 994.486   |
| AB031547  | 1661.853  | 1271.48   |
| NM_003970 | 928.95    | 865.231   |
| AK022496  | 1230.703  | 1519.757  |
| AB042636  | 549.645   | 681.204   |
| AB033035  | 475.022   | 580.404   |
| NM_002883 | 2441.199  | 2485.048  |
| NM_019012 | 418.332   | 560.489   |
| NM_000141 | 494.859   | 544.081   |
| NM_016150 | 3415.031  | 2686.603  |
| NM_002674 | 316.032   | 426.439   |
| U57058    | 1615.441  | 947.892   |
| AL137452  | 1999.01   | 1632.008  |
| NM_004312 | 31041.176 | 30491.02  |
| NM_001347 | 3424.229  | 3093.936  |
| AK024549  | 23606.283 | 20329.982 |
| NM_006338 | 10887.299 | 11885.207 |
| NM_007164 | 7438.426  | 6690.25   |
| NM_000261 | 1801.099  | 1607.24   |
| NM_002606 | 6002.7    | 5104.441  |
| NM_002570 | 1720.691  | 1647.594  |
| NM_003183 | 2861.338  | 2627.488  |
| NM_001657 | 386.846   | 477.71    |
| NM_003585 | 680.59    | 790.416   |
| NM_019851 | 2442.539  | 2028.576  |
| NM_003238 | 1310.341  | 2519.996  |
| NM_018367 | 1210.286  | 412.752   |
| NM_001363 | 4548.668  | 7853.266  |
| NM_014096 | 12578.37  | 11299.599 |
| NM_005706 | 3285.165  | 3608.045  |
| NM_001261 | 3833.048  | 2726.773  |
| NM_001977 | 464.287   | 954.736   |
| NM_007219 | 6524.709  | 7863.201  |
| AK026854  | 2342.553  | 3149.922  |
| NM_001269 | 3583.424  | 3465.664  |



|           |           |           |
|-----------|-----------|-----------|
| NM_00250€ | 888.37    | 1052.911  |
| NM_00490€ | 2707.636  | 2762.151  |
| X98261    | 180.422   | 347.314   |
| NM_012447 | 15934.101 | 12529.957 |
| NM_00636€ | 9062.336  | 6467.547  |
| AK027013  | 31954.016 | 42657.395 |
| NM_001344 | 29085.418 | 32546.008 |
| NM_018294 | 3473.086  | 2961.279  |
| AL389934  | 3853.042  | 2842.268  |
| NM_00433€ | 7741.415  | 5794.15   |
| AF151802  | 13644.976 | 7950.938  |
| AB006746  | 1506.19   | 1423.142  |
| NM_00649€ | 5003.918  | 4204.176  |
| AB023233  | 1365.434  | 1772.357  |
| AL133071  | 643.281   | 260.508   |
| NM_00436€ | 1426.208  | 1648.16   |
| NM_00437€ | 447.979   | 535.041   |
| NM_01813€ | 4803.217  | 3806.79   |
| AF085878  | 934.632   | 445.877   |
| AB006630  | 849.586   | 2205.097  |
| NM_01615€ | 2309.15   | 2017.943  |
| NM_001224 | 6442.623  | 6352.728  |
| NM_017811 | 7457.64   | 6122.782  |
| NM_00156€ | 2388.436  | 2702.634  |
| AK023284  | 2866.619  | 2388.36   |
| AF106069  | 515.703   | 354.653   |
| NM_005101 | 12982.563 | 3847.25   |
| NM_00420€ | 335.848   | 391.562   |
| AF130060  | 14276.956 | 13769.255 |
| NM_007057 | 8458.851  | 9231.688  |
| NM_000177 | 12079.201 | 8439.363  |
| NM_003387 | 11317.116 | 10472.289 |
| U60665    | 2122.775  | 2176.911  |
| NM_005507 | 47019.672 | 46687.199 |
| AL080133  | 8016.534  | 6990.766  |
| AY014403  | 1655.513  | 1702.314  |
| NM_006912 | 5408.984  | 4795.911  |
| X12534    | 1845.701  | 2663.813  |
| NM_003112 | 513.696   | 329.898   |
| NM_018951 | 3626.654  | 6715.758  |
| NM_014323 | 6712.582  | 6885.188  |
| NM_00320€ | 2762.549  | 3849.384  |
| AB002324  | 2030.813  | 2458.612  |
| AK026231  | 922.764   | 1169.439  |
| NM_00214€ | 12045.645 | 11125.638 |
| NM_020143 | 2542.042  | 2367.001  |
| NM_01246€ | 3583.14   | 3748.842  |
| NM_005131 | 1457.655  | 1979.563  |
| NM_00705€ | 1771.02   | 2410.268  |
| AF083383  | 1735.583  | 2826.739  |
| NM_00692€ | 1964.879  | 2085.957  |
| NM_00489€ | 52815.223 | 45268.711 |
| AK023181  | 4386.279  | 3666.602  |

|           |           |           |
|-----------|-----------|-----------|
| NM_004294 | 2754.752  | 1764.535  |
| NM_005051 | 36624.105 | 36177.98  |
| NM_001968 | 18049.732 | 29357.822 |
| D17259    | 61898.121 | 51282.246 |
| AF264627  | 35746.215 | 42618.41  |
| AL133053  | 1520.235  | 1340.202  |
| NM_018142 | 5054.504  | 5001.874  |
| NM_017653 | 4051.805  | 3760.374  |
| AL109695  | 10132.145 | 8380.944  |
| NM_002168 | 1974.378  | 2852.661  |
| AK027115  | 323.659   | 328.546   |
| NM_004453 | 2166.903  | 1405.684  |
| NM_016229 | 4792.081  | 5671.673  |
| NM_018244 | 2233.023  | 1633.401  |
| NM_002492 | 34851.188 | 28725.676 |
| AB046855  | 336.372   | 443.564   |
| NM_005642 | 8090.847  | 4166.049  |
| NM_018105 | 2477.846  | 1552.758  |
| AK023452  | 4430.005  | 4138.12   |
| NM_000332 | 2166.426  | 1675.419  |
| AK022215  | 5158.399  | 3265.234  |
| U90305    | 525.537   | 451.483   |
| NM_001527 | 14288.056 | 13752.554 |
| AK025269  | 7875.462  | 6159.932  |
| NM_001438 | 903.219   | 745.259   |
| AB040971  | 2082.654  | 1469.919  |
| NM_006562 | 8403.004  | 6652.987  |
| AK024254  | 1867.525  | 1577.516  |
| NM_018456 | 2678.759  | 5248.655  |
| NM_019021 | 896.667   | 1169.749  |
| AK002183  | 1044.642  | 1039.779  |
| NM_018996 | 1104.661  | 1358.203  |
| AL137304  | 3396.529  | 1913.599  |
| AL049274  | 429.324   | 709.972   |
| NM_018279 | 2107.436  | 597.809   |
| AF147369  | 234.824   | 290.55    |
| AK026883  | 2005.863  | 2125.281  |
| NM_014350 | 8497.766  | 10283.701 |
| U00925    | 5221.026  | 5561.891  |
| AL390185  | 1440.64   | 1762.755  |
| AF143886  | 1524.772  | 1439.629  |
| AK025975  | 1037.584  | 1214.478  |
| AB037765  | 540.499   | 880.325   |
| AK025068  | 950.149   | 585.693   |
| AK026720  | 963.642   | 192.302   |
| AL137566  | 2473.755  | 2746.395  |
| AF087962  | 6468.986  | 4351.515  |
| AL050166  | 4642.56   | 4507.257  |
| AK001085  | 1250.168  | 1402.079  |
| AK001906  | 2483.172  | 2229.846  |
| AK021528  | 983.558   | 911.983   |
| AK021746  | 5275.965  | 3417.638  |
| AK001136  | 1843.237  | 1605.618  |

|           |           |           |
|-----------|-----------|-----------|
| AK021617  | 757.882   | 598.224   |
| AK021810  | 1389.61   | 1245.354  |
| AK026743  | 371.367   | 430.235   |
| AK025214  | 641.228   | 768.112   |
| AK025846  | 2006.023  | 1602.914  |
| AK026805  | 3210.234  | 4006.989  |
| AL389983  | 3574.546  | 6472.544  |
| AJ008159  | 728.226   | 617.762   |
| U00959    | 1774.057  | 2064.447  |
| NM_014578 | 9547.79   | 9951.973  |
| AF147306  | 2170.788  | 2789.727  |
| AF086267  | 3263.583  | 2326.896  |
| X74606    | 884.63    | 891.518   |
| NM_012183 | 2201.839  | 2187.408  |
| AK026785  | 1611.07   | 937.495   |
| AK022994  | 293.281   | 419.199   |
| NM_018225 | 15630.718 | 15040.628 |
| AK025534  | 1194.036  | 1307.995  |
| AF091526  | 1321.685  | 1220.44   |
| AK022170  | 445.952   | 389.807   |
| AL390169  | 562.397   | 370.39    |
| M60749    | 3344.836  | 2558.201  |
| X79986    | 1846.095  | 1470.798  |
| NM_003523 | 19759.193 | 8663.767  |
| X01448    | 883.554   | 697.124   |
| NM_016503 | 3061.307  | 3541.733  |
| AK056351  | 24133.129 | 17720.492 |
| NM_014690 | 4975.301  | 4265.086  |
| NM_017698 | 7015.762  | 4623.869  |
| AF086490  | 1249.033  | 1010.865  |
| AF131738  | 32174.838 | 26916.449 |
| AK021666  | 1994.28   | 1775.958  |
| AK024081  | 690.333   | 647.152   |
| AK024825  | 1712.594  | 2796.635  |
| AF086317  | 5239.62   | 5394.578  |
| U16850    | 5368.743  | 4064.222  |
| AL390178  | 2203.975  | 1534.487  |
| Z36806    | 485.915   | 1123.282  |
| NM_018618 | 1382.673  | 1028.097  |
| AJ008121  | 20682.666 | 21071.191 |
| AJ008153  | 1942.133  | 2391.857  |
| AK023739  | 1546.856  | 1559.475  |
| NM_005830 | 6303.913  | 5372.629  |
| NM_001507 | 1031.139  | 1109.245  |
| X92108    | 691.738   | 512.93    |
| AL389876  | 920.38    | 1672.515  |
| AK022120  | 1457.042  | 1482.998  |
| Z70762    | 1069.176  | 1505.323  |
| D17099    | 485.685   | 408.556   |
| BF037206  | 889.493   | 1394.183  |
| AK021474  | 8646.862  | 7527.654  |
| AK023642  | 1505.059  | 1685.877  |
| AW511510  | 153.718   | 229.58    |

|                  |           |           |
|------------------|-----------|-----------|
| <b>U52827</b>    | 1466.556  | 889.086   |
| <b>AL049466</b>  | 13564.527 | 8452.407  |
| <b>AB037802</b>  | 1402.34   | 1576.188  |
| <b>U17623</b>    | 506.328   | 903.779   |
| <b>AL137450</b>  | 5994.525  | 5611.631  |
| <b>AK023058</b>  | 1391.35   | 1802.87   |
| <b>NM_012064</b> | 5960.101  | 7024.505  |
| <b>AK001460</b>  | 2027.236  | 1747.427  |
| <b>AK092508</b>  | 3974.082  | 3750.76   |
| <b>AK027111</b>  | 47653.465 | 45834.754 |
| <b>NM_003518</b> | 1473.416  | 856.24    |

Vertical line 1

Vertical line 2

Vertical line 3

Vertical line 1

Vertical line 2

Vertical line 3

Vertical line 1

Vertical line 2

Vertical line 3

Vertical line 1

Vertical line 2

Vertical line 3



Vertical line 1

Vertical line 2

Vertical line 3

Vertical line 1

Vertical line 2

Vertical line 3

Vertical line 1

Vertical line 2

Vertical line 3

Vertical line 1

Vertical line 2

Vertical line 3

Vertical line 1

Vertical line 2

Vertical line 3

Vertical line 1

Vertical line 2

Vertical line 3

Vertical line 1

Vertical line 2

Vertical line 3

Vertical line 1

Vertical line 2

Vertical line 3



Vertical line 1

Vertical line 2

Vertical line 3

Vertical line 1

Vertical line 2

Vertical line 3

Vertical line 1

Vertical line 2

Vertical line 3

Vertical line 1

Vertical line 2

Vertical line 3

Vertical line 1

Vertical line 2

Vertical line 3

Vertical line 1

Vertical line 2

Vertical line 3

Vertical line 1

Vertical line 2

Vertical line 3

Vertical line 1

Vertical line 2

Vertical line 3



Vertical line 1

Vertical line 2

Vertical line 3

Vertical line 1

Vertical line 2

Vertical line 3

Vertical line 1

Vertical line 2

Vertical line 3

Vertical line 1

Vertical line 2

Vertical line 3

Vertical line 1

Vertical line 2

Vertical line 3

Vertical line 1

Vertical line 2

Vertical line 3

Vertical line 1

Vertical line 2

Vertical line 3

Vertical line 1

Vertical line 2

Vertical line 3



Vertical line 1

Vertical line 2

Vertical line 3

Vertical line 1

Vertical line 2

Vertical line 3

Vertical line 1

Vertical line 2

Vertical line 3

| control<br>AMPCH2 | ID        | Replicate 1       |                    | ID        | Replicate 2       |                    | ID        | Replicate 3       |
|-------------------|-----------|-------------------|--------------------|-----------|-------------------|--------------------|-----------|-------------------|
|                   |           | control<br>AMPCH1 | 2uM TPEN<br>AMPCH2 |           | control<br>AMPCH1 | 2uM TPEN<br>AMPCH2 |           | control<br>AMPCH1 |
| 827.392           | CY3Cy5    | 15223.777         | 1225.345           | CY3Cy5    | 8738.747          | 389.494            | CY3Cy5    | 7083.547          |
| 11989.216         | NM_000041 | 22023.752         | 51994.805          | NM_000041 | 37453.48          | 44131.082          | NM_000041 | 14715.945         |
| 1191.624          | W69211    | 620.842           | 589.977            | W69211    | 1050.452          | 1527.9             | W69211    | 646.024           |
| 4557.345          | AA449931  | 3299.04           | 4119.151           | AA449931  | 7091.749          | 7347.099           | AA449931  | 1683.942          |
| 4942.369          | AA877347  | 7836.809          | 13448.261          | AA877347  | 10822.939         | 26838.029          | AA877347  | 4629.134          |
| 3594.772          | S57235    | 7722.795          | 11377.626          | R54049    | 420.905           | 543.728            | S57235    | 2598.853          |
| 4320.961          | AI376272  | 1867.57           | 2631.6             | S57235    | 3604.009          | 2622.126           | AI376272  | 1022.828          |
| 37251.637         | BF242229  | 2404.422          | 2806.664           | AI376272  | 1248.394          | 824.74             | BF242229  | 1790.576          |
| 4025.777          | X75756    | 12496.451         | 15348.457          | BF242229  | 2339.95           | 1347.188           | X75756    | 4848.865          |
| 10441.839         | AI754623  | 2893.419          | 3484.688           | X75756    | 11084.661         | 7969.257           | AI754623  | 1669.805          |
| 520.273           | AA401326  | 3746.709          | 5300.005           | AI754623  | 2039.223          | 1503.443           | AA401326  | 3180.268          |
| 8479.029          | AA504482  | 1348.046          | 2044.562           | AA401326  | 3765.773          | 3272.994           | AA504482  | 3096.785          |
| 991.583           | NM_006003 | 2349.384          | 2770.831           | AA504482  | 3156.014          | 3735.615           | BI602175  | 329.23            |
| 30373.943         | NM_006555 | 739.393           | 1268.459           | NM_006003 | 15777.984         | 16264.727          | NM_006003 | 15077.652         |
| 2336.597          | SR5       | 1638.626          | 2098.152           | NM_006555 | 1522.566          | 2109.975           | NM_006555 | 1385.177          |
| 41620.426         | SR7       | 3856.353          | 37534.543          | SR5       | 5023.845          | 5586.489           | SR9       | 17706.281         |
| 5570.595          | SR9       | 9501.497          | 3186.802           | SR7       | 4435.058          | 40720.453          | CY3Cy5    | 9516.444          |
| 880.394           | CY3Cy5    | 19067.354         | 2215.668           | SR9       | 12359.645         | 2107.21            | NM_006869 | 10655.2           |
| 7947.398          | NM_006869 | 12117.884         | 13059.582          | CY3Cy5    | 8535.543          | 317.3              | NM_015364 | 524.879           |
| 639.078           | NM_004963 | 3010.257          | 4004.333           | NM_006869 | 21959.211         | 29573.564          | NM_006611 | 513.541           |
| 811.964           | NM_001181 | 698.477           | 6432.761           | NM_015364 | 920.835           | 1400.598           | NM_004963 | 2339.822          |
| 2157.137          | NM_005535 | 7815.06           | 8592.158           | NM_006611 | 424.497           | 1144.101           | NM_001181 | 437.703           |
| 954.463           | AB037857  | 1336.885          | 1545.453           | NM_004963 | 3011.132          | 4881.305           | NM_005535 | 3454.589          |
| 4218.072          | AF218021  | 1118.026          | 1030.976           | NM_001181 | 1336.949          | 5245.568           | AB037857  | 921.642           |
| 1018.303          | NM_013262 | 8501.342          | 9530.983           | NM_005535 | 10605.894         | 16901.682          | AF218021  | 908.649           |
| 1423.035          | NM_007185 | 4761.827          | 5350.552           | AB037857  | 519.306           | 752.584            | NM_013262 | 5636.162          |
| 8565.323          | NM_003357 | 5731.893          | 5624.328           | AF218021  | 606.869           | 592.341            | NM_007185 | 2810.622          |
| 7739.539          | AK023261  | 3220.068          | 3239.061           | NM_013262 | 7240.835          | 6753.377           | NM_003357 | 3302.839          |
| 923.524           | NM_012278 | 479.655           | 617.753            | NM_007185 | 3322.632          | 2699.062           | AF195420  | 522.458           |
| 6942.228          | NM_014057 | 392.854           | 863.663            | NM_003357 | 3668.911          | 2624.071           | NM_005097 | 207.87            |
| 491.227           | NM_001550 | 6971.837          | 6163.237           | AK023261  | 3784.628          | 4981.941           | NM_012278 | 854.41            |
| 3984.414          | AK026849  | 1966.907          | 2248.574           | NM_005097 | 567.51            | 558.187            | NM_016100 | 438.299           |
| 798.541           | NM_018677 | 898.571           | 883.361            | NM_012278 | 697.996           | 790.866            | NM_014057 | 523.842           |
| 568.241           | NM_002785 | 513.943           | 648.065            | NM_014057 | 656.171           | 904.315            | NM_001550 | 7390.16           |
| 696.885           | NM_016582 | 2911.241          | 5836.677           | NM_001550 | 10489.595         | 6430.719           | AK026849  | 4141.317          |
| 7186.249          | NM_014229 | 1265.512          | 1000.457           | AK026849  | 3949.241          | 5316.904           | NM_002785 | 859.848           |
| 6003.265          | NM_013265 | 4736.22           | 3067.045           | NM_016582 | 5448.596          | 8153.275           | NM_016582 | 5031.251          |
| 677.112           | NM_014964 | 1214.271          | 1555.601           | NM_014229 | 1742.449          | 1914.304           | NM_014229 | 1236.25           |
| 871.261           | NM_014016 | 14115.061         | 11295.45           | NM_013265 | 9641.1            | 6172.616           | NM_013265 | 4997.647          |
| 313.365           | NM_013433 | 1680.414          | 1909.162           | NM_014964 | 3716.001          | 4753.405           | NM_014964 | 1179.819          |
| 6343.804          | NM_003794 | 5336.435          | 7070.959           | NM_014016 | 20004.59          | 18161.607          | NM_014016 | 9302.441          |
| 1421.588          | NM_019892 | 5549.672          | 4832.988           | NM_013433 | 2080.29           | 3079.007           | NM_013433 | 1310.365          |
| 5786.962          | NM_016169 | 3165.729          | 3680.317           | AJ224867  | 315.711           | 340.625            | NM_003794 | 5246.024          |
| 1153.461          | BF307652  | 601.069           | 1026.309           | NM_003794 | 6138.511          | 8068.157           | NM_019892 | 3356.785          |
| 7001.572          | NM_017772 | 2090.769          | 3322.936           | NM_019892 | 4212.273          | 1585.786           | NM_016169 | 1721.374          |
| 2732.265          | AF116574  | 1067.301          | 1212.274           | NM_016169 | 3005.554          | 2057.33            | BF307652  | 1104.273          |
| 438.007           | NM_005529 | 1047.089          | 1173.36            | BF307652  | 1162.62           | 943.918            | NM_017772 | 1784.829          |
| 8288.54           | NM_005869 | 2960.969          | 3361.305           | NM_017772 | 2150.935          | 2511.974           | AF116574  | 1023.72           |
| 5312.553          | AF105067  | 292.023           | 427.786            | AF116574  | 1067.89           | 1031.628           | NM_005529 | 1040.45           |

|           |           |           |           |           |           |           |           |           |
|-----------|-----------|-----------|-----------|-----------|-----------|-----------|-----------|-----------|
| 2181.186  | NM_018676 | 287.928   | 414.059   | NM_005529 | 933.575   | 542.364   | AF105067  | 789.82    |
| 1787.321  | NM_006014 | 575.236   | 782.02    | NM_005869 | 3421.099  | 3870.35   | NM_006014 | 1061.995  |
| 1904.029  | NM_006280 | 37269.172 | 54476.988 | AF105067  | 768.353   | 882.223   | NM_006280 | 50405.547 |
| 1161.769  | NM_002155 | 303.059   | 449.29    | NM_018676 | 535.357   | 661.816   | NM_001771 | 444.637   |
| 927.473   | NM_007355 | 55744.824 | 51528.285 | NM_006014 | 743.644   | 750.987   | NM_002066 | 464.841   |
| 2260.685  | NM_006096 | 3709.12   | 2828.857  | NM_006280 | 51596.117 | 57817.637 | NM_007355 | 57038.633 |
| 513.849   | NM_012288 | 3604.32   | 5457.06   | NM_002155 | 223.877   | 354.657   | NM_006096 | 2441.259  |
| 548.904   | NM_005264 | 871.015   | 1345.547  | NM_002066 | 554.459   | 893.458   | NM_012288 | 3479.658  |
| 608.206   | NM_020373 | 1204.223  | 1707.005  | NM_007355 | 65920.125 | 59146.055 | NM_005264 | 1272.264  |
| 1301.745  | NM_002556 | 2007.515  | 2148.531  | NM_006096 | 3029.514  | 1161.415  | NM_020373 | 1445.555  |
| 35108.637 | NM_018089 | 2559.082  | 2623.094  | NM_012288 | 5129.84   | 8030.682  | NM_000714 | 64509.66  |
| 448.613   | L21934    | 1033.16   | 1987.049  | NM_005264 | 1669.624  | 2276.242  | NM_002556 | 1374.192  |
| 272.134   | AL117442  | 3282.138  | 4825.228  | NM_020373 | 2023.307  | 2406.943  | NM_018089 | 2265.01   |
| 623.215   | NM_004695 | 571.265   | 908.503   | NM_002556 | 2121.716  | 1688.306  | L21934    | 1201.283  |
| 45721.238 | AF299075  | 491.147   | 477.715   | NM_018089 | 1857.189  | 1325.228  | AL117442  | 2894.829  |
| 2692.989  | NM_007188 | 1129.955  | 1353.466  | L21934    | 678.363   | 1206.301  | NM_004695 | 892.154   |
| 6098.245  | NM_001214 | 2420.288  | 2719.675  | AL117442  | 4257.041  | 3329.029  | NM_000340 | 498.342   |
| 1652.872  | AK022409  | 340.212   | 554.617   | NM_004695 | 633.287   | 706.099   | NM_007188 | 1644.41   |
| 3400.232  | U16851    | 3628.726  | 4964.675  | NM_007188 | 1591.5    | 1679.477  | NM_001214 | 2631.523  |
| 2162.827  | NM_014341 | 3737.706  | 6244.665  | NM_001214 | 3043.752  | 2924.962  | AK022409  | 593.846   |
| 1138.698  | NM_020309 | 1018.993  | 2959.823  | AK022409  | 613.215   | 576.763   | U16851    | 4711.798  |
| 2864.875  | AK023533  | 406.301   | 553.843   | U16851    | 3778.366  | 2895.319  | NM_014341 | 4029.598  |
| 852.647   | NM_012450 | 762.096   | 1054.483  | NM_014341 | 3185.078  | 3462.663  | NM_020309 | 1644.789  |
| 482.719   | NM_007071 | 2234.911  | 3534.834  | NM_020309 | 1520.832  | 2026.203  | NM_000341 | 689.054   |
| 527.901   | AK024434  | 4926.327  | 4478.418  | NM_000341 | 1220.866  | 712.314   | AK023533  | 728.661   |
| 1085.961  | NM_002388 | 7248.807  | 4297.162  | AK023533  | 1125.203  | 1024.014  | NM_012450 | 922.636   |
| 2617.241  | NM_016069 | 18635.715 | 19104.969 | NM_012450 | 1083.345  | 1024.708  | NM_007071 | 3039.553  |
| 828.795   | NM_017612 | 2304.771  | 1285.676  | NM_007071 | 3475.73   | 3724.714  | NM_006812 | 9280.322  |
| 5007.168  | NM_013236 | 8513.46   | 7164.411  | AK024434  | 8149.247  | 6377.918  | AK024434  | 3281.588  |
| 2270.445  | NM_017841 | 3252.231  | 3623.844  | NM_002388 | 7227.432  | 10207.964 | NM_002388 | 4370.421  |
| 946.046   | NM_001254 | 2302.435  | 861.036   | NM_016069 | 21167.848 | 28165.088 | NM_016069 | 12899.631 |
| 229.562   | NM_020412 | 5518.248  | 6640.277  | NM_017612 | 2310.093  | 2313.341  | NM_017612 | 1633.847  |
| 670.977   | NM_003032 | 3529.115  | 2301.488  | NM_013236 | 8562.328  | 7248.701  | NM_013236 | 5572.179  |
| 563.705   | NM_017453 | 6790.059  | 6273.253  | NM_017841 | 4688.284  | 4309.415  | NM_017841 | 2131.174  |
| 1046.65   | AF038564  | 2654.073  | 2776.96   | NM_001254 | 1711.151  | 2066.823  | NM_001254 | 1470.114  |
| 3463.489  | AB033768  | 775.891   | 1293.218  | NM_020412 | 8273.715  | 6765.445  | NM_020412 | 3993.137  |
| 302.538   | NM_017659 | 1809.797  | 2436.671  | NM_003032 | 5467.501  | 3357.232  | NM_003032 | 3776.073  |
| 745.374   | NM_006904 | 4196.63   | 3608.436  | NM_017453 | 13547.839 | 8262.881  | NM_017453 | 9320.377  |
| 3644.861  | NM_004217 | 3186.319  | 3641.55   | AF038564  | 2868.142  | 2134.147  | AF038564  | 2882.244  |
| 5167.944  | NM_006347 | 19746.547 | 13170.747 | AB033768  | 1273.835  | 840.881   | AB033768  | 1234.993  |
| 14135.056 | NM_020406 | 481.441   | 524.457   | NM_017659 | 1928.544  | 1329.974  | NM_017659 | 1907.733  |
| 1056.376  | NM_014685 | 6793.08   | 10525.63  | NM_006904 | 3725.62   | 4371.203  | NM_006904 | 3058.52   |
| 3446.858  | NM_001550 | 2722.571  | 2577.549  | NM_004217 | 3835.314  | 3852.917  | NM_004217 | 3074.4    |
| 2677.435  | AK026849  | 904.844   | 1230.788  | NM_006347 | 20947.598 | 23393.387 | NM_006347 | 19092.713 |
| 1250.755  | NM_018677 | 809.485   | 1074.435  | NM_020406 | 1134.749  | 945.258   | NM_020406 | 1260.75   |
| 5901.395  | NM_002785 | 880.363   | 1014.628  | NM_014685 | 19034.08  | 11767.517 | NM_014685 | 14467.827 |
| 2176.522  | NM_000041 | 30195.801 | 51616.93  | AK026849  | 5973.168  | 6050.759  | NM_001550 | 6656.151  |
| 6890.213  | W69211    | 922.459   | 644.992   | NM_002785 | 791.015   | 824.981   | AK026849  | 983.571   |
| 2196.888  | AA449931  | 4649.848  | 4519.083  | NM_000041 | 34611.875 | 39423.238 | NM_002785 | 453.811   |
| 906.757   | AA877347  | 8448.848  | 12257.026 | W69211    | 735.53    | 925.711   | NM_000041 | 13373.8   |
| 1431.695  | S57235    | 9125.696  | 12661.029 | AA449931  | 4075.275  | 3612.351  | AA449931  | 1189.598  |
| 2052.889  | AI376272  | 2243.476  | 3130.747  | AA877347  | 6995.333  | 16780.785 | AA877347  | 4273.82   |
| 3302.142  | BF242229  | 2778.451  | 2605.76   | S57235    | 4412.032  | 4289.547  | S57235    | 2718.707  |

|           |           |           |           |           |           |           |           |           |
|-----------|-----------|-----------|-----------|-----------|-----------|-----------|-----------|-----------|
| 16073.801 | X75756    | 13289.541 | 14447.995 | AI376272  | 1886.058  | 2344.776  | AI376272  | 1246.037  |
| 1891.757  | AI754623  | 2405.999  | 2996.625  | BF242229  | 3203.792  | 4213.65   | BF242229  | 1502.927  |
| 12906.45  | AA401326  | 6029.609  | 7912.768  | X75756    | 17086.818 | 21446.943 | X75756    | 3521.326  |
| 1862.806  | N55461    | 291.004   | 515.637   | AI754623  | 2794.295  | 3877.122  | AI754623  | 1398.718  |
| 991.566   | AA504482  | 4459.647  | 7414.405  | AA401326  | 5086.807  | 6990.949  | AA401326  | 3150.043  |
| 1022.834  | NM_006003 | 12571.604 | 12388.217 | AA504482  | 3569.033  | 3813.062  | AA504482  | 2681.371  |
| 31765.021 | NM_006555 | 1936.553  | 2891.932  | NM_006003 | 14825.711 | 13767.015 | NM_006003 | 13797.314 |
| 850.037   | NM_016516 | 2298.477  | 1618.335  | NM_006555 | 1448.891  | 1490.986  | NM_006555 | 1249.559  |
| 3123.254  | AF263538  | 516.221   | 505.544   | NM_016516 | 2961.903  | 1552.128  | NM_016516 | 2660.327  |
| 6262.989  | NM_006280 | 60165.789 | 58235.82  | NM_002066 | 633.605   | 776.972   | AF263538  | 960.132   |
| 3394.552  | NM_002155 | 477.198   | 750.135   | NM_007355 | 66953.867 | 57430.719 | NM_006280 | 45424.223 |
| 1721.812  | NM_007355 | 61915.375 | 54262.336 | NM_006096 | 3877.331  | 2414.399  | NM_002155 | 409.289   |
| 1713.677  | NM_006096 | 5449.308  | 2587.99   | NM_006869 | 42957.559 | 49370.031 | NM_002066 | 400.307   |
| 12615.02  | NM_006869 | 22456.25  | 24825.346 | NM_015364 | 471.298   | 824.936   | NM_007355 | 57010.375 |
| 1685.987  | NM_015364 | 445.134   | 523.493   | NM_006611 | 687.551   | 1046.825  | NM_006096 | 2058.594  |
| 4749.92   | NM_006611 | 500.378   | 582.228   | NM_004963 | 1762.358  | 1432.106  | NM_006869 | 6914.607  |
| 449.851   | NM_004963 | 3066.566  | 3167.826  | NM_001181 | 872.969   | 2045.905  | NM_015364 | 276.674   |
| 3442.157  | NM_001181 | 791.963   | 6435.598  | NM_005535 | 10904.911 | 8077.402  | NM_004963 | 1878.504  |
| 354.566   | NM_005535 | 8041.119  | 8837.055  | AB037857  | 924.515   | 724.408   | NM_001181 | 489.899   |
| 11416.726 | AB037857  | 1010.52   | 1604.762  | AF218021  | 1230.728  | 1251.262  | NM_005535 | 2954.031  |
| 1407.975  | AF218021  | 1313.849  | 1022.385  | NM_013262 | 8483.908  | 8343.521  | AB037857  | 735.245   |
| 2574.5    | NM_013262 | 9090.464  | 9344.979  | NM_007185 | 4913.07   | 3792.435  | AF218021  | 789.015   |
| 723.841   | NM_007185 | 7555.956  | 7524.288  | NM_003357 | 4442.405  | 3994.821  | NM_013262 | 4930.111  |
| 617.859   | NM_003357 | 7386.411  | 7625.432  | AK023261  | 4193.589  | 6659.381  | NM_007185 | 2110.537  |
| 572.176   | AF195420  | 337.419   | 331.738   | NM_005097 | 448.366   | 914.734   | NM_003357 | 3546.305  |
| 46019.742 | AK023261  | 4200.993  | 3586.855  | NM_012278 | 1072.698  | 1290.097  | AK023261  | 2627.754  |
| 2383.552  | NM_005097 | 555.001   | 555.476   | NM_014057 | 688.515   | 753.729   | NM_012278 | 758.835   |
| 22392.354 | NM_012278 | 937.389   | 1594.902  | NM_020309 | 1792.598  | 3522.49   | NM_014057 | 630.28    |
| 869.137   | NM_016100 | 668.053   | 863.051   | NM_000341 | 978.271   | 1376.848  | NM_020309 | 1203.769  |
| 568.49    | NM_014057 | 584.955   | 1523.423  | AK023533  | 1145.741  | 1472.761  | NM_000341 | 668.578   |
| 2742.71   | NM_020309 | 1695.289  | 4651.903  | NM_012450 | 1332.487  | 1619.114  | AK023533  | 562.991   |
| 489.318   | NM_000341 | 825.288   | 1026.823  | NM_007071 | 6131.245  | 8283.607  | NM_012450 | 497.563   |
| 6440.605  | AK023533  | 940.338   | 927.377   | NM_016582 | 5872.461  | 11310.341 | NM_007071 | 2687.48   |
| 618.323   | NM_012450 | 1693.269  | 1101.619  | NM_014229 | 2308.534  | 2940.362  | NM_016582 | 3409.98   |
| 1135.124  | NM_007071 | 4499.549  | 5315.292  | NM_013265 | 7509.564  | 2592.278  | NM_014229 | 991.232   |
| 4390.833  | NM_016582 | 6116.134  | 11265.255 | NM_014964 | 1532.868  | 995.333   | NM_013265 | 3777.294  |
| 4771.372  | NM_014229 | 1900.098  | 1550.812  | NM_014016 | 11268.855 | 5841.815  | NM_014964 | 926.778   |
| 496.629   | NM_013265 | 6680.29   | 3747.7    | NM_013433 | 1620.288  | 1314.736  | NM_014016 | 6006.874  |
| 4367.975  | NM_014964 | 1685.95   | 1749.066  | NM_003794 | 6906.311  | 6390.705  | NM_013433 | 1160.209  |
| 748.172   | NM_014016 | 17550.65  | 13562.409 | NM_019892 | 5009.421  | 2276.131  | NM_003794 | 3709.081  |
| 2766.599  | NM_013433 | 2402.917  | 2371.585  | NM_016169 | 3072.686  | 2672.027  | NM_019892 | 3821.64   |
| 643.442   | NM_003794 | 5988.097  | 7557.407  | BF307652  | 1520.169  | 1284.724  | NM_016169 | 2008.234  |
| 710.311   | NM_019892 | 7046.08   | 5355.42   | NM_017772 | 1957.469  | 2726.418  | BF307652  | 924.257   |
| 1066.074  | NM_016169 | 4108.482  | 4528.118  | AF116574  | 999.266   | 769.406   | NM_017772 | 1764.512  |
| 1016.132  | BF307652  | 1339.469  | 1452.236  | NM_005869 | 3547.953  | 3711.709  | AF116574  | 847.95    |
| 2599.329  | NM_017772 | 1803.974  | 2846.104  | AF105067  | 772.753   | 702.131   | NM_005529 | 1001.44   |
| 1182.127  | AF116574  | 1143.743  | 1215.651  | NM_006014 | 775.543   | 570.457   | NM_005869 | 2274.078  |
| 3271.263  | NM_005529 | 1040.523  | 1506.681  | NM_006904 | 4197.748  | 7487.392  | AF105067  | 728.157   |
| 10226.337 | NM_005869 | 3685.208  | 4565.603  | NM_004217 | 4403.253  | 7073.176  | NM_018676 | 742.609   |
| 1676.901  | AF105067  | 891.697   | 965.398   | NM_006347 | 27265.777 | 39257.172 | NM_006014 | 1027.364  |
| 6043.869  | NM_018676 | 1152.369  | 685.398   | NM_020406 | 1302.333  | 1790.347  | NM_006904 | 2334.075  |
| 1266.204  | NM_012072 | 208.77    | 344.466   | NM_014685 | 19345.842 | 17348.795 | NM_004217 | 2525.321  |
| 8047.652  | NM_006014 | 1367.015  | 1255.372  | NM_012288 | 5836.927  | 10857.407 | NM_006347 | 15187.779 |

|           |           |           |           |           |           |           |           |           |
|-----------|-----------|-----------|-----------|-----------|-----------|-----------|-----------|-----------|
| 1000.244  | NM_006904 | 3888.49   | 2649.472  | NM_005264 | 1458.469  | 1308.721  | NM_020406 | 873.774   |
| 4053.726  | NM_004217 | 3712.481  | 3232.076  | NM_020373 | 1898.797  | 1143.616  | NM_014685 | 14657.945 |
| 5397.381  | NM_006347 | 25006.828 | 15384.764 | NM_000714 | 66631.602 | 49686.305 | NM_012288 | 2660.352  |
| 1860.444  | NM_020406 | 1245.654  | 1108.278  | NM_002556 | 2051.721  | 1248.076  | NM_005264 | 929.568   |
| 1588.113  | NM_014685 | 17559.82  | 24225.064 | NM_018089 | 1669.83   | 1077.929  | NM_020373 | 1229.29   |
| 2364.976  | NM_012288 | 3956.077  | 4443.095  | L21934    | 1013.074  | 1268.291  | NM_000714 | 56507.891 |
| 1899.467  | NM_005264 | 1485.594  | 2218.648  | AL117442  | 5051.327  | 4300.008  | NM_018089 | 1323.379  |
| 864.583   | NM_020373 | 1274.383  | 1624.238  | NM_004695 | 734.725   | 809.6     | L21934    | 618.167   |
| 2558.063  | NM_000714 | 67646.586 | 53985.59  | NM_007188 | 1573.499  | 1445.866  | AL117442  | 3585.139  |
| 738.142   | NM_002556 | 2595.198  | 2274.166  | NM_001214 | 3530.727  | 3228.195  | NM_004695 | 824.242   |
| 427.727   | NM_018089 | 2834.926  | 3275.533  | U16851    | 2710.254  | 2127.64   | NM_000340 | 534.355   |
| 477.539   | L21934    | 1438.838  | 2252.327  | NM_014341 | 3363.73   | 3050.459  | NM_007188 | 1338.975  |
| 818.769   | AL117442  | 5049.298  | 6459.375  | NM_006003 | 19619.838 | 31107.6   | NM_001214 | 2084.754  |
| 5142.97   | NM_004695 | 567.216   | 802.363   | NM_006555 | 2010.454  | 3517.135  | AK022409  | 484.436   |
| 6907.064  | AF299075  | 525.183   | 516.527   | NM_016516 | 4287.467  | 3894.809  | U16851    | 3620.3    |
| 31249.111 | NM_007188 | 1142.766  | 1415.296  | AF263538  | 818.541   | 1150.126  | NM_014341 | 3384.65   |
| 2957.821  | NM_001214 | 3003.529  | 3417.519  | NM_006812 | 12308.392 | 11887.962 | NM_006003 | 13169.027 |
| 5891.791  | AK022409  | 367.46    | 632.854   | AK024434  | 8409.55   | 4854.934  | NM_006555 | 1247.089  |
| 2768.75   | U16851    | 6474.676  | 7943.089  | NM_002388 | 6407.913  | 9374.329  | NM_016516 | 1994.828  |
| 2487.256  | NM_014341 | 5666.998  | 8371.622  | NM_016069 | 27585.902 | 37109.355 | AF263538  | 521.103   |
| 974.243   | NM_006003 | 22365.314 | 25574.248 | NM_017612 | 2122.812  | 1742.937  | NM_006812 | 7313.978  |
| 1981.252  | NM_006555 | 2878.217  | 3684.865  | NM_013236 | 7463.406  | 9522.37   | AK024434  | 3162.044  |
| 520.115   | NM_016516 | 2979.702  | 2755.861  | NM_017841 | 3305.681  | 4481.287  | NM_002388 | 3740.282  |
| 2696.015  | AF263538  | 810.547   | 905.711   | NM_001254 | 1531.271  | 1439.289  | NM_016069 | 12103.713 |
| 2100.07   | NM_006812 | 13768.374 | 18361.143 | NM_020412 | 9764.717  | 8462.452  | NM_017612 | 1001.648  |
| 880.18    | AK024434  | 5523.104  | 4896.417  | NM_003032 | 7568.002  | 5396.492  | NM_013236 | 5114.025  |
| 380.205   | NM_002388 | 6043.568  | 3430.085  | NM_017453 | 10250.814 | 5546.106  | NM_017841 | 2280.617  |
| 2087.698  | NM_016069 | 20209.859 | 19878.715 | AF038564  | 1982.664  | 1527.177  | NM_001254 | 1523.504  |
| 3503.255  | NM_017612 | 1828.053  | 1417.751  | AB033768  | 1140.46   | 903.207   | NM_020412 | 4306.929  |
| 862.382   | NM_013236 | 8686.212  | 6651.577  | NM_017659 | 1992.268  | 1334.113  | NM_003032 | 5187.976  |
| 5179.48   | NM_017841 | 3997.333  | 3810.731  | AK023261  | 4479.379  | 6331.846  | NM_017453 | 9030.207  |
| 3877.2    | NM_001254 | 2654.302  | 1120.549  | NM_005097 | 629.226   | 1020.006  | AF038564  | 2492.985  |
| 31600.504 | NM_020412 | 8456.509  | 9745.32   | NM_012278 | 597.135   | 1836.861  | AB033768  | 1669.871  |
| 2986.154  | NM_003032 | 4481.008  | 3062.742  | AF023142  | 233.824   | 359.48    | NM_017659 | 1608.321  |
| 3082.904  | NM_017453 | 11805.02  | 9472.711  | NM_016100 | 776.546   | 1661.886  | AK023261  | 2865.45   |
| 663.487   | AF038564  | 3421.281  | 3428.393  | NM_014057 | 759.169   | 1568.427  | NM_016100 | 667.482   |
| 1115.095  | AB033768  | 1297.74   | 1294.77   | NM_001550 | 13168.809 | 9418.976  | NM_014057 | 670.624   |
| 574.803   | NM_017659 | 2146.459  | 2361.602  | AK026849  | 3418.553  | 2610.153  | NM_001550 | 6826.619  |
| 3245.358  | AK023261  | 3366.034  | 3070.344  | NM_000041 | 22325.029 | 25075.799 | AK026849  | 2802.576  |
| 3682.546  | NM_005097 | 585.871   | 719.265   | W69211    | 655.182   | 1048.223  | NM_018677 | 650.659   |
| 12337.303 | NM_012278 | 1508.087  | 1907.547  | AA449931  | 3278.996  | 2975.658  | NM_000041 | 9282.401  |
| 1518.576  | AF023142  | 465.24    | 501.888   | AA877347  | 7625.691  | 16712.18  | AA449931  | 1277.31   |
| 3292.009  | NM_016100 | 972.454   | 1167.913  | S57235    | 3560.139  | 5481.876  | AA877347  | 2823.959  |
| 4074.764  | NM_014057 | 1464.576  | 2132.589  | AI376272  | 1527.462  | 2134.797  | S57235    | 2264.84   |
| 1078.094  | NM_001550 | 15548.383 | 9536.889  | BF242229  | 2167.306  | 2350.549  | AI376272  | 838.83    |
| 3303.684  | AK026849  | 11293.424 | 12217.008 | X75756    | 17781.055 | 19542.42  | BF242229  | 1511.208  |
| 9068.001  | NM_018677 | 2530.452  | 2543.222  | AI754623  | 1900.972  | 2268.211  | X75756    | 3019.85   |
| 3481.39   | NM_002785 | 1417.273  | 1078.597  | AA401326  | 2484.803  | 2816.336  | AI754623  | 1969.911  |
| 2640.779  | X78947    | 398.253   | 754.514   | AA504482  | 5455.15   | 6396.839  | AA401326  | 2801.844  |
| 2891.853  | NM_000041 | 34802.781 | 53434.52  | NM_005529 | 745.049   | 660.328   | AA504482  | 3869.036  |
| 6049.118  | W69211    | 632.178   | 854.39    | NM_005869 | 3685.165  | 4741.971  | NM_005529 | 756.415   |
| 2096.793  | AA449931  | 3404.817  | 3827.644  | AF105067  | 821.994   | 1246.883  | NM_005869 | 2289.408  |
| 1625.343  | AA877347  | 7925.03   | 11669.808 | NM_018676 | 387.349   | 682.164   | AF105067  | 880.773   |

|           |                  |           |           |                  |           |           |                  |           |
|-----------|------------------|-----------|-----------|------------------|-----------|-----------|------------------|-----------|
| 560.942   | <b>S57235</b>    | 8080.821  | 11820.139 | <b>NM_006014</b> | 1051.506  | 1277.237  | <b>NM_018676</b> | 734.027   |
| 1162.521  | <b>AI376272</b>  | 2127.165  | 2405.058  | <b>NM_006280</b> | 50220.117 | 40186.273 | <b>NM_006014</b> | 780.442   |
| 1109.425  | <b>BF242229</b>  | 3185      | 3397.599  | <b>NM_002066</b> | 351.624   | 752.578   | <b>NM_006280</b> | 44740.273 |
| 6861.194  | <b>X75756</b>    | 16261.59  | 16293.597 | <b>NM_007355</b> | 60408.875 | 53509.063 | <b>NM_007355</b> | 46210.039 |
| 693.05    | <b>AA401326</b>  | 9084.848  | 9314.799  | <b>NM_006096</b> | 2999.785  | 1620.757  | <b>NM_006096</b> | 2081.513  |
| 517.791   | <b>N55461</b>    | 539.175   | 407.603   | <b>NM_006869</b> | 28884.873 | 30648.801 | <b>NM_006869</b> | 5178.846  |
| 17851.219 | <b>AA504482</b>  | 4583.752  | 5279.584  | <b>NM_015364</b> | 407.567   | 665.734   | <b>NM_015364</b> | 127.456   |
| 551.475   | <b>NM_005529</b> | 1621.591  | 1706.861  | <b>NM_006611</b> | 478.249   | 948.827   | <b>NM_004963</b> | 1628.426  |
| 2615.177  | <b>NM_005869</b> | 4362.493  | 5541.024  | <b>NM_004963</b> | 1464.861  | 1808.62   | <b>NM_001181</b> | 218.34    |
| 6829.114  | <b>AF105067</b>  | 1534.923  | 1632.078  | <b>NM_001181</b> | 523.251   | 3163.498  | <b>NM_005535</b> | 2309.01   |
| 325.769   | <b>NM_018676</b> | 1052.766  | 1072.541  | <b>NM_005535</b> | 5162.784  | 6096.778  | <b>AB037857</b>  | 461.59    |
| 220.961   | <b>NM_012072</b> | 819.656   | 644.761   | <b>AB037857</b>  | 545.396   | 854.989   | <b>AF218021</b>  | 881.593   |
| 3634.813  | <b>NM_006014</b> | 1431.386  | 1384.78   | <b>AF218021</b>  | 1124.919  | 1232.524  | <b>NM_013262</b> | 5595.166  |
| 1493.658  | <b>NM_006280</b> | 56539.938 | 55228.273 | <b>NM_013262</b> | 7561.469  | 8691.295  | <b>NM_007185</b> | 2400.98   |
| 1941.154  | <b>NM_002155</b> | 6961.262  | 9029.105  | <b>NM_007185</b> | 4686.74   | 4186.523  | <b>NM_003357</b> | 4188.667  |
| 1446.228  | <b>NM_002066</b> | 924.689   | 1149.069  | <b>NM_003357</b> | 5147.738  | 5528.398  | <b>NM_000340</b> | 300.484   |
| 4094.422  | <b>NM_007355</b> | 59128.504 | 51796.852 | <b>NM_007185</b> | 1589.145  | 2549.66   | <b>NM_007185</b> | 1133.327  |
| 707.954   | <b>NM_006096</b> | 6191.437  | 2992.215  | <b>NM_001214</b> | 3663.061  | 5583.525  | <b>NM_001214</b> | 1955.736  |
| 1521.492  | <b>NM_006869</b> | 24146.098 | 28076.422 | <b>AK022409</b>  | 586.579   | 667.341   | <b>U16851</b>    | 4278.411  |
| 5803.917  | <b>NM_015364</b> | 585.845   | 601.088   | <b>U16851</b>    | 4458.153  | 4515.355  | <b>NM_014341</b> | 3501.414  |
| 1195.554  | <b>NM_006611</b> | 472.754   | 510.459   | <b>NM_014341</b> | 5699.144  | 9082.568  | <b>NM_020309</b> | 1142.372  |
| 691.883   | <b>NM_004963</b> | 2771.12   | 3151.614  | <b>NM_020309</b> | 1455.194  | 1422.086  | <b>AK023533</b>  | 643.53    |
| 355.377   | <b>NM_001181</b> | 858.396   | 5652.543  | <b>NM_000341</b> | 539.016   | 506.958   | <b>NM_012450</b> | 800.45    |
| 1364.764  | <b>NM_005535</b> | 11059.54  | 11314.082 | <b>NM_012450</b> | 932.212   | 623.131   | <b>NM_007071</b> | 2446.953  |
| 490.757   | <b>AB037857</b>  | 1327.446  | 1690.891  | <b>NM_007071</b> | 4312.451  | 4693.69   | <b>NM_016582</b> | 2737.286  |
| 588.962   | <b>NM_005012</b> | 562.092   | 425.406   | <b>NM_016582</b> | 5603.73   | 7491.415  | <b>NM_014229</b> | 880.096   |
| 43491.191 | <b>AF218021</b>  | 1342.108  | 1151.187  | <b>NM_014229</b> | 1622.455  | 1543.219  | <b>NM_013265</b> | 1888.145  |
| 1786.396  | <b>NM_007185</b> | 10203.31  | 9838.352  | <b>NM_013265</b> | 9804.105  | 7009.624  | <b>NM_014964</b> | 842.469   |
| 16685.336 | <b>NM_003357</b> | 8789.364  | 8423.47   | <b>NM_014964</b> | 1323.847  | 1892.918  | <b>NM_014016</b> | 6555.692  |
| 256.678   | <b>NM_000340</b> | 446.01    | 525.24    | <b>NM_014016</b> | 11005.58  | 9462.666  | <b>NM_003794</b> | 3039.502  |
| 749.629   | <b>NM_007185</b> | 1915.913  | 2310.374  | <b>NM_013433</b> | 1171.415  | 1912.112  | <b>NM_019892</b> | 4192.281  |
| 2090.598  | <b>NM_001214</b> | 3991.395  | 5133.811  | <b>AJ224867</b>  | 228.017   | 268.836   | <b>NM_016169</b> | 1968.096  |
| 358.695   | <b>AK022409</b>  | 953.047   | 1201.193  | <b>NM_003794</b> | 5360.603  | 6633.894  | <b>BF307652</b>  | 655.813   |
| 5617.115  | <b>U16851</b>    | 7828.058  | 7001.797  | <b>NM_019892</b> | 7318.092  | 3955.829  | <b>NM_017772</b> | 2534.239  |
| 514.333   | <b>NM_014341</b> | 6615.46   | 6443.62   | <b>NM_016169</b> | 3464.88   | 3978.715  | <b>NM_020412</b> | 4987.999  |
| 4790.686  | <b>NM_020309</b> | 1991.767  | 3895.309  | <b>BF307652</b>  | 1759.685  | 2206.783  | <b>NM_003032</b> | 3889.39   |
| 3264.264  | <b>NM_000341</b> | 1014.228  | 855.18    | <b>NM_017772</b> | 2407.793  | 3651.493  | <b>NM_017453</b> | 9405.735  |
| 441.535   | <b>AK023533</b>  | 1349.807  | 955.392   | <b>NM_020412</b> | 8929.408  | 9158.978  | <b>AF038564</b>  | 3111.941  |
| 5254.081  | <b>NM_012450</b> | 1791.15   | 2010.28   | <b>NM_003032</b> | 6399.267  | 7699.145  | <b>AB033768</b>  | 1379.115  |
| 462.914   | <b>NM_007071</b> | 6949.884  | 7243.688  | <b>NM_017453</b> | 14522.659 | 15559.074 | <b>NM_017659</b> | 1751.847  |
| 473.461   | <b>NM_016582</b> | 8217.281  | 15041.384 | <b>AF038564</b>  | 5574.259  | 6415.661  | <b>NM_006904</b> | 2942.352  |
| 2643.082  | <b>NM_014229</b> | 2393.761  | 1997.972  | <b>AB033768</b>  | 2432.193  | 3243.386  | <b>NM_004217</b> | 3035.024  |
| 3923.536  | <b>NM_013265</b> | 11154.188 | 7009.549  | <b>NM_017659</b> | 2976.24   | 1947.523  | <b>NM_006347</b> | 16433.525 |
| 1072.346  | <b>NM_014964</b> | 1540.447  | 1733.206  | <b>NM_006904</b> | 4200.149  | 4126.978  | <b>NM_020406</b> | 785.892   |
| 3461.553  | <b>NM_014016</b> | 14855.624 | 9892.62   | <b>NM_004217</b> | 3696.921  | 3520.059  | <b>NM_014685</b> | 11398.722 |
| 1021.502  | <b>NM_013433</b> | 2222.757  | 1856.069  | <b>NM_006347</b> | 23729.314 | 28579.4   | <b>NM_012288</b> | 1645.023  |
| 465.679   | <b>AJ224867</b>  | 393.049   | 464.916   | <b>NM_020406</b> | 907.728   | 911.403   | <b>NM_005264</b> | 1009.126  |
| 825.557   | <b>NM_003794</b> | 5181.758  | 5102.114  | <b>NM_014685</b> | 19727.063 | 13702.43  | <b>NM_020373</b> | 628.041   |
| 2666.177  | <b>NM_019892</b> | 7706.594  | 4223.545  | <b>NM_012288</b> | 4568.453  | 5787.77   | <b>NM_000714</b> | 55284.488 |
| 5895.566  | <b>NM_016169</b> | 3869.128  | 2904.978  | <b>NM_005264</b> | 2109.983  | 2325.755  | <b>NM_002556</b> | 1272.471  |
| 995.81    | <b>BF307652</b>  | 1280.068  | 1018.784  | <b>NM_020373</b> | 1944.365  | 2577.489  | <b>NM_018089</b> | 1276.742  |
| 4692.829  | <b>NM_017772</b> | 2536.354  | 2696.566  | <b>NM_000714</b> | 62599.203 | 53832.824 | <b>L21934</b>    | 718.024   |
| 827.188   | <b>NM_020412</b> | 11662.187 | 11619.188 | <b>NM_002556</b> | 1500.425  | 1536.582  | <b>AL117442</b>  | 2630.068  |



|           |           |           |           |           |           |           |           |           |
|-----------|-----------|-----------|-----------|-----------|-----------|-----------|-----------|-----------|
| 5665.306  | NM_003032 | 8625.177  | 5508.213  | NM_018089 | 2070.228  | 1472.821  | NM_004695 | 1481.537  |
| 770.886   | NM_017453 | 17923.799 | 12723.224 | L21934    | 685.323   | 1148.083  | AF299075  | 618.17    |
| 3580.982  | AF038564  | 6520.127  | 5568.555  | AL117442  | 6503.408  | 6532.024  | AK026663  | 786.838   |
| 4044.546  | AB033768  | 2469.733  | 1672.196  | NM_004695 | 841.914   | 1062.573  | NM_001174 | 754.908   |
| 1884.732  | NM_017659 | 4995.684  | 4767.506  | AF299075  | 750.273   | 509.714   | U69645    | 3808.214  |
| 2293.061  | NM_006904 | 6581.655  | 4824.308  | AK026663  | 1927.569  | 2548.31   | NM_019082 | 3278.616  |
| 2293.269  | NM_004217 | 9637.227  | 8781.199  | NM_001174 | 1827.751  | 2549.326  | NM_001424 | 867.047   |
| 11025.325 | NM_020406 | 1943.567  | 1865.401  | U69645    | 8881.515  | 6038.783  | AB040950  | 1050.589  |
| 3655.207  | NM_014685 | 30366.949 | 45327.809 | NM_019082 | 6839.35   | 7935.669  | NM_014003 | 2744.642  |
| 12520.692 | NM_012288 | 4460.7    | 5573.167  | NM_001424 | 1509.667  | 2170.583  | AB002282  | 22240.176 |
| 3760.264  | NM_005264 | 2597.825  | 2452.451  | AB040950  | 1624.558  | 963.673   | AB037805  | 3106.393  |
| 1753.333  | NM_020373 | 1565.28   | 961.805   | NM_014003 | 3190.32   | 3436.192  | NM_016516 | 1671.964  |
| 3524.888  | NM_000714 | 64359.145 | 52445.797 | NM_001356 | 1372.24   | 931.559   | NM_006812 | 7613.791  |
| 5076.425  | NM_002556 | 2659.295  | 1533.752  | AB002282  | 61219.645 | 53969.129 | AK024434  | 2761.501  |
| 6201.146  | NM_018089 | 2414.08   | 2348.671  | AB037805  | 4484.473  | 3336.532  | NM_002388 | 3302.363  |
| 20288.979 | L21934    | 1235.497  | 1819.03   | NM_016516 | 3335.774  | 2153.33   | NM_016069 | 14008.115 |
| 1630.375  | AL117442  | 5501.886  | 5965.749  | AF263538  | 806.633   | 938.568   | NM_017612 | 1314.548  |
| 13497.106 | NM_004695 | 764.623   | 1261.775  | NM_006812 | 8820.079  | 14568.19  | NM_013236 | 4883.922  |
| 2723.456  | AF299075  | 499.034   | 646.577   | AK024434  | 9401.569  | 8826.857  | NM_017841 | 2633.595  |
| 1301.167  | AK026663  | 618.096   | 673.592   | NM_002388 | 5483.336  | 6048.208  | NM_001254 | 1547.59   |
| 1567.558  | NM_001174 | 1722.37   | 1240.544  | NM_016069 | 26980.613 | 31842.48  | NM_004389 | 598.554   |
| 530.122   | U69645    | 7534.615  | 4145.346  | NM_017612 | 1529.018  | 1345.208  | NM_003952 | 1125.946  |
| 1185.291  | NM_019082 | 6185.848  | 3829.644  | NM_013236 | 6962.077  | 6861.657  | NM_005424 | 976.301   |
| 575.384   | NM_001424 | 1879.577  | 2095.774  | NM_017841 | 3337.984  | 3985.457  | NM_005975 | 3041.437  |
| 3782.548  | AB040950  | 2184.723  | 1667.145  | NM_001254 | 1909.177  | 2324.732  | AY007220  | 2687.904  |
| 781.14    | NM_014003 | 2532.241  | 2490.292  | NM_004389 | 695.882   | 1563.259  | NM_004438 | 1242.777  |
| 3090.978  | NM_001356 | 1602.886  | 1475.869  | AF278532  | 316.669   | 676.676   | X89399    | 1213.305  |
| 1235.374  | AB037805  | 5630.434  | 5200.628  | NM_003952 | 1242.62   | 1371.131  | NM_003808 | 830.647   |
| 7610.294  | NM_016516 | 3883.077  | 1837.664  | NM_005424 | 1135.431  | 525.885   | AK023666  | 612.07    |
| 6310.792  | AF263538  | 772.122   | 977.641   | NM_005975 | 4404.973  | 2703.655  | NM_005399 | 1043.328  |
| 2194.262  | NM_012135 | 374.188   | 265.458   | AY007220  | 3230.076  | 2198.077  | NM_006573 | 522.85    |
| 1926.86   | NM_006812 | 11911.344 | 15422.354 | NM_004438 | 1483.964  | 1136.137  | NM_015185 | 1369.793  |
| 2959.61   | AK024434  | 5680.871  | 4859.563  | X89399    | 2006.295  | 1245.072  | NM_005374 | 903.083   |
| 1587.366  | NM_002388 | 5983.81   | 2570.921  | NM_003808 | 1484.587  | 3692.985  | NM_003632 | 1533.042  |
| 48902.398 | NM_016069 | 19858.047 | 20194.955 | AK023666  | 1256.487  | 942.331   | NM_002194 | 1954.297  |
| 5123.532  | NM_017612 | 2293.758  | 1488.778  | NM_005399 | 1791.637  | 832.44    | NM_016166 | 5469.717  |
| 1799      | NM_013236 | 8703.041  | 6005.955  | NM_006573 | 1410.946  | 1861.799  | NM_002086 | 8091.455  |
| 478.699   | NM_017841 | 4300.202  | 3871.254  | NM_015185 | 1632.109  | 1593.512  | NM_020482 | 1254.296  |
| 2553.164  | NM_001254 | 2087.508  | 1085.676  | AF011757  | 647.83    | 810.117   | NM_005417 | 474.968   |
| 2791.421  | NM_003952 | 2255.524  | 2519.859  | NM_003632 | 2553.433  | 2664.676  | NM_002649 | 1756.898  |
| 14565.78  | NM_005424 | 1499.446  | 1185.717  | NM_002194 | 2820.015  | 3002.799  | AK025329  | 6135.793  |
| 1125.384  | NM_005975 | 7106.648  | 6678.702  | NM_000530 | 425.361   | 507.346   | AL137679  | 623.998   |
| 1117.019  | AY007220  | 9657.418  | 8914.279  | NM_016166 | 8730.237  | 9916.62   | NM_001786 | 2923.11   |
| 5360.871  | NM_004438 | 3408.009  | 1316.384  | NM_002086 | 15443.925 | 15919.397 | AK025026  | 722.101   |
| 2965.49   | X89399    | 1680.141  | 1669.779  | NM_016248 | 1071.97   | 1453.643  | AK023052  | 1066.912  |
| 1566.459  | NM_003808 | 1305.193  | 2472.056  | NM_005489 | 9136.021  | 8362.969  | NM_006455 | 19367.684 |
| 492.097   | AK023666  | 722.635   | 696.738   | NM_020482 | 2395.665  | 2517.936  | NM_018460 | 2562.346  |
| 831.475   | NM_005399 | 1537.091  | 693.62    | NM_004464 | 402.107   | 657.993   | NM_002705 | 1842.931  |
| 1098.363  | NM_006573 | 1140.036  | 2451.554  | NM_002398 | 915.489   | 862.177   | NM_005591 | 3519.951  |
| 1501.082  | NM_005118 | 864.361   | 420.809   | NM_005417 | 984.588   | 698.512   | NM_002373 | 793.268   |
| 2186.293  | NM_015185 | 1528.649  | 1449.908  | NM_002649 | 2954.388  | 2325.951  | AK024251  | 998.694   |
| 7155.87   | AF011757  | 392.244   | 575.416   | AK025329  | 9306.997  | 12109.043 | NM_002545 | 692.242   |
| 659.708   | NM_003632 | 1976.71   | 2523.797  | AL137679  | 1178.476  | 2019.495  | NM_004855 | 2324.48   |

|           |           |           |           |           |           |           |           |           |
|-----------|-----------|-----------|-----------|-----------|-----------|-----------|-----------|-----------|
| 1306.74   | NM_002194 | 3870.478  | 4419.389  | NM_001786 | 5064.658  | 7259.997  | NM_006952 | 382.327   |
| 718.465   | NM_000530 | 650.223   | 785.37    | AK025026  | 1342.349  | 1493.483  | NM_004617 | 1022.993  |
| 455.898   | AB028989  | 615.269   | 548.718   | AK023052  | 1075.424  | 1508.489  | NM_005666 | 1700.817  |
| 514.586   | NM_016166 | 7648.181  | 8416.962  | NM_006455 | 49578.938 | 46487.047 | NM_012177 | 2481.162  |
| 1390.592  | NM_002086 | 18902.361 | 15790.966 | NM_018460 | 5779.654  | 3999.081  | NM_006666 | 8183.392  |
| 311.137   | NM_016248 | 1255.414  | 1654.557  | NM_002705 | 9831.015  | 9136.644  | NM_002807 | 1704.618  |
| 1441.493  | NM_005489 | 13802.093 | 26805.805 | NM_005591 | 3855.046  | 4604.221  | NM_002799 | 49476.738 |
| 287.533   | NM_020482 | 1648.792  | 1666.129  | NM_002373 | 940.681   | 702.483   | NM_002790 | 25284.508 |
| 1679.22   | NM_002398 | 405.389   | 539.006   | AK024251  | 1609.141  | 832.259   | NM_018386 | 1456.892  |
| 1201.728  | NM_005417 | 1033.924  | 2721.821  | NM_002545 | 921.051   | 1396.068  | NM_014948 | 195.475   |
| 431.859   | NM_002649 | 3492.338  | 3180.867  | NM_006688 | 50920.559 | 49345.723 | BF217579  | 6606.075  |
| 198.837   | AK025329  | 12215.602 | 8851.092  | NM_005411 | 3051.424  | 3165.984  | NM_004335 | 1517.496  |
| 6671.101  | NM_001259 | 1153.903  | 615.624   | NM_004855 | 4107.177  | 4204.752  | AF040965  | 4455.861  |
| 11115.773 | AL137679  | 1911.044  | 1710.73   | NM_006952 | 726.453   | 843.556   | AB037840  | 2202.216  |
| 562.34    | NM_001786 | 7856.327  | 4980.961  | NM_005055 | 774.356   | 644.989   | NM_007011 | 3964.884  |
| 8014.279  | AB040965  | 734.302   | 528.193   | NM_004617 | 1412.881  | 1043.393  | Y10210    | 1712.473  |
| 590.188   | AK025026  | 1389.903  | 1028.339  | NM_005668 | 3401.25   | 2509.505  | AB020689  | 1552.595  |
| 5443.004  | AK023052  | 1631.083  | 1735.471  | NM_006748 | 622.737   | 646.048   | AK023916  | 320.843   |
| 423.128   | AB018350  | 834.544   | 571.753   | NM_012177 | 3324.913  | 4159.309  | NM_003203 | 2582.399  |
| 794.132   | NM_006455 | 47002.613 | 38653.871 | NM_006666 | 11714.521 | 12169.104 | NM_002514 | 447.823   |
| 1386.282  | NM_017541 | 590.924   | 466.582   | NM_002807 | 6791.375  | 8281.144  | AL096747  | 565.824   |
| 3524.093  | NM_018460 | 5786.776  | 3431.053  | NM_002799 | 51104.891 | 51551.965 | AB021641  | 340.252   |
| 10073.738 | NM_002705 | 4059.547  | 4588.632  | NM_002790 | 32333.656 | 46411.516 | NM_012406 | 1884.137  |
| 567.101   | NM_005591 | 2826.929  | 2973.719  | NM_018386 | 3794.576  | 2869.565  | NM_014947 | 2418.077  |
| 1169.761  | NM_002373 | 1018.615  | 1102.624  | NM_014948 | 408.551   | 724.989   | AB033112  | 1367.257  |
| 3518.907  | AK024251  | 1599.38   | 1054.742  | BF217579  | 9287.273  | 9849.677  | NM_005674 | 705.643   |
| 669.703   | NM_002545 | 2004.681  | 1838.19   | NM_004335 | 5183.188  | 4757.712  | AK023243  | 600.17    |
| 1390.981  | NM_006688 | 43892.648 | 45356.414 | AF040965  | 15485.918 | 12928.575 | NM_014409 | 1003.548  |
| 1227.929  | NM_005411 | 5455.491  | 4914.239  | AB037840  | 4692.087  | 6326.23   | BE791857  | 638.985   |
| 41325.125 | NM_004855 | 4431.675  | 4846.467  | NM_007011 | 6682.809  | 4837.536  | NM_001422 | 1510.359  |
| 3014.828  | NM_004808 | 639.916   | 629.104   | Y10210    | 3041.66   | 3765.502  | AK022358  | 762.88    |
| 3086.664  | NM_004617 | 977.217   | 967.124   | AB020689  | 1852.508  | 2181.477  | NM_000977 | 11483.769 |
| 1289.21   | NM_005668 | 2632.816  | 3159.779  | AK023916  | 326.458   | 461.298   | NM_014205 | 23423.93  |
| 876.788   | NM_006748 | 329.81    | 1276.541  | NM_003203 | 3031.208  | 3439.097  | NM_018141 | 7714.218  |
| 594.544   | NM_012177 | 4388.575  | 2222.601  | NM_002514 | 696.953   | 706.099   | NM_016504 | 17805.785 |
| 1341.625  | NM_006666 | 16968.736 | 10278.18  | AF177238  | 1238.315  | 486.969   | U25752    | 56701.391 |
| 46294.891 | NM_002807 | 5086.483  | 3868.052  | AL096747  | 741.432   | 956.029   | X96646    | 3982.954  |
| 3637.465  | NM_002799 | 57526.992 | 53984.16  | AB021641  | 841.715   | 663.327   | AB032991  | 6009.524  |
| 5606.029  | NM_002790 | 36832.984 | 45394.461 | NM_012406 | 3423.815  | 1674.589  | AK026985  | 1463.912  |
| 1054.031  | NM_018386 | 4533.458  | 2037.246  | NM_014947 | 5715.773  | 3444.199  | AK000855  | 905.602   |
| 995.188   | BF217579  | 10007.551 | 8534.127  | AB033112  | 2015.624  | 1774.733  | NM_004109 | 1779.221  |
| 2217.322  | NM_004335 | 2446.804  | 2311.668  | NM_005674 | 945.421   | 736.551   | NM_003198 | 3293.027  |
| 2372.328  | AF040965  | 7741.159  | 7424.28   | AK023243  | 1312.149  | 962.705   | AF220415  | 631.149   |
| 610.915   | AB037840  | 3662.529  | 6102.834  | NM_014409 | 1681.486  | 1825.581  | NM_005174 | 57492.633 |
| 4343.029  | NM_007011 | 8004.778  | 8873.129  | BE791857  | 911.6     | 886.904   | NM_000365 | 811.67    |
| 14721.343 | Y10210    | 2594.627  | 3063.085  | NM_001422 | 1977.807  | 3696.766  | AF110322  | 627.413   |
| 3357.786  | AB020689  | 1765.95   | 2103.16   | AK022358  | 1941.293  | 2086.129  | NM_013450 | 1248.943  |
| 40702.328 | AK023916  | 789.23    | 855.134   | NM_000977 | 10540.584 | 7392.101  | NM_004538 | 1261.651  |
| 24114.131 | NM_003203 | 5116.848  | 6752.054  | NM_014205 | 30107.336 | 24729.605 | NM_003077 | 1288.992  |
| 1979.265  | AF177238  | 2169.522  | 667.772   | NM_018141 | 12935.177 | 12686.644 | NM_002105 | 890.289   |
| 8112.733  | AL096747  | 699.095   | 744.718   | NM_016504 | 24252.412 | 24530.99  | NM_018489 | 1310.167  |
| 1048.348  | AB021641  | 571.142   | 546.125   | U25752    | 62102.191 | 55263.664 | L13203    | 2087.996  |
| 5990.094  | NM_012406 | 9325.839  | 7639.509  | X96646    | 26161.383 | 24252.701 | NM_018040 | 1061.011  |

|           |           |           |           |           |           |           |           |           |
|-----------|-----------|-----------|-----------|-----------|-----------|-----------|-----------|-----------|
| 2132.58   | NM_014947 | 18689.426 | 21027.693 | AB032991  | 7623.396  | 2844.833  | AB042646  | 2509.521  |
| 4016.098  | AB033112  | 2407.901  | 3019.915  | AK026985  | 1880.949  | 1156.085  | NM_003431 | 1974.361  |
| 1214.871  | AK023243  | 1516.999  | 1260.506  | AK000855  | 1300.258  | 605.756   | AL359622  | 174.139   |
| 1939.866  | NM_014409 | 1331.11   | 1519.752  | NM_004109 | 2159.882  | 2427.006  | AL050204  | 1018.558  |
| 926.789   | BE791857  | 410.293   | 475.497   | NM_003198 | 4653.808  | 4906.356  | AF085999  | 575.156   |
| 3795.469  | NM_006867 | 386.981   | 263.448   | AF220415  | 777.871   | 462.423   | AK025316  | 1304.319  |
| 835.453   | NM_001422 | 1537.446  | 1961.2    | NM_005174 | 68677.406 | 51339.566 | AK026357  | 1551.486  |
| 874.641   | AK022358  | 1417.637  | 2006.151  | NM_000365 | 1529.964  | 1502.291  | NM_018323 | 1882.538  |
| 2145.232  | NM_000977 | 17506.082 | 13293.355 | AF110322  | 1085.168  | 714.269   | NM_014235 | 3064.523  |
| 666.791   | NM_014205 | 22774.764 | 19771.102 | NM_013450 | 2157.057  | 2197.501  | AK026922  | 2214.435  |
| 4203.893  | NM_018141 | 15517.961 | 15930.483 | NM_004538 | 1557.964  | 1832.594  | AK022006  | 9749.452  |
| 7163.355  | NM_016504 | 40455.051 | 47127.086 | NM_003077 | 1567.737  | 1363.453  | AF070552  | 10482.792 |
| 13076.771 | U25752    | 58487.957 | 54567.719 | NM_002105 | 1288.686  | 1837.617  | NM_004271 | 1864.774  |
| 1373.648  | X96646    | 36768.496 | 36383.453 | NM_018489 | 2053.745  | 2113.199  | AF129928  | 813.371   |
| 509.537   | AB032991  | 6319.882  | 7580.324  | L13203    | 4889.42   | 4504.651  | AK022282  | 771.623   |
| 1286.702  | AK026985  | 3537.897  | 3204.852  | NM_018040 | 993.265   | 1074.289  | NM_018266 | 2553.882  |
| 821.84    | AF007153  | 223.335   | 320.294   | AB042646  | 4744.752  | 3516.563  | AL050021  | 8526.04   |
| 927.789   | AK000855  | 1814.037  | 862.692   | NM_003431 | 3707.144  | 3453.646  | AB002448  | 725.934   |
| 1371.11   | NM_004109 | 3425.019  | 2886.026  | M29581    | 2683.066  | 2804.529  | NM_003838 | 1123.483  |
| 615.772   | NM_003198 | 5853.314  | 6434.196  | AL359622  | 851.873   | 341.91    | AK023089  | 2449.412  |
| 16512.447 | NM_005174 | 57561.082 | 51638.605 | AL050204  | 1404.792  | 364.12    | AK026059  | 2934.98   |
| 18401.15  | NM_000365 | 2908.599  | 2596.777  | AK025316  | 1454.385  | 847.95    | AK026942  | 752.333   |
| 12834.643 | AF110322  | 1221.672  | 1203.618  | AK026357  | 2059.393  | 1193.535  | AK025814  | 2116.677  |
| 36778.27  | NM_013450 | 4821.401  | 5126.634  | NM_018323 | 2582.576  | 2787.504  | AK000655  | 1598.111  |
| 6028.654  | NM_004538 | 939.231   | 808.325   | NM_014235 | 3648.382  | 4376.68   | D63134    | 466.046   |
| 4544.047  | NM_003077 | 1529.702  | 1234      | AK026922  | 4815.12   | 3193.702  | Y12018    | 26149.129 |
| 525.206   | NM_002105 | 938.117   | 953.179   | NM_014353 | 887.323   | 991.472   | X64990    | 555.867   |
| 726.18    | NM_018489 | 2840.391  | 3437.275  | AF070541  | 652.577   | 795.743   | Y10513    | 1282.518  |
| 1390.296  | L13203    | 4502.764  | 4793.505  | AK022006  | 14357.469 | 13933.674 | M21536    | 1045.068  |
| 3124.486  | NM_018040 | 1947.727  | 1784.702  | AF070552  | 14583.181 | 9873.959  | NM_014029 | 34738.414 |
| 331.461   | AB042646  | 4351.952  | 4098.093  | NM_004271 | 4831.313  | 4934.06   | Z83937    | 631.58    |
| 41091.824 | NM_003431 | 3064.243  | 3516.4    | AF129928  | 1012.91   | 885.64    | L08443    | 1444.232  |
| 1381.96   | M29581    | 2979.264  | 2520.161  | AK022282  | 1162.717  | 1135.362  | AK025818  | 2719.772  |
| 196.34    | AL050204  | 3560.617  | 3372.192  | NM_018266 | 4150.259  | 2461.94   | AK023185  | 1267.715  |
| 1789.51   | AF085999  | 992.174   | 682.563   | NM_004867 | 540.47    | 544.495   | NM_018278 | 1062.176  |
| 1198.407  | AK025316  | 2283.617  | 1503.165  | AL050021  | 12293.184 | 5742.202  | AK000864  | 743.188   |
| 897.773   | AK026357  | 3376.143  | 3438.992  | AB002448  | 958.944   | 1357.836  | NM_017624 | 3713.13   |
| 914.91    | NM_018323 | 2229.782  | 1841.473  | NM_003838 | 2384.733  | 2104.033  | AK000907  | 1770.958  |
| 1955.353  | NM_014235 | 5648.994  | 6408.871  | AK023089  | 3193.776  | 3067.373  | AK024390  | 644.02    |
| 4238.788  | AK026922  | 5098.646  | 3873.904  | AK026059  | 6169.679  | 2275.367  | AK024887  | 1500.337  |
| 778.528   | AK022426  | 579.533   | 228.098   | AK026942  | 1050.296  | 1250.637  | AK095587  | 5267.059  |
| 8131.083  | AK022645  | 481.205   | 365.233   | AK025814  | 2715.528  | 2234.319  | AF086043  | 860.381   |
| 497.824   | NM_014353 | 904.484   | 710.632   | AK000655  | 2856.868  | 2089.017  | AK000038  | 1004.326  |
| 2777.73   | AF070541  | 716.629   | 655.363   | AL117611  | 714.857   | 756.265   | U10513    | 952.138   |
| 614.205   | AK022006  | 22148.549 | 19837.49  | NM_017936 | 941.804   | 1034.836  | AK022203  | 352.274   |
| 1117.704  | AF070552  | 18317.594 | 4565.349  | Y10209    | 466.511   | 481.74    | AK023037  | 442.273   |
| 1638.203  | NM_004271 | 4613.991  | 5961.117  | D63134    | 1179.48   | 1249.25   | AF086195  | 433.122   |
| 2007.784  | AF129928  | 472.095   | 504.498   | AJ227893  | 1161.824  | 1235.643  | AK021963  | 413.071   |
| 3096.749  | AK022282  | 876.55    | 1188.771  | Y12018    | 60291.539 | 46436.832 | AK002209  | 661.706   |
| 2157.645  | NM_018266 | 4863.738  | 2112.94   | Y10513    | 1580.756  | 1165.104  | NM_017854 | 13243.034 |
| 252.386   | NM_004867 | 655.579   | 403.49    | M21536    | 1045.088  | 1154.281  | NM_014354 | 1029.403  |
| 329.028   | AL050021  | 10988.119 | 2578.144  | NM_014029 | 58242.922 | 48236.746 | AL137548  | 2193.578  |
| 486.479   | AB002448  | 1118.097  | 1291.453  | Z83937    | 1010.472  | 851.766   | AK095051  | 802.242   |

|           |            |           |           |           |           |           |           |           |
|-----------|------------|-----------|-----------|-----------|-----------|-----------|-----------|-----------|
| 16202.137 | NM_00383E  | 2186.248  | 1608.916  | L08443    | 1656.005  | 1907.382  | AK024929  | 1858.809  |
| 7878.521  | AK023089   | 3776.314  | 3824.786  | L38936    | 751.418   | 514.51    | NM_01777E | 1206.754  |
| 3672.708  | AK026059   | 34697.102 | 33669.34  | D55643    | 1018.33   | 1162.725  | D17232    | 2927.349  |
| 492.441   | AK026942   | 3020.013  | 3602.79   | AK025818  | 7233.298  | 7850.171  | NM_00526C | 886.122   |
| 1402.032  | AK025814   | 3490.942  | 1535.71   | AK023185  | 2948.808  | 4058.932  | AF085880  | 848.677   |
| 3613.581  | AK000655   | 3281.515  | 3463.993  | AK022183  | 321.172   | 423.651   | AF000990  | 645.908   |
| 712.346   | AL117611   | 532.026   | 935.217   | NM_01827E | 385.131   | 404.913   | NM_016094 | 1418.615  |
| 7779.375  | NM_01793E  | 2974.549  | 2532.713  | AK000864  | 3351.375  | 2319.214  | AK025003  | 826.531   |
| 889.761   | D63134     | 1253.149  | 1486.684  | AK022414  | 452.958   | 372.354   | NM_001427 | 983.583   |
| 446.35    | Y12018     | 53227.5   | 44641.875 | NM_017624 | 8799.599  | 10129.979 | NM_01617E | 568.251   |
| 1836.861  | X64990     | 539.893   | 715.47    | AK000907  | 2887.272  | 2410.063  | M15639    | 1846.76   |
| 1926.77   | Y10513     | 2531.294  | 2450.75   | AK024390  | 1438.101  | 1493.337  | AF130084  | 1749.07   |
| 44658.641 | M21536     | 1924.813  | 1694.621  | AK024868  | 499.637   | 567.503   | AF133334  | 2630.116  |
| 2055.318  | NM_01402E  | 57394.477 | 53953.16  | AK024517  | 2584.207  | 2331.612  | NM_01629C | 1016.821  |
| 2139.457  | Z83937     | 955.692   | 1106.682  | AK024585  | 556.405   | 615.01    | NM_003894 | 1154.41   |
| 3253.576  | L08443     | 1796.087  | 1686.313  | AK024887  | 3298.188  | 2253.034  | NM_00637E | 11584.64  |
| 353.025   | L38936     | 2060.287  | 1388.752  | AK025005  | 400.968   | 341.754   | AK001007  | 1869.078  |
| 604.489   | D55643     | 2288.197  | 2266.37   | AK095587  | 6424.971  | 5797.614  | AF116655  | 6031.919  |
| 2926.276  | AK025818   | 14096.788 | 12785.91  | AF086043  | 874.658   | 833.177   | NM_004627 | 1937.775  |
| 969.735   | AK023185   | 4693.385  | 5368.848  | AK000038  | 1412.12   | 903.024   | AK026523  | 1025.792  |
| 446.322   | AK022183   | 840.452   | 966.142   | BC010084  | 1399.147  | 1686.888  | AL050217  | 1776.494  |
| 35103.199 | AK026345   | 1760.881  | 1460.169  | U10513    | 1785.698  | 1379.147  | NM_00516E | 1843.389  |
| 387.459   | AB007971   | 1481.264  | 912.999   | L10151    | 474.034   | 405.647   | AB007968  | 912.099   |
| 1996.074  | NM_01827E  | 3460.611  | 2682.163  | AK022203  | 462.027   | 710.778   | NM_005664 | 11373.711 |
| 935.688   | AK026328   | 1494.836  | 1106.134  | AK023037  | 319.946   | 572.08    | NM_00627C | 17161.043 |
| 39684.926 | AK000864   | 2010.959  | 1590.091  | S71611    | 783.991   | 1000.975  | U50277    | 647.37    |
| 595.388   | AK022414   | 1473.266  | 1268.835  | AK055950  | 847.858   | 773.892   | Z48633    | 1735.034  |
| 1913.482  | NM_017624  | 10078.528 | 12595.224 | AL050122  | 842.792   | 947.232   | M62627    | 8899.104  |
| 803.206   | AK000907   | 4511.325  | 5126.964  | AK000839  | 5723.23   | 5478.542  | NM_00668E | 1859.092  |
| 1073.481  | AK024390   | 2031.862  | 1508.092  | AF086195  | 861.336   | 636.741   | CY3Cy5    | 7032.135  |
| 5544.259  | AK024565   | 924.244   | 1080.619  | AK021963  | 695.527   | 498.663   | A1889961  | 3177.919  |
| 2220.354  | AK024968   | 831.297   | 686.993   | AK002209  | 823.28    | 670.801   | A1360116  | 3503.224  |
| 552.547   | AK024517   | 3234.218  | 3594.312  | NM_017854 | 18419.816 | 12022.939 | NM_01398E | 770.783   |
| 336.419   | AK024585   | 1789.615  | 1330.647  | NM_014354 | 1102.825  | 1008.174  | A1572835  | 4569      |
| 1685.131  | AK024887   | 5577.285  | 5711.495  | AL137548  | 3427.79   | 4186.215  | R20392    | 6330.005  |
| 282.894   | AF086151   | 332.724   | 662.02    | AK095051  | 711.115   | 698.07    | AA486367  | 4550.818  |
| 2335.521  | AK095587   | 12462.57  | 28652.791 | AK024929  | 2954.938  | 2303.411  | N56684    | 1122.427  |
| 3788.011  | AF086043   | 1475.222  | 1660.319  | D17232    | 4432.375  | 8393.238  | M55153    | 989.971   |
| 405.122   | AK024174   | 1050.057  | 953.537   | NM_00526C | 963.936   | 1056.495  | AF414120  | 473.362   |
| 2258.526  | AK000038   | 2355.508  | 2282.939  | AF085880  | 5679.688  | 7262.804  | AK097322  | 662.177   |
| 787.767   | BC010084   | 1381.036  | 1444.748  | NM_01615E | 1334.178  | 1382.663  | AL136131  | 22838.818 |
| 375.882   | U10513     | 2434.406  | 1566.278  | AF000990  | 1042.756  | 599.828   | NM_033357 | 1642.594  |
| 2649.617  | AK022203   | 958.531   | 990.84    | NM_016094 | 3434.233  | 2858.918  | AF335109  | 1643.905  |
| 2599.216  | AK023037   | 1918.726  | 1355.299  | AK025003  | 1614.076  | 1624.398  | NM_00326E | 499.339   |
| 386.395   | unknown (E | 1224.147  | 681.631   | AK023601  | 540.783   | 521.088   | U59911    | 4075.417  |
| 69.397    | AL050122   | 862.861   | 832.185   | NM_001427 | 1890.244  | 1765.131  | NM_002054 | 1123.311  |
| 5738.605  | AK000839   | 6092.437  | 4506.354  | NM_01617E | 1121.392  | 1086.983  | SR2       | 51318.992 |
| 1150.254  | AF086195   | 1070.055  | 909.968   | M15639    | 3555.843  | 4686.194  | SR4       | 17360.717 |
| 1065.022  | AK021963   | 885.492   | 495.479   | AF130084  | 3595.009  | 3233.753  | SR6       | 2642.619  |
| 676.735   | AK002209   | 1168.95   | 1422.731  | AF133334  | 8231.402  | 5352.937  | SR8       | 8827.231  |
| 872.832   | NM_017854  | 37766.566 | 35645.059 | NM_01629C | 2076.428  | 2018.386  | SR10      | 33004.785 |
| 626.6     | NM_014354  | 3483.99   | 3293.212  | NM_003894 | 1307.776  | 1041.523  | CY3Cy5    | 8299.376  |
| 196.947   | AL137548   | 6422.49   | 5132.938  | NM_00637E | 14163.308 | 11040.662 | NM_00086E | 1764.017  |

|           |           |           |           |           |           |           |           |           |
|-----------|-----------|-----------|-----------|-----------|-----------|-----------|-----------|-----------|
| 764.515   | AK095051  | 1324.505  | 1577.927  | AK001007  | 1670.034  | 3312.727  | NM_000867 | 814.675   |
| 272.163   | AK026468  | 1292.32   | 1620.475  | NM_014485 | 340.47    | 502.367   | AF076642  | 1763.573  |
| 803.52    | AK024929  | 1985.311  | 1421.348  | AF116655  | 8766.065  | 9636.32   | NM_002386 | 2308.771  |
| 941.464   | D17232    | 5885.786  | 2917.289  | AF086134  | 555.87    | 580.877   | NM_005314 | 2409.683  |
| 316.964   | NM_005260 | 1549.845  | 1319.877  | AF009308  | 23406.822 | 33968.371 | NM_004885 | 2139.853  |
| 3908.688  | AF085880  | 6133.315  | 5738.359  | AB032969  | 20400.641 | 22428.439 | NM_005145 | 1072.521  |
| 431.02    | NM_016094 | 3594.461  | 2388.805  | Y11610    | 529.968   | 497.958   | NM_012152 | 13086.438 |
| 622.217   | AK025003  | 1303.911  | 1662.988  | AF085940  | 769.939   | 392.43    | AK024093  | 2829.513  |
| 971.715   | NM_001427 | 1682.556  | 2939.294  | NM_004627 | 3395.588  | 4858.426  | NM_001940 | 3302.038  |
| 27038.826 | NM_016175 | 860.206   | 562.129   | AK026523  | 1899.797  | 1984.698  | U83115    | 3104.113  |
| 1105.067  | M15639    | 3776.269  | 4899.63   | AL050217  | 8133.723  | 7791.658  | NM_001264 | 5553.982  |
| 1306.833  | AF130084  | 2992.979  | 2976.68   | L37704    | 627.03    | 665.081   | NM_013364 | 23693.08  |
| 334.605   | AF133334  | 5948.085  | 4450.75   | NM_005162 | 1702.035  | 1680.363  | NM_014368 | 1302.447  |
| 1695.081  | NM_016290 | 3603.127  | 2709.978  | AB007968  | 1167.257  | 1366.443  | NM_000850 | 2484.177  |
| 2215.569  | AK026498  | 1499.794  | 608.837   | NM_005664 | 30713.748 | 31980.682 | NM_004676 | 376.698   |
| 2254.581  | NM_003894 | 2192.174  | 1292.673  | NM_006270 | 39453.02  | 39189.59  | NM_001994 | 3690.461  |
| 3802.987  | NM_006373 | 22546.076 | 29394.846 | U50277    | 1088.826  | 1102.791  | J00129    | 9819.466  |
| 1295.604  | AK001007  | 3765.85   | 5264.372  | Z48633    | 2869.779  | 2842.172  | NM_003320 | 2255.048  |
| 3241.871  | AF116655  | 9409.089  | 8304.634  | M62627    | 15121.955 | 12143.758 | L10146    | 3687.339  |
| 1583.67   | AF009308  | 18347.676 | 14180.701 | NM_006686 | 3987.872  | 4229.994  | NM_000685 | 3909.144  |
| 404.897   | AB032969  | 11464.561 | 11021.377 | CY3Cy5    | 4762.209  | 149.318   | AK025657  | 11452.148 |
| 2002.924  | Y11610    | 675.71    | 540.907   | AI889961  | 569.892   | 852.147   | AF142063  | 662.991   |
| 834.282   | AF085940  | 331.78    | 469.578   | AI572835  | 1059.791  | 1276.227  | W42849    | 1833.263  |
| 2763.248  | NM_004627 | 3658.03   | 4082.45   | R20392    | 4374.28   | 6322.626  | AK022790  | 49360.07  |
| 2248.647  | AK026523  | 1570.001  | 1657.554  | AA486367  | 3805.385  | 2521.523  | NM_004311 | 4710.174  |
| 7528.862  | AL050217  | 4970.005  | 4973.202  | M55153    | 177.275   | 483.918   | NM_005624 | 1725.716  |
| 2189.089  | NM_005162 | 2525.576  | 1679.77   | AL136131  | 22563.439 | 10762.346 | NM_002302 | 659.592   |
| 1021.108  | AB007968  | 1282.93   | 893.967   | NM_033357 | 2569.169  | 3298.347  | AB020672  | 2315.239  |
| 698.331   | NM_005664 | 26521.408 | 18127.043 | NM_002054 | 765.688   | 1369.988  | AK026958  | 740.418   |
| 9226.207  | NM_006270 | 43614.543 | 44794.184 | SR6       | 2445.1    | 2506.401  | NM_000579 | 690.321   |
| 1439.962  | U50277    | 1263.528  | 1238.3    | SR8       | 8171.979  | 30801.873 | AF263462  | 3522.277  |
| 8174.364  | Z48633    | 4172.784  | 3606.753  | SR10      | 28919.908 | 11457.947 | AB040962  | 968.712   |
| 367.415   | M62627    | 20871.08  | 16878.727 | CY3Cy5    | 5578.893  | 211.893   | AV697672  | 761.928   |
| 15237.455 | NM_006686 | 6926.375  | 5187.07   | AF076642  | 720.129   | 846.439   | NM_000942 | 46541.742 |
| 21609.648 | CY3Cy5    | 12747.723 | 635.476   | NM_002386 | 1424.258  | 1659.498  | NM_002982 | 923.755   |
| 675.495   | AI889961  | 1961.781  | 2420.17   | NM_005314 | 804.238   | 923.039   | AK056773  | 5440.675  |
| 808.478   | AI360116  | 1411.329  | 2003.911  | NM_004885 | 1258.53   | 1344.918  | NM_002182 | 12000.478 |
| 2371.801  | AI572835  | 1015.203  | 1262.418  | NM_005145 | 1074.528  | 418.138   | NM_016470 | 2223.476  |
| 2373.234  | R20392    | 5514.309  | 8237.466  | NM_012152 | 3460.973  | 3617.633  | AL365408  | 24722.205 |
| 9854.382  | AA486367  | 4687.024  | 5158.238  | AK024093  | 760.412   | 882.135   | AK026204  | 6828.922  |
| 438.676   | N56684    | 1549.692  | 505.951   | NM_001940 | 653.312   | 704.44    | NM_014635 | 3918.225  |
| 1775.013  | M55153    | 576.829   | 593.991   | U83115    | 1268.536  | 2066.321  | NM_004145 | 8905.77   |
| 1313.742  | AL136131  | 18920.594 | 18227.223 | NM_001264 | 8302.896  | 7494.532  | AK023196  | 1287.707  |
| 24893.295 | NM_033357 | 1628.525  | 2330.858  | NM_013364 | 29428.76  | 46251.758 | NM_018728 | 3746.385  |
| 13862.889 | AF335109  | 1285.73   | 1185.247  | NM_007193 | 200.417   | 597.609   | AK024014  | 4940.731  |
| 1604.914  | NM_003263 | 282.674   | 707.384   | NM_001994 | 4560.157  | 5841.184  | NM_016234 | 5894.721  |
| 2829.567  | U59911    | 6252.361  | 5857.924  | J00129    | 11638.955 | 16344.232 | NM_001876 | 3493.38   |
| 14210.908 | NM_002054 | 1523.987  | 1503.793  | NM_003320 | 2525.286  | 2999.938  | NM_016144 | 8006.772  |
| 256.078   | SR2       | 55223.871 | 56652.156 | L10146    | 2366.897  | 1023.318  | AL133099  | 11574.412 |
| 2652.376  | SR4       | 21069.279 | 38367.621 | NM_000685 | 5495.147  | 8201.614  | NM_016082 | 1203.476  |
| 2548.908  | SR6       | 2989.517  | 4573.925  | AK025657  | 9087.391  | 3155.98   | NM_000433 | 1376.173  |
| 598.994   | SR8       | 10084.509 | 37414.559 | AF142063  | 448.173   | 677.81    | NM_000190 | 5547.131  |
| 790.725   | SR10      | 32734.658 | 20507.717 | W42849    | 2531.379  | 2858.957  | X15667    | 15153.211 |

|           |           |           |           |           |           |           |           |           |
|-----------|-----------|-----------|-----------|-----------|-----------|-----------|-----------|-----------|
| 585.698   | CY3Cy5    | 10694.986 | 449.525   | AK022790  | 17162.68  | 15277.527 | NM_017512 | 1446.263  |
| 372.462   | NM_000865 | 628.59    | 809.67    | NM_004311 | 2315.82   | 6103.009  | NM_018661 | 327.24    |
| 23793.809 | NM_000867 | 269.354   | 686.493   | NM_005624 | 750.842   | 1100.041  | NM_001678 | 587.086   |
| 1070.563  | AF076642  | 1020.936  | 720.976   | NM_002302 | 286.859   | 336.909   | AK023078  | 4487.122  |
| 1425.378  | NM_002386 | 1182.283  | 1632.573  | NM_000579 | 396.291   | 570.229   | NM_002239 | 38993.426 |
| 5113.172  | NM_005314 | 1206.709  | 986.638   | AF263462  | 760.31    | 1041.399  | NM_002249 | 25355.746 |
| 1397.568  | NM_004885 | 1494.502  | 1669.902  | NM_000942 | 45706.23  | 44644.652 | NM_015684 | 2694.284  |
| 2261.847  | NM_005145 | 1163.008  | 627.143   | NM_002982 | 1204.722  | 1440.759  | NM_003945 | 21556.08  |
| 32163.721 | NM_012152 | 5732.685  | 5412.411  | NM_002190 | 747.104   | 640.041   | NM_004981 | 5525.521  |
| 10169.843 | AK024093  | 1670.613  | 2114.12   | NM_002182 | 18711.881 | 17604.326 | AK096507  | 2211.129  |
| 419.886   | NM_001940 | 2529.889  | 3045.866  | NM_016470 | 2199.707  | 2724.68   | NM_016524 | 3174.226  |
| 1002.97   | U83115    | 2190.045  | 2821.202  | AL365408  | 37408.098 | 43813.559 | NM_007126 | 52360.672 |
| 613.074   | NM_001264 | 3551.439  | 3299.424  | AK026204  | 7882.265  | 7142.791  | AL137631  | 12823.799 |
| 1115.785  | NM_013364 | 10404.788 | 11293.995 | NM_014635 | 2953.929  | 2500.347  | NM_016057 | 14638.511 |
| 1796.725  | NM_014368 | 967.318   | 817.494   | NM_004145 | 14632.05  | 13224.785 | NM_014677 | 2342.216  |
| 1053.197  | NM_000850 | 3199.655  | 4534.895  | AK023196  | 1428.284  | 1549.788  | NM_006855 | 1299.537  |
| 1296.706  | NM_004676 | 767.767   | 1047.555  | NM_018728 | 2924.776  | 2241.917  | NM_015599 | 1759.875  |
| 298.572   | NM_001994 | 4683.97   | 4229.981  | AK024014  | 17598.416 | 16406.539 | NM_000136 | 9651.508  |
| 4779.039  | J00129    | 15429.048 | 16554.104 | NM_016234 | 1866.596  | 2565.374  | AL157456  | 869.774   |
| 1683.632  | NM_003320 | 3374.874  | 6240.87   | NM_001876 | 2021.365  | 2030.544  | AL162056  | 744.719   |
| 1910.013  | L10146    | 4883.331  | 4181.358  | NM_016144 | 6403.602  | 6201.839  | NM_000380 | 5789.326  |
| 2845.583  | NM_000685 | 5043.158  | 7076.32   | AL133099  | 8740.501  | 13430.375 | NM_004628 | 1770.964  |
| 1222.45   | AK025657  | 14628.263 | 4591.006  | NM_016082 | 1112.071  | 1165.446  | NM_014876 | 1329.068  |
| 2293.555  | AF142063  | 437.427   | 767.99    | NM_000433 | 1296.748  | 1208.17   | NM_005406 | 3813.508  |
| 865.765   | W42849    | 2351.757  | 2385.807  | NM_000190 | 3443.141  | 3485.91   | NM_003328 | 4443.032  |
| 545.161   | AK022790  | 16058.865 | 22350.762 | X15667    | 4884.59   | 6891.778  | X93921    | 7661.19   |
| 4064.742  | NM_004311 | 2341.004  | 4487.117  | NM_017512 | 926.448   | 767.661   | AF073482  | 3377.611  |
| 3289.502  | NM_005624 | 1217.55   | 1149.75   | AK023078  | 2387.434  | 3092.655  | NM_005990 | 3889.981  |
| 868.556   | NM_000579 | 498.224   | 503.139   | NM_002239 | 4814.742  | 3576.455  | NM_016276 | 37247.605 |
| 3115.285  | AF263462  | 1519.883  | 1375.331  | NM_002249 | 7823.417  | 5931.56   | NM_017762 | 3341.783  |
| 48903.039 | NM_000942 | 49519.668 | 37997.191 | NM_015684 | 2171.029  | 2527.545  | NM_001863 | 55040.555 |
| 4743.951  | NM_002982 | 420.09    | 1247.503  | NM_003945 | 16821.92  | 24536.99  | NM_000921 | 10245.589 |
| 1383.676  | AK056773  | 5262.002  | 7104.182  | NM_004981 | 5871.256  | 6884.242  | NM_000098 | 2884.384  |
| 1288.693  | NM_002182 | 3841.819  | 3042.902  | AK096507  | 1053.987  | 483.608   | NM_000016 | 17079.879 |
| 339.669   | NM_016470 | 3280.403  | 4935.034  | NM_016524 | 2969.151  | 2136.624  | AK026913  | 5240.452  |
| 699.453   | AL365408  | 24570.457 | 25336.83  | NM_007126 | 32211.045 | 28312.039 | L10146    | 3425.677  |
| 338.535   | AK026204  | 8534.055  | 9867.21   | AL137631  | 10394.652 | 12361.205 | NM_000685 | 3769.967  |
| 1218.866  | NM_014635 | 3844.228  | 4163.239  | NM_016057 | 14261.146 | 9840.102  | AK025657  | 10216.977 |
| 584.919   | NM_004145 | 8374.068  | 9706.958  | NM_014677 | 2956.817  | 4511.173  | A1889961  | 2398.57   |
| 588.604   | AK023196  | 1291.803  | 910.568   | NM_015599 | 1923.778  | 885.354   | A1360116  | 1699.047  |
| 36355.801 | NM_018728 | 3462.844  | 1863.681  | NM_018696 | 6798.512  | 5649.554  | NM_013983 | 670.423   |
| 754.291   | AK024014  | 1727.349  | 1361.772  | NM_000136 | 8982.137  | 9650.458  | A1572835  | 1872.335  |
| 5160.448  | NM_016234 | 4140.122  | 5295.548  | AL157456  | 788.604   | 821.738   | R20392    | 5406.998  |
| 10961.73  | NM_001876 | 2758.71   | 2046.288  | AL162056  | 427.868   | 788.479   | AA486367  | 3974.198  |
| 2865.844  | NM_016144 | 4989.477  | 5265.723  | NM_000380 | 3884.36   | 3377.438  | AF414120  | 342.53    |
| 7229.903  | AL133099  | 6567.194  | 9423.308  | NM_004628 | 1195.285  | 1945.995  | AL136131  | 22451.887 |
| 3225.958  | NM_016082 | 1496.791  | 1726.428  | NM_014876 | 418.507   | 548.008   | NM_033357 | 1799.157  |
| 8506.283  | NM_000433 | 2410.77   | 2919.116  | NM_005406 | 2381.219  | 2500.879  | AF335109  | 1085.471  |
| 1731.064  | NM_000190 | 4165.014  | 3415.795  | NM_003328 | 1999.594  | 1814.877  | NM_003263 | 349.372   |
| 3942.783  | X15667    | 5356.345  | 13934.725 | X93921    | 4832.293  | 3409.864  | U59911    | 3586.916  |
| 7791.547  | NM_017512 | 1767.281  | 1017.761  | AF073482  | 2358.956  | 2739.783  | NM_002054 | 911.895   |
| 7552.293  | NM_018661 | 385.245   | 313.854   | NM_005990 | 2252.496  | 1419.37   | AK026204  | 6267.02   |
| 3160.813  | AK023078  | 1349.19   | 1949.828  | NM_016276 | 24065.754 | 27509.582 | NM_014635 | 2950.256  |

|           |           |           |           |           |           |           |           |           |
|-----------|-----------|-----------|-----------|-----------|-----------|-----------|-----------|-----------|
| 6525.373  | NM_002239 | 16542.537 | 23869.939 | NM_017762 | 1977.357  | 2040.048  | NM_004145 | 6602.58   |
| 11301.125 | NM_002249 | 8750.108  | 14454.566 | NM_001863 | 61608.703 | 52886.387 | AK023196  | 1211.128  |
| 951.878   | NM_003945 | 12152.006 | 26830.584 | NM_000921 | 5351.487  | 5852.709  | NM_018728 | 2269.72   |
| 1238.677  | NM_004981 | 2796.245  | 3609.962  | NM_000098 | 2702.138  | 3583.299  | AK024014  | 2594.594  |
| 4064.347  | AK096507  | 1258.069  | 1319.027  | NM_000016 | 12549.628 | 11506.096 | NM_000865 | 1035.513  |
| 10100.557 | NM_016524 | 2111.877  | 3580.825  | AK026913  | 3785.475  | 4485.708  | NM_000867 | 584.261   |
| 1295.513  | NM_007126 | 24527.447 | 31472.605 | L10146    | 2846.033  | 1173.152  | AF076642  | 1475.547  |
| 999.242   | AL137631  | 6798.469  | 8749.336  | NM_000685 | 2477.704  | 3354.193  | NM_002386 | 1478.03   |
| 798.611   | NM_016057 | 13485.508 | 11239.539 | AK025657  | 9592.426  | 2283.129  | NM_005314 | 1437.854  |
| 5220.911  | NM_014677 | 597.224   | 909.396   | W42849    | 1668.688  | 1521.764  | NM_004885 | 1467.946  |
| 31191.295 | NM_006855 | 894.418   | 598.759   | AI889961  | 2090.127  | 2297.913  | NM_005145 | 764.088   |
| 17641.77  | NM_015599 | 1653.576  | 888.584   | AI360116  | 1448.125  | 1561.196  | NM_012152 | 7984.336  |
| 2889.275  | NM_018696 | 4794.399  | 4543.673  | NM_013983 | 393.049   | 350.399   | AK024093  | 1505.686  |
| 25443.42  | NM_000136 | 8887.57   | 8815.375  | AI572835  | 1480.481  | 1259.707  | NM_001940 | 2109.321  |
| 9003.909  | AL157456  | 861.646   | 849.957   | R20392    | 5146.668  | 6535.819  | U83115    | 2787.265  |
| 1314.297  | AL162056  | 486.026   | 645.686   | AA486367  | 4048.024  | 1674.349  | NM_001264 | 4265.365  |
| 2859.6    | NM_000380 | 2836.435  | 3154.715  | M55153    | 696.914   | 423.601   | NM_013364 | 15937.411 |
| 39549.91  | NM_004628 | 1059.193  | 2424.219  | AL136131  | 24124.092 | 8447.905  | NM_014368 | 767.125   |
| 11202.892 | NM_014876 | 685.515   | 709.693   | NM_033357 | 1300.282  | 1345.892  | NM_000850 | 2697.172  |
| 14338.187 | NM_005406 | 1896.186  | 3216.733  | AF335109  | 552.163   | 632.817   | NM_004676 | 822.224   |
| 1409.316  | NM_003328 | 337.693   | 501.146   | NM_003263 | 418.236   | 552.979   | NM_007193 | 732.522   |
| 1301.278  | X93921    | 2508.313  | 2107.208  | U59911    | 2172.416  | 1994.96   | NM_001994 | 4617.242  |
| 818.167   | AF073482  | 521.729   | 843.841   | NM_002054 | 846.284   | 695.415   | J00129    | 11563.659 |
| 6536.424  | NM_005990 | 2591.199  | 2267.29   | AK026204  | 5131.566  | 4015.198  | NM_003320 | 2902.957  |
| 7468.798  | NM_016276 | 2765.475  | 4146.215  | NM_014635 | 3116.701  | 1885.752  | NM_016524 | 2289.269  |
| 841.682   | NM_017762 | 1317.845  | 1463.125  | NM_004145 | 6378.079  | 4993.417  | NM_007126 | 41547.371 |
| 5945.569  | NM_001863 | 16577.887 | 24490.162 | AK023196  | 744.133   | 650.523   | AL137631  | 9189.616  |
| 1932.916  | NM_000921 | 2687.991  | 2830.204  | NM_018728 | 2266.164  | 1467.89   | NM_016057 | 11751.396 |
| 1059.638  | NM_000098 | 2201.181  | 3097.287  | AK024014  | 1808.54   | 1585.791  | NM_014677 | 740.383   |
| 4238.582  | NM_000016 | 12245.302 | 9613.675  | NM_000865 | 713.964   | 765.882   | NM_006855 | 1101.812  |
| 2775.532  | AK026913  | 2546.649  | 4203.746  | NM_002386 | 1373.493  | 1426.61   | AK022790  | 45478.707 |
| 4714.779  | L10146    | 3352.384  | 2531.241  | NM_005314 | 1087.235  | 1040.642  | NM_004311 | 4780.827  |
| 3070.066  | NM_000685 | 2530.147  | 4260.169  | NM_004885 | 1145.044  | 907.163   | NM_005624 | 1115.868  |
| 2902.378  | AK025657  | 12521.912 | 4362.89   | NM_012152 | 3933.485  | 3803.882  | NM_002302 | 675.422   |
| 37614.559 | AF142063  | 656.981   | 434.914   | AK024093  | 1072.339  | 925.156   | NM_000579 | 724.871   |
| 3180.508  | W42849    | 1657.7    | 1726.417  | NM_001940 | 1818.439  | 1631.473  | AF263462  | 1249.741  |
| 54479.445 | AI889961  | 2474.573  | 3607.254  | U83115    | 2428.735  | 3273.922  | AB040962  | 579.425   |
| 9248.899  | AI360116  | 3029.613  | 3540.956  | NM_001264 | 3717.931  | 3836.471  | AV697672  | 671.152   |
| 4042.385  | NM_013983 | 385.356   | 947.334   | NM_013364 | 9347.806  | 12187.129 | NM_000942 | 40688.66  |
| 18466.041 | AI572835  | 2196.491  | 2726.486  | NM_014368 | 585.426   | 670.224   | NM_002982 | 804.861   |
| 5432.525  | R20392    | 5438.2    | 8653.2    | NM_000850 | 2210.984  | 2528.482  | AK056773  | 5538.446  |
| 2798.711  | AA486367  | 4342.025  | 4925.305  | NM_004676 | 618.405   | 571.463   | NM_002182 | 13309.896 |
| 459.276   | AL136131  | 4168.373  | 4306.921  | NM_007193 | 201.79    | 423.559   | NM_016470 | 2185.696  |
| 823.51    | NM_033357 | 714.1     | 1307.875  | NM_001994 | 3794.767  | 3635.166  | AL365408  | 19560.969 |
| 22675.369 | U59911    | 2542.26   | 3420.01   | J00129    | 10641.772 | 11754.972 | NM_017762 | 2787.768  |
| 4403.543  | AK026204  | 4638.72   | 5391.028  | NM_003320 | 2232.559  | 2980.436  | NM_001863 | 53630.281 |
| 882.603   | NM_014635 | 3092.879  | 3104.685  | NM_016524 | 3008.695  | 3261.676  | NM_000921 | 6975.82   |
| 1264.026  | NM_004145 | 6762.521  | 7685.984  | AL137631  | 8795.896  | 13527.399 | NM_000098 | 1950.272  |
| 4520.727  | AK023196  | 1177.513  | 1066.592  | NM_016057 | 14733.934 | 10722.095 | NM_000016 | 10310.906 |
| 1945.466  | NM_018728 | 3306.375  | 1717.318  | NM_014677 | 1222.866  | 2093.454  | AK026913  | 1883.79   |
| 5786.692  | AK024014  | 2065.584  | 2014.771  | AK022790  | 52566.273 | 46450.887 | NM_016234 | 5343.479  |
| 1385.963  | NM_000865 | 1723.388  | 1515.074  | NM_002302 | 718.18    | 306.692   | NM_001876 | 2500.838  |
| 3103.063  | NM_000867 | 466.333   | 1318.987  | NM_000579 | 704.316   | 479.296   | NM_016144 | 6857.441  |

|           |           |           |           |           |           |           |           |           |
|-----------|-----------|-----------|-----------|-----------|-----------|-----------|-----------|-----------|
| 6440.836  | AF076642  | 1508.38   | 1064.883  | AF263462  | 982.713   | 911.622   | AL133099  | 9563.677  |
| 1695.857  | NM_002386 | 2453.447  | 2830.925  | NM_000942 | 35619.555 | 33862.484 | NM_016082 | 1466.284  |
| 765.406   | NM_005314 | 1096.754  | 1420      | NM_002982 | 1012.339  | 1202.508  | NM_000433 | 1355.805  |
| 1456.238  | NM_004885 | 762.089   | 1295.14   | NM_002190 | 452.834   | 423.131   | NM_000190 | 4938.128  |
| 2932.569  | NM_012152 | 1719.714  | 1551.809  | AK056773  | 4411.08   | 3447.905  | X15667    | 9012.46   |
| 1892.938  | AK024093  | 482.75    | 642.309   | NM_002182 | 12402.735 | 8800.689  | NM_017512 | 1527.587  |
| 1816.202  | NM_001940 | 653.761   | 1535.675  | NM_016470 | 2097.611  | 2483.997  | NM_018661 | 771.861   |
| 846.024   | U83115    | 821.127   | 1246.342  | AL365408  | 18805.896 | 15836.541 | NM_001678 | 814.341   |
| 2366.792  | NM_001264 | 1518.773  | 2021.418  | NM_017762 | 2911.803  | 2759.323  | AK023078  | 4217.08   |
| 3488.159  | NM_013364 | 1964.774  | 2522.086  | NM_000921 | 5694.407  | 5940.868  | NM_002239 | 30327.094 |
| 4525.47   | NM_000850 | 2259.68   | 3021.312  | NM_000098 | 2382.458  | 2234.288  | NM_002249 | 19961.367 |
| 9195.984  | NM_001994 | 1549.977  | 1582.652  | NM_000016 | 12336.598 | 8459.819  | NM_015684 | 1483.516  |
| 1120.802  | J00129    | 5939.045  | 8125.945  | AK026913  | 4040.23   | 4932.015  | NM_003945 | 11845.591 |
| 2190.86   | NM_003320 | 1143.201  | 2170.24   | NM_016234 | 8323.636  | 11756.392 | NM_004981 | 6216.269  |
| 1682.95   | NM_016524 | 2164.047  | 2634.434  | NM_001876 | 2718.561  | 2557.336  | AK096507  | 1225.087  |
| 1959.878  | NM_007126 | 33149.762 | 36413.246 | NM_000433 | 1580.772  | 1621.273  | NM_002054 | 1204.801  |
| 34283.742 | AL137631  | 8840.931  | 10819.089 | NM_000190 | 4451.932  | 4111.884  | NM_015599 | 2162.092  |
| 8510.107  | NM_016057 | 15093.364 | 11865.749 | X15667    | 8993.123  | 14197.184 | NM_018696 | 10532.571 |
| 11630.842 | NM_014677 | 1078.002  | 1186.14   | NM_017512 | 1977.253  | 1916.354  | NM_000136 | 10359.862 |
| 1600.509  | NM_006855 | 1660.866  | 827.058   | NM_018661 | 583.349   | 786.012   | AL157456  | 794.709   |
| 1474.998  | AK022790  | 58528.727 | 53467.082 | NM_001678 | 243.334   | 544.309   | AL162056  | 848.651   |
| 45559.824 | NM_004311 | 5081.41   | 9728.708  | AK023078  | 6266.305  | 9428.779  | NM_000380 | 4515.734  |
| 6877.104  | NM_005624 | 1317.717  | 1584.959  | NM_002239 | 47373.758 | 45232.57  | NM_004628 | 1704.397  |
| 2073.482  | NM_002302 | 333.668   | 463.502   | NM_002249 | 40879.293 | 39530.402 | NM_014876 | 1124.823  |
| 1173.027  | AF263462  | 439.753   | 667.566   | NM_015684 | 3156.029  | 4474.595  | NM_005406 | 2039.437  |
| 509.171   | AV697672  | 221.066   | 293.791   | NM_003945 | 19924.453 | 25789.762 | NM_003328 | 1797.55   |
| 481.037   | NM_000942 | 28191.4   | 19012.668 | NM_004981 | 12418.159 | 15289.445 | X93921    | 5512.161  |
| 1224.873  | AK056773  | 2321.524  | 2350.987  | AK096507  | 2168.891  | 1086.814  | AF073482  | 1828.449  |
| 1344.049  | NM_002182 | 1570.92   | 1546.928  | NM_002054 | 784.306   | 598.517   | NM_005990 | 3277.482  |
| 469.751   | NM_016470 | 1108.884  | 2007.746  | NM_015599 | 1796.325  | 791.552   | NM_016276 | 17910.232 |
| 30768.525 | AL365408  | 6546.474  | 7243.657  | NM_000136 | 9585.523  | 7201.631  | NM_000850 | 2475.846  |
| 1188.755  | NM_017762 | 3257.17   | 2416.036  | AL157456  | 951.614   | 850.879   | NM_004676 | 790.505   |
| 2329.499  | NM_001863 | 66091.031 | 54069.039 | AL162056  | 495.626   | 788.031   | NM_007193 | 129.786   |
| 44968.09  | NM_000921 | 6708.599  | 5809.868  | NM_000380 | 3354.945  | 2856.766  | NM_001994 | 2976.576  |
| 6236.733  | NM_000098 | 2974.287  | 3475.358  | NM_004628 | 2013.961  | 1943.049  | J00129    | 7455.977  |
| 1971.582  | NM_000016 | 16865.238 | 9814.018  | NM_014876 | 1263.574  | 1209.052  | NM_003320 | 1370.891  |
| 17209.195 | AK026913  | 4319.544  | 4244.123  | NM_005406 | 3911.369  | 3730.412  | L10146    | 2736.982  |
| 4724.337  | NM_016234 | 9676.358  | 10980.607 | NM_003328 | 3028.41   | 2529.479  | NM_000685 | 2008.028  |
| 10848.473 | NM_001876 | 4623.794  | 4433.458  | X93921    | 7079.357  | 4356.462  | AK025657  | 7396.71   |
| 5315.055  | NM_016144 | 5813.232  | 7675.903  | AF073482  | 3874.947  | 4190.218  | AF142063  | 581.523   |
| 10383.164 | AL133099  | 3541.969  | 5813.875  | NM_005990 | 4697.533  | 3188.767  | W42849    | 1064.855  |
| 15409.574 | NM_016082 | 1010.16   | 1251.334  | NM_016276 | 54610.492 | 50931.902 | A1889961  | 1376.052  |
| 1837.387  | NM_000433 | 1035.731  | 2143.351  | NM_000850 | 2322.918  | 2351.031  | A1360116  | 1797.242  |
| 2150.304  | NM_000190 | 2110.242  | 1878.127  | NM_004676 | 428.612   | 413.558   | A1572835  | 1755.889  |
| 3756.218  | X15667    | 751.969   | 1758.779  | NM_007193 | 448.912   | 570.638   | R20392    | 4542.006  |
| 5838.821  | NM_017512 | 1077.77   | 569.637   | NM_001994 | 4115.124  | 3572.99   | AA486367  | 3237.053  |
| 1410.519  | AK023078  | 959.015   | 1122.923  | J00129    | 8012.905  | 9764.02   | M55153    | 896.326   |
| 359.584   | NM_002239 | 7365.549  | 9150.048  | NM_003320 | 1806.506  | 1956.705  | AF414120  | 346.745   |
| 779.773   | NM_002249 | 5236.614  | 8246.941  | L10146    | 3505.732  | 1332.851  | NM_003263 | 413.151   |
| 5801.141  | NM_015684 | 1215.412  | 1709.632  | NM_000685 | 2487.648  | 3635.406  | U59911    | 1499.93   |
| 33205.836 | NM_003945 | 10811.255 | 19462.959 | AK025657  | 8345.347  | 2117.832  | AK056773  | 4382.32   |
| 26358.193 | NM_004981 | 1361.799  | 1490.7    | W42849    | 2171.094  | 1975.798  | NM_002182 | 6766.77   |
| 1340.357  | AK096507  | 992.822   | 821.058   | A1889961  | 1858.995  | 1877.222  | NM_016470 | 1815.375  |



|           |           |           |           |           |           |           |           |           |
|-----------|-----------|-----------|-----------|-----------|-----------|-----------|-----------|-----------|
| 616.732   | NM_002054 | 1106.172  | 842.085   | AI360116  | 1345.18   | 869.599   | AL365408  | 8950.487  |
| 1950.871  | NM_015599 | 4133.417  | 1701.571  | NM_013983 | 773.386   | 568.717   | AK026204  | 5004.319  |
| 1160.831  | NM_018696 | 3377.442  | 3460.2    | AI572835  | 2341.703  | 1929.27   | NM_014635 | 2577.227  |
| 11709.005 | NM_000136 | 3504.849  | 3524.353  | R20392    | 4357.526  | 4925.777  | NM_004145 | 2850.595  |
| 12003.324 | NM_004628 | 434.726   | 833.568   | AA486367  | 4044.313  | 1921.916  | NM_018728 | 1576.864  |
| 1270.378  | NM_005406 | 2946.589  | 3414.552  | M55153    | 510.281   | 599.489   | AK024014  | 1189.216  |
| 711.416   | X93921    | 5454.62   | 3931.445  | AF414120  | 548.7     | 287.969   | NM_000865 | 1096.837  |
| 5340.54   | AF073482  | 2872.369  | 4082.346  | AL136131  | 24605.529 | 9616.863  | NM_000867 | 320.239   |
| 1642.764  | NM_005990 | 3764.485  | 3601.58   | NM_033357 | 1448.741  | 1528.191  | AF076642  | 1012.222  |
| 830.734   | NM_016276 | 11284.475 | 14407.782 | AF335109  | 1021.541  | 727.901   | NM_002386 | 1407.898  |
| 941.312   | NM_000850 | 3537.587  | 3879.35   | NM_003263 | 660.734   | 473.566   | NM_005314 | 662.17    |
| 4430.912  | NM_004676 | 899.927   | 1102.421  | U59911    | 3839.859  | 3013.717  | NM_012152 | 4646.701  |
| 4508.655  | NM_001994 | 5439.226  | 5627.976  | NM_002982 | 586.445   | 745.408   | NM_013364 | 9145.256  |
| 5145.898  | J00129    | 18761.824 | 19920.441 | NM_002190 | 149.014   | 210.835   | NM_014368 | 1059.262  |
| 3591.08   | NM_003320 | 3792.602  | 6802.587  | AK056773  | 3651.142  | 3043.388  | NM_002239 | 12870.761 |
| 3112.458  | L10146    | 4737.451  | 3852.989  | NM_002182 | 8245.946  | 7208.44   | NM_002249 | 15739.551 |
| 35795.738 | NM_000685 | 2446.767  | 4167.331  | NM_016470 | 1685.756  | 2668.857  | NM_015684 | 2361.813  |
| 2233.943  | AK025657  | 8888.712  | 3140.65   | AL365408  | 16804.328 | 16633.822 | NM_003945 | 13729.584 |
| 825.611   | W42849    | 1074.572  | 1342.436  | AK026204  | 5229.051  | 4832.864  | NM_004981 | 2615.057  |
| 4009.783  | AI889961  | 1541.05   | 1855.12   | NM_014635 | 2729.308  | 2372.833  | AK096507  | 1568.023  |
| 11098.413 | AI360116  | 919.221   | 1621.498  | AK023196  | 1054.851  | 993.779   | NM_016524 | 1952.601  |
| 4318.41   | AI572835  | 277.389   | 282.187   | NM_018728 | 2226.374  | 2107.507  | NM_007126 | 25145.219 |
| 27812.105 | R20392    | 1596.133  | 2737.026  | AK024014  | 1428.765  | 1453.405  | AL137631  | 4668.368  |
| 714.787   | AA486367  | 1951.044  | 2700.615  | NM_000865 | 839.723   | 1147.414  | NM_016057 | 9127.414  |
| 4256.461  | AL136131  | 13167.962 | 11054.128 | NM_002386 | 1713.515  | 2239.164  | NM_014677 | 641.335   |
| 10185.974 | NM_033357 | 1725.555  | 2859.235  | NM_005314 | 962.109   | 1037.878  | NM_006855 | 1256.483  |
| 2711.696  | AF335109  | 1397.662  | 1534.454  | NM_004885 | 1117.146  | 1632.059  | NM_005624 | 1090.349  |
| 26985.746 | NM_003263 | 416.427   | 983.412   | NM_005145 | 1260.345  | 215.753   | NM_000942 | 34163.305 |
| 6813.943  | U59911    | 6657.585  | 6306.008  | NM_012152 | 6720.881  | 5628.438  | X93921    | 3050.581  |
| 3177.81   | NM_002982 | 976.998   | 1500.001  | AK024093  | 1598.615  | 1366.794  | AF073482  | 1794.655  |
| 7440.616  | AK056773  | 9618.857  | 9078.138  | NM_001940 | 2227.656  | 2103.154  | NM_005990 | 3001.775  |
| 2295.84   | NM_002182 | 11379.715 | 6063.768  | U83115    | 2848.998  | 3242.872  | NM_016276 | 13839.472 |
| 824.082   | NM_016470 | 3605.691  | 4267.633  | NM_001264 | 4859.117  | 5182.244  | NM_017762 | 2973.554  |
| 1990.259  | AL365408  | 13180.214 | 10964.283 | NM_013364 | 9673.092  | 12102.2   | NM_000921 | 4808.022  |
| 3200.368  | AK026204  | 3471.76   | 3776.837  | NM_014368 | 902.688   | 638.784   | NM_000098 | 1629.324  |
| 1666.739  | NM_014635 | 1088.832  | 1645.286  | NM_002239 | 25518.055 | 23904.135 | NM_000016 | 9694.062  |
| 2048.435  | NM_004145 | 3472.75   | 4088.561  | NM_002249 | 36315.813 | 35243.102 | AK026913  | 3385.568  |
| 1190.912  | AK023196  | 996.198   | 812.602   | NM_015684 | 2502.96   | 2251.751  | NM_016234 | 6145.238  |
| 8798.188  | NM_018728 | 1797.516  | 1209.46   | NM_003945 | 18602.879 | 20010.566 | NM_001876 | 2716.909  |
| 2541.317  | NM_000867 | 239.226   | 347.091   | NM_004981 | 6388.967  | 5932.261  | NM_016144 | 6350      |
| 8055.046  | AF076642  | 997.982   | 431.387   | AK096507  | 1037.962  | 605.323   | AL133099  | 10269.01  |
| 3741.802  | NM_002386 | 672.844   | 974.742   | NM_016524 | 1737.412  | 1897.868  | NM_016082 | 1166.99   |
| 5164.479  | NM_005314 | 443.187   | 788.829   | NM_007126 | 37138.422 | 43178.516 | NM_000433 | 985.1     |
| 10304.396 | NM_012152 | 2830.867  | 3149.719  | NM_016057 | 11828.297 | 6959.006  | NM_000190 | 1793.5    |
| 1421.841  | AK024093  | 1171.135  | 1420.166  | NM_014677 | 1146.469  | 1408.924  | NM_017512 | 1367.55   |
| 33633.266 | NM_001940 | 2084.374  | 2526.128  | AK022790  | 47078.711 | 48446.168 | NM_018661 | 306.11    |
| 22632.723 | U83115    | 2759.375  | 3166.076  | NM_002302 | 604.15    | 693.821   | AK023078  | 3362.283  |
| 2084.499  | NM_001264 | 4421.31   | 4518.288  | NM_000579 | 346.13    | 562.824   | NM_014737 | 905.245   |
| 19118.967 | NM_013364 | 13498.371 | 13940.029 | AF263462  | 1443.24   | 1550.572  | NM_001454 | 40521.492 |
| 7976.038  | NM_014368 | 1201.657  | 1002.465  | AB040962  | 519.165   | 493.959   | NM_005797 | 474.434   |
| 1311.973  | NM_002239 | 40391.117 | 35786.969 | AV697672  | 697.382   | 688.387   | NM_004824 | 1634.684  |
| 2190.202  | NM_002249 | 33463.82  | 34433.273 | NM_000942 | 37256.105 | 32732.338 | U83191    | 620.426   |
| 34569.09  | NM_015684 | 3084.32   | 2932.319  | NM_005406 | 3645.811  | 3317.919  | NM_013952 | 2491.592  |

|           |           |           |           |           |           |           |           |           |
|-----------|-----------|-----------|-----------|-----------|-----------|-----------|-----------|-----------|
| 1909.591  | NM_003945 | 24114.678 | 43440.68  | NM_003328 | 3742.869  | 3071.783  | NM_015596 | 1942.525  |
| 1406.528  | NM_004981 | 7039.672  | 8853.384  | X93921    | 6739.463  | 3864.144  | AB037902  | 1891.601  |
| 43854.129 | AK096507  | 1324.701  | 889.648   | AF073482  | 2904.093  | 2869.627  | NM_018696 | 5548.447  |
| 5395.535  | NM_016524 | 1447.067  | 2060.987  | NM_005990 | 3393.816  | 2337.21   | AL157456  | 764.702   |
| 2170.763  | NM_007126 | 21329.766 | 28568.332 | NM_016276 | 36371.781 | 39930.098 | AL162056  | 778.633   |
| 1060.017  | AL137631  | 6732.041  | 8671.479  | NM_017762 | 2237.634  | 2447.712  | NM_004628 | 1275.497  |
| 1080.895  | NM_016057 | 11061.83  | 10031.528 | NM_000921 | 5653.969  | 6163.644  | NM_014876 | 1012.266  |
| 1744.569  | NM_014677 | 490.489   | 628.565   | NM_000098 | 2280.084  | 2689.05   | AB032958  | 720.207   |
| 1938.667  | AK022790  | 10446.368 | 15062.864 | AL133099  | 12745.172 | 18522.047 | AK024427  | 1647.339  |
| 1033.235  | NM_004311 | 1510.554  | 2868.022  | NM_016082 | 1517.453  | 1659.196  | NM_003006 | 743.145   |
| 548.221   | NM_005624 | 963.056   | 985.829   | NM_000433 | 1541.552  | 1066.579  | AF272035  | 1222.862  |
| 36160.363 | AF263462  | 1716.451  | 1357.351  | NM_000190 | 4633.159  | 4387.784  | NM_000965 | 677.275   |
| 4711.276  | NM_000942 | 54721.164 | 36221.125 | X15667    | 11978.401 | 25937.424 | NM_013403 | 1015.612  |
| 3917.727  | NM_005406 | 4471.982  | 4561.523  | NM_017512 | 2417.035  | 3539.962  | NM_004123 | 466.462   |
| 4904.713  | NM_003328 | 3063.748  | 3444.942  | NM_018661 | 564.524   | 677.778   | NM_000206 | 686.497   |
| 3434.558  | X93921    | 9049.842  | 6167.563  | NM_001678 | 433.02    | 394.431   | NM_018255 | 2474.109  |
| 2714.665  | AF073482  | 3453.563  | 4454.884  | AK023078  | 4272.08   | 5516.237  | AF178930  | 728.106   |
| 35517.707 | NM_005990 | 3884.834  | 3851.686  | NM_014737 | 3458.328  | 3523.708  | M74161    | 1607.962  |
| 2856.533  | NM_016276 | 7130.835  | 8687.557  | NM_003488 | 2998.361  | 2932.126  | S40369    | 10079.891 |
| 17688.514 | NM_017762 | 2330.786  | 2599.942  | NM_001454 | 49735.125 | 49079.895 | NM_015831 | 3063.842  |
| 3998.08   | NM_000921 | 6405.817  | 6874.99   | NM_006558 | 992.717   | 579.32    | AK023154  | 2087.735  |
| 9870.358  | NM_000098 | 2515.212  | 3473.663  | NM_005797 | 1132.778  | 953.72    | Z36820    | 1222.255  |
| 4426.154  | NM_000016 | 11436.544 | 9436.562  | NM_004824 | 1823.243  | 1380.99   | NM_003967 | 2600.615  |
| 6681.155  | AK026913  | 2647.383  | 3416.922  | U83191    | 624.647   | 660.48    | NM_012451 | 1046.086  |
| 11451.885 | NM_016234 | 4365.561  | 5834.65   | NM_013952 | 3107.537  | 3516.735  | NM_002510 | 933.563   |
| 1462.359  | NM_001876 | 2523.611  | 2240.625  | NM_015596 | 2072.276  | 1386.822  | NM_006624 | 1998.147  |
| 1977.39   | NM_016144 | 5768.202  | 6194.837  | AB037902  | 439.171   | 534.046   | AK002211  | 1262.533  |
| 4267.338  | AL133099  | 5160.394  | 6505.527  | NM_018696 | 14100.101 | 12485.688 | NM_012127 | 2903.452  |
| 7004.315  | NM_016082 | 1275.613  | 1264.753  | NM_000136 | 11945.787 | 11569.424 | NM_014454 | 621.646   |
| 1321.242  | NM_000433 | 1559.693  | 2540.923  | AL157456  | 933.772   | 1269.332  | NM_017489 | 916.207   |
| 1155.217  | NM_000190 | 4970.902  | 3259.19   | AL162056  | 419.391   | 729.2     | NM_002824 | 11132.292 |
| 1148.952  | X15667    | 6797.511  | 14907.403 | NM_000380 | 7210.36   | 9492.004  | NM_006835 | 9779.212  |
| 4589.816  | NM_017512 | 1604.647  | 831.585   | NM_004628 | 1551.406  | 2506.924  | NM_006023 | 3577.61   |
| 4070.694  | NM_018661 | 639.26    | 683.887   | NM_014876 | 1404.42   | 1515.887  | AL137509  | 5181.088  |
| 3484.234  | NM_001678 | 842.406   | 2234.069  | AB032958  | 692.136   | 646.177   | NM_004050 | 4355.124  |
| 42653.344 | AK023078  | 4230.487  | 4357.08   | AK024427  | 2420.524  | 1842.235  | NM_006024 | 9779.105  |
| 519.481   | NM_014737 | 3997.49   | 3370.422  | NM_003006 | 821.266   | 1040.594  | NM_020191 | 1577.688  |
| 956.977   | NM_003488 | 3189.553  | 2968.333  | NM_000493 | 413.764   | 334.326   | NM_017434 | 2708.805  |
| 1959.678  | NM_001454 | 45328.051 | 48377.773 | AF272035  | 1936.971  | 2603.879  | NM_020405 | 319.446   |
| 1228.18   | NM_004824 | 1170.043  | 1249.842  | AY009133  | 708.772   | 646.799   | NM_020182 | 936.283   |
| 2312.302  | NM_013952 | 2344.094  | 3364.161  | NM_000965 | 1231.463  | 982.715   | AL137669  | 1323.803  |
| 1433.094  | NM_018696 | 6855.901  | 5991.827  | NM_013403 | 2967.821  | 2502.602  | NM_004793 | 4392.403  |
| 7622.359  | NM_000136 | 10610.434 | 11927.393 | NM_004123 | 674.105   | 738.619   | NM_004390 | 1296.544  |
| 12074.219 | AL157456  | 842.088   | 789.852   | NM_000674 | 754.253   | 280.917   | NM_014263 | 1435.291  |
| 3069.654  | NM_000380 | 3126.735  | 2702.965  | NM_000206 | 400.088   | 504.169   | NM_020361 | 341.527   |
| 1526.613  | NM_004628 | 1388.369  | 2270.064  | NM_018255 | 4034.917  | 1945.101  | NM_015907 | 537.864   |
| 1596.998  | NM_014876 | 1755.593  | 1345.837  | NM_016232 | 959.461   | 1201.146  | AK026343  | 154.684   |
| 1511.074  | AB032958  | 1023.922  | 1082.454  | AF178930  | 972.324   | 1622.908  | NM_001912 | 870.115   |
| 2887.188  | AK024427  | 3644.364  | 3021.789  | NM_000484 | 1789.461  | 1748.805  | NM_013267 | 890.147   |
| 1415.519  | NM_003006 | 807.888   | 1247.88   | S40369    | 10093.364 | 8955.518  | NM_002454 | 1444.745  |
| 1549.638  | AF272035  | 1663.123  | 3395.319  | NM_015831 | 4319.869  | 7150.78   | NM_001917 | 1472.934  |
| 321.079   | NM_013403 | 2170.898  | 2514.452  | AK023154  | 2482.414  | 4033.162  | NM_005956 | 11200.687 |
| 1183.854  | NM_018255 | 5643.883  | 3011.461  | Z36820    | 1611.741  | 1508.044  | NM_003043 | 2329.418  |

|           |           |           |           |           |           |           |           |           |
|-----------|-----------|-----------|-----------|-----------|-----------|-----------|-----------|-----------|
| 2722.619  | AF178930  | 619.394   | 1648.084  | NM_003967 | 2600.138  | 3860.062  | D87077    | 1734.561  |
| 953.157   | M74161    | 2362.835  | 2457.004  | NM_012451 | 2374.914  | 2153.738  | NM_005993 | 1952.926  |
| 704.787   | NM_016542 | 5765.795  | 2992.45   | NM_002510 | 528.19    | 631.519   | AK026341  | 934.16    |
| 784.106   | NM_000484 | 1955.563  | 1488.698  | NM_006624 | 3093.889  | 3029.349  | NM_018943 | 1888.748  |
| 878.739   | S40369    | 12414.63  | 16775.375 | NM_017667 | 790.142   | 817.481   | AJ292757  | 161.929   |
| 3658.534  | NM_015831 | 4149.532  | 4856.06   | AK002211  | 2140.5    | 1969.359  | NM_003999 | 941.286   |
| 1231.117  | AK023154  | 3253.948  | 2463.187  | NM_012127 | 2698.901  | 2086.99   | NM_003433 | 3777.712  |
| 1137.336  | Z36820    | 1462.381  | 1289.094  | NM_014454 | 702.123   | 805.215   | NM_005221 | 1172.277  |
| 1158.137  | NM_003967 | 3451.026  | 3768.829  | NM_017489 | 1125.383  | 1675.094  | NM_001270 | 1808.715  |
| 2329.538  | NM_012451 | 1905.901  | 1560.38   | NM_002824 | 16224.442 | 17105.941 | NM_001952 | 4055.472  |
| 4636.948  | NM_002510 | 850.855   | 1990.283  | NM_006835 | 14110.162 | 10459.948 | NM_003223 | 2459.452  |
| 2440.018  | NM_006624 | 3851.007  | 3068.029  | NM_006023 | 9162.695  | 14126.86  | NM_006713 | 43907.98  |
| 281.827   | NM_017667 | 562.795   | 550.308   | NM_014673 | 2745.948  | 1954.197  | NM_020201 | 1624.889  |
| 5024.698  | AK002211  | 1988.851  | 1764.878  | AB002330  | 1618.03   | 1967.933  | NM_016019 | 2455.275  |
| 4274.254  | NM_012127 | 3715.35   | 3791.329  | AL137509  | 14063.736 | 11032.286 | NM_012245 | 3113.422  |
| 4053.372  | NM_014454 | 1203.35   | 1656.14   | NM_004050 | 8859.607  | 7869.209  | NM_001533 | 5018.804  |
| 2466.544  | NM_017489 | 998.1     | 964.177   | NM_006024 | 11580.152 | 11305.489 | NM_006929 | 3547.755  |
| 815.181   | NM_002824 | 16118.232 | 21072.594 | NM_020191 | 1468.082  | 2097.702  | NM_003977 | 13168.983 |
| 3259.086  | NM_006835 | 25087.287 | 22806.391 | NM_017434 | 3271.66   | 2639.465  | NM_005998 | 17684.174 |
| 688.684   | NM_006023 | 13466.584 | 12940.479 | NM_020182 | 1136.41   | 605.062   | U28424    | 1532.529  |
| 1723.039  | NM_014673 | 3400.386  | 1987.99   | AL137669  | 1485.531  | 2750.93   | BF541372  | 1715.201  |
| 3207.157  | AB002330  | 2575.712  | 1352.699  | NM_004793 | 5324.68   | 3455.23   | AF092137  | 3521.593  |
| 1453.715  | AL137509  | 12755.729 | 11991.386 | NM_004390 | 1244.872  | 306.991   | NM_016551 | 1765.266  |
| 1851.657  | NM_006538 | 3199.517  | 1805.992  | NM_014263 | 1681.256  | 1292.101  | AK024631  | 1570.696  |
| 21642.877 | NM_019887 | 5970.482  | 5501.922  | NM_020361 | 433.534   | 515.787   | AF087977  | 486.812   |
| 18311.867 | NM_004050 | 6728.756  | 5291.725  | NM_015907 | 280.502   | 573.575   | AK026949  | 433.737   |
| 9810.289  | NM_006024 | 16666.52  | 14545.522 | AK026343  | 270.165   | 401.513   | NM_004957 | 1313.177  |
| 2861.867  | NM_020191 | 2644.029  | 3231.145  | NM_001912 | 1440.956  | 1474.908  | AL050028  | 2441.892  |
| 2635.535  | NM_017434 | 3084.455  | 2418.009  | NM_013267 | 1361.672  | 1287.964  | BE732255  | 2421.049  |
| 12831.929 | NM_020182 | 1295.645  | 647.183   | NM_002454 | 1975.475  | 1424.395  | NM_003364 | 758.378   |
| 2602.676  | AL137669  | 2086.077  | 2198.752  | NM_001917 | 2118.763  | 2374.564  | NM_005994 | 1877.198  |
| 6026.66   | NM_014263 | 2306.656  | 1931.698  | NM_005956 | 24543.27  | 20536.729 | AB027508  | 2050.256  |
| 11468.301 | NM_015907 | 944.536   | 740.245   | NM_003043 | 3757.107  | 2644.47   | NM_014360 | 4192.023  |
| 9940.054  | NM_001912 | 1371.625  | 3177.667  | D87077    | 1892.26   | 1790.13   | NM_007358 | 2136.527  |
| 2035.856  | NM_013267 | 1641.142  | 1197.412  | L07033    | 1173.295  | 912.4     | NM_001571 | 1218.182  |
| 5623.265  | NM_002454 | 3205.681  | 2535.254  | NM_005993 | 1815.795  | 1710.249  | AF126749  | 284.177   |
| 338.281   | NM_001917 | 2368.072  | 2195.489  | AK026341  | 1132.198  | 1088.271  | NM_003408 | 411.186   |
| 1588.058  | NM_005956 | 26145.703 | 19377.342 | NM_018943 | 2491.016  | 2501.409  | NM_003450 | 1297.396  |
| 3039.601  | NM_003043 | 5513.667  | 4951.314  | AJ292757  | 229.678   | 713.712   | AK021577  | 902.103   |
| 528.44    | D87077    | 2602.551  | 2099.311  | U01922    | 484.947   | 748.727   | AF075019  | 877.333   |
| 6011.234  | NM_014308 | 632.797   | 457.111   | NM_003999 | 1041.379  | 895.736   | AF147388  | 2199.824  |
| 881.346   | L07033    | 1646.336  | 1899.87   | NM_003433 | 5862.006  | 4668.924  | AK021498  | 3995.75   |
| 1707.004  | AK000142  | 822.024   | 835.215   | NM_005221 | 1797.044  | 1300.129  | AF085874  | 1413.667  |
| 851.098   | NM_005993 | 4808.788  | 2902.665  | NM_005870 | 562.432   | 365.296   | AK026959  | 1231.422  |
| 477.71    | AK026341  | 1532.296  | 1101.889  | NM_018561 | 1641.938  | 417.895   | NM_019556 | 806.141   |
| 1230.676  | NM_018943 | 2880.948  | 2114.194  | NM_001270 | 2221.41   | 2465.162  | NM_004753 | 1364.348  |
| 1900.219  | NM_003999 | 1044.331  | 1142.802  | NM_001952 | 5971.407  | 5616.523  | NM_015462 | 2199.628  |
| 2300.371  | NM_001270 | 2951.745  | 2009.97   | NM_003223 | 5365.323  | 4270.104  | AF086332  | 3712.727  |
| 2507.312  | NM_001952 | 8497.897  | 6680.848  | NM_006713 | 55333.598 | 50744.031 | AF086347  | 1593.749  |
| 24791.273 | AK023530  | 1423.475  | 183.711   | NM_020201 | 2559.166  | 2563.468  | AF086388  | 530.385   |
| 5555.971  | NM_016019 | 8081.061  | 4496.971  | NM_016019 | 5570.453  | 3781.157  | AK001043  | 3150.316  |
| 1650.651  | NM_012245 | 9473.434  | 5715.035  | NM_012245 | 6634.782  | 4710.009  | AK024535  | 4812.235  |
| 555.591   | NM_001533 | 15067.77  | 12541.227 | NM_001533 | 10381.444 | 9639.699  | AF088025  | 829.576   |

|           |           |           |           |           |           |           |           |          |
|-----------|-----------|-----------|-----------|-----------|-----------|-----------|-----------|----------|
| 441.694   | NM_006929 | 6983.076  | 9751.184  | NM_006929 | 8613.69   | 8332.892  | AF085934  | 814.8    |
| 5725.992  | NM_003977 | 8599.475  | 7672.766  | NM_003977 | 18320.113 | 17216.268 | AF147423  | 1036.779 |
| 877.734   | NM_005998 | 24751.053 | 14561.778 | NM_005998 | 18745.602 | 26928.877 | AK023971  | 8125.768 |
| 3887.733  | U28424    | 2067.757  | 1370.676  | U28424    | 1909.082  | 1283.17   | AK024738  | 495.07   |
| 1026.177  | BF541372  | 1492.661  | 990.078   | BF541372  | 3201.004  | 3387.146  | AL133103  | 615.568  |
| 4855.051  | AF092137  | 1907.666  | 1807.617  | AF092137  | 3507.381  | 3145.262  | AL157450  | 949.432  |
| 2051.963  | NM_004623 | 1346.398  | 1661.559  | NM_004623 | 1146.722  | 1410.85   | AL359594  | 660.541  |
| 205.83    | NM_004957 | 3865.321  | 2747.123  | NM_016551 | 2212.383  | 2914.606  | AF086068  | 807.42   |
| 1183.774  | NM_005994 | 6062.614  | 3859.5    | AK024631  | 1652.369  | 1952.177  | AF086091  | 413.61   |
| 2047.339  | AB027508  | 6173.001  | 6004.347  | AF087977  | 751.422   | 786.978   | AK021838  | 3677.565 |
| 5970.715  | NM_016331 | 2311.674  | 1199.827  | AK026949  | 647.591   | 727.094   | AK021990  | 465.76   |
| 4531.617  | NM_014360 | 16177.783 | 11982.103 | NM_004957 | 2621.609  | 2654.473  | AF083118  | 569.3    |
| 39531.289 | AB033053  | 954.725   | 1186.238  | AL050028  | 2617.706  | 3016.876  | AK021909  | 691.73   |
| 3950.905  | NM_007358 | 3742.514  | 3090.839  | NM_000371 | 814.949   | 218.212   | AK022353  | 1455.623 |
| 738.155   | NM_001571 | 2320.453  | 2364.332  | BE732255  | 3562.019  | 4153.442  | AK022200  | 2460.932 |
| 696.59    | NM_018108 | 1707.076  | 1126.394  | NM_004955 | 884.478   | 702.814   | AK024604  | 789.763  |
| 5916.93   | NM_003450 | 1313.953  | 545.837   | NM_003364 | 936.185   | 817.433   | AK023396  | 596.001  |
| 5784.857  | AK021577  | 1688.441  | 1358.83   | NM_017803 | 660.19    | 774.324   | NM_018101 | 1531.132 |
| 7903.864  | AK021498  | 2531.659  | 1507.322  | AB027508  | 4703.171  | 3823.722  | AJ491695  | 1861.289 |
| 9609.452  | AK026700  | 923.906   | 1123.757  | NM_016331 | 1390.105  | 902.254   | AF052107  | 3570.221 |
| 11901.518 | AF086370  | 936.136   | 757.142   | NM_014360 | 21871.574 | 32093.992 | AK001022  | 1555.834 |
| 24293.445 | AF086347  | 3898.344  | 2923.637  | AB033053  | 931.936   | 969.215   | AL049351  | 2258.095 |
| 1996.171  | AF086388  | 1144.515  | 1132.216  | NM_007358 | 3351.959  | 2508.969  | AK021826  | 2659.104 |
| 3136.631  | AK001043  | 3300.703  | 2898.496  | NM_001571 | 2228.203  | 3251.919  | AK024541  | 546.558  |
| 2775.303  | AK024535  | 7705.299  | 7171.766  | NM_018108 | 1377.421  | 1861.468  | AK025341  | 175.831  |
| 1548.871  | AL359608  | 1721.225  | 920.69    | NM_003408 | 451.613   | 745.856   | AK024138  | 1191.627 |
| 2509.566  | NM_016498 | 17608.619 | 14508.895 | NM_003450 | 1000.927  | 766.158   | Y10505    | 433.192  |
| 1843.146  | AL137293  | 2627.24   | 1850.693  | AK021577  | 1111.727  | 907.743   | U00946    | 1666.12  |
| 881.55    | AL137458  | 1529.513  | 1627.105  | AF147390  | 386.781   | 484.493   | NM_005615 | 2892.018 |
| 1992.245  | AL157490  | 18769.508 | 18619.535 | AF075019  | 1261.71   | 1275.386  | Z34290    | 533.874  |
| 2659.677  | AL390167  | 4750.991  | 4659.179  | AF147388  | 754.734   | 523.362   | AF070642  | 3801.182 |
| 3902.55   | AF075018  | 737.131   | 364.876   | AK021498  | 2396.946  | 2462.37   | AK027125  | 2802.015 |
| 1808.63   | AK021838  | 12569.64  | 11958.427 | AF085874  | 3203.977  | 2847.969  | AF166125  | 912.768  |
| 945.486   | AK022168  | 1487.989  | 1095.704  | AF147346  | 750.704   | 493.497   | AF225425  | 683.745  |
| 1457.179  | AK022327  | 1071.332  | 666.296   | AK026959  | 2064.246  | 1844.689  | AF064848  | 5042.012 |
| 5104.551  | AK022200  | 4356.587  | 4137.224  | NM_019556 | 1372.935  | 716.492   | U61089    | 1069.28  |
| 4174.134  | NM_018101 | 2096.099  | 1010.236  | NM_004753 | 4425.611  | 2712.079  | AK001036  | 1081.156 |
| 949.609   | AF293366  | 668.829   | 3425.494  | NM_015462 | 2586.483  | 2333.815  | AK024858  | 2724.063 |
| 15565.644 | BF526704  | 1578.948  | 1119.694  | AK000127  | 1102.579  | 1039.087  | NM_001049 | 1966.298 |
| 832.055   | AK001022  | 3152.04   | 2488.384  | AF086242  | 861.036   | 607.294   | AF068294  | 771.293  |
| 3947.084  | AL049351  | 4555.937  | 2887.256  | AF086370  | 595.868   | 616.083   | AK025909  | 1531.185 |
| 2590.5    | AK021826  | 1760.932  | 1391.401  | AF086332  | 12612.312 | 10425.899 | AK026138  | 1462.662 |
| 2048.757  | AK024138  | 4299.843  | 3315.861  | AJ404614  | 1215.162  | 1325.7    | Z70706    | 954.756  |
| 1682.846  | U00946    | 5144.235  | 4892.483  | AF086347  | 4241.98   | 2667.3    | AK021434  | 3431.377 |
| 1159.82   | NM_005615 | 2357.041  | 1909.353  | AF086388  | 1115.445  | 1294.182  | NM_016479 | 2500.707 |
| 1482.148  | AF090932  | 1468.787  | 2574.61   | AF086444  | 1147.146  | 1986.078  | AK000933  | 3460.315 |
| 1025.006  | AF166125  | 3112.777  | 2597.891  | AK001043  | 3243.519  | 4249.488  | NM_014626 | 990.479  |
| 327.588   | AF225425  | 2244.106  | 1786.409  | AK024535  | 5045.583  | 6982.715  | AF086095  | 666.249  |
| 1473.527  | AF068294  | 1474.935  | 1343.398  | AL359608  | 1147.936  | 1051.445  | NM_018352 | 447.137  |
| 805.27    | AK025909  | 2345.435  | 1813.042  | NM_016498 | 17798.527 | 17134.029 | AK026880  | 1123.338 |
| 2003.08   | AK026138  | 1749.489  | 1036.846  | AF088025  | 743.545   | 870.926   | AL080092  | 1241.546 |
| 3546.35   | Z70706    | 399.192   | 636.14    | AF085934  | 1509.818  | 1529.763  | AL137279  | 477.458  |
| 852.768   | AK021434  | 11777.929 | 8619.172  | AF147423  | 234.659   | 337.636   | M77818    | 6703.024 |

|           |           |           |           |           |           |           |           |           |
|-----------|-----------|-----------|-----------|-----------|-----------|-----------|-----------|-----------|
| 2890.12   | NM_016479 | 8165.876  | 10175.897 | AF075088  | 845.523   | 954.123   | AF009267  | 1569.588  |
| 1716.297  | AK000933  | 10846.28  | 9013.356  | AK023971  | 12399.611 | 13638.385 | AK027129  | 1399.462  |
| 3661.896  | Y10205    | 982.754   | 771.68    | AK024738  | 829.399   | 856.988   | NM_01569E | 2026.997  |
| 2586.921  | NM_01462E | 2022.647  | 1369.026  | AL133103  | 1216.463  | 1404.469  | CY3Cy5    | 14669.961 |
| 636.416   | AK025277  | 1650.598  | 717.207   | BC015321  | 1441.405  | 1268.647  | BG696293  | 2669.497  |
| 980.895   | AK026880  | 2244.197  | 972.367   | AL157450  | 838.137   | 1199.219  | AA777410  | 240.423   |
| 592.037   | AF086061  | 1198.363  | 439.922   | AL359594  | 1661.433  | 1395.671  | BC013135  | 12689.343 |
| 12249.866 | AL080092  | 5830.639  | 5491.36   | AL137293  | 1911.746  | 1599.879  | AI625002  | 910.214   |
| 658.43    | AF086384  | 64734.52  | 59965.113 | AL137458  | 1130.889  | 1104.785  | H07899    | 190.489   |
| 3610.681  | M77818    | 17205.328 | 10009.19  | AL157490  | 16461.568 | 15596.367 | AA281652  | 3051.872  |
| 1217.896  | AF009267  | 1451.246  | 1409.397  | AL390167  | 4089.854  | 3520.231  | U31905    | 2298.561  |
| 346.343   | AK027129  | 3124.235  | 1807.369  | AK023657  | 841.386   | 1015.377  | X52479    | 1788.904  |
| 4600.493  | NM_01569E | 2338.94   | 2301.587  | NM_014332 | 472.823   | 676.828   | AW408832  | 6090.868  |
| 6852.8    | CY3Cy5    | 19425.346 | 1360.446  | AF086068  | 1512.036  | 1394.115  | AA486364  | 5950.905  |
| 1574.791  | BG696293  | 3451.502  | 3144.164  | AF086059  | 1236.975  | 1498.113  | M15476    | 29911.389 |
| 10551.577 | BG113873  | 448.654   | 666.547   | AF086091  | 463.016   | 589.401   | U57456    | 2851.684  |
| 1062.1    | BC013135  | 7753.798  | 9443.511  | AK024239  | 590.531   | 162.768   | N70057    | 48247.633 |
| 1186.382  | AI625002  | 265.521   | 366.053   | AK021990  | 205.446   | 373.233   | NM_006497 | 8039.451  |
| 1020.665  | AA281652  | 2069.427  | 3284.615  | AF083118  | 835.898   | 1100.599  | NM_006892 | 1581.369  |
| 764.691   | U31905    | 564.709   | 785.832   | AF089811  | 630.748   | 813.892   | SR9       | 28157.768 |
| 7470.216  | X52479    | 865.855   | 1100.278  | AF147444  | 840.15    | 953.277   | CY3Cy5    | 12630.577 |
| 943.136   | AW408832  | 3736.187  | 5132.118  | NM_01656E | 468.318   | 838.186   | AF254067  | 2435.048  |
| 2114.74   | AA486364  | 4252.747  | 4561.245  | AK021909  | 1062.23   | 753.016   | NM_016363 | 3535.68   |
| 1770.716  | M15476    | 17530.879 | 23663.689 | AK022043  | 709.16    | 661.224   | AY009090  | 1305.741  |
| 1372.31   | U57456    | 2205.63   | 1669.45   | AK022168  | 1659.615  | 1043.053  | NM_005592 | 997.433   |
| 1694.598  | N70057    | 35308.922 | 54717.113 | AK022327  | 732.68    | 829.927   | U81380    | 1660.539  |
| 2031.672  | NM_006497 | 2831.43   | 3744.633  | AK021959  | 275.478   | 376.492   | NM_002303 | 778.393   |
| 1989.313  | NM_006892 | 1405.96   | 1244.309  | AK022201  | 742.073   | 730.24    | NM_016509 | 1110.585  |
| 19338.248 | SR5       | 3052.094  | 4974.479  | AK022353  | 4099.655  | 3782.575  | NM_01229E | 9111.735  |
| 5260.494  | SR7       | 5442.328  | 50285.957 | AK026868  | 661.819   | 730.198   | AF041038  | 2944.777  |
| 1010.606  | SR9       | 10442.051 | 2851.821  | AK022200  | 4822.289  | 4838.049  | NM_00453E | 2376.579  |
| 1633.77   | CY3Cy5    | 16748.617 | 942.315   | AK023396  | 561.286   | 642.786   | NM_014672 | 4912.784  |
| 1080.733  | AF254067  | 1420.543  | 1384.285  | AF264625  | 349.692   | 422.838   | AB058719  | 1708.401  |
| 8622.923  | NM_016363 | 1660.464  | 2922.265  | BF526704  | 1054.662  | 799.857   | AK025935  | 1136.458  |
| 2542.543  | AY009090  | 782.279   | 886.92    | AJ491695  | 3325.64   | 3405.663  | AB032953  | 1016.749  |
| 2507.747  | U81380    | 688.098   | 869.927   | AK022430  | 1774.087  | 1853.341  | NM_016441 | 2024.409  |
| 1066.604  | NM_002303 | 443.127   | 811.519   | AK001022  | 3821.092  | 2220.412  | NM_00462E | 4127.027  |
| 566.936   | NM_016509 | 470.699   | 713.016   | AL049351  | 9437.477  | 5989.563  | NM_00130E | 1621.272  |
| 1910.126  | NM_01229E | 5319.028  | 4654.595  | AL137508  | 543.262   | 343.042   | AB046861  | 1172.746  |
| 1220.102  | AF041038  | 946.161   | 1092.281  | AK021826  | 3855.936  | 3364.143  | AF061034  | 7832.625  |
| 1951.689  | NM_00453E | 1319.992  | 1834.053  | AK024541  | 488.593   | 550.077   | X03655    | 748.173   |
| 975.939   | NM_014672 | 2930.699  | 3707.708  | AK025341  | 615.307   | 481.866   | NM_005833 | 2486.027  |
| 624.87    | AB058719  | 938.403   | 1283.56   | AK024138  | 2539.973  | 3883.445  | NM_00310C | 5198.124  |
| 518.601   | AK025935  | 834.103   | 798.91    | Y10505    | 1253.975  | 1032.781  | NM_006344 | 435.654   |
| 1120.007  | AB032953  | 724.588   | 671.485   | U00946    | 4136.612  | 4410.944  | NM_013322 | 5786.928  |
| 3944.485  | NM_016441 | 1269.419  | 1633.038  | AF070642  | 7458.807  | 12298.592 | AB020627  | 2920.668  |
| 522.753   | NM_00462E | 3652.212  | 3935.03   | AK027125  | 2361.723  | 1890.282  | NM_002003 | 2004.529  |
| 5829.95   | NM_007179 | 3424.069  | 10562.199 | D16918    | 1187.64   | 968.579   | NM_005387 | 5229.978  |
| 607.444   | NM_00130E | 1091.442  | 986.643   | D16467    | 1832.315  | 1880.88   | NM_00684E | 694.509   |
| 2124.455  | AB046861  | 679.46    | 1287.76   | AF090932  | 1004.636  | 854.602   | AL137938  | 21228.588 |
| 894.784   | AF061034  | 4761.197  | 5423.856  | AF166125  | 1981.31   | 2093.367  | AF228704  | 1843.338  |
| 2840.096  | X03655    | 417.795   | 660.256   | AF225425  | 1593.484  | 2040.631  | AK022746  | 2237.309  |
| 4912.981  | NM_005833 | 2885.972  | 2878.09   | AF064848  | 12746.934 | 16317.658 | NM_00656E | 3682.724  |

|           |           |           |           |           |           |           |           |           |
|-----------|-----------|-----------|-----------|-----------|-----------|-----------|-----------|-----------|
| 8796.704  | NM_003100 | 1959.775  | 2123.572  | U61089    | 3014.353  | 2960.664  | NM_004847 | 10567.536 |
| 1690.385  | NM_013322 | 4434.058  | 8280.752  | AK001036  | 1940.8    | 4067.572  | NM_002255 | 1708.846  |
| 1313.037  | AB020627  | 1211.198  | 1565.937  | AK024858  | 9695.843  | 11306.889 | BC034483  | 1307.797  |
| 3098.236  | NM_002003 | 771.399   | 998.501   | Y16697    | 396.115   | 530.187   | NM_003620 | 2523.381  |
| 7210.963  | NM_005387 | 3256.742  | 4107.317  | NM_001049 | 5236.861  | 3767.146  | AA586375  | 1015.735  |
| 571.549   | AL137938  | 20855.553 | 12464.12  | AK024554  | 1276.804  | 1388.365  | BE910339  | 21538.297 |
| 3582.099  | AF228704  | 2305.253  | 2268.933  | AF068294  | 1630.208  | 1318.139  | NM_005227 | 2971.204  |
| 2657.572  | AK022746  | 1745.796  | 2811.319  | AK025909  | 2529.506  | 2531.143  | NM_000286 | 13700.745 |
| 1910.428  | NM_006568 | 2887.177  | 4083.449  | AK026138  | 1593.241  | 1962.525  | NM_016454 | 15260.89  |
| 735.501   | NM_004847 | 5325.4    | 6087.101  | Z70706    | 781.028   | 555.897   | NM_003469 | 6951.033  |
| 5927.299  | NM_002255 | 834.977   | 702.878   | AK021434  | 6964.949  | 6105.064  | NM_000859 | 3153.361  |
| 4176.873  | AF151889  | 10199.683 | 12427.813 | NM_016479 | 9196.934  | 9633      | NM_005480 | 1884.059  |
| 951.668   | BC034483  | 1036.911  | 1416.692  | AK000933  | 7754.445  | 9634.08   | AB034694  | 1033.497  |
| 4690.656  | NM_003620 | 2434.358  | 2675.137  | Y10205    | 737.146   | 1121.996  | NM_003273 | 2970.161  |
| 2990.591  | AA586375  | 931.818   | 563.05    | NM_014626 | 1814.954  | 2284.412  | AK026404  | 2234.112  |
| 824.918   | BE910339  | 14228.989 | 15103.766 | AK025277  | 1592.795  | 1308.274  | NM_017948 | 6459.665  |
| 927.67    | NM_005227 | 2184.774  | 2472.783  | AF086095  | 683.283   | 1096.923  | NM_000392 | 2352.958  |
| 1810.852  | NM_000286 | 11281.08  | 5905.083  | NM_018352 | 946.471   | 1468.534  | AF208536  | 1091.014  |
| 709.823   | NM_016454 | 11562.861 | 16893.078 | AK026880  | 1328.815  | 1417.569  | AB037848  | 1064.023  |
| 999.823   | NM_003469 | 631.17    | 707.609   | AF086061  | 436.857   | 454.691   | AF082657  | 2615.235  |
| 2056.174  | NM_000859 | 2668.297  | 1206.858  | AL080092  | 3540.632  | 5879      | NM_006744 | 1746.649  |
| 9622.645  | NM_005480 | 1270.294  | 1972.221  | AL137279  | 1975.524  | 1974.807  | AF297659  | 1034.449  |
| 4664.579  | NM_003273 | 1862.474  | 1385.111  | AK023981  | 1142.998  | 1297.797  | NM_018231 | 3219.503  |
| 2737.355  | AK026404  | 1262.312  | 1525.708  | AK025037  | 1223.947  | 1118.949  | NM_007163 | 415.773   |
| 9610.402  | NM_017948 | 5315.909  | 9066.846  | AK021874  | 6596.458  | 5492.874  | NM_000583 | 4787.017  |
| 1369.224  | AF208536  | 1105.148  | 820.691   | AF086384  | 63142.512 | 59526.445 | NM_004254 | 3163.84   |
| 6560.107  | AF082657  | 1425      | 1259.075  | M77818    | 16470.918 | 11986.555 | NM_014914 | 3912.814  |
| 2349.11   | NM_006744 | 366.9     | 580.97    | AF009267  | 2714.827  | 2153.234  | NM_004484 | 3955.081  |
| 2774.697  | NM_018231 | 1997.798  | 2460.871  | AK027129  | 2596.47   | 2400.973  | NM_018289 | 2434.462  |
| 3027.352  | NM_000583 | 3549.821  | 3424.189  | L19367    | 512.246   | 345.908   | AB018260  | 2375.486  |
| 2797.183  | NM_014914 | 2304.974  | 2572.461  | NM_015698 | 2741.668  | 1929.092  | NM_015985 | 268.351   |
| 6911.659  | NM_004484 | 3071.547  | 2411.46   | CY3Cy5    | 10643.473 | 407.897   | NM_014766 | 3687.062  |
| 6314.756  | NM_018289 | 565.449   | 620.177   | BG696293  | 2030.415  | 1824.089  | NM_016121 | 2907.852  |
| 8944.326  | AB018260  | 435.433   | 770.229   | BC013135  | 6261.634  | 5305.25   | NM_014769 | 5470.951  |
| 782.676   | NM_014766 | 770.456   | 706.252   | AA281652  | 1642.25   | 1907.17   | NM_006349 | 25184.555 |
| 2101.329  | NM_016627 | 2239.898  | 2868.149  | U31905    | 1042.538  | 1130.344  | AK026264  | 12225.064 |
| 1201.108  | NM_016121 | 1853.786  | 2223.939  | X52479    | 927.326   | 804.09    | NM_014345 | 3959.168  |
| 1344.866  | NM_014769 | 1389.676  | 1758.313  | AW408832  | 4545.096  | 4305.193  | NM_018217 | 9805.564  |
| 1500.643  | AK026264  | 6248.529  | 6008.308  | AA486364  | 4202.113  | 4842.694  | AF241831  | 2691.109  |
| 817.989   | NM_014345 | 2309.019  | 2844.763  | M15476    | 18607.33  | 23904.541 | NM_003033 | 2469.569  |
| 5691.093  | NM_018217 | 3687.412  | 4135.803  | U57456    | 2025.215  | 2149.267  | U96113    | 840.548   |
| 1290.254  | AF241831  | 930.122   | 962.253   | N70057    | 46023.844 | 45620.723 | NM_002733 | 1034.989  |
| 4967.726  | NM_003033 | 1606.612  | 2817.364  | NM_006497 | 4996.939  | 4414.042  | M31008    | 973.498   |
| 1771.798  | U96113    | 697.936   | 865.796   | NM_006892 | 921.661   | 1246.803  | NM_006288 | 1346.869  |
| 969.798   | NM_002733 | 1320.94   | 2391.66   | SR5       | 5090.245  | 6308.883  | NM_016224 | 5633.508  |
| 10418.609 | NM_006288 | 522.313   | 812.622   | SR7       | 6295.228  | 38175.414 | AB046861  | 1034.911  |
| 4261.44   | NM_016224 | 4706.373  | 6129.533  | SR9       | 20545.643 | 5271.923  | AF061034  | 11202.166 |
| 2963.133  | AB046861  | 603.424   | 810.368   | CY3Cy5    | 8213.604  | 273.369   | X03655    | 1207.984  |
| 835.446   | AF061034  | 1346.624  | 1441.004  | AF254067  | 3847.528  | 3218.2    | BG696293  | 2093.184  |
| 4326.664  | BG696293  | 834.083   | 799.818   | NM_016363 | 2283.583  | 2288.939  | AA777410  | 299.309   |
| 482.477   | BC013135  | 3724.271  | 3195.222  | AY009090  | 398.185   | 614.185   | BC013135  | 7138.314  |
| 1230.886  | AA281652  | 1996.735  | 2578.093  | NM_002303 | 406.311   | 581.864   | AA281652  | 2653.475  |
| 15917.076 | X52479    | 622.884   | 902.13    | NM_016509 | 362.345   | 431.411   | U31905    | 2356.74   |

|           |           |           |           |           |           |           |           |           |
|-----------|-----------|-----------|-----------|-----------|-----------|-----------|-----------|-----------|
| 757.22    | AW408832  | 1063.422  | 1302.701  | NM_012296 | 6895.346  | 1499.58   | X52479    | 1647.167  |
| 2345.695  | AA486364  | 512.369   | 709.126   | AF041038  | 1876.574  | 1375.047  | U57456    | 2439.302  |
| 2133.302  | M15476    | 4430.886  | 7294.043  | NM_004536 | 1288.579  | 1632.912  | N70057    | 47165.445 |
| 1258.962  | N70057    | 26317.758 | 52536.113 | NM_014672 | 1871.095  | 1980.216  | NM_006497 | 7961.372  |
| 5294      | NM_006497 | 3370.513  | 4828.915  | AB058719  | 967.437   | 1145.06   | NM_006892 | 1191.741  |
| 3510.659  | NM_006892 | 1219.255  | 1350.373  | AK025935  | 571.257   | 506.909   | AK000124  | 1638.782  |
| 23894.229 | AK000124  | 1389.885  | 1130.038  | AB032953  | 627.232   | 538.585   | NM_004480 | 1906.591  |
| 2201.315  | NM_004480 | 2279.551  | 3209.481  | NM_016441 | 1724.03   | 2073.302  | BC034483  | 1110.257  |
| 43392.992 | BC034483  | 574.648   | 1047.299  | NM_004625 | 3592.293  | 3428.14   | NM_003620 | 1908.442  |
| 8454.624  | NM_003620 | 1227.114  | 1645.462  | NM_007179 | 6162.158  | 6933.919  | BE910339  | 22499.076 |
| 1351.452  | BE910339  | 3018.054  | 3601.316  | NM_001306 | 905.844   | 1099.726  | U89715    | 868.524   |
| 4522.536  | NM_016363 | 524.003   | 567.774   | AB046861  | 1020.834  | 1630.949  | AF254067  | 1633.791  |
| 827.115   | NM_002303 | 243.571   | 518.23    | NM_005940 | 175.488   | 369.749   | NM_016363 | 821.03    |
| 2275.913  | NM_012296 | 2392.749  | 2151.574  | AF061034  | 8936.321  | 12774.791 | NM_002303 | 350.281   |
| 3169.987  | NM_004536 | 526.335   | 435.148   | X03655    | 792.431   | 1237.624  | NM_016509 | 993.042   |
| 1090.43   | NM_014672 | 1463.113  | 1288.884  | NM_005833 | 916.022   | 738.306   | NM_012296 | 8882.075  |
| 618.383   | AB058719  | 291.203   | 1099.582  | NM_003100 | 1430.186  | 2011.418  | AF041038  | 1988.584  |
| 1245.865  | NM_016441 | 752.563   | 817.929   | NM_013322 | 4468.054  | 10746.086 | NM_004625 | 4313.677  |
| 2509.03   | NM_004625 | 4731.452  | 5059.736  | AB020627  | 1900.702  | 1713.64   | NM_007179 | 12419.748 |
| 2374.146  | NM_007179 | 7231.662  | 16329.467 | NM_002003 | 1032.035  | 905.907   | NM_001306 | 1459.663  |
| 4797.069  | NM_018231 | 879.185   | 1199.504  | NM_005387 | 3480.182  | 4502.81   | AF297659  | 493.595   |
| 1373.208  | NM_000583 | 451.416   | 713.569   | AL137938  | 18534.664 | 12416.458 | NM_018231 | 1710.532  |
| 1070.136  | NM_005833 | 818.535   | 936.136   | AF228704  | 1824.839  | 2509.595  | NM_000583 | 2515.851  |
| 962.548   | NM_003100 | 1583.623  | 1959.672  | AK022746  | 2048.788  | 2759.334  | NM_004254 | 2757.165  |
| 1769.276  | NM_013322 | 2278.262  | 3430.071  | NM_006568 | 3228.26   | 4434.478  | NM_005833 | 510.21    |
| 1425.921  | NM_005387 | 1973.612  | 2345.177  | NM_004847 | 6754.797  | 9010.851  | NM_003100 | 906.646   |
| 1183.942  | AL137938  | 8359.18   | 4893.208  | NM_002255 | 1050.714  | 1302.679  | NM_013322 | 4407.33   |
| 5623.293  | AF228704  | 779.347   | 907.484   | AF151889  | 11620.724 | 14957.617 | AB020627  | 1592.982  |
| 7158.876  | AK022746  | 787.085   | 1096.197  | BC034483  | 1466.939  | 2477.786  | NM_002003 | 983.761   |
| 1280.348  | NM_006440 | 2292.138  | 1999.72   | NM_003620 | 2935.907  | 2828.741  | AL137938  | 19736.375 |
| 1136.629  | NM_004847 | 6915.397  | 6549.361  | NM_013289 | 406.799   | 377.85    | NM_006440 | 2428.317  |
| 7166.675  | NM_002255 | 1340.363  | 1219.783  | AA586375  | 665.198   | 1020.972  | NM_004847 | 8905.043  |
| 780.414   | AF151889  | 12549.363 | 10686.044 | BE910339  | 23099.725 | 27462.111 | NM_002255 | 1683.327  |
| 3892.151  | U96113    | 592.06    | 777.555   | U89715    | 531.04    | 868.221   | AF151889  | 10025.349 |
| 694.301   | NM_002733 | 665.098   | 1298.592  | NM_005227 | 1779.958  | 1199.887  | U96113    | 300.724   |
| 23568.84  | M31008    | 330.071   | 302.178   | NM_000286 | 4977.264  | 1882.734  | NM_002733 | 542.742   |
| 1781.576  | NM_016224 | 1221.047  | 1616.743  | NM_016454 | 5622.392  | 6895.222  | NM_006288 | 857.694   |
| 2358.048  | NM_000286 | 3174.784  | 1766.257  | NM_003273 | 1832.011  | 670.871   | NM_016224 | 3628.25   |
| 3732.221  | NM_016454 | 5063.462  | 6370.072  | AK026404  | 1879.629  | 1952.824  | NM_005227 | 1202.625  |
| 3326.968  | NM_003469 | 396.429   | 640.162   | NM_017948 | 6700.612  | 8145.839  | NM_000286 | 8499.162  |
| 12599.117 | NM_000859 | 1608.749  | 704.59    | NM_000392 | 2294.877  | 2638.174  | NM_016454 | 4784.496  |
| 1915.757  | NM_005480 | 742.554   | 657.429   | AF208536  | 1371.889  | 1669.113  | NM_003469 | 2551.795  |
| 1299.803  | AB034694  | 337.399   | 367.613   | AB037848  | 1183.362  | 971.854   | NM_005480 | 1324.461  |
| 2548.993  | NM_003273 | 1392.307  | 873.722   | AF082657  | 1970.439  | 1549.502  | NM_003273 | 2990.263  |
| 884.664   | AK026404  | 437.439   | 544.112   | NM_006744 | 1117.094  | 1243.995  | AK026404  | 1465.683  |
| 24322.107 | NM_017948 | 1214.602  | 1919.506  | AF297659  | 961.113   | 1133.751  | NM_017948 | 5945.384  |
| 915.418   | NM_000392 | 499.592   | 535.979   | NM_018231 | 3621.073  | 3922.534  | AB037848  | 950.123   |
| 2822.192  | AB037848  | 619.899   | 504.511   | NM_000583 | 4870.999  | 4731.473  | AF082657  | 1759.308  |
| 9842.036  | AF082657  | 2055.284  | 1668.253  | NM_014914 | 2239.967  | 2219.601  | NM_006744 | 1224.5    |
| 13424.104 | NM_006744 | 1267.031  | 2341.672  | NM_004484 | 2162.906  | 533.648   | NM_006892 | 714.477   |
| 3265.857  | NM_006497 | 3381.29   | 3590.594  | NM_018289 | 1754.234  | 2391.804  | AK000124  | 941.299   |
| 1465.188  | NM_006892 | 773.008   | 865.46    | NM_014766 | 1145.272  | 2770.059  | NM_004480 | 1572.023  |
| 2114.951  | AK000124  | 869.726   | 741.296   | NM_016627 | 2901.017  | 3002.653  | NM_014914 | 2991.151  |

|           |           |           |           |           |           |           |           |           |
|-----------|-----------|-----------|-----------|-----------|-----------|-----------|-----------|-----------|
| 1271.961  | NM_00448C | 713.955   | 1268.894  | NM_016121 | 2487.008  | 2093.81   | NM_004484 | 2221.441  |
| 1836.209  | NM_014914 | 1356.987  | 1144.42   | NM_014769 | 4940.487  | 5303.171  | NM_014766 | 2104.734  |
| 1863.071  | NM_004484 | 2234.731  | 941.358   | NM_006349 | 24732.322 | 34963.203 | NM_016627 | 2959.741  |
| 7683.439  | NM_018289 | 510.853   | 670.69    | AK026264  | 20824.445 | 19785.547 | M74509    | 1831.607  |
| 1094.6    | AB018260  | 723.798   | 1058.328  | AF222927  | 1282.161  | 1221.854  | NM_016121 | 1709.985  |
| 1414.774  | NM_014766 | 770.512   | 705.606   | NM_014345 | 4900.12   | 4278.042  | NM_014769 | 3398.452  |
| 2177.634  | NM_016627 | 1927.607  | 2040.661  | NM_018217 | 10496.923 | 10240.574 | NM_006349 | 21645.455 |
| 1633.186  | NM_016121 | 985.094   | 1354.049  | AF241831  | 2244.215  | 2003.702  | NM_018217 | 9211.776  |
| 1086.31   | NM_014769 | 525.514   | 494.098   | NM_003033 | 2736.568  | 2410.09   | AF241831  | 1685.094  |
| 2147.069  | NM_006349 | 11054.35  | 16228.571 | U96113    | 1076.734  | 835.983   | NM_003033 | 2080.083  |
| 3450.328  | AK026264  | 5391.122  | 4493.868  | NM_002733 | 1416.417  | 1297.374  | NM_006334 | 505.48    |
| 4187.973  | AF222927  | 569.085   | 712.191   | M31008    | 1101.78   | 1104.343  | NM_004625 | 2390.221  |
| 4423.398  | NM_014345 | 1984.961  | 2124.712  | NM_006288 | 953.976   | 1087.597  | NM_007179 | 3516.256  |
| 2078.518  | NM_018217 | 5854.596  | 5639.724  | NM_016224 | 10138.421 | 9943.883  | NM_001306 | 1322.654  |
| 2071.959  | AF241831  | 1593.051  | 1465.09   | AB046861  | 725.04    | 747.258   | AB046861  | 927.387   |
| 2030.533  | NM_003033 | 2757.375  | 4081.265  | NM_00594C | 191.577   | 426.835   | NM_00594C | 264.964   |
| 2993.652  | NM_016441 | 1161.978  | 1001.677  | AF061034  | 7254.992  | 9951.822  | AF061034  | 6464.227  |
| 853.803   | NM_006334 | 511.803   | 647.637   | X03655    | 810.034   | 1113.03   | X03655    | 387.961   |
| 3621.119  | NM_003474 | 437.305   | 464.416   | BG696293  | 1170.615  | 879.446   | BG113873  | 523.044   |
| 8899.749  | NM_004625 | 2435.946  | 2825.443  | BC013135  | 5586.833  | 4840.636  | BC013135  | 5274.28   |
| 2443.274  | NM_007179 | 3647.894  | 7591.832  | AA281652  | 2247.245  | 2248.763  | AI625002  | 343.186   |
| 2205.624  | NM_001306 | 927.365   | 1002.104  | U31905    | 1188.037  | 1214.966  | AA281652  | 2082.44   |
| 791.935   | AB046861  | 337.705   | 604.594   | X52479    | 1337.635  | 1443.981  | U31905    | 1286.018  |
| 929.701   | AF061034  | 4498.355  | 5064.841  | AW408832  | 6494.964  | 6031.843  | X52479    | 1271.19   |
| 759.898   | X03655    | 412.045   | 678.332   | AA486364  | 9114.904  | 10662.15  | AA486364  | 4524.447  |
| 1001.292  | BG696293  | 2209.257  | 2004.157  | M15476    | 35659.824 | 43394.465 | M15476    | 26167.305 |
| 3743.555  | BC013135  | 2543.713  | 2747.377  | U57456    | 2676.079  | 2501.706  | NM_006568 | 1849.561  |
| 1924.877  | AA281652  | 1535.745  | 1780.73   | N70057    | 46726.73  | 48048.941 | NM_004847 | 3608.441  |
| 15072.979 | U31905    | 531.12    | 659.482   | NM_006497 | 15410.589 | 14379.465 | NM_002255 | 1011.072  |
| 1327.052  | X52479    | 1036.444  | 951.421   | NM_006892 | 970.105   | 920.123   | AF151889  | 9785.285  |
| 2933.308  | AW408832  | 2904.525  | 3429.77   | AK000124  | 1702.576  | 1463.747  | BC034483  | 1203.452  |
| 572.13    | AA486364  | 2661.572  | 2722.271  | NM_00448C | 2318.915  | 3358.794  | NM_00362C | 1291.275  |
| 737.432   | M15476    | 15609.931 | 20085.27  | BC034483  | 1716.058  | 2181.514  | BE910339  | 10628.701 |
| 11855.258 | U57456    | 2638.722  | 2182.466  | NM_00362C | 2630.429  | 2261.163  | AF254067  | 1122.48   |
| 526.627   | AK022746  | 1770.625  | 2183.37   | AA586375  | 641.568   | 678.593   | NM_016363 | 1415.748  |
| 657.649   | NM_006568 | 2829.336  | 3087.306  | NM_016363 | 541.79    | 733.72    | AY009090  | 551.116   |
| 2723.635  | NM_00644C | 2835.638  | 2319.754  | NM_005592 | 468.045   | 295.379   | NM_005592 | 172.889   |
| 2604.959  | NM_004847 | 8317.058  | 8978.344  | U81380    | 687.717   | 825.682   | U81380    | 368.201   |
| 547.887   | NM_002255 | 1611.232  | 1549.532  | NM_002303 | 498.168   | 428.099   | NM_002303 | 859.572   |
| 6299.234  | AF151889  | 11677.782 | 13758.488 | NM_016509 | 714.716   | 732.451   | NM_016509 | 404.768   |
| 5116.097  | BC034483  | 950.02    | 1071.587  | NM_012296 | 9033.026  | 2411.693  | NM_012296 | 7730.308  |
| 3090.55   | NM_00362C | 1991.251  | 2371.99   | AF041038  | 1723.06   | 1721.566  | AF041038  | 1393.565  |
| 43612.902 | AA586375  | 799.161   | 573.433   | NM_004536 | 1069.783  | 1663.427  | NM_014672 | 4544.942  |
| 8404.042  | BE910339  | 14360.678 | 16372.732 | NM_014672 | 2146.211  | 2396.22   | AB058719  | 1150.956  |
| 1472.002  | U89715    | 505.479   | 368.369   | AB058719  | 866.72    | 1348.149  | AF082657  | 1459.88   |
| 1510.937  | AF254067  | 783.921   | 957.672   | AK025935  | 906.102   | 480.135   | NM_006744 | 1713.416  |
| 1265.661  | NM_016363 | 883.921   | 1205.765  | AB032953  | 477.711   | 534.52    | AF297659  | 1055.903  |
| 822.083   | NM_002303 | 221.946   | 523.118   | NM_016441 | 1238.737  | 1203.556  | NM_018231 | 1481.694  |
| 1673.712  | NM_012296 | 2725.855  | 2264.744  | NM_006334 | 1099.274  | 1473.663  | NM_000583 | 2838.521  |
| 3077.059  | AF041038  | 575.779   | 959.006   | NM_004625 | 4867.459  | 4111.229  | NM_004254 | 2097.484  |
| 977.981   | NM_004536 | 1195.864  | 1757.385  | NM_007179 | 33669.73  | 33880.5   | NM_013322 | 4152.243  |
| 837.082   | NM_014672 | 3056.496  | 3650.906  | NM_001306 | 2380.922  | 1876.715  | AB020627  | 1060.944  |
| 1380.788  | AB058719  | 1298.81   | 1241.888  | AF297659  | 1087.322  | 1021.664  | NM_002003 | 1042.08   |



|          |                  |           |           |                  |           |           |                  |           |
|----------|------------------|-----------|-----------|------------------|-----------|-----------|------------------|-----------|
| 1794.084 | <b>AK025935</b>  | 1017.362  | 878.494   | <b>NM_018231</b> | 4060.02   | 3606.469  | <b>NM_005387</b> | 4192.938  |
| 1831.927 | <b>AF208536</b>  | 1722.936  | 1453.261  | <b>NM_007163</b> | 1808.694  | 1045.007  | <b>AL137938</b>  | 19314.887 |
| 2559.845 | <b>AB037848</b>  | 727.113   | 564.097   | <b>NM_000583</b> | 3679.693  | 2909.788  | <b>AF228704</b>  | 2093.78   |
| 3061.238 | <b>AF082657</b>  | 1984.214  | 1396.974  | <b>NM_005833</b> | 2410.747  | 1863.533  | <b>NM_014345</b> | 1747.15   |
| 5207.441 | <b>NM_006744</b> | 1187.353  | 1020.242  | <b>NM_003100</b> | 4629.703  | 4389.679  | <b>NM_018217</b> | 3392.71   |
| 1213.278 | <b>NM_018231</b> | 2194.852  | 2408.254  | <b>NM_013322</b> | 4516.066  | 8921.953  | <b>AF241831</b>  | 1061.709  |
| 984.603  | <b>NM_000583</b> | 3026.267  | 2769.338  | <b>AB020627</b>  | 1352.869  | 1365.341  | <b>NM_003033</b> | 1759.772  |
| 1578.662 | <b>NM_005833</b> | 2542.765  | 2813.262  | <b>NM_002003</b> | 1084.91   | 788.234   | <b>NM_002733</b> | 791.142   |
| 1186.819 | <b>NM_003100</b> | 4076.221  | 5046.394  | <b>NM_005387</b> | 4489.534  | 5044.378  | <b>M31008</b>    | 810.359   |
| 689.97   | <b>NM_013322</b> | 2861.099  | 5500.159  | <b>AL137938</b>  | 19902.932 | 12192.285 | <b>NM_016224</b> | 1944.663  |
| 4182.357 | <b>AB020627</b>  | 1149.601  | 1625.706  | <b>AK022746</b>  | 1250.158  | 1601.041  | <b>NM_005227</b> | 933.841   |
| 5894.005 | <b>NM_002003</b> | 617.264   | 854.785   | <b>NM_006568</b> | 2255.276  | 2537.398  | <b>NM_000286</b> | 2653.145  |
| 1074.437 | <b>NM_005387</b> | 4066.921  | 4627.963  | <b>NM_006440</b> | 1979.431  | 1700.654  | <b>NM_000859</b> | 2034.981  |
| 4216.619 | <b>AL137938</b>  | 21933.482 | 10305.273 | <b>NM_004847</b> | 5964.916  | 6490.199  | <b>NM_005480</b> | 1125.044  |
| 1300.892 | <b>AF228704</b>  | 2513.581  | 2159.37   | <b>NM_002255</b> | 1545.332  | 1261.069  | <b>NM_003273</b> | 2431.822  |
| 5864.958 | <b>AF222927</b>  | 798.231   | 485.065   | <b>AF151889</b>  | 12676.665 | 13256.962 | <b>AK026404</b>  | 1506.997  |
| 4919.062 | <b>NM_014345</b> | 3483.576  | 2576.709  | <b>U96113</b>    | 1407.274  | 1334.325  | <b>NM_017948</b> | 6198.665  |
| 2064.679 | <b>NM_018217</b> | 8905.586  | 6519.242  | <b>NM_002733</b> | 1296.179  | 1445.387  | <b>NM_000392</b> | 1979.666  |
| 1674.344 | <b>AF241831</b>  | 1625.827  | 1448.959  | <b>M31008</b>    | 1148.218  | 720.132   | <b>NM_016603</b> | 1334.538  |
| 3508.642 | <b>NM_003033</b> | 2168.277  | 2589.822  | <b>NM_016224</b> | 2082.668  | 1902.336  | <b>NM_004398</b> | 22554.713 |
| 2932.902 | <b>U96113</b>    | 1189.322  | 744.871   | <b>NM_005227</b> | 1677.228  | 972.439   | <b>NM_016181</b> | 568.872   |
| 10663.4  | <b>NM_002733</b> | 996.001   | 1250.415  | <b>NM_000286</b> | 10499.281 | 3921.171  | <b>NM_014966</b> | 3589.875  |
| 959.886  | <b>M31008</b>    | 581.152   | 431.025   | <b>NM_016454</b> | 8412.753  | 10765.765 | <b>NM_014962</b> | 1341.072  |
| 2535.107 | <b>NM_006288</b> | 696.819   | 557.551   | <b>NM_003469</b> | 2958.699  | 2813.07   | <b>D87684</b>    | 8460.922  |
| 1204.232 | <b>NM_016224</b> | 4669.914  | 5434.442  | <b>NM_000859</b> | 2555.202  | 559.243   | <b>NM_006317</b> | 40344.273 |
| 1003.557 | <b>NM_005227</b> | 2897.776  | 2731.906  | <b>NM_005480</b> | 1203.456  | 1985.124  | <b>NM_001219</b> | 2982.896  |
| 1116.811 | <b>NM_000286</b> | 12307.436 | 5229.166  | <b>AB034694</b>  | 696.324   | 597.551   | <b>NM_014914</b> | 1014.719  |
| 4181.691 | <b>NM_016454</b> | 8811.389  | 10191.981 | <b>NM_003273</b> | 1882.334  | 653.706   | <b>NM_018289</b> | 1781.254  |
| 2506.498 | <b>NM_003469</b> | 2299.068  | 3054.122  | <b>AK026404</b>  | 1540.336  | 1118.63   | <b>AB018260</b>  | 1738.891  |
| 8789.196 | <b>NM_000859</b> | 3364.394  | 1229.398  | <b>NM_017948</b> | 7007.719  | 6545.559  | <b>NM_014766</b> | 1581.896  |
| 11677.05 | <b>NM_005480</b> | 841.18    | 1263.541  | <b>AF208536</b>  | 687.458   | 1050.908  | <b>NM_016627</b> | 3351.427  |
| 3555.828 | <b>AB034694</b>  | 764.974   | 854.838   | <b>AB037848</b>  | 451.968   | 359.722   | <b>NM_016121</b> | 2708.21   |
| 2816.259 | <b>NM_003273</b> | 3065.468  | 2270.813  | <b>AF082657</b>  | 1290.377  | 515.236   | <b>NM_014769</b> | 2437.544  |
| 1657.949 | <b>AK026404</b>  | 2138.867  | 2109.854  | <b>NM_006744</b> | 702.555   | 571.07    | <b>NM_006349</b> | 22064.613 |
| 933.719  | <b>NM_017948</b> | 7344.017  | 8143.09   | <b>NM_006497</b> | 8043.966  | 8626.8    | <b>AK026264</b>  | 11467.558 |
| 2682.201 | <b>NM_000392</b> | 1802.681  | 1977.851  | <b>NM_006892</b> | 1252.487  | 1184.501  | <b>NM_005876</b> | 5416.755  |
| 1837.793 | <b>NM_000267</b> | 2949.975  | 2777.312  | <b>NM_014914</b> | 1245.588  | 1337.12   | <b>NM_004934</b> | 433.418   |
| 6865.493 | <b>NM_016603</b> | 3487.438  | 3675.93   | <b>NM_004484</b> | 4506.86   | 1593.493  | <b>AF284436</b>  | 649.99    |
| 1487.224 | <b>NM_004398</b> | 57243.664 | 27426.727 | <b>NM_018289</b> | 2884.866  | 3179.002  | <b>U39657</b>    | 4547.707  |
| 1282.862 | <b>NM_016181</b> | 835.256   | 1196.45   | <b>AB018260</b>  | 2847.478  | 3326.784  | <b>NM_016340</b> | 1096.662  |
| 1262.33  | <b>NM_014966</b> | 5967.133  | 3229.354  | <b>NM_014766</b> | 2283.899  | 1649.248  | <b>NM_018373</b> | 688.945   |
| 1317.044 | <b>NM_014962</b> | 1454.968  | 535.801   | <b>NM_016627</b> | 3357.001  | 2119.42   | <b>NM_006449</b> | 4606.805  |
| 941.48   | <b>D87684</b>    | 8624.849  | 6896.347  | <b>NM_016121</b> | 5254.805  | 3888.735  | <b>BF216030</b>  | 4490.153  |
| 6958.975 | <b>NM_006317</b> | 43900.652 | 51251.836 | <b>NM_014769</b> | 3977.212  | 5593.771  | <b>NM_005657</b> | 1656.864  |
| 2891.022 | <b>NM_001219</b> | 4674.663  | 3249.437  | <b>NM_006349</b> | 28911.906 | 38660.887 | <b>NM_018639</b> | 2180.898  |
| 1612.772 | <b>AK000124</b>  | 1063.389  | 954.32    | <b>AK026264</b>  | 14596.101 | 10120.362 | <b>NM_001715</b> | 2079.29   |
| 1658.072 | <b>NM_004480</b> | 1607.464  | 2513.44   | <b>AF222927</b>  | 537.834   | 479.393   | <b>NM_004395</b> | 4559.132  |
| 4449.804 | <b>NM_014914</b> | 5469.075  | 4222.27   | <b>NM_014345</b> | 3294.018  | 1749.776  | <b>NM_002663</b> | 586.934   |
| 3571.006 | <b>NM_004484</b> | 3643.712  | 1780.684  | <b>NM_018217</b> | 8424.385  | 5443.272  | <b>NM_006094</b> | 5099.944  |
| 1568.862 | <b>NM_018289</b> | 1168.955  | 1116.313  | <b>AF241831</b>  | 1298.221  | 797.34    | <b>AF080158</b>  | 2312.736  |
| 2145.943 | <b>AB018260</b>  | 2060.948  | 2837.753  | <b>NM_003033</b> | 1621.401  | 1288.554  | <b>NM_014178</b> | 1509.219  |
| 2560.015 | <b>NM_014766</b> | 2179.546  | 1690.921  | <b>NM_016441</b> | 1460.185  | 1551.646  | <b>NM_001251</b> | 12384.539 |
| 4534.92  | <b>NM_016627</b> | 3937.423  | 4199.425  | <b>NM_004625</b> | 4490.91   | 3696.242  | <b>AB011112</b>  | 1818.855  |

|           |           |           |           |           |           |           |           |           |
|-----------|-----------|-----------|-----------|-----------|-----------|-----------|-----------|-----------|
| 3711.56   | NM_016121 | 1831.235  | 1845.773  | NM_007179 | 5711.187  | 5436.92   | NM_018669 | 1358.242  |
| 2615.596  | NM_014769 | 3270.658  | 3259.892  | NM_005940 | 295.769   | 466.859   | NM_002623 | 1551.974  |
| 23012.488 | NM_006349 | 17220.676 | 18760.168 | AF061034  | 7777.709  | 11101.071 | NM_018844 | 3333.862  |
| 12187.213 | AK026264  | 12661.208 | 9141.388  | X03655    | 1472.359  | 1630.091  | AK023212  | 1800.364  |
| 903.88    | NM_004385 | 3117.652  | 1686.994  | BG696293  | 3628.465  | 3173.007  | AB002336  | 1033.932  |
| 3780.559  | NM_005876 | 21264.063 | 18383.834 | AA777410  | 506.214   | 579.358   | NM_013286 | 4964.198  |
| 8672.913  | AF039697  | 666.831   | 371.73    | BG113873  | 207.834   | 483.701   | NM_006082 | 69184.141 |
| 1351.626  | NM_004934 | 349.765   | 253.946   | BC013135  | 9618.633  | 6017.296  | NM_006633 | 416.258   |
| 1577.956  | AF284436  | 650.905   | 418.682   | AI625002  | 2065.993  | 1660.679  | NM_016262 | 3249.548  |
| 7794.693  | NM_004445 | 710.663   | 755.406   | AA281652  | 2618.39   | 2395.477  | AB011116  | 7277.696  |
| 1000.35   | U39657    | 6714.383  | 5289.16   | U31905    | 2218.377  | 1669.147  | AB037858  | 909.167   |
| 3978.84   | NM_016340 | 1781.65   | 1611.563  | X52479    | 1866.979  | 1050.132  | NM_005775 | 1990.157  |
| 5356.96   | NM_018373 | 608.047   | 584.083   | AW408832  | 5203.775  | 3683.927  | AL157437  | 2622.104  |
| 1160.925  | NM_006449 | 5741.183  | 2361.95   | AA486364  | 4154.074  | 3678.439  | L25629    | 2201.472  |
| 1450.715  | BF216030  | 3774.422  | 3266.983  | M15476    | 20235.178 | 15946.287 | NM_001490 | 1608.118  |
| 9473.315  | NM_002757 | 2253.579  | 1859.743  | U57456    | 1843.59   | 1250.454  | NM_017740 | 2574.385  |
| 1336.514  | NM_003684 | 4350.488  | 2905.096  | N70057    | 41460.535 | 39793.551 | AB033052  | 2827.891  |
| 3547.616  | NM_005657 | 1450.678  | 1482.415  | AK022746  | 1801.838  | 2039.512  | NM_018227 | 1504.4    |
| 1256.163  | NM_017671 | 1194.482  | 278.892   | NM_006440 | 2628.035  | 2138.655  | NM_003340 | 10416.999 |
| 16959.758 | NM_018639 | 4075.255  | 6649.25   | NM_004847 | 6182.963  | 6203.179  | U46752    | 726.389   |
| 584.078   | NM_001715 | 1533.457  | 1763.091  | NM_002255 | 593.858   | 480.01    | NM_002794 | 3778.589  |
| 2393.451  | NM_004395 | 5056.746  | 4253.242  | BC034483  | 1154.546  | 1413.718  | BF244646  | 12331.656 |
| 2049.535  | NM_002663 | 551.308   | 770.125   | NM_003620 | 3823.138  | 3420.741  | AK024030  | 2548.272  |
| 1437.897  | NM_006094 | 4744.015  | 3716.794  | AA586375  | 1084.328  | 1072.794  | AF275808  | 1061.798  |
| 488.19    | AF080158  | 3022.524  | 3902.155  | AF254067  | 1764.249  | 1262.869  | AK024038  | 4299.047  |
| 5453.354  | AB037794  | 923.423   | 657.685   | NM_016363 | 3067.186  | 4301.569  | NM_002055 | 2346.646  |
| 5487.767  | NM_005935 | 2595.31   | 1306.265  | AY009090  | 1484.623  | 2019.497  | NM_005803 | 5373.551  |
| 28008.984 | NM_012415 | 1013.82   | 740.024   | NM_005592 | 665.513   | 751.404   | NM_015515 | 3408.583  |
| 1919.803  | NM_014178 | 7007.833  | 4828.962  | U81380    | 861.443   | 1629.194  | AK001579  | 9465.009  |
| 1854.335  | NM_001251 | 14311.981 | 15641.725 | NM_002303 | 792.892   | 1123.446  | AF163302  | 2782.598  |
| 6431.73   | NM_004789 | 1021.117  | 443.279   | NM_016509 | 950.342   | 1361.583  | NM_006408 | 2179.412  |
| 1660.032  | AB011112  | 2195.762  | 1982.966  | NM_012296 | 11266.325 | 3314.57   | NM_002419 | 3581.074  |
| 1480.532  | NM_018669 | 1942.387  | 1479.599  | AF041038  | 4545.115  | 4987.939  | NM_001989 | 3333.278  |
| 1125.65   | NM_002623 | 1746.134  | 1158.42   | NM_004536 | 2560.843  | 3374.542  | NM_002653 | 2866.98   |
| 2326.679  | NM_018844 | 4262.468  | 2765.835  | NM_014672 | 2390.471  | 2117.966  | NM_003454 | 2046.644  |
| 3248.813  | AF279778  | 1027.049  | 450.349   | AB058719  | 1305.454  | 1516.139  | NM_003418 | 16425.799 |
| 1104.137  | NM_015477 | 5068.455  | 3458.14   | AK025935  | 703.649   | 642.352   | NM_017908 | 2056.441  |
| 778.839   | AK023212  | 3387.792  | 2042.152  | AB032953  | 472.273   | 599.614   | M25077    | 2261.612  |
| 1143.257  | AL353943  | 1177.424  | 869.662   | AF208536  | 932.159   | 1361.351  | NM_018702 | 1677.135  |
| 671.968   | BE568801  | 2274.614  | 1187.73   | AB037848  | 1205.549  | 812.643   | NM_004593 | 1883.328  |
| 984.895   | AB002336  | 657.398   | 700.957   | AF082657  | 905.242   | 420.275   | NM_005778 | 9472.978  |
| 2129.543  | NM_013286 | 6949.863  | 7416.607  | AF297659  | 599.694   | 873.971   | NM_018084 | 14845.097 |
| 2210.05   | NM_006082 | 74565.961 | 72696.117 | NM_018231 | 3773.478  | 3363.976  | AF164797  | 53587.535 |
| 4133.273  | NM_006633 | 657.156   | 1818.262  | NM_000583 | 3712.223  | 2258.865  | NM_017840 | 20021.914 |
| 1731.436  | NM_016262 | 3053.494  | 701.344   | NM_005833 | 2736.476  | 2106.494  | NM_001415 | 38544.488 |
| 1110.802  | AB011116  | 9128.737  | 9428.383  | NM_003100 | 6532.555  | 6742.892  | NM_004564 | 4744.69   |
| 1964.888  | AB037858  | 994.977   | 1238.472  | NM_013322 | 6566.271  | 12242.8   | NM_000968 | 59286.539 |
| 1850.33   | NM_005775 | 1210.637  | 1429.471  | AB020627  | 3152.53   | 3177.697  | AL355743  | 1736.311  |
| 1693.255  | NM_003270 | 1095.479  | 731.095   | NM_002003 | 1181.901  | 841.75    | NM_002202 | 1295.549  |
| 2924.716  | AL157437  | 10736.087 | 8150.403  | NM_005387 | 3835.741  | 3862.407  | NM_006005 | 1453.97   |
| 3604.288  | L25629    | 2267.604  | 3282.768  | AL137938  | 18609.785 | 8173.82   | NM_002629 | 37466.363 |
| 2196.47   | NM_001490 | 2150.441  | 1374.61   | AF228704  | 1704.135  | 1061.938  | NM_014364 | 1200.248  |
| 1301.456  | NM_017740 | 3059.783  | 1990.515  | AF222927  | 1020.604  | 790.567   | NM_001685 | 48548.117 |

|           |           |           |           |           |           |           |           |           |
|-----------|-----------|-----------|-----------|-----------|-----------|-----------|-----------|-----------|
| 3446.718  | AB033052  | 3262.723  | 1753.627  | NM_014345 | 3489.511  | 2902.181  | NM_004813 | 2085.367  |
| 9260.351  | NM_018227 | 1632.238  | 1023.094  | NM_018217 | 7771.267  | 7799.825  | AK023008  | 2097.762  |
| 1923.232  | NM_003340 | 17233.859 | 16382.806 | AF241831  | 1641.029  | 1374.885  | NM_004689 | 1864.642  |
| 2402.128  | U46752    | 1139.884  | 559.241   | NM_003033 | 826.247   | 940.119   | NM_006026 | 3142.735  |
| 1257.724  | NM_002794 | 16541.316 | 20507.475 | U96113    | 1056.512  | 1245.728  | AB040956  | 3583.146  |
| 1142.689  | BF244646  | 39214.965 | 33685.031 | NM_002733 | 1151.449  | 1686.993  | NM_016587 | 2140.997  |
| 882.047   | AK024030  | 2056.398  | 1513.766  | M31008    | 1004.44   | 1113.392  | NM_017953 | 1975.924  |
| 1343.806  | AF275808  | 925.098   | 1204.712  | NM_006288 | 1229.524  | 884.214   | BC000124  | 16247.766 |
| 3365.313  | AK024038  | 5913.116  | 4042.337  | NM_016224 | 7206.665  | 6681.828  | Z11773    | 1613.501  |
| 2038.359  | NM_002055 | 1843.997  | 2186.071  | NM_005227 | 2399.747  | 2333.522  | NM_003446 | 16355.483 |
| 8552.262  | NM_005803 | 8152.26   | 8247.434  | NM_000286 | 14571.329 | 7801.322  | NM_001485 | 3059.895  |
| 11874.136 | NM_015515 | 4495.881  | 5279.706  | NM_016454 | 13720.507 | 18834.512 | NM_002702 | 920.443   |
| 4572.701  | AK001579  | 8835.834  | 9316.441  | NM_003469 | 4142.14   | 4050.554  | AK023039  | 441.901   |
| 2479.022  | NM_002670 | 3062.932  | 3021.977  | NM_000859 | 2875.903  | 986.695   | AL109688  | 1471.696  |
| 1099.676  | AF163302  | 3189.993  | 3846.314  | NM_005480 | 1898.327  | 2862.869  | AF074981  | 729.303   |
| 780.304   | NM_006408 | 1616.422  | 1372.527  | AB034694  | 846.658   | 1038.693  | AK025863  | 1286.546  |
| 2366.498  | NM_002419 | 3282.978  | 4547.651  | NM_003273 | 1964.33   | 844.745   | D42044    | 2643.911  |
| 2035.251  | NM_001989 | 3579.356  | 3217.387  | AK026404  | 1668.507  | 1632.909  | AK026149  | 1866.87   |
| 6311.709  | NM_002653 | 6429.769  | 3842.027  | NM_017948 | 6486.475  | 6872.264  | AF038185  | 3239.696  |
| 2194.147  | NM_005604 | 1889.655  | 2303.409  | NM_000392 | 1984.85   | 1953.632  | AL117415  | 1953.532  |
| 1682.231  | S69023    | 1932.25   | 998.442   | NM_000267 | 2241.842  | 2657.421  | AK023616  | 611.122   |
| 3187.1    | NM_003454 | 2839.662  | 3725.319  | NM_016603 | 2472.885  | 4803.067  | AK025665  | 5220.989  |
| 39537.484 | NM_003418 | 21504.799 | 9464.766  | NM_004398 | 54745.344 | 38907.77  | BC037530  | 13102.743 |
| 6132.122  | M25077    | 2941.782  | 2546.859  | NM_016181 | 795.887   | 1061.711  | NM_014851 | 5204.728  |
| 2135.694  | NM_018702 | 2930.299  | 2347.344  | NM_014966 | 3238.052  | 3343.399  | AL117635  | 1320.402  |
| 6179.745  | M62843    | 642.938   | 417.785   | NM_014962 | 2464.067  | 2979.597  | AK025332  | 1271.491  |
| 43199.574 | NM_004593 | 1511.81   | 941.676   | D87684    | 7165.214  | 6685.564  | AB020735  | 674.007   |
| 1980.853  | NM_005778 | 11561.114 | 9856.987  | NM_001586 | 745.064   | 508.409   | D17010    | 372.794   |
| 1583.322  | NM_001032 | 61735.898 | 56385.965 | NM_006317 | 49324     | 50493.652 | AJ011596  | 4352.99   |
| 1385.179  | NM_018084 | 19959.633 | 15085.657 | NM_001219 | 4954.594  | 6275.799  | X51779    | 973.324   |
| 3410.872  | AF164797  | 59304.137 | 49284.438 | AK000124  | 1401.933  | 1515.278  | AL049254  | 378.779   |
| 3344.892  | NM_017840 | 22547.746 | 22972.654 | NM_004480 | 2485.7    | 4140.561  | Z83954    | 2839.534  |
| 1789.579  | AK001052  | 36259.25  | 39441.727 | NM_014914 | 6166.676  | 6426.326  | M74093    | 3137.408  |
| 1881.294  | NM_000968 | 58958.355 | 50983.789 | NM_004484 | 3086.762  | 1328.421  | M28219    | 2030.519  |
| 1727.142  | AL355743  | 4365.992  | 13595.465 | NM_018289 | 3766.704  | 3612.829  | L17326    | 731.227   |
| 3523.711  | X81896    | 857.636   | 681.447   | AB018260  | 2527.581  | 3311.023  | D17207    | 3227.748  |
| 3023.479  | NM_002202 | 1548.606  | 1004.214  | NM_014766 | 3362.73   | 2669.208  | D55640    | 2018.122  |
| 2962.48   | NM_006005 | 1290.018  | 1099.175  | NM_016121 | 2764.766  | 2212.299  | AF085897  | 634.717   |
| 21701.637 | NM_002629 | 45291.469 | 39980.109 | NM_014769 | 3239.178  | 2875.052  | AF085822  | 978.717   |
| 12131.819 | NM_014364 | 1038.386  | 508.965   | NM_006349 | 22037.813 | 27725.207 | AK021551  | 1745.194  |
| 5275.688  | NM_001685 | 50368.961 | 49567.703 | AK026264  | 14271.163 | 11722.694 | AB015616  | 1086.115  |
| 36462.223 | NM_006067 | 16458.936 | 13751.054 | NM_004385 | 3896.412  | 2993.839  | AK000024  | 2143.534  |
| 888.814   | NM_000284 | 3771.103  | 2694.716  | NM_005876 | 36635.285 | 38725.254 | AK026693  | 1670.19   |
| 1028.948  | NM_004813 | 2585.013  | 2955.577  | AF039697  | 305.751   | 524.851   | NM_012285 | 601.595   |
| 1082.856  | AK023008  | 1881.971  | 1118.211  | NM_004934 | 579.749   | 486.633   | AK000794  | 2080.994  |
| 5925.759  | NM_004689 | 4850.688  | 2578.187  | NM_004445 | 1277.487  | 1111.585  | AK000950  | 904.035   |
| 1516.822  | NM_006026 | 11290.027 | 18074.367 | U39657    | 7448.5    | 7144.202  | AK000831  | 1874.865  |
| 728.688   | BG339855  | 1754.572  | 1804.839  | NM_016340 | 2532.013  | 2143.937  | AK000981  | 1125.715  |
| 5437.691  | AB040956  | 2627.879  | 4336.767  | NM_018373 | 897.21    | 1142.044  | AK025054  | 3033.473  |
| 5531.444  | NM_016587 | 2285.712  | 1063.091  | NM_006449 | 5944.125  | 3485.167  | AK024556  | 937.58    |
| 1906.098  | NM_003516 | 10906.276 | 47199.07  | BF216030  | 7057.446  | 7084.643  | AK024935  | 846.255   |
| 2741.235  | NM_017953 | 1920.149  | 1360.291  | AF131839  | 565.672   | 549.24    | AK025325  | 1566.922  |
| 1623.83   | BC000124  | 13444.784 | 18391.197 | NM_002757 | 1780.478  | 1430.851  | U50531    | 2905.73   |

|           |           |           |           |           |           |           |           |           |
|-----------|-----------|-----------|-----------|-----------|-----------|-----------|-----------|-----------|
| 2239.61   | Z11773    | 1626.492  | 472.98    | NM_003684 | 2974.513  | 3039.04   | NM_00531E | 11230.242 |
| 565.618   | NM_00344E | 22421.367 | 20677.637 | NM_005657 | 2339.462  | 2590.973  | L09099    | 1004.805  |
| 2404.31   | NM_00148E | 4791.131  | 3565.125  | NM_017671 | 1008.253  | 819.704   | NM_005421 | 2046.505  |
| 8358.015  | AK021510  | 968.829   | 563.494   | AB040883  | 1539.091  | 2004.602  | AK024580  | 17793.781 |
| 949.703   | AK022711  | 1269.676  | 1210.037  | NM_01863E | 5710.333  | 6888.297  | AL442093  | 6148.306  |
| 4269.342  | AK024310  | 881.819   | 789.931   | AF264628  | 644.243   | 652.193   | AK024331  | 1348.003  |
| 1859.314  | AK023039  | 637.444   | 869.245   | NM_00266E | 2120.778  | 2273.159  | AK024452  | 1738.611  |
| 1223.94   | AL109688  | 2324.354  | 2094.875  | NM_006094 | 4812.483  | 4495.554  | AK021733  | 1794.072  |
| 2095.247  | AK025863  | 1112.265  | 668.879   | AF080158  | 2538.698  | 3197.607  | AK000543  | 2930.009  |
| 1922.079  | D42044    | 2782.784  | 1205.901  | AB037794  | 1046.595  | 968.594   | AK026683  | 1632.41   |
| 6082.425  | AK026149  | 1995.27   | 2003.732  | NM_00593E | 1695.507  | 1251.9    | D16906    | 4481.451  |
| 22878.865 | AF038185  | 3292.152  | 2540.237  | NM_01241E | 742.014   | 1141.647  | AL079309  | 3095.808  |
| 616.73    | AB027011  | 10411.642 | 8420.797  | NM_01417E | 8151.241  | 6744.586  | AK022335  | 198.24    |
| 2060.267  | AK025305  | 1060.567  | 650.09    | NM_001251 | 21679.268 | 29588.98  | AL110280  | 1510.521  |
| 1736.641  | AL117415  | 8946.215  | 8352.512  | NM_00478E | 868.183   | 1015.598  | NM_01745E | 969.814   |
| 1484.929  | AK023616  | 608.132   | 626.73    | AB011112  | 2718.713  | 2843.104  | AF086196  | 666.074   |
| 3193.496  | AK025665  | 8117.145  | 6286.626  | NM_01866E | 2124.189  | 3721.197  | NM_00554E | 18409.691 |
| 868.098   | AL355694  | 991.76    | 945.483   | NM_00262E | 2102.451  | 2130.982  | X95095    | 1010.642  |
| 2923.852  | BC037530  | 17721.98  | 15571.288 | NM_018844 | 4695.05   | 4612.719  | AF078528  | 8300.631  |
| 3450.909  | NM_014851 | 4760.293  | 4037.327  | NM_015477 | 3947.49   | 5969.818  | AF161411  | 2240.624  |
| 1118.653  | AK022811  | 481.456   | 318.488   | AK023212  | 1465.298  | 2059.847  | AK000450  | 13685.987 |
| 1901.169  | AL117635  | 1493.374  | 1123.365  | BE568801  | 4008.12   | 4159.806  | NM_018224 | 8735.089  |
| 854.988   | AK025332  | 1651.132  | 1803.328  | AB002336  | 1306.911  | 1474.498  | NM_01989E | 3263.674  |
| 472.491   | AB040929  | 366.856   | 490.404   | NM_003127 | 591.401   | 616.09    | NM_01856E | 3193.548  |
| 5337.808  | AB020735  | 929.789   | 1429.009  | NM_01328E | 7348.111  | 10355.794 | J04118    | 401.579   |
| 56127.176 | D17010    | 573.309   | 727.903   | NM_00608E | 64878.672 | 65086.922 | NM_00073C | 2190.978  |
| 908.441   | AJ011596  | 4267.68   | 4905.07   | NM_00663E | 596.931   | 1598.427  | U31734    | 27850.629 |
| 3039.312  | U17639    | 622.172   | 547.343   | AB011116  | 7578.564  | 8738.519  | AF085885  | 1631.55   |
| 8967.933  | AL049215  | 33003.625 | 28751.164 | AB037858  | 863.865   | 1464.582  | AK022953  | 1341.144  |
| 1454.431  | X51779    | 1155.577  | 1302.323  | NM_00577E | 1914.6    | 1539.426  | AF009319  | 2132.647  |
| 347.946   | X81001    | 562.077   | 511.835   | NM_01763E | 1110.544  | 1254.83   | AL365519  | 417.135   |
| 1714.852  | AL049254  | 1449.577  | 1432.495  | NM_00327C | 964.137   | 1209.976  | NM_01846E | 3206.956  |
| 498.677   | Z83954    | 3449.431  | 3824.364  | NM_016591 | 769.392   | 619.127   | Z36845    | 1065.555  |
| 1817.026  | M74093    | 2750.912  | 2279.952  | AL157437  | 12420.936 | 11812.16  | M73792    | 822.748   |
| 11285.449 | M28219    | 1850.079  | 1883.762  | L25629    | 1508.851  | 900.487   | NM_016127 | 3308.215  |
| 2717.831  | L17326    | 776.012   | 954.36    | AJ245539  | 464.5     | 476.134   | NM_00679E | 12456.969 |
| 828.609   | D17207    | 5397.392  | 3920.424  | NM_00149C | 2189.719  | 1918.613  | Z36874    | 9137.209  |
| 3733.171  | D55640    | 1276.99   | 1524.252  | NM_01774C | 4770.831  | 4280.419  | AK023326  | 1154.539  |
| 2261.556  | AK021551  | 2192.667  | 960.666   | AB033052  | 4458.917  | 4713.111  | AK022462  | 1433.517  |
| 2591.209  | AK025117  | 793.648   | 580.871   | NM_018227 | 1666.963  | 2228.453  | NM_02053C | 1404.474  |
| 1266.246  | AK000024  | 5176.924  | 5186.271  | AF050199  | 2109.87   | 1682.578  | AK022418  | 2641.132  |
| 17460.803 | AK026693  | 1258.609  | 1631.31   | NM_00334C | 18037.273 | 17693.424 | AF279777  | 1372.682  |
| 1111.887  | AK001128  | 637.503   | 607.154   | U46752    | 2142.636  | 1553.683  | AK021748  | 26501.271 |
| 10398.684 | AK000090  | 286.946   | 260.317   | NM_002794 | 16700.695 | 29822.123 | AL137257  | 9511.83   |
| 27356.428 | AK000794  | 2375.74   | 1915.924  | BF244646  | 63746.73  | 47351.789 | AF086503  | 859.5     |
| 1617.996  | AK000950  | 1878.633  | 1796.208  | AK024030  | 3117.108  | 1643.924  | CY3Cy5    | 7241.811  |
| 1165.622  | AK000176  | 546.685   | 578.916   | AF275808  | 1935.811  | 1666.005  | AA778392  | 8204.572  |
| 2636.249  | AK000831  | 2881.431  | 2781.778  | AK024038  | 6073.194  | 5958.852  | AI478178  | 1703.144  |
| 1877.721  | AK000981  | 745.625   | 837.058   | NM_00205E | 2337.15   | 2495.473  | AA101279  | 664.176   |
| 8518.125  | AK024615  | 512.699   | 895.225   | NM_00580E | 7717.404  | 7804.823  | M19154    | 2690.584  |
| 4034.91   | AK025054  | 2258.475  | 3063.905  | NM_01551E | 4426.269  | 5420.913  | AA399410  | 5558.062  |
| 18830.453 | AK024556  | 606.536   | 670.954   | AK001579  | 15735.873 | 14334.506 | AA137031  | 1451.75   |
| 6064.1    | AK024935  | 947.688   | 700.061   | NM_00267C | 4281.322  | 4635.25   | AA292226  | 6811.042  |

|           |                  |           |           |                  |           |           |                  |           |
|-----------|------------------|-----------|-----------|------------------|-----------|-----------|------------------|-----------|
| 3073.207  | <b>AK025325</b>  | 2531.196  | 1703.359  | <b>AF163302</b>  | 3705.234  | 4266.719  | <b>NM_000500</b> | 2163.38   |
| 2868.559  | <b>U50531</b>    | 2898.426  | 2745.141  | <b>NM_006408</b> | 4687.461  | 3219.298  | <b>M29873</b>    | 540.886   |
| 3552.594  | <b>NM_005318</b> | 14426.208 | 17131.375 | <b>NM_002419</b> | 3935.526  | 5205.476  | <b>BC007031</b>  | 4581.362  |
| 3304.923  | <b>L09099</b>    | 914.795   | 1018.526  | <b>NM_001989</b> | 7664.217  | 7558.708  | <b>AF129756</b>  | 10744.666 |
| 8736.148  | <b>NM_005421</b> | 1875.221  | 2277.038  | <b>NM_002653</b> | 10950.338 | 7887.684  | <b>NM_002957</b> | 16335.637 |
| 2118.909  | <b>AK024580</b>  | 30865.531 | 39249.516 | <b>NM_005604</b> | 1608.585  | 2477.048  | <b>BC036369</b>  | 2423.007  |
| 2009.318  | <b>AL442093</b>  | 6287.285  | 9605.594  | <b>S69023</b>    | 2183.029  | 1650.534  | <b>X12492</b>    | 12381.88  |
| 840.217   | <b>AK024331</b>  | 1318.314  | 1250.147  | <b>NM_003454</b> | 2376.362  | 2749.48   | <b>U93051</b>    | 11718.172 |
| 2021.8    | <b>AK024452</b>  | 1097.806  | 3795.696  | <b>NM_003418</b> | 21630.402 | 12592.723 | <b>SR2</b>       | 66199.5   |
| 12790.958 | <b>AJ249975</b>  | 409.275   | 540.66    | <b>NM_017908</b> | 2457.238  | 3029.28   | <b>SR4</b>       | 19123.721 |
| 1650.42   | <b>AK021733</b>  | 2120.135  | 2147.018  | <b>NM_006885</b> | 831.967   | 575.148   | <b>SR6</b>       | 3857.514  |
| 2752.441  | <b>AK000543</b>  | 9770.607  | 4716.271  | <b>M25077</b>    | 2831.216  | 3669.886  | <b>SR8</b>       | 12362.274 |
| 2500.044  | <b>AK026683</b>  | 2556.256  | 1860.818  | <b>NM_018702</b> | 2723.755  | 2024.375  | <b>SR10</b>      | 40179.789 |
| 507.331   | <b>D16906</b>    | 5356.173  | 5900.667  | <b>U96131</b>    | 279.746   | 361.918   | <b>CY3Cy5</b>    | 8478.41   |
| 7493.403  | <b>AK022335</b>  | 1114.149  | 500.308   | <b>NM_004593</b> | 1571.538  | 1995.007  | <b>NM_005682</b> | 1712.685  |
| 56544.094 | <b>AL110280</b>  | 1801.428  | 1901.974  | <b>NM_005778</b> | 12871.299 | 12160.969 | <b>NM_002926</b> | 1846.735  |
| 11749.896 | <b>AF014457</b>  | 913.684   | 962.157   | <b>NM_018084</b> | 16985.449 | 12777.411 | <b>NM_000233</b> | 1041.724  |
| 45106.727 | <b>NM_017458</b> | 1285.174  | 1491.21   | <b>AF164797</b>  | 57246.414 | 47441.301 | <b>NM_018697</b> | 1586.397  |
| 27849.594 | <b>AF086196</b>  | 912.838   | 1052.852  | <b>NM_017840</b> | 20288.678 | 24566.756 | <b>AF090116</b>  | 979.44    |
| 22575.369 | <b>NM_005542</b> | 38895.098 | 9500.942  | <b>AK001052</b>  | 32350.453 | 32402.701 | <b>NM_014030</b> | 25260.146 |
| 39302.168 | <b>X95095</b>    | 1995.204  | 1134.61   | <b>NM_001415</b> | 37833.172 | 32747.715 | <b>NM_004224</b> | 2423.365  |
| 3790.455  | <b>AF078528</b>  | 14767.888 | 18248.83  | <b>NM_004564</b> | 4592.227  | 2292.149  | <b>Z21967</b>    | 4088.588  |
| 44097.84  | <b>NM_018224</b> | 8957.983  | 5397.886  | <b>NM_000968</b> | 67880.602 | 47136.805 | <b>NM_016185</b> | 20009.467 |
| 4089.709  | <b>NM_019896</b> | 4795.305  | 6057.96   | <b>AL355743</b>  | 3581.368  | 10619.689 | <b>NM_012110</b> | 8629.997  |
| 983.604   | <b>NM_018569</b> | 3632.844  | 3022.516  | <b>L77571</b>    | 572.595   | 654.838   | <b>NM_005461</b> | 1088.556  |
| 1031.915  | <b>NM_000730</b> | 5337.457  | 3597.312  | <b>X81896</b>    | 734.885   | 1079.671  | <b>AF052693</b>  | 4325.127  |
| 799.402   | <b>U31734</b>    | 28201.883 | 20990.148 | <b>AF070595</b>  | 661.983   | 997.466   | <b>NM_001129</b> | 11401.883 |
| 1581.905  | <b>AF085885</b>  | 1863.245  | 2802.776  | <b>NM_002202</b> | 1333.147  | 1626.228  | <b>L09100</b>    | 1918.321  |
| 1724.125  | <b>M24751</b>    | 1216.296  | 1846.461  | <b>NM_006005</b> | 1538.886  | 1155.942  | <b>NM_005472</b> | 1609.869  |
| 33060.086 | <b>AL049974</b>  | 1283.22   | 1002.877  | <b>NM_002629</b> | 44952.68  | 47648.324 | <b>NM_004313</b> | 926.972   |
| 951.53    | <b>AF009319</b>  | 2659.833  | 1836.98   | <b>NM_014364</b> | 2175.519  | 1551.817  | <b>NM_000132</b> | 8515.543  |
| 38259.594 | <b>AL365519</b>  | 1203.59   | 616.964   | <b>NM_001685</b> | 53793.07  | 50706.031 | <b>NM_001727</b> | 2537.315  |
| 11491.26  | <b>NM_018465</b> | 6346.81   | 9914.731  | <b>NM_006067</b> | 15996.342 | 16505.471 | <b>NM_004076</b> | 2355.405  |
| 2258.044  | <b>Z36845</b>    | 1147.88   | 1288.364  | <b>NM_000284</b> | 4415.778  | 5272.845  | <b>BG717460</b>  | 3168.521  |
| 2065.463  | <b>M73792</b>    | 1037.073  | 1105.454  | <b>NM_004813</b> | 2567.562  | 3017.848  | <b>NM_018086</b> | 10319.798 |
| 2093.577  | <b>NM_016127</b> | 8343.523  | 7134.141  | <b>AK023008</b>  | 1740.37   | 1221.635  | <b>NM_004161</b> | 10584.337 |
| 3507.895  | <b>AF085939</b>  | 1212.269  | 901.306   | <b>NM_004689</b> | 5205.097  | 4014.79   | <b>NM_001295</b> | 2131.21   |
| 7452.265  | <b>NM_006792</b> | 34105.012 | 30301.564 | <b>NM_006026</b> | 8139.918  | 8277.441  | <b>NM_005161</b> | 1438.429  |
| 1088.866  | <b>Z36874</b>    | 44455.738 | 17084.162 | <b>BG339855</b>  | 749.37    | 712.34    | <b>NM_001462</b> | 1564.892  |
| 3451.626  | <b>AK095477</b>  | 3732.266  | 1944.682  | <b>AB040956</b>  | 4811.964  | 4161.844  | <b>NM_004072</b> | 849.31    |
| 1475.008  | <b>AK023326</b>  | 1451.396  | 1208.423  | <b>NM_016587</b> | 2178.001  | 1057.311  | <b>NM_006890</b> | 512.78    |
| 8639.972  | <b>AK022462</b>  | 1505.569  | 1649.662  | <b>NM_017953</b> | 1846.604  | 1341.694  | <b>NM_003110</b> | 2622.089  |
| 1210.268  | <b>NM_020530</b> | 2350.661  | 3024.503  | <b>Z11773</b>    | 1767.216  | 855.118   | <b>NM_003612</b> | 2858.394  |
| 13206.855 | <b>AK022418</b>  | 4322.638  | 4714.001  | <b>NM_006914</b> | 673.081   | 1053.964  | <b>NM_013230</b> | 1919.487  |
| 1473.936  | <b>AF279777</b>  | 1194.191  | 1310.238  | <b>NM_003446</b> | 22876.807 | 35312.172 | <b>X72308</b>    | 4358.891  |
| 17888.293 | <b>AK021748</b>  | 15719.529 | 10881.683 | <b>NM_001485</b> | 6445.457  | 4530.477  | <b>NM_005408</b> | 1009.242  |
| 7053.519  | <b>AK021771</b>  | 582.036   | 298.02    | <b>NM_002702</b> | 903.277   | 763.708   | <b>BC008376</b>  | 14991.211 |
| 1012.097  | <b>AL137257</b>  | 11343.471 | 10113.354 | <b>AK021510</b>  | 894.81    | 666.274   | <b>AK024908</b>  | 4018.682  |
| 3167.496  | <b>CY3Cy5</b>    | 10188.38  | 523.332   | <b>AK022711</b>  | 1924.29   | 1946.895  | <b>NM_018270</b> | 5064.066  |
| 2884.078  | <b>AA778392</b>  | 3242.083  | 5266.54   | <b>AK024310</b>  | 363.036   | 413.767   | <b>NM_000260</b> | 18522.348 |
| 1322.86   | <b>AI478178</b>  | 886.175   | 1870.695  | <b>AK023039</b>  | 422.1     | 546.204   | <b>NM_014160</b> | 9017.218  |
| 737.946   | <b>M19154</b>    | 2301.612  | 2026.759  | <b>AL109688</b>  | 3978.833  | 4202.478  | <b>AF230877</b>  | 2776.831  |
| 940.041   | <b>AA399410</b>  | 5275.359  | 8616.317  | <b>AF074981</b>  | 1439.542  | 1361.244  | <b>AB033049</b>  | 16701.385 |

|           |           |           |           |           |           |           |           |           |
|-----------|-----------|-----------|-----------|-----------|-----------|-----------|-----------|-----------|
| 834.098   | AA137031  | 1446.012  | 2115.66   | AK025863  | 1085.068  | 634.376   | NM_004377 | 3891.49   |
| 3163.271  | AA292226  | 7503.215  | 3168.229  | D42044    | 2959.578  | 1783.766  | AB037815  | 13898.511 |
| 11571.566 | NM_000500 | 1530.471  | 1454.462  | AK026149  | 2083.436  | 2326.274  | NM_003645 | 7401.116  |
| 9016.623  | J04449    | 539.252   | 838.331   | AF038185  | 4444.483  | 3553.845  | AF263613  | 2641.376  |
| 629.577   | BC007031  | 4834.913  | 6053.137  | AB027011  | 11742.796 | 10246.603 | NM_000097 | 2334.907  |
| 3420.209  | AF129756  | 8737.103  | 11367.165 | AK025305  | 596.992   | 502.985   | NM_001509 | 1984.84   |
| 946.989   | NM_002957 | 10747.044 | 13073.936 | AF131788  | 450.485   | 236.438   | AK022878  | 6469.271  |
| 658.917   | BC036369  | 2516.445  | 2866.445  | AK023616  | 1115.73   | 962.726   | NM_018099 | 2601.834  |
| 28004.543 | X12492    | 13269.158 | 15971.195 | AK022249  | 266.949   | 417.699   | AF217187  | 16859.625 |
| 5962.98   | U93051    | 11418.916 | 10534.012 | AK025665  | 7106.753  | 5013.986  | NM_017750 | 1866.053  |
| 3208.283  | SR2       | 59847.938 | 61300.676 | AK027152  | 340.736   | 664.635   | AK027122  | 10044.394 |
| 726.309   | SR4       | 21363.131 | 35833.879 | BC037530  | 30939.758 | 31252.316 | AK026196  | 2677.147  |
| 28499.293 | SR6       | 3094.231  | 4002.002  | NM_014851 | 7112.741  | 6068.988  | AL137668  | 956.229   |
| 1317.168  | SR8       | 9434.779  | 43648.551 | AK022811  | 408.061   | 568.339   | NM_013348 | 2393.594  |
| 736.509   | SR10      | 37842.34  | 20304.934 | AL117635  | 1416.632  | 2199.007  | NM_004977 | 4826.311  |
| 1605.743  | CY3Cy5    | 1779.61   | 148.377   | AK025332  | 2717.213  | 3132.298  | NM_004888 | 24380.27  |
| 3756.177  | NM_005682 | 1035.094  | 1503.516  | AB040929  | 322.043   | 891.054   | NM_012283 | 26797.051 |
| 3578.708  | NM_002926 | 1073.079  | 1063.527  | AB020735  | 996.841   | 906.496   | NM_004700 | 2114.403  |
| 2236.326  | NM_018697 | 1306.43   | 1310.451  | D17010    | 247.594   | 412.905   | NM_004162 | 7709.367  |
| 5448.713  | NM_014030 | 23254.16  | 23094.361 | AJ011596  | 4814.687  | 4277.099  | NM_006868 | 6329.829  |
| 1896.71   | NM_004224 | 1456.441  | 1799.333  | U17639    | 841.861   | 683.672   | AB020706  | 5165.05   |
| 1272.526  | Z21967    | 4370.584  | 4677.225  | AL049215  | 42642.629 | 37339.469 | NM_007166 | 4611.904  |
| 902.705   | NM_003738 | 564.766   | 552.045   | X51779    | 1465.03   | 1171.977  | NM_002869 | 3491.129  |
| 1075.89   | NM_016185 | 19751.855 | 19855.762 | X81001    | 345.725   | 359.525   | NM_006755 | 4278.688  |
| 3537.317  | NM_012110 | 4966.101  | 6548.562  | Z83954    | 5214.104  | 5435.205  | NM_005881 | 1288.654  |
| 2081.537  | NM_005461 | 1043.914  | 3776.863  | M74093    | 3652.291  | 4714.369  | L40519    | 896.144   |
| 1359.721  | AF052693  | 2928.089  | 3455.219  | M28219    | 2571.33   | 2764.088  | NM_004204 | 1094.605  |
| 663.237   | NM_001129 | 17773.51  | 13650.281 | L17326    | 1004.024  | 1425.851  | AK002181  | 1347.011  |
| 2470.837  | L09100    | 1700.356  | 2567.927  | D17207    | 5507.921  | 4335.793  | NM_001641 | 15061.357 |
| 764.461   | NM_005472 | 2194.689  | 2535.8    | D55640    | 1644.23   | 2153.413  | BC015750  | 62536.434 |
| 737.325   | NM_013435 | 918.589   | 831.35    | AF085897  | 682.446   | 746.295   | AK025769  | 4932.573  |
| 3559.615  | NM_000132 | 9513.197  | 14906.252 | AF085822  | 641.79    | 706.518   | AW945166  | 1302.498  |
| 1715.448  | NM_001727 | 3563.044  | 3515.359  | AK021551  | 2449.081  | 1241.793  | NM_005236 | 3565.829  |
| 554.464   | NM_004076 | 2401.589  | 2146.73   | AK025117  | 1034.332  | 2197.617  | NM_006384 | 9783.583  |
| 3782.622  | NM_007123 | 52394.5   | 51146.281 | AK000024  | 6767.973  | 6047.326  | NM_013257 | 2180.666  |
| 11957.19  | NM_004161 | 10836.559 | 9985.791  | AK026693  | 1872.646  | 2031.022  | AB044546  | 2192.779  |
| 653.227   | NM_001295 | 1670.98   | 7144.762  | NM_012285 | 542.824   | 456.073   | NM_014225 | 44630.418 |
| 2546.576  | NM_005161 | 799.51    | 466.4     | AK001128  | 281.131   | 343.05    | AF163473  | 2080.527  |
| 22715.209 | NM_020347 | 856.037   | 351.328   | AK000794  | 2931.594  | 2539.822  | NM_006256 | 4798.155  |
| 5165.112  | NM_001462 | 1691.392  | 2440.8    | AK000950  | 1769.635  | 1426.971  | NM_002846 | 1948.199  |
| 1496.532  | NM_004072 | 843.622   | 879.355   | AK026812  | 1193.305  | 1293.839  | NM_002837 | 5246.063  |
| 1957.924  | NM_003110 | 2711.269  | 3799.748  | AK000176  | 691.739   | 748.737   | NM_002662 | 892.733   |
| 588.727   | NM_003612 | 2849.174  | 2978.313  | AK000831  | 2038.9    | 2387.108  | NM_000132 | 7937.613  |
| 1737.715  | NM_013230 | 2348.733  | 1975.759  | AK000981  | 866.246   | 665.092   | NM_001727 | 2891.05   |
| 480.09    | X72308    | 2877.494  | 3347.266  | AK024615  | 2208.263  | 3263.855  | NM_004076 | 3121.392  |
| 4418.777  | NM_005408 | 1197.236  | 1528.375  | AK025054  | 3094.442  | 3252.074  | AA778392  | 7718.056  |
| 6468.695  | BC008376  | 18546.275 | 26316.578 | AK024556  | 1652.414  | 1647.807  | M19154    | 2595.206  |
| 4120.107  | AB041269  | 1509.774  | 1960.073  | AK024935  | 876.42    | 991.543   | AA399410  | 5634.903  |
| 1390.761  | AK024908  | 4035.586  | 4438.182  | AK025107  | 462.554   | 986.975   | AA137031  | 1462.417  |
| 1066.225  | NM_018270 | 6260.965  | 4991.963  | AK025325  | 4058.555  | 3898.368  | AA292226  | 6837.723  |
| 544.581   | NM_000260 | 36594.43  | 39493.766 | U50531    | 2542.574  | 2356.179  | NM_000500 | 2617.942  |
| 31603.598 | NM_014160 | 8212.564  | 5019.113  | NM_005318 | 18373.277 | 33226.293 | M29873    | 701.753   |
| 3452.694  | AF230877  | 4514.222  | 4417.225  | L09099    | 1140.9    | 802.106   | BC007031  | 4909.772  |

|           |           |           |           |           |           |           |           |           |
|-----------|-----------|-----------|-----------|-----------|-----------|-----------|-----------|-----------|
| 16168.187 | NM_01766E | 3811.431  | 4276.37   | NM_005421 | 2010.501  | 1919.419  | AF129756  | 10014.612 |
| 2145.625  | NM_004377 | 1854.226  | 1701.642  | AK024580  | 27858.76  | 34363.082 | NM_002957 | 11014.256 |
| 10327.341 | AB037815  | 4904.021  | 4599.99   | AL442093  | 5925.238  | 8464.202  | BC036369  | 3678.524  |
| 10030.844 | NM_00364E | 5540.617  | 3635.297  | AK024331  | 1350.404  | 1597.623  | U93051    | 9207.178  |
| 3334.53   | AF263613  | 2125.973  | 3488.99   | AK024452  | 1774.854  | 2181.255  | NM_01754C | 1148.49   |
| 3493.722  | NM_000097 | 2543.258  | 1879.697  | AJ249975  | 665.756   | 714.019   | NM_01827C | 4549.488  |
| 856.312   | AK022878  | 2909.978  | 4643.193  | AK021733  | 2055.429  | 1916.439  | NM_00026C | 36623.117 |
| 2779.397  | NM_01809E | 3391.279  | 2735.392  | NM_01244E | 491.555   | 756.861   | NM_01416C | 8330.824  |
| 681.237   | AF217187  | 18538.781 | 10597.196 | AK000543  | 10184.193 | 11193.517 | AB033049  | 26812.363 |
| 2888.756  | NM_01775C | 2183.73   | 3927.188  | AK026683  | 2515.694  | 2198.98   | NM_00292E | 1634.113  |
| 984.707   | AK027122  | 11140.1   | 10802.774 | D16906    | 5353.9    | 5566.772  | NM_00023E | 635.023   |
| 538.997   | AK026196  | 2163.671  | 2128.406  | AK022335  | 1159.212  | 1542.077  | NM_018697 | 1544.048  |
| 3062.339  | AL137668  | 970.327   | 722.58    | AL110280  | 2974.339  | 3145.029  | NM_01403C | 24377.496 |
| 31593.836 | NM_01334E | 1829.401  | 2540.215  | NM_01745E | 1415.26   | 1028.671  | NM_004224 | 1957.394  |
| 31085.377 | NM_004977 | 5994.718  | 6961.661  | AF086196  | 706.544   | 657.958   | NM_000254 | 7005.595  |
| 2952.879  | NM_002251 | 732.406   | 427.525   | NM_00554E | 30786.01  | 12600.678 | Z21967    | 3525.657  |
| 976.625   | NM_00470C | 1636.159  | 1823.413  | X95095    | 1568.528  | 941.892   | NM_00373E | 3361.825  |
| 1487.221  | NM_00686E | 10061.749 | 15048.123 | AF078528  | 12297.885 | 13505.83  | NM_01618E | 20020.414 |
| 1870.924  | AB020706  | 7503.089  | 7876.586  | AF161411  | 2364.09   | 2013.755  | NM_012110 | 7158.858  |
| 4066.985  | NM_00716E | 5282.899  | 6047.967  | AK000450  | 15442.109 | 16630.895 | AF052693  | 2225.479  |
| 1574.145  | NM_00286E | 4650.874  | 4582.786  | NM_018224 | 10666.721 | 7032.087  | NM_001129 | 7293.443  |
| 30548.762 | NM_00675E | 1911.059  | 2905.586  | NM_01989E | 3167.46   | 4484.324  | L09100    | 1010.912  |
| 423.812   | NM_005881 | 960.866   | 1673.077  | NM_01856E | 3495.131  | 3488.489  | NM_00547E | 803.979   |
| 8956.725  | L40519    | 1095.021  | 1256.007  | NM_00073C | 4063.378  | 5298.092  | NM_00431E | 497.314   |
| 412.657   | NM_004204 | 1255.06   | 1296.222  | U31734    | 25384.025 | 27821.195 | NM_01343E | 603.639   |
| 674.899   | AK002181  | 1064.036  | 902.699   | AF085885  | 1500.174  | 3073.439  | NM_00686E | 5584.487  |
| 8812.129  | AK025769  | 4984.874  | 4362.09   | AK022953  | 455.241   | 500.913   | NM_00286E | 3292.173  |
| 2039.733  | AW945166  | 1386.517  | 1787.764  | AF009319  | 2886.53   | 2680.586  | NM_01808E | 5006.046  |
| 807.818   | NM_00523E | 3716.95   | 4785.321  | AL365519  | 995.037   | 813.166   | NM_004161 | 13134.326 |
| 2372.395  | NM_006384 | 12346.637 | 14386.916 | NM_01846E | 3549.374  | 4359.926  | NM_00129E | 2254.84   |
| 4682.064  | NM_013257 | 2504.436  | 3293.472  | Z36845    | 946.801   | 875.349   | NM_005161 | 1724.576  |
| 1590.998  | AB044546  | 1380.391  | 1594.529  | M73792    | 650.054   | 508.498   | NM_00146E | 1562.891  |
| 5675.156  | AF163473  | 1463.248  | 1304.035  | NM_016127 | 5685.422  | 3482.944  | NM_00407E | 715.743   |
| 1380.67   | NM_00284E | 1670.773  | 6138.428  | NM_00679E | 20173.816 | 16117.545 | AB040957  | 3026.175  |
| 516.075   | NM_002837 | 4649.492  | 4639.363  | Z36874    | 22454.766 | 15925.287 | NM_003110 | 2892.068  |
| 7045.951  | AL133077  | 27451.016 | 38575.621 | AK095477  | 2525.467  | 1813.462  | NM_00361E | 2288.487  |
| 7624.929  | AK025211  | 3715.566  | 6855.208  | AK023326  | 980.418   | 805.956   | NM_01323C | 2024.305  |
| 17765.826 | U06715    | 2226.432  | 1789.339  | AK022462  | 1008.029  | 893.568   | X72308    | 3446.653  |
| 2184.453  | NM_00266E | 1482.837  | 1728.505  | NM_02053C | 1473.622  | 1469.006  | NM_00540E | 31821.83  |
| 6402.958  | NM_00013E | 9568.9    | 14504.885 | AK022418  | 3738.484  | 2411.199  | BC008376  | 8365.092  |
| 8353.583  | NM_001727 | 3057.421  | 2270.796  | AF279777  | 1804.316  | 1942.77   | AB041269  | 1204.151  |
| 1561.748  | NM_00407E | 2311.233  | 1636.124  | AK021748  | 34763.109 | 41943.863 | AK024908  | 2988.398  |
| 14082.838 | NM_00712E | 43427.469 | 39953.992 | AK021771  | 924.909   | 1120.434  | NM_002837 | 3629.066  |
| 5021.516  | AA778392  | 8049.614  | 11511.185 | AL137257  | 11041.828 | 14672.573 | AL133077  | 15617.636 |
| 334.934   | AI478178  | 1912.059  | 2605.293  | CY3Cy5    | 6578.708  | 191.663   | NM_00266E | 1285.152  |
| 739.562   | AA101279  | 1134.242  | 1177.458  | AA778392  | 14047.524 | 15172.82  | NM_004377 | 3208.6    |
| 4177.639  | AA137031  | 2126.703  | 2306.427  | AI478178  | 2474.095  | 3058.607  | AB037815  | 12376.895 |
| 1176.312  | AA292226  | 9537.742  | 3936.7    | AA101279  | 528.066   | 1278.472  | NM_00364E | 6485.485  |
| 454.287   | NM_00050C | 3070.91   | 2238.529  | M19154    | 2488.376  | 2272.772  | AF263613  | 2839.973  |
| 1291.926  | M29873    | 691.794   | 621.322   | AA399410  | 5917.871  | 6744.145  | NM_000097 | 2423.799  |
| 668.527   | BC007031  | 4275.127  | 5250.188  | AA137031  | 2031.881  | 1237.017  | AK022878  | 4328.079  |
| 25196.359 | AF129756  | 10423.625 | 12128.024 | AA292226  | 5692.819  | 2836.146  | NM_01809E | 2562.886  |
| 4497.215  | NM_002957 | 14015.488 | 13561.706 | NM_00050C | 2097.256  | 2614.3    | AF217187  | 16628.322 |

|           |                  |           |           |                  |           |           |                  |           |
|-----------|------------------|-----------|-----------|------------------|-----------|-----------|------------------|-----------|
| 5147.321  | <b>BC036369</b>  | 2590.239  | 2055.305  | <b>BC007031</b>  | 5121.151  | 5017.224  | <b>NM_017750</b> | 2071.302  |
| 3208.546  | <b>U93051</b>    | 10750.031 | 6926.469  | <b>AF129756</b>  | 11748.281 | 11800.896 | <b>AK027122</b>  | 10237.364 |
| 12643.13  | <b>NM_017540</b> | 1774.58   | 2181.776  | <b>NM_002957</b> | 12139.03  | 13144.367 | <b>AK026196</b>  | 2835.385  |
| 7043.517  | <b>NM_018270</b> | 5777.918  | 4668.748  | <b>BC036369</b>  | 2544.277  | 2607.292  | <b>AL137668</b>  | 912.101   |
| 747.166   | <b>NM_000260</b> | 19497.166 | 20111.283 | <b>X12492</b>    | 10848.585 | 9810.726  | <b>NM_013348</b> | 1730.602  |
| 2770.821  | <b>NM_014160</b> | 5939.945  | 2701.039  | <b>U93051</b>    | 13078.551 | 11190.286 | <b>NM_004977</b> | 4660.755  |
| 8319.397  | <b>AF230877</b>  | 2802.402  | 2004.843  | <b>SR2</b>       | 71215.25  | 66688.898 | <b>NM_004888</b> | 20125.355 |
| 1488.333  | <b>AB033049</b>  | 20287.057 | 18975.363 | <b>SR4</b>       | 22443.426 | 36051.754 | <b>NM_012283</b> | 34720.254 |
| 1108.239  | <b>NM_005682</b> | 1630.22   | 1102.797  | <b>SR6</b>       | 3710.971  | 4745.346  | <b>NM_004700</b> | 1550.855  |
| 637.261   | <b>NM_002926</b> | 1644.796  | 962.977   | <b>SR8</b>       | 13706.8   | 42367.949 | <b>U93051</b>    | 9518.954  |
| 396.379   | <b>NM_018697</b> | 1506.766  | 1430.856  | <b>SR10</b>      | 45415.559 | 25271.412 | <b>NM_017540</b> | 1489.797  |
| 4177.25   | <b>NM_014030</b> | 28147.906 | 32590.842 | <b>CY3Cy5</b>    | 4518.73   | 74.573    | <b>NM_006755</b> | 4839.405  |
| 2381.955  | <b>NM_004224</b> | 1853.807  | 2277.98   | <b>NM_000406</b> | 917.623   | 865.165   | <b>NM_005881</b> | 1029.051  |
| 1788.639  | <b>NM_000254</b> | 7445.257  | 4259.168  | <b>NM_005682</b> | 2318.15   | 2556.233  | <b>L40519</b>    | 1389.898  |
| 10309.99  | <b>Z21967</b>    | 4281.202  | 4695.928  | <b>NM_002926</b> | 1329.85   | 1756.62   | <b>NM_004204</b> | 1378.25   |
| 2644.521  | <b>NM_003738</b> | 618.318   | 1269.263  | <b>NM_018697</b> | 1454.445  | 1832.402  | <b>AK002181</b>  | 959.808   |
| 1579.007  | <b>NM_016185</b> | 25641.502 | 36575.223 | <b>NM_014030</b> | 27081.791 | 28251.4   | <b>AW945166</b>  | 1381.838  |
| 503.965   | <b>NM_012110</b> | 5199.846  | 8939.614  | <b>NM_004224</b> | 3488.026  | 5219.1    | <b>NM_005236</b> | 3189.703  |
| 1515.242  | <b>AF052693</b>  | 3228.454  | 3950.152  | <b>NM_000254</b> | 5609.278  | 4000.081  | <b>NM_006384</b> | 9387.58   |
| 886.954   | <b>NM_001129</b> | 12884.452 | 9706.702  | <b>Z21967</b>    | 3040.961  | 2741.072  | <b>NM_013257</b> | 1743.868  |
| 332.144   | <b>L09100</b>    | 1434.165  | 1581.657  | <b>NM_016185</b> | 20199.572 | 19994.381 | <b>AB044546</b>  | 1855.681  |
| 2261.767  | <b>NM_005472</b> | 1463.605  | 1460.081  | <b>NM_012110</b> | 7177.206  | 9718.188  | <b>NM_014225</b> | 40199.813 |
| 2360.231  | <b>NM_004313</b> | 607.718   | 740.853   | <b>NM_005461</b> | 1157.223  | 1193.542  | <b>AF163473</b>  | 1100.964  |
| 2154.865  | <b>NM_013435</b> | 1058.932  | 1281.232  | <b>AF052693</b>  | 3106.615  | 3138.421  | <b>NM_006256</b> | 4527.956  |
| 1328.597  | <b>AB020706</b>  | 3922.717  | 3877.792  | <b>NM_001129</b> | 12002.313 | 12017.497 | <b>NM_002846</b> | 1754.619  |
| 5006.24   | <b>NM_007166</b> | 5380.176  | 9602.011  | <b>L09100</b>    | 1688.592  | 1987.318  | <b>AF052693</b>  | 1749.455  |
| 543.69    | <b>NM_016223</b> | 70151.5   | 61975.023 | <b>NM_005472</b> | 1622.535  | 2072.406  | <b>NM_001129</b> | 7733.039  |
| 13028.501 | <b>NM_002869</b> | 4245.5    | 4222.058  | <b>NM_004313</b> | 876.837   | 1225.215  | <b>L09100</b>    | 1000.951  |
| 1047.785  | <b>NM_004161</b> | 12871.585 | 7248.687  | <b>NM_013435</b> | 617.464   | 950.172   | <b>NM_005472</b> | 1001.895  |
| 2409.335  | <b>NM_001295</b> | 1921.793  | 7167.467  | <b>NM_000132</b> | 11383.725 | 18879.09  | <b>NM_004313</b> | 471.741   |
| 3388.644  | <b>NM_005161</b> | 1541.666  | 746.577   | <b>NM_001727</b> | 5604.281  | 5749.388  | <b>NM_013435</b> | 823.512   |
| 26533.418 | <b>NM_020347</b> | 696.09    | 378.352   | <b>NM_004076</b> | 2738.804  | 2402.428  | <b>NM_000132</b> | 8066.095  |
| 4619.712  | <b>NM_001462</b> | 1535.867  | 2005.408  | <b>BG717460</b>  | 4154.238  | 7912.316  | <b>NM_001727</b> | 2411.239  |
| 3864.199  | <b>NM_004072</b> | 910.057   | 1173.964  | <b>NM_004161</b> | 12452.099 | 9364.263  | <b>NM_004076</b> | 2481.479  |
| 17136.801 | <b>AF068286</b>  | 476.583   | 758.556   | <b>NM_001295</b> | 3057.121  | 6447.422  | <b>BG717460</b>  | 3193.756  |
| 3460.289  | <b>AB040957</b>  | 3254.452  | 3358.844  | <b>NM_005161</b> | 2295.63   | 1594.428  | <b>AA778392</b>  | 5457.853  |
| 13472.218 | <b>NM_003110</b> | 3219.743  | 4680.401  | <b>AB037749</b>  | 433.34    | 459.033   | <b>AI478178</b>  | 1294.619  |
| 5457.945  | <b>NM_003612</b> | 2326.797  | 3438.003  | <b>NM_001462</b> | 1941.747  | 2441.793  | <b>AA101279</b>  | 609.515   |
| 2449.746  | <b>NM_013230</b> | 2434.818  | 2569.581  | <b>NM_004072</b> | 1148.606  | 1739.951  | <b>AA292226</b>  | 5992.371  |
| 1722.042  | <b>X72308</b>    | 2090.6    | 3384.973  | <b>AB040957</b>  | 2697.17   | 2383.1    | <b>NM_000500</b> | 2216.05   |
| 1569.723  | <b>NM_005408</b> | 1245.94   | 1215.483  | <b>NM_003110</b> | 2112.056  | 3422.831  | <b>BC007031</b>  | 3902.468  |
| 2172.71   | <b>BC008376</b>  | 12901.767 | 13251.767 | <b>NM_003612</b> | 2512.592  | 1799.56   | <b>AF129756</b>  | 7785.301  |
| 473.364   | <b>AB041269</b>  | 1008.969  | 616.389   | <b>NM_013230</b> | 2108.471  | 1574.249  | <b>NM_002957</b> | 9963.845  |
| 1940.63   | <b>AK024908</b>  | 3869.581  | 3715.6    | <b>X72308</b>    | 3770.121  | 4018.87   | <b>BC036369</b>  | 2405.599  |
| 4165.355  | <b>NM_002837</b> | 3352.566  | 3970.698  | <b>NM_005408</b> | 1003.437  | 1473.721  | <b>X12492</b>    | 8585.976  |
| 12067.546 | <b>AK025211</b>  | 1905.901  | 3283.42   | <b>BC008376</b>  | 15316.878 | 15744.485 | <b>X72308</b>    | 2407.681  |
| 31597.064 | <b>U06715</b>    | 1352.474  | 717.763   | <b>AB041269</b>  | 1109.664  | 1524.09   | <b>NM_005408</b> | 464.701   |
| 1346.026  | <b>NM_013402</b> | 12265.294 | 7406.816  | <b>AK024908</b>  | 5122.085  | 6389.496  | <b>BC008376</b>  | 8947.509  |
| 2203.229  | <b>NM_002662</b> | 1596.52   | 1409.97   | <b>NM_018270</b> | 9822.515  | 12616.587 | <b>AB041269</b>  | 1265.887  |
| 1895.772  | <b>NM_004377</b> | 1927.366  | 2074.209  | <b>AF230877</b>  | 10747.327 | 8833.812  | <b>AK024908</b>  | 3197.223  |
| 4777.189  | <b>AB037815</b>  | 5791.024  | 4270.932  | <b>AB033049</b>  | 38990.047 | 50325.035 | <b>NM_018270</b> | 2403.269  |
| 750.863   | <b>NM_003645</b> | 6578.807  | 3458.006  | <b>NM_004377</b> | 8737.197  | 9418.771  | <b>NM_017668</b> | 3331.117  |
| 924.049   | <b>AF263613</b>  | 2579.851  | 4377.046  | <b>AB037815</b>  | 33139.246 | 34238.902 | <b>AB033049</b>  | 17894.705 |



|           |           |           |           |           |           |           |           |           |
|-----------|-----------|-----------|-----------|-----------|-----------|-----------|-----------|-----------|
| 986.268   | NM_000097 | 3020.248  | 2451.494  | NM_003645 | 7293.635  | 7233.77   | NM_005682 | 1966.425  |
| 1806.02   | AK022878  | 3637.713  | 5565.203  | AF263613  | 3168.354  | 4359.333  | NM_002926 | 1734.642  |
| 11656.053 | NM_018099 | 2631.742  | 2371.566  | NM_000097 | 2953.361  | 2121.6    | NM_018697 | 1304.987  |
| 48381.203 | AF217187  | 19755.162 | 16602.447 | NM_018099 | 2292.34   | 3129.97   | NM_014030 | 13342.882 |
| 2874.509  | NM_017750 | 1907.961  | 5774.068  | AF217187  | 18912.537 | 19306.846 | Z21967    | 3580.014  |
| 593.051   | AK027122  | 10899.585 | 10760.459 | NM_017750 | 2489.455  | 3331.751  | NM_016185 | 19158.771 |
| 1868.748  | AK026196  | 1955.715  | 1666.181  | AK027122  | 10196.842 | 12352.226 | NM_012110 | 6653.171  |
| 5268.345  | AL137668  | 661.745   | 1459.965  | AK026196  | 1728.459  | 1903.059  | NM_005461 | 642.742   |
| 1508.318  | AV704019  | 726.818   | 820.164   | AL137668  | 709.167   | 513.435   | NM_013348 | 2467.558  |
| 14319.045 | NM_013348 | 2110.419  | 3546.149  | NM_013348 | 3256.385  | 2308.235  | NM_004977 | 4150.806  |
| 427.202   | NM_004977 | 5708.875  | 8462.863  | NM_004977 | 5878.27   | 5803.582  | NM_012283 | 35073.832 |
| 2241.055  | NM_004888 | 26317.59  | 42065.598 | NM_012283 | 36709.691 | 31570.467 | NM_004700 | 2009.881  |
| 3247.547  | NM_012283 | 28927.998 | 25173.99  | NM_004700 | 2497.837  | 2461.177  | NM_004162 | 9026.266  |
| 1723.007  | NM_004700 | 1285.545  | 924.75    | NM_006868 | 10025.91  | 13090.193 | NM_006868 | 6205.308  |
| 11391.404 | U93051    | 10578.268 | 10034.639 | AB020706  | 6288.7    | 7149.002  | AB020706  | 4022.906  |
| 1315.041  | NM_017540 | 1154.01   | 1716.642  | NM_007166 | 7097.075  | 8212.979  | NM_007166 | 4350.067  |
| 609.487   | NM_006755 | 4535.596  | 4817.15   | NM_002869 | 6480.139  | 5909.57   | NM_016223 | 60208.563 |
| 8065.864  | NM_005881 | 1083.681  | 1917.902  | NM_006755 | 4858.889  | 9306.802  | NM_002869 | 3239.094  |
| 3291.559  | L40519    | 1469.247  | 894.303   | NM_005881 | 1761.006  | 2157.268  | NM_018086 | 6837.752  |
| 2563.111  | NM_004204 | 1147.949  | 1546.886  | L40519    | 1165.043  | 1393.861  | NM_004161 | 12812.27  |
| 2780.74   | AK002181  | 982.708   | 1710.799  | NM_004204 | 3186.05   | 3443.826  | NM_001295 | 2261.679  |
| 2394.287  | AW945166  | 1149.879  | 724.738   | AK002181  | 1690.422  | 2451.389  | NM_005161 | 1349.084  |
| 882.298   | NM_005236 | 4052.71   | 4692.146  | AK025769  | 4278.011  | 4071.958  | NM_001462 | 1428.942  |
| 2680.113  | NM_006384 | 14939.758 | 20393.098 | AW945166  | 1020.758  | 1552.191  | NM_004072 | 937.73    |
| 4928.608  | NM_013257 | 3591.797  | 5665.951  | NM_005236 | 2802.979  | 2282.276  | AB040957  | 2384.01   |
| 1537.704  | AB044546  | 1035.827  | 1175.486  | NM_006384 | 9458.93   | 8529.502  | NM_003110 | 2043.57   |
| 4973.988  | AF163473  | 1744.329  | 2597.036  | NM_013257 | 2268.328  | 1613.979  | NM_003612 | 1506.015  |
| 1702.977  | NM_006256 | 4128.591  | 3868.808  | AB044546  | 2343.907  | 1702.473  | NM_013230 | 1631.451  |
| 572.184   | NM_002846 | 1290.606  | 5334.492  | AF163473  | 1348.509  | 1622.938  | NM_013257 | 1664.26   |
| 5668.588  | AF052693  | 2821.72   | 3461.459  | NM_006256 | 4919.594  | 5370.72   | AB044546  | 1460.547  |
| 6491.705  | NM_001129 | 8059.775  | 6439.351  | NM_002846 | 3074.606  | 10476.083 | AF163473  | 1045.695  |
| 13949.984 | L09100    | 1201.717  | 1819.961  | NM_002837 | 4076.131  | 5890.832  | NM_006256 | 4502.76   |
| 1760.859  | NM_005472 | 1304.892  | 1394.07   | AL133077  | 23354.064 | 46257.891 | NM_002846 | 1498.121  |
| 6353.789  | NM_013435 | 747.836   | 1159.341  | AK025211  | 4252.507  | 4549.7    | AK025211  | 1996.932  |
| 7683.341  | NM_000132 | 6441.156  | 7608.03   | U06715    | 1431.497  | 1936.512  | U06715    | 1081.481  |
| 636.847   | NM_001727 | 3637.974  | 2134.858  | NM_002662 | 2036.734  | 2054.165  | NM_013402 | 11158.259 |
| 5755.157  | NM_004076 | 2385.84   | 1121.466  | NM_000132 | 9600.543  | 14683.69  | NM_002662 | 1239.989  |
| 42402.133 | NM_007123 | 46880.73  | 46181.992 | NM_001727 | 7117.121  | 7194.329  | NM_004377 | 4556.551  |
| 7612.009  | BG717460  | 3904.865  | 8894.407  | NM_004076 | 2982.721  | 2981.734  | AB037815  | 10766.777 |
| 2778.221  | AA778392  | 6859.528  | 6456.597  | NM_007123 | 36864.48  | 36702.223 | NM_003645 | 7053.971  |
| 599.072   | AI478178  | 1740.7    | 1823.158  | BG717460  | 3826.743  | 6607.342  | AF263613  | 2790.265  |
| 2597.848  | AA101279  | 584.723   | 951.931   | AA778392  | 15035.041 | 17050.664 | NM_000097 | 2355.615  |
| 1224.943  | AA292226  | 7800.872  | 3033.907  | AI478178  | 2575.73   | 3644.257  | NM_001509 | 2345.706  |
| 1036.834  | NM_000500 | 2497.341  | 2273.335  | AA101279  | 944.975   | 1042.536  | AK022878  | 3847.001  |
| 31633.652 | M29873    | 663.213   | 1030.459  | AA399410  | 6960.53   | 7840.765  | NM_018099 | 2404.735  |
| 3528.214  | J04449    | 539.045   | 449.757   | AA137031  | 1983.517  | 1004.052  | AF217187  | 16858.209 |
| 4114.598  | BC007031  | 3815.468  | 4308.685  | AA292226  | 6171.628  | 2347.411  | NM_017750 | 1885.374  |
| 3738.743  | NM_002957 | 13975.042 | 17072.242 | NM_000500 | 2281.753  | 2779.932  | AK027122  | 10274.265 |
| 364.94    | BC036369  | 2993.446  | 3736.572  | BC007031  | 4163.423  | 2748.891  | AK026196  | 2204.395  |
| 11063.796 | X72308    | 1796.541  | 2771.257  | AF129756  | 10298.965 | 8558.077  | AL137668  | 1609.094  |
| 5298.63   | BC008376  | 12600.652 | 14580.849 | NM_002957 | 9337.152  | 7969.276  | NM_016444 | 880.887   |
| 698.457   | AB041269  | 2357.33   | 2919.904  | BC036369  | 2597.897  | 3061.497  | AL137718  | 926.727   |
| 2275.596  | AK024908  | 2444.703  | 2169.766  | X12492    | 12606.808 | 11114.841 | NM_003460 | 5363.189  |

|           |           |           |           |           |           |           |           |           |
|-----------|-----------|-----------|-----------|-----------|-----------|-----------|-----------|-----------|
| 7977.852  | NM_018270 | 4821.377  | 2723.229  | U93051    | 14550.116 | 11393.337 | NM_005686 | 4571.896  |
| 1309.116  | NM_000260 | 19720.602 | 14879.611 | NM_017540 | 2461.871  | 3991.74   | NM_006767 | 826.927   |
| 633.199   | NM_014160 | 7429.21   | 2968.668  | NM_014160 | 9115.539  | 5850.733  | NM_017540 | 1563.14   |
| 436.975   | AF230877  | 4135.585  | 3856.648  | AB033049  | 60073.164 | 53684.988 | NM_006755 | 6068.713  |
| 4123.896  | NM_017668 | 3306.719  | 3810.316  | NM_000406 | 733.127   | 808.366   | NM_005881 | 1485.903  |
| 9568.349  | AB033049  | 16432.965 | 14582.766 | NM_005682 | 2737.299  | 2947.434  | L40519    | 1258.282  |
| 2435.071  | NM_005682 | 1558.216  | 1654.142  | NM_002926 | 1397.121  | 1846.605  | NM_004204 | 2909.487  |
| 1376.505  | NM_002926 | 1885.053  | 1073.235  | NM_018697 | 1467.448  | 1419.378  | AK002181  | 1439.293  |
| 415.053   | NM_000233 | 744.429   | 973.476   | AF090116  | 500.91    | 697.827   | BC015750  | 59972.699 |
| 1301.639  | NM_018697 | 1427.69   | 1309.962  | NM_014030 | 26070.299 | 21063.82  | AW945166  | 1678.724  |
| 828.069   | NM_014030 | 27875.199 | 35743.785 | NM_004224 | 3101.243  | 4085.255  | NM_005236 | 2968.041  |
| 382.215   | NM_004224 | 1415.932  | 1916.72   | NM_000254 | 6503.435  | 3610.345  | NM_006384 | 9778.427  |
| 2023.593  | NM_000254 | 6992.754  | 4284.308  | Z21967    | 3316.254  | 2424.175  | NM_002589 | 4387.33   |
| 1956.543  | Z21967    | 4266.445  | 4266.817  | NM_016185 | 20568.482 | 35581.402 | AL110227  | 1731.921  |
| 1438.974  | NM_003738 | 392.472   | 1080.336  | NM_012110 | 7940.829  | 8503.958  | NM_001400 | 2509.365  |
| 1264.269  | NM_016185 | 21667.066 | 24615.475 | NM_005461 | 1052.705  | 1335.845  | AB033281  | 3323.264  |
| 2957.986  | NM_012110 | 5466.437  | 8192.493  | AF052693  | 3291.662  | 3094.87   | NM_002882 | 19792.045 |
| 518.495   | NM_013348 | 1760.271  | 2208.87   | NM_001129 | 14227.925 | 14380.939 | AB011161  | 1357.189  |
| 11241.112 | NM_004977 | 4896.226  | 6558.908  | L09100    | 2062.208  | 2995.986  | NM_000827 | 610.769   |
| 878.797   | NM_004888 | 22699.178 | 30548.193 | NM_005472 | 1693.533  | 2195.043  | NM_002944 | 1703.533  |
| 1984.623  | NM_012283 | 19949.734 | 17767.977 | NM_004313 | 1128.582  | 1472.813  | AF327354  | 896.278   |
| 3547.226  | NM_006868 | 6354.587  | 5700.473  | NM_013435 | 1211.598  | 1540.076  | AB014513  | 7304.951  |
| 16233.133 | AB020706  | 5123.146  | 3558.958  | NM_006868 | 8393.674  | 8372.115  | NM_004747 | 1353.27   |
| 2066.002  | NM_007166 | 4226.465  | 4002.006  | AB020706  | 4196.953  | 4084.584  | NM_002341 | 6233.676  |
| 1001.081  | NM_016223 | 68194.477 | 66297.383 | NM_007166 | 5757.359  | 5511.329  | AL137651  | 1996.429  |
| 9060.908  | NM_002869 | 4439.027  | 4509.225  | NM_018086 | 12618.347 | 17969.5   | NM_018945 | 2585.458  |
| 843.13    | NM_004161 | 14459.255 | 9864.452  | NM_004161 | 15064.384 | 10854.799 | AB029018  | 2190.863  |
| 3726.144  | NM_001295 | 2275.205  | 11927.411 | NM_001295 | 2738.712  | 6894.077  | NM_006650 | 1561.348  |
| 12340.591 | NM_005161 | 2245.06   | 1478.535  | NM_005161 | 2509.364  | 1401.296  | NM_006648 | 1279.125  |
| 6230.208  | AB037749  | 2985.483  | 1677.927  | AB037749  | 838.773   | 923.091   | NM_000868 | 950.025   |
| 2298.883  | NM_020347 | 674.743   | 220.169   | NM_001462 | 1609.22   | 2068.074  | NM_004711 | 2897.24   |
| 1380.576  | NM_001462 | 1567.554  | 1933.294  | NM_004072 | 1229.987  | 1401.322  | AF161361  | 608.754   |
| 2025.741  | NM_004072 | 824.791   | 851.366   | AB040957  | 3229.934  | 2266.039  | NM_006463 | 6619.774  |
| 448.647   | AB040957  | 2958.613  | 2443.68   | NM_003110 | 2789.599  | 2655.746  | AK023050  | 3952.961  |
| 1935.609  | NM_006890 | 708.769   | 796.267   | NM_003612 | 3249.614  | 3081.998  | NM_001444 | 7294.736  |
| 3620.533  | NM_003110 | 3139.817  | 6392.671  | NM_013230 | 2051.988  | 2215.493  | NM_016521 | 3213.5    |
| 11844.077 | NM_003612 | 1843.492  | 2005.53   | X72308    | 3402.75   | 3442.557  | X98494    | 7419.494  |
| 23860.875 | NM_013230 | 2374.827  | 2791.046  | NM_005408 | 712.494   | 774.318   | NM_001240 | 2099.304  |
| 892.537   | NM_013257 | 1656.199  | 2768.534  | BC008376  | 14194.384 | 16632.557 | NM_002709 | 4326.956  |
| 13488.732 | AB044546  | 1397.943  | 1741.486  | AB041269  | 780.593   | 1882.751  | NM_001099 | 1015.401  |
| 1144.039  | AF163473  | 1215.492  | 1440.976  | AK024908  | 3036.287  | 3625.032  | NM_006823 | 2889.961  |
| 3850.033  | NM_006256 | 4153.887  | 4298.596  | NM_002837 | 2084.212  | 2148.889  | NM_007031 | 1136.464  |
| 736.254   | NM_002846 | 1358.624  | 4645.333  | AL133077  | 14946.112 | 17565.627 | NM_002657 | 2990.861  |
| 848.337   | NM_002837 | 2153.352  | 2015.188  | AK025211  | 2239.459  | 2204.51   | NM_001350 | 9770.998  |
| 1042.99   | AL133077  | 18061.547 | 20067.611 | U06715    | 1518.929  | 1109.55   | NM_014809 | 1145.233  |
| 1440.012  | AK025211  | 2064.755  | 2802.077  | NM_002662 | 1398.956  | 1295.531  | NM_016074 | 25396.104 |
| 8700.245  | U06715    | 1185.024  | 808.453   | NM_004377 | 5862.178  | 6921.587  | NM_003921 | 1694.539  |
| 2455.222  | NM_013402 | 13131.818 | 7337.485  | AB037815  | 25043.787 | 22715.92  | NM_004208 | 13702.089 |
| 608.577   | NM_002662 | 1564.546  | 819.819   | NM_003645 | 10466.695 | 10613.057 | NM_001843 | 2020.217  |
| 1668.581  | NM_004377 | 3624.272  | 2566.907  | AF263613  | 3334.525  | 3967.289  | NM_000419 | 1017.655  |
| 5526.445  | AB037815  | 5611.677  | 4359.196  | NM_000097 | 3318.432  | 2218.074  | NM_017768 | 2527.22   |
| 17303.174 | NM_003645 | 7653.01   | 5178.435  | AK022878  | 6336.852  | 5817.345  | NM_002776 | 912.33    |
| 1847.16   | AF263613  | 3863.996  | 8562.013  | NM_018099 | 2556.332  | 3423.005  | AK023398  | 1949.457  |

|           |           |           |           |           |           |           |           |           |
|-----------|-----------|-----------|-----------|-----------|-----------|-----------|-----------|-----------|
| 2275.879  | NM_000097 | 3597.229  | 3043.084  | AF217187  | 19126.166 | 13661.452 | NM_001907 | 449.233   |
| 3624.409  | NM_001509 | 811.338   | 254.09    | NM_017750 | 1969.877  | 2011.871  | NM_015711 | 67862.445 |
| 12822.791 | AK022878  | 4208.838  | 5392.047  | AK027122  | 10645.326 | 10701.786 | NM_000050 | 833.573   |
| 2703.968  | NM_018099 | 2900.69   | 2234.409  | AK026196  | 1739.303  | 1210.922  | NM_000481 | 1203.572  |
| 1868.786  | AF217187  | 17472.305 | 10868.188 | NM_013348 | 2645.671  | 2617.577  | AK025681  | 2415.626  |
| 640.494   | NM_017750 | 2182      | 3606.628  | NM_004977 | 5427.086  | 4735.018  | NM_014905 | 5431.735  |
| 749.338   | AK027122  | 10374.857 | 9358.355  | NM_012283 | 17171.561 | 11311.972 | NM_012137 | 3913.581  |
| 7638.412  | AK026196  | 2836.308  | 3183.646  | NM_004700 | 2135.676  | 1146.96   | NM_004483 | 21095.791 |
| 3998.719  | NM_016444 | 1022.096  | 1369.281  | U93051    | 14282.506 | 11549.633 | NM_001513 | 49441.059 |
| 2519.498  | NM_017839 | 3692.572  | 3671.56   | NM_017540 | 2361.291  | 2345.249  | NM_001281 | 3125.95   |
| 2744.201  | AL137718  | 1227.052  | 924.111   | NM_006755 | 5209.419  | 6225.303  | NM_016835 | 503.444   |
| 7838.55   | NM_003460 | 5522.351  | 4081.236  | NM_005881 | 1656.423  | 1472.01   | NM_003981 | 12836.006 |
| 2392.078  | U94354    | 906.888   | 1324.478  | L40519    | 1461.413  | 1219.178  | U26596    | 18299.809 |
| 540.889   | NM_002904 | 21225.52  | 24174.992 | NM_004204 | 2971.268  | 3023.148  | AF070600  | 43490.625 |
| 2271.051  | NM_014189 | 3184.488  | 2629.735  | AK002181  | 1580.005  | 1727.206  | AB014522  | 9741.377  |
| 1379.309  | NM_005686 | 3441.914  | 4160.84   | AK025769  | 4613.856  | 3049.58   | NM_014875 | 4004.424  |
| 4447.553  | NM_017540 | 1427.379  | 974.421   | AW945166  | 1022.602  | 689.929   | AB033023  | 6372.893  |
| 1387.481  | NM_006755 | 6663.547  | 5880.908  | NM_005236 | 3174.248  | 2150.576  | BC027895  | 543.727   |
| 3698.293  | NM_005881 | 1579.192  | 1937.44   | NM_006384 | 11128.656 | 7857.36   | AF116238  | 2295.683  |
| 4628.462  | L40519    | 1631.435  | 1415.121  | NM_013257 | 2564.646  | 2514.889  | NM_006982 | 831.143   |
| 6396.675  | NM_004204 | 2671.476  | 2947.149  | AB044546  | 2348.907  | 1666.776  | NM_016531 | 1574.464  |
| 1303.399  | AK002181  | 993.421   | 1151.202  | AF163473  | 2020.227  | 1477.768  | NM_003593 | 5610.144  |
| 5794.815  | BC015750  | 55182.797 | 56403.973 | NM_006256 | 5230.061  | 3195.393  | NM_014383 | 23974.738 |
| 5153.177  | AK025769  | 4336.333  | 2739.11   | NM_002846 | 1978.147  | 4207.101  | NM_000244 | 3055.44   |
| 757.835   | AW945166  | 1058.212  | 1020.261  | AF052693  | 4560.273  | 3973.196  | NM_014285 | 1912.997  |
| 2174.892  | NM_005236 | 4599.979  | 6623.589  | NM_001129 | 6746.515  | 4144.303  | AF026816  | 18173.154 |
| 3558.556  | NM_006384 | 10700.379 | 12183.898 | L09100    | 3123.406  | 4368.654  | NM_004719 | 2883.583  |
| 6442.012  | NM_002589 | 5494.717  | 6086.844  | NM_005472 | 2194.65   | 2487.517  | NM_018553 | 1974.32   |
| 43692.75  | AF064846  | 1065.744  | 1195.21   | NM_013435 | 1392.586  | 1221.151  | NM_004704 | 3322.505  |
| 6964.054  | AL110227  | 1840.912  | 1161.841  | NM_000132 | 8546.237  | 11399.586 | NM_005455 | 4535.572  |
| 2486.606  | NM_001400 | 1581.989  | 1517.856  | NM_001727 | 7247.005  | 5158.871  | NM_014633 | 2892.675  |
| 40709.879 | AB033281  | 3413.694  | 3025.333  | NM_004076 | 4229.195  | 3326.148  | NM_001970 | 27560.32  |
| 484.475   | NM_002882 | 20682.982 | 10662.23  | NM_007123 | 45467.043 | 45813.855 | NM_006810 | 11909.035 |
| 2256.561  | AB011161  | 1761.27   | 2106.912  | BG717460  | 5155.02   | 8404.892  | AK024054  | 4758.135  |
| 923.305   | NM_000827 | 726.551   | 861.329   | AA778392  | 11829.963 | 12952.405 | NM_004116 | 3035.259  |
| 978.085   | NM_002944 | 1237.391  | 1033.447  | AI478178  | 2797.628  | 3131.702  | AK024508  | 3662.967  |
| 478.036   | AF327354  | 1397.467  | 1044.288  | AA101279  | 1114.798  | 1038.858  | AK027213  | 4327.241  |
| 19078.277 | AB014513  | 4715.125  | 3549.566  | AA292226  | 6773.341  | 2424.591  | AL096749  | 8429.169  |
| 2804.199  | NM_004747 | 787.619   | 682.284   | NM_000500 | 2155.846  | 1991.633  | AK023620  | 2163.046  |
| 2961.864  | AK024430  | 30242.496 | 30641.461 | BC007031  | 3565.611  | 2544.758  | AF086189  | 3296.238  |
| 2227.337  | NM_002341 | 10678.209 | 54235.773 | AF129756  | 8016.694  | 4372.393  | AL050055  | 4636.568  |
| 8463.365  | AL137651  | 1662.259  | 1599.839  | NM_002957 | 8245.023  | 3764.652  | NM_005009 | 13086.711 |
| 4767.486  | NM_018945 | 2403.692  | 2444.279  | BC036369  | 2559.12   | 1023.544  | NM_014596 | 4829.138  |
| 586.081   | AB029018  | 2170.375  | 640.431   | X12492    | 9778.542  | 4734.618  | NM_006703 | 5541.914  |
| 2855.458  | NM_006650 | 1710.797  | 1533.529  | X72308    | 4172.111  | 4095.396  | NM_004037 | 1670.582  |
| 8011.237  | AK024436  | 4179.467  | 3938.391  | NM_005408 | 1592.453  | 2004.149  | NM_005116 | 2376.743  |
| 467.309   | NM_006648 | 1115.679  | 1001.808  | BC008376  | 23864.535 | 30646.559 | NM_002766 | 3780.542  |
| 49051.332 | NM_000868 | 802.48    | 1570.738  | AB041269  | 1853.536  | 2732.561  | NM_000788 | 10634.149 |
| 2461.966  | NM_004711 | 5713.419  | 8308.764  | AK024908  | 4959.637  | 7374.75   | AF254088  | 1911.812  |
| 8846.138  | AF161361  | 601.019   | 1149.19   | NM_018270 | 8792.408  | 11705.207 | NM_001420 | 2372.963  |
| 2361.78   | NM_006463 | 8849.526  | 8765.863  | AF230877  | 21115.457 | 16464.459 | NM_000248 | 1176.828  |
| 1356.176  | NM_001444 | 6551.396  | 3885.022  | NM_017668 | 4851.953  | 5543.75   | AB031046  | 1634.211  |
| 433.903   | NM_016521 | 5861.603  | 4697.138  | AB033049  | 64390.805 | 57599.242 | NM_002449 | 18707.809 |

|           |                  |           |           |                  |           |           |                  |           |
|-----------|------------------|-----------|-----------|------------------|-----------|-----------|------------------|-----------|
| 369.507   | <b>X98494</b>    | 6907.104  | 5225.465  | <b>NM_005682</b> | 2498.03   | 3265.644  | <b>AK025388</b>  | 1514.066  |
| 1095.988  | <b>NM_001240</b> | 1990.366  | 1006.234  | <b>NM_002926</b> | 2197.959  | 3086.718  | <b>NM_006147</b> | 722.858   |
| 638.622   | <b>NM_002709</b> | 7708.331  | 5699.357  | <b>NM_000233</b> | 847.413   | 736.11    | <b>AB006631</b>  | 1508.077  |
| 1152.242  | <b>NM_001099</b> | 2318.069  | 2602.618  | <b>NM_018697</b> | 1992.577  | 2688.712  | <b>AF291181</b>  | 1409.165  |
| 1592.017  | <b>NM_006823</b> | 1683.837  | 1339.774  | <b>AF090116</b>  | 381.454   | 763.816   | <b>NM_005741</b> | 2464.858  |
| 766.763   | <b>NM_002657</b> | 2289.796  | 413.668   | <b>NM_014030</b> | 34569.359 | 40243.074 | <b>NM_000964</b> | 2185.507  |
| 1181.391  | <b>NM_004089</b> | 22695.811 | 14469.928 | <b>NM_004224</b> | 4655.428  | 7664.427  | <b>BF343886</b>  | 1305.372  |
| 2863.945  | <b>NM_001350</b> | 7701.911  | 7728.68   | <b>NM_000254</b> | 8553.074  | 7061.138  | <b>NM_013263</b> | 5658.591  |
| 2139.033  | <b>NM_014809</b> | 1567.694  | 1360.576  | <b>Z21967</b>    | 4710.41   | 5537.982  | <b>AL137407</b>  | 2128.613  |
| 1201.816  | <b>NM_016074</b> | 18254.438 | 9631.724  | <b>NM_003738</b> | 2480.104  | 2434.272  | <b>NM_018178</b> | 7510.451  |
| 9633.3    | <b>NM_003921</b> | 2271.351  | 1519.578  | <b>NM_016185</b> | 23858.637 | 30983.246 | <b>AK025204</b>  | 992.73    |
| 852.735   | <b>NM_004208</b> | 18219.17  | 19797.549 | <b>NM_012110</b> | 5761.515  | 5367.105  | <b>AK027256</b>  | 890.81    |
| 3234.809  | <b>NM_001843</b> | 1505.671  | 1305.278  | <b>NM_013348</b> | 1496.433  | 1299.687  | <b>NM_019000</b> | 558.365   |
| 11442.879 | <b>NM_000419</b> | 1402.35   | 2294.904  | <b>NM_004977</b> | 7121.128  | 7137.674  | <b>AF143330</b>  | 716.093   |
| 6863.01   | <b>NM_017768</b> | 3340.905  | 4176.939  | <b>NM_004888</b> | 24110.518 | 38175.879 | <b>AK025178</b>  | 1824.414  |
| 875.184   | <b>NM_002776</b> | 1232.079  | 1589.24   | <b>NM_012283</b> | 62392.07  | 50914.953 | <b>NM_014835</b> | 6191.169  |
| 1116.175  | <b>AK023398</b>  | 2434.643  | 2204.124  | <b>NM_006868</b> | 8853.317  | 8992.88   | <b>AK001822</b>  | 4737.112  |
| 253.065   | <b>NM_015711</b> | 44638.695 | 40026.609 | <b>NM_007166</b> | 7805.266  | 9528.324  | <b>AK026969</b>  | 1917.668  |
| 1902.889  | <b>NM_000481</b> | 1056.517  | 537.65    | <b>NM_004161</b> | 22067.662 | 17845.604 | <b>AF086287</b>  | 1898.558  |
| 537.978   | <b>AK025681</b>  | 2665.126  | 1448.579  | <b>NM_001295</b> | 3604.021  | 9795.449  | <b>AF086409</b>  | 1160.068  |
| 11049.399 | <b>NM_014905</b> | 4198.114  | 3851.3    | <b>NM_005161</b> | 2117.536  | 1449.592  | <b>AK024268</b>  | 2392.994  |
| 325.136   | <b>NM_012137</b> | 3005.944  | 2065.991  | <b>AB037749</b>  | 845.467   | 775.43    | <b>AF086295</b>  | 1467.834  |
| 16906.418 | <b>NM_004483</b> | 18395.125 | 7471.967  | <b>NM_020347</b> | 910.894   | 615.286   | <b>AF086344</b>  | 4556.015  |
| 3749.583  | <b>NM_001513</b> | 48072.695 | 38627.773 | <b>NM_001462</b> | 1999.607  | 2749.358  | <b>AF086424</b>  | 956.987   |
| 1251.309  | <b>NM_001281</b> | 3394.656  | 2789.1    | <b>NM_004072</b> | 1411.996  | 1848.762  | <b>AL110130</b>  | 1023.479  |
| 4326.318  | <b>NM_016835</b> | 1121.149  | 1400.953  | <b>AB040957</b>  | 3894.966  | 3924.907  | <b>AF052116</b>  | 937.368   |
| 903.794   | <b>NM_003981</b> | 13275.54  | 10263.398 | <b>NM_003110</b> | 3750.919  | 6555.185  | <b>NM_018087</b> | 3790.901  |
| 329.917   | <b>U26596</b>    | 20004.063 | 12344.206 | <b>NM_003612</b> | 3232.913  | 3836.592  | <b>AK023647</b>  | 918.894   |
| 822.85    | <b>AB014522</b>  | 9903.491  | 8642.583  | <b>NM_013230</b> | 2988.371  | 2893.771  | <b>AL137366</b>  | 1007.008  |
| 1051.507  | <b>NM_014875</b> | 4980.231  | 6669.368  | <b>NM_014225</b> | 31400.277 | 28365.76  | <b>BC031635</b>  | 886.991   |
| 786.241   | <b>AB033023</b>  | 10713.895 | 17259.33  | <b>NM_002837</b> | 3972.879  | 5536.962  | <b>AF085916</b>  | 767.035   |
| 6766.069  | <b>BC027895</b>  | 940.549   | 751.982   | <b>U06715</b>    | 2104.068  | 2228.435  | <b>AL359598</b>  | 729.91    |
| 45327.145 | <b>AF116238</b>  | 4086.219  | 2732.245  | <b>NM_013402</b> | 20492.332 | 18375.523 | <b>AF085927</b>  | 1074.416  |
| 2143.302  | <b>NM_006982</b> | 852.549   | 596.29    | <b>NM_002662</b> | 1570.844  | 1796.081  | <b>AF085954</b>  | 2206.381  |
| 499.878   | <b>AB033085</b>  | 3537.896  | 2132.732  | <b>NM_004377</b> | 7423.31   | 8845.649  | <b>AL137337</b>  | 894.376   |
| 2065.035  | <b>AF024703</b>  | 14680.885 | 16594.623 | <b>AB037815</b>  | 20702.777 | 19036.055 | <b>AL161969</b>  | 1116.642  |
| 5144.33   | <b>NM_016531</b> | 2128.731  | 1790.699  | <b>NM_000097</b> | 3810.851  | 2923.824  | <b>AL442095</b>  | 1397.314  |
| 1151.206  | <b>NM_003593</b> | 8729.06   | 10954.904 | <b>NM_018099</b> | 4186.412  | 4973.869  | <b>AL137378</b>  | 1190.079  |
| 1594.884  | <b>NM_014383</b> | 27318.996 | 28907.879 | <b>AF217187</b>  | 24473.996 | 26054.125 | <b>AL137609</b>  | 25654.248 |
| 6500.353  | <b>NM_000244</b> | 3180.621  | 2253.234  | <b>NM_017750</b> | 2955.679  | 4496.824  | <b>AL353946</b>  | 5449.412  |
| 2565.201  | <b>NM_014285</b> | 1901.496  | 1306.49   | <b>AK027122</b>  | 13444.054 | 23115.264 | <b>X69081</b>    | 4952.017  |
| 17422.783 | <b>AF026816</b>  | 23563.742 | 17841.055 | <b>AK026196</b>  | 2321.166  | 3098.88   | <b>NM_005714</b> | 2148.563  |
| 1507.113  | <b>NM_004719</b> | 3673.708  | 1784.4    | <b>AL137668</b>  | 965.404   | 1474.102  | <b>AL359931</b>  | 7283.752  |
| 623.888   | <b>NM_018553</b> | 1908.41   | 659.578   | <b>NM_016444</b> | 715.653   | 718.218   | <b>AK000954</b>  | 2070.397  |
| 2252.087  | <b>NM_004704</b> | 3047.392  | 980.544   | <b>NM_017839</b> | 2961.088  | 2749.736  | <b>AK025800</b>  | 2431.542  |
| 1784.708  | <b>NM_005455</b> | 4445.74   | 3033.697  | <b>NM_003707</b> | 7780.303  | 5866.806  | <b>AK022333</b>  | 558.998   |
| 8808.631  | <b>NM_014633</b> | 3334.713  | 3539.41   | <b>AL137718</b>  | 1082.16   | 1550.733  | <b>AK023294</b>  | 669.737   |
| 1529.698  | <b>NM_001970</b> | 42854.066 | 44573.387 | <b>NM_003460</b> | 11579.448 | 8615.638  | <b>AF095854</b>  | 1126.293  |
| 41199.234 | <b>NM_006810</b> | 12522.457 | 10703.424 | <b>U94354</b>    | 493.273   | 484.877   | <b>NM_014162</b> | 1322.132  |
| 3039.135  | <b>NM_004116</b> | 3404.975  | 3184.679  | <b>NM_002904</b> | 26345.639 | 32381.75  | <b>AF113689</b>  | 670.237   |
| 1461.952  | <b>AK024508</b>  | 3831.069  | 2717.374  | <b>NM_005686</b> | 6626.145  | 6808.158  | <b>AF159093</b>  | 2277.978  |
| 1478.487  | <b>AK027213</b>  | 4035.935  | 2533.673  | <b>NM_006767</b> | 1142.53   | 1031.929  | <b>AF113679</b>  | 568.125   |
| 811.522   | <b>AL096749</b>  | 10688.603 | 14711.241 | <b>NM_017540</b> | 2808.487  | 3139.097  | <b>AK021997</b>  | 1881.103  |

|           |           |           |           |           |           |           |           |           |
|-----------|-----------|-----------|-----------|-----------|-----------|-----------|-----------|-----------|
| 1805.797  | AK023620  | 3395.004  | 2217.505  | NM_006755 | 6713.876  | 7645.609  | AK022125  | 1253.852  |
| 793.605   | AF086189  | 2955.329  | 3274.447  | NM_005881 | 1727.857  | 2930.628  | AK022244  | 2593.162  |
| 2990.79   | AL050055  | 3759.216  | 2595.854  | NM_005794 | 662.356   | 701.458   | AK022381  | 4938.516  |
| 743.186   | NM_005009 | 12893.52  | 6664.772  | L40519    | 2244.105  | 2320.019  | AK022012  | 1136.095  |
| 669.467   | NM_014596 | 5750.459  | 2357.213  | NM_004204 | 3142.923  | 3844.018  | AK022149  | 489.027   |
| 771.172   | NM_006703 | 14659.524 | 17308.318 | AK002181  | 2019.51   | 2865.674  | AK022286  | 2756.98   |
| 503.389   | NM_004037 | 2232.638  | 2368.719  | BC015750  | 63903.715 | 55085.719 | AK022613  | 5959.256  |
| 449.717   | NM_005116 | 2429.479  | 2499.205  | AW945166  | 1722.768  | 2055.729  | AK023843  | 301.818   |
| 7420.164  | NM_002766 | 4591.544  | 1625.199  | NM_005236 | 4115.132  | 5028.848  | AL359557  | 1557.259  |
| 5586.721  | AJ404857  | 1014.043  | 591.945   | NM_006384 | 13294.027 | 18326.488 | AK024582  | 919.332   |
| 477.59    | NM_000788 | 13263.813 | 8359.665  | NM_002589 | 5293.76   | 4453.351  | AK024143  | 888.302   |
| 5725.07   | AF254088  | 1924.316  | 1376.451  | AF064846  | 986.603   | 958.421   | NM_014367 | 1076.619  |
| 5808.724  | NM_001420 | 1190.135  | 734.223   | AL110227  | 1374.161  | 1032.322  | AK025835  | 712.831   |
| 2334.87   | NM_000248 | 729.05    | 875.808   | NM_001400 | 6560.899  | 5166.972  | NM_002365 | 2334.652  |
| 7262.626  | AB031046  | 1244.901  | 864.62    | AB033281  | 3280.268  | 2850.785  | AF161441  | 2286.485  |
| 1803.291  | NM_002449 | 12400.055 | 12064.229 | NM_002882 | 21214.188 | 36030.379 | AL137474  | 2701.747  |
| 725.928   | AK025388  | 1280.503  | 764.463   | AB011161  | 2496.764  | 1640.205  | AL133023  | 573.731   |
| 1257.047  | NM_006147 | 601.648   | 1714.626  | NM_000827 | 934.093   | 1034.756  | AK021572  | 1456.795  |
| 1670.969  | AF291181  | 1041.118  | 687.94    | NM_002944 | 3086.583  | 4398.044  | AK026757  | 766.338   |
| 9397.038  | NM_005741 | 2269.578  | 1423.597  | AF327354  | 2159.159  | 2999.12   | AF119908  | 1532.264  |
| 4758.462  | NM_000964 | 3528.15   | 2248.446  | NM_006259 | 626.237   | 585.992   | U50539    | 549.288   |
| 591.541   | BF343886  | 983.331   | 617.375   | NM_004747 | 2636.132  | 2439.703  | AK000653  | 7195.557  |
| 9178.298  | NM_013263 | 4935.124  | 5480.144  | NM_002341 | 9080.175  | 5449.611  | AK000908  | 1017.84   |
| 826.029   | AL137407  | 2807.622  | 2653.681  | AL137651  | 2486.77   | 1773.383  | X96660    | 1565.64   |
| 8190.082  | AF085839  | 772.797   | 705.162   | NM_018945 | 3619.571  | 2755.393  | AK023519  | 1610.793  |
| 1177.206  | NM_018178 | 10425.328 | 7904.782  | AB029018  | 2568.224  | 2107.14   | Z70696    | 1242.918  |
| 821.553   | AK025204  | 801.266   | 1246.517  | NM_006650 | 1902.345  | 2099.568  | NM_005792 | 5688.335  |
| 2412.302  | AK027256  | 772.483   | 1651.495  | NM_006648 | 1904.876  | 1819.483  | AF048847  | 3469.092  |
| 3088.912  | NM_019000 | 418.463   | 1369.683  | NM_000868 | 1067.938  | 1275.099  | L37718    | 59866.129 |
| 425.307   | AK025178  | 2512.593  | 1605.154  | NM_004711 | 5284.117  | 4837.739  | AL137717  | 2935.778  |
| 51356.844 | AF147359  | 1236.249  | 868.016   | AF161361  | 629.979   | 592.933   | AF035297  | 1427.924  |
| 1626.321  | NM_014835 | 6423.644  | 5938.181  | NM_006463 | 6528.994  | 8193.934  | NM_014039 | 2469.489  |
| 1119.633  | AK001822  | 4219.966  | 3552.486  | NM_001444 | 6121.275  | 10854.465 | S67154    | 4506.462  |
| 1291.171  | AK026969  | 1299.082  | 1064.687  | NM_016521 | 6994.071  | 8682.696  | AK026181  | 7029.243  |
| 4732.075  | AF086287  | 1721.604  | 1525.806  | X98494    | 10308.14  | 12987.362 | AK021451  | 978.968   |
| 3653.437  | AF086409  | 844.378   | 590.453   | NM_001240 | 4537.173  | 4925.735  | AF086468  | 1571.593  |
| 17468.1   | AK024268  | 1837.519  | 1080.342  | NM_002709 | 10299.865 | 11109.997 | AK027239  | 1595.329  |
| 1640.308  | AF086295  | 1890.35   | 2833.805  | NM_001099 | 1730.76   | 2285.519  | AF005082  | 15336.46  |
| 376.785   | AF086344  | 4969.368  | 3886.317  | NM_006823 | 1170.172  | 2457.131  | AL117595  | 3055.863  |
| 6634.436  | NM_018087 | 5573.044  | 2762.056  | NM_007031 | 1343.007  | 987.144   | AB028988  | 17012.488 |
| 5751.628  | AL360260  | 809.792   | 559.399   | NM_002657 | 3517.809  | 1474.653  | AK023072  | 1810.041  |
| 11677.392 | AK023647  | 494.07    | 852.72    | NM_001350 | 11086.386 | 15538.195 | AF086105  | 6467.817  |
| 3555.884  | AL137366  | 1322.715  | 1134.858  | NM_014809 | 1727.425  | 1148.015  | AK026600  | 769.586   |
| 2016.363  | BC031635  | 939.818   | 1489.288  | NM_016074 | 27023.582 | 27468.545 | AF251189  | 690.647   |
| 4196.349  | AF085916  | 617.066   | 852.93    | NM_003921 | 2448.643  | 2580.343  | AF161429  | 3206.987  |
| 228.855   | AL359598  | 823.287   | 1050.755  | NM_004208 | 17110.664 | 14452.306 | AK021495  | 3241.748  |
| 2304.623  | AF085980  | 1108.206  | 1147.187  | NM_001843 | 3295.561  | 2822.66   | AF067777  | 24243.881 |
| 759.216   | AF085927  | 1944.607  | 2633.1    | NM_000419 | 1008.373  | 620.368   | U17613    | 732.847   |
| 2504.861  | AF085954  | 2420.682  | 4437.45   | NM_017768 | 3636.274  | 3625.13   | AJ299406  | 1049.701  |
| 13348.25  | AL137337  | 1124.844  | 1047.72   | NM_002776 | 1760.697  | 1335.061  | Y10697    | 1137.834  |
| 1114.661  | AL161969  | 1088.389  | 1222.89   | AK023398  | 4049.427  | 4736.635  | AY007166  | 8652.914  |
| 9222.179  | AL442095  | 2661.047  | 2273.133  | NM_001907 | 217.088   | 564.143   | NM_004937 | 2290.273  |
| 35740.383 | AL137378  | 933.36    | 1066.711  | NM_015711 | 67692.266 | 60543.402 | L13197    | 2056.451  |

|           |           |           |           |           |           |           |           |           |
|-----------|-----------|-----------|-----------|-----------|-----------|-----------|-----------|-----------|
| 1726.318  | AL137609  | 21772.137 | 22855.188 | NM_000050 | 1393.085  | 1924.544  | AF056450  | 4134.639  |
| 1741.216  | AL353946  | 3521.566  | 3531.544  | NM_000481 | 1403.399  | 1318.679  | CY3Cy5    | 8627.092  |
| 10683.796 | X69081    | 5350.353  | 4564.671  | AK025681  | 2660.039  | 2341.435  | AI298884  | 14444.867 |
| 2123.81   | NM_005714 | 2549.205  | 1642.074  | NM_014905 | 5944.914  | 4881.438  | D87845    | 432.691   |
| 1371.132  | AL359931  | 6025.768  | 6672.795  | NM_012137 | 5397.919  | 3932.008  | X53279    | 614.509   |
| 2424.616  | AF086052  | 347.268   | 1153.221  | NM_004483 | 22730.746 | 21807.074 | H58872    | 5347.533  |
| 1275.576  | AK000954  | 2323.497  | 1566.885  | NM_001513 | 65765.805 | 52322.797 | J04543    | 1704.329  |
| 6115.79   | AK025800  | 3438.569  | 2930.323  | NM_001281 | 2605.842  | 3000.701  | BE733577  | 1104.816  |
| 5312.274  | AK022333  | 1182.041  | 1131.208  | NM_003981 | 15204.207 | 24049.785 | BG762340  | 983.196   |
| 1357.809  | AK023294  | 1014.296  | 696.222   | U26596    | 18465.203 | 13360.221 | SR5       | 3033.231  |
| 680.886   | AF095854  | 2108.492  | 1509.338  | AF070600  | 46701.664 | 37000.844 | SR7       | 3833.98   |
| 1503.47   | AF159093  | 2082.515  | 3007.517  | AB014522  | 10801.053 | 6393.918  | SR9       | 9961.436  |
| 1949.23   | AF113679  | 718.661   | 1117.731  | NM_014875 | 5258.166  | 7316.235  | CY3Cy5    | 4744.88   |
| 12111.074 | AK021997  | 4007.021  | 4574.449  | AB033023  | 8870.981  | 7239.391  | NM_016453 | 695.865   |
| 2665.701  | AK022125  | 1253.67   | 1084.068  | BC027895  | 517.584   | 702.632   | NM_006202 | 14356.559 |
| 4105.53   | AK022244  | 5624.375  | 5609.058  | AF116238  | 2264.05   | 1662.066  | NM_017410 | 3317.226  |
| 4206.271  | AK022381  | 4754.039  | 5070.845  | NM_006982 | 920.247   | 725.352   | X99680    | 1328.785  |
| 10037.276 | AK022012  | 972.288   | 928.299   | AB033085  | 2959.739  | 1663.012  | NM_001448 | 1313.482  |
| 3769.366  | AK022149  | 555.792   | 631.665   | AF024703  | 16146.479 | 14348.557 | NM_016072 | 1906.579  |
| 11291.32  | AK022286  | 2380.155  | 2062.027  | NM_016531 | 1848.562  | 1067.657  | AK026349  | 2519.009  |
| 1543.276  | AK022613  | 7161.651  | 12023.662 | NM_003593 | 9084.825  | 10725.201 | NM_014733 | 490.56    |
| 2266.725  | AK023843  | 783.247   | 1145.604  | NM_014383 | 26514.654 | 34182.895 | D12485    | 295.754   |
| 2564.726  | AL359557  | 1405.222  | 1293.389  | NM_000244 | 3383.5    | 2690.582  | AK023204  | 1373.863  |
| 679.173   | AK027257  | 456.26    | 766.226   | NM_014285 | 2032.612  | 2128.834  | NM_002478 | 889.532   |
| 10121.811 | AK024582  | 850.249   | 992.69    | NM_004719 | 3207.034  | 2436.671  | D38163    | 583.425   |
| 1916.421  | NM_014367 | 1456.184  | 2606.468  | NM_018553 | 1583.117  | 1443.653  | S78774    | 675.325   |
| 1820.067  | AK025835  | 891.953   | 784.532   | NM_004704 | 3208.667  | 2433.39   | NM_003059 | 229.259   |
| 1672.248  | NM_002365 | 1973.217  | 1922.001  | NM_005455 | 5113.304  | 4728.066  | NM_004922 | 2365.365  |
| 1520.087  | AF161441  | 2489.209  | 3133.228  | NM_014633 | 2632.551  | 1762.497  | NM_002871 | 651.431   |
| 12300.202 | AL137474  | 3519.475  | 5866.253  | NM_001970 | 28329.123 | 24276.979 | BE873653  | 3793.013  |
| 457.281   | AK026757  | 700.025   | 374.427   | NM_006810 | 12569.591 | 13640.465 | NM_001282 | 1393.512  |
| 126.595   | AF119908  | 1871.248  | 1044.001  | AK024054  | 4852.166  | 5608.251  | U44105    | 292.567   |
| 757.517   | U50539    | 316.722   | 1083.446  | NM_001969 | 1035.147  | 249.406   | NM_016103 | 714.114   |
| 448.772   | AK000653  | 7728.455  | 9773.624  | NM_004116 | 2947.648  | 2723.895  | AL133654  | 930.456   |
| 1445.762  | AK000908  | 818.764   | 836.289   | AK024508  | 3932.89   | 3069.553  | AL137262  | 397.84    |
| 343.64    | L77586    | 657.13    | 1046.835  | AK027213  | 4373.953  | 2631.532  | NM_018643 | 428.297   |
| 2787.483  | X96660    | 2904.985  | 3342.171  | AL096749  | 14284.61  | 14709.581 | M30142    | 1134.435  |
| 2031.716  | AK000993  | 778.959   | 881.257   | AK023620  | 2886.757  | 1761.509  | NM_005018 | 391.551   |
| 9839.155  | Z70696    | 1129.941  | 1286.382  | AF086189  | 3730.07   | 3629.073  | NM_013378 | 2076.963  |
| 1671.448  | NM_005792 | 5594.719  | 2788.35   | AL050055  | 3472.549  | 3006.84   | NM_001085 | 419.477   |
| 693.891   | AF048847  | 4149.569  | 4505.808  | NM_005009 | 11085.042 | 7974.77   | NM_002860 | 2516.703  |
| 751.619   | L37718    | 64913.859 | 59780.824 | NM_014596 | 4178.665  | 2161.029  | NM_006169 | 835.535   |
| 789.864   | AL137717  | 3781.395  | 4484.516  | NM_006703 | 9656.241  | 10675.553 | NM_014183 | 6010.148  |
| 891.921   | AF035297  | 1349.382  | 914.368   | NM_004037 | 1733.832  | 1220.505  | AB046780  | 5108.493  |
| 3218.912  | NM_014039 | 2404.889  | 2967.883  | NM_005116 | 2417.305  | 3007.47   | NM_018353 | 2445.816  |
| 1237.735  | S67154    | 4172.178  | 2199.04   | NM_002766 | 4666.223  | 2040.918  | NM_003560 | 9946.84   |
| 11836.136 | AK026181  | 4525.981  | 2655.049  | AJ404857  | 735.688   | 768.938   | NM_014403 | 1040.314  |
| 5041.789  | AK021451  | 1737.118  | 1688.923  | AF254088  | 2119.851  | 1963.511  | AL050100  | 1044.854  |
| 803.623   | AK001971  | 974.578   | 1358.605  | NM_001420 | 1901.714  | 2083.808  | NM_020139 | 419.228   |
| 4787.166  | AF086468  | 2075.355  | 1811.451  | NM_000248 | 2739.198  | 2784.193  | NM_000748 | 3376.31   |
| 564.785   | AK027239  | 1767.271  | 2104.424  | AB031046  | 2628.135  | 2545.823  | NM_000048 | 1664.008  |
| 1316.956  | AF005082  | 19192.006 | 17423.117 | NM_002449 | 27550.316 | 28243.887 | NM_004925 | 1517.172  |
| 816.907   | AL117595  | 2783.193  | 5056.248  | AK025388  | 1365.358  | 837.989   | NM_003234 | 4499.276  |

|           |                  |           |           |                  |           |           |                  |           |
|-----------|------------------|-----------|-----------|------------------|-----------|-----------|------------------|-----------|
| 2789.034  | <b>AB028988</b>  | 16911.063 | 17747.549 | <b>NM_006147</b> | 569.524   | 3728.441  | <b>AB051826</b>  | 988.3     |
| 168.124   | <b>AK023072</b>  | 1835.669  | 2248.034  | <b>AB006631</b>  | 1138.992  | 816.592   | <b>NM_015046</b> | 1199.936  |
| 498.133   | <b>AF086105</b>  | 2925.065  | 2999.813  | <b>AF291181</b>  | 1056.125  | 956.046   | <b>NM_002014</b> | 4149.863  |
| 2478.469  | <b>AK026600</b>  | 766.083   | 1221.907  | <b>NM_005741</b> | 2860.688  | 1962.322  | <b>NM_017761</b> | 1049.738  |
| 1349.011  | <b>AK021495</b>  | 3126.837  | 4153.74   | <b>NM_000964</b> | 3703.394  | 2657.449  | <b>D38163</b>    | 323.443   |
| 956.831   | <b>AF067777</b>  | 31453.301 | 24141.041 | <b>BF343886</b>  | 1122.973  | 953.481   | <b>D28449</b>    | 820.532   |
| 574.255   | <b>Y10697</b>    | 1077.416  | 1984.835  | <b>NM_013263</b> | 5342.154  | 4596.146  | <b>NM_003281</b> | 504.124   |
| 781.868   | <b>AY007166</b>  | 10777.99  | 8583.761  | <b>AL137407</b>  | 2705.914  | 3163.25   | <b>AI298884</b>  | 13254.718 |
| 522.343   | <b>NM_004937</b> | 2025.05   | 1682.112  | <b>NM_018178</b> | 8749.834  | 4637.107  | <b>D87845</b>    | 311.747   |
| 680.466   | <b>L13197</b>    | 2547.392  | 1581.321  | <b>AK025204</b>  | 1263.341  | 1349.792  | <b>H58872</b>    | 5061.852  |
| 5699.146  | <b>CY3Cy5</b>    | 6581.208  | 303.083   | <b>AF143330</b>  | 1114.194  | 1129.788  | <b>J04543</b>    | 2128.329  |
| 1491.03   | <b>AI298884</b>  | 26189.076 | 19349.203 | <b>AK025178</b>  | 2624.475  | 3268.815  | <b>AA456295</b>  | 217.462   |
| 1337.999  | <b>D87845</b>    | 1634.448  | 2759.039  | <b>AF147359</b>  | 1319.764  | 1335.487  | <b>BE733577</b>  | 1082.95   |
| 3314.332  | <b>X53279</b>    | 314.931   | 689.713   | <b>AK001822</b>  | 4882.277  | 4322.422  | <b>BG762340</b>  | 860.138   |
| 2713.576  | <b>M83254</b>    | 2824.142  | 3667.344  | <b>AK026969</b>  | 1841.442  | 2529.027  | <b>M30142</b>    | 1433.751  |
| 11516.596 | <b>S56770</b>    | 1022.53   | 1118.868  | <b>AF086287</b>  | 2222.942  | 1956.347  | <b>NM_005018</b> | 756.373   |
| 3558.557  | <b>H58872</b>    | 14542.604 | 4652.921  | <b>AF086409</b>  | 1004.909  | 795.691   | <b>NM_013378</b> | 1674.698  |
| 2087.998  | <b>J02938</b>    | 698.888   | 1030.213  | <b>AK024268</b>  | 2278.284  | 1963.033  | <b>NM_001085</b> | 768.091   |
| 821.173   | <b>J04543</b>    | 5819.041  | 8305.108  | <b>AF086295</b>  | 1344.418  | 1216.033  | <b>NM_016453</b> | 579.929   |
| 4373.476  | <b>S60415</b>    | 537.891   | 701.413   | <b>AF086344</b>  | 5193.251  | 6259.36   | <b>NM_014226</b> | 414.229   |
| 758.046   | <b>AA456295</b>  | 791.098   | 947.652   | <b>AF086424</b>  | 1150.244  | 959.536   | <b>NM_006202</b> | 13332.479 |
| 3743.573  | <b>BE733577</b>  | 2432.39   | 2701.16   | <b>AL110130</b>  | 421.81    | 666.671   | <b>NM_017410</b> | 4373.113  |
| 1119.822  | <b>BG762340</b>  | 2902.734  | 3059.313  | <b>AF052116</b>  | 731.585   | 500.657   | <b>AY009398</b>  | 100.137   |
| 1053.638  | <b>AA009484</b>  | 268.164   | 515.795   | <b>NM_018087</b> | 4011.29   | 3664.743  | <b>X99680</b>    | 1481.851  |
| 1350.866  | <b>NM_005456</b> | 1734.899  | 2189.39   | <b>AL360260</b>  | 1043.875  | 873.692   | <b>NM_001448</b> | 1063.261  |
| 2464.002  | <b>NM_006534</b> | 3996.843  | 8956.743  | <b>AK023647</b>  | 768.481   | 645.282   | <b>NM_016072</b> | 985.131   |
| 815.32    | <b>SR5</b>       | 5422.433  | 6344.68   | <b>AL137366</b>  | 1055.088  | 1233.283  | <b>AK026349</b>  | 2083.25   |
| 3718.416  | <b>SR7</b>       | 7681.08   | 50860.363 | <b>BC031635</b>  | 899.118   | 985.097   | <b>D12485</b>    | 214.599   |
| 969.35    | <b>SR9</b>       | 28730.318 | 7840.225  | <b>AL359598</b>  | 428.244   | 808.899   | <b>AK023204</b>  | 1034.069  |
| 4552.827  | <b>CY3Cy5</b>    | 5385.459  | 174.575   | <b>AF085980</b>  | 466.578   | 591.389   | <b>NM_003449</b> | 444.584   |
| 1246.994  | <b>NM_016453</b> | 1788.254  | 3251.487  | <b>AF085927</b>  | 917.158   | 1180.622  | <b>NM_002478</b> | 561.712   |
| 6124.111  | <b>NM_017701</b> | 1126.887  | 976.55    | <b>AF085954</b>  | 3753.637  | 5327      | <b>NM_003234</b> | 5769.753  |
| 5926.061  | <b>NM_014226</b> | 1927.356  | 2237.139  | <b>AL137337</b>  | 1236.177  | 990.729   | <b>NM_004858</b> | 968.47    |
| 897.998   | <b>AF142567</b>  | 943.055   | 965.36    | <b>AL161969</b>  | 2062.925  | 2404.419  | <b>S78774</b>    | 1659.452  |
| 1537.225  | <b>NM_005621</b> | 191.882   | 552.266   | <b>AL137378</b>  | 2072.929  | 2419.878  | <b>NM_004922</b> | 1585.863  |
| 3517.618  | <b>NM_006202</b> | 23706.73  | 24967.01  | <b>AL137609</b>  | 27520.158 | 34822.957 | <b>NM_001282</b> | 1356.002  |
| 328.098   | <b>NM_017410</b> | 10580.605 | 5998.538  | <b>AL353946</b>  | 4064.372  | 4454.731  | <b>NM_016103</b> | 730.679   |
| 963.987   | <b>X99680</b>    | 7044.139  | 4868.19   | <b>X69081</b>    | 5447.775  | 4680.303  | <b>AL133654</b>  | 859.415   |
| 840.507   | <b>NM_001448</b> | 2239.214  | 3040.43   | <b>NM_005714</b> | 4263.979  | 3847.762  | <b>NM_018643</b> | 494.222   |
| 969.749   | <b>NM_016072</b> | 3663.457  | 3785.45   | <b>AL359931</b>  | 6550.095  | 5944.381  | <b>NM_006927</b> | 3525.746  |
| 1255.746  | <b>AK026349</b>  | 5121.741  | 6527.109  | <b>AK000954</b>  | 2132.66   | 1926.417  | <b>NM_014601</b> | 1035.653  |
| 351.397   | <b>NM_014733</b> | 1195.122  | 1314.749  | <b>AK025800</b>  | 3776.806  | 3092.813  | <b>NM_017761</b> | 7391.896  |
| 404.163   | <b>D12485</b>    | 1277.771  | 4317.894  | <b>AK022333</b>  | 1047.314  | 889.421   | <b>NM_002860</b> | 2158.578  |
| 364.314   | <b>AK023204</b>  | 3964.937  | 3726.312  | <b>AK023294</b>  | 531.953   | 839.91    | <b>NM_006169</b> | 814.846   |
| 2559.204  | <b>NM_003449</b> | 1705.667  | 1709.041  | <b>AF095854</b>  | 1559.42   | 1167.526  | <b>NM_014183</b> | 2955.66   |
| 2959.695  | <b>NM_002478</b> | 2106.319  | 2366.078  | <b>NM_014162</b> | 695.295   | 729.921   | <b>NM_018353</b> | 2135.508  |
| 998.143   | <b>D38163</b>    | 822.106   | 646.516   | <b>AF159093</b>  | 3708.097  | 3999.124  | <b>NM_003560</b> | 8691.39   |
| 2794.8    | <b>NM_004967</b> | 847.686   | 274.452   | <b>AF113679</b>  | 1090.622  | 1154.938  | <b>NM_014403</b> | 1083.438  |
| 288.529   | <b>D28449</b>    | 1954.128  | 2243.848  | <b>AK021997</b>  | 2456.893  | 3009.071  | <b>AL050100</b>  | 893.653   |
| 335.102   | <b>NM_003281</b> | 1312.564  | 2585.727  | <b>AK022125</b>  | 1405.813  | 1719.324  | <b>NM_000748</b> | 3624.815  |
| 1783.595  | <b>AA460480</b>  | 951.244   | 1122.932  | <b>AK022244</b>  | 8488.242  | 13396.285 | <b>NM_000048</b> | 1475.295  |
| 671.991   | <b>S78774</b>    | 4920.774  | 5998.414  | <b>AK022381</b>  | 6287.403  | 6986.917  | <b>U53531</b>    | 262.913   |
| 1876.755  | <b>NM_003059</b> | 317.705   | 549.953   | <b>AK022012</b>  | 1028.886  | 1178.327  | <b>NM_004925</b> | 1468.162  |

|           |           |           |           |           |           |           |           |           |
|-----------|-----------|-----------|-----------|-----------|-----------|-----------|-----------|-----------|
| 715.328   | NM_004922 | 5820.938  | 6127.123  | AK022286  | 1057.489  | 752.573   | NM_005456 | 793.334   |
| 8990.398  | NM_002871 | 707.624   | 684.6     | AK022411  | 313.03    | 348.575   | AB051826  | 799.516   |
| 2322.173  | BE873653  | 31642.643 | 37037.047 | AK022613  | 6621.896  | 6043.461  | NM_015046 | 1174.898  |
| 370.182   | NM_001282 | 3052.114  | 2190.096  | AL359557  | 1445.738  | 1695.774  | NM_002014 | 3323.036  |
| 898.021   | NM_016830 | 1037.245  | 1109.533  | AK024582  | 872.475   | 1053.251  | AK026349  | 2700.055  |
| 817.37    | U44105    | 609.82    | 595.435   | AK024143  | 789.964   | 965.62    | D12485    | 597.673   |
| 3743.865  | NM_016103 | 1647.154  | 2601.304  | AK022099  | 949.014   | 540.848   | AK023204  | 1620.333  |
| 2406.199  | AL133654  | 2342.319  | 2854.552  | NM_014367 | 2137.404  | 2586.718  | NM_003449 | 699.044   |
| 1407.219  | AL137262  | 941.163   | 857.38    | NM_002365 | 2499.699  | 1987.825  | NM_002478 | 925.713   |
| 493.85    | NM_020437 | 335.779   | 373.239   | AF161441  | 2383.938  | 2156.358  | D28449    | 641.673   |
| 4062.276  | NM_004010 | 442.293   | 798.633   | AL137474  | 3093.23   | 2213.931  | NM_003281 | 398.239   |
| 4666.959  | NM_018643 | 1680.352  | 1626.206  | AK021572  | 1434.959  | 1175.49   | AA460480  | 28795.064 |
| 7004.91   | M30142    | 3083.893  | 2555.776  | AK026757  | 1153.505  | 934.042   | AI298884  | 9953.157  |
| 1432.069  | NM_005018 | 946.379   | 995.569   | AF119908  | 1641.256  | 1658.353  | D87845    | 406.788   |
| 720.794   | NM_013378 | 7273.61   | 7090.952  | AK000653  | 5908.402  | 5676.324  | M83254    | 756.596   |
| 1489.399  | NM_001085 | 1286.252  | 1292.332  | AK000908  | 900.884   | 1240.167  | H58872    | 4129.002  |
| 2628.763  | NM_006110 | 1038.142  | 1399.538  | AK000993  | 522.572   | 499       | J04543    | 1736.84   |
| 21889.098 | NM_002860 | 4201.208  | 3647.379  | Z70696    | 1359.995  | 1255.829  | BE733577  | 969.705   |
| 3969.045  | NM_006169 | 2687.736  | 4001.988  | NM_005792 | 6207.399  | 5020.864  | BG762340  | 855.394   |
| 25901.006 | NM_001218 | 793.982   | 924.93    | AF048847  | 3533.051  | 3250.375  | M30142    | 948.567   |
| 1185.203  | NM_014183 | 9126.81   | 11652.655 | L37718    | 69753.984 | 57305.785 | NM_013378 | 1335.641  |
| 7786.434  | AB046780  | 12349.015 | 15085.061 | AL137717  | 3413.149  | 3025.981  | NM_001085 | 531.519   |
| 477.205   | NM_001801 | 558.757   | 500.402   | AF035297  | 1368.622  | 1274.878  | NM_016453 | 636.583   |
| 3432.93   | NM_003560 | 23264.027 | 19660.313 | NM_014039 | 2681.289  | 3012.455  | NM_014226 | 520.418   |
| 3061.843  | NM_014403 | 2121.82   | 2719.176  | S67154    | 4185.249  | 1807.968  | AF142567  | 474.241   |
| 19638.945 | AL050100  | 1654.528  | 1674.133  | AK026181  | 7043.683  | 4816.445  | NM_006202 | 10778.12  |
| 381.471   | NM_020139 | 860.936   | 768.846   | AK021451  | 1382.614  | 1699.769  | NM_017410 | 3681.571  |
| 662.439   | NM_000048 | 3322.258  | 4219.595  | AK001971  | 662.116   | 440.97    | X99680    | 1319.935  |
| 758.895   | AF104032  | 15441.86  | 5565.377  | AF086468  | 1575.786  | 2255.541  | NM_001448 | 917.431   |
| 815.683   | U53531    | 687.845   | 646.903   | AK027239  | 1653.915  | 1962.497  | NM_016072 | 1496.19   |
| 7844.062  | NM_004925 | 3947.919  | 2573.998  | AF005082  | 15506.258 | 19625.172 | NM_000748 | 3905.102  |
| 3731.542  | NM_003234 | 13169.978 | 7836.262  | AL117595  | 4206.242  | 3561.297  | NM_000048 | 1835.136  |
| 2751.982  | NM_004858 | 2352.007  | 1567.351  | AB028988  | 16508.783 | 13975.139 | AF104032  | 5666.838  |
| 461.542   | AB051826  | 1789.618  | 1349.513  | AK023072  | 1702.395  | 1511.705  | NM_004925 | 1452.758  |
| 15266.681 | M20697    | 851.376   | 703.19    | AF086105  | 10832.37  | 10185.33  | NM_003234 | 3694.302  |
| 696.523   | NM_015046 | 1991.928  | 2642.648  | AK026600  | 710.384   | 845.286   | NM_004858 | 753.781   |
| 427.762   | NM_002014 | 7456.27   | 4629.287  | AF067777  | 50903.254 | 41454.32  | S78774    | 2158.746  |
| 2390.359  | NM_016585 | 5727.002  | 6216.649  | Y10697    | 1167.925  | 1065.57   | NM_004922 | 2388.502  |
| 807.139   | NM_003333 | 60607.137 | 61987.508 | AY007166  | 12960.712 | 9847.327  | BE873653  | 14573.783 |
| 10374.258 | NM_002013 | 6605.229  | 10822.217 | NM_004937 | 2703.22   | 2390.976  | NM_006987 | 183.416   |
| 732.741   | NM_006927 | 9005.241  | 13424.038 | CY3Cy5    | 6222.309  | 859.864   | NM_001282 | 1353.375  |
| 3844.267  | NM_014601 | 2422.745  | 3118.836  | AI298884  | 16918.279 | 19009.359 | U44105    | 309.966   |
| 553.62    | NM_017761 | 11718.27  | 14808.147 | D87845    | 810.585   | 1268.014  | NM_016103 | 627.004   |
| 3672.727  | NM_006928 | 754.048   | 735.236   | M83254    | 582.375   | 780.58    | AL133654  | 989.45    |
| 1216.452  | AF237700  | 1563.421  | 1339.745  | S56770    | 438.601   | 440.414   | AL137262  | 358.722   |
| 2670.159  | D38163    | 650.995   | 948.51    | H58872    | 8123.095  | 4986.938  | NM_002014 | 4581.158  |
| 1360.707  | NM_004967 | 317.4     | 572.252   | J02938    | 713.266   | 490.13    | NM_002538 | 4488.988  |
| 1225.802  | D28449    | 1577.988  | 2121.661  | J04543    | 4064.366  | 3835.379  | NM_016585 | 4572.652  |
| 754.747   | NM_003281 | 1240.86   | 2328.62   | S60415    | 608.098   | 491.414   | NM_006927 | 2652.98   |
| 1347.29   | AA460480  | 775.782   | 1173.686  | AA456295  | 704.04    | 572.944   | NM_014601 | 789.404   |
| 764.929   | M83254    | 1879.89   | 2459.033  | BE733577  | 2012.888  | 2660.16   | NM_017761 | 5442.349  |
| 835.562   | S56770    | 850.671   | 1241.795  | AI817942  | 427.442   | 585.213   | NM_002860 | 2075.521  |
| 792.139   | H58872    | 10966.954 | 3126.917  | BG762340  | 1631.837  | 1977.77   | NM_006169 | 1036.768  |



|           |           |           |           |           |           |           |           |          |
|-----------|-----------|-----------|-----------|-----------|-----------|-----------|-----------|----------|
| 3229.86   | J02938    | 524.942   | 901.531   | AA009484  | 409.684   | 444.674   | NM_014183 | 3820.187 |
| 1704.821  | J04543    | 5632.756  | 7563.051  | NM_005456 | 1429.094  | 1669.968  | AB046780  | 5140.849 |
| 1937.561  | S60415    | 496.297   | 539.025   | NM_006534 | 4929.695  | 8487.821  | NM_018353 | 1837.034 |
| 781.847   | AA456295  | 995.29    | 913.261   | SR5       | 4640.848  | 6360.333  | NM_003560 | 9821.847 |
| 6102.371  | BE733577  | 2153.618  | 1614.125  | SR7       | 6074.374  | 43813.348 | NM_014403 | 928.069  |
| 721.743   | AI817942  | 771.018   | 839.43    | SR9       | 17214.299 | 3414.08   | AL050100  | 859.945  |
| 6238.849  | BG762340  | 2748.46   | 2009.322  | CY3Cy5    | 5178.503  | 244.26    | NM_020139 | 410.339  |
| 794.961   | NM_005456 | 1933.99   | 1938.651  | NM_016453 | 940.121   | 848.787   | NM_017730 | 1225.048 |
| 875.842   | NM_006534 | 5413.527  | 8498.001  | NM_014226 | 499.294   | 650.811   | AB051826  | 836.067  |
| 2879.619  | NM_016186 | 472.705   | 487.216   | NM_005621 | 538.091   | 1161.918  | M20697    | 161.639  |
| 1163.446  | M30142    | 2813.395  | 2212.973  | NM_006202 | 6797.134  | 7297.433  | AF231022  | 4615.922 |
| 2106.601  | NM_005018 | 965.59    | 1152.182  | NM_017410 | 7323.088  | 2796.238  | AF149019  | 463.174  |
| 1256.601  | NM_013378 | 6319.119  | 7239.873  | X99680    | 5205.642  | 4119.035  | NM_016327 | 1196.978 |
| 740.321   | NM_001085 | 1087.766  | 1202.269  | NM_001448 | 1678.664  | 1619.33   | U66702    | 11496.82 |
| 672.254   | NM_016453 | 1665.104  | 2804.899  | NM_016072 | 2823.577  | 3321.01   | AF216381  | 5892.338 |
| 266.183   | NM_017701 | 1207.85   | 980.282   | AK026349  | 3904.791  | 3870.603  | AB014593  | 839.901  |
| 256.321   | NM_014226 | 1856.344  | 1697.308  | NM_014733 | 864.095   | 851.332   | AK074832  | 7190.326 |
| 1202.969  | AF142567  | 875.365   | 978.316   | D12485    | 973.629   | 1719.314  | U00954    | 910.279  |
| 527.497   | NM_003391 | 389.906   | 959.822   | AK023204  | 2889.579  | 4011.662  | NM_015942 | 1960.585 |
| 1811.02   | NM_017410 | 9473.39   | 4045.559  | NM_003449 | 1444.849  | 1082.768  | NM_017907 | 2755.465 |
| 1103.865  | X99680    | 6859.131  | 4427.587  | NM_002478 | 1868.681  | 1736.613  | NM_002044 | 3646.914 |
| 4116.792  | NM_001448 | 2458.603  | 2533.302  | D38163    | 907.554   | 1064.107  | NM_002103 | 2774.621 |
| 4627.944  | NM_016072 | 3773.917  | 2737.546  | D28449    | 1146.458  | 1166.091  | NM_006665 | 1156.047 |
| 3809.012  | AK026349  | 4490.223  | 5129.161  | NM_003281 | 761.624   | 1159.58   | NM_000270 | 2417.802 |
| 1116.987  | NM_014733 | 1072.272  | 1005.602  | AA460480  | 842.925   | 923.665   | U89277    | 134.624  |
| 8802.494  | D12485    | 1455.8    | 4162.017  | S78774    | 901.695   | 969.491   | NM_002876 | 908.806  |
| 5020.854  | AK023204  | 3912.275  | 3587.795  | NM_004922 | 3053.761  | 2283.058  | AK022332  | 771.225  |
| 15065.91  | NM_003449 | 1670.745  | 1605.239  | NM_002871 | 433.844   | 459.841   | NM_006465 | 710.613  |
| 1827.486  | NM_002478 | 2593.369  | 2528.998  | BE873653  | 7643.238  | 8317.45   | NM_006769 | 2402.106 |
| 1086.805  | NM_003234 | 10665.769 | 7760.007  | NM_001282 | 2261.122  | 1665.759  | NM_001189 | 1242.573 |
| 967.497   | NM_004858 | 1303.959  | 1066.553  | U44105    | 482.037   | 758.903   | AL365370  | 1330.998 |
| 342.923   | S78774    | 4662.964  | 5052.56   | NM_016103 | 1348.997  | 1584.993  | AK001127  | 445.174  |
| 7305.231  | NM_003059 | 178.384   | 353.788   | AL133654  | 1699.852  | 1589.166  | U79256    | 3479.923 |
| 846.524   | NM_004922 | 6186.893  | 6312.392  | AL137262  | 648.505   | 765.373   | AL832550  | 505.573  |
| 2338.525  | NM_002871 | 764.672   | 627.339   | NM_018643 | 958.413   | 1008.871  | NM_001412 | 2080.76  |
| 7602.142  | NM_006987 | 464.015   | 647.038   | M30142    | 1668.963  | 855.78    | AF095771  | 135.591  |
| 975.306   | NM_016830 | 2094.247  | 2459.102  | NM_005018 | 777.759   | 1015.295  | AF086205  | 1010.83  |
| 941.311   | NM_016103 | 1458.776  | 1921.305  | NM_013378 | 5234.881  | 5200.597  | AF087967  | 164.071  |
| 1754.137  | AL133654  | 2599.846  | 1853.219  | NM_001085 | 1106.484  | 1498.439  | AF085985  | 320.875  |
| 6232.82   | AL137262  | 1130.504  | 862.373   | NM_006110 | 601.902   | 943.226   | AK026384  | 468.348  |
| 7648.035  | NM_020437 | 168.537   | 382.06    | NM_002860 | 2505.523  | 2317.753  | AF075105  | 785.389  |
| 2670.163  | NM_018643 | 1635.002  | 1946.662  | NM_006169 | 970.701   | 920.864   | NM_005117 | 689.539  |
| 11392.424 | NM_006927 | 8308.817  | 14973.97  | NM_001218 | 551.203   | 463.883   | AK021625  | 1340.397 |
| 570.628   | NM_014601 | 2213.138  | 3643.243  | NM_014183 | 6992.249  | 8843.143  | AK021679  | 474.92   |
| 676.177   | NM_017761 | 11873.616 | 18259.688 | AB046780  | 6864.872  | 6704.492  | AK001380  | 1223.288 |
| 573.495   | NM_006928 | 939.636   | 759.184   | NM_018353 | 3807.997  | 2767.151  | AK025312  | 981.362  |
| 962.017   | AF237700  | 704.27    | 553.5     | NM_001801 | 472.983   | 503.011   | AK026493  | 293.522  |
| 627.174   | NM_002860 | 3501.689  | 3291.51   | NM_003560 | 16451.367 | 16908.441 | AK002042  | 289.527  |
| 516.112   | NM_006169 | 2266.776  | 3067.201  | NM_014403 | 2143.942  | 1633.953  | AK023963  | 4876.396 |
| 12204.562 | NM_001218 | 760.543   | 681.372   | AL050100  | 1974.367  | 1848.263  | AK022473  | 2731.362 |
| 848.895   | NM_014183 | 9224.659  | 11114.625 | NM_020139 | 998.792   | 1157.834  | AK023810  | 492.199  |
| 382.74    | NM_018353 | 4974.749  | 3323.473  | AL080207  | 357.968   | 513.445   | AK024133  | 380.938  |
| 1987.716  | NM_001801 | 522.707   | 368.142   | NM_000748 | 9724.966  | 12257.709 | U80761    | 1171.664 |

|           |           |           |           |           |           |           |           |           |
|-----------|-----------|-----------|-----------|-----------|-----------|-----------|-----------|-----------|
| 612.264   | NM_016373 | 513.314   | 449.501   | NM_000048 | 2787.031  | 4178.908  | U61100    | 677.652   |
| 197.397   | NM_014403 | 1839.947  | 1741.985  | U53531    | 564.903   | 565.028   | NM_018582 | 681.946   |
| 7620.165  | AL050100  | 2139.92   | 1649.385  | NM_004925 | 2152.835  | 3060.156  | M21539    | 2923.649  |
| 588.045   | NM_020139 | 766.972   | 670.484   | NM_004858 | 902.155   | 907.854   | AK024125  | 214.941   |
| 2780.624  | AL080207  | 361.73    | 500.533   | AF203728  | 31.108    | 242.584   | AK024761  | 3153.245  |
| 452.802   | NM_000748 | 10590.23  | 10460.786 | AB051826  | 1322.264  | 395.175   | NM_014335 | 8234.743  |
| 481.579   | AF104032  | 18926.484 | 7912.244  | AK024964  | 585.855   | 634.886   | AF086067  | 1420.221  |
| 1780.403  | U53531    | 550.74    | 588.488   | M20697    | 689.454   | 1012.963  | AK024967  | 3222.991  |
| 1325.741  | NM_004925 | 3471.032  | 2423.332  | NM_015046 | 1972.546  | 2706.252  | AK025102  | 862.601   |
| 2175.444  | NM_005456 | 1969.835  | 2684.651  | NM_002014 | 5323.642  | 3840.399  | AF086562  | 848.063   |
| 2717.105  | AB051826  | 2258.176  | 1820.707  | NM_002538 | 5251.834  | 7124.274  | AY007113  | 1094.347  |
| 269.456   | M20697    | 487.827   | 558.492   | NM_006927 | 6727.2    | 8905.931  | AF130083  | 5965.734  |
| 1118.61   | NM_015046 | 2257.867  | 2582.656  | NM_014601 | 1739.644  | 1542.711  | NM_002700 | 3337.223  |
| 618.435   | NM_002014 | 7502.394  | 4434.664  | D38163    | 519.157   | 701.935   | AB002437  | 18233.549 |
| 3594.946  | AK026349  | 5179.752  | 7252.721  | NM_004967 | 806.566   | 243.761   | AK023496  | 497.508   |
| 737.215   | D12485    | 1372.59   | 5712.757  | D28449    | 1107.517  | 679.803   | NM_006777 | 1181.439  |
| 371.824   | AK023204  | 4402.309  | 4549.218  | NM_003281 | 763.583   | 802.309   | AK024969  | 1753.407  |
| 838.826   | NM_003449 | 1844.732  | 2046.921  | AA460480  | 552.714   | 650.337   | AK022250  | 573.97    |
| 629.338   | NM_002478 | 1626.429  | 1485.468  | AI298884  | 18016.088 | 18054.232 | J05063    | 195.893   |
| 1074.724  | D38163    | 1144.888  | 1545.427  | D87845    | 887.735   | 1109.373  | NM_012369 | 480.104   |
| 601.239   | D28449    | 1585.299  | 2202.206  | M83254    | 1527.938  | 1587.167  | AK025092  | 1108.864  |
| 41886.191 | NM_003281 | 1129.567  | 2832.317  | S56770    | 609.177   | 796.772   | AF130047  | 315.463   |
| 5498.56   | AA460480  | 740.263   | 612.612   | H58872    | 9515.13   | 6387.301  | Z83944    | 793.3     |
| 194.542   | AI298884  | 22650.432 | 13327.489 | J02938    | 700.523   | 351.763   | AF085871  | 496.767   |
| 3137.024  | D87845    | 1105.702  | 2082.74   | J04543    | 3760.988  | 4941.156  | X97301    | 1709.494  |
| 1216.198  | X53279    | 629.381   | 574.753   | S60415    | 447.016   | 330.236   | NM_019063 | 11741.042 |
| 1298.399  | M83254    | 1357.03   | 1465.922  | AA456295  | 454.905   | 551.429   | NM_014336 | 694.369   |
| 1031.92   | S56770    | 672.235   | 562.066   | BE733577  | 1930.027  | 2789.418  | NM_012143 | 2766.821  |
| 546.278   | H58872    | 11891.602 | 2651.603  | AI817942  | 442.605   | 465.887   | AF085892  | 988.707   |
| 1499.22   | J04543    | 4983.757  | 5425.138  | BG762340  | 1328.749  | 1958.047  | AF075114  | 1580.997  |
| 579.429   | S60415    | 351.408   | 357.766   | AA009484  | 225.91    | 401.444   | S82075    | 1901.274  |
| 539.708   | AA456295  | 1009.535  | 880.112   | NM_005456 | 1170.399  | 974.088   | AK000660  | 2972.685  |
| 4415.876  | BE733577  | 2896.985  | 2463.137  | NM_006534 | 3745.736  | 5358.386  | NM_014711 | 786.479   |
| 578.861   | BG762340  | 2648.696  | 1921.061  | M30142    | 1602.562  | 500.021   | AK022015  | 1262.233  |
| 2880.906  | AA009484  | 331.102   | 387.111   | NM_005018 | 727.552   | 654.796   | AB033083  | 1483.417  |
| 2700.145  | NM_018643 | 1231.717  | 1534.484  | NM_013378 | 2944.931  | 3026.193  | CY3Cy5    | 3364.131  |
| 293.134   | NM_016186 | 360.598   | 512.473   | NM_001085 | 805.456   | 838.588   | H41522    | 894.582   |
| 347.98    | M30142    | 2980.296  | 3073.771  | NM_016453 | 1117.422  | 1168.221  | AA460291  | 1608.153  |
| 1405.063  | NM_005018 | 931.141   | 1211.196  | NM_017701 | 858.151   | 761.762   | B1821333  | 5466.358  |
| 331.996   | NM_013378 | 5975.208  | 6483.087  | NM_014226 | 1393.311  | 1440.333  | X51841    | 8102.192  |
| 414.106   | NM_001085 | 757.402   | 969.902   | AF142567  | 585.213   | 676.377   | BG506100  | 1119.583  |
| 531.823   | NM_006110 | 631.345   | 567.435   | NM_005621 | 243.891   | 497.774   | M17176    | 707.365   |
| 445.605   | NM_016453 | 1603.781  | 1906.977  | NM_006202 | 25779.502 | 29573.283 | M26576    | 410.463   |
| 1148.568  | NM_017701 | 1303.166  | 957.42    | NM_003391 | 80.713    | 258.793   | M32972    | 1127.309  |
| 4369.815  | NM_014226 | 1678.067  | 1229.77   | NM_017410 | 7317.394  | 3746.437  | M97815    | 696.681   |
| 2032.448  | AF142567  | 1032.895  | 696.537   | X99680    | 4845.439  | 3358.909  | NM_006325 | 3041.321  |
| 6089.963  | NM_017410 | 9396.683  | 4019.476  | NM_001448 | 2012.376  | 2014.067  | SR8       | 2410.258  |
| 290.901   | X99680    | 7188.921  | 4254.617  | NM_016072 | 3069.505  | 3054.025  | SR10      | 24068.592 |
| 2252.053  | NM_001448 | 2400.401  | 2057.826  | AK026349  | 3960.158  | 2904.041  | CY3Cy5    | 4514.827  |
| 1578.69   | NM_016072 | 3641.522  | 3236.391  | NM_014733 | 667.279   | 445.165   | NM_003188 | 2087.094  |
| 360.006   | NM_000748 | 9707.941  | 13484.582 | D12485    | 911.514   | 1548.48   | U59431    | 923.206   |
| 4469.927  | NM_000048 | 4056.351  | 5264.992  | NM_002478 | 2840.984  | 5560.967  | AF300648  | 912.494   |
| 1744.573  | AF104032  | 20350.207 | 11452.925 | NM_003234 | 6691.512  | 9025.178  | NM_020384 | 1416.343  |

|          |           |           |           |           |           |           |           |           |
|----------|-----------|-----------|-----------|-----------|-----------|-----------|-----------|-----------|
| 1648.12  | U53531    | 702.178   | 1054.594  | NM_00485E | 992.676   | 776.61    | NM_00605E | 8654.499  |
| 334.605  | NM_00492E | 2688.574  | 1503.191  | S78774    | 3294.461  | 3745.427  | NM_017817 | 1462.029  |
| 408.516  | NM_003234 | 10401.28  | 8244.98   | NM_00305E | 201.515   | 371.928   | NM_018184 | 14741.789 |
| 4145.649 | NM_00485E | 1514.763  | 911.094   | NM_00492E | 3212.485  | 2759.309  | AB046823  | 683.903   |
| 1179.236 | S78774    | 4041.983  | 3342.942  | NM_002871 | 360.628   | 550.62    | NM_00466E | 2928.371  |
| 923.918  | NM_00305E | 274.462   | 379.537   | BE873653  | 26258.789 | 29829.045 | NM_01663E | 1568.192  |
| 1589.551 | NM_00492E | 4987.626  | 3986.064  | NM_00128E | 1973.916  | 1670.937  | U61739    | 1999.11   |
| 993.804  | NM_002871 | 585.902   | 505.87    | NM_01683C | 792.489   | 909.889   | AJ132089  | 681.508   |
| 4175.994 | BE873653  | 31335.836 | 26837.787 | U44105    | 414.449   | 626.593   | U92819    | 10814.21  |
| 709.544  | NM_006987 | 597.649   | 436.873   | NM_01610E | 1308.17   | 2215.387  | NM_00203E | 2722.161  |
| 344.818  | NM_01683C | 2029.321  | 1890.828  | AL133654  | 1484.533  | 1695.383  | AB013103  | 427.651   |
| 6606.054 | U44105    | 620.634   | 555.62    | AL137262  | 699.176   | 747.559   | AF019225  | 1806.786  |
| 5028.165 | NM_01610E | 1576.283  | 1638.732  | NM_020437 | 291.581   | 375.765   | Z36803    | 4256.212  |
| 7112.769 | AL133654  | 2595.492  | 2433.462  | NM_006927 | 6591.234  | 9282.07   | NM_013371 | 576.893   |
| 2691.096 | AL137262  | 973.373   | 1114.426  | NM_014601 | 1821.331  | 1812.446  | NM_000707 | 4146.574  |
| 716.757  | NM_002014 | 7769.394  | 5297.085  | NM_017761 | 9278.911  | 12177.607 | NM_00691E | 1453.242  |
| 696.45   | NM_00253E | 7936.826  | 9866.063  | AF237700  | 585.911   | 565.019   | AK022625  | 3663.163  |
| 1642.861 | NM_01658E | 7810.864  | 9985.394  | NM_00286C | 2638.739  | 3548.003  | AK023084  | 3123.083  |
| 1049.578 | NM_006927 | 8019.389  | 12507.572 | NM_00616E | 1393.166  | 2029.604  | BC012333  | 3684.941  |
| 1527.956 | NM_014601 | 2434.989  | 3875.188  | NM_00121E | 394.718   | 412.523   | AF237952  | 1824.888  |
| 450.897  | NM_017761 | 11778.586 | 20329.387 | NM_01418E | 4743.523  | 6667.746  | AL079287  | 1503.983  |
| 652.042  | NM_00692E | 695.888   | 480.251   | AB046780  | 4805.844  | 5278.461  | NM_014427 | 1709.234  |
| 318.772  | AF237700  | 982.093   | 507.314   | NM_01835E | 2790.17   | 2472.182  | NM_01592E | 3817.162  |
| 4413.231 | NM_00286C | 3286.975  | 2081.177  | NM_001801 | 497.656   | 603.31    | NM_020381 | 931.766   |
| 490.763  | NM_00616E | 2558.849  | 2504.793  | NM_00356C | 18046.088 | 24821.859 | NM_002957 | 2593.664  |
| 349.95   | NM_01418E | 5963.284  | 6048.786  | NM_01440E | 1805.94   | 1824.874  | NM_01810E | 3486.47   |
| 263.282  | AB046780  | 8685.771  | 7391.169  | AL050100  | 1884.441  | 1783.372  | NM_00372E | 998.774   |
| 2199.69  | NM_01835E | 4593.424  | 2264.332  | NM_02013E | 1319.345  | 1499.774  | BE899154  | 1189.502  |
| 547.141  | NM_001801 | 606.08    | 308.549   | AL080207  | 389.953   | 485.461   | NM_00486E | 765.832   |
| 1750.779 | NM_00356C | 22442.34  | 15025.719 | NM_00074E | 11607.348 | 12026.191 | NM_00229E | 1935.198  |
| 667.966  | NM_01440E | 2148.248  | 2116.093  | NM_00004E | 1804.962  | 1916.458  | AB032963  | 1403.355  |
| 522.786  | AL050100  | 2145.314  | 1767.543  | U53531    | 578.707   | 747.054   | U15688    | 1605.927  |
| 1683.363 | NM_02013E | 1120.977  | 856.163   | NM_00492E | 2470.457  | 4510.435  | NM_01844E | 3174.465  |
| 897.432  | AL080207  | 550.821   | 573.53    | NM_00545E | 921.173   | 928.064   | NM_00165E | 11038.404 |
| 694.159  | NM_01773C | 4105.265  | 5792.584  | NM_006534 | 3888.986  | 4643.853  | AB020663  | 10046.393 |
| 328.777  | AB051826  | 1413.944  | 733.02    | AL133109  | 312.193   | 682.614   | AF297866  | 1095.879  |
| 963.535  | M20697    | 957.602   | 815.168   | AB051826  | 768.986   | 524.57    | NM_002864 | 1478.464  |
| 1382.119 | NM_01504E | 2611.962  | 2852.859  | M20697    | 568.691   | 746.366   | NM_01430E | 1697.172  |
| 321.057  | AF231022  | 15979.188 | 16347.147 | NM_01504E | 2223.594  | 2298.807  | NM_01212E | 1505.029  |
| 392.151  | NM_016327 | 2793.318  | 3056.158  | NM_002014 | 5390.67   | 2601.865  | U87972    | 1163.191  |
| 319.793  | NM_00632E | 1845.721  | 810.726   | NM_00253E | 5925.144  | 6567.458  | NM_01792E | 1239.922  |
| 675.673  | AF216381  | 12475.035 | 7820.228  | AK026349  | 3453.919  | 2496.202  | NM_003171 | 1669.313  |
| 397.751  | L08442    | 327.675   | 406.19    | NM_01473E | 1043.163  | 607.805   | NM_006437 | 5781.208  |
| 401.879  | AB014593  | 1738.184  | 1823.57   | D12485    | 810.116   | 1182.363  | NM_01789C | 602.818   |
| 37503    | NM_01626E | 541.567   | 815.971   | AK023204  | 2560.999  | 2907.865  | NM_00392E | 7479.84   |
| 270.529  | NM_00623E | 490.895   | 620.729   | NM_00344E | 883.621   | 830.975   | AB040812  | 10307.649 |
| 497.795  | AK026353  | 1289.016  | 1796.292  | NM_00247E | 1277.664  | 1575.814  | NM_00628E | 2236.517  |
| 4088.896 | L24123    | 1544.045  | 1793.75   | D38163    | 434.334   | 877.395   | NM_00134E | 1102.01   |
| 4484.234 | AF071111  | 649.132   | 626.057   | D28449    | 802.505   | 933.906   | AK027148  | 8269.432  |
| 1238.594 | U00954    | 1005.515  | 1208.747  | NM_003281 | 582.874   | 911.455   | NM_005084 | 3024.396  |
| 1549.375 | NM_01594E | 3020.279  | 2906.464  | AA460480  | 360.916   | 621.168   | NM_00728E | 1039.033  |
| 7026.125 | NM_017907 | 6632.514  | 10471.531 | AI298884  | 16798.189 | 18453.492 | NM_006111 | 2892.911  |
| 1482.725 | NM_002044 | 7471.493  | 8320.052  | D87845    | 557.872   | 1327.165  | AK026071  | 4139.795  |

|           |           |           |           |           |           |           |           |           |
|-----------|-----------|-----------|-----------|-----------|-----------|-----------|-----------|-----------|
| 402.404   | AJ272267  | 1227.511  | 1368.313  | M83254    | 1353.637  | 1562.061  | NM_003172 | 1256.036  |
| 1932.102  | NM_002103 | 3389.617  | 4190.674  | S56770    | 562.547   | 675.906   | AA460291  | 1576.788  |
| 1358.421  | NM_006665 | 2053.878  | 2171.095  | H58872    | 8168.363  | 4589.072  | B1821333  | 4904.919  |
| 271.282   | NM_000270 | 4573.438  | 4604.278  | J04543    | 3844.214  | 3652.791  | X51841    | 5844.999  |
| 606.425   | U89277    | 501.735   | 581.685   | S60415    | 505.146   | 277.559   | AF051344  | 1283.301  |
| 1011.586  | AK026670  | 651.513   | 1062.145  | AA456295  | 682.852   | 431.049   | BG506100  | 2311.57   |
| 275.958   | NM_002876 | 1443.059  | 844.069   | BE733577  | 2067.48   | 2518.783  | M26576    | 820.222   |
| 21926.979 | AK022332  | 1698.365  | 999.305   | BG762340  | 1238.119  | 1496.895  | M32972    | 1468.463  |
| 373.766   | NM_006465 | 1052.261  | 1396.219  | AA009484  | 156.737   | 261.716   | NM_006325 | 3345.335  |
| 1239.482  | NM_006769 | 4659.601  | 3207.195  | NM_018643 | 731.522   | 932.002   | AF085893  | 652.324   |
| 899.098   | NM_001189 | 1774.405  | 983.848   | M30142    | 1733.64   | 706.084   | NM_003201 | 1995.909  |
| 637.851   | AL365370  | 2440.978  | 1361.009  | NM_005018 | 499.71    | 533.507   | AB011139  | 608.715   |
| 879.842   | AK022204  | 527.498   | 814.015   | NM_013378 | 3443.476  | 5476.993  | AK025588  | 721.931   |
| 630.758   | AF086147  | 664.311   | 605.812   | NM_001085 | 532.689   | 818.589   | NM_003188 | 930.011   |
| 5188.34   | AL109726  | 582.058   | 846.239   | NM_006110 | 441.332   | 655.737   | U59431    | 1038.829  |
| 4310.276  | AF085912  | 845.039   | 332.445   | NM_016453 | 704.265   | 1329.84   | NM_020152 | 1200.152  |
| 5574.723  | AK001127  | 569.351   | 565.373   | NM_017701 | 845.781   | 829.755   | AK024443  | 41094.887 |
| 3959.593  | U79256    | 6578.053  | 6377.414  | NM_014226 | 1320.976  | 1283.212  | NM_020384 | 1225.939  |
| 6378.466  | AL832550  | 1067.184  | 1085.491  | AF142567  | 601.144   | 458.943   | NM_006058 | 5844.527  |
| 1952.973  | AF131798  | 583.823   | 491.357   | NM_005621 | 229.229   | 446.545   | NM_001659 | 2607.337  |
| 1843.901  | AF052176  | 829.066   | 175.03    | NM_006202 | 28628.479 | 27667.141 | AB020663  | 8415.129  |
| 266.808   | NM_001412 | 3357.953  | 1204.784  | NM_017410 | 7690.092  | 2844.429  | AF297866  | 869.983   |
| 446.263   | AF095771  | 339.989   | 442.512   | X99680    | 6097.85   | 3494.791  | NM_002864 | 596.238   |
| 1305.87   | AF086205  | 1689.366  | 2086.514  | NM_001448 | 1939.025  | 1362.115  | NM_017817 | 3481.736  |
| 3791.891  | AK024169  | 774.723   | 835.929   | NM_016072 | 2765.903  | 2447.353  | NM_018184 | 18811.5   |
| 2741.702  | AF147395  | 283.847   | 1176.173  | NM_000748 | 8324.034  | 6710.182  | AB046823  | 418.662   |
| 118.056   | AF087967  | 520.061   | 540.991   | NM_000048 | 2434.21   | 3242.016  | NM_004929 | 778.168   |
| 3946.9    | AF085985  | 751.566   | 616.901   | AF104032  | 10928.111 | 5454.85   | NM_016639 | 6691.037  |
| 1251.535  | AK026384  | 714.38    | 319.908   | U53531    | 606.226   | 562.248   | AF019225  | 2236.304  |
| 893.915   | AK025217  | 710.973   | 600.055   | NM_004925 | 2651.919  | 3421.319  | Z36803    | 4173.718  |
| 2108.648  | AF075105  | 1447.715  | 1378.862  | NM_003234 | 5756.707  | 5331.421  | NM_000707 | 3250.408  |
| 13723.55  | U03241    | 694.509   | 581.862   | NM_004858 | 780.763   | 871.873   | AF202092  | 4958.285  |
| 537.611   | NM_005117 | 1869.962  | 1781.368  | S78774    | 2984.255  | 2785.584  | AK027148  | 1445.935  |
| 492.672   | AJ007733  | 667.777   | 762.102   | NM_003059 | 121.539   | 480.785   | NM_005084 | 2341.787  |
| 1448.034  | AK021625  | 3550.732  | 4183.769  | NM_004922 | 3304.808  | 2616.962  | NM_007283 | 680.1     |
| 318.104   | AK021679  | 1875.755  | 2571.352  | NM_002871 | 241.93    | 380.987   | NM_006111 | 2997.377  |
| 39528.359 | AK025312  | 1730.615  | 1553.624  | BE873653  | 28797.729 | 32290.73  | AK026071  | 5340.037  |
| 7742.597  | AK027205  | 629.508   | 914.512   | NM_006987 | 158.65    | 429.461   | BC012333  | 5215.384  |
| 361.357   | AL049268  | 636.725   | 480.531   | NM_001282 | 2081.113  | 1526.534  | AF237952  | 2301.197  |
| 540.751   | AK023963  | 12007.012 | 7050.779  | NM_016830 | 794.161   | 774.173   | AL079287  | 1676.493  |
| 9356.384  | AK022473  | 5003.251  | 5270.655  | U44105    | 967.573   | 509.23    | NM_014427 | 1960.481  |
| 378.771   | AK023810  | 1293.258  | 697.323   | NM_016103 | 1114.564  | 1552.883  | AB046769  | 2397.262  |
| 585.381   | U80761    | 4361.234  | 6509.354  | AL133654  | 1523.905  | 1193.733  | NM_015922 | 5583.352  |
| 545.656   | U61100    | 762.167   | 615.82    | NM_002014 | 5265.858  | 3271.263  | NM_020381 | 1417.152  |
| 520.534   | NM_018582 | 765.382   | 761.125   | NM_002538 | 5085.743  | 5055.494  | AK024573  | 1949.36   |
| 275.383   | M21539    | 3971.689  | 2364.559  | NM_016585 | 7175.326  | 7540.679  | NM_002299 | 969.291   |
| 320.301   | AF130117  | 460.059   | 779.191   | NM_006927 | 7777.212  | 13206.878 | AB032963  | 1297.073  |
| 1234.336  | AK024761  | 4813.923  | 5430.779  | NM_014601 | 2639.377  | 2227.212  | NM_000385 | 677.677   |
| 1993.61   | NM_014335 | 13572.474 | 15477.729 | NM_017761 | 6245.198  | 6778.968  | AF301013  | 2741.067  |
| 358.065   | AF086067  | 2196.392  | 1651.262  | NM_006928 | 497.516   | 346.544   | NM_018992 | 37483.688 |
| 538.914   | AK024967  | 4023.198  | 3236.219  | AF237700  | 408.325   | 322.455   | U15688    | 1795.268  |
| 576.072   | AK025102  | 1886.839  | 2511.754  | NM_002860 | 2254.659  | 2831.116  | AF085893  | 727.927   |
| 962.595   | AF086562  | 1222.311  | 1069.962  | NM_006169 | 1738.85   | 2225.075  | NM_014305 | 2052.277  |

|           |           |           |           |           |           |           |           |           |
|-----------|-----------|-----------|-----------|-----------|-----------|-----------|-----------|-----------|
| 304.898   | AJ011980  | 1885.798  | 1509.262  | NM_001218 | 295.314   | 472.458   | NM_012123 | 4944.097  |
| 295.983   | AY007113  | 1995.17   | 1400.472  | NM_014183 | 5553.505  | 7688.286  | U87972    | 1147.122  |
| 814.892   | AF130083  | 11973.561 | 16012.445 | AB046780  | 8387.216  | 8657.121  | NM_017925 | 1156.848  |
| 331.288   | NM_002700 | 10210.736 | 9672.347  | NM_018353 | 3304.164  | 2714.774  | NM_003171 | 2083.645  |
| 1856.413  | AB002437  | 31831.332 | 25890.641 | NM_001801 | 554.488   | 423.57    | NM_006437 | 7949.839  |
| 362.631   | NM_006777 | 2846.259  | 2251.615  | NM_003560 | 17609.721 | 14520.07  | NM_017890 | 1149.527  |
| 2235.074  | AK024969  | 2225.491  | 2773.812  | NM_014403 | 1899.039  | 1304.045  | AK021654  | 1537.837  |
| 448.68    | AK022250  | 600.841   | 744.79    | AL050100  | 1524.205  | 1066.61   | NM_016481 | 391.536   |
| 335.758   | J05063    | 383.553   | 449.745   | NM_020139 | 1114.503  | 671.395   | NM_003925 | 5783.696  |
| 2537.231  | NM_012369 | 286.057   | 687.791   | NM_017730 | 2696.607  | 3447.551  | AB040812  | 10892.183 |
| 344.836   | AK025092  | 1956.125  | 2069.361  | AB051826  | 1323.437  | 904.586   | NM_006285 | 2650.66   |
| 847.938   | AF130047  | 865.992   | 676.685   | M20697    | 481.941   | 604.573   | NM_003656 | 54316.516 |
| 293.332   | Z83944    | 2596.352  | 2106.121  | NM_015046 | 1562.27   | 1660.366  | NM_020384 | 1224.674  |
| 846.337   | AF085871  | 1045.269  | 612.384   | AF231022  | 14736.47  | 13321.001 | NM_006058 | 9790.91   |
| 636.902   | AF026564  | 1215.97   | 776.174   | NM_016327 | 2222.884  | 1677.42   | NM_006628 | 7170.599  |
| 244.311   | X97301    | 4321.255  | 2783.039  | NM_006322 | 1229.106  | 359.463   | M97496    | 9055.318  |
| 300.758   | AL110141  | 63100.117 | 43983.609 | U66702    | 38145.973 | 34087.016 | NM_003172 | 2198.094  |
| 1114.329  | NM_019063 | 20322.955 | 26742.779 | AF216381  | 8261.709  | 2900.155  | NM_004809 | 761.212   |
| 2135.753  | NM_014336 | 1574.34   | 1172.517  | AB014593  | 1218.187  | 630.942   | H41522    | 1312.261  |
| 444.641   | AB002308  | 1389.452  | 1049.606  | AK074832  | 15724.428 | 12044.401 | AA460291  | 1749.747  |
| 189.181   | NM_012143 | 2565.494  | 2490.944  | NM_016269 | 261.079   | 278.916   | B1821333  | 4548.853  |
| 143.891   | AF085892  | 1552.001  | 1655.263  | NM_006235 | 852.535   | 777.59    | X51841    | 9094.361  |
| 355.895   | AF075114  | 1994.766  | 1853.607  | AK026353  | 852.51    | 930.267   | AF051344  | 1590.819  |
| 421.641   | AK022218  | 37207.004 | 35600.105 | L24123    | 1242.17   | 894.225   | BG506100  | 2644.73   |
| 679.501   | NM_007112 | 2831.424  | 1867.699  | AF071111  | 499.54    | 507.449   | M26576    | 710.893   |
| 1889.23   | S82075    | 4060.121  | 1244.201  | U00954    | 895.635   | 502.974   | M32972    | 1184.667  |
| 2474.478  | Z70766    | 682.726   | 478.455   | NM_015942 | 2384.41   | 2199.698  | AF019225  | 1891.697  |
| 451.988   | AK000660  | 4411.783  | 1780.317  | NM_017907 | 3481.982  | 4619.207  | Z36803    | 4226.761  |
| 3262.694  | AK026298  | 325.692   | 481.198   | NM_002044 | 5596.94   | 4350.226  | NM_000707 | 4213.588  |
| 310.935   | NM_014711 | 2041.216  | 1069.724  | AJ272267  | 842.474   | 888.513   | AF202092  | 8116.022  |
| 588.718   | AK022015  | 2430.516  | 1756.176  | NM_002103 | 3860.784  | 4291.983  | NM_003201 | 2539.831  |
| 599.183   | D17234    | 1018.686  | 1764.206  | NM_006665 | 1661.81   | 1618.923  | NM_006919 | 889.961   |
| 616.262   | D63135    | 1002.463  | 997.288   | NM_000270 | 3701.902  | 3765.196  | AK022625  | 2083.127  |
| 303.506   | AB033083  | 4056.829  | 5189.342  | U89277    | 176.214   | 648.165   | AK023084  | 2025.084  |
| 2673.171  | NM_017828 | 7025.775  | 13473.162 | AK026670  | 356.651   | 421.928   | AK025588  | 741.045   |
| 1091.83   | CY3Cy5    | 3858.183  | 180.348   | NM_002876 | 1516.789  | 2764.474  | NM_003188 | 1277.28   |
| 515.398   | H41522    | 4079.477  | 6762.948  | AK022332  | 1234.431  | 1054.676  | U59431    | 733.695   |
| 776.628   | X51841    | 16513.32  | 17088.396 | NM_006465 | 858.016   | 908.459   | NM_013404 | 721.179   |
| 423.481   | AF051344  | 6703.728  | 6294.16   | NM_006769 | 3287.963  | 1602.624  | AF300648  | 995.904   |
| 930.961   | BG506100  | 6772.862  | 4405.834  | NM_001189 | 2032.695  | 1106.989  | AK024443  | 51907.98  |
| 5428.094  | X53586    | 896.078   | 869.772   | AL365370  | 1959.181  | 1359.069  | X06710    | 1375.366  |
| 13271.69  | M17176    | 2189.783  | 2097.415  | AK022204  | 741.524   | 546.041   | D79998    | 19168.244 |
| 16365.063 | M26576    | 1602.088  | 3144.731  | AF086147  | 419.148   | 362.36    | AB032963  | 1149.298  |
| 169.978   | M32972    | 4364.93   | 4346.753  | AL109726  | 517.975   | 475.926   | NM_000385 | 577.479   |
| 225.687   | D11151    | 657.223   | 721.532   | AL109716  | 293.475   | 336.652   | AF301013  | 2622.866  |
| 444.582   | D89854    | 838.549   | 851.958   | AF085912  | 267.874   | 379.598   | NM_018992 | 43410.668 |
| 233.548   | M13207    | 912.646   | 946.551   | AK001127  | 666.944   | 651.324   | U15688    | 1752.419  |
| 300.308   | SR2       | 67552.883 | 70395.664 | U79256    | 8073.526  | 6827.704  | NM_018448 | 2809.872  |
| 504.368   | SR4       | 21670.879 | 30566.322 | AL832550  | 684.238   | 496.53    | NM_001659 | 8031.222  |
| 339.785   | SR6       | 2877.455  | 2890.68   | AF131798  | 528.07    | 589.44    | AB020663  | 7865.191  |
| 1135.161  | SR8       | 8775.333  | 35415.141 | AF052176  | 799.347   | 359.475   | AF297866  | 574.136   |
| 330.431   | SR10      | 33199.781 | 15467.203 | NM_001412 | 2996.483  | 2779.372  | NM_002864 | 558.404   |
| 658.591   | CY3Cy5    | 3017.263  | 183.355   | AF086205  | 1487.72   | 1530.751  | NM_017817 | 3576.783  |

|           |           |           |           |           |           |           |           |           |
|-----------|-----------|-----------|-----------|-----------|-----------|-----------|-----------|-----------|
| 806.464   | AK025588  | 3498.331  | 4090.745  | AK024169  | 664.864   | 538.924   | NM_018184 | 18887.861 |
| 9845.023  | NM_003188 | 3700.591  | 5180.499  | AF147395  | 627.782   | 581.285   | AB046823  | 562.855   |
| 1085.685  | U59431    | 3123.008  | 3671.045  | AF087967  | 379.762   | 279.873   | NM_004929 | 553.599   |
| 386.534   | U49349    | 1578.269  | 794.559   | AF085985  | 583.546   | 523.656   | NM_016639 | 2065.919  |
| 985.017   | NM_020152 | 2930.768  | 2949.648  | AK026384  | 554.951   | 1116.522  | U61739    | 2722.747  |
| 2960.578  | NM_013404 | 1624.945  | 1788.584  | AF075105  | 1217.265  | 1132.249  | AJ132089  | 460.388   |
| 1051.741  | AF300648  | 2595.654  | 2438.717  | U03241    | 633.356   | 443.364   | U92819    | 11982.474 |
| 37424.539 | X06710    | 3474.277  | 7474.595  | NM_005117 | 1192.102  | 847.066   | AB020626  | 431.746   |
| 514.675   | AK000896  | 1664.246  | 1362.608  | AJ007733  | 369.189   | 298.684   | NM_002036 | 4215.226  |
| 856.279   | NM_020384 | 2600.107  | 2410.268  | AK021625  | 2500.046  | 1970.726  | NM_005384 | 1652.374  |
| 1099.102  | NM_006058 | 15973.773 | 12094.718 | AK021679  | 782.927   | 908.305   | NM_006850 | 414.634   |
| 263.388   | AK026074  | 1253.152  | 1385.443  | AK001380  | 1490.404  | 1412.939  | Z15114    | 1996.729  |
| 820.98    | NM_003172 | 4620.69   | 5738.63   | AK024938  | 189.143   | 343.954   | AB040812  | 7921.898  |
| 339.709   | NM_004809 | 3383.312  | 2688.547  | AK025312  | 1662.682  | 922.261   | NM_006285 | 1782.366  |
| 1674.031  | NM_017817 | 5855.808  | 12915.457 | AK027205  | 400.516   | 484.479   | NM_001348 | 1147.189  |
| 636.955   | NM_018184 | 30376.717 | 25157.811 | NM_018606 | 393.512   | 861.841   | AK027148  | 4577.085  |
| 1505.6    | AB046823  | 1562.739  | 2373.113  | AK026493  | 558.379   | 476.987   | NM_005084 | 2072.143  |
| 468.317   | NM_004929 | 1636.329  | 3473.27   | AL049268  | 480.539   | 573.139   | NM_006111 | 2421.486  |
| 5315.738  | NM_004662 | 2117.093  | 2538.919  | AK023963  | 7938.501  | 3178.994  | AK026071  | 4277.678  |
| 5806.664  | NM_016639 | 29453.936 | 33554.855 | AK022473  | 3745.877  | 3702.935  | BC012333  | 4657.402  |
| 1225.417  | U61739    | 9917.294  | 8524.378  | AK023810  | 759.553   | 839.657   | AF237952  | 2137.715  |
| 2083.666  | AJ132089  | 1367.547  | 1855.736  | AK024133  | 572.462   | 271.441   | AL079287  | 1896.188  |
| 1605.918  | U92819    | 32898.027 | 31715.197 | U80761    | 2946.739  | 2586.536  | NM_014427 | 1918.026  |
| 3005.249  | AB020626  | 1304.537  | 1247.791  | U61100    | 466.621   | 382.868   | AB046769  | 1216.85   |
| 736.886   | NM_002036 | 10036.798 | 8876.19   | NM_018582 | 514.021   | 500.706   | NM_020381 | 670.551   |
| 967.817   | NM_012400 | 814.039   | 795.591   | M21539    | 4666.597  | 4020.794  | NM_002957 | 3219.082  |
| 1019.567  | NM_006850 | 773.544   | 411.346   | AF130117  | 503.147   | 768.208   | NM_018106 | 2661.568  |
| 3636.054  | AB013103  | 912.034   | 1227.677  | AK024125  | 538.014   | 355.609   | BE899154  | 1317.057  |
| 1865.415  | AF019225  | 3988.51   | 5480.405  | AK024761  | 2804.035  | 2628.121  | NM_004863 | 1180.316  |
| 23875.703 | Z36803    | 9106.03   | 9891.96   | NM_014335 | 10504.426 | 11573.702 | AK024573  | 1993.734  |
| 9526.441  | NM_000707 | 7297.91   | 9294.855  | AF086067  | 1849.525  | 1467.387  | NM_002299 | 2064.38   |
| 550.441   | AB011139  | 2497.698  | 2167.852  | AK024967  | 4407.901  | 4647.905  | NM_003830 | 626.532   |
| 2348.899  | NM_006919 | 1981.433  | 1909.165  | AK025102  | 1928.962  | 2336.007  | NM_000842 | 504.768   |
| 2831.013  | AK022625  | 7568.776  | 5120.54   | AF086562  | 1095.627  | 998.631   | NM_015642 | 556.762   |
| 1008.289  | NM_005425 | 1005.117  | 1449.292  | Y11897    | 689.913   | 476.406   | NM_004640 | 12227.759 |
| 4224.622  | AK023084  | 6064.378  | 5179.572  | AY007113  | 1357.297  | 1007.834  | NM_016222 | 3081.345  |
| 1719.398  | BC012333  | 8464.737  | 7545.046  | AF130083  | 9080.821  | 7974.397  | AB037823  | 1472.544  |
| 2707.911  | AF237952  | 4513.915  | 5189.696  | NM_002700 | 12868.424 | 10373.934 | NM_015380 | 4925.316  |
| 940.012   | AL079287  | 3746.639  | 5115.129  | AB002437  | 24914.422 | 9548.953  | BE254485  | 658.215   |
| 49225.984 | NM_014427 | 5056.992  | 6809.185  | AK023496  | 371.715   | 310.056   | NM_002732 | 1228.044  |
| 2103.592  | AB046769  | 4541.154  | 5795.171  | NM_006777 | 2473.894  | 1420.936  | NM_014305 | 2003.967  |
| 831.798   | NM_015922 | 12867.223 | 8950.747  | AK024969  | 3177.162  | 3023.992  | NM_012123 | 3353.809  |
| 1872.687  | NM_020381 | 4854.452  | 4022.363  | AK022250  | 665.248   | 528.33    | NM_017925 | 702.963   |
| 9840.218  | NM_002957 | 9430.702  | 9307.979  | NM_012369 | 622.016   | 729.253   | NM_003171 | 1985.492  |
| 7933.295  | NM_018106 | 7266.926  | 7312.343  | AK025092  | 1792.46   | 1440.235  | NM_006437 | 6278.054  |
| 2418.638  | NM_003725 | 681.193   | 1701.603  | AF130047  | 803.621   | 641.125   | NM_017890 | 737.866   |
| 3410.233  | BE899154  | 2924.931  | 2746.366  | Z83944    | 1517.708  | 1267.319  | AK021654  | 1369.632  |
| 2510.566  | NM_004863 | 2380.974  | 2393.892  | AF085871  | 744.041   | 541.719   | NM_016481 | 557.062   |
| 4185.06   | AK024573  | 3683.554  | 4395.787  | NM_005298 | 453.798   | 1011.794  | NM_003925 | 7510.952  |
| 28317.094 | NM_002299 | 4736.867  | 4186.021  | AF026564  | 724.95    | 680.131   | AF217974  | 3039.618  |
| 1409.547  | NM_000385 | 1158.16   | 1946.807  | X97301    | 2667.999  | 2642.436  | NM_000888 | 1722.097  |
| 2086.201  | AF301013  | 4798.903  | 7566.203  | AL110141  | 67281.617 | 28649.984 | NM_000595 | 1745.809  |
| 42303.012 | U15688    | 4700.15   | 7482.439  | NM_019063 | 12264.158 | 14108.866 | X99663    | 1502.378  |

|           |           |           |           |           |           |           |           |           |
|-----------|-----------|-----------|-----------|-----------|-----------|-----------|-----------|-----------|
| 9013.225  | NM_01844E | 6361.543  | 4428.652  | NM_01433E | 1051.483  | 507.916   | NM_01655E | 709.926   |
| 1508.057  | NM_00165E | 15032.353 | 18437.227 | AB002308  | 802.969   | 475.7     | NM_00356E | 1697.107  |
| 23160.281 | AB020663  | 12519.176 | 8742.49   | NM_01214E | 3213.941  | 3460.506  | NM_004841 | 1551.332  |
| 1290.557  | AF297866  | 2361.155  | 3337.553  | AF085892  | 1150.254  | 1205.235  | NM_01844C | 3384.931  |
| 7852.277  | NM_002864 | 2013.507  | 1095.954  | AF075114  | 2907.285  | 2804.999  | M35410    | 1610.265  |
| 957.062   | NM_01430E | 3659.252  | 2315.508  | AK022218  | 31175.516 | 37590.207 | AB023227  | 588.103   |
| 2734.621  | NM_01212E | 9699.144  | 14197.446 | NM_007112 | 2147.143  | 2024.467  | NM_00577E | 8877.718  |
| 599.271   | U87972    | 2791.761  | 3139.35   | S82075    | 2714.842  | 1741.799  | AK023071  | 2011.151  |
| 812.275   | NM_01792E | 2708.045  | 1804.046  | Z70766    | 578.987   | 321.769   | AK022888  | 2051.377  |
| 2494.334  | NM_003171 | 3944.373  | 3234.296  | AK000660  | 3795.669  | 3300.631  | AK024484  | 5317.444  |
| 5992.328  | NM_006437 | 14289.499 | 8514.036  | NM_014711 | 1307.579  | 1139.05   | NM_00195E | 28360.367 |
| 568.945   | NM_01789C | 1763.025  | 1405.779  | D63135    | 688.344   | 630.933   | NM_00140E | 922.736   |
| 5447.229  | AK021654  | 2186.788  | 2559.776  | AB033083  | 2549.54   | 2377.055  | NM_00229E | 2192.973  |
| 7288.486  | NM_016481 | 977.628   | 1778.773  | NM_01782E | 3366.387  | 8922.949  | AF305200  | 606.345   |
| 3677.012  | NM_00392E | 11350.235 | 17613.939 | CY3Cy5    | 3345.138  | 209.191   | AL570170  | 1275.63   |
| 1505.58   | AB040812  | 17320.881 | 20249.443 | H41522    | 1960.545  | 2238.121  | D56495    | 1603.156  |
| 1365.212  | NM_01762E | 371.948   | 1237.655  | AA460291  | 3966.019  | 4260.927  | NM_00661E | 4333.356  |
| 7796.313  | NM_00628E | 4796.288  | 5464.516  | BI821333  | 6907.116  | 7359.899  | NM_00463E | 6561.78   |
| 460.29    | NM_00134E | 3089.435  | 4702.402  | X51841    | 18019.514 | 31644.727 | L40027    | 1040.684  |
| 4869.918  | AK027148  | 18417.912 | 17895.795 | X53586    | 609.331   | 803.873   | NM_00371E | 17245.34  |
| 5849.364  | NM_005084 | 5668.279  | 6052.618  | M17176    | 1674.936  | 2217.498  | NM_00706E | 683.85    |
| 3945.517  | NM_00728E | 936.103   | 1124.988  | M26576    | 1196.079  | 1488.919  | NM_01418C | 9084.798  |
| 3067.948  | NM_006111 | 7913.554  | 13596.898 | M32972    | 2395.107  | 2763.097  | NM_01770E | 1598.272  |
| 5106.119  | AK026071  | 8240.229  | 6442.879  | M97815    | 926.111   | 857.57    | AF334406  | 575.153   |
| 4231.506  | AK026074  | 1865.667  | 1385.556  | NM_00632E | 4479.733  | 6071.137  | NM_01599E | 2317.627  |
| 10141.734 | NM_00317E | 5825.124  | 8904.45   | SR2       | 53970.063 | 57574.188 | NM_003804 | 3680.563  |
| 2406.816  | NM_00480E | 3793.346  | 4287.636  | SR4       | 15005.89  | 18363.129 | NM_00470E | 55625.938 |
| 5410.301  | AA903183  | 1079.727  | 1720.876  | SR6       | 2528.868  | 2063.521  | NM_016001 | 5741.059  |
| 5553.912  | H41522    | 3671.794  | 3945.579  | SR8       | 7854.529  | 27897.695 | NM_01610E | 11118.164 |
| 1424.805  | AA460291  | 8648.316  | 7962.188  | SR10      | 28883.375 | 9485.734  | S49432    | 918.624   |
| 2035.418  | BI821333  | 13363.817 | 9222.799  | CY3Cy5    | 2391.926  | 137.529   | D86984    | 832.429   |
| 1864.427  | X51841    | 17127.439 | 18787.227 | AK025588  | 2612.621  | 2672.21   | NM_01595E | 662.514   |
| 2163.631  | AF051344  | 6186.092  | 5967.236  | NM_00318E | 2183.349  | 2389.801  | AK026904  | 1883.772  |
| 3284.315  | BG506100  | 6494.937  | 4523.902  | U59431    | 3724.608  | 4478.461  | J03210    | 1263.227  |
| 38723.313 | X53586    | 670.318   | 1037.056  | U49349    | 1278.782  | 1715.697  | NM_00190E | 3974.882  |
| 1266.047  | M17176    | 2428.844  | 1738.114  | AK024443  | 67768.625 | 64871.895 | NM_01219E | 896.865   |
| 836.454   | M26576    | 1763.848  | 3150.45   | X06710    | 1527.926  | 2741.578  | NM_00336E | 1463.418  |
| 2759.469  | M32972    | 5027.079  | 4803.685  | AK000896  | 940.392   | 1189.408  | AB040886  | 397.925   |
| 2705.259  | D89854    | 846.879   | 934.842   | NM_020384 | 1915.797  | 3062.36   | AB029020  | 1123.901  |
| 3785.214  | M13207    | 789.209   | 744.563   | NM_00605E | 14077.663 | 12948.007 | AK022759  | 1167.68   |
| 12304.503 | M97815    | 1320.051  | 1145.068  | NM_00662E | 10808.101 | 15157.021 | NM_01233E | 4044.868  |
| 9154.768  | NM_00632E | 6000.142  | 3219.173  | AK026074  | 850.693   | 614.044   | AF161472  | 1052.449  |
| 4502.676  | AF085893  | 1036.806  | 1454.23   | NM_00317E | 2809.158  | 3984.085  | AL133642  | 3459.148  |
| 2781.299  | NM_003201 | 4951.308  | 4644      | NM_00480E | 1741.366  | 1472.881  | AF124432  | 1282.442  |
| 2633.222  | AB011139  | 2211.041  | 2770.528  | NM_017817 | 4396.932  | 6296.146  | NM_00633C | 4594.398  |
| 6392.097  | NM_00691E | 1687.248  | 1553.223  | NM_018184 | 23946.141 | 20916.869 | NM_01587E | 1912.998  |
| 1077.611  | AK022625  | 9237.125  | 8433.12   | AB046823  | 836.094   | 1193.071  | NM_000377 | 2210.43   |
| 1693.842  | NM_00542E | 998.378   | 1367.685  | NM_00492E | 1008.769  | 1298.866  | NM_00681E | 466.746   |
| 36343.004 | AK023084  | 5919.621  | 5549.954  | NM_00466E | 744.561   | 933.409   | NM_01682E | 1593.434  |
| 2140.343  | AK025588  | 2817.187  | 2949.881  | NM_01663E | 20566.357 | 28049.428 | NM_00263E | 12412.818 |
| 1230.32   | NM_00318E | 3069.207  | 3497.551  | AB020626  | 826.43    | 852.069   | NM_016494 | 12565.532 |
| 1734.657  | NM_007118 | 606.138   | 645.137   | NM_00203E | 8403.851  | 9928.103  | U09410    | 2926.781  |
| 434.796   | U59431    | 3497.871  | 2552.482  | NM_005384 | 1505.276  | 2224.085  | NM_02022E | 471.345   |

|           |                  |           |           |                  |           |           |                  |           |
|-----------|------------------|-----------|-----------|------------------|-----------|-----------|------------------|-----------|
| 8089.739  | <b>U49349</b>    | 1140.471  | 760.071   | <b>AB013103</b>  | 669.423   | 1653.018  | <b>NM_001186</b> | 2331.159  |
| 3717.099  | <b>NM_020152</b> | 2747.17   | 2898.905  | <b>AF019225</b>  | 4013.534  | 6884.759  | <b>NM_004502</b> | 1184.949  |
| 10069.596 | <b>NM_013404</b> | 2223.459  | 2078.248  | <b>Z36803</b>    | 7285.787  | 8206.971  | <b>AF000560</b>  | 4173.481  |
| 404.497   | <b>AF300648</b>  | 3027.739  | 2792.838  | <b>NM_013371</b> | 946.531   | 976.968   | <b>NM_013282</b> | 2425.437  |
| 2782.065  | <b>AK024443</b>  | 67744.922 | 64129.223 | <b>NM_000707</b> | 6104.167  | 7648.94   | <b>NM_005777</b> | 3532.258  |
| 1477.207  | <b>X06710</b>    | 2900.863  | 6377.867  | <b>AF202092</b>  | 7465.439  | 6732.443  | <b>NM_012345</b> | 1269.048  |
| 7027.24   | <b>AK000896</b>  | 1491.098  | 956.168   | <b>AB011139</b>  | 1229.904  | 1394.308  | <b>NM_005826</b> | 8403.461  |
| 2474.115  | <b>NM_020384</b> | 2959.471  | 4210.483  | <b>NM_006919</b> | 1482.775  | 1302.605  | <b>NM_004592</b> | 1566.28   |
| 1343.774  | <b>NM_006058</b> | 15257.797 | 12855.296 | <b>AK022625</b>  | 7478.59   | 4859.002  | <b>NM_015001</b> | 3202.748  |
| 754.927   | <b>NM_006628</b> | 12107.968 | 14923.381 | <b>AK023084</b>  | 3690.344  | 3268.96   | <b>NM_016107</b> | 1438.742  |
| 2740.842  | <b>M97496</b>    | 15094.034 | 19223.076 | <b>BC012333</b>  | 6786.509  | 5818.665  | <b>NM_002567</b> | 12464.505 |
| 2706.631  | <b>NM_018448</b> | 6481.027  | 4987.362  | <b>AF237952</b>  | 3608.459  | 4160.61   | <b>NM_001404</b> | 1448.465  |
| 4328.554  | <b>NM_001659</b> | 14037.466 | 16452.654 | <b>AL079287</b>  | 2805.112  | 3353.488  | <b>NM_001605</b> | 16824.764 |
| 6449.834  | <b>AB020663</b>  | 13278.476 | 9880.813  | <b>NM_014427</b> | 3583.287  | 3765.195  | <b>AF225422</b>  | 4744.285  |
| 12025.841 | <b>AF297866</b>  | 1760.315  | 2708.111  | <b>AB046769</b>  | 4394.786  | 4485.615  | <b>AB040960</b>  | 2758.419  |
| 3751.399  | <b>NM_002864</b> | 1922.543  | 1124.976  | <b>NM_015922</b> | 9056.001  | 7454.339  | <b>NM_015946</b> | 1186.65   |
| 467.518   | <b>NM_017817</b> | 6404.938  | 12421.171 | <b>NM_020381</b> | 2037.447  | 1879.267  | <b>NM_006303</b> | 3056.343  |
| 1869.829  | <b>NM_018184</b> | 30122.313 | 20876.879 | <b>NM_002957</b> | 4266.385  | 6640.393  | <b>AK024165</b>  | 547.48    |
| 341.124   | <b>AB046823</b>  | 1506.734  | 1802.8    | <b>NM_018106</b> | 5749.704  | 6772.056  | <b>NM_003001</b> | 816.633   |
| 619.455   | <b>NM_004929</b> | 1587.844  | 1677.919  | <b>NM_003725</b> | 625.972   | 949.599   | <b>NM_001985</b> | 1516.634  |
| 760.736   | <b>NM_004662</b> | 1196.864  | 1142.685  | <b>BE899154</b>  | 1542.331  | 1959.403  | <b>BE563532</b>  | 505.305   |
| 3894.022  | <b>NM_016639</b> | 28701.168 | 30585.756 | <b>NM_004863</b> | 1676.695  | 1817.419  | <b>NM_001916</b> | 4096.118  |
| 1995.238  | <b>U61739</b>    | 10443.146 | 10032.911 | <b>AK024573</b>  | 2503.619  | 2477.12   | <b>NM_002491</b> | 862.659   |
| 538.623   | <b>AJ132089</b>  | 1800.997  | 2024.915  | <b>NM_002299</b> | 3493.52   | 4528.292  | <b>NM_015425</b> | 783.98    |
| 633.943   | <b>U92819</b>    | 34925.301 | 32919.539 | <b>AB032963</b>  | 1761.54   | 4284.171  | <b>NM_015153</b> | 2913.685  |
| 6425.652  | <b>AB020626</b>  | 806.856   | 979.903   | <b>NM_000385</b> | 1287.817  | 1937.63   | <b>AB032966</b>  | 6966.396  |
| 896.895   | <b>NM_002036</b> | 8282.503  | 6483.113  | <b>AF301013</b>  | 4104.489  | 9211.705  | <b>NM_014820</b> | 1082.205  |
| 2092.929  | <b>NM_005384</b> | 2480.687  | 2074.527  | <b>NM_018992</b> | 61983.824 | 55008.563 | <b>NM_005035</b> | 466.393   |
| 1352.456  | <b>NM_006850</b> | 639.988   | 643.918   | <b>U15688</b>    | 3047.994  | 2877.777  | <b>NM_019014</b> | 1576.273  |
| 3074.608  | <b>AB013103</b>  | 1330.913  | 2065.097  | <b>NM_018448</b> | 4697.983  | 5247.968  | <b>NM_002097</b> | 6143.743  |
| 705.957   | <b>AF019225</b>  | 4601.963  | 4311.278  | <b>NM_001659</b> | 14517.958 | 13788.666 | <b>X04706</b>    | 1959.186  |
| 2268.25   | <b>Z36803</b>    | 10960.485 | 11542.55  | <b>AB020663</b>  | 9710.399  | 10390.256 | <b>NM_006494</b> | 1427.349  |
| 1389.982  | <b>NM_013371</b> | 970.546   | 1911.712  | <b>AF297866</b>  | 1297.888  | 1488.018  | <b>X52343</b>    | 1759.936  |
| 60902.133 | <b>NM_000707</b> | 8577.004  | 16788.078 | <b>NM_002864</b> | 876.911   | 922.034   | <b>NM_005853</b> | 4415.407  |
| 1476.487  | <b>AF202092</b>  | 9847.394  | 10767.532 | <b>NM_014305</b> | 2900.176  | 3264.836  | <b>NM_017814</b> | 2754.509  |
| 629.105   | <b>AK027148</b>  | 17553.334 | 17793.127 | <b>NM_012123</b> | 6320.925  | 10732.931 | <b>AF131811</b>  | 864.803   |
| 2742.429  | <b>NM_005084</b> | 4902.469  | 5140.829  | <b>U87972</b>    | 1628.296  | 2050.9    | <b>AF293026</b>  | 5433.739  |
| 8800.922  | <b>NM_007283</b> | 857.931   | 1357.019  | <b>NM_017925</b> | 1512.147  | 1564.49   | <b>AF236158</b>  | 859.362   |
| 6855.29   | <b>NM_006111</b> | 6716.416  | 9475.68   | <b>NM_003171</b> | 2258.639  | 2420.74   | <b>NM_015953</b> | 4268.563  |
| 20941.264 | <b>AK026071</b>  | 9532.402  | 6555.261  | <b>NM_006437</b> | 8798.724  | 7162.116  | <b>AK024775</b>  | 1389.936  |
| 1333.436  | <b>BC012333</b>  | 7867.197  | 7203.318  | <b>NM_017890</b> | 1310.488  | 1138.887  | <b>AK025562</b>  | 363.757   |
| 5046.486  | <b>AF237952</b>  | 3893.667  | 4198.242  | <b>AK021654</b>  | 2000.085  | 2251.546  | <b>AF088024</b>  | 745.259   |
| 7936.913  | <b>AL079287</b>  | 3315.703  | 4233.764  | <b>NM_016481</b> | 768.791   | 1170.487  | <b>AK025887</b>  | 1715.331  |
| 1281.902  | <b>NM_014427</b> | 4450.423  | 4395.373  | <b>NM_003925</b> | 10181.969 | 19603.791 | <b>AB037719</b>  | 996.32    |
| 905.35    | <b>AB046769</b>  | 3629.32   | 4094.034  | <b>AB040812</b>  | 12380.315 | 15423.063 | <b>AF086229</b>  | 216.468   |
| 3198.978  | <b>NM_015922</b> | 11795.189 | 7230.637  | <b>NM_017625</b> | 452.565   | 573.706   | <b>AK026143</b>  | 700.575   |
| 1378.474  | <b>NM_020381</b> | 4806.129  | 3342.57   | <b>NM_006285</b> | 3874.674  | 4429.661  | <b>AL110252</b>  | 606.754   |
| 1705.07   | <b>NM_002957</b> | 9348.933  | 8314.551  | <b>NM_003656</b> | 66208.406 | 58358.125 | <b>AK021752</b>  | 11562.365 |
| 8156.966  | <b>NM_018106</b> | 6674.833  | 6361.298  | <b>NM_001348</b> | 2370.348  | 3017.706  | <b>AL109706</b>  | 3546.234  |
| 1026.896  | <b>NM_003725</b> | 557.687   | 1038.467  | <b>AK027148</b>  | 17652.471 | 15278.131 | <b>AK001118</b>  | 529.418   |
| 652.355   | <b>BE899154</b>  | 2608.73   | 2372.29   | <b>NM_005084</b> | 2831.916  | 2952.761  | <b>AF035291</b>  | 24373.854 |
| 7625.201  | <b>NM_004863</b> | 2176.155  | 2451.662  | <b>NM_007283</b> | 700.834   | 714.409   | <b>AK026291</b>  | 2938.162  |
| 677.269   | <b>AK024573</b>  | 3242.608  | 4489.192  | <b>NM_006111</b> | 3808.21   | 4533.585  | <b>AL080106</b>  | 719.392   |



|           |           |           |           |           |           |           |           |           |
|-----------|-----------|-----------|-----------|-----------|-----------|-----------|-----------|-----------|
| 1143.894  | NM_002299 | 4504.75   | 4438.528  | AK026071  | 7276.874  | 4237.792  | AL117520  | 240.269   |
| 2820.484  | NM_000385 | 1443.587  | 2226.936  | NM_004809 | 1855.762  | 1569.93   | AL050059  | 567.769   |
| 6443.271  | AF301013  | 5768.622  | 12905.313 | H41522    | 1478.736  | 1735.268  | AL080208  | 894.009   |
| 859.933   | U15688    | 4304.424  | 6875.955  | AA460291  | 2970.115  | 2899.527  | L35592    | 5324.854  |
| 6616.101  | NM_006325 | 5395.638  | 3467.038  | BI821333  | 6323.511  | 5588.865  | NM_012079 | 607.822   |
| 8691.014  | AF085893  | 964.646   | 1532.152  | X51841    | 16438     | 21937.965 | AL360274  | 7054.203  |
| 2540.578  | NM_014305 | 3364.326  | 2130.41   | AF051344  | 2700.674  | 2533.91   | NM_014050 | 2754.891  |
| 1334.073  | NM_012123 | 8430.557  | 9800.025  | BG506100  | 3630.942  | 4061.072  | AF085854  | 533.151   |
| 724.376   | U87972    | 2237.049  | 1931.973  | M17176    | 1332.844  | 1775.43   | AK097417  | 1417.892  |
| 2707.33   | NM_017925 | 2405.438  | 2123.92   | M26576    | 985.393   | 1403.634  | AF009289  | 2352.13   |
| 2977.586  | NM_003171 | 3724.279  | 2849.852  | M32972    | 2180.393  | 2360.404  | AF009303  | 2127.929  |
| 3108.521  | NM_006437 | 14558.924 | 7595.703  | M13207    | 534.21    | 689.954   | NM_004474 | 1672.926  |
| 2269.66   | NM_017890 | 1361.859  | 1120.74   | M97815    | 728.088   | 837.429   | AF056449  | 636.348   |
| 1684.782  | AK021654  | 2146.676  | 2109.836  | NM_006325 | 3681.042  | 4129.563  | AK001033  | 791.79    |
| 3490.67   | NM_016481 | 897.446   | 1657.375  | AB011139  | 1239.988  | 1666.939  | AK021463  | 947.007   |
| 2742.866  | NM_003925 | 11265.08  | 15073.01  | NM_006919 | 1359.373  | 1410.665  | AK001082  | 1973.497  |
| 2447.323  | Z15114    | 4689.929  | 7172.681  | AK022625  | 6911.033  | 4493.811  | AK021743  | 1354.874  |
| 5799.042  | AB040812  | 20239.92  | 15938.376 | AK023084  | 3506.227  | 3070.511  | NM_016633 | 8218.278  |
| 1232.197  | NM_006285 | 5480.777  | 6100.252  | AK025588  | 1174.234  | 1489.427  | AK023250  | 3560.824  |
| 29326.15  | NM_001348 | 2221.246  | 3844.343  | NM_003188 | 1434.831  | 1668.838  | AK024882  | 1236.365  |
| 785.578   | NM_020384 | 2366.468  | 3209.486  | U59431    | 2667.161  | 2285.13   | NM_014062 | 11371.331 |
| 1332.581  | NM_006058 | 16369.939 | 16559.375 | U49349    | 608.948   | 473.196   | NM_006304 | 31387.318 |
| 51162.086 | NM_006628 | 11266.702 | 13243.861 | NM_020152 | 1727.567  | 1692.993  | X74804    | 410.176   |
| 3316.923  | M97496    | 19035.789 | 23043.186 | NM_013404 | 1240.05   | 1353.177  | AF293367  | 732.666   |
| 1920.811  | H41522    | 3331.761  | 4230.115  | AF300648  | 2307.682  | 3107.696  | AF086231  | 1838.644  |
| 717.395   | AA460291  | 7386.518  | 7919.29   | AK024443  | 62239.438 | 56159.902 | AK001494  | 1082.185  |
| 2112.283  | BI821333  | 12024.115 | 7464.144  | X06710    | 1843.817  | 2134.92   | AL133438  | 977.234   |
| 5334.18   | X51841    | 15895.674 | 15564.201 | AK000896  | 791.187   | 721.62    | NM_018520 | 886.633   |
| 560.391   | AF051344  | 6773.211  | 4975.783  | NM_020384 | 1704.166  | 2028.352  | AK026647  | 892.123   |
| 1524.385  | BG506100  | 6432.062  | 4775.251  | NM_006058 | 9559.913  | 8644.103  | AK022152  | 541.431   |
| 33759.078 | X53586    | 828.285   | 717.066   | NM_006628 | 9392.504  | 10587.367 | NM_003534 | 33768.508 |
| 1757.794  | M17176    | 2143.494  | 1595.097  | M97496    | 12481.921 | 13362.097 | AK057143  | 6249.458  |
| 4799.543  | M26576    | 1397.891  | 2417.135  | NM_018448 | 3554.564  | 4326.319  | NM_015594 | 7595.386  |
| 342.441   | M32972    | 6352.773  | 8152.795  | NM_001659 | 13987.972 | 13591.135 | AF056423  | 1269.914  |
| 5465.678  | D89854    | 916.132   | 907.861   | AB020663  | 9314.931  | 9076.165  | X04293    | 585.434   |
| 2259.857  | M13207    | 739.653   | 655.385   | AF297866  | 1189.971  | 1368.353  | AK026475  | 780.81    |
| 5232.446  | M97815    | 895.386   | 1007.725  | NM_002864 | 757.565   | 940.019   | K01884    | 992.818   |
| 2987.083  | AB013103  | 920.786   | 1051.927  | NM_017817 | 4119.709  | 4370.354  | U00962    | 5386.068  |
| 1011.946  | AF019225  | 3443.466  | 3609.679  | NM_018184 | 21741.48  | 14410.565 | NM_000522 | 3188.527  |
| 1923.955  | Z36803    | 10126.479 | 9843.47   | AB046823  | 694.087   | 814.42    | AK026130  | 6622.722  |
| 1807.291  | NM_013371 | 716.896   | 1025.673  | NM_004929 | 764.268   | 739.826   | NM_012480 | 2224.718  |
| 3557.063  | NM_000707 | 7171.886  | 10348.897 | NM_004662 | 651.001   | 650.941   | AK024144  | 3223.508  |
| 3316.338  | AF202092  | 13270.848 | 15955.707 | NM_016639 | 19742.889 | 20862.084 | Y08959    | 1534.397  |
| 6820.678  | NM_003201 | 4758.601  | 4992.896  | U61739    | 7594.436  | 7121.201  | NM_005346 | 5132.879  |
| 2622.671  | AB011139  | 2188.411  | 2567.618  | AJ132089  | 1273.283  | 1657.135  | NM_005343 | 11398.585 |
| 1337.81   | NM_006919 | 1964.772  | 2035.174  | U92819    | 16826.688 | 18377.484 | AB032985  | 446.348   |
| 1844.818  | AK022625  | 10908.792 | 11545.312 | NM_002036 | 8602.291  | 8578.191  | AJ008114  | 30518.26  |
| 2240.238  | AK023084  | 5992.755  | 4600.234  | NM_005384 | 1837.085  | 1480.37   | AF147432  | 1560.732  |
| 3374.5    | AK025588  | 2608.336  | 2654.796  | AB013103  | 663.773   | 951.876   | AK024690  | 829.321   |
| 3723.488  | NM_003188 | 3052.925  | 2915.995  | AF019225  | 2679.893  | 2799.22   | AK021893  | 1191.134  |
| 10422.417 | U59431    | 2221.37   | 1527.558  | Z36803    | 5169.443  | 5019.092  | NM_001048 | 5374.351  |
| 1620.471  | U49349    | 862.291   | 792.982   | NM_000707 | 3643.925  | 4057.869  | AK026497  | 4141.438  |
| 1170.347  | NM_020152 | 2389.002  | 2333.241  | AF202092  | 8080.251  | 8877.481  | BE958139  | 786.479   |

|           |           |           |           |           |           |           |           |           |
|-----------|-----------|-----------|-----------|-----------|-----------|-----------|-----------|-----------|
| 380.159   | NM_013404 | 1787.829  | 1795.239  | AK027148  | 13577.759 | 12016.552 | AF085359  | 695.617   |
| 1051.893  | AF300648  | 2519.294  | 2004.873  | NM_005084 | 2998.888  | 2913.934  | AF086516  | 1085.381  |
| 1875.779  | AK024443  | 64758.027 | 67336.68  | NM_007283 | 610.964   | 613.732   | D86978    | 3430.603  |
| 476.14    | X06710    | 3383.301  | 6018.448  | NM_006111 | 3705.652  | 4077.442  | AL080060  | 1893.208  |
| 2225.114  | AK000896  | 1173.506  | 1044.793  | AK026071  | 6481.52   | 4345.794  | NM_005267 | 1236.91   |
| 5345.057  | D79998    | 33496.785 | 51809.305 | BC012333  | 5355.949  | 3766.303  | AF086017  | 751.68    |
| 455.138   | AB032963  | 2652.931  | 3855.328  | AF237952  | 2570.538  | 2389.102  | AK024978  | 3638.123  |
| 1974.35   | NM_000385 | 1391.413  | 1736.059  | AL079287  | 2228.259  | 1805.191  | U12897    | 2932.029  |
| 2085.816  | AF301013  | 4492.693  | 6625.434  | NM_014427 | 3305.136  | 2642.378  | NM_020357 | 9049.638  |
| 1642.831  | NM_018992 | 61046.277 | 60059.652 | AB046769  | 3088.81   | 2764.333  | AK026836  | 1343.512  |
| 485.135   | U15688    | 4784.174  | 8251.974  | NM_015922 | 9389.165  | 5476.324  | T59562    | 11200.899 |
| 5881.687  | NM_018448 | 6168.027  | 5013.763  | NM_020381 | 2291.853  | 1965.419  | NM_018219 | 922.156   |
| 601.866   | NM_001659 | 14894.238 | 16480.432 | NM_002957 | 5335.202  | 5787.647  | NM_014114 | 1788.936  |
| 2078.875  | AB020663  | 13375.653 | 9476.14   | NM_018106 | 5267.823  | 4239.601  | U62822    | 2782.186  |
| 671.684   | AF297866  | 1541.682  | 1747.529  | NM_003725 | 524.671   | 773.157   | CY3Cy5    | 7909.494  |
| 342.202   | NM_002864 | 1680.653  | 764.736   | BE899154  | 1470.948  | 1821.714  | AA220921  | 4616.6    |
| 536.496   | NM_017817 | 4968.746  | 10634.211 | NM_004863 | 1688.01   | 1976.978  | AA486200  | 64759.27  |
| 957.392   | NM_018184 | 27086.477 | 18437.631 | AK024573  | 2297.716  | 2270.116  | AJ005898  | 1665.57   |
| 942.128   | AB046823  | 1619.124  | 1324.93   | NM_002299 | 2920.705  | 2633.65   | X57303    | 1747.217  |
| 1082.912  | NM_004929 | 1093.771  | 1187.679  | D79998    | 38389.785 | 47245.125 | BG248802  | 2350.473  |
| 52108.945 | NM_004662 | 937.274   | 808.27    | AB032963  | 1715.329  | 3366.066  | L19605    | 1062.392  |
| 1582.363  | NM_016639 | 27480.283 | 28385.602 | NM_000385 | 1023.801  | 1118.555  | AA876532  | 1807.881  |
| 33664.781 | U61739    | 8015.445  | 5957.091  | AF301013  | 3328.239  | 6364.395  | S74349    | 814.474   |
| 939.593   | AJ132089  | 1274.213  | 1208.79   | NM_018992 | 50453.809 | 47159.086 | X07979    | 8388.931  |
| 939.129   | U92819    | 30786.875 | 28149.27  | U15688    | 2015.652  | 1891.621  | BG744224  | 1109.747  |
| 51735.902 | AB020626  | 920.005   | 608.256   | AF085893  | 694.603   | 661.089   | NM_006079 | 23761.516 |
| 2259.025  | NM_002036 | 8258.07   | 6551.598  | NM_014305 | 2100.954  | 1370.429  | NM_006696 | 2094.928  |
| 26477.25  | NM_012400 | 1118.196  | 2073.588  | NM_012123 | 6549.921  | 7475.075  | SR5       | 4402.679  |
| 742.583   | NM_005384 | 1823.314  | 1474.428  | U87972    | 1710.518  | 1739.146  | SR7       | 5450.08   |
| 7137.177  | NM_006850 | 608.326   | 908.032   | NM_017925 | 2034.176  | 1434.012  | SR9       | 19872.184 |
| 5326.351  | Z15114    | 3752.747  | 2769.067  | NM_003171 | 1998.739  | 2529.843  | CY3Cy5    | 7895.992  |
| 672.964   | AB040812  | 18008.219 | 15213.73  | NM_006437 | 7690.048  | 6207.971  | AK002163  | 1661.306  |
| 236.254   | NM_006285 | 5013.534  | 4919.482  | NM_017890 | 1295.808  | 1061.96   | NM_002287 | 5574.042  |
| 1277.117  | NM_001348 | 2604.839  | 3537.344  | AK021654  | 2229.779  | 2211.581  | NM_002351 | 742.032   |
| 4685.104  | AK027148  | 21164.473 | 20253.246 | NM_016481 | 725.18    | 1110.501  | NM_014385 | 378.095   |
| 557.638   | NM_005084 | 5471.971  | 5075.214  | NM_003925 | 7524.625  | 8948.688  | NM_001704 | 1214.423  |
| 34707.133 | NM_007283 | 1124.313  | 1457.489  | Z15114    | 3784.892  | 4035.738  | AB036432  | 3022.139  |
| 4368.649  | NM_006111 | 6476.053  | 8527.422  | AB040812  | 12212.25  | 12425.339 | NM_014872 | 3560.401  |
| 482.047   | AK026071  | 8287.987  | 5320.534  | NM_006285 | 2549.151  | 3403.638  | NM_003480 | 999.159   |
| 12748.068 | BC012333  | 7880.834  | 6874.137  | NM_003656 | 62454.102 | 55950.109 | NM_032951 | 992.859   |
| 540.737   | AF237952  | 3677.833  | 4097.427  | NM_001348 | 1651.539  | 1952.563  | NM_000503 | 2676.831  |
| 6634.925  | AL079287  | 3526.701  | 4011.347  | NM_006058 | 8599.208  | 6603.945  | NM_002405 | 754.277   |
| 957.155   | NM_014427 | 4448.051  | 3247.422  | NM_006628 | 7754.763  | 10170.98  | NM_012421 | 14982.33  |
| 1508.401  | AB046769  | 3729.128  | 3689.803  | M97496    | 7831.395  | 7980.552  | AB014601  | 1617.335  |
| 2723.168  | NM_015922 | 12055.942 | 6905.608  | AK026074  | 845.423   | 452.163   | AK001393  | 3347.852  |
| 8172.996  | NM_020381 | 4144.175  | 3047.477  | NM_003172 | 2502.076  | 2925.18   | NM_000023 | 3300.025  |
| 892.162   | NM_002957 | 8432.491  | 6465.318  | NM_004809 | 1525.427  | 1163.197  | AF022654  | 808.63    |
| 2542.868  | NM_018106 | 6341.025  | 6116.091  | H41522    | 2025.691  | 1832.611  | AK022638  | 3929.157  |
| 1306.068  | BE899154  | 2101.78   | 2037.221  | AA460291  | 4602.484  | 4269.015  | BG698409  | 800.677   |
| 3225.607  | NM_004863 | 2264.403  | 3045.187  | BI821333  | 7178.838  | 5378.239  | AF224741  | 476.941   |
| 1095.414  | AK024573  | 2711.332  | 2354.191  | X51841    | 16455.682 | 21095.664 | NM_006594 | 1009.791  |
| 488.95    | NM_002299 | 4099.553  | 3632.373  | AF051344  | 2121.549  | 2085.121  | NM_004177 | 636.099   |
| 2563.196  | NM_003830 | 757.162   | 670.996   | BG506100  | 3179.334  | 3023.626  | NM_012429 | 800.537   |

|           |           |           |           |           |           |           |           |           |
|-----------|-----------|-----------|-----------|-----------|-----------|-----------|-----------|-----------|
| 2478.509  | NM_015642 | 1126.786  | 1101.678  | M17176    | 1047.44   | 1592.553  | NM_004871 | 1884.819  |
| 1976.836  | NM_004640 | 19016.891 | 14029.789 | M26576    | 956.827   | 1175.508  | NM_00569E | 3661.511  |
| 905.713   | NM_016222 | 7823.667  | 4962.593  | M32972    | 2030.768  | 1910.895  | AF202146  | 2319.182  |
| 356.498   | AB037823  | 5950.604  | 6657.453  | M97815    | 729.149   | 657.052   | NM_006393 | 862.32    |
| 652.089   | NM_015380 | 4877.254  | 4492.896  | Z36803    | 4336.627  | 3727.786  | NM_014923 | 907.82    |
| 2468.925  | BE254485  | 1856.164  | 1976.999  | NM_000707 | 4103.485  | 3645.701  | NM_005477 | 2423.483  |
| 5900.154  | NM_002732 | 1374.968  | 1477.615  | AF202092  | 8507.024  | 8434.499  | L09089    | 440.85    |
| 1054.357  | AF085893  | 1260.856  | 1210.705  | NM_003201 | 2851.372  | 2377.606  | NM_002640 | 1168.725  |
| 3045.411  | NM_014305 | 3945.212  | 3208.589  | AB011139  | 747.249   | 829.32    | M15530    | 6428.964  |
| 2292.318  | NM_012123 | 8426.866  | 7836.263  | NM_006919 | 1020.479  | 665.976   | NM_001877 | 1174.281  |
| 893.49    | U87972    | 2548.504  | 2278.795  | AK022625  | 6351.587  | 3432.783  | NM_014207 | 4218.53   |
| 1413.24   | NM_017925 | 3295.473  | 1889.429  | AK023084  | 4995.777  | 3421.693  | NM_004059 | 620.53    |
| 1525.873  | NM_003171 | 4006.842  | 4995.101  | AK025588  | 2202.757  | 2227.666  | NM_001634 | 12678.507 |
| 1946.948  | NM_006437 | 14377.341 | 5799.251  | NM_00318E | 1947.235  | 2177.569  | NM_002267 | 2392.629  |
| 429.055   | NM_017890 | 1440.782  | 538.705   | U59431    | 3109.999  | 2915.579  | NM_006412 | 5824.724  |
| 8808.527  | AK021654  | 2068.875  | 1249.502  | NM_020152 | 1704.721  | 1647.705  | NM_003063 | 1677.912  |
| 4937.053  | NM_016481 | 552.568   | 678.653   | NM_013404 | 1136.398  | 1324.605  | NM_014041 | 23326.141 |
| 828.584   | NM_003925 | 9123.093  | 11745.397 | AF300648  | 2169.81   | 2138.643  | NM_007169 | 2242.831  |
| 723.152   | AF217974  | 5822.257  | 3338.33   | AK024443  | 63796.051 | 53996.336 | NM_014313 | 343.945   |
| 813.885   | NM_00088E | 2593.59   | 2204.287  | X06710    | 2135.724  | 2235.906  | AK024966  | 1586.509  |
| 3742.052  | NM_00059E | 4680.868  | 4153.792  | AK000896  | 757.197   | 681.623   | AF178941  | 5250.373  |
| 390.686   | X99663    | 3942.749  | 4257.032  | D79998    | 32004.332 | 39933.777 | NM_016033 | 3541.998  |
| 1297.86   | NM_016552 | 1410.631  | 1470.337  | AB032963  | 1307.274  | 1756.836  | NM_01758E | 2809.851  |
| 30967.24  | AK025340  | 920.508   | 819.547   | NM_00038E | 1022.879  | 984.158   | U61737    | 5819.339  |
| 1380.504  | NM_00356E | 4606.357  | 4049.854  | AF301013  | 3470.192  | 4951.558  | X06389    | 507.582   |
| 5016.307  | NM_004841 | 3123.658  | 2308.326  | NM_018992 | 49001.156 | 45862.859 | NM_000033 | 1096.844  |
| 287.978   | NM_018440 | 8018.583  | 10554.198 | U15688    | 2071.541  | 2086.753  | NM_014861 | 922.956   |
| 706.499   | AK025470  | 749.426   | 1208.219  | NM_000483 | 39757.547 | 53551.996 | NM_012434 | 439.59    |
| 2615.498  | M35410    | 4762.025  | 5857.197  | NM_01844E | 2867.68   | 2878.596  | NM_005694 | 4244.523  |
| 4323.09   | AB023227  | 1974.061  | 2636.051  | NM_001659 | 10319.805 | 8762.987  | AK022983  | 800.94    |
| 1979.531  | NM_00577E | 14037.635 | 9154.845  | AB020663  | 8189.035  | 7428.385  | NM_01486E | 3240.286  |
| 2538.868  | AK023071  | 6278.891  | 7155.544  | AF297866  | 1628.857  | 1335.033  | AL442089  | 5173.787  |
| 827.957   | NM_004041 | 2663.858  | 2732.205  | NM_002864 | 805.676   | 859.49    | NM_001200 | 1147.781  |
| 439.791   | AK022888  | 4771.609  | 3187.499  | NM_017817 | 3991.61   | 4583.47   | AB007964  | 737.404   |
| 847.545   | NM_001953 | 46886.344 | 48853.238 | NM_018184 | 22515.967 | 16277.3   | AF128541  | 3265.048  |
| 1616.164  | NM_00140E | 950.796   | 592.387   | AB046823  | 640.577   | 1018.552  | AK026305  | 1493.027  |
| 2078.465  | NM_002292 | 2271.033  | 1860.901  | NM_004929 | 851.84    | 1124.756  | NM_002552 | 1800.618  |
| 976.383   | NM_00016E | 502.596   | 378.844   | NM_004662 | 474.494   | 598.095   | NM_014321 | 3498.198  |
| 4777.894  | AL570170  | 2675.789  | 1385.734  | NM_016639 | 17316.6   | 19627.805 | AK022733  | 1056.56   |
| 1960.817  | D56495    | 1981.628  | 1816.592  | U61739    | 5606.828  | 4876.264  | AB011132  | 2877.416  |
| 840.008   | NM_006613 | 12215.94  | 8541.03   | AJ132089  | 950.546   | 1087.782  | NM_020362 | 2162.305  |
| 1011.227  | NM_00463E | 16348.64  | 11259.482 | U92819    | 17983.189 | 18388.844 | AB040937  | 2642.481  |
| 2323.752  | L40027    | 3039.881  | 2603.244  | AB020626  | 628.544   | 652.159   | AF275798  | 11050.682 |
| 42561.258 | NM_00371E | 46963.527 | 40030.313 | NM_002036 | 12399.281 | 10131.441 | NM_005441 | 4088.384  |
| 755.321   | NM_007062 | 1144.563  | 1312.739  | NM_012400 | 718.385   | 566.406   | NM_016079 | 6907.321  |
| 1537.643  | NM_014180 | 15259.527 | 18656.637 | NM_005384 | 1943.176  | 1359.317  | AK023108  | 725.44    |
| 749.064   | NM_01770E | 3520.1    | 3335.147  | Z15114    | 3347.357  | 2677.944  | AK026409  | 9839.531  |
| 1058.727  | AF334406  | 1832.2    | 2109.224  | AB040812  | 10889.165 | 10051.179 | AF097025  | 3735.843  |
| 2070.61   | NM_017444 | 4777.897  | 6556.933  | NM_00628E | 2867.899  | 2351.102  | Y11339    | 3777.343  |
| 998.975   | NM_01802E | 2504.729  | 3052.451  | NM_00134E | 1677.52   | 2046.423  | AB030176  | 902.046   |
| 365.417   | NM_01599E | 6328.843  | 8091.458  | NM_00021E | 5875.584  | 4644.026  | NM_003937 | 2818.047  |
| 15802.164 | NM_003804 | 13306.418 | 20395.873 | AK027148  | 12132.988 | 8876.59   | NM_002537 | 5555.421  |
| 450.274   | NM_018453 | 5017.958  | 4410.858  | NM_005084 | 2561.687  | 1867.896  | NM_003139 | 2912.123  |

|           |           |           |           |           |           |           |           |           |
|-----------|-----------|-----------|-----------|-----------|-----------|-----------|-----------|-----------|
| 7515.13   | NM_016001 | 9137.436  | 10034.75  | NM_007283 | 617.985   | 583.903   | NM_012316 | 2456.669  |
| 631.095   | NM_016108 | 17773.154 | 4427.902  | NM_006111 | 3322.272  | 3598.172  | AF022654  | 483.203   |
| 476.191   | S49432    | 883.521   | 476.246   | AK026071  | 6364.267  | 3802.216  | NM_003282 | 443.381   |
| 950       | D86984    | 1124.902  | 528.173   | BC012333  | 5889.503  | 4784.173  | AK022638  | 2142.641  |
| 1694.043  | AK026904  | 3554.403  | 1541.72   | AF237952  | 3214.68   | 2962.553  | BG698409  | 759.726   |
| 6344.198  | NM_001910 | 1248.536  | 1773.374  | AL079287  | 2978.861  | 2643.285  | AA220921  | 4589.085  |
| 1589.668  | J03210    | 3042.893  | 4908.121  | NM_014427 | 3153.446  | 2912.175  | N67770    | 613.346   |
| 42130.613 | NM_001909 | 8120.022  | 20004.426 | AB046769  | 2943.109  | 2916.485  | AA486200  | 52158.848 |
| 3906.008  | NM_012198 | 4109.615  | 6006.909  | NM_015922 | 8119.797  | 5613.951  | AJ005898  | 1595.847  |
| 4689.688  | NM_003368 | 4080.949  | 2055.389  | NM_020381 | 1956.839  | 1922.193  | X57303    | 1529.882  |
| 858.865   | AB040886  | 1318.156  | 1021.137  | NM_002957 | 5427.798  | 5250.35   | BG248802  | 2164.565  |
| 1259.505  | AB029020  | 1881.908  | 1356.65   | NM_018106 | 5420.86   | 4658.936  | L19605    | 984.917   |
| 918.596   | AK022759  | 3035.659  | 3452.503  | NM_003725 | 418.781   | 600.469   | AA876532  | 1553.624  |
| 904.612   | NM_012333 | 8655.676  | 8300.104  | BE899154  | 1995.241  | 1956.714  | S74349    | 907.401   |
| 1846.801  | AF217798  | 1556.497  | 1724.198  | NM_004863 | 1684.526  | 1813.691  | X07979    | 6325.886  |
| 308.452   | AF161472  | 2688.489  | 2784.486  | AK024573  | 2635.964  | 1923.9    | BG744224  | 6127.25   |
| 376.733   | AL133642  | 8215.493  | 9763.49   | NM_002299 | 3459.858  | 3002.286  | NM_006079 | 23448.889 |
| 420.391   | AB011154  | 902.735   | 1283.404  | NM_003830 | 902.907   | 793.61    | NM_006696 | 1950.171  |
| 1496.015  | AF124432  | 3175.305  | 6779.444  | NM_015642 | 832.495   | 924.967   | NM_018026 | 9588.408  |
| 709.344   | NM_006330 | 10851.282 | 6819.582  | NM_004640 | 13885.037 | 10966.985 | NM_001707 | 12524.267 |
| 965.867   | NM_015873 | 3986.909  | 2547.207  | NM_016222 | 2445.6    | 1484.978  | M15530    | 4596.409  |
| 2982.201  | NM_000377 | 4487.772  | 6883.469  | AB037823  | 3462.306  | 2890.52   | NM_001877 | 495.06    |
| 1440.294  | NM_006818 | 1377.476  | 1923.151  | NM_015380 | 5929.654  | 5025.6    | NM_014207 | 2395.223  |
| 4831.514  | NM_016823 | 2454.599  | 1503.129  | BE254485  | 959.33    | 928.885   | AK002163  | 1676.628  |
| 2485.36   | NM_003120 | 12544.819 | 11059.368 | NM_002732 | 737.44    | 626.894   | NM_002287 | 5721.963  |
| 1691.152  | X52360    | 2972.602  | 2207.373  | AF085893  | 585.717   | 807.168   | NM_012344 | 793.225   |
| 950.256   | NM_002636 | 28732.463 | 27138.395 | NM_014305 | 2421.901  | 1793.104  | NM_002351 | 911.732   |
| 577.042   | NM_016494 | 28928.654 | 23970.189 | NM_012123 | 6839.248  | 11264.826 | NM_001704 | 890.49    |
| 4318.006  | U09410    | 5318.877  | 3652.743  | U87972    | 2112.947  | 2165.513  | AB036432  | 2962.963  |
| 2739.473  | NM_001186 | 6054.321  | 7314.11   | NM_017925 | 2124.51   | 1861.622  | NM_014872 | 3391.578  |
| 31381.834 | NM_004502 | 3072.236  | 3028.518  | NM_003171 | 2623.875  | 2493.849  | NM_003643 | 477.326   |
| 10317.739 | AF000560  | 10218.396 | 9079.572  | NM_006437 | 10908.48  | 6303.797  | NM_003480 | 848.315   |
| 3615.521  | NM_013282 | 6867.781  | 2945.711  | NM_017890 | 1249.995  | 779.295   | NM_032951 | 1142.603  |
| 1009.151  | NM_005777 | 7973.172  | 9085.378  | AK021654  | 2568.045  | 2048.121  | NM_000503 | 3982.013  |
| 3512.207  | NM_012345 | 2448.954  | 1973.972  | NM_016481 | 938.398   | 1215.672  | NM_002405 | 1052.334  |
| 3064.097  | NM_005826 | 12441.178 | 10731.415 | NM_003925 | 10239.092 | 13555.771 | AK000004  | 787.354   |
| 997.843   | NM_004592 | 2858.897  | 2545.44   | AF217974  | 6170.004  | 6076.821  | NM_012421 | 15321.856 |
| 642.315   | NM_015001 | 6168.594  | 5731.264  | NM_003285 | 715.349   | 697.227   | AB014601  | 1765.867  |
| 2111.322  | NM_019027 | 2188.364  | 4133.904  | NM_000888 | 2189.468  | 1444.595  | AK001393  | 3375.744  |
| 2352.656  | NM_016107 | 4440.054  | 4094.522  | NM_000595 | 4222.763  | 3292.309  | NM_000023 | 3025.455  |
| 1120.152  | NM_002567 | 16693.195 | 15330.634 | X99663    | 2807.923  | 2793.555  | NM_014861 | 1034.206  |
| 6730.171  | NM_001404 | 2251.165  | 3305.304  | NM_016552 | 2252.09   | 2042.669  | NM_012434 | 403.542   |
| 1529.853  | NM_001605 | 32119.328 | 6018.034  | NM_003565 | 2460.084  | 2291.607  | NM_005694 | 1965.535  |
| 14166.025 | AF225422  | 11328.098 | 3370.352  | NM_004841 | 1668.181  | 1209.55   | AF224741  | 587.235   |
| 7634.198  | AB040960  | 5419.262  | 2451.398  | NM_018440 | 4992.278  | 4953.035  | NM_006594 | 1230.79   |
| 3690.103  | NM_015946 | 2073.803  | 1656.784  | M35410    | 2344.956  | 1577.604  | NM_004177 | 630.185   |
| 945.863   | NM_006303 | 5466.973  | 1528.159  | AB023227  | 639.257   | 794.3     | NM_012429 | 759.694   |
| 1208.107  | AL080219  | 5013.196  | 3560.441  | NM_005776 | 12149.863 | 6752.941  | NM_004871 | 2816.718  |
| 2537.568  | AK026709  | 558.555   | 1209.986  | AK023071  | 5669.573  | 4982.88   | NM_005698 | 3720.707  |
| 958.458   | AK024165  | 795.555   | 674.908   | NM_004041 | 2076.845  | 1704.959  | AF202146  | 1980.541  |
| 1369.068  | NM_003001 | 2280.477  | 3869.892  | AK022888  | 4039.364  | 2666.827  | NM_005477 | 3248.455  |
| 261.172   | NM_001985 | 2976.37   | 5029.973  | AK024484  | 6974.199  | 5152.143  | NM_004318 | 910.699   |
| 709.168   | NM_000102 | 1421.719  | 761.24    | NM_001953 | 57170.984 | 45151.855 | NM_002640 | 1186.003  |

|           |           |           |           |           |           |           |           |           |
|-----------|-----------|-----------|-----------|-----------|-----------|-----------|-----------|-----------|
| 601.094   | NM_00249C | 18806.32  | 19632.893 | NM_001406 | 912.415   | 580.08    | Y11339    | 2433.219  |
| 5596.214  | BE563532  | 1451.041  | 1057.406  | NM_002292 | 3682.231  | 4095.427  | AB030176  | 512.523   |
| 1443.327  | NM_001916 | 8447.718  | 6435.739  | AL570170  | 2406.82   | 3133.097  | NM_003937 | 2119.503  |
| 1692.241  | NM_002491 | 1618.885  | 5745.13   | D56495    | 1538.371  | 1563.872  | NM_002537 | 4613.229  |
| 5882.515  | NM_015425 | 2354.988  | 2449.317  | NM_006613 | 7466.646  | 4720.524  | NM_003139 | 1426.743  |
| 3581.578  | NM_015153 | 5677.866  | 5332.753  | NM_004638 | 7941.41   | 5465.927  | NM_012316 | 1593.629  |
| 2401.385  | AB032966  | 17922.91  | 18516.365 | L40027    | 1396.764  | 1330.049  | NM_001634 | 14431.408 |
| 3406.5    | NM_01482C | 7208.465  | 5346.293  | NM_003718 | 25588.609 | 19101.191 | NM_002267 | 2807.793  |
| 5769.274  | NM_005035 | 1155.716  | 929.937   | NM_007062 | 820.916   | 1201.859  | NM_006412 | 6765.694  |
| 2335.398  | NM_019014 | 4128.226  | 2433.935  | NM_01418C | 10545.683 | 18393.33  | NM_003063 | 2637.194  |
| 2852.894  | NM_002097 | 16165.136 | 10210.01  | NM_017706 | 2413.512  | 3674.23   | NM_014041 | 24105.865 |
| 560.83    | X04706    | 4069.232  | 2464.894  | AF334406  | 771.399   | 841.243   | NM_007169 | 2507.033  |
| 1291.73   | NM_006494 | 4128.308  | 2141.876  | NM_017444 | 3039.811  | 4186.276  | NM_014313 | 519.581   |
| 5849.524  | X52343    | 3247.54   | 1505.216  | NM_018025 | 1986.526  | 2205.157  | AK024966  | 1383.452  |
| 814.53    | NM_005853 | 9817.175  | 2315.504  | NM_015999 | 3861.224  | 4135.784  | AF178941  | 6204.292  |
| 751.115   | NM_017814 | 4397.824  | 2747.923  | NM_003804 | 11202.958 | 10468.476 | NM_016033 | 4604.067  |
| 946.658   | AF131811  | 1251.435  | 1154.894  | NM_018453 | 4105.567  | 3222.486  | NM_017585 | 4318.135  |
| 2306.289  | AF293026  | 9520.154  | 9419.289  | NM_004708 | 64720.508 | 57738.73  | U61737    | 8188.429  |
| 1080.007  | AF236158  | 1761.029  | 3852.772  | NM_016001 | 7619.939  | 8617.596  | X06389    | 705.118   |
| 222.306   | AF217986  | 5018.565  | 9475.756  | NM_016108 | 16836.824 | 13322.135 | NM_000033 | 1611.347  |
| 687.381   | AK026320  | 1188.719  | 883.923   | S49432    | 2198.817  | 1117.504  | NM_006079 | 15907.011 |
| 597.871   | AL137530  | 2998.965  | 3278.458  | D86984    | 905.201   | 790.649   | NM_006696 | 850.528   |
| 1125.657  | NM_015953 | 7290.556  | 7006.566  | AK026904  | 2879.514  | 2406.889  | NM_018026 | 1448.229  |
| 877.391   | AF147310  | 979.376   | 1042.591  | NM_00191C | 1556.942  | 1265.532  | NM_001707 | 9347.993  |
| 646.542   | AK024775  | 3243.078  | 2946.893  | J03210    | 1969.777  | 2340.433  | AK022983  | 955.318   |
| 4925.934  | AK025562  | 975.566   | 1377.102  | NM_001909 | 6684.837  | 6689.009  | NM_014868 | 3931.303  |
| 670.959   | AF088024  | 1889.27   | 908.442   | NM_012198 | 3020.477  | 2849.852  | AL442089  | 6114.863  |
| 606.32    | AK025887  | 2160.405  | 1817.362  | NM_003368 | 1687.027  | 3177.408  | NM_00120C | 1741.603  |
| 580.233   | AB037719  | 2412.343  | 3934.576  | AB040886  | 548.706   | 533.071   | AF128541  | 3512.23   |
| 793.362   | AF086229  | 342.626   | 2910.16   | AB029020  | 1211.562  | 1182.178  | AK026305  | 1610.034  |
| 7780.929  | AL110252  | 711.365   | 524.261   | AK022759  | 1748.589  | 1966.054  | NM_002552 | 1715.43   |
| 593.003   | AL050143  | 1460.819  | 548.415   | NM_012333 | 5609.582  | 9006.45   | NM_014321 | 3364.208  |
| 11373.169 | AL137616  | 1474.453  | 1500.29   | AF217798  | 1152.321  | 974.981   | AK022733  | 733.534   |
| 648.4     | AL109706  | 9509.626  | 9100.202  | AF161472  | 2210.817  | 2251.18   | AB011132  | 1982.874  |
| 4377.533  | AK001118  | 1108.185  | 1285.642  | AL133642  | 7372.963  | 7706.02   | NM_020362 | 1748.002  |
| 642.916   | AF035291  | 55412.898 | 48625.703 | AB011154  | 813.254   | 876.282   | AB040937  | 6326.484  |
| 450.245   | AK026291  | 4946.522  | 5018.466  | AF124432  | 2146.028  | 3668.505  | AF275798  | 14218.042 |
| 528.609   | AL080106  | 789.48    | 648.888   | NM_00633C | 8101.402  | 7528.602  | NM_005441 | 6111.107  |
| 1223.549  | AL080208  | 686.783   | 915.436   | NM_015873 | 4028.577  | 3694.566  | NM_016079 | 12571.23  |
| 2722.833  | L35592    | 9399.217  | 5617.931  | NM_000377 | 2471.082  | 2563.665  | AK023108  | 2324.753  |
| 899.602   | NM_012079 | 1436.311  | 616.389   | NM_006818 | 840.002   | 597.706   | AK026409  | 9871.74   |
| 3890.619  | AL360274  | 14415.887 | 11482.751 | NM_016823 | 1800.756  | 1251.278  | AF097025  | 4063.99   |
| 387.04    | AK021858  | 1055.295  | 315.217   | NM_00312C | 9131.837  | 10490.873 | NM_002405 | 269.191   |
| 707.512   | NM_01405C | 4255.411  | 1758.911  | X52360    | 2567.323  | 2345.175  | AK000004  | 611.031   |
| 2047.821  | AF085854  | 1050.774  | 700.459   | NM_002636 | 28142.83  | 21240.211 | NM_012421 | 15367.128 |
| 20476.533 | AF074997  | 718.593   | 533.812   | NM_016494 | 23693.023 | 19571.203 | AB014601  | 1651.68   |
| 2882.874  | AK027027  | 817.006   | 843.773   | U09410    | 4283.322  | 3027.463  | AK001393  | 2752.918  |
| 1135.35   | AF009289  | 5330.182  | 3612.043  | NM_020229 | 1236.017  | 1087.145  | NM_000023 | 1549.442  |
| 4149.451  | AF040247  | 900.133   | 610.124   | NM_001186 | 4270.324  | 4575.709  | AF022654  | 593.324   |
| 30991.328 | AF056439  | 1036.288  | 1512.509  | NM_004502 | 2502.719  | 2432.665  | AK022638  | 2355.896  |
| 973.901   | AF009303  | 3034.608  | 2351.508  | AF000560  | 7315.208  | 6878.678  | BG698409  | 960.895   |
| 800.077   | NM_004474 | 2771.33   | 1761.939  | NM_013282 | 3319.299  | 10425.429 | AA220921  | 4939.407  |
| 489.768   | AF056449  | 1392.447  | 1201.765  | NM_005777 | 5377.709  | 12678.653 | N67770    | 480.632   |

|           |           |           |           |           |           |           |           |           |
|-----------|-----------|-----------|-----------|-----------|-----------|-----------|-----------|-----------|
| 760.57    | AK001033  | 1043.167  | 918.184   | NM_012345 | 1845.784  | 3323.563  | AA486200  | 57909.191 |
| 1190.463  | AK001082  | 2684.527  | 1359.174  | NM_005826 | 11428.538 | 12278.883 | AJ005898  | 1413.451  |
| 971.985   | AK001871  | 607.348   | 462.607   | NM_004592 | 1443.02   | 1704.916  | X57303    | 1576.517  |
| 1618.901  | AK021743  | 1505.996  | 1015.543  | NM_015001 | 6448.316  | 6376.2    | AA463224  | 552.756   |
| 985.988   | AK026699  | 1209.369  | 1052.341  | NM_019027 | 1051.602  | 988.95    | BG248802  | 2909.118  |
| 37298.387 | AK025589  | 2502.635  | 2146.872  | NM_016107 | 1629.239  | 1687.991  | L19605    | 1235.687  |
| 1689.944  | NM_016633 | 12485.41  | 8516.355  | NM_002567 | 17451.781 | 33204.344 | AA876532  | 2301.345  |
| 6178.525  | AK023250  | 4479.854  | 3290.207  | NM_001404 | 2007.625  | 2005.318  | S74349    | 1066.266  |
| 11622.771 | AK024882  | 2545.579  | 2142.124  | NM_001605 | 21267.572 | 4750.886  | X07979    | 11901.055 |
| 1328.538  | NM_014062 | 18929.338 | 9585.415  | AF225422  | 8730.995  | 7517.967  | BG744224  | 5861.367  |
| 449.256   | NM_006304 | 47663.133 | 26095.658 | AB040960  | 4728.271  | 3509.333  | NM_005477 | 1665.142  |
| 913.797   | X74804    | 1211.423  | 1324.115  | NM_015946 | 2251.499  | 2262.334  | NM_004318 | 562.234   |
| 512.439   | AF293367  | 2502.873  | 3005.537  | NM_006303 | 3874.071  | 2761.992  | M15530    | 5234.807  |
| 696.811   | AF086231  | 5134.609  | 4756.736  | AL080219  | 3545.232  | 3260.458  | NM_000488 | 199.258   |
| 8317.906  | AK001494  | 1714.518  | 1497.915  | AK026709  | 595.935   | 707.338   | NM_001877 | 916.827   |
| 1928.824  | AL133438  | 2226.213  | 2225.534  | AK024165  | 779.237   | 759.7     | NM_014207 | 3016.45   |
| 3379.426  | AK022310  | 823.369   | 776.636   | NM_003001 | 1448.805  | 973.681   | AK002163  | 1617.791  |
| 1633.396  | AK021784  | 1461.303  | 1343.853  | NM_001985 | 1959.85   | 2881.387  | NM_002287 | 5672.986  |
| 4872.679  | AF230800  | 675.587   | 602.615   | NM_000102 | 2719.491  | 1975.954  | NM_012344 | 869.305   |
| 11986.992 | NM_018520 | 2003.953  | 2011.271  | NM_002490 | 13493.108 | 20225.846 | NM_001704 | 1435.193  |
| 945.074   | AK026647  | 2450.384  | 4494.906  | NM_001916 | 6059.86   | 8917.77   | AB036432  | 3077.945  |
| 42641.594 | AK022152  | 1472.36   | 1732.327  | NM_002491 | 941.327   | 6056.623  | NM_014872 | 4215.162  |
| 1725.309  | NM_003534 | 62123.594 | 57479.844 | NM_015425 | 1154.545  | 1461.899  | NM_003643 | 803.644   |
| 2185.986  | L08437    | 4244      | 4979.354  | NM_015153 | 3644.792  | 4210.017  | NM_003480 | 1378.991  |
| 48907.992 | AK057143  | 14174.706 | 16863.807 | AB032966  | 22426.32  | 25918.605 | NM_032951 | 1361.472  |
| 2091.316  | NM_015594 | 20205.305 | 25046.385 | M26747    | 492.226   | 755.327   | NM_000503 | 4233.108  |
| 6988.547  | AF056423  | 3054.858  | 3758.218  | NM_014820 | 5126.1    | 4480.375  | NM_017585 | 4875.876  |
| 2718.506  | X04293    | 1106.956  | 1668.704  | NM_005035 | 826.688   | 785.35    | U61737    | 11438.739 |
| 707.058   | AK026475  | 756.036   | 1270.072  | NM_019014 | 3365.639  | 3375.936  | Y10506    | 434.725   |
| 1306.695  | K01884    | 1319.321  | 1748.308  | NM_002097 | 12248.37  | 9127.067  | X06389    | 613.584   |
| 1372.236  | U00962    | 14734.414 | 20941.684 | X04706    | 3274.701  | 3167.519  | NM_014861 | 587.094   |
| 3656.868  | NM_000522 | 7279.227  | 3428.03   | NM_006494 | 3704.172  | 2528.068  | NM_012434 | 550.431   |
| 1307.663  | AK026130  | 19428.713 | 25547.48  | X52343    | 3583.344  | 2477.648  | NM_005694 | 2994.602  |
| 359.659   | NM_012480 | 5218.013  | 4710.244  | NM_005853 | 7709.952  | 5001.575  | AF224741  | 596.578   |
| 917.226   | AK024144  | 7275.114  | 9358.083  | NM_014068 | 1199.442  | 1462.955  | NM_006594 | 1277.239  |
| 6771.761  | Y08959    | 2136.42   | 2073.856  | NM_017814 | 3212.322  | 3625.905  | NM_005698 | 4293.319  |
| 2543.702  | NM_005346 | 8055.56   | 9938.904  | AF074996  | 908.524   | 855.141   | AF202146  | 3431.035  |
| 820.564   | NM_005343 | 21594.049 | 27781.875 | AF131811  | 980.901   | 696.989   | NM_006393 | 901.26    |
| 5874.765  | AF196865  | 1491.781  | 995.157   | AF293026  | 7888.707  | 7314.842  | NM_014923 | 1198.77   |
| 1322.777  | AJ008114  | 49031.535 | 34760.297 | AF236158  | 1894.597  | 2620.533  | AF275798  | 12763.872 |
| 27325.91  | AF147432  | 3544.156  | 3945.916  | AF217986  | 4478.761  | 6240.017  | NM_005441 | 5821.799  |
| 1135.46   | AK024690  | 1772.793  | 951.614   | AL137530  | 2488.872  | 2331.434  | NM_016079 | 12893.537 |
| 1506.581  | BC005946  | 58248.875 | 46136.691 | NM_015953 | 4917.226  | 7066.169  | AK023108  | 2107.567  |
| 2423.46   | AK021893  | 3334.97   | 3441.529  | AF147310  | 965.002   | 744.369   | AK026409  | 12260.244 |
| 1068.319  | NM_001048 | 15518.642 | 13644.192 | AK024775  | 2783.518  | 2140.566  | AF097025  | 3709.641  |
| 1981.01   | AK026497  | 8520.333  | 9698.377  | AK025562  | 1650.564  | 2361.852  | Y11339    | 4391.989  |
| 586.529   | BE958139  | 1591.034  | 2171.787  | AF088024  | 1688.026  | 1921.672  | AB030176  | 666.068   |
| 3106.826  | AF086516  | 1727.09   | 2112.274  | AK025887  | 2022.991  | 2177.577  | NM_003937 | 2359.918  |
| 1062.957  | D86978    | 7875.751  | 4389.7    | AB037719  | 1769.817  | 2108.167  | NM_002537 | 5435.147  |
| 4041.769  | AL080060  | 5139.275  | 4886.196  | AK026143  | 1317.939  | 894.986   | NM_003139 | 3312.282  |
| 1594.902  | NM_005267 | 3545.837  | 2604.19   | AL110252  | 453.204   | 766.287   | NM_001634 | 14570.749 |
| 27199.246 | AF086017  | 1881.212  | 1184.572  | AL050143  | 922.514   | 671.703   | NM_014041 | 23205.111 |
| 414.92    | NM_005780 | 867.887   | 2160.602  | AL137616  | 1408.333  | 1501.724  | NM_007169 | 3611.831  |

|           |                  |           |           |                  |           |           |                  |           |
|-----------|------------------|-----------|-----------|------------------|-----------|-----------|------------------|-----------|
| 8778.132  | <b>AK024978</b>  | 10035.204 | 13563.932 | <b>AK021752</b>  | 790.27    | 651.77    | <b>NM_014313</b> | 674.838   |
| 34163.25  | <b>U12897</b>    | 6298.551  | 7447.438  | <b>AL109706</b>  | 5313.005  | 3921.037  | <b>AK024966</b>  | 2289.865  |
| 4472.891  | <b>NM_020357</b> | 16961.264 | 19069.451 | <b>AK001118</b>  | 1055.59   | 843.653   | <b>AF178941</b>  | 8637.904  |
| 551.439   | <b>AK026836</b>  | 2340.823  | 3940.236  | <b>AF035291</b>  | 58691.305 | 48407.73  | <b>NM_016033</b> | 4792.392  |
| 880.536   | <b>T59562</b>    | 27148.332 | 34986.516 | <b>AK026291</b>  | 3253.974  | 3840.948  | <b>NM_013439</b> | 13543.487 |
| 4015.022  | <b>NM_018219</b> | 1756.308  | 2190.888  | <b>AL080106</b>  | 518.783   | 843.488   | <b>NM_003406</b> | 19392.912 |
| 4068.257  | <b>NM_014114</b> | 2928.729  | 3484.993  | <b>AL080208</b>  | 530.656   | 881.32    | <b>NM_018316</b> | 2382.902  |
| 810.67    | <b>U62822</b>    | 5267.8    | 2311.43   | <b>L23851</b>    | 696.4     | 899.066   | <b>AB011180</b>  | 1625.526  |
| 1329.661  | <b>CY3Cy5</b>    | 6541.587  | 263.052   | <b>L35592</b>    | 9373.997  | 8930.539  | <b>NM_007167</b> | 5755.062  |
| 805.261   | <b>AA220921</b>  | 6678.234  | 19889.91  | <b>NM_012079</b> | 1015.553  | 1040.591  | <b>NM_014832</b> | 1596.224  |
| 2429.784  | <b>N67770</b>    | 871.589   | 1401.425  | <b>AL360274</b>  | 11866.087 | 12029.274 | <b>NM_013359</b> | 939.604   |
| 6801.52   | <b>AA486200</b>  | 64969.371 | 61693.188 | <b>AK021858</b>  | 521.064   | 303.509   | <b>NM_002477</b> | 5839.039  |
| 1769.329  | <b>AJ005898</b>  | 3611.84   | 3999.912  | <b>NM_014050</b> | 4859.312  | 4120.434  | <b>AK022983</b>  | 920.629   |
| 1184.799  | <b>X57303</b>    | 3730.001  | 1936.534  | <b>AF085854</b>  | 808.327   | 881.567   | <b>NM_014868</b> | 4161.912  |
| 30278.34  | <b>AA463224</b>  | 1162.02   | 1956.454  | <b>AF074997</b>  | 877.993   | 630.944   | <b>AL442089</b>  | 6050.177  |
| 1699.955  | <b>BG248802</b>  | 6691.027  | 6511.821  | <b>AK027027</b>  | 732.845   | 556.45    | <b>AF128541</b>  | 3733.564  |
| 4588.809  | <b>L19605</b>    | 1463.115  | 2132.708  | <b>AF009289</b>  | 3321.318  | 2021.652  | <b>AK026305</b>  | 1902.021  |
| 1417.863  | <b>AA876532</b>  | 5124.466  | 3453.392  | <b>AF040247</b>  | 1073.673  | 660.871   | <b>NM_002552</b> | 2166.757  |
| 849.016   | <b>S74349</b>    | 1791.814  | 1457.418  | <b>AF056439</b>  | 1554.221  | 1331.234  | <b>NM_014321</b> | 4360.412  |
| 1666.876  | <b>X07979</b>    | 26806.49  | 34392.992 | <b>AF007835</b>  | 1153.109  | 865.921   | <b>AK022733</b>  | 1019.353  |
| 1301.599  | <b>BG324670</b>  | 965.243   | 459.649   | <b>AF009303</b>  | 2509.996  | 2174.95   | <b>AB011132</b>  | 3668.295  |
| 1448.709  | <b>BG744224</b>  | 11786.657 | 11613.775 | <b>NM_004474</b> | 3249.633  | 2714.31   | <b>NM_020362</b> | 3180.625  |
| 3723.78   | <b>SR5</b>       | 5533.47   | 8357.661  | <b>AF056449</b>  | 1067.954  | 1065.908  | <b>AB040937</b>  | 4025.004  |
| 4220.626  | <b>SR7</b>       | 8067.489  | 53996.195 | <b>AK001033</b>  | 1080.349  | 1317.222  | <b>NM_000095</b> | 1621.856  |
| 2677.449  | <b>SR9</b>       | 28582.861 | 8335.736  | <b>AK021463</b>  | 544.11    | 640.214   | <b>AL137493</b>  | 848.477   |
| 566.285   | <b>CY3Cy5</b>    | 5454.281  | 129.476   | <b>AK001082</b>  | 2933.949  | 2834.946  | <b>NM_004797</b> | 685.072   |
| 1034.499  | <b>AK002163</b>  | 2558.771  | 4120.72   | <b>AK001871</b>  | 518.104   | 358.806   | <b>NM_001338</b> | 4142.856  |
| 7355.898  | <b>NM_002287</b> | 11902.531 | 10430.105 | <b>AK021743</b>  | 3948.777  | 3741.729  | <b>NM_003637</b> | 839.243   |
| 1166.368  | <b>NM_012344</b> | 1610.111  | 2162.597  | <b>AK026699</b>  | 704.38    | 1193.852  | <b>BC035133</b>  | 939.356   |
| 529.466   | <b>NM_002351</b> | 1768.208  | 2193.412  | <b>AK025589</b>  | 1530.267  | 1418.017  | <b>NM_004233</b> | 1149.488  |
| 1354.573  | <b>NM_014385</b> | 851.632   | 1686.191  | <b>NM_016633</b> | 23712.418 | 21188.043 | <b>NM_001544</b> | 10195.542 |
| 7318.679  | <b>NM_001704</b> | 1283.047  | 1339.122  | <b>AK023250</b>  | 2892.196  | 2261.16   | <b>X58531</b>    | 1512.963  |
| 1242.18   | <b>AB036432</b>  | 10537.058 | 8622.978  | <b>AK024882</b>  | 1828.272  | 1338.782  | <b>AB011168</b>  | 2829.364  |
| 5247.475  | <b>NM_014872</b> | 7937.287  | 7309.98   | <b>NM_014062</b> | 14903.387 | 5634.833  | <b>BE794262</b>  | 1485.135  |
| 11672.815 | <b>NM_003643</b> | 1112.595  | 706.819   | <b>NM_006304</b> | 42928.602 | 35176.922 | <b>NM_003212</b> | 4700.581  |
| 5078.996  | <b>NM_003480</b> | 1749.088  | 3030.657  | <b>X74804</b>    | 872.426   | 676.792   | <b>NM_006382</b> | 1398.13   |
| 19228.832 | <b>NM_000899</b> | 1123.745  | 617.949   | <b>AF293367</b>  | 1197.773  | 1385.281  | <b>NM_004811</b> | 748.179   |
| 1231.727  | <b>NM_032951</b> | 3006.097  | 4080.903  | <b>AF086231</b>  | 2178.548  | 1971.908  | <b>AK021910</b>  | 44194.012 |
| 391.256   | <b>NM_000503</b> | 5095.516  | 6179.562  | <b>AK001494</b>  | 1285.712  | 1053.152  | <b>M62402</b>    | 784.759   |
| 1474.405  | <b>NM_002405</b> | 1817.448  | 2627.812  | <b>AL133438</b>  | 1050.595  | 755.887   | <b>NM_002547</b> | 407.171   |
| 12717.914 | <b>AK000004</b>  | 1768.572  | 3145.773  | <b>AK022310</b>  | 1066.178  | 1215.456  | <b>NM_004748</b> | 3294.884  |
| 6097.584  | <b>NM_012421</b> | 35978.77  | 35086.723 | <b>AK021784</b>  | 976.247   | 1683.464  | <b>NM_002668</b> | 8642.089  |
| 6741.984  | <b>AB014601</b>  | 2589.408  | 4608.741  | <b>AF230800</b>  | 955.201   | 1283.982  | <b>NM_001058</b> | 1438.107  |
| 27737.307 | <b>NM_000023</b> | 5925.394  | 7682.175  | <b>NM_018520</b> | 1240.135  | 1156.554  | <b>NM_014316</b> | 6726.438  |
| 1244.235  | <b>AF022654</b>  | 1261.577  | 2867.754  | <b>AK026647</b>  | 2382.351  | 2032.198  | <b>NM_004054</b> | 4923.994  |
| 1802.465  | <b>NM_001143</b> | 419.324   | 779.673   | <b>AK022152</b>  | 1172.1    | 757.704   | <b>NM_001138</b> | 1887.783  |
| 840.286   | <b>AK022638</b>  | 5248.5    | 8915.061  | <b>NM_003534</b> | 42093.176 | 45384.629 | <b>NM_007289</b> | 722.352   |
| 750.456   | <b>BG698409</b>  | 1232.281  | 950.1     | <b>L08437</b>    | 1859.076  | 1795.325  | <b>NM_004219</b> | 33954.324 |
| 4162.554  | <b>AF224741</b>  | 938.199   | 1684.685  | <b>AK057143</b>  | 8331.953  | 9070.872  | <b>NM_003443</b> | 27278.287 |
| 2208.696  | <b>NM_006594</b> | 2399.934  | 1997      | <b>NM_015594</b> | 13463.606 | 11161.432 | <b>AB015228</b>  | 1310.414  |
| 4084.172  | <b>NM_004177</b> | 1399.898  | 1619.264  | <b>K01884</b>    | 834.64    | 800.026   | <b>AL049685</b>  | 1705.379  |
| 3083.373  | <b>NM_012429</b> | 1057.428  | 972.67    | <b>U00962</b>    | 12543.295 | 11969.255 | <b>AK026800</b>  | 3184.155  |
| 912.919   | <b>NM_004871</b> | 4725.621  | 5179.233  | <b>NM_000522</b> | 3135.024  | 1095.898  | <b>NM_001442</b> | 694.897   |

|           |           |           |           |           |           |           |           |           |
|-----------|-----------|-----------|-----------|-----------|-----------|-----------|-----------|-----------|
| 857.043   | NM_00569E | 7850.028  | 6382.467  | AK026130  | 9756.586  | 9051.768  | NM_01777E | 3957.388  |
| 2696.455  | AF202146  | 5841.94   | 7148.45   | NM_01248C | 3399.598  | 2064.627  | AK001958  | 850.942   |
| 898.811   | NM_006393 | 1128.217  | 679.304   | AK024144  | 3473.358  | 3637.922  | AK025947  | 2057.171  |
| 2476.83   | NM_014923 | 1933.255  | 1501.269  | Y08959    | 1372.007  | 1017.31   | AF217973  | 3527.949  |
| 2610.802  | NM_005477 | 7044.909  | 5410.704  | NM_00534E | 7931.055  | 8303.189  | NM_007033 | 5723.411  |
| 4448.29   | NM_00431E | 1204.899  | 1019.59   | NM_005343 | 17240.76  | 16010.909 | AF226048  | 2466.437  |
| 18285.807 | L09089    | 425.857   | 719.629   | AF196865  | 659.541   | 743.648   | NM_005573 | 6581.392  |
| 6653.754  | NM_00264C | 1946.794  | 4558.494  | AJ008114  | 37564.48  | 39966.891 | D50918    | 4229.608  |
| 14178.849 | X03084    | 341.899   | 782.624   | AF147432  | 2350.586  | 2402.516  | U48734    | 7471.477  |
| 2309.636  | M15530    | 8005.762  | 9888.829  | AK024690  | 1358.969  | 745.177   | NM_00640C | 4029.931  |
| 17857.014 | NM_001877 | 1211.853  | 1424.039  | BC005946  | 49320.691 | 41830.23  | NM_003903 | 2830.607  |
| 5643.221  | NM_014207 | 5866.123  | 6100.581  | AK021893  | 2588.315  | 1649.755  | NM_01795E | 1951.313  |
| 4452.668  | NM_001634 | 20845.734 | 11432.806 | AF086516  | 798.886   | 872.663   | NM_01606C | 2305.757  |
| 808.773   | NM_002267 | 5916.896  | 3599.732  | D86978    | 3883.001  | 2704.184  | NM_00220E | 3996.62   |
| 3466.137  | NM_006412 | 12988.775 | 16642.656 | AL080060  | 4995.597  | 4319.544  | NM_00721E | 1640.578  |
| 7300.32   | NM_003063 | 6161.589  | 5038.32   | NM_005267 | 1832.733  | 1247.036  | AK023518  | 952.894   |
| 3220.977  | NM_014041 | 33589.133 | 46620.344 | AF086017  | 1047.173  | 729.285   | NM_000944 | 4030.69   |
| 3651.731  | NM_00716E | 3254.818  | 2646.36   | AK024978  | 6940.121  | 7713.987  | NM_01223E | 1469.562  |
| 1324.518  | NM_014313 | 655.752   | 534.35    | U12897    | 3336.747  | 6766.701  | NM_012262 | 1023.183  |
| 756.222   | AK024966  | 2797.555  | 3560.354  | AJ227894  | 350.369   | 1167.879  | NM_01339C | 3106.31   |
| 5624.408  | AF178941  | 19893.717 | 18870.807 | NM_020357 | 9674.724  | 14088.288 | NM_00282E | 1292.04   |
| 43517.074 | NM_016033 | 7523.466  | 9778.473  | AK026836  | 1212.943  | 7950.997  | J02783    | 62777.066 |
| 2742.974  | NM_01758E | 6858.441  | 8177.846  | T59562    | 17640.754 | 18625.002 | NM_006577 | 10180.52  |
| 2656.434  | U61737    | 30765.213 | 26908.117 | NM_01821E | 1710.642  | 2446.561  | NM_005317 | 903.869   |
| 919.003   | NM_000033 | 2395.129  | 3109.183  | NM_014114 | 1770.49   | 1633.77   | AF120493  | 494.262   |
| 5433.662  | NM_014861 | 1081.457  | 1164.875  | U62822    | 4022.513  | 1584.493  | U12597    | 1388.207  |
| 1570.614  | NM_012434 | 1583.019  | 1807.82   | CY3Cy5    | 5298.445  | 181.963   | U28055    | 839.284   |
| 3927.607  | NM_005694 | 7341.528  | 5423.483  | AA220921  | 6748.955  | 7907.663  | AB044343  | 2961.232  |
| 1425.794  | AK022983  | 912.52    | 3139.754  | AA486200  | 67069.422 | 61854.586 | NM_00517E | 4140.779  |
| 30493.742 | NM_01486E | 6446.113  | 6896.11   | AJ005898  | 2274.007  | 3520.936  | NM_017702 | 2434.908  |
| 506.058   | AL442089  | 8562.562  | 10733.642 | X57303    | 2802.759  | 2031.486  | AB014516  | 3744.459  |
| 8986.525  | NM_00120C | 2181.721  | 904.62    | AA463224  | 165.553   | 836.831   | Z83950    | 1146.844  |
| 2141.72   | AF128541  | 3824.937  | 5945.928  | BG248802  | 2798.328  | 3082.168  | AL080063  | 1682.304  |
| 11322.028 | AK026305  | 2701.666  | 1510.636  | L19605    | 1151.852  | 1368.649  | NM_01659C | 1355.982  |
| 4138.281  | NM_002552 | 2373.37   | 1462.065  | AA876532  | 1965.793  | 1874.613  | NM_00562E | 7860.621  |
| 1093.186  | NM_014321 | 6941.087  | 6716.737  | S74349    | 681.138   | 745.295   | X15262    | 3455.621  |
| 4825.978  | AK022733  | 1325.154  | 2327.766  | X07979    | 16434.25  | 15677.374 | NM_00547E | 554.975   |
| 1759.371  | AB011132  | 3415.183  | 4067.999  | BG744224  | 10496.513 | 6106.01   | AB040918  | 2346.241  |
| 2887.645  | NM_020362 | 4457.494  | 6285.218  | NM_00607E | 23915.674 | 19988.387 | NM_01585E | 1695      |
| 924.244   | AB040937  | 4784.055  | 3473.646  | SR5       | 5663.986  | 6200.023  | X60152    | 1024.594  |
| 1266.424  | AF275798  | 26821.902 | 23816.771 | CY3Cy5    | 5544.049  | 265.501   | NM_00231E | 2114.518  |
| 816.521   | NM_005441 | 11174.189 | 14429.27  | AK002163  | 1657.169  | 2939.681  | AB023232  | 1273.307  |
| 1228.295  | AK023108  | 2320.19   | 2443.467  | NM_002287 | 7002.77   | 9525.021  | AL137589  | 923.906   |
| 6280.78   | AK026409  | 13675.537 | 13717.85  | NM_012344 | 1144.466  | 1686.487  | NM_002502 | 1261.15   |
| 6924.756  | AF097025  | 6881.976  | 6718.547  | NM_002351 | 1224.046  | 1665.44   | AF226732  | 2693.036  |
| 1494.957  | Y11339    | 5340.915  | 6752.176  | NM_01438E | 707.723   | 1166.226  | NM_006312 | 6037.273  |
| 3311.897  | AB030176  | 950.43    | 1773.14   | NM_001704 | 2068.319  | 4019.636  | NM_00280E | 409.72    |
| 823.873   | NM_003937 | 4651.71   | 3142.739  | AB036432  | 6361.645  | 10624.462 | NM_003662 | 1519.254  |
| 2752.996  | NM_002537 | 7914.692  | 10917.206 | NM_014872 | 5239.649  | 4938.584  | NM_00293E | 7248.854  |
| 6904.84   | NM_00313E | 4759.103  | 2969.092  | NM_00348C | 1403.464  | 1821.36   | NM_01583E | 19854.623 |
| 1552.12   | NM_01231E | 3402.159  | 2930.962  | NM_032951 | 1297.189  | 1707.798  | NM_004713 | 1791.768  |
| 1397.914  | AF022654  | 935.324   | 3023.794  | NM_000503 | 4150.43   | 4653.082  | NM_00169E | 6549.48   |
| 26047.314 | NM_001143 | 524.481   | 752.964   | NM_00240E | 870.817   | 591.743   | AF086431  | 1202.477  |



|           |           |           |           |           |           |           |           |           |
|-----------|-----------|-----------|-----------|-----------|-----------|-----------|-----------|-----------|
| 1782.911  | AK022638  | 5322.88   | 8065.266  | NM_012421 | 16793.365 | 15053.313 | NM_01418E | 26677.221 |
| 4648.731  | BG698409  | 2196.881  | 2382.117  | AB014601  | 1727.275  | 1818.863  | AK026365  | 1566.321  |
| 4477.454  | AA220921  | 7750.985  | 27952.934 | AK001393  | 3314.92   | 4253.544  | S70004    | 1834.777  |
| 948.67    | N67770    | 824.108   | 1044.512  | AF022654  | 762.861   | 2108.194  | AF105378  | 1064.274  |
| 663.874   | AA486200  | 68667.148 | 56074.734 | NM_001143 | 485.001   | 746.858   | NM_000167 | 2771.533  |
| 4130.948  | AJ005898  | 3465.56   | 4306.472  | AK022638  | 3282.481  | 4296.404  | AY007125  | 1798.635  |
| 1061.439  | X57303    | 3810.637  | 1883.827  | BG698409  | 1712.08   | 1585.195  | NM_000691 | 1161.685  |
| 517.296   | AA463224  | 909.002   | 741.181   | NM_006594 | 1395.657  | 1625.673  | Y18643    | 501.924   |
| 1120.806  | BG248802  | 6122.949  | 5494.829  | NM_012429 | 1265.82   | 2675.778  | NM_000305 | 1753.816  |
| 3350.578  | L19605    | 1712.127  | 1590.907  | NM_004871 | 3849.342  | 4787.01   | D86971    | 6122.076  |
| 5731.59   | BG744224  | 14159.536 | 10044.337 | NM_00569E | 4922.675  | 8960.943  | NM_003073 | 3332.285  |
| 4812.295  | NM_006079 | 33447.148 | 32060.137 | AF202146  | 2876.446  | 3156.794  | AF274863  | 328.154   |
| 1450.72   | NM_018026 | 2870.086  | 2443.073  | NM_006393 | 503.238   | 870.003   | AF024697  | 2129.329  |
| 1282.648  | NM_001707 | 15865.832 | 10454.497 | NM_014923 | 874.19    | 646.411   | AF164156  | 404.034   |
| 7146.762  | M15530    | 6388.503  | 8752.027  | NM_005477 | 4204.226  | 3112.874  | NM_005612 | 2561.79   |
| 816.056   | NM_001877 | 865.483   | 730.201   | NM_002640 | 1147.786  | 2392.617  | D17018    | 1160.156  |
| 1820.663  | NM_014207 | 4697.491  | 5366.618  | NM_000949 | 689.658   | 2082.187  | AB046852  | 559.712   |
| 5226.713  | AK002163  | 2694.396  | 4580.426  | M15530    | 6740.702  | 6367.701  | AF086167  | 1003.243  |
| 828.481   | NM_002287 | 11267.19  | 10866.238 | NM_001877 | 749.643   | 969.715   | AL109727  | 629.311   |
| 2048.4    | NM_012344 | 1389.881  | 1915.586  | NM_014207 | 3767.42   | 4543.357  | AF085891  | 2696.231  |
| 5627.828  | NM_002351 | 1441.287  | 1860.132  | NM_001634 | 17128.799 | 8901.961  | AF019618  | 1029.191  |
| 2701.4    | NM_014385 | 884.646   | 1435.96   | NM_002267 | 3633.144  | 3652.662  | AK025656  | 1363.663  |
| 3927.867  | NM_001704 | 1048.608  | 1054.707  | NM_006412 | 8694.828  | 9490.196  | AF161414  | 2028.309  |
| 9046.584  | AB036432  | 9554.302  | 9017.198  | NM_003063 | 3484.428  | 3465.758  | AK025967  | 840.126   |
| 2467.755  | NM_014872 | 5935.657  | 5898.927  | NM_014041 | 29086.043 | 46187.848 | AL110177  | 1531.062  |
| 7768.633  | NM_003480 | 2334.253  | 4568.948  | NM_007169 | 2914.194  | 3122.198  | NM_002763 | 5088.104  |
| 4451.477  | NM_032951 | 2901.425  | 4738.219  | NM_014313 | 556.084   | 1049.592  | AF070628  | 457.693   |
| 33290.988 | NM_000503 | 4939.102  | 6775.102  | AF178941  | 13483.608 | 12376.372 | U79293    | 330.452   |
| 3171.188  | AB014601  | 2435.459  | 4733      | NM_016033 | 5678.552  | 6017.748  | NM_015434 | 1846.536  |
| 969.595   | AK001393  | 5751.206  | 7100.05   | NM_017585 | 6055.555  | 5512.062  | NM_014055 | 1210.794  |
| 6164.349  | NM_000023 | 4603.685  | 4946.262  | U61737    | 14891.339 | 11479.922 | NM_018691 | 1419.996  |
| 7555.896  | NM_014861 | 710.413   | 1085.68   | NM_000033 | 1479.535  | 1992.243  | AK001020  | 599.263   |
| 20271.135 | NM_012434 | 1373.253  | 2078.884  | NM_014861 | 643.941   | 1225.365  | AK022098  | 935.565   |
| 1090.992  | NM_005694 | 5655.569  | 4282.465  | NM_012434 | 722.639   | 1059.954  | AB040933  | 826.519   |
| 1782.087  | AF224741  | 959.378   | 745.068   | NM_005694 | 4269.991  | 5179.497  | AK021875  | 363.19    |
| 2045.764  | NM_006594 | 2459.098  | 1259.161  | AK022983  | 756.514   | 825.22    | AK022072  | 459.596   |
| 11997.4   | NM_004177 | 925.75    | 785.834   | NM_01486E | 4174.521  | 4117.864  | AK026900  | 1602.311  |
| 1092.507  | NM_012429 | 1028.098  | 848.329   | AL442089  | 9456.237  | 8885.665  | AK025020  | 2864.337  |
| 3404.779  | NM_004871 | 4531.464  | 3646.338  | NM_001200 | 1578.498  | 1041.721  | AF086009  | 1659.754  |
| 4592.736  | AF202146  | 6724.064  | 8454.104  | AF128541  | 4355.517  | 6115.807  | AK024130  | 710.849   |
| 1596.727  | NM_014923 | 1829.801  | 1596.812  | AK026305  | 1830.093  | 2218.593  | AK024598  | 1142.086  |
| 4203.773  | L09089    | 633.297   | 735.906   | NM_002552 | 2180.747  | 1481.485  | AF087983  | 1348.707  |
| 2588.194  | NM_002640 | 1754.839  | 3061.911  | NM_020362 | 5724.43   | 8804.733  | NM_020234 | 4141.048  |
| 2418.36   | Y11339    | 5312.324  | 6150.444  | AB040937  | 3741.479  | 4909.14   | U70772    | 529.549   |
| 4191.877  | AB030176  | 697.333   | 1727.885  | AF275798  | 14532.968 | 15986.466 | Z36825    | 3591.129  |
| 9686.109  | NM_003937 | 3550.912  | 2431.098  | NM_005441 | 5117.707  | 5403.116  | AF086127  | 293.598   |
| 18129.543 | NM_002537 | 7290.655  | 6857.37   | NM_016079 | 12747.35  | 15873.671 | AF086157  | 2198.426  |
| 6513.216  | NM_003139 | 4444.178  | 2086.597  | AK023108  | 2239.343  | 2654.187  | AL109710  | 1180.181  |
| 12568.762 | NM_012316 | 3137.478  | 3707.591  | AK026409  | 19219.943 | 18209.379 | AK021538  | 1412.364  |
| 1913.693  | NM_001634 | 22686.404 | 14998.482 | AF097025  | 6106.128  | 8179.794  | AK023793  | 2837.253  |
| 16082.622 | NM_002267 | 5217.533  | 3032.171  | Y11339    | 5781.674  | 7243.782  | AK022185  | 432.046   |
| 4891.229  | NM_006412 | 11637.461 | 12802.021 | AB030176  | 922.382   | 1584.619  | AK023286  | 2187.418  |
| 943.176   | NM_003063 | 4519.898  | 2471.245  | NM_003937 | 3568.114  | 1779.714  | AF116714  | 918.377   |

|           |           |           |           |           |           |           |           |           |
|-----------|-----------|-----------|-----------|-----------|-----------|-----------|-----------|-----------|
| 13822.672 | NM_014041 | 32551.129 | 42911.254 | NM_002537 | 5911.021  | 7313.174  | NM_01405E | 1382.233  |
| 885.299   | NM_00716E | 3654.839  | 2886.764  | NM_00313E | 3313.688  | 1961.547  | AK026340  | 713.562   |
| 3803.042  | AF178941  | 17668.891 | 16428.709 | NM_01231E | 3429.218  | 4435.298  | AK02268E  | 5654.312  |
| 3318.867  | NM_01603E | 6421.057  | 9503.88   | AF022654  | 741.588   | 1674.402  | AK02351E  | 2040.509  |
| 887.175   | Y10506    | 314.728   | 524.689   | AK022638  | 2992.626  | 3526.561  | AK023864  | 1788.315  |
| 3265.686  | X06389    | 814.535   | 845.856   | BG698409  | 935.933   | 1049.983  | AK023017  | 4694.65   |
| 1351.372  | NM_00003E | 2510.521  | 2695.848  | AA220921  | 7255.56   | 9568.848  | AK023908  | 3268.861  |
| 267.741   | NM_00607E | 35326.934 | 42372.809 | N67770    | 691.3     | 747.691   | AK02423E  | 878.357   |
| 7170.904  | NM_00669E | 2541.369  | 3896.665  | AA486200  | 60111.172 | 55736.879 | Z24724    | 4767.76   |
| 47096.246 | NM_01802E | 2641.419  | 1902.849  | AJ005898  | 2409.542  | 2995.545  | AK022712  | 7677.804  |
| 3515.068  | NM_001707 | 16730.895 | 9613.92   | X57303    | 3832.029  | 3757.12   | AK024132  | 1247.767  |
| 3648.007  | AK022983  | 844.525   | 1902.808  | AA463224  | 406.961   | 962.826   | AK021863  | 16900.758 |
| 1004.137  | NM_01486E | 6894.778  | 12102.54  | BG248802  | 3082.696  | 2929.871  | NM_02042E | 1122.032  |
| 4452.497  | AL442089  | 8831.11   | 16044.627 | L19605    | 1253.103  | 1304.298  | AK022293  | 844.075   |
| 1487.286  | NM_00120C | 1864.526  | 782.528   | AA876532  | 2245.65   | 2152.97   | AL117439  | 1294.865  |
| 3302.592  | AF128541  | 4262.047  | 8469.927  | S74349    | 1318.789  | 971.672   | AL133065  | 1678.536  |
| 1126.395  | AK026305  | 4215.039  | 4149.954  | X07979    | 22648.662 | 27602.938 | NM_005297 | 6554.142  |
| 18674.166 | NM_002552 | 2738.934  | 2402.893  | NM_00669E | 2437.162  | 4604.844  | U80769    | 1139.964  |
| 8195.973  | NM_014321 | 6671.589  | 3598.566  | NM_01802E | 2026.647  | 2038.995  | AK021678  | 1067.264  |
| 2762.371  | AK022733  | 1675.37   | 2138.842  | NM_001707 | 12590.671 | 16717.082 | AJ011377  | 892.245   |
| 336.302   | AB011132  | 4853.658  | 5539.045  | M15530    | 5816.994  | 5557.869  | AL137734  | 940.102   |
| 879.752   | NM_020362 | 3685.731  | 5412.963  | NM_001877 | 704.52    | 905.798   | AK026323  | 1264.171  |
| 4225.141  | AB040937  | 5024.698  | 3759.818  | NM_014207 | 3776.523  | 4193.592  | AL133430  | 10062.629 |
| 1214.057  | AF275798  | 26012.834 | 24456.451 | AK002163  | 2139.314  | 3496.971  | AF070633  | 32226.574 |
| 5142.344  | NM_005441 | 9425.958  | 12900.879 | NM_002287 | 8258.94   | 10373.344 | Y16184    | 377.034   |
| 2441.362  | NM_01607E | 20207.422 | 24796.961 | NM_012344 | 1323.561  | 1391.758  | NM_01837C | 811.164   |
| 7720.555  | AK023108  | 2532.384  | 2588.605  | NM_002351 | 1326.047  | 1176.715  | AF054996  | 8086.42   |
| 1586.165  | AK026409  | 14276.161 | 14995.363 | NM_01438E | 2226.774  | 2326.535  | AF090098  | 2577.861  |
| 1249.429  | AF097025  | 7480.079  | 6253.861  | NM_001704 | 714.568   | 948.099   | AF146694  | 3175.961  |
| 1122.556  | NM_00240E | 1762.521  | 1710.611  | AB036432  | 7567.83   | 7340.476  | AK057104  | 932.706   |
| 1206.95   | AK000004  | 1545.502  | 1927.784  | NM_01487E | 5085.977  | 4500.764  | AL133555  | 2073.002  |
| 6075.848  | NM_012421 | 25856.049 | 18650.857 | NM_00364E | 758.677   | 674.191   | AF233648  | 1190.997  |
| 5499.059  | AB014601  | 1906.549  | 1221.03   | NM_00348C | 1620.292  | 2350.208  | AK021781  | 599.113   |
| 980.426   | AK001393  | 5125.636  | 3478.138  | NM_00089E | 768.506   | 855.063   | NM_018584 | 994.017   |
| 1451.236  | NM_00002E | 4859.742  | 4639.188  | NM_032951 | 2271.869  | 3168.206  | AY007126  | 7792.085  |
| 788.148   | AF022654  | 967.786   | 2502.265  | NM_00240E | 1406.624  | 1695.165  | AF085951  | 1941.28   |
| 1897.156  | NM_001143 | 681.288   | 522.6     | AK000004  | 1297.443  | 1608.078  | AF131787  | 703.503   |
| 5330.636  | AK022638  | 6414.476  | 12889.498 | NM_012421 | 20093.477 | 28890.051 | AF087989  | 3478.828  |
| 3684.858  | BG698409  | 1495.896  | 1013.409  | AB014601  | 1859.117  | 2362.827  | Z70715    | 1014.179  |
| 11501.504 | AA220921  | 6806.937  | 17906.67  | AK001393  | 3766.172  | 4425.326  | NM_01818E | 4419.95   |
| 4198.368  | N67770    | 1009.401  | 1309.091  | NM_00002E | 2788.673  | 3639.686  | U80771    | 4044.639  |
| 642.676   | AA486200  | 66281.922 | 56045.68  | NM_014861 | 1127.952  | 2773.615  | NM_00618E | 714.618   |
| 1861.635  | U90065    | 413.872   | 524.393   | NM_012434 | 362.644   | 1142.286  | NM_00564E | 2415.432  |
| 449.908   | AJ005898  | 3844.651  | 5171.752  | NM_005694 | 3749.227  | 4173.444  | NM_002037 | 1622.27   |
| 632.424   | X57303    | 4481.552  | 1619.754  | NM_006594 | 1593.48   | 1516.166  | NM_020157 | 17316.117 |
| 3898.731  | AA463224  | 639.562   | 1013.459  | NM_004177 | 973.688   | 1077.927  | X64991    | 673.282   |
| 750.947   | BG248802  | 6158.558  | 6436.526  | NM_01242E | 657.606   | 947.167   | NM_01432C | 2645.187  |
| 1885.997  | L19605    | 1625.048  | 1829.5    | NM_004871 | 3108.542  | 3844.475  | AK025703  | 3576.788  |
| 946.097   | AA876532  | 5231.723  | 3539.965  | NM_00569E | 6084.303  | 9385.327  | NM_01818E | 1608.661  |
| 1405.476  | S74349    | 2421.078  | 2295.299  | AF202146  | 4563.978  | 4421.641  | AK022598  | 2972.197  |
| 3480.535  | X07979    | 27472.68  | 35953.309 | NM_00639E | 1344.107  | 1283.382  | AK024306  | 1186.049  |
| 4983.016  | BG744224  | 14036.038 | 8693.451  | NM_01492E | 1085.876  | 1183.345  | AK025862  | 22772.209 |
| 3338.004  | NM_005477 | 5441.36   | 2956.229  | NM_005477 | 5854.413  | 6873.885  | AK026495  | 2657.41   |

|           |           |           |           |           |           |           |           |           |
|-----------|-----------|-----------|-----------|-----------|-----------|-----------|-----------|-----------|
| 1196.664  | NM_00431E | 976.159   | 412.044   | NM_00431E | 599.217   | 1011.596  | AK025052  | 1068.975  |
| 944.434   | NM_00264C | 1209.597  | 1920.03   | L09089    | 526.514   | 809.587   | NM_01438E | 1287.338  |
| 4153.976  | M15530    | 5979.904  | 5901.796  | NM_00264C | 1357.619  | 2150.511  | NM_00254E | 632.802   |
| 701.939   | NM_001877 | 682.762   | 888.983   | Y11339    | 5683.875  | 5410.924  | U85044    | 874.249   |
| 11770.567 | NM_014207 | 4965.672  | 4735.39   | AB030176  | 603.103   | 1414.956  | BC018880  | 898.458   |
| 5157.352  | AK002163  | 2833.763  | 3505.164  | NM_003937 | 3373.021  | 3520.07   | AK002173  | 14786.011 |
| 4890.777  | NM_002287 | 11975.936 | 9220.885  | NM_002537 | 4833.751  | 6768.713  | NM_01774E | 1320.067  |
| 482.682   | NM_012344 | 2067.196  | 1730.071  | NM_00313E | 3127.334  | 1966.764  | NM_02018E | 9577.397  |
| 1830.006  | NM_002351 | 1634.705  | 1716.766  | NM_01231E | 3582.56   | 3647.987  | CY3Cy5    | 4549.113  |
| 4911.774  | NM_01438E | 1262.331  | 1673.499  | NM_001634 | 19222.543 | 11901.017 | BG617923  | 321.144   |
| 2693.207  | NM_001704 | 1587.942  | 1561.41   | NM_002267 | 3614.179  | 3474.056  | U37448    | 800.81    |
| 2585.11   | AB036432  | 10679.106 | 11324.297 | NM_00641E | 9420.053  | 8954.032  | AA927698  | 2524.929  |
| 15982.44  | NM_01487E | 7381.615  | 5757.946  | NM_00306E | 2297.447  | 2051.796  | BG824773  | 727.973   |
| 4330.805  | NM_00364E | 946.111   | 782.524   | NM_014041 | 33050.34  | 44245.574 | D01038    | 7010.799  |
| 7725.241  | NM_00348C | 1924.516  | 2697.148  | NM_00716E | 3389.49   | 3387.376  | AB019205  | 1249.855  |
| 4380.849  | NM_00089E | 1051.101  | 808.534   | AF178941  | 21099.012 | 20015.375 | J05008    | 1308.766  |
| 32132.572 | NM_032951 | 3243.209  | 3864.039  | NM_01603E | 5834.068  | 8689.006  | U11087    | 919.11    |
| 2579.563  | NM_00050E | 4050.894  | 4929.631  | Y10506    | 1423.126  | 2020.13   | D50640    | 1649.068  |
| 786.744   | NM_01758E | 5021.1    | 4613.3    | X06389    | 1090.557  | 1174.279  | X99135    | 29368.334 |
| 2570.623  | U61737    | 28928.361 | 18252.158 | NM_00003E | 2095.977  | 2129.519  | AF009744  | 1135.376  |
| 14791.279 | X06389    | 439.491   | 534.037   | NM_00607E | 23752.912 | 17328.713 | NM_17214C | 2081.23   |
| 3118.717  | NM_00003E | 2083.934  | 2122.531  | NM_00669E | 1856.315  | 3210.692  | SR2       | 54261.844 |
| 6422.704  | NM_014861 | 905.933   | 518.575   | NM_01802E | 2286.866  | 2581.157  | SR4       | 14327.005 |
| 6714.952  | NM_012434 | 964.637   | 899.935   | NM_001707 | 16413.096 | 17742.373 | SR6       | 2445.887  |
| 1630.111  | NM_005694 | 6027.95   | 4071.567  | AK022983  | 763.189   | 1308.809  | SR8       | 8534.842  |
| 835.908   | AF224741  | 1358.31   | 1002.138  | NM_01486E | 5710.328  | 6951.968  | SR10      | 31390.34  |
| 2048.636  | NM_006594 | 3027.037  | 2207.344  | AL442089  | 9650.377  | 12012.189 | CY3Cy5    | 3312.625  |
| 7769.869  | NM_004177 | 1254.625  | 1301.667  | NM_00120C | 1863.769  | 863.824   | NM_005311 | 2757.619  |
| 2403.043  | NM_01242E | 1438.234  | 1282.347  | AF128541  | 5149.75   | 5650.194  | NM_00590E | 809.651   |
| 10685.25  | NM_004871 | 5574.126  | 5181.468  | AK026305  | 3494.897  | 3142.715  | NM_00535E | 857.866   |
| 980.097   | NM_00569E | 8548.18   | 9989.507  | NM_00255E | 2539.974  | 2233.932  | NM_002511 | 1250.196  |
| 5180.336  | AF202146  | 5590.089  | 5639.504  | AB011132  | 2044.868  | 3829.668  | AF295378  | 2497.965  |
| 7283.767  | NM_00639E | 1460.809  | 987.35    | NM_02036E | 3001.005  | 6349.046  | NM_00408E | 3510.838  |
| 1762.39   | NM_01492E | 2387.855  | 1522.195  | AK026409  | 22114.73  | 19147.203 | NM_01244E | 9462.953  |
| 425.817   | AF275798  | 24379.355 | 18247.801 | AF097025  | 5748.185  | 7176.736  | NM_018104 | 1431.757  |
| 4369.497  | NM_005441 | 10446.086 | 10277.233 | NM_00240E | 821.789   | 728.69    | NM_00442E | 2735.147  |
| 2612.452  | NM_01607E | 20351.992 | 24122.996 | AK000004  | 1258.182  | 637.459   | U64564    | 736.407   |
| 2506.955  | AK023108  | 2682.378  | 2669.001  | NM_012421 | 14881.303 | 12828.888 | NM_00647C | 1312.019  |
| 3965.229  | AK026409  | 14058.07  | 9479.968  | AB014601  | 1994.523  | 2305.271  | NM_00285E | 1570.782  |
| 902.67    | AF097025  | 6512.867  | 5175.993  | AK001393  | 4319.061  | 7111.215  | M30262    | 1532.557  |
| 3693.058  | Y11339    | 6745.906  | 6657.731  | NM_00002E | 3476.785  | 4333.926  | NM_00546C | 877.005   |
| 2504.947  | AB030176  | 1018.112  | 1272.532  | AF022654  | 707.888   | 2483.941  | AF160477  | 1769.226  |
| 3155.91   | NM_003937 | 3635.203  | 1828.15   | NM_00114E | 1841.826  | 3290.631  | M12883    | 1236.631  |
| 702.863   | NM_002537 | 6487.442  | 5457.806  | NM_00328E | 1756.805  | 3575.447  | BG288747  | 1115.134  |
| 2381.173  | NM_00313E | 4788.886  | 2962.087  | AK022638  | 3039.228  | 3969.157  | AI524814  | 3728.146  |
| 673.183   | NM_01231E | 3420.839  | 2733.734  | BG698409  | 1226.347  | 709.948   | AB024411  | 773.814   |
| 563.558   | NM_001634 | 20026.637 | 9654.209  | AA220921  | 6619.524  | 6518.655  | NM_002444 | 21279.266 |
| 7867.818  | NM_002267 | 7549.645  | 4909.24   | N67770    | 618.036   | 883.966   | NM_001104 | 1622.18   |
| 835.976   | NM_00641E | 12543.093 | 9615.601  | AA486200  | 61950.625 | 56802.613 | NM_00298E | 3070.982  |
| 3277.596  | NM_00306E | 5797.627  | 3020.282  | AJ005898  | 3197.781  | 3502.25   | U88898    | 2717.115  |
| 1581.281  | NM_014041 | 31657.939 | 47149.191 | X57303    | 3043.127  | 1612.659  | NM_020154 | 22399.83  |
| 5685.556  | NM_00716E | 3670.883  | 3376.885  | AA463224  | 570.216   | 639.688   | NM_00466E | 1625.406  |
| 1639.297  | NM_01431E | 803.069   | 767.243   | BG248802  | 3830.488  | 4247.05   | NM_00530C | 1257.992  |

|           |           |           |           |           |           |           |           |           |
|-----------|-----------|-----------|-----------|-----------|-----------|-----------|-----------|-----------|
| 906.02    | AK024966  | 2397.796  | 2202.303  | L19605    | 1651.289  | 1878.78   | NM_000893 | 612.791   |
| 29829.309 | AF178941  | 21361.18  | 19281.557 | BG744224  | 10015.958 | 5849.518  | NM_000698 | 28432.066 |
| 735.928   | NM_016033 | 6502.155  | 8299.299  | NM_005477 | 4602.265  | 3903.107  | NM_005091 | 478.726   |
| 4833.34   | NM_013439 | 21614.176 | 17999.664 | NM_004318 | 540.304   | 585.603   | NM_003204 | 1168.541  |
| 7642.605  | NM_003406 | 25878.658 | 32845.707 | NM_002640 | 927.481   | 2292.209  | AF254069  | 1354.528  |
| 1453.872  | NM_018316 | 2188.72   | 2293.563  | M15530    | 6242.589  | 5908.767  | AL117600  | 5295.895  |
| 5940.723  | AB011180  | 2279.759  | 3756.007  | NM_001877 | 865.74    | 844.592   | NM_004487 | 7717.838  |
| 6279.204  | NM_007167 | 6666.224  | 6755.48   | NM_014207 | 3997.219  | 3215.054  | AB029000  | 5371.338  |
| 2743.359  | NM_014832 | 1938.374  | 1763.578  | AK002163  | 2093.119  | 2663.463  | AK026965  | 4050.923  |
| 11708.977 | NM_003243 | 384.345   | 658.704   | NM_002287 | 8761.233  | 9856.031  | AK025859  | 4258.996  |
| 29230.676 | NM_013359 | 644.531   | 503.484   | NM_012344 | 1298.704  | 1748.804  | AL117499  | 8140.238  |
| 1698.817  | NM_002477 | 7826.128  | 4297.729  | NM_002351 | 876.164   | 1068.528  | NM_007054 | 467.309   |
| 507.324   | NM_018026 | 2853.839  | 1800.038  | NM_014385 | 718.26    | 899.556   | AK000160  | 2708.992  |
| 2049.248  | NM_001707 | 21034.945 | 11145.229 | NM_001704 | 857.991   | 1048.839  | NM_006032 | 3718.932  |
| 527.484   | AK022983  | 1251.732  | 1909.976  | AB036432  | 7908.365  | 8115.163  | NM_014788 | 1033.253  |
| 1774.895  | NM_014868 | 7492.077  | 8379.597  | NM_014872 | 5434.167  | 5188.574  | NM_002153 | 318.579   |
| 3680.146  | AL442089  | 9944.393  | 9915.407  | NM_032951 | 1181.925  | 1770.626  | AB040890  | 1508.775  |
| 6973.435  | NM_001200 | 3180.346  | 1397.856  | NM_000503 | 4376.886  | 4970.883  | AK024233  | 836.089   |
| 3047.885  | AF128541  | 3987.13   | 3439.316  | NM_017585 | 6050.074  | 5908.793  | AK021870  | 1495.98   |
| 7040.598  | AK026305  | 4395.5    | 3590.458  | U61737    | 12328.444 | 7977.585  | U06680    | 2735.497  |
| 2973.051  | NM_002552 | 3233.75   | 3104.21   | X06389    | 291.345   | 848.169   | NM_005123 | 675.179   |
| 7465.87   | NM_014321 | 7478.55   | 5125.926  | NM_000033 | 1472.806  | 2200.07   | NM_015584 | 4640.907  |
| 5536.489  | AK022733  | 1545.406  | 2465.477  | NM_014861 | 773.772   | 654.161   | NM_001697 | 34007.328 |
| 3190.621  | AB011132  | 4541.88   | 5855.692  | NM_012434 | 479.052   | 1013.057  | NM_016098 | 15203.68  |
| 1731.527  | NM_020362 | 3670.687  | 5970.381  | NM_005694 | 3791.105  | 3428.771  | NM_002063 | 790.545   |
| 1875.607  | AB040937  | 5114.721  | 3501.874  | NM_006594 | 2160.108  | 1458.801  | NM_006667 | 16853.814 |
| 1798.44   | NM_000095 | 1788.936  | 1688.025  | NM_004177 | 1025.959  | 829.538   | AK025125  | 3970.168  |
| 962.398   | AL137493  | 745.394   | 534.045   | NM_012429 | 913.133   | 1079.454  | NM_000815 | 717.739   |
| 603.231   | NM_004797 | 459.34    | 597.387   | NM_004871 | 4121.296  | 3947.94   | NM_001293 | 735.082   |
| 1083.75   | NM_002457 | 207.666   | 517.254   | NM_005698 | 5673.468  | 7793.08   | AB023173  | 4132.799  |
| 1844.97   | NM_001338 | 5140.583  | 5342.517  | NM_014923 | 1179.526  | 780.159   | AF156548  | 2020.495  |
| 639.365   | NM_003637 | 676.642   | 652.333   | AF275798  | 12983.358 | 13644.864 | NM_000387 | 7698.139  |
| 45868.305 | BC035133  | 705.886   | 655.554   | NM_005441 | 4712.169  | 4391.15   | NM_004663 | 1615.984  |
| 11704.221 | NM_004233 | 2039.616  | 1677.437  | NM_016079 | 10466.95  | 11946.085 | NM_015310 | 1207.95   |
| 848.55    | NM_001544 | 16703.656 | 9409.688  | AK023108  | 1771.047  | 1526.04   | NM_016154 | 7273.922  |
| 646.846   | X58531    | 531.998   | 446.057   | AK026409  | 13010.657 | 10967.878 | NM_005013 | 39029.379 |
| 1104.9    | AB011168  | 3285.701  | 2479.38   | AF097025  | 4994.175  | 6021.723  | AB002338  | 1016.252  |
| 6123.864  | BE794262  | 1975.105  | 1557.335  | Y11339    | 5550.37   | 6486.694  | NM_001072 | 1062.743  |
| 738.264   | NM_003212 | 6158.33   | 5076.995  | AB030176  | 696.848   | 1167.832  | BC010659  | 235.334   |
| 914.865   | NM_006382 | 1954.822  | 1567.28   | NM_003937 | 2679.762  | 1442.64   | NM_014070 | 895.268   |
| 6044.584  | NM_004811 | 1596.374  | 2081.218  | NM_002537 | 5306.705  | 4937.827  | NM_016280 | 12623.974 |
| 2932.777  | AK021910  | 63079.848 | 49831.535 | NM_003139 | 2683.845  | 930.074   | NM_016027 | 2161.761  |
| 5028.519  | M62402    | 880.736   | 985.417   | NM_012316 | 3486.433  | 2597.629  | NM_014297 | 4906.946  |
| 616.31    | NM_004748 | 5482.775  | 4535.169  | NM_001634 | 16593.396 | 7388.112  | NM_018156 | 14900.041 |
| 2055.777  | NM_002668 | 10068.473 | 28961.523 | NM_002267 | 4607.208  | 3181.417  | X98266    | 1218.468  |
| 1487.674  | NM_014316 | 8211.548  | 13216.692 | NM_006412 | 9904.202  | 8751.356  | U00930    | 12652.511 |
| 7199.991  | NM_004054 | 5572.645  | 9467.429  | NM_003063 | 4452.416  | 4545.615  | AK024958  | 774.268   |
| 2836.1    | NM_001138 | 2720.615  | 3006.922  | NM_014041 | 30558.332 | 48483.691 | NM_014575 | 2091.555  |
| 1359.627  | NM_004219 | 43891.996 | 45784.559 | NM_007169 | 3237.35   | 3032.595  | NM_002439 | 3511.067  |
| 1302.25   | NM_003443 | 62235.773 | 55961.953 | NM_014313 | 586.404   | 769.341   | AL117552  | 1208.098  |
| 612.862   | AB015228  | 2013.533  | 2456.268  | AK024966  | 3006.821  | 2873.576  | NM_002692 | 5583.104  |
| 775.718   | AL049685  | 2553.457  | 3802.114  | AF178941  | 17479.846 | 12229.15  | AB023190  | 8611.376  |
| 1523.045  | AK026800  | 5733.133  | 6169.092  | NM_016033 | 5313.673  | 5251.829  | NM_007064 | 1041.04   |

|           |           |           |           |           |           |           |           |           |
|-----------|-----------|-----------|-----------|-----------|-----------|-----------|-----------|-----------|
| 4045.613  | NM_001442 | 1374.221  | 1040.251  | NM_013439 | 13883.801 | 13691.646 | NM_006281 | 1532.794  |
| 6775.477  | NM_017775 | 4050.638  | 3443.327  | NM_003406 | 19920.895 | 19641.451 | NM_002738 | 6795.739  |
| 2126.232  | AK001958  | 922.736   | 965.296   | NM_018316 | 1724.199  | 1924.989  | U23460    | 20361.744 |
| 7359.19   | AK025947  | 2551.572  | 1438.661  | AB011180  | 1416.146  | 1485.241  | Z25434    | 3353.648  |
| 20465.525 | AF217973  | 3901.799  | 2218.081  | NM_007167 | 4627.27   | 4017.545  | NM_005884 | 7747.208  |
| 1438.836  | NM_007033 | 7080.715  | 5774.009  | NM_014832 | 1234.596  | 1125.08   | NM_012399 | 9526.534  |
| 758.083   | AF226048  | 3885.6    | 2433.204  | NM_003243 | 604.58    | 572.829   | AF229804  | 21504.328 |
| 6104.993  | NM_005573 | 11056.779 | 4827.385  | NM_002477 | 8347.203  | 4736.079  | AF151638  | 1406.251  |
| 46994.609 | D50918    | 6124.615  | 4135.191  | NM_018026 | 2367.469  | 1644.184  | U90552    | 6552.783  |
| 50723.074 | U48734    | 11931.521 | 11685.847 | NM_001707 | 15914.209 | 10759.382 | NM_005460 | 938.371   |
| 962.92    | NM_006400 | 5567.856  | 8679.938  | AK022983  | 867.789   | 549.52    | AF160477  | 1581.774  |
| 28932.605 | NM_003903 | 4836.183  | 4143.981  | NM_014868 | 4213.064  | 2905.63   | NM_003226 | 180.041   |
| 634.316   | NM_007216 | 2106.943  | 2335.259  | AL442089  | 8476.882  | 6820.601  | M12883    | 695.276   |
| 1001.577  | AK023518  | 1594.67   | 1433.283  | NM_001200 | 1980.379  | 1100.074  | BG288747  | 575.703   |
| 850.733   | NM_000944 | 6212.587  | 4475.289  | AF128541  | 4580.99   | 5282.34   | U37448    | 698.101   |
| 1347.015  | NM_012239 | 1482.306  | 1059.708  | AK026305  | 4498.724  | 3420.471  | AA927698  | 2456.604  |
| 882.145   | NM_012262 | 1421.919  | 1226.511  | NM_002552 | 3189.533  | 3568.004  | BG824773  | 517.257   |
| 2938.411  | NM_013390 | 6029.024  | 6128.808  | NM_014321 | 6284.492  | 9339.243  | D01038    | 6231.89   |
| 1248.832  | NM_002829 | 1992.192  | 2330.523  | AK022733  | 1547.202  | 2471.863  | AB019205  | 1076.82   |
| 1845.997  | J02783    | 63632.113 | 55473.539 | AB011132  | 4015.319  | 3901.799  | J05008    | 1252.891  |
| 8543.784  | NM_006577 | 23496.869 | 15054.984 | NM_020362 | 3005.652  | 4401.875  | U11087    | 334.623   |
| 3826.648  | NM_005317 | 1127.191  | 569.397   | AB040937  | 4097.105  | 4779.561  | M98776    | 751.439   |
| 565.304   | U12597    | 1150.094  | 777.389   | NM_000095 | 1767.937  | 1491.615  | X99135    | 28818.834 |
| 558.197   | U28055    | 551.252   | 943.303   | AL137493  | 582.143   | 530.682   | AF009744  | 1245.581  |
| 1944.473  | AB044343  | 2620.531  | 2220.733  | NM_001338 | 5672.687  | 4613.817  | NM_172140 | 2637.323  |
| 711.398   | NM_014662 | 779.852   | 897.235   | NM_003637 | 392.698   | 885.866   | AK026965  | 4013.471  |
| 1718.458  | NM_005178 | 4835.416  | 6870.217  | BC035133  | 848.807   | 701.01    | AK025859  | 3544.43   |
| 1153.8    | NM_017702 | 3601.508  | 3342.51   | NM_004233 | 1138.936  | 842.169   | AL117499  | 6504.441  |
| 1455.127  | AB014516  | 4933.929  | 4187.924  | NM_001544 | 13297.304 | 5442.965  | AK000160  | 2779.725  |
| 929.437   | Z83950    | 1553.257  | 1461.168  | X58531    | 752.227   | 992.18    | NM_005311 | 2739.944  |
| 1072.695  | AL080063  | 3535.84   | 1778.911  | AB011168  | 4153.63   | 3791.575  | NM_005905 | 965.4     |
| 2682.943  | NM_016590 | 2166.516  | 735.785   | BE794262  | 1603.059  | 1512.543  | NM_016235 | 443.483   |
| 670.729   | NM_005625 | 13069.415 | 13047     | NM_003212 | 4585.679  | 3772.496  | NM_000960 | 408.841   |
| 1572.093  | NM_005475 | 1173.883  | 1125.317  | NM_006382 | 1673      | 984.067   | NM_005359 | 784.638   |
| 4241.779  | AB040918  | 3618.21   | 2080.419  | NM_004811 | 926.818   | 1170.475  | NM_002511 | 1062.345  |
| 811.523   | NM_015859 | 2129.853  | 1149.416  | AK021910  | 63746.125 | 51258.879 | AF295378  | 1210.311  |
| 1464.417  | X60152    | 626.676   | 1412.821  | M62402    | 803.804   | 885.95    | NM_004085 | 2181.43   |
| 1830.111  | NM_002316 | 5669.771  | 4770.593  | NM_002547 | 684.56    | 889.166   | NM_012445 | 8322.548  |
| 1079.841  | NM_004575 | 476.395   | 584.532   | NM_004748 | 4330.093  | 3558.777  | NM_018104 | 1807.914  |
| 668.692   | AB023232  | 2348.631  | 3636.873  | NM_014316 | 7704.342  | 7321.823  | NM_006080 | 452.838   |
| 1040.67   | AL137589  | 1978.351  | 1399.442  | NM_004054 | 5682.087  | 3985.289  | NM_004429 | 3040.225  |
| 618.965   | NM_002502 | 2080.055  | 1191.705  | NM_001138 | 3635.593  | 2495.836  | U64564    | 1000.545  |
| 1065.587  | AF226732  | 3802.579  | 3134.559  | NM_004219 | 35218.199 | 48097.996 | NM_006470 | 1285.354  |
| 594.676   | NM_006312 | 8076.192  | 4847.352  | NM_003443 | 44089.289 | 37572.039 | NM_002855 | 1749.893  |
| 1972.532  | NM_003662 | 2501.271  | 1391.751  | AB015228  | 895.528   | 942.678   | AB038463  | 1101.992  |
| 730.906   | NM_002939 | 12772.789 | 5061.556  | AL049685  | 1744.818  | 4379.969  | M30262    | 1278.867  |
| 774.094   | NM_015836 | 28215.818 | 15113.937 | AK026800  | 3527.028  | 4336.066  | NM_000387 | 8130.293  |
| 1406.223  | NM_004713 | 2584.879  | 1426.818  | NM_001442 | 854.538   | 1087.723  | NM_004663 | 1133.539  |
| 835.68    | NM_001698 | 7396.349  | 6162.783  | NM_017775 | 3052.665  | 2628.683  | NM_015310 | 841.215   |
| 3880.866  | AF086431  | 1546.726  | 867.701   | AK001958  | 661.281   | 578.681   | NM_005013 | 35411.938 |
| 5033.432  | S70004    | 1714.423  | 2317.616  | AK025947  | 2480.734  | 2457.459  | AB002338  | 1105.438  |
| 603.923   | AF105378  | 1037.706  | 621.322   | AF217973  | 4174.805  | 3084.45   | AI524814  | 3671.933  |
| 166.675   | NM_000167 | 4693.101  | 3428.883  | NM_007033 | 6393.09   | 5114.591  | AB024411  | 1024.535  |

|           |           |           |          |           |           |           |           |           |
|-----------|-----------|-----------|----------|-----------|-----------|-----------|-----------|-----------|
| 1258.909  | AY007125  | 4261.854  | 4774.355 | AF226048  | 2898.216  | 1168.903  | NM_002444 | 35833.387 |
| 3767.147  | AB032987  | 1664.659  | 1562.563 | NM_005573 | 6962.78   | 6475.766  | NM_001104 | 1460.835  |
| 1452.583  | NM_017567 | 7540.495  | 6148.205 | D50918    | 5489.458  | 3247.925  | U88898    | 2413.6    |
| 1777.997  | NM_000691 | 2571.502  | 2842.885 | U48734    | 7112.321  | 13311.313 | NM_020154 | 23439.969 |
| 912.437   | Y18643    | 286.156   | 960.045  | NM_006400 | 5600.728  | 6704.962  | NM_005300 | 729.806   |
| 8709.209  | NM_000305 | 2220.697  | 682.808  | NM_003903 | 3999.495  | 3825.19   | NM_000893 | 1009.711  |
| 2013.141  | D86971    | 11712.647 | 5172.256 | NM_007216 | 1492.568  | 2394.728  | NM_005091 | 839.378   |
| 4897.838  | NM_003073 | 5973.57   | 1762.289 | AK023518  | 1068.036  | 1111.382  | AF031167  | 942.899   |
| 738.354   | AF274863  | 704.606   | 639.792  | NM_000944 | 6106.22   | 4752.578  | NM_003204 | 1629.363  |
| 5635.224  | AF319458  | 973.958   | 559.645  | NM_012239 | 1183.17   | 671.334   | AF254069  | 1578.421  |
| 4595.211  | AF024697  | 3617.747  | 4179.625 | NM_012262 | 885.074   | 439.025   | AL117600  | 6362.667  |
| 657.89    | NM_018651 | 892.094   | 1330.564 | NM_013390 | 2927.04   | 2709.9    | AB029000  | 5611.382  |
| 11359.741 | AF164156  | 435.547   | 865.098  | NM_002829 | 1184.529  | 1803.593  | Z25434    | 3433.926  |
| 775.97    | NM_005612 | 5011.457  | 3965.263 | J02783    | 71623.352 | 59853.848 | NM_005884 | 6999.538  |
| 553.678   | AK025281  | 778.195   | 1282.018 | NM_006577 | 15467.421 | 20273.881 | NM_012399 | 8877.274  |
| 830.448   | AB046852  | 522.812   | 728.967  | NM_005317 | 665.738   | 797.358   | AF151638  | 1229.22   |
| 996.271   | AF086167  | 1224.827  | 1114.48  | U12597    | 1517.041  | 1509.287  | U90552    | 4888.276  |
| 7729.645  | AL109727  | 402.253   | 423.935  | AB044343  | 3950.838  | 2794.638  | NM_006032 | 4285.148  |
| 1471.271  | AF085891  | 4317.82   | 3811.262 | NM_014662 | 489.123   | 999.82    | NM_014788 | 1434.003  |
| 609.948   | AF019618  | 1971.917  | 1148.254 | AB014516  | 5154.694  | 6082.188  | NM_002153 | 800.067   |
| 464.521   | AK025656  | 1321.777  | 798.891  | AL080063  | 1682.836  | 1765.408  | AB040890  | 1335.75   |
| 1242.908  | AK025967  | 554.357   | 635.898  | NM_016590 | 2983.048  | 840.811   | AK024233  | 820.771   |
| 2659.165  | AF070628  | 684.177   | 1596.215 | NM_005625 | 10226.062 | 6520.103  | AK021870  | 1497.16   |
| 19847.945 | AF038194  | 466.696   | 1143.985 | X15262    | 4050.929  | 2722.771  | U06680    | 2255.008  |
| 2913.194  | U79293    | 408.784   | 858.925  | AB040918  | 2651.326  | 2983.545  | NM_015584 | 3106.508  |
| 1283.927  | NM_015434 | 4273.112  | 4752.943 | NM_015859 | 1574.337  | 787.736   | NM_001697 | 34695.016 |
| 3596.963  | NM_014055 | 2307.413  | 2638.401 | X60152    | 1138.132  | 878.042   | NM_002063 | 981.134   |
| 936.092   | NM_018691 | 1965.076  | 2242.172 | NM_002316 | 3000.534  | 1521.587  | NM_006667 | 25916.766 |
| 2040.372  | AK001020  | 465.274   | 845.587  | NM_004575 | 782.324   | 347.582   | AK025125  | 4296.313  |
| 25479.02  | AK022098  | 2061.843  | 2479.885 | AB023232  | 1446.658  | 2117.014  | NM_000815 | 1116.714  |
| 1077.479  | AB040933  | 1286.473  | 1260.893 | AL137589  | 1387.953  | 1431.741  | NM_001293 | 997.201   |
| 820.17    | AK021875  | 647.337   | 1069.094 | NM_002502 | 889.12    | 919.182   | AF156548  | 2236.013  |
| 746.075   | AK026900  | 3842.422  | 3758.338 | AF226732  | 2290.593  | 2454.675  | NM_172140 | 2325.061  |
| 17156.33  | AK025020  | 6179.83   | 5033.011 | NM_006312 | 5461.453  | 3925.687  | NM_001072 | 1193.993  |
| 2419.144  | AF086009  | 1040.162  | 1252.407 | NM_003662 | 2291.099  | 1861.657  | NM_014070 | 1402.781  |
| 991.891   | AF086463  | 2094.675  | 2527.072 | NM_002939 | 10445.459 | 5614.738  | NM_016280 | 17329.398 |
| 4517.226  | AF086031  | 3737.213  | 2056.52  | NM_015836 | 17373.4   | 12793.939 | NM_016027 | 2502.455  |
| 1063.157  | AK024598  | 2151.941  | 2949.768 | NM_004713 | 1349.431  | 1320.951  | NM_014297 | 5698.358  |
| 4313.735  | AF087983  | 1861.035  | 1850.955 | NM_001698 | 5359.883  | 3200.027  | NM_018156 | 14643.558 |
| 3075.917  | Z36825    | 9588.458  | 6404.299 | NM_000661 | 64922.457 | 59556.93  | X98266    | 925.956   |
| 341.205   | AF086127  | 873.423   | 1870.582 | NM_000973 | 68021.547 | 53151.754 | U00930    | 9754.979  |
| 9375.345  | AF086157  | 3280.567  | 4743.234 | AF086431  | 2090.861  | 1306.902  | NM_014575 | 1957.205  |
| 863.23    | AL109710  | 565.795   | 802.926  | NM_014188 | 46536.109 | 40452.34  | NM_002439 | 3727.111  |
| 11218.232 | AK021538  | 1513.108  | 1696.747 | AK026365  | 2248.877  | 5204.496  | AL117552  | 1447.244  |
| 1672.836  | AK021986  | 658.77    | 730.023  | S70004    | 1755.921  | 1001.272  | NM_002692 | 5999.38   |
| 3193.147  | AK023286  | 4259.854  | 4488.638 | AF105378  | 1036.967  | 1253.277  | AB023190  | 13829.903 |
| 1669.312  | AK021544  | 820.09    | 672.731  | NM_000167 | 2905.842  | 3086.806  | NM_007064 | 853.6     |
| 2388.398  | AL079282  | 942.946   | 591.878  | AY007125  | 2670.535  | 2520.951  | NM_006281 | 1725.605  |
| 829.053   | AK022079  | 1222.118  | 714.043  | AB032987  | 995.267   | 870.428   | NM_002738 | 7340.294  |
| 5243.731  | AF116714  | 681.976   | 758.829  | NM_000305 | 1399.653  | 1071.954  | U23460    | 17101.465 |
| 22339.342 | NM_014058 | 2387.365  | 2038.208 | D86971    | 11786.912 | 8038.544  | NM_005356 | 1022.827  |
| 2640.685  | AK002005  | 454.613   | 531.748  | NM_003073 | 4491.692  | 2402.887  | NM_004429 | 2878.057  |
| 1424.123  | AK022686  | 9495.358  | 9774.238 | AF024697  | 1881.6    | 1416.88   | U64564    | 1209.282  |

|           |                  |           |           |                  |           |           |                  |           |
|-----------|------------------|-----------|-----------|------------------|-----------|-----------|------------------|-----------|
| 1126.179  | <b>AK023516</b>  | 3905.95   | 4106.508  | <b>NM_005612</b> | 950.772   | 268.066   | <b>NM_00647C</b> | 962.927   |
| 740.889   | <b>AK023864</b>  | 4844.183  | 4057.841  | <b>D17018</b>    | 1264.151  | 871.092   | <b>NM_00285E</b> | 1409.362  |
| 758.152   | <b>AK024183</b>  | 345.332   | 594.363   | <b>AF086167</b>  | 1017.71   | 819.055   | <b>AB038463</b>  | 834.3     |
| 864.755   | <b>AK023017</b>  | 9061.693  | 10107.487 | <b>AF085891</b>  | 3169.73   | 2731.184  | <b>M30262</b>    | 1441.61   |
| 958.699   | <b>AK023908</b>  | 4568.044  | 5494.414  | <b>AF019618</b>  | 1389.966  | 916.321   | <b>NM_00546C</b> | 775.116   |
| 19200.641 | <b>AK024236</b>  | 1336.341  | 906.632   | <b>AK025656</b>  | 1203.438  | 1501.846  | <b>AF160477</b>  | 1488.676  |
| 960.059   | <b>Z24724</b>    | 16226.435 | 16007.407 | <b>AF138859</b>  | 430.483   | 774.269   | <b>M12883</b>    | 817.845   |
| 8973.429  | <b>AK022712</b>  | 8240.138  | 16669.371 | <b>AF161414</b>  | 2915.27   | 2812.362  | <b>BG288747</b>  | 852.477   |
| 5336.453  | <b>AK024132</b>  | 2274.313  | 4817.975  | <b>AK025967</b>  | 720.681   | 774.181   | <b>U37448</b>    | 608.006   |
| 316.819   | <b>AK024208</b>  | 1400.45   | 1919.484  | <b>AL110177</b>  | 2155.106  | 1215.916  | <b>AA927698</b>  | 1780.71   |
| 527.896   | <b>NM_02042E</b> | 2099.331  | 1629.196  | <b>NM_002763</b> | 6810.311  | 5415.706  | <b>BG824773</b>  | 366.615   |
| 770.179   | <b>NM_005684</b> | 768.485   | 814.234   | <b>NM_015434</b> | 1425.834  | 1259.259  | <b>D01038</b>    | 5660.634  |
| 2750.954  | <b>AK022293</b>  | 1179.813  | 3352.475  | <b>AK001020</b>  | 120.819   | 944.018   | <b>AB019205</b>  | 1162.386  |
| 746.803   | <b>AL117439</b>  | 1977.24   | 2259.622  | <b>AK022098</b>  | 5507.96   | 6848.14   | <b>J05008</b>    | 1595.8    |
| 503.788   | <b>AL133065</b>  | 2754.373  | 2198.865  | <b>AB040933</b>  | 829.454   | 1047.24   | <b>U11087</b>    | 811.909   |
| 12334.519 | <b>NM_005297</b> | 9384.909  | 6402.526  | <b>AK026900</b>  | 1877.399  | 1594.513  | <b>D50640</b>    | 1880.114  |
| 1792.163  | <b>U80769</b>    | 1634.378  | 1945.916  | <b>AK025020</b>  | 3423.907  | 4896.271  | <b>X99135</b>    | 19237.326 |
| 1395.866  | <b>S80491</b>    | 851.475   | 745.544   | <b>AF086009</b>  | 978.472   | 970.473   | <b>AF009744</b>  | 988.577   |
| 1051.966  | <b>AJ011377</b>  | 711.629   | 1067.85   | <b>AF086463</b>  | 1356.142  | 1538.879  | <b>NM_003204</b> | 2021.433  |
| 1324.231  | <b>AL137734</b>  | 1453.444  | 1129.199  | <b>AK024130</b>  | 2469.032  | 3742.026  | <b>AF254069</b>  | 1274.662  |
| 341.91    | <b>AK023784</b>  | 1069.131  | 807.044   | <b>AK024598</b>  | 1295.47   | 1109.557  | <b>AL117600</b>  | 5822.632  |
| 573.565   | <b>AK026323</b>  | 1669.894  | 1305.768  | <b>AF087983</b>  | 1294.658  | 1061.723  | <b>NM_004487</b> | 6721.391  |
| 888.97    | <b>AL133430</b>  | 12870.585 | 17463.422 | <b>NM_020234</b> | 3790.992  | 2256.369  | <b>AK025859</b>  | 3759.601  |
| 2863.524  | <b>AF070633</b>  | 46943.598 | 51404.457 | <b>Z36825</b>    | 4405.877  | 3498.825  | <b>AL117499</b>  | 7345.519  |
| 1176.374  | <b>NM_01837C</b> | 1848.131  | 2598.257  | <b>AF086127</b>  | 115.094   | 1544.353  | <b>NM_007054</b> | 305.26    |
| 14211.881 | <b>AF054996</b>  | 13175.386 | 12672.131 | <b>AF086157</b>  | 1162.11   | 632.352   | <b>AB007957</b>  | 245.426   |
| 4648.879  | <b>AF090098</b>  | 6449.124  | 5328.003  | <b>AK022185</b>  | 724.499   | 632.383   | <b>AK000160</b>  | 2808.106  |
| 103.325   | <b>AF146694</b>  | 3614.436  | 4453.423  | <b>AK023286</b>  | 3175.124  | 2644.084  | <b>NM_005311</b> | 2525.243  |
| 2921.094  | <b>AK057104</b>  | 1750.972  | 3070.682  | <b>AK021544</b>  | 459.03    | 620.844   | <b>NM_00590E</b> | 693.092   |
| 1845.095  | <b>AL133555</b>  | 3468.596  | 6955.938  | <b>AF116714</b>  | 970.374   | 396.92    | <b>AF172932</b>  | 944.569   |
| 702.77    | <b>AK024979</b>  | 15014.11  | 17590.402 | <b>NM_01405E</b> | 1944.565  | 1270.589  | <b>NM_00535E</b> | 938.301   |
| 832.787   | <b>AF233648</b>  | 2585.949  | 3289.932  | <b>AK022686</b>  | 4365.352  | 2206.791  | <b>NM_002511</b> | 1051.864  |
| 1248.192  | <b>AK021781</b>  | 503.602   | 1218.616  | <b>AK023516</b>  | 1637.386  | 979.196   | <b>AF295378</b>  | 2750.877  |
| 2416.677  | <b>NM_018584</b> | 1586.609  | 714.306   | <b>AK023864</b>  | 5061.906  | 2892.628  | <b>NM_00408E</b> | 3023.146  |
| 3620.456  | <b>AY007126</b>  | 19395.006 | 16709.904 | <b>AK023017</b>  | 4884.559  | 3678.073  | <b>NM_01244E</b> | 10074.689 |
| 11748.257 | <b>AF085951</b>  | 3416.264  | 6836.494  | <b>AK023908</b>  | 3796.937  | 1973.512  | <b>NM_018104</b> | 1706.535  |
| 2047.721  | <b>AF131787</b>  | 826.129   | 957.374   | <b>AK024132</b>  | 1207.728  | 1597.798  | <b>NM_006667</b> | 30762.99  |
| 610.714   | <b>AF087989</b>  | 4503.201  | 3946.724  | <b>AK024208</b>  | 717.721   | 623.214   | <b>AK025125</b>  | 3534.163  |
| 885.469   | <b>Z70715</b>    | 1249.724  | 1480.164  | <b>AK022293</b>  | 994.627   | 832.916   | <b>NM_00081E</b> | 1019.457  |
| 1215.017  | <b>NM_018182</b> | 5090.335  | 6097.586  | <b>AL117439</b>  | 1090.734  | 918.827   | <b>NM_001293</b> | 626.269   |
| 1532.87   | <b>U80771</b>    | 5249.455  | 4975.74   | <b>AL133065</b>  | 1831.81   | 811.448   | <b>AB023173</b>  | 3779.32   |
| 531.808   | <b>AJ272173</b>  | 11095.664 | 8386.065  | <b>NM_005297</b> | 9976.909  | 3868.375  | <b>AF156548</b>  | 1834.873  |
| 1132.223  | <b>NM_00564E</b> | 5573.791  | 4900.087  | <b>U80769</b>    | 1267.456  | 1171.454  | <b>NM_000387</b> | 7643.883  |
| 651.406   | <b>NM_002037</b> | 927.286   | 799.917   | <b>AL137734</b>  | 1517.598  | 526.819   | <b>NM_004663</b> | 1505.02   |
| 1325.927  | <b>NM_020157</b> | 17080.145 | 8084.506  | <b>AK023784</b>  | 921.234   | 412.509   | <b>NM_01531C</b> | 1110.242  |
| 603.998   | <b>X64991</b>    | 1011.062  | 856.409   | <b>AK026323</b>  | 983.72    | 663.799   | <b>NM_016154</b> | 8069.716  |
| 261.816   | <b>NM_01432C</b> | 6250.271  | 6962.366  | <b>NM_003493</b> | 60056.84  | 50886.242 | <b>NM_005013</b> | 35433.469 |
| 4126.631  | <b>AK025703</b>  | 7716.906  | 6504.565  | <b>AF070633</b>  | 46248.461 | 48759.48  | <b>AB002338</b>  | 1010.216  |
| 688.455   | <b>AK022598</b>  | 3780.657  | 2519.609  | <b>NM_01837C</b> | 646.691   | 667.951   | <b>A1524814</b>  | 3286.081  |
| 29192.592 | <b>AK024306</b>  | 1971.816  | 1346.032  | <b>AF054996</b>  | 6258.152  | 3885.122  | <b>AB024411</b>  | 650.074   |
| 2179.149  | <b>NM_018322</b> | 7305.826  | 8771.033  | <b>AF090098</b>  | 2702.999  | 1830.849  | <b>NM_002444</b> | 25191.367 |
| 3966.125  | <b>AK025862</b>  | 38073.695 | 11790.138 | <b>AF146694</b>  | 2977.456  | 2292.024  | <b>NM_001104</b> | 1011.15   |
| 2747.146  | <b>AK026495</b>  | 3683.307  | 1413.089  | <b>AK057104</b>  | 862.962   | 1631.679  | <b>NM_00298E</b> | 2678.876  |

|           |                  |           |           |                  |           |           |                  |           |
|-----------|------------------|-----------|-----------|------------------|-----------|-----------|------------------|-----------|
| 19579.742 | <b>AK025052</b>  | 1230.163  | 820.684   | <b>AL133555</b>  | 2239.03   | 1266.169  | <b>U88898</b>    | 2836.963  |
| 1905.694  | <b>NM_01438E</b> | 1440.787  | 533.515   | <b>AK026776</b>  | 841.147   | 448.327   | <b>NM_020154</b> | 24403.078 |
| 1411.438  | <b>U85044</b>    | 1271.414  | 765.74    | <b>AY007126</b>  | 7336.368  | 2665.822  | <b>NM_00466E</b> | 2156.676  |
| 794.962   | <b>BC018880</b>  | 877.756   | 633.299   | <b>AF085951</b>  | 1731.129  | 1298.814  | <b>NM_00530C</b> | 1283.284  |
| 19265.021 | <b>AF086090</b>  | 1224.026  | 1258.55   | <b>U80771</b>    | 3372.046  | 2167.772  | <b>NM_00089E</b> | 689.613   |
| 370.573   | <b>AK002173</b>  | 24449.355 | 35688.383 | <b>AJ272173</b>  | 8779.332  | 5664.845  | <b>NM_00069E</b> | 14623.709 |
| 2145.868  | <b>NM_01774E</b> | 1967.372  | 1739.53   | <b>Y17180</b>    | 69123.75  | 58585.828 | <b>NM_005091</b> | 1104.01   |
| 1642.967  | <b>NM_02018E</b> | 12696.598 | 8936.084  | <b>NM_00564E</b> | 2758.459  | 2385.687  | <b>AB023190</b>  | 13959.345 |
| 5408.616  | <b>U88897</b>    | 10849.521 | 8432.351  | <b>NM_002037</b> | 1279.828  | 846.232   | <b>NM_007064</b> | 1074.233  |
| 505.897   | <b>CY3Cy5</b>    | 1587.949  | 174.234   | <b>NM_020157</b> | 24246.734 | 16311.31  | <b>NM_006281</b> | 2099.13   |
| 5180.224  | <b>BG617923</b>  | 342.77    | 1120.668  | <b>X64991</b>    | 1132.111  | 1014.602  | <b>NM_00273E</b> | 6409.139  |
| 3895.113  | <b>U37448</b>    | 961.045   | 1301.734  | <b>NM_01432C</b> | 3628.544  | 3739.404  | <b>Z25434</b>    | 3421.069  |
| 3835.075  | <b>AA927698</b>  | 3457.319  | 7252.855  | <b>AK025703</b>  | 4727.265  | 3637.23   | <b>NM_005884</b> | 6682.413  |
| 3940.89   | <b>AI498426</b>  | 1083.166  | 1249.902  | <b>NM_01818E</b> | 1165.936  | 1084.858  | <b>NM_01239E</b> | 8372.072  |
| 5870.381  | <b>BG824773</b>  | 965.099   | 2756.212  | <b>AK022598</b>  | 2188.86   | 1411.467  | <b>AF229804</b>  | 29652.238 |
| 274.225   | <b>D01038</b>    | 17908.91  | 19262.941 | <b>AK024306</b>  | 1220.728  | 836.313   | <b>AF151638</b>  | 1205.932  |
| 1914.031  | <b>AB019205</b>  | 1199.957  | 2074.485  | <b>AK025862</b>  | 10018.768 | 2893.827  | <b>U90552</b>    | 5665.762  |
| 5583.813  | <b>J05008</b>    | 1163.524  | 1893.086  | <b>AK026495</b>  | 1054.884  | 455.265   | <b>NM_00603E</b> | 4264.979  |
| 1432.089  | <b>U11087</b>    | 763.939   | 1663.703  | <b>NM_01438E</b> | 1075.953  | 516.117   | <b>NM_01478E</b> | 1277.919  |
| 596.335   | <b>D50640</b>    | 2112.04   | 1391.523  | <b>NM_02018E</b> | 14777.651 | 7768.81   | <b>AB040890</b>  | 576.578   |
| 1207.975  | <b>M98776</b>    | 757.257   | 781.77    | <b>U88897</b>    | 14255.357 | 7078.046  | <b>AK021870</b>  | 1476.959  |
| 831.471   | <b>X99135</b>    | 64215.578 | 50033.293 | <b>BG617923</b>  | 314.775   | 1138.942  | <b>U06680</b>    | 1741.556  |
| 1418.186  | <b>AF009744</b>  | 1506.286  | 1487.399  | <b>AA927698</b>  | 1410.16   | 2667.679  | <b>NM_00512E</b> | 600.003   |
| 2713.444  | <b>NM_17214C</b> | 2699.745  | 2212.524  | <b>D01038</b>    | 4937.246  | 4747.481  | <b>NM_015584</b> | 5372.374  |
| 587.6     | <b>SR6</b>       | 2847.087  | 2698.718  | <b>AB019205</b>  | 691.656   | 1054.615  | <b>NM_001697</b> | 38433.469 |
| 4245.123  | <b>SR8</b>       | 9990.164  | 32128.623 | <b>J05008</b>    | 899.686   | 975.469   | <b>NM_01609E</b> | 17063.955 |
| 26783.709 | <b>SR10</b>      | 35712.949 | 11587.227 | <b>U11087</b>    | 874.726   | 882.28    | <b>NM_00206E</b> | 844.8     |
| 776.614   | <b>CY3Cy5</b>    | 671.51    | 99.178    | <b>D50640</b>    | 1307.402  | 1133.328  | <b>AL137479</b>  | 981.988   |
| 26904.43  | <b>NM_005311</b> | 4257.743  | 1696.756  | <b>M98776</b>    | 606.177   | 726.729   | <b>NM_004211</b> | 2172.195  |
| 4391.7    | <b>NM_00590E</b> | 1199.996  | 1252.099  | <b>X99135</b>    | 62902.621 | 45594.215 | <b>Y10776</b>    | 1476.439  |
| 870.322   | <b>NM_00096C</b> | 802.802   | 862.425   | <b>AF009744</b>  | 1248.295  | 1097.737  | <b>AK027241</b>  | 2431.94   |
| 733.358   | <b>NM_00535E</b> | 937.585   | 1862.12   | <b>NM_17214C</b> | 2712.336  | 2716.046  | <b>NM_004561</b> | 555.126   |
| 2721.274  | <b>NM_002511</b> | 1545.256  | 1591.217  | <b>SR6</b>       | 2234.422  | 2514.987  | <b>AK024812</b>  | 2392.369  |
| 1718.447  | <b>AF295378</b>  | 2774.511  | 3732.799  | <b>SR8</b>       | 8799.372  | 31229.004 | <b>M20642</b>    | 886.46    |
| 873.779   | <b>NM_00408E</b> | 4803.566  | 4174.321  | <b>SR10</b>      | 30953.602 | 10886.656 | <b>AK026412</b>  | 1284.116  |
| 3489.266  | <b>NM_01244E</b> | 22573.332 | 27594.195 | <b>CY3Cy5</b>    | 993.569   | 114.774   | <b>X89669</b>    | 1966.846  |
| 27631.75  | <b>NM_018104</b> | 2932.541  | 3314.34   | <b>NM_005311</b> | 2490.844  | 1614.849  | <b>NM_01407C</b> | 607.527   |
| 1216.172  | <b>NM_00608C</b> | 362.64    | 1134.583  | <b>NM_00590E</b> | 800.577   | 1414.746  | <b>NM_01628C</b> | 10987.416 |
| 490.565   | <b>NM_00442E</b> | 4660.685  | 5002.22   | <b>NM_00096C</b> | 468.681   | 755.304   | <b>NM_016027</b> | 1922.502  |
| 851.667   | <b>U64564</b>    | 1346.93   | 1421.688  | <b>NM_00535E</b> | 363.184   | 619.248   | <b>NM_014297</b> | 5945.152  |
| 11146.295 | <b>NM_00647C</b> | 2207.111  | 1890.231  | <b>NM_002511</b> | 822.817   | 725.513   | <b>NM_01815E</b> | 13852.381 |
| 1944.263  | <b>NM_00285E</b> | 2240.036  | 1420.835  | <b>AF295378</b>  | 1838.201  | 1935.014  | <b>X98266</b>    | 1090.51   |
| 5445.382  | <b>AB038463</b>  | 1575.43   | 866.02    | <b>NM_00408E</b> | 2821.973  | 3174.81   | <b>U00930</b>    | 15942.141 |
| 14116.576 | <b>M30262</b>    | 2819.186  | 3945.841  | <b>NM_01244E</b> | 10799.659 | 12502.222 | <b>AK024958</b>  | 1218.2    |
| 822.664   | <b>NM_00546C</b> | 1144.772  | 1075.852  | <b>NM_018104</b> | 2560.995  | 2722.471  | <b>NM_01457E</b> | 2603.426  |
| 12684.18  | <b>AF160477</b>  | 1915.347  | 1651.662  | <b>NM_00442E</b> | 5851.807  | 6796.899  | <b>NM_00243E</b> | 4065.618  |
| 557.118   | <b>M12883</b>    | 1054.207  | 846.285   | <b>U64564</b>    | 1420.072  | 1639.77   | <b>AL117552</b>  | 1630.578  |
| 1612.008  | <b>BG288747</b>  | 1307.987  | 1072.569  | <b>NM_00647C</b> | 1314.647  | 1233.657  | <b>NM_00269E</b> | 6231.308  |
| 709.471   | <b>AI524814</b>  | 6357.406  | 5011.027  | <b>NM_00285E</b> | 3855.76   | 2605.851  | <b>X55525</b>    | 1213.384  |
| 4032.573  | <b>AB024411</b>  | 1304.939  | 1744.096  | <b>AB038463</b>  | 948.622   | 875.506   | <b>NM_00024E</b> | 440.169   |
| 15581.444 | <b>NM_002444</b> | 50711.176 | 54537.598 | <b>M30262</b>    | 1962.041  | 1978.583  | <b>AB040878</b>  | 916.859   |
| 1418.818  | <b>NM_001104</b> | 1753.265  | 2275.272  | <b>NM_00546C</b> | 854.407   | 926.856   | <b>S74647</b>    | 1036.161  |
| 1084.016  | <b>NM_00298E</b> | 6995.429  | 6196.125  | <b>AF160477</b>  | 1450.142  | 2343.522  | <b>NM_00350E</b> | 1466.012  |



|           |                  |           |           |                  |           |           |                  |           |
|-----------|------------------|-----------|-----------|------------------|-----------|-----------|------------------|-----------|
| 4886.472  | <b>U88898</b>    | 3245.799  | 2219.929  | <b>M12883</b>    | 1037.288  | 1080.158  | <b>NM_018093</b> | 3728.046  |
| 11101.388 | <b>NM_020154</b> | 27682.902 | 28418.563 | <b>BG288747</b>  | 674.459   | 942.529   | <b>NM_000430</b> | 1045.97   |
| 2105.752  | <b>NM_004665</b> | 1431.696  | 1395.46   | <b>AI524814</b>  | 3855.394  | 4724.071  | <b>AB033030</b>  | 701.481   |
| 14297.206 | <b>NM_005300</b> | 2275.293  | 3400.043  | <b>AB024411</b>  | 1506.732  | 2268.739  | <b>NM_016656</b> | 739.566   |
| 7318.698  | <b>NM_000893</b> | 927.208   | 861.516   | <b>NM_002444</b> | 33158.609 | 49526.762 | <b>NM_015963</b> | 3229.253  |
| 10225.685 | <b>NM_000698</b> | 19582.172 | 24720.115 | <b>NM_002989</b> | 4125.07   | 4971.521  | <b>NM_017813</b> | 2207.98   |
| 467.409   | <b>AF031167</b>  | 415.402   | 973.889   | <b>U88898</b>    | 1967.826  | 1912.455  | <b>NM_003840</b> | 4316.864  |
| 8251.696  | <b>NM_003204</b> | 2298.313  | 2876.917  | <b>NM_020154</b> | 21605.697 | 25034.199 | <b>NM_018378</b> | 419.863   |
| 964.067   | <b>AF254069</b>  | 1919.726  | 1483.528  | <b>NM_004665</b> | 1098.793  | 1046.406  | <b>NM_018423</b> | 576.524   |
| 2020.947  | <b>AL117600</b>  | 6115.481  | 5230.036  | <b>NM_005300</b> | 721.883   | 1080.873  | <b>NM_001741</b> | 6998.401  |
| 587.536   | <b>NM_004487</b> | 9766.333  | 7188.905  | <b>NM_000698</b> | 21817.498 | 24187.338 | <b>NM_000745</b> | 1168.202  |
| 1001.401  | <b>AB029000</b>  | 5067.228  | 4021.264  | <b>NM_003204</b> | 1910.79   | 1842.627  | <b>AF116705</b>  | 7491.678  |
| 774.971   | <b>AK026965</b>  | 4870.344  | 7945.32   | <b>AF254069</b>  | 1268.838  | 1433.495  | <b>NM_004460</b> | 936.049   |
| 582.57    | <b>AK025859</b>  | 5059.368  | 3303.179  | <b>AL117600</b>  | 6768.856  | 6564.548  | <b>NM_006072</b> | 1663.859  |
| 640.368   | <b>AL117499</b>  | 9916.804  | 6097.101  | <b>NM_004487</b> | 12855.405 | 11286.457 | <b>BE794490</b>  | 969.948   |
| 3150.733  | <b>AK000160</b>  | 2718.64   | 2511.899  | <b>AB029000</b>  | 5114.859  | 5300.153  | <b>NM_003561</b> | 1620.713  |
| 609.797   | <b>NM_006032</b> | 3507.99   | 4984.405  | <b>AK026965</b>  | 5886.325  | 6359.103  | <b>NM_002991</b> | 1043.675  |
| 478.516   | <b>NM_014788</b> | 2025.644  | 2344.893  | <b>AK025859</b>  | 4039.836  | 4538.438  | <b>NM_004071</b> | 2799.187  |
| 7113.29   | <b>NM_002153</b> | 830.32    | 1054.425  | <b>AL117499</b>  | 8434.954  | 8833.151  | <b>NM_001316</b> | 5685.366  |
| 910.106   | <b>AB040890</b>  | 1455.736  | 2136.56   | <b>NM_007054</b> | 473.802   | 974.666   | <b>AJ008149</b>  | 3433.344  |
| 1345.7    | <b>AK024233</b>  | 1037.068  | 1255.06   | <b>AK000160</b>  | 1401.344  | 1494.695  | <b>NM_012153</b> | 1420.189  |
| 1082.343  | <b>AK021870</b>  | 1838.175  | 980.409   | <b>NM_006032</b> | 4467.471  | 6521.583  | <b>NM_013241</b> | 1654.507  |
| 969.814   | <b>U06680</b>    | 4357.256  | 3069.799  | <b>NM_014788</b> | 1439.896  | 2738.858  | <b>AF161362</b>  | 3184.451  |
| 327.893   | <b>NM_005123</b> | 825.739   | 727.772   | <b>NM_002153</b> | 534.421   | 881.693   | <b>NM_015939</b> | 2891.215  |
| 1235.45   | <b>NM_015584</b> | 5788.064  | 6854.518  | <b>AK021870</b>  | 1530.217  | 1559.322  | <b>AB046840</b>  | 1997.204  |
| 33567.031 | <b>NM_001697</b> | 44691.73  | 45790.336 | <b>U06680</b>    | 2732.04   | 3347.753  | <b>AF174487</b>  | 814.906   |
| 10153.171 | <b>NM_016098</b> | 20595.086 | 21873.656 | <b>NM_005123</b> | 260.107   | 827.28    | <b>NM_006407</b> | 8390.006  |
| 3619.253  | <b>NM_002063</b> | 879.464   | 939.125   | <b>NM_015584</b> | 4014.334  | 6517.427  | <b>NM_007373</b> | 3083.726  |
| 7912.152  | <b>NM_006667</b> | 43165.383 | 44980.363 | <b>NM_001697</b> | 27795.57  | 35392.086 | <b>M34572</b>    | 710.138   |
| 511.02    | <b>AK025125</b>  | 4842.776  | 8073.951  | <b>NM_016098</b> | 13858.72  | 19384.451 | <b>NM_006263</b> | 13631.191 |
| 481.198   | <b>NM_000815</b> | 1132.811  | 989.867   | <b>AK025125</b>  | 3561.515  | 5506.383  | <b>NM_004791</b> | 1355.177  |
| 4101.302  | <b>NM_001293</b> | 752.451   | 791.995   | <b>NM_000815</b> | 1027.591  | 821.961   | <b>Z36876</b>    | 2374.207  |
| 3393.521  | <b>AB023173</b>  | 4547.145  | 3405.396  | <b>NM_001293</b> | 606.963   | 838.505   | <b>NM_000892</b> | 1046.598  |
| 1374.213  | <b>AF156548</b>  | 2675.707  | 1761.467  | <b>AB023173</b>  | 3528.235  | 2445.897  | <b>NM_005046</b> | 443.196   |
| 427.491   | <b>NM_000387</b> | 10291.569 | 17103.67  | <b>AF156548</b>  | 2100.086  | 1090.307  | <b>NM_001873</b> | 1060.766  |
| 225.262   | <b>NM_004663</b> | 1696.605  | 1018.197  | <b>NM_000387</b> | 10894.519 | 9214.83   | <b>AB029025</b>  | 1316.657  |
| 672.396   | <b>NM_015310</b> | 1054.774  | 1025.154  | <b>NM_004663</b> | 1209.602  | 1880.456  | <b>NM_003940</b> | 926.617   |
| 900.498   | <b>NM_016154</b> | 8256.873  | 7465.719  | <b>NM_015310</b> | 1055.396  | 1452.246  | <b>NM_016572</b> | 1331.858  |
| 224.538   | <b>NM_005013</b> | 39784.664 | 7577.185  | <b>NM_016154</b> | 8355.002  | 9214.189  | <b>NM_000027</b> | 956.269   |
| 2323.324  | <b>AB002338</b>  | 1258.899  | 1344.515  | <b>AB002338</b>  | 1006.425  | 1049.417  | <b>NM_001824</b> | 331.953   |
| 3831.187  | <b>NM_001072</b> | 1239.654  | 1183.551  | <b>NM_001072</b> | 862.867   | 969.447   | <b>NM_017548</b> | 12000.584 |
| 13703.848 | <b>NM_014070</b> | 1480.653  | 1596.366  | <b>NM_014070</b> | 1768.993  | 3163.67   | <b>AF134802</b>  | 1555.715  |
| 1727.391  | <b>NM_016280</b> | 23417.156 | 24819.654 | <b>NM_016280</b> | 20100.695 | 26786.412 | <b>NM_018222</b> | 845.654   |
| 457.988   | <b>NM_016027</b> | 2618.998  | 2848.447  | <b>NM_016027</b> | 2300.491  | 3634.171  | <b>NM_005740</b> | 1856.155  |
| 4872.225  | <b>NM_014297</b> | 7002.147  | 8502.771  | <b>NM_014297</b> | 6520.421  | 10293.488 | <b>NM_004308</b> | 11183.869 |
| 1028.817  | <b>NM_018156</b> | 14106.701 | 10882.549 | <b>NM_018156</b> | 15878.895 | 14940.015 | <b>AF112366</b>  | 1829.763  |
| 1177.182  | <b>X98266</b>    | 936.763   | 948.377   | <b>X98266</b>    | 988.345   | 932.355   | <b>NM_004274</b> | 1692.087  |
| 2246.81   | <b>U00930</b>    | 14979.973 | 8191.348  | <b>U00930</b>    | 12640.309 | 10007.129 | <b>AK024002</b>  | 5655.236  |
| 1462.062  | <b>AK024958</b>  | 1154.91   | 448.219   | <b>AK024958</b>  | 658       | 743.815   | <b>NM_020399</b> | 6238.177  |
| 1625.963  | <b>NM_014575</b> | 2355.87   | 2863.833  | <b>NM_014575</b> | 1686.721  | 2037.922  | <b>AB011117</b>  | 1540.366  |
| 13759.445 | <b>NM_002439</b> | 3091.178  | 3572.008  | <b>NM_002439</b> | 3558.38   | 3192.322  | <b>AF060935</b>  | 3666.509  |
| 1849.74   | <b>AL117552</b>  | 983.683   | 1861.412  | <b>AL117552</b>  | 732.045   | 1160.474  | <b>AK026886</b>  | 884.832   |
| 2262.806  | <b>NM_002692</b> | 6925.237  | 7990.357  | <b>NM_002692</b> | 5363.655  | 7826.289  | <b>D83778</b>    | 1180.54   |

|           |                  |           |           |                  |           |           |                  |           |
|-----------|------------------|-----------|-----------|------------------|-----------|-----------|------------------|-----------|
| 10975.022 | <b>AB023190</b>  | 14493.718 | 15252.899 | <b>NM_007064</b> | 1327.172  | 1535.741  | <b>NM_004264</b> | 1304.109  |
| 29353.744 | <b>NM_007064</b> | 1305.309  | 1624.482  | <b>NM_006281</b> | 1083.386  | 1220.783  | <b>AK024788</b>  | 854.844   |
| 1314.435  | <b>NM_006281</b> | 1726.436  | 1761.679  | <b>NM_002738</b> | 6386.338  | 4507.173  | <b>NM_001206</b> | 2070.912  |
| 5208.495  | <b>NM_002738</b> | 8417.008  | 7144.229  | <b>U23460</b>    | 37049.723 | 39649.324 | <b>NM_005016</b> | 607.66    |
| 855.319   | <b>U23460</b>    | 20357.781 | 16544.275 | <b>NM_005356</b> | 794.911   | 981.807   | <b>NM_014469</b> | 1667.131  |
| 30793.334 | <b>NM_005356</b> | 978.583   | 654.604   | <b>Z25434</b>    | 4160.659  | 3334.827  | <b>NM_014852</b> | 1961.389  |
| 1279.022  | <b>Z25434</b>    | 3028.649  | 1748.809  | <b>NM_005884</b> | 7502.415  | 10787.548 | <b>NM_000344</b> | 9564.03   |
| 3289.634  | <b>NM_005884</b> | 8856.374  | 6651.432  | <b>NM_012399</b> | 9111.783  | 9762.498  | <b>AF248650</b>  | 2317.582  |
| 2366.605  | <b>NM_012399</b> | 8697.613  | 5361.31   | <b>AF229804</b>  | 19533.178 | 22132.5   | <b>S74678</b>    | 20633.445 |
| 18614.451 | <b>AF229804</b>  | 13469.735 | 8926.213  | <b>U90552</b>    | 5063.006  | 5744.816  | <b>AF248651</b>  | 430.486   |
| 2595.268  | <b>AF151638</b>  | 1613.06   | 2193.679  | <b>M12883</b>    | 1136.264  | 1469.225  | <b>NM_001358</b> | 17318.561 |
| 1393.688  | <b>U90552</b>    | 7458.514  | 9369.585  | <b>BG288747</b>  | 625.282   | 1110.765  | <b>NM_004836</b> | 4804.293  |
| 590.403   | <b>NM_005460</b> | 898.024   | 1200.871  | <b>U37448</b>    | 751.708   | 1075.344  | <b>AB037751</b>  | 4305.619  |
| 17483.41  | <b>AF160477</b>  | 2346.935  | 2746.754  | <b>AA927698</b>  | 2166.842  | 3729.028  | <b>S79281</b>    | 4927.082  |
| 404.965   | <b>M12883</b>    | 1728.303  | 1518.96   | <b>AI498426</b>  | 757.577   | 758.968   | <b>AK025585</b>  | 2987.411  |
| 710.975   | <b>BG288747</b>  | 858.242   | 947.136   | <b>BG824773</b>  | 424.323   | 761.657   | <b>NM_001414</b> | 4613.077  |
| 2393.697  | <b>BG617923</b>  | 169.65    | 1002.182  | <b>D01038</b>    | 8701.028  | 9390.579  | <b>D16891</b>    | 2794.816  |
| 955.752   | <b>U37448</b>    | 1039.101  | 1042.619  | <b>AB019205</b>  | 1040.67   | 1476.606  | <b>NM_017760</b> | 5062.069  |
| 4894.696  | <b>AA927698</b>  | 3164.229  | 7023.337  | <b>J05008</b>    | 1088.162  | 1329.759  | <b>NM_015936</b> | 6427.591  |
| 389.977   | <b>AI498426</b>  | 806.168   | 1171.171  | <b>U11087</b>    | 1067.49   | 1125.595  | <b>AL109698</b>  | 1534.827  |
| 7718.115  | <b>BG824773</b>  | 825.215   | 1990.235  | <b>D50640</b>    | 1259.091  | 762.596   | <b>AF217980</b>  | 6056.458  |
| 8458.878  | <b>D01038</b>    | 18122.578 | 16894.477 | <b>X99135</b>    | 47878.434 | 35691.219 | <b>AL117461</b>  | 2248.469  |
| 3986.409  | <b>AB019205</b>  | 1572.128  | 1999.727  | <b>AF009744</b>  | 969.217   | 1098.454  | <b>NM_016499</b> | 1699.961  |
| 8700.395  | <b>J05008</b>    | 1614.528  | 1743.023  | <b>NM_172140</b> | 2712.082  | 2219.378  | <b>AF104921</b>  | 13027.406 |
| 6428.936  | <b>U11087</b>    | 1270.193  | 1862.238  | <b>AK026965</b>  | 5823.943  | 7625.062  | <b>NM_000126</b> | 13195.521 |
| 37567.762 | <b>D50640</b>    | 2157.668  | 1149.223  | <b>AL117499</b>  | 7339.328  | 10018.359 | <b>BF239974</b>  | 1810.807  |
| 1221.559  | <b>X99135</b>    | 63085.449 | 40419.598 | <b>AK000160</b>  | 1504.246  | 1689.619  | <b>NM_000104</b> | 876.919   |
| 7435.714  | <b>AF009744</b>  | 1454.249  | 1093.344  | <b>NM_005311</b> | 1500.859  | 872.147   | <b>NM_005015</b> | 12644.138 |
| 6044.015  | <b>NM_172140</b> | 2457.968  | 3452.066  | <b>NM_005905</b> | 904.793   | 933.299   | <b>NM_004255</b> | 53404.762 |
| 1391.41   | <b>AK026965</b>  | 6819.207  | 7556.98   | <b>NM_005359</b> | 697.452   | 704.472   | <b>NM_000269</b> | 24766.938 |
| 538.69    | <b>AK025859</b>  | 5594.455  | 5025.348  | <b>NM_002511</b> | 1359.647  | 1246.102  | <b>AF182288</b>  | 2980.896  |
| 1362.207  | <b>AL117499</b>  | 10428.063 | 8672.42   | <b>AF295378</b>  | 2368.337  | 1977.644  | <b>NM_004491</b> | 1921.635  |
| 890.178   | <b>AK000160</b>  | 2908.332  | 3090.796  | <b>NM_004085</b> | 5017.601  | 4141.548  | <b>NM_015629</b> | 3555.308  |
| 1657.487  | <b>NM_005311</b> | 3571.703  | 1238.998  | <b>NM_012445</b> | 14308.854 | 14917.175 | <b>AF218032</b>  | 2616.739  |
| 2045.05   | <b>NM_005905</b> | 1415.053  | 1343.308  | <b>NM_018104</b> | 2100.136  | 2292.829  | <b>NM_017542</b> | 5158.503  |
| 415.406   | <b>NM_005359</b> | 661.578   | 1277.609  | <b>NM_004429</b> | 5829.937  | 6222.314  | <b>AK024407</b>  | 1157.037  |
| 2911.767  | <b>NM_002511</b> | 1008.18   | 1031.663  | <b>U64564</b>    | 1060.297  | 1348.852  | <b>NM_004182</b> | 10996.692 |
| 20213.826 | <b>AF295378</b>  | 2780.333  | 4344.547  | <b>NM_006470</b> | 1555.523  | 1700.667  | <b>NM_018419</b> | 1474.254  |
| 8826.116  | <b>NM_004085</b> | 4745.37   | 3788.77   | <b>NM_002855</b> | 2505.256  | 1874.643  | <b>NM_014240</b> | 1419.774  |
| 1088.686  | <b>NM_012445</b> | 18469.896 | 16830.686 | <b>AB038463</b>  | 890.088   | 757.744   | <b>BE379399</b>  | 2213.255  |
| 2498.519  | <b>NM_018104</b> | 3000.061  | 2122.553  | <b>M30262</b>    | 1648.434  | 1928.415  | <b>NM_015877</b> | 3727.342  |
| 42941.148 | <b>NM_004429</b> | 5293.255  | 7346.004  | <b>NM_000387</b> | 10411.862 | 11746.319 | <b>AL117598</b>  | 2282.406  |
| 3355.16   | <b>U64564</b>    | 1311.647  | 1253.619  | <b>NM_004663</b> | 1417.279  | 2443.631  | <b>AL109670</b>  | 1493.959  |
| 669.541   | <b>NM_006470</b> | 1966.432  | 1528.572  | <b>NM_015310</b> | 953.299   | 1627.912  | <b>AF085831</b>  | 1229.103  |
| 1109.721  | <b>NM_002855</b> | 1485.265  | 885.932   | <b>NM_016154</b> | 10936.172 | 15387.599 | <b>AL832149</b>  | 2869.156  |
| 4583.458  | <b>NM_000387</b> | 10507.341 | 10960.602 | <b>NM_005013</b> | 34437.301 | 46274.988 | <b>AK022839</b>  | 2889.78   |
| 2391.11   | <b>NM_004663</b> | 1719.331  | 1488.631  | <b>AB002338</b>  | 809.186   | 1245.132  | <b>NM_018350</b> | 1325.094  |
| 2977.117  | <b>NM_015310</b> | 1281.778  | 2072.2    | <b>AI524814</b>  | 2973.28   | 2957.349  | <b>AK025839</b>  | 329.857   |
| 708.741   | <b>NM_016154</b> | 13209.111 | 14989.162 | <b>AB024411</b>  | 1096.538  | 631.242   | <b>NM_003946</b> | 1372.88   |
| 859.614   | <b>NM_005013</b> | 40646.82  | 10528.571 | <b>NM_002444</b> | 15785.662 | 19581.982 | <b>AB045292</b>  | 2077.545  |
| 14785.892 | <b>AB002338</b>  | 1394.491  | 1678.507  | <b>NM_001104</b> | 2158.926  | 2608.385  | <b>AK022998</b>  | 731.526   |
| 1885.218  | <b>AI524814</b>  | 5001.144  | 3196.231  | <b>NM_002989</b> | 2717.529  | 2798.501  | <b>AK025699</b>  | 12783.729 |
| 6503.359  | <b>AB024411</b>  | 805.333   | 1177.961  | <b>U88898</b>    | 2417.657  | 1866.392  | <b>NM_018024</b> | 3752.228  |

|           |           |           |           |           |           |           |           |           |
|-----------|-----------|-----------|-----------|-----------|-----------|-----------|-----------|-----------|
| 11030.832 | NM_002444 | 46405.375 | 55452.156 | NM_020154 | 24836.088 | 27937.625 | AK027173  | 268.733   |
| 975.855   | NM_001104 | 1283.085  | 1724.943  | NM_004665 | 1463.323  | 1325.689  | AK021814  | 666.426   |
| 8547.951  | NM_002989 | 4999.018  | 4725.93   | NM_005300 | 1018.391  | 1057.107  | AF088035  | 2046.955  |
| 413.321   | U88898    | 2975.551  | 2060.54   | NM_000893 | 900.864   | 928.029   | AF086251  | 538.79    |
| 1083.283  | NM_020154 | 27325.518 | 22605.221 | AF031167  | 497.941   | 468.644   | NM_018092 | 5797.91   |
| 2461.879  | NM_004665 | 2258.159  | 1946.712  | NM_003204 | 2515.444  | 2061.258  | NM_005842 | 10847.064 |
| 2345.834  | NM_005300 | 1727.393  | 1667.28   | AF254069  | 1263.04   | 1688.419  | AF147419  | 2243.431  |
| 792.505   | NM_000893 | 1748.52   | 1602.624  | AL117600  | 6302.325  | 6027.57   | AK024280  | 1261.691  |
| 845.927   | NM_000698 | 17909.91  | 16604.578 | NM_001712 | 25.879    | 1707.392  | AF075036  | 1164.042  |
| 5514.552  | NM_003204 | 2836.909  | 3612.179  | NM_004487 | 9544.439  | 9008.545  | NM_014797 | 3406.45   |
| 35123.172 | AF254069  | 1653.198  | 1313.238  | AB029000  | 4275.081  | 4943.665  | AL831841  | 2870.163  |
| 772.722   | AL117600  | 6655.53   | 4901.013  | Z25434    | 3824.884  | 4151.313  | AL110165  | 3080.805  |
| 4813.378  | AB029000  | 7789.052  | 13357.708 | NM_005884 | 7319.166  | 13517.161 | AL117652  | 1100.691  |
| 1327.424  | Z25434    | 4607.029  | 4422.637  | NM_012399 | 8418.109  | 11432.328 | AL050168  | 1669.299  |
| 1892.897  | NM_005884 | 9636.49   | 10244.143 | AF229804  | 44178.773 | 52993.18  | AL117447  | 326.992   |
| 3434.484  | NM_012399 | 9064.985  | 8971.104  | AF151638  | 951.55    | 1513.073  | AL122122  | 3939.045  |
| 850.851   | AF229804  | 23194.404 | 21281.416 | U90552    | 4455.731  | 5806.292  | AK000122  | 5138.429  |
| 2596.714  | AF151638  | 1508.928  | 2008.427  | NM_006032 | 4303.554  | 5242.086  | AK023159  | 2192.785  |
| 789.291   | U90552    | 6276.192  | 7731.774  | NM_014788 | 995.377   | 1674.033  | AK001091  | 3061.411  |
| 1593.896  | NM_006032 | 3900.218  | 4364.973  | AB040890  | 807.093   | 905.281   | AF086428  | 1473.313  |
| 310.02    | NM_014788 | 2000.703  | 2172.117  | AK024233  | 649.474   | 1137.181  | AK025310  | 2566.157  |
| 1149.153  | NM_002153 | 555.16    | 996.408   | AK021870  | 1272.557  | 849.612   | AL049353  | 1760.148  |
| 778.275   | AB040890  | 1381.832  | 2174.142  | U06680    | 3548.807  | 3880.487  | AF009269  | 1985.683  |
| 472.345   | AK024233  | 872.514   | 953.971   | NM_015584 | 4656.118  | 6475.458  | AF009313  | 2175.542  |
| 715.79    | AK021870  | 1699.625  | 878.455   | NM_001697 | 32554.414 | 37624.227 | AF056420  | 498.242   |
| 163.022   | U06680    | 2456.768  | 1554.419  | NM_002063 | 971.654   | 1093.587  | AF090887  | 1004.192  |
| 1648.773  | NM_005123 | 831.699   | 657.965   | NM_006667 | 46456.75  | 43785.477 | AF009279  | 394.582   |
| 326.736   | NM_015584 | 5540.828  | 6066.557  | AK025125  | 4341.625  | 6358.204  | NM_015883 | 2245.328  |
| 200.114   | NM_001697 | 38828.285 | 33392.461 | NM_000815 | 824.253   | 903.568   | AF056429  | 1071.89   |
| 4690.69   | NM_016098 | 18993.188 | 16042.018 | NM_001293 | 627.496   | 772.27    | AF070547  | 2206.484  |
| 1778.624  | NM_002063 | 769.427   | 732.245   | AB023173  | 3372.352  | 2918.267  | AK001110  | 10335.739 |
| 2109.912  | NM_006667 | 33766.641 | 25134.656 | AF156548  | 1551.714  | 1014.526  | AK002184  | 754.354   |
| 771.881   | AK025125  | 4856.359  | 4912.674  | NM_172140 | 2006.734  | 2829.197  | AK021652  | 401.173   |
| 956.264   | NM_000815 | 765.382   | 632.358   | NM_001072 | 707.253   | 717.585   | AK021859  | 834.257   |
| 436.326   | NM_001293 | 1326.761  | 1478.214  | NM_014070 | 1140.302  | 1813.877  | AK025826  | 514.229   |
| 474.488   | AB023173  | 7752.405  | 11567.498 | NM_016280 | 16484.059 | 15615.037 | AK026439  | 2069.783  |
| 34806.801 | AF156548  | 3676.307  | 3815.374  | NM_016027 | 2592.533  | 3280.322  | AK025278  | 378.667   |
| 987.054   | NM_172140 | 2364.421  | 2815.331  | NM_014297 | 6237.186  | 8409.063  | AK026828  | 934.15    |
| 2558.665  | AF086109  | 537.931   | 361.402   | NM_018156 | 17123.871 | 14418.891 | AY007163  | 3874.552  |
| 1469.686  | NM_001072 | 1265.347  | 809.137   | X98266    | 999.522   | 1195.598  | NM_006236 | 28180.279 |
| 6618.343  | NM_014070 | 1374.182  | 1868.876  | U00930    | 11052.382 | 7397.441  | AK023734  | 1121.864  |
| 12292.367 | NM_016280 | 23345.982 | 26483.686 | AK024958  | 735.512   | 758.77    | D17265    | 35082.707 |
| 4415.132  | NM_016027 | 2312.835  | 2606.646  | NM_014575 | 1639.515  | 2161.094  | AF085827  | 944.78    |
| 9040.813  | NM_014297 | 7008      | 7799.316  | NM_002439 | 6452.703  | 5304.538  | Y08266    | 19372.158 |
| 2553.315  | NM_018156 | 11356.011 | 7763.546  | AL117552  | 906.793   | 1591.603  | AK002171  | 4863.58   |
| 7251.25   | X98266    | 1019.47   | 887.273   | NM_002692 | 7475.625  | 9642.723  | AJ002572  | 2345.47   |
| 547.551   | U00930    | 16476.23  | 8917.813  | AB023190  | 30281.658 | 22338.99  | AK026897  | 3792.677  |
| 3542.268  | AK024958  | 1116.134  | 532.898   | NM_007064 | 1994.85   | 2587.126  | AB037861  | 4859.536  |
| 2919.249  | NM_014575 | 2403.082  | 2163.275  | NM_006281 | 1615.064  | 1386.909  | AK021887  | 3039.751  |
| 686.997   | NM_002439 | 3997.416  | 2994.593  | NM_002738 | 6941.884  | 4463.32   | AF086180  | 7383.531  |
| 267.383   | AL117552  | 1338.139  | 1304.391  | U23460    | 23992.471 | 25055.613 | AK022135  | 1680.862  |
| 351.608   | NM_002692 | 7062      | 5139.495  | NM_005356 | 704.081   | 783.123   | AK022898  | 1405.142  |
| 960.391   | AB023190  | 11111.379 | 6862.928  | NM_004429 | 4018.216  | 6120.008  | NM_017559 | 5387.544  |

|           |           |           |           |           |           |           |           |           |
|-----------|-----------|-----------|-----------|-----------|-----------|-----------|-----------|-----------|
| 171.174   | NM_007064 | 1032.891  | 881.636   | U64564    | 1352.574  | 1487.265  | NM_003547 | 870.497   |
| 1178.945  | NM_006281 | 1705.569  | 1441.549  | NM_006470 | 1053.894  | 1281.523  | AL049980  | 2261.501  |
| 3765.909  | NM_002738 | 10409.963 | 17125.293 | NM_002855 | 3805.889  | 3228.186  | AF070529  | 1222.937  |
| 14375.325 | U23460    | 22089.625 | 36731.891 | AB038463  | 875.643   | 1060.144  | AK022978  | 1970.271  |
| 2430.997  | NM_005356 | 1488.292  | 2070.51   | M30262    | 2251.046  | 2571.442  | AK021447  | 3843.146  |
| 36447.391 | NM_004429 | 4765.353  | 6122.926  | NM_005460 | 786.629   | 1144.748  | AF131774  | 1977.42   |
| 3838.931  | U64564    | 1931.753  | 1703.804  | AF160477  | 1560.354  | 1702.141  | AK025793  | 566.674   |
| 1253.743  | NM_006470 | 2049.964  | 2420.915  | M12883    | 973.446   | 772.443   | AK000151  | 840.156   |
| 723.159   | NM_002855 | 2390.885  | 1946.15   | BG288747  | 776.149   | 876.816   | AL389942  | 729.926   |
| 3333.513  | AB038463  | 1398.043  | 1301.442  | U37448    | 606.542   | 668.219   | D17052    | 1067.279  |
| 1632.414  | M30262    | 2848.309  | 2718.783  | AA927698  | 2295.543  | 3249.303  | L41143    | 3147.949  |
| 12540.164 | NM_005460 | 932.231   | 1286.861  | BG824773  | 555.327   | 923.753   | NM_005331 | 14703.172 |
| 1052.733  | AF160477  | 1831.819  | 2645.592  | D01038    | 11899.37  | 9023.791  | NM_014111 | 1710.811  |
| 1407.345  | M12883    | 1454.646  | 1312.91   | AB019205  | 1274.567  | 1558.789  | S85075    | 531.817   |
| 9540.872  | BG288747  | 812.936   | 870.107   | J05008    | 1255.499  | 1432.204  | AJ008129  | 2057.302  |
| 33101.063 | U37448    | 811.934   | 734.42    | U11087    | 1140.54   | 1315.351  | AF161451  | 4854.696  |
| 1002.014  | AA927698  | 2858.628  | 5977.731  | D50640    | 1402.688  | 1117.182  | X02067    | 7323.855  |
| 2596.058  | AI498426  | 1017.087  | 902.253   | X99135    | 37113.363 | 27853.402 | U92013    | 7880.155  |
| 449.56    | BG824773  | 812.199   | 1545.644  | AF009744  | 946.054   | 930.885   | AK023965  | 1555.776  |
| 24721.318 | D01038    | 17067.076 | 13417.335 | AL117600  | 6214.627  | 6999.943  | AK026211  | 1382.32   |
| 546.672   | J05008    | 1511.286  | 892.339   | NM_004487 | 9279.95   | 9002.393  | X58968    | 3415.372  |
| 1236.526  | U11087    | 917.583   | 910.592   | AB029000  | 3854.683  | 4457.715  | U92020    | 3825.177  |
| 1243.277  | D50640    | 2314.92   | 966.131   | AK026965  | 6562.881  | 7387.348  | AL117542  | 1692.678  |
| 1044.236  | M98776    | 813.706   | 1601.858  | AK025859  | 3304.297  | 3518.821  | X04215    | 571.988   |
| 11916.836 | X99135    | 50488.129 | 58882.469 | AL117499  | 7125.632  | 5400.067  | NM_017782 | 3774.478  |
| 944.79    | AF009744  | 2276.882  | 4209.97   | AK000160  | 1538.561  | 1793.51   | NM_018149 | 2011.146  |
| 1160.329  | NM_003204 | 2788.92   | 3581.055  | NM_005311 | 2504.407  | 1127.596  | NM_018468 | 10644.149 |
| 1070.076  | AF254069  | 2007.692  | 1182.889  | NM_005905 | 1067.074  | 828.492   | Z36814    | 1876.052  |
| 19776.367 | AL117600  | 6709.368  | 5889.905  | NM_005359 | 965.431   | 752.304   | D17045    | 972.804   |
| 298.938   | NM_004487 | 10588.063 | 10190.233 | NM_002511 | 1514.62   | 1343.187  | AK000827  | 2714.911  |
| 27137.15  | AB029000  | 5924.927  | 6495.684  | AF295378  | 2163.114  | 1761.952  | NM_002503 | 21782.084 |
| 1919.698  | AK026965  | 8185.211  | 9031.438  | NM_004085 | 3993.335  | 3867.798  | NM_005319 | 3706.559  |
| 1507.353  | AK025859  | 4932.847  | 5316.977  | NM_012445 | 12244.474 | 13728.618 | NM_019058 | 594.213   |
| 6088.316  | AL117499  | 9606.196  | 7968.738  | NM_018104 | 1698.872  | 1618.57   | AK022351  | 1436.86   |
| 955.301   | AK000160  | 2879.092  | 2360.757  | NM_000815 | 904.121   | 1314.202  | AK022059  | 1270.736  |
| 3597.518  | NM_005311 | 3669.22   | 1373.234  | NM_001293 | 688.657   | 895.574   | NM_020194 | 4538.395  |
| 7545.434  | NM_005905 | 900.397   | 1147.071  | AB023173  | 2700.067  | 2722.476  | AK026853  | 476.045   |
| 8054.477  | NM_000960 | 603.33    | 973.65    | AF156548  | 1933.344  | 1869.67   | AF038183  | 17426.602 |
| 35759.008 | NM_005359 | 914.953   | 1080.521  | NM_000387 | 6590.869  | 6027.557  | NM_017882 | 2241.037  |
| 1122.368  | NM_002511 | 838.065   | 712.891   | NM_004663 | 1249.735  | 1718.133  | NM_003521 | 1094.082  |
| 4777.822  | AF295378  | 2563.456  | 2264.34   | NM_015310 | 787.177   | 879.06    | CY3Cy5    | 4143.546  |
| 3041.579  | NM_004085 | 4649.853  | 5746.948  | NM_016154 | 9434.296  | 9051.854  | J03571    | 5265.991  |
| 1079.692  | NM_012445 | 16656.24  | 30451.332 | NM_005013 | 34072.461 | 44710.281 | T57791    | 1745.607  |
| 1336.634  | NM_018104 | 2907.663  | 4057.795  | AB002338  | 1049.077  | 964.299   | AI421041  | 12623.032 |
| 1035.3    | NM_006080 | 862.153   | 1508.912  | AI524814  | 3772.353  | 3186.284  | B1759091  | 1429.531  |
| 753.952   | NM_006667 | 48424.762 | 48334.563 | AB024411  | 1032.985  | 1191.619  | BG685843  | 4026.4    |
| 1028.47   | AK025125  | 4937.791  | 7556.456  | NM_002444 | 33011.004 | 33954.773 | BI490011  | 813.149   |
| 321.382   | NM_000815 | 1284.24   | 1127.956  | NM_001104 | 2156.34   | 2572.922  | N20475    | 2760.647  |
| 636.805   | NM_001293 | 629.14    | 887.135   | NM_002989 | 4567.624  | 3728.971  | H61726    | 338.541   |
| 3887.707  | AB023173  | 5439.196  | 5034.522  | U88898    | 2188.041  | 1679.5    | NM_004774 | 1827.089  |
| 31425.135 | AF156548  | 2519.433  | 1889.916  | NM_020154 | 23873.814 | 22943.275 | SR5       | 3645.522  |
| 1589.102  | NM_000387 | 10928.504 | 11424.731 | NM_004665 | 1699.025  | 1369.415  | SR7       | 4105.724  |
| 584.484   | NM_004663 | 1750.882  | 1889.211  | NM_005300 | 1210.866  | 1079.494  | SR9       | 12371.931 |

|           |           |           |           |           |           |           |           |           |
|-----------|-----------|-----------|-----------|-----------|-----------|-----------|-----------|-----------|
| 2652.496  | NM_01531C | 1231.432  | 1747.354  | NM_000893 | 622.617   | 772.927   | CY3Cy5    | 4459.564  |
| 1932.689  | NM_016154 | 13120.051 | 14379.593 | NM_00069E | 17053.768 | 15716.285 | M27544    | 677.361   |
| 3982.976  | NM_005013 | 38983.672 | 10484.556 | NM_00273E | 4958.668  | 4313.876  | AL133097  | 2329.758  |
| 566.561   | AB002338  | 1225.805  | 1155.605  | NM_00535E | 923.615   | 941.792   | NM_001165 | 1052.479  |
| 2360.005  | AI524814  | 5634.804  | 3856.559  | Z25434    | 3790.086  | 3048.096  | NM_001381 | 30975.732 |
| 1266.357  | AB024411  | 876.411   | 626.514   | NM_005884 | 6788.243  | 9372.859  | NM_004093 | 431.249   |
| 3425.099  | NM_002444 | 39853.922 | 47911.129 | NM_01239E | 6970.654  | 6448.215  | NM_00144E | 2445.092  |
| 326.03    | NM_001104 | 964.81    | 822.864   | AF229804  | 35336.156 | 38819.672 | AF086122  | 782.947   |
| 707.061   | NM_00298E | 4992.714  | 3501.904  | AF151638  | 1103.026  | 1172.196  | AK024397  | 3832.8    |
| 13574.595 | U88898    | 3341.508  | 2193.563  | U90552    | 5062.522  | 5098.702  | AF073931  | 617.11    |
| 1403.012  | NM_020154 | 27866.941 | 15778.1   | NM_006032 | 5207.999  | 5295.707  | NM_018047 | 514.829   |
| 2782.022  | NM_00466E | 1946.598  | 807.155   | NM_01478E | 1451.305  | 2266.53   | NM_003564 | 737.905   |
| 8423.227  | NM_00530C | 1708.174  | 1100.283  | NM_002153 | 419.562   | 806.437   | AF317516  | 1322.653  |
| 1683.138  | NM_000893 | 1451.945  | 1537.712  | AB040890  | 1079.953  | 1342.878  | S78203    | 509.612   |
| 22750.434 | NM_00069E | 16562.652 | 29287.404 | AK024233  | 1072.796  | 1299.102  | NM_01620E | 7745.328  |
| 768.503   | NM_005091 | 924.993   | 1334.729  | AK021870  | 1180.027  | 681.57    | NM_00563E | 10852.903 |
| 1781.353  | AF031167  | 727.484   | 1110.425  | U06680    | 3276.508  | 3461.713  | NM_00723E | 8432.288  |
| 719.329   | AB023190  | 18966.498 | 17572.379 | NM_005123 | 601.572   | 575.292   | NM_00726E | 2562.517  |
| 4138.853  | NM_007064 | 1739.797  | 2317.898  | NM_015584 | 4282.617  | 5117.247  | AK026014  | 1606.266  |
| 1228.608  | NM_006281 | 1648.596  | 1424.138  | NM_001697 | 31155.811 | 29444.65  | NM_01484E | 1347.886  |
| 466.298   | NM_00273E | 8484.672  | 7846.054  | NM_01609E | 14472.204 | 16636.93  | NM_00429E | 2302.244  |
| 995.86    | U23460    | 23324.268 | 25303.561 | NM_002063 | 860.67    | 837.716   | AB007857  | 272.16    |
| 854.52    | NM_00535E | 1397.917  | 1322.284  | AL137479  | 847.407   | 1208.455  | NM_00177E | 470.842   |
| 1360.92   | Z25434    | 5326.245  | 4891.846  | Y10776    | 958.547   | 1549.46   | NM_004997 | 3737.939  |
| 4557.977  | NM_005884 | 10665.758 | 12407.968 | AK027241  | 2249.856  | 2560.347  | NM_005923 | 1641.726  |
| 211.398   | NM_01239E | 9628.101  | 8479.435  | AK024812  | 1690.399  | 1620.572  | NM_00346E | 416.829   |
| 1073.155  | AF229804  | 27194.166 | 26741.865 | AK026412  | 869.296   | 1342.238  | NM_005127 | 209.293   |
| 1125.209  | AF151638  | 1282.837  | 1758.724  | X89669    | 1481.142  | 1432.878  | NM_005567 | 1331.577  |
| 1042.913  | U90552    | 6353.355  | 7694.803  | NM_001072 | 854.753   | 371.948   | NM_00521E | 4749.247  |
| 932.178   | NM_006032 | 4351.727  | 4087.637  | NM_01407C | 1721.958  | 1672.06   | NM_00396E | 124.639   |
| 1292.338  | NM_01478E | 1821.663  | 1452.742  | NM_01628C | 18050.303 | 16703.871 | NM_004584 | 968.58    |
| 2281.311  | AB040890  | 1914.863  | 1652.144  | NM_016027 | 2214.791  | 2174.802  | X15183    | 34507.652 |
| 1223.814  | AK024233  | 1511.609  | 715.463   | NM_014297 | 5239.719  | 5042.147  | AK023618  | 1098.063  |
| 2916.324  | AK021870  | 1958.275  | 763.17    | NM_01815E | 17565.061 | 11297.76  | NM_001492 | 1338.281  |
| 571.766   | U06680    | 2765.498  | 1325.218  | X98266    | 790.234   | 781.914   | AB012643  | 7269.552  |
| 657.082   | NM_005123 | 708.366   | 424.758   | U00930    | 11266.071 | 6319.39   | AB023170  | 791.948   |
| 8856.489  | NM_015584 | 6312.909  | 6751.95   | AK024958  | 737.696   | 605.867   | NM_014153 | 6704.166  |
| 7553.366  | NM_01609E | 25485.813 | 34527.539 | NM_01457E | 1456.378  | 1700.906  | NM_00229E | 9400.303  |
| 766.764   | AB032525  | 192.548   | 1443.056  | NM_00243E | 3675.615  | 2728.24   | NM_000414 | 2456.437  |
| 1097.356  | NM_002063 | 837.897   | 1603.458  | AL117552  | 713.882   | 1394.819  | NM_01884E | 2157.309  |
| 876.526   | AL137479  | 1093.601  | 1402.524  | NM_002692 | 5087.734  | 6496.6    | NM_00550E | 2824.959  |
| 2433.678  | NM_004211 | 2193.56   | 2746.761  | X55525    | 1011.18   | 1204.197  | NM_001134 | 668.719   |
| 452.552   | Y10776    | 2051.073  | 2866.928  | NM_000242 | 622.671   | 779.752   | NM_01601E | 2503.772  |
| 2949.724  | AK027241  | 2934.735  | 2572.643  | AB040878  | 792.165   | 419.957   | NM_020407 | 400.117   |
| 5442.723  | NM_00697E | 8630.794  | 8163.315  | S74647    | 802.387   | 1106.961  | AF118274  | 1499.95   |
| 5398.851  | NM_004561 | 768.796   | 1008.593  | NM_018093 | 4464.647  | 4664.918  | NM_018344 | 618.963   |
| 292.743   | AK024812  | 2329.879  | 2907.533  | NM_00338E | 1282.827  | 1502.484  | NM_00007E | 2918.009  |
| 742.238   | M20642    | 885.073   | 938.889   | NM_00043C | 626.753   | 512.763   | NM_000083 | 591.146   |
| 2012.934  | AK026412  | 1252.037  | 1440.171  | AB033030  | 933.726   | 664.343   | AL110245  | 1057.498  |
| 46523.301 | X89669    | 1777.785  | 1589.34   | NM_01665E | 533.909   | 570.309   | NM_00562E | 9387.417  |
| 406.49    | NM_001072 | 1202.423  | 371.608   | NM_015963 | 2177.584  | 1970.61   | NM_01660E | 8381.253  |
| 288.995   | NM_01407C | 1371.467  | 1021.059  | AB007871  | 3669.162  | 3101.03   | X74609    | 6344.397  |
| 2199.763  | NM_01628C | 23143.811 | 15757.227 | NM_017813 | 2549.417  | 2046.649  | NM_01899C | 265.569   |

|           |           |           |           |           |           |           |           |           |
|-----------|-----------|-----------|-----------|-----------|-----------|-----------|-----------|-----------|
| 48716.156 | NM_016027 | 2466.876  | 1784.219  | NM_003840 | 8293.759  | 7370.393  | NM_013363 | 622.833   |
| 21499.154 | NM_014297 | 7814.272  | 7025.54   | NM_018378 | 931.67    | 892.178   | NM_000947 | 2344.708  |
| 2825.876  | NM_018156 | 18034.639 | 11502.455 | NM_018423 | 875.92    | 524.694   | NM_016062 | 15494.164 |
| 5051.541  | X98266    | 1562.039  | 947.359   | NM_001741 | 5971.698  | 3655.698  | NM_004153 | 1354.193  |
| 1163.732  | U00930    | 22420.461 | 9350.71   | NM_000745 | 727.104   | 726.72    | AK024740  | 1201.264  |
| 143.475   | AK024958  | 1620.588  | 1010.154  | AF116705  | 8156.921  | 5596.415  | AF078164  | 4619.214  |
| 178.799   | NM_002439 | 4715.009  | 6190.319  | NM_004460 | 1051.498  | 554.112   | NM_019049 | 1741.474  |
| 6999.983  | AL117552  | 1938.85   | 3605.27   | NM_006072 | 837.908   | 1051.679  | AF130101  | 499.85    |
| 2198.281  | NM_002692 | 10131.8   | 20168.273 | BE794490  | 1252.265  | 547.076   | NM_004656 | 1347.917  |
| 483.501   | X55525    | 1451.085  | 1861.799  | NM_003561 | 1486.837  | 1334.356  | AF071569  | 1577.898  |
| 8855.878  | NM_000242 | 584.5     | 1135.281  | NM_002991 | 622.848   | 478.166   | NM_002269 | 1592.608  |
| 1130.945  | AB040878  | 928.472   | 343.879   | NM_004071 | 2375.978  | 1923.005  | J04948    | 766.413   |
| 2192.942  | S74647    | 1211.207  | 1073.188  | NM_001316 | 5530.547  | 7732.42   | AK022564  | 42758.496 |
| 1093.801  | NM_003506 | 997.169   | 719.764   | AJ008149  | 4150.816  | 3985.279  | AF317516  | 2066.564  |
| 271.52    | NM_018093 | 6611.745  | 3844.652  | NM_012153 | 798.748   | 1143.94   | J03571    | 6520.501  |
| 405.165   | NM_003389 | 1949.075  | 1778.466  | NM_013241 | 1351.992  | 2502.692  | T57791    | 2222.832  |
| 1403.942  | NM_000430 | 1601.478  | 919.972   | AF161362  | 1683.294  | 1311.572  | X56134    | 380.769   |
| 1379.384  | AB033030  | 788.138   | 1277.65   | NM_015939 | 3128.237  | 3414.216  | NM_001456 | 312.017   |
| 13617.48  | NM_016656 | 1007.476  | 1059.327  | AB046840  | 2341.717  | 2784.904  | AI421041  | 12466.137 |
| 47916.695 | NM_015963 | 5279.609  | 1771.276  | AF174487  | 1069.216  | 1218.52   | BI759091  | 1341.641  |
| 274.716   | AB007871  | 1788.999  | 2523.889  | NM_006407 | 7489.887  | 6320.403  | BG685843  | 3584.752  |
| 530.805   | NM_017813 | 2623.424  | 2246.417  | NM_007373 | 1910.236  | 1180.108  | BI490011  | 681.486   |
| 1093.29   | NM_003840 | 6053.882  | 8440.842  | NM_006263 | 10534.77  | 10922.923 | AF035771  | 819.14    |
| 1450.993  | NM_018378 | 1211.528  | 874.503   | NM_004791 | 905.72    | 661.71    | N20475    | 2609.24   |
| 32121.623 | NM_018423 | 1053.992  | 1630.715  | Z36876    | 2024.085  | 3936.11   | AA026626  | 452.545   |
| 926.301   | NM_001741 | 12647.776 | 13077.138 | NM_000892 | 1332.864  | 1320.864  | H61726    | 718.348   |
| 355.823   | NM_000745 | 1662.406  | 1827.259  | NM_001873 | 721.449   | 745.551   | NM_004774 | 2343.665  |
| 975.566   | AF116705  | 10480.397 | 9196.127  | AB029025  | 1128.928  | 888.993   | NM_005234 | 1591.598  |
| 15875.043 | NM_004460 | 807.693   | 1050.801  | NM_002954 | 63038.535 | 58543.703 | NM_005216 | 4456.551  |
| 690.919   | NM_006072 | 2139.38   | 1985.851  | NM_016572 | 770.305   | 487.045   | NM_004584 | 819.563   |
| 1722.522  | BE794490  | 776.685   | 1317.006  | NM_000027 | 840.434   | 951.721   | X15183    | 38097.469 |
| 5763.08   | NM_003561 | 1794.076  | 3077.26   | NM_001824 | 588.225   | 787.1     | AK023618  | 1079.612  |
| 4319.298  | NM_002991 | 1163.728  | 2893.416  | NM_017548 | 16444.471 | 9496.236  | AF212842  | 399.855   |
| 2667.926  | NM_004071 | 3806.196  | 2637.717  | AF134802  | 1026.109  | 768.849   | NM_018404 | 126.604   |
| 2049.753  | NM_001316 | 9470.34   | 4794.407  | NM_018222 | 695.815   | 837.334   | M27544    | 1149.154  |
| 890.577   | AJ008149  | 4759.205  | 3376.904  | NM_005740 | 1503.85   | 1345.524  | NM_002258 | 299.703   |
| 980.577   | NM_012153 | 2271.322  | 1559.314  | NM_004308 | 10354.035 | 7825.595  | NM_001118 | 760.379   |
| 843.698   | NM_013241 | 4970.561  | 10741.478 | AF112366  | 1636.517  | 1517.863  | AL133097  | 2528.954  |
| 1217.172  | Z24725    | 645.041   | 946.505   | NM_004274 | 1182.034  | 972.599   | NM_001165 | 850.893   |
| 1289.117  | AF161362  | 7351.174  | 9934.899  | AK024002  | 5081.709  | 4092.763  | NM_001381 | 31673.035 |
| 1872.243  | AK024078  | 556.256   | 268.89    | NM_020399 | 5675.632  | 4660.07   | NM_006458 | 1307.131  |
| 1148.593  | NM_015939 | 4788.952  | 7692.459  | AB011117  | 613.395   | 833.665   | NM_001449 | 2488.536  |
| 1331.526  | AB046840  | 5658.558  | 9780.005  | AF060935  | 1310.24   | 755.044   | AF086122  | 1063.744  |
| 1200.571  | AF174487  | 1643.211  | 2861.192  | AK026886  | 1312.464  | 1297.113  | AK024397  | 3978.613  |
| 6722.653  | NM_006407 | 12215.479 | 15437.937 | D83778    | 881.553   | 794.671   | AF073931  | 616.081   |
| 3270.756  | NM_007373 | 5190.337  | 3637.033  | NM_004264 | 1045.249  | 1459.92   | NM_018047 | 730.009   |
| 1794.523  | M34572    | 819.917   | 1794.597  | AK024788  | 678.345   | 821.464   | NM_005022 | 554.025   |
| 2629.355  | NM_006263 | 22318.598 | 33802.059 | AK022696  | 1407.373  | 986.209   | NM_000083 | 576.957   |
| 1230.121  | NM_004791 | 1718.461  | 2140.215  | NM_001206 | 925.164   | 775.263   | AL110245  | 1191.533  |
| 2423.124  | Z36876    | 4590.659  | 6435.449  | NM_005016 | 1041.712  | 1037.016  | NM_005628 | 7363.019  |
| 2354.45   | NM_000892 | 1689.815  | 2093.468  | NM_014469 | 1783.707  | 1118.941  | NM_016605 | 8064.986  |
| 2528.228  | X75363    | 778.004   | 1031.36   | NM_014852 | 1734.706  | 1363.895  | NM_004172 | 574.118   |
| 1023.832  | NM_005046 | 901.135   | 1532.874  | NM_000344 | 10761.291 | 7395.862  | S78203    | 476.209   |

|           |           |           |           |           |           |           |           |           |
|-----------|-----------|-----------|-----------|-----------|-----------|-----------|-----------|-----------|
| 2724.209  | NM_001873 | 2338.285  | 2471.417  | AF248650  | 2251.448  | 1276.157  | NM_01620E | 8946.732  |
| 5687.631  | AB029025  | 2330.954  | 2171.248  | S74678    | 28913.301 | 22528.857 | NM_00563E | 14327.998 |
| 1354.26   | NM_00130E | 518.166   | 946.916   | AF248651  | 716.074   | 547.721   | NM_00723E | 11939.891 |
| 5028.723  | NM_00394C | 1171.465  | 628.868   | NM_00135E | 14655.982 | 11001.313 | NM_00726E | 2451.359  |
| 2039.694  | NM_016572 | 2538.512  | 2704.457  | NM_00483E | 4477.632  | 3545.653  | AK026014  | 1403.88   |
| 1987.664  | NM_000027 | 2115.441  | 3613.789  | AB037751  | 2317.229  | 1814.798  | NM_01484E | 1145.923  |
| 9654.718  | NM_001824 | 1246.334  | 3097.892  | S79281    | 3040.254  | 1196.25   | NM_00429E | 2106.014  |
| 11767.399 | NM_01754E | 27764.766 | 31544.432 | AK025585  | 1636.348  | 784.252   | NM_001232 | 856.777   |
| 1539.287  | AF134802  | 2069.038  | 1803.19   | NM_001414 | 2922.897  | 3292.021  | NM_007181 | 369.949   |
| 803.93    | NM_018222 | 1121.749  | 2132.942  | D16891    | 1450.554  | 850.339   | NM_004997 | 3687.281  |
| 7998.44   | NM_00574C | 2754.625  | 2988.675  | NM_01776C | 2371.919  | 1156.918  | NM_005923 | 1450.014  |
| 43702.199 | NM_00430E | 17504.645 | 15960.674 | NM_01593E | 4544.676  | 2757.022  | NM_005567 | 1376.768  |
| 15851.731 | AF112366  | 2367.42   | 2196.46   | AL109698  | 1069.526  | 1132.586  | AF071569  | 1577.283  |
| 1622.825  | NM_004274 | 2208.226  | 2209.792  | AF217980  | 5468.92   | 4859.221  | NM_00226E | 1216.054  |
| 1201.287  | AK024002  | 4443.469  | 5978.38   | AL117461  | 2105.678  | 2355.415  | J04948    | 707.981   |
| 3579.536  | NM_02039E | 9016.314  | 9423.841  | NM_01649E | 2144.803  | 2483.478  | NM_018043 | 642.641   |
| 1084.2    | AB011117  | 2417.733  | 3812.126  | AF104921  | 12958.353 | 13016.957 | AK022564  | 37725.48  |
| 2101.911  | AF060935  | 6716.189  | 7083.649  | NM_00012E | 13021.296 | 14980.327 | NM_001492 | 1210.263  |
| 678.109   | AK026886  | 2042.321  | 1468.783  | BF239974  | 1552.233  | 1718.822  | NM_014153 | 9438.707  |
| 8917.848  | D83778    | 2169.531  | 1397.041  | NM_000104 | 768.073   | 2304.979  | NM_00229E | 9972.989  |
| 500.6     | NM_004264 | 2313.796  | 2470.43   | NM_00501E | 9491.31   | 6422.409  | NM_000414 | 2624.015  |
| 1154.942  | AK024788  | 2099.131  | 2393.744  | NM_00425E | 56605.813 | 52069.629 | NM_01884E | 2178.636  |
| 3254.55   | NM_004473 | 923.687   | 787.251   | NM_00026E | 27861.084 | 22263.932 | NM_00550E | 2679.321  |
| 1868.806  | AK022696  | 3280.696  | 2352.905  | AF182288  | 2375.245  | 1485.984  | AK026964  | 634.518   |
| 1707.465  | NM_00120E | 3609.354  | 4595.342  | NM_004491 | 1722.781  | 934.188   | NM_001134 | 827.728   |
| 1062.702  | NM_00501E | 1186.297  | 1258.187  | AK026810  | 1535.043  | 920.534   | NM_01601E | 2421.003  |
| 2372.45   | NM_01446E | 2117.676  | 2161.354  | NM_01562E | 3299.088  | 2691.236  | NM_018344 | 457.359   |
| 2130.641  | NM_014852 | 2553.309  | 3513.786  | AF218032  | 2151.945  | 1392.841  | NM_00007E | 2757.662  |
| 1461.965  | NM_000344 | 18007.199 | 16038.189 | NM_017542 | 4304.38   | 3175.421  | NM_004774 | 2446.12   |
| 447.563   | AF248650  | 4897.801  | 4515.514  | AK024407  | 964.763   | 455.072   | NM_005234 | 2168.617  |
| 980.459   | S74678    | 56091.367 | 52569.156 | NM_004182 | 9441.75   | 6700.599  | AB002316  | 285.397   |
| 1445.106  | AF248651  | 1800.756  | 2251.874  | NM_01841E | 728.063   | 364.47    | NM_01899C | 262.735   |
| 753.331   | NM_00135E | 30389.813 | 19341.002 | NM_01424C | 1369.24   | 758.887   | NM_013363 | 525.837   |
| 7779.968  | NM_00483E | 8846.262  | 8824.549  | BE379399  | 1142.332  | 955.347   | NM_000947 | 2070.214  |
| 256.586   | AB037751  | 6441.897  | 5441.024  | NM_015877 | 1879.707  | 1471.452  | AL096750  | 12998.796 |
| 3168.219  | S79281    | 8581.941  | 3120.593  | AL109670  | 879.699   | 1077.362  | NM_016061 | 3388.854  |
| 918.091   | AK025585  | 4895.638  | 2117.181  | AF085831  | 807.266   | 613.566   | NM_016062 | 15424.421 |
| 1282.947  | NM_001414 | 8854.014  | 7128.554  | AL832149  | 2318.451  | 2185.472  | NM_004153 | 1376.962  |
| 587.295   | D16891    | 3935.628  | 3919.802  | AK022839  | 1788.487  | 1782.546  | AK024740  | 1395.299  |
| 330.973   | NM_01776C | 5932.172  | 6180.133  | NM_01835C | 1433.714  | 1466.065  | AF078164  | 5105.948  |
| 2049.806  | NM_01593E | 7071.901  | 8234.212  | AK025839  | 115.634   | 896.863   | NM_01904E | 1527.17   |
| 392.491   | AL109698  | 2382.569  | 2477.623  | NM_00394E | 945.273   | 822.224   | NM_00465E | 1324.137  |
| 3297.35   | AF217980  | 6834.033  | 5217.898  | AB045292  | 1573.657  | 1534.966  | AF086122  | 892.974   |
| 3063.943  | AL117461  | 2873.527  | 2460.716  | AK022998  | 806.602   | 878.04    | AK024397  | 3296.188  |
| 310.055   | NM_01649E | 3555.842  | 3269.099  | AK025699  | 12159.516 | 10179.625 | AF073931  | 879.285   |
| 274.212   | AF104921  | 22039.902 | 18149.789 | AF147353  | 742.467   | 817.59    | NM_005022 | 447.453   |
| 2546.754  | NM_00012E | 23581.16  | 27300.516 | NM_018024 | 4457.66   | 2496.499  | NM_003564 | 613.137   |
| 928.733   | AK022291  | 1095.627  | 1217.021  | AK027173  | 676.142   | 509.681   | NM_002581 | 330.593   |
| 732.123   | BF239974  | 3676.134  | 4270.302  | AK026783  | 646.824   | 351.476   | J03571    | 6605.419  |
| 3369.727  | NM_000104 | 1526.212  | 10717.028 | AK021814  | 643.456   | 743.569   | T57791    | 2078.195  |
| 362.072   | NM_00501E | 22338.736 | 27355.836 | AF088035  | 1299.832  | 943.014   | X56134    | 326.596   |
| 3083.352  | NM_00425E | 56548.164 | 57581.25  | NM_018092 | 3487.082  | 2080.101  | A1421041  | 12151.168 |
| 1708.847  | NM_00026E | 53317.477 | 46238.207 | NM_005842 | 7672.211  | 3793.543  | B1759091  | 1236.339  |

|           |           |           |           |           |           |           |           |           |
|-----------|-----------|-----------|-----------|-----------|-----------|-----------|-----------|-----------|
| 1555.888  | AF182288  | 6681.267  | 4630.317  | AF147419  | 1359.946  | 1803.241  | BG685843  | 3918.822  |
| 395.068   | NM_004491 | 2550.498  | 2611.35   | AF075036  | 1177.861  | 1066.917  | BI490011  | 818.501   |
| 1082.802  | AK026810  | 3007.602  | 2723.7    | NM_014797 | 2427.908  | 2345.317  | N20475    | 3062.273  |
| 2353.416  | NM_015629 | 8898.032  | 9216.475  | AL831841  | 2496.898  | 2111.669  | AA026626  | 810.467   |
| 611.392   | AF218032  | 4810.75   | 3991.94   | AL110165  | 2526.839  | 2101.239  | H61726    | 540.625   |
| 4935.394  | NM_017542 | 10287.538 | 9521.296  | AL117652  | 856.007   | 893.621   | NM_004997 | 2908.253  |
| 898.47    | AK024407  | 1420.01   | 1356.005  | AL050168  | 1657.978  | 1461.411  | NM_005923 | 1351.122  |
| 1529.212  | NM_004182 | 17495.932 | 17217.887 | AL117447  | 426.995   | 540.543   | NM_005567 | 2906.463  |
| 277.591   | NM_018419 | 1651.909  | 588.876   | AL122122  | 3980.411  | 4421.226  | NM_005216 | 5157.578  |
| 2638.89   | NM_014240 | 2341.281  | 2592.434  | AK000122  | 6590.888  | 5195.115  | NM_004584 | 1006.992  |
| 1799.002  | BE379399  | 2748.136  | 1201.09   | AK023159  | 1448.365  | 1277.459  | AK023618  | 1078.012  |
| 614.061   | NM_015877 | 3972.386  | 4966.255  | AK001091  | 4264.083  | 2367.16   | AF212842  | 364.215   |
| 192.254   | AL117598  | 2619.867  | 3874.204  | U80775    | 355.782   | 297.444   | M27544    | 933.469   |
| 1817.095  | AL109670  | 1882.648  | 2452.827  | AF086428  | 1136.179  | 855.613   | NM_001118 | 649.272   |
| 2002.099  | AF085831  | 1794.585  | 2549.276  | AK025310  | 1889.06   | 770.172   | AL133097  | 2472.999  |
| 289.028   | AL832149  | 5184.542  | 4973.501  | AL049353  | 1066.524  | 828.878   | NM_001165 | 932.353   |
| 934.417   | AK022839  | 3433.385  | 5058.898  | AF009269  | 1197.779  | 1406.183  | NM_001381 | 34429.785 |
| 908.705   | NM_018350 | 1591.422  | 2638.991  | AF009313  | 856.043   | 1034.906  | NM_006458 | 1600.122  |
| 2174.919  | AK025839  | 687.377   | 2013.805  | AF090887  | 609.426   | 630.873   | NM_001449 | 3213.734  |
| 963.872   | NM_003946 | 2129.085  | 2943.159  | AF009279  | 521.021   | 571.815   | NM_016016 | 2340.335  |
| 1639.922  | AB045292  | 4100.708  | 7196.118  | NM_015883 | 1457.641  | 1047.651  | AF118274  | 1532.395  |
| 5161.062  | AK022998  | 1398.082  | 1861.855  | AF056429  | 498.555   | 539.256   | NM_018344 | 634.929   |
| 301.298   | AK025699  | 15941.962 | 13824.854 | AF070547  | 1788.179  | 1125.66   | NM_000079 | 2768.607  |
| 469.476   | NM_018024 | 4262.232  | 2457.375  | AK001110  | 7285.991  | 5299.63   | NM_000083 | 675.758   |
| 401.06    | AK026783  | 1764.08   | 926.756   | AK002184  | 810.47    | 720.718   | AL110245  | 1254.848  |
| 679.273   | AK021814  | 1018.617  | 1489.984  | AK021652  | 661.588   | 884.353   | NM_005628 | 9503.122  |
| 338.753   | AF088035  | 3343.659  | 2579.022  | AK021859  | 987.952   | 580.713   | NM_004172 | 519.593   |
| 1908.02   | NM_018092 | 7858.816  | 4303.983  | AK025826  | 1737.193  | 1394.559  | S78203    | 415.568   |
| 135.858   | NM_003787 | 1450.73   | 2178.622  | AK026439  | 2923.554  | 1804.166  | NM_016208 | 7101.444  |
| 1478.079  | AK024492  | 856.144   | 1153.996  | AK025278  | 1344.839  | 715.823   | NM_005638 | 12329.163 |
| 444.163   | AF086390  | 785.408   | 1035.938  | AY007163  | 2768.968  | 3328.57   | NM_007235 | 9546.742  |
| 3754.237  | AF147419  | 2290.829  | 3791.612  | NM_006236 | 25992.998 | 25526.414 | NM_007269 | 2145.586  |
| 21263.547 | AK024280  | 1931.024  | 1963.123  | D17265    | 13526.071 | 18373.547 | AK026014  | 1304.117  |
| 721.546   | AF075036  | 2174.012  | 2821.532  | AK002171  | 3437.727  | 3435.981  | NM_014845 | 834.23    |
| 23374.869 | NM_014797 | 5919.689  | 9175.641  | AJ002572  | 1827.589  | 1223.183  | NM_004298 | 2058.229  |
| 774.746   | AK027139  | 633.653   | 1325.85   | AK026897  | 2628.985  | 2238.325  | NM_001232 | 1101.747  |
| 12032.21  | AL831841  | 3511.972  | 4179.692  | AB037861  | 4023.498  | 2949.771  | NM_007181 | 369.082   |
| 4159.657  | AL110165  | 2954.032  | 1374.171  | AK021887  | 1932.697  | 1014.918  | NM_001778 | 436.094   |
| 2111.847  | AL117652  | 924.41    | 709.803   | AF086180  | 5992.959  | 4519.875  | NM_019049 | 1741.249  |
| 3311.742  | AL050168  | 1571.872  | 647.075   | AK022135  | 2114.253  | 1380.735  | NM_004656 | 1420.452  |
| 4362.938  | AL122122  | 4114.004  | 3252.311  | AK022898  | 1451.531  | 980.976   | AF071569  | 1784.902  |
| 3795.374  | AK023159  | 2408.455  | 1252.856  | NM_017559 | 7357.671  | 4694.301  | NM_002269 | 1500.23   |
| 573.724   | AK001091  | 3179.232  | 1882.496  | AL049980  | 1012.593  | 1850.255  | J04948    | 698.32    |
| 1084.963  | AF086428  | 2508.908  | 3641.057  | AK022978  | 913.351   | 1073.602  | NM_018043 | 521.839   |
| 10364.261 | AK025310  | 3132.135  | 2875.601  | AK021447  | 1625.019  | 1490.391  | AK022564  | 40900.273 |
| 329.428   | AI793165  | 751.655   | 1665.462  | AF131774  | 1089.401  | 845.147   | NM_001492 | 1337.433  |
| 789.623   | NM_014896 | 841.195   | 1070.357  | D17052    | 658.106   | 576.086   | AB012643  | 7897.344  |
| 500.353   | AF009269  | 1989.647  | 2372.235  | D28378    | 56678.746 | 45838.723 | AB023170  | 1215.61   |
| 1475.661  | AF009313  | 2925.256  | 2325.235  | M64700    | 555.728   | 752.917   | NM_014153 | 8239.788  |
| 533.083   | AF009279  | 844.775   | 695.785   | L41143    | 3015.593  | 2455.603  | NM_002296 | 9283.862  |
| 642.487   | NM_015883 | 3168.908  | 3266.37   | NM_005331 | 27215.025 | 17054.342 | NM_000414 | 2754.02   |
| 1432.698  | AF056429  | 1096.464  | 866.88    | NM_014111 | 1257.147  | 1036.923  | NM_018845 | 2062.496  |
| 2708.007  | AF070547  | 2443.496  | 1297.767  | S85075    | 1192.271  | 549.849   | NM_005505 | 3498.244  |



|           |           |           |           |           |           |           |           |           |
|-----------|-----------|-----------|-----------|-----------|-----------|-----------|-----------|-----------|
| 849.266   | AK001110  | 9385.271  | 5365.433  | AJ008129  | 1495.99   | 965.951   | AK026964  | 623.732   |
| 215.661   | AK021609  | 319.781   | 369.314   | AF161451  | 3368.537  | 1669.408  | NM_001134 | 837.78    |
| 2098.419  | AK002184  | 946.546   | 566.509   | X02067    | 4588.304  | 2778.394  | NM_006695 | 479.086   |
| 498.776   | AK021652  | 636.89    | 639.274   | U92013    | 7466.559  | 11519.688 | NM_004815 | 743.697   |
| 507.293   | AK021859  | 534.762   | 263.525   | X58968    | 1641.955  | 1526.554  | AB037743  | 1209.298  |
| 477.493   | AK025826  | 743.935   | 797.082   | U92020    | 3370.461  | 3284.574  | AB046820  | 1811.794  |
| 429.897   | AK026439  | 1077.397  | 779.391   | AL117542  | 1316.825  | 1197.923  | NM_006375 | 790.397   |
| 40447.906 | AK025278  | 668.039   | 670.499   | AL109712  | 12910.777 | 10042.901 | AF123659  | 1307.461  |
| 625.222   | AK026466  | 874.805   | 903.779   | NM_017782 | 1723.282  | 1082.797  | AF007190  | 2851.406  |
| 403.639   | AK026828  | 465.381   | 1216.052  | NM_018149 | 1045.992  | 848.138   | X74609    | 10557.888 |
| 1321.912  | AY007163  | 8266.429  | 9645.071  | NM_018468 | 8701.652  | 10269.354 | AB002316  | 409.572   |
| 11324.847 | NM_006236 | 41767.152 | 34278.77  | Z36814    | 935.908   | 604.487   | NM_018990 | 232.967   |
| 1639.775  | AK023734  | 1232.913  | 846.573   | AK000827  | 1610.47   | 942.707   | NM_000947 | 2025.864  |
| 454.69    | D17265    | 42679.133 | 35353.508 | NM_002503 | 27758.977 | 20937.975 | AL096750  | 14985.396 |
| 2070.38   | AF085827  | 947.497   | 480.409   | NM_005319 | 6491.119  | 51801.836 | NM_016061 | 3106.965  |
| 932.687   | Y08266    | 27290.588 | 16366.243 | NM_019058 | 571.577   | 751.221   | NM_016062 | 17379.773 |
| 8692.616  | AK002171  | 6946.528  | 6653.036  | AK022351  | 1098.932  | 3558.948  | NM_004153 | 1578.338  |
| 7510.828  | AJ002572  | 2408.445  | 1590.228  | AK022059  | 854.985   | 320.578   | AK024740  | 4991.667  |
| 6996.418  | AK026897  | 4223.577  | 3544.578  | NM_020194 | 4234.584  | 3441.124  | AF078164  | 4611.301  |
| 1424.041  | AB037861  | 5797.442  | 4704.082  | AF038183  | 14589.039 | 4575.738  | NM_003628 | 1332.304  |
| 826.122   | AK021887  | 3670.54   | 2150.988  | NM_017882 | 1544.485  | 1145.468  | NM_004648 | 834.343   |
| 2571.03   | AF086180  | 10076.584 | 8680.803  | NM_003521 | 604.468   | 1459.574  | AF029325  | 1058.149  |
| 3366.65   | AK022135  | 1256.101  | 735.459   | CY3Cy5    | 2565.684  | 167.082   | AF097021  | 711.102   |
| 1463.809  | NM_017559 | 6158.363  | 6582.286  | J03571    | 9694.031  | 10848.322 | NM_001365 | 2030.932  |
| 10948.068 | AL117592  | 449.613   | 1010.271  | T57791    | 2182.081  | 2125.184  | NM_000677 | 4849.123  |
| 682.516   | NM_003547 | 1296.729  | 1031.977  | X56134    | 558.16    | 658.553   | BF308728  | 530.531   |
| 2209.352  | AL049980  | 2431.096  | 1587.518  | AI421041  | 12598.993 | 24848.307 | NM_013280 | 1858.738  |
| 1255.227  | NM_006683 | 805.947   | 674.39    | BI759091  | 1488.881  | 1789.42   | NM_018315 | 6924.838  |
| 5314.606  | AF070529  | 822.331   | 563.395   | BG685843  | 3396.187  | 2748.259  | AF051151  | 715.227   |
| 982.979   | AK022978  | 2972.188  | 2212.421  | BI490011  | 1079.76   | 1156.066  | AF142421  | 7457.04   |
| 679.382   | AK021447  | 4317.62   | 3760.895  | AF035771  | 822.744   | 722.465   | M84131    | 903.28    |
| 1490.811  | AK025096  | 993.474   | 793.329   | N20475    | 3824.104  | 4246.082  | AB037836  | 5231.312  |
| 11546.084 | AF131774  | 1751.595  | 1710.812  | AA026626  | 890.975   | 935.987   | NM_014247 | 747.12    |
| 3417.479  | AL389942  | 678.058   | 895.973   | H61726    | 472.886   | 638.749   | NM_018695 | 49408.816 |
| 379.138   | D17052    | 1182.742  | 1179.348  | SR9       | 8453.271  | 2306.594  | NM_006343 | 670.762   |
| 571.302   | D28378    | 65103.789 | 55727.617 | CY3Cy5    | 4771.337  | 286.71    | NM_014786 | 792.693   |
| 467.594   | M64700    | 595.687   | 965.965   | AF212842  | 592.752   | 1114.567  | NM_001423 | 537.558   |
| 4282.824  | L41143    | 4444.639  | 4367.785  | NM_018404 | 390.522   | 823.881   | NM_015716 | 3982.812  |
| 280.36    | NM_005331 | 16139.279 | 8162.282  | M27544    | 1401.239  | 1811.459  | NM_003955 | 921.034   |
| 12904.18  | NM_014111 | 1054.864  | 800.023   | NM_001118 | 821.211   | 829.772   | NM_005739 | 697.484   |
| 2328.293  | AJ008129  | 2504.413  | 1183.448  | AL133097  | 3524.268  | 3946.841  | AB023166  | 863.587   |
| 542.629   | AF161451  | 10866.816 | 15323.733 | NM_001165 | 1136.004  | 1209.979  | AB028966  | 3020.099  |
| 392.907   | X02067    | 16177.556 | 29828.266 | NM_006458 | 2346.268  | 3416.943  | NM_005758 | 3407.43   |
| 6874.316  | U92013    | 11891.832 | 9660.905  | NM_014459 | 252.98    | 512.936   | AF044774  | 1027.387  |
| 1366.574  | AK023965  | 2404.116  | 1772.435  | NM_004093 | 650.172   | 684.485   | NM_005402 | 2369.992  |
| 580.002   | AK026211  | 1137.857  | 630.227   | NM_001449 | 3091.748  | 2937.617  | AF055027  | 1164.372  |
| 3273.06   | X58968    | 3342.081  | 3457.857  | AF086122  | 864.005   | 2026.566  | U63541    | 1818.814  |
| 1258.893  | U92020    | 4353.214  | 4258.409  | AK024397  | 5616.25   | 5980.78   | AB033045  | 1805.936  |
| 679.591   | AL117542  | 1269.716  | 934.612   | AF073931  | 683.867   | 711.553   | AF055006  | 5515.809  |
| 1723.2    | AL109712  | 7942.006  | 8633.942  | NM_018047 | 741.131   | 602.353   | NM_004935 | 1142.862  |
| 474.947   | NM_017782 | 3386.464  | 2275.982  | NM_005022 | 813.207   | 919.791   | NM_006951 | 984.24    |
| 721.554   | NM_018149 | 2148.501  | 2068.68   | NM_003564 | 624.756   | 1132.096  | NM_001896 | 4870.894  |
| 607.324   | NM_018468 | 10043.325 | 13717.851 | NM_002581 | 539.509   | 639.436   | NM_014023 | 715.775   |

|           |           |           |           |           |           |           |           |           |
|-----------|-----------|-----------|-----------|-----------|-----------|-----------|-----------|-----------|
| 1995.978  | Z36814    | 1804.395  | 1604.111  | AI417964  | 531.158   | 458.032   | NM_002745 | 6251.703  |
| 2624.979  | D17045    | 1221.187  | 4725.558  | S78203    | 506.986   | 1105.034  | D26488    | 3152.439  |
| 582.024   | AK000827  | 2927.706  | 2335.47   | NM_016208 | 8791.71   | 8740.238  | NM_001432 | 681.608   |
| 580.466   | NM_002503 | 21827.43  | 20584.584 | NM_005638 | 11788.298 | 14602.668 | AB014554  | 715.992   |
| 1526.041  | NM_005319 | 5755.583  | 17200.494 | NM_007235 | 9963.479  | 4693.973  | AF097431  | 5262.631  |
| 919.173   | AK022351  | 1677.537  | 1497.83   | NM_007269 | 2595.029  | 3640.566  | NM_002579 | 973.705   |
| 3034.909  | AK022059  | 907.975   | 686.89    | AK026014  | 1267.308  | 2581.443  | NM_004221 | 1252.646  |
| 58688.902 | NM_020194 | 4468.154  | 3000.063  | NM_004298 | 2368.131  | 6030.544  | NM_006923 | 1784.789  |
| 1593.1    | AF038183  | 19695.523 | 6059.078  | NM_001232 | 903.729   | 1695.054  | AF119889  | 3632.061  |
| 1782.901  | NM_017882 | 4731.875  | 4684.218  | NM_007181 | 249.77    | 719.267   | M90657    | 544.238   |
| 798.342   | NM_003521 | 1723.013  | 3756.069  | AB007857  | 650.011   | 448.653   | NM_006699 | 1604.365  |
| 2777.111  | CY3Cy5    | 4264.228  | 219.729   | NM_001778 | 673.72    | 383.387   | AK025645  | 1454.696  |
| 882.265   | J03571    | 20826.006 | 17529     | NM_004997 | 7512.771  | 9096.911  | AK023266  | 691.256   |
| 672.897   | T57791    | 2249.902  | 2300.27   | NM_005923 | 1821.347  | 2282.344  | NM_006814 | 5841.013  |
| 1101.852  | X56134    | 979.138   | 961.072   | NM_003465 | 214.818   | 565.38    | NM_005067 | 3733.582  |
| 2472.101  | BI490011  | 1922.766  | 2271.2    | NM_005567 | 3427.509  | 3155.759  | AB007899  | 824.857   |
| 869.45    | AF035771  | 1944.329  | 2476.321  | NM_005216 | 5270.968  | 4306.792  | NM_002817 | 2885.294  |
| 455.587   | N20475    | 10343.901 | 28891.699 | X15183    | 32650.545 | 62057.266 | NM_002801 | 7697.232  |
| 5346.088  | BI199286  | 866.418   | 1092.696  | AK023618  | 1413.491  | 2469.072  | NM_014780 | 717.606   |
| 4619.564  | AA026626  | 3069.785  | 3872.705  | NM_001492 | 1314.246  | 881.212   | NM_014730 | 3894.052  |
| 7958.458  | H61726    | 2747.225  | 4576.952  | AB012643  | 11392.115 | 12968.738 | NM_014167 | 904.389   |
| 1864.764  | NM_004774 | 5408.094  | 6612.898  | AB023170  | 1221.663  | 1284.608  | NM_016063 | 1225.818  |
| 857.48    | NM_005234 | 6127.875  | 6047.248  | NM_014153 | 6278.674  | 8042.338  | U82987    | 1507.962  |
| 1576.364  | SR5       | 5987.668  | 7377.749  | NM_002296 | 8020.861  | 16457.582 | NM_005732 | 1194.897  |
| 781.711   | SR7       | 7636.8    | 54438.758 | NM_000414 | 3379.89   | 3053.548  | NM_014890 | 497.919   |
| 397.424   | SR9       | 24056.922 | 4910.376  | NM_018845 | 2089.663  | 2262.57   | AK056481  | 2152.569  |
| 4359.034  | CY3Cy5    | 3273.101  | 135.574   | NM_005505 | 2725.311  | 2712.486  | NM_005433 | 937.492   |
| 3507.07   | AF212842  | 1140.097  | 3463.376  | AK026964  | 402.487   | 854.943   | AF232000  | 47076.441 |
| 4044.976  | NM_018404 | 806.079   | 1210.746  | NM_001134 | 1194.932  | 1207.195  | NM_018118 | 779.355   |
| 362.564   | M27544    | 4617.822  | 6524.466  | NM_016016 | 2481.455  | 844.236   | L35035    | 2172.476  |
| 1498.554  | NM_002258 | 783.793   | 828.513   | NM_020407 | 557.594   | 606.542   | NM_007152 | 1969.069  |
| 38764.219 | NM_001118 | 1766.844  | 2167.34   | AF118274  | 2598.631  | 3029.83   | NM_018293 | 1102.382  |
| 890.928   | AL133097  | 8564.588  | 12061.229 | NM_018344 | 857.318   | 752.271   | NM_001938 | 3885.307  |
| 691.433   | NM_014459 | 602.617   | 1100.279  | NM_000079 | 2917.474  | 3851.334  | AF230808  | 2023.61   |
| 12962.669 | NM_004093 | 1193.693  | 1481.718  | NM_000083 | 503.363   | 390.192   | NM_005238 | 1566.668  |
| 859.945   | NM_001449 | 5173.178  | 4576.725  | AL110245  | 2128.905  | 2447.759  | AK075306  | 3528.207  |
| 6486.667  | AF086122  | 3834.15   | 4394.831  | NM_005628 | 8562.104  | 6699.371  | NM_001280 | 4284.155  |
| 6864.817  | AK024397  | 13704.506 | 13012.702 | NM_016605 | 11043.182 | 16240.354 | AB019572  | 61665.156 |
| 2589.073  | AF073931  | 1218.11   | 1022.545  | X74609    | 13650.931 | 13801.404 | NM_002948 | 56871.199 |
| 1165.052  | NM_018047 | 1756.349  | 1777.154  | NM_018990 | 316.422   | 765.05    | AF113008  | 1311.637  |
| 1788.443  | NM_005022 | 1701.254  | 1902.555  | NM_000947 | 1935.409  | 2728.487  | NM_020217 | 1458.801  |
| 637.123   | NM_001288 | 918.212   | 514.842   | AL096750  | 20228     | 19696.27  | NM_018135 | 52018.688 |
| 629.756   | NM_003564 | 1871.07   | 1470.582  | NM_016061 | 2969.073  | 4787.446  | AF205435  | 10707.4   |
| 730.633   | AF317516  | 5468.355  | 4008.087  | NM_016062 | 13593.916 | 14423.526 | L05093    | 64360.102 |
| 2703.065  | NM_002581 | 1202.081  | 951.116   | NM_004153 | 1500.976  | 1909.848  | AF085983  | 1828.136  |
| 881.413   | AI417964  | 761.405   | 451.451   | AK024740  | 1414.404  | 1597.312  | AF052105  | 1110.775  |
| 3884.877  | S78203    | 1382.534  | 3030.338  | AF078164  | 4594.587  | 6532      | AK001204  | 2750.354  |
| 533.888   | NM_016208 | 20672.295 | 28321.127 | NM_019049 | 1797.38   | 1990.579  | M15465    | 2526.489  |
| 2089.138  | NM_005638 | 17040.867 | 24013.014 | NM_005447 | 316.399   | 324.633   | J03866    | 3660.014  |
| 8472.188  | NM_007235 | 18213.252 | 6520.266  | AF130101  | 321.936   | 744.171   | AK022836  | 1198.72   |
| 9590.898  | NM_007269 | 2403.348  | 4163.258  | NM_004656 | 1047.926  | 1891.724  | NM_012343 | 6493.744  |
| 8980.028  | AK026014  | 2100.159  | 4373.02   | AF071569  | 1764.735  | 1463.319  | NM_000397 | 699.951   |
| 276.35    | NM_004298 | 1029.47   | 1157.999  | NM_002269 | 1528.926  | 1604.241  | NM_002046 | 68330.047 |

|           |           |           |           |           |           |           |           |           |
|-----------|-----------|-----------|-----------|-----------|-----------|-----------|-----------|-----------|
| 357.287   | NM_001232 | 1049.703  | 865.477   | J04948    | 755.211   | 799.549   | NM_00307E | 1280.487  |
| 530.748   | NM_007181 | 475.832   | 871.6     | NM_018043 | 572.928   | 549.866   | AL137703  | 703.656   |
| 1398.76   | AB007857  | 697.08    | 1460.424  | AK022564  | 55644.348 | 60811.598 | NM_00180C | 2658.162  |
| 13132.036 | NM_004997 | 13559.691 | 12270.915 | NM_003564 | 705.332   | 1013.152  | AL117477  | 1167.954  |
| 2104.452  | NM_005923 | 3274.713  | 3190.95   | AK023414  | 373.397   | 539.635   | NM_012107 | 2415.544  |
| 9363.269  | NM_00346E | 864.174   | 797.36    | AF317516  | 2070.854  | 2077.312  | AB037760  | 1574.202  |
| 1585.981  | NM_005127 | 846.784   | 646.985   | NM_002581 | 458.504   | 645.292   | NM_01568C | 1043.661  |
| 576.483   | NM_005567 | 3045.213  | 1870.382  | AI417964  | 464.978   | 442.132   | M22637    | 2298.064  |
| 1995.261  | NM_00521E | 10095.922 | 4885.36   | T57791    | 1799.502  | 1829.523  | NM_018364 | 5529.526  |
| 1322.763  | NM_00396E | 407.776   | 836.048   | BI759091  | 1459.135  | 1569.977  | NM_007022 | 1314.335  |
| 1168.925  | NM_004584 | 1396.337  | 1242.567  | BG685843  | 3351.596  | 2096.433  | AL049943  | 10505.268 |
| 1675.383  | X15183    | 46051.527 | 41428.453 | BI490011  | 762.327   | 925.213   | AL137303  | 1755.069  |
| 557.809   | AK023618  | 2202.077  | 2204.95   | AF035771  | 580.95    | 595.431   | AB002449  | 1442.807  |
| 488.109   | NM_001492 | 3568.716  | 2298.432  | N20475    | 3062.199  | 3356.616  | NM_01648C | 14204.327 |
| 57444.016 | AB012643  | 17813.455 | 26659.598 | AA026626  | 657.002   | 819.075   | AK001489  | 1701.586  |
| 1026.664  | AB023170  | 3053.449  | 4640.875  | H61726    | 393.816   | 487.266   | NM_015681 | 1445.14   |
| 1573.774  | NM_014153 | 12461.414 | 17740.65  | NM_004774 | 2413.928  | 2334.511  | AF070582  | 1648.36   |
| 473.337   | NM_00229E | 18127.281 | 20082.014 | NM_005234 | 2708.152  | 2037.277  | NM_006383 | 2859.444  |
| 526.415   | NM_000414 | 6900.471  | 6679.047  | NM_00521E | 5233.195  | 5596.989  | NM_01540C | 5952.019  |
| 8289.42   | NM_01884E | 3583.688  | 3206.095  | NM_004584 | 733.175   | 1065.002  | AL359561  | 508.062   |
| 1602.227  | NM_00550E | 3670.65   | 1374.477  | X15183    | 34376.055 | 61759.148 | AK026464  | 1139.498  |
| 4030.665  | NM_001134 | 1083.296  | 903.402   | AF212842  | 496.632   | 1118.723  | AK001362  | 533.45    |
| 1485.269  | NM_01601E | 4637.612  | 1044.417  | M27544    | 1287.973  | 1292.393  | AK022400  | 1273.798  |
| 1548.699  | NM_020407 | 1204.477  | 1014.005  | NM_001118 | 832.146   | 798.249   | AF052100  | 986.416   |
| 748.328   | AF118274  | 3653.159  | 3518.714  | NM_001165 | 1072.431  | 883.291   | AL110235  | 1759.929  |
| 848.015   | NM_018344 | 1532.446  | 2128.87   | NM_001381 | 59540.766 | 53014.461 | AK024820  | 635.411   |
| 3059.752  | NM_00007E | 5315.673  | 5454.42   | NM_00645E | 1694.94   | 1801.946  | AF052117  | 377.015   |
| 2398.526  | NM_000083 | 1179.786  | 795.988   | NM_00144C | 1959.129  | 1570.4    | AB033105  | 1484.831  |
| 3387.28   | AL110245  | 2091.73   | 1622.31   | AF086122  | 778.224   | 1397.606  | AJ001865  | 897.834   |
| 781.554   | NM_00562E | 15657.637 | 8665.823  | AK024397  | 5014.394  | 4860.997  | D61704    | 6722.342  |
| 878.159   | NM_01660E | 17596.25  | 26037.686 | AF073931  | 723.911   | 457.3     | AJ227889  | 1105.011  |
| 637.509   | NM_004172 | 952.899   | 593.117   | NM_018047 | 748.297   | 625.652   | Y12017    | 706.244   |
| 1223.458  | X74609    | 27398.07  | 27005.244 | NM_005022 | 918.645   | 800.822   | X64989    | 834.222   |
| 501.166   | NM_01899C | 669.563   | 2390.863  | NM_000083 | 553.316   | 580.495   | L34409    | 8519.489  |
| 2129.825  | NM_013363 | 871.289   | 735.035   | AL110245  | 1597.724  | 2083.701  | U12210    | 2983.864  |
| 832.745   | NM_000947 | 2466.553  | 1874.13   | NM_00562E | 8621.948  | 8079.598  | Z83936    | 784.675   |
| 51533.352 | AL096750  | 17905.598 | 11188.19  | NM_01660E | 10847.818 | 14511.78  | L08440    | 2477.372  |
| 646.537   | NM_016061 | 2026.478  | 2936.536  | S78203    | 523.609   | 824.809   | M73799    | 975.084   |
| 3052.479  | NM_016062 | 14732.686 | 9556.597  | NM_01620E | 8224.466  | 7621.639  | AF086119  | 996.225   |
| 887.792   | NM_004153 | 881.751   | 431.644   | NM_00563E | 8148.088  | 8118.764  | NM_003782 | 564.648   |
| 6490.647  | AK024740  | 1169.387  | 546.486   | NM_00723E | 4563.783  | 1910.491  | AL442096  | 866.497   |
| 757.002   | AF078164  | 4879.764  | 2220.176  | NM_00726E | 910.531   | 919.841   | AK023299  | 531.149   |
| 700.549   | NM_01904C | 1805.351  | 1215.186  | AK026014  | 1111.778  | 1712.235  | NM_01822E | 608.739   |
| 938.948   | AF130101  | 745.515   | 453.666   | NM_01484E | 707.202   | 710.109   | NM_01779C | 741.958   |
| 470.565   | NM_00465E | 2831.122  | 2643.382  | NM_00429E | 1230.413  | 2219.701  | AK000023  | 1177.264  |
| 1334.928  | AF071569  | 2477.91   | 1333.307  | NM_001232 | 768.374   | 990.349   | AK000901  | 492.637   |
| 5844.578  | NM_00226E | 2689.709  | 2176.087  | NM_007181 | 264.548   | 525.277   | AK024351  | 362.275   |
| 468.602   | J04948    | 1168.172  | 1211.741  | AB007857  | 129.331   | 628.876   | AK024867  | 764.961   |
| 480.841   | NM_018043 | 672.333   | 514.318   | NM_00177E | 549.185   | 630.203   | AK025002  | 2523.495  |
| 6362.923  | AK022564  | 59793.16  | 58322.281 | NM_004997 | 4254.02   | 4319.186  | AK024011  | 761.016   |
| 11259.517 | NM_003564 | 1540.144  | 1353.382  | NM_005923 | 1136.416  | 1537.914  | AL390145  | 693.188   |
| 8985.733  | AK023414  | 814.047   | 333.651   | NM_005567 | 2977.91   | 2983.21   | AF119913  | 958.373   |
| 2181.713  | AF317516  | 5415.623  | 4192.126  | AF071569  | 1817.291  | 1381.446  | NM_01834C | 943.013   |

|           |           |           |           |           |           |           |           |           |
|-----------|-----------|-----------|-----------|-----------|-----------|-----------|-----------|-----------|
| 595.697   | NM_002581 | 717.904   | 642.542   | NM_002269 | 1377.505  | 1615.969  | L10148    | 2974.181  |
| 1136.689  | J03571    | 12824.243 | 9966.736  | J04948    | 670.421   | 656.741   | AK026247  | 893.378   |
| 1885.51   | T57791    | 2055.256  | 2378.361  | NM_018043 | 414.194   | 574.436   | AL110175  | 1254.384  |
| 1428.567  | X56134    | 808.359   | 768.074   | AK022564  | 57155.695 | 50613.258 | AK023328  | 5654.983  |
| 409.614   | AI421041  | 14374.359 | 12756.404 | NM_001492 | 1525.314  | 807.47    | AF119879  | 16287.336 |
| 6054.147  | BI759091  | 1410.91   | 1134.801  | AB012643  | 9780.521  | 11260.317 | AF086244  | 1464.016  |
| 1565.027  | BG685843  | 4585.761  | 2681.176  | AB023170  | 1293.407  | 781.803   | AL161992  | 4395.971  |
| 3977.211  | BI490011  | 1731.701  | 1584.907  | NM_014153 | 6689.302  | 8573.564  | AK023910  | 1169.526  |
| 732.936   | AF035771  | 1287.503  | 747.649   | NM_002296 | 4579.97   | 7348.696  | D16991    | 2697.308  |
| 1311.722  | N20475    | 6753.841  | 12878.33  | NM_000414 | 1670.334  | 1183.278  | AK023538  | 647.741   |
| 702.741   | BI199286  | 779.688   | 790.329   | NM_018845 | 1012.253  | 1171.461  | X77485    | 7279.74   |
| 499.221   | AA026626  | 1474.027  | 1155.211  | NM_005505 | 973.908   | 955.278   | AB046765  | 2051.717  |
| 52997.219 | H61726    | 1067.447  | 1071.815  | NM_001134 | 805.583   | 785.366   | AF133333  | 2172.652  |
| 772.362   | NM_004774 | 3843.605  | 2520.862  | NM_016016 | 2042.323  | 895.389   | NM_004881 | 6602.256  |
| 9572.963  | NM_005234 | 4746.272  | 2943.913  | NM_020407 | 686.315   | 866.375   | U94903    | 1235.34   |
| 1177.689  | NM_005216 | 10100.343 | 6331.265  | AF118274  | 2548.272  | 3227.34   | NM_005155 | 6854.375  |
| 7497.102  | NM_003965 | 367.463   | 1185.246  | NM_018344 | 1005.761  | 899.868   | U80764    | 8804.409  |
| 8256.184  | NM_004584 | 1654.206  | 1747.836  | NM_000079 | 3509.875  | 4137.041  | NM_020421 | 1066.128  |
| 2347.89   | X15183    | 36786.699 | 43446.074 | NM_004774 | 2263.179  | 3598.433  | D17094    | 2115.076  |
| 1707.372  | AK023618  | 1722.513  | 2385.446  | X74609    | 13665.894 | 11756.256 | L37690    | 12366.846 |
| 1633.963  | AF212842  | 297.55    | 1275.366  | NM_000947 | 830.101   | 1257.44   | D61707    | 929.806   |
| 1017.973  | M27544    | 1953.75   | 2120.36   | AL096750  | 10999.914 | 10695.157 | AK021610  | 2162.938  |
| 879.688   | AL133097  | 4584.005  | 5945.871  | NM_016061 | 741.013   | 954.762   | AK023767  | 2241.868  |
| 1982.85   | U90908    | 677.294   | 1186.159  | NM_016062 | 5568.903  | 6210.89   | AL137554  | 622.732   |
| 556.006   | NM_006458 | 4725.874  | 5361.01   | NM_004153 | 931.894   | 1121.665  | AJ001907  | 918.67    |
| 2946.342  | NM_014459 | 397.711   | 636.216   | AK024740  | 741.352   | 751.277   | M32220    | 2746.262  |
| 782.442   | NM_004093 | 866.178   | 699.44    | AF078164  | 1853.468  | 1938.904  | D17188    | 7573.563  |
| 2913.306  | NM_001449 | 4450.991  | 3684.258  | NM_019049 | 1260.889  | 1241.236  | AJ001432  | 16014.306 |
| 1954.199  | AF086122  | 1573.002  | 1369.353  | NM_004656 | 1301.293  | 1786.961  | NM_020435 | 7523.806  |
| 1895.344  | AK024397  | 7822.863  | 5886.729  | AF086122  | 1163.391  | 2177.092  | AF052169  | 1086.255  |
| 17525.896 | AF073931  | 897.902   | 808.148   | AF073931  | 542.683   | 679.78    | CY3Cy5    | 1751.903  |
| 704.87    | NM_018047 | 1382.8    | 1202.871  | NM_018047 | 433.832   | 711.826   | BF942101  | 427.923   |
| 316.209   | NM_005022 | 1256.816  | 1962.057  | NM_005022 | 623.439   | 771.809   | BI825012  | 5456.551  |
| 403.84    | NM_001288 | 714.937   | 755.331   | NM_003564 | 675.398   | 938.936   | BE314182  | 5595.069  |
| 1774.973  | NM_000083 | 1635.435  | 1412.907  | AF317516  | 2007.902  | 1514.108  | AI808029  | 679.988   |
| 19179.801 | AL110245  | 2200.511  | 2931.801  | J03571    | 3664.906  | 2424.012  | AI971217  | 468.633   |
| 2462.579  | NM_005628 | 12672.998 | 11712.67  | AI421041  | 6161.382  | 8583.708  | X03225    | 2794.648  |
| 2639.684  | NM_016605 | 16127.901 | 29518.83  | BI759091  | 584.334   | 488.862   | AK097395  | 2165.612  |
| 1305.729  | NM_016208 | 9400.972  | 12910.582 | BG685843  | 1920.361  | 952.672   | M12783    | 682.185   |
| 1191.322  | NM_005638 | 12299.888 | 14983.172 | BI490011  | 997.492   | 816.72    | AK091535  | 538.703   |
| 1859.044  | NM_007235 | 14585.399 | 5209.947  | N20475    | 2124.615  | 1979.755  | AF085357  | 1313.545  |
| 955.804   | NM_007269 | 3925.595  | 7430.575  | AA026626  | 913.056   | 535.137   | NM_003841 | 2192.501  |
| 2310.872  | AK026014  | 1694.894  | 4400.818  | NM_004997 | 4837.194  | 7234.771  | SR2       | 46104.297 |
| 1243.52   | NM_014845 | 1983.893  | 2993.234  | NM_005923 | 1476.086  | 1890.495  | SR4       | 10999.41  |
| 1271.163  | NM_004298 | 2386.738  | 2491.6    | NM_003465 | 270.25    | 550.527   | SR6       | 1527.554  |
| 720.863   | NM_001232 | 1598.429  | 1039.759  | NM_005567 | 2259.867  | 2243.381  | SR8       | 5617.559  |
| 4336.229  | NM_007181 | 457.38    | 874.139   | NM_005216 | 3864.246  | 3624.816  | SR10      | 20836.488 |
| 323.913   | AB007857  | 776.862   | 796.332   | X15183    | 13299.22  | 38017.836 | CY3Cy5    | 2407.925  |
| 429.121   | NM_004997 | 12265.438 | 10510.38  | AK023618  | 607.951   | 742.193   | NM_014322 | 912.513   |
| 595.507   | NM_005923 | 2614.188  | 2388.503  | M27544    | 1092.329  | 807.046   | NM_004122 | 766.799   |
| 674.093   | NM_003465 | 811.417   | 726.284   | NM_001118 | 462.051   | 602.445   | NM_002928 | 7149.347  |
| 1262.35   | AF289028  | 869.78    | 532.06    | NM_001165 | 764.933   | 517.95    | NM_000160 | 1036.403  |
| 1782.019  | NM_005127 | 591.044   | 640.376   | NM_001381 | 59385.461 | 49134.492 | NM_000955 | 951.721   |

|           |           |           |           |           |           |           |           |           |
|-----------|-----------|-----------|-----------|-----------|-----------|-----------|-----------|-----------|
| 909.497   | NM_005567 | 2552.119  | 2082.547  | NM_006458 | 1561.102  | 1614.831  | AF305550  | 845.807   |
| 8839.788  | AF071569  | 2960.885  | 1947.317  | NM_001449 | 1711.353  | 1419.72   | U66582    | 3872.142  |
| 1433.782  | NM_002269 | 2265.352  | 2150.714  | NM_016016 | 2054.067  | 682.287   | NM_006198 | 1169.588  |
| 681.877   | J04948    | 1062.019  | 1665.524  | NM_020407 | 649.023   | 795.091   | NM_000849 | 3062.615  |
| 5700.263  | NM_018043 | 469.299   | 590.509   | AF118274  | 1857.271  | 2679.008  | NM_000950 | 4747.94   |
| 1621.638  | AK022564  | 59318.629 | 54596.191 | NM_018344 | 756.131   | 700.554   | NM_005139 | 3053.637  |
| 4235.418  | AB012643  | 6859.674  | 10790.064 | NM_000079 | 2840.653  | 3032.365  | NM_000039 | 36820.418 |
| 804.369   | AB023170  | 1680.24   | 2489.989  | NM_005628 | 8394.784  | 5640.707  | NM_020470 | 2950.262  |
| 1948.744  | NM_014153 | 8403.329  | 12573.505 | NM_016605 | 2937.153  | 4369.256  | AA478950  | 834.466   |
| 440.632   | NM_002296 | 13845.155 | 17207.057 | NM_016208 | 4241.742  | 3297.463  | AB029033  | 2045.168  |
| 660.398   | NM_000414 | 6517.479  | 11017.952 | NM_005638 | 5872.555  | 6117.364  | AF091034  | 1539.852  |
| 4520.353  | AL133033  | 1226.788  | 2313.426  | NM_007269 | 1152.529  | 1424.923  | NM_005301 | 7158.003  |
| 1056.715  | NM_018845 | 4071.727  | 4754.879  | AK026014  | 1145.64   | 1665.64   | NM_016653 | 1108.397  |
| 387.867   | NM_005505 | 5069.333  | 3438.485  | NM_014845 | 800.552   | 643.648   | AB035124  | 1209.458  |
| 5069.715  | NM_001134 | 1646.852  | 1817.596  | NM_004298 | 1633.021  | 2074.945  | NM_016602 | 324.99    |
| 4695.889  | NM_016016 | 4600.728  | 1280.193  | NM_001232 | 815.345   | 1232.424  | NM_004409 | 4549.924  |
| 1141.464  | NM_020407 | 892.637   | 812.822   | NM_001778 | 968.892   | 1441.419  | AK023397  | 1176.09   |
| 1380.155  | AF118274  | 3110.971  | 3507.609  | NM_019049 | 2100.947  | 3352.988  | NM_001725 | 566.207   |
| 674.9     | NM_018344 | 1300.263  | 1760.292  | AF130101  | 298.896   | 678.701   | NM_004079 | 7520.761  |
| 1067.688  | NM_000079 | 5428.636  | 7187.702  | NM_004656 | 1265.565  | 2256.6    | X01394    | 7323.578  |
| 3157.27   | NM_004774 | 4738.15   | 4268.975  | AF071569  | 1829.575  | 1071.993  | NM_000041 | 11428.788 |
| 1050.887  | NM_005234 | 5718.077  | 5264.27   | NM_002269 | 1830.832  | 1791.023  | NM_002984 | 1678.167  |
| 944.05    | NM_018990 | 390.592   | 2582.931  | AK022564  | 53541.457 | 44391.18  | AB037752  | 2514.799  |
| 382.948   | NM_013363 | 753.566   | 1030.378  | AB012643  | 6797.222  | 6797.556  | AK024821  | 6198.275  |
| 54183.508 | NM_000947 | 2659.216  | 3852.635  | AB023170  | 523.654   | 379.97    | AB002340  | 1092.093  |
| 1945.225  | AL096750  | 25760.943 | 23564.496 | NM_014153 | 4679.849  | 4986.344  | NM_000224 | 1705.302  |
| 525.233   | NM_016061 | 4349.149  | 9842.119  | NM_002296 | 3394.546  | 5869.88   | NM_014328 | 2070.236  |
| 1498.036  | NM_016062 | 22414.336 | 21290.697 | NM_000414 | 1902.555  | 1317.528  | NM_006414 | 3269.475  |
| 506.171   | NM_004153 | 2400.958  | 1690.061  | NM_018845 | 1281.389  | 1234.733  | NM_018479 | 4483.719  |
| 2065.913  | AK024740  | 1861.412  | 1388.236  | NM_005505 | 2131.125  | 1745.944  | NM_014362 | 1912.666  |
| 642.139   | AF078164  | 8921.629  | 5098.007  | AK026964  | 254.226   | 1186.235  | NM_018308 | 1022.207  |
| 3058.22   | NM_019049 | 2776.229  | 1897.505  | NM_001134 | 961.551   | 763.033   | NM_001832 | 3928.51   |
| 666.274   | NM_004656 | 2869.429  | 2660.777  | NM_006695 | 1075.258  | 1954.131  | NM_017774 | 4324.515  |
| 2213.469  | AF086122  | 1646.864  | 2213.316  | NM_004815 | 919.355   | 1142.346  | AB037716  | 1853.968  |
| 8163.657  | AF073931  | 1092.053  | 1178.102  | NM_004147 | 641.387   | 912.754   | NM_001926 | 830.974   |
| 746.986   | NM_018047 | 1250.901  | 1411.635  | AB037743  | 990.842   | 1296.597  | NM_016297 | 2403.137  |
| 598.261   | NM_005022 | 1006.596  | 1376.824  | AB046820  | 1773.23   | 1236.06   | NM_001752 | 6131.222  |
| 7724.87   | NM_003564 | 474.46    | 642.349   | AK025922  | 451.034   | 468.177   | AL137672  | 529.692   |
| 8535.465  | NM_002581 | 572.924   | 791.686   | NM_014646 | 613.402   | 546.709   | X64177    | 3316.546  |
| 8578.131  | J03571    | 15166.729 | 19409.889 | NM_006375 | 885.479   | 1066.819  | NM_015994 | 2516.432  |
| 702.394   | T57791    | 3031.01   | 4989.199  | AF123659  | 874.309   | 572.619   | NM_014065 | 1206.31   |
| 525.97    | X56134    | 1221.376  | 2571.058  | X74609    | 11704.185 | 10111.785 | NM_001695 | 2581.908  |
| 1573.784  | AI421041  | 22336.525 | 20136.643 | NM_000947 | 1271.632  | 1387      | NM_002248 | 1115.157  |
| 1346.463  | BI759091  | 2467.477  | 1570.187  | AL096750  | 21463.188 | 18025.248 | NM_012281 | 1034.675  |
| 995.595   | BG685843  | 6491.385  | 3283.772  | NM_016061 | 1164.176  | 906.548   | AK025772  | 1167.158  |
| 1237.37   | BI490011  | 2953.778  | 2490.122  | NM_016062 | 7717.407  | 8034.269  | NM_005509 | 1312.106  |
| 1753.045  | AF035771  | 1285.502  | 872.09    | NM_004153 | 1372.168  | 1787.458  | NM_152747 | 1189.058  |
| 1162.056  | N20475    | 6112.853  | 12896.402 | AK024740  | 1094.597  | 1278.835  | NM_017415 | 637.339   |
| 598.077   | BI199286  | 551.842   | 651.629   | AF078164  | 4003.173  | 4897.687  | NM_001667 | 9559.508  |
| 52731.637 | AA026626  | 1403.792  | 1362.185  | NM_003628 | 1384.482  | 1254.174  | AB046834  | 382.197   |
| 769.366   | H61726    | 1095.495  | 1198.224  | NM_004648 | 1271.774  | 1575.942  | NM_000262 | 1454.539  |
| 11410.493 | NM_004997 | 11972.666 | 14515.098 | AF029325  | 1077.729  | 1127.898  | NM_017831 | 1456.1    |
| 1409.587  | NM_003465 | 364.633   | 728.069   | NM_005704 | 475.276   | 767.357   | AK022537  | 3607.457  |

|           |                  |           |           |                  |           |           |                  |          |
|-----------|------------------|-----------|-----------|------------------|-----------|-----------|------------------|----------|
| 6435.006  | <b>AF289028</b>  | 718.862   | 825.748   | <b>AF097021</b>  | 535.546   | 1049.666  | <b>AF116632</b>  | 547.611  |
| 8312.172  | <b>NM_005127</b> | 407.033   | 683.21    | <b>NM_001365</b> | 1909.85   | 1808.684  | <b>AF064597</b>  | 898.826  |
| 2567.523  | <b>NM_005216</b> | 3902.492  | 3311.686  | <b>NM_000677</b> | 2375.182  | 1557.535  | <b>NM_006345</b> | 1815.884 |
| 1374.407  | <b>NM_003965</b> | 298.125   | 1198.101  | <b>BF308728</b>  | 914.303   | 824.952   | <b>NM_006875</b> | 909.763  |
| 1380.508  | <b>NM_004584</b> | 1229.324  | 1999.35   | <b>NM_013280</b> | 1841.829  | 679.666   | <b>D87119</b>    | 1274.054 |
| 1715.685  | <b>AK023618</b>  | 1983.843  | 3230.811  | <b>NM_018315</b> | 8061.015  | 4625.111  | <b>AL050040</b>  | 861.448  |
| 1280.962  | <b>AF212842</b>  | 704.798   | 2061.342  | <b>AF142421</b>  | 2613.638  | 1053.852  | <b>NM_006556</b> | 6389.046 |
| 973.335   | <b>M27544</b>    | 3141.656  | 3104.35   | <b>AB037836</b>  | 1803.354  | 1372.923  | <b>AF264717</b>  | 1425.32  |
| 631.921   | <b>NM_002258</b> | 390.087   | 1372.112  | <b>NM_018695</b> | 51486.25  | 44364.375 | <b>NM_012260</b> | 3899.483 |
| 1147.308  | <b>NM_001118</b> | 1497.111  | 1640.654  | <b>NM_014786</b> | 309.078   | 441.587   | <b>NM_001141</b> | 1039.906 |
| 1539.336  | <b>AL133097</b>  | 7839.102  | 7896.266  | <b>NM_015716</b> | 3241.113  | 1908.594  | <b>NM_000018</b> | 4254.813 |
| 389.1     | <b>NM_001165</b> | 1752.544  | 1397.869  | <b>AB023166</b>  | 804.153   | 868.993   | <b>AB028992</b>  | 709.241  |
| 386.087   | <b>NM_001381</b> | 62435.566 | 59771.988 | <b>AB028966</b>  | 4156.958  | 3178.291  | <b>NM_020470</b> | 2185.156 |
| 838.169   | <b>U90908</b>    | 648.962   | 466.826   | <b>NM_005758</b> | 2770.301  | 4263.52   | <b>AA478950</b>  | 1073.287 |
| 3065.768  | <b>NM_006458</b> | 5088.534  | 5166.814  | <b>AF044774</b>  | 1145.584  | 910.154   | <b>BF942101</b>  | 1989.316 |
| 21308.717 | <b>NM_014459</b> | 726.025   | 464.206   | <b>NM_005402</b> | 2889.157  | 3165.963  | <b>B1825012</b>  | 6570.177 |
| 610.958   | <b>NM_004093</b> | 848.838   | 846.844   | <b>AF055027</b>  | 1403.54   | 1206.01   | <b>BM051302</b>  | 1256.727 |
| 570.514   | <b>NM_001449</b> | 3309.87   | 2977.167  | <b>U63541</b>    | 2138.777  | 2512.906  | <b>BE314182</b>  | 5057.589 |
| 1338.467  | <b>NM_016016</b> | 5028.738  | 2162.833  | <b>AB033045</b>  | 1799.191  | 1656.61   | <b>A1808029</b>  | 732.282  |
| 1010.214  | <b>NM_020407</b> | 1073.43   | 1518.652  | <b>AF055006</b>  | 5425.243  | 4753.956  | <b>X03225</b>    | 2853.583 |
| 19116.586 | <b>AF118274</b>  | 2800.249  | 3722.044  | <b>NM_004935</b> | 1079.466  | 1161.964  | <b>AK097395</b>  | 2063.653 |
| 775.076   | <b>NM_018344</b> | 950.451   | 1804.682  | <b>NM_006951</b> | 893.302   | 1470.222  | <b>AK091535</b>  | 762.062  |
| 4072.975  | <b>NM_000079</b> | 1180.24   | 1819.477  | <b>NM_001896</b> | 1646.768  | 933.635   | <b>AF085357</b>  | 1563.635 |
| 681.618   | <b>AL110245</b>  | 1846.264  | 2408.036  | <b>NM_002745</b> | 3169.801  | 2230.109  | <b>NM_003841</b> | 2359.226 |
| 1004.64   | <b>NM_005628</b> | 14059.585 | 12097.715 | <b>D26488</b>    | 1273.849  | 531.473   | <b>NM_080824</b> | 459.772  |
| 4008.464  | <b>NM_004172</b> | 2004.648  | 2289.083  | <b>AF097431</b>  | 2568.644  | 1953.378  | <b>AL137698</b>  | 605.727  |
| 938.228   | <b>S78203</b>    | 1484.658  | 2644.604  | <b>NM_004221</b> | 665.545   | 766.056   | <b>NM_018002</b> | 1673.948 |
| 1162.256  | <b>NM_016208</b> | 12226.433 | 11338.24  | <b>NM_003019</b> | 702.569   | 629.941   | <b>AB002340</b>  | 1083.125 |
| 547.549   | <b>NM_005638</b> | 15760.494 | 16545.326 | <b>NM_006923</b> | 1709.809  | 2047.351  | <b>NM_000224</b> | 1504.595 |
| 1717.758  | <b>NM_007235</b> | 15649.531 | 4033.335  | <b>AF119889</b>  | 4524.586  | 4388.078  | <b>NM_014328</b> | 1852.471 |
| 4893.475  | <b>NM_007269</b> | 4032.442  | 5190.533  | <b>M90657</b>    | 407.357   | 511.082   | <b>NM_006414</b> | 3025.682 |
| 776.207   | <b>AK026014</b>  | 2349.189  | 3232.517  | <b>NM_006699</b> | 1744.402  | 1475.416  | <b>NM_014322</b> | 964.758  |
| 1613.627  | <b>NM_014845</b> | 2053.744  | 1951.221  | <b>AK025645</b>  | 2037.164  | 2105.089  | <b>NM_004122</b> | 2216.639 |
| 13632.775 | <b>NM_004298</b> | 3507.523  | 3130.834  | <b>AK023266</b>  | 782.682   | 908.007   | <b>NM_002928</b> | 7902.427 |
| 882.174   | <b>NM_001232</b> | 2036.025  | 1267.3    | <b>NM_006814</b> | 3665.401  | 2686.655  | <b>NM_000160</b> | 901.159  |
| 8518.285  | <b>NM_007181</b> | 709.213   | 1189.655  | <b>NM_005067</b> | 767.638   | 216.714   | <b>NM_000955</b> | 315.766  |
| 596.716   | <b>AB007857</b>  | 1492.438  | 1572.9    | <b>NM_002817</b> | 1418.266  | 1268.238  | <b>U66582</b>    | 4228.673 |
| 2658.189  | <b>NM_019049</b> | 2577.311  | 2441.837  | <b>NM_002801</b> | 3521.354  | 3365.45   | <b>NM_006198</b> | 1290.932 |
| 764.183   | <b>NM_004656</b> | 1031.813  | 941.28    | <b>NM_014730</b> | 1047.926  | 795.056   | <b>NM_000849</b> | 3228.715 |
| 41818.371 | <b>AF071569</b>  | 2376.834  | 1378.595  | <b>U82987</b>    | 952.318   | 561.491   | <b>NM_004678</b> | 819.651  |
| 487.615   | <b>NM_002269</b> | 2303.499  | 2119.843  | <b>NM_005732</b> | 968.449   | 1037.396  | <b>NM_000950</b> | 9444.81  |
| 1533.983  | <b>J04948</b>    | 1080.817  | 1400.08   | <b>AK056481</b>  | 1546.966  | 1750.755  | <b>AK025772</b>  | 1093.92  |
| 1114.382  | <b>NM_018043</b> | 557.389   | 841.75    | <b>L35035</b>    | 1753.82   | 1280.315  | <b>NM_005509</b> | 1003.22  |
| 8293.531  | <b>AK022564</b>  | 61809.16  | 60259.891 | <b>NM_007152</b> | 1478.329  | 1184.755  | <b>NM_152747</b> | 1521.285 |
| 2536.139  | <b>AB023170</b>  | 1254.77   | 2235.28   | <b>NM_018293</b> | 1133.537  | 809.905   | <b>NM_017415</b> | 660.416  |
| 423.754   | <b>NM_014153</b> | 16992.59  | 22308.695 | <b>NM_002955</b> | 753.423   | 348.507   | <b>NM_001667</b> | 9178.013 |
| 2715.029  | <b>NM_000414</b> | 6805.703  | 5642.175  | <b>NM_001938</b> | 3612.315  | 3235.109  | <b>AB029033</b>  | 2002.734 |
| 1140.876  | <b>NM_018845</b> | 5274.114  | 4349.746  | <b>AF230808</b>  | 2476.169  | 2017.212  | <b>AF091034</b>  | 1579.485 |
| 1406.842  | <b>NM_005505</b> | 5825.325  | 2968.927  | <b>AK075306</b>  | 1897.831  | 1155.194  | <b>NM_005301</b> | 8212.87  |
| 1276.065  | <b>AK026964</b>  | 895.637   | 409.712   | <b>NM_001280</b> | 1409.832  | 954.227   | <b>NM_016653</b> | 962.658  |
| 3488.048  | <b>NM_006695</b> | 1303.637  | 1908.241  | <b>AB019572</b>  | 51398.207 | 11785.429 | <b>AB035124</b>  | 1212.313 |
| 855.273   | <b>NM_004815</b> | 2014.271  | 2226.325  | <b>NM_002948</b> | 37195.438 | 14381.22  | <b>NM_004409</b> | 4476.961 |
| 1075.684  | <b>NM_004147</b> | 1011.38   | 1462.174  | <b>AF113008</b>  | 829.818   | 354.007   | <b>AK023397</b>  | 1220.105 |

|           |           |           |           |           |           |           |           |           |
|-----------|-----------|-----------|-----------|-----------|-----------|-----------|-----------|-----------|
| 4082.777  | AB037743  | 713.086   | 2082.566  | NM_020217 | 1146.605  | 439.894   | NM_004079 | 7861.084  |
| 557.363   | NM_014646 | 618.4     | 682.269   | AF085983  | 1294.414  | 885.112   | X01394    | 9499.611  |
| 4969.498  | NM_006375 | 959.151   | 1232.834  | AF052105  | 740.292   | 545.601   | NM_000041 | 18909.943 |
| 3525.169  | AF123659  | 2850.673  | 3765.574  | AK001204  | 4437.913  | 3296.542  | NM_002984 | 3050.891  |
| 716.495   | X74609    | 17793.137 | 17980.705 | M15465    | 2485.753  | 2739.21   | AF264717  | 1017.108  |
| 1029.579  | AB002316  | 348.352   | 1115.558  | J03866    | 3572.322  | 2491.304  | NM_012260 | 3203.47   |
| 3147.844  | NM_013363 | 1191.553  | 1005.072  | AK022836  | 1159.815  | 1236.992  | NM_001141 | 628.371   |
| 515.643   | NM_000947 | 3257.69   | 2786.227  | NM_012343 | 2479.742  | 1912.988  | NM_000018 | 3884.467  |
| 883.575   | AL096750  | 25852.061 | 19456.164 | NM_002046 | 64133.5   | 60328.184 | NM_018479 | 4743.994  |
| 843.327   | NM_016061 | 4420.845  | 9402.69   | NM_001809 | 1048.357  | 1166.308  | NM_014362 | 1905.544  |
| 1653.521  | NM_016062 | 21515.471 | 17630.354 | AL117477  | 746.451   | 355.887   | NM_018308 | 995.721   |
| 5895.813  | NM_004153 | 2202.399  | 1222.075  | NM_012107 | 1432.637  | 1331.373  | NM_001832 | 3325.614  |
| 474.936   | AK024740  | 2167.182  | 1688.297  | AB037760  | 1114.842  | 1285.282  | NM_017774 | 3982.765  |
| 1382.241  | NM_003628 | 2568.469  | 2359.125  | NM_015680 | 892.557   | 1088.654  | AB037716  | 2136.012  |
| 2106.106  | NM_004648 | 2535.12   | 5330.641  | M22637    | 2644.524  | 967.418   | NM_016297 | 1600.437  |
| 766.134   | AF029325  | 1993.023  | 3163.176  | NM_018364 | 5628.619  | 4332.692  | NM_001752 | 5616.28   |
| 5538.776  | NM_005704 | 745.72    | 964.997   | NM_006778 | 754.454   | 298.919   | AL137672  | 453.844   |
| 3245.765  | AF097021  | 375.824   | 800.402   | NM_007022 | 2251.956  | 5230.534  | X64177    | 3100.507  |
| 838.895   | NM_001365 | 1392.648  | 1604.28   | AL049943  | 13182.499 | 13509.818 | NM_015994 | 2485.915  |
| 2053.562  | NM_000677 | 5493.027  | 6408.746  | AL137303  | 1589.448  | 1207.849  | NM_002241 | 1536.737  |
| 10302.797 | BF308728  | 1650.45   | 1756.821  | AL161980  | 365.359   | 533.031   | NM_014065 | 1350.817  |
| 889.236   | NM_013280 | 2406.286  | 731.902   | AB002449  | 430.883   | 296.468   | NM_001695 | 3505.135  |
| 4904.278  | NM_018315 | 12459.433 | 12698.864 | NM_016480 | 1718.464  | 1640.717  | NM_002248 | 832.707   |
| 891.111   | AF051151  | 889.102   | 1330.525  | NM_015681 | 933.281   | 472.302   | NM_012281 | 1196.139  |
| 554.46    | AF142421  | 8093.748  | 8087.708  | AF070582  | 604.753   | 583.07    | NM_000262 | 1378.413  |
| 1028.11   | AB037836  | 6755.101  | 9376.917  | NM_006383 | 2931.909  | 2678.203  | NM_017831 | 1513.212  |
| 387.435   | NM_014247 | 1199.615  | 1245.878  | NM_015400 | 6205.655  | 5819.575  | AK022537  | 3223.072  |
| 379.442   | NM_018695 | 51581.668 | 57592.727 | AL359561  | 661.536   | 793.57    | AF064597  | 944.455   |
| 1122.33   | NM_006343 | 366.042   | 505.067   | AK026464  | 847.931   | 795.29    | NM_006345 | 1690.816  |
| 1514.18   | NM_014786 | 1519.221  | 1187.386  | AK022400  | 1165.536  | 996.71    | NM_006875 | 1059.256  |
| 585.357   | NM_001423 | 978.353   | 1179.301  | AF052100  | 963.829   | 880.481   | D87119    | 1753.987  |
| 1570.968  | NM_015716 | 5362.772  | 4717.481  | AL110235  | 1847.254  | 1564.368  | AL050040  | 652.686   |
| 2527.309  | NM_003955 | 572.424   | 711.653   | U79245    | 527.88    | 341.415   | NM_006556 | 6549.367  |
| 910.592   | NM_005739 | 1649.235  | 1963.924  | AF086124  | 544.515   | 545.782   | NM_000849 | 3122.868  |
| 3238.63   | AB023166  | 1204.765  | 1434.343  | AK024820  | 539.127   | 358.856   | NM_004678 | 634.912   |
| 5690.722  | AB028966  | 5932.989  | 5241.765  | AF052117  | 351.381   | 495.206   | NM_000950 | 10072.145 |
| 1541.975  | NM_005758 | 6009.868  | 4973.666  | AB033105  | 1502.404  | 2300.03   | NM_005139 | 2844.302  |
| 4660.31   | AF044774  | 1521.887  | 1786.975  | AF038192  | 539.137   | 402.456   | NM_000039 | 31951.5   |
| 50820.375 | NM_005402 | 3881.394  | 7041.536  | D61704    | 5216.295  | 4680.074  | NM_020470 | 1851.909  |
| 10163.511 | AF055027  | 2656.53   | 2535.592  | AJ227889  | 878.275   | 740.518   | AA478950  | 719.022   |
| 1171.199  | U63541    | 1142.183  | 985.868   | Y12017    | 443.195   | 489.71    | BF942101  | 1348.385  |
| 31801.578 | AB033045  | 1698.663  | 1636.938  | X64989    | 864.19    | 575.498   | B1825012  | 6155.3    |
| 1042.6    | AF055006  | 3554.104  | 3069.191  | L34409    | 10983.186 | 7060.957  | BE314182  | 4581.304  |
| 1198.392  | NM_004935 | 2039.49   | 2274.946  | U12210    | 2719.022  | 1116.231  | A1808029  | 475.62    |
| 936.821   | NM_006951 | 1546.462  | 1494.087  | Z83936    | 504.362   | 391.173   | X03225    | 2626.817  |
| 3506.339  | NM_001896 | 4987.744  | 4389.052  | L08440    | 4354.344  | 3141.656  | AK097395  | 2773.133  |
| 3224.988  | D26488    | 4592.345  | 2856.393  | M73799    | 1078.002  | 802.612   | M12783    | 1005.43   |
| 3554.437  | NM_001432 | 1146.724  | 1275.174  | AF086119  | 1524.255  | 1032.533  | AK091535  | 678.077   |
| 1053.338  | AB014554  | 1439.914  | 1302.664  | NM_003782 | 475.178   | 821.156   | AF085357  | 1829.912  |
| 11306.558 | AF097431  | 5778.581  | 4797.013  | AL442096  | 1110.224  | 833.547   | NM_003841 | 2836.928  |
| 1225.412  | NM_002579 | 1234.187  | 479.7     | AK000861  | 452.805   | 533.829   | NM_004633 | 549.452   |
| 769.029   | NM_004221 | 1318.547  | 1409.81   | AK000023  | 657.492   | 537.413   | NM_002984 | 3525.441  |
| 3268.267  | NM_003019 | 653.167   | 616.082   | AK000901  | 379.715   | 422.559   | AB037752  | 3104.248  |

|           |           |           |           |           |           |           |           |          |
|-----------|-----------|-----------|-----------|-----------|-----------|-----------|-----------|----------|
| 683.17    | NM_006923 | 3426.833  | 4651.125  | AK025002  | 1987.686  | 1891.823  | NM_018002 | 1826.462 |
| 1151.932  | AF119889  | 10709.783 | 12581.872 | AK024011  | 470.909   | 521.044   | AK024821  | 5906.18  |
| 750.504   | NM_006699 | 1319.106  | 1355.207  | NM_018340 | 871.34    | 978.728   | AB002340  | 1109.135 |
| 2122.214  | AK025645  | 1729.935  | 1993.645  | AF049883  | 898.642   | 748.014   | NM_000224 | 1283.36  |
| 3047.865  | AK023266  | 999.621   | 1330.009  | L10148    | 2739.004  | 1965.788  | NM_014328 | 1857.908 |
| 734.706   | NM_006814 | 8924.371  | 8297.987  | AK026247  | 393.161   | 573.619   | NM_006414 | 2331.712 |
| 1749.217  | NM_005067 | 5232.691  | 3214.078  | AL110175  | 626.426   | 519.787   | NM_014322 | 927.565  |
| 16596.785 | NM_002801 | 13743.29  | 16535.529 | AK023328  | 5115.034  | 4001.583  | NM_004122 | 1023.718 |
| 1072.083  | BE905810  | 633.109   | 735.297   | AJ012499  | 62690.906 | 60993.883 | NM_002928 | 7092.868 |
| 373.167   | NM_014780 | 1245.652  | 1296.456  | AK024900  | 2399.923  | 1893.7    | NM_000160 | 839.775  |
| 918.684   | NM_014730 | 5111.613  | 3587.051  | AF119879  | 19422.254 | 15386.598 | NM_000955 | 428.986  |
| 1092.449  | NM_014167 | 1772.643  | 1376.113  | AF086244  | 1505.524  | 1453.436  | AF305550  | 947.914  |
| 1457.433  | NM_016063 | 1813.215  | 1569.922  | AL161992  | 407.909   | 733.068   | U66582    | 5127.293 |
| 2727.491  | U82987    | 2941.953  | 2359.406  | AK023910  | 1009.971  | 1472.804  | NM_006198 | 1889.446 |
| 1628.465  | NM_005732 | 2365.994  | 2015.404  | D16991    | 910.61    | 1024.798  | NM_003812 | 695.336  |
| 3279.291  | NM_014890 | 783.177   | 711.945   | AK023538  | 480.343   | 715.143   | NM_001695 | 2530.117 |
| 8089.914  | AK056481  | 3500.338  | 4434.402  | AF075086  | 28549.896 | 23429.02  | AK025772  | 1101.194 |
| 653.34    | NM_005433 | 1370.494  | 963.7     | X77485    | 10247.917 | 6480.441  | NM_005509 | 573.467  |
| 1367.72   | AF232000  | 57984.648 | 56482.285 | AB046765  | 1392.797  | 536.936   | NM_017415 | 504.57   |
| 867.56    | NM_018118 | 948.265   | 447.552   | AF133333  | 2233.995  | 1129.326  | NM_001667 | 8587.049 |
| 988.528   | L35035    | 3928.883  | 2867.032  | NM_018368 | 779.769   | 589.627   | AB046834  | 431.587  |
| 775.791   | NM_007152 | 3483.354  | 2048.822  | NM_004881 | 10645.849 | 7130.618  | AB029033  | 1830.17  |
| 585.457   | NM_018293 | 1036.355  | 947.864   | U94903    | 1345.62   | 1238.968  | AF091034  | 1341.928 |
| 9607.018  | NM_001938 | 3325.565  | 3278.585  | NM_005155 | 9331.896  | 5614.331  | NM_005301 | 4551.432 |
| 1597.222  | AF230808  | 2551.069  | 2549.059  | U80764    | 9992.896  | 13832.012 | NM_016653 | 1124.5   |
| 523.464   | U18910    | 1006.971  | 941.059   | AB020684  | 4345.955  | 5403.771  | AB035124  | 1190.288 |
| 912.076   | NM_005238 | 2186.639  | 3842.89   | AF077036  | 25268.99  | 22821.785 | NM_004409 | 4792.686 |
| 2554.628  | AK075306  | 6674.049  | 5581.1    | D17094    | 737.72    | 1279.157  | AK023397  | 1198.427 |
| 860.831   | AB037820  | 989.487   | 772.78    | L37690    | 9595.425  | 9826.081  | NM_004079 | 7449.416 |
| 715.084   | NM_001280 | 6631.757  | 5806.418  | AK021610  | 721.052   | 502.641   | NM_006875 | 807.82   |
| 552.823   | AB019572  | 67833.914 | 34326.305 | Z36835    | 2131.228  | 1781.305  | D87119    | 1217.972 |
| 216.667   | NM_002948 | 58340.703 | 49545.078 | L37703    | 13644.378 | 9347.229  | NM_006556 | 6735.97  |
| 1273.481  | AF113008  | 1905.367  | 1086.573  | AK023767  | 3208.812  | 1982.867  | AF264717  | 1085.216 |
| 601.807   | NM_020217 | 2716.1    | 1870.525  | AF084516  | 424.856   | 749.905   | NM_012260 | 2267.8   |
| 1540.235  | NM_018135 | 59072.359 | 60542.813 | AL137554  | 629.793   | 333.398   | NM_001141 | 587.712  |
| 1031.819  | AF205435  | 16447.471 | 12586.813 | AJ001907  | 719.902   | 361.643   | NM_000018 | 3450.216 |
| 788.132   | L05093    | 63228.379 | 62074.48  | M32220    | 1422.988  | 757.963   | NM_018479 | 3174.899 |
| 332.005   | AF085983  | 2975.511  | 2526.002  | D17188    | 6333.529  | 3542.358  | NM_014362 | 2031.351 |
| 880.023   | AF052105  | 1486.889  | 1790.991  | AJ001432  | 14181.188 | 8289.127  | NM_018308 | 517.046  |
| 422.157   | AK001204  | 3050.311  | 2474.881  | NM_020435 | 7239.148  | 4669.665  | NM_001832 | 2692.788 |
| 742.269   | M15465    | 1407.123  | 1424.378  | AF052169  | 1769.855  | 2269.344  | NM_017774 | 4254.142 |
| 667.913   | J03866    | 4035.336  | 2423.549  | CY3Cy5    | 2303.404  | 64.432    | AB037716  | 1932.651 |
| 798.348   | AK022836  | 2847.57   | 3589.358  | BE314182  | 4448.909  | 8483.127  | NM_016297 | 2045.135 |
| 2129.776  | NM_012343 | 10817.64  | 9200.092  | AK097395  | 3736.841  | 3955.756  | NM_001752 | 5310.275 |
| 654.778   | NM_000397 | 846.83    | 1082.241  | M12783    | 629.53    | 750.806   | AL137672  | 476.592  |
| 543.454   | NM_002046 | 63428.703 | 61270.676 | AK091535  | 728.688   | 1299.848  | X64177    | 3052.64  |
| 1857.27   | AL157461  | 1208.674  | 691.298   | AF085357  | 1596.917  | 623.906   | NM_015994 | 2133.878 |
| 2102.398  | BF217340  | 677.703   | 1082.885  | NM_003841 | 4828.654  | 8162.158  | NM_018476 | 7382.036 |
| 692.59    | NM_003078 | 2254.683  | 1019.746  | AF296673  | 322.004   | 459.306   | AF220492  | 3274.073 |
| 768.194   | AL137703  | 1348.447  | 1365.43   | SR6       | 1794.91   | 2034.368  | X89671    | 1407.355 |
| 260.633   | NM_001809 | 4238.979  | 1978.477  | SR8       | 5470.532  | 23545.928 | NM_014941 | 2607.838 |
| 23172.279 | AL117477  | 2127.859  | 1164.295  | SR10      | 20546.674 | 8330.108  | NM_018372 | 3238.974 |
| 18795.094 | NM_012107 | 3672.725  | 2674.463  | CY3Cy5    | 2643.317  | 113.029   | NM_013253 | 1644.365 |



|           |           |           |           |           |           |           |           |           |
|-----------|-----------|-----------|-----------|-----------|-----------|-----------|-----------|-----------|
| 1223.954  | AB037760  | 2724.409  | 1971.796  | NM_014322 | 861.615   | 1100.707  | NM_005895 | 2475.276  |
| 2647.191  | NM_015680 | 3696.207  | 5617.131  | NM_002928 | 7403.126  | 4873.389  | NM_003814 | 495.303   |
| 506.869   | M22637    | 5380.262  | 2210.561  | AF305550  | 1120.48   | 2253.268  | NM_000262 | 1544.642  |
| 1640.4    | NM_018364 | 8632.073  | 6753.828  | U66582    | 4742.407  | 3823.707  | NM_017831 | 1427.27   |
| 1205.546  | NM_006778 | 842.256   | 975.696   | NM_006198 | 1142.835  | 1658.466  | AK022537  | 3333.913  |
| 1205.021  | NM_007022 | 1975.755  | 3329.096  | NM_003812 | 464.279   | 369.009   | AF064597  | 757.46    |
| 22119.154 | AL049943  | 5550.324  | 5191.785  | NM_000849 | 3447.538  | 4687.306  | NM_006345 | 1121.165  |
| 1692.128  | AL137303  | 1064.718  | 606.56    | NM_004678 | 2259.901  | 2715.803  | NM_003259 | 9274.603  |
| 827.035   | AL161980  | 1101.164  | 862.605   | NM_000950 | 13206.954 | 16131.627 | AL080128  | 2750.052  |
| 11540.276 | AB002449  | 1858.62   | 1818.274  | NM_005139 | 2915.206  | 3182.964  | AB037787  | 2092.557  |
| 1583.338  | NM_016480 | 16151.479 | 13747.474 | L10139    | 580.814   | 595.185   | AB040892  | 1089.554  |
| 8233.846  | AK001489  | 2133.873  | 1547.782  | NM_000039 | 33859.586 | 32790.125 | NM_018268 | 7733.679  |
| 6552.165  | NM_015681 | 1161.237  | 553.502   | NM_020470 | 3373.232  | 5609.812  | AF230904  | 4125.387  |
| 6477.565  | AF070582  | 2585.963  | 2992.267  | NM_006574 | 586.841   | 1293.079  | NM_017596 | 608.707   |
| 4453.183  | NM_006383 | 5583.139  | 5417.956  | AA478950  | 1125.854  | 1351.763  | AL157480  | 1708.491  |
| 39804.148 | NM_015400 | 7995.771  | 6415.149  | AB029033  | 3647.427  | 2938.539  | NM_018110 | 1445.284  |
| 855.312   | AL359561  | 549.996   | 607.812   | AF091034  | 1534.23   | 2344.964  | AF312678  | 301.378   |
| 1716.016  | AK026464  | 1797.999  | 1379.195  | NM_004167 | 771.746   | 1020.892  | NM_006253 | 1239.032  |
| 14790.924 | AK022400  | 1793.715  | 1288.693  | NM_016653 | 1450.301  | 1716.6    | NM_003866 | 712.131   |
| 1111.055  | AF052100  | 1342.171  | 1486.872  | AB035124  | 1326.67   | 1733.612  | NM_018262 | 778.497   |
| 1694.651  | AL110235  | 3701.229  | 5981.835  | AF060170  | 421.85    | 597.43    | NM_006207 | 1207.253  |
| 3040.651  | U79245    | 1013.034  | 831.837   | AK023397  | 1223.464  | 1024.771  | AF009674  | 1710.756  |
| 548.151   | AK024820  | 917.124   | 740.715   | NM_001725 | 608.949   | 847.172   | NM_000844 | 795.396   |
| 1265.158  | AF052117  | 516.19    | 1174.96   | NM_004079 | 8276.187  | 11559.652 | NM_005510 | 2766.368  |
| 2344.461  | AB033105  | 993.075   | 781.081   | NM_004633 | 377.641   | 523.212   | Z36817    | 565.495   |
| 2348.815  | AJ001865  | 1108.801  | 883.574   | X01394    | 15945.656 | 15021.531 | NM_014505 | 7739.667  |
| 609.563   | D61704    | 8510.723  | 6277.696  | NM_000041 | 21112.574 | 22809.637 | NM_004209 | 2753.398  |
| 279.32    | AJ227889  | 1109.467  | 1224.868  | NM_002984 | 2990.52   | 3194.012  | NM_016162 | 996.849   |
| 1619.215  | Y12017    | 823.945   | 995.195   | AB037752  | 3734.322  | 4392.686  | AF130056  | 1111.746  |
| 5767.588  | X64989    | 1089.054  | 468.705   | AK024821  | 7391.548  | 7900.056  | NM_002201 | 25274.088 |
| 1474.219  | L34409    | 22124.104 | 17008.979 | AB002340  | 1248.871  | 1598.99   | AK025047  | 1114.688  |
| 4375.812  | U12210    | 4842.023  | 2934.465  | NM_000224 | 2164.688  | 2569.552  | NM_006806 | 746.184   |
| 947.456   | Z83936    | 889.732   | 919.188   | NM_014328 | 1740.203  | 4600.146  | NM_006763 | 712.301   |
| 1488.621  | L08440    | 3335.243  | 2214.515  | NM_006414 | 3263.196  | 3318.305  | NM_006119 | 1973.027  |
| 3410.663  | M73799    | 1697.449  | 1588.22   | NM_018479 | 4819.95   | 7832.764  | NM_004465 | 722.037   |
| 2204.125  | AF086119  | 1330.14   | 1542.329  | NM_014362 | 1895.274  | 3295.719  | AK026927  | 1192.012  |
| 632.781   | NM_003782 | 808.719   | 4350.086  | NM_001752 | 5998.453  | 5386.953  | NM_014059 | 4212.366  |
| 1888.752  | NM_018228 | 755.689   | 698.499   | X64177    | 3459.508  | 499.114   | NM_001761 | 852.661   |
| 21292.643 | NM_017790 | 1337.54   | 1047.384  | NM_015994 | 2275.771  | 2884.798  | BE884341  | 1184.888  |
| 309.771   | AK000023  | 1870.122  | 1717.098  | NM_002241 | 232.029   | 479.645   | AF231997  | 517.576   |
| 697.892   | AK024351  | 1184.564  | 927.088   | NM_014065 | 1600.131  | 1893.75   | NM_002598 | 4089.478  |
| 1038.211  | AK025002  | 3092.635  | 1909.757  | NM_001695 | 1862.946  | 2011.088  | NM_020184 | 540.343   |
| 2803.954  | AK024011  | 1253.583  | 915.57    | NM_002248 | 1322.507  | 1564.591  | NM_005815 | 899.537   |
| 670.821   | AL390145  | 750.325   | 461.136   | NM_012281 | 1218.028  | 965.078   | NM_001229 | 908.322   |
| 578.877   | AF119913  | 1441.155  | 996.523   | AK025772  | 1293.44   | 2450.614  | NM_000250 | 1859.371  |
| 945.466   | NM_018340 | 778.831   | 1613.996  | NM_005509 | 801.929   | 881.802   | NM_018147 | 7721.984  |
| 5508.231  | AF049883  | 1338.144  | 934.125   | NM_152747 | 1009.455  | 863.676   | NM_018967 | 1569.594  |
| 650.702   | U10512    | 667.05    | 1438.676  | NM_017415 | 801.277   | 1103.495  | NM_001850 | 705.733   |
| 1718.804  | L10148    | 3387.909  | 3464.437  | NM_001667 | 14646.81  | 23556.373 | BC030636  | 893.772   |
| 734.043   | AK026247  | 410.488   | 926.846   | NM_000262 | 1544.071  | 1493.76   | D21064    | 296.049   |
| 3513.368  | AL110175  | 1103.45   | 593.574   | NM_017831 | 1586.001  | 991.106   | NM_002812 | 1175.198  |
| 1336.407  | AF288406  | 829.749   | 558.314   | AK022537  | 3287.87   | 3686.697  | NM_020365 | 1887.481  |
| 17245.246 | AK027156  | 19236.133 | 16144.304 | AF064597  | 799.423   | 845.834   | NM_003982 | 1172.585  |

|           |           |           |           |           |           |           |           |           |
|-----------|-----------|-----------|-----------|-----------|-----------|-----------|-----------|-----------|
| 2966.017  | AL157504  | 5047.066  | 5995.441  | NM_006345 | 1765.823  | 1452.496  | NM_002079 | 1213.315  |
| 933.828   | NM_015931 | 854.82    | 1571.27   | NM_006875 | 1070.894  | 1088.723  | NM_002112 | 4119.843  |
| 609.969   | AJ012499  | 65850.867 | 62862.262 | D87119    | 2349.198  | 1685.454  | NM_004121 | 2034.612  |
| 836.496   | AK024900  | 3103.608  | 2665.513  | AL050040  | 730.146   | 689.533   | AY007092  | 1127.323  |
| 2028.976  | AF119879  | 24040.459 | 20146.543 | NM_006556 | 6158.641  | 7640.014  | AL137605  | 11732.44  |
| 845.194   | Y10482    | 5458.251  | 3493.205  | AL133066  | 556.859   | 416.629   | NM_016261 | 850.083   |
| 7676.1    | AY007095  | 950.012   | 616.267   | AF264717  | 1236.765  | 1128.13   | NM_006519 | 497.711   |
| 810.124   | AF086244  | 2391.284  | 2380.641  | NM_012260 | 4348.623  | 4968.29   | NM_004607 | 49525.031 |
| 1374.727  | AL161992  | 5087.291  | 5358.955  | AB028992  | 330.14    | 574.743   | NM_007285 | 7934.947  |
| 692.988   | AK023910  | 1924.265  | 1050.342  | L10139    | 832.423   | 1045.708  | D14678    | 3195.516  |
| 4345.513  | AK023538  | 1469.347  | 922.644   | NM_006574 | 456.354   | 295.905   | NM_016221 | 1506.341  |
| 1248.629  | X77485    | 8646.121  | 7131.729  | AA478950  | 989.473   | 1076.744  | NM_018113 | 398.457   |
| 1038.817  | AB046765  | 3414.355  | 4117.804  | BF942101  | 1610.029  | 1251.658  | NM_005187 | 666.033   |
| 8681.051  | NM_004881 | 12276.188 | 9292.57   | BI825012  | 9105.634  | 7639.338  | NM_002199 | 1399.786  |
| 524.149   | U94903    | 1809.097  | 1699.236  | BE314182  | 5381.592  | 6219.959  | BC005219  | 2384.206  |
| 20935.047 | NM_005155 | 9418.193  | 8063.886  | AI808029  | 295.53    | 622.339   | NM_006662 | 3825.601  |
| 36446.805 | NM_019095 | 4357.528  | 2108.969  | X03225    | 2591.941  | 2348.379  | NM_004031 | 591.444   |
| 3129.876  | U80764    | 16371.835 | 10621.705 | AK097395  | 5058.679  | 5150.386  | NM_004514 | 1257.624  |
| 4051.815  | AB020684  | 16248.647 | 12815.907 | M12783    | 1039.451  | 1092.293  | NM_006163 | 790.991   |
| 8339.802  | AF077036  | 50910.887 | 36584.98  | AK091535  | 971.993   | 1258.9    | NM_001272 | 3663.462  |
| 2757.482  | NM_020421 | 1580.014  | 964.473   | AF085357  | 1843.402  | 1035.036  | NM_006199 | 27764.947 |
| 2454.622  | D61707    | 1919.077  | 1356.854  | NM_003841 | 4738.021  | 6697.805  | AV733560  | 582.32    |
| 2746.699  | AF084516  | 1145.275  | 1397.412  | NM_018002 | 1676.13   | 1304.846  | D17129    | 38068.309 |
| 1908.819  | AL137554  | 960.476   | 1241.683  | AB002340  | 1068.203  | 1163.274  | NM_003091 | 8247.139  |
| 398.209   | AJ001907  | 2426.353  | 2498.098  | NM_000224 | 2086.437  | 1598.799  | NM_004247 | 1716.535  |
| 436.167   | D17188    | 16142.835 | 11314.017 | NM_014328 | 2126.98   | 3946.271  | NM_017722 | 1589.211  |
| 984.306   | AJ001432  | 34316.383 | 38117.137 | NM_006414 | 3246.352  | 2451.417  | AL137730  | 1897.958  |
| 1444.541  | NM_020435 | 18839.744 | 20774.338 | NM_014322 | 1554.707  | 1313.379  | NM_004500 | 14352.945 |
| 3144.567  | AF052169  | 1817.789  | 3728.491  | NM_004122 | 1316.245  | 1133.572  | NM_003276 | 2822.481  |
| 802.985   | CY3Cy5    | 1435.925  | 119.168   | NM_002928 | 8444.791  | 4728.362  | NM_002157 | 42279.359 |
| 3682.875  | BF942101  | 3517.342  | 3792.999  | NM_000160 | 962.554   | 549.523   | NM_004095 | 9200.041  |
| 2496.374  | BI825012  | 19680.986 | 21778.186 | NM_003301 | 372.23    | 508.458   | NM_005147 | 834.505   |
| 418.555   | M21574    | 814.104   | 1011.933  | NM_000955 | 598.856   | 360.931   | NM_014665 | 386.923   |
| 1291.314  | BM051302  | 805.27    | 519.404   | AF305550  | 1432.306  | 2765.152  | AK023609  | 1069.704  |
| 1448.261  | BE314182  | 19902.029 | 23452.797 | U66582    | 7047.891  | 7111.053  | NM_018019 | 1528.944  |
| 1290.819  | AI808029  | 1342.146  | 2316.984  | NM_006198 | 1370.411  | 1451.53   | AK027220  | 577.197   |
| 1018.003  | AI971217  | 1102.619  | 1213.324  | NM_000849 | 2655.396  | 3928.046  | NM_018011 | 2789.188  |
| 1045.21   | X03225    | 5028.825  | 4641.133  | NM_004678 | 537.373   | 760.806   | NM_000476 | 956.197   |
| 876.321   | AK097395  | 6915.335  | 10511.279 | NM_000950 | 12382.556 | 13960.798 | AF132733  | 1587.024  |
| 14255.449 | M12783    | 2131.842  | 2588.894  | AK025772  | 1371.675  | 2150.787  | NM_001071 | 4484.792  |
| 565.448   | AK091535  | 2589.098  | 2568.076  | NM_005509 | 934.095   | 710.493   | NM_020354 | 1564.539  |
| 886.329   | AF085357  | 4054.024  | 2496.764  | NM_152747 | 874.015   | 611.612   | AF202637  | 3536.798  |
| 994.322   | NM_003841 | 5473.064  | 2306.741  | NM_017415 | 559.327   | 623.908   | NM_000026 | 14761.196 |
| 2643.548  | AF296673  | 686.805   | 560.649   | NM_001667 | 14292.328 | 12177.614 | AB033016  | 5425.237  |
| 705.994   | SR2       | 59738.32  | 47851.297 | AB046834  | 626.488   | 546.047   | D87452    | 1020.593  |
| 1770.225  | SR4       | 19348.977 | 16266.042 | AB029033  | 4291.43   | 2802.722  | AB037864  | 1864.36   |
| 1039.899  | SR6       | 2957.018  | 1870.524  | AF091034  | 1474.518  | 2110.931  | L26494    | 548.216   |
| 1855.073  | SR8       | 9384.943  | 25170.689 | NM_005301 | 10142.762 | 10483.237 | AK024322  | 802.639   |
| 6201.891  | SR10      | 30887.842 | 7888.74   | NM_016653 | 1321.508  | 1547.791  | BF382513  | 1845.674  |
| 594.2     | CY3Cy5    | 1702.738  | 129.316   | AB035124  | 1407.319  | 1469.833  | AB020713  | 6507.558  |
| 1149.82   | NM_014322 | 1319.567  | 1503.995  | AF060170  | 528.254   | 1177.419  | AK025426  | 552.665   |
| 4028.427  | NM_004122 | 2465.825  | 1511.516  | NM_004409 | 6286.257  | 6792.731  | NM_016558 | 1900.78   |
| 996.947   | NM_002928 | 14701.654 | 5348.763  | AK023397  | 1610.772  | 1333.422  | NM_007145 | 2758.962  |

|           |           |           |           |           |           |           |           |           |
|-----------|-----------|-----------|-----------|-----------|-----------|-----------|-----------|-----------|
| 5579.688  | NM_00016C | 1986.741  | 1255.148  | NM_001725 | 867.152   | 1330.777  | AK002078  | 1054.251  |
| 1044.521  | NM_003301 | 970.169   | 704.372   | NM_004079 | 9698.139  | 14178.229 | AF085837  | 1540.738  |
| 648.69    | NM_000955 | 895.092   | 609.416   | NM_002996 | 383.798   | 580.445   | NM_016115 | 1187.786  |
| 5638.284  | U27768    | 1077.384  | 805.344   | X01394    | 17654.105 | 17343.115 | NM_01495C | 1581.726  |
| 577.496   | AF305550  | 2517.181  | 3624.472  | NM_000041 | 20190.801 | 19444.729 | AL080180  | 711.03    |
| 547.932   | U66582    | 13409.659 | 10644.85  | NM_002984 | 2375.137  | 2440.393  | X89067    | 513.388   |
| 5462.308  | NM_00619E | 1972.621  | 1905.421  | AF264717  | 1212.069  | 1079.429  | AL360136  | 2788.618  |
| 547.952   | NM_003812 | 826.634   | 680.002   | NM_01226C | 3964.601  | 3185.387  | AF086259  | 780.389   |
| 419.981   | NM_000849 | 5328.957  | 6831.175  | NM_001141 | 676.819   | 514.978   | AF086328  | 1126.089  |
| 2919.57   | NM_00467E | 1338.699  | 1173.512  | NM_00001E | 4226.377  | 4567.469  | AK024196  | 741.925   |
| 4770.192  | NM_00095C | 15756.287 | 11428.706 | AB028992  | 884.146   | 740.319   | AK023753  | 1576.319  |
| 1168.517  | NM_005139 | 5440.75   | 3585.504  | NM_018479 | 4616.417  | 7007.375  | AF086441  | 7448.784  |
| 970.157   | L10139    | 1310.938  | 1843.625  | NM_014362 | 2066.217  | 3391.037  | AK027255  | 719.546   |
| 2650.279  | NM_000039 | 64875.414 | 46826.281 | NM_01830E | 1485.728  | 1425.499  | AK022487  | 3318.888  |
| 7523.416  | NM_02047C | 3464.632  | 2748.191  | NM_001832 | 9562.452  | 9116.094  | AF086087  | 2262.722  |
| 320.128   | AA478950  | 1027.843  | 501.356   | NM_017774 | 4917.468  | 5918.69   | AF147422  | 874.525   |
| 474.581   | AB029033  | 9084.989  | 11442.812 | AB037716  | 2219.83   | 1519.056  | AK000671  | 12754.024 |
| 660.407   | AF091034  | 2344.061  | 4303.844  | NM_001926 | 160.939   | 986.931   | AK094020  | 1320.944  |
| 1105.171  | NM_005301 | 19720.646 | 24250.58  | NM_016297 | 2317.423  | 3494.85   | AL137425  | 725.335   |
| 1059.134  | NM_016653 | 1992.876  | 1610.432  | NM_001752 | 6615.554  | 6377.766  | AL137637  | 444.07    |
| 1987.192  | AB035124  | 2613.82   | 1502.922  | AL137672  | 723.435   | 581.12    | AL359584  | 742.597   |
| 588.284   | AF060170  | 352.998   | 672.241   | X64177    | 3394.238  | 450.469   | AL137285  | 761.366   |
| 882.66    | NM_004409 | 7211.335  | 9232.382  | NM_015994 | 2437.738  | 2449.656  | AL137456  | 1251.282  |
| 7677.65   | AK023397  | 2199.127  | 1610.769  | NM_014065 | 1231.415  | 1528.371  | AL157489  | 835.662   |
| 859.929   | NM_001725 | 1041.092  | 1534.269  | NM_001695 | 1512.266  | 1891.281  | AL390157  | 1334.161  |
| 491.154   | NM_004079 | 16751.701 | 30543.826 | AB032956  | 648.495   | 422.915   | AK024874  | 1183.794  |
| 587.988   | NM_004633 | 620.05    | 923.539   | NM_000262 | 1459.979  | 1803.263  | AK021847  | 343.704   |
| 914.557   | X01394    | 26563.545 | 23066.896 | NM_017831 | 1310.34   | 1074.661  | AK023086  | 891.147   |
| 1244.577  | NM_000041 | 37535.043 | 52711.945 | AK022537  | 3836.592  | 4870.438  | NM_017621 | 3226.575  |
| 1893.355  | NM_002984 | 4101.83   | 4358.647  | AF064597  | 783.771   | 1005.196  | AK023574  | 709.646   |
| 549.911   | AB037752  | 5627.026  | 4775.184  | NM_006345 | 1927.274  | 1277.396  | AF131767  | 2312.707  |
| 3239.855  | AK024821  | 13830.613 | 28470.406 | NM_006875 | 893.531   | 665.847   | AF090920  | 950.309   |
| 888.587   | AB002340  | 1701.759  | 2695.958  | D87119    | 1697.801  | 1083.62   | AK021907  | 955.844   |
| 9791.044  | NM_000224 | 2618.522  | 1258.814  | NM_000849 | 3095.126  | 3822.006  | AK022320  | 974.762   |
| 46413.695 | NM_01432E | 3232.854  | 1777.526  | NM_00467E | 632.893   | 599.678   | AK022058  | 595.997   |
| 504.487   | NM_006414 | 4329.192  | 2315.123  | NM_00095C | 10235.712 | 8621.137  | AK022196  | 749.55    |
| 325.317   | NM_018479 | 9325.163  | 19705.477 | NM_005139 | 2621.988  | 2341.823  | AK024381  | 393.617   |
| 3947.476  | NM_014362 | 2722.696  | 6017.62   | L10139    | 527.027   | 478.592   | AK026503  | 733.947   |
| 539.996   | NM_01830E | 1324.652  | 1471.507  | NM_000039 | 30246.707 | 22799.338 | AK025522  | 6667.166  |
| 2678.528  | NM_001832 | 9226.774  | 11994.855 | NM_02047C | 3106.671  | 2882.248  | AK025464  | 24244.234 |
| 941.68    | NM_017774 | 8216.451  | 7028.263  | AA478950  | 840.238   | 894.616   | NM_02040E | 676.471   |
| 9826.489  | AB037716  | 3336.132  | 3520.698  | BF942101  | 1236.537  | 1325.857  | NM_00498E | 3573.863  |
| 753.799   | NM_016297 | 3286.896  | 3332.379  | BI825012  | 9813.321  | 10218.853 | AL080151  | 1297.978  |
| 997.657   | NM_001752 | 9389.129  | 7584.71   | M21574    | 414.311   | 481.279   | AL050085  | 473.307   |
| 544.272   | AL137672  | 1049.221  | 1145.474  | BM051302  | 450.13    | 517.816   | AF119911  | 6735.106  |
| 5092.715  | X64177    | 5461.556  | 696.788   | BE314182  | 5638.349  | 8545.93   | AF116656  | 2755.848  |
| 1575.037  | NM_015994 | 3387.307  | 3554.989  | AI808029  | 634.437   | 1670.399  | NM_00105C | 2357.679  |
| 446.643   | NM_014065 | 1974.483  | 1724.934  | X03225    | 2894.525  | 2263.823  | AJ001869  | 4380.948  |
| 24372.844 | NM_001695 | 3166.071  | 2128.328  | AK097395  | 4840.591  | 3681.108  | NM_005295 | 1013.15   |
| 25810.17  | NM_00224E | 2088.988  | 1674.607  | M12783    | 838.058   | 750.57    | NM_020213 | 2172.034  |
| 2800.765  | NM_012281 | 1664.687  | 931.135   | AK091535  | 774.143   | 888.337   | D17267    | 4731.7    |
| 1746.298  | AK025772  | 1887.574  | 2790.364  | AF085357  | 1915.422  | 799.5     | AB040944  | 1352.789  |
| 807.895   | NM_005509 | 2069.38   | 2493.946  | NM_003841 | 5901.981  | 16571.852 | NM_018145 | 1714.115  |

|           |           |           |           |           |           |           |           |           |
|-----------|-----------|-----------|-----------|-----------|-----------|-----------|-----------|-----------|
| 1392.6    | NM_152747 | 1551.963  | 834.406   | AF296673  | 329.364   | 749.192   | AK024326  | 316.334   |
| 3272.165  | NM_017415 | 1028.658  | 603.753   | NM_004633 | 573.558   | 420.052   | U61088    | 516.009   |
| 794.485   | NM_001667 | 15693.824 | 8144.195  | X01394    | 16598.227 | 13901.424 | AF086467  | 1116.132  |
| 617.261   | NM_000262 | 1924.458  | 2654.606  | NM_000041 | 21553.602 | 20818.672 | AL137345  | 1213.404  |
| 5445.672  | NM_017831 | 1776.386  | 1771.423  | NM_002984 | 2115.665  | 2056.218  | AK000967  | 1419.047  |
| 1075.265  | AK024393  | 423.577   | 883.882   | AB037752  | 2992.961  | 3578.047  | AK021583  | 1044.095  |
| 1079.474  | AK022537  | 5816.691  | 5641.392  | AF317425  | 1307.92   | 1719.115  | AL137442  | 2015.008  |
| 1974.772  | AF064597  | 1059.153  | 1281.197  | NM_018002 | 1659.838  | 1171.637  | AK026898  | 4318.812  |
| 5420.545  | NM_006345 | 2653.698  | 1512.121  | AK024821  | 6524.331  | 5432.222  | AK022419  | 557.289   |
| 1711.712  | NM_006875 | 1726.411  | 2015.302  | AB002340  | 937.285   | 1397.308  | NM_014624 | 26375.059 |
| 920.24    | D87119    | 1969.654  | 1717.286  | NM_000224 | 2003.94   | 1513.767  | AF086145  | 1101.604  |
| 3402.646  | AL050040  | 480.305   | 491.656   | NM_014328 | 1957.326  | 4320.151  | BC002538  | 2664.326  |
| 2132.847  | NM_006556 | 7761.196  | 5607.944  | NM_006414 | 3530.252  | 3001.751  | NM_017836 | 1533.627  |
| 444.151   | AF264717  | 1598.91   | 647.744   | NM_014322 | 1065.516  | 1434.273  | AK096584  | 10516.72  |
| 1309.592  | NM_012260 | 6662.018  | 2234.916  | NM_004122 | 2152.168  | 2638.684  | AL078636  | 469.053   |
| 2383.016  | NM_001141 | 841.596   | 743.227   | NM_002928 | 8452.07   | 6740.621  | S72917    | 716.105   |
| 1085.121  | NM_000018 | 7100.084  | 5652.396  | NM_000160 | 909.124   | 985.176   | AF076617  | 53608.602 |
| 1090.265  | L10139    | 1505.086  | 211.618   | NM_003301 | 483.464   | 792.39    | M91159    | 1770.201  |
| 849.275   | NM_020470 | 3552.384  | 4832.382  | NM_000955 | 676.353   | 729.396   | NM_014392 | 2752.102  |
| 1774.965  | AA478950  | 1689.178  | 2546.989  | U27768    | 776.753   | 484.243   | CY3Cy5    | 4106.884  |
| 3625.455  | BF942101  | 4014.538  | 6069.031  | AF305550  | 1409.579  | 1954.08   | X07696    | 2095.076  |
| 978.491   | B1825012  | 15900.443 | 15247.962 | U66582    | 5896.924  | 4855.55   | A1925826  | 3107.914  |
| 1236.985  | M21574    | 513.6     | 803.354   | S73288    | 432.904   | 495.157   | U04209    | 2397.319  |
| 899.131   | BM051302  | 952.868   | 955.754   | NM_006198 | 1741.112  | 2911.5    | Z15108    | 628.44    |
| 1607.359  | BE314182  | 17664.52  | 22719.137 | NM_003812 | 421.724   | 664.518   | AA001218  | 326.745   |
| 728.042   | A1808029  | 1211.526  | 1890.629  | NM_014065 | 1286.96   | 1804.631  | AA679391  | 660.805   |
| 5198.546  | A1971217  | 654.946   | 935.005   | NM_001695 | 1651.128  | 1836.315  | BG682146  | 1842.931  |
| 447.253   | X03225    | 4068.033  | 3745.28   | NM_002248 | 1936.237  | 2273.621  | NM_005060 | 1414.702  |
| 1375.64   | AK097395  | 5684.14   | 7684.559  | NM_012281 | 2782.806  | 2631.481  | NM_005437 | 4383.125  |
| 481.916   | M12783    | 1589.866  | 1210.77   | AK025772  | 1370.165  | 2611.947  | SR9       | 14809.611 |
| 1767.073  | AK091535  | 1967.523  | 1576.664  | NM_005509 | 913.566   | 954.447   | CY3Cy5    | 5032.804  |
| 47222.305 | AF085357  | 3165.617  | 1399.135  | NM_152747 | 990.355   | 998.116   | NM_003974 | 842.345   |
| 24469.979 | NM_003841 | 5593.044  | 2898.295  | NM_017415 | 610.687   | 629.96    | NM_006065 | 1386.524  |
| 2267.512  | AF296673  | 427.049   | 300.56    | NM_001667 | 13682.276 | 12668.479 | NM_014339 | 15016.005 |
| 538.265   | NM_018002 | 2373.939  | 1868.651  | AB046834  | 513.638   | 497.305   | NM_002288 | 1252.953  |
| 579.626   | AB002340  | 1537.727  | 2739.331  | AB029033  | 4100.735  | 3419.164  | NM_000325 | 6726.553  |
| 12420.992 | NM_000224 | 2441.735  | 2622.425  | AF091034  | 1677.216  | 2907.015  | AK000184  | 925.625   |
| 381.088   | NM_014328 | 3563.853  | 3839.172  | NM_005301 | 10252.585 | 15444.564 | AF055020  | 3331.506  |
| 754.995   | NM_006414 | 4449.757  | 4009.523  | NM_004167 | 402.73    | 800.738   | NM_006986 | 543.277   |
| 5898.882  | NM_014322 | 1728.678  | 2020.462  | NM_016653 | 1157.301  | 1447.467  | AF272043  | 1914.52   |
| 648.756   | NM_004122 | 2457.69   | 1956.704  | AB035124  | 1264.264  | 1511.244  | NM_002587 | 6626.117  |
| 2521.91   | NM_002928 | 12770.76  | 6769.405  | AF060170  | 409.665   | 472.271   | NM_002238 | 576.278   |
| 3682.531  | NM_000160 | 2010.634  | 1738.519  | NM_004409 | 6935.371  | 5346.417  | NM_004868 | 1264.931  |
| 1002.902  | NM_003301 | 731.676   | 801.4     | AK023397  | 1544.501  | 866.074   | NM_007028 | 3403.354  |
| 896.42    | NM_000955 | 999.487   | 708.632   | NM_001725 | 742.978   | 978.963   | AF130728  | 787.406   |
| 1774.219  | U27768    | 1078.152  | 825.133   | NM_004079 | 9772.981  | 16357.657 | AA831963  | 260.548   |
| 6672.772  | AF305550  | 2474.458  | 3472.864  | NM_006875 | 1077.098  | 669.974   | NM_002414 | 8062.456  |
| 13985.757 | U66582    | 11510.204 | 7960.947  | D87119    | 2147.004  | 1470.778  | NM_000355 | 783.19    |
| 2509.485  | NM_006198 | 1688.291  | 1693.083  | AL050040  | 649.382   | 816.673   | AL133580  | 1777.615  |
| 679.379   | NM_003812 | 1170.32   | 1623.231  | AL133066  | 623.676   | 785.898   | NM_014666 | 7997.498  |
| 574.084   | NM_000849 | 4610.288  | 6076.553  | AF264717  | 1109.069  | 786.792   | NM_005451 | 1777.023  |
| 2826.867  | NM_004678 | 1000.141  | 697.497   | NM_012260 | 4244.336  | 3814.057  | NM_007172 | 1219.303  |
| 1044.648  | NM_000950 | 13897.592 | 5840.942  | NM_001141 | 497.62    | 703.741   | NM_006152 | 1994.865  |

|           |           |           |           |           |           |           |           |           |
|-----------|-----------|-----------|-----------|-----------|-----------|-----------|-----------|-----------|
| 1830.316  | NM_005139 | 5340.761  | 2787.775  | NM_000018 | 4377.619  | 5105.803  | NM_013333 | 15746.356 |
| 1340.739  | AK025772  | 1916.172  | 2881.768  | AB028992  | 998.936   | 81.471    | NM_002333 | 2342.384  |
| 1643.627  | NM_005509 | 1462.901  | 1114.512  | NM_018479 | 4750.74   | 7389.051  | NM_003400 | 7114.469  |
| 800.581   | NM_152747 | 1548.576  | 1293.729  | NM_014362 | 2055.073  | 3709.08   | NM_006705 | 2209.526  |
| 1384.158  | NM_017415 | 791.85    | 1180.358  | NM_018308 | 1023.836  | 1457.221  | NM_014439 | 810.872   |
| 9117.458  | NM_001667 | 17493.824 | 12828.346 | NM_001832 | 8551.679  | 9575.31   | NM_005582 | 961.367   |
| 1374.991  | AB046834  | 568.036   | 608.091   | NM_017774 | 4979.44   | 5887.988  | NM_012266 | 1838.981  |
| 1315.561  | AB029033  | 7996.89   | 8769.452  | AB037716  | 1971.916  | 1351.571  | NM_004559 | 1080.467  |
| 754.463   | AF091034  | 2893.455  | 3497.78   | NM_001926 | 199.956   | 908.068   | X56692    | 2617.71   |
| 620.535   | NM_005301 | 21234.064 | 26528.961 | NM_016297 | 2430.033  | 2802.335  | NM_014278 | 1037.052  |
| 1440.896  | NM_016653 | 2182.102  | 2093.368  | NM_001752 | 6658.962  | 6831.962  | NM_000734 | 1110.911  |
| 6290.504  | AB035124  | 2394.532  | 1392.473  | AL137672  | 634.403   | 741.73    | NM_012331 | 2284.939  |
| 1396.963  | NM_016602 | 754.231   | 669.021   | NM_018476 | 11741.077 | 12083.131 | NM_006644 | 1495.954  |
| 487.701   | NM_004409 | 7248.083  | 6337.907  | AF220492  | 3235.793  | 3035.329  | NM_006583 | 47343.684 |
| 1750.879  | AK023397  | 2175.686  | 839.252   | X89671    | 876.62    | 1093.877  | X82693    | 4026.702  |
| 2078.76   | NM_001725 | 789.487   | 826.292   | NM_014941 | 2959.33   | 2957.105  | NM_007176 | 6035.167  |
| 748.038   | NM_004079 | 13861.011 | 15541.855 | NM_013253 | 1372.274  | 2704.865  | NM_002722 | 1134.111  |
| 865.983   | NM_000383 | 903.257   | 896.586   | NM_005895 | 2657.179  | 3333.725  | M22538    | 10702.405 |
| 1079.69   | NM_004633 | 1128.707  | 1651.158  | D82345    | 334.293   | 341.231   | NM_006028 | 568.262   |
| 190.363   | X01394    | 23019.258 | 8590.335  | NM_003814 | 639.044   | 560.935   | NM_014904 | 631.827   |
| 554.015   | NM_000041 | 33603.109 | 27721.441 | NM_002968 | 495.553   | 493.368   | AL137576  | 5480.511  |
| 1667.8    | NM_002984 | 4605.513  | 5183.379  | AB032956  | 819.074   | 489.049   | NM_018358 | 2168.904  |
| 13426.125 | AF264717  | 1740.017  | 971.764   | NM_000262 | 1871.069  | 2249.152  | NM_013356 | 543.747   |
| 416.487   | NM_012260 | 5626.267  | 3791.344  | NM_017831 | 1496.141  | 908.696   | AF131781  | 1758.02   |
| 4561.731  | NM_001141 | 1011.558  | 991.311   | AK022537  | 3936.672  | 4162.07   | NM_006516 | 7940.276  |
| 1292.98   | NM_000018 | 7714.69   | 9009.352  | AF064597  | 1014.761  | 937.111   | NM_015865 | 613.195   |
| 11425.2   | NM_018479 | 7107.41   | 10223.18  | NM_006345 | 2065.777  | 1806.509  | NM_003055 | 5881.687  |
| 1343.313  | NM_014362 | 2680.981  | 3931.603  | NM_003259 | 14653.242 | 10137.89  | NM_005075 | 545.57    |
| 1581.627  | NM_018308 | 1722.927  | 1510.072  | AL080128  | 2667.073  | 1870.952  | NM_014824 | 1312.422  |
| 367.911   | NM_001832 | 8353.888  | 10290.464 | AB037787  | 2199.63   | 1691.022  | NM_014504 | 1255.749  |
| 5149.016  | NM_017774 | 9077.701  | 9383.242  | AB033072  | 324.933   | 259.517   | NM_014408 | 2645.488  |
| 1462.587  | AB037716  | 3354.759  | 3659.354  | AB040892  | 1910.588  | 1493.251  | NM_014741 | 1123.804  |
| 1313.726  | NM_016297 | 3669.437  | 2710.746  | NM_018268 | 12449.069 | 8260.883  | AF212247  | 2758.646  |
| 8333.517  | NM_001752 | 7946.152  | 4418.422  | AF230904  | 4569.83   | 3409.091  | AF161407  | 10341.872 |
| 783.146   | AL137672  | 669.047   | 410.666   | NM_017596 | 820.156   | 757.486   | NM_014738 | 1705.473  |
| 1207.633  | X64177    | 4201.13   | 338.859   | AL157480  | 2634.877  | 3773.628  | NM_016406 | 1426.293  |
| 429.11    | NM_015994 | 3221.391  | 2767.158  | NM_014386 | 988.643   | 1023.553  | NM_018080 | 3212.283  |
| 3912.752  | NM_014065 | 1722.231  | 839.918   | NM_018110 | 1274.022  | 1031.148  | AF174605  | 553.437   |
| 918.563   | NM_001695 | 3702.44   | 3283.248  | AF312678  | 496.061   | 640.993   | NM_014453 | 6133.205  |
| 2739.718  | NM_002248 | 3859.228  | 5165.383  | NM_006253 | 1316.017  | 2072.512  | NM_005713 | 1042.474  |
| 1013.568  | NM_012281 | 1835.942  | 2693.172  | NM_003866 | 624.84    | 656.174   | AK023553  | 853.539   |
| 5023.003  | NM_080824 | 624.405   | 1082.132  | NM_018262 | 708.325   | 710.567   | NM_014600 | 726.379   |
| 3160.744  | NM_000262 | 2741.691  | 2391.708  | NM_006207 | 1159.096  | 1422.829  | NM_016733 | 954.441   |
| 657.035   | NM_017831 | 2122.622  | 1809.2    | NM_003220 | 838.749   | 1012.372  | AF181994  | 1998.444  |
| 845.042   | AK022537  | 4536.041  | 3492.208  | AF009674  | 4074.741  | 3278.083  | NM_018962 | 1809.882  |
| 5335.456  | AF064597  | 1101.147  | 737.098   | NM_000360 | 719.69    | 567.676   | AF125100  | 2385.76   |
| 2447.139  | NM_006345 | 2363.854  | 1721.444  | NM_000844 | 792.366   | 800.901   | NM_006114 | 5804.984  |
| 1651.746  | NM_006875 | 1774.842  | 1049.798  | NM_005510 | 3358.441  | 2330.281  | AF130728  | 438.623   |
| 1913.272  | D87119    | 1898.867  | 875.497   | Z36817    | 963.622   | 1082.981  | NM_001289 | 6905.45   |
| 5705.034  | AL050040  | 840.737   | 1600.941  | NM_014505 | 16846.016 | 28674.127 | NM_001131 | 6862.7    |
| 554.871   | NM_006556 | 11451.881 | 13760.366 | NM_004209 | 5553.479  | 4720.185  | AA831963  | 216.165   |
| 3772.427  | AL133066  | 695.665   | 1826.784  | NM_016162 | 1091.677  | 824.884   | X07696    | 1835.481  |
| 1973.012  | NM_000849 | 4657.917  | 6657.55   | AF130056  | 1234.854  | 1167.167  | AI925826  | 3269.983  |

|           |           |           |           |           |           |           |           |           |
|-----------|-----------|-----------|-----------|-----------|-----------|-----------|-----------|-----------|
| 3294.036  | NM_004678 | 1163.152  | 1242.416  | NM_002201 | 48834.363 | 40265.125 | U04209    | 2481.604  |
| 3015.219  | NM_000950 | 13842.947 | 10976.63  | AK025047  | 1284.972  | 925.981   | Z15108    | 759.58    |
| 3054.315  | NM_005139 | 4455.48   | 4006.055  | NM_006806 | 1053.199  | 783.542   | AA001218  | 298.412   |
| 1344.019  | L10139    | 569.194   | 626.244   | NM_006763 | 845.694   | 793.544   | AA679391  | 412.354   |
| 1849.021  | NM_000039 | 67010.695 | 51192.262 | NM_006119 | 2319.223  | 1542.702  | BG682146  | 1504.835  |
| 402.259   | NM_020470 | 3658.387  | 4994.611  | NM_004465 | 756.396   | 761.195   | NM_005060 | 1411.057  |
| 355.851   | AA478950  | 1550.682  | 1720.885  | AK026927  | 1348.196  | 1613.282  | NM_005437 | 3263.056  |
| 1362.077  | BF942101  | 4080.953  | 6834.998  | NM_014059 | 3449.196  | 2794.58   | AK022417  | 1773.962  |
| 1398.527  | BI825012  | 15926.768 | 15297.693 | NM_001761 | 1785.648  | 1925.976  | U50534    | 693.068   |
| 3182.381  | M21574    | 710.918   | 612.152   | BE884341  | 1409.933  | 1178.406  | NM_014278 | 805.584   |
| 3082.673  | BM051302  | 679.727   | 448.938   | AF231997  | 695.786   | 617.17    | NM_000734 | 698.205   |
| 844.687   | BE314182  | 15123.447 | 14165.662 | NM_002598 | 3924.064  | 2699.327  | NM_012331 | 1499.655  |
| 1080.14   | AI808029  | 1040.317  | 1289.141  | NM_020184 | 584.938   | 790.653   | NM_006644 | 1137.61   |
| 3743.98   | AI971217  | 842.033   | 669.536   | NM_005815 | 990.41    | 1038.142  | NM_006583 | 46594.305 |
| 1041.903  | X03225    | 3475.307  | 2397.377  | NM_001229 | 853.822   | 1191.73   | NM_003974 | 414.721   |
| 1569.685  | AK097395  | 6823.937  | 13403.524 | NM_000250 | 1455.538  | 1418.249  | NM_006065 | 1142.329  |
| 8633.237  | M12783    | 1565.751  | 945.656   | NM_018147 | 6539.035  | 4862.064  | NM_014339 | 13267.593 |
| 2696.428  | AK091535  | 1355.879  | 699.722   | NM_018967 | 2712.158  | 1893.698  | NM_002288 | 1849.472  |
| 731.299   | AF085357  | 3088.293  | 1151.05   | NM_001850 | 952.929   | 1177.916  | NM_000325 | 7012.739  |
| 2149.346  | AK092768  | 608.511   | 1407.896  | NM_002160 | 2127.12   | 3678.705  | AF015041  | 739.217   |
| 894.696   | NM_003841 | 6968.027  | 8458.788  | NM_005675 | 869.388   | 1120.471  | NM_002363 | 444.438   |
| 1138.614  | AF296673  | 690.025   | 1635.341  | BC030636  | 1266.295  | 752.432   | AK000184  | 648.12    |
| 393.163   | X01394    | 27668.088 | 28183.625 | NM_002812 | 1139.671  | 881.697   | AF055020  | 2547.519  |
| 1095.608  | NM_000041 | 39272.141 | 54127.594 | NM_020365 | 2012.382  | 1348.711  | AF272043  | 1341.059  |
| 327.459   | NM_002984 | 3309.727  | 4625.221  | NM_003982 | 806.785   | 838.639   | NM_002587 | 3888.887  |
| 671.872   | NM_018002 | 2486.017  | 1842.98   | NM_002079 | 1702.077  | 1485.939  | NM_004868 | 1033.662  |
| 549.784   | AK024821  | 8056.063  | 7668.273  | NM_002112 | 5275.461  | 3062.953  | NM_004669 | 1187.243  |
| 2187.325  | AB002340  | 1884.97   | 3008.405  | NM_004121 | 2134.939  | 1691.354  | NM_007028 | 3166.1    |
| 769.905   | NM_000224 | 3109.623  | 2573.489  | AY007092  | 1091.442  | 1885.824  | AF131781  | 1428.293  |
| 936.059   | NM_014328 | 3523.456  | 4212.304  | AL137605  | 16612.725 | 13169.604 | NM_006516 | 8387.344  |
| 2457.478  | NM_006414 | 4723.683  | 4347.893  | NM_016261 | 1000.325  | 1271.668  | NM_015865 | 440.32    |
| 781.83    | NM_014322 | 1411.388  | 1895.411  | NM_006519 | 494.696   | 853.303   | NM_003055 | 5587.937  |
| 9674.725  | NM_004122 | 2823.507  | 1932.635  | NM_004607 | 46816.867 | 46463.719 | NM_002414 | 6948.508  |
| 3434.252  | NM_002928 | 12771.169 | 5998.586  | NM_012076 | 534.517   | 443.598   | NM_000355 | 816.799   |
| 1282.979  | NM_000160 | 1994.28   | 1480.422  | NM_007285 | 8680.824  | 9633.938  | AL133580  | 1593.468  |
| 2454.989  | NM_003301 | 1445.817  | 2093.428  | D14678    | 5136.64   | 5120.133  | NM_014666 | 7082.83   |
| 32110.301 | NM_000955 | 4817.554  | 2467.271  | NM_016221 | 2194.61   | 1434.66   | NM_005451 | 1710.801  |
| 2161.184  | U27768    | 1433.306  | 1652.548  | NM_018113 | 634.334   | 760.554   | NM_007172 | 1346.438  |
| 728.587   | U66582    | 11477.225 | 11451.871 | NM_002199 | 1743.976  | 1263.559  | NM_006152 | 1985.966  |
| 430.966   | S73288    | 435.805   | 1655.351  | BC005219  | 2722.099  | 1766.702  | NM_013333 | 13759.052 |
| 935.85    | NM_006198 | 2284.29   | 4274.75   | NM_004268 | 881.928   | 316.752   | NM_002333 | 1614.936  |
| 341.755   | NM_003812 | 1096.299  | 1658.183  | NM_006662 | 5243.48   | 3614.061  | NM_003400 | 6681.397  |
| 705.354   | NM_014065 | 1966.675  | 2143.559  | NM_004031 | 733.531   | 697.757   | NM_006705 | 1550.293  |
| 2746.495  | NM_001695 | 2642.533  | 3034.125  | NM_004514 | 1324.34   | 863.149   | NM_014439 | 561.311   |
| 1145.641  | NM_002248 | 2033.102  | 1974.894  | NM_006163 | 1002.767  | 1394.219  | NM_005582 | 763.105   |
| 1532.887  | NM_012281 | 780.826   | 643.482   | NM_001272 | 3862.053  | 2658.418  | NM_012266 | 1452.418  |
| 681.799   | AK025772  | 1864.724  | 3082.853  | NM_006196 | 32120.904 | 16519.285 | NM_004559 | 914.214   |
| 2273.916  | NM_005509 | 1356.32   | 1323.766  | AV733560  | 657.874   | 424.724   | X56692    | 1502.31   |
| 291.303   | NM_152747 | 1614.193  | 1482.13   | D17129    | 35749.629 | 34564.055 | NM_014600 | 1995.861  |
| 489.433   | NM_017415 | 1159.35   | 1285.286  | NM_003091 | 8869.089  | 6916.145  | NM_016733 | 743.832   |
| 702.45    | NM_001667 | 15346.21  | 13574.157 | NM_004247 | 1465.661  | 1709.464  | AF181994  | 1598.854  |
| 354.484   | AB046834  | 794.396   | 459.546   | NM_017722 | 1496.972  | 1130.023  | NM_018962 | 1669.528  |
| 983.917   | AB029033  | 7475.104  | 8019.664  | AL137730  | 2234.937  | 2122.294  | AF125100  | 2608.619  |

|           |           |           |           |           |           |           |           |           |
|-----------|-----------|-----------|-----------|-----------|-----------|-----------|-----------|-----------|
| 7101.277  | AF091034  | 2443.757  | 2836.612  | NM_004500 | 12449.399 | 14376.196 | NM_006114 | 5935.802  |
| 1822.268  | NM_005301 | 21495.693 | 23813.723 | NM_003276 | 3367.791  | 2022.631  | X82693    | 5707.306  |
| 659.644   | NM_016653 | 1829.676  | 1741.749  | AL137681  | 1039.785  | 1217.244  | NM_007176 | 7231.152  |
| 1128.898  | AB035124  | 2107.627  | 1190.09   | AK025694  | 41107.82  | 38478.875 | NM_002722 | 1036.269  |
| 848.25    | AF060170  | 540.569   | 503.368   | NM_002157 | 43678.672 | 57261.031 | M22538    | 9124.624  |
| 1822.499  | AK023397  | 2007.09   | 658.268   | NM_004095 | 9691.371  | 3630.566  | NM_006028 | 736.646   |
| 1191.521  | NM_001725 | 986.642   | 2714.021  | AK023609  | 1190.041  | 549.855   | NM_014904 | 671.27    |
| 697.174   | NM_004079 | 19523.881 | 50626.652 | NM_018019 | 1423.177  | 1276.126  | AL137576  | 5293.166  |
| 1845.348  | NM_006875 | 1587.217  | 1216.949  | AK027220  | 980.7     | 744.936   | NM_018358 | 1635.867  |
| 2726.148  | D87119    | 2298.609  | 2645.121  | NM_018011 | 3636.134  | 2022.024  | NM_005060 | 1179.969  |
| 2169.334  | AL050040  | 711.782   | 1059.537  | NM_000476 | 741.269   | 641.108   | NM_005437 | 3475.413  |
| 680.645   | NM_006556 | 9016.649  | 7859.554  | AF132733  | 1567.153  | 1504.034  | AK022417  | 2514.005  |
| 10999.393 | AF264717  | 1758.985  | 1222.717  | NM_001071 | 4013.035  | 5628.663  | U50534    | 1085.699  |
| 527.292   | NM_012260 | 6485.745  | 4339.612  | NM_020354 | 1752.875  | 1602.573  | NM_014824 | 1591.359  |
| 33996.852 | NM_001141 | 736.661   | 747.541   | AF202637  | 3502.601  | 2603.874  | NM_014504 | 1210.244  |
| 450.208   | NM_000018 | 7701.96   | 11825.433 | NM_000026 | 12420.82  | 9797.64   | NM_014408 | 3580.024  |
| 4907.95   | AB028992  | 568.09    | 384.19    | AB033016  | 5855.177  | 4480.266  | NM_014741 | 1366.585  |
| 3078.422  | NM_018479 | 7430.532  | 10209.032 | D87452    | 665.056   | 769.431   | AF212247  | 3748.96   |
| 913.429   | NM_014362 | 2536.42   | 3598.855  | AB037864  | 1644.953  | 1705.662  | AF161407  | 11113.484 |
| 881.471   | NM_018308 | 1496.09   | 1350.532  | L26494    | 918.169   | 847.22    | NM_014738 | 1754.297  |
| 1375.285  | NM_001832 | 8393.647  | 8628.658  | AK024322  | 851.937   | 579.296   | NM_016406 | 1542.649  |
| 1281.233  | NM_017774 | 10968.423 | 16288.227 | BF382513  | 2281.913  | 1849.824  | NM_018080 | 3504.92   |
| 2058.97   | AB037716  | 3727.862  | 2714.852  | AB020713  | 6199.367  | 4804.564  | AF174605  | 568.405   |
| 1056.251  | NM_016297 | 3638.7    | 2478.694  | AK025426  | 872.911   | 535.798   | NM_014453 | 6204.389  |
| 734.84    | NM_001752 | 8661.182  | 8881.519  | NM_016558 | 2493.958  | 2384.421  | NM_005713 | 747.865   |
| 539.155   | AL137672  | 1193.249  | 1525.18   | NM_007145 | 4795.979  | 3588.926  | AK023553  | 848.764   |
| 354.304   | X64177    | 5401.885  | 1001.299  | AL133112  | 662.61    | 588.703   | AF272043  | 1591.699  |
| 1840.287  | NM_015994 | 3423.908  | 5576.225  | AK002078  | 1487.093  | 747.832   | NM_002587 | 4689.656  |
| 620.959   | NM_018476 | 10454.688 | 11517.066 | AF085837  | 1659.058  | 764.966   | NM_002238 | 591.782   |
| 41574.184 | AF220492  | 4646.428  | 5321.6    | AK023165  | 700.945   | 343.075   | NM_004868 | 1141.942  |
| 5770.29   | X89671    | 1849.727  | 2877.667  | NM_016115 | 1144.96   | 1498.35   | NM_004669 | 1498.38   |
| 1031.627  | NM_014941 | 3798.744  | 3313.675  | NM_014950 | 2029.522  | 1155.964  | NM_007028 | 3491.529  |
| 774.638   | NM_018372 | 5318.359  | 3776.193  | AL080180  | 821.032   | 550.257   | AF130728  | 623.546   |
| 896.87    | NM_013253 | 1800.284  | 3211.205  | X89067    | 876.539   | 463.041   | NM_001289 | 7451.095  |
| 7636.752  | NM_005895 | 4135.449  | 4883.514  | AF147376  | 763.044   | 736.424   | NM_001131 | 9016.344  |
| 909.588   | D82345    | 529.221   | 565.96    | AK027190  | 807.026   | 740.555   | X07696    | 2474.051  |
| 334.474   | NM_003814 | 1103.931  | 1251.385  | AL360136  | 2214.239  | 2473.305  | AA481015  | 583.031   |
| 39181.223 | NM_002968 | 486.157   | 714.561   | AF086259  | 714.693   | 1032.257  | AI925826  | 3499.626  |
| 36514.246 | NM_000262 | 2291.183  | 2030.282  | AF086328  | 1124.157  | 975.558   | U04209    | 2570.79   |
| 6872.103  | NM_017831 | 2516.352  | 2961.507  | AK024196  | 632.415   | 843.931   | AI393201  | 2278.503  |
| 1783.444  | AK022537  | 7408.3    | 14064.365 | AK001099  | 696.933   | 306.688   | BG682146  | 1470.668  |
| 1377.903  | AF064597  | 1347.032  | 1625.951  | AK023753  | 1596.559  | 1239.49   | NM_012266 | 1610.302  |
| 1605.041  | NM_006345 | 2228.835  | 1075.407  | AF086441  | 10176.681 | 6430.795  | NM_004559 | 1227.354  |
| 1103.392  | NM_003259 | 17411.568 | 17891.873 | AK022487  | 3314.445  | 2390.71   | X56692    | 2552.959  |
| 1121.575  | AL080128  | 4682.931  | 4870.322  | NM_014117 | 1351.67   | 1136.741  | NM_014278 | 2699.686  |
| 7328.954  | AB037787  | 2138.576  | 1994.718  | AF086087  | 1876.336  | 1210.164  | NM_000734 | 1215.347  |
| 741.998   | AB033072  | 529.467   | 731.308   | AK000671  | 25522.021 | 14587.529 | NM_012331 | 2092.876  |
| 2151.974  | AB040892  | 1736.407  | 2007.189  | AK094020  | 538.669   | 474.06    | NM_006644 | 1084.692  |
| 379.333   | NM_018268 | 11807.331 | 9119.999  | AL137425  | 895.465   | 777.895   | NM_006583 | 47254.02  |
| 2216.213  | AF230904  | 6028.593  | 4091.672  | AL359584  | 738.207   | 658.283   | NM_003974 | 777.333   |
| 11797.837 | NM_017596 | 1175.235  | 1935.17   | AL137285  | 747.658   | 724.49    | NM_006065 | 1402.16   |
| 744.491   | AL157480  | 3879.152  | 7022.185  | AL137456  | 1103.067  | 1202.028  | NM_014339 | 17899.295 |
| 618.529   | NM_014386 | 1550.93   | 1211.156  | AL157489  | 652.796   | 899.504   | NM_001495 | 652.088   |

|           |           |           |           |           |           |           |           |           |
|-----------|-----------|-----------|-----------|-----------|-----------|-----------|-----------|-----------|
| 789.065   | NM_018110 | 2151.904  | 1751.708  | AL390157  | 551.11    | 639.254   | NM_00228E | 2094.116  |
| 607.712   | AF312678  | 784.395   | 588.924   | AK024874  | 585.093   | 565.389   | NM_00441E | 4465.652  |
| 1344.589  | NM_006253 | 1993.543  | 2166.325  | AK023086  | 1542.518  | 1353.941  | NM_00062E | 5604.008  |
| 3284.985  | NM_00386E | 848.901   | 687.184   | AF241534  | 945.89    | 1026.384  | NM_00032E | 6850.21   |
| 415.364   | NM_018262 | 1080.26   | 668.566   | NM_017621 | 3704.868  | 2296.745  | AF015041  | 583.587   |
| 1374.995  | NM_006207 | 1410.489  | 1141.681  | AK023574  | 794.45    | 597.159   | AK000184  | 858.815   |
| 3073.356  | NM_00322C | 1691.887  | 1743.895  | AF083117  | 644.718   | 267.149   | AF055020  | 2287.466  |
| 716.18    | AF009674  | 5675.946  | 4076.923  | AF131767  | 2258.414  | 1459.326  | NM_014904 | 1041.739  |
| 2469.64   | NM_00036C | 1680.737  | 2254.869  | AK021907  | 924.181   | 970.137   | AL137576  | 5481.439  |
| 2264.588  | NM_00551C | 4238.552  | 5795.263  | AK022029  | 769.534   | 775.792   | NM_01835E | 1856.057  |
| 1278.599  | Z36817    | 1561.764  | 2982.519  | AK022320  | 937.415   | 891.755   | NM_01335E | 405.299   |
| 580.681   | NM_01450E | 14304.115 | 14878.675 | AK022058  | 774.683   | 861.725   | AF131781  | 1812.851  |
| 694.847   | NM_00420E | 6384.798  | 5786.743  | AK022196  | 1006.781  | 1256.098  | NM_00651E | 9662.773  |
| 2652.682  | NM_016162 | 1588.401  | 1652.682  | NM_01828C | 1027.618  | 757.791   | NM_01586E | 378.321   |
| 1250.355  | AF130056  | 2759.918  | 4841.875  | AK026671  | 1331.846  | 1457.677  | NM_00305E | 5525.609  |
| 769.04    | NM_002201 | 48474.652 | 47186.285 | AK025522  | 6387.569  | 2454.555  | NM_002414 | 7684.434  |
| 1636.286  | AK025047  | 1232.686  | 1434.352  | AK025464  | 37329.191 | 22984.645 | NM_00035E | 938.453   |
| 919.466   | NM_00680E | 2017.422  | 2377.292  | AL049962  | 1168.528  | 803.915   | AL133580  | 1832.258  |
| 831.686   | NM_006763 | 1251.687  | 2524.702  | NM_02040E | 1040.467  | 816.571   | NM_01466E | 9224.75   |
| 4477.388  | NM_006119 | 4326.947  | 4414.987  | NM_00498E | 3115.232  | 1751.049  | NM_005451 | 1932.186  |
| 692.044   | NM_00446E | 1540.913  | 1528.958  | AL080151  | 1563.516  | 1484.739  | NM_007172 | 1859.194  |
| 3231.22   | AK026927  | 2415.286  | 1902.809  | AL050085  | 647.091   | 552.967   | NM_002333 | 1901.711  |
| 940.189   | NM_01405E | 7722.284  | 7678.74   | AK024127  | 553.312   | 523.976   | NM_00340C | 6175.196  |
| 1263.921  | NM_001761 | 1541.728  | 1623.655  | AK021574  | 1991.478  | 1457.599  | NM_00670E | 1856.746  |
| 721.699   | BE884341  | 1773.022  | 1409.407  | AF119911  | 5788.023  | 2663.973  | NM_01443E | 430.068   |
| 294.94    | AF231997  | 1033.87   | 1547.414  | AF116656  | 2636.604  | 1488.465  | NM_005582 | 960.44    |
| 8434.117  | NM_00712E | 560.396   | 503.038   | NM_00105C | 2343.141  | 1394.138  | NM_014453 | 6202.778  |
| 632.655   | NM_00259E | 7286.818  | 4769.914  | AF132206  | 1164.773  | 643.797   | NM_005713 | 929.507   |
| 1216.719  | NM_020184 | 716.105   | 1149.295  | AJ001869  | 4738.531  | 2620.957  | AK023553  | 905.914   |
| 528.241   | NM_00581E | 1692.932  | 1520.53   | NM_00529E | 1494.129  | 818.143   | NM_01460C | 1610.406  |
| 865.938   | NM_00122E | 1407.583  | 841.072   | NM_020213 | 2294.617  | 1172.538  | NM_016733 | 927.189   |
| 503.295   | NM_00025C | 2305.182  | 1527.49   | D17267    | 5477.719  | 3043.429  | AF181994  | 1454.256  |
| 787.435   | NM_018147 | 14525.467 | 23079.42  | AF200341  | 627.771   | 346.955   | NM_018962 | 1342.509  |
| 770.406   | NM_018967 | 3472.684  | 5311.671  | AB040944  | 1725.209  | 1833.239  | AF125100  | 1853.942  |
| 1564.328  | NM_00185C | 1261.182  | 1526.715  | NM_01814E | 1908.573  | 1473.84   | NM_006114 | 5430.196  |
| 4415.077  | NM_00216C | 2207.45   | 3076.945  | AK024326  | 704.555   | 810.338   | X82693    | 3748.637  |
| 479.556   | NM_00567E | 1476.319  | 1431.018  | U61088    | 2713.437  | 2169.188  | M22538    | 9914.384  |
| 2079.633  | BC030636  | 2436.704  | 1101.801  | AK024538  | 530.536   | 633.312   | NM_00602E | 502.985   |
| 586.94    | D21064    | 649.397   | 494.342   | AF086467  | 1847.036  | 2374.464  | NM_012297 | 4154.199  |
| 597.523   | NM_002812 | 3676.352  | 2184.078  | AL137345  | 1154.715  | 1350.937  | AB007925  | 9822.936  |
| 304.59    | NM_02036E | 3677.112  | 2743.928  | AK000967  | 1434.876  | 1338.555  | NM_01818C | 1039.218  |
| 1098.274  | NM_003982 | 1613.503  | 3640.135  | AK021583  | 1299.019  | 1576.411  | NM_000361 | 4911.131  |
| 451.179   | NM_00207E | 2791.963  | 2753.804  | AL137442  | 2279.542  | 1603.771  | NM_00247E | 20038.477 |
| 2327.995  | NM_002112 | 8348.824  | 5758.089  | AL049281  | 947.655   | 608.33    | NM_00383E | 5152.271  |
| 695.13    | NM_004121 | 3008.229  | 3169.807  | NM_00120E | 17459.955 | 9922.506  | NM_018203 | 472.961   |
| 702.052   | AY007092  | 1983.876  | 2746.88   | AL050061  | 1457.635  | 1597.074  | NM_014244 | 734.108   |
| 44841.414 | NM_001902 | 540.503   | 302.469   | AK026898  | 4308.575  | 1785.783  | AK022417  | 1470.86   |
| 442.071   | AL137605  | 18362.5   | 9135.097  | NM_006637 | 999.219   | 639.833   | U50534    | 758.625   |
| 1049.76   | NM_016261 | 1613.493  | 1537.638  | AK022419  | 714.89    | 413.891   | NM_014824 | 1336.901  |
| 405.638   | NM_00651E | 933.117   | 415.219   | NM_014624 | 22744.707 | 21218.48  | NM_014504 | 1684.045  |
| 1162.847  | NM_004607 | 59265.398 | 34104.547 | AF086145  | 850.875   | 749.122   | NM_01440E | 4587.494  |
| 1257.374  | NM_01207E | 1364.172  | 1174.674  | BC002538  | 2161.69   | 1462.649  | NM_014741 | 1857.705  |
| 511.239   | D14678    | 6391.71   | 9766.968  | AK022355  | 920.759   | 300.331   | AF212247  | 3123.241  |



|           |           |           |           |           |           |           |           |           |
|-----------|-----------|-----------|-----------|-----------|-----------|-----------|-----------|-----------|
| 901.949   | NM_016221 | 5436.35   | 6650.093  | NM_017836 | 1664.88   | 1814.736  | AF161407  | 10181.5   |
| 5613.514  | NM_018113 | 1112.096  | 2564.703  | AK096584  | 14755.838 | 10611.048 | NM_014738 | 1780.502  |
| 3961.888  | NM_005187 | 2174.22   | 2237.867  | AL078636  | 966.899   | 657.539   | NM_016406 | 1512.264  |
| 576.105   | U73377    | 4997.139  | 6161.753  | AK022382  | 621.521   | 364.851   | NM_018080 | 3534.425  |
| 685.888   | NM_002199 | 1760.491  | 2380.656  | S72917    | 619.006   | 531.857   | NM_003821 | 1453.953  |
| 1108.044  | BC005219  | 5370.022  | 4684.144  | AF076617  | 57162.32  | 41300.59  | NM_017692 | 4332.061  |
| 1375.482  | NM_004268 | 953.502   | 750.055   | M91159    | 463.666   | 374.742   | NM_003975 | 1745.97   |
| 3867.972  | NM_006662 | 5506.349  | 5041.73   | AK025129  | 973.51    | 258.685   | NM_004834 | 3558.665  |
| 1286.17   | NM_004031 | 1103.096  | 1918.688  | NM_014392 | 2453.368  | 1503.539  | AK024747  | 5965.378  |
| 1161.736  | NM_004514 | 3643.562  | 2299.396  | AK023291  | 4409.709  | 3951.137  | NM_006390 | 1249.73   |
| 400.893   | NM_006163 | 2152.871  | 4175.58   | BF541820  | 457.954   | 504.205   | NM_003580 | 2983.133  |
| 481.221   | NM_001272 | 7668.992  | 7445.643  | CY3Cy5    | 3349.123  | 141.845   | NM_006506 | 898.527   |
| 2261.047  | NM_006196 | 55520.879 | 57648.5   | X07696    | 2055.414  | 1916.707  | NM_003235 | 5787.899  |
| 605.951   | AV733560  | 1199.815  | 972.707   | AI925826  | 3870      | 4331.927  | AB042562  | 1005.099  |
| 507.48    | D17129    | 53267.16  | 47391.105 | U04209    | 2593.873  | 2616.917  | NM_016009 | 2667.407  |
| 782.816   | NM_003091 | 15292.233 | 8646.289  | BG682146  | 556.113   | 784.727   | NM_002378 | 2254.538  |
| 1420.129  | NM_004247 | 3921.932  | 1919.383  | NM_005060 | 785.327   | 719.42    | NM_001364 | 655.238   |
| 1026.913  | NM_017722 | 2313.467  | 743.5     | NM_005437 | 3108.708  | 1457.448  | NM_017431 | 722.922   |
| 15800.457 | AL137730  | 2541.652  | 1222.261  | CY3Cy5    | 1922.992  | 93.058    | NM_006097 | 4890.741  |
| 1143.74   | NM_003276 | 8018.129  | 5656.899  | NM_003974 | 677.572   | 1178.353  | NM_006113 | 2449.792  |
| 578.167   | AL137681  | 2546.501  | 1861.675  | NM_006065 | 1785.916  | 2141.59   | NM_015313 | 2871.809  |
| 2258.968  | NM_002157 | 52302.59  | 60584.938 | NM_014339 | 26304.479 | 26877.512 | AK022287  | 2265.474  |
| 843.941   | NM_004095 | 19921.773 | 11176.841 | NM_001495 | 632.241   | 808.838   | NM_015897 | 1399.13   |
| 863.294   | NM_014365 | 897.722   | 1525.978  | NM_002288 | 2322.619  | 822.319   | AF177473  | 3557.081  |
| 578.935   | NM_005147 | 3563.484  | 2763.286  | NM_004416 | 6139.844  | 11434.068 | NM_000546 | 1389.579  |
| 11408.672 | NM_014665 | 4209.833  | 4341.19   | NM_000628 | 6171.584  | 10834.802 | AB018257  | 1333.112  |
| 409.087   | AK023609  | 1960.484  | 1870.861  | NM_000325 | 5979.265  | 6095.81   | NM_002708 | 7287.202  |
| 1424.379  | NM_018019 | 2482.062  | 2477.648  | AF015041  | 633.455   | 569.225   | AK001059  | 993.332   |
| 464.714   | AK027220  | 1345.289  | 1857.935  | AK000184  | 684.658   | 736.901   | NM_007282 | 997.339   |
| 1121.024  | NM_018011 | 4839.208  | 4752.536  | AF055020  | 2825.862  | 1765.058  | NM_017770 | 682.534   |
| 15208.54  | NM_000476 | 1318.311  | 2713.263  | AF272043  | 683.465   | 409.198   | NM_017610 | 753.249   |
| 980.571   | AF132733  | 3515.08   | 3287.177  | NM_002587 | 3271.699  | 1658.389  | AK025133  | 17172.188 |
| 539.748   | NM_001071 | 7084.693  | 2237.457  | NM_004868 | 969.633   | 862.58    | AB020704  | 771.694   |
| 39240.625 | NM_006187 | 465.43    | 549.166   | NM_002414 | 10253.999 | 13450.476 | NM_004087 | 2807.153  |
| 557.019   | NM_020354 | 3746.255  | 3995.442  | NM_000355 | 967.075   | 1066.484  | NM_018700 | 788.675   |
| 1906.775  | AF202637  | 7445.11   | 4863.145  | AL133580  | 1684.703  | 1544.257  | NM_000119 | 4852.173  |
| 2987.098  | NM_000026 | 24678.891 | 14129.57  | NM_014666 | 9968.44   | 8177.012  | NM_001065 | 7304.554  |
| 444.074   | AB033016  | 12217.104 | 8394.112  | NM_005451 | 1881.536  | 1930.619  | AK027100  | 792.83    |
| 567.083   | D87452    | 1268.657  | 530.928   | NM_007172 | 1805.239  | 1230.033  | NM_003622 | 1067.994  |
| 396.113   | AB037864  | 3377.677  | 2320.064  | NM_006152 | 2722.047  | 2462.026  | NM_001774 | 2734.208  |
| 1650.641  | L26494    | 1799.789  | 1407.225  | NM_013333 | 15149.883 | 18643.795 | NM_013339 | 1223.854  |
| 3134.957  | AK024322  | 1199.06   | 1306.316  | NM_002333 | 1971.957  | 2745.394  | NM_001491 | 1779.631  |
| 1952.165  | BF382513  | 4232.875  | 4816.6    | NM_003400 | 8065.636  | 12706.252 | AK026541  | 1072.356  |
| 3302.266  | AB020713  | 10249.254 | 4065.935  | NM_006705 | 2100.569  | 1778.84   | NM_005899 | 7735.686  |
| 514.886   | AK025426  | 1352.961  | 1263.974  | NM_005582 | 836.391   | 631.835   | D42055    | 5498.288  |
| 613.035   | NM_016558 | 5030.054  | 10163.418 | X56692    | 2504.189  | 1667.32   | AL137349  | 1308.671  |
| 842.461   | NM_007145 | 7452.7    | 4101.024  | NM_014278 | 621.898   | 957.94    | NM_003339 | 601.134   |
| 2042.483  | AL133112  | 1001.932  | 992.813   | NM_000734 | 1400.043  | 845.792   | NM_016476 | 17640.34  |
| 1844.591  | AK002078  | 2129.414  | 1681.982  | NM_012331 | 1738.352  | 1569.015  | NM_015902 | 914.512   |
| 3754.434  | AF085837  | 2569.08   | 1426.751  | NM_006583 | 68492.875 | 1358.193  | NM_020155 | 1659.591  |
| 315.772   | AK023165  | 1074.878  | 664.607   | X82693    | 6841.44   | 5579.106  | BE874471  | 2267.248  |
| 613.71    | NM_016115 | 1964.857  | 2825.339  | NM_007176 | 8139.625  | 6130.283  | NM_006121 | 1370.477  |
| 666.667   | NM_014950 | 3721.829  | 2434.441  | NM_002722 | 1468.134  | 1492.084  | AK023520  | 3386.081  |

|           |           |           |           |           |           |           |           |           |
|-----------|-----------|-----------|-----------|-----------|-----------|-----------|-----------|-----------|
| 11045.034 | AL080180  | 2287.993  | 1874.55   | NM_005039 | 2173.224  | 697.495   | NM_004693 | 676.363   |
| 709.472   | X89067    | 2693.915  | 2811.305  | M22538    | 10514.639 | 11647.744 | NM_007211 | 2646.228  |
| 362.371   | AF147376  | 1304.431  | 1636.812  | NM_014904 | 1173.214  | 1181.693  | AB011152  | 1422.589  |
| 2795.535  | AK027190  | 1444.329  | 1119.178  | AL137576  | 808.729   | 539.453   | NM_014956 | 5195.898  |
| 722.889   | AL360136  | 4160.404  | 4326.978  | NM_018358 | 1642.882  | 1338.139  | AB014592  | 821.587   |
| 894.986   | AF086259  | 1033.398  | 554.015   | AF131781  | 1458.079  | 2301.903  | NM_016952 | 1278.117  |
| 2475.127  | AF086369  | 713.485   | 452.162   | NM_006516 | 9838.179  | 4306.09   | NM_001654 | 2449.715  |
| 5546.763  | AF086328  | 1927.677  | 1297.885  | NM_003055 | 3135.799  | 2698.344  | NM_007147 | 1320.43   |
| 644.953   | AF086427  | 973.613   | 871.037   | NM_014824 | 1530.623  | 1013.917  | X65463    | 996.449   |
| 1498.414  | AK024196  | 1145.109  | 1314.353  | NM_014504 | 1627.783  | 2004.332  | AK024418  | 790.704   |
| 970.163   | AK023753  | 2394.752  | 4165.457  | NM_014408 | 4013.074  | 5381.087  | NM_003367 | 1114.861  |
| 198.674   | AF086441  | 9825.357  | 9999.204  | NM_014741 | 1453.776  | 1647.06   | NM_005194 | 2291.351  |
| 5666.845  | AK027255  | 1162.769  | 1891.44   | AF212247  | 3513.993  | 3517.323  | AB002296  | 727.227   |
| 1051.284  | AK022487  | 5790.509  | 3419.441  | AF161407  | 14121.099 | 10239.625 | NM_014315 | 1383.686  |
| 567.091   | NM_014117 | 3118.034  | 3959.657  | NM_014738 | 1652.581  | 1658.298  | NM_012087 | 868.466   |
| 3221.965  | AF086087  | 3633.22   | 1975.754  | NM_016406 | 1311.653  | 2338.069  | AF165520  | 608.427   |
| 1347.61   | AF075091  | 737.129   | 683.002   | NM_018080 | 3779.272  | 3788.724  | AK026072  | 684.627   |
| 848.957   | AK000671  | 42064.715 | 37864.359 | NM_014453 | 7395.566  | 4689.27   | NM_015679 | 2511.144  |
| 9480.569  | AK094020  | 2065.346  | 2432.71   | AK023553  | 692.208   | 646.982   | AF299118  | 50515.523 |
| 1891.591  | AL137425  | 2709.216  | 3147.117  | NM_014600 | 848.133   | 401.518   | AK025353  | 11541.325 |
| 1528.607  | AL137637  | 789.844   | 1466.052  | NM_016733 | 902.799   | 922.457   | AK056896  | 24796.109 |
| 2179.129  | AL359584  | 1716.893  | 2581.375  | AF181994  | 1341.54   | 990.013   | AK022763  | 13980.647 |
| 1433.914  | AL137285  | 1399.854  | 1868.068  | NM_018962 | 936.053   | 776.492   | AF288207  | 16268.001 |
| 2557.87   | AL137456  | 2639.197  | 3748.902  | NM_006114 | 6101.354  | 4763.394  | AL137343  | 3733.074  |
| 268.691   | AL157489  | 1330.165  | 1247.148  | AF130728  | 602.944   | 736.856   | NM_004541 | 15439.007 |
| 1317.34   | AL390157  | 1165.43   | 1528.546  | NM_001289 | 8352.624  | 10056.043 | NM_006830 | 18971.096 |
| 1362.875  | AK024874  | 925.441   | 1289.739  | NM_001131 | 22282.191 | 17079.414 | AK026414  | 2295.855  |
| 1140.644  | AK021847  | 1226.53   | 1208.372  | BG752013  | 375.128   | 1698.077  | NM_004074 | 10943.489 |
| 6521.295  | AK023086  | 2800.835  | 3478.005  | AA481015  | 1214.635  | 1690.533  | NM_002626 | 8383.977  |
| 4190.188  | AF241534  | 932.49    | 1368.892  | AI925826  | 2341.432  | 3439.013  | NM_018436 | 6526.581  |
| 993.716   | NM_017621 | 7251.492  | 8717.942  | U04209    | 2411.958  | 2610.098  | AF157115  | 2979.81   |
| 1220.27   | AK023574  | 2173.08   | 3200.872  | BG682146  | 1280.902  | 1647.441  | AJ223353  | 4262.407  |
| 720.537   | AF083117  | 897.207   | 1433.511  | NM_005060 | 1291.97   | 978.386   | NM_012241 | 3756.625  |
| 7455.594  | AF131767  | 4930.2    | 8038.913  | NM_005437 | 2940.147  | 1545.841  | NM_018486 | 2322.376  |
| 2013.101  | AF211976  | 650.094   | 873.296   | AK022417  | 2292.591  | 1911.691  | NM_005324 | 13621.807 |
| 649.051   | AK022320  | 1583.123  | 2391.635  | U50534    | 898.081   | 926.436   | AL080201  | 8247.242  |
| 2073.948  | AK022058  | 891.372   | 585.496   | NM_014278 | 964.74    | 1348.266  | NM_015363 | 1094.252  |
| 7481.329  | AK022196  | 1227.733  | 1186.913  | NM_000734 | 1600.438  | 1024.541  | NM_001806 | 5476.951  |
| 5162.286  | AK022429  | 662.077   | 636.435   | NM_012331 | 2131.378  | 2345.28   | AB040941  | 3265.762  |
| 796.983   | NM_018280 | 1092.549  | 1307.907  | NM_006644 | 1753.383  | 3782.643  | AL137241  | 836.612   |
| 906.918   | AK025763  | 589.648   | 678.667   | NM_006583 | 66557.844 | 2638.552  | AB037742  | 1547.411  |
| 642.627   | AK024381  | 621.709   | 954.779   | NM_003974 | 864.239   | 1423.068  | AB007890  | 1861.896  |
| 1848.787  | AK026503  | 974.067   | 1684.207  | NM_006065 | 2036.784  | 3135.906  | NM_020411 | 40668.648 |
| 2180.693  | AK026671  | 1436.778  | 2063.057  | NM_001495 | 1464.252  | 1564.638  | AF275800  | 1271.779  |
| 10057.28  | AK025522  | 12710.409 | 5185.918  | NM_002288 | 1719.149  | 795.861   | AL359605  | 1484.88   |
| 1814.316  | AK025464  | 55359.785 | 56837.152 | NM_004416 | 5594.756  | 10641.736 | AB020633  | 2410.981  |
| 1530.692  | AL049962  | 2579.111  | 3047.889  | NM_000628 | 6988.614  | 11532.372 | AK025445  | 4326.823  |
| 3590.531  | NM_004988 | 8516.379  | 9199.78   | NM_000325 | 3639.211  | 3236.46   | AL357200  | 1550.436  |
| 649.554   | AL080151  | 2069.29   | 2190.226  | AF015041  | 609.348   | 566.373   | NM_017727 | 9328.449  |
| 6638.486  | AK024127  | 826.913   | 1315.111  | AF055020  | 4675.741  | 2386.99   | NM_018319 | 2574.172  |
| 1324.955  | AK024243  | 570.183   | 1071.942  | AF272043  | 1286.06   | 1368.237  | AL359559  | 651.978   |
| 916.351   | AK021574  | 2129.66   | 1972.024  | NM_002587 | 7926.08   | 4859.249  | AY008301  | 639.247   |
| 707.038   | AF119911  | 12745.685 | 13692.992 | NM_004868 | 939.007   | 1074.408  | AK021714  | 1062.362  |

|           |           |           |           |           |           |           |           |           |
|-----------|-----------|-----------|-----------|-----------|-----------|-----------|-----------|-----------|
| 1190.738  | AF116656  | 4807.832  | 5127.41   | NM_004669 | 1106.466  | 757.3     | NM_020314 | 3091.086  |
| 1812.102  | NM_001050 | 4350.093  | 6575.549  | NM_007028 | 3042.589  | 2865.584  | AK022972  | 2080.615  |
| 1059.524  | AF132206  | 2181.427  | 3061.425  | AF131781  | 1666.16   | 3650.957  | AK025996  | 2836.057  |
| 2454.676  | AJ001869  | 5809.09   | 6459.003  | NM_006516 | 10884.179 | 5630.57   | AF088015  | 483.656   |
| 5457.623  | NM_005295 | 2588.067  | 1966.761  | NM_015865 | 592.796   | 1117.067  | AK026711  | 1294.43   |
| 6546.49   | NM_020213 | 4398.667  | 4684.507  | NM_003055 | 6554.061  | 7161.664  | NM_017864 | 1137.694  |
| 12354.419 | D17267    | 7394.129  | 5491.977  | NM_005075 | 358.818   | 646.841   | NM_004869 | 837.049   |
| 694.519   | NM_018145 | 4242.773  | 3745.24   | NM_002414 | 10612.792 | 14887.133 | AF136408  | 2891.03   |
| 2391.135  | AK024326  | 1176.462  | 608.698   | NM_000355 | 1484.271  | 1401.994  | AJ011595  | 1803.718  |
| 2763.519  | U61088    | 732.429   | 1038.102  | AL133580  | 1668.111  | 2285.564  | AJ011602  | 450.658   |
| 2663.907  | AF086467  | 2935.163  | 2812.173  | NM_014666 | 10871.654 | 10436.731 | AJ002787  | 2982.421  |
| 973.967   | AL137345  | 1772.878  | 1992.266  | NM_005451 | 2255.502  | 2458.619  | Z70764    | 1466.063  |
| 840.545   | AK000967  | 2325.89   | 2343.038  | NM_007172 | 1860.365  | 1442.351  | Z83948    | 1251.807  |
| 2026.835  | AK021583  | 2200.255  | 2262.698  | NM_006152 | 2458.234  | 1792.892  | M25785    | 926.724   |
| 1823.045  | AL137442  | 2863.101  | 3466.61   | NM_013333 | 15187.923 | 16777.59  | M32443    | 2431.674  |
| 5269.383  | AL049281  | 2032.959  | 2462.715  | NM_002333 | 1850.234  | 2262.866  | M73048    | 856.116   |
| 1919.291  | NM_001208 | 35402.477 | 37813.387 | NM_003400 | 1682.277  | 1845.524  | D16908    | 926.245   |
| 876.115   | AL050061  | 1005.042  | 2080.701  | NM_006705 | 1765.27   | 1880.112  | D55639    | 322.882   |
| 1330.357  | AL050206  | 996.798   | 1375.341  | NM_014439 | 765.492   | 700.992   | D16477    | 948.115   |
| 1330.207  | AK026898  | 7931.238  | 3302.971  | NM_005582 | 1134.804  | 1025.667  | AK024759  | 540.445   |
| 955.06    | NM_006637 | 1426.369  | 1123.549  | NM_012266 | 1338.682  | 1173.924  | AK025041  | 1339.063  |
| 612.223   | AK022419  | 1277.836  | 1607.693  | NM_004559 | 866.221   | 632.186   | AK022309  | 693.138   |
| 879.509   | AJ251832  | 533.287   | 1610.544  | X56692    | 1973.61   | 1730.623  | AK000063  | 1006.444  |
| 10104.072 | NM_014624 | 47645.348 | 62381.652 | NM_014600 | 796.639   | 932.638   | AK000949  | 575.607   |
| 719.626   | NM_013936 | 977.174   | 1082.71   | NM_016733 | 977.097   | 2351.259  | AK027068  | 603.608   |
| 1569.174  | AF086145  | 2481.792  | 3583.886  | AF181994  | 1717.163  | 1313.512  | AK000974  | 771.777   |
| 526.717   | BC002538  | 5418.772  | 4386.603  | NM_018962 | 1578.576  | 1329.963  | AK025051  | 1227.329  |
| 8152.073  | AK022355  | 1016.515  | 1050.324  | AF125100  | 1937.977  | 1968.849  | AK024553  | 28881.424 |
| 1070.852  | Z29070    | 789.278   | 842.166   | NM_006114 | 7442.728  | 5289.397  | AK024930  | 714.36    |
| 430.067   | AL078636  | 1627.254  | 1585.606  | X82693    | 8002.446  | 7131.305  | AF143879  | 5934.364  |
| 1099.536  | AK022382  | 472.957   | 530.254   | NM_007176 | 8075.358  | 6636.534  | AK024621  | 3480.719  |
| 3202.761  | AF147362  | 528.175   | 816.099   | NM_002722 | 1431.847  | 1697.342  | AL157449  | 3760.126  |
| 756.685   | S72917    | 967.075   | 872.721   | M22538    | 7185.798  | 6378.929  | AK025525  | 1534.498  |
| 2042.142  | AF076617  | 57624.281 | 59441.313 | AL137576  | 4910.21   | 3442.164  | AK001134  | 1730.745  |
| 6365.143  | NM_014392 | 5324.748  | 6142.75   | NM_018358 | 1995.358  | 1880.012  | NM_018233 | 10745.87  |
| 701.75    | AK023291  | 5838.068  | 9082.763  | NM_016321 | 454.71    | 399.915   | AV740891  | 963.767   |
| 1560.036  | CY3Cy5    | 2538.104  | 136.832   | NM_005060 | 1957.605  | 1881.461  | AF143329  | 595.474   |
| 1444.11   | X07696    | 3594.102  | 1969.218  | NM_005437 | 3945.022  | 2594.39   | AF090916  | 817.489   |
| 3203.542  | AI925826  | 6458.297  | 3144.096  | AK022417  | 1803.662  | 2181.856  | AK026860  | 5359.996  |
| 2867.48   | Z15108    | 1067.802  | 1000.085  | U50534    | 943.437   | 598.436   | AK024211  | 736.194   |
| 1259.498  | M55284    | 512.88    | 726.865   | NM_014824 | 1488.041  | 1602.622  | NM_014895 | 761.209   |
| 465.995   | AA001218  | 387.327   | 982.249   | NM_014408 | 4718.758  | 6218.765  | AK023435  | 1108.335  |
| 5681.714  | AA679391  | 870.425   | 917.753   | NM_014741 | 1525.644  | 1788.62   | AK022159  | 2561.704  |
| 2053.757  | BG682146  | 3603.919  | 7560.586  | AF161407  | 12702.545 | 8515.407  | U25750    | 1944.249  |
| 5725.897  | AA884709  | 1027.619  | 1317.438  | NM_014738 | 1435.728  | 1392.222  | AK023691  | 1339.649  |
| 1804.206  | NM_005060 | 2855.458  | 3291.531  | NM_016406 | 1211.971  | 1598.04   | AK026744  | 419.456   |
| 1514.329  | NM_005437 | 8322.012  | 8406.611  | NM_018080 | 3148.933  | 2979.107  | AK002105  | 772.008   |
| 1764.363  | SR7       | 6459.876  | 61111.023 | NM_014453 | 9829.943  | 8585.205  | NM_005234 | 5396.596  |
| 16606.369 | SR9       | 26431.535 | 7757.75   | NM_005713 | 1927.96   | 1994.117  | BC023536  | 1465.499  |
| 2509.979  | CY3Cy5    | 2526.036  | 129.832   | AK021951  | 579.518   | 1765.737  | NM_001803 | 3744.583  |
| 5745.405  | NM_003974 | 1107.39   | 2161.689  | AK023553  | 996.833   | 916.225   | NM_006233 | 7378.129  |
| 1525.591  | NM_006065 | 2118.462  | 1959.21   | AF272043  | 2072.452  | 2206.804  | AK000992  | 621.859   |
| 331.171   | NM_014339 | 30967.83  | 23744.506 | NM_002587 | 9209.815  | 7457.926  | L23544    | 16271.881 |

|           |           |           |           |           |           |           |           |           |
|-----------|-----------|-----------|-----------|-----------|-----------|-----------|-----------|-----------|
| 800.471   | NM_00228E | 1739.728  | 302.115   | NM_00223E | 645.939   | 664.389   | NM_01902C | 1961.318  |
| 1930.572  | NM_00062E | 8046.422  | 7689.41   | NM_00486E | 1225.587  | 1275.943  | NM_016474 | 947.883   |
| 1298.796  | NM_00032E | 8181.74   | 12116.324 | NM_00466E | 1495.727  | 963.992   | NM_00091C | 820.291   |
| 2383.145  | AF015041  | 1177.591  | 1319.993  | NM_00702E | 3363.095  | 3415.534  | AF086001  | 16608.789 |
| 645.248   | NM_00236E | 533.001   | 722.603   | AF130728  | 551.066   | 633.658   | AL117560  | 3643.167  |
| 655.021   | AK000184  | 1168.008  | 1680.603  | NM_004987 | 746.802   | 543.139   | M24749    | 808.707   |
| 1383.58   | AF055020  | 4157.375  | 3806.7    | NM_00128E | 8316.493  | 13030.25  | NM_005831 | 16001.798 |
| 1219.484  | NM_00698E | 973.108   | 1049.164  | BG752013  | 499.85    | 857.312   | NM_00585C | 47714.922 |
| 1709.123  | AF272043  | 4329.961  | 8739.912  | AI925826  | 3833.649  | 4008.174  | NM_000554 | 12906.04  |
| 3533.667  | NM_002587 | 8040.468  | 9977.881  | U04209    | 1890.199  | 1458.032  | AF009317  | 2278.457  |
| 2053.988  | NM_00223E | 1128.432  | 5040.144  | AI393201  | 1772.296  | 1356.477  | AK026583  | 1914.659  |
| 4539.374  | NM_00486E | 2017.246  | 4586.98   | M55284    | 358.443   | 628.09    | AF218031  | 2871.968  |
| 1273.34   | NM_001131 | 24835.402 | 22379.166 | AA001218  | 644.72    | 577.175   | AF210650  | 2304.917  |
| 962.276   | NM_002414 | 9802.265  | 10378.921 | AA679391  | 828.539   | 878.473   | NM_01835E | 2379.28   |
| 406.926   | NM_00035E | 1032.717  | 1894.084  | BG682146  | 2131.937  | 4868.001  | AF085896  | 877.872   |
| 778.539   | AL133580  | 2264.275  | 2681.75   | NM_01226E | 2276.053  | 2746.307  | X74613    | 11336.966 |
| 6583.671  | NM_01466E | 9267.9    | 3253.787  | NM_00455E | 1254.61   | 1220.018  | AF075080  | 16075.419 |
| 1967.87   | NM_005451 | 2164.141  | 1109.696  | X56692    | 2907.151  | 2488.517  | Y13897    | 1293.373  |
| 792.916   | NM_00717E | 1685.708  | 801.332   | NM_01427E | 1266.524  | 1490.347  | AL133577  | 3393.902  |
| 1365.737  | NM_00615E | 2750.5    | 770.852   | NM_000734 | 1951.184  | 1502.49   | AK025378  | 1592.75   |
| 3120.309  | NM_01333E | 16515.719 | 8533.7    | NM_012331 | 2322.318  | 3199.758  | NM_00047E | 1105.604  |
| 1485.972  | NM_00233E | 3939.578  | 3585.494  | NM_006644 | 2213.073  | 5701.512  | AF038199  | 2885.844  |
| 378.446   | NM_00340C | 7557.512  | 8435.325  | NM_00658E | 73133.398 | 5100.088  | CY3Cy5    | 3931.476  |
| 1505.099  | NM_00670E | 2408.721  | 2942.051  | NM_003974 | 1503.004  | 2186.616  | BE908993  | 6909.396  |
| 4276.204  | NM_01443E | 1022.328  | 1594.587  | NM_00606E | 2202.262  | 3653.762  | AB012701  | 1016.106  |
| 1569.418  | NM_00558E | 1200.18   | 2168.445  | NM_01433E | 36577.984 | 53665.547 | M61156    | 788.488   |
| 3706.915  | NM_01226E | 2687.109  | 3579.13   | NM_00149E | 1158.528  | 1670.334  | M55040    | 406.926   |
| 10411.715 | NM_00455E | 1987.969  | 2094.254  | NM_00228E | 1673.597  | 788.316   | AW009739  | 1499.448  |
| 1900.333  | X56692    | 4381.254  | 4600.646  | NM_00441E | 3666.998  | 4551.733  | BC036805  | 5214.976  |
| 2735.858  | NM_01447E | 770.091   | 818.571   | NM_00062E | 4413.531  | 5133.935  | Z74615    | 6148.696  |
| 5427.311  | NM_006644 | 2813.471  | 5394.813  | NM_00032E | 6108.707  | 4745.22   | X03884    | 2658.097  |
| 1153.872  | NM_00658E | 57892.609 | 2286.304  | AF015041  | 1353.328  | 1396.958  | U36759    | 1805.442  |
| 986.229   | X82693    | 7285.963  | 4314.603  | AK000184  | 1088.29   | 841.729   | X91625    | 1264.203  |
| 1375.819  | NM_00717E | 6678.751  | 2058.602  | AF055020  | 6892.334  | 4902.296  | AF004231  | 560.623   |
| 6076.083  | NM_00272E | 1254.315  | 635.211   | NM_00698E | 734.155   | 429.096   | AF001862  | 831.157   |
| 512.507   | NM_00602E | 1436.743  | 2207.566  | NM_014904 | 611.653   | 572.697   | SR6       | 2081.378  |
| 990.638   | NM_014904 | 992.239   | 817.994   | AL137576  | 6131.112  | 5325.088  | SR8       | 6365.827  |
| 1198.866  | AL137576  | 8373.079  | 8424.246  | NM_01835E | 2607.967  | 3099.372  | SR10      | 25320.449 |
| 2526.076  | NM_01835E | 4029.078  | 6587.753  | NM_016321 | 563.451   | 524.579   | CY3Cy5    | 3223.302  |
| 4195.817  | NM_01335E | 610.124   | 791.759   | NM_01335E | 513.078   | 592.136   | NM_00412E | 395.82    |
| 14634.753 | NM_00507E | 852.42    | 1133.297  | AF131781  | 2083.947  | 4568.892  | U87460    | 3911.736  |
| 447.247   | NM_006841 | 658.213   | 546.217   | NM_00651E | 12743.375 | 7304.527  | NM_003617 | 993.551   |
| 708.108   | NM_014824 | 1454.772  | 931.603   | NM_01586E | 680.474   | 815.039   | NM_00412E | 710.599   |
| 1999.17   | NM_014504 | 1518.991  | 789.371   | NM_00305E | 7547.797  | 7995.029  | NM_00082E | 3554.354  |
| 555.466   | NM_01440E | 4961.045  | 2692.034  | NM_00507E | 456.182   | 666.73    | NM_004414 | 1421.702  |
| 2773.51   | NM_014741 | 2421.672  | 1273.929  | NM_006841 | 503.587   | 691.139   | NM_003317 | 2118.493  |
| 2275.682  | AF212247  | 4174.158  | 2316.543  | NM_002414 | 11702.2   | 16817.223 | NM_001139 | 1123.738  |
| 3092.249  | AF161407  | 12557.092 | 8981.51   | NM_00035E | 1500.973  | 1620.942  | NM_00460E | 14587.179 |
| 36999.367 | NM_01473E | 2666.889  | 2887.246  | AL133580  | 1925.911  | 2508.359  | NM_00377E | 761.701   |
| 897.992   | NM_01808C | 4854.54   | 6400.391  | NM_01466E | 5469.921  | 4847.899  | NM_001541 | 2330.708  |
| 577.183   | AF174605  | 694.043   | 967.473   | NM_005451 | 1358.615  | 1587.302  | NM_00541E | 465.845   |
| 1660.895  | NM_01445E | 12204.771 | 19543.842 | NM_00717E | 1838.493  | 1408.926  | L09081    | 1609.63   |
| 1409.668  | NM_00571E | 2153.22   | 3477.242  | NM_00615E | 1960.744  | 1138.595  | NM_00021E | 59944.52  |

|          |           |           |           |           |           |           |           |           |
|----------|-----------|-----------|-----------|-----------|-----------|-----------|-----------|-----------|
| 1077.69  | AK021951  | 703.598   | 768.06    | NM_013333 | 14638.352 | 12601.989 | NM_016113 | 2744.947  |
| 2503.812 | AK023553  | 1332.748  | 1438.773  | NM_002333 | 2428.348  | 2653.213  | NM_014222 | 2460.272  |
| 831.12   | NM_014600 | 827.112   | 1039.736  | NM_003400 | 8267.414  | 10758.563 | NM_000509 | 1512.806  |
| 586.846  | AF125100  | 2725.375  | 3131.757  | NM_006705 | 2735.943  | 2500.521  | X06182    | 761.778   |
| 1730.9   | NM_006114 | 9313.518  | 5442.694  | NM_014439 | 638.718   | 749.638   | BF217496  | 4463.817  |
| 1264.276 | AF130728  | 1343.53   | 2083.257  | NM_005582 | 1273.697  | 957.168   | NM_004762 | 2173.149  |
| 839.415  | NM_001289 | 12309.925 | 7852.659  | AF174605  | 439.315   | 993.138   | NM_006641 | 30163.768 |
| 1144.778 | NM_001131 | 19586.592 | 8333.763  | NM_014453 | 10283.204 | 9764.701  | NM_003467 | 1880.676  |
| 1752.739 | X07696    | 3846.687  | 2049.346  | NM_005713 | 1082.749  | 1078.92   | NM_014936 | 655.811   |
| 900.277  | AA481015  | 579.18    | 403.136   | AK023553  | 1045.607  | 1126.768  | NM_003943 | 889.427   |
| 2404.772 | A1925826  | 6991.866  | 4292.611  | NM_014600 | 1052.566  | 859.781   | NM_019052 | 2960.633  |
| 911.052  | U04209    | 3555.986  | 2818.089  | NM_016733 | 1202.981  | 1955.76   | AF119902  | 439.588   |
| 6049.189 | A1393201  | 5233.392  | 4597.239  | AF181994  | 1840.81   | 1879.517  | NM_020525 | 3068.611  |
| 6780.3   | M34664    | 52814.906 | 21234.43  | NM_018962 | 2199.301  | 1794.975  | NM_003890 | 2429.896  |
| 729.693  | Z15108    | 1169.006  | 762.476   | AF125100  | 2209.975  | 1985.957  | BF127978  | 2541.472  |
| 676.332  | AA001218  | 767.929   | 1217.024  | NM_006114 | 9205.929  | 7643.178  | NM_016579 | 5745.671  |
| 3494.104 | AA679391  | 761.338   | 1464.46   | X82693    | 12053.151 | 11196.93  | AB018297  | 773.293   |
| 602.333  | BG682146  | 3743.817  | 7295.685  | NM_007176 | 8876.183  | 7034.881  | AK022565  | 7604.084  |
| 536.297  | AA884709  | 625.183   | 1145.935  | NM_002722 | 1226.548  | 1340.317  | AK023151  | 2271.867  |
| 4306.618 | NM_005060 | 3143.367  | 3173.979  | M22538    | 11290.707 | 11438.775 | AB033076  | 1381.018  |
| 1667.269 | NM_005437 | 8439.317  | 8886.415  | NM_006028 | 695.762   | 462.013   | AK022876  | 679.101   |
| 1462.747 | AK022417  | 2592.824  | 3189.358  | NM_012297 | 9775.707  | 9822.285  | AF134894  | 3654.12   |
| 3871.895 | U50534    | 1282.365  | 1898.413  | AB007925  | 40009.422 | 35911.219 | NM_003938 | 5808.467  |
| 918.888  | NM_014278 | 1675.868  | 2259.692  | NM_018180 | 1545.71   | 1920.222  | NM_014827 | 10756.134 |
| 4298.09  | NM_005838 | 1264.288  | 619.4     | NM_000361 | 6028.486  | 13107.935 | NM_001441 | 1361.306  |
| 1010.116 | NM_000734 | 1906.72   | 1369.531  | NM_002475 | 27477.828 | 38527.445 | NM_018324 | 642.505   |
| 8666.731 | NM_012331 | 2031.279  | 713.724   | NM_003836 | 8063.328  | 5689.807  | AF064255  | 14497.698 |
| 1396.525 | NM_006644 | 2042.631  | 1387.15   | NM_017987 | 505.551   | 867.006   | NM_004261 | 3578.691  |
| 6616.018 | NM_006583 | 61332.523 | 816.622   | NM_018203 | 485.193   | 808.347   | NM_016006 | 919.865   |
| 2046.246 | NM_003974 | 1154.997  | 1649.082  | NM_014244 | 1373.168  | 1200.093  | NM_016245 | 9810.506  |
| 2116.28  | NM_006065 | 2061.673  | 1171.084  | AK022417  | 3730.832  | 3144.88   | AF005632  | 2559.796  |
| 2266.854 | NM_014339 | 32217.469 | 26671.941 | U50534    | 1207.417  | 1114.583  | NM_000903 | 9435.732  |
| 5064.904 | NM_001495 | 767.126   | 571.004   | NM_014824 | 1676.023  | 1126.047  | NM_004493 | 6806.111  |
| 1476.084 | NM_002288 | 2097.005  | 361.546   | NM_014504 | 1413.16   | 1643.79   | NM_004047 | 18404.168 |
| 772.419  | NM_004416 | 7078.853  | 10444.402 | NM_014408 | 3940.58   | 4307.051  | NM_004823 | 1653.782  |
| 1246.056 | NM_000628 | 7622.181  | 9303.557  | NM_014741 | 1494.987  | 1514.502  | Y17179    | 52664.574 |
| 345.483  | NM_000325 | 8319.082  | 8458.687  | AF212247  | 3598.896  | 3037.884  | NM_000891 | 588.017   |
| 754.422  | AF015041  | 1089.111  | 1095.534  | AF161407  | 17508.85  | 12440.688 | AF239613  | 4336.061  |
| 7150.079 | NM_002363 | 585.941   | 702.603   | NM_014738 | 2149.079  | 1952.816  | AK026840  | 1060.924  |
| 720.217  | AK000184  | 1101.458  | 2089.969  | NM_016406 | 1787.465  | 2325.749  | NM_000288 | 1340.41   |
| 807.366  | AF055020  | 4491.143  | 5306.471  | NM_018080 | 5398.387  | 4774.108  | AK026317  | 4710.985  |
| 1237.672 | NM_006986 | 844.997   | 1317.786  | NM_007115 | 556.606   | 815.152   | X82207    | 9505.823  |
| 922.5    | AF272043  | 3822.234  | 7313.63   | NM_004616 | 1335.917  | 2617.263  | NM_015044 | 2679.122  |
| 614.648  | NM_002587 | 8083.946  | 8402.372  | NM_004360 | 3169.955  | 5574.121  | NM_002867 | 404.644   |
| 1378.587 | NM_002238 | 926.331   | 3979.685  | X71927    | 4895.066  | 6838.655  | NM_000520 | 3607.951  |
| 950.615  | NM_004868 | 3036.128  | 7063.134  | NM_003821 | 1769.783  | 1755.869  | NM_000289 | 1166.892  |
| 2067.793 | NM_004669 | 2617.649  | 5504.32   | NM_017692 | 2914.038  | 3708.553  | NM_001500 | 1464.164  |
| 4767.913 | NM_007028 | 6076.922  | 5487.051  | NM_003975 | 1168.932  | 1382.085  | AL110127  | 1290.222  |
| 3065.245 | AF131781  | 3380.417  | 4718.837  | NM_004834 | 3821.886  | 3303.257  | NM_002528 | 1276.132  |
| 6588.998 | NM_006516 | 13068.623 | 5333.219  | NM_000812 | 932.482   | 711.276   | D38438    | 4206.503  |
| 1029.884 | NM_015865 | 1225.101  | 879.382   | AK024747  | 11473.644 | 13721.189 | AF007872  | 1282.806  |
| 586.215  | NM_003055 | 4465.232  | 2104.813  | NM_006390 | 1739.568  | 1655.439  | M30938    | 3255.699  |
| 608.055  | NM_005075 | 535.801   | 294.868   | NM_003580 | 3802.872  | 2782.604  | NM_015148 | 1082.059  |

|           |           |           |           |           |           |           |           |           |
|-----------|-----------|-----------|-----------|-----------|-----------|-----------|-----------|-----------|
| 8389.938  | NM_002414 | 10373.154 | 9142.588  | NM_006506 | 1048.225  | 780.813   | NM_004714 | 1152.589  |
| 662.407   | NM_000355 | 925.994   | 942.517   | NM_003235 | 10569.795 | 7103.809  | NM_005401 | 670.386   |
| 4496.747  | AL133580  | 2163.418  | 1457.549  | AB042562  | 1217.9    | 1206.975  | NM_017677 | 224.371   |
| 18048.842 | NM_014666 | 9549.043  | 4160.153  | NM_016009 | 2898.701  | 2040.917  | NM_002497 | 3539.831  |
| 937.971   | NM_005451 | 2854.918  | 2202.91   | NM_002378 | 2808.137  | 1146.846  | AB025194  | 4365.819  |
| 3938.869  | NM_007172 | 2089.616  | 1115.502  | NM_001364 | 723.6     | 636.983   | NM_006239 | 711.495   |
| 16147.66  | NM_006152 | 2821.029  | 1047.473  | NM_017431 | 750.412   | 889.806   | BC020863  | 716.66    |
| 2925.196  | NM_013333 | 19249.549 | 11726.827 | NM_006097 | 7713.63   | 9742.605  | NM_017897 | 2446.078  |
| 771.802   | NM_002333 | 3997.913  | 2808.158  | NM_006113 | 2881.514  | 2409.536  | NM_004265 | 13475.944 |
| 758.455   | NM_003400 | 8831.26   | 7767.217  | NM_015313 | 1344.921  | 1193.292  | NM_002572 | 2100.265  |
| 1299.121  | NM_006705 | 2888.147  | 3623.688  | AK022287  | 3587.263  | 3271.461  | NM_000509 | 1303.54   |
| 675.5     | NM_014439 | 1254.456  | 2010.614  | NM_015897 | 1143.746  | 1482.256  | X06182    | 628.077   |
| 986.26    | NM_005582 | 1037.682  | 1379.942  | NM_005436 | 6312.762  | 5911.291  | BE908993  | 6500.602  |
| 1352.052  | NM_012266 | 2751.085  | 3441.661  | AF177473  | 24283.938 | 37187.23  | R44005    | 769.26    |
| 3837.082  | NM_004559 | 2005.302  | 1892.517  | NM_000546 | 5545.705  | 5949.24   | A1942392  | 1778.411  |
| 2024.786  | X56692    | 4236.007  | 4177.268  | AB023223  | 689.469   | 938.722   | M55040    | 640.666   |
| 3495.981  | NM_016733 | 1853.395  | 2720.36   | AB018257  | 2827.734  | 3128.49   | AW009739  | 1625.617  |
| 8101.913  | AF181994  | 2355.667  | 1767.608  | NM_002708 | 11344.461 | 21093.164 | BC036805  | 5260.941  |
| 1465.652  | NM_018962 | 910.142   | 302.274   | AK001059  | 1500.268  | 1435.126  | Z74615    | 7369.517  |
| 1431.762  | AF125100  | 2059.737  | 747.65    | NM_007282 | 2442.546  | 2174.595  | X03884    | 2471.311  |
| 3051.511  | NM_006114 | 7821.65   | 1863.325  | NM_017610 | 1061.756  | 648.772   | U36759    | 1527.179  |
| 931.958   | X82693    | 6817.196  | 2928.755  | AL122070  | 407.722   | 613.908   | X91625    | 1064.776  |
| 803.552   | NM_007176 | 10401.677 | 3648.119  | AK025133  | 23408.061 | 16513.156 | AF004231  | 491.536   |
| 941.616   | NM_002722 | 1694.386  | 1966.964  | AB020704  | 913.946   | 1255.267  | AF001862  | 1996.483  |
| 1338.297  | M22538    | 15381.378 | 27307.74  | NM_020197 | 689.417   | 1500.356  | NM_058197 | 691.543   |
| 584.497   | NM_006028 | 597.43    | 1266.128  | NM_004087 | 3405.378  | 5161.792  | NM_016044 | 1407.176  |
| 1862.854  | NM_014904 | 680.988   | 792.938   | NM_018700 | 1076.246  | 1738.961  | AK023151  | 1350.673  |
| 5325.367  | AL137576  | 8704.721  | 8159.72   | NM_000119 | 7077.801  | 8867.905  | AB033076  | 1111.208  |
| 2556.472  | NM_018358 | 4075.877  | 4847.254  | NM_001065 | 8482.523  | 7202.519  | AK022876  | 787.486   |
| 1148.347  | NM_016321 | 476.734   | 450.267   | AK027100  | 609.82    | 821.564   | AF134894  | 3061.583  |
| 1564.281  | NM_013356 | 451.758   | 857.44    | NM_003622 | 1046.096  | 1553.347  | NM_003938 | 4645.71   |
| 923.022   | NM_005060 | 3612.687  | 4385.867  | NM_001774 | 15413.499 | 15002.292 | NM_014827 | 8161.911  |
| 2385.275  | AK022417  | 2232.627  | 1080.66   | NM_005023 | 3085.634  | 8347.436  | U87460    | 4126.967  |
| 2240.298  | U50534    | 988.715   | 680.115   | AK021645  | 1809.332  | 2154.358  | NM_003617 | 439.563   |
| 1123.956  | NM_014824 | 2570.338  | 2281.994  | NM_013339 | 1538.903  | 2116.958  | NM_001841 | 654.634   |
| 795.171   | NM_014504 | 3006.333  | 5795.594  | NM_001491 | 2922.604  | 2936.522  | NM_002054 | 2742.946  |
| 2012.374  | NM_014408 | 5626.624  | 4734.14   | AK026541  | 1876.363  | 2735.781  | AF300649  | 1187.167  |
| 1417.96   | NM_014741 | 2716.337  | 1357.69   | NM_005899 | 21436.021 | 16782.125 | NM_004125 | 1036.072  |
| 1021.704  | AF212247  | 4452.226  | 1983.891  | D42055    | 8200.898  | 10391.507 | NM_003317 | 2424.387  |
| 967.884   | AF161407  | 12466.144 | 7021.042  | AL137349  | 1410.341  | 1211.602  | NM_001139 | 854.727   |
| 2683.191  | NM_014738 | 2943.24   | 3641.66   | NM_003339 | 576.32    | 745.667   | NM_004609 | 9433.549  |
| 9451.15   | NM_016406 | 2703.326  | 6937.348  | NM_016476 | 31662.148 | 35325.891 | NM_001541 | 2084.548  |
| 2106.021  | NM_018080 | 5111.059  | 4859.623  | NM_015902 | 1007.55   | 480.533   | NM_005416 | 902.353   |
| 672.217   | AF174605  | 422.2     | 623.14    | NM_020155 | 2523.221  | 1986.105  | NM_004670 | 285.769   |
| 1150.674  | NM_014453 | 10866.551 | 13496.752 | BE874471  | 2531.689  | 4545.543  | L09081    | 1368.271  |
| 6719.189  | NM_005713 | 1401.132  | 1639.647  | NM_006121 | 1297.681  | 2866.933  | NM_000218 | 52720.598 |
| 1132.545  | AK023553  | 1284.328  | 865.917   | NM_007211 | 4306.478  | 4373.955  | NM_016113 | 1964.099  |
| 2495.69   | AF272043  | 4760.839  | 14522.915 | AB011152  | 644.562   | 1392.89   | NM_014222 | 2463.952  |
| 13469.849 | NM_002238 | 1785.855  | 3325.971  | NM_014956 | 4864.276  | 5870.894  | AK026840  | 849.095   |
| 2097.306  | NM_004868 | 2176.162  | 2423.081  | AB014592  | 724.921   | 737.234   | NM_000288 | 1128.167  |
| 1040.129  | NM_004669 | 2405.619  | 1653.944  | NM_016952 | 1456.314  | 1924.38   | AK026317  | 4421.259  |
| 5339.549  | NM_007028 | 6356.507  | 3281.569  | NM_001654 | 1740.108  | 1982.873  | X82207    | 7354.958  |
| 532.809   | AF130728  | 1383.932  | 1896.521  | NM_014519 | 686.94    | 1717.616  | NM_015044 | 1871.779  |

|           |           |           |           |           |           |           |           |           |
|-----------|-----------|-----------|-----------|-----------|-----------|-----------|-----------|-----------|
| 601.492   | NM_001289 | 21642.266 | 50048.762 | NM_002517 | 283.602   | 1202.819  | BF217496  | 3769.169  |
| 7741.866  | NM_001131 | 33646.73  | 51578.188 | NM_007147 | 11121.427 | 10673.628 | NM_004762 | 2086.145  |
| 1259.786  | AA831963  | 324.023   | 1897.91   | X65463    | 4277.209  | 4249.926  | NM_006641 | 29756.916 |
| 1934.659  | BG752013  | 723.257   | 1941.558  | AK024418  | 2549.556  | 2389.469  | NM_000634 | 6473.306  |
| 2041.016  | X07696    | 3544.903  | 1957.681  | NM_003367 | 2229.187  | 1669.496  | NM_014679 | 12121.654 |
| 2709.013  | AI925826  | 6950.051  | 5022.901  | NM_005194 | 5374.277  | 5638.539  | AB040969  | 1138.036  |
| 5499.436  | U04209    | 3405.698  | 2387.016  | AB002296  | 1227.839  | 878.341   | NM_003467 | 2078.185  |
| 6623.092  | AI393201  | 5550.946  | 6781.155  | NM_012087 | 808.787   | 667.527   | NM_003943 | 1123.415  |
| 1361.014  | M34664    | 52246.922 | 23160.412 | AF165520  | 1031.632  | 1431.935  | NM_019052 | 3278.857  |
| 542.094   | Z15108    | 902.991   | 533.204   | AK026072  | 626.64    | 583.443   | NM_020525 | 1443.49   |
| 23680.031 | AA001218  | 452.423   | 1569.931  | NM_015679 | 3065.655  | 3062.095  | X62468    | 645.968   |
| 1312.397  | AA679391  | 1557.336  | 2214.06   | AK022763  | 14252.227 | 19657.037 | NM_003890 | 1444.73   |
| 2353.472  | BG682146  | 3623.139  | 7389.749  | AF288207  | 16416.555 | 11523.785 | BF127978  | 2264.535  |
| 1323.388  | AA884709  | 668.677   | 685.815   | NM_001001 | 52454.039 | 51949.465 | AF110801  | 269.547   |
| 3050.958  | NM_012266 | 3376.502  | 6392.854  | AL137343  | 208.073   | 821.002   | NM_016579 | 4523.099  |
| 727.459   | NM_004559 | 1939.772  | 843.733   | NM_004541 | 38952.551 | 39425.68  | AB018297  | 855.464   |
| 2010.702  | X56692    | 4172.082  | 1384.522  | NM_006830 | 35347.016 | 36842.191 | AK022565  | 8030.56   |
| 4433.725  | NM_014278 | 1564.78   | 1491.39   | AK026414  | 3994.752  | 4331.556  | AB025194  | 4035.713  |
| 473.484   | NM_005838 | 599.164   | 951.928   | NM_004074 | 13505.639 | 13733.693 | NM_006239 | 520.423   |
| 1061.19   | NM_000734 | 2642.974  | 3773.117  | NM_018436 | 4669.375  | 2751.078  | BC020863  | 446.926   |
| 1685.383  | NM_012331 | 3028.079  | 4173.147  | AF157115  | 3562.25   | 2766.285  | NM_017897 | 1658.198  |
| 568.45    | NM_006644 | 3537.883  | 4231.242  | AJ223353  | 4738.649  | 4590.476  | NM_004265 | 11375.61  |
| 3247.403  | NM_006583 | 53796.645 | 1359.532  | NM_012241 | 3977.364  | 3569.177  | NM_002572 | 1412.714  |
| 2291.516  | NM_003974 | 1615.839  | 2606.657  | NM_018486 | 2432.042  | 1530.912  | NM_001441 | 1164.385  |
| 994.449   | NM_006065 | 2333.552  | 1578.91   | NM_005324 | 14317.508 | 24362.967 | NM_018324 | 422.51    |
| 1854.524  | NM_014339 | 33892.973 | 27683.066 | AL080201  | 7705.608  | 11511.229 | AF064255  | 13127.813 |
| 3310.283  | NM_001495 | 1075.447  | 818.521   | NM_015363 | 1117.867  | 1270.245  | NM_016368 | 33965.273 |
| 1505.934  | NM_002288 | 2435.232  | 455.129   | NM_001806 | 5894.303  | 4231.748  | U08853    | 1603.872  |
| 541.234   | NM_000325 | 8246.568  | 10710.081 | AB040941  | 3765.38   | 4130.686  | NM_004261 | 14297.924 |
| 759.331   | AF015041  | 1207.8    | 1210.966  | AL137241  | 760.03    | 603.069   | NM_016006 | 1430.085  |
| 2118.653  | NM_002363 | 695.81    | 506.583   | AB037742  | 1356.331  | 1583.96   | NM_016245 | 10739.083 |
| 26445.682 | AK000184  | 1250.17   | 2994.861  | AF272375  | 913.313   | 912.293   | AF005632  | 2589.567  |
| 10090.176 | AF055020  | 4891.463  | 4681.479  | AK025078  | 600.236   | 734.515   | NM_000903 | 9028.177  |
| 25970.508 | NM_006986 | 1005.8    | 921.861   | AK023754  | 834.965   | 1278.279  | NM_004493 | 5371.462  |
| 13625.7   | NM_014904 | 887.749   | 1170.469  | AK024737  | 1199.146  | 1196.814  | AF309489  | 452.278   |
| 33761.977 | AL137576  | 9038.897  | 12132.133 | AB007890  | 6124.137  | 5986.387  | NM_004047 | 14142.614 |
| 2691.392  | NM_018358 | 3987.162  | 2359.091  | AF070591  | 1796.187  | 2053.993  | NM_004823 | 1406.359  |
| 1702.526  | AF131781  | 2647.465  | 1883.714  | NM_020411 | 32876.867 | 20534.006 | AB013889  | 352.332   |
| 710.823   | NM_006516 | 13017.283 | 2734.125  | AF275800  | 1144.626  | 643.877   | Y17179    | 53875.559 |
| 3011.084  | NM_015865 | 765.561   | 456.304   | AL359605  | 1791.916  | 1057.493  | NM_000891 | 674.078   |
| 758.489   | NM_003055 | 5795.479  | 2847.589  | AB020633  | 2271.875  | 1869.536  | AF239613  | 3824.129  |
| 5757.98   | NM_005075 | 1454.336  | 423.704   | AK025445  | 5866.431  | 3045.055  | NM_016044 | 1086.145  |
| 12205.439 | NM_002414 | 11455.098 | 9519.7    | AL357200  | 1103.87   | 542.505   | NM_000520 | 3166.09   |
| 3284.264  | NM_000355 | 949.27    | 1098.973  | NM_017727 | 10697.372 | 8328.425  | NM_001500 | 1433.374  |
| 1482.822  | AL133580  | 2360.998  | 2952.698  | NM_018319 | 2848.102  | 2460.718  | NM_004388 | 1609.479  |
| 2156.721  | NM_014666 | 9923.495  | 5644.066  | AL359559  | 638.229   | 1035.791  | AL110127  | 1721.787  |
| 2250.653  | NM_005451 | 3407.849  | 2746.715  | AY008301  | 384.879   | 696.233   | AK001997  | 281.145   |
| 2361.952  | NM_013333 | 18495.961 | 17553.516 | AK021714  | 1085.298  | 747.741   | NM_002528 | 1285.502  |
| 8416.056  | NM_002333 | 4342.973  | 4464.308  | NM_020314 | 3212.199  | 3654.438  | D38438    | 3286.406  |
| 7758.675  | NM_003400 | 8325.43   | 9503.289  | AK022972  | 1774.119  | 2580.413  | AV714945  | 714.205   |
| 763.696   | NM_006705 | 3183.777  | 4158.353  | AK025996  | 2890.469  | 2329.646  | AF007872  | 1096.368  |
| 1670.614  | NM_014439 | 1019.494  | 1328.917  | AF088015  | 595.735   | 584.954   | M30938    | 3854.004  |
| 688.129   | NM_005582 | 1450.503  | 1517.767  | AF086168  | 391.497   | 1037.166  | NM_015148 | 1303.112  |

|           |           |           |           |           |           |           |           |           |
|-----------|-----------|-----------|-----------|-----------|-----------|-----------|-----------|-----------|
| 1013.364  | AF174605  | 699.367   | 740.443   | AF007132  | 742.547   | 1641.064  | NM_004714 | 1227.663  |
| 806.694   | NM_014453 | 12366.942 | 4727.679  | AK026711  | 5477.106  | 3866.308  | NM_005401 | 737.62    |
| 698.772   | NM_005713 | 1046.681  | 371.698   | NM_017864 | 5103.697  | 6394.29   | NM_017677 | 605.944   |
| 309.74    | AK023553  | 529.378   | 254.501   | NM_004869 | 4583.489  | 5138.85   | NM_002497 | 5651.798  |
| 442.943   | NM_014600 | 600.438   | 300.383   | AF136408  | 1010.225  | 922.537   | NM_005416 | 505.742   |
| 572.485   | NM_016733 | 2039.065  | 1737.987  | AJ002787  | 3860.797  | 2516.861  | L09081    | 1811.302  |
| 1372.723  | AF181994  | 3087.026  | 4050.26   | Z70764    | 1469.486  | 934.667   | NM_000218 | 56749.43  |
| 27902.732 | NM_018962 | 1181.44   | 1442.083  | Z83948    | 1252.724  | 1052.6    | NM_016113 | 3021.164  |
| 574.697   | AF125100  | 3182.309  | 3903.988  | M25785    | 1074.489  | 964.631   | NM_014222 | 2365.976  |
| 998.54    | NM_006114 | 9605.019  | 8158.698  | M32443    | 2748.236  | 2391.373  | L14819    | 239.905   |
| 1750.3    | X82693    | 9645.799  | 18012.088 | M73048    | 487.645   | 696.775   | NM_000509 | 1554.718  |
| 2385.549  | NM_007176 | 10988.849 | 8196.223  | D16908    | 698.936   | 586.697   | NM_004542 | 274.08    |
| 5172.462  | NM_002722 | 1628.615  | 1420.542  | D16477    | 924.427   | 982.792   | X06182    | 762.549   |
| 1010.436  | M22538    | 12862.201 | 13737.674 | AK024759  | 386.617   | 589.818   | BE908993  | 8122.545  |
| 1517.855  | NM_006028 | 846.353   | 944.465   | AK000063  | 903.964   | 438.792   | AB012701  | 1391.16   |
| 2095.836  | NM_012297 | 7483.033  | 8084.569  | AK000974  | 908.19    | 667.509   | M61156    | 695.814   |
| 304.638   | AB007925  | 39733.676 | 40607.023 | AK024553  | 39616.727 | 26909.941 | R44005    | 572.213   |
| 524.036   | NM_018180 | 1929.293  | 575.871   | AK024930  | 574.442   | 662.112   | A1942392  | 1659.92   |
| 2343.472  | NM_000361 | 5378.391  | 4639.811  | NM_018233 | 20128.209 | 9241.823  | M55040    | 402.73    |
| 836.555   | NM_002475 | 21060.215 | 7809.148  | AV740891  | 1067.855  | 974.653   | AW009739  | 1715.365  |
| 580.71    | NM_003836 | 6468.469  | 1304.046  | AK026860  | 4954.26   | 4600.659  | BC036805  | 4182.158  |
| 283.398   | NM_017987 | 744.735   | 738.634   | AK024211  | 725.259   | 350.585   | Z74615    | 5386.65   |
| 736.336   | NM_018203 | 982.659   | 1958.503  | AK023435  | 1043.781  | 984.946   | X03884    | 2464.993  |
| 1069.982  | NM_014244 | 1620.615  | 1836.125  | U25750    | 3945.125  | 3918.811  | U36759    | 1992.885  |
| 782.929   | AK022417  | 2660.343  | 3030.577  | AK023691  | 3366.17   | 2599.494  | X91625    | 1927.316  |
| 796.492   | U50534    | 1318.062  | 2408.363  | AK026744  | 564.331   | 1020.009  | AF090901  | 478.45    |
| 1271.844  | NM_014824 | 2047.58   | 1909.877  | NM_005234 | 6110.001  | 3417.879  | AF004231  | 664.248   |
| 594.265   | NM_014504 | 1977.409  | 1939.608  | BC023536  | 1494.212  | 506.036   | AF001862  | 1776.409  |
| 616.882   | NM_014741 | 3059.817  | 2600.027  | NM_001803 | 4337.351  | 4612.524  | AF110801  | 311.187   |
| 529.558   | AF212247  | 4952.508  | 4325.956  | NM_006233 | 6509.891  | 2636.639  | NM_016579 | 7138.535  |
| 17746.73  | AF161407  | 13557.037 | 8947.102  | AK021889  | 460.296   | 269.751   | AB018297  | 891.446   |
| 531.196   | NM_014738 | 2958.397  | 3194.217  | L23544    | 13350.271 | 9966.366  | AK022565  | 6821.344  |
| 2047.114  | NM_016406 | 2452.306  | 5139.917  | NM_019020 | 1540.36   | 766.523   | AK023151  | 1957.378  |
| 5492.935  | NM_018080 | 5929.326  | 5970.735  | NM_016474 | 818.338   | 582.259   | AB033076  | 1293.371  |
| 9613.803  | NM_007115 | 1029.983  | 1407.927  | NM_000910 | 825.211   | 1605.141  | AK022876  | 981.225   |
| 585.636   | NM_004616 | 1206.297  | 1015.224  | NM_005850 | 60185.891 | 49736.668 | AF134894  | 3014.772  |
| 708.627   | NM_003821 | 1617.855  | 811.572   | NM_000554 | 19871.137 | 17190.193 | NM_003938 | 5034.725  |
| 850.144   | NM_017692 | 3115.813  | 1436.34   | AF009317  | 4116.827  | 3481.997  | NM_014827 | 10050.095 |
| 2088.785  | NM_003975 | 1218.646  | 3609.7    | AK026583  | 2855.764  | 3110.362  | NM_004126 | 511.008   |
| 3598.355  | NM_004834 | 4900.704  | 11612.617 | AF218031  | 3830.073  | 2853.894  | U87460    | 4406.334  |
| 269.958   | NM_000812 | 934.145   | 1760.165  | AF210650  | 1990.735  | 934.073   | NM_003617 | 825.494   |
| 467.763   | AK024747  | 13699.357 | 17670.574 | NM_018356 | 2954.632  | 2709.784  | NM_001841 | 941.699   |
| 787.945   | NM_006390 | 2279.459  | 2430.09   | AF085896  | 877.492   | 643.456   | NM_002054 | 1962.652  |
| 5132.014  | NM_003580 | 4667.271  | 5301.485  | X74613    | 23888.945 | 13723.75  | AF300649  | 821.914   |
| 1464.739  | NM_006506 | 1592.151  | 1781.184  | AF075080  | 27372.354 | 16558.141 | NM_004125 | 914.516   |
| 2063.679  | NM_003235 | 9240.983  | 11786.975 | Y13897    | 1172.171  | 695.915   | NM_000823 | 2882.778  |
| 1320.869  | AB042562  | 1590.568  | 1092.651  | AK001857  | 677.892   | 412.876   | NM_004414 | 1439.8    |
| 725.724   | NM_016009 | 3562.072  | 1823.422  | AL133577  | 3138.211  | 1556.104  | NM_003317 | 1789.798  |
| 3772.209  | NM_002378 | 3147.519  | 1483.987  | AK025378  | 1005.277  | 728.688   | NM_001139 | 2000.207  |
| 3615.841  | NM_017431 | 788.29    | 1152.583  | NM_000479 | 810.456   | 431.254   | NM_004609 | 10187.885 |
| 4197.613  | NM_006097 | 7964.523  | 9433.142  | AF038199  | 2276.705  | 1709.825  | NM_003772 | 1389.427  |
| 1891.812  | NM_006113 | 4345.402  | 3194.454  | CY3Cy5    | 1550.383  | 181.598   | NM_001541 | 1757.512  |
| 16070.96  | NM_015313 | 5944.537  | 4336.192  | BE908993  | 1666.513  | 1723.024  | Y17179    | 56737.77  |



|           |           |           |           |           |           |           |           |           |
|-----------|-----------|-----------|-----------|-----------|-----------|-----------|-----------|-----------|
| 1696.346  | AK022287  | 3313.162  | 2357.511  | AB012701  | 2220.613  | 3832.907  | NM_000891 | 733.888   |
| 1287.076  | NM_015897 | 1691.054  | 1826.053  | M61156    | 680.658   | 845.73    | AF239613  | 3264.09   |
| 959.83    | NM_005436 | 2660.027  | 1333.471  | R44005    | 903.469   | 1521.413  | AK026840  | 873.13    |
| 29214.805 | AF177473  | 9710.687  | 2694.009  | AI942392  | 1414.651  | 2144.643  | NM_00028E | 1618.082  |
| 11420.863 | NM_000546 | 3594.155  | 1761.006  | M55040    | 387.304   | 445.982   | AK026317  | 5589.162  |
| 3730.145  | AB023223  | 392.997   | 278.708   | AW009739  | 1301.922  | 839.305   | X82207    | 9303.021  |
| 33811.219 | AB018257  | 3593.29   | 4358.663  | BC036805  | 3452.525  | 6125.622  | NM_015044 | 2624.945  |
| 39964.898 | NM_00270E | 16432.367 | 38922.566 | Z74615    | 9648.56   | 11734.304 | NM_002867 | 791.058   |
| 23527.553 | AK001059  | 2953.661  | 4382.313  | X03884    | 1808.496  | 3613.022  | BF217496  | 2315.479  |
| 3581.058  | NM_007282 | 4272.599  | 9459.641  | U36759    | 1200.504  | 1773.757  | NM_004762 | 2011.1    |
| 2278.942  | NM_017610 | 960.064   | 1274.305  | X91625    | 1036.61   | 1170.042  | NM_006641 | 18048.594 |
| 3642.889  | AL122070  | 447.816   | 1259.72   | AF004231  | 832.975   | 1181.669  | NM_000634 | 2992.822  |
| 2995.374  | AK025133  | 25648.4   | 24094.459 | AF001862  | 1169.213  | 1178.308  | NM_014679 | 6805.771  |
| 2917.72   | AB020704  | 588.491   | 227.533   | SR6       | 1393.237  | 1277.319  | AB040969  | 1321.409  |
| 1397.603  | NM_004087 | 2987.159  | 2476.446  | SR8       | 4946.822  | 11360.844 | NM_003467 | 1916.894  |
| 1445.292  | NM_018700 | 1191.334  | 1239.563  | SR10      | 17072.971 | 4523.287  | NM_014936 | 1003.245  |
| 606.717   | NM_000119 | 7925.683  | 8645.903  | CY3Cy5    | 1897.335  | 199.24    | NM_003943 | 1301.817  |
| 4579.787  | NM_001065 | 9838.094  | 8332.741  | NM_004126 | 322.467   | 240.971   | NM_019052 | 4160.017  |
| 838.179   | AK027100  | 851.81    | 678.027   | U87460    | 2761.754  | 2885.956  | NM_003202 | 557.876   |
| 2357.833  | NM_003622 | 1319.495  | 1369.18   | NM_003617 | 362.509   | 964.914   | AF119902  | 689.021   |
| 1989.922  | NM_001774 | 17757.805 | 20458.596 | NM_001841 | 310.111   | 421.718   | NM_020525 | 1779.467  |
| 4859.005  | AK021645  | 1717.456  | 560.44    | NM_002054 | 1696.774  | 1521.35   | X62468    | 374.608   |
| 208.231   | NM_013339 | 2399.188  | 4098.054  | AF300649  | 836.414   | 1124.74   | NM_004714 | 1115.494  |
| 9510.892  | NM_001491 | 3883.658  | 6170.059  | NM_004125 | 753.428   | 808.88    | NM_005401 | 1279.604  |
| 2302.266  | NM_002642 | 526.065   | 1300.562  | NM_000823 | 2425.665  | 2749.816  | NM_002497 | 3851.804  |
| 1213.141  | AK026541  | 1699.938  | 3144.288  | NM_004414 | 1024.685  | 1204.989  | AB025194  | 4613.369  |
| 1419.332  | NM_005899 | 12140.903 | 14050.913 | NM_003317 | 2858.823  | 3258.464  | NM_006239 | 714.586   |
| 2715.765  | D42055    | 15409.276 | 36536.848 | NM_001139 | 929.227   | 1130.171  | BC020863  | 431.91    |
| 555.844   | AL137349  | 1387.354  | 1945.238  | NM_004609 | 14840.579 | 13410.021 | NM_017897 | 2076.887  |
| 2009.851  | NM_003339 | 749.821   | 1139.571  | NM_003772 | 543.929   | 670.575   | NM_004265 | 11728.632 |
| 5710.274  | NM_016476 | 34667.637 | 42203.32  | NM_001541 | 2031.716  | 2248.138  | NM_002572 | 1951.986  |
| 11273.824 | NM_015902 | 1411.169  | 1228.234  | L09081    | 1832.599  | 1568.851  | NM_001441 | 1110.442  |
| 2263.824  | NM_020155 | 2538.677  | 3422.391  | NM_000218 | 57636.75  | 59161.988 | NM_018324 | 680.39    |
| 989.757   | BE874471  | 2731.301  | 2050.894  | NM_016113 | 2324.606  | 2280.259  | AF064255  | 5134.041  |
| 774.769   | NM_006121 | 1725.612  | 1401.534  | NM_014222 | 1612.057  | 1909.435  | NM_016368 | 12839.12  |
| 587.946   | AK023520  | 5017.143  | 4250.144  | NM_000509 | 908.421   | 504.983   | U08853    | 1968.954  |
| 3357.306  | NM_004693 | 979.118   | 636.984   | NM_004542 | 171.093   | 455.452   | NM_004261 | 12996.382 |
| 2046.74   | NM_007211 | 2321.359  | 1519.715  | BF217496  | 3589.984  | 3770.205  | NM_016006 | 1225.876  |
| 114.22    | AB011152  | 1914.234  | 2054.856  | NM_004762 | 1391.692  | 2863.117  | NM_016245 | 9896.38   |
| 4619.713  | NM_014956 | 4956.859  | 3422.307  | NM_006641 | 24019.404 | 28741.82  | AF005632  | 1438.27   |
| 696.72    | AB014592  | 690.727   | 914.842   | NM_000634 | 3765.499  | 4821.913  | NM_000903 | 10280.338 |
| 1150.056  | NM_016952 | 1581.261  | 1467.053  | NM_014679 | 13725.263 | 12695.331 | NM_004493 | 7356.765  |
| 3144.922  | NM_001654 | 3626.391  | 4082.939  | AB040969  | 914.656   | 1120.921  | NM_004047 | 17688.184 |
| 2312.446  | NM_014519 | 979.178   | 1020.625  | NM_003467 | 1344.021  | 1855.738  | AK024439  | 3543.001  |
| 803.562   | NM_007147 | 3760.214  | 1127.922  | NM_014936 | 371.644   | 364.319   | Z32684    | 4099.253  |
| 3991.302  | X65463    | 5201.193  | 2078.866  | NM_003943 | 807.909   | 1157.441  | NM_016512 | 471.18    |
| 2563.022  | AK024418  | 2362.916  | 2542.065  | NM_019052 | 2151.717  | 5453.443  | NM_017488 | 5119.942  |
| 1094.122  | NM_003367 | 3693.864  | 2994.191  | NM_003202 | 340.487   | 578.74    | NM_005069 | 494.83    |
| 503.049   | NM_005194 | 8545.843  | 12463.917 | AF119902  | 334.245   | 689.977   | NM_016044 | 1181.882  |
| 2267.763  | AB002296  | 2229.75   | 3597.396  | NM_020525 | 2989.519  | 2483.413  | NM_000520 | 3446.997  |
| 554.786   | NM_014315 | 3434.058  | 4250.161  | X62468    | 329.875   | 163.34    | NM_000289 | 708.587   |
| 2323.882  | NM_012087 | 1167.208  | 966.373   | NM_003890 | 2466.718  | 2062.367  | NM_001500 | 1465.477  |
| 48892.875 | AF165520  | 1160.81   | 723.7     | BF127978  | 2341.646  | 2441.146  | NM_00438E | 1932.918  |

|           |           |           |           |           |           |           |           |           |
|-----------|-----------|-----------|-----------|-----------|-----------|-----------|-----------|-----------|
| 2599.61   | AK026072  | 839.768   | 684.489   | NM_016579 | 5421.696  | 5898.158  | AL110127  | 904.729   |
| 3484.531  | NM_015679 | 2569.518  | 1524.149  | AB018297  | 378.535   | 346.514   | NM_002528 | 1801.28   |
| 1822.46   | AF299118  | 55889.066 | 50792.754 | AK022565  | 5347.509  | 6157.027  | D38438    | 2640.877  |
| 875.454   | AK025353  | 15545.467 | 7595.27   | AK023151  | 1312.154  | 1059.104  | AV714945  | 983.139   |
| 4074.034  | AK056896  | 36374.508 | 26737.488 | AB033076  | 732.067   | 367.219   | AF007872  | 1289.853  |
| 2112.567  | AK022763  | 19061.555 | 15550.547 | AK022876  | 520.09    | 431.053   | M30938    | 3469.959  |
| 33435.488 | AF288207  | 18816.756 | 8993.583  | AF134894  | 2100.166  | 1514.627  | X03168    | 837.18    |
| 5849.638  | NM_001001 | 55338.078 | 58776.082 | NM_003938 | 3479.797  | 1723.622  | NM_005168 | 967.889   |
| 11243.494 | NM_005715 | 3001.032  | 4726.588  | NM_014827 | 6808.893  | 7443.295  | NM_017801 | 4652.552  |
| 1431.208  | AK026992  | 3556.36   | 5340.125  | NM_001441 | 563.235   | 731.228   | NM_007348 | 2799.249  |
| 2389.223  | AL137343  | 641.604   | 398.108   | AF064255  | 11599.76  | 13357.591 | NM_016953 | 246.73    |
| 749.187   | NM_004541 | 50597.574 | 50426.352 | NM_016368 | 27197.455 | 34631.852 | U65473    | 1058.255  |
| 1339.417  | NM_006830 | 47289.23  | 56619.586 | U08853    | 1191.851  | 1216.679  | D63481    | 1460.103  |
| 3843.331  | AK026414  | 9028.401  | 12450.719 | NM_004261 | 10220.584 | 7630.938  | AL157424  | 536.289   |
| 760.059   | D17297    | 927.179   | 1230.211  | NM_016006 | 1046.651  | 1487.037  | AK024422  | 1400.199  |
| 306.874   | NM_004074 | 28785.277 | 32679.047 | NM_016245 | 7660.559  | 5995.27   | NM_002673 | 2150.852  |
| 153.597   | NM_002626 | 32186.436 | 47573.195 | AF005632  | 2265.887  | 2023.622  | NM_003876 | 2825.27   |
| 1849.509  | NM_018436 | 9868.097  | 11241.355 | NM_000903 | 7474.202  | 10112.304 | NM_012295 | 3147.145  |
| 2195.539  | AF157115  | 3250.696  | 4140.628  | NM_004493 | 5324.699  | 12922.436 | NM_000222 | 1240.135  |
| 632.476   | AJ223353  | 6223.748  | 8619.415  | AF309489  | 247.124   | 468.6     | NM_000663 | 670.109   |
| 5252.301  | NM_012241 | 5908.765  | 7595.666  | NM_004047 | 13378.503 | 17946.354 | NM_004710 | 2619.06   |
| 4674.035  | NM_018486 | 2583.434  | 781.763   | NM_004823 | 1299.143  | 2147.764  | NM_004396 | 9441.444  |
| 1773.106  | NM_005324 | 15929.184 | 10717.824 | Y17179    | 51582.395 | 64101.254 | NM_017999 | 1848.043  |
| 1749.95   | AL080201  | 5990.291  | 4593.872  | NM_000891 | 397.434   | 783.259   | NM_015989 | 14308.891 |
| 1153.177  | NM_015363 | 683.44    | 611.202   | AF239613  | 2562.128  | 3781.071  | NM_001043 | 1262.809  |
| 2840.169  | NM_001806 | 6846.241  | 3089.741  | AK026840  | 720.212   | 888.065   | NM_004779 | 6295.561  |
| 4735.787  | AB040941  | 4469.819  | 2803.249  | NM_000288 | 825.338   | 755.158   | NM_019071 | 2763.458  |
| 3343.807  | AL137241  | 1103.636  | 718.87    | AK026317  | 4209.089  | 4498.396  | AF113685  | 761.022   |
| 1004.727  | AB037742  | 1687.312  | 1255.04   | X82207    | 4485.091  | 2650.922  | NM_005470 | 2068.668  |
| 734.717   | AF272375  | 1906.909  | 1011.575  | NM_015044 | 1591.045  | 1232.92   | AF142570  | 590.482   |
| 12929.803 | AK025078  | 1401.923  | 3430.313  | NM_000520 | 1817.797  | 2348.349  | NM_004225 | 4127.389  |
| 32996.043 | AK023754  | 898.128   | 1401.185  | NM_000289 | 478.764   | 520.703   | NM_003862 | 655.895   |
| 1206.336  | AK021689  | 886.141   | 676.951   | NM_001500 | 376.043   | 201.249   | NM_002873 | 1773.257  |
| 10521.649 | AK024737  | 2146.858  | 1170.016  | NM_004388 | 402.772   | 429.913   | NM_015571 | 5044.6    |
| 2200.145  | AB007890  | 5976.552  | 6357.755  | AL110127  | 790.679   | 1013.78   | NM_004701 | 2532.409  |
| 10644.584 | AF286160  | 334.242   | 1271.426  | AK001997  | 254.742   | 167.7     | AK025554  | 1549.904  |
| 3037.756  | NM_020411 | 61553.707 | 60238.996 | NM_002528 | 928.462   | 1116.185  | B1824151  | 2792.09   |
| 12493.016 | AF275800  | 1764.021  | 2184.368  | D38438    | 4583.193  | 5608.43   | AK021791  | 2097.209  |
| 5858.051  | AL359605  | 2141.901  | 2758.177  | AV714945  | 518.354   | 360.86    | NM_004052 | 4866.459  |
| 7905.919  | AB020633  | 3227.094  | 5219.329  | AF007872  | 1014.824  | 1306.666  | NM_004394 | 9776.392  |
| 1247.02   | AK025445  | 11501.482 | 16829.176 | M30938    | 2039.583  | 3187.209  | NM_005727 | 2632.3    |
| 49105.027 | AL357200  | 1608.623  | 2522.689  | NM_015148 | 720.833   | 769.206   | AK027242  | 770.033   |
| 333.417   | NM_017727 | 11555.029 | 10360.933 | NM_004714 | 783.101   | 775.727   | NM_001279 | 5856.235  |
| 2204.233  | NM_018319 | 2931.263  | 1227.663  | NM_005401 | 412.058   | 472.32    | NM_005010 | 814.367   |
| 841.682   | AL359559  | 631.485   | 398.988   | NM_002497 | 3311.776  | 4474.263  | NM_019055 | 1289.381  |
| 1372.917  | AY008301  | 1158.509  | 888.199   | AB025194  | 2982.125  | 2963.638  | U96136    | 468.375   |
| 5372.835  | AK021714  | 1043.685  | 571.438   | NM_006239 | 717.151   | 469.587   | AF188747  | 3515.854  |
| 19908.531 | AK025996  | 3183.501  | 2330.345  | BC020863  | 253.871   | 308.709   | NM_005941 | 640.511   |
| 2172.329  | AF088015  | 758.374   | 801.381   | NM_017897 | 1334.26   | 796.161   | AF201380  | 1817.887  |
| 2295.653  | AK026702  | 413.682   | 402.586   | NM_004265 | 8490.83   | 3131.269  | NM_003619 | 2470.539  |
| 590.004   | AF007132  | 937.266   | 562.88    | NM_002572 | 1337.223  | 1035.249  | NM_012392 | 2430.185  |
| 1323.548  | AK026711  | 8686.965  | 4549.489  | NM_000509 | 598.628   | 335.969   | NM_014833 | 5699.007  |
| 1835.414  | NM_017864 | 5386.667  | 6379.251  | NM_004542 | 203.236   | 192.312   | NM_003878 | 2915.209  |

|           |           |           |           |           |           |           |           |           |
|-----------|-----------|-----------|-----------|-----------|-----------|-----------|-----------|-----------|
| 1250.681  | NM_004869 | 4528.809  | 7450.095  | AI742810  | 648.923   | 898.401   | NM_004832 | 383.766   |
| 1543.998  | AF136408  | 1810.776  | 2099.242  | X06182    | 515.689   | 684.798   | NM_005957 | 752.577   |
| 4451.05   | AL110203  | 783.283   | 966.273   | BE908993  | 6129.794  | 4904.915  | AK024374  | 973.503   |
| 734.941   | AJ011595  | 679.057   | 1154.146  | AB012701  | 1157.518  | 1102.852  | NM_018234 | 1981.668  |
| 573.032   | AJ011602  | 571.091   | 1130.13   | M61156    | 767.893   | 843.341   | AB033062  | 468.934   |
| 1338.873  | AJ002787  | 3496.825  | 4998.876  | R44005    | 987.387   | 1185.282  | NM_016437 | 2700.579  |
| 545.544   | Z70764    | 1896.337  | 2458.257  | AI942392  | 1354.661  | 2175.612  | NM_002720 | 4087.954  |
| 567.049   | M25785    | 1460.744  | 790.876   | M55040    | 360.866   | 496.437   | AK024716  | 8256.27   |
| 523.429   | M32443    | 2023.559  | 1739.427  | AW009739  | 1254.472  | 996.992   | X67155    | 712.715   |
| 2294.46   | D16908    | 874.956   | 977.659   | BC036805  | 3681.879  | 5768.372  | NM_020380 | 2939.018  |
| 4443.38   | D16477    | 1112.869  | 1028.022  | Z74615    | 9032.042  | 9166.396  | NM_001330 | 24234.01  |
| 1512.554  | AK024759  | 436.234   | 508.66    | X03884    | 1786.826  | 2827.568  | NM_015927 | 860.828   |
| 691.02    | AK022309  | 901.382   | 1635.986  | U36759    | 1306.022  | 1483.177  | NM_005122 | 246.99    |
| 1723.505  | AK000063  | 1004.391  | 2178.98   | X91625    | 999.741   | 1149.406  | NM_014552 | 3186.191  |
| 8490.443  | AK000949  | 1011.349  | 1278.393  | AF004231  | 755.24    | 801.365   | NM_003072 | 6163.805  |
| 638.568   | AK027068  | 643.178   | 987.124   | AF001862  | 1238.159  | 1015.536  | NM_001913 | 2716.346  |
| 338.979   | AK000974  | 959.137   | 553.681   | NM_058197 | 211.744   | 163.762   | AK025594  | 1261.003  |
| 1409.896  | AK024553  | 13275.606 | 10047.916 | NM_016044 | 618.877   | 265.333   | AB040931  | 2310.752  |
| 540.237   | AK024930  | 968.17    | 1306.519  | AK023151  | 965.052   | 982.298   | NM_003599 | 1052.833  |
| 738.605   | AF143879  | 3061.452  | 2491.843  | AB033076  | 599.29    | 268.434   | NM_015911 | 1166.157  |
| 1807.308  | AK024621  | 19409.975 | 15245.507 | AK022876  | 322.603   | 448.115   | BC011826  | 3038.544  |
| 1144.095  | AL157449  | 16299.044 | 15697.192 | AF134894  | 1150.458  | 1523.154  | NM_017647 | 2254.792  |
| 1434.748  | AL117582  | 865.174   | 181.601   | NM_003938 | 2996.575  | 1917.495  | NM_012091 | 706.343   |
| 1871.109  | AK025525  | 837.55    | 422.631   | NM_014827 | 6459.533  | 8755.73   | NM_012321 | 1684.355  |
| 531.472   | NM_018233 | 18773.91  | 22562.865 | U87460    | 3540.825  | 3525.877  | D13642    | 2965.884  |
| 1397.209  | AV740891  | 1129.983  | 1829.592  | NM_003617 | 479.039   | 557.099   | NM_004741 | 4678.961  |
| 2694.278  | AF143329  | 909.489   | 1058.821  | NM_001841 | 443.638   | 238.933   | NM_018032 | 2568.541  |
| 7891.522  | AF090916  | 668.012   | 1461.879  | NM_002054 | 2184.985  | 1609.401  | NM_003675 | 2526.893  |
| 2037.483  | AK026860  | 7028.572  | 4550.096  | AF300649  | 1000.407  | 1001.225  | NM_017518 | 1346.204  |
| 1107.155  | AK024211  | 1012.411  | 711.953   | NM_004125 | 581.319   | 557.399   | NM_004117 | 4736.359  |
| 1022.857  | NM_014898 | 462.115   | 424.924   | NM_000823 | 1872.006  | 2424.852  | NM_016594 | 1309.122  |
| 354.498   | AK023435  | 692.856   | 813.396   | NM_004414 | 1051.269  | 1034.152  | NM_030752 | 3783.442  |
| 2370.143  | AF086035  | 8104.777  | 6205.1    | NM_003317 | 2441.154  | 2544.089  | D26068    | 16769.441 |
| 517.586   | AK022159  | 3680.031  | 3513.498  | NM_001139 | 965.788   | 865.282   | NM_017593 | 961.476   |
| 601.314   | U25750    | 4965.468  | 2485.866  | NM_004609 | 13386.709 | 11640.24  | NM_004282 | 8089.835  |
| 1088.215  | AK023691  | 6005.677  | 9401.916  | NM_003772 | 615.152   | 696.635   | AK025695  | 1246.51   |
| 681.26    | AK023502  | 849.258   | 1442.372  | NM_001541 | 2005.304  | 1915.796  | AK025442  | 4403.024  |
| 639.004   | AF014456  | 298.383   | 1283.427  | NM_005416 | 487.369   | 512.575   | AL050041  | 1995.554  |
| 2179.952  | AK026744  | 1204.666  | 5697.576  | L09081    | 1664.793  | 1288.052  | NM_002451 | 1931.289  |
| 3615.335  | AK002105  | 1137.795  | 2180.202  | NM_000218 | 53053.695 | 39349.848 | NM_013411 | 1543.328  |
| 755.415   | BC023536  | 1570.61   | 2042.139  | NM_016113 | 1030.955  | 694.463   | NM_001248 | 300.365   |
| 685.054   | NM_006233 | 11691.457 | 7236.383  | NM_014222 | 1455.103  | 1119.777  | NM_000180 | 1315.15   |
| 2100.029  | AK021889  | 1062.554  | 479.495   | AK026840  | 683.461   | 1229.155  | NM_000858 | 2606.575  |
| 1070.405  | AK000992  | 537.771   | 761.093   | NM_000288 | 779.241   | 805.627   | AF254087  | 1264.734  |
| 587.566   | L23544    | 17104.076 | 20181.758 | AK026317  | 3783.084  | 4547.189  | NM_017715 | 774.297   |
| 3518.603  | NM_019020 | 2272.2    | 1548.324  | X82207    | 3558.395  | 3170.223  | AL117607  | 1782.785  |
| 1098.835  | NM_016474 | 1055.069  | 795.177   | NM_015044 | 913.817   | 866.087   | AB037774  | 1162.993  |
| 2618.125  | NM_000910 | 1562.698  | 1580.055  | BF217496  | 2497.59   | 2481.528  | NM_005438 | 958.716   |
| 1746.801  | AF086001  | 28321.645 | 39487.664 | NM_004762 | 1609.426  | 2666.878  | AK024361  | 953.75    |
| 14924.026 | AL117560  | 21320.414 | 24009.848 | NM_006641 | 31442.598 | 30298.848 | NM_004350 | 1098.539  |
| 405.026   | M24749    | 6191.703  | 4115.411  | NM_000634 | 3818.72   | 4217.113  | NM_018044 | 1359.414  |
| 1548.344  | NM_005831 | 44667.07  | 12530.506 | NM_014679 | 11452.973 | 9838.827  | AF274347  | 2246.385  |
| 803.779   | NM_005850 | 56821.168 | 19744.881 | AB040969  | 887.814   | 876.312   | NM_018555 | 2204.309  |

|           |           |           |           |           |           |           |           |           |
|-----------|-----------|-----------|-----------|-----------|-----------|-----------|-----------|-----------|
| 1863.632  | NM_000554 | 30280.246 | 14211.957 | NM_003467 | 1464.309  | 2015.597  | AK023525  | 3063.35   |
| 47289.723 | AF009317  | 6141.9    | 4252.243  | NM_014936 | 348.57    | 380.87    | AF085829  | 935.657   |
| 2339.759  | AK026583  | 4125.008  | 4017.138  | NM_003943 | 672.898   | 1106.603  | AF075029  | 735.746   |
| 1425.49   | AF218031  | 6797.508  | 9022.125  | NM_019052 | 2451.263  | 5037.092  | AK021903  | 5294.156  |
| 861.247   | AF210650  | 3632.965  | 2761.107  | NM_003202 | 347.314   | 763.415   | AL390143  | 2396.715  |
| 1197.936  | AF085896  | 1243.958  | 2260.021  | AF119902  | 349.785   | 518.745   | AL162075  | 1692.688  |
| 5754.252  | AF075080  | 13203.013 | 6894.396  | NM_020525 | 2538.802  | 2090.82   | AK021595  | 1095.743  |
| 9941.627  | AL390183  | 1070.624  | 1638.598  | NM_003890 | 2275.647  | 1759.349  | AK021648  | 2566.989  |
| 1523.304  | Y13897    | 1709.869  | 1312.538  | BF127978  | 2269.455  | 2360.094  | AF147358  | 5467.147  |
| 470       | AK001857  | 879.478   | 609.542   | NM_016579 | 4808.384  | 3740.295  | NM_018410 | 1560.468  |
| 4356.525  | AF067801  | 820.569   | 662.814   | AB018297  | 349.735   | 238.488   | AF147404  | 336.813   |
| 1845.518  | AL133577  | 3511.332  | 1589.616  | AK022565  | 5337.101  | 3325.665  | NM_016364 | 517.15    |
| 33383.379 | AK025378  | 852.277   | 413.331   | AB025194  | 3234.576  | 3500.333  | AF086419  | 2573.976  |
| 5714.334  | NM_000479 | 882.51    | 551.362   | NM_006239 | 465.382   | 397.457   | AF131795  | 502.261   |
| 11639.63  | AF038199  | 2827.533  | 2160.147  | BC020863  | 488.288   | 611.982   | AL833296  | 1722.4    |
| 841.17    | CY3Cy5    | 2714.467  | 126.108   | NM_017897 | 861.04    | 1089.353  | AL110240  | 3854.075  |
| 1605.111  | BE908993  | 14437.931 | 17122.541 | NM_004265 | 5629.286  | 2787.978  | AF075081  | 501.914   |
| 770.797   | AB012701  | 1992.047  | 2165.973  | NM_002572 | 1164.378  | 1239.26   | NM_015372 | 588.715   |
| 3560.443  | M61156    | 1291.338  | 1260.201  | NM_001441 | 1156.436  | 993.383   | AF085933  | 881.979   |
| 892.767   | R44005    | 1585.498  | 3113.622  | NM_018324 | 510.064   | 802.369   | AF147431  | 798.455   |
| 743.936   | AI942392  | 3830.905  | 6193.027  | AF064255  | 15954.689 | 15579.418 | AK026422  | 3632.744  |
| 2238.898  | M55040    | 745.604   | 1346.578  | NM_016368 | 29958.809 | 32889.09  | AF085938  | 422.638   |
| 1851.517  | AW009739  | 2811.656  | 2901.802  | U08853    | 1048.2    | 819.684   | AK022264  | 1252.186  |
| 2080.469  | BC036805  | 7169.701  | 6808.84   | NM_004261 | 9019.733  | 6014.769  | AL137331  | 1368.566  |
| 3619.824  | Z74615    | 17178.73  | 20424.584 | NM_016006 | 986.443   | 1375.602  | AL162040  | 1660.055  |
| 447.56    | X03884    | 4881.408  | 10009.378 | NM_016245 | 7990.221  | 5816.49   | AL442084  | 1080.323  |
| 3477.767  | U36759    | 2128.368  | 12191.251 | AF005632  | 2099.336  | 1454.751  | AL137371  | 9870.604  |
| 4290.029  | X91625    | 1980.989  | 2337.719  | NM_000903 | 6918.556  | 8883.866  | AL137596  | 3198.635  |
| 658.837   | AF090901  | 303.096   | 538.928   | NM_004493 | 4747.199  | 9437.429  | AL353942  | 16067.968 |
| 404.065   | AF004231  | 654.09    | 1363.819  | AF309489  | 1174.708  | 1437.953  | Z38010    | 1936.272  |
| 1651.346  | AF001862  | 2709.544  | 2316.681  | NM_004047 | 11598.124 | 13526.672 | AF088003  | 747.891   |
| 9630.203  | SR2       | 53143.988 | 58610.367 | NM_004823 | 1260.372  | 1481.887  | AK024713  | 771.844   |
| 1346.368  | SR4       | 17834.508 | 17718.912 | Y17179    | 47467.879 | 58446.391 | AK024204  | 471.421   |
| 1051.386  | SR6       | 2503.922  | 2303.935  | NM_000891 | 418.85    | 360.847   | AK023737  | 939.524   |
| 527.436   | SR8       | 8296.071  | 20087.539 | AF239613  | 2217.607  | 1775.276  | NM_006609 | 1745.32   |
| 14922.608 | SR10      | 27959.037 | 5556.491  | NM_016044 | 600.626   | 390.305   | AK023643  | 1553.175  |
| 34420.996 | CY3Cy5    | 7313.023  | 392.145   | NM_000520 | 1375.922  | 937.4     | AL390159  | 651.532   |
| 1465.044  | NM_004126 | 595.045   | 1035.126  | NM_000289 | 547.933   | 463.627   | AF095853  | 261.517   |
| 9459.495  | NM_003617 | 613.731   | 855.185   | NM_001500 | 847.227   | 327.035   | NM_014157 | 790.915   |
| 1208.186  | NM_001841 | 1032.37   | 594.611   | NM_004388 | 1403.323  | 773.955   | AF111851  | 1769.437  |
| 11263.858 | NM_002054 | 3868.818  | 4230.351  | NM_020379 | 209.016   | 388.737   | AF152529  | 424.733   |
| 2001.646  | AF300649  | 1791.655  | 1970.417  | AL110127  | 834.372   | 902.488   | AL360200  | 601.277   |
| 11824.391 | NM_004125 | 1004.439  | 1249.435  | NM_002528 | 932.111   | 992.368   | AK021992  | 853.072   |
| 838.562   | NM_000823 | 3096.843  | 4336.66   | D38438    | 3853.983  | 4328.649  | AK022102  | 587.968   |
| 17114.986 | NM_004414 | 1800.009  | 2926.02   | AV714945  | 371.344   | 280.972   | AK022235  | 1039.565  |
| 760.297   | NM_003317 | 3510.51   | 4521.525  | AF007872  | 810.188   | 1024.959  | AK022378  | 2806.548  |
| 32609.645 | NM_001139 | 2188.314  | 2033.735  | M30938    | 2128.773  | 3079.675  | AK022009  | 663.22    |
| 226.689   | NM_004609 | 36100.148 | 30342.76  | NM_015148 | 564.933   | 484.495   | AK027174  | 515.818   |
| 1828.227  | NM_003772 | 854.197   | 1425.063  | NM_004714 | 686.495   | 767.307   | AK027254  | 1528.745  |
| 661.92    | NM_001541 | 2027.451  | 2609.553  | NM_005401 | 501.202   | 481.658   | NM_017597 | 53.132    |
| 1059.332  | NM_005416 | 1309.397  | 1914.157  | NM_002497 | 3521.292  | 3614.589  | AK021772  | 1491.974  |
| 1920.308  | NM_004670 | 302.379   | 930.567   | NM_005416 | 435.813   | 463.056   | AK054831  | 27635.215 |
| 557.811   | L09081    | 2655.615  | 2621.826  | L09081    | 1439.049  | 1367.199  | AK021770  | 1098.524  |

|           |           |           |           |           |           |           |           |           |
|-----------|-----------|-----------|-----------|-----------|-----------|-----------|-----------|-----------|
| 1592.18   | NM_000218 | 66494.102 | 66193.859 | NM_000218 | 53180.414 | 48427.363 | AK027248  | 1181.301  |
| 2245.55   | NM_016113 | 3838.249  | 3657.204  | NM_016113 | 806.582   | 638.373   | AK022804  | 8201.621  |
| 1183.363  | NM_014222 | 3456.356  | 3615.115  | NM_014222 | 1259.985  | 1680.353  | AF009263  | 789.423   |
| 1080.724  | NM_000509 | 2350.457  | 1016.461  | NM_000509 | 699.002   | 293.828   | AF086329  | 1713.674  |
| 1113.228  | NM_004542 | 881.417   | 540.388   | X06182    | 405.947   | 338.566   | AK022857  | 550.213   |
| 552.388   | BF217496  | 3866.99   | 4679.351  | BE908993  | 5160.914  | 4093.937  | AL110206  | 729.065   |
| 1459.087  | NM_004762 | 2859.943  | 5167.534  | AB012701  | 945.972   | 773.571   | NM_004821 | 1309.886  |
| 1221.367  | NM_000634 | 6565.029  | 6796.58   | M61156    | 685.149   | 921.203   | AK024292  | 1776.308  |
| 738.718   | NM_014679 | 20578.281 | 17350.572 | R44005    | 961.115   | 793.977   | AK026263  | 1690.629  |
| 343.839   | AB040969  | 1911.707  | 4173.777  | AI942392  | 1196.502  | 1208.794  | S75105    | 2232.352  |
| 2179.759  | NM_003467 | 3523.974  | 3197.472  | AW009739  | 879.717   | 387.188   | AF056455  | 11334.875 |
| 658.518   | NM_014936 | 710.785   | 791.863   | BC036805  | 3095.18   | 3608.831  | NM_018510 | 1764.555  |
| 541.122   | NM_003943 | 1683.531  | 1838.401  | Z74615    | 6407.944  | 5785.713  | U50537    | 4557.464  |
| 2643.291  | NM_019052 | 3575.208  | 6339.948  | X03884    | 1855.013  | 2041.091  | AK024988  | 709.94    |
| 52309.965 | AF119902  | 652.419   | 1089.56   | U36759    | 1125.739  | 1295.316  | AF026943  | 1667.439  |
| 3808.544  | NM_020525 | 4201.246  | 4302.037  | X91625    | 1081.471  | 1197.419  | NM_020448 | 583.531   |
| 2758.452  | NM_003890 | 3372.134  | 3643.048  | AF004231  | 655.058   | 527.61    | NM_005419 | 2638.641  |
| 323.165   | BF127978  | 2786.148  | 3265.248  | AF001862  | 1085.163  | 744.121   | NM_003479 | 7057.205  |
| 932.158   | AF110801  | 219.036   | 655.027   | NM_003890 | 2303.992  | 2153.11   | NM_020224 | 3195.574  |
| 604.468   | NM_016579 | 7736.131  | 6598.168  | BF127978  | 2255.301  | 2261.015  | U17617    | 889.07    |
| 918.55    | AB018297  | 667.383   | 849.435   | AF110801  | 361.873   | 672.225   | AK022952  | 3403.398  |
| 734.703   | AK022565  | 10346.061 | 11790.713 | NM_016579 | 4977.951  | 4115.833  | BF218888  | 1130.716  |
| 6100.339  | AK023151  | 1778.717  | 1348.865  | AK022565  | 3952.454  | 3967.798  | AF086401  | 3616.344  |
| 1526.247  | AB033076  | 1289.422  | 687.454   | AK023151  | 802.988   | 710.778   | L23869    | 1301.838  |
| 750.051   | AK022876  | 1059.305  | 700.374   | AB033076  | 680.393   | 455.205   | Z21853    | 1634.684  |
| 1180.026  | AF134894  | 3813.489  | 2068.26   | AK022876  | 449.955   | 428.325   | U80770    | 672.839   |
| 4301.415  | NM_003938 | 5760.474  | 1261.881  | AF134894  | 1756.083  | 1793.779  | AB075846  | 570.158   |
| 5272.193  | NM_001441 | 1472.135  | 1795.332  | NM_003938 | 3195.493  | 1948.376  | NM_018342 | 810.14    |
| 4873.013  | NM_018324 | 1411.01   | 1787.949  | NM_014827 | 5915.083  | 7183.853  | BC020260  | 761.175   |
| 1435.106  | AF064255  | 18180.906 | 19722.684 | NM_004126 | 276.951   | 231.96    | D17156    | 3638.827  |
| 790.988   | NM_016368 | 30944.807 | 32066.479 | U87460    | 3446.731  | 2803.954  | AK026938  | 2838.019  |
| 848.701   | U08853    | 2575.744  | 2220.78   | NM_003617 | 402.947   | 395.588   | AK024373  | 6893.613  |
| 612.685   | NM_004261 | 11232.956 | 5477.641  | NM_001841 | 354.455   | 312.724   | AK022343  | 3550.659  |
| 1460.409  | NM_016006 | 1875.547  | 2212.905  | NM_002054 | 1433.125  | 1367.633  | U92989    | 3331.142  |
| 2153.707  | NM_016245 | 12912.3   | 11171.399 | AF300649  | 657.572   | 615.297   | AF075102  | 1283.427  |
| 2395.861  | AF005632  | 3447.185  | 2953.342  | NM_004125 | 338.943   | 363.596   | NM_018463 | 2136      |
| 5407.584  | NM_000903 | 11723.811 | 20330.711 | NM_000823 | 1594.58   | 1464.803  | X74956    | 8085.109  |
| 488.822   | NM_004493 | 8690.174  | 10209.783 | NM_004414 | 893.722   | 721.351   | AF132197  | 3859.495  |
| 4333.612  | AF309489  | 686.361   | 736.183   | NM_003317 | 2084.098  | 1478.025  | AK025546  | 904.089   |
| 893.285   | NM_004047 | 27545.213 | 27177.889 | NM_001139 | 1080.944  | 765.372   | AL137487  | 1828.915  |
| 571.899   | AF287303  | 193.25    | 525.16    | NM_004609 | 13706.776 | 8288.75   | AK023800  | 768.29    |
| 795.248   | NM_004823 | 1751.986  | 3646.415  | NM_003772 | 555.641   | 839.984   | AK024120  | 1621.048  |
| 2443.522  | Y17179    | 55116.746 | 58329.43  | NM_001541 | 1778.16   | 1259.337  | CY3Cy5    | 6110.892  |
| 4240.495  | NM_000891 | 479.947   | 1021.719  | NM_004823 | 1284.914  | 1799.017  | W96179    | 1153.168  |
| 6983.32   | AF239613  | 4581.538  | 3631.796  | Y17179    | 48033.547 | 60687.117 | AW247841  | 3559.827  |
| 304.873   | AK026840  | 1399.075  | 1600.914  | NM_000891 | 421.487   | 561.481   | M76559    | 1306.768  |
| 3866.178  | NM_000288 | 1570.123  | 895.63    | AF239613  | 2147.714  | 2730.139  | U03884    | 205.333   |
| 708.181   | AK026317  | 4390.696  | 2751.471  | AK026840  | 713.027   | 1487.314  | AI222585  | 461.047   |
| 997.076   | X82207    | 6283.095  | 3150.615  | NM_000288 | 585.35    | 570.493   | AA411678  | 3246.577  |
| 3347.168  | NM_015044 | 3633.848  | 1289.454  | AK026317  | 3872.194  | 3526.558  | AA862813  | 7071.837  |
| 905.137   | NM_000520 | 5403.545  | 10056.283 | X82207    | 7646.086  | 6400.083  | AA398427  | 898.712   |
| 1506.092  | NM_000289 | 1419.378  | 1557.13   | NM_015044 | 1171.446  | 1038.711  | T55728    | 1494.525  |
| 555.801   | NM_001500 | 2147.021  | 906.31    | BF217496  | 3136.616  | 2776.036  | H20856    | 731.162   |

|           |           |           |           |           |           |           |           |          |
|-----------|-----------|-----------|-----------|-----------|-----------|-----------|-----------|----------|
| 1176.772  | NM_00438E | 2564.412  | 2354.521  | NM_004762 | 1711.681  | 2233.204  | N62586    | 1007.058 |
| 873.973   | NM_020379 | 469.793   | 780.871   | NM_006641 | 31964.727 | 26610.434 | AA242743  | 1068.534 |
| 6043.749  | AL110127  | 1415.294  | 1580.583  | NM_000634 | 2832.025  | 2169.255  | NM_00475E | 508.538  |
| 847.296   | NM_00252E | 1451.271  | 1492.716  | NM_014679 | 8204.124  | 6730.559  | CY3Cy5    | 5646.881 |
| 1437.709  | D38438    | 5738.506  | 7878.64   | AB040969  | 872.691   | 870.373   | NM_016382 | 718.462  |
| 1400.732  | AV714945  | 875.992   | 666.274   | NM_003467 | 1281.485  | 1399.868  | AK023117  | 1130.228 |
| 44907.438 | AF089897  | 561.121   | 333.885   | NM_014936 | 272.218   | 185.136   | AF119914  | 207.021  |
| 249.773   | AF007872  | 1671.211  | 2227.817  | NM_003943 | 630.418   | 669.664   | NM_005536 | 2271.111 |
| 2267.406  | M30938    | 4800.072  | 4630.214  | NM_019052 | 2076.456  | 4234.684  | NM_005077 | 1029.418 |
| 548.305   | NM_01514E | 962.913   | 920.1     | NM_003202 | 333.925   | 344.752   | NM_004423 | 1967.019 |
| 849.643   | NM_004714 | 1042.005  | 1583.217  | NM_020525 | 2600.147  | 1666.809  | NM_002141 | 567.261  |
| 5364.594  | NM_005401 | 879.808   | 1206.5    | X62468    | 193.008   | 186.81    | NM_003311 | 3490.865 |
| 9887.954  | NM_002497 | 5528.646  | 5078.326  | NM_01514E | 639.378   | 777.779   | NM_003776 | 1428.289 |
| 1915.653  | AB025194  | 4279.806  | 4127.514  | NM_004714 | 639.992   | 544.6     | NM_00709E | 724.209  |
| 2720.944  | NM_006239 | 810.041   | 754.601   | NM_005401 | 436.662   | 373.814   | NM_015719 | 668.77   |
| 1353.895  | BC020863  | 394.161   | 843.472   | NM_002497 | 2613.383  | 2996.776  | NM_000582 | 1083.452 |
| 27462.025 | NM_017897 | 2235.018  | 1632.987  | AB025194  | 2649.349  | 2628.377  | AJ224741  | 399.944  |
| 8575.451  | NM_004265 | 16799.584 | 3706.156  | NM_006239 | 377.525   | 334.895   | NM_004684 | 436.672  |
| 3422.958  | NM_002572 | 2604.861  | 1439.741  | NM_017897 | 1134.611  | 1186.948  | BF338709  | 455.832  |
| 2766.347  | L14819    | 520.444   | 694.793   | NM_004265 | 7673.99   | 3281.378  | AF204171  | 234.925  |
| 726.886   | NM_000509 | 2163.06   | 1575.336  | NM_002572 | 1167.447  | 1372.993  | AF100756  | 4697.905 |
| 1744.589  | NM_004542 | 701.239   | 1460.019  | NM_001441 | 834.077   | 595.068   | NM_006825 | 3939.964 |
| 238.033   | X06182    | 1127.952  | 1551.545  | NM_018324 | 490.151   | 410.463   | NM_004862 | 924.36   |
| 2747.097  | AB012701  | 2264.626  | 2436.004  | AF064255  | 12229.442 | 10581.766 | NM_001661 | 367.519  |
| 513.972   | M61156    | 1594.158  | 1731.133  | NM_01636E | 25667.148 | 22428.508 | NM_014563 | 588.488  |
| 789.414   | R44005    | 1423.042  | 2729.972  | U08853    | 1150.914  | 846.897   | NM_020150 | 1264.567 |
| 661.744   | A1942392  | 4285.813  | 5914.005  | NM_004261 | 8956.505  | 4517.758  | NM_007150 | 1167.996 |
| 609.226   | M55040    | 960.956   | 1160.448  | NM_016006 | 812.25    | 1062.583  | NM_006831 | 876.621  |
| 215.9     | AW009739  | 2598.272  | 2607.606  | NM_016245 | 7062.87   | 5098.089  | AL162044  | 1326.667 |
| 2913.125  | BC036805  | 7684.133  | 6047.067  | AF005632  | 1709.572  | 1313.173  | AK024004  | 325.393  |
| 3306.624  | Z74615    | 16524.996 | 17989.453 | NM_000903 | 6761.874  | 6791.817  | BE892273  | 9302.487 |
| 440.842   | X03884    | 5062.527  | 10038.222 | NM_004493 | 4751.13   | 8006.25   | AF035803  | 470.238  |
| 484.625   | U36759    | 2323.561  | 14435.18  | AF309489  | 260.164   | 211.866   | Y08147    | 1666.022 |
| 1293.548  | X91625    | 2157.263  | 2438.597  | NM_004047 | 11190.283 | 11334.44  | D00174    | 2469.356 |
| 12336.045 | AF090901  | 428.846   | 525.849   | NM_006773 | 821.217   | 1315.063  | AB000520  | 806.428  |
| 1806.844  | AF004231  | 908.845   | 1344.196  | AK024439  | 1775.201  | 2157.007  | NM_006907 | 367.639  |
| 854.448   | AF001862  | 2387.336  | 1946.754  | X89676    | 567.672   | 561.832   | NM_00268E | 242.147  |
| 401.317   | NM_016044 | 1227.378  | 411.965   | Z32684    | 614.16    | 748.856   | NM_006267 | 753.307  |
| 10586.102 | AK023151  | 1714.653  | 1817.764  | NM_016512 | 458.111   | 600.923   | NM_002661 | 4700.702 |
| 29262.469 | AB033076  | 1366.822  | 1289.24   | NM_01748E | 2455.103  | 1697.458  | NM_001263 | 362.476  |
| 3041.652  | AK022876  | 927.033   | 1207.097  | NM_005069 | 447.465   | 238.842   | AK023982  | 218.69   |
| 25032.107 | AF134894  | 4366.495  | 4597.293  | NM_016044 | 676.47    | 288.542   | NM_01846E | 448.568  |
| 1745.31   | NM_00393E | 6803.218  | 5662.019  | NM_000520 | 1810.964  | 1677.8    | AB014533  | 2061.822 |
| 6907.116  | NM_00412E | 590.474   | 664.404   | NM_000289 | 590.08    | 463.007   | NM_000744 | 334.982  |
| 1253.855  | U87460    | 5565.174  | 5691.385  | NM_001500 | 801.147   | 323.636   | NM_003039 | 4178.127 |
| 4511.412  | NM_003617 | 512.41    | 1078.295  | NM_00438E | 1240.807  | 978.479   | NM_020372 | 963.582  |
| 3733.369  | NM_001841 | 690.912   | 561.791   | AL110127  | 887.342   | 765.68    | NM_016077 | 2078.866 |
| 17108.877 | NM_002054 | 4055.159  | 4107.36   | NM_00252E | 644.893   | 547.398   | NM_015537 | 1388.708 |
| 817.881   | AF300649  | 2135.265  | 2110.425  | D38438    | 3304.278  | 3529.005  | NM_016520 | 3474.072 |
| 1666.378  | NM_004125 | 931.303   | 657.4     | AF007872  | 1011.725  | 1061.41   | AB018353  | 1078.693 |
| 672.947   | NM_000823 | 2425.672  | 2858.171  | M30938    | 2157.441  | 2513.887  | NM_007036 | 840.598  |
| 903.653   | NM_004414 | 1565.979  | 2041.829  | NM_01758E | 5236.592  | 5850.69   | NM_002617 | 758.393  |
| 347.404   | NM_003317 | 3218.63   | 3529.248  | NM_00414E | 1463.066  | 1483.75   | NM_003313 | 4348.405 |

|           |           |           |           |           |           |           |           |          |
|-----------|-----------|-----------|-----------|-----------|-----------|-----------|-----------|----------|
| 2450.778  | NM_001139 | 2240.873  | 2693.732  | X03168    | 607.193   | 674.297   | AF090907  | 910.876  |
| 484.603   | NM_004609 | 20172.18  | 18840.154 | NM_005168 | 828.007   | 579.375   | AK024476  | 1390.064 |
| 837.025   | NM_003772 | 773.592   | 1178.664  | NM_017801 | 3048.191  | 3627.997  | X74794    | 2479.962 |
| 1000.593  | NM_001541 | 1996.545  | 1848.59   | NM_007348 | 1795.752  | 1828.893  | AL050298  | 1436.521 |
| 1543.366  | NM_005416 | 1077.235  | 1314.141  | U65473    | 2404.277  | 1498.908  | NM_007079 | 11524.47 |
| 543.704   | NM_004670 | 316.255   | 742.906   | D63481    | 4004.724  | 3684.286  | M20696    | 1544.621 |
| 757.445   | L09081    | 2751.293  | 2813.656  | AL157424  | 422.9     | 462.908   | NM_002915 | 413.671  |
| 1124.084  | NM_000218 | 63774.969 | 59939.262 | AK024422  | 835.924   | 413.231   | NM_006736 | 387.817  |
| 1283.696  | NM_016113 | 2690.536  | 1969.88   | NM_002673 | 1641.192  | 1873.281  | NM_003640 | 664.214  |
| 586.713   | NM_014222 | 3155.509  | 3132.731  | NM_003876 | 1677.353  | 1931.026  | NM_012248 | 2842.101 |
| 1685.801  | AK026840  | 1521.159  | 2423.533  | AJ276310  | 391.305   | 356.441   | NM_004223 | 2416.28  |
| 257.502   | NM_000288 | 1782.601  | 1576.952  | NM_012295 | 2503.325  | 1863.524  | NM_006813 | 406.069  |
| 1710.65   | AK026317  | 11496.723 | 12522.127 | NM_015910 | 271.72    | 172.056   | NM_001355 | 5200.208 |
| 4191.009  | X82207    | 12157.507 | 12420.237 | AL133666  | 716.789   | 590.238   | NM_004684 | 288.128  |
| 3837.369  | NM_015044 | 3201.226  | 3448.049  | NM_004710 | 1886.346  | 1139.321  | W96179    | 927.145  |
| 2254.931  | BF217496  | 4588.077  | 4789.393  | NM_004396 | 4907.511  | 3246.26   | AW247841  | 3146.53  |
| 708.59    | NM_004762 | 2549.655  | 5122.82   | NM_017999 | 1152.851  | 902.945   | M76559    | 1233.272 |
| 810.884   | NM_006641 | 38518.27  | 34917.363 | NM_015989 | 20569.969 | 16010.317 | AI222585  | 314.763  |
| 4199.536  | NM_000634 | 7278.417  | 6910.907  | NM_001043 | 635.666   | 595.95    | AA411678  | 3288.549 |
| 2287.351  | NM_014679 | 26644.564 | 23399.451 | NM_004779 | 4267.38   | 6213.165  | AA862813  | 6656.66  |
| 275.098   | AB040969  | 1533.238  | 3170.157  | NM_019071 | 1503.118  | 1748.268  | AA398427  | 813.714  |
| 1699.369  | NM_003467 | 3000.593  | 2878.475  | AF113685  | 631.133   | 656.721   | H20856    | 647.602  |
| 4052.749  | NM_014936 | 784.994   | 755.09    | NM_005470 | 1873.834  | 1243.627  | N62586    | 1231.465 |
| 1130.915  | NM_003943 | 1178.031  | 1697.845  | NM_004225 | 3800.17   | 4276.75   | NM_015361 | 4632.881 |
| 1822.17   | NM_019052 | 3356.681  | 4519.697  | NM_003862 | 477.189   | 439.338   | NM_004310 | 390.953  |
| 1171.769  | NM_003202 | 524.526   | 683.185   | NM_002873 | 1544.168  | 1082.971  | Y08147    | 1152.276 |
| 335.948   | AF119902  | 560.464   | 1004.091  | NM_015571 | 3101.158  | 2376.607  | D00174    | 1769.155 |
| 1874.262  | NM_020525 | 2735.253  | 2203.457  | NM_004701 | 1602.457  | 2342.771  | AB000520  | 602.353  |
| 510.607   | NM_003890 | 2142.402  | 1910.681  | AK025554  | 723.043   | 933.891   | NM_016382 | 871.787  |
| 309.363   | BF127978  | 2034.781  | 1947.235  | BI824151  | 1752.962  | 1290.583  | AK023117  | 1190.881 |
| 1248.769  | NM_016579 | 7036.102  | 4402.208  | AK021791  | 1342.248  | 2281.188  | AL122046  | 319.119  |
| 5440.513  | AB018297  | 837.203   | 448.546   | NM_004052 | 3025.722  | 999.76    | NM_000855 | 622.877  |
| 2450.446  | AK022565  | 10215.377 | 8695.816  | NM_004394 | 6399.056  | 5137.78   | NM_005536 | 1919.513 |
| 23242.113 | AB025194  | 4570.009  | 5525.409  | NM_005727 | 11935.916 | 9352.899  | NM_005077 | 1011.026 |
| 1367.04   | NM_006239 | 967.583   | 955.993   | AK027242  | 863.153   | 987.125   | NM_004423 | 1910.517 |
| 3918.17   | BC020863  | 659.167   | 845.51    | NM_001279 | 4653.537  | 6242.689  | NM_002141 | 589.01   |
| 1137.529  | NM_017897 | 2424.698  | 2891.856  | NM_005010 | 509.386   | 320.936   | NM_003311 | 3535.411 |
| 486.022   | NM_004265 | 17931.717 | 8022.812  | NM_019055 | 646.166   | 646.878   | NM_006129 | 1062.899 |
| 1346.1    | NM_002572 | 2585.796  | 2876.172  | U96136    | 326.076   | 339.721   | NM_000582 | 1036.203 |
| 332.251   | NM_001441 | 1329.865  | 1673.966  | AF188747  | 334.434   | 176.937   | NM_005593 | 712.192  |
| 3011.319  | NM_018324 | 785.196   | 931.649   | NM_005941 | 477.811   | 517.2     | NM_004979 | 401.451  |
| 1096.92   | AF064255  | 21244.023 | 23118.611 | NM_015884 | 176.386   | 127.333   | NM_016077 | 1607.146 |
| 3324.95   | NM_016368 | 31329.654 | 39623.82  | AF201380  | 1447.418  | 1245.56   | AF100756  | 4454.103 |
| 1896.333  | U08853    | 2910.18   | 3055.622  | NM_003619 | 1297.966  | 767.321   | NM_006825 | 3288.724 |
| 1070.334  | NM_004261 | 14895.107 | 7525.72   | NM_012392 | 2009.665  | 2122.718  | NM_004862 | 1192.479 |
| 1541.143  | NM_016006 | 1760      | 2183.071  | NM_014833 | 7425.127  | 12042.473 | NM_001661 | 368.886  |
| 1070.593  | NM_016245 | 12885.392 | 9627.437  | NM_000045 | 533.674   | 337.282   | NM_014563 | 702.574  |
| 2680.064  | AF005632  | 3750.579  | 2443.403  | NM_003878 | 1778.716  | 2010.618  | NM_020150 | 1267.861 |
| 3731.809  | NM_000903 | 12301.591 | 20072.092 | NM_004832 | 341.816   | 284.669   | NM_007150 | 1121.196 |
| 5562.701  | NM_004493 | 9389.989  | 10296.896 | NM_005957 | 249.254   | 289.26    | NM_006831 | 568.618  |
| 1759.266  | AF309489  | 467.269   | 481.229   | AK024374  | 916.605   | 785.055   | AL162044  | 1299.304 |
| 4744.4    | NM_004047 | 26389.672 | 28613.908 | NM_018234 | 1557.687  | 2009.164  | AF026929  | 526.351  |
| 543.667   | AF287303  | 176.572   | 362.823   | AB033062  | 749.791   | 567.929   | NM_016734 | 577.769  |

|           |           |           |           |           |          |           |           |           |
|-----------|-----------|-----------|-----------|-----------|----------|-----------|-----------|-----------|
| 1396.539  | NM_004823 | 1596.86   | 2770.382  | NM_016437 | 8799.132 | 7883.292  | NM_014393 | 1519.502  |
| 892.529   | Y17179    | 55381.625 | 59227.73  | NM_002720 | 2425.704 | 3319.545  | NM_004223 | 2432.112  |
| 676.582   | NM_000891 | 498.213   | 695.726   | AK024716  | 4268.771 | 3564.063  | NM_006813 | 277.648   |
| 1218.929  | AF239613  | 4615.28   | 2588.875  | X67155    | 322.659  | 480.567   | NM_001355 | 4353.755  |
| 1658.471  | NM_058197 | 725.923   | 713.091   | NM_020380 | 2119.767 | 3275.344  | NM_001216 | 261.867   |
| 1231.527  | NM_016044 | 1691.147  | 1237.678  | NM_002890 | 8747.834 | 8602.103  | U63336    | 467.709   |
| 6779.078  | NM_000520 | 4895.785  | 8233.849  | NM_001330 | 30146.18 | 22340.123 | NM_002686 | 235.406   |
| 580.767   | NM_000289 | 1433.189  | 1612.545  | NM_015927 | 758.372  | 637.481   | NM_006267 | 553.112   |
| 1265.782  | NM_001500 | 1878.651  | 708.007   | NM_005122 | 331.045  | 572.481   | NM_002661 | 3843.983  |
| 830.111   | NM_004388 | 2389.531  | 2173.245  | NM_014552 | 2807.306 | 2892.098  | NM_001263 | 495.886   |
| 384.948   | NM_020379 | 552.125   | 927.513   | NM_003072 | 4050.615 | 4764.905  | NM_018466 | 488.047   |
| 960.499   | AL110127  | 1729.145  | 1321.944  | NM_001913 | 1731.511 | 1191.615  | Y11312    | 260.862   |
| 546.854   | NM_002528 | 1492.838  | 1500.516  | AK025594  | 478.993  | 495.339   | AB014533  | 2009.413  |
| 4410.146  | D38438    | 4990.139  | 7567.332  | AB040931  | 1202.697 | 1109.581  | NM_014509 | 390.985   |
| 2605.35   | AV714945  | 736.895   | 600.955   | NM_003599 | 518.119  | 461.029   | U26662    | 153.291   |
| 11904.192 | AF007872  | 1898.406  | 2568.986  | NM_015911 | 956.501  | 866.321   | NM_020372 | 1183.224  |
| 877.58    | M30938    | 4667.729  | 4134.885  | BC011826  | 1894.477 | 1618.533  | NM_004758 | 526.411   |
| 1912.806  | NM_015148 | 1183.943  | 838.827   | NM_017647 | 1716.379 | 2388.32   | NM_005163 | 1915.313  |
| 36513.816 | NM_004714 | 989.66    | 840.715   | NM_012091 | 503.158  | 538.521   | NM_015361 | 4388.403  |
| 27746.193 | NM_005401 | 846.549   | 890.305   | NM_012321 | 1255.528 | 1051.223  | NM_004310 | 395.274   |
| 1254.448  | NM_002497 | 5052.25   | 2775.209  | D13642    | 1894.007 | 1828.507  | NM_015537 | 1644.585  |
| 2965.677  | NM_005416 | 1932.432  | 2395.169  | NM_004741 | 5053.644 | 2794.849  | NM_016520 | 2204.561  |
| 3401.781  | NM_004670 | 1472.38   | 2056.162  | NM_018032 | 1865.72  | 1640.104  | AB018353  | 1073.441  |
| 1104.215  | L09081    | 4769.279  | 6673.518  | NM_003675 | 2418.213 | 1650.149  | NM_007036 | 673.66    |
| 1289.632  | NM_000218 | 60774.648 | 61521.359 | NM_017518 | 1020.66  | 879.956   | NM_002617 | 620.883   |
| 346.709   | NM_016113 | 5374.815  | 5261.396  | NM_004117 | 2643.252 | 2618.683  | NM_003313 | 4150.029  |
| 848.666   | NM_014222 | 3836.296  | 4984.938  | NM_016594 | 734.504  | 810.691   | AF090907  | 503.871   |
| 1587.555  | L14819    | 524.115   | 559.42    | NM_030752 | 1555.566 | 2091.705  | AK024476  | 1119.423  |
| 1009.724  | NM_000509 | 1740.455  | 1158.582  | D26068    | 8194.127 | 5231.43   | X74794    | 1288.865  |
| 406.567   | NM_004542 | 826.402   | 1217.527  | NM_018559 | 4177.351 | 3259.48   | AL050298  | 1133.605  |
| 2310.906  | X06182    | 1291.127  | 1768.422  | NM_017593 | 808.482  | 648.815   | NM_007079 | 10758.818 |
| 1670.271  | BE908993  | 15320.989 | 18187.674 | NM_004282 | 5003.02  | 5381.073  | M20696    | 1502.961  |
| 3390.501  | AB012701  | 2569.075  | 2844.29   | AF070549  | 176.576  | 250.443   | NM_007098 | 814.129   |
| 842.258   | M61156    | 1699.927  | 1814.065  | AK025695  | 1043.799 | 1875.947  | NM_015719 | 647.797   |
| 1202.56   | R44005    | 2153.224  | 4236.665  | AK025442  | 3298.404 | 6235.63   | NM_006129 | 916.182   |
| 564.117   | A1942392  | 4614.677  | 6567.803  | AL050041  | 561.728  | 609.158   | NM_000582 | 812.477   |
| 2607.324  | M55040    | 715.266   | 984.453   | NM_002451 | 726.797  | 810.609   | NM_005593 | 713.517   |
| 904.006   | AW009739  | 2866.597  | 2473.349  | NM_013411 | 709.44   | 683.719   | AF204171  | 926.406   |
| 2978.091  | BC036805  | 7288.262  | 5499.156  | NM_001248 | 296.397  | 331.577   | W96179    | 853.176   |
| 31038.107 | Z74615    | 12841.409 | 13283.778 | NM_000180 | 3978.15  | 3030.311  | AW247841  | 2990.549  |
| 8203.629  | X03884    | 4930.019  | 8608.793  | NM_000858 | 1844.662 | 1784.999  | M76559    | 1267.395  |
| 1539.953  | U36759    | 1816.703  | 11751.252 | AF254087  | 1010.232 | 686.136   | A1222585  | 498.954   |
| 12628.956 | X91625    | 2250.357  | 2058.498  | NM_017715 | 436.608  | 427.483   | AA411678  | 3220.916  |
| 554.255   | AF090901  | 506.439   | 303.096   | AL117607  | 2816.663 | 2796.738  | AA862813  | 6899.152  |
| 3340.871  | AF004231  | 746.75    | 807.755   | AB037774  | 1079.944 | 418.244   | AA398427  | 670.635   |
| 759.908   | AF001862  | 3003.397  | 1820.282  | NM_005438 | 630.449  | 373.41    | BE892273  | 7687.721  |
| 707.809   | NM_003890 | 3565.206  | 3651.61   | AK024361  | 653.344  | 568.671   | AF026929  | 371.919   |
| 408.131   | BF127978  | 2532.792  | 2841.36   | NM_004350 | 664.49   | 421.579   | NM_016734 | 538.039   |
| 2936.138  | NM_016579 | 11388.841 | 9925.405  | NM_018044 | 833.105  | 935.598   | AF035803  | 419.048   |
| 1827.91   | AB018297  | 843.069   | 876.367   | AF274347  | 1926.934 | 1366.748  | Y08147    | 1341.945  |
| 386.787   | AK022565  | 10468.261 | 13289.083 | NM_018555 | 2106.527 | 1405.676  | D00174    | 1549.397  |
| 2877.76   | AK023151  | 1806.286  | 1807.859  | AK023525  | 3019.501 | 9514.072  | AB000520  | 624.083   |
| 459.389   | AB033076  | 1384.141  | 1365.463  | AF085829  | 1625.576 | 2685.499  | NM_016382 | 707.069   |



|          |                  |           |           |                  |           |           |                  |          |
|----------|------------------|-----------|-----------|------------------|-----------|-----------|------------------|----------|
| 469.702  | <b>AK022876</b>  | 800.366   | 1300.177  | <b>AF075029</b>  | 696.532   | 1205.095  | <b>AK023117</b>  | 1617.244 |
| 416.369  | <b>AF134894</b>  | 3737.893  | 4157.707  | <b>AK021903</b>  | 3412.6    | 3329.025  | <b>AL122046</b>  | 259.049  |
| 550.471  | <b>NM_003938</b> | 7155.293  | 5745.75   | <b>AL390143</b>  | 2248.374  | 1854.967  | <b>NM_000855</b> | 935.342  |
| 1136.604 | <b>NM_014827</b> | 10985.918 | 16440.891 | <b>AL162075</b>  | 922.823   | 1330.865  | <b>NM_005536</b> | 2466.024 |
| 602.016  | <b>NM_004126</b> | 667.767   | 883.704   | <b>AF147384</b>  | 498.384   | 328.924   | <b>NM_005077</b> | 1055.871 |
| 1084.3   | <b>U87460</b>    | 6218.942  | 6299.422  | <b>AK021595</b>  | 523.607   | 452.07    | <b>NM_004423</b> | 2098.834 |
| 3862.844 | <b>NM_003617</b> | 581.172   | 755.183   | <b>AK021648</b>  | 831.6     | 855.371   | <b>NM_001990</b> | 327.285  |
| 3025.581 | <b>NM_001841</b> | 864.424   | 612.572   | <b>AF147358</b>  | 7284.74   | 8477.321  | <b>NM_002141</b> | 580.93   |
| 1675.421 | <b>NM_002054</b> | 3986.86   | 3834.149  | <b>NM_018410</b> | 739.318   | 1433.088  | <b>NM_003311</b> | 3741.719 |
| 690.262  | <b>AF300649</b>  | 1246.011  | 1227.969  | <b>AF086355</b>  | 329.369   | 272.034   | <b>NM_003776</b> | 1643.063 |
| 3067.174 | <b>NM_004125</b> | 920.235   | 835.916   | <b>AF086314</b>  | 316.387   | 273.995   | <b>NM_000744</b> | 308.161  |
| 1595.287 | <b>NM_000823</b> | 2378.695  | 2858.219  | <b>NM_016364</b> | 532.435   | 340.457   | <b>NM_003039</b> | 4109.949 |
| 844.202  | <b>NM_004414</b> | 1683.781  | 2212.153  | <b>AF086419</b>  | 2224.488  | 1919.294  | <b>NM_014509</b> | 536.058  |
| 750.4    | <b>NM_003317</b> | 2310.025  | 2486.907  | <b>AF086461</b>  | 420.37    | 312.637   | <b>NM_020372</b> | 757.663  |
| 1512.918 | <b>NM_001139</b> | 2174.31   | 1906.229  | <b>AL833296</b>  | 1262.686  | 971.167   | <b>NM_002635</b> | 37769.23 |
| 6664.008 | <b>NM_004609</b> | 17261.018 | 12957.634 | <b>AL110240</b>  | 1943.816  | 1301.899  | <b>NM_004979</b> | 300.058  |
| 819.404  | <b>NM_003772</b> | 996.356   | 842.414   | <b>AF075081</b>  | 396.874   | 824.503   | <b>NM_016077</b> | 1729.077 |
| 222.09   | <b>NM_001541</b> | 1457.397  | 1555.367  | <b>NM_015372</b> | 504.661   | 1135.607  | <b>AF100756</b>  | 4420.174 |
| 307.561  | <b>Y17179</b>    | 51505.73  | 56626.773 | <b>AF085919</b>  | 761.037   | 805.854   | <b>NM_006825</b> | 4442.158 |
| 790.206  | <b>NM_000891</b> | 728.13    | 1300.337  | <b>AF085933</b>  | 625.746   | 847.722   | <b>NM_004862</b> | 1431.856 |
| 3412.172 | <b>AF239613</b>  | 4955.605  | 4028.288  | <b>AF147431</b>  | 346.55    | 354.08    | <b>NM_001661</b> | 553.479  |
| 1311.398 | <b>AK026840</b>  | 1399.128  | 2038.44   | <b>AK026422</b>  | 4408.556  | 4665.083  | <b>NM_014563</b> | 743.02   |
| 1633.569 | <b>NM_000288</b> | 1385.815  | 1228.276  | <b>AK022264</b>  | 468.071   | 588.177   | <b>NM_020150</b> | 1593.218 |
| 3631.158 | <b>AK026317</b>  | 11694.549 | 11516.81  | <b>AL137331</b>  | 610.842   | 625.746   | <b>NM_007150</b> | 923.461  |
| 384.022  | <b>X82207</b>    | 13641.101 | 13868.903 | <b>AL162040</b>  | 1935.219  | 1951.32   | <b>NM_006831</b> | 893.206  |
| 780.961  | <b>NM_015044</b> | 4108.995  | 4144.723  | <b>AL442084</b>  | 627.829   | 412.454   | <b>AL162044</b>  | 1364.361 |
| 347.986  | <b>BF217496</b>  | 4490.777  | 4481.485  | <b>AL137371</b>  | 4661.684  | 3994.274  | <b>NM_006736</b> | 361.582  |
| 292.255  | <b>NM_004762</b> | 3051.603  | 5166.195  | <b>AL137596</b>  | 1561.031  | 1517.722  | <b>NM_003640</b> | 744.521  |
| 2601.409 | <b>NM_006641</b> | 40149.234 | 34085.578 | <b>AL353942</b>  | 9255.976  | 7535.637  | <b>NM_014444</b> | 2283.989 |
| 306.761  | <b>NM_000634</b> | 6205.589  | 6379.917  | <b>Z38010</b>    | 8148.974  | 5919.125  | <b>NM_012248</b> | 3298.011 |
| 657.837  | <b>NM_014679</b> | 21753.393 | 17455.129 | <b>AK024713</b>  | 316.961   | 498.176   | <b>NM_014970</b> | 2588.222 |
| 604.08   | <b>AB040969</b>  | 1761.557  | 2415.135  | <b>AK024204</b>  | 376.247   | 346.792   | <b>NM_014393</b> | 1075.416 |
| 1178.27  | <b>NM_003467</b> | 3289.031  | 2897.84   | <b>AK023737</b>  | 458.577   | 448.687   | <b>NM_004223</b> | 1806.977 |
| 383.675  | <b>NM_014936</b> | 693.89    | 720.367   | <b>NM_006609</b> | 1038.436  | 685.074   | <b>NM_001355</b> | 5001.026 |
| 3961.767 | <b>NM_003943</b> | 1310.41   | 1453.227  | <b>NM_014118</b> | 100.228   | 167.666   | <b>U63336</b>    | 423.886  |
| 1412.273 | <b>NM_019052</b> | 3502.443  | 4465.641  | <b>AK023643</b>  | 1450.597  | 4097.294  | <b>NM_006907</b> | 464.768  |
| 4967.738 | <b>NM_003202</b> | 595.349   | 771.906   | <b>AL390159</b>  | 375.534   | 1117.192  | <b>NM_006267</b> | 623.6    |
| 2983.397 | <b>AF119902</b>  | 787.066   | 641.591   | <b>NM_014157</b> | 443.639   | 1100.198  | <b>NM_002661</b> | 4516.855 |
| 116.349  | <b>NM_020525</b> | 1732.914  | 1076.908  | <b>AF090933</b>  | 346.143   | 269.198   | <b>NM_001263</b> | 359.649  |
| 533.302  | <b>NM_005401</b> | 1339.233  | 1759.156  | <b>AF111851</b>  | 2673.345  | 2004.767  | <b>AK023982</b>  | 279.981  |
| 833.098  | <b>NM_017677</b> | 318.858   | 683.247   | <b>AL360200</b>  | 596.999   | 969.309   | <b>NM_018466</b> | 580.074  |
| 1120.408 | <b>NM_002497</b> | 5227.255  | 4859.549  | <b>AK021992</b>  | 334.128   | 266.845   | <b>Y11312</b>    | 438.056  |
| 1882.193 | <b>AB025194</b>  | 5740.136  | 6564.756  | <b>AK022102</b>  | 278.705   | 182.099   | <b>AB014533</b>  | 2316.465 |
| 667.969  | <b>NM_006239</b> | 792.55    | 795.526   | <b>AK022235</b>  | 325.635   | 309.229   | <b>AK022097</b>  | 1625.515 |
| 325.948  | <b>BC020863</b>  | 718.23    | 595.046   | <b>AK022378</b>  | 1294.978  | 1156.312  | <b>NM_002166</b> | 7860.484 |
| 666.605  | <b>NM_017897</b> | 2283.685  | 2954.784  | <b>AL110173</b>  | 330.055   | 274.706   | <b>NM_004660</b> | 6032.26  |
| 2332.91  | <b>NM_004265</b> | 17568.627 | 7676.431  | <b>AK024106</b>  | 329.643   | 373.716   | <b>NM_006165</b> | 1685.254 |
| 173.211  | <b>NM_002572</b> | 2235.977  | 2807.602  | <b>AK027254</b>  | 1301.216  | 952.42    | <b>NM_016011</b> | 2602.543 |
| 506.368  | <b>NM_001441</b> | 1457.34   | 1840.441  | <b>AK021772</b>  | 966.906   | 821.81    | <b>AL035307</b>  | 475.207  |
| 355.384  | <b>NM_018324</b> | 938.282   | 861.471   | <b>AK054831</b>  | 32995.867 | 40696.457 | <b>NM_012234</b> | 2999.399 |
| 536.742  | <b>AF064255</b>  | 22606.621 | 20922.482 | <b>AK021770</b>  | 667.561   | 954.559   | <b>NM_015361</b> | 4615.873 |
| 1190.807 | <b>NM_016368</b> | 28282.547 | 31912.131 | <b>AK027248</b>  | 717.915   | 1201.81   | <b>NM_004310</b> | 465.739  |
| 354.391  | <b>U08853</b>    | 2485.04   | 2737.299  | <b>AK022804</b>  | 4561.276  | 5769.167  | <b>NM_015537</b> | 1728.755 |

|           |           |           |           |           |           |           |           |           |
|-----------|-----------|-----------|-----------|-----------|-----------|-----------|-----------|-----------|
| 469.382   | NM_004261 | 15692.103 | 6950.046  | AF009263  | 1226.966  | 1201.257  | NM_016520 | 2840.457  |
| 906.701   | NM_016006 | 1726.917  | 2366.434  | AF086329  | 3947.099  | 3278.419  | AB018353  | 1096.053  |
| 625.598   | NM_016245 | 13859.397 | 11193.577 | unknown ( | 1.24      | 1526.947  | NM_007036 | 675.727   |
| 590.587   | AF005632  | 3903.115  | 2524.906  | AK025799  | 373.953   | 309.146   | NM_002617 | 852.278   |
| 2055.838  | NM_000903 | 13635.415 | 18270.049 | AL110206  | 711.206   | 419.94    | NM_003313 | 5898.093  |
| 1696.044  | NM_004493 | 8677.697  | 7027.025  | NM_004821 | 861.044   | 647.283   | AF090907  | 1002.544  |
| 655.013   | AF309489  | 675.325   | 466.387   | AK024292  | 859.095   | 946.451   | AK024476  | 1476.191  |
| 9626.295  | NM_004047 | 25414.109 | 17999.611 | AK026263  | 824.385   | 544.662   | X74794    | 3034.051  |
| 567.991   | NM_006773 | 2653.237  | 5034.316  | U50526    | 525.203   | 546.029   | AL050298  | 1501.88   |
| 832.582   | AK024439  | 5964.595  | 7939.756  | S75105    | 1948.962  | 2420.182  | NM_007079 | 15870.709 |
| 4318.715  | X89676    | 832.474   | 907.171   | AF056455  | 6665.233  | 7819.911  | M20696    | 1847.211  |
| 1465.876  | NM_012444 | 542.088   | 1029.248  | NM_018510 | 930.295   | 1010.609  | NM_002915 | 296.216   |
| 2924.373  | Z32684    | 1428.308  | 1593.092  | U50537    | 374.539   | 713.669   | AK026154  | 4677.264  |
| 701.453   | NM_016512 | 639.923   | 902.474   | AK024988  | 365.703   | 417.901   | AL117546  | 11125.979 |
| 1223.72   | NM_017488 | 4267.5    | 3465.401  | AK025719  | 371.05    | 245.642   | AK027073  | 400.949   |
| 998.75    | NM_005069 | 980.793   | 697.034   | AF026943  | 784.992   | 1261.327  | AL157482  | 3182.293  |
| 1545.91   | NM_016044 | 1650.466  | 1297.094  | L77582    | 218.906   | 217.043   | NM_005428 | 2111.78   |
| 1677.027  | NM_000520 | 5295.32   | 8273.292  | NM_020448 | 705.89    | 589.414   | NM_017974 | 466.231   |
| 715.969   | NM_000289 | 1602.006  | 1504.33   | NM_005419 | 1357.845  | 1305.094  | X14677    | 1097.834  |
| 2981.059  | NM_001500 | 1971.526  | 628.93    | NM_003479 | 5159.118  | 3191.329  | NM_005863 | 7344.471  |
| 10488.965 | NM_004388 | 2570.475  | 2767.244  | AK022078  | 228.05    | 173.575   | U17077    | 1017.186  |
| 2147.851  | NM_020379 | 353.06    | 726.011   | NM_020224 | 3049.276  | 2024.06   | NM_000915 | 787.228   |
| 736.778   | AL110127  | 1768.429  | 1349.196  | U17617    | 1953.879  | 2363.827  | AK024475  | 1140.467  |
| 612.319   | AK001997  | 269.181   | 570.188   | AK022952  | 2622.223  | 1794.068  | AB026542  | 7527.324  |
| 814.526   | NM_002528 | 1609.412  | 1461.094  | BF218888  | 507.885   | 270.259   | NM_019846 | 2080.286  |
| 1874.82   | D38438    | 3310.027  | 4566.376  | AF086401  | 2375.485  | 2851.355  | NM_014433 | 555.917   |
| 1102.6    | AV714945  | 901.386   | 495.871   | L23869    | 1045.173  | 1115.109  | NM_002062 | 5664.473  |
| 3231.43   | AF089897  | 524.301   | 357.723   | Z21853    | 1047.054  | 1114.068  | NM_014394 | 31402.223 |
| 876.354   | AF007872  | 1929.501  | 1505.595  | AB075846  | 420.618   | 602.671   | NM_005243 | 5968.167  |
| 8527.054  | M30938    | 5349.546  | 3773.156  | NM_018342 | 438.717   | 288.487   | NM_006218 | 1118.467  |
| 602.131   | NM_017586 | 10313.736 | 21662.764 | BC020260  | 812.089   | 801.622   | NM_018140 | 2424.075  |
| 677.708   | NM_004148 | 3504.111  | 7025.357  | D17156    | 2187.557  | 1943.164  | NM_016948 | 675.712   |
| 552.514   | X03168    | 1270.246  | 1456.978  | AK026938  | 4816.984  | 3192.71   | NM_000142 | 472.199   |
| 5277.032  | NM_005168 | 1466.54   | 1482.521  | AK024373  | 4272.404  | 3954.315  | AF272372  | 7493.896  |
| 690.255   | NM_017801 | 6994.775  | 9394.155  | AK022343  | 4094.293  | 3289.297  | AK097045  | 801.453   |
| 5061.93   | NM_007348 | 5000.207  | 4415.75   | AK026400  | 540.168   | 254.106   | NM_018256 | 1925.703  |
| 1013.015  | NM_016953 | 459.6     | 1098.165  | U92989    | 2261.043  | 1821.619  | AK025150  | 369.733   |
| 5828.389  | U65473    | 2274.279  | 2429.754  | AF075102  | 1002.32   | 750.578   | AK024611  | 4294.645  |
| 2063.87   | D63481    | 3775.736  | 3569.397  | NM_018463 | 4250.83   | 3190.318  | BC010420  | 2443.052  |
| 1554.777  | AY009951  | 530.895   | 444.361   | X74956    | 14135.255 | 11277.702 | NM_012280 | 6371.404  |
| 894.511   | AL157424  | 713.038   | 557.717   | AK025546  | 409.729   | 392.662   | NM_018172 | 1995.953  |
| 853.107   | AK024422  | 1638.147  | 1179.199  | AL137487  | 1114.823  | 877.035   | U03886    | 362.934   |
| 1687.389  | NM_002673 | 2276.332  | 2986.048  | AK024120  | 989.687   | 1017.55   | AK022040  | 518.068   |
| 1567.14   | NM_003876 | 3192.109  | 3168.251  | CY3Cy5    | 2172.077  | 214.271   | AK022722  | 670.53    |
| 3764.919  | NM_012295 | 3896.972  | 3294.519  | W96179    | 922.369   | 1620.694  | NM_003591 | 10740.38  |
| 927.297   | NM_015910 | 362.543   | 569.661   | AW247841  | 2988.724  | 3532.415  | AL080111  | 1628.78   |
| 11136.133 | AL133666  | 1059.471  | 947.279   | M76559    | 1494.778  | 1430.821  | NM_003550 | 5342.5    |
| 11516.824 | NM_000663 | 751.117   | 701.759   | AA411678  | 1282.099  | 1885.25   | NM_014642 | 2340.239  |
| 8814.236  | NM_004710 | 3200.816  | 2128.295  | AA862813  | 4008.027  | 6152.299  | AB037821  | 307.493   |
| 1042.299  | NM_004396 | 10847.152 | 8574.143  | T55728    | 1246.586  | 1645.3    | NM_003829 | 1135.99   |
| 4495.031  | NM_017999 | 2194.473  | 1972.867  | H20856    | 520.598   | 540.682   | AL110168  | 1342.6    |
| 1783.777  | NM_015989 | 16249.137 | 11079.772 | N62586    | 904.122   | 870.986   | NM_014522 | 290.561   |
| 6701.936  | NM_001043 | 892.295   | 684.027   | AA242743  | 1371.002  | 1544.775  | NM_002831 | 9644.152  |

|           |           |           |           |           |           |           |           |           |
|-----------|-----------|-----------|-----------|-----------|-----------|-----------|-----------|-----------|
| 23556.535 | NM_004779 | 5382.176  | 10174.778 | NM_004758 | 364.254   | 901.194   | AL833409  | 1625.761  |
| 1019.322  | NM_019071 | 2679.565  | 2873.876  | NM_005163 | 1381.088  | 1608.905  | NM_015966 | 593.007   |
| 884.487   | AF113685  | 754.11    | 897.955   | SR5       | 2459.634  | 2371.469  | NM_016147 | 1852.188  |
| 1650.522  | NM_005470 | 2163.725  | 1722.078  | SR7       | 2846.353  | 23658.301 | NM_002833 | 1016.655  |
| 740.131   | AF142570  | 812.028   | 852.368   | SR9       | 9395.348  | 1862.007  | NM_018326 | 916.508   |
| 748.682   | NM_004225 | 8044.62   | 9150.06   | CY3Cy5    | 2099.17   | 192.978   | NM_001868 | 279.206   |
| 3156.527  | NM_003862 | 923.627   | 923.638   | NM_016382 | 767.053   | 1030.188  | NM_014773 | 330.871   |
| 998.232   | NM_002873 | 2026.393  | 1645.095  | AK023117  | 1317.629  | 1025.862  | AF134707  | 2427.541  |
| 581.911   | NM_015571 | 5724.886  | 3670.697  | AL122046  | 209.828   | 359.185   | NM_001223 | 1617.457  |
| 1326.048  | NM_004701 | 3260.256  | 2479.809  | NM_000855 | 752.221   | 664.896   | BE730629  | 879.586   |
| 331.125   | AK025554  | 1571.679  | 1393.573  | NM_005536 | 541.639   | 961.704   | AK027167  | 1065.782  |
| 521.412   | B1824151  | 3128.48   | 2196.815  | NM_005077 | 304.111   | 315.513   | AK025265  | 2120.15   |
| 2966.196  | AK021791  | 2092.767  | 4137.508  | NM_004423 | 1386.127  | 2285.626  | NM_018652 | 6210.943  |
| 6260.133  | NM_004052 | 7138.933  | 2498.123  | NM_002141 | 327.638   | 222.638   | AB011166  | 821.111   |
| 860.691   | NM_004394 | 12145.504 | 9218.055  | NM_003311 | 2526.74   | 2129.839  | AK024460  | 1755.392  |
| 1614.944  | NM_005727 | 17754.115 | 14160.578 | NM_003776 | 1100.193  | 826       | NM_006606 | 4323.257  |
| 716.135   | AK027242  | 1798.994  | 2610.639  | NM_007098 | 499.332   | 298.054   | NM_006442 | 6348.646  |
| 1382.649  | NM_001279 | 10280.014 | 17432.727 | NM_015719 | 560.452   | 496.822   | NM_003902 | 3605.376  |
| 2617.032  | NM_005010 | 886.65    | 960.415   | NM_006129 | 729.599   | 420.984   | NM_016427 | 2548.378  |
| 256.791   | NM_019055 | 1207.514  | 825.284   | NM_000582 | 1223.937  | 919.34    | U80741    | 2650.045  |
| 1165.443  | NM_020199 | 557.08    | 236.021   | NM_005593 | 548.625   | 449.078   | NM_014497 | 1270.762  |
| 429.262   | U96136    | 665.919   | 477.107   | AJ224741  | 290.465   | 273.016   | AL133598  | 4714.24   |
| 4657.646  | AF188747  | 468.636   | 595.382   | BF338709  | 307.403   | 374.517   | NM_015511 | 2249.781  |
| 193.263   | NM_005941 | 540.769   | 640.172   | AF100756  | 3263.82   | 3270.404  | NM_006625 | 2408.29   |
| 368.736   | NM_015884 | 518.778   | 310.905   | NM_006825 | 3609.141  | 6417.218  | NM_004891 | 10437.02  |
| 734.672   | AF201380  | 2284.7    | 1996.37   | NM_004862 | 823.385   | 1020.103  | AF075068  | 2534.832  |
| 1143.157  | NM_003619 | 2925.729  | 1753.805  | NM_014563 | 481.12    | 628.989   | AK024366  | 428.259   |
| 677.425   | NM_012392 | 3063.387  | 2757.285  | NM_020150 | 563.651   | 978.074   | AK021930  | 213.447   |
| 1692.012  | NM_014833 | 12655.15  | 13235.265 | NM_007150 | 463.942   | 531.072   | X78938    | 522.309   |
| 882.912   | NM_000045 | 527.973   | 405.781   | NM_006831 | 343.161   | 295.008   | AK001439  | 229.784   |
| 2552.892  | NM_003878 | 3303.132  | 781.513   | AL162044  | 793.295   | 767.751   | AK022452  | 251.875   |
| 399.056   | NM_004832 | 691.052   | 591.847   | BE892273  | 14333.653 | 10670.155 | AF085881  | 611.375   |
| 1000.637  | NM_005957 | 815.607   | 697.293   | NM_016734 | 331.963   | 168.651   | AK022737  | 5018.909  |
| 5413.743  | AK024374  | 1270.904  | 1096.295  | Y08147    | 1067.584  | 924.054   | NM_003472 | 19216.486 |
| 2042.661  | NM_007101 | 522.789   | 676.929   | D00174    | 2427.46   | 2320.291  | U92980    | 550.671   |
| 1092.987  | NM_018234 | 2410.581  | 3253.997  | AB000520  | 678.594   | 680.166   | AF133658  | 741.49    |
| 1046.305  | AB033062  | 1528.637  | 1258.549  | NM_006907 | 517.921   | 343.124   | AB048287  | 3601.173  |
| 1056.452  | NM_016437 | 18755.162 | 11333.371 | NM_006267 | 398.016   | 485.405   | Y11159    | 796.876   |
| 2056.056  | NM_002720 | 3684.365  | 3926.569  | NM_002661 | 4020.234  | 3596.011  | AB020648  | 970.252   |
| 386.508   | AK024716  | 10301.948 | 9624.497  | AK023982  | 240.86    | 225.033   | AK025798  | 12457.307 |
| 361.169   | X67155    | 1079.919  | 669.455   | AB014533  | 1700.85   | 2019.354  | AK025164  | 435.981   |
| 4412.584  | NM_020380 | 3911.94   | 4252.663  | M11427    | 245.601   | 289.673   | NM_018366 | 3875.991  |
| 4176.818  | AL137519  | 750.689   | 509.882   | NM_000744 | 263.719   | 393.328   | AB040290  | 620.46    |
| 847.056   | NM_002890 | 23016.119 | 16888.666 | NM_003039 | 2566.341  | 3504.582  | NM_019848 | 3477.727  |
| 752.081   | NM_001330 | 14070.022 | 9446.937  | NM_014509 | 325.25    | 399.727   | AK021497  | 1641.232  |
| 1168.23   | NM_015927 | 803.333   | 589.086   | NM_020372 | 1645.797  | 1253.143  | AF124367  | 463.832   |
| 1752.398  | NM_005122 | 508.37    | 477.1     | NM_004979 | 276.784   | 293.414   | AK000798  | 296.039   |
| 1759.112  | NM_014552 | 3272.766  | 3815.304  | NM_016077 | 1223.852  | 1311.9    | AK026947  | 6477.412  |
| 1646.137  | NM_003072 | 7696.513  | 5767.726  | NM_015537 | 1497.666  | 1714.341  | U84526    | 5788.716  |
| 3633.533  | NM_001913 | 2120.26   | 1566.698  | NM_016520 | 3852.71   | 4541.113  | L23401    | 1432.157  |
| 590.88    | AK025594  | 1027.853  | 715.947   | AB018353  | 661.77    | 494.182   | NM_018090 | 22945.969 |
| 565.34    | AB040931  | 2540.557  | 2388.438  | NM_007036 | 599.281   | 782.696   | AK022728  | 7852.264  |
| 42255.391 | NM_003599 | 1050.083  | 1153.624  | NM_002617 | 611.301   | 605.184   | AL109678  | 862.435   |

|           |           |           |           |           |           |           |           |           |
|-----------|-----------|-----------|-----------|-----------|-----------|-----------|-----------|-----------|
| 672.302   | NM_015911 | 1168.474  | 1577.758  | NM_003313 | 5567.793  | 7534.133  | AL137524  | 848.74    |
| 1106.206  | BC011826  | 2950.853  | 2229.326  | AF090907  | 454.418   | 886.789   | AF218008  | 5178.57   |
| 1162.807  | NM_017647 | 2866.95   | 2790.366  | AK024476  | 1102.344  | 3640.855  | M22404    | 10553.7   |
| 1668.862  | NM_012091 | 811.392   | 881.223   | X74794    | 2352.788  | 4487.237  | AF052115  | 768.066   |
| 523.27    | NM_012321 | 2824.335  | 2072.789  | AL050298  | 701.731   | 634.249   | NM_014019 | 6978.459  |
| 809.085   | D13642    | 4101.394  | 2936.68   | NM_007079 | 16566.754 | 18325.768 | Z70711    | 497.294   |
| 668.918   | NM_004741 | 8202.79   | 4888.495  | M20696    | 1295.801  | 708.291   | AF116653  | 491.849   |
| 1242.13   | NM_018032 | 2651.437  | 2742.421  | NM_006736 | 242.301   | 234.282   | NM_012368 | 681.648   |
| 4615.067  | NM_003675 | 4661.351  | 3592.491  | NM_003640 | 481.703   | 858.892   | AK025323  | 517.046   |
| 573.768   | NM_017518 | 2327.687  | 1280.126  | NM_014444 | 1506.563  | 1478.614  | NM_013326 | 2175.157  |
| 392.467   | NM_004117 | 6973.987  | 3786.062  | NM_012248 | 2433.254  | 3049.435  | BC037322  | 794.713   |
| 500.892   | NM_016594 | 1818.164  | 1652.613  | NM_014393 | 1271.965  | 1560.45   | Y12022    | 805.909   |
| 5046.841  | NM_030752 | 4667.491  | 3990.568  | NM_004223 | 2329.906  | 3377.107  | AK001375  | 860.139   |
| 563.046   | D26068    | 23358.076 | 14518.156 | NM_006813 | 312.852   | 240.865   | AL137559  | 922.179   |
| 692.959   | NM_018559 | 4409.277  | 2460.841  | NM_001355 | 4017.45   | 5544.151  | AF026944  | 1270.317  |
| 4005.36   | NM_017593 | 840.038   | 595.804   | U63336    | 379.462   | 192.07    | AK021493  | 1397.91   |
| 450.979   | NM_004282 | 10060.328 | 6540.744  | NM_004684 | 221.16    | 173.648   | NM_006161 | 1911.047  |
| 1916.08   | AF070549  | 285.132   | 839.293   | BF338709  | 389.768   | 521.082   | NM_006192 | 588.218   |
| 286.316   | AK025442  | 4313.877  | 5003.715  | W96179    | 933.877   | 1285.56   | NM_012155 | 4593.596  |
| 1562.139  | AL050041  | 1158.052  | 924.41    | AW247841  | 3498.26   | 4166.076  | AF144700  | 988.745   |
| 2732.861  | NM_002451 | 1555.665  | 955.949   | M76559    | 728.894   | 1044.655  | NM_004105 | 1959.751  |
| 987.53    | NM_013411 | 1399.194  | 1112.108  | AI222585  | 367.478   | 261.862   | AB046825  | 1663.643  |
| 466.686   | AB007956  | 549.286   | 579.265   | AA411678  | 2376.196  | 3122.35   | X64975    | 752.125   |
| 638.448   | NM_020200 | 59.914    | 791.941   | AA862813  | 5807.703  | 8914.367  | AL050297  | 1278.409  |
| 5242.138  | NM_001248 | 586.986   | 480.76    | AA398427  | 560.621   | 395.85    | AK026966  | 879.323   |
| 722.635   | NM_000180 | 3874.77   | 3832.348  | T55728    | 1428.533  | 1787.195  | AK025268  | 1070.41   |
| 974.939   | NM_000858 | 3860.82   | 3555.612  | H20856    | 851.196   | 855.646   | AL833005  | 1859.307  |
| 1636.538  | AF254087  | 1606.726  | 999.794   | N62586    | 1121.458  | 1464.666  | L43366    | 1546.785  |
| 740.648   | NM_017715 | 1013.308  | 862.178   | AA242743  | 1784.395  | 1548.375  | AK026124  | 3583.239  |
| 12931.522 | AL117607  | 3865.028  | 3485.375  | NM_004758 | 454.023   | 733.591   | NM_015509 | 1013.787  |
| 1572.501  | AB037774  | 1030.786  | 678.185   | NM_005163 | 1311.663  | 1759.633  | AL110157  | 10479.073 |
| 148.647   | NM_005438 | 1699.489  | 966.08    | NM_015361 | 4342.25   | 2923.766  | L38712    | 3853.9    |
| 381.119   | AK024361  | 1192.391  | 1651.792  | Y08147    | 1388.416  | 1160.779  | U84508    | 501.798   |
| 505.325   | NM_004350 | 1484.307  | 761.858   | D00174    | 1984.899  | 2126.418  | NM_017793 | 1943.885  |
| 863.314   | NM_018044 | 2560.062  | 2242.91   | AB000520  | 674.342   | 659.63    | NM_012131 | 1709.346  |
| 969.928   | NM_001717 | 481.256   | 323.079   | NM_016382 | 763.671   | 1510.675  | S41540    | 735.374   |
| 277.117   | AF274347  | 2540.852  | 1506.987  | AK023117  | 448.577   | 292.538   | AI417481  | 242.173   |
| 391.502   | NM_018555 | 2236.646  | 1678.638  | NM_000855 | 735.661   | 769.43    | BI906766  | 566.353   |
| 440.813   | AK021903  | 5086.279  | 3802.379  | NM_005536 | 1269.728  | 2397.948  | U60519    | 663.154   |
| 368.25    | AL390143  | 3626.258  | 2569.918  | NM_005077 | 814.432   | 735.967   | AA282906  | 754.461   |
| 609.107   | AL162075  | 1800.486  | 3742.976  | NM_004423 | 1938.109  | 2228.476  | L02870    | 952.198   |
| 319.176   | AF147384  | 489.322   | 467.659   | NM_002141 | 531.47    | 398.609   | BG755482  | 1652.406  |
| 903.515   | AK021595  | 751.536   | 968.474   | NM_001804 | 317.833   | 217.295   | AI480307  | 1591.664  |
| 3910.539  | AK021648  | 2795.404  | 2964.403  | NM_003311 | 3077.74   | 2316.253  | X51420    | 717.11    |
| 495.197   | AF147358  | 11313.374 | 14180.023 | NM_003776 | 1385.956  | 976.225   | X51757    | 265.631   |
| 1511.064  | AL110290  | 510.902   | 440.651   | NM_007098 | 512.817   | 241.817   | L24038    | 266.442   |
| 641.818   | NM_018410 | 1347.451  | 1568.537  | NM_006129 | 838.482   | 653.825   | NM_053056 | 1349.193  |
| 3685.487  | AF086278  | 310.485   | 397.932   | NM_000582 | 1405.365  | 1188.29   | NM_002751 | 422.17    |
| 6004.853  | AF086355  | 676.291   | 405.069   | NM_016077 | 1398.802  | 1408.579  | M55593    | 1204.837  |
| 703.59    | AF086452  | 453.936   | 501.424   | AF100756  | 1974.621  | 1494.041  | NM_078467 | 1297.395  |
| 844.439   | AF086314  | 562.566   | 629.814   | NM_006825 | 3197.575  | 4922.843  | SR2       | 31549.66  |
| 212.244   | NM_016364 | 834.753   | 1044.77   | NM_004862 | 797.047   | 891.982   | SR4       | 6287.11   |
| 828.438   | AF086419  | 3038.486  | 2301.683  | NM_014563 | 843.361   | 896.229   | SR6       | 1001.659  |

|           |           |           |           |           |           |           |           |           |
|-----------|-----------|-----------|-----------|-----------|-----------|-----------|-----------|-----------|
| 1325.885  | AF086461  | 828.85    | 602.328   | NM_020150 | 1044.281  | 1310.681  | CY3Cy5    | 904.917   |
| 86.418    | AL833296  | 1398.312  | 882.622   | NM_007150 | 919.903   | 1097.027  | AL137432  | 936.258   |
| 790.792   | AL110240  | 3357.52   | 2555.201  | NM_006831 | 602.46    | 702.573   | NM_000957 | 847.54    |
| 1266.783  | AF085919  | 1198.517  | 871.27    | BE892273  | 16559.199 | 13493.119 | NM_019043 | 1037.903  |
| 1586.201  | AF085933  | 1050.889  | 1416.475  | AF026929  | 242.878   | 299.423   | NM_003240 | 749.354   |
| 758.651   | AF147431  | 436.307   | 591.683   | NM_016734 | 475.632   | 714.72    | NM_016564 | 5325.943  |
| 842.958   | AK026422  | 5193.3    | 3099.628  | NM_014393 | 1437.582  | 2741.455  | AK021660  | 469.884   |
| 1180.603  | AF085938  | 440.971   | 887.73    | NM_004223 | 2535.536  | 3597.337  | AB007933  | 5355.369  |
| 1055.757  | AK022264  | 1012.457  | 1061.556  | NM_001355 | 4494.195  | 6480.317  | NM_006702 | 1137.309  |
| 2311.698  | AL137331  | 1094.795  | 1097.056  | U63336    | 208.076   | 159.284   | NM_001396 | 1701.692  |
| 971.331   | AL162040  | 2338.974  | 2135.551  | NM_006907 | 371.691   | 311.198   | NM_014474 | 670.723   |
| 3496.184  | AL442084  | 1016.618  | 785.817   | NM_006267 | 281.682   | 218.883   | NM_016249 | 761.775   |
| 261.244   | AL137371  | 6407.299  | 6332.633  | NM_002661 | 3380.045  | 2245.763  | NM_006181 | 278.106   |
| 456.048   | AL137596  | 2248.469  | 2138.884  | NM_001263 | 191.295   | 183.687   | NM_003796 | 2139.91   |
| 1993.853  | AL353942  | 10955.644 | 10493.448 | NM_018466 | 498.604   | 755.68    | NM_002973 | 477.633   |
| 586.384   | Z38010    | 8980.03   | 6797.682  | Y11312    | 320.569   | 562.993   | NM_004436 | 13998.958 |
| 93.189    | AK024713  | 899.09    | 961.361   | M11427    | 319.34    | 418.875   | NM_006580 | 1643.116  |
| 631.875   | AK024204  | 672.051   | 527.811   | NM_000744 | 322.071   | 339.222   | NM_001305 | 1604.238  |
| 579.592   | AK023737  | 729.165   | 506.979   | NM_003039 | 2937.667  | 4281.042  | D17028    | 6577.738  |
| 174.29    | NM_006609 | 1634.381  | 1109.874  | NM_014509 | 354.306   | 487.162   | NM_013442 | 6876.545  |
| 1396.169  | NM_014118 | 674.51    | 306.488   | NM_020372 | 1823.173  | 1369.493  | BG611243  | 483.573   |
| 3377.352  | NM_014157 | 617.713   | 890.116   | NM_002635 | 34512.242 | 37979.641 | AK023221  | 2530.946  |
| 4297.025  | AF090933  | 613.41    | 426.373   | NM_004758 | 534.681   | 1396.411  | NM_003664 | 3200.052  |
| 1120.339  | AF111851  | 2556.345  | 2280.113  | NM_005163 | 1630.33   | 1744.825  | AK027182  | 394.297   |
| 699.329   | AL360200  | 570.392   | 1080.17   | NM_015361 | 4263.247  | 3215.361  | J03651    | 907.605   |
| 706.735   | AK022102  | 627.682   | 563.338   | NM_015537 | 1347.437  | 1123.832  | U61738    | 895.89    |
| 1346.483  | AK022235  | 653.336   | 553.33    | NM_016520 | 2181.419  | 2143.193  | U92818    | 688.23    |
| 522.357   | AK022378  | 1509.401  | 1489.782  | AB018353  | 605.401   | 377.25    | NM_000442 | 3227.342  |
| 323.712   | AK027174  | 448.852   | 336.367   | NM_007036 | 391.929   | 282.245   | NM_002934 | 31523.467 |
| 558.372   | AL110173  | 579.044   | 505.489   | NM_002617 | 624.957   | 679.974   | AK023011  | 4271.715  |
| 2062.11   | AK024106  | 498.718   | 720.456   | NM_003313 | 6202.823  | 6039.023  | NM_016816 | 543.781   |
| 753.638   | AK027254  | 935.35    | 1186.018  | AF090907  | 958.777   | 940.746   | L17325    | 1057.713  |
| 1381.879  | AK021772  | 1298.27   | 883.647   | AK024476  | 1259.782  | 1371.276  | NM_017716 | 358.103   |
| 2170.6    | AK026297  | 616.056   | 372.126   | NM_006736 | 283.215   | 298.007   | M58603    | 1513.987  |
| 372.324   | AK021770  | 1977.911  | 1653.628  | NM_003640 | 454.214   | 969.691   | NM_003639 | 1065.552  |
| 5233.192  | AK027248  | 1285.551  | 1750.857  | NM_014444 | 1786.58   | 2055.778  | NM_001549 | 372.268   |
| 515.807   | AK022804  | 9504.329  | 9092.049  | NM_012248 | 2525.836  | 3763.462  | NM_000115 | 990.681   |
| 699.511   | AF009263  | 1240.908  | 1703.234  | NM_014970 | 2158.377  | 3857.258  | AF308801  | 1160.131  |
| 401.337   | AF086329  | 5496.251  | 3481.807  | NM_007098 | 614.86    | 451.832   | NM_007318 | 21908.068 |
| 639.406   | AK025799  | 321.46    | 600.644   | NM_015719 | 712.155   | 850.589   | NM_005765 | 6388.159  |
| 4733.715  | AL110206  | 557.213   | 540.764   | NM_006129 | 912.472   | 907.674   | NM_002762 | 352.609   |
| 350.395   | NM_004821 | 585.033   | 629.505   | NM_000582 | 1388.434  | 1207.977  | NM_006324 | 3333.817  |
| 257.247   | AK026263  | 1400.569  | 1210.663  | NM_005593 | 627.614   | 626.11    | NM_005469 | 3553.13   |
| 567.648   | U50526    | 1123.687  | 1242.451  | W96179    | 900.416   | 1383.773  | NM_016361 | 1528.178  |
| 317.433   | S75105    | 2257.298  | 2093.595  | AW247841  | 3126.831  | 2886.999  | AB040895  | 251.105   |
| 1207.739  | AF056455  | 7049.343  | 6570.581  | M76559    | 1286.681  | 1232.26   | NM_018210 | 798.388   |
| 330.586   | NM_018510 | 1269.256  | 1310.017  | AI222585  | 483.724   | 458.882   | NM_001096 | 2367.846  |
| 270.124   | U50537    | 550.968   | 640.923   | AA411678  | 3054.663  | 3341.613  | NM_016014 | 735.876   |
| 1929.435  | AK024988  | 832.936   | 533.03    | AA862813  | 5865.49   | 6742.049  | NM_018327 | 244.339   |
| 29028.715 | AF026943  | 1355.992  | 2102.038  | AA398427  | 537.469   | 463.659   | NM_017581 | 1099.268  |
| 636.026   | L77582    | 440.891   | 484.015   | T55728    | 1511.479  | 2089.139  | AA488804  | 2628.073  |
| 1541.482  | NM_020448 | 791.765   | 704.875   | H20856    | 672.777   | 613.303   | NM_006539 | 461.119   |
| 2871.847  | NM_005419 | 3499.338  | 4238.738  | N62586    | 1009.439  | 1303.302  | NM_001684 | 771.061   |

|           |           |           |           |           |           |           |           |           |
|-----------|-----------|-----------|-----------|-----------|-----------|-----------|-----------|-----------|
| 479.296   | NM_003479 | 8504.699  | 6625.731  | AA242743  | 1978.888  | 2476.751  | AB028977  | 410.723   |
| 1866.525  | AK022078  | 576.192   | 350.543   | BE892273  | 15990.994 | 11158.521 | NM_000808 | 364.191   |
| 2712.427  | NM_020224 | 3744.087  | 2643.709  | AF026929  | 326.869   | 157.452   | NM_016318 | 2811.16   |
| 1383.791  | U17617    | 825.507   | 999.959   | NM_016734 | 504.099   | 332.8     | NM_019891 | 369.905   |
| 864.738   | AK022952  | 4470.099  | 4030.424  | Y08147    | 1223.387  | 798.572   | AF038186  | 478.467   |
| 849.908   | BF218888  | 793.132   | 584.157   | D00174    | 2865.208  | 2079.47   | NM_016277 | 649.707   |
| 9590.438  | AF086401  | 3426.49   | 2732.326  | AB000520  | 713.83    | 539.471   | NM_007247 | 369.418   |
| 1144.913  | L23869    | 1625.917  | 1115.049  | NM_016382 | 759.14    | 841.795   | NM_006554 | 670.7     |
| 2695.973  | Z21853    | 1843.531  | 1647.781  | AK023117  | 1173.405  | 951.864   | X99962    | 1724.111  |
| 3155.825  | U80770    | 659.967   | 478.828   | AL122046  | 335.89    | 313.712   | AB033103  | 1174.035  |
| 737.361   | AB075846  | 621.87    | 327.007   | NM_000855 | 1840.606  | 1588.104  | NM_002907 | 352.771   |
| 6418.557  | NM_018342 | 1150.626  | 862.808   | NM_005536 | 2268.737  | 2970.988  | AK001116  | 204.304   |
| 473.415   | BC020260  | 932.959   | 1110.352  | NM_005077 | 1032.067  | 743.3     | AK022371  | 1282.114  |
| 332.967   | D17156    | 2810.962  | 2149.863  | NM_004423 | 2066.318  | 1839.309  | D42045    | 789.866   |
| 475.411   | L04461    | 1083.589  | 662.74    | NM_001990 | 315.47    | 257.817   | AB007953  | 462.615   |
| 459.99    | AK026938  | 7349.239  | 5361.212  | NM_002141 | 489.575   | 384.694   | NM_014002 | 1428.275  |
| 2863.176  | AK024373  | 6366.906  | 5973.811  | NM_003311 | 2736.198  | 2254.216  | NM_004197 | 2247.201  |
| 613.648   | AK022343  | 3944.381  | 3128.997  | NM_003776 | 1243.088  | 1301.807  | NM_004073 | 425.195   |
| 1181.995  | AK026400  | 1086.422  | 580.731   | NM_000744 | 365.875   | 536.73    | NM_001278 | 656.722   |
| 187.194   | U92989    | 2738.61   | 2083.829  | NM_003039 | 3546.731  | 4863.402  | NM_019105 | 827.089   |
| 704.308   | AF075102  | 1146.19   | 1250.467  | NM_014509 | 513.049   | 681.614   | NM_000294 | 803.894   |
| 1862.053  | NM_018463 | 2710.086  | 2070.587  | NM_020372 | 1868.976  | 1325.089  | AJ272212  | 483.803   |
| 1058.277  | X74956    | 11524.127 | 10609.212 | NM_002635 | 37121.746 | 34460.039 | NM_001626 | 4554.315  |
| 320.597   | AK025546  | 631.636   | 609.054   | NM_016077 | 1582.268  | 1108.501  | NM_005677 | 614.093   |
| 311.806   | AL137487  | 1572.425  | 1344.492  | AF100756  | 3695.517  | 3009.512  | AF229803  | 371.832   |
| 518.623   | AK023800  | 695.424   | 679.947   | NM_006825 | 4497.792  | 6811.846  | NM_002130 | 5842.767  |
| 308.008   | AK024120  | 1158.65   | 978.774   | NM_004862 | 1019.442  | 1128.197  | NM_001305 | 1444.194  |
| 1101.546  | CY3Cy5    | 5556.98   | 388.094   | NM_001661 | 490.941   | 331.703   | NM_005082 | 358.653   |
| 4835.134  | W96179    | 2300.272  | 3616.54   | NM_014563 | 696.596   | 580.317   | B1906766  | 583.961   |
| 571.625   | AW247841  | 8380.014  | 12946.963 | NM_020150 | 1189.105  | 1160.792  | U60519    | 502.842   |
| 2039.305  | BG568198  | 536.041   | 497.688   | NM_007150 | 817.257   | 777.58    | AA282906  | 686.264   |
| 183.2     | M76559    | 3444.827  | 3702.813  | NM_006831 | 626.78    | 703.38    | L02870    | 807.811   |
| 1029.382  | U03884    | 201.185   | 1208.557  | AL162044  | 1178.696  | 1672.276  | BG755482  | 1066.333  |
| 1219.347  | U11058    | 598.592   | 1032.87   | NM_006736 | 475.061   | 446.855   | A1480307  | 1805.104  |
| 552.777   | A1222585  | 1449.437  | 2178.844  | NM_003640 | 671.535   | 1434.38   | X51420    | 623.295   |
| 468.162   | AA411678  | 10113.41  | 21582.988 | NM_014444 | 1516.328  | 1453.794  | D28235    | 29.667    |
| 1721.34   | AA862813  | 22477.576 | 18175.643 | NM_012248 | 2818.163  | 4351.446  | X51757    | 503.687   |
| 4848.254  | AA398427  | 1520.857  | 1586.127  | NM_014970 | 2194.239  | 3964.641  | L24038    | 616.717   |
| 23431.217 | T55728    | 4757.617  | 6778.058  | NM_014393 | 766.547   | 1110.292  | NM_053056 | 999.706   |
| 429.865   | H20856    | 2146.354  | 2811.578  | NM_004223 | 1792.836  | 1931.605  | NM_006186 | 457.389   |
| 842.173   | N62586    | 3763.596  | 5186.318  | NM_006813 | 253.946   | 143.258   | NM_002751 | 483.04    |
| 177.536   | AA242743  | 3587.522  | 4542.489  | NM_001355 | 4995.455  | 4664.542  | M55593    | 1281.462  |
| 354.41    | NM_004758 | 1522.212  | 2997.59   | U63336    | 246.339   | 212.74    | NM_078467 | 1354.17   |
| 1991.498  | NM_005163 | 5891.005  | 6141.668  | NM_006907 | 409.459   | 345.12    | AK001883  | 2701.313  |
| 3021.141  | SR5       | 5780.719  | 8965.859  | NM_002686 | 200.864   | 150.893   | NM_014629 | 303.549   |
| 705.774   | SR7       | 8449.563  | 65004.152 | NM_006267 | 660.579   | 566.008   | NM_007318 | 18940.752 |
| 829.591   | SR9       | 29715.609 | 9371.666  | NM_002661 | 5397.58   | 3538.762  | NM_014874 | 534.096   |
| 1812.488  | CY3Cy5    | 9781.688  | 601.688   | NM_001263 | 340.235   | 129.934   | NM_006324 | 3392.089  |
| 415.383   | NM_016382 | 1854.032  | 7458.171  | NM_018466 | 401.141   | 458.817   | NM_016848 | 1189.81   |
| 1219.695  | AK023117  | 2810.439  | 3324.77   | Y11312    | 438.014   | 177.488   | NM_000514 | 916.646   |
| 817.09    | AL122046  | 340.084   | 523.858   | AB014533  | 3131.676  | 6771.822  | AL137432  | 1049.975  |
| 458.838   | NM_005536 | 4799.847  | 8325.009  | M11427    | 376.461   | 397.487   | NM_000957 | 626.443   |
| 945.77    | NM_005077 | 2531.128  | 4179.123  | AK022097  | 1594.17   | 2132.387  | NM_019043 | 1083.318  |

|           |           |           |           |           |           |           |           |           |
|-----------|-----------|-----------|-----------|-----------|-----------|-----------|-----------|-----------|
| 4368.399  | NM_00199C | 1243.338  | 1729.158  | NM_002166 | 7496.082  | 9935.116  | NM_00324C | 840.228   |
| 1015.824  | NM_002141 | 1342.149  | 1589.289  | NM_00466C | 5930.594  | 11464.608 | NM_016564 | 5116.041  |
| 692.232   | NM_001804 | 439.753   | 1055.604  | NM_006165 | 1434.446  | 1535.963  | AK021660  | 432.53    |
| 5580.425  | NM_003311 | 9506.322  | 15025.104 | NM_016011 | 3404.86   | 3552.42   | AB007933  | 3935.763  |
| 567.406   | NM_003776 | 5121.81   | 5095.948  | AL035307  | 240.132   | 337.851   | NM_006702 | 933.077   |
| 3650.177  | NM_007098 | 2331.9    | 1519.784  | AK023772  | 184.542   | 131.125   | NM_001396 | 1135.341  |
| 38124.91  | NM_015719 | 1879.43   | 1909.816  | NM_012234 | 2564.893  | 1570.994  | NM_016249 | 782.808   |
| 387.962   | NM_012464 | 533.604   | 660.282   | NM_015361 | 5571.793  | 2835.385  | NM_006181 | 335.854   |
| 1298.612  | NM_006129 | 2633.553  | 3153.438  | NM_00431C | 303.187   | 245.588   | NM_003796 | 1455.146  |
| 6071.833  | NM_000582 | 3587.344  | 3692.99   | NM_015537 | 1980.237  | 1229.698  | NM_002973 | 491.494   |
| 3849.334  | NM_005593 | 1757.696  | 2714.886  | NM_01652C | 3271.926  | 3006.326  | NM_004436 | 7633.025  |
| 454.564   | NM_004684 | 929.148   | 1017.805  | AB018353  | 1162.598  | 781.835   | NM_00658C | 895.895   |
| 2233.497  | BF338709  | 1026.85   | 1786.846  | NM_007036 | 756.002   | 626.61    | NM_019891 | 869.973   |
| 1779.901  | AF204171  | 866.016   | 1261.987  | NM_002617 | 1063.663  | 1125.525  | NM_016277 | 2226.792  |
| 763.66    | M18182    | 339.315   | 804.642   | NM_003313 | 7392.632  | 6812.249  | NM_007247 | 1229.138  |
| 564.038   | AF100756  | 4552.506  | 3584.9    | AF090907  | 1057.124  | 1213.709  | NM_006554 | 1497.724  |
| 1587.417  | NM_006825 | 6426.663  | 6375.387  | NM_007079 | 19672.855 | 20338.072 | X99962    | 2381.954  |
| 933.231   | NM_001661 | 1199.07   | 2025.818  | M20696    | 2311.711  | 2071.483  | AK023221  | 2677.25   |
| 941.605   | NM_014563 | 2427.68   | 3011.684  | AK026015  | 244.989   | 869.131   | NM_003664 | 2866.588  |
| 1171.58   | NM_00715C | 2867.385  | 3072.988  | NM_005203 | 373.75    | 317.025   | NM_002426 | 1044.834  |
| 1991.783  | NM_006831 | 2018.16   | 1479.248  | AK026154  | 5148.064  | 5556.979  | AK027182  | 603.872   |
| 2266.612  | AL162044  | 4983.428  | 5771.752  | AL117546  | 14103.652 | 15280.355 | J03651    | 860.414   |
| 2452.082  | AK024004  | 660.242   | 427.3     | AK027073  | 374.437   | 408.522   | U61738    | 899.42    |
| 1558.233  | AK022365  | 443.88    | 597.8     | NM_000384 | 363.548   | 355.226   | AJ132087  | 303.751   |
| 2693.115  | BE892273  | 43322.785 | 47985.262 | AB018325  | 1120.577  | 1193.586  | U92818    | 588.117   |
| 287.856   | AF026929  | 889.368   | 646.281   | AL157482  | 3023.836  | 2106.799  | NM_000442 | 2596.401  |
| 3027.802  | NM_016734 | 1070.876  | 905.195   | NM_005428 | 2112.168  | 2171.64   | NM_002934 | 26816.801 |
| 408.2     | Y08147    | 2455.012  | 1422.729  | NM_003979 | 209.64    | 172.3     | AK023011  | 3550.164  |
| 456.371   | D00174    | 5422.934  | 4069.697  | X14677    | 1558.091  | 1166.27   | NM_016816 | 567.292   |
| 576.523   | AB000520  | 1788.475  | 1699.026  | NM_005863 | 6910.266  | 2912.287  | L17325    | 462.453   |
| 674.748   | NM_006907 | 1023.756  | 460.603   | U17077    | 1752.917  | 1505.14   | NM_017716 | 342.962   |
| 4496.601  | NM_002686 | 1643.702  | 2513.897  | NM_000915 | 1034.893  | 977.314   | M58603    | 1199.129  |
| 478.203   | NM_002661 | 5450.516  | 3759.212  | NM_002344 | 433.506   | 342.904   | NM_003639 | 466.664   |
| 319.764   | AK023982  | 427.915   | 227.263   | AK024475  | 703.941   | 214.361   | AF308801  | 714.54    |
| 3947.058  | NM_018466 | 1147.241  | 1059.438  | NM_014433 | 512.02    | 438.066   | NM_005677 | 1160.652  |
| 480.295   | Y11312    | 787.631   | 741.993   | NM_002062 | 6017.643  | 5196.186  | AF229803  | 789.619   |
| 5366.557  | AB014533  | 3113.954  | 4361.478  | NM_014394 | 26934.836 | 17378.029 | AF151810  | 342.627   |
| 1841.352  | M11427    | 942.682   | 1379.698  | NM_005243 | 7105.186  | 15371.405 | NM_00213C | 13776.41  |
| 8745.52   | NM_000744 | 669.599   | 951.917   | NM_006218 | 791.501   | 732.706   | NM_005469 | 3356.121  |
| 749.607   | NM_003039 | 8381.463  | 14123.021 | NM_01814C | 1435.548  | 1255.483  | NM_016361 | 1650.871  |
| 360.804   | NM_014509 | 852.613   | 1467.824  | NM_016948 | 832.802   | 1165.849  | NM_003708 | 9259.824  |
| 3176.396  | NM_020372 | 2409.652  | 1535.478  | NM_000142 | 672.307   | 564.119   | NM_014349 | 2533.088  |
| 4876.473  | NM_004979 | 1147.681  | 971.879   | AF272372  | 9030.319  | 9279.028  | AB040895  | 179.761   |
| 819.096   | NM_016077 | 3109.96   | 1040.546  | AK097045  | 488.329   | 949.296   | NM_01821C | 904.545   |
| 2659.611  | NM_015537 | 4372.678  | 3737.1    | AF161356  | 36144.32  | 47791.945 | NM_001096 | 1892.065  |
| 2096.829  | NM_01652C | 4980.732  | 7258.233  | AB014548  | 2061.977  | 1688.788  | NM_016014 | 588.164   |
| 909.232   | AB018353  | 1247.712  | 559.553   | NM_018256 | 1859.671  | 961.486   | NM_018327 | 334.084   |
| 905.271   | NM_007036 | 791.049   | 618.257   | AK024611  | 5115.87   | 3969.4    | NM_017581 | 625.961   |
| 2168.041  | NM_002617 | 1382.383  | 1370.333  | BC010420  | 2158.352  | 2284.907  | AA488804  | 2324.765  |
| 1700.903  | NM_003313 | 8406.127  | 8315.181  | NM_01228C | 8594.023  | 7569.883  | NM_006539 | 288.458   |
| 24865.182 | AF090907  | 1478.401  | 1183.444  | NM_018172 | 1641.309  | 762.73    | NM_001684 | 759.14    |
| 1366.637  | AK024476  | 1955.094  | 1447.684  | AK022040  | 669.871   | 728.408   | NM_016318 | 2293.217  |
| 690.894   | X74794    | 6961.922  | 4356.767  | AK022722  | 427.121   | 354.999   | NM_078467 | 1889.522  |

|           |           |           |           |           |           |           |           |           |
|-----------|-----------|-----------|-----------|-----------|-----------|-----------|-----------|-----------|
| 301.857   | AL050298  | 1705      | 1167.692  | NM_003591 | 4882.213  | 5107.339  | AK001883  | 5180.945  |
| 4653.29   | NM_007079 | 25003.785 | 28238.82  | AL080111  | 1260.808  | 657.641   | NM_014629 | 694.45    |
| 23843.629 | M20696    | 3190.008  | 1645.209  | NM_003550 | 4878.765  | 2548.1    | AL050114  | 303.712   |
| 606.501   | NM_002915 | 572.418   | 265.401   | NM_014642 | 1895.21   | 1624.472  | AK021492  | 664.794   |
| 586.517   | NM_006736 | 760.778   | 1389.022  | NM_003829 | 1107.892  | 1142.524  | AK023794  | 4521.843  |
| 4821.66   | NM_003640 | 1219.35   | 1354.93   | AL110168  | 1744.777  | 1523.297  | NM_019885 | 1241.525  |
| 1630.682  | NM_014444 | 3801.471  | 3657.672  | NM_002831 | 10830.95  | 9831.165  | AB033103  | 610.629   |
| 712.758   | NM_012248 | 7268.833  | 4886.792  | AL833409  | 1946.741  | 1676.383  | NM_002907 | 238.35    |
| 804.031   | NM_014393 | 2461.842  | 1872.358  | NM_015966 | 509.321   | 483.384   | AK024098  | 425.176   |
| 3375.105  | NM_004223 | 4853.438  | 3828.241  | NM_016147 | 1652.127  | 1894.663  | AK022371  | 1143.565  |
| 6119.104  | NM_006813 | 474.996   | 231.371   | NM_002833 | 961.822   | 991.931   | D42045    | 719.31    |
| 1959.965  | NM_001355 | 8976.093  | 5024.338  | NM_016592 | 441.287   | 437.616   | AB007953  | 906.751   |
| 724.023   | U63336    | 660.105   | 291.596   | NM_018326 | 931.102   | 741.631   | NM_014002 | 1453.451  |
| 6197.637  | AJ224741  | 532.711   | 655.482   | NM_001868 | 322.59    | 248.576   | NM_004197 | 2579.93   |
| 2289.201  | NM_004684 | 553.463   | 705.945   | AF134707  | 281.82    | 139.772   | NM_004073 | 565.609   |
| 3327.2    | W96179    | 2535.94   | 2988.904  | NM_001223 | 1646.672  | 2337.401  | NM_001278 | 962.936   |
| 22226.824 | AW247841  | 7563.81   | 6301.351  | BE730629  | 1138.381  | 744.388   | NM_019105 | 1339.578  |
| 4260.935  | BG568198  | 609.382   | 425.19    | AK027167  | 1567.824  | 1510.037  | NM_000294 | 927.021   |
| 960.701   | M76559    | 3638.665  | 1923.96   | AK025265  | 2168.931  | 1625.423  | NM_016249 | 794.876   |
| 1414.425  | AI222585  | 1063.333  | 1078.774  | NM_018652 | 7314.489  | 4689.89   | NM_006181 | 435.035   |
| 1118.546  | AA411678  | 6664.232  | 8036.487  | AB011166  | 718.241   | 1178.58   | NM_003796 | 4023.428  |
| 680.562   | AA862813  | 21181.418 | 15177.308 | AK024460  | 1534.167  | 2097.713  | NM_002973 | 989.119   |
| 12321.938 | AA398427  | 1157.726  | 1185.578  | NM_006606 | 3455.385  | 2531.193  | NM_004436 | 19771.201 |
| 750.308   | T55728    | 3837.667  | 4694.892  | NM_006442 | 8485.59   | 6303.008  | NM_006580 | 1960.591  |
| 2332.3    | H20856    | 1667.313  | 1022.751  | NM_003902 | 4352.488  | 3538.383  | NM_001305 | 1220.21   |
| 2314.838  | N62586    | 2359.046  | 2046.871  | NM_016427 | 2448.356  | 2187.62   | NM_005082 | 185.26    |
| 788.171   | AA242743  | 2391.277  | 2078.672  | NM_006706 | 174.467   | 104.099   | D17028    | 7098.824  |
| 2515.578  | NM_004758 | 1120.5    | 1267.463  | U80741    | 1907.396  | 1021.557  | NM_013442 | 8276.12   |
| 2495.853  | NM_005163 | 4065.268  | 2439.021  | NM_014497 | 1052.469  | 533.597   | BG611243  | 405.575   |
| 13567.254 | NM_015361 | 6187.664  | 3087.969  | AL133598  | 3300.748  | 1824.423  | B1906766  | 409.134   |
| 1660.213  | NM_004310 | 423.539   | 299.415   | NM_015511 | 1784.795  | 1402.376  | U60519    | 618.189   |
| 12107.61  | Y08147    | 2027.078  | 2327.508  | NM_006625 | 1402.986  | 1188.073  | AA282906  | 524.784   |
| 707.344   | D00174    | 2939.23   | 2002.588  | NM_004891 | 8694.453  | 11157.552 | L02870    | 927.566   |
| 4409.539  | AB000520  | 1415.584  | 1369.77   | NM_002879 | 198.147   | 110.948   | BG755482  | 2428.08   |
| 2002.147  | NM_016382 | 1144.398  | 3956.298  | AF075068  | 1855.407  | 2125.538  | AI480307  | 1701.614  |
| 493.673   | AK023117  | 2052.653  | 2313.669  | X78938    | 252.137   | 280.068   | X51420    | 605.297   |
| 574.653   | NM_000855 | 1391.445  | 2023.792  | AK022452  | 228.406   | 199.349   | D28235    | 184.017   |
| 740.063   | NM_005536 | 3406.263  | 3674.656  | AF085881  | 660.152   | 765.719   | L24038    | 300.068   |
| 756.547   | NM_005077 | 1766.312  | 1863.377  | AK022737  | 4230.885  | 2996.192  | NM_053056 | 1353.306  |
| 8776.16   | NM_004423 | 3523.515  | 4299.382  | NM_003472 | 19224.514 | 16351.099 | NM_006186 | 275.743   |
| 3286.338  | NM_001990 | 833.723   | 881.226   | U92980    | 453.029   | 684.228   | NM_002751 | 529.408   |
| 790.179   | NM_002141 | 879.846   | 786.586   | AF133658  | 614.299   | 738.127   | M55593    | 1474.725  |
| 1322.564  | NM_003311 | 6273.797  | 6616.777  | AB048287  | 3610.659  | 2634.913  | NM_017716 | 514.087   |
| 1089.133  | NM_003776 | 3697.74   | 1759.509  | Y11159    | 666.607   | 594.511   | M58603    | 2028.617  |
| 604.243   | NM_007098 | 1361.754  | 419.699   | AB020648  | 822.118   | 1738.242  | NM_003639 | 1075.694  |
| 550.235   | NM_015719 | 1365.291  | 1196.534  | AK025798  | 13081.683 | 11557.287 | NM_001549 | 434.679   |
| 1786.884  | NM_006129 | 2006.676  | 992.857   | NM_018366 | 3671.8    | 3543.072  | NM_007318 | 21026.047 |
| 593.536   | NM_000582 | 2037.812  | 1176.16   | AB040290  | 561.373   | 2065.155  | NM_014874 | 288.097   |
| 289.676   | NM_005593 | 1201.936  | 916.79    | NM_019848 | 3653.81   | 2710.601  | NM_005765 | 9183.084  |
| 273.322   | NM_004979 | 904.252   | 1033.318  | AK021497  | 713.474   | 329.115   | NM_002762 | 297.172   |
| 798.826   | NM_016077 | 2393.312  | 1898.892  | AK000798  | 217.999   | 118.89    | NM_006324 | 2536.7    |
| 1271.201  | AF100756  | 7818.98   | 5048.424  | AK023803  | 303.412   | 216.333   | NM_016848 | 1288.272  |
| 2010.932  | NM_004862 | 2912.205  | 4293.166  | AK026947  | 12051.937 | 9893.834  | NM_000514 | 1038.531  |



|           |           |           |           |           |           |           |           |           |
|-----------|-----------|-----------|-----------|-----------|-----------|-----------|-----------|-----------|
| 152.288   | NM_001661 | 843.942   | 1004.672  | U84526    | 5394.145  | 3115.558  | AL137432  | 638.397   |
| 5528.458  | NM_014563 | 1900.33   | 1811.869  | L23401    | 1171.475  | 914.854   | NM_000957 | 589.086   |
| 1572.287  | NM_020150 | 2670.231  | 2027.995  | NM_018090 | 35846.449 | 36046.148 | NM_019043 | 701.712   |
| 2006.186  | NM_007150 | 2570.061  | 2002.852  | AK022728  | 13011.271 | 11368.842 | NM_003240 | 900.911   |
| 1827.394  | NM_006831 | 1885.772  | 1561.591  | AL109678  | 749.456   | 693.478   | NM_016564 | 5980.685  |
| 11257.265 | AL162044  | 3205.184  | 2304.576  | AL137524  | 857.061   | 937.967   | AF279656  | 344.963   |
| 4017.171  | AK024004  | 555.107   | 239.411   | AF218008  | 4582.894  | 2930.116  | AK021660  | 334.078   |
| 2615.504  | BE892273  | 29415.658 | 21279.518 | M22404    | 14174.731 | 14452.655 | AB007933  | 6124.705  |
| 2359.829  | AF026929  | 496.438   | 303.61    | AF052115  | 560.565   | 545.287   | NM_006702 | 1227.002  |
| 826.653   | NM_016734 | 971.747   | 559.191   | NM_014019 | 9227.093  | 6387.339  | NM_001396 | 1451.506  |
| 4213.354  | NM_014393 | 2153.957  | 2746.738  | Z70711    | 605.732   | 474.847   | NM_014474 | 553.429   |
| 2460.547  | NM_006813 | 351.613   | 689.121   | NM_013326 | 2327.113  | 1782.379  | NM_001684 | 743.307   |
| 1419.319  | NM_001355 | 8192.669  | 7703.885  | BC037322  | 741.982   | 1067.087  | NM_000808 | 532.775   |
| 3706.09   | U63336    | 752.931   | 1006.432  | Y12022    | 747.398   | 650.134   | NM_019891 | 912.664   |
| 976.709   | NM_006907 | 844.646   | 385.447   | AK001375  | 753.617   | 445.194   | AF038186  | 932.59    |
| 456.066   | NM_002686 | 330.744   | 593.998   | NM_019597 | 4110.51   | 3803.272  | NM_016277 | 2208.445  |
| 6871.742  | NM_018466 | 1171.604  | 1295.015  | AL137559  | 720.781   | 642.109   | NM_007247 | 898.883   |
| 1837.212  | Y11312    | 697.687   | 627.33    | AF026944  | 975.001   | 797.564   | NM_006554 | 963.14    |
| 154.586   | AB014533  | 1971.762  | 2176.67   | AK021493  | 1252.212  | 1022.681  | X99962    | 1865.77   |
| 414.337   | M11427    | 523.088   | 621.181   | NM_006161 | 2189.205  | 1542.295  | AK023221  | 2273.551  |
| 159.482   | NM_000744 | 508.837   | 413.266   | NM_012155 | 3377.406  | 1418.386  | NM_003664 | 2449.698  |
| 112.375   | NM_003039 | 5994.245  | 9041.352  | AF144700  | 947.034   | 896.116   | NM_002426 | 929.823   |
| 206.897   | NM_014509 | 639.509   | 717.818   | NM_004105 | 3011.169  | 3337.469  | AK027182  | 541.791   |
| 420.364   | NM_020372 | 2332.62   | 1896.444  | AB046825  | 1646.24   | 1284.253  | J03651    | 924.352   |
| 968.156   | NM_002635 | 47888.898 | 46398.234 | X64975    | 916.398   | 910.227   | U61738    | 1157.99   |
| 557.722   | NM_004758 | 1041.317  | 1545.821  | AF064876  | 189.235   | 92.798    | AJ132087  | 628.519   |
| 888.935   | NM_005163 | 4533.005  | 3842.092  | AL050297  | 1368.528  | 568.783   | U92818    | 711.037   |
| 5083.669  | NM_015361 | 5462.625  | 4230.868  | AK026966  | 660.381   | 250.549   | NM_000442 | 3908.698  |
| 12939.544 | NM_016520 | 4910.738  | 5491.749  | AF185573  | 247.759   | 183.745   | NM_002934 | 35361.969 |
| 107.819   | AB018353  | 2234.704  | 2133.082  | AJ009817  | 205.626   | 160.624   | AK023011  | 4282.012  |
| 4637.801  | NM_007036 | 1370.013  | 1296.451  | AK025268  | 875.476   | 1455.075  | NM_016816 | 563.404   |
| 918.22    | NM_002617 | 1147.219  | 1544.999  | AL833005  | 1537.145  | 1362.649  | L17325    | 844.139   |
| 1205.486  | NM_003313 | 7156.826  | 6562.988  | L43366    | 1721.031  | 1226.865  | NM_014002 | 2461.965  |
| 200.223   | AF090907  | 1660.408  | 1342.496  | AK026124  | 2886.009  | 2226.655  | NM_004197 | 3664.955  |
| 321.918   | AK024476  | 2195.828  | 2226.344  | NM_015509 | 996.555   | 729.83    | NM_004073 | 399.229   |
| 1255.939  | X74794    | 6268.262  | 4952.595  | AL110157  | 8520.331  | 4095.447  | NM_001278 | 1935.848  |
| 305.509   | AL050298  | 1463.187  | 1162.228  | NM_002319 | 3397.98   | 2409.354  | NM_019105 | 1267.516  |
| 172.741   | NM_007079 | 20906.91  | 19852.457 | L38712    | 3219.113  | 2667.033  | NM_000294 | 1677.785  |
| 238.241   | M20696    | 2516.267  | 1608.616  | U84508    | 530.671   | 553.819   | AJ272212  | 1095.448  |
| 3962.561  | NM_002915 | 633.826   | 314.5     | NM_017793 | 1274.954  | 1116.48   | NM_001626 | 7069.517  |
| 945.301   | NM_006736 | 593.15    | 1024.948  | NM_012131 | 1198.008  | 654.864   | NM_005677 | 1171.958  |
| 2184.073  | NM_003640 | 844.346   | 837.486   | S41540    | 582.496   | 383.063   | AF229803  | 808.782   |
| 21496.793 | NM_014444 | 2826.144  | 2454.981  | CY3Cy5    | 479.983   | 114.349   | AF151810  | 351.892   |
| 1005.725  | NM_012248 | 6165.254  | 4141.179  | BI906766  | 576.539   | 187.006   | NM_002130 | 12114.969 |
| 588.196   | NM_014970 | 4860.353  | 4346.53   | U60519    | 576.994   | 573.1     | NM_005469 | 2745.337  |
| 6522.365  | NM_007098 | 1647.023  | 729.69    | AA282906  | 1217.328  | 582.843   | NM_016361 | 1478.294  |
| 1200.951  | NM_015719 | 1157.381  | 1025.597  | L02870    | 1853.598  | 1466.182  | NM_003708 | 12502.311 |
| 7715.309  | NM_006129 | 1191.814  | 1165.045  | BG755482  | 2365.45   | 2042.369  | NM_014349 | 2910.805  |
| 1303.742  | NM_000582 | 1832.533  | 1764.487  | AI480307  | 1965.898  | 1195.745  | AB040895  | 263.978   |
| 1019.679  | NM_005593 | 2081.916  | 2507.623  | X51420    | 851.411   | 781.895   | NM_004820 | 1664.477  |
| 699.786   | NM_004684 | 462.62    | 533.164   | L24038    | 330.033   | 177.822   | NM_018210 | 795.243   |
| 4611.615  | BF338709  | 816.577   | 1075.555  | NM_053056 | 1697.057  | 884.309   | NM_001096 | 2568.49   |
| 479.32    | AF204171  | 445.467   | 549.911   | NM_006186 | 393.372   | 341.903   | NM_016014 | 933.512   |

|           |                  |           |           |                  |           |           |                  |          |
|-----------|------------------|-----------|-----------|------------------|-----------|-----------|------------------|----------|
| 1060.691  | <b>W96179</b>    | 2137.923  | 2590.322  | <b>NM_002751</b> | 728.398   | 874.702   | <b>NM_018327</b> | 388.063  |
| 1818.552  | <b>AW247841</b>  | 7544.658  | 8377.813  | <b>M55593</b>    | 2234.629  | 3904.508  | <b>NM_017581</b> | 879.062  |
| 2723.827  | <b>M76559</b>    | 4547.25   | 2581.227  | <b>NM_078467</b> | 3622.311  | 3558.236  | <b>AA488804</b>  | 2779.872 |
| 8057.225  | <b>AI222585</b>  | 853.449   | 867.049   | <b>SR2</b>       | 40839.559 | 32489.836 | <b>L29496</b>    | 2367.753 |
| 35143.598 | <b>AA411678</b>  | 6654.895  | 7343.501  | <b>SR4</b>       | 8771.928  | 7257.953  | <b>NM_00092E</b> | 185.058  |
| 1440.245  | <b>AA862813</b>  | 18874.535 | 11789.118 | <b>SR6</b>       | 1140.698  | 1070.982  | <b>NM_007002</b> | 3604.284 |
| 16720.809 | <b>AA398427</b>  | 1043.553  | 540.726   | <b>SR8</b>       | 2983.778  | 8072.594  | <b>NM_012121</b> | 735.738  |
| 1205.438  | <b>T55728</b>    | 3355.359  | 2950.889  | <b>SR10</b>      | 15012.527 | 3924.423  | <b>NM_00325E</b> | 3167.019 |
| 1115.208  | <b>H20856</b>    | 1519.685  | 1062.162  | <b>CY3Cy5</b>    | 528.456   | 92.486    | <b>NM_01415E</b> | 1208.702 |
| 1825.24   | <b>N62586</b>    | 2189.977  | 1948.078  | <b>NM_01684E</b> | 2198.106  | 2016.275  | <b>AK026331</b>  | 5965.638 |
| 470.481   | <b>AA242743</b>  | 2210.618  | 1864.86   | <b>NM_000514</b> | 1603.978  | 1145.571  | <b>M30773</b>    | 1593.606 |
| 1513.977  | <b>BE892273</b>  | 31263.838 | 31435.088 | <b>AL137432</b>  | 979.499   | 807.605   | <b>NM_01633E</b> | 3328.366 |
| 893.358   | <b>NM_016734</b> | 859.008   | 934.169   | <b>NM_000957</b> | 1223.899  | 829.561   | <b>AF113699</b>  | 6187.96  |
| 647.145   | <b>AF035803</b>  | 389.555   | 467.056   | <b>NM_019043</b> | 1057.009  | 740.721   | <b>AK001883</b>  | 5107.487 |
| 758.174   | <b>Y08147</b>    | 2253.462  | 2036.188  | <b>NM_003240</b> | 1855.15   | 1042.505  | <b>NM_01462E</b> | 662.311  |
| 1257.24   | <b>D00174</b>    | 5761.551  | 4649.322  | <b>NM_016564</b> | 11101.607 | 8475.809  | <b>AL050114</b>  | 479.108  |
| 2305.631  | <b>AB000520</b>  | 1393.173  | 1328.159  | <b>AF279656</b>  | 812.699   | 849.833   | <b>AK023794</b>  | 5641.103 |
| 4019.552  | <b>NM_016382</b> | 1258.532  | 4304.009  | <b>AK021660</b>  | 440.549   | 395.905   | <b>NM_01988E</b> | 1747.427 |
| 412.004   | <b>AK023117</b>  | 2193.836  | 2093.136  | <b>AB007933</b>  | 17904.906 | 9922.264  | <b>AB033103</b>  | 699.186  |
| 6491.614  | <b>AL122046</b>  | 547.927   | 311.138   | <b>NM_006702</b> | 1595.863  | 3411.233  | <b>NM_002907</b> | 410.914  |
| 881.701   | <b>NM_00085E</b> | 2008.634  | 2337.193  | <b>NM_00139E</b> | 1897.156  | 1668.572  | <b>AK024098</b>  | 494.531  |
| 3051.48   | <b>NM_00553E</b> | 3252.323  | 3203.931  | <b>NM_014474</b> | 689.237   | 775.473   | <b>AK022371</b>  | 1336.604 |
| 3040.204  | <b>NM_005077</b> | 1592.624  | 1658.388  | <b>NM_01624E</b> | 709.263   | 732.64    | <b>D42045</b>    | 928.655  |
| 596.007   | <b>NM_004423</b> | 2977.522  | 3075.716  | <b>NM_006181</b> | 336.647   | 682.409   | <b>AB007953</b>  | 695.222  |
| 3161.837  | <b>NM_001990</b> | 484.746   | 481.166   | <b>NM_00379E</b> | 4531.172  | 4807.926  | <b>NM_017820</b> | 363.977  |
| 1280.182  | <b>NM_002141</b> | 1187.506  | 557.775   | <b>NM_002973</b> | 1065.203  | 1601.238  | <b>NM_00184E</b> | 1218.91  |
| 789.455   | <b>NM_003311</b> | 6238.977  | 6296.792  | <b>NM_00443E</b> | 23845.025 | 35968.438 | <b>NM_003734</b> | 2931.529 |
| 870.361   | <b>NM_00377E</b> | 3288.771  | 1794.618  | <b>NM_006580</b> | 2744.307  | 2302.021  | <b>NM_003247</b> | 454.154  |
| 407.247   | <b>NM_000744</b> | 625.356   | 701.665   | <b>NM_00130E</b> | 1079.192  | 851.517   | <b>NM_01493E</b> | 1903.04  |
| 1099.725  | <b>NM_00303E</b> | 1979.952  | 3729.195  | <b>NM_005082</b> | 283.771   | 358.399   | <b>X99660</b>    | 3316.005 |
| 2302.739  | <b>NM_01450E</b> | 494.272   | 1084.534  | <b>D17028</b>    | 9151.307  | 7417.886  | <b>X03635</b>    | 1880.685 |
| 4522.244  | <b>NM_020372</b> | 2517.452  | 2366.294  | <b>NM_013442</b> | 11320.02  | 12764.185 | <b>X97671</b>    | 541.067  |
| 898.885   | <b>NM_016077</b> | 3016.876  | 2316.838  | <b>BG611243</b>  | 913.781   | 508.881   | <b>NM_004351</b> | 2002.734 |
| 8754.186  | <b>AF100756</b>  | 8672.024  | 5437.594  | <b>AK023221</b>  | 2744.854  | 2105.073  | <b>NM_00423E</b> | 4599.514 |
| 6243.001  | <b>NM_00682E</b> | 8561.066  | 7615.602  | <b>NM_003664</b> | 3161.599  | 3369.565  | <b>AB011093</b>  | 1348.936 |
| 1593.424  | <b>NM_004862</b> | 2906.447  | 2837.088  | <b>NM_00242E</b> | 1317.792  | 1094.422  | <b>NM_004560</b> | 305.749  |
| 671.42    | <b>NM_001661</b> | 922.558   | 941.489   | <b>AK027182</b>  | 424.403   | 242.498   | <b>NM_00561E</b> | 2594.72  |
| 134.654   | <b>NM_014563</b> | 1476.276  | 1520.262  | <b>J03651</b>    | 1208.748  | 936.657   | <b>NM_020533</b> | 2265.636 |
| 365.524   | <b>NM_020150</b> | 2181.188  | 1572.824  | <b>U61738</b>    | 2062.929  | 1434.455  | <b>NM_001894</b> | 3187.528 |
| 965.687   | <b>NM_007150</b> | 2485.882  | 1814.173  | <b>AJ132087</b>  | 287.225   | 224.88    | <b>NM_000614</b> | 475.555  |
| 990.571   | <b>NM_006831</b> | 1769.674  | 1374.063  | <b>U92818</b>    | 762.661   | 645.154   | <b>NM_006620</b> | 2809.208 |
| 2363.768  | <b>AL162044</b>  | 3501.578  | 2859.205  | <b>NM_000442</b> | 6562.354  | 6723.88   | <b>Y08770</b>    | 262.302  |
| 3965.731  | <b>AK024004</b>  | 466.022   | 302.728   | <b>NM_002934</b> | 37232.629 | 39692.672 | <b>NM_004772</b> | 4425.785 |
| 4683.928  | <b>NM_00673E</b> | 654.24    | 1470.36   | <b>AK023011</b>  | 8265.728  | 5274.623  | <b>NM_003714</b> | 2058.9   |
| 2440.287  | <b>NM_003640</b> | 786.292   | 1282.483  | <b>NM_01681E</b> | 663.314   | 824.177   | <b>AF024540</b>  | 524.281  |
| 1033.752  | <b>NM_014444</b> | 1751.69   | 2559.942  | <b>L17325</b>    | 835.617   | 870.919   | <b>NM_00218E</b> | 941.081  |
| 554.351   | <b>NM_01224E</b> | 3983.451  | 4673.655  | <b>NM_01771E</b> | 689.995   | 664.676   | <b>U42977</b>    | 1042.449 |
| 352.927   | <b>NM_014970</b> | 4084.382  | 4540.387  | <b>M58603</b>    | 1837.369  | 2998.053  | <b>NM_002881</b> | 2063.92  |
| 682.331   | <b>NM_014393</b> | 2613.172  | 3433.961  | <b>NM_00363E</b> | 1052.739  | 1472.406  | <b>NM_00366E</b> | 884.516  |
| 2821.631  | <b>NM_004223</b> | 4083.785  | 6160.133  | <b>NM_000115</b> | 871.181   | 908.103   | <b>NM_00328E</b> | 2254.798 |
| 789.903   | <b>NM_006813</b> | 634.93    | 813.18    | <b>AF308801</b>  | 1301.661  | 1951.772  | <b>M83822</b>    | 1071.471 |
| 1407.405  | <b>NM_00135E</b> | 9501.409  | 8098.368  | <b>NM_00731E</b> | 41779.93  | 32417.445 | <b>NM_018434</b> | 1090.674 |
| 3621.133  | <b>NM_00121E</b> | 87.247    | 406.104   | <b>NM_014874</b> | 444.142   | 507.01    | <b>NM_003914</b> | 2892.976 |

|           |           |           |           |           |           |           |           |           |
|-----------|-----------|-----------|-----------|-----------|-----------|-----------|-----------|-----------|
| 4532.187  | U63336    | 829.74    | 633.601   | NM_005765 | 12118.616 | 14186.264 | NM_020423 | 693.993   |
| 230.693   | NM_006907 | 1049.764  | 488.013   | NM_002762 | 510.102   | 479.801   | AK021437  | 1251.767  |
| 3874.503  | NM_002686 | 552.561   | 689.405   | NM_006324 | 4368.933  | 4421.327  | NM_003831 | 4120.765  |
| 4399.155  | NM_006267 | 1157.283  | 1575.684  | NM_005469 | 3527.931  | 3486.271  | NM_001759 | 297.101   |
| 2440.743  | NM_002661 | 8857.036  | 7658.944  | NM_016361 | 1670.396  | 907.053   | AB007965  | 2685.033  |
| 3326.134  | NM_001263 | 400.809   | 734.277   | NM_003708 | 22857.104 | 18623.215 | NM_017649 | 660.167   |
| 2099.054  | AK023982  | 350.966   | 403.806   | NM_014349 | 3964.087  | 3343.817  | NM_000066 | 909.292   |
| 4254.893  | NM_018466 | 1106.256  | 1290.712  | NM_004820 | 486.743   | 628.523   | NM_017744 | 1043.963  |
| 27239.857 | Y11312    | 569.314   | 676.36    | NM_018210 | 965.57    | 1325.833  | NM_001924 | 915.195   |
| 1168.645  | AB014533  | 2446.135  | 3172.983  | NM_001096 | 3131.773  | 1574.319  | NM_017705 | 3946.642  |
| 1127.843  | M11427    | 511.854   | 563.906   | NM_016014 | 1084.195  | 973.854   | NM_001796 | 1326.771  |
| 1792.478  | AK022097  | 1995.548  | 5420.773  | NM_018327 | 888.341   | 811.658   | AB040880  | 501.921   |
| 26599.234 | NM_002166 | 5103.291  | 4013.384  | NM_017581 | 1132.487  | 1287.92   | NM_009587 | 4337      |
| 2310.237  | NM_004660 | 8176.263  | 9216.576  | AA488804  | 3921.935  | 4044.566  | AL133566  | 380.578   |
| 2642.91   | NM_006165 | 2173.145  | 3456.321  | NM_006539 | 429.759   | 518.818   | M36118    | 2290.818  |
| 2851.709  | NM_016011 | 7189.353  | 5127.861  | NM_001684 | 819.388   | 584.601   | NM_003399 | 8206.929  |
| 457.902   | AL035307  | 1050.633  | 1858.624  | AB028977  | 286.524   | 292.95    | NM_002630 | 592.052   |
| 1465.562  | NM_012234 | 3667.97   | 3359.656  | NM_000808 | 350.723   | 486.552   | AJ295149  | 14756.49  |
| 1984.427  | NM_015361 | 8334.152  | 5341.528  | NM_016318 | 5458.147  | 7250.384  | NM_013438 | 2677.896  |
| 27679.525 | NM_004310 | 323.747   | 215.22    | NM_013309 | 313.116   | 453.597   | NM_005099 | 921.139   |
| 3992.042  | NM_015537 | 3478.192  | 2604.977  | NM_019891 | 797.646   | 588.581   | NM_014688 | 1869.76   |
| 1999.025  | NM_016520 | 5209.709  | 5163.226  | AF038186  | 1204.093  | 1025.604  | AB037784  | 337.076   |
| 12627.816 | AB018353  | 1947.85   | 1764.244  | NM_016277 | 2574.519  | 3033.247  | AL359623  | 352.365   |
| 948.042   | NM_007036 | 1795.009  | 1980.793  | NM_007247 | 1535.945  | 1477.465  | AB037715  | 1839.089  |
| 3453.171  | NM_002617 | 1431.36   | 1258.427  | NM_006554 | 1522.16   | 1655.714  | AF250924  | 3641.087  |
| 4321.441  | NM_003313 | 9036.859  | 8985.752  | X99962    | 3312.781  | 2609.124  | D86979    | 659.38    |
| 1705.177  | AF090907  | 1789.012  | 1401.855  | AL050114  | 289.724   | 502.825   | NM_018212 | 185.927   |
| 1239.719  | AK024476  | 1631.037  | 1749.656  | AK021492  | 1073.039  | 806.614   | AB023230  | 343.125   |
| 1867.838  | AK026015  | 395.373   | 888.908   | AK023794  | 8252.438  | 7489.593  | AF018081  | 8018.273  |
| 2547.137  | AK026154  | 7406.652  | 9327.208  | NM_019885 | 1063.391  | 749.678   | NM_020202 | 5001.704  |
| 520.35    | AL117546  | 17716.461 | 18719.809 | AB033103  | 777.321   | 392.257   | AK022889  | 6480.81   |
| 1106.025  | AK027073  | 543.135   | 857.146   | NM_002907 | 444.616   | 543.91    | X52357    | 21968.328 |
| 4101.589  | NM_000384 | 408.163   | 498.14    | AK024098  | 624.246   | 688.578   | AF211891  | 425.471   |
| 26008.15  | AB018325  | 2846.274  | 4415.49   | AK022371  | 1144.783  | 1343.02   | NM_005641 | 486.611   |
| 3885.739  | AL157482  | 3802.167  | 3921.02   | D42045    | 1210.324  | 1224.254  | NM_001668 | 1532.074  |
| 660.132   | NM_005428 | 4171.383  | 4198.569  | AB007953  | 519.584   | 638.62    | AK025362  | 531.052   |
| 759.125   | NM_017974 | 711.088   | 849.33    | NM_014002 | 1876.242  | 1985.618  | AK021776  | 851.204   |
| 591.431   | NM_003979 | 663.03    | 544.463   | NM_004197 | 4081.922  | 6035.583  | AB002304  | 107.512   |
| 1379.712  | X14677    | 2849.941  | 2510.212  | NM_004073 | 711.907   | 1034.732  | AK026042  | 449.818   |
| 882.962   | NM_005863 | 11989.396 | 5644.711  | NM_001278 | 1690.942  | 1920.052  | NM_014233 | 6120.039  |
| 1163.37   | U17077    | 2095.949  | 2299.569  | NM_019105 | 2323.472  | 3707.412  | NM_002137 | 32632.461 |
| 1520.537  | NM_000915 | 1823.622  | 2194.612  | NM_000294 | 1818.043  | 2719.554  | NM_002911 | 497.98    |
| 30773.947 | NM_002344 | 919.042   | 857.573   | AJ272212  | 1180.875  | 1157.218  | U94386    | 438.012   |
| 626.661   | AK024475  | 1832.599  | 516.278   | NM_001626 | 10609.047 | 12130.838 | NM_016000 | 2772.677  |
| 11419.89  | NM_002062 | 10061.297 | 6557.074  | NM_005677 | 1529.206  | 1654.462  | NM_006372 | 3545.354  |
| 3298.979  | NM_014394 | 44281.039 | 29926.434 | AF229803  | 545.927   | 423.036   | NM_014150 | 1376.758  |
| 2074.42   | NM_005243 | 12251.089 | 12782.603 | NM_002130 | 17649.719 | 5291.139  | NM_004681 | 1771.87   |
| 1463.883  | NM_006218 | 1547.112  | 1223.09   | NM_001305 | 1121.278  | 1173.342  | AB033096  | 2877.85   |
| 18130.414 | NM_018140 | 2892.401  | 1740.926  | D17028    | 8626.688  | 9226.692  | NM_014886 | 524.447   |
| 3632.789  | NM_016948 | 903.713   | 830.264   | NM_013442 | 8801.533  | 10317.416 | L31408    | 3612.65   |
| 1213.997  | NM_000142 | 1110.496  | 736.813   | BG611243  | 625.928   | 325.971   | NM_001545 | 3556.891  |
| 501.782   | AF272372  | 15644.756 | 13197.167 | BI906766  | 633.203   | 258.699   | NM_004446 | 6162.076  |
| 2337.328  | AK097045  | 988.047   | 740.436   | U60519    | 843.35    | 809.939   | AF070625  | 1656.505  |

|           |           |           |           |           |           |           |           |           |
|-----------|-----------|-----------|-----------|-----------|-----------|-----------|-----------|-----------|
| 645.48    | AF161356  | 52979.203 | 61932.082 | AA282906  | 1489.239  | 715.017   | AL365512  | 1121.324  |
| 562.047   | AB014548  | 2792.25   | 3299.81   | L02870    | 2370.79   | 2227.537  | AK001740  | 1737.213  |
| 2477.731  | NM_018256 | 3062.371  | 2223.402  | BG755482  | 3355.927  | 2472.651  | NM_005918 | 10179.389 |
| 701.412   | AK025150  | 596.724   | 617.545   | AI480307  | 2005.156  | 1116.552  | J02625    | 3347.343  |
| 5343.056  | AK024611  | 9360.282  | 7396.176  | X51420    | 844.383   | 914.811   | Y17175    | 51461.391 |
| 574.244   | BC010420  | 4124.054  | 4557.693  | X51757    | 322.368   | 385.537   | NM_004549 | 8622.003  |
| 793.271   | NM_012280 | 14752.608 | 15711.112 | L24038    | 308.997   | 480.181   | NM_005333 | 6430.496  |
| 1591.63   | NM_018172 | 2961.01   | 1213.977  | NM_053056 | 1534.03   | 907.915   | AK026161  | 600.972   |
| 2566.916  | U03886    | 589.368   | 598.055   | NM_006186 | 389.155   | 305.931   | NM_004553 | 12065.46  |
| 1192.291  | AK022040  | 783.892   | 663.346   | NM_002751 | 903.783   | 932.901   | D63484    | 668.827   |
| 2174.57   | AK022722  | 764.61    | 353.102   | M55593    | 2134.562  | 3005.534  | AK026745  | 1292.825  |
| 2724.886  | NM_003591 | 15745.039 | 16160.562 | NM_078467 | 2816.421  | 3504.53   | AL157440  | 784.189   |
| 294.816   | AL080111  | 2390.465  | 1777.7    | AK001883  | 8805.428  | 8727.615  | NM_016423 | 1465.648  |
| 4189.364  | NM_003550 | 10496.275 | 9439.404  | NM_014629 | 782.351   | 697.142   | AB040975  | 968.66    |
| 1052.174  | NM_002831 | 16750.932 | 24941.979 | NM_007318 | 43771.352 | 48302.238 | NM_005119 | 2141.175  |
| 721.233   | AL833409  | 3258.527  | 2924.767  | NM_014874 | 1052.211  | 3151.52   | NM_003168 | 4798.779  |
| 485.408   | NM_015966 | 827.996   | 1170.409  | NM_005765 | 9542.033  | 13989.055 | AK055844  | 487.436   |
| 701.601   | NM_016147 | 1992.446  | 1183.913  | NM_002762 | 393.275   | 239.191   | NM_018288 | 8611.683  |
| 799.214   | NM_002833 | 1602.501  | 1574.447  | NM_006324 | 3386.021  | 3379.221  | NM_003146 | 1317.963  |
| 2088.029  | NM_016592 | 515.826   | 615.8     | NM_016848 | 2316.44   | 1549.611  | NM_003131 | 5900.14   |
| 678.274   | NM_018527 | 571.039   | 362.174   | NM_000514 | 1603.815  | 1435.293  | NM_005239 | 1041.826  |
| 1355.336  | NM_018326 | 1711.648  | 2529.974  | AL137432  | 1152.479  | 1247.51   | NM_018538 | 1845.532  |
| 1622.09   | NM_014773 | 784.383   | 1156.98   | NM_000957 | 1418.725  | 1360.86   | NM_013346 | 670.4     |
| 2694.204  | AF134707  | 765.058   | 696.556   | NM_019043 | 1265.772  | 677.224   | NM_017851 | 566.548   |
| 2164.506  | NM_001223 | 2629.64   | 6341.646  | NM_003240 | 1762.53   | 1213.158  | AK026182  | 47638.422 |
| 7596.11   | BE730629  | 847.219   | 781.861   | NM_016564 | 10727.471 | 9177.033  | AK025603  | 609.162   |
| 2248.504  | AK027167  | 1730.585  | 1687.024  | AF279656  | 534.995   | 1137.357  | NM_016085 | 6188.488  |
| 863.737   | AK025265  | 3172.141  | 2654.921  | AK021660  | 369.597   | 315.182   | AK025768  | 2853.393  |
| 1965.699  | NM_013279 | 428.047   | 526.069   | AB007933  | 16639.063 | 12491.097 | AL117502  | 971.985   |
| 12232.661 | NM_006442 | 16558.16  | 14859.14  | NM_006702 | 1737.958  | 4911.289  | AK001846  | 536.69    |
| 561.521   | NM_003902 | 8497.803  | 8251.256  | NM_001396 | 2143.37   | 1840.455  | AK024637  | 455.311   |
| 2082.365  | NM_016427 | 4101.047  | 3694.803  | NM_014474 | 631.175   | 845.345   | AK024108  | 325.02    |
| 5221.868  | U80741    | 5539.436  | 3094.41   | NM_016249 | 892.368   | 952.727   | NM_013345 | 526.367   |
| 568.468   | NM_014497 | 1940.788  | 1232.245  | NM_003796 | 4509.666  | 6371.138  | AL117454  | 12355.328 |
| 552.546   | AL133598  | 7224.849  | 5421.48   | NM_002973 | 1011.745  | 1576.072  | AF272890  | 2361.626  |
| 462.214   | AF075068  | 7020.384  | 7572.191  | NM_004436 | 22534.021 | 34563.031 | NM_016459 | 2336.289  |
| 864.237   | AF086529  | 270.257   | 384.529   | NM_006580 | 2336.438  | 2499.775  | AF086227  | 665.176   |
| 801.435   | AK022171  | 491.924   | 672.757   | NM_019891 | 840.513   | 774.376   | AK026246  | 1324.276  |
| 1243.588  | X78938    | 1143.628  | 1661.218  | AF038186  | 946.927   | 1685.166  | AF070524  | 328.824   |
| 885.857   | AK001439  | 673.513   | 654.404   | NM_016277 | 2289.298  | 3826.14   | AF035281  | 676.077   |
| 409.202   | AF085881  | 858.156   | 928.224   | NM_007247 | 1286.182  | 1341.38   | AK026304  | 876.894   |
| 439.284   | AK022737  | 4095.406  | 4045.146  | NM_006554 | 1052.497  | 1345.919  | AL133446  | 1263.12   |
| 259.308   | NM_003472 | 20710.928 | 18862.885 | X99962    | 2512.722  | 2333.117  | AF147406  | 296.23    |
| 1506.211  | U92980    | 850.755   | 647.352   | AK023221  | 3061.704  | 1755.385  | NM_006553 | 250.602   |
| 409.318   | AF133658  | 640.415   | 927.446   | NM_003664 | 3307.959  | 3217.795  | U56251    | 391.755   |
| 1061.025  | AB048287  | 4375.3    | 3790.664  | NM_002426 | 1483.057  | 1059.248  | AK024689  | 516.367   |
| 2094.212  | Y11159    | 1056.312  | 839.29    | AK027182  | 528.553   | 356.09    | BC035667  | 521.305   |
| 2155.635  | AB020648  | 1469.59   | 1877.607  | J03651    | 1187.38   | 604.728   | AL049277  | 582.202   |
| 3573.166  | AK025798  | 17785.492 | 10794.279 | U61738    | 1753.628  | 1536.472  | AL050043  | 385.564   |
| 5279.051  | AF086173  | 887.758   | 894.515   | AJ132087  | 372.619   | 712.614   | AL117571  | 936.203   |
| 1084.271  | AK025164  | 538.693   | 1347.183  | U92818    | 828.938   | 834.158   | L22263    | 272.959   |
| 23697.82  | NM_018366 | 5952.577  | 8057.799  | NM_000442 | 5129.068  | 5682.246  | AF131814  | 763.696   |
| 3720      | AB040290  | 768.185   | 839.46    | NM_002934 | 38218.426 | 49589     | AL360144  | 1921.496  |

|           |           |           |           |           |           |           |            |           |
|-----------|-----------|-----------|-----------|-----------|-----------|-----------|------------|-----------|
| 199.388   | NM_01984E | 5278.965  | 4712.943  | AK023011  | 6882.434  | 5952.665  | BC028617   | 1502.37   |
| 1089.73   | AK021497  | 1609.129  | 1408.349  | NM_01681E | 1036.414  | 1738.553  | AL117653   | 378.534   |
| 612.916   | AF124367  | 596.233   | 798.504   | L17325    | 715.972   | 1212.657  | AF087999   | 418.01    |
| 548.635   | AK023803  | 658.982   | 486.889   | NM_01771E | 567.771   | 1001.484  | NM_00374C  | 1677.867  |
| 369       | AK026947  | 13951.178 | 10294.197 | M58603    | 2315.344  | 3808.221  | AL050078   | 793.286   |
| 325.191   | U84526    | 4642.605  | 2471.709  | NM_00363E | 1524.063  | 4614.919  | AK022933   | 305.427   |
| 216.447   | L23401    | 1600.546  | 1606.617  | NM_00154E | 250.335   | 1387.906  | NM_01427E  | 1926.242  |
| 390.945   | NM_01809C | 43650.457 | 38722.941 | NM_000115 | 912.515   | 1236.167  | AF056438   | 873.138   |
| 6360.873  | AK022728  | 8322.345  | 9352.399  | AF308801  | 1490.57   | 2620.02   | AF003737   | 7934.237  |
| 502.123   | AL109678  | 940.289   | 1026.359  | AJ272212  | 1343.903  | 1616.204  | AF009296   | 1104.052  |
| 403.776   | AL137524  | 1143.172  | 1003.213  | NM_00162E | 14521.796 | 16711.939 | AF041410   | 235.98    |
| 10832.181 | AF218008  | 7240.82   | 4854.594  | NM_005677 | 1295.238  | 1972.86   | AF056448   | 220.409   |
| 969.067   | M22404    | 10175.863 | 9763.506  | AF229803  | 774.108   | 619.756   | AK001011   | 1639.825  |
| 1833.458  | AF052115  | 1177.979  | 1489.982  | NM_00213C | 15972.917 | 4657.853  | AK021457   | 386.867   |
| 625.21    | NM_01401E | 14706.643 | 14081.061 | NM_00546E | 3788.928  | 3138.704  | AK021690   | 898.21    |
| 669.482   | Z70711    | 665.728   | 756.513   | NM_016361 | 1645.261  | 1261.106  | AK001840   | 1166.335  |
| 807.832   | AF116653  | 419.117   | 427.003   | NM_00370E | 30036.754 | 21488.125 | AK021486   | 2877.103  |
| 12588.008 | NM_01236E | 923.241   | 832.986   | NM_01434E | 3905.903  | 4272.553  | AK021740   | 443.152   |
| 2367.234  | AK025323  | 444.721   | 327.019   | AB040895  | 196.799   | 293.959   | AK025148   | 800.182   |
| 25705.486 | NM_01332E | 2131.464  | 1932.335  | NM_01821C | 864.818   | 1544.222  | AK026694   | 439.118   |
| 3464.758  | BC037322  | 1188.156  | 1183.444  | NM_00109E | 2436.463  | 1522.839  | AK025564   | 1145.769  |
| 386.099   | Y12022    | 1414.15   | 1228.42   | NM_016014 | 1432.556  | 1434.645  | AK026286   | 1068.11   |
| 587.58    | AK001375  | 1385.954  | 1104.669  | NM_018327 | 636.17    | 895.479   | AK026731   | 597.519   |
| 203.953   | NM_019597 | 7192.141  | 9685.341  | NM_017581 | 1071.538  | 1151.37   | NM_00419E  | 759.152   |
| 735.701   | AL137559  | 1429.309  | 862.17    | AA488804  | 3879.815  | 5493.837  | AK024160   | 435.44    |
| 757.606   | AF026944  | 2428.991  | 1490.733  | NM_00653E | 511.654   | 646.171   | AK025077   | 812.224   |
| 939.386   | AK021493  | 1374.739  | 879.333   | NM_001684 | 1077.743  | 763.147   | NM_006417  | 1259.326  |
| 510.294   | NM_006161 | 4498.234  | 2964.496  | AB028977  | 258.573   | 437.15    | L43350     | 512.018   |
| 488.533   | NM_01215E | 5180.36   | 3378.923  | NM_01631E | 6186.992  | 7635.963  | NM_020317  | 3151.699  |
| 731.857   | AF144700  | 1414.412  | 1190.686  | NM_078467 | 3330.851  | 4150.167  | AL080234   | 2623.12   |
| 660.817   | NM_00410E | 4152.417  | 2376.847  | AK001883  | 8366.309  | 8044.645  | AK027025   | 458.668   |
| 2761.36   | AB046825  | 1974.844  | 2213.012  | NM_01462E | 688.341   | 877.561   | AK025105   | 313.804   |
| 20799.236 | X64975    | 1022.843  | 1130.673  | AL050114  | 452.541   | 276.741   | AF212220   | 803.254   |
| 2438.913  | AL050297  | 2470.943  | 1828.144  | AK021492  | 1295.005  | 949.437   | unknown (E | 266.115   |
| 486.703   | AK026966  | 1696.398  | 860.329   | AK023794  | 9015.119  | 9432.337  | AL137470   | 177.771   |
| 750.995   | AF147398  | 555.483   | 505.511   | NM_01988E | 1191.312  | 950.512   | AL137709   | 965.906   |
| 661.495   | AK025268  | 1515.045  | 1611.73   | AB033103  | 908.423   | 767.075   | AK023277   | 567.585   |
| 2054.762  | AL833005  | 3565.802  | 3668.374  | NM_002907 | 425.887   | 884.232   | AK000425   | 704.435   |
| 1963.337  | L43366    | 3020.124  | 2844.89   | AK024098  | 701.686   | 435.836   | Z27200     | 817.956   |
| 557.649   | AK026124  | 4088.51   | 4057.758  | AK022371  | 1283.16   | 1511.324  | AF070571   | 2374.152  |
| 1306.506  | NM_01550E | 1604.063  | 1281.985  | D42045    | 1036.177  | 1215.024  | AK023554   | 626.574   |
| 1492.242  | AL110157  | 13676.852 | 6656.217  | AB007953  | 825.733   | 1160.513  | NM_00351E  | 1480.222  |
| 710.908   | NM_00231E | 6433.405  | 7590.405  | NM_01400E | 3163.663  | 2480.92   | AK024844   | 493.559   |
| 4256.818  | L38712    | 7274.361  | 6106.388  | NM_004197 | 6372.269  | 7868.442  | AL049437   | 389.236   |
| 5641.446  | U84508    | 916.867   | 607.062   | NM_00407E | 813.372   | 1560.286  | AF161427   | 31260.967 |
| 1124.833  | NM_01779E | 2887.376  | 2743.655  | NM_00127E | 1406.027  | 1989.501  | AK021715   | 3232.604  |
| 439.542   | NM_012131 | 2276.487  | 1235.809  | NM_01910E | 2382.585  | 3032.448  | AK000315   | 2324.817  |
| 8424.816  | S41540    | 1158.609  | 655.624   | NM_000294 | 2513.805  | 7134.023  | AK023248   | 599.991   |
| 1189.165  | CY3Cy5    | 2425.35   | 216.146   | NM_01624E | 796.803   | 814.654   | NM_012404  | 7673.435  |
| 273.679   | AI417481  | 430.181   | 964.69    | NM_006181 | 351.171   | 536.166   | AF251190   | 419.758   |
| 1624.831  | BI906766  | 2394.014  | 1444.609  | NM_00379E | 4979.905  | 4287.75   | AF130075   | 2165.614  |
| 739.68    | U60519    | 1570.769  | 3472.691  | NM_00297E | 1229.158  | 1493.33   | NM_005444  | 698.941   |
| 1253.292  | AA282906  | 3409.643  | 4698.956  | NM_00443E | 22676.262 | 30131.277 | V00589     | 9582.528  |

|          |                  |           |           |                  |           |           |                  |           |
|----------|------------------|-----------|-----------|------------------|-----------|-----------|------------------|-----------|
| 292.505  | <b>L02870</b>    | 3594.793  | 3540.171  | <b>NM_006580</b> | 2780.543  | 1994.012  | <b>AL390163</b>  | 957.925   |
| 1125.276 | <b>BG755482</b>  | 7208.212  | 9233.874  | <b>NM_001305</b> | 1141.968  | 866.197   | <b>AK000175</b>  | 1727.057  |
| 600.172  | <b>AI480307</b>  | 3354.779  | 2448.951  | <b>NM_005082</b> | 251.121   | 217.391   | <b>AL137736</b>  | 1966.54   |
| 4293.423 | <b>X51420</b>    | 1842.644  | 2403.302  | <b>D17028</b>    | 8172.785  | 6294.714  | <b>AF143870</b>  | 519.502   |
| 1495.214 | <b>X51757</b>    | 405.085   | 672.314   | <b>NM_013442</b> | 8930.35   | 9588.843  | <b>AK021897</b>  | 4125.755  |
| 270.772  | <b>L24038</b>    | 758.633   | 642.081   | <b>BG611243</b>  | 619.619   | 401.884   | <b>AK001051</b>  | 651.884   |
| 1959.15  | <b>NM_053056</b> | 3545.972  | 1551.722  | <b>BI906766</b>  | 614.08    | 370.255   | <b>AK024356</b>  | 493.489   |
| 694.087  | <b>NM_006186</b> | 1101.298  | 1175.4    | <b>U60519</b>    | 596.701   | 1126.009  | <b>AL049370</b>  | 531.287   |
| 685.023  | <b>NM_002751</b> | 2193.944  | 3369.448  | <b>AA282906</b>  | 1610.247  | 868.86    | <b>AL365410</b>  | 4115.489  |
| 444.257  | <b>M55593</b>    | 7603.077  | 20369.201 | <b>L02870</b>    | 1952.509  | 2450.637  | <b>D17082</b>    | 6440.499  |
| 420.298  | <b>NM_078467</b> | 7449.27   | 13860.105 | <b>BG755482</b>  | 2438.552  | 3008.807  | <b>D17252</b>    | 21490.285 |
| 771.796  | <b>SR2</b>       | 54127.758 | 67869.031 | <b>AI480307</b>  | 1964.577  | 1527.291  | <b>D16476</b>    | 523.037   |
| 739.27   | <b>SR4</b>       | 19548.773 | 31544.346 | <b>X51420</b>    | 724.827   | 796.154   | <b>NM_003673</b> | 1098.145  |
| 424.455  | <b>SR6</b>       | 2989.225  | 4005.864  | <b>D28235</b>    | 299.473   | 567.227   | <b>Z36823</b>    | 1856.766  |
| 1548.837 | <b>SR8</b>       | 8805.76   | 52841.27  | <b>X51757</b>    | 284.362   | 403.954   | <b>AK022110</b>  | 382.025   |
| 1719.458 | <b>SR10</b>      | 29885.113 | 17253.9   | <b>L24038</b>    | 356.168   | 275.528   | <b>AF147387</b>  | 1843.828  |
| 3210.818 | <b>CY3Cy5</b>    | 799.46    | 106.974   | <b>NM_053056</b> | 1988.527  | 1504.027  | <b>NM_012081</b> | 753.044   |
| 2168.951 | <b>NM_016848</b> | 4682.799  | 5722.131  | <b>NM_006186</b> | 335.697   | 274.163   | <b>AL137463</b>  | 340.776   |
| 1679.619 | <b>NM_000514</b> | 4520.793  | 7654.247  | <b>NM_002751</b> | 758.334   | 861.996   | <b>AF085909</b>  | 9444.482  |
| 1380.15  | <b>AL137432</b>  | 2619.858  | 6032.638  | <b>M55593</b>    | 2156.743  | 4613.145  | <b>AF090888</b>  | 273.221   |
| 1405.618 | <b>NM_000957</b> | 2182.315  | 2461.154  | <b>NM_017716</b> | 560.594   | 476.97    | <b>AK027193</b>  | 368.453   |
| 494.421  | <b>NM_019043</b> | 1903.378  | 1653.47   | <b>M58603</b>    | 1978.033  | 2535.906  | <b>AF086471</b>  | 1908.481  |
| 1473.28  | <b>NM_003240</b> | 3780.949  | 2922.178  | <b>NM_003639</b> | 998.165   | 1295.904  | <b>NM_018455</b> | 2781.876  |
| 455.443  | <b>NM_016564</b> | 17294.777 | 17474.352 | <b>NM_001549</b> | 471.074   | 594.403   | <b>AK021996</b>  | 909.688   |
| 7578.974 | <b>AF279656</b>  | 968.621   | 1091.811  | <b>NM_000115</b> | 1131.496  | 1047.42   | <b>AL049337</b>  | 1313.032  |
| 1691.728 | <b>AK021660</b>  | 413.837   | 310.016   | <b>AF308801</b>  | 1833.67   | 2200.18   | <b>CY3Cy5</b>    | 2923.605  |
| 2261.762 | <b>AB007933</b>  | 19285.645 | 11629.102 | <b>NM_007318</b> | 32102.191 | 21255.906 | <b>U13697</b>    | 602.951   |
| 245.294  | <b>NM_006702</b> | 2747.808  | 5926.332  | <b>NM_014874</b> | 436.919   | 405.429   | <b>X75308</b>    | 168.258   |
| 373.628  | <b>NM_001396</b> | 2659.881  | 2548.109  | <b>NM_005765</b> | 10051.507 | 13691.58  | <b>U04270</b>    | 1062.935  |
| 1068.66  | <b>NM_014474</b> | 1655.02   | 1589.404  | <b>NM_006324</b> | 3689.332  | 3366.658  | <b>L02840</b>    | 432.555   |
| 1776.651 | <b>NM_016249</b> | 1013.185  | 1048.836  | <b>NM_016848</b> | 1720.974  | 1560.97   | <b>AA629719</b>  | 50341.254 |
| 717.732  | <b>NM_006181</b> | 913.54    | 1854.946  | <b>NM_000514</b> | 1404.513  | 1189.467  | <b>X02152</b>    | 49322.18  |
| 627.133  | <b>NM_003796</b> | 10543.343 | 8685.903  | <b>AL137432</b>  | 843.605   | 1480.015  | <b>BG676364</b>  | 1052.844  |
| 276.114  | <b>NM_002973</b> | 3442.107  | 3928.234  | <b>NM_000957</b> | 1570.973  | 1730.973  | <b>BG181154</b>  | 587.357   |
| 2995.92  | <b>NM_006580</b> | 7528.736  | 10632.182 | <b>NM_019043</b> | 1173.225  | 930.361   | <b>AA843679</b>  | 1108.937  |
| 2688.123 | <b>NM_001305</b> | 3113.194  | 3360.968  | <b>NM_003240</b> | 1532.986  | 1483.608  | <b>NM_004957</b> | 954.782   |
| 693.331  | <b>NM_005082</b> | 1143.568  | 1636.369  | <b>NM_016564</b> | 10545.188 | 10384.901 | <b>NM_005252</b> | 478.913   |
| 585.577  | <b>D17028</b>    | 18177.158 | 41363.422 | <b>AF279656</b>  | 770.641   | 1040.272  | <b>SR9</b>       | 13388.551 |
| 881.061  | <b>NM_013442</b> | 16870.23  | 15608.099 | <b>AK021660</b>  | 531.498   | 372.839   |                  | 862.523   |
| 613.485  | <b>BG611243</b>  | 844.288   | 318.635   | <b>AB007933</b>  | 26986.834 | 20493.531 | <b>CY3Cy5</b>    | 4451.313  |
| 2257.92  | <b>AK023221</b>  | 4767.353  | 5742.126  | <b>NM_006702</b> | 2271.318  | 3699.717  | <b>NM_004380</b> | 3625.072  |
| 1012.982 | <b>NM_003664</b> | 3672.692  | 6001.075  | <b>NM_001396</b> | 1908.296  | 2056.562  | <b>NM_004119</b> | 864.618   |
| 894.969  | <b>NM_002426</b> | 2093.287  | 3681.677  | <b>NM_014474</b> | 849.276   | 843.204   | <b>AY007378</b>  | 549.803   |
| 1553.93  | <b>AK027182</b>  | 867.211   | 1242.652  | <b>NM_006539</b> | 483.673   | 568.583   | <b>D26070</b>    | 1653.384  |
| 311.014  | <b>J03651</b>    | 3470.11   | 2137.307  | <b>NM_001684</b> | 896.058   | 709.992   | <b>NM_001642</b> | 10587.284 |
| 1633.708 | <b>U61738</b>    | 2465.272  | 1856.064  | <b>NM_000808</b> | 414.646   | 431.897   | <b>NM_000501</b> | 6444.235  |
| 241.452  | <b>AJ132087</b>  | 709.832   | 337.794   | <b>NM_016318</b> | 5819.481  | 5922.399  | <b>NM_000114</b> | 1889.506  |
| 919.441  | <b>U92818</b>    | 2113.385  | 1339.695  | <b>NM_013309</b> | 498.226   | 375.317   | <b>NM_005156</b> | 1848.415  |
| 1132.636 | <b>NM_000442</b> | 10262.981 | 15982.334 | <b>AF038186</b>  | 858.122   | 816.54    | <b>X98834</b>    | 932.275   |
| 1351.515 | <b>NM_002934</b> | 46693.516 | 32578.076 | <b>NM_016277</b> | 2210.848  | 1912.61   | <b>NM_007035</b> | 3274.198  |
| 539.781  | <b>L17325</b>    | 1413.1    | 1497.553  | <b>NM_007247</b> | 1060.482  | 1371.903  | <b>AF036364</b>  | 1009.085  |
| 491.885  | <b>NM_017716</b> | 1021.32   | 1130.293  | <b>NM_006554</b> | 1814.312  | 2650.298  | <b>AK022847</b>  | 689.09    |
| 876.72   | <b>M58603</b>    | 3549.887  | 4537.19   | <b>X99962</b>    | 2826.443  | 2174.879  | <b>NM_020203</b> | 959.242   |

|           |           |           |           |           |           |           |           |           |
|-----------|-----------|-----------|-----------|-----------|-----------|-----------|-----------|-----------|
| 1645.363  | NM_003639 | 2315.704  | 3148.841  | AK023221  | 2658.796  | 2255.619  | U20582    | 7434.718  |
| 5935.126  | NM_001549 | 846.312   | 1993.149  | NM_003664 | 3502.417  | 4498.794  | NM_002079 | 1745.513  |
| 643.857   | NM_000115 | 1933.006  | 2291.526  | NM_002426 | 1263.041  | 1461.353  | NM_006808 | 9102.548  |
| 3778.233  | NM_007318 | 53668.797 | 66577.273 | AK027182  | 561.549   | 701.165   | NM_006634 | 485.865   |
| 1670.294  | NM_014874 | 1564.546  | 2305.053  | J03651    | 1330.455  | 1640.104  | NM_016465 | 565.048   |
| 1105.199  | NM_012397 | 248.906   | 340.174   | U61738    | 1506.723  | 1749.067  | NM_013399 | 1237.386  |
| 521.949   | NM_005765 | 18957.051 | 59453.246 | AJ132087  | 351.16    | 417.294   | AL122120  | 643.069   |
| 713.634   | NM_002762 | 642.6     | 749.404   | U92818    | 937.039   | 930.854   | NM_014684 | 645.473   |
| 1958.677  | NM_006324 | 5771.973  | 4456.129  | NM_000442 | 7002.54   | 8656.571  | AK027247  | 450.231   |
| 523.289   | NM_005469 | 6025.106  | 3906.711  | NM_002934 | 47072.531 | 56796.738 | NM_002480 | 1383.966  |
| 11270.781 | NM_016361 | 3035.187  | 1301.309  | AK023011  | 7138.099  | 5417.559  | NM_017571 | 1401.377  |
| 527.451   | NM_003708 | 26684.293 | 21237.596 | NM_016816 | 943.15    | 1054.78   | L03169    | 1780.525  |
| 428.779   | NM_014349 | 5888.327  | 7957.677  | L17325    | 961.95    | 1078.894  | NM_001928 | 34342.527 |
| 609.241   | AB040895  | 1022.587  | 1233.058  | NM_014002 | 2146.888  | 2443.64   | NM_018965 | 1827.674  |
| 436.766   | NM_018210 | 1358.066  | 2258.457  | NM_004197 | 5255.406  | 8300.689  | NM_000185 | 2203.063  |
| 298.924   | NM_001096 | 6107.423  | 3177.3    | NM_004073 | 755.452   | 864.258   | Y00816    | 520.865   |
| 256.785   | NM_016014 | 1512.553  | 1484.35   | NM_001278 | 1425.072  | 1305.391  | NM_004512 | 1139.489  |
| 871.766   | AA488804  | 8365.424  | 8109.97   | NM_019105 | 2736.799  | 2400.261  | NM_001055 | 6376.97   |
| 1483.539  | NM_006539 | 685.413   | 950.529   | NM_000294 | 1881.77   | 2509.823  | NM_002271 | 21108.5   |
| 1759.335  | NM_001684 | 1267.456  | 1423.502  | AJ272212  | 1310.187  | 817.099   | NM_018361 | 2145.685  |
| 667.214   | NM_000808 | 641.937   | 852.975   | NM_001626 | 13479.146 | 12424.596 | NM_019893 | 567.487   |
| 242.506   | NM_016318 | 6607.968  | 7906.359  | NM_005677 | 1411.505  | 1196.169  | AB040966  | 1678.505  |
| 1257.86   | NM_013309 | 416.922   | 317.012   | AF229803  | 629.371   | 693.7     | NM_020132 | 3503.521  |
| 1200.366  | NM_019891 | 1179.409  | 1151.359  | NM_002130 | 16258.938 | 4618.377  | NM_016467 | 6125.815  |
| 921.061   | AF038186  | 1576.458  | 2194.708  | NM_005469 | 3862.704  | 4147.531  | NM_007253 | 1332.692  |
| 6883.17   | NM_016277 | 3233.306  | 4040.74   | NM_016361 | 1513.7    | 1103.694  | NM_019106 | 653.95    |
| 4441.54   | NM_007247 | 2547.208  | 5629.908  | NM_003708 | 23048.432 | 19957.684 | L08436    | 430.589   |
| 584.278   | NM_006554 | 3780.96   | 5504.742  | NM_014349 | 5360.682  | 7110.479  | NM_000558 | 1529.509  |
| 474.052   | X99962    | 6134.487  | 10298.935 | AB040895  | 729.921   | 928.211   | NM_014170 | 1301.819  |
| 3540.006  | AL050114  | 652.717   | 424.007   | NM_004820 | 1313.66   | 2196.478  | AF116652  | 16282.374 |
| 7098.411  | AK021492  | 1912.298  | 1930.013  | NM_018210 | 882.186   | 2100.304  | NM_000835 | 854.02    |
| 1391.453  | AK023794  | 14633.54  | 17076.219 | NM_001096 | 2969.622  | 1850.208  | NM_014148 | 337.854   |
| 1670.242  | NM_019885 | 2171.688  | 1682.227  | NM_016014 | 1043.265  | 1118.038  | NM_018835 | 786.651   |
| 2551.085  | AB033103  | 1205.588  | 1042.779  | NM_018327 | 414.005   | 689.331   | NM_003401 | 1448.457  |
| 2383.883  | NM_002907 | 758.87    | 1308.366  | NM_017581 | 1161.749  | 1360.779  | AL137724  | 726.713   |
| 964.464   | AK024098  | 944.097   | 631.36    | AA488804  | 3301.254  | 3655.809  | NM_004758 | 721.246   |
| 7379.653  | AK001116  | 219.394   | 412.721   | L29496    | 2377.706  | 3500.141  | NM_002913 | 741.883   |
| 298.68    | AK022371  | 1875.305  | 2334.533  | NM_000928 | 701.738   | 862.053   | AK022797  | 411.855   |
| 4714.63   | D42045    | 2042.074  | 2055.982  | NM_007002 | 3858.054  | 6973.096  | NM_007370 | 1140.275  |
| 2406.911  | AB007953  | 1311.692  | 1732.843  | NM_012121 | 785.301   | 706.403   | NM_006231 | 548.394   |
| 847.346   | NM_014002 | 4588.063  | 5321.308  | NM_003255 | 3269.191  | 2874.778  | AK023471  | 1072.846  |
| 9075.338  | NM_004197 | 6186.969  | 12608.743 | NM_014155 | 1246.862  | 1050.847  | AF044578  | 676.38    |
| 2271.935  | NM_004073 | 915.62    | 1447.939  | AK026331  | 7310.179  | 5662.5    | NM_001948 | 903.99    |
| 899.993   | NM_001278 | 2642.1    | 3175.984  | M30773    | 1659.533  | 1631.591  | NM_001067 | 2774.502  |
| 1160.668  | NM_019105 | 2796.233  | 2293.445  | NM_016338 | 5066.03   | 4132.711  | NM_014034 | 1482.699  |
| 3327.646  | NM_000294 | 3238.59   | 3581.811  | AF113699  | 11175.897 | 8365.357  | NM_005335 | 7449.098  |
| 1363.034  | AJ272212  | 1604.064  | 1381.732  | AK001883  | 9196.704  | 8532.521  | J04474    | 3255.768  |
| 1101.021  | NM_001626 | 12110.244 | 11777.984 | NM_014629 | 926.014   | 645.305   | NM_003761 | 20244.832 |
| 344.322   | NM_005677 | 3827.931  | 5189.418  | AL050114  | 436.899   | 441.35    | NM_014011 | 2702.263  |
| 660.145   | AF229803  | 1332.333  | 1711.662  | AK021492  | 1187.103  | 1570.869  | AK025994  | 1070.932  |
| 2567.801  | AF151810  | 610.717   | 1108.925  | AK023794  | 11368.338 | 12241.913 | L29306    | 664.571   |
| 3198.421  | NM_002130 | 25878.955 | 10822.262 | NM_019885 | 1190.812  | 1181.947  | NM_013989 | 1246.044  |
| 6793.451  | NM_001305 | 2687.116  | 2474.081  | AB033103  | 1150.535  | 905.278   | NM_001738 | 859.408   |

|          |           |           |           |           |           |           |           |           |
|----------|-----------|-----------|-----------|-----------|-----------|-----------|-----------|-----------|
| 1654.479 | D17028    | 14410.406 | 23406.355 | NM_002907 | 465.908   | 872.97    | NM_020203 | 788.192   |
| 1708.792 | NM_013442 | 17495.77  | 17953.521 | AK024098  | 768.235   | 839.8     | U20582    | 7011.66   |
| 1270.521 | BG611243  | 1196.206  | 876.113   | AK022371  | 1318.749  | 1525.722  | NM_002079 | 1250.168  |
| 9695.507 | BI906766  | 1413.121  | 730.185   | D42045    | 948.296   | 1421.051  | U13697    | 1568.523  |
| 640.909  | U60519    | 1331.596  | 2287.51   | AB007953  | 747.408   | 1045.807  | U04270    | 2860.602  |
| 1325.092 | AA282906  | 2406.625  | 3672.935  | NM_001849 | 1472.441  | 1531.697  | J03810    | 549.321   |
| 4783.588 | L02870    | 2926.9    | 3417.395  | NM_003734 | 3782.499  | 2357.234  | AA629719  | 49642.438 |
| 3341.105 | BG755482  | 4908.119  | 7755.994  | NM_014935 | 3610.321  | 2560.237  | X02152    | 48368.492 |
| 435.351  | AI480307  | 2607.556  | 2182.045  | X99660    | 5931.622  | 5009.455  | BG676364  | 1227.525  |
| 467.021  | X51420    | 1908.334  | 2275.837  | X03635    | 1860.665  | 1203.707  | BG181154  | 1468.993  |
| 638.744  | D28235    | 394.469   | 459.426   | NM_004351 | 4569.51   | 2654.336  | AA843679  | 1161.942  |
| 5124.271 | X51757    | 443.121   | 780.427   | NM_004236 | 5299.555  | 4137.856  | H68922    | 147.389   |
| 1502.055 | L24038    | 775.453   | 814.742   | AB011093  | 1948.824  | 2945.027  | NM_004957 | 788.041   |
| 1036.589 | NM_053056 | 3058.685  | 1731.766  | NM_004560 | 146.767   | 147.139   | NM_005252 | 323.498   |
| 606.991  | NM_006186 | 622.572   | 1038.639  | NM_005618 | 2792.535  | 798.489   | AF090906  | 769.929   |
| 1076.972 | NM_002751 | 1931.896  | 2436.76   | NM_020533 | 3628.282  | 5088.333  | AB023219  | 1252.931  |
| 1267.595 | M55593    | 5273.181  | 8641.706  | NM_001894 | 4931.43   | 3954.707  | NM_001928 | 30016.477 |
| 718.831  | NM_078467 | 5009.341  | 5219.424  | NM_000614 | 402.217   | 602.027   | NM_018965 | 1820.063  |
| 455.956  |           | 976.383   | 266.321   | AK022884  | 621.599   | 450.973   | NM_000185 | 2131.884  |
| 712.157  | AK001883  | 11291.14  | 16335.095 | NM_006620 | 3901.775  | 5260.033  | Y00816    | 992.71    |
| 2130.323 | NM_014629 | 2077.796  | 2036.1    | NM_001397 | 527.025   | 576.265   | NM_004512 | 1103.818  |
| 6878.317 | NM_007318 | 47025.047 | 46543.262 | NM_005543 | 435.24    | 971.53    | NM_004380 | 4079.868  |
| 3291.217 | NM_014874 | 1256.794  | 1148.311  | Y08770    | 406.956   | 773.376   | U86813    | 366.245   |
| 9487.161 | NM_005765 | 15081.332 | 33927.309 | NM_004772 | 5895.001  | 5929.156  | NM_004119 | 1367.587  |
| 2757.965 | NM_002762 | 563.483   | 466.147   | NM_003714 | 2970.383  | 1789.286  | AY007378  | 917.746   |
| 199.06   | NM_006324 | 5411.592  | 4758.047  | AF024540  | 483.676   | 196.921   | D26070    | 2295.586  |
| 1173.85  | NM_016848 | 3716.027  | 2488.651  | U42977    | 1074.736  | 948.507   | NM_000501 | 6959.604  |
| 1282.346 | NM_000514 | 2432.329  | 2094.477  | NM_002881 | 2419.476  | 1649.256  | NM_000114 | 1240.021  |
| 794.771  | AL137432  | 1675.427  | 2436.64   | NM_003666 | 1279.475  | 925.551   | NM_005156 | 1105.674  |
| 1971.351 | NM_000957 | 1645.495  | 1172.191  | NM_003288 | 2644.924  | 2596.921  | X98834    | 903.692   |
| 2133.747 | NM_019043 | 1502.644  | 1587.626  | NM_018242 | 438.044   | 446.807   | NM_007035 | 3850.611  |
| 3124.18  | NM_003240 | 2820.799  | 3251.116  | M83822    | 1112.005  | 1299.737  | AB019562  | 483.414   |
| 2454.258 | NM_016564 | 15752.501 | 17681.354 | NM_018434 | 1309.689  | 1331.145  | AK022847  | 1023.917  |
| 2368.448 | AF279656  | 854.966   | 866.505   | NM_003914 | 3354.566  | 3243.787  | NM_006808 | 10721.292 |
| 2627.18  | AK021660  | 663.56    | 761.936   | NM_020423 | 801.256   | 947.48    | NM_006634 | 2160.918  |
| 1176.455 | AB007933  | 22508.219 | 18411.289 | AK021437  | 1004.235  | 856.074   | NM_016465 | 532.687   |
| 1702.98  | NM_006702 | 2841.298  | 6211.631  | NM_003831 | 5251.352  | 4169.416  | NM_013399 | 1186.231  |
| 1578.883 | NM_001396 | 2922.293  | 3118.289  | NM_001759 | 275.531   | 406.418   | NM_002480 | 1832.997  |
| 2101.991 | NM_014474 | 1374.191  | 1273.023  | AB007965  | 2915.603  | 3190.402  | NM_017571 | 1898.018  |
| 2051.404 | NM_016249 | 811.096   | 954.067   | NM_000066 | 726.087   | 366.064   | NM_014011 | 1843.466  |
| 522.486  | NM_006181 | 887.245   | 1112.24   | NM_001196 | 6185.163  | 4853.821  | AK025994  | 677.193   |
| 424.293  | NM_003796 | 9391.763  | 6097.917  | NM_016008 | 846.234   | 466.133   | L29306    | 488.917   |
| 273.958  | NM_002973 | 2790.298  | 3108.814  | NM_017744 | 1323.458  | 1080.408  | NM_013989 | 2791.424  |
| 1104.83  | NM_004436 | 40285.215 | 47182.156 | NM_001924 | 922.845   | 907.244   | NM_001738 | 733.036   |
| 206.421  | NM_006580 | 7875.465  | 13124.245 | NM_017705 | 6909.47   | 11641.187 | NM_001055 | 6549.784  |
| 563.303  | NM_019891 | 977.301   | 1242.032  | NM_001796 | 1715.066  | 2225.609  | NM_002271 | 10431.399 |
| 2832.754 | AF038186  | 1393.236  | 1413.406  | AB040880  | 577.681   | 451.963   | NM_018361 | 1543.998  |
| 2418.519 | NM_016277 | 2450.421  | 1885.936  | NM_009587 | 7938.161  | 15274.996 | AB040966  | 1290.048  |
| 1493.982 | NM_007247 | 2095.117  | 3072.112  | AL133566  | 368.702   | 307.141   | NM_020132 | 1856.375  |
| 692.004  | NM_006554 | 2530.791  | 2301.252  | M36118    | 3923.618  | 2559.761  | NM_016467 | 3426.997  |
| 4012.608 | X99962    | 5477.858  | 4815.068  | NM_003399 | 10934.129 | 6339.871  | NM_007253 | 1547.85   |
| 1459.806 | AK023221  | 3820.371  | 2937.266  | NM_002630 | 652.283   | 551.575   | NM_019106 | 948.527   |
| 1349.509 | NM_003664 | 4277.967  | 4913.009  | AJ295149  | 24551.586 | 14828.337 | L08436    | 786.054   |



|           |           |           |           |           |           |           |           |           |
|-----------|-----------|-----------|-----------|-----------|-----------|-----------|-----------|-----------|
| 2021.427  | NM_002426 | 1692.937  | 2256.708  | NM_013438 | 3046.779  | 2178.862  | NM_000558 | 2301.029  |
| 4313.976  | AK027182  | 869.537   | 847.461   | NM_005099 | 1180.27   | 1441.939  | NM_004198 | 968.015   |
| 264.505   | J03651    | 3350.121  | 2597.379  | NM_014688 | 2460.864  | 3945.45   | AF116652  | 23036.031 |
| 338.17    | U61738    | 2365.722  | 2271.01   | AL359623  | 480.484   | 471.485   | NM_000835 | 618.602   |
| 2685.243  | AJ132087  | 821.288   | 864.072   | AK026920  | 1602.265  | 1738.804  | NM_004957 | 564.054   |
| 2481.394  | U92818    | 2716.132  | 1754.268  | AL137255  | 1055.623  | 1035.305  | NM_005252 | 458.022   |
| 3575.657  | NM_000442 | 10791.531 | 13110.816 | NM_003370 | 12200.454 | 12759.465 | AB023219  | 5333.65   |
| 12362.166 | NM_002934 | 45911.777 | 27536.258 | AB037715  | 2312.695  | 2146.052  | NM_018835 | 977.057   |
| 6103.747  | AK023011  | 13194.697 | 9736.756  | AF250924  | 6315.367  | 5385.334  | NM_003401 | 1342.176  |
| 594.786   | NM_016816 | 1055.765  | 2382.357  | D86979    | 749.398   | 1147.676  | AL137724  | 1016.49   |
| 344.695   | L17325    | 1585.674  | 1282.09   | AB023230  | 426.497   | 439.566   | NM_004758 | 473.86    |
| 435.385   | NM_017716 | 1241.11   | 1041.502  | AF018081  | 10205.03  | 9520.474  | NM_007370 | 564.087   |
| 172.355   | M58603    | 3267.352  | 2882.957  | NM_020202 | 6977.797  | 9311.903  | NM_006231 | 731.337   |
| 1536.303  | NM_003639 | 2218.377  | 2017.271  | AK022889  | 5882.649  | 3649.898  | AK023471  | 635.782   |
| 5032.924  | NM_001549 | 921.196   | 1283.745  | X52357    | 25393.48  | 15401.062 | AF044578  | 626.293   |
| 638.482   | NM_000115 | 2299.573  | 1354.19   | AF211891  | 508.185   | 157.477   | NM_001948 | 595.038   |
| 2127.509  | AF308801  | 2899.227  | 2297.422  | NM_005641 | 426.254   | 341.404   | NM_001067 | 3169.097  |
| 3890.725  | AJ272212  | 1379.664  | 1153.444  | NM_001668 | 1597.957  | 1190.395  | NM_014034 | 1836.184  |
| 4894.001  | NM_001626 | 9531.204  | 10880.531 | AK025362  | 492.991   | 868.227   | NM_005335 | 7772.492  |
| 17997.744 | NM_005677 | 1584.177  | 1667.346  | AK021776  | 869.663   | 859.904   | J04474    | 3463.594  |
| 1392.486  | AF229803  | 977.863   | 1074.282  | NM_014233 | 6589.538  | 8533.596  | NM_003761 | 20857.211 |
| 9992.897  | AF151810  | 497.687   | 361.833   | NM_002137 | 48264.418 | 66509.844 | X98834    | 664.064   |
| 653.001   | NM_002130 | 16823.975 | 3552.117  | NM_002911 | 656.74    | 738.813   | NM_007035 | 2563.643  |
| 591.877   | NM_005469 | 4793.383  | 4515.8    | NM_016000 | 4539.659  | 4858.093  | AF036364  | 446.029   |
| 5419.63   | NM_016361 | 2621.658  | 1329.499  | NM_006372 | 4643.535  | 4167.828  | AK022847  | 252.071   |
| 1930.231  | NM_003708 | 29164.295 | 26384.711 | NM_014150 | 938.168   | 887.141   | U20582    | 2453.156  |
| 573.2     | NM_014349 | 5580.191  | 6926.292  | NM_006805 | 16938.158 | 13901.991 | NM_002079 | 869.082   |
| 8342.508  | NM_018210 | 1579.346  | 2803.15   | AF132027  | 10772.235 | 9113.203  | U04270    | 1581.557  |
| 3309.119  | NM_001096 | 6504.171  | 2168.467  | NM_004681 | 2302.614  | 1239.245  | L02840    | 421.417   |
| 2907.227  | NM_016014 | 1270.63   | 1231.469  | AB033096  | 3376.007  | 4066.028  | AA629719  | 51680.27  |
| 341.137   | NM_018327 | 570.546   | 563.609   | NM_014886 | 722.133   | 2359.208  | AA927528  | 678.359   |
| 1120.816  | NM_017581 | 1699.85   | 1821.521  | L31408    | 3944.253  | 4002.353  | X02152    | 51753.395 |
| 1548.325  | AA488804  | 8265.204  | 7283.695  | NM_001545 | 4252.069  | 4728.101  | BG676364  | 1234.057  |
| 3403.01   | NM_006539 | 681.998   | 1038.277  | NM_004446 | 7325.606  | 5850.751  | AA843679  | 1848.687  |
| 1068.953  | NM_001684 | 1330.559  | 1360.618  | AF070625  | 2133.495  | 1357.245  | NM_017571 | 1174.092  |
| 888.751   | NM_000808 | 436.779   | 643.941   | AL365512  | 846.255   | 645.674   | NM_001928 | 18985.662 |
| 1936.069  | NM_016318 | 6740.791  | 6003.463  | AK001740  | 2384.404  | 2021.333  | NM_000185 | 2571.925  |
| 1486.401  | NM_078467 | 4804.418  | 5760.996  | AF131793  | 429.965   | 365.601   | Y00816    | 214.056   |
| 32510.297 | AK001883  | 8039.629  | 6668.461  | NM_005918 | 9369.308  | 6657.918  | NM_004512 | 628.194   |
| 1158.723  | NM_014629 | 1525.648  | 822.822   | J02625    | 2941.284  | 2336.328  | NM_004380 | 2093.85   |
| 440.222   | AK025587  | 318.722   | 67.246    | Y17175    | 58421.074 | 61597.465 | NM_004119 | 920.322   |
| 1084.933  | AL050114  | 655.984   | 382.498   | NM_004549 | 7994.773  | 6269.282  | AY007378  | 597.271   |
| 198.563   | AK021492  | 2824.555  | 3493.13   | NM_005333 | 6275.345  | 4800.77   | D26070    | 2321.157  |
| 734.857   | AK023794  | 15776.275 | 21047.668 | AK026161  | 1032.778  | 1618.309  | NM_001642 | 11402.948 |
| 472.293   | NM_019885 | 1863.663  | 2067.656  | NM_004553 | 13194.26  | 19551.51  | NM_003392 | 530.786   |
| 1064.646  | AB033103  | 1379.23   | 1283.904  | D63484    | 744.787   | 527.848   | NM_002280 | 356.244   |
| 794.943   | NM_002907 | 813.29    | 1308.379  | AK026745  | 1645.698  | 2746.809  | NM_000501 | 9514.049  |
| 8717.712  | AK024098  | 1089.424  | 752.489   | AL157440  | 770.236   | 988.328   | NM_000114 | 1242.377  |
| 8794.525  | AK022371  | 1970.458  | 2350.536  | NM_016423 | 1798.104  | 2639.978  | NM_005156 | 1141.922  |
| 1280.607  | D42045    | 2219.7    | 1598.893  | AB040975  | 1044.663  | 1595.321  | NM_000558 | 1033.38   |
| 128.76    | AB007953  | 1621.915  | 1346.204  | NM_005119 | 2576.769  | 2053.049  | NM_014170 | 921.193   |
| 2476.448  | NM_014002 | 4944      | 4768.575  | NM_003168 | 6471.365  | 8036.759  | AF116652  | 9336.964  |
| 616.393   | NM_004197 | 4655.83   | 4943.195  | AK055844  | 586.414   | 485.966   | NM_001830 | 1346.361  |

|           |           |           |           |           |           |           |           |           |
|-----------|-----------|-----------|-----------|-----------|-----------|-----------|-----------|-----------|
| 691.599   | NM_004073 | 897.043   | 1179.329  | NM_018288 | 10010.795 | 16881.814 | NM_006808 | 8475.471  |
| 40121.492 | NM_001278 | 2941.342  | 2427.778  | NM_003146 | 1701.902  | 1127.074  | NM_016465 | 1294.089  |
| 588.014   | NM_019105 | 2685.662  | 2028.15   | NM_003131 | 6195.593  | 6455.47   | NM_013399 | 1687.51   |
| 1173.871  | NM_000294 | 3018.193  | 3008.563  | NM_005239 | 1370.142  | 1540.032  | NM_002410 | 403.566   |
| 4136.028  | NM_016249 | 716.193   | 824.656   | NM_018538 | 1405.284  | 1045.438  | AL122120  | 542.99    |
| 658.798   | NM_006181 | 779.649   | 1286.883  | NM_013346 | 540.082   | 354.181   | NM_014684 | 568.023   |
| 937.84    | NM_003796 | 8603.488  | 9099.128  | NM_017851 | 458.019   | 231.105   | AK027247  | 447.419   |
| 348.516   | NM_002973 | 2284.313  | 2759.147  | AK026182  | 63996.477 | 64390.098 | NM_002480 | 2037.288  |
| 1171.142  | NM_004436 | 33515.121 | 36171.355 | AK025603  | 551.698   | 325.212   | NM_014034 | 1299.295  |
| 7197.689  | NM_006580 | 5347.582  | 5429.296  | NM_016085 | 6130.413  | 2938.328  | NM_005335 | 6773.893  |
| 283.684   | BG611243  | 1318.169  | 680.201   | AK025768  | 2170.947  | 1284.556  | J04474    | 2195.843  |
| 391.438   | BI906766  | 1672.288  | 736.716   | AL117502  | 1445.05   | 2344.21   | NM_013989 | 1083.425  |
| 622.525   | U60519    | 1375.575  | 2323.784  | AK001846  | 530.474   | 458.9     | NM_001738 | 625.792   |
| 2095.94   | AA282906  | 2658.417  | 2970.571  | AK024637  | 586.732   | 499.372   | NM_001055 | 7001.04   |
| 1099.729  | L02870    | 2972.864  | 2819.365  | AK024108  | 1008.215  | 1525.441  | NM_002271 | 16892.932 |
| 651.992   | BG755482  | 5167.658  | 6772.885  | NM_013345 | 530.116   | 553.817   | NM_018361 | 1393.659  |
| 583.523   | AI480307  | 2856.05   | 2252.544  | AL117454  | 18410.199 | 21883.152 | NM_019893 | 448.679   |
| 967.662   | X51420    | 1525.185  | 1600.969  | AF272890  | 2910.405  | 2601.724  | AB040966  | 817.641   |
| 851.425   | X51757    | 374.298   | 805.669   | U00684    | 938.877   | 748.239   | NM_020132 | 3473.191  |
| 7706.048  | L24038    | 785.494   | 883.122   | NM_016459 | 4387.253  | 3099.073  | NM_016467 | 7119.409  |
| 265.405   | NM_053056 | 2869.142  | 1438.039  | AF086227  | 795.573   | 1242.334  | NM_007253 | 2157.583  |
| 294.714   | NM_006186 | 762.082   | 657.455   | AK026246  | 1993.299  | 2779.129  | NM_019106 | 1004.025  |
| 373.648   | NM_002751 | 1097.672  | 1019.27   | AF070524  | 336.27    | 336.402   | L08436    | 881.047   |
| 378.033   | M55593    | 5050.683  | 6441.824  | AF035281  | 936.606   | 1058.438  | NM_005607 | 766.476   |
| 633.663   | NM_017716 | 793.373   | 565.223   | AK026304  | 816.694   | 1464.086  | NM_006761 | 21510.76  |
| 320.578   | M58603    | 3098.778  | 4057.155  | AL133446  | 1581.047  | 1184.598  | NM_014897 | 835.25    |
| 570.626   | NM_003639 | 2650.975  | 5575.83   | NM_006553 | 272.782   | 232.707   | NM_003453 | 2454.701  |
| 1072.331  | NM_001549 | 757.274   | 1715.157  | BC035667  | 653.057   | 896.835   | NM_014390 | 2613.069  |
| 710.423   | NM_000115 | 2093.944  | 2201.589  | AL049277  | 1298.461  | 997.172   | X78924    | 4656.384  |
| 602.308   | AF308801  | 3372.148  | 4341.347  | AL080104  | 1321.156  | 2630.711  | AF090906  | 805.41    |
| 599.844   | NM_014874 | 1368.92   | 1305.926  | AL117506  | 580.673   | 455.024   | AB023219  | 3019.814  |
| 275.929   | NM_012397 | 631.493   | 452.428   | AL050043  | 1253.826  | 1282.789  | NM_018835 | 695.321   |
| 339.025   | NM_006324 | 4640.418  | 4879.816  | AL080205  | 263.205   | 165.436   | NM_003401 | 894.502   |
| 1223.946  | NM_016848 | 3553.661  | 3239.142  | AL117571  | 1015.413  | 1021.744  | AL137724  | 827.844   |
| 2470.381  | NM_000514 | 2371.045  | 2118.5    | AF131814  | 1076.961  | 1749.78   | NM_004758 | 600.97    |
| 787.178   | AL137432  | 1504.407  | 2448.82   | AL359600  | 297.581   | 287.279   | NM_002913 | 637.649   |
| 3833.612  | NM_000957 | 1488.239  | 849.51    | AL360144  | 1418.012  | 1294.251  | NM_007370 | 1345.452  |
| 38987.289 | NM_019043 | 1569.682  | 1164.915  | BC028617  | 1911.769  | 2961.246  | NM_006231 | 738.927   |
| 669.652   | NM_003240 | 3377.953  | 3621.935  | AL117653  | 233.231   | 324.28    | AK023471  | 1051.392  |
| 591.789   | NM_016564 | 16186.604 | 13646.32  | AF087999  | 454.238   | 625.732   | AF044578  | 1099.222  |
| 1222.272  | AF279656  | 901.442   | 1030.984  | NM_003740 | 2339.432  | 2490.166  | NM_001948 | 1296.791  |
| 1411.158  | AK021660  | 465.018   | 323.854   | AL050078  | 1024.557  | 1123.525  | AK025337  | 687.598   |
| 511.101   | AB007933  | 20297.354 | 16095.452 | AK022933  | 253.998   | 228.963   | NM_005602 | 1977.885  |
| 6534.179  | NM_006702 | 2765.828  | 5028.333  | NM_014276 | 1920.215  | 1240.615  | NM_003573 | 1400.949  |
| 453.208   | NM_001396 | 2825.811  | 2578.857  | AF056438  | 1239.779  | 988.329   | NM_000296 | 1629.197  |
| 1817.878  | NM_014474 | 1257.908  | 1062.039  | AF003737  | 30132.979 | 16968.584 | NM_012302 | 766.438   |
| 1328.342  | NM_006539 | 390.26    | 638.357   | AF009296  | 935.502   | 779.686   | NM_017422 | 3737.912  |
| 198.316   | NM_001684 | 1083.633  | 1124.971  | AF041410  | 348.863   | 477.383   | NM_005879 | 485.922   |
| 980.939   | NM_000808 | 493.529   | 660.061   | AK001011  | 2327.222  | 2317.418  | AF147790  | 457.923   |
| 527.131   | NM_016318 | 6491.723  | 6960.937  | AK021457  | 408.279   | 406.87    | NM_004112 | 1203.392  |
| 2739.903  | NM_013309 | 482.914   | 479.708   | AK021690  | 1154.081  | 1401.092  | AK025592  | 1890.093  |
| 826.915   | AF038186  | 1803.473  | 1376.586  | AK001840  | 1404.356  | 1343.646  | NM_004635 | 6110.95   |
| 653.323   | NM_006554 | 3157.929  | 3198.083  | AK021486  | 684.89    | 944.355   | AK023023  | 2916.578  |

|           |           |           |           |           |           |           |           |           |
|-----------|-----------|-----------|-----------|-----------|-----------|-----------|-----------|-----------|
| 3530.678  | X99962    | 5388.005  | 6145.529  | AK021740  | 360.584   | 419.666   | NM_015993 | 1383.087  |
| 1286.274  | AK023221  | 4166.475  | 3093.225  | AK026238  | 281.965   | 271.601   | Z36776    | 1891.799  |
| 4723.553  | NM_003664 | 4273.188  | 4116.044  | AK026694  | 435.693   | 571.541   | AB029015  | 526.399   |
| 980.978   | NM_002426 | 1819.299  | 2074.349  | AK025564  | 1300.461  | 1531.448  | NM_002430 | 209.561   |
| 585.046   | AK027182  | 731.509   | 697.516   | AK026286  | 1197.085  | 1429.547  | NM_006150 | 1049.973  |
| 495.849   | J03651    | 3340.4    | 2220.48   | AK026731  | 759.026   | 608.108   | NM_012325 | 4346.965  |
| 4827.267  | U61738    | 2149.775  | 1732.575  | NM_004192 | 858.464   | 621.197   | NM_019607 | 1144.328  |
| 412.074   | AJ132087  | 516.42    | 485.441   | AK024160  | 582.545   | 621.781   | U79260    | 7038.527  |
| 1051.095  | U92818    | 2076.07   | 1460.109  | AK025077  | 882.213   | 368.479   | NM_001895 | 3560.686  |
| 1354.028  | NM_000442 | 9231.463  | 10833.23  | NM_006417 | 1935.297  | 1173.278  | NM_006447 | 2142.022  |
| 2452.922  | NM_002934 | 42003.879 | 24538.242 | NM_020317 | 3861.813  | 2568.394  | NM_014129 | 3014.808  |
| 1045.04   | AK023011  | 11770.74  | 9075.021  | AL080234  | 3330.052  | 2360.343  | D87455    | 1311.425  |
| 842.911   | NM_016816 | 1211.446  | 2498.302  | AK027025  | 674.766   | 364.752   | AF080577  | 689.017   |
| 383.937   | L17325    | 1120.262  | 1291.979  | AF212220  | 1220.766  | 503.85    | L22005    | 3380.613  |
| 500.931   | NM_014002 | 3674.014  | 2982.692  | AK025010  | 401.522   | 218.319   | NM_012291 | 4117.247  |
| 595.676   | NM_004197 | 4548.97   | 5112.615  | AL137470  | 305.828   | 255.015   | NM_013368 | 1274.478  |
| 1764.625  | NM_004073 | 769.123   | 1272.584  | AL137709  | 1123.679  | 3424.385  | NM_003807 | 4543.928  |
| 2480.155  | NM_001278 | 2600.528  | 3121.594  | AK023277  | 714.11    | 1412.521  | NM_004358 | 494.006   |
| 52036.691 | NM_019105 | 2560.814  | 2599.528  | AK000425  | 959.538   | 612.158   | Y17866    | 476.725   |
| 281.14    | NM_000294 | 2966.616  | 3582.071  | Z27200    | 1057.755  | 892.548   | NM_003005 | 2615.274  |
| 729.953   | AJ272212  | 1657.96   | 1886.49   | AF070571  | 2346.57   | 1548.204  | NM_002842 | 1605.198  |
| 1748.036  | NM_001626 | 9420.028  | 10351.396 | AK023554  | 602.341   | 449.115   | NM_004418 | 1177.064  |
| 2995.056  | NM_005677 | 1873.51   | 1692.462  | NM_003513 | 1568.66   | 3149.705  | NM_000917 | 4723.438  |
| 382.692   | AF151810  | 457.141   | 365.165   | AK024844  | 585.558   | 261.904   | NM_005389 | 4643.432  |
| 3580.734  | NM_002130 | 18627.043 | 5063.469  | AF161427  | 51636.68  | 49285.32  | NM_014445 | 16807.895 |
| 1428.016  | NM_005469 | 5435.225  | 5472.611  | AK021715  | 3808.872  | 3466.27   | NM_016123 | 684.164   |
| 799.183   | NM_016361 | 2715.399  | 1521.199  | AK000315  | 3818.375  | 2502.817  | NM_000391 | 4209.735  |
| 2060.346  | NM_003708 | 28649.797 | 26547.553 | AK023248  | 717.367   | 699.961   | NM_014771 | 3376.909  |
| 9291.648  | NM_014349 | 5577.33   | 5983.368  | NM_012404 | 10527.488 | 7569.705  | NM_002275 | 2258.796  |
| 593.297   | NM_018210 | 1508.544  | 2229.774  | AF251190  | 526.634   | 497.975   | AK025215  | 3386.7    |
| 1521.382  | NM_001096 | 6461.436  | 2094.429  | AF130075  | 5405.43   | 5640.948  | AK024625  | 764.86    |
| 1237.202  | NM_016014 | 1187.666  | 1296.668  | NM_005444 | 1081.346  | 826.393   | NM_018131 | 1070.795  |
| 1578.974  | NM_000198 | 272.877   | 172.928   | V00589    | 22887.932 | 30289.322 | NM_017636 | 17596.619 |
| 7727.036  | NM_018327 | 402.744   | 818.59    | AL390163  | 542.202   | 386.051   | NM_012468 | 627.692   |
| 867.603   | NM_017581 | 1832.136  | 2060.522  | NM_018572 | 915.226   | 1070.026  | M27877    | 11752.731 |
| 2069.014  | AA488804  | 8349.819  | 7040.015  | AK000175  | 2444.907  | 2400.634  | D70836    | 21537.816 |
| 1684.661  | L29496    | 2742.031  | 1934.289  | AL137736  | 3212.408  | 3208.292  | AK024392  | 1199.357  |
| 1695.473  | NM_007002 | 5975.166  | 7061.615  | AK021897  | 3885.521  | 2574.268  | NM_013260 | 557.734   |
| 12097.068 | NM_012121 | 1347.208  | 1402.235  | AK001051  | 685.782   | 568.549   | NM_018300 | 473.031   |
| 905.795   | NM_003255 | 4885.678  | 11434.457 | AF086051  | 858.638   | 473.019   | NM_004875 | 1392.701  |
| 1833.811  | NM_014155 | 2031.357  | 2150.537  | AK024356  | 1072.203  | 622.874   | NM_018254 | 5148.67   |
| 11344.408 | AK026331  | 11383.417 | 11529.116 | AL049370  | 2045.177  | 1041.513  | NM_017745 | 1553.254  |
| 600.7     | M30773    | 1983.363  | 2050.261  | AL365410  | 5103.769  | 4119.26   | NM_018433 | 1423.102  |
| 691.32    | NM_016338 | 7784.075  | 8669.384  | D17082    | 9676.174  | 7162.312  | AK024810  | 4776.498  |
| 1109.685  | AF113699  | 12777.892 | 15018.231 | D17252    | 27861.354 | 26913.654 | AK022615  | 22499.877 |
| 583.888   | AK001883  | 9210.235  | 9671.361  | D16476    | 269.458   | 186.439   | NM_004043 | 2504.552  |
| 521.71    | NM_014629 | 1603.478  | 879.479   | NM_003673 | 1624.278  | 1073.678  | BM458096  | 7211.906  |
| 630.285   | AL050114  | 810.715   | 537.655   | Z36823    | 2431.256  | 2296.859  | NM_005626 | 4115.383  |
| 1989.794  | AK021492  | 2633.651  | 3014.141  | AF147387  | 2914.636  | 1339.453  | D29958    | 7983.677  |
| 1780.098  | AK023794  | 17001.297 | 19312.719 | NM_012081 | 1068.559  | 1504.038  | NM_015971 | 6168.005  |
| 456.267   | NM_019885 | 2187.422  | 1924.923  | AL137463  | 660.355   | 499.789   | D17257    | 43223.637 |
| 688.571   | AB033103  | 1839.836  | 1169.168  | AF085909  | 16825.691 | 18751.414 | AK023309  | 340.093   |
| 46263.063 | NM_002907 | 847.46    | 1677.827  | AF090888  | 618.853   | 6558.711  | AK000724  | 797.769   |

|           |           |           |           |           |           |           |           |           |
|-----------|-----------|-----------|-----------|-----------|-----------|-----------|-----------|-----------|
| 2615.331  | AK024098  | 922.968   | 595.887   | AK027193  | 704.822   | 554.497   | NM_003720 | 3454.306  |
| 2645.232  | AK022371  | 1827.487  | 2380.898  | AF086471  | 2267.647  | 2478.596  | NM_003918 | 913.323   |
| 1040.409  | D42045    | 2171.813  | 1865.742  | NM_018455 | 3832.759  | 5131.18   | NM_004807 | 708.152   |
| 1606.054  | AB007953  | 1544.549  | 1694.634  | AF113018  | 608.284   | 956.441   | J03569    | 23756.641 |
| 3679.435  | NM_017820 | 453.935   | 569.697   | AK021996  | 1248.131  | 1691.451  | NM_003115 | 5680.461  |
| 30349.861 | NM_001849 | 2275.181  | 8149.861  | AL049337  | 3105.053  | 5244.729  | NM_000687 | 10226.616 |
| 1526.785  | NM_003734 | 7236.113  | 4967.2    | CY3Cy5    | 2235.99   | 203.206   | NM_018200 | 802.714   |
| 1247.45   | NM_014935 | 6426.882  | 8744.874  | U13697    | 2038.139  | 5453.661  | NM_014838 | 914.702   |
| 976.595   | X99660    | 9884.794  | 11245.288 | X75308    | 819.426   | 2182.141  | NM_007212 | 1395.628  |
| 1211.86   | X03635    | 2985.078  | 3239.519  | U04270    | 2082.752  | 2026.3    | AF005067  | 1141.228  |
| 905.32    | X97671    | 1673.547  | 1817.686  | L02840    | 642.86    | 437.681   | NM_005710 | 5685.581  |
| 1048.017  | NM_002462 | 298.222   | 298.765   | AA629719  | 55954.883 | 68135.398 | AF252284  | 1525.784  |
| 661.97    | NM_004560 | 275.898   | 397.28    | BG676364  | 1362.236  | 994.261   | NM_014930 | 882.448   |
| 1908.981  | NM_005618 | 3854.969  | 1037.522  | AA843679  | 2159.931  | 3357.529  | NM_001530 | 898.657   |
| 1146.185  | NM_020533 | 5249.74   | 9080.075  | NM_004957 | 1655.649  | 1775.774  | U80232    | 8059.411  |
| 20278.521 | NM_001894 | 5378.248  | 3232.617  | NM_005252 | 625.844   | 526.484   | AF086526  | 805.309   |
| 691.166   | NM_000614 | 560.744   | 584.131   | SR5       | 2552.795  | 2003.106  | AK025788  | 1563.491  |
| 992.486   | AK022884  | 481.16    | 476.199   | SR7       | 3761.551  | 19800.307 | AF086164  | 748.168   |
| 438.381   | AF305072  | 341.761   | 347.879   | SR9       | 9814.614  | 1298.33   | AK025577  | 1017.399  |
| 699.322   | NM_006620 | 4580.258  | 3343.672  | CY3Cy5    | 1053.371  | 174.185   | AK000216  | 1661.173  |
| 760.14    | NM_001397 | 527.266   | 520.328   | NM_004380 | 3686.082  | 3160.699  | AK023440  | 573.029   |
| 944.195   | NM_005543 | 381.346   | 386.765   | U86813    | 824.596   | 2330.784  | AB033041  | 4109.545  |
| 2687.859  | Y08770    | 373.556   | 351.913   | NM_004119 | 1315.75   | 1000.166  | NM_014894 | 48117.176 |
| 1631.569  | NM_004772 | 6377.352  | 3298.656  | AY007378  | 926.271   | 879.719   | AY007155  | 1320.808  |
| 7856.901  | NM_003714 | 3316.325  | 1491.214  | D26070    | 3278.375  | 4488.799  | AK027160  | 3981.531  |
| 3366.313  | AF024540  | 812.883   | 320.648   | NM_001642 | 16117.145 | 18004.945 | U79264    | 3321.47   |
| 18442.475 | NM_002189 | 1497.749  | 1435.409  | NM_002280 | 1002.371  | 2796.894  | NM_015699 | 7186.318  |
| 459.623   | U42977    | 1985.355  | 1832.827  | NM_000114 | 1467.94   | 952.277   | AF070530  | 6837.345  |
| 3517.542  | NM_002881 | 4881.236  | 4015.623  | NM_015193 | 387.412   | 555.963   | AF086487  | 608.169   |
| 1182.762  | NM_003666 | 2231.198  | 2199.734  | X98834    | 1301.809  | 1986.862  | NM_006420 | 1181.193  |
| 482.962   | NM_003288 | 4732.485  | 6095.1    | NM_007035 | 4080.459  | 2890.641  | AF131855  | 788.272   |
| 1792.979  | NM_018242 | 1701.399  | 2788.376  | AF036364  | 920.324   | 479.511   | AF086046  | 3143.545  |
| 1306.568  | M83822    | 3103.161  | 4027.089  | NM_020203 | 1056.733  | 1176.766  | AK024962  | 734.805   |
| 8776.43   | AK021437  | 1623.445  | 1527.592  | U20582    | 6262.484  | 6172.468  | AK025135  | 1485.425  |
| 1330.174  | NM_003831 | 8524.127  | 7331.587  | NM_002079 | 1418.03   | 1151.193  | NM_017926 | 805.84    |
| 1288.721  | NM_001759 | 452.536   | 200.013   | NM_006808 | 11143.842 | 9077.989  | AY007145  | 1111.79   |
| 3145.837  | AB007965  | 4755.977  | 4268.669  | NM_006634 | 440.072   | 1337.093  | D38549    | 2023.69   |
| 51651.809 | NM_017649 | 682.182   | 361.978   | NM_016465 | 733.254   | 695.925   | AK024780  | 794.975   |
| 49786.793 | NM_000066 | 699.378   | 744.852   | NM_013399 | 1575.832  | 1635.527  | AF085947  | 945.019   |
| 1687.123  | NM_001196 | 8892.789  | 4958.059  | AL122120  | 546.79    | 922.142   | AF086000  | 612.555   |
| 524.731   | NM_016008 | 1328.728  | 727.748   | NM_002480 | 1773.182  | 1696.749  | AK022123  | 400.094   |
| 1555.297  | NM_017744 | 1624.13   | 1112.963  | NM_017571 | 1823.466  | 1528.985  | AK024184  | 320.715   |
| 1324.188  | NM_001924 | 1454.394  | 1099.199  | NM_018965 | 1704.393  | 3190.513  | U10510    | 5285.923  |
| 962.6     | NM_017705 | 8187.281  | 8943.96   | NM_000185 | 2486.631  | 1733.211  | Z36818    | 416.486   |
| 734.339   | NM_001796 | 1329.477  | 1123.107  | NM_004512 | 1416.044  | 1339.495  | Z36842    | 1633.832  |
| 1501.671  | AB040880  | 925.352   | 647.151   | NM_001055 | 7116.243  | 7317.717  | AF086137  | 737.014   |
| 1949.323  | NM_009587 | 10248.576 | 8681.644  | NM_002271 | 21563.135 | 20424.305 | AF086155  | 805.175   |
| 1169.897  | AL133566  | 578.404   | 664.715   | NM_018361 | 1844.229  | 2051.132  | AF116677  | 286.875   |
| 343.789   | M36118    | 3003.907  | 1987.212  | AB040966  | 1946.063  | 1330.541  | AK022010  | 657.722   |
| 671.185   | NM_003399 | 15283.939 | 9658.123  | NM_020132 | 3095.717  | 3057.881  | NM_014159 | 1704.545  |
| 3632.633  | NM_002630 | 827.515   | 1088.762  | NM_016467 | 7493.623  | 10224.404 | AK021795  | 656.355   |
| 191.023   | AJ295149  | 21862.623 | 15980.271 | NM_019106 | 958.62    | 952.452   | AL162042  | 1702.09   |
| 1038.112  | NM_013438 | 4519.121  | 4258.825  | L08436    | 527.456   | 545.118   | AK026131  | 1346.263  |

|           |           |           |           |           |           |           |           |           |
|-----------|-----------|-----------|-----------|-----------|-----------|-----------|-----------|-----------|
| 555.416   | NM_005099 | 2030.269  | 5755.8    | NM_000558 | 2480.377  | 1792.313  | AK023312  | 657.698   |
| 960.768   | NM_014688 | 3754.217  | 3662.427  | NM_014170 | 1550.664  | 1097.539  | AL133570  | 700.78    |
| 5828.348  | AB037784  | 612.398   | 652.422   | AF116652  | 36518.148 | 28878.127 | AK022678  | 536.942   |
| 12408.396 | AL359623  | 896.302   | 842.832   | NM_000835 | 426.777   | 429.268   | AK023835  | 1232.095  |
| 1708.439  | AK026920  | 2218.221  | 2944.46   | NM_018835 | 633.032   | 548.792   | AK023012  | 742.593   |
| 1191.058  | AL137255  | 1106.568  | 1152.78   | NM_003401 | 1410.867  | 1676.776  | AK023906  | 2799.491  |
| 609.599   | NM_003370 | 14230.957 | 11657.089 | AL137724  | 731.239   | 353.468   | AK024234  | 366.926   |
| 1405.731  | AB037715  | 1884.827  | 1878.245  | NM_004758 | 678.14    | 2096.037  | NM_012409 | 673.588   |
| 5339.063  | AF250924  | 6941.551  | 4858.14   | NM_002913 | 740.182   | 777.612   | AL050205  | 2183.769  |
| 648.958   | D86979    | 722.544   | 910.274   | AK022797  | 515.777   | 730.371   | AK023947  | 404.46    |
| 1683.527  | AF018081  | 17566.557 | 13511.594 | NM_007370 | 1135.715  | 2170.584  | NM_005691 | 902.391   |
| 1153.007  | NM_020202 | 9462.078  | 5941.61   | NM_006231 | 633.164   | 1448.651  | AF086156  | 374.466   |
| 9544.89   | AK022889  | 11334.149 | 5380.617  | NM_001948 | 942.089   | 2799.226  | AK023814  | 716.975   |
| 297.794   | X52357    | 37545.848 | 28381.385 | NM_001067 | 2451.774  | 6610.474  | AF251187  | 783.038   |
| 347.01    | AF211891  | 565.452   | 222.595   | NM_014034 | 1983.608  | 1151.366  | NM_006543 | 1114.107  |
| 944.088   | NM_005641 | 1000.191  | 632.557   | NM_005335 | 9119.49   | 14074.862 | AK023018  | 614.987   |
| 488.895   | NM_001668 | 2888.436  | 3183.05   | J04474    | 3574.606  | 2457.862  | AK022672  | 937.259   |
| 601.919   | AK025362  | 944.797   | 2500.858  | NM_003761 | 21738.223 | 24214.146 | AK023870  | 1245.256  |
| 367.721   | AK021776  | 2038.197  | 2896.386  | NM_014011 | 2359.919  | 2320.582  | AK021599  | 1331.333  |
| 2318.299  | AK026042  | 2784.081  | 4181.504  | AK025994  | 1044.909  | 1045.387  | AK024263  | 338.476   |
| 1767.124  | NM_014233 | 13861.323 | 28343.602 | L29306    | 299.088   | 292.857   | NM_016613 | 1367.797  |
| 606.565   | NM_002137 | 47542.918 | 38650.941 | NM_013989 | 1225.645  | 667.266   | AJ012490  | 3697.888  |
| 1843.001  | NM_002911 | 1568.742  | 896.895   | NM_001738 | 677.537   | 568.351   | AL049270  | 700.822   |
| 684.168   | U94386    | 716.785   | 896.58    | NM_020203 | 1182.914  | 1609.567  | U88834    | 2921.602  |
| 1503.911  | NM_016000 | 4282.382  | 4057.808  | U20582    | 7036.783  | 9105.861  | BC025324  | 876.832   |
| 1122.489  | NM_006372 | 6152.576  | 2274.817  | NM_002079 | 1522.561  | 1675.523  | AK023564  | 971.452   |
| 2270.265  | NM_014150 | 1575.809  | 1241.315  | U13697    | 1780.427  | 3367.05   | NM_003533 | 590.397   |
| 18228.576 | NM_006805 | 15619.699 | 11475.562 | U04270    | 1969.896  | 1876.516  | AL157478  | 700.119   |
| 512.6     | AF132027  | 17478.715 | 14450.539 | L02840    | 1199.508  | 2090.465  | AK023726  | 2405.9    |
| 630.542   | NM_004681 | 2699.602  | 1592.937  | AA629719  | 51715.016 | 64808.086 | AK024906  | 658.531   |
| 799.161   | AB033096  | 5475.758  | 3235.703  | AA927528  | 647.241   | 412.935   | AF131836  | 1260.495  |
| 3054.774  | NM_014886 | 949.529   | 1634.49   | X02152    | 54558.32  | 45849.914 | AF275804  | 11479.059 |
| 1412.243  | L31408    | 7037.323  | 5349.079  | BG676364  | 1399.986  | 822.017   | AL137488  | 1549.889  |
| 940.181   | NM_001545 | 5500.992  | 3237.536  | AA843679  | 2108.509  | 2317.197  | AL049447  | 29358.668 |
| 624.514   | NM_004446 | 11033.979 | 5632.284  | NM_004957 | 1218.5    | 1238.795  | NM_020527 | 2003.258  |
| 2099.063  | AF070625  | 2288.495  | 1800.826  | NM_005252 | 536.909   | 356.546   | NM_005286 | 2541.725  |
| 1690.796  | AL365512  | 1555.23   | 1087.367  | AF090906  | 627.377   | 358.325   | AK024365  | 3239.715  |
| 20878.908 | AK001740  | 2814.699  | 3444.863  | AB023219  | 1245.665  | 841.94    | AJ251759  | 1000.124  |
| 725.824   | AF131793  | 982.25    | 1652.484  | NM_001928 | 37174.445 | 27248.766 | AK024371  | 1340.129  |
| 738.079   | NM_005918 | 17004.447 | 11256.534 | NM_018965 | 1634.314  | 5022.946  | NM_001889 | 2555.728  |
| 676.092   | J02625    | 4627.369  | 3625.87   | NM_000185 | 1710.413  | 1512.913  | NM_004999 | 649.348   |
| 554.208   | Y17175    | 57624.113 | 64556.336 | NM_004512 | 1366.597  | 1281.01   | NM_004458 | 3417.514  |
| 1127.556  | NM_004549 | 5879.479  | 3197.495  | NM_004380 | 3127.706  | 2128.766  | NM_018530 | 4195.861  |
| 397.331   | NM_005333 | 4545.919  | 4580.94   | NM_004119 | 1259.113  | 709.322   | AJ003145  | 551.106   |
| 611.989   | AK026161  | 936.964   | 950.086   | AY007378  | 1062.047  | 1474.982  | AK022855  | 5526.681  |
| 264.404   | NM_004553 | 14999.55  | 10155.759 | D26070    | 3800.862  | 4974.642  | AK025981  | 600.622   |
| 509.164   | D63484    | 533.101   | 268.763   | NM_001642 | 16286.251 | 17221.58  | AF113212  | 524.021   |
| 389.72    | AK026745  | 864.009   | 751.441   | NM_003392 | 391.323   | 324.074   | AF086266  | 803.215   |
| 622.678   | AL157440  | 995.331   | 774.705   | NM_000501 | 15254.416 | 8195.61   | AF086252  | 735.776   |
| 508.3     | NM_016423 | 3739.203  | 3516.742  | NM_000114 | 1162.601  | 573.211   | AK026703  | 4479.892  |
| 867.638   | AB040975  | 1715.7    | 1659.939  | NM_005156 | 695.505   | 329.794   | NM_017866 | 2584.311  |
| 3157.808  | NM_005119 | 3672.252  | 2128.301  | X98834    | 891.925   | 677.815   | NM_003536 | 933.196   |
| 1999.377  | NM_003168 | 7505.093  | 8432.671  | NM_007035 | 2891.974  | 1304.422  | AF116707  | 1256.051  |

|           |           |           |           |           |           |           |           |           |
|-----------|-----------|-----------|-----------|-----------|-----------|-----------|-----------|-----------|
| 7246.362  | AK055844  | 844.274   | 924.356   | AF036364  | 847.352   | 382.66    | U90910    | 5783.514  |
| 3571.687  | NM_018288 | 13875.111 | 10408.591 | AK022847  | 845.06    | 1026.484  | CY3Cy5    | 2118.092  |
| 19939.24  | NM_003146 | 2819.936  | 717.184   | NM_006808 | 8821.21   | 4885.202  | AA143087  | 5562.439  |
| 344.864   | NM_003131 | 9288.413  | 4207.243  | NM_006634 | 761.617   | 1345.967  | B1870965  | 625.695   |
| 1163.776  | NM_005239 | 1628.278  | 1648.635  | NM_016465 | 745.124   | 778.857   | NM_001903 | 5939.912  |
| 5125.2    | NM_018538 | 1987.103  | 1672.517  | NM_013399 | 1358.74   | 981.791   | B1835536  | 4996.777  |
| 682.897   | NM_013346 | 654.8     | 895.52    | NM_014684 | 430.308   | 124.59    | BF205051  | 975.685   |
| 1391.466  | NM_017851 | 420.514   | 206.346   | NM_002480 | 1725.141  | 1065.591  | J03060    | 1285.652  |
| 712.775   | AK026182  | 52683.738 | 53704.094 | NM_017571 | 1380.647  | 1139.541  | X54156    | 1179.208  |
| 957.996   | AK025603  | 695.962   | 1203.147  | NM_014011 | 2691.829  | 4037.675  | NM_003743 | 824.429   |
| 7982.075  | NM_016085 | 7370.645  | 3531.28   | AK025994  | 1176.525  | 1744.119  | AA829383  | 2502.161  |
| 1253.717  | AK025768  | 3244.662  | 1671.307  | NM_013989 | 1456.374  | 1318.949  | AF012434  | 4634.063  |
| 608.094   | AL117502  | 1447.189  | 3195.803  | NM_001738 | 629.711   | 806.75    | SR2       | 43098.246 |
| 2067.22   | AK001846  | 535.572   | 496.958   | NM_001055 | 6470.816  | 7771.539  | SR4       | 9444.099  |
| 50643.914 | AK024108  | 438.134   | 694.021   | NM_002271 | 20615.74  | 17378.232 | SR6       | 1611.052  |
| 779.46    | AL110293  | 248.466   | 521.156   | NM_018361 | 1926.051  | 1895.75   | SR8       | 3993.213  |
| 52209.516 | NM_013345 | 725.022   | 759.257   | AB040966  | 1242.018  | 931.912   | SR10      | 15123.169 |
| 1504.635  | AL117454  | 11569.007 | 11787.637 | NM_020132 | 2487.912  | 1531.702  | CY3Cy5    | 1058.059  |
| 1007.15   | AF272890  | 3615.629  | 2596.221  | NM_016467 | 6725.405  | 5078.441  | NM_005902 | 2530.004  |
| 1117.254  | U00684    | 722.469   | 519.864   | NM_007253 | 2337.513  | 1510.447  | NM_005903 | 813.659   |
| 428.884   | NM_016459 | 5505.79   | 3922.56   | NM_019106 | 777.726   | 598.065   | NM_000861 | 471.063   |
| 17377.314 | AF086227  | 995.061   | 846.35    | NM_000558 | 1756.256  | 1126.159  | NM_000024 | 530.265   |
| 2390.796  | AK026246  | 1466.898  | 1679.568  | NM_014170 | 1254.424  | 746.011   | U77493    | 391.747   |
| 1502.76   | AF070524  | 455.287   | 617.061   | AF116652  | 32060.365 | 20238.664 | NM_014253 | 351.878   |
| 1923.658  | AF035281  | 1129.718  | 1168.164  | NM_004957 | 1549.339  | 2160.667  | NM_000263 | 1399.414  |
| 6763.175  | AK026304  | 688.695   | 461.953   | NM_005252 | 753.484   | 817.338   | AF073519  | 1431.567  |
| 642.496   | AL133446  | 2459.032  | 2377.709  | AF090906  | 706.619   | 946.731   | AB001451  | 2754.478  |
| 1487.779  | NM_006553 | 285.612   | 231.856   | AB023219  | 1156.982  | 894.857   | NM_017583 | 3208.586  |
| 402.197   | U56251    | 582.862   | 464.716   | NM_018835 | 464.343   | 568.908   | Y16132    | 1918.251  |
| 763.884   | AK024689  | 458.066   | 394.962   | NM_003401 | 1543.935  | 1845.358  | NM_001150 | 1223      |
| 7307.794  | BC035667  | 636.184   | 876.686   | AL137724  | 738.405   | 312.589   | NM_002856 | 1425.094  |
| 463.567   | AL049277  | 1070.369  | 652.255   | NM_004758 | 254.954   | 997.737   | NM_003225 | 566.325   |
| 10713.95  | AL117571  | 1206.56   | 982.215   | NM_002913 | 669.007   | 561.042   | NM_000096 | 472.092   |
| 1253.056  | AF131814  | 1142.118  | 1599.829  | AK022797  | 538.604   | 552.467   | NM_019045 | 721.17    |
| 1066.038  | AL359600  | 343.25    | 615.225   | NM_007370 | 1147.46   | 979.527   | NM_006380 | 1334.184  |
| 1035.654  | AL360144  | 2148.139  | 2538.928  | AK023471  | 859.123   | 826.601   | AB020710  | 1159.394  |
| 502.934   | BC028617  | 2029.521  | 3414.202  | AF044578  | 945.784   | 504.424   | NM_016174 | 1937.824  |
| 1202.095  | AL117653  | 490.486   | 485.215   | NM_001948 | 884.496   | 1245.441  | NM_020377 | 617.848   |
| 573.629   | AF087999  | 655.033   | 744.871   | NM_001067 | 3019.867  | 5512.583  | U88896    | 1599.25   |
| 5868.945  | NM_003740 | 2354.115  | 1344.235  | NM_014034 | 1890.314  | 1097.634  | NM_005724 | 5005.472  |
| 213.822   | AL050078  | 544.361   | 391.814   | NM_005335 | 9063.268  | 12841.352 | X58794    | 32870.953 |
| 387.601   | AK022933  | 252.037   | 217.283   | J04474    | 2973.509  | 1628.063  | NM_001735 | 2029.395  |
| 1671.194  | NM_014276 | 1985.692  | 2354.807  | NM_003761 | 20596.754 | 20931.727 | NM_002349 | 862.349   |
| 587.295   | AF056438  | 941.338   | 781.342   | NM_015193 | 311.691   | 358.382   | NM_004887 | 5768.272  |
| 931.995   | AF003737  | 13490.198 | 9725.509  | X98834    | 1073.402  | 1317.139  | NM_014795 | 3976.948  |
| 438.743   | AF009296  | 1153.807  | 1083.494  | NM_007035 | 4098.234  | 2265.173  | NM_002986 | 585.333   |
| 1950.98   | AK001011  | 3516.558  | 1738.19   | AF036364  | 889.259   | 620.143   | M15330    | 1161.027  |
| 1388.954  | AK001840  | 832.706   | 762.318   | AK022847  | 970.515   | 1264.174  | NM_014396 | 1455.887  |
| 4313.158  | AK021486  | 347.191   | 435.322   | NM_020203 | 715.145   | 1244.714  | AK027201  | 1414.498  |
| 3953.393  | AK021740  | 398.813   | 396.133   | U20582    | 6332.685  | 8720.039  | NM_000489 | 2760.723  |
| 309.462   | AK025148  | 319.167   | 381.182   | NM_002079 | 1151.542  | 1015.817  | X98507    | 956.716   |
| 279.044   | AK026238  | 659.929   | 690.057   | U13697    | 1523.49   | 2298.586  | NM_016030 | 11926.986 |
| 1926.599  | AK026694  | 434.254   | 389.288   | U04270    | 1487.476  | 834.767   | NM_014669 | 4711.509  |

|           |           |           |           |           |           |           |           |           |
|-----------|-----------|-----------|-----------|-----------|-----------|-----------|-----------|-----------|
| 3496.033  | AK025564  | 1319.019  | 1007.306  | L02840    | 408.925   | 210.41    | NM_005652 | 1886.188  |
| 684.47    | AK026286  | 959.008   | 823.966   | AA629719  | 54017.645 | 52021.008 | AK026686  | 505.847   |
| 7219.396  | AK026731  | 881.917   | 684.684   | AA927528  | 408.786   | 496.401   | AL133064  | 1503.667  |
| 16028.255 | NM_004192 | 1053.777  | 953.619   | X02152    | 52936.277 | 42153.125 | NM_006227 | 2732.948  |
| 710.901   | AK024160  | 493.103   | 706.764   | BG676364  | 1118.399  | 745.528   | NM_002905 | 4998.971  |
| 1384.507  | AK025077  | 1521.953  | 1465.901  | AA843679  | 1855.854  | 2045.521  | NM_019025 | 1800.693  |
| 1615.755  | NM_006417 | 2204.449  | 3854.329  | NM_017571 | 1809.021  | 1925.862  | NM_000431 | 1267.267  |
| 6013.129  | L43350    | 614.604   | 477.87    | NM_001925 | 34475.043 | 24382.926 | AB033118  | 3864.123  |
| 1342.585  | NM_020317 | 4724.484  | 5520.494  | NM_018965 | 1684.204  | 3807.999  | NM_019605 | 1646.217  |
| 982.526   | AL080234  | 3988.137  | 3070.583  | NM_000185 | 1411.434  | 1399.438  | NM_001690 | 4145.013  |
| 597.794   | AK027025  | 680.246   | 597.913   | NM_004512 | 850.8     | 586.313   | AF034374  | 1151.127  |
| 952.702   | AK025105  | 437.927   | 393.263   | NM_004380 | 3961.984  | 2184.87   | NM_016118 | 1749.194  |
| 10111.718 | AK021675  | 337.669   | 257.767   | NM_004119 | 1375.314  | 394.033   | NM_018674 | 3278.343  |
| 929.206   | AF212220  | 1323.517  | 619.105   | AY007378  | 847.505   | 532.054   | NM_001683 | 5292.713  |
| 4898.042  | AK025010  | 887.81    | 1076.609  | D26070    | 3571.072  | 2999.976  | NM_001682 | 1070.312  |
| 1218.836  | AL137709  | 1063.289  | 2019.208  | NM_001642 | 16882.59  | 12181.168 | NM_014405 | 900.596   |
| 1145.079  | AK023277  | 710.87    | 689.71    | NM_003392 | 347.944   | 355.203   | NM_000815 | 1739.581  |
| 1178.248  | AK000425  | 1048.513  | 718.85    | NM_000501 | 18191.732 | 11193.229 | AK025130  | 3472.3    |
| 1707.601  | Z27200    | 1531.055  | 1243.431  | NM_000114 | 1349.151  | 972.272   | NM_017875 | 803.652   |
| 454.591   | AF070571  | 3025.101  | 2190.336  | NM_005155 | 999.159   | 710.34    | AK023232  | 1108.681  |
| 573.251   | AK023554  | 978.982   | 1061.602  | NM_000555 | 2362.968  | 2393.154  | NM_000271 | 4400.317  |
| 557.832   | NM_003513 | 2687.765  | 3068.043  | NM_004195 | 433.329   | 893.317   | NM_006184 | 19264.275 |
| 898.633   | AK024844  | 614.181   | 575.616   | NM_014170 | 1496.164  | 1396.739  | AB018268  | 3466.953  |
| 691.562   | AF161427  | 51836.859 | 44258.176 | AF116652  | 37071.715 | 33799.93  | Z70701    | 6258.354  |
| 1162.168  | AK021715  | 3901.913  | 3565.382  | NM_000835 | 849.299   | 738.728   | AB040972  | 2232.032  |
| 800.129   | AK000315  | 3459.371  | 3147.464  | NM_006805 | 10555.379 | 4873.139  | BE260997  | 989.658   |
| 824.793   | AK023248  | 553.362   | 779.292   | NM_006634 | 569.444   | 895.802   | NM_018685 | 3679.069  |
| 2261.327  | NM_012404 | 9070.719  | 5782.301  | NM_016465 | 802.596   | 492.044   | NM_017675 | 1259.337  |
| 901.532   | NM_005444 | 561.244   | 310.16    | NM_013395 | 1634.132  | 1287.198  | NM_005431 | 3304.78   |
| 1018.384  | V00589    | 10747.026 | 9053.928  | AL122120  | 651.472   | 438.746   | AB036063  | 981.791   |
| 2585.267  | AL390163  | 505.649   | 618.226   | NM_014684 | 508.376   | 383.72    | NM_002894 | 2358.436  |
| 824.416   | NM_018572 | 1184.762  | 1221.753  | NM_002480 | 1877.338  | 1118.781  | NM_004625 | 2952.256  |
| 1504.281  | AK000175  | 2076.305  | 1842.041  | NM_014034 | 1836.678  | 1955.872  | NM_004260 | 1862.642  |
| 910.688   | AL137736  | 2238.444  | 2182.064  | NM_005335 | 9811.139  | 21892.324 | AL050067  | 813.353   |
| 7358.997  | AF143870  | 484.339   | 512.632   | J04474    | 3550.477  | 3608.76   | NM_004972 | 2253.316  |
| 1340.787  | AK021897  | 6400.082  | 4243.078  | NM_004725 | 290.529   | 471.448   | NM_006251 | 2327.546  |
| 926.574   | AK001051  | 929.504   | 1033.196  | NM_014011 | 2853.092  | 3821.11   | NM_004103 | 2146.954  |
| 575.043   | AF086051  | 817.166   | 711.773   | AK025994  | 1111.628  | 1448.269  | NM_002314 | 3213.639  |
| 1507.277  | AK024356  | 816.99    | 864.067   | NM_013985 | 923.952   | 993.175   | NM_001744 | 1709.16   |
| 706.572   | AL049370  | 787.241   | 568.897   | NM_001735 | 512.963   | 469.496   | NM_006295 | 2102.191  |
| 11137.965 | AL365410  | 5255.596  | 3687.63   | NM_001055 | 5447.361  | 4082.219  | Z25433    | 985.318   |
| 52820.305 | D17082    | 10499.363 | 7839.777  | NM_002271 | 19663.957 | 12021.322 | NM_005922 | 4502.789  |
| 779.441   | D17252    | 26699.131 | 20302.27  | NM_018361 | 1749.214  | 1152.27   | NM_018635 | 2279.836  |
| 1082.742  | D16476    | 419.658   | 341.691   | AB040966  | 2086.705  | 1141.907  | NM_000382 | 1184.696  |
| 4918.58   | NM_003673 | 1411.153  | 919.245   | NM_020132 | 3265.704  | 2282.625  | NM_001150 | 1127.169  |
| 436.227   | Z36823    | 980.742   | 567.96    | NM_016467 | 7598.634  | 5713.557  | NM_003225 | 402.08    |
| 2994.155  | AF147387  | 2154.221  | 913.896   | NM_007253 | 2937.674  | 2469.455  | NM_000095 | 608.756   |
| 3700.022  | NM_012081 | 1175.105  | 2377.613  | NM_019105 | 939.392   | 727.668   | AA143087  | 1691.29   |
| 440.888   | AL137463  | 841.328   | 1096.015  | NM_005607 | 805.501   | 1254.805  | U25804    | 2660.235  |
| 330.159   | AF085909  | 10963.592 | 11487.078 | NM_006761 | 27365.053 | 31539.063 | B1870965  | 492.001   |
| 4113.085  | AF090888  | 560.751   | 1731.299  | NM_014897 | 670.856   | 778.07    | B1835536  | 4697.202  |
| 6962.677  | AK027193  | 774.165   | 691.751   | NM_003453 | 3376.396  | 3021.572  | BF205051  | 1181.531  |
| 603.886   | AF086471  | 3283.182  | 2798.978  | NM_014390 | 8452.716  | 5007.039  | M91463    | 493.721   |

|           |           |           |           |           |           |           |           |           |
|-----------|-----------|-----------|-----------|-----------|-----------|-----------|-----------|-----------|
| 2896.205  | NM_01845E | 4172.051  | 3482.233  | NM_01814E | 220.459   | 493.576   | J03060    | 1307.262  |
| 543.813   | AF113018  | 625.558   | 745.253   | X78924    | 10132.907 | 8054.569  | X54156    | 507.582   |
| 801.013   | AK021996  | 1288.096  | 1652.668  | AF090906  | 547.541   | 641.22    | NM_00374E | 430.813   |
| 734.585   | AL049337  | 2047.522  | 2199.679  | AB023219  | 1458.257  | 883.418   | AA829383  | 1693.16   |
| 423.423   | CY3Cy5    | 4127.637  | 264.154   | NM_01883E | 716.658   | 557.446   | AF012434  | 3401.868  |
| 2432.569  | U13697    | 3102.608  | 8051.545  | NM_003401 | 1185.937  | 1137.708  | AB037791  | 581.962   |
| 621.973   | U04270    | 5798.469  | 2702.54   | AL137724  | 725.053   | 238.445   | NM_018124 | 3280.136  |
| 1154.393  | L02840    | 811.326   | 130.487   | NM_00475E | 958.986   | 1633.735  | NM_01603E | 12255.659 |
| 743.172   | AA629719  | 57747.82  | 33265.059 | NM_00291E | 869.89    | 769.465   | NM_01466E | 4973.619  |
| 915.599   | AA927528  | 771.225   | 231.262   | AK022797  | 641.291   | 565.633   | NM_00565E | 1475.26   |
| 1177.23   | X02152    | 60475.328 | 23840.23  | NM_00737E | 1306.097  | 1633.432  | NM_00590E | 2214.58   |
| 2047.536  | BG676364  | 3534.296  | 1814.04   | NM_006231 | 418.869   | 506.896   | NM_00590E | 637.666   |
| 1489.676  | BG181154  | 898.059   | 873.294   | AK023471  | 1144.429  | 1304.326  | NM_000024 | 741.525   |
| 4756.77   | AA843679  | 2449.898  | 1503.566  | AF044578  | 1427.182  | 1212.862  | AB037734  | 639.419   |
| 732.856   | SR7       | 5503.106  | 42838.148 | NM_00194E | 1369.004  | 2626.765  | NM_00026E | 1128.449  |
| 1524.262  | SR9       | 23548.422 | 3648.217  | NM_001067 | 3267.847  | 6285.149  | AF073519  | 1290.193  |
| 1555.346  | CY3Cy5    | 2134.146  | 148.338   | AF063936  | 612.151   | 610.458   | AB001451  | 2118.625  |
| 619.513   | NM_00293E | 455.698   | 991.13    | NM_00560E | 1641.551  | 1354.477  | NM_01758E | 2883.727  |
| 1331.508  | NM_00438E | 10402.086 | 12002.536 | NM_00357E | 3572.009  | 2697.077  | Y16132    | 2779.557  |
| 634.985   | U86813    | 265.899   | 965.715   | NM_00029E | 5058.275  | 3363.433  | NM_01787E | 582.81    |
| 2830.748  | NM_004119 | 2320.417  | 2435.976  | NM_01230E | 2742.867  | 3420.814  | AK023232  | 1446.378  |
| 487.634   | AY007378  | 1003.136  | 1035.233  | NM_01742E | 8827.319  | 5676.336  | NM_000271 | 4352.414  |
| 348.455   | D26070    | 4059.283  | 2348.021  | NM_00587E | 407.219   | 544.746   | NM_01820E | 1721.79   |
| 551.997   | NM_00164E | 20055.748 | 8221.789  | AF147790  | 1225.793  | 1393.598  | NM_006184 | 17715.975 |
| 577.18    | NM_00154E | 554.286   | 151.576   | NM_00411E | 1575.568  | 1051.396  | AB018268  | 1053.286  |
| 9020.783  | NM_00339E | 640.573   | 194.117   | AK025592  | 2040.9    | 748.256   | NM_01904E | 628.945   |
| 418.086   | NM_000501 | 14933.83  | 6897.832  | NM_00463E | 8083.563  | 5227.223  | NM_00638E | 1071.011  |
| 1002.937  | NM_000114 | 1783.245  | 1586.166  | AK023023  | 4413.042  | 2530.465  | AB020710  | 941.138   |
| 11366.78  | NM_00515E | 1891.406  | 1455.188  | NM_01599E | 2953.203  | 2569.052  | NM_016174 | 1038.641  |
| 547.857   | NM_01519E | 562.855   | 596.473   | NM_00265E | 1524.213  | 982.173   | NM_020377 | 665.912   |
| 293.342   | X98834    | 1892.999  | 2971.927  | Z36776    | 2251.074  | 1660.909  | U88896    | 1436.591  |
| 527.347   | NM_00703E | 10224.259 | 8494.446  | AB029015  | 627.765   | 834.505   | NM_005724 | 4122.659  |
| 1402.242  | AF036364  | 2109.726  | 2031.392  | NM_002067 | 20006.854 | 10333.732 | X58794    | 22665.703 |
| 848.242   | NM_02020E | 1453.437  | 4015.154  | NM_00105E | 55898.801 | 70842.102 | NM_00173E | 1086.833  |
| 1496.289  | U20582    | 17263.348 | 37006.223 | NM_00615E | 1869.878  | 2007.618  | NM_00234E | 903.146   |
| 855.335   | NM_000337 | 775.896   | 591.369   | NM_003287 | 491.36    | 331.399   | NM_00508E | 17112.102 |
| 1082.25   | NM_00207E | 2134.936  | 1884.336  | NM_01232E | 7841.869  | 6735.245  | NM_004887 | 5702.355  |
| 863.28    | NM_00680E | 22950.803 | 21170.131 | NM_014434 | 510.811   | 878.914   | NM_006404 | 515.999   |
| 4901.16   | NM_006634 | 1210.31   | 2651.589  | NM_019607 | 2028.251  | 1984.791  | NM_01479E | 3201.538  |
| 14659.468 | NM_01646E | 1288.133  | 911.318   | U79260    | 11525.411 | 9100.603  | NM_00298E | 538.194   |
| 2188.548  | NM_01339E | 2373.108  | 1143.34   | NM_00189E | 4812.686  | 3353.68   | M15330    | 722.92    |
| 5297.646  | AL122120  | 1298.49   | 409.509   | NM_006447 | 1551.273  | 1426.849  | NM_01439E | 1359.519  |
| 2855.186  | NM_014684 | 779.121   | 213.758   | AF119851  | 582.986   | 712.796   | AK027201  | 1421.06   |
| 4213.436  | AK027247  | 750.529   | 607.363   | NM_01412E | 3594.538  | 3437.013  | Z25433    | 1355.861  |
| 35756.117 | NM_00248E | 3321.418  | 2006.314  | AF080577  | 446.135   | 407.299   | NM_00592E | 4124.444  |
| 504.716   | NM_017571 | 2672.172  | 2269.994  | L22005    | 3971.649  | 1650.015  | NM_01863E | 2055.605  |
| 2452.1    | L03169    | 674.353   | 687.01    | NM_012291 | 4445.842  | 2990.43   | AL137593  | 7679.021  |
| 424.209   | NM_01896E | 3450.475  | 8270.976  | NM_01336E | 1031.176  | 749.825   | NM_00391E | 1331.094  |
| 2622.644  | NM_00018E | 3226.602  | 2597.93   | NM_003807 | 9202.594  | 4938.511  | NM_00038E | 1392.098  |
| 2629.257  | Y00816    | 707.227   | 1049.856  | NM_00435E | 917.322   | 1097.974  | AL133064  | 1630.237  |
| 707.685   | NM_00451E | 2169.245  | 2185.127  | NM_00179E | 625.733   | 1815.686  | NM_006227 | 1869.264  |
| 350.629   | NM_00105E | 13177.083 | 24244.35  | NM_01824E | 2150.44   | 1025.179  | NM_00290E | 2939.373  |
| 669.001   | NM_01587E | 564.661   | 688.392   | NM_01493E | 2423.81   | 2325.023  | NM_00070E | 1659.466  |



|           |           |           |           |           |           |           |           |           |
|-----------|-----------|-----------|-----------|-----------|-----------|-----------|-----------|-----------|
| 922.26    | NM_002271 | 43948.637 | 54759.648 | Y17866    | 574.459   | 779.091   | NM_01902E | 1265.428  |
| 2854.276  | NM_018361 | 3561.471  | 4087.9    | NM_00300E | 2839.178  | 1602.721  | NM_000431 | 1163.65   |
| 791.214   | NM_01989E | 676.903   | 641.431   | NM_00087E | 766.555   | 613.925   | AB033118  | 3181.022  |
| 388.671   | AB040966  | 2972.763  | 863.469   | NM_00284E | 2359.727  | 2032.14   | NM_01960E | 1192.389  |
| 3792.696  | NM_02013E | 3233.994  | 1205.802  | NM_00441E | 1185.846  | 749.847   | NM_00169C | 3235.322  |
| 548.645   | NM_01646E | 10081.261 | 3173.899  | NM_000917 | 8866.559  | 3309.044  | AF034374  | 2254.671  |
| 570.463   | NM_00725E | 2247.139  | 1436.195  | NM_00538E | 6116.795  | 6297.998  | NM_016118 | 1964.747  |
| 927.587   | NM_01910E | 948.871   | 676.954   | NM_01444E | 22153.156 | 14174.906 | NM_018674 | 5495.651  |
| 515.883   | L08436    | 644.674   | 745.498   | AL832826  | 695.182   | 697.985   | NM_00168E | 11167.051 |
| 879.678   | NM_00055E | 2123.565  | 1987.98   | NM_000391 | 4918.675  | 3971.06   | NM_00168E | 735.442   |
| 535.173   | NM_01417C | 1967.487  | 1351.209  | NM_014771 | 4325.693  | 2626.506  | NM_01440E | 1018.332  |
| 2309.334  | AF116652  | 26343.785 | 18094.182 | NM_00227E | 3269.239  | 2193.955  | NM_00081E | 934.315   |
| 15327.321 | NM_00083E | 578.794   | 1166.976  | AK024625  | 729.902   | 848.596   | NM_01492E | 591.594   |
| 1209.033  | AK000271  | 434.958   | 929.251   | NM_018131 | 1018.914  | 1428.457  | AK025130  | 2410.331  |
| 3449.453  | NM_01883E | 1405.164  | 2034.605  | NM_01763E | 18186.111 | 10347.51  | NM_033334 | 432.984   |
| 632.026   | NM_003401 | 2001.505  | 4490.375  | NM_01246E | 560.467   | 410.458   | AB037791  | 598.904   |
| 2267.462  | AL137724  | 1019.914  | 972.963   | M27877    | 18470.26  | 16416.646 | NM_018124 | 3006.048  |
| 6059.92   | NM_00475E | 857.999   | 1706.292  | D70836    | 30350.145 | 26661.229 | Z70701    | 3076.204  |
| 767.034   | NM_00291E | 1578.606  | 967.531   | D16878    | 555.747   | 287.318   | AB040972  | 1016.265  |
| 398.503   | AK022797  | 788.07    | 548.031   | NM_01494E | 1568.245  | 1431.581  | AF148505  | 980.989   |
| 1482.735  | NM_00737C | 1650.206  | 785.485   | AK024392  | 1612.74   | 1211.233  | NM_01868E | 3315.707  |
| 1078.547  | NM_006231 | 663.348   | 162.768   | NM_01326C | 609.308   | 1010.304  | NM_01767E | 1016.152  |
| 3228.807  | AK023471  | 964.999   | 817.357   | NM_01830C | 579.846   | 440.94    | NM_005431 | 824.707   |
| 3626.179  | AF044578  | 1168.511  | 677.287   | NM_00487E | 1470.179  | 770.661   | AB036063  | 1149.448  |
| 821.714   | NM_00194E | 1128.884  | 326.379   | NM_018254 | 5579.725  | 4054.572  | NM_002894 | 1028.53   |
| 716.763   | NM_001067 | 4306.917  | 2153.11   | NM_01774E | 1383.109  | 721.236   | NM_00462E | 2795.646  |
| 1064.866  | NM_014034 | 2494.973  | 1064.956  | NM_01843E | 1032.778  | 262.439   | NM_00426C | 3114.207  |
| 754.188   | NM_00533E | 11554.628 | 11462.62  | AK024810  | 8339.826  | 5595.272  | AL050067  | 1782.389  |
| 339.34    | J04474    | 5816.86   | 2520.684  | NM_00404E | 2924.323  | 1715.903  | NM_00497E | 2932.834  |
| 616.253   | NM_003761 | 29671.301 | 21183.613 | BM458096  | 6693.125  | 3346.69   | NM_006251 | 1618.637  |
| 1969      | NM_00472E | 298.927   | 583.882   | NM_00562E | 4311.032  | 3600.68   | NM_00410E | 3283.13   |
| 868.525   | NM_014011 | 5195.977  | 6125.431  | D29958    | 7576.978  | 3863.211  | NM_002314 | 3603.965  |
| 848.923   | AK025994  | 1620.314  | 1858.669  | NM_015971 | 5879.253  | 4168.978  | NM_001744 | 1479.801  |
| 1490.958  | L29306    | 722.405   | 595.011   | D17257    | 44513.355 | 33047.082 | NM_00629E | 2360.613  |
| 515.378   | NM_01398E | 2046.665  | 2448.826  | AK000724  | 1738.792  | 1804.828  | AF073519  | 1725.409  |
| 1495.416  | NM_00173E | 1636.083  | 3595.153  | NM_00372C | 8060.007  | 8538.889  | AB001451  | 2334.504  |
| 1074.372  | NM_02020E | 1864.616  | 6080.516  | AF097159  | 647.375   | 469.582   | NM_01758E | 3026.719  |
| 2146.03   | U20582    | 18208.475 | 52371.895 | NM_00391E | 937.905   | 1238.366  | Y16132    | 2956.362  |
| 552.756   | NM_000337 | 685.061   | 771.169   | NM_004807 | 799.401   | 563.07    | NM_01659E | 456.977   |
| 686.105   | NM_00207E | 2936.067  | 4556.226  | J03569    | 36102.984 | 25292.682 | NM_002521 | 496.726   |
| 532.972   | AI660957  | 320.6     | 703.756   | NM_00311E | 5966.875  | 3480.883  | NM_001150 | 1031.737  |
| 313.115   | U13697    | 3266.084  | 9244.18   | NM_000687 | 9496.49   | 4162.14   | NM_00285E | 1265.002  |
| 576.724   | U04270    | 5859.897  | 3651.868  | NM_01820C | 436.787   | 212.647   | NM_00322E | 443.182   |
| 428.032   | L02840    | 903.171   | 80.814    | NM_00721E | 1881.532  | 1044.518  | NM_00009E | 704.434   |
| 516.404   | AA629719  | 66180.727 | 34924.844 | AF005067  | 1142.253  | 684.587   | AA143087  | 1893.049  |
| 309.468   | AA927528  | 907.771   | 368.3     | NM_00571C | 6212.183  | 3088.432  | U25804    | 2002.286  |
| 51210.469 | X02152    | 57597.324 | 25442.664 | AF252284  | 1940.462  | 1402.382  | B1870965  | 339.29    |
| 833.389   | BG676364  | 3056.709  | 1487.696  | NM_01493C | 858.331   | 426.314   | NM_00190E | 2371.031  |
| 477.657   | BG181154  | 969.929   | 684.39    | NM_00153C | 1495.396  | 740.287   | B1835536  | 2427.428  |
| 326.216   | AA843679  | 2638.303  | 1208.204  | U80232    | 10412.881 | 7139.49   | BF205051  | 1128.148  |
| 755.253   | NM_00525E | 1135.357  | 1776.088  | AF086526  | 754.291   | 1135.761  | M91463    | 578.794   |
| 520.686   | AF090906  | 690.135   | 1140.902  | AK025788  | 1827.904  | 1416.994  | J03060    | 1679.816  |
| 1478.511  | AB023219  | 2095.69   | 1080.332  | AF086164  | 1410.397  | 1495.314  | NM_00374E | 615.733   |

|           |           |           |           |           |           |           |           |           |
|-----------|-----------|-----------|-----------|-----------|-----------|-----------|-----------|-----------|
| 20352.744 | NM_00192E | 50121.785 | 68102.477 | AK025577  | 1882.04   | 1461.946  | AA829383  | 2105.973  |
| 311.634   | NM_00639E | 337.869   | 826.103   | AK000216  | 2570.46   | 3117.3    | AF012434  | 3643.897  |
| 16573.82  | NM_01896E | 3958.397  | 15933.727 | AK023440  | 793.498   | 975.544   | NM_006404 | 395.449   |
| 543.465   | NM_00018E | 3742.01   | 4205.021  | AB033041  | 4944.736  | 4966.596  | NM_01479E | 3327.36   |
| 1693.574  | Y00816    | 1017.872  | 2131.356  | NM_014894 | 45956.535 | 17959.004 | NM_00298E | 639.424   |
| 1841.666  | NM_004512 | 3376.28   | 5446.822  | AF070526  | 641.006   | 219.493   | M15330    | 726.208   |
| 538.87    | NM_00293C | 486.47    | 974.062   | U79264    | 4052.249  | 1716.135  | NM_01439E | 1396.114  |
| 565.521   | NM_00438C | 10412.232 | 12733.064 | NM_01569E | 10069.505 | 6298.502  | AK027201  | 1230.981  |
| 45160.008 | U86813    | 477.424   | 891.004   | AF070530  | 6890.736  | 4969.083  | NM_00048E | 4155.864  |
| 1352.549  | NM_004119 | 1805.768  | 1370.623  | NM_00642C | 1113.005  | 877.178   | X98507    | 993.729   |
| 509.282   | AY007378  | 965.382   | 1246.707  | AF131855  | 501.18    | 367.703   | NM_01603C | 7479.373  |
| 16553.934 | D26070    | 3884.876  | 5353.746  | AF086046  | 3085.136  | 2820.823  | NM_01466E | 5455.681  |
| 5459.231  | NM_001642 | 19358.945 | 16298.575 | AK024962  | 777.961   | 752.828   | NM_005652 | 2177.001  |
| 601.997   | NM_003392 | 772.124   | 83.617    | AK025135  | 5164.266  | 7966.584  | AK026686  | 629.424   |
| 1817.808  | NM_000501 | 12610.989 | 4965.529  | NM_01792E | 1557.444  | 975.344   | NM_005902 | 998.113   |
| 2116.607  | NM_000114 | 1723.738  | 1315.679  | AY007145  | 1804.389  | 2277.223  | NM_00285C | 10010.954 |
| 2377.995  | X98834    | 2071.836  | 2810.613  | D38549    | 3215.224  | 2873.697  | NM_005302 | 933.563   |
| 661.686   | NM_00703E | 8458.279  | 5416.042  | AK024780  | 988.908   | 965.335   | NM_005903 | 653.344   |
| 1595.783  | AB019562  | 1049.647  | 703.906   | AF085947  | 942.409   | 1250.393  | NM_000024 | 712.138   |
| 1064.977  | AF036364  | 2133.5    | 1850.957  | AF086000  | 432.922   | 625.652   | NM_000263 | 947.904   |
| 448.129   | AK022847  | 1829.6    | 1480.371  | Z36818    | 626.577   | 387.56    | NM_001683 | 15055.188 |
| 619.288   | AK000271  | 631.726   | 2395.687  | Z36842    | 1150.258  | 710.86    | NM_001682 | 1113.038  |
| 664.716   | NM_00680E | 20737.049 | 12468.084 | AF086155  | 747.171   | 391.776   | NM_01440E | 1479.766  |
| 967.209   | NM_006634 | 761.26    | 1059.224  | NM_01415E | 3169.506  | 3006.443  | NM_00081E | 707.827   |
| 743.85    | NM_01646E | 1246.391  | 979.694   | AK021795  | 1399.143  | 3245.266  | NM_01492E | 858.11    |
| 407.416   | NM_01339E | 2279.45   | 1550.482  | AL162042  | 3342.308  | 4678.97   | AK025130  | 2440.952  |
| 365.521   | AL122120  | 921.685   | 289.481   | AK026131  | 1700.519  | 4145.163  | NM_01787E | 627.45    |
| 2319.026  | NM_014684 | 833.645   | 279.713   | AK023312  | 934.569   | 1701.443  | AK023232  | 1400.478  |
| 258.955   | NM_00248C | 3157.927  | 2159.911  | AK021462  | 1486.883  | 2954.872  | NM_000271 | 3730.034  |
| 5942.946  | NM_017571 | 2886.311  | 2562.726  | AK023392  | 332.262   | 1300.924  | NM_01820E | 1654.628  |
| 2534.801  | AB007946  | 174.293   | 791.359   | AK022678  | 576.701   | 923.992   | NM_006184 | 19645.965 |
| 1136.917  | L03169    | 518.989   | 664.318   | AK023835  | 1686.453  | 1482.727  | AB018268  | 3273.324  |
| 4609.447  | NM_014011 | 4716.875  | 2056.804  | AK023012  | 1046.815  | 1460.435  | NM_01904E | 623.107   |
| 4278.45   | AK025994  | 2598.575  | 4787.896  | AK023906  | 2763.539  | 1860.217  | NM_00638C | 1622.305  |
| 1540.987  | L29306    | 849.559   | 1839.282  | NM_01240E | 1713.386  | 2208.865  | AB020710  | 1263.339  |
| 594.216   | NM_01398E | 3286.609  | 4283.6    | AK021708  | 420.342   | 432.271   | NM_016174 | 1908.375  |
| 460.063   | NM_00173E | 1275.297  | 1901.707  | AL050205  | 3512.428  | 3431.032  | NM_020377 | 765.043   |
| 1389.759  | NM_00105E | 13905.223 | 34275.473 | AK023947  | 347.15    | 799.299   | U88896    | 2366.409  |
| 602.895   | NM_01587E | 625.785   | 476.091   | NM_005691 | 1402.653  | 2094.241  | AF116702  | 32561.637 |
| 2518.091  | NM_002271 | 38594.391 | 55511.582 | AB045832  | 533.79    | 1520.657  | NM_005724 | 3443.211  |
| 3719.32   | NM_018361 | 3315.293  | 2631.842  | AF086156  | 696.24    | 1562.068  | X58794    | 28203.311 |
| 2594.993  | NM_019893 | 659.384   | 476.341   | AK023814  | 607.725   | 1422.928  | NM_00173E | 1654.35   |
| 49318.438 | AB040966  | 3852.01   | 3569.092  | AF130063  | 453.902   | 573.977   | NM_00234E | 1287.394  |
| 12884.963 | NM_020132 | 4857.525  | 5962.778  | AL162043  | 347.446   | 87.466    | NM_004972 | 3497.075  |
| 273.499   | NM_016467 | 12209.703 | 13677.82  | AK024171  | 641.292   | 1622.598  | NM_006251 | 2397.742  |
| 2254.936  | NM_007253 | 2503.058  | 1823.887  | AK023018  | 795.283   | 1530.848  | NM_004103 | 4983.753  |
| 48314.176 | NM_01910E | 982.109   | 315.484   | AK022672  | 2054.435  | 3414.425  | NM_002314 | 3972.415  |
| 727.809   | L08436    | 665.68    | 407.599   | AK023870  | 1824.017  | 2692.043  | NM_001744 | 1616.703  |
| 295.932   | NM_00055E | 2487.949  | 2895.798  | AK021599  | 1871.9    | 2174.52   | NM_00629E | 2284.037  |
| 212.372   | NM_01417C | 2225.83   | 1607.693  | BC030975  | 467.822   | 886.653   | Z25433    | 1392.543  |
| 254.715   | AF116652  | 35029.469 | 29936.512 | AK024263  | 746.454   | 919.777   | NM_005922 | 4138.968  |
| 1294.591  | NM_00083E | 658.646   | 909.562   | NM_016613 | 2157.533  | 2572.706  | NM_01863E | 2330.376  |
| 1126.448  | NM_004957 | 2287.641  | 1393.736  | AF086414  | 1685.429  | 1923.482  | AL137593  | 8573.227  |

|           |           |           |           |           |           |           |           |          |
|-----------|-----------|-----------|-----------|-----------|-----------|-----------|-----------|----------|
| 1374.609  | NM_005252 | 1156.826  | 543.386   | AJ012490  | 5772.573  | 3412.623  | NM_00391E | 1838.196 |
| 1873.056  | AF090906  | 1093.028  | 2427.52   | U84516    | 12583.974 | 11800.962 | AL133064  | 1751.259 |
| 2388.676  | AB023219  | 3350.933  | 3174.377  | AL049270  | 997.7     | 787.186   | NM_006227 | 2875.836 |
| 1205.887  | NM_01883E | 1497.25   | 2242.008  | U88834    | 7671.115  | 8593.622  | NM_00290E | 5069.598 |
| 1869.134  | NM_003401 | 2146.552  | 3783.006  | BC025324  | 930.851   | 1152.793  | NM_00070C | 2144.696 |
| 448.987   | AL137724  | 1147.357  | 966.342   | AK023564  | 1922.072  | 516.631   | NM_01902E | 3034.674 |
| 1185.391  | NM_00475E | 925.188   | 3026.13   | NM_003533 | 1947.543  | 16007.605 | NM_000431 | 1207.711 |
| 798.535   | NM_002913 | 1125.686  | 1261.729  | AL157478  | 942.212   | 288.706   | NM_013421 | 816.67   |
| 2590.674  | AK022797  | 688.399   | 1064.686  | AF131836  | 1981.281  | 5586.603  | NM_012474 | 2803.878 |
| 851.264   | NM_00737C | 2304.691  | 3762.402  | AL137488  | 3160.077  | 6352.412  | AB033118  | 2520.834 |
| 2293.057  | NM_006231 | 1053.69   | 1560.296  | AB020637  | 695.755   | 995.884   | NM_01960E | 1358.015 |
| 3648.302  | AK023471  | 1688.752  | 4690.535  | NM_00528E | 6906.7    | 9196.146  | NM_00169C | 3502.407 |
| 26739.402 | AF044578  | 1307.24   | 1127.65   | AK024365  | 7244.618  | 8415.188  | AF034374  | 3001.791 |
| 1070.905  | NM_00194E | 1169.795  | 329.654   | AJ251759  | 1343.831  | 2047.549  | NM_016118 | 1628.392 |
| 758.666   | NM_001067 | 4044.193  | 1798.369  | AK024371  | 3527.291  | 4026.899  | NM_018674 | 6683.473 |
| 12941.456 | NM_00533E | 11315.143 | 21945.027 | NM_005454 | 1766.479  | 1751.352  | NM_00006E | 1208.153 |
| 4775.749  | J04474    | 6828.773  | 4610.76   | NM_00188E | 2922.052  | 5907.077  | AB033046  | 3739.24  |
| 384.033   | NM_003761 | 32458.709 | 28368.75  | NM_00499E | 1216.968  | 1451.025  | NM_01591E | 3342.59  |
| 2346.278  | NM_015193 | 778.356   | 288.468   | X89668    | 12063.693 | 22997.904 | AK023228  | 633.76   |
| 546.184   | X98834    | 1834.38   | 1338.538  | NM_00445E | 6794.489  | 4757.14   | NM_01324E | 923.939  |
| 394.429   | AF036364  | 3195.255  | 3957.025  | NM_006901 | 1627.775  | 1425.403  | AB029041  | 10072.02 |
| 932.608   | AK022847  | 2090.401  | 3205.5    | NM_01853C | 6490.727  | 7115.088  | AK026642  | 1708.885 |
| 918.97    | NM_020203 | 2051.675  | 5487.651  | AK022855  | 9618.661  | 8628.285  | AL359063  | 585.906  |
| 3125.474  | L40992    | 567.601   | 1435.336  | AL050102  | 788.95    | 689.865   | AL079292  | 2588.362 |
| 10440.672 | U20582    | 19982.598 | 57467.266 | AF305686  | 1264.052  | 796.845   | X89667    | 2180.345 |
| 4302.701  | NM_000337 | 674.059   | 680.719   | NM_01786E | 3333.746  | 3187.088  | AB037791  | 988.67   |
| 1150.509  | NM_00207E | 3267.156  | 4067.027  | NM_00353E | 831.912   | 2648.875  | Z70701    | 8682.218 |
| 1650.924  | AI660957  | 385.04    | 1152.147  | AF116707  | 1250.423  | 1151.385  | AB040972  | 2964.851 |
| 3142.342  | U13697    | 3482.866  | 10588.173 | U90910    | 8221.654  | 6939.614  | AF148505  | 1357.472 |
| 4649.859  | U04270    | 7739.088  | 8845.361  | CY3Cy5    | 457.549   | 122.621   | BE260997  | 715.542  |
| 1939.538  | Z34820    | 140.336   | 839.078   | AA143087  | 4524.211  | 4479.907  | NM_01868E | 4685.473 |
| 2087.185  | L02840    | 1237.423  | 1612.417  | U25804    | 2043.477  | 2659.617  | NM_01767E | 1094.273 |
| 1181.816  | AA629719  | 58856.48  | 37191.105 | BI870965  | 680.546   | 439.649   | AK021764  | 408.397  |
| 565.697   | H68922    | 532.296   | 501.541   | NM_001903 | 3270.707  | 5152.267  | NM_005431 | 1295.891 |
| 2869.354  | NM_017571 | 2527.775  | 1743.362  | BI835536  | 3433.829  | 2459.146  | AB036063  | 1161.976 |
| 1061.427  | L03169    | 863.222   | 1453.395  | BF205051  | 1190.84   | 1161.797  | NM_002894 | 1838.809 |
| 2356.524  | NM_00192E | 49708.355 | 66940.656 | X02761    | 497.068   | 557.849   | NM_00462E | 3213.609 |
| 2774.306  | NM_00639E | 420.762   | 801.455   | M91463    | 350.506   | 463.083   | NM_00426C | 3937.548 |
| 1024.949  | NM_01896E | 4793.506  | 24848.211 | J03060    | 1603.416  | 2541.3    | AL050067  | 1735.734 |
| 6087.049  | NM_00018E | 3166.734  | 3958.213  | AA829383  | 1539.096  | 1674.276  | AK024732  | 1567.51  |
| 9401.97   | Y00816    | 1529.225  | 2312.998  | AF012434  | 3616.332  | 4191.887  | NM_015564 | 975.093  |
| 609.62    | NM_004512 | 3078.272  | 5427.02   | SR2       | 33350.625 | 27635.291 | AF160476  | 356.174  |
| 780.752   | NM_00438C | 10977.113 | 12944.12  | SR4       | 7509.972  | 6292.895  | L22650    | 779.233  |
| 542.458   | NM_004119 | 3044.872  | 3549.1    | SR6       | 1076.43   | 1059.119  | AB014520  | 8491.245 |
| 374.766   | AY007378  | 1299.828  | 1675.786  | SR8       | 3643.899  | 12271.509 | AF161420  | 902.077  |
| 1483.58   | D26070    | 5724.628  | 11081.012 | SR10      | 13799.509 | 4135.698  | NM_004907 | 1618.569 |
| 1774.184  | NM_001642 | 23560.32  | 40071.938 | CY3Cy5    | 324.307   | 111.666   | NM_002891 | 611.143  |
| 3200.824  | NM_001542 | 1614.065  | 1538.535  | NM_005902 | 1587.925  | 1619.386  | NM_00177E | 1188.791 |
| 26267.789 | NM_00055E | 2792.13   | 1810.004  | NM_00285C | 41903.313 | 37477.492 | BE083789  | 415.329  |
| 6525.242  | NM_01417C | 2084.198  | 602.691   | NM_005903 | 451.293   | 414.977   | X04526    | 8925.688 |
| 2012.989  | AF116652  | 43651.711 | 50215.703 | NM_000861 | 495.015   | 575.517   | D26067    | 1418.197 |
| 992.477   | NM_00083E | 1001.845  | 2407.959  | NM_000024 | 469.012   | 227.942   | AF227924  | 2517.321 |
| 2382.319  | AK000271  | 786.066   | 1674.48   | AB037734  | 1351.712  | 499.036   | NM_00571E | 8476.579 |

|           |           |           |           |           |           |           |           |           |
|-----------|-----------|-----------|-----------|-----------|-----------|-----------|-----------|-----------|
| 696.748   | NM_00680E | 28103.984 | 26899.229 | NM_01906E | 363.632   | 277.355   | NM_00618E | 1232.702  |
| 1015.109  | NM_00663A | 1105.755  | 2155.946  | NM_00026E | 917.345   | 787.352   | NM_01608E | 588.976   |
| 1513.148  | NM_01646E | 1725.582  | 2028.889  | AF073519  | 1255.061  | 1293.435  | S59184    | 1269.57   |
| 1944.506  | NM_01339E | 5790.359  | 9248.977  | AB001451  | 1478.808  | 512.03    | NM_00513C | 532.058   |
| 2424.195  | NM_00241C | 1071.544  | 2596.345  | NM_01758E | 2056.654  | 1511.866  | NM_006661 | 2033.688  |
| 1037.588  | AL122120  | 1647.488  | 1581.761  | Y16132    | 3006.775  | 2833.358  | NM_00574E | 4728.141  |
| 2478.135  | NM_01468A | 1166.087  | 531.951   | NM_00115C | 777.702   | 845.781   | NM_00458E | 530.108   |
| 2075.645  | AK027247  | 852.633   | 811.816   | NM_00285E | 1116.884  | 881.454   | U16126    | 540.379   |
| 2351.924  | NM_00248C | 4547.016  | 5156.896  | NM_00638C | 949.729   | 1288.876  | NM_00217E | 9499.182  |
| 2311.285  | NM_01403A | 2185.825  | 740.39    | AB020710  | 682.271   | 1064.165  | NM_00261A | 583.768   |
| 1035.947  | NM_00533E | 11880.267 | 10856.438 | NM_01617A | 1892.567  | 1474.063  | NM_00565E | 852.921   |
| 1581.022  | J04474    | 5647.632  | 1655.833  | NM_020377 | 491.926   | 684.913   | NM_00731A | 1016.579  |
| 866.654   | NM_003761 | 31444.521 | 11955.598 | U88896    | 2028.151  | 1486.321  | NM_01607E | 457.442   |
| 5295.607  | NM_014011 | 7401.692  | 12071.223 | X58794    | 24179.615 | 20939.6   | NM_00660C | 7103.313  |
| 3681.591  | AK025994  | 2621.268  | 5547.508  | NM_00173E | 951.675   | 1219.869  | AF297709  | 1256.308  |
| 14584.654 | L29306    | 755.757   | 1675.719  | NM_00234E | 1556.273  | 1683.682  | L77564    | 913.324   |
| 2063.499  | NM_01398E | 2683.47   | 3300.873  | NM_004887 | 3209.125  | 2958.828  | NM_01538A | 2719.762  |
| 1193.438  | NM_00173E | 1651.348  | 2324.34   | NM_01479E | 2364.005  | 1066.542  | AK023327  | 2985.482  |
| 1661.109  | NM_00227C | 390.882   | 939.658   | M15330    | 487.155   | 832.054   | AB046858  | 757.542   |
| 693.992   | NM_00105E | 13405.497 | 27050.902 | NM_01439E | 1328.367  | 987.786   | D50914    | 3113.022  |
| 601.259   | NM_01587E | 821.438   | 986.722   | AK027201  | 969.456   | 865.417   | NM_01589E | 797.989   |
| 4184.444  | NM_002271 | 48428.27  | 60213.559 | NM_00048E | 4862.397  | 2686.389  | NM_00230E | 40562.41  |
| 1831.984  | NM_018361 | 3614.835  | 3966.9    | X98507    | 1012.546  | 1154.406  | AK025439  | 1338.152  |
| 592.021   | NM_01989E | 813.361   | 604.565   | NM_01603C | 17384.23  | 13948.312 | NM_001737 | 1307.695  |
| 3851.725  | AB040966  | 4784.833  | 6419.584  | NM_01466E | 3138.665  | 2447.469  | NM_01662E | 4945.976  |
| 3787.216  | NM_02013E | 5720.215  | 4804.183  | NM_00565E | 1686.089  | 1841.065  | NM_00721E | 371.78    |
| 1120.043  | NM_016467 | 10844.619 | 8176.821  | AL133064  | 1024.887  | 1417.52   | NM_01906A | 515.913   |
| 335.83    | NM_00725E | 3324.971  | 3227.346  | NM_006227 | 1790.314  | 2289.518  | NM_00009A | 1984.344  |
| 1348.409  | NM_01910E | 1615.747  | 1604.422  | NM_00290E | 2953.224  | 3464.575  | AF176701  | 465.733   |
| 272.945   | NM_005607 | 1805.878  | 1666.004  | NM_00070C | 1669.378  | 3381.567  | NM_00415E | 26508.826 |
| 507.376   | NM_006761 | 33989.066 | 16618.516 | NM_01902E | 2308.962  | 2966.004  | AK021866  | 392.023   |
| 1443.479  | NM_014897 | 897.374   | 778.082   | NM_000431 | 860.75    | 615.61    | NM_00324E | 4040.002  |
| 3160.821  | NM_00345E | 5306.948  | 1940.76   | NM_013421 | 631.333   | 584.816   | M21897    | 829.429   |
| 6520.336  | NM_018371 | 16814.791 | 3941.924  | AB033118  | 2493.372  | 1237.259  | AF301463  | 871.085   |
| 4470.005  | NM_01439C | 18668.961 | 22695.006 | NM_01960E | 1258.017  | 1458.79   | NM_01598A | 2958.941  |
| 1477.41   | NM_01814E | 858.581   | 1148.971  | NM_00169C | 2970.068  | 3807.731  | NM_00689A | 1234.54   |
| 24960.971 | X78924    | 9177.811  | 14438.601 | AF034374  | 5329.26   | 4599.232  | AK023031  | 2003.827  |
| 3978.462  | NM_01325C | 918.803   | 1497.497  | NM_01611E | 1419.693  | 1588.246  | NM_005717 | 17098.727 |
| 1879.604  | AF090906  | 1130.039  | 2048.719  | NM_01867A | 10121.563 | 11711.271 | NM_01209C | 807.054   |
| 1400.823  | AB023219  | 3433.754  | 3546.325  | NM_00168E | 10729.601 | 9628.553  | BE793385  | 564.552   |
| 38361.23  | NM_01414E | 375.765   | 1465.179  | NM_00168E | 648.667   | 649.726   | NM_00308E | 4043.65   |
| 1089.358  | NM_01883E | 1236.556  | 1500.806  | NM_01440E | 1064.188  | 939.094   | AF043290  | 287.012   |
| 290.021   | NM_003401 | 2506.702  | 5236.354  | NM_00081E | 500.415   | 594.277   | NM_00408E | 1588.253  |
| 380.797   | AL137724  | 1295.726  | 1435.148  | NM_01492E | 440.699   | 552.493   | NM_01439E | 1161.811  |
| 1090.941  | NM_00475E | 1138.897  | 3185.389  | AK025130  | 1874.771  | 1912.648  | NM_00593A | 8069.571  |
| 900.332   | NM_00291E | 2014.688  | 3008.759  | NM_01787E | 451.583   | 333.12    | NM_00712E | 5422.688  |
| 2249.325  | AK022797  | 632.225   | 870.781   | AK023232  | 1295.869  | 1197.148  | AY004253  | 3598.052  |
| 7116.322  | NM_00737C | 2896.165  | 2630.644  | NM_000271 | 5761.814  | 4296.346  | NM_00269E | 875.746   |
| 12870.04  | NM_006231 | 5497.196  | 15424.944 | Z70701    | 4982.881  | 7056.29   | AF069138  | 293.697   |
| 918.318   | AK023471  | 1363.112  | 2052.96   | AB040972  | 2047.519  | 2986.603  | NM_00214E | 500.53    |
| 594.896   | AF063936  | 738.618   | 411.944   | AF148505  | 737.327   | 831.624   | AL137449  | 615.193   |
| 1609.199  | AK025337  | 1038.211  | 553.64    | BE260997  | 272.311   | 428.632   | U88153    | 1299.895  |
| 4527.082  | NM_00560E | 2280.81   | 1011.603  | NM_01868E | 2778.436  | 4362.7    | NM_01842E | 5106.375  |

|           |           |           |           |           |           |          |           |           |
|-----------|-----------|-----------|-----------|-----------|-----------|----------|-----------|-----------|
| 1563.142  | NM_003573 | 4418.954  | 1760.619  | NM_017676 | 571.748   | 522.543  | NM_006924 | 13305.631 |
| 13074.069 | NM_000296 | 4136.553  | 1560.892  | NM_005431 | 1054.247  | 827.302  | NM_016024 | 3539.172  |
| 2819.411  | NM_012302 | 6703.456  | 8866.083  | AB036063  | 1573.353  | 1102.37  | NM_018107 | 1066.257  |
| 548.739   | NM_017422 | 6823.169  | 10299.764 | NM_002894 | 1570.15   | 2160.017 | NM_012279 | 591.552   |
| 702.55    | NM_006149 | 621.219   | 897.559   | NM_004629 | 2496.115  | 3300.175 | NM_018387 | 6525.794  |
| 475.764   | NM_005879 | 1221.676  | 1363.913  | NM_004260 | 3913.942  | 3836.45  | BF310673  | 864.101   |
| 1861.211  | AF147790  | 864.674   | 1631.635  | AL050067  | 1211.332  | 1474.279 | R97012    | 15600.02  |
| 525.225   | NM_018969 | 773.75    | 1270.594  | NM_004972 | 2569.988  | 2082.745 | U77700    | 7811.734  |
| 1481.887  | NM_004112 | 2562.151  | 3424.432  | NM_006251 | 1720.814  | 1856.83  | NM_006567 | 2842.456  |
| 3487.604  | AY007233  | 313.133   | 1065.494  | NM_004103 | 3306.208  | 3364.415 | AF038554  | 7976.688  |
| 23375.066 | AK025592  | 4545.876  | 3706.659  | NM_002314 | 2806.247  | 1919.65  | AF264621  | 2677.346  |
| 923.04    | NM_004635 | 13419.805 | 12075.083 | NM_001744 | 1152.256  | 1417.089 | NM_005875 | 3963.25   |
| 759.941   | AK023023  | 6467.321  | 9162.172  | NM_006296 | 1502.369  | 1502.479 | NM_004184 | 2791.322  |
| 14626.533 | NM_015993 | 5177.793  | 7960.292  | Z25433    | 989.755   | 1106.207 | AK075087  | 463.468   |
| 2914.656  | NM_002659 | 2120.374  | 3495.574  | NM_005922 | 2980.771  | 1877.899 | AK026571  | 2033.427  |
| 175.796   | Z36776    | 1550.504  | 1107.747  | NM_018638 | 1571.379  | 1209.222 | AK024673  | 4103.748  |
| 2416.232  | NM_006150 | 1972.689  | 2458.387  | NM_001150 | 1019.411  | 1860.219 | AF070618  | 839.286   |
| 971.913   | NM_020345 | 748.66    | 604.597   | NM_002856 | 1000.083  | 1202.222 | NM_000456 | 1709.617  |
| 2631.193  | NM_003287 | 698.877   | 343.94    | NM_003225 | 280.476   | 523.358  | NM_002496 | 5323.079  |
| 1131.823  | NM_012325 | 8801.548  | 3803.754  | AA143087  | 4184.708  | 3359.334 | NM_016243 | 1462.463  |
| 4027.666  | NM_014434 | 1410.092  | 523.642   | U25804    | 1891.34   | 2074.354 | NM_004649 | 3451.758  |
| 1629.036  | NM_019607 | 5061.954  | 5865.447  | BI870965  | 804.72    | 468.203  | NM_006540 | 1444.475  |
| 6921.412  | U79260    | 17988.563 | 15336.345 | NM_001903 | 3663.81   | 5128.671 | NM_017766 | 836.805   |
| 1250.945  | NM_001895 | 8976.148  | 10267.396 | BI835536  | 3757.896  | 2750.713 | NM_002811 | 4315.464  |
| 1274.193  | NM_006447 | 3605.87   | 5649.135  | BF205051  | 1389.7    | 1212.154 | NM_020310 | 1418.972  |
| 1147.485  | AF119851  | 617.269   | 1619.41   | X02761    | 542.043   | 637.276  | NM_005802 | 1957.981  |
| 1639.049  | NM_014129 | 8567.374  | 13803.797 | J03060    | 1481.779  | 2647.31  | AB002331  | 1154.92   |
| 3186.378  | D87455    | 2865.501  | 4158.814  | AA829383  | 1576.958  | 1279.828 | NM_002504 | 1563.734  |
| 1864.153  | AF080577  | 1568.396  | 2859.995  | AF012434  | 3296.996  | 3835.277 | AB046775  | 968.588   |
| 1609.919  | L22005    | 7451.545  | 9204.29   | NM_018124 | 1810.42   | 1603.687 | X74862    | 709.63    |
| 987.072   | NM_012291 | 14831.319 | 23089.432 | X98507    | 780.44    | 1802.371 | X65663    | 2188.91   |
| 324.393   | NM_013368 | 2366.042  | 4413.514  | NM_014669 | 2778.176  | 3355.144 | NM_003185 | 2186.443  |
| 2107.614  | NM_003807 | 8485.523  | 9429.692  | NM_005652 | 1736.385  | 2279.109 | NM_004456 | 1947.025  |
| 1210.592  | NM_004358 | 1175.296  | 1880.272  | AK026686  | 407.087   | 584.485  | NM_004284 | 13778.479 |
| 1751.846  | NM_001790 | 1492.731  | 3081.424  | NM_005903 | 519.004   | 462.16   | NM_012243 | 1837.289  |
| 3071.137  | NM_018243 | 3203.944  | 1223.303  | NM_000024 | 501.876   | 195.968  | AK025743  | 984.008   |
| 1101.834  | NM_002842 | 2283.097  | 2289.601  | NM_003873 | 228.165   | 246.117  | AL137466  | 672.763   |
| 4253.048  | NM_004418 | 1530.996  | 692.424   | NM_000263 | 1317.833  | 1439.569 | AL122040  | 532.199   |
| 5023.211  | NM_000917 | 9610.074  | 1751.686  | AB001451  | 1536.21   | 747.14   | AK023768  | 1260.84   |
| 499.582   | NM_005389 | 8196.476  | 2428.358  | NM_017583 | 1975.998  | 1182.031 | AF147335  | 928.702   |
| 1744.523  | NM_014445 | 38932.879 | 36528.441 | Y16132    | 2238.169  | 2610.225 | BI768072  | 719.95    |
| 473.703   | AL832826  | 1477.347  | 2391.651  | NM_016593 | 222.578   | 287.492  | AK022216  | 3078.201  |
| 2231.824  | NM_016123 | 1355.549  | 2595.572  | AK023232  | 1822.717  | 4937.496 | AK025812  | 4132.736  |
| 3971.428  | AB048365  | 900.693   | 1352.328  | AB018268  | 5175.212  | 7967.693 | AK021459  | 657.544   |
| 1250.125  | AF229179  | 597.264   | 1461.172  | NM_019045 | 533.36    | 409.229  | U00960    | 912.293   |
| 753.005   | NM_014771 | 7661.561  | 9364.63   | NM_006380 | 853.328   | 1359.839 | AK022262  | 935.591   |
| 264.604   | NM_002275 | 4248.771  | 6430.046  | AB020710  | 828.894   | 574.335  | AF088039  | 50413.66  |
| 1596.077  | AK025215  | 6769.224  | 6124.09   | NM_016174 | 1807.463  | 1560.159 | AF086220  | 2539.432  |
| 543.251   | AK024625  | 552.301   | 1109.575  | NM_020377 | 411.469   | 474.739  | AK023941  | 1165.234  |
| 803.64    | NM_014834 | 205.489   | 902.131   | U88896    | 2552.113  | 1628.101 | AF086265  | 703.634   |
| 799.438   | NM_017636 | 23109.963 | 24385.215 | NM_001735 | 1059.812  | 1034.66  | AL390083  | 7509.75   |
| 1160.307  | NM_012468 | 820.506   | 817.759   | NM_002349 | 1150.246  | 1056.79  | AB020702  | 393.114   |
| 1869.896  | M27877    | 22821.309 | 15944.462 | NM_005080 | 14770.421 | 7898.395 | NM_012202 | 299.219   |

|           |           |           |           |           |          |           |           |           |
|-----------|-----------|-----------|-----------|-----------|----------|-----------|-----------|-----------|
| 2414.852  | D70836    | 37263.844 | 24017.176 | NM_004887 | 2976.979 | 2633.609  | NM_01335E | 1155.169  |
| 713.238   | D16878    | 905.584   | 392.688   | NM_01479E | 2322.453 | 1318.956  | AK021973  | 1187.726  |
| 1724.138  | NM_014943 | 1389.088  | 1292.792  | NM_00298E | 346.148  | 318.911   | AF075054  | 409.005   |
| 1589.633  | AK024392  | 1872.78   | 857.074   | M15330    | 442.799  | 884.286   | AL050116  | 279.111   |
| 6054.229  | NM_01326C | 1018.279  | 736.603   | NM_01439E | 1070.409 | 911.526   | AL110155  | 464.348   |
| 2865.467  | NM_01830C | 1495.462  | 2360.389  | AK027201  | 855.076  | 959.842   | AL050165  | 48333.879 |
| 3367.958  | NM_00487E | 2268.143  | 1832.117  | Z25433    | 1230.554 | 2158.867  | AL117445  | 1678.674  |
| 1261.169  | NM_018254 | 5834.55   | 7352.036  | NM_005922 | 3519.748 | 3724.9    | AL049365  | 1221.459  |
| 2263.077  | NM_018433 | 3258.143  | 3229.202  | NM_01863E | 1878.199 | 2551.419  | AK025132  | 598.798   |
| 2691.225  | NM_000937 | 671.57    | 1623.143  | NM_000382 | 895.195  | 1571.294  | AK025157  | 2080.725  |
| 3089.574  | AB028451  | 749.735   | 977.115   | AL133064  | 1064.305 | 1201.455  | NM_02021E | 455.466   |
| 521.101   | AK024810  | 15941.115 | 18638.135 | NM_006227 | 1868.519 | 1874.991  | AK022001  | 2776.086  |
| 895.592   | AK022615  | 34691.555 | 25140.932 | NM_00290E | 3072.434 | 2887.776  | AK022633  | 678.669   |
| 1106.071  | NM_004043 | 5107.866  | 1918.883  | NM_00070C | 1571.409 | 2552.544  | AK000079  | 1980.847  |
| 479.48    | BM458096  | 12411.772 | 7186.919  | NM_01902E | 2540.958 | 2891.294  | AJ227874  | 722.643   |
| 2498.181  | NM_00562E | 11141.125 | 6687.161  | NM_000431 | 692.228  | 437.644   | AF009268  | 743.376   |
| 1518.346  | D29958    | 14570.652 | 8140.858  | NM_013421 | 494.408  | 410.769   | AF009312  | 1001.384  |
| 653.772   | NM_015971 | 4091.91   | 2670.196  | AB033118  | 2170.547 | 879.381   | AF009276  | 1438.937  |
| 2952.879  | D17257    | 49783.262 | 28036.098 | NM_01960E | 1057.804 | 907.451   | AF019616  | 281.303   |
| 2433.474  | AK000724  | 1883.679  | 1067.666  | NM_00169C | 2301.666 | 2687.297  | AF056428  | 10052.095 |
| 1041.088  | NM_00372C | 9009.776  | 3666.482  | AF034374  | 3634.832 | 2750.117  | AF069136  | 583.526   |
| 526.831   | AF097159  | 953.129   | 415.254   | NM_01611E | 1266.792 | 1208.852  | AK001995  | 296.117   |
| 362.25    | NM_00391E | 1013.852  | 848.08    | NM_018674 | 9364.472 | 10548.069 | AK021594  | 736.517   |
| 731.591   | NM_004807 | 1286.095  | 516.508   | NM_001683 | 9457.561 | 7945.465  | AK021635  | 853.607   |
| 1003.748  | J03569    | 41774.402 | 14398.658 | NM_001682 | 440.275  | 645.639   | AK021856  | 1422.431  |
| 13785.771 | NM_00311E | 12524.033 | 5294.167  | NM_01440E | 1006.123 | 1147.07   | AK026419  | 302.063   |
| 2393.227  | NM_000687 | 31740.404 | 30986.463 | NM_00081E | 469.065  | 557.065   | AK025276  | 5081.593  |
| 766.597   | NM_00044E | 541.458   | 993.818   | NM_01492E | 611.136  | 393.942   | AK026027  | 1153.001  |
| 746.762   | NM_01820C | 2286.978  | 3228.87   | AK025130  | 1639.901 | 1847.654  | AK026457  | 1791.973  |
| 969.806   | NM_01483E | 2743.986  | 2827.775  | AB037791  | 701.586  | 295.79    | AJ008131  | 10667.125 |
| 1309.989  | NM_007212 | 1931.208  | 1713.369  | NM_018124 | 2683.227 | 2898.225  | AF086338  | 521.364   |
| 3734.804  | AF005067  | 1617.141  | 596.263   | Z70701    | 5698.577 | 6094.46   | NM_006272 | 791.324   |
| 465.005   | NM_00571C | 7678.879  | 4337.659  | AB040972  | 1870.477 | 2201.47   | AK024303  | 1777.472  |
| 15988.618 | AF252284  | 925.085   | 852.726   | AF148505  | 708.73   | 802.848   | AL160131  | 3671.112  |
| 3314.266  | NM_01493C | 611.921   | 287.751   | BE260997  | 390.454  | 368.707   | AF086045  | 1866.425  |
| 1297.008  | NM_00153C | 871.811   | 775.482   | NM_01868E | 2641.552 | 3452.677  | AK027028  | 2561.063  |
| 1245.853  | U80232    | 6542.636  | 2427.559  | NM_01767E | 675.231  | 717.542   | AK027069  | 6951.407  |
| 25102.602 | AF086526  | 606.27    | 461.324   | NM_005431 | 729.551  | 779.078   | AK026916  | 1848.158  |
| 379.644   | AK025788  | 2172.53   | 1683.65   | AB036063  | 1107.994 | 771.672   | AK026914  | 3251.829  |
| 309.903   | AF086164  | 1350.655  | 1216.841  | NM_002894 | 1491.539 | 1885.309  | Y11166    | 988.797   |
| 138.286   | AK025577  | 1884.021  | 1115.941  | NM_00462E | 2409.316 | 2712.337  | AK023515  | 1449.953  |
| 2673.005  | AK000216  | 2227.094  | 2039.396  | NM_00426C | 3591.545 | 4054.066  | AL137623  | 12057.928 |
| 6982.853  | AK023440  | 654.157   | 856.38    | AL050067  | 1342.914 | 1417.503  | AK026485  | 505.461   |
| 709.513   | AB033041  | 7624.055  | 5023.531  | NM_004972 | 2372.683 | 1809.857  | NM_00354E | 1328.636  |
| 1051.731  | NM_014894 | 57109.281 | 64622.445 | NM_006251 | 1882.507 | 1591.65   | AF118077  | 1955.818  |
| 666.756   | AY007155  | 2654.529  | 765.277   | NM_00410E | 3514.327 | 3457.34   | AL137625  | 718.687   |
| 513.138   | AK027160  | 8166.729  | 4506.652  | NM_002314 | 3013.787 | 2072.193  | AK025750  | 1308.043  |
| 2091.257  | AL359211  | 683.537   | 970.761   | NM_001744 | 1096.912 | 1118.563  | BF031253  | 1159.884  |
| 580.918   | AF070526  | 792.497   | 1598.615  | NM_00629E | 1540.998 | 1278.281  | AK025783  | 1413.381  |
| 1015.728  | U79264    | 3795.567  | 2208.101  | AF073519  | 1284.696 | 2232.068  | AF113675  | 1829.206  |
| 3317.61   | NM_01569E | 6086.095  | 3325.412  | AB001451  | 1708.893 | 637.458   | AK024514  | 947.337   |
| 1067.265  | AF070530  | 13283.255 | 5714.171  | NM_01758E | 2149.318 | 2039.982  | NM_02011E | 1851.983  |
| 10224.477 | AF131855  | 546.988   | 133.878   | Y16132    | 3312.256 | 3103.674  | AL049417  | 11555.338 |

|           |           |           |           |           |           |           |           |           |
|-----------|-----------|-----------|-----------|-----------|-----------|-----------|-----------|-----------|
| 1755.345  | AF086046  | 2767.637  | 1204.98   | NM_001150 | 935.248   | 936.92    | AK023507  | 552.823   |
| 191.754   | AK025135  | 5621.794  | 6721.843  | NM_002856 | 1014.949  | 1004.717  | NM_005169 | 2125.006  |
| 609.026   | NM_017926 | 2498.436  | 1351.264  | NM_000096 | 437.687   | 480.743   | NM_017929 | 453.984   |
| 450.072   | AY007145  | 1864.304  | 1227.761  | AA143087  | 3575.855  | 2448.442  | NM_018472 | 1049.739  |
| 1402.312  | D38549    | 3121.413  | 2030.862  | U25804    | 1919.616  | 1698.203  | AJ008128  | 24027.924 |
| 604.948   | AK024780  | 975.259   | 576.945   | BI870965  | 803.984   | 412.703   | AL449243  | 5020.107  |
| 1858.958  | AF085947  | 669.55    | 617.8     | NM_001903 | 3303.249  | 3632.929  | M12211    | 862.656   |
| 21270.76  | AF086000  | 649.013   | 431.042   | BI835536  | 3327.887  | 2423.189  | AK026449  | 10470.712 |
| 2004.87   | AK022123  | 1418.14   | 1124.006  | BF205051  | 984.201   | 785.565   | NM_014027 | 2653.985  |
| 16207.024 | AK024184  | 1100.939  | 824.709   | J03060    | 1244.588  | 2132.933  | AF116621  | 3585.458  |
| 1319.231  | U10510    | 7600.254  | 5251.303  | NM_003743 | 389.364   | 256.806   | AF086554  | 1817.563  |
| 9646.385  | Z36842    | 1009.235  | 898.381   | AA829383  | 1456.978  | 1197.558  | AL390136  | 22855.213 |
| 3048.056  | NM_014159 | 3023.116  | 1981.438  | AF012434  | 2988.706  | 3127.454  | AK023156  | 827.643   |
| 2329.773  | AK021795  | 675.138   | 709.998   | NM_006404 | 237.186   | 204.602   | AF086398  | 49645.344 |
| 3606.316  | AL162042  | 1480.867  | 943.783   | NM_014795 | 2615.58   | 1451.917  | AK023444  | 957.819   |
| 3266.272  | AK026131  | 704.152   | 736.583   | NM_002986 | 416.494   | 675.392   | NM_003180 | 1505.765  |
| 1317.104  | AK023312  | 1024.686  | 706.61    | M15330    | 487.668   | 947.73    | AF086406  | 7382.755  |
| 1871.525  | AL133570  | 1237.878  | 598.142   | NM_014396 | 1487.975  | 1244.348  | D17216    | 1921.47   |
| 1257.521  | AK023835  | 1587.817  | 1149.379  | AK027201  | 995.146   | 983.767   | AL137581  | 851.216   |
| 2753.766  | AK023012  | 697.401   | 772.877   | NM_000489 | 5358.271  | 3670.8    | AK024942  | 1218.883  |
| 1159.525  | AK023906  | 2024.399  | 1163.686  | X98507    | 827.962   | 784.565   | AJ227873  | 11044.819 |
| 5623.94   | NM_012409 | 1441.631  | 1770.394  | NM_014669 | 3256.11   | 2891.329  | AK022886  | 2071.431  |
| 833.929   | AL050205  | 5194.229  | 3258.563  | NM_005652 | 1814.431  | 1514.569  | AK024665  | 3532.506  |
| 645.215   | AK023947  | 416.23    | 498.529   | NM_005902 | 1398.572  | 936.048   | AK000691  | 1301.16   |
| 889.654   | NM_005691 | 1149.29   | 1501.458  | NM_002850 | 35775.855 | 24240.604 | AK001448  | 1134.222  |
| 1727.355  | AK023814  | 762.076   | 439.087   | NM_005903 | 491.162   | 260.286   | AK026890  | 877.496   |
| 2519.614  | AF086528  | 502.581   | 429.012   | NM_000861 | 388.045   | 230.974   | AL049321  | 3538.549  |
| 1286.64   | NM_006543 | 832.22    | 932.569   | NM_000024 | 391.072   | 225       | CY3Cy5    | 3169.701  |
| 1436.254  | AK023018  | 530.552   | 278.033   | U77493    | 262.362   | 341.847   | W74254    | 949.53    |
| 1201.179  | AK022672  | 1276.376  | 874.027   | NM_014253 | 497.023   | 855.164   | M58603    | 1652.936  |
| 2344.064  | AK023870  | 913.378   | 646.73    | NM_000263 | 1024.658  | 1195.586  | AB003334  | 1535.098  |
| 2209.09   | AK021599  | 688.381   | 283.81    | NM_001683 | 12671.08  | 11431.439 | AA490737  | 709.614   |
| 683.84    | AK024263  | 1241.145  | 1162.553  | NM_001682 | 713.769   | 746.465   | A1878886  | 13803.337 |
| 3136.28   | NM_016613 | 2398.871  | 2598.086  | NM_014405 | 1036.994  | 1326.895  | BG697179  | 3317.819  |
| 3902.817  | AF086414  | 1416.563  | 1484.324  | NM_000816 | 520.052   | 506.528   | NM_002136 | 21071.498 |
| 1132.182  | AJ012490  | 4953.441  | 3914.042  | NM_014928 | 674.542   | 648.329   | BM012504  | 3288.552  |
| 3667.76   | U84516    | 19926.447 | 16099.852 | AK025130  | 1899.345  | 2188.053  | AA664145  | 754.647   |
| 2437.932  | AL049270  | 1334.162  | 1184.889  | NM_017875 | 542.345   | 576.113   | X72308    | 2635.866  |
| 413.304   | U88834    | 4047.674  | 4309.689  | AK023232  | 1571.937  | 1344.507  | T50790    | 681.032   |
| 7072.378  | BC025324  | 2583.211  | 1822.379  | NM_018209 | 1156.595  | 1464.574  | R48168    | 8029.414  |
| 1306.948  | NM_006087 | 56897     | 64657.648 | NM_006184 | 14650.867 | 17179.016 | NM_003942 | 1297.464  |
| 326.266   | AK023564  | 1974.732  | 1511.243  | AB018268  | 4623.134  | 4553.745  | SR5       | 2445.982  |
| 1558.982  | NM_003533 | 1064.518  | 2479.34   | NM_006380 | 975.922   | 1022.007  | SR7       | 2987.438  |
| 963.995   | AK023726  | 2084.104  | 1669.884  | AB020710  | 758.197   | 467.733   | SR9       | 9499.801  |
| 299.422   | AK024906  | 577.606   | 520.197   | NM_016174 | 1500.843  | 1043.186  | CY3Cy5    | 2464.617  |
| 1671.895  | AF131836  | 1017.221  | 1135.063  | NM_020377 | 410.719   | 440.474   | NM_000418 | 255.936   |
| 3257.608  | AF275804  | 15216.055 | 3851.142  | U88896    | 2910.961  | 2007.438  | NM_000591 | 670.69    |
| 1252.688  | AL137488  | 888.522   | 797.98    | AF116702  | 28677.844 | 24888.234 | NM_000565 | 4542.749  |
| 638.57    | AL049447  | 32771.605 | 20161.545 | NM_005724 | 2928.537  | 2980.395  | AF253318  | 459.921   |
| 2153.847  | NM_020527 | 2207.456  | 1666.459  | X58794    | 25179.258 | 17613.979 | NM_017767 | 5425.952  |
| 812.052   | NM_005286 | 2418.926  | 1843.527  | NM_001735 | 1146.317  | 948.786   | AK024848  | 1414.62   |
| 1193.551  | AK024365  | 3901.656  | 2172.15   | NM_002349 | 899.398   | 858.068   | NM_000543 | 402.24    |
| 596.126   | AJ251759  | 799.283   | 472.167   | NM_005080 | 13469.543 | 6376.107  | U06699    | 1536.905  |

|           |           |           |           |           |           |           |           |           |
|-----------|-----------|-----------|-----------|-----------|-----------|-----------|-----------|-----------|
| 1828.609  | AK024371  | 1169.858  | 521.478   | NM_004887 | 2949.362  | 2723.148  | AJ290954  | 1782.552  |
| 1005.892  | AB019569  | 58791.051 | 57913.984 | NM_004972 | 3317.203  | 2747.895  | AK025451  | 1192.766  |
| 993.903   | NM_001889 | 5572.052  | 5395.68   | NM_006251 | 2102.592  | 1785.904  | NM_002783 | 538.353   |
| 868.718   | NM_004999 | 1445.168  | 1514.654  | NM_004103 | 4124.714  | 4253.57   | NM_001047 | 1316.204  |
| 462.673   | X89668    | 9966.158  | 10299.634 | NM_002314 | 3013.02   | 2409.358  | AK024396  | 394.98    |
| 464.059   | NM_004458 | 7429.027  | 5522.923  | NM_001744 | 1251.648  | 1247.009  | U58514    | 628.163   |
| 6857.478  | NM_006901 | 1548.575  | 1306.124  | NM_006296 | 1952.05   | 1571.194  | NM_000544 | 1820.859  |
| 726.122   | NM_018530 | 5294.542  | 4292.937  | Z25433    | 1224.539  | 1402.701  | NM_004644 | 397.305   |
| 646.174   | AK022855  | 9383.984  | 7270.455  | NM_005922 | 3169.322  | 2115.385  | AV681967  | 978.154   |
| 486.102   | AK023816  | 808.892   | 1029      | NM_018638 | 1790.447  | 1314.336  | NM_016553 | 2792.43   |
| 3263.898  | AL050102  | 660.074   | 806.167   | AL137593  | 6048.522  | 5454.828  | NM_005701 | 711.655   |
| 498.969   | AF305686  | 1554.745  | 1025.551  | NM_003915 | 1332.848  | 1140.788  | NM_006819 | 10532.594 |
| 1009.013  | AF085832  | 1009.524  | 866.408   | NM_000382 | 770.857   | 957.258   | NM_014744 | 1599.463  |
| 2847.512  | AK025981  | 1260.986  | 1092.624  | AL133064  | 1068.573  | 1021.92   | AF146759  | 504.023   |
| 292.218   | AF086266  | 788.588   | 752.672   | NM_006227 | 1862.113  | 1840.448  | AB032993  | 1842.492  |
| 728.819   | AF086252  | 981.237   | 1011.6    | NM_002905 | 2970.254  | 2430.976  | NM_000854 | 1093.578  |
| 834.885   | AK026703  | 2981.545  | 2379.748  | NM_000700 | 1702.024  | 2894.052  | NM_002084 | 728.014   |
| 2034.822  | NM_017866 | 3529.713  | 2601.238  | NM_019028 | 2248.535  | 2137.051  | NM_004750 | 811.071   |
| 872.224   | NM_003536 | 947.159   | 1184.387  | NM_000431 | 815.413   | 409.323   | NM_007295 | 830.974   |
| 8042.057  | AF116707  | 942.276   | 656.976   | NM_013421 | 676.198   | 798.398   | NM_003651 | 3033.596  |
| 549.931   | U90910    | 3804.293  | 2860.083  | NM_012474 | 2737.497  | 1756.03   | NM_003262 | 1494.534  |
| 847.89    | AK025765  | 796.267   | 599.869   | AB033118  | 2477.974  | 1457.768  | AK022832  | 1764.345  |
| 3830.171  | CY3Cy5    | 990.671   | 132.852   | NM_019606 | 1251.774  | 1052.608  | NM_014641 | 1186.749  |
| 929.448   | AA143087  | 7296.214  | 7155.569  | NM_001690 | 3503.359  | 3673.728  | NM_004462 | 5787.29   |
| 345.427   | U25804    | 3589.255  | 7795.673  | AF034374  | 4004.219  | 2876.511  | AB020664  | 1671.876  |
| 1360.403  | B1870965  | 1894.377  | 1700.634  | NM_016118 | 1002.946  | 1157.754  | NM_006640 | 1166.65   |
| 1321.427  | NM_001903 | 7287.961  | 14259.87  | NM_018674 | 5816.081  | 7011.943  | NM_000343 | 521.818   |
| 1102.412  | B1835536  | 6989.043  | 6699.359  | NM_000068 | 902.746   | 1286.5    | NM_019112 | 2189.347  |
| 684.821   | BF205051  | 2961.259  | 3449.725  | AB033046  | 2414.913  | 2789.075  | NM_020246 | 675.441   |
| 13684.513 | X02761    | 863.728   | 879.325   | NM_015918 | 2903.595  | 6423.248  | NM_000084 | 638.532   |
| 200.966   | M91463    | 736.984   | 953.161   | AK023228  | 563.02    | 384.917   | NM_016354 | 558.826   |
| 331.839   | J03060    | 2090.635  | 7378.842  | NM_013249 | 432.813   | 527.786   | NM_003038 | 780.301   |
| 2982.098  | NM_003743 | 693.456   | 756.937   | AB029041  | 13177.465 | 12544.954 | NM_004731 | 645.589   |
| 135.19    | AA829383  | 2938.59   | 4301.762  | AK026642  | 1266.155  | 705.697   | AB023139  | 1602.455  |
| 757.935   | AF012434  | 7962.859  | 6855.948  | AL359063  | 346.204   | 481.977   | NM_017885 | 761.598   |
| 526.049   | SR2       | 45832.684 | 62089.391 | AL079292  | 1703.314  | 1917.937  | D80004    | 2570.143  |
| 303.751   | SR4       | 13460.725 | 19049.359 | X89667    | 1426.628  | 1801.524  | NM_000946 | 1670.682  |
| 985.176   | SR6       | 2048.182  | 2465.619  | AB037791  | 486.695   | 420.053   | NM_016070 | 904.974   |
| 12470.777 | SR8       | 6583.902  | 26961.572 | NM_018124 | 2617.381  | 2350.552  | NM_016390 | 499.813   |
| 3374.709  | SR10      | 21609.738 | 8442.068  | Z70701    | 5592.593  | 5253.101  | NM_016101 | 4210.916  |
| 300.362   | CY3Cy5    | 1541.821  | 208.714   | AB040972  | 1959.333  | 1835.618  | NM_005859 | 9227.637  |
| 667.843   | NM_005903 | 872.695   | 880.597   | AF148505  | 883.952   | 688.998   | NM_014628 | 2683.821  |
| 396.259   | NM_000861 | 781.834   | 1920.983  | BE260997  | 589.328   | 606.723   | AK025630  | 853.44    |
| 840.938   | NM_000024 | 672.725   | 965.196   | NM_018686 | 2831.85   | 2904.103  | AL365404  | 4987.037  |
| 7148.846  | U77493    | 612.04    | 867.31    | NM_017676 | 795.622   | 667.806   | AK022907  | 1085.278  |
| 508.743   | NM_019062 | 425.941   | 731.231   | NM_005431 | 884.421   | 763.376   | NM_014793 | 1305.68   |
| 202.359   | NM_003873 | 309.797   | 894.89    | AB036063  | 1216.421  | 1081.573  | NM_003241 | 682.333   |
| 1513.062  | NM_000263 | 1528.439  | 1186.172  | NM_002894 | 1775.427  | 2190.348  | NM_002685 | 1838.549  |
| 2073.057  | AF073519  | 1619.481  | 2108.508  | NM_004629 | 2328.496  | 2750.801  | AK024504  | 471.703   |
| 1840.085  | AB001451  | 2799.988  | 2929.098  | NM_004260 | 3133.302  | 3405.172  | AF039023  | 924.857   |
| 2980.829  | NM_017583 | 2917.631  | 2839.408  | AL050067  | 1041.742  | 1148.968  | NM_005511 | 2428.45   |
| 3125.989  | Y16132    | 5052.375  | 5940.754  | AK024732  | 1058.307  | 1375.267  | NM_014698 | 3850.264  |
| 2018.75   | NM_016593 | 576.531   | 866.066   | NM_015564 | 806.815   | 724.376   | NM_018475 | 3064.413  |



|           |           |           |           |           |           |           |           |           |
|-----------|-----------|-----------|-----------|-----------|-----------|-----------|-----------|-----------|
| 336.733   | NM_001150 | 1797.439  | 2981.003  | L22650    | 653.886   | 654.696   | X52005    | 5860.141  |
| 411.109   | NM_002856 | 2159.659  | 2673.945  | AB014520  | 7085.458  | 5671.348  | NM_001047 | 1867.976  |
| 2795.848  | NM_003225 | 561.246   | 477.587   | AF161420  | 747.14    | 658.936   | AK024396  | 447.598   |
| 5051.361  | NM_000096 | 870.367   | 1397.354  | NM_004907 | 1061.927  | 784.386   | W74254    | 1222.885  |
| 1266.863  | NM_019045 | 826.278   | 1021.654  | NM_002891 | 474.279   | 267.164   | M58603    | 1418.141  |
| 334.568   | NM_006380 | 1335.613  | 2405.5    | NM_001775 | 662.182   | 290.862   | AB003334  | 1608.286  |
| 234.557   | AB020710  | 1057.14   | 1035.534  | BE083789  | 258.26    | 209.112   | AA490737  | 748.187   |
| 2234.614  | NM_016174 | 3148.167  | 3451.935  | X04526    | 6080.68   | 5581.824  | BG697179  | 3140.781  |
| 481.134   | NM_020377 | 821.848   | 839.252   | D26067    | 1287.472  | 1140.121  | NM_002136 | 23171.354 |
| 13981.336 | U88896    | 4644.687  | 3573.777  | AF227924  | 1359.76   | 1252.533  | BM012504  | 3510.205  |
| 2988.709  | NM_005724 | 7625.513  | 6452.729  | NM_005716 | 6996.123  | 4935.565  | AA664145  | 983.02    |
| 1098.799  | NM_001735 | 1831.591  | 2031.575  | NM_006183 | 803.861   | 1168.356  | X72308    | 2824.673  |
| 4109.365  | NM_002349 | 1447.667  | 2365.736  | S59184    | 897.356   | 568.183   | T50790    | 837.861   |
| 3109.544  | NM_005080 | 23945.014 | 12133.492 | NM_006661 | 1432.065  | 1442.15   | R48168    | 8282.57   |
| 16737.883 | NM_004887 | 5107.224  | 5666.606  | NM_005746 | 3822.085  | 2067.894  | NM_003942 | 1311.638  |
| 4260.529  | NM_006404 | 427.643   | 571.609   | NM_004588 | 522.904   | 484.235   | NM_004452 | 596.313   |
| 728.49    | NM_014795 | 3476.569  | 2347.756  | NM_002172 | 7942.207  | 5562.028  | NM_002084 | 818.009   |
| 2658.892  | NM_002986 | 909.012   | 1303.219  | NM_002614 | 478.408   | 682.291   | D16892    | 15474.772 |
| 1155.123  | M15330    | 563.536   | 4276.924  | NM_005655 | 692.772   | 1243.778  | NM_004750 | 1077.59   |
| 896.801   | NM_014396 | 1411.238  | 1768.916  | AJ008144  | 410.478   | 235.904   | NM_007295 | 902.315   |
| 1775.544  | AK027201  | 1399.853  | 1906.198  | NM_007314 | 767.896   | 716.07    | NM_003651 | 2260.461  |
| 797.379   | NM_000489 | 3177.375  | 3510.329  | NM_006600 | 4980.944  | 5069.469  | NM_000418 | 180.193   |
| 11884.991 | X98507    | 1117.962  | 1985.437  | AF297709  | 809.117   | 764.912   | NM_000591 | 728.019   |
| 1018.045  | NM_016030 | 11445.51  | 11344.364 | L77564    | 492.284   | 579.829   | AF253318  | 552.492   |
| 487.084   | NM_014669 | 5291.723  | 4207.543  | NM_015384 | 2269.337  | 2101.032  | NM_017767 | 5790.186  |
| 1681.626  | NM_005652 | 2441.687  | 2820.54   | AK023327  | 1204.946  | 971.113   | AK024848  | 1569.524  |
| 809.051   | AK026686  | 639.883   | 706.108   | AB046858  | 432.672   | 342.172   | NM_000543 | 344.93    |
| 736.679   | AL133064  | 1585.34   | 2498.922  | D50914    | 1755.308  | 1326.108  | U06699    | 1474.369  |
| 574.321   | NM_006227 | 3337.365  | 3962.897  | NM_015896 | 521.501   | 415.92    | AJ290954  | 1936.621  |
| 351.018   | NM_002905 | 3737.426  | 4976.539  | NM_002305 | 27896.109 | 31043.045 | NM_002783 | 742.672   |
| 279.083   | NM_000700 | 2393.753  | 13904.462 | AK025439  | 967.283   | 1063.113  | NM_000084 | 659.072   |
| 270.28    | NM_019028 | 4065.303  | 6667.195  | NM_001737 | 912.844   | 1419.402  | NM_016354 | 693.392   |
| 1194.294  | NM_000431 | 1851.799  | 1261.331  | Z36784    | 143.08    | 237.79    | NM_003038 | 852.899   |
| 3297.406  | NM_013421 | 645.275   | 613.95    | NM_016626 | 3488.443  | 2799.939  | NM_018155 | 2672.468  |
| 5607.584  | AB033118  | 3754.186  | 2701.983  | NM_000094 | 1967.334  | 1872.616  | AL050358  | 419.336   |
| 15291.812 | NM_019606 | 2126.57   | 2713.237  | AJ295148  | 507.1     | 950.145   | NM_000544 | 1297.304  |
| 668.345   | NM_001690 | 4805.258  | 6306.005  | AF176701  | 281.281   | 487.01    | NM_004644 | 341.873   |
| 147.273   | NM_016118 | 2035.249  | 2748.841  | NM_016302 | 1037.121  | 732.372   | AV681967  | 866.775   |
| 1009.638  | NM_018674 | 6233.879  | 6806.749  | NM_004159 | 18609.283 | 21386.752 | NM_018250 | 636.269   |
| 491.721   | NM_001683 | 15024.319 | 15330.376 | NM_003249 | 2785.995  | 1351.847  | NM_016553 | 2880.96   |
| 357.479   | NM_001682 | 874.06    | 997.462   | M21897    | 525.727   | 313.2     | NM_003795 | 22621.494 |
| 1650.669  | NM_014405 | 1100.755  | 1475.874  | AF301463  | 414.786   | 319.687   | NM_014232 | 784.444   |
| 608.488   | NM_000816 | 646.714   | 1031.054  | NM_015984 | 1659.131  | 1232.053  | NM_005701 | 860.023   |
| 823.825   | NM_014928 | 832.613   | 934.593   | NM_006894 | 708.287   | 687.033   | NM_001231 | 356.265   |
| 1448.254  | AK025130  | 2334.341  | 4544.663  | AK023031  | 1684.474  | 1297.985  | NM_006819 | 10607.401 |
| 24736.336 | NM_017875 | 582.687   | 620.09    | NM_005717 | 12916.536 | 12269.213 | NM_014744 | 1533.459  |
| 688.884   | AK023232  | 1146.937  | 965.425   | NM_012090 | 516.945   | 378.454   | AF146759  | 697.293   |
| 556.807   | NM_000271 | 2826.516  | 4858.643  | BE793385  | 204.523   | 480.818   | AB032993  | 2128.202  |
| 1848.548  | NM_018209 | 1489.235  | 1949.7    | NM_003088 | 3161.66   | 1566.01   | NM_000854 | 989.674   |
| 634.796   | NM_006184 | 19926.486 | 24362.057 | NM_004082 | 1006.508  | 851.609   | AL117423  | 1523.153  |
| 1312.759  | AB018268  | 1943.609  | 1921.786  | NM_014398 | 685.16    | 586.989   | NM_002685 | 2238.615  |
| 309.624   | Z70701    | 9071.253  | 11214.386 | NM_005934 | 7810.476  | 4741.95   | AK024504  | 506.79    |
| 428.517   | AB040972  | 2088.719  | 3075.174  | NM_007129 | 5043.086  | 9440.137  | AF039023  | 1034.28   |

|           |           |           |           |           |           |           |           |           |
|-----------|-----------|-----------|-----------|-----------|-----------|-----------|-----------|-----------|
| 4310.222  | AF148505  | 1557.536  | 2183.578  | AY004253  | 3584.522  | 5760.713  | NM_005511 | 2473.375  |
| 323.721   | BE260997  | 298.903   | 397.575   | Z46967    | 281.593   | 254.923   | NM_01469E | 2361.351  |
| 668.003   | NM_01868E | 3251.57   | 4303.024  | NM_00269E | 606.091   | 604.315   | NM_01847E | 3073.966  |
| 19005.301 | NM_01767E | 1274.972  | 1235.448  | NM_00214E | 308.148   | 327.907   | NM_00326E | 1846.094  |
| 613.566   | NM_005431 | 1095.904  | 1189.762  | U88153    | 737.239   | 415.623   | AK022832  | 1698.868  |
| 1899.82   | AB036063  | 1419.24   | 1612.461  | X03910    | 6754.932  | 5257.178  | NM_014641 | 1277.155  |
| 1505.598  | NM_002894 | 2457.681  | 2882.923  | NM_01842E | 4349.946  | 3188.023  | NM_00446E | 6361.709  |
| 732.139   | NM_00426C | 4992.855  | 5599.361  | NM_006924 | 10257.766 | 8547.965  | AB020664  | 2073.377  |
| 970.412   | AL050067  | 919.814   | 1179.709  | NM_016024 | 2656.86   | 2071.713  | NM_00664C | 1657.953  |
| 635.96    | NM_00497E | 3685.903  | 3632.22   | NM_018107 | 878.374   | 731.853   | NM_00034E | 651.531   |
| 3130.96   | NM_006251 | 3107.785  | 3274.604  | NM_01227E | 321.498   | 229.541   | NM_01911E | 2133.776  |
| 791.034   | NM_00410E | 4977.627  | 7812.427  | NM_018387 | 4449.932  | 1931.777  | NM_01233E | 4781.999  |
| 375.519   | NM_002314 | 4906.133  | 4636.573  | BF310673  | 481.779   | 350.586   | NM_02024E | 709.419   |
| 3755.888  | NM_001744 | 1730.431  | 2184.322  | R97012    | 10689.068 | 5121.05   | NM_00394E | 1448.598  |
| 222.064   | NM_00629E | 2103.66   | 2524.72   | U77700    | 5601.808  | 4570.421  | NM_00445E | 561.436   |
| 144.526   | Z25433    | 1264.314  | 1176.313  | NM_006567 | 2035.897  | 1517.261  | AB040954  | 1136.741  |
| 269.788   | NM_00592E | 4959.368  | 3691.42   | AF038554  | 5739.956  | 6665.592  | NM_002081 | 515.484   |
| 1417.813  | NM_01863E | 1850.107  | 1595.6    | AF264621  | 1627.894  | 932.621   | AB023139  | 1994.94   |
| 1205.126  | AL137593  | 5212.609  | 4716.377  | NM_00587E | 5115.228  | 4567.56   | D80004    | 2362.584  |
| 2227.706  | NM_00391E | 1724.949  | 1169.97   | NM_004184 | 1783.337  | 568.021   | NM_01607C | 744.009   |
| 6520.695  | NM_00038E | 1766.493  | 2120.323  | AK075087  | 454.71    | 849.273   | NM_01639C | 611.923   |
| 675.897   | NM_001150 | 1938.162  | 2928.617  | AK026571  | 1550.615  | 1681.717  | NM_016101 | 3931.734  |
| 1420.106  | NM_00285E | 2778.899  | 3330.549  | AK024673  | 3065.597  | 2876.866  | NM_00585E | 10223.419 |
| 883.281   | NM_00322E | 518.401   | 781.875   | AF070618  | 423.464   | 1235.723  | NM_01462E | 2449.703  |
| 1191.119  | NM_00009E | 793.164   | 1885.921  | AF131748  | 1427.392  | 1032.69   | AK025630  | 767.649   |
| 1767.904  | AA143087  | 5867.897  | 6121.609  | NM_00045E | 1493.78   | 1655.343  | AL365404  | 5125.195  |
| 795.261   | U25804    | 3177.735  | 5223.906  | NM_00249E | 3826.302  | 2161.079  | AK022907  | 1227.121  |
| 1256.797  | B1870965  | 1587.697  | 1347.682  | NM_01624E | 883.619   | 638.603   | NM_01479E | 1651.748  |
| 7065.224  | B1835536  | 7331      | 6350.977  | NM_00464E | 2546.48   | 1723.5    | NM_003241 | 880.027   |
| 1280.948  | BF205051  | 2591.364  | 2728.621  | NM_00654C | 933.782   | 785.946   | NM_00054E | 437.188   |
| 786.368   | X02761    | 893.861   | 867.828   | NM_01776E | 523.657   | 583.54    | U06699    | 1274.781  |
| 980.521   | M91463    | 816.921   | 916.417   | NM_002811 | 2408.039  | 2441.215  | AJ290954  | 1713.851  |
| 849.144   | J03060    | 2174.901  | 5652.552  | NM_02031C | 865.232   | 635.519   | AK025451  | 1040.289  |
| 528.107   | NM_00374E | 743.661   | 750.109   | NM_00580E | 1086.841  | 699.516   | NM_00278E | 520.662   |
| 779.738   | AA829383  | 2873.014  | 3739.641  | AB002331  | 699.64    | 584.864   | X52005    | 6520.121  |
| 382.101   | AF012434  | 7130.491  | 5716.356  | NM_002504 | 1177.194  | 669.173   | NM_001047 | 1545.782  |
| 736.593   | AB037791  | 988.118   | 773.44    | AB046775  | 591.09    | 482.089   | AK024396  | 277.662   |
| 4675.954  | NM_018124 | 4206.761  | 3228.753  | X74862    | 755.844   | 494.556   | U58514    | 416.988   |
| 515.187   | NM_00048E | 7853.166  | 6317.989  | X65663    | 1547.317  | 1284.988  | AB003334  | 1389.242  |
| 4764.8    | X98507    | 1622.329  | 2436.829  | NM_00318E | 1528.822  | 929.591   | AW276315  | 577.56    |
| 1291.164  | NM_01603C | 33221.238 | 35511.375 | NM_00445E | 1286.959  | 1254.209  | AA490737  | 678.342   |
| 1717.654  | NM_01466E | 5222.459  | 6276.635  | NM_004284 | 9645.989  | 7280.896  | A1878886  | 13433.544 |
| 3289.764  | NM_00565E | 3149.247  | 4916.631  | NM_01224E | 1039.156  | 903.131   | BG697179  | 2763.567  |
| 1884.94   | NM_00590E | 2407.661  | 2848.787  | AK025743  | 724.768   | 789.698   | NM_00213E | 23044.66  |
| 1366.107  | NM_00590E | 715.697   | 914.258   | AK023974  | 919.951   | 1068.024  | BM012504  | 3435.605  |
| 1122.522  | NM_000861 | 672.853   | 1472.337  | AK023768  | 826.83    | 1247.467  | AA664145  | 864.131   |
| 6232.537  | NM_000024 | 420.986   | 398.307   | AF147335  | 790.201   | 428.274   | X72308    | 2761.111  |
| 241.336   | U77493    | 523.396   | 685.678   | AK022216  | 2276.91   | 1787.718  | T50790    | 609.906   |
| 21227.854 | NM_01906E | 433.23    | 370.193   | AK025812  | 3033.483  | 2291.777  | R48168    | 7806.251  |
| 248.073   | NM_00387E | 383.864   | 592.939   | U00960    | 535.102   | 360.825   | AB032993  | 1896.489  |
| 277.606   | NM_00026E | 1605.183  | 1349.509  | AK02226E  | 647.631   | 737.603   | NM_000854 | 1320.171  |
| 2086.481  | AF073519  | 1716.666  | 1937.571  | AF088039  | 44984.039 | 49430.898 | AL117423  | 1318.992  |
| 734.489   | AB001451  | 2290.89   | 2431.08   | AF143888  | 270.665   | 180.24    | NM_002084 | 740.197   |

|           |           |           |           |           |           |           |           |           |
|-----------|-----------|-----------|-----------|-----------|-----------|-----------|-----------|-----------|
| 1783.971  | NM_017583 | 3324.357  | 3276.251  | AF086220  | 1026.803  | 1039.886  | D16892    | 14667.854 |
| 3038.75   | Y16132    | 3613.186  | 3961.118  | AK023941  | 697.379   | 558.973   | NM_004750 | 579.266   |
| 865.001   | NM_016593 | 796.953   | 817.984   | AL390083  | 5103.991  | 3031.092  | NM_007295 | 871.666   |
| 1328.985  | NM_002521 | 504.185   | 620.237   | NM_012202 | 194.463   | 559.173   | NM_003651 | 3251.734  |
| 374.511   | NM_017875 | 795.878   | 1168.445  | NM_013355 | 1199.563  | 1895.792  | NM_000591 | 633.669   |
| 277.488   | AK023232  | 2085.528  | 1702.12   | NM_003847 | 11471.351 | 10091.119 | NM_000565 | 4438.846  |
| 325.704   | NM_000271 | 4571.919  | 6834.899  | AK021973  | 872.081   | 942.833   | AF253318  | 643.158   |
| 7358.42   | NM_018209 | 2379.227  | 3286.935  | AL050165  | 37918.93  | 34174.664 | AK024848  | 1984.613  |
| 165.252   | NM_006184 | 28454.383 | 70070.195 | AL117445  | 891.579   | 1066.453  | NM_000343 | 603.291   |
| 1171.36   | AB018268  | 7549.376  | 12827.777 | AL122113  | 4713.997  | 4654.987  | NM_019112 | 1617.719  |
| 1200.417  | NM_019045 | 798.874   | 1177.911  | AK024415  | 2087.563  | 1580.693  | NM_012336 | 4707.214  |
| 726.577   | NM_006380 | 1415.423  | 2391.64   | AL049365  | 850.455   | 424.047   | NM_000084 | 634.721   |
| 1365.305  | AB020710  | 1197.176  | 837.847   | AK025132  | 559.788   | 568.85    | NM_016354 | 617.163   |
| 729.138   | NM_016174 | 3518.024  | 3522.05   | AK025157  | 2088.11   | 1891.423  | NM_003038 | 993.49    |
| 749.575   | NM_020377 | 876.789   | 669.191   | AK022001  | 1574.436  | 1133.458  | NM_018155 | 2429.133  |
| 14347.582 | U88896    | 4832.606  | 3748.94   | AK022633  | 415.444   | 274.703   | AL050358  | 754.777   |
| 2323.274  | NM_005724 | 6175.399  | 4609.413  | AK000079  | 1346.985  | 969.434   | NM_004731 | 659.661   |
| 13288.105 | NM_001735 | 1703.869  | 1640.665  | AJ227874  | 729.557   | 973.823   | NM_000544 | 1909.971  |
| 2974.916  | NM_002349 | 1012.552  | 1849.416  | AF009268  | 567.974   | 683.102   | NM_001044 | 549.461   |
| 4230.038  | NM_005080 | 22422.867 | 9449.641  | AF009312  | 501.56    | 698.738   | NM_004644 | 337.534   |
| 1687.967  | NM_004887 | 4636.863  | 5036.583  | AF009276  | 910.641   | 811.298   | AV681967  | 747.268   |
| 1064.124  | NM_006404 | 498.236   | 594.687   | AF056428  | 7512.949  | 5943.139  | NM_018250 | 486.072   |
| 3241.525  | NM_014795 | 3811.421  | 2853.63   | AF069136  | 277.313   | 343.556   | NM_016553 | 2889.354  |
| 272.553   | NM_002986 | 739.456   | 710.056   | AK021594  | 420.792   | 302.505   | NM_003795 | 22326.016 |
| 877.469   | M15330    | 1188.706  | 5547.325  | AK002150  | 403.812   | 464.378   | NM_005701 | 737.524   |
| 3871.394  | NM_014396 | 2048.075  | 1516.342  | AK021635  | 600.682   | 932.295   | NM_006819 | 10970.166 |
| 710.114   | AK027201  | 1867.363  | 2327.614  | AK021856  | 992.255   | 893.812   | NM_014744 | 1640.699  |
| 1751.061  | Z25433    | 1498.471  | 2239.039  | AK025276  | 2134.893  | 1931.882  | AF146759  | 702.305   |
| 358.737   | NM_005922 | 4472.94   | 3648.523  | AK026027  | 696.076   | 266.822   | AL365404  | 5101.12   |
| 1199.113  | NM_018638 | 1994.5    | 2016.959  | AK026457  | 1410.154  | 949.173   | AK022907  | 1004.759  |
| 651.262   | AL137593  | 9792.683  | 11579.106 | AJ008131  | 14923.021 | 22524.973 | NM_014793 | 1199.512  |
| 2657.186  | NM_003915 | 1655.432  | 1813.276  | AF086338  | 654.191   | 1532.296  | NM_003241 | 625.561   |
| 1288.276  | NM_000382 | 1496.845  | 2039.182  | AK024303  | 695.044   | 1020.729  | NM_002685 | 2358.98   |
| 887.229   | AL133064  | 1692.42   | 2557.318  | AL160131  | 3369.282  | 7962.211  | AK024504  | 461.482   |
| 316.524   | NM_006227 | 3442.896  | 3506.311  | AF086045  | 1321.07   | 2369.622  | AF039023  | 1360.84   |
| 871.673   | NM_002905 | 4142.976  | 5155.874  | AK027028  | 1713.683  | 2497.546  | NM_005511 | 2945.675  |
| 783.346   | NM_000700 | 2467.35   | 9913.403  | AK027069  | 5445.828  | 4684.797  | NM_014698 | 3460.154  |
| 2897.603  | NM_019028 | 4879.194  | 7460.866  | AK026916  | 1379.846  | 988.883   | NM_018475 | 3381.751  |
| 254.47    | NM_000431 | 2212.756  | 987.98    | AK026914  | 1987.222  | 2089.594  | NM_003262 | 1943.379  |
| 21559.674 | NM_013421 | 919.636   | 999.404   | Y11166    | 493.268   | 482.034   | AK022832  | 1747.174  |
| 814.336   | AB033118  | 3797.726  | 2307.346  | AK023515  | 1053.95   | 1095.279  | NM_014641 | 1304.182  |
| 781.328   | NM_001690 | 4440.262  | 6000.193  | AL137623  | 10334.441 | 10254.51  | NM_004462 | 6624.855  |
| 709.373   | AF034374  | 5652.239  | 4998.391  | AK026485  | 342.399   | 274.24    | AB020664  | 1242.889  |
| 966.548   | NM_016118 | 2128.178  | 2031.717  | NM_003546 | 2095.872  | 7113.472  | NM_006640 | 1540.102  |
| 1271.392  | NM_018674 | 2542.042  | 2821.389  | AF118077  | 2582.55   | 7645.474  | NM_000857 | 811.802   |
| 1558.28   | NM_001683 | 7595.049  | 7388.573  | AL137625  | 882.138   | 2567.899  | L20688    | 14129.193 |
| 1966.015  | NM_001682 | 1085.616  | 1123.358  | AK025750  | 1997.425  | 6014.88   | X69111    | 2517.545  |
| 403.824   | NM_014405 | 930.026   | 986.672   | BF031253  | 1595.751  | 3547.623  | AB037799  | 1445.758  |
| 1280.953  | NM_000816 | 885.556   | 1221.457  | AF143887  | 305.748   | 870.039   | AB007950  | 4914.474  |
| 648.749   | NM_014928 | 438.456   | 340.334   | AK025783  | 1729.252  | 3915.548  | AK025593  | 748.039   |
| 5655.338  | AK025130  | 3779.535  | 6268.552  | AF113675  | 1719.155  | 3676.479  | AB018304  | 1770.968  |
| 1870.111  | AB037791  | 695.358   | 569.673   | AK024514  | 866.685   | 2439.34   | NM_007061 | 8011.645  |
| 1681.705  | NM_018124 | 4590.233  | 3460.629  | NM_020119 | 1793.101  | 6384.165  | AB040954  | 1333.568  |

|           |           |           |           |           |           |           |           |           |
|-----------|-----------|-----------|-----------|-----------|-----------|-----------|-----------|-----------|
| 996.109   | Z70701    | 8869.06   | 8419.652  | AL049417  | 11403.336 | 20739.664 | AB023139  | 1418.932  |
| 4458.271  | AB040972  | 2029.662  | 2344.175  | AK023507  | 655.778   | 1198.329  | NM_017885 | 744.218   |
| 1764.955  | AF148505  | 1390.18   | 1691.209  | NM_005169 | 2499.112  | 3677.481  | D80004    | 2057.411  |
| 1987.494  | BE260997  | 372.459   | 589.735   | NM_017929 | 560.757   | 663.054   | NM_000946 | 1892.68   |
| 3861.64   | NM_018686 | 3696.458  | 4496.228  | AF085923  | 338.697   | 487.534   | NM_016070 | 985.878   |
| 693.548   | NM_017676 | 1182.324  | 1607.276  | AJ008128  | 20131.889 | 21600.744 | NM_016390 | 675.262   |
| 1901.999  | AK021764  | 278.072   | 334.168   | AL449243  | 3779.313  | 4998.639  | NM_016101 | 3993.967  |
| 928.501   | NM_005431 | 977.341   | 661.413   | M12211    | 1104.41   | 1018.398  | NM_005859 | 11665.592 |
| 278.44    | AB036063  | 1380.638  | 1735.606  | AK026449  | 7586.276  | 11301.367 | NM_020313 | 531.486   |
| 929.15    | NM_002894 | 2490.859  | 2525.014  | NM_014027 | 2058.915  | 3137.547  | NM_014628 | 2864.989  |
| 2271.026  | NM_004629 | 2987.616  | 2259.89   | NM_020467 | 336.214   | 506.758   | AK025630  | 791.79    |
| 1865.173  | NM_004260 | 4653.823  | 4091.409  | AF116621  | 2572.05   | 2859.605  | NM_014718 | 650.857   |
| 900.167   | AL050067  | 874.88    | 1123.586  | AF086554  | 1798.127  | 2504.657  | NM_000632 | 430.725   |
| 439.27    | NM_004972 | 2559.822  | 2731.785  | AL390136  | 15496.768 | 15049.339 | AK024488  | 716.881   |
| 3474.253  | NM_006251 | 2900.426  | 3207.128  | AF086398  | 43289.254 | 64986.199 | AK023249  | 28679.246 |
| 19045.725 | NM_004103 | 3317.098  | 6347.907  | AK023444  | 707.684   | 1161.183  | NM_017442 | 1734.793  |
| 914.973   | NM_002314 | 5582.917  | 4631.447  | AK025953  | 599.158   | 1386.066  | NM_007218 | 760.304   |
| 7963.609  | NM_001744 | 1916.73   | 2709.115  | NM_003180 | 1364.129  | 3454.62   | Z25436    | 942.248   |
| 2282.391  | NM_006296 | 2633.806  | 2776.414  | AF086406  | 7540.722  | 17661.102 | NM_005275 | 2934.29   |
| 1832.03   | NM_017583 | 3476.955  | 4334.492  | D17216    | 2525.478  | 5232.331  | NM_003844 | 6590.533  |
| 942.893   | Y16132    | 6448.177  | 6665.898  | AL137581  | 792.143   | 1934.32   | NM_002005 | 8824.139  |
| 1072.203  | NM_016593 | 539.44    | 720.062   | AK024942  | 1546.826  | 4121.816  | NM_012324 | 1175.541  |
| 594.103   | NM_001150 | 1957.35   | 2588.772  | AJ227873  | 10902.525 | 33009.172 | AK000039  | 635.054   |
| 506.093   | NM_002856 | 2374.822  | 2598.905  | AK022886  | 2954.47   | 6348.42   | AL137352  | 580.257   |
| 1471.391  | NM_003225 | 624.771   | 626.056   | AK024665  | 4617.14   | 17267.133 | NM_014749 | 1647.3    |
| 8015.511  | NM_000096 | 929.334   | 1211.83   | AF147363  | 509.576   | 1529.607  | NM_004489 | 1967.471  |
| 1886.821  | AA418251  | 173.133   | 214.286   | AJ227880  | 333.477   | 894.368   | AK090409  | 189.404   |
| 1362.731  | AA143087  | 7182.756  | 5689.466  | AK000691  | 1250.188  | 3040.287  | AF172264  | 1179.934  |
| 870.375   | U25804    | 3570.502  | 4654.512  | AK001448  | 1093.505  | 2832.014  | Y08267    | 834.981   |
| 1779.365  | B1870965  | 1879.116  | 1732.251  | AK026890  | 870.282   | 1883.792  | U80756    | 5369.339  |
| 1576.779  | NM_001903 | 6549.936  | 10733.384 | AL049321  | 3722.302  | 12268.981 | NM_018161 | 723.683   |
| 851.429   | B1835536  | 7173.171  | 6048.649  | CY3Cy5    | 967.998   | 110.32    | NM_005248 | 530.134   |
| 890.231   | BF205051  | 2701.339  | 2427.008  | W74254    | 913.362   | 1069.813  | NM_004810 | 491.48    |
| 4266.61   | X02761    | 706.356   | 792.047   | M58603    | 1243.482  | 2013.665  | AL117629  | 1518.982  |
| 967.662   | M91463    | 911.522   | 854.355   | AA443286  | 383.471   | 332.148   | NM_002595 | 865.052   |
| 1334.561  | J03060    | 1790.198  | 5221.263  | AB003334  | 1564.229  | 3297.034  | NM_015726 | 798.703   |
| 11076.771 | X54156    | 542.355   | 551.961   | AW276315  | 526.605   | 309.697   | AF174604  | 889.185   |
| 900.202   | NM_003743 | 862.305   | 719.31    | AA490737  | 678.127   | 326.443   | AB002379  | 2326.39   |
| 1569.5    | AA829383  | 3005.433  | 3683.883  | AI878886  | 12638.545 | 6973.093  | AF113223  | 422.783   |
| 1920.324  | AF012434  | 7204.362  | 5374.209  | BG697179  | 2926.204  | 2977.657  | AB046851  | 1213.074  |
| 873.289   | NM_002986 | 702.953   | 1017.828  | NM_002136 | 22760.35  | 15302.48  | NM_018174 | 609.716   |
| 1044.896  | M15330    | 741.834   | 5139.598  | BM012504  | 2870.195  | 2855.997  | NM_014548 | 1187.129  |
| 1723.1    | NM_014396 | 1671.457  | 1640.615  | AA664145  | 664.664   | 528.279   | NM_000226 | 769.199   |
| 1002.548  | AK027201  | 1423.847  | 1736.074  | X72308    | 4140.136  | 3135.777  | AB037779  | 11358.79  |
| 762.385   | NM_000489 | 7831.786  | 5715.812  | T50790    | 708.003   | 431.106   | NM_000393 | 775.248   |
| 919.651   | X98507    | 1553.847  | 1712.286  | R48168    | 6965.496  | 10661.124 | NM_000889 | 1510.411  |
| 1232.395  | NM_016030 | 32699.84  | 24381.551 | NM_003942 | 1150.452  | 1158.929  | NM_003859 | 4414.746  |
| 2498.998  | NM_014669 | 5232.609  | 4505.87   | NM_004452 | 713.432   | 596.157   | NM_000236 | 873.621   |
| 3865.937  | NM_005652 | 3381.232  | 3779.666  | SR5       | 2389.246  | 2580.698  | NM_002903 | 10874.279 |
| 1086.481  | AK026686  | 405.725   | 364.839   | SR7       | 2589.025  | 24662.125 | NM_012339 | 1206.367  |
| 2904.763  | NM_018842 | 282.268   | 246.249   | SR9       | 9017.958  | 1652.418  | NM_005787 | 14157.356 |
| 2681.497  | NM_005902 | 2741.648  | 2434.142  | CY3Cy5    | 1037.299  | 228.85    | NM_002143 | 2843.409  |
| 2184.97   | NM_002850 | 49414.418 | 62742.223 | NM_000591 | 604.564   | 502.185   | AF284421  | 3503.333  |

|           |           |           |           |           |           |           |           |           |
|-----------|-----------|-----------|-----------|-----------|-----------|-----------|-----------|-----------|
| 833.273   | NM_005903 | 678.005   | 541.401   | NM_000565 | 4199.914  | 5917.324  | NM_00604E | 1761.339  |
| 4099.441  | NM_000861 | 779.794   | 1135.486  | AF253318  | 605.306   | 591.685   | NM_00396E | 2958.212  |
| 2300.182  | NM_000024 | 793.244   | 663.491   | NM_017767 | 5186.02   | 4185.7    | NM_00278E | 1422.217  |
| 1041.203  | U77493    | 442.27    | 374.728   | AK024848  | 1814.245  | 1682.894  | NM_003343 | 5661.334  |
| 1426.513  | NM_003873 | 497.926   | 858.941   | NM_000543 | 279.416   | 621.05    | NM_00278E | 16975.617 |
| 287.436   | NM_000263 | 1468.189  | 1264.941  | U06699    | 2541.802  | 3145.846  | NM_00347C | 2843.48   |
| 695.337   | NM_001683 | 17891.154 | 35541.297 | AJ290954  | 1695.471  | 2957.366  | AL080137  | 390.174   |
| 715.345   | NM_00081E | 531.764   | 512.138   | AK025451  | 1283.591  | 1233.049  | NM_01767E | 812.593   |
| 2851.653  | NM_01492E | 455.681   | 460.135   | NM_002783 | 788.606   | 593.176   | AF155103  | 539.58    |
| 19074.414 | AK025130  | 2786.836  | 3515.366  | NM_001047 | 1378.432  | 1463.021  | BC016062  | 5972.31   |
| 1149.1    | AK023232  | 1870.357  | 1628.994  | AK024396  | 713.121   | 940.295   | NM_002814 | 1625.489  |
| 1533.453  | NM_000271 | 4050.384  | 4879.728  | U58514    | 472.629   | 559.533   | NM_006283 | 2216.531  |
| 449.168   | NM_01820E | 1865.39   | 2138.214  | NM_000544 | 1509.272  | 2299.475  | NM_005693 | 610.434   |
| 13543.554 | NM_006184 | 21125.453 | 23945.027 | NM_004644 | 279.435   | 595.384   | X97303    | 3705.734  |
| 2109.334  | AB018268  | 8496.061  | 11317.844 | AV681967  | 550.997   | 625.554   | NM_01753C | 1652.645  |
| 716.824   | NM_00638C | 1426.285  | 2453.805  | NM_01825C | 441.94    | 457.43    | AL360183  | 892.837   |
| 1029.128  | AB020710  | 1122.841  | 1005.935  | NM_016553 | 2626.252  | 4684.868  | AK027046  | 1021.373  |
| 1016.956  | NM_016174 | 3210.802  | 2692.696  | NM_00379E | 18566.785 | 23177.656 | NM_003113 | 1849.562  |
| 1509.994  | NM_020377 | 852.96    | 517.442   | NM_014232 | 762.824   | 922.734   | NM_01431E | 1044.035  |
| 2300.576  | U88896    | 4853.767  | 3200.168  | NM_005701 | 675.581   | 730.504   | NM_00486E | 1078.423  |
| 721.725   | AF116702  | 42700.98  | 32892.266 | NM_001231 | 347.103   | 405.69    | AB019566  | 60560.93  |
| 2788.73   | NM_005724 | 6777.989  | 4598.335  | NM_00681E | 10545.913 | 9893.018  | NM_001031 | 60384.367 |
| 9734.019  | X58794    | 39378.066 | 13406.623 | NM_014744 | 1256.772  | 880.524   | NM_00720E | 6281.061  |
| 2802.673  | NM_00173E | 1899.783  | 1762.936  | AF146759  | 483.228   | 646.636   | NM_00099E | 60951.402 |
| 2361.753  | NM_00234E | 1009.138  | 962.874   | AB032993  | 1536.489  | 1518.87   | NM_00098E | 13552.46  |
| 1469.821  | NM_00508C | 21930.209 | 8859.605  | NM_000854 | 1059.295  | 1268.775  | BF130622  | 5681.729  |
| 856.393   | NM_004887 | 8737.169  | 8556.199  | AL117423  | 1407.645  | 1737.961  | BU165106  | 1027.528  |
| 4133.422  | NM_001744 | 1677.308  | 2269.427  | NM_002084 | 649.201   | 541.365   | AF038202  | 542.031   |
| 1364.274  | NM_00629E | 2272.284  | 2370.521  | NM_00475C | 877.245   | 905.886   | AB040925  | 449.333   |
| 1949.291  | Z25433    | 1236.01   | 1039.522  | NM_00729E | 940.342   | 1380.655  | NM_001861 | 867.943   |
| 388.492   | NM_005922 | 4473.49   | 3328.861  | NM_003651 | 2391.413  | 1768.896  | AK025558  | 3145.702  |
| 1027.682  | NM_01863E | 2010.527  | 1734.078  | NM_003262 | 1521.486  | 1380.831  | AK024355  | 661.257   |
| 2434.905  | AL137593  | 9516.276  | 7297.089  | AK022832  | 1439.513  | 2388.667  | NM_001864 | 10664.625 |
| 659.546   | NM_00391E | 1488.872  | 1235.701  | NM_014641 | 1172.65   | 1239.221  | NM_003477 | 3669.765  |
| 1306.999  | NM_000382 | 1320.95   | 1324.283  | NM_004462 | 4535.668  | 1928.583  | NM_002654 | 10771.486 |
| 683.169   | AL133064  | 1521.462  | 1911.642  | AB020664  | 1657.175  | 1634.347  | NM_020382 | 1360.214  |
| 1618.761  | NM_006227 | 3625.328  | 3311.789  | NM_00664C | 1535.95   | 1446.673  | NM_007192 | 3463.536  |
| 1925.873  | NM_00290E | 4343.525  | 4488.963  | NM_000343 | 436.403   | 402.482   | AB002337  | 5049.955  |
| 901.051   | NM_00070C | 2014.14   | 8789.459  | NM_019112 | 1468.266  | 1523.527  | NM_014933 | 4016.005  |
| 3239.778  | NM_01902E | 4701.028  | 6387.869  | NM_01233E | 4062.059  | 4253.332  | NM_00638E | 570.363   |
| 774.749   | NM_000431 | 2248.723  | 669.996   | NM_02024E | 633.287   | 751.41    | NM_00345E | 1883.807  |
| 1541.935  | NM_013421 | 820.319   | 622.086   | NM_000084 | 664.057   | 332.395   | NM_00258E | 1003.392  |
| 512.032   | NM_012474 | 4317.061  | 2225.533  | NM_016354 | 701.106   | 549.304   | AB029016  | 1260.849  |
| 3948.481  | AB033118  | 4262.492  | 2776.51   | NM_00303E | 532.006   | 293.374   | AK000445  | 605.758   |
| 30361.621 | NM_01960E | 2361.313  | 2097.384  | NM_01815E | 1919.132  | 1169.815  | AL049390  | 1999.142  |
| 3363.051  | NM_00169C | 5053.847  | 5202.887  | AL050358  | 986.467   | 990.613   | AK000584  | 3298.271  |
| 608.893   | AF034374  | 1054.249  | 1031.752  | NM_004731 | 490.227   | 950.084   | AJ297363  | 912.239   |
| 7178.302  | NM_016118 | 2007.925  | 1639.671  | AB023139  | 960.561   | 987.325   | AK026379  | 2616.004  |
| 2603.677  | NM_018674 | 1420.505  | 1652.332  | D80004    | 1797.927  | 962.509   | AK022965  | 1146.167  |
| 1291.08   | AK023228  | 414.309   | 540.884   | NM_00094E | 1651.503  | 1127.278  | AK024278  | 4568.133  |
| 615.613   | NM_01324E | 719.766   | 736.462   | NM_01607C | 810.719   | 619.634   | AK026982  | 790.399   |
| 1191.297  | AB029041  | 5587.867  | 4998.303  | NM_01639C | 541.827   | 377.729   | NM_018022 | 1306.383  |
| 306.942   | AK026642  | 1873.283  | 1727.408  | NM_016101 | 3761.356  | 3008.346  | AB056722  | 2607.885  |

|           |           |           |           |           |           |           |           |          |
|-----------|-----------|-----------|-----------|-----------|-----------|-----------|-----------|----------|
| 2004.328  | AL359063  | 432.804   | 548.954   | NM_005859 | 13567.369 | 8975.131  | NM_013242 | 2331.503 |
| 2076.651  | AL079292  | 1995.747  | 1484.955  | NM_020313 | 392.665   | 420.704   | AK023198  | 429.237  |
| 1370.336  | X89667    | 960.887   | 1132.092  | NM_014628 | 2229.321  | 2247.563  | NM_012066 | 3748.359 |
| 1226.405  | AB037791  | 710.219   | 672.702   | AK025630  | 602.358   | 794.479   | AF052168  | 1650.498 |
| 5506.15   | NM_018124 | 4579.391  | 2441      | AL365404  | 5582.149  | 6531.152  | NM_014650 | 811.359  |
| 1700.97   | Z70701    | 8697.12   | 7384.86   | AK022907  | 1490.958  | 1156.506  | AK022632  | 927.436  |
| 1197.311  | AB040972  | 2392.065  | 2893.76   | NM_014793 | 1422.671  | 1627.96   | AK021554  | 938.498  |
| 1945.16   | AF148505  | 1220.463  | 1516.332  | NM_003241 | 693.593   | 394.491   | NM_020235 | 1069.702 |
| 1863.213  | NM_018686 | 3674.214  | 3332.014  | NM_002685 | 1698.826  | 1425.281  | AK000532  | 489.915  |
| 956.441   | NM_017676 | 1251.838  | 1046.679  | AK024504  | 317.053   | 426.617   | AL162039  | 1470.596 |
| 933.604   | AK021764  | 773.297   | 617.351   | AF039023  | 754.172   | 966.575   | AK024896  | 1345.206 |
| 259.871   | NM_005431 | 1193.849  | 774.828   | NM_005511 | 1587.874  | 1613.647  | AK095125  | 477.506  |
| 1188.794  | AB036063  | 1084.506  | 1037.267  | NM_014698 | 5050.305  | 4825.688  | AK024059  | 536.552  |
| 584.293   | NM_002894 | 2465.118  | 1800.533  | NM_018475 | 2600.548  | 3179.427  | AK023663  | 1490.304 |
| 12844.574 | NM_004629 | 3159.22   | 1632.402  | X52005    | 4248.836  | 6775.519  | AB007928  | 562.527  |
| 3375.069  | NM_004260 | 2135.237  | 1319.288  | NM_001047 | 1392.089  | 1128.03   | AK023645  | 635.705  |
| 19572.328 | AK024732  | 1824.92   | 7345.471  | AK024396  | 606.929   | 854.382   | D83543    | 753.859  |
| 6772.909  | AF160476  | 685.557   | 1190.511  | U58514    | 559.635   | 598.392   | NM_016930 | 1560.929 |
| 855.891   | L22650    | 940.475   | 816.459   | W74254    | 993.461   | 980.172   | AJ001861  | 736.975  |
| 7529.988  | AB014520  | 7307.834  | 3530.978  | M58603    | 1261.236  | 1686.184  | X64981    | 1228.75  |
| 415.594   | AF161420  | 1120.964  | 1065.372  | AA443286  | 619.946   | 91.349    | X75692    | 1923.869 |
| 6425.167  | NM_004907 | 707.356   | 589.299   | AB003334  | 1407.985  | 2805.409  | Y10511    | 3410.983 |
| 1172.506  | NM_002891 | 441.916   | 330.566   | AW276315  | 538.334   | 149.454   | AF018254  | 712.302  |
| 592.153   | NM_001775 | 663.867   | 366.198   | AA490737  | 635.105   | 488.053   | NM_016240 | 928.265  |
| 1457.87   | X04526    | 7685.951  | 4431.337  | AI878886  | 11940.087 | 5665.985  | AK025238  | 383.6    |
| 770.374   | D26067    | 1258.019  | 1310.279  | BG697179  | 3129.059  | 2637.032  | AK026416  | 6923.188 |
| 16247.535 | AF227924  | 2101.593  | 2393.815  | NM_002136 | 19475.361 | 10153.373 | AK025797  | 591.69   |
| 871.847   | NM_005716 | 8343.594  | 5843.382  | BM012504  | 2976.331  | 3630.96   | AK024864  | 738.442  |
| 1868.608  | NM_006183 | 1320.145  | 933.274   | AA664145  | 734.995   | 475.806   | AK024947  | 813.02   |
| 2511.656  | NM_016087 | 473.07    | 419.157   | X72308    | 3718.782  | 2924.532  | AK024606  | 1966.011 |
| 818.924   | S59184    | 1930.662  | 1071.208  | T50790    | 734.44    | 393.053   | NM_016417 | 5081.579 |
| 3896.104  | NM_006661 | 936.967   | 726.661   | R48168    | 7201.637  | 8419.867  | NM_019108 | 498.035  |
| 1315.947  | NM_005746 | 6912.501  | 4485.561  | NM_003942 | 1211.609  | 1250.665  | AL080118  | 2721.758 |
| 1251.836  | U16126    | 265.632   | 233.175   | NM_004452 | 713.249   | 642.442   | AL049378  | 3361.747 |
| 1957.15   | NM_002172 | 2689.403  | 1635.755  | AB040954  | 1381.971  | 1458.804  | L09086    | 740.602  |
| 1152.972  | NM_002614 | 380.055   | 521.723   | NM_002081 | 596.606   | 541.439   | AK021505  | 1624.736 |
| 3705.059  | NM_005655 | 1099.479  | 3050.043  | NM_002084 | 711.504   | 708.651   | AK021598  | 2341.937 |
| 357.768   | NM_007314 | 1447.996  | 1986.728  | D16892    | 12549.287 | 6419.613  | AJ012498  | 539.95   |
| 626.968   | NM_006600 | 7401.956  | 3726.352  | NM_004750 | 854.725   | 616.498   | NM_005973 | 5252.393 |
| 655.585   | AF297709  | 1513.977  | 1484.086  | NM_007295 | 924.255   | 1326.694  | X04547    | 1885.776 |
| 718.26    | L77564    | 460.28    | 392.633   | NM_003651 | 2949.816  | 2272.412  | AK025823  | 1002.464 |
| 2353.469  | NM_015384 | 2283.865  | 2067.918  | NM_000418 | 324.94    | 362.575   | AK026691  | 503.113  |
| 1381.202  | AK023327  | 1573.94   | 1375.577  | NM_000591 | 630.516   | 577.907   | AL359941  | 1230.342 |
| 496.312   | AB046858  | 528.122   | 536.854   | NM_000565 | 4611.122  | 6707.114  | U52076    | 784.563  |
| 980.977   | D50914    | 2528.211  | 1376.683  | AF253318  | 629.221   | 714.343   | AF035278  | 991.886  |
| 420.435   | NM_015896 | 763.362   | 547.326   | NM_017767 | 4847.501  | 3953.641  | U32999    | 3294.14  |
| 588.151   | NM_002305 | 44173.234 | 53709.309 | AK024848  | 1742.167  | 1798.057  | U66052    | 2629.087 |
| 485.915   | AK025439  | 1832.506  | 1690.532  | NM_000543 | 358.241   | 305.855   | AK024156  | 779.68   |
| 2263.904  | NM_001737 | 958.073   | 1583.818  | U06699    | 2557.525  | 1860.87   | AK023109  | 729.535  |
| 251.375   | Z36784    | 635.347   | 456.847   | AJ290954  | 1726.046  | 3157.836  | NM_005293 | 7036.263 |
| 15662.64  | NM_016626 | 5863.886  | 2878.406  | AK025451  | 1207.818  | 1279.908  | S50185    | 430.103  |
| 1205.482  | NM_007213 | 639.179   | 1107.583  | NM_002783 | 860.031   | 1302.655  | AF133332  | 1223.176 |
| 696.934   | NM_019064 | 279.439   | 279.663   | NM_000084 | 525.043   | 475.443   | AK022805  | 406.99   |

|           |           |           |           |           |           |           |           |           |
|-----------|-----------|-----------|-----------|-----------|-----------|-----------|-----------|-----------|
| 17289.008 | NM_000094 | 497.368   | 694.847   | NM_016354 | 502.807   | 477.074   | NM_00108E | 2882.632  |
| 877.352   | AF176701  | 515.011   | 1287.695  | NM_00303E | 756.778   | 267.782   | BC015991  | 3205.896  |
| 638.33    | NM_016302 | 1515.971  | 1335.721  | NM_01815E | 2026.945  | 1301.446  | U94902    | 440.258   |
| 3924.262  | NM_00415E | 22945.504 | 15146.128 | AL050358  | 1058.5    | 898.238   | AF161343  | 1874.048  |
| 949.639   | NM_00324E | 3511.768  | 564.173   | NM_004731 | 502.841   | 874.626   | NM_00476E | 2264.555  |
| 864.647   | M21897    | 787.294   | 346.772   | NM_000544 | 1463.56   | 1877.484  | AK022246  | 645.494   |
| 674.39    | AF301463  | 642.401   | 545.596   | NM_004644 | 365.68    | 316.332   | X75684    | 1521.607  |
| 1310.342  | NM_015984 | 2510.1    | 1160.038  | AV681967  | 504.973   | 518.386   | D17200    | 416.533   |
| 2155.333  | NM_006894 | 700.178   | 632.643   | NM_01825C | 472.104   | 383.227   | AF113701  | 6383.645  |
| 319.635   | AK023031  | 2223.634  | 1775.64   | NM_01655E | 2744.437  | 3894.274  | Y11158    | 655.355   |
| 644.159   | NM_005717 | 20854.982 | 14586.04  | AB023136  | 241.475   | 231.594   | NM_006771 | 5540.559  |
| 494.787   | NM_01209C | 1034.361  | 580.114   | NM_00379E | 16501.512 | 20906.303 | L37702    | 4994.563  |
| 7166.429  | AF177292  | 636.038   | 315.686   | NM_01423E | 708.598   | 761.989   | AK022812  | 536.561   |
| 2069.189  | NM_00308E | 3927.784  | 1714.64   | NM_005701 | 692.23    | 719.331   | U79301    | 1883.018  |
| 1744.265  | NM_00408E | 1887.983  | 651.52    | NM_001231 | 341.556   | 295.637   | AK022260  | 2241.062  |
| 607.221   | NM_005934 | 2594.558  | 1177.929  | NM_00681E | 11773.247 | 12709.034 | M32219    | 3809.946  |
| 880.013   | NM_00269E | 366.597   | 438.941   | NM_014744 | 1295.127  | 944.043   | AF007128  | 1768.759  |
| 959.563   | AL137449  | 411.378   | 337.039   | AF146759  | 664.227   | 631.242   | CY3Cy5    | 2200.544  |
| 4884.159  | U88153    | 736.903   | 473.986   | AB032993  | 1720.944  | 1598.636  | AI351740  | 1218.828  |
| 1271.623  | NM_01842E | 4948.758  | 3672.671  | NM_000854 | 942.371   | 1309.882  | AA444051  | 419.945   |
| 1454.069  | NM_006924 | 12066.128 | 5542.917  | AL117423  | 1307.023  | 1425.554  | NM_007164 | 465.023   |
| 498.821   | NM_016024 | 3886.562  | 2225.548  | NM_00268E | 1349.904  | 1146.174  | BE783826  | 3999.009  |
| 8271.506  | NM_018107 | 1198.88   | 1580.865  | AK024504  | 305.37    | 279.32    | X04827    | 689.235   |
| 1578.919  | NM_01227E | 408.313   | 499.612   | AF039023  | 930.406   | 1240.67   | H07088    | 293.917   |
| 2086.95   | NM_018387 | 6892.177  | 2818.371  | NM_005511 | 1549.805  | 1357.617  | AI004656  | 645.185   |
| 12639.608 | BF310673  | 1245.47   | 684.803   | NM_01469E | 5371.186  | 4552.412  | BC020596  | 1058.695  |
| 201.639   | R97012    | 19502.266 | 10465.371 | NM_01847E | 2628.133  | 2758.821  | AF116606  | 17248.602 |
| 998.997   | U77700    | 7905.82   | 3109.68   | NM_00326E | 1873.711  | 1112.693  | X98922    | 836.505   |
| 1731.141  | NM_006567 | 3241.983  | 1433.79   | AK022832  | 1399.414  | 2236.604  | AK098435  | 1143.736  |
| 3082.923  | AF038554  | 8558.777  | 4819.35   | NM_014641 | 991.802   | 1096.908  | AK092872  | 1118.064  |
| 834.868   | AF264621  | 2817.219  | 823.472   | NM_00446E | 5029.664  | 2360.244  | NM_145904 | 8185.677  |
| 326.328   | NM_00587E | 8531.18   | 3252.88   | AB020664  | 1451.617  | 1573.912  | SR2       | 30622.24  |
| 830.742   | NM_004184 | 4337.326  | 1304.284  | NM_00664C | 1881.15   | 1712.314  | SR4       | 5440.87   |
| 1681.176  | AF131748  | 1913.263  | 1276.843  | NM_00034E | 424.587   | 530.594   | SR6       | 891.184   |
| 1877.928  | NM_00045E | 1549.7    | 1572.579  | NM_01911E | 1673.567  | 1539.739  | SR8       | 3125.358  |
| 1114.152  | NM_00249E | 3805.71   | 2811.638  | NM_01233E | 3891.355  | 4009.564  | SR10      | 12150.728 |
| 4009.66   | NM_01624E | 1060.677  | 972.682   | NM_020161 | 370.28    | 276.461   | CY3Cy5    | 1935.488  |
| 28218.609 | X53943    | 6842.553  | 1681.192  | NM_02024E | 670.165   | 765.351   | NM_00241E | 350.195   |
| 578.7     | NM_00464E | 3995.431  | 2291.26   | NM_00394E | 1004.891  | 862.185   | NM_00448E | 594.266   |
| 1988.582  | NM_00654C | 1760.756  | 1399.3    | NM_00445E | 713.07    | 671.578   | NM_01329E | 1681.811  |
| 512.44    | NM_01776E | 672.612   | 733.389   | AB040954  | 1333.388  | 1429.133  | AL117478  | 519.837   |
| 674.831   | NM_002811 | 4246.674  | 3830.751  | NM_002081 | 309.014   | 216.999   | NM_005307 | 283.651   |
| 29357.824 | NM_02031C | 1589.407  | 1332.584  | AB023139  | 1613.825  | 1958.289  | NM_00595E | 519.826   |
| 2671.16   | AK024444  | 450.501   | 431.439   | NM_01788E | 629.805   | 435.362   | AF225426  | 280.956   |
| 1553.246  | NM_00580E | 1982.993  | 1109.27   | D80004    | 1960.721  | 1056.919  | NM_00520E | 1167.726  |
| 1175.877  | AB002331  | 1532.348  | 1064.204  | X63966    | 465.776   | 150.815   | AK025687  | 3168.303  |
| 7627.306  | NM_002504 | 1783.858  | 906.251   | NM_00094E | 1429.184  | 1311.559  | AL137264  | 1209.75   |
| 1070.523  | AB046775  | 810.023   | 592.595   | NM_01607C | 674.072   | 655.377   | X84370    | 1941.359  |
| 674.207   | X74862    | 482.666   | 362.317   | NM_01639C | 495.823   | 629.952   | NM_00091E | 1373.078  |
| 993.002   | X65663    | 2793.276  | 936.189   | NM_016101 | 3749.967  | 4425.091  | NM_00129E | 483.762   |
| 1572.596  | NM_00318E | 3068.969  | 731.223   | NM_00585E | 14350.996 | 12177.627 | BG325046  | 320.301   |
| 2537.899  | NM_00445E | 2691.411  | 1018.184  | NM_02031E | 552.27    | 635.582   | AK026248  | 757.235   |
| 674.752   | NM_004284 | 17370.232 | 4584.402  | NM_01462E | 2290.602  | 2446.846  | NM_00457E | 1717.364  |

|           |                  |           |           |                  |           |           |                  |           |
|-----------|------------------|-----------|-----------|------------------|-----------|-----------|------------------|-----------|
| 357.666   | <b>AK023974</b>  | 935.363   | 528.263   | <b>AK025630</b>  | 693.134   | 885.855   | <b>NM_000647</b> | 431.165   |
| 869.488   | <b>AK023768</b>  | 766.657   | 605.102   | <b>AL365404</b>  | 5679.295  | 5918.359  | <b>NM_017604</b> | 537.849   |
| 2295.323  | <b>AF147335</b>  | 482.322   | 373.123   | <b>AK022907</b>  | 1482.426  | 1338.875  | <b>NM_017738</b> | 2934.725  |
| 1510.331  | <b>NM_016323</b> | 1073.413  | 249.41    | <b>NM_014793</b> | 1505.96   | 1508.757  | <b>NM_016557</b> | 355.073   |
| 917.214   | <b>BI768072</b>  | 380.168   | 518.67    | <b>NM_004245</b> | 550.812   | 499.46    | <b>NM_000623</b> | 1143.8    |
| 1012.668  | <b>AK022216</b>  | 2822.145  | 2149.709  | <b>NM_003241</b> | 814.387   | 912.135   | <b>AF161348</b>  | 873.285   |
| 1628.792  | <b>AK025812</b>  | 2967.654  | 2560.274  | <b>NM_000543</b> | 339.448   | 538.779   | <b>NM_018467</b> | 1832.641  |
| 585.162   | <b>U00960</b>    | 759.012   | 814.993   | <b>U06699</b>    | 2435.702  | 1339.645  | <b>NM_006068</b> | 508.563   |
| 899.402   | <b>AK022262</b>  | 716.797   | 626.21    | <b>AJ290954</b>  | 1740.947  | 2826.564  | <b>NM_002038</b> | 754.676   |
| 2952.74   | <b>AF088039</b>  | 44036.277 | 42229.699 | <b>AK025451</b>  | 1334.743  | 1276.779  | <b>NM_005729</b> | 3769.405  |
| 747.323   | <b>AF143888</b>  | 356.964   | 253.173   | <b>NM_002783</b> | 718.858   | 757.236   | <b>NM_015493</b> | 359.677   |
| 1493.907  | <b>AF086220</b>  | 1421.329  | 1230.708  | <b>X52005</b>    | 5130.371  | 5605.2    | <b>NM_003747</b> | 579.532   |
| 50054.031 | <b>AK023941</b>  | 701.653   | 492.897   | <b>NM_001047</b> | 1264.955  | 1094.723  | <b>AB037744</b>  | 916.994   |
| 1603.668  | <b>AL390083</b>  | 1790.748  | 1346.738  | <b>AK024396</b>  | 455.787   | 679.509   | <b>AF141901</b>  | 571.081   |
| 26931.004 | <b>AB020702</b>  | 391.038   | 328.98    | <b>U58514</b>    | 548.301   | 284.531   | <b>NM_007008</b> | 197.488   |
| 1195.094  | <b>NM_013355</b> | 1090.68   | 1460.354  | <b>W74254</b>    | 909.49    | 882.018   | <b>AL109708</b>  | 414.121   |
| 2431.329  | <b>NM_003847</b> | 3731.176  | 2583.433  | <b>M58603</b>    | 1147.391  | 1494.666  | <b>AF234532</b>  | 711.48    |
| 5559.944  | <b>AL050165</b>  | 31067.582 | 23052.248 | <b>AB003334</b>  | 1277.921  | 2793.955  | <b>AF099740</b>  | 734.649   |
| 513.285   | <b>AL117445</b>  | 605.456   | 629.11    | <b>AW276315</b>  | 526.953   | 388.017   | <b>NM_006117</b> | 4377.986  |
| 12828.257 | <b>AL122113</b>  | 4865.888  | 4445.763  | <b>AA490737</b>  | 639.954   | 557.772   | <b>NM_002225</b> | 1019.091  |
| 1206.65   | <b>AK024415</b>  | 2541.749  | 1665.927  | <b>AI878886</b>  | 11652.983 | 7147.951  | <b>NM_015415</b> | 5043.214  |
| 14871.867 | <b>AL049365</b>  | 1227.494  | 753.923   | <b>BG697179</b>  | 2625.638  | 2359.154  | <b>NM_004897</b> | 808.838   |
| 3535.934  | <b>AK025132</b>  | 639.362   | 653       | <b>NM_002136</b> | 20487.969 | 11809.896 | <b>NM_002555</b> | 1220.899  |
| 8459.86   | <b>AK025157</b>  | 2776.958  | 2021.655  | <b>BM012504</b>  | 2785.754  | 2617.328  | <b>NM_000309</b> | 733.938   |
| 3752.082  | <b>AK022001</b>  | 1533.32   | 530.896   | <b>AA664145</b>  | 631.241   | 504.326   | <b>NM_001686</b> | 292.754   |
| 16378.89  | <b>AK022633</b>  | 276.867   | 198.592   | <b>X72308</b>    | 4837.218  | 4275.988  | <b>NM_000705</b> | 593.303   |
| 1291.954  | <b>AK027199</b>  | 290.499   | 149.302   | <b>T50790</b>    | 879.648   | 635.021   | <b>NM_004231</b> | 18211.391 |
| 9642.045  | <b>AK000079</b>  | 2127.757  | 1018.724  | <b>R48168</b>    | 7392.615  | 12229.36  | <b>AK023107</b>  | 1714.284  |
| 18599.336 | <b>AJ227874</b>  | 577.792   | 521.378   | <b>AB032993</b>  | 1829.52   | 1792.962  | <b>NM_006854</b> | 4694.562  |
| 1818.272  | <b>AF009268</b>  | 603.366   | 553.73    | <b>NM_000854</b> | 928.921   | 1240.081  | <b>NM_004580</b> | 4301.671  |
| 1171.369  | <b>AF009312</b>  | 446.65    | 490.995   | <b>AL117423</b>  | 1269.293  | 1503.561  | <b>NM_020387</b> | 7393.551  |
| 1200.186  | <b>AF056418</b>  | 854.166   | 720.219   | <b>NM_002084</b> | 768.638   | 776.812   | <b>NM_007246</b> | 505.367   |
| 1392.193  | <b>AF009276</b>  | 707.629   | 639.502   | <b>D16892</b>    | 12771.906 | 6360.111  | <b>AF150735</b>  | 1798.144  |
| 605.668   | <b>AF056428</b>  | 4260.355  | 3846.661  | <b>NM_004750</b> | 709.945   | 518.237   | <b>NM_018183</b> | 1013.989  |
| 8446.443  | <b>AF069136</b>  | 358.042   | 354.989   | <b>NM_007295</b> | 862.7     | 1069.749  | <b>NM_016440</b> | 3035.037  |
| 1565.254  | <b>AK021594</b>  | 454.023   | 444.342   | <b>NM_003651</b> | 2955.531  | 2370.269  | <b>NM_007194</b> | 643.809   |
| 909.015   | <b>AK002150</b>  | 639.869   | 389.112   | <b>NM_013246</b> | 312.945   | 566.563   | <b>NM_000314</b> | 1454.848  |
| 3158.506  | <b>AK021635</b>  | 844.463   | 740.686   | <b>NM_000591</b> | 604.386   | 923.905   | <b>AB002369</b>  | 307.223   |
| 1166.879  | <b>AK021856</b>  | 1069.884  | 898.376   | <b>NM_000565</b> | 4563.528  | 7461.808  | <b>AF305239</b>  | 272.537   |
| 3373.168  | <b>AK025276</b>  | 648.752   | 303.934   | <b>AF253318</b>  | 666.282   | 651.429   | <b>NM_002827</b> | 914.835   |
| 4466.739  | <b>AJ008131</b>  | 10387.854 | 8952.918  | <b>NM_017767</b> | 4923.069  | 4539.992  | <b>BF035425</b>  | 9097.635  |
| 1082.792  | <b>AF086338</b>  | 710.553   | 1077.263  | <b>AK024848</b>  | 1998.921  | 1915.599  | <b>NM_000159</b> | 27647.838 |
| 1260.852  | <b>AK024303</b>  | 995.032   | 1181.255  | <b>NM_003633</b> | 393.195   | 264.51    | <b>NM_014638</b> | 1174.632  |
| 1758.292  | <b>AL160131</b>  | 2265.937  | 841.291   | <b>NM_000343</b> | 525.799   | 407.359   | <b>NM_000118</b> | 205.389   |
| 2080.503  | <b>AF086045</b>  | 1493.593  | 941.318   | <b>NM_019112</b> | 1628.59   | 1489.542  | <b>NM_000913</b> | 1860.006  |
| 4198.585  | <b>AK027028</b>  | 2138.714  | 1504.681  | <b>NM_012336</b> | 3656.447  | 3308.077  | <b>NM_001298</b> | 760.646   |
| 1125.888  | <b>AK027069</b>  | 6807.296  | 2892.951  | <b>NM_020246</b> | 529.014   | 747.557   | <b>BG325046</b>  | 615.672   |
| 887.728   | <b>AK026916</b>  | 1499.929  | 799.229   | <b>NM_016354</b> | 554.622   | 457.933   | <b>AI351740</b>  | 1128.671  |
| 41109.863 | <b>AK026914</b>  | 1648.975  | 1325.771  | <b>NM_003038</b> | 543.619   | 203.333   | <b>AA444051</b>  | 418.515   |
| 37731.535 | <b>Y11166</b>    | 965.865   | 594.357   | <b>NM_018155</b> | 2012.7    | 1047.336  | <b>NM_007164</b> | 663.058   |
| 9957.547  | <b>AK023515</b>  | 1669.76   | 1218.403  | <b>AL050358</b>  | 939.688   | 1035.736  | <b>BE783826</b>  | 4094.878  |
| 40278.289 | <b>AL137623</b>  | 1911.962  | 1324.908  | <b>NM_004731</b> | 516.215   | 776.613   | <b>X04827</b>    | 778.689   |
| 58176.855 | <b>AK026485</b>  | 316.155   | 286.009   | <b>NM_000544</b> | 1801.371  | 1933.664  | <b>H07088</b>    | 274.345   |



|          |           |           |           |           |           |           |           |           |
|----------|-----------|-----------|-----------|-----------|-----------|-----------|-----------|-----------|
| 8122.092 | NM_003546 | 1159.87   | 1972.09   | NM_004644 | 418.807   | 1048.112  | AI004656  | 537.145   |
| 5235.872 | AF118077  | 1441.973  | 1614.115  | AV681967  | 631.957   | 700.136   | BC020596  | 901.507   |
| 1666.656 | AL137625  | 318.527   | 268.159   | NM_018250 | 426.338   | 509.71    | AF116606  | 17296.893 |
| 525.885  | AK025750  | 927.967   | 922.536   | NM_016553 | 2792.734  | 5184.355  | X98922    | 990.13    |
| 4527.965 | BF031253  | 336.636   | 326.21    | NM_003795 | 18609.512 | 26494.35  | AK098435  | 1083.939  |
| 9027.154 | AK025783  | 1052.084  | 1127.317  | NM_014232 | 668.066   | 771.879   | AK092872  | 619.455   |
| 1116.771 | AF113675  | 588.005   | 495.433   | NM_005701 | 675.935   | 887.904   | NM_145904 | 5824.085  |
| 984.662  | AK024514  | 392.211   | 429.172   | NM_001231 | 406.331   | 425.671   | NM_013334 | 1137.546  |
| 2363.494 | NM_020119 | 1348.327  | 2066.802  | NM_006819 | 12992.334 | 13470.146 | AB037744  | 1529.332  |
| 1525.248 | AL049417  | 9424.114  | 7502.739  | NM_014744 | 1350.46   | 1126.527  | AF141901  | 631.913   |
| 3920.545 | AK023507  | 333.251   | 419.74    | AF146759  | 816.278   | 1024.141  | NM_007008 | 362.811   |
| 453.822  | NM_005169 | 1466.931  | 1155.968  | AL365404  | 6761.523  | 9576.768  | AL109708  | 575.933   |
| 935.438  | NM_017929 | 533.965   | 394.96    | AK022907  | 1531.093  | 1357.378  | AF234532  | 853.288   |
| 611.894  | NM_018472 | 705.327   | 891.305   | NM_014793 | 1320.33   | 1820.738  | NM_004485 | 601.078   |
| 1344.121 | AJ008128  | 8651.46   | 4394.803  | NM_003241 | 704.481   | 534.257   | NM_012419 | 501.221   |
| 1673.126 | AL449243  | 5269.861  | 2947.206  | NM_002685 | 1873.419  | 1406.815  | NM_013296 | 1660.566  |
| 852.957  | AK026449  | 3347.236  | 7596.811  | AK024504  | 467.03    | 422.787   | AL117478  | 543.029   |
| 2165.309 | NM_014027 | 2321.508  | 2322.305  | AF039023  | 878.36    | 1014.812  | NM_005307 | 328.183   |
| 5184.244 | AF116621  | 2606.181  | 1693.49   | NM_005511 | 2060.815  | 1360.124  | NM_005958 | 473.466   |
| 1132.459 | AF086554  | 723.415   | 525.717   | NM_014698 | 6441.829  | 5676.307  | NM_013436 | 347.254   |
| 1585.264 | AL390136  | 15490.697 | 8991.401  | NM_018475 | 2651.369  | 3302      | AF225426  | 287.072   |
| 6492.366 | AK023156  | 373.175   | 365.554   | NM_003262 | 1859.932  | 1491.904  | NM_005208 | 1278.341  |
| 2965.807 | AF086398  | 48723.98  | 43634.465 | AK022832  | 1543.026  | 3305.022  | AK025687  | 2364.874  |
| 359.354  | AK023444  | 388.336   | 366.793   | NM_014641 | 1146.258  | 1199.519  | AL137264  | 1154.59   |
| 906.769  | AK025953  | 521.836   | 559.081   | NM_004462 | 5142.771  | 1945.309  | NM_002226 | 484.576   |
| 662.318  | NM_003180 | 545.668   | 750.831   | AB020664  | 1880.902  | 2398.345  | X84370    | 1291.321  |
| 866.359  | AF086406  | 6748.487  | 4753.548  | NM_006640 | 2425.847  | 3132.188  | NM_004039 | 311.073   |
| 407.181  | D17216    | 1740.814  | 1521.865  | NM_000857 | 646.313   | 574.991   | NM_016577 | 432.692   |
| 1077.084 | AL137581  | 663.699   | 568.985   | L20688    | 14059.209 | 15641.135 | AK023107  | 3275.881  |
| 691.332  | AK024942  | 902.017   | 901.214   | X69111    | 3745.102  | 3313.721  | NM_006854 | 8469.775  |
| 996.828  | AJ227873  | 9067.34   | 7496.579  | AB037799  | 1540.001  | 1347.192  | NM_004580 | 5352.589  |
| 1188.484 | AK022886  | 2777.978  | 2075.287  | AB007950  | 5969.345  | 5115.057  | NM_020387 | 8102.29   |
| 1198.896 | AK024665  | 4145.717  | 3508.689  | AK025593  | 550.058   | 614.589   | NM_007246 | 581.18    |
| 565.444  | AF147363  | 594.291   | 524.932   | AB018304  | 1585.457  | 1406.141  | AK026248  | 715.199   |
| 682.638  | AJ227880  | 319.528   | 254.751   | NM_007061 | 7601.134  | 6927.484  | NM_004578 | 1652.272  |
| 449.997  | AK000691  | 503.05    | 335.987   | AB040954  | 1607.852  | 1654.61   | NM_000647 | 467.785   |
| 156.813  | AK001448  | 854.07    | 468.138   | NM_002081 | 431.545   | 340.994   | NM_017604 | 791.148   |
| 9620.458 | AK026890  | 321.366   | 359.215   | AB023139  | 1373.464  | 1773.672  | NM_017738 | 2849.832  |
| 811.511  | AL049321  | 3288.611  | 2147.585  | NM_017885 | 1107.722  | 2726.414  | NM_016557 | 383.425   |
| 350.585  | CY3Cy5    | 2551.516  | 177.958   | D80004    | 3333.802  | 4732.79   | NM_000623 | 1393.179  |
| 565.094  | W74254    | 1651.312  | 1625.62   | X63966    | 403.113   | 215.47    | AF161348  | 939.3     |
| 815.337  | M58603    | 1728.151  | 2730.444  | NM_000946 | 1755.487  | 1386.315  | NM_018467 | 1877.563  |
| 957.242  | AA443286  | 634.487   | 1079.985  | NM_016070 | 915.607   | 825.989   | NM_006068 | 624.892   |
| 2859.905 | AB003334  | 2856.309  | 4998.649  | NM_016390 | 479.115   | 598.102   | U16752    | 996.138   |
| 5995.31  | AW276315  | 1123.641  | 675.523   | NM_016101 | 4079.089  | 4352.937  | NM_002038 | 475.125   |
| 2257.19  | BG697179  | 6708.386  | 5731.16   | NM_005859 | 15632.916 | 13370.126 | NM_005729 | 2902.909  |
| 3144.153 | NM_002136 | 49858.23  | 31479.018 | NM_020313 | 610.472   | 803.373   | NM_003747 | 292.957   |
| 1546.861 | BM012504  | 6386.218  | 5500.531  | NM_014628 | 2213.413  | 3639.434  | NM_002827 | 1744.897  |
| 1134.575 | AA664145  | 1360.562  | 1288.25   | AK025630  | 1221.907  | 2020.498  | NM_001946 | 1022.171  |
| 1199.302 | X72308    | 10364.437 | 9511.652  | NM_014718 | 804.596   | 517.733   | BF035425  | 10389.033 |
| 3965.828 | T50790    | 1775.904  | 967.374   | NM_000632 | 375.429   | 530.243   | NM_000159 | 22328.258 |
| 1545.568 | R48168    | 12236.188 | 19722.518 | AB002298  | 269.619   | 239.645   | NM_014638 | 1226.092  |
| 434.549  | NM_003942 | 2755.615  | 2546.094  | AK024488  | 394.378   | 239.436   | AF099740  | 519.316   |

|           |           |           |           |           |           |           |           |           |
|-----------|-----------|-----------|-----------|-----------|-----------|-----------|-----------|-----------|
| 886.053   | NM_004452 | 1237.137  | 1392.076  | AK023249  | 25987.729 | 15827.188 | NM_006117 | 4032.191  |
| 1600.729  | SR5       | 3932.412  | 4672.448  | NM_017442 | 2365.67   | 1892.045  | NM_002225 | 1032.601  |
| 595.074   | SR7       | 4545.823  | 44592.477 | NM_000743 | 253.477   | 430.892   | NM_015415 | 5143.678  |
| 1027.459  | SR9       | 19037.232 | 5416.19   | NM_007218 | 571.82    | 400.926   | NM_004897 | 794.846   |
| 480.754   | CY3Cy5    | 1846.115  | 114.639   | Z25436    | 1272.563  | 1035.055  | NM_002555 | 1146.41   |
| 583.783   | NM_014012 | 265.132   | 946.087   | NM_005275 | 3055.117  | 4002.495  | NM_000309 | 713.286   |
| 4603.761  | NM_000418 | 516.775   | 1519.745  | NM_002005 | 11845.452 | 17208.922 | NM_004528 | 17305.785 |
| 4085.96   | NM_000591 | 1280.634  | 1930.969  | NM_012324 | 1332.723  | 1302.209  | AK026381  | 3312.573  |
| 703.127   | NM_000565 | 8172.423  | 16465.465 | AK000039  | 674.144   | 513.628   | NM_002450 | 4333.545  |
| 7024.886  | AF253318  | 1104.194  | 1900.715  | AL137352  | 722.749   | 694.213   | NM_004231 | 14097.784 |
| 762.42    | NM_017767 | 7018.374  | 6088.11   | NM_014749 | 1252.417  | 1371.953  | NM_145904 | 12051.373 |
| 728.355   | AK024848  | 3578.559  | 2925.045  | NM_004489 | 1829.996  | 2026.979  | NM_013334 | 1451.899  |
| 7730.934  | NM_000543 | 725.627   | 1522.949  | BF240063  | 424.026   | 337.87    | AF150735  | 1904.939  |
| 1613.736  | U06699    | 4632.792  | 4352.123  | AK090409  | 157.379   | 1246.865  | NM_018183 | 819.69    |
| 3165.08   | AJ290954  | 3300.098  | 23945.395 | AF172264  | 730.537   | 767.08    | NM_012382 | 918.92    |
| 27176.734 | AK025451  | 3526.466  | 5117.517  | Y08267    | 785.209   | 570.06    | NM_002452 | 4201.575  |
| 1722.071  | NM_002783 | 1148.771  | 1799.209  | U80756    | 4272.237  | 3010.873  | NM_012304 | 328.526   |
| 1449.39   | NM_001047 | 3809.041  | 7068.449  | NM_018161 | 729.433   | 571.577   | NM_016440 | 4004.302  |
| 1071.639  | AK024396  | 1407.106  | 3337.605  | NM_005248 | 769.779   | 731.615   | NM_007194 | 937.187   |
| 3265.906  | U58514    | 1129.007  | 915.574   | NM_004810 | 606.88    | 525.202   | NM_000314 | 2598.582  |
| 644.665   | NM_000544 | 2920.73   | 3780.243  | AL117629  | 1448.748  | 1001.007  | AB002369  | 409.39    |
| 5907.328  | NM_004644 | 506.775   | 1059.488  | NM_015726 | 615.636   | 363.57    | AL137264  | 1995.916  |
| 4583.405  | AV681967  | 1017.086  | 968.506   | AF174604  | 960.275   | 904.864   | NM_002226 | 1078.649  |
| 679.046   | NM_018250 | 984.145   | 979.698   | AB002379  | 2851.992  | 2319.423  | X84370    | 2689.336  |
| 3361.934  | NM_016553 | 4374.268  | 5949.674  | AF113223  | 337.673   | 477.984   | NM_004039 | 356.394   |
| 3706.544  | AB023136  | 354.982   | 583.971   | AB046851  | 1110.625  | 872.505   | AB014558  | 499.313   |
| 3614.226  | NM_003795 | 32111.109 | 48247.305 | NM_018174 | 271.527   | 701.269   | BG325046  | 415.898   |
| 1036.667  | NM_014232 | 1048.912  | 1422.186  | NM_014548 | 1344.62   | 1137.263  | AI351740  | 861.959   |
| 2464.938  | NM_005701 | 1907.99   | 2617.766  | NM_004437 | 390.333   | 465.554   | AA444051  | 511.342   |
| 368.396   | NM_001231 | 684.552   | 888.023   | AK025875  | 533.095   | 447.878   | NM_007164 | 557.741   |
| 943.11    | NM_006819 | 24110.088 | 23720.066 | BC014152  | 8960.938  | 5718.109  | BE783826  | 4106.896  |
| 341.971   | NM_014744 | 1822.186  | 1274.815  | NM_000226 | 506.492   | 581.726   | X04827    | 653.385   |
| 714.546   | AF146759  | 898.679   | 1014.834  | AB037779  | 18103.195 | 23349.725 | H07088    | 269.261   |
| 6486.769  | AB032993  | 3262.061  | 3953.348  | NM_000393 | 485.214   | 864.64    | BC020596  | 1081.424  |
| 4448.046  | AL117423  | 2959.275  | 3547.876  | NM_000889 | 906.62    | 1686.039  | AF116606  | 16241.64  |
| 951.491   | NM_006140 | 625.12    | 757.611   | NM_003859 | 6312.453  | 5151.653  | X98922    | 1024.653  |
| 440.581   | NM_007003 | 1027.025  | 3004.486  | NM_000236 | 650.577   | 581.674   | AK098435  | 1199.707  |
| 1024.018  | NM_002084 | 1412.851  | 1326.924  | NM_002903 | 11981.391 | 7980.365  | AK092872  | 1180.158  |
| 10733.898 | NM_004750 | 1959.854  | 1910.778  | NM_012339 | 878.816   | 598.748   | NM_002038 | 1307.92   |
| 3703.94   | NM_007295 | 1396.582  | 982.669   | NM_005787 | 11833.635 | 8854.646  | NM_005729 | 5922.611  |
| 144.442   | NM_003651 | 7479.763  | 4371.858  | NM_002143 | 1635.915  | 1482.521  | NM_015493 | 615.682   |
| 875.196   | NM_003262 | 2154.615  | 1932.484  | AF284421  | 4495.848  | 2921.354  | NM_003747 | 891.236   |
| 1567.546  | AK022832  | 2060.211  | 5123.542  | NM_006048 | 2251.699  | 2129.461  | AB037744  | 1439.577  |
| 675.154   | NM_014641 | 2365.706  | 1941.563  | NM_006360 | 6841.379  | 4706.7    | AF141901  | 506.86    |
| 928.07    | NM_004462 | 10372.461 | 3865.999  | NM_003968 | 2583.794  | 2634.672  | AL109708  | 461       |
| 416.995   | AB020664  | 2807.264  | 1997.062  | NM_002786 | 1261.79   | 400.622   | AF234532  | 928.245   |
| 741.403   | NM_006640 | 4127.762  | 3895.367  | NM_003343 | 6148.432  | 7151.26   | NM_002418 | 405.185   |
| 1376.75   | NM_019112 | 3426.497  | 3968.306  | NM_002789 | 16750.627 | 21875.309 | NM_013296 | 1397.725  |
| 1787.858  | NM_012336 | 6775.479  | 6918.508  | NM_003470 | 2357.676  | 2467.691  | AL117478  | 1027.044  |
| 654.85    | NM_020161 | 344.407   | 745.681   | AL080137  | 449.687   | 507.167   | NM_005958 | 317.875   |
| 478.624   | NM_020246 | 1102.947  | 1587.498  | NM_017679 | 787.249   | 820.454   | AF225426  | 415.798   |
| 2461.905  | NM_000084 | 927.893   | 905.496   | AF155103  | 449.251   | 358.538   | AK025687  | 3827.268  |
| 1264.107  | NM_016354 | 1179.691  | 691.474   | NM_017704 | 1045.831  | 765.474   | NM_000705 | 318.611   |

|           |           |           |           |           |           |           |           |           |
|-----------|-----------|-----------|-----------|-----------|-----------|-----------|-----------|-----------|
| 2458.793  | NM_00303E | 1721.105  | 618.495   | BC006359  | 520.437   | 502.845   | NM_004231 | 28469.168 |
| 943.171   | NM_01815E | 3219.685  | 1378.733  | AK026127  | 284.275   | 462.176   | NM_016577 | 402.236   |
| 582.438   | AL050358  | 1196.772  | 1186.449  | BC016062  | 5362.735  | 7956.824  | AK023107  | 2982.979  |
| 1365.586  | NM_004731 | 961.71    | 960.892   | NM_002814 | 1461.767  | 3238.353  | NM_006854 | 7602.51   |
| 2679.771  | AB023139  | 1903.11   | 3140.407  | NM_006283 | 1168      | 3479.742  | NM_00724E | 899.664   |
| 2449.377  | NM_01788E | 930.572   | 1025.899  | NM_002701 | 544.449   | 352.179   | AK026248  | 713.676   |
| 184.844   | D80004    | 3267.534  | 1587.015  | X97303    | 2622.727  | 2003.898  | NM_00457E | 1653.899  |
| 428.066   | X63966    | 421.023   | 1702.95   | NM_01753C | 2064.673  | 1295.746  | NM_000647 | 346.562   |
| 1175.898  | NM_00094E | 2852.967  | 1545.809  | AL360183  | 677.078   | 454.322   | NM_017604 | 528.189   |
| 225.26    | NM_01607C | 1518.648  | 1228.129  | AK027046  | 801.846   | 541.454   | NM_01773E | 3274.043  |
| 964.936   | NM_01639C | 1250.205  | 1192.242  | NM_003113 | 1476.717  | 950.999   | NM_016557 | 351.316   |
| 5852.171  | NM_016101 | 5699.554  | 4051.675  | NM_01657E | 2239.327  | 1317.283  | NM_000623 | 1394.433  |
| 591.96    | NM_00585E | 17528.379 | 19243.168 | NM_01431E | 803.488   | 595.266   | AF161348  | 886.781   |
| 1536.697  | NM_020313 | 833.241   | 620.873   | NM_00486E | 1047.339  | 823.684   | NM_00606E | 1989.759  |
| 761.896   | NM_01462E | 3544.26   | 5106.61   | AB019566  | 49823.016 | 56184.191 | NM_01644C | 5125.775  |
| 397.018   | AK025630  | 1765.518  | 1789.246  | NM_000981 | 47857.98  | 47989.41  | NM_007194 | 1269.626  |
| 612.964   | AL365404  | 7480.055  | 8940.974  | NM_002047 | 9521.143  | 3858.67   | NM_000314 | 3484.028  |
| 3712.417  | AK022907  | 1634.455  | 1391.688  | NM_001031 | 49847.254 | 73092.258 | AB002369  | 809.569   |
| 450.892   | NM_014793 | 2193.454  | 2283.734  | NM_00720E | 5554.87   | 4631.397  | S74620    | 306.794   |
| 629.879   | NM_00424E | 1068.745  | 877.12    | NM_00099E | 55326.031 | 79790.648 | AF305239  | 790.3     |
| 6943.886  | NM_003241 | 1346.337  | 884.473   | NM_00098E | 13190.96  | 8707.525  | NM_002827 | 1270.67   |
| 2111.224  | NM_00268E | 2964.801  | 2002.311  | BF130622  | 5118.803  | 7554.685  | NM_00194E | 847.234   |
| 1842.218  | AK024504  | 689.987   | 711.338   | BU165106  | 1731.732  | 2237.318  | BF035425  | 11466.979 |
| 1075.2    | AF039023  | 1608.813  | 1490.628  | AF038202  | 865.799   | 747.492   | NM_00160E | 243.905   |
| 2407.187  | NM_005511 | 3579.174  | 3562.392  | AB040925  | 435.458   | 190.221   | NM_00015E | 28799.469 |
| 7516.864  | NM_01469E | 6583.892  | 5106.477  | AK025558  | 2656.433  | 1141.908  | NM_01463E | 1297.487  |
| 3961.131  | NM_01847E | 5101.73   | 3665.244  | AK024355  | 472.77    | 288.016   | AF099740  | 465.882   |
| 8667.027  | X52005    | 10661.597 | 10814.157 | NM_001864 | 8570.677  | 5531.79   | NM_006117 | 3760.631  |
| 576.97    | AK024396  | 1295.804  | 3476.766  | NM_003477 | 2677.271  | 2129.69   | NM_00222E | 1015.909  |
| 439.872   | U58514    | 996.759   | 1338.684  | NM_002654 | 9597.121  | 13127.713 | NM_01541E | 5539.205  |
| 242.129   | M57627    | 669.413   | 1042.578  | NM_02038E | 1179.994  | 787.078   | NM_004897 | 754.913   |
| 675.179   | W74254    | 1709.671  | 1691.238  | NM_00719E | 2733.883  | 4193.494  | NM_00255E | 1228.439  |
| 2069.5    | M58603    | 2688.813  | 4167.209  | AB002337  | 4139.339  | 3504.87   | AF225418  | 174.943   |
| 1902.863  | AA443286  | 850.514   | 580.028   | NM_014933 | 3033.112  | 2485.055  | NM_00030E | 900.372   |
| 710.631   | AB003334  | 2992.889  | 4587.727  | NM_00307E | 7090.294  | 13405.823 | NM_00452E | 19972.154 |
| 1583.016  | AW276315  | 1397.771  | 916.801   | NM_00638E | 536.549   | 835.15    | AK026381  | 7806.317  |
| 489.906   | AA490737  | 1690.218  | 1879.032  | AK024250  | 572.9     | 831.479   | NM_00245C | 4712.672  |
| 22735.893 | A1878886  | 22115.152 | 8572.146  | NM_00345E | 2179.218  | 1585.528  | NM_014723 | 348.182   |
| 28199.25  | BG697179  | 5907.871  | 3206.498  | NM_00258E | 1046.663  | 1857.18   | AB011106  | 558.497   |
| 1199.815  | NM_00213E | 50068.363 | 24328.092 | AB029016  | 1078.098  | 2699.245  | D26362    | 2434.116  |
| 335.099   | BM012504  | 6972.127  | 5816.026  | AL049390  | 1057.014  | 1153.704  | NM_01345E | 1046.838  |
| 1120.978  | AA664145  | 1986.889  | 2514.419  | AK000584  | 2789.918  | 1854.76   | AY009402  | 1094.266  |
| 685.172   | X72308    | 11016.062 | 10269.196 | AJ297363  | 644.263   | 670.489   | NM_018451 | 462.406   |
| 497.792   | T50790    | 1894.824  | 1060.675  | AK026379  | 1720.713  | 1457.325  | NM_012443 | 341.128   |
| 175.446   | R48168    | 12653.993 | 17270.078 | AK022965  | 936.235   | 1000.727  | NM_002584 | 1872.833  |
| 775.811   | NM_00394E | 2724.766  | 2330.123  | AK024278  | 5007.435  | 4205.379  | NM_013334 | 1448.085  |
| 5690.86   | NM_00445E | 1328.909  | 1468.955  | AK026982  | 522.456   | 591.096   | AF150735  | 1686.198  |
| 146.514   | NM_002081 | 1379.674  | 672.187   | NM_01802E | 1210.031  | 791.209   | NM_01818E | 572.082   |
| 416.46    | NM_002084 | 1612.805  | 1614.407  | AB056722  | 4628.235  | 2062.875  | NM_01238E | 1408.139  |
| 530.2     | NM_00475C | 1411.295  | 1466.434  | NM_01324E | 1731.214  | 1232.268  | BF038366  | 336.904   |
| 1100.989  | NM_003651 | 7218.476  | 4669.414  | AK023198  | 399.928   | 288.681   | NM_00245E | 5139.348  |
| 2587.802  | NM_00041E | 485.204   | 1427.73   | NM_01206E | 4444.622  | 3773.021  | NM_012304 | 448.38    |
| 1379.319  | NM_01324E | 763.895   | 456.669   | AF052168  | 3447.348  | 3823.749  | AF245505  | 552.939   |

|           |           |           |           |           |           |          |           |           |
|-----------|-----------|-----------|-----------|-----------|-----------|----------|-----------|-----------|
| 980.571   | NM_000591 | 1487.365  | 2417.022  | NM_014650 | 456.103   | 497.652  | AB037776  | 370.59    |
| 10024.198 | NM_000565 | 7209.073  | 11602.604 | AK022632  | 1442.165  | 1371.099 | AF196976  | 2918.726  |
| 1025.52   | NM_002019 | 402.659   | 438.601   | AK021554  | 943.197   | 1016.925 | AL050379  | 457.172   |
| 1801.279  | AF253318  | 1143.996  | 1200.685  | NM_020235 | 887.488   | 726.24   | NM_003161 | 869.851   |
| 700.271   | NM_017767 | 8104.005  | 9599.106  | AL162039  | 1312.783  | 2133.597 | NM_014496 | 325.626   |
| 580.377   | U06699    | 5030.131  | 4287.634  | AK024896  | 1024.106  | 1168.922 | NM_016215 | 5911.383  |
| 784.303   | AJ290954  | 3726.075  | 22747.588 | AL353952  | 320.419   | 667.647  | AK026919  | 145.255   |
| 372.019   | NM_002783 | 1055.333  | 1587.539  | AK024059  | 361.944   | 370.911  | NM_001501 | 1422.895  |
| 958.693   | NM_000084 | 1125.117  | 1046.451  | AK023663  | 981.42    | 1339.485 | NM_006176 | 10721.397 |
| 1543.007  | NM_016354 | 1179.579  | 1195.725  | AB007928  | 398.372   | 591.791  | AL137459  | 602.594   |
| 455.229   | NM_003038 | 1334.278  | 433.503   | AK023645  | 473.195   | 552.754  | AB037812  | 243.993   |
| 463.551   | NM_018155 | 2656.574  | 1819.595  | D83543    | 799.309   | 574.394  | AB007932  | 539.346   |
| 665.097   | AL050358  | 1206.102  | 1696.177  | NM_016930 | 1074.875  | 666.92   | AF219257  | 5161.133  |
| 1431.862  | NM_004731 | 822.43    | 1169.083  | AJ001861  | 661.212   | 501.355  | NM_003978 | 433.041   |
| 3130.577  | NM_000544 | 3336.361  | 5109.485  | X64981    | 909.253   | 1054.771 | NM_002561 | 1162.147  |
| 1697.478  | NM_004644 | 457.336   | 1060.659  | X75692    | 2972.755  | 2228.675 | NM_006103 | 7711.211  |
| 4710.198  | AV681967  | 1367.092  | 1631.282  | Y10511    | 2552.059  | 2017.425 | NM_006206 | 160.579   |
| 1247.706  | NM_018250 | 942.026   | 1123.465  | AF018254  | 754.076   | 621.066  | NM_000805 | 413.586   |
| 3177.165  | NM_016553 | 4931.689  | 3919.17   | NM_016240 | 660.696   | 926.318  | AL359933  | 5328.33   |
| 6345.263  | NM_014232 | 1560.795  | 1879.424  | AK025238  | 238.216   | 453.956  | NM_001302 | 457.416   |
| 3110.81   | NM_005701 | 2009.778  | 2433.038  | AK026416  | 10002.697 | 6185.394 | M17783    | 3338.786  |
| 10824.115 | NM_001231 | 529.256   | 1267.836  | AK025797  | 374.577   | 288.187  | NM_018590 | 2483.051  |
| 633.851   | NM_000854 | 2442.636  | 3269.388  | AK000645  | 359.374   | 504.889  | NM_003178 | 912.206   |
| 342.038   | AL117423  | 3490.821  | 3050.051  | AK024864  | 977.326   | 1287.388 | NM_012437 | 3539.721  |
| 618.161   | NM_006140 | 628.227   | 678.216   | AK024947  | 1028.384  | 1027.262 | NM_002607 | 555.923   |
| 503.021   | NM_002685 | 2987.986  | 2081.708  | AK024606  | 2600.99   | 2002.982 | NM_001760 | 15009.565 |
| 3233.665  | AK024504  | 901.566   | 778.8     | NM_016417 | 4577.319  | 3965.285 | NM_002527 | 689.476   |
| 325.345   | AF039023  | 1125.045  | 1406.764  | NM_019108 | 437.213   | 540.524  | NM_005890 | 503.364   |
| 1798.169  | NM_005511 | 2915.742  | 3136.108  | AL080118  | 2263.375  | 1790.449 | AF149785  | 1137.036  |
| 6105.037  | NM_014698 | 6335.544  | 6828.444  | AL049378  | 2760.086  | 1627.899 | NM_012068 | 3987.307  |
| 1307.403  | NM_018475 | 5007.889  | 3923.927  | L09086    | 601.733   | 438.727  | NM_004064 | 2086.48   |
| 581.236   | NM_003262 | 3086.128  | 2639.423  | AK021832  | 504.52    | 1246.025 | NM_001256 | 1072.408  |
| 420.448   | AK022832  | 2281.682  | 4201.803  | AK021505  | 1600.064  | 1508.693 | NM_014704 | 1571.593  |
| 2453.333  | NM_004462 | 10695.494 | 3307.21   | AK021598  | 2774.291  | 4001.697 | NM_020205 | 483.258   |
| 839.712   | NM_000343 | 951.164   | 1118.657  | AJ012498  | 416.62    | 370.254  | NM_001191 | 1244.96   |
| 24051.303 | NM_019112 | 3579.102  | 3881.678  | NM_005973 | 5954.191  | 5003.737 | NM_013342 | 835.964   |
| 204.951   | NM_012336 | 7727.206  | 7156.915  | X04547    | 1639.592  | 785.036  | NM_014344 | 597.184   |
| 39596.219 | NM_020161 | 559.863   | 690.76    | AK025823  | 661.257   | 635.702  | AB040917  | 570.878   |
| 528.195   | NM_020246 | 1389.749  | 1940.227  | AK026691  | 363.38    | 180.416  | AL110261  | 3977.096  |
| 2389.416  | NM_003942 | 2600.678  | 2261.367  | AL359941  | 1729.459  | 1409.5   | AK021786  | 365.723   |
| 1232.185  | NM_004452 | 1285.881  | 1517.394  | U52076    | 562.37    | 348.974  | NM_005932 | 466.263   |
| 4602.013  | AB040954  | 1986.768  | 2059.771  | AF035278  | 1009.161  | 675.372  | NM_001908 | 876.504   |
| 601.875   | NM_002081 | 883.267   | 878.442   | AL050202  | 502.756   | 335.606  | NM_000285 | 1533.275  |
| 1206.921  | AB023139  | 3373.816  | 5489.957  | U32999    | 4006.708  | 3129.459 | AV702690  | 572.386   |
| 1586.38   | NM_017885 | 1380.978  | 1365.014  | U66052    | 1882.479  | 2158.411 | AL117452  | 1161.604  |
| 1656.28   | D80004    | 3866.327  | 1289.934  | AK024156  | 777.113   | 815.47   | NM_012230 | 553.608   |
| 1575.611  | X63966    | 469.399   | 618.344   | AF086288  | 385.072   | 518.831  | NM_014038 | 3328.084  |
| 1950.036  | NM_000946 | 2345.804  | 797.346   | AK023109  | 877.64    | 977.248  | NM_002061 | 1381.449  |
| 28665.426 | NM_016070 | 1751.421  | 1437.435  | NM_005293 | 8025.756  | 9962.791 | AF169974  | 1055.847  |
| 8901.588  | NM_016390 | 1255.472  | 1276.177  | S50185    | 385.592   | 751.922  | NM_005733 | 737.108   |
| 1253.269  | NM_016101 | 5880.805  | 4055.532  | AF133332  | 3359.114  | 5670.83  | NM_018138 | 1060.39   |
| 2965.701  | NM_005859 | 22554.33  | 25245.383 | NM_001088 | 3861.434  | 3446.741 | NM_019619 | 1799.202  |
| 1136.499  | NM_014793 | 2141.772  | 2291.062  | BC015991  | 2485.425  | 1795.317 | AF183411  | 1510.846  |

|           |           |           |           |           |           |           |           |           |
|-----------|-----------|-----------|-----------|-----------|-----------|-----------|-----------|-----------|
| 1483.858  | NM_004245 | 1220.651  | 569.148   | U94902    | 358.449   | 161.288   | BF244591  | 810.189   |
| 3613.659  | NM_003241 | 1465.514  | 1072.349  | U46214    | 2445.346  | 2486.716  | NM_005886 | 5772.67   |
| 1860.656  | NM_000543 | 714.52    | 1421.017  | NM_000310 | 25421.459 | 21752.959 | U63785    | 625.684   |
| 503.296   | U06699    | 4526.958  | 4380.701  | AF161343  | 1472.844  | 981.789   | NM_005966 | 620.802   |
| 5029.377  | AJ290954  | 3456.944  | 24138.727 | NM_004765 | 1995.481  | 2477.855  | NM_003156 | 501.482   |
| 586.113   | AK025451  | 3248.198  | 5437.884  | AK022246  | 547.496   | 423.565   | NM_003106 | 377.841   |
| 1210.61   | NM_002783 | 1126.778  | 1653.757  | X75684    | 1053.336  | 710.07    | NM_013310 | 1848.063  |
| 2294.622  | X52005    | 13734.627 | 14711.009 | D17200    | 391.179   | 191.785   | BC004958  | 785.177   |
| 1470.094  | NM_001047 | 3665.553  | 8300.165  | AF113701  | 5830.357  | 2764.871  | NM_005762 | 3225.101  |
| 2065.445  | AK024396  | 1577.401  | 4379.136  | Y11158    | 737.25    | 936.994   | NM_014643 | 1380.828  |
| 902.887   | U58514    | 1196.918  | 1350.651  | NM_006771 | 6620.73   | 8381.691  | NM_005653 | 1268.895  |
| 417.6     | W74254    | 1681.286  | 946.56    | L37702    | 5567.953  | 6446.161  | NM_003440 | 895.79    |
| 1490.04   | M58603    | 1940.202  | 3086.494  | AK022812  | 820.182   | 615.645   | NM_004696 | 5073.583  |
| 10009.768 | AA443286  | 843.519   | 525.124   | U79301    | 1603.868  | 1714.098  | NM_004516 | 2581.887  |
| 214.754   | AB003334  | 2836.566  | 4474.816  | AK022260  | 2405.067  | 4695.755  | NM_003685 | 8453.276  |
| 924.524   | AW276315  | 1187.511  | 495.246   | M32219    | 3476.697  | 7635.771  | NM_006295 | 3222.02   |
| 16008.023 | AA490737  | 2047.791  | 1927.748  | BC018868  | 238.734   | 501.292   | NM_001540 | 1127.592  |
| 925.209   | X72308    | 11063.205 | 10907.686 | AF007128  | 1820.76   | 1986.924  | NM_012111 | 3147.467  |
| 1094.327  | T50790    | 1909.56   | 817.906   | CY3Cy5    | 1046.508  | 219.908   | NM_004470 | 4651.941  |
| 1089.472  | R48168    | 12338.889 | 16315.311 | AI351740  | 1569.035  | 837.408   | NM_001416 | 2725.734  |
| 712.897   | AB032993  | 3619.803  | 4064.09   | AA444051  | 700.161   | 514.211   | NM_003756 | 16512.742 |
| 2316.09   | NM_000854 | 2598.889  | 4212.622  | NM_007164 | 1817.588  | 1507.127  | AL049680  | 1454.15   |
| 562.955   | AL117423  | 3192.757  | 2874.387  | BE783826  | 11469.164 | 10279.012 | AK001595  | 837.924   |
| 784.018   | NM_006140 | 691.459   | 912.854   | X04827    | 880.546   | 854.53    | NM_018015 | 354.294   |
| 453.279   | NM_002084 | 1569.423  | 2136.486  | H07088    | 503.92    | 727.478   | NM_003715 | 2905.381  |
| 674.534   | D16892    | 27728.447 | 13481.685 | AI004656  | 769.962   | 473.124   | M94065    | 541.893   |
| 585.97    | NM_004750 | 1908.067  | 2032.89   | BC020596  | 1753.654  | 1547.664  | BF036874  | 586.259   |
| 1253.218  | NM_007295 | 1409.363  | 1278.968  | AF116606  | 23275.938 | 18794.902 | AF182419  | 721.713   |
| 717.336   | NM_003651 | 7393.919  | 3783.421  | X98922    | 1490.035  | 2445.677  | NM_007016 | 597.496   |
| 424.917   | NM_000416 | 555.383   | 1145.792  | AK098435  | 1793.167  | 1588.769  | NM_005375 | 5498.252  |
| 2339.859  | NM_013246 | 932.569   | 826.566   | AK092872  | 1897.97   | 1586.481  | NM_005985 | 1645.524  |
| 2912.52   | NM_000591 | 1545.793  | 2259.423  | M16801    | 435.652   | 584       | NM_015906 | 1584.335  |
| 165.141   | NM_000565 | 8777.335  | 18188.895 | NM_145904 | 12417.845 | 12084.818 | AK023759  | 1221.669  |
| 578.342   | NM_017767 | 7690.649  | 7204.642  | SR2       | 39023.402 | 35096.492 | L25270    | 7320.125  |
| 23905.475 | AK024848  | 4257.443  | 4469.979  | SR4       | 8227.808  | 8561.015  | AB033111  | 475.131   |
| 530.727   | NM_000343 | 764.152   | 966.82    | SR6       | 1339.402  | 1361.134  | AJ276316  | 794.328   |
| 1989.294  | NM_019112 | 2834.104  | 2833.248  | SR8       | 4759.899  | 17050.549 | AF229246  | 3712.896  |
| 4898.159  | NM_012336 | 6781.164  | 5989.455  | SR10      | 17610.521 | 8107.334  | S64709    | 1924.82   |
| 1989.822  | NM_020161 | 587.508   | 487.971   | CY3Cy5    | 1469.738  | 131.464   | NM_018486 | 787.27    |
| 10162.704 | NM_020246 | 1246.432  | 1851.441  | NM_002416 | 634.498   | 455.267   | NM_003071 | 2168.309  |
| 445.296   | NM_000084 | 1097.459  | 1075.397  | NM_004485 | 721.808   | 607.372   | AK021494  | 1115.108  |
| 704.513   | NM_016354 | 1248.269  | 1103.723  | NM_013296 | 2643.334  | 2597.669  | AF075023  | 568.197   |
| 1860.382  | NM_003036 | 1787.745  | 680.675   | AL117478  | 683.657   | 543.951   | AL360160  | 4782.887  |
| 398.374   | NM_018155 | 3587.41   | 1926.795  | NM_005307 | 817.437   | 639.372   | AK001092  | 16031.131 |
| 319.288   | AL050358  | 1122.612  | 1659.323  | NM_005956 | 894.892   | 662.472   | NM_014144 | 937.74    |
| 2263.985  | NM_004731 | 902.321   | 1172.955  | NM_013436 | 1417.671  | 4139.159  | AF147373  | 1841.685  |
| 341.942   | NM_000544 | 3315.164  | 4433.601  | NM_005206 | 3007.986  | 2097.115  | AK026209  | 341.217   |
| 1201.42   | NM_004644 | 719.112   | 1283.093  | AK025687  | 7649.374  | 6092.278  | AF086253  | 723.597   |
| 973.905   | AV681967  | 1387.914  | 2214.919  | AF218941  | 521.666   | 549.398   | AF086303  | 447.63    |
| 2889.093  | NM_018250 | 943.057   | 1140.768  | AL137264  | 3752.009  | 3840.202  | AF086434  | 771.408   |
| 602.386   | NM_016553 | 5009.15   | 6771.945  | NM_002226 | 1020.258  | 420.558   | AK022063  | 1793.583  |
| 2932.45   | NM_003795 | 34052.551 | 47712.301 | X84370    | 4117.335  | 3235.924  | AF086345  | 1582.02   |
| 655.12    | NM_014232 | 1195.626  | 1663.896  | NM_004039 | 794.586   | 1106.768  | AF086400  | 268.631   |

|           |           |           |           |           |           |           |           |           |
|-----------|-----------|-----------|-----------|-----------|-----------|-----------|-----------|-----------|
| 308.459   | NM_005701 | 1913.042  | 2279.942  | AB014558  | 451.676   | 379.352   | AF086464  | 602.049   |
| 1997.333  | NM_001231 | 536.53    | 736.513   | NM_006287 | 440.853   | 245.531   | AL049278  | 1219.018  |
| 499.609   | NM_006819 | 25255.004 | 23083.182 | NM_000913 | 2969.57   | 4748.308  | AK025063  | 370.117   |
| 21342.107 | NM_014744 | 2052.025  | 1478.476  | NM_001298 | 1028.069  | 1041.536  | NM_005060 | 418.605   |
| 37936.844 | AF146759  | 963.882   | 1040.283  | BG325046  | 616.071   | 559.427   | AF075097  | 1363.648  |
| 1544.524  | AL365404  | 7759.969  | 10480.293 | AK026248  | 807.547   | 549.103   | AL133075  | 5004.707  |
| 469.188   | AK022907  | 1456.798  | 1081.2    | NM_004578 | 1710.914  | 1484.62   | AL137692  | 2013.558  |
| 4764.243  | NM_014793 | 1804.814  | 1917.057  | NM_000647 | 604.272   | 1722.534  | AL137630  | 1774.997  |
| 1231.62   | NM_004245 | 948.247   | 804.037   | NM_017604 | 533.723   | 928.079   | AL137277  | 4706.398  |
| 5695.498  | NM_003241 | 1025.61   | 1071.61   | NM_017738 | 3850.804  | 3659.777  | AL137447  | 482.285   |
| 897.543   | NM_002685 | 3213.035  | 2682.338  | NM_016557 | 649.981   | 907.106   | BC023609  | 711.204   |
| 9178.395  | AK024504  | 917.855   | 997.58    | NM_000623 | 2219.755  | 1774.27   | AK025100  | 1121.333  |
| 5829.3    | AF039023  | 1521.019  | 1985.489  | AF161348  | 1103.808  | 552.178   | AF086395  | 542.797   |
| 3454.956  | NM_005511 | 3725.214  | 4076.867  | NM_018467 | 4450.792  | 3728.674  | AF086049  | 1357.563  |
| 561.354   | NM_014698 | 7605.048  | 8271.936  | NM_006068 | 779.969   | 749.587   | AF114263  | 542.468   |
| 317.367   | NM_018475 | 4758.231  | 3425.592  | NM_002704 | 430.925   | 389.914   | AK026142  | 1473.983  |
| 1257.2    | NM_003262 | 2978.438  | 2291.936  | U16752    | 475.915   | 692.898   | AF161369  | 1211.77   |
| 696.871   | AB028127  | 576.902   | 454.968   | NM_002038 | 1920.941  | 1940.07   | AK027176  | 934.63    |
| 962.187   | AK022832  | 2537.204  | 6067.963  | NM_005729 | 8174.25   | 7243.983  | Y12019    | 1485.925  |
| 555.993   | NM_014641 | 2460.22   | 1869.269  | NM_015493 | 1332.397  | 1507.74   | AF147418  | 558.931   |
| 2606.703  | NM_004462 | 11980.135 | 4440.774  | NM_003747 | 1075.968  | 633.105   | AK021898  | 917.676   |
| 2056.779  | AB020664  | 3262.369  | 2329.924  | AB037744  | 1883.294  | 1251.01   | AK022024  | 1991.187  |
| 923.251   | NM_006640 | 3977.095  | 3820.403  | AF141901  | 513.483   | 496.675   | AK022163  | 217.812   |
| 814.25    | NM_000857 | 900.416   | 1003.156  | NM_007008 | 435.194   | 374.211   | AK022301  | 1174.559  |
| 5604.467  | L20688    | 22346.154 | 22321.385 | AL109708  | 1403.504  | 1232.586  | AK021948  | 579.662   |
| 440.726   | X69111    | 7470.211  | 9297.958  | AF234532  | 1420.861  | 1170.589  | AK022341  | 533.605   |
| 1495.368  | AB037799  | 2333.863  | 1888.437  | AF099740  | 525.071   | 660.864   | AK026861  | 651.562   |
| 460.579   | AB007950  | 5193      | 3459.058  | NM_006117 | 4619.307  | 3566.952  | AK021642  | 2046.253  |
| 375.948   | AK025593  | 1089.642  | 999.989   | NM_002225 | 1452.076  | 1082.045  | AK022455  | 542.138   |
| 12139.541 | AB018304  | 2281.873  | 2279.69   | NM_006229 | 370.001   | 203.236   | AK021987  | 1493.843  |
| 284.633   | NM_007061 | 12803.112 | 15610.973 | NM_015415 | 8284.106  | 7495.915  | NM_006638 | 1283.943  |
| 2230.04   | AB040954  | 1864.346  | 1664.344  | NM_004897 | 799.195   | 902.612   | AF071170  | 714.178   |
| 19473.195 | NM_002081 | 915.404   | 553.183   | NM_002555 | 1835.399  | 1353.002  | AK025259  | 618.268   |
| 1016.726  | AB023139  | 1844.227  | 2511.27   | NM_000309 | 1033.949  | 797.785   | NM_018304 | 2665.534  |
| 3305.439  | NM_017885 | 1286.519  | 1064.87   | NM_004528 | 23160.445 | 13238.52  | AK023264  | 298.617   |
| 2498.642  | D80004    | 4373.212  | 1981.194  | AK026381  | 9715.365  | 6766.81   | AK026894  | 348.377   |
| 1501.032  | X63966    | 547.259   | 460.56    | NM_002450 | 6509.733  | 996.766   | NM_014186 | 546.973   |
| 3007.787  | NM_000946 | 2984.132  | 1232.455  | NM_001686 | 511.349   | 1558.913  | AK024752  | 7417.307  |
| 23374.117 | NM_016070 | 1664.143  | 1500.938  | NM_016577 | 446.358   | 560.033   | AF131859  | 926.261   |
| 964.063   | NM_016390 | 1353.168  | 1237.611  | AK023107  | 4492.844  | 3667.029  | AK023632  | 526.737   |
| 4296.656  | NM_016101 | 5983.622  | 4772.207  | NM_006854 | 12341.582 | 6274.939  | AF086118  | 1066.438  |
| 679.118   | NM_005859 | 26452.088 | 45805.664 | NM_004580 | 8643.323  | 10643.748 | AK025044  | 540.883   |
| 3168.322  | NM_020313 | 855.858   | 592.449   | NM_020387 | 15058.877 | 16751.525 | AF230317  | 294.355   |
| 2201.328  | NM_014628 | 4032.76   | 5967.963  | NM_007246 | 1109.562  | 2436.376  | AK023806  | 1405.923  |
| 804.117   | AK025630  | 1865.008  | 1867.948  | AF150735  | 2231.481  | 2365.437  | Y16696    | 10719.938 |
| 6183.869  | NM_014718 | 1272.916  | 1167.613  | NM_018183 | 1222.257  | 1201.978  | AK026094  | 1043.253  |
| 678.386   | NM_000632 | 682.367   | 895.048   | NM_012382 | 1633.421  | 1269.078  | AF161344  | 5598.021  |
| 534.883   | AK024488  | 837.044   | 770.977   | NM_002452 | 6098.708  | 8955.927  | AF086027  | 1246.376  |
| 1207.872  | AK023249  | 45833.184 | 39149.656 | NM_012304 | 630.797   | 944.875   | NM_001207 | 47250.711 |
| 17965.971 | NM_017442 | 4508.665  | 5519.2    | NM_016440 | 7327.276  | 7243.928  | AF075045  | 7453.917  |
| 1123.589  | NM_000743 | 878.173   | 477.981   | S74620    | 1873.323  | 1535.522  | NM_003524 | 994.136   |
| 574.435   | NM_007218 | 928.918   | 547.38    | AF305239  | 1016.871  | 622.069   | S39891    | 334.952   |
| 2046.951  | Z25436    | 2168.245  | 2118.485  | NM_002827 | 2402.199  | 1746.827  | AK021624  | 400.732   |

|           |           |           |           |           |           |           |           |           |
|-----------|-----------|-----------|-----------|-----------|-----------|-----------|-----------|-----------|
| 8338.047  | NM_005275 | 4803.23   | 4592.8    | NM_001946 | 1369.224  | 1929.576  | AF278605  | 4098.525  |
| 7034.789  | NM_003844 | 8147.05   | 10763.324 | BF035425  | 39449.203 | 24831.127 | NM_006497 | 4915.402  |
| 2096.404  | AK000039  | 728.635   | 768.452   | NM_000159 | 47751.09  | 52953.977 | AK022329  | 169.037   |
| 1029.771  | AL137352  | 1118.779  | 1265.638  | NM_014638 | 1437.616  | 1462.132  | AL133599  | 808.586   |
| 431.815   | NM_014749 | 2644.548  | 2930.21   | NM_000913 | 2885.843  | 4942.781  | NM_016472 | 996.021   |
| 1050.345  | NM_004489 | 3048.845  | 2549.336  | AI351740  | 1826.976  | 1500.493  | AF086064  | 494.596   |
| 2111.758  | BF240063  | 654.568   | 502.185   | AA444051  | 1318.509  | 2022.59   | AK023042  | 1997.18   |
| 517.969   | AK090409  | 265.771   | 1816.672  | X04827    | 984.882   | 940.231   | AK026429  | 392.13    |
| 592.27    | AF172264  | 2011.908  | 1384.179  | H07088    | 535.481   | 504.835   | NM_016550 | 2387.183  |
| 697.234   | Y08267    | 1828.241  | 1764.392  | AI004656  | 763.829   | 480.269   | AK024813  | 2093.002  |
| 3346.472  | U80756    | 10107.418 | 10152.019 | BC020596  | 1503.368  | 1452.452  | AJ227909  | 22207.02  |
| 2275.704  | NM_018161 | 958.303   | 781.822   | AF116606  | 23291.541 | 17766.961 | CY3Cy5    | 3005.521  |
| 2182.448  | NM_005248 | 880.712   | 967.015   | X98922    | 1438.434  | 2750.081  | BG534366  | 354.439   |
| 378.405   | NM_004810 | 676.122   | 983.035   | AK092872  | 3159.873  | 3484.076  | BG698522  | 1946.921  |
| 2149.439  | AL117629  | 1622.728  | 498.741   | AF230496  | 304.806   | 281.289   | AA152346  | 434.256   |
| 1616.409  | NM_002595 | 800.54    | 737.643   | M16801    | 456.478   | 393.06    | L15189    | 793.756   |
| 3652.644  | AB002379  | 3462.361  | 2649.125  | NM_145904 | 12085.213 | 11224.708 | AB023420  | 2895.297  |
| 992.225   | AB046851  | 1872.718  | 2703.696  | NM_013334 | 2745.093  | 2227.151  | AF022912  | 759.268   |
| 2095.247  | NM_014548 | 3129.361  | 5194.849  | AB037744  | 1952.958  | 1146.371  | AA477428  | 3042.029  |
| 1557.198  | AK025875  | 1390.847  | 1109.293  | AF141901  | 555.131   | 469.933   | R45594    | 719.201   |
| 1811.182  | BC014152  | 59521.965 | 46101.023 | NM_007008 | 370.484   | 417.98    | H46425    | 766.238   |
| 752.672   | NM_000226 | 884.642   | 677.687   | AF234532  | 1183.163  | 788.481   | AA278152  | 2105.21   |
| 1124.496  | AB037779  | 22515.887 | 23185.898 | NM_002418 | 545.03    | 831.913   | H75530    | 896.311   |
| 1411.616  | NM_000393 | 887.97    | 1053.285  | NM_004485 | 487.509   | 783.243   | NM_004176 | 1324.864  |
| 1634.785  | NM_000889 | 1237.938  | 1415.805  | NM_013296 | 2725.905  | 2759.565  | NM_004548 | 9114.204  |
| 4483.281  | NM_003859 | 7480.275  | 6533.379  | AL117478  | 1146.678  | 946.267   | SR9       | 6483.618  |
| 713.535   | NM_000236 | 1199.159  | 1651.318  | NM_005307 | 684.476   | 485.471   | CY3Cy5    | 1525.48   |
| 327.212   | NM_002903 | 21687.914 | 24572.031 | NM_005958 | 855.254   | 654.982   | NM_001315 | 3795.266  |
| 501.275   | NM_012339 | 1130.879  | 1100.718  | NM_013436 | 457.961   | 213.743   | AF286095  | 491.025   |
| 1429.807  | NM_005787 | 17599.938 | 7678.655  | NM_005208 | 4474.126  | 3976.26   | S66407    | 464.706   |
| 939.822   | NM_002143 | 3479.751  | 3302.797  | AK025687  | 8019.523  | 6633.758  | NM_004258 | 18641.643 |
| 795.46    | AF284421  | 4903.187  | 4562.154  | AF218941  | 592.134   | 490.923   | NM_001981 | 953.661   |
| 297.886   | NM_006048 | 2533.275  | 3441.073  | AL137264  | 3795.945  | 3898.77   | NM_001585 | 6413.171  |
| 2510.466  | NM_006360 | 27009.064 | 24245.604 | NM_002226 | 1135.583  | 587.677   | AK026108  | 519.199   |
| 1134.868  | NM_003968 | 2591.721  | 2949.795  | X84370    | 4495.855  | 3405.928  | NM_006379 | 1102.962  |
| 351.789   | NM_002786 | 1649.701  | 565.091   | NM_004039 | 554.383   | 756.228   | BF571428  | 653.55    |
| 5243.002  | NM_002810 | 38127.984 | 32392.139 | AB014558  | 440.257   | 527.931   | AB037723  | 1231.905  |
| 3638.539  | NM_003343 | 7200.151  | 7823.331  | NM_016577 | 319.554   | 170.129   | NM_006246 | 919.066   |
| 1052.19   | NM_002789 | 20703.008 | 24894.051 | AK023107  | 3936.88   | 3136.375  | U58096    | 13161.128 |
| 1563.708  | NM_003470 | 3451.59   | 3534.574  | NM_006854 | 9945.013  | 5265.448  | NM_016929 | 1356.219  |
| 633.307   | AL080137  | 894.791   | 953.076   | NM_004580 | 6751.668  | 8799.479  | NM_012323 | 728.02    |
| 1419.95   | NM_017679 | 971.481   | 1573.741  | NM_007246 | 1009.355  | 895.609   | NM_013943 | 678.252   |
| 11313.041 | AF155103  | 637.866   | 794.917   | AK026248  | 946.083   | 907.272   | NM_001639 | 1410.869  |
| 988.568   | NM_017704 | 1543.378  | 1160.932  | NM_004578 | 2037.519  | 2098.838  | AF182404  | 957.016   |
| 2034.944  | BC006359  | 1127.88   | 1808.399  | NM_000647 | 907.204   | 2199.576  | NM_000804 | 544.387   |
| 885.046   | BC016062  | 8833.607  | 8015.542  | NM_017604 | 982.722   | 903.728   | NM_006555 | 907.08    |
| 447.402   | NM_002814 | 2257.871  | 2425.041  | NM_017738 | 2599.457  | 1614.036  | NM_014521 | 377.882   |
| 890.431   | NM_006283 | 2789.281  | 3062.705  | NM_016557 | 1437.687  | 1502.607  | NM_017809 | 531.322   |
| 5888.946  | NM_005693 | 927.615   | 821.663   | AF161348  | 1455.773  | 1309.639  | AK023202  | 781.299   |
| 2644.354  | X97303    | 4818.317  | 3659.587  | NM_018467 | 4893.281  | 5033.012  | D63877    | 1647.181  |
| 2508.687  | NM_017530 | 2702.217  | 1843.344  | NM_006068 | 1323.667  | 963.614   | AF131760  | 261.871   |
| 1327.031  | AL360183  | 1247.056  | 784.509   | U16752    | 438.546   | 440.05    | NM_018698 | 427.659   |
| 7312.241  | AK027046  | 861.168   | 987.907   | M30134    | 248.302   | 412.576   | NM_014438 | 504.317   |

|           |           |           |           |           |           |           |           |           |
|-----------|-----------|-----------|-----------|-----------|-----------|-----------|-----------|-----------|
| 493.136   | NM_003113 | 2652.92   | 2729.399  | NM_002038 | 1769.003  | 2002.368  | NM_014880 | 1675.379  |
| 954.546   | NM_016578 | 3652.09   | 2685.192  | NM_005729 | 8788.517  | 7279.95   | NM_003764 | 1080.392  |
| 1233.555  | NM_015832 | 4266.389  | 3269.714  | NM_015493 | 830.145   | 957.055   | NM_004829 | 331.685   |
| 674.258   | NM_001326 | 3334.483  | 2228.971  | NM_003747 | 1217.933  | 851.774   | NM_006793 | 12249.335 |
| 3805.507  | NM_014319 | 1313.034  | 976.15    | NM_002827 | 2627.113  | 1741.727  | NM_001538 | 2485.272  |
| 464.145   | NM_004865 | 1503.672  | 1345.048  | NM_001946 | 1287.465  | 1880.589  | D87666    | 35537.289 |
| 611.634   | AB019566  | 62314.219 | 67687.758 | BF035425  | 22750.607 | 12851.042 | AF149304  | 572.322   |
| 10974.21  | NM_000981 | 56435.559 | 59051.426 | NM_001608 | 249.08    | 241.118   | NM_012095 | 3417.155  |
| 27054.568 | NM_002047 | 16828.908 | 5007.713  | NM_014638 | 1125.283  | 1076.647  | X73079    | 9181.658  |
| 1693.505  | NM_001031 | 62305.934 | 69674.594 | AF099740  | 627.766   | 832.627   | AF264781  | 719.839   |
| 604.275   | NM_007208 | 10408.058 | 5131.181  | NM_006117 | 5494.677  | 4645.256  | AK024215  | 3814.049  |
| 2411.824  | NM_000999 | 62140.207 | 66452.633 | NM_002225 | 1151.74   | 1062.165  | AB044661  | 1503.574  |
| 464.656   | NM_000985 | 21543.748 | 8883.498  | NM_006229 | 1084.484  | 777.501   | NM_000606 | 2476.938  |
| 136.481   | BF130622  | 11969.717 | 9325.462  | NM_015415 | 5391.096  | 4786.08   | NM_016124 | 2122.935  |
| 361.505   | BU165106  | 2058.329  | 2227.086  | NM_004897 | 993.544   | 777.019   | NM_019079 | 484.541   |
| 562.042   | AF038202  | 1305.574  | 1263.677  | NM_002555 | 1504.694  | 913.976   | U53530    | 1580.634  |
| 2048.275  | AK025558  | 4540.565  | 2886.207  | NM_000309 | 1023.463  | 964.241   | NM_006598 | 1309.956  |
| 1255.474  | AK024355  | 859.806   | 804.636   | NM_004528 | 23508.602 | 17015.844 | NM_015948 | 2991.304  |
| 871.72    | NM_001864 | 16776.053 | 11472.486 | AK026381  | 11930.652 | 11387.852 | NM_002219 | 6839.251  |
| 1157.615  | NM_003477 | 5816.921  | 3433.978  | NM_002450 | 6737.228  | 764.596   | NM_002826 | 3010.236  |
| 859.242   | NM_002654 | 18013.627 | 21074.104 | NM_001686 | 472.946   | 499.895   | AF159141  | 1227.588  |
| 259.052   | NM_020382 | 2284.04   | 1026.639  | NM_000705 | 272.843   | 589.855   | NM_002420 | 718.834   |
| 308.874   | NM_007192 | 4039.989  | 2951.729  | NM_004231 | 36859.633 | 37012.418 | NM_016458 | 15301.29  |
| 577.475   | AB002337  | 6802.585  | 5816.553  | NM_145904 | 12554.64  | 10050.018 | AK022233  | 1401.417  |
| 1110.691  | NM_014933 | 6005.911  | 3026.696  | NM_013334 | 1871.287  | 1509.407  | AK026410  | 2887.597  |
| 4902.616  | NM_003076 | 8046.074  | 9953.217  | AF150735  | 1784.018  | 1623.101  | NM_013379 | 847.31    |
| 643.232   | NM_006385 | 911.522   | 1045.336  | NM_018183 | 1906.751  | 1962.688  | AF113208  | 3512.906  |
| 4583.542  | AK024250  | 883.339   | 1145.385  | NM_012382 | 2137.366  | 1766.151  | NM_006153 | 2346.132  |
| 595.853   | NM_003456 | 3101.948  | 1620.33   | BF038366  | 501.913   | 594.113   | NM_012164 | 817.014   |
| 1495.01   | NM_002585 | 2219.373  | 3234.062  | NM_002452 | 6257.483  | 11184.699 | AK026010  | 760.758   |
| 1199.916  | AB029016  | 1334.375  | 1835.94   | NM_012304 | 657.274   | 700.191   | NM_004721 | 475.117   |
| 2391.091  | AK000445  | 1025.867  | 765.586   | NM_016440 | 7018.065  | 8573.121  | AB011156  | 740.94    |
| 654.668   | AL049390  | 1853.809  | 1873.466  | NM_007194 | 1250.639  | 1409.301  | NM_018079 | 832.641   |
| 1200.87   | AK000584  | 5203.307  | 4388.807  | NM_000314 | 4451.395  | 4388.166  | NM_004760 | 2208.23   |
| 2551.105  | AJ297363  | 1067.854  | 957.153   | AB002369  | 781.431   | 955.69    | NM_006752 | 2604.596  |
| 2458.315  | AK026379  | 2658.388  | 2361.351  | S74620    | 592.22    | 385.775   | NM_004428 | 824.225   |
| 741.352   | AK022965  | 859.326   | 605.626   | AF305239  | 915.876   | 776.039   | NM_006809 | 2416.049  |
| 274.283   | AK024278  | 7744.85   | 9298.317  | AL137264  | 3571.104  | 3257.514  | NM_013943 | 407.895   |
| 1066.642  | AK026982  | 1182.191  | 951.681   | NM_002226 | 1141.042  | 483.55    | NM_001639 | 1280.041  |
| 623.505   | NM_018022 | 2856.997  | 2750.447  | X84370    | 3831.677  | 3577.065  | BG534366  | 382.341   |
| 1263.79   | AB056722  | 3310.483  | 1350.777  | NM_004039 | 456.729   | 968.732   | BG698522  | 2479.879  |
| 1298.167  | NM_013242 | 3048.923  | 1059.798  | NM_000508 | 346.005   | 649.865   | AA152346  | 445.237   |
| 684.174   | NM_012066 | 7298.548  | 5231.06   | AB014558  | 421.801   | 605.087   | L15189    | 712.881   |
| 1020.752  | AF052168  | 4324.885  | 3243.285  | NM_000118 | 962.854   | 1179.519  | AB023420  | 2896.434  |
| 1128.251  | NM_014650 | 1161.072  | 1274.859  | NM_000913 | 2554.086  | 2792.386  | AA477428  | 501.061   |
| 1002.269  | AK022632  | 2893.743  | 2691.212  | NM_001298 | 704.925   | 606.548   | R45594    | 7433.585  |
| 3368.126  | AK021554  | 1420.899  | 1327.133  | BG325046  | 999.823   | 638.855   | H46425    | 4177.779  |
| 1394.018  | AF070620  | 471.076   | 914.397   | AI351740  | 1330.43   | 861.012   | AI355949  | 906.429   |
| 1625.58   | NM_020235 | 1533.015  | 1329.802  | AA444051  | 661.262   | 696.091   | AA278152  | 3124.648  |
| 2013.653  | AK000532  | 649.688   | 540.114   | NM_007164 | 1370.254  | 1145.611  | H75530    | 1074.253  |
| 846.311   | AL162039  | 2002.296  | 2292.625  | X04827    | 960.988   | 846.955   | NM_004176 | 1796.336  |
| 895.555   | AK024896  | 1855.052  | 2633.999  | H07088    | 535.383   | 441.048   | NM_004548 | 9422.246  |
| 1164.378  | AK024059  | 668.488   | 775.418   | AI004656  | 642.806   | 581.663   | AK000554  | 1853.425  |



|           |                  |           |           |                  |           |           |                  |           |
|-----------|------------------|-----------|-----------|------------------|-----------|-----------|------------------|-----------|
| 431.046   | <b>AK023663</b>  | 1598.671  | 1770      | <b>BC020596</b>  | 1144.883  | 1164.754  | <b>NM_006472</b> | 2722.543  |
| 462.766   | <b>AB007928</b>  | 598.762   | 837.394   | <b>AF116606</b>  | 20711.42  | 22838.848 | <b>NM_001538</b> | 1790.394  |
| 777.479   | <b>AK023645</b>  | 682.317   | 604.024   | <b>X98922</b>    | 1397.131  | 2330.945  | <b>X97261</b>    | 5582.223  |
| 1135.85   | <b>D83543</b>    | 570.177   | 810.505   | <b>AK098435</b>  | 1819.182  | 1611.981  | <b>D87666</b>    | 31860.92  |
| 3014.359  | <b>NM_016930</b> | 1839.126  | 1041.846  | <b>AK092872</b>  | 1510.236  | 1092.18   | <b>NM_001315</b> | 4283.689  |
| 294.452   | <b>X64981</b>    | 1788.476  | 1176.463  | <b>AF230496</b>  | 98.676    | 463.55    | <b>AF286095</b>  | 637.579   |
| 1115.577  | <b>X75692</b>    | 5427.611  | 5284.508  | <b>M16801</b>    | 338.655   | 379.253   | <b>NM_000878</b> | 439.7     |
| 7928.048  | <b>Y10511</b>    | 5052.58   | 3630.806  | <b>NM_002038</b> | 2042.512  | 3983.447  | <b>S66407</b>    | 509.788   |
| 1803.794  | <b>AF018254</b>  | 1076.592  | 1087.245  | <b>NM_005729</b> | 9282.221  | 13714.357 | <b>NM_004258</b> | 8661.581  |
| 1139.057  | <b>NM_016240</b> | 850.818   | 699.624   | <b>NM_015493</b> | 841.707   | 1639.328  | <b>NM_001981</b> | 1144.329  |
| 468.222   | <b>AK025238</b>  | 574.687   | 1124.399  | <b>NM_003747</b> | 1219.825  | 901.045   | <b>NM_014654</b> | 425.18    |
| 1757.198  | <b>AK026416</b>  | 12326.817 | 4807.811  | <b>AB037744</b>  | 1997.42   | 1243.201  | <b>NM_001585</b> | 22807.846 |
| 1734.907  | <b>AK025797</b>  | 1062.174  | 588.455   | <b>AL109708</b>  | 548.99    | 406.662   | <b>AK026108</b>  | 4460.377  |
| 13594.72  | <b>AK000019</b>  | 638.31    | 722.871   | <b>AF234532</b>  | 1092.648  | 862.095   | <b>NM_006379</b> | 2049.767  |
| 640.837   | <b>AK024864</b>  | 890.751   | 787.155   | <b>NM_004485</b> | 818.394   | 852.192   | <b>BF571428</b>  | 1326.583  |
| 1790.936  | <b>AK024947</b>  | 1907.897  | 1540.488  | <b>NM_013296</b> | 2452.702  | 2657.324  | <b>AB037723</b>  | 2038.878  |
| 2016.359  | <b>AK024606</b>  | 3368.206  | 3010.105  | <b>AL117478</b>  | 658.414   | 631.342   | <b>NM_006246</b> | 1662.1    |
| 1103.207  | <b>NM_016417</b> | 5883.416  | 3613.874  | <b>NM_005307</b> | 595.604   | 628.927   | <b>U58096</b>    | 13763.799 |
| 596.876   | <b>NM_019108</b> | 876.742   | 1284.978  | <b>NM_005958</b> | 768.358   | 614.077   | <b>NM_016929</b> | 2212.967  |
| 3507.669  | <b>AL080118</b>  | 2975.248  | 2612.226  | <b>AF225426</b>  | 569.967   | 397.004   | <b>NM_012323</b> | 615.074   |
| 818.935   | <b>AL049378</b>  | 4150.26   | 4099.541  | <b>NM_005208</b> | 3342.704  | 3543.986  | <b>NM_015948</b> | 2475.708  |
| 917.664   | <b>L09086</b>    | 1529.889  | 985.577   | <b>AK025687</b>  | 7647.169  | 5654.965  | <b>NM_003054</b> | 1422.863  |
| 658.484   | <b>AK021505</b>  | 2646.243  | 1617.687  | <b>AF218941</b>  | 376.717   | 648.544   | <b>NM_002219</b> | 6023.206  |
| 2733.56   | <b>AK021598</b>  | 4440.022  | 4567.75   | <b>NM_000705</b> | 433.515   | 858.828   | <b>AF182404</b>  | 1101.154  |
| 804.761   | <b>AJ012498</b>  | 671.442   | 249.997   | <b>NM_004231</b> | 36093.145 | 57783.441 | <b>NM_000804</b> | 713.336   |
| 22592.568 | <b>NM_005973</b> | 5808.547  | 4284.626  | <b>NM_002243</b> | 787.193   | 1420.159  | <b>NM_006555</b> | 670.898   |
| 2222.433  | <b>X04547</b>    | 2495.48   | 1902.063  | <b>AK023107</b>  | 3752.665  | 3497.425  | <b>NM_014521</b> | 425.145   |
| 859.889   | <b>AK025823</b>  | 1170.34   | 1148.812  | <b>NM_020387</b> | 5387.563  | 5521.221  | <b>AK023202</b>  | 431.664   |
| 1266.194  | <b>AK026691</b>  | 693.221   | 425.988   | <b>NM_007246</b> | 1572.597  | 1526.926  | <b>AF131760</b>  | 569.256   |
| 48217.711 | <b>AL359941</b>  | 1864.431  | 1932.964  | <b>NM_017604</b> | 631.928   | 1264.903  | <b>NM_018698</b> | 1037.053  |
| 1080.089  | <b>AF035278</b>  | 1238.303  | 923.612   | <b>NM_017738</b> | 4456.495  | 5137.171  | <b>NM_018201</b> | 1744.516  |
| 472.477   | <b>U32999</b>    | 8221.076  | 6478.324  | <b>NM_016557</b> | 473.097   | 710.133   | <b>NM_014438</b> | 917.968   |
| 1757.896  | <b>U66052</b>    | 3993.151  | 3951.978  | <b>NM_000623</b> | 1939.791  | 1198.633  | <b>NM_014880</b> | 2177.006  |
| 853.593   | <b>AK024156</b>  | 1038.867  | 654.646   | <b>AF161348</b>  | 1384.856  | 1324.769  | <b>NM_003764</b> | 1633.754  |
| 764.204   | <b>AF086288</b>  | 894.648   | 583.278   | <b>NM_018467</b> | 4990.978  | 5689.721  | <b>NM_004829</b> | 423.175   |
| 7384.183  | <b>AK023109</b>  | 1141.973  | 495.097   | <b>NM_006068</b> | 1323.658  | 1067.57   | <b>NM_006793</b> | 13223.868 |
| 4261.99   | <b>NM_005293</b> | 8027.028  | 7541.983  | <b>NM_002704</b> | 1199.595  | 1649.32   | <b>NM_018079</b> | 653.789   |
| 3122.421  | <b>S50185</b>    | 714.67    | 483.888   | <b>NM_016440</b> | 4845.896  | 5819.672  | <b>NM_004760</b> | 1964.285  |
| 4623.881  | <b>AF133332</b>  | 2124.467  | 1446.933  | <b>NM_007194</b> | 1672.165  | 2181.192  | <b>NM_006752</b> | 2125.687  |
| 4389.725  | <b>NM_001088</b> | 4353.352  | 4312.594  | <b>NM_000314</b> | 4713.369  | 4937.324  | <b>NM_006809</b> | 2158.212  |
| 1015.712  | <b>BC015991</b>  | 4164.126  | 2839.569  | <b>AB002369</b>  | 908.398   | 1458.321  | <b>AF149304</b>  | 617.482   |
| 2907.164  | <b>U94902</b>    | 789.391   | 418.803   | <b>S74620</b>    | 588.4     | 1005.827  | <b>NM_012095</b> | 3525.723  |
| 902.577   | <b>U46214</b>    | 4682.208  | 3492.273  | <b>AF305239</b>  | 1068.599  | 880.266   | <b>X73079</b>    | 7038.936  |
| 2461.197  | <b>NM_000310</b> | 39765.555 | 36079.945 | <b>NM_002827</b> | 2430.098  | 2008.782  | <b>NM_019091</b> | 349.529   |
| 920.229   | <b>AF161343</b>  | 3376.997  | 1740.014  | <b>NM_001946</b> | 1180.114  | 1923.233  | <b>AF264781</b>  | 972.08    |
| 210.152   | <b>NM_004765</b> | 2967.922  | 2486.453  | <b>BF035425</b>  | 27237.662 | 16131.746 | <b>AK024215</b>  | 7199.734  |
| 604.596   | <b>AK022246</b>  | 930.692   | 661.153   | <b>AF099740</b>  | 653.538   | 975.724   | <b>AB044661</b>  | 2148.709  |
| 4126.447  | <b>X75684</b>    | 1765.864  | 1376.41   | <b>NM_006117</b> | 5188.823  | 4707.364  | <b>NM_000606</b> | 5345.573  |
| 515.794   | <b>AF113701</b>  | 8706.044  | 4883.942  | <b>NM_006229</b> | 317.43    | 691.237   | <b>NM_016124</b> | 3928.906  |
| 1062.729  | <b>Y11158</b>    | 973.464   | 353.673   | <b>NM_015415</b> | 8171.964  | 7633.471  | <b>NM_019079</b> | 709.346   |
| 5503.523  | <b>NM_006771</b> | 9672.304  | 11316.596 | <b>NM_004897</b> | 971.743   | 1148.168  | <b>U53530</b>    | 1536.282  |
| 685.9     | <b>L37702</b>    | 7881.091  | 6147.474  | <b>NM_002555</b> | 1754.872  | 1452.786  | <b>NM_006598</b> | 1345.177  |
| 1815.091  | <b>AK022812</b>  | 746.062   | 1024.588  | <b>NM_000309</b> | 1078.786  | 922.61    | <b>NM_004176</b> | 1282.712  |

|           |                  |           |           |                  |           |           |                  |           |
|-----------|------------------|-----------|-----------|------------------|-----------|-----------|------------------|-----------|
| 228.278   | <b>U79301</b>    | 2112.708  | 2029.276  | <b>NM_00452E</b> | 25132.391 | 18475.529 | <b>NM_00454E</b> | 7727.19   |
| 3981.326  | <b>AK022260</b>  | 4417.165  | 6420.552  | <b>AK026381</b>  | 12664.62  | 10038.691 | <b>AK000554</b>  | 1500.847  |
| 750.063   | <b>M32219</b>    | 5395.599  | 5467.88   | <b>NM_002450</b> | 6861.945  | 912.572   | <b>NM_006472</b> | 2420.739  |
| 267.128   | <b>AF007128</b>  | 4190.707  | 4951.502  | <b>NM_001686</b> | 570.148   | 598.822   | <b>NM_00282E</b> | 2943.061  |
| 5784.416  | <b>CY3Cy5</b>    | 2130.064  | 113.59    | <b>NM_014723</b> | 549.644   | 360.783   | <b>AF159141</b>  | 1107.994  |
| 1449.027  | <b>AI351740</b>  | 3455.173  | 22972.6   | <b>AB011106</b>  | 857.744   | 702.28    | <b>NM_002420</b> | 442.019   |
| 641.079   | <b>AA444051</b>  | 1066.147  | 2223.397  | <b>D26362</b>    | 2657.472  | 2041.665  | <b>NM_01645E</b> | 15695.322 |
| 2320.491  | <b>NM_007164</b> | 2225.937  | 1973.205  | <b>NM_013452</b> | 1542.33   | 1469.89   | <b>AK022233</b>  | 1397.001  |
| 1690.332  | <b>BE783826</b>  | 12339.124 | 14355.884 | <b>AY009402</b>  | 1871.836  | 2084.799  | <b>AK026410</b>  | 2632.492  |
| 22603.711 | <b>X04827</b>    | 1327.878  | 1445.871  | <b>NM_018451</b> | 789.747   | 364.95    | <b>NM_014637</b> | 1716.812  |
| 781.346   | <b>H07088</b>    | 987.288   | 1731.898  | <b>NM_002584</b> | 2554.978  | 2253.292  | <b>NM_01337E</b> | 7770.666  |
| 196.737   | <b>AI004656</b>  | 1084.563  | 1350.068  | <b>NM_013334</b> | 2220.465  | 1946.04   | <b>AF113208</b>  | 4377.8    |
| 3112.293  | <b>BC020596</b>  | 1613.188  | 1816.194  | <b>AF150735</b>  | 2082.551  | 2116.311  | <b>NM_006153</b> | 3031.465  |
| 2201.602  | <b>AF116606</b>  | 41898.371 | 33302.578 | <b>NM_018183</b> | 1130.288  | 1219.318  | <b>NM_012164</b> | 866.375   |
| 1139.56   | <b>AK098435</b>  | 898.973   | 666.821   | <b>NM_012382</b> | 2391.378  | 1924.504  | <b>AK026010</b>  | 847.265   |
| 684.201   | <b>AK092872</b>  | 2114.049  | 1282.08   | <b>NM_002452</b> | 6911.39   | 10499.733 | <b>AB011156</b>  | 593.151   |
| 9149.307  | <b>AF230496</b>  | 522.817   | 305.103   | <b>NM_012304</b> | 482.978   | 793.024   | <b>NM_00624E</b> | 1382.068  |
| 682.564   | <b>NM_145904</b> | 30783.232 | 19015.355 | <b>AF196976</b>  | 3454.379  | 3229.914  | <b>U58096</b>    | 10508.66  |
| 10025.96  | <b>SR2</b>       | 47264.941 | 60806.957 | <b>AL050379</b>  | 770.745   | 867.492   | <b>NM_01692E</b> | 1362.424  |
| 1432.997  | <b>SR4</b>       | 13546.216 | 19053.787 | <b>NM_003161</b> | 1032.997  | 1262.387  | <b>NM_012323</b> | 516.926   |
| 817.386   | <b>SR6</b>       | 1918.046  | 1888.392  | <b>NM_01449E</b> | 372.766   | 499.701   | <b>NM_00163E</b> | 1023.235  |
| 643.377   | <b>SR8</b>       | 6987.351  | 39690.098 | <b>NM_01621E</b> | 9544.855  | 7779.625  | <b>BG534366</b>  | 369.09    |
| 865.02    | <b>SR10</b>      | 23884.844 | 11055.254 | <b>AK026919</b>  | 305.171   | 720.453   | <b>BG698522</b>  | 1252.878  |
| 1307.861  | <b>CY3Cy5</b>    | 2555.845  | 132.922   | <b>NM_001501</b> | 2725.161  | 2640.4    | <b>AB023420</b>  | 1754.625  |
| 2909.75   | <b>NM_00448E</b> | 679.991   | 785.002   | <b>NM_00617E</b> | 17673.221 | 19991.396 | <b>BI822179</b>  | 392.328   |
| 347.341   | <b>NM_01329E</b> | 4876.815  | 5120.958  | <b>AL137459</b>  | 790.103   | 945.034   | <b>AF022912</b>  | 1589.467  |
| 302.503   | <b>AL117478</b>  | 1251.329  | 902.27    | <b>AB007932</b>  | 896.448   | 1067.666  | <b>AA477428</b>  | 6054.935  |
| 1580.094  | <b>NM_005307</b> | 725.658   | 693.968   | <b>AF219257</b>  | 16790.334 | 18378.855 | <b>AA156342</b>  | 711.229   |
| 602.101   | <b>NM_00595E</b> | 1536.432  | 1019.042  | <b>NM_00397E</b> | 611.814   | 1344.843  | <b>R45594</b>    | 7551.035  |
| 1208.176  | <b>NM_01343E</b> | 942.106   | 858.883   | <b>NM_002561</b> | 1941.108  | 2058.207  | <b>H46425</b>    | 864.069   |
| 726.994   | <b>AF225426</b>  | 781.934   | 808.578   | <b>NM_006103</b> | 13795.977 | 16048.674 | <b>AA278152</b>  | 2277.806  |
| 612.886   | <b>NM_00520E</b> | 4310.402  | 3694.692  | <b>NM_00620E</b> | 330.526   | 318.046   | <b>H75530</b>    | 868.53    |
| 219.258   | <b>AK025687</b>  | 4966.921  | 1823.381  | <b>NM_00080E</b> | 476.557   | 787.585   | <b>NM_003764</b> | 1248.474  |
| 535.801   | <b>AF218941</b>  | 748.459   | 876.531   | <b>AL359933</b>  | 7297.188  | 7840.355  | <b>NM_00482E</b> | 362.688   |
| 1115.496  | <b>AL137264</b>  | 5098.022  | 5030.319  | <b>NM_001302</b> | 536.116   | 485.6     | <b>NM_006793</b> | 12472.441 |
| 306.476   | <b>NM_00222E</b> | 1725.252  | 699.094   | <b>M17783</b>    | 3762.86   | 5110.976  | <b>NM_00153E</b> | 2296.228  |
| 537.313   | <b>X84370</b>    | 5212.018  | 5237.314  | <b>NM_018590</b> | 3113.555  | 1773.514  | <b>X97261</b>    | 5360.269  |
| 443.6     | <b>NM_00403E</b> | 1240.78   | 2396.419  | <b>NM_00317E</b> | 1284.903  | 1017.603  | <b>D87666</b>    | 29494.645 |
| 762.19    | <b>NM_00050E</b> | 471.498   | 467.612   | <b>NM_012437</b> | 4854.544  | 2793.526  | <b>NM_00131E</b> | 3608.022  |
| 464.025   | <b>AB014558</b>  | 866.5     | 1107.708  | <b>AF090944</b>  | 584.231   | 273.167   | <b>AF286095</b>  | 331.453   |
| 601.765   | <b>NM_000118</b> | 333.842   | 760.926   | <b>NM_002607</b> | 601.674   | 442.509   | <b>NM_00087E</b> | 374.302   |
| 605.845   | <b>NM_000913</b> | 5542.251  | 15233.729 | <b>AF116712</b>  | 502.368   | 431.048   | <b>NM_00425E</b> | 10933.712 |
| 3865.889  | <b>NM_00129E</b> | 728.191   | 978.936   | <b>AF116626</b>  | 1573.707  | 1780.404  | <b>NM_001981</b> | 2274.489  |
| 850.565   | <b>BG325046</b>  | 1159.238  | 622.873   | <b>NM_001760</b> | 17774.307 | 22091.445 | <b>NM_00158E</b> | 22617.873 |
| 4951.91   | <b>AK026248</b>  | 1506.25   | 1502.358  | <b>NM_002527</b> | 837.328   | 825.78    | <b>AK026108</b>  | 4362.961  |
| 113.217   | <b>NM_00457E</b> | 2806.392  | 3671.724  | <b>NM_005890</b> | 690.26    | 685.651   | <b>NM_00637E</b> | 1515.227  |
| 21477.479 | <b>NM_000647</b> | 896.286   | 3210.522  | <b>NM_00706E</b> | 23399.297 | 32655.195 | <b>BF571428</b>  | 677.132   |
| 532.024   | <b>NM_017604</b> | 838.665   | 1200.399  | <b>AF149785</b>  | 1913.452  | 1708.262  | <b>AB037723</b>  | 1567.372  |
| 1899.469  | <b>NM_01773E</b> | 3828.346  | 3829.841  | <b>NM_01206E</b> | 6505.755  | 4688.543  | <b>NM_00060E</b> | 3340.077  |
| 7949.127  | <b>NM_016557</b> | 589.331   | 774.451   | <b>NM_004064</b> | 3265.438  | 3410.498  | <b>NM_016124</b> | 3730.178  |
| 299.981   | <b>NM_000623</b> | 2602.61   | 2389.56   | <b>NM_00125E</b> | 1462.301  | 1950.098  | <b>NM_01907E</b> | 440.688   |
| 137.51    | <b>AF161348</b>  | 1823.275  | 2376.134  | <b>NM_014704</b> | 3100.611  | 4998.996  | <b>U53530</b>    | 1046.04   |
| 7875.237  | <b>NM_018467</b> | 4791.154  | 8029.595  | <b>NM_02020E</b> | 513.342   | 583.707   | <b>NM_00659E</b> | 1316.415  |

|          |           |           |           |           |           |           |           |          |
|----------|-----------|-----------|-----------|-----------|-----------|-----------|-----------|----------|
| 732.819  | NM_00606E | 745.917   | 648.334   | NM_001227 | 379.396   | 639.51    | NM_01594E | 2709.436 |
| 1003.925 | NM_00203E | 1784.908  | 3198.363  | NM_001191 | 1872.829  | 1290.297  | NM_003054 | 1279.522 |
| 1821.796 | NM_00572E | 15779.435 | 10113.744 | U15174    | 399.179   | 620.092   | NM_003042 | 300.372  |
| 763.414  | NM_01549E | 1382.965  | 1761.194  | NM_013342 | 1163.781  | 1962.684  | NM_00221E | 4794.836 |
| 367.859  | NM_003747 | 1441.837  | 1138.283  | NM_014344 | 738.696   | 513.941   | AF182404  | 846.277  |
| 1518.173 | AB037744  | 2879.93   | 2265.866  | AB040917  | 564.143   | 541.915   | NM_000804 | 515.41   |
| 763.999  | AF141901  | 886.549   | 910.739   | AL110261  | 4617.133  | 4023.258  | NM_00655E | 1417.005 |
| 5381.857 | AL109708  | 914.354   | 873.422   | AA203539  | 413.618   | 439.722   | NM_01780E | 554.415  |
| 2209.909 | L29143    | 616.059   | 451.282   | AK021786  | 546.544   | 391.753   | D63877    | 2205.548 |
| 721.732  | AF234532  | 2155.621  | 1274.14   | NM_005932 | 429.778   | 184.651   | AF131760  | 589.468  |
| 260.49   | AF099740  | 841.241   | 1165.492  | NM_00427E | 3010.205  | 2848.579  | NM_01869E | 821.959  |
| 2392.019 | NM_006117 | 6218.797  | 4956.572  | NM_004851 | 185.264   | 495.431   | NM_006461 | 446.798  |
| 540.279  | NM_00222E | 2355.394  | 3584.633  | NM_00190E | 1683.824  | 1606.16   | NM_018201 | 1437.692 |
| 759.279  | NM_00622E | 410.57    | 688.918   | NM_00028E | 2268.65   | 2942.956  | NM_01443E | 809.812  |
| 337.387  | NM_01541E | 13681.576 | 9055.938  | NM_005911 | 22316.404 | 23850.492 | NM_01488C | 1787.025 |
| 2077.727 | NM_004897 | 834.172   | 1064.631  | AV702690  | 803.702   | 601.176   | NM_00615E | 2557.562 |
| 733.004  | NM_00255E | 2166.789  | 3434.031  | AL117452  | 1524.552  | 1059.82   | NM_012164 | 793.641  |
| 468.966  | NM_00030E | 1427.844  | 1588.951  | NM_01223C | 705.789   | 721.74    | AK026010  | 590.016  |
| 313.275  | NM_00452E | 30750.873 | 31168.229 | NM_01403E | 4834.654  | 2981.53   | NM_004721 | 326.645  |
| 232.132  | AK026381  | 10614.997 | 11529.442 | NM_002061 | 1901.4    | 3022.154  | AB011156  | 641.51   |
| 157.84   | NM_00245C | 4746.368  | 519.82    | AF169974  | 1663.725  | 1963.212  | NM_01807E | 763.595  |
| 412.624  | NM_00070E | 626.001   | 515.589   | NM_00573E | 685.565   | 1945.578  | NM_00476C | 1778.435 |
| 1474.289 | NM_004231 | 38009.004 | 42544.246 | NM_01813E | 1320.346  | 1215.526  | NM_00675E | 2766.01  |
| 2077.877 | NM_016577 | 526.408   | 576.981   | NM_01961E | 2144.861  | 2165.559  | NM_00680E | 2007.351 |
| 1772.762 | AK023107  | 5380.14   | 4352.03   | AF183411  | 1365.112  | 1043.888  | AF149304  | 438.897  |
| 156.941  | NM_006854 | 12646.086 | 6795.627  | BF244591  | 1020.923  | 877.551   | NM_01209E | 2950.818 |
| 590.693  | NM_00458C | 10255.614 | 10640.499 | NM_00588E | 7093.032  | 11248.637 | X73079    | 3465.148 |
| 137.904  | NM_020387 | 19749.852 | 17943.371 | U63785    | 585.387   | 761.385   | AF264781  | 938.961  |
| 619.629  | NM_00724E | 1578.547  | 1279.238  | NM_00596E | 1063.032  | 805.089   | AK024215  | 6079.52  |
| 171.437  | AF150735  | 2789.445  | 2692.885  | NM_00315E | 1332.977  | 1014.348  | AB044661  | 1851.051 |
| 311.536  | NM_01818E | 1205.889  | 1138.588  | NM_00310E | 297.778   | 329.097   | NM_01537E | 896.945  |
| 1038.412 | NM_01238E | 1741.116  | 1509.52   | NM_01331C | 2243.381  | 1604.083  | NM_004941 | 1778.736 |
| 242.518  | BF038366  | 861.542   | 2898.703  | NM_00576E | 3511.812  | 3954.373  | AF151831  | 1027.109 |
| 1179.084 | NM_00245E | 5819.086  | 3825.836  | NM_00647E | 402.016   | 496.525   | AB011121  | 343.099  |
| 175.788  | NM_01644C | 8642.236  | 8614.078  | NM_01464E | 1628.876  | 1532.661  | AF083255  | 3652.808 |
| 1352.677 | NM_007194 | 1500.835  | 732.774   | NM_00565E | 946.787   | 1202.611  | AK022605  | 561.664  |
| 223.226  | NM_000314 | 5151.036  | 4767.126  | NM_00344C | 1564.707  | 1800.489  | AK000554  | 1049.276 |
| 932.335  | AB002369  | 1417.712  | 1736.577  | NM_00469E | 6909.794  | 8357.467  | NM_00647E | 1721.498 |
| 224.293  | S74620    | 632.051   | 527.044   | U41387    | 8603.42   | 6581.548  | NM_00282E | 2472.885 |
| 820.173  | AF305239  | 1213.951  | 1094      | NM_00451E | 3433.935  | 3123.944  | AF159141  | 628.632  |
| 5681.942 | NM_002827 | 3741.432  | 3907.088  | NM_00651E | 609.035   | 343.997   | NM_00242C | 518.014  |
| 951.724  | NM_00194E | 2318.596  | 8489.325  | NM_00368E | 10788.735 | 17322.783 | AK022233  | 1711.779 |
| 1494.997 | BF035425  | 11802.226 | 12660.212 | NM_00629E | 5273.299  | 5587.276  | AK026410  | 4914.623 |
| 888.076  | NM_00015E | 34187.699 | 33690.766 | NM_00154C | 1399.74   | 801.78    | NM_014637 | 1378.632 |
| 4391.739 | NM_01463E | 1802.479  | 2130.192  | NM_012111 | 4850.927  | 5106.899  | NM_01337E | 7300.277 |
| 5951.322 | NM_000118 | 275.961   | 1158.708  | NM_00447C | 7578.184  | 8435.435  | AF113208  | 3611.583 |
| 1353.146 | NM_00091E | 5275.929  | 15051.762 | NM_00141E | 2773.594  | 2755.584  | AF019382  | 277.107  |
| 216.864  | NM_00129E | 483.377   | 664.085   | NM_00375E | 18863.57  | 8997.611  | BC012757  | 978.893  |
| 239.665  | BG325046  | 1112.462  | 258.208   | AL049680  | 1573.233  | 1106.544  | NM_00406E | 886.982  |
| 3557.395 | AI351740  | 3345.476  | 18328.965 | AL133660  | 341.647   | 468.401   | NM_00588E | 469.056  |
| 570.211  | AA444051  | 1050.228  | 1723.516  | NM_01801E | 403.923   | 697.96    | NM_00444E | 773.435  |
| 3294.554 | NM_007164 | 2607.747  | 1969.278  | AF182419  | 917.232   | 1306.867  | NM_014591 | 1147.669 |
| 541.1    | BE783826  | 13048.87  | 14892.369 | NM_00429E | 364.183   | 522.499   | NM_01459E | 676.365  |

|           |           |           |           |           |           |           |           |           |
|-----------|-----------|-----------|-----------|-----------|-----------|-----------|-----------|-----------|
| 248.452   | X04827    | 1343.529  | 1455.615  | NM_007016 | 957.005   | 703.889   | NM_001945 | 1470.48   |
| 157.149   | H07088    | 1913.75   | 4629.119  | NM_002703 | 2262.719  | 1820.012  | NM_020039 | 1183.835  |
| 325.688   | AI004656  | 1373.098  | 1285.749  | NM_005375 | 7839.25   | 2607.57   | NM_006653 | 801.23    |
| 836.434   | AF116606  | 38879.02  | 27520.039 | NM_005985 | 3535.178  | 3132.389  | NM_014442 | 684.435   |
| 7913.1    | X98922    | 1711.359  | 3709.72   | NM_015906 | 3066.352  | 5915.193  | AB002313  | 576.17    |
| 1442.735  | AK098435  | 2940.804  | 2375.575  | AK023759  | 1446.12   | 1984.203  | NM_005409 | 869.214   |
| 583.575   | AK092872  | 3908.222  | 3344.207  | L25270    | 10803.904 | 11469.526 | NM_000208 | 751.733   |
| 1343.701  | AF230496  | 1322.342  | 1145.647  | AB033111  | 609.536   | 562.299   | NM_002188 | 4603.678  |
| 369.537   | M16801    | 686.844   | 563.801   | AJ276316  | 794.461   | 1027.07   | AK027119  | 4028.206  |
| 1983.885  | NM_145904 | 32931.492 | 24771.17  | AF229246  | 6144.64   | 5694.933  | NM_005426 | 1951.277  |
| 533.889   | NM_013334 | 3225.459  | 2530.087  | S64709    | 2306.988  | 1693.46   | NM_014063 | 3996.052  |
| 268.528   | AB037744  | 2868.282  | 2968.319  | NM_018488 | 833.295   | 640.365   | D86964    | 2582.703  |
| 799.828   | AF141901  | 1607.641  | 2716.629  | NM_003071 | 5018.967  | 4752.062  | AL049801  | 959.12    |
| 225.378   | NM_007008 | 294.568   | 467.221   | AF075023  | 801.465   | 1007.224  | NM_016395 | 4104.694  |
| 192.014   | AL109708  | 756.737   | 803.617   | AL360160  | 22095.168 | 49668.898 | NM_003152 | 680.774   |
| 292.348   | L29143    | 547.397   | 267.432   | AK001092  | 24562.018 | 22212.061 | NM_014727 | 1094.441  |
| 533.739   | AF234532  | 1682.999  | 793.23    | NM_014144 | 986.327   | 1458.224  | NM_006342 | 1006.86   |
| 108.912   | NM_002418 | 813.477   | 388.51    | AF147345  | 890.405   | 995.583   | NM_016396 | 1266.318  |
| 166.237   | NM_004485 | 734.803   | 675.012   | AF147373  | 3493.324  | 3557.26   | NM_005689 | 436.852   |
| 171.5     | NM_013296 | 5010.412  | 6227.115  | AK026209  | 282.104   | 378.636   | NM_005552 | 2127.011  |
| 167.852   | AL117478  | 965.947   | 714.64    | AF086253  | 791.38    | 1159.595  | NM_006717 | 713.284   |
| 197.964   | AF225426  | 602.326   | 388.22    | AK022063  | 2863.288  | 6134.797  | AK026479  | 1921.947  |
| 257.427   | NM_005208 | 5971.349  | 6157.145  | AF086345  | 2546.632  | 2441.385  | AK022860  | 2783.839  |
| 477.919   | NM_000421 | 411.3     | 311.984   | AF086464  | 519.459   | 285.465   | X60188    | 5129.486  |
| 10038.802 | AK025687  | 13170.862 | 8186.905  | AL049278  | 1490.311  | 1454.067  | NM_005977 | 390.887   |
| 322.056   | AF218941  | 977.565   | 1667.205  | NM_005060 | 524.636   | 588.481   | NM_006265 | 703.724   |
| 334.663   | AL137264  | 5934.563  | 9262.965  | AF075097  | 3069.464  | 3380.796  | NM_000347 | 2367.544  |
| 553.901   | NM_002226 | 1810.715  | 887.706   | AL133075  | 5915.336  | 7269.087  | M13452    | 3197.74   |
| 542.589   | X84370    | 4949.402  | 5416.899  | AL137630  | 2814.596  | 5473.992  | NM_016114 | 2132.148  |
| 215.288   | NM_004039 | 1564.015  | 4515.823  | AK055236  | 489.89    | 610.758   | AF086604  | 607.226   |
| 110.402   | AB014558  | 902.357   | 1176.454  | AL137277  | 5811.983  | 5441.926  | AK022178  | 404.187   |
| 1011.575  | AK023107  | 5483.963  | 4682.23   | AL137447  | 418.072   | 574.535   | L00635    | 436.393   |
| 439.096   | NM_006854 | 10548.03  | 4831.5    | BC023609  | 952.143   | 1329.741  | NM_015601 | 324.582   |
| 1469.029  | NM_004580 | 8293.889  | 8254.096  | AF086395  | 889.552   | 1446.378  | NM_001780 | 12705.681 |
| 2283.703  | NM_020387 | 16121.265 | 11767.682 | AF086049  | 2098.872  | 2230.336  | AJ277442  | 328.21    |
| 302.688   | NM_007246 | 1123.842  | 743.263   | AF114263  | 756.322   | 782.526   | NM_004569 | 754.221   |
| 1084.692  | AK026248  | 1689.897  | 1377.72   | AK026142  | 2911.023  | 2805.201  | AF089088  | 516.057   |
| 1022.82   | NM_004578 | 2721.149  | 2969.257  | AF161369  | 2208.206  | 2300.224  | L07557    | 991.94    |
| 906.9     | NM_000647 | 871.993   | 2399.567  | AF073328  | 485.325   | 555.65    | D78514    | 2259.284  |
| 1817.907  | NM_017604 | 794.606   | 1271.803  | Y12019    | 3017.257  | 2345.023  | AK021665  | 468.692   |
| 515.182   | NM_017738 | 3678.753  | 3390.588  | AF147418  | 376.785   | 321.326   | NM_002787 | 5789.012  |
| 2011.251  | NM_016557 | 397.264   | 629.045   | AF232217  | 83.689    | 599.915   | U95006    | 2152.809  |
| 690.374   | NM_000623 | 1164.046  | 737.677   | AL137326  | 696.577   | 268.264   | NM_003347 | 1330.559  |
| 501.715   | AF161348  | 1796.955  | 1405.561  | AK021898  | 1120.367  | 1524.847  | NM_014516 | 895.595   |
| 4140.948  | NM_018467 | 5910.989  | 6790.968  | AK022024  | 2084.152  | 1926.358  | AK000643  | 52083.813 |
| 474.946   | NM_006068 | 926.724   | 1438.165  | AK022163  | 419.284   | 408.816   | NM_018421 | 1804.258  |
| 274.923   | U16752    | 969.594   | 1044.941  | AK022301  | 1011.76   | 994.093   | NM_020127 | 705.922   |
| 804.647   | M30134    | 284.542   | 461.671   | AK021948  | 852.293   | 949.82    | NM_015623 | 5020.264  |
| 370.507   | NM_002038 | 3183.828  | 7258.961  | AK022054  | 428.136   | 443.112   | AB045116  | 1040.516  |
| 1312.786  | NM_005729 | 15516.239 | 11542.012 | AK022341  | 737.917   | 1198.906  | L49054    | 676.196   |
| 540.673   | NM_015493 | 1374.4    | 1904.905  | AK026861  | 791.134   | 1049.536  | NM_001675 | 474.097   |
| 1003.851  | NM_003747 | 1366.019  | 1143.729  | AK021642  | 3931.221  | 3407.219  | NM_003422 | 1208.518  |
| 455.781   | NM_002827 | 3771.965  | 4778.193  | AK022455  | 506.865   | 483.812   | NM_014779 | 426.887   |

|           |           |           |           |           |           |           |           |           |
|-----------|-----------|-----------|-----------|-----------|-----------|-----------|-----------|-----------|
| 421.55    | NM_001946 | 1751.309  | 4420.022  | AK021987  | 1312.642  | 1008.207  | NM_002943 | 1067.218  |
| 224.325   | BF035425  | 8018.229  | 7758.679  | AK026905  | 1332.103  | 1145.434  | AL133649  | 487.959   |
| 671.138   | NM_000159 | 30224.16  | 25069.658 | AK023449  | 542.195   | 302.551   | AB018303  | 716.479   |
| 397.629   | NM_014638 | 1470.787  | 1224.078  | AK026704  | 685.446   | 989.873   | NM_015846 | 1882.809  |
| 3975.137  | AF099740  | 831.545   | 986.851   | NM_006638 | 1884.655  | 1331.701  | NM_015972 | 5111.836  |
| 436.09    | NM_006117 | 5711.742  | 3702.923  | AF071170  | 2373.35   | 1383.94   | NM_001013 | 16503.949 |
| 481.435   | NM_002225 | 1520.915  | 1386.659  | AK025259  | 777.52    | 488.191   | AK024040  | 1896.633  |
| 612.82    | NM_006229 | 324.268   | 371.941   | NM_018304 | 3611.34   | 3940.872  | NM_005061 | 1379.159  |
| 1543.148  | NM_015415 | 9702.219  | 6126.165  | AK023264  | 316.907   | 415.164   | AL137354  | 8169.404  |
| 407.57    | NM_004897 | 568.692   | 682.728   | AK024457  | 3481.45   | 3457.007  | NM_001023 | 53005.742 |
| 255.654   | NM_002555 | 1371.138  | 1507.575  | AL389977  | 1195.878  | 939.505   | AK021571  | 4662.143  |
| 1686.653  | NM_000309 | 899.5     | 372.003   | AK026894  | 967.06    | 969.581   | AF052149  | 758.735   |
| 318.04    | NM_004528 | 24255.91  | 18442.041 | AK026372  | 731.654   | 604.83    | AK025586  | 208.451   |
| 330.742   | AK026381  | 12237.071 | 14727.683 | AF056442  | 987.131   | 477.486   | NM_002541 | 528.823   |
| 866.172   | NM_002450 | 8010.519  | 1986.615  | AK024752  | 22295.076 | 20406.871 | NM_000056 | 1209.31   |
| 274.502   | NM_001686 | 968.277   | 871.616   | BG117194  | 604.371   | 339.312   | NM_016311 | 2928.825  |
| 1032.128  | NM_000705 | 616.991   | 861.701   | AF131859  | 2021.81   | 1878.37   | NM_001867 | 39885.898 |
| 120.9     | NM_004231 | 37538.789 | 50032.555 | AK023632  | 662       | 500.92    | NM_002300 | 53524.293 |
| 2986.297  | NM_145904 | 37037.793 | 37317.441 | AF086118  | 3292.205  | 3301.674  | NM_000290 | 1204.057  |
| 580.478   | NM_013334 | 2743.949  | 1515.048  | NM_014138 | 590.345   | 1249.196  | NM_016538 | 3172.661  |
| 2891.804  | AF150735  | 1850.483  | 1398.268  | AK025044  | 801.201   | 811.807   | AK023275  | 3461.58   |
| 790.794   | NM_012382 | 1049.844  | 756.823   | AK023690  | 591.686   | 1269.986  | AJ223352  | 982.592   |
| 328.828   | BF038366  | 559.366   | 568.041   | AF230317  | 328.065   | 618.017   | NM_012238 | 488.614   |
| 1011.957  | NM_002452 | 6560.149  | 5092.384  | AK023806  | 2208.515  | 2313.398  | NM_016539 | 1630.318  |
| 20039.635 | NM_012304 | 605.022   | 1200.15   | AF088068  | 283.902   | 733.061   | NM_006807 | 2140.292  |
| 3809.21   | NM_007194 | 1912.613  | 1451.162  | Y16696    | 12770.351 | 16295.991 | NM_000326 | 768.201   |
| 11250.142 | NM_000314 | 4706.188  | 5671.747  | AK026094  | 887.97    | 863.254   | U07132    | 3232.842  |
| 40733.254 | AB002369  | 1370.271  | 2147.812  | AF161344  | 5749.917  | 6070.683  | NM_003436 | 539.28    |
| 3491.73   | S74620    | 570.766   | 1039.615  | AF086027  | 1626.515  | 1391.476  | AL035301  | 394.259   |
| 421.829   | AF305239  | 1423.02   | 1512.47   | NM_001207 | 52561.344 | 56067.719 | NM_017687 | 1018.758  |
| 259.013   | AL137264  | 6400.729  | 10617.368 | AF075045  | 335.66    | 380.374   | NM_017975 | 693.795   |
| 2682.562  | NM_002226 | 2073.164  | 1271.445  | AK022199  | 1268.508  | 1142.515  | AK024843  | 1159.203  |
| 593.024   | X84370    | 4794.052  | 4875.08   | NM_006211 | 679.636   | 242.656   | NM_017670 | 2032.625  |
| 20180.24  | NM_004039 | 1162.344  | 1977.78   | NM_003524 | 3373.125  | 11547.575 | AK021468  | 704.142   |
| 2053.27   | AB014558  | 849.121   | 833.202   | AK021438  | 632.548   | 337.651   | BC033020  | 623.718   |
| 1592.542  | NM_006287 | 298.165   | 257.921   | NM_005913 | 418.105   | 237.217   | NM_004366 | 1490.823  |
| 1075.496  | NM_000913 | 4869.005  | 12287.768 | S39891    | 568.448   | 263.886   | AK026168  | 973.063   |
| 1355.805  | NM_001298 | 350.383   | 522.403   | AK021624  | 649.412   | 543.768   | AJ296152  | 7755.03   |
| 1151.238  | BG325046  | 1079.831  | 355.552   | AF278605  | 4933.639  | 4518.036  | AK001067  | 586.746   |
| 1073.044  | AI351740  | 3213.739  | 16726.832 | NM_006497 | 7133.993  | 5692.614  | AK027088  | 1474.195  |
| 425.221   | AA444051  | 982.119   | 1554.657  | AK022329  | 195.751   | 498.785   | AB037721  | 1151.629  |
| 1910.765  | NM_007164 | 1189.085  | 1103.487  | AL133599  | 956.807   | 933.69    | AK027120  | 3307.6    |
| 1307.323  | BE783826  | 5670.673  | 5478.312  | AK022380  | 241.769   | 311.379   | AB029001  | 855.864   |
| 4436.705  | X04827    | 940.424   | 978.021   | NM_016472 | 970.588   | 1367.428  | AB006624  | 1349.232  |
| 1746.185  | H07088    | 1146.066  | 1814.329  | AF086064  | 428.197   | 594.999   | AL109717  | 733.673   |
| 1657.239  | AI004656  | 1261.044  | 1092.909  | AK023042  | 2922.869  | 3359.144  | AK025473  | 509.031   |
| 679.664   | BC020596  | 1978.583  | 2112.005  | AF086501  | 328.778   | 372.033   | AF271070  | 6825.373  |
| 12163.484 | X98922    | 1992.743  | 4654.537  | AK026429  | 561.422   | 697.265   | NM_014903 | 1609.509  |
| 1871.943  | AK098435  | 3180.678  | 3021.5    | NM_016550 | 1698.107  | 1105.354  | AK055959  | 826.423   |
| 613.714   | AK092872  | 3642.914  | 3663.71   | AK024813  | 3441.13   | 3772.784  | AF052141  | 584.536   |
| 606.817   | AF230496  | 535.592   | 454.792   | AJ227909  | 21346.039 | 28600.607 | AK021705  | 1223.948  |
| 450.302   | M16801    | 482.885   | 696.12    | AK021880  | 662.755   | 586.889   | NM_016141 | 3528.832  |
| 349.28    | M30134    | 244.261   | 666.062   | L19365    | 769.133   | 1030.407  | AK025624  | 3305.796  |

|           |           |           |           |           |           |           |            |           |
|-----------|-----------|-----------|-----------|-----------|-----------|-----------|------------|-----------|
| 204.72    | NM_00203E | 3480.965  | 5633.439  | AK024107  | 494.138   | 699.58    | AL110125   | 3486.693  |
| 555.851   | NM_00572E | 15577.419 | 9728.497  | CY3Cy5    | 3442.845  | 734.58    | AJ011600   | 415.129   |
| 1136.238  | NM_01549E | 1271.029  | 1280.372  | BG534366  | 498.881   | 1191.357  | AJ002785   | 571.241   |
| 517.006   | NM_003747 | 1335.175  | 791.375   | BG698522  | 4144.175  | 5221.787  | L32606     | 559.893   |
| 1147.458  | AB037744  | 2371.962  | 1657.425  | AA152346  | 534.677   | 606.402   | AK091125   | 634.469   |
| 2019.065  | AF141901  | 914.64    | 845.317   | L15189    | 1334.869  | 1587.064  | D16904     | 581.9     |
| 1155.638  | AL109708  | 651.493   | 651.596   | AB023420  | 4926.692  | 5148.078  | M93056     | 3733.312  |
| 2359.867  | AF234532  | 1535.31   | 571.758   | AF022912  | 1322.716  | 1707.404  | D16474     | 6060.552  |
| 1187.746  | NM_00241E | 583.522   | 381.462   | AA477428  | 5575.657  | 6250.631  | AL080072   | 835.287   |
| 446.578   | NM_00448E | 532.917   | 394.602   | AA156342  | 631.793   | 663.685   | AL049280   | 802.693   |
| 1143.47   | NM_01329E | 5068.628  | 4640.767  | R45594    | 7028.367  | 4032.549  | AK025212   | 3138.485  |
| 1007.085  | AL117478  | 1265.447  | 876.135   | H46425    | 810.613   | 797.341   | AL157503   | 926.542   |
| 2598.165  | NM_005307 | 684.105   | 662.682   | AA278152  | 2698.118  | 3399.023  | AK000786   | 719.527   |
| 5002.486  | NM_00595E | 1846.856  | 1094.702  | H75530    | 975.952   | 844.97    | AK021458   | 475.564   |
| 823.381   | NM_01343E | 919.045   | 790.257   | NM_00417E | 2316.903  | 1932.678  | AK024525   | 2559.982  |
| 3300.267  | AF225426  | 907.892   | 922.027   | NM_00454E | 8498.001  | 6709.027  | AK024909   | 452.978   |
| 931.482   | NM_00520E | 6276.346  | 7568.19   | SR9       | 12099.094 | 2773.326  | AK024544   | 764.981   |
| 6782.468  | NM_000421 | 479.341   | 456.606   | NM_00131E | 5968.458  | 8722.968  | AK025097   | 382.175   |
| 21213.436 | AK025687  | 12786.922 | 8230.949  | AF286095  | 859       | 2916.062  | AK001880   | 1086.5    |
| 552.886   | AF218941  | 1024.67   | 1935.021  | NM_00087E | 557.385   | 842.803   | AF156166   | 2566.851  |
| 240.627   | NM_00070E | 744.403   | 515.026   | S66407    | 873.162   | 1071.167  | NM_01437E  | 12579.929 |
| 901.99    | NM_004231 | 35165.98  | 39212.059 | NM_001981 | 2564.679  | 1955.835  | NM_01420E  | 4142.08   |
| 159.029   | AK023107  | 5236.127  | 3383.655  | NM_00158E | 23629.395 | 17310.98  | NM_001651  | 2870.467  |
| 637.842   | NM_006854 | 11562.843 | 5214.365  | AK026108  | 4441.753  | 2297.074  | L32786     | 1958.513  |
| 9877.659  | NM_00458E | 9125.295  | 9426.031  | NM_00637E | 1572.064  | 1385.033  | U03239     | 416.512   |
| 3105.147  | NM_020387 | 25277.033 | 40393.703 | BF571428  | 1221.464  | 1201.078  | AL355720   | 1862.62   |
| 920.768   | NM_00724E | 1184.729  | 991.14    | AB037723  | 1867.639  | 1460.296  | AK002023   | 1576.385  |
| 2267.114  | AK026248  | 1264.656  | 1139.988  | NM_00624E | 1649.115  | 1369.769  | NM_016464  | 646.543   |
| 2820.584  | NM_00457E | 1742.98   | 1525.665  | U58096    | 12083.649 | 10394.039 | unknown (E | 643.791   |
| 1397.46   | NM_000647 | 355.476   | 1101.389  | NM_01232E | 402.324   | 603.57    | AF086216   | 275.587   |
| 5538.017  | NM_017604 | 729.871   | 1153.011  | AF182404  | 1375.464  | 2683.213  | AK022422   | 1262.107  |
| 1526.733  | NM_01773E | 3972.234  | 4106.885  | NM_000804 | 716.048   | 903.796   | AK023485   | 442.497   |
| 2319.854  | NM_016557 | 820.357   | 726.675   | NM_00655E | 1253.719  | 2300.411  | AK022474   | 9831.875  |
| 3650.53   | NM_00062E | 3183.698  | 3032.123  | NM_014521 | 619.353   | 685.182   | AK022392   | 2134.989  |
| 4387.29   | AF161348  | 2343.337  | 2698.065  | NM_00244E | 518.932   | 664.831   | AL117451   | 517.998   |
| 1045.442  | NM_018467 | 6341.871  | 9932.299  | NM_01780E | 578.271   | 619.437   | AK025949   | 713.776   |
| 366.735   | NM_00606E | 979.406   | 1362.879  | AK023202  | 973.42    | 1191.606  | Y10259     | 652.563   |
| 5363.416  | U16752    | 1047.256  | 1101.257  | AF131760  | 531.251   | 940.052   | AK021725   | 714.883   |
| 896.539   | NM_01644E | 11500.976 | 14525.158 | NM_01869E | 1041.138  | 1514.309  | NM_00240E  | 2406.101  |
| 2881.974  | NM_007194 | 1801.216  | 1208.652  | NM_006461 | 663.607   | 640.163   | AK024282   | 973.257   |
| 940.362   | NM_000314 | 5436.603  | 4245.154  | NM_018201 | 1426.465  | 1512.503  | AF085838   | 1026.994  |
| 10099.644 | AB002369  | 1447.141  | 1733.465  | NM_01443E | 431.825   | 430.554   | AF086335   | 1288.074  |
| 2687.32   | AF305239  | 1333.604  | 650.305   | NM_01488E | 1610.881  | 1395.997  | AB011118   | 3172.08   |
| 1198.228  | NM_002827 | 3733.596  | 2901.901  | NM_003764 | 1507.909  | 1671.575  | NM_01863E  | 583.905   |
| 932.336   | NM_00194E | 1755.067  | 3462.733  | NM_00679E | 12454.883 | 10450.269 | AF040097   | 607.139   |
| 851.139   | BF035425  | 12534.258 | 11824.581 | NM_00153E | 2080.689  | 2024.918  | AK024182   | 749.277   |
| 2301.699  | NM_00160E | 62.734    | 268.25    | X97261    | 5724.521  | 1187.715  | NM_00691E  | 6488.476  |
| 1587.659  | NM_00015E | 34359.664 | 40257.898 | AF149304  | 593.424   | 629.534   | NM_00049E  | 3996.955  |
| 1194.269  | NM_01463E | 1487.057  | 1078.273  | NM_01209E | 5020.527  | 6046.382  | AL049955   | 4909.328  |
| 721.276   | AF099740  | 760.109   | 1089.701  | X73079    | 11244.114 | 13311.031 | AF155654   | 2690.37   |
| 822.669   | NM_006117 | 5981.966  | 3471.332  | NM_019091 | 651.287   | 750.645   | AK000028   | 954.044   |
| 8283.455  | NM_00222E | 1582.142  | 1181.558  | AF264781  | 839.093   | 1067.543  | NM_01332E  | 27847.221 |
| 1553.411  | NM_00622E | 32.411    | 315.594   | AK024215  | 6712.55   | 8639.176  | Z36840     | 602.033   |

|           |           |           |           |           |           |           |           |           |
|-----------|-----------|-----------|-----------|-----------|-----------|-----------|-----------|-----------|
| 2463.518  | NM_015415 | 13107.308 | 9324.504  | AB044661  | 1883.946  | 1668.879  | AB002368  | 1084.261  |
| 771.463   | NM_004897 | 859.35    | 1237.496  | NM_000606 | 3787.81   | 3831.811  | AL360263  | 18237.236 |
| 209.072   | NM_002555 | 2411.285  | 3130.567  | NM_016124 | 3187.154  | 3922.687  | Z36780    | 798.749   |
| 2487.073  | NM_000309 | 1640.307  | 1513.537  | NM_019079 | 368.152   | 374.017   | AK022403  | 785.543   |
| 1471.281  | NM_004528 | 28656.172 | 25696.271 | U53530    | 1248.439  | 736.758   | AK022955  | 802.193   |
| 706.393   | NM_002450 | 7709.383  | 2523.297  | NM_006598 | 645.232   | 659.996   | BC035855  | 872.583   |
| 3059.235  | NM_001686 | 693.251   | 1082.947  | NM_015948 | 2832.655  | 1533.072  | AL137408  | 8969.868  |
| 501.587   | NM_014723 | 582.404   | 861.33    | NM_003054 | 2047.42   | 1730.745  | AF054995  | 1271.193  |
| 1921.228  | AB011106  | 932.139   | 782.298   | NM_002826 | 4290.438  | 7574.946  | AL080176  | 1432.445  |
| 3547.439  | D26362    | 3353.035  | 1603.636  | AF159141  | 1779.427  | 1848.223  | AK023627  | 876.256   |
| 904.372   | NM_013452 | 1122.749  | 864.72    | NM_002420 | 557.492   | 472.136   | CY3Cy5    | 1683.991  |
| 971.425   | AY009402  | 1497.691  | 1265.529  | NM_016458 | 16405.15  | 15955.397 | BI759406  | 1679.83   |
| 2588.289  | NM_018451 | 913.375   | 154.453   | AK022233  | 1827.709  | 1830.193  | R76099    | 515.693   |
| 16362.499 | NM_012443 | 618.3     | 672.333   | AK026410  | 5683.855  | 4274.133  | S74445    | 672.376   |
| 1870.893  | NM_007009 | 435.74    | 392.159   | NM_014637 | 1405.484  | 1218.092  | BI763360  | 703.732   |
| 3614.61   | NM_002584 | 4134.69   | 4390.306  | NM_013379 | 8794.684  | 7353.929  | D25538    | 517.674   |
| 484.502   | NM_013334 | 3025.244  | 2183.512  | AF113208  | 4291.92   | 5164.599  | NM_000360 | 3147.487  |
| 324.791   | AF150735  | 3626.989  | 3415.47   | NM_006153 | 3407.906  | 3685.335  | D49950    | 2685.491  |
| 505.214   | NM_018183 | 1715.43   | 1956.819  | NM_012164 | 2209.253  | 5478.069  | NM_001849 | 553.023   |
| 695.655   | NM_012382 | 1867.81   | 1756.451  | AK026010  | 704.01    | 698.22    | X03635    | 1491.531  |
| 378.81    | BF038366  | 891.114   | 728.418   | AB011156  | 697.737   | 576.683   | X03348    | 1437.587  |
| 461.403   | NM_012304 | 1042.082  | 2145.875  | NM_018079 | 534.039   | 357.967   | AF353674  | 3087.021  |
| 1066.382  | AF245505  | 616.809   | 791.657   | NM_004760 | 1714.807  | 1282.789  | BC002645  | 2027.203  |
| 1022.422  | AB037776  | 568.9     | 574.232   | NM_006752 | 2761.697  | 1575.446  | NM_021138 | 1170.416  |
| 15920.576 | AF196976  | 3901.385  | 3238.815  | NM_006942 | 318.297   | 851.421   | BC002792  | 513.15    |
| 892.125   | AL050379  | 752.921   | 640.833   | NM_013943 | 528.651   | 794.927   | NM_021005 | 1219.287  |
| 1152.419  | NM_003161 | 1286.214  | 1044.709  | NM_001639 | 2136.448  | 4066.357  | SR6       | 1300.111  |
| 1957.03   | NM_016215 | 13630.746 | 14230.357 | BG534366  | 596.237   | 718.844   | SR8       | 4034.124  |
| 464.409   | AK026919  | 210.118   | 771.098   | BG698522  | 4496.417  | 6204.465  | SR10      | 16215.264 |
| 16246.564 | NM_001501 | 3054.049  | 4050.579  | AA152346  | 352.991   | 327.291   | CY3Cy5    | 1882.592  |
| 2933.16   | NM_006176 | 16768.771 | 18496.656 | L15189    | 1274.883  | 1411.253  | X07203    | 487.181   |
| 3417.482  | AL137459  | 1028.64   | 1255.705  | AB023420  | 5050.023  | 3747.189  | NM_003834 | 2125.421  |
| 200.142   | AB007932  | 1185.955  | 1397.646  | AF022912  | 1233.442  | 1689.951  | NM_005959 | 1195.112  |
| 1114.158  | AF219257  | 13876.243 | 13841.305 | AA477428  | 5818.642  | 6914.7    | NM_003381 | 679.329   |
| 21383.404 | NM_003978 | 838.514   | 1622.557  | R45594    | 7358.084  | 5042.175  | NM_005756 | 407.427   |
| 903.942   | NM_002561 | 1071.002  | 890.828   | H46425    | 965.739   | 993.789   | NM_003702 | 4938.452  |
| 598.685   | NM_006103 | 14518.335 | 15008.477 | AA278152  | 3212.06   | 3557.036  | NM_000369 | 465.885   |
| 3087.193  | NM_006206 | 346.362   | 441.981   | H75530    | 929.17    | 680.37    | NM_016351 | 525.959   |
| 1409.643  | NM_000805 | 501.633   | 590.399   | NM_004176 | 1326.583  | 1334.185  | NM_004405 | 826.265   |
| 440.323   | AL359933  | 10871.857 | 14038.391 | NM_004548 | 8684.8    | 5918.188  | NM_006060 | 1048.655  |
| 1143.257  | M17783    | 4574.051  | 7449.165  | AK000554  | 1800.304  | 2149.185  | NM_005667 | 1173.704  |
| 2555.953  | NM_018590 | 5190.988  | 4494.066  | NM_006472 | 2630.962  | 10564.904 | NM_006308 | 952.059   |
| 735.536   | NM_003178 | 913.852   | 1166.326  | NM_001538 | 2691.268  | 3673.132  | NM_000060 | 806.37    |
| 1161.905  | NM_012437 | 5848.722  | 5902.786  | X97261    | 7196.367  | 2024.311  | NM_009589 | 443.249   |
| 1297.253  | AF090944  | 387.121   | 319.287   | D87666    | 37250.008 | 39226.277 | L09080    | 986.136   |
| 888.376   | NM_002607 | 936.893   | 527.037   | NM_001315 | 6456.044  | 5765.244  | NM_007326 | 2972.953  |
| 1841.956  | AF116626  | 2183.739  | 1816.701  | AF286095  | 627.849   | 576.833   | NM_001886 | 2196.194  |
| 7091.75   | NM_001760 | 24146.475 | 26903.266 | NM_000878 | 469.257   | 452.809   | NM_004467 | 527.679   |
| 1013.548  | NM_002527 | 911.647   | 710.044   | S66407    | 872.233   | 754.904   | NM_005622 | 552.299   |
| 288.507   | NM_005890 | 836.555   | 1190.452  | NM_004258 | 26528.299 | 13600.864 | NM_018058 | 3693.167  |
| 306.76    | NM_007065 | 32259.729 | 32651.063 | NM_001981 | 2528.188  | 2131.462  | NM_004548 | 2304.184  |
| 6905.092  | AF149785  | 3022.08   | 2441.998  | NM_001585 | 30252.205 | 24746.57  | X69079    | 9061.469  |
| 328.993   | NM_012068 | 9666.525  | 6177.69   | AK026108  | 6936.912  | 3987.176  | AF091033  | 478.111   |

|           |           |           |           |           |           |           |           |           |
|-----------|-----------|-----------|-----------|-----------|-----------|-----------|-----------|-----------|
| 691.472   | NM_004064 | 5444.625  | 3883.928  | NM_006379 | 1621.845  | 1305.64   | NM_001122 | 3692.424  |
| 17304.904 | NM_001256 | 1709.497  | 1354.925  | BF571428  | 1549.561  | 1227.374  | NM_004591 | 1261.545  |
| 5421.122  | NM_014704 | 1781.532  | 1513.521  | AB037723  | 2532.864  | 1132.759  | AL133027  | 591.061   |
| 48063.707 | NM_020205 | 645.736   | 439.719   | NM_006246 | 1526.592  | 1110.255  | AB037732  | 1449.005  |
| 2179.042  | NM_001191 | 2735.69   | 1890.854  | U58096    | 12030.266 | 8412.234  | NM_001839 | 54814.363 |
| 596.531   | U15174    | 876.787   | 1067.89   | NM_016929 | 2130.269  | 1627.792  | M27487    | 682.542   |
| 1401.828  | NM_013342 | 1798.906  | 3960.355  | NM_012323 | 774.821   | 1016.567  | NM_002286 | 35160.152 |
| 1398.823  | AL110261  | 4484.06   | 5208.433  | NM_015948 | 3313.592  | 4020.652  | NM_003811 | 3817.744  |
| 973.48    | AA203539  | 411.304   | 428.951   | NM_003054 | 2270.335  | 2660.123  | NM_002981 | 2582.031  |
| 971.231   | AK021786  | 721.749   | 642.231   | NM_002219 | 7927.674  | 5552.617  | NM_001244 | 1546.896  |
| 1465.482  | NM_005932 | 956.446   | 296.307   | AF182404  | 1341.965  | 2104.592  | NM_012275 | 448.246   |
| 4258.52   | NM_004279 | 5006.244  | 3040.299  | NM_000804 | 696.241   | 419.363   | NM_016139 | 15580.98  |
| 63013.289 | NM_004851 | 321.398   | 569.275   | NM_006555 | 978.117   | 1081.892  | AL117468  | 1922.757  |
| 1394.758  | NM_001908 | 1619.051  | 1360.208  | NM_002445 | 690.773   | 648.588   | NM_019613 | 1579.223  |
| 3475.278  | NM_000285 | 4194.067  | 6038.868  | NM_017809 | 512.807   | 465.614   | NM_005382 | 632.71    |
| 6683.89   | NM_005911 | 14635.81  | 12851.459 | AK023202  | 1035.547  | 1172.14   | AK027086  | 1394.807  |
| 2566.016  | AV702690  | 1196.728  | 1003.948  | D63877    | 2445.517  | 1964.427  | AB032997  | 552.799   |
| 1515.74   | AL117452  | 1825.362  | 777.371   | AF131760  | 746.116   | 1063.305  | AL096857  | 1571.171  |
| 964.396   | NM_012230 | 956.25    | 868.953   | NM_018698 | 888.905   | 896.683   | AF073770  | 1070.652  |
| 1358.368  | NM_014038 | 5444.865  | 2051.753  | NM_006461 | 737.814   | 881.089   | AL359401  | 4060.99   |
| 1386.535  | NM_002061 | 3030.011  | 2896.239  | NM_018201 | 1799.828  | 1478.47   | NM_012213 | 1615.698  |
| 1408.268  | AF169974  | 1009.127  | 1063.663  | NM_014438 | 555.737   | 330.444   | NM_016573 | 2563.119  |
| 2281.671  | NM_005733 | 1352.349  | 1219.588  | NM_014880 | 1698.102  | 686.43    | NM_001303 | 3316.875  |
| 912.839   | NM_018138 | 1761.396  | 1252.35   | NM_003764 | 1419.519  | 1345.599  | M21304    | 1471.608  |
| 821.653   | NM_019619 | 3528.035  | 2951.22   | NM_004829 | 621.986   | 427.471   | NM_001979 | 717.563   |
| 6564.34   | AF183411  | 1675.61   | 1187.876  | NM_006793 | 13956.684 | 18620.381 | AB040896  | 1385.014  |
| 759.867   | BF244591  | 998.126   | 1205.646  | NM_018079 | 573.453   | 749.153   | NM_001107 | 1385.764  |
| 3121.49   | NM_005886 | 7008.657  | 8023.336  | NM_004760 | 2341.233  | 2273.494  | AF151851  | 3719.378  |
| 937.091   | U63785    | 1123.111  | 1395.844  | NM_006752 | 2710.51   | 2201.666  | NM_005176 | 538.59    |
| 2112.15   | NM_005966 | 1430.143  | 1234.213  | NM_006809 | 2661.314  | 4803.78   | NM_003636 | 2361.452  |
| 964.341   | NM_003156 | 1438.913  | 1706.122  | AF149304  | 642.588   | 714.295   | NM_002234 | 1394.457  |
| 8755.378  | NM_013310 | 3014.237  | 2290.944  | NM_012095 | 5284.642  | 6082.342  | NM_000701 | 1005.848  |
| 1422.48   | BC004958  | 1436.84   | 765.096   | X73079    | 11485.277 | 8619.737  | AB022696  | 1568.249  |
| 3795.768  | NM_005762 | 6748.367  | 3348.19   | AF264781  | 1091.493  | 1256.963  | AF137372  | 2259.789  |
| 4002.416  | NM_006473 | 593.325   | 699.774   | AK024215  | 7302.562  | 6867.766  | AF220417  | 729.799   |
| 2475.681  | NM_014643 | 2169.778  | 1697.676  | AB044661  | 1746.247  | 1475.225  | D83782    | 3375.113  |
| 391.311   | NM_005653 | 1290.706  | 1271.849  | NM_000606 | 4256.09   | 3118.991  | NM_002078 | 1533.614  |
| 294.457   | NM_014553 | 830.413   | 571.444   | NM_016124 | 3765.739  | 3492.969  | NM_000287 | 2633.387  |
| 107.094   | NM_003440 | 1522.497  | 1293.148  | NM_019079 | 260.051   | 383.976   | NM_001656 | 1151.99   |
| 253.39    | NM_004698 | 8939.892  | 7184.64   | U53530    | 1248.203  | 598.922   | Z70705    | 579.509   |
| 256.304   | U41387    | 8451.527  | 3975.581  | NM_006598 | 1302.765  | 905.595   | NM_002611 | 1033.959  |
| 3797.732  | NM_004516 | 5349.082  | 2729.924  | NM_004176 | 1467.689  | 2042.252  | NM_017417 | 564.678   |
| 806.42    | NM_003685 | 11232.62  | 7082.601  | NM_004548 | 9145.683  | 11320.433 | AL133602  | 1379.735  |
| 207.699   | NM_002486 | 532.908   | 383.547   | AK000554  | 2183.085  | 2704.852  | AF037219  | 1779.178  |
| 2569.257  | NM_006295 | 8097.074  | 5707.182  | NM_006472 | 3111.959  | 13249.99  | AK026075  | 565.231   |
| 5738.865  | NM_001540 | 2741.516  | 2673.182  | NM_002826 | 4508.334  | 6440.914  | NM_000251 | 2121.508  |
| 1200.233  | NM_012111 | 7481.694  | 10619.711 | AF159141  | 1810.422  | 1428.606  | NM_006038 | 1953.128  |
| 9611.245  | NM_004470 | 8182.665  | 10791.398 | NM_002420 | 582.156   | 833.419   | AB011133  | 1108.293  |
| 754.476   | NM_001418 | 5995.593  | 4653.286  | NM_016458 | 21759.385 | 18385.695 | NM_017572 | 17870.057 |
| 4894.235  | NM_003756 | 30545.736 | 34178.797 | AK022233  | 1218.036  | 1049.795  | NM_018444 | 1478.767  |
| 516.142   | AL049680  | 3801.044  | 1671.194  | AK026410  | 5708.819  | 3447.559  | NM_000252 | 1784.87   |
| 727.991   | AL133660  | 641.787   | 886.25    | NM_014637 | 1424.694  | 976.871   | NM_006947 | 5978.968  |
| 889.996   | AK001595  | 984.295   | 889.407   | NM_013379 | 9878.745  | 7141.235  | NM_017917 | 1520.74   |



|           |           |           |           |           |           |           |           |           |
|-----------|-----------|-----------|-----------|-----------|-----------|-----------|-----------|-----------|
| 573.988   | NM_003715 | 5043.486  | 4059.984  | AF113208  | 4638.27   | 3641.025  | NM_00409C | 2464.589  |
| 1214.059  | BF036874  | 1388.806  | 847.958   | NM_006153 | 3710.799  | 1992.311  | NM_014634 | 5618.766  |
| 442.094   | BE888487  | 555.849   | 365.806   | NM_012164 | 781.344   | 547.54    | NM_001919 | 6660.515  |
| 458.884   | AF182419  | 826.987   | 1193.159  | AK026010  | 395.741   | 352.648   | BC031485  | 1581.116  |
| 226.812   | NM_007016 | 1120.142  | 704.549   | NM_004721 | 338.346   | 294.47    | NM_004092 | 3728.636  |
| 217.537   | NM_002703 | 3110.576  | 2007.133  | AB011156  | 731.451   | 490.085   | X15624    | 1044.229  |
| 2257.245  | NM_005375 | 10512.969 | 1640.56   | NM_006246 | 1658.865  | 1678.87   | NM_005622 | 456.286   |
| 2249.758  | NM_005985 | 2217.591  | 1550.967  | U58096    | 12871.773 | 20553.492 | NM_01805E | 3191.946  |
| 279.498   | NM_015906 | 2983.199  | 2788.402  | NM_016929 | 2288.539  | 2183.533  | NM_00454E | 1943.016  |
| 1383.128  | AK023759  | 1299.192  | 1064.822  | NM_012323 | 774.358   | 742.612   | X69079    | 9684.226  |
| 3214.197  | L25270    | 8860.66   | 7574.442  | NM_013943 | 559.272   | 644.768   | BI759406  | 2046.039  |
| 477.356   | AB033111  | 920.664   | 1073.055  | NM_001639 | 1119.137  | 755.056   | R76099    | 439.048   |
| 2083.996  | AJ276316  | 1982.16   | 3719.311  | BG534366  | 418.086   | 379.365   | S74445    | 623.461   |
| 1068.216  | AF229246  | 7210.674  | 6836.925  | BG698522  | 3175.372  | 2599.676  | BI763360  | 890.06    |
| 1247.318  | S64709    | 3531.804  | 3344.746  | L15189    | 1421.275  | 1158.211  | D49950    | 2810.604  |
| 960.595   | NM_01848E | 970.572   | 818.865   | AB023420  | 4925.964  | 3299.894  | NM_001849 | 914.461   |
| 190.142   | NM_003071 | 6532.769  | 6031.254  | AF022912  | 1439.086  | 1592.598  | X03635    | 1558.749  |
| 586.511   | AK021494  | 1420.615  | 981.764   | AA477428  | 7048.49   | 5423.582  | BC011847  | 50510.117 |
| 591.67    | AK022117  | 294.889   | 458.036   | AA156342  | 426.741   | 296.804   | X03348    | 1261.885  |
| 148.631   | AF075023  | 737.922   | 651.983   | R45594    | 7655.799  | 2980.189  | AF353674  | 2524.113  |
| 2998.002  | AL360160  | 16827.48  | 15134.883 | AI143386  | 335.911   | 276.179   | BC002645  | 1986.297  |
| 2989.858  | AK001092  | 15519.441 | 16366.83  | H46425    | 873.571   | 499.481   | NM_021138 | 1392.039  |
| 31924.527 | AK023427  | 1172.372  | 1629.484  | AA278152  | 2689.063  | 2786.62   | BC002792  | 280.762   |
| 25518.387 | NM_014144 | 2278.354  | 4125.532  | H75530    | 1023.631  | 1106.862  | NM_021005 | 1216.761  |
| 4461.329  | AF147345  | 819.08    | 782.484   | NM_003764 | 1309.915  | 1763.386  | NM_001523 | 672.263   |
| 2639.185  | AF147373  | 3070.501  | 3762.164  | NM_004829 | 331.081   | 359.484   | NM_017423 | 794.704   |
| 566.154   | AF086253  | 496.334   | 228.028   | NM_006793 | 14532.713 | 18769.52  | NM_019613 | 1353.75   |
| 2444.977  | AF086303  | 519.171   | 390.689   | NM_00153E | 3047.904  | 4168.669  | AK027086  | 1140.9    |
| 2211.178  | AF086434  | 1002.123  | 1107.196  | X97261    | 6776.878  | 2019.256  | AB032997  | 538.521   |
| 691.854   | AK022063  | 2273.758  | 3663.691  | D87666    | 36129.754 | 33270.363 | AL096857  | 1588.023  |
| 947.172   | AF086345  | 2312.546  | 1921.02   | NM_001315 | 5690.589  | 5025.971  | X07203    | 584.114   |
| 679.139   | AF086464  | 768.756   | 866.113   | AF286095  | 637.109   | 661.964   | AB040104  | 533.802   |
| 6401.925  | AL049278  | 2110.357  | 2125.018  | NM_00087E | 483.409   | 491.315   | NM_003834 | 2206.535  |
| 785.692   | AL117519  | 361.401   | 488.16    | S66407    | 1071.463  | 750.341   | NM_005959 | 1404.293  |
| 1082.61   | AK055338  | 208.42    | 267.288   | NM_00425E | 39610.039 | 15606.611 | NM_003381 | 766.911   |
| 1155.505  | NM_00506C | 596.006   | 620.049   | NM_001981 | 3355.164  | 1768.605  | NM_00575E | 663.103   |
| 1007.449  | AF085935  | 380.065   | 364.989   | NM_001585 | 31674.457 | 17317.656 | NM_003702 | 4953.324  |
| 4220.304  | AL035369  | 975.431   | 1331.277  | AK026108  | 7412.574  | 2987.136  | NM_016351 | 719.72    |
| 1992.915  | AF075097  | 2836.172  | 3468.996  | NM_006379 | 1252.961  | 901.129   | NM_004405 | 1064.121  |
| 1733.878  | AL133075  | 4735.774  | 9413.149  | BF571428  | 1252.992  | 932.895   | NM_00198E | 3101.402  |
| 1303.617  | AL137630  | 2162.961  | 2130.669  | AB037723  | 1941.051  | 966.257   | NM_00606C | 949.739   |
| 1841.399  | AL137277  | 4695.959  | 5305.681  | NM_000606 | 3614.169  | 4157.479  | NM_005667 | 1118.536  |
| 7634.365  | AL137447  | 595.289   | 607.042   | NM_016124 | 3625.085  | 3550.92   | NM_00630E | 944.172   |
| 857.323   | BC023609  | 810.828   | 631.26    | NM_019079 | 419.149   | 599.011   | NM_00006C | 604.872   |
| 1295.298  | AK025100  | 1646.473  | 792.816   | U53530    | 1293.867  | 1132.334  | NM_009589 | 371.361   |
| 1594.209  | AF086395  | 897.635   | 527.71    | NM_00659E | 773.622   | 932.892   | L09080    | 805.801   |
| 703.17    | AF086049  | 1279.619  | 1797.928  | NM_01594E | 3487.514  | 3528.237  | NM_00732E | 2539.94   |
| 312.014   | AF114263  | 771.54    | 582.118   | NM_003054 | 2334.645  | 3937.616  | NM_00188E | 2307.155  |
| 579.115   | AK026142  | 3871.542  | 3630.008  | NM_003042 | 571.139   | 1104.934  | AF137372  | 2172.847  |
| 4401.968  | AF161369  | 1439.06   | 1324.061  | NM_002219 | 7605.418  | 4953.46   | AF220417  | 587.338   |
| 1299.377  | AK027176  | 1793.776  | 1594.188  | AF182404  | 1371.178  | 2040.677  | D83782    | 3180.581  |
| 8022      | AF211968  | 396.737   | 303.876   | NM_000804 | 669.929   | 662.52    | NM_00207E | 1542.25   |
| 4583.267  | Y12019    | 4108.254  | 4001.88   | NM_006555 | 1237.57   | 1209.684  | NM_000287 | 2121.91   |

|           |           |           |           |           |           |           |           |           |
|-----------|-----------|-----------|-----------|-----------|-----------|-----------|-----------|-----------|
| 2214.88   | AF147418  | 366.88    | 401.544   | NM_014521 | 666.877   | 412.818   | NM_001656 | 768.278   |
| 48360.984 | AL137326  | 510.123   | 462.248   | NM_002445 | 588.405   | 455.086   | NM_001122 | 4152.799  |
| 536.853   | AK021898  | 652.712   | 858.567   | NM_017809 | 539.723   | 405.267   | NM_004591 | 1390.255  |
| 566.846   | AK022024  | 2157.253  | 2181.026  | AK023202  | 1070.749  | 822.128   | NM_006274 | 512.195   |
| 1374.582  | AK022301  | 1030.952  | 1081.067  | D63877    | 3378.412  | 1927.984  | AL133027  | 662.99    |
| 5033.437  | AK021948  | 719.953   | 582.307   | AF131760  | 1016.768  | 952.78    | AB037732  | 1249.328  |
| 32339.795 | AK022341  | 432.921   | 508.636   | NM_018698 | 1008.449  | 721.531   | M27487    | 677.968   |
| 1466.114  | AK021642  | 3854.265  | 3180.994  | NM_006461 | 424.637   | 597.549   | NM_002286 | 32240.455 |
| 812.231   | AK022455  | 727.658   | 822.567   | NM_018201 | 1521.432  | 807.414   | NM_002164 | 476.465   |
| 634.316   | AK021987  | 1226.775  | 997.2     | NM_014438 | 649.622   | 584.1     | NM_003811 | 3144.822  |
| 466.583   | AK026905  | 903.19    | 1126.46   | NM_014880 | 1917.739  | 929.643   | NM_002981 | 2501.378  |
| 2073.3    | AK023449  | 350.443   | 542.458   | NM_006153 | 3826.097  | 2748.389  | NM_001244 | 1235.672  |
| 652.528   | AK026704  | 740.527   | 1999.227  | NM_012164 | 1024.427  | 891.379   | NM_016139 | 15569.646 |
| 513.092   | NM_000134 | 328.479   | 411.862   | AK026010  | 591.145   | 639.008   | AL117468  | 1730.071  |
| 490.399   | NM_006638 | 1964.227  | 1727.999  | AB011156  | 698.195   | 859.868   | NM_004090 | 2564.559  |
| 283.197   | X14675    | 1103.448  | 679.988   | NM_018079 | 657.955   | 787.295   | NM_014634 | 6137.473  |
| 1772.388  | AF071170  | 4224.555  | 2637.041  | NM_004760 | 2467.451  | 2491.901  | NM_001919 | 7103.516  |
| 149.545   | AF075075  | 422.681   | 305.215   | NM_006752 | 2707.149  | 2325.893  | BC031485  | 1734.33   |
| 526.52    | AK025259  | 1381.365  | 1871.865  | NM_006809 | 2777.568  | 4382.511  | NM_004092 | 3108.984  |
| 388.608   | NM_018304 | 3913.354  | 4060.818  | AF149304  | 616.816   | 791.524   | X15624    | 888.556   |
| 518.542   | AK023264  | 348.812   | 450.938   | NM_012095 | 5234.524  | 5088.618  | AF073770  | 1308.494  |
| 2229.528  | AK024457  | 1946.569  | 2015.787  | X73079    | 11618.488 | 8016.279  | AL359401  | 4081.701  |
| 1878.891  | AK026894  | 950.732   | 973.935   | NM_019091 | 590.908   | 396.843   | NM_012213 | 1811.416  |
| 426.894   | AK026372  | 422.781   | 579.136   | L07518    | 399.113   | 423.354   | NM_016573 | 2126.962  |
| 900.924   | AL109684  | 642.696   | 488.63    | AF264781  | 824.301   | 584.337   | NM_001303 | 2967.403  |
| 38160.215 | NM_014186 | 3669.427  | 4934.722  | AK024215  | 6851.341  | 4725.231  | M21304    | 1461.765  |
| 1113.198  | AF056442  | 671.666   | 552.78    | AB044661  | 1874.445  | 792.31    | NM_001979 | 608.505   |
| 1617.321  | AK024752  | 30600.334 | 32492.139 | NM_015376 | 1048.425  | 2368.695  | AB040896  | 1284.917  |
| 1168.869  | BG117194  | 1091.413  | 702.116   | NM_001176 | 438.458   | 1035.622  | AF151851  | 3550.403  |
| 606.294   | AF131859  | 3156.776  | 3291.742  | NM_004941 | 2401.151  | 2100.55   | NM_005176 | 331.435   |
| 241.868   | AK023632  | 526.171   | 294.08    | AF151831  | 1977.164  | 2246.363  | NM_003636 | 2229.616  |
| 765.64    | AF086118  | 3252.42   | 3962.593  | AB011121  | 561.259   | 421.247   | NM_002234 | 1224.637  |
| 554.527   | NM_014138 | 973.702   | 1984.314  | AF083255  | 4564.494  | 7457.71   | NM_000701 | 881.423   |
| 4768.136  | AK025044  | 376.705   | 295.71    | AK022605  | 508.869   | 634.566   | AB022696  | 1759.375  |
| 2033.905  | AK023690  | 374.526   | 363.35    | AK000554  | 2172.253  | 2870.321  | NM_021005 | 1040.818  |
| 1433.425  | AK023806  | 1737.481  | 1327.397  | NM_006472 | 2651.624  | 12586.247 | NM_001523 | 623.361   |
| 1044.945  | Y16696    | 16594.955 | 16014.359 | NM_002826 | 4118.564  | 5696.136  | NM_017423 | 684.538   |
| 640.651   | AK026094  | 1448.343  | 2156.259  | AF159141  | 2141.641  | 1418.734  | Z70705    | 622.017   |
| 195.901   | AF161344  | 4080.933  | 4131.776  | NM_002420 | 588.721   | 523.335   | NM_002611 | 999.395   |
| 3788.577  | AF022793  | 353.596   | 507.285   | NM_016458 | 24808.244 | 13918.391 | NM_017417 | 592.41    |
| 426.258   | AF086027  | 575.361   | 729.752   | AK022233  | 1415.33   | 1057.559  | AL133602  | 1251.766  |
| 587.728   | NM_001207 | 57960.68  | 57869.172 | AK026410  | 7250.43   | 3751.849  | AF037219  | 1462.028  |
| 553.104   | AK022199  | 1288.427  | 1007.112  | NM_014637 | 1321.709  | 469.795   | AK026075  | 491.629   |
| 1812.312  | NM_006211 | 654.556   | 381.702   | NM_013379 | 10305.477 | 4321.301  | NM_000251 | 1937.479  |
| 633.424   | NM_003524 | 6694.387  | 10876.896 | AF019382  | 929.181   | 1427.232  | NM_006038 | 2064.273  |
| 776.695   | AK021438  | 1028.578  | 1067.698  | BC012757  | 1014.984  | 2263.172  | AB011133  | 1268.675  |
| 703.682   | NM_005913 | 350.26    | 451.697   | NM_004062 | 721.044   | 1148.267  | NM_017572 | 17366.861 |
| 512.156   | S39891    | 666.023   | 652.223   | NM_005883 | 581.344   | 641.849   | NM_018444 | 1492.213  |
| 203.858   | AK021624  | 933.794   | 340.021   | NM_004449 | 566.481   | 869.703   | NM_000252 | 1913.733  |
| 442.174   | AF278605  | 5994.4    | 5850.362  | NM_014591 | 1309.197  | 1241.242  | NM_006947 | 6626.159  |
| 1041.406  | NM_006497 | 6902.178  | 8518.644  | NM_014592 | 1173.176  | 1024.712  | NM_017917 | 1632.751  |
| 1098.718  | AK022329  | 489.547   | 482.938   | NM_001945 | 1835.45   | 3486.779  | NM_000060 | 820.313   |
| 656.209   | AL133599  | 918.892   | 784.127   | NM_020039 | 1479.45   | 3000.537  | NM_009589 | 313.831   |

|           |                  |           |           |                  |           |           |                  |           |
|-----------|------------------|-----------|-----------|------------------|-----------|-----------|------------------|-----------|
| 1284.454  | <b>AK022380</b>  | 2499.532  | 2820.753  | <b>NM_006653</b> | 800.125   | 527.032   | <b>L09080</b>    | 864.96    |
| 1744.542  | <b>NM_016472</b> | 619.709   | 525.393   | <b>NM_014442</b> | 2765.415  | 2591.093  | <b>NM_007326</b> | 2641.807  |
| 3162.849  | <b>AF086064</b>  | 613.143   | 438.308   | <b>AB002313</b>  | 1099.85   | 927.835   | <b>NM_001886</b> | 1781.53   |
| 843.891   | <b>AK023042</b>  | 3333.822  | 2249.392  | <b>AB011167</b>  | 709.489   | 595.848   | <b>NM_005622</b> | 402.859   |
| 507.706   | <b>AK024813</b>  | 3006.203  | 3338.688  | <b>NM_005409</b> | 730.089   | 651.931   | <b>NM_018058</b> | 3101.141  |
| 1127.118  | <b>AJ227909</b>  | 17332.357 | 23202.664 | <b>NM_000208</b> | 1843.645  | 1329.944  | <b>NM_004548</b> | 1939.271  |
| 168.321   | <b>CY3Cy5</b>    | 3004.758  | 247.775   | <b>NM_002188</b> | 25015.559 | 15215.335 | <b>X69079</b>    | 8522.252  |
| 163.961   | <b>BG534366</b>  | 823.159   | 5611.915  | <b>AK027119</b>  | 8989.855  | 5159.625  | <b>B1759406</b>  | 1750.299  |
| 70987.641 | <b>BG698522</b>  | 5066.609  | 7445.994  | <b>AB037727</b>  | 28320.73  | 11386.047 | <b>S74445</b>    | 718.665   |
| 229.883   | <b>AA152346</b>  | 556.442   | 1106.222  | <b>NM_005426</b> | 2794.436  | 2447.277  | <b>B1763360</b>  | 866.614   |
| 124.124   | <b>L15189</b>    | 2307.6    | 1764.703  | <b>NM_004763</b> | 1689.717  | 971.351   | <b>D25538</b>    | 657.171   |
| 17944.277 | <b>AB023420</b>  | 7912.241  | 9200.684  | <b>NM_014063</b> | 6039.158  | 2665.911  | <b>NM_000360</b> | 3270.262  |
| 379.408   | <b>AF022912</b>  | 1867.524  | 2805.788  | <b>D86964</b>    | 2364.745  | 1974.4    | <b>D49950</b>    | 2931.349  |
| 1708.69   | <b>AA477428</b>  | 8350.896  | 7834.888  | <b>AL049801</b>  | 1079.527  | 1213.332  | <b>NM_001849</b> | 660.783   |
| 2207.563  | <b>AA156342</b>  | 1554.396  | 1335.932  | <b>NM_014727</b> | 3231.493  | 2860.075  | <b>X03635</b>    | 1750.285  |
| 698.106   | <b>R45594</b>    | 10524.262 | 3537.743  | <b>NM_006342</b> | 1055.451  | 2536.242  | <b>BC011847</b>  | 51656.465 |
| 8474.787  | <b>H46425</b>    | 1099.556  | 1135.02   | <b>NM_016396</b> | 2895.889  | 3121.383  | <b>X03348</b>    | 1232.439  |
| 562.854   | <b>AI355949</b>  | 568.519   | 625.235   | <b>NM_005689</b> | 805.722   | 786.981   | <b>AF353674</b>  | 2563.497  |
| 633.854   | <b>AA278152</b>  | 4767.62   | 2835.66   | <b>NM_005552</b> | 8786.563  | 7930.854  | <b>BC002645</b>  | 2223.493  |
| 147.07    | <b>H75530</b>    | 1786.698  | 1693.788  | <b>NM_006717</b> | 944.228   | 1257.563  | <b>NM_021138</b> | 1376.315  |
| 713.765   | <b>NM_004176</b> | 3400.464  | 2267.451  | <b>AK026479</b>  | 3913.681  | 7631.745  | <b>BC002792</b>  | 419.306   |
| 105.483   | <b>NM_004548</b> | 12508.219 | 9217.103  | <b>AK022860</b>  | 3604.171  | 5889.938  | <b>NM_002981</b> | 1992.117  |
| 1088.893  | <b>SR5</b>       | 3387.618  | 3383.439  | <b>X60188</b>    | 15164.342 | 14338.785 | <b>NM_001244</b> | 1254.91   |
| 655.356   | <b>SR7</b>       | 4009.237  | 29713.559 | <b>NM_005977</b> | 1495.319  | 1353.869  | <b>NM_012275</b> | 373.089   |
| 3265.745  | <b>SR9</b>       | 16378.393 | 2905.842  | <b>NM_002747</b> | 386.907   | 693.928   | <b>NM_016139</b> | 11680.579 |
| 1276.743  | <b>CY3Cy5</b>    | 1806.836  | 158.792   | <b>NM_006265</b> | 3319.501  | 2690.892  | <b>AL117468</b>  | 1581.628  |
| 1230.526  | <b>NM_001315</b> | 6477.834  | 8233.125  | <b>NM_006059</b> | 900.713   | 620.878   | <b>NM_019613</b> | 1274.034  |
| 1799.65   | <b>AF286095</b>  | 858.669   | 1313.82   | <b>NM_000347</b> | 6068.734  | 3481.221  | <b>NM_005382</b> | 795.176   |
| 732.746   | <b>NM_000878</b> | 598.751   | 627.05    | <b>M13452</b>    | 4384.942  | 3785.096  | <b>AK027086</b>  | 1313.661  |
| 949.307   | <b>S66407</b>    | 1360.191  | 1329.964  | <b>NM_016114</b> | 1207.786  | 568.067   | <b>AB032997</b>  | 523.341   |
| 931.364   | <b>NM_016523</b> | 334.395   | 923.254   | <b>AY007114</b>  | 944.095   | 700.37    | <b>AL096857</b>  | 1586.777  |
| 199.928   | <b>NM_004258</b> | 41897.324 | 25725.242 | <b>AK022178</b>  | 1159.275  | 1128.292  | <b>X07203</b>    | 479.185   |
| 1805.876  | <b>NM_001981</b> | 2829.285  | 3468.095  | <b>NM_006011</b> | 431.686   | 408.354   | <b>AB040104</b>  | 248.154   |
| 1436.251  | <b>NM_014654</b> | 857.284   | 911.672   | <b>L00635</b>    | 618.829   | 689.48    | <b>NM_003834</b> | 2268.034  |
| 537.886   | <b>NM_001585</b> | 21077.988 | 21912.098 | <b>NM_015601</b> | 690.891   | 864.116   | <b>NM_005959</b> | 1530.822  |
| 415.777   | <b>AK026108</b>  | 5085.162  | 5034.296  | <b>NM_001780</b> | 15965.657 | 28854.641 | <b>NM_003381</b> | 789.796   |
| 747.219   | <b>NM_006379</b> | 2032.946  | 2609.812  | <b>AJ277442</b>  | 501.052   | 498.823   | <b>NM_005756</b> | 351.84    |
| 1018.03   | <b>BF571428</b>  | 1749.31   | 1425.408  | <b>NM_004569</b> | 2012.281  | 3225.386  | <b>NM_003702</b> | 5388.12   |
| 316.137   | <b>AB037723</b>  | 2284.839  | 1736.156  | <b>L07557</b>    | 1517.65   | 1401.979  | <b>NM_000369</b> | 419.22    |
| 461.765   | <b>NM_006246</b> | 2091.153  | 1883.353  | <b>NM_013366</b> | 393.109   | 392.057   | <b>NM_004405</b> | 719.295   |
| 345.207   | <b>NM_004316</b> | 1666.254  | 3894.601  | <b>NM_002787</b> | 12161.526 | 16553.002 | <b>NM_001988</b> | 3302.884  |
| 815.297   | <b>NM_014446</b> | 1273.595  | 2015.119  | <b>U95006</b>    | 4201.323  | 7597.346  | <b>NM_006060</b> | 925.557   |
| 622.034   | <b>U58096</b>    | 15603.027 | 10027.282 | <b>NM_003347</b> | 5853.395  | 5956.547  | <b>NM_005667</b> | 1284.472  |
| 1021.085  | <b>NM_012323</b> | 798.704   | 960.008   | <b>AF273051</b>  | 406.736   | 472.553   | <b>NM_006308</b> | 1178.034  |
| 1132.201  | <b>NM_006942</b> | 468.532   | 1226.766  | <b>NM_014516</b> | 6881.107  | 3433.457  | <b>NM_002234</b> | 1279.086  |
| 800.773   | <b>NM_013943</b> | 746.704   | 740.713   | <b>AK000643</b>  | 58605.828 | 66173.148 | <b>NM_000701</b> | 804.925   |
| 849.119   | <b>NM_001639</b> | 3585.726  | 1535.443  | <b>NM_018421</b> | 2241.293  | 1472.191  | <b>AB022696</b>  | 1788.899  |
| 7626.731  | <b>AF182404</b>  | 2210.327  | 3540.408  | <b>NM_020127</b> | 774.815   | 651.244   | <b>NM_014379</b> | 310.17    |
| 855.454   | <b>NM_000804</b> | 799.851   | 479.769   | <b>NM_001675</b> | 1048.217  | 825.814   | <b>AF137372</b>  | 2110.188  |
| 1123.201  | <b>NM_006555</b> | 2410.942  | 3581.68   | <b>NM_003422</b> | 1663.158  | 1959.203  | <b>AF220417</b>  | 659.629   |
| 2478.454  | <b>NM_014521</b> | 734.564   | 610.823   | <b>NM_014779</b> | 796.217   | 1089.857  | <b>D83782</b>    | 2999.334  |
| 792.269   | <b>NM_002445</b> | 913.049   | 1129.966  | <b>NM_002943</b> | 2201.953  | 2177.747  | <b>NM_002078</b> | 1459.172  |
| 1363.534  | <b>NM_017809</b> | 729.501   | 632.153   | <b>AL133649</b>  | 510.178   | 490.066   | <b>NM_000287</b> | 2258.707  |

|           |           |           |           |           |           |           |           |           |
|-----------|-----------|-----------|-----------|-----------|-----------|-----------|-----------|-----------|
| 1382.478  | AK023202  | 1511.705  | 2203.158  | NM_015846 | 2254.05   | 2009.499  | NM_001656 | 1013.769  |
| 597.15    | D63877    | 2690.859  | 3079.613  | NM_015972 | 6297.735  | 4592.196  | AF091033  | 546.898   |
| 699.893   | AF131760  | 1159.074  | 1820.125  | NM_016132 | 1080.966  | 841.552   | NM_001122 | 3674.504  |
| 2657.259  | NM_018696 | 1391.83   | 1471.277  | NM_018006 | 954.115   | 1002.128  | NM_004591 | 1230.769  |
| 1704.335  | NM_006461 | 922.519   | 514.463   | NM_016090 | 801.611   | 578.964   | AL133027  | 490.104   |
| 5882.251  | NM_018201 | 2627.761  | 3979.892  | NM_001013 | 30303.783 | 10626.521 | AB037732  | 1332.13   |
| 1544.495  | NM_014438 | 887.924   | 794.372   | AK024040  | 2289.593  | 1099.732  | NM_005767 | 413.045   |
| 383.702   | NM_014880 | 2201.717  | 1623.594  | NM_005061 | 1611.156  | 543.096   | NM_001839 | 53814.898 |
| 466.261   | NM_003764 | 2916.747  | 4567.236  | AF052149  | 1476.894  | 2286.035  | M27487    | 843.42    |
| 652.314   | NM_004829 | 337.21    | 257.123   | AK025586  | 387.629   | 550.112   | NM_002286 | 34291.957 |
| 510.956   | NM_001538 | 1545.333  | 1755.361  | AL137512  | 929.825   | 1638.524  | NM_002164 | 564.596   |
| 2536.106  | X97261    | 10934.959 | 3026.858  | NM_002541 | 799.978   | 1327.763  | NM_003811 | 3304.011  |
| 1447.614  | D87666    | 44607.781 | 36680.762 | NM_000056 | 1451.837  | 1927.166  | AB011133  | 850.594   |
| 333.85    | AF149304  | 675.202   | 974.725   | NM_016311 | 4337.265  | 6392.491  | NM_017572 | 14806.459 |
| 690.01    | NM_012095 | 6878.14   | 7612.382  | NM_001867 | 45227.922 | 40565.742 | NM_018444 | 1297.181  |
| 49517.191 | X73079    | 18384.584 | 22842.234 | NM_002300 | 53571.234 | 68078.188 | NM_000252 | 1240.953  |
| 1089.955  | NM_019091 | 1002.119  | 703.674   | NM_000290 | 2080.853  | 2038.435  | NM_006947 | 6038.56   |
| 4828.785  | L07518    | 588.773   | 1001.315  | NM_016538 | 3743.972  | 3601.133  | NM_017917 | 1674.982  |
| 1225.292  | AF264781  | 1348.476  | 1515.904  | AK023275  | 6293.417  | 3492.644  | NM_004090 | 2477.455  |
| 782.654   | AK022823  | 362.376   | 802.509   | AJ223352  | 3675.084  | 18994.918 | NM_001919 | 7109.886  |
| 652.782   | NM_002456 | 717.46    | 379.363   | NM_012238 | 1822.813  | 1679.347  | BC031485  | 1503.897  |
| 2413.638  | AK024215  | 9177.976  | 10946.982 | NM_016539 | 3466.625  | 6587.958  | NM_004092 | 3165.837  |
| 1141.778  | AB044661  | 2988.722  | 2510.309  | NM_006807 | 5702.075  | 3173.512  | X15624    | 1120.151  |
| 478.323   | NM_000606 | 6063.722  | 6762.882  | L16464    | 286.395   | 261.292   | AF073770  | 1056.722  |
| 1702.53   | NM_016124 | 4933.443  | 4630.921  | NM_006532 | 3059.007  | 1253.85   | AL359401  | 3798.47   |
| 459.03    | NM_019079 | 662.649   | 368.604   | U07132    | 3510.886  | 961.419   | NM_012213 | 1680.693  |
| 1190.202  | U53530    | 1572.087  | 1361.834  | AL035301  | 890.904   | 894.673   | NM_016573 | 2506.595  |
| 130.884   | NM_006598 | 1149.38   | 997.524   | NM_017687 | 2401.602  | 3120.455  | NM_001303 | 2993.262  |
| 1652.464  | NM_015948 | 3279.291  | 2406.887  | NM_017975 | 896.51    | 1755.193  | M21304    | 1442.759  |
| 1102.776  | NM_003054 | 1645.546  | 1778.817  | AK025036  | 788.188   | 1038.603  | NM_001979 | 512.022   |
| 671.989   | NM_003042 | 469.941   | 625.57    | AK024843  | 5404.311  | 6129.497  | AB040896  | 1249.129  |
| 3313.16   | NM_002219 | 10865.414 | 3467.408  | AF074994  | 441.399   | 499.837   | NM_001107 | 1323.848  |
| 166.746   | NM_002826 | 5480.426  | 10291.498 | NM_017670 | 2761.404  | 3126.131  | AF151851  | 3454.386  |
| 300.119   | AF159141  | 2665.423  | 2683.886  | AF286598  | 309.673   | 296.3     | NM_005176 | 371.171   |
| 1356.837  | NM_002420 | 715.211   | 836.484   | AK021468  | 540.089   | 641.949   | NM_003636 | 2371.835  |
| 561.852   | NM_016458 | 11457.639 | 13296.768 | BC033020  | 764.942   | 994.624   | AF040723  | 5331.502  |
| 1007.417  | AK022233  | 2347.734  | 2078.613  | NM_004366 | 7404.784  | 7017.188  | NM_015527 | 1249.467  |
| 453.802   | AL137713  | 222.63    | 223.727   | AK026168  | 1585.844  | 1511.977  | X89675    | 754.838   |
| 259.899   | AK026410  | 4511.939  | 3559.815  | AJ296152  | 9901.876  | 11010.279 | NM_012189 | 359.895   |
| 334.631   | NM_014637 | 2504.421  | 2271.243  | AK001067  | 1680.842  | 1635.777  | NM_005798 | 4759.406  |
| 396.088   | NM_013379 | 15108.175 | 17971.959 | AK027088  | 6465.925  | 8847.797  | NM_004216 | 1419.374  |
| 752.427   | AF113208  | 3569.094  | 5130.4    | AB037721  | 9696.574  | 6325.349  | NM_001464 | 448.827   |
| 1585.033  | NM_006153 | 3874.739  | 2666.548  | AK027120  | 7179.28   | 6685.475  | NM_002051 | 1083.829  |
| 747.14    | NM_012164 | 1191.426  | 749.185   | AB029001  | 1453.154  | 718.08    | NM_001523 | 732.866   |
| 2119.793  | AK026010  | 777.777   | 1404.39   | AB006624  | 2818.584  | 1500.786  | NM_017423 | 666.796   |
| 1028.739  | AB011156  | 753.364   | 517.978   | AL109717  | 1062.496  | 907.318   | Z70705    | 769.949   |
| 1561.922  | NM_018079 | 905.447   | 659.816   | AK025473  | 547.228   | 346.924   | NM_002611 | 733.299   |
| 925.475   | NM_004760 | 2461.239  | 1370.953  | AF146693  | 412.148   | 278.45    | NM_017417 | 484.77    |
| 192.598   | NM_006752 | 7176.886  | 11076.97  | AF271070  | 8713.87   | 3626.857  | AL133602  | 1346.628  |
| 2136.488  | NM_004428 | 573.934   | 484.698   | AK021705  | 3223.762  | 4239.65   | AF037219  | 1513.147  |
| 668.89    | NM_006809 | 2744.164  | 2366.512  | NM_016141 | 7485.013  | 7289.547  | NM_000251 | 1913.91   |
| 254.284   | NM_006942 | 381.567   | 1041.995  | AL109702  | 1039.891  | 1230.673  | NM_006038 | 2025.936  |
| 490.137   | NM_013943 | 1156.39   | 1509.77   | AK025624  | 8860.758  | 11407.302 | U87223    | 1204.345  |

|           |           |           |           |           |           |           |           |          |
|-----------|-----------|-----------|-----------|-----------|-----------|-----------|-----------|----------|
| 693.994   | NM_001639 | 4071.087  | 2223.43   | AK026684  | 457.97    | 465.936   | NM_000093 | 233.117  |
| 147.762   | H39560    | 486.213   | 804.709   | AL110125  | 4401.917  | 4422.873  | NM_001779 | 1369.316 |
| 216.777   | BG534366  | 999.862   | 6550.714  | AJ011600  | 1360.219  | 1442.774  | AB033059  | 376.664  |
| 1430.122  | BG698522  | 5529.225  | 9659.464  | AJ002785  | 1202.675  | 1018.908  | NM_016484 | 1138.904 |
| 1411.791  | AA152346  | 642.839   | 1048.776  | Z70716    | 663.743   | 796.434   | AK026114  | 380.653  |
| 434.608   | L15189    | 2351.745  | 1341.022  | AL049251  | 495.184   | 881.892   | NM_014452 | 599.963  |
| 2470.235  | AB023420  | 8739.231  | 6642.84   | Z83945    | 768.545   | 558.337   | NM_014683 | 441.805  |
| 3209.75   | AF022912  | 2033.741  | 2735.5    | L32606    | 459.245   | 292.32    | AK021536  | 3090.541 |
| 5198.304  | AA477428  | 9049.669  | 9145.754  | L05148    | 312.322   | 182.056   | AF079529  | 271.658  |
| 1271.418  | AA156342  | 2039.497  | 2938.355  | AK091125  | 539.892   | 368.624   | NM_002600 | 1848.165 |
| 3272.948  | R45594    | 10458.548 | 3244.134  | D16904    | 423.355   | 281.977   | NM_003646 | 9925.53  |
| 1012.577  | H46425    | 1209.895  | 759.348   | M93056    | 4899.101  | 2939.953  | NM_006663 | 425.914  |
| 776.583   | AI355949  | 525.02    | 311.608   | D16474    | 6963.716  | 5024.756  | NM_006092 | 755.052  |
| 2606.002  | AA278152  | 4718.233  | 1944.67   | AL049280  | 988.111   | 1201.113  | NM_012424 | 339.656  |
| 1253.884  | H75530    | 1919.662  | 1403.42   | AK025212  | 6108.23   | 10954.462 | NM_000863 | 658.327  |
| 1316.276  | NM_004176 | 4143.134  | 2711.008  | AB021925  | 447.193   | 581.267   | NM_006651 | 1760.943 |
| 1850.977  | NM_004548 | 12421.173 | 10489.165 | AL157503  | 2756.55   | 6307.462  | NM_005336 | 5532.959 |
| 606.15    | AK000554  | 2134.731  | 1837.44   | AK000053  | 403.329   | 1111.802  | NM_001419 | 4243.978 |
| 215.78    | NM_006472 | 3335.788  | 19657.986 | AK000786  | 1266.785  | 1886.576  | AF119817  | 9709.131 |
| 866.984   | NM_001538 | 1923.481  | 3284.218  | AK021458  | 2326.133  | 1676.825  | AL035306  | 1195.248 |
| 381.641   | X97261    | 12741.977 | 4306.476  | NM_017674 | 3438.815  | 2676.33   | NM_001328 | 7703.835 |
| 1286.118  | NM_001468 | 357.439   | 587.063   | AK024525  | 4233.922  | 2070.193  | NM_005749 | 1085.354 |
| 468.494   | D87666    | 46660.699 | 58173.73  | AK024909  | 452.877   | 189.636   | NM_004230 | 3475.807 |
| 685.109   | NM_001315 | 7058.621  | 10789.129 | AK024544  | 1288.053  | 1164.055  | NM_014503 | 468.923  |
| 796.872   | AF286095  | 974.866   | 1404.919  | AK025097  | 363.404   | 130.359   | NM_014659 | 796.611  |
| 614.481   | NM_000878 | 787.455   | 680.082   | AK001880  | 2181.245  | 3405.423  | NM_004399 | 1460.185 |
| 1277.481  | S66407    | 1197.337  | 858.401   | AF156166  | 3891.898  | 4575.455  | NM_006337 | 2279.055 |
| 361.01    | NM_016523 | 418.126   | 554.755   | NM_014373 | 23461.84  | 17033.744 | NM_004507 | 1786.64  |
| 696.652   | NM_004258 | 40592.918 | 20007.377 | NM_014206 | 13198.303 | 10862.327 | NM_002710 | 9202.069 |
| 449.201   | NM_001981 | 2938.261  | 2805.216  | NM_001651 | 4765.569  | 5005.635  | NM_014060 | 1623.006 |
| 486.439   | NM_014654 | 878.372   | 710.189   | L32786    | 2335.181  | 2822.204  | NM_004749 | 5155.687 |
| 385.879   | NM_001585 | 19047.105 | 16404.701 | AL355720  | 2461.056  | 3109.432  | BQ446064  | 789.843  |
| 536.221   | AK026108  | 4919.929  | 3579.255  | AK002023  | 3773.837  | 5179.054  | AF274571  | 744.491  |
| 1688.129  | NM_006379 | 1813.964  | 1784.835  | AF150156  | 563.528   | 672.854   | NM_005449 | 729.113  |
| 1429.426  | BF571428  | 1409.362  | 859.848   | NM_016464 | 646.808   | 1357.72   | NM_003879 | 2422.489 |
| 1163.12   | AB037723  | 2002.291  | 1136.125  | L40402    | 2810.342  | 5434.763  | NM_016052 | 3320.244 |
| 1059.816  | NM_006246 | 2216.687  | 1499.28   | AK022422  | 712.33    | 411.081   | NM_006718 | 907.121  |
| 10947.151 | U58096    | 16373.17  | 14174.146 | AK023485  | 462.4     | 331.647   | NM_005427 | 514.852  |
| 1564.949  | NM_016929 | 1995.741  | 3444.848  | AK022474  | 10538.046 | 6767.85   | NM_016312 | 644.956  |
| 2298.855  | NM_012323 | 771.942   | 707.995   | AK022392  | 3227.366  | 1893.988  | NM_001776 | 909.805  |
| 9552.508  | NM_015948 | 3766.778  | 3928.496  | AK025949  | 1465.526  | 1701.538  | NM_001792 | 535.006  |
| 4830.356  | NM_003054 | 2312.108  | 2810.026  | Y10259    | 1143.66   | 1765.209  | NM_001903 | 5138.1   |
| 627.426   | NM_002219 | 12237.492 | 7645.313  | AK021725  | 1530.017  | 1624.382  | NM_001874 | 2000.474 |
| 545.991   | AF182404  | 2410.422  | 4021.443  | NM_002408 | 2640.81   | 2879.2    | NM_005857 | 7823.466 |
| 1304.461  | NM_000804 | 680.654   | 564.818   | AK024282  | 985.35    | 1276.786  | NM_002429 | 251.198  |
| 2503.293  | NM_006555 | 2075.923  | 2335.759  | AF085838  | 853.586   | 1874.644  | AK027037  | 1122.967 |
| 306.876   | NM_014521 | 760.774   | 413.737   | NM_018277 | 1573.809  | 1168.399  | NM_003875 | 4058.269 |
| 3173.384  | NM_002445 | 859.472   | 773.208   | AF086335  | 1811.565  | 2545.91   | AF191687  | 1356.99  |
| 679.817   | NM_017809 | 576.669   | 417.606   | AB011118  | 17595.027 | 18729.01  | NM_003046 | 252.102  |
| 709.387   | AK023202  | 1453.521  | 1330.365  | AK021476  | 1564.125  | 1390.017  | NM_000274 | 4755.991 |
| 3544.537  | D63877    | 3271.382  | 2526.155  | NM_018630 | 1706.414  | 1680.349  | NM_000170 | 1409.181 |
| 3514.757  | AF131760  | 1289.309  | 1525.328  | NM_004576 | 886.991   | 414.185   | NM_000281 | 4452.833 |
| 11988.336 | NM_018698 | 1410.734  | 1456.094  | AF040097  | 583.796   | 356.464   | AK001295  | 2754.797 |

|           |           |           |           |           |           |           |           |           |
|-----------|-----------|-----------|-----------|-----------|-----------|-----------|-----------|-----------|
| 2405.536  | NM_006461 | 894.461   | 540.448   | AK024182  | 669.771   | 430.583   | NM_006031 | 1136.31   |
| 792.066   | NM_018201 | 2544.699  | 2591.476  | NM_006913 | 7712.519  | 4564.458  | NM_002715 | 2986.226  |
| 991.089   | NM_014438 | 552.825   | 380.255   | NM_000499 | 3563.036  | 1844.614  | NM_001020 | 49476.797 |
| 1040.421  | NM_014880 | 1804.784  | 1250.403  | AL049955  | 10908.719 | 12748.565 | AB020660  | 1962.532  |
| 1322.525  | NM_003764 | 2446.667  | 2648.099  | AF155654  | 6567.597  | 7069.394  | NM_006659 | 11949.559 |
| 6252.469  | NM_006793 | 21159.289 | 13089.562 | AK000028  | 1478.102  | 1874.663  | NM_018051 | 1210.85   |
| 4078.938  | NM_018079 | 1136.841  | 915.857   | NM_013320 | 30265.756 | 46094.973 | NM_015371 | 2707.017  |
| 2005.891  | NM_004760 | 2704.597  | 1766.82   | AL050039  | 577.387   | 479.805   | AB040915  | 850.552   |
| 74652.523 | NM_006752 | 5859.383  | 5232.473  | AF087987  | 394.537   | 392.733   | AF147791  | 585.684   |
| 2166.066  | NM_004428 | 446.658   | 459.285   | H09474    | 1273.129  | 1432.781  | NM_006481 | 1073.78   |
| 4139.024  | NM_006809 | 3314.386  | 3663.345  | AB002368  | 5071.879  | 4860.399  | NM_003910 | 8196.915  |
| 3021.479  | AF149304  | 727.16    | 943.44    | AL360263  | 33919.156 | 32631.605 | AB007913  | 1570.392  |
| 2257.872  | NM_012095 | 6363.605  | 7735.636  | Z36780    | 1855.168  | 1589.201  | NM_006696 | 1837.705  |
| 1593.208  | X73079    | 16197.148 | 16716.498 | AK022403  | 1481.336  | 1772.839  | NM_004599 | 4276.288  |
| 2659.624  | NM_019091 | 737.91    | 386.754   | AK022955  | 1862.964  | 891.771   | NM_006037 | 5191.829  |
| 1232.899  | L07518    | 665.542   | 813.179   | AF054995  | 1047.503  | 414.538   | NM_015871 | 2334.134  |
| 551.028   | AF264781  | 1403.597  | 1424.247  | AL080176  | 1279.11   | 390.04    | NM_019037 | 3682.826  |
| 34311.434 | AK022823  | 281.433   | 655.161   | AK023627  | 587.365   | 457.366   | NM_015891 | 1815.138  |
| 2981.195  | NM_002456 | 352.48    | 138.785   | CY3Cy5    | 953.943   | 126.671   | NM_006802 | 513.099   |
| 2934.947  | AK024215  | 8343.874  | 6526.326  | BI759406  | 2096.978  | 2384.705  | AB037778  | 1072.757  |
| 1269.269  | AB044661  | 2298.887  | 1425.299  | S74445    | 454.39    | 462.554   | NM_005066 | 19911.029 |
| 3246.207  | NM_000606 | 5179.592  | 5329.594  | BI763360  | 585.855   | 579.312   | NM_003089 | 3122.648  |
| 1096.453  | NM_016124 | 4419.673  | 4104.435  | D25538    | 492.053   | 819.464   | NM_003753 | 10881.341 |
| 2337.079  | NM_019079 | 412.317   | 431.86    | NM_000360 | 3380.332  | 4359.751  | NM_006223 | 568.091   |
| 568.466   | U53530    | 1326.422  | 923.516   | D49950    | 2667.17   | 1849.957  | NM_017590 | 1568.641  |
| 520.005   | NM_006598 | 1317.314  | 829.664   | NM_001849 | 388.298   | 340.189   | AB011145  | 3883.603  |
| 3005.51   | NM_004176 | 4151.508  | 4212.736  | X03635    | 1281.119  | 1066.725  | NM_003750 | 18701.801 |
| 1934.008  | NM_004548 | 13509.688 | 14987.187 | BC011847  | 51964.156 | 59128.023 | M92422    | 1154.635  |
| 1010.838  | AK000554  | 2334.561  | 3115.018  | X03348    | 997.589   | 579.519   | NM_017868 | 1083.221  |
| 6211.292  | NM_006472 | 3497.264  | 34673.121 | AF353674  | 2329.627  | 2419.021  | AK021888  | 781.735   |
| 650.877   | NM_002826 | 6156.951  | 13040.936 | BC002645  | 1551.261  | 1120.726  | AK022848  | 2636.142  |
| 747.691   | AF159141  | 2423.105  | 1810.526  | NM_021138 | 1085.882  | 821.158   | AK055302  | 240.268   |
| 459.693   | NM_002420 | 507.212   | 638.278   | NM_021005 | 881.53    | 369.901   | AL049957  | 265.593   |
| 1572.564  | NM_016458 | 12192.027 | 9032.796  | SR6       | 1078.155  | 897.409   | NM_018159 | 8221.103  |
| 927.616   | AK022233  | 2119.19   | 1722.165  | SR8       | 4123.077  | 11055.412 | NM_000819 | 1777.151  |
| 1193.566  | AL137713  | 192.259   | 224.468   | SR10      | 15682.602 | 4349.133  | NM_002513 | 1472.048  |
| 2004.798  | AK026410  | 5067.938  | 3566.216  | CY3Cy5    | 631.976   | 150.586   | NM_017424 | 807.097   |
| 1772.457  | NM_014637 | 2120.768  | 1531.158  | X07203    | 406.386   | 739.597   | NM_001522 | 3123.529  |
| 364.218   | NM_013379 | 13026.371 | 11502.452 | NM_003834 | 1613.679  | 2026.827  | NM_000883 | 1610.172  |
| 2517.078  | AF113208  | 2958.091  | 3136.198  | NM_005959 | 986.75    | 1302.909  | AF254086  | 1463.116  |
| 4601.451  | NM_006153 | 3640.469  | 2341.345  | NM_003381 | 512.311   | 389.736   | AL390142  | 1591.259  |
| 843.583   | NM_012164 | 1067.323  | 860.947   | NM_003702 | 4437.417  | 2760.226  | NM_006565 | 1257.763  |
| 3160.901  | AK026010  | 605.213   | 1012.718  | NM_004405 | 694.306   | 635.244   | AB007930  | 7161.349  |
| 1271.295  | AB011156  | 790.357   | 648.799   | NM_001988 | 2937.516  | 2161.291  | AJ005273  | 1810.37   |
| 3062.216  | NM_006246 | 2180.904  | 2381.036  | NM_006060 | 727.186   | 359.181   | AK021892  | 1678.218  |
| 1354.315  | NM_014446 | 372.036   | 911.934   | NM_005667 | 916.686   | 1010.607  | NM_003121 | 502.527   |
| 2218.728  | U58096    | 21917.629 | 32815.418 | NM_006308 | 460.381   | 353.588   | NM_003437 | 1887.162  |
| 988.305   | NM_016929 | 2436.061  | 6973.549  | NM_000060 | 493.162   | 699.847   | NM_018337 | 5289.209  |
| 2470.102  | NM_012323 | 947.025   | 1572.676  | L09080    | 895.076   | 576.44    | AA193295  | 11384.5   |
| 786.256   | NM_013943 | 894.634   | 1520.39   | NM_007326 | 2176.823  | 1428.844  | NM_018045 | 1956.486  |
| 313.001   | NM_001639 | 3810.54   | 1707.404  | NM_001886 | 1741.226  | 1289.629  | NM_014803 | 1235.334  |
| 1034.955  | H39560    | 463.341   | 329.943   | NM_005622 | 409.674   | 789.949   | AK024956  | 420.757   |
| 144.695   | BG534366  | 788.46    | 4201.419  | NM_018058 | 2992.531  | 1814.9    | AF147386  | 1854.75   |

|           |                  |           |           |                  |           |           |                  |           |
|-----------|------------------|-----------|-----------|------------------|-----------|-----------|------------------|-----------|
| 35741.066 | <b>BG698522</b>  | 5133.257  | 5490.12   | <b>NM_004548</b> | 1859.753  | 2125.514  | <b>AF273052</b>  | 5904.981  |
| 163.704   | <b>AA152346</b>  | 615.335   | 512.903   | <b>X69079</b>    | 6928.224  | 5222.168  | <b>NM_017943</b> | 2390.302  |
| 94.421    | <b>L15189</b>    | 2067.721  | 1165.919  | <b>NM_001122</b> | 5455.449  | 6062.473  | <b>AF147383</b>  | 537.098   |
| 8619.401  | <b>AB023420</b>  | 8488.544  | 5675.482  | <b>NM_004591</b> | 1253.954  | 1917.804  | <b>AK025682</b>  | 860.066   |
| 4913.837  | <b>AF022912</b>  | 1944.235  | 1849.747  | <b>AL133027</b>  | 453.941   | 614.918   | <b>NM_013352</b> | 245.93    |
| 2173.538  | <b>AA477428</b>  | 7803.976  | 5784.317  | <b>AB037732</b>  | 918.402   | 1254.959  | <b>NM_016478</b> | 6295.899  |
| 25741.25  | <b>AA156342</b>  | 1133.756  | 950.831   | <b>NM_001839</b> | 54489.836 | 79661.484 | <b>AL389986</b>  | 2743.142  |
| 2247.562  | <b>R45594</b>    | 9021.587  | 3035.349  | <b>M27487</b>    | 579.53    | 634.272   | <b>AF142409</b>  | 1440.73   |
| 3416.661  | <b>AI143386</b>  | 694.805   | 859.313   | <b>NM_002286</b> | 35872.078 | 21479.35  | <b>AF086279</b>  | 337.358   |
| 11421.909 | <b>H46425</b>    | 971.033   | 1069.049  | <b>NM_003811</b> | 4289.737  | 3756.475  | <b>AF088052</b>  | 1137.697  |
| 1489.962  | <b>AI355949</b>  | 524.161   | 447.34    | <b>NM_002981</b> | 1695.423  | 1475.881  | <b>AF086342</b>  | 423.964   |
| 2934.669  | <b>AA278152</b>  | 4805.585  | 3015.663  | <b>NM_001244</b> | 1117.594  | 694.404   | <b>AF086451</b>  | 340.494   |
| 3126.327  | <b>H75530</b>    | 1745.026  | 1875.16   | <b>NM_016139</b> | 15096.208 | 12579.705 | <b>AF086310</b>  | 317.697   |
| 5002.599  | <b>NM_003764</b> | 2344.679  | 4142.759  | <b>AL117468</b>  | 1134.565  | 1182.096  | <b>AF086387</b>  | 627.583   |
| 1398.028  | <b>NM_004829</b> | 431.978   | 732.363   | <b>NM_019613</b> | 1023.797  | 750.609   | <b>AF086443</b>  | 330.241   |
| 2963.566  | <b>NM_006793</b> | 25197.957 | 24222.26  | <b>AK027086</b>  | 1164.732  | 1384.301  | <b>AL389941</b>  | 691.834   |
| 804.376   | <b>NM_001538</b> | 1946.736  | 3375.471  | <b>AB032997</b>  | 363.218   | 311.399   | <b>AB037756</b>  | 1820.365  |
| 681.436   | <b>X97261</b>    | 12307.225 | 3750.837  | <b>AL096857</b>  | 1335.597  | 1155.425  | <b>AK001853</b>  | 2349.353  |
| 2412.02   | <b>NM_005410</b> | 261.129   | 590.086   | <b>AL359401</b>  | 4052.726  | 4543.839  | <b>AK025071</b>  | 516.182   |
| 913.867   | <b>D87666</b>    | 46732.887 | 48337.688 | <b>NM_012213</b> | 1321.089  | 1610.221  | <b>NM_015370</b> | 1494.946  |
| 999.499   | <b>NM_001315</b> | 6778.062  | 6506.704  | <b>NM_016573</b> | 1933.292  | 2029.1    | <b>AF085917</b>  | 656.61    |
| 1173.829  | <b>AF286095</b>  | 787.912   | 879.927   | <b>NM_001303</b> | 2815.723  | 2533.239  | <b>AF085989</b>  | 591.744   |
| 479.548   | <b>NM_000878</b> | 776.452   | 628.009   | <b>M21304</b>    | 743.564   | 712.91    | <b>AL360139</b>  | 42761.332 |
| 629.21    | <b>S66407</b>    | 1253.924  | 939.789   | <b>NM_001979</b> | 644.13    | 511.662   | <b>AF075110</b>  | 1608.871  |
| 461.293   | <b>NM_004258</b> | 28337.643 | 12509.52  | <b>AB040896</b>  | 1065.89   | 1424.913  | <b>AK022157</b>  | 281.164   |
| 172.635   | <b>NM_001981</b> | 2932.753  | 2232.045  | <b>NM_001107</b> | 1022.367  | 1710.94   | <b>AL137323</b>  | 686.501   |
| 765.928   | <b>NM_014654</b> | 846.5     | 565.422   | <b>AF151851</b>  | 3722.563  | 2944.565  | <b>AL137494</b>  | 2658.578  |
| 277.16    | <b>NM_001585</b> | 16010.34  | 20264.17  | <b>NM_003636</b> | 1795.308  | 1170.672  | <b>AL162037</b>  | 3725.086  |
| 4654.699  | <b>NM_006379</b> | 1702.333  | 1629.928  | <b>NM_002234</b> | 1177.211  | 1091.276  | <b>AL390150</b>  | 905.071   |
| 5568.661  | <b>NM_000606</b> | 6560.208  | 10523.993 | <b>NM_000701</b> | 925.156   | 854.311   | <b>AL137359</b>  | 483.97    |
| 755.438   | <b>NM_016124</b> | 5142.032  | 6844.004  | <b>AB022696</b>  | 2327.64   | 1684.031  | <b>AL137575</b>  | 237.882   |
| 1033.613  | <b>NM_019079</b> | 586.136   | 710.1     | <b>AF137372</b>  | 2014.888  | 1771.83   | <b>NM_002761</b> | 753.982   |
| 456.195   | <b>U53530</b>    | 1917.113  | 2858.53   | <b>D83782</b>    | 2743.241  | 2091.156  | <b>AF086063</b>  | 627.621   |
| 4101.02   | <b>NM_006598</b> | 1424.044  | 1903.407  | <b>NM_002078</b> | 1323.161  | 876.154   | <b>AF086098</b>  | 832.509   |
| 1424.566  | <b>NM_015948</b> | 3927.071  | 4874.134  | <b>NM_000287</b> | 1975.743  | 1835.953  | <b>AF086076</b>  | 740.824   |
| 7601.398  | <b>NM_003054</b> | 2072.247  | 2741.47   | <b>NM_001656</b> | 808.757   | 660.953   | <b>AL833393</b>  | 1565.254  |
| 242.005   | <b>NM_002219</b> | 8853.188  | 3654.695  | <b>NM_002611</b> | 704.123   | 769.919   | <b>AF088005</b>  | 1189.355  |
| 689.42    | <b>AF182404</b>  | 1802.818  | 2436.485  | <b>NM_017417</b> | 591.891   | 777.113   | <b>AF086096</b>  | 3382.706  |
| 339.442   | <b>NM_000804</b> | 595.798   | 343.031   | <b>AL133602</b>  | 903.786   | 790.394   | <b>AL390132</b>  | 527.381   |
| 401.079   | <b>NM_006555</b> | 2009.226  | 2216.084  | <b>AF037219</b>  | 1142.369  | 1275.911  | <b>NM_017933</b> | 3554.396  |
| 331.784   | <b>NM_014521</b> | 701.356   | 513.125   | <b>NM_000251</b> | 1474.004  | 1384.692  | <b>NM_017819</b> | 4937.954  |
| 253.723   | <b>NM_002445</b> | 903.843   | 714.169   | <b>NM_006038</b> | 1640.96   | 2030.442  | <b>AK024653</b>  | 12929.692 |
| 798.973   | <b>NM_017809</b> | 504.007   | 446.375   | <b>AB011133</b>  | 813.645   | 959.096   | <b>AF103907</b>  | 2378.411  |
| 737.64    | <b>AK023202</b>  | 1414.155  | 1189.705  | <b>NM_017572</b> | 15235.15  | 9171.564  | <b>AF094508</b>  | 543.796   |
| 279.043   | <b>D63877</b>    | 3231.807  | 2843.879  | <b>NM_018444</b> | 1171.129  | 1031.831  | <b>AF161351</b>  | 1379.19   |
| 1063.853  | <b>AF131760</b>  | 1851.26   | 2896.225  | <b>NM_000252</b> | 1386.286  | 807.246   | <b>AF257098</b>  | 602.38    |
| 522.688   | <b>NM_018201</b> | 2634.434  | 3634.509  | <b>NM_006947</b> | 6113.318  | 3692.992  | <b>AF111782</b>  | 1685.408  |
| 1615.854  | <b>NM_014438</b> | 996.612   | 870.124   | <b>NM_017917</b> | 1498.501  | 1701.217  | <b>AF151530</b>  | 562.32    |
| 945.343   | <b>NM_006153</b> | 3803.479  | 3221.082  | <b>NM_004090</b> | 2220.305  | 1805.008  | <b>AK022093</b>  | 2849.97   |
| 304.52    | <b>NM_012164</b> | 1252.677  | 1225.679  | <b>NM_014634</b> | 6458.921  | 3879.069  | <b>AK022376</b>  | 608.795   |
| 429.567   | <b>AK026010</b>  | 695.135   | 1891.164  | <b>NM_001919</b> | 8249.75   | 4497.65   | <b>AK022005</b>  | 1730.906  |
| 1867.477  | <b>NM_004721</b> | 556.954   | 755.147   | <b>BC031485</b>  | 1233.708  | 832.721   | <b>AK022137</b>  | 409.148   |
| 699.525   | <b>AB011156</b>  | 945.307   | 1215.549  | <b>NM_004092</b> | 3298.639  | 3824.479  | <b>AK022272</b>  | 1001.407  |

|           |           |           |           |           |           |           |           |           |
|-----------|-----------|-----------|-----------|-----------|-----------|-----------|-----------|-----------|
| 4982.767  | NM_018079 | 1172.014  | 1476.759  | X15624    | 814.167   | 1051.552  | AK027155  | 2695.936  |
| 230.003   | NM_004760 | 2393.487  | 1800.318  | NM_004467 | 378.638   | 403.666   | AF221846  | 652.014   |
| 268.386   | NM_006752 | 5922.225  | 5113.499  | NM_005622 | 544.355   | 711.273   | AF264626  | 424.276   |
| 291.389   | NM_004428 | 409.095   | 400.854   | NM_018058 | 3199.837  | 2520.08   | AK027219  | 392.382   |
| 177.346   | NM_006809 | 2642.332  | 3068.382  | NM_004548 | 1745.369  | 2200.883  | AK024528  | 4314.981  |
| 330.596   | AF149304  | 628.039   | 647.415   | X69079    | 10075.77  | 7688.345  | AL049311  | 325.437   |
| 1521.282  | NM_012095 | 6152.747  | 5381.96   | BI759406  | 1704.035  | 1474.791  | AK000016  | 1718.651  |
| 847.134   | NM_016438 | 353.831   | 430.714   | S74445    | 624.625   | 643.908   | AK023367  | 982.962   |
| 1261.486  | X73079    | 8065.421  | 8328.404  | BI763360  | 644.238   | 725.952   | AL080209  | 1450.675  |
| 1658.996  | NM_019091 | 765.152   | 296.981   | D25538    | 1430.967  | 1613.267  | AL137431  | 583.801   |
| 5936.896  | L07518    | 538.594   | 530.253   | NM_000360 | 2299.586  | 2510.361  | NM_016255 | 1326.22   |
| 1217.013  | AF264781  | 1326.664  | 1283.42   | D49950    | 2330.379  | 1472.531  | NM_014318 | 1057.005  |
| 2021.956  | NM_002456 | 359.021   | 183.84    | NM_001849 | 393.106   | 303.484   | AK056674  | 680.569   |
| 268.721   | AK024215  | 8165.958  | 9257.89   | X03635    | 1122.47   | 616.68    | AK022856  | 506.67    |
| 496.352   | AB044661  | 2991.918  | 2541.247  | BC011847  | 55693.473 | 54147.352 | AK022042  | 834.287   |
| 1056.936  | NM_015376 | 1735.035  | 5136.593  | X03348    | 1052.01   | 786.098   | AL117588  | 662.4     |
| 1148.025  | NM_001176 | 973.187   | 1143.907  | BC002645  | 1670.413  | 1091.129  | BE895529  | 2073.257  |
| 742.386   | NM_013341 | 629.207   | 647.946   | NM_021138 | 1093.881  | 810.044   | AK000964  | 715.733   |
| 4773.431  | NM_016536 | 403.376   | 553.146   | BC002792  | 287.098   | 332.305   | AL117536  | 590.83    |
| 776.279   | NM_004066 | 821.257   | 783.995   | NM_021005 | 820.507   | 345.044   | NM_017751 | 2825.803  |
| 2013.428  | NM_004941 | 3212.988  | 4083.846  | NM_001523 | 673.379   | 471.884   | NM_003771 | 1833.466  |
| 473.551   | AF151831  | 3318.05   | 5025.097  | NM_017423 | 620.522   | 802.457   | NM_017860 | 3528.876  |
| 207.216   | AB011121  | 904.233   | 624.801   | NM_019613 | 1088.041  | 985.307   | X91195    | 29930.092 |
| 991.468   | AF083255  | 6581.665  | 7632.724  | AK027086  | 1326.661  | 1893.298  | AF086190  | 1006.18   |
| 1513.575  | AK022605  | 772.127   | 705.44    | AB032997  | 419.839   | 484.428   | NM_006143 | 413.807   |
| 322.829   | AK000554  | 2527.823  | 2865.214  | AL096857  | 1133.195  | 1031.469  | AL050035  | 1829.453  |
| 189.019   | NM_006472 | 3334.963  | 26399.457 | NM_003834 | 1597.821  | 1638.808  | AK024449  | 2311.329  |
| 213.175   | NM_002826 | 5480.073  | 8584.294  | NM_005959 | 1151.899  | 947.282   | AF279780  | 33425.281 |
| 6028.475  | AF159141  | 2607.644  | 1700.189  | NM_003381 | 479.939   | 402.311   | AK022510  | 936.463   |
| 1252.72   | NM_002420 | 618.392   | 906.057   | NM_003702 | 3908.556  | 2030.236  | AK023878  | 544.285   |
| 5392.517  | NM_016458 | 11181.61  | 8678.918  | NM_004405 | 605.249   | 642.886   | AK021851  | 836.703   |
| 160.559   | AK022233  | 2370.632  | 1948.659  | NM_006060 | 826.826   | 313.6     | L37717    | 683.391   |
| 318.764   | AL137713  | 261.513   | 196.582   | NM_005667 | 899.186   | 1056.451  | AJ131609  | 1278.826  |
| 2278.737  | AK026410  | 4427.285  | 4335.694  | NM_000060 | 499.578   | 434.883   | BC019280  | 2931.372  |
| 1856.697  | NM_014637 | 2079.606  | 3113.549  | NM_009589 | 416.041   | 549.164   | AF086498  | 555.67    |
| 1686.701  | NM_013379 | 14135.071 | 15120.239 | L09080    | 992.407   | 910.261   | AK022177  | 556.543   |
| 801.547   | AF113208  | 3336.513  | 4166.806  | NM_007326 | 1943.395  | 1464.822  | AF086466  | 1342.354  |
| 375.957   | AF019382  | 887.037   | 1288.406  | NM_001886 | 1822.421  | 1684.385  | AB007962  | 6510.923  |
| 1270.935  | BC012757  | 1933.888  | 2166.956  | AF137372  | 2063.854  | 2228.903  | AF005081  | 899.576   |
| 46124.941 | NM_004062 | 1478.217  | 1824.061  | AF220417  | 587.186   | 516.516   | AK026438  | 724.67    |
| 563.841   | NM_005883 | 603.951   | 827.429   | D83782    | 3729.404  | 3636.411  | AK021546  | 493.035   |
| 1345.86   | NM_004449 | 1434.383  | 1652.81   | NM_002078 | 1165.484  | 982.28    | AL050186  | 6888.469  |
| 208.101   | NM_014591 | 2578.464  | 2982.436  | NM_000287 | 1950.891  | 1929.992  | AK021918  | 2224.729  |
| 493.909   | NM_014592 | 1757.355  | 1234.207  | NM_001656 | 661.832   | 772.427   | AK021669  | 2466.652  |
| 198.317   | NM_001945 | 2063.544  | 4755.94   | AF091033  | 397.661   | 307.779   | AL080113  | 29575.73  |
| 674.255   | NM_020039 | 1211.981  | 1333.979  | NM_001122 | 5740.677  | 4493.531  | AL050083  | 1167.023  |
| 821.23    | NM_006653 | 975.478   | 610.417   | NM_004591 | 1295.049  | 1368.166  | AK022766  | 413.606   |
| 4659.982  | NM_014442 | 1405.009  | 1496.626  | AL133027  | 463.786   | 449.356   | AL049422  | 3073.14   |
| 758.654   | AB002313  | 1603.955  | 1875.42   | AB037732  | 946.727   | 933.846   | AL133089  | 864.763   |
| 1022.181  | AB011167  | 1432.461  | 746.307   | NM_001839 | 54123.027 | 67189.875 | AK023526  | 1759.379  |
| 2379.049  | NM_005409 | 1286.343  | 602.046   | M27487    | 495.004   | 535.14    | BE266129  | 834.848   |
| 2392.385  | NM_000208 | 2928.109  | 1970.438  | NM_003811 | 4455.372  | 3439.314  | AK025602  | 3751.714  |
| 1206.808  | NM_002188 | 24548.734 | 21360.045 | NM_002981 | 1724.929  | 1445.213  | AK026309  | 1991.079  |



|           |           |           |           |           |           |           |           |          |
|-----------|-----------|-----------|-----------|-----------|-----------|-----------|-----------|----------|
| 1481.589  | AK027119  | 8863.722  | 8653.267  | NM_001244 | 1224.992  | 1053.438  | AL137486  | 3262.994 |
| 563.704   | AB037727  | 18092.688 | 14943.166 | NM_016139 | 16967.096 | 14614.929 | AL110162  | 648.01   |
| 6090.065  | NM_005426 | 3299.644  | 4508.432  | AL117468  | 1374.693  | 1125.26   | AK022681  | 6733.238 |
| 963.271   | NM_004763 | 640.57    | 693.731   | NM_004090 | 2155.869  | 1929.674  | CY3Cy5    | 3724.554 |
| 180.443   | NM_014063 | 5180.962  | 4625.819  | NM_014634 | 7262.036  | 3762.326  | Y18483    | 402.564  |
| 805.09    | D86964    | 2765.927  | 3909.442  | NM_001919 | 9800.148  | 7137.239  | AI299075  | 1224.11  |
| 2697.401  | AL049801  | 1582.348  | 1461.478  | BC031485  | 1368.378  | 891.234   | AB011098  | 442.5    |
| 499.454   | NM_016395 | 4649.113  | 4344.441  | NM_004092 | 3720.269  | 4835.693  | AA609759  | 399.767  |
| 463.95    | NM_003152 | 764.106   | 678.502   | X15624    | 781.779   | 1405.663  | AA029418  | 2330.854 |
| 1179.139  | NM_014727 | 3123.897  | 3499.446  | AF073770  | 888.402   | 1055.976  | L20815    | 1866.353 |
| 4166.016  | BE885010  | 496.263   | 706.774   | AL359401  | 3967.579  | 3150.39   | AI364483  | 2667.349 |
| 1393.267  | NM_006342 | 1322.615  | 1485.377  | NM_012213 | 1285.206  | 1284.175  | AA456001  | 2662.147 |
| 298.114   | NM_016396 | 3587.638  | 3716.315  | NM_016573 | 1914.135  | 2030.466  | AA451686  | 1801.698 |
| 1630.985  | NM_005689 | 679.343   | 1246.026  | NM_001303 | 3130.005  | 2494.702  | NM_003822 | 426.703  |
| 584.92    | AF086546  | 323.566   | 588.738   | M21304    | 892.41    | 658.473   | NM_004412 | 1121.53  |
| 712.38    | NM_005552 | 10501.039 | 9993.179  | NM_001979 | 388.505   | 302.486   | SR5       | 2551.124 |
| 606.331   | NM_006717 | 1444.933  | 1713.724  | AB040896  | 878.2     | 771.659   | SR7       | 3091.479 |
| 2366.744  | AL109786  | 1157.412  | 658.617   | NM_001107 | 993.313   | 1301.057  | SR9       | 8639.514 |
| 443.059   | AK026479  | 4039.183  | 3255.665  | NM_003636 | 1866.333  | 1275.946  | CY3Cy5    | 4232.359 |
| 571.442   | AK022860  | 4064.956  | 5592.723  | NM_002234 | 978.913   | 877.312   | NM_012096 | 4104.708 |
| 170.974   | X60188    | 19751.279 | 24023.875 | NM_000701 | 1011.073  | 1237.609  | L12052    | 1202.777 |
| 540.372   | NM_005977 | 2124.494  | 1251.701  | AB022696  | 2675.93   | 2112.431  | AB028976  | 1539.692 |
| 2028.933  | NM_006265 | 5237.531  | 3749.048  | NM_021005 | 905.338   | 446.386   | NM_015869 | 810.477  |
| 354.47    | NM_003126 | 455.184   | 397.037   | NM_001523 | 555.329   | 689.196   | NM_004626 | 464.033  |
| 1165.817  | NM_006059 | 1369.269  | 1669.547  | NM_017423 | 661.342   | 1246.345  | NM_004305 | 5810.009 |
| 319.611   | NM_000347 | 1805.3    | 2880.695  | Z70705    | 769.869   | 582.67    | NM_006089 | 830.021  |
| 752.093   | M13452    | 5124.902  | 10404.114 | NM_002611 | 648.035   | 784.187   | NM_005992 | 1416.241 |
| 2473.6    | AF082075  | 771.105   | 1060.947  | NM_017417 | 689.414   | 856.647   | AB011102  | 2267.242 |
| 1669.391  | NM_016114 | 1143.659  | 527.659   | AL133602  | 721.664   | 621.451   | D63480    | 826.586  |
| 378.928   | AY007114  | 818.431   | 742.512   | AF037219  | 1252.643  | 673.576   | NM_002969 | 1320.376 |
| 1909.843  | AF086604  | 456.224   | 360.54    | NM_000251 | 1216.364  | 1089.335  | NM_004620 | 406.271  |
| 1045.216  | AB000895  | 649.441   | 482.592   | NM_006038 | 1440.438  | 1404.651  | AJ277587  | 887.586  |
| 546.209   | X80031    | 350.21    | 269.644   | AB011133  | 879.143   | 853.815   | D87432    | 1292.532 |
| 182.468   | AK022178  | 582.313   | 659.787   | NM_017572 | 14985.352 | 10131.244 | AK023749  | 184.986  |
| 328.694   | NM_006011 | 361.789   | 628.695   | NM_018444 | 1209.951  | 1108.212  | NM_002337 | 899.858  |
| 107.007   | L00635    | 824.171   | 679.742   | NM_000252 | 1372.372  | 1054.019  | NM_013245 | 1042.888 |
| 112.457   | NM_015601 | 1319.031  | 1263.527  | NM_006947 | 6259.88   | 3727.578  | NM_006423 | 2873.489 |
| 249.003   | NM_001780 | 24130.715 | 47143.984 | NM_017917 | 1550.706  | 2004.26   | NM_004766 | 1139.252 |
| 426.701   | AJ277442  | 673.791   | 1017.122  | NM_000060 | 540.908   | 494.146   | NM_005819 | 2082.675 |
| 430.084   | NM_004569 | 2119.869  | 3088.09   | L09080    | 1366.906  | 1277.376  | AK025520  | 1348.368 |
| 404.673   | AF089088  | 1058.431  | 1554.696  | NM_007326 | 2680.294  | 2209.007  | NM_004892 | 5242.896 |
| 672.939   | L07557    | 2032.1    | 2068.776  | NM_001886 | 2417.125  | 2199.395  | NM_014597 | 4258.062 |
| 352.796   | D78514    | 3148.265  | 2321.664  | NM_004467 | 279.69    | 354.61    | NM_017896 | 2344.362 |
| 23939.516 | AK021665  | 596.906   | 556.807   | NM_005622 | 453.069   | 670.6     | AB002374  | 994.326  |
| 659.711   | NM_013366 | 506.473   | 326.718   | NM_018058 | 3010.977  | 1741.082  | U17327    | 484.39   |
| 1288.041  | NM_002787 | 16152.602 | 18105.09  | NM_004548 | 1742.186  | 2177.593  | M87790    | 4423.053 |
| 1505.244  | U95006    | 5281.826  | 4206.901  | X69079    | 10203.762 | 6525.38   | NM_001768 | 936.16   |
| 361.817   | NM_003347 | 6842.24   | 10974.825 | BI759406  | 1785.535  | 1225.239  | NM_000029 | 2484.278 |
| 182.964   | AF273051  | 685.428   | 890.138   | S74445    | 315.716   | 313.597   | AF035802  | 1246.279 |
| 143.374   | NM_014516 | 4272.253  | 4918.595  | BI763360  | 492.709   | 347.339   | M26123    | 234.917  |
| 283.871   | AK021868  | 486.886   | 616.778   | D25538    | 507.259   | 437.41    | NM_001838 | 530.138  |
| 73.514    | AK000643  | 50786.254 | 61146.938 | NM_000360 | 2639.591  | 2542.568  | NM_002660 | 971.969  |
| 626.223   | NM_018421 | 3408.151  | 3476.818  | D49950    | 2185.508  | 1298.733  | NM_003706 | 423.441  |

|           |           |           |           |           |           |           |           |           |
|-----------|-----------|-----------|-----------|-----------|-----------|-----------|-----------|-----------|
| 242.236   | AB014574  | 23476.492 | 21307.963 | NM_001849 | 330.609   | 366.547   | NM_005218 | 4553.902  |
| 2998.596  | NM_020127 | 1120.91   | 922.148   | X03635    | 1132.702  | 650.575   | AB033054  | 5071.267  |
| 5713.232  | NM_015623 | 8507.363  | 7135.714  | BC011847  | 48235.578 | 32260.672 | NM_016122 | 603.25    |
| 823.572   | AB045116  | 640.13    | 731.189   | X03348    | 972.644   | 924.117   | AF153330  | 503.145   |
| 319.708   | L49054    | 728.315   | 517.409   | AF353674  | 2297.212  | 2280.54   | BF540935  | 698.088   |
| 750.675   | NM_001675 | 991.093   | 818.542   | BC002645  | 1570.856  | 886.791   | NM_004466 | 467.802   |
| 465.011   | NM_003422 | 2594.429  | 2678.691  | NM_021138 | 1069.959  | 837.918   | NM_007081 | 1516.728  |
| 802.336   | NM_001451 | 425.038   | 566.286   | NM_002981 | 1611.092  | 1087.049  | AB032964  | 1559.989  |
| 167.815   | NM_014779 | 891.534   | 780.751   | NM_001244 | 1270.457  | 1328.235  | BE733605  | 1336.397  |
| 293.18    | NM_002943 | 2759.922  | 2905.935  | NM_016139 | 15748.061 | 13307.667 | NM_003334 | 5788.918  |
| 357.18    | AL133649  | 1010.226  | 1179.978  | AL117468  | 1678.886  | 1729.752  | NM_002693 | 1073.7    |
| 81.642    | AB018303  | 450.597   | 667.218   | NM_019613 | 1167.152  | 1050.912  | NM_003671 | 420.869   |
| 268.158   | NM_015846 | 3360.83   | 4285.153  | AK027086  | 1100.404  | 1589.838  | AK026000  | 1039.321  |
| 481.672   | NM_015972 | 7149.208  | 5561.083  | AB032997  | 380.03    | 479.006   | NM_017833 | 900.773   |
| 145.73    | NM_016132 | 1358.953  | 1324.962  | AL096857  | 1225.715  | 1151.257  | NM_006675 | 1783.642  |
| 1935.807  | NM_018006 | 1802.775  | 1448.681  | X07203    | 310.13    | 245.707   | NM_003022 | 8051.16   |
| 829.145   | NM_016090 | 1589.194  | 1591.498  | NM_003834 | 1173.878  | 1025.664  | NM_004873 | 924.65    |
| 679.863   | NM_001013 | 49881.762 | 32390.438 | NM_005959 | 871.863   | 600.368   | NM_019842 | 480.117   |
| 273.914   | AK024040  | 3816.779  | 2366.039  | NM_003381 | 482.582   | 267.398   | NM_002951 | 5245.294  |
| 624.916   | NM_005061 | 3469.891  | 2491.987  | NM_003702 | 3824.98   | 2216.434  | NM_002317 | 815.527   |
| 211.853   | NM_000997 | 48185.969 | 68652.148 | NM_004405 | 669.949   | 608.767   | NM_000320 | 1638.642  |
| 251.392   | AF182417  | 35335.367 | 21844.301 | NM_001988 | 2627.337  | 1693.991  | NM_004620 | 561.887   |
| 126.069   | AL137354  | 14139.324 | 11667.419 | NM_006060 | 875.152   | 445.457   | AF087940  | 1017.48   |
| 1204.642  | NM_001023 | 47511.809 | 67058.281 | NM_005667 | 959.502   | 1027.248  | AJ277587  | 1176.144  |
| 262.493   | AK021571  | 6902.551  | 3462.028  | NM_006308 | 425.455   | 400.554   | D87432    | 1928.24   |
| 143.298   | AY007128  | 310.397   | 235.76    | NM_002234 | 1306.902  | 837.95    | A1565117  | 53247.234 |
| 1126.302  | AF052149  | 1469.47   | 1611.472  | NM_000701 | 802.646   | 914.602   | A1299075  | 1146.12   |
| 603.193   | AK025586  | 599.471   | 597.214   | AB022696  | 2963.247  | 2625.253  | AB011098  | 450.838   |
| 1689.144  | AL137512  | 674.348   | 512.607   | AF137372  | 2118.176  | 2334.194  | AA609759  | 308.251   |
| 17344.563 | NM_005036 | 706.364   | 500.061   | AF220417  | 469.473   | 298.124   | AA029418  | 2242.771  |
| 321.132   | NM_002541 | 1252.477  | 2054.591  | D83782    | 3402.442  | 2776.906  | L20815    | 1684.958  |
| 181.374   | NM_000056 | 2733.79   | 2710.325  | NM_002078 | 1150.505  | 949.258   | A1364483  | 2837.811  |
| 475.707   | NM_016311 | 6973.275  | 7741.728  | NM_000287 | 1772.791  | 2002.228  | AA456001  | 2684.259  |
| 684.516   | NM_001867 | 52228.66  | 51878.18  | NM_001656 | 707.166   | 619.806   | AA451686  | 701.366   |
| 10593.65  | NM_002300 | 52765.219 | 65125.957 | AF091033  | 360.793   | 417.902   | NM_003822 | 370.993   |
| 367.632   | NM_000290 | 1649.134  | 1468.477  | NM_001122 | 4145.166  | 2623.934  | NM_004412 | 544.764   |
| 83.339    | NM_016538 | 4303.483  | 3854.901  | NM_004591 | 590.138   | 636.333   | NM_002050 | 698.605   |
| 356.816   | AK023275  | 6334.402  | 3177.673  | AL133027  | 253.81    | 228.786   | NM_007097 | 2078.559  |
| 545.809   | AJ223352  | 5368.512  | 11327.524 | AB037732  | 677.055   | 648.992   | NM_000029 | 2547.443  |
| 180.34    | NM_012238 | 2095.597  | 1963.968  | M27487    | 1027.88   | 968.822   | NM_000715 | 316.563   |
| 252.361   | NM_016539 | 6746.141  | 6998.23   | NM_002286 | 34897.328 | 19559.547 | AF035802  | 1315.184  |
| 329.171   | NM_006807 | 6281.981  | 4367.032  | NM_003811 | 3964.662  | 3677.848  | Y08145    | 267.543   |
| 613.731   | NM_006532 | 1858.733  | 1333.503  | AB011133  | 885.521   | 640.287   | M26123    | 375.979   |
| 3458.051  | U07132    | 3237.93   | 2024.791  | NM_017572 | 15026.013 | 5537.958  | NM_001838 | 381.049   |
| 324.221   | NM_003436 | 637.301   | 520.304   | NM_018444 | 1092.546  | 816.311   | NM_012096 | 4049.619  |
| 428.744   | AL035301  | 1121.935  | 829.264   | NM_000252 | 1200.262  | 1104.047  | NM_003905 | 8399.726  |
| 125.217   | NM_017687 | 2663.278  | 2169.837  | NM_006947 | 6559.967  | 5114.973  | L12052    | 1099.157  |
| 3009.316  | NM_017975 | 1163.184  | 1006.243  | NM_017917 | 1503.796  | 2250.343  | AB028976  | 1565.057  |
| 1110.32   | AK025036  | 1000.051  | 1227.163  | NM_004090 | 2258.336  | 2461.034  | AK026337  | 1052.242  |
| 1104.551  | AK024843  | 5317.794  | 4716.207  | NM_014634 | 7266.633  | 5560.332  | NM_015869 | 699.173   |
| 10581.566 | AF074994  | 452.747   | 684.701   | NM_001919 | 11100.028 | 9677.754  | NM_004626 | 1528.465  |
| 333.96    | NM_017670 | 3470.114  | 4182.419  | BC031485  | 1545.479  | 1221.766  | NM_004305 | 4111.238  |
| 241.18    | AF286598  | 391.824   | 553.577   | NM_004092 | 3662.572  | 4248.651  | NM_006089 | 625.913   |

|           |                  |           |           |                  |           |           |                  |           |
|-----------|------------------|-----------|-----------|------------------|-----------|-----------|------------------|-----------|
| 1416.362  | <b>AK021468</b>  | 916.793   | 1174.12   | <b>X15624</b>    | 712.652   | 905.127   | <b>NM_005992</b> | 742.197   |
| 1110.1    | <b>BC033020</b>  | 1053.695  | 1469.169  | <b>AF073770</b>  | 702.714   | 653.692   | <b>NM_003144</b> | 24115.221 |
| 907.212   | <b>NM_004366</b> | 4970.169  | 4696.318  | <b>AL359401</b>  | 3195.979  | 2304.314  | <b>AB011102</b>  | 578.771   |
| 412.004   | <b>AK026168</b>  | 2029.031  | 2045.984  | <b>NM_012213</b> | 994.511   | 1014.738  | <b>NM_002969</b> | 846.621   |
| 354.918   | <b>AJ296152</b>  | 10701.551 | 11832.411 | <b>NM_016573</b> | 1342.713  | 1214.948  | <b>AK023749</b>  | 316.151   |
| 199.785   | <b>AK001067</b>  | 1826.393  | 2334.562  | <b>NM_001303</b> | 1924.897  | 1367.545  | <b>NM_002337</b> | 1486.43   |
| 4594.839  | <b>AK027088</b>  | 5890.61   | 11337.916 | <b>M21304</b>    | 412.87    | 324.781   | <b>NM_013245</b> | 851.076   |
| 399.129   | <b>AB037721</b>  | 4281.051  | 3568.726  | <b>NM_001979</b> | 369.178   | 351.284   | <b>NM_006423</b> | 2638.063  |
| 2297.875  | <b>AK027120</b>  | 7841.257  | 21462.596 | <b>AB040896</b>  | 837.253   | 754.434   | <b>NM_004766</b> | 1118.685  |
| 996.102   | <b>AB029001</b>  | 3018.853  | 4433.28   | <b>NM_001107</b> | 1010.428  | 1191.753  | <b>NM_005819</b> | 1761.001  |
| 1040.235  | <b>AB006624</b>  | 3255.13   | 2337.342  | <b>AF151851</b>  | 2987.61   | 2470.99   | <b>AK025520</b>  | 1064.524  |
| 1038.126  | <b>AL109717</b>  | 530.647   | 731.56    | <b>NM_003636</b> | 1932.56   | 1400.501  | <b>NM_004892</b> | 4650.183  |
| 12431.532 | <b>AK025473</b>  | 860.485   | 669.276   | <b>X89675</b>    | 944.772   | 401.878   | <b>NM_014597</b> | 2821.536  |
| 9799.661  | <b>AF146693</b>  | 521.318   | 449.807   | <b>NM_005798</b> | 5518.459  | 4623.192  | <b>NM_017896</b> | 1534.559  |
| 714.529   | <b>AF271070</b>  | 7380.254  | 3910.015  | <b>NM_004216</b> | 1550.913  | 1539.237  | <b>AB002374</b>  | 549.036   |
| 696.018   | <b>NM_014903</b> | 1326.676  | 964.668   | <b>NM_016289</b> | 22794.668 | 21399.295 | <b>M87790</b>    | 2456.049  |
| 4394.285  | <b>AK055959</b>  | 567.606   | 610.074   | <b>NM_002051</b> | 755.112   | 655.215   | <b>NM_001768</b> | 423.493   |
| 703.676   | <b>AF052141</b>  | 404.498   | 214.828   | <b>NM_001523</b> | 503.966   | 494.797   | <b>NM_002951</b> | 6288.4    |
| 41150.25  | <b>AK021705</b>  | 3717.322  | 1881.94   | <b>NM_017423</b> | 511.713   | 610.832   | <b>NM_002317</b> | 571.383   |
| 1851.367  | <b>NM_016141</b> | 6650.297  | 7275.931  | <b>Z70705</b>    | 531.404   | 399.712   | <b>NM_000320</b> | 1773.807  |
| 360.195   | <b>AL109702</b>  | 1100.495  | 805.361   | <b>NM_002611</b> | 497.433   | 363.58    | <b>NM_003136</b> | 3241.265  |
| 600.759   | <b>AK025624</b>  | 10563.46  | 6438.292  | <b>NM_017417</b> | 487.44    | 356.719   | <b>NM_013328</b> | 15609.682 |
| 834.484   | <b>AK026684</b>  | 490.43    | 604.362   | <b>AL133602</b>  | 736.125   | 664.409   | <b>NM_002660</b> | 1789.341  |
| 7409.465  | <b>AL110125</b>  | 3150.261  | 3467.38   | <b>AF037219</b>  | 1120.188  | 1112.407  | <b>NM_015900</b> | 385.101   |
| 3156.855  | <b>X89744</b>    | 366.086   | 398.859   | <b>NM_000251</b> | 1416.451  | 1425.103  | <b>NM_006656</b> | 63.345    |
| 9661.508  | <b>AJ011600</b>  | 1083.002  | 1208.255  | <b>NM_006038</b> | 1483.887  | 1497.965  | <b>NM_003706</b> | 319.567   |
| 968.771   | <b>AJ002785</b>  | 743.628   | 733.284   | <b>NM_016484</b> | 426.325   | 451.644   | <b>NM_005218</b> | 3571.201  |
| 785.939   | <b>Z70716</b>    | 602.523   | 974.586   | <b>AK026114</b>  | 274.936   | 330.951   | <b>AB033054</b>  | 3388.481  |
| 35562.211 | <b>AL049251</b>  | 609.872   | 1045.166  | <b>NM_014452</b> | 458.91    | 309.602   | <b>NM_004412</b> | 1201.253  |
| 2641.589  | <b>Z83945</b>    | 780.632   | 679.419   | <b>NM_014683</b> | 460.382   | 280.094   | <b>NM_002050</b> | 1146.899  |
| 850.497   | <b>L32606</b>    | 618.049   | 703.119   | <b>AK021536</b>  | 2829.244  | 1515.559  | <b>NM_007097</b> | 4123.542  |
| 2277.745  | <b>AK091125</b>  | 755.312   | 652.03    | <b>NM_002600</b> | 1194.455  | 861.007   | <b>D87446</b>    | 3684.611  |
| 32133.781 | <b>D16904</b>    | 675.99    | 777.214   | <b>NM_003646</b> | 9872.82   | 6811.318  | <b>BF540935</b>  | 1047.993  |
| 407.04    | <b>M93056</b>    | 4344.362  | 5906.104  | <b>NM_006663</b> | 289.645   | 321.193   | <b>NM_007081</b> | 1485.776  |
| 1297.756  | <b>D16474</b>    | 2461.224  | 2063.291  | <b>NM_012424</b> | 389.07    | 297.263   | <b>AB032964</b>  | 1768.772  |
| 674.248   | <b>AL080072</b>  | 598.075   | 508.017   | <b>NM_002446</b> | 493.077   | 368.012   | <b>BE733605</b>  | 1284.381  |
| 2382.011  | <b>AK024898</b>  | 502.905   | 540.691   | <b>NM_000863</b> | 373.019   | 267.487   | <b>NM_003334</b> | 5355.784  |
| 526.188   | <b>AL049280</b>  | 606.946   | 749.211   | <b>NM_006651</b> | 1432.234  | 1397.422  | <b>NM_002693</b> | 855.252   |
| 945.419   | <b>AK025212</b>  | 5423.121  | 10154.141 | <b>NM_005336</b> | 4655.74   | 1893.84   | <b>NM_003671</b> | 263.995   |
| 1887.075  | <b>AB021925</b>  | 460.265   | 307.124   | <b>NM_001419</b> | 3890.96   | 2427.547  | <b>AK026000</b>  | 518.097   |
| 1063.307  | <b>AL157503</b>  | 2427.945  | 2462.197  | <b>AF119817</b>  | 9477.474  | 5178.595  | <b>NM_017833</b> | 630.124   |
| 1634.745  | <b>AK000053</b>  | 435.979   | 402.205   | <b>AL035306</b>  | 906.791   | 767.954   | <b>NM_006675</b> | 1224.167  |
| 1142.792  | <b>AK000786</b>  | 1058.079  | 819.537   | <b>NM_005749</b> | 3506.554  | 8100.089  | <b>NM_003022</b> | 4813.396  |
| 3530.922  | <b>AK000935</b>  | 464.405   | 543.127   | <b>NM_004230</b> | 8355.666  | 21745.061 | <b>NM_004873</b> | 1032.746  |
| 1922.544  | <b>AK021458</b>  | 2288.712  | 1910.247  | <b>NM_014503</b> | 390.867   | 490.451   | <b>NM_019842</b> | 628.525   |
| 4690.085  | <b>NM_017674</b> | 2455.295  | 3083.387  | <b>NM_014659</b> | 996.778   | 716.418   | <b>NM_005992</b> | 1217.416  |
| 2265.447  | <b>AK024525</b>  | 1499.041  | 1209.901  | <b>NM_004399</b> | 1105.102  | 1059.692  | <b>NM_003144</b> | 32006.998 |
| 9223.896  | <b>AK024544</b>  | 656.766   | 326.151   | <b>NM_006337</b> | 1858.262  | 1438.307  | <b>NM_000908</b> | 384.545   |
| 592.944   | <b>AK001880</b>  | 2837.844  | 2863.672  | <b>NM_004507</b> | 1597.493  | 1145.593  | <b>AB011102</b>  | 2343.104  |
| 888.679   | <b>AF156166</b>  | 3424.616  | 3986.36   | <b>NM_002710</b> | 10566.672 | 4508.111  | <b>D63480</b>    | 1020.383  |
| 5836.893  | <b>NM_014373</b> | 24249.162 | 8829.479  | <b>NM_014060</b> | 1492.308  | 1557.962  | <b>NM_002969</b> | 1386.556  |
| 4605.941  | <b>NM_014206</b> | 19236.543 | 8727.232  | <b>NM_004749</b> | 4900.211  | 3383.445  | <b>NM_004620</b> | 580.516   |
| 3672.439  | <b>NM_001651</b> | 3579.633  | 3311.538  | <b>BQ446064</b>  | 425.772   | 264.548   | <b>AF087940</b>  | 822.831   |

|          |                  |           |           |                  |           |           |                  |          |
|----------|------------------|-----------|-----------|------------------|-----------|-----------|------------------|----------|
| 1515.614 | <b>L32786</b>    | 2021.378  | 2236.78   | <b>AF302502</b>  | 359.501   | 326.75    | <b>AJ277587</b>  | 852.305  |
| 868.043  | <b>U03239</b>    | 298.134   | 536.312   | <b>AF274571</b>  | 379.404   | 313.858   | <b>D87432</b>    | 1872.144 |
| 3610.656 | <b>AL355720</b>  | 2495.656  | 2449.609  | <b>NM_005449</b> | 377.358   | 162.314   | <b>AA029418</b>  | 996.906  |
| 539.435  | <b>AK002023</b>  | 1754.623  | 2016.972  | <b>NM_003879</b> | 1691.451  | 1489.57   | <b>L20815</b>    | 1106.091 |
| 2756.143 | <b>NM_016464</b> | 675.692   | 1028.894  | <b>NM_016052</b> | 2711.021  | 2090.514  | <b>AI364483</b>  | 1726.369 |
| 574.55   | <b>L40402</b>    | 769.822   | 795.87    | <b>NM_006718</b> | 572.799   | 437.365   | <b>AA456001</b>  | 1714.375 |
| 2441.153 | <b>AK022422</b>  | 1040.066  | 794.916   | <b>NM_016312</b> | 382.721   | 291.918   | <b>AA451686</b>  | 1147.734 |
| 239.338  | <b>AK023485</b>  | 617.256   | 287.76    | <b>NM_001776</b> | 622.264   | 549.347   | <b>AB040938</b>  | 6011.401 |
| 296.399  | <b>AK022474</b>  | 12109.24  | 14362.05  | <b>NM_001903</b> | 5088.229  | 4461.365  | <b>M87790</b>    | 4299.274 |
| 7391.177 | <b>AK022392</b>  | 1899.774  | 2156.059  | <b>NM_001874</b> | 3437.443  | 10799.029 | <b>NM_001768</b> | 1044.06  |
| 437.742  | <b>AK025949</b>  | 1647.08   | 1552.093  | <b>AK027037</b>  | 563.414   | 1344.577  | <b>NM_000029</b> | 3143.986 |
| 2152.829 | <b>Y10259</b>    | 1247.602  | 1450.034  | <b>NM_003875</b> | 6046.683  | 2681.578  | <b>NM_000715</b> | 450.88   |
| 770.936  | <b>AK021725</b>  | 1548.691  | 1864.288  | <b>AF191687</b>  | 1008.263  | 848.937   | <b>AF035802</b>  | 1273.282 |
| 863.581  | <b>NM_002408</b> | 3444.704  | 3118.16   | <b>NM_000274</b> | 5011.545  | 3796.238  | <b>Y08145</b>    | 310.04   |
| 3890.65  | <b>AK024282</b>  | 1226.579  | 1262.771  | <b>NM_000170</b> | 1049.854  | 492.302   | <b>M26123</b>    | 447.607  |
| 890.775  | <b>AF085838</b>  | 1874.343  | 1797.775  | <b>NM_000281</b> | 3867.564  | 2880.788  | <b>AB028976</b>  | 1225.52  |
| 7404.5   | <b>NM_018277</b> | 716.009   | 996.023   | <b>AK001295</b>  | 1744.763  | 1509.746  | <b>NM_015869</b> | 567.704  |
| 732.769  | <b>AF014455</b>  | 488.49    | 842.067   | <b>NM_006031</b> | 855.488   | 1074.39   | <b>NM_004626</b> | 344.237  |
| 387.328  | <b>AF086335</b>  | 1186.396  | 1455.914  | <b>NM_002715</b> | 2054.829  | 2206.47   | <b>NM_004305</b> | 5259.443 |
| 409.408  | <b>AL355741</b>  | 354.981   | 422.387   | <b>NM_001020</b> | 51061.547 | 68532.992 | <b>NM_006089</b> | 695.274  |
| 690.935  | <b>AB011118</b>  | 11981.498 | 8556.36   | <b>AB020660</b>  | 1043.047  | 1154.226  | <b>AB033054</b>  | 6213.034 |
| 2353.482 | <b>S66666</b>    | 406.009   | 272.382   | <b>NM_006659</b> | 12795.208 | 6830.397  | <b>NM_016122</b> | 552.153  |
| 2021.329 | <b>AK021476</b>  | 1354.617  | 1722.33   | <b>NM_018051</b> | 696.78    | 415.412   | <b>AF153330</b>  | 595.921  |
| 374.863  | <b>NM_018630</b> | 2154.684  | 2080.918  | <b>NM_015371</b> | 2191.41   | 1449.277  | <b>AK023749</b>  | 371.74   |
| 1513.801 | <b>AF086175</b>  | 656.847   | 881.711   | <b>AB040915</b>  | 668.388   | 605.86    | <b>NM_006423</b> | 1952.766 |
| 1659.787 | <b>AK002196</b>  | 695.349   | 415.826   | <b>AF147791</b>  | 297.83    | 329.807   | <b>NM_004766</b> | 681.248  |
| 860.602  | <b>NM_004576</b> | 1039.701  | 870.844   | <b>NM_006481</b> | 1280.453  | 3831.844  | <b>NM_005819</b> | 1129.871 |
| 7326.461 | <b>AF040097</b>  | 762.891   | 790.813   | <b>AB011115</b>  | 385.847   | 715.584   | <b>AK025520</b>  | 969.36   |
| 962.237  | <b>NM_020436</b> | 336.01    | 381.822   | <b>NM_003910</b> | 11454.652 | 24309.34  | <b>NM_004892</b> | 3411.475 |
| 947.068  | <b>AK024182</b>  | 1405.248  | 1440.234  | <b>AB007913</b>  | 3160.006  | 4794.559  | <b>NM_014597</b> | 2960.82  |
| 1200.616 | <b>NM_006913</b> | 8415.87   | 9277.445  | <b>NM_006696</b> | 2611.416  | 5805.859  | <b>NM_017896</b> | 1599.604 |
| 1695.264 | <b>NM_000499</b> | 3951.856  | 2610.867  | <b>NM_004599</b> | 5866.124  | 7647.397  | <b>NM_017833</b> | 1097.587 |
| 1466.489 | <b>AL049955</b>  | 13581.316 | 12614.957 | <b>NM_006037</b> | 7395.295  | 11625.246 | <b>NM_006675</b> | 1804.943 |
| 4298.941 | <b>AF155654</b>  | 4103.715  | 4515.135  | <b>NM_015871</b> | 3688.821  | 5717.626  | <b>NM_003022</b> | 8715.548 |
| 946.878  | <b>AF088044</b>  | 448.898   | 381.491   | <b>NM_019037</b> | 4163.398  | 4830.92   | <b>NM_004873</b> | 1652.509 |
| 464.686  | <b>AK000028</b>  | 1744.809  | 1635.67   | <b>NM_015891</b> | 1456.211  | 1277.821  | <b>NM_019842</b> | 655.903  |
| 5362.853 | <b>NM_013320</b> | 42453.141 | 36200.598 | <b>AB037778</b>  | 633.906   | 678.242   | <b>NM_002951</b> | 6395.584 |
| 544.972  | <b>AJ245902</b>  | 509.216   | 440.354   | <b>NM_005066</b> | 17283.217 | 9703.171  | <b>NM_002317</b> | 688.165  |
| 2042.582 | <b>AL050039</b>  | 438.343   | 808.559   | <b>NM_003089</b> | 1704.964  | 1020.24   | <b>NM_000320</b> | 2134.265 |
| 2025.526 | <b>AF009316</b>  | 436.058   | 457.019   | <b>NM_003753</b> | 8950.302  | 3187.669  | <b>NM_003136</b> | 2893.559 |
| 854.708  | <b>AF087987</b>  | 604.392   | 361.693   | <b>NM_017590</b> | 1021.512  | 730.54    | <b>NM_013328</b> | 5569.378 |
| 2072.76  | <b>H09474</b>    | 946.943   | 1006.384  | <b>AB011145</b>  | 3378.021  | 2350.605  | <b>NM_002660</b> | 615.292  |
| 1029.63  | <b>AB002368</b>  | 6658.823  | 7626.135  | <b>NM_003750</b> | 17257.479 | 7253.95   | <b>NM_003706</b> | 330.401  |
| 2060.257 | <b>AL360263</b>  | 42211.836 | 39508.363 | <b>M92422</b>    | 847.404   | 607.831   | <b>NM_005218</b> | 3255.404 |
| 497.711  | <b>Z36780</b>    | 1605.581  | 2242.903  | <b>NM_017868</b> | 794.137   | 458.682   | <b>NM_014913</b> | 5081.861 |
| 1494.78  | <b>AK022403</b>  | 1286.04   | 1889.106  | <b>AK021888</b>  | 695.256   | 2407.172  | <b>NM_005864</b> | 3368.545 |
| 427.717  | <b>AK022955</b>  | 3409.215  | 1988.943  | <b>AK022848</b>  | 4409.97   | 10904.519 | <b>NM_012341</b> | 1208.009 |
| 490.276  | <b>AF131741</b>  | 854.868   | 909.149   | <b>AL049957</b>  | 453.72    | 760.978   | <b>NM_003256</b> | 7977.569 |
| 796.098  | <b>AK021760</b>  | 841.744   | 966.46    | <b>NM_018159</b> | 14212.337 | 20016.451 | <b>D87450</b>    | 1722.579 |
| 3984.234 | <b>BC035855</b>  | 1343.641  | 983.488   | <b>NM_000819</b> | 3587.416  | 5812.242  | <b>NM_017797</b> | 5646.1   |
| 2293.204 | <b>AL137408</b>  | 5371.939  | 3209.155  | <b>NM_002513</b> | 1187.364  | 2245.153  | <b>AK021919</b>  | 671.223  |
| 7215.51  | <b>AF054995</b>  | 944.339   | 1051.349  | <b>NM_017424</b> | 646.093   | 1780.247  | <b>AF000562</b>  | 1216.557 |
| 3946.944 | <b>AL080176</b>  | 2471.434  | 1974.826  | <b>NM_001522</b> | 3992.245  | 6272.392  | <b>AK025713</b>  | 1262.773 |

|           |           |           |           |           |           |           |           |           |
|-----------|-----------|-----------|-----------|-----------|-----------|-----------|-----------|-----------|
| 1127.402  | AK023627  | 1151.099  | 734.821   | NM_000883 | 1718.14   | 4069.151  | NM_018100 | 428.859   |
| 397.922   | CY3Cy5    | 1351.633  | 143.461   | AF254086  | 1546.965  | 2575.713  | NM_002050 | 1278.356  |
| 927.143   | BI759406  | 3375.436  | 5998.175  | AL390142  | 2336.334  | 3956.292  | NM_007097 | 5035.074  |
| 1531.286  | R76099    | 434.614   | 474.722   | NM_006565 | 1292.292  | 3077.11   | D87446    | 2867.424  |
| 2103.862  | S74445    | 583.257   | 769.611   | AB007930  | 10058.245 | 20028.932 | NM_004466 | 388.277   |
| 4295.015  | BI763360  | 629.917   | 678.809   | X76978    | 525.853   | 973.97    | NM_007081 | 890.637   |
| 479.128   | D25538    | 1109.909  | 1873.504  | AJ005273  | 2094.231  | 4161.042  | AB032964  | 1189.276  |
| 1782.207  | NM_000360 | 4502.831  | 12042.176 | AK021892  | 2007.12   | 5548.519  | BE733605  | 1011.501  |
| 381.789   | D49950    | 3227.5    | 2290.705  | NM_003121 | 861.314   | 1388.619  | NM_003334 | 5319.019  |
| 436.583   | NM_001849 | 964.126   | 3562.241  | NM_014803 | 1344.465  | 3453.549  | NM_002693 | 919.479   |
| 222.879   | X03635    | 2331.649  | 2246.704  | AK024956  | 448.725   | 1489.643  | AK026000  | 866.625   |
| 4365.111  | BC011847  | 58337.598 | 74065.297 | AF147386  | 2836.042  | 7673.785  | NM_000211 | 9172.628  |
| 8703.054  | X03348    | 1778.273  | 1559.806  | NM_017943 | 3318.459  | 5362.065  | AB037830  | 882.309   |
| 1462.333  | AF353674  | 3105.462  | 2701.703  | AF147383  | 640.528   | 1184.932  | NM_015685 | 903.67    |
| 3677.6    | BC002645  | 1925.064  | 1819.382  | AK025682  | 1187.791  | 1527.118  | NM_004357 | 7205.664  |
| 657.616   | NM_021138 | 2082.15   | 1947.48   | NM_013352 | 233.187   | 1146.914  | X03324    | 1628.138  |
| 853.596   | BC002792  | 614.499   | 589.89    | NM_016478 | 7894.743  | 17555.98  | NM_014934 | 845.017   |
| 10524.028 | NM_021005 | 1434.581  | 724.066   | AL389986  | 2914.75   | 5660.946  | NM_003690 | 1762.938  |
| 1105.583  | SR2       | 47994.023 | 43293.184 | AF142409  | 1692.76   | 4061.792  | NM_000876 | 1902.488  |
| 845.114   | SR4       | 12175.774 | 12505.184 | AF086279  | 154.975   | 1078.069  | NM_014214 | 1730.635  |
| 27651.984 | SR6       | 1963.194  | 1610.917  | AF088052  | 1274.429  | 2174.644  | NM_002752 | 1087.684  |
| 428.395   | SR8       | 5597.282  | 17343.967 | AF086342  | 485.817   | 928.017   | NM_013281 | 647.542   |
| 2166.663  | SR10      | 18671.002 | 5006.913  | AF086451  | 392.328   | 746.026   | NM_003931 | 622.646   |
| 1171.804  | CY3Cy5    | 1602.832  | 284.945   | AF086387  | 612.564   | 1529.077  | NM_012479 | 20740.9   |
| 1673.508  | NM_003834 | 1658.198  | 1737.377  | AF086443  | 328.872   | 1277.628  | AF250226  | 4728.712  |
| 619.068   | NM_005959 | 2266.968  | 2182.034  | AL389941  | 987.604   | 1292.161  | NM_003217 | 10041.849 |
| 1441.104  | NM_003381 | 818.697   | 504.112   | AB037756  | 1962.984  | 3034.221  | AL157475  | 1902.946  |
| 787.19    | NM_005756 | 538.395   | 490.13    | AK001853  | 3392.426  | 6679.309  | NM_006069 | 5815.955  |
| 1913.214  | NM_003702 | 7737.485  | 5476.576  | AK025071  | 726.315   | 1460.129  | NM_006534 | 1998.259  |
| 1377.024  | NM_000369 | 351.955   | 219.424   | AL360139  | 45621.199 | 47935.418 | NM_017601 | 1085.62   |
| 3437.232  | NM_016351 | 506.572   | 442.604   | AF075110  | 1515.419  | 1359.412  | AF110265  | 3967.795  |
| 827.881   | NM_004405 | 706.836   | 790.911   | AL137323  | 531.549   | 473.647   | AF272371  | 40826.012 |
| 3388.013  | NM_001988 | 3181.661  | 3011.267  | AL137494  | 2091.683  | 1814.336  | AK021848  | 633.074   |
| 3134.452  | NM_006060 | 1203.846  | 675.079   | AL162037  | 3175.588  | 3592.144  | NM_003704 | 871.34    |
| 1317.973  | NM_005667 | 1188.003  | 1757.108  | AL390150  | 732.077   | 1286.873  | AK023140  | 435.843   |
| 948.598   | NM_006308 | 823.276   | 881.188   | NM_002761 | 989.767   | 1497.72   | NM_001553 | 1599.426  |
| 5760.83   | NM_000060 | 809.15    | 1405.358  | AF086063  | 715.934   | 1282.312  | NM_014173 | 2544.322  |
| 1292.503  | NM_009589 | 706.637   | 1638.227  | AF086098  | 1068.498  | 1984.679  | NM_001731 | 6736.132  |
| 6412.764  | L09080    | 1131.097  | 1106.564  | AF086076  | 818.246   | 2154.132  | NM_007375 | 2165.73   |
| 540.855   | NM_007326 | 3821.366  | 3104.186  | AL833393  | 1501.171  | 2486.613  | NM_014371 | 1418.189  |
| 1304.302  | NM_001886 | 3471.022  | 3348.525  | AF088005  | 1105.277  | 1937.659  | AF290512  | 1546.834  |
| 2866.178  | NM_004467 | 335.477   | 321.292   | AF086096  | 4417.386  | 6606.826  | NM_006716 | 1935.003  |
| 12480.507 | NM_005622 | 631.267   | 816.693   | AL390132  | 678.253   | 1320.769  | AB002323  | 762.205   |
| 266.283   | NM_018058 | 3202.592  | 1179.771  | NM_017933 | 5240.145  | 9909.027  | AK022241  | 1628.611  |
| 1123.796  | NM_004548 | 3283.642  | 3346.812  | NM_017819 | 7094.412  | 11174.443 | AK022587  | 2517.112  |
| 614.047   | X69079    | 3177.293  | 2253.131  | AF094508  | 555.181   | 480.506   | NM_005512 | 269.971   |
| 491.62    | NM_001122 | 3905.262  | 3746.864  | AF161351  | 1284.159  | 1387.145  | NM_005506 | 617.983   |
| 3208.353  | NM_004591 | 1101.628  | 1369.008  | AF111782  | 1772.04   | 1437.453  | AL137404  | 29611.027 |
| 549.449   | AL133027  | 376.324   | 372.88    | AF151530  | 665.555   | 615.514   | NM_020185 | 432.671   |
| 4648.233  | AB037732  | 1390.431  | 2220.82   | AK022093  | 4064.678  | 3776.714  | NM_002832 | 20452.199 |
| 361.379   | NM_005767 | 326.108   | 290.174   | AK022232  | 315.808   | 251.66    | NM_017732 | 1861.902  |
| 60.102    | NM_001837 | 411.876   | 334.575   | AK022005  | 782.015   | 525.858   | NM_002851 | 1309.276  |
| 1135.191  | NM_001839 | 54976.879 | 69879.422 | AK022137  | 366.949   | 519.033   | NM_005339 | 7950.389  |

|           |           |           |           |           |           |           |           |           |
|-----------|-----------|-----------|-----------|-----------|-----------|-----------|-----------|-----------|
| 425.518   | BC016029  | 341.106   | 413.184   | AK022272  | 1132.752  | 878.185   | NM_001906 | 2183.886  |
| 1173.643  | M27487    | 321.678   | 397.126   | AK027155  | 2106.101  | 2065.378  | AK024210  | 506.489   |
| 1099.013  | NM_002286 | 51093.941 | 40362.191 | AF221846  | 423.068   | 469.856   | NM_002276 | 1374.922  |
| 2654.128  | NM_002164 | 414.443   | 397.721   | AK024528  | 7116.023  | 7920.275  | AL133087  | 763.926   |
| 2737.185  | NM_003811 | 3230.38   | 5640.098  | AK000016  | 2603.111  | 1635.006  | NM_018010 | 393.12    |
| 2857.417  | NM_002981 | 2570.942  | 2962.005  | AK023367  | 776.177   | 540.908   | NM_002274 | 1633.496  |
| 362.258   | NM_001244 | 1575.971  | 1465.201  | AL080209  | 1331.796  | 1055.1    | BF337874  | 898.877   |
| 1333.574  | NM_012275 | 355.945   | 417.541   | AL137431  | 602.935   | 426.619   | NM_003475 | 3223.333  |
| 1164.568  | NM_006137 | 331.754   | 273.614   | NM_016255 | 1036.488  | 1035.401  | NM_000243 | 1400.41   |
| 735.868   | NM_016139 | 28812.621 | 21083.801 | NM_014318 | 788.232   | 798.441   | NM_004383 | 5298.812  |
| 6224.922  | AL117468  | 1799.296  | 1568.558  | AK056674  | 510.685   | 915.303   | NM_012256 | 2362.467  |
| 615.505   | NM_019613 | 1742.471  | 1309.22   | AK022042  | 499.537   | 560.672   | NM_006006 | 590.698   |
| 338.707   | NM_005382 | 502.818   | 516.924   | AL117588  | 348.499   | 608.277   | NM_016325 | 704.598   |
| 1013.276  | AK027086  | 2204.952  | 2359.529  | BE895529  | 2441.788  | 2284.441  | NM_001604 | 712.555   |
| 1371.952  | AB032997  | 663.771   | 475.292   | AL117536  | 460.237   | 482.874   | NM_017656 | 1224.722  |
| 1348.754  | AL096857  | 1809.571  | 875.883   | NM_017751 | 2398.857  | 3103.213  | X16282    | 2951.257  |
| 1623.043  | AF073770  | 833.606   | 1544.03   | NM_003771 | 1400.016  | 1415.477  | AK022519  | 899.403   |
| 1388.749  | AL359401  | 3878.939  | 2637.414  | NM_017860 | 3506.371  | 1888.255  | NM_014415 | 1146.742  |
| 721.534   | NM_012213 | 1678.889  | 1672.891  | X91195    | 25880.473 | 22224.906 | S75264    | 5320.308  |
| 1194.828  | NM_016573 | 2440.79   | 5053.172  | AF086190  | 880.459   | 742.583   | AF027513  | 779.361   |
| 27911.201 | NM_001303 | 3441.716  | 3247.309  | AL050035  | 1491.633  | 1114.111  | NM_001379 | 1053.353  |
| 294.615   | M21304    | 1201.714  | 1929.551  | AK024449  | 2097      | 3764.791  | NM_018664 | 1140.232  |
| 2213.998  | NM_001979 | 501.309   | 354.995   | AF279780  | 24422.1   | 22444.984 | NM_005034 | 509.79    |
| 941.657   | AB040896  | 1323.289  | 1261.693  | AK022510  | 916.683   | 938.567   | NM_003926 | 2201.79   |
| 1903.632  | NM_001107 | 1238.188  | 1170.377  | AK023878  | 720.353   | 653.867   | NM_016047 | 16129.024 |
| 203.132   | AF084645  | 462.996   | 397.336   | AK021851  | 563.207   | 731.221   | NM_001499 | 3289.795  |
| 661.869   | AF151851  | 4436.116  | 4252.678  | L37717    | 254.338   | 209.603   | BF030165  | 5141.184  |
| 2173.146  | NM_003636 | 3415.604  | 3061.286  | AJ131609  | 1020.215  | 1121.759  | NM_016732 | 6246.902  |
| 910.762   | NM_002234 | 811.244   | 927.972   | BC019280  | 2783.224  | 2192.548  | NM_014763 | 5026.837  |
| 1884.377  | NM_000701 | 1475.563  | 1701.353  | AF086498  | 305.939   | 617.48    | AK026261  | 712.474   |
| 479.034   | AB022696  | 2370.335  | 2214.586  | AF079567  | 292.261   | 279.627   | AF070617  | 1091.828  |
| 50974.723 | AF137372  | 2498.63   | 2368.252  | AK022177  | 413.56    | 647.063   | NM_014918 | 5140.704  |
| 931.763   | AF220417  | 918.872   | 499.396   | AF086466  | 1250.632  | 1666.24   | NM_000152 | 3071.763  |
| 399.375   | D83782    | 3303.657  | 2731.755  | AB007962  | 6793.852  | 6254.435  | D17222    | 13258.475 |
| 326.505   | NM_002078 | 1516.379  | 899.703   | AF005081  | 831.062   | 1291.165  | NM_000154 | 1603.43   |
| 1870.101  | NM_000287 | 2608.611  | 1365.933  | AK026438  | 453.251   | 637.209   | NM_000671 | 621.291   |
| 1866.765  | NM_001656 | 831.376   | 614.417   | AK021546  | 365.222   | 442.603   | NM_006297 | 3762.762  |
| 4910.606  | Z70705    | 479.239   | 657.546   | AL050186  | 6932.12   | 5723.412  | X85325    | 31912.428 |
| 3258.683  | NM_002611 | 756.302   | 986.088   | AK021918  | 1726.199  | 1817.378  | AF318366  | 3008.232  |
| 1618.676  | AL133602  | 867.858   | 858.378   | AK021669  | 2277.079  | 2296.23   | AF182423  | 615.734   |
| 8065.487  | AF037219  | 1985.286  | 1114.43   | AL080113  | 27907.037 | 19664.332 | D26018    | 1018.853  |
| 1661.71   | AK026075  | 340.999   | 269.348   | AL050083  | 1023.133  | 1056.48   | NM_007237 | 353.808   |
| 5569.728  | NM_000251 | 1944.252  | 1061.948  | AK022766  | 394.873   | 380.392   | NM_004608 | 269.451   |
| 516.851   | NM_006038 | 1417.14   | 1448.471  | AL049422  | 3505.839  | 3242.817  | NM_018257 | 1759.792  |
| 2867.966  | AB011133  | 1593.456  | 2237.483  | AL133089  | 565.953   | 526.008   | NM_005919 | 459.763   |
| 298.615   | NM_017572 | 17124.037 | 18334.277 | AK023526  | 1576.643  | 1726.583  | AF086112  | 429.192   |
| 2743.85   | NM_018444 | 1452.773  | 1699.821  | BE266129  | 1015.047  | 973.791   | AL137254  | 917.487   |
| 5509.778  | NM_000252 | 1837.127  | 1576.673  | AK025602  | 3390.106  | 2823.506  | AK026359  | 446.82    |
| 868.269   | NM_006947 | 6456.304  | 4555.892  | AK026309  | 1891.057  | 1612.457  | AF085884  | 1003.452  |
| 2717.183  | NM_017917 | 1860.445  | 2452.565  | AL137486  | 3823.133  | 2450.802  | S81522    | 2081.386  |
| 420.874   | NM_004090 | 3804.581  | 3800.265  | AL110162  | 421.356   | 350.93    | S94541    | 746.338   |
| 830.471   | NM_014634 | 7892.773  | 6500.111  | AK022681  | 7182.923  | 5467.234  | L36587    | 8466.823  |
| 512.066   | NM_001919 | 8934.054  | 6754.042  | CY3Cy5    | 667.804   | 176.519   | AK024228  | 744.802   |

|          |           |           |           |           |           |           |           |          |
|----------|-----------|-----------|-----------|-----------|-----------|-----------|-----------|----------|
| 664.273  | BC031485  | 1820.207  | 648.863   | AI299075  | 900.504   | 800.972   | NM_016647 | 662.389  |
| 5658.285 | NM_004092 | 4682.816  | 3781.066  | AB011098  | 316.994   | 345.67    | AK024695  | 712.337  |
| 876.439  | X15624    | 1005.182  | 863.999   | AA609759  | 359.914   | 584.731   | AF038174  | 859.676  |
| 9373.305 | NM_004467 | 453.723   | 528.147   | AA029418  | 1744.16   | 1526.031  | NM_013243 | 209.265  |
| 688.152  | NM_005622 | 349.009   | 693.233   | L20815    | 1557.147  | 1420.748  | AF070632  | 387.247  |
| 780.199  | NM_018058 | 3284.148  | 2056.035  | AI364483  | 3544.381  | 2804.031  | AF161359  | 949.356  |
| 241.535  | BI759406  | 3433.381  | 9269.715  | AA456001  | 3234.713  | 2525.221  | AL365520  | 838.707  |
| 315.661  | R76099    | 780.022   | 1145.409  | AA451686  | 1784.234  | 1003.611  | AL359338  | 720.682  |
| 954.064  | S74445    | 752.242   | 826.792   | NM_003822 | 499.777   | 410.905   | AK023623  | 706.07   |
| 580.776  | BI763360  | 688.465   | 816.701   | NM_004412 | 1111.061  | 2072.282  | AK021539  | 1793.916 |
| 1475.711 | D25538    | 1053.834  | 2101.038  | SR5       | 2250.318  | 3157.831  | AK021819  | 543.703  |
| 813.424  | NM_000360 | 5019.985  | 13727.58  | SR7       | 2895      | 35896.586 | AK026738  | 771.657  |
| 2400.439 | D49950    | 3432.819  | 2588.285  | SR9       | 8548.464  | 2803.512  | AL157491  | 410.999  |
| 635.069  | NM_001849 | 1102.463  | 3704.107  | CY3Cy5    | 885.362   | 195.494   | NM_005266 | 1131.748 |
| 3966.004 | X03635    | 2363.04   | 1846.392  | NM_012096 | 3197.27   | 2348.46   | AF087965  | 377.82   |
| 2952.617 | BC011847  | 58309.285 | 70923.773 | L12052    | 844.957   | 700.645   | AF085998  | 800.64   |
| 829.419  | X03348    | 1701.43   | 1622.406  | AB028976  | 1550.881  | 1359.042  | AK024681  | 670.116  |
| 903.667  | AF353674  | 3638.608  | 2888.554  | AK026337  | 219.564   | 166.756   | AF085990  | 211.084  |
| 406.706  | BC002645  | 2405.984  | 2181.037  | NM_015869 | 683.679   | 589.919   | NM_014907 | 4901.489 |
| 1710.212 | NM_021138 | 2270.049  | 2051.072  | NM_004626 | 497.848   | 318.748   | AB007977  | 3063.029 |
| 2081.783 | BC002792  | 579.209   | 652.774   | NM_004305 | 9363.042  | 8242.518  | NM_014221 | 760.951  |
| 5673.704 | NM_021005 | 1516.09   | 721.084   | NM_006089 | 768.15    | 970.569   | U84515    | 625.977  |
| 1480.052 | NM_001523 | 470.19    | 425.675   | AF072506  | 196.252   | 109.242   | AF086143  | 2757.425 |
| 808.303  | NM_017423 | 682.491   | 625.778   | NM_005992 | 915.21    | 275.463   | AK022239  | 410.763  |
| 8146.328 | NM_019613 | 1543.027  | 1287.283  | NM_003144 | 33145.625 | 19905.814 | AK022364  | 442.708  |
| 821.526  | AK027086  | 2008.845  | 3318.06   | NM_000908 | 370.805   | 382.826   | AK024674  | 671.796  |
| 1639.252 | AB032997  | 1381.627  | 1801.402  | AB011102  | 2120.783  | 2642.3    | AK024244  | 1462.278 |
| 2562.41  | AL096857  | 2538.445  | 3163.275  | D63480    | 678.925   | 674.682   | AK023812  | 468.082  |
| 8231.38  | NM_003834 | 1870.927  | 1930.822  | NM_002969 | 1233.733  | 1354.054  | AL390084  | 701.163  |
| 356.07   | NM_005959 | 2677.23   | 2539.56   | NM_004620 | 409.423   | 733.22    | AK023565  | 473.373  |
| 1156.546 | NM_003381 | 978.736   | 578.186   | AF087940  | 2128.022  | 6067.247  | AK021479  | 713.123  |
| 449.642  | NM_005756 | 441.355   | 367.958   | AJ277587  | 973.612   | 2222.182  | NM_003835 | 735.179  |
| 1135.559 | NM_003702 | 8051.067  | 6569.492  | D87432    | 1670.355  | 2265.72   | AK000245  | 1296.983 |
| 121.594  | NM_000369 | 424.364   | 466.763   | NM_002337 | 1055.355  | 1075.222  | AF085900  | 5302.936 |
| 1650.095 | NM_016351 | 694.041   | 1041.973  | NM_013245 | 637.113   | 267.292   | AK022420  | 631.791  |
| 420.852  | NM_004405 | 681.766   | 827.391   | NM_006423 | 1957.028  | 1980.017  | AK023254  | 378.857  |
| 5478.755 | NM_001988 | 3468.168  | 3148.775  | NM_004766 | 697.243   | 420.128   | AK023748  | 423.339  |
| 3867.821 | NM_006060 | 1451.565  | 814.486   | NM_005819 | 1955.286  | 1552.48   | AK023945  | 3931.766 |
| 1559.282 | NM_005667 | 1344.834  | 1963.392  | AK025520  | 939.91    | 616.098   | AK022446  | 477.128  |
| 8812.896 | NM_006308 | 986.201   | 788.679   | NM_004892 | 3991.329  | 5342.059  | AK023773  | 510.362  |
| 1448.506 | NM_000060 | 737.343   | 1129.422  | NM_014597 | 3381.52   | 2588.031  | AF116709  | 758.713  |
| 4595.114 | NM_009589 | 661.762   | 1285.071  | NM_017896 | 1815.697  | 1347.323  | AK025533  | 625.1    |
| 715.344  | L09080    | 1266.874  | 1116.941  | AB002374  | 705.276   | 799.886   | AK021911  | 3078.466 |
| 1025.236 | NM_007326 | 3718.176  | 2024.195  | U17327    | 385.395   | 311.083   | D17225    | 595.835  |
| 1033.588 | NM_001886 | 2862.242  | 2553.295  | M87790    | 4207.563  | 4549.174  | AF147430  | 1542.064 |
| 358.389  | AF137372  | 2329.718  | 2738.568  | NM_001768 | 681.245   | 1195.41   | AK025766  | 4975.85  |
| 964.381  | AF220417  | 884.586   | 732.316   | NM_000029 | 2723.957  | 2525.057  | U35875    | 5293.112 |
| 2771.434 | D83782    | 2897.475  | 3432.465  | NM_000715 | 291.252   | 347.287   | AK021857  | 8542.988 |
| 2161.887 | NM_002078 | 1593.634  | 1405.596  | AF035802  | 1825.558  | 2380.011  | AK022257  | 1370.732 |
| 2413.187 | NM_000287 | 2790.593  | 2836.124  | Y08145    | 372.987   | 311.305   | BE887356  | 26573.91 |
| 477.428  | NM_001656 | 1013.738  | 1704.304  | M26123    | 372.22    | 634.936   | AK001074  | 521.981  |
| 953.787  | AF091033  | 473.878   | 482.357   | NM_013328 | 11874.469 | 11578.623 | AK023329  | 1903.485 |
| 1235.716 | NM_001122 | 4390.297  | 5040.348  | NM_002660 | 823.005   | 955.043   | AK021773  | 970.283  |

|           |           |           |           |           |           |           |            |           |
|-----------|-----------|-----------|-----------|-----------|-----------|-----------|------------|-----------|
| 498.016   | NM_004591 | 993.211   | 1316.953  | NM_003706 | 378.807   | 561.098   | AK027074   | 1328.669  |
| 8388.332  | AL133027  | 733.731   | 659.147   | NM_005218 | 3310.127  | 2610.462  | AL365456   | 573.572   |
| 1387.847  | AB037732  | 1392.633  | 1721.525  | AB033054  | 5108.893  | 4107.336  | NM_01803E  | 420.025   |
| 814.9     | NM_001839 | 62823.121 | 73590.961 | NM_016122 | 341.022   | 298.009   | U84522     | 1297.995  |
| 1775.964  | BC016029  | 469.709   | 531.311   | AF153330  | 456.234   | 338.964   | AK021694   | 1649.709  |
| 492.97    | M27487    | 498.125   | 375.873   | NM_001652 | 344.074   | 483.948   | U84505     | 1719.798  |
| 7187.537  | NM_002164 | 422.657   | 385.029   | D87446    | 2499.019  | 2554.494  | X81005     | 856.248   |
| 1218.676  | NM_003811 | 3642.721  | 5964.651  | BF540935  | 792.499   | 615.078   | AL049265   | 854.394   |
| 3658.285  | NM_002981 | 3440.449  | 3484.623  | NM_004466 | 188.083   | 241.447   | AL137635   | 413.566   |
| 11224.106 | NM_001244 | 1668.022  | 1663.977  | NM_007081 | 1286.393  | 1232.786  | AL049430   | 1499.341  |
| 1564.549  | NM_012275 | 293.269   | 392.898   | AB032964  | 1403.721  | 1449.295  | AK021461   | 455.408   |
| 540.168   | NM_006137 | 361.078   | 216.602   | BE733605  | 865.433   | 1058.645  | AL079274   | 5649.008  |
| 458.227   | NM_016139 | 26267.961 | 14547.553 | NM_003334 | 4864.082  | 3181.504  | AL137398   | 983.452   |
| 1302.749  | AL117468  | 1975.688  | 1548.952  | NM_002693 | 857.627   | 428.114   | Y12021     | 477.958   |
| 2859.962  | NM_004090 | 4042.433  | 5514.84   | NM_003671 | 401.733   | 390.943   | AF127771   | 558.869   |
| 1581.979  | NM_014634 | 6571.29   | 6745.332  | AK026000  | 676.587   | 618.249   | NM_013300  | 8540.164  |
| 845.036   | NM_001919 | 9042.248  | 9017.729  | NM_017833 | 770.105   | 773.183   | AK026039   | 3728.531  |
| 846.98    | BC031485  | 2050.514  | 1143.101  | NM_006675 | 1347.154  | 1620.705  | AF108756   | 6794.193  |
| 474.577   | NM_004092 | 4868.126  | 7687.073  | NM_003022 | 5928.348  | 5638.586  | NM_004075  | 1331.87   |
| 384.497   | X15624    | 1086.155  | 2109.537  | NM_004873 | 1872.004  | 5791.875  | NM_001887  | 1451.103  |
| 633.775   | AF073770  | 948.159   | 1575.226  | NM_019842 | 656.128   | 1677.833  | NM_006533  | 829.51    |
| 14799.262 | AL359401  | 3795.58   | 2422.984  | NM_002951 | 6595.852  | 9417.755  | NM_00199E  | 1498.523  |
| 2679.717  | NM_012213 | 1518.804  | 1758.218  | NM_002317 | 442.328   | 607.129   | X87825     | 1766.857  |
| 9689.511  | NM_016573 | 2197.603  | 4632.38   | NM_000320 | 1811.208  | 2769.432  | AK001285   | 12124.202 |
| 4933.951  | NM_001303 | 3743.024  | 3701.07   | NM_003136 | 2311.094  | 3595.852  | D17215     | 2098.487  |
| 16741.168 | M21304    | 1073.671  | 1210.589  | NM_004620 | 377.935   | 382.602   | NM_015714  | 5462.085  |
| 2378.928  | NM_001979 | 576.059   | 443.146   | AF087940  | 1217.77   | 1513.691  | AK075564   | 706.849   |
| 1215.61   | AB040896  | 1363.141  | 1206.657  | AJ277587  | 846.831   | 928.481   | AK024756   | 737.078   |
| 5448.055  | NM_001107 | 1151.346  | 1262.048  | D87432    | 1664.851  | 1499.788  | NM_017911  | 705.556   |
| 50771.555 | AF084645  | 379.922   | 223.821   | AI565117  | 47844.352 | 62472.363 | AJ224168   | 1573.814  |
| 842.921   | NM_003636 | 3442.173  | 3281.028  | U28015    | 179.337   | 171.255   | AF147325   | 43833.391 |
| 978.344   | NM_002234 | 705.947   | 802.415   | AI299075  | 672.933   | 568.771   | AK023584   | 217.411   |
| 551.37    | NM_000701 | 1283.07   | 1888.512  | AA609759  | 245.409   | 411.717   | NM_003774  | 591.187   |
| 950.606   | AB022696  | 1979.043  | 1558.632  | AA029418  | 1545.818  | 1487.61   | D87466     | 3745.458  |
| 2326.859  | NM_021005 | 1506.861  | 953.227   | L20815    | 1382.014  | 1224.788  | CY3Cy5     | 1491.654  |
| 4053.878  | SB        | 254.552   | 240.012   | AI364483  | 2782.66   | 2401.984  | AA608568   | 744.752   |
| 5724.393  | NM_001523 | 681.142   | 871.983   | AA456001  | 2814.917  | 2383.421  | BG831301   | 2530.859  |
| 1069.241  | NM_017423 | 843.537   | 1696.772  | AA451686  | 1403.462  | 1184.481  | AA478647   | 478.598   |
| 1418.247  | NM_017417 | 832.923   | 490.636   | NM_003822 | 313.49    | 255.727   | ID 2623896 | 1574.645  |
| 2078.098  | AL133602  | 784.618   | 808.552   | NM_004412 | 929.624   | 1706.63   | ID 2602214 | 1287.539  |
| 1335.023  | AF037219  | 2164.741  | 1413.287  | NM_002050 | 1202.786  | 2685.259  | ID 2071279 | 2298.389  |
| 4135.495  | AK026075  | 268.331   | 207.914   | NM_007097 | 2614.055  | 4535.276  | L10709     | 1635.54   |
| 1956.211  | NM_000251 | 2388.927  | 1390.937  | NM_000029 | 2927.605  | 2532.841  | N35489     | 491.359   |
| 911.839   | NM_00603E | 1752.039  | 1598.557  | NM_000715 | 222.503   | 157.196   | AI928195   | 1735.94   |
| 2644.352  | AB011133  | 1735.715  | 2204.345  | AF035802  | 1697.967  | 1403.334  | AA458922   | 3559.594  |
| 1876.799  | NM_017572 | 17214.936 | 17125.203 | M26123    | 267.132   | 314.327   | SR6        | 971.206   |
| 681.769   | NM_018444 | 1388.493  | 1434.554  | NM_00183E | 221.603   | 191.996   | SR8        | 4940.183  |
| 736.584   | NM_000252 | 1819.837  | 985.726   | NM_012096 | 2838.782  | 1825.856  | SR10       | 9376.884  |
| 35911.785 | NM_006947 | 6380.869  | 3385.424  | NM_003905 | 5843.523  | 5677.719  | CY3Cy5     | 939.999   |
| 2625.884  | NM_017917 | 2020.536  | 2168.559  | L12052    | 792.641   | 519.669   | NM_017729  | 442.005   |
| 2805.676  | L09080    | 1217.307  | 1432.72   | AB028976  | 1670.607  | 1072.232  | NM_015850  | 830.759   |
| 772.572   | NM_007326 | 3147.093  | 3460.526  | AK026337  | 258.27    | 119.956   | NM_004864  | 417.576   |
| 9115.955  | NM_01805E | 3278.988  | 1467.846  | NM_015869 | 769.613   | 516.741   | NM_00283E  | 843.945   |



|           |           |           |           |           |           |           |           |           |
|-----------|-----------|-----------|-----------|-----------|-----------|-----------|-----------|-----------|
| 1380.775  | NM_00454E | 3729.094  | 8023.931  | AB031038  | 175.331   | 173.931   | NM_01468E | 33715.422 |
| 403.737   | X69079    | 16031.892 | 14653.547 | NM_00462E | 281.777   | 208.311   | NM_01231E | 933.357   |
| 796.362   | B1759406  | 3831.351  | 8162.875  | NM_00430E | 8995.942  | 8843.313  | AK026235  | 342.612   |
| 3544.824  | R76099    | 495.751   | 779.171   | NM_00608E | 860.475   | 1164.557  | NM_00651C | 3699.51   |
| 1901.136  | S74445    | 610.309   | 483.494   | NM_00599E | 776.535   | 220.605   | NM_02024E | 1349.21   |
| 772.501   | B1763360  | 713.384   | 577.131   | NM_00314A | 32096.129 | 22240.113 | NM_00301E | 710.501   |
| 364.558   | D25538    | 1246.47   | 1892.416  | NM_00090E | 282.428   | 898.639   | W61100    | 14543.606 |
| 3737.613  | NM_00036C | 4785.157  | 15185.403 | AB011102  | 1484.663  | 2525.506  | AF215923  | 545.649   |
| 416.325   | D49950    | 3369.014  | 2848.703  | D63480    | 708.565   | 899.889   | U66621    | 1149.126  |
| 1418.843  | NM_00184E | 1078.736  | 3663.764  | NM_00296E | 1039.827  | 970.579   | NM_00572C | 2837.459  |
| 7623.026  | X03635    | 2578.517  | 2397.703  | AK023749  | 327.53    | 393.979   | U92816    | 2317.294  |
| 1213.983  | BC011847  | 54702.305 | 71550.102 | NM_002337 | 1194.55   | 1235.491  | BC011987  | 4901.261  |
| 917.484   | X03348    | 1925.2    | 1586.289  | NM_01324E | 426.626   | 123.431   | NM_00410E | 16236.875 |
| 23852.232 | AF353674  | 3229.856  | 2719.699  | NM_00642E | 1872.858  | 2107.935  | NM_00348E | 1122.996  |
| 1113.527  | BC002645  | 2276.873  | 1555.407  | NM_00476E | 737.084   | 433.334   | NM_00503E | 1386.91   |
| 1046.387  | NM_021138 | 2352.783  | 1483.016  | NM_00581E | 1911.874  | 1677.811  | L03418    | 3202.836  |
| 775.168   | BC002792  | 609.15    | 653.174   | AK025520  | 876.357   | 604.749   | NM_00241E | 47096.477 |
| 1219.297  | NM_00124A | 1442.085  | 1973.379  | NM_00489E | 4213.987  | 7460.258  | NM_00633E | 2653.293  |
| 2630.766  | NM_006137 | 372.073   | 546.322   | NM_014597 | 3173.468  | 3432.904  | NM_00091E | 1141.695  |
| 481.269   | NM_01613E | 29556.051 | 27587.014 | NM_01789E | 1611.75   | 1736.371  | NM_14590A | 4964.044  |
| 707.735   | AL117468  | 1757.753  | 2741.843  | AB002374  | 705.448   | 772.119   | NM_015941 | 545.827   |
| 5767.436  | AK027086  | 2081.848  | 2996.918  | U17327    | 289.869   | 284.669   | NM_00365E | 3357.24   |
| 500.608   | AB032997  | 695.398   | 711.803   | M87790    | 3778.266  | 4683.106  | NM_014837 | 1507.774  |
| 525.519   | AL096857  | 2077.337  | 2081.019  | NM_00176E | 756.895   | 1088.777  | NM_00173E | 311.256   |
| 1120.773  | NM_00383A | 1918.382  | 2206.627  | NM_002951 | 7929.491  | 10481.366 | NM_01869C | 1184.914  |
| 833.224   | NM_00595E | 2414.541  | 2680.109  | NM_002317 | 506.199   | 644.726   | AF272663  | 1377.784  |
| 3082.197  | NM_003381 | 758.913   | 503.767   | NM_00032C | 1885.379  | 1805.684  | AF277719  | 589.763   |
| 242.984   | NM_00575E | 627.179   | 272.544   | NM_00313E | 2497.4    | 2413.504  | NM_000791 | 1006.662  |
| 9583.865  | NM_00370E | 8390.976  | 6886.69   | NM_01332E | 9646.536  | 9836.479  | NM_003681 | 1305.201  |
| 2928.257  | NM_00036E | 495.264   | 290.912   | NM_00266C | 658.829   | 734.601   | NM_00480C | 6744.198  |
| 4609.312  | NM_016351 | 658.593   | 623.786   | NM_00370E | 303.27    | 386.736   | NM_01495A | 6644.247  |
| 4926.27   | NM_00440E | 734.728   | 731.287   | NM_00521E | 3446.419  | 3290.018  | X91148    | 773.908   |
| 1592.417  | NM_00198E | 3330.37   | 2812.883  | AB03305A  | 4662.866  | 3065.461  | NM_01570C | 4172.586  |
| 526.098   | NM_00606C | 1168.962  | 504.642   | NM_01612E | 368.592   | 272.917   | NM_019087 | 1373.223  |
| 715.44    | NM_005667 | 1283.817  | 1320.638  | AF153330  | 390.444   | 392.518   | S76984    | 1289.669  |
| 3897.69   | NM_00630E | 949.296   | 837.667   | NM_00165E | 268.426   | 298.224   | NM_01449E | 50419.836 |
| 3004.596  | NM_000701 | 1549.941  | 2413.325  | NM_00382E | 322.891   | 258.34    | AK023337  | 1271.455  |
| 7448      | AB022696  | 2145.67   | 2547.271  | NM_00441E | 1231.613  | 1102.049  | NM_01327E | 4115.531  |
| 962.669   | NM_01437E | 170.296   | 196.062   | NM_00205C | 738.41    | 700.063   | NM_019011 | 1148.437  |
| 879.199   | AF137372  | 2423.037  | 3614.757  | NM_007097 | 2750.611  | 3473.111  | AF45909A  | 2216.922  |
| 6419.824  | AF220417  | 940.013   | 654.748   | D87446    | 2070.085  | 2957.601  | NM_003157 | 877.292   |
| 20235.424 | D83782    | 2936.045  | 3078.52   | BF540935  | 762.259   | 429.566   | NM_00493E | 783.3     |
| 1906.907  | NM_00207E | 1537.258  | 1223.356  | NM_007081 | 1141.012  | 1156.002  | NM_01432E | 631.202   |
| 699.684   | NM_000287 | 3012.972  | 3024.392  | AB03296A  | 1091.599  | 1117.763  | NM_00444E | 269.184   |
| 1037.281  | NM_00165E | 1158.188  | 1735.407  | BE733605  | 818.967   | 732.698   | NM_015981 | 685.44    |
| 408.94    | AF091033  | 452.703   | 504.709   | NM_00333A | 6196.383  | 5557.132  | NM_00045E | 1808.709  |
| 420.756   | NM_00112E | 4271.466  | 4296.936  | NM_00269E | 846.608   | 628.85    | NM_014791 | 3567.575  |
| 351.211   | NM_004591 | 1039.194  | 1441.41   | NM_003671 | 401.516   | 416.336   | NM_00331E | 1158.994  |
| 1565.741  | AL133027  | 564.633   | 689.657   | AK026000  | 878.17    | 976.983   | NM_00436E | 1601.994  |
| 971.28    | AB037732  | 1515.549  | 1318.696  | NM_01783E | 829.298   | 501.942   | NM_00018E | 11163.632 |
| 155.007   | NM_001837 | 419.888   | 421.111   | NM_00667E | 1341.841  | 1933.411  | AK02338A  | 959.943   |
| 1105.484  | NM_00183E | 54271.34  | 73325.82  | NM_00302E | 5571.821  | 5562.783  | NM_01602E | 3070.707  |
| 433.614   | BC016029  | 629.549   | 747.267   | NM_00487E | 1228.641  | 1837.532  | W61100    | 3399.351  |

|           |                  |           |           |                  |           |           |                   |           |
|-----------|------------------|-----------|-----------|------------------|-----------|-----------|-------------------|-----------|
| 1514.029  | <b>M27487</b>    | 314.838   | 374.056   | <b>NM_019842</b> | 628.749   | 1276.26   | <b>AA608568</b>   | 1105.683  |
| 1426.26   | <b>NM_002286</b> | 49995.738 | 32101.375 | <b>NM_005992</b> | 900.243   | 240.1     | <b>BG831301</b>   | 1643.983  |
| 1048.902  | <b>NM_002164</b> | 280.271   | 257.227   | <b>NM_003144</b> | 30481.543 | 13683.933 | <b>AA478647</b>   | 1046.376  |
| 5517.135  | <b>NM_003811</b> | 3592.198  | 6361.933  | <b>NM_000908</b> | 283.025   | 415.181   | <b>ID 2623896</b> | 1581.677  |
| 803.107   | <b>AB011133</b>  | 2080.317  | 6340.674  | <b>AB011102</b>  | 1830.679  | 1746.694  | <b>ID 2602214</b> | 1106.823  |
| 494.401   | <b>NM_017572</b> | 17863.305 | 22699.527 | <b>D63480</b>    | 835.236   | 877.997   | <b>ID 2071279</b> | 1999.214  |
| 601.88    | <b>NM_018444</b> | 1388.15   | 1830.628  | <b>NM_002969</b> | 1200.662  | 1585.674  | <b>L10709</b>     | 1742.625  |
| 698.544   | <b>NM_000252</b> | 1978.134  | 1730.12   | <b>NM_004620</b> | 311.888   | 240.398   | <b>AI928195</b>   | 564.135   |
| 1504.149  | <b>NM_006947</b> | 6637.025  | 5259.347  | <b>AF087940</b>  | 1003.73   | 936.914   | <b>AA458922</b>   | 3323.118  |
| 418.952   | <b>NM_017917</b> | 1917.559  | 2915.613  | <b>AJ277587</b>  | 653.667   | 714.622   | <b>NM_001719</b>  | 2891.433  |
| 369.655   | <b>NM_004090</b> | 4558.211  | 5337.665  | <b>D87432</b>    | 1419.595  | 1248.329  | <b>AL080062</b>   | 559.043   |
| 588.599   | <b>NM_014634</b> | 7402.14   | 8156.475  | <b>AI565117</b>  | 46756.52  | 64295.492 | <b>NM_145904</b>  | 1234.369  |
| 965.433   | <b>NM_001919</b> | 8791.067  | 7941.106  | <b>AI299075</b>  | 644.966   | 530.916   | <b>NM_006796</b>  | 2343.224  |
| 758.831   | <b>BC031485</b>  | 2110.765  | 1169.211  | <b>M59979</b>    | 170.717   | 192.604   | <b>NM_015941</b>  | 240.591   |
| 472.97    | <b>NM_004092</b> | 4906.209  | 6204.773  | <b>AB011098</b>  | 295.444   | 281.027   | <b>NM_003655</b>  | 812.999   |
| 2346.889  | <b>X15624</b>    | 1252.895  | 1917.377  | <b>AA609759</b>  | 291.391   | 421.989   | <b>NM_014837</b>  | 458.689   |
| 889.07    | <b>AF073770</b>  | 999.213   | 2124.362  | <b>AA029418</b>  | 1460.586  | 1689.854  | <b>NM_002840</b>  | 537.62    |
| 421.522   | <b>AL359401</b>  | 4553.775  | 2823.81   | <b>L20815</b>    | 1296.086  | 1275.558  | <b>NM_015850</b>  | 1314.718  |
| 1487.073  | <b>NM_012213</b> | 1479.546  | 1570.741  | <b>AI364483</b>  | 2702.384  | 2036.953  | <b>NM_004864</b>  | 646.197   |
| 853.316   | <b>NM_016573</b> | 2458.218  | 4737.762  | <b>AA456001</b>  | 2289.903  | 2163.081  | <b>NM_002838</b>  | 1137.002  |
| 664.453   | <b>NM_001303</b> | 3388.127  | 3471.802  | <b>AA451686</b>  | 1357.188  | 1154.268  | <b>NM_014686</b>  | 29381.801 |
| 3940.979  | <b>M21304</b>    | 1336.441  | 1415.126  | <b>M87790</b>    | 3745.591  | 4241.568  | <b>BF528358</b>   | 311.655   |
| 3600.224  | <b>NM_001979</b> | 413.441   | 324.752   | <b>NM_001768</b> | 748.679   | 1057.438  | <b>NM_016339</b>  | 309.025   |
| 620.693   | <b>AB040896</b>  | 1587.917  | 1604.199  | <b>NM_000029</b> | 3042.476  | 3024.546  | <b>NM_006510</b>  | 3670.203  |
| 808.975   | <b>NM_001107</b> | 1477.411  | 1581.591  | <b>NM_000715</b> | 228.295   | 127.146   | <b>NM_003141</b>  | 798.156   |
| 2383.951  | <b>AF084645</b>  | 401.364   | 349.501   | <b>AF035802</b>  | 1402.222  | 1017.468  | <b>NM_020245</b>  | 1153.261  |
| 110.644   | <b>AF151851</b>  | 4472.383  | 3206.965  | <b>M26123</b>    | 268.246   | 317.924   | <b>NM_007175</b>  | 541.452   |
| 343.555   | <b>NM_005176</b> | 303.365   | 287.804   | <b>NM_012096</b> | 2392.686  | 1425.805  | <b>NM_015700</b>  | 2509.678  |
| 1213.557  | <b>NM_003636</b> | 3769.064  | 3480.392  | <b>NM_003905</b> | 5532.649  | 6850.797  | <b>NM_019087</b>  | 704.189   |
| 418.756   | <b>AF040723</b>  | 6535.043  | 9001.582  | <b>L12052</b>    | 727.309   | 478.712   | <b>AF215923</b>   | 949.422   |
| 1199.509  | <b>NM_015527</b> | 2158.189  | 2629.41   | <b>AB028976</b>  | 1701.122  | 1437.48   | <b>U66621</b>     | 689.791   |
| 569.1     | <b>X89675</b>    | 744.143   | 844.976   | <b>AK026337</b>  | 313.377   | 354.544   | <b>NM_005720</b>  | 4415.29   |
| 720.947   | <b>NM_005798</b> | 5814.236  | 6923.532  | <b>NM_015869</b> | 593.964   | 376.065   | <b>AJ132086</b>   | 467.15    |
| 851.89    | <b>NM_004216</b> | 2012.279  | 2169.05   | <b>NM_001899</b> | 212.985   | 260.462   | <b>U92816</b>     | 3263.208  |
| 1302.243  | <b>NM_016289</b> | 21529.1   | 25389.322 | <b>NM_004305</b> | 8983.67   | 8192.492  | <b>NM_003485</b>  | 752.825   |
| 541.088   | <b>NM_001464</b> | 345.419   | 360.481   | <b>NM_006089</b> | 646.749   | 924.703   | <b>L03418</b>     | 2917.07   |
| 379.825   | <b>NM_002051</b> | 1371.554  | 1200.543  | <b>AB033054</b>  | 5543.88   | 6087.143  | <b>NM_002415</b>  | 47770.586 |
| 9226.491  | <b>NM_001523</b> | 610.259   | 976.957   | <b>NM_016122</b> | 396.316   | 343.946   | <b>NM_006332</b>  | 2659.921  |
| 426.154   | <b>NM_017423</b> | 916.652   | 1339.765  | <b>NM_016583</b> | 152.133   | 96.174    | <b>NM_000916</b>  | 1253.74   |
| 476.967   | <b>Z70705</b>    | 753.417   | 552.69    | <b>AF153330</b>  | 436.792   | 359.564   | <b>NM_018663</b>  | 2021.375  |
| 2827.298  | <b>NM_002611</b> | 971.841   | 1182.864  | <b>NM_001652</b> | 255.962   | 291.66    | <b>NM_014791</b>  | 1499.032  |
| 647.965   | <b>NM_017417</b> | 819.949   | 827.076   | <b>AK023749</b>  | 188.264   | 237.646   | <b>NM_003318</b>  | 506.793   |
| 457.505   | <b>AL133602</b>  | 915.807   | 710.289   | <b>NM_002337</b> | 1057.086  | 1161.388  | <b>NM_004362</b>  | 695.992   |
| 809.948   | <b>AF037219</b>  | 2296.898  | 1539.813  | <b>NM_013245</b> | 472.77    | 180.315   | <b>NM_000182</b>  | 4371.811  |
| 549.764   | <b>AK026075</b>  | 362.467   | 328.83    | <b>NM_006423</b> | 1864.695  | 2177.184  | <b>NM_016026</b>  | 1362.257  |
| 551.189   | <b>NM_000251</b> | 2256.385  | 1698.948  | <b>NM_004766</b> | 680.527   | 589.848   | <b>NM_001732</b>  | 454.188   |
| 3890.276  | <b>NM_006038</b> | 1878.743  | 1496.264  | <b>NM_005819</b> | 1995.974  | 2244.385  | <b>NM_018690</b>  | 1728.071  |
| 462.534   | <b>U87223</b>    | 1743.187  | 1765.168  | <b>AK025520</b>  | 851.414   | 353.257   | <b>NM_000860</b>  | 679.224   |
| 1140.971  | <b>NM_000093</b> | 598.553   | 1276.136  | <b>NM_004892</b> | 4026.181  | 8358.034  | <b>AB037798</b>   | 1145.535  |
| 2309.454  | <b>NM_001779</b> | 2092.35   | 2933.359  | <b>NM_014597</b> | 2876.042  | 2951.993  | <b>NM_012190</b>  | 431.287   |
| 8448.95   | <b>AB033059</b>  | 383.725   | 353.503   | <b>NM_017896</b> | 1624.735  | 1319.026  | <b>AF277719</b>   | 645.009   |
| 11142.469 | <b>NM_016484</b> | 1589.41   | 1751.074  | <b>AB002374</b>  | 697.485   | 488.969   | <b>NM_003681</b>  | 844.509   |
| 880.553   | <b>AK026114</b>  | 323.214   | 504.053   | <b>U17327</b>    | 258.649   | 261.484   | <b>NM_004800</b>  | 1363.752  |

|           |           |           |           |           |           |           |            |           |
|-----------|-----------|-----------|-----------|-----------|-----------|-----------|------------|-----------|
| 32743.773 | NM_014452 | 825.793   | 792.967   | NM_017833 | 922.593   | 709.688   | NM_014954  | 6939.257  |
| 690.936   | NM_014683 | 377.851   | 290.061   | NM_006675 | 1561.264  | 1379.761  | NM_014909  | 1591.141  |
| 525.816   | AK021536  | 3710.768  | 2537.358  | NM_003022 | 6078.724  | 5377.809  | NM_145659  | 653.347   |
| 1206.37   | U31285    | 211.545   | 394.395   | NM_004873 | 4334.288  | 1415.848  | NM_001719  | 2020.577  |
| 1013.199  | NM_002600 | 1781.607  | 2699.806  | NM_019842 | 662.363   | 563.282   | AF308802   | 251.857   |
| 1331.378  | NM_003646 | 12374.831 | 18404.568 | NM_002951 | 7804.327  | 8866.051  | S76984     | 2383.687  |
| 479.841   | NM_006663 | 510.648   | 1082.778  | NM_002317 | 378.407   | 433.303   | NM_014495  | 48074.766 |
| 391.736   | NM_006092 | 536.898   | 462.816   | NM_000320 | 1664.543  | 1354.287  | NM_007195  | 920.215   |
| 1218.211  | NM_003939 | 274.43    | 347.628   | NM_003136 | 2339.943  | 3482.75   | AK023337   | 1364.138  |
| 960.67    | NM_012424 | 633.332   | 749.892   | NM_013328 | 9710.597  | 8727.084  | NM_013275  | 1977      |
| 402.597   | NM_002446 | 513.487   | 755.322   | NM_002660 | 955.907   | 1114.624  | NM_019011  | 560.037   |
| 2945.053  | NM_000863 | 683.55    | 586.304   | NM_003706 | 481.805   | 1106.583  | AF459094   | 669.049   |
| 677.709   | NM_006651 | 2397.141  | 2064.56   | NM_005218 | 3201.912  | 2529.388  | NM_014326  | 702.774   |
| 602.157   | NM_005336 | 7253.333  | 4001.023  | AL122071  | 280.462   | 309.634   | NM_004448  | 855.255   |
| 721.552   | NM_001419 | 4165.559  | 2200.336  | NM_014913 | 4916.419  | 8602.893  | NM_015981  | 1081.183  |
| 507.113   | AF119817  | 10335.859 | 8512.229  | NM_005864 | 3994.068  | 5854.547  | NM_000455  | 1925.356  |
| 8388.002  | AL035306  | 1133.974  | 1334.716  | NM_012341 | 1619.527  | 1242.825  | NM_006510  | 2633.683  |
| 1132.807  | NM_001328 | 10401.235 | 8725.435  | NM_003256 | 6892.716  | 6918.052  | NM_020245  | 807.138   |
| 571.359   | NM_005749 | 3226.245  | 6441.229  | D87450    | 1370.149  | 1559.008  | AJ011497   | 516.537   |
| 9556.216  | NM_004230 | 2328.173  | 2942.182  | NM_017797 | 4196.522  | 2750.266  | NM_000336  | 366.277   |
| 2437.76   | NM_014503 | 349.036   | 248.023   | AK021919  | 377.789   | 226.28    | AA478647   | 644.37    |
| 5611.159  | NM_014659 | 739.268   | 672.223   | AF000562  | 642.561   | 744.635   | ID 2623896 | 324.353   |
| 2074.903  | NM_004399 | 1853.849  | 1664.19   | AK025713  | 1232.241  | 1014.398  | L10709     | 1528.323  |
| 755.851   | NM_006337 | 2732.204  | 2232.159  | NM_018100 | 236.569   | 157.658   | N35489     | 427.868   |
| 1752.705  | NM_004507 | 2472.489  | 2012.616  | NM_002050 | 704.142   | 339.924   | AI928195   | 512.096   |
| 1584.623  | NM_002710 | 13173.311 | 6377.761  | NM_007097 | 2474.795  | 3165.776  | AA458922   | 2936.004  |
| 8694.41   | NM_014060 | 2255.143  | 3129.263  | D87446    | 2703.12   | 2331.592  | NM_002415  | 40277.211 |
| 3478.074  | NM_004749 | 5124.246  | 3168.595  | BF540935  | 1029.672  | 805.292   | NM_006332  | 1868.189  |
| 2294.26   | BQ446064  | 826.782   | 478.171   | NM_004466 | 270.706   | 512.802   | NM_000916  | 914.366   |
| 401.915   | AF274571  | 627.813   | 538.409   | NM_007081 | 1214.918  | 1511.662  | NM_018663  | 752.41    |
| 7061.7    | NM_005449 | 455.283   | 393.72    | AB032964  | 1291.017  | 1258.516  | NM_145904  | 4165.216  |
| 1821.481  | NM_003879 | 3033.267  | 3778.65   | BE733605  | 876.083   | 825.845   | NM_006796  | 2731.487  |
| 398.802   | NM_016052 | 3535.424  | 2593.031  | NM_003334 | 6676.604  | 7287.621  | NM_000706  | 607.037   |
| 12537.428 | NM_006718 | 1098.169  | 780.937   | NM_002693 | 873.809   | 688.397   | NM_015941  | 518.337   |
| 473.172   | NM_005427 | 592.013   | 761.198   | NM_003671 | 380.892   | 382.313   | NM_014837  | 829.953   |
| 611.651   | NM_016312 | 477.84    | 301.124   | AK026000  | 892.941   | 1220.562  | NM_005259  | 714.217   |
| 890.67    | NM_001776 | 1094.72   | 1059.877  | NM_005814 | 502.03    | 649.403   | NM_002840  | 394.804   |
| 464.817   | NM_001903 | 6114.446  | 9219.138  | NM_016279 | 307.432   | 217.982   | NM_002838  | 440.564   |
| 481.629   | NM_001874 | 2555.687  | 3861.667  | NM_000211 | 7403.447  | 4580.784  | NM_013340  | 128.475   |
| 1041.485  | X69637    | 180.49    | 180.588   | AB037830  | 791.129   | 820.851   | NM_005462  | 494.652   |
| 44524.469 | NM_005857 | 9595.833  | 17649.695 | NM_015685 | 1194.262  | 807.02    | NM_014954  | 4047.288  |
| 316.595   | NM_002429 | 349.376   | 299.833   | NM_004357 | 9851.604  | 10248.405 | NM_000807  | 211.833   |
| 375.413   | AK027037  | 1185.62   | 1467.078  | X03324    | 1169.228  | 1118.117  | NM_014909  | 578.327   |
| 2920.98   | NM_003875 | 6076.863  | 3755.861  | NM_014934 | 355.911   | 385.817   | NM_015700  | 2869.889  |
| 693.19    | AF191687  | 1121.262  | 681.893   | NM_003690 | 1265.587  | 804.549   | NM_019087  | 1096.606  |
| 2633.029  | NM_003046 | 362.165   | 348.871   | NM_000876 | 2002.281  | 1428.673  | NM_016322  | 593.981   |
| 21890.557 | NM_000274 | 4941.588  | 4392.24   | NM_014214 | 1709.205  | 2085.339  | AF215923   | 421.756   |
| 5423.724  | NM_000170 | 593.204   | 663.561   | NM_002752 | 1077.286  | 752.755   | U66621     | 2461.342  |
| 613.322   | NM_000281 | 4569.748  | 3778.44   | NM_013281 | 493.323   | 649.496   | NM_005720  | 6267.108  |
| 475.149   | AK001295  | 2515.945  | 1414.164  | Y11306    | 392.469   | 249.361   | U61736     | 79.047    |
| 1656.385  | NM_006031 | 1520.666  | 1387.23   | X85106    | 311.487   | 258.709   | AJ132086   | 583.16    |
| 1649.557  | NM_002715 | 3187.455  | 2891.203  | NM_003931 | 729.335   | 837.513   | U92816     | 2443.677  |
| 1583.373  | NM_001020 | 47668.473 | 67860     | NM_012479 | 16599.695 | 14051.279 | BC011987   | 1381.297  |

|           |           |           |           |           |           |           |           |           |
|-----------|-----------|-----------|-----------|-----------|-----------|-----------|-----------|-----------|
| 1122.081  | AB020660  | 2098.326  | 2332.269  | AF250226  | 1593.257  | 2271.353  | NM_00410E | 8586.547  |
| 585.991   | NM_00665E | 14161.014 | 12947.545 | NM_003217 | 13195.595 | 17425.902 | L03418    | 3211.696  |
| 5880.873  | NM_018051 | 1100.652  | 656.611   | AL157475  | 1406.2    | 1734.873  | NM_003157 | 811.038   |
| 2862.588  | NM_015371 | 2768.012  | 1469.139  | NM_00606E | 7370.723  | 4978.375  | NM_00493E | 610.292   |
| 117.399   | AB040915  | 830.399   | 476.519   | NM_006534 | 1720.996  | 1971.595  | NM_015981 | 899.684   |
| 442.262   | AF147791  | 418.296   | 593.089   | NM_017601 | 819.029   | 751.194   | NM_00045E | 1510.328  |
| 1576.268  | NM_006481 | 1554.446  | 1652.133  | AF110265  | 3503.35   | 3573.637  | NM_014791 | 2444.026  |
| 931.362   | AB011115  | 334.393   | 298.703   | AF272371  | 42673.121 | 55188.328 | NM_00331E | 1009.822  |
| 801.832   | NM_00391C | 8544.579  | 6592.179  | AK021848  | 453.603   | 422.594   | NM_00436E | 1177.866  |
| 4409.988  | AB007913  | 767.272   | 569.1     | NM_003704 | 730.516   | 836.389   | NM_00018E | 9021.08   |
| 30636.264 | NM_00669E | 2047.862  | 2783.131  | AK023140  | 437.281   | 645.589   | AK023384  | 658.026   |
| 1177.652  | NM_00459E | 6634.618  | 4170.667  | NM_00155E | 1237.843  | 901.009   | NM_01602E | 2817.959  |
| 3265.783  | NM_006037 | 5793.514  | 4051.15   | NM_01417E | 4863.533  | 8288.302  | NM_00173E | 664.464   |
| 1097.078  | NM_015871 | 2708.987  | 2123.414  | NM_001731 | 6580.743  | 7433.852  | NM_01869C | 3220.429  |
| 1411.425  | AB032962  | 1532.19   | 3786.92   | AL137506  | 353.779   | 491.198   | NM_00086C | 792.511   |
| 591.603   | NM_019037 | 3967.317  | 3591.271  | AK022961  | 1360.999  | 961.851   | AB037798  | 597.714   |
| 940.848   | NM_015891 | 2184.081  | 1488.041  | NM_00737E | 2544.643  | 3055.436  | NM_00078C | 265.692   |
| 439.72    | NM_00680E | 398.473   | 327.663   | NM_014371 | 1154.283  | 1334.98   | AF272663  | 3682.297  |
| 1689.846  | AB037778  | 627.865   | 468.532   | AF290512  | 2065.628  | 1976.332  | NM_01219C | 288.29    |
| 3348.671  | NM_00506E | 20015.42  | 7720.684  | NM_00671E | 2051.298  | 2725.886  | AF277719  | 336.779   |
| 4764.229  | NM_00308E | 3796.318  | 2832.363  | AB002323  | 722.151   | 579.682   | NM_000791 | 579.313   |
| 8614.06   | NM_00375E | 13690.209 | 8266.842  | AK022241  | 1815.512  | 1000.994  | NM_003681 | 2320.339  |
| 620.482   | NM_00622E | 483.419   | 690.345   | AK022587  | 2357.938  | 4864.366  | NM_00480C | 7312.868  |
| 229.449   | NM_01759C | 1714.684  | 1330.487  | NM_00551E | 255.657   | 202.73    | NM_00495E | 805.644   |
| 742.346   | AB011145  | 5123.021  | 5190.186  | NM_00550E | 622.077   | 1088.373  | AY007239  | 198.982   |
| 10335.767 | NM_00375C | 22091.133 | 11208.439 | AL137404  | 38197.293 | 36308.484 | NM_020414 | 842.996   |
| 1673.024  | M92422    | 1895.975  | 1114.946  | NM_02018E | 553.504   | 724.37    | AB037730  | 1434.63   |
| 1571.839  | NM_01786E | 1286.319  | 827.158   | NM_00283E | 18890.49  | 16299.141 | NM_001357 | 2857.246  |
| 3289.558  | AK021888  | 958.426   | 1000.769  | NM_01773E | 1993.244  | 1768.456  | NM_00389E | 686.744   |
| 2492.962  | AK022848  | 3285.025  | 4919.727  | NM_002851 | 1092.431  | 1065.148  | AB037816  | 998.965   |
| 366.013   | NM_01815E | 8717.192  | 8205.641  | NM_002071 | 359.271   | 485.189   | NM_00171E | 3018.637  |
| 431.162   | NM_00081E | 3341.589  | 2522.308  | NM_00533E | 7698.743  | 5642.832  | AL080062  | 705.693   |
| 1370.768  | NM_00251E | 2265.785  | 1920.207  | NM_00190E | 1643.707  | 1316.037  | AF308802  | 652.037   |
| 453.856   | NM_017424 | 503.474   | 804.803   | NM_00414E | 233.178   | 165.345   | S76984    | 6003.136  |
| 1412.715  | NM_00152E | 3531.14   | 2750.855  | AF108138  | 588.716   | 1015.466  | NM_01449E | 49969.168 |
| 511.6     | NM_00088E | 1741      | 1600.305  | BF340302  | 1662.638  | 1425.383  | NM_014081 | 628.818   |
| 713.895   | AF254086  | 1244.515  | 1104.894  | AK024210  | 603.607   | 606.836   | NM_005651 | 428.898   |
| 307.987   | AL390142  | 1281.672  | 1263.888  | NM_00227E | 1556.506  | 1470.084  | NM_00541E | 177.057   |
| 652.63    | NM_00656E | 1554.205  | 925.523   | AL133087  | 701.6     | 628.899   | NM_00719E | 1467.636  |
| 833.76    | AB007930  | 7101.864  | 5834.053  | NM_01801C | 265.836   | 215.931   | AK023337  | 1887.752  |
| 1431.652  | AJ005273  | 1782.064  | 1706.807  | NM_002274 | 2251.2    | 1645.691  | NM_01327E | 4856.226  |
| 2802.69   | AK021892  | 1814.577  | 2316.316  | BF337874  | 1089.609  | 831.536   | NM_019011 | 1084.748  |
| 2175.206  | NM_017637 | 277.999   | 199.05    | NM_00347E | 5535.601  | 7172.814  | AF459094  | 2933.005  |
| 1569.958  | NM_003121 | 287.05    | 487.253   | NM_00024E | 1323.464  | 1315.068  | NM_002544 | 806.008   |
| 2946.492  | NM_003437 | 1149.542  | 1144.682  | NM_00438E | 4697.795  | 4753.976  | AB011542  | 378.152   |
| 1267.971  | NM_018337 | 3281.547  | 2571.195  | NM_01225E | 3426.353  | 2868.112  | NM_00185E | 960.942   |
| 2689.881  | AA193295  | 12392.833 | 5651.523  | NM_01632E | 838.717   | 939.796   | X99661    | 482.381   |
| 51483.25  | NM_01804E | 2512.885  | 2352.157  | NM_001604 | 565.324   | 519.126   | NM_005927 | 1456.961  |
| 361.683   | NM_01480E | 1221.761  | 991.344   | NM_01765E | 947.223   | 912.951   | AB028983  | 1118.659  |
| 851.718   | AK024956  | 336.767   | 365.023   | X16282    | 2711.079  | 1982.593  | AB037800  | 646.237   |
| 1344.835  | AF147386  | 1199.303  | 1448.872  | AK022519  | 359.791   | 322.48    | NM_01866C | 3345.603  |
| 3174.443  | AF273052  | 5037.027  | 2723.69   | NM_01441E | 778.864   | 631.082   | NM_003394 | 1521.92   |
| 529.723   | NM_01794E | 3138.721  | 2635.704  | S75264    | 4502.187  | 3392.848  | NM_006747 | 476.83    |

|           |           |           |           |           |           |           |           |           |
|-----------|-----------|-----------|-----------|-----------|-----------|-----------|-----------|-----------|
| 1196.807  | AK025682  | 704.374   | 484.676   | AF027513  | 458.43    | 325.962   | NM_007086 | 797.543   |
| 7516.91   | NM_016478 | 3483.986  | 4420.242  | NM_001379 | 552.331   | 786.945   | NM_003870 | 4226.45   |
| 685.102   | AL389986  | 2233.402  | 3174.965  | NM_018664 | 800.036   | 471.977   | AK024507  | 607.851   |
| 1019.77   | AF142409  | 1363.424  | 3789.033  | BC006428  | 891.467   | 715.585   | NM_001243 | 1491.355  |
| 6880.915  | AF088052  | 759.151   | 954.545   | NM_005034 | 279.526   | 255.493   | AK025997  | 1520.113  |
| 537.897   | AF086342  | 347.939   | 354.168   | NM_003926 | 2398.146  | 2304.896  | NM_000299 | 656.218   |
| 1591.991  | AF086451  | 243.117   | 287.405   | AF085356  | 409.427   | 363.01    | NM_014887 | 2282.785  |
| 1054.33   | AF086310  | 289.266   | 276.581   | NM_016047 | 14647.723 | 11155.558 | NM_018556 | 4019.148  |
| 530.941   | AF086387  | 564.48    | 774.11    | NM_001499 | 2510.303  | 2291.888  | NM_005824 | 413.674   |
| 673.829   | AF086443  | 358.161   | 523.582   | BF030165  | 4686.293  | 4911.424  | AF052211  | 1001.816  |
| 38614.188 | AL389941  | 688.63    | 601.211   | NM_016732 | 5787.218  | 5046.731  | NM_005600 | 1372.472  |
| 1102.124  | AB037756  | 1838.61   | 1270.627  | NM_014763 | 4859.583  | 4779.108  | NM_005967 | 1425.638  |
| 8269.346  | AK001853  | 2051.067  | 1432.987  | AF086534  | 292.508   | 244.644   | AB014566  | 658.776   |
| 960.232   | AK025071  | 574.958   | 502.739   | AF070617  | 951.708   | 1249.58   | NM_014223 | 1287.4    |
| 1650.413  | NM_015370 | 1325.287  | 1919.143  | NM_014918 | 5076.931  | 4798.464  | NM_016194 | 2209.366  |
| 806.865   | AF085917  | 585.041   | 508.566   | NM_000152 | 2334.366  | 2406.288  | AL050385  | 1657.138  |
| 542.412   | AF085989  | 544.481   | 503.004   | D17222    | 8189.259  | 5719.939  | NM_007027 | 1066.515  |
| 1486.652  | AL360139  | 46250.898 | 44627.379 | NM_000154 | 1011.224  | 915.846   | NM_000633 | 8353.141  |
| 729.247   | AF075110  | 1297.878  | 3232.861  | NM_000671 | 771.028   | 739.873   | AB037855  | 714.64    |
| 447.346   | AL137323  | 468.216   | 304.404   | NM_006297 | 3948.931  | 2418.768  | AK024524  | 2592.853  |
| 1780.745  | AL137494  | 2385.659  | 2983.382  | X85325    | 21409.258 | 17137.307 | NM_000562 | 1950.859  |
| 1998.822  | AL162037  | 3755.04   | 4510.347  | AF318366  | 2434.91   | 1969.926  | NM_019011 | 4510.341  |
| 2393.127  | AL390150  | 965.763   | 871.306   | AF182423  | 418.648   | 358.494   | NM_004879 | 6812.118  |
| 1555.676  | AL137359  | 302.995   | 223.325   | D26018    | 1112.381  | 1644.515  | AB020694  | 1222.166  |
| 950.634   | NM_002761 | 387.339   | 782.781   | AB037863  | 250.88    | 187.693   | NM_016071 | 2306.861  |
| 803.896   | AF086063  | 396.532   | 314.891   | NM_007237 | 487.967   | 575.358   | AL050131  | 1278.954  |
| 1666.596  | AF086098  | 581.486   | 671.413   | NM_004608 | 337.965   | 361.388   | NM_004475 | 2794.899  |
| 29564.68  | AF086076  | 545.535   | 318.089   | NM_018257 | 1774.671  | 1159.903  | NM_001627 | 2939.554  |
| 1507.454  | AL833393  | 1276.419  | 1191.089  | NM_005919 | 577.238   | 780.654   | NM_001226 | 564.859   |
| 658.716   | AF088005  | 1443.688  | 1015.939  | AF086112  | 328.138   | 223.126   | NM_001336 | 383.32    |
| 2086.44   | AF086096  | 3516.281  | 3206.493  | AL137254  | 855.481   | 912.006   | AB050716  | 562.116   |
| 638.624   | AL390132  | 423.686   | 341.787   | AK026359  | 405.386   | 350.753   | X77690    | 1124.736  |
| 1159.789  | NM_017933 | 2049.668  | 1755.241  | AF085884  | 1034.051  | 1274.263  | NM_006536 | 469.865   |
| 536.651   | NM_017819 | 5372.924  | 3644.241  | S81522    | 1513.83   | 2171      | NM_006690 | 1247.172  |
| 1814.064  | AK024653  | 11586.916 | 10694.726 | S94541    | 596.792   | 460.184   | AF218022  | 1496.571  |
| 380.422   | AF103907  | 1663.579  | 1756.49   | L36587    | 6145.896  | 3783.967  | NM_003348 | 1375.238  |
| 1787.363  | AF094508  | 374.969   | 376.236   | AK024228  | 885.039   | 749.956   | AB006198  | 4396.011  |
| 3041.833  | AF161351  | 1453.474  | 1452.114  | NM_016647 | 365.597   | 236.236   | U72518    | 726.902   |
| 400.184   | AF257098  | 326.06    | 420.001   | AK024695  | 698.733   | 859.597   | NM_015322 | 2808.157  |
| 3558.043  | AF111782  | 1183.652  | 842.585   | AF038174  | 826.182   | 739       | NM_016607 | 1889.535  |
| 6160.651  | AF151530  | 526.213   | 395.152   | NM_013243 | 226.694   | 286.008   | NM_003275 | 696.496   |
| 15239.536 | AK021991  | 239.815   | 238.561   | AF070632  | 291.341   | 356.576   | NM_000268 | 11275.808 |
| 1227.115  | AK022093  | 2825.921  | 2918.118  | AF161359  | 729.586   | 614.967   | M30493    | 8032.27   |
| 710.622   | AK022376  | 330.82    | 330.886   | AL365520  | 571.5     | 593.267   | NM_004343 | 18361.688 |
| 27234.006 | AK022005  | 431.475   | 470.502   | AL359338  | 764.331   | 1380.941  | X52355    | 1930.641  |
| 288.282   | AK022137  | 360.106   | 471.477   | AK023623  | 848.241   | 1105.417  | NM_006963 | 4052.795  |
| 799.932   | AK022272  | 664.683   | 595.547   | AK021539  | 2089.577  | 2031.759  | U66561    | 2234.523  |
| 1110.048  | AK027155  | 1868.166  | 1739.72   | AK021819  | 427.551   | 379.743   | NM_000306 | 1304.158  |
| 1883.759  | AF221846  | 343.75    | 359.318   | AK026738  | 753.753   | 746.136   | NM_002200 | 1050.844  |
| 664.032   | AK027219  | 354.668   | 387.731   | AK025011  | 276.2     | 302.228   | AF017433  | 821.347   |
| 839.417   | AK024528  | 5453.738  | 4158.898  | AL157491  | 367.562   | 500.014   | AF130111  | 1360.431  |
| 4379.731  | AL049311  | 921.421   | 2248.65   | NM_005266 | 1069.144  | 786.485   | NM_016307 | 1162.23   |
| 1643.546  | AK000016  | 1111.493  | 1143.275  | AF085998  | 625.552   | 634.699   | AB028449  | 934.764   |

|           |           |           |           |           |           |           |           |           |
|-----------|-----------|-----------|-----------|-----------|-----------|-----------|-----------|-----------|
| 2224.342  | AK023367  | 1155.131  | 576.687   | AK024681  | 495.081   | 542.432   | NM_004697 | 888.3     |
| 640.685   | AL080209  | 1465.265  | 1728.406  | AF085990  | 360       | 407.401   | AF131776  | 1448.44   |
| 504.677   | NM_016255 | 1724.123  | 940.249   | NM_014907 | 3518.756  | 3520.34   | NM_020528 | 1664.726  |
| 1792.986  | NM_014318 | 1275.806  | 997.703   | AB007977  | 4215.623  | 3043.571  | NM_007040 | 10299.227 |
| 645.179   | AK056674  | 842.101   | 731.461   | NM_014221 | 857.625   | 1274.509  | NM_014483 | 4584.355  |
| 557.421   | AK022042  | 666.557   | 477.062   | U84515    | 531.18    | 565.714   | AK024249  | 808.072   |
| 3874.484  | AL117588  | 350.611   | 275.941   | AF086143  | 2790.648  | 3157.99   | AF239156  | 4457.936  |
| 365.59    | BE895529  | 1614.791  | 2344.516  | AK022239  | 202.721   | 264.635   | NM_020390 | 807.558   |
| 13857.629 | AK000964  | 502.187   | 524.057   | AK024674  | 332.198   | 383.597   | NM_003321 | 10981.104 |
| 3553.432  | AL117536  | 608.823   | 773.063   | AK024244  | 1636.645  | 1443.62   | U18937    | 5022.979  |
| 8520.555  | NM_017751 | 2825.04   | 2451.166  | AK023812  | 354.282   | 282.076   | AF268872  | 915.532   |
| 104.445   | NM_003771 | 1347.529  | 1368.72   | AL390084  | 840.513   | 918.209   | AK022180  | 14112.838 |
| 1359.494  | NM_017860 | 2885.37   | 2010.649  | AK023565  | 304.32    | 298.081   | AK001384  | 394.248   |
| 629.92    | X91195    | 27390.465 | 19534.686 | AK021479  | 474.901   | 411.305   | AK025437  | 1338.322  |
| 1311.694  | AF086190  | 921.485   | 802.363   | NM_003835 | 885.372   | 723.567   | AK074164  | 572.193   |
| 265.99    | AL050035  | 1334.847  | 1372.391  | AK000245  | 1117.825  | 997.878   | NM_004168 | 5207.217  |
| 2030.053  | AK024449  | 2351.22   | 14701.216 | AF118072  | 329.859   | 232.572   | AF161353  | 2640.669  |
| 48295.008 | AF279780  | 29449.887 | 26788.924 | AF085900  | 6726.475  | 6020.858  | NM_004146 | 8121.5    |
| 3028.266  | AK022510  | 971.917   | 1005.793  | AK026195  | 247.16    | 301.849   | NM_003002 | 6723.797  |
| 783.656   | AK021851  | 316.459   | 477.425   | AK022420  | 455.234   | 411.933   | D42047    | 925.282   |
| 1765.004  | L37717    | 282.539   | 348.342   | AK023945  | 2829.003  | 4025.752  | AB009282  | 6217.007  |
| 2253.809  | AJ131609  | 1594.512  | 2054.821  | AK022446  | 488.901   | 418.832   | NM_005004 | 24907.709 |
| 1102.965  | BC019280  | 3190.617  | 3056.987  | AK023773  | 442.573   | 674.681   | NM_003670 | 3352.533  |
| 1733.551  | AF086498  | 371.08    | 807.99    | AF116709  | 622.721   | 538.376   | NM_014639 | 1338.005  |
| 997.148   | AK000687  | 347.038   | 253.25    | AK025533  | 391.824   | 349.028   | NM_006392 | 1388.33   |
| 2066.574  | AF079567  | 535.877   | 482.056   | AK021911  | 3244.589  | 3158.908  | NM_014717 | 750.1     |
| 2645.292  | AK022177  | 676.087   | 968.51    | D17225    | 348.754   | 333.794   | NM_017922 | 954.692   |
| 2596.624  | AK023852  | 347.288   | 261.652   | AF147430  | 1231.305  | 826.604   | NM_002823 | 53889.852 |
| 440.281   | AF086466  | 926.242   | 999.523   | AK025766  | 3982.857  | 2652.033  | NM_017916 | 8743.253  |
| 2748.591  | AB007962  | 10186.628 | 10469.626 | U35875    | 6672.268  | 5480.523  | NM_001805 | 3694.501  |
| 878.481   | AF005081  | 938.731   | 1118.839  | AK021857  | 9593.719  | 5169.481  | AK022360  | 1181.561  |
| 908.293   | AK026438  | 645.492   | 1112.451  | AK022257  | 816.217   | 697.091   | AK095694  | 1100.233  |
| 264.744   | AK021546  | 588.208   | 751.647   | BE887356  | 25312.037 | 18838.842 | X52341    | 41452.117 |
| 606.419   | AL050186  | 8220.974  | 7397.011  | X84369    | 331.958   | 275.012   | NM_003082 | 2587.632  |
| 524.563   | AK021918  | 2628.82   | 2293.015  | AK023329  | 1450.793  | 1769.549  | AL133632  | 751.037   |
| 28988.74  | AK021669  | 2636.75   | 3992.856  | AK025181  | 171.674   | 344.496   | AK024551  | 411.826   |
| 2624.557  | AL080113  | 29410.824 | 19987.93  | AK021773  | 849.974   | 1475.269  | AL833249  | 1352.873  |
| 8265.427  | AL050083  | 963.875   | 1168.138  | AK027074  | 1289.776  | 1495.322  | NM_018374 | 1546.471  |
| 1106.062  | AK022766  | 390.927   | 387.952   | AL365456  | 404.572   | 691.211   | AF131852  | 297.95    |
| 793.774   | AL049422  | 3710.91   | 2983.417  | NM_018038 | 348.384   | 388.319   | AK021894  | 1546.551  |
| 868.382   | AL133089  | 363.931   | 236.134   | AK025048  | 243.584   | 149.254   | NM_020424 | 1228.931  |
| 3226.774  | AK023526  | 2043.25   | 2628.204  | U84522    | 1234.833  | 986.784   | AB033009  | 6351.493  |
| 3570.821  | BE266129  | 919.432   | 736.262   | AK021694  | 969.731   | 1033.262  | AK022086  | 565.492   |
| 1898.762  | AK025602  | 4531.6    | 5175.048  | AF086013  | 429.337   | 530.265   | AF147320  | 1652.399  |
| 22635.662 | AK026309  | 1702.156  | 1792.036  | U84505    | 1785.338  | 1758.507  | AK022138  | 1072.447  |
| 271.697   | AL137486  | 2616.254  | 2492.847  | X81005    | 556.132   | 480.471   | AF086191  | 2325.893  |
| 842.984   | AL110162  | 730.737   | 633.674   | AL049265  | 750.568   | 1130.353  | NM_017638 | 3169.641  |
| 755.951   | AK022681  | 8658.157  | 9299.837  | AL137635  | 353.406   | 287.211   | AL133052  | 1355.003  |
| 1513.87   | CY3Cy5    | 1418.139  | 140.172   | AL049430  | 1023.889  | 761.817   | AB037824  | 1301.658  |
| 1709.645  | Y18483    | 539.78    | 500.807   | AK021461  | 246.9     | 196.148   | AF361494  | 216.311   |
| 508.784   | AI299075  | 2300.996  | 2012.937  | AB015349  | 222.299   | 164.879   | AK022810  | 864.433   |
| 585.685   | M59979    | 480.173   | 713.181   | AL079274  | 5631.77   | 4445.975  | NM_005110 | 451.57    |
| 4345.188  | AB011098  | 1121.163  | 1050.667  | S46403    | 224.436   | 198.003   | AF147408  | 582.135   |

|           |           |           |           |            |           |           |           |           |
|-----------|-----------|-----------|-----------|------------|-----------|-----------|-----------|-----------|
| 557.226   | AA609759  | 827.825   | 1806.846  | AL137398   | 1221.414  | 1320.996  | AK027222  | 3564.527  |
| 322.533   | AA029418  | 3951.965  | 3322.595  | Y12021     | 695.181   | 805.251   | AK054767  | 386.165   |
| 2795.714  | L20815    | 2560.808  | 2718.393  | AF127771   | 325.396   | 431.199   | AL049301  | 546.555   |
| 1269.298  | AI364483  | 6656.391  | 5060.175  | NM_013300  | 7460.138  | 7586.553  | AL050042  | 2293.536  |
| 2177.35   | AA456001  | 9198.404  | 9592.087  | AK026039   | 2811.77   | 4181.754  | NM_018469 | 1361.026  |
| 2045.76   | BI818232  | 302.162   | 146.723   | AF108756   | 6084.589  | 7777.075  | NM_014867 | 5653.427  |
| 25858.406 | AA451686  | 3582.165  | 3434.868  | NM_004075  | 2419.157  | 2483.427  | AL359932  | 441.468   |
| 6794.014  | AA934644  | 357.053   | 308.436   | NM_001887  | 887.162   | 1041.209  | AB037850  | 1694.273  |
| 15151.826 | NM_003822 | 850.284   | 745.786   | NM_006533  | 955.378   | 1101.554  | AK002197  | 2321.664  |
| 1430.075  | NM_004412 | 2163.076  | 3871.928  | AK026747   | 1441.227  | 1827.095  | AF087996  | 2631.003  |
| 1425.495  | SR5       | 3542.757  | 6178.748  | AL110150   | 3096.856  | 2847.565  | AK021710  | 1551.868  |
| 482.442   | SR7       | 5127.525  | 60160.629 | NM_001998  | 1525.577  | 1278.097  | NM_007017 | 969.677   |
| 613.516   | SR9       | 17950.475 | 5526.319  | X87825     | 1619.385  | 1194.984  | AL137446  | 927.213   |
| 1695.462  | CY3Cy5    | 2188.298  | 170.772   | AK001285   | 9496.159  | 8714.391  | AB025286  | 868.372   |
| 4849.069  | NM_019555 | 410.574   | 1280.593  | D17215     | 1762.358  | 1902.664  | AF009286  | 525.438   |
| 1856.279  | NM_012096 | 4665.871  | 3442.566  | BE781513   | 258.443   | 196.262   | AF056437  | 453.543   |
| 1461.857  | L12052    | 1721.243  | 759.128   | NM_015714  | 7349.476  | 4739.151  | AB032364  | 567.02    |
| 2635.243  | AB028976  | 4539.162  | 2913.13   | AK075564   | 439.569   | 431.385   | AF009295  | 340.896   |
| 727.924   | AK026337  | 550.647   | 464.102   | AK026219   | 385.664   | 252.341   | NM_005029 | 2630.371  |
| 1770.212  | NM_015869 | 1570.053  | 1611.432  | D28446     | 584.491   | 525.263   | AF056447  | 976.938   |
| 710.963   | AB031038  | 98.897    | 1889.144  | AK024756   | 673.229   | 952.695   | AK001010  | 847.455   |
| 448.597   | NM_004626 | 967.328   | 700.733   | NM_017911  | 478.096   | 503       | NM_018076 | 777.296   |
| 912.869   | NM_001899 | 436.256   | 1036.636  | AJ224168   | 1302.38   | 1062.26   | AK021442  | 822.921   |
| 1431.31   | NM_004305 | 16262.78  | 14924.959 | AF147325   | 43470.172 | 51983.195 | AK001076  | 874.977   |
| 1636.808  | NM_006089 | 1081.14   | 779.217   | NM_003774  | 323.441   | 230.721   | AK001820  | 397.698   |
| 403.671   | NM_005992 | 2189.715  | 476.804   | D87466     | 3688.469  | 5512.891  | AK021482  | 2421.584  |
| 3048.532  | NM_003144 | 45666.586 | 24809.48  | CY3Cy5     | 435.342   | 113.142   | AK021730  | 367.823   |
| 4640.624  | NM_000908 | 572.518   | 2187.391  |            | 1070.048  | 797.366   | AK025317  | 4803.747  |
| 1312.462  | AB011102  | 3070.825  | 2613.021  | AA608568   | 2285.11   | 1605.907  | AK025177  | 341.656   |
| 886.187   | D63480    | 1596.3    | 1151.689  | BG831301   | 7231.095  | 3270.725  | AK026725  | 1479.26   |
| 1584.751  | NM_002969 | 1651.271  | 2350.066  | M14764     | 547.152   | 300.342   | AJ008118  | 50622.074 |
| 613.673   | NM_006475 | 377.151   | 678.087   | AA478647   | 1195.355  | 1013.249  | NM_005523 | 1001.857  |
| 560.021   | NM_004620 | 789.346   | 906.876   | AW058501   | 509.177   | 480.284   | AK024512  | 1973.438  |
| 854.025   | AF087940  | 2578.301  | 5460.504  | ID 2623896 | 1676.673  | 2116.097  | AK023454  | 1000.417  |
| 666.049   | AJ277587  | 1735.407  | 3672.686  | ID 2602214 | 1396.122  | 1444.654  | L23207    | 1020.372  |
| 924.684   | D87432    | 3296.907  | 3555.47   | ID 2071279 | 2315.461  | 3754.375  | NM_018627 | 494.999   |
| 2359.717  | NM_002337 | 2364.173  | 2482.666  | L10709     | 2133.999  | 831.361   | NM_015377 | 508.941   |
| 325.652   | NM_013245 | 1745.836  | 715.959   | N35489     | 523.337   | 431.336   | AL137531  | 858.168   |
| 605.012   | NM_006423 | 3153.44   | 4972.302  | AI928195   | 766.967   | 820.453   | AL080085  | 2308.429  |
| 3753.851  | NM_004766 | 2363.133  | 1757.561  | AA458922   | 3781.697  | 3894.818  | AF086519  | 524.33    |
| 227.026   | NM_005819 | 5477.171  | 5205.904  | NM_145659  | 872.493   | 1097.819  | AF055012  | 1528.268  |
| 50989.688 | AK025520  | 2133.884  | 1128.32   | NM_021957  | 508.52    | 805.029   | AK022307  | 1386.807  |
| 875.759   | NM_004892 | 5887.785  | 9268.153  | SR2        | 46172.305 | 50448.152 | AK025192  | 5616.814  |
| 961.39    | NM_014597 | 8724.554  | 7813.495  | SR4        | 9521.778  | 9439.463  | NM_012403 | 2991.881  |
| 2165.489  | NM_017896 | 6514.403  | 5490.928  | SR6        | 1139.947  | 1215.751  | NM_006346 | 1314.948  |
| 1930.961  | AB002374  | 2207.459  | 1544.511  | SR8        | 4268.507  | 12671.83  | AK025240  | 2818.568  |
| 1213.803  | U17327    | 907.543   | 786.065   | SR10       | 17516.053 | 5053.046  | NM_017633 | 8465.608  |
| 250.109   | M87790    | 12574.439 | 17996.283 | CY3Cy5     | 594.325   | 131.439   | AF086186  | 13413.517 |
| 1743.75   | NM_001768 | 1689.878  | 2034.516  | NM_017729  | 514.82    | 396.582   | NM_017802 | 2958.661  |
| 254.438   | NM_000029 | 5641.527  | 5400.708  | NM_005259  | 868.199   | 517.151   | AK023667  | 780.197   |
| 355.467   | NM_000715 | 408.155   | 594.813   | NM_002840  | 378.44    | 179.915   | AJ008137  | 6651.431  |
| 739.796   | AF035802  | 2402.176  | 2617.817  | NM_015850  | 2190.836  | 1144.296  | AF085841  | 607.178   |
| 748.969   | Y08145    | 569.731   | 710.368   | NM_004864  | 366.527   | 231.467   | AF086234  | 19101.064 |

|           |           |           |           |           |           |           |           |           |
|-----------|-----------|-----------|-----------|-----------|-----------|-----------|-----------|-----------|
| 504.732   | M26123    | 555.955   | 1503.057  | NM_002838 | 1638.765  | 1425.556  | AK023680  | 1437.578  |
| 3932.58   | NM_001838 | 392.066   | 579.255   | NM_014686 | 48774.227 | 47778.074 | AF009324  | 1237.245  |
| 1080.939  | NM_013328 | 18521.453 | 9463.383  | NM_005462 | 390.464   | 300.085   | AF019226  | 985.849   |
| 553.581   | NM_002660 | 1441.212  | 1590.958  | NM_012319 | 658.381   | 588.55    | D16473    | 1314.085  |
| 1234.909  | NM_015900 | 464.151   | 386.363   | NM_006510 | 5142.306  | 4418.307  | AB028968  | 975.41    |
| 1274.986  | NM_003706 | 803.438   | 2400.374  | NM_003141 | 1116.298  | 1021.242  | S82164    | 1299.585  |
| 1515.083  | NM_005218 | 5356.926  | 1296.611  | NM_020245 | 2304.541  | 2637.89   | AK024394  | 780.958   |
| 834.505   | AB033054  | 8625.879  | 7009.217  | NM_007175 | 759.434   | 940.694   | AF147374  | 927.193   |
| 1375.073  | NM_016122 | 770.112   | 499.934   | AB046381  | 260.123   | 543.846   | L43338    | 9179.391  |
| 841.69    | AF153330  | 913.72    | 1111.24   | AJ011497  | 1030.336  | 1250.87   | AJ227866  | 17761.365 |
| 5466.014  | NM_001652 | 603.939   | 789.547   | NM_003018 | 293.487   | 677.752   | AF458223  | 2618.083  |
| 1084.645  | D87446    | 3346.105  | 3925.672  | NM_000336 | 599.621   | 603.3     | AK026822  | 467.981   |
| 933.341   | BF540935  | 627.35    | 435.187   | W61100    | 30714.77  | 26069.291 | AK022838  | 6018.678  |
| 676.285   | NM_004466 | 304.948   | 366.531   | AF215923  | 959.043   | 362.164   | NM_003509 | 407.45    |
| 709.342   | NM_007081 | 1694.665  | 1578.614  | U66621    | 2945.818  | 1905.001  | CY3Cy5    | 3245.073  |
| 274.086   | AB032964  | 2205.078  | 2205.683  | NM_005720 | 6918.311  | 4525.537  | AA700390  | 2021.776  |
| 458.935   | BE733605  | 2016.653  | 1872.68   | AJ132086  | 524.92    | 582.384   | Y18474    | 330.432   |
| 1087.464  | NM_003334 | 10939.86  | 8568.32   | U92816    | 3815.299  | 3886.769  | BI907981  | 314.262   |
| 346.266   | NM_002693 | 1674.734  | 950.067   | BC011987  | 5104.247  | 6617.054  | BI603841  | 971.566   |
| 201.554   | NM_003671 | 678.787   | 949.803   | L03418    | 2740.444  | 1394.136  | BG696638  | 2963.031  |
| 792.974   | AK026000  | 1656.222  | 1287.067  | M95923    | 423.18    | 438.073   | M19888    | 620.733   |
| 487.866   | NM_017833 | 1143.883  | 2054.482  | NM_002415 | 49998.645 | 36107.262 | AA156863  | 981.256   |
| 3672.324  | NM_006675 | 2857.149  | 2910.938  | NM_006332 | 2617.131  | 2944.066  | R82957    | 30526.525 |
| 3361.398  | NM_003022 | 11604.952 | 13883.062 | NM_000916 | 1545.14   | 1029.395  | AA398951  | 1255.071  |
| 3937.333  | NM_004873 | 3450.427  | 8920.204  | NM_018663 | 2036.359  | 2213.924  | AI218732  | 875.678   |
| 1179.294  | NM_019842 | 1532.144  | 1910.417  | NM_145904 | 4518.045  | 3600.206  | NM_004102 | 1819.582  |
| 2875.613  | NM_002317 | 896.322   | 1168.571  | NM_006796 | 5428.704  | 5799.181  | NM_004544 | 1793.899  |
| 1235.151  | NM_000320 | 3114.559  | 5708.931  | NM_000706 | 641.002   | 619.753   | SR7       | 3393.961  |
| 363.846   | NM_003136 | 3435.419  | 4666.831  | NM_015941 | 538.423   | 969.805   | SR9       | 10313.535 |
| 291.34    | NM_004620 | 693.505   | 722.38    | NM_003655 | 3419.666  | 1917.664  | CY3Cy5    | 2630.968  |
| 677.997   | AF087940  | 2345.293  | 3298.323  | NM_014837 | 1715.672  | 1823.517  | NM_018049 | 708.305   |
| 1395.18   | AJ277587  | 1516.39   | 2473.304  | NM_001732 | 664.377   | 509.946   | NM_014395 | 345.39    |
| 1146.683  | D87432    | 4205.169  | 3548.458  | NM_018690 | 3416.594  | 2585.047  | NM_001561 | 457.2     |
| 2596.79   | Y18483    | 522.471   | 376.849   | NM_000860 | 561.855   | 354.7     | NM_005160 | 821.732   |
| 2876.261  | AI565117  | 56255.914 | 66390.609 | AB037798  | 1120.982  | 897.085   | X78817    | 6265.363  |
| 2379.357  | AI299075  | 2393.299  | 1882.129  | AF272663  | 4310.754  | 3219.989  | AY009401  | 428.139   |
| 1122.456  | M59979    | 503.887   | 672.106   | NM_012190 | 507.636   | 537.049   | NM_001991 | 632.718   |
| 54430.012 | AB011098  | 1162.079  | 1033.355  | AF277719  | 761.885   | 531.805   | AF053952  | 12972.245 |
| 4141.699  | AA609759  | 688.842   | 2519.7    | NM_000791 | 1027.017  | 1390.751  | NM_003213 | 3050.474  |
| 298.956   | AA029418  | 3398.814  | 2600.977  | NM_003681 | 1661.083  | 1194.74   | NM_014044 | 1439.798  |
| 2053.722  | L20815    | 2680.861  | 3100.057  | NM_004800 | 7812.55   | 9116.262  | NM_000900 | 891.843   |
| 2316.456  | AI364483  | 6973.189  | 4491.348  | NM_014954 | 15372.992 | 15285.969 | AK023684  | 2672.282  |
| 768.427   | AA456001  | 8954.855  | 11020.044 | NM_014909 | 2254.142  | 2040.002  | NM_000232 | 549.422   |
| 4143.342  | AA451686  | 3881.163  | 4964.978  | NM_015700 | 4541.476  | 5895.779  | NM_015057 | 318.498   |
| 1574.264  | AA934644  | 346.837   | 440.532   | NM_019087 | 1035.575  | 1691.383  | AF303398  | 3084.51   |
| 520.381   | NM_004412 | 2360.882  | 3811.696  | NM_016322 | 465.778   | 395.921   | NM_014810 | 947.16    |
| 2467.537  | NM_002050 | 1836.078  | 685.714   | NM_005072 | 440.998   | 476.285   | NM_004738 | 719.698   |
| 9231.352  | NM_007097 | 5922.79   | 7923.664  | AF308802  | 450.851   | 325.403   | NM_007357 | 1840.085  |
| 471.693   | NM_000029 | 5172.818  | 3757.568  | S76984    | 6056.941  | 4759.766  | NM_003763 | 1414.24   |
| 44825.734 | NM_000715 | 454.058   | 559.4     | NM_014495 | 54264.746 | 48749.516 | AK023448  | 355.651   |
| 946.807   | AF035802  | 2791.853  | 1994.627  | NM_014081 | 547.129   | 229.998   | NM_003283 | 344.767   |
| 977.436   | M26123    | 613.372   | 1173.062  | NM_007195 | 858.035   | 511.139   | AF249898  | 1045.543  |
| 21351.152 | NM_001838 | 472.068   | 273.242   | AK023337  | 1505.963  | 1204.525  | M69181    | 1132.853  |



|           |           |           |           |            |           |          |           |           |
|-----------|-----------|-----------|-----------|------------|-----------|----------|-----------|-----------|
| 979.581   | NM_019555 | 383.349   | 982.599   | NM_013275  | 5041.538  | 3768.448 | L09078    | 376.422   |
| 732.882   | NM_012096 | 4559.313  | 3750.198  | AB037842   | 228.958   | 206.736  | NM_002652 | 289.493   |
| 1074.572  | NM_003905 | 10489.23  | 7040.66   | NM_019011  | 1390.829  | 1480.44  | NM_001311 | 625.987   |
| 1337.329  | L12052    | 1726.841  | 823.943   | AF459094   | 2991.661  | 2677.668 | NM_01779E | 3599.042  |
| 630.693   | AB028976  | 3914.13   | 2603.099  | NM_003157  | 1104.824  | 678.627  | NM_012410 | 1382.521  |
| 5622.743  | AK026337  | 776.71    | 1826.099  | NM_00493E  | 1107.239  | 1138.241 | NM_001111 | 4439.734  |
| 640.508   | NM_015869 | 1443.944  | 1523.477  | NM_014326  | 539.61    | 474.66   | NM_001611 | 390.462   |
| 524.552   | AB031038  | 323.793   | 176.563   | NM_015981  | 949.536   | 910.63   | AB018310  | 1240.212  |
| 3456.15   | NM_004626 | 918.611   | 769.653   | NM_000455  | 2452.887  | 2166.626 | NM_015379 | 8245.432  |
| 619.029   | NM_001899 | 430.275   | 380.293   | NM_014791  | 3865.841  | 5002.275 | NM_002355 | 3711.283  |
| 735.811   | NM_004305 | 16458.277 | 19022.271 | NM_00331E  | 1028.293  | 1438.172 | AK026608  | 458.268   |
| 148.65    | NM_006089 | 1201.605  | 1311.238  | NM_004362  | 2734.829  | 2318.082 | AJ224166  | 648.673   |
| 311.509   | NM_005992 | 2205.739  | 473.854   | NM_000182  | 10807.4   | 9897.296 | AK026098  | 1137.724  |
| 2771.493  | NM_003144 | 42776.848 | 30002.291 | AK023384   | 943.568   | 907.211  | NM_012381 | 1001.644  |
| 1444.86   | NM_00090E | 785.506   | 3961.083  | NM_016026  | 3885.232  | 3334.419 | NM_006397 | 4185.327  |
| 3109.167  | AB011102  | 3062.362  | 2480.014  | AJ011497   | 1182.761  | 810.88   | D83776    | 880.343   |
| 504.308   | D63480    | 1571.492  | 1288.709  | NM_000336  | 455.012   | 416.441  | NM_00408E | 1334.237  |
| 1549.792  | NM_002969 | 1659.46   | 2262.68   | AA608568   | 1871.472  | 1587.741 | NM_00013E | 810.045   |
| 2425.033  | AK023749  | 668.165   | 379.96    | BG831301   | 9623.715  | 5221.624 | NM_018163 | 593       |
| 1234.353  | NM_002337 | 2604.832  | 2826.01   | AA478647   | 959.744   | 996.346  | AK026362  | 1565.817  |
| 465.789   | NM_013245 | 1528.839  | 811.508   | ID 2623896 | 1480.573  | 1762.432 | NM_00496E | 1966.438  |
| 514.821   | NM_006423 | 2933.616  | 3960.72   | ID 2602214 | 1872.649  | 1584.547 | NM_00590E | 823.844   |
| 1318.446  | NM_004766 | 2571.09   | 1554.236  | ID 2071279 | 2418.436  | 3005.48  | NM_00478E | 1190.253  |
| 166.167   | NM_005819 | 4638.959  | 4573.612  | L10709     | 1908.238  | 614.652  | NM_00242E | 1181.294  |
| 405.552   | AK024722  | 86.501    | 3591.454  | N35489     | 278.428   | 358.16   | NM_014674 | 1576.636  |
| 1142.565  | AK025520  | 2139.875  | 1153.659  | AI928195   | 663.977   | 755.547  | NM_018271 | 1046.299  |
| 3524.466  | NM_004892 | 6801.244  | 12506.701 | AA458922   | 3563.607  | 4111.605 | NM_014652 | 1227.491  |
| 892.735   | NM_014597 | 8173.669  | 10444.527 | NM_145659  | 838.553   | 879.065  | AL133020  | 4240.002  |
| 397.733   | NM_017896 | 5648.162  | 6572.469  | NM_001719  | 3573.34   | 3047.503 | NM_014044 | 1068.635  |
| 434.676   | AB002374  | 2215.966  | 2232.163  | AL080062   | 735.827   | 408.214  | NM_000900 | 780.444   |
| 1008.363  | U17327    | 1108.781  | 852.298   | NM_145904  | 4474.839  | 2575.541 | AK023684  | 2534.618  |
| 924.717   | AB046781  | 1205.401  | 2000.84   | NM_006796  | 4143.968  | 3113.342 | AA700390  | 2589.289  |
| 1380.777  | M87790    | 11476.796 | 12243.665 | NM_000706  | 530.902   | 363.114  | Y18474    | 290.744   |
| 1114.293  | NM_00176E | 1748.537  | 1571.89   | NM_015941  | 638.466   | 819.9    | BI907981  | 341.793   |
| 1874.812  | NM_002951 | 12227.228 | 10859.341 | NM_014837  | 1420.741  | 812.183  | BI603841  | 811.101   |
| 579.838   | NM_002317 | 880.202   | 701.128   | NM_017729  | 470.825   | 373.115  | BG696638  | 2159.628  |
| 236.709   | NM_000320 | 2916.706  | 3897.49   | NM_005259  | 806.494   | 823.475  | M19888    | 598.274   |
| 5061.683  | NM_003136 | 3874.102  | 4156.593  | NM_002840  | 475.589   | 290.588  | Y08136    | 520.794   |
| 2490.112  | NM_01332E | 19108.057 | 11976.862 | NM_015850  | 1973.896  | 1580.946 | AA156863  | 1415.395  |
| 1005.395  | NM_002660 | 1258.955  | 1331.582  | NM_004864  | 425.576   | 168.913  | BI915199  | 392.49    |
| 2981.776  | NM_015900 | 485.421   | 385.961   | NM_00283E  | 1373.201  | 1333.819 | R82957    | 46201.367 |
| 1883.859  | NM_003706 | 513.997   | 1973.535  | NM_014686  | 46788.273 | 36754.18 | AA398951  | 1843.916  |
| 324.785   | NM_00521E | 5845.97   | 1705.808  | NM_002487  | 462.025   | 516.613  | AI218732  | 839.626   |
| 1667.592  | AB033054  | 9016.638  | 8047.441  | NM_005462  | 485.923   | 308.359  | NM_004102 | 1762.019  |
| 2215.859  | NM_016122 | 761.644   | 542.446   | NM_012319  | 781.46    | 777.301  | NM_004544 | 2649.435  |
| 15467.717 | AF153330  | 724.985   | 601.615   | NM_006510  | 5917.126  | 6108.419 | NM_016204 | 971.802   |
| 4483.888  | NM_001652 | 469.596   | 405.21    | NM_003141  | 1052.132  | 1113.731 | NM_001311 | 657.195   |
| 848.49    | NM_003822 | 719.769   | 621.016   | NM_020245  | 1626.99   | 2173.805 | NM_01779E | 3288.768  |
| 2541.268  | NM_004412 | 2225.886  | 2926.72   | NM_007175  | 904.84    | 1078.417 | NM_012410 | 1268.59   |
| 1312.808  | NM_002050 | 1614.617  | 756.833   | X91148     | 204.662   | 679.782  | NM_001111 | 3136.647  |
| 6380.667  | NM_007097 | 5466.484  | 6391.121  | NM_015700  | 3513.443  | 3332.642 | NM_018049 | 2214.206  |
| 1276.027  | D87446    | 3492.098  | 3573.262  | NM_019087  | 1104.39   | 1149.359 | NM_01439E | 302.997   |
| 1844.248  | BF540935  | 680.698   | 609.314   | NM_016322  | 248.608   | 386.507  | NM_005160 | 392.461   |

|           |           |           |           |           |           |           |           |           |
|-----------|-----------|-----------|-----------|-----------|-----------|-----------|-----------|-----------|
| 307.697   | NM_004466 | 300.298   | 219.412   | NM_005072 | 272.291   | 272.572   | X78817    | 5277.87   |
| 1411.771  | NM_007081 | 1725.012  | 1402.135  | AF215923  | 1155.083  | 643.6     | AF294628  | 291.129   |
| 4967.524  | AB032964  | 2002.656  | 2022.913  | U66621    | 3105.087  | 2422.774  | NM_001991 | 413.715   |
| 2253.25   | BE733605  | 2173.667  | 2213.221  | NM_005720 | 7758.29   | 5914.639  | NM_000193 | 954.323   |
| 1972.386  | NM_003334 | 12210.921 | 12391.79  | U61736    | 248.861   | 374.025   | NM_002448 | 714.549   |
| 7826.057  | NM_002693 | 2047.172  | 2031.273  | AJ132086  | 508.954   | 657.739   | AF053952  | 11691.077 |
| 822.832   | NM_003671 | 934.487   | 866.952   | U92816    | 3778.776  | 3394.323  | AF303398  | 3244.917  |
| 2639.993  | AK026000  | 1798.926  | 1662.736  | BC011987  | 5736.265  | 4854.832  | NM_014810 | 1128.503  |
| 1832.776  | NM_017833 | 1088.931  | 2212.539  | NM_004106 | 17218.059 | 13480.959 | NM_004738 | 833.131   |
| 737.751   | NM_006675 | 3013.276  | 4264.57   | NM_003485 | 1431.414  | 1224.557  | NM_007357 | 2550.17   |
| 756.446   | NM_003022 | 11632.497 | 16971.652 | NM_005038 | 1409.415  | 1754.28   | NM_003763 | 1905.48   |
| 984.885   | NM_004873 | 2887.455  | 2646.14   | L03418    | 3148.208  | 1145.538  | Y18213    | 760.914   |
| 2805.358  | NM_019842 | 1280.212  | 1100.319  | M95923    | 433.137   | 275.736   | NM_003283 | 998.214   |
| 6174.946  | NM_005992 | 2042.945  | 364.668   | NM_002415 | 50513.488 | 46269.898 | AF249898  | 2927.036  |
| 1213.595  | NM_003144 | 42917.098 | 24098.959 | NM_006332 | 3119.808  | 4042.196  | M69181    | 3895.304  |
| 747.9     | NM_000908 | 651.319   | 1730.454  | NM_000916 | 2479.252  | 1936.977  | AK027224  | 163.372   |
| 2421.542  | AB011102  | 2783.015  | 2195.209  | NM_018663 | 2152.137  | 2592.834  | NM_002428 | 992.705   |
| 1328.909  | D63480    | 1674.348  | 1216.961  | NM_014791 | 3375.004  | 4554.771  | NM_014674 | 2233.855  |
| 58398.793 | NM_002969 | 1795.123  | 1795.844  | NM_003318 | 930.771   | 1158.898  | NM_018271 | 772.667   |
| 427.907   | NM_006475 | 540.943   | 590.611   | NM_004362 | 2043.473  | 1317.022  | NM_014652 | 974.783   |
| 1306.025  | NM_004620 | 836.192   | 778.958   | NM_000182 | 10330.604 | 6973.267  | AL133020  | 3558.622  |
| 607.478   | AF087940  | 2153.444  | 3285.805  | AK023384  | 806.177   | 975.753   | BU565263  | 55455.094 |
| 258.194   | AJ277587  | 1606.05   | 2688.656  | NM_016026 | 3471.265  | 1613.577  | NM_005028 | 936.64    |
| 1088.645  | D87432    | 4910.474  | 3891.4    | AK025111  | 803.458   | 338.154   | AB018310  | 1405.003  |
| 258.318   | Y18483    | 441.981   | 383.819   | NM_001732 | 1267.668  | 811.322   | NM_015379 | 11047.295 |
| 855.036   | AI299075  | 2593.334  | 2149.409  | NM_018690 | 3926.657  | 3310.124  | AF144638  | 47919.09  |
| 1344.614  | M59979    | 501.523   | 1221.947  | NM_000860 | 593.817   | 797.144   | NM_000742 | 655.005   |
| 11163.646 | AB011098  | 1250.303  | 2569.935  | AB037798  | 1169.272  | 1089.557  | NM_002355 | 5309.84   |
| 560.216   | AA609759  | 705.93    | 2512.243  | AF272663  | 4498.182  | 4453.814  | AK026608  | 684.302   |
| 658.58    | AA029418  | 3821.764  | 4095.722  | NM_012190 | 515.7     | 528.755   | NM_004102 | 1301.164  |
| 716.49    | L20815    | 2785.096  | 3796.898  | AF277719  | 884.735   | 755.916   | NM_004544 | 1813.196  |
| 402.415   | AI364483  | 7021.382  | 6660.078  | NM_000791 | 751.099   | 1023.996  | AB046836  | 576.584   |
| 396.133   | AA456001  | 10266.563 | 16533.844 | NM_003681 | 1077.614  | 990.211   | NM_017816 | 2129.175  |
| 608.705   | AA451686  | 3656.312  | 3304.569  | NM_004800 | 7138.823  | 6828.182  | AJ224166  | 746.374   |
| 1464.882  | M87790    | 13324.858 | 14673.097 | NM_014954 | 21135.346 | 28671.502 | AK026098  | 1212.499  |
| 731.727   | NM_001768 | 1925.434  | 1994.003  | NM_000807 | 583.853   | 517.758   | NM_012381 | 1063.741  |
| 554.034   | NM_000029 | 6208.314  | 4516.242  | NM_014909 | 2611.707  | 2340.136  | NM_006397 | 5487.185  |
| 1143.134  | NM_000715 | 401.307   | 425.701   | NM_145659 | 981.358   | 597.272   | D83776    | 1117.781  |
| 649.813   | AF035802  | 2419.121  | 2269.91   | NM_021957 | 309.181   | 206.56    | NM_004088 | 1876.751  |
| 7335.241  | M26123    | 442.445   | 1191.747  | NM_001719 | 3474.47   | 2444.954  | NM_002180 | 496.638   |
| 1365.254  | NM_019555 | 317.003   | 1235.793  | AL080062  | 647.613   | 470.138   | NM_000138 | 1204.617  |
| 1389.602  | NM_012096 | 3969.511  | 2466.271  | S76984    | 6077.125  | 6373.395  | NM_018163 | 843.15    |
| 3030.248  | NM_003905 | 9852.915  | 6988.771  | NM_014495 | 52258.777 | 52764.676 | AK026362  | 2430.56   |
| 2843.766  | L12052    | 1809.809  | 1075.186  | NM_014081 | 895.2     | 1843.268  | NM_004968 | 1875.32   |
| 611.72    | AB028976  | 4620.587  | 3438.778  | NM_007195 | 864.349   | 573.592   | NM_005908 | 824.716   |
| 1270.744  | AK026337  | 846.131   | 1878.235  | AK023337  | 1973.371  | 1171.561  | NM_004785 | 1276.755  |
| 964.011   | NM_015869 | 1656.094  | 2277.052  | NM_013275 | 4885.764  | 3433.907  | NM_000193 | 642.75    |
| 522.141   | NM_004626 | 1046.049  | 704.889   | NM_019011 | 1544.385  | 1218.236  | NM_002448 | 531.416   |
| 859.394   | NM_001899 | 340.202   | 754.391   | AF459094  | 3097.29   | 2895.499  | AF053952  | 14724.445 |
| 243.076   | NM_004305 | 16679.596 | 17270.453 | NM_003157 | 1189.751  | 909.738   | NM_014044 | 2062.536  |
| 1645.708  | NM_006089 | 1180.311  | 742.828   | NM_004938 | 1156.856  | 1409.137  | NM_000900 | 745.338   |
| 799.389   | AB033054  | 9013.444  | 6176.069  | NM_014326 | 661.881   | 833.788   | AK023684  | 2474.835  |
| 1791.088  | NM_016122 | 743.858   | 391.654   | NM_004448 | 557.583   | 586.415   | AA700390  | 2119.209  |

|           |           |           |           |            |           |           |           |           |
|-----------|-----------|-----------|-----------|------------|-----------|-----------|-----------|-----------|
| 1296.645  | AF153330  | 774.477   | 711.643   | NM_015981  | 1310.741  | 1540.751  | Y18474    | 457.836   |
| 2818.313  | NM_001652 | 423.608   | 302.518   | NM_000455  | 2480.563  | 3343.186  | AA436163  | 376.382   |
| 14213.844 | AK023749  | 423.677   | 425.59    | NM_012319  | 608.66    | 593.82    | BI603841  | 1066.037  |
| 683.083   | NM_002337 | 2739.706  | 2652.168  | NM_006510  | 4684.667  | 3613.429  | BG696638  | 3623.701  |
| 93.372    | NM_013245 | 1653.058  | 936.838   | NM_003141  | 849.499   | 782.625   | M19888    | 505.03    |
| 119.841   | NM_006423 | 2837.818  | 5441.518  | NM_020245  | 1422.803  | 1830.037  | Y08136    | 526.729   |
| 597.836   | NM_004766 | 2551.878  | 2083.367  | NM_007175  | 665.713   | 808.061   | AA156863  | 1962.141  |
| 1613.444  | NM_005819 | 5585.444  | 7927.38   | AB046381   | 607.749   | 1403.144  | R82957    | 48443.488 |
| 2147.017  | AK025520  | 2243.828  | 1564.353  | NM_000336  | 631.547   | 427.715   | BI830442  | 570.28    |
| 2056.195  | NM_004892 | 7078.787  | 13644.111 | W61100     | 27198.936 | 22100.84  | AA398951  | 1740.773  |
| 897.963   | NM_014597 | 8381.907  | 9413.084  | AA608568   | 1930.148  | 1981.544  | AI218732  | 831.433   |
| 6083.259  | NM_017896 | 5599.335  | 5063.963  | BG831301   | 9930.71   | 6707.134  | AF249898  | 2165.442  |
| 1590.243  | AB002374  | 2341.986  | 1871.902  | AA478647   | 1123.917  | 1347.09   | M69181    | 3236.743  |
| 2247.355  | U17327    | 1108.984  | 896.673   | ID 2623896 | 1442.709  | 1749.362  | NM_001311 | 626.431   |
| 1086.063  | NM_017833 | 1038.615  | 1495.239  | ID 2602214 | 1589.608  | 1273.746  | NM_017798 | 3138.187  |
| 189.769   | NM_006675 | 2630.656  | 2566.001  | ID 2071279 | 2407.283  | 3209.482  | NM_012410 | 1207.964  |
| 956.049   | NM_003022 | 10881.351 | 10590.118 | L10709     | 1929.995  | 727.258   | NM_001111 | 3230.992  |
| 388.575   | NM_004873 | 2972.254  | 2787.404  | N35489     | 694.82    | 883.473   | NM_018049 | 2166.847  |
| 173.905   | NM_019842 | 1256.03   | 1195.27   | AI928195   | 835.337   | 713.441   | NM_014395 | 207.1     |
| 427.725   | NM_000320 | 2996.819  | 3945.76   | AA458922   | 3843.78   | 4435.521  | NM_005160 | 735.948   |
| 543.959   | NM_003136 | 3597.963  | 5002.15   | M95923     | 283.647   | 238.387   | NM_000596 | 657.188   |
| 1010.268  | NM_013328 | 19156.139 | 11835.149 | NM_002415  | 53769.723 | 41966.984 | X78817    | 7240.221  |
| 340.264   | NM_002660 | 1562.929  | 2078.529  | NM_006332  | 2355.312  | 2892.012  | AB023135  | 413.541   |
| 385.564   | NM_015900 | 659.802   | 563.464   | NM_000916  | 1622.788  | 1578.121  | AY009401  | 615.475   |
| 1562.56   | NM_003706 | 627.565   | 2162.635  | NM_018663  | 1755.619  | 2864.895  | AK026960  | 656.344   |
| 1154.379  | NM_005218 | 5756.255  | 1305.722  | NM_000706  | 463.347   | 582.615   | NM_001991 | 803.284   |
| 694.296   | AL122071  | 500.898   | 441.541   | NM_015941  | 682.561   | 885.317   | NM_000742 | 210.342   |
| 643.581   | NM_014913 | 8635.592  | 13384.259 | NM_003655  | 3470.7    | 1706.551  | NM_002355 | 3917.555  |
| 1025.663  | NM_005864 | 6250.127  | 19603.793 | NM_014837  | 1535.431  | 1222.598  | AK026608  | 776.398   |
| 1880.875  | NM_012341 | 2670.125  | 1814.327  | NM_017729  | 510.881   | 548.492   | AF303398  | 3105.939  |
| 766.092   | NM_003256 | 12480.644 | 8193.219  | NM_005259  | 1197.622  | 824.182   | NM_014810 | 992.489   |
| 2460.357  | D87450    | 2577.564  | 2758.447  | NM_002840  | 576.191   | 388.615   | NM_004738 | 679.642   |
| 5422.369  | NM_017797 | 5826.477  | 2852.407  | NM_006174  | 338.418   | 219.478   | NM_007357 | 2728.714  |
| 772.542   | AF000562  | 1748.893  | 1462.001  | NM_015850  | 2752.674  | 2219.767  | NM_003763 | 1726.673  |
| 270.096   | AK025713  | 1756.209  | 2052.322  | NM_004864  | 470.813   | 265.257   | AK023448  | 338.538   |
| 689.783   | NM_018100 | 532.559   | 308.173   | NM_002838  | 1449.856  | 1475.779  | Y18213    | 505.202   |
| 283.461   | NM_002050 | 1821.205  | 859.348   | NM_014686  | 50850.895 | 42338.566 | NM_003283 | 1007.922  |
| 8918.863  | NM_007097 | 6421.435  | 7754.599  | NM_016339  | 241.909   | 907.305   | NM_018163 | 488.261   |
| 651.168   | D87446    | 3967.41   | 4213.11   | NM_002487  | 927.5     | 1500.964  | AK026362  | 1856.426  |
| 453.853   | BF540935  | 826.326   | 530.535   | NM_013340  | 314.527   | 264.075   | NM_004968 | 1572.333  |
| 910.204   | NM_007081 | 1647.873  | 2136.081  | NM_005462  | 592.628   | 633.071   | NM_005908 | 774.061   |
| 1331.152  | AB032964  | 2261.085  | 2239.176  | NM_014954  | 15931.001 | 26593.789 | NM_004785 | 1367.739  |
| 5969.504  | BE733605  | 1885.989  | 2448.793  | NM_019087  | 1247.617  | 2028.724  | NM_002428 | 1206.654  |
| 1233.637  | NM_003334 | 11329.071 | 13825.87  | NM_016322  | 315.386   | 408.099   | NM_014674 | 2089.163  |
| 988.665   | NM_002693 | 2112.893  | 1900.694  | NM_005072  | 379.524   | 233.365   | NM_018271 | 500.133   |
| 1497.621  | NM_003671 | 760.583   | 832.55    | AF215923   | 897.488   | 654.536   | AL133020  | 3638.298  |
| 307.609   | AK026000  | 1894.724  | 1424.553  | U66621     | 4504.58   | 3312.776  | NM_005028 | 1418.346  |
| 768.706   | NM_005814 | 719.31    | 713.346   | NM_005720  | 10291.326 | 7626.476  | NM_001611 | 487.139   |
| 525.393   | NM_016279 | 349.247   | 386.155   | AJ132086   | 709.041   | 621.562   | AB018310  | 1932.111  |
| 862.213   | NM_000211 | 17527.209 | 18416.66  | U92816     | 4111.743  | 4453.679  | NM_020133 | 859.696   |
| 6528.934  | AB037830  | 1212.735  | 1201.591  | BC011987   | 5261.761  | 5585.911  | NM_015379 | 10148.911 |
| 508.133   | NM_015685 | 2034.948  | 1436.951  | NM_004106  | 18859.318 | 22462.527 | AF144638  | 51819.996 |
| 141.775   | NM_004357 | 19722.994 | 17858.398 | NM_003485  | 1363.177  | 1477.257  | NM_001777 | 6540.688  |

|           |           |           |           |           |           |           |           |           |
|-----------|-----------|-----------|-----------|-----------|-----------|-----------|-----------|-----------|
| 108.342   | X03324    | 2118.222  | 2618.054  | NM_005038 | 1828.297  | 2883.363  | U79457    | 2116.832  |
| 335.414   | AF130988  | 657.058   | 470.853   | L03418    | 3762.874  | 1954.44   | NM_014347 | 3245.444  |
| 761.393   | NM_014934 | 696.219   | 202.694   | NM_003157 | 987.482   | 674.593   | NM_001296 | 6298.838  |
| 3419.594  | NM_015385 | 442.483   | 363.408   | NM_004938 | 1798.328  | 2033.915  | NM_004344 | 4479.377  |
| 2615.198  | NM_003690 | 2159.954  | 1417.857  | NM_014326 | 957.704   | 1052.611  | AB046786  | 836.742   |
| 382.188   | NM_000876 | 3930.075  | 4353.557  | NM_004448 | 473.573   | 534.564   | NM_016620 | 5635.713  |
| 646.814   | NM_014214 | 2669.087  | 4655.904  | NM_014791 | 5322.25   | 20751.896 | NM_018890 | 13003.827 |
| 2099.664  | NM_002752 | 1292.584  | 1149.156  | NM_004362 | 2162.425  | 2762.972  | NM_016204 | 864.587   |
| 447.305   | NM_013281 | 1007.167  | 1422.59   | NM_000182 | 10465.183 | 10652.077 | AB046836  | 497.7     |
| 318.172   | NM_016112 | 595.582   | 624.666   | AK023384  | 971.809   | 868.111   | AJ224166  | 1058.92   |
| 840.618   | X85106    | 649.715   | 580.285   | NM_016026 | 3385.205  | 1960.869  | AK026098  | 1389.837  |
| 627.236   | NM_003931 | 1530.74   | 2017.001  | AK025111  | 521.333   | 411       | NM_012381 | 1258.286  |
| 64.227    | NM_012479 | 25033.355 | 21872.539 | NM_001732 | 830.942   | 831.357   | NM_006397 | 6188.79   |
| 386.823   | AF250226  | 7491.923  | 7957.675  | NM_018690 | 4803.725  | 4550.791  | D83776    | 1028.488  |
| 495.637   | NM_003217 | 21454.623 | 18921.619 | NM_000860 | 845.419   | 837.214   | NM_004088 | 1816.146  |
| 1532.329  | AL157475  | 3088.504  | 3447.431  | AB037798  | 1222.2    | 1256.708  | NM_002180 | 649.064   |
| 1478.579  | NM_006069 | 9993.41   | 8904.603  | NM_000780 | 325.617   | 397.968   | NM_000138 | 1072.786  |
| 926.107   | NM_006534 | 2444.053  | 3503.148  | AF272663  | 6092.187  | 5595.015  | AB011541  | 871.434   |
| 1831.912  | NM_017601 | 1287.147  | 1350.832  | NM_012190 | 588.965   | 629.602   | BC032460  | 3265.417  |
| 756.534   | AF110265  | 7283.001  | 6157.867  | AF277719  | 567.397   | 685.796   | NM_014071 | 1331.047  |
| 648.055   | AF272371  | 48832.707 | 56518.594 | NM_000791 | 1145.657  | 1318.923  | AK024404  | 1061.967  |
| 1751.437  | AK021848  | 961.509   | 851.812   | NM_003681 | 1242.246  | 1113.587  | NM_000213 | 11192.149 |
| 363.261   | NM_003704 | 1462.843  | 1228.571  | NM_004800 | 8370.379  | 9305.364  | BE906107  | 5197.739  |
| 669.033   | AK023140  | 693.901   | 956.751   | AB037738  | 390.769   | 402.216   | NM_015516 | 1977.35   |
| 2544.816  | AF084362  | 476.658   | 232.836   | NM_004952 | 1162.166  | 879.692   | AB033065  | 554.537   |
| 14461.208 | NM_001553 | 3120.628  | 2509.054  | AY007239  | 263.26    | 355.253   | NM_005211 | 398.478   |
| 169.754   | NM_014173 | 9663.002  | 14813.708 | NM_020414 | 1400.426  | 1320.088  | NM_004857 | 6113.117  |
| 1985.477  | NM_001731 | 11793.561 | 21254.916 | AB037730  | 1800.482  | 2988.729  | NM_012108 | 474.637   |
| 302.516   | AL137506  | 630.047   | 967.546   | NM_014380 | 275.094   | 275.705   | NM_003253 | 588.054   |
| 910.356   | AK022961  | 2476.286  | 3581.01   | NM_001719 | 4371.156  | 3326.93   | NM_013285 | 2646.007  |
| 1435.686  | NM_007375 | 5016.263  | 4564.525  | AL080062  | 848.76    | 368.816   | NM_002872 | 8327.102  |
| 11227.085 | NM_014371 | 3161.755  | 4366.07   | AF308802  | 676.951   | 558.791   | NM_000490 | 766.044   |
| 600.292   | AF290512  | 4305.231  | 5133.575  | S76984    | 7243.749  | 7035.089  | NM_004839 | 1078.552  |
| 405.013   | NM_006716 | 3840.452  | 3105.979  | NM_014495 | 52476.715 | 51853.336 | NM_012193 | 829.251   |
| 287.465   | AB002323  | 1920.849  | 1319.808  | NM_014081 | 736.186   | 385.564   | NM_003405 | 4149.011  |
| 458.278   | AK022241  | 3503.202  | 2160.539  | NM_005651 | 434.357   | 306.988   | NM_004720 | 2559.513  |
| 561.821   | AK022587  | 5437.865  | 3713.771  | NM_007195 | 992.295   | 919.481   | NM_001057 | 656.344   |
| 1274.651  | NM_005512 | 408.281   | 374.874   | AK023337  | 2540.665  | 2137.225  | NM_005561 | 2862.895  |
| 349.541   | NM_005506 | 1055.422  | 1484.598  | NM_013275 | 7454.974  | 5275.197  | AF272381  | 2410.919  |
| 770.204   | AL137404  | 47106.121 | 46580.73  | NM_019011 | 1747.578  | 1821.34   | NM_004524 | 1469.771  |
| 630.687   | NM_020185 | 738.489   | 1589.44   | AF459094  | 3902.026  | 5106.63   | NM_006315 | 1225.806  |
| 362.803   | NM_002832 | 28119.342 | 17242.615 | NM_002544 | 1020.666  | 689.363   | NM_018401 | 492.941   |
| 1188.452  | NM_017732 | 3600.008  | 2465.66   | AB011542  | 538.389   | 1195.105  | NM_005163 | 1053.583  |
| 1248.216  | NM_002851 | 1601.753  | 2048.661  | NM_001853 | 1941.447  | 2149.928  | NM_007273 | 17106.955 |
| 388.362   | NM_002071 | 558.271   | 334.79    | U41737    | 487.342   | 398.279   | BE894943  | 474.237   |
| 754.912   | NM_005339 | 13098.067 | 9054.85   | NM_005799 | 608.726   | 602.151   | NM_016422 | 1116.184  |
| 1130.011  | NM_001906 | 3236.006  | 2866.764  | NM_005927 | 2058.71   | 4866.201  | NM_017878 | 2217.354  |
| 549.429   | NM_004142 | 533.738   | 517.878   | AB028983  | 1823.059  | 2241.275  | NM_004494 | 46312.645 |
| 4207.196  | AF108138  | 1075.706  | 1323.656  | AB037800  | 940.369   | 1081.714  | AL049687  | 734.517   |
| 1645.42   | NM_004347 | 460.555   | 2154.126  | NM_018660 | 3310.522  | 2015.044  | NM_005643 | 7999.268  |
| 697.377   | BF340302  | 2242.407  | 2381.502  | NM_003394 | 2605.256  | 2490.701  | NM_003592 | 2358.851  |
| 789.015   | AK024210  | 1007.729  | 1461.227  | NM_006747 | 865.922   | 974.25    | NM_014953 | 1575.143  |
| 922.256   | NM_002276 | 2653.672  | 2663.963  | NM_007086 | 890.365   | 1267.184  | AF179995  | 446.066   |

|           |           |           |           |           |           |           |           |           |
|-----------|-----------|-----------|-----------|-----------|-----------|-----------|-----------|-----------|
| 1991.203  | AL133087  | 1461.677  | 1589.497  | NM_003870 | 5294.605  | 5192.148  | NM_016195 | 2838.441  |
| 440.981   | NM_018010 | 547.205   | 378.377   | AK024507  | 472.002   | 367.594   | NM_004523 | 675.43    |
| 982.429   | NM_002274 | 5621.998  | 6993.097  | NM_001243 | 1109.589  | 1036.758  | NM_004404 | 4011.24   |
| 229.044   | AL080200  | 394.933   | 476.41    | AK025997  | 1512.072  | 987.186   | NM_002960 | 3184.439  |
| 633.659   | BF337874  | 1740.838  | 1858.045  | NM_014887 | 3402.158  | 2229.68   | NM_006790 | 837.698   |
| 1846.106  | NM_003475 | 7428.948  | 9797.916  | NM_002590 | 600.806   | 583.683   | AL117522  | 5897.706  |
| 430.081   | NM_000243 | 2542.776  | 3002.188  | NM_018556 | 4314.468  | 5327.285  | NM_006572 | 3854.051  |
| 236.358   | NM_004383 | 6121.42   | 4675.288  | NM_005824 | 408.662   | 462.371   | NM_019061 | 1553.771  |
| 750.545   | NM_012256 | 3458.139  | 2386.477  | AF052211  | 1358.496  | 1254.503  | AB033007  | 2412.514  |
| 531.941   | NM_006006 | 475.818   | 135.565   | NM_005600 | 1557.991  | 1792.055  | NM_003781 | 443.905   |
| 19829.824 | NM_016325 | 1157.356  | 1671.778  | NM_005967 | 2637.307  | 2372.642  | NM_003130 | 394.018   |
| 966.814   | NM_001604 | 996.953   | 652.044   | AB014566  | 485.578   | 604.029   | NM_004716 | 6777.963  |
| 471.973   | NM_017656 | 1777.271  | 1584.058  | NM_015678 | 309.549   | 381.256   | D29810    | 2077.108  |
| 2498.85   | X16282    | 5170.472  | 4326.032  | NM_014223 | 1294.119  | 1288.736  | NM_000128 | 934.735   |
| 2523.8    | AK022519  | 602.376   | 811.532   | NM_016194 | 925.458   | 986.533   | AB002384  | 907.382   |
| 143.787   | NM_014415 | 1454.404  | 1264.856  | NM_007027 | 1724.701  | 1292.312  | NM_018437 | 714.856   |
| 441.816   | S75264    | 7993.272  | 6746.085  | NM_000633 | 11324.519 | 8042.925  | NM_000422 | 451.323   |
| 3457.052  | AF027513  | 868.732   | 904.919   | AB037855  | 963.623   | 535.274   | AK023164  | 1210.17   |
| 1070.481  | NM_001379 | 1832.236  | 1038.471  | AK024524  | 2991.327  | 1807.458  | NM_005379 | 1388.024  |
| 1917.1    | NM_018664 | 2157.079  | 715.165   | NM_000562 | 2207.94   | 2144.931  | AK027121  | 2275.43   |
| 1638.98   | NM_003926 | 5184.682  | 4311.762  | NM_019011 | 5241.796  | 4575.018  | NM_017433 | 1705.467  |
| 3010.881  | AF085356  | 513.662   | 409.581   | NM_004879 | 6305.434  | 8342.981  | AL117661  | 1552.381  |
| 140.986   | NM_016047 | 16052.874 | 12613.681 | AB020694  | 1593.197  | 2022.981  | X64643    | 1014.796  |
| 705.48    | NM_001499 | 7111.555  | 7107.259  | NM_016071 | 2694.449  | 1608.037  | NM_005380 | 4182.479  |
| 4952.787  | BF030165  | 10621.705 | 11285.346 | AL050131  | 472.979   | 560.234   | D70835    | 37780.191 |
| 330.536   | NM_016732 | 10448.156 | 8364.971  | NM_004475 | 3883.385  | 6863.38   | NM_002697 | 1025.698  |
| 135.781   | NM_014763 | 9753.635  | 7029.923  | NM_001627 | 4158.392  | 4901.507  | NM_001518 | 4277.786  |
| 345.65    | AF086534  | 363.556   | 365.559   | NM_001336 | 502.213   | 1305.84   | NM_003412 | 13304.132 |
| 1428.607  | AF070617  | 1002.847  | 1332.757  | AB050716  | 590.546   | 1078.311  | NM_018336 | 416.966   |
| 131.082   | NM_014918 | 5759.791  | 3196.683  | X77690    | 939.187   | 1515.526  | AK022668  | 1499.139  |
| 373.952   | NM_000152 | 4534.787  | 5402.163  | NM_006536 | 400.51    | 512.87    | AW975132  | 969.425   |
| 1435.641  | D17222    | 11618.36  | 10540.612 | NM_006690 | 1466.249  | 1000.619  | NM_006051 | 2229.583  |
| 698.004   | NM_000154 | 1703.546  | 1505.488  | AF218022  | 1364.339  | 1203.918  | NM_018427 | 1218.286  |
| 508.516   | NM_000671 | 1304.43   | 837.795   | NM_003348 | 1279.658  | 1678.408  | NM_014663 | 3577.891  |
| 1389.68   | NM_006297 | 8264.119  | 4346.959  | NM_002021 | 881.846   | 588.458   | AF007217  | 831.466   |
| 1144.876  | AF318366  | 5226.317  | 4164.198  | AB006198  | 4540.195  | 4095.666  | AB037753  | 1892.98   |
| 388.823   | AF182423  | 1048.812  | 588.737   | U72518    | 954.719   | 1139.672  | NM_004674 | 1504.939  |
| 494.237   | D26018    | 2075.968  | 1262.052  | AF264765  | 339.937   | 477.985   | AB037801  | 3527.603  |
| 415.137   | AB037863  | 488.643   | 714.242   | NM_015322 | 3245.465  | 2413.593  | AL080159  | 9847.922  |
| 877.21    | BC000363  | 461.52    | 708.095   | NM_016607 | 2695.286  | 1912.995  | NM_017823 | 29720.543 |
| 1500.158  | NM_007237 | 1078.304  | 1867.658  | NM_000268 | 15459.964 | 17898.49  | U55185    | 444.537   |
| 1568.661  | NM_004608 | 583.216   | 525.564   | M30493    | 12447.885 | 12562.618 | U30828    | 5351.579  |
| 636.67    | NM_018257 | 2889.735  | 2350.126  | AJ008160  | 331.819   | 564.603   | AF085886  | 47971.82  |
| 337.847   | NM_005919 | 826.946   | 1321.231  | NM_004343 | 20033.418 | 8559.338  | AK023828  | 4040.567  |
| 666.937   | AF086112  | 448.303   | 537.798   | X52355    | 2496.467  | 2317.38   | AK022664  | 591.793   |
| 2134.891  | AL137254  | 835.217   | 623.604   | NM_006963 | 5085.228  | 2106.935  | AL080223  | 1135.118  |
| 464.212   | AK026359  | 614.68    | 638.935   | U66561    | 3156.158  | 1815.017  | AK001630  | 618.773   |
| 801.591   | AF085884  | 1262.542  | 1475.741  | NM_000306 | 1797.969  | 1244.893  | NM_014612 | 6158.023  |
| 2467.963  | S81522    | 3357.246  | 2081.862  | NM_002200 | 1303.051  | 1412.798  | AF079098  | 377.244   |
| 56642.348 | S94541    | 915.546   | 811.111   | AF017433  | 811.792   | 955.323   | AK021815  | 528.957   |
| 687.478   | AK024228  | 1140.994  | 1142.547  | AF130111  | 1128.001  | 846.878   | NM_016641 | 1681.035  |
| 222.823   | NM_016647 | 1137.635  | 303.28    | NM_016307 | 1866.049  | 1643.999  | AB018010  | 382.176   |
| 742.216   | AK024695  | 1020.661  | 1697.885  | AB028449  | 1147.679  | 962.25    | NM_014610 | 4712.182  |

|           |           |           |           |           |           |           |           |           |
|-----------|-----------|-----------|-----------|-----------|-----------|-----------|-----------|-----------|
| 5150.792  | NM_018659 | 416.33    | 233.994   | NM_004697 | 1027.357  | 1043.016  | NM_006621 | 2394.761  |
| 15942.029 | AF038174  | 1467.832  | 1949.7    | AF131776  | 1241.702  | 1485.166  | BF347398  | 3270.912  |
| 482.24    | NM_013243 | 356.291   | 1386.656  | NM_020528 | 1794.072  | 1548.106  | AK026762  | 1219.842  |
| 335.517   | AF070632  | 666.033   | 319.855   | NM_007040 | 13195.647 | 9678.728  | L48516    | 874.71    |
| 2488.063  | AF161359  | 1346.208  | 1171.209  | NM_014483 | 3693.001  | 3052.695  | NM_016648 | 2777.65   |
| 1340.493  | AL365520  | 1076.065  | 940.181   | AK024249  | 739.059   | 783.525   | AF083930  | 700.438   |
| 1710.978  | AL359338  | 1350.997  | 1272.336  | AF239156  | 5279.805  | 4162.249  | NM_003426 | 613.4     |
| 338.762   | AK023623  | 973.864   | 1609.013  | NM_020390 | 661.061   | 850.953   | NM_014862 | 814.861   |
| 4566.032  | AK021539  | 3379.083  | 2286.225  | NM_003321 | 11479.545 | 11522.07  | AK027159  | 839.485   |
| 8251.418  | AK026738  | 659.516   | 578.238   | U18937    | 4489.85   | 3184.713  | AF086152  | 4046.775  |
| 480.572   | AK025011  | 591.094   | 259.41    | U01925    | 573.499   | 460.035   | U78519    | 847.898   |
| 375.288   | AL157491  | 587.739   | 461.584   | AJ420488  | 51016.996 | 59652.633 | AK026872  | 949.537   |
| 1146.788  | NM_005266 | 1353.4    | 1346.699  | AF268872  | 1045.161  | 958.757   | AL157505  | 1239.42   |
| 279.173   | AF085998  | 1117.246  | 659.695   | AK022180  | 21004.234 | 17832.705 | NM_007190 | 2816.119  |
| 930.914   | AK024681  | 673.626   | 501.618   | AK001384  | 564.907   | 952.328   | AF043897  | 696.278   |
| 659.339   | AF085990  | 658.834   | 604.492   | AK025437  | 2496.927  | 5119.425  | U79246    | 1180.973  |
| 299.686   | NM_014907 | 7878.104  | 9831.153  | AK074164  | 633.861   | 842.603   | AF052140  | 419.691   |
| 2796.576  | AB007977  | 2551.61   | 2207.909  | NM_004168 | 5988.953  | 6457.816  | NM_018836 | 1669.056  |
| 646.416   | NM_014221 | 1242.292  | 1896.14   | AF161353  | 3376.148  | 3219.15   | AF007147  | 1738.393  |
| 877.941   | U84515    | 900.368   | 1295.691  | NM_000764 | 1353.231  | 497.317   | AF052150  | 556.19    |
| 481.178   | AF086143  | 5577.173  | 4034.755  | NM_004146 | 10977.23  | 9697.814  | AF086481  | 596.633   |
| 579.72    | AK024674  | 598.32    | 508.834   | NM_003002 | 7525.487  | 7746.75   | AL355689  | 529.623   |
| 2403.215  | AK024244  | 1991.441  | 2011.916  | D42047    | 1167.077  | 1325.77   | AK024885  | 726.431   |
| 1557.455  | AK023812  | 478.023   | 231.46    | AB009282  | 7743.781  | 7383.498  | AK022441  | 660.003   |
| 681.448   | AL390084  | 925.344   | 747.875   | NM_005004 | 25791.369 | 41400.082 | AK026208  | 1372.448  |
| 6917.084  | AK023565  | 612.658   | 543.315   | NM_003670 | 4189.589  | 4320.979  | NM_016947 | 41016.336 |
| 6423.864  | AK021479  | 995.477   | 1046.028  | NM_014639 | 1199.368  | 1159.979  | AL359940  | 1680.444  |
| 631.167   | NM_003835 | 1051.404  | 1202.947  | NM_006392 | 1280.8    | 1408.919  | NM_018286 | 618.671   |
| 122.955   | AK000245  | 1417.359  | 1248.661  | NM_017922 | 973.737   | 681.644   | AK024925  | 6706.869  |
| 1921.006  | AF118072  | 750.936   | 933.124   | NM_002823 | 58274.258 | 56332.555 | AL049460  | 3564.07   |
| 269.244   | AK023724  | 500.212   | 466.353   | AK022360  | 1351.667  | 1346.221  | AK022396  | 610.246   |
| 1129.68   | AF085900  | 8179.512  | 9454.037  | AK095694  | 1191.764  | 941.92    | AK022892  | 4037.25   |
| 1645.422  | AK022420  | 867.479   | 452.813   | X52341    | 50548.715 | 47214.242 | NM_017939 | 1133.048  |
| 391.827   | AK023254  | 822.033   | 727.67    | NM_003082 | 3212.038  | 2960.135  | AK021837  | 1369.708  |
| 592.398   | AK023945  | 6627.544  | 8937.549  | AL133632  | 1196.549  | 1645.109  | AK002088  | 9342.805  |
| 437.087   | AK023773  | 387.702   | 705.071   | AK024551  | 421.026   | 602.539   | AK000106  | 621.29    |
| 1108.626  | AF116709  | 790.837   | 389.413   | AL833249  | 2653.742  | 3813.523  | AK022370  | 1150.616  |
| 1128.205  | AK025533  | 727.076   | 553.461   | NM_018374 | 3035.788  | 4564.241  | AK026765  | 659.544   |
| 308.419   | AK021911  | 4780.934  | 5974.701  | AF131852  | 298.783   | 524.461   | AL117530  | 766.015   |
| 735.917   | D17225    | 495.149   | 347.129   | AK021894  | 1613.784  | 1346.501  | AL080191  | 1729.105  |
| 479.561   | AF147430  | 1535.605  | 1311.667  | NM_020424 | 919.948   | 929.449   | AK021639  | 6391.25   |
| 1061.322  | AK025766  | 4502.993  | 2106.852  | AF438313  | 1494.35   | 1747.833  | AK023189  | 372.246   |
| 533.458   | U35875    | 13147.834 | 15890.011 | NM_017815 | 949.115   | 983.949   | AK023872  | 485.185   |
| 681.984   | AK021857  | 17980.279 | 14320.547 | AF147341  | 494.823   | 645.475   | AF306347  | 714.798   |
| 8388.344  | AK022257  | 1354.38   | 1461.068  | AB033009  | 14538.337 | 34718.055 | AK023464  | 581.901   |
| 513.096   | BE887356  | 22693.033 | 16826.791 | AL137761  | 257.913   | 722.096   | AK024157  | 1211.321  |
| 1023.938  | X84369    | 515.332   | 799.185   | AK022086  | 480.336   | 644.656   | AK022963  | 505.943   |
| 1270.003  | AK001074  | 603.594   | 665.547   | AF147320  | 2036.494  | 3159.508  | AK023905  | 1699.921  |
| 26754.838 | AK023329  | 2892.885  | 3388.253  | AK027024  | 460.658   | 494.615   | AK024231  | 2330.475  |
| 5371.954  | AK025181  | 357.714   | 252.974   | AK022339  | 531.569   | 609.23    | NM_016940 | 837.586   |
| 746.03    | AK021773  | 1864.085  | 5559.576  | AL133052  | 1430.106  | 2298.985  | AK025757  | 742.582   |
| 498.488   | AK027074  | 2232.158  | 2092.444  | AB037824  | 1529.921  | 2483.445  | Y16713    | 596.436   |
| 526.073   | AL365456  | 905.404   | 824.1     | AF361494  | 978.007   | 1704.141  | L07394    | 3670.286  |

|           |            |           |           |           |           |           |           |           |
|-----------|------------|-----------|-----------|-----------|-----------|-----------|-----------|-----------|
| 1910.35   | NM_01803E  | 497.848   | 391.692   | AK022810  | 924.242   | 1063.771  | AK056133  | 530.916   |
| 1285.254  | U84522     | 1307.696  | 1398.954  | AF147408  | 845.338   | 1107.473  | NM_01784E | 2319.051  |
| 346.973   | AK021694   | 1695.346  | 886.589   | AK027222  | 4850.556  | 3484.246  | AF130080  | 419.136   |
| 2155.339  | AF086013   | 668.908   | 462.705   | AK054767  | 513.971   | 618.789   | AK026006  | 847.579   |
| 999.744   | U84505     | 2749.35   | 2870.554  | AL049301  | 1532.996  | 5588.964  | NM_01908E | 7776.201  |
| 1629.587  | X81005     | 735.126   | 710.367   | AL050042  | 5551.671  | 9958.84   | AL122072  | 1765.007  |
| 1003.405  | AL049265   | 952.153   | 2090.672  | AL117570  | 329.541   | 472.645   | AK026221  | 544.615   |
| 180.767   | AL137635   | 594.99    | 476.547   | NM_014867 | 5789.779  | 4546.509  | Y13870    | 551.975   |
| 4611.431  | AL049430   | 1959.628  | 1555.156  | AF087996  | 3884.795  | 4462.459  | AK026403  | 915.375   |
| 1260.017  | AK021461   | 605.45    | 580.488   | AK021710  | 2064.551  | 2685.014  | AK002162  | 247.489   |
| 893.797   | AL079274   | 9608.24   | 9797.28   | NM_007017 | 1115.882  | 1259.286  | AK022980  | 683.324   |
| 993.895   | S46403     | 554.724   | 594.515   | AL137446  | 2121.672  | 1715.704  | AL359058  | 1025.011  |
| 456.561   | AL137398   | 1961.334  | 1598.545  | AB025286  | 1859.147  | 1584.595  | NM_01763E | 946.802   |
| 304.466   | Y12021     | 1125.002  | 1026.33   | AF009286  | 538.816   | 534.863   | AK026655  | 367.337   |
| 455.268   | AF127771   | 565.798   | 703.617   | AF056437  | 581.896   | 458.843   | AF129926  | 924.175   |
| 647.499   | NM_01330C  | 12094.143 | 11520.785 | AB032364  | 317.116   | 256.856   | AK025822  | 973.717   |
| 1132.128  | AK026039   | 4154.564  | 6931.838  | AF009295  | 377.519   | 248.298   | AL360140  | 794.863   |
| 751.781   | AF108756   | 9253.324  | 11945.99  | NM_00502E | 1379.142  | 1161.611  | AF201937  | 20610.164 |
| 677.518   | NM_00407E  | 1967.48   | 2366.159  | AF056447  | 1417.509  | 1484.656  | AL390128  | 1188.78   |
| 462.54    | NM_001887  | 2006.773  | 1693.798  | AK001010  | 1319.196  | 1386.231  | AL157429  | 2827.741  |
| 1317.293  | NM_00653E  | 1672.223  | 1889.37   | NM_01807E | 1006.873  | 1046.953  | NM_012071 | 21771.322 |
| 12221.673 | AK026747   | 3166.304  | 3323.071  | AK021442  | 1330.702  | 1637.92   | AF055018  | 7158.28   |
| 2866.882  | AL110150   | 2760.189  | 2572.681  | AK001076  | 763.451   | 843.732   | AF070599  | 3504.904  |
| 8069.524  | NM_00199E  | 2854.705  | 1893.092  | AK001820  | 570.735   | 548.578   | NM_00545C | 712.319   |
| 527.914   | X87825     | 2223.914  | 2024.874  | AK025317  | 1277.105  | 1827.988  | AK023600  | 552.25    |
| 861.653   | AK001285   | 13301.314 | 12725.869 | AK025552  | 338.221   | 429.493   | NM_00552E | 1336.256  |
| 1427.833  | D17215     | 3465.032  | 5077.176  | AK026725  | 2311.385  | 3644.216  | NM_00528E | 2338.289  |
| 2288.053  | BE781513   | 679.304   | 525.575   | AJ008118  | 53903.449 | 47980.258 | AK001918  | 880.808   |
| 1038.477  | NM_015714  | 13108.418 | 8707.171  | AK000939  | 499.308   | 2655.464  | NM_01863E | 18249.311 |
| 2303.363  | AK075564   | 886.722   | 835.881   | NM_00552E | 1302.459  | 634.744   | L15616    | 1984.137  |
| 502.896   | AK026219   | 610.908   | 599.697   | AL109674  | 668.499   | 1124.016  | AB019565  | 4690.694  |
| 711.521   | D28446     | 1147.535  | 967.599   | AK024512  | 1966.505  | 1668.094  | D16914    | 44037.887 |
| 577.499   | AK024756   | 1222.861  | 1721.044  | AK023454  | 1202.768  | 1034.386  | NM_00083E | 1596.848  |
| 1634.047  | NM_017911  | 1079.912  | 1018.471  | L23207    | 1146.536  | 853.599   | NM_00028E | 1446.339  |
| 3609.125  | AJ224168   | 2448.222  | 1880.002  | NM_01806E | 672.627   | 914.181   | NM_01246C | 1696.671  |
| 10574.08  | S69873     | 573.153   | 559.849   | NM_00712E | 4281.634  | 3345.666  | NM_012118 | 1697.388  |
| 1559.465  | AF147325   | 60256.387 | 78042.344 | NM_00716C | 213.853   | 317.939   | AK001133  | 511.506   |
| 27009.25  | NM_01442E  | 435.518   | 545.305   | AL080085  | 5293.576  | 11826.376 | AK024092  | 937.728   |
| 1068.229  | D87466     | 6348.018  | 7174.472  | AK022106  | 295.689   | 690.382   | AK002044  | 3425.287  |
| 3894.448  | CY3Cy5     | 1769.661  | 60.249    | AF086519  | 612.524   | 1975.592  | AK022206  | 916.088   |
| 297.011   | AA608568   | 3566.589  | 1414.64   | L08435    | 912.821   | 2640.65   | U90904    | 3952.16   |
| 1070.814  | BG831301   | 23838.082 | 18527.48  | AF055012  | 2196.855  | 2253.22   | AF088053  | 1998.331  |
| 600.766   | M14764     | 277.759   | 331.255   | AK022307  | 2545.966  | 3102.681  | AL133662  | 463.812   |
| 5048.728  | AA478647   | 2435.156  | 2021.55   | NM_00517E | 2275.92   | 2046.451  | U90903    | 865.443   |
| 314.497   | AW058501   | 428.262   | 275.903   | AK025192  | 9115.33   | 7305.632  | AF278760  | 1038.396  |
| 2498.348  | ID 2623896 | 2870.096  | 3109.692  | NM_01240E | 2585.131  | 2356.291  | AL110197  | 2447.131  |
| 1527.517  | ID 2602214 | 1949.25   | 1400.801  | AK022611  | 4090.151  | 8019.648  | AF085995  | 663.68    |
| 827.616   | ID 2071279 | 3156.509  | 4447.063  | NM_00615E | 11818.946 | 11262.451 | CY3Cy5    | 856.585   |
| 465.534   | L10709     | 2579.686  | 1025.405  | NM_00634E | 1618.562  | 1284.195  | AA029300  | 1766.888  |
| 1295.979  | N35489     | 804.344   | 528.915   | NM_01763E | 10103.085 | 16803.404 | BG708842  | 14543.529 |
| 504.054   | AI928195   | 629.547   | 540.138   | AF086186  | 17690.314 | 11682.289 | M19723    | 42410.359 |
| 1595.614  | AA458922   | 5400.253  | 3425.552  | NM_01780E | 2958.078  | 3217.416  | X06256    | 2737.841  |
| 1428.292  | NM_14565E  | 1514.929  | 1206.951  | AJ008137  | 15590.938 | 17082.496 | AA709271  | 407.367   |

|           |           |           |           |           |           |           |            |           |
|-----------|-----------|-----------|-----------|-----------|-----------|-----------|------------|-----------|
| 1798.617  | SR6       | 1858.91   | 1983.679  | AF085841  | 1030.055  | 1626.455  | M34057     | 649.139   |
| 679.548   | SR8       | 6716.733  | 20736.77  | AL049232  | 289.839   | 698.125   | ID 1984668 | 725.982   |
| 556.058   | SR10      | 24457.648 | 7575.389  | U92026    | 708.553   | 1152.357  | ID 1832579 | 651.007   |
| 457.095   | CY3Cy5    | 1658.314  | 100.48    | AF086234  | 22422.902 | 24195.131 | H-430185 M | 713.664   |
| 1866.731  | NM_017729 | 947.959   | 1359.363  | AK023680  | 3041.228  | 3532.241  | D16583     | 2534.616  |
| 256.95    | NM_005259 | 1559.502  | 1483.297  | AF009324  | 1729.752  | 2080.077  | H44051     | 334.161   |
| 346.268   | NM_002840 | 1842.043  | 501.115   | AF019226  | 1641.904  | 1016.074  | AA481547   | 674.983   |
| 423.691   | NM_015850 | 2865.461  | 1971.281  | AL137480  | 7703.765  | 4363.479  | AA831880   | 420.802   |
| 355.754   | NM_004864 | 1038.747  | 370.101   | AK022182  | 371.593   | 203.127   | T64880     | 839.233   |
| 693.48    | NM_002838 | 2542.706  | 3021.17   | D16473    | 1257.26   | 958.212   | NM_020967  | 496.484   |
| 32749.176 | NM_014686 | 53439.664 | 46062.926 | AB028968  | 956.908   | 1013.034  | NM_001071  | 5028.164  |
| 664.861   | BF528358  | 514.587   | 664.918   | AK001202  | 488.944   | 695.173   | SR2        | 41997.535 |
| 680.215   | NM_016339 | 332.655   | 487.372   | AF195764  | 32535.762 | 29159.305 | SR4        | 7719.289  |
| 5344.276  | NM_002487 | 503.073   | 275.384   | AF055029  | 712.09    | 932.944   | SR6        | 1444.265  |
| 2676.234  | NM_005462 | 691.84    | 329.314   | S82164    | 1647.174  | 1290.88   | SR8        | 4513.771  |
| 677.545   | NM_012319 | 854.435   | 899.514   | AK024394  | 921.202   | 1016.396  | SR10       | 16324.505 |
| 780.215   | NM_006510 | 7215.012  | 6005.538  | L43338    | 12248.863 | 14034.482 | CY3Cy5     | 844.505   |
| 587.189   | NM_003141 | 1085.558  | 1753.034  | AJ227866  | 18600.617 | 19940.572 | NM_005027  | 1623.073  |
| 697.241   | AB046381  | 546.681   | 366.414   | AK022838  | 12941.681 | 10147.326 | NM_004612  | 1097.398  |
| 4066.154  | AJ011497  | 1264.368  | 1526.455  | NM_003509 | 501.821   | 1231.879  | NM_005608  | 858.372   |
| 825.627   | NM_003018 | 518.672   | 472.147   | CY3Cy5    | 2590.371  | 168.019   | NM_001106  | 740.375   |
| 840.267   | NM_000336 | 592.986   | 632.825   | AA700390  | 3555.902  | 4096.14   | NM_015583  | 919.378   |
| 4674.638  | W61100    | 15328.473 | 15245.228 | AA436163  | 566.464   | 581.801   | NM_018490  | 1326.54   |
| 531.401   | AF215923  | 1735.411  | 1935.711  | BI907981  | 648.487   | 689.548   | NM_006245  | 1827.344  |
| 1414.485  | U66621    | 8009.611  | 16732.492 | BI603841  | 1851.577  | 2227.973  | NM_005103  | 2279.28   |
| 5269.161  | NM_005720 | 17783.512 | 24867.727 | BG696638  | 4575.417  | 3667.468  | NM_004822  | 525.545   |
| 441.499   | AJ132086  | 933.732   | 915.193   | M19888    | 557.414   | 304.839   | AK022349   | 796.186   |
| 429.689   | U92816    | 5854.144  | 7468.988  | AA156863  | 2006.437  | 2213.321  | NM_004973  | 1460.013  |
| 198.226   | BC011987  | 11930.399 | 9146.517  | BI915199  | 825.285   | 1023.297  | NM_007245  | 2151.752  |
| 324.973   | NM_004106 | 19995.035 | 40553.574 | R82957    | 57327.922 | 37695.875 | NM_001890  | 831.378   |
| 526.674   | NM_003485 | 1740.431  | 1966.035  | BI830442  | 461.076   | 390.253   | NM_001286  | 945.593   |
| 2063.64   | NM_005038 | 2213.857  | 2345.253  | AA398951  | 2157.322  | 1788.595  | NM_000951  | 1067.299  |
| 2061.312  | L03418    | 6236.788  | 5114.675  | AI218732  | 940.734   | 680.054   | X52599     | 655.241   |
| 640.037   | M95923    | 610.932   | 333.548   | NM_004102 | 1912.485  | 634.609   | AK000158   | 5844.75   |
| 1794.857  | NM_002415 | 55824.332 | 30004.59  | SR9       | 19307.086 | 5331.583  | NM_005769  | 2145.539  |
| 335.947   | NM_006332 | 868.465   | 4483.557  | NM_018049 | 2827.904  | 3342.985  | AK024500   | 4518.781  |
| 542.705   | NM_000916 | 1942.335  | 1257.498  | NM_014395 | 320.754   | 1103.753  | NM_002564  | 5517.873  |
| 7629.131  | NM_018663 | 2906.108  | 1114.162  | NM_001561 | 599.775   | 713.893   | NM_000963  | 1773.122  |
| 1188.639  | NM_145904 | 11549.941 | 5247.042  | NM_005160 | 933.162   | 798.594   | NM_013308  | 3052.03   |
| 383.705   | NM_006796 | 4959.33   | 4243.607  | AY009401  | 663.801   | 604.143   | AF027302   | 1879.193  |
| 596.893   | NM_000706 | 816.997   | 729.682   | NM_001991 | 585.911   | 653.473   | NM_002852  | 2219.124  |
| 467.464   | NM_015941 | 1326.745  | 2029.467  | NM_000193 | 1020.883  | 1059.714  | NM_001817  | 2246.823  |
| 1055.782  | NM_003655 | 5611.276  | 3181.474  | NM_002448 | 483.231   | 241.946   | AF063611   | 957.281   |
| 695.78    | NM_014837 | 1855.959  | 1915.39   | NM_014044 | 1320.377  | 1423.385  | NM_006039  | 1250.279  |
| 819.497   | AK025111  | 726.467   | 869.462   | NM_000900 | 1325.326  | 2547.889  | NM_002089  | 491.295   |
| 770.745   | NM_001732 | 960.597   | 1573.129  | AK023684  | 4009.374  | 6940.372  | NM_014656  | 3859.569  |
| 777.194   | NM_018690 | 5442.76   | 12606.425 | NM_000232 | 943.371   | 2125.286  | NM_002076  | 1757.797  |
| 8657.557  | NM_000860 | 804.232   | 1263.498  | NM_015057 | 487.304   | 274.736   | X05299     | 2131.056  |
| 810.857   | AB037798  | 1718.531  | 1351.134  | AF303398  | 5398.124  | 5166.08   | BM468475   | 759.217   |
| 2735.823  | NM_000780 | 476.599   | 400.04    | NM_014810 | 1460.617  | 1173.504  | NM_000318  | 1499.667  |
| 12618.445 | AF272663  | 3244.268  | 3390.559  | NM_007357 | 3034.037  | 2400.121  | NM_002060  | 3600.16   |
| 3867.154  | NM_012190 | 872.816   | 877.536   | NM_003763 | 2966.029  | 2836.688  | AK001230   | 1004.981  |
| 1238.434  | AF277719  | 1228.66   | 1813.271  | AK023448  | 434.375   | 581.525   | NM_014680  | 3553.017  |



|           |            |           |           |           |           |           |            |           |
|-----------|------------|-----------|-----------|-----------|-----------|-----------|------------|-----------|
| 544.215   | NM_000791  | 2125.606  | 2150.34   | Y18213    | 807.689   | 656.059   | NM_006224  | 31527.75  |
| 743.569   | NM_003681  | 3073.404  | 2705.247  | NM_003283 | 893.196   | 783.262   | NM_000229  | 1744.751  |
| 564.022   | NM_004800  | 9687.928  | 10439.435 | AF249898  | 3616.021  | 2758.877  | NM_006995  | 9798.955  |
| 10049.447 | NM_014954  | 9610.637  | 9355.245  | M69181    | 4918.49   | 3573.814  | NM_003129  | 8596.942  |
| 1956.123  | NM_014909  | 1727.51   | 1866.143  | NM_002652 | 752.874   | 673.04    | NM_001956  | 1241.17   |
| 2231.017  | X91148     | 528.682   | 543.968   | NM_001311 | 939.878   | 837.17    | AB033064   | 1453.505  |
| 5160.255  | NM_015700  | 5803.173  | 5273.65   | NM_017798 | 5691.38   | 14260.048 | AK022317   | 1813.813  |
| 37710.66  | NM_019087  | 2554.276  | 3722.29   | NM_012410 | 2043.288  | 3421.904  | NM_018396  | 3337.049  |
| 2752.494  | NM_016322  | 524.712   | 366.709   | NM_001611 | 675.536   | 619.811   | NM_003124  | 2618.028  |
| 843.435   | NM_005072  | 667.404   | 718.184   | AB018310  | 1820.079  | 1417.805  | AL133581   | 656.927   |
| 1133.684  | AF308802   | 1014.619  | 1040.078  | NM_015379 | 11384.958 | 12953.047 | NM_002558  | 2619.594  |
| 1370.423  | S76984     | 10270.069 | 18811.57  | AF144638  | 60426.359 | 52891.18  | NM_005031  | 1745.301  |
| 1786.605  | NM_014495  | 51109.207 | 56598.074 | NM_000742 | 443.702   | 444.266   | AB040920   | 510.465   |
| 519.331   | NM_014081  | 498.337   | 595.702   | NM_002355 | 5997.517  | 2742.764  | NM_000720  | 490.076   |
| 740.691   | NM_005651  | 495.779   | 424.625   | AB046836  | 807.416   | 890.303   | NM_004842  | 711.961   |
| 2200.658  | NM_005418  | 207.861   | 582.498   | AJ224166  | 1240.679  | 897.565   | AK024639   | 2758.172  |
| 2119.675  | NM_007195  | 1360.194  | 939.09    | AK026098  | 1456.953  | 1963.487  | NM_015720  | 2543.069  |
| 1303.557  | AK023337   | 2381.875  | 2240.328  | NM_012381 | 1330.99   | 1287.264  | AB007915   | 469.791   |
| 285.7     | NM_013275  | 10288.054 | 15690.03  | NM_006397 | 8886.916  | 8748.928  | AB033070   | 393.755   |
| 629.188   | AB037842   | 474.527   | 563.485   | D83776    | 1273.346  | 1395.692  | NM_018229  | 896.118   |
| 672.521   | NM_019011  | 1973.976  | 2454.946  | NM_004088 | 2358.508  | 1745.699  | AY009127   | 5604.816  |
| 625.9     | AF459094   | 3497.497  | 2659.888  | NM_002180 | 601.015   | 936.823   | NM_014869  | 1157.429  |
| 1156.637  | NM_003157  | 1279.464  | 1014.498  | NM_000138 | 1059.386  | 1379.763  | AB037835   | 1033.859  |
| 16830.355 | NM_004938  | 996.03    | 835.428   | NM_018163 | 840.398   | 574.033   | NM_016228  | 447.379   |
| 2938.604  | NM_014326  | 737.121   | 545.757   | AK026362  | 2410.086  | 1997.345  | NM_000157  | 2480.768  |
| 1078.812  | NM_015981  | 985.766   | 753.99    | NM_004968 | 2300.786  | 1625.863  | NM_000712  | 5154.03   |
| 152.473   | NM_000455  | 3207.524  | 2199.919  | NM_005908 | 841.416   | 389.724   | NM_018088  | 675.781   |
| 1156.96   | NM_014791  | 3885.677  | 2978.146  | NM_002428 | 1742.878  | 1981.532  | AB011164   | 1599.978  |
| 7218.812  | NM_003318  | 1494.329  | 768       | NM_014674 | 3466.96   | 2068.458  | M24750     | 702.012   |
| 15790.727 | NM_004362  | 2181.625  | 1632.454  | NM_018271 | 892.49    | 1695.678  | NM_005965  | 955.448   |
| 1443.817  | NM_000182  | 16079.394 | 7448.457  | NM_014652 | 1192.213  | 3250.795  | NM_002740  | 1948.998  |
| 303.226   | AK023384   | 1051.677  | 999.853   | NM_014044 | 1828.787  | 1963.602  | AL117482   | 1431.676  |
| 270.993   | NM_016026  | 4517.264  | 2972.31   | NM_000900 | 1723.419  | 2415.028  | NM_006549  | 14260.37  |
| 313.624   | AB046381   | 248.668   | 431.414   | AK023684  | 3843.604  | 6133.587  | AB018324   | 4734.495  |
| 375.667   | AJ011497   | 1261.136  | 2091.72   | NM_000232 | 878.298   | 848.146   | NM_002742  | 33073.066 |
| 669.074   | NM_003018  | 500.885   | 1455.911  | AA700390  | 3947.731  | 4892.573  | Z25431     | 2628.319  |
| 87.369    | NM_000336  | 833.913   | 804.767   | AA436163  | 560.364   | 459.533   | NM_005627  | 2365.062  |
| 218.286   | W61100     | 18268.109 | 18984.957 | BI907981  | 687.475   | 1167.25   | M64497     | 1818.538  |
| 298.044   | AA608568   | 3284.229  | 1647.816  | BI603841  | 1541.111  | 1995.65   | NM_003356  | 4114.464  |
| 288.54    | BG831301   | 23593.977 | 18016.51  | BG696638  | 4292.077  | 3375.806  | AF238315   | 488.595   |
| 9450.326  | M14764     | 475.257   | 461.996   | M19888    | 606.338   | 361.414   | NM_000951  | 1023.231  |
| 2304.844  | AA478647   | 2360.977  | 2693.838  | Y08136    | 398.801   | 502.992   | X52599     | 543.199   |
| 358.117   | AW058501   | 312.609   | 561.18    | AA156863  | 1946.683  | 2098.512  | AA029300   | 1379.79   |
| 3695.359  | ID 2623896 | 2745.54   | 3347.691  | BI915199  | 914.261   | 1094.993  | BG708842   | 11414.886 |
| 1814.477  | ID 2602214 | 1477.339  | 1301.272  | R82957    | 58418.957 | 31859.857 | M19723     | 42527.688 |
| 147.287   | ID 2071279 | 2951.024  | 4241.877  | BI830442  | 483.548   | 167.925   | AA709271   | 406.48    |
| 1061.036  | L10709     | 2673.199  | 894.447   | NM_004544 | 2631.231  | 4025.76   | M34057     | 533.031   |
| 804.635   | N35489     | 689.148   | 617.009   | NM_001311 | 1186.463  | 1683.097  | ID 1984668 | 764.098   |
| 456.032   | AI928195   | 732.55    | 358.677   | NM_017798 | 4754.124  | 6886.048  | ID 1832579 | 637.655   |
| 374.549   | AA458922   | 6507.159  | 3663.376  | NM_012410 | 2154.222  | 2597.99   | H-430185 N | 722.487   |
| 443.84    | NM_145659  | 1666.181  | 1231.42   | NM_001111 | 5174.267  | 4651.942  | D16583     | 2701.949  |
| 571.469   | NM_021957  | 384.39    | 524.154   | NM_018049 | 3835.677  | 3980.097  | H44051     | 425.732   |
| 1107.338  | NM_001719  | 3735.805  | 3542.749  | NM_014395 | 437.519   | 1034.524  | AA481547   | 736.594   |

|           |           |           |           |           |           |           |           |          |
|-----------|-----------|-----------|-----------|-----------|-----------|-----------|-----------|----------|
| 830.04    | AL080062  | 1236.715  | 602.859   | NM_001561 | 488.361   | 299.323   | AA831880  | 523.023  |
| 464.707   | NM_145904 | 11467.898 | 5098.692  | NM_005160 | 886.28    | 725.803   | T64880    | 838.047  |
| 228.311   | NM_006796 | 5251.612  | 5206.422  | X78817    | 10123.683 | 7349.127  | NM_020967 | 669.564  |
| 356.412   | NM_000706 | 885.999   | 937.055   | AB023135  | 417.901   | 635.228   | NM_001071 | 5094.813 |
| 1137.555  | NM_015941 | 1472.293  | 2462.047  | AY009401  | 372.644   | 819.728   | AB028990  | 518.867  |
| 270.228   | NM_003655 | 5805.019  | 3034.105  | NM_002448 | 1259.168  | 1854.653  | X05299    | 1954.207 |
| 351.613   | NM_014837 | 1909.915  | 1651.061  | AF053952  | 41327.754 | 65414.113 | BM468475  | 549.566  |
| 132.436   | NM_017729 | 1209.205  | 1129.934  | NM_015057 | 641.942   | 657.857   | NM_000318 | 1486.505 |
| 334.778   | NM_005259 | 1347.485  | 1044.691  | AF303398  | 4708.493  | 4042.511  | NM_002060 | 3337.007 |
| 232.873   | NM_002840 | 2156.149  | 730.856   | NM_014810 | 1171.323  | 1038.035  | AK001230  | 879.782  |
| 1736.534  | NM_006174 | 585.777   | 505.016   | NM_004738 | 830.216   | 1054.212  | NM_014680 | 3455.835 |
| 1111.66   | NM_015850 | 2866.837  | 3413.094  | NM_007357 | 3176.439  | 2418.066  | NM_005027 | 1346.893 |
| 2708.1    | NM_004864 | 1052.957  | 405.314   | NM_003763 | 2682.641  | 2739.789  | NM_004612 | 1034.71  |
| 2643.52   | NM_002838 | 2146.518  | 3736.908  | NM_002428 | 1402.043  | 1641.757  | NM_005608 | 692.71   |
| 1391.156  | AK027377  | 222.814   | 771.748   | NM_014674 | 3468.003  | 2025.595  | NM_001106 | 746.924  |
| 1521.996  | NM_014686 | 44842.09  | 44447.785 | NM_018271 | 1102.424  | 1502.628  | NM_015583 | 879.156  |
| 862.496   | BF528358  | 510.751   | 770.577   | NM_014652 | 1344.515  | 1686.543  | NM_018490 | 1209.631 |
| 1123.478  | NM_002487 | 329.081   | 252.956   | AL133020  | 4835.189  | 4988.359  | NM_006245 | 1862.648 |
| 764.037   | NM_005462 | 557.435   | 584.562   | BU565263  | 59628.961 | 62879.453 | NM_005103 | 2316.233 |
| 774.964   | NM_012319 | 1516.903  | 768.15    | NM_005028 | 1630.298  | 1426.906  | NM_004822 | 445.836  |
| 738.179   | AK026235  | 668.514   | 155.416   | AB018310  | 1859.407  | 1576.708  | AK022349  | 734.307  |
| 158.235   | NM_006510 | 7136.229  | 6005.978  | NM_015379 | 11658.949 | 11995.815 | NM_004973 | 1351.02  |
| 554.384   | NM_003141 | 1239.792  | 1518.415  | NM_004102 | 2073.733  | 2479.41   | NM_007245 | 2151.754 |
| 388.651   | NM_020245 | 2702.416  | 2464.079  | NM_004544 | 2665.425  | 3079.029  | NM_001890 | 805.798  |
| 634.272   | NM_007175 | 1336.988  | 1285.651  | NM_018890 | 21773.135 | 25289.166 | AB007915  | 358.941  |
| 176.309   | X91148    | 935.783   | 1669.529  | NM_016204 | 1262.928  | 1405.426  | AB033070  | 403.125  |
| 411.959   | NM_015700 | 6529      | 6700.743  | AB046836  | 826.923   | 813.397   | NM_018229 | 849.073  |
| 623.289   | NM_019087 | 2298.478  | 4547.791  | NM_017816 | 3624.431  | 3011.065  | NM_006325 | 3151.733 |
| 386.952   | NM_016322 | 715.388   | 1309.071  | AJ224166  | 994.652   | 702.061   | AY009127  | 5774.434 |
| 1604.833  | NM_005072 | 593.169   | 746.403   | AK026098  | 1221.312  | 1598.134  | NM_014869 | 1120.742 |
| 8881.245  | AF215923  | 1742.161  | 1389.433  | NM_012381 | 1215.411  | 728.834   | AK000158  | 2865.974 |
| 2320.965  | U66621    | 5892.211  | 6537.799  | NM_006397 | 8493.847  | 7167.293  | NM_005769 | 1945.578 |
| 1365.495  | NM_005720 | 18830.75  | 21731.061 | D83776    | 1341.642  | 1223.629  | AK024500  | 4448.511 |
| 7495.255  | AB040936  | 489.071   | 362.227   | NM_004088 | 2138.896  | 1123.164  | NM_002564 | 5189.643 |
| 4399.799  | AJ132086  | 1792.087  | 3761.898  | NM_000138 | 1139.19   | 1856.857  | NM_000963 | 1587.531 |
| 677.175   | U92816    | 5233.516  | 7780.487  | NM_018163 | 485.163   | 780.939   | NM_013308 | 2820.231 |
| 547.625   | BC011987  | 12092.463 | 8244.351  | NM_004968 | 2098.81   | 1539.619  | AF027302  | 1546.567 |
| 955.169   | NM_004106 | 18333.318 | 36108.547 | NM_004785 | 1955.656  | 1335.609  | NM_002852 | 2079.777 |
| 1962.027  | NM_003485 | 1704.241  | 1727.294  | NM_000193 | 1399.001  | 1541.915  | NM_001817 | 2179.365 |
| 1135.531  | NM_005038 | 2058.593  | 2186.782  | NM_002448 | 751.708   | 805.599   | AF063611  | 758.382  |
| 17993.768 | L03418    | 7087.161  | 6309.757  | AF053952  | 26838.195 | 29530.322 | NM_006039 | 1175.772 |
| 270.482   | M95923    | 647.091   | 516.539   | NM_003213 | 4881.03   | 2626.207  | NM_002089 | 357.775  |
| 216.34    | NM_002415 | 50911.102 | 23828.492 | BF184738  | 382.911   | 409.375   | M28983    | 1232.994 |
| 1491.262  | NM_006332 | 1247.903  | 6838.994  | NM_014044 | 1598.532  | 1551.467  | Z25431    | 2112.668 |
| 530.983   | NM_000916 | 1912.393  | 1468.902  | NM_000900 | 1040.174  | 1072.994  | NM_005627 | 1985.187 |
| 287.402   | NM_018663 | 2889.246  | 1367.539  | AK023684  | 3155.032  | 3738.312  | M64497    | 1727.558 |
| 250.091   | NM_014791 | 4157      | 2930.187  | NM_000232 | 421.729   | 355.365   | NM_007274 | 3978.301 |
| 712.962   | NM_003318 | 1304.096  | 914.077   | AA700390  | 3384.716  | 3429.242  | NM_003356 | 3301.561 |
| 165.204   | NM_004362 | 2612.26   | 2391.98   | Y18474    | 342.6     | 502.671   | AF238315  | 371.395  |
| 293.358   | NM_000182 | 18488.078 | 17807.703 | BI907981  | 496.798   | 447.653   | NM_006224 | 20638.52 |
| 1119.293  | AK023384  | 1294.463  | 1348.163  | BI603841  | 1629.478  | 2261.915  | AL137300  | 4052.55  |
| 2912.96   | NM_016026 | 4361.169  | 2867.139  | BG696638  | 4348.797  | 2437.702  | NM_000229 | 1453.121 |
| 724.342   | AK025111  | 461.721   | 708.065   | AA156863  | 1604.522  | 2187.534  | NM_006995 | 9857.824 |

|          |            |           |           |           |           |           |            |           |
|----------|------------|-----------|-----------|-----------|-----------|-----------|------------|-----------|
| 8412.818 | NM_001732  | 925.32    | 940.304   | BI915199  | 700.573   | 1168.269  | NM_003129  | 8622.859  |
| 672.654  | NM_018690  | 5871.139  | 10458.184 | R82957    | 53923.5   | 35837.473 | NM_001956  | 1341.62   |
| 188.318  | NM_000860  | 932.337   | 1384.9    | BI830442  | 1140.698  | 1107.913  | AB033064   | 1465.101  |
| 746.159  | AB037798   | 1852.08   | 2082.782  | AA398951  | 2363.238  | 1550.516  | AK022317   | 1746.25   |
| 2117.02  | NM_000780  | 262.88    | 625.869   | AI218732  | 898.735   | 812.355   | NM_018396  | 3696.651  |
| 233.551  | AF272663   | 2737.297  | 4170.158  | AF249898  | 5183.006  | 5348.653  | NM_003124  | 2193.945  |
| 3482.755 | NM_012190  | 756.107   | 1150.495  | M69181    | 6359.121  | 5212.364  | NM_004531  | 638.624   |
| 348.801  | AF277719   | 858.503   | 1556.903  | NM_001311 | 816.667   | 1212.72   | AL133581   | 713.882   |
| 712.122  | NM_000791  | 1883.677  | 2172.086  | NM_017798 | 3997.494  | 5698.491  | NM_002558  | 2411.104  |
| 679.153  | NM_003681  | 2382.905  | 2004.264  | NM_012410 | 1337.584  | 1321.248  | NM_005031  | 1906.884  |
| 278.244  | NM_004800  | 8176.196  | 8333.434  | NM_001111 | 3733.041  | 2664.582  | AB040920   | 368.78    |
| 333.478  | NM_014954  | 9779.076  | 9141.735  | NM_018049 | 2617.157  | 2729.458  | NM_000720  | 512.882   |
| 604.126  | NM_014909  | 1811.631  | 1824.92   | NM_014395 | 299.023   | 1064.057  | NM_004842  | 936.03    |
| 272.819  | NM_145659  | 1353.35   | 1017.72   | NM_005160 | 837.023   | 504.472   | AK024639   | 2690.772  |
| 2103.784 | NM_021957  | 282.053   | 535.832   | NM_003393 | 1405.16   | 1799.085  | NM_015720  | 2092.771  |
| 1763.826 | NM_001719  | 4434.473  | 6142.932  | NM_000742 | 491.782   | 1091.396  | NM_020967  | 393.42    |
| 5393.417 | AL080062   | 1217.119  | 1063.121  | NM_002355 | 5897.994  | 7093.79   | NM_001071  | 4658.379  |
| 653.477  | AF308802   | 936.337   | 1571.918  | AK026608  | 1007.798  | 841.025   | AB028990   | 390.797   |
| 809.315  | S76984     | 10508.967 | 12497.474 | NM_015057 | 792.579   | 509.895   | NM_006708  | 15015.507 |
| 456.696  | NM_014495  | 51365.781 | 55398.242 | AF303398  | 5415.571  | 3692.848  | AB037835   | 948.84    |
| 685.244  | NM_014081  | 643.16    | 1115.172  | NM_014810 | 1373.32   | 836.784   | NM_016228  | 453.148   |
| 1009.367 | NM_005651  | 831.067   | 1005.488  | NM_004738 | 932.274   | 1281.268  | NM_000157  | 2606.564  |
| 150.019  | NM_005418  | 188.305   | 775.806   | NM_007357 | 3278.28   | 2313.64   | NM_000712  | 5398.398  |
| 193.662  | NM_007195  | 1282.495  | 999.585   | NM_003763 | 2836.107  | 3571.531  | NM_018088  | 764.679   |
| 384.572  | AK023337   | 2357.538  | 2629.491  | Y18213    | 827.674   | 374.492   | NM_014846  | 1730.804  |
| 389.832  | NM_013275  | 6987.973  | 7014.362  | NM_003283 | 1049.015  | 782.678   | AB011164   | 1506.665  |
| 914.439  | AB037842   | 552.394   | 438.377   | NM_018163 | 834.95    | 1303.09   | M24750     | 647.311   |
| 5626.322 | NM_019011  | 1730.251  | 1585.28   | AK026362  | 3260.089  | 3542.793  | NM_005965  | 703.408   |
| 11687.54 | AF459094   | 3725.262  | 2830.664  | NM_004968 | 2439.341  | 2696.861  | NM_002740  | 1738.216  |
| 1226.978 | NM_003157  | 1541.003  | 1271.499  | NM_005908 | 1254.95   | 1582.561  | AL117482   | 1324.102  |
| 251.433  | NM_004938  | 1369.121  | 1423.527  | NM_004785 | 1824.358  | 2237.941  | NM_006549  | 13856.191 |
| 147.807  | NM_014326  | 606.695   | 571.671   | NM_002428 | 1279.06   | 1217.199  | AB018324   | 4616.114  |
| 270.442  | NM_015981  | 1080.41   | 806.734   | NM_014674 | 2049.107  | 1126.656  | NM_002742  | 25619.117 |
| 576.871  | NM_000455  | 3284.663  | 3759.15   | NM_018271 | 948.102   | 1159.658  | NM_004973  | 1049.538  |
| 318.187  | NM_012319  | 1692.102  | 960.783   | NM_014652 | 1179.919  | 1145.651  | NM_007245  | 1861.072  |
| 706.289  | AK026235   | 557.813   | 241.649   | AL133020  | 4540.394  | 4211.98   | NM_001890  | 607.576   |
| 367.946  | NM_006510  | 7450.164  | 6302.296  | NM_001611 | 476.648   | 364.606   | NM_001286  | 708.138   |
| 283.513  | NM_003141  | 1683.467  | 1589.359  | AB018310  | 2025.28   | 1425.991  | NM_000951  | 780.64    |
| 238.872  | NM_020245  | 4076.017  | 8066.751  | NM_015379 | 12087.846 | 13011.84  | X52599     | 653.899   |
| 104.369  | NM_007175  | 1588.246  | 2560.735  | AF144638  | 63352.52  | 57736.055 | AA029300   | 1664.568  |
| 1563.931 | AB046381   | 571.813   | 933.499   | NM_001777 | 9865.595  | 16599.088 | BG708842   | 13051.291 |
| 267.683  | AJ011497   | 1379.116  | 2261.346  | U79457    | 3094.61   | 3610.894  | M19723     | 41355.254 |
| 1205.719 | NM_003018  | 675.227   | 1107.059  | NM_014347 | 7919.99   | 8814.873  | AA709271   | 497.949   |
| 565.874  | NM_000336  | 987.555   | 1604.151  | NM_001296 | 11356.002 | 6405.887  | M34057     | 625.27    |
| 1262.218 | W61100     | 17404.104 | 23144.492 | NM_004344 | 6314.254  | 5550.869  | ID 1984668 | 578.215   |
| 1552.628 | AA608568   | 3817.354  | 2119.115  | NM_000757 | 406.912   | 558.17    | ID 1832579 | 538.838   |
| 484.581  | BG831301   | 9895.332  | 12096.076 | AB046786  | 1380.631  | 1813.326  | H-430185 N | 724.844   |
| 1428.922 | AA478647   | 2092.846  | 2731.097  | NM_016620 | 7957.409  | 6866.562  | D16583     | 3089.905  |
| 784.112  | ID 2623896 | 2840.658  | 3343.03   | NM_018890 | 19888.85  | 21046.928 | H44051     | 337.923   |
| 579.188  | ID 2602214 | 1704.631  | 1348.408  | NM_016204 | 1138.791  | 937.564   | AA481547   | 750.226   |
| 565.093  | ID 2071279 | 2999.152  | 3898.616  | AB046836  | 762.96    | 722.541   | AA831880   | 527.444   |
| 316.128  | L10709     | 2376.734  | 874.896   | AJ224166  | 935.23    | 688.742   | T64880     | 758.772   |
| 209.027  | N35489     | 821.347   | 715.824   | AK026098  | 1302.274  | 1419.455  | NM_006039  | 1027.257  |

|           |           |           |           |           |           |           |           |           |
|-----------|-----------|-----------|-----------|-----------|-----------|-----------|-----------|-----------|
| 714.9     | AI928195  | 942.088   | 778.184   | NM_012381 | 1492.328  | 866.125   | NM_002089 | 586.726   |
| 722.82    | AA458922  | 6617.783  | 4822.016  | NM_006397 | 10985.799 | 8723.537  | NM_014656 | 3614.692  |
| 777.797   | M95923    | 659.592   | 411.972   | D83776    | 1380.622  | 1292.562  | NM_002076 | 1440.412  |
| 330.416   | NM_002415 | 55989.754 | 28379.535 | NM_004088 | 2145.333  | 1287.445  | X05299    | 1886.76   |
| 197.084   | NM_006332 | 1341.603  | 7265.54   | NM_002180 | 719.5     | 587.222   | BM468475  | 543.362   |
| 99.005    | NM_000916 | 2161.955  | 2203.627  | NM_000138 | 1375.605  | 1385.605  | NM_000318 | 1453.528  |
| 416.23    | NM_018663 | 4064.333  | 4531.366  | AB011541  | 1408.411  | 1349.484  | NM_002060 | 3122.378  |
| 510.883   | NM_145904 | 12742.566 | 8545.185  | BC032460  | 6208.312  | 5991.537  | AK001230  | 901.747   |
| 253.376   | NM_006796 | 5346.467  | 6271.491  | NM_014071 | 2389.106  | 2554.984  | NM_014680 | 3518.016  |
| 1065.129  | NM_000706 | 783.912   | 1033.04   | AK024404  | 1459.365  | 2639.705  | NM_005027 | 1473.333  |
| 882.119   | NM_015941 | 1652.531  | 3263.078  | NM_000213 | 22370.238 | 21488.889 | NM_004612 | 1172.541  |
| 340.021   | NM_003655 | 6164.158  | 3944.783  | BE906107  | 9444.777  | 7648.988  | NM_005608 | 897.803   |
| 787.242   | NM_014837 | 1856.677  | 1998.303  | NM_015516 | 2787.625  | 2390.939  | NM_001106 | 851.506   |
| 1969.397  | NM_017729 | 1486.884  | 2254.11   | AB033065  | 557.745   | 498.689   | NM_015583 | 763.401   |
| 2998.847  | NM_005259 | 959.428   | 1143.879  | NM_005211 | 748.323   | 639.173   | NM_018490 | 1449.458  |
| 635.409   | NM_002840 | 2199.56   | 468.596   | NM_004857 | 8535.33   | 5057.543  | NM_006245 | 2194.323  |
| 1220.356  | NM_015850 | 1786.695  | 1917.227  | NM_012108 | 477.075   | 475.156   | NM_005103 | 2206.204  |
| 937.656   | NM_004864 | 933.279   | 493.712   | NM_003253 | 648.016   | 492.976   | NM_004822 | 469.215   |
| 2077.615  | NM_002838 | 2132.663  | 2813.319  | NM_013285 | 2802.744  | 1414.633  | AK022349  | 611.556   |
| 2195.683  | NM_014686 | 40940.668 | 40182.371 | NM_002872 | 8443.651  | 5173.861  | NM_005031 | 1541.869  |
| 1295.245  | BF528358  | 617.363   | 647.049   | NM_000490 | 864.098   | 1020.938  | AB040920  | 364.847   |
| 1220.944  | NM_016339 | 303.955   | 316.11    | NM_004839 | 1454.217  | 1112.671  | NM_000720 | 289.875   |
| 616.113   | NM_002487 | 363.909   | 283.956   | NM_012193 | 1520.785  | 1294.377  | NM_004842 | 680.407   |
| 916.731   | NM_013340 | 327.526   | 463.13    | NM_003405 | 6650.713  | 4123.523  | AK024639  | 2001.174  |
| 960.601   | NM_005462 | 735.702   | 503.346   | NM_004720 | 3244.421  | 2375.772  | NM_015720 | 2221.899  |
| 655.243   | NM_014954 | 13004.658 | 11034.932 | NM_001057 | 706.315   | 830.308   | NM_018229 | 1046.76   |
| 441.406   | NM_000807 | 328.461   | 372.801   | NM_005561 | 4526.345  | 6658.603  | NM_006325 | 3565.899  |
| 223.576   | NM_014909 | 2021.839  | 2739.976  | AF272381  | 4700.921  | 4647.941  | AY009127  | 5075.904  |
| 695.717   | X91148    | 419.401   | 1097.135  | NM_004524 | 1314.653  | 1597.069  | NM_014869 | 1479.237  |
| 1829.568  | NM_015700 | 6312.725  | 9270.188  | NM_006315 | 1567.746  | 1417.097  | AK000158  | 3277.219  |
| 2029.85   | NM_019087 | 2664.861  | 6778.281  | NM_005163 | 1526.833  | 2240.172  | NM_005769 | 2195.738  |
| 1755.609  | NM_005072 | 622.723   | 606.93    | NM_007273 | 27857.504 | 27232.625 | AK024500  | 5111.977  |
| 1208.165  | AF215923  | 1524.374  | 1787.831  | BE894943  | 661.208   | 715.016   | NM_002564 | 5385.166  |
| 1694.001  | U66621    | 4912.3    | 7344.643  | NM_016422 | 1324.732  | 1352.663  | NM_000963 | 1720.314  |
| 1479.774  | AJ132086  | 749.514   | 912.997   | NM_017878 | 3075.607  | 2640.826  | NM_013308 | 3357.382  |
| 469.579   | U92816    | 4923.66   | 6677.414  | NM_004494 | 61418.645 | 67542.164 | AF027302  | 1795.734  |
| 8548.357  | BC011987  | 11450.123 | 8706.906  | AL049687  | 698.696   | 699.411   | NM_002852 | 2132.111  |
| 1290.526  | NM_004106 | 20250.457 | 41304.793 | NM_005643 | 11955.77  | 13011.424 | NM_001817 | 2304.527  |
| 1065.739  | NM_003485 | 2196.82   | 2070.932  | NM_003592 | 2401.985  | 2233.561  | AF063611  | 1014.569  |
| 5382.494  | NM_005038 | 2304.373  | 2944.963  | NM_014953 | 1587.777  | 870.331   | NM_005965 | 646.794   |
| 3351.686  | L03418    | 8079.601  | 7833.961  | NM_016195 | 2039.645  | 879.971   | NM_002740 | 1581.009  |
| 381.255   | NM_003157 | 1574.359  | 1011.592  | NM_004523 | 855.294   | 884.899   | AL117482  | 1176.222  |
| 273.196   | NM_004938 | 1581.992  | 1647.815  | NM_004404 | 5417.02   | 4310.61   | NM_006549 | 11795.673 |
| 890.164   | NM_014326 | 781.018   | 543.683   | NM_002960 | 4525.54   | 3916.475  | AB018324  | 4128.077  |
| 1682.618  | NM_004448 | 543.782   | 407.827   | NM_006790 | 1036.859  | 771.319   | NM_002742 | 30432.482 |
| 870.667   | NM_015981 | 1158.546  | 1566.184  | AL117522  | 10485.18  | 6241.479  | Z25431    | 2274.571  |
| 12727.393 | NM_000455 | 3576.274  | 4242.597  | NM_006572 | 6474.979  | 9268.259  | NM_005627 | 2277.49   |
| 232.76    | NM_014791 | 5878.98   | 8700.439  | NM_019061 | 2311.111  | 2175.836  | M64497    | 1741.237  |
| 446.992   | NM_003318 | 3074.024  | 5408.836  | AB033007  | 4872.458  | 3854.406  | NM_007274 | 3905.998  |
| 1318.117  | NM_004362 | 2557.138  | 3694.045  | NM_003130 | 585.992   | 465.083   | NM_003356 | 3639.652  |
| 459.729   | NM_000182 | 18057.689 | 14318.509 | NM_004716 | 11531.874 | 8505.499  | NM_006224 | 27041.225 |
| 230.027   | AK023384  | 1227.393  | 1811.161  | D29810    | 2108.594  | 1567.109  | AL137300  | 4966.143  |
| 234.386   | NM_016026 | 4827.064  | 3213.004  | NM_000128 | 1308.468  | 1235.509  | NM_000229 | 1976.187  |

|           |           |           |           |           |           |           |           |           |
|-----------|-----------|-----------|-----------|-----------|-----------|-----------|-----------|-----------|
| 1763.602  | AK025111  | 669.056   | 838.978   | AB002384  | 1790.546  | 1494.23   | NM_006995 | 11566.043 |
| 444.048   | NM_001732 | 805.292   | 1119.594  | NM_018437 | 764.029   | 450.961   | NM_003129 | 8836.112  |
| 2985.694  | NM_018690 | 4965.923  | 10454.763 | NM_000422 | 533.708   | 676.188   | NM_001956 | 1758.239  |
| 143.522   | NM_000860 | 556.387   | 1186.915  | AK023164  | 1219.859  | 1258.54   | AB033064  | 1509.291  |
| 4562.15   | AB037798  | 2150.542  | 2353.067  | NM_005379 | 1259.266  | 1079.352  | AK022317  | 1782.914  |
| 386.617   | AF272663  | 2481.006  | 2081.093  | AK027121  | 2208.437  | 2744.927  | NM_018396 | 3512.318  |
| 252.314   | NM_012190 | 814.745   | 708.494   | NM_017433 | 2329.981  | 1575.557  | NM_003124 | 2305.144  |
| 746.255   | AF277719  | 1226.116  | 1551.086  | AL117661  | 1697.445  | 1601.768  | NM_006886 | 46586.52  |
| 1564.763  | NM_000791 | 2489.433  | 2345.93   | X64643    | 1329.901  | 805.627   | AL133581  | 650.279   |
| 335.066   | NM_003681 | 3171.567  | 2639.806  | NM_005380 | 5374.84   | 4078.395  | NM_002558 | 2671.686  |
| 306.845   | NM_004800 | 9200.517  | 11466.503 | D70835    | 50143.637 | 44869.535 | NM_003586 | 1025.531  |
| 576.687   | NM_004952 | 1506.71   | 1034.082  | NM_002697 | 1496.982  | 1153.695  | NM_000922 | 1050.063  |
| 902.555   | NM_020414 | 2117.389  | 1343.07   | NM_001518 | 6161.975  | 5810.369  | NM_013232 | 3348.677  |
| 258.695   | AB037730  | 2973.094  | 2897.778  | NM_003412 | 22620.859 | 29337.336 | NM_017993 | 625.066   |
| 296.024   | NM_001357 | 7585.021  | 7562.403  | NM_018336 | 655.891   | 1149.264  | NM_000362 | 4920.295  |
| 619.085   | NM_003893 | 1441.529  | 2711.629  | AK022668  | 2551.949  | 3730.277  | NM_014429 | 1278.115  |
| 374.404   | AB037816  | 2350.514  | 4218.044  | AW975132  | 1916.094  | 1566.989  | AK000770  | 1294.606  |
| 2784.866  | NM_014380 | 2402.744  | 2042.69   | NM_006051 | 3107.749  | 2967.591  | NM_002370 | 5755.302  |
| 765.202   | NM_001719 | 4942.323  | 5823.923  | NM_018427 | 1678.606  | 1666.896  | NM_015670 | 999.189   |
| 1131.04   | AL080062  | 1572.994  | 1035.71   | NM_014663 | 4846.572  | 2037.232  | NM_014709 | 662.105   |
| 433.396   | AF308802  | 1514.814  | 1934.017  | AF007217  | 855.046   | 438.227   | AB028990  | 476.651   |
| 650.925   | S76984    | 13317.479 | 27204.547 | AB037753  | 2175.228  | 2579.552  | NM_006708 | 17143.182 |
| 140.469   | NM_014495 | 48026.414 | 55861.203 | NM_004674 | 1460.921  | 1239.222  | AB037835  | 1225.085  |
| 117.733   | NM_014081 | 847.373   | 692.799   | AB037801  | 3800.323  | 2948.207  | NM_016228 | 532.665   |
| 373.135   | NM_005651 | 706.153   | 837.988   | AL080159  | 10872.326 | 9006.821  | NM_000157 | 2509.961  |
| 309.271   | AK023699  | 180.3     | 366.908   | NM_017823 | 29679.934 | 25222.711 | NM_000712 | 5342.275  |
| 672.448   | NM_005418 | 272.003   | 624.077   | U55185    | 756.027   | 618.739   | NM_018088 | 819.073   |
| 4363.239  | NM_007195 | 1329.544  | 942.801   | U30828    | 2424.877  | 2257.664  | BC013695  | 9267.505  |
| 11406.063 | AK023337  | 1780.024  | 1434.576  | AF085886  | 58087.113 | 25183.266 | AB011164  | 1758.554  |
| 84.492    | NM_013275 | 7112.018  | 5655.865  | AK023828  | 5750.188  | 3575.377  | M24750    | 646.481   |
| 271.056   | AB037842  | 606.017   | 552.048   | AK022664  | 996.313   | 998.711   | AB046776  | 666.975   |
| 196.754   | NM_019011 | 1971.484  | 1933.709  | AL080223  | 1748.378  | 1597.038  | NM_002687 | 6567.642  |
| 244.811   | AF459094  | 3877.114  | 3189.88   | NM_014612 | 17218.801 | 16373.029 | NM_000627 | 1275.227  |
| 296.225   | NM_002544 | 1464.474  | 503.721   | AF079098  | 603.173   | 573.83    | NM_000038 | 522.104   |
| 298.943   | AB011542  | 690.856   | 1251.572  | AK021815  | 784.059   | 1108.319  | NM_000825 | 415.892   |
| 126.454   | NM_001853 | 1839.993  | 2284.74   | NM_001543 | 389.188   | 752.167   | NM_004334 | 1016.286  |
| 244.46    | U41737    | 585.995   | 542.68    | NM_016641 | 2366.626  | 3247.786  | NM_003886 | 1975.738  |
| 1108.646  | NM_005799 | 648.66    | 668.854   | AB018010  | 639.12    | 649.947   | NM_005843 | 1240.009  |
| 470.896   | X99661    | 970.085   | 804.952   | NM_014610 | 8039.163  | 8075.92   | NM_003854 | 434.872   |
| 1208.695  | NM_005927 | 2112      | 3664.427  | NM_006621 | 3091.697  | 2364.849  | NM_017980 | 566.563   |
| 703.393   | AB028983  | 1334.422  | 1605.702  | BF347398  | 6200.125  | 3335.046  | NM_001252 | 7354.138  |
| 1019.482  | AB037800  | 1336.689  | 1605.372  | AK026762  | 1396.861  | 904.549   | AF053712  | 1012.151  |
| 253.007   | AK026377  | 1898.427  | 2127.3    | L48516    | 853.724   | 1140.083  | NM_003947 | 863.841   |
| 602.785   | NM_018660 | 5046.563  | 2478.702  | NM_016648 | 4940.009  | 15246.704 | NM_002821 | 9169.079  |
| 1022.715  | NM_003394 | 2845.575  | 3274.424  | AF083930  | 1055.857  | 956.559   | M96652    | 6030.458  |
| 421.304   | NM_014636 | 432.437   | 561.871   | NM_003426 | 589.449   | 399.145   | L41690    | 1566.499  |
| 1189.31   | NM_006747 | 1019.419  | 2068.475  | AK027159  | 1340.309  | 999.685   | NM_000939 | 30260.074 |
| 400.268   | NM_007086 | 1400.219  | 923.901   | AF075112  | 573.691   | 745.643   | NM_006514 | 1438.255  |
| 344.349   | NM_003870 | 5714.507  | 10597.036 | AK001796  | 821.819   | 986.859   | AF065164  | 2421.995  |
| 200.655   | AK024507  | 438.494   | 758.838   | AF086152  | 9543.208  | 8381.041  | AB028991  | 2199.974  |
| 267.665   | NM_001243 | 2517.151  | 2448.718  | U78519    | 1131.338  | 1648.965  | AF263547  | 1454.189  |
| 734.268   | AK025997  | 1757.756  | 1434.052  | AK026872  | 1424.335  | 1735.5    | AJ008143  | 3626.931  |
| 746.497   | NM_005546 | 497.205   | 509.666   | AL157505  | 742.583   | 829.394   | NM_007144 | 635.174   |

|           |           |           |           |           |           |           |           |           |
|-----------|-----------|-----------|-----------|-----------|-----------|-----------|-----------|-----------|
| 824.857   | NM_000299 | 239.678   | 590.923   | NM_007190 | 5045.107  | 4260.024  | NM_005093 | 226.936   |
| 2298.841  | NM_014887 | 3633.314  | 3021.392  | AF043897  | 1023.06   | 964.423   | NM_004424 | 2485.67   |
| 1576.108  | NM_002590 | 1211.164  | 1230.971  | U79246    | 1326.106  | 1509.372  | AL133117  | 1422.016  |
| 341.329   | NM_018556 | 2902.834  | 3656.406  | AF052140  | 421.775   | 727.049   | AF070586  | 3026.318  |
| 227.104   | NM_005824 | 1239.313  | 430.539   | NM_018836 | 813.643   | 867.167   | NM_014412 | 721.083   |
| 523.352   | AF052211  | 2980.792  | 2354.335  | AF007147  | 708.33    | 1062.145  | NM_013303 | 1147.205  |
| 1422.212  | NM_005600 | 2143.809  | 3186.096  | AF052127  | 6723.562  | 10247.896 | NM_012227 | 2025.01   |
| 1797.655  | NM_005967 | 3214.305  | 3158.776  | AK024261  | 558.392   | 678.572   | NM_006101 | 795.953   |
| 1547.872  | AB014566  | 835.215   | 863.295   | AF052150  | 597.556   | 554.139   | NM_001237 | 2337.484  |
| 1767.355  | NM_015678 | 433.261   | 476.559   | AF086481  | 648.443   | 494.988   | NM_002507 | 1453.651  |
| 2639.723  | NM_014223 | 2411.788  | 2149.53   | AK024885  | 3006.146  | 2464.338  | NM_015962 | 1886.343  |
| 687.748   | NM_016194 | 2098.375  | 2640.63   | AK022441  | 872.598   | 1446.114  | NM_016145 | 490.046   |
| 1016.146  | AL050385  | 712.292   | 738.254   | AK026208  | 1767.585  | 2409.848  | NM_016078 | 2347.569  |
| 703.675   | NM_007027 | 2797.287  | 1970.607  | NM_016947 | 57636.117 | 53013.668 | NM_004401 | 513.959   |
| 1488.379  | NM_000633 | 8961.846  | 7813.613  | AY007136  | 553.201   | 769.374   | NM_001849 | 5801.544  |
| 1847.455  | AB037855  | 1233.691  | 1384.017  | AL359940  | 2200.947  | 2280.797  | AF255910  | 714.087   |
| 248.552   | AK024524  | 5552.983  | 4101.286  | NM_018286 | 909.717   | 394.856   | NM_000425 | 2129.763  |
| 1308.285  | NM_000562 | 701.592   | 694.17    | AK024925  | 11809.006 | 8880.435  | NM_016146 | 4140.996  |
| 1062.505  | NM_019011 | 3316.981  | 3377.055  | AL049460  | 6014.023  | 6535.757  | AK024343  | 908.788   |
| 946.259   | NM_004879 | 11448.934 | 13232.879 | AK022396  | 1040.16   | 1230.818  | NM_001936 | 469.117   |
| 909.92    | AB020694  | 2514.887  | 2735.683  | AK022892  | 8065.417  | 4740.137  | NM_002569 | 556.857   |
| 3631.441  | NM_016071 | 3291.988  | 1928.828  | Z36807    | 18512.91  | 11348.439 | D42084    | 1306.757  |
| 1106.61   | NM_004475 | 4614.676  | 6146.05   | U52836    | 563.608   | 463.301   | NM_014693 | 543.731   |
| 926.897   | NM_001627 | 6174.107  | 4267.896  | NM_017939 | 1413.569  | 1068.743  | AB007896  | 790.041   |
| 7475.466  | NM_001226 | 1099.406  | 899.218   | AK021837  | 1661.256  | 979.284   | AB007916  | 5149.766  |
| 2975.558  | NM_001336 | 697.666   | 1595.424  | AK002088  | 16394.32  | 21190.516 | NM_002874 | 341.744   |
| 22957.334 | AB050716  | 866.566   | 1168.404  | X98206    | 530.747   | 1069.324  | AF049140  | 870.916   |
| 1491.909  | X77690    | 1388.725  | 2479.489  | AK000106  | 824.73    | 1185.696  | AL136794  | 368.778   |
| 1152.362  | NM_006536 | 594.152   | 715.072   | AK022370  | 1415.798  | 1737.211  | BC035601  | 24852.5   |
| 1005.498  | NM_006690 | 1140.924  | 938.538   | AK026765  | 1151.775  | 1060.098  | NM_001458 | 860.078   |
| 1202.212  | AF218022  | 2700.6    | 2182.635  | AL117530  | 580.744   | 951.371   | NM_020388 | 3572.985  |
| 1316.583  | NM_003348 | 2455.985  | 1774.837  | AL080191  | 3234.297  | 2705.981  | AB046829  | 445.508   |
| 228.505   | AB006198  | 6350.499  | 5698.104  | AK021639  | 9452.579  | 9069.104  | NM_016445 | 724.365   |
| 6718.076  | U72518    | 1621.964  | 1864.535  | AK023189  | 804.852   | 1154.832  | NM_003379 | 14430.081 |
| 1291.92   | AF264765  | 414.321   | 522.771   | AK023872  | 731.193   | 898.226   | NM_004521 | 3772.637  |
| 738.952   | NM_015322 | 3677.467  | 2831.814  | AF306347  | 703.457   | 800.596   | AF229162  | 1093.749  |
| 4035.864  | NM_016607 | 2167.303  | 1931.672  | AK023464  | 426.862   | 515.163   | U02309    | 22182.475 |
| 3419.705  | NM_000268 | 5760.837  | 5789.63   | AK024157  | 497.933   | 530.971   | NM_005257 | 6084.856  |
| 337.852   | M30493    | 12175.517 | 10585.338 | AK022963  | 312.09    | 368.803   | AF011573  | 3009.872  |
| 567.988   | AJ008160  | 468.259   | 464.669   | AK023905  | 2895.908  | 1996.046  | NM_002145 | 1552.184  |
| 1111.566  | NM_004343 | 30564.686 | 4977.34   | AK024231  | 3522.26   | 3135.526  | NM_003923 | 324.066   |
| 1007.04   | X52355    | 3557.011  | 2325.879  | NM_016940 | 1591.199  | 1926.91   | NM_004831 | 400.241   |
| 16098.979 | NM_006963 | 6557.299  | 1686.344  | AK025757  | 1659.771  | 3521.039  | NM_014213 | 2202.381  |
| 235.512   | U66561    | 4266.21   | 4499.363  | Y16713    | 554.467   | 1405.533  | NM_000168 | 1830.386  |
| 11273.81  | NM_000306 | 1606.65   | 1238.259  | L07394    | 8650.632  | 7851.293  | AF294629  | 1739.713  |
| 566.194   | NM_002200 | 2423.919  | 2726.312  | AK056133  | 696.255   | 994.749   | NM_000545 | 3821.777  |
| 631.101   | AF017433  | 1161.19   | 942.367   | NM_017845 | 2764.349  | 5358.586  | NM_002136 | 30204.389 |
| 2804.441  | AF130111  | 1794.936  | 1777.796  | AF130080  | 551.042   | 760.008   | AK025571  | 1008.219  |
| 780.932   | NM_016307 | 1550.966  | 1127.328  | AK026006  | 807.282   | 997.112   | NM_014463 | 16262.854 |
| 2716.316  | AB028449  | 1953.156  | 1234.292  | NM_019089 | 9482.364  | 9995.021  | NM_005520 | 10544.486 |
| 631.518   | NM_004697 | 1864.318  | 1634.272  | AL122072  | 2560.448  | 2507.471  | AK023265  | 1049.961  |
| 604.159   | AF131776  | 2516.642  | 2421.923  | AK026221  | 616.491   | 678.455   | NM_018723 | 452.905   |
| 2662.818  | NM_020528 | 4026.348  | 3036.526  | Y13870    | 562.332   | 721.466   | AB029009  | 1460.909  |

|           |           |           |           |           |           |           |           |           |
|-----------|-----------|-----------|-----------|-----------|-----------|-----------|-----------|-----------|
| 472.592   | NM_007040 | 13906.946 | 13230.36  | AK026403  | 1164.391  | 973.74    | AF112207  | 1364.74   |
| 319.033   | NM_014483 | 8728.283  | 7889.325  | AK022980  | 729.277   | 567.135   | NM_004461 | 45057.566 |
| 212.805   | AK024249  | 1820.413  | 2789.691  | AL359058  | 707.011   | 476.624   | NM_018473 | 3147.305  |
| 65.447    | AF239156  | 5028.064  | 3807.806  | AK026237  | 2630.413  | 2431.98   | BF106121  | 699.577   |
| 7582.379  | NM_020390 | 1680.714  | 995.144   | AK023687  | 674.753   | 493.081   | AK022590  | 1945.014  |
| 399.696   | NM_003321 | 13957.708 | 10636.419 | NM_017632 | 1188.905  | 1460.031  | AK023719  | 3296.218  |
| 303.847   | U18937    | 9809.765  | 7110.725  | AK026655  | 744.169   | 1012.139  | AK025590  | 1011.539  |
| 754.694   | U01925    | 903.887   | 632.135   | AF129926  | 1336.337  | 926.026   | AY007149  | 1999.319  |
| 1904.956  | AJ420488  | 51759.754 | 60561.5   | AK025822  | 1359.457  | 2305.884  | M12078    | 531.044   |
| 462.498   | AK022180  | 20270.973 | 17846.652 | AL360140  | 1361.702  | 1639.455  | NM_004550 | 5946.387  |
| 401.27    | AK001384  | 797.8     | 404.41    | AF201937  | 26842.973 | 27457.256 | NM_000785 | 761.38    |
| 1030.578  | AK025437  | 2135.605  | 1872.247  | AL390128  | 1636.021  | 1369.49   | NM_004110 | 3208.53   |
| 2929.801  | AK074164  | 888.647   | 709.845   | AL157429  | 4737.134  | 5185.036  | NM_013387 | 20063.363 |
| 340.292   | NM_004165 | 8924.049  | 7997.68   | NM_012071 | 24431.146 | 28155.119 | NM_005262 | 6119.5    |
| 3155.628  | AF161353  | 5800.883  | 4826.597  | AF055018  | 7183.133  | 6248.465  | NM_020125 | 309.572   |
| 475.171   | NM_000764 | 1156.903  | 611.331   | AF070599  | 2395.555  | 2304.129  | NM_005065 | 2206.285  |
| 235.911   | NM_004146 | 13892.729 | 10092.617 | NM_005450 | 2178.695  | 1683.58   | NM_018223 | 2783.809  |
| 271.872   | NM_003002 | 9100.039  | 8636.855  | AK023600  | 800.875   | 638.001   | NM_006693 | 6762.711  |
| 538.305   | D42047    | 1623.918  | 1046.148  | Z83952    | 604.07    | 611.295   | NM_001722 | 1039.985  |
| 955.084   | AB009282  | 9796.49   | 8518.974  | NM_005525 | 978.109   | 688.266   | AB046802  | 2091.561  |
| 482.417   | NM_005004 | 32286.771 | 28663.758 | NM_005285 | 2718.832  | 2290.545  | NM_003297 | 646.267   |
| 216.773   | NM_003670 | 5718.915  | 4964.72   | AK001918  | 921.809   | 828.498   | NM_018265 | 6929.644  |
| 4487.766  | NM_014639 | 2200.395  | 1555.017  | NM_018635 | 27706.693 | 16580.951 | AK024633  | 1738.86   |
| 347.997   | NM_006392 | 2776.244  | 1359.278  | AF086048  | 1972.693  | 1492.729  | NM_001453 | 4184.668  |
| 159.134   | NM_014717 | 1257.403  | 1239.273  | L15616    | 3080.658  | 2255.247  | NM_012075 | 1095.023  |
| 2998.888  | NM_017922 | 1507.458  | 1383.777  | AB019565  | 6205.054  | 3929.417  | AB004851  | 490.349   |
| 1436.442  | NM_002823 | 41606.059 | 33795.211 | D16914    | 63115.27  | 70822.117 | NM_013381 | 390.851   |
| 195.58    | NM_017916 | 9059.132  | 7253.71   | AA084879  | 342.684   | 727.934   | AK023911  | 2684.038  |
| 12915.408 | NM_001805 | 1678.166  | 2572.593  | NM_000833 | 2625.067  | 3703.03   | NM_001283 | 1273.16   |
| 270.563   | AK022360  | 1456.857  | 1637.917  | NM_000283 | 1856.754  | 1454.807  | AL110237  | 605.423   |
| 1085.068  | X52341    | 33904.223 | 34940.906 | NM_012460 | 2325.91   | 1243.391  | D87470    | 658.595   |
| 3725.669  | NM_003082 | 4325.443  | 2759.139  | X64980    | 703.409   | 919.775   | AF147307  | 3431.669  |
| 1385.407  | AL133632  | 2421.694  | 2325.817  | NM_012118 | 2368.026  | 3013.896  | AK001829  | 999.242   |
| 993.108   | AL833249  | 2269.456  | 1786.228  | AK001133  | 600.324   | 440.005   | NM_016525 | 1581.757  |
| 2197.085  | NM_018374 | 2321.884  | 2837.392  | AK024092  | 1061.284  | 1300.403  | AK024931  | 9051.751  |
| 217.949   | AF131852  | 352.607   | 679.327   | AK002044  | 3055.663  | 1850.067  | AL109715  | 599.498   |
| 122.466   | AK021894  | 1974.938  | 2227.988  | AK022206  | 930.211   | 938.427   | AF086181  | 629.626   |
| 1494.036  | NM_020424 | 1747.393  | 1503.525  | U90904    | 4448.945  | 5158.32   | D86985    | 379.68    |
| 1024.876  | AF438313  | 1474.76   | 1725.714  | AF088053  | 2304.612  | 2348.533  | AF088043  | 357.689   |
| 1263.614  | AB033009  | 13365.773 | 15964.964 | U90903    | 744.473   | 671.005   | AF131799  | 535.753   |
| 332.796   | AL137761  | 218.804   | 252.11    | AF278760  | 1708.047  | 1287.849  | AK000455  | 606.206   |
| 532.008   | AK022086  | 403.269   | 540.356   | X58061    | 360.918   | 529.794   | NM_005230 | 511.917   |
| 972.69    | AF147320  | 2003.412  | 2141.185  | AB032954  | 1622.658  | 1355.005  | AL365407  | 1734.045  |
| 348.819   | AK027024  | 1533.142  | 2285.526  | NM_006003 | 16423.59  | 10653.456 | AK000840  | 3316.452  |
| 1304.697  | AK022138  | 1171.858  | 1462.052  | AL110197  | 3138.725  | 2735.882  | AL162073  | 680.611   |
| 529.612   | AF086191  | 1156.147  | 1272.12   | AF085995  | 764.12    | 555.411   | AL390160  | 713.404   |
| 512.414   | AF143880  | 435.706   | 592.992   | CY3Cy5    | 522.956   | 178.568   | AJ006835  | 1447.779  |
| 219.185   | NM_017635 | 4204.731  | 5666.82   | AA029300  | 2050.951  | 2274.579  | AL110138  | 460.889   |
| 940.469   | AL133052  | 1627.771  | 1531.167  | BG708842  | 22116.984 | 22498.17  | AL122039  | 483.897   |
| 198.193   | AB037824  | 2017.966  | 2752.421  | M19723    | 47575.863 | 53367.965 | AF070577  | 5535.024  |
| 439.906   | AF361494  | 766.626   | 1094.389  | X06256    | 2559.008  | 3114.871  | AL157484  | 6940.16   |
| 2000.196  | AK022810  | 1490.704  | 2555.407  | AA709271  | 556.75    | 908.905   | AK024850  | 1002.096  |
| 634.383   | AF147408  | 1171.89   | 1694.484  | M34057    | 585.532   | 801.097   | Y09836    | 1606.318  |

|           |           |           |           |            |           |           |           |           |
|-----------|-----------|-----------|-----------|------------|-----------|-----------|-----------|-----------|
| 591.601   | AK027222  | 3300.239  | 2402.357  | ID 1984668 | 582.031   | 2090.896  | AL137597  | 5893.756  |
| 6812.017  | AK054767  | 605.322   | 363.378   | ID 1832579 | 454.433   | 262.473   | AF131790  | 618.764   |
| 598.664   | AL049301  | 705.304   | 662.693   | H-430185 N | 703.867   | 438.456   | AJ011378  | 685.167   |
| 268.612   | AL050042  | 2797.266  | 3279.61   | D16583     | 3021.52   | 1324.888  | AF009266  | 1191.523  |
| 628.398   | AL117570  | 372.156   | 398.432   | H44051     | 396.48    | 392.848   | AF009310  | 1514.475  |
| 1273.139  | NM_018469 | 1218.407  | 1274.64   | AA481547   | 819.539   | 543.778   | AF054991  | 311.46    |
| 229.909   | NM_014867 | 7507.721  | 3655.291  | AA831880   | 394.944   | 490.728   | AF060168  | 1066.908  |
| 332.719   | AL359932  | 320.505   | 383.198   | T64880     | 840.426   | 579.633   | AF009275  | 691.693   |
| 2457.376  | AB037850  | 1611.711  | 1549.251  | NM_020967  | 478.059   | 375.823   | AF015251  | 615.124   |
| 474.499   | AK002197  | 1373.462  | 1568.328  | NM_001071  | 5221.849  | 6010.331  | AF056426  | 947.63    |
| 253.975   | AF087996  | 746.82    | 722.271   | SR2        | 33554.777 | 17991.051 | AK001096  | 320.225   |
| 4711.834  | AK021710  | 2763.872  | 3750.045  | SR4        | 7730.529  | 4495.071  | NM_018329 | 1217.017  |
| 517.666   | BC033114  | 824.074   | 1164.045  | SR6        | 1053.122  | 766.272   | AK021565  | 499.826   |
| 1992.317  | AL137446  | 1382.931  | 1357.624  | SR8        | 4119.803  | 8179.863  | AK021778  | 305.637   |
| 4851.614  | AB025286  | 1290.229  | 1099.93   | SR10       | 14270.008 | 3233.065  | AK001150  | 4236.862  |
| 295.356   | AF009286  | 658.248   | 774.965   | CY3Cy5     | 256.002   | 156.198   | AK021633  | 1088.974  |
| 5020.192  | AF056437  | 731.393   | 626.378   | NM_005027  | 1466.896  | 1750.287  | AK025659  | 1257.217  |
| 6489.718  | AB032364  | 658.221   | 383.886   | NM_004612  | 1337.076  | 1106.339  | AK026788  | 976.492   |
| 4353.69   | NM_005029 | 1357.462  | 1290.299  | NM_005608  | 960.442   | 1113.676  | AK026824  | 576.131   |
| 55172.715 | AF056447  | 1549.137  | 1528.303  | NM_001106  | 713.863   | 595.613   | AJ008130  | 12992.799 |
| 4127.75   | AK001010  | 1283.254  | 938.679   | NM_015583  | 1834.874  | 3882.671  | NM_003669 | 300.32    |
| 2353.881  | NM_018076 | 808.198   | 693.759   | NM_018490  | 1638.773  | 1983.936  | AF086502  | 1470.402  |
| 722.288   | AK021442  | 892.239   | 849.964   | NM_006245  | 2137.527  | 2522.416  | L39924    | 1002.087  |
| 244.997   | AK001076  | 1112.235  | 1422.749  | NM_005103  | 1988.661  | 1893.919  | U52054    | 2762.417  |
| 1302.784  | AK021482  | 4127.791  | 4879.799  | NM_004822  | 504.501   | 545.969   | AK023325  | 2422.13   |
| 848.529   | AK021730  | 1525.869  | 1617.839  | AK022349   | 447.41    | 639.922   | NM_017985 | 1418.102  |
| 1386.772  | AK025126  | 716.868   | 1007.743  | NM_004973  | 1207.567  | 585.133   | AK025866  | 1767.668  |
| 15354.426 | AK025317  | 1075.021  | 902.709   | NM_007245  | 1943.951  | 915.373   | AF088058  | 1876.614  |
| 299.446   | AK026284  | 770.557   | 765.747   | NM_001890  | 425.25    | 341.021   | NM_000513 | 987.482   |
| 111.235   | AK026725  | 1350.493  | 1670.386  | NM_001286  | 667.304   | 292.923   | Y11165    | 979.045   |
| 6433.112  | AJ008118  | 50022.301 | 41190.613 | NM_000951  | 980.219   | 766.946   | AL137445  | 374.022   |
| 5123.277  | NM_005523 | 1764.199  | 595.486   | NM_005769  | 2169.668  | 1670.116  | BC028422  | 543.381   |
| 353.655   | AK024512  | 2983.318  | 1654.874  | AK024500   | 5943.527  | 6834.164  | NM_013244 | 386.042   |
| 372.714   | AK023454  | 1993.446  | 1494.84   | NM_002564  | 6749.013  | 7318.958  | AK024413  | 907.496   |
| 454.618   | L23207    | 1346.241  | 742.894   | NM_001884  | 990.051   | 915.504   | AK022247  | 974.021   |
| 659.027   | NM_018062 | 1096.303  | 854.383   | NM_000963  | 1728.324  | 2466.441  | AK001453  | 2270.531  |
| 60824.527 | NM_007128 | 4538.043  | 4071.552  | NM_013308  | 3815.588  | 3874.725  | AB007972  | 2446.194  |
| 3818.626  | NM_007160 | 628.734   | 344.371   | AF027302   | 1671.645  | 1978.047  | AL390144  | 2788.216  |
| 29348.371 | NM_018627 | 771.139   | 437.851   | NM_002852  | 2298.442  | 2204.991  | AK024017  | 1563.544  |
| 2771.914  | NM_015377 | 568.01    | 580.813   | NM_001817  | 2547.485  | 1953.94   | X56196    | 724.725   |
| 1247.426  | AL137531  | 855.188   | 1258.526  | AF063611   | 587.481   | 632.801   | D17220    | 2726.745  |
| 4930.555  | AK022210  | 644.791   | 682.16    | NM_006039  | 1249.158  | 527.418   | D28363    | 32504.951 |
| 2114.137  | AL080085  | 4333.95   | 8457.941  | NM_002089  | 496.72    | 345.833   | AB011171  | 1560.899  |
| 804.004   | AF086519  | 615.431   | 627.075   | NM_014656  | 5298.047  | 4642.872  | AF090099  | 448.511   |
| 1323.13   | AF055012  | 2927.469  | 2189.999  | NM_002076  | 1369.711  | 956.381   | AF189251  | 423.401   |
| 280.26    | AK022307  | 2631.234  | 3679.862  | X05299     | 1869.868  | 1543.016  | NM_005322 | 2624.595  |
| 3299.621  | NM_005172 | 1516.16   | 1362.807  | BM468475   | 417.33    | 396.174   | AK024465  | 1805.297  |
| 540.306   | AK025192  | 4427.908  | 3636.999  | NM_000318  | 1281.097  | 683.722   | AK021478  | 1882.72   |
| 1263.383  | NM_012403 | 3217.016  | 2806.327  | NM_002060  | 3003.113  | 1613.921  | AF131782  | 1961      |
| 10227.17  | AK023251  | 1793.694  | 2277.238  | AK001230   | 960.427   | 601.865   | NM_014210 | 3509.778  |
| 1476.974  | AK022611  | 6762.526  | 11070.178 | NM_014680  | 3542.01   | 2650.057  | AK021603  | 1406.816  |
| 127.897   | NM_006158 | 8718.882  | 11384.303 | NM_000229  | 2816.318  | 6137.853  | AL110136  | 1766.621  |
| 275.438   | NM_006346 | 1560.861  | 1057.887  | NM_001956  | 2444.15   | 6583.445  | AK002203  | 373.682   |



|           |                  |           |           |                   |           |           |                  |           |
|-----------|------------------|-----------|-----------|-------------------|-----------|-----------|------------------|-----------|
| 734.161   | <b>AK025240</b>  | 3640.765  | 2835.209  | <b>AB033064</b>   | 2859.987  | 4119.198  | <b>AK026469</b>  | 2631.825  |
| 1362.175  | <b>NM_017633</b> | 11832.808 | 15847.669 | <b>AK022317</b>   | 3672.737  | 9171.954  | <b>D16935</b>    | 1933.995  |
| 2857.696  | <b>AF086186</b>  | 11120.273 | 8741.174  | <b>NM_018396</b>  | 5662.415  | 10309.493 | <b>AK027019</b>  | 795.808   |
| 710.877   | <b>NM_017802</b> | 3839.422  | 2298.369  | <b>NM_002558</b>  | 2380.468  | 1465.768  | <b>U92019</b>    | 482.376   |
| 577.709   | <b>AK023667</b>  | 883.197   | 666.045   | <b>NM_005031</b>  | 2700.586  | 2462.926  | <b>U52835</b>    | 4791.69   |
| 16690.889 | <b>AJ008137</b>  | 6788.943  | 6828.682  | <b>AB040920</b>   | 464.305   | 572.03    | <b>NM_000756</b> | 1950.487  |
| 4204.94   | <b>AF085841</b>  | 492.036   | 924.613   | <b>NM_000720</b>  | 294.99    | 297.597   | <b>AK022148</b>  | 1031.222  |
| 14962.943 | <b>U92026</b>    | 922.792   | 722.66    | <b>NM_004842</b>  | 545.054   | 335.652   | <b>Z36811</b>    | 43785.355 |
| 806.313   | <b>AF086234</b>  | 30803.264 | 19998.201 | <b>AK024639</b>   | 2441.381  | 1290.363  | <b>NM_018950</b> | 804.319   |
| 596.708   | <b>AK023680</b>  | 4306.734  | 4195.491  | <b>NM_015720</b>  | 3177.324  | 1851.685  | <b>K03200</b>    | 6005.604  |
| 358.167   | <b>AF009324</b>  | 1837.143  | 1831.24   | <b>NM_018229</b>  | 704.103   | 662.42    | <b>U17629</b>    | 2897.11   |
| 1200.489  | <b>AF019226</b>  | 2624.222  | 2339.885  | <b>AY009127</b>   | 5837.493  | 5420.844  | <b>NM_020428</b> | 1506.181  |
| 869.692   | <b>AL137480</b>  | 10500.501 | 7350.314  | <b>NM_014869</b>  | 1178.886  | 1176.302  | <b>U79265</b>    | 2215.44   |
| 551.913   | <b>AK022182</b>  | 697.929   | 540.523   | <b>AB037835</b>   | 1419.517  | 2572.424  | <b>AK022868</b>  | 2774.015  |
| 494.651   | <b>D16473</b>    | 1627.645  | 1111.43   | <b>NM_000712</b>  | 7408.023  | 13950.089 | <b>NM_003530</b> | 677.996   |
| 2152.238  | <b>AB028968</b>  | 1214.576  | 804.646   | <b>NM_018088</b>  | 1043.978  | 2393.583  | <b>AJ227871</b>  | 677.808   |
| 887.653   | <b>AK001202</b>  | 578.178   | 557.022   | <b>NM_005965</b>  | 1527.965  | 2168.047  | <b>AK025344</b>  | 1081.365  |
| 862.257   | <b>AF195764</b>  | 32348.035 | 33369.535 | <b>NM_002740</b>  | 1642.368  | 1461.773  | <b>D28589</b>    | 9271.814  |
| 2187.454  | <b>AF055029</b>  | 1053.864  | 1120.199  | <b>AL117482</b>   | 1418.085  | 1053.149  | <b>AF301223</b>  | 457.574   |
| 389.176   | <b>S82164</b>    | 989.673   | 994.756   | <b>NM_006549</b>  | 17720.975 | 12335.047 | <b>NM_017867</b> | 3194.562  |
| 207.087   | <b>AK024394</b>  | 1226.609  | 1894.44   | <b>AB018324</b>   | 4379.971  | 3120.476  | <b>U92820</b>    | 5481.27   |
| 234.087   | <b>AF147374</b>  | 1405.129  | 2613.77   | <b>NM_005627</b>  | 1993.19   | 1238.505  | <b>NM_017937</b> | 1580.969  |
| 559.967   | <b>L43338</b>    | 7260.76   | 5091.593  | <b>M64497</b>     | 1540.065  | 633.909   | <b>AL360266</b>  | 1324.185  |
| 581.673   | <b>AJ227866</b>  | 10389.575 | 13366.249 | <b>NM_003356</b>  | 2785.759  | 2463.475  | <b>AL160132</b>  | 17985.32  |
| 112.506   | <b>AF458223</b>  | 4152.058  | 6857.551  | <b>NM_014648</b>  | 548.971   | 1360.644  | <b>NM_019557</b> | 2445.426  |
| 480.729   | <b>AK026822</b>  | 425.319   | 639.367   | <b>NM_019604</b>  | 395.113   | 1706.618  | <b>CY3Cy5</b>    | 2454.343  |
| 1347.443  | <b>AK022838</b>  | 4934.338  | 6024.499  | <b>NM_005073</b>  | 578.076   | 1319.924  | <b>AA150828</b>  | 854.875   |
| 1678.015  | <b>NM_003509</b> | 817.248   | 1480.383  | <b>NM_000951</b>  | 2569.844  | 7137.107  | <b>A1859208</b>  | 302.91    |
| 1490.319  | <b>CY3Cy5</b>    | 4503.798  | 332.016   | <b>X52599</b>     | 1098.114  | 2503.552  | <b>H64379</b>    | 3568.839  |
| 1298.641  | <b>AA700390</b>  | 4618.915  | 5473.356  | <b>AA029300</b>   | 2615.652  | 6017.937  | <b>BE208258</b>  | 32150.012 |
| 2341.819  | <b>Y18474</b>    | 528.322   | 2599.599  | <b>BG708842</b>   | 30436.516 | 51359.977 | <b>B1831922</b>  | 1508.911  |
| 348.067   | <b>AA436163</b>  | 968.162   | 503.784   | <b>M19723</b>     | 47928.324 | 75679.039 | <b>M69238</b>    | 1181.375  |
| 280.123   | <b>BI907981</b>  | 1052.03   | 843.493   | <b>AA709271</b>   | 931.657   | 1171.347  | <b>AA599158</b>  | 5286.892  |
| 970.266   | <b>BI603841</b>  | 2208.337  | 2909.6    | <b>M34057</b>     | 852.214   | 1567.725  | <b>BE294756</b>  | 233.537   |
| 105.611   | <b>BG696638</b>  | 5973.934  | 1071.023  | <b>ID 1984668</b> | 857.254   | 6728.547  | <b>SR5</b>       | 2562.623  |
| 338.051   | <b>M19888</b>    | 1986.899  | 683.687   | <b>ID 1832579</b> | 859.537   | 1609.833  | <b>SR7</b>       | 2991.591  |
| 269.564   | <b>Y08136</b>    | 959.843   | 1278.666  | <b>H-430185 M</b> | 1162.482  | 2462.651  | <b>SR9</b>       | 9261.801  |
| 394.64    | <b>AA156863</b>  | 3256.043  | 2819.349  | <b>D16583</b>     | 5125.015  | 6931.915  | <b>CY3Cy5</b>    | 2233.195  |
| 1603.999  | <b>BI915199</b>  | 1676.388  | 1092.463  | <b>H44051</b>     | 894.913   | 1521.869  | <b>NM_001560</b> | 2547.886  |
| 3122.427  | <b>BI830442</b>  | 716.054   | 573.257   | <b>AA481547</b>   | 1269.309  | 2287.443  | <b>NM_001783</b> | 3221.519  |
| 1493.227  | <b>AA398951</b>  | 3672.44   | 1688.912  | <b>NM_020967</b>  | 881.742   | 1528.637  | <b>J03171</b>    | 1096.906  |
| 4207.802  | <b>AI218732</b>  | 1688.817  | 2493.314  | <b>AB028990</b>   | 675.918   | 1123.776  | <b>NM_005856</b> | 543.494   |
| 14719.822 | <b>NM_004102</b> | 3037.678  | 4221.645  | <b>X05299</b>     | 2674.411  | 4817.853  | <b>NM_004323</b> | 8136.271  |
| 1181.074  | <b>NM_004544</b> | 4716.063  | 5861.718  | <b>BM468475</b>   | 612.505   | 1105.727  | <b>NM_005312</b> | 743.113   |
| 1020.091  | <b>SR5</b>       | 3663.082  | 4602.717  | <b>NM_000318</b>  | 1607.719  | 2260.005  | <b>NM_001711</b> | 459.053   |
| 1296.092  | <b>SR7</b>       | 3823.649  | 36650.844 | <b>NM_002060</b>  | 7248.172  | 8623.573  | <b>NM_004210</b> | 7276.321  |
| 654.951   | <b>SR9</b>       | 20169.455 | 5063.065  | <b>AK001230</b>   | 1284.977  | 1928.762  | <b>NM_020140</b> | 1317.05   |
| 750.089   | <b>CY3Cy5</b>    | 3589.532  | 210.052   | <b>NM_014680</b>  | 4741.393  | 6271.813  | <b>NM_001496</b> | 1211.409  |
| 391.673   | <b>NM_018049</b> | 5214.396  | 4161.306  | <b>NM_005027</b>  | 1499.864  | 1786.692  | <b>U65404</b>    | 445.672   |
| 774.525   | <b>NM_014395</b> | 786.627   | 1638.667  | <b>NM_004612</b>  | 1226.278  | 920.195   | <b>AK026232</b>  | 911.502   |
| 423.234   | <b>NM_005160</b> | 1855.497  | 1176.938  | <b>NM_005608</b>  | 864.248   | 1349.701  | <b>NM_014892</b> | 3005.182  |
| 428.979   | <b>X78817</b>    | 16849.307 | 14843.285 | <b>NM_001106</b>  | 1508.124  | 1339.876  | <b>AK023827</b>  | 1609.816  |
| 335.651   | <b>AB023135</b>  | 705.795   | 676.583   | <b>NM_015583</b>  | 1260.467  | 2294.244  | <b>NM_001117</b> | 316.345   |

|           |           |           |           |           |           |           |           |           |
|-----------|-----------|-----------|-----------|-----------|-----------|-----------|-----------|-----------|
| 341.118   | AY009401  | 927.706   | 1374.407  | NM_018490 | 2672.557  | 3546.979  | NM_000231 | 1383.764  |
| 419.823   | AF294628  | 539.966   | 431.368   | NM_006245 | 2984.25   | 6908.347  | L07517    | 541.24    |
| 851.028   | NM_000193 | 1391.628  | 1619.192  | NM_005103 | 3000.154  | 7447.155  | NM_001045 | 2303.826  |
| 461.277   | BC014586  | 634.747   | 451.327   | NM_004822 | 1011.808  | 1700.025  | NM_005697 | 1794.458  |
| 322.779   | NM_002448 | 943.193   | 799.954   | AK022349  | 615.065   | 2026.011  | NM_003099 | 2496.683  |
| 2320.857  | AF053952  | 20107.061 | 26022.285 | NM_005750 | 381.218   | 554.705   | NM_004781 | 625.182   |
| 476.175   | NM_003213 | 7902.359  | 4792.201  | NM_007245 | 2477.549  | 3343.043  | NM_018303 | 867.427   |
| 931.497   | BF184738  | 709.656   | 862.291   | NM_001890 | 683.799   | 1817.976  | NM_014758 | 636.784   |
| 497.315   | NM_014044 | 3114.545  | 3366.635  | NM_001286 | 1253.892  | 2007.305  | AK000947  | 1614.107  |
| 2595.532  | NM_000900 | 1243.888  | 3706.596  | AB033070  | 552.714   | 1279.33   | NM_017952 | 493.657   |
| 1162.056  | J05070    | 226.141   | 1184.294  | NM_018229 | 912.541   | 1965.505  | NM_002940 | 911.961   |
| 512.819   | NM_015057 | 838.314   | 418.709   | AY009127  | 6575.75   | 12303.668 | NM_016081 | 4328.243  |
| 1021.293  | AF303398  | 4185.727  | 4335.846  | NM_014869 | 1428.211  | 1837.069  | NM_006389 | 2136.121  |
| 3540.598  | NM_014810 | 1791.84   | 1670.689  | AK000158  | 4318.403  | 4446.346  | M30818    | 276.851   |
| 728.422   | NM_004738 | 1705.693  | 1926.631  | NM_005769 | 1701.1    | 943.275   | NM_000163 | 382.498   |
| 471.595   | NM_007357 | 3704.522  | 2414.809  | AK024500  | 5731.527  | 5177.717  | NM_014330 | 6944.082  |
| 1316.213  | NM_003763 | 4069.444  | 4476.638  | NM_002564 | 5914.051  | 4225.471  | NM_007214 | 8192.479  |
| 1592.746  | AK023448  | 1130.014  | 830.584   | NM_000963 | 2632.957  | 3473.051  | NM_000311 | 1798.359  |
| 829.627   | Y18213    | 1764.892  | 1608.02   | NM_013308 | 5228.843  | 8686.604  | NM_017909 | 1667.194  |
| 1935.936  | NM_003283 | 2186.588  | 1851.841  | NM_004590 | 542.727   | 655.186   | NM_006335 | 6719.765  |
| 1256.427  | AF249898  | 6566.294  | 5621.09   | NM_014656 | 6430.689  | 17674.453 | NM_000786 | 5478.627  |
| 1380.141  | M69181    | 9230.392  | 10155.571 | NM_002076 | 2218.532  | 4731.64   | AL133561  | 848.448   |
| 1340.275  | AK027224  | 620.222   | 963.822   | NM_005627 | 2216.406  | 2928.048  | AB040891  | 1619.32   |
| 472.351   | NM_002652 | 598.932   | 582.696   | M64497    | 1600.195  | 1610.557  | AB037780  | 398.81    |
| 579.712   | NM_001311 | 1486.562  | 1176.868  | NM_003356 | 6352.164  | 7922.137  | NM_005845 | 4181.653  |
| 1168.729  | NM_017798 | 5222.322  | 6824.471  | AF238315  | 438.117   | 649.279   | NM_016209 | 3869.399  |
| 883.602   | NM_000354 | 3231.474  | 992.134   | NM_006224 | 32731.072 | 24725.488 | NM_018964 | 2154.425  |
| 629.041   | NM_012410 | 3122.86   | 4956.533  | AL137300  | 2395.65   | 1284.36   | NM_000080 | 981.558   |
| 697.688   | NM_001111 | 6643.305  | 6716.855  | NM_000229 | 1525.873  | 2166.662  | NM_001829 | 577.121   |
| 1505.417  | NM_005028 | 1881.352  | 2393.255  | NM_006995 | 8830.827  | 6162.155  | AF283645  | 1114.881  |
| 2299.192  | NM_001611 | 698.335   | 1189.841  | NM_003129 | 8017.197  | 3962.227  | NM_016575 | 1087.209  |
| 2979.702  | M59979    | 310.354   | 840.034   | NM_001956 | 1414.613  | 1311.934  | NM_003897 | 1024.089  |
| 1904.404  | AB018310  | 1972.938  | 1612.373  | AB033064  | 1313.147  | 1172.238  | NM_014165 | 4410.851  |
| 1446.583  | NM_015379 | 16121.825 | 30141.172 | AK022317  | 2364.568  | 2436.653  | AL442085  | 1307.901  |
| 5549.744  | NM_004878 | 526.238   | 535.459   | NM_018396 | 3828.07   | 2664.753  | NM_014736 | 332.611   |
| 49626.297 | AF144638  | 44454.797 | 28503.373 | NM_003124 | 2385.069  | 2262.487  | AK023886  | 585.999   |
| 2239.862  | NM_005502 | 329.349   | 320.26    | NM_004531 | 853.891   | 1106.175  | NM_002553 | 957.157   |
| 722.173   | NM_000742 | 931.753   | 966.67    | AL133581  | 639.84    | 426.988   | AJ404615  | 1683.566  |
| 642.63    | NM_002355 | 8545.814  | 7605.436  | NM_002558 | 2127.914  | 882.061   | NM_016053 | 5505.475  |
| 952.992   | AK026608  | 1039.62   | 761.406   | NM_005031 | 2430.554  | 2021.936  | AB007869  | 1105.971  |
| 3268.824  | AB046836  | 767.876   | 739.115   | AB040920  | 301.448   | 434.628   | AB046844  | 404.989   |
| 2305.951  | AJ224166  | 1298.36   | 743.61    | NM_004842 | 746.238   | 740.027   | NM_000302 | 825.955   |
| 1167.174  | AK026098  | 2013.862  | 2097.315  | AK024639  | 2558.106  | 2594.691  | NM_013235 | 9664.649  |
| 1914.629  | NM_012381 | 1340.534  | 781.927   | NM_015720 | 3833.406  | 4334.327  | NM_016015 | 1922.907  |
| 2685.8    | M20702    | 470.198   | 486.77    | NM_020967 | 606.25    | 838.519   | AK022900  | 901.06    |
| 7624.556  | NM_006397 | 6743.665  | 3923.283  | NM_001071 | 5628.478  | 11374.281 | AB023216  | 511.555   |
| 1254.973  | D83776    | 1674.364  | 1522.879  | AB028990  | 431.111   | 462.042   | NM_002266 | 10122.568 |
| 1820.281  | NM_004088 | 2768.197  | 1907.057  | NM_006708 | 15476.067 | 14453.853 | NM_014400 | 3415.467  |
| 774.508   | NM_002180 | 1012.537  | 998.23    | AB037835  | 972.292   | 1277.867  | AL157492  | 443.155   |
| 853.299   | NM_000138 | 1956.953  | 2901.627  | NM_000157 | 2372.881  | 3558.682  | AL353957  | 1574.622  |
| 3717.989  | NM_018163 | 1468.059  | 1138.337  | NM_000712 | 4791.609  | 3464.658  | NM_000231 | 688.834   |
| 4415.551  | AK026362  | 2454.97   | 3734.774  | NM_018088 | 675.965   | 579.577   | A1859208  | 268.907   |
| 1499.474  | NM_004968 | 4232.78   | 6882.706  | NM_007205 | 269.409   | 174.458   | H64379    | 2998.846  |

|           |           |           |           |            |           |           |           |          |
|-----------|-----------|-----------|-----------|------------|-----------|-----------|-----------|----------|
| 5346.582  | NM_005908 | 1436.22   | 1937.646  | NM_014846  | 1500.041  | 1142.522  | BI831922  | 1234.347 |
| 3051.542  | NM_004785 | 2865.109  | 2613.835  | AB011164   | 1528.443  | 704.971   | M69238    | 1150.995 |
| 942.727   | NM_002428 | 1598.315  | 1710.403  | M24750     | 483.423   | 367.465   | AK026092  | 1029.833 |
| 63666.836 | NM_014674 | 6060.051  | 3050.711  | NM_005965  | 668.236   | 550.645   | AK001175  | 1179.845 |
| 9947.66   | NM_014652 | 1719.62   | 1521.893  | NM_002740  | 1536.824  | 1402.803  | NM_001560 | 687.213  |
| 5626.668  | AL133020  | 5039.39   | 4563.865  | AL117482   | 941.074   | 944.555   | NM_001783 | 1342.142 |
| 1766.017  | NM_014044 | 3082.698  | 3074.336  | NM_006549  | 13614.581 | 8861.521  | J03171    | 754.136  |
| 3000.004  | NM_000900 | 1716.46   | 4230.051  | AB018324   | 4223.509  | 3549.383  | NM_005856 | 551.052  |
| 5846.942  | AK023684  | 3559.603  | 6316.298  | NM_002742  | 25149.504 | 18077.703 | NM_005312 | 651.042  |
| 1082.112  | NM_000232 | 595.46    | 651.715   | NM_005750  | 317.34    | 648.554   | NM_001711 | 508.534  |
| 793.163   | J05070    | 129.315   | 1174.887  | NM_004973  | 1327.445  | 983.337   | NM_004210 | 6706.063 |
| 2629.507  | AA700390  | 4287.148  | 6239.503  | NM_007245  | 2003.084  | 1408.443  | NM_020140 | 1199.671 |
| 13706.255 | Y18474    | 629.923   | 2476.202  | NM_001890  | 620.161   | 1213.274  | AK026232  | 744.95   |
| 1093.615  | AA436163  | 1042.904  | 541.464   | NM_001286  | 808.46    | 618.398   | NM_014892 | 2710.691 |
| 6442.761  | BI907981  | 953.22    | 624.064   | NM_000951  | 1247.634  | 1400.324  | AK023827  | 1244.158 |
| 11207.02  | BI603841  | 2196.542  | 2425.485  | X52599     | 480.069   | 571.193   | AF283645  | 419.527  |
| 2831.741  | BG696638  | 5772.446  | 1289.885  | AA029300   | 1513.463  | 1236.427  | NM_016575 | 424.571  |
| 2373.615  | M19888    | 1711.036  | 885.628   | BG708842   | 14894.56  | 8933.095  | NM_001045 | 1180.468 |
| 12872.349 | Y08136    | 932.34    | 1253.121  | M19723     | 45808.934 | 23950.348 | NM_005697 | 1847.308 |
| 7125.864  | AA156863  | 3682.774  | 3094.34   | AA709271   | 528.484   | 420.431   | NM_003099 | 2194.146 |
| 231.853   | BI915199  | 1461.363  | 1110.615  | M34057     | 563.33    | 557.7     | NM_004781 | 540.978  |
| 789.228   | R82957    | 59877.098 | 48507.547 | ID 1984668 | 605.856   | 2706.183  | NM_018303 | 828.291  |
| 432.351   | BI830442  | 583.897   | 542.925   | ID 1832579 | 452.909   | 375.586   | NM_014758 | 588.737  |
| 270.136   | AA398951  | 3423.752  | 1849.436  | H-430185 N | 652.531   | 469.156   | NM_005124 | 983.984  |
| 4144.443  | AI218732  | 2793.861  | 4031.883  | D16583     | 2467.279  | 1618.22   | AK000947  | 1464.68  |
| 23933.361 | NM_004102 | 2707.92   | 3931.959  | H44051     | 331.378   | 299.301   | L08240    | 415.428  |
| 191.739   | NM_004544 | 4733.94   | 6742.43   | AA481547   | 613.482   | 543.987   | NM_002940 | 1084.939 |
| 1115.051  | NM_018890 | 20141.555 | 21984.709 | AA831880   | 314.353   | 209.349   | NM_016081 | 3096.624 |
| 1762.003  | NM_016204 | 868.737   | 1299.945  | T64880     | 610.898   | 512.994   | NM_006389 | 1345.354 |
| 325.911   | NM_002652 | 504.543   | 661.224   | NM_006039  | 1293.078  | 1032.748  | M30818    | 221.844  |
| 4514.314  | NM_001311 | 1718.745  | 1644.861  | NM_002089  | 504.001   | 598.363   | AB023216  | 269.753  |
| 390.399   | NM_017798 | 4661.826  | 6013.926  | NM_014656  | 7796.602  | 10649.735 | NM_002266 | 7648.273 |
| 2446.217  | NM_012410 | 2843.06   | 4108.717  | NM_002076  | 2180.807  | 2371.694  | NM_014400 | 1843.963 |
| 236.381   | NM_001111 | 6142.521  | 7057.103  | X05299     | 2286.601  | 3217.299  | AL353957  | 442.011  |
| 1384.352  | NM_018049 | 5211.755  | 4677.738  | BM468475   | 611.106   | 775.472   | NM_007214 | 1281.312 |
| 5721.257  | NM_014395 | 591.431   | 2231.061  | NM_000318  | 1533.345  | 1217.164  | NM_000311 | 983.603  |
| 822.527   | NM_005160 | 1933.562  | 1014.764  | NM_002060  | 5046.56   | 3288.671  | NM_017909 | 1376.689 |
| 606.544   | X78817    | 15836.463 | 14308.181 | AK001230   | 959.069   | 732.415   | NM_006335 | 5882.573 |
| 9851.335  | AB023135  | 512.814   | 584.318   | NM_014680  | 3507.853  | 2626.085  | NM_000786 | 5195.034 |
| 660.533   | AY009401  | 966.431   | 1073.027  | NM_005027  | 1211.781  | 942.834   | AL133561  | 1520.255 |
| 636.142   | AF294628  | 498.614   | 443.373   | NM_004612  | 1019.035  | 598.366   | AB040891  | 1111.734 |
| 6397.746  | AK026960  | 364.453   | 230.588   | NM_005608  | 852.824   | 461.524   | AB037780  | 466.234  |
| 1445.004  | NM_001991 | 600.197   | 842.375   | NM_001106  | 480.068   | 244.452   | NM_005845 | 4251.174 |
| 471.993   | NM_000193 | 1644.17   | 2474.774  | NM_015583  | 634.084   | 428.718   | NM_016209 | 3256.645 |
| 805.938   | BC014586  | 610.59    | 675.38    | NM_018490  | 1564.923  | 809.654   | NM_018964 | 1859.185 |
| 858.601   | NM_002448 | 1083.851  | 727.637   | NM_006245  | 1796.669  | 1186.11   | NM_000080 | 844.495  |
| 2725.725  | AF053952  | 22279.008 | 27187.332 | NM_005103  | 2034.215  | 2002.093  | AK026092  | 523.418  |
| 2464.952  | NM_003213 | 7666.471  | 4759.703  | NM_004822  | 504.672   | 427.204   | AK001175  | 616.105  |
| 350.513   | NM_015057 | 803.419   | 381.075   | AK022349   | 427.594   | 479.84    | NM_003897 | 1055.634 |
| 1151.171  | AF303398  | 4271.827  | 4482.313  | NM_005031  | 3068.152  | 4226.742  | NM_014165 | 4587.406 |
| 512.459   | NM_014810 | 1824.052  | 1505.464  | AB040920   | 423.038   | 593.461   | AL442085  | 1969.261 |
| 2015.47   | NM_004738 | 1792.575  | 1845.166  | NM_000720  | 413.782   | 639.777   | NM_013313 | 1356.616 |
| 53041.621 | NM_007357 | 3627.778  | 2544.523  | NM_004842  | 665.53    | 672.45    | NM_014736 | 2421.837 |

|           |           |           |           |           |           |           |           |           |
|-----------|-----------|-----------|-----------|-----------|-----------|-----------|-----------|-----------|
| 1626.978  | NM_003763 | 4193.673  | 4315.116  | AK024639  | 2516.265  | 1887.225  | AK023886  | 690.115   |
| 5433.05   | AK023448  | 1155.83   | 767.555   | NM_015720 | 4593.574  | 4179.042  | NM_002553 | 880.263   |
| 1502.907  | Y18213    | 2003.416  | 1355.074  | AB007915  | 377.134   | 699.009   | AJ404615  | 1305.193  |
| 1835.73   | NM_003283 | 2032.769  | 1783.629  | AB033070  | 425.942   | 505.74    | NM_016053 | 6497.842  |
| 613.113   | AF249898  | 7781.781  | 8600.396  | NM_018229 | 914.007   | 725.534   | AB007869  | 1275.044  |
| 930.684   | M69181    | 9218.756  | 11247.8   | NM_006325 | 3817.359  | 3216.404  | AB046844  | 497.594   |
| 1818.027  | NM_002428 | 2242.847  | 1968.047  | AY009127  | 4952.379  | 4855.949  | NM_000302 | 773.42    |
| 1165.836  | NM_014674 | 5877.441  | 3182.949  | NM_014869 | 1075.577  | 866.338   | NM_013235 | 8485.982  |
| 1321.344  | NM_018271 | 945.14    | 1210.493  | AK000158  | 3444.241  | 2161.054  | NM_016015 | 2085.29   |
| 655.804   | NM_014652 | 1695.258  | 1329.573  | NM_005769 | 1439.285  | 533.72    | AK022900  | 663.221   |
| 853.628   | AL133020  | 6254.902  | 4910.149  | AK024500  | 5407.596  | 3919.344  | NM_014892 | 1298.703  |
| 5545.568  | NM_001611 | 578.523   | 1220.188  | NM_002564 | 5899.553  | 2688.288  | AK023827  | 730.638   |
| 1128.464  | M59979    | 390.153   | 532.261   | NM_000963 | 868.498   | 509.834   | NM_000231 | 1130.008  |
| 279.431   | AB018310  | 2113.051  | 1374.23   | NM_013308 | 3205.962  | 2993.94   | L07517    | 487.858   |
| 662.874   | NM_015379 | 16080.465 | 31266.455 | AF027302  | 1626.397  | 1778.744  | AK022451  | 515.822   |
| 31215.885 | NM_004878 | 372.87    | 290.082   | NM_002852 | 2048.017  | 1632.182  | BM918441  | 601.087   |
| 29510.396 | AF144638  | 35607.926 | 22284.982 | NM_001817 | 2203.007  | 1839.117  | AA150828  | 735.48    |
| 22614.398 | NM_000742 | 957.543   | 797.509   | AF063611  | 818.96    | 632.064   | A1859208  | 275.418   |
| 5223.292  | NM_002355 | 8330.531  | 7739.93   | NM_005965 | 854.901   | 1734.381  | H64379    | 3319.773  |
| 1223.006  | AK026608  | 1017.82   | 903.386   | NM_002740 | 1862.857  | 1976.511  | B1831922  | 1051.099  |
| 1266.12   | NM_004102 | 2657.803  | 3086.606  | AL117482  | 1297.823  | 1515.605  | M69238    | 1000.695  |
| 5149.104  | NM_004544 | 5043.684  | 6335.787  | NM_006549 | 23721.719 | 21535.563 | NM_016081 | 1891.339  |
| 3822.578  | NM_018890 | 21533.609 | 25552.98  | AB018324  | 4814.252  | 4970.345  | NM_006389 | 1105.473  |
| 1211.458  | NM_016204 | 649.966   | 561.713   | NM_002742 | 47922.355 | 56872.449 | M30818    | 141.671   |
| 397.823   | AB046836  | 787.543   | 783.723   | Z25431    | 2345.639  | 1796.685  | NM_003329 | 44247.926 |
| 1436.174  | AJ224166  | 1326.676  | 894.459   | NM_005627 | 1960.619  | 1990.892  | NM_003299 | 18218.596 |
| 544.397   | AK026098  | 1971.218  | 1944.153  | M64497    | 1448.124  | 1029.635  | NM_007034 | 292.674   |
| 3962.835  | NM_012381 | 1387.041  | 620.438   | NM_007274 | 6930.3    | 4672.275  | NM_001560 | 2233.5    |
| 3853.532  | M20702    | 543.945   | 317.22    | NM_003356 | 4582.989  | 3261.906  | NM_001783 | 4326.688  |
| 2453.885  | NM_006397 | 8467.449  | 4071.668  | NM_006224 | 25444.051 | 14299.927 | J03171    | 1292.63   |
| 1042.614  | D83776    | 1540.533  | 1182.7    | NM_000229 | 1524.791  | 1128.938  | NM_005856 | 653.576   |
| 481.651   | NM_004088 | 2370.453  | 1425.688  | NM_006995 | 8596.263  | 4758.412  | NM_005312 | 520.049   |
| 482.075   | NM_002180 | 909.598   | 775.254   | NM_003129 | 7832.498  | 3161.786  | NM_001711 | 455.605   |
| 958.411   | NM_000138 | 2263.03   | 2688.709  | NM_001956 | 1468.294  | 1176.953  | NM_004210 | 6121.532  |
| 2351.146  | NM_018163 | 1409.185  | 1164.809  | AB033064  | 1582.792  | 1061.74   | NM_020140 | 1023.351  |
| 855.333   | AK026362  | 2944.661  | 3987.324  | AK022317  | 2054.666  | 1790.596  | NM_018964 | 1622.736  |
| 4977.737  | NM_004968 | 3054.602  | 2676.907  | NM_018396 | 3383.796  | 2285.839  | NM_000080 | 700.994   |
| 2522.026  | NM_005908 | 1814.023  | 1967.609  | NM_003124 | 2350.647  | 1872.826  | NM_016575 | 960.157   |
| 1742.409  | NM_004785 | 3712.384  | 2478.292  | NM_004531 | 739.189   | 1204.453  | NM_001045 | 3070.478  |
| 2814.685  | NM_000193 | 1279.094  | 1945.881  | AL133581  | 542.618   | 537.323   | NM_005697 | 2064.711  |
| 1091.754  | BC014586  | 538.954   | 685.219   | NM_002558 | 2179.77   | 1072.528  | NM_003099 | 2739.616  |
| 869.601   | NM_002448 | 952.589   | 717.635   | NM_003586 | 1051.988  | 3171.398  | NM_004781 | 501.955   |
| 1395.074  | AF053952  | 20213.744 | 21022.197 | NM_000922 | 1030.327  | 1073.666  | NM_018303 | 714.971   |
| 7178.955  | NM_003213 | 7215.839  | 4417.08   | NM_013232 | 7010.154  | 6576.473  | NM_014758 | 679.99    |
| 2671.768  | BF184738  | 595.876   | 829.289   | NM_017993 | 838.307   | 928.914   | NM_005124 | 1062.753  |
| 467.185   | NM_014044 | 3186.745  | 3285.765  | NM_000362 | 5388.881  | 2957.906  | AK000947  | 1406.754  |
| 646.994   | NM_000900 | 1338.567  | 3892.854  | NM_014429 | 1380.478  | 1343.091  | L08240    | 417.04    |
| 8389.309  | AK023684  | 3456.216  | 6553.464  | AK000770  | 1419.466  | 2010.293  | NM_002940 | 924.147   |
| 1720.138  | NM_000232 | 595.507   | 567.825   | NM_002370 | 6715.666  | 11768.053 | NM_000302 | 184.803   |
| 883.186   | J05070    | 140.54    | 1229.794  | NM_015670 | 1000.677  | 1135.686  | NM_013235 | 4524.85   |
| 630.334   | AA700390  | 4985.798  | 5866.103  | NM_014709 | 613.786   | 482.134   | NM_016015 | 812.408   |
| 332.209   | Y18474    | 583.569   | 2214.393  | AB037835  | 815.565   | 578.563   | NM_020120 | 438.809   |
| 10297.151 | AA436163  | 905.696   | 408.822   | NM_016228 | 318.089   | 261.279   | AK022900  | 630.022   |

|           |                  |           |           |                  |           |           |                  |           |
|-----------|------------------|-----------|-----------|------------------|-----------|-----------|------------------|-----------|
| 4571.437  | <b>BI907981</b>  | 793.337   | 605.463   | <b>NM_000157</b> | 2223.582  | 2344.079  | <b>AB023216</b>  | 590.87    |
| 732.398   | <b>BI603841</b>  | 2368.043  | 2254.014  | <b>NM_000712</b> | 4894.417  | 2901.721  | <b>NM_002266</b> | 9172.434  |
| 2263.689  | <b>BG696638</b>  | 5916.672  | 1078.978  | <b>NM_018088</b> | 583.912   | 419.747   | <b>NM_014400</b> | 3618.177  |
| 1052.59   | <b>M19888</b>    | 1919.251  | 591.573   | <b>BC013695</b>  | 8394.074  | 2899.784  | <b>AL157492</b>  | 451.958   |
| 710.027   | <b>Y08136</b>    | 863.923   | 980.986   | <b>NM_014846</b> | 1796.399  | 1539.302  | <b>AL353957</b>  | 1570.358  |
| 1274.922  | <b>AA156863</b>  | 3993.322  | 3462.911  | <b>AB011164</b>  | 1697.873  | 1886.374  | <b>NM_007214</b> | 5795.895  |
| 1266.341  | <b>BI915199</b>  | 1572.185  | 1108.976  | <b>M24750</b>    | 555.222   | 516.708   | <b>NM_000311</b> | 1691.18   |
| 981.059   | <b>R82957</b>    | 54648.102 | 52630.293 | <b>AB046776</b>  | 660.524   | 753.693   | <b>NM_017909</b> | 1550.566  |
| 462.534   | <b>BI830442</b>  | 611.549   | 549.295   | <b>NM_002687</b> | 8644.313  | 9336.211  | <b>NM_006335</b> | 6360.775  |
| 337.679   | <b>AA398951</b>  | 3464.402  | 1354.251  | <b>NM_000627</b> | 1611.996  | 3049.817  | <b>NM_000786</b> | 4847.041  |
| 4610.987  | <b>AI218732</b>  | 1683.002  | 1946.189  | <b>NM_000038</b> | 619.605   | 735.125   | <b>AL133561</b>  | 1302.18   |
| 264.738   | <b>AF249898</b>  | 7833.657  | 8140.45   | <b>NM_000825</b> | 722.737   | 1066.457  | <b>AB040891</b>  | 1087.684  |
| 1142.666  | <b>M69181</b>    | 8436.99   | 9964.651  | <b>NM_004334</b> | 1645.81   | 1509.573  | <b>AB037780</b>  | 414.19    |
| 1001.395  | <b>AK027224</b>  | 250.179   | 783.476   | <b>NM_003886</b> | 2474.608  | 1689.076  | <b>NM_005845</b> | 3592.005  |
| 422.866   | <b>L09078</b>    | 358.978   | 559.755   | <b>NM_005843</b> | 873.432   | 801.423   | <b>NM_016209</b> | 3209.629  |
| 521.833   | <b>NM_002652</b> | 574.722   | 685.565   | <b>NM_003854</b> | 310.215   | 496.122   | <b>AK002114</b>  | 505.508   |
| 1625.437  | <b>NM_001311</b> | 1924.408  | 1527.639  | <b>NM_001252</b> | 6192.181  | 3044.3    | <b>AK026318</b>  | 682.441   |
| 1597.673  | <b>NM_017798</b> | 5357.483  | 6904.808  | <b>AF053712</b>  | 563.769   | 363.676   | <b>AF291673</b>  | 468.374   |
| 34862.602 | <b>NM_012410</b> | 2615.624  | 3848.068  | <b>NM_003947</b> | 588.611   | 478.356   | <b>NM_004365</b> | 5129.241  |
| 29537.318 | <b>NM_001111</b> | 6797.79   | 6721.312  | <b>NM_002821</b> | 9310.365  | 4509.472  | <b>NM_016355</b> | 1529.739  |
| 453.86    | <b>NM_018049</b> | 5244.367  | 4778.939  | <b>M96652</b>    | 8621.496  | 4276.349  | <b>AJ296290</b>  | 1162.324  |
| 2663.526  | <b>NM_014395</b> | 658.218   | 1789.989  | <b>L41690</b>    | 1285.708  | 964.56    | <b>AK026092</b>  | 1119.561  |
| 9383.276  | <b>NM_005160</b> | 1908.67   | 846.604   | <b>NM_000939</b> | 35959.336 | 28265.16  | <b>AK001175</b>  | 1284.272  |
| 1125.28   | <b>X78817</b>    | 15320.1   | 10596.783 | <b>NM_006514</b> | 2028.74   | 1258.786  | <b>NM_003897</b> | 1283.104  |
| 665.367   | <b>AB023135</b>  | 650.259   | 532.716   | <b>AF065164</b>  | 3624.58   | 2452.892  | <b>NM_014165</b> | 4952.679  |
| 245.298   | <b>AY009401</b>  | 1081.284  | 1334.618  | <b>AB028991</b>  | 2491.586  | 3816.361  | <b>AL442085</b>  | 2264.185  |
| 697.786   | <b>AF294628</b>  | 439.791   | 271.744   | <b>AF263547</b>  | 1343.082  | 1776.936  | <b>NM_013313</b> | 1352.565  |
| 563.372   | <b>AK026960</b>  | 362.769   | 410.924   | <b>AJ008143</b>  | 7977.28   | 12496.914 | <b>NM_014736</b> | 2437.399  |
| 5695.459  | <b>NM_001991</b> | 839.875   | 734.323   | <b>NM_007144</b> | 912.795   | 3900.09   | <b>AK023886</b>  | 675.831   |
| 1479.462  | <b>NM_005502</b> | 407.369   | 346.398   | <b>NM_005093</b> | 123.689   | 899.069   | <b>NM_002553</b> | 851.287   |
| 3085.362  | <b>NM_000742</b> | 780.726   | 921.063   | <b>NM_004424</b> | 3583.618  | 3880.002  | <b>AJ404615</b>  | 1314.132  |
| 3036.42   | <b>NM_002355</b> | 8022.44   | 7598.402  | <b>AL133117</b>  | 1394.179  | 1720.228  | <b>NM_016053</b> | 5286.26   |
| 614.368   | <b>AK026608</b>  | 822.895   | 1038.611  | <b>AF070586</b>  | 3334.235  | 2619.692  | <b>AB007869</b>  | 1160.133  |
| 408.945   | <b>NM_015057</b> | 1038.334  | 511.733   | <b>NM_014412</b> | 511.516   | 635.316   | <b>M64108</b>    | 1054.007  |
| 453.315   | <b>AF303398</b>  | 4159.692  | 3593.669  | <b>NM_013303</b> | 949.532   | 642.522   | <b>Y17867</b>    | 491.765   |
| 308.979   | <b>NM_014810</b> | 1984.764  | 1573.112  | <b>NM_012227</b> | 1356.667  | 1151.596  | <b>NM_018071</b> | 990.061   |
| 787.519   | <b>NM_004738</b> | 1852.097  | 2200.796  | <b>NM_006101</b> | 521.52    | 1034.858  | <b>NM_004333</b> | 1941.523  |
| 1591.749  | <b>NM_007357</b> | 4226.979  | 2775.591  | <b>NM_001237</b> | 1607.975  | 1677.275  | <b>M31520</b>    | 52712.945 |
| 456.281   | <b>NM_003763</b> | 4115.003  | 5275.771  | <b>NM_002507</b> | 843.229   | 706.74    | <b>NM_002020</b> | 1584.509  |
| 8209.827  | <b>AK023448</b>  | 1234.571  | 656.933   | <b>NM_015962</b> | 1218.492  | 796.223   | <b>AL050137</b>  | 311.693   |
| 2323.579  | <b>Y18213</b>    | 1655.693  | 1253.117  | <b>NM_016145</b> | 394.356   | 649.949   | <b>AK024423</b>  | 947.371   |
| 2443.144  | <b>NM_003283</b> | 2239.902  | 1489.687  | <b>NM_016078</b> | 2275.445  | 1260.826  | <b>NM_005043</b> | 6024.153  |
| 704.087   | <b>NM_018163</b> | 1490.927  | 1371.497  | <b>NM_004401</b> | 732.102   | 400.508   | <b>NM_005979</b> | 4830.279  |
| 1105.13   | <b>AK026362</b>  | 2902.748  | 4961.387  | <b>NM_001849</b> | 9566.092  | 6330.397  | <b>NM_006282</b> | 1825.538  |
| 1802.044  | <b>NM_004968</b> | 2822.282  | 3356.239  | <b>AF255910</b>  | 867.435   | 699.332   | <b>NM_020321</b> | 295.157   |
| 926.829   | <b>NM_005908</b> | 1535.538  | 1968.723  | <b>NM_016146</b> | 1765.16   | 2124.432  | <b>NM_015920</b> | 11920.699 |
| 1364.003  | <b>NM_004785</b> | 3462.238  | 3196.359  | <b>AK024343</b>  | 936.096   | 1217.938  | <b>AB011113</b>  | 1661.455  |
| 310.136   | <b>AK024079</b>  | 329.78    | 645.526   | <b>NM_001936</b> | 814.497   | 938.443   | <b>NM_004115</b> | 1016.772  |
| 1850.135  | <b>NM_002428</b> | 2373.965  | 1846.801  | <b>NM_002569</b> | 638.47    | 967.841   | <b>NM_018287</b> | 692.466   |
| 694.929   | <b>NM_014674</b> | 5791.858  | 3477.773  | <b>D42084</b>    | 1705.153  | 2361.338  | <b>NM_001955</b> | 1570.365  |
| 166.293   | <b>NM_018271</b> | 1040.925  | 1393.663  | <b>NM_014693</b> | 805.425   | 787.521   | <b>AF016004</b>  | 1124.579  |
| 511.624   | <b>NM_000547</b> | 414.813   | 334.494   | <b>AB007896</b>  | 639.25    | 455.633   | <b>NM_003567</b> | 3900.34   |
| 10696.7   | <b>NM_014652</b> | 1953.35   | 1437.829  | <b>AB007916</b>  | 5192.938  | 4409.422  | <b>NM_007315</b> | 2026.206  |

|          |           |           |           |           |           |           |           |           |
|----------|-----------|-----------|-----------|-----------|-----------|-----------|-----------|-----------|
| 3735.624 | AL133020  | 5492.408  | 4999.03   | NM_002874 | 447.393   | 122.909   | L20686    | 1998.619  |
| 629.892  | NM_005028 | 1892.601  | 2209.54   | AF049140  | 838.316   | 967.834   | NM_000304 | 471.991   |
| 2463.042 | NM_001611 | 568.703   | 934.867   | AL136794  | 324.714   | 396.225   | S72604    | 6148.711  |
| 9408.638 | M59979    | 488.329   | 438.655   | BC035601  | 26649.463 | 15644.855 | NM_002675 | 508.482   |
| 1858.495 | AB018310  | 2144.321  | 1640.763  | NM_001458 | 835.818   | 450.359   | NM_012432 | 7450.074  |
| 1241.49  | NM_015379 | 17806.631 | 40268.906 | NM_020388 | 3529.234  | 2366.581  | NM_005007 | 4381.24   |
| 6703.478 | NM_004878 | 459.827   | 222.38    | AB046829  | 371.664   | 370.683   | AK024996  | 1553.611  |
| 4242.508 | AF144638  | 38957.578 | 22957.33  | NM_003379 | 9619.748  | 6337.847  | NM_012290 | 2023.527  |
| 1368.33  | NM_001777 | 8916.573  | 19411.525 | NM_004521 | 3836.014  | 2959.259  | NM_002431 | 1194.61   |
| 247.25   | U79457    | 5116.16   | 4505.169  | AF229162  | 1043.101  | 641.585   | NM_001827 | 14005.957 |
| 1489.074 | NM_014347 | 6518.998  | 5315.263  | U02309    | 29264.68  | 19114.047 | NM_020466 | 1820.464  |
| 3615.787 | NM_001296 | 11849.475 | 6212.612  | NM_005257 | 7200.665  | 4869.61   | AL079280  | 364.637   |
| 711.222  | NM_004344 | 8027.427  | 5230.791  | AF011573  | 3919.448  | 3534.285  | NM_002853 | 1961.957  |
| 255.389  | NM_000757 | 633.106   | 549.307   | NM_002145 | 1931.152  | 1842.901  | NM_003174 | 448.502   |
| 2149.161 | AB046786  | 1274.746  | 1693.438  | NM_003923 | 467.042   | 359.628   | NM_012307 | 8314.211  |
| 1606.522 | NM_016620 | 11648.018 | 11388.392 | NM_004831 | 453.421   | 466.549   | NM_006371 | 1208.166  |
| 950.581  | NM_018890 | 24048.311 | 27267.131 | NM_014213 | 2360.141  | 2322.66   | NM_018834 | 795.08    |
| 5079.984 | NM_016204 | 725.313   | 528.501   | NM_000168 | 2431.315  | 1470.152  | NM_004574 | 458.258   |
| 2834.409 | AB046836  | 1014.598  | 1107.219  | AF294629  | 2188.528  | 1903.455  | NM_004848 | 567.276   |
| 2043.672 | AJ224166  | 1415.97   | 997.062   | NM_000545 | 7300.007  | 7084.153  | NM_001944 | 366.686   |
| 2624.921 | AK026098  | 2210.524  | 2490.682  | NM_002136 | 31780.393 | 15783.655 | AF014459  | 1642.449  |
| 732.153  | NM_012381 | 1725.185  | 886.488   | AK025571  | 1122.009  | 978.662   | AK024601  | 1835.412  |
| 754.291  | M20702    | 545.662   | 964.459   | NM_014463 | 14736.576 | 14296.536 | S68069    | 2089.118  |
| 5439.316 | NM_006397 | 8483.762  | 6173.967  | NM_005520 | 10241.292 | 6037.27   | AB011095  | 503.571   |
| 1442.246 | D83776    | 1742.804  | 1306.321  | AK023265  | 801.411   | 327.097   | NM_006302 | 1707.084  |
| 1369.515 | NM_004088 | 2718.932  | 1742.059  | AB029009  | 1471.703  | 746.709   | AJ224875  | 2112.467  |
| 1993.926 | NM_002180 | 903.797   | 921.045   | AF112207  | 1152.485  | 915.444   | NM_002149 | 4187.058  |
| 1055.231 | NM_000138 | 2331.635  | 2577.572  | NM_005594 | 11174.711 | 6262.188  | AF043324  | 2166.044  |
| 409.22   | AB011541  | 1538.385  | 1659.774  | NM_004461 | 40772.391 | 26774.816 | AK024172  | 638.234   |
| 1068.148 | BC032460  | 6292.94   | 8909.643  | NM_018473 | 2535.052  | 1277.654  | NM_014814 | 2322.98   |
| 1088.743 | NM_014071 | 1989.056  | 1971.77   | BF106121  | 578.907   | 512.814   | NM_002797 | 5529.828  |
| 4362.169 | AK024404  | 1570.255  | 5085.087  | AK022590  | 1529.959  | 1055.023  | AK024318  | 689.979   |
| 3137.171 | NM_006329 | 1051.651  | 718.081   | AK023719  | 4869.634  | 4854.234  | NM_016129 | 2045.157  |
| 627.879  | NM_000213 | 8119.768  | 8763.559  | AK025590  | 1161.391  | 725.709   | NM_002809 | 3360.528  |
| 2123.514 | BE906107  | 8373.368  | 7545.856  | AY007149  | 2306.877  | 3655.758  | NM_017912 | 2282.018  |
| 1405.441 | NM_015516 | 2332.283  | 2014.764  | M12078    | 898.078   | 737.712   | NM_000423 | 4127.408  |
| 1778.542 | AB033065  | 1041.854  | 1567.812  | NM_004550 | 8076.818  | 5941.944  | AB046838  | 1306.615  |
| 1243.645 | NM_005211 | 564.672   | 3158.869  | NM_000785 | 562.727   | 569.252   | AK026339  | 627.549   |
| 198.318  | NM_004857 | 4784.677  | 3446.351  | NM_004110 | 5711.543  | 4753.474  | X98411    | 2431.072  |
| 966.662  | NM_012108 | 596.242   | 381.578   | NM_013387 | 23386.215 | 23029.619 | AF116658  | 1856.707  |
| 589.819  | NM_003253 | 693.044   | 555.626   | NM_005262 | 8980.164  | 6479.237  | NM_014865 | 4045.645  |
| 222.995  | NM_013285 | 3400.583  | 1695.322  | NM_005068 | 2117.093  | 1629.726  | AB032977  | 3988.549  |
| 7778.491 | NM_002872 | 17269.299 | 10452.417 | NM_018223 | 2315.563  | 1372.245  | AK001725  | 426.016   |
| 3363.336 | NM_000490 | 666.184   | 823.105   | NM_006693 | 7004.267  | 2403.804  | NM_003036 | 1467.148  |
| 1209.67  | NM_004839 | 989.307   | 1027.906  | NM_001722 | 869.324   | 536.934   | NM_020529 | 1597.527  |
| 2079.774 | NM_012193 | 1196.502  | 1268.682  | AB046802  | 2115.87   | 1361.822  | NM_020395 | 911.142   |
| 2027.323 | NM_003405 | 7715.381  | 6211.334  | NM_003297 | 417.202   | 452.419   | NM_003425 | 641.35    |
| 369.872  | NM_004720 | 5391.82   | 5636.163  | NM_018269 | 6921.735  | 4451.669  | NM_013388 | 2873.303  |
| 5594.139 | NM_001057 | 1054.374  | 1499.866  | AK024633  | 1557.179  | 1130.933  | AF038951  | 5629.938  |
| 2190.584 | NM_005561 | 5821.148  | 8286.135  | NM_001453 | 3771.495  | 2342.414  | NM_006492 | 651.142   |
| 401.064  | AF272381  | 4580.241  | 4442.001  | NM_012075 | 1204.241  | 1561.759  | AK021811  | 695.574   |
| 1117.773 | NM_004524 | 2105.236  | 1913.022  | AB004851  | 619.37    | 1087.998  | NM_003428 | 1145.199  |
| 484.134  | NM_006315 | 1684.842  | 1587.83   | NM_013381 | 492.923   | 686.52    | AF055030  | 1257.228  |

|           |           |           |           |           |           |           |           |           |
|-----------|-----------|-----------|-----------|-----------|-----------|-----------|-----------|-----------|
| 51049.559 | NM_018401 | 1006.342  | 919.729   | AK023911  | 6035.771  | 5100.965  | AK000589  | 1002.001  |
| 50157.23  | NM_005163 | 2984.759  | 2946.214  | NM_001283 | 1672.713  | 2016.115  | X53281    | 3955.024  |
| 402.388   | NM_007273 | 30209.08  | 29409.873 | AL110237  | 683.473   | 834.931   | BC012782  | 915.9     |
| 4576.611  | BE894943  | 646.758   | 777.565   | D87470    | 645.264   | 823.116   | AF132026  | 36607.793 |
| 16681.207 | NM_016422 | 1321.451  | 1527.595  | AF147307  | 3269.346  | 2722.831  | AL050353  | 792.053   |
| 2248.5    | NM_017878 | 1826.872  | 2464.226  | AK001829  | 1049.202  | 1616.779  | AB037788  | 5608.328  |
| 1541.449  | NM_004494 | 56589.938 | 63206.57  | NM_016525 | 1531.486  | 1431.926  | NM_004587 | 2767.254  |
| 690.407   | AL049687  | 657.489   | 864.839   | AK024931  | 8949.377  | 6605.388  | AK024570  | 8213.333  |
| 440.608   | NM_005643 | 10207.847 | 12518.621 | AL109715  | 361.427   | 313.63    | AF161401  | 3579.175  |
| 6885.758  | NM_003592 | 2524.438  | 2032.663  | AF086181  | 402.86    | 401.984   | NM_000990 | 5189.86   |
| 1149.268  | NM_014953 | 2043.606  | 1206.562  | AK022258  | 323.585   | 289.995   | NM_014740 | 1464.296  |
| 707.45    | AF179995  | 812.299   | 450.849   | AF131799  | 461.171   | 445.73    | NM_015956 | 2991.022  |
| 380.239   | NM_016195 | 4122.156  | 1389.966  | AK000455  | 549.577   | 413.402   | AF075008  | 1233.211  |
| 4821.038  | NM_004523 | 1064.281  | 666.666   | NM_005230 | 363.551   | 298.925   | NM_006504 | 1726.192  |
| 2031.845  | NM_004404 | 6261.154  | 4702.701  | AL365407  | 1988.533  | 2325.773  | AF070538  | 389.011   |
| 994.599   | NM_002960 | 2842.282  | 2974.526  | AK000840  | 8146.67   | 6956.08   | AL137430  | 327.861   |
| 1144.236  | NM_006790 | 898.085   | 1136.056  | AL162073  | 1163.57   | 992.758   | NM_000696 | 3492.222  |
| 676.268   | AL117522  | 7818.069  | 5822.625  | AL390160  | 760.095   | 1332.238  | NM_002488 | 10374.687 |
| 1462.125  | NM_006572 | 5891.081  | 7556.86   | AJ006835  | 1708.982  | 1571.946  | NM_004003 | 5098.661  |
| 3069.947  | NM_019061 | 2450.365  | 3065.308  | AL110138  | 511.819   | 535.329   | NM_000188 | 431.678   |
| 494.191   | AB033007  | 2090.516  | 1969.125  | AL122039  | 432.368   | 355.935   | BF244401  | 1371.453  |
| 20078.852 | NM_003781 | 874.405   | 794.762   | AF070577  | 6961.537  | 3771.331  | NM_004718 | 19282.285 |
| 4681.68   | NM_001304 | 844.775   | 774.515   | AL157484  | 6438.977  | 4143.877  | AL359585  | 1554.371  |
| 3481.485  | NM_003130 | 748.428   | 439.655   | AK024850  | 806.09    | 1036.631  | AB046850  | 1336.62   |
| 644.038   | NM_004716 | 10703.646 | 9674.989  | Y09836    | 1473.533  | 383.639   | NM_014801 | 1452.845  |
| 1553.044  | D29810    | 2432.828  | 2398.867  | AL137597  | 5489.488  | 11778.677 | NM_003642 | 3366.438  |
| 1743.018  | NM_000128 | 790.826   | 639.015   | AK022144  | 247.699   | 267.922   | AB027013  | 2395.02   |
| 620.597   | AB002384  | 936.683   | 931.567   | AF086044  | 439.539   | 316.434   | BC032686  | 443.469   |
| 705.113   | NM_018437 | 520.607   | 277.979   | NM_014926 | 344.626   | 278.464   | BF185480  | 2526.572  |
| 844.236   | NM_000422 | 516.3     | 1679.566  | AJ011378  | 994.882   | 1027.299  | NM_002128 | 6364.542  |
| 1941.379  | AK023164  | 1320.188  | 1252.444  | AF009266  | 495.446   | 676.117   | NM_007105 | 387.926   |
| 24567.664 | NM_005379 | 1042.089  | 1204.008  | AF009310  | 1087.775  | 1214.164  | AL360195  | 834.416   |
| 4711.511  | AK027121  | 2667.124  | 2200.652  | AF054991  | 376.136   | 302.117   | U14383    | 520.008   |
| 2718.769  | NM_017433 | 828.55    | 622.515   | AF060168  | 831.205   | 819.146   | NM_017810 | 704.486   |
| 2009.262  | AL117661  | 1799.938  | 1922.566  | AF009275  | 509.605   | 582.946   | NM_004364 | 29279.539 |
| 809.952   | X64643    | 1925.885  | 2015.522  | AF015251  | 458.936   | 373.306   | AK023505  | 906.557   |
| 1342.806  | NM_005380 | 9900.401  | 8792.572  | AF056426  | 795.337   | 802.936   | AB037851  | 2351.492  |
| 26138.479 | D70835    | 38526.191 | 31689.754 | AF064850  | 426.854   | 462.64    | AL050389  | 1222.216  |
| 10642.671 | NM_002697 | 2162.358  | 1678.301  | NM_018329 | 1083.365  | 1144.269  | AK024684  | 1041.568  |
| 1554.807  | NM_001518 | 7255.542  | 10680.982 | AK021565  | 315.471   | 315.636   | NM_014945 | 4248.277  |
| 2912.613  | NM_003412 | 6621.526  | 8561.168  | AK001150  | 2800.387  | 1959.917  | AK001546  | 1365.338  |
| 8443.501  | NM_018336 | 866.811   | 1134.498  | AK002123  | 233.257   | 327.409   | NM_006537 | 3776.754  |
| 1382.473  | AK022668  | 1419.453  | 1744.207  | AK021633  | 829.403   | 601.039   | AF007155  | 2996.037  |
| 1481.305  | AW975132  | 1652.238  | 1790.672  | AK025659  | 846.129   | 380.539   | AK023055  | 419.374   |
| 5119.957  | NM_006051 | 2126.899  | 2245.807  | AK026407  | 279.91    | 237.595   | AL049282  | 2802.664  |
| 2303.433  | NM_018427 | 1561.477  | 1796.798  | AK026788  | 904.682   | 866.046   | AK021443  | 1087.015  |
| 3148.168  | AB037814  | 720.457   | 415.122   | AK026824  | 398.151   | 373.513   | AF070569  | 362.613   |
| 2768.947  | NM_014663 | 6492.01   | 2398.202  | AJ008130  | 23242.715 | 22480.277 | NM_020233 | 1356.396  |
| 429.783   | AF007217  | 1372.093  | 709.267   | AF086502  | 2119.037  | 2925.892  | AF143873  | 495.779   |
| 2733.76   | AB037753  | 4478.281  | 3530.068  | L39924    | 890.593   | 953.229   | AL355732  | 597.544   |
| 1496.639  | NM_004674 | 2437.533  | 1671.252  | U52054    | 2581.472  | 6234.536  | NM_017966 | 1628.404  |
| 2100.867  | AB037801  | 4882.396  | 4132.362  | AK023325  | 1397.742  | 985.972   | AF143327  | 1087.826  |
| 395.698   | AL080159  | 10550.611 | 8034.388  | NM_017985 | 1397.435  | 1386.389  | AL049991  | 423.645   |

|           |           |           |           |           |           |           |           |           |
|-----------|-----------|-----------|-----------|-----------|-----------|-----------|-----------|-----------|
| 1444.587  | NM_017823 | 46345.375 | 54516.707 | AK025866  | 1602.085  | 1383.96   | AL049990  | 557.432   |
| 1400.781  | U55185    | 1261.654  | 1265.602  | AF088058  | 2354.815  | 3377.564  | AF131843  | 728.159   |
| 13038.561 | U30828    | 8747.797  | 6942.59   | NM_000513 | 691.359   | 1160.957  | AK026653  | 378.78    |
| 2094.494  | AF085886  | 59082.453 | 61467.191 | Y11165    | 1405.859  | 1272.155  | NM_020231 | 698.635   |
| 980.89    | AK023828  | 3021.296  | 4262.051  | BC028422  | 299.52    | 339.747   | AL133118  | 1073.172  |
| 1745.334  | AK022664  | 764.15    | 613.873   | NM_003545 | 433.923   | 678.805   | AK023571  | 747.522   |
| 1445.669  | AL080223  | 2900.646  | 2140.936  | AK024413  | 893.247   | 1356.852  | NM_001702 | 2161.873  |
| 949.611   | AK001630  | 1130.306  | 2462.495  | AK022247  | 934.27    | 972.274   | AK026657  | 492.549   |
| 2838.048  | NM_014612 | 5839.469  | 4469.043  | AK001453  | 1359.91   | 1146.605  | AL833558  | 376.036   |
| 1692.876  | AF079098  | 869.584   | 1130.613  | AB007972  | 2842.094  | 2515.059  | AF087991  | 4196.079  |
| 982.148   | AK021815  | 1044.838  | 1313.674  | AL390144  | 2257.585  | 1771      | Y12839    | 503.975   |
| 2055.641  | NM_001543 | 661.446   | 768.088   | AK024017  | 1426.528  | 972.512   | AJ227884  | 833.507   |
| 611.136   | NM_016641 | 3465.038  | 3525.902  | X56196    | 369.334   | 373.186   | X64986    | 696.016   |
| 675.266   | AB018010  | 637.659   | 425.083   | D17220    | 4152.412  | 12703.203 | L38282    | 3329.236  |
| 1077.158  | NM_014610 | 7277.393  | 4203.477  | D28363    | 31921.689 | 35120.188 | NM_018056 | 1381.185  |
| 5429.843  | NM_000689 | 519.716   | 732.654   | AB011171  | 1119.673  | 1626.231  | L25446    | 293.988   |
| 2123.02   | NM_006621 | 4474.609  | 4710.794  | AF189251  | 292.761   | 271.642   | NM_019006 | 1096.017  |
| 4865.534  | BF347398  | 1530.471  | 1143.59   | NM_005322 | 2537.826  | 5700.844  | M20838    | 689.098   |
| 1076.412  | AK026762  | 1607.243  | 1197.997  | AK024465  | 1110.484  | 528.821   | AK024252  | 344.16    |
| 5214.005  | NM_004412 | 516.107   | 401.017   | AF075119  | 304.562   | 357.097   | AK000821  | 1475.694  |
| 2366.638  | L48516    | 1334.061  | 1240.084  | AK021478  | 1463.39   | 1075.116  | AK024526  | 5256.644  |
| 2877.579  | NM_016646 | 3117.039  | 3650.066  | AF131782  | 1454.926  | 1597.857  | AK000848  | 458.125   |
| 3245.998  | AF083930  | 1608.335  | 1255.699  | NM_014210 | 3203.574  | 2846.053  | AK023307  | 635.827   |
| 53596.953 | NM_003426 | 512.271   | 309.56    | AK021603  | 2030.141  | 1364.098  | NM_017616 | 2185.39   |
| 7935.074  | NM_014862 | 1092.828  | 2099.789  | AL110136  | 1360.86   | 1708.828  | NM_017846 | 321.473   |
| 513.607   | AK027159  | 893.156   | 1597.535  | AK002203  | 544.615   | 971.167   | AK024315  | 3010.536  |
| 1229.962  | AF075112  | 771.84    | 490.997   | AK026469  | 3450.531  | 4136.035  | AK024945  | 890.652   |
| 9517.607  | AK001796  | 599.778   | 823.626   | D16935    | 1552.228  | 2550.587  | AK024579  | 4569.436  |
| 5451.416  | AF086152  | 2751.559  | 3028.196  | AK027019  | 480.436   | 578.582   | S75708    | 3770.256  |
| 1890.172  | U78519    | 1245.704  | 1526.949  | U92019    | 401.885   | 374.416   | U79291    | 3163.914  |
| 189.388   | AK026872  | 981.891   | 1473.405  | U52835    | 2926.417  | 3049.429  | D17172    | 4522.319  |
| 5338.142  | AL157505  | 802.721   | 739.724   | NM_000756 | 1719.613  | 1563.869  | AJ227859  | 532.03    |
| 643.315   | NM_007190 | 5311.909  | 6282.561  | AK022148  | 769.971   | 656.758   | L10141    | 492.531   |
| 406.747   | AF043897  | 1227.36   | 1480.879  | Z36811    | 46665.152 | 61111.957 | AB020699  | 2676.952  |
| 243.042   | U79246    | 1793.553  | 1839.726  | K03200    | 4318.376  | 3858.656  | AF086269  | 726.413   |
| 1586.024  | AF052140  | 629.02    | 602.088   | U17629    | 1683.86   | 1687.952  | U90437    | 1615.402  |
| 1504.945  | NM_018836 | 538.925   | 331.999   | NM_020426 | 1454.624  | 1216.497  | AK000842  | 8418.442  |
| 3082.988  | AF007147  | 748.332   | 763.282   | U79265    | 1919.507  | 1509.047  | AK023386  | 3494.341  |
| 1316.35   | AF052127  | 2007.374  | 2122      | AK022868  | 2098.008  | 1739.199  | NM_007053 | 17268.813 |
| 3385.775  | AK024261  | 654.488   | 571.067   | NM_003530 | 369.113   | 471.941   | AK022153  | 719.001   |
| 490.765   | AF052150  | 721.837   | 951.233   | AJ227871  | 345.069   | 389.423   | AK022789  | 672.707   |
| 27243.135 | AF086481  | 838.801   | 1012.001  | AK025344  | 918.491   | 691.434   | AK023756  | 406.211   |
| 841.819   | AK021982  | 445.868   | 582.155   | D28589    | 8867.739  | 6021.724  | NM_001126 | 2745.318  |
| 329.612   | AL355689  | 1055.526  | 1255.641  | NM_017867 | 2565.296  | 2479.865  | AK023673  | 1111.624  |
| 1176.101  | AK024885  | 1366.63   | 1213.793  | U92820    | 5544.87   | 3186.277  | NM_018252 | 742.948   |
| 18309.734 | AK022441  | 720.56    | 1148.646  | NM_017937 | 1386.296  | 1065.646  | NM_018000 | 16091.589 |
| 6307.405  | AK026208  | 2035.53   | 1898.579  | AL360266  | 1118.295  | 878.456   | AF164963  | 611.494   |
| 1141.565  | NM_016947 | 58609.32  | 46415.754 | AL160132  | 22981.742 | 23012.199 | AF124366  | 7304.043  |
| 836.422   | AY007136  | 508.265   | 587.453   | NM_019557 | 2203.315  | 3005.445  | AF130112  | 544.726   |
| 916.556   | AL359940  | 2863.39   | 2815.137  | CY3Cy5    | 712.674   | 104.407   | NM_000551 | 2153.692  |
| 8744.758  | NM_018286 | 1024.926  | 663.604   | AA150828  | 826.688   | 843.186   | AL365518  | 1303.041  |
| 2278.029  | AF085961  | 506.768   | 496.506   | H64379    | 2981.896  | 2468.194  | AF086257  | 1946.866  |
| 1462.797  | AK024925  | 3937.306  | 3828.555  | BE208258  | 26722.15  | 41226.844 | AF075056  | 307.104   |



|           |           |           |           |           |           |           |           |           |
|-----------|-----------|-----------|-----------|-----------|-----------|-----------|-----------|-----------|
| 6129.896  | AL049460  | 1892.133  | 2915.581  | T72202    | 302.849   | 171.642   | AC119751  | 914.16    |
| 535.16    | AK022892  | 3305.336  | 1682.724  | BI831922  | 1250.619  | 946.445   | U00928    | 497.472   |
| 550.575   | Z36807    | 13244.902 | 9590.285  | M69238    | 1567.05   | 1232.59   | NM_019056 | 2126.76   |
| 447.193   | U52836    | 602.646   | 499.829   | AA599158  | 4843.792  | 2991.676  | AF279783  | 2406.507  |
| 778.67    | NM_017939 | 1405.526  | 2026.693  | SR5       | 2286.519  | 2901.904  | AF182422  | 3983.929  |
| 641.91    | AK021837  | 1873.388  | 2040.791  | SR7       | 2684.302  | 26291.609 | NM_016943 | 463.262   |
| 1164.841  | AK002088  | 7025.983  | 10411.206 | SR9       | 7089.555  | 1727.138  | AF070602  | 761.413   |
| 661.552   | X98206    | 473.926   | 903.59    | CY3Cy5    | 1087.773  | 139.267   | BE393290  | 599.158   |
| 388.909   | AK000106  | 1149.474  | 1097.453  | NM_001560 | 2219.843  | 2996.858  | NM_017622 | 838.443   |
| 2815.551  | AK022370  | 1249.74   | 1857.889  | NM_001783 | 3875.322  | 3079.362  | AF133331  | 1423.917  |
| 3100.301  | AL117530  | 609.895   | 937.338   | J03171    | 771.207   | 692.665   | AK022289  | 591.204   |
| 2481.945  | AK025016  | 299.025   | 454.992   | NM_005856 | 332.929   | 461.232   | L34408    | 340.686   |
| 968.252   | AL080191  | 1385.897  | 1780.453  | NM_004323 | 7096.634  | 6280.179  | AF161403  | 4963.464  |
| 506.409   | AK021639  | 9330.037  | 6493.441  | NM_005312 | 583.113   | 278.833   | NM_020183 | 1045.738  |
| 1197.034  | AK023189  | 562.581   | 345.987   | NM_004210 | 6013.175  | 4899.055  | NM_018029 | 181.995   |
| 1455.547  | AK023464  | 351.739   | 354.012   | NM_020140 | 1039.837  | 1250.377  | AL389954  | 519.419   |
| 1655.429  | AK024157  | 504.971   | 624.609   | NM_001496 | 1515.112  | 1657.029  | NM_019852 | 1615.191  |
| 892.366   | AK023905  | 828.368   | 1205.285  | U65404    | 534.131   | 466.473   | NM_006118 | 3353.415  |
| 474.495   | AK024231  | 2402.99   | 4542.526  | NM_002500 | 390.319   | 283.002   | AK026225  | 13712.067 |
| 936.676   | NM_016940 | 1413.577  | 1306.202  | AK026232  | 778.531   | 497.4     | AL050032  | 1907.911  |
| 5154.302  | AK025757  | 1163.835  | 1844.373  | NM_014892 | 2641.93   | 5550.105  | AF009304  | 486.507   |
| 1165.286  | Y16713    | 517.12    | 530.014   | AK023827  | 1149.58   | 1363.346  | AF086177  | 4980.711  |
| 1866.59   | L07394    | 4427.09   | 4794.608  | NM_000231 | 1067.996  | 1517.011  | NM_018949 | 752.539   |
| 6887.093  | AK056133  | 969.117   | 1093.181  | L07517    | 449.627   | 479.051   | AK021593  | 382.875   |
| 2649.283  | NM_017845 | 2837.69   | 5722.719  | AK022451  | 578.421   | 619.842   | Z36847    | 248.994   |
| 753.159   | AF130080  | 861.648   | 810.97    | NM_014359 | 56778.824 | 65987.266 | D17187    | 989.951   |
| 512.488   | AK026006  | 1004.352  | 1394.251  | BM918441  | 752.478   | 1198.181  | AJ243672  | 759.013   |
| 2561.26   | NM_019089 | 4568.508  | 4992.453  | NM_001045 | 2584.029  | 2655.306  | AL122087  | 624.544   |
| 1731.457  | AF147440  | 5314.905  | 10853.218 | NM_005697 | 1908.905  | 1768.482  | D17169    | 19175.273 |
| 3943.965  | AL122072  | 1829.367  | 1887.033  | NM_003099 | 2172.307  | 2505.758  | NM_017924 | 3801.68   |
| 6859      | AK026221  | 594.446   | 954.806   | NM_004781 | 417.145   | 353.561   | S81578    | 743.675   |
| 836.371   | AK026403  | 1177.074  | 1067.752  | NM_018303 | 807.05    | 961.68    | NM_017546 | 2620.86   |
| 1563.592  | AK022980  | 822.577   | 1382.481  | NM_014758 | 781.278   | 643.859   | AJ001889  | 402.525   |
| 1786.319  | AL359058  | 1343.222  | 1165.17   | NM_005124 | 1040.187  | 594.202   | AL137400  | 456.005   |
| 1088.782  | AK026237  | 1470.074  | 1790.809  | AK000947  | 1121.492  | 607.132   | AF007142  | 1232.018  |
| 486.435   | AK023687  | 535.027   | 773.53    | L08240    | 352.672   | 231.53    | AF119853  | 4588.518  |
| 1959.735  | NM_017632 | 904.596   | 1380.167  | NM_017952 | 556.471   | 904.825   | CY3Cy5    | 2328.099  |
| 2416.17   | AK026655  | 817.442   | 758.729   | NM_002940 | 820.328   | 945.431   | R45026    | 621.351   |
| 541.225   | NM_005279 | 438.661   | 345.865   | NM_016081 | 4150.98   | 3764.207  | AI970239  | 574.218   |
| 386.667   | AF129926  | 1338.436  | 1312.434  | NM_006389 | 1320.549  | 1101.166  | NM_015869 | 573.18    |
| 1079.388  | AK025822  | 1850.87   | 3578.789  | NM_000163 | 432.951   | 614.198   | AB000734  | 597.678   |
| 746.906   | AL360140  | 545.562   | 944.832   | NM_003329 | 37534.883 | 33290.273 | NM_005987 | 56376.008 |
| 592.491   | AF201937  | 25288.943 | 18326.672 | NM_003299 | 20705.977 | 13788.033 | X87838    | 1519.03   |
| 5595.153  | AL390128  | 839.908   | 674.776   | NM_014330 | 8357.236  | 6299.567  | NM_015001 | 655.177   |
| 794.955   | AL157429  | 2681.815  | 3176.803  | NM_007214 | 5798.003  | 3748.363  | SR2       | 41120.07  |
| 26204.205 | NM_012071 | 26887.266 | 21713.93  | NM_000311 | 1254.895  | 562.367   | SR4       | 7728.929  |
| 779.248   | AF055018  | 2931.299  | 3637.079  | NM_017909 | 1137.972  | 716.42    | SR6       | 1006.29   |
| 1901.998  | AF070599  | 1297.111  | 1642.681  | NM_006335 | 5377.066  | 3757.924  | SR8       | 3865.967  |
| 1681.564  | NM_005450 | 1191.918  | 1356.504  | NM_000786 | 3980.996  | 1606.915  | SR10      | 14559.977 |
| 49325.715 | AK023600  | 614.378   | 783.794   | AL133561  | 1070.881  | 680.423   | CY3Cy5    | 1464.79   |
| 16847.93  | NM_005525 | 1530.98   | 471.946   | AB040891  | 991.251   | 718.993   | NM_003775 | 415.852   |
| 7091.691  | NM_005285 | 1388.65   | 1717.407  | AB037780  | 364.92    | 502.161   | NM_002082 | 1280.27   |
| 3988.862  | AK001918  | 901.612   | 882.216   | NM_005845 | 3108.939  | 2979.813  | AF155657  | 5301.651  |

|           |            |           |           |           |          |           |           |           |
|-----------|------------|-----------|-----------|-----------|----------|-----------|-----------|-----------|
| 2620.15   | NM_018635  | 21711.266 | 24877.467 | NM_016209 | 3117.026 | 4452.493  | NM_006056 | 1188.089  |
| 1693.059  | AF086048   | 1951.078  | 2722.446  | NM_018964 | 1760.181 | 1902.657  | AF045229  | 2900.089  |
| 4105.509  | L15616     | 3230.806  | 2909.934  | NM_000080 | 708.573  | 835.77    | NM_001840 | 1570.169  |
| 1051.807  | AB019565   | 8695.559  | 14084.168 | NM_001829 | 379.142  | 341.914   | AK025099  | 665.761   |
| 2119.811  | D16914     | 57589.918 | 62470.215 | NM_007256 | 202.79   | 340.476   | NM_016099 | 6979.235  |
| 410.412   | AA084879   | 612.789   | 799.94    | AF283645  | 802.579  | 906.041   | NM_000228 | 788.831   |
| 284.266   | NM_000833  | 1850.758  | 1937.895  | NM_016575 | 1048.884 | 1032.395  | NM_005209 | 494.159   |
| 1529.121  | NM_000283  | 1792.879  | 1200.699  | NM_003897 | 805.262  | 619.932   | NM_001155 | 2730.302  |
| 6479.83   | NM_012460  | 2440.326  | 1376.391  | NM_014165 | 4279.352 | 2779.319  | M62896    | 9220.011  |
| 4873.278  | NM_012118  | 1820.638  | 2207.346  | AL442085  | 1514.928 | 1006.134  | NM_017736 | 1462.536  |
| 487.604   | AK024092   | 1179.51   | 1054.121  | NM_013313 | 1225.523 | 1424.241  | AF263523  | 815.319   |
| 1774.469  | AK002044   | 4953.712  | 2514.588  | NM_014736 | 2345.958 | 3233.291  | L08441    | 3371.478  |
| 12418.191 | U90904     | 7476.849  | 6734.954  | AK023886  | 532.63   | 813.491   | AA641953  | 754.417   |
| 967.409   | AF088053   | 2384.304  | 2063.823  | NM_002553 | 717.968  | 485.169   | AL137764  | 14172.597 |
| 1029.88   | AL133662   | 437.698   | 1151.568  | AJ404615  | 1130.51  | 725.199   | NM_001660 | 9620.191  |
| 2660.979  | U90903     | 1103.528  | 935.521   | NM_016053 | 5566.829 | 4772.184  | NM_000710 | 233.922   |
| 2393.418  | AF278760   | 968.78    | 745.682   | AB007869  | 1557.896 | 1134.064  | NM_000752 | 345.47    |
| 3202.616  | X58061     | 515.07    | 674.159   | NM_000302 | 693.585  | 857.054   | NM_002018 | 1802.017  |
| 293.151   | AB032954   | 1639.167  | 2809.527  | NM_013235 | 8177.384 | 9365.095  | AF161383  | 815.119   |
| 1140.608  | NM_006003  | 19376.289 | 18074.334 | NM_016015 | 1945.355 | 2317.084  | NM_000410 | 3944.053  |
| 3191.757  | AL110197   | 3301.449  | 5688.487  | NM_020120 | 906.692  | 1046.608  | AF224266  | 635.872   |
| 1592.292  | AF085995   | 1428.444  | 1776.691  | AK022900  | 768.365  | 483.869   | U72882    | 3529.611  |
| 1134.128  | CY3Cy5     | 1050.637  | 125.435   | AB023216  | 452.081  | 338.092   | NM_014337 | 3918.934  |
| 413.884   | AA029300   | 2492.235  | 2883.511  | NM_002266 | 9429.702 | 12231.671 | NM_007161 | 28361.789 |
| 724.577   | BG708842   | 30940.68  | 29525.09  | NM_014400 | 2906.099 | 2610.748  | NM_014387 | 1355.617  |
| 45855.84  | M19723     | 47843.227 | 29503.318 | AL157492  | 428.028  | 658.506   | NM_003641 | 1859.302  |
| 1371.721  | X06256     | 4331.827  | 3620.985  | AL353957  | 1517.824 | 3847.034  | NM_012463 | 754.102   |
| 29575.436 | AA709271   | 736.739   | 474.643   | NM_000231 | 913.52   | 1243.033  | L29140    | 8241.208  |
| 1769.254  | M34057     | 956.714   | 603.64    | L07517    | 431.342  | 354.06    | AK026448  | 1106.133  |
| 3957.898  | ID 1984668 | 1092.719  | 3006.241  | AK022451  | 691.802  | 473.179   | AK057418  | 4077.552  |
| 1787.239  | ID 1832579 | 1051.823  | 478.949   | BM918441  | 729.288  | 819.131   | L37199    | 561.71    |
| 870.465   | H-430185 M | 1614.206  | 1194.234  | AA150828  | 647.596  | 453.368   | AF148646  | 1601.059  |
| 3269.337  | D16583     | 5740.942  | 4085.547  | H64379    | 2920.956 | 2064.6    | AL110218  | 631.838   |
| 750.283   | AA481547   | 1427.835  | 1303.552  | BI831922  | 1038.421 | 974.791   | AB023201  | 3059.237  |
| 3553.764  | AA831880   | 636.201   | 475.149   | M69238    | 893.08   | 1034.647  | NM_000072 | 855.237   |
| 4054.874  | T64880     | 1120.719  | 1480.755  | AA664180  | 395.192  | 375.339   | NM_000697 | 1004.105  |
| 3380.8    | NM_020967  | 1464.206  | 840.079   | AK026092  | 925.379  | 1054.017  | NM_000017 | 1948.393  |
| 950.545   | NM_001071  | 7283.213  | 2926.82   | AK001175  | 1120.914 | 2118.819  | NM_018346 | 1440.247  |
| 251.606   | SR2        | 50242.371 | 45627.48  | NM_001560 | 2037.358 | 2339.433  | AL122054  | 576.487   |
| 1290.277  | SR4        | 13339.727 | 11408.123 | NM_001783 | 3324.765 | 2407.54   | AB011182  | 784.256   |
| 734.522   | SR6        | 1922.421  | 1813.016  | J03171    | 867.285  | 490.836   | NM_000140 | 2010.173  |
| 850.033   | SR8        | 6542.396  | 17561.074 | NM_005312 | 466.62   | 322.817   | NM_005125 | 1690.852  |
| 673.384   | SR10       | 22759.734 | 5545.014  | NM_001711 | 470.312  | 405.569   | NM_016246 | 621.102   |
| 843.805   | CY3Cy5     | 599.144   | 143.693   | NM_004210 | 5374.599 | 5572.005  | NM_015926 | 5838.96   |
| 692.514   | NM_005027  | 2453.978  | 2958.378  | NM_020140 | 1062.167 | 1384.393  | X03757    | 1976.378  |
| 955.859   | NM_004612  | 1735.173  | 2841.464  | NM_002500 | 436.251  | 451.843   | NM_001183 | 6611.521  |
| 564.858   | NM_005608  | 1359.698  | 2129.614  | AK026232  | 637.162  | 692.095   | NM_000890 | 1624.24   |
| 749.322   | NM_015583  | 1437.907  | 1230.483  | NM_014892 | 2672.782 | 5139.546  | NM_004976 | 5143.313  |
| 1200.719  | NM_018490  | 2658.014  | 1694.442  | AK023827  | 1227.527 | 1132.407  | AK021597  | 6758.026  |
| 2835.165  | NM_006245  | 3631.768  | 3446.082  | NM_001829 | 366.937  | 166.938   | NM_005737 | 8848.306  |
| 467.886   | NM_005103  | 4612.303  | 5756.539  | AF283645  | 929.396  | 911.131   | NM_006803 | 477.374   |
| 2934.336  | NM_004822  | 867.765   | 587.95    | NM_016575 | 841.972  | 508.123   | NM_002533 | 916.776   |
| 465.741   | AK022349   | 629.744   | 909.372   | NM_001045 | 2359.646 | 2087.57   | AF235022  | 431.352   |

|           |           |           |           |           |           |           |           |           |
|-----------|-----------|-----------|-----------|-----------|-----------|-----------|-----------|-----------|
| 322.671   | NM_004973 | 2233.62   | 1747.319  | NM_005697 | 1484.892  | 1723.637  | AF182814  | 1282.953  |
| 4086.165  | NM_007245 | 3206.039  | 1428.125  | NM_003099 | 2024.567  | 2316.94   | NM_005329 | 264.386   |
| 503.096   | NM_001890 | 843.392   | 637.701   | NM_004781 | 470.151   | 378.631   | AL157445  | 784.565   |
| 466.695   | NM_001286 | 1702.18   | 947.66    | NM_018303 | 688.209   | 662.301   | NM_001517 | 1386.814  |
| 1068.657  | NM_005073 | 521.832   | 254.9     | NM_014758 | 765.398   | 549.44    | NM_005053 | 1217.515  |
| 970.945   | NM_000951 | 1637.658  | 881.158   | NM_005124 | 866.097   | 869.06    | D86974    | 1015.945  |
| 3291.746  | X52599    | 880.756   | 635.557   | AK000947  | 1119.174  | 971.434   | NM_018283 | 642.379   |
| 730.943   | NM_000963 | 3686.745  | 2681.314  | NM_017952 | 615.12    | 938.494   | NM_001983 | 2002.364  |
| 300.82    | NM_013308 | 6259.555  | 6508.494  | NM_002940 | 750.613   | 1113.86   | M29551    | 7191.279  |
| 881.879   | AF027302  | 2926.05   | 2945.688  | NM_016081 | 4344.028  | 3959.916  | AB023148  | 155.104   |
| 296.723   | NM_002852 | 3024.293  | 2971.722  | NM_006389 | 1282.019  | 1420.8    | NM_002929 | 912.207   |
| 594.899   | NM_001817 | 3406.405  | 2862.791  | NM_000163 | 485.703   | 458.533   | BC028375  | 526.596   |
| 809.101   | AF063611  | 1315.359  | 1519.521  | AB023216  | 438.384   | 202.518   | AB026436  | 1249.09   |
| 1311.081  | NM_006039 | 2589.093  | 1851.618  | NM_002266 | 8945.67   | 8659.085  | NM_016029 | 2490.705  |
| 7044.294  | NM_002089 | 466.042   | 606.11    | NM_014400 | 2670.845  | 1701.214  | AK024562  | 796.918   |
| 838.309   | NM_014656 | 6167.834  | 4948.917  | AL157492  | 395.778   | 482.931   | NM_014066 | 705.319   |
| 721.872   | NM_002076 | 2873.595  | 2880.699  | AL353957  | 1265.553  | 1268.194  | NM_004573 | 975.253   |
| 1756.023  | X05299    | 3879.895  | 3261.422  | NM_007214 | 5276.452  | 2535.87   | NM_001498 | 30779.854 |
| 1816.1    | BM468475  | 966.418   | 815.176   | NM_000311 | 1333.794  | 637.097   | AF263523  | 875.165   |
| 1104.378  | NM_000318 | 1932.913  | 1184.248  | NM_017909 | 1156.803  | 695.273   | L08441    | 3883.819  |
| 6062.954  | NM_002060 | 4581.883  | 4250.554  | NM_006335 | 4964.378  | 2683.442  | AA641953  | 870.268   |
| 141.661   | AK001230  | 1525.679  | 887.333   | NM_000786 | 3686.192  | 1527.681  | R45026    | 800.49    |
| 232.654   | NM_014680 | 5684.2    | 3357.123  | AL133561  | 1057.334  | 807.961   | AA496452  | 947.968   |
| 6259.006  | NM_006995 | 20821.846 | 27692.555 | AB040891  | 1044.054  | 974.411   | X67594    | 550.556   |
| 3606.798  | NM_003129 | 13300.726 | 9583.495  | AB037780  | 418.555   | 688.173   | AB000734  | 681.183   |
| 3613.053  | NM_001956 | 2145.95   | 3640.852  | NM_005845 | 3390.072  | 4324.929  | NM_005987 | 56460.738 |
| 671.131   | AB033064  | 1040.175  | 1591.381  | NM_016209 | 2975.25   | 5774.081  | X87838    | 1828.319  |
| 719.649   | AK022317  | 2706.078  | 3275.724  | NM_018964 | 2012.851  | 2601.067  | NM_033199 | 528.971   |
| 640.656   | NM_018396 | 5688.298  | 3465.199  | NM_000080 | 791.919   | 735.13    | NM_015001 | 588.392   |
| 3141.718  | NM_003124 | 2537.122  | 3028.221  | NM_002711 | 315.914   | 533.007   | NM_000169 | 2306.571  |
| 824.23    | NM_004531 | 923.035   | 2795.64   | AK026092  | 874.196   | 740.377   | AK057418  | 3218.027  |
| 1116.776  | AL133581  | 929.039   | 1620.734  | AK001175  | 988.4     | 888.857   | NM_007260 | 791.971   |
| 353.105   | NM_002558 | 4045.207  | 3408.549  | NM_003897 | 818.289   | 439.237   | AF148646  | 1404.909  |
| 7189.876  | NM_005031 | 4060.032  | 4686.832  | NM_014165 | 3971.124  | 2500.724  | AL110218  | 574.681   |
| 6076.093  | AB040920  | 875.226   | 2492.414  | AL442085  | 1777.2    | 1306.116  | AB023201  | 2550.349  |
| 11480.805 | NM_004842 | 1053.083  | 670.503   | NM_013313 | 1206.521  | 1341.408  | NM_002082 | 954.262   |
| 1159.274  | AK024639  | 3642.78   | 2372.39   | NM_014736 | 1963.746  | 2765.447  | AF155657  | 3163.615  |
| 2720.629  | NM_015720 | 4971.896  | 3633.262  | AK023886  | 594.533   | 745.887   | NM_001840 | 1448.179  |
| 871.552   | AB007915  | 800.107   | 728.95    | NM_002553 | 427.002   | 432.503   | NM_000228 | 971.799   |
| 2619.831  | AB033070  | 812.919   | 941.771   | AJ404615  | 1213.341  | 1001.01   | NM_001155 | 2509.322  |
| 1043.464  | NM_018229 | 1285.657  | 886.309   | NM_016053 | 5677.763  | 7325.269  | M62896    | 7045.674  |
| 669.166   | NM_006325 | 4183.539  | 2244.759  | AB007869  | 1330.821  | 1371.228  | NM_017736 | 1025.232  |
| 30110.221 | AY009127  | 8822.023  | 9974.301  | AB046844  | 306.413   | 368.9     | AK021597  | 5888.336  |
| 1062.871  | NM_014869 | 1681.374  | 1963.696  | NM_000302 | 717.999   | 1074.897  | NM_005737 | 6011.107  |
| 7684.277  | AB037835  | 1439.843  | 2317.007  | NM_013235 | 9723.551  | 13617.746 | NM_006803 | 450.951   |
| 552.019   | NM_016228 | 443.467   | 908.852   | NM_016015 | 1648.145  | 1962.352  | NM_002533 | 1138.642  |
| 1863.76   | NM_000157 | 2684.466  | 8549.653  | AK022900  | 671.25    | 404.358   | AL137764  | 9369.512  |
| 837.234   | NM_000712 | 7459.69   | 5339.438  | AK026232  | 894.439   | 552.955   | NM_001660 | 2446.867  |
| 1254.661  | NM_018088 | 973.687   | 1476.06   | NM_014892 | 2691.502  | 4442.768  | NM_002018 | 2481.997  |
| 472.329   | NM_014846 | 2650.876  | 2728.288  | AK023827  | 820.892   | 769.207   | NM_000410 | 4969.673  |
| 810.832   | AB011164  | 2650.895  | 4364.088  | NM_000231 | 875.361   | 1285.68   | AF224266  | 681.477   |
| 543.76    | M24750    | 1215.752  | 1001.359  | AK022451  | 743.543   | 417.944   | U72882    | 3543.988  |
| 1921.381  | NM_005965 | 1241.974  | 1435      | NM_014359 | 56467.801 | 64109.145 | NM_014337 | 4033.725  |

|           |            |           |           |           |           |           |           |           |
|-----------|------------|-----------|-----------|-----------|-----------|-----------|-----------|-----------|
| 2187.344  | NM_002740  | 3124.412  | 3733.825  | BM918441  | 829.396   | 589.156   | NM_014387 | 1115.334  |
| 2633.808  | AL117482   | 2022.446  | 1990.857  | AA150828  | 646.231   | 735.885   | NM_003641 | 1586.807  |
| 536.063   | NM_006549  | 22868.818 | 15998.661 | H64379    | 2758.204  | 2720.119  | NM_012463 | 756.432   |
| 1405.766  | AB018324   | 7275.143  | 5752.598  | BE208258  | 24180.732 | 45372.883 | AB026436  | 1243.86   |
| 569.049   | NM_002742  | 43510.695 | 33681.43  | T72202    | 257.051   | 263.005   | NM_016029 | 2343.446  |
| 527.6     | Z25431     | 3770.339  | 2650.604  | BI831922  | 1138.215  | 1093.093  | AK024562  | 576.73    |
| 1111.398  | NM_005627  | 3653.094  | 2592.808  | M69238    | 1091.375  | 1406.393  | NM_014066 | 644.623   |
| 494.246   | M64497     | 2579.716  | 911.008   | AA664180  | 379.695   | 402.341   | NM_004573 | 727.484   |
| 378.232   | NM_007274  | 7404.635  | 4259.831  | NM_016081 | 4484.405  | 3910.109  | NM_000072 | 407.932   |
| 8307.943  | NM_003356  | 2582.873  | 2052.385  | NM_006389 | 1347.557  | 933.191   | NM_000697 | 825.213   |
| 1129.888  | AF238315   | 407.713   | 339.983   | NM_000163 | 363.207   | 162.996   | NM_000017 | 1083.569  |
| 238.292   | NM_005073  | 941.723   | 1156.613  | NM_003329 | 36168.398 | 24434.047 | NM_018346 | 950.877   |
| 476.342   | NM_000951  | 1599.96   | 1906.959  | NM_003299 | 17096.031 | 8422.34   | AL122054  | 787.849   |
| 1504.912  | X52599     | 765.122   | 810.716   | NM_014330 | 7335.665  | 4329.716  | AB011182  | 1519.007  |
| 3196.311  | AA029300   | 2815.012  | 3979.267  | NM_001560 | 1908.724  | 2459.423  | NM_000140 | 2048.757  |
| 10296.416 | BG708842   | 36059.098 | 53126.758 | NM_001783 | 3748.76   | 3299.536  | NM_005125 | 1818.392  |
| 7891.686  | M19723     | 51610.145 | 46629.523 | J03171    | 881.865   | 578.451   | NM_016246 | 635.318   |
| 539.449   | AA709271   | 1067.413  | 729.643   | NM_005856 | 332.57    | 277.97    | NM_015926 | 5364.011  |
| 4051.504  | M34057     | 775.642   | 911.71    | NM_004323 | 6475.277  | 8447.571  | X03757    | 2011.969  |
| 1688.972  | ID 1984668 | 1283.322  | 5181.714  | NM_005312 | 511.636   | 279.668   | NM_005136 | 315.709   |
| 381.931   | ID 1832579 | 1316.102  | 695.423   | NM_001711 | 492.499   | 564.81    | AK094513  | 685.844   |
| 395.992   | H-430185 M | 1685.001  | 1650.256  | NM_004210 | 5420.443  | 8167.198  | NM_001183 | 4571.802  |
| 702.244   | D16583     | 5253.367  | 4495.98   | NM_020140 | 974.6     | 1799.567  | NM_004976 | 4804.231  |
| 1331.036  | H44051     | 555.431   | 830.437   | NM_001496 | 1377.187  | 1915.539  | NM_033199 | 425.858   |
| 540.575   | AA481547   | 1399.511  | 1206.675  | NM_018964 | 2105.427  | 2020.023  | NM_015001 | 751.568   |
| 13199.618 | AA831880   | 639.088   | 664.824   | NM_000080 | 686.798   | 1052.769  | NM_000169 | 1665.721  |
| 3397.031  | T64880     | 1027.775  | 1459.369  | NM_001829 | 262.552   | 222.793   | AF182814  | 638.931   |
| 1964.022  | NM_020967  | 1256.974  | 850.351   | NM_000339 | 191.908   | 206.068   | AL157445  | 761.601   |
| 630.307   | NM_001071  | 7129.006  | 2405.523  | AF283645  | 851.376   | 943.609   | NM_001517 | 2608.526  |
| 365.701   | AB028990   | 693.35    | 590.179   | NM_016575 | 1031.435  | 767.1     | NM_005053 | 1480.797  |
| 224.897   | X05299     | 3526.472  | 4920.944  | NM_001045 | 2804.629  | 2872.511  | D86974    | 1351.269  |
| 1194.755  | BM468475   | 918.134   | 899.745   | NM_005697 | 1585.498  | 1995.708  | NM_018283 | 758.897   |
| 5660.746  | NM_000318  | 2109.067  | 1791.406  | NM_003099 | 2063.411  | 2698.447  | NM_001983 | 2410.236  |
| 178.165   | NM_002060  | 5240.285  | 8243.189  | NM_004781 | 416.71    | 323.753   | Y12337    | 843.101   |
| 44425.281 | AK001230   | 1386.271  | 1785.927  | NM_018303 | 638.457   | 1033.623  | M29551    | 5082.317  |
| 639.496   | NM_014680  | 5361.554  | 8469.434  | NM_014758 | 631.405   | 1089.665  | NM_002929 | 659.721   |
| 2296.614  | NM_005027  | 3685.579  | 7977.44   | NM_005124 | 1062.281  | 1151.966  | BC028375  | 827.924   |
| 261.075   | NM_004612  | 2082.663  | 3626.509  | AK000947  | 1221.762  | 1260.813  | NM_001155 | 2459.855  |
| 5578.119  | NM_005608  | 1221.321  | 1494.685  | NM_017952 | 488.872   | 798.197   | M62896    | 6362.684  |
| 2662.707  | NM_001106  | 2267.852  | 3136.256  | NM_002940 | 792.59    | 1252.089  | NM_017736 | 978.513   |
| 162.511   | NM_015583  | 2635.312  | 6257.558  | NM_000302 | 848.801   | 873.903   | NM_000313 | 358.143   |
| 309.708   | NM_018490  | 2939.486  | 3020.695  | NM_013235 | 9550.346  | 8934.17   | NM_001498 | 30109.59  |
| 1130.398  | NM_006245  | 3495.078  | 3958.932  | NM_016015 | 2045.054  | 2589.911  | AF263523  | 602.91    |
| 400.777   | NM_005103  | 3031.419  | 2234.685  | NM_020120 | 925.412   | 782.407   | L08441    | 1806.964  |
| 1865.491  | NM_004822  | 600.787   | 539.03    | AK022900  | 782.184   | 370.318   | AA641953  | 523.918   |
| 1992.85   | AK022349   | 614.236   | 896.804   | AB023216  | 336.334   | 290.748   | R45026    | 991.457   |
| 310.059   | NM_004973  | 2490.5    | 1467.016  | NM_002266 | 10319.317 | 10060.434 | BI768063  | 715.136   |
| 1467.904  | NM_007245  | 3237.941  | 1054.37   | NM_014400 | 2819.719  | 2021.37   | AI970239  | 812.249   |
| 16214.617 | NM_001890  | 752.383   | 588.523   | AL157492  | 469.733   | 434.919   | AA496452  | 1642.804  |
| 8714.987  | NM_001286  | 1603.118  | 615.954   | AL353957  | 1476.959  | 1168.758  | X67594    | 891.475   |
| 445.636   | AB007915   | 793.738   | 1242.757  | NM_007214 | 5632.846  | 3124.211  | BC008837  | 302.442   |
| 497.874   | AB033070   | 900.658   | 1149.026  | NM_000311 | 1266.828  | 731.038   | AB000734  | 459.944   |
| 1963.72   | NM_018229  | 1314.874  | 1190.592  | NM_017909 | 1081.287  | 812.758   | NM_005987 | 55460.609 |

|           |           |           |           |           |           |           |           |           |
|-----------|-----------|-----------|-----------|-----------|-----------|-----------|-----------|-----------|
| 715.087   | NM_006325 | 3944.882  | 3529.756  | NM_006335 | 5286.721  | 3797.899  | X87838    | 1467.137  |
| 3235.943  | AY009127  | 9181.037  | 18114.139 | NM_000786 | 3855.636  | 2142.163  | NM_007161 | 27126.291 |
| 268.524   | NM_014869 | 1817.796  | 4927.925  | AL133561  | 1211.738  | 1228.025  | NM_014387 | 1098.946  |
| 639.004   | AK000158  | 4645.339  | 4934.409  | AB040891  | 803.166   | 1193.175  | NM_003641 | 1451.484  |
| 1923.897  | NM_005769 | 2090.099  | 990.749   | AB037780  | 447.782   | 1004.323  | NM_012463 | 505.364   |
| 934.751   | AK024500  | 9097.896  | 16075.638 | NM_005845 | 3254.223  | 4823.49   | L29140    | 5253.735  |
| 1167.249  | NM_002564 | 9566.939  | 9698.973  | NM_016209 | 3084.755  | 6205.48   | AK026448  | 839.841   |
| 1368.771  | NM_000963 | 3681.199  | 2884.501  | AK002114  | 957.367   | 1109.767  | AK057418  | 2851.848  |
| 1163.145  | NM_013308 | 6334.537  | 7580.479  | AL390184  | 378.645   | 252.236   | NM_007260 | 563.801   |
| 1200.291  | AF027302  | 3099.438  | 3878.757  | NM_018699 | 495.949   | 468.631   | AB023201  | 1791.977  |
| 204.985   | NM_002852 | 2995.95   | 2625.783  | AK026318  | 415.696   | 448.656   | NM_002082 | 2534.049  |
| 571.494   | NM_001817 | 3428.896  | 2731.518  | AF291673  | 467.213   | 337.479   | NM_002922 | 304.843   |
| 759.418   | AF063611  | 1303.124  | 1205.292  | NM_004365 | 4799.19   | 3533.202  | AF155657  | 7541.58   |
| 2097.375  | NM_006039 | 2409.613  | 1345.566  | NM_016355 | 1493.811  | 1299.048  | NM_006056 | 1569.487  |
| 2143.893  | NM_002089 | 502.809   | 413.603   | AJ296290  | 770.555   | 334.541   | AF045229  | 3538.37   |
| 1253.462  | NM_014656 | 3871.523  | 3256.315  | AK026092  | 1211.46   | 1044.249  | NM_001840 | 2127.571  |
| 5739.579  | NM_002076 | 2535.276  | 2174.011  | AK001175  | 939.647   | 826.072   | AK025099  | 623.656   |
| 10542.666 | Z25431    | 4259.697  | 3733.067  | NM_003897 | 680.755   | 664.161   | NM_016099 | 8519.362  |
| 1245.281  | NM_005627 | 3426.643  | 3367.65   | NM_014165 | 3345.974  | 2799.005  | NM_000228 | 714.449   |
| 539.883   | M64497    | 2322.779  | 1241.986  | AL442085  | 2169.694  | 1868.049  | NM_018658 | 3167.087  |
| 1105.294  | NM_007274 | 8090.486  | 8436.755  | NM_013313 | 1394.703  | 1964.269  | NM_005136 | 146.314   |
| 235.639   | NM_003356 | 2573.775  | 3938.893  | NM_014736 | 2207.035  | 3918.927  | NM_001183 | 4906.36   |
| 973.82    | AF238315  | 1383.384  | 1815.467  | AK023886  | 625.31    | 1286.488  | NM_000890 | 872.521   |
| 793.208   | NM_006224 | 34717.863 | 41658.656 | NM_002553 | 614.382   | 1198.762  | NM_004976 | 3274.652  |
| 790.355   | AL137300  | 9669.151  | 6964.145  | AJ404615  | 1386.546  | 1227.31   | AK021597  | 5305.434  |
| 1678.127  | NM_000229 | 2495.382  | 3551.67   | NM_016053 | 5628.906  | 6798.691  | NM_005737 | 5789.356  |
| 644.525   | NM_006995 | 18494.947 | 21910.197 | AB007869  | 1936.797  | 2296.461  | AL137764  | 11586.797 |
| 1024.833  | NM_003129 | 12776.023 | 8485.076  | M64108    | 1667.113  | 1603.337  | NM_001660 | 5385.951  |
| 2367.585  | NM_001956 | 2392.097  | 3265.045  | Y17867    | 1075.135  | 892.477   | NM_000710 | 450.612   |
| 1464.308  | AB033064  | 1104.384  | 1479.501  | M92642    | 342.765   | 342.685   | NM_000752 | 476.959   |
| 623.736   | AK022317  | 2310.847  | 3196.071  | NM_018071 | 787.354   | 721.842   | AB040945  | 342.651   |
| 1030.25   | NM_018396 | 5505.846  | 4140.348  | NM_004333 | 1617.827  | 1320.262  | NM_002018 | 4142.089  |
| 991.566   | NM_003124 | 2639.55   | 3871.829  | M31520    | 50340.434 | 61181.039 | NM_002377 | 557.057   |
| 617.941   | NM_006886 | 51364.246 | 70007.836 | NM_002020 | 2976.683  | 2102.084  | NM_006018 | 214.851   |
| 488.024   | NM_004531 | 1163.23   | 2536.517  | AK024423  | 957.326   | 460.971   | AF161383  | 1194.129  |
| 614.833   | AL133581  | 944.229   | 1357.649  | NM_005043 | 7885.724  | 6076.369  | NM_000410 | 4943.27   |
| 1871.511  | NM_002558 | 3683.012  | 3033.733  | NM_005979 | 4342.971  | 4759.98   | AF224266  | 775.102   |
| 950.166   | NM_005031 | 3122.944  | 3006.661  | NM_006282 | 1693.719  | 3055.982  | U72882    | 3269.057  |
| 2118.128  | AB040920  | 595.339   | 1118.694  | NM_015920 | 8772.711  | 10926.678 | NM_014337 | 3660.436  |
| 8539.416  | NM_000720 | 495.288   | 501.911   | AB011113  | 982.139   | 763.238   | Y12337    | 1000.438  |
| 1551.879  | NM_004842 | 1182.107  | 723.155   | NM_004115 | 584.057   | 463.453   | M29551    | 4975.577  |
| 1552.677  | AK024639  | 3628.538  | 1805.233  | NM_018287 | 505.693   | 685.947   | NM_002929 | 810.807   |
| 1352.386  | NM_015720 | 3819.423  | 2984.752  | NM_001955 | 1545.496  | 1846.052  | BC028375  | 597.225   |
| 1359.403  | NM_020967 | 1237.08   | 1057.48   | AF016004  | 1381.592  | 2061.365  | AB026436  | 1360.601  |
| 844.599   | NM_001071 | 7727.556  | 3296.662  | NM_003567 | 3933.091  | 3302.282  | AK024562  | 491.787   |
| 860.216   | AB028990  | 773.638   | 1718.125  | NM_007315 | 2165.099  | 1310.898  | NM_004573 | 759.174   |
| 668.623   | NM_006708 | 20947.717 | 12290.593 | L20686    | 2096.331  | 2898.317  | NM_000072 | 505.693   |
| 3594.24   | AB037835  | 1576.244  | 1260.254  | S72604    | 9906.185  | 6535.271  | NM_000697 | 637.331   |
| 2458.942  | NM_016228 | 602.329   | 544.75    | NM_017984 | 387.379   | 289.356   | NM_000017 | 2124.503  |
| 5388.751  | NM_000157 | 2958.677  | 7252.248  | NM_002675 | 546.597   | 296.192   | NM_000237 | 1002.929  |
| 856.424   | NM_000712 | 6514.735  | 3719.337  | NM_012432 | 12157.144 | 9199.313  | NM_018346 | 2296.85   |
| 1251.253  | NM_018088 | 743.498   | 1347.874  | NM_005007 | 4709.548  | 4769.921  | AL122054  | 1895.37   |
| 11265.73  | AK023035  | 1300.734  | 1182.59   | AK024996  | 1271.849  | 1139.41   | AB011182  | 2610.216  |

|           |            |           |           |           |           |           |           |           |
|-----------|------------|-----------|-----------|-----------|-----------|-----------|-----------|-----------|
| 19495.057 | NM_014846  | 2595.573  | 2332.793  | NM_004417 | 190.882   | 295.178   | NM_000140 | 2607.251  |
| 343.545   | AB011164   | 2586.547  | 3580.706  | NM_012290 | 1530.628  | 1356.311  | NM_005125 | 1929.237  |
| 563.084   | M24750     | 1081.591  | 626.982   | NM_002431 | 1597.49   | 499.11    | NM_020038 | 1817.288  |
| 13800.642 | NM_005965  | 1053.918  | 980.668   | NM_001827 | 12121.249 | 13730.921 | NM_015926 | 5947.646  |
| 2239.823  | NM_002740  | 2864.747  | 2495.922  | NM_020466 | 1911.816  | 1634.877  | X03757    | 1814.734  |
| 511.991   | AL117482   | 2044.393  | 1881.959  | NM_002853 | 1739.595  | 1650.524  | NM_020248 | 6786.855  |
| 5039.634  | NM_006549  | 20404.564 | 11689.802 | NM_003174 | 457.493   | 241.323   | X89670    | 601.832   |
| 974.728   | AB018324   | 7730.241  | 4724.672  | NM_012307 | 7489.266  | 6740.339  | NM_004053 | 2535.543  |
| 6244.111  | NM_002742  | 38330.531 | 30106.033 | NM_002540 | 342.417   | 361.663   | NM_014420 | 246.204   |
| 3863.746  | NM_005750  | 379.49    | 436.205   | NM_006371 | 1018.499  | 1028.215  | NM_001489 | 901.19    |
| 791.409   | NM_004973  | 2183.698  | 1934.431  | NM_018834 | 548.583   | 544.327   | NM_000169 | 1230.804  |
| 1275.279  | NM_007245  | 3302.662  | 1990.577  | AK026882  | 375.275   | 310.69    | BE799167  | 140.901   |
| 114.057   | NM_001890  | 877.745   | 1288.796  | NM_004574 | 444.714   | 707.875   | AF182814  | 755.371   |
| 4166.189  | NM_001286  | 1634.478  | 1999.486  | NM_004848 | 959.407   | 3800.807  | NM_005329 | 447.697   |
| 294.597   | NM_014648  | 407.511   | 1216.279  | NM_001944 | 403.759   | 548.64    | NM_000107 | 647.046   |
| 2747.802  | NM_019604  | 371.892   | 292.946   | AF014459  | 1373.815  | 1906.958  | D86974    | 1108.823  |
| 3591.372  | NM_005073  | 1777.95   | 878.896   | AK024601  | 2214.151  | 1658.522  | NM_001793 | 5091.368  |
| 1158.866  | NM_000951  | 1609.273  | 1591.987  | S68069    | 2713.171  | 2469.212  | NM_001943 | 1064.335  |
| 770.615   | X52599     | 775.608   | 709.59    | AB011095  | 516.632   | 394.784   | NM_004927 | 1649.92   |
| 683.229   | AA029300   | 2564.835  | 2461.552  | NM_001503 | 429.435   | 330.936   | NM_001459 | 795.295   |
| 639.978   | BG708842   | 32038.793 | 30209.246 | NM_006302 | 1509.775  | 1680.443  | NM_015513 | 3430.354  |
| 1230.113  | M19723     | 51212.488 | 39730.723 | AJ224875  | 1883.297  | 2316.728  | NM_006219 | 4018.654  |
| 2841.813  | AA709271   | 919.079   | 693.56    | NM_002149 | 2790.247  | 2502.26   | NM_004443 | 2546.523  |
| 899.887   | M34057     | 594.03    | 443.683   | AF043324  | 1991.073  | 1545.566  | NM_002964 | 4754.459  |
| 801.388   | ID 1984668 | 1095.088  | 3214.877  | AK024172  | 543.994   | 396.658   | AF311862  | 19259.736 |
| 2267.732  | ID 1832579 | 1060.881  | 547.245   | NM_014814 | 2188.351  | 1942.31   | NM_015626 | 2137.382  |
| 619.528   | H-430185 M | 1360.395  | 821.66    | NM_002797 | 6705.508  | 7561.373  | NM_004899 | 2938.538  |
| 3725.456  | D16583     | 5183.45   | 3257.456  | AK024318  | 482.662   | 488.576   | AB006628  | 6478.214  |
| 865.194   | AA481547   | 1531.165  | 949.022   | NM_016129 | 1659.268  | 1566.017  | AF272036  | 3476.006  |
| 2504.052  | AA831880   | 524.458   | 390.155   | NM_002809 | 2599.249  | 2811.11   | AF090942  | 630.507   |
| 501.377   | T64880     | 1043.067  | 1433.472  | NM_017912 | 4445.666  | 5195.853  | AF508940  | 2182.756  |
| 1276.628  | NM_006039  | 2327.532  | 1977.827  | NM_000423 | 3211.41   | 3391.904  | NM_005429 | 1610.115  |
| 817.004   | NM_002089  | 351.26    | 522.441   | AB046838  | 1127.43   | 1018.555  | M25753    | 3699.981  |
| 1179.87   | NM_014656  | 4516.536  | 9349.873  | AK026339  | 465.279   | 1046.238  | NM_003883 | 773.529   |
| 1842.746  | BM468475   | 975.639   | 1256.441  | AF116658  | 1820.526  | 3482.099  | NM_001951 | 922.877   |
| 569.804   | NM_000318  | 1959.147  | 1648.832  | NM_014865 | 4967.622  | 8612.137  | NM_003674 | 8070.728  |
| 4699.563  | NM_002060  | 5181.734  | 6965.148  | AB032977  | 5186.112  | 7314.521  | NM_001197 | 2158.419  |
| 836.955   | AK001230   | 1464.691  | 1646.36   | AK001725  | 420.104   | 667.346   | NM_006682 | 1941.55   |
| 855.603   | NM_014680  | 5093.791  | 4581.801  | NM_003036 | 1582.625  | 1449.187  | NM_006410 | 1071.822  |
| 369.542   | NM_005027  | 2872.822  | 2716.829  | NM_020529 | 1467.176  | 2616.393  | NM_014977 | 20036.049 |
| 553.396   | NM_004612  | 1780.726  | 2273.544  | NM_020395 | 1120.293  | 899.33    | AB011539  | 769.441   |
| 392.662   | NM_005608  | 1250.627  | 1484.463  | NM_003425 | 895.302   | 796.191   | U37028    | 1533.897  |
| 4012.707  | NM_012294  | 155.507   | 1069.7    | NM_013388 | 3174.769  | 4376.026  | AK024313  | 2006.529  |
| 701.466   | NM_001106  | 918.736   | 899.5     | AF038951  | 4448.933  | 3027.941  | NM_003891 | 1606.425  |
| 3610.013  | NM_015583  | 1499.3    | 860.004   | NM_006492 | 643.9     | 298.85    | NM_002022 | 665.17    |
| 17655.479 | NM_018490  | 2860.053  | 1661.851  | AK021811  | 588.196   | 527.721   | NM_015524 | 1302.358  |
| 1598.082  | NM_006245  | 3406.549  | 2947.993  | NM_003428 | 1249.161  | 1097.803  | NM_001673 | 2563.629  |
| 298.326   | NM_005103  | 3110.508  | 1655.164  | AF055030  | 871.793   | 546.011   | AK023167  | 366.948   |
| 1028.005  | NM_004822  | 738.741   | 538.703   | AK000589  | 854.531   | 341.316   | NM_016510 | 1247.62   |
| 509.882   | AK022349   | 643.606   | 808.543   | X53281    | 4427.386  | 3335.654  | NM_014270 | 997.439   |
| 152.383   | NM_005031  | 2885.808  | 4079.656  | BC012782  | 604.317   | 364.019   | NM_000071 | 2257.236  |
| 468.96    | AB040920   | 581.765   | 1447.683  | AF132026  | 25274.904 | 14674.471 | NM_006843 | 1129.587  |
| 678.412   | NM_000720  | 512.734   | 615.848   | AL050353  | 601.357   | 482.672   | NM_004321 | 1265.484  |

|           |           |           |           |           |           |           |           |           |
|-----------|-----------|-----------|-----------|-----------|-----------|-----------|-----------|-----------|
| 960.903   | NM_004842 | 1152.953  | 1566.094  | AB037788  | 3340.306  | 2786.909  | AF311212  | 3874.952  |
| 61502.879 | AK024639  | 5313.334  | 9135.27   | NM_004587 | 2083.849  | 1963.636  | NM_006915 | 631.49    |
| 463.953   | NM_015720 | 5052.103  | 8376.918  | AF147412  | 9290.369  | 8703.311  | NM_006035 | 963.64    |
| 19468.377 | AB007915  | 732.502   | 1643.789  | AK024570  | 6577.226  | 8127.887  | NM_006086 | 2744.211  |
| 1020.016  | AB033070  | 840.023   | 945.313   | AF161401  | 3341.46   | 6286.483  | NM_004520 | 3057.183  |
| 1792.391  | NM_018229 | 1342.872  | 1269.901  | NM_000990 | 4791.114  | 3727.158  | AK027118  | 2030.754  |
| 723.442   | NM_006325 | 4695.378  | 3763.304  | NM_014740 | 1114.408  | 1098.402  | AK022882  | 6186.499  |
| 8755.641  | AY009127  | 9294.241  | 14759.981 | NM_015956 | 1524.282  | 1580.813  | NM_006105 | 988.208   |
| 1095.731  | NM_014869 | 1711.497  | 3013.782  | AF075008  | 1180.986  | 2303.238  | NM_005981 | 628.398   |
| 2701.656  | AK000158  | 4822.12   | 7099.855  | NM_006504 | 2907.689  | 2261.498  | NM_000474 | 3468.504  |
| 804.367   | NM_005769 | 2343.403  | 1207.235  | AF070538  | 479.612   | 338.645   | NM_016264 | 590.437   |
| 909.842   | AK024500  | 8266.729  | 12040.048 | AL137430  | 456.243   | 354.174   | NM_006079 | 18467.627 |
| 441.994   | NM_002564 | 8266.866  | 3747.323  | NM_000696 | 2779.942  | 2790.164  | AB037837  | 1000.722  |
| 2051.092  | NM_000963 | 3284.998  | 2285.749  | NM_002488 | 8775.424  | 11119.581 | NM_014595 | 1982.187  |
| 585.712   | NM_013308 | 6374.29   | 5913.63   | NM_004003 | 3772.595  | 2771.993  | NM_014789 | 684.714   |
| 980.662   | AF027302  | 3019.915  | 2139.528  | BF244401  | 1089.344  | 840.463   | AB046784  | 473.65    |
| 1079.885  | NM_002852 | 2962.226  | 2074.514  | NM_004718 | 15245.732 | 8605.992  | X52402    | 2109.278  |
| 5706.997  | NM_001817 | 3307.472  | 2269.623  | AL359585  | 1168.181  | 898.286   | AL133663  | 547.427   |
| 633.257   | AF063611  | 1236.624  | 1149.559  | AB046850  | 989.665   | 807.066   | NM_004992 | 1142.772  |
| 5926.931  | NM_005965 | 1082.957  | 1172.817  | NM_014801 | 1672.578  | 1200.297  | NM_014462 | 1173.596  |
| 320.789   | NM_002740 | 2728.877  | 3302.759  | NM_003642 | 2342.289  | 4387.682  | NM_014156 | 38593.332 |
| 160.694   | AL117482  | 1958.405  | 2757.657  | AB027013  | 2379.314  | 1838.6    | NM_003137 | 3116.271  |
| 4093.368  | NM_006549 | 26647.518 | 26595.396 | BC032686  | 247.315   | 852.208   | NM_006938 | 12231.625 |
| 840.893   | AB018324  | 8538.278  | 11366.254 | BF185480  | 1870.696  | 2182.664  | NM_020158 | 1522.756  |
| 1918.996  | Z25431    | 3654.703  | 4294.028  | NM_002128 | 4128.26   | 4974.602  | AF176085  | 1461.167  |
| 2856.198  | NM_005627 | 3915.291  | 3999.708  | NM_003074 | 1917.428  | 1174.859  | NM_006985 | 3225.375  |
| 4792.283  | M64497    | 2506.762  | 1294.62   | AL360195  | 908.932   | 1024.138  | AF265228  | 761.052   |
| 1368.487  | NM_007274 | 6925.415  | 6722.851  | U14383    | 494.265   | 772.509   | NM_003757 | 9591.651  |
| 2208.458  | NM_003356 | 3024.209  | 3955.631  | NM_017810 | 571.779   | 756.635   | AK025561  | 1533.822  |
| 459.471   | AF238315  | 561.482   | 827.026   | NM_003181 | 50229.918 | 56310.332 | NM_018602 | 9308.353  |
| 5824.773  | NM_006224 | 33721.449 | 29135.277 | NM_004451 | 1086.039  | 1089.777  | NM_004096 | 2097.743  |
| 1748.715  | AL137300  | 10912.741 | 6459.376  | NM_004364 | 23879.484 | 14991.049 | NM_017629 | 2068.214  |
| 3862.555  | NM_000229 | 2657.619  | 3338.418  | AK023505  | 1018.406  | 903.262   | AL049681  | 1029.888  |
| 2869.278  | NM_006995 | 18373.229 | 21028.438 | AB037851  | 2642.626  | 1624.784  | NM_006584 | 526.317   |
| 2136.089  | NM_003129 | 13126.341 | 8124.063  | AL050389  | 1413.899  | 1030.499  | AL050074  | 3013.871  |
| 1158.366  | NM_001956 | 2333.83   | 2371.745  | AK024684  | 919.347   | 1007.253  | AK026436  | 432.983   |
| 6296.643  | AB033064  | 1224.193  | 1025.126  | NM_014945 | 3389.042  | 3856.955  | NM_018061 | 1128.18   |
| 606.648   | AK022317  | 2666.097  | 3234.852  | AK001546  | 1030.755  | 1437.368  | NM_003551 | 1366.865  |
| 225.586   | NM_018396 | 4652.006  | 2605.829  | NM_006537 | 3346.31   | 1741.002  | AF305210  | 597.666   |
| 433.741   | NM_003124 | 2416.584  | 2826.289  | AF007155  | 3888.277  | 3400.287  | AK021900  | 1900.152  |
| 638.509   | NM_006886 | 51358.27  | 56512.266 | AL049282  | 2309.703  | 1685.001  | NM_002764 | 4383.11   |
| 464.946   | NM_004531 | 1026.093  | 2210.844  | AK021443  | 954.508   | 1699.742  | NM_019857 | 588.221   |
| 397.736   | AL133581  | 970.787   | 1220.469  | AF070569  | 317.614   | 383.267   | NM_015455 | 8328.397  |
| 1601.834  | NM_002558 | 3837.258  | 2723.977  | NM_020233 | 1186.888  | 977.078   | AF024702  | 2682.774  |
| 1582.282  | NM_003586 | 988.387   | 3324.495  | AL355732  | 755.528   | 739.237   | NM_001964 | 1253.985  |
| 1153.899  | NM_000922 | 2153.921  | 2161.839  | NM_017966 | 1148.343  | 1424.779  | NM_005962 | 7424.365  |
| 195.643   | NM_013232 | 5394      | 5445.008  | AF143327  | 720.82    | 895.731   | X74864    | 1317.57   |
| 631.822   | NM_017993 | 1570.719  | 1730.35   | AL049990  | 462.141   | 734.724   | AK026804  | 1101.675  |
| 4730.004  | NM_000362 | 5991.951  | 2752.252  | AF131843  | 705.02    | 1180.343  | NM_016170 | 4865.823  |
| 502.296   | AK000770  | 1464.062  | 2599.385  | AK026653  | 451.332   | 479.204   | NM_006166 | 798.472   |
| 4033.559  | NM_002370 | 9372.451  | 9454.198  | NM_020231 | 550.165   | 738.958   | S72620    | 15694.19  |
| 11879.165 | NM_015670 | 1773.689  | 1983.984  | AL133118  | 653.609   | 599.946   | NM_005263 | 11755.547 |
| 1124.744  | NM_014709 | 1199.682  | 1116.434  | AK023571  | 1357.724  | 893.234   | AB033022  | 2623.458  |

|           |           |           |           |           |           |           |           |          |
|-----------|-----------|-----------|-----------|-----------|-----------|-----------|-----------|----------|
| 1840.221  | AB028990  | 857.313   | 1486.293  | NM_001702 | 2261.382  | 1741.126  | AF147397  | 801.573  |
| 516.45    | NM_006708 | 20985.83  | 10843.761 | AK026657  | 431.023   | 244.761   | AK027158  | 637.476  |
| 66.633    | AB037835  | 1655.818  | 1570.925  | NM_018050 | 431.738   | 829.055   | AF085836  | 1614.083 |
| 409.501   | NM_016228 | 602.678   | 565.805   | AF087991  | 2973.909  | 2451.002  | AL049449  | 523.785  |
| 3281.083  | NM_000157 | 3182.605  | 8624.214  | AJ227862  | 10.732    | 429.489   | AL359654  | 675.553  |
| 1120.186  | NM_000712 | 7312.945  | 3405.366  | AJ227884  | 748.021   | 650.257   | AK024224  | 881.682  |
| 859.105   | NM_018088 | 946.633   | 1103.007  | X64986    | 1225.092  | 1050.726  | NM_015362 | 2640.943 |
| 453.066   | BC013695  | 13891.295 | 6779.021  | L38282    | 2734.461  | 3824.958  | AF147344  | 571.907  |
| 1025.8    | AK023035  | 1082.471  | 512.392   | NM_018056 | 978.276   | 1093.354  | AF147371  | 731.411  |
| 9847.812  | NM_014846 | 2859.978  | 1920.774  | L25446    | 269.439   | 274.158   | NM_018982 | 1457.113 |
| 1487.473  | AB011164  | 2558.567  | 2664.039  | NM_019008 | 1169.953  | 1651.896  | AF086254  | 2514.871 |
| 2092.357  | M24750    | 1183.13   | 764.765   | M20838    | 582.74    | 698.139   | AF086324  | 322.896  |
| 1039.763  | AB046776  | 1048.461  | 2490.51   | Y11918    | 412.044   | 344.166   | AF086261  | 578.685  |
| 3972.701  | NM_002687 | 9187.073  | 6825.858  | AK002095  | 449.191   | 450.546   | AF086367  | 1163.58  |
| 1957.675  | NM_000627 | 1466.039  | 1521.789  | AK000821  | 1241.472  | 1138.108  | AF086437  | 793.162  |
| 1240.627  | NM_000038 | 608.4     | 770.304   | AK024526  | 6403.116  | 4626.745  | AK025088  | 2063.867 |
| 835.382   | NM_000825 | 389.476   | 622.38    | AK000848  | 388.917   | 595.709   | U79295    | 751.674  |
| 488.04    | NM_004334 | 1255.298  | 1400.105  | NM_017618 | 1782.346  | 1633.475  | AK002107  | 320.187  |
| 220.403   | NM_003854 | 556.644   | 1898.216  | AK024315  | 2024.182  | 2930.263  | NM_003596 | 1821.742 |
| 728.126   | NM_017980 | 488.808   | 609.432   | AK024945  | 1136.303  | 1620.692  | NM_018838 | 1483.673 |
| 1020.889  | NM_001252 | 14355.303 | 12899.209 | AK024579  | 3429.607  | 5966.845  | AF075083  | 401.606  |
| 9133.468  | AF053712  | 770.504   | 734.263   | AK024877  | 197.55    | 414.928   | AK021454  | 773.796  |
| 208.941   | NM_003947 | 896.419   | 911.731   | S75708    | 4862.779  | 4360.976  | AK022069  | 646.534  |
| 271.595   | NM_002821 | 17640.807 | 16190.322 | U79291    | 4023.552  | 3149.211  | AL137457  | 641.82   |
| 2165.778  | M96652    | 4890.997  | 3118.99   | D17172    | 4012.472  | 3667.061  | AF085944  | 1442.015 |
| 1431.861  | L41690    | 2542.759  | 3215.745  | AJ227859  | 457.537   | 564.533   | AL133038  | 693.347  |
| 2118.278  | NM_018059 | 2435.317  | 1468.429  | L10141    | 778.906   | 501.453   | AL137414  | 589.58   |
| 601.733   | NM_000939 | 45067.328 | 38235.27  | AB020699  | 2671.141  | 2329.358  | AL359574  | 1785.14  |
| 327.018   | NM_006514 | 2460.708  | 1618.208  | AF086269  | 847.181   | 895.419   | AL133569  | 2260.721 |
| 12537.798 | AF065164  | 4378.612  | 2218.511  | U90437    | 1149.587  | 1543.785  | AL137435  | 563.04   |
| 520.054   | AB028991  | 3035.332  | 4355.197  | AK000842  | 6690.15   | 10061.657 | AL157463  | 424.247  |
| 348.182   | AF263547  | 2633.662  | 2650.792  | AK023386  | 3671.055  | 5895.771  | AK027189  | 376.615  |
| 363.205   | AJ008143  | 5858.95   | 8003.405  | NM_007053 | 16263.071 | 19707.775 | AF088014  | 718.128  |
| 419.192   | NM_007144 | 1049.814  | 1239.719  | AK022153  | 606.92    | 1058.966  | AL109719  | 807.07   |
| 1118.916  | NM_005093 | 627.774   | 698.078   | AK022789  | 655.172   | 678.751   | U92022    | 636.31   |
| 710.726   | NM_004424 | 4083.232  | 4261.839  | AK023756  | 351.615   | 667.643   | NM_003650 | 5795.627 |
| 1954.08   | AL133117  | 2377.914  | 2193.65   | NM_001126 | 3032.382  | 2102.815  | AK022119  | 1631.779 |
| 899.944   | NM_012227 | 4393.834  | 5305.849  | AK023673  | 1092.465  | 833.531   | NM_016644 | 561.305  |
| 3426.176  | NM_006101 | 1085.744  | 1369.024  | NM_018252 | 701.881   | 304.821   | AF085842  | 509.806  |
| 174.821   | NM_001237 | 3423.74   | 1729.919  | NM_018000 | 23105.713 | 17049.914 | AK023882  | 205.893  |
| 456.544   | NM_002507 | 1747.54   | 1280.056  | AF164963  | 573.711   | 552.748   | AK026750  | 790.593  |
| 293.782   | NM_015962 | 1721.646  | 1359.575  | AF124366  | 7411.693  | 7770.61   | AF072164  | 975.737  |
| 424.01    | NM_016145 | 775.391   | 1467.501  | AF130112  | 401.301   | 581.643   | NM_018610 | 640.903  |
| 214.193   | NM_016078 | 3820.697  | 3617.185  | NM_000551 | 2062.663  | 1708.617  | AF083122  | 2339.87  |
| 434.059   | NM_004401 | 1436.812  | 947.461   | AL365518  | 1397.14   | 1063.203  | AF232216  | 743.891  |
| 949.492   | NM_001849 | 5695.728  | 4539.93   | AF086257  | 1922.217  | 2246.44   | NM_017773 | 1784.608 |
| 151.108   | AF255910  | 649.502   | 377.505   | AC119751  | 476.665   | 517.183   | AK021885  | 419.342  |
| 335.662   | NM_016146 | 2989.575  | 1804.976  | U00928    | 459.422   | 289.69    | AK022161  | 539.982  |
| 1710.832  | AK024343  | 1219.484  | 2242.713  | NM_019056 | 1131.88   | 1090.112  | AK021940  | 696.847  |
| 1161.986  | NM_001936 | 549.25    | 629.732   | AF279783  | 2102.782  | 1975.306  | AK022189  | 567.783  |
| 461.945   | NM_002569 | 990.466   | 1215.99   | AF182422  | 3055.271  | 2588.457  | AK022338  | 439.453  |
| 1862.915  | D42084    | 2603.094  | 2769.767  | NM_016943 | 481.948   | 279.742   | AK026856  | 635.677  |
| 688.878   | NM_001734 | 596.237   | 827.187   | AF070602  | 577.136   | 885.452   | AL162033  | 1389.87  |



|           |           |           |           |           |           |           |           |           |
|-----------|-----------|-----------|-----------|-----------|-----------|-----------|-----------|-----------|
| 4678.445  | NM_014693 | 866.247   | 1130.165  | BE393290  | 559.873   | 759.618   | AK026761  | 301.496   |
| 872.189   | AB007896  | 1358.731  | 1208.518  | NM_017622 | 786.79    | 806.817   | NM_005001 | 6263.412  |
| 19576.99  | AB007916  | 7905.894  | 13433.664 | AF133331  | 1287.179  | 1360.644  | AK024175  | 2349.164  |
| 614.549   | AF049140  | 1583.856  | 2269.454  | AK022289  | 335.88    | 332.18    | NM_000510 | 584.425   |
| 3618.879  | AL136794  | 915.803   | 558.765   | AF161403  | 6313.489  | 8043.488  | NM_017787 | 1243.102  |
| 885.978   | BC035601  | 38403.605 | 30876.451 | NM_020183 | 1055.702  | 1531.004  | NM_020315 | 2338.971  |
| 385.774   | NM_001458 | 1196.666  | 959.83    | NM_018029 | 460.909   | 255.233   | AK001910  | 478.013   |
| 1232.491  | NM_020388 | 4616.848  | 4414.704  | AL389954  | 478.096   | 578.971   | AK023892  | 359.533   |
| 17850.117 | AB046829  | 757.978   | 1224.462  | NM_019852 | 1256.985  | 985.465   | AF265210  | 3272.414  |
| 360.216   | NM_016445 | 777.601   | 989.779   | NM_006118 | 2659.386  | 2645.115  | AK024241  | 603.317   |
| 1364.797  | NM_003379 | 19503.975 | 10284.425 | AK026225  | 11548.789 | 13412.98  | AK025061  | 940.742   |
| 460.265   | NM_004521 | 4194.097  | 2058.983  | AL050032  | 2148.817  | 1629.535  | AF088067  | 4101.289  |
| 1151.771  | AF229162  | 1751.917  | 750.592   | AF009304  | 365.594   | 456.522   | AK022213  | 382.834   |
| 3362.897  | U02309    | 37678.805 | 16529.492 | AF086177  | 3714.632  | 3117.679  | AF056441  | 1242.667  |
| 415.785   | NM_005257 | 16296.29  | 10874.172 | NM_018949 | 1000.673  | 1049.546  | Y10509    | 523.076   |
| 4287.394  | AF011573  | 5028.251  | 5235.499  | AK021593  | 311.867   | 400.838   | AK024389  | 4559.35   |
| 952.32    | NM_002145 | 1858.178  | 1953.998  | D17187    | 745.961   | 662.468   | AK026793  | 1753.91   |
| 1060.362  | NM_003923 | 622.214   | 376.372   | AJ243672  | 876.132   | 906.15    | NM_001672 | 525.85    |
| 507.503   | NM_004831 | 1124.798  | 1015.046  | AL122087  | 515.757   | 381.408   | AJ276253  | 6105.412  |
| 922.784   | NM_014213 | 3498.523  | 3940.997  | D17169    | 14456.101 | 4811.665  | AF147314  | 1128.449  |
| 5246.379  | NM_000545 | 7015.38   | 7264.531  | NM_017924 | 3238.545  | 4691.216  | NM_018980 | 2537.172  |
| 570.557   | NM_002136 | 49068.953 | 41474.395 | S81578    | 725.321   | 892.942   | AF086201  | 978.675   |
| 1380.879  | AK025571  | 1050.376  | 1236.728  | NM_017546 | 2168.224  | 2753.666  | K00629    | 1650.689  |
| 407.063   | NM_004940 | 399.846   | 660.531   | AJ001889  | 362.859   | 350.399   | AK024515  | 1997.824  |
| 954.513   | NM_014463 | 30901.268 | 58836.508 | AL137400  | 463.198   | 636.372   | AF085862  | 2550.091  |
| 377.99    | NM_005520 | 19008.598 | 14746.354 | AF007142  | 989.978   | 1694.717  | NM_017998 | 693.537   |
| 812.347   | AK023265  | 1139.102  | 700.805   | AF119853  | 4110.307  | 5931.929  | AL049271  | 10478.267 |
| 823.357   | AB029009  | 2583.456  | 1202.565  | CY3Cy5    | 734.848   | 152.231   | AK023079  | 15717.513 |
| 681.013   | AF112207  | 1823.836  | 2240.052  | AI248827  | 481.25    | 267.29    | NM_019609 | 1004.693  |
| 826.262   | NM_005594 | 8449.744  | 6022.167  | R45026    | 1681.51   | 1356.188  | AK026198  | 1266.801  |
| 536.096   | NM_004461 | 53323.703 | 45707.957 | AI970239  | 955.382   | 668.664   | AF183570  | 601.875   |
| 643.676   | NM_018473 | 4658.794  | 2199.404  | AA496452  | 1651.298  | 1446.963  | NM_005497 | 6461.861  |
| 2491.393  | BF106121  | 624.196   | 304.203   | X67594    | 1139.48   | 845.5     | AL117603  | 420.383   |
| 338.119   | AK022590  | 2539.919  | 1115.464  | NM_015869 | 501.688   | 353.269   | AK024048  | 1246.2    |
| 7279.297  | AK023719  | 4376.295  | 5322.375  | NM_001631 | 335.187   | 189.54    | AB033093  | 827.969   |
| 5688.153  | AK025590  | 1286.706  | 810.284   | AB000734  | 1035.67   | 1111.883  | NM_005912 | 564.617   |
| 1471.575  | AY007149  | 3084.343  | 4387.75   | NM_005987 | 63038.078 | 55811.484 | NM_005909 | 20494.035 |
| 753.299   | M12078    | 601.965   | 871.296   | X87838    | 2028.379  | 1471.714  | AK055991  | 555.252   |
| 791.418   | NM_004110 | 3160.364  | 4422.902  | NM_015001 | 692.307   | 742.883   | NM_005683 | 571.567   |
| 5558.93   | NM_013387 | 37993.074 | 45287.352 | SR2       | 53262.918 | 55502.277 | AJ011601  | 347.006   |
| 1311.336  | NM_005262 | 4868.243  | 4906.296  | SR4       | 10088.964 | 10759.244 | AF085920  | 1191.232  |
| 481.005   | NM_005757 | 589.819   | 645.601   | SR6       | 1455.916  | 1427.16   | AK023173  | 9719.08   |
| 633.735   | NM_020128 | 731.858   | 480.456   | SR8       | 6502.808  | 18265.475 | U79275    | 2027.78   |
| 701.143   | NM_005068 | 2406.501  | 2468.695  | SR10      | 20236.646 | 6308.645  | AJ227908  | 542.518   |
| 340.066   | NM_018223 | 4403.867  | 2655.981  | CY3Cy5    | 689.147   | 135.374   | AF007193  | 1560.316  |
| 292.911   | NM_006693 | 13073.83  | 3814.853  | NM_003775 | 497.891   | 483.606   | AK022367  | 520.678   |
| 630.072   | NM_001722 | 1923.433  | 1005.84   | NM_002082 | 3229.416  | 2323.24   | BC028589  | 1160.47   |
| 596.261   | AB046802  | 2617.381  | 1199.2    | AF155657  | 8028.366  | 7620.071  | CY3Cy5    | 2648.042  |
| 315.322   | NM_003297 | 1119.473  | 387.252   | NM_006056 | 1557.376  | 910.096   | K02765    | 516.892   |
| 925.153   | NM_018269 | 9674.956  | 3944.73   | AF045229  | 4519.208  | 2508.358  | M65134    | 579.743   |
| 2141.684  | AK024633  | 2057.653  | 716.883   | NM_001840 | 2550.812  | 1122.192  | BG539651  | 4566.156  |
| 1300.818  | NM_001453 | 5845.418  | 1746.268  | AK025099  | 757.015   | 842.346   | N52646    | 8418.057  |
| 752.702   | NM_012075 | 1484.572  | 3493.155  | NM_016099 | 13527.738 | 8669.581  | AW160671  | 36086.371 |

|           |           |           |           |           |           |           |           |           |
|-----------|-----------|-----------|-----------|-----------|-----------|-----------|-----------|-----------|
| 2046.68   | NM_013381 | 511.955   | 755.044   | NM_000228 | 1044.246  | 790.645   | BI870529  | 1879.112  |
| 1153.788  | AK023911  | 1151.167  | 1371.211  | NM_000830 | 737.715   | 752.049   | AA702698  | 440.714   |
| 1326.84   | NM_001283 | 2326.5    | 3324.388  | NM_001155 | 3332.439  | 3237.062  | AI681514  | 579.045   |
| 265.113   | AL110237  | 665.871   | 768.961   | M62896    | 13793.623 | 9276.677  | NM_001300 | 1020.771  |
| 772.302   | D87470    | 1004.32   | 884.268   | NM_017736 | 1424.226  | 1499.4    | BG748827  | 2529.754  |
| 1584.101  | AF147307  | 5576.171  | 7475.688  | NM_001498 | 59358.91  | 57267.469 | AA952897  | 625.332   |
| 448.841   | AK001829  | 1582.231  | 2322.511  | L08441    | 4180.585  | 6059.596  | BG760342  | 1123.3    |
| 735.771   | NM_016525 | 2898.008  | 4140.891  | AA641953  | 1069.181  | 859.996   | AA703141  | 365.915   |
| 273.379   | AK001109  | 826.461   | 1626.534  | AL137764  | 22698.871 | 42160.461 | AI122630  | 4199.529  |
| 442.251   | AK024931  | 9308.472  | 12330.623 | NM_001660 | 15633.965 | 11893.061 | NM_002103 | 10311.676 |
| 1865.384  | AL109715  | 663.059   | 376.698   | NM_000752 | 542.982   | 608.91    | NM_003379 | 4512.835  |
| 1655.868  | AF086181  | 442.424   | 628.738   | NM_002018 | 4321.705  | 2184.408  | SR1       | 51649.508 |
| 748.066   | D86985    | 355.945   | 331.216   | NM_002377 | 856.945   | 714.387   | SR3       | 35949.066 |
| 787.811   | AK022258  | 613.921   | 325.138   | AF161383  | 1269.975  | 1447.488  | SR5       | 2942.556  |
| 482.292   | AF131799  | 929.603   | 469.844   | NM_000410 | 7657.528  | 6895.325  | SR7       | 3699.378  |
| 1292.98   | AK000455  | 718.672   | 556.909   | AF224266  | 1130.162  | 929.033   | SR9       | 9591.225  |
| 541.441   | NM_005230 | 550.432   | 618.588   | U72882    | 5183.973  | 4176.556  | CY3Cy5    | 1821.306  |
| 1823.452  | AL365407  | 2118.835  | 3509.464  | NM_014337 | 4840.838  | 3941.441  | NM_012428 | 1647.985  |
| 396.071   | AK022407  | 705.616   | 610.57    | NM_007161 | 35150.293 | 25477.717 | NM_013269 | 369.647   |
| 556.261   | AK000840  | 988.944   | 1102.82   | NM_014387 | 1846.095  | 1558.049  | NM_001728 | 5216.359  |
| 980.15    | AL162073  | 823.876   | 959.253   | NM_003641 | 2773.177  | 1693.67   | NM_005565 | 4240.542  |
| 11743.828 | AJ006835  | 2564.927  | 1958.439  | NM_012463 | 1088.004  | 920.022   | NM_003824 | 2216.354  |
| 3105.209  | AL050153  | 291.206   | 325.351   | L29140    | 12399.962 | 11564.88  | NM_000686 | 1289.697  |
| 1142.781  | AL122039  | 686.622   | 446.711   | AK026448  | 1232.923  | 1050.752  | NM_012452 | 2372.881  |
| 781.501   | AF070577  | 4447.369  | 3699.269  | AK057418  | 5227.097  | 4472.246  | AF229166  | 211.121   |
| 492.967   | AL157484  | 4892.565  | 6936.911  | NM_007260 | 1125.859  | 1884.064  | NM_005137 | 904.327   |
| 398.381   | AK024850  | 1105.732  | 1330.825  | AL110218  | 754.107   | 876.793   | NM_006764 | 1366.796  |
| 341.022   | Y09836    | 2450.82   | 670.348   | AB023201  | 4110.105  | 3002.033  | NM_001386 | 995.952   |
| 751.024   | AL137597  | 9316.006  | 15225.388 | NM_000017 | 2831.455  | 2303.955  | NM_001163 | 670.357   |
| 7117.094  | NM_014926 | 542.268   | 282.046   | NM_000237 | 751.433   | 852.979   | NM_005878 | 1159.406  |
| 1203.627  | AF131790  | 495.147   | 423.406   | NM_018346 | 2401.13   | 1424.097  | AF308602  | 839.148   |
| 3216.786  | AJ011378  | 552.827   | 880.803   | AL122054  | 2010.087  | 978.305   | NM_001276 | 3194.068  |
| 434.493   | AF009266  | 686.194   | 788.864   | AB011182  | 3267.165  | 1545.896  | NM_016157 | 1131.777  |
| 890.798   | AF009310  | 743.225   | 755.418   | NM_020038 | 388.321   | 432.413   | NM_014915 | 8025.291  |
| 5766.578  | AF060168  | 1112.157  | 1403.879  | NM_016246 | 757.377   | 536.593   | NM_012286 | 676.248   |
| 994.774   | AF009275  | 688.034   | 768.167   | NM_015926 | 7563.732  | 5977.986  | NM_002195 | 2008.512  |
| 648.323   | AF015251  | 701.546   | 759.58    | X03757    | 2542.594  | 1730.025  | D84294    | 1050.749  |
| 3973.791  | AF056426  | 1057.248  | 1030.14   | NM_005136 | 510.994   | 385.349   | M31659    | 629.99    |
| 552.841   | AF064850  | 533.127   | 591.796   | NM_001183 | 7130.556  | 7486.739  | NM_016226 | 4423.678  |
| 1215.34   | AK001096  | 334.968   | 419.039   | NM_000890 | 1950.679  | 1346.365  | AK024311  | 276.462   |
| 310.743   | NM_018329 | 1049.696  | 1390.763  | NM_004976 | 5189.661  | 5180.841  | AF052155  | 1637.064  |
| 883.442   | AK021565  | 659.428   | 751.45    | AK021597  | 7438.092  | 3712.339  | NM_005085 | 726.309   |
| 1391.064  | AK021778  | 499.464   | 599.029   | NM_005737 | 11266.767 | 11628.666 | AF060902  | 623.857   |
| 912.276   | AK001150  | 2627.825  | 3998.06   | AF235022  | 513.698   | 704.123   | AF121858  | 1694.534  |
| 7110.487  | AK021633  | 1271.797  | 1244.631  | AF182814  | 1275.504  | 881.788   | NM_013437 | 704.525   |
| 9404.249  | AK025659  | 1436.056  | 827.29    | D86974    | 1474.563  | 1216.214  | X57655    | 451.202   |
| 1461.686  | AK026407  | 309.217   | 220.449   | NM_018283 | 802.7     | 636.866   | AK025966  | 1653.776  |
| 5007.571  | AK026788  | 727.474   | 784.881   | NM_001983 | 1973.848  | 586.593   | NM_003081 | 7087.264  |
| 477.281   | AK026824  | 398.139   | 232.108   | M29551    | 12130.286 | 7860.155  | NM_016495 | 1075.283  |
| 13178.882 | AJ008130  | 13505.441 | 23054.832 | NM_002929 | 795.652   | 1029.48   | D50402    | 11699.451 |
| 1750.875  | NM_003669 | 269.864   | 281.625   | BC028375  | 1060.836  | 793.155   | M73547    | 3807.751  |
| 1119.79   | AF086502  | 1367.664  | 1702.593  | AB026436  | 1508.312  | 1400.068  | NM_003687 | 645.302   |
| 2467.935  | L39924    | 1288.198  | 1332.987  | NM_016029 | 2951.287  | 3479.906  | NM_004134 | 1897.167  |

|           |           |           |           |           |           |           |           |           |
|-----------|-----------|-----------|-----------|-----------|-----------|-----------|-----------|-----------|
| 34446.477 | U52054    | 3247.805  | 2543.343  | AK024562  | 1061.13   | 1024.931  | NM_00595E | 1708.856  |
| 381.902   | AK023325  | 1955.578  | 1335.264  | NM_01406E | 658.256   | 1145.741  | NM_00404E | 326.071   |
| 1893.225  | NM_01798E | 1316.848  | 941.294   | NM_00457E | 1402.326  | 1234.328  | NM_01776E | 7999.825  |
| 5311.721  | AK025866  | 2823.755  | 2025.867  | AF263523  | 872.758   | 1518.026  | NM_00042E | 525.578   |
| 736.136   | AF088058  | 1305.265  | 989.602   | AI970239  | 1074.752  | 1153.702  | AB040967  | 4184.182  |
| 1552.201  | NM_00051E | 1297.163  | 1054.066  | AA496452  | 1651.929  | 1975.594  | NM_014721 | 1021.116  |
| 454.129   | Y11165    | 1283.307  | 1656.727  | X67594    | 895.579   | 702.443   | AK026352  | 486.246   |
| 186.71    | BC028422  | 598.892   | 661.403   | BC008837  | 578.944   | 674.321   | AL137705  | 2261.066  |
| 148.999   | AK022219  | 326.433   | 429.382   | AB000734  | 1015.071  | 1230.116  | NM_01484E | 622.677   |
| 1792.231  | AK024413  | 634.877   | 1030.741  | NM_00598E | 62935.609 | 61995.527 | BF217766  | 392.832   |
| 5385.607  | AL137752  | 440.138   | 793.956   | X87838    | 2197.318  | 1886.605  | NM_000184 | 1099.565  |
| 16005.747 | AK022247  | 736.008   | 752.307   | NM_015001 | 876.119   | 1108.12   | NM_01618C | 409.36    |
| 1682.058  | AK001453  | 1859.01   | 1158.591  | NM_00016E | 2648.007  | 5292.758  | NM_005827 | 3169.217  |
| 441.929   | AB007972  | 1836.658  | 1541.957  | NM_00726C | 883.285   | 911.608   | NM_00305E | 1796.571  |
| 477.608   | AL390144  | 2998.687  | 1978.35   | NM_00377E | 1103.065  | 2913.93   | NM_003044 | 1014.716  |
| 613.38    | AK024017  | 1434.838  | 1066.587  | AF155657  | 9512.867  | 10840.12  | NM_00667E | 5371.818  |
| 3039.866  | X56196    | 440.244   | 515.042   | NM_00605E | 1560.304  | 1079.802  | AB007875  | 429.839   |
| 1144.015  | D17220    | 4846.807  | 5226.352  | AF045229  | 4715.79   | 3524.496  | AL050288  | 17976.26  |
| 1547.117  | D28363    | 45025.508 | 33587.07  | NM_00184C | 2597.248  | 1899.809  | NM_00504C | 2470.913  |
| 384.687   | AB011171  | 1830.623  | 2447.094  | AK025099  | 797.429   | 693.253   | NM_016391 | 6786.603  |
| 6260.689  | AK023606  | 292.388   | 291.148   | NM_01609E | 12265.203 | 9335.227  | AF075033  | 1734.342  |
| 16892.939 | AF189251  | 373.918   | 418.123   | NM_00022E | 978.817   | 954.546   | D50911    | 5724.806  |
| 7864.565  | NM_00532E | 2438.473  | 2937.26   | NM_00083C | 612.19    | 802.283   | AB011104  | 841.21    |
| 3492.863  | AK024465  | 1530.395  | 1242.106  | AF148950  | 785.718   | 1484.37   | AK024069  | 5403.243  |
| 476.53    | AF075119  | 1181.737  | 1878.407  | NM_00115E | 3262.859  | 5020.213  | NM_00458E | 6834.883  |
| 261.086   | AK021478  | 2731.181  | 2779.36   | M62896    | 15585.489 | 11944.518 | NM_01564C | 10325.092 |
| 954.609   | AF131782  | 1512.134  | 2325.322  | NM_01773E | 2415.718  | 3456.93   | AF233450  | 660.317   |
| 2423.451  | NM_01421C | 4662.418  | 14051.976 | NM_00201E | 5430.077  | 3827.83   | NM_01623E | 1136.893  |
| 1158.126  | AK021603  | 813.36    | 501.159   | NM_002377 | 575.013   | 441.413   | NM_000821 | 6516.633  |
| 3307.258  | AL110136  | 1748.684  | 1701.174  | AF161383  | 1384.728  | 1627.199  | NM_020121 | 944.006   |
| 679.445   | AK002203  | 586.543   | 816.156   | NM_00041C | 7801.365  | 7870.285  | NM_00314E | 32960.941 |
| 1736.54   | AK026469  | 1716.947  | 3752.977  | AF224266  | 1141.965  | 1376.639  | NM_00163E | 955.174   |
| 1923.579  | D16935    | 4253.7    | 5182.485  | U72882    | 5927.184  | 5714.072  | NM_012264 | 580.29    |
| 1352.899  | AK027019  | 1069.965  | 1223.088  | NM_014337 | 5397.739  | 6102.179  | AF311312  | 1490.341  |
| 1055.304  | U92019    | 389.77    | 632.327   | NM_00716E | 35025.992 | 33188.773 | NM_01491E | 6867.799  |
| 1692.618  | U52835    | 3136.238  | 2769.482  | NM_014387 | 1541.045  | 1958.558  | NM_01228E | 622.744   |
| 442.848   | NM_00075E | 2516.149  | 2043.16   | NM_003641 | 2529.105  | 3192.529  | NM_00219E | 1761.913  |
| 1486.65   | AK022148  | 376.29    | 270.454   | NM_01246E | 1689.421  | 2190.999  | D84294    | 1155.673  |
| 705.262   | Z36811    | 51803.859 | 59300.039 | L29140    | 14926.71  | 18194.475 | K02765    | 547.399   |
| 661.406   | K03200    | 7427.946  | 7742.343  | AK026448  | 1395.729  | 1712.314  | M65134    | 987.904   |
| 1069.031  | U17629    | 3221.125  | 4130.102  | AB026436  | 1144.841  | 956.99    | BG539651  | 5169.22   |
| 8902.052  | NM_02042E | 1884.294  | 2263.816  | NM_01602E | 2924.996  | 1757.923  | N52646    | 9060.09   |
| 1130.721  | U79265    | 3855.065  | 3462.458  | NM_000237 | 1443.849  | 1529.162  | AW160671  | 32811.805 |
| 2718.852  | AK022868  | 4227.046  | 3541.525  | NM_01834E | 2729.234  | 1746.786  | B1870529  | 1730.134  |
| 2530.588  | NM_00353C | 660.292   | 776.111   | AL122054  | 1672.786  | 1539.2    | AA702698  | 438.222   |
| 1522.074  | AJ227871  | 736.34    | 1735.191  | AB011182  | 3469.11   | 2552.048  | A1681514  | 500.747   |
| 2593.996  | AK025344  | 1983.619  | 2093.992  | NM_00014C | 4658.408  | 4323.964  | NM_00130C | 1273.703  |
| 679.567   | D28589    | 10907.376 | 6655.649  | NM_00512E | 3113.809  | 2329.111  | BG748827  | 2268.451  |
| 1062.845  | AF301223  | 560.247   | 660.295   | NM_02003E | 377.222   | 652.197   | AA952897  | 740.246   |
| 5241.79   | NM_017867 | 4258.356  | 3647.89   | NM_01624E | 951.804   | 951.586   | BG760342  | 1101.766  |
| 1435.304  | U92820    | 9778.612  | 5619.537  | NM_01592E | 10676.846 | 10933.309 | AA703141  | 390.773   |
| 2190.787  | NM_017937 | 2279.161  | 1887.326  | X03757    | 2601.74   | 2759.098  | A1122630  | 3844.2    |
| 581.825   | AL360266  | 1647.127  | 1078.717  | NM_01865E | 10277.915 | 9729.165  | NM_00210E | 9769.824  |

|           |           |           |           |           |           |           |           |           |
|-----------|-----------|-----------|-----------|-----------|-----------|-----------|-----------|-----------|
| 8078.478  | AL160132  | 15379.53  | 11491.833 | NM_001183 | 7582.27   | 10282.521 | NM_003379 | 4086.125  |
| 373.198   | NM_019557 | 3529.97   | 3963.382  | NM_000890 | 2147.7    | 2444.937  | NM_006589 | 3148.165  |
| 14970.371 | CY3Cy5    | 1586.257  | 128.714   | NM_004976 | 5365.956  | 5482.201  | NM_004134 | 1649.401  |
| 5015.719  | AA150828  | 1244.898  | 1751.541  | NM_015001 | 590.108   | 412.058   | NM_005955 | 1303.057  |
| 1021.419  | A1859208  | 458.47    | 1184.478  | NM_005329 | 441.535   | 597.324   | NM_004048 | 302.534   |
| 2994.499  | H64379    | 6478.205  | 5556.235  | NM_000107 | 1230.964  | 2562.428  | NM_012428 | 1969.97   |
| 358.908   | BE208258  | 36826.188 | 39563.762 | AL157445  | 1024.29   | 981.379   | NM_013269 | 542.384   |
| 321.742   | T72202    | 954.106   | 1167.854  | NM_001517 | 6103.358  | 4893.43   | NM_001728 | 5782.231  |
| 5234.457  | B1831922  | 2005.654  | 1832.046  | NM_005053 | 2441.44   | 2398.022  | NM_005565 | 6026.635  |
| 11160.368 | M69238    | 3960.124  | 4742.442  | D86974    | 1912.926  | 1943.042  | NM_003824 | 2579.04   |
| 5471.135  | M80244    | 482.775   | 473.474   | NM_018283 | 1090.228  | 1193.033  | NM_000686 | 1313.013  |
| 1292.334  | AA599158  | 11092.178 | 5251.935  | NM_001983 | 2578.737  | 906.665   | NM_012452 | 2307.56   |
| 1040.791  | NM_002711 | 539.909   | 654.531   | Y12337    | 1836.358  | 2030.287  | AF229166  | 386.062   |
| 3185.408  | SR5       | 3745.706  | 4870.513  | M29551    | 12337.938 | 11201.521 | NM_005137 | 937.865   |
| 1184.857  | SR7       | 4907.39   | 54900.703 | NM_002929 | 1261.608  | 2275.689  | NM_006764 | 1560.81   |
| 499.035   | SR9       | 17159.447 | 4135.476  | BC028375  | 808.609   | 1005.331  | NM_001386 | 1163.963  |
| 1054.006  | CY3Cy5    | 2324.972  | 150.518   | NM_001155 | 2943.946  | 2195.135  | NM_001163 | 604.425   |
| 777.494   | NM_001560 | 4581.392  | 8492.676  | M62896    | 12571.593 | 5778.319  | NM_005878 | 1451.197  |
| 285.973   | NM_001783 | 6269.993  | 5276.328  | AF263523  | 1051.928  | 1700.184  | AF308602  | 813.776   |
| 1507.39   | J03171    | 1807.319  | 1719.647  | L08441    | 5157.338  | 6322.928  | AB011089  | 485.305   |
| 810.044   | NM_005856 | 768.905   | 860.421   | AA641953  | 1061.376  | 736.826   | AF007192  | 305.293   |
| 2844.89   | NM_004323 | 14200.134 | 12097.801 | AI248827  | 412.753   | 305.85    | NM_001276 | 3250.715  |
| 786.349   | NM_005312 | 1305.779  | 1198.551  | R45026    | 1533.517  | 1212.499  | NM_016157 | 857.789   |
| 7860.211  | NM_001711 | 852.235   | 752.177   | AI970239  | 1075.519  | 1188.026  | NM_005827 | 1882.385  |
| 1807.706  | NM_004210 | 9893.977  | 10857.786 | AA496452  | 1689.979  | 2882.433  | NM_003053 | 1486.319  |
| 4338.704  | NM_020140 | 1941.518  | 3178.288  | X67594    | 1379.101  | 1454.398  | NM_003044 | 1020.81   |
| 2646.945  | NM_001496 | 3872.137  | 3677.412  | AB000734  | 1480.301  | 1436.475  | NM_006672 | 5299.604  |
| 4957.186  | NM_001962 | 507.839   | 454.625   | NM_005987 | 63242.25  | 62410.156 | M31659    | 697.733   |
| 800.473   | NM_002500 | 699.151   | 1028.921  | X87838    | 2485.393  | 2913.74   | NM_016226 | 5459.819  |
| 4347.457  | AK026232  | 1794.917  | 1735.206  | NM_007161 | 28617.184 | 14737.398 | AK024311  | 538.908   |
| 4877.004  | NM_014892 | 6754.84   | 35818.965 | NM_014387 | 1262.603  | 888.198   | AF052155  | 2357.972  |
| 3718.11   | AK023827  | 2178.746  | 2654.373  | NM_003641 | 2088.189  | 1121.149  | NM_005085 | 1358.306  |
| 2016.904  | NM_001117 | 616.776   | 693.974   | NM_012463 | 1158.127  | 808.605   | AF060902  | 787.984   |
| 262.448   | NM_000231 | 2640.755  | 2802.174  | L29140    | 12439.381 | 8525.138  | AF121858  | 2061.89   |
| 8880.118  | L07517    | 1063.369  | 1276.575  | AK026448  | 1163.115  | 848.773   | NM_013437 | 702.975   |
| 476.342   | AK022451  | 1424.654  | 1255.118  | NM_007260 | 1420.353  | 1913.651  | X57655    | 464.665   |
| 320.42    | NM_014359 | 63611.066 | 70332.281 | AF148646  | 2668.896  | 2023.382  | AK025966  | 1941.102  |
| 573.599   | BM918441  | 2990.819  | 4318.847  | AL110218  | 701.527   | 639.036   | NM_003081 | 8508.634  |
| 3470.73   | NM_001045 | 4469.516  | 3483.236  | AB023201  | 4443.635  | 2572.668  | NM_016495 | 1064.854  |
| 688.953   | NM_005697 | 5173.839  | 7212.948  | NM_003775 | 585.28    | 746.477   | D50402    | 12497.438 |
| 636.453   | NM_003099 | 4041.176  | 4211.785  | NM_002082 | 3661.688  | 3510.744  | M73547    | 3407.025  |
| 579.168   | NM_004781 | 1049.788  | 817.928   | AF155657  | 9193.171  | 13083.024 | NM_003687 | 674.746   |
| 931.636   | NM_018303 | 1254.542  | 1640.666  | NM_006056 | 2006.488  | 1873.375  | NM_020121 | 748.399   |
| 1278.007  | NM_014758 | 1228.645  | 1618.641  | AF045229  | 5348.804  | 4039.733  | NM_003145 | 30854.273 |
| 4993.973  | NM_005124 | 1776.993  | 984.583   | NM_001840 | 2777.498  | 2178.908  | NM_001632 | 894.652   |
| 377.911   | AK000947  | 3353.798  | 2680.754  | AK025099  | 1039.922  | 908.079   | NM_012264 | 676.779   |
| 121.839   | L08240    | 642.487   | 683.628   | NM_016099 | 14600.372 | 14657.408 | AF311312  | 1486.386  |
| 402.769   | NM_017952 | 1222.896  | 1253.545  | NM_000228 | 1229.12   | 1332.005  | NM_000428 | 692.837   |
| 456.431   | NM_016081 | 13096.074 | 17532.693 | NM_018658 | 7196.123  | 3972.34   | AB040967  | 5028.293  |
| 2196.273  | NM_006389 | 4414.548  | 1924.063  | NM_001183 | 6656.443  | 4813.991  | NM_014721 | 1275.612  |
| 760.172   | M30818    | 511.774   | 791.675   | NM_000890 | 1892.019  | 883.771   | AK026352  | 664.529   |
| 916.878   | NM_000163 | 690.036   | 913.747   | NM_004976 | 4950.894  | 3415.936  | NM_006668 | 845.26    |
| 447.912   | NM_005755 | 908.696   | 830.697   | AK021597  | 8140.566  | 3240.34   | AL137705  | 1130.635  |

|          |           |           |           |           |           |           |           |           |
|----------|-----------|-----------|-----------|-----------|-----------|-----------|-----------|-----------|
| 130.781  | NM_003329 | 53796.801 | 53720.656 | NM_005737 | 11610.958 | 9405.504  | NM_014848 | 653.143   |
| 482.324  | NM_003299 | 42883.633 | 25380.75  | NM_000014 | 376.692   | 227.51    | BF217766  | 390.59    |
| 251.384  | NM_014330 | 11623.279 | 9828.859  | NM_006803 | 848.136   | 965.684   | NM_000184 | 1454.732  |
| 137.843  | NM_007214 | 9305.33   | 4870.078  | NM_002533 | 1316.818  | 925.614   | NM_016180 | 388.352   |
| 210.362  | NM_000311 | 2163.574  | 1804.208  | AF235022  | 439.338   | 457.335   | NM_002103 | 6341.762  |
| 1803.152 | NM_017909 | 2240.886  | 1438.622  | AL137764  | 23236.357 | 17836.652 | NM_003379 | 3747.373  |
| 236.315  | NM_006335 | 9263.351  | 4444.082  | NM_001660 | 16210.638 | 12200.679 | NM_006589 | 3373.552  |
| 665.068  | NM_000786 | 11721.621 | 4930.374  | NM_000752 | 563.239   | 748.232   | AB007875  | 857.84    |
| 773.948  | AL133561  | 2197.142  | 2041.689  | NM_002018 | 5374.25   | 5001.686  | AL050288  | 20876.051 |
| 667.204  | NM_017731 | 425.502   | 351.542   | NM_002377 | 518.394   | 560.022   | NM_005040 | 2805.534  |
| 433.694  | AB040891  | 1907.262  | 1622.855  | NM_006018 | 260.451   | 357.759   | NM_016391 | 7137.759  |
| 289.985  | AB037780  | 930.349   | 470.33    | AF161383  | 1639.106  | 2850.458  | AF075033  | 1968.875  |
| 157.37   | NM_016209 | 6614.247  | 7775.283  | NM_000410 | 8559.047  | 12531.457 | D50911    | 2270.004  |
| 121.662  | AK075415  | 552.068   | 510.554   | AF224266  | 2180.683  | 2038.355  | AB011104  | 736.235   |
| 450.302  | NM_018964 | 2785.024  | 3030.941  | U72882    | 6415.96   | 6400.432  | AK024069  | 5707.224  |
| 1731.1   | NM_000080 | 1861.626  | 1858.661  | NM_014337 | 6171.662  | 6065.84   | NM_004582 | 7168.621  |
| 4287.951 | NM_001829 | 815.847   | 629.958   | Y12337    | 1188.873  | 733.771   | NM_015640 | 9795.335  |
| 1578.812 | NM_000339 | 316.674   | 524.282   | M29551    | 10069.947 | 4506.609  | AF233450  | 681.386   |
| 453.527  | AF283645  | 1526.866  | 1957.986  | NM_002929 | 1103.354  | 939.856   | AF308602  | 461.759   |
| 3635.86  | NM_016575 | 1855.976  | 1460.925  | BC028375  | 663.307   | 479.998   | NM_001276 | 3088.413  |
| 4751.585 | NM_003897 | 1428.493  | 1107.029  | AB026436  | 2077.936  | 1373.793  | NM_016157 | 976.913   |
| 407.034  | NM_014165 | 6677.945  | 3569.688  | NM_016029 | 3447.204  | 2776.227  | NM_014915 | 7200.507  |
| 4542.136 | AL442085  | 3162.643  | 2583.223  | AK024562  | 949.417   | 1142.159  | NM_012286 | 768.135   |
| 2938.229 | NM_013313 | 1925.776  | 3015.621  | NM_014066 | 757.044   | 1145.464  | NM_002195 | 2400.158  |
| 591.134  | NM_014736 | 4694.187  | 4752.355  | NM_004573 | 1824.963  | 1315.456  | D84294    | 1200.612  |
| 585.428  | AK023886  | 1246.466  | 1213.179  | NM_000072 | 1573.639  | 3219.882  | K02765    | 986.05    |
| 238.173  | NM_002553 | 1218.752  | 1100.304  | NM_000697 | 1817.976  | 1521.956  | BG539651  | 6110.267  |
| 797.925  | AJ404615  | 2279.215  | 1760.67   | NM_000017 | 4571.688  | 4358.481  | N52646    | 9682.727  |
| 1393.192 | AB007869  | 2103.585  | 1902.122  | NM_000237 | 1192.147  | 1587.174  | AW160671  | 35059.512 |
| 4013.181 | AB046844  | 633.239   | 777.262   | NM_018346 | 2487.008  | 1959.565  | A1681514  | 638.826   |
| 880.047  | NM_000302 | 1497.317  | 2071.829  | AL122054  | 2507.792  | 2239.466  | NM_001300 | 922.431   |
| 546.126  | NM_013235 | 18370.387 | 18574.385 | AB011182  | 3688.88   | 3232.794  | BG748827  | 2283.132  |
| 632.843  | NM_016015 | 3149.729  | 2733.488  | NM_000140 | 6414.029  | 6064.29   | AA952897  | 682.558   |
| 2511.357 | AK022900  | 1181.489  | 561.01    | NM_005125 | 3714.085  | 3562.136  | BG760342  | 1113.221  |
| 726.789  | NM_001125 | 417.557   | 891.446   | NM_020038 | 964.397   | 1031.545  | NM_003081 | 1923.257  |
| 311.9    | AB023216  | 1018.295  | 970.361   | NM_016246 | 1092.94   | 1203.756  | NM_016495 | 1007.246  |
| 430.292  | NM_002266 | 20075.076 | 23880.143 | NM_015926 | 10099.932 | 10272.131 | D50402    | 12310.597 |
| 169.516  | NM_014400 | 6225.41   | 6033.358  | X03757    | 2808.155  | 2642.095  | M73547    | 3065.442  |
| 1144.238 | AL157492  | 612.471   | 744.701   | NM_020248 | 10890.323 | 6798.408  | NM_003687 | 531.263   |
| 2440.285 | AL353957  | 2278.521  | 2330.697  | X89670    | 937.676   | 613.603   | NM_004134 | 1726.153  |
| 3133.724 | NM_000231 | 2343.625  | 2272.15   | NM_004053 | 3585.212  | 2646.104  | NM_005955 | 1576.846  |
| 352.682  | L07517    | 1063.68   | 755.803   | NM_001489 | 1508.64   | 1859.618  | NM_004048 | 360.992   |
| 5775.332 | AK022451  | 1415.111  | 1280.386  | NM_020374 | 1709.742  | 2230.784  | NM_012428 | 2414.724  |
| 250.804  | BM918441  | 3011.2    | 4097.515  | NM_014922 | 1376.656  | 1217.617  | NM_001728 | 5338.662  |
| 576.625  | AA425102  | 233.146   | 621.979   | NM_000169 | 3580.631  | 4423.727  | NM_005565 | 2074.735  |
| 197.921  | AA150828  | 1372.06   | 2032.106  | AF182814  | 1734.263  | 1704.962  | NM_003824 | 2311.798  |
| 944.128  | A1859208  | 433.052   | 1074.849  | NM_005329 | 349.144   | 554.19    | NM_000686 | 1300.276  |
| 116.949  | H64379    | 6320.891  | 5306.744  | NM_000107 | 979.716   | 1325.684  | NM_012452 | 2769.397  |
| 127.739  | T72202    | 824.392   | 1259.851  | AL157445  | 1425.668  | 1766.987  | AF229166  | 558.585   |
| 665.029  | B1831922  | 2256.63   | 1788.996  | NM_001517 | 8335.243  | 7492.622  | NM_005137 | 1002.825  |
| 1345.161 | M69238    | 3924.082  | 4191.653  | NM_005053 | 3280.027  | 3938.346  | NM_006764 | 1199.9    |
| 3890.493 | AA664180  | 680.488   | 812.941   | D86974    | 3217.436  | 3917.787  | NM_001386 | 1306.723  |
| 413.757  | BE294756  | 1854.073  | 5718.876  | NM_018283 | 1231.611  | 1634.949  | NM_001163 | 687.668   |

|           |           |           |           |           |           |           |           |           |
|-----------|-----------|-----------|-----------|-----------|-----------|-----------|-----------|-----------|
| 109.958   | NM_001073 | 256.853   | 471.994   | NM_001983 | 2908.53   | 1103.378  | NM_00587E | 1325.226  |
| 186.977   | NM_002711 | 385.551   | 934.309   | NM_001793 | 8035.559  | 4156.3    | NM_01484E | 314.612   |
| 789.622   | AK026092  | 1612.209  | 2068.736  | NM_001943 | 1418.307  | 730.135   | BF217766  | 333.637   |
| 403.319   | AK001175  | 1937.42   | 1817.915  | NM_004927 | 2147.166  | 1448.309  | NM_000184 | 875.327   |
| 2937.178  | NM_003329 | 52799.012 | 39789.563 | NM_001459 | 1187.474  | 891.251   | NM_000112 | 403.394   |
| 4212.844  | NM_003299 | 44106.855 | 22015.719 | NM_015513 | 5232.271  | 3826.494  | NM_005827 | 2906.36   |
| 2267.606  | NM_001560 | 4459.992  | 9315.581  | NM_006219 | 5007.585  | 3360.28   | NM_003053 | 1883.163  |
| 5429.241  | NM_001783 | 6699.868  | 5775.886  | NM_004443 | 4759.453  | 3884.512  | NM_003044 | 874.059   |
| 516.285   | J03171    | 1684.431  | 1677.957  | NM_002964 | 18694.754 | 30998.229 | NM_006672 | 6194.138  |
| 391.3     | NM_005856 | 713.968   | 721.132   | NM_016447 | 630.695   | 418.779   | AF052155  | 1867.88   |
| 221.998   | NM_005312 | 1154.343  | 1303.022  | NM_015626 | 2495.271  | 2531.146  | NM_00508E | 800.553   |
| 235.616   | NM_001711 | 850.351   | 1138.788  | NM_004899 | 3174.805  | 2875.913  | AF060902  | 751.835   |
| 649.139   | NM_004210 | 9766.579  | 12906.278 | AB006628  | 9753.583  | 8409.598  | AF121858  | 2297.831  |
| 617.697   | NM_020140 | 1716.821  | 3167.751  | AF272036  | 5387.339  | 4694.232  | NM_013437 | 584.402   |
| 403.829   | NM_007029 | 908.125   | 728.083   | AF231023  | 726.332   | 972.019   | X57655    | 675.107   |
| 420.747   | NM_001962 | 1278.042  | 1302.747  | NM_00514E | 1315.374  | 1396.961  | NM_01872E | 380.536   |
| 553.149   | NM_002500 | 1047.356  | 1761.521  | NM_004746 | 750.277   | 818.837   | AK024069  | 3437.079  |
| 170.927   | AK026232  | 2045.343  | 2474.557  | AF146019  | 3958.57   | 4160.963  | NM_004582 | 6630.77   |
| 678.821   | NM_014892 | 6167.712  | 36009.855 | Z36782    | 5093.438  | 5196.361  | NM_015640 | 8184.189  |
| 635.591   | AK023827  | 2039.902  | 2575.62   | NM_003490 | 12914.708 | 15208.693 | AF233450  | 498.859   |
| 593.025   | NM_001117 | 578.291   | 658.703   | AF508940  | 2468.729  | 2156.075  | NM_016233 | 843.259   |
| 499.217   | NM_001829 | 618.523   | 467.872   | NM_005429 | 1558.381  | 1842.628  | NM_000821 | 4699.402  |
| 725.516   | AF283645  | 1499.137  | 1473.738  | AF130051  | 494.975   | 1516.46   | NM_020121 | 576.57    |
| 1695.833  | NM_01657E | 1857.498  | 1488.337  | M25753    | 5748.619  | 7258.475  | NM_00314E | 16780.699 |
| 1547.373  | NM_00104E | 4358.799  | 4934.482  | NM_003883 | 840.341   | 914.519   | NM_001632 | 802.969   |
| 344.295   | NM_005697 | 5188.391  | 8016.455  | NM_014929 | 1927.81   | 1584.482  | NM_012264 | 581.577   |
| 462.286   | NM_003099 | 3771.476  | 4409.271  | NM_004203 | 6192.436  | 6255.399  | NM_00042E | 549.535   |
| 443.495   | NM_004781 | 1175.425  | 981.328   | NM_001951 | 1163.68   | 1336.366  | AB040967  | 4433.912  |
| 1371.282  | NM_018303 | 1538.217  | 1494.912  | NM_002391 | 547.418   | 405.743   | NM_014721 | 1236.329  |
| 78.286    | NM_01475E | 1383.5    | 1643.498  | NM_003674 | 30647.072 | 24775.717 | AK026352  | 527.884   |
| 917.337   | NM_005124 | 1690.635  | 1443.692  | NM_001197 | 2974.318  | 1823.614  | AL137705  | 2269.253  |
| 593.835   | AK000947  | 3061.034  | 3099.21   | NM_006682 | 762.03    | 852.088   | U41898    | 223.501   |
| 671.724   | L08240    | 612.277   | 718.374   | NM_006410 | 1389.387  | 2604.467  | NM_007262 | 8054.008  |
| 383.276   | NM_017952 | 1286.68   | 1787.51   | NM_014977 | 48736.129 | 46464.629 | NM_014783 | 3393.175  |
| 328.226   | NM_002940 | 1526.491  | 1769.766  | AK026325  | 1723.367  | 3151.395  | NM_014053 | 1218.328  |
| 1148.905  | NM_016081 | 10602.196 | 18104.934 | U83857    | 852.118   | 1028.055  | NM_002571 | 516.186   |
| 293.879   | NM_006389 | 4179.338  | 2234.522  | NM_001230 | 1444.019  | 2301.976  | NM_004939 | 2054.435  |
| 911.475   | M30818    | 418.798   | 803.405   | AK025662  | 1029.255  | 1634.142  | NM_00142E | 8059.726  |
| 604.213   | NM_000163 | 625.677   | 548.801   | NM_000201 | 466.816   | 824.1     | NM_015710 | 548.133   |
| 953.951   | NM_00575E | 660.044   | 628.357   | AB011539  | 1114.443  | 1373.594  | NM_01415E | 3436.931  |
| 893.104   | NM_001125 | 500.841   | 696.164   | U37028    | 2119.046  | 1770.934  | AK021591  | 708.371   |
| 1419.672  | AB023216  | 1018.187  | 644.751   | AB014597  | 1928.106  | 2325.192  | NM_01467E | 734.455   |
| 3839.49   | NM_002266 | 18164.922 | 15175.557 | AK024313  | 4141.325  | 6643.909  | NM_006589 | 1767.926  |
| 4878.271  | NM_014400 | 5588.368  | 3752.553  | NM_003891 | 1727.689  | 2131.385  | NM_005040 | 2525.868  |
| 327.637   | AL157492  | 622.737   | 635.003   | NM_002022 | 740.006   | 1060.214  | NM_016391 | 6811.271  |
| 10310.806 | AL353957  | 2027.096  | 1864.869  | NM_015524 | 1984.8    | 1718.546  | AF075033  | 1392.562  |
| 3140.539  | NM_007214 | 8675.954  | 5538.167  | NM_001673 | 3712.413  | 1362.001  | D50911    | 6125.49   |
| 1201.208  | NM_000311 | 2057.862  | 2063.277  | NM_016510 | 2182.444  | 1880.684  | AB011104  | 884.364   |
| 583.263   | NM_017909 | 2394.531  | 1728.256  | NM_014270 | 1818.825  | 1681.03   | NM_00324E | 786.54    |
| 2532.029  | NM_00633E | 9267.652  | 5103.946  | NM_000071 | 3715.078  | 2972.672  | NM_00107E | 819.966   |
| 2155.457  | NM_000786 | 11510.82  | 6086.636  | NM_006843 | 1902.6    | 1801.622  | NM_000552 | 3171.592  |
| 422.542   | AL133561  | 2405.448  | 2130.456  | NM_004321 | 1666.523  | 1665.176  | AK000860  | 3142.034  |
| 790.241   | NM_017731 | 482.484   | 354.661   | AF311212  | 4462.721  | 3775.369  | NM_014961 | 468.731   |

|           |           |           |           |           |           |           |           |           |
|-----------|-----------|-----------|-----------|-----------|-----------|-----------|-----------|-----------|
| 1182.376  | AB040891  | 1975.222  | 1873.838  | NM_006915 | 1119.704  | 1431.219  | NM_020145 | 665.024   |
| 520.941   | AB037780  | 735.682   | 591.246   | NM_006035 | 1235.939  | 1459.511  | AK021529  | 1228.84   |
| 272.943   | NM_005845 | 8495.015  | 11497.047 | NM_006086 | 5919.985  | 4654.912  | AB037845  | 1409.186  |
| 120.184   | NM_016209 | 6583.044  | 9391.844  | NM_004520 | 6077.653  | 10702.976 | NM_005980 | 878.549   |
| 7882.904  | AK075415  | 426.736   | 714.307   | AK027118  | 2907.237  | 3083.346  | NM_016190 | 31475.582 |
| 977.338   | AK025616  | 509.918   | 1563.3    | AK022882  | 9107.879  | 13972.138 | AL137579  | 5106.745  |
| 1690.134  | NM_018964 | 3387.412  | 4759.971  | NM_006105 | 1632.306  | 2053.104  | AJ271684  | 1247.885  |
| 1002.523  | NM_000080 | 1383.26   | 1379.8    | NM_005981 | 1305.356  | 1685.188  | AF255342  | 4599.763  |
| 3593.663  | NM_002711 | 588.011   | 530.047   | NM_000474 | 3700.262  | 1104.043  | NM_003300 | 3078.325  |
| 1159.937  | AK026092  | 1555.061  | 1515.476  | NM_016264 | 585.954   | 342.795   | AK026682  | 1110.609  |
| 3978.545  | AK001175  | 1758.417  | 1504.745  | NM_006079 | 19932.719 | 9469.445  | NM_004655 | 2608.653  |
| 676.274   | NM_003897 | 1285.823  | 1320.811  | AB037837  | 383.231   | 527.777   | NM_003942 | 1616.248  |
| 1459.037  | NM_014165 | 5869.063  | 4015.096  | NM_014595 | 3683.914  | 2607.123  | NM_006471 | 13636.46  |
| 11298.502 | AL442085  | 3493.043  | 2755.749  | NM_014789 | 663.81    | 567.784   | NM_004165 | 2923.952  |
| 1307.924  | NM_013313 | 1297.14   | 1995.623  | AB046784  | 445.564   | 493.23    | NM_016586 | 697.845   |
| 1255.885  | NM_014736 | 4758.452  | 5058.751  | X52402    | 2416.24   | 2601.172  | NM_002866 | 2446.711  |
| 1316.687  | AK023886  | 1257.389  | 1814.784  | AL133663  | 524.027   | 517.7     | NM_003860 | 5434.554  |
| 437.796   | NM_002553 | 1314.727  | 1014.205  | NM_004992 | 1170.842  | 1481.805  | NM_005414 | 520.435   |
| 18025.715 | AJ404615  | 2421.199  | 2188.231  | NM_014462 | 1457.348  | 1646.24   | NM_004468 | 5374.948  |
| 572.516   | NM_016053 | 10148.771 | 11043.345 | NM_014156 | 50715.984 | 47742.582 | NM_016031 | 10077.658 |
| 609.011   | AB007869  | 2021.567  | 2317.039  | NM_003137 | 4402.005  | 5208.516  | NM_004804 | 489.673   |
| 3534.106  | AB046844  | 622.99    | 798.291   | NM_006938 | 22028.307 | 16914.193 | M92439    | 5017.554  |
| 968.446   | NM_000302 | 1629.148  | 2625.846  | NM_020158 | 1816.916  | 1200.125  | AL117665  | 1087.856  |
| 1038.498  | NM_013235 | 20597.551 | 26270.398 | AF176085  | 1662.82   | 1946.727  | AF263541  | 760.773   |
| 651.691   | NM_016015 | 2913.012  | 4189.745  | NM_006985 | 3644.785  | 3930.69   | NM_001262 | 2393.396  |
| 2060.665  | NM_020120 | 2355.111  | 3255.13   | AF265228  | 1029.909  | 1498.941  | BE873030  | 966.795   |
| 723.7     | AK022900  | 1170.981  | 1045.634  | NM_003757 | 13812.013 | 11210.985 | NM_002440 | 833.132   |
| 540.921   | NM_001962 | 451.893   | 229.54    | AK025561  | 2110.935  | 2460.016  | NM_003625 | 718.7     |
| 3469.478  | NM_002500 | 510.567   | 885.391   | NM_018602 | 17196.533 | 14765.382 | BC006990  | 3286.238  |
| 1649.297  | AK026232  | 1826.263  | 1456.908  | NM_004096 | 3457.626  | 3449.318  | NM_002277 | 2481.434  |
| 157.455   | NM_014892 | 5631.729  | 25159.219 | NM_017629 | 3832.834  | 4449.253  | NM_019114 | 1038.954  |
| 1806.031  | AK023827  | 2000.096  | 2241.732  | AL049681  | 1198.157  | 1088.738  | M33552    | 4675.532  |
| 362.913   | NM_001117 | 701.024   | 574.094   | AF052181  | 725.168   | 545.746   | AJ252060  | 1095.829  |
| 554.26    | NM_000231 | 2308.469  | 2659.293  | AL050074  | 3753.841  | 2553.036  | NM_006403 | 2610.501  |
| 537.553   | L07517    | 944.688   | 900.067   | AK026436  | 524.772   | 425.417   | NM_018977 | 345.896   |
| 1119.494  | AK022451  | 1400.125  | 1121.793  | NM_018061 | 1651.432  | 1295.608  | AJ001402  | 1122.425  |
| 802.936   | AA150828  | 1372.63   | 1859.024  | NM_003551 | 1289.387  | 1245.863  | NM_004540 | 804.362   |
| 461.691   | H90764    | 519.505   | 493.558   | AF305210  | 516.767   | 547.407   | L25628    | 1657.32   |
| 1522.289  | A1859208  | 460.836   | 1588.416  | AK021900  | 2581.145  | 2381.13   | M37033    | 952.256   |
| 493.523   | H64379    | 7160.437  | 6580.122  | NM_002764 | 6181.688  | 6047.454  | NM_007171 | 1711.741  |
| 2951.837  | T72202    | 1184.333  | 1359.429  | NM_019857 | 749.69    | 868.608   | NM_004278 | 574.098   |
| 519.106   | B1831922  | 2264.709  | 2654.739  | NM_015455 | 12752.103 | 13148.299 | NM_005632 | 570.768   |
| 1440.629  | M69238    | 3258.027  | 4404.778  | AF024702  | 5217.491  | 4751.447  | AK000336  | 773.682   |
| 696.301   | AA664180  | 629.366   | 882.906   | NM_001964 | 1433.241  | 1618.687  | NM_002795 | 9317.367  |
| 924.939   | M80244    | 574.045   | 612.909   | NM_005962 | 8377.673  | 3681.875  | NM_006292 | 1737.485  |
| 9173.415  | NM_016081 | 10293.064 | 11188.355 | X74864    | 1578.062  | 1623.688  | AB007948  | 470.309   |
| 633.801   | NM_006389 | 3661.235  | 1319.316  | AK026804  | 1244.253  | 1160.156  | AB033066  | 917.315   |
| 200.509   | M30818    | 342.996   | 728.02    | NM_016170 | 7701.783  | 7094.259  | AF126028  | 1159.802  |
| 305.423   | NM_000163 | 802.388   | 543.519   | NM_006166 | 1152.741  | 1115.338  | NM_007019 | 1794.125  |
| 1808.443  | NM_005755 | 568.946   | 314.504   | S72620    | 19520.773 | 13723.362 | NM_017640 | 745.337   |
| 368.887   | NM_003329 | 50916.855 | 44319.672 | NM_005263 | 16990.188 | 12983.793 | NM_017721 | 1460.473  |
| 600.102   | NM_003299 | 40531.75  | 23069.699 | AB033022  | 4460.224  | 3616.383  | NM_019088 | 3111.914  |
| 2041.705  | NM_001560 | 4191.437  | 9806.053  | AF147397  | 588.259   | 415.381   | AB002373  | 919.998   |

|           |           |           |           |           |          |          |           |           |
|-----------|-----------|-----------|-----------|-----------|----------|----------|-----------|-----------|
| 793.248   | NM_001783 | 7278.831  | 6868.53   | AK027158  | 463.425  | 347.831  | NM_016350 | 14595.068 |
| 9882.223  | J03171    | 1632.489  | 1812.065  | AF085836  | 5334.516 | 3078.651 | AK024167  | 1746.84   |
| 1713.673  | NM_005856 | 708.344   | 945.22    | AL049449  | 1072.709 | 1079.241 | AK025308  | 1911.806  |
| 1878.657  | NM_005312 | 1285.628  | 1277.97   | AF147344  | 628.651  | 816.348  | NM_005026 | 1432.293  |
| 799.387   | NM_001711 | 1281.052  | 1583.581  | AF147371  | 973.281  | 1343.904 | BC035716  | 954.489   |
| 376.88    | NM_004210 | 10173.44  | 16321.914 | AK023745  | 399.803  | 627.533  | NM_018014 | 657.438   |
| 496.42    | NM_020140 | 1985.61   | 4454.347  | NM_018982 | 2463.267 | 3143.718 | NM_002359 | 6515.187  |
| 1816.878  | NM_018964 | 3234.331  | 2180.605  | AF086254  | 3492.75  | 3327.336 | AF230809  | 1548.65   |
| 150.698   | NM_000080 | 1273.567  | 1245.839  | AF086324  | 376.085  | 328.51   | NM_017894 | 15959.456 |
| 6920.209  | NM_001829 | 655.6     | 598.147   | AF086261  | 1031.154 | 1015.422 | NM_006509 | 897.482   |
| 16016.001 | AF283645  | 1434.731  | 1318.343  | AF086367  | 1508.491 | 1630.877 | AK025447  | 958.209   |
| 233.124   | NM_016575 | 2123.922  | 1565.771  | AF086437  | 1088.668 | 987.259  | NM_002624 | 17157.031 |
| 1831.458  | NM_001045 | 6025.181  | 6221.03   | AK025088  | 3669.533 | 3498.961 | AF006199  | 665.386   |
| 268.232   | NM_005697 | 6109.514  | 10484.484 | U79295    | 813.415  | 982.43   | NM_004554 | 2710.42   |
| 327.339   | NM_003099 | 3960.178  | 4796.053  | AK002107  | 374.955  | 317.421  | NM_018119 | 1312.862  |
| 536.608   | NM_004781 | 1189.386  | 1247.834  | NM_003596 | 3320.664 | 2953.575 | AL162035  | 1305.523  |
| 363.877   | NM_018303 | 1517.622  | 1886.554  | NM_018838 | 1986.034 | 1126.574 | NM_006692 | 1394.86   |
| 1864.07   | NM_014758 | 1409.699  | 1711.977  | AF075083  | 409.013  | 314.289  | NM_003084 | 1292.47   |
| 51406.465 | NM_005124 | 1909.813  | 1638.578  | AK021454  | 839.473  | 678.418  | NM_001009 | 48373.766 |
| 3089.988  | AK000947  | 3608.039  | 3611.125  | AK022069  | 1143.629 | 913.433  | NM_001026 | 47709.383 |
| 10370.379 | L08240    | 657.57    | 860.221   | AL137457  | 1153.188 | 910.477  | NM_001011 | 47826.25  |
| 5222.674  | NM_017952 | 1115.584  | 1357.214  | AF085944  | 1616.575 | 2115.923 | D17289    | 3244.812  |
| 1950.439  | NM_002940 | 1667.143  | 1616.813  | AL157463  | 475.59   | 422.199  | NM_002949 | 8747.556  |
| 900.006   | AB046844  | 507.334   | 401.957   | AL359604  | 375.201  | 411.981  | NM_014230 | 3210.764  |
| 206.956   | NM_000302 | 1659.129  | 1559.264  | AK027189  | 413.732  | 293.278  | NM_017748 | 2339.834  |
| 622.852   | NM_013235 | 16275.751 | 13432.979 | AF088014  | 1024.671 | 1320.385 | AK025374  | 494.553   |
| 529.227   | NM_016015 | 3173.187  | 2615.187  | AL109719  | 998.47   | 1071.258 | NM_014901 | 2581.37   |
| 1367.855  | NM_020120 | 1806.807  | 1393.902  | U92022    | 636.324  | 722.729  | AK000005  | 3996.549  |
| 8264.65   | AK022900  | 1096.499  | 608.437   | NM_003650 | 9018.037 | 2921.179 | AF086790  | 980.958   |
| 251.572   | NM_001125 | 411.856   | 917.837   | AK022119  | 4344.456 | 7165.86  | NM_000108 | 6327.216  |
| 1509.399  | AB023216  | 919.479   | 749.499   | AL157488  | 793.624  | 781.777  | NM_018128 | 856.388   |
| 1099.185  | NM_002266 | 20871.238 | 20219.959 | NM_016644 | 947.075  | 1069.623 | NM_016931 | 3933.094  |
| 4841.748  | NM_014400 | 6380.341  | 4805.419  | AF085842  | 472.948  | 484.633  | NM_004373 | 13024.2   |
| 229.834   | AL157492  | 769.811   | 844.185   | AK026750  | 841.391  | 425.286  | NM_005566 | 46917.594 |
| 1210.641  | AL353957  | 2222.479  | 2530.482  | AF072164  | 996.967  | 548.845  | NM_000162 | 1512.419  |
| 814.723   | NM_007214 | 9071.36   | 5629.253  | NM_018610 | 457.321  | 394.496  | NM_016287 | 2684.948  |
| 1329.022  | NM_000311 | 2086.318  | 2167.017  | AF083122  | 609.726  | 388.554  | AK021661  | 200.192   |
| 1069.551  | NM_017909 | 2405.958  | 1947.036  | AF232216  | 826.14   | 768.609  | NM_006824 | 9683.166  |
| 2348.451  | NM_006335 | 9780.367  | 5953.483  | AK022018  | 753.228  | 351.036  | NM_002107 | 476.358   |
| 967.339   | NM_000786 | 11981.318 | 7016.483  | AK022161  | 808.776  | 645.138  | NM_002694 | 5483.195  |
| 4513.177  | AL133561  | 2505.76   | 2355.189  | AK021940  | 1393.555 | 1210.429 | NM_004454 | 1180.353  |
| 400.915   | NM_017731 | 491.581   | 567.974   | AK022189  | 597.001  | 575.192  | NM_012482 | 1992.836  |
| 6760.314  | AB040891  | 2303.198  | 2259.491  | AK022338  | 669.61   | 625.862  | AF217227  | 794.99    |
| 406.811   | AB037780  | 894.24    | 916.858   | AK026856  | 654.894  | 714.331  | AK024141  | 3104.546  |
| 339.356   | NM_005845 | 8600.372  | 9673.287  | AL162033  | 2429.67  | 2296.406 | NM_002813 | 5834.572  |
| 2047.704  | NM_016209 | 6720.024  | 8395.638  | AK026761  | 634.411  | 510.865  | NM_001198 | 324.182   |
| 344.913   | AK002114  | 1517.198  | 1164.595  | NM_005001 | 6004.974 | 4405.906 | AK022745  | 794.167   |
| 499.423   | AL390184  | 673.432   | 281.031   | AK024175  | 2583.688 | 1619     | AL049450  | 1808.908  |
| 609.392   | NM_018699 | 892.071   | 417.469   | NM_000510 | 560.333  | 314.193  | AK023481  | 795.902   |
| 610.239   | AK026318  | 892.423   | 683.952   | NM_017787 | 1685.023 | 1834.433 | NM_005086 | 27889.275 |
| 1583.24   | AF291673  | 804.287   | 642.953   | AK001910  | 938.621  | 1009.672 | NM_007238 | 856.255   |
| 1596.584  | NM_004365 | 6458.553  | 5312.867  | AK023892  | 706.75   | 697.523  | NM_017606 | 2483.229  |
| 202.387   | NM_016355 | 2325.42   | 1776.21   | AF124368  | 1053.205 | 1369.204 | AK024644  | 4155.869  |



|           |                  |           |           |                  |           |           |                   |           |
|-----------|------------------|-----------|-----------|------------------|-----------|-----------|-------------------|-----------|
| 1007.939  | <b>AJ296290</b>  | 1975.345  | 1265.88   | <b>AF265210</b>  | 6107.576  | 8861.246  | <b>AB019573</b>   | 269.894   |
| 1696.325  | <b>AK026092</b>  | 1877.062  | 2114.611  | <b>AK024241</b>  | 1088.657  | 2251.575  | <b>U68494</b>     | 740.949   |
| 618.021   | <b>AK001175</b>  | 1596.407  | 1476.27   | <b>AK025061</b>  | 1600.784  | 2757.937  | <b>AF064254</b>   | 642.275   |
| 335.344   | <b>NM_003897</b> | 1013.78   | 1065.588  | <b>AF088067</b>  | 6278.968  | 4611.378  | <b>AL137360</b>   | 2869.992  |
| 1210.369  | <b>NM_014165</b> | 6307.182  | 4566.949  | <b>AF056441</b>  | 1332.005  | 989.754   | <b>AF143331</b>   | 1444.607  |
| 134.474   | <b>AL442085</b>  | 4130.707  | 3981.709  | <b>Y10509</b>    | 590.891   | 514.393   | <b>AK000819</b>   | 657.19    |
| 402.474   | <b>J03250</b>    | 403.581   | 333.2     | <b>AK024389</b>  | 6494.412  | 6064.271  | <b>AF201941</b>   | 775.327   |
| 944.09    | <b>NM_013313</b> | 2445.89   | 3585.061  | <b>AK026793</b>  | 2321.918  | 2026.822  | <b>AF026941</b>   | 1053.449  |
| 749.513   | <b>NM_014736</b> | 4699.354  | 6537.921  | <b>NM_001672</b> | 621.294   | 568.11    | <b>NM_007070</b>  | 2384.409  |
| 3362.142  | <b>AK023886</b>  | 1375.337  | 1861.894  | <b>AJ276253</b>  | 8870.223  | 10020.806 | <b>AL133019</b>   | 1372.539  |
| 750.97    | <b>NM_002553</b> | 1291.097  | 1429.66   | <b>AF147314</b>  | 1658.236  | 2154.659  | <b>NM_014895</b>  | 694.7     |
| 1212.445  | <b>AJ404615</b>  | 2558.993  | 2522.562  | <b>AF086201</b>  | 1779.183  | 1666.131  | <b>AK024883</b>   | 2190.712  |
| 9884.512  | <b>NM_016053</b> | 9740.57   | 9794.687  | <b>AK024712</b>  | 727.36    | 673.891   | <b>AF217989</b>   | 1528.519  |
| 2150.116  | <b>AB007869</b>  | 2074.883  | 2372.637  | <b>U48696</b>    | 592.492   | 611.748   | <b>NM_017654</b>  | 837.282   |
| 569.417   | <b>M64108</b>    | 1837.205  | 1517.064  | <b>AF230316</b>  | 5998.74   | 5509.03   | <b>AL109696</b>   | 613.844   |
| 185.937   | <b>NM_014767</b> | 401.063   | 257.108   | <b>AK024515</b>  | 4915.686  | 3967.401  | <b>AK022190</b>   | 626.938   |
| 1762.851  | <b>Y17867</b>    | 1562.443  | 1241.336  | <b>AF085862</b>  | 4172.23   | 4159.349  | <b>AJ011593</b>   | 763.588   |
| 157.945   | <b>M92642</b>    | 872.924   | 501.118   | <b>NM_017998</b> | 1354.217  | 1069.969  | <b>AJ227907</b>   | 230.993   |
| 421.261   | <b>NM_018071</b> | 2073.299  | 1614.701  | <b>AL049271</b>  | 15144.447 | 14549.793 | <b>X89743</b>     | 408.451   |
| 342.087   | <b>NM_004333</b> | 2703.107  | 2411.579  | <b>AK023079</b>  | 30817.686 | 45425.805 | <b>U17621</b>     | 835.765   |
| 761.431   | <b>M31520</b>    | 48987.633 | 61795.762 | <b>NM_019609</b> | 1784.573  | 2140.824  | <b>AL049239</b>   | 1802.787  |
| 649.497   | <b>NM_002020</b> | 3858.733  | 3406.34   | <b>AK026198</b>  | 3482.83   | 3473.694  | <b>NM_013288</b>  | 966.887   |
| 7428.994  | <b>AL050137</b>  | 425.829   | 341.257   | <b>AF183570</b>  | 541.834   | 616.552   | <b>M60721</b>     | 6137.896  |
| 727.158   | <b>AK024423</b>  | 1885.739  | 1939.915  | <b>NM_005497</b> | 12299.696 | 6318.358  | <b>L39061</b>     | 1593.425  |
| 536.985   | <b>NM_005043</b> | 13728.835 | 10836.942 | <b>AK024048</b>  | 1358.624  | 1417.317  | <b>AF071508</b>   | 1627.84   |
| 469.734   | <b>NM_005979</b> | 5300.43   | 8233.983  | <b>AB033093</b>  | 887.523   | 482.888   | <b>L07265</b>     | 12053.891 |
| 1820.563  | <b>NM_006282</b> | 3008.689  | 5447.058  | <b>NM_005912</b> | 467.596   | 544.774   | <b>D16472</b>     | 4193.983  |
| 524.32    | <b>NM_015920</b> | 14949.874 | 17931.932 | <b>NM_005909</b> | 30901.123 | 19298.719 | <b>AL157459</b>   | 1221.397  |
| 186.334   | <b>AB011113</b>  | 1833.531  | 1902.045  | <b>AK055991</b>  | 373.1     | 499.607   | <b>AL353954</b>   | 665.851   |
| 655.029   | <b>NM_004115</b> | 754.24    | 494.735   | <b>AF113697</b>  | 406.944   | 464.546   | <b>NM_017630</b>  | 1213.802  |
| 442.504   | <b>NM_018287</b> | 1218.572  | 1782.785  | <b>AK022326</b>  | 1210.85   | 1157.852  | <b>AK000778</b>   | 1094.021  |
| 19984.563 | <b>NM_001955</b> | 2543.355  | 2945.296  | <b>AF085991</b>  | 906.322   | 1184.781  | <b>AL133573</b>   | 4025.254  |
| 1355.432  | <b>AF016004</b>  | 1920.302  | 3046.772  | <b>NM_005683</b> | 669.048   | 548.508   | <b>AK000115</b>   | 629.94    |
| 294.931   | <b>NM_003567</b> | 5978.244  | 4468.964  | <b>NM_020427</b> | 10690.158 | 8507.813  | <b>AK000958</b>   | 806.301   |
| 204.915   | <b>NM_007315</b> | 3087.44   | 2701.326  | <b>AF085920</b>  | 1413.749  | 1658.178  | <b>AK024523</b>   | 678.859   |
| 1165.818  | <b>L20686</b>    | 2458.181  | 2761.994  | <b>AK023173</b>  | 23293.324 | 21740.258 | <b>AK024600</b>   | 1458.173  |
| 359.381   | <b>NM_000304</b> | 552.656   | 511.667   | <b>AK025225</b>  | 545.329   | 590.834   | <b>AK024543</b>   | 1225.24   |
| 2333.537  | <b>AK023362</b>  | 507.069   | 491.231   | <b>U79275</b>    | 4553.226  | 3764.722  | <b>AK024624</b>   | 10981.634 |
| 2323.92   | <b>S72604</b>    | 12781.772 | 8427.547  | <b>AJ227908</b>  | 724.525   | 915.466   | <b>AK025090</b>   | 996.91    |
| 1931.366  | <b>NM_017984</b> | 720.207   | 369.259   | <b>AF007193</b>  | 2245.668  | 2891.675  | <b>D87682</b>     | 681.15    |
| 2335.454  | <b>NM_002675</b> | 1314.031  | 1097.336  | <b>AK022367</b>  | 857.233   | 1227.658  | <b>AF321617</b>   | 2560.231  |
| 4865.199  | <b>NM_012432</b> | 16992.203 | 12585.485 | <b>BC028589</b>  | 1821.666  | 1715.825  | <b>AF223389</b>   | 793.042   |
| 2379.869  | <b>NM_005007</b> | 11505.078 | 14941.851 | <b>CY3Cy5</b>    | 1723.53   | 88.593    | <b>NM_006950</b>  | 262.886   |
| 240.025   | <b>AK024996</b>  | 2098.256  | 1981.768  | <b>K02765</b>    | 850.914   | 1014.952  | <b>NM_000682</b>  | 482.209   |
| 338.659   | <b>NM_012290</b> | 3046.559  | 2523.004  | <b>M65134</b>    | 738.09    | 915.083   | <b>AK025141</b>   | 542.645   |
| 643.565   | <b>NM_002431</b> | 2664.101  | 651.347   | <b>BG539651</b>  | 7241.551  | 11335.352 | <b>unknown (S</b> | 308.352   |
| 1456.877  | <b>NM_001827</b> | 18152.771 | 11117.498 | <b>N52646</b>    | 18205.988 | 26852.043 | <b>AF086208</b>   | 910.605   |
| 6806.801  | <b>NM_020466</b> | 2098.067  | 1650.6    | <b>AW160671</b>  | 43014.699 | 49827.34  | <b>AK023335</b>   | 2694.038  |
| 435.101   | <b>AL079280</b>  | 565.234   | 420.889   | <b>BI870529</b>  | 2453.558  | 7767.323  | <b>AK023187</b>   | 845.087   |
| 434.932   | <b>NM_002853</b> | 3239.747  | 2542.95   | <b>AA702698</b>  | 486.266   | 581.803   | <b>AK022231</b>   | 337.483   |
| 725.457   | <b>NM_003174</b> | 752.061   | 451.94    | <b>AI681514</b>  | 514.248   | 544.29    | <b>NM_019033</b>  | 891.457   |
| 4412.319  | <b>NM_012307</b> | 11521.46  | 11769.881 | <b>NM_001300</b> | 1030.652  | 845.53    | <b>AL133101</b>   | 756.409   |
| 52940.652 | <b>NM_002540</b> | 1142.206  | 586.836   | <b>BG748827</b>  | 2198.92   | 1427.345  | <b>AK024602</b>   | 19160.801 |

|           |           |           |           |           |           |           |           |           |
|-----------|-----------|-----------|-----------|-----------|-----------|-----------|-----------|-----------|
| 488.983   | NM_006371 | 2596.173  | 1979.393  | AA952897  | 629.262   | 524.711   | NM_018507 | 398.685   |
| 316.312   | NM_018834 | 870.263   | 638.575   | BG760342  | 823.147   | 1382.706  | NM_000485 | 3863.151  |
| 194.031   | AK026882  | 883.653   | 1167.159  | AI122630  | 4368.224  | 3103.254  | NM_018542 | 654.937   |
| 2063.033  | NM_004574 | 632.488   | 934.756   | NM_002103 | 17102.307 | 10133.358 | AK025503  | 1055.013  |
| 1679.502  | NM_004848 | 1748.794  | 9415.8    | NM_003379 | 5612.697  | 4438.694  | AF130073  | 1334.67   |
| 1163.883  | NM_001944 | 560.659   | 790.519   | SR1       | 61337.629 | 58526.629 | AK024225  | 6192.941  |
| 2658.543  | NM_014813 | 442.101   | 608.829   | SR3       | 34167.648 | 18019.9   | AF086334  | 1189.672  |
| 18327.332 | AF014459  | 1861.101  | 2911.174  | SR5       | 2825.735  | 2051.606  | AL137602  | 847.672   |
| 866.88    | AK024601  | 3180.264  | 2019.624  | SR7       | 3583.297  | 19257.787 | AF075035  | 10166.699 |
| 1421.458  | S68069    | 2633.847  | 5531.036  | SR9       | 9850.526  | 1158.983  | AL110180  | 1895.782  |
| 1567.362  | AB011095  | 725.889   | 660.841   | CY3Cy5    | 1222.721  | 77.67     | BC024924  | 4540.38   |
| 1736.991  | NM_001503 | 493.214   | 529.759   | NM_012428 | 3213.865  | 10029.493 | NM_017906 | 3697.846  |
| 952.867   | NM_006302 | 2539.518  | 2376.074  | NM_013269 | 437.8     | 714.982   | AL110286  | 4984.481  |
| 1655.348  | AJ224875  | 2594.512  | 2154.254  | NM_001728 | 6912.59   | 8459.507  | AL162066  | 7170.752  |
| 3203.857  | NM_002149 | 7081.529  | 5143.898  | NM_005565 | 7654.696  | 5665.365  | NM_016096 | 9324.843  |
| 1982.002  | AF043324  | 3422.083  | 2402.47   | NM_003824 | 3398.667  | 5316.604  | U79290    | 1142.294  |
| 1343.184  | AK024172  | 782.18    | 681.609   | NM_000686 | 1475.512  | 1807.629  | X98114    | 1332.231  |
| 5135.562  | NM_014814 | 4320.858  | 6114.456  | NM_012452 | 5009.448  | 6840.505  | NM_014040 | 2778.625  |
| 10386.242 | NM_002797 | 10083.128 | 13223.468 | AF229166  | 832.597   | 835.088   | AK000799  | 2236.372  |
| 1315.184  | AK024318  | 991.446   | 717.377   | NM_005137 | 1463.079  | 1454.306  | NM_015582 | 10313.78  |
| 1327.464  | NM_016129 | 2713.889  | 1308.849  | NM_006764 | 1177.844  | 1402.598  | AK027091  | 840.402   |
| 1493.096  | NM_002809 | 5213.285  | 5348.838  | NM_001386 | 1599.542  | 2887.245  | NM_001526 | 876.078   |
| 721.53    | NM_017912 | 4301.084  | 5198.396  | NM_001163 | 472.685   | 552.319   | U31738    | 603.68    |
| 1470.577  | NM_000423 | 6334.756  | 8385.578  | NM_005878 | 1261.263  | 1003.06   | AF179890  | 1590.632  |
| 617.559   | AB046838  | 1996.703  | 1756.312  | AF308602  | 908.8     | 823.058   | AK023536  | 2289.658  |
| 505.722   | AK026339  | 865.88    | 1279.741  | AB011089  | 505.174   | 378.023   | AK026561  | 1515.904  |
| 1539.608  | X98411    | 4702.525  | 5160.374  | AF007192  | 702.869   | 294.033   | AK021568  | 2697.229  |
| 2740.044  | AF116658  | 3441.486  | 14410.726 | NM_001276 | 3323.185  | 2116.844  | Z36838    | 551.266   |
| 289.326   | NM_014865 | 6437.22   | 7611.279  | NM_016157 | 893.784   | 699.882   | NM_016298 | 1512.833  |
| 673.804   | AB032977  | 5292.364  | 6896.276  | NM_014915 | 9023.506  | 8240.418  | AK002146  | 706.149   |
| 3506.71   | AK001725  | 1061.13   | 2343.738  | NM_012286 | 1017.56   | 645.556   | NM_003159 | 953.656   |
| 2171.896  | NM_003036 | 2739.616  | 4001.481  | NM_002195 | 2472.326  | 2207.848  | AF086256  | 683.747   |
| 612.645   | NM_020529 | 2906.377  | 7912.01   | D84294    | 985.592   | 968.66    | NM_015492 | 3473.141  |
| 572.872   | NM_020395 | 1873.428  | 1090.196  | M31659    | 780.607   | 1502.566  | NM_006933 | 443.226   |
| 585.961   | NM_003425 | 1516.992  | 1127.026  | NM_016226 | 5717.79   | 11864.465 | AF132204  | 1922.313  |
| 907.263   | NM_013388 | 6007.743  | 3438.416  | AK024311  | 531.838   | 662.903   | AK022874  | 2382.501  |
| 798.194   | AF038951  | 6139.708  | 4258.08   | AF052155  | 2691.051  | 3444.379  | CY3Cy5    | 1913.183  |
| 112.648   | NM_006492 | 1181.822  | 651.249   | NM_005085 | 1789.157  | 1658.72   | BI912037  | 855.531   |
| 2658.025  | AK021811  | 996.853   | 1167.618  | AF060902  | 1107.648  | 1493.409  | AA454646  | 1083.039  |
| 434.141   | NM_003428 | 1350.206  | 1014.907  | AF121858  | 3151.487  | 2973.326  | BF063899  | 609.201   |
| 563.526   | AF055030  | 1625.697  | 1106.827  | NM_013437 | 733.191   | 789.11    | U18087    | 15140.013 |
| 4350.297  | AK000589  | 1388.747  | 901.477   | NM_017681 | 601.447   | 1094.819  | U66349    | 545.695   |
| 717.498   | X53281    | 6945.882  | 6555.541  | X57655    | 582.677   | 608.726   | U19487    | 755.798   |
| 1571.163  | BC012782  | 1300.555  | 1955.279  | AK025966  | 2096.708  | 1645.648  | AF166327  | 4617.361  |
| 1059.625  | AF132026  | 45047.113 | 37351.754 | NM_003081 | 13457.234 | 10532.291 | AF260739  | 1003.984  |
| 1802.233  | AL050353  | 1294.344  | 704.015   | NM_016495 | 1233.333  | 967.93    | AF531423  | 934.622   |
| 546.088   | AB037788  | 8087.473  | 7643.542  | D50402    | 14883.854 | 10507.527 | X76555    | 620.635   |
| 962.246   | NM_004587 | 4108.341  | 2640      | M73547    | 3956.811  | 2422.254  | NM_005432 | 1138.561  |
| 713.413   | NM_000975 | 48790.582 | 61291.441 | NM_003687 | 720.769   | 568.694   | L10386    | 1703.699  |
| 9957.302  | AF147412  | 19075.965 | 21035.086 | NM_004134 | 1983.315  | 1374.897  | AF061812  | 2082.145  |
| 1545.779  | AK024570  | 11595.896 | 8965.688  | NM_005955 | 1824.855  | 1658.659  | AL136756  | 765.45    |
| 595.533   | AF161401  | 5455.249  | 8236.693  | NM_017765 | 12695.764 | 14231.919 | NM_012469 | 2450.98   |
| 2688.874  | NM_000990 | 11136.271 | 8919.442  | NM_000428 | 817.122   | 1481.445  | NM_134260 | 5376.715  |

|           |           |           |           |           |           |           |           |           |
|-----------|-----------|-----------|-----------|-----------|-----------|-----------|-----------|-----------|
| 462.02    | NM_01474C | 3413.108  | 2766.221  | AB040967  | 6563.792  | 8749.658  | SR10      | 16024.576 |
| 220.277   | NM_01595E | 6956.876  | 6451.552  | NM_00357E | 529.59    | 424.02    | CY3Cy5    | 1529.151  |
| 112.813   | AF075008  | 2410.95   | 2760.1    | NM_014721 | 1396.161  | 1871.247  | AL080157  | 563.648   |
| 159.545   | NM_006504 | 4226.154  | 6855.558  | AK026352  | 976.63    | 2188.268  | NM_00530E | 888.404   |
| 550.54    | AF070538  | 567.389   | 534.64    | AL137705  | 2845.577  | 2107.611  | NM_000911 | 483.228   |
| 9978.826  | AL137430  | 659.522   | 705.272   | U41898    | 488.472   | 748.289   | NM_007023 | 642.268   |
| 17309.986 | NM_00069E | 4726.937  | 3187.643  | NM_01484E | 633.704   | 493.501   | NM_00386E | 246.675   |
| 5877.085  | NM_00248E | 13153.963 | 13325.58  | NM_000184 | 1387.196  | 1179.268  | AB015330  | 1377.681  |
| 647.613   | NM_004003 | 6022.37   | 6318.397  | NM_000112 | 519.968   | 306.612   | NM_00145E | 2418.489  |
| 3716.629  | NM_00018E | 639.823   | 589.719   | NM_005827 | 3835.389  | 2415.751  | NM_00238E | 19.408    |
| 374.35    | BF244401  | 1856.993  | 1804.106  | NM_003053 | 2697.21   | 3437.194  | L09071    | 416.873   |
| 447.367   | NM_00471E | 23997.969 | 14855.312 | NM_003044 | 1629.786  | 905.895   | AL049667  | 2285.446  |
| 693.457   | AL359585  | 2016.551  | 1540.187  | NM_006672 | 6466.996  | 4366.657  | NM_000334 | 1118.112  |
| 518.112   | AB046850  | 2088.075  | 1543.507  | AB007875  | 629.448   | 569.232   | NM_02040C | 648.334   |
| 734.078   | NM_014801 | 1594.72   | 1337.305  | AL050288  | 23451.859 | 35947.934 | NM_001504 | 896.892   |
| 852.787   | NM_003642 | 5132.593  | 3966.448  | NM_00504C | 3354.798  | 3971.018  | D50926    | 1593.113  |
| 1525.909  | AB027013  | 2139.326  | 1285.25   | NM_016391 | 8368.888  | 9574.509  | BF205683  | 1520.865  |
| 850.324   | BC032686  | 570.565   | 814.751   | AF075033  | 1735.181  | 1831.844  | NM_00156E | 140.792   |
| 706.625   | BF185480  | 2571.185  | 2979.429  | D50911    | 6959.621  | 6727.048  | NM_00154E | 195.591   |
| 577.407   | NM_00212E | 10430.126 | 5159.476  | AB011104  | 1011.191  | 953.968   | NM_00075E | 4939.675  |
| 2175.998  | NM_003074 | 2828.34   | 1441.074  | AK024069  | 6525.498  | 2609.625  | M17017    | 731.176   |
| 114.232   | AL360195  | 1155.088  | 1028.744  | NM_004582 | 8128.347  | 4217.081  | NM_00299C | 588.719   |
| 3396.259  | U14383    | 648.252   | 737.999   | NM_01564C | 11008.448 | 6739.457  | NM_002432 | 6969.712  |
| 2191.28   | NM_01781C | 1700.292  | 1867.227  | AF233450  | 773.287   | 388.928   | AB033037  | 666.245   |
| 569.603   | NM_003181 | 49513.414 | 58095.852 | NM_016233 | 1206.461  | 1057.877  | L40400    | 1892.845  |
| 4894.023  | NM_004451 | 2185.257  | 3101.048  | NM_000821 | 9352.506  | 6883.65   | AK025688  | 903.429   |
| 413.045   | NM_004364 | 41449.324 | 36707.23  | NM_020121 | 814.866   | 385.169   | NM_001195 | 213.617   |
| 888.103   | AK023505  | 1480.937  | 1431.989  | NM_00314E | 34311.559 | 16564.102 | NM_01444E | 1534.504  |
| 5893.35   | AB037851  | 4528.129  | 2627.084  | NM_001632 | 913.26    | 712.873   | S56138    | 244.317   |
| 158.906   | AL050389  | 2652.218  | 1754.088  | NM_012264 | 748.78    | 482.993   | AK023860  | 1402.849  |
| 375.409   | AK024684  | 1323.07   | 1473.073  | AF311312  | 1458.357  | 1420.314  | NM_01628E | 3788.242  |
| 508.806   | NM_01494E | 6086.161  | 7020.945  | NM_01491E | 8062.271  | 19435.949 | NM_001567 | 1875.284  |
| 3436.122  | AK001546  | 2164.937  | 2869.078  | NM_01228E | 809.992   | 894.123   | NM_00490E | 9592.306  |
| 244.299   | NM_006537 | 4787.986  | 7388.532  | NM_00219E | 2588.713  | 3949.779  | AF217971  | 1785.714  |
| 454.46    | AF007155  | 5501.282  | 5879.733  | D84294    | 1206.285  | 1529.485  | NM_00192E | 785.812   |
| 286.62    | AK023055  | 713.002   | 640.104   | K02765    | 1083.915  | 1329.541  | AF245517  | 427.976   |
| 476.654   | AL049282  | 4405.864  | 3592.438  | M65134    | 790.868   | 964.862   | NM_004982 | 765.855   |
| 1056.635  | AK021443  | 1045.048  | 1175.879  | BG539651  | 7068.734  | 11928.023 | NM_001694 | 42551.863 |
| 850.469   | AF070569  | 603.999   | 1888.427  | N52646    | 17083.59  | 18188.066 | NM_000217 | 1113.318  |
| 395.881   | NM_020233 | 1675.512  | 1775.093  | AW160671  | 41589.363 | 44365.363 | AK026180  | 452.512   |
| 1750.954  | AL355732  | 1110.384  | 1148.144  | BI870529  | 2412.958  | 7646.876  | NM_01336E | 1456.918  |
| 3940.679  | NM_01796E | 1793.305  | 2045.883  | AA702698  | 665.368   | 637.604   | NM_00287C | 12477.569 |
| 856.516   | AF143327  | 1146.481  | 1108.18   | AI681514  | 552.648   | 703.253   | AF135422  | 984.794   |
| 10891.48  | AL049991  | 312.895   | 535.661   | NM_00130C | 1072.295  | 950.032   | NM_00447E | 11097.636 |
| 749.993   | AL049990  | 715.783   | 997.023   | BG748827  | 2490.596  | 1558.289  | NM_00261C | 695.276   |
| 281.355   | AF131843  | 911.389   | 673.195   | AA952897  | 657.447   | 365.831   | AF070587  | 1152.666  |
| 704.515   | AK026653  | 955.004   | 1120.451  | BG760342  | 1115.541  | 1358.844  | BE250526  | 642.36    |
| 352.222   | NM_020231 | 1229.383  | 1660.415  | AI122630  | 4653.697  | 3021.13   | NM_01681E | 1551.511  |
| 381.605   | AL133118  | 1606.85   | 1540.275  | NM_002103 | 15803.144 | 10329.641 | NM_012222 | 2041.488  |
| 2164.289  | AK023571  | 1499.253  | 1394.143  | NM_00337E | 4810.093  | 3175.654  | NM_005002 | 1112.871  |
| 459.963   | NM_001702 | 3921.726  | 4824.279  | NM_00658E | 3602.353  | 1602.202  | NM_00659E | 1681.989  |
| 141.649   | AK026657  | 678.942   | 521.406   | NM_004134 | 1718.153  | 2555.343  | AK023214  | 3096.637  |
| 549.796   | AL833558  | 542.928   | 498.9     | NM_00595E | 1703.191  | 3006.51   | NM_00146E | 3055.924  |

|           |           |           |           |           |           |           |           |           |
|-----------|-----------|-----------|-----------|-----------|-----------|-----------|-----------|-----------|
| 1107.443  | NM_01805C | 446.138   | 753.711   | NM_00404E | 262.175   | 507.718   | NM_00360C | 3189.455  |
| 257.233   | AF087991  | 7857.887  | 7835.314  | NM_01242E | 2930.465  | 6406.678  | NM_01749C | 1849.069  |
| 1509.771  | Y12839    | 1138.869  | 1213.025  | NM_01326E | 705.711   | 1007.628  | NM_00271E | 1330.586  |
| 5003.09   | X64979    | 653.253   | 378.914   | NM_00172E | 6716.433  | 8588.545  | AK026727  | 1229.919  |
| 2909.984  | AJ001876  | 618.888   | 764.712   | NM_00556E | 7505.11   | 4421.351  | NM_006247 | 2306.238  |
| 10511.522 | AJ227884  | 1490.453  | 1562.367  | NM_003824 | 3223.956  | 4112.813  | AB032983  | 568.189   |
| 1488.409  | X64986    | 1027.949  | 1468.679  | NM_00068E | 1610.723  | 1663.762  | NM_018281 | 4311.615  |
| 1142.484  | L38282    | 3309.651  | 4485.864  | NM_01245E | 4602.592  | 6564.842  | NM_00539E | 444.817   |
| 363.541   | NM_01805E | 1926.65   | 1967.536  | AF229166  | 412.661   | 849.929   | BC036375  | 8223.859  |
| 200.417   | NM_01900E | 1669.329  | 1934.28   | NM_005137 | 1195.646  | 1137.578  | BI912037  | 756.674   |
| 638.223   | M20838    | 841.281   | 863.095   | NM_006764 | 1202.823  | 950.734   | AA454646  | 1388.96   |
| 373.961   | AK022738  | 591.293   | 834.705   | NM_00138E | 2002.046  | 2165.468  | U18087    | 14478.297 |
| 165.126   | Y11918    | 315.868   | 603.95    | NM_001163 | 671.492   | 313.08    | U66349    | 515.164   |
| 4269.534  | AK002095  | 566.644   | 348.562   | NM_00587E | 1664.489  | 1322.911  | AA057156  | 413.645   |
| 443.362   | AK000821  | 2549.416  | 2594.898  | AF308602  | 1078.646  | 701.792   | U19487    | 749.493   |
| 558.623   | AK024526  | 8241.631  | 7474.567  | AB011089  | 650.683   | 240.337   | AF166327  | 4182.209  |
| 5520.458  | AK000848  | 540.304   | 553.18    | AF007192  | 623.839   | 191.35    | AF260739  | 932.33    |
| 277.785   | NM_01761E | 2624.703  | 2620.416  | NM_00127E | 3258.348  | 1683.068  | AF531423  | 920.968   |
| 474.145   | AK024315  | 4877.084  | 4972.183  | NM_016157 | 751.535   | 672.148   | X76555    | 574.104   |
| 2272.081  | AK024945  | 1343.184  | 1667.139  | NM_005827 | 4509.404  | 5049.035  | NM_00543E | 1216.913  |
| 1782.472  | AK024579  | 4905.751  | 5620.583  | NM_00305E | 3296.982  | 8017.665  | L10386    | 1533.404  |
| 581.07    | S75708    | 6039.431  | 5594.474  | NM_003044 | 1791.784  | 2321.372  | AF061812  | 1917.607  |
| 3901.571  | U79291    | 5092.349  | 3992.018  | NM_00667E | 7141.537  | 8404.634  | AL136756  | 821.712   |
| 1618.94   | D17172    | 5515.077  | 4063.302  | M31659    | 761.996   | 1777.008  | NM_01246E | 2994.708  |
| 1019.025  | AJ227859  | 774.59    | 678.007   | NM_01622E | 6833.379  | 15279.087 | NM_13426C | 5459.889  |
| 3140.598  | NM_018544 | 641.291   | 874.796   | AF052155  | 2493.244  | 2484.105  | AK025688  | 818.61    |
| 1231.906  | AK022670  | 1186.587  | 902.218   | NM_00508E | 1580.691  | 947.654   | Z36819    | 13004.513 |
| 134.762   | L10141    | 470.778   | 343.169   | AF060902  | 957.099   | 922.223   | NM_01444E | 1891.039  |
| 934.903   | AB020699  | 4020.407  | 4169.166  | AF121858  | 2544.015  | 1953.997  | AL080157  | 639.327   |
| 915.94    | AF086269  | 1210.589  | 2158.74   | NM_013437 | 868.15    | 709.937   | NM_00530E | 1105.479  |
| 8737.642  | U90437    | 2139.568  | 2888.736  | X57655    | 538.26    | 257.933   | NM_014461 | 406.449   |
| 1403.35   | AK000842  | 10155.728 | 17257.98  | AK025966  | 2100.623  | 1145.133  | AB015330  | 1316.813  |
| 762.871   | AK023386  | 4495.777  | 5396.52   | NM_01872E | 537.646   | 409.278   | NM_00145E | 2583.179  |
| 2624.575  | NM_00705E | 22721.135 | 30537.387 | NM_003081 | 12655.803 | 8233.311  | L09071    | 390.063   |
| 505.219   | AK022153  | 611.49    | 711.443   | NM_01649E | 1252.001  | 614.447   | AK026180  | 420.669   |
| 318.858   | AK022789  | 789.048   | 686.073   | D50402    | 12786.039 | 8092.68   | NM_01336E | 1235.23   |
| 377.431   | AK023756  | 670.377   | 1177.907  | M73547    | 4304.701  | 2448.331  | NM_005817 | 5206.145  |
| 18000.83  | NM_00112E | 4643.361  | 2203.816  | NM_003687 | 844.842   | 677.081   | NM_00391E | 3986.6    |
| 249.056   | AK023673  | 1205.035  | 1409.737  | NM_020121 | 631.303   | 1197.321  | NM_00287C | 11691.652 |
| 2506.322  | NM_01825E | 1386.056  | 702.753   | NM_00314E | 45535.977 | 52738.293 | NM_02040C | 630.32    |
| 4604.462  | NM_01800C | 34561.055 | 33550.754 | NM_00163E | 1419.923  | 3822.487  | NM_001504 | 936.409   |
| 12301.585 | AF164963  | 709.749   | 516.103   | NM_012264 | 702.027   | 824.193   | D50926    | 1668.733  |
| 191.241   | AF124366  | 10747.408 | 11676.041 | AF311312  | 1625.963  | 2670.403  | BF205683  | 1665.441  |
| 716.926   | AF130112  | 658.569   | 1046.319  | NM_001179 | 423.177   | 614.966   | NM_00154E | 312.16    |
| 4565.942  | NM_000551 | 3116.724  | 3149.394  | NM_01776E | 15373.891 | 17289.127 | NM_00075E | 5435.037  |
| 379.66    | AL365518  | 2883.691  | 4126.68   | NM_00042E | 490.174   | 667.105   | M17017    | 557.443   |
| 100.248   | AF086257  | 3219.62   | 4616.066  | AB040967  | 5296.303  | 4505.36   | NM_00299C | 742.928   |
| 669.672   | AF075056  | 572.791   | 446.363   | NM_00357E | 563.276   | 508.504   | NM_00243E | 6859.557  |
| 865.81    | AC119751  | 629.83    | 899.796   | NM_014721 | 1132.855  | 1318.76   | AB033037  | 604.091   |
| 557.994   | U00928    | 549.254   | 582.059   | AK026352  | 610.385   | 1114.645  | L40400    | 1563.529  |
| 927.969   | NM_01905E | 2498.29   | 2497.776  | AL137705  | 2631.207  | 1990.467  | NM_006247 | 1650.096  |
| 1137.923  | AF279783  | 3493.558  | 3512.006  | NM_01484E | 552.3     | 491.808   | NM_018281 | 3502.68   |
| 2008.43   | AF182422  | 6071.192  | 3792.261  | NM_000184 | 1199.401  | 1012.127  | NM_004457 | 3353.12   |

|           |           |           |           |           |           |           |           |           |
|-----------|-----------|-----------|-----------|-----------|-----------|-----------|-----------|-----------|
| 704.248   | AF070602  | 1144.202  | 1205.165  | NM_002103 | 15006.769 | 15619.771 | NM_014049 | 1424.581  |
| 804.791   | BE393290  | 909.485   | 1124.409  | NM_003379 | 4928.016  | 4727.056  | NM_005396 | 287.117   |
| 482.78    | NM_017622 | 1227.552  | 2155.308  | NM_006589 | 3387.258  | 2871.603  | NM_020166 | 2095.13   |
| 535.312   | AF133331  | 2250.124  | 1948.05   | AB007875  | 723.791   | 684.969   | AK023860  | 1599.275  |
| 302.464   | AK022289  | 956.48    | 327.924   | NM_014796 | 707.538   | 825.353   | NM_016286 | 3616.784  |
| 618.114   | AF161403  | 6971.816  | 9686.332  | AL050288  | 21249.316 | 28998.174 | NM_001567 | 1830.102  |
| 301.192   | NM_020183 | 1700.922  | 1722.212  | NM_005040 | 2854.958  | 2633.501  | NM_004905 | 9181.476  |
| 5724.457  | NM_018029 | 610.35    | 465.853   | NM_016391 | 6570.567  | 5069.901  | AF217971  | 1794.011  |
| 334.969   | AL389954  | 860.789   | 712.79    | AF075033  | 1169.266  | 1083.917  | NM_001925 | 720.176   |
| 835.555   | NM_019852 | 2402.303  | 1371.582  | D50911    | 5346.62   | 3898.772  | AF245517  | 503.347   |
| 3629.334  | NM_006118 | 4896.268  | 5038.924  | AB011104  | 963.938   | 998.529   | NM_004982 | 622.591   |
| 270.82    | AK026225  | 19321.457 | 16725.682 | AK024069  | 6264.698  | 2047.909  | NM_001694 | 40319.574 |
| 175.167   | AL050032  | 1619.843  | 1469.497  | NM_004582 | 7856.789  | 3995.174  | NM_000217 | 363.961   |
| 329.135   | AF009304  | 519.536   | 544.856   | NM_015640 | 11432.019 | 6838.287  | NM_012469 | 2885.53   |
| 2670.109  | AF086177  | 5599.95   | 4862.904  | AF233450  | 729.282   | 301.781   | NM_134260 | 3704.944  |
| 225.353   | NM_018949 | 854.203   | 954.344   | NM_016233 | 1264.923  | 634.169   | AF135422  | 1441.925  |
| 438.63    | D17187    | 1293.078  | 1203.537  | NM_000821 | 9137.435  | 6886.456  | NM_004479 | 12607.944 |
| 147.218   | AJ243672  | 885.742   | 753.774   | AF308602  | 843.209   | 1060.877  | AF070587  | 1068.542  |
| 349.175   | AL122087  | 851.762   | 699.227   | AB011089  | 667.856   | 710.087   | BE250526  | 698.184   |
| 747.423   | D17169    | 25458.49  | 8435.306  | AF007192  | 576.188   | 379.434   | NM_016819 | 1411.147  |
| 435.912   | NM_017924 | 5180.256  | 10260.032 | NM_001276 | 3299.752  | 3143.485  | NM_012222 | 2309.187  |
| 459.946   | S81578    | 1269.478  | 1380.252  | NM_016157 | 815.989   | 1108.547  | NM_005002 | 1202.755  |
| 954.057   | NM_017546 | 3899.241  | 3540.667  | NM_014915 | 8951.509  | 18004.992 | NM_006596 | 1754.73   |
| 6053.165  | AJ001889  | 333.08    | 338.872   | NM_012286 | 923.051   | 1316.269  | AK023214  | 3111.085  |
| 591.782   | AF086210  | 565.109   | 464.557   | NM_002195 | 2598.386  | 4176.75   | NM_001469 | 3477.201  |
| 1585.825  | AL137400  | 503.413   | 409.05    | D84294    | 1132.981  | 1198.893  | NM_003600 | 3258.959  |
| 1016.013  | NM_006511 | 603.54    | 772.733   | K02765    | 692.909   | 793.376   | NM_017490 | 2190.973  |
| 10036.938 | AF007142  | 2145.146  | 2067.464  | M65134    | 575.102   | 517.203   | NM_002718 | 1085.412  |
| 589.458   | AF119853  | 5177.396  | 7943.169  | BG539651  | 5278.598  | 6753.216  | AK026727  | 1158.619  |
| 301.439   | CY3Cy5    | 1445.481  | 228.735   | N52646    | 11687.461 | 8976.442  | NM_002830 | 278.718   |
| 382.408   | AI248827  | 986.235   | 1637.033  | AW160671  | 32577.086 | 26117.16  | AF039196  | 1242.271  |
| 2152.981  | R45026    | 2253.636  | 4928.832  | BI870529  | 1833.31   | 4643.71   | L09071    | 332.299   |
| 332.746   | AI970239  | 1209.851  | 1257.477  | AA702698  | 509.53    | 405.85    | NM_003322 | 310.781   |
| 234.15    | AA496452  | 4468.648  | 9342.057  | AI681514  | 596.677   | 543.126   | BC036375  | 10788.091 |
| 446.933   | X67594    | 3099.945  | 2833.687  | NM_001300 | 1075.79   | 736.005   | BI912037  | 882.207   |
| 952.449   | BC008837  | 553.245   | 508.031   | BG748827  | 2764.799  | 1211.873  | AA454646  | 1303.155  |
| 791.259   | NM_015869 | 1488.688  | 1326.8    | AA952897  | 747.194   | 264.143   | U18087    | 17245.371 |
| 51634.766 | AB000734  | 1009.857  | 1372.868  | BG760342  | 1148.523  | 1353.617  | U66349    | 541.273   |
| 411.996   | NM_000862 | 699.624   | 1072.22   | AI122630  | 5029.348  | 3359.041  | AA057156  | 507.142   |
| 570.61    | NM_005987 | 65370.34  | 61588.156 | NM_003081 | 15075.254 | 16236.802 | U19487    | 925.415   |
| 989.036   | X87838    | 5155.517  | 5858.852  | NM_016495 | 1238.89   | 1518.481  | AF531423  | 1233.691  |
| 1356.352  | NM_015001 | 1232.878  | 1443.792  | D50402    | 20808.426 | 24513.32  | X76555    | 721.22    |
| 4530.496  | SR2       | 53009.387 | 60662.781 | M73547    | 4085.141  | 5185.264  | NM_005432 | 1177.578  |
| 3063.665  | SR4       | 15269.835 | 19253.492 | AF181722  | 629.272   | 1114.475  | L10386    | 1580.785  |
| 8044.459  | SR6       | 2242.835  | 2643.576  | NM_003687 | 725.313   | 1072.752  | AF061812  | 1332.317  |
| 1383.164  | SR8       | 8991.093  | 39067.832 | NM_004134 | 1798.687  | 2628.664  | AL136756  | 493.458   |
| 158.877   | SR10      | 26289.223 | 9317.11   | NM_005955 | 1929.827  | 3695.01   | NM_002990 | 600.921   |
| 697.772   | CY3Cy5    | 1593.245  | 157.786   | NM_012428 | 2189.526  | 3412.687  | NM_002432 | 5679.154  |
| 390.812   | X00094    | 600.751   | 491.294   | NM_013269 | 532.143   | 540.168   | AB033037  | 1619.302  |
| 243.176   | NM_003775 | 1033.212  | 1130.01   | NM_001728 | 5936.246  | 4185.349  | L40400    | 1544.919  |
| 229.359   | NM_002082 | 4475.907  | 7113.198  | NM_005565 | 6331.836  | 2805.304  | AK025688  | 944.151   |
| 611.438   | AF155657  | 14071.907 | 20344.703 | NM_003824 | 2355.113  | 2797.326  | Z36819    | 14414.367 |
| 511.947   | NM_006056 | 2374.294  | 2005.536  | NM_000686 | 1331.226  | 1016.237  | NM_014448 | 1797.466  |

|          |           |           |           |           |           |           |           |           |
|----------|-----------|-----------|-----------|-----------|-----------|-----------|-----------|-----------|
| 155.521  | AF045229  | 8227.859  | 11299.015 | NM_012452 | 3426.25   | 3495.085  | AL080157  | 634.731   |
| 2805.043 | NM_00184C | 5926.533  | 3356.027  | AF229166  | 519.842   | 536.577   | NM_00530E | 944.645   |
| 545.78   | AK025099  | 1970.859  | 1934.441  | NM_005137 | 1174.046  | 943.871   | NM_000911 | 359.787   |
| 4850.98  | NM_01609E | 12582.514 | 8474.18   | NM_006764 | 1071.454  | 968.902   | NM_007227 | 560.667   |
| 2549.671 | NM_000394 | 472.984   | 299.821   | NM_00138E | 2254.767  | 2868.496  | NM_004624 | 841.965   |
| 1573.792 | NM_00022E | 1229.351  | 619.413   | NM_001163 | 603.964   | 565.454   | NM_014461 | 387.306   |
| 1452.029 | NM_00083C | 1020.954  | 827.064   | NM_00587E | 1793.072  | 1035.839  | NM_00386E | 567.015   |
| 797.927  | NM_00520E | 775.832   | 1128.041  | NM_02034E | 216.713   | 408.709   | AB015330  | 1536.13   |
| 4215.097 | NM_01773E | 2230.73   | 4241.412  | AF169257  | 355.727   | 517.341   | NM_00145E | 2392.191  |
| 1063.848 | NM_00039C | 196.23    | 1524.006  | NM_01484E | 1108.919  | 1454.829  | NM_00498E | 659.922   |
| 4293.114 | NM_00031E | 575.776   | 339.566   | BF217766  | 555.049   | 816.18    | NM_001694 | 42793.168 |
| 2145.706 | AF263523  | 1907.232  | 1921.525  | NM_000184 | 2628.496  | 5023.536  | AF286370  | 418.848   |
| 1259.18  | L08441    | 11460.111 | 10030.803 | NM_01618C | 301.191   | 585.629   | AK026180  | 415.821   |
| 2795.165 | AA641953  | 2276.031  | 1187.063  | NM_000112 | 501.548   | 406.25    | NM_01336E | 1516.696  |
| 961.552  | AL137764  | 24171.113 | 20956.096 | NM_005827 | 3767.643  | 4617.57   | NM_005817 | 6239.875  |
| 739.395  | NM_00166C | 19116.268 | 11542.41  | NM_00305E | 3655.687  | 7218.383  | NM_00391E | 3995.15   |
| 466.331  | NM_00075E | 1362.058  | 1563.711  | NM_003044 | 1826.959  | 1564.694  | NM_00287C | 13120.282 |
| 6446.838 | AB040945  | 539.928   | 512.739   | NM_00667E | 7523.995  | 6497.896  | NM_00636E | 3696.039  |
| 1143.9   | NM_00201E | 4286.876  | 4162.556  | M31659    | 737.562   | 878.95    | NM_02041E | 557.111   |
| 588.261  | NM_002377 | 874.57    | 995.268   | NM_00305E | 4971.234  | 4053.486  | AL049667  | 2447.157  |
| 2735.602 | NM_00601E | 344.109   | 402.974   | NM_01622E | 5596.053  | 7392.372  | NM_000334 | 1399.097  |
| 539.117  | AF161383  | 3021.932  | 2310.126  | AF052155  | 2349.181  | 1603.705  | NM_02040C | 672.172   |
| 255.397  | NM_00041C | 11014.214 | 12193.607 | NM_00508E | 1409.415  | 802.42    | NM_001504 | 1140.116  |
| 156.413  | AF224266  | 1426.366  | 989.296   | AF060902  | 1154.968  | 897.2     | D50926    | 1637.039  |
| 3951.622 | U72882    | 5701.35   | 7095.549  | AF121858  | 2431.693  | 1761.855  | BF205683  | 1489.896  |
| 1339.605 | NM_014337 | 6457.254  | 6462.396  | NM_013437 | 725.584   | 443.882   | NM_00156E | 244.387   |
| 1471.005 | NM_007161 | 49858.965 | 62703.547 | AK025966  | 2222.073  | 1541.796  | NM_00154E | 137.965   |
| 674.416  | NM_014387 | 1992.841  | 1336.335  | NM_01872E | 588.135   | 468.701   | NM_00075E | 4809.393  |
| 2699.471 | AK026448  | 1260.45   | 1609.874  | AK024069  | 7221.476  | 3760.689  | M17017    | 532.533   |
| 2649.414 | AK057418  | 6337.164  | 6459.237  | NM_00458E | 9614.951  | 7735.672  | NM_00360C | 2718.267  |
| 2216.512 | L37199    | 525.573   | 406.784   | NM_01564C | 13861.364 | 13806.835 | NM_01749C | 1502.924  |
| 696.296  | AF148646  | 3628.635  | 2962.696  | AF233450  | 903.964   | 856.091   | NM_00271E | 1010.81   |
| 1152.157 | AL110218  | 1131.551  | 933.297   | NM_01623E | 1592.653  | 1803.834  | AK026727  | 1249.612  |
| 11743.75 | AB023201  | 5777.846  | 4702.655  | NM_000821 | 12980.695 | 17439.76  | NM_006247 | 1911.748  |
| 134.878  | NM_00007E | 1712.898  | 3112.883  | NM_020121 | 727.775   | 997.021   | AB032983  | 656.049   |
| 470.619  | NM_000697 | 1956.571  | 1431.788  | NM_00314E | 41301.828 | 29941.051 | NM_018281 | 6296.582  |
| 2854.896 | NM_000017 | 3204.791  | 3667.053  | NM_00163E | 1098.702  | 1016.538  | NM_004457 | 3284.222  |
| 267.334  | NM_000237 | 1438.988  | 1577.641  | NM_012264 | 874.55    | 690.288   | NM_01404E | 1629.927  |
| 122.397  | NM_01834E | 3338.697  | 2956.766  | AF311312  | 1750.961  | 2104.85   | NM_00539E | 504.973   |
| 375.904  | AL122054  | 3283.554  | 3764.47   | NM_01776E | 14311.52  | 9567.37   | NM_02016E | 2313.294  |
| 504.285  | AB011182  | 4719.066  | 3450.346  | NM_00042E | 483.754   | 500.333   | AK023860  | 1961.854  |
| 389.392  | NM_00014C | 4498.386  | 4617.208  | AB040967  | 5043.402  | 2618.38   | NM_01628E | 3579.407  |
| 709.684  | NM_00512E | 3649.804  | 4320.017  | NM_00357E | 629.742   | 187.098   | NM_001567 | 1952.153  |
| 885.653  | NM_01624E | 1933.366  | 1586.988  | NM_014721 | 1273.817  | 1397.312  | NM_00490E | 8588.458  |
| 1921.075 | NM_01592E | 6620.45   | 5430.574  | AK026352  | 743.883   | 1121.591  | AF217971  | 1447.099  |
| 683.627  | X03757    | 3934.483  | 2938.351  | AL137705  | 2649.55   | 1471.284  | NM_00192E | 775.74    |
| 2191.04  | NM_01865E | 6145.432  | 5682.613  | U41898    | 298.892   | 524.268   | AF245517  | 596.029   |
| 8920.561 | NM_00497E | 10260.396 | 12235.68  | NM_00726E | 12881.463 | 23112.656 | X78926    | 6976.564  |
| 1575.828 | AK021597  | 12722.743 | 4354.016  | NM_01478E | 6662.253  | 9949.639  | AJ278110  | 418.538   |
| 5356.056 | NM_005737 | 14756.766 | 13651.986 | NM_01405E | 1293.418  | 1562.285  | NM_014237 | 2403.74   |
| 302.621  | NM_00680E | 1127.085  | 909.973   | NM_002571 | 891.291   | 1113.291  | NM_02039E | 620.027   |
| 873.983  | NM_00253E | 1870.831  | 1223.675  | NM_00493E | 2411.304  | 2008.277  | AF029900  | 3116.54   |
| 1541.362 | AF235022  | 838.903   | 1222.002  | NM_00142E | 12271.126 | 12917.947 | NM_00332E | 2826.767  |

|           |           |           |           |           |           |           |           |           |
|-----------|-----------|-----------|-----------|-----------|-----------|-----------|-----------|-----------|
| 1220.191  | AF182814  | 2798.457  | 2473.235  | NM_015710 | 622.402   | 786.257   | NM_016178 | 1618.721  |
| 887.563   | NM_005329 | 1221.005  | 1601.488  | NM_014158 | 4847.531  | 8956.708  | AK022639  | 1137.92   |
| 226.191   | NM_000107 | 1007.117  | 1018.331  | AK021591  | 788.846   | 935.133   | D31766    | 1364.07   |
| 461.666   | AL157445  | 787.83    | 1180.235  | NM_014675 | 1266.616  | 1056.544  | NM_006547 | 447.993   |
| 3378.402  | NM_001517 | 7750.071  | 7250.111  | NM_006589 | 4219.113  | 2801.11   | AF135422  | 1968.804  |
| 171.995   | NM_005053 | 2069.559  | 1955.144  | NM_005040 | 3013.755  | 2048.966  | NM_004479 | 14815.448 |
| 727.574   | D86974    | 1947.11   | 1513.046  | NM_016391 | 8837.092  | 6546.417  | NM_002610 | 353.585   |
| 201.885   | NM_018283 | 1707.606  | 1092.558  | AF075033  | 1872.123  | 1344.26   | AF070587  | 1121.707  |
| 457.009   | NM_001983 | 4340.889  | 2273.077  | D50911    | 6619.202  | 4668.718  | BE250526  | 553.449   |
| 240.623   | NM_004993 | 578.649   | 524.188   | AB011104  | 910.742   | 1006.525  | NM_016819 | 1590.618  |
| 1325.284  | Y12337    | 1395.641  | 1238.103  | NM_003248 | 981.159   | 1743.192  | NM_012222 | 2015.755  |
| 754.219   | M29551    | 14727.803 | 15352.646 | NM_001078 | 1680.85   | 2290.243  | NM_005002 | 1078.051  |
| 16381.454 | NM_002929 | 2418.516  | 3415.689  | NM_000552 | 4675.542  | 5502.154  | NM_006596 | 1731.22   |
| 46799.074 | BC028375  | 989.554   | 942.462   | AK000860  | 4292.274  | 4425.601  | AK023214  | 2979.757  |
| 1756.378  | AB026436  | 1707.774  | 2437.474  | NM_014961 | 551.047   | 766.623   | NM_001469 | 3557.148  |
| 599.997   | NM_016029 | 4217.607  | 4842.372  | NM_020145 | 1082.847  | 1196.511  | NM_001851 | 1451.865  |
| 483.236   | AK024562  | 1144.735  | 1174.701  | AK021529  | 2042.869  | 2769.407  | S67789    | 435.681   |
| 1996.63   | NM_014066 | 1473.463  | 1715.554  | AB037845  | 1699.355  | 1353.93   | AK022689  | 1037.69   |
| 1737.032  | NM_004573 | 1697.948  | 2100.77   | NM_005980 | 1934.365  | 467.274   | NM_016227 | 647.923   |
| 1872.17   | NM_000313 | 447.657   | 308.354   | NM_016190 | 52589.988 | 48438.809 | NM_004195 | 12123.214 |
| 783.486   | NM_001498 | 56315.254 | 53441.227 | NM_012383 | 4453.374  | 5842.077  | NM_004705 | 1787.283  |
| 806.613   | AF263523  | 1899.293  | 2155.283  | AJ271684  | 1359.527  | 1031.945  | NM_020190 | 9927.457  |
| 1102.467  | L08441    | 9925.72   | 7779.768  | AF255342  | 8583.769  | 5986.87   | AK024003  | 608.179   |
| 527.81    | AA641953  | 2552.039  | 1328.195  | NM_003300 | 1994      | 1378.653  | NM_014357 | 1442.086  |
| 466.746   | AI248827  | 1100.337  | 1855.082  | AK026682  | 1347.426  | 1495.878  | NM_004067 | 665.255   |
| 586.266   | R45026    | 2206.899  | 3390.16   | NM_004655 | 1629.452  | 1729.734  | NM_000121 | 3972.34   |
| 364.829   | BI768063  | 650.922   | 690.228   | NM_003942 | 1735.342  | 1400.229  | NM_002091 | 3561.558  |
| 152.092   | AI970239  | 1543.923  | 1792.365  | NM_006471 | 10582.259 | 7183.758  | AB033092  | 2345.655  |
| 1295.197  | AA496452  | 4856.396  | 12417.72  | NM_004165 | 3798.787  | 1201.126  | M89957    | 730.646   |
| 200.604   | X67594    | 2556.387  | 2713.496  | NM_000368 | 662.701   | 616.349   | NM_003023 | 769.851   |
| 477.121   | AB000734  | 1164.781  | 1766.04   | NM_016586 | 732.694   | 589.009   | BC035030  | 2136.008  |
| 664.468   | NM_005987 | 63684.418 | 59434.625 | NM_004140 | 391.364   | 708.424   | NM_005340 | 11877.715 |
| 555.902   | X87838    | 4972.959  | 4807.604  | NM_002866 | 6470.333  | 6983.073  | NM_016201 | 747.47    |
| 748.701   | NM_033199 | 539.273   | 441.13    | NM_003860 | 1644.678  | 2139.027  | NM_000864 | 1876.737  |
| 1433.41   | NM_015001 | 1439.395  | 1155.809  | NM_005414 | 619.4     | 683.232   | NM_017977 | 1090.725  |
| 3191.188  | NM_000169 | 4285.652  | 6265.636  | NM_004468 | 7248.714  | 7790.271  | AF147727  | 1244.188  |
| 4672.925  | AK057418  | 4670.324  | 3844.742  | NM_016031 | 12481.009 | 9949.292  | NM_006751 | 1819.091  |
| 1629.615  | L37199    | 711.382   | 447.385   | NM_004804 | 602.055   | 747.85    | AB037834  | 7981.974  |
| 304.088   | NM_007260 | 1717.662  | 2064.493  | M92439    | 8747.081  | 6145.016  | NM_003569 | 685.581   |
| 1910.44   | AF148646  | 3595.302  | 3054.617  | AL117665  | 1843.824  | 1994.778  | NM_014052 | 11761.526 |
| 972.245   | AL110218  | 1255.387  | 1027.34   | AF263541  | 1313.424  | 657.137   | NM_002777 | 27293.857 |
| 20529.186 | AB023201  | 6703.693  | 6838.899  | BE873030  | 2534.148  | 2560.918  | AF202635  | 618.955   |
| 1143.036  | X00094    | 1169.293  | 1782.618  | NM_002440 | 876.992   | 610.256   | NM_017904 | 505.316   |
| 318.685   | NM_003775 | 1052.255  | 1289.597  | NM_003625 | 527.197   | 595.479   | NM_013367 | 1496.512  |
| 1363.339  | NM_002082 | 4120.104  | 4929.259  | BC006990  | 3973.113  | 3587.585  | AL137550  | 110.517   |
| 1110.859  | AF155657  | 13646.772 | 22873.611 | NM_002277 | 3201.307  | 2566.969  | NM_000321 | 2703.56   |
| 242.177   | NM_006056 | 2735.407  | 2442.622  | NM_019114 | 1009.233  | 847.716   | NM_006341 | 5090.189  |
| 888.608   | AF045229  | 8409.236  | 14307.666 | M33552    | 6592.756  | 6451.06   | NM_001709 | 1202.547  |
| 2715.957  | NM_001840 | 6340.057  | 3327.245  | AJ252060  | 1313.73   | 793.508   | NM_006191 | 2001.146  |
| 179.401   | AK025099  | 2077.522  | 2069.191  | NM_006403 | 3523.862  | 3240.435  | NM_001800 | 891.495   |
| 474.858   | NM_016099 | 12858.967 | 9895.607  | NM_018977 | 438.327   | 263.731   | NM_004336 | 2565.61   |
| 1778.292  | NM_000228 | 1442.484  | 796.132   | AJ001402  | 1649.981  | 829.398   | NM_015949 | 1092.131  |
| 5273.945  | NM_000830 | 1177.963  | 1077.381  | NM_004540 | 962.287   | 664.672   | NM_013979 | 1115.656  |

|           |           |           |           |           |           |           |           |          |
|-----------|-----------|-----------|-----------|-----------|-----------|-----------|-----------|----------|
| 592.559   | AF148950  | 523.147   | 601.052   | NM_000235 | 2902.156  | 6147.223  | NM_003790 | 2738.648 |
| 1807.144  | NM_017736 | 2366.804  | 3153.791  | NM_015879 | 586.907   | 644.973   | NM_000494 | 1632.743 |
| 697.609   | AK021597  | 11412.521 | 3107.914  | AF068236  | 38255.793 | 48454.387 | NM_016023 | 562.772  |
| 1408.817  | NM_005737 | 14867.644 | 11258.396 | L25628    | 2218.278  | 2348.069  | NM_003722 | 6756.768 |
| 1192.352  | NM_000014 | 335.714   | 383.949   | M37033    | 1621.352  | 2516.292  | NM_000495 | 662.151  |
| 1895.994  | NM_006803 | 1052.364  | 828.586   | NM_007171 | 2066.115  | 3348.451  | AF085883  | 740.411  |
| 3909.586  | NM_002533 | 1859.403  | 1237.612  | NM_004278 | 1125.453  | 2170.03   | NM_016571 | 1346.269 |
| 1041.235  | AF235022  | 713.351   | 1343.341  | NM_005632 | 849.827   | 1077.921  | NM_016446 | 2481.297 |
| 1447.219  | AL137764  | 28709.814 | 39067.977 | AK021499  | 1117.386  | 1421.589  | NM_002516 | 563.816  |
| 3224.268  | NM_001660 | 21860.578 | 20395.816 | AK000336  | 1821.584  | 1912.708  | NM_001870 | 368.397  |
| 716.092   | AB040945  | 806.268   | 668.15    | NM_002795 | 15028.455 | 25440.582 | U23028    | 2131.48  |
| 559.581   | NM_002018 | 3758.515  | 3909.925  | NM_006292 | 2247.281  | 1888.803  | NM_000817 | 6191.625 |
| 2829.981  | NM_002377 | 1372.136  | 1261.081  | AB007948  | 877.852   | 773.79    | AF113132  | 8445.588 |
| 4969.8    | AF161383  | 2851.687  | 2695.021  | AB033066  | 1312.343  | 618.026   | NM_001875 | 374.738  |
| 808.549   | NM_000410 | 11280.85  | 15887.847 | AF126028  | 1762.421  | 1797.557  | AK022680  | 874.881  |
| 1329.721  | AF224266  | 1413.522  | 1481.225  | NM_007019 | 2173.502  | 4586.988  | NM_018946 | 4691.997 |
| 1153.392  | U72882    | 5335.015  | 8087.708  | NM_007075 | 1101.922  | 839.611   | NM_016359 | 2803.492 |
| 370.087   | NM_014337 | 6674.862  | 7784.241  | NM_017640 | 573.997   | 826.938   | NM_004156 | 2629.567 |
| 503.903   | NM_007161 | 47417.309 | 60192.945 | NM_017721 | 1321.425  | 1732.368  | AK000561  | 501.795  |
| 824.466   | NM_014387 | 2002.783  | 1678.175  | NM_019088 | 4304.045  | 2797.31   | AB051449  | 4991.907 |
| 3932.434  | NM_003641 | 2992.149  | 2902.141  | AB002373  | 885.613   | 764.913   | BC009187  | 4397.165 |
| 3052.512  | NM_012463 | 1171.337  | 880.719   | NM_016350 | 31568.367 | 15804.393 | AL133617  | 515.916  |
| 985.168   | L29140    | 15276.441 | 14459.586 | AK024167  | 2099.757  | 924.506   | NM_016485 | 2745.359 |
| 652.749   | AK026448  | 1102.04   | 1331.921  | NM_005026 | 2046.259  | 1373.635  | NM_002615 | 8587.226 |
| 1056.8    | AB026436  | 1871.494  | 1426.861  | AF213356  | 2073.12   | 1762.065  | AF090894  | 622.745  |
| 638.828   | NM_016029 | 3712.616  | 4211.777  | BC035716  | 1491.551  | 1738.338  | NM_006167 | 435.234  |
| 2739.64   | AK024562  | 836.02    | 1135.146  | NM_018014 | 1028.475  | 1452.179  | NM_016357 | 1800.161 |
| 3385.566  | NM_014066 | 1330.291  | 1613.647  | NM_002359 | 9888.099  | 8985.187  | NM_014500 | 5730.335 |
| 1210.592  | NM_004573 | 1571.739  | 2081.988  | AF230809  | 1767.13   | 1901.253  | AK023792  | 359.377  |
| 2081.584  | NM_000072 | 1679.712  | 5197.319  | NM_017894 | 31366.107 | 30541.207 | NM_020149 | 1615.092 |
| 1963.301  | NM_000697 | 1880.499  | 2105.089  | NM_006509 | 1147.858  | 936.134   | NM_006237 | 697.884  |
| 734.157   | NM_000237 | 1678.295  | 1555.124  | AK025447  | 976.485   | 1140.291  | NM_001271 | 2833.297 |
| 226.875   | NM_018346 | 3133.977  | 2236.557  | NM_002624 | 35931.359 | 35519.043 | NM_003683 | 1286.158 |
| 221.773   | AL122054  | 2891.431  | 2993.263  | AF006199  | 1024.059  | 1314.157  | AF039019  | 2813.416 |
| 81.243    | AB011182  | 4732.964  | 3975.726  | NM_004554 | 6038.646  | 5251.642  | NM_012255 | 3454.345 |
| 241.813   | NM_005125 | 3036.245  | 2924.038  | NM_018119 | 1448.274  | 1095.666  | NM_004818 | 1852.763 |
| 188.933   | NM_020038 | 520.408   | 477.366   | AL162035  | 1799.339  | 1584.688  | J04205    | 3860.789 |
| 1153.582  | NM_016246 | 1497.978  | 1608.984  | NM_006692 | 1737.666  | 1703.131  | D38491    | 2389.875 |
| 1368.443  | NM_015926 | 6519.392  | 6938.972  | NM_003084 | 1104.371  | 850.539   | AK026835  | 1167.316 |
| 475.495   | X03757    | 3369.33   | 3053.331  | NM_002582 | 4087.245  | 3824.712  | NM_002819 | 8194.718 |
| 2990.917  | NM_018658 | 6437.861  | 6493.259  | NM_001009 | 54088.324 | 56436.68  | NM_013264 | 1867.826 |
| 8115.186  | AK094513  | 377.378   | 418.959   | NM_001026 | 58267.773 | 58506.23  | NM_003315 | 5512.529 |
| 15894.722 | NM_001183 | 14694.116 | 14844.97  | NM_001011 | 55710.004 | 42585.027 | NM_005570 | 4187.97  |
| 1935.22   | NM_000890 | 802.574   | 1131.28   | D17289    | 3858.939  | 1162.313  | NM_000086 | 2354.862 |
| 2347.886  | NM_004976 | 12858.08  | 19065.74  | NM_002949 | 10457.662 | 5585.122  | NM_003752 | 944.333  |
| 5819.535  | NM_033199 | 390.764   | 348.142   | NM_014230 | 4208.782  | 1672.76   | NM_003932 | 6106.427 |
| 497.357   | NM_015001 | 1343.359  | 1000.803  | NM_017748 | 4488.38   | 6131.493  | NM_016491 | 7416.351 |
| 376.808   | NM_000169 | 4231.695  | 9389.141  | AK025374  | 800.244   | 1574.816  | NM_006429 | 11510.5  |
| 106.467   | NM_005329 | 804.116   | 643.459   | NM_014901 | 5359.536  | 5556.449  | NM_003307 | 3263.2   |
| 202.145   | NM_000107 | 910.754   | 945.254   | AK000005  | 6741.289  | 6968.01   | AF070565  | 700.111  |
| 200.01    | AL157445  | 654.378   | 812.13    | AF086790  | 1857.476  | 2449.511  | AK021644  | 1114.086 |
| 517.159   | NM_005053 | 1632.437  | 1656.97   | U28480    | 453.95    | 687.014   | NM_016599 | 305.747  |
| 242.085   | D86974    | 2034.348  | 1961.761  | NM_000108 | 10165.034 | 14027.45  | NM_002064 | 599.311  |



|           |           |           |           |           |           |           |           |           |
|-----------|-----------|-----------|-----------|-----------|-----------|-----------|-----------|-----------|
| 1725.708  | NM_018283 | 1260.701  | 1199.631  | NM_018128 | 1546.724  | 1970.393  | NM_015523 | 2517.515  |
| 353.147   | NM_001983 | 4116.406  | 2906.431  | NM_016931 | 7368.906  | 6769.765  | NM_015960 | 3632.638  |
| 208.821   | NM_004993 | 446.665   | 493.453   | NM_004373 | 16036.858 | 18702.566 | NM_006085 | 1077.533  |
| 659.887   | Y12337    | 1214.48   | 1067.376  | NM_005566 | 54305.98  | 53859.203 | NM_000907 | 2879.938  |
| 478.234   | M29551    | 12573.275 | 13023.446 | NM_000162 | 2571.229  | 3150.063  | AF254085  | 1108.396  |
| 624.233   | AB023148  | 550.51    | 463.713   | AK027067  | 421.363   | 622.911   | NM_001987 | 920.344   |
| 9154.012  | NM_002929 | 1516.204  | 1650.089  | NM_016287 | 3762.141  | 3169.66   | AF244088  | 1582.966  |
| 931.802   | BC028375  | 787.734   | 907.558   | NM_003864 | 2953.944  | 3381.826  | NM_007136 | 861.389   |
| 732.517   | NM_001155 | 6664.968  | 4824.242  | NM_006824 | 11665.241 | 11029.562 | AK025434  | 599.027   |
| 193.586   | M62896    | 13546.361 | 10825.073 | NM_002107 | 623.29    | 619.65    | AK000435  | 889.339   |
| 197.041   | NM_017736 | 2205.902  | 3781.093  | NM_002694 | 8050.969  | 7570.806  | AK000569  | 1525.841  |
| 423.265   | NM_000390 | 385.752   | 627.443   | NM_004454 | 1238.534  | 943.265   | NM_006049 | 730.933   |
| 299.54    | NM_000313 | 421.638   | 272.709   | NM_012482 | 1929.358  | 2254.757  | NM_017661 | 1010.171  |
| 210.428   | NM_001498 | 59564.938 | 54377.566 | AF217227  | 1029.961  | 613.325   | BC016698  | 4245.048  |
| 2171.058  | AA641953  | 2553.547  | 1528.332  | AK024141  | 3334.334  | 2244.748  | AK027185  | 828.378   |
| 1174.386  | AI248827  | 1134.937  | 1521.347  | NM_002813 | 15330.437 | 18590.902 | AK025576  | 1494.177  |
| 5708.308  | R45026    | 1413.877  | 1601.706  | NM_001198 | 471.823   | 1002.6    | AF147385  | 512.918   |
| 1582.159  | BI768063  | 1620.798  | 817.536   | AK022745  | 2290.907  | 2099.195  | AL442086  | 2515.039  |
| 960.928   | AI970239  | 1432.227  | 1595.701  | AL049450  | 4357.761  | 6223.867  | BC034819  | 1650.379  |
| 927.725   | AA496452  | 4268.802  | 11592.024 | AK023481  | 801.793   | 961.093   | AF147313  | 10433.621 |
| 558.245   | X67594    | 2576.838  | 3058.566  | AK022011  | 432.547   | 504.946   | AF147382  | 21134.953 |
| 4143.046  | AB000734  | 1128.272  | 1374.575  | NM_005086 | 48577.289 | 55989.117 | AK001957  | 2114.495  |
| 1620.991  | NM_005987 | 64267.723 | 61064.453 | NM_007238 | 1366.568  | 1775.574  | AK000850  | 1504.515  |
| 830.407   | X87838    | 5089.448  | 6151.75   | AL049340  | 758.966   | 910.674   | AK021833  | 1396.398  |
| 239.877   | NM_007161 | 46762.414 | 56068.684 | NM_017606 | 4068.848  | 4032.735  | AF143867  | 1078.152  |
| 386.923   | NM_014387 | 1915.851  | 1477.165  | AK024644  | 5579.405  | 6057.998  | AK025889  | 2965.411  |
| 225.646   | NM_003641 | 3419.074  | 3007.44   | AB019573  | 798.439   | 700.007   | NM_014715 | 1346.348  |
| 123.367   | NM_012463 | 1108.938  | 739.626   | U68494    | 873.361   | 722.333   | AF088056  | 395.029   |
| 256.746   | L29140    | 19689.658 | 21041.393 | AF064254  | 1538.019  | 1382.78   | AF086448  | 1419.63   |
| 333.024   | AK026448  | 1200.495  | 1545.749  | AL137360  | 4433.929  | 4929.567  | AF086386  | 756.802   |
| 453.498   | AK057418  | 5755.303  | 6360.861  | AF143331  | 829.914   | 1722.488  | AF086413  | 312.387   |
| 375.975   | AB023201  | 5731.799  | 4187.292  | AK000819  | 903.26    | 908.011   | AF086457  | 1036.682  |
| 1107.285  | X00094    | 800.264   | 406.218   | AF201941  | 1016.274  | 746.223   | AK025469  | 833.528   |
| 1684.065  | NM_002922 | 323.763   | 582.711   | AF026941  | 1101.822  | 569.621   | NM_020239 | 6797.372  |
| 8837.464  | AF155657  | 12768.152 | 22721.516 | NM_007070 | 2982.847  | 3540.775  | AF070581  | 1100.208  |
| 600.832   | NM_006056 | 2567.996  | 2560.376  | AL133019  | 2923.397  | 2733.318  | AK024187  | 850.235   |
| 747.004   | AF045229  | 7507.853  | 13975.918 | NM_014895 | 864.109   | 753.067   | AF075079  | 334.761   |
| 501.955   | NM_001840 | 5597.426  | 3334.444  | AK024883  | 3312.895  | 4441.453  | AK022479  | 574.434   |
| 257.425   | AK025099  | 1523.061  | 1534.787  | AF086215  | 657.147   | 651.087   | AK023572  | 496.337   |
| 207.378   | NM_016099 | 11030.206 | 8432.032  | AF217989  | 2708.286  | 3291.186  | AF086004  | 5700.308  |
| 458.204   | NM_000228 | 1131.827  | 870.752   | NM_017654 | 1226.15   | 1959.391  | AF147433  | 635.888   |
| 485.657   | NM_000830 | 843.32    | 1099.023  | L77561    | 355.311   | 581.178   | AF085978  | 343.612   |
| 94.13     | NM_018658 | 6373.325  | 5089.483  | AL109696  | 882.495   | 1364.687  | AF086006  | 408.851   |
| 314.641   | NM_005136 | 387.211   | 404.731   | AK022190  | 1124.729  | 1587.115  | AL137318  | 773.277   |
| 531.986   | AK094513  | 438.931   | 349.281   | AJ011593  | 1304.935  | 1687.691  | AL137482  | 649.117   |
| 1829.939  | NM_001183 | 12845.065 | 11373.624 | AJ227907  | 655.966   | 1381.281  | AL162011  | 10898.505 |
| 1391.142  | NM_000890 | 1356.127  | 1072.742  | X89743    | 464.609   | 797.329   | AL390177  | 693.035   |
| 32499.207 | NM_004976 | 10930.468 | 14024.422 | AJ002784  | 542.893   | 540.267   | AL137678  | 513.226   |
| 3249.684  | AK021597  | 13873.496 | 4959.197  | U17621    | 695.306   | 736.915   | AK056111  | 851       |
| 2875.216  | NM_005737 | 16951.75  | 18438.078 | AL049239  | 2798.169  | 2790.288  | Y13807    | 1233.038  |
| 672.132   | NM_000014 | 495.67    | 545.544   | NM_013288 | 1392.385  | 1356.591  | AK022053  | 380.876   |
| 1201.995  | NM_006803 | 1046.284  | 930.891   | M60721    | 7525.486  | 4966.868  | AK023038  | 572.862   |
| 57.164    | NM_002533 | 1694.064  | 1299.687  | L39061    | 1715.874  | 1012.397  | AK026206  | 991.581   |

|           |           |           |           |           |           |           |            |           |
|-----------|-----------|-----------|-----------|-----------|-----------|-----------|------------|-----------|
| 305.383   | NM_000752 | 1347.74   | 1530.721  | AF071508  | 1892.071  | 1958.24   | AF086074   | 992.702   |
| 2182.736  | NM_002018 | 4511.249  | 4450.158  | L07265    | 19838.984 | 14444.934 | AK023964   | 1186.712  |
| 724.259   | NM_002377 | 692.798   | 982.971   | L19369    | 249.779   | 351.937   | AF086084   | 823.716   |
| 11864.34  | AF161383  | 2870.025  | 2383.857  | D16472    | 7605.326  | 5443.645  | AK000156   | 168.078   |
| 706.321   | NM_000410 | 10613.651 | 13783.394 | AL157459  | 1717.096  | 2080.166  | AL050184   | 662.508   |
| 986.447   | AF224266  | 1403.396  | 1096.764  | AB020654  | 708.446   | 1053.072  | AF085853   | 523.536   |
| 891.395   | U72882    | 5578.999  | 8923.685  | AL353954  | 979.662   | 1836.029  | AK027112   | 2612.888  |
| 194.153   | NM_014337 | 6422.688  | 9421.615  | NM_017630 | 2089.716  | 1465.084  | AL049314   | 896.91    |
| 464.382   | NM_003384 | 3445.351  | 1983.056  | AK000778  | 1102.267  | 1200.081  | AF093016   | 3770.766  |
| 1066.443  | Y12337    | 1450.805  | 1073.06   | AK000932  | 950.327   | 893.1     | AF161345   | 1269.72   |
| 814.779   | M29551    | 17738.793 | 15182.722 | AL133573  | 5666.934  | 5098.27   | -          | 629.432   |
| 499.733   | NM_002929 | 1532.756  | 1793.105  | AK000115  | 652.813   | 651.56    | AF090925   | 826.686   |
| 654.708   | BC028375  | 1156.509  | 2091.261  | NM_017959 | 519.679   | 598.256   | NM_014163  | 4248.521  |
| 799.208   | AB026436  | 2157.851  | 4283.153  | AK000958  | 849.156   | 704.417   | AK021659   | 361.44    |
| 881.389   | NM_016029 | 4520.304  | 6410.704  | AK024523  | 656.747   | 574.452   | NM_014137  | 476.308   |
| 516.803   | AK024562  | 1240.231  | 1507.467  | AK024600  | 2484.715  | 1378.992  | AK021974   | 1130.755  |
| 1627.365  | NM_014066 | 1600.009  | 1911.447  | AK024543  | 1374.132  | 1203.928  | AK022068   | 716.993   |
| 507.886   | NM_004573 | 1508.162  | 2028.447  | AK024624  | 10405.939 | 7437.056  | AK022229   | 1000.319  |
| 891.803   | NM_000072 | 1291.683  | 3415.68   | AK025090  | 1121.568  | 803.822   | AK022362   | 1367.247  |
| 341.965   | NM_000697 | 2326.795  | 2188.4    | NM_014152 | 563.204   | 864.638   | AK022004   | 1996.75   |
| 11142.891 | NM_000017 | 3288.327  | 4251.78   | NM_018608 | 534.079   | 1195.802  | AK022136   | 447.382   |
| 484.519   | NM_000237 | 1572.634  | 1493.17   | AF086473  | 553.33    | 848.665   | AK022390   | 1158.664  |
| 182.233   | NM_018346 | 3375.507  | 2095.082  | D87682    | 998.815   | 1122.149  | AK027134   | 714.012   |
| 613.513   | AL122054  | 3013.336  | 3466.471  | AF321617  | 7483.487  | 11903.264 | AK024168   | 575.073   |
| 938.566   | AB011182  | 4234.889  | 2702.997  | AF223389  | 1309.46   | 1838.311  | AF264622   | 735.17    |
| 196.157   | NM_000140 | 3918.374  | 3464.533  | AV710479  | 719.732   | 1053.779  | AK021793   | 1392.704  |
| 185.787   | NM_005125 | 3031.69   | 3837.623  | NM_006950 | 803.388   | 535.231   | AK022255   | 2021.662  |
| 460.292   | NM_015926 | 6365.016  | 8079.51   | NM_000682 | 447.896   | 553.231   | AK021720   | 1853.864  |
| 379.073   | X03757    | 3275.246  | 3622.202  | AF086208  | 808.962   | 818.203   | NM_016497  | 12920.203 |
| 271.748   | NM_002902 | 5689.604  | 4120.721  | AK023335  | 3240.238  | 3328.217  | AF009261   | 514.625   |
| 488.985   | NM_020248 | 9235.598  | 8676.059  | AK023187  | 801.547   | 721.59    | unknown (S | 651.29    |
| 5525.292  | X89670    | 594.604   | 687.733   | AK022231  | 471.929   | 387.656   | AB037792   | 1321.277  |
| 335.35    | NM_004053 | 5332.544  | 4145.138  | NM_019033 | 1345.398  | 913.402   | AK022480   | 556.717   |
| 700.466   | NM_001489 | 1928.651  | 2114.183  | AL133101  | 811.78    | 618.115   | AK024158   | 970.01    |
| 11876.344 | M20259    | 267.837   | 262.536   | AK024602  | 42517.59  | 45156.371 | AL080082   | 2003.06   |
| 2282.354  | NM_020374 | 2022.41   | 2972.755  | NM_018507 | 592.771   | 837.146   | AK021623   | 1314.902  |
| 1109.204  | NM_014922 | 1611.132  | 1574.972  | NM_000485 | 6722.411  | 11647.65  | AK023733   | 401.55    |
| 4816.762  | NM_000169 | 4805.045  | 8842.127  | NM_018542 | 1066.024  | 1769.435  | AF056452   | 815.424   |
| 1114.589  | AF182814  | 1813.599  | 1743.326  | AK025503  | 3016.549  | 7093.952  | AF119901   | 2268.475  |
| 452.327   | NM_005329 | 627.562   | 619.395   | AF130073  | 1982.199  | 2831.37   | AK001936   | 1020.513  |
| 2876.422  | NM_000107 | 844.417   | 943.109   | AK024225  | 9943.831  | 15991.392 | NM_003770  | 33453.961 |
| 286.955   | AL157445  | 891.551   | 989.046   | AF086334  | 1573.716  | 2008.63   | AK001395   | 2887.938  |
| 1033.465  | NM_001517 | 7179.885  | 6453.964  | AL137602  | 923.565   | 906.728   | S57803     | 2782.283  |
| 765.197   | NM_005053 | 1797.031  | 1659.958  | AF075035  | 30723.965 | 29737.639 | AF131822   | 674.856   |
| 10903.774 | NM_001983 | 4331.705  | 3932.48   | AL110180  | 2579.64   | 1946.992  | AK023131   | 1903.372  |
| 2019.178  | NM_004993 | 405.733   | 814.382   | U00949    | 2593.735  | 2442.51   | AF090100   | 206.386   |
| 21916.037 | NM_001793 | 7328.814  | 5185.113  | BC024924  | 6425.684  | 3973.302  | U61096     | 535.258   |
| 1702.502  | NM_001943 | 2733.03   | 1813.809  | NM_017906 | 5195.439  | 4636.667  | AF085865   | 2898.063  |
| 291.856   | NM_004927 | 3740.525  | 3442.507  | AL110286  | 4819.315  | 3984.203  | X78261     | 395.811   |
| 4680.777  | NM_001459 | 1690.132  | 2008.435  | AF086374  | 870.644   | 744.21    | AK025521   | 1703.039  |
| 1646.695  | NM_015513 | 4836.042  | 4599.173  | AL162066  | 17544.426 | 14550.129 | NM_001053  | 39324.523 |
| 1376.42   | NM_006219 | 7738.481  | 5681.386  | NM_016096 | 12144.655 | 10080.817 | Z70694     | 2947.981  |
| 61.221    | NM_004443 | 3166.418  | 2751.741  | U79290    | 1311.607  | 959.958   | L77602     | 793.085   |

|           |           |           |           |           |           |           |           |           |
|-----------|-----------|-----------|-----------|-----------|-----------|-----------|-----------|-----------|
| 500.909   | NM_001932 | 436.808   | 365.195   | X98114    | 670.718   | 535.809   | NM_015421 | 3513.67   |
| 2324.976  | NM_002964 | 9820.454  | 53305.969 | NM_014040 | 3471.395  | 3754.874  | AF086081  | 2726.026  |
| 1439.886  | AF311862  | 39596.957 | 36199.719 | AK000799  | 3046.642  | 3450.892  | NM_018634 | 588.708   |
| 409.344   | NM_003215 | 383.645   | 419.45    | NM_015582 | 15816.116 | 15306.916 | NM_018111 | 543.2     |
| 660.047   | NM_016447 | 568.73    | 437.221   | AK027091  | 1310.733  | 2819.704  | L23867    | 1002.496  |
| 2333.761  | NM_015626 | 2765.409  | 2982.331  | NM_001526 | 1832.145  | 2622.685  | AB020968  | 903.399   |
| 535.73    | NM_004899 | 3603.485  | 2809.487  | U31738    | 1229.144  | 1577.919  | AL138690  | 897.019   |
| 487.84    | AB006628  | 6495.229  | 5737.481  | AF179890  | 2599.077  | 4910.014  | AK000394  | 524.217   |
| 1896.388  | AF272036  | 5494.752  | 4108.779  | AK023536  | 3963.397  | 6143.262  | NM_013941 | 656.706   |
| 5852.626  | AF231023  | 1470.646  | 1424.64   | AK026561  | 2597.115  | 3020.785  | AF074989  | 884.73    |
| 382.286   | NM_005148 | 2095.733  | 2185.167  | AK021568  | 5197.897  | 6489.81   | AK001107  | 979.45    |
| 528.476   | NM_004746 | 674.324   | 638.848   | Z36838    | 2676.04   | 2090.843  | AK022368  | 357.865   |
| 390.85    | AF146019  | 4672.435  | 4051.894  | AF043467  | 792.962   | 683.276   | AL080112  | 1856.26   |
| 773.995   | Z36782    | 7251.135  | 5967.381  | AF088054  | 552.717   | 619.897   | AK022299  | 489.197   |
| 793.149   | M70435    | 464.385   | 576.436   | AK023881  | 2279.886  | 1919.336  | AL137325  | 395.032   |
| 416.005   | NM_003490 | 6317.643  | 8563.959  | AK027114  | 59848.996 | 59415.281 | AF147361  | 2018.367  |
| 829.359   | AF090942  | 571.93    | 371.83    | NM_016298 | 1736.483  | 1284.424  | AL133086  | 1243.52   |
| 444.275   | AF508940  | 3535.723  | 3066.499  | AK002146  | 1194.821  | 1348.72   | NM_012151 | 32385.598 |
| 952.65    | NM_005429 | 3552.913  | 1942.006  | NM_003159 | 956.539   | 946.492   | AF087994  | 837.99    |
| 889.825   | NM_020237 | 781.207   | 567.862   | AF086256  | 762.245   | 566.766   | AJ227912  | 503.016   |
| 4807.655  | M25753    | 8564.939  | 7137.91   | NM_015492 | 5514.429  | 4228.701  | NM_018195 | 1434.871  |
| 2959.942  | NM_003883 | 1731.456  | 1237.159  | NM_006933 | 387.236   | 482.719   | AK025532  | 6205.305  |
| 1150.758  | NM_014929 | 2413.979  | 1777.595  | AF132204  | 2547.208  | 2522.529  | AK021789  | 464.312   |
| 930.725   | NM_004203 | 4531.483  | 3548.267  | AK022874  | 2827.49   | 1948.279  | NM_003522 | 622.604   |
| 471.959   | NM_001951 | 1705.342  | 1697.684  | CY3Cy5    | 749.789   | 136.231   | BF217847  | 1046.656  |
| 2338.578  | NM_002391 | 938.176   | 661.228   | BI912037  | 734.98    | 1037.161  | NM_005320 | 1454.736  |
| 1893.179  | NM_007066 | 2624.625  | 2316.056  | AA454646  | 1139.238  | 982.694   | CY3Cy5    | 3114.875  |
| 2131.846  | NM_003674 | 11540.051 | 9557.998  | U18087    | 13743.356 | 11703.818 | U79292    | 1611.252  |
| 5557.995  | NM_001197 | 4020.06   | 1229.027  | AA057156  | 435.843   | 691.808   | BI830753  | 397.302   |
| 366.344   | NM_006682 | 791.615   | 468.72    | U19487    | 684.533   | 365.264   | X68314    | 371.584   |
| 2709.951  | NM_006410 | 1345.686  | 3018.719  | AF166327  | 3755.202  | 3884.219  | X71973    | 16869.799 |
| 2078.2    | NM_014977 | 19427.773 | 12898.837 | AF260739  | 1112.092  | 1070.916  | T49651    | 2596.656  |
| 563.385   | AK026325  | 2025.042  | 1704.23   | AF531423  | 789.338   | 489.213   | N51014    | 1016.897  |
| 212.697   | U83857    | 791.692   | 646.867   | X76555    | 345.199   | 237.86    | BE392471  | 5293.121  |
| 517.121   | NM_001230 | 1239.309  | 2411.492  | NM_005432 | 1021.554  | 747.078   | AI802950  | 697.392   |
| 1270.155  | AK025662  | 1178.221  | 624.302   | L10386    | 1232.761  | 631.374   | AL043686  | 2812.773  |
| 218.091   | NM_000201 | 544.621   | 897.503   | AF061812  | 1942.714  | 1260.617  | AA775212  | 1736.427  |
| 2503.825  | AB011539  | 778.021   | 631.777   | AL136756  | 542.26    | 339.199   | NM_000945 | 1169.773  |
| 2670.178  | U37028    | 840.161   | 871.443   | NM_012469 | 2642.784  | 1590.245  | SR5       | 2854.306  |
| 5041.6    | AB014597  | 2174.572  | 3159.463  | NM_134260 | 4031.774  | 2491.523  | SR7       | 3501.407  |
| 339.103   | AK024313  | 3473.311  | 2554.293  | SR2       | 32289.225 | 15615.989 | SR9       | 10399.029 |
| 1785.876  | NM_003891 | 1912.121  | 1530.263  | SR4       | 7357.288  | 4203.207  | CY3Cy5    | 2680.076  |
| 2230.991  | NM_002022 | 673.569   | 1042.37   | SR6       | 1205.188  | 826.144   | NM_003371 | 1039.092  |
| 889.042   | NM_015524 | 2372.654  | 2335.998  | SR8       | 4291.889  | 8125.66   | AK023114  | 2574.854  |
| 3134.12   | NM_001673 | 6410.242  | 1544.354  | SR10      | 15238.325 | 3269.311  | NM_003678 | 1933.44   |
| 584.268   | AK023167  | 352.067   | 276.176   | CY3Cy5    | 508.04    | 91.643    | NM_014419 | 971.893   |
| 15343.115 | NM_016510 | 2250.911  | 1680.384  | AL080157  | 660.232   | 1815.758  | NM_014938 | 1281.995  |
| 17661.66  | NM_014270 | 1064.637  | 1232.377  | NM_005308 | 784.724   | 1122.644  | AF049460  | 331.058   |
| 385.453   | NM_000071 | 4778.258  | 2725.25   | NM_000911 | 501.36    | 1464.868  | AK026066  | 694.372   |
| 1259.248  | NM_006843 | 2166.772  | 2154.061  | NM_007227 | 146.713   | 645.582   | NM_005244 | 952.767   |
| 223.858   | NM_004321 | 1399.645  | 1223.665  | NM_007023 | 347.153   | 355.571   | NM_005270 | 374.715   |
| 1118.846  | AF311212  | 5449.213  | 3371.525  | AB015330  | 1460.67   | 1137.593  | NM_014815 | 748.418   |
| 1350.806  | NM_006915 | 1447.201  | 1379.737  | NM_001455 | 2174.26   | 1245.563  | NM_007221 | 2715.95   |

|           |           |           |           |           |           |           |           |           |
|-----------|-----------|-----------|-----------|-----------|-----------|-----------|-----------|-----------|
| 5248.367  | NM_006035 | 1732.444  | 1661.163  | BC036375  | 8759.297  | 4183.945  | X54163    | 4153.006  |
| 909.637   | NM_006086 | 5442.188  | 4767.881  | NM_006363 | 3184.384  | 4254.606  | NM_000388 | 548.846   |
| 702.391   | NM_004520 | 5910.547  | 4366.157  | NM_020415 | 600.306   | 914.131   | NM_002469 | 460.879   |
| 6860.278  | AK027118  | 3419.711  | 2213.139  | AL049667  | 2121.909  | 2543.457  | NM_014668 | 632.138   |
| 1571.988  | AK022882  | 12000.092 | 11356.433 | NM_000334 | 1375.131  | 1883.339  | NM_004722 | 713.255   |
| 1619.152  | NM_006105 | 1741.263  | 1687.368  | NM_020400 | 695.942   | 1020.55   | NM_014425 | 454.051   |
| 6457.849  | NM_005981 | 1508.114  | 4243.747  | NM_001504 | 789.927   | 688.29    | NM_012133 | 1192.35   |
| 6036.725  | NM_000474 | 5107.452  | 1333.926  | D50926    | 1484.139  | 1710.518  | NM_006612 | 655.567   |
| 1498.123  | NM_016264 | 839.078   | 943.314   | BF205683  | 1570.842  | 1375.557  | NM_016451 | 728.044   |
| 1779.506  | NM_006079 | 32734.627 | 18920.178 | NM_000758 | 3754.486  | 2341.719  | NM_007351 | 4145.57   |
| 920.652   | AB037837  | 929.151   | 860.666   | M17017    | 668.476   | 408.32    | AK026266  | 2336.867  |
| 1659.309  | NM_014595 | 2769.5    | 2167.982  | NM_002990 | 389.809   | 532.859   | NM_007124 | 1159.541  |
| 966.165   | NM_014789 | 984.963   | 506.67    | NM_002432 | 5917.386  | 6334.297  | NM_003176 | 737.364   |
| 1498.339  | AB046784  | 645.805   | 728.522   | AB033037  | 392.137   | 167.564   | NM_000723 | 477.901   |
| 1124.095  | X52402    | 1714.972  | 1206.667  | L40400    | 1210.401  | 897.672   | AL096751  | 1371.844  |
| 17784.002 | AL133663  | 493.495   | 383.839   | AK025688  | 784.455   | 447.328   | AF026920  | 1017.427  |
| 1327.713  | NM_004992 | 1562.568  | 1102.329  | Z36819    | 13447.786 | 8618.808  | NM_004931 | 3024.916  |
| 5325.663  | NM_014462 | 1615.26   | 1226.854  | NM_014448 | 1586.966  | 1535.782  | NM_000607 | 7614.358  |
| 626.637   | NM_014156 | 52203.512 | 37682.297 | NM_020166 | 1746.438  | 1960.18   | NM_002575 | 2824.643  |
| 2330.753  | NM_003137 | 5595.893  | 5822.572  | AK023860  | 1368.772  | 1566.341  | NM_004244 | 1739.866  |
| 7118.258  | NM_006938 | 26443.113 | 10780.973 | AK026061  | 343.217   | 604.465   | AK001500  | 564.919   |
| 7421.668  | NM_020158 | 3118.51   | 1473.47   | NM_016286 | 3339.106  | 4294.895  | NM_020129 | 491.854   |
| 537.461   | AF176085  | 2648.294  | 2043.102  | NM_001567 | 1703.265  | 1545.433  | Y16521    | 1386.448  |
| 591.407   | NM_006985 | 4599.394  | 3866.788  | NM_004905 | 8913.696  | 9470.742  | AL050371  | 2089.981  |
| 360.574   | AF265228  | 911.441   | 1052.825  | AF217971  | 1621.745  | 1988.231  | NM_002651 | 3140.385  |
| 551.508   | NM_003757 | 17434.975 | 11941.378 | NM_001925 | 797.992   | 6725.161  | NM_002413 | 4529.179  |
| 5718.086  | AK025561  | 2259.662  | 2591.036  | AF245517  | 393.949   | 297.078   | NM_017577 | 617.218   |
| 223.334   | NM_018602 | 10918.445 | 9060.8    | NM_004982 | 531.715   | 435.437   | NM_001757 | 2058.787  |
| 516.488   | NM_004096 | 5148.684  | 4628.819  | NM_001694 | 44034.355 | 25290.619 | NM_001647 | 1344.001  |
| 714.789   | NM_017629 | 4530.125  | 4172.902  | AK026180  | 436.187   | 184.235   | NM_018158 | 782.455   |
| 12964.415 | AL049681  | 1369.049  | 1548.367  | NM_013365 | 1497.008  | 1171.841  | NM_016301 | 2942.823  |
| 2417.114  | NM_006584 | 554.625   | 511.351   | NM_003916 | 4031.031  | 2973.194  | AB032952  | 7847.449  |
| 951.061   | AF052181  | 1048.489  | 772.175   | NM_002870 | 12863.272 | 8716.537  | NM_002522 | 4140.279  |
| 5853.455  | AL050074  | 3835.118  | 4641.925  | AF135422  | 1151.846  | 1369.206  | NM_002978 | 824.272   |
| 1246.715  | AK026436  | 784.282   | 926.975   | NM_004479 | 11882.632 | 16238.64  | AB040879  | 1297.68   |
| 438.535   | NM_018061 | 1984.423  | 1701.573  | AF070587  | 760.048   | 820.315   | AL049935  | 2059.795  |
| 666.399   | AK023059  | 856.494   | 1014.932  | BE250526  | 549.446   | 673.242   | AB033043  | 1760.472  |
| 3966.537  | NM_003551 | 2196.853  | 1787.376  | NM_016819 | 1157.371  | 1907.551  | NM_014999 | 1315.923  |
| 507.804   | AK021900  | 3984.348  | 2276.438  | NM_012222 | 3013.688  | 2205.899  | AK025220  | 940.102   |
| 1663.543  | NM_002764 | 5117.686  | 3299.852  | NM_005002 | 962.603   | 732.673   | NM_016308 | 8645.814  |
| 958.425   | NM_019857 | 775.892   | 636.07    | NM_006596 | 1453.435  | 1815.473  | D42046    | 1671.603  |
| 1055.602  | NM_015455 | 18239.771 | 15934.203 | AK023214  | 2985.003  | 2154.189  | NM_001033 | 1622.187  |
| 9597.745  | AF024702  | 6246.052  | 8448.126  | NM_001469 | 2949.892  | 3102.946  | NM_004526 | 7526.076  |
| 2927.956  | NM_001964 | 1765.232  | 1420.214  | NM_003600 | 3243.323  | 1712.849  | NM_002526 | 3639.104  |
| 2081.845  | NM_005962 | 10031.354 | 4860.164  | NM_017490 | 1537.49   | 977.922   | AK023149  | 697.655   |
| 7360.831  | X74864    | 1598.122  | 1442.629  | NM_002718 | 891.445   | 746.136   | AK023168  | 1216.582  |
| 2535.727  | AK026804  | 945.947   | 652.306   | AK026727  | 994.394   | 595.12    | NM_006646 | 928.195   |
| 2090.04   | NM_016170 | 4248.168  | 4062.062  | NM_006247 | 1656.379  | 1451.132  | NM_004742 | 487.102   |
| 646.814   | NM_002114 | 428.339   | 256.131   | AB032983  | 430.695   | 383.676   | NM_014753 | 1287.252  |
| 2122.33   | NM_006166 | 1159.36   | 1058.67   | NM_018281 | 4278.075  | 2812.463  | NM_006585 | 20669.387 |
| 1314.429  | S72620    | 26975.674 | 15887.155 | NM_014049 | 1490.978  | 1856.6    | NM_014331 | 1411.033  |
| 621.264   | NM_005263 | 16400.199 | 7625.086  | NM_005396 | 251.667   | 254.88    | NM_006795 | 3031.656  |
| 439.257   | AB033022  | 4261.675  | 4773.575  | BC036375  | 10228.506 | 7506.042  | AF070568  | 906.762   |

|           |           |          |           |           |           |           |           |          |
|-----------|-----------|----------|-----------|-----------|-----------|-----------|-----------|----------|
| 1466.882  | AF147397  | 579.964  | 684.691   | BI912037  | 683.659   | 1862.576  | NM_000240 | 1472.07  |
| 6107.475  | AK027158  | 527.355  | 686.688   | AA454646  | 1277.849  | 1442.791  | AK055733  | 6856.395 |
| 1090.889  | AF085836  | 3695.105 | 4121.682  | U66349    | 292.479   | 703.211   | AF298880  | 6027.049 |
| 530.09    | AL049449  | 727.979  | 716.088   | AA057156  | 515.635   | 858.747   | AK025395  | 423.064  |
| 4295.932  | AL359654  | 397.371  | 287.467   | U19487    | 957.274   | 510.057   | NM_00038E | 368.066  |
| 12164.938 | AK024224  | 1519.294 | 1140.576  | AF166327  | 4059.947  | 3474.906  | U79292    | 1578.776 |
| 1373.359  | NM_015362 | 3875.27  | 2900.771  | AF260739  | 1029.07   | 1006.023  | X68314    | 322.19   |
| 2259.323  | AF147344  | 534.171  | 398.672   | AF531423  | 595.344   | 551.228   | N51014    | 914.032  |
| 3243.633  | AF147371  | 604.187  | 906.955   | X76555    | 363.361   | 271.895   | BE392471  | 4438.528 |
| 1234.636  | NM_018982 | 2227.052 | 2880.821  | NM_005432 | 997.665   | 720.643   | AI802950  | 563.217  |
| 2260.486  | AF086254  | 3624.616 | 3378.535  | L10386    | 1343.768  | 566.056   | AI741278  | 563.589  |
| 687.83    | AF086367  | 1682.274 | 1052.771  | AF061812  | 1996.748  | 1129.314  | AL043686  | 2361.052 |
| 1558.575  | AF086437  | 829.888  | 849.379   | AL136756  | 596.127   | 386.626   | AA775212  | 1455.775 |
| 1322.143  | AK025088  | 2490.825 | 2373.314  | NM_012469 | 2968.447  | 1813.881  | NM_00094E | 1319.978 |
| 344.24    | U79295    | 1050.65  | 1880.52   | NM_134260 | 4426.137  | 2846.08   | AB011174  | 765.709  |
| 8370.878  | AK002107  | 436.157  | 592.754   | AK025688  | 670.934   | 1036.026  | AB043635  | 125.919  |
| 2997.724  | NM_00359E | 2949.19  | 4965.779  | Z36819    | 14722.259 | 15323.916 | NM_000607 | 6999.433 |
| 1720.464  | NM_01883E | 2405.542 | 1864.668  | NM_001195 | 493.354   | 1142.885  | NM_00257E | 2662.581 |
| 327.676   | AK021454  | 1633.259 | 1494.203  | NM_01444E | 3021.372  | 4933.518  | NM_004244 | 2828.11  |
| 1642.624  | AK022069  | 930.938  | 1145.079  | AL080157  | 628.512   | 1088.757  | NM_003371 | 1225.426 |
| 2732.164  | AF085944  | 1168.88  | 1004.83   | NM_007227 | 216.732   | 413.636   | AK023114  | 2211.53  |
| 7282.361  | AL133038  | 594.216  | 609.228   | NM_007023 | 627.554   | 387.629   | NM_00367E | 1731.926 |
| 1055.846  | AL137414  | 1252.41  | 942.34    | NM_014461 | 344.274   | 312.636   | NM_01441E | 952.143  |
| 556.17    | AL359574  | 1825.371 | 1384.751  | AB015330  | 1621.596  | 1263.032  | NM_01493E | 1085.99  |
| 2959.421  | AL133569  | 2174.873 | 2220.691  | NM_00145E | 1966.846  | 930.389   | AK026066  | 533.2    |
| 10291.536 | AL137435  | 270.688  | 280.439   | AK026180  | 384.073   | 440.467   | NM_005244 | 1224.669 |
| 10790.354 | AL359604  | 370.101  | 421.002   | NM_01336E | 1185.043  | 1843.088  | NM_01481E | 632.464  |
| 1390.128  | AK027189  | 803.071  | 367.798   | NM_005817 | 6321.106  | 10203.806 | NM_005443 | 216.044  |
| 1042.631  | AF088014  | 1250.853 | 998.555   | NM_00391E | 3869.472  | 4332.593  | NM_007221 | 2393.88  |
| 1516.077  | U92022    | 838.506  | 1187.568  | NM_002870 | 15967.997 | 19346.518 | X54163    | 6138.764 |
| 4144.575  | NM_003650 | 9973.735 | 14420.664 | NM_006363 | 3410.011  | 5285.138  | NM_00297E | 496.33   |
| 2418.578  | AK022119  | 1272.397 | 3333.804  | NM_02041E | 530.887   | 789.031   | NM_01466E | 618.649  |
| 2191.992  | AL157488  | 936.008  | 1255.454  | NM_000334 | 1254.353  | 1458.208  | NM_004722 | 887.89   |
| 4430.285  | NM_016644 | 1044.834 | 961.609   | NM_020400 | 593.307   | 755.998   | NM_01442E | 354.689  |
| 429.934   | AF085842  | 330.073  | 544.719   | NM_001504 | 725.677   | 618.447   | NM_006612 | 671.752  |
| 1759.492  | AK023882  | 554.739  | 399.186   | D50926    | 1317.874  | 1005.84   | NM_016451 | 700.391  |
| 550.664   | AK026750  | 591.462  | 701.633   | BF205683  | 1448.377  | 1049.96   | NM_007351 | 4186.196 |
| 2701.771  | AF072164  | 1872.796 | 2572.454  | NM_00075E | 4335.088  | 2315.077  | AK026266  | 2111.334 |
| 16310.578 | NM_018610 | 1232.963 | 1680.427  | M17017    | 636.91    | 500.705   | NM_007124 | 1221.931 |
| 20755.949 | AF232216  | 512      | 331.833   | NM_002990 | 582.846   | 576.531   | NM_00317E | 834.506  |
| 1847.157  | NM_017773 | 1234.227 | 1320.085  | NM_002432 | 6502.008  | 7434.743  | NM_000723 | 421.318  |
| 19259.449 | AK021940  | 1144.849 | 875.403   | AB033037  | 480.968   | 164.087   | AL096751  | 1648.313 |
| 437.989   | AK022189  | 495.404  | 639.865   | L40400    | 1639.953  | 1123.432  | NM_000364 | 301.217  |
| 1461.272  | AK022338  | 564.773  | 541.707   | NM_006247 | 1815.362  | 3047.755  | AF026920  | 885.002  |
| 924.007   | AK026856  | 761.295  | 968.119   | AB032983  | 566.306   | 692.572   | NM_004931 | 2930.049 |
| 1874.76   | AL162033  | 1219.616 | 1179.218  | NM_018281 | 4345.241  | 5456.271  | NM_00679E | 2968.986 |
| 1882.905  | NM_005001 | 9506.573 | 6653.606  | NM_004457 | 2739.09   | 2574.39   | AF070568  | 1002.505 |
| 6974.294  | AK024175  | 3465.697 | 4122.953  | NM_01404E | 1555.334  | 2950.88   | NM_000277 | 284.143  |
| 1066.343  | NM_000510 | 647.334  | 987.967   | NM_00539E | 357.828   | 429.567   | NM_000240 | 1055.663 |
| 1145.109  | BE067520  | 795.963  | 2072.185  | NM_00431E | 4667.586  | 9716.491  | AK055733  | 8640.426 |
| 8939.066  | NM_017787 | 1855.995 | 2792.518  | NM_02016E | 2092.628  | 3207.571  | AF298880  | 7087.195 |
| 2368.932  | NM_02031E | 3674.407 | 1807.698  | AK023860  | 1362.186  | 1421.387  | AK001500  | 541.211  |
| 1524.285  | AK023892  | 423.365  | 513.093   | NM_01628E | 3244.148  | 2611.327  | AL050371  | 2176.865 |

|           |           |           |           |           |           |           |           |           |
|-----------|-----------|-----------|-----------|-----------|-----------|-----------|-----------|-----------|
| 5681.706  | AF265210  | 5790.141  | 4875.516  | NM_001567 | 903.74    | 803.609   | NM_002651 | 2978.797  |
| 5089.99   | AK025061  | 787.015   | 975.717   | NM_004905 | 7438.33   | 5828.897  | NM_002413 | 4857.01   |
| 1159.46   | AF088067  | 3784.152  | 4211.462  | AF217971  | 1180.424  | 1528.807  | NM_017577 | 257.585   |
| 1897.212  | AF056441  | 1174.825  | 1930.997  | NM_001925 | 661.423   | 5007.154  | NM_001757 | 1715.109  |
| 749.48    | NM_018023 | 912.646   | 1180.919  | AF245517  | 461.619   | 366.504   | NM_001647 | 1669.702  |
| 982.659   | AK024389  | 4938.323  | 5611.723  | NM_004982 | 447.112   | 290.142   | NM_018158 | 927.972   |
| 18607.49  | AK026793  | 1434.114  | 1455.542  | NM_001694 | 44656.371 | 27676.504 | NM_016301 | 3093.741  |
| 1381.037  | NM_001672 | 427.658   | 378.7     | NM_000217 | 365.158   | 346.56    | AB032952  | 8965.339  |
| 387.581   | AJ276253  | 10979.207 | 12268.882 | NM_012469 | 3394.831  | 4071.875  | NM_002522 | 5214.333  |
| 673.814   | AF147314  | 1250.932  | 1814.511  | NM_134260 | 3794.216  | 5124.783  | NM_000945 | 1475.236  |
| 710.299   | NM_018980 | 2075.758  | 1974.788  | NM_001478 | 36248.707 | 33787.602 | NM_002574 | 17492.246 |
| 233.911   | AF086201  | 1246.333  | 1096.408  | AF135422  | 1329.789  | 1502.507  | AB011174  | 903.302   |
| 1929.232  | U48696    | 745.72    | 496.669   | NM_004479 | 10883.557 | 9093.468  | AB040879  | 1206.654  |
| 6855.079  | AF230316  | 5660.777  | 5430.927  | AF070587  | 886.368   | 564.018   | AL049935  | 2028.266  |
| 252.759   | K00629    | 253.665   | 340.791   | BE250526  | 531.604   | 350.936   | D42046    | 1808.975  |
| 485.605   | AK024515  | 1729.395  | 1850.871  | NM_016819 | 1150.22   | 908.6     | NM_001033 | 1789.852  |
| 338.242   | AF085862  | 4490.32   | 6849.082  | NM_012222 | 2690.84   | 1376.324  | NM_004526 | 7949.141  |
| 645.448   | NM_017998 | 1529.151  | 1302.332  | NM_005002 | 935.997   | 488.233   | NM_002526 | 4230.886  |
| 6508.399  | AL049271  | 21665.572 | 22295.787 | NM_006596 | 1363.89   | 1431.618  | NM_020135 | 1145.571  |
| 308.561   | AK023079  | 33134.41  | 30049.234 | AK023214  | 2958.664  | 1808.67   | NM_018518 | 1637.977  |
| 12242.96  | NM_019609 | 1575.508  | 1652.793  | NM_001469 | 2817.698  | 2844.049  | AK023149  | 809.637   |
| 1727.499  | AK026198  | 1185.359  | 1061.062  | NM_003600 | 3439.024  | 1968.338  | AK023168  | 1269.387  |
| 768.703   | AF183570  | 698.881   | 584.421   | NM_017490 | 1597.194  | 1149.765  | NM_006646 | 952.093   |
| 2990.69   | NM_005497 | 9586.75   | 9806.497  | NM_002718 | 990.575   | 713.984   | NM_004742 | 543.183   |
| 495.174   | AK024048  | 2378.046  | 3775.008  | AK026727  | 1158.634  | 842.529   | NM_014753 | 1383.393  |
| 1172.929  | AB033093  | 1720.377  | 834.491   | L09071    | 369.818   | 625.131   | NM_006585 | 22179.262 |
| 464.868   | NM_005909 | 31767.027 | 15904.297 | BC036375  | 9845.665  | 6556.051  | NM_014331 | 1414.003  |
| 2347.248  | AK001948  | 1103.995  | 2264.475  | BI912037  | 707.463   | 685.827   | AF054589  | 348.927   |
| 361.468   | AK021879  | 2133.656  | 3322.372  | AA454646  | 1249.031  | 837.687   | NM_005270 | 437.672   |
| 1833.562  | AL355717  | 561.33    | 2057.212  | U18087    | 15552.468 | 9327.018  | NM_014815 | 663.287   |
| 2687.984  | AK055991  | 665.818   | 1116.358  | U66349    | 380.427   | 412.18    | NM_005443 | 244.797   |
| 10079.301 | AF113697  | 494.401   | 842.846   | AA057156  | 446.228   | 339.974   | NM_007221 | 2778.603  |
| 334.673   | AK022326  | 731.271   | 656.983   | U19487    | 665.13    | 251.94    | X54163    | 6276.707  |
| 2732.705  | AF085991  | 621.445   | 580.214   | AF166327  | 4299.343  | 2940.479  | NM_000388 | 487.303   |
| 2617.544  | NM_005683 | 861.728   | 618.107   | AF260739  | 741.27    | 399.24    | X58377    | 311.527   |
| 7509.603  | NM_020427 | 9226.754  | 7828.011  | AF531423  | 791.876   | 484.928   | U79292    | 1991.028  |
| 2017.313  | AF085920  | 1003.526  | 1158.956  | X76555    | 3080.597  | 7889.089  | X68314    | 339.553   |
| 1251.223  | AK023173  | 6312.84   | 7400.464  | NM_005432 | 918.99    | 652.555   | X71973    | 14118.213 |
| 549.355   | AK025225  | 481.895   | 540.488   | L10386    | 1449.709  | 899.379   | T49651    | 2148.614  |
| 206.031   | U79275    | 2913.138  | 2482.175  | AF061812  | 2177.788  | 1409.049  | N51014    | 966.173   |
| 2040.288  | AJ227908  | 718.974   | 997.359   | AL136756  | 609.963   | 405.803   | BE392471  | 5112.545  |
| 1082.886  | AF007193  | 2457.989  | 3915.492  | NM_002990 | 528.845   | 1423.509  | AI802950  | 659.25    |
| 356.962   | AK022367  | 2250.898  | 2400.268  | AB033037  | 479.803   | 593.043   | AL043686  | 3111.361  |
| 505.508   | BC028589  | 2665.587  | 4762.221  | L40400    | 1644.319  | 2120.894  | AA775212  | 1600.43   |
| 2818.419  | CY3Cy5    | 3478.739  | 169.98    | AK025688  | 906.761   | 1233.318  | NM_000723 | 497.453   |
| 797.534   | K02765    | 1426.11   | 1601.182  | Z36819    | 14512.41  | 13690.777 | AL096751  | 1335.006  |
| 3518.46   | M65134    | 961.593   | 673.594   | NM_014448 | 2422.53   | 2655.643  | AF026920  | 1420.053  |
| 498.385   | BG539651  | 10607.79  | 20050.285 | AL080157  | 692.781   | 560.28    | NM_004931 | 3357.169  |
| 15400.501 | N52646    | 12158.232 | 11598.093 | NM_005100 | 1814.668  | 1413.535  | NM_000607 | 7882.309  |
| 20791.496 | AW160671  | 52242.578 | 45070.672 | NM_005308 | 790.675   | 507.312   | NM_002575 | 3169.554  |
| 1045.078  | BI870529  | 5361.237  | 8662.928  | NM_007023 | 390.389   | 266.412   | NM_004244 | 2718.839  |
| 1156.529  | AA702698  | 967.75    | 1485.716  | NM_005873 | 5761.003  | 4119.523  | NM_003371 | 1839.579  |
| 1279.137  | AI681514  | 1142.804  | 886.586   | NM_004624 | 813.089   | 586.506   | AK023114  | 2174.222  |

|           |           |           |           |           |           |           |           |           |
|-----------|-----------|-----------|-----------|-----------|-----------|-----------|-----------|-----------|
| 394.508   | NM_00130C | 1538.17   | 4378.134  | NM_00386E | 525.4     | 309.823   | NM_00367E | 1713.857  |
| 1026.395  | BG748827  | 8419.392  | 6156.088  | AB015330  | 1474.013  | 1066.316  | NM_014271 | 220.854   |
| 601.667   | AA952897  | 1503.541  | 1041.125  | NM_00145E | 2048.421  | 1220.547  | NM_01441E | 1191.636  |
| 912.466   | BG760342  | 2187.69   | 2325.622  | AF286370  | 502.445   | 474.68    | NM_01493E | 1694.4    |
| 317.105   | AA703141  | 676.848   | 621.332   | NM_000217 | 361.008   | 616.815   | AF049460  | 243.618   |
| 4021.826  | AI122630  | 6988.923  | 4172.205  | AK026180  | 356.128   | 606.86    | AK026066  | 585.615   |
| 2108.331  | NM_00210E | 16360.115 | 11869.327 | NM_01336E | 1574.192  | 1818.123  | NM_005244 | 1378.853  |
| 829.535   | NM_00337E | 8738.771  | 5808.084  | NM_005817 | 7216.024  | 14505.362 | NM_01815E | 931.374   |
| 869.323   | SR1       | 57879.332 | 62564.652 | NM_00391E | 4305.034  | 4104.575  | NM_016301 | 3566.418  |
| 1580.94   | SR3       | 42075.848 | 46412.168 | NM_00287C | 13359.729 | 10219.027 | AK021975  | 357.038   |
| 1256.78   | SR5       | 3807.812  | 4351.248  | NM_00636E | 3112.377  | 2864.742  | AB032952  | 6146.978  |
| 1033.187  | SR7       | 5124.794  | 48882.813 | NM_02041E | 544.378   | 551.924   | NM_00252E | 3156.247  |
| 1143.88   | SR9       | 21503.215 | 5959.481  | AL049667  | 1824.241  | 1292.339  | NM_00297E | 490.939   |
| 19250.525 | CY3Cy5    | 2677.072  | 144.753   | NM_000334 | 1349.313  | 1146.835  | NM_01466E | 678.962   |
| 1812.904  | NM_00172E | 17772.053 | 13291.995 | NM_02040C | 476.014   | 545.729   | NM_00472E | 1029.874  |
| 3760.915  | NM_00556E | 9220.95   | 4288.17   | NM_001504 | 851.05    | 377.712   | NM_01442E | 512.647   |
| 510.187   | NM_003824 | 4112.563  | 4310.739  | D50926    | 1227.552  | 1129.943  | NM_01213E | 1069.963  |
| 2124.121  | NM_00068E | 1293.359  | 1069.348  | BF205683  | 1157.647  | 934.827   | NM_017954 | 340.462   |
| 6559.219  | NM_01245E | 4126.781  | 4043.618  | NM_00154E | 224.473   | 343.193   | NM_00661E | 744.775   |
| 6917.277  | AF229166  | 792.09    | 980.405   | NM_00075E | 4481.717  | 3125.344  | NM_016451 | 822.605   |
| 778.987   | NM_005137 | 2024.832  | 1654.79   | M17017    | 546.758   | 463.886   | NM_007351 | 4969.015  |
| 540.58    | NM_006764 | 1736.103  | 2184.983  | NM_00360C | 4521.212  | 5287.44   | AK026266  | 2820.889  |
| 833.839   | NM_00138E | 890.408   | 1132.332  | NM_01749C | 2075.825  | 2377.427  | NM_007124 | 1119.228  |
| 1893.297  | NM_00116E | 1150.568  | 816.706   | AK026727  | 1824.124  | 2625.129  | NM_00317E | 763.53    |
| 2312.386  | NM_00587E | 1105.166  | 1098.709  | NM_006247 | 2026.695  | 2713.523  | AK023168  | 1412.313  |
| 2449.999  | AF308602  | 2024.999  | 2083.401  | AB032983  | 628.864   | 604.325   | NM_00664E | 755.179   |
| 4735.555  | AB011089  | 1094.907  | 1034.947  | NM_018281 | 4923.857  | 4488.459  | NM_00474E | 411.862   |
| 354.186   | AF007192  | 659.453   | 391.524   | NM_004457 | 2960.41   | 2712.428  | NM_01475E | 1345.897  |
| 1684.926  | NM_00127E | 8361.13   | 5448.272  | NM_01404E | 1644.558  | 2813.726  | NM_00658E | 24316.096 |
| 2467.507  | NM_016157 | 839.555   | 847.489   | NM_00539E | 397.654   | 208.904   | NM_014331 | 1655.295  |
| 405.411   | NM_01491E | 22086.354 | 16756.801 | NM_00431E | 4711.835  | 4424.728  | NM_00679E | 3696.662  |
| 2591.949  | NM_01228E | 1442.125  | 1435.539  | NM_02016E | 2246.943  | 1775.327  | AF070568  | 875.226   |
| 601.963   | NM_00219E | 3612.332  | 2810.694  | AK023860  | 1254.373  | 849.091   | NM_00024C | 1515.636  |
| 2286.799  | D84294    | 2702.7    | 2014.161  | NM_000031 | 1099.922  | 811.721   | AK055733  | 8434.792  |
| 1300.592  | X59770    | 439.49    | 707.828   | NM_01628E | 3298.258  | 2332.342  | AF298880  | 6880.193  |
| 5590.026  | AK024311  | 679.14    | 1052.44   | NM_001567 | 1578.292  | 1015.007  | AK001500  | 625.147   |
| 608.936   | AF052155  | 6050.585  | 3691.606  | NM_00490E | 7623.574  | 6340.751  | NM_02012E | 401.2     |
| 1944.869  | NM_00508E | 1176.005  | 913.034   | AF217971  | 1241.145  | 1326.016  | Y16521    | 1393.027  |
| 651.034   | AF060902  | 1043.134  | 1077.211  | NM_00192E | 774.721   | 6352.011  | AL050371  | 2306.211  |
| 633.659   | AF121858  | 3573.297  | 2982.519  | AF245517  | 377.228   | 195.884   | NM_002651 | 3228.106  |
| 1253.264  | NM_013437 | 1054.859  | 783.237   | X78926    | 7597.891  | 5242.449  | NM_00241E | 4920.526  |
| 1438.188  | AK025966  | 2093.598  | 2156.076  | AJ278110  | 486.665   | 833.204   | NM_017577 | 381.112   |
| 1403.736  | NM_01872E | 560.953   | 572.767   | NM_014237 | 2805.923  | 2915.386  | NM_001757 | 1741.445  |
| 5124.47   | NM_003081 | 16013.771 | 18966.148 | NM_02039E | 504.258   | 573.3     | NM_001647 | 1375.819  |
| 1229.609  | NM_01649E | 1571.214  | 1546.945  | AF029900  | 2628.645  | 3042.526  | NM_00622E | 467.045   |
| 1045.23   | D50402    | 13586.74  | 13250.089 | NM_00332E | 1763.312  | 2236.418  | NM_00376E | 2752.338  |
| 7609.315  | M73547    | 6467.049  | 5503.084  | NM_01617E | 1625.096  | 3689.04   | NM_01839E | 439.818   |
| 2538.955  | NM_003687 | 1034.852  | 1079.787  | AK022639  | 1582.48   | 1842.614  | BF032535  | 1292.857  |
| 1365.616  | NM_004134 | 2821.276  | 1647.025  | D31766    | 1195.268  | 1380.46   | NM_01833E | 1132.361  |
| 5905.722  | NM_00595E | 1766.204  | 2470.461  | NM_006547 | 429.845   | 344.763   | NM_00509E | 6089.868  |
| 8225.563  | NM_00404E | 663.138   | 1255.155  | NM_00147E | 36587.008 | 28930.572 | NM_00676C | 563.896   |
| 1027.895  | NM_00042E | 732.99    | 724.203   | AF135422  | 1569.438  | 812.504   | NM_01228E | 3927.69   |
| 1963.516  | AB040967  | 8443.905  | 3735.777  | NM_00447E | 12260.778 | 8764.063  | AB037775  | 820.9     |

|           |           |           |           |           |           |           |           |           |
|-----------|-----------|-----------|-----------|-----------|-----------|-----------|-----------|-----------|
| 1198.357  | NM_014721 | 1582.771  | 1670.428  | AF070587  | 943.626   | 550.986   | L27560    | 849.604   |
| 1105.724  | AK026352  | 642.628   | 783.593   | NM_016819 | 1214.423  | 776.471   | AB011174  | 759.128   |
| 533.009   | AL137705  | 3309.379  | 3752.9    | NM_012222 | 2398.492  | 1415.84   | AB040879  | 1155.44   |
| 529.26    | U41898    | 570.756   | 583.298   | NM_005002 | 833.726   | 553.374   | AL049935  | 2010.06   |
| 1106.362  | NM_014848 | 622.411   | 454.41    | NM_006596 | 1452.767  | 1538.424  | AB033043  | 2356.029  |
| 338.172   | BF217766  | 1081.075  | 654.379   | AK023214  | 3144.466  | 2158.195  | NM_014999 | 1235.8    |
| 8747.67   | NM_000184 | 2190.174  | 1542.57   | NM_001469 | 3286.401  | 3567.832  | AK025220  | 871.533   |
| 1211.648  | NM_016180 | 585.06    | 576.521   | BC036368  | 323.739   | 589.45    | NM_016308 | 8500.021  |
| 7909.499  | NM_000112 | 691.511   | 661.187   | NM_001851 | 1489.242  | 4111.934  | D42046    | 1710.169  |
| 428.933   | NM_005827 | 4479.474  | 2564.782  | S67789    | 393.823   | 543.643   | NM_001033 | 1779.865  |
| 4944.536  | NM_003053 | 2437.019  | 3147.872  | AK022689  | 1157.918  | 1749.459  | NM_004526 | 7539.125  |
| 1021.874  | NM_003044 | 753.344   | 815.239   | NM_016227 | 446.116   | 248.401   | NM_002526 | 3414.514  |
| 2665.531  | NM_006672 | 4766.03   | 5609.909  | NM_004195 | 14494.216 | 13576.099 | NM_020135 | 738.613   |
| 4183.978  | AB007875  | 1048.961  | 565.812   | NM_004705 | 1225.546  | 1028.052  | NM_018518 | 1739.42   |
| 941.664   | AL050288  | 32243.314 | 39875.484 | NM_020190 | 10998.639 | 14157.152 | AK023149  | 559.959   |
| 961.177   | NM_005040 | 4830.761  | 4975.283  | AK024003  | 458.594   | 646.57    | NM_006438 | 485.916   |
| 563.39    | NM_016391 | 11104.974 | 10750.184 | NM_014357 | 1587.258  | 2021.718  | NM_001845 | 849.647   |
| 1667.352  | M80783    | 251.359   | 576.335   | NM_004067 | 793.515   | 755.077   | AK024697  | 764.217   |
| 1211.649  | AF075033  | 3524.417  | 3257.988  | NM_000121 | 5040.414  | 4120.543  | NM_006460 | 1309.101  |
| 3069.907  | D50911    | 11444.164 | 9859.322  | NM_002091 | 6355.497  | 5093.164  | NM_003749 | 13058.122 |
| 6142.382  | AB011104  | 1905.759  | 2047.45   | AB033092  | 2183.339  | 2019.836  | NM_003557 | 1209.392  |
| 2262.814  | AK024069  | 7236.964  | 6172.73   | M89957    | 313.423   | 198.809   | NM_001257 | 4714.375  |
| 855.404   | NM_004582 | 9723.177  | 6511.034  | NM_003023 | 686.852   | 506.975   | D85245    | 5461.254  |
| 4232.054  | NM_015640 | 14646.652 | 9382.553  | BC035030  | 2550.791  | 1325.207  | NM_000943 | 862.937   |
| 2511.009  | AF233450  | 1155.978  | 865.559   | NM_005340 | 10869.453 | 9006.326  | NM_004658 | 1414.353  |
| 605.481   | NM_016233 | 1276.891  | 785.083   | NM_016201 | 651.551   | 470.63    | NM_001250 | 3108.165  |
| 2127.345  | NM_000821 | 9465.361  | 9013.402  | NM_000864 | 1492.445  | 1122.235  | AF298812  | 531.588   |
| 5444.264  | NM_020121 | 696.096   | 697.755   | NM_017977 | 1244.17   | 1046.438  | NM_004969 | 1022.885  |
| 4367.736  | NM_003145 | 39738.348 | 30861.479 | AF147727  | 1045.255  | 646.843   | AJ249900  | 291.078   |
| 1743.939  | NM_001632 | 1632.727  | 1745.15   | NM_006751 | 1533.419  | 1274.683  | AK022581  | 3855.226  |
| 1296.553  | NM_012264 | 1218.767  | 1160.634  | AB037834  | 7276.603  | 2797.753  | NM_018054 | 1324.039  |
| 779.045   | AF311312  | 2200.559  | 2202.887  | NM_003569 | 473.176   | 477.749   | NM_006186 | 514.561   |
| 4128.667  | NM_014915 | 22032.293 | 15282.349 | NM_014052 | 10348.194 | 15128.338 | NM_000958 | 3841.04   |
| 318.681   | NM_012286 | 1732.357  | 1413.325  | NM_002777 | 15051.336 | 20457.258 | NM_001401 | 632.509   |
| 833.436   | NM_002195 | 3771.366  | 2644.298  | AF202635  | 721.86    | 1047.666  | NM_013271 | 3591.005  |
| 1066.477  | D84294    | 2736.457  | 1885.297  | NM_017904 | 403.237   | 510.462   | NM_004157 | 3443.73   |
| 1096.228  | X59770    | 221.728   | 238.548   | NM_013367 | 1851.056  | 2902.808  | NM_000684 | 1119.697  |
| 1577.681  | K02765    | 1236.475  | 1457.073  | NM_000321 | 2813.866  | 4097.179  | NM_015913 | 7810.766  |
| 886.692   | BG539651  | 11471.864 | 24187.941 | NM_006341 | 5817.64   | 5265.375  | NM_005157 | 3592.651  |
| 1662.559  | N52646    | 12481.12  | 12961.308 | NM_001709 | 1211.07   | 1370.055  | U67037    | 1727.223  |
| 4595.87   | AW160671  | 54885.469 | 44468.137 | NM_006191 | 1861.192  | 2373.434  | NM_004960 | 8930.524  |
| 3148.491  | BI870529  | 5373.381  | 7782.41   | NM_001800 | 628.282   | 1740.723  | AF272370  | 2753.738  |
| 1993.882  | AA702698  | 1054.818  | 1251.291  | NM_004336 | 1974.388  | 1882.43   | AF130050  | 2452.642  |
| 1609.196  | AI681514  | 882.187   | 973.318   | NM_015949 | 359.197   | 494.051   | NM_012197 | 2315.302  |
| 1765.082  | NM_001300 | 1550.463  | 4234.732  | NM_013979 | 861.289   | 703.476   | AK024016  | 1664.204  |
| 3372.182  | BG748827  | 8511.971  | 6904.7    | NM_003790 | 2451.49   | 1672.038  | NM_003581 | 3296.437  |
| 852.295   | AA952897  | 1516.646  | 1361.046  | NM_000494 | 1333.816  | 979.136   | NM_012407 | 764.06    |
| 34786.695 | BG760342  | 2806.506  | 3181.587  | NM_016023 | 360.952   | 301.482   | NM_007186 | 831.681   |
| 7696.823  | AA703141  | 748.113   | 870.882   | NM_003722 | 7737.497  | 5129.653  | NM_007044 | 1658.873  |
| 2480.629  | AI122630  | 7367.462  | 4176.223  | NM_000495 | 555.895   | 286.971   | AF294326  | 2956.42   |
| 282.083   | NM_002103 | 20811.77  | 16929.982 | AF085883  | 454.079   | 750.389   | NM_014678 | 1069.194  |
| 1005.375  | NM_003379 | 8577.884  | 6776.511  | NM_016571 | 1185.392  | 879.487   | NM_012317 | 51337.063 |
| 608.501   | NM_006589 | 7406.088  | 6538.483  | NM_016446 | 1805.999  | 1536.419  | NM_017853 | 2029.624  |



|           |           |           |           |           |           |           |           |           |
|-----------|-----------|-----------|-----------|-----------|-----------|-----------|-----------|-----------|
| 1285.774  | NM_004134 | 3220.059  | 1909.209  | NM_002516 | 659.136   | 852.343   | NM_016097 | 7139.685  |
| 8144.911  | NM_005955 | 1692.508  | 1506.807  | NM_001870 | 538.659   | 1152.827  | AB046800  | 2142.114  |
| 1807.34   | NM_004048 | 698.478   | 783.823   | AJ271216  | 352.057   | 501.987   | NM_002162 | 2178.016  |
| 409.983   | NM_012428 | 4448.208  | 7386.112  | U23028    | 2080.579  | 2563.31   | NM_015458 | 2522.73   |
| 1043.402  | NM_013269 | 502.975   | 982.051   | NM_000817 | 3223.855  | 4062.64   | D13540    | 3173.222  |
| 3495.948  | NM_001728 | 18099.563 | 14009.664 | AF113132  | 8199.132  | 4033.779  | NM_016570 | 5974.052  |
| 3916.55   | NM_005565 | 9799.916  | 4908.213  | NM_006571 | 2207.978  | 1918.788  | AF209198  | 1145.979  |
| 20666.656 | NM_003824 | 3940.443  | 4690.232  | AK022680  | 693.974   | 542.168   | M69012    | 12587.677 |
| 658.959   | NM_000686 | 3325.769  | 4490.259  | NM_018946 | 4211.155  | 2666.179  | NM_006936 | 9518.184  |
| 1062.065  | NM_012452 | 5234.345  | 5773.551  | NM_016359 | 2630.958  | 3111.647  | NM_001327 | 4886.857  |
| 3656.657  | AF229166  | 862.195   | 1295.746  | NM_001069 | 51153.938 | 47584.398 | NM_003652 | 706.096   |
| 465.566   | NM_005137 | 2288.321  | 2405.996  | NM_004156 | 2300.258  | 1123.579  | NM_000063 | 739.646   |
| 17888.945 | NM_006764 | 1945.752  | 2048.637  | AB051449  | 8262.262  | 4778.227  | NM_018389 | 840.948   |
| 406.021   | NM_001386 | 1124.905  | 1419.068  | BC009187  | 4403.243  | 5223.697  | AB033026  | 852.444   |
| 624.374   | NM_001163 | 1457.552  | 1060.801  | AL133617  | 425.201   | 376.427   | AF104914  | 12343.776 |
| 406.703   | NM_005878 | 1289.11   | 1052.97   | NM_016485 | 2583.109  | 1917.146  | NM_014716 | 1441.592  |
| 499.444   | AF308602  | 1732.912  | 2025.595  | NM_002615 | 7392.871  | 4701.987  | AK023845  | 1604.708  |
| 584.973   | AF007192  | 915.474   | 1024.467  | NM_016357 | 2015.601  | 3469.989  | NM_002638 | 2624.48   |
| 9430.057  | NM_001276 | 8168.089  | 6599.185  | NM_014500 | 5511.529  | 6211.18   | NM_016487 | 624.863   |
| 2577.235  | NM_016157 | 662.103   | 638.901   | AK023792  | 228.352   | 335.539   | NM_005808 | 3847.304  |
| 806.017   | NM_000112 | 658.707   | 435.466   | NM_006237 | 1094.561  | 1882.428  | NM_006401 | 17828.973 |
| 2963.647  | NM_005827 | 4910.367  | 2597.669  | NM_001271 | 1532.088  | 1363.086  | AF269249  | 502.488   |
| 532.12    | NM_003053 | 2228.309  | 2499.784  | NM_003683 | 1070.354  | 1301.165  | D31763    | 2223.804  |
| 2937.204  | NM_003044 | 409.994   | 582.123   | AF039019  | 2703.043  | 4686.414  | NM_018169 | 2749.285  |
| 966.934   | NM_006672 | 5025.813  | 4702.123  | NM_012255 | 3663.349  | 3451.513  | AK021452  | 6454.053  |
| 537.749   | M31659    | 1236.234  | 3866.016  | NM_018196 | 876.484   | 747.781   | NM_004506 | 1118.073  |
| 1123.668  | NM_016226 | 8500.081  | 12022.775 | NM_004818 | 1851.416  | 2221.544  | S74529    | 19564.146 |
| 1529.698  | AK024311  | 828.799   | 1148.9    | J04205    | 3593.925  | 3027.288  | NM_005933 | 480.188   |
| 581.487   | AF052155  | 6012.956  | 4130.467  | D38491    | 1956.63   | 1187.76   | NM_005596 | 262.546   |
| 2963.105  | NM_005085 | 1125.604  | 924.599   | AK026835  | 1144.727  | 765.283   | NM_001421 | 705.314   |
| 1369.756  | AF060902  | 1101.114  | 1135.053  | NM_002819 | 6506.132  | 4532.914  | M73837    | 758.201   |
| 2877.239  | AF121858  | 4008.192  | 2875.471  | NM_003090 | 33346.875 | 19019.113 | U69127    | 11842.182 |
| 475.126   | NM_013437 | 1055.134  | 1038.956  | NM_013264 | 1257.25   | 691.456   | NM_005839 | 3464.001  |
| 1642.033  | AK025966  | 2225.975  | 1992.662  | NM_003315 | 4856.988  | 3063.185  | AK023379  | 1059.913  |
| 1240.504  | NM_018725 | 1214.626  | 843.367   | NM_005570 | 4588.578  | 1718.095  | AK021904  | 4333.625  |
| 1669.427  | NM_003081 | 11899.478 | 12983.512 | NM_000086 | 2709.673  | 2917.217  | -         | 551.713   |
| 1859.161  | NM_016495 | 3001.53   | 2901.191  | NM_003752 | 1171.608  | 780.679   | NM_018292 | 403.952   |
| 5372.73   | D50402    | 12209.082 | 11566.797 | NM_003932 | 2911.569  | 2134.65   | AL049705  | 3783.272  |
| 511.585   | M73547    | 6834.904  | 6256.194  | NM_016491 | 6264.529  | 4572.854  | AK022294  | 1002.43   |
| 1160.471  | NM_003687 | 965.652   | 1049.977  | NM_006429 | 9626.63   | 4496.953  | AF086507  | 664.705   |
| 1952.147  | NM_020121 | 713.207   | 612.054   | NM_003307 | 3669.847  | 9863.549  | U79289    | 1107.683  |
| 2392.99   | NM_003145 | 37236.355 | 22631.029 | AF070565  | 562.56    | 1092.125  | NM_014028 | 2638.971  |
| 16189.247 | NM_001632 | 1401.894  | 1400.982  | AK021644  | 1108.625  | 1474.466  | NM_000402 | 803.913   |
| 437.945   | NM_012264 | 1278.428  | 936.92    | NM_015944 | 456.983   | 746.913   | NM_000690 | 5095.755  |
| 4017.032  | AF311312  | 2289.445  | 2514.998  | NM_015960 | 3960.643  | 4936.646  | NM_000155 | 2899.914  |
| 1132.33   | NM_001179 | 553.131   | 307.811   | L27943    | 145.844   | 507.78    | NM_000181 | 5329.567  |
| 926.647   | NM_017765 | 8860.185  | 9039.496  | NM_006085 | 1204.833  | 1951.044  | NM_014121 | 622.917   |
| 616.537   | NM_000428 | 788.331   | 737.748   | NM_000907 | 2463.254  | 2903.992  | NM_006730 | 1980.116  |
| 618.265   | AB040967  | 8304.247  | 3569.335  | AF254085  | 898.631   | 1372.856  | NM_005644 | 1906.629  |
| 293.699   | NM_014721 | 1689.783  | 1843.05   | NM_001987 | 960.75    | 788.303   | NM_018442 | 2261.557  |
| 170.636   | AK026352  | 643.194   | 935.342   | AF244088  | 1148.655  | 857.542   | AF182416  | 2767.649  |
| 25612.377 | AL137705  | 3303.424  | 3742.528  | AK025434  | 454.268   | 267.523   | NM_005999 | 6626.667  |
| 455.609   | U41898    | 1296.004  | 1192.416  | AK000435  | 798.817   | 432.78    | NM_006015 | 667.64    |

|           |           |           |           |           |           |           |           |           |
|-----------|-----------|-----------|-----------|-----------|-----------|-----------|-----------|-----------|
| 386.993   | AF169257  | 950.767   | 922.987   | AK000569  | 1999.511  | 1148.601  | NM_004634 | 1290.723  |
| 4633.918  | BF217766  | 841.021   | 804.584   | NM_006049 | 707.163   | 606.956   | NM_002017 | 4015.977  |
| 856.944   | NM_000184 | 2176.438  | 1924.103  | NM_017661 | 828.075   | 203.128   | NM_017523 | 4051.156  |
| 4067.786  | NM_016180 | 526.21    | 489.268   | BC016698  | 4025.149  | 2565.525  | NM_002382 | 12936.79  |
| 3668.589  | NM_002103 | 21373.518 | 18412.574 | AK027185  | 605.227   | 1230.642  | NM_002158 | 573.216   |
| 1263.615  | NM_003379 | 8988.161  | 7336.667  | AK025576  | 1261.189  | 1905.507  | U13223    | 3941.931  |
| 30205.447 | NM_006589 | 6139.703  | 2959.837  | AF147385  | 566.826   | 753.358   | NM_016270 | 1312.417  |
| 1184.993  | AB007875  | 954.845   | 822.905   | AL442086  | 2977.681  | 4055.57   | AK001357  | 1067.755  |
| 833.277   | AL050288  | 37180.156 | 55527.922 | AK026784  | 357.884   | 470.323   | NM_015721 | 1552.027  |
| 3993.997  | NM_005040 | 4771.512  | 5052.05   | BC034819  | 3299.52   | 9340.479  | AF086298  | 1079.871  |
| 722.415   | NM_016391 | 10594.146 | 9838.391  | AF147313  | 15334.299 | 28126.254 | AK027238  | 762.507   |
| 4073.947  | M80783    | 296.274   | 561.394   | AF147382  | 33118.828 | 42805.637 | AK025758  | 264.394   |
| 451.628   | AF075033  | 3179.157  | 2656.647  | AK001957  | 2476.904  | 3973.342  | S94540    | 5426.261  |
| 471.895   | D50911    | 10259.341 | 8854.196  | AK000850  | 1018.513  | 1827.024  | U79297    | 387.4     |
| 1804.431  | AB011104  | 1833.062  | 1606.041  | AK021833  | 1208.304  | 3068.658  | AK002164  | 550.7     |
| 318.441   | AK024069  | 7116.383  | 5636.717  | AF143867  | 1119.219  | 1731.421  | AF052122  | 4537.904  |
| 113.765   | NM_004582 | 9440.165  | 6123.629  | AK025889  | 4577.607  | 5600.851  | AF052091  | 1009.8    |
| 417.031   | NM_015640 | 15385.65  | 9671.314  | NM_014715 | 1060.322  | 1077.624  | AK024447  | 46816.336 |
| 772.984   | AF233450  | 966.056   | 778.223   | AF086448  | 1430.531  | 1531.607  | AF052145  | 1342.057  |
| 755.201   | NM_016233 | 1443.04   | 951.963   | AB019391  | 391.338   | 66.944    | AF086458  | 1639.771  |
| 527.336   | NM_000821 | 10837.519 | 10576.168 | AF086386  | 712.277   | 374.783   | AF086548  | 3778.231  |
| 694.719   | AF308602  | 1851.708  | 2222.481  | AF086457  | 727.114   | 553.236   | AK023717  | 1339.943  |
| 988.611   | AB011089  | 1246.47   | 989.688   | AK025469  | 601.499   | 576.826   | AK023727  | 635.428   |
| 788.004   | AF007192  | 687.352   | 527.321   | NM_020239 | 5823.653  | 4378.637  | AF086204  | 1761.722  |
| 152.567   | NM_001276 | 8088.278  | 6651.475  | AF070581  | 749.676   | 469.631   | NM_007021 | 517.15    |
| 5308.06   | NM_016157 | 1337.947  | 1912.836  | AK024187  | 571.656   | 468.392   | AK022076  | 334.863   |
| 229.443   | NM_014915 | 20178.096 | 17893.883 | AK022479  | 454.413   | 859.25    | AK023065  | 409.477   |
| 1648.472  | NM_012286 | 1460.58   | 1658.923  | AK023572  | 425.264   | 744.536   | NM_017678 | 236.581   |
| 681.665   | NM_002195 | 3772.634  | 3297.286  | AF086004  | 7053.757  | 8720.213  | AK021570  | 465.277   |
| 793.153   | D84294    | 2395.038  | 1775.601  | AF147433  | 380.735   | 433.196   | AL360204  | 377.904   |
| 707.182   | X59770    | 618.523   | 431.106   | AF086006  | 594.072   | 846.054   | AK000103  | 624.599   |
| 358.386   | K02765    | 1370.104  | 1618.77   | AL137318  | 635.817   | 972.865   | AF085959  | 676.104   |
| 894.06    | BG539651  | 10839.772 | 23181.232 | AL137482  | 540.551   | 554.399   | AF075107  | 491.259   |
| 233.488   | N52646    | 11831.69  | 11598.807 | AL162011  | 8291.602  | 9686.982  | AK023104  | 638.01    |
| 291.18    | AW160671  | 52581.066 | 50695.402 | AL390177  | 449.623   | 781.921   | Y11177    | 790       |
| 852.515   | B1870529  | 4905.628  | 8763.354  | AK056111  | 650.046   | 457.806   | U61091    | 351.113   |
| 9896.28   | AA702698  | 841.703   | 1048.023  | Y13807    | 781.072   | 594.994   | AK021691  | 6150.783  |
| 6386.801  | AI681514  | 823.372   | 489.162   | AK023038  | 553.962   | 272.054   | AK000141  | 1605.32   |
| 7229.06   | NM_001300 | 1497.602  | 3937.893  | AK026206  | 879.958   | 952.568   | AL137758  | 1510.113  |
| 3119.287  | BG748827  | 7660.208  | 5033.686  | AF086074  | 1126.383  | 920.919   | AK025786  | 816.7     |
| 249.237   | AA952897  | 1490.372  | 1247.788  | AK023964  | 1028.283  | 1223.337  | AK024188  | 915.088   |
| 387.153   | BG760342  | 2327.146  | 3452.403  | AF086084  | 510.01    | 388.306   | AK026820  | 582.147   |
| 993.762   | AA703141  | 769.322   | 627.855   | AL050184  | 414.786   | 293.254   | AK001716  | 689.562   |
| 2077.999  | AI122630  | 7581.041  | 4625.698  | AK027112  | 2993.327  | 5039.78   | AF113683  | 278.78    |
| 654.251   | NM_003081 | 17161.311 | 21086.967 | AL049314  | 1310.636  | 3820.177  | AK026821  | 655.322   |
| 641.423   | NM_016495 | 1391.219  | 1629.718  | AF093016  | 4417.245  | 6868.719  | AK026280  | 2441.376  |
| 1236.477  | D50402    | 14604.053 | 15031.78  | AF161345  | 1017.352  | 2240.309  | AF113017  | 2785.993  |
| 1490.407  | M73547    | 6511.922  | 5531.009  | -         | 640.258   | 894.795   | AL080232  | 3930.072  |
| 756.188   | NM_003687 | 942.066   | 1250.098  | AF090925  | 423.954   | 870.618   | AK001120  | 3228.304  |
| 7609.991  | NM_004134 | 3676.404  | 2757.931  | AF100637  | 1123.745  | 2691.594  | AK023224  | 941.625   |
| 688.288   | NM_005955 | 1811.502  | 2347.699  | NM_014163 | 6133.171  | 8072.013  | AK023731  | 2124.116  |
| 10322.396 | NM_004048 | 508.104   | 1334.463  | NM_014137 | 450.782   | 669.34    | AK022442  | 483.809   |
| 1153.001  | NM_012428 | 3188.108  | 4196.834  | AK021974  | 769.656   | 904.525   | AK023336  | 511.471   |

|           |           |           |           |           |           |           |           |           |
|-----------|-----------|-----------|-----------|-----------|-----------|-----------|-----------|-----------|
| 542.744   | NM_013269 | 407.759   | 891.91    | AK022068  | 685.591   | 612.547   | AK023771  | 436.737   |
| 368.558   | NM_001728 | 16883.4   | 12753.838 | AK022229  | 719.296   | 759.089   | AK026873  | 1438.715  |
| 541.17    | NM_005565 | 9899.261  | 5738.089  | AK022362  | 1065.998  | 1119.445  | AK026394  | 1537.232  |
| 435.888   | NM_003824 | 4339.649  | 5929.014  | AK022004  | 1720.108  | 1365.524  | NM_005448 | 1101.578  |
| 724.928   | AF229166  | 893.62    | 1283.766  | AK022136  | 167.1     | 457.149   | AK025943  | 9867.36   |
| 3205.29   | NM_005137 | 2201.288  | 1956.064  | AK022265  | 156.493   | 417.778   | BG106479  | 571.926   |
| 3636.199  | NM_006764 | 1407.007  | 1703.119  | AK022390  | 736.807   | 448.664   | AF130069  | 7218.488  |
| 4141.645  | NM_001386 | 868.82    | 1117.602  | AK027134  | 495.82    | 254.825   | AL109669  | 545.505   |
| 712.994   | NM_001163 | 999.89    | 1046.5    | AK024168  | 610.592   | 317.194   | AB037766  | 1058.124  |
| 452.486   | NM_005878 | 967.872   | 1084.606  | AF264622  | 587.231   | 351.925   | AL133091  | 623.081   |
| 1801.013  | NM_020346 | 569.672   | 834.853   | AK021793  | 1173.222  | 1009.112  | BF842915  | 590.681   |
| 497.984   | NM_014848 | 1116.173  | 1981.154  | AK022255  | 931.868   | 1043.585  | X82545    | 3494.381  |
| 446.65    | BF217766  | 642.81    | 485.38    | AF161360  | 761.583   | 1683.967  | AK024632  | 2798.759  |
| 270.527   | NM_000184 | 2088.903  | 2801.321  | AK021720  | 1403.467  | 2264.131  | NM_018474 | 3990.671  |
| 3893.541  | NM_016180 | 556.665   | 520.385   | NM_016497 | 12710.097 | 25641.305 | AK024937  | 1231.12   |
| 2708.402  | NM_000112 | 892.49    | 669.485   | AB037792  | 959.89    | 744.851   | D17178    | 708.497   |
| 1027.807  | NM_005827 | 5557.648  | 4117.216  | AK022480  | 455.096   | 433.21    | AK022094  | 1407.388  |
| 1460.507  | NM_003053 | 2805.685  | 5844.155  | AK024158  | 609.5     | 673.008   | AK026695  | 948.085   |
| 28906.789 | NM_003044 | 1102.844  | 1417.371  | AL080082  | 1373.583  | 1023.301  | AK022220  | 237.606   |
| 4763.261  | NM_006672 | 4319.465  | 4392.022  | AK021623  | 1142.943  | 991.608   | AL137539  | 383.303   |
| 542.759   | M31659    | 1271.768  | 4327.284  | U79242    | 214.619   | 694.057   | U84520    | 1063.938  |
| 468.775   | NM_003056 | 6826.665  | 2846.269  | AF056452  | 543.142   | 488.134   | AL133616  | 4401.674  |
| 8887.715  | NM_016226 | 7995.499  | 11891.793 | AF119901  | 2298.758  | 3091.3    | AK026382  | 1459.282  |
| 907.77    | AK024311  | 765.368   | 1013.968  | AK001936  | 1277.825  | 2540.536  | AK091169  | 2249.998  |
| 9704.76   | AF052155  | 5911.873  | 4190.303  | AK001395  | 3321.63   | 4355.756  | NM_014745 | 23103.791 |
| 550.094   | NM_005085 | 1280.401  | 782.691   | S57803    | 2720.348  | 4127.6    | AF086026  | 4928.003  |
| 464.587   | AF060902  | 1209.798  | 1137.46   | AF131822  | 677.585   | 595.636   | AL133011  | 457.501   |
| 812.295   | AF121858  | 3774.978  | 2759.435  | AK023131  | 1971.663  | 2014.799  | NM_016300 | 596.593   |
| 783.954   | NM_013437 | 997.388   | 581.238   | AF090100  | 279.512   | 624.379   | NM_015607 | 12885.137 |
| 9249.717  | AK025966  | 2091.799  | 1831.733  | U61096    | 224.158   | 187.903   | AK026955  | 1414.515  |
| 4571.908  | NM_014440 | 594.31    | 994.553   | AF085865  | 2294.108  | 1914.859  | AL110202  | 11070.779 |
| 659.672   | NM_018725 | 879.103   | 1080.865  | X78261    | 340.805   | 570.083   | AF075048  | 450.75    |
| 348.722   | AK024069  | 7695.125  | 6638.78   | AK025521  | 1125.628  | 764.382   | Z83940    | 484.759   |
| 387.81    | NM_004582 | 10168.031 | 7230.168  | NM_001053 | 48885.508 | 26406.563 | NM_005800 | 983.699   |
| 2692.128  | NM_015640 | 15416.434 | 10672.114 | Z70694    | 3221.326  | 2119.922  | AF019617  | 4007.811  |
| 557.071   | AF233450  | 1108.471  | 898.437   | L77602    | 899.046   | 542.829   | AL137305  | 4082.419  |
| 10313.419 | NM_016233 | 1947.504  | 1508.544  | NM_015421 | 3463.115  | 1974.937  | NM_005290 | 492.838   |
| 8052.875  | NM_000821 | 11038.949 | 12234.835 | AF086081  | 2133.141  | 1257.705  | NM_018013 | 1962.785  |
| 1977.856  | NM_020121 | 836.563   | 734.291   | NM_018634 | 380.6     | 357.353   | AK022517  | 1444.1    |
| 2722.654  | NM_003145 | 40196.898 | 35540.508 | NM_018111 | 424.627   | 419.618   | NM_000329 | 12708.627 |
| 3532.887  | NM_001632 | 1747.941  | 2413.567  | L23867    | 602.311   | 624.511   | NM_001182 | 3012.895  |
| 12161.399 | NM_012264 | 1270.309  | 1046.229  | AL138690  | 633.314   | 1114.312  | AF143328  | 232.953   |
| 473.471   | AF311312  | 2343.277  | 2675.779  | AK000394  | 434.934   | 971.891   | NM_000333 | 1876.821  |
| 2300.951  | NM_017765 | 9968.853  | 10171.312 | NM_013941 | 792.941   | 1319.122  | NM_000172 | 1974.852  |
| 4785.884  | NM_000428 | 790.984   | 715.417   | AK001107  | 855.185   | 2123.468  | NM_002297 | 1828.495  |
| 5714.196  | AB040967  | 9016.778  | 4412.495  | AF147393  | 513.842   | 672.8     | AB040968  | 5920.982  |
| 764.104   | NM_014721 | 1669.021  | 1598.297  | AK022368  | 392.5     | 839.518   | X85323    | 773.613   |
| 813.879   | AK026352  | 977.695   | 1265.171  | AL080112  | 1589.207  | 1987.258  | U17615    | 1630.555  |
| 8312.058  | AL137705  | 3879.374  | 4886.916  | AK022299  | 544.12    | 371.021   | NM_005303 | 2239.909  |
| 1210.24   | U41898    | 635.513   | 482.668   | AL137325  | 219.829   | 516.679   | NM_016126 | 7213.905  |
| 1166.054  | NM_007262 | 18274.477 | 19576.359 | AF147361  | 1135.751  | 1340.512  | U84119    | 905.302   |
| 1025.281  | NM_014783 | 6688.734  | 5088.79   | AL133086  | 798.659   | 779.946   | NM_003608 | 868.998   |
| 483.059   | NM_014053 | 2953.088  | 2709.882  | NM_012151 | 29086.219 | 22651.805 | AF302079  | 8217.731  |

|           |           |           |           |           |          |           |           |           |
|-----------|-----------|-----------|-----------|-----------|----------|-----------|-----------|-----------|
| 21675.58  | NM_002571 | 827.456   | 772.555   | AF087994  | 785.999  | 1104.393  | NM_002550 | 1238.659  |
| 2673.553  | NM_004939 | 3697.048  | 2169.689  | AJ227912  | 382.326  | 421.792   | NM_000692 | 1181.739  |
| 3022.651  | NM_001425 | 19937.922 | 24282.426 | NM_018195 | 1407.213 | 1384.479  | AF086062  | 1286.618  |
| 177.565   | NM_015710 | 393.773   | 359.634   | AK025532  | 8219.666 | 2893.438  | L47668    | 9454.834  |
| 488.256   | NM_014158 | 5331.384  | 7408.677  | AF086383  | 224.147  | 99.773    | NM_017920 | 2453.463  |
| 7113.653  | AK021591  | 1330.82   | 864.445   | NM_003522 | 466.839  | 914.062   | AK025345  | 615.369   |
| 634.398   | NM_014675 | 1010.817  | 1185.125  | BF217847  | 932.366  | 836.537   | D25274    | 4239.928  |
| 3885.011  | NM_006589 | 6333.358  | 3485.134  | NM_005320 | 2743.975 | 9889.78   | CY3Cy5    | 1128.843  |
| 689.938   | AB007875  | 1374.737  | 1446.063  | CY3Cy5    | 771.149  | 150.273   | AA488757  | 1792.587  |
| 420.251   | NM_005040 | 5032.418  | 4969.809  | BI830936  | 287.069  | 285.38    | AI394286  | 1499.914  |
| 863.48    | NM_016391 | 12777.679 | 12865.164 | U79292    | 2207.025 | 2046.629  | M25322    | 1022.359  |
| 7786.45   | AF075033  | 3479      | 2750.112  | BI830753  | 257.702  | 140.905   | AA436187  | 96.207    |
| 1470.52   | D50911    | 12089.52  | 9956.86   | X68314    | 289.061  | 185.855   | ID 214180 | 409.694   |
| 272.812   | AB011104  | 1873.805  | 1654.664  | X71973    | 12417.85 | 9674.427  | SR2       | 41580.645 |
| 3245.234  | NM_003248 | 1076.543  | 335.005   | T49651    | 2100.159 | 4932.25   | SR4       | 7172.726  |
| 1094.553  | NM_001078 | 1271.312  | 1607.299  | N51014    | 851.866  | 626.364   | SR6       | 1140.093  |
| 168.56    | NM_000552 | 6307.954  | 10915.889 | BE392471  | 4328.715 | 3126.31   | SR8       | 3960.274  |
| 2115.948  | NM_003809 | 553.644   | 748.075   | AI802950  | 443.532  | 437.436   | SR10      | 15515.501 |
| 888.891   | AK000860  | 5552.545  | 9767.846  | AI741278  | 173.621  | 112.253   | CY3Cy5    | 1451.962  |
| 2098      | NM_014961 | 1052.035  | 1024.277  | AL043686  | 2209.056 | 1671.425  | NM_005811 | 1386.714  |
| 4609.148  | NM_020145 | 1295.845  | 1539.528  | AA490172  | 231.324  | 295.124   | NM_005764 | 463.877   |
| 9365.834  | AK021529  | 1680.522  | 2276.764  | AA775212  | 1302.011 | 988.793   | NM_016362 | 739.894   |
| 1727.332  | AB037845  | 3548.601  | 2922.725  | NM_000945 | 1053.844 | 1225.426  | NM_004214 | 2963.594  |
| 660.343   | NM_005980 | 3261.454  | 528.669   | SR5       | 2581.681 | 3343.633  | NM_004329 | 3397.052  |
| 1070.672  | NM_016190 | 41995.52  | 36762.867 | SR7       | 3195.154 | 38876.707 | NM_002836 | 1185.782  |
| 1207.435  | AL137579  | 8623.122  | 6331.707  | SR9       | 8678.214 | 2125.287  | NM_020167 | 737.658   |
| 326.976   | NM_012383 | 5625.927  | 11719.186 | CY3Cy5    | 1351.061 | 170.282   | AL049963  | 5210.422  |
| 505.515   | AJ271684  | 1313.49   | 1262.047  | NM_003371 | 2853.346 | 1246.952  | NM_016058 | 8478.045  |
| 288.23    | AF255342  | 3833.697  | 3339.488  | AK023114  | 1787.166 | 2530.713  | NM_014005 | 476.644   |
| 551.216   | NM_003300 | 4355.454  | 3556.175  | NM_003678 | 1394.53  | 1070.62   | NM_003976 | 1548.149  |
| 270.624   | NM_004655 | 3035.669  | 5577.233  | NM_012301 | 473.978  | 222.461   | NM_006895 | 467.612   |
| 2770.759  | NM_003942 | 3259.167  | 3185.963  | NM_014419 | 900.568  | 707.41    | NM_006459 | 3966.142  |
| 2810.184  | NM_006471 | 27686.58  | 33684.02  | NM_014938 | 1068.535 | 754.994   | NM_003827 | 3053.962  |
| 730.48    | NM_004165 | 4484.398  | 3477.656  | AK026066  | 549.098  | 506.535   | NM_004583 | 363.103   |
| 563.516   | NM_000368 | 1126.063  | 998.886   | NM_005244 | 1293.424 | 1296.303  | NM_001103 | 376.789   |
| 11808.178 | NM_016586 | 1213.646  | 1389.391  | AF054589  | 164.102  | 266.509   | AF228710  | 7719.792  |
| 519.544   | NM_002866 | 4547.146  | 4969.762  | NM_005270 | 257.333  | 204.788   | NM_018399 | 573.315   |
| 24211.307 | NM_003860 | 1058      | 918.568   | NM_014815 | 455.446  | 522.02    | AY007131  | 10050.763 |
| 3420.179  | NM_005414 | 815.293   | 885.048   | NM_007221 | 2031.162 | 2362.478  | U61735    | 1686.084  |
| 1129.127  | NM_004468 | 5373.191  | 6839.498  | X54163    | 5553.851 | 8256.957  | NM_001144 | 1066.591  |
| 493.845   | NM_016031 | 18447.131 | 29722.143 | NM_000388 | 343.527  | 447.853   | AK023766  | 2155.933  |
| 678.843   | NM_004804 | 1612.89   | 1639.509  | NM_002469 | 270.446  | 320.635   | NM_001897 | 940.91    |
| 230.869   | M92439    | 11259.885 | 7260.624  | NM_014668 | 378.703  | 284.904   | NM_003853 | 894.3     |
| 3837.026  | AK027169  | 295.501   | 1186.505  | NM_004722 | 776.146  | 786.817   | AB033109  | 1157.326  |
| 743.289   | NM_001262 | 8008.769  | 10747.595 | NM_014425 | 241.084  | 194.267   | NM_014589 | 860.201   |
| 422.531   | BE873030  | 2388.372  | 2203.058  | NM_012133 | 942.622  | 734.275   | NM_000759 | 633.313   |
| 923.556   | NM_002440 | 723.755   | 898.774   | NM_017954 | 163.556  | 204.291   | AK023334  | 600.638   |
| 981.857   | NM_003625 | 943.517   | 857.844   | NM_006612 | 578.906  | 583.55    | D79991    | 799.054   |
| 479.406   | NM_019114 | 2782.771  | 3317.72   | NM_016451 | 507.565  | 417.457   | NM_014713 | 2953.1    |
| 5678.906  | M33552    | 5184.817  | 5916.772  | NM_007351 | 3508.315 | 2487.634  | NM_001812 | 776.003   |
| 4094.177  | AJ252060  | 2035.766  | 1443.688  | AK026266  | 1572.412 | 1428.92   | NM_014785 | 522.321   |
| 1456.775  | NM_006403 | 4823.75   | 5802.304  | NM_007124 | 786.947  | 710.051   | NM_006033 | 2237.168  |
| 3877.038  | NM_018977 | 720.597   | 894.745   | NM_003176 | 522.974  | 426.714   | NM_004837 | 3403.878  |

|           |           |           |           |           |           |          |             |           |
|-----------|-----------|-----------|-----------|-----------|-----------|----------|-------------|-----------|
| 51613.41  | AJ001402  | 1540.546  | 1057.111  | NM_000723 | 360.143   | 226.048  | NM_000370   | 1185.54   |
| 2902.153  | NM_004540 | 1533.157  | 1063.796  | AL096751  | 1181.601  | 1062.026 | BE865893    | 1452.008  |
| 33710.387 | NM_000235 | 3463.35   | 8713.866  | NM_000364 | 216.197   | 212.421  | NM_003123   | 34506.039 |
| 1395.692  | NM_015879 | 460.452   | 478.856   | AF026920  | 1019.324  | 1337.581 | AY005822    | 2053.639  |
| 323.763   | AF068236  | 15297.791 | 15860.169 | NM_004931 | 1790.019  | 1756.319 | NM_018129   | 10810.995 |
| 972.314   | L25628    | 2769.214  | 4783.078  | NM_000607 | 6139.017  | 6791.253 | AF289022    | 1172.612  |
| 665.691   | M37033    | 1869.887  | 5460.326  | NM_002575 | 2395.178  | 1487.688 | NM_016025   | 1186.893  |
| 1530.659  | NM_007171 | 2634.895  | 2497.789  | NM_004244 | 1848.297  | 2114.45  | NM_013319   | 1009.004  |
| 414.153   | NM_004278 | 1029.491  | 1210.018  | AK001500  | 400.786   | 259.652  | NM_000746   | 611.564   |
| 890.515   | NM_005632 | 1394.629  | 1525.128  | NM_006774 | 215.48    | 190.023  | NM_000722   | 909.509   |
| 1016.851  | AK021499  | 969.095   | 1242      | NM_020129 | 433.592   | 339.69   | NM_000453   | 966.141   |
| 1150.482  | NM_006292 | 3803.649  | 4114.707  | Y16521    | 966.125   | 727.429  | NM_002868   | 1532.345  |
| 1166.277  | AB007948  | 1567.479  | 1708.684  | AL050371  | 1723.247  | 1871.651 | AK024100    | 1631.848  |
| 327.376   | AB033066  | 1492.942  | 743.642   | NM_002651 | 2479.568  | 2276.379 | NM_005135   | 700.933   |
| 4849.798  | AF126028  | 2340.296  | 2728.886  | NM_002413 | 3199.925  | 2733.168 | NM_000317   | 3148.111  |
| 3181.342  | NM_007019 | 3332.36   | 4749.604  | NM_001757 | 1481.707  | 2045.861 | NM_018376   | 2839.022  |
| 594.438   | NM_007075 | 858.193   | 996.332   | NM_001647 | 1189.812  | 574.442  | NM_017438   | 1074.13   |
| 1299.758  | NM_017721 | 2429.539  | 2598.368  | NM_018158 | 735.597   | 726.388  | U59209      | 1074.17   |
| 1193.022  | NM_019088 | 5953.495  | 5209.167  | NM_016301 | 2417.453  | 2945.009 | NM_020195   | 1348.119  |
| 1876.301  | AB002373  | 1644.154  | 1182.183  | AK021975  | 279.933   | 149.387  | AK023824    | 1792.558  |
| 4373.383  | NM_016350 | 14431.693 | 10652.47  | AB032952  | 7710.363  | 8998.467 | AL133069    | 1838.303  |
| 914.275   | AK024167  | 3180.851  | 1498.272  | NM_002522 | 8728.19   | 8032.352 | AL117574    | 1235.184  |
| 765.68    | NM_005026 | 3614.419  | 3101.945  | NM_002978 | 601.42    | 539.235  | AK026055    | 2084.199  |
| 1518.39   | AF213356  | 3326.786  | 4880.393  | AB040879  | 985.873   | 1143.074 | AK024126    | 522.653   |
| 1642.32   | BC035716  | 1784.848  | 2715.356  | AL049935  | 1593.931  | 912.03   | NM_001516   | 1797.332  |
| 672.443   | NM_018014 | 865.471   | 2393.913  | AB033043  | 2088.854  | 2110.598 | NM_002744   | 1286.247  |
| 222.022   | NM_002359 | 11350.803 | 10203.351 | NM_014999 | 979.24    | 751.838  | NM_015917   | 3597.331  |
| 472.332   | AF230809  | 1367.233  | 976.96    | AK025220  | 589.316   | 311.524  | NM_000061   | 1930.782  |
| 10483.897 | NM_017894 | 10761.747 | 12183.722 | NM_016308 | 7370.718  | 5357.442 | AB046859    | 3291.982  |
| 3999.453  | NM_006509 | 1679.132  | 2397.845  | D42046    | 1629.893  | 2051.433 | NM_005109   | 2787.481  |
| 865.724   | AK025447  | 1291.355  | 753.015   | NM_001033 | 1590.905  | 1506.88  | AK023573    | 1230.933  |
| 617.461   | NM_002624 | 20947.07  | 15189.654 | NM_004526 | 5109.363  | 5765.277 | NM_004828   | 1301.524  |
| 2134.691  | NM_018119 | 2293.769  | 1548.139  | NM_002526 | 3016.192  | 1833.645 | AB011540    | 6304.229  |
| 1074.795  | NM_014576 | 561.726   | 645.222   | NM_018518 | 802.771   | 1043.934 | NM_004736   | 1053.363  |
| 940.941   | AL162035  | 2473.218  | 2174.622  | AK023149  | 648.096   | 656.172  | NM_006895   | 514.982   |
| 10288.753 | NM_006692 | 1110.309  | 1376.251  | AK023168  | 1232.703  | 1272.253 | NM_006459   | 3820.604  |
| 1199.042  | NM_003084 | 2173.316  | 1340.618  | NM_006646 | 345.747   | 294.863  | D50373      | 358.939   |
| 751.955   | NM_002582 | 3553.238  | 4414.461  | NM_004742 | 389.744   | 534.27   | AA488757    | 2476.366  |
| 1426.901  | NM_001011 | 56178.324 | 60706.492 | NM_014753 | 1138.397  | 752.237  | AA205399    | 665.815   |
| 293.632   | AB061315  | 415.172   | 434.019   | NM_006585 | 17262.773 | 12058.76 | AI394286    | 1130.273  |
| 1057.318  | D17289    | 9389.353  | 6315.922  | NM_014331 | 1336.21   | 1533.663 | M25322      | 1052.235  |
| 761.923   | NM_002949 | 17120.979 | 9670.583  | NM_006795 | 4080.708  | 4242.896 | AA436187    | 202.426   |
| 876.772   | NM_014230 | 7862.501  | 4486.445  | AF070568  | 741.373   | 1487.784 | H-L 27586 I | 717.641   |
| 889.885   | NM_017748 | 3453.994  | 3549.948  | NM_000240 | 1320.743  | 1688.997 | ID 1867426  | 1690.964  |
| 263.162   | AK025374  | 1249.585  | 1423.234  | AK055733  | 6821.899  | 9060.87  | W99328      | 450.618   |
| 3223.876  | NM_014901 | 5983.549  | 5722.156  | AF298880  | 4982.689  | 7254.022 | BE735403    | 566.612   |
| 882.297   | AK000005  | 7215.267  | 7900.582  | AK025395  | 315.409   | 157.319  | NM_022552   | 1576.267  |
| 660.75    | AF086790  | 1047.234  | 897.143   | NM_000388 | 391.392   | 220.724  | AF116659    | 1989.802  |
| 3074.51   | U28480    | 348.915   | 323.421   | X58377    | 207.003   | 112.19   | D79991      | 805.377   |
| 567.207   | NM_000108 | 10098.392 | 11804.187 | NM_002469 | 217.451   | 177.278  | NM_000054   | 1543.294  |
| 506.245   | NM_018128 | 1826.904  | 1132.408  | U79292    | 1966.215  | 1735.02  | NM_014713   | 3620.572  |
| 613.969   | NM_016931 | 7045.949  | 6842.903  | X68314    | 253.414   | 113.349  | NM_001812   | 898.101   |
| 2870.547  | NM_004373 | 31276.57  | 22827.719 | X71973    | 11412.45  | 9645.264 | NM_014785   | 613.484   |

|           |           |           |           |           |           |           |           |           |
|-----------|-----------|-----------|-----------|-----------|-----------|-----------|-----------|-----------|
| 304.768   | NM_005566 | 53563.668 | 37990.523 | T49651    | 1977.912  | 3841.805  | AK025175  | 369.529   |
| 312.152   | NM_000162 | 1055.286  | 1172.919  | N51014    | 761.86    | 697.239   | NM_005811 | 1718.001  |
| 189.144   | NM_016287 | 4865.359  | 5561.69   | BE392471  | 4250.127  | 3541.375  | NM_005764 | 545.402   |
| 1941.711  | AK021661  | 400.368   | 951.885   | AI802950  | 456.427   | 453.484   | NM_016362 | 853.892   |
| 1136.097  | NM_003864 | 3322.692  | 3819.863  | AA682423  | 174.34    | 168.952   | NM_004214 | 2538.175  |
| 325.791   | NM_006824 | 13531.287 | 10143.701 | AL043686  | 2282.976  | 2414.804  | NM_004329 | 3561.005  |
| 582.094   | NM_002107 | 964.959   | 481.016   | AA490172  | 312.909   | 404.719   | NM_002836 | 1186.579  |
| 2514.594  | NM_004454 | 2102.405  | 1636.91   | AA775212  | 1302.229  | 1216.768  | NM_020167 | 709.789   |
| 2427.157  | NM_000966 | 1192.645  | 1935      | NM_000945 | 1008.835  | 1396.792  | AL049963  | 5146.936  |
| 643.092   | NM_012482 | 3125.99   | 5823.061  | NM_002574 | 13473.359 | 27713.777 | NM_016058 | 8421.881  |
| 3194.341  | AF217227  | 2513.624  | 1513.44   | AB011174  | 685.219   | 753.497   | AK022603  | 680.426   |
| 1282.373  | AK024141  | 2632.549  | 2251.393  | NM_000607 | 6640.424  | 4180.104  | NM_004896 | 2772.602  |
| 490.162   | NM_002813 | 7204.419  | 10837.124 | NM_002575 | 2058.039  | 785.003   | NM_003976 | 1324.24   |
| 845.121   | AK022745  | 3859.164  | 2048.646  | NM_004244 | 1902.057  | 1359.719  | NM_012268 | 999.988   |
| 684.614   | AL049450  | 3984.922  | 3491.225  | NM_003371 | 2776.691  | 1653.857  | NM_012203 | 351.363   |
| 238.806   | AK023481  | 812.455   | 635.827   | AK023114  | 1723.838  | 2653.958  | J03077    | 4882.744  |
| 3093.173  | NM_005086 | 22547.074 | 29798.404 | NM_003678 | 1567.029  | 1516.295  | J03048    | 4952.663  |
| 317.299   | NM_007238 | 1827.918  | 1704.827  | NM_005631 | 142.873   | 127.484   | NM_002868 | 1788.082  |
| 423.982   | NM_017606 | 4819.127  | 1569.016  | NM_014419 | 943.317   | 922.958   | AK024100  | 1828.073  |
| 444.239   | AK024644  | 6355.928  | 4403.726  | NM_014938 | 958.396   | 898.026   | NM_005135 | 671.952   |
| 430.463   | AB019573  | 920.354   | 869.364   | AF049460  | 183.324   | 106.261   | NM_003827 | 3049.606  |
| 398.255   | U68494    | 1437.162  | 1161.007  | AK026066  | 585.01    | 780.468   | NM_004583 | 587.256   |
| 2176.552  | AF064254  | 903.682   | 1446.993  | NM_005244 | 1038.615  | 1357.786  | NM_001103 | 417.141   |
| 436.673   | AL137360  | 5932.816  | 9220.031  | AF054589  | 201.667   | 212.071   | AF228710  | 8760.389  |
| 1593.668  | AF143331  | 216.231   | 1018.203  | NM_005270 | 336.975   | 370.654   | AY007131  | 11574.843 |
| 1489.851  | AK000819  | 358.121   | 416.233   | NM_014815 | 544.726   | 825.431   | U61735    | 1892.929  |
| 1422.297  | AF201941  | 2152.271  | 967.226   | NM_005443 | 228.904   | 335.363   | NM_001144 | 1049.728  |
| 14765.223 | AF026941  | 1683.416  | 2388.833  | NM_007221 | 1926.044  | 3242.676  | AK023766  | 1782.878  |
| 4791.815  | NM_007070 | 3998.195  | 5399.354  | X54163    | 5284.029  | 9450.036  | NM_001897 | 942.435   |
| 2095.68   | AL133019  | 3801.448  | 3807.852  | NM_018607 | 123.285   | 108.585   | NM_003853 | 758.719   |
| 5540.017  | AK026192  | 518.612   | 446.28    | NM_002978 | 273.395   | 211.092   | AB033109  | 931.053   |
| 4870.103  | NM_014895 | 1148.617  | 1607.276  | NM_014668 | 336.327   | 321.294   | NM_002053 | 7292.755  |
| 653.051   | AK024883  | 3788.278  | 4855.833  | NM_004722 | 837.361   | 835.821   | NM_006889 | 812.122   |
| 34646.012 | AF217989  | 2222.96   | 2172.702  | NM_014425 | 298.695   | 117.463   | NM_002438 | 1002.182  |
| 8055.603  | NM_017654 | 1034.814  | 1798.792  | NM_012133 | 833.36    | 841.17    | NM_014589 | 791.76    |
| 517.559   | AL109696  | 1199.282  | 1202.318  | NM_006612 | 494.88    | 339.303   | NM_000759 | 778.399   |
| 142.947   | AK022190  | 782.808   | 464.511   | NM_007351 | 3176.703  | 2783.067  | AK023334  | 458.758   |
| 477.756   | AJ011593  | 1471.398  | 1231.245  | AK026266  | 1471.047  | 1619.425  | NM_002563 | 2927.59   |
| 484.315   | X89743    | 850.85    | 868.733   | NM_007124 | 730.781   | 971.646   | NM_002437 | 717.225   |
| 472.333   | AJ002784  | 618.759   | 590.439   | NM_003176 | 516.086   | 710.496   | AK023573  | 1483.494  |
| 295.179   | U17621    | 843.238   | 1217.323  | NM_000723 | 330.823   | 306.8     | NM_002730 | 1218.392  |
| 279.816   | AL049239  | 2120.517  | 1812.359  | AL096751  | 1281.455  | 1689.595  | NM_004828 | 1468.681  |
| 733.671   | NM_013288 | 1394.625  | 1457.179  | AF026920  | 990.691   | 1494.616  | AB011540  | 8040.221  |
| 4669.565  | M60721    | 11463.832 | 13231.31  | NM_004931 | 1841.057  | 2503.796  | NM_000040 | 2300.073  |
| 211.371   | L39061    | 3179.375  | 3028.853  | NM_006795 | 3702.417  | 2368.828  | NM_004631 | 1928.867  |
| 695.835   | AF071508  | 1572.878  | 1748.486  | AF070568  | 643.538   | 523.472   | NM_006033 | 2690.09   |
| 965.597   | L07265    | 7313.609  | 8569.61   | NM_000240 | 1173.343  | 785.492   | NM_004837 | 4058.242  |
| 1519.083  | L19369    | 448.901   | 1001.97   | AK055733  | 6353.647  | 5848.148  | NM_000370 | 1383.873  |
| 2996.985  | D16472    | 2736.928  | 1926.558  | AF298880  | 5744.956  | 5038.598  | BE865893  | 1963.676  |
| 1860.514  | AF085823  | 560.961   | 606.814   | AK001500  | 287.687   | 305.531   | NM_003123 | 39699.691 |
| 5335.38   | AL157459  | 1961.972  | 1280.927  | NM_006774 | 234.778   | 258.366   | AY005822  | 1918.656  |
| 3587.98   | AL353954  | 799.905   | 509.447   | NM_020129 | 364.859   | 331.856   | NM_018129 | 12290.655 |
| 1112.548  | NM_017630 | 2125.688  | 1108.934  | Y16521    | 919.911   | 800.345   | AF289022  | 1200.257  |

|          |           |           |           |           |           |           |             |          |
|----------|-----------|-----------|-----------|-----------|-----------|-----------|-------------|----------|
| 321.758  | AK000778  | 806.771   | 432.993   | AL050371  | 1598.221  | 1681.193  | M17252      | 191.14   |
| 495.98   | AK000932  | 461.625   | 578.7     | NM_002651 | 2123.025  | 2575.647  | NM_016025   | 1194.039 |
| 792.346  | AL133573  | 4513.528  | 5976.065  | NM_002413 | 3615.346  | 3731.46   | NM_013319   | 966.86   |
| 505.324  | AK000958  | 636.539   | 547.903   | NM_001757 | 1377.409  | 2982.453  | NM_000746   | 832.432  |
| 865.445  | AK024523  | 529.132   | 504.08    | NM_001647 | 1496.351  | 1125.063  | NM_000722   | 817.565  |
| 195.306  | AK024600  | 950.928   | 655.18    | NM_018158 | 654.902   | 1005.541  | NM_006030   | 751.268  |
| 602.216  | AK024543  | 1264.848  | 1440.759  | NM_016301 | 2462.809  | 5061.947  | NM_020410   | 2683.359 |
| 1087.903 | AK024624  | 7268.377  | 8382.521  | AK021975  | 280.303   | 306.557   | AF000143    | 5702.972 |
| 800.631  | AK025090  | 987.609   | 1101.36   | AB032952  | 9121.387  | 13327.572 | NM_000814   | 565.531  |
| 281.255  | NM_014152 | 722.467   | 640.593   | NM_002522 | 9254.127  | 10853.03  | NM_000453   | 1453.591 |
| 1296.743 | AF086473  | 371.241   | 381.553   | NM_000945 | 940.524   | 835.188   | NM_022552   | 2156.482 |
| 5221.505 | D87682    | 1510.339  | 837.142   | NM_002574 | 12109.295 | 13806.35  | NM_014389   | 2810.749 |
| 2445.453 | AF321617  | 2825.042  | 2397.67   | AB011174  | 705.578   | 755.115   | AF116659    | 1778.737 |
| 191.553  | AF223389  | 999.797   | 921.967   | AB040879  | 824.641   | 913.107   | NM_000317   | 4411.564 |
| 1676.505 | NM_006950 | 351.962   | 884.864   | AL049935  | 1590.393  | 923.687   | NM_018376   | 3216.324 |
| 578.219  | NM_000682 | 822.26    | 862.754   | AB033043  | 2509.333  | 2056.45   | NM_017438   | 1182.875 |
| 3287.548 | AF086208  | 1323.111  | 1175.015  | NM_014999 | 968.778   | 1000.145  | U59209      | 796.523  |
| 2725.027 | AK023335  | 2354.072  | 1811.218  | AK025220  | 693.76    | 581.197   | NM_020195   | 1348.803 |
| 689.021  | AK023187  | 1245.191  | 1514.289  | NM_016308 | 6843.6    | 6188.928  | AK023824    | 1792.569 |
| 1703.242 | AK022231  | 413.776   | 568.262   | D42046    | 1574.329  | 2217.366  | AL133069    | 1861.602 |
| 1082.001 | NM_019033 | 501.773   | 692.314   | NM_001033 | 1197.553  | 1356.356  | AL117574    | 317.792  |
| 1487.494 | AL133101  | 1362.722  | 1248.963  | NM_004526 | 5577.692  | 7743.402  | AK026055    | 2093.541 |
| 1560.946 | AK024602  | 8667.626  | 13208.38  | NM_002526 | 3664.426  | 3004.882  | AK024126    | 479.644  |
| 286.493  | NM_018507 | 504.963   | 865.02    | NM_020135 | 1618.369  | 2201.735  | NM_001516   | 1873.289 |
| 786.872  | NM_000485 | 12034.641 | 13026.343 | NM_018518 | 1406.726  | 1825.885  | NM_002744   | 1527.434 |
| 154.198  | NM_018542 | 614.143   | 417.732   | AK023149  | 540.757   | 883.307   | NM_015917   | 3362.768 |
| 385.185  | AK025503  | 1408.587  | 1757.504  | AK023168  | 1073.311  | 1626.931  | NM_020397   | 485.767  |
| 1368.872 | AF130073  | 1647.859  | 894.204   | NM_006646 | 474.643   | 785.959   | NM_000061   | 1882.566 |
| 296.839  | AK024225  | 13287.845 | 23352.387 | NM_004742 | 627.876   | 720.076   | AB046859    | 4122.378 |
| 410.168  | AF086334  | 1103.245  | 2144.727  | NM_014753 | 1154.136  | 1124.268  | NM_005109   | 3245.651 |
| 786.227  | AL137602  | 445.999   | 856.879   | NM_006585 | 16646.664 | 15693.021 | NM_003976   | 2025.178 |
| 1295.399 | AF075035  | 3856.409  | 7110.791  | NM_014331 | 1188.22   | 2062.894  | NM_017688   | 341.715  |
| 1450.577 | AL110180  | 2700.479  | 2270.292  | AF054589  | 233.209   | 189.998   | AK025612    | 1667.118 |
| 983.393  | BC024924  | 6950.084  | 4529.745  | NM_005270 | 271.065   | 246.772   | NM_012268   | 971.566  |
| 1015.006 | NM_017906 | 5088.847  | 5887.68   | NM_014815 | 467.065   | 337.878   | NM_012203   | 322.979  |
| 3714.747 | AL110286  | 4727.257  | 7639.963  | NM_005443 | 186.315   | 137.162   | NM_004736   | 1318.687 |
| 905.937  | AF086374  | 1122.126  | 1153.948  | NM_007221 | 2072.298  | 1817.929  | NM_006895   | 432.026  |
| 964.631  | AL162066  | 5305.798  | 5213.509  | X54163    | 5976.48   | 6230.629  | NM_006459   | 4144.809 |
| 439.934  | NM_016096 | 12507.109 | 12734.65  | AK025395  | 415.268   | 483.145   | D50373      | 406.643  |
| 3637.934 | U79290    | 1923.068  | 2151.717  | NM_000388 | 326.73    | 246.9     | AA488757    | 3508.647 |
| 733.269  | X98114    | 427.612   | 276.857   | X58377    | 188.636   | 143.78    | AI394286    | 1139.95  |
| 315.355  | NM_014040 | 4848.382  | 7170.69   | BI830936  | 233.812   | 228.506   | H07071      | 511.623  |
| 564.81   | AK000799  | 4744.479  | 3955.5    | U79292    | 2433.438  | 2014.308  | M25322      | 1283.449 |
| 262.98   | NM_015582 | 17235.998 | 17670.744 | X68314    | 282.156   | 315.068   | AA436187    | 79.877   |
| 374.16   | AK027091  | 2467.979  | 3886.862  | X71973    | 10589.139 | 11750.33  | H-L 27586 I | 577.741  |
| 1414.233 | NM_001526 | 1698.335  | 1448.421  | T49651    | 2000.255  | 6465.712  | ID 214180   | 190.717  |
| 2353.714 | U31738    | 1982.295  | 2757.35   | N51014    | 702.615   | 824.464   | ID 1867426  | 1649.551 |
| 814.02   | AF179890  | 3307.902  | 5519.241  | BE392471  | 3907.787  | 4916.211  | W99328      | 404.142  |
| 606.999  | AK023536  | 4549.844  | 8170.606  | AI802950  | 569.256   | 534.34    | BE735403    | 710.167  |
| 1711.839 | AK023881  | 2705.729  | 1460.176  | AL043686  | 2168.024  | 3077.389  | NM_002438   | 939.689  |
| 2602.485 | AK027114  | 54820.574 | 61765.566 | AA490172  | 302.724   | 460.347   | NM_014589   | 1086.669 |
| 459.725  | NM_016298 | 1980.266  | 1870.16   | AA775212  | 1000.272  | 1376.318  | NM_000759   | 742.533  |
| 787.365  | AK002146  | 583.328   | 848.686   | NM_000723 | 372.969   | 231.362   | AK023334    | 595.847  |

|           |           |           |           |           |           |           |           |           |
|-----------|-----------|-----------|-----------|-----------|-----------|-----------|-----------|-----------|
| 1094.133  | AF086256  | 1259.662  | 1636.65   | AK023707  | 73.994    | 66.047    | NM_002563 | 3277.091  |
| 930.231   | NM_015492 | 3911.401  | 3766.046  | AL096751  | 1250.093  | 881.608   | NM_002437 | 635.156   |
| 4104.094  | NM_006933 | 360.002   | 411.354   | NM_000364 | 194.567   | 208.403   | D79991    | 809.464   |
| 10650.157 | AF132204  | 981.835   | 1309.075  | AF026920  | 799.77    | 886.565   | NM_000054 | 1997.969  |
| 706.229   | AK022874  | 4184.756  | 5471.661  | NM_004931 | 2125.44   | 1406.798  | NM_014713 | 4203.802  |
| 1158.845  | CY3Cy5    | 2410.33   | 131.222   | NM_000607 | 6589.317  | 4591.884  | NM_001812 | 916.463   |
| 2129.654  | BI912037  | 868.876   | 1346.066  | NM_002575 | 2348.906  | 791.724   | NM_014785 | 462.885   |
| 5900.861  | AA454646  | 2937.929  | 2884.402  | NM_004244 | 1745.536  | 1566.22   | NM_005811 | 1667.987  |
| 6734.973  | U18087    | 16177.809 | 12517.355 | NM_003371 | 3341.049  | 2292.102  | NM_005764 | 521.052   |
| 1692.171  | U66349    | 654.615   | 703.868   | AK023114  | 1886.504  | 2475.152  | NM_016362 | 964.221   |
| 669.484   | AA057156  | 1157.223  | 4719.235  | NM_003678 | 1380.112  | 1233.617  | NM_004214 | 2844.545  |
| 1124.476  | U19487    | 1569.836  | 868.31    | NM_012301 | 280.694   | 312.023   | NM_004329 | 3615.48   |
| 316.559   | AF166327  | 10375.382 | 8412.065  | NM_014419 | 1230.163  | 1507.555  | NM_002836 | 1066.849  |
| 1689.802  | AF260739  | 1081.976  | 1097.987  | NM_014938 | 1220.971  | 1698.573  | NM_020167 | 736.781   |
| 4610.867  | AF531423  | 1972.794  | 1760.428  | AK026066  | 533.704   | 1065.455  | AL049963  | 4719.664  |
| 335.843   | X76555    | 846.926   | 999.12    | NM_005244 | 1361.512  | 1980.03   | NM_016058 | 8819.872  |
| 12118.766 | NM_005432 | 1486.496  | 1184.342  | NM_018158 | 690.107   | 735.084   | NM_014005 | 941.179   |
| 531.887   | L10386    | 4765.239  | 4914.329  | NM_016301 | 2349.266  | 1658.29   | NM_004636 | 506.976   |
| 451.436   | NM_012469 | 4782.214  | 4929.723  | AK021975  | 284.408   | 351.787   | AK022603  | 602.161   |
| 464.799   | NM_134260 | 8384.144  | 8251.406  | AB032952  | 7226.782  | 5851.817  | NM_004896 | 3275.741  |
| 9981.854  | SR6       | 2912.854  | 2280.047  | NM_002522 | 7605      | 5249.035  | NM_006030 | 737.316   |
| 475.496   | SR8       | 6739.966  | 17279.678 | NM_018607 | 104.223   | 72.83     | NM_020410 | 3951.341  |
| 4266.377  | SR10      | 25731.219 | 6492.914  | NM_002978 | 423.738   | 220.202   | AF000143  | 7857.569  |
| 4284.963  | CY3Cy5    | 1369.653  | 107.728   | NM_014668 | 369.474   | 419.694   | NM_000814 | 583.675   |
| 645.595   | AL080157  | 751.751   | 1253.788  | NM_004722 | 841.573   | 818.728   | NM_000453 | 1428.681  |
| 2253.881  | NM_005308 | 1175.2    | 1462.787  | NM_014425 | 328.529   | 338.73    | J03077    | 6145.524  |
| 6158.958  | NM_007227 | 516.463   | 589.938   | NM_012133 | 890.102   | 1138.953  | J03048    | 6350.818  |
| 4083.751  | NM_007023 | 693.382   | 488.556   | NM_017954 | 201.918   | 639.038   | NM_002868 | 1727.824  |
| 1785.071  | NM_003865 | 838.76    | 891.819   | NM_006612 | 552.763   | 631.936   | AK024100  | 1882.552  |
| 1661.511  | AB015330  | 3592.188  | 2597.005  | NM_016451 | 440.059   | 274.304   | NM_005135 | 579.073   |
| 1476.161  | NM_001455 | 3923.637  | 3985.378  | NM_007351 | 3472.088  | 5570.277  | NM_003827 | 2268.414  |
| 10566.565 | L09071    | 421.887   | 1047.635  | AK026266  | 1457.614  | 2421.706  | NM_004583 | 182.801   |
| 2720.97   | NM_003322 | 379.65    | 848.211   | NM_007124 | 789.888   | 1417.425  | NM_001103 | 819.63    |
| 748.429   | BC036375  | 12898.273 | 5329.37   | NM_003176 | 742.312   | 1138.112  | AF228710  | 9322.719  |
| 3815.217  | NM_006363 | 5878.828  | 7953.981  | AK023168  | 1110.205  | 913.087   | NM_018399 | 657.677   |
| 634.566   | NM_020415 | 948.716   | 1225.071  | NM_006646 | 429.345   | 334.905   | AY007131  | 10866.437 |
| 2875.058  | NM_014879 | 320.788   | 791.382   | NM_004742 | 404.754   | 270.288   | U61735    | 1661.348  |
| 40498.184 | AL049667  | 3561.077  | 6822.384  | NM_014753 | 979.803   | 607.196   | NM_001144 | 1058.405  |
| 1314.54   | NM_000334 | 1346.088  | 1151.606  | NM_006585 | 19163.271 | 10268.463 | AK023766  | 1754.713  |
| 7681.257  | NM_020400 | 810.309   | 1385.679  | NM_014331 | 1346.476  | 1376.905  | NM_001897 | 983.77    |
| 431.395   | NM_001504 | 961.305   | 783.946   | NM_006795 | 4068.017  | 3381.701  | NM_003853 | 819.955   |
| 206.773   | D50926    | 2554.237  | 2167.449  | AF070568  | 766.454   | 902.736   | AB033109  | 1072.604  |
| 785.74    | BF205683  | 1349.901  | 1145.842  | NM_000277 | 139.886   | 143.787   | NM_002053 | 7530.479  |
| 903.198   | NM_001548 | 299.209   | 1014.721  | NM_000240 | 1272.742  | 921.282   | NM_006889 | 653.184   |
| 571.55    | NM_000758 | 9407.794  | 20009.258 | AK055733  | 6997.883  | 6519.742  | NM_002744 | 1748.002  |
| 704.993   | M17017    | 1119.774  | 1508.846  | AF298880  | 6122.676  | 4853.293  | NM_015917 | 5087.908  |
| 882.385   | NM_002990 | 1608.192  | 3509.564  | AK001500  | 471.411   | 314.822   | NM_020397 | 693.056   |
| 904.305   | NM_002432 | 10649.475 | 13603.878 | NM_006774 | 211.885   | 163.9     | NM_000061 | 2673.177  |
| 870.551   | AB033037  | 858.342   | 1000.527  | NM_020129 | 489.385   | 428.695   | AB046859  | 3668.949  |
| 2039.593  | L40400    | 2727.179  | 2085.813  | Y16521    | 1048.117  | 1128.312  | NM_005109 | 3287.692  |
| 940.014   | AK025688  | 1688.979  | 1833.37   | AL050371  | 1820.978  | 2587.972  | AK023573  | 1578.896  |
| 2042.375  | Z36819    | 21842.969 | 14649.646 | NM_002651 | 2487.626  | 5463.844  | NM_002730 | 1950.042  |
| 825.479   | NM_014448 | 2099.085  | 2109.941  | NM_002413 | 3980.396  | 6072.194  | NM_004828 | 1562.735  |



|           |                  |           |           |                  |           |          |                  |           |
|-----------|------------------|-----------|-----------|------------------|-----------|----------|------------------|-----------|
| 941.053   | <b>S56138</b>    | 1231.832  | 797.466   | <b>NM_017577</b> | 281.273   | 416.652  | <b>AB011540</b>  | 9063.748  |
| 691.822   | <b>AK023860</b>  | 1355.998  | 1491.097  | <b>NM_001757</b> | 1682.382  | 4382.763 | <b>NM_000040</b> | 2681.702  |
| 353.866   | <b>NM_016286</b> | 6723.709  | 4292.11   | <b>NM_001647</b> | 1702.598  | 1427.972 | <b>NM_004631</b> | 1681.585  |
| 2330.345  | <b>NM_001567</b> | 3226.963  | 1992.647  | <b>NM_006228</b> | 220.051   | 243.54   | <b>NM_006033</b> | 2008.74   |
| 626.643   | <b>NM_004905</b> | 12831.368 | 6894.845  | <b>NM_003768</b> | 2148.921  | 1259.545 | <b>NM_004837</b> | 2814.333  |
| 780.924   | <b>AF217971</b>  | 1937.005  | 2041.104  | <b>NM_018393</b> | 425.758   | 378.521  | <b>NM_000370</b> | 982.23    |
| 1967.005  | <b>NM_001925</b> | 1258.841  | 2612.081  | <b>BF032535</b>  | 1418.04   | 872.719  | <b>BE865893</b>  | 1766.983  |
| 576.718   | <b>AF245517</b>  | 1059.784  | 815.385   | <b>NM_018332</b> | 876.973   | 936.003  | <b>NM_003123</b> | 38225.188 |
| 2302.924  | <b>NM_004982</b> | 889.104   | 980.247   | <b>NM_005096</b> | 5935.689  | 3871.824 | <b>AY005822</b>  | 1890.796  |
| 373.641   | <b>NM_000217</b> | 722.13    | 796.42    | <b>NM_006760</b> | 362.607   | 375.913  | <b>NM_018129</b> | 20050.848 |
| 2726.615  | <b>AK026180</b>  | 580.888   | 741.551   | <b>NM_012289</b> | 2832.299  | 2270.312 | <b>AF289022</b>  | 1046.767  |
| 1403.366  | <b>NM_013365</b> | 2821.241  | 2614.839  | <b>AB037775</b>  | 625.454   | 818.312  | <b>NM_016025</b> | 1047.434  |
| 3272.233  | <b>NM_003916</b> | 6173.92   | 6510.984  | <b>L27560</b>    | 533.817   | 304.4    | <b>NM_013319</b> | 1016.157  |
| 540.875   | <b>NM_002870</b> | 20347.049 | 16984.426 | <b>AB011174</b>  | 808.59    | 597.498  | <b>NM_000746</b> | 1371.389  |
| 713.544   | <b>AF135422</b>  | 2437.281  | 2377.02   | <b>AB040879</b>  | 1068.525  | 1350.305 | <b>NM_000722</b> | 1179.749  |
| 768.451   | <b>NM_004479</b> | 12134.524 | 14146.085 | <b>AL049935</b>  | 1500.663  | 994.63   | <b>NM_016116</b> | 323.897   |
| 1421.009  | <b>AF070587</b>  | 1411.965  | 1023.439  | <b>AB033043</b>  | 2699.161  | 2863.113 | <b>NM_018655</b> | 825.894   |
| 1479.663  | <b>NM_016819</b> | 1734.327  | 1225.657  | <b>NM_014999</b> | 857.059   | 906.171  | <b>NM_005663</b> | 899.701   |
| 3154.65   | <b>NM_012222</b> | 1971.531  | 916.019   | <b>AK025220</b>  | 750.826   | 621.697  | <b>X89960</b>    | 714.224   |
| 3995.913  | <b>NM_005002</b> | 1711.281  | 740.337   | <b>NM_016308</b> | 7331.876  | 7899.259 | <b>NM_005773</b> | 799.497   |
| 596.51    | <b>NM_006596</b> | 3292.107  | 2945.698  | <b>D42046</b>    | 1991.513  | 2912.635 | <b>NM_017644</b> | 1853.696  |
| 1631.076  | <b>AK023214</b>  | 5292.008  | 5250.991  | <b>NM_001033</b> | 1486.859  | 2139.632 | <b>NM_002482</b> | 672.277   |
| 4740.94   | <b>NM_001469</b> | 9615.382  | 6557.755  | <b>NM_004526</b> | 6423.924  | 16021.61 | <b>AF116659</b>  | 1889.973  |
| 927.518   | <b>NM_003600</b> | 4878.86   | 4681.901  | <b>NM_002526</b> | 4132.898  | 5077.33  | <b>NM_000317</b> | 4115.328  |
| 1227.955  | <b>NM_017490</b> | 2902.923  | 2873.811  | <b>NM_020135</b> | 1185.984  | 2358.369 | <b>NM_018376</b> | 2690.852  |
| 4957.632  | <b>AK026727</b>  | 1523.081  | 1695.293  | <b>NM_018518</b> | 1751.305  | 2750.939 | <b>NM_017438</b> | 1018.025  |
| 1157.051  | <b>NM_002830</b> | 505.552   | 373.404   | <b>AK023149</b>  | 736.405   | 1406.673 | <b>U59209</b>    | 937.257   |
| 2065.494  | <b>NM_006247</b> | 4204.269  | 3501.534  | <b>NM_006438</b> | 508.03    | 533.628  | <b>NM_020195</b> | 1285.566  |
| 4418.905  | <b>AB032983</b>  | 691.799   | 711.893   | <b>NM_001845</b> | 589.639   | 309.928  | <b>AK023824</b>  | 2560.218  |
| 1581.305  | <b>NM_018281</b> | 7299.845  | 6465.42   | <b>AK024697</b>  | 471.129   | 208.838  | <b>AL133069</b>  | 1829.876  |
| 1639.91   | <b>NM_014049</b> | 2314.477  | 2223.228  | <b>NM_006460</b> | 1024.933  | 1661.985 | <b>AL117574</b>  | 398.846   |
| 1854.736  | <b>BC036375</b>  | 15572.509 | 10432.565 | <b>L34156</b>    | 175.771   | 97.63    | <b>AK026055</b>  | 2527.769  |
| 2889.98   | <b>BI912037</b>  | 885.118   | 1286.461  | <b>NM_003749</b> | 10503.932 | 5882.324 | <b>AK024126</b>  | 764.973   |
| 1140.969  | <b>AA454646</b>  | 2948.958  | 2778.953  | <b>NM_003557</b> | 1239.92   | 956.128  | <b>NM_001516</b> | 2559.449  |
| 8745.993  | <b>U18087</b>    | 15496.751 | 10674.816 | <b>NM_001257</b> | 5731.072  | 3442.325 | <b>NM_019086</b> | 786.239   |
| 1768.857  | <b>U66349</b>    | 874.254   | 649.564   | <b>NM_001795</b> | 140.186   | 64.719   | <b>NM_006670</b> | 1188.828  |
| 6141.474  | <b>AA057156</b>  | 1069.145  | 2214.454  | <b>D85245</b>    | 4727.711  | 4139.664 | <b>NM_012425</b> | 2594.525  |
| 686.293   | <b>U19487</b>    | 1965.316  | 1302.991  | <b>NM_000943</b> | 833.381   | 1257.103 | <b>NM_002750</b> | 2776.266  |
| 6201.347  | <b>AF166327</b>  | 12409.396 | 12706.742 | <b>NM_004658</b> | 1249.875  | 929.039  | <b>NM_000081</b> | 1033.081  |
| 1763.113  | <b>AF260739</b>  | 1130.861  | 1072.162  | <b>NM_001250</b> | 3250.008  | 2617.21  | <b>AK024134</b>  | 2610.661  |
| 413.953   | <b>AF531423</b>  | 1881.57   | 2099.411  | <b>AF298812</b>  | 638.829   | 472.706  | <b>NM_003014</b> | 732.918   |
| 1806.945  | <b>X76555</b>    | 788.291   | 1323.687  | <b>NM_004969</b> | 985.068   | 1212.779 | <b>NM_018558</b> | 806.44    |
| 1285.452  | <b>NM_005432</b> | 1495.974  | 1196.255  | <b>AJ249900</b>  | 241.201   | 225.412  | <b>NM_001974</b> | 1222.22   |
| 11444.627 | <b>L10386</b>    | 5761.506  | 8817.796  | <b>AK022581</b>  | 3133.675  | 1396.363 | <b>NM_013957</b> | 1305.597  |
| 5913.819  | <b>AF061812</b>  | 2520.448  | 1675.339  | <b>NM_018054</b> | 1057.264  | 1585.581 | <b>NM_002468</b> | 2034.069  |
| 580.853   | <b>AL136756</b>  | 1217.956  | 1366.432  | <b>NM_006186</b> | 577.065   | 574.187  | <b>NM_003028</b> | 1095.93   |
| 823.003   | <b>NM_012469</b> | 5108.482  | 5242.628  | <b>NM_000958</b> | 3038.37   | 4050.633 | <b>NM_001566</b> | 280.045   |
| 1359.75   | <b>NM_134260</b> | 8610.623  | 7989.554  | <b>NM_001401</b> | 386.01    | 1093.721 | <b>NM_016541</b> | 1035.939  |
| 574.975   | <b>AK025688</b>  | 1355.569  | 1837.948  | <b>NM_013271</b> | 4359.648  | 5735.914 | <b>NM_018548</b> | 1866.012  |
| 4626.193  | <b>Z36819</b>    | 23741.236 | 23823.406 | <b>NM_004157</b> | 2816.61   | 3591.912 | <b>NM_013401</b> | 843.278   |
| 781.635   | <b>NM_014448</b> | 2017.795  | 3677.338  | <b>NM_000684</b> | 1063.127  | 1012.741 | <b>NM_001405</b> | 3992.039  |
| 3197.767  | <b>AL080157</b>  | 933.721   | 1026.746  | <b>NM_015913</b> | 5876.916  | 6540.929 | <b>NM_003880</b> | 462.364   |
| 8628.091  | <b>NM_005308</b> | 1138.99   | 975.674   | <b>NM_005157</b> | 1972.755  | 1653.385 | <b>AF131778</b>  | 872.867   |

|           |           |           |           |           |           |           |           |           |
|-----------|-----------|-----------|-----------|-----------|-----------|-----------|-----------|-----------|
| 4061.875  | NM_007227 | 520.745   | 420.737   | NM_007354 | 294.81    | 208.384   | NM_001562 | 4566.528  |
| 2334.509  | NM_004624 | 2229.723  | 2715.581  | U67037    | 1158.435  | 736.38    | NM_01327E | 868.743   |
| 1231.512  | NM_014461 | 652.887   | 1029.254  | NM_004960 | 7222.275  | 4635.542  | NM_003487 | 1409.019  |
| 844.499   | AB015330  | 3436.042  | 2905.891  | AF272370  | 3309.247  | 2020.388  | NM_006887 | 6515.346  |
| 1804.642  | NM_00145E | 3986.595  | 4777.239  | AF130050  | 2002.492  | 1533.751  | NM_006477 | 1187.432  |
| 47049.793 | L09071    | 584.892   | 813.456   | AK023045  | 200.257   | 146.605   | NM_002880 | 3102.647  |
| 822.948   | NM_003322 | 549.013   | 557.198   | NM_012197 | 2019.964  | 2147.844  | NM_00067E | 3507.584  |
| 1310.73   | AK026180  | 654.675   | 996.92    | AK024016  | 1292.13   | 1383.212  | NM_00106E | 1373.044  |
| 753.147   | NM_01336E | 2287.194  | 3315.966  | NM_003581 | 3790.49   | 2649.38   | NM_004657 | 1124.895  |
| 2584.313  | NM_005817 | 10997.543 | 15759.425 | NM_00288E | 207.435   | 139.737   | NM_006291 | 2367.212  |
| 6493.213  | NM_00391E | 6123.011  | 9670.835  | NM_012407 | 566.567   | 643.551   | NM_018170 | 3165.278  |
| 375.196   | NM_002870 | 24116.965 | 29843.385 | AF302505  | 165.379   | 149.286   | NM_003867 | 876.786   |
| 4789.912  | NM_00636E | 5253.136  | 3884.95   | NM_00718E | 791.291   | 518.2     | AL162062  | 1015.707  |
| 54249.824 | NM_02041E | 643.851   | 623.136   | NM_007044 | 1167.168  | 1419.519  | NM_00317E | 3320.144  |
| 15104.598 | NM_000334 | 1497.187  | 1281.338  | AF294326  | 2969.332  | 3631.634  | NM_005030 | 1924.764  |
| 1097.579  | NM_020400 | 720.948   | 1300.671  | NM_01467E | 857.92    | 1004.045  | NM_017584 | 1200.782  |
| 709.354   | NM_001504 | 1019.851  | 1287.197  | NM_012317 | 47448.105 | 51020.711 | NM_02035E | 1682.921  |
| 9004.394  | D50926    | 2835.531  | 3254.382  | NM_01785E | 1400.617  | 1907.064  | AB014541  | 7247.658  |
| 836.166   | BF205683  | 1666.104  | 1852.329  | NM_016097 | 6365.591  | 9988.092  | NM_00258E | 2045.279  |
| 995.642   | NM_00154E | 934.637   | 2439.954  | AB046800  | 2557.56   | 3184.963  | NM_006034 | 6784.405  |
| 614.315   | NM_00075E | 9203.771  | 24278.506 | NM_00216E | 1114.461  | 2058.844  | NM_005201 | 6312.869  |
| 581.037   | M17017    | 1026.839  | 1747.202  | NM_01545E | 1768.94   | 794.287   | X56807    | 1432.476  |
| 525.886   | NM_002990 | 1514.798  | 2973.36   | D13540    | 2479.844  | 2347.82   | NM_00009E | 401.66    |
| 884.393   | NM_00243E | 11025.715 | 9850.151  | NM_016570 | 4628.569  | 3293.497  | AF174600  | 2225.428  |
| 4829.925  | AB033037  | 687.148   | 340.4     | AF209198  | 569.808   | 228.04    | AK001003  | 1710.177  |
| 704.248   | L40400    | 2528.464  | 1452.368  | L09247    | 267.338   | 231.568   | NM_002800 | 14676.791 |
| 6633.265  | NM_006247 | 4175.192  | 4667.335  | M69012    | 18687.002 | 14108.777 | NM_018384 | 6768.778  |
| 9238.442  | NM_018281 | 7465.739  | 9670.845  | NM_016347 | 177.551   | 189.485   | AF282617  | 857.692   |
| 638.608   | NM_004457 | 3761.477  | 3740.829  | NM_00693E | 10243.468 | 7429.426  | AF157323  | 1666.311  |
| 414.772   | NM_01404E | 2164.468  | 3078.45   | NM_001327 | 3598.436  | 2566.151  | NM_00602E | 465.519   |
| 813.924   | NM_00431E | 6270.856  | 13066.276 | AF321182  | 224.062   | 278.689   | NM_005877 | 5840.914  |
| 701.773   | NM_02016E | 3462.455  | 2886.656  | AB037722  | 125.243   | 72.951    | NM_00333E | 1620.468  |
| 2321.432  | AK023860  | 1434.071  | 1140.251  | NM_00365E | 350.409   | 382.847   | NM_01339E | 330.464   |
| 484.396   | NM_01628E | 7072.407  | 5019.778  | NM_00006E | 678.561   | 588.41    | NM_01775E | 1132.919  |
| 419.22    | NM_001567 | 3594.73   | 3464.942  | NM_01838E | 374.307   | 479.926   | D26069    | 2929.706  |
| 2345.313  | NM_00490E | 14138.892 | 11170.443 | AB033026  | 695.097   | 1013.682  | BF107577  | 8100.186  |
| 560.087   | AF217971  | 2011.601  | 3763.228  | AF104914  | 10381.162 | 6330.016  | NM_005837 | 3200.756  |
| 400.39    | NM_00192E | 1327.382  | 4483.461  | NM_01471E | 1530.17   | 1609.263  | NM_01662E | 3069.935  |
| 606.898   | AF245517  | 1574.438  | 2441.048  | AK023845  | 1266.88   | 1515.591  | NM_01749E | 524.701   |
| 12132.076 | NM_001694 | 48888.191 | 41822.066 | NM_00263E | 2541.201  | 3396.325  | NM_00613E | 3269.604  |
| 1578.522  | NM_000217 | 479.305   | 292.259   | NM_016487 | 734.082   | 1360.2    | AF237772  | 9302.152  |
| 725.052   | NM_01246E | 4415.062  | 6607.843  | NM_00580E | 3593.722  | 4888.751  | AK025934  | 790.9     |
| 753.989   | NM_134260 | 7632.183  | 9547.838  | NM_006401 | 16477.529 | 15844.238 | AJ008154  | 674.039   |
| 2999.394  | NM_00147E | 28130.787 | 20862.656 | AF269249  | 270.851   | 225.121   | NM_00685E | 1802.361  |
| 1197.233  | AF135422  | 2395.141  | 1503.532  | X51417    | 171.644   | 139.658   | X52350    | 55825.09  |
| 2410.982  | NM_00447E | 12284.403 | 9512.917  | D31763    | 1526.755  | 673.914   | AF071554  | 605.585   |
| 716.754   | AF070587  | 1584.501  | 987.599   | NM_01816E | 1493.579  | 1067.068  | U90919    | 1240.357  |
| 2524.564  | BE250526  | 655.812   | 481.559   | AK021452  | 4753.704  | 3739.097  | NM_006177 | 600.755   |
| 1310.781  | NM_01681E | 2233.002  | 2877.235  | NM_00450E | 1073.447  | 880.327   | AL137286  | 3373.208  |
| 1781.252  | NM_01222E | 2703.679  | 3255.541  | S74529    | 19844.002 | 14471.321 | NM_01635E | 4975.976  |
| 481.429   | NM_00500E | 1638.365  | 1562.841  | NM_020227 | 163.907   | 156.923   | NM_01627E | 5012.075  |
| 1461.311  | NM_00659E | 3363.898  | 2975.467  | NM_00593E | 182.135   | 169.965   | NM_02041E | 1898.796  |
| 490.106   | AK023214  | 5014.772  | 4738.112  | M73837    | 549.626   | 1478.428  | NM_01329E | 1457.443  |

|           |           |           |           |           |           |           |           |           |
|-----------|-----------|-----------|-----------|-----------|-----------|-----------|-----------|-----------|
| 1286.184  | NM_001469 | 9181.971  | 5873.565  | U69127    | 9132.359  | 9627.021  | AF315592  | 1981.417  |
| 1345.248  | NM_003600 | 4988.639  | 4462.534  | NM_005839 | 2480.413  | 1894.046  | AF095844  | 505.962   |
| 639.049   | NM_017490 | 3434.426  | 2754.958  | AK023379  | 717.995   | 677.53    | NM_015833 | 850.268   |
| 37026.258 | NM_002718 | 1401.713  | 1233.38   | AK021904  | 4016.949  | 3928.832  | NM_000986 | 57826.172 |
| 355.288   | AK026727  | 1546.674  | 991.196   | -         | 422.307   | 621.958   | AK026760  | 14254.646 |
| 591.958   | NM_002830 | 291.904   | 333.683   | NM_018292 | 295.732   | 563.528   | NM_014772 | 1091.193  |
| 1330.353  | L09071    | 529.972   | 1062.314  | AL049705  | 3181.522  | 5909.959  | NM_004539 | 8288.188  |
| 1868.891  | NM_003322 | 490.353   | 604.952   | AK022294  | 892.789   | 760.434   | NM_006428 | 3743.91   |
| 3160.871  | BC036375  | 13306.679 | 6616.639  | AF086507  | 420.336   | 276.637   | NM_004280 | 6944.418  |
| 2297.417  | BI912037  | 947.268   | 1067.219  | U79289    | 917.974   | 772.887   | AF110399  | 699.53    |
| 5228.039  | AA454646  | 3039.416  | 2702.256  | NM_014028 | 1867.131  | 1315.568  | AK027094  | 1030.981  |
| 331.238   | U18087    | 19281.572 | 19982.354 | NM_000402 | 567.186   | 506.283   | AL359596  | 746.244   |
| 873.259   | U66349    | 981.065   | 2417.891  | NM_004273 | 228.184   | 197.492   | U79249    | 715.326   |
| 810.704   | AA057156  | 1240.089  | 3752.063  | NM_000690 | 2920.752  | 2533.538  | AK022114  | 605.109   |
| 989.678   | U19487    | 2005.415  | 1641.03   | NM_000155 | 2969.084  | 2374.471  | AL133585  | 1017.685  |
| 1051.602  | AF166327  | 11069.051 | 11126.423 | AK024489  | 151.703   | 137.413   | NM_002631 | 5797.123  |
| 760.02    | AF260739  | 1219.147  | 906.103   | NM_000181 | 3959.984  | 4445.251  | BF217864  | 3940.821  |
| 4302.974  | AF531423  | 1935.525  | 1921.545  | NM_014121 | 487.234   | 432.232   | NM_005917 | 17581.1   |
| 999.712   | X76555    | 896.558   | 1025.084  | NM_006730 | 828.673   | 1097.295  | NM_007052 | 526.705   |
| 5199.415  | NM_005432 | 1245.957  | 967.149   | NM_005644 | 1367.782  | 1480.922  | AV758498  | 612.239   |
| 1290.945  | L10386    | 3793.621  | 2558.89   | NM_018442 | 1794.117  | 1105.085  | NM_020196 | 1042.606  |
| 454.78    | AF061812  | 1968.282  | 1132.551  | AF182416  | 1684.586  | 1503.209  | NM_018657 | 456.073   |
| 3501.274  | AL136756  | 993.803   | 743.18    | NM_005999 | 5359.247  | 5484.722  | L40410    | 2390.293  |
| 929.722   | NM_002990 | 1319.159  | 2913.864  | NM_006015 | 389.431   | 297.309   | NM_007055 | 626.703   |
| 2851.575  | NM_002432 | 9274.02   | 12242.89  | NM_004634 | 762.036   | 1130.09   | NM_016652 | 394.501   |
| 2195.405  | AB033037  | 685.915   | 762.156   | NM_002017 | 3227.917  | 2383.1    | NM_016310 | 3605.754  |
| 3732.525  | L40400    | 2343.276  | 1850.806  | NM_017523 | 3385.524  | 3778.82   | AK021562  | 452.567   |
| 7848.819  | AK025688  | 1299.431  | 1298.654  | NM_002382 | 17003.09  | 23378.887 | BC006560  | 807.83    |
| 3134.46   | Z36819    | 20162.266 | 15739.906 | NM_002158 | 412.174   | 496.218   | NM_006298 | 515.087   |
| 689.449   | NM_014448 | 2102.376  | 3315.256  | U13223    | 3289.075  | 3999.313  | AF060938  | 13483.486 |
| 2380.402  | AL080157  | 802.95    | 1010.12   | NM_016270 | 1108.955  | 1604.502  | NM_001973 | 2063.466  |
| 485.446   | NM_005308 | 1301.728  | 1566.464  | AK001357  | 794.133   | 287.381   | NM_014468 | 1643.146  |
| 556.535   | NM_007227 | 543.835   | 672.742   | NM_015721 | 1477.406  | 894.446   | AL050015  | 937.577   |
| 677.632   | NM_007023 | 911.444   | 525.307   | AF086298  | 923.582   | 764.797   | AY007117  | 1826.49   |
| 1469.044  | NM_003865 | 829.468   | 842.184   | AK027238  | 656.002   | 721.87    | AF039698  | 1377.942  |
| 536.74    | AB015330  | 3161.807  | 2091.051  | AK025758  | 229.101   | 407.365   | AL109679  | 346.139   |
| 789.478   | NM_001455 | 3855.155  | 2371.055  | AL360201  | 258.993   | 200.736   | AB046828  | 1281.751  |
| 4124.38   | NM_004982 | 848.34    | 835.23    | S94540    | 15395.979 | 13772.975 | AL137532  | 2344.424  |
| 1162.609  | NM_001694 | 52343.379 | 60585.41  | U79297    | 279.268   | 94.763    | AK025419  | 1319.879  |
| 3257.054  | NM_000217 | 509.434   | 380.007   | AK002164  | 439.402   | 603.586   | NM_017413 | 570.585   |
| 1499.91   | AK026180  | 645.858   | 748.621   | AF052122  | 6645.65   | 5697.91   | NM_013259 | 3552.407  |
| 837.199   | NM_013365 | 2095.197  | 2060.833  | NM_001310 | 817.83    | 692.782   | NM_018375 | 3573.435  |
| 2838.832  | NM_005817 | 11266.806 | 13910.38  | AK026924  | 2872.189  | 2208.401  | NM_004913 | 495.372   |
| 550.857   | NM_003916 | 6505.729  | 9383.438  | AL122047  | 4045.43   | 5967.333  | AK026838  | 967.672   |
| 2965.176  | NM_002870 | 24225.242 | 24764.949 | AF052091  | 947.741   | 862.727   | AK022443  | 367.216   |
| 2027.405  | NM_006363 | 5538.162  | 4350.852  | AK024447  | 41987.457 | 27526.875 | AK023371  | 1165.16   |
| 4832.435  | NM_020415 | 903.878   | 751.957   | AF052145  | 1130.73   | 1319.331  | AK025015  | 1404.518  |
| 582.796   | AL049667  | 3753.184  | 5655.146  | AF086458  | 1416.791  | 1024.042  | AF086187  | 1166.644  |
| 806.988   | NM_000334 | 1532.897  | 1313.162  | AF086548  | 2400.817  | 3504.961  | AF305836  | 43178.922 |
| 562.022   | NM_001504 | 1153.75   | 1380.956  | AK024350  | 539.814   | 401.186   | AL109784  | 380.57    |
| 5732.979  | D50926    | 2834.564  | 2886.704  | AK023717  | 1152.001  | 1124.653  | AL035295  | 1563.335  |
| 529.447   | BF205683  | 1686.942  | 1973.363  | AK023727  | 296.938   | 225.32    | NM_018302 | 1664.618  |
| 935.257   | NM_000758 | 7977.73   | 12343.964 | AK025271  | 322.061   | 190.176   | AK027252  | 2996.499  |

|           |           |           |           |           |          |          |           |           |
|-----------|-----------|-----------|-----------|-----------|----------|----------|-----------|-----------|
| 687.771   | M17017    | 963.065   | 1111.672  | AF086204  | 2049.196 | 1623.86  | AF165527  | 2683.816  |
| 403.681   | NM_00360C | 5652.199  | 7416.417  | NM_007021 | 451.352  | 375.672  | NM_014092 | 599.712   |
| 415.613   | NM_01749C | 3073.472  | 3633.401  | AK022076  | 223.064  | 174.02   | AL110133  | 5454.295  |
| 1671.31   | NM_00271E | 1639.582  | 1788.938  | AK023065  | 213.3    | 180.682  | AL050053  | 379.265   |
| 656.462   | AK026727  | 1959.014  | 2087.231  | AK021570  | 360.955  | 302.542  | AK000529  | 1204.3    |
| 1544.183  | NM_00283C | 536.58    | 388.354   | AL360204  | 203.998  | 197.271  | AK027243  | 729.822   |
| 1091.147  | NM_006247 | 3833.598  | 3486.913  | AK000103  | 649.685  | 627.264  | AF147415  | 891.733   |
| 1107.246  | AB032983  | 663.63    | 596.804   | AF085959  | 378.679  | 317.851  | AL049273  | 501.495   |
| 1191.693  | NM_018281 | 7744.822  | 6767.068  | AF075107  | 297.712  | 626.886  | AK098474  | 651.701   |
| 1049.798  | NM_004457 | 4516.19   | 3119.194  | AK023104  | 545.144  | 595.404  | AL117475  | 1322.52   |
| 1699.724  | NM_01404E | 2436.16   | 3026.485  | AK026923  | 835.455  | 1035.774 | AL049300  | 322.327   |
| 8867.773  | NM_02016E | 3877.916  | 3252.224  | Y11177    | 498.838  | 481.746  | NM_01753E | 3296.76   |
| 401.717   | S56138    | 375.154   | 295.848   | U61091    | 268.688  | 343.03   | NM_003887 | 908.543   |
| 1256.701  | AK023860  | 1390.054  | 1516.893  | U92017    | 107.977  | 93.542   | NM_004267 | 6856.736  |
| 1249.851  | NM_000031 | 2494.546  | 2161.655  | AK021691  | 5255.131 | 8126.158 | AL357212  | 753       |
| 1883.002  | NM_01628E | 6650.051  | 5029.259  | AK022037  | 259.013  | 194.593  | AK026687  | 1352.575  |
| 39990.125 | NM_00490E | 13501.2   | 7231.137  | AK000141  | 1511.046 | 1235.877 | AL117444  | 510.667   |
| 3571.444  | AF217971  | 2156.946  | 2159.75   | AL137758  | 902.208  | 768.707  | NM_017994 | 5486.062  |
| 629.708   | NM_00192E | 1089.854  | 1442.184  | AK023865  | 221.833  | 267.216  | AK021693  | 1213.266  |
| 692.459   | AF245517  | 721.856   | 357.146   | AK025786  | 649.309  | 496.256  | AB023177  | 3427.903  |
| 406.263   | X78926    | 10895.989 | 7234.929  | AK024188  | 737.298  | 700.142  | Y11609    | 1421.675  |
| 1759.454  | AJ278110  | 459.485   | 615.292   | AK024379  | 268.223  | 318.462  | NM_012122 | 3611.415  |
| 609.089   | NM_014237 | 3039.945  | 3747.842  | AK026820  | 430.449  | 358.641  | AF009285  | 6142.721  |
| 554.413   | NM_02039E | 655.654   | 696.021   | AK001716  | 1223.484 | 837.379  | NM_01212E | 3238.666  |
| 530.334   | AF029900  | 2150.052  | 2699.871  | AF113683  | 196.438  | 287.532  | AB032363  | 229.424   |
| 1322.31   | NM_00332E | 4139.951  | 3043.43   | AK026821  | 603.668  | 677.474  | AF009294  | 1303.42   |
| 893.656   | NM_01617E | 3220.774  | 4064.476  | AK026280  | 6206.69  | 6185.12  | NM_001524 | 883.613   |
| 1169.258  | AK022639  | 1095.371  | 997.813   | AF113017  | 3907.115 | 3753.958 | AK000998  | 790.294   |
| 945.344   | D31766    | 1779.835  | 2630.41   | AL080232  | 5687.722 | 5377.521 | AK001225  | 408.5     |
| 3497.453  | NM_006547 | 532.011   | 346.26    | AK001120  | 3915.477 | 3323.788 | AK021684  | 2407.219  |
| 2657.583  | AF135422  | 2716.954  | 1864.595  | AF264629  | 190.596  | 120.117  | AK001060  | 677.513   |
| 2292.957  | NM_00447E | 13572.001 | 13097.582 | AK022416  | 266.984  | 428.937  | AK021480  | 389.065   |
| 1179.269  | AF070587  | 1549.302  | 1268.256  | AK023224  | 1173.408 | 1557.926 | AK021726  | 370.459   |
| 330.756   | BE250526  | 609.701   | 380.112   | AK023731  | 2381.078 | 2343.601 | AK025112  | 1111.48   |
| 254.795   | NM_012222 | 2630.041  | 2062.856  | AK023929  | 154.758  | 209.208  | AK026079  | 407.35    |
| 688.133   | NM_005002 | 1474.488  | 693.079   | AK022442  | 819.915  | 1260.287 | AK026675  | 196.505   |
| 1444.112  | NM_00659E | 2965.353  | 1259.006  | AK023336  | 680.302  | 901.767  | AK025173  | 3686.788  |
| 633.458   | AK023214  | 4142.345  | 2693.035  | AK023771  | 308.758  | 441.318  | AK025430  | 581.756   |
| 556.65    | NM_00146E | 7130.123  | 4634.523  | AK026873  | 1500.471 | 1185.905 | AF117338  | 2034.6    |
| 461.599   | NM_001851 | 2558.77   | 7284.597  | AK026394  | 1444.358 | 989.006  | AK025567  | 1271.991  |
| 4068.954  | AK022689  | 2391.605  | 2660.8    | NM_00544E | 720.346  | 488.268  | U56857    | 2297.85   |
| 6283.387  | NM_016227 | 689.821   | 329.225   | AK025943  | 7760.232 | 5864.303 | L43349    | 310.298   |
| 445.551   | NM_00419E | 12910.655 | 10430.481 | BG106479  | 527.815  | 511.792  | BE905682  | 340.179   |
| 35967.586 | NM_00470E | 1849.49   | 1016.589  | AF130069  | 8370.386 | 5742.614 | AF086421  | 1793.008  |
| 170.404   | NM_02019C | 7206.349  | 9872.674  | AL109669  | 661.011  | 561.137  | AK001612  | 3172.738  |
| 1377.496  | AK024003  | 563.363   | 717.888   | AB037766  | 960.68   | 687.088  | AF161522  | 1904.42   |
| 15546.107 | NM_014357 | 1458.455  | 1435.241  | AK026995  | 203.777  | 215.649  | AF086028  | 10181.745 |
| 1236.223  | NM_004067 | 719.453   | 953.866   | AL133091  | 551.499  | 580.693  | AK025365  | 550.381   |
| 173.721   | NM_000121 | 3611.654  | 4224.139  | BF842915  | 428.822  | 464.411  | AK023489  | 624.241   |
| 899.408   | NM_002091 | 3379.143  | 1640.316  | AF086212  | 267.135  | 221.459  | AK021561  | 2009.11   |
| 2682.675  | AB033092  | 3595.049  | 4329.616  | X82545    | 2247.771 | 1845.623 | NM_003531 | 1002.45   |
| 236.024   | NM_003023 | 1304.075  | 1457.181  | AK024632  | 2986.974 | 2833.309 | NM_01779E | 888.872   |
| 189.179   | BC035030  | 2419.77   | 2060.962  | NM_018474 | 4625.628 | 3044.453 | NM_00351C | 463.797   |

|           |           |           |           |           |           |           |           |           |
|-----------|-----------|-----------|-----------|-----------|-----------|-----------|-----------|-----------|
| 5150.757  | NM_005340 | 20326.277 | 29330.57  | AK024937  | 540.242   | 571.787   | AL137403  | 1335.797  |
| 1241.892  | NM_016201 | 971.055   | 983.099   | D17178    | 438.037   | 641.72    | NM_018534 | 593.764   |
| 1263.82   | NM_000864 | 1669.309  | 1265.357  | AK022094  | 2255.526  | 3052.462  | AB037847  | 877.816   |
| 1242.082  | NM_017977 | 2046.438  | 1388.732  | AK026695  | 910.84    | 1202.175  | NM_005170 | 1104.733  |
| 1475.917  | AF147727  | 1567.593  | 904.047   | AK022220  | 293.421   | 165.586   | S96437    | 1368.527  |
| 590.952   | NM_006751 | 2798.488  | 1662.428  | AL137539  | 216.161   | 399.077   | NM_015170 | 1186.659  |
| 3992.13   | AB037834  | 9692.929  | 3587.752  | U84520    | 1574.837  | 1072.601  | AL353939  | 994.237   |
| 1320.612  | NM_003569 | 869.816   | 826.088   | AL133616  | 3453.914  | 1792.69   | AL117573  | 2245.07   |
| 305.334   | NM_014052 | 16582.029 | 20426.371 | AK023391  | 140.904   | 245.579   | NM_005300 | 22509.127 |
| 747.203   | NM_002777 | 28284.336 | 8606.853  | AK026382  | 940.604   | 946.293   | NM_001640 | 3511.504  |
| 639.144   | AF202635  | 1170.02   | 1092.838  | AK091169  | 2016.411  | 1708.457  | AF358454  | 1278.224  |
| 699.977   | NM_014125 | 382.276   | 236.224   | NM_014745 | 26231.824 | 22852.451 | AK026090  | 1003.71   |
| 165.343   | NM_017904 | 542.272   | 520.566   | AF086026  | 5126.341  | 4033.746  | AF070637  | 401.901   |
| 601.357   | NM_013367 | 3869.99   | 4244.801  | AL133011  | 369.785   | 282.489   | AL137634  | 784.427   |
| 565.297   | NM_000321 | 4660.009  | 5676.401  | NM_016300 | 373.151   | 278.415   | AL050068  | 618.047   |
| 802.052   | NM_006341 | 8401.478  | 5109.206  | NM_015607 | 11178.987 | 9499.915  | AB046766  | 355.611   |
| 1694.335  | NM_001709 | 1410.856  | 752.757   | AK026955  | 941.842   | 594.34    | AF009323  | 543.89    |
| 485.258   | NM_006191 | 2043.689  | 2031.294  | AL110202  | 8330.579  | 6908.841  | AK001526  | 1771.036  |
| 447.666   | NM_001800 | 1043.419  | 1159.8    | AK021980  | 442.826   | 477.691   | AK000525  | 563.473   |
| 15271.006 | NM_004330 | 3704.893  | 1676.573  | S46402    | 568.301   | 469.713   | AL137434  | 797.395   |
| 494.948   | NM_015940 | 1824.939  | 2079.154  | AF075048  | 269.512   | 318.785   | Z36795    | 1091.375  |
| 1747.918  | NM_013970 | 1410.101  | 1464.381  | Z83940    | 762       | 655.537   | AL080216  | 869.559   |
| 830.303   | NM_003790 | 2114.78   | 2278.4    | NM_005800 | 739.357   | 967.83    | AF038188  | 6711.426  |
| 1215.3    | NM_000494 | 992.058   | 985.142   | AF019617  | 6757.404  | 6172.182  | AJ227888  | 585.844   |
| 887.441   | NM_003722 | 12289.112 | 14272.184 | AL137305  | 3989.007  | 5185.945  | D17046    | 585.564   |
| 575.983   | NM_014430 | 494.27    | 396.069   | NM_005290 | 347.175   | 556.129   | NM_017645 | 4375.69   |
| 1903.002  | NM_000495 | 1357.761  | 1757.948  | AK025802  | 304.018   | 327.774   | AK021958  | 3097.462  |
| 441.8     | AF085883  | 959.272   | 914.882   | AF085973  | 370.884   | 458.582   | CY3Cy5    | 5336.403  |
| 754.696   | NM_016571 | 1359.664  | 1116.858  | NM_018013 | 2424.011  | 2988.168  | H97792    | 874.796   |
| 1140.71   | NM_016440 | 2127.821  | 1736.358  | AK022517  | 896.682   | 517.319   | M13509    | 1018.093  |
| 461.447   | NM_002510 | 856.387   | 839.116   | NM_000320 | 13382.352 | 10065.849 | X04076    | 3865.847  |
| 1302.362  | AJ271216  | 930.331   | 649.03    | NM_001182 | 4466.365  | 3442.721  | AA485362  | 1963.359  |
| 382.635   | U23028    | 2144.154  | 1610.079  | NM_000330 | 1136.438  | 1048.138  | AJ222801  | 1476.042  |
| 2100.829  | NM_000817 | 5238.773  | 6349.983  | NM_000172 | 2084.38   | 1547.115  | W72207    | 28888.223 |
| 1191.049  | AF113132  | 10960.589 | 2341.182  | NM_002297 | 2481.723  | 1623.992  | BI772354  | 1399.476  |
| 4395.057  | NM_006571 | 4423.855  | 6026.112  | AB040968  | 7479.202  | 6692.142  | AA733033  | 451.126   |
| 939.648   | NM_001875 | 704.314   | 1576.884  | X85323    | 518.122   | 452.076   | AA583574  | 1090.666  |
| 3996.754  | AK022680  | 1066.584  | 1103.589  | U17615    | 1197.754  | 1198.15   | AI690184  | 9838.063  |
| 524.984   | NM_018940 | 6496.998  | 5143.466  | NM_005300 | 2215.496  | 1600.548  | SR5       | 3034.381  |
| 2731.455  | NM_016350 | 4417.327  | 4514.969  | NM_016120 | 5617.898  | 7169.471  | SR7       | 1857.347  |
| 2149.452  | NM_004150 | 4197.034  | 3432.835  | U84119    | 624.27    | 629.639   | SR9       | 7321.73   |
| 869.324   | AK000561  | 871.279   | 902.403   | NM_003600 | 591.495   | 711.157   | CY3Cy5    | 3757.729  |
| 376.566   | AB051449  | 13839.921 | 11388.681 | AF302079  | 7362.502  | 6693.992  | NM_017810 | 1139.106  |
| 900.862   | BC009187  | 5864.087  | 8238.333  | AJ224167  | 222.31    | 192.15    | AF028823  | 2743.468  |
| 1325.018  | NM_016480 | 4168.314  | 2850.452  | NM_002550 | 475.136   | 539.816   | NM_004290 | 8451.731  |
| 732.878   | NM_002610 | 12648.09  | 10379.027 | NM_000690 | 875.631   | 738.292   | NM_002087 | 2308.365  |
| 476.02    | AF090894  | 354.125   | 285.151   | AF086062  | 998.081   | 1484.773  | NM_014580 | 568.119   |
| 3232.854  | NM_016357 | 2399.625  | 2784.797  | L47668    | 15131.856 | 19039.414 | AF200815  | 647.52    |
| 7895.905  | NM_014500 | 6761.97   | 4696.084  | NM_017920 | 1963.446  | 2497.529  | NM_013441 | 948.286   |
| 813.631   | NM_020140 | 2491.227  | 2005.048  | AK025345  | 387.772   | 458.354   | NM_014421 | 743.178   |
| 53038.816 | NM_006237 | 670.436   | 613.209   | D25274    | 3860.976  | 8371.736  | NM_003830 | 2999.891  |
| 684.801   | NM_001271 | 3282.209  | 2207.767  | CY3Cy5    | 492.212   | 95.089    | AK000868  | 1114.95   |
| 3297.926  | NM_003680 | 2044.937  | 1147.895  | D50373    | 618.057   | 661.937   | NM_001230 | 785.099   |

|           |           |           |           |             |           |           |           |           |
|-----------|-----------|-----------|-----------|-------------|-----------|-----------|-----------|-----------|
| 1119.243  | AF039019  | 3323.659  | 4270.569  | AA488757    | 5509.887  | 8033.952  | NM_001234 | 1339.811  |
| 322.669   | NM_012255 | 7605.024  | 7174.709  | AI394286    | 1846.326  | 1696.393  | BF679789  | 1391.354  |
| 1395.422  | NM_018196 | 1649.705  | 1339.689  | H07071      | 770.018   | 753.137   | NM_001127 | 1462.475  |
| 522.165   | NM_004818 | 3337.135  | 3746.135  | M25322      | 1285.434  | 1270.109  | NM_012430 | 1330.193  |
| 439.791   | J04205    | 9307.422  | 6647.187  | H-L 27586 I | 956.61    | 1134.969  | NM_003917 | 5838.771  |
| 3194.803  | D38491    | 4411.215  | 3306.011  | ID 214180   | 290.644   | 577.633   | NM_002956 | 612.59    |
| 261.036   | AK026835  | 2388.003  | 1844.758  | ID 1867426  | 2385.955  | 2171.753  | AB018739  | 483.921   |
| 260.726   | NM_002819 | 14095.833 | 7403.135  | ID 396450   | 379.831   | 248.098   | NM_006750 | 5974.033  |
| 1224.126  | NM_013264 | 3281.123  | 2398.257  | W99328      | 614.867   | 536.783   | NM_020164 | 1569.202  |
| 2430.256  | NM_003315 | 10539.218 | 10676.248 | H08563      | 602.492   | 495.394   | AK023521  | 1337.816  |
| 998.425   | NM_005570 | 8451.431  | 3683.12   | BE735403    | 1084.276  | 880.51    | NM_014267 | 8782.666  |
| 3506.402  | NM_000086 | 3789.802  | 10417.535 | NM_022552   | 2627.52   | 2158.998  | U30872    | 287.523   |
| 574.318   | NM_003752 | 2798.871  | 1354.458  | NM_014389   | 3907.635  | 3250.213  | NM_020469 | 1703.1    |
| 737.52    | NM_003932 | 8583.484  | 4916.258  | SR2         | 42019.484 | 37133.273 | NM_014734 | 865.965   |
| 8651.055  | NM_016491 | 7875.797  | 5010.34   | SR4         | 9838.202  | 11622.301 | M74782    | 1314.507  |
| 1173.522  | NM_006429 | 17078.117 | 7571.111  | SR6         | 1297.975  | 1303.76   | NM_001056 | 1086.069  |
| 6157.972  | AF070565  | 771.17    | 1102.078  | SR8         | 4834.323  | 15606.432 | AK025708  | 1711.492  |
| 617.137   | NM_016599 | 485.865   | 665.404   | SR10        | 19786.791 | 5285.918  | NM_000405 | 942.375   |
| 16481.404 | NM_002064 | 1040.44   | 3439.868  | CY3Cy5      | 677.752   | 106.398   | NM_005564 | 30570.596 |
| 572.753   | NM_015523 | 4248.583  | 3442.737  | NM_005811   | 1751.998  | 1692.02   | NM_004508 | 1509.407  |
| 4003.771  | NM_015960 | 5030.334  | 3418.935  | NM_005764   | 386.041   | 361.268   | NM_006405 | 5814.363  |
| 605.305   | L27943    | 129.912   | 836.425   | NM_016362   | 1315.215  | 1290.782  | NM_006749 | 1452.525  |
| 484.148   | NM_006085 | 2168.317  | 2678.07   | NM_004214   | 3771.902  | 8588.592  | AL137619  | 1217.33   |
| 1752.539  | NM_000907 | 4072.046  | 3047.739  | NM_004329   | 5159.016  | 4531.037  | NM_004300 | 1612.042  |
| 1192.026  | AF254085  | 2286.234  | 2359.818  | NM_002836   | 1692.519  | 1538.265  | AF319476  | 659.874   |
| 3334.718  | NM_001987 | 1110.286  | 1192.635  | NM_020167   | 1012.853  | 796.619   | NM_004292 | 667.366   |
| 487.545   | AF244088  | 1711.221  | 1561.042  | AL049963    | 6820.029  | 6744.261  | NM_015484 | 2481.603  |
| 354.009   | NM_007136 | 964.571   | 564.318   | NM_016058   | 10503.756 | 16228.239 | NM_018046 | 1100.427  |
| 530.961   | AK025434  | 921.971   | 870.097   | NM_014005   | 1104.89   | 847.065   | NM_013316 | 1522.654  |
| 2231.422  | AK000435  | 1239.327  | 844.696   | NM_004636   | 1096.697  | 551.221   | M20701    | 4249.208  |
| 532.528   | AK000569  | 2594.236  | 1725.023  | AK022603    | 659.839   | 705.597   | NM_002912 | 1002.949  |
| 628.937   | NM_006049 | 1455.038  | 1768.861  | NM_004896   | 4387.269  | 7056.355  | NM_013284 | 1624.619  |
| 1617.473  | NM_017661 | 1483.867  | 524.488   | NM_003976   | 2301.748  | 2652.639  | NM_006739 | 943.607   |
| 1605.511  | BC016698  | 5965.336  | 3819.539  | NM_017688   | 520.205   | 721.356   | NM_013274 | 2493.903  |
| 6899.462  | AK025576  | 1372.751  | 2525.722  | AK025612    | 2208.825  | 1936.554  | AL050187  | 2037.209  |
| 2032.088  | AF147385  | 899.44    | 1606.385  | NM_012268   | 1178.775  | 747.431   | NM_012387 | 4980.821  |
| 7916.615  | AL442086  | 2926.096  | 3139.815  | NM_012203   | 335.201   | 608.791   | NM_014735 | 1155.018  |
| 2734.359  | BC034819  | 2868.882  | 3613.708  | NM_004736   | 1361.761  | 1406.757  | NM_004252 | 5639.03   |
| 2201.983  | AF147313  | 5973.543  | 6140.522  | NM_006459   | 4424.708  | 2828.832  | AF172929  | 2129.659  |
| 59970.27  | AF147382  | 18639.035 | 19586.695 | NM_003827   | 2622.391  | 2596.128  | NM_006398 | 4951.25   |
| 1380.97   | AK001957  | 3006.209  | 4209.467  | NM_004583   | 386.707   | 343.513   | AK025655  | 1107.808  |
| 449.214   | AK000850  | 1141.975  | 1306.423  | AF228710    | 6823.404  | 4636.432  | NM_003833 | 5878.248  |
| 662.884   | AK021833  | 1897.156  | 1493.266  | AY007131    | 14849.897 | 12608.798 | AK000868  | 1675.921  |
| 495.81    | AF143867  | 1018.115  | 1786.817  | U61735      | 1775.356  | 1777.643  | NM_001233 | 1464.527  |
| 652.743   | AK025889  | 3494.411  | 5686.423  | NM_001144   | 1319.733  | 958.53    | NM_001234 | 1684.699  |
| 1343.337  | NM_014715 | 1349.583  | 1338.642  | AK023766    | 1989.36   | 2111.826  | BF679789  | 1380.976  |
| 1670.988  | AF086448  | 2182.28   | 3338.629  | NM_001897   | 1164.6    | 1051.767  | H97792    | 979.258   |
| 937.073   | AB019391  | 599.167   | 892.936   | NM_003853   | 1113.925  | 646.419   | L33404    | 425.568   |
| 665.954   | AF086386  | 1266.625  | 999.89    | AB033109    | 1288.01   | 1089.247  | M13509    | 1122.543  |
| 1344.209  | AF086457  | 1524.45   | 1268.363  | NM_002053   | 12526.865 | 9649.632  | X04076    | 3776.692  |
| 579.824   | AK025469  | 1212.658  | 1081.24   | NM_006889   | 1211.933  | 1292.217  | AA485362  | 1904.605  |
| 1951.673  | NM_020239 | 10238.258 | 9349.891  | NM_002438   | 1340.654  | 2201.804  | AJ222801  | 1070.54   |
| 423.28    | AF070581  | 1123.899  | 596.169   | NM_014589   | 1932.153  | 2632.001  | W72207    | 26528.922 |

|           |                  |           |           |                  |           |           |                  |           |
|-----------|------------------|-----------|-----------|------------------|-----------|-----------|------------------|-----------|
| 440.071   | <b>AK024187</b>  | 899.319   | 638.406   | <b>NM_000759</b> | 1170.721  | 1093.021  | <b>BI772354</b>  | 1429.613  |
| 475.116   | <b>AK023572</b>  | 500.375   | 733.45    | <b>AK023334</b>  | 555.86    | 850.021   | <b>AA733033</b>  | 599.932   |
| 9596.266  | <b>AF086004</b>  | 5456.531  | 5891.029  | <b>NM_002563</b> | 3319.963  | 3166.261  | <b>AA583574</b>  | 752.021   |
| 1303.815  | <b>AF147433</b>  | 454.76    | 636.501   | <b>NM_002437</b> | 754.95    | 613.734   | <b>AI690184</b>  | 8893.848  |
| 693.025   | <b>AF085930</b>  | 165.62    | 1000.308  | <b>D79991</b>    | 1159.651  | 1041.368  | <b>AA927490</b>  | 1233.674  |
| 688.198   | <b>AF086006</b>  | 380.255   | 710.901   | <b>NM_000054</b> | 2428.731  | 2117.594  | <b>NM_001824</b> | 45941     |
| 573.123   | <b>AL137318</b>  | 1130.662  | 1323.172  | <b>NM_014713</b> | 3628.117  | 3346.27   | <b>NM_002964</b> | 1178.206  |
| 816.148   | <b>AL137482</b>  | 586.584   | 659.021   | <b>NM_001812</b> | 926.566   | 936.526   | <b>NM_005052</b> | 5398.68   |
| 1954.141  | <b>AL162011</b>  | 12811.868 | 14019.508 | <b>NM_014785</b> | 516.095   | 594.805   | <b>NM_014734</b> | 1439.629  |
| 563.997   | <b>AL390177</b>  | 512.597   | 769.689   | <b>NM_006033</b> | 2591.59   | 1578.504  | <b>NM_002289</b> | 405.057   |
| 559.622   | <b>AL137678</b>  | 367.851   | 436.435   | <b>NM_004837</b> | 3458.516  | 1765.741  | <b>AK026408</b>  | 1083.024  |
| 4896.84   | <b>AK056111</b>  | 766.59    | 531.74    | <b>NM_000370</b> | 1180.09   | 775.078   | <b>NM_005025</b> | 726.806   |
| 383.455   | <b>Y13807</b>    | 1261.992  | 1226.799  | <b>BE865893</b>  | 2739.538  | 1536.577  | <b>NM_006307</b> | 630.307   |
| 414.479   | <b>AK023038</b>  | 761.256   | 433.977   | <b>NM_003123</b> | 42806.848 | 34845.453 | <b>M74782</b>    | 1497.75   |
| 4259.539  | <b>AK026206</b>  | 1050.312  | 1078.651  | <b>AY005822</b>  | 2068.512  | 1725.14   | <b>NM_017818</b> | 998.833   |
| 1144.406  | <b>AF086074</b>  | 731.592   | 905.923   | <b>NM_018129</b> | 19584.221 | 9488.787  | <b>NM_020433</b> | 431.999   |
| 1552.728  | <b>AK023964</b>  | 1904.893  | 1960.565  | <b>AF289022</b>  | 924.956   | 1170.051  | <b>AF028823</b>  | 2676.976  |
| 6155.271  | <b>AF086084</b>  | 872.834   | 965.053   | <b>NM_016025</b> | 1443.352  | 1352.798  | <b>NM_004295</b> | 8901.685  |
| 1301.53   | <b>AK000156</b>  | 395.159   | 527.987   | <b>NM_013319</b> | 906.837   | 975.136   | <b>NM_002087</b> | 1682.578  |
| 7643.092  | <b>AL050184</b>  | 729.505   | 505.86    | <b>NM_000746</b> | 724.993   | 925.582   | <b>AF200815</b>  | 678.692   |
| 2490.454  | <b>AF085853</b>  | 520.525   | 332.468   | <b>NM_000722</b> | 887.447   | 815.686   | <b>NM_013441</b> | 953.542   |
| 14291.961 | <b>AK027112</b>  | 3678.914  | 4054.8    | <b>NM_006030</b> | 1062.762  | 1176.616  | <b>NM_014421</b> | 650.1     |
| 2911.081  | <b>AL049314</b>  | 1506.384  | 1696.246  | <b>NM_020410</b> | 4244.229  | 5078.053  | <b>M60499</b>    | 978.428   |
| 3819.741  | <b>AF093016</b>  | 6147.156  | 6885.471  | <b>AF000143</b>  | 13243.705 | 9087.118  | <b>NM_004300</b> | 2181.879  |
| 1371.276  | <b>AF161345</b>  | 1163.007  | 1417.169  | <b>NM_014211</b> | 457.871   | 379.449   | <b>NM_001127</b> | 1294.99   |
| 4925.838  | -                | 664.262   | 789.494   | <b>NM_000814</b> | 944.499   | 643.455   | <b>NM_012430</b> | 1092.81   |
| 3678.827  | <b>AF090925</b>  | 840.381   | 943.782   | <b>NM_000453</b> | 1771.674  | 2174.189  | <b>NM_003917</b> | 4889.166  |
| 40311.742 | <b>NM_014163</b> | 3538.399  | 5061.771  | <b>J03077</b>    | 6851.281  | 7288.978  | <b>NM_006750</b> | 4052.077  |
| 1200.786  | <b>AK021974</b>  | 1441.587  | 1532.199  | <b>J03048</b>    | 8646.835  | 5785.281  | <b>NM_020164</b> | 1145.868  |
| 7057.104  | <b>AK022068</b>  | 874.435   | 936.145   | <b>NM_002868</b> | 2536.756  | 1613.402  | <b>AK023521</b>  | 1274.504  |
| 454.442   | <b>AK022229</b>  | 858.003   | 802.305   | <b>AK024100</b>  | 2192.796  | 1945.019  | <b>NM_014267</b> | 8498.531  |
| 591.551   | <b>AK022362</b>  | 1758.776  | 1735.567  | <b>NM_005135</b> | 891.871   | 887.98    | <b>NM_002639</b> | 697.234   |
| 919.596   | <b>AK022004</b>  | 2477.134  | 2244.911  | <b>NM_000317</b> | 3449.975  | 1661.384  | <b>NM_006398</b> | 7300.327  |
| 5366.427  | <b>AK022390</b>  | 1073.896  | 1034.59   | <b>NM_018376</b> | 2788.694  | 2116.954  | <b>AK025655</b>  | 1192.512  |
| 871.084   | <b>AK027134</b>  | 1103.432  | 923.231   | <b>NM_017438</b> | 984.394   | 667.053   | <b>NM_001056</b> | 879.084   |
| 1129.747  | <b>AK024168</b>  | 988.705   | 602.364   | <b>U59209</b>    | 619.561   | 807.036   | <b>AY026461</b>  | 2219.901  |
| 2134.99   | <b>AF264622</b>  | 764.861   | 548.355   | <b>NM_020195</b> | 1341.385  | 1696.653  | <b>AK025708</b>  | 1538.843  |
| 588.729   | <b>AK021793</b>  | 1716.184  | 1365.361  | <b>AK023824</b>  | 2412.732  | 2010.777  | <b>NM_000405</b> | 729.325   |
| 1021.227  | <b>AK022255</b>  | 1039.028  | 924.837   | <b>AL133069</b>  | 1845.452  | 1649.208  | <b>NM_005564</b> | 24393.078 |
| 327.097   | <b>AF161360</b>  | 920.027   | 1100.833  | <b>AK026055</b>  | 2243.489  | 2592.782  | <b>NM_004508</b> | 1091.082  |
| 736.222   | <b>AK021720</b>  | 1665.025  | 2451.5    | <b>AK024126</b>  | 614.167   | 636.296   | <b>NM_006405</b> | 3826.054  |
| 512.774   | <b>NM_016497</b> | 16377.146 | 21819.6   | <b>NM_001516</b> | 2897.162  | 2263.062  | <b>NM_006749</b> | 625.544   |
| 1054.93   | <b>AF009261</b>  | 612.831   | 798.763   | <b>NM_002744</b> | 2780      | 2170.856  | <b>NM_000324</b> | 378.487   |
| 8141.753  | <b>AB037792</b>  | 1556.885  | 1936.835  | <b>NM_015917</b> | 5011.039  | 4929.601  | <b>AL137619</b>  | 1256.665  |
| 819.826   | <b>AK022480</b>  | 508.728   | 864.67    | <b>NM_020397</b> | 782.308   | 599.909   | <b>AF319476</b>  | 628.86    |
| 1543.498  | <b>AK024158</b>  | 862.51    | 678.648   | <b>NM_000061</b> | 2620.001  | 2294.123  | <b>AK001913</b>  | 2519.476  |
| 893.835   | <b>AL080082</b>  | 2366.827  | 2272.584  | <b>AB046859</b>  | 5296.247  | 4898.405  | <b>NM_004292</b> | 517.629   |
| 2257.885  | <b>AK021623</b>  | 1757.275  | 1567.01   | <b>NM_005109</b> | 3513.625  | 3686.168  | <b>NM_015484</b> | 2111.685  |
| 22905.26  | <b>AF119901</b>  | 2078.255  | 1890.545  | <b>AK023573</b>  | 1989.425  | 1437.36   | <b>NM_018046</b> | 936.392   |
| 1268.933  | <b>AK001936</b>  | 2146.258  | 3397.088  | <b>NM_002730</b> | 2059.258  | 3422.149  | <b>NM_013316</b> | 1742.521  |
| 3597.383  | <b>NM_003770</b> | 19256.984 | 20812.035 | <b>NM_004828</b> | 1437.46   | 1605.031  | <b>M20701</b>    | 4844.52   |
| 1479.8    | <b>AK001395</b>  | 6356.927  | 9164.768  | <b>AB011540</b>  | 15086.166 | 11617.127 | <b>NM_002912</b> | 809.27    |
| 629.596   | <b>S57803</b>    | 2941.073  | 3512.893  | <b>NM_000040</b> | 3850.93   | 3771.979  | <b>NM_013284</b> | 1548.028  |

|           |                  |           |           |                    |           |           |                  |           |
|-----------|------------------|-----------|-----------|--------------------|-----------|-----------|------------------|-----------|
| 1347.765  | <b>AF131822</b>  | 910.336   | 753.161   | <b>NM_004631</b>   | 2341.792  | 2462.823  | <b>NM_006739</b> | 1061.766  |
| 425.166   | <b>AK023131</b>  | 1242.455  | 1810.238  | <b>NM_004736</b>   | 1214.019  | 739.894   | <b>NM_013274</b> | 2346.811  |
| 1044.92   | <b>AF085865</b>  | 3290.826  | 3323.039  | <b>NM_006459</b>   | 4050.747  | 1717.446  | <b>AL050187</b>  | 1850.663  |
| 2448.198  | <b>AK025521</b>  | 2116.156  | 2634.775  | <b>D50373</b>      | 488.071   | 614.709   | <b>NM_012387</b> | 4882.655  |
| 340.004   | <b>NM_015421</b> | 5595.959  | 4733.616  | <b>AA488757</b>    | 3874.745  | 3566.368  | <b>NM_014735</b> | 1219.134  |
| 2928.347  | <b>AF086081</b>  | 4065.68   | 2952.34   | <b>AI394286</b>    | 1222.984  | 756.251   | <b>NM_004252</b> | 5707.104  |
| 795.59    | <b>NM_018111</b> | 603.631   | 248.809   | <b>H07071</b>      | 616.236   | 613.969   | <b>AF172929</b>  | 2466.877  |
| 417.076   | <b>L23867</b>    | 761.131   | 676.702   | <b>M25322</b>      | 1167.496  | 1251.013  | <b>M60499</b>    | 1214.84   |
| 28344.424 | <b>AB020968</b>  | 1010.294  | 833.959   | <b>H-L 27586 I</b> | 801.056   | 910.523   | <b>NM_003833</b> | 4310.509  |
| 17786.178 | <b>AL138690</b>  | 1187.396  | 1269.901  | <b>ID 214180</b>   | 273.318   | 531.796   | <b>AK000868</b>  | 1280.643  |
| 6689.365  | <b>AK000394</b>  | 639.391   | 751.61    | <b>ID 1867426</b>  | 2524.164  | 3064.722  | <b>NM_001233</b> | 1382.633  |
| 1010.267  | <b>NM_013941</b> | 1029.022  | 1197.708  | <b>W99328</b>      | 492.443   | 557.078   | <b>NM_001234</b> | 1106.401  |
| 24073.869 | <b>AF074989</b>  | 1169.864  | 818.043   | <b>H08563</b>      | 484.213   | 391.089   | <b>BF679789</b>  | 1274.1    |
| 981.459   | <b>AK001107</b>  | 627.201   | 844.988   | <b>BE735403</b>    | 985.294   | 814.542   | <b>H97792</b>    | 909.514   |
| 481.183   | <b>AF147393</b>  | 598.213   | 646.388   | <b>NM_022552</b>   | 2237.81   | 1858.966  | <b>L33404</b>    | 512.855   |
| 3121.975  | <b>AL080112</b>  | 2279.935  | 2703.638  | <b>NM_014389</b>   | 3908.949  | 3654.913  | <b>M13509</b>    | 1136.262  |
| 9950.482  | <b>AK022299</b>  | 561.975   | 224.418   | <b>AF116659</b>    | 1167.57   | 1193.34   | <b>X04076</b>    | 2528.788  |
| 2278.27   | <b>AL137325</b>  | 438.842   | 489.57    | <b>D79991</b>      | 784.038   | 594.154   | <b>AA485362</b>  | 2195.94   |
| 391.291   | <b>AF147361</b>  | 1487.892  | 1600.441  | <b>NM_000054</b>   | 1862.231  | 720.129   | <b>AJ222801</b>  | 1847.468  |
| 526.364   | <b>AL133086</b>  | 1097.319  | 969.359   | <b>NM_014713</b>   | 2851.456  | 1846.235  | <b>W72207</b>    | 30346.574 |
| 2834.076  | <b>NM_012151</b> | 42448.34  | 46442.723 | <b>NM_001812</b>   | 711.477   | 619.798   | <b>BI772354</b>  | 1898.112  |
| 2233.85   | <b>AF087994</b>  | 1582.966  | 2229.146  | <b>NM_014785</b>   | 461.122   | 273.19    | <b>AA733033</b>  | 498.265   |
| 841.714   | <b>AJ227912</b>  | 605.763   | 956.991   | <b>NM_005811</b>   | 2102.046  | 2335.232  | <b>AA583574</b>  | 877.739   |
| 3177.933  | <b>AK025532</b>  | 2804.661  | 4135.238  | <b>NM_016362</b>   | 1202.449  | 1425.976  | <b>AI690184</b>  | 9274.74   |
| 402.236   | <b>NM_003522</b> | 700.12    | 487.062   | <b>NM_004214</b>   | 3090.891  | 4171.306  | <b>AA927490</b>  | 1380.537  |
| 1524.138  | <b>BF217847</b>  | 1192.689  | 1139.16   | <b>NM_004329</b>   | 5068.373  | 4128.766  | <b>U30872</b>    | 458.187   |
| 1185.518  | <b>NM_005320</b> | 1437.172  | 1514.224  | <b>NM_002836</b>   | 3281.398  | 2741.981  | <b>NM_002639</b> | 725.222   |
| 5319.822  | <b>CY3Cy5</b>    | 1245.109  | 113.327   | <b>NM_020167</b>   | 1017.78   | 1100.643  | <b>NM_014734</b> | 1159.825  |
| 852.969   | <b>BI830936</b>  | 591.157   | 391.583   | <b>AL049963</b>    | 6364.479  | 7549.673  | <b>AK026408</b>  | 929.538   |
| 6904.346  | <b>U79292</b>    | 4491.031  | 3939.653  | <b>NM_016058</b>   | 9966.952  | 18260.119 | <b>NM_005025</b> | 674.518   |
| 1707.303  | <b>BI830753</b>  | 602.577   | 437.454   | <b>NM_014005</b>   | 814.538   | 988.175   | <b>M74782</b>    | 1021.233  |
| 831.649   | <b>X68314</b>    | 607.439   | 576.855   | <b>NM_004636</b>   | 882.811   | 679.54    | <b>NM_017818</b> | 1005.649  |
| 829.649   | <b>X71973</b>    | 34520.66  | 29647.123 | <b>AK022603</b>    | 485.94    | 820.961   | <b>AF028823</b>  | 2554.936  |
| 885.207   | <b>T49651</b>    | 4221.046  | 16924.994 | <b>NM_013372</b>   | 3354.111  | 3762.819  | <b>NM_004295</b> | 12133.049 |
| 769.081   | <b>N51014</b>    | 2478.177  | 2827.104  | <b>NM_003976</b>   | 2220.585  | 2714.082  | <b>NM_002087</b> | 3200.83   |
| 2420.253  | <b>BE392471</b>  | 11204.791 | 13809.911 | <b>NM_017688</b>   | 625.757   | 885.287   | <b>NM_014585</b> | 357.84    |
| 741.973   | <b>AI802950</b>  | 1108.082  | 1398.058  | <b>AK025612</b>    | 2926.514  | 2833.208  | <b>AF200815</b>  | 574.579   |
| 608.664   | <b>AI741278</b>  | 334.571   | 383.202   | <b>NM_012268</b>   | 1207.367  | 1145.635  | <b>NM_013441</b> | 781.686   |
| 2546.678  | <b>AA682423</b>  | 361.538   | 354.504   | <b>NM_012203</b>   | 356.592   | 588.988   | <b>NM_014421</b> | 472.488   |
| 924.825   | <b>AL043686</b>  | 4785.165  | 4774.098  | <b>J03077</b>      | 4626.592  | 2963.712  | <b>NM_006749</b> | 536.149   |
| 4737.069  | <b>AA490172</b>  | 895.71    | 802.119   | <b>J03048</b>      | 6135.641  | 2893.853  | <b>NM_004694</b> | 447.096   |
| 14245.402 | <b>AA775212</b>  | 3510.466  | 2868.855  | <b>NM_002868</b>   | 1991.955  | 950.323   | <b>NM_000324</b> | 524.475   |
| 57664.145 | <b>NM_000945</b> | 1936.057  | 1581.266  | <b>AK024100</b>    | 2116.657  | 1483.842  | <b>AL137619</b>  | 1132.338  |
| 418.639   | <b>NM_002574</b> | 27694.932 | 32833.129 | <b>NM_005135</b>   | 612.065   | 616.115   | <b>NM_004300</b> | 1685.207  |
| 747.457   | <b>SR5</b>       | 4401.152  | 5326.42   | <b>NM_003827</b>   | 2737.13   | 4155.138  | <b>AB007859</b>  | 581.667   |
| 730.996   | <b>SR7</b>       | 6041.957  | 55017.004 | <b>NM_001103</b>   | 804.763   | 620.425   | <b>NM_001127</b> | 1517.722  |
| 2345.268  | <b>CY3Cy5</b>    | 2985.138  | 186.318   | <b>AF228710</b>    | 8190.734  | 7206.322  | <b>NM_012430</b> | 1289.054  |
| 1419.575  | <b>NM_003371</b> | 6843.866  | 6376.318  | <b>NM_018399</b>   | 244.768   | 572.774   | <b>NM_003917</b> | 8282.738  |
| 486.116   | <b>AK023114</b>  | 3610.837  | 5343.337  | <b>AY007131</b>    | 17825.555 | 15801.765 | <b>NM_007077</b> | 623.905   |
| 459.566   | <b>NM_003678</b> | 3348.526  | 4355.395  | <b>U61735</b>      | 2220.223  | 2148.875  | <b>NM_002956</b> | 791.15    |
| 1331.792  | <b>NM_014271</b> | 77.25     | 602.328   | <b>NM_001144</b>   | 1136.087  | 806.997   | <b>NM_006750</b> | 5577.619  |
| 1213.139  | <b>NM_012301</b> | 456.917   | 433.961   | <b>AK023766</b>    | 1970.386  | 2475.218  | <b>NM_020164</b> | 1451.416  |
| 3191.423  | <b>NM_005631</b> | 391.456   | 228.304   | <b>NM_001897</b>   | 903.954   | 1184.542  | <b>AK023521</b>  | 1287.062  |



|           |           |           |           |           |           |           |           |           |
|-----------|-----------|-----------|-----------|-----------|-----------|-----------|-----------|-----------|
| 1481.089  | NM_014419 | 2228.662  | 2268.38   | NM_003853 | 946.405   | 699.734   | NM_014267 | 7603.613  |
| 550.827   | NM_014938 | 2525.115  | 2218.04   | AB033109  | 1241.63   | 1632.24   | AL050187  | 1914.247  |
| 10138.521 | AF049460  | 430.857   | 475.434   | NM_002053 | 11160.804 | 10634.384 | NM_012387 | 4886.211  |
| 1338.707  | AK026066  | 1195.878  | 1375.524  | NM_002438 | 1747.347  | 2891.011  | NM_014735 | 1018.721  |
| 17182.885 | NM_005244 | 2629.983  | 2295.441  | NM_014589 | 2132.74   | 2760.796  | NM_004252 | 5828.404  |
| 19672.219 | AF054589  | 386.879   | 370.852   | NM_000759 | 1332.418  | 1554.078  | AF172929  | 1737.163  |
| 2549.198  | NM_005270 | 889.741   | 637.296   | AK023334  | 1391.383  | 2575.984  | NM_006398 | 6305.891  |
| 4088.161  | NM_014815 | 1810.746  | 1572.596  | NM_002563 | 5149.165  | 8133.057  | AK025655  | 1106.709  |
| 774.937   | NM_005443 | 527.398   | 622.338   | NM_002437 | 677.971   | 624.885   | NM_001056 | 720.085   |
| 2536.136  | NM_007221 | 4489.641  | 4352.074  | NM_000040 | 3625.177  | 2304.679  | AY026461  | 2537.538  |
| 645.198   | AK025395  | 680.716   | 764.715   | NM_004631 | 2015.262  | 1637.265  | AK025708  | 1753.618  |
| 346.552   | NM_000388 | 960.753   | 986.426   | NM_006033 | 2764.708  | 2295.739  | NM_000405 | 849.146   |
| 2428.278  | NM_014668 | 657.405   | 604.283   | NM_004837 | 3891.115  | 3089.793  | NM_004508 | 1481.448  |
| 312.435   | NM_004722 | 1701.78   | 1230.943  | NM_000370 | 1100.73   | 1114.484  | NM_006405 | 5630.552  |
| 485.718   | NM_014425 | 658.247   | 684.459   | BE865893  | 3149.75   | 2962.84   | AJ245946  | 305.643   |
| 1826.627  | NM_012133 | 1794.749  | 2099.62   | NM_003123 | 48114.984 | 46309.605 | NM_002390 | 1215.745  |
| 7577.631  | NM_006612 | 1422.126  | 1866.688  | AY005822  | 2260.201  | 2029.23   | NM_006142 | 360.179   |
| 2054.201  | NM_016451 | 1788.206  | 1564.457  | NM_018129 | 21275.719 | 11602.574 | NM_014910 | 3491.89   |
| 616.691   | NM_007351 | 12303.215 | 10194.39  | AF289022  | 936.909   | 1270.23   | AK001064  | 2579.9    |
| 475.368   | AK026266  | 6701.151  | 4823.96   | NM_016025 | 1332.196  | 1667.021  | AB029031  | 2178.759  |
| 263.976   | NM_007124 | 3291.768  | 2746.031  | NM_013319 | 1094.085  | 1277.95   | NM_001294 | 2488.651  |
| 1404.361  | NM_003176 | 2278.398  | 1730.841  | NM_000746 | 595.121   | 580.435   | NM_014241 | 4068.03   |
| 1184.117  | NM_000723 | 1001.623  | 905.46    | NM_000722 | 741.066   | 1068.088  | AF302786  | 1415.893  |
| 2014.122  | AL096751  | 3336.845  | 2560.6    | NM_006030 | 903.666   | 1049.144  | AL122083  | 1651.529  |
| 3101.642  | NM_000364 | 604.669   | 572.796   | NM_020410 | 4102.291  | 5017.341  | NM_005052 | 5756.074  |
| 533.373   | AF026920  | 2685.115  | 3279.695  | AF000143  | 14277.608 | 11123.296 | AF319476  | 664.803   |
| 8017.146  | NM_004931 | 4329.43   | 4455.176  | NM_014211 | 651.168   | 463.833   | AK001913  | 2738.614  |
| 3493.976  | NM_002575 | 4870.93   | 1493.204  | NM_000814 | 1197.626  | 945.644   | NM_017737 | 801.549   |
| 5003.779  | NM_004244 | 3202.208  | 4002.082  | NM_000453 | 1758.579  | 2046.165  | NM_015484 | 2783.121  |
| 3002.019  | AK001500  | 817.656   | 517.561   | AF116659  | 1102.612  | 766.805   | NM_018046 | 1128.703  |
| 2035.844  | NM_006774 | 378.589   | 349.979   | NM_000317 | 4295.988  | 3049.629  | NM_013316 | 1797.483  |
| 869.199   | NM_020129 | 751.661   | 740.865   | NM_018376 | 2793.437  | 3992.021  | M20701    | 5483.528  |
| 1978.016  | Y16521    | 1714.294  | 2117.466  | NM_017438 | 1010.667  | 1213.703  | NM_006739 | 1056.219  |
| 2145.022  | AL050371  | 3062.465  | 3055.266  | U59209    | 689.252   | 804.568   | NM_013274 | 1903.792  |
| 921.353   | NM_002651 | 5917.042  | 6338.579  | NM_020195 | 1307.364  | 1968.245  | AK024955  | 7892.087  |
| 470.187   | NM_002413 | 8576.171  | 7946.963  | AK023824  | 2669.865  | 2270.645  | NM_016580 | 601.214   |
| 371.191   | NM_017577 | 365.737   | 460.871   | AL133069  | 1888.756  | 2386.32   | AF169693  | 612.184   |
| 526.028   | NM_001647 | 2972.265  | 1993.308  | AL117574  | 260.065   | 500.189   | L23206    | 1523.909  |
| 802.513   | NM_018158 | 1497.127  | 1750.718  | AK026055  | 2437.646  | 3190.245  | NM_012192 | 1678.304  |
| 1636.658  | NM_016301 | 6223.481  | 6742.292  | AK024126  | 537.793   | 681.976   | NM_006293 | 1229.156  |
| 999.321   | AK021975  | 699.313   | 832.93    | NM_001516 | 2835.32   | 2420.149  | NM_007229 | 2597.466  |
| 660.275   | AB032952  | 16200.343 | 16951.195 | NM_002744 | 2275.204  | 1548.956  | AB011105  | 1264.703  |
| 2925.426  | NM_002522 | 9949.98   | 10007.394 | NM_015917 | 5090.006  | 5492.083  | NM_018970 | 523.235   |
| 5985.918  | NM_018607 | 1001.471  | 1367.13   | NM_020397 | 745.429   | 542.488   | NM_004814 | 3680.128  |
| 1345.79   | NM_002978 | 2119.072  | 2899.631  | NM_000061 | 2713.857  | 2568.48   | D86976    | 11152.401 |
| 1114.71   | AB040879  | 1344.74   | 911.414   | AB046859  | 5708.434  | 5013.253  | AF307080  | 1392.981  |
| 2782.062  | AL049935  | 2892.858  | 1442.561  | NM_005109 | 3849.647  | 3865.928  | NM_004057 | 1444.326  |
| 944.489   | AB033043  | 2759.321  | 2641.847  | NM_012268 | 1153.634  | 504.623   | K03175    | 465.973   |
| 594.311   | NM_014999 | 2105.167  | 1291.864  | NM_004736 | 1202.726  | 1849.752  | NM_003015 | 940.898   |
| 1598.487  | AK025220  | 1237.481  | 624.72    | NM_006459 | 4432.093  | 3162.771  | BE904126  | 12851.559 |
| 473.722   | NM_016308 | 13535.372 | 7953.096  | D50373    | 448.312   | 779.915   | AF272380  | 11196.268 |
| 482.08    | D42046    | 3230.648  | 3791.24   | AA488757  | 5208.245  | 4666.866  | NM_004431 | 2984.628  |
| 2078.41   | NM_001033 | 1981.245  | 1134.475  | AI394286  | 1481.868  | 858.789   | NM_002012 | 620.04    |

|           |           |           |           |             |           |           |           |           |
|-----------|-----------|-----------|-----------|-------------|-----------|-----------|-----------|-----------|
| 492.985   | NM_004526 | 12588.391 | 4871.66   | H07071      | 895.294   | 754.488   | NM_002070 | 23781.633 |
| 1280.365  | NM_002526 | 6804.725  | 3447.267  | M25322      | 1691.527  | 1313.18   | AF227969  | 755.292   |
| 3851.571  | AK023149  | 1226.755  | 706.17    | H-L 27586 I | 657.513   | 745.922   | NM_003944 | 11173.651 |
| 1058.259  | AK023168  | 2646.484  | 3620.917  | ID 1867426  | 2292.531  | 2304.354  | NM_016120 | 42308.059 |
| 1316.189  | NM_006646 | 1081.293  | 1417.676  | W99328      | 580.069   | 566.432   | NM_002893 | 1745.872  |
| 1238.623  | NM_004742 | 1048.118  | 622.515   | AI434176    | 137.944   | 637.61    | NM_002393 | 4125.749  |
| 1977.465  | NM_014331 | 4543.847  | 9778.822  | H08563      | 394.724   | 376.262   | NM_003803 | 1170.702  |
| 3005.941  | NM_006795 | 12572.89  | 15770.266 | BE735403    | 1114.407  | 839.549   | AK021608  | 1136.419  |
| 312.659   | AF070568  | 2081.327  | 4976.541  | NM_014589   | 1630.65   | 3202.049  | NM_004297 | 721.946   |
| 1486.098  | NM_000277 | 445.273   | 544.346   | NM_000759   | 1181.183  | 1508.01   | NM_006044 | 4154.743  |
| 746.477   | NM_000240 | 3558.574  | 3612.465  | NM_002563   | 3660.193  | 2318.262  | AK025498  | 870.199   |
| 518.642   | AK055733  | 19968.98  | 28485.6   | NM_002437   | 618.815   | 409.785   | NM_001395 | 3156.193  |
| 1034.377  | AF298880  | 13031.318 | 14075.252 | D79991      | 876.79    | 617.694   | NM_002068 | 2563.07   |
| 547.068   | AK025395  | 878.447   | 668.244   | NM_000054   | 2608.635  | 2146.801  | NM_013338 | 884.21    |
| 51876.02  | NM_000388 | 1402.392  | 1030.171  | NM_014713   | 3423.457  | 3618.168  | NM_014671 | 2745.382  |
| 1793.699  | X58377    | 614.99    | 638.895   | NM_001812   | 1011.834  | 819.878   | NM_001814 | 5832.162  |
| 1914.821  | NM_002469 | 957.582   | 867.97    | NM_014785   | 523.474   | 563.365   | NM_018439 | 605.708   |
| 1502.561  | B1830936  | 893.597   | 850.948   | NM_005811   | 2658.736  | 2947.344  | NM_005656 | 601.13    |
| 18041.102 | U79292    | 5201.717  | 6079.35   | NM_005764   | 683.558   | 617.472   | NM_006012 | 2859.075  |
| 840.717   | B1830753  | 1016.034  | 1194.557  | NM_016362   | 1922.536  | 1720.024  | NM_002151 | 1310.059  |
| 828.337   | X68314    | 1074.07   | 989.019   | NM_004214   | 3464.047  | 4037.902  | NM_014889 | 806.468   |
| 2659.166  | X71973    | 47188.563 | 48883.195 | NM_004329   | 5236.141  | 4706.948  | AF173935  | 509.681   |
| 2957.542  | T49651    | 5718.934  | 29780.094 | NM_002836   | 1660.534  | 1494.817  | AK025322  | 3906.975  |
| 20850.975 | N51014    | 3705.829  | 7704.292  | NM_020167   | 850.101   | 1273.526  | NM_018083 | 814.456   |
| 1340.37   | BE392471  | 17947.992 | 34614.699 | AL049963    | 7059.082  | 8267.48   | AL110188  | 2972.842  |
| 1589.566  | A1802950  | 1831.843  | 3512.715  | NM_016058   | 10786.719 | 19416.436 | D70834    | 9780.476  |
| 34167.891 | A1741278  | 644.927   | 1045.356  | NM_014005   | 947.635   | 1073.492  | NM_000970 | 54474.801 |
| 504.033   | AA682423  | 627.295   | 944.562   | NM_004636   | 1114.329  | 409.276   | AB040916  | 701.227   |
| 364.537   | AL043686  | 6524.81   | 10224.617 | NM_004896   | 4061.507  | 6385.521  | NM_005587 | 1244.243  |
| 333.495   | AA490172  | 1179.153  | 1508.472  | NM_020410   | 5238.342  | 9310.843  | AF038362  | 1990.608  |
| 2187.818  | AA775212  | 4684.789  | 6012.803  | AF000143    | 11773.239 | 12530.361 | NM_005481 | 592.535   |
| 656.536   | NM_000945 | 3017.415  | 3440.991  | NM_000814   | 553.901   | 322.386   | NM_004715 | 1659.115  |
| 5431.871  | AB011174  | 1957.972  | 2136.885  | NM_000453   | 1705.063  | 1330.916  | NM_001007 | 57593.539 |
| 40765.059 | NM_000607 | 19112.477 | 19399.549 | J03077      | 6602.577  | 5954.456  | NM_003017 | 3158.709  |
| 188.397   | AF035799  | 318.03    | 122.581   | J03048      | 8815.741  | 4921.395  | NM_020141 | 1864.195  |
| 1364.885  | AF090409  | 441.907   | 87.222    | NM_002868   | 2726.747  | 1876.758  | NM_003779 | 501.084   |
| 288.166   | NM_002575 | 6272.009  | 2065.892  | AK024100    | 2357.138  | 1724.008  | NM_000662 | 1086.1    |
| 1137.661  | NM_004244 | 4627.484  | 5055.547  | NM_005135   | 624.079   | 779.984   | NM_000292 | 789.369   |
| 475.081   | NM_003371 | 7942.028  | 9506.609  | NM_003827   | 3207.679  | 4659.954  | NM_016173 | 690.731   |
| 5134.877  | AK023114  | 4853.937  | 10136.321 | NM_004583   | 287.823   | 602.349   | NM_002875 | 2149.354  |
| 2225.197  | NM_003678 | 4301.034  | 6320.5    | NM_001103   | 449.337   | 513.136   | NM_013240 | 3084.628  |
| 2221.843  | NM_012301 | 750.349   | 609.411   | AF228710    | 7980.261  | 6355.209  | NM_015874 | 12946.561 |
| 248.457   | NM_014419 | 3772.652  | 4850.175  | NM_018399   | 505.033   | 549.478   | AF272898  | 3844.972  |
| 3034.952  | NM_014938 | 3394.634  | 3708.148  | AY007131    | 14923.844 | 13024.865 | AB032951  | 4257.483  |
| 723.126   | AF049460  | 714.347   | 829.967   | U61735      | 2084.277  | 1902.48   | NM_003417 | 615.097   |
| 562.378   | AK026066  | 1466.133  | 2343.135  | NM_001144   | 1264.912  | 902.452   | NM_005887 | 1879.755  |
| 3255.098  | NM_005244 | 2676.705  | 2938.221  | AK023766    | 2474.617  | 2460.141  | AK024921  | 394.676   |
| 508.033   | AF054589  | 621.589   | 570.492   | NM_001897   | 1491.05   | 2807.133  | AL110232  | 264.568   |
| 1661.691  | NM_014815 | 1863.521  | 1988.543  | NM_003853   | 1465.124  | 926.362   | AK026103  | 1477.528  |
| 404.332   | NM_007221 | 4390.851  | 3958.892  | AB033109    | 1524.944  | 1360.877  | NM_016353 | 6209.733  |
| 3988.9    | X54163    | 14952.289 | 25507.076 | NM_002053   | 11766.021 | 9881.253  | AK022567  | 599.448   |
| 1271.413  | NM_002978 | 1326.103  | 900.605   | NM_006889   | 1203.393  | 1344.619  | AK023450  | 571.031   |
| 136.35    | NM_014668 | 652.325   | 914.168   | NM_015917   | 6879.365  | 12076.001 | AL080280  | 2189.209  |

|          |           |           |           |           |           |           |           |          |
|----------|-----------|-----------|-----------|-----------|-----------|-----------|-----------|----------|
| 1319.341 | NM_004722 | 1866.072  | 1381.026  | NM_020397 | 911.121   | 1110.108  | AB028947  | 1988.357 |
| 428.659  | NM_014425 | 854.049   | 733.11    | NM_005109 | 4028.453  | 2517.97   | AF035314  | 991.243  |
| 414.781  | NM_012133 | 2001.349  | 1956.385  | AK023573  | 2127.483  | 1546.166  | NM_018036 | 770.973  |
| 526.698  | NM_017954 | 557.323   | 788.412   | NM_002730 | 2178.771  | 3161.781  | AF007143  | 1771.872 |
| 185.867  | NM_006612 | 1560.851  | 1727.583  | NM_004828 | 2023.998  | 1450.719  | AF147417  | 532.321  |
| 620.28   | NM_016451 | 1613.011  | 1038.335  | AB011540  | 16049.117 | 12334.584 | AK023656  | 797.323  |
| 5023.414 | NM_007351 | 12066.436 | 9135.449  | NM_000040 | 4874.956  | 4021.267  | AF086511  | 2452.058 |
| 378.171  | AK026266  | 6826.576  | 5065.756  | NM_004631 | 2318.302  | 2608.258  | AK022989  | 2820.114 |
| 995.059  | NM_007124 | 2797.69   | 2819.522  | NM_006033 | 4270.815  | 3839.516  | AK001604  | 3003.903 |
| 500.599  | NM_003176 | 2013.046  | 1811.996  | NM_004837 | 4583.353  | 3592.033  | AF131762  | 6637.368 |
| 1256.316 | NM_000723 | 929.359   | 877.175   | NM_000370 | 1023.618  | 1286.841  | AY007089  | 3307.264 |
| 770.118  | AL096751  | 3067.322  | 3010.068  | BE865893  | 3615.791  | 3235.737  | AK021816  | 3150.524 |
| 313.94   | NM_000364 | 456.682   | 488.855   | NM_003123 | 46460.492 | 49711.457 | D43770    | 3039.441 |
| 857.548  | AF026920  | 2475.084  | 3721.32   | AY005822  | 2373.591  | 2207.052  | AF085960  | 1293.132 |
| 311.181  | NM_004931 | 3640.435  | 4047.49   | NM_018129 | 28655.496 | 15248.943 | NM_014254 | 1557.175 |
| 1468.2   | NM_006795 | 8204.031  | 6171.569  | AF289022  | 1381.631  | 1531.976  | U09197    | 761.994  |
| 972.985  | AF070568  | 1418.277  | 1775.359  | M17252    | 666.138   | 610.932   | U50529    | 510.656  |
| 3018.938 | NM_000240 | 2115.603  | 1631.37   | NM_016025 | 1810.978  | 1911.71   | U15553    | 3021.842 |
| 90.186   | AK055733  | 13536.149 | 11507.558 | NM_013319 | 1332.837  | 1332.154  | NM_017741 | 664.368  |
| 218.502  | AF298880  | 9204.617  | 5061.721  | NM_000746 | 969.892   | 952.497   | AK000144  | 942.401  |
| 500.969  | AK001500  | 765.122   | 825.988   | NM_000722 | 961.221   | 1050.106  | NM_016349 | 451.279  |
| 2421.684 | NM_006774 | 405.308   | 492.943   | NM_018655 | 855.465   | 1973.305  | AL117533  | 491.213  |
| 2933.728 | NM_020129 | 784.255   | 801.195   | NM_005663 | 1465.073  | 1323.481  | AK026036  | 554.443  |
| 1258.027 | Y16521    | 1895.078  | 2475.792  | NM_005773 | 898.102   | 819.608   | AK023422  | 618.656  |
| 420.793  | AL050371  | 2624.591  | 3185.69   | NM_017644 | 2686.667  | 1865.877  | AK022796  | 343.576  |
| 654.963  | NM_002651 | 6110.99   | 7480.688  | NM_002482 | 1104.987  | 596.415   | AK095193  | 414.31   |
| 534.342  | NM_002413 | 9853.07   | 9825.121  | AF116659  | 1367.371  | 1479.15   | AL122088  | 994.777  |
| 867.155  | NM_001757 | 2912.317  | 7115.686  | NM_000317 | 7025.214  | 5093.037  | AF116633  | 303.095  |
| 330.685  | NM_001647 | 3219.796  | 2678.696  | NM_018376 | 3992.713  | 4958.789  | AF119912  | 668.325  |
| 1003.284 | NM_018158 | 1369.78   | 2456.84   | NM_017438 | 1432.772  | 1445.447  | AK023134  | 567.748  |
| 748.83   | NM_016301 | 5726.837  | 8452.576  | U59209    | 1132.107  | 1179.723  | AK023437  | 1235.46  |
| 1330.864 | AK021975  | 599.857   | 911.055   | NM_020195 | 1643.763  | 3037.07   | AK022897  | 1666.875 |
| 291.405  | AB032952  | 15784.703 | 21656.178 | AK023824  | 5822.769  | 4475.711  | NM_019040 | 3035.218 |
| 614.276  | NM_002522 | 7074.843  | 9203.956  | AL133069  | 2710.748  | 2731.528  | NM_005978 | 794.951  |
| 230.196  | NM_000945 | 2004.217  | 1270.318  | AK026055  | 3064.012  | 3336.317  | Y16711    | 608.26   |
| 192.398  | NM_002574 | 26414.623 | 25964.49  | AK024126  | 764.121   | 982.324   | AJ272179  | 1844.925 |
| 200.903  | AB011174  | 1502.482  | 1284.541  | NM_001516 | 3435.365  | 2457.941  | AJ007015  | 537.344  |
| 1458.884 | AB040879  | 1465.515  | 1212.164  | NM_019086 | 715.216   | 711.343   | AL049317  | 1171.525 |
| 719.752  | AL049935  | 3281.712  | 2281.57   | NM_012425 | 3671.146  | 5246.973  | AL050090  | 1497.867 |
| 208.881  | AB033043  | 3682.36   | 3524.509  | NM_000081 | 1670.585  | 1620.774  | AF238870  | 413.703  |
| 185.449  | NM_014999 | 1923.181  | 1892.272  | AK024134  | 4438.022  | 5353.976  | AK026279  | 1531.622 |
| 247.995  | AK025220  | 1509.543  | 1106.526  | NM_003014 | 1738.833  | 2669.136  | AF130094  | 1484.388 |
| 114.662  | NM_016308 | 12631.531 | 11289.519 | NM_018558 | 793.287   | 829.451   | AK026673  | 509.427  |
| 538.126  | D42046    | 3029.815  | 4090.111  | NM_001974 | 1486.348  | 1614.321  | NM_005452 | 1163.903 |
| 233.052  | NM_001033 | 3035.407  | 1644.368  | NM_013957 | 1357.509  | 1955.329  | AF170935  | 9514.684 |
| 1174.571 | NM_004526 | 11864.757 | 5110.084  | NM_002468 | 2776.205  | 5369.285  | AJ227899  | 928.575  |
| 2636.508 | NM_002526 | 4702.898  | 3533.113  | NM_003028 | 1602.857  | 1043.725  | AL359607  | 1303.371 |
| 1825.085 | AK023149  | 1347.11   | 1252.77   | NM_001566 | 685.369   | 632.018   | AF161371  | 5726.856 |
| 3305.743 | AK023168  | 1962.954  | 3960.474  | NM_016541 | 1740.632  | 1593.57   | AK022464  | 782.523  |
| 1562.721 | NM_006646 | 1266.374  | 2979.921  | NM_018548 | 3242.958  | 2763.063  | AF086230  | 1630.567 |
| 479.864  | NM_004742 | 1126.091  | 1308.416  | NM_013401 | 926.585   | 1017.605  | AK023408  | 1258.323 |
| 972.608  | NM_014753 | 2103.587  | 2215.961  | NM_018238 | 4412.645  | 4180.172  | U84509    | 1364.033 |
| 9670.644 | NM_006585 | 40874.625 | 43385.828 | NM_006858 | 9350.55   | 6566.794  | AK002036  | 585.812  |

|          |           |           |           |           |           |           |            |           |
|----------|-----------|-----------|-----------|-----------|-----------|-----------|------------|-----------|
| 470.475  | NM_014331 | 3258.502  | 4902.041  | NM_001405 | 7572.223  | 7566.003  | AK025775   | 936.633   |
| 509.745  | AF054589  | 393.72    | 331.603   | NM_003880 | 768.258   | 638.96    | AB046791   | 485.759   |
| 1072.039 | NM_005270 | 704.144   | 331.831   | AF131778  | 1039.869  | 1040.795  | AK022008   | 819.38    |
| 2419.438 | NM_014815 | 1315.066  | 1014.738  | NM_001562 | 5716.542  | 3138.626  | AL080188   | 1452.572  |
| 2658.019 | NM_005443 | 445.553   | 443.775   | NM_013278 | 941.321   | 846.593   | T99941     | 3892.829  |
| 550.629  | NM_007221 | 4314.993  | 3395.102  | NM_003487 | 1780.606  | 1024.316  | AF113678   | 2237.631  |
| 220.346  | X54163    | 15962.678 | 21971.295 | NM_002880 | 4347.289  | 5960.725  | AL137313   | 54053.086 |
| 1156.728 | AK025395  | 716.755   | 422.742   | NM_001066 | 2964.22   | 4074.773  | AB002363   | 4931.179  |
| 5031.709 | NM_000388 | 875.192   | 779.126   | NM_004657 | 3286.14   | 4025.74   | NM_005284  | 2899.703  |
| 166.084  | X58377    | 565.46    | 400.739   | NM_006291 | 3910.508  | 10509.36  | AF086351   | 1884.866  |
| 171.348  | NM_002469 | 509.297   | 549.796   | NM_018170 | 5850.97   | 5830.235  | D83199     | 14751.229 |
| 522.906  | B1830936  | 728.723   | 571.309   | NM_003867 | 1314.399  | 2586.27   | AK025957   | 576.235   |
| 750.314  | U79292    | 4259.244  | 4703.02   | AL162062  | 416.543   | 726.618   | Y16708     | 962.409   |
| 744.288  | B1830753  | 749.857   | 588.401   | NM_003173 | 5334.448  | 10897.95  | AL157453   | 2953.357  |
| 2073.724 | X68314    | 787.278   | 658.201   | NM_005030 | 4403.958  | 9029.978  | NM_019098  | 1610.803  |
| 933.515  | X71973    | 35436.129 | 34083.09  | NM_017584 | 2703.547  | 3721.299  | AK022212   | 5849.431  |
| 5043.472 | T49651    | 3795.907  | 19357.471 | NM_020359 | 2341.385  | 2888.71   | X64974     | 696.27    |
| 1686.026 | N51014    | 2622.054  | 3553.197  | AB014541  | 13557.492 | 18155.594 | NM_000834  | 1319.653  |
| 2232.595 | BE392471  | 13398.952 | 22602.332 | NM_002583 | 4198.597  | 3194.631  | NM_006485  | 1787.298  |
| 4652.412 | A1802950  | 1534.194  | 3785.981  | NM_006570 | 14214.814 | 17944.645 | AL137268   | 887.881   |
| 3807.279 | A1741278  | 665.452   | 1202.542  | NM_020348 | 597.61    | 728.953   | AK001143   | 450.076   |
| 1116.794 | AA682423  | 544.793   | 635.371   | NM_006034 | 12600.571 | 10621.224 | AK001701   | 908.962   |
| 1283.414 | AL043686  | 5121.831  | 7046.216  | NM_005201 | 9624.371  | 6017.33   | AK022205   | 611.983   |
| 2946.133 | AA490172  | 930.548   | 1083.619  | X56807    | 1553.531  | 631.307   | AF217970   | 549.47    |
| 451.018  | AA775212  | 3172.918  | 3412.291  | AF174600  | 2194.969  | 2007.952  | AF086297   | 1182.437  |
| 846.847  | NM_000723 | 963.256   | 524.599   | AF282617  | 810.657   | 430.024   | AK025455   | 1618.491  |
| 1074.037 | AL096751  | 2826.225  | 1673.9    | AF157323  | 1774.633  | 2831.973  | AK026799   | 7255.162  |
| 748.996  | NM_000364 | 425.623   | 414.564   | NM_006025 | 256.055   | 509.038   | NM_014860  | 717.745   |
| 205.676  | AF026920  | 2277.839  | 2156.849  | NM_005877 | 6698.903  | 6117.11   | AK022549   | 766.089   |
| 1141.166 | NM_004931 | 4007.238  | 3030.229  | NM_003338 | 2183.436  | 2898.351  | NM_018157  | 587.713   |
| 374.873  | NM_000607 | 15458.051 | 12638.677 | NM_013396 | 993.283   | 750.292   | Z70714     | 3727.495  |
| 727.558  | NM_002575 | 4618.004  | 1016.943  | NM_017752 | 946.556   | 1253.713  | AK021640   | 3907.032  |
| 827.512  | NM_004244 | 3643.593  | 3348.455  | D26069    | 5839.49   | 8745.476  | NM_016565  | 38304.555 |
| 610.353  | NM_003371 | 6708.825  | 7873.427  | BF107577  | 17814.295 | 19543.455 | CY3Cy5     | 1874.768  |
| 738.837  | AK023114  | 4053.781  | 6227.715  | NM_005837 | 9174.067  | 14793.271 | BF310427   | 1006.694  |
| 1480.3   | NM_003678 | 3955.343  | 4818.732  | NM_016625 | 5958.85   | 6486.912  | N94424     | 495.144   |
| 1656.868 | NM_014271 | 89.649    | 1052.34   | NM_017493 | 1756.949  | 1463.97   | AA045192   | 931.707   |
| 751.705  | NM_012301 | 443.676   | 348.677   | NM_006136 | 5817.604  | 7324.489  | M92642     | 600.43    |
| 4203.476 | NM_000680 | 262.946   | 144.737   | AF237772  | 11823.514 | 7342.912  | H-U 44385  | 6989.697  |
| 9645.554 | NM_005631 | 394.341   | 307.92    | AK025934  | 803.262   | 383.553   | ID 1654970 | 2469.185  |
| 540.812  | NM_014419 | 2640.995  | 3433.487  | AJ008154  | 636.542   | 414.421   | ID 2531132 | 2126.031  |
| 426.724  | NM_014938 | 2743.002  | 2869.411  | NM_006856 | 1769.39   | 1405.021  | AA485665   | 477.537   |
| 1821.251 | AF049460  | 363.709   | 892.676   | X52350    | 55180.207 | 31262.258 | BF125928   | 5846.774  |
| 1397.752 | AK026066  | 1314.835  | 1719.382  | AL137286  | 3249.313  | 2852.663  | BG571026   | 1577.648  |
| 1079.786 | NM_005244 | 2377.64   | 2331.999  | NM_016358 | 5890.66   | 4603.902  | AA489017   | 1509.106  |
| 374.325  | NM_018158 | 1269.753  | 1412.771  | NM_016275 | 5838.853  | 5938.86   | NM_012245  | 7030.552  |
| 452.493  | NM_016301 | 5686.23   | 4361.827  | NM_020418 | 2637.057  | 2324.447  | NM_133263  | 1115.738  |
| 4480.223 | AK021975  | 483.819   | 568.717   | NM_013293 | 1583.498  | 1730.277  | SR2        | 37157.266 |
| 1618.095 | AB032952  | 12135.354 | 10781.905 | AF315592  | 4158.717  | 4262.591  | SR4        | 7636.076  |
| 1423.597 | NM_002522 | 7643.336  | 5623.914  | AF095844  | 1048.796  | 1554.169  | SR6        | 1371.791  |
| 130.662  | NM_002978 | 1069.405  | 1064.477  | NM_015833 | 1163.075  | 1297.033  | SR8        | 3713.625  |
| 99.424   | NM_014668 | 740.93    | 732.536   | NM_000986 | 54141.676 | 62930.348 | SR10       | 14709.387 |
| 2103.633 | NM_004722 | 1931.372  | 1712.768  | AK026760  | 19357.268 | 15634.503 | CY3Cy5     | 1335.243  |

|           |           |           |           |           |           |           |           |           |
|-----------|-----------|-----------|-----------|-----------|-----------|-----------|-----------|-----------|
| 431.976   | NM_014425 | 839.787   | 736.027   | NM_014772 | 1602.649  | 1557.629  | NM_017450 | 912.322   |
| 523.245   | NM_012133 | 1800.165  | 2548.762  | AK025248  | 1182.921  | 1419.428  | NM_002023 | 337.034   |
| 2198.193  | NM_017954 | 590.452   | 1014.013  | NM_004539 | 14877.159 | 16205.511 | AF190500  | 629.469   |
| 381.27    | NM_006612 | 1382.939  | 1986.109  | NM_006428 | 8479.467  | 11166.126 | NM_005904 | 568.199   |
| 1189.792  | NM_016451 | 2093.784  | 1876.41   | NM_004280 | 11803.234 | 15942.699 | NM_005273 | 5969.872  |
| 582.062   | NM_007351 | 11630.404 | 12711.527 | AF110399  | 994.204   | 1537.693  | NM_006576 | 840.07    |
| 1077.62   | AK026266  | 6462.249  | 6122.813  | AK027094  | 1560.762  | 1850.372  | AB035266  | 2324.177  |
| 1146.131  | NM_007124 | 3131.599  | 2932.02   | AL359596  | 747.836   | 439.355   | NM_003744 | 1389.224  |
| 1413.237  | NM_003176 | 2214.481  | 2072.237  | NM_002631 | 6664.132  | 3704.781  | NM_006378 | 852.252   |
| 463.124   | AK023168  | 1914.823  | 2057.83   | BF217864  | 4071.096  | 3485      | NM_018132 | 2018.49   |
| 446.367   | NM_006646 | 701.717   | 510.317   | NM_005917 | 13526.545 | 8124.396  | NM_018207 | 621.704   |
| 486.6     | NM_004742 | 465.272   | 342.497   | NM_007052 | 457.016   | 500.981   | NM_000345 | 4402.959  |
| 225.817   | NM_014753 | 2228.719  | 1177.876  | AV758498  | 554.138   | 1111.048  | NM_006531 | 1035.673  |
| 4580.438  | NM_006585 | 31642.813 | 16902.838 | NM_020196 | 1247.65   | 969.38    | AB029021  | 2420.154  |
| 506.226   | NM_014331 | 2874.124  | 3013.067  | AK024113  | 238.901   | 763.723   | NM_002101 | 9296.925  |
| 755.59    | NM_006795 | 8729.595  | 6794.358  | NM_018657 | 526.676   | 410       | Z36789    | 484.147   |
| 404.368   | AF070568  | 1560.08   | 2233.36   | L40410    | 3353.203  | 3898.788  | J02874    | 1402.637  |
| 173.978   | NM_000240 | 2328.869  | 1425.154  | NM_007055 | 699.97    | 844.382   | AF070525  | 2819.802  |
| 514.069   | AK055733  | 14304.597 | 13494.012 | NM_016652 | 343.501   | 994.929   | NM_001177 | 3208.723  |
| 152.904   | AF298880  | 9338.04   | 5616.76   | NM_016310 | 3781.88   | 3545.055  | NM_014447 | 804.553   |
| 1195.304  | AK001500  | 1179.641  | 907.205   | AK021562  | 586.041   | 452.999   | NM_006691 | 482.978   |
| 10727.833 | NM_006774 | 548.032   | 438.871   | BC006560  | 602.526   | 660.259   | NM_001505 | 409.543   |
| 188.526   | NM_020129 | 686.072   | 1115.969  | NM_006298 | 584.558   | 353.342   | NM_003710 | 916.267   |
| 3045.998  | Y16521    | 2344.745  | 3015.275  | AF060938  | 12209.979 | 13871.057 | Z83805    | 444.629   |
| 3033.129  | AL050371  | 3109.193  | 4323.761  | NM_001973 | 2370.743  | 2226.573  | NM_004666 | 791.717   |
| 2980.069  | NM_002651 | 5975.407  | 9123.552  | NM_014468 | 1796.023  | 1763.125  | NM_003614 | 659.965   |
| 4222.339  | NM_002413 | 9376.002  | 11338.352 | AL050015  | 918.398   | 968.43    | NM_014257 | 1400.107  |
| 418.467   | NM_017577 | 415.731   | 828.308   | AY007117  | 1962.366  | 2106.38   | NM_001140 | 480.143   |
| 2625.474  | NM_001757 | 2997.329  | 6354.748  | AF039698  | 1577.314  | 1137.651  | NM_004843 | 1058.129  |
| 860.737   | NM_001647 | 3190.699  | 2552.523  | AK025419  | 1202.271  | 965.772   | AK022845  | 576.612   |
| 593.456   | NM_006228 | 470.304   | 519.387   | NM_013259 | 7795.621  | 7376.381  | NM_003004 | 404.024   |
| 984.601   | NM_003768 | 3968.81   | 2312.35   | NM_018375 | 6142.797  | 7913.961  | S77835    | 394.23    |
| 508.109   | NM_018393 | 938.706   | 707.904   | NM_004913 | 519.641   | 1171.696  | NM_002985 | 2914.184  |
| 848.303   | BF032535  | 3295.449  | 1840.935  | AK026838  | 1566.05   | 2015.353  | AB018347  | 2110.096  |
| 207.057   | NM_018332 | 2193.46   | 1952.914  | AK022443  | 710.671   | 1188.458  | NM_003284 | 855.089   |
| 769.941   | NM_005096 | 11956.496 | 7389.875  | AK023371  | 2689.737  | 2852.74   | NM_018152 | 514.736   |
| 344.443   | NM_006760 | 862.411   | 883.447   | AK025015  | 2371.186  | 3330.314  | NM_000319 | 740.306   |
| 439.034   | NM_012289 | 5639.305  | 4314.062  | AF086187  | 1618.166  | 1495.816  | NM_012461 | 1596.117  |
| 347.3     | AB037775  | 1041.498  | 892.42    | AF305836  | 48604.23  | 54967.336 | AK001379  | 610.011   |
| 374.617   | L27560    | 1538.888  | 1109.541  | AL035295  | 2896.117  | 2354.089  | NM_007072 | 1160.47   |
| 129.008   | AB011174  | 1506.173  | 1318.729  | NM_018302 | 1942.81   | 1954.809  | NM_012320 | 2500.047  |
| 123.153   | AB043635  | 397.579   | 323.643   | AK027252  | 2365.693  | 2782.189  | NM_018208 | 1363.022  |
| 1033.022  | AB040879  | 1614.927  | 1286.52   | AF165527  | 3186.733  | 2876.843  | NM_015929 | 3704.474  |
| 818.719   | AL049935  | 3298.692  | 2047.109  | NM_014092 | 757.439   | 805.901   | U90653    | 1609.388  |
| 719.431   | AB033043  | 4353.293  | 5282.425  | AL110133  | 6381.796  | 5393.759  | NM_018339 | 1378.497  |
| 3866.077  | NM_014999 | 2233.099  | 2171.55   | AK000529  | 1373.452  | 857.436   | NM_006745 | 13662.676 |
| 718.07    | AK025220  | 1655.499  | 1813.543  | AL049273  | 753.808   | 379.157   | AK000037  | 661.156   |
| 7812.427  | NM_016308 | 13726.224 | 13304.813 | AK098474  | 605.709   | 609.54    | NM_014760 | 1155.431  |
| 3791.124  | D42046    | 2811.207  | 4943.908  | AL117475  | 1895.347  | 2470.651  | NM_018398 | 1127.779  |
| 1584.988  | NM_001033 | 2770.119  | 1976.739  | AL049300  | 526.313   | 582.798   | NM_002560 | 5717.597  |
| 2855.575  | NM_004526 | 12184.829 | 6814.986  | NM_017535 | 5807.214  | 6236.683  | NM_014404 | 1177.42   |
| 1943.605  | NM_002526 | 7937.478  | 7755.071  | NM_003887 | 2087.485  | 1924.582  | NM_018713 | 552.737   |
| 3456.869  | NM_020135 | 3838.697  | 4253.341  | NM_004267 | 10548.2   | 12935.165 | NM_015947 | 2746.077  |

|           |           |           |           |           |           |           |            |           |
|-----------|-----------|-----------|-----------|-----------|-----------|-----------|------------|-----------|
| 1598.565  | NM_018518 | 4195.355  | 3354.64   | AL357212  | 543.258   | 426.073   | NM_002042  | 21094.809 |
| 400.273   | AK023149  | 1551.744  | 1132.562  | AK026687  | 1862.803  | 1488.666  | AB028944   | 494.596   |
| 736.498   | NM_006438 | 805.905   | 911.682   | AL117444  | 534.362   | 667.705   | AJ006268   | 501.816   |
| 6457.426  | NM_001845 | 1027.352  | 1610.071  | NM_017994 | 6122.679  | 5374.022  | M74089     | 1679.229  |
| 406.569   | AK024697  | 1101.217  | 766.31    | AK021693  | 2105.367  | 2430.007  | AF190864   | 2762.852  |
| 312.193   | NM_006460 | 2196.252  | 3527.802  | AB023177  | 3858.309  | 3924.617  | NM_002779  | 1855.708  |
| 415.792   | L34156    | 434.11    | 399.935   | Y11609    | 2122.511  | 1865.582  | L40397     | 6616.938  |
| 279.026   | NM_003749 | 18430.025 | 7619.449  | NM_012122 | 4591.455  | 3425.586  | NM_020198  | 3509.813  |
| 2212.467  | NM_003557 | 1629.124  | 1776.437  | AF009285  | 10144.315 | 7359.18   | AA098879   | 482.14    |
| 420.571   | NM_001257 | 10090.929 | 8749.978  | AF056435  | 210.055   | 1550.6    | NM_000025  | 6221.602  |
| 192.414   | NM_001795 | 472.443   | 350.424   | AB032363  | 579.282   | 1427.228  | D38521     | 1533.86   |
| 877.775   | D85245    | 6993.304  | 7034.07   | NM_001524 | 1069.756  | 1046.461  | NM_000403  | 1604.718  |
| 3485.043  | NM_000943 | 1857.86   | 3911.939  | AK000998  | 1283.566  | 2064.281  | NM_018127  | 4862.675  |
| 266.53    | NM_004658 | 2078.306  | 2169.535  | AK001225  | 517.927   | 721.716   | AB020677   | 4583.997  |
| 166.225   | NM_001250 | 6195.078  | 7264.415  | AK021435  | 589.21    | 695.578   | AB033097   | 1316.257  |
| 1621.237  | AF298812  | 1410.315  | 960.49    | AK021684  | 2730.807  | 2440.277  | NM_000135  | 1088.904  |
| 5852.693  | NM_004969 | 2002.159  | 2585.927  | AK001060  | 900.034   | 1961.153  | AJ223948   | 1876.238  |
| 1514.525  | AJ249900  | 559.636   | 655.851   | AK021480  | 549.499   | 805.918   | AK022947   | 1053.711  |
| 2062.062  | AK022581  | 5074.326  | 2842.734  | AK025112  | 1367.405  | 1304.703  | AL050029   | 1064.346  |
| 3832.284  | NM_018054 | 3372.601  | 3427.596  | AK025173  | 5748.344  | 5035.808  | NM_005204  | 1254.11   |
| 3088.749  | NM_006186 | 787.798   | 1190.861  | AK025430  | 632.88    | 712.346   | NM_016203  | 589.275   |
| 997.794   | NM_000958 | 6542.982  | 7325.338  | AK026722  | 474.488   | 577.433   | NM_002759  | 2970.873  |
| 676.435   | NM_001401 | 801.343   | 1528.198  | AF117338  | 2420.287  | 1796.648  | NM_007271  | 1200.116  |
| 1105.967  | NM_013271 | 6153.886  | 7072.871  | AK025567  | 1829.41   | 1444.978  | NM_006255  | 1176.254  |
| 308.801   | NM_004157 | 5897.725  | 3667.983  | U56857    | 3279.962  | 2258.328  | BE392143   | 1609.313  |
| 616.352   | NM_000684 | 2093.336  | 1645.875  | L43349    | 597.453   | 2040.812  | NM_005813  | 1514.322  |
| 384.946   | NM_015913 | 10427.1   | 10130.458 | BE905682  | 692.861   | 1541.329  | AB037718   | 2512.592  |
| 569.886   | NM_005157 | 5466.217  | 4050.704  | AF086421  | 2066.954  | 3908.718  | AL389994   | 470.499   |
| 108.356   | NM_007354 | 525.908   | 354.313   | AF161522  | 1728.745  | 1259.492  | NM_003909  | 3326.128  |
| 908.988   | U67037    | 1493.622  | 1593.438  | AF086028  | 14306.01  | 17909     | NM_001277  | 4523.717  |
| 514.736   | NM_004960 | 15155.234 | 8672.179  | AK025365  | 613.737   | 598.316   | NM_003659  | 2699.073  |
| 784.603   | AF272370  | 5880.374  | 3214.84   | AK023489  | 778.977   | 823.701   | AB029021   | 1835.579  |
| 741.817   | AF130050  | 4174.743  | 3194.762  | AK021561  | 2710.76   | 2517.894  | NM_002101  | 9228.8    |
| 659.276   | NM_012197 | 2692.833  | 3457.529  | AK025222  | 574.715   | 450.067   | Z36789     | 389.299   |
| 7168.543  | AK024016  | 2406.438  | 2003.772  | NM_003531 | 881.708   | 1301.083  | J02874     | 1318.943  |
| 33038.613 | NM_003581 | 6434.328  | 4419.484  | NM_017799 | 796.36    | 496.159   | BF310427   | 747.162   |
| 1398.36   | NM_012407 | 1318.707  | 1554.561  | NM_003510 | 604.007   | 289.299   | AA045192   | 1295.402  |
| 5323.652  | NM_007186 | 1265.23   | 1189.592  | AL137403  | 2320.509  | 2873.634  | H45617     | 81.822    |
| 9364.644  | NM_007044 | 3204.291  | 2312.54   | AL049348  | 695.299   | 1005.437  | M92642     | 397.522   |
| 612.845   | AF294326  | 6092.26   | 4997.788  | NM_018534 | 545.229   | 1268.243  | H-U 44385  | 6960.034  |
| 427.465   | NM_014678 | 2670.34   | 2614.95   | AB037847  | 1156.229  | 1378.346  | ID 1654970 | 2553.588  |
| 1816.779  | NM_012317 | 57075.023 | 60476.469 | NM_005170 | 1221.314  | 1264.224  | ID 2531132 | 2017.481  |
| 1102.169  | NM_017853 | 3126.318  | 3383.384  | S96437    | 1236.277  | 1271.946  | AA485665   | 422.583   |
| 384.931   | NM_016097 | 10588.683 | 10980.791 | NM_015176 | 1463.711  | 1326.659  | BF125928   | 5221.118  |
| 808.867   | AB046800  | 3064.822  | 3233.979  | AL353939  | 1023.906  | 970.322   | BG571026   | 1267.876  |
| 71.623    | NM_002162 | 3761.062  | 4295.175  | AL117573  | 2339.409  | 1653.701  | AA489017   | 1155.964  |
| 2693.552  | NM_015458 | 4106.505  | 1816.531  | AL080186  | 515.007   | 842.122   | NM_012245  | 5992.164  |
| 1258.823  | D13540    | 4503.678  | 3514.066  | NM_005306 | 51088.352 | 52345.508 | NM_133263  | 1176.109  |
| 1106.655  | NM_016570 | 7243.194  | 4521.628  | NM_001646 | 11479.072 | 9892.389  | NM_003284  | 652.613   |
| 254.375   | AF209198  | 1439.507  | 730.439   | AL137327  | 734.221   | 990.961   | NM_000319  | 651.239   |
| 2043.924  | L09247    | 411.585   | 322.769   | AF358454  | 1761.78   | 2137.635  | NM_012461  | 1566.536  |
| 539.637   | M69012    | 36677.348 | 22441.025 | AK026090  | 1456.88   | 2049.523  | AK001379   | 569.331   |
| 459.611   | NM_006936 | 17373.086 | 12131.393 | AF070637  | 475.854   | 737.062   | NM_002023  | 670.81    |

|          |           |           |           |           |           |           |           |           |
|----------|-----------|-----------|-----------|-----------|-----------|-----------|-----------|-----------|
| 1212.999 | NM_001327 | 7097.288  | 5146.996  | AL137634  | 1138.727  | 808.563   | NM_002839 | 580.704   |
| 287.743  | NM_003652 | 530.954   | 660.641   | AK024863  | 2698.846  | 2483.436  | AF190500  | 678.311   |
| 3132.914 | NM_000063 | 991.744   | 1558.51   | AJ008135  | 48429.629 | 44847.637 | NM_005904 | 507.102   |
| 2992.008 | NM_018389 | 805.882   | 1467.842  | AK026908  | 4449.773  | 3191.168  | NM_005273 | 6084.296  |
| 3139.202 | AB033026  | 950.547   | 1908.687  | AL050068  | 488.918   | 465.273   | NM_006576 | 876.638   |
| 1239.169 | AF104914  | 19452.102 | 9991.574  | AB046766  | 469.709   | 491.127   | NM_018645 | 398.446   |
| 795.521  | NM_014716 | 2410.018  | 2937.368  | U52829    | 311       | 1615.007  | AB035266  | 2024.703  |
| 1160.613 | AB002354  | 435.223   | 697.89    | AK001526  | 2732.532  | 3903.09   | NM_003744 | 1185.115  |
| 1765.314 | NM_002278 | 164.846   | 585.691   | AF086183  | 629.171   | 1340.074  | NM_006378 | 718.441   |
| 479.206  | AK023845  | 2158.963  | 2077.287  | AK000525  | 654.989   | 567.861   | NM_018132 | 1491.7    |
| 1135.145 | NM_002638 | 3568.428  | 3717.705  | AL137434  | 831.214   | 1092.213  | NM_018207 | 478.324   |
| 385.715  | NM_016487 | 1017.674  | 1560.383  | Z36795    | 1332.43   | 1461.056  | NM_000345 | 4257.637  |
| 451.087  | NM_005808 | 8004.365  | 9189.915  | AL080216  | 1579.509  | 1729.78   | NM_001862 | 32953.02  |
| 233.94   | NM_006401 | 23428.746 | 10602.591 | AF038188  | 12599.914 | 10604.071 | NM_006531 | 786.178   |
| 151.933  | AF269249  | 595.62    | 323.646   | D17046    | 1019.267  | 939.766   | M74089    | 1434.209  |
| 3532.124 | D31763    | 2443.479  | 1452.83   | NM_017645 | 7451.917  | 7834.843  | AF190864  | 2492.387  |
| 260.449  | NM_018169 | 4092.501  | 6841.459  | AF157562  | 3916.544  | 4230.641  | NM_002779 | 2053.17   |
| 430.64   | AK021452  | 8325.577  | 5775.9    | AK021958  | 3301.686  | 3984.886  | L40397    | 7315.891  |
| 733.301  | NM_004506 | 1825.209  | 1378.891  | M31164    | 915.29    | 1005.131  | NM_020198 | 3648.071  |
| 480.174  | S74529    | 39513.207 | 24903.547 | AF113674  | 6240.923  | 6713.025  | AA098879  | 823.052   |
| 191.074  | NM_020227 | 264.454   | 313.182   | NM_003511 | 294.053   | 3712.131  | AF070525  | 3126.341  |
| 1540.683 | NM_001421 | 1166.901  | 940.255   | CY3Cy5    | 2546.941  | 116.929   | NM_001177 | 3294.497  |
| 969.712  | M73837    | 1188.925  | 1289.463  | H97792    | 1207.175  | 1083.924  | NM_014447 | 854.643   |
| 2954.458 | U69127    | 26908.104 | 21990.426 | L33404    | 827.453   | 334.765   | NM_002356 | 350.039   |
| 558.781  | NM_005839 | 5397.169  | 2738.545  | M13509    | 1445.771  | 1093.029  | NM_006691 | 766.71    |
| 721.016  | AK023379  | 1582.493  | 1697.205  | X04076    | 4155.453  | 3812.439  | NM_001505 | 399.499   |
| 1680.875 | NM_006076 | 385.972   | 456.369   | AA485362  | 2319.097  | 2033.839  | NM_003710 | 1007.196  |
| 3069.752 | AK021904  | 9028.151  | 7526.565  | AJ222801  | 1956.946  | 1976.985  | Z83805    | 415.038   |
| 2838.313 | -         | 1264.842  | 909.928   | W72207    | 35515.59  | 13364.048 | NM_004666 | 866.144   |
| 9055.104 | NM_018292 | 556.727   | 476.7     | BI772354  | 1665.589  | 1531.538  | NM_003614 | 606.287   |
| 4247.495 | AL049705  | 6791.483  | 6301.832  | AA733033  | 512.282   | 438.848   | NM_014257 | 1081.598  |
| 440.367  | AK022294  | 1037.058  | 1140.036  | AA583574  | 990.862   | 827.591   | NM_004843 | 981.532   |
| 2916.313 | AF086507  | 1000.036  | 926.591   | AI690184  | 19861.799 | 13644.443 | AK022845  | 554.12    |
| 2055.702 | U79289    | 1268.98   | 1569.503  | AA927490  | 1658.552  | 1444.398  | S77835    | 365.16    |
| 599.011  | NM_014028 | 2909.826  | 2763.614  | NM_001824 | 56678.996 | 41716.492 | NM_002985 | 2888.722  |
| 224.637  | NM_000402 | 1322.057  | 1221.576  | NM_002964 | 1485.478  | 10686.7   | AB018347  | 2128.153  |
| 232.356  | NM_000690 | 7742.387  | 5798.529  | SR3       | 38253.793 | 24913.486 | AB033073  | 2581.206  |
| 179.985  | NM_000155 | 4982.524  | 4776.344  | SR5       | 3181.326  | 2309.615  | NM_005813 | 1127.967  |
| 362.226  | AK024489  | 360.854   | 381.729   | SR7       | 4004.561  | 23005.051 | AB037718  | 2578.789  |
| 158.188  | NM_000181 | 8716.129  | 8640.512  | SR9       | 11911.948 | 1363.378  | AL389994  | 623.079   |
| 498.971  | NM_014121 | 881.169   | 640.04    | CY3Cy5    | 1836.611  | 108.078   | NM_003909 | 2261.401  |
| 338.013  | NM_006730 | 2932.192  | 3132.587  | NM_017818 | 1039.411  | 1268.298  | NM_001277 | 4201.773  |
| 520.146  | NM_005644 | 3422.844  | 3478.024  | NM_020433 | 256.342   | 659.852   | NM_003659 | 2921.976  |
| 185.345  | NM_018442 | 4439.489  | 2277.972  | AF028823  | 3188.318  | 4742.763  | NM_007072 | 1352.638  |
| 432.392  | AF182416  | 5164.773  | 3143.963  | NM_004295 | 14808.075 | 10891.647 | NM_012320 | 3238.268  |
| 1431.592 | NM_005999 | 16096.261 | 12277.91  | NM_002087 | 2660.56   | 3135.11   | NM_018208 | 1781.977  |
| 580.434  | NM_006015 | 1040.46   | 777.062   | NM_014585 | 666.835   | 192.583   | NM_015929 | 4101.63   |
| 2647.346 | NM_004634 | 2701.884  | 2101.117  | AF200815  | 721.362   | 724.486   | U90653    | 1721.349  |
| 2150.703 | NM_002017 | 6811.402  | 5379.684  | NM_013441 | 1118.883  | 711.624   | NM_000196 | 504.825   |
| 2660.442 | NM_017523 | 9358.033  | 7339.453  | NM_014421 | 704.705   | 451.011   | NM_018339 | 1253.992  |
| 2168.231 | NM_002382 | 17782.334 | 18909.354 | M60499    | 1455.076  | 1359.348  | NM_006745 | 13380.535 |
| 6320.28  | NM_002158 | 1393.899  | 1412.201  | NM_003833 | 7978.208  | 7380.062  | NM_000275 | 498.779   |
| 833.04   | U13223    | 9363.81   | 10675.977 | AK000868  | 1942.608  | 1119.169  | AK000037  | 715.932   |

|           |           |           |           |           |           |           |            |           |
|-----------|-----------|-----------|-----------|-----------|-----------|-----------|------------|-----------|
| 3726.201  | NM_01627C | 3748.548  | 9244.115  | NM_001233 | 1620.076  | 941.859   | NM_01476C  | 1167.217  |
| 5875.939  | AK001357  | 1600.211  | 1333.741  | NM_001234 | 1646.886  | 1409.11   | NM_01839E  | 969.231   |
| 3307.093  | NM_015721 | 2357.648  | 1251.854  | BF679789  | 2620.683  | 1725.741  | NM_00256C  | 5966.291  |
| 1383.044  | AF086298  | 1009.63   | 1009.911  | AB007859  | 467.813   | 464.776   | NM_014404  | 1099.253  |
| 1720.303  | AK027238  | 856.653   | 780.287   | NM_001127 | 1508.754  | 2628.848  | NM_018713  | 669.925   |
| 1158.294  | AK025758  | 546.007   | 465.265   | NM_01243C | 1308.775  | 1487.326  | NM_015947  | 2583.03   |
| 2031.765  | AL360201  | 306.955   | 296.678   | NM_003917 | 8341.832  | 7236.132  | NM_002042  | 21158.281 |
| 1112.93   | S94540    | 11122.749 | 11529.184 | NM_007077 | 772.826   | 1187.627  | AB028944   | 557.782   |
| 78.241    | U79297    | 1074.443  | 413.094   | NM_002956 | 902.775   | 622.116   | AJ006268   | 480.837   |
| 652.352   | AK002164  | 951.465   | 4298.092  | AB018739  | 448.906   | 694.154   | NM_012245  | 6116.479  |
| 4961.498  | AF052122  | 14911.5   | 24083.727 | NM_00675C | 6815.566  | 5268.227  | NM_133263  | 812.581   |
| 135.684   | NM_00131C | 2933.473  | 4333.292  | NM_020164 | 1062.942  | 1124.941  | NM_000025  | 8044.201  |
| 298.988   | AK026924  | 8322.023  | 11055.007 | AK023521  | 1368.741  | 1279.736  | D38521     | 1686.26   |
| 251.453   | AL122047  | 8580.523  | 8700.746  | NM_014267 | 8987.495  | 7285.137  | NM_000403  | 2263.342  |
| 432.155   | AF052091  | 1898.11   | 2585.845  | U30872    | 645.29    | 877.716   | NM_018127  | 5131.437  |
| 1778.509  | AK024447  | 60832.84  | 53150.715 | NM_020469 | 2213.637  | 1220.992  | AB020677   | 4809.122  |
| 488.943   | AF052145  | 1663.231  | 2470.267  | NM_014734 | 1266.77   | 963.97    | AB033097   | 1351.993  |
| 3642.276  | AF086458  | 2965.674  | 2841.703  | AK026408  | 1296.581  | 1198.929  | NM_000135  | 1242.744  |
| 3609.264  | AF086548  | 5362.555  | 7004.617  | NM_005025 | 949.45    | 957.329   | AJ223948   | 1997.198  |
| 11628.481 | AK024350  | 1732.877  | 1081.455  | NM_006307 | 272.168   | 258.24    | NM_01621E  | 407.419   |
| 4164.018  | AK023717  | 2355.731  | 2441.484  | M74782    | 1379.924  | 455.394   | AK022947   | 991.053   |
| 1622.022  | AK023727  | 834.268   | 519.13    | NM_001056 | 734.291   | 885.356   | AL050029   | 1139.707  |
| 825.765   | AK025271  | 969.293   | 490.249   | AY026461  | 2213.977  | 2225.828  | NM_005204  | 1367.798  |
| 1700.565  | AF086204  | 3892.514  | 2594.1    | AK025708  | 1958.084  | 3716.945  | NM_016203  | 499.623   |
| 2926.455  | NM_007021 | 835.427   | 747.977   | NM_000405 | 746.235   | 914.653   | NM_002759  | 3062.545  |
| 3622.987  | AK026283  | 666.446   | 537.516   | NM_005564 | 37322.262 | 29855.555 | NM_007271  | 1482.964  |
| 881.348   | AK022076  | 834.282   | 732.085   | NM_00450E | 1491.239  | 1369.115  | NM_006255  | 1402.39   |
| 1156.186  | AK023065  | 799.427   | 547.711   | NM_006405 | 7489.708  | 5151.274  | BE392143   | 2113.567  |
| 3089.78   | NM_01767E | 754.204   | 397.286   | NM_006749 | 681.21    | 855.249   | NM_018132  | 1525.106  |
| 1889.134  | AK021570  | 1453.909  | 987.983   | NM_000324 | 686.695   | 444.972   | NM_018207  | 482.321   |
| 594.847   | AL360204  | 1032.09   | 1138.916  | AL137619  | 1790.043  | 1512.624  | NM_000345  | 4992.336  |
| 422.247   | AK000103  | 2004.563  | 2447.06   | NM_00430C | 1917.12   | 1902.5    | NM_001862  | 33293.938 |
| 849.699   | AK026294  | 687.878   | 352.194   | NM_017737 | 638.712   | 492.901   | NM_006531  | 1125.03   |
| 148.442   | AF085959  | 1198.411  | 2433.613  | NM_004292 | 837.436   | 1056.992  | AB029021   | 3165.093  |
| 507.36    | AF075107  | 664.241   | 1115.9    | NM_015484 | 2876.685  | 2627.275  | NM_002101  | 10272.667 |
| 427.541   | AK023104  | 1113.612  | 1223.364  | NM_018046 | 1997.77   | 3504.583  | Z36789     | 405.162   |
| 586.167   | AK022181  | 521.425   | 801.887   | NM_013316 | 2327.379  | 2881.926  | J02874     | 1894.496  |
| 3538.686  | AK026923  | 2355.131  | 4663.705  | M20701    | 5846.434  | 4946.721  | BF310427   | 858.314   |
| 1766.146  | Y11177    | 1176.746  | 1422.038  | NM_002912 | 1503.376  | 1711.911  | N94424     | 719.222   |
| 798.983   | U61091    | 658.439   | 954.484   | NM_013284 | 1914.741  | 1713.215  | AA045192   | 1253.906  |
| 434.51    | AK021691  | 17816.85  | 21458.533 | NM_006739 | 1069.516  | 1801.075  | M92642     | 446.55    |
| 499.201   | AK023595  | 724.794   | 779.209   | NM_013274 | 2365.305  | 2200.938  | H-U 44385  | 6572.163  |
| 1551.317  | AK022037  | 815.311   | 553.385   | AL050187  | 2220.275  | 1913.067  | ID 1654970 | 2732.832  |
| 1179.419  | AK000141  | 4988.635  | 5483.447  | NM_012387 | 6224.241  | 6140.39   | ID 2531132 | 1992.138  |
| 2099.143  | AL137758  | 1912.407  | 2315.345  | NM_014735 | 1095.784  | 580.509   | AA485665   | 485.476   |
| 4455.314  | AK023865  | 512.434   | 495.134   | NM_004252 | 8223.503  | 7112.663  | BF125928   | 6221.976  |
| 884.353   | AK025786  | 1351.842  | 1716.203  | AF172929  | 2869.81   | 3663.12   | BG571026   | 1338.311  |
| 1092.669  | AK024188  | 1349.716  | 2015.904  | NM_00639E | 7858.435  | 4779.59   | AA489017   | 1691.949  |
| 1624.688  | AK024379  | 640.399   | 780.451   | AK025655  | 1401.151  | 1049.946  | NM_002985  | 2686.602  |
| 8911.116  | AK026820  | 1204.468  | 1408.275  | NM_001362 | 346.774   | 330.49    | AB018347   | 2240.946  |
| 1531.086  | AK001716  | 2525.06   | 2514.344  | NM_003833 | 6391.262  | 10001.913 | AB033073   | 3003.096  |
| 1542.827  | NM_014095 | 530.728   | 604.921   | NM_001234 | 1684.663  | 2184.766  | NM_003284  | 1123.023  |
| 209.818   | AK026821  | 1353.587  | 2125.546  | BF679789  | 2202.041  | 2096.468  | NM_018152  | 779.139   |



|           |           |           |           |           |           |           |           |           |
|-----------|-----------|-----------|-----------|-----------|-----------|-----------|-----------|-----------|
| 409.175   | AK026280  | 4698.565  | 8651.099  | H97792    | 1305.474  | 1615.259  | NM_000319 | 746.365   |
| 146.746   | AF113017  | 4350.756  | 4609.226  | L33404    | 1165.416  | 893.982   | NM_012461 | 1675.812  |
| 252.267   | AL080232  | 6369.268  | 9628.031  | M13509    | 1632.574  | 2260.163  | AK001379  | 702.722   |
| 161.046   | AK001120  | 5354.651  | 6213.734  | X04076    | 4691.365  | 3927.719  | NM_017450 | 1165.102  |
| 134.912   | AF264629  | 515.121   | 868.885   | AA485362  | 2272.931  | 1813.236  | NM_002023 | 484.676   |
| 550.204   | AK022416  | 882.366   | 1068.682  | AJ222801  | 1766.181  | 1748.389  | NM_002839 | 402.891   |
| 3326.539  | AK023224  | 2947.904  | 4700.685  | W72207    | 34854.629 | 13004.84  | NM_005904 | 546.469   |
| 7601.952  | AK023731  | 3489.687  | 2330.653  | BI772354  | 1690.142  | 1578.797  | NM_005273 | 6024.247  |
| 1485.966  | AK022442  | 1293.531  | 1443.742  | AA733033  | 527.991   | 427.612   | NM_000524 | 270.511   |
| 4483.588  | AK023336  | 980.578   | 1085.04   | AA583574  | 955.86    | 1517.163  | NM_006576 | 1050.359  |
| 10115.657 | AK023771  | 607.767   | 687.341   | AI690184  | 16952.684 | 10200.761 | NM_018645 | 552.711   |
| 2095.863  | AK026873  | 3661.563  | 3835.831  | AA927490  | 1654.214  | 1623.966  | NM_014682 | 264.953   |
| 1340.067  | AK026394  | 3865.886  | 4123.323  | NM_001824 | 56345.359 | 58332.918 | AB035266  | 2502.916  |
| 1923.393  | NM_005448 | 1257.855  | 1543.026  | NM_002964 | 1283.224  | 10299.951 | NM_003744 | 1349.515  |
| 1412.163  | AK025943  | 21098.686 | 21986.846 | NM_005052 | 6480.011  | 3904.163  | NM_006378 | 929.445   |
| 1433.26   | BG106479  | 1172.014  | 1456.43   | NM_014734 | 1067.539  | 1380.089  | NM_014404 | 1033.978  |
| 1006.853  | AF130069  | 19894.43  | 16050.988 | AK026408  | 1064.25   | 1802.842  | NM_018713 | 470.767   |
| 2628.119  | AL109669  | 2108.843  | 2092.919  | NM_005025 | 802.905   | 713.441   | NM_015947 | 2721.312  |
| 1709.596  | AB037766  | 1820.195  | 1354.547  | M74782    | 1365.319  | 772.083   | NM_002042 | 22657.416 |
| 1578.787  | AK026995  | 560.001   | 363.435   | NM_017818 | 1424.552  | 1557.752  | AB028944  | 416.745   |
| 833.659   | AL133091  | 985.816   | 1186.088  | NM_020433 | 472.768   | 827.838   | AJ006268  | 628.143   |
| 189.487   | AF086212  | 606.879   | 436.782   | AF028823  | 3167.742  | 3747.76   | M74089    | 1707.524  |
| 57.118    | X82545    | 6092.29   | 6786.351  | NM_004295 | 13001.663 | 8727.071  | AF190864  | 3248.497  |
| 15281.553 | AK024632  | 4729.666  | 8012.888  | NM_002087 | 2791.798  | 2842.045  | NM_002779 | 2728.174  |
| 5831.796  | NM_018474 | 7801.089  | 6712.24   | NM_014585 | 676.036   | 325.244   | L40397    | 7379.515  |
| 641.526   | AK024937  | 1207.608  | 1592.517  | AF200815  | 714.616   | 655.163   | NM_020198 | 3828.942  |
| 530.016   | D17178    | 1105.876  | 1149.567  | NM_013441 | 1104.963  | 655.767   | AA098879  | 497.764   |
| 673.349   | AK022094  | 2895.628  | 3496.451  | NM_014421 | 492.558   | 379.625   | AF070525  | 2928.482  |
| 216.057   | AK026695  | 1319.31   | 1254.032  | M60499    | 1220.577  | 1370.99   | NM_001177 | 3603.237  |
| 895.81    | AK022220  | 461.742   | 454.278   | NM_004300 | 1673.363  | 2637.444  | NM_014447 | 860.741   |
| 1669.092  | AK000807  | 338.64    | 227.044   | AB007859  | 532.383   | 502.445   | NM_006691 | 848.163   |
| 538.526   | U84520    | 2500.502  | 2144.344  | NM_001127 | 1707.74   | 2432.008  | NM_001505 | 515.898   |
| 576.25    | AL133616  | 7245.31   | 3606.128  | NM_012430 | 2107.739  | 1812.759  | NM_003710 | 965.872   |
| 447.415   | AK023391  | 390.468   | 488.351   | NM_003917 | 9204.619  | 6904.101  | Z83805    | 388.12    |
| 687.838   | AK026382  | 2291.489  | 1872.442  | NM_007077 | 660.129   | 758.031   | NM_004666 | 811.832   |
| 343.71    | AK091169  | 3691.165  | 4615.287  | NM_002956 | 717.158   | 758.646   | NM_003614 | 610.26    |
| 1421.87   | NM_014745 | 42168.758 | 45928.613 | AB018739  | 617.322   | 686.578   | NM_014257 | 1417.033  |
| 152.462   | AF086026  | 7038.107  | 6615.565  | NM_006750 | 6659.55   | 5385.968  | NM_004843 | 996.3     |
| 4820.529  | AL133011  | 573.996   | 540.458   | NM_020164 | 1333.754  | 947.924   | NM_005204 | 1329.018  |
| 300.393   | NM_016300 | 836.312   | 583.763   | AK023521  | 1548.877  | 1323.35   | NM_016203 | 390.545   |
| 1183.636  | NM_015607 | 27272.271 | 25074.1   | NM_014267 | 8471.021  | 7831.61   | NM_002759 | 2789.857  |
| 685.006   | AK026955  | 1734.993  | 732.576   | U30872    | 464.844   | 782.466   | NM_007271 | 1427.966  |
| 661.895   | AL110202  | 17945.977 | 14963.781 | NM_002639 | 634.141   | 553.068   | NM_006255 | 983.909   |
| 40437.781 | AK021980  | 1123.881  | 1040.925  | NM_006398 | 6299.35   | 5590.169  | BE392143  | 1847.599  |
| 1141.364  | S46402    | 1977.763  | 2096.009  | AK025655  | 1191.07   | 1298.548  | NM_005813 | 1519.873  |
| 2124.455  | AF075048  | 392.901   | 590.15    | NM_001056 | 767.178   | 641.865   | AB037718  | 3430.42   |
| 7896.679  | Z83940    | 1166.829  | 1394.711  | AY026461  | 2334.387  | 1907.454  | AL389994  | 696.347   |
| 1241.115  | NM_005800 | 1528.428  | 1746.302  | AK025708  | 2490.012  | 2891.143  | NM_003909 | 2826.543  |
| 545.553   | AF019617  | 7960.286  | 9879.446  | NM_000405 | 1691.896  | 1569.662  | NM_001277 | 4230.046  |
| 873.063   | AL137305  | 7652.633  | 11257.156 | NM_005564 | 35887.676 | 28621.096 | NM_003659 | 2895.293  |
| 868.561   | NM_005290 | 629.973   | 643.277   | NM_004508 | 1453.546  | 1131.475  | NM_007072 | 1411.787  |
| 875.672   | AK025802  | 609.955   | 643.167   | NM_006405 | 8622.396  | 5997.517  | NM_018208 | 2106.019  |
| 5656.16   | NM_018013 | 3540.528  | 3337.256  | AJ245946  | 277.214   | 272.806   | NM_015929 | 4581.268  |

|           |             |           |           |           |           |           |           |           |
|-----------|-------------|-----------|-----------|-----------|-----------|-----------|-----------|-----------|
| 12405.035 | AK022517    | 1296.978  | 905.408   | NM_006749 | 618.077   | 880.403   | U90653    | 1671.088  |
| 6200.177  | NM_000329   | 20404.902 | 16317.525 | NM_000324 | 395.31    | 267.175   | NM_018339 | 1355.995  |
| 1072.35   | NM_001182   | 4761.072  | 3335.963  | AL137619  | 1543.294  | 1188.365  | NM_006745 | 12658.832 |
| 4544.03   | NM_000333   | 2645.991  | 1877.492  | NM_001824 | 58170.379 | 59214.449 | NM_000275 | 699.558   |
| 983.598   | NM_000172   | 3094.579  | 2244.998  | NM_002964 | 1202.564  | 13391.187 | AK000037  | 825.881   |
| 594.712   | NM_002297   | 3581.793  | 2837.708  | NM_005052 | 6710.098  | 5445.048  | NM_014760 | 1325.95   |
| 971.194   | AB040968    | 9804.029  | 10397.838 | AF319476  | 633.447   | 658.514   | NM_018398 | 1070.49   |
| 11241.447 | X85323      | 703.74    | 1064.094  | AK001913  | 2585.138  | 1899.447  | NM_002560 | 5723.429  |
| 407.336   | U17615      | 1797.792  | 1608.528  | NM_004292 | 890.341   | 787.256   | NM_000787 | 521.072   |
| 591.08    | NM_005303   | 4622.382  | 3652.148  | NM_015484 | 2813.213  | 2130.311  | U57962    | 1910.674  |
| 849.673   | NM_016126   | 9946.951  | 5926.504  | NM_018046 | 1119.674  | 1378.397  | NM_016176 | 3497.613  |
| 971.015   | U84119      | 1168.235  | 1272.062  | NM_013316 | 2194.027  | 2155.681  | NM_005574 | 13252.842 |
| 442.577   | NM_003608   | 1332.185  | 1753.533  | M20701    | 4671.945  | 3940.978  | NM_017895 | 4597.386  |
| 75.026    | AF302079    | 14942.187 | 13501.892 | NM_002912 | 1260.939  | 1314.007  | NM_004610 | 1457.195  |
| 4080.083  | AJ224167    | 540.398   | 601.62    | NM_013284 | 804.357   | 834.628   | NM_001612 | 1220.918  |
| 1348.154  | NM_002550   | 955.12    | 1257.026  | NM_006739 | 1043.607  | 1471.344  | AK027002  | 1142.941  |
| 554.152   | NM_000692   | 2123.013  | 2263.829  | NM_013274 | 2601.396  | 2670.674  | AB025254  | 2434.957  |
| 12049.182 | AF086062    | 1612.398  | 1839.381  | AL050187  | 2165.8    | 1596.506  | NM_004081 | 877.264   |
| 1432.598  | AF000268    | 383.403   | 479.956   | NM_012387 | 5811.099  | 4405.529  | D38521    | 1763.029  |
| 1588.566  | L47668      | 27753.83  | 27591.652 | NM_014735 | 974.829   | 551.344   | NM_000403 | 1941.281  |
| 24003.91  | NM_017920   | 3222.234  | 3097.377  | NM_004252 | 7938.55   | 8173.361  | NM_018127 | 5188.571  |
| 40567.535 | AK025345    | 677.011   | 1156.414  | AF172929  | 2200.168  | 3495.679  | AB020677  | 4626.254  |
| 6254.402  | D25274      | 7128.019  | 9297.557  | M60499    | 1195.694  | 1598.949  | AB033097  | 1264.188  |
| 321.188   | CY3Cy5      | 1393.881  | 137.629   | NM_001614 | 61316.547 | 62012.719 | NM_000135 | 1497.276  |
| 5496.691  | D50373      | 1465.882  | 1880.832  | NM_003833 | 6466.937  | 7902.925  | AJ223948  | 2313.491  |
| 129.375   | AA488757    | 4466.822  | 5712.937  | AK000868  | 1685.477  | 1486.954  | NM_016218 | 439.515   |
| 3258.601  | AI394286    | 2100.314  | 1952.93   | NM_001233 | 1276.575  | 853.348   | AK022947  | 1172.911  |
| 1393.527  | H07071      | 1184.011  | 1331.334  | NM_001234 | 1573.276  | 1682.208  | AL050029  | 1291.526  |
| 1392.609  | M25322      | 2270.163  | 2550.694  | BF679789  | 2032.988  | 1594.943  | NM_004063 | 627.618   |
| 1159.902  | AA436187    | 208.134   | 1580.673  | H97792    | 1041.198  | 1271.356  | AB040976  | 2851.726  |
| 364.205   | H-L 27586 I | 1291.885  | 1616.882  | L33404    | 644.123   | 401.661   | NM_018641 | 2711.811  |
| 267.962   | ID 214180   | 567.163   | 948.263   | M13509    | 1585.395  | 1339.606  | NM_002221 | 1515.372  |
| 410.167   | ID 1867426  | 2844.644  | 4681.395  | X04076    | 4487.698  | 3912.198  | NM_002371 | 234.021   |
| 792.38    | W99328      | 981.844   | 961.753   | AA485362  | 2051.396  | 1624.937  | NM_002562 | 280.876   |
| 149.078   | H08563      | 364.155   | 251.847   | AJ222801  | 1685.556  | 1576.13   | AK024502  | 2649.593  |
| 494.525   | BE735403    | 1177.554  | 969.055   | W72207    | 33114.051 | 11435.512 | NM_001124 | 966.795   |
| 212.098   | NM_022552   | 3759.02   | 2816.821  | BI772354  | 1740.703  | 1518.814  | NM_004586 | 982.59    |
| 930.438   | NM_014389   | 4574.517  | 4879.416  | AA733033  | 670.399   | 368.853   | NM_004844 | 3623.745  |
| 814.912   | SR2         | 54163.629 | 56383.043 | AA583574  | 895.206   | 835.682   | NM_013447 | 1039.693  |
| 654.138   | SR4         | 16431.754 | 14269.511 | AI690184  | 18719.543 | 13558.914 | NM_000051 | 1533.855  |
| 470.885   | SR6         | 2275.419  | 2511.973  | AA927490  | 1504.088  | 1403.343  | NM_005709 | 381.686   |
| 1872.064  | SR8         | 8316.162  | 20888.721 | U30872    | 455.859   | 675.953   | NM_004180 | 3225.62   |
| 523.154   | SR10        | 25959.074 | 7926.966  | NM_020469 | 1800.073  | 1461.169  | NM_004786 | 20502.842 |
| 1242.996  | CY3Cy5      | 1598.108  | 152.131   | NM_002639 | 690.894   | 776.713   | AF302109  | 2568.066  |
| 1484.904  | NM_005811   | 4084.888  | 4697.975  | NM_014734 | 1304.506  | 1195.335  | AL117485  | 5597.541  |
| 264.216   | NM_005764   | 718.691   | 940.057   | AK026408  | 1099.922  | 1208.784  | NM_003505 | 442.92    |
| 336.23    | NM_016362   | 1224.469  | 1029.75   | NM_005025 | 642.283   | 545.055   | NM_007191 | 1140.338  |
| 296.766   | NM_004214   | 4745.059  | 4187.557  | M74782    | 1371.063  | 583.882   | AL109667  | 621.162   |
| 317.085   | NM_004329   | 6900.959  | 5388.822  | NM_017818 | 1325.777  | 1196.615  | NM_000840 | 883.316   |
| 142.149   | NM_002836   | 3003.06   | 2357.263  | NM_020433 | 513.453   | 461.287   | NM_004476 | 377.624   |
| 353.306   | NM_020167   | 1153.609  | 975.323   | AF028823  | 3365.137  | 3900.606  | AF034102  | 3509      |
| 430.362   | AL049963    | 10194.543 | 6947.262  | NM_004295 | 18600.4   | 10159.27  | AJ008142  | 6159.752  |
| 551.141   | NM_016058   | 19243.422 | 22462.75  | NM_002087 | 2651.075  | 2668.865  | NM_001343 | 1835.747  |

|          |           |           |           |           |           |           |           |           |
|----------|-----------|-----------|-----------|-----------|-----------|-----------|-----------|-----------|
| 2073.473 | NM_014005 | 2210.683  | 2053.87   | AF200815  | 663.783   | 720.871   | NM_007275 | 4499.115  |
| 388.747  | NM_004636 | 1928.129  | 1789.665  | NM_013441 | 1061.828  | 856.244   | NM_019025 | 7899.137  |
| 1639.361 | AK022603  | 1155.494  | 1394.357  | NM_014421 | 3995.169  | 3262.478  | NM_018461 | 2479.475  |
| 122.652  | NM_004896 | 8314.99   | 7663.594  | NM_006749 | 741.9     | 877.949   | AF235023  | 1282.534  |
| 660.353  | NM_013372 | 549.125   | 549.673   | NM_000324 | 420.343   | 464.436   | NM_006910 | 2549.702  |
| 1066.776 | NM_003976 | 3718.283  | 2851.53   | AL137619  | 1601.461  | 1553.812  | AF162667  | 1436.114  |
| 1163.902 | NM_017688 | 1401.998  | 1014.838  | NM_004300 | 1820.87   | 2246.843  | AB046847  | 1745.535  |
| 525.167  | AK025612  | 2780.777  | 2196.869  | AB007859  | 356.447   | 919.883   | NM_000447 | 1394.498  |
| 6254.313 | NM_012268 | 1604.87   | 1074.119  | NM_001127 | 1827.08   | 3033.191  | NM_006354 | 3608.505  |
| 243.701  | NM_012203 | 746.134   | 1149.066  | NM_012430 | 1534.08   | 1068.189  | AF303378  | 4193.144  |
| 1302.829 | NM_004736 | 3501.77   | 3620.093  | NM_003917 | 11540.295 | 8261.186  | NM_016037 | 3903.271  |
| 1492.566 | NM_006895 | 840.987   | 659.099   | NM_007077 | 741.009   | 683.53    | NM_000417 | 1575.435  |
| 185.509  | NM_006459 | 7089.604  | 2642.121  | NM_002956 | 724.573   | 666.645   | NM_020356 | 972.946   |
| 1330.211 | NM_003827 | 7084.668  | 8623.743  | AB018739  | 844.266   | 981.594   | AF152527  | 351.858   |
| 674.824  | NM_004583 | 758.247   | 1232.389  | NM_006750 | 6918.272  | 5097.76   | AF225421  | 414.503   |
| 397.07   | NM_001103 | 755.748   | 772.064   | NM_020164 | 1162.095  | 1089.051  | NM_006144 | 547.128   |
| 151.234  | AF228710  | 9208.777  | 7073.669  | AK023521  | 1732.656  | 1828.713  | AL136549  | 1590.824  |
| 729.73   | NM_018399 | 1096.183  | 707.135   | NM_014267 | 12712.602 | 25592.258 | NM_012168 | 821.282   |
| 1945.356 | AY007131  | 25938.061 | 18472.516 | AL050187  | 2922.201  | 4946.659  | NM_007038 | 1296.153  |
| 719.076  | U61735    | 5108.119  | 5569.893  | NM_007127 | 1151.358  | 1816.983  | AF311324  | 1356.115  |
| 526.3    | NM_001144 | 2684.476  | 2726.962  | NM_012387 | 7055.939  | 8953.854  | AF124433  | 571.48    |
| 529.137  | AK023766  | 6411.444  | 8392.479  | NM_014735 | 956.908   | 865.737   | NM_001461 | 579.447   |
| 431.941  | NM_001897 | 2184.879  | 2759.805  | NM_004252 | 8177.824  | 8830.702  | AF061556  | 757.683   |
| 1624.939 | NM_003853 | 1704.865  | 1602.669  | AF172929  | 2810.209  | 4671.697  | AL162049  | 1013.052  |
| 2264.212 | AB033109  | 2377.107  | 3626.48   | NM_006398 | 8110.504  | 11923.228 | AF036144  | 281.65    |
| 1040.481 | NM_002053 | 16237.029 | 12888.821 | AK025655  | 1152.377  | 1137.998  | NM_005032 | 616.261   |
| 1548.376 | NM_006889 | 1592.632  | 2432.997  | NM_001056 | 1021.665  | 687.651   | NM_004160 | 2329.714  |
| 1276.495 | NM_002438 | 1680.734  | 3110.749  | AY026461  | 2770.43   | 2225.897  | NM_003941 | 12067.191 |
| 312.491  | NM_014589 | 991.621   | 1433.621  | AK025708  | 2039.646  | 2723.133  | AF177909  | 824.517   |
| 693.729  | NM_000759 | 1307.39   | 1615.036  | NM_000405 | 823.294   | 752.178   | NM_002664 | 3609.795  |
| 1458.432 | AK023334  | 1608.133  | 1850.771  | NM_005564 | 32237.23  | 24538.49  | AB018271  | 2019.556  |
| 455.534  | NM_002563 | 9499.411  | 10429.81  | NM_004508 | 1532.177  | 1371.363  | AL137665  | 1771.339  |
| 3471.851 | NM_002437 | 1448.225  | 1479.56   | NM_006405 | 8452.571  | 6213.585  | NM_016434 | 823.248   |
| 662.425  | D79991    | 2374.687  | 1765.305  | NM_002390 | 1352.102  | 3026.645  | AB007892  | 891.346   |
| 312.367  | AK022425  | 1068.101  | 1183.362  | NM_006142 | 1020.412  | 2085.476  | AB037748  | 443.732   |
| 304.878  | NM_000054 | 3700.239  | 2881.114  | NM_014910 | 8829.671  | 9818.976  | AB002306  | 957.214   |
| 160.599  | NM_014713 | 4628.863  | 7226.647  | AK001064  | 2753.17   | 2401.438  | NM_001300 | 1008.286  |
| 768.361  | NM_001812 | 1797.885  | 1342.237  | AB029031  | 3498.412  | 2609.703  | NM_018187 | 3951.576  |
| 613.394  | NM_014785 | 1719.129  | 1756.188  | NM_001294 | 2977.896  | 4249.521  | NM_003016 | 10722.594 |
| 964.96   | NM_006033 | 3509.551  | 4044.479  | NM_014241 | 4551.972  | 7271.937  | NM_005463 | 4618.821  |
| 549.121  | NM_004837 | 9302.383  | 10849.079 | AF302786  | 1795.035  | 3193.071  | NM_001325 | 1365.553  |
| 804.162  | NM_000370 | 2321.912  | 3496.588  | AL122083  | 3076.94   | 2599.102  | NM_018282 | 8412.648  |
| 304.417  | BE865893  | 3831.133  | 3405.347  | NM_005052 | 7853.647  | 5605.166  | BC019932  | 1049.866  |
| 1447.987 | NM_003123 | 52839.25  | 53186.715 | AF319476  | 841.978   | 686.38    | AF114818  | 1740.555  |
| 1465.433 | AY005822  | 6096.626  | 4720.093  | AK001913  | 3400.782  | 1971.778  | AK025106  | 1402.048  |
| 781.645  | NM_018129 | 12028.111 | 11833.494 | NM_017737 | 480.842   | 321.479   | NM_020144 | 1435.459  |
| 8410.003 | AF289022  | 2923.052  | 3744.698  | NM_004292 | 876.344   | 977.948   | NM_003908 | 35625.387 |
| 1698.986 | NM_016025 | 4086.485  | 7287.578  | NM_015484 | 3347.234  | 2397.883  | BE893142  | 1064.978  |
| 353.181  | NM_013319 | 2242.424  | 2437.037  | NM_018046 | 1390.545  | 1493.063  | NM_003103 | 3208.459  |
| 457.693  | NM_000746 | 1294.277  | 1919.235  | NM_013316 | 2918.844  | 2057.839  | NM_015340 | 2791.192  |
| 1782.083 | NM_000722 | 1270.788  | 1773.002  | M20701    | 9406.308  | 8968.402  | NM_006451 | 2066.947  |
| 460.689  | NM_006030 | 1622.74   | 1730.09   | NM_002912 | 1742.954  | 1847.266  | NM_002094 | 1053.398  |
| 318.39   | NM_020410 | 7794.074  | 6992.338  | NM_013284 | 1867.406  | 1207.911  | NM_002937 | 358.67    |

|           |             |           |           |           |           |           |           |           |
|-----------|-------------|-----------|-----------|-----------|-----------|-----------|-----------|-----------|
| 718.308   | AF000143    | 14499.792 | 14054.463 | NM_006739 | 1123.254  | 1928.805  | AF070590  | 806.371   |
| 478.517   | NM_014211   | 645.106   | 852.412   | NM_013274 | 2723.313  | 2914.258  | NM_004709 | 592.188   |
| 353.873   | NM_000814   | 702.539   | 1200.299  | AK024955  | 21419.859 | 23524.18  | NM_000761 | 13129.632 |
| 75.403    | NM_000453   | 2660.797  | 4183.095  | NM_016580 | 1318.921  | 1387.18   | NM_020142 | 2048.104  |
| 269.258   | J03077      | 16822.803 | 34059.027 | AF169693  | 1133.753  | 1133.461  | NM_000774 | 1794.431  |
| 406.804   | AL157469    | 1325.591  | 2669.904  | L23206    | 3489.373  | 2704.187  | NM_017781 | 19434.77  |
| 260.97    | NM_005135   | 2624.798  | 4184.529  | NM_012192 | 2178.812  | 1912.068  | NM_006004 | 45609.152 |
| 20512.979 | NM_000317   | 6617.357  | 13469.418 | NM_006293 | 1777.298  | 1679.661  | NM_004894 | 8872.629  |
| 1125.172  | NM_018376   | 6357.287  | 5830.895  | NM_007229 | 3184.254  | 3009.283  | AB028960  | 474.164   |
| 1338.293  | NM_017615   | 462.401   | 688.408   | AB011105  | 2206.956  | 1722.355  | NM_005648 | 11748.486 |
| 13494.119 | NM_017438   | 2940.09   | 2677.544  | NM_002213 | 627.721   | 574.646   | NM_006943 | 9071.227  |
| 1322.898  | U59209      | 2076.847  | 1407.993  | NM_018970 | 459.043   | 858.054   | NM_006741 | 2685.202  |
| 734.367   | NM_020195   | 2575.937  | 3582.372  | NM_004814 | 4113.558  | 4815.07   | NM_014166 | 2751.996  |
| 4088.252  | AK023824    | 3507.04   | 2777.919  | D86976    | 16074.812 | 14682.475 | AL117606  | 3797.946  |
| 617.086   | AL133069    | 4271.682  | 4241.735  | AF307080  | 2629.688  | 3239.86   | NM_012330 | 1024.22   |
| 2865.006  | AL117574    | 582.712   | 510.977   | NM_004057 | 2213.372  | 1678.974  | AF294278  | 1303.356  |
| 1099.929  | AK026055    | 4863.353  | 3615.446  | NM_018971 | 464.673   | 178.527   | NM_018211 | 1019.637  |
| 846.397   | AK024126    | 1016.284  | 794.883   | K03175    | 606.142   | 458.103   | NM_014520 | 2164.706  |
| 529.015   | NM_001516   | 3886.232  | 2139.457  | NM_003015 | 1106.243  | 833.525   | NM_002616 | 1099.852  |
| 976.309   | NM_002744   | 2282.974  | 1340.023  | NM_006496 | 12252.292 | 15360.701 | AK025712  | 5582.44   |
| 1784.505  | NM_015917   | 7065.865  | 6994.375  | NM_000828 | 492.34    | 410.391   | NM_014710 | 246.89    |
| 308.221   | NM_020397   | 1117.917  | 969.352   | NM_004826 | 810.344   | 782.208   | U85992    | 559.358   |
| 2638.393  | NM_000061   | 5992.837  | 5662.793  | NM_002072 | 877.989   | 568.854   | AL110152  | 464.895   |
| 51.27     | AB046859    | 7564.324  | 5721.181  | NM_003182 | 610.871   | 347.658   | AF131745  | 331.178   |
| 184.464   | NM_005109   | 5077.052  | 4453.757  | AF272380  | 17191.221 | 19679.51  | AL117565  | 2034.819  |
| 310.87    | AK023573    | 4195.198  | 2742.528  | NM_004431 | 6822.812  | 5890.713  | AK022109  | 1080.831  |
| 1834.582  | NM_004631   | 5840.355  | 4710.191  | NM_002012 | 798.184   | 617       | AK022103  | 538.48    |
| 325.931   | NM_003296   | 580.649   | 749.281   | NM_002070 | 36045.648 | 52169.926 | NM_007030 | 402.928   |
| 112.555   | NM_004736   | 3162.612  | 3115.812  | AF227969  | 1171.814  | 1140.29   | AK021527  | 530.23    |
| 1320.7    | NM_006895   | 684.099   | 1014.888  | AF116657  | 759.385   | 575.683   | AF143882  | 502.625   |
| 2270.495  | NM_006459   | 7635.374  | 3205.991  | NM_004102 | 438.234   | 381.811   | U00953    | 757.219   |
| 1224.041  | D50373      | 809.48    | 776.345   | NM_003944 | 25315.977 | 21453.355 | AF086176  | 718.421   |
| 553.086   | AA488757    | 3678.881  | 3729.298  | NM_016120 | 52804.316 | 56102.398 | AF086232  | 517.755   |
| 436.241   | AI394286    | 2134.32   | 1967.015  | NM_002893 | 1726.235  | 1417.42   | NM_017742 | 577.972   |
| 496.351   | H07071      | 1184.667  | 1323.169  | NM_002393 | 6281.605  | 5627.551  | NM_005108 | 1295.102  |
| 356.407   | M25322      | 2173.113  | 2506.597  | NM_002669 | 3474.814  | 4082.396  | AK022292  | 1978.342  |
| 902.484   | AA436187    | 219.93    | 1272.155  | AB014600  | 2568.453  | 2302.932  | AB051436  | 1394.566  |
| 2786.462  | H-L 27586 I | 1385.377  | 1397.602  | NM_018312 | 1553.048  | 1373.159  | AK026482  | 6306.098  |
| 573.023   | ID 214180   | 560.138   | 794.883   | X98259    | 585.187   | 658.297   | AL137473  | 1193.094  |
| 458.314   | ID 1867426  | 2635.202  | 4691.716  | X98260    | 5346.933  | 2813.912  | AJ001873  | 5145.835  |
| 3924.351  | ID 396450   | 814.169   | 1017.536  | NM_007217 | 4786.604  | 4216.066  | AB026054  | 617.011   |
| 808.357   | W99328      | 1101.084  | 842.53    | NM_014777 | 4129.935  | 3934.656  | AK022604  | 708.997   |
| 3003.599  | AI434176    | 816.771   | 958.715   | NM_001102 | 2924.137  | 2592.744  | U66048    | 1201.68   |
| 495.074   | H08563      | 362.756   | 547.997   | NM_003803 | 1133.208  | 1056.667  | AK023401  | 2072.028  |
| 335.787   | BE735403    | 1061.402  | 1079.504  | NM_002818 | 33115.684 | 37938.66  | AK001865  | 668.624   |
| 887.094   | NM_022552   | 3279.023  | 2913.812  | NM_001937 | 3189.331  | 2807.731  | AK024035  | 6778.445  |
| 237.793   | D79991      | 1487.746  | 1096.278  | AK024778  | 894.303   | 389.491   | AL049331  | 227.728   |
| 404.487   | AK022425    | 431.36    | 480.435   | NM_004297 | 783.783   | 1270.228  | AL080233  | 1793.844  |
| 1028.565  | NM_000054   | 3050.441  | 2086.404  | NM_006044 | 6629.354  | 8918.806  | AL049361  | 604.933   |
| 239.895   | NM_014713   | 4058.476  | 5854.451  | AK025498  | 1152.886  | 1070.08   | AL050132  | 467.993   |
| 2483.575  | NM_005811   | 3158.617  | 3342.759  | NM_001395 | 7870.741  | 7063.747  | AL117663  | 1611.941  |
| 517.003   | NM_005764   | 669.688   | 627.402   | NM_002068 | 4421.155  | 3682.694  | NM_014293 | 2160.913  |
| 215.245   | NM_016362   | 966.692   | 986.135   | NM_013338 | 1787.884  | 1794.719  | AK024432  | 1535.986  |

|           |           |           |           |           |           |           |           |           |
|-----------|-----------|-----------|-----------|-----------|-----------|-----------|-----------|-----------|
| 345.78    | NM_004214 | 4166.886  | 4179.281  | NM_014671 | 4402.928  | 4608.909  | AL137513  | 940       |
| 2788.696  | NM_004329 | 5971.852  | 5268.282  | NM_001814 | 7198.769  | 5305.562  | AF088001  | 410.967   |
| 834.56    | NM_002836 | 2694.673  | 2577.066  | NM_018439 | 1011.057  | 783.322   | NM_018067 | 2261.561  |
| 430.581   | NM_020167 | 992.755   | 1094.939  | NM_005656 | 790.616   | 808.971   | NM_018956 | 5886.43   |
| 1134.363  | AL049963  | 8734.875  | 6384.188  | NM_006012 | 3776.271  | 3358.648  | NM_014787 | 1237.762  |
| 412.362   | NM_016058 | 14846.075 | 17284.828 | NM_002151 | 1470.346  | 1373.743  | AL122109  | 1126.459  |
| 560.756   | NM_014005 | 1202.806  | 1094.901  | NM_014889 | 1206.354  | 972.12    | AF074988  | 1016.086  |
| 463.49    | NM_004636 | 1219.962  | 985.516   | AF173935  | 651.629   | 825.033   | AK024946  | 917.847   |
| 1542.507  | AK022603  | 937.68    | 1010.364  | AK025322  | 6534.774  | 4976.97   | AK001432  | 2319.449  |
| 1593.63   | NM_004896 | 6571.246  | 4451.729  | NM_017887 | 2746.472  | 2640.098  | AL133568  | 1921.661  |
| 894.705   | NM_017688 | 1292.367  | 2107.658  | NM_017650 | 674.709   | 468.777   | AF009265  | 919.748   |
| 3781.567  | AK025612  | 3656.188  | 5921.983  | NM_000526 | 1550.713  | 1392.974  | AF009309  | 1462.594  |
| 26068.574 | NM_012268 | 1577.667  | 2340.92   | AF007152  | 1344.468  | 1826.865  | AF054830  | 678.203   |
| 1081.068  | J03077    | 11649.685 | 17267.506 | AL122100  | 769.657   | 645.181   | NM_002360 | 1199.5    |
| 15236.838 | J03048    | 10889.989 | 7573.255  | NM_005310 | 1159.542  | 744.489   | AF009274  | 238.549   |
| 2856.421  | NM_002868 | 3738.207  | 2582.472  | NM_014423 | 3914.836  | 3476.95   | AF009322  | 684.824   |
| 22716.611 | NM_004583 | 722.81    | 518.057   | NM_018083 | 1402.891  | 949.998   | AF056425  | 958.819   |
| 1145.392  | NM_001103 | 686.695   | 483.256   | AL110188  | 6448.043  | 5274.097  | AF090893  | 457.008   |
| 273.545   | AF228710  | 7404.704  | 6692.913  | D70834    | 18970.727 | 19180.879 | NM_018033 | 4821.948  |
| 3764.005  | NM_018399 | 488.682   | 421.166   | NM_000970 | 55333.02  | 61529.672 | AK001945  | 768.105   |
| 2030.336  | AY007131  | 20208.051 | 14574.168 | NM_033288 | 625.665   | 561.453   | AK021541  | 359.501   |
| 1613.677  | U61735    | 2938.478  | 3306.128  | AK000102  | 765.734   | 630.784   | AK021766  | 366.133   |
| 527.355   | NM_001144 | 2727.457  | 3483.696  | AB040916  | 1238.076  | 1505.149  | AK001147  | 448.277   |
| 880.962   | AK023766  | 4195.03   | 4409.04   | NM_005587 | 1480.262  | 1519.404  | AK002109  | 248.338   |
| 8155.727  | NM_001897 | 1516.632  | 1528.99   | AF038362  | 2972.29   | 2326.274  | AK021630  | 1445.836  |
| 1467.935  | NM_003853 | 1602.222  | 744.915   | NM_005481 | 1240.819  | 423.787   | AK021831  | 741.613   |
| 447.22    | AB033109  | 1710.006  | 2219.469  | NM_004715 | 3507.998  | 2900.29   | AK025650  | 3303.457  |
| 1786.699  | NM_002053 | 11689.582 | 5676.606  | L40392    | 1437.295  | 1432.499  | AK026401  | 855.731   |
| 806.828   | NM_002438 | 1460.93   | 3765.385  | NM_001007 | 60127.957 | 60576.391 | AK026773  | 1398.669  |
| 624.579   | NM_000759 | 1170.967  | 2402.962  | NM_003017 | 4306.152  | 3808.593  | AK026452  | 257.81    |
| 1304.391  | AK023334  | 1462.267  | 2235.925  | NM_020366 | 1837.912  | 1593.18   | U73530    | 428.027   |
| 1412.556  | NM_002563 | 10160.691 | 14976.966 | NM_020141 | 3995.942  | 5543.734  | AF086158  | 1356.238  |
| 491.755   | AK023573  | 3010.312  | 2053.259  | NM_006482 | 855.797   | 1232.074  | AF086050  | 1487.611  |
| 15796.541 | NM_002730 | 3673.716  | 4770.915  | NM_003779 | 694.162   | 730.279   | AF147375  | 878.65    |
| 2078.334  | NM_004828 | 2963.906  | 1949.71   | NM_003635 | 784.654   | 1612.216  | X51524    | 10756.564 |
| 2680.351  | AB011540  | 10448.455 | 6477.725  | NM_000662 | 2001.367  | 5792.898  | AK025759  | 1752.167  |
| 656.676   | NM_000040 | 3559.881  | 3434.039  | NM_000292 | 1492.009  | 3247.638  | AJ238556  | 448.698   |
| 774.721   | NM_004631 | 3813.084  | 2751.961  | NM_016173 | 1391.613  | 1673.973  | AK021516  | 1590.972  |
| 545.79    | NM_006033 | 1933.005  | 2345.654  | NM_002875 | 4240.001  | 10968.069 | NM_006898 | 674.491   |
| 891.603   | NM_004837 | 7328.837  | 11633.921 | NM_004427 | 8002.383  | 16660.545 | AK023429  | 607.198   |
| 3058.43   | NM_000370 | 3192.107  | 5665.465  | U90549    | 4047.13   | 8836.419  | AK022276  | 626.159   |
| 5443.537  | BE865893  | 2824.863  | 2386.642  | NM_013240 | 6550.794  | 14440.771 | AK026881  | 406.453   |
| 864.582   | NM_003123 | 37962.555 | 33538.16  | AF312393  | 38742.395 | 55648.992 | AL133653  | 658.572   |
| 1887.17   | AY005822  | 3528.007  | 2698.462  | AF272898  | 7067.526  | 10979.827 | AK023774  | 457.489   |
| 515.924   | NM_018129 | 10624.188 | 8208.219  | AB037817  | 646.035   | 973.252   | AL049377  | 782.41    |
| 791.152   | AF289022  | 2425.36   | 3250.691  | AB032951  | 7151.761  | 9391.507  | NM_003544 | 17875.213 |
| 1762.147  | NM_016025 | 2650.115  | 3288.502  | NM_003417 | 1244.682  | 1575.24   | U17640    | 862.645   |
| 807.54    | NM_013319 | 1692.942  | 1214.377  | NM_005149 | 5771.699  | 6215.067  | AK001187  | 1061.46   |
| 924.995   | NM_000722 | 1129.989  | 1265.302  | AK024073  | 626.27    | 479.922   | NM_003529 | 20459.457 |
| 60518.496 | NM_006030 | 1260.607  | 1716.126  | NM_005887 | 3129.245  | 2065.676  | AF056436  | 967.604   |
| 2082.23   | AF000143  | 13513.665 | 16486.563 | AK024921  | 431.991   | 1070.863  | AB023191  | 701.872   |
| 4499.266  | NM_014211 | 504.182   | 815.285   | AL110232  | 525.753   | 1470.302  | AK027212  | 3775.377  |
| 1495.068  | NM_000814 | 714.361   | 1304.37   | AK026103  | 2417.875  | 2658.24   | X56197    | 374.026   |

|           |             |          |           |           |           |           |           |          |
|-----------|-------------|----------|-----------|-----------|-----------|-----------|-----------|----------|
| 1627.747  | NM_022552   | 3238.452 | 2435.206  | NM_016353 | 17501.486 | 15940.953 | NM_005199 | 4476.208 |
| 2183.479  | NM_014389   | 6580.644 | 6293.094  | AK022567  | 1852.876  | 1313.244  | U90905    | 719.307  |
| 2380.652  | NM_001718   | 518.255  | 515.778   | AK023450  | 749.248   | 756.229   | AF161422  | 793.779  |
| 4763.565  | AF116659    | 2250.843 | 1730.757  | AL080280  | 5154.233  | 6918.346  | AL137384  | 616.986  |
| 13029.333 | NM_000317   | 6257.729 | 10992.563 | AB028947  | 3186.644  | 4384.857  | AF070619  | 858.623  |
| 13371.994 | NM_018376   | 4571.348 | 4421.521  | AF035314  | 1130.987  | 1154.019  | NM_020153 | 265.72   |
| 536.826   | NM_017438   | 2200.505 | 1897.84   | NM_018036 | 1142.599  | 1250.042  | NM_005321 | 3271.952 |
| 947.724   | U59209      | 1420.337 | 1130.585  | AF052087  | 1049.281  | 1315.709  | AF073520  | 619.096  |
| 339.537   | NM_020195   | 2415.969 | 3685.443  | AF007143  | 1618.085  | 1354.228  | AF143885  | 453.684  |
| 1413.125  | AK023824    | 2479.925 | 1725.356  | AF147417  | 630.981   | 972.138   | NM_014015 | 4320.077 |
| 6952.32   | AL133069    | 2750.58  | 2515.248  | AK023656  | 1062.915  | 1499.895  | Z34278    | 477.816  |
| 197.262   | AL117574    | 319.918  | 264.508   | AF086511  | 5465.387  | 7793.389  | AK024973  | 583.361  |
| 8263.646  | NM_001516   | 5406.219 | 4100.362  | AK022989  | 3600.133  | 5588.02   | AJ008123  | 4557.985 |
| 1477.929  | NM_002744   | 2377.962 | 2111.45   | AK001604  | 5648.672  | 8814.264  | AJ008156  | 820.543  |
| 5887.378  | NM_015917   | 7457.141 | 9885.156  | AK025872  | 549.45    | 1046.355  | AF147321  | 433.027  |
| 1106.699  | NM_000061   | 6413.356 | 9685.609  | AF131762  | 12519.594 | 15571.953 | AF161437  | 3087.093 |
| 596.227   | AB046859    | 9294.085 | 15893.76  | AY007089  | 4851.271  | 4358.126  | AK024321  | 671.139  |
| 14353.82  | NM_005109   | 6187.213 | 9343.641  | AK021816  | 9215.617  | 10839.467 | U52834    | 506.626  |
| 940.947   | NM_003976   | 3112.929 | 2454.981  | D43770    | 4597.217  | 5467.442  | AJ227898  | 260.032  |
| 1481.722  | NM_017688   | 1274.736 | 1276.096  | AF085960  | 347.982   | 593.641   | NM_003532 | 514.752  |
| 897.052   | AK025612    | 2971.363 | 2513.546  | AK021519  | 780.145   | 842.629   | NM_017869 | 2859.526 |
| 2646.704  | NM_012268   | 1321.098 | 1179.992  | NM_014254 | 1513.324  | 1410.025  | AF075100  | 322.089  |
| 2058.206  | NM_012203   | 759.037  | 907.226   | AF086036  | 502.275   | 538.209   | AF203447  | 4889.41  |
| 1683.585  | NM_003296   | 385.282  | 304.575   | AF086010  | 339.797   | 542.038   | NM_018502 | 935.183  |
| 1597.756  | NM_004736   | 2462.441 | 2688.797  | U09197    | 1672.661  | 2546.609  | AL080066  | 4559.636 |
| 625.583   | NM_006895   | 752.292  | 908.551   | U50529    | 502.624   | 858.611   | AJ227870  | 867.597  |
| 1775.335  | NM_006459   | 7759.033 | 3200.67   | U66050    | 253.528   | 386.951   | AL137620  | 500.635  |
| 965.719   | AA427949    | 198.025  | 800.858   | Z36800    | 557.357   | 868.798   | NM_005294 | 1186.77  |
| 2407.209  | D50373      | 1017.076 | 1333.796  | U15553    | 4769.772  | 4161.245  | AK026879  | 408.689  |
| 51795.289 | AA488757    | 5647.108 | 5628.496  | Z36829    | 778.478   | 864.58    | AF085826  | 393.008  |
| 9926.656  | AA205399    | 432.014  | 586.292   | AK024734  | 1978.535  | 1948.702  | AK024362  | 616.183  |
| 7955.636  | AI394286    | 2131.73  | 1731.279  | NM_017741 | 896.919   | 956.091   | AF118068  | 1579.157 |
| 2904.326  | H07071      | 1309.271 | 1209.252  | AK000144  | 820.811   | 1018.054  | NM_019018 | 4216.87  |
| 1945.345  | H-L 27586 I | 1580.15  | 2117.031  | AK022275  | 698.46    | 364.585   | M87931    | 712.185  |
| 34588.477 | ID 214180   | 754.331  | 1215.645  | NM_016349 | 429.201   | 499.696   | CY3Cy5    | 3286.294 |
| 305.588   | ID 1867426  | 3750.966 | 7031.758  | AL117533  | 2577.138  | 2540.074  | L35594    | 437.029  |
| 720.276   | ID 396450   | 537.336  | 741.342   | AK026036  | 1016.334  | 1320.587  | BE790116  | 3711.468 |
| 802.517   | AI434176    | 495.201  | 969.338   | AK023422  | 2343.658  | 1828.467  | AI922341  | 491.603  |
| 1218.474  | NM_002438   | 1346.255 | 1603.577  | AK022796  | 2041.802  | 1914.339  | M12824    | 764.734  |
| 1379.498  | NM_014589   | 1203.231 | 1044.384  | AK095193  | 1401.005  | 1803.606  | W60100    | 543.385  |
| 3589.287  | NM_000759   | 1315.066 | 1384.678  | AK025081  | 957.083   | 997.533   | AA457153  | 2405.042 |
| 4614.519  | AK023334    | 1631.994 | 2003.123  | AL122088  | 1625.057  | 1862.974  | AA283122  | 1635.272 |
| 1957.602  | NM_002563   | 7738.38  | 6470.344  | AF116633  | 415.25    | 596.71    | AA868504  | 1149.327 |
| 8656.652  | NM_002437   | 1266.504 | 992.235   | AF119912  | 624.122   | 648.53    | AA877845  | 3838.77  |
| 1062.254  | D79991      | 1687.719 | 986.248   | AL137518  | 1709.639  | 1608.098  | AA664241  | 6884.521 |
| 511.786   | AK022425    | 560.066  | 321.323   | AK022556  | 370.182   | 333.381   | NM_000588 | 12672.54 |
| 14366.643 | NM_000054   | 2837.939 | 2296.502  | AK023437  | 1608.085  | 1849.935  | SR5       | 2866.12  |
| 5671.278  | NM_014713   | 3975.98  | 6045.491  | AK024147  | 384.943   | 638.366   | SR7       | 4033.162 |
| 4599.495  | NM_001812   | 1609.87  | 979.55    | AK022897  | 1250.325  | 913.216   | SR9       | 8000.847 |
| 6959.095  | NM_014785   | 947.797  | 1125.234  | AK023898  | 6006.337  | 6295.656  | CY3Cy5    | 2873.107 |
| 1791.797  | NM_005811   | 3342.502 | 2938.374  | NM_019040 | 5985.576  | 5436.238  | NM_005810 | 3111.921 |
| 2331.859  | NM_005764   | 846.606  | 589.007   | NM_005978 | 1212.976  | 1423.838  | M28170    | 1613.409 |
| 832.778   | NM_016362   | 1035.215 | 718.047   | Y16711    | 1276.959  | 1503.076  | AK026223  | 1777.237 |

|           |           |           |           |           |           |           |           |           |
|-----------|-----------|-----------|-----------|-----------|-----------|-----------|-----------|-----------|
| 1079.881  | NM_004329 | 7548.948  | 8555.146  | AJ272179  | 3164.868  | 2025.67   | NM_000874 | 694.001   |
| 650.356   | NM_002836 | 3140.728  | 3185.473  | AJ007015  | 765.941   | 850.266   | NM_005854 | 911.612   |
| 788.156   | NM_020167 | 1216.432  | 1488.911  | AL049317  | 1230.253  | 1345.045  | AB007863  | 5359.991  |
| 3404.34   | AL049963  | 6762.871  | 5545.886  | AL050090  | 1337.108  | 1460.439  | AK024456  | 1509.148  |
| 877.386   | NM_016058 | 21630.711 | 33872.449 | AF086309  | 937.637   | 935.364   | D31887    | 2122.4    |
| 428.176   | NM_006030 | 981.317   | 1053.938  | AF238870  | 1474.406  | 1789.83   | NM_002313 | 814.976   |
| 877.489   | NM_020410 | 5490.949  | 4457.344  | AK026279  | 3608.988  | 3306.616  | NM_004459 | 715.747   |
| 356.179   | AF000143  | 13505.436 | 9019.178  | AF130094  | 8484.064  | 9370.681  | NM_005503 | 1202.257  |
| 589.297   | NM_014211 | 440.242   | 429.05    | AK026673  | 1682.091  | 1452.998  | NM_005721 | 512.103   |
| 1681.184  | NM_000814 | 644.642   | 758.44    | NM_005452 | 3819.981  | 3817.51   | AF284223  | 14379.246 |
| 1962.538  | NM_000453 | 2567.231  | 2863.428  | AF170935  | 15368.405 | 12774.727 | AF176012  | 2212.858  |
| 1068.14   | J03077    | 13558.623 | 22664.313 | AK025218  | 781.306   | 746.327   | NM_001081 | 780.888   |
| 4005.353  | J03048    | 11998.076 | 9256.51   | AJ227899  | 1313.197  | 1402.62   | NM_002483 | 698.968   |
| 21985.977 | AL157469  | 819.527   | 1129.712  | AL359607  | 1142.517  | 1300.596  | BF002026  | 354.391   |
| 1140.903  | NM_002868 | 4059.961  | 3185.243  | AF161371  | 7140.881  | 10311.982 | NM_004171 | 721.292   |
| 2290.125  | AK024100  | 3026.991  | 1870.837  | AK022464  | 1261.327  | 1111.692  | NM_014037 | 1029.923  |
| 12862.03  | NM_005135 | 1604.886  | 3053.705  | AF086230  | 2039.947  | 1802.24   | NM_004866 | 8127.298  |
| 479.562   | NM_003827 | 5868.993  | 7206.305  | AK023408  | 1916.397  | 2064.851  | NM_018688 | 1340.141  |
| 648.987   | NM_004583 | 828.56    | 724.932   | U84509    | 2244.749  | 2883.962  | AK056652  | 2351.112  |
| 1246.008  | NM_001103 | 881.156   | 1779.021  | AK002036  | 4698.119  | 6209.064  | NM_015839 | 648.56    |
| 395.759   | AY007131  | 27717.621 | 30350.998 | AK025775  | 4416.735  | 6576.465  | AL137438  | 705.167   |
| 6335.051  | U61735    | 4080.926  | 3816.92   | AB046791  | 885.777   | 1079.031  | NM_017957 | 1326.221  |
| 2546.978  | NM_001144 | 3065.903  | 3085.613  | AF043469  | 1155.305  | 551.047   | NM_003024 | 881.671   |
| 449.173   | AK023766  | 4732.641  | 4055.289  | AL109671  | 1343.547  | 1519.914  | NM_013248 | 1535.812  |
| 1521.823  | NM_001897 | 2064.604  | 2073.532  | NM_012375 | 333.493   | 380.891   | NM_000034 | 61252.906 |
| 479.056   | NM_002744 | 1953.251  | 1356.251  | AK022008  | 3072.118  | 2677.68   | AK022230  | 1273.458  |
| 1013.848  | NM_015917 | 7618.817  | 7821.736  | NM_018186 | 1508.662  | 844.241   | AK022147  | 3441.641  |
| 9599.971  | NM_020397 | 898.269   | 689.499   | AL080188  | 3620.057  | 2490.043  | L25664    | 956.637   |
| 1291.383  | NM_000061 | 5873.313  | 4940.611  | T99941    | 8207.515  | 6653.8    | NM_014940 | 1589.052  |
| 679.795   | AB046859  | 9090.469  | 7478.452  | AF113678  | 2838.992  | 3051.584  | NM_005783 | 417.364   |
| 1710.409  | NM_005109 | 5191.085  | 4461.402  | AL137313  | 55899.191 | 57949.234 | NM_006406 | 3163.669  |
| 965.011   | AK023573  | 3696.755  | 2936.708  | AL833529  | 399.029   | 385.234   | NM_005894 | 588.159   |
| 564.809   | NM_002730 | 4151.594  | 5424.556  | AB002363  | 6003.629  | 5581.587  | NM_014584 | 1452.365  |
| 1544.951  | NM_004828 | 3991.42   | 2463.757  | NM_005284 | 3265.023  | 2945.6    | M30627    | 466.444   |
| 1488.884  | AB011540  | 10606.061 | 7493.437  | AF086351  | 2118.686  | 3647.054  | NM_016649 | 2387.992  |
| 2742.81   | NM_000040 | 3554.44   | 4047.004  | AK025957  | 719.027   | 590.554   | AK090536  | 10000.123 |
| 1229.251  | NM_004631 | 4041.296  | 3202.169  | Y16708    | 621.34    | 621.421   | D63477    | 693.567   |
| 624.611   | NM_006033 | 2876.837  | 3326.855  | AL157453  | 3160.322  | 2272.874  | NM_020243 | 13376.598 |
| 2514.549  | NM_004837 | 6541.627  | 6572.581  | NM_019098 | 3059.393  | 4618.814  | NM_014051 | 2263.01   |
| 1380.792  | NM_000370 | 1863.181  | 2052.453  | AK022212  | 29746.068 | 31244.133 | AK025398  | 6729.104  |
| 1708.729  | NM_003123 | 52930.527 | 53925.25  | X64974    | 1306.638  | 1798.559  | AB037750  | 1660.03   |
| 3375.757  | AY005822  | 5571.482  | 4452.543  | NM_000834 | 2399.455  | 3532.744  | AK023056  | 559.264   |
| 5163.19   | NM_018129 | 13128.827 | 9343.494  | NM_006485 | 42668.684 | 50672.313 | NM_017888 | 755.052   |
| 878.697   | AF289022  | 2071.819  | 2454.242  | NM_012459 | 841.293   | 1538.152  | NM_004915 | 865.582   |
| 1885.745  | AB002326  | 407.346   | 383.22    | NM_012360 | 420.105   | 856.589   | AK022207  | 905.866   |
| 568.976   | M17252    | 439.642   | 706.325   | AL137268  | 3529.4    | 3235.599  | NM_004996 | 1673.844  |
| 833.359   | NM_000722 | 796.877   | 1265.591  | AK022398  | 1023.669  | 1141.866  | NM_017435 | 558.897   |
| 2569.905  | NM_016116 | 429.608   | 635.319   | AK024109  | 2589.361  | 1726.102  | NM_013386 | 3077.427  |
| 829.729   | NM_018655 | 1211.005  | 966.299   | AF088048  | 638.384   | 954.056   | NM_006517 | 1630.319  |
| 1348.694  | NM_005663 | 1318.421  | 930.01    | AK001143  | 3143.689  | 2716.3    | AK026680  | 3391.275  |
| 58696.953 | X89960    | 1278.422  | 898.601   | AK001701  | 2975.47   | 2643.302  | NM_012436 | 45004.684 |
| 2154.988  | NM_005773 | 1148.195  | 1473.349  | AK022205  | 804.164   | 586.995   | AK001299  | 6968.782  |
| 5055.966  | NM_017644 | 4274.556  | 4739.502  | AF217970  | 616.088   | 796.981   | AB014559  | 5961.591  |

|           |           |           |           |            |           |           |           |           |
|-----------|-----------|-----------|-----------|------------|-----------|-----------|-----------|-----------|
| 1624.645  | AB032971  | 435.521   | 451.217   | AF086297   | 1057.838  | 1116.925  | NM_016489 | 3711.387  |
| 1589.044  | NM_002482 | 1614.012  | 1075.541  | AK025455   | 1468.504  | 1326.664  | NM_005033 | 2287.185  |
| 606.663   | NM_001718 | 353.507   | 367.875   | AK026799   | 9663.627  | 3908.34   | NM_015932 | 52334.121 |
| 288.573   | AF116659  | 2440.997  | 2283.494  | AK021640   | 9834.97   | 11096.06  | NM_017949 | 453.283   |
| 1135.26   | NM_000317 | 8354.866  | 13712.993 | NM_016565  | 47545.523 | 43874.957 | AK022169  | 691.513   |
| 1154.177  | NM_018376 | 6119.075  | 4096.556  | CY3Cy5     | 1017.056  | 132.924   | AF015592  | 996.301   |
| 1180.294  | NM_017615 | 1358.418  | 1100.803  | BF310427   | 1329.744  | 1487.55   | AK026795  | 1391.456  |
| 19270.287 | NM_017438 | 3726.825  | 4091.411  | N94424     | 568.272   | 349.976   | NM_016617 | 4412.028  |
| 8545.004  | U59209    | 2430.548  | 2292.594  | AA045192   | 1211.904  | 1957.157  | NM_002027 | 4830.889  |
| 1483.547  | NM_020195 | 3643.554  | 6117.947  | H-U 44385  | 7853.162  | 4998.665  | AL162078  | 1069.01   |
| 5830.001  | AK023824  | 3936.96   | 2934.762  | ID 1654970 | 3205.249  | 2591.134  | AB011114  | 20658.516 |
| 7823.332  | AK026055  | 4622.334  | 3850.373  | ID 2531132 | 2985.932  | 3692.633  | D11466    | 9270.763  |
| 1276.911  | AK024126  | 1649.115  | 1748.967  | BF125928   | 6122.912  | 3067.73   | NM_014056 | 8747.605  |
| 5282.034  | NM_001516 | 4308.578  | 2708.002  | BG571026   | 990.185   | 548.872   | D31885    | 7360.414  |
| 1683.896  | NM_019086 | 1307.013  | 1511.22   | AA489017   | 1134.735  | 774.012   | BE743838  | 3367.099  |
| 727.845   | NM_006670 | 2743.783  | 2042.458  | NM_012245  | 8791.585  | 5419.178  | AF273046  | 2111.449  |
| 14751.776 | NM_012425 | 5599.632  | 3496.523  | NM_133263  | 877.774   | 667.576   | NM_001081 | 1255.604  |
| 792.182   | NM_005816 | 348.381   | 390.305   | SR2        | 38462.469 | 19989.582 | NM_002483 | 847.529   |
| 1255.153  | NM_002750 | 3708.61   | 2323.725  | SR4        | 8547.578  | 4962.269  | L35594    | 660.558   |
| 676.495   | NM_000081 | 2949.776  | 1602.47   | SR6        | 1299.589  | 806.771   | BE790116  | 4150.141  |
| 768.647   | AK024134  | 4040.192  | 3600.186  | SR8        | 4372.29   | 7880.246  | AI922341  | 379.999   |
| 561.162   | NM_003014 | 914.434   | 850.744   | SR10       | 15504.868 | 3018.308  | AA410517  | 379.973   |
| 316.637   | NM_018558 | 1011.365  | 890.645   | CY3Cy5     | 348.802   | 116.681   | M12824    | 1095.899  |
| 12002.604 | NM_001974 | 2248.376  | 1726.584  | NM_017450  | 1208.78   | 1131.723  | W60100    | 459.919   |
| 540.918   | NM_013957 | 1046.455  | 1854.048  | NM_002023  | 350.843   | 368.319   | AA457153  | 2204.607  |
| 687.19    | NM_002468 | 3217.092  | 9613.586  | NM_002839  | 532.595   | 410.523   | AA283122  | 1289.682  |
| 2200.319  | NM_003028 | 2057.373  | 1545.798  | AF190500   | 726.247   | 687.184   | NM_000588 | 11984.488 |
| 52681.965 | NM_001566 | 917.172   | 748.088   | NM_001616  | 266.483   | 285.861   | AK026281  | 461.33    |
| 10863.388 | NM_016541 | 2241.6    | 2789.49   | NM_005273  | 12199.962 | 32894.273 | NM_006406 | 3664.733  |
| 6714.321  | NM_018548 | 6230.014  | 6391.123  | AB035266   | 3773.323  | 3162.975  | AF216292  | 17634.068 |
| 2252.343  | NM_013401 | 1632.127  | 2547.407  | NM_003744  | 1384.677  | 981.201   | NM_000952 | 662.262   |
| 1596.931  | NM_018238 | 7460.598  | 7961.88   | NM_006378  | 742.814   | 731.373   | NM_014584 | 1709.09   |
| 41699.613 | NM_003880 | 456.308   | 364.893   | NM_018132  | 1509.22   | 1658.549  | M30627    | 519.572   |
| 465.773   | NM_005468 | 529.708   | 553.938   | NM_018207  | 461.062   | 472.238   | NM_005810 | 4616.337  |
| 938.054   | AF131778  | 817.207   | 1066.84   | NM_000345  | 6725.619  | 3783.682  | M28170    | 2948.261  |
| 903.897   | NM_001562 | 6762.679  | 6714.737  | NM_006531  | 1338.356  | 630.742   | AK026223  | 2445.063  |
| 1154.369  | NM_013278 | 1184.56   | 1315.665  | AB029021   | 4324.584  | 2003.787  | NM_000874 | 629.466   |
| 1662.184  | NM_003487 | 1644.273  | 1407.455  | NM_002101  | 10319.88  | 5438.459  | NM_005854 | 1068.804  |
| 3080.569  | NM_006887 | 13333.696 | 17582.396 | NM_005423  | 279.609   | 129.142   | AB007863  | 7190.769  |
| 3632.155  | NM_006477 | 1417.849  | 1175.199  | Z36789     | 524.967   | 441.137   | AK024456  | 1592.38   |
| 1628.33   | NM_002880 | 5748.355  | 4216.199  | J02874     | 1790.061  | 1118.454  | NM_017789 | 587.726   |
| 6958.688  | NM_000678 | 4595.655  | 4118.649  | AF070525   | 3266.856  | 3637.063  | D31887    | 2331.919  |
| 853.031   | NM_001066 | 4310.172  | 8657.381  | NM_001177  | 2875.829  | 1711.213  | NM_004459 | 724.371   |
| 1002.56   | NM_004657 | 1495.969  | 1281.225  | NM_014447  | 983.634   | 1113.792  | NM_005503 | 1292.989  |
| 896.481   | NM_006291 | 3823.833  | 6272.5    | NM_002356  | 310.373   | 486.193   | NM_001502 | 1227.856  |
| 11146.478 | NM_018170 | 4645.952  | 2220.433  | NM_006691  | 571.24    | 890.29    | NM_005721 | 431.792   |
| 1554.468  | NM_003867 | 741.103   | 677.197   | NM_001505  | 314.165   | 406.465   | AF284223  | 15204.334 |
| 1070.409  | AL162062  | 549.92    | 514.338   | NM_014257  | 1620.817  | 1840.533  | AF176012  | 2353.882  |
| 1660.305  | NM_003173 | 3907.493  | 1992.96   | NM_001140  | 324.123   | 486.04    | NM_005971 | 1568.712  |
| 817.524   | NM_005030 | 6228.032  | 4668.096  | NM_004843  | 1276.499  | 1679.305  | NM_017435 | 814.506   |
| 742.372   | NM_017584 | 3451.709  | 4289.208  | AK022845   | 480.019   | 347.444   | NM_013386 | 3485.036  |
| 508.706   | NM_020359 | 3030.419  | 3018.021  | NM_003004  | 207.062   | 244.676   | NM_006517 | 1611.082  |
| 569.19    | AB014541  | 12378.932 | 12192.894 | NM_002985  | 3128.615  | 1364.898  | NM_004171 | 1003.278  |



|           |           |           |           |           |           |          |           |           |
|-----------|-----------|-----------|-----------|-----------|-----------|----------|-----------|-----------|
| 2749.517  | NM_002583 | 8043.354  | 4705.268  | AB018347  | 3084.025  | 1907.681 | NM_014037 | 2675.432  |
| 908.925   | NM_006570 | 15199.375 | 17038.568 | NM_003284 | 727.834   | 429.304  | NM_004866 | 8523.227  |
| 530.704   | NM_006034 | 9579.499  | 7987.25   | NM_018152 | 473.381   | 300.965  | NM_018688 | 1361.6    |
| 978.453   | AB040943  | 440.604   | 702.718   | NM_012461 | 1455.5    | 1373.528 | AK056652  | 2351.526  |
| 502.985   | NM_005201 | 6081.475  | 5372.126  | AK001379  | 423.435   | 603.922  | NM_015839 | 677.201   |
| 504.4     | X56807    | 2086.558  | 2236.876  | NM_007072 | 1070.772  | 1308.037 | AL137438  | 829.274   |
| 493.365   | NM_000092 | 568.273   | 578.219   | NM_018208 | 1405.235  | 1859.716 | NM_017957 | 2713.719  |
| 1556.931  | AF174600  | 4091.989  | 3988.147  | NM_015929 | 3520.063  | 3193.133 | NM_003024 | 1085.377  |
| 1637.335  | AK001003  | 2051.208  | 815.571   | U90653    | 1942.273  | 4006.598 | NM_013248 | 1355.069  |
| 879.932   | NM_002800 | 20343.133 | 28890.645 | NM_000196 | 618.621   | 1599.812 | NM_000034 | 61258.832 |
| 2332.659  | NM_018384 | 8587.879  | 5917.967  | AK000037  | 852.571   | 879.734  | AK022230  | 1300.43   |
| 19920.607 | AF282617  | 1677.613  | 1469.871  | NM_014760 | 1445.707  | 2303.328 | AK022147  | 4132.567  |
| 549.073   | AF157323  | 2380.028  | 4434.296  | NM_002560 | 9191.215  | 8918.854 | L25664    | 1394.74   |
| 1322.241  | NM_006025 | 750.494   | 398.705   | NM_014404 | 1201.865  | 918.271  | NM_014940 | 1765.452  |
| 469.992   | NM_005877 | 9152.784  | 3708.487  | NM_018713 | 437.987   | 600.256  | NM_005783 | 253.625   |
| 1349.432  | NM_003338 | 3605.895  | 3189.719  | NM_015947 | 2440.611  | 1743.4   | NM_006900 | 1566.152  |
| 1578.699  | NM_013396 | 2094.194  | 1853.314  | NM_002042 | 21882.922 | 8744.035 | AJ289111  | 1987.059  |
| 2698.842  | NM_017752 | 1144.357  | 1377.165  | AB028944  | 408.31    | 251.77   | NM_016356 | 2517.199  |
| 1933.524  | D26069    | 9179.503  | 9633.537  | AJ006268  | 371.779   | 404.268  | NM_014043 | 2169.551  |
| 10661.09  | NM_005837 | 8612.72   | 5478.935  | M74089    | 1492.449  | 1134.599 | NM_014622 | 853.594   |
| 584.106   | NM_016625 | 4436.26   | 3078.657  | AF190864  | 2658.001  | 1925.529 | AB011114  | 25673.109 |
| 569.705   | NM_017493 | 1393.034  | 1088.827  | NM_002779 | 2275.841  | 1779.714 | D11466    | 10464.671 |
| 866.507   | NM_006136 | 5444.123  | 7862.375  | L40397    | 7769.181  | 5113.796 | NM_014056 | 8373.914  |
| 287.145   | AF237772  | 18916.982 | 20117.098 | NM_020198 | 3915.567  | 2168.145 | D31885    | 7242.252  |
| 3948.261  | AK025934  | 1380.452  | 1110.118  | D38521    | 1580.141  | 2721.033 | NM_016649 | 2223.885  |
| 2580.952  | AJ008154  | 1174.065  | 673.034   | NM_000403 | 1985.465  | 2795.328 | AK090536  | 8723.487  |
| 1868.218  | NM_006856 | 3619.279  | 2166.214  | NM_018127 | 6184.716  | 7458.002 | D63477    | 563.99    |
| 542.34    | X52350    | 59926.527 | 49145.34  | AB033097  | 2054.868  | 2492.424 | NM_020243 | 12628.706 |
| 1211.5    | AF071554  | 1325.978  | 851.096   | AJ223948  | 2300.296  | 3031.256 | NM_014051 | 2098.392  |
| 11211.455 | NM_002147 | 870.518   | 571.7     | NM_016218 | 371.756   | 375.908  | AK025398  | 6701.52   |
| 1324.853  | U90919    | 3385.371  | 2448.642  | AK022947  | 1180.56   | 1206.92  | AB037750  | 1866.278  |
| 443.235   | NM_016358 | 6234.196  | 7903.175  | NM_005204 | 1196.568  | 1049.208 | AK023056  | 657.172   |
| 1327.273  | NM_016275 | 12310.878 | 10398.536 | NM_016203 | 316.13    | 291.736  | NM_001120 | 16086.549 |
| 1104.282  | NM_013293 | 3233.729  | 3288.608  | NM_002759 | 2419.349  | 2107.629 | NM_017888 | 902.023   |
| 2891.145  | AF315592  | 7375.353  | 6841.116  | NM_007271 | 1177.854  | 1113.563 | NM_004915 | 1633.543  |
| 2318.565  | AF095844  | 1536.604  | 2786.393  | NM_006255 | 1040.681  | 1132.487 | AK022207  | 990.703   |
| 370.67    | NM_015833 | 1554.579  | 1626.252  | BE392143  | 1523.469  | 934.976  | NM_004996 | 2029.531  |
| 1931.461  | NM_000986 | 57520.91  | 57634.73  | NM_005813 | 1391.362  | 976.398  | NM_000588 | 18577.568 |
| 1282.844  | NM_014772 | 2902.958  | 2493.189  | AB037718  | 2535.258  | 1244.748 | AK026680  | 3290.041  |
| 626.832   | AK025248  | 1586.731  | 1633.371  | AL389994  | 424.248   | 338.252  | NM_012436 | 49279.563 |
| 2476.72   | NM_004539 | 14604.295 | 10387.479 | NM_003909 | 2746.333  | 1707.334 | AK001299  | 5893.561  |
| 877.756   | NM_006428 | 10897.348 | 11583.954 | NM_001277 | 4424.934  | 3209.524 | AB014559  | 6407.438  |
| 962.7     | NM_004280 | 12004.18  | 5920.287  | NM_003659 | 2732.145  | 1798.751 | NM_016489 | 3419.855  |
| 3417.824  | AF110399  | 1366.99   | 1033.145  | AB029021  | 3662.689  | 3386.629 | NM_005033 | 2273.457  |
| 5154.459  | AK027094  | 2134.109  | 1476.278  | NM_002101 | 9241.683  | 7612.313 | NM_015932 | 51115.121 |
| 1083.765  | AL359596  | 1434.995  | 1251.531  | NM_005423 | 234.052   | 344.833  | NM_017949 | 561.472   |
| 2218.22   | U79249    | 1072.148  | 1486.132  | Z36789    | 400.116   | 819.242  | AK022169  | 814.824   |
| 720.419   | AK022114  | 1011.354  | 1471.961  | J02874    | 1874.142  | 2010.81  | AF015592  | 1109.808  |
| 782.004   | AL133585  | 1963.741  | 1767.023  | BF310427  | 1099.273  | 1096.493 | AK026795  | 1337.336  |
| 2885.014  | NM_002631 | 17193.52  | 11399.086 | N94424    | 582.08    | 416.608  | NM_016399 | 1705.451  |
| 999.983   | NM_005917 | 35678.234 | 15416.368 | M92642    | 720.106   | 844.82   | NM_016617 | 4577.313  |
| 689.184   | NM_007052 | 666.692   | 641.837   | H-U 44385 | 8152.917  | 7642.155 | NM_002027 | 5288.754  |
| 5114.027  | BC017044  | 502.348   | 663.951   | ID 165490 | 2817.654  | 1772.737 | AL162078  | 2189.357  |

|           |           |           |           |            |          |           |           |           |
|-----------|-----------|-----------|-----------|------------|----------|-----------|-----------|-----------|
| 1634.447  | NM_020196 | 2463.87   | 2253.957  | ID 2531132 | 1842.106 | 1317.616  | NM_013382 | 6887.702  |
| 4633.097  | AK024113  | 392.236   | 770.852   | BF125928   | 4620.203 | 2176.848  | AB002314  | 740.059   |
| 1737.716  | NM_018657 | 1312.554  | 1207.349  | BG571026   | 839.882  | 544.452   | NM_005503 | 1725.599  |
| 10448.488 | L40410    | 6496.071  | 8005.357  | AA489017   | 1035.839 | 405.72    | NM_001502 | 1064.505  |
| 1528.446  | NM_016652 | 774.283   | 634.436   | NM_012245  | 7022.211 | 3262.897  | NM_005721 | 594.313   |
| 1176.075  | NM_016310 | 5455.68   | 3444.774  | NM_133263  | 750.5    | 399.814   | AF284223  | 17700.855 |
| 405.036   | AK021562  | 647.34    | 907.947   | NM_003284  | 905.576  | 1062.706  | AF176012  | 2743.628  |
| 11741.913 | NM_006298 | 918.619   | 642.606   | NM_018152  | 460.456  | 434.328   | BE743838  | 2442.893  |
| 4809.5    | AF060938  | 10505.867 | 10520.447 | NM_000319  | 556.003  | 761.559   | AF273046  | 1768.953  |
| 4410.899  | NM_001973 | 2717.933  | 3822.277  | NM_012461  | 1288.8   | 2251.167  | NM_001081 | 1051.09   |
| 5317.642  | NM_014468 | 4161.585  | 4554.069  | AK001379   | 459.236  | 1052.296  | NM_002483 | 934.346   |
| 1004.964  | AL050015  | 2055.205  | 2811.656  | NM_017450  | 3279.867 | 1035.336  | BF002026  | 500.375   |
| 5034.901  | AY007117  | 4305.302  | 6226.386  | AF190500   | 648.655  | 456.286   | L35594    | 551.668   |
| 9664.618  | AF039698  | 2741.717  | 2666.401  | NM_005904  | 413.724  | 327.647   | BE790116  | 3209.278  |
| 1328.787  | AL109679  | 808.892   | 599.261   | NM_005273  | 7667.441 | 6828.04   | AI922341  | 627.55    |
| 7168.475  | AB046828  | 4241.886  | 2590.504  | NM_006576  | 955.227  | 791.031   | M12824    | 931.128   |
| 1442.647  | AL137532  | 5279.332  | 5148.95   | NM_018645  | 187.538  | 178.868   | W60100    | 468.236   |
| 789.729   | AK025419  | 2439.659  | 2574.646  | AB035266   | 2106.208 | 1554.272  | M24898    | 533.13    |
| 11806.468 | NM_017413 | 900.603   | 313.474   | NM_003744  | 892.861  | 506.403   | U72508    | 698.244   |
| 454.086   | NM_013259 | 6590.587  | 6209.725  | NM_006378  | 490.043  | 432.841   | AA457153  | 2207.541  |
| 1306.587  | NM_018375 | 4788.3    | 4548.6    | NM_018132  | 1480.74  | 1650.867  | AA283122  | 1898.598  |
| 2755.187  | AK026838  | 2069.219  | 2683.477  | NM_018207  | 371.282  | 378.067   | AA868504  | 1001.555  |
| 2783.317  | AK022443  | 1285.219  | 1495.726  | NM_000345  | 4496.698 | 2349.306  | AA877845  | 4463.588  |
| 1476.774  | AF305836  | 48662.355 | 42237.949 | NM_006531  | 758.124  | 439.788   | AA664241  | 14215.216 |
| 927.662   | AL137383  | 602.571   | 523.879   | M74089     | 1876.315 | 2222.215  | AI016456  | 692.286   |
| 4445.86   | AL035295  | 790.834   | 879.115   | AF190864   | 2995.434 | 3719.502  | NM_014940 | 2121.21   |
| 605.378   | NM_018302 | 3281.907  | 3206.991  | NM_002779  | 2386.071 | 2875.873  | NM_006900 | 1227.647  |
| 1129.933  | AK027252  | 2017.552  | 2978.335  | L40397     | 9034.927 | 10985.776 | AJ289111  | 2071.307  |
| 1343.488  | AF165527  | 2326.539  | 2447.112  | NM_020198  | 4541.142 | 4032.798  | NM_016356 | 2105.466  |
| 515.992   | NM_014092 | 981.431   | 1198.078  | AA098879   | 423.946  | 475.835   | NM_006406 | 3494.358  |
| 1610.855  | AL110133  | 6992.751  | 8794.795  | AF070525   | 2937.916 | 3096.073  | AF216292  | 15676.912 |
| 42843.219 | AL050053  | 701.5     | 700.746   | NM_001177  | 2938.049 | 1483.555  | NM_000952 | 696.337   |
| 10916.814 | AK000529  | 2816.176  | 2906.856  | NM_014447  | 674.696  | 1222.497  | NM_005894 | 703.536   |
| 7436.408  | AK027243  | 1688.604  | 1050.887  | NM_002356  | 268.061  | 347.732   | NM_014584 | 1758.287  |
| 3218.956  | AL109783  | 356.445   | 141.419   | NM_006691  | 607.734  | 648.103   | M30627    | 371.374   |
| 2095.275  | AF147415  | 1262.173  | 936.895   | NM_001505  | 275.877  | 253.521   | NM_005810 | 4164.693  |
| 45257.57  | AL049273  | 609.248   | 543.037   | NM_003710  | 1165.45  | 1145.254  | M28170    | 2896.025  |
| 669.388   | AK098474  | 567.89    | 328.164   | NM_004666  | 789.891  | 709.68    | NM_000874 | 757.901   |
| 998.506   | AL117475  | 2464.929  | 1785.478  | NM_003614  | 563.109  | 523.85    | NM_005854 | 779.93    |
| 822.207   | NM_003887 | 1447.449  | 1751.812  | NM_014257  | 1178.395 | 1042.723  | AB007863  | 6408.863  |
| 973.224   | NM_004267 | 6145.68   | 7185.369  | NM_001140  | 183.752  | 226.17    | AK024456  | 1699.684  |
| 1064.71   | AL357212  | 422.741   | 757.778   | NM_004843  | 690.867  | 703.534   | NM_017789 | 906.042   |
| 2708.863  | AK026687  | 2369.53   | 1211.398  | AK022845   | 333.819  | 395.726   | D31887    | 1956.62   |
| 2083.914  | AL117444  | 830.824   | 1095.524  | NM_002985  | 2472.28  | 1174.179  | NM_002313 | 1137.792  |
| 541.538   | NM_017994 | 6805.979  | 6014.092  | AB033073   | 2644.228 | 1297.111  | NM_004915 | 1039.282  |
| 960.092   | AK021693  | 1833.38   | 1819.718  | NM_005813  | 1451.705 | 1964.966  | AK022207  | 836.759   |
| 5859.428  | AB023177  | 5179.81   | 4652.818  | AB037718   | 2361.07  | 2527.817  | AV708752  | 3742.233  |
| 1334.637  | Y11609    | 2266.429  | 1508.705  | AL389994   | 510.998  | 612.835   | AF119885  | 2565.391  |
| 434.226   | AJ278482  | 681.604   | 428.889   | NM_003909  | 2363.539 | 2371.745  | NM_004996 | 1999.733  |
| 3959.599  | NM_012122 | 7134.378  | 6293.079  | NM_001277  | 4995.231 | 5944.69   | NM_005971 | 1261.099  |
| 3740.77   | AF009285  | 9822.904  | 7616.838  | NM_003659  | 3260.229 | 3125.643  | NM_017435 | 757.254   |
| 716.36    | NM_012125 | 3552.774  | 3220.866  | NM_007072  | 1286.786 | 1323.39   | NM_013386 | 3455.516  |
| 1386.311  | AF056435  | 454.951   | 458.92    | NM_012320  | 3119.796 | 3510.073  | NM_006517 | 1431.939  |

|           |           |           |           |            |           |           |           |           |
|-----------|-----------|-----------|-----------|------------|-----------|-----------|-----------|-----------|
| 1405.6    | AB032363  | 1018.758  | 720.874   | NM_01820E  | 1351.48   | 1472.886  | NM_004171 | 957.392   |
| 293.421   | AF009294  | 2795.243  | 2124.447  | NM_015929  | 3279.064  | 2253.732  | NM_014037 | 3548.007  |
| 22798.531 | NM_001524 | 915.584   | 783.404   | U90653     | 1462.863  | 1443.067  | NM_00486E | 8376.09   |
| 326.827   | AK000998  | 879.156   | 951.516   | NM_018339  | 1088.5    | 1528.932  | NM_01868E | 1181.168  |
| 3247.875  | AK021435  | 818.389   | 567.462   | NM_006745  | 14902.563 | 8124.915  | NM_015839 | 296.93    |
| 564.264   | AK021684  | 2407.025  | 1868.995  | NM_000275  | 447.044   | 411.395   | AL137438  | 696.948   |
| 416.592   | AK021480  | 738.256   | 715.226   | AK000037   | 652.882   | 682.734   | NM_017957 | 2172.596  |
| 586.676   | AK025112  | 1356.24   | 1674.769  | NM_014760  | 1047.296  | 826.733   | NM_003024 | 1234.173  |
| 499.304   | AK026079  | 605.787   | 776.972   | NM_01839E  | 705.625   | 772.416   | AK022230  | 1431.233  |
| 998.685   | AK025173  | 3151.77   | 4093.668  | NM_002560  | 6006.608  | 3203.205  | AK022147  | 4711.354  |
| 1752.917  | AK025430  | 433.273   | 592.981   | NM_014404  | 932.831   | 697.473   | L25664    | 1322.815  |
| 1111.423  | AK026722  | 343.163   | 646.347   | NM_018713  | 323.193   | 248.397   | NM_002027 | 5883.153  |
| 1367.217  | AF117338  | 1881.896  | 1407.555  | NM_015947  | 1994.696  | 1506.112  | AL162078  | 1345.164  |
| 547.075   | AK025567  | 2000.231  | 1673.367  | NM_002042  | 17953.59  | 7168.716  | NM_013382 | 4573.611  |
| 633.438   | NM_019102 | 741.771   | 434.251   | AB028944   | 243.47    | 210.953   | AB002314  | 693.096   |
| 12178.167 | U56857    | 3066.476  | 2957.356  | AJ006268   | 345.337   | 321.089   | NM_014043 | 2074.982  |
| 2798.144  | L43349    | 592.694   | 760.735   | NM_012245  | 7014.325  | 10218.619 | NM_014622 | 607.454   |
| 3299.18   | BE905682  | 507.112   | 430.385   | NM_133263  | 620.931   | 870.259   | AB011114  | 22764.031 |
| 649.081   | AF086421  | 2508.909  | 5321.261  | NM_000025  | 8875.454  | 7464.72   | D11466    | 10582.092 |
| 1642.213  | AK001612  | 1568.582  | 1477.713  | D38521     | 1789.005  | 2376.604  | NM_01405E | 8826.385  |
| 1455.169  | AF161522  | 2581.495  | 1714.583  | NM_000403  | 2623.816  | 2401.405  | D31885    | 7243.152  |
| 865.219   | AF086028  | 2627.802  | 2729.829  | NM_018127  | 6147.574  | 6016.807  | NM_016649 | 2030.955  |
| 24242.395 | U46119    | 386.077   | 389.562   | AB020677   | 6251.86   | 4657.737  | AK090536  | 9023.851  |
| 888.774   | AK025365  | 881.572   | 1164.141  | AB033097   | 2078.159  | 1688.919  | D63477    | 580.848   |
| 1715.559  | AK023445  | 118.448   | 1038.407  | NM_000135  | 976.557   | 734.844   | NM_020243 | 11877.939 |
| 1275.147  | AK023489  | 798.601   | 1088.453  | AJ223948   | 2211.175  | 2090.197  | NM_014051 | 1995.443  |
| 3644.838  | AK021561  | 1998.163  | 2093.369  | NM_01621E  | 387.281   | 286.119   | NM_000413 | 749.479   |
| 987.361   | AL050145  | 338.997   | 618.863   | AK022947   | 779.762   | 682.551   | AK025398  | 5913.978  |
| 612.067   | AK025222  | 626.992   | 749.845   | AL050029   | 918.312   | 786.69    | AB037750  | 1633.647  |
| 1878.353  | NM_003531 | 1821.721  | 1495.559  | NM_005204  | 1017.848  | 606.779   | AK023056  | 759.134   |
| 3845.324  | NM_017799 | 1182.943  | 1035.937  | NM_016203  | 261.058   | 200.616   | NM_001120 | 14934.184 |
| 1115.235  | NM_003510 | 722.235   | 766.464   | NM_002759  | 2400.266  | 2007.968  | NM_01788E | 804.634   |
| 6239.768  | NM_00353E | 310.5     | 333.741   | NM_007271  | 1103.17   | 773.555   | NM_003150 | 1559.76   |
| 10969.792 | AL137403  | 1408.791  | 1628.739  | NM_006255  | 829.601   | 923.024   | NM_014784 | 1939.513  |
| 3637.522  | AL049348  | 1224.769  | 1238.163  | BE392143   | 1195.555  | 836.349   | AK026383  | 2304.746  |
| 806.966   | NM_018534 | 605.857   | 864.266   | NM_018132  | 1521.254  | 3192.169  | AB014594  | 2031.373  |
| 6498.344  | AB037847  | 1686.039  | 1483.361  | NM_018207  | 430.528   | 963.263   | M94547    | 678.415   |
| 722.446   | NM_005170 | 2258.789  | 2032.444  | NM_000345  | 6266.904  | 5334.078  | NM_005087 | 7790.227  |
| 447.338   | S96437    | 1275.125  | 1008.546  | NM_001862  | 40323.152 | 48394.855 | NM_01209E | 762.477   |
| 1277.801  | NM_01517E | 2074.591  | 2206.695  | NM_006531  | 1460.132  | 1306.254  | NM_018095 | 881.37    |
| 862.489   | AL353939  | 1278.874  | 1373.286  | AB029021   | 4870.718  | 3835.483  | AB023164  | 1692.592  |
| 965.641   | AL117573  | 2924.321  | 2651.54   | NM_002101  | 10999.44  | 8805.767  | AK026680  | 3457.25   |
| 12164.447 | AL080186  | 1118.813  | 1446.026  | Z36789     | 449.211   | 473.201   | NM_01243E | 51226.289 |
| 1293.294  | NM_00530E | 27005.293 | 23502.404 | J02874     | 2248.218  | 1855.289  | AK001299  | 11430.813 |
| 648.77    | NM_00164E | 6460.25   | 6103.094  | BF310427   | 1337.967  | 1021.42   | AB014559  | 8423.06   |
| 1516.59   | AL137327  | 865.616   | 962.314   | N94424     | 670.04    | 395.523   | NM_016489 | 3392.966  |
| 6406.698  | AF358454  | 2776.93   | 4973.969  | AA045192   | 1469.966  | 1198.018  | NM_005033 | 2155.339  |
| 2094.14   | AK026090  | 1044.439  | 1651.373  | M92642     | 741.046   | 595.701   | NM_015932 | 50227.316 |
| 6153.734  | AF070637  | 251.858   | 785.575   | H-U 44385  | 6653.356  | 2941.275  | NM_017949 | 478.869   |
| 749.869   | AL137634  | 1215.437  | 1626.606  | ID 1654970 | 2320.041  | 1420.678  | AK022169  | 941.086   |
| 1407.054  | AK024863  | 4086.677  | 3855.789  | ID 2531132 | 2020.196  | 1282.387  | AF015592  | 982.513   |
| 807.133   | AJ008135  | 36949.238 | 30574.197 | BF125928   | 4636.197  | 2194.174  | AK026795  | 1383.096  |
| 1161.886  | AK026908  | 3513.488  | 3539.589  | BG571026   | 931.288   | 667.048   | NM_01639E | 1672.138  |

|           |                  |           |           |                  |           |           |                  |           |
|-----------|------------------|-----------|-----------|------------------|-----------|-----------|------------------|-----------|
| 6533.604  | <b>AL050068</b>  | 744.375   | 451.103   | <b>AA489017</b>  | 1007.471  | 593.585   | <b>NM_016617</b> | 4643.404  |
| 1027.718  | <b>U92025</b>    | 584.923   | 327.422   | <b>AK022845</b>  | 360.669   | 676.783   | <b>NM_00233E</b> | 1338.81   |
| 7402.078  | <b>AF095856</b>  | 776.575   | 271.099   | <b>NM_002985</b> | 3091.94   | 2834.227  | <b>AL117666</b>  | 498.401   |
| 898.45    | <b>AB046766</b>  | 1046.831  | 1105.008  | <b>AB018347</b>  | 4900.319  | 9330.389  | <b>NM_005825</b> | 7575.687  |
| 3965.015  | <b>AF009323</b>  | 918.063   | 501.517   | <b>AB033073</b>  | 4430.686  | 3552.144  | <b>NM_00275E</b> | 1811.424  |
| 2695.61   | <b>Z25437</b>    | 972.237   | 417.856   | <b>NM_003284</b> | 1217.564  | 1000.332  | <b>U79299</b>    | 453.876   |
| 17004.035 | <b>AK001526</b>  | 2953.689  | 3278.718  | <b>NM_018152</b> | 623.74    | 594.323   | <b>AJ000414</b>  | 919.996   |
| 5115.047  | <b>AF086183</b>  | 793.812   | 653.462   | <b>NM_000319</b> | 758.356   | 762.248   | <b>AK025674</b>  | 4520.616  |
| 2940.307  | <b>AK000525</b>  | 852.786   | 829.674   | <b>NM_003257</b> | 301.762   | 575.19    | <b>AF007194</b>  | 3023.48   |
| 2620.438  | <b>AL137434</b>  | 1033.276  | 1432.73   | <b>NM_012461</b> | 1533.069  | 1954.115  | <b>NM_019069</b> | 1017.936  |
| 693.005   | <b>Z36795</b>    | 2140.211  | 2626.043  | <b>AK001379</b>  | 747.222   | 708.021   | <b>NM_004761</b> | 2234.427  |
| 1046.368  | <b>AL080216</b>  | 1686.901  | 1417.501  | <b>NM_017450</b> | 1330.951  | 1070.623  | <b>Z25424</b>    | 1081.051  |
| 3677.623  | <b>AF038188</b>  | 8069.723  | 6593.204  | <b>NM_002023</b> | 362.746   | 368.682   | <b>U79458</b>    | 4721.938  |
| 851.626   | <b>D17046</b>    | 1032.504  | 995.902   | <b>NM_002839</b> | 409.867   | 380.153   | <b>NM_014920</b> | 481.664   |
| 17230.115 | <b>NM_017645</b> | 3342.115  | 2074.627  | <b>AF190500</b>  | 640.108   | 448.245   | <b>NM_01829E</b> | 592.653   |
| 714.872   | <b>AJ227864</b>  | 670.067   | 650.27    | <b>NM_005904</b> | 309.853   | 260.108   | <b>NM_00067E</b> | 2550.546  |
| 662.05    | <b>AF157562</b>  | 5719.753  | 6587.417  | <b>NM_005273</b> | 8136.49   | 5738.629  | <b>NM_00576E</b> | 622.602   |
| 381.955   | <b>AK021958</b>  | 7832.108  | 7687.954  | <b>NM_00657E</b> | 992.789   | 789.39    | <b>NM_004127</b> | 42283.566 |
| 1673.092  | <b>M31164</b>    | 1389.89   | 1337.388  | <b>AB035266</b>  | 2284.212  | 1330.22   | <b>NM_013324</b> | 4400.125  |
| 547.622   | <b>AF113674</b>  | 8484.501  | 9801.857  | <b>NM_003744</b> | 1030.891  | 536.128   | <b>AL133022</b>  | 607.972   |
| 749.071   | <b>NM_003511</b> | 683.447   | 1564.39   | <b>NM_00637E</b> | 663.824   | 478.124   | <b>NM_003953</b> | 813.037   |
| 2193.633  | <b>CY3Cy5</b>    | 5615.561  | 327.572   | <b>NM_014404</b> | 1404.031  | 2091.005  | <b>NM_006301</b> | 708.865   |
| 1762.745  | <b>H97792</b>    | 2534.45   | 3477.305  | <b>NM_018713</b> | 461.753   | 716.368   | <b>AL049925</b>  | 1006.686  |
| 2553.139  | <b>L33404</b>    | 672.156   | 474.392   | <b>NM_015947</b> | 2978.965  | 3885.523  | <b>NM_01221E</b> | 2446.313  |
| 501.957   | <b>M13509</b>    | 1823.45   | 1674.323  | <b>NM_002042</b> | 33116.738 | 19794.463 | <b>X72887</b>    | 1099.851  |
| 1515.625  | <b>W95082</b>    | 409.333   | 1205.035  | <b>AJ006268</b>  | 448.171   | 743.629   | <b>NM_00452E</b> | 650.987   |
| 729.887   | <b>AA485362</b>  | 3988.581  | 5012.436  | <b>M74089</b>    | 1677.417  | 1905.37   | <b>NM_000127</b> | 834.555   |
| 389.647   | <b>AJ222801</b>  | 3098.131  | 4370.61   | <b>AF190864</b>  | 3636.64   | 3937.921  | <b>Y10483</b>    | 4290.888  |
| 943.021   | <b>W72207</b>    | 49627.586 | 32154.463 | <b>NM_002779</b> | 3438.024  | 3266.846  | <b>NM_006784</b> | 1089.477  |
| 5139.093  | <b>BI772354</b>  | 3534.643  | 5781.849  | <b>L40397</b>    | 10191.292 | 10792.196 | <b>NM_01787E</b> | 1273.223  |
| 464.865   | <b>AA733033</b>  | 1339.417  | 2757.658  | <b>NM_02019E</b> | 6434.396  | 4715.053  | <b>NM_001087</b> | 16592.557 |
| 924.215   | <b>AA583574</b>  | 1721.087  | 2495.957  | <b>AA098879</b>  | 463.546   | 309.912   | <b>NM_003721</b> | 4843.578  |
| 4231.466  | <b>AA927490</b>  | 3638.459  | 4388.591  | <b>AF070525</b>  | 3589.227  | 2986.516  | <b>NM_004724</b> | 741.056   |
| 2063.619  | <b>SR5</b>       | 4737.587  | 4192.224  | <b>NM_001177</b> | 3316.801  | 1383.647  | <b>NM_000381</b> | 453.057   |
| 581.218   | <b>SR7</b>       | 6174.6    | 43574.781 | <b>NM_014447</b> | 800.136   | 606.016   | <b>NM_000427</b> | 827.987   |
| 664.909   | <b>SR9</b>       | 22470.305 | 3953.559  | <b>NM_00235E</b> | 284.631   | 180.598   | <b>NM_00694E</b> | 664.412   |
| 21511.891 | <b>CY3Cy5</b>    | 3026.651  | 140.546   | <b>NM_006691</b> | 730.014   | 435.901   | <b>NM_000174</b> | 34978.418 |
| 920.535   | <b>NM_01781E</b> | 2085.184  | 2137.402  | <b>NM_00150E</b> | 313.888   | 312.765   | <b>NM_00250E</b> | 2439.917  |
| 10988.875 | <b>NM_020433</b> | 331.009   | 513.056   | <b>NM_003710</b> | 1095.056  | 1063.195  | <b>NM_014343</b> | 2355.098  |
| 1221.958  | <b>AF028823</b>  | 4484.792  | 7657.123  | <b>Z83805</b>    | 337.628   | 201.893   | <b>D25303</b>    | 1090.956  |
| 2060.771  | <b>NM_00429E</b> | 12722.141 | 13944.259 | <b>NM_00466E</b> | 559.53    | 360.535   | <b>AB043007</b>  | 19014.365 |
| 5209.582  | <b>NM_01458E</b> | 1015.899  | 434.121   | <b>NM_003614</b> | 479.296   | 343.522   | <b>NM_004861</b> | 767.99    |
| 2336.926  | <b>AF200815</b>  | 1025.145  | 1283.704  | <b>NM_014257</b> | 1057.413  | 998.394   | <b>AF022913</b>  | 2294.442  |
| 3878.461  | <b>NM_014564</b> | 732.444   | 429.205   | <b>NM_004843</b> | 990.428   | 899.412   | <b>NM_00002E</b> | 945.538   |
| 18991.742 | <b>NM_013441</b> | 2108.756  | 1702.065  | <b>NM_005204</b> | 1291.813  | 1706.006  | <b>NM_001382</b> | 4432.486  |
| 1372.83   | <b>NM_017680</b> | 958.016   | 1143.377  | <b>NM_016203</b> | 474.125   | 597.665   | <b>M93718</b>    | 3090.484  |
| 586.537   | <b>M60499</b>    | 4460.919  | 10539.698 | <b>NM_00275E</b> | 2889.273  | 4756.938  | <b>NM_00538E</b> | 793.674   |
| 1442.989  | <b>NM_003833</b> | 11350.298 | 18894.537 | <b>NM_007271</b> | 1536.75   | 2183.75   | <b>AK023807</b>  | 4652.847  |
| 364.905   | <b>AK000868</b>  | 3613.85   | 2956.551  | <b>NM_00625E</b> | 1470.67   | 2444.817  | <b>AK024273</b>  | 918.939   |
| 565.255   | <b>NM_001233</b> | 3070.114  | 1778.8    | <b>BE392143</b>  | 2147.241  | 2030.332  | <b>X59417</b>    | 10564.295 |
| 1858.92   | <b>NM_001234</b> | 2909.777  | 3577.59   | <b>NM_005813</b> | 1551.867  | 1936.416  | <b>NM_00565E</b> | 16985.664 |
| 13383.135 | <b>BF679789</b>  | 2823.808  | 3357.113  | <b>AB037718</b>  | 3259.671  | 3086.407  | <b>D28476</b>    | 4757.833  |
| 3597.74   | <b>AB007859</b>  | 1370.105  | 1768.275  | <b>AL389994</b>  | 586.688   | 896.469   | <b>NM_016263</b> | 1221.595  |

|           |           |           |           |           |           |           |           |           |
|-----------|-----------|-----------|-----------|-----------|-----------|-----------|-----------|-----------|
| 2508.959  | NM_006754 | 1007.759  | 1216.559  | NM_003909 | 2881.677  | 2736.384  | NM_003335 | 6534.396  |
| 524.179   | NM_001127 | 4531.221  | 5819.557  | NM_001277 | 6920.817  | 7654.015  | AB002376  | 1698.756  |
| 1439.516  | NM_003917 | 7702.049  | 11304.052 | NM_003659 | 3861.479  | 3227.231  | NM_018249 | 415.596   |
| 336.781   | NM_002956 | 1405.233  | 2906.963  | NM_007072 | 1449.171  | 1170.57   | NM_005558 | 958.195   |
| 414.048   | AB018739  | 1003.527  | 1544.819  | NM_012320 | 3495.406  | 3488.525  | NM_016631 | 970.694   |
| 783.737   | NM_006750 | 12788.399 | 16961.082 | NM_018208 | 1626.07   | 1553.833  | AB015617  | 9412.442  |
| 1052.496  | NM_020164 | 3406.023  | 4478.256  | NM_015929 | 3911.378  | 2337.709  | AK022730  | 1426.972  |
| 837.951   | AK023521  | 4039.094  | 5678.127  | U90653    | 1766.168  | 1310.78   | NM_002256 | 7628.417  |
| 1597.915  | NM_014267 | 16743.271 | 20397.438 | NM_018339 | 1190.561  | 967.704   | AF064839  | 13749.292 |
| 21868.25  | U30872    | 1140.03   | 627.088   | NM_006745 | 13539.22  | 6188.488  | NM_005439 | 3840.145  |
| 728.443   | NM_020469 | 3931.218  | 2639.167  | NM_000275 | 314.958   | 291.599   | AB037810  | 805.683   |
| 3471.485  | NM_002289 | 973.892   | 461.215   | AK000037  | 469.23    | 297.805   | NM_006593 | 1281.37   |
| 422.881   | AK026408  | 1956.714  | 1695.199  | NM_014760 | 991.043   | 716.692   | NM_000376 | 2517.275  |
| 1189.549  | NM_005025 | 1043.845  | 602.889   | NM_018398 | 932.015   | 676.639   | NM_000475 | 2997.338  |
| 1427.373  | M74782    | 1870.886  | 1693.068  | NM_002560 | 6502.603  | 3149.81   | M61872    | 8602.238  |
| 916.842   | NM_001056 | 1777.703  | 1885.485  | NM_000787 | 493.553   | 598.844   | AK027089  | 1347.365  |
| 606.386   | AY026461  | 3810.665  | 3955.554  | U57962    | 2403.449  | 3657.473  | NM_006284 | 3458.66   |
| 10170.517 | AK025708  | 3437.927  | 4329.928  | NM_016176 | 4327.285  | 6664.819  | U18909    | 749.609   |
| 1129.989  | NM_005564 | 46212.336 | 46361.906 | NM_005574 | 16137.896 | 14111.639 | NM_003489 | 1583.729  |
| 1304.704  | NM_004508 | 2388.44   | 3523.465  | NM_017895 | 5966.62   | 7542.496  | NM_016589 | 5726.17   |
| 763.799   | NM_006405 | 6460.673  | 7300.445  | NM_004610 | 1818.011  | 1761.938  | NM_003597 | 1109.787  |
| 32354.797 | NM_000324 | 468.142   | 388.714   | NM_001612 | 1164.475  | 1335.541  | NM_002568 | 24356.271 |
| 33752.828 | AL137619  | 1446.106  | 1689.018  | AK027002  | 1394.664  | 1441.507  | NM_006561 | 2051.449  |
| 2094.738  | NM_004300 | 4252.879  | 3597.426  | AB025254  | 3272.314  | 3202.519  | NM_017521 | 505.495   |
| 11157.675 | AF319476  | 934.877   | 870.693   | NM_004081 | 1536.344  | 1353.039  | AK025200  | 3771.942  |
| 2178.091  | AK001913  | 6491.642  | 4843.975  | NM_000025 | 11171.947 | 8273.246  | NM_001383 | 3316.598  |
| 8768.773  | NM_004292 | 1447.493  | 1902.837  | D38521    | 2009.148  | 1779.973  | NM_001029 | 43149.543 |
| 1860.716  | NM_015484 | 6030.23   | 7631.836  | NM_000403 | 3107.675  | 2255.379  | NM_005008 | 12911.466 |
| 11468.412 | NM_018046 | 2450.691  | 3298.443  | NM_018127 | 5535.597  | 3725.447  | NM_016304 | 13361.43  |
| 1354.589  | NM_013316 | 2395.243  | 3084.609  | AB020677  | 5573.318  | 3352.624  | NM_006013 | 27841.201 |
| 584.973   | M20701    | 5558.91   | 7722.705  | AB033097  | 1533.7    | 1389.157  | NM_014046 | 6123.874  |
| 13808.738 | NM_002912 | 1430.591  | 1269.729  | NM_000135 | 815.751   | 565.271   | L34071    | 4036.481  |
| 9695.169  | NM_013284 | 3060.916  | 4072.914  | AJ223948  | 2150.138  | 1699.306  | AK025201  | 4684.013  |
| 13657.532 | NM_006739 | 2651.643  | 2219.43   | NM_016218 | 277.968   | 223.04    | AK021927  | 453.026   |
| 437.684   | NM_013274 | 4955.98   | 5885.243  | AK022947  | 1118.882  | 640.724   | AK022995  | 1122.416  |
| 3493.882  | NM_012387 | 10732.432 | 7392.932  | AL050029  | 968.588   | 638.556   | NM_006066 | 4780.135  |
| 4616.178  | NM_014735 | 1465.303  | 1260.191  | NM_004063 | 795.954   | 731.99    | NM_005165 | 1364.82   |
| 5164.134  | NM_004252 | 12581.903 | 11676.154 | AB040976  | 3743.444  | 3128.969  | NM_005138 | 12069.775 |
| 357.573   | AF172929  | 5387.683  | 17869.113 | NM_018641 | 2956.436  | 1602.038  | NM_002115 | 5759.359  |
| 7191.951  | AK025655  | 2169.757  | 2388.617  | NM_002221 | 859.426   | 1084.678  | AK023162  | 1406.714  |
| 722.914   | AK000868  | 4609.249  | 5279.291  | NM_002562 | 289.212   | 448.739   | NM_006396 | 1673.94   |
| 581.93    | NM_001233 | 4423.868  | 4138.618  | AK024502  | 3025.398  | 4238.335  | NM_018649 | 950.754   |
| 948.72    | BF679789  | 3367.498  | 4696.164  | NM_001124 | 1104.464  | 923.388   | NM_013449 | 2068.745  |
| 913.778   | H97792    | 3235.338  | 3920.491  | NM_004586 | 1113.979  | 1224.088  | NM_004537 | 755.368   |
| 18035.625 | L33404    | 681.165   | 1321.652  | NM_004844 | 4695.427  | 7232.335  | NM_020226 | 1192.397  |
| 1128.449  | M13509    | 1882.624  | 3060.024  | NM_013447 | 1183.355  | 1470.255  | NM_017865 | 1852.448  |
| 1301.048  | X04076    | 9033.399  | 9714.232  | NM_000051 | 1773.454  | 1898.468  | NM_003427 | 1651.242  |
| 419.475   | W95082    | 234.626   | 1087.701  | NM_005709 | 274.161   | 384.506   | NM_005920 | 3499.837  |
| 2571.565  | AA485362  | 3231.827  | 4287.735  | NM_004180 | 3153.611  | 1731.987  | Y09321    | 741.523   |
| 645.294   | AJ222801  | 3553.217  | 4982.043  | NM_004786 | 22491.232 | 14101.163 | AK001499  | 2190.336  |
| 1474.077  | BI772354  | 3029.764  | 6053.693  | AF302109  | 3143.661  | 2684.031  | AK023568  | 822.183   |
| 7328.777  | AI690184  | 30111.283 | 33666.965 | AL117485  | 5986.435  | 3268.898  | AK021728  | 372.579   |
| 7065.646  | NM_002964 | 2860.794  | 33673.762 | NM_003505 | 327.764   | 203.91    | AK026852  | 1097.733  |

|           |           |           |           |           |           |           |           |           |
|-----------|-----------|-----------|-----------|-----------|-----------|-----------|-----------|-----------|
| 2451.201  | NM_005052 | 13409.255 | 13133.19  | NM_007191 | 876.308   | 382.743   | AK021629  | 664.856   |
| 1029.839  | AK026408  | 1520.606  | 1786.293  | AL109667  | 510.954   | 421.857   | AL110257  | 25962.955 |
| 299.021   | M74782    | 2046.05   | 1936.216  | NM_000840 | 601.814   | 385.232   | AB013384  | 1164.812  |
| 1171.048  | NM_020433 | 414.967   | 1189.228  | AF205437  | 650.828   | 1364.026  | AK024824  | 766.82    |
| 437.86    | NM_001767 | 474.485   | 1266.48   | AF034102  | 4316.69   | 7883.519  | AK024270  | 1151.102  |
| 437.434   | AF028823  | 4418.138  | 12942.35  | AJ008142  | 9448.796  | 14248.637 | AK025569  | 2041.257  |
| 2998.66   | AF200815  | 740.511   | 415.223   | NM_001343 | 1877.232  | 3094.051  | AK023060  | 1017.101  |
| 1945.8    | NM_013441 | 1407.069  | 797.657   | NM_007275 | 6346.15   | 7350.271  | NM_014870 | 667.234   |
| 1428.715  | NM_017680 | 929.556   | 1827.181  | NM_019025 | 11527.396 | 13020.623 | AK021917  | 673.298   |
| 213.381   | NM_004300 | 5446.144  | 8391.672  | NM_018461 | 2836.124  | 3187.835  | AF052146  | 20143.385 |
| 1647.93   | NM_000052 | 748.264   | 786.481   | NM_006910 | 2665.869  | 3644.683  | NM_004870 | 1996.146  |
| 1137.644  | AB007859  | 990.351   | 1643.72   | AF162667  | 1480.806  | 1394.484  | AF143872  | 11296.3   |
| 1202.016  | NM_006754 | 588.043   | 1031.021  | AB046847  | 2158.334  | 1824.543  | AF143326  | 1864.436  |
| 659.071   | NM_001127 | 3968.246  | 7505.228  | NM_000447 | 1719.005  | 1320.453  | AL049229  | 2478.159  |
| 546.311   | AB018739  | 985.898   | 929.654   | NM_006354 | 4625.921  | 3988.156  | AK026146  | 4231.719  |
| 1715.68   | NM_006750 | 11581.028 | 8126.14   | AF303378  | 5199.55   | 2792.076  | AK023152  | 2879.804  |
| 630.335   | NM_020164 | 3297.654  | 2151.902  | NM_016037 | 4737.621  | 3498.434  | AK000155  | 1494.79   |
| 2798.847  | AK023521  | 3022.879  | 2323.486  | NM_000043 | 512.291   | 509.221   | AL389937  | 3359.941  |
| 1364.523  | NM_014267 | 13379.874 | 9579.741  | NM_000417 | 1353.313  | 1017.758  | AK022628  | 30319.088 |
| 1929.186  | NM_001481 | 732.995   | 619.169   | NM_020356 | 1069.142  | 833.904   | AK021737  | 2820.706  |
| 4956.623  | U30872    | 1386.128  | 1099.501  | NM_018235 | 24674.646 | 27434.973 | AL357454  | 598.732   |
| 7258.26   | NM_002639 | 1027.936  | 1044.399  | NM_006144 | 695.638   | 855.192   | AK026295  | 4181.683  |
| 2531.541  | AK025655  | 1810.842  | 1196.721  | AL136549  | 1963.066  | 3187.158  | AK022346  | 406.182   |
| 25954.584 | NM_004056 | 295.174   | 2053.374  | NM_012168 | 841.205   | 628.711   | AK025007  | 1196.628  |
| 5021.052  | NM_001056 | 1613.989  | 1565.568  | AF311324  | 1699.615  | 3952.066  | NM_016486 | 5169.637  |
| 739.894   | NM_005564 | 44784.16  | 32783.828 | AF124433  | 363.376   | 567.714   | AK026490  | 18764.744 |
| 8379.466  | NM_004508 | 2068.92   | 2001.961  | NM_001461 | 533.537   | 730.262   | AJ227861  | 1618.783  |
| 3110.143  | NM_006405 | 5455.654  | 3894.482  | AF061556  | 460.776   | 424.691   | AJ001020  | 624.917   |
| 141.4     | NM_006749 | 1043.156  | 1164.817  | AL162049  | 732.146   | 457.878   | NM_005553 | 441.059   |
| 6005.506  | AL137619  | 1565.609  | 1420.182  | NM_005032 | 397.584   | 268.365   | AJ001875  | 2372      |
| 4641.703  | NM_002964 | 2470.903  | 26661.439 | NM_004160 | 2677.211  | 2019.752  | X64985    | 540.805   |
| 1315.827  | NM_005052 | 14151.424 | 15554.848 | AL109677  | 489.791   | 333.098   | NM_007220 | 656.455   |
| 1116.036  | BF038439  | 1115.735  | 1287.101  | NM_003941 | 19956.424 | 10479.645 | D25271    | 1008.176  |
| 1989.534  | AF319476  | 1597.091  | 1487.046  | NM_002664 | 3254.323  | 1828.699  | NM_017777 | 1011.173  |
| 3018.572  | AK001913  | 4915.866  | 3915.183  | AB018271  | 1921.989  | 2103.824  | AK022298  | 1325.54   |
| 1388.505  | NM_004292 | 1165.704  | 1288.584  | AL137665  | 1570.825  | 1089.197  | AJ277441  | 12740.036 |
| 4637.865  | NM_015484 | 4355.265  | 3912.467  | NM_016434 | 495.529   | 420.589   | NM_006057 | 1094.838  |
| 439.567   | NM_018046 | 1963.767  | 1686.046  | U36561    | 54121.137 | 65593.609 | AK024242  | 4882.555  |
| 3104.454  | NM_013316 | 1995.675  | 1906.125  | NM_005634 | 1369.804  | 1556.948  | AK024851  | 703.649   |
| 28419.158 | M20701    | 5525.832  | 4907.647  | NM_017757 | 3020.292  | 4249.255  | AK024943  | 1316.037  |
| 809.033   | NM_002912 | 1198.348  | 939.586   | AB007892  | 883.648   | 1566.085  | AK024410  | 573.582   |
| 229.293   | NM_013284 | 2688.812  | 2463.674  | AB037748  | 528.13    | 973.294   | AK024577  | 387.848   |
| 1857.251  | NM_006739 | 2618.121  | 1158.318  | AB002306  | 697.778   | 851.373   | AK024995  | 761.718   |
| 1586.266  | NM_013274 | 4411.571  | 3558.322  | NM_001300 | 1318.074  | 1337.762  | AL359943  | 24139.566 |
| 4712.335  | AL050187  | 3768.174  | 3808.486  | NM_012472 | 338.303   | 637.925   | NM_000534 | 3289.774  |
| 1052.478  | NM_012387 | 11348.658 | 10081.281 | NM_018187 | 4517.639  | 7117.858  | L10140    | 979.392   |
| 3655.414  | NM_014735 | 1731.607  | 1630.556  | NM_003016 | 13444.105 | 17539.262 | AL133447  | 845.887   |
| 939.826   | NM_004252 | 13617.771 | 16046.499 | NM_005463 | 9897.273  | 8074.769  | AB037853  | 16258.763 |
| 503.269   | AF172929  | 5649.91   | 15605.522 | NM_001325 | 1448.906  | 1631.997  | D28450    | 31045.463 |
| 761.718   | NM_017680 | 934.746   | 913.621   | NM_018282 | 11611.922 | 6120.656  | AK056222  | 1328.846  |
| 910.502   | NM_000366 | 869.352   | 776.685   | BC019932  | 1675.118  | 1037.543  | AK002028  | 15798.13  |
| 2564.664  | NM_003833 | 14246.552 | 28310.627 | AF114818  | 1873.727  | 1697.016  | AL050127  | 1427.408  |
| 3407.375  | AK000868  | 3828.646  | 4347.025  | AK025106  | 1365.894  | 1447.592  | AK024805  | 8232.324  |

|           |           |           |           |           |           |           |           |           |
|-----------|-----------|-----------|-----------|-----------|-----------|-----------|-----------|-----------|
| 19473.748 | NM_001233 | 3540.837  | 2855.739  | NM_020144 | 1477.354  | 1182.929  | AK001423  | 913.341   |
| 950.941   | NM_001234 | 3001.45   | 3974.85   | NM_003908 | 41248.395 | 24515.818 | AJ012496  | 421.09    |
| 1449.706  | BF679789  | 2807.218  | 4244.103  | BE893142  | 721.383   | 586.588   | AK024090  | 17952.996 |
| 3138.589  | H97792    | 2124.985  | 2520.551  | NM_003103 | 2827.189  | 1851.047  | AL133574  | 997.901   |
| 2085.239  | L33404    | 676.831   | 550.908   | NM_015340 | 2733.303  | 1398.068  | AK021936  | 1172.782  |
| 5904.614  | M13509    | 1633.668  | 1958.068  | NM_006451 | 1773.716  | 1054.065  | AF147339  | 16871.395 |
| 694.365   | X04076    | 8065.793  | 4653.747  | NM_002094 | 723.343   | 599.508   | AL390181  | 13389.112 |
| 711.17    | AA485362  | 3002.61   | 2641.598  | NM_003191 | 1600.092  | 1081.716  | NM_017914 | 13487.307 |
| 617.809   | AJ222801  | 2441.436  | 2378.69   | AL137476  | 11145.829 | 25675.131 | NM_006350 | 456.152   |
| 963.263   | W72207    | 45098.922 | 19628.797 | AF052174  | 1547.551  | 2036.819  | AK024953  | 3408.4    |
| 534.987   | BI772354  | 2815.708  | 3147.496  | AF070590  | 649.471   | 1576.875  | AK024276  | 2589.272  |
| 1029.442  | AA733033  | 1202.814  | 2195.03   | NM_000761 | 23843.357 | 33785.551 | S83374    | 1820.382  |
| 650.343   | AA583574  | 1337.414  | 1490.938  | NM_020142 | 4269.974  | 7840      | AL161979  | 293.274   |
| 2270.974  | U67733    | 710.137   | 1188.873  | NM_000774 | 1867.657  | 3604.928  | AK025784  | 10509.811 |
| 1708.729  | AI690184  | 31851.549 | 54489.914 | NM_017781 | 37714.461 | 30760.23  | U07199    | 1839.893  |
| 18401.322 | AA927490  | 3483.17   | 4532.991  | NM_006004 | 54610.645 | 66191.797 | AK023713  | 839.165   |
| 2019.022  | U30872    | 1307.216  | 1088.489  | NM_004894 | 10991.877 | 13385.318 | X81445    | 686.964   |
| 2942.831  | AF111783  | 646.164   | 853.967   | AB028960  | 570.076   | 676.687   | U95091    | 668.248   |
| 1809.801  | NM_002639 | 1141.945  | 1266.599  | NM_005648 | 15805.338 | 17072.664 | NM_017900 | 14757.667 |
| 506.373   | NM_014734 | 2515.07   | 2011.748  | NM_006943 | 9536.315  | 4616.1    | S50182    | 1338.608  |
| 5218.83   | NM_002289 | 811.861   | 440.53    | NM_006741 | 4266.868  | 2818.68   | AL360145  | 826.611   |
| 3743.694  | AK026408  | 1818.992  | 2012.363  | NM_014166 | 2502.63   | 2286.314  | Y12016    | 618.948   |
| 590.117   | NM_005025 | 1129.835  | 789.737   | AL117606  | 3983.168  | 3127.521  | NM_001178 | 809.909   |
| 4950.468  | M74782    | 2175.772  | 1907.52   | NM_012330 | 815.465   | 652.287   | AK023696  | 3310.091  |
| 2705.358  | NM_017818 | 2040.584  | 1678.604  | AF294278  | 1526.583  | 1035.774  | NM_000704 | 1363.431  |
| 13052.484 | AF028823  | 4848.746  | 8055.091  | NM_018211 | 981.862   | 707.325   | NM_015987 | 837.242   |
| 3560.165  | NM_004295 | 9431.89   | 5903.716  | NM_014520 | 1938.61   | 1115.055  | NM_019605 | 1326.874  |
| 2226.379  | NM_002087 | 5406.956  | 11988.412 | NM_002616 | 630.765   | 322.391   | NM_015369 | 614.149   |
| 4170.308  | NM_014585 | 548.609   | 246.101   | AK025712  | 4444.515  | 2507.603  | Z49090    | 3888.765  |
| 850.185   | AF200815  | 749.876   | 818.145   | AF052497  | 730.413   | 1000.976  | AK021592  | 4239.038  |
| 2267.06   | NM_013441 | 2004.773  | 1699.411  | AK026375  | 1683.158  | 3350.747  | AK025467  | 2956.992  |
| 383.673   | NM_014421 | 914.191   | 1138.655  | NM_014710 | 400.515   | 1004.524  | AK026593  | 2617.125  |
| 478.884   | NM_006749 | 1104.098  | 881.113   | U85992    | 891.799   | 2401.083  | L37700    | 779.44    |
| 967.892   | NM_004694 | 775.113   | 874.592   | AL110152  | 681.663   | 1700.609  | NM_017665 | 2037.642  |
| 633.355   | NM_000324 | 595.312   | 439.458   | NM_004795 | 258.898   | 553.821   | AK024819  | 478.326   |
| 1440.405  | AL137619  | 1804.551  | 1894.919  | AF131745  | 501.95    | 679.546   | AF052106  | 2379.471  |
| 1099.17   | NM_003615 | 350.663   | 303.812   | AL117565  | 4051.984  | 7735.391  | AK000441  | 426.255   |
| 657.534   | NM_004300 | 4438.25   | 3111.27   | AF147305  | 499.764   | 1601.939  | AK022391  | 1586.318  |
| 1753.827  | AB007859  | 817.589   | 1156.254  | AK022109  | 2513.317  | 5654.012  | NM_016125 | 1581.921  |
| 2631.677  | NM_006754 | 1126.919  | 1789.255  | AK022103  | 951.739   | 1403.205  | CY3Cy5    | 2255.823  |
| 929.725   | NM_001127 | 3148.394  | 4408.84   | NM_007030 | 628.313   | 1553.56   | R72122    | 1079.169  |
| 454.774   | NM_012430 | 2106.869  | 1662.13   | AK021527  | 511.612   | 850.135   | Z35309    | 750.06    |
| 4005.728  | NM_003917 | 6113.891  | 5475.28   | U00953    | 936.495   | 1192.741  | AA700005  | 691.079   |
| 766.104   | NM_007077 | 1216.27   | 1004.014  | AF086176  | 1398.692  | 1505.121  | AA292025  | 298.093   |
| 21429.414 | NM_002956 | 1761.574  | 2244.364  | AF086232  | 348.532   | 384.552   | AA437226  | 390.491   |
| 4451.897  | AB018739  | 1222.29   | 1655.764  | NM_017742 | 566.351   | 575.496   | XM_056359 | 502.325   |
| 2603.688  | NM_006750 | 14754.876 | 13846.789 | NM_005108 | 1112.267  | 999.244   | D10353/NM | 2048.01   |
| 1018.04   | NM_020164 | 3711.491  | 3075.981  | AK022292  | 2568.967  | 2479.637  | M15042    | 1497.958  |
| 1568.066  | AK023521  | 3673.182  | 3183.882  | AB051436  | 1131.376  | 653.694   | AK056843  | 1350.873  |
| 2846.419  | NM_014267 | 14695.912 | 11468.358 | AK026482  | 8243.467  | 6941.596  | U49928    | 3098.467  |
| 16635.439 | AL050187  | 3132.445  | 2817.701  | AL137473  | 894.406   | 883.345   | AK096645  | 3743.079  |
| 913.989   | NM_012387 | 12211.497 | 9508.949  | AJ001873  | 7385.015  | 4970.52   | NM_019884 | 1601.447  |
| 1779.189  | NM_014735 | 2147.355  | 1381.227  | AK022604  | 703.448   | 1317.25   | SR6       | 1289.113  |

|           |           |           |           |           |          |           |           |           |
|-----------|-----------|-----------|-----------|-----------|----------|-----------|-----------|-----------|
| 496.537   | NM_004252 | 14584.334 | 11140.77  | U66048    | 1766.65  | 2681.057  | SR8       | 4372.854  |
| 1626.347  | AF172929  | 6362.727  | 17058.754 | AK023401  | 2956.501 | 7377.506  | SR10      | 17345.35  |
| 1802.039  | NM_006398 | 12014.845 | 4595.041  | AK001865  | 811.535  | 1345.074  | CY3Cy5    | 5538.745  |
| 8267.426  | AK025655  | 2127.307  | 1615.543  | AK024035  | 8193.019 | 11479.882 | NM_005291 | 6264.042  |
| 976.121   | NM_004056 | 405.038   | 498.906   | AL049331  | 284.484  | 144.226   | NM_002923 | 745.351   |
| 1738.119  | NM_001056 | 1380.467  | 1194.107  | AL050079  | 1462.548 | 1827.179  | NM_006794 | 701.931   |
| 777.842   | AY026461  | 4236.503  | 6056.404  | AL080233  | 3711.226 | 7041.659  | NM_018653 | 1953.695  |
| 661.228   | AK025708  | 2934.234  | 5462.969  | AL049361  | 369.147  | 727.808   | NM_005388 | 1738.589  |
| 694.963   | NM_000405 | 1086.788  | 1335.101  | AL050132  | 358.902  | 660.488   | NM_007232 | 7674.122  |
| 584.288   | NM_005564 | 41120.332 | 35478.543 | AL117663  | 3988.12  | 6460.792  | NM_002717 | 1802.557  |
| 4187.18   | NM_004508 | 2882.499  | 4238.78   | NM_014293 | 4962.548 | 7497.633  | NM_003025 | 2963.611  |
| 1852.611  | NM_006405 | 6113.239  | 5714.961  | AK024432  | 2636.411 | 4152.991  | NM_020179 | 1078.277  |
| 2097.001  | AJ245946  | 414.563   | 314.68    | AL137513  | 1101.287 | 2315.222  | NM_004306 | 13813.603 |
| 7993.071  | NM_002390 | 2351.352  | 6335.865  | AF088001  | 583.349  | 2330.905  | NM_006205 | 603.838   |
| 9270.708  | NM_006142 | 641.879   | 791.228   | NM_018067 | 3576.225 | 8865.825  | NM_004034 | 2143.197  |
| 878.246   | NM_014910 | 8491.1    | 8522.099  | NM_018956 | 14705.5  | 23550.938 | NM_000130 | 1936.372  |
| 1976.034  | AK001064  | 6442.094  | 4791.076  | NM_014787 | 1456.62  | 2891.315  | AF193756  | 1022.468  |
| 705.351   | AB029031  | 4656.857  | 3452.388  | AL122109  | 1545.01  | 3425.417  | AI492087  | 8677.299  |
| 596.172   | NM_001294 | 4667.729  | 4507.878  | AF074988  | 1315.586 | 1893.744  | NM_004193 | 1146.015  |
| 2205.848  | NM_014241 | 6455.633  | 5368.116  | AK024946  | 1881.466 | 4201.743  | NM_002803 | 4630.908  |
| 5285.869  | AF302786  | 3325.863  | 6502.076  | AK001432  | 3269.229 | 7386.835  | NM_005508 | 987.509   |
| 1540.906  | AL122083  | 2226.284  | 2049.511  | AL133568  | 3028.103 | 4509.447  | NM_006788 | 356.833   |
| 9193.461  | NM_005052 | 12420.29  | 8666.43   | AF009265  | 959.281  | 1907.5    | NM_016568 | 528.429   |
| 1633.957  | AF319476  | 921.605   | 761.009   | AF009309  | 2946.174 | 3986.863  | AB033102  | 2902.62   |
| 1308.637  | AK001913  | 4782.398  | 3446.54   | NM_002360 | 1620.191 | 1956.828  | NM_014774 | 2022.203  |
| 1598.756  | NM_017737 | 1506.347  | 656.361   | AF009274  | 409.353  | 937.512   | NM_014143 | 2832.976  |
| 2310.664  | NM_004292 | 1475.971  | 3190.051  | AF009322  | 596.389  | 827.938   | M55646    | 5794.432  |
| 3176.898  | NM_015484 | 4846.409  | 4694.476  | AF056425  | 1293.763 | 1620.165  | NM_006112 | 14939.052 |
| 21023.957 | NM_018046 | 2127.152  | 1554.204  | AF090893  | 560.681  | 673.801   | M12807    | 740.654   |
| 801.611   | NM_013316 | 2490.076  | 1888.033  | NM_018033 | 7622.278 | 7286.355  | NM_001765 | 688.608   |
| 506.602   | M20701    | 7005.004  | 6073.979  | AK001945  | 635.238  | 944.133   | NM_003361 | 1105.61   |
| 2286.721  | NM_002912 | 1279.622  | 906.763   | AK021541  | 295.009  | 352.846   | NM_012099 | 1016.611  |
| 436.885   | NM_013284 | 3029.413  | 2331.029  | AK021766  | 312.155  | 278.311   | NM_018684 | 3658.549  |
| 5633.864  | NM_006739 | 2707.255  | 1449.729  | AK001147  | 252.269  | 295.491   | AF116909  | 649.376   |
| 560.602   | NM_013274 | 4579.191  | 3347.072  | AK021630  | 1279.807 | 871.001   | BE906724  | 816.667   |
| 5886.247  | AK024955  | 12219.817 | 10280.381 | AK021831  | 926.617  | 1170.644  | NM_002283 | 2072.957  |
| 321.616   | NM_016580 | 985.129   | 1137.013  | AK025650  | 3676.254 | 3731.322  | AJ276095  | 7378.337  |
| 590.865   | AF169693  | 812.176   | 956.119   | AK026401  | 958.517  | 1107.099  | NM_004819 | 2152.799  |
| 1643.495  | L23206    | 3665.835  | 3698.774  | AK026773  | 1586.299 | 1638.799  | NM_007184 | 1032.607  |
| 4991.935  | NM_012192 | 4119.261  | 3974.305  | AF147375  | 1093.459 | 1616.81   | AF231916  | 1384.263  |
| 576.56    | NM_006293 | 3021.123  | 3899.447  | X51524    | 8004.498 | 14210.054 | NM_003501 | 1946.024  |
| 7628.906  | NM_007229 | 4151.181  | 3961.235  | AK025759  | 2418.891 | 4019.471  | AK022654  | 16118.417 |
| 968.832   | AB011105  | 2509.573  | 3045.436  | AK024105  | 793.043  | 1353.506  | BC002905  | 2183.057  |
| 1176.487  | NM_002213 | 811.692   | 605.752   | AJ238556  | 391.486  | 635.953   | NM_018091 | 3680.8    |
| 1424.109  | NM_018970 | 492.04    | 921.461   | AK021516  | 2329.004 | 2329.445  | NM_001108 | 2612.263  |
| 3360.964  | NM_004814 | 5334.583  | 3009.472  | Z70699    | 473.32   | 359.014   | NM_001637 | 399.197   |
| 1291.952  | D86976    | 22979.729 | 26911.471 | NM_006898 | 1467.26  | 1424.752  | NM_016630 | 6112.966  |
| 516.855   | AF307080  | 1744.133  | 2438.941  | AK023429  | 513.525  | 389.701   | NM_014291 | 2239.538  |
| 584.374   | NM_004057 | 1949.99   | 2128.814  | AK022276  | 596.459  | 339.277   | NM_014631 | 663.995   |
| 7394.058  | K03175    | 693.871   | 1093.345  | AL133653  | 792.34   | 533.509   | NM_001089 | 4389.838  |
| 2713.27   | NM_003015 | 847.989   | 683.782   | AK023774  | 244.365  | 261.802   | NM_000120 | 2255.143  |
| 3891.652  | NM_006496 | 17764.232 | 24325.445 | AL049377  | 837.361  | 631.633   | AF172327  | 9122.373  |
| 12120.782 | NM_004826 | 839.211   | 822.78    | AF086284  | 723.671  | 1344.261  | NM_001676 | 1488.15   |



|           |           |           |           |           |           |           |           |           |
|-----------|-----------|-----------|-----------|-----------|-----------|-----------|-----------|-----------|
| 28456.877 | NM_013314 | 566.239   | 908.947   | AF056436  | 1413.485  | 1725.792  | NM_000220 | 303.892   |
| 770.471   | NM_002072 | 1301.462  | 1766.221  | AB023191  | 1060.025  | 1487.282  | NM_001679 | 4608.318  |
| 538.094   | NM_003182 | 645.838   | 786.871   | AK027212  | 4591.373  | 5976.621  | NM_004046 | 62059.363 |
| 590.2     | BE904126  | 8936.944  | 9324.561  | NM_005199 | 7531.413  | 11215.43  | NM_004983 | 874.446   |
| 380.328   | AF272380  | 18562.289 | 18709.789 | U90905    | 990.804   | 1314.61   | NM_006860 | 3035.783  |
| 1954.629  | NM_004431 | 4759.156  | 4699.701  | AF161422  | 1076.003  | 1069.582  | AK026308  | 1138.678  |
| 626.221   | NM_002012 | 1640.805  | 1203.122  | AL137384  | 594.989   | 344.389   | NM_013337 | 817.818   |
| 3096.841  | NM_002070 | 48983.957 | 63214.629 | AF070619  | 847.43    | 1025.693  | NM_006899 | 1977.764  |
| 22601.77  | AF227969  | 1930.587  | 1838.646  | NM_020153 | 259.327   | 242.517   | NM_012200 | 1173.764  |
| 1421.846  | AF116657  | 954.92    | 1130.053  | NM_005321 | 4927.917  | 8280.188  | NM_001724 | 901.093   |
| 4992.055  | NM_004102 | 657.504   | 968.413   | AF073520  | 773.294   | 808.944   | NM_000150 | 957.364   |
| 698.188   | NM_003944 | 17387.746 | 20849.293 | AF143885  | 252.947   | 205.24    | AB023152  | 377.868   |
| 3575.473  | NM_016120 | 43395.777 | 28600.1   | NM_014015 | 6167.502  | 3629.729  | NM_006212 | 964.591   |
| 1902.76   | NM_002893 | 1693.279  | 1801.822  | Z34278    | 233.106   | 189.367   | AK022872  | 2293.532  |
| 25898.033 | NM_002393 | 3506.673  | 4031.678  | AK024973  | 412.891   | 240.377   | AK024272  | 2959.962  |
| 5003.36   | NM_002669 | 4638.082  | 4108.971  | AJ008123  | 4306.979  | 2774.438  | NM_016381 | 1321.653  |
| 4138.083  | AB014600  | 2246.188  | 2366.211  | AJ008156  | 608.861   | 556.021   | AL591715  | 594.468   |
| 2175.97   | NM_018312 | 1900.523  | 1626.813  | AF147321  | 295.95    | 187.243   | NM_018042 | 2496.487  |
| 883.455   | X98259    | 657.664   | 907.041   | AF161437  | 3544.6    | 1957.152  | BE741525  | 616.524   |
| 4908.145  | X98260    | 6481.118  | 2653.084  | U92018    | 717.857   | 772.468   | BF030555  | 8950.751  |
| 3006.187  | NM_007217 | 6423.216  | 6647.171  | U52834    | 493.975   | 641.603   | NM_012433 | 4019.925  |
| 442.666   | NM_014777 | 3839.933  | 3848.308  | AJ227898  | 410.978   | 502.351   | NM_005605 | 1258.452  |
| 6412.269  | NM_001102 | 9236.824  | 13314.784 | M34428    | 228.762   | 219.012   | NM_003582 | 1433.405  |
| 3428.141  | NM_003803 | 636.606   | 769.738   | NM_003532 | 760.003   | 1541.523  | NM_000532 | 7719.229  |
| 13020.803 | NM_002818 | 51940.621 | 64127.52  | NM_017869 | 4415.019  | 4444.145  | NM_016341 | 726.01    |
| 4817.371  | NM_001937 | 3798.428  | 4105.513  | AF075100  | 312.3     | 383.457   | NM_004034 | 2139.925  |
| 1223.332  | AK024778  | 1189.754  | 687.842   | AF203447  | 4908.667  | 3696.565  | NM_000130 | 2083.463  |
| 35991.246 | AK021608  | 3273.845  | 5132.747  | NM_018502 | 1076.367  | 1001.015  | AI492087  | 11578.197 |
| 1207.409  | NM_004297 | 1225.254  | 1017.335  | AL080066  | 6042.715  | 5655.496  | R72122    | 1151.742  |
| 2983.31   | NM_006044 | 7036.684  | 7591.697  | AJ227870  | 597.301   | 476.481   | Z35309    | 898.975   |
| 1280.909  | AK025498  | 1810.065  | 1805.372  | AL137620  | 255.154   | 374.634   | AA700005  | 849.36    |
| 1726.175  | NM_001395 | 6841.328  | 4210.799  | NM_005294 | 1310.74   | 1010.02   | AA292025  | 422.235   |
| 1115.747  | NM_002068 | 6832.434  | 3196.72   | AF085826  | 347.29    | 367.01    | AA437226  | 472.499   |
| 745.893   | NM_013338 | 4601.464  | 2566.376  | AK024362  | 425.932   | 340.109   | R36143    | 628.529   |
| 3754.375  | NM_014671 | 5415.496  | 4049.095  | AF118068  | 971.935   | 1096.967  | XM_056359 | 269.357   |
| 516.391   | NM_001814 | 12778.174 | 14617.188 | NM_004164 | 266.55    | 272.265   | D10353/NM | 1831.146  |
| 861.161   | NM_018439 | 1564.367  | 1243.626  | NM_019018 | 4055      | 2666.805  | M15042    | 1280.092  |
| 2572.847  | NM_005656 | 1287.397  | 1150.734  | M87931    | 579.817   | 546.215   | AK056843  | 1489.565  |
| 2573.377  | NM_006012 | 5603.538  | 4920.847  | CY3Cy5    | 617.554   | 88.667    | U49928    | 2775.401  |
| 1111.255  | NM_002151 | 929.382   | 1246.603  | BE790116  | 2903.169  | 3284.777  | AK096645  | 6322.066  |
| 603.733   | NM_014889 | 1449.306  | 1198.345  | AI922341  | 468.235   | 311.51    | NM_019884 | 1940.552  |
| 3338.552  | AF173935  | 1030.978  | 794.94    | M12824    | 755.496   | 571.824   | NM_018291 | 3040.295  |
| 727.935   | AK025322  | 6118.495  | 4529.096  | W60100    | 429.612   | 753.227   | NM_005530 | 1437.227  |
| 8181.126  | NM_017887 | 4564.5    | 4008.335  | AA457153  | 1921.306  | 1504.919  | AF116909  | 820.554   |
| 1359.074  | NM_000526 | 630.402   | 814.408   | AA283122  | 1523.945  | 1202.748  | NM_002283 | 1964.538  |
| 656.243   | AF007152  | 2183.011  | 3680.836  | AA868504  | 869.243   | 509.788   | AJ276095  | 7085.815  |
| 1185.949  | NM_017575 | 395.495   | 375.26    | AA877845  | 3499.743  | 3257.099  | NM_004819 | 2221.757  |
| 17105.146 | AL122100  | 533.634   | 350.743   | AA664241  | 9551.722  | 9042.665  | NM_007184 | 1583.796  |
| 432.934   | NM_005310 | 1286.063  | 1060.964  | NM_000588 | 11028.812 | 11422.29  | NM_005291 | 7865.243  |
| 848.107   | NM_014423 | 7657.324  | 4606.046  | SR1       | 54821.035 | 68897.477 | NM_005855 | 6843.974  |
| 600.975   | NM_018083 | 1920.6    | 1373.124  | SR3       | 21127.52  | 22248.049 | NM_002923 | 851.786   |
| 3099.05   | AL110188  | 8568.322  | 7095.646  | SR5       | 2481.054  | 2778.077  | NM_006794 | 885.144   |
| 3322.545  | D70834    | 24196.813 | 20591.893 | SR7       | 2734.937  | 34202.387 | NM_018653 | 2003.165  |

|           |           |           |           |           |           |           |           |           |
|-----------|-----------|-----------|-----------|-----------|-----------|-----------|-----------|-----------|
| 709.682   | NM_00097C | 58695.242 | 66201.648 | SR9       | 8580.013  | 1923.204  | NM_00538E | 1612.669  |
| 13031.69  | AK000102  | 1071.928  | 1083.719  | CY3Cy5    | 1635.389  | 151.762   | NM_00723Z | 9950.091  |
| 1716.53   | AB040916  | 1903.05   | 1565.723  | NM_00581C | 2662.608  | 1722.943  | NM_002717 | 1570.66   |
| 1285.217  | NM_005587 | 1427.382  | 1080.687  | M28170    | 2217.963  | 1410.689  | NM_00302E | 3038.015  |
| 1022.125  | AF038362  | 3036.3    | 2392.127  | AK026223  | 1853.793  | 1798.939  | U52051    | 360.936   |
| 733.363   | NM_00519E | 12718.015 | 6674.395  | NM_000874 | 696.358   | 635.757   | NM_02017E | 1503.539  |
| 932.935   | NM_005481 | 1205.405  | 819.337   | NM_005854 | 669.613   | 600.015   | NM_00430E | 19620     |
| 765.536   | NM_00471E | 5125.011  | 5206.5    | AB007863  | 5485.958  | 2801.365  | NM_001153 | 661.289   |
| 720.04    | L40392    | 2162.062  | 1319.048  | AK024456  | 1137.559  | 1243.056  | NM_00678E | 1534.708  |
| 3900.502  | BF541482  | 350.577   | 235.215   | NM_01778E | 440.015   | 305.737   | NM_00620E | 608.89    |
| 1601.772  | NM_001007 | 63498.352 | 70205.703 | D31887    | 1653.354  | 789.622   | NM_00686C | 2747.462  |
| 817.483   | NM_003017 | 7039.94   | 3273.149  | NM_00231Z | 799.546   | 592.668   | NM_004794 | 6928.777  |
| 1764.643  | NM_02036E | 3213.312  | 1974.771  | NM_00445E | 466.323   | 496.168   | NM_00428Z | 987.089   |
| 482.139   | NM_020141 | 5118.413  | 4825.607  | NM_00550Z | 991.415   | 2083.615  | NM_00416Z | 8267.7    |
| 583.547   | NM_00648Z | 701.213   | 810.485   | NM_00150Z | 1015.361  | 1232.75   | AK026308  | 1072.049  |
| 1017.195  | NM_00377E | 1040.672  | 1327.83   | AF284223  | 13030.926 | 7953.499  | NM_013337 | 1348.144  |
| 1396.441  | NM_00363E | 1105.507  | 1265.308  | AF176012  | 1797.954  | 1541.782  | NM_00419Z | 1413.209  |
| 5215.698  | NM_00066Z | 1832.469  | 2559.508  | BE743838  | 2034.443  | 2538.429  | NM_00280Z | 5036.063  |
| 599.859   | NM_00029Z | 1384.794  | 1169.282  | AF273046  | 1670.965  | 3248.361  | NM_00550E | 1142.469  |
| 775.543   | NM_00368E | 39693.777 | 35549.031 | NM_001081 | 614.505   | 1015.851  | NM_00678E | 362.889   |
| 1187.911  | NM_01617Z | 994.814   | 1077.463  | NM_00248Z | 652.96    | 885.705   | NM_01656E | 510.124   |
| 3329.687  | NM_00287E | 3585.738  | 2178.844  | BF002026  | 418.004   | 726.989   | AB033102  | 3368.994  |
| 8911.49   | NM_004427 | 5359.896  | 7070.995  | NM_004171 | 666.084   | 350.722   | NM_014774 | 2046.937  |
| 2357.084  | U90549    | 5376.515  | 8690.743  | NM_014037 | 1228.406  | 1261.717  | NM_01414Z | 2558.813  |
| 1507.804  | NM_01324C | 8326.266  | 6581.626  | NM_00486E | 5831.285  | 3435.624  | M55646    | 7163.712  |
| 10622.788 | NM_015874 | 25008.324 | 22276.033 | NM_01868E | 1213.307  | 849.868   | NM_00611Z | 12482.192 |
| 938.809   | NM_00496E | 45895.891 | 29059.125 | AK056652  | 2020.429  | 1364.473  | M12807    | 811.264   |
| 1264.77   | AF312393  | 28495.059 | 23232.396 | AL137438  | 697.331   | 710.597   | NM_00176E | 1662.95   |
| 2290.048  | AF272898  | 3980.996  | 3091.381  | NM_017957 | 1467.049  | 952.13    | NM_003361 | 1593.124  |
| 2728.632  | AB037817  | 412.199   | 511.212   | NM_003024 | 778.252   | 676.048   | NM_01209E | 1002.917  |
| 22907.924 | AB032951  | 3590.146  | 2831.479  | NM_01324E | 1286.864  | 923.331   | NM_018684 | 4898.944  |
| 430.006   | NM_003417 | 942.563   | 1140.723  | NM_000034 | 57547.148 | 66993.914 | NM_01798Z | 608.879   |
| 505.462   | NM_00514E | 6649.413  | 4742.531  | AK022230  | 1383.226  | 1186.263  | AF169351  | 6582.046  |
| 722.704   | AK024073  | 871.539   | 674.958   | AK022147  | 3225.51   | 3334.006  | M14200    | 43813.73  |
| 4960.433  | NM_005887 | 4658.491  | 2055.719  | L25664    | 877.692   | 703.561   | NM_00028Z | 2455.303  |
| 53383.781 | AK024921  | 658.651   | 1044.824  | NM_01494C | 1314.771  | 1794.986  | NM_00053Z | 7681.348  |
| 911.051   | AL110232  | 672.777   | 1171.125  | NM_00690C | 996.773   | 894.014   | NM_016341 | 955.643   |
| 2758.932  | AK026103  | 2650.481  | 2385.114  | AJ289111  | 1134.055  | 1276.216  | AF231916  | 2149.139  |
| 7288.895  | NM_01635Z | 12288.531 | 13125.132 | NM_01635E | 2293.575  | 2150.617  | NM_003501 | 2568.825  |
| 1459.058  | AK022567  | 1437.75   | 1392.4    | NM_00640E | 2144.205  | 5422.958  | AK022654  | 21352.732 |
| 17417.898 | S77357    | 1011.896  | 1255.399  | AF216292  | 12181.924 | 7889.68   | BC002905  | 3579.425  |
| 1538.652  | AK023450  | 1407.64   | 2199.089  | NM_00095Z | 458.97    | 695.28    | NM_018091 | 3922.741  |
| 1048.746  | AL080280  | 1922.925  | 2118.592  | NM_014584 | 1399.639  | 1701.439  | NM_001637 | 606.545   |
| 1287.837  | AB028947  | 1590.327  | 1454.361  | M30627    | 425.939   | 510.474   | NM_01663C | 5791.893  |
| 4618.207  | AF035314  | 1189.148  | 1093.252  | NM_01664E | 1529.24   | 693.145   | NM_014291 | 2809.594  |
| 1095.04   | NM_01803E | 1353.754  | 1321.275  | AK090536  | 7035.464  | 5282.74   | NM_014631 | 446.282   |
| 407.731   | AF052087  | 1078.748  | 639.866   | D63477    | 303.917   | 488.158   | NM_00108E | 3897.679  |
| 650.672   | AF007143  | 1468.176  | 770.32    | NM_02024Z | 10497.327 | 8304.978  | NM_00167E | 1751.816  |
| 6602.921  | AK023656  | 1353.567  | 2334.536  | NM_014051 | 1860.705  | 2583.532  | NM_00498Z | 725.019   |
| 1136.806  | AF086511  | 1788.108  | 2375.261  | AK025398  | 5725.451  | 4341.088  | NM_019884 | 2466.936  |
| 972.042   | AK022989  | 1679.812  | 2262.081  | AB037750  | 1320.092  | 673.108   | NM_018291 | 2003.076  |
| 2584.385  | AK001604  | 3968.365  | 3231.897  | NM_01788E | 630.781   | 559.151   | NM_00553C | 1921.297  |
| 6151.359  | AK021619  | 620.462   | 508.875   | NM_00491E | 887.594   | 887.997   | NM_00689E | 2019.295  |

|           |                  |           |           |                  |           |           |                  |           |
|-----------|------------------|-----------|-----------|------------------|-----------|-----------|------------------|-----------|
| 777.816   | <b>AK022347</b>  | 467.178   | 387.898   | <b>AK022207</b>  | 507.104   | 752.36    | <b>NM_012200</b> | 1361.355  |
| 13893.116 | <b>AF131762</b>  | 14262.184 | 8209.313  | <b>AV708752</b>  | 2222.825  | 2061.317  | <b>NM_001724</b> | 1102.406  |
| 2106.522  | <b>AY007089</b>  | 7995.697  | 4207.851  | <b>AF119885</b>  | 1684.718  | 1747.592  | <b>NM_000150</b> | 1638.339  |
| 1248.728  | <b>AK021816</b>  | 6071.093  | 8136.932  | <b>NM_004996</b> | 1412.865  | 1480.195  | <b>AB023152</b>  | 345.092   |
| 513.391   | <b>AK024018</b>  | 883.704   | 1148.484  | <b>NM_017435</b> | 594.47    | 287.893   | <b>AK024272</b>  | 2756.041  |
| 757.854   | <b>D43770</b>    | 6558.188  | 5449.938  | <b>NM_013386</b> | 2455.862  | 4061.438  | <b>NM_016381</b> | 1053.945  |
| 5154.812  | <b>AF085960</b>  | 1042.795  | 982.088   | <b>NM_006517</b> | 980.848   | 1189.757  | <b>NM_018042</b> | 2615.312  |
| 36303.242 | <b>AK021519</b>  | 1245.068  | 1227.793  | <b>AK026680</b>  | 2234.135  | 1064.723  | <b>BE741525</b>  | 520.78    |
| 2888.109  | <b>NM_014254</b> | 2592.473  | 1769.088  | <b>NM_012436</b> | 41088.105 | 20442.871 | <b>NM_002576</b> | 642.101   |
| 7909.487  | <b>AF086036</b>  | 1637.306  | 1432.032  | <b>AK001299</b>  | 5496.456  | 3656.963  | <b>NM_003582</b> | 871.268   |
| 857.493   | <b>U09197</b>    | 1698.83   | 1577.353  | <b>AB014559</b>  | 3863.427  | 2700.699  | <b>U52051</b>    | 476.792   |
| 4651.772  | <b>U50529</b>    | 716.078   | 1492.901  | <b>NM_016489</b> | 2463.633  | 1611.76   | <b>NM_020179</b> | 1072.046  |
| 2488.025  | <b>U15553</b>    | 3095.448  | 2506.115  | <b>NM_005033</b> | 1806.361  | 1270.221  | <b>NM_004306</b> | 18932.086 |
| 30143.365 | <b>Z36829</b>    | 640.432   | 736.135   | <b>NM_015932</b> | 45215.719 | 39618.254 | <b>NM_006786</b> | 1039.957  |
| 3906.426  | <b>AK024734</b>  | 3173.004  | 2615.427  | <b>AK022169</b>  | 605.196   | 347.127   | <b>NM_006205</b> | 753.898   |
| 4202.552  | <b>NM_017741</b> | 951.118   | 992.281   | <b>AF015592</b>  | 617.74    | 603.112   | <b>NM_004034</b> | 2532.558  |
| 2296.438  | <b>AK000144</b>  | 1064.541  | 1057.904  | <b>AK026795</b>  | 1044.965  | 1347.115  | <b>NM_000130</b> | 1917.669  |
| 755.164   | <b>AL117533</b>  | 1164.635  | 1189.973  | <b>NM_016617</b> | 3722.149  | 2590.646  | <b>AF193756</b>  | 623.26    |
| 6009.743  | <b>AK023422</b>  | 3221.052  | 2558.008  | <b>NM_002027</b> | 4286.833  | 2827.255  | <b>AI492087</b>  | 12404.843 |
| 3516.476  | <b>AK022796</b>  | 3729.202  | 2090.591  | <b>AL162078</b>  | 1388.32   | 1238.008  | <b>R72122</b>    | 1000.692  |
| 3172.655  | <b>AK095193</b>  | 1175.744  | 1078.228  | <b>NM_013382</b> | 5778.359  | 7023.15   | <b>AA700005</b>  | 632.102   |
| 1326.042  | <b>AK025081</b>  | 3668.544  | 2901.912  | <b>AB002314</b>  | 535.692   | 617.426   | <b>AA292025</b>  | 393.765   |
| 4017.373  | <b>AL122088</b>  | 794.503   | 1659.587  | <b>NM_014622</b> | 397.48    | 689.275   | <b>AA437226</b>  | 361.304   |
| 1138.203  | <b>AK023437</b>  | 1383.203  | 1090.764  | <b>AB011114</b>  | 16723.793 | 20970.492 | <b>XM_056359</b> | 270.699   |
| 7969.76   | <b>AK024147</b>  | 371.914   | 232.613   | <b>D11466</b>    | 7379.619  | 8041.635  | <b>D10353/NM</b> | 1844.514  |
| 644.802   | <b>AK022897</b>  | 1408.849  | 1217.549  | <b>NM_014056</b> | 6139.675  | 16006.185 | <b>M15042</b>    | 1158.282  |
| 670.37    | <b>AK023898</b>  | 5792.147  | 4674.945  | <b>D31885</b>    | 6230.54   | 12614.25  | <b>AK056843</b>  | 1278.599  |
| 461.455   | <b>NM_019040</b> | 5578.257  | 5061.926  | <b>BE743838</b>  | 1790.861  | 1399.88   | <b>U49928</b>    | 3408.882  |
| 1362.419  | <b>NM_005978</b> | 1276.937  | 2228.684  | <b>AF273046</b>  | 1337.193  | 1606.482  | <b>AK096645</b>  | 4519.125  |
| 5703.503  | <b>Y16711</b>    | 1545.26   | 1821.608  | <b>NM_001081</b> | 756.772   | 504.224   | <b>M12807</b>    | 649.872   |
| 3447.748  | <b>AJ272179</b>  | 3954.52   | 3006.31   | <b>NM_002483</b> | 542.491   | 408.858   | <b>NM_001765</b> | 866.325   |
| 4096.468  | <b>AJ007015</b>  | 906.258   | 1018.167  | <b>BE790116</b>  | 2918.401  | 3255.498  | <b>NM_003361</b> | 1135.214  |
| 4243.921  | <b>AL049317</b>  | 1495.193  | 1735.15   | <b>AI922341</b>  | 348.905   | 374.494   | <b>NM_012099</b> | 1124.61   |
| 1825.219  | <b>AL050090</b>  | 1620.453  | 1532.202  | <b>M12824</b>    | 763.846   | 703.882   | <b>NM_018684</b> | 5613.617  |
| 2285.034  | <b>AF086309</b>  | 1168.024  | 1279.698  | <b>W60100</b>    | 413.615   | 629.293   | <b>NM_017983</b> | 767.963   |
| 1046.009  | <b>AF238870</b>  | 1188.131  | 1240.175  | <b>AA457153</b>  | 1544.749  | 1435.613  | <b>AF116909</b>  | 708.997   |
| 909.745   | <b>AK026279</b>  | 4963.56   | 3145.134  | <b>AA283122</b>  | 1251.139  | 1073.487  | <b>BE906724</b>  | 1574.139  |
| 2238.045  | <b>AF130094</b>  | 8484.123  | 7618.064  | <b>AA868504</b>  | 639.416   | 661.123   | <b>NM_002283</b> | 2216.934  |
| 847.243   | <b>AK026673</b>  | 1826.913  | 1567.787  | <b>AA877845</b>  | 2810.2    | 2774.269  | <b>AJ276095</b>  | 7094.314  |
| 1094.489  | <b>NM_005452</b> | 5049.66   | 3846.267  | <b>AA664241</b>  | 8766.436  | 7540.134  | <b>NM_004819</b> | 2294.833  |
| 2455.039  | <b>AF170935</b>  | 19539.553 | 17004.057 | <b>NM_000588</b> | 9471.866  | 12752.002 | <b>NM_007184</b> | 1610.217  |
| 4489.446  | <b>AJ227899</b>  | 1181.424  | 802.302   | <b>NM_006406</b> | 2333.708  | 2080.343  | <b>NM_005291</b> | 8699.046  |
| 1015.062  | <b>AL359607</b>  | 706.469   | 490.917   | <b>AF216292</b>  | 11268.253 | 4098.924  | <b>NM_002923</b> | 860.055   |
| 1659.321  | <b>AF161371</b>  | 9063.988  | 8535.414  | <b>NM_000952</b> | 377.549   | 179.302   | <b>NM_006794</b> | 733.461   |
| 758.838   | <b>AK022464</b>  | 1024.664  | 1021.527  | <b>NM_014584</b> | 1303.875  | 985.309   | <b>NM_018653</b> | 1881.689  |
| 200.356   | <b>AF086230</b>  | 1488.276  | 2104.928  | <b>NM_005810</b> | 2364.642  | 1741.879  | <b>NM_005388</b> | 2054.092  |
| 950.381   | <b>AK023408</b>  | 2083.919  | 1903.828  | <b>M28170</b>    | 2421.984  | 1148.055  | <b>NM_002717</b> | 1765.762  |
| 8236.384  | <b>U84509</b>    | 2257.295  | 3334.523  | <b>AK026223</b>  | 1712.753  | 2001.934  | <b>NM_003025</b> | 2031.934  |
| 928.933   | <b>AL110201</b>  | 1405.67   | 1151.717  | <b>NM_000874</b> | 681.024   | 784.983   | <b>NM_001679</b> | 6043.662  |
| 931.814   | <b>AK002036</b>  | 7226.533  | 7087.678  | <b>NM_005854</b> | 631.032   | 600.746   | <b>NM_004046</b> | 55743.316 |
| 1592.378  | <b>U84512</b>    | 457.877   | 428.36    | <b>AB007863</b>  | 5430.924  | 3959.48   | <b>NM_004983</b> | 722.002   |
| 382.86    | <b>AK025775</b>  | 5195.382  | 4805.671  | <b>AK024456</b>  | 904.47    | 1268.149  | <b>NM_006860</b> | 2292.106  |
| 5067.229  | <b>AB046791</b>  | 676.954   | 630.223   | <b>D31887</b>    | 1522.551  | 672.141   | <b>NM_004794</b> | 7421.309  |

|           |            |           |           |           |           |           |           |           |
|-----------|------------|-----------|-----------|-----------|-----------|-----------|-----------|-----------|
| 1181.063  | AF043469   | 1500.21   | 787.716   | NM_002313 | 640.289   | 668.081   | NM_004283 | 862.518   |
| 1913.259  | AL109671   | 950.851   | 998.333   | NM_004459 | 396.89    | 352.019   | NM_004163 | 10120.063 |
| 2182.453  | NM_012375  | 563.91    | 429.292   | NM_005503 | 936.252   | 2448.211  | AK026308  | 1344.701  |
| 742.34    | AK022008   | 3348.859  | 2480.3    | NM_001502 | 1036.114  | 1392.225  | NM_013337 | 1080.187  |
| 8972.362  | NM_018186  | 2589.372  | 871.376   | AF284223  | 12770.688 | 10710.731 | NM_004193 | 1100.481  |
| 10761.426 | AL080188   | 4448.541  | 4155.132  | AF176012  | 1800.931  | 2471.925  | NM_002803 | 4354.19   |
| 2071.148  | T99941     | 6070.254  | 4197.112  | NM_005971 | 866.012   | 674.111   | NM_005508 | 922.521   |
| 1685.144  | AF113678   | 1370.862  | 1649.024  | NM_017435 | 370.365   | 86.928    | NM_006788 | 415.92    |
| 14519.082 | AL137313   | 47934.52  | 36645.883 | NM_013386 | 2857.092  | 2405.78   | NM_014774 | 1939.969  |
| 1082.487  | AB002363   | 6888.025  | 4704.271  | NM_006517 | 1073.737  | 504.455   | NM_014143 | 2600.692  |
| 3796.396  | NM_005284  | 2076.206  | 1601.95   | NM_004171 | 659.236   | 457.608   | M55646    | 6932.757  |
| 780.552   | AF086351   | 3290.478  | 5005.923  | NM_014037 | 1684.279  | 1648.069  | NM_006112 | 11993.979 |
| 715.342   | D83199     | 21513.117 | 19631.49  | NM_004866 | 5966.494  | 3358.167  | BE741525  | 548.68    |
| 1153.773  | Y16708     | 998.385   | 679.662   | NM_018688 | 944.246   | 798.635   | BF030555  | 19287.934 |
| 3111.928  | AL157453   | 3600.441  | 3492.039  | AK056652  | 1880.236  | 1372.02   | NM_012433 | 5166.462  |
| 1014.262  | NM_019098  | 5587.937  | 6231.304  | AL137438  | 623.18    | 452.854   | NM_005605 | 1608.56   |
| 27108.736 | AK022212   | 29444.699 | 33982.801 | NM_017957 | 1541.007  | 1329.467  | NM_002576 | 868.865   |
| 4697.468  | X64974     | 2955.198  | 3474.464  | NM_003024 | 732.741   | 749.358   | NM_003582 | 1385.226  |
| 2158.33   | NM_000834  | 5054.425  | 5604.569  | NM_013248 | 1175.51   | 1105.902  | AF169351  | 7993.191  |
| 776.963   | NM_006485  | 16899.598 | 12009.466 | NM_000034 | 57426.965 | 71539.547 | NM_000282 | 2451.195  |
| 6054.602  | NM_012459  | 1760.734  | 1727.829  | AK022230  | 1394.12   | 1597.443  | NM_000532 | 7922.813  |
| 1270.971  | NM_012360  | 352.906   | 772.064   | AK022147  | 3284.746  | 3660.462  | NM_016341 | 670.585   |
| 2507.328  | AL137268   | 4596.858  | 4457.595  | L25664    | 964.681   | 895.863   | AF231916  | 2937.807  |
| 416.327   | AK022398   | 603.649   | 460.664   | NM_014940 | 1671.641  | 2389.818  | NM_003501 | 1975.301  |
| 18430.434 | AK024109   | 2448.82   | 2163.69   | NM_005783 | 225.685   | 371.629   | AK022654  | 29749.338 |
| 9754.01   | AF088048   | 937.88    | 733.943   | NM_006900 | 1124.564  | 1355.615  | BC002905  | 2117.701  |
| 7950.147  | AK001143   | 3976.084  | 4926.746  | AJ289111  | 1128.89   | 1615.752  | NM_001637 | 393.834   |
| 1095.685  | AK001701   | 4338.202  | 4222.657  | NM_016356 | 2306.259  | 2985.792  | NM_016630 | 4759.356  |
| 1962.76   | AK022205   | 358.621   | 485.941   | NM_014043 | 1426.995  | 1294      | NM_014291 | 2829.06   |
| 9127.17   | AF217970   | 1205.59   | 1224.892  | AB011114  | 15566.628 | 12643.996 | NM_014631 | 731.238   |
| 581.317   | AF086297   | 1183.169  | 1241.93   | D11466    | 7259.354  | 5162.218  | NM_001089 | 3496.386  |
| 1860.435  | AK025455   | 1965.169  | 1229.226  | NM_014056 | 7546.265  | 10610.792 | NM_000120 | 2413.001  |
| 835.36    | AK026799   | 14064.981 | 6163.801  | D31885    | 6034.316  | 6453      | AF172327  | 9263.365  |
| 253.542   | NM_014860  | 713.789   | 722.624   | NM_016649 | 1611.193  | 897.667   | NM_001676 | 1072.805  |
| 1230.339  | AK022549   | 1263.34   | 493.74    | AK090536  | 6958.322  | 6044.83   | AB018338  | 11227.49  |
| 364.134   | Z70714     | 3593.177  | 3282.951  | D63477    | 397.565   | 407.049   | D80010    | 602.241   |
| 512.76    | AK021640   | 4254.761  | 3750.172  | NM_020243 | 9660.437  | 7750.507  | NM_004923 | 1044.428  |
| 2298.613  | NM_016565  | 48405.234 | 37316.195 | NM_014051 | 1672.209  | 2898.768  | NM_003971 | 1018.127  |
| 2310.451  | CY3Cy5     | 2078.755  | 124.271   | AK025398  | 5011.664  | 5659.6    | AK026973  | 660.641   |
| 636.214   | BF310427   | 1965.841  | 2199.933  | AB037750  | 1446.437  | 771.167   | NM_005822 | 462.777   |
| 4907.274  | N94424     | 873.619   | 1505.647  | AK023056  | 760.93    | 640.36    | U81002    | 1987.44   |
| 2085.231  | AA045192   | 1775.565  | 2077.21   | NM_001120 | 12988.371 | 14223.832 | NM_016299 | 5194.992  |
| 751.109   | M92642     | 703.693   | 1275.159  | NM_017888 | 766.59    | 816.878   | L38517    | 3114.681  |
| 25955.506 | H-U 44385  | 13368.238 | 9290.595  | NM_004915 | 1302.746  | 1673.584  | NM_018291 | 4804.512  |
| 1608.784  | ID 1654970 | 6326.896  | 4002.649  | AK022207  | 609.52    | 925.978   | NM_005530 | 1610.066  |
| 976.58    | ID 2531132 | 5715.946  | 5306.334  | AV708752  | 2151.329  | 2878.99   | NM_006899 | 1985.331  |
| 5188.644  | AA485665   | 455.498   | 726.44    | AF119885  | 1714.343  | 2049.804  | NM_012200 | 1166.746  |
| 999.381   | BF125928   | 13826.688 | 13566.354 | NM_004996 | 1278.673  | 1845.262  | NM_001724 | 964.973   |
| 2100.962  | BG571026   | 1791.849  | 1945.247  | NM_000588 | 11402.881 | 7010.854  | NM_000150 | 1416.749  |
| 20898.398 | AA489017   | 3516.618  | 3060.732  | AK026680  | 2868.497  | 1275.817  | AB023152  | 425.47    |
| 2057.895  | NM_012245  | 14044.957 | 11241.647 | NM_012436 | 46397.625 | 26740.248 | NM_006212 | 979.417   |
| 53152.059 | NM_133263  | 2035.759  | 1852.556  | AK001299  | 7195.951  | 5029.015  | AK022872  | 2754.241  |
| 7900.792  | SR2        | 49779.051 | 64431.547 | AB014559  | 5090.763  | 4182.426  | AK024272  | 2511.499  |

|           |           |           |           |           |           |           |           |           |
|-----------|-----------|-----------|-----------|-----------|-----------|-----------|-----------|-----------|
| 344.898   | SR4       | 13606.898 | 14015.186 | NM_016489 | 2649.67   | 1826.475  | NM_016381 | 3371.032  |
| 9063.157  | SR6       | 1876.945  | 2162.937  | NM_005033 | 1757.986  | 1821.224  | NM_018042 | 1154.731  |
| 1017.784  | SR8       | 7817.654  | 22541.963 | NM_015932 | 45687.254 | 49197.445 | NM_014944 | 3685.834  |
| 2371.15   | SR10      | 26465.635 | 7049.74   | NM_017949 | 303.781   | 953.773   | NM_001942 | 621.261   |
| 2775.225  | CY3Cy5    | 1263.119  | 131.096   | AK022169  | 586.558   | 569.532   | AF200348  | 1327.72   |
| 293.787   | NM_017450 | 1758.768  | 1028.461  | AF015592  | 799.076   | 1025.998  | Y11710    | 556.607   |
| 2552.211  | NM_002023 | 723.59    | 750.085   | AK026795  | 1175.84   | 1572.124  | NM_002650 | 1481.309  |
| 2372.798  | NM_002839 | 896.608   | 819.265   | NM_016399 | 1520.865  | 1877.457  | NM_003260 | 9078.236  |
| 1442.305  | AF190500  | 842.278   | 992.159   | NM_016617 | 3823.155  | 2648.832  | AK024071  | 1202.308  |
| 2373.481  | NM_001616 | 290.587   | 515.067   | NM_002027 | 4049.16   | 3857.775  | AF056490  | 1065.763  |
| 496.705   | NM_005904 | 861.215   | 807.796   | AL162078  | 1705.334  | 2001.141  | NM_005539 | 1390.575  |
| 5836.673  | NM_005273 | 13014.947 | 13214.906 | NM_013382 | 6289.794  | 8836.801  | BF341504  | 556.504   |
| 4715.313  | NM_006576 | 1311.501  | 1246.915  | AB002314  | 548.747   | 827.767   | NM_005541 | 5226.798  |
| 2204.072  | NM_018645 | 643.131   | 340.308   | NM_005503 | 1054.036  | 1476.717  | AB002319  | 787.719   |
| 1008.465  | AB035266  | 2520.062  | 2330.258  | NM_001502 | 796.482   | 846.495   | AF039942  | 2582.319  |
| 4908.031  | NM_003744 | 2273.327  | 1822.187  | AF284223  | 12495.646 | 6474.654  | NM_004421 | 1562.09   |
| 2055.014  | NM_006378 | 1307.48   | 1240.962  | AF176012  | 1932.238  | 1371.887  | NM_018654 | 1212.542  |
| 2249.506  | NM_018132 | 2855.446  | 2779.051  | BE743838  | 1998.743  | 1484.319  | AB046863  | 7715.087  |
| 2560.494  | NM_018207 | 991.429   | 2098.907  | AF273046  | 1687.63   | 2017.493  | M62403    | 7150.691  |
| 1572.073  | NM_000345 | 7581.359  | 5653.465  | NM_001081 | 769.179   | 469.109   | NM_017883 | 2519.742  |
| 566.317   | NM_006531 | 1102.236  | 560.35    | NM_002483 | 655.678   | 478.866   | AK025131  | 1387.343  |
| 1573.504  | AB029021  | 5754.549  | 4423.448  | BF002026  | 379.177   | 352.738   | NM_000754 | 9819.566  |
| 873.483   | NM_002101 | 21603.559 | 11641.577 | BE790116  | 2883.768  | 4211.776  | NM_014619 | 1221.498  |
| 1889.772  | NM_005423 | 439.383   | 357.579   | AI922341  | 370.263   | 281.119   | NM_005629 | 6666.409  |
| 7635.578  | Z36789    | 1224.278  | 4867.402  | M12824    | 672.671   | 1129.12   | J04621    | 1066.846  |
| 772.767   | J02874    | 2267.215  | 2850.306  | W60100    | 357.216   | 1012.77   | NM_000718 | 960.183   |
| 19374.43  | AF070525  | 5204.462  | 4494.965  | AA457153  | 1656.046  | 1755.83   | NM_000161 | 2428.068  |
| 2051.932  | NM_001177 | 4760.304  | 2495.731  | AA283122  | 1455.435  | 1612.01   | NM_002634 | 6843.325  |
| 449.051   | NM_014447 | 1575.382  | 1390.693  | AA868504  | 759.382   | 909.973   | NM_017749 | 1624.486  |
| 9263.528  | NM_002356 | 365.929   | 215.284   | AA877845  | 2674.561  | 3138.184  | NM_001972 | 52105.277 |
| 2334.487  | NM_006691 | 956.191   | 1017.189  | AA664241  | 8935.538  | 12375.646 | NM_002006 | 7732.28   |
| 1113.571  | NM_001505 | 501.311   | 451.989   | NM_014940 | 1364.122  | 1007.879  | NM_007111 | 3012.357  |
| 1959.251  | NM_003710 | 1163.044  | 1826.337  | NM_006900 | 835.748   | 599.585   | NM_007109 | 917.752   |
| 3182.272  | NM_004666 | 2602.449  | 2607.698  | AJ289111  | 1136.039  | 1136.909  | AK023404  | 4432.175  |
| 24762.814 | NM_003614 | 840.699   | 1130.047  | NM_016356 | 1711.074  | 1405.411  | NM_001789 | 1293.762  |
| 770.485   | NM_014257 | 2190.728  | 2739.303  | NM_006406 | 2394.145  | 3061.414  | NM_016004 | 2837.193  |
| 53179.66  | NM_001140 | 453.358   | 465.376   | AF216292  | 11889.752 | 4398.835  | NM_002655 | 848.891   |
| 18066.65  | NM_004843 | 1818.883  | 3740.337  | NM_005894 | 377.129   | 152.576   | AB028955  | 11191.334 |
| 576.204   | AK022845  | 669.024   | 552.924   | NM_014584 | 1247.597  | 1009.976  | U66879    | 4694.63   |
| 2801.376  | NM_003004 | 442.4     | 419.94    | NM_005810 | 2715.344  | 2586.984  | NM_016022 | 6924.175  |
| 3563.552  | NM_002985 | 6106.833  | 7291.247  | M28170    | 2622.066  | 1963.419  | NM_004874 | 1029.079  |
| 2149.988  | AB018347  | 3148.918  | 2866.271  | AK026223  | 1704.349  | 2425.027  | NM_014204 | 1319.828  |
| 563.172   | NM_003284 | 992.542   | 836.315   | NM_000874 | 585.385   | 876.828   | S70385    | 10658.51  |
| 6167.316  | NM_018152 | 1073.466  | 632.22    | NM_005854 | 608.059   | 760.871   | NM_001941 | 674.019   |
| 719.451   | NM_000319 | 1254.762  | 850.406   | AB007863  | 6523.504  | 5367.587  | NM_018509 | 4113.861  |
| 944.219   | NM_012461 | 1978.922  | 2559.287  | AK024456  | 1043.874  | 1625.509  | NM_004086 | 718.116   |
| 933.155   | AK001379  | 935.059   | 745.762   | D31887    | 1641.434  | 1083.34   | AL050199  | 1833.318  |
| 2036.757  | NM_007072 | 1988.192  | 2032.541  | NM_002313 | 666.979   | 1002.024  | NM_001748 | 2582.623  |
| 687.263   | NM_012320 | 5087.373  | 8973.655  | NM_004459 | 464.518   | 686.384   | NM_001109 | 352.849   |
| 809.936   | NM_018208 | 1996.614  | 2264.706  | NM_004915 | 805.065   | 383.11    | AF176706  | 1512.855  |
| 492.981   | NM_015929 | 4904.892  | 4114.909  | AK022207  | 686.075   | 507.269   | NM_014484 | 397.605   |
| 592.115   | U90653    | 2855.686  | 2507.411  | AV708752  | 2736.514  | 1859.76   | NM_001086 | 1095.764  |
| 2088.642  | NM_000196 | 488.951   | 384.057   | AF119885  | 1793.764  | 1449.415  | NM_014670 | 3317.229  |

|           |            |           |           |           |           |           |           |           |
|-----------|------------|-----------|-----------|-----------|-----------|-----------|-----------|-----------|
| 4556.434  | NM_018339  | 2167.953  | 2563.302  | NM_004996 | 1458.898  | 1209.155  | NM_019048 | 3099.795  |
| 735.851   | NM_006745  | 20019.449 | 13164.327 | NM_005971 | 1026.602  | 841.359   | NM_001040 | 1155.833  |
| 463.523   | NM_000275  | 772.442   | 832.293   | NM_017435 | 404.52    | 241.22    | AF279698  | 1706.385  |
| 3368.72   | AK000037   | 877.058   | 811.664   | NM_013386 | 2433.884  | 2573.661  | NM_019849 | 1750.913  |
| 10447.71  | NM_014760  | 2144.233  | 2300.269  | NM_006517 | 982.383   | 766.195   | NM_000049 | 559.272   |
| 907.365   | NM_018398  | 1536.511  | 1957.047  | NM_014037 | 2015.575  | 2433.335  | AB032996  | 26308.133 |
| 1350.693  | NM_002560  | 11313.632 | 9075.021  | NM_004866 | 5639.135  | 4620.079  | AB040881  | 1655.247  |
| 612.081   | NM_014404  | 1397.751  | 1297.601  | NM_018688 | 886.858   | 1067.635  | AY007121  | 1092.105  |
| 305.258   | NM_018713  | 810.502   | 756.709   | AK056652  | 2301.258  | 1766.092  | NM_003372 | 4983.772  |
| 970.543   | NM_015947  | 4007.88   | 4021.369  | AL137438  | 646.413   | 729.477   | NM_007317 | 1721.826  |
| 3845.516  | NM_002042  | 11062.551 | 7253.681  | NM_017957 | 1539.659  | 1494.031  | AB037826  | 20750.672 |
| 1536.792  | AB028944   | 784.804   | 354.351   | NM_003024 | 813.967   | 983.577   | AK021466  | 1333.828  |
| 959.425   | AJ006268   | 854.615   | 803.61    | NM_013248 | 1104.341  | 1388.474  | NM_006443 | 11725.627 |
| 3533.945  | M74089     | 2524.088  | 1926.158  | NM_000034 | 59250.809 | 73408.227 | NM_001559 | 974.085   |
| 8209.938  | AF190864   | 5306.986  | 4411.151  | AK022230  | 1593.185  | 1861.116  | NM_004959 | 825.132   |
| 696.668   | NM_002779  | 4471.046  | 4096.507  | AK022147  | 3636.712  | 5925.966  | AK026022  | 16613.418 |
| 1024.835  | L40397     | 10599.389 | 6471.998  | L25664    | 974.852   | 1264.261  | NM_003199 | 1834.579  |
| 1838.832  | NM_020198  | 4286.89   | 2031.313  | NM_002027 | 4205.353  | 1962.598  | NM_002938 | 4063.766  |
| 1664.169  | AA098879   | 536.405   | 588.784   | AL162078  | 1248.832  | 810.387   | AK023652  | 4396.291  |
| 1067.248  | NM_000025  | 8144.503  | 8715.356  | NM_013382 | 5154.521  | 4210.68   | AF099032  | 498.218   |
| 4777.114  | D38521     | 2855.252  | 2888.431  | AB002314  | 513.529   | 367.709   | NM_003070 | 4410.816  |
| 319.982   | NM_000403  | 2651.165  | 2654.363  | NM_014043 | 1577.124  | 1873.13   | AL122101  | 2498.914  |
| 446.121   | NM_018127  | 8272.053  | 7899.861  | NM_014622 | 460.866   | 477.423   | NM_004780 | 1586.281  |
| 10429.869 | AB020677   | 6914.66   | 3764.49   | AB011114  | 17529.068 | 14354.03  | NM_016216 | 1815.034  |
| 2398.239  | AB033097   | 1727.37   | 2112.087  | D11466    | 7546.409  | 5288.256  | AK001649  | 368.142   |
| 23531.102 | NM_000135  | 1465.126  | 1260.164  | NM_014056 | 7089.248  | 11301.588 | NM_016638 | 5099.597  |
| 7704.547  | AJ223948   | 4212.78   | 5600.093  | D31885    | 6234.937  | 8782.1    | AB018274  | 4416.146  |
| 1136.298  | NM_016218  | 713.655   | 1111.319  | NM_016649 | 1456.589  | 1109.522  | NM_005871 | 2735.732  |
| 1055.613  | AK022947   | 1772.15   | 1579.426  | D63477    | 290.882   | 839.192   | NM_007042 | 1371.882  |
| 5010.776  | AL050029   | 1884.443  | 1773.024  | NM_020243 | 9610.454  | 10388.967 | NM_016333 | 4829.982  |
| 16177.5   | AL049966   | 481.199   | 444.534   | NM_014051 | 1658.116  | 3704.425  | BE875028  | 1400.824  |
| 731.707   | NM_005204  | 2149.811  | 2190.596  | AK025398  | 5217.9    | 6920.244  | AK000511  | 2049.504  |
| 641.521   | NM_016203  | 817.041   | 885.124   | AB037750  | 1491.255  | 1153.452  | NM_005494 | 1603.79   |
| 43842.465 | NM_002759  | 4256.755  | 7409.57   | AK023056  | 666.657   | 577.767   | NM_004953 | 2225.993  |
| 545.29    | NM_007271  | 1913.389  | 2166.529  | NM_001120 | 13329.668 | 18477.283 | AL049682  | 596.523   |
| 1321.888  | NM_006255  | 2398.003  | 1778.491  | NM_017888 | 668.785   | 1347.416  | NM_005528 | 2473.223  |
| 697.467   | BE392143   | 3092.438  | 2003.576  | NM_003150 | 1300.656  | 639.842   | NM_007006 | 13967.553 |
| 392.848   | NM_005813  | 2207.913  | 1179.452  | NM_014784 | 1565.292  | 1352.697  | AL137346  | 1574.451  |
| 5660.125  | AB037718   | 4173.641  | 2484.382  | AK026383  | 1658.022  | 1016.998  | NM_017756 | 20640.592 |
| 546.892   | AL389994   | 954.333   | 858.54    | AB014594  | 1587.907  | 914.387   | NM_005793 | 3092.321  |
| 2874.691  | NM_003909  | 2572.02   | 1567.852  | M94547    | 653.181   | 618.326   | NM_004901 | 978.761   |
| 330.904   | NM_001277  | 5614.227  | 3998.091  | NM_005087 | 6657.822  | 3314.546  | U77088    | 716.428   |
| 493.625   | NM_003659  | 4015.117  | 3323.963  | NM_012098 | 874.002   | 670.505   | NM_006721 | 14727.149 |
| 11020.367 | AB029021   | 6342.949  | 8416.666  | NM_018095 | 736.343   | 1895.155  | NM_016282 | 1969.222  |
| 990.692   | NM_002101  | 19789.088 | 16507.971 | AB023164  | 1628.15   | 1233.186  | NM_002765 | 1848.859  |
| 3244.328  | NM_005423  | 436.335   | 480.672   | AK026680  | 3037.747  | 1962.844  | NM_001905 | 2272.71   |
| 908.505   | Z36789     | 1873.125  | 14533.127 | AK001299  | 9111.712  | 8981.436  | AF292100  | 2958.148  |
| 1491.947  | J02874     | 2560.155  | 4406.238  | AB014559  | 6550.466  | 7906.839  | NM_003434 | 18978.172 |
| 6083.657  | AA045192   | 1601.388  | 1574.546  | NM_016489 | 2844.205  | 2308.613  | NM_005654 | 855.792   |
| 2294.202  | M92642     | 913.136   | 2070.201  | NM_005033 | 1695.293  | 1930.058  | AF024698  | 55133.516 |
| 735.183   | H-U 44385  | 12868.117 | 11527.967 | NM_015932 | 43546.289 | 50659.008 | BE904617  | 9458.89   |
| 1378.154  | ID 1654970 | 6108.683  | 4371.063  | NM_017949 | 356.582   | 784.759   | AK024495  | 844.156   |
| 2142.701  | ID 2531132 | 4576.774  | 3748.59   | AK022169  | 711.526   | 1111.583  | AF091081  | 2268.12   |

|           |           |           |           |           |           |           |           |           |
|-----------|-----------|-----------|-----------|-----------|-----------|-----------|-----------|-----------|
| 378.632   | AA485665  | 378.554   | 399.967   | AF015592  | 750.019   | 1172.517  | AK001758  | 2572.054  |
| 2902.15   | BF125928  | 11351.101 | 8341.448  | AK026795  | 1291.221  | 1830.61   | U90842    | 448.322   |
| 1511.394  | BG571026  | 1466.097  | 1352.876  | NM_016399 | 1634.897  | 2576.439  | AF086325  | 1900.765  |
| 40357.477 | AA489017  | 3104.499  | 2826.28   | NM_016617 | 4508.965  | 5430.567  | NM_00492E | 515.552   |
| 1160.75   | NM_012245 | 12247.768 | 8731.976  | NM_00233E | 1152.667  | 567.191   | AF147401  | 1390.822  |
| 6027.774  | NM_133263 | 1617.81   | 1377.285  | AL117666  | 357.099   | 333.699   | AF075022  | 1558.656  |
| 722.034   | NM_003284 | 855.481   | 859.74    | Y17865    | 695.425   | 368.11    | AF075060  | 2638.201  |
| 898.77    | NM_018152 | 1014.266  | 816.231   | NM_005825 | 4429.268  | 3759.286  | AF147436  | 735.799   |
| 3704.57   | NM_000319 | 1287.121  | 1812.506  | NM_002756 | 1185.124  | 1193.169  | AK021441  | 588.83    |
| 887.964   | NM_003257 | 447.998   | 521.325   | U79299    | 282.419   | 177.242   | AK026018  | 718.621   |
| 1923.062  | NM_012461 | 2396.688  | 4301.026  | AJ000414  | 689.572   | 703.422   | AF085846  | 2325.131  |
| 4434.347  | AK001379  | 1167.67   | 1255.446  | AK025674  | 4725.54   | 3095.377  | AK023901  | 3211.056  |
| 804.327   | NM_002023 | 928.266   | 860.829   | AF007194  | 3401.799  | 2558.212  | AL109705  | 711.933   |
| 1065.162  | NM_002839 | 808.309   | 769.722   | NM_019069 | 1121.31   | 756.183   | AF088057  | 2149.907  |
| 12441.055 | AF190500  | 1290.767  | 2001.254  | NM_004761 | 1188.684  | 1858.103  | AF086255  | 8380.184  |
| 29194.967 | NM_001616 | 642.115   | 1255.756  | Z25424    | 633.326   | 499.513   | AK022660  | 605.209   |
| 721.949   | NM_005904 | 785.962   | 988.31    | U79458    | 3026.317  | 3488.887  | AF088051  | 1252.955  |
| 5859.624  | NM_005273 | 11670.355 | 14597.381 | NM_000676 | 2442.839  | 2575.639  | AF087993  | 1626.228  |
| 424.475   | NM_000524 | 602.923   | 710.906   | NM_004127 | 38841.539 | 38475.043 | AF035282  | 705.393   |
| 8078.369  | NM_006576 | 1109.623  | 1089.818  | NM_013324 | 3002.131  | 2898.083  | AK021966  | 3103.978  |
| 12100.419 | NM_018645 | 786.747   | 387.983   | AL133022  | 359.829   | 699.551   | AB018292  | 7723.627  |
| 3346.494  | AB035266  | 2552.509  | 2045.337  | NM_003953 | 667.236   | 712.268   | AF075032  | 235.064   |
| 492.78    | NM_003744 | 1842.887  | 1525.34   | NM_006301 | 525.868   | 777.02    | AF085971  | 1736.836  |
| 5692.779  | NM_00637E | 1362.729  | 1401.361  | AF222694  | 343.919   | 277.005   | AF147302  | 1431.991  |
| 828.787   | NM_018132 | 3437.057  | 4357.008  | AL049925  | 560.692   | 414.5     | AF085929  | 1602.764  |
| 941.161   | NM_018207 | 647.07    | 732.324   | NM_012219 | 1622.895  | 831.862   | AK001126  | 1666.365  |
| 7052.189  | NM_000345 | 4684.863  | 2537.212  | X72887    | 746.552   | 809.129   | AF085976  | 2891.134  |
| 3559.778  | NM_006531 | 1003.099  | 439.793   | NM_004529 | 338.255   | 377.654   | AF075104  | 4775.044  |
| 9981.546  | M74089    | 2463.731  | 2775.943  | NM_000127 | 547.664   | 322.865   | AL133025  | 647.276   |
| 778.55    | AF190864  | 4704.779  | 6157.598  | Y10483    | 3003.497  | 2442.941  | AL137402  | 9701.575  |
| 11952.031 | NM_002779 | 4436.136  | 6383.105  | NM_006784 | 698.138   | 452.595   | AL137617  | 1727.829  |
| 12265.982 | L40397    | 11922.966 | 14734.766 | NM_017876 | 1016.383  | 583.93    | AL137428  | 960.61    |
| 814.578   | NM_02019E | 4957.546  | 4627.436  | NM_001087 | 28073.285 | 19532.533 | AL157462  | 1284.177  |
| 2833.648  | AF070525  | 5939.547  | 6459.346  | NM_001826 | 202.752   | 339.939   | AL359602  | 3141.976  |
| 11349.927 | NM_002356 | 747.851   | 705.161   | NM_003721 | 4241.236  | 6368.21   | NM_01819C | 15195.77  |
| 1280.272  | NM_006691 | 1179.141  | 1528.71   | NM_004724 | 560.405   | 892.391   | AF086054  | 309.885   |
| 382.123   | NM_001505 | 473.055   | 835.853   | NM_000427 | 564.421   | 886.73    | AK026794  | 305.38    |
| 1586.159  | NM_00371C | 1129.146  | 1945.141  | NM_00250E | 1850.892  | 2773.869  | AK022461  | 739.759   |
| 1055.425  | Z83805    | 381.905   | 547.983   | NM_014343 | 1653.988  | 2505.541  | NM_01601C | 1535.433  |
| 2636.809  | NM_00466E | 1539.351  | 1367.646  | D25303    | 680.395   | 1225.705  | AF161442  | 489.69    |
| 3400.261  | NM_003614 | 901.907   | 1082.935  | AB043007  | 12686.943 | 6725.327  | AK023783  | 2013.636  |
| 1224.537  | NM_014257 | 2008.45   | 1943.743  | NM_004861 | 550.645   | 472.575   | AL358312  | 710.481   |
| 1065.667  | NM_001140 | 405.371   | 721.838   | AF022913  | 1462.81   | 847.417   | AF070647  | 10046.623 |
| 45093.16  | NM_004843 | 1817.193  | 3233.945  | NM_00002E | 598.453   | 635.414   | AF116649  | 737.72    |
| 6208.444  | AK022845  | 639.358   | 492.296   | NM_001382 | 3209.604  | 2080.118  | AF174394  | 3289.037  |
| 469.159   | NM_003004 | 348.804   | 312.395   | M93718    | 2060.107  | 877.362   | AK025384  | 780.957   |
| 1208.583  | S77835    | 375.033   | 451.57    | NM_005386 | 790.833   | 804.38    | AF083121  | 776.561   |
| 739.945   | NM_00298E | 6155.648  | 6151.89   | AK023807  | 2937.669  | 1688.592  | AF144054  | 410.872   |
| 559.879   | AB033073  | 3339.519  | 2416.951  | NM_01818E | 3918.463  | 3453.087  | AK025924  | 499.897   |
| 638.1     | NM_005813 | 2624.214  | 2174.714  | AK024273  | 811.009   | 911.87    | AK021876  | 5275.202  |
| 11162.705 | AB037718  | 4465.281  | 4753.941  | X59417    | 7883.094  | 10112.068 | AK022160  | 2220.661  |
| 4012.742  | AL389994  | 1182.026  | 1719.339  | NM_005659 | 24621.842 | 19706.609 | AK022295  | 615.921   |
| 811.21    | NM_003909 | 4359.142  | 7244.897  | D28476    | 3979.657  | 4755.844  | AK021935  | 1397.737  |

|           |           |           |           |           |           |           |            |           |
|-----------|-----------|-----------|-----------|-----------|-----------|-----------|------------|-----------|
| 922.846   | NM_001277 | 7410.992  | 10542.046 | NM_016263 | 1301.092  | 1129.319  | AK022187   | 3999.177  |
| 210.106   | NM_003659 | 4433.874  | 6723.014  | NM_003335 | 9204.477  | 10338.566 | AK022337   | 2652.781  |
| 752.332   | NM_007072 | 1589.538  | 2394.915  | AB002376  | 1563.543  | 1834.773  | AK026847   | 625.557   |
| 252.306   | NM_012320 | 4213.732  | 7020.063  | NM_018249 | 558.4     | 549.019   | AK026891   | 3431.517  |
| 1207.032  | NM_018208 | 2627.976  | 3039.974  | NM_005558 | 725.129   | 813.454   | AK025573   | 644.604   |
| 12835.801 | NM_015929 | 5646.221  | 5740.367  | NM_016631 | 623.248   | 755.929   | AL137562   | 1993.841  |
| 584.516   | U90653    | 3306.4    | 3650.622  | AB015617  | 9515.301  | 10272.103 | M90355     | 53506.883 |
| 428.764   | NM_000196 | 411.689   | 658.661   | AK022730  | 877.953   | 994.289   | AK022495   | 1522.807  |
| 39006.16  | NM_018339 | 1759.987  | 2822.423  | AF064839  | 11385.547 | 12877.834 | AK021632   | 534.823   |
| 286.56    | NM_006745 | 21895.672 | 15700.241 | NM_005439 | 2666.45   | 5061.02   | AK026373   | 8481.898  |
| 48611.102 | NM_000275 | 624.608   | 791.478   | AB037810  | 433.969   | 580.298   | AK021581   | 787.508   |
| 22164.807 | AK000037  | 773.599   | 931.805   | NM_006593 | 398.276   | 229.063   | unknown (S | 698.186   |
| 1576.622  | NM_014760 | 2321.072  | 2298.119  | NM_000376 | 2541.347  | 1481.415  | AK021744   | 939.318   |
| 12353.871 | NM_018398 | 1001.773  | 1111.914  | NM_000475 | 1473.492  | 1345.244  | NM_018430  | 2439.049  |
| 1637.903  | NM_002560 | 11703.379 | 8773.076  | M61872    | 6981.003  | 3599.33   | AL110200   | 961.47    |
| 334.38    | NM_014404 | 1186.953  | 1129.029  | AK027089  | 1017.877  | 303.557   | AL133640   | 1480.535  |
| 1015.795  | NM_018713 | 510.21    | 358.809   | NM_006284 | 2885.957  | 3383.979  | AJ012502   | 6360.982  |
| 939.97    | NM_015947 | 4118.879  | 2971.988  | U18909    | 676.693   | 582.935   | AK021722   | 1609.319  |
| 597.921   | NM_002042 | 8608.838  | 4729.196  | NM_003489 | 1165.621  | 951.442   | NM_000681  | 1072.334  |
| 879.058   | AB028944  | 644.884   | 375.17    | NM_016589 | 4500.155  | 5020.994  | AF147445   | 1383.193  |
| 834.466   | AJ006268  | 704.569   | 639.548   | NM_003597 | 794.972   | 285.083   | Y10508     | 13744.909 |
| 1333.485  | NM_012245 | 14480.192 | 15783.135 | NM_002568 | 19467.021 | 12473.709 | NM_005182  | 39281.426 |
| 1591.656  | NM_133263 | 1674.951  | 2266.343  | NM_006561 | 1688.744  | 1657.333  | D17074     | 856.948   |
| 366.366   | NM_000025 | 9613.105  | 12124.433 | NM_017521 | 400.472   | 353.544   | AF039944   | 8657.625  |
| 1140.334  | D38521    | 3447.901  | 3521.777  | AK025200  | 3641.246  | 2171.201  | AJ276252   | 437.508   |
| 3096.842  | NM_000403 | 3320.183  | 4272.871  | NM_001383 | 2356.336  | 2054.47   | AK021716   | 7150.739  |
| 1055.417  | NM_018127 | 9296.547  | 15908.76  | NM_001029 | 36206.141 | 42408.723 | AK025035   | 7503.372  |
| 6133.131  | AB020677  | 7322.812  | 6087.116  | NM_005008 | 10293.455 | 10423.373 | AK002085   | 2950.181  |
| 449.64    | AB033097  | 1727.799  | 2307.43   | NM_016304 | 14147.903 | 14840.588 | AL133618   | 3470.825  |
| 817.112   | NM_000135 | 1632.708  | 1326.242  | NM_006013 | 18654.172 | 4897.404  | AF230314   | 906.032   |
| 687.787   | AJ223948  | 3106.636  | 4047.534  | NM_014046 | 4862.286  | 4481.449  | AK001086   | 1448.861  |
| 1926.062  | NM_016218 | 960.18    | 1272.627  | L34071    | 2675.31   | 1723.684  | AJ131610   | 4463.878  |
| 871.065   | AK022947  | 2075.29   | 1724.289  | AK025201  | 3354.736  | 1658.101  | S50207     | 1031.082  |
| 878.43    | AL050029  | 2325.938  | 1848.202  | AK022995  | 1191.831  | 868.241   | AF119872   | 6351.589  |
| 1189.055  | AL049966  | 323.291   | 306.765   | NM_006066 | 3862.577  | 3815.569  | X99687     | 1168.359  |
| 1542.456  | NM_005204 | 2541.947  | 1961.78   | NM_005165 | 655.906   | 222.491   | AK023255   | 14991.754 |
| 1064.073  | NM_016203 | 1027.559  | 880.419   | NM_005138 | 9935.015  | 7651.32   | NM_002622  | 15470.565 |
| 9522.852  | NM_002759 | 4204.837  | 5175.801  | NM_002115 | 13988.697 | 14971.678 | AK024185   | 1175.137  |
| 696.41    | NM_007271 | 1975.342  | 1982.602  | AK023162  | 991.686   | 1414.334  | NM_015417  | 176.075   |
| 754.32    | NM_006255 | 1946.379  | 1233.766  | NM_006396 | 1382.443  | 1654.612  | AK026101   | 3018.824  |
| 684.848   | BE392143  | 3018.402  | 2034.857  | NM_013449 | 1836.064  | 2198.234  | AK022194   | 12279.638 |
| 4413.415  | NM_018132 | 3660.775  | 5760.367  | NM_004537 | 567.119   | 536.51    | AF085963   | 1658.296  |
| 1057.673  | NM_018207 | 536.99    | 1262.051  | NM_020226 | 718.969   | 988.579   | AK021436   | 1280.403  |
| 1579.975  | NM_006531 | 1342.917  | 1645.716  | NM_017865 | 1449.112  | 2768.29   | U58664     | 1043.114  |
| 2864.461  | AB029021  | 9602.891  | 14554.936 | NM_003427 | 1222.163  | 1584.648  | AF085937   | 548.908   |
| 406.837   | NM_002101 | 23292.1   | 25335.537 | NM_005920 | 2054.194  | 2211.025  | AL137569   | 2542.042  |
| 416.716   | NM_005423 | 881.001   | 1153.348  | Y09321    | 455.893   | 434.75    | AK021920   | 4859.391  |
| 9215.744  | Z36789    | 1371.035  | 10144.607 | AK001499  | 1562.816  | 421.073   | AL049415   | 1250.492  |
| 961.413   | JO2874    | 2847.411  | 5222.69   | AK023568  | 507.056   | 362.844   | AK022375   | 731.43    |
| 625.017   | BF310427  | 2219.138  | 3153.245  | AK026852  | 925.823   | 672.607   | NM_003378  | 35908.168 |
| 1708.043  | N94424    | 579.947   | 674.364   | AK021629  | 507.495   | 427.779   | AL110194   | 6619.59   |
| 803.101   | AA045192  | 1734.797  | 2215.783  | AL110257  | 16357.374 | 14559.087 | AF138860   | 1070.285  |
| 572.426   | H45617    | 863.867   | 833.389   | AB013384  | 982.769   | 1184.01   | NM_006687  | 1066.353  |



|           |            |           |           |           |           |           |           |           |
|-----------|------------|-----------|-----------|-----------|-----------|-----------|-----------|-----------|
| 1520.118  | M92642     | 986.981   | 1875.916  | AK024824  | 643.432   | 443.758   | NM_013301 | 983.144   |
| 461.844   | H-U 44385  | 12856.276 | 7360.54   | AK024270  | 967.178   | 1016.443  | NM_017673 | 802.116   |
| 5646.872  | ID 1654970 | 5598.972  | 2821.205  | AK025569  | 1995.838  | 2100.504  | AB046857  | 738.752   |
| 6016.062  | ID 2531132 | 4082.372  | 2659.984  | AK023060  | 884.719   | 905.751   | AK024408  | 8032.418  |
| 1460.343  | BF125928   | 12110.568 | 9012.105  | NM_014870 | 488.235   | 685.404   | AF086307  | 6275.597  |
| 14648.626 | BG571026   | 1328.632  | 956.941   | AK021917  | 684.982   | 811.846   | L19364    | 1059.673  |
| 228.228   | AA489017   | 3414.27   | 2568.935  | AF052146  | 29843.58  | 22910.783 | NM_005390 | 1424.087  |
| 3858.484  | AK022845   | 1017.398  | 905.25    | NM_004870 | 1699.8    | 2213.539  | CY3Cy5    | 7112.735  |
| 503.952   | NM_003004  | 677.643   | 631.774   | AF143872  | 11555.606 | 16650.881 | AA676470  | 700.66    |
| 1343.597  | S77835     | 367.138   | 471.228   | AF143326  | 1586.098  | 2008.422  | AA457155  | 446.735   |
| 1105.385  | NM_002985  | 6257.462  | 8847.732  | AL049229  | 1934.189  | 2871.18   | U78045    | 630.636   |
| 1491.973  | AB018347   | 3121.978  | 3952.867  | NM_018306 | 35685.25  | 33632.594 | AA878561  | 57937.781 |
| 341.761   | AB033073   | 3931.19   | 5734.745  | AK026146  | 2598.732  | 4121.314  | BF688309  | 420.641   |
| 2185.09   | NM_003284  | 1467.747  | 2373.352  | AK023152  | 1906.032  | 2737.696  | AI538525  | 1597.383  |
| 772.031   | NM_018152  | 1306.496  | 1083.943  | AK000155  | 1460.255  | 2485.564  | NM_000941 | 859.242   |
| 447.825   | NM_000319  | 1799.784  | 1838.137  | AL389937  | 3490.714  | 4554.089  | SR5       | 2883.379  |
| 3687.217  | NM_012461  | 2702.14   | 4941.989  | AK022628  | 20036.65  | 12158.293 | SR7       | 3329.648  |
| 1123.772  | AK001379   | 1115.905  | 1454.784  | AK021737  | 2594.821  | 1796.489  | SR9       | 10222.884 |
| 31364.326 | NM_017450  | 2247.331  | 1874.34   | AL357454  | 695.705   | 683.266   | CY3Cy5    | 2428.395  |
| 1794.438  | NM_002023  | 598.357   | 1069.546  | AK026295  | 3587.671  | 1973.472  | U62858    | 659.789   |
| 4032.499  | NM_002839  | 644.107   | 680.224   | AK022346  | 435.279   | 341.711   | NM_005954 | 421.9     |
| 2249.174  | AF190500   | 1050.755  | 1199.839  | AK025007  | 1129.236  | 722.235   | NM_001321 | 1651.87   |
| 862.561   | NM_001616  | 738.302   | 734.685   | NM_016486 | 4442.068  | 4132.212  | AB018264  | 2049.987  |
| 2801.589  | NM_005904  | 1034.446  | 938.324   | AK026490  | 13152.253 | 10873.199 | U92544    | 1552.967  |
| 1106.505  | NM_000524  | 776.728   | 1165.545  | AJ227861  | 1368.962  | 1355.12   | NM_006791 | 2260.159  |
| 606.846   | NM_006576  | 1115.391  | 1106.704  | AJ001020  | 628.638   | 759.96    | AJ278348  | 3992.634  |
| 1144.609  | NM_018645  | 983.214   | 229.058   | AJ001875  | 2234.438  | 1635.894  | AI285199  | 1002.184  |
| 9642.817  | AB035266   | 2581.876  | 3751.478  | X64985    | 654.146   | 648.209   | AK023106  | 377.416   |
| 2512.105  | NM_003744  | 2201.427  | 1444.622  | L13433    | 1852.053  | 2393.263  | NM_016730 | 2480.536  |
| 470.499   | NM_006378  | 1279.88   | 826.474   | NM_017777 | 1025.276  | 1464.024  | NM_004408 | 424.779   |
| 41793.125 | NM_014404  | 1454.384  | 1439.042  | AK021989  | 450.306   | 278.494   | NM_002532 | 554.5     |
| 401.808   | NM_018713  | 873.831   | 931.445   | AK023407  | 527.322   | 369.59    | BE878426  | 5841.73   |
| 1858.618  | NM_015947  | 4179.417  | 5191.301  | AK022298  | 1096.354  | 1283.022  | NM_001745 | 2267.736  |
| 986.835   | NM_002042  | 13322.324 | 12087.104 | AJ277441  | 19368.457 | 18408.5   | NM_003825 | 2475.196  |
| 1328.083  | AB028944   | 792.022   | 643.198   | NM_006057 | 934.46    | 1225.892  | AK025006  | 10343.373 |
| 1021.09   | AJ006268   | 928.878   | 1282.336  | AK024242  | 3683.396  | 4650.253  | AF218014  | 2963.775  |
| 1599.831  | M74089     | 2945.19   | 3509.274  | AK024559  | 432.401   | 560.007   | NM_006678 | 1661.234  |
| 1773.554  | AF190864   | 5522.993  | 8309.761  | AK024851  | 582.141   | 602.834   | AY007729  | 11173.416 |
| 438.541   | NM_002779  | 4617.201  | 7253.152  | AK024943  | 907.912   | 1403.868  | AF159092  | 690.699   |
| 1185.832  | L40397     | 14452.853 | 24547.973 | AK024995  | 571.915   | 1350.385  | BC007318  | 1259.505  |
| 233.449   | NM_020198  | 5235.866  | 4655.268  | AL359943  | 19248.969 | 17824.789 | M36693    | 888.81    |
| 648.614   | AA098879   | 818.576   | 562.3     | NM_000534 | 3008.533  | 1691.298  | NM_016292 | 5071.505  |
| 1637.02   | AF070525   | 5912.47   | 5900.424  | L10140    | 739.331   | 594.313   | NM_002601 | 1546.312  |
| 4689.862  | NM_001177  | 5117.558  | 2700.389  | AL133447  | 834.773   | 631.641   | NM_005898 | 2749.545  |
| 2326.794  | NM_014447  | 1382.712  | 1939.877  | AB037853  | 17179.932 | 17476.959 | NM_002889 | 3238.612  |
| 1203.441  | NM_002356  | 623.111   | 433.73    | AK056222  | 1281.233  | 978.625   | AF078866  | 480.665   |
| 3717.617  | NM_006691  | 1166.511  | 1445.648  | AK002028  | 5802.483  | 11066.044 | NM_001360 | 860.307   |
| 920.451   | NM_001505  | 676.024   | 949.127   | AL050127  | 1725.718  | 1784.915  | AJ276207  | 1360.081  |
| 423.377   | Z83805     | 980.219   | 1181.303  | AK024805  | 6818.265  | 11250.915 | AB011131  | 5800.436  |
| 4811.037  | NM_004666  | 1544.555  | 1664.909  | AK024090  | 16547.756 | 9830.558  | NM_000751 | 2812.553  |
| 399.524   | NM_003614  | 1102.224  | 1164.891  | AL133574  | 1177.631  | 920.117   | NM_014849 | 1475.064  |
| 2090.675  | NM_014257  | 1810.672  | 1627.625  | AK021936  | 656.541   | 390.595   | NM_001042 | 3385.711  |
| 581.867   | NM_001140  | 594.204   | 867.262   | AF147339  | 26617.209 | 22814.119 | NM_012229 | 3215.435  |

|           |           |           |           |           |           |           |           |           |
|-----------|-----------|-----------|-----------|-----------|-----------|-----------|-----------|-----------|
| 485.642   | NM_004843 | 1948.892  | 3374.147  | AL390181  | 10995.521 | 10826.958 | AB023147  | 7990.283  |
| 47114.219 | NM_005204 | 2553.791  | 2800.574  | NM_017914 | 11830.419 | 11207.915 | NM_016615 | 6299.555  |
| 8454.345  | NM_016203 | 796.268   | 1155.953  | AK024953  | 3069.967  | 13084.029 | NM_005630 | 1325.178  |
| 4627.156  | NM_002759 | 4799.76   | 10349.031 | S83374    | 1948.644  | 1877.598  | NM_012201 | 477.792   |
| 1749.99   | NM_007271 | 2166.999  | 3055.498  | AK025784  | 8552.185  | 11520.533 | AB046774  | 218.293   |
| 14717.715 | NM_006255 | 2914.023  | 3018.16   | U07199    | 1421.625  | 1372.428  | AK022385  | 2354.277  |
| 13490.022 | BE392143  | 3941.717  | 3612.374  | AK023713  | 708.059   | 734.095   | NM_013295 | 258.618   |
| 2543.037  | NM_005813 | 2688.523  | 2050.257  | X81445    | 598.44    | 1100.759  | NM_007267 | 428.579   |
| 1365.578  | AB037718  | 5081.097  | 5193.724  | U95091    | 706.52    | 429.371   | NM_005865 | 670.686   |
| 613.005   | AL389994  | 1122.569  | 1302.724  | NM_017900 | 15280.383 | 19138.186 | NM_006413 | 1593.873  |
| 2178.626  | NM_003909 | 4244.442  | 5575.852  | S50182    | 1116.293  | 1816.288  | AK025542  | 1129.324  |
| 2002.374  | NM_001277 | 7794.753  | 8857.644  | AL360145  | 1048.171  | 1541.786  | NM_002765 | 2356      |
| 2795.831  | NM_003659 | 4927.929  | 5851.743  | Y12016    | 523.203   | 436.794   | NM_003691 | 1346.947  |
| 714.839   | NM_007072 | 2063.376  | 3689.646  | NM_001178 | 404.602   | 218.876   | NM_002950 | 11690.044 |
| 1384.591  | NM_012320 | 4528.352  | 8148.936  | AK023696  | 2679.188  | 1809.796  | NM_002315 | 1041.742  |
| 3047.754  | NM_018205 | 2715.486  | 3028.301  | NM_000704 | 864.997   | 772.687   | NM_003134 | 38425.746 |
| 6082.435  | NM_015929 | 5740.899  | 5442.235  | NM_015987 | 495.921   | 443.459   | NM_004314 | 1371.512  |
| 3794.89   | U90653    | 3668.296  | 3324.413  | NM_019605 | 853.48    | 841.608   | NM_018247 | 4697.508  |
| 1668.485  | NM_000196 | 402.307   | 702.321   | Z49090    | 2837.503  | 2062.476  | NM_006791 | 806.292   |
| 4756.927  | NM_018339 | 2265.138  | 2791.904  | AK021592  | 3503.579  | 3858.78   | AJ278348  | 1760.193  |
| 110.301   | NM_006745 | 21767.15  | 13448.807 | AK025467  | 2412.902  | 2334.078  | BI906283  | 7396.846  |
| 371.819   | NM_000275 | 819.468   | 675.734   | AK026593  | 2132.623  | 4791.471  | AA676470  | 1456.51   |
| 576.826   | AK000037  | 947.841   | 647.321   | L37700    | 888.071   | 1145.037  | AA457155  | 6139.49   |
| 376.829   | NM_014760 | 2307.453  | 2314.415  | NM_017665 | 1857.568  | 3833.95   | BM014365  | 384.814   |
| 9435.048  | NM_018395 | 1098.729  | 945.23    | AK024819  | 459.022   | 910.667   | U78045    | 1062.408  |
| 1121.838  | NM_002560 | 11323.855 | 8578.962  | AF052106  | 2416.475  | 2186.728  | AA878561  | 59314.645 |
| 1306.521  | NM_000787 | 772.529   | 1131.578  | AK000441  | 314.694   | 816.781   | BF688309  | 408.355   |
| 1401.45   | U57962    | 4639.214  | 8128.714  | AK022391  | 1638.994  | 2242.767  | AI538525  | 1235.431  |
| 1276.368  | NM_016176 | 9369.245  | 15520.025 | CY3Cy5    | 1270.739  | 102.988   | NM_000941 | 944.885   |
| 617.866   | NM_005574 | 23137.846 | 24234.055 | R72122    | 907.997   | 1115.501  | AF222980  | 1560.708  |
| 2825.003  | NM_017895 | 7813.052  | 8290.816  | Z35309    | 614.441   | 832.272   | BC007318  | 441.361   |
| 2817.875  | NM_004610 | 2056.823  | 1954.013  | AA700005  | 746.887   | 3231.75   | M36693    | 213.841   |
| 1394.192  | NM_001612 | 2035.211  | 3390.84   | AA292025  | 662.154   | 1194.984  | NM_016292 | 1412.808  |
| 2850.736  | AK027002  | 1513.9    | 1399.085  | AA437226  | 360.162   | 1009.063  | NM_002601 | 371.849   |
| 1133.246  | AB025254  | 5270.439  | 4185.249  | R36143    | 590.091   | 898.316   | NM_014432 | 424.62    |
| 13501.169 | NM_004081 | 1665.631  | 1870.671  | XM_056359 | 388.948   | 556.937   | NM_001555 | 365.604   |
| 1558.422  | NM_000025 | 9109.077  | 11393.334 | D10353/NM | 1932.198  | 2179.025  | NM_006953 | 826.351   |
| 401.752   | D38521    | 3660.936  | 3221.272  | M15042    | 1430.527  | 1142.937  | U96173    | 1728.577  |
| 468.54    | NM_000403 | 3414.731  | 3814.494  | AK056843  | 1445.491  | 1260.028  | NM_018941 | 515.965   |
| 497.235   | NM_018127 | 9718.435  | 9212.074  | U49928    | 4661.81   | 4707.288  | NM_005954 | 541.091   |
| 491.031   | AB020677  | 7484.044  | 4459.531  | AK096645  | 7005.936  | 9977.086  | NM_001321 | 1446.065  |
| 1178.838  | AB033097  | 2012.281  | 1963.666  | NM_019884 | 1935.753  | 1874.975  | AB018264  | 1893.19   |
| 188.801   | NM_000135 | 1736.738  | 1096.261  | SR2       | 49704.664 | 45193.328 | NM_006911 | 507.041   |
| 1217.172  | AJ223948  | 3288.966  | 2636.478  | SR4       | 9127.876  | 8962.38   | NM_012229 | 1524.898  |
| 670.822   | NM_016215 | 897.681   | 865.029   | SR6       | 1486.578  | 1299.033  | AB023147  | 3704.754  |
| 6062.583  | AK022947  | 2123.743  | 1356.703  | SR8       | 4915.638  | 15444.648 | NM_016615 | 1227.197  |
| 322.424   | AL050029  | 2039.785  | 1215.572  | SR10      | 18781.623 | 5937.21   | NM_005630 | 528.202   |
| 8677.947  | NM_004063 | 678.779   | 1497.276  | CY3Cy5    | 2000.355  | 233.314   | NM_016730 | 1771.267  |
| 549.995   | AB040976  | 4125.737  | 2798.084  | NM_005291 | 7578.585  | 5596.481  | AL035297  | 497.973   |
| 550.453   | NM_018641 | 4562.996  | 2278.818  | NM_006794 | 790.176   | 504.181   | NM_004405 | 639.336   |
| 1215.18   | U49089    | 407.278   | 114.456   | NM_018653 | 2324.191  | 1187.212  | AJ131244  | 626.113   |
| 55116.637 | NM_002221 | 1941.167  | 2429.94   | NM_005385 | 2297.469  | 2853.029  | NM_002532 | 2086.932  |
| 574.379   | NM_002371 | 685.806   | 921.722   | NM_007232 | 12613.539 | 13068.037 | NM_012385 | 1160.603  |

|           |           |           |           |           |           |           |           |           |
|-----------|-----------|-----------|-----------|-----------|-----------|-----------|-----------|-----------|
| 1447.289  | NM_002562 | 478.691   | 562.119   | NM_003027 | 548.86    | 467.763   | NM_019843 | 1752.988  |
| 1320.011  | AK024502  | 5677.184  | 8267.901  | NM_002717 | 2075.365  | 1920.188  | NM_016192 | 1929.374  |
| 2216.285  | NM_001124 | 1513.623  | 657.746   | NM_003025 | 4541.552  | 4434.795  | BE878426  | 54519.348 |
| 998.442   | NM_004586 | 2299.315  | 3457.439  | U52051    | 424.263   | 214.419   | NM_001745 | 4664.56   |
| 547.304   | NM_004844 | 6101.929  | 15593.05  | NM_020179 | 2115.616  | 2695.045  | NM_003825 | 3348.143  |
| 2298.614  | NM_013447 | 2111.858  | 5310.858  | NM_004306 | 23092.863 | 21341.318 | AK025006  | 10126.704 |
| 274.871   | NM_000051 | 2491.448  | 3843.921  | NM_006786 | 1040.58   | 504.877   | AF218014  | 3286.41   |
| 756.641   | NM_005709 | 338.653   | 597.5     | NM_006205 | 840.483   | 815.879   | NM_006678 | 2056.646  |
| 4864.43   | NM_004180 | 5009.497  | 4756.088  | NM_004034 | 2730.958  | 2367.066  | AY007729  | 15932.277 |
| 1067.612  | NM_004786 | 31194.916 | 36880.895 | NM_000130 | 1964.692  | 1749.369  | NM_003134 | 17057.781 |
| 1296.961  | AF302109  | 4024.895  | 4238.528  | AF193756  | 488.573   | 382.274   | NM_004314 | 1005.551  |
| 735.899   | AL117485  | 6235.097  | 5105.172  | NM_004183 | 123.908   | 1042.429  | NM_018247 | 1234.011  |
| 703.547   | NM_003505 | 450.457   | 500.106   | AI492087  | 12714.339 | 9645.443  | NM_017979 | 523.265   |
| 987.356   | NM_007191 | 1122.304  | 904.04    | NM_004193 | 1062.494  | 849.829   | NM_005898 | 1332.535  |
| 1603.165  | AL109667  | 826.157   | 834.317   | NM_002803 | 4388.31   | 5157.852  | NM_002889 | 2246.327  |
| 718.201   | NM_000840 | 1014.438  | 546.574   | NM_005508 | 841.067   | 900.15    | BF311880  | 969.409   |
| 606.571   | AF205437  | 1110.576  | 4614.008  | NM_016568 | 499.22    | 394.793   | NM_000078 | 191.873   |
| 600.156   | AF034102  | 7453.679  | 10631.795 | AB033102  | 5537.369  | 3749.544  | NM_001360 | 5424.104  |
| 1204.336  | AJ008142  | 8047.29   | 8911.634  | NM_014774 | 2310.22   | 2519.91   | AK026656  | 2009.147  |
| 492.518   | NM_001343 | 3915.894  | 7280.816  | NM_014143 | 2998.944  | 2533.665  | AJ276207  | 3095.873  |
| 3063.39   | NM_007275 | 8919.883  | 10702.327 | M55646    | 9222.827  | 8089.407  | AB011131  | 6639.284  |
| 3471.049  | NM_019025 | 12395.835 | 18868.742 | NM_006112 | 15893.084 | 14931.247 | NM_000749 | 1136.801  |
| 6371.649  | NM_018461 | 3986.889  | 3842.859  | M12807    | 1049.95   | 934.195   | NM_000751 | 3070.061  |
| 2392.344  | AF235023  | 2424.222  | 2186.408  | NM_001765 | 1341.077  | 1705.011  | NM_014849 | 1282.23   |
| 314.742   | NM_006910 | 3738.443  | 3342.197  | NM_003361 | 1670.87   | 1402.567  | NM_001042 | 3505.501  |
| 18593.98  | AF162667  | 2777.514  | 3278.229  | NM_012099 | 7669.691  | 11292.467 | NM_000623 | 107.382   |
| 196.988   | AB046847  | 2719.506  | 2297.584  | NM_018684 | 5764.869  | 6493.986  | NM_000941 | 469.98    |
| 733.066   | NM_000447 | 2552.387  | 2119.488  | NM_017983 | 705.448   | 373.149   | AF222980  | 338.778   |
| 325.499   | NM_006354 | 8027.399  | 6837.011  | AF116909  | 836.037   | 865.958   | AK026758  | 347.318   |
| 1147.274  | AF303378  | 5604.573  | 4038.225  | BE906724  | 1137.208  | 564.647   | NM_012201 | 207.894   |
| 1177.247  | NM_016037 | 6150.713  | 5967.133  | NM_002283 | 3390.145  | 2597.728  | AK022385  | 5172.537  |
| 278.785   | NM_000043 | 600.728   | 712.453   | AJ276095  | 8331.708  | 8230.763  | NM_002775 | 889.864   |
| 1610.894  | NM_016140 | 471.368   | 805.578   | NM_004819 | 2140.369  | 1644.457  | AK024584  | 2084.851  |
| 1840.904  | NM_015965 | 326.455   | 272.643   | NM_007184 | 1730.6    | 2537.099  | NM_003504 | 3889.989  |
| 52176.453 | NM_000417 | 2520.14   | 2340.638  | AF231916  | 1688.859  | 1127.921  | NM_013298 | 2373.377  |
| 5259.16   | NM_020356 | 1135.663  | 900.082   | NM_003501 | 2020.953  | 1860.457  | NM_007267 | 1230.132  |
| 477.992   | Y11709    | 26.983    | 5601.258  | AK022654  | 23294.414 | 18501.773 | Z36816    | 815.485   |
| 167.337   | NM_018235 | 23343.143 | 25963.785 | BC002905  | 3030.117  | 2503.61   | NM_005865 | 2279.645  |
| 670.771   | NM_002424 | 346.83    | 604.257   | NM_018091 | 4462.582  | 3565.944  | NM_006413 | 5952.137  |
| 563.598   | NM_012104 | 7335.404  | 9050.591  | NM_001108 | 2430.332  | 7387.156  | AK025542  | 1083.301  |
| 2090.878  | NM_006144 | 911.92    | 903.617   | NM_001637 | 444.704   | 437.104   | AF207547  | 487.053   |
| 456.376   | AL136549  | 1370.216  | 1499.864  | NM_016630 | 6518.286  | 7732.184  | NM_002768 | 2469.196  |
| 18383.164 | NM_012168 | 1257.995  | 902.596   | NM_014291 | 2979.016  | 2857.74   | NM_003691 | 1359.229  |
| 2140.111  | NM_007038 | 2003.64   | 2476.432  | NM_014631 | 792.589   | 862.964   | NM_002950 | 13776.235 |
| 1854.436  | AF311324  | 2180.161  | 1125.27   | NM_001089 | 3233.707  | 2884.809  | NM_002318 | 1204.777  |
| 2430.55   | AF124433  | 1178.228  | 1089.153  | NM_000120 | 3130.576  | 2966.193  | NM_001321 | 500.715   |
| 1911.334  | AK001647  | 528.618   | 330.588   | AF172327  | 10110.962 | 10445.936 | AB018264  | 839.958   |
| 15216.542 | NM_001461 | 982.012   | 819.279   | NM_001676 | 1923.126  | 2489.085  | U92544    | 648.599   |
| 784.342   | AF061556  | 782.179   | 783.771   | NM_001679 | 7457.77   | 7858.643  | NM_006791 | 579.151   |
| 5359.379  | AL162049  | 1811.257  | 1076.701  | NM_004983 | 684.355   | 781.497   | AJ278348  | 1806.545  |
| 3344.604  | AF036144  | 437.795   | 315.821   | NM_006860 | 3266.639  | 2823.943  | AI285199  | 277.46    |
| 3410.131  | NM_005032 | 764.261   | 660.266   | NM_004794 | 8175.005  | 4154.164  | L07738    | 776.576   |
| 6206.717  | NM_004160 | 5138.394  | 3722.975  | NM_004283 | 1046.462  | 854.814   | H90415    | 924.628   |

|           |           |           |           |           |           |           |           |           |
|-----------|-----------|-----------|-----------|-----------|-----------|-----------|-----------|-----------|
| 932.28    | AL109677  | 1193.766  | 895.741   | NM_004163 | 15635.86  | 16884.188 | AA676470  | 6691.799  |
| 605.227   | NM_003941 | 26115.869 | 22300.896 | AK026308  | 1142.253  | 1214.51   | AA457155  | 5463.496  |
| 259.729   | AF177909  | 1379.444  | 986.905   | NM_013337 | 1026.131  | 1151.091  | BM014365  | 475.054   |
| 1865.858  | NM_002664 | 7279.094  | 4185.252  | NM_006899 | 1587.534  | 1803.933  | BF688309  | 678.305   |
| 1469.126  | AB018271  | 3201.013  | 4514.875  | NM_012200 | 1105.432  | 1151.546  | AI538525  | 1784.202  |
| 404.395   | AL137665  | 2705.314  | 2369.028  | NM_001724 | 767.473   | 1524.588  | NM_003825 | 1765.051  |
| 12688.903 | NM_016434 | 1181.251  | 775.643   | NM_000150 | 849.323   | 646.663   | AK025006  | 4357.162  |
| 910.173   | U36561    | 51510.293 | 65123.055 | AB023152  | 411.699   | 764.933   | AF218014  | 1182.268  |
| 588.164   | NM_005634 | 2723.118  | 1468.941  | NM_006212 | 788.541   | 490.778   | NM_006678 | 495.412   |
| 1531.109  | NM_017757 | 4102.655  | 4323.688  | AK022872  | 2366.194  | 1611.847  | AY007729  | 3406.718  |
| 525.175   | NM_002146 | 10589.005 | 8330.841  | AK024272  | 3079.497  | 4623.303  | BC007318  | 468.709   |
| 653.129   | AB007892  | 2009.764  | 2119.312  | NM_016381 | 1037.692  | 1514.343  | M36693    | 234.172   |
| 2933.752  | AB037748  | 1545.192  | 2114.682  | NM_018042 | 4104.521  | 1770.853  | NM_016292 | 2248.418  |
| 3035.406  | AB002306  | 2422.34   | 1693.19   | BE741525  | 590.504   | 582.309   | NM_002601 | 1129.405  |
| 5743.684  | NM_001300 | 1821.78   | 5352.313  | BF030555  | 21945.336 | 19695.857 | U62858    | 2260.811  |
| 614.774   | NM_012472 | 1082.78   | 1262.625  | NM_012433 | 4726.105  | 2820.647  | NM_000877 | 381.784   |
| 35704.809 | NM_018187 | 8236.01   | 6240.279  | NM_002576 | 657.986   | 839.401   | NM_014432 | 794.118   |
| 1231.406  | NM_003016 | 21398.756 | 9683.77   | NM_003582 | 1481.654  | 2663.162  | NM_001558 | 550.978   |
| 458.291   | NM_005463 | 10808.331 | 7166.173  | AF169351  | 8255.157  | 11807.794 | NM_006953 | 705.044   |
| 27732.914 | NM_001325 | 2830.228  | 2227.847  | M14200    | 55171.184 | 62845.203 | U96173    | 1366.689  |
| 2834.646  | NM_018282 | 16053.65  | 8013.648  | NM_000282 | 2730.943  | 2654.953  | NM_018941 | 777.847   |
| 704.585   | BC019932  | 3027.269  | 1656.147  | NM_000532 | 7916.256  | 7125.005  | NM_000751 | 1433.946  |
| 505.8     | AF114818  | 2831.894  | 1804.653  | NM_016341 | 841.466   | 981.952   | NM_014849 | 949.355   |
| 1203.131  | AK025106  | 2643.124  | 2324.291  | NM_004034 | 1889.423  | 1660.746  | NM_001042 | 3702.025  |
| 1998.426  | NM_020144 | 3415.495  | 2212.537  | NM_000130 | 1411.711  | 1274.415  | NM_012229 | 1368.599  |
| 4636.261  | NM_003908 | 50590.352 | 30979.904 | AI492087  | 13598.408 | 7383.4    | NM_005071 | 1397.784  |
| 3077.593  | BE893142  | 1863.332  | 1450.553  | R72122    | 1434.094  | 1404.585  | AB023147  | 3256.161  |
| 3402.657  | NM_003103 | 6056.33   | 5117.505  | Z35309    | 1338.975  | 1061.636  | NM_016615 | 1889.021  |
| 1558.646  | NM_015340 | 5644.083  | 4395.303  | AA700005  | 1645.958  | 10272.836 | NM_005630 | 728.818   |
| 615.842   | NM_002937 | 509.608   | 366.759   | AA292025  | 637.898   | 1984.749  | AK023106  | 708.864   |
| 516.787   | NM_003191 | 3045.949  | 1479.972  | AA437226  | 445.592   | 1345.165  | NM_016730 | 17101.68  |
| 725.48    | AL137476  | 4813.44   | 5525.324  | R36143    | 539.174   | 540.46    | AL035297  | 975.515   |
| 2016.025  | AF052174  | 1756.871  | 1572.566  | D10353/NM | 2271.827  | 2419.676  | NM_004408 | 2017.584  |
| 1659.993  | AF070590  | 1124.214  | 1407.677  | M15042    | 1313.735  | 1022.823  | AJ131244  | 880.661   |
| 1207.917  | NM_000761 | 28401.072 | 32027.133 | AK056843  | 1950.199  | 1383.607  | NM_002532 | 3173.11   |
| 1491.214  | NM_020142 | 3251.673  | 2371.336  | U49928    | 4253.227  | 3355.987  | NM_012388 | 1404.569  |
| 690.327   | NM_000774 | 2520.139  | 2239.608  | AK096645  | 7331.739  | 10491.836 | NM_016651 | 333.615   |
| 1284.521  | NM_017781 | 18964.762 | 13532.554 | NM_019884 | 2041.215  | 2381.309  | NM_019843 | 1350.81   |
| 914.368   | NM_006004 | 53894.227 | 65061.008 | NM_018291 | 2430.645  | 1907.589  | NM_016192 | 1164.46   |
| 51028.836 | NM_004894 | 17270.652 | 18605.223 | NM_005530 | 1363.872  | 2074.394  | BE878426  | 53094.813 |
| 4773.466  | AB028960  | 690.32    | 502.563   | AF116909  | 659.983   | 607.722   | NM_001745 | 5929.305  |
| 3498.657  | NM_005648 | 23062.781 | 20417.225 | BE906724  | 794.981   | 527.309   | AK025542  | 589.728   |
| 1620.33   | AK000689  | 945.196   | 1060.73   | NM_002283 | 2534.222  | 1737.12   | NM_003691 | 860.189   |
| 2907.919  | NM_006943 | 15687.131 | 5787.974  | AJ276095  | 8316.202  | 6760.184  | NM_002950 | 9541.545  |
| 3587.688  | NM_006741 | 5020.347  | 2947.82   | NM_004819 | 2719.857  | 1566.674  | NM_002318 | 920.734   |
| 1064.744  | NM_014166 | 4785.155  | 2897.397  | NM_007184 | 2080.486  | 2591.349  | NM_003134 | 25667.725 |
| 813.109   | AL117606  | 5969.841  | 3182.904  | NM_005291 | 10304.333 | 7472.403  | NM_004314 | 1705.731  |
| 3711.007  | NM_012330 | 1773.679  | 1276.353  | NM_002923 | 734.09    | 722.031   | NM_018247 | 1996.139  |
| 1486.94   | AF294278  | 1508.787  | 1218.531  | NM_006794 | 711.641   | 744.709   | NM_017979 | 1695.156  |
| 25579.584 | NM_018211 | 1354.188  | 1661.936  | NM_018653 | 2036.337  | 1143.441  | AF078866  | 1001.309  |
| 1355.462  | NM_002616 | 1326.683  | 781.68    | NM_005388 | 1965.234  | 2194.192  | BF311880  | 2151.605  |
| 2377.108  | AK025712  | 9091.376  | 5195.374  | NM_007232 | 12429.912 | 10997.005 | NM_000078 | 299.025   |
| 415.776   | AK026375  | 1913.02   | 1241.211  | NM_002717 | 2022.517  | 2438.83   | NM_016075 | 424.449   |

|           |           |          |          |           |           |           |           |           |
|-----------|-----------|----------|----------|-----------|-----------|-----------|-----------|-----------|
| 51606.52  | U85992    | 858.927  | 894.557  | NM_003025 | 4438.552  | 4892.782  | NM_001360 | 5387.525  |
| 13354.358 | AL110152  | 975.797  | 1076.684 | U52051    | 342.406   | 334.374   | AK026656  | 2027.592  |
| 536.428   | AF131745  | 410.236  | 329.301  | NM_020179 | 2174.173  | 2295.118  | AJ276207  | 3611.047  |
| 1169.112  | AL117565  | 3657.962 | 3868.724 | NM_004306 | 24112.986 | 26520.732 | AB011131  | 7463.768  |
| 546.342   | AF147305  | 563.501  | 452.499  | NM_006786 | 1134.165  | 445.387   | AF164794  | 1290.357  |
| 142.806   | AK022109  | 1681.597 | 1555.86  | NM_006205 | 1148.745  | 1406.693  | AK023648  | 2213.618  |
| 515.075   | AK022103  | 729.133  | 370.347  | NM_006860 | 2654.942  | 1727.455  | NM_000412 | 689.074   |
| 2806.607  | NM_007030 | 805.466  | 815.419  | NM_004794 | 7098.107  | 2869.193  | NM_004991 | 313.596   |
| 581.671   | AK022111  | 491.448  | 225.532  | NM_004283 | 781.439   | 591.764   | AF222980  | 706.856   |
| 597.446   | AK021527  | 508.598  | 398.214  | NM_004163 | 15193.321 | 13036.273 | AK022385  | 14445.135 |
| 587.763   | AF143882  | 1272.316 | 2072.046 | AK026308  | 1265.141  | 1109.838  | NM_002775 | 1249.273  |
| 557.289   | U00953    | 918.636  | 1299.689 | NM_013337 | 1528.247  | 1045.751  | AK024584  | 2429.664  |
| 3840.221  | AF086176  | 904.508  | 999.364  | NM_004193 | 1326.666  | 1158.399  | NM_003504 | 3219.229  |
| 1922.704  | NM_017742 | 834.714  | 650.95   | NM_002803 | 5812.972  | 7711.567  | NM_013298 | 2100.032  |
| 1067.614  | NM_005108 | 1325.924 | 1167.956 | NM_005508 | 1088.408  | 1216.171  | NM_007267 | 1199.553  |
| 3528.079  | AK022292  | 2923.614 | 2971.697 | NM_006788 | 740.562   | 1583.078  | AK022830  | 572.132   |
| 12211.516 | AB051436  | 2454.07  | 1877.476 | NM_016568 | 643.178   | 472.869   | NM_005865 | 2600.831  |
| 868.119   | AK026482  | 6703.068 | 5255.86  | AB033102  | 4649.711  | 3654.472  | NM_006413 | 4017.691  |
| 1255.573  | AL137473  | 2061.557 | 1806.274 | NM_014774 | 2235.588  | 2553.406  | AL049689  | 117.99    |
| 934.374   | AJ001873  | 6400.127 | 3518.425 | NM_014143 | 3186.765  | 2811.866  | NM_001115 | 532.193   |
| 3032.016  | AB026054  | 383.758  | 469.989  | M55646    | 9785.588  | 10483.968 | NM_007183 | 626.483   |
| 59056.406 | AK022604  | 1005.146 | 715.855  | NM_006112 | 16925.697 | 18363.754 | AJ238243  | 4989.282  |
| 2072.863  | U66048    | 1644.364 | 1796.047 | M12807    | 1094.276  | 1455.01   | J05046    | 12263.298 |
| 41765.832 | AL080095  | 416.604  | 486.235  | NM_001765 | 1492.852  | 1597.74   | NM_012318 | 924.502   |
| 51629.328 | AK023401  | 1978.415 | 3043.092 | NM_003361 | 2653.4    | 2494.445  | NM_002751 | 1254.725  |
| 6575.644  | AK001865  | 1048.093 | 1025.17  | NM_012099 | 1409.528  | 1792.108  | NM_004291 | 1162.678  |
| 957.748   | AK024035  | 8381.656 | 8688.781 | NM_018684 | 6770.158  | 8710.991  | NM_003816 | 1614.069  |
| 809.226   | AL049331  | 399.486  | 520.791  | NM_017983 | 744.252   | 672.397   | AK022635  | 466.941   |
| 3621.144  | AL050079  | 1384.692 | 1197.98  | AF169351  | 5844.473  | 4455.686  | NM_004912 | 1594.818  |
| 37649.754 | AL080233  | 3489.223 | 5151.26  | M14200    | 43140.691 | 48397.668 | U79304    | 7417.921  |
| 884.962   | AL117591  | 483.788  | 1161.284 | NM_000282 | 2493.724  | 1962.631  | NM_016267 | 3391.436  |
| 1146.565  | AL049361  | 353.954  | 319.524  | NM_000532 | 8270.713  | 6622.221  | NM_004671 | 4767.977  |
| 24855.906 | AL050132  | 400.202  | 376.788  | NM_016341 | 1039.191  | 750.761   | NM_005180 | 7041.215  |
| 1498.511  | AL110230  | 1089.682 | 3821.356 | AF231916  | 3164.135  | 2616.897  | NM_002093 | 1595.541  |
| 13730.084 | AL117663  | 2486.436 | 3933.014 | NM_003501 | 2498.597  | 2407.48   | AB042555  | 2893.16   |
| 736.256   | NM_014293 | 2365.438 | 3253.119 | AK022654  | 29701.719 | 22815.76  | NM_017763 | 625.624   |
| 3476.804  | AK024432  | 2893.697 | 2089.52  | BC002905  | 3145.047  | 3396.016  | NM_013975 | 1098.48   |
| 350.596   | AL137513  | 788.191  | 308.21   | NM_018091 | 4058.601  | 4058.551  | NM_003843 | 2555.759  |
| 1633.11   | AF088001  | 501.729  | 797.162  | NM_001108 | 2615.165  | 8186.888  | NM_012216 | 530.118   |
| 3493.955  | NM_018067 | 3153.585 | 3965.629 | NM_016630 | 5944.33   | 7452.361  | X73502    | 1958.581  |
| 509.056   | NM_018956 | 4459.797 | 3708.633 | NM_014291 | 3409.669  | 2828.459  | NM_020445 | 32476.377 |
| 801.869   | NM_014787 | 2057.095 | 1612.988 | NM_014631 | 429.865   | 398.373   | NM_016376 | 3388.384  |
| 1456.084  | AL122109  | 1432.289 | 1117.318 | NM_001089 | 2544.027  | 2315.571  | AB046848  | 2417.194  |
| 739.727   | AF074988  | 1350.485 | 907.773  | NM_000120 | 3394.627  | 3707.868  | AL133057  | 3014.108  |
| 1135.588  | AK024946  | 1738.671 | 1278.904 | AF172327  | 11950.969 | 14494.041 | U04845    | 3921.868  |
| 4548.291  | AK001432  | 2744.378 | 2514.148 | NM_001676 | 4005.728  | 6193.546  | NM_018103 | 4938.194  |
| 1221.854  | AL133568  | 4655.764 | 3454.574 | NM_001679 | 7667.1    | 8895.339  | AK026302  | 4129.896  |
| 867.306   | AF009265  | 1642.564 | 1412.866 | NM_004046 | 62766.688 | 66562.836 | NM_012214 | 1580.636  |
| 1692.916  | AF009309  | 773.551  | 695.93   | NM_019884 | 1847.847  | 1748.64   | NM_012160 | 974.807   |
| 2195.237  | NM_002360 | 1001.059 | 1459.946 | NM_018291 | 2571.37   | 1882.204  | NM_006357 | 49665.977 |
| 1017.96   | AF009322  | 588.945  | 1252.298 | NM_005530 | 1820.653  | 1824.406  | NM_014248 | 32948.406 |
| 1025.789  | AF056425  | 1742.914 | 1549.198 | NM_006899 | 2433.669  | 2554.968  | AK027070  | 720.769   |
| 934.618   | AK001945  | 918.981  | 1194.375 | NM_012200 | 1377.805  | 1512.513  | NM_003341 | 3604.711  |

|          |           |          |           |           |           |           |           |           |
|----------|-----------|----------|-----------|-----------|-----------|-----------|-----------|-----------|
| 4125.47  | AK021541  | 441.927  | 368.455   | NM_001724 | 1038.472  | 1919.819  | NM_017785 | 652.562   |
| 563.297  | AK021766  | 512.33   | 651.478   | NM_000150 | 1303.917  | 1001.051  | NM_006249 | 1843.942  |
| 732.155  | AK001147  | 1997.377 | 887.803   | AB023152  | 500.346   | 570.852   | NM_018318 | 515.467   |
| 4312.806 | AK002109  | 926.195  | 261.88    | NM_006212 | 680.497   | 589.771   | AB020640  | 1246.859  |
| 814.217  | AK021630  | 2269.649 | 3693.702  | AK022872  | 2108.002  | 1627.271  | D29954    | 5853.459  |
| 5628.202 | AK021831  | 1053.258 | 1775.351  | AK024272  | 2651.752  | 4036.092  | AF007131  | 1056.783  |
| 1368.277 | AK025650  | 3318.171 | 2652.09   | NM_016381 | 1128.511  | 1158.16   | NM_006839 | 636.194   |
| 1724.082 | AK026401  | 1041.066 | 955.439   | NM_018042 | 5426.514  | 3241.455  | NM_000223 | 576.742   |
| 692.739  | AK026773  | 1527.843 | 994.932   | BE741525  | 617.248   | 675.092   | NM_005851 | 647.472   |
| 722.369  | AF086158  | 3175.965 | 2669.417  | BF030555  | 26228.279 | 26703.311 | AF119256  | 1050.739  |
| 888.967  | AF086050  | 1967.401 | 1632.646  | NM_012433 | 5436.281  | 3383.267  | X74497    | 908.314   |
| 2660.39  | AF147375  | 1055.57  | 1021.022  | NM_005605 | 2075.02   | 2236.48   | NM_001730 | 939.282   |
| 1545.68  | X51524    | 5797.756 | 6220.811  | NM_002576 | 2999.469  | 4923.429  | U37146    | 11309.155 |
| 676.956  | AK025759  | 3387.594 | 2651.912  | NM_003582 | 1902.522  | 3572.957  | NM_012086 | 1436.136  |
| 2721.536 | AJ238556  | 518.354  | 435.479   | NM_020179 | 1575.943  | 1682.481  | NM_000991 | 51449.203 |
| 719.226  | NM_006898 | 1094.702 | 984.7     | NM_004306 | 19509.465 | 16721.113 | NM_016034 | 11275.074 |
| 9005.541 | AK023429  | 683.208  | 477.293   | NM_001153 | 376.748   | 318.867   | X69150    | 52765.227 |
| 1476.705 | AL133653  | 701.544  | 712.729   | NM_006786 | 964.015   | 405.273   | NM_001025 | 59336.398 |
| 781.171  | AK023774  | 621.551  | 666.256   | NM_006205 | 628.845   | 728.649   | NM_016067 | 14584.931 |
| 2168.735 | AL049377  | 794.05   | 568.756   | NM_004034 | 2694.024  | 2211.057  | NM_018285 | 6668.276  |
| 4190.742 | NM_003544 | 38762.34 | 20645.396 | NM_000130 | 1945.899  | 1826.303  | AK022393  | 5954.592  |
| 1497.889 | AK001187  | 1325.333 | 1813.58   | AF193756  | 661.843   | 344.139   | AB020643  | 615.98    |
| 354.963  | NM_003529 | 25931.52 | 33575.617 | NM_004183 | 301.014   | 921.787   | AK025245  | 970.531   |
| 704.465  | AF056436  | 2391.551 | 2109.794  | AI492087  | 12683.272 | 8911.299  | AF174482  | 4914.362  |
| 5090.465 | AB023191  | 994.052  | 1231.375  | R72122    | 887.421   | 1073.975  | NM_003528 | 1259.388  |
| 660.538  | AK027212  | 6987.043 | 5056.225  | Z35309    | 803.086   | 827.981   | NM_017769 | 507.314   |
| 982.437  | X56197    | 804.414  | 1280.81   | AA700005  | 691.979   | 3570.213  | D85131    | 5054.953  |
| 1280.547 | NM_005199 | 3435.829 | 4662.304  | AA292025  | 411.533   | 903.181   | D30612    | 1771.85   |
| 702.053  | AF143885  | 420.603  | 592.82    | R36143    | 547.169   | 685.346   | NM_002163 | 6964.869  |
| 812.627  | NM_014015 | 6294.027 | 6366.287  | XM_056359 | 358.815   | 395.271   | U52097    | 11513.718 |
| 946.154  | AK026839  | 414.157  | 322.57    | D10353/NM | 3185.136  | 4386.431  | NM_003416 | 1959.443  |
| 1401.301 | Z34278    | 391.272  | 660.666   | M15042    | 1357.306  | 1723.806  | NM_018484 | 623.248   |
| 422.198  | AF147321  | 396.313  | 251.438   | AK056843  | 1570.93   | 1614.6    | NM_017594 | 1100.026  |
| 1448.36  | AF161437  | 3987.093 | 3272.167  | U49928    | 4646.681  | 4741.233  | AK027237  | 583.51    |
| 1709.295 | U52834    | 623.604  | 468.485   | AK096645  | 9001.963  | 18130.859 | AL133090  | 7028.613  |
| 862.704  | AF075100  | 1087.588 | 1014.533  | M12807    | 722.899   | 806.797   | AF085867  | 1523.303  |
| 5544.543 | AF203447  | 9393.306 | 12888.545 | NM_001765 | 906.429   | 902.714   | AK026158  | 756.63    |
| 6853.96  | NM_018502 | 1435.8   | 2496.34   | NM_003361 | 1317.084  | 1049.325  | AF086510  | 1446.934  |
| 1803.277 | AL080066  | 11171.03 | 23173.811 | NM_012099 | 1227.49   | 1179.432  | Z36779    | 1408.931  |
| 2588.084 | NM_005294 | 1532.125 | 1313.766  | NM_018684 | 5816.183  | 6131.241  | NM_017822 | 3210.367  |
| 45410.32 | AF085826  | 1001.154 | 616.632   | NM_017983 | 663.675   | 290.458   | AK026844  | 2048.129  |
| 1978.548 | AK024362  | 730.508  | 1040.024  | AF116909  | 747.746   | 803.468   | AK026735  | 2401.704  |
| 5917.27  | NM_019018 | 5153.535 | 6185.016  | BE906724  | 915.984   | 721.248   | AL110104  | 19881.355 |
| 6883.544 | M87931    | 1297.79  | 1036.235  | NM_002283 | 2616.274  | 1795.533  | AF240633  | 621.117   |
| 987.552  | CY3Cy5    | 2070.895 | 94.929    | AJ276095  | 7647.646  | 7855.093  | AK027056  | 2580.789  |
| 1777.064 | L35594    | 958.784  | 757.243   | NM_004819 | 2348.745  | 1827.691  | AK091109  | 11742.479 |
| 1519.031 | BE790116  | 6986.875 | 4479.231  | NM_007184 | 2674.949  | 5891.021  | NM_014967 | 1288.241  |
| 2908.852 | AI922341  | 2979.619 | 2079.017  | NM_005291 | 7930.222  | 8575.079  | AK022915  | 2519.768  |
| 879.76   | M12824    | 2325.922 | 2543.82   | NM_002923 | 577.415   | 456.122   | AF131834  | 500.505   |
| 2178.601 | W60100    | 1071.466 | 2579.964  | NM_006794 | 632.629   | 547.663   | AJ011409  | 4436.192  |
| 1322.754 | M24898    | 701.267  | 624.964   | NM_018653 | 1851.397  | 1152.394  | AJ227906  | 997.582   |
| 4222.686 | U72508    | 1008.952 | 385.249   | NM_005388 | 2380.693  | 2477.269  | AJ001906  | 723.089   |
| 5771.469 | AA457153  | 3455.769 | 2453.006  | NM_007232 | 15141.805 | 14773.46  | U17633    | 997.857   |

|           |           |           |           |           |           |           |           |           |
|-----------|-----------|-----------|-----------|-----------|-----------|-----------|-----------|-----------|
| 2774.198  | AA283122  | 3557.127  | 2662.568  | NM_003027 | 237.425   | 471.493   | L10404    | 881.71    |
| 3443.942  | AA868504  | 2723.364  | 1207.896  | NM_002717 | 2101.243  | 2700.063  | AF283776  | 4906.349  |
| 864.023   | AA877845  | 8873.814  | 9166.688  | NM_003025 | 4221.829  | 4617.281  | L10123    | 17986.936 |
| 1793.488  | AA664241  | 20691.234 | 18411.854 | NM_001679 | 6975.425  | 6285.419  | L19363    | 578.748   |
| 959.616   | AI016456  | 863.479   | 951.7     | NM_004046 | 60745.938 | 61946.285 | AL109781  | 2413.541  |
| 1227.062  | NM_000588 | 20964.418 | 24577.277 | NM_004983 | 1021.12   | 745.894   | AK021895  | 2202.971  |
| 982.382   | SR5       | 4451.323  | 5886.626  | NM_006860 | 2676.086  | 2009.056  | AK000036  | 1339.314  |
| 549.953   | SR7       | 5884.814  | 57811.258 | NM_004794 | 7242.988  | 3319.858  | AK000769  | 636.461   |
| 777.949   | SR9       | 21606.549 | 6358.435  | NM_004283 | 926.911   | 635.531   | AK000924  | 792.454   |
| 6687.67   | CY3Cy5    | 3220.569  | 146.01    | NM_004163 | 13079.758 | 14930.614 | AK022252  | 1408.47   |
| 3088.663  | NM_005810 | 7406.747  | 5429.538  | AK026308  | 1102.242  | 1355.703  | AK000114  | 1074.299  |
| 210.875   | M28170    | 5239.377  | 2980.948  | NM_013337 | 1395.429  | 2303.908  | AK024592  | 1409.931  |
| 1700.018  | AK026223  | 4115.734  | 4793.89   | NM_004193 | 1302.706  | 1745.081  | AK024904  | 1567.7    |
| 3092.526  | NM_000874 | 1479.833  | 2141.249  | NM_002803 | 5235.083  | 7012.405  | AK024542  | 2068.746  |
| 303.995   | NM_005854 | 1341.684  | 1341.488  | NM_005508 | 1093.62   | 1044.965  | AB050477  | 1061.113  |
| 2761.602  | AB007863  | 18286.561 | 12724.438 | NM_016568 | 493.296   | 661.258   | AK000152  | 583.771   |
| 814.422   | AK024456  | 3111.239  | 3036.842  | AB033102  | 5864.841  | 4958.545  | AK024300  | 821.889   |
| 1001.551  | NM_017789 | 970.267   | 871.074   | NM_014774 | 2487.257  | 2561.815  | NM_012132 | 639.286   |
| 8042.333  | D31887    | 3930.949  | 1865.611  | NM_014143 | 3365.217  | 3089.841  | NM_012129 | 1058.734  |
| 1252.944  | NM_002313 | 1475.778  | 1846.523  | M55646    | 10478.877 | 10891.486 | AK024881  | 1054.127  |
| 488.205   | NM_004459 | 1322.354  | 1371.31   | NM_006112 | 17357.447 | 18441.211 | AK025716  | 892.129   |
| 1536.956  | NM_005503 | 2074.02   | 2807.178  | BE741525  | 587.994   | 577.398   | AF086202  | 4461.996  |
| 5485.538  | NM_001502 | 1499.459  | 1828.957  | BF030555  | 20125.09  | 16850.684 | AK023270  | 2044.889  |
| 2865.283  | NM_005721 | 726.959   | 714.231   | NM_012433 | 5332.442  | 2407.121  | AF085979  | 21869.115 |
| 915.226   | AF284223  | 22354.867 | 8865.386  | NM_005605 | 1691.875  | 1126.605  | AK023112  | 1520.843  |
| 15257.836 | AF176012  | 3780.654  | 5744.914  | NM_002576 | 725.696   | 795.965   | NM_017806 | 10959.335 |
| 701.273   | BE743838  | 4739.552  | 5412.05   | NM_003582 | 1469.1    | 2094.45   | AK001937  | 34760.156 |
| 868.56    | AF273046  | 3070.633  | 6023.326  | AF169351  | 6722.299  | 5989.985  | AL365517  | 1017.272  |
| 207.409   | NM_001081 | 2016.693  | 2341.106  | NM_000282 | 2758.421  | 2537.518  | AK021988  | 4671.626  |
| 16598.322 | NM_002483 | 1530.766  | 2491.817  | NM_000532 | 8432.515  | 8303.175  | AF086494  | 6668.312  |
| 2603.948  | BF002026  | 1048.808  | 1225.806  | NM_016341 | 945.218   | 1004.275  | B1769977  | 1461.847  |
| 251.741   | NM_004171 | 1571.75   | 1157.917  | BC002905  | 3932.242  | 3758.526  | AL137567  | 318.996   |
| 8384.42   | NM_014037 | 4455.127  | 4994.765  | NM_018091 | 3955.938  | 3772.033  | AK024913  | 1583.178  |
| 2810.321  | NM_004866 | 12090.351 | 6289.039  | NM_001108 | 2898.338  | 9214.951  | AB007961  | 1118.548  |
| 114.816   | NM_018688 | 1803.831  | 1520.096  | NM_016630 | 6787.876  | 7765.618  | NM_005547 | 1787.454  |
| 365.801   | AK056652  | 3637.367  | 2572.199  | NM_014291 | 3846.471  | 3798.436  | AF119862  | 3324.161  |
| 860.072   | AL137438  | 1636.415  | 1130.625  | NM_014631 | 540.316   | 576.686   | U17628    | 1427.395  |
| 2685.528  | NM_017957 | 3067.634  | 2859.616  | NM_001089 | 3520.546  | 3748.709  | AF119867  | 2503.012  |
| 487.992   | NM_003024 | 1745.013  | 1674.379  | NM_000120 | 3448.175  | 3905.064  | AL357205  | 5965.473  |
| 1037.2    | AK022230  | 2414.49   | 2865.395  | AF172327  | 12318.402 | 12689.646 | D17091    | 708.592   |
| 433.447   | AK022147  | 5181.939  | 6273.162  | NM_001676 | 2668.643  | 3275.233  | AL133074  | 598.787   |
| 1709.072  | L25664    | 2286.19   | 2466.334  | AB018338  | 11663.204 | 10850.755 | AF086318  | 5327.841  |
| 3448.625  | NM_014940 | 3311.094  | 3010.282  | NM_004923 | 1135.885  | 724.622   | AF088012  | 717.128   |
| 137.258   | NM_005783 | 756.022   | 928.41    | NM_003971 | 1428.294  | 858.46    | NM_018121 | 667.522   |
| 665.527   | NM_006900 | 1468.779  | 1677.941  | AK026973  | 468.178   | 623.628   | AK026708  | 1825.295  |
| 613.926   | AJ289111  | 3844.123  | 4005.441  | NM_005822 | 531.753   | 396.567   | NM_017903 | 3779.117  |
| 1059.997  | NM_016356 | 4061.867  | 5520.541  | U81002    | 1889.595  | 2128.644  | NM_018074 | 863.514   |
| 777.269   | NM_006406 | 6274.758  | 4811.037  | NM_016299 | 4576.042  | 4363.911  | NM_000909 | 1192.969  |
| 270.659   | AF216292  | 24050.363 | 11311.861 | L38517    | 3425.778  | 3928.159  | AK024828  | 639.466   |
| 1237.597  | NM_005894 | 848.484   | 739.245   | NM_018291 | 4620.584  | 3357.714  | AF009315  | 1356.043  |
| 459.823   | NM_014584 | 2272.904  | 2640.501  | NM_005530 | 2196.726  | 2614.344  | NM_019013 | 587.694   |
| 1396.942  | M30627    | 891.412   | 935.073   | NM_006899 | 2967.169  | 3555.59   | NM_006783 | 438.686   |
| 897.363   | NM_016649 | 2606.749  | 1619.969  | NM_012200 | 1479.086  | 1708.915  | S70313    | 4389.207  |

|           |           |           |           |           |           |           |           |           |
|-----------|-----------|-----------|-----------|-----------|-----------|-----------|-----------|-----------|
| 1095.232  | AK090536  | 12478.344 | 8561.838  | NM_001724 | 1274.794  | 2157.074  | AK021607  | 526.349   |
| 4259.234  | D63477    | 1201.75   | 1122.698  | NM_000150 | 2022.283  | 1414.391  | NM_020186 | 4216.25   |
| 2175.858  | NM_020243 | 15405.991 | 10705.555 | AB023152  | 463.887   | 806.385   | AF090947  | 2277.68   |
| 356.943   | NM_014051 | 2719.767  | 4865.341  | NM_006212 | 992.01    | 713.149   | AF116662  | 489.861   |
| 3833.433  | AK025398  | 10896.177 | 9888.883  | AK022872  | 2564.283  | 2003.198  | X58162    | 8046.428  |
| 1439.091  | AB037750  | 2691.136  | 892.653   | AK024272  | 3342.379  | 4764.011  | AK022825  | 683.465   |
| 1072.485  | AK023056  | 810.084   | 758.045   | NM_016381 | 1347.225  | 1373.576  | CY3Cy5    | 2942.635  |
| 226.786   | NM_017886 | 1382.301  | 1337.955  | AL591715  | 863.768   | 1187.195  | L35251    | 1480.29   |
| 1772.421  | NM_004915 | 1428.871  | 1358.459  | NM_018042 | 5421.557  | 3118.184  | BE910395  | 755.184   |
| 1225.739  | AK022207  | 1126.259  | 1330.49   | NM_014944 | 3284.032  | 2141.057  | N46828    | 1075.721  |
| 949.413   | AV708752  | 3677.454  | 4261.065  | AF200348  | 1293.329  | 676.379   | BI908302  | 3474.915  |
| 281.665   | AF119885  | 3890.526  | 5562.582  | NM_002650 | 1220.081  | 1188.636  | AA460969  | 1069.835  |
| 950.544   | NM_000750 | 866.739   | 719.259   | NM_003260 | 10076.042 | 10763.378 | BG695859  | 192.237   |
| 1300.472  | NM_004996 | 2448.574  | 3949.906  | AK024071  | 997.167   | 1178.765  | M85079    | 1781.87   |
| 3535.007  | NM_005971 | 2595.289  | 3379.465  | AF056490  | 1253.245  | 967.039   | AA457671  | 4120.278  |
| 10076.833 | NM_017435 | 1377.697  | 496.955   | NM_005539 | 1706.865  | 1564.903  | X07437    | 1595.624  |
| 1634.698  | NM_013386 | 4357.903  | 5845.588  | BF341504  | 426.48    | 391.48    | NM_000641 | 1108.397  |
| 514.413   | NM_006517 | 2035.567  | 1146.909  | NM_005541 | 7016.665  | 5734.472  | AE006466  | 767.273   |
| 1479.22   | AK026680  | 4558.334  | 2283.234  | AB002319  | 1156.474  | 1078.656  | BC008737  | 22077.824 |
| 5972.464  | NM_012436 | 52992.332 | 35459.785 | AF039942  | 2913.568  | 1868.188  | BC011655  | 1141.367  |
| 1463.71   | AK001299  | 11827.503 | 10905.283 | NM_004421 | 1959.509  | 1469.145  | BC002396  | 1236.263  |
| 13500.668 | AB014559  | 9009.021  | 5323.599  | NM_018654 | 548.744   | 1026.432  | NM_022095 | 447.385   |
| 3529.198  | NM_016489 | 3909.397  | 2482.727  | AB046863  | 2723.115  | 2851.207  | SR6       | 1751.813  |
| 2280.633  | NM_005033 | 2933.122  | 1796.511  | M62403    | 5360.364  | 8398.267  | SR8       | 5023.089  |
| 1652.682  | NM_015932 | 54497.988 | 56873.977 | NM_017883 | 1951.33   | 1371.341  | SR10      | 18032.078 |
| 760.477   | AK022169  | 1067.637  | 826.074   | AK025131  | 1544.271  | 1863.665  | CY3Cy5    | 3179.701  |
| 1787.611  | AF015592  | 1499.684  | 592.507   | NM_000754 | 9461.193  | 12795.834 | NM_020370 | 292.94    |
| 1866.232  | AK026795  | 1797.823  | 1459.277  | NM_014619 | 1006.08   | 1218.591  | NM_004767 | 787.38    |
| 347.939   | NM_016617 | 7015.306  | 4233.186  | NM_005629 | 7985.615  | 6719.33   | BF310159  | 2109.517  |
| 804.09    | NM_002027 | 7326.471  | 7218.055  | J04621    | 1401.876  | 1754.731  | NM_018986 | 583.267   |
| 293.434   | AL162078  | 1913.853  | 2297.167  | NM_000718 | 1310.467  | 1061.483  | U27655    | 1670.019  |
| 9539.523  | NM_000919 | 772.32    | 808.494   | NM_000161 | 3434.295  | 3283.035  | NM_003360 | 614.627   |
| 234.731   | NM_013382 | 8601.3    | 9034.888  | NM_002634 | 5308.309  | 4856.103  | Z21965    | 5302.734  |
| 1098.484  | AB002314  | 775.486   | 964.416   | NM_017749 | 1630.399  | 1510.562  | NM_012427 | 1915.798  |
| 1074.289  | NM_014043 | 2995.719  | 4805.963  | NM_001972 | 51838.809 | 57603.098 | AF131857  | 2773.798  |
| 1202.959  | NM_014622 | 749.813   | 1007.269  | NM_002006 | 5426.033  | 4992.405  | NM_000852 | 2974.721  |
| 1087.461  | AB011114  | 38433.496 | 38045.141 | NM_007111 | 2906.483  | 2809.435  | NM_000399 | 330.732   |
| 1175.487  | D11466    | 15502.922 | 17013.303 | NM_004702 | 510.704   | 555.044   | AW797282  | 456.294   |
| 2152.258  | NM_014056 | 10699.352 | 15197.79  | NM_007109 | 1039.988  | 1297.019  | NM_002402 | 816.688   |
| 545.455   | D31885    | 12794.813 | 21500.436 | AK023404  | 7619.578  | 9048.663  | L09070    | 1321.51   |
| 2274.362  | BE743838  | 4479.714  | 3067.115  | NM_013239 | 441.406   | 329.745   | NM_000062 | 1595.605  |
| 84.152    | AF273046  | 3226.877  | 4304.048  | NM_001789 | 1506.466  | 1254.591  | NM_009590 | 1818.096  |
| 1281.104  | NM_001081 | 2239.448  | 1798.725  | NM_016004 | 3060.735  | 3275.245  | AL133037  | 741.236   |
| 4723.429  | NM_002483 | 2087.79   | 1915.943  | NM_002655 | 551.825   | 339.478   | NM_020350 | 2727.359  |
| 930.684   | BF002026  | 922.395   | 800.87    | AB028955  | 9153.623  | 6949.795  | NM_000350 | 1331.177  |
| 40165.605 | L35594    | 998.229   | 605.619   | U66879    | 3811.251  | 3357.619  | AA419164  | 2354.484  |
| 574.35    | BE790116  | 7158.102  | 4265.623  | NM_016022 | 7220.272  | 7529.645  | AL117235  | 748.418   |
| 756.432   | AI922341  | 2964.584  | 2216.697  | NM_004874 | 1121.53   | 843.809   | NM_014822 | 3858.642  |
| 2113.54   | M12824    | 2265.885  | 1936.902  | NM_014204 | 1036.115  | 1137.118  | NM_005296 | 1885.389  |
| 141.612   | W60100    | 1130.774  | 2142.463  | S70385    | 11749.478 | 4040.249  | NM_001337 | 315.003   |
| 851.678   | M24898    | 885.598   | 863.797   | NM_018509 | 5507.731  | 5992.246  | NM_003611 | 3563.472  |
| 1282.286  | U72508    | 1035.588  | 474.77    | NM_004086 | 515.467   | 1278.292  | AB014538  | 842.796   |
| 434.537   | AA457153  | 3613.934  | 3362.654  | NM_001748 | 2285.955  | 1912.009  | NM_006209 | 874.029   |



|           |           |           |           |           |           |           |           |           |
|-----------|-----------|-----------|-----------|-----------|-----------|-----------|-----------|-----------|
| 670.382   | AA283122  | 4018.047  | 3476.535  | NM_001109 | 241.784   | 784.739   | AK025118  | 2643.869  |
| 612.151   | AA868504  | 2518.465  | 1715.684  | AF176706  | 1356.754  | 822.913   | NM_000727 | 1601.365  |
| 747.86    | AA877845  | 6817.964  | 8759.874  | NM_001086 | 583.833   | 579.595   | NM_002621 | 185.942   |
| 767.08    | AA664241  | 24259.811 | 25035.381 | NM_014670 | 2064.97   | 1505.995  | NM_005385 | 4580.912  |
| 2325.071  | AI016456  | 1049.089  | 1311.987  | NM_019048 | 3457.916  | 3861.442  | NM_018985 | 1363.48   |
| 1316.924  | NM_000588 | 21822.92  | 29354.35  | NM_001040 | 796.172   | 568.531   | NM_006074 | 6934.775  |
| 5002.001  | NM_006406 | 5805.532  | 3087.568  | AF279698  | 3024.278  | 2771.611  | AF208232  | 1427.16   |
| 2396.052  | AF216292  | 24074.506 | 7498.224  | NM_019849 | 2163.728  | 2049.599  | NM_002988 | 1377.049  |
| 5776.811  | NM_000952 | 796.574   | 588.734   | AB032996  | 24802.211 | 21674.77  | NM_004186 | 745.576   |
| 4003.847  | NM_005894 | 968.099   | 471.226   | AB040881  | 1440.673  | 1405.535  | NM_016258 | 1715.032  |
| 875.861   | NM_014584 | 2768.472  | 2070.574  | AY007121  | 839.98    | 860.22    | AF203032  | 2735.956  |
| 652.921   | M30627    | 803.67    | 418.846   | NM_003372 | 4785.168  | 6497.102  | AB014542  | 6374.037  |
| 10435.486 | NM_005810 | 6863.669  | 5129.347  | NM_007317 | 2072.029  | 3301.147  | Y10518    | 20677.518 |
| 802.454   | M28170    | 6103.446  | 4441.85   | Z36796    | 65969.547 | 71532.484 | AF155135  | 4066.502  |
| 876.412   | AK026223  | 3697.972  | 4411.983  | NM_006443 | 14299.665 | 12533.89  | NM_014790 | 1159.236  |
| 214.164   | NM_000874 | 1224.515  | 2145.485  | NM_004959 | 556.099   | 552.584   | AB032965  | 13475.862 |
| 4935.637  | NM_005854 | 1207.713  | 1589.756  | AK026022  | 12444.424 | 10106.698 | AF133424  | 1600.412  |
| 104.489   | AB007863  | 15980.173 | 14128.658 | NM_003199 | 1595.3    | 1129.438  | NM_005003 | 10255.125 |
| 638.595   | AK024456  | 3047.512  | 3960.292  | NM_002938 | 2613.442  | 2639.738  | AF084560  | 3742.631  |
| 42926.922 | NM_017789 | 830.543   | 1081.69   | AK023652  | 3726.869  | 3338.968  | NM_015715 | 2201.246  |
| 4502.264  | D31887    | 3822.099  | 2216.545  | NM_003070 | 3818.886  | 4965.502  | NM_000032 | 2040.916  |
| 1426.459  | NM_006180 | 821.436   | 1301.097  | AL122101  | 1508.25   | 1332.518  | NM_002035 | 1757.56   |
| 4494.121  | NM_002313 | 1207.71   | 2348.849  | NM_004780 | 1295.064  | 2051.9    | NM_014900 | 674.168   |
| 2349.641  | NM_004459 | 1478.541  | 1409.322  | NM_016216 | 2260.325  | 2664.759  | BF342908  | 857.546   |
| 720.307   | NM_005503 | 2174.386  | 3391.693  | NM_016638 | 6463.313  | 6564.046  | AK023510  | 1493.173  |
| 357.317   | NM_001502 | 1527.914  | 1763.901  | AB018274  | 5027.702  | 4131.593  | NM_004345 | 805.061   |
| 1133.813  | NM_005721 | 790.686   | 1051.239  | NM_005871 | 3011.225  | 2204.865  | NM_000702 | 9917.977  |
| 401.812   | AF284223  | 21202.117 | 10878.648 | NM_007042 | 981.227   | 1202.202  | X71490    | 4219.333  |
| 5936.197  | NM_005971 | 2258.953  | 2110.684  | NM_016333 | 4312.644  | 4451.152  | AF257081  | 719.946   |
| 346.018   | NM_017435 | 1220.606  | 305.009   | BE875028  | 1483.046  | 1634.903  | NM_001688 | 19798.854 |
| 1525.123  | NM_013386 | 4040.427  | 3995.5    | AK000511  | 1364.941  | 1309.975  | NM_000219 | 459.768   |
| 2424.441  | NM_006517 | 2268.102  | 477.283   | AF121255  | 1789.214  | 1334.473  | NM_016106 | 2424.468  |
| 355.08    | NM_004171 | 1870.411  | 1147.081  | NM_005494 | 1677.129  | 2832.316  | NM_014570 | 2447.335  |
| 930.85    | NM_014037 | 4852.832  | 4670.991  | NM_017946 | 542.417   | 397.115   | NM_014747 | 2443.611  |
| 729.674   | NM_004866 | 11709.893 | 6129.146  | NM_012199 | 695.391   | 619.182   | Y19240    | 1975.663  |
| 1685.482  | NM_018688 | 1846.779  | 1391.903  | AL049682  | 752.868   | 1197.93   | AF091029  | 2359.259  |
| 1052.026  | AK056652  | 3643.699  | 2649.673  | NM_005528 | 2103.931  | 2269.854  | X97074    | 3941.475  |
| 6641.992  | AL137438  | 1429.074  | 1295.621  | NM_007006 | 14869.003 | 9711.048  | NM_004135 | 2791.261  |
| 2420.347  | NM_017957 | 3209.47   | 3385.957  | AL137346  | 1653.22   | 1583.06   | NM_000203 | 350.85    |
| 2695.828  | NM_003024 | 1904.529  | 2889.401  | NM_017756 | 25993.242 | 17683.779 | NM_013443 | 1685.124  |
| 1993.419  | NM_013248 | 2643.742  | 2199.22   | NM_005793 | 2202.483  | 1951.371  | NM_000925 | 5250.347  |
| 4877.289  | NM_000034 | 62320.328 | 69370.414 | U77088    | 875.909   | 418.563   | NM_000465 | 1059.78   |
| 12380.798 | AK022230  | 2224.729  | 3011.432  | NM_006721 | 12320.615 | 12008.83  | NM_000123 | 2023.05   |
| 286.606   | AK022147  | 5926.491  | 7709.176  | NM_016282 | 1716.618  | 1764.627  | AL137501  | 371.409   |
| 3263.783  | L25664    | 1968.164  | 2292.424  | NM_002765 | 1489.086  | 1818.362  | BE858979  | 1813.333  |
| 1149.011  | NM_014940 | 3259.84   | 3362.719  | NM_001905 | 2370.75   | 2885.928  | NM_000122 | 1141.34   |
| 1080.445  | NM_005783 | 708.614   | 852.874   | AF292100  | 2349.791  | 2820.115  | NM_006712 | 56153.105 |
| 1701.25   | NM_006900 | 1363.257  | 1622.996  | NM_005654 | 652.21    | 353.959   | NM_006240 | 1248.294  |
| 989.363   | NM_016356 | 3630.57   | 4542.9    | AF024698  | 62281.043 | 56392.867 | NM_007026 | 1549.949  |
| 345.759   | NM_014043 | 2345.25   | 3282.486  | BE904617  | 10934.82  | 10713.881 | M37712    | 3610.662  |
| 1875.063  | NM_014622 | 681.012   | 688.227   | AK024495  | 500.501   | 496.256   | NM_002648 | 730.677   |
| 815.073   | AB011114  | 34530.094 | 25074.891 | AF024694  | 2302.547  | 1456.069  | AF070670  | 2343.358  |
| 5622.42   | D11466    | 14956.891 | 10914.829 | AF091081  | 1931.473  | 2039.835  | NM_016156 | 2948.52   |

|           |           |           |           |           |           |           |           |           |
|-----------|-----------|-----------|-----------|-----------|-----------|-----------|-----------|-----------|
| 959.331   | NM_014056 | 10762.762 | 11117.497 | AK001758  | 2469.214  | 2192.865  | NM_016528 | 856.692   |
| 1127.392  | D31885    | 12530.846 | 14934.69  | AF086325  | 1360.888  | 1467.045  | NM_015974 | 1434.522  |
| 520.256   | NM_016649 | 2693.838  | 1779.084  | NM_004928 | 315.835   | 532.811   | NM_014384 | 907.344   |
| 1441.473  | D63477    | 1010.961  | 997.019   | AF147401  | 1327.765  | 1035.124  | NM_002573 | 1510.133  |
| 1796.782  | NM_020243 | 15668.775 | 11371.141 | AF075022  | 1542.99   | 1234.658  | NM_000350 | 1321.774  |
| 3488.152  | NM_014051 | 2989.664  | 5386.51   | AF075060  | 2198.391  | 3326.51   | X91103    | 4859.958  |
| 2452.535  | AK025398  | 11232.767 | 13729.652 | AF147436  | 666.758   | 588.914   | AA419164  | 1936.773  |
| 3247.827  | AK027082  | 3818.275  | 4074.442  | AK021441  | 670.232   | 584.463   | BE910395  | 352.104   |
| 847.913   | AB037750  | 2932.061  | 1346.035  | AK026018  | 638.142   | 387.999   | N46828    | 875.883   |
| 1243.881  | AK023056  | 972.997   | 938.695   | AF085846  | 2434.049  | 2217.241  | BI908302  | 3940.847  |
| 1104.444  | NM_001120 | 31143.256 | 30337.246 | AK023901  | 5532.133  | 5677.568  | AA460969  | 1100.41   |
| 1568.529  | NM_017888 | 1399.932  | 1648.754  | AL109705  | 552.302   | 798.97    | BG695859  | 391.101   |
| 10301.067 | NM_004915 | 1783.066  | 2700.125  | AF086255  | 10971.269 | 8956.485  | M85079    | 1876.966  |
| 2811.448  | AK022207  | 1269.171  | 1492.05   | AK022660  | 438.724   | 619.368   | AA457671  | 5355.133  |
| 2091.979  | AV708752  | 3935.561  | 5254.773  | AF088051  | 1078.57   | 907.489   | X07437    | 2289.055  |
| 1812.139  | AF119885  | 2415.794  | 3688.228  | AK023883  | 811.308   | 775.116   | NM_000641 | 1223.403  |
| 695.697   | NM_000750 | 719.622   | 691.382   | AF086360  | 2600.074  | 2563.692  | AE006466  | 631.788   |
| 1359.441  | NM_004996 | 2402.991  | 3394.788  | AF087993  | 1540.048  | 1767.459  | BC008737  | 21284.117 |
| 481.922   | NM_000588 | 23332.629 | 20747.896 | AF035282  | 607.082   | 778.054   | BC011655  | 726.079   |
| 890.263   | AK026680  | 5307.275  | 2720.14   | AK021966  | 3570.353  | 2641.908  | BC002396  | 1465.881  |
| 1037.385  | AK001299  | 17675.398 | 16624.035 | AB018292  | 6564.381  | 6927.813  | NM_022095 | 649.626   |
| 7225.738  | AB014559  | 12309.653 | 9749.278  | AF085971  | 922.925   | 1353.566  | AF112219  | 9801.448  |
| 4422.571  | NM_016489 | 4855.757  | 3250.229  | AF147302  | 1483.126  | 1911.648  | AF155135  | 4135.558  |
| 718.728   | NM_005033 | 3228.152  | 2568.825  | AF085929  | 2708.784  | 2909.526  | NM_014790 | 1227.09   |
| 12530.21  | NM_015932 | 54578.246 | 61790.371 | AK001126  | 1706.353  | 2589.659  | NM_003571 | 4148.691  |
| 238.048   | AK022169  | 1246.681  | 889.244   | AF085976  | 1663.195  | 1412.92   | NM_020370 | 285.542   |
| 415.87    | AF015592  | 1560.692  | 953.135   | AF075104  | 5873.741  | 4632.24   | NM_004767 | 732.697   |
| 715.634   | AK026795  | 1967.694  | 1738.551  | AL133025  | 554.139   | 429.371   | BF310159  | 2355.139  |
| 10100.713 | NM_016399 | 2880.262  | 2523.457  | AL137402  | 7881.094  | 8665.395  | AB044934  | 455.851   |
| 258.731   | NM_016617 | 7874.024  | 6002.196  | AL137617  | 2495.477  | 2183.285  | U27655    | 1620.453  |
| 2102.729  | NM_002027 | 8343.904  | 8616.667  | AL359568  | 21025.178 | 21590.289 | NM_003360 | 590.306   |
| 1215.611  | AL162078  | 3205.834  | 3014.805  | AL133564  | 6202.167  | 6391.919  | Z21965    | 6028.217  |
| 3568.569  | NM_000919 | 802.605   | 603.108   | AL137428  | 1023.375  | 990.773   | NM_012427 | 511.109   |
| 740.61    | NM_013382 | 11464.755 | 11809.429 | AL157462  | 980.923   | 1232.067  | AF131857  | 3221.593  |
| 823.202   | AB002314  | 1256.372  | 1430.368  | AL359602  | 5374.215  | 5928.853  | NM_000852 | 1487.836  |
| 1226.476  | NM_005503 | 1992.222  | 1980.928  | NM_018190 | 12839.515 | 14843.468 | NM_000399 | 465.693   |
| 711.739   | NM_001502 | 1748.237  | 1276.46   | AK022259  | 48192.234 | 42786.781 | AW797282  | 303.754   |
| 1090.19   | NM_005721 | 1037.792  | 941.257   | AK022461  | 862.085   | 790.14    | NM_002402 | 1619.42   |
| 551.232   | AF284223  | 24105.736 | 8006.901  | NM_016010 | 1249.919  | 1417.451  | L09070    | 1073.361  |
| 18.938    | AF176012  | 3792.072  | 4776.562  | AF161442  | 399.147   | 437.09    | NM_000062 | 2325.455  |
| 42217.527 | BE743838  | 5247.639  | 4391.694  | AK023783  | 414.125   | 393.257   | NM_009590 | 1509.384  |
| 762.286   | AF273046  | 4302.202  | 6229.266  | AF174394  | 3448.852  | 4212.872  | NM_016106 | 2620.039  |
| 1133.749  | NM_001081 | 2271.837  | 2131.39   | AF083121  | 659.755   | 523.114   | NM_014570 | 2595.43   |
| 2864.229  | NM_002483 | 2427.946  | 2581.279  | AK025924  | 563.41    | 813.903   | NM_014747 | 2889.455  |
| 428.806   | BF002026  | 1362.718  | 1139.269  | AK021876  | 10277.4   | 9262.583  | Y19240    | 1824.999  |
| 491.629   | L35594    | 987.091   | 897.798   | AK022017  | 1135.45   | 847.214   | AF091029  | 3764.738  |
| 2018.684  | BE790116  | 8203.215  | 5378.395  | AK022160  | 2368.688  | 2230.323  | X97074    | 8831.91   |
| 1860.63   | AI922341  | 3664.9    | 2822.357  | AK022295  | 1177.515  | 1473.013  | AL117235  | 842.827   |
| 3140.766  | AA410517  | 784.771   | 842.638   | AK021935  | 1062.799  | 1460.672  | NM_014822 | 3665.982  |
| 824.911   | M12824    | 3937.709  | 6034.095  | AK022187  | 6747.754  | 7015.528  | NM_005296 | 1801.03   |
| 2159.325  | W60100    | 1946.234  | 5918.426  | AK022337  | 3484.542  | 4364.863  | AB014538  | 981.152   |
| 836.719   | M24898    | 1223.809  | 1350.175  | AK026847  | 580.902   | 930.846   | NM_006209 | 1025.894  |
| 2089.405  | U72508    | 1357.72   | 1064.517  | AK023048  | 867.062   | 835.595   | AK025118  | 2758.159  |

|           |           |           |           |           |           |           |           |           |
|-----------|-----------|-----------|-----------|-----------|-----------|-----------|-----------|-----------|
| 1227.595  | AA457153  | 6302.52   | 6859.877  | AK026891  | 2044.099  | 3368.76   | NM_000727 | 1328.199  |
| 3953.183  | AA283122  | 5934.039  | 7546.579  | AL137562  | 2756.804  | 2375.568  | NM_002621 | 207.528   |
| 2378.834  | AA868504  | 3726.38   | 2682.916  | M90355    | 56684.703 | 53287.609 | NM_005385 | 4636.176  |
| 1146.067  | AA877845  | 10038.094 | 16360.642 | AK026373  | 8986.367  | 10716.807 | NM_018985 | 1100.555  |
| 482.446   | AA664241  | 31692.797 | 36381.305 | AK021581  | 819.529   | 1363.799  | NM_006074 | 7150.043  |
| 1036.115  | AI016456  | 1091.428  | 1898.127  | AK021744  | 724.914   | 1326.661  | AF208232  | 1541.405  |
| 3715.248  | NM_014940 | 3121.073  | 1728.669  | NM_018430 | 3296.596  | 3939.226  | NM_002985 | 1182.251  |
| 764.888   | NM_005783 | 994.754   | 369.555   | AL110200  | 1012.675  | 1104.156  | NM_004186 | 626.371   |
| 190.024   | NM_006900 | 1969.899  | 1641.237  | AK022308  | 523.684   | 482.055   | NM_016255 | 2214.982  |
| 1100.246  | AJ289111  | 4575.895  | 3340.499  | AL133640  | 2226.307  | 2446.777  | AF203032  | 3310.874  |
| 3098.966  | NM_016356 | 5879.424  | 6718.561  | AJ012502  | 7109.223  | 11187.544 | AB014542  | 7526.415  |
| 1558.561  | NM_006406 | 7564.544  | 5919.131  | AK024170  | 618.424   | 869.979   | AF070670  | 2908.479  |
| 915.522   | AF216292  | 38674.629 | 19985.973 | AK021722  | 1649.43   | 1687.551  | NM_016156 | 2830.1    |
| 743.681   | NM_000952 | 1311.104  | 1756.935  | NM_000681 | 390.012   | 393.024   | NM_016525 | 895.453   |
| 16600.627 | NM_005894 | 1368.23   | 1973.407  | AF147445  | 1376.336  | 1756.242  | NM_015974 | 1542.217  |
| 921.856   | NM_014584 | 4806.072  | 5744.867  | Y10508    | 14674.812 | 12937.699 | NM_014384 | 1262.269  |
| 1388.239  | M30627    | 918.198   | 1244.183  | NM_005182 | 40776.762 | 39650.672 | NM_002573 | 1693.527  |
| 2362.258  | NM_005810 | 9004.776  | 12341.231 | D17074    | 1019.868  | 1104.093  | AF133424  | 1707.154  |
| 2950.383  | M28170    | 7821.302  | 10820.356 | AF039944  | 8023.715  | 5312.91   | NM_005003 | 9745.617  |
| 1111.739  | NM_001555 | 641.788   | 1555.676  | AJ276252  | 432.496   | 612.116   | AF084560  | 2706.639  |
| 2548.17   | NM_000874 | 1994.733  | 5887.758  | AK021716  | 7816.305  | 7649.491  | NM_015715 | 1841.115  |
| 3617.529  | NM_005854 | 2020.786  | 3045.026  | AK025035  | 7734.277  | 7797.746  | NM_000032 | 2089.625  |
| 11363.186 | AB007863  | 28169.205 | 27424.674 | AK002085  | 2959.562  | 3690.13   | NM_002083 | 1207.225  |
| 710.963   | AK024456  | 4424.086  | 5229.567  | AF086200  | 562.046   | 826.696   | NM_002035 | 1779.672  |
| 32744.32  | NM_017789 | 1252.163  | 1957.342  | AL133618  | 4319.699  | 4384.4    | NM_014900 | 577.602   |
| 3712.558  | NM_006180 | 657.908   | 1256.748  | AF230314  | 839.128   | 1403.927  | BF342908  | 821.925   |
| 1513.988  | NM_002313 | 1643.133  | 2484.213  | AJ131610  | 4378.098  | 5444.784  | AK023510  | 1528.957  |
| 4555.931  | NM_004459 | 1927.05   | 1664.439  | AF119872  | 7259.531  | 7133.505  | NM_004345 | 831.242   |
| 17946.131 | NM_004915 | 1977.98   | 816.683   | X99687    | 936.618   | 1196.479  | NM_000702 | 12112.301 |
| 210.961   | AK022207  | 1619.334  | 1103.243  | AK023255  | 16799.672 | 19485.521 | X71490    | 4216.118  |
| 596.036   | AV708752  | 4771.923  | 5649.67   | NM_002622 | 20901.873 | 27378.883 | AF257081  | 716.564   |
| 1568.887  | AF119885  | 3897.441  | 4670.531  | AK024185  | 1301.477  | 1582.69   | NM_006525 | 262.854   |
| 310.336   | NM_000750 | 1198.615  | 1476.455  | NM_015417 | 499.021   | 1074.454  | NM_001685 | 24724.131 |
| 1049.007  | NM_004996 | 3783.66   | 5534.429  | AK026101  | 4806.292  | 4720.42   | NM_022095 | 685.199   |
| 345.312   | NM_005971 | 3577.292  | 4206.8    | AK022194  | 13775.519 | 12344.863 | AF112219  | 10428.518 |
| 5988.28   | NM_017435 | 1447.806  | 595.421   | AF085963  | 1723.394  | 1279.956  | NM_002625 | 244.661   |
| 498.052   | NM_013386 | 6464.66   | 7825.444  | AK021436  | 1397.39   | 1515.822  | NM_004135 | 2595.243  |
| 2519.061  | NM_006517 | 3056.063  | 2452.893  | U58664    | 1075.476  | 850.459   | NM_000203 | 267.578   |
| 3552.619  | NM_004171 | 2487.133  | 3482.94   | AF085937  | 445.649   | 681.83    | NM_013443 | 1596.921  |
| 407.708   | NM_014037 | 8150.794  | 16845.465 | AL137569  | 3761.032  | 3370.391  | NM_000925 | 6184.373  |
| 1565.491  | NM_004866 | 19210.072 | 19369.387 | AK021920  | 3415.131  | 2695.346  | NM_000465 | 987.788   |
| 23148.578 | NM_018685 | 3143.146  | 4472.192  | AL049415  | 1487.689  | 1129.255  | AF116685  | 424.728   |
| 333.119   | NM_015839 | 815.465   | 1322.072  | AK022375  | 715.044   | 910.559   | NM_000123 | 2124.572  |
| 516.412   | AL137438  | 1754.588  | 1972.07   | NM_003375 | 46185.906 | 36072.148 | BE858979  | 1571.508  |
| 2057.343  | NM_017957 | 4323.009  | 4471.248  | AL110194  | 7045.631  | 6951.242  | NM_000122 | 1063.549  |
| 2247.879  | NM_003024 | 2806.309  | 3292.975  | AF138860  | 403.449   | 610.316   | NM_006712 | 50668.91  |
| 2498.523  | NM_013245 | 3374.706  | 2360.053  | NM_006687 | 786.9     | 1243.889  | NM_006240 | 1032.854  |
| 2209.749  | AK022147  | 6925.16   | 8768.521  | NM_013301 | 1041.316  | 669.261   | NM_007026 | 1652.138  |
| 4381.177  | L25664    | 2409.151  | 2136.403  | NM_017673 | 848.562   | 1090.542  | M37712    | 5422.875  |
| 8325.272  | NM_002027 | 10715.43  | 12214.23  | AB046857  | 670.452   | 811.314   | NM_002645 | 483.525   |
| 571.417   | AL162078  | 4123.723  | 4120.893  | AK024408  | 16003.013 | 15733.466 | NM_002402 | 1664.839  |
| 2344.628  | NM_000919 | 863.88    | 559.899   | AF086307  | 9039.91   | 11805.14  | L09070    | 1765.702  |
| 1677.723  | NM_013382 | 11540.424 | 9103.048  | L19364    | 1056.815  | 1437.296  | NM_000062 | 2082.955  |

|           |           |           |           |           |           |           |           |           |
|-----------|-----------|-----------|-----------|-----------|-----------|-----------|-----------|-----------|
| 160.305   | AB002314  | 1271.379  | 764.464   | NM_005390 | 1629.483  | 2466.411  | NM_017877 | 293       |
| 2078.628  | NM_014043 | 3847.253  | 5533.491  | CY3Cy5    | 2603.671  | 113.508   | NM_009590 | 1914.957  |
| 778.339   | NM_014622 | 1098.66   | 1359.965  | L07738    | 697.245   | 684.143   | AL133037  | 647.531   |
| 850.582   | AB011114  | 45532.34  | 41949.434 | H90415    | 1138.771  | 1651.165  | NM_020350 | 2277.245  |
| 1799.399  | D11466    | 20443.473 | 16414.156 | AA676470  | 7979.614  | 7688.59   | NM_000350 | 887.355   |
| 903.587   | NM_014056 | 13608.881 | 17013.242 | M38258    | 358.329   | 257.268   | X91103    | 4177.142  |
| 172.931   | D31885    | 20860.756 | 35449.094 | AA457155  | 7853.238  | 5475.187  | BE910395  | 626.437   |
| 3047.333  | NM_016649 | 4485.588  | 4100.391  | BM014365  | 672.988   | 408.234   | N46828    | 952.605   |
| 1135.232  | AK090536  | 15716.811 | 11781.741 | U78045    | 1344.949  | 1151.056  | BI908302  | 4236.653  |
| 9090.047  | D63477    | 1403.257  | 1034.844  | AA878561  | 58373.008 | 53494.219 | AA460969  | 1354.273  |
| 58594.617 | NM_020243 | 17789.061 | 13823.005 | BF688309  | 508.513   | 372.987   | BG695859  | 266.178   |
| 2251.754  | NM_014051 | 3643.497  | 5889.125  | AI538525  | 1401.199  | 1010.986  | M85079    | 1826.615  |
| 2608.269  | AK025398  | 12777.964 | 12140.137 | NM_000941 | 1093.646  | 1034.78   | AA457671  | 5612.769  |
| 5524.877  | AB037750  | 3089.991  | 1387.949  | SR1       | 56949.867 | 63760.301 | X07437    | 1732.728  |
| 718.768   | AK023056  | 874.348   | 1014.933  | SR3       | 42601.609 | 42493.145 | NM_000641 | 1192.308  |
| 2949.467  | NM_001120 | 31188.182 | 34909.574 | SR9       | 14135.589 | 3578.694  | AE006466  | 570.232   |
| 3219.145  | NM_017888 | 1770.276  | 2192.682  | CY3Cy5    | 2039.072  | 94.289    | BC008737  | 21539.197 |
| 806.354   | NM_003150 | 4268.172  | 3435.143  | U62858    | 3344.469  | 1720.461  | BC011655  | 1296.887  |
| 1584.42   | NM_014784 | 4138.714  | 3448.809  | NM_014432 | 936.967   | 1008.919  | BC002396  | 1450.763  |
| 1113.721  | AK026383  | 4668.797  | 2082.252  | NM_001558 | 568.987   | 937.041   | AF208232  | 2025.024  |
| 1260.044  | AK023821  | 1000.124  | 209.191   | NM_006953 | 856.41    | 1449.549  | NM_002988 | 2084.901  |
| 1229.131  | AB014594  | 4649.555  | 1843.108  | NM_002530 | 295.595   | 491.283   | NM_004186 | 915.823   |
| 8814.857  | M94547    | 1379.664  | 777.701   | U96173    | 1609.832  | 1576.109  | NM_016258 | 2369.144  |
| 2262.964  | NM_005087 | 13019.352 | 6228.2    | NM_018941 | 973.844   | 598.708   | AF203032  | 4051.785  |
| 1139.597  | NM_012098 | 2117.342  | 1728.734  | BE730585  | 341.367   | 482.006   | AB014542  | 13214.07  |
| 1251.501  | NM_018095 | 1763.371  | 2580.475  | NM_001980 | 506.708   | 282.442   | Y10518    | 22514.158 |
| 430.7     | AB023164  | 3038.073  | 1814.324  | NM_005954 | 523.345   | 366.992   | AF155135  | 4101.359  |
| 1119.899  | AK026281  | 749.634   | 674.482   | NM_012471 | 433.389   | 541.877   | NM_014790 | 1067.308  |
| 380.855   | AK026680  | 6973.751  | 5406.706  | NM_001321 | 2473.72   | 1751.533  | NM_003571 | 3730.919  |
| 313.392   | NM_012436 | 59811.023 | 51844.988 | AB018264  | 2949.474  | 2160.939  | NM_020370 | 412.576   |
| 1021.868  | AK001299  | 21120.674 | 18796.723 | NM_006911 | 538.074   | 450.21    | NM_004767 | 912.992   |
| 957.508   | AB014559  | 11789.05  | 10727.781 | U92544    | 2248.371  | 2770.128  | BF310159  | 2657.438  |
| 14835.864 | NM_016489 | 5063.774  | 3929.66   | NM_006791 | 816.352   | 1390.16   | NM_000316 | 378.459   |
| 4924.076  | NM_005033 | 3459.235  | 2654.338  | AJ278348  | 5377.023  | 5143.32   | NM_018986 | 672.163   |
| 7444.531  | NM_015932 | 57729.594 | 64788.602 | AI285199  | 1059.194  | 2044.703  | U27655    | 1656.599  |
| 1343.282  | NM_017949 | 712.348   | 1050.843  | AK023106  | 643.883   | 703.239   | NM_003360 | 914.089   |
| 844.662   | AF015592  | 1695.29   | 1336.7    | NM_016730 | 18864.588 | 18829.727 | Z21965    | 3963.174  |
| 505.34    | AK026795  | 1896.147  | 2277.616  | AL035297  | 1112.775  | 1050.475  | NM_012427 | 583.79    |
| 3023.459  | NM_016399 | 2745.154  | 3082.814  | NM_004408 | 1980.165  | 4260.385  | NM_000852 | 4015.197  |
| 427.77    | NM_016617 | 8550.023  | 12482.022 | AJ131244  | 1078.009  | 640.067   | NM_000399 | 297.933   |
| 3653.193  | NM_002338 | 3432.84   | 3359.747  | NM_002532 | 4011.103  | 4359.177  | AF257081  | 1000.576  |
| 1235.641  | AL117666  | 996.435   | 673.564   | NM_012388 | 2106.06   | 2539.416  | NM_001688 | 24505.932 |
| 694.106   | Y17865    | 1526.528  | 1181.215  | NM_016651 | 500.749   | 576.579   | NM_002232 | 644.51    |
| 7880.002  | NM_005825 | 14682.426 | 9648.902  | NM_001671 | 307.32    | 255.755   | NM_016106 | 2415.053  |
| 8295.849  | NM_002756 | 2865.361  | 2694.617  | NM_019843 | 1843.847  | 1883.399  | NM_014570 | 2357.697  |
| 124.848   | U79299    | 671.182   | 443.851   | NM_016192 | 3100.171  | 2615.446  | NM_014747 | 2222.339  |
| 257.816   | AJ000414  | 1454.205  | 2224.524  | BE878426  | 56639.211 | 55521.188 | Y19240    | 1537.676  |
| 1876.547  | AK025674  | 8759.004  | 6761.957  | NM_001745 | 5515.943  | 3501.91   | AF091029  | 3769.291  |
| 985.85    | AF007194  | 6654.152  | 4235.863  | NM_003825 | 4886.41   | 5727.884  | X97074    | 7987.483  |
| 2534.736  | NM_019069 | 2329.549  | 1771.753  | AK025006  | 10746.648 | 8563.857  | AL117235  | 1019.621  |
| 797.664   | NM_004761 | 4521.985  | 8954.826  | AF218014  | 5235.534  | 3203.098  | NM_014822 | 4310.057  |
| 1421.787  | Z25424    | 2404.128  | 2448.749  | NM_006678 | 2559.49   | 1776.606  | NM_005296 | 2202.757  |
| 247.127   | U79458    | 8419.014  | 10637.558 | AY007729  | 17326.85  | 16023.196 | NM_001337 | 379.865   |

|           |           |           |           |           |           |           |           |           |
|-----------|-----------|-----------|-----------|-----------|-----------|-----------|-----------|-----------|
| 1661.051  | NM_002961 | 63621.91  | 76308.148 | NM_014424 | 378.683   | 404.49    | NM_003611 | 3652.435  |
| 1167.986  | NM_018298 | 1143.75   | 1252.041  | AF159092  | 1099.939  | 994.791   | AB014538  | 861.942   |
| 1359.6    | NM_000676 | 4180.811  | 9186.604  | BC007318  | 1548.526  | 1708.635  | NM_006209 | 794.663   |
| 19625.07  | NM_005766 | 753.761   | 1751.433  | M36693    | 1586.346  | 1331.764  | AK025118  | 3232.769  |
| 1460.12   | NM_013324 | 7160.128  | 8122.403  | NM_016292 | 7443.804  | 4562.335  | NM_000727 | 1245.066  |
| 1017.51   | AL133022  | 1135.663  | 1879.328  | NM_002601 | 2608.755  | 5049.547  | NM_002621 | 172.374   |
| 790.176   | NM_003953 | 1150.334  | 1077.576  | NM_005898 | 7499.472  | 5322.962  | NM_018985 | 1373.567  |
| 4892.811  | NM_006301 | 766.5     | 1064.077  | NM_002889 | 24006.4   | 22402.855 | NM_006074 | 6541.502  |
| 32569.156 | AF222694  | 718.69    | 374.67    | AF078866  | 882.109   | 1043.579  | NM_006240 | 1976.56   |
| 2920.617  | AL049925  | 1712.63   | 1191.509  | BF311880  | 4105.261  | 5950.469  | NM_007026 | 2298.847  |
| 1984.893  | NM_012219 | 3197.972  | 1270.13   | NM_016075 | 336.965   | 275.206   | M37712    | 5752.413  |
| 408.097   | X72887    | 1568.184  | 1989.884  | NM_001360 | 6818.021  | 2649.1    | NM_002648 | 722.725   |
| 15256.901 | NM_004529 | 1110.867  | 355.118   | AK026656  | 2838.485  | 2661.252  | AF070670  | 2640.354  |
| 576.748   | Y10483    | 7450.354  | 6350.289  | AJ276207  | 2991.361  | 2972.666  | NM_016156 | 2652.791  |
| 1234.867  | NM_006784 | 1994.242  | 1297.321  | AB011131  | 8032.518  | 7863.53   | NM_016528 | 1064.27   |
| 2483.065  | NM_017876 | 2368.912  | 1258.24   | NM_000751 | 4613.242  | 3990.454  | NM_015974 | 1590.798  |
| 917.839   | NM_001087 | 39447.043 | 41242.215 | NM_014849 | 2026.038  | 2384.678  | NM_014384 | 1089.108  |
| 458.691   | NM_001826 | 693.762   | 578.682   | NM_001042 | 4662.963  | 3673.502  | NM_002573 | 1255.626  |
| 389.538   | NM_003721 | 11020.105 | 17255.508 | NM_012229 | 3460.824  | 1810.042  | AF133424  | 1552.764  |
| 32116.287 | NM_004724 | 1348.279  | 1375      | NM_005071 | 581.416   | 483.921   | NM_005003 | 10953.692 |
| 1796.92   | NM_001431 | 8116.89   | 9662.816  | AB023147  | 10952.855 | 13274.369 | AF084560  | 3138.405  |
| 3261.37   | NM_000427 | 1297.308  | 2895.004  | NM_016615 | 11454.041 | 10167.37  | NM_015715 | 1818.085  |
| 4706.7    | NM_014924 | 695.171   | 1118.029  | NM_005630 | 1554.273  | 1550.93   | NM_000032 | 1802.197  |
| 1623.75   | NM_006946 | 892.186   | 891.821   | NM_012201 | 1092.024  | 769.391   | NM_002083 | 867.314   |
| 522.256   | NM_000174 | 51994.844 | 63760.363 | AK022385  | 10964.961 | 9416.065  | NM_002035 | 2033.571  |
| 9127.021  | NM_002508 | 4023.947  | 5591.926  | NM_002775 | 1561.806  | 1145.583  | NM_014900 | 691.519   |
| 1912.041  | NM_014343 | 3291.705  | 5326.951  | AK024584  | 3000.655  | 1921.223  | BF342908  | 746.436   |
| 988.501   | D25303    | 1538.599  | 2708.918  | NM_003504 | 4794.275  | 9273.356  | AK023510  | 1481.08   |
| 2503.59   | AB043007  | 23285.664 | 9642.666  | NM_013298 | 2816.519  | 3215.799  | NM_004345 | 860.754   |
| 5977.153  | NM_004861 | 1506.552  | 1143.354  | NM_007267 | 1377.664  | 1286.08   | NM_000702 | 13120.044 |
| 624.036   | AF022913  | 2624.768  | 1129.866  | Z36816    | 711.58    | 719.409   | X71490    | 4154.756  |
| 3331.666  | NM_000028 | 1214.756  | 639.889   | NM_005865 | 2216.219  | 2255.052  | NM_014273 | 7160.975  |
| 2408.287  | NM_001382 | 6071.559  | 4106.148  | NM_006413 | 4062.082  | 4331.323  | NM_004680 | 521.766   |
| 2002.897  | M93718    | 3988.151  | 2017.884  | AK025542  | 1305.256  | 1335.029  | AF104260  | 287.14    |
| 353.839   | NM_005386 | 1355.375  | 1407.877  | AF207547  | 422.561   | 425.402   | NM_005671 | 2567.093  |
| 2833.594  | AK023807  | 7139.545  | 4105.355  | NM_002768 | 4096.01   | 3409.279  | NM_017409 | 630.449   |
| 1635.204  | NM_018188 | 9531.792  | 6829.25   | NM_003691 | 1347.846  | 931.05    | NM_019625 | 2035.03   |
| 2529.108  | AK024273  | 1587.665  | 1600.428  | NM_002950 | 13794.9   | 11309.515 | NM_006729 | 1789.951  |
| 1040.424  | X59417    | 17016.08  | 20184.518 | NM_002318 | 1314.276  | 1200.053  | NM_006071 | 493.649   |
| 7443.073  | D28476    | 7171.239  | 12296.484 | NM_003134 | 43863.258 | 48268.191 | NM_012236 | 8002.917  |
| 2052.398  | NM_016263 | 2206.236  | 2243.12   | NM_004314 | 2298.795  | 2139.897  | AF112219  | 9526.937  |
| 10811.28  | NM_003335 | 13635.699 | 21106.289 | NM_018247 | 3567.739  | 5650.393  | NM_000521 | 47.769    |
| 448.852   | AB002376  | 3664.765  | 7363.594  | NM_017979 | 3958.435  | 3614.38   | NM_004135 | 3038.938  |
| 1395.081  | NM_018249 | 357.699   | 1310.611  | NM_019644 | 421.927   | 479.461   | NM_000203 | 378.245   |
| 2397.087  | NM_005558 | 2078.324  | 2558.541  | NM_006791 | 1382.601  | 1804.794  | NM_013443 | 1769.329  |
| 703.058   | NM_016631 | 1430.501  | 1699.796  | AJ278348  | 3205.192  | 3147.53   | NM_000925 | 5371.458  |
| 1896.524  | AB015617  | 18394.883 | 25171.979 | AI285199  | 683.646   | 843.662   | AF116685  | 418.633   |
| 1300.181  | AK022730  | 2633.355  | 1966.389  | L07738    | 635.603   | 501.211   | NM_000123 | 2079.102  |
| 1034.53   | NM_002256 | 7737.857  | 6215.064  | H90415    | 1000.105  | 1709.485  | AL137501  | 338.869   |
| 1156.238  | AF064839  | 18789.756 | 15344.479 | AA676470  | 7513.715  | 6775.081  | BE858979  | 1465.76   |
| 2336.924  | NM_005439 | 6896.801  | 10962.66  | AA457155  | 5513.078  | 4322.345  | NM_000122 | 1184.151  |
| 1194.883  | AB037810  | 838.839   | 1116.442  | BM014365  | 374.825   | 572.512   | U87223    | 896.708   |
| 3137.635  | NM_006593 | 815.438   | 386.941   | U78045    | 1529.935  | 1961.309  | X91348    | 12894.71  |

|           |           |           |           |           |           |           |           |           |
|-----------|-----------|-----------|-----------|-----------|-----------|-----------|-----------|-----------|
| 1161.383  | NM_000376 | 5424.507  | 3850.982  | AA878561  | 58792.48  | 56818.438 | Z36505    | 1058.267  |
| 1864.885  | NM_000475 | 1646.991  | 1639.804  | BF688309  | 606.486   | 585.092   | NM_001854 | 1112.332  |
| 4601.086  | M61872    | 14083.573 | 8858.879  | AI538525  | 1728.452  | 1123      | NM_017913 | 835.368   |
| 3672.88   | AK027089  | 2203.042  | 771.982   | NM_000941 | 968.567   | 903.786   | NM_002755 | 3460.336  |
| 1281.654  | NM_006284 | 7252.564  | 10845.593 | AF222980  | 1769.258  | 1674.298  | NM_003330 | 3451.837  |
| 890.312   | U18909    | 1798.591  | 1295.511  | AK026758  | 1615.393  | 1320.132  | NM_002481 | 434.117   |
| 2971.044  | NM_003489 | 2273.147  | 1780.665  | AF159092  | 628.128   | 772.398   | NM_003647 | 429.744   |
| 705.214   | NM_016589 | 8883.646  | 10010.399 | BC007318  | 1309.88   | 1351.843  | NM_018351 | 807.918   |
| 283.257   | NM_003597 | 1818.331  | 1755.682  | M36693    | 903.922   | 1162.704  | NM_147171 | 2475.542  |
| 619.256   | NM_006561 | 4550.205  | 4249.452  | NM_016292 | 5873.412  | 3184.028  | AF238083  | 4558.469  |
| 1015.36   | NM_017521 | 1431.053  | 2999.8    | NM_002601 | 1621.411  | 2084.072  | NM_002962 | 229.53    |
| 1693.475  | AK025200  | 5890.961  | 3457.877  | U62858    | 2889.503  | 1806.245  | NM_016388 | 1889.37   |
| 990.244   | NM_001383 | 5721.009  | 5560.143  | NM_014432 | 1317.113  | 1629.971  | NM_000845 | 534.262   |
| 3917.88   | NM_001029 | 52353.781 | 53570.488 | NM_001558 | 650.241   | 696.237   | NM_014965 | 1687.318  |
| 506.016   | NM_005008 | 20236.479 | 18121.236 | NM_006953 | 805.477   | 1175.807  | NM_004882 | 6034.351  |
| 866.867   | NM_016304 | 34038.012 | 32481.838 | U96173    | 1579.392  | 1485.203  | AK024055  | 1204.196  |
| 5404.132  | NM_006013 | 40856.52  | 10124.323 | NM_018941 | 649.596   | 838.528   | AK025326  | 4945.706  |
| 15310.441 | NM_014046 | 13382.793 | 11921.625 | NM_020241 | 1580.131  | 2817.567  | NM_013376 | 849.874   |
| 661.49    | L34071    | 7421.464  | 4588.536  | NM_012471 | 82.191    | 814.641   | NM_017964 | 1673.11   |
| 2784.499  | AK025201  | 5866.741  | 2624.731  | NM_001321 | 2086.627  | 1843.28   | NM_016428 | 881.535   |
| 868.917   | AK022995  | 2016.843  | 1365.584  | AB018264  | 3221.353  | 4293.854  | NM_001184 | 1181.179  |
| 1526.043  | NM_006066 | 7366.273  | 6161.902  | U92544    | 1707.976  | 2077.996  | NM_015530 | 5035.193  |
| 515.655   | NM_005165 | 2603.901  | 614.853   | NM_012229 | 3281.458  | 1916.166  | NM_016238 | 2350.619  |
| 6867.365  | NM_005138 | 30327.186 | 22554.277 | NM_005071 | 604.797   | 602.913   | NM_015997 | 2696.309  |
| 3626.573  | NM_002115 | 32125.123 | 38918.547 | AB023147  | 9567.284  | 11988.352 | NM_001167 | 4699.484  |
| 875.989   | AK023162  | 2875.84   | 2580.117  | NM_016615 | 8672.569  | 6223.244  | NM_012115 | 2651.886  |
| 1962.642  | NM_006396 | 3093.67   | 3110.517  | NM_005630 | 1250.324  | 1184.682  | NM_004933 | 16537.348 |
| 1408.208  | NM_018649 | 1613.171  | 2182.197  | AK023106  | 826.543   | 793.178   | M96577    | 5260.703  |
| 1247.101  | NM_013449 | 3392.684  | 3511.763  | NM_016730 | 20077.002 | 20633.709 | NM_013258 | 14905.171 |
| 5491.433  | NM_004537 | 857.531   | 1090.022  | AL035297  | 844.722   | 858.874   | NM_003842 | 1031.559  |
| 2127.747  | AL390134  | 361.442   | 457.194   | NM_004408 | 2244.294  | 4758.6    | L11238    | 4171.966  |
| 1624.375  | NM_020226 | 1800.125  | 2180.34   | AJ131244  | 1124.627  | 705.781   | K02046    | 1178.974  |
| 13238.063 | NM_017865 | 4202.266  | 5193.658  | NM_002532 | 4141.482  | 3840.981  | AL110151  | 1003.627  |
| 2062.976  | NM_003427 | 3308.722  | 4261.486  | NM_012388 | 1965.356  | 2422.205  | AK024841  | 1435.187  |
| 1320.944  | NM_005920 | 6697.922  | 5575.546  | NM_001671 | 256.723   | 145.938   | NM_004995 | 1319.668  |
| 12644.532 | Y09321    | 989.846   | 815.679   | NM_019843 | 2095.527  | 2640.868  | NM_000386 | 2997.458  |
| 668.277   | AK001499  | 3196.879  | 1652.503  | NM_016192 | 2488.459  | 2604.017  | NM_001190 | 2085.35   |
| 413.994   | AK023568  | 768.205   | 757.111   | BE878426  | 51781.516 | 51058.477 | NM_005271 | 3856.29   |
| 1706.93   | AK026852  | 1969.221  | 1357.712  | NM_001745 | 6401.159  | 4472.963  | NM_015654 | 2678.73   |
| 1437.518  | AK021629  | 877.523   | 900.652   | NM_003825 | 5341.715  | 7145.186  | AB082521  | 4849.729  |
| 628.644   | AL110257  | 42191.238 | 32276.67  | AK025006  | 11268.323 | 10657.941 | AL050182  | 909.658   |
| 1085.843  | AB013384  | 2203.116  | 3082.181  | AF218014  | 5209.861  | 4930.398  | NM_002374 | 1663.591  |
| 6551.628  | AK024824  | 1614.59   | 1417.649  | NM_006678 | 2510.087  | 1690.561  | AK026940  | 1973.724  |
| 556.057   | AK024270  | 2366.802  | 3227.318  | AY007729  | 16075.222 | 14909.844 | AF155117  | 1447.038  |
| 1620.568  | AK025569  | 4150.975  | 5032.799  | NM_001433 | 580.814   | 338.332   | AB014527  | 1193.199  |
| 389.911   | AK023060  | 1770.708  | 3181.165  | NM_003134 | 39552.801 | 52778.836 | NM_004411 | 931.426   |
| 1140.226  | NM_014870 | 1174.962  | 1331.505  | NM_004314 | 3423.705  | 5520.895  | NM_015938 | 3905.069  |
| 1425.224  | AK021917  | 865.705   | 1241.468  | NM_018247 | 5222.093  | 10155.368 | NM_017843 | 182.255   |
| 2424.119  | AF052146  | 31260.053 | 39219.523 | NM_017979 | 2754.965  | 2928.753  | AK025985  | 1946.463  |
| 496.498   | NM_004870 | 2902.71   | 3545.944  | NM_005898 | 7018.689  | 4928.377  | NM_013256 | 1210.305  |
| 1705.052  | AF143872  | 13948.996 | 20321.215 | NM_002889 | 28187.275 | 23784.305 | NM_004143 | 690.529   |
| 1568.975  | AF143326  | 3086.603  | 3799.715  | AF078866  | 877.241   | 1099.577  | NM_016328 | 5181.796  |
| 1032.592  | AL049229  | 4029.013  | 4212.703  | BF311880  | 5247.811  | 7151.677  | NM_017544 | 14168.668 |

|           |           |           |           |           |           |           |           |           |
|-----------|-----------|-----------|-----------|-----------|-----------|-----------|-----------|-----------|
| 2588.073  | AK023152  | 4767.738  | 5794.34   | NM_000078 | 146.465   | 622.24    | NM_003153 | 625.471   |
| 2313.615  | AK000155  | 3088.584  | 3693.066  | NM_001360 | 7482.067  | 2941.742  | NM_016285 | 786.117   |
| 406.578   | AL389937  | 4555.97   | 4873.879  | AK026656  | 3270.073  | 2459.799  | AF025771  | 1497.202  |
| 3500.281  | AK022628  | 39693.07  | 27091.318 | AJ276207  | 3152.621  | 3607.714  | NM_018215 | 676.506   |
| 705.339   | AK021737  | 4997.498  | 3481.984  | AB011131  | 8674.703  | 8564.155  | AB033110  | 604.186   |
| 2170.468  | AK026295  | 7038.032  | 3129.208  | NM_000749 | 407.251   | 311.188   | NM_005083 | 8630.836  |
| 584.437   | AK025007  | 2093.114  | 1164.629  | NM_000751 | 5200.379  | 5012.87   | NM_007187 | 6957.226  |
| 193.711   | NM_016486 | 7170.03   | 6410.177  | NM_014849 | 2355.076  | 2765.655  | NM_018983 | 5833.483  |
| 1041.591  | AK026490  | 27195.613 | 22921.428 | NM_001042 | 4931.419  | 5586.537  | NM_003096 | 2840.528  |
| 885.691   | AJ227861  | 2382.602  | 2212.25   | NM_000623 | 487.659   | 893.242   | NM_007279 | 2288.073  |
| 864.766   | AJ001020  | 933.438   | 1507.386  | NM_000941 | 1218.352  | 1160.736  | BE390833  | 11534.399 |
| 607.768   | NM_005553 | 474.766   | 1602.635  | AF222980  | 1622.238  | 2036.281  | NM_004730 | 7129      |
| 4075.609  | AJ001875  | 3771.044  | 4896.532  | AK026758  | 1491.084  | 1463.784  | NM_000801 | 2224.004  |
| 1323.987  | X64985    | 658.259   | 1071.708  | NM_012201 | 958.426   | 962.26    | NM_006115 | 11499.804 |
| 1391.249  | L77562    | 655.836   | 1025.764  | AB046774  | 303.906   | 465.304   | NM_005801 | 1947.599  |
| 1073.92   | NM_017777 | 1573.545  | 1686.799  | AK022385  | 15832.123 | 15007.888 | NM_018198 | 1232.373  |
| 7171.352  | AK021989  | 1050.382  | 657.427   | NM_002775 | 1808.896  | 2350.514  | NM_001539 | 10916.98  |
| 3922.796  | AK023407  | 599.577   | 634.507   | AK024584  | 3428.502  | 1640.319  | AK027232  | 2576.992  |
| 1016.026  | AK022298  | 2526.395  | 3081.509  | NM_003504 | 4570.875  | 6689.035  | NM_012204 | 585.589   |
| 408.288   | AJ277441  | 27707.467 | 28261.639 | NM_013298 | 3990.195  | 3443.144  | AK091117  | 578.248   |
| 670.193   | NM_006057 | 1283.376  | 1884.079  | NM_007267 | 1913.538  | 1649.55   | NM_003613 | 693.608   |
| 1209.224  | AK024242  | 11329.092 | 21334.682 | Z36816    | 814.414   | 795.6     | NM_000022 | 2720.649  |
| 786.721   | AK024559  | 880.297   | 2225.412  | NM_005865 | 3080.097  | 2446.242  | NM_016576 | 1400.827  |
| 2532.866  | AK024851  | 842.976   | 1261.606  | NM_006413 | 4236.093  | 5254.618  | NM_004213 | 1209.602  |
| 1263.194  | AK024943  | 957.615   | 1163      | NM_017684 | 341.805   | 501.578   | NM_000906 | 954.19    |
| 569.374   | AK024995  | 622.327   | 1168.162  | AK025542  | 2046.508  | 1573.066  | NM_000480 | 1651.129  |
| 530.211   | AL359943  | 34115.77  | 26203.684 | AF207547  | 737.384   | 679.038   | AF254084  | 11190.848 |
| 617.679   | NM_000534 | 4641.135  | 2275.223  | NM_002768 | 4944.747  | 5129.271  | AK022648  | 1158.627  |
| 790.317   | L10140    | 1241.412  | 1017.138  | NM_003691 | 1723.82   | 1775.219  | AK022976  | 878.812   |
| 1874.152  | AL133447  | 1359.771  | 749.377   | NM_002950 | 15681.256 | 15139.777 | AB048791  | 2182.154  |
| 513.977   | AB037853  | 17637.15  | 19429.047 | NM_002318 | 1521.984  | 1398.533  | NM_003107 | 729.674   |
| 896.918   | D28450    | 38132.113 | 28546.299 | NM_005954 | 449.182   | 453.346   | NM_006874 | 2551.54   |
| 374.106   | AK056222  | 2108.401  | 2071.93   | NM_001321 | 2006.39   | 2007.221  | AB046777  | 3359.101  |
| 1260.298  | AK002028  | 25475.418 | 31875.594 | AB018264  | 2486.058  | 2916.007  | AJ251844  | 3894.775  |
| 700.584   | AL050127  | 1877.692  | 2290.305  | U92544    | 1627.331  | 2060.463  | D16815    | 480.403   |
| 4792.313  | AK024805  | 9075.783  | 13965.98  | NM_019644 | 421.396   | 411.48    | NM_001880 | 1707.62   |
| 447.586   | AK001423  | 1010.184  | 1693.026  | NM_006791 | 1545.484  | 1932.634  | AB028943  | 1609.63   |
| 1058.436  | AK024090  | 24801.322 | 16058.681 | AJ278348  | 4004.325  | 3534.7    | NM_006194 | 756.367   |
| 789.844   | AL133574  | 1797.198  | 1311.414  | AI285199  | 932.022   | 1151.639  | AK001603  | 2676.714  |
| 297.963   | AK021936  | 1159.273  | 880.48    | L07738    | 901.241   | 674.27    | U71601    | 1573.386  |
| 1265.661  | AF147339  | 26361.643 | 24322.482 | Z48054    | 370.388   | 428.186   | AF042838  | 2297.723  |
| 264.283   | AL390181  | 21991.889 | 20029.361 | H90415    | 1192.622  | 1328.546  | AL137511  | 525.969   |
| 36817.453 | NM_017914 | 25499.686 | 22324.664 | AA676470  | 9638.247  | 8311.903  | X91221    | 368.696   |
| 1098.174  | AK024953  | 5574.228  | 20913.117 | AA457155  | 5735.054  | 4203.869  | AF075031  | 541.188   |
| 675.145   | AK024276  | 4933.778  | 5350.138  | H91842    | 568.435   | 770.284   | AF075062  | 2088.631  |
| 604.141   | S83374    | 2855.36   | 4161.749  | U78045    | 2884.971  | 4641.913  | NM_004188 | 746.708   |
| 1468.494  | AK025784  | 18144.156 | 29802.006 | AA878561  | 55597.535 | 59375.676 | AF147381  | 2400.756  |
| 2008.361  | U07199    | 3556.37   | 4115.416  | BF688309  | 685.602   | 743.052   | AB002452  | 441.887   |
| 461.084   | AK023713  | 1085.669  | 1330.609  | AI538525  | 1978.91   | 1491.668  | AK024358  | 448.769   |
| 409.623   | X81445    | 1198.056  | 1387.633  | NM_003825 | 4308.222  | 7456.537  | NM_014840 | 486.568   |
| 714.294   | U95091    | 1110.45   | 1474.575  | AK025006  | 11054.633 | 10233.36  | AF088075  | 825.461   |
| 5989.823  | NM_017900 | 28429.252 | 29383.467 | AF218014  | 4784.044  | 4530.933  | AK026376  | 1146.293  |
| 880.107   | S50182    | 2116.357  | 3117.349  | NM_006678 | 3051.6    | 2286.738  | AF088061  | 2680.303  |

|           |                  |           |           |                  |           |           |                  |           |
|-----------|------------------|-----------|-----------|------------------|-----------|-----------|------------------|-----------|
| 810.922   | <b>AL360145</b>  | 1363.132  | 1505.403  | <b>AY007729</b>  | 17656.74  | 20331.414 | <b>AF086286</b>  | 1739.926  |
| 1015.357  | <b>Y12016</b>    | 1007.133  | 826.666   | <b>NM_014424</b> | 425.827   | 358.468   | <b>AF086376</b>  | 1239.206  |
| 661.718   | <b>NM_001178</b> | 945.443   | 1295.153  | <b>AF159092</b>  | 1044.929  | 729.317   | <b>AK022997</b>  | 3873.71   |
| 1054.621  | <b>AK023696</b>  | 5179.18   | 3908.098  | <b>BC007318</b>  | 1330.547  | 1280.905  | <b>NM_017617</b> | 2176.233  |
| 444.192   | <b>NM_000704</b> | 1643.756  | 1218.936  | <b>M36693</b>    | 1355.16   | 987.13    | <b>AF131830</b>  | 1276.068  |
| 1095.118  | <b>NM_015987</b> | 1165.866  | 1093.52   | <b>NM_016292</b> | 6167.125  | 3322.321  | <b>NM_014811</b> | 779.429   |
| 1743.456  | <b>NM_019605</b> | 2114.416  | 2001.54   | <b>NM_002601</b> | 1612.659  | 2044.672  | <b>AF147426</b>  | 597.979   |
| 601.393   | <b>NM_015369</b> | 586.515   | 705.641   | <b>U62858</b>    | 3218.625  | 1931.722  | <b>BC019667</b>  | 14347.422 |
| 5636.538  | <b>Z49090</b>    | 5980.693  | 3882.316  | <b>NM_014432</b> | 1205.273  | 1175.938  | <b>AK026026</b>  | 6140.624  |
| 8333.299  | <b>AK021592</b>  | 5490.353  | 6356.445  | <b>NM_001558</b> | 585.389   | 525.734   | <b>AF085941</b>  | 4642.312  |
| 729.71    | <b>AK025467</b>  | 4375.874  | 2810.695  | <b>NM_006953</b> | 815.196   | 1072.568  | <b>Z69892</b>    | 1365.544  |
| 1244.424  | <b>AK026593</b>  | 4276.473  | 6322.959  | <b>U96173</b>    | 1580.969  | 1531.496  | <b>AK023590</b>  | 596.683   |
| 38270.73  | <b>L37700</b>    | 1134.201  | 1854.242  | <b>NM_018941</b> | 870.309   | 706.209   | <b>AF087961</b>  | 872.676   |
| 30589.234 | <b>NM_017665</b> | 3798.25   | 5247.008  | <b>BE730585</b>  | 555.684   | 455.786   | <b>AL137309</b>  | 1251.811  |
| 3726.635  | <b>AF052106</b>  | 4621.182  | 4792.337  | <b>NM_001980</b> | 485.831   | 634.666   | <b>AL137475</b>  | 956.081   |
| 5419.655  | <b>AK000441</b>  | 1042.31   | 2483.972  | <b>NM_000751</b> | 5335.6    | 6029.068  | <b>AL161956</b>  | 3649.696  |
| 928.126   | <b>AK022391</b>  | 1983.742  | 3109.922  | <b>NM_014849</b> | 1476.299  | 1655.179  | <b>AL390176</b>  | 1965.926  |
| 1359.885  | <b>NM_016125</b> | 2376.906  | 2587.216  | <b>NM_001042</b> | 4663.351  | 4967.448  | <b>AL137356</b>  | 594.401   |
| 748.207   | <b>CY3Cy5</b>    | 3004.906  | 90.689    | <b>NM_012229</b> | 3298.198  | 2217.489  | <b>AL137547</b>  | 824.047   |
| 1227.355  | <b>R72122</b>    | 2436.303  | 3598.543  | <b>NM_005071</b> | 716.583   | 616.348   | <b>AK021994</b>  | 773.606   |
| 1275.06   | <b>Z35309</b>    | 1820.347  | 1665.609  | <b>AB023147</b>  | 10062.868 | 12198.176 | <b>Z70763</b>    | 774.594   |
| 1049.584  | <b>X04571</b>    | 1052.269  | 246.781   | <b>NM_016615</b> | 10193.146 | 7151.233  | <b>AK023802</b>  | 4571.136  |
| 10498.412 | <b>AA700005</b>  | 1865.429  | 10059.85  | <b>NM_005630</b> | 1677.465  | 2801.684  | <b>AF086103</b>  | 778.112   |
| 941.063   | <b>AA292025</b>  | 953.795   | 3194.914  | <b>AK023106</b>  | 997.716   | 915.349   | <b>AK023158</b>  | 744.835   |
| 1005.864  | <b>AA437226</b>  | 998.969   | 4106.797  | <b>NM_016730</b> | 24046.268 | 21201.18  | <b>AK000580</b>  | 512.487   |
| 6183.967  | <b>R36143</b>    | 1251.622  | 1354.563  | <b>AL035297</b>  | 997.013   | 807.108   | <b>AF085852</b>  | 1298.618  |
| 172.994   | <b>XM_056359</b> | 829.515   | 504.868   | <b>NM_004408</b> | 2586.078  | 4705.088  | <b>AF090885</b>  | 5278.263  |
| 4523.128  | <b>D10353/NM</b> | 5989.129  | 3716.833  | <b>AJ131244</b>  | 816.322   | 532.898   | <b>AF161342</b>  | 538.49    |
| 12067.631 | <b>M15042</b>    | 3540.265  | 2583.462  | <b>NM_002532</b> | 3894.643  | 3066.764  | <b>NM_016646</b> | 781.528   |
| 1127.231  | <b>AK056843</b>  | 2880.18   | 2585.884  | <b>NM_012388</b> | 2224.045  | 2398.122  | <b>NM_014082</b> | 1236.577  |
| 356.497   | <b>U49928</b>    | 10276.392 | 8069.278  | <b>NM_016651</b> | 393.772   | 322.271   | <b>AF100636</b>  | 960.002   |
| 652.798   | <b>AK096645</b>  | 12014.904 | 16900.348 | <b>NM_019843</b> | 2562.392  | 2159.925  | <b>AK022197</b>  | 1728.662  |
| 1454.3    | <b>AK092859</b>  | 1068.885  | 1116.368  | <b>NM_016192</b> | 3529.986  | 3151.463  | <b>AF090940</b>  | 653.637   |
| 809.137   | <b>NM_019884</b> | 4391.21   | 4334.988  | <b>BE878426</b>  | 52616.918 | 54148.922 | <b>AK021970</b>  | 778.949   |
| 596.632   | <b>SR2</b>       | 64050.813 | 60793.773 | <b>NM_001745</b> | 6355.367  | 4426.51   | <b>AK022066</b>  | 50720.516 |
| 936.899   | <b>SR4</b>       | 19055.035 | 22000.141 | <b>AK025542</b>  | 2512.632  | 2331.287  | <b>AK022224</b>  | 1414.863  |
| 672.519   | <b>SR6</b>       | 2439.164  | 3360.784  | <b>AF207547</b>  | 847.809   | 1135.062  | <b>AK022359</b>  | 967.381   |
| 603.069   | <b>SR8</b>       | 8594.847  | 32930.934 | <b>NM_002768</b> | 4648.315  | 7153.772  | <b>AK022000</b>  | 817.738   |
| 2633.292  | <b>SR10</b>      | 31965.723 | 12798.511 | <b>NM_003691</b> | 1932.187  | 1533.767  | <b>AK022129</b>  | 1776.945  |
| 854.864   | <b>CY3Cy5</b>    | 2435.548  | 71.64     | <b>NM_002950</b> | 19889.693 | 16676.68  | <b>AK022263</b>  | 5320.062  |
| 2066.056  | <b>NM_005291</b> | 12346.479 | 11668.13  | <b>NM_002318</b> | 2316.032  | 2231.337  | <b>AK022384</b>  | 914.419   |
| 1100.241  | <b>NM_005855</b> | 503.505   | 681.743   | <b>NM_001433</b> | 485.484   | 252.276   | <b>AK027097</b>  | 311.793   |
| 1227.196  | <b>NM_002923</b> | 1135.013  | 1770.541  | <b>NM_003134</b> | 47058.816 | 51353.082 | <b>AK024613</b>  | 749.805   |
| 2204.324  | <b>NM_006794</b> | 1208.946  | 977.898   | <b>NM_004314</b> | 2842.005  | 2411.978  | <b>AK027198</b>  | 1190.831  |
| 4274.038  | <b>NM_018653</b> | 4561.703  | 5176.531  | <b>NM_018247</b> | 6121.761  | 8878.721  | <b>NM_000529</b> | 1168.699  |
| 956.506   | <b>NM_005388</b> | 2944.254  | 2810.978  | <b>NM_017979</b> | 4146.494  | 4337.36   | <b>AF009259</b>  | 1042.951  |
| 810.995   | <b>NM_007232</b> | 19660.85  | 16108.892 | <b>NM_005898</b> | 10014.899 | 6479.456  | <b>AF009260</b>  | 1660.63   |
| 458.959   | <b>NM_003027</b> | 582.427   | 776.321   | <b>NM_002889</b> | 36508.934 | 29021.486 | <b>NM_003079</b> | 951.484   |
| 1068.387  | <b>NM_002717</b> | 6242.42   | 9248.478  | <b>AF078866</b>  | 1046.312  | 1313.533  | <b>NM_017902</b> | 1298.885  |
| 888.824   | <b>NM_014486</b> | 1429.586  | 2300.874  | <b>BF311880</b>  | 3878.798  | 4697.458  | <b>AK021981</b>  | 408.055   |
| 1814.795  | <b>NM_003025</b> | 11025.197 | 7432.317  | <b>NM_000078</b> | 453.678   | 484.301   | <b>AL359567</b>  | 881.507   |
| 12015.188 | <b>NM_020179</b> | 6909.277  | 9718.868  | <b>NM_016075</b> | 658.895   | 446.629   | <b>NM_017726</b> | 1668.671  |
| 457.867   | <b>NM_004306</b> | 40028.898 | 47069.703 | <b>NM_001360</b> | 7033.352  | 2723.686  | <b>AK021977</b>  | 110.579   |



|           |           |           |           |           |           |           |           |           |
|-----------|-----------|-----------|-----------|-----------|-----------|-----------|-----------|-----------|
| 751.006   | NM_001153 | 986.318   | 779.582   | AK026656  | 4351.067  | 4320.979  | AK026716  | 525.594   |
| 224.903   | NM_006786 | 1934.086  | 1073.005  | AJ276207  | 4118.75   | 4065.82   | AL049325  | 6921.371  |
| 1060.366  | NM_006205 | 1649.379  | 2416.49   | AB011131  | 9399.124  | 10958.974 | AK024154  | 9227.741  |
| 752.094   | NM_004034 | 3748.27   | 4417.721  | AF164794  | 4013.06   | 5371.503  | AF086341  | 861.717   |
| 1771.694  | NM_000130 | 3765.283  | 3423.963  | AB020656  | 529.914   | 552.696   | AK026672  | 1392.191  |
| 2225.582  | AF193756  | 730.319   | 682.74    | AK023648  | 4183.807  | 4397.929  | S83282    | 40797.121 |
| 918.654   | AI492087  | 21396.932 | 8624.576  | NM_000412 | 1295.284  | 1405.89   | AK024164  | 34927.871 |
| 1684.222  | NM_004193 | 2375.292  | 1750.259  | AF077033  | 1630.859  | 1708.713  | AF052130  | 3900.524  |
| 783.273   | NM_002803 | 7608.073  | 10262.118 | NM_004991 | 567.085   | 701.763   | AF130090  | 7437.294  |
| 598.017   | NM_005508 | 2248.865  | 2824.785  | AF222980  | 1871.147  | 2370.289  | AL096727  | 1405.462  |
| 1052.33   | NM_018485 | 627.305   | 1486.373  | AK026758  | 2161.948  | 2342.97   | AL080110  | 1561.858  |
| 3124.204  | NM_006788 | 777.244   | 863.056   | NM_012201 | 1185.933  | 1243.06   | NM_020425 | 1053.573  |
| 29932.543 | NM_016568 | 982.261   | 942.288   | AB046774  | 613.895   | 520.396   | AK024076  | 1653.466  |
| 2216.878  | AB033102  | 9207.136  | 9063.233  | AK022385  | 18950.094 | 16427.828 | M87940    | 1719.899  |
| 456.931   | NM_014774 | 4242.753  | 3205.686  | NM_002775 | 1621.16   | 1254.429  | L77588    | 1501.26   |
| 867.454   | NM_014143 | 8071.185  | 7282.495  | AK024584  | 3229.712  | 1170.776  | AF086304  | 13005.125 |
| 569.751   | M55646    | 10487.996 | 19070.521 | NM_003504 | 4329.449  | 7842.216  | U61094    | 1151.457  |
| 2933.927  | NM_006112 | 33718.207 | 42764.633 | NM_013298 | 3338.35   | 3326.071  | AB032976  | 1391.062  |
| 1091.41   | M12807    | 1823.386  | 3969.137  | NM_007267 | 1694.316  | 1344.79   | AF301222  | 8104.141  |
| 3209.803  | NM_001765 | 1065.362  | 1047.733  | Z36816    | 677.486   | 787.229   | AF215981  | 2724.331  |
| 30384.93  | NM_003361 | 2618.366  | 1925.788  | NM_005865 | 3152.507  | 2738.969  | NM_000732 | 9957.361  |
| 2052.824  | NM_012099 | 2305.141  | 2223.169  | NM_006413 | 4397.292  | 5927.335  | AF130044  | 1134.693  |
| 835.462   | NM_018684 | 6784.972  | 7736.449  | NM_017684 | 410.351   | 521.138   | AF116709  | 244.955   |
| 1227.08   | NM_017983 | 1402.315  | 1340.241  | AL049689  | 303.061   | 998.998   | AF087980  | 556.535   |
| 2665.713  | AF116909  | 1997.302  | 1725.305  | NM_000216 | 357.619   | 494.641   | NM_013939 | 684.905   |
| 673.056   | BE906724  | 1690.513  | 1529.843  | AF135960  | 979.284   | 690.561   | AB038651  | 1463.875  |
| 2270.136  | NM_002283 | 6178.443  | 6101.76   | NM_014216 | 6723.216  | 8424.531  | AL359603  | 739.653   |
| 592.884   | AJ276095  | 12782.45  | 7862.629  | NM_003010 | 1058.907  | 837.564   | X84838    | 521.234   |
| 740.382   | NM_004819 | 3447.062  | 2541.391  | NM_006871 | 663.401   | 623.887   | NM_013940 | 650.934   |
| 722.527   | NM_007184 | 2831.787  | 3678.878  | NM_019074 | 2318.228  | 2121.204  | AL117643  | 875.771   |
| 23382.338 | AF231916  | 1557.369  | 1531.066  | NM_018494 | 46302.586 | 36268.316 | AF075063  | 712.84    |
| 920.808   | NM_003501 | 3346.569  | 3455.853  | AK000006  | 492.886   | 428.393   | AF069135  | 5051.717  |
| 1221.032  | AK022654  | 33124.633 | 45651.184 | NM_001115 | 1068.627  | 1101.293  | AK026524  | 1151.047  |
| 355.577   | BC002905  | 4776.392  | 5638.286  | NM_014921 | 839.71    | 469.581   | AB011157  | 3885.723  |
| 5881.985  | NM_018091 | 5983.46   | 5552.726  | NM_016581 | 44264.023 | 42392.07  | U17632    | 2151.191  |
| 3082.864  | NM_001108 | 3629.05   | 18371.703 | NM_013255 | 627.981   | 988.591   | AK026764  | 2210.213  |
| 14369.172 | NM_001637 | 677.179   | 835.491   | NM_007183 | 607.21    | 465.532   | AF113700  | 2876.913  |
| 5472.078  | NM_016630 | 7845.092  | 10944.563 | AJ238243  | 5490.36   | 4237.761  | NM_017835 | 8204.858  |
| 1871.721  | NM_014291 | 5373.483  | 3391.83   | J05046    | 13904.257 | 13510.277 | NM_018347 | 2125.724  |
| 1040.908  | NM_014631 | 976.041   | 1080.229  | NM_012318 | 986.094   | 730.429   | AK024986  | 759.56    |
| 1178.011  | NM_001089 | 4910.341  | 3889.669  | NM_002751 | 3835.576  | 2894.994  | AK026730  | 587.72    |
| 983.112   | NM_000120 | 4442.101  | 4670.188  | NM_004291 | 1238.424  | 1270.258  | AK024739  | 1027.001  |
| 1273.329  | AF172327  | 20683.889 | 22576.027 | NM_003816 | 2339.321  | 2501.554  | AK098681  | 822.188   |
| 1582.143  | NM_001676 | 2426.994  | 2181.291  | NM_004912 | 2478.778  | 2786.733  | AK026772  | 1177.334  |
| 1672.053  | NM_001679 | 13992.399 | 19770.91  | U79304    | 9269.641  | 8114.68   | NM_014260 | 9534.763  |
| 641.291   | NM_004046 | 66350.398 | 60224.898 | NM_016267 | 6224.717  | 11455.349 | AK026458  | 367.391   |
| 1172.431  | NM_004983 | 799.477   | 965.03    | NM_004671 | 4475.675  | 4364.218  | AK022266  | 371.975   |
| 3741.157  | U09384    | 639.374   | 455.218   | NM_005180 | 8232.739  | 10773.305 | CY3Cy5    | 4173.622  |
| 17093.172 | NM_006860 | 5358.843  | 6335.363  | NM_006526 | 1942.888  | 1885.443  | M23254    | 3830.762  |
| 3958.563  | NM_004794 | 10179.083 | 3558.627  | U35622    | 692.214   | 502.733   | BE618539  | 443.641   |
| 2091.276  | NM_004283 | 1984.188  | 2423.063  | NM_007045 | 1254.649  | 961.595   | R28062    | 1429.186  |
| 705.47    | NM_004163 | 14224.421 | 14480.359 | NM_003627 | 2617.565  | 1592.196  | AI627464  | 1453.84   |
| 1198.494  | AK026308  | 1309.148  | 1633.47   | NM_012145 | 8706.862  | 13834.957 | BI756258  | 859.607   |

|           |           |           |           |           |           |           |           |           |
|-----------|-----------|-----------|-----------|-----------|-----------|-----------|-----------|-----------|
| 1517.966  | NM_013337 | 1800.538  | 1825.016  | AF305779  | 600.294   | 465.444   | AA608557  | 2212.793  |
| 6925.165  | NM_006899 | 3914.39   | 3553.439  | AF225416  | 3690.131  | 5132.226  | AL050095  | 986.33    |
| 929.211   | NM_012200 | 2205.867  | 2008.222  | NM_016231 | 759.417   | 736.468   | U03272    | 1028.638  |
| 1136.305  | NM_001724 | 1498.658  | 2599.431  | NM_002093 | 3016.38   | 3789.202  | NM_000664 | 955.689   |
| 2761.553  | NM_000150 | 1128.489  | 1385.787  | AB042555  | 5460.808  | 4936.281  | SR5       | 3159.407  |
| 4179.987  | AB023152  | 828.239   | 1463.472  | NM_017763 | 814.097   | 715.573   | SR7       | 3402.104  |
| 2195.611  | NM_006212 | 1424.664  | 1144.349  | NM_013975 | 1250.69   | 1148.932  | SR9       | 10688.462 |
| 760.194   | AK022872  | 3369.176  | 2613.568  | NM_003843 | 3186.889  | 2594.133  | CY3Cy5    | 4814.272  |
| 1690.68   | AK024272  | 4316.896  | 4294.897  | NM_012216 | 690.192   | 574.567   | NM_014808 | 685.271   |
| 3056.747  | NM_016381 | 2019.023  | 1060.931  | NM_005338 | 351.609   | 448.65    | AB006627  | 783.879   |
| 688.867   | NM_018042 | 2294.988  | 1776.576  | X73502    | 2571.383  | 2720.933  | NM_000416 | 1694.877  |
| 5319.282  | BE741525  | 1402.421  | 1585.253  | NM_020445 | 47538.199 | 42776.77  | NM_003382 | 649.253   |
| 1662.526  | BF030555  | 22381.717 | 21471.664 | NM_016376 | 5185.313  | 5617.445  | NM_002965 | 3220.38   |
| 620.94    | NM_012433 | 5825.336  | 4663.353  | AB046848  | 3781.3    | 3585.896  | AB007883  | 1794.416  |
| 1393.862  | NM_005605 | 2225.348  | 2214.816  | AL133057  | 4229.516  | 4173.639  | AK093780  | 2834.551  |
| 4771.233  | NM_002576 | 1415.229  | 1825.468  | U04845    | 5784.966  | 5927.469  | NM_007037 | 5753.021  |
| 8182.509  | NM_003582 | 1888.369  | 3760.083  | NM_018103 | 4985.48   | 5093.088  | NM_001649 | 832.592   |
| 3041.26   | AF057354  | 629.581   | 505.129   | AK026302  | 3808.565  | 3400.571  | AF038196  | 1706.722  |
| 1078.908  | AF169351  | 7489.105  | 8172.666  | NM_012214 | 1733.724  | 1917.666  | NM_004859 | 2879.077  |
| 1868.492  | M14200    | 64477.531 | 62324.359 | AF049656  | 15188.672 | 16349.179 | AB037804  | 610.121   |
| 988.514   | NM_000282 | 3475.518  | 4770.238  | NM_000312 | 1217.321  | 1135.692  | NM_003289 | 15053.589 |
| 1734.648  | NM_000532 | 12085.894 | 8470.448  | NM_016598 | 3289.121  | 2390.035  | NM_006323 | 3808.114  |
| 770.954   | NM_016341 | 1119.606  | 1381.787  | BE874867  | 39371.145 | 42682.098 | NM_016466 | 614.732   |
| 2612.968  | NM_004034 | 4399.724  | 4722.259  | AL136719  | 1262.333  | 1181.716  | NM_001493 | 3467.548  |
| 2044.982  | NM_000130 | 3033.694  | 2903.7    | NM_014109 | 3695.12   | 4436.292  | NM_014841 | 673.85    |
| 435.99    | AF193756  | 1573.657  | 2242.834  | NM_012160 | 1420.932  | 714.523   | NM_014426 | 2768.55   |
| 1181.935  | NM_004183 | 1008.928  | 1415.543  | NM_006357 | 29819.125 | 29790.744 | NM_006816 | 11469.806 |
| 4666.344  | AI492087  | 21737.578 | 8847.277  | NM_014248 | 36647.023 | 32025.002 | NM_000258 | 4520.073  |
| 1551.271  | R72122    | 2524.029  | 3186.669  | AK027070  | 531.097   | 584.242   | AB033055  | 2288.794  |
| 376.711   | Z35309    | 1590.069  | 1369.898  | NM_003341 | 3394.231  | 3540.122  | AF311287  | 1191.118  |
| 513.066   | AA700005  | 1804.294  | 9550.871  | NM_017785 | 644.982   | 1027.611  | NM_014781 | 1861.62   |
| 306.237   | AA292025  | 1418.167  | 3227.813  | NM_006249 | 2568.721  | 2132.487  | X87896    | 600.98    |
| 14994.074 | AA437226  | 1138.475  | 5006.292  | NM_018318 | 604.849   | 1059.645  | M88310    | 1101.22   |
| 1834.397  | R36143    | 1567.461  | 2294.871  | AB020640  | 1779.985  | 1651.498  | NM_000042 | 1123.35   |
| 4152.754  | XM_056359 | 995.665   | 1308.84   | D29954    | 10293.11  | 7401.618  | AF090405  | 717.038   |
| 979.029   | D10353/NM | 5425.25   | 4389.197  | AF007131  | 1135.772  | 966.866   | NM_005024 | 1268.537  |
| 3752.948  | M15042    | 4010.291  | 2619.489  | NM_006839 | 1196.929  | 983.208   | NM_016335 | 425.188   |
| 921.059   | AK056843  | 3746.784  | 3077.539  | NM_000223 | 614.081   | 565.964   | NM_003165 | 1403.41   |
| 1153.972  | U49928    | 11824.485 | 12203.53  | NM_005851 | 753.074   | 557.117   | NM_003906 | 1523.95   |
| 628.345   | AK096645  | 12918.637 | 17094.303 | AF119256  | 1226.36   | 962.235   | AL359590  | 11691.449 |
| 2671.201  | AK092859  | 1152.822  | 1371.208  | X74497    | 687.072   | 709.301   | NM_002861 | 4166.131  |
| 1825.652  | NM_019884 | 4582.218  | 5016.159  | NM_012210 | 392.761   | 345.113   | NM_003080 | 2135.689  |
| 1174.206  | NM_018291 | 3447.741  | 3877.278  | U10072    | 1379.923  | 1087.474  | NM_002645 | 1096.381  |
| 655.83    | NM_005530 | 2717.789  | 3566.231  | AF222749  | 8311.646  | 6579.396  | AB033027  | 1229.646  |
| 1384.23   | AF116909  | 1927.117  | 1878.344  | NM_003410 | 1465.604  | 1448.384  | AK021805  | 3583.488  |
| 32724.467 | BE906724  | 1551.053  | 1285.928  | NM_007146 | 1336.559  | 1323.363  | AB014550  | 1242.675  |
| 3471.424  | NM_007184 | 2711.238  | 3799.884  | NM_002229 | 584.655   | 624.985   | AF320294  | 1629.968  |
| 1021.882  | NM_005291 | 11729.497 | 10480.66  | S69027    | 2405.27   | 2285.361  | AF161436  | 2764.581  |
| 1933.698  | NM_005855 | 535.588   | 770.382   | NM_012119 | 4130.762  | 3176.292  | NM_020402 | 2687.402  |
| 859.557   | NM_002923 | 1311.801  | 2050.883  | X99631    | 9088.374  | 8532.724  | NM_004299 | 1450.452  |
| 2386.195  | NM_006794 | 1189.999  | 1083.44   | NM_001730 | 1400.827  | 1513.694  | NM_001171 | 688.018   |
| 1535.773  | NM_018653 | 4647.895  | 4942.208  | AB014589  | 1780.879  | 1500.043  | NM_002250 | 1464.337  |
| 565.115   | NM_005388 | 2756.239  | 2698.554  | AF248649  | 350.073   | 510.653   | AF132734  | 6070.621  |

|           |           |           |           |           |           |           |           |           |
|-----------|-----------|-----------|-----------|-----------|-----------|-----------|-----------|-----------|
| 2346.748  | NM_007232 | 16344.109 | 15001.496 | U37146    | 14389.438 | 8969.777  | NM_018379 | 1572.804  |
| 2788.877  | NM_003027 | 603.175   | 850.05    | NM_012086 | 1541.348  | 1064.484  | NM_016403 | 7419.555  |
| 1807.676  | NM_002717 | 4420.931  | 5061.665  | AB040431  | 839.35    | 1286.054  | NM_001921 | 3730.183  |
| 55208.023 | NM_003025 | 12878.372 | 11482.483 | NM_000991 | 50484.543 | 50518.77  | NM_006230 | 5210.164  |
| 11585.172 | U52051    | 741.537   | 771.94    | NM_016034 | 14166.33  | 4341.909  | NM_014699 | 2440.173  |
| 1102.714  | NM_020179 | 6774.468  | 8304.652  | X69150    | 45685.078 | 45559.938 | NM_013400 | 3030.835  |
| 1338.947  | NM_004306 | 34869.074 | 42051.617 | NM_001025 | 52892.199 | 56329.441 | AK026257  | 1189.135  |
| 1842.782  | NM_001153 | 1017.721  | 446.925   | NM_016067 | 16744.564 | 13802.608 | AK023836  | 2118.501  |
| 5960.875  | NM_006786 | 2072.411  | 780.039   | NM_018285 | 8705.754  | 3094.337  | NM_018109 | 1017.447  |
| 1127.741  | NM_006205 | 1590.624  | 1776.777  | AK022393  | 5696.052  | 1300.073  | AJ299442  | 2508.187  |
| 1252.508  | NM_006860 | 5340.825  | 6743.438  | AK026654  | 703.848   | 595.101   | NM_000129 | 748.762   |
| 730.524   | NM_004794 | 10599.097 | 3901.203  | AB020643  | 321.274   | 561.289   | NM_003762 | 2235.413  |
| 775.162   | AK026308  | 1663.851  | 1820.313  | AK025496  | 4130.148  | 4589.183  | NM_018446 | 1982.21   |
| 4120.542  | NM_013337 | 1921.767  | 1843.38   | NM_005205 | 59656.984 | 63559.297 | NM_014465 | 1008.247  |
| 1444.3    | NM_004193 | 2026.266  | 1808.263  | NM_001966 | 973.519   | 714.88    | D87292    | 3796.783  |
| 2618.645  | NM_002803 | 7539.755  | 9022.375  | NM_016138 | 776.478   | 811.672   | NM_001202 | 633.289   |
| 464.462   | NM_005508 | 2002.841  | 1686.948  | Z36833    | 32100.568 | 31332.164 | AB037804  | 647.511   |
| 2782.883  | NM_018485 | 412.798   | 1051.645  | NM_014355 | 1262.979  | 1357.735  | NM_003289 | 12878.194 |
| 987.682   | NM_006788 | 1204.936  | 1031.423  | M21191    | 22726.803 | 19853.379 | M23254    | 3413.983  |
| 1846.26   | AB033102  | 8230.431  | 6808.268  | AF072810  | 859.615   | 934.767   | BE618539  | 427.106   |
| 20941.244 | NM_014774 | 4113.065  | 3560.23   | L19778    | 469.925   | 658.433   | R28062    | 1372.516  |
| 20534.049 | NM_014143 | 7192.089  | 6097.948  | AF174482  | 9013.177  | 6920.212  | AI627464  | 1241.022  |
| 4768.896  | M55646    | 9643.332  | 12465.374 | NM_003528 | 1748.284  | 4368.556  | BI756258  | 786.21    |
| 2417.032  | NM_006112 | 26185.1   | 24261.76  | NM_017769 | 666.111   | 777.464   | AA608557  | 2312.536  |
| 1794.119  | M12807    | 1922.623  | 3666.165  | D85131    | 6689.909  | 4879.011  | AL050095  | 902.39    |
| 730.898   | NM_001765 | 1251.788  | 1030.914  | NM_004956 | 620.91    | 938.534   | U03272    | 745.506   |
| 3013.612  | NM_003361 | 2562.235  | 1758.257  | D30612    | 3311.342  | 3272.23   | NM_000664 | 986.693   |
| 1185.483  | NM_012099 | 2583.293  | 1966.526  | NM_002163 | 9650.453  | 9423.074  | AF075085  | 22324.58  |
| 1813.696  | NM_018684 | 7437.686  | 6875.917  | U52097    | 14441.503 | 10301.898 | NM_005892 | 1991.665  |
| 1665.141  | NM_017983 | 1534.166  | 1327.94   | NM_003416 | 1926.194  | 1604.875  | NM_000042 | 1344.217  |
| 461.049   | AF057354  | 1092.685  | 347.904   | NM_018484 | 471.277   | 596.125   | NM_005024 | 1175.734  |
| 683.271   | AF169351  | 7882.115  | 6088.036  | NM_017594 | 1080.635  | 1388.883  | NM_014808 | 783.312   |
| 1912.68   | M14200    | 58012.457 | 57629.934 | AK027237  | 665.236   | 985.022   | AB006627  | 1166.153  |
| 745.601   | NM_000282 | 3785.609  | 3272.55   | AK027104  | 1047.245  | 1031.229  | NM_000416 | 1549.095  |
| 2386.642  | NM_000532 | 11916.442 | 6132.92   | AL133090  | 8296.088  | 8743.481  | NM_002965 | 2908.33   |
| 6416.086  | NM_016341 | 1128.651  | 1093.384  | AF085867  | 2318.335  | 3673.275  | AB007883  | 1714.392  |
| 11057.165 | AF231916  | 2304.579  | 1454.814  | AK026158  | 763.999   | 776.974   | AK093780  | 2122.758  |
| 3987.76   | NM_003501 | 3883.079  | 2692.58   | AF086510  | 2680.056  | 3026.412  | AY009397  | 24609.889 |
| 3747.542  | AK022654  | 34729.313 | 33893.395 | Z36779    | 2057.416  | 2302.384  | NM_007037 | 5380.445  |
| 1089.511  | BC002905  | 6265.303  | 7380.308  | NM_002816 | 1540.553  | 2442.158  | NM_001649 | 996.215   |
| 2086.553  | NM_018091 | 8456.5    | 9471.36   | NM_017513 | 408.322   | 396.215   | NM_005492 | 555.779   |
| 6384.426  | NM_001108 | 5385.683  | 37180.824 | NM_017822 | 4495.092  | 4572.08   | AF038196  | 2358.029  |
| 1622.911  | NM_001637 | 1034.617  | 1818.361  | AK026844  | 2802.132  | 2353.295  | NM_004859 | 2931.816  |
| 2354.114  | NM_016630 | 11374.303 | 18318.865 | AK026735  | 2153.918  | 1338.129  | NM_016352 | 470.231   |
| 5089.386  | NM_014291 | 6531.488  | 5103.788  | AL110104  | 20536.262 | 24913.799 | NM_000070 | 1603.065  |
| 5003.333  | NM_014631 | 1251.88   | 1920.337  | AF240633  | 733.057   | 973.1     | NM_002250 | 1680.635  |
| 3111.933  | NM_001089 | 6681.958  | 7376.927  | AK027056  | 2005.301  | 1426.209  | AL021682  | 4007.344  |
| 1436.185  | NM_000120 | 6210.94   | 9070.741  | AK024294  | 1813.506  | 1803.328  | NM_006323 | 3593.132  |
| 1042.262  | AF172327  | 30523.561 | 34326.406 | AB014573  | 3763.067  | 4327.622  | NM_016466 | 418.125   |
| 16274.205 | NM_001676 | 3316.831  | 3762.98   | AK025418  | 407.681   | 497.155   | NM_001493 | 3096.39   |
| 1877.51   | NM_001679 | 15513.175 | 20901.771 | AK091109  | 9045.71   | 10384.71  | NM_014841 | 566.852   |
| 433.861   | NM_004046 | 58233.355 | 58401.055 | NM_014967 | 1912.231  | 3361.287  | NM_014426 | 2096.607  |
| 3877.669  | NM_004983 | 1272.816  | 1033.77   | AK022915  | 2143.488  | 2436.134  | NM_006816 | 9545.182  |

|           |           |           |           |           |           |           |           |           |
|-----------|-----------|-----------|-----------|-----------|-----------|-----------|-----------|-----------|
| 1518.461  | U09384    | 866.905   | 544.044   | AL355711  | 651.784   | 597.013   | AK026518  | 13584.104 |
| 8339.335  | NM_019884 | 6923.725  | 8745.541  | AK025851  | 1048.063  | 1035.229  | NM_00025E | 3863.364  |
| 645.685   | NM_018291 | 4217.813  | 4356.144  | AJ011409  | 5366.509  | 5193.671  | AB033055  | 1334.47   |
| 398.375   | NM_005530 | 3936.037  | 5063.669  | AJ227906  | 1609.716  | 1779.456  | AF311287  | 1070.562  |
| 3197.479  | NM_00689E | 6114.23   | 7394.992  | AJ001906  | 504.071   | 435.996   | NM_014781 | 1499.733  |
| 3233.736  | NM_012200 | 2983.606  | 2664.375  | U17633    | 704.475   | 483.226   | M88310    | 1110.172  |
| 6417      | NM_001724 | 2183.316  | 2771.341  | L10404    | 890.697   | 845.299   | NM_01844E | 2411.025  |
| 3769.049  | NM_000150 | 1378.737  | 1531.792  | AF283776  | 6460.29   | 7359.466  | NM_01446E | 1289.174  |
| 1513.551  | AB023152  | 1501.617  | 3139.794  | L10123    | 22459.32  | 28715.365 | D87292    | 4001.377  |
| 3448.813  | NM_006212 | 1954.52   | 1679.264  | AF071507  | 443.282   | 658.364   | NM_00549E | 704.234   |
| 1502.049  | AK022872  | 4772.885  | 5136.331  | D16877    | 2852.656  | 2999.587  | NM_01633E | 502.369   |
| 3807.982  | AK024272  | 6756.429  | 8640.54   | L19363    | 856.492   | 1026.663  | NM_00316E | 1680.976  |
| 1393.312  | NM_016381 | 2542.599  | 1440.404  | AL109781  | 3148.556  | 2580.898  | NM_00390E | 3724.924  |
| 3781.188  | AL591715  | 792.672   | 1009.861  | AK000036  | 1511.062  | 1744.529  | AL359590  | 11353.19  |
| 4588.694  | NM_018042 | 2742.14   | 1961.76   | AK000769  | 358.048   | 497.994   | NM_002861 | 3943.726  |
| 1234.151  | BE741525  | 1409.196  | 1263.125  | AK000924  | 585.689   | 452.247   | NM_003080 | 2142.911  |
| 330.497   | BF030555  | 23601.887 | 18263.088 | AK022252  | 1284.792  | 1087.277  | NM_00264E | 754.821   |
| 1999.523  | NM_012433 | 7392.253  | 4605.696  | AK000114  | 1910.501  | 1916.74   | AB033027  | 1425.355  |
| 444.672   | NM_00560E | 2385.283  | 2027.52   | AK000952  | 4849.702  | 3678.775  | AK021805  | 3121.222  |
| 737.452   | NM_00257E | 1684.294  | 1809.405  | AK024520  | 1749.093  | 1969.324  | AB014550  | 1703.574  |
| 786.256   | NM_003582 | 2536.487  | 4135.488  | AK024592  | 2433.313  | 2968.754  | AF320294  | 1870.182  |
| 29293.797 | U52051    | 1535.119  | 1292.841  | AK024904  | 2319.865  | 2649.053  | AF161436  | 2925.216  |
| 783.662   | NM_02017E | 9855.005  | 12962.026 | AK025030  | 1003.187  | 978.829   | NM_020402 | 2731.605  |
| 4010.736  | NM_00430E | 51012.625 | 56959.961 | AK024542  | 2680.888  | 3107.595  | NM_00429E | 1646.196  |
| 1096.371  | NM_001153 | 1300.989  | 649.689   | AK025064  | 1131.303  | 629.886   | NM_001171 | 609.342   |
| 1718.013  | NM_00678E | 2502.566  | 1156.034  | AB050477  | 515.735   | 496.367   | NM_000664 | 1168.839  |
| 719.143   | NM_00620E | 1989.619  | 2215.802  | AK000152  | 477.085   | 477.493   | AF075085  | 27414.271 |
| 2337.284  | NM_004034 | 4822.071  | 4520.182  | AK024300  | 960.995   | 630.864   | NM_005892 | 1719.023  |
| 1015.676  | NM_000130 | 3798.631  | 2474.732  | L09092    | 425.404   | 584.002   | NM_00647E | 383.53    |
| 1146.581  | AF193756  | 1210.239  | 909.63    | NM_012132 | 280.772   | 678.135   | AF132734  | 6327.888  |
| 5809.421  | NM_004183 | 824.371   | 653.971   | NM_01212E | 1173.132  | 970.591   | NM_01837E | 1349.13   |
| 4478.997  | AI492087  | 23906.035 | 11073.533 | AK024881  | 390.551   | 632.468   | NM_016403 | 6939.813  |
| 2435.593  | R72122    | 3235.596  | 4960.074  | AK025716  | 1009.075  | 819.198   | NM_015603 | 713.182   |
| 839.61    | Z35309    | 1992.968  | 2666.73   | AF086202  | 5798.124  | 6324.849  | NM_001921 | 3459.747  |
| 2143.332  | X04571    | 823.108   | 399.28    | AK023270  | 2769.026  | 2839.533  | NM_006230 | 4740.161  |
| 749.224   | AA700005  | 1835.617  | 8531.88   | AF085979  | 18796.102 | 22196.172 | NM_01469E | 2595.713  |
| 2860.602  | AA292025  | 1285.138  | 2754.337  | AK023112  | 1514.061  | 1770.21   | NM_013400 | 2930.696  |
| 570.229   | AA437226  | 1219.019  | 3703.359  | NM_01780E | 26154.996 | 16668.553 | AK026257  | 1029.614  |
| 2424.76   | R36143    | 1371.587  | 1775.118  | AK001937  | 47345.164 | 44548.242 | AK023836  | 2002.242  |
| 690.815   | XM_056359 | 979.485   | 1036.172  | AL365517  | 1400.541  | 1846.177  | NM_01810E | 1326.927  |
| 2394.27   | D10353/NM | 7070.027  | 5664.467  | AK021988  | 6156.258  | 6383.197  | AJ299442  | 2988.569  |
| 809.515   | M15042    | 3971.138  | 2524.083  | AF086494  | 7029.688  | 7893.249  | NM_00012E | 844.885   |
| 1288.198  | AK056843  | 3098.936  | 1968.405  | BI769977  | 606.043   | 899.78    | NM_003762 | 2001.166  |
| 4219.306  | U49928    | 8079.506  | 4729.32   | AK024913  | 2090.259  | 1168.218  | NM_00485E | 3284.335  |
| 2436.22   | AK096645  | 10780.853 | 13161.49  | AB007961  | 2199.559  | 3892.857  | NM_005014 | 426.435   |
| 953.502   | AK092859  | 1397.116  | 741.507   | NM_005547 | 2361.568  | 2924.808  | NM_000070 | 1232.554  |
| 6131.924  | M12807    | 2356.785  | 4295.377  | AF119862  | 4039.529  | 4147.941  | NM_001202 | 532.238   |
| 6299.712  | NM_00176E | 1455.235  | 1205.915  | U17628    | 1226.871  | 1337.473  | AB037804  | 581.716   |
| 3625.724  | NM_003361 | 2523.188  | 1295.257  | AF119867  | 3582.385  | 3255.228  | NM_00328E | 13269.051 |
| 63966.141 | NM_01209E | 2038.876  | 1576.726  | AL357205  | 8769.819  | 9938.963  | M23254    | 3049.989  |
| 1804.199  | NM_018684 | 7462.961  | 5760.3    | AF124819  | 385.843   | 555.939   | BE618539  | 410.609   |
| 1842.156  | NM_017983 | 1410.165  | 1157.277  | D17091    | 674.081   | 665.417   | R28062    | 1063.865  |
| 2571.221  | AF116909  | 1942.074  | 914.039   | AL133074  | 891.778   | 1247.283  | AI627464  | 1207.927  |

|           |           |           |           |           |           |           |           |           |
|-----------|-----------|-----------|-----------|-----------|-----------|-----------|-----------|-----------|
| 4245.494  | BE906724  | 2507.375  | 950.552   | AF086318  | 7750.357  | 7455.641  | BI756258  | 706.993   |
| 708.175   | NM_007184 | 3525.075  | 4488.626  | AF088012  | 785.002   | 1023.021  | AI342225  | 54071.051 |
| 6408.877  | NM_005291 | 11668.709 | 9004.89   | NM_018121 | 746.429   | 1099.026  | AF110020  | 353.379   |
| 5527.769  | NM_005855 | 413.547   | 413.815   | AK026708  | 3445.25   | 3381.059  | AA608557  | 6434.881  |
| 4013.143  | NM_002923 | 1148.061  | 1602.309  | NM_017903 | 5279.374  | 7255.452  | AL050095  | 960.659   |
| 1863.564  | NM_006794 | 1284.753  | 1658.495  | NM_018074 | 857.049   | 910.736   | U03272    | 1003.095  |
| 3656.109  | NM_018653 | 5256.326  | 6253.498  | NM_000909 | 1289.253  | 1417.307  | NM_014781 | 2019.019  |
| 4481.173  | NM_005388 | 3292.752  | 4327.367  | AK024828  | 867.611   | 873.768   | X87896    | 718.404   |
| 1147.629  | NM_007232 | 22773.445 | 23192.75  | AF009315  | 857.916   | 1235.614  | M88310    | 1184.821  |
| 5882.17   | NM_003027 | 542.059   | 901.365   | NM_019013 | 863.313   | 678.581   | NM_000042 | 1257.657  |
| 740.027   | NM_016257 | 370.919   | 307.431   | NM_006783 | 802.17    | 650.86    | NM_005024 | 1025.46   |
| 3109.057  | NM_002717 | 4618.051  | 4690.652  | L37711    | 409.942   | 634.52    | NM_014808 | 531.863   |
| 26701.732 | NM_003025 | 10206.567 | 8871.291  | S70313    | 7055.992  | 6269.77   | AB006627  | 32501.533 |
| 6544.96   | NM_001679 | 13594.466 | 12043.652 | AK021607  | 619.704   | 847.604   | NM_000416 | 1700.838  |
| 2959.295  | NM_004046 | 62100.164 | 59288.047 | AK025860  | 242.253   | 523.551   | NM_003382 | 461.741   |
| 2096.723  | NM_004983 | 1035.455  | 901.079   | L09268    | 361.366   | 504.646   | NM_002965 | 2689.015  |
| 6693.528  | U09384    | 670.117   | 520.908   | NM_020186 | 5227.937  | 4557.075  | AB007883  | 1926.604  |
| 871.433   | NM_006860 | 6356.237  | 6285.801  | AF090947  | 2364.377  | 4528.86   | AK093780  | 2375.765  |
| 2842.554  | NM_013337 | 2127.877  | 2074.77   | BC016962  | 437.85    | 863.917   | AY009397  | 33739.992 |
| 2193.677  | NM_004193 | 2322.243  | 2257.981  | AJ272196  | 5748.079  | 7159.766  | NM_007037 | 7104.985  |
| 614.081   | NM_002803 | 7727.014  | 9813.696  | AF116662  | 577.2     | 1312.269  | NM_001649 | 975.123   |
| 1476.895  | NM_005508 | 2005.985  | 1909.222  | X58162    | 11071.577 | 19842.041 | NM_005492 | 671.161   |
| 3113.908  | NM_018485 | 218.751   | 424.092   | AK022825  | 708.487   | 923.743   | AF038196  | 1661.234  |
| 1454.767  | NM_006788 | 1080.365  | 1358.139  | CY3Cy5    | 1851.26   | 132.817   | AF320294  | 1306.746  |
| 1411.129  | NM_016568 | 895.113   | 1089.629  | AA460969  | 985.519   | 1405.726  | AF161436  | 3396.172  |
| 2202.295  | AB033102  | 9900.455  | 11613.942 | BG695859  | 364.83    | 332.78    | NM_020402 | 3056.044  |
| 8753.85   | NM_014774 | 4306.528  | 4476.369  | M85079    | 1977.498  | 2739.072  | NM_004299 | 1787.051  |
| 15150.819 | NM_014143 | 7660.61   | 7201.812  | AA457671  | 4444.273  | 2199.217  | NM_001171 | 817.689   |
| 4910.958  | M55646    | 7929.602  | 10018.31  | X07437    | 1927.025  | 1989.275  | NM_002250 | 2005.046  |
| 3809.408  | NM_006112 | 24522.709 | 23635.391 | NM_000641 | 891.224   | 836.608   | NM_006323 | 3036.218  |
| 1355.031  | BE741525  | 1146.58   | 787.753   | AE006466  | 941.291   | 787.671   | NM_001493 | 2710.525  |
| 2724.051  | BF030555  | 22191.678 | 16427.455 | BC008737  | 18586.289 | 10963.682 | NM_014841 | 471.794   |
| 4765.332  | NM_012433 | 6308.444  | 3994.288  | BC011655  | 4920.193  | 2429.08   | NM_014426 | 2403.877  |
| 1635.048  | NM_005605 | 2074.01   | 1532.194  | BC002396  | 1410.451  | 1122.703  | NM_006816 | 11346.706 |
| 2944.771  | NM_002576 | 1421.295  | 1919.379  | NM_022095 | 436.122   | 622.245   | AK026518  | 15818.68  |
| 1718.721  | NM_003582 | 2145.782  | 3798.54   | SR6       | 1255.127  | 843.653   | NM_000258 | 4493.368  |
| 5056.725  | AF057354  | 777.419   | 524.412   | SR8       | 4506.036  | 10193.279 | AB033055  | 1760.344  |
| 1588.285  | AF169351  | 9073.244  | 10208.726 | SR10      | 15173.807 | 3231.904  | AF311287  | 1456.466  |
| 1677.595  | NM_000282 | 3551.939  | 5351.469  | CY3Cy5    | 560.926   | 160.414   | AJ299442  | 3018.042  |
| 2825.74   | NM_000532 | 13041.031 | 8069.024  | BF310159  | 2710.698  | 6603.083  | NM_000129 | 794.458   |
| 558.602   | NM_016341 | 1199.641  | 1305.724  | AB044934  | 264.359   | 378.417   | NM_003762 | 2505.499  |
| 24436.488 | AF231916  | 2116.191  | 2207.194  | U27655    | 1177.32   | 949.17    | NM_018446 | 2308.222  |
| 3480.905  | NM_003501 | 3757.148  | 3869.619  | NM_003360 | 557.731   | 573.448   | NM_014465 | 1115.236  |
| 691.924   | AK022654  | 31436.041 | 43326.941 | Z21965    | 9119.625  | 9257.63   | D87292    | 3757.825  |
| 5407.724  | BC002905  | 5135.646  | 5982.585  | NM_000852 | 2890.152  | 2146.211  | NM_005498 | 1011.98   |
| 987.586   | NM_018091 | 7202.89   | 7098.784  | NM_002402 | 1013.636  | 212.443   | NM_016335 | 691.883   |
| 8845.926  | NM_001108 | 4146.681  | 25440.008 | L09070    | 411.655   | 357.46    | NM_003165 | 1779.764  |
| 911.131   | NM_001637 | 880.123   | 1333.588  | NM_000062 | 1412.046  | 1957.528  | NM_003906 | 4765.966  |
| 539.155   | NM_016630 | 8839.912  | 13800.824 | NM_009590 | 1532.028  | 933.311   | AL359590  | 10401.835 |
| 3725.927  | NM_014291 | 6513.325  | 5781.458  | AL133037  | 368.605   | 362.8     | NM_002861 | 3319.117  |
| 4780.406  | NM_014631 | 696.809   | 1155.755  | NM_020350 | 1912.858  | 1319.899  | NM_003080 | 2238.538  |
| 9318.683  | NM_001089 | 4706.74   | 4852.701  | NM_000350 | 657.58    | 345.767   | NM_013268 | 502.251   |
| 4028.517  | NM_000120 | 4405.968  | 4929.043  | X91103    | 3349.285  | 2498.616  | NM_002645 | 4914.617  |

|           |           |           |           |           |           |           |           |           |
|-----------|-----------|-----------|-----------|-----------|-----------|-----------|-----------|-----------|
| 1611.209  | AF172327  | 22567.123 | 22203.385 | AA419164  | 1582.843  | 713.679   | AB033027  | 1570.323  |
| 3382.499  | NM_001676 | 2457.302  | 3030.741  | NM_001337 | 540.24    | 2930.459  | AK021805  | 3879.182  |
| 1867.99   | AB018338  | 10204.287 | 10756.196 | NM_003611 | 4826.268  | 14440.196 | AB014550  | 1249.189  |
| 3923.04   | D80010    | 899.062   | 664.159   | NM_006209 | 518.306   | 619.641   | NM_006826 | 6454.487  |
| 577.712   | NM_004923 | 1572.128  | 1655.348  | AK025118  | 2625.572  | 3203.77   | AB007973  | 3213.188  |
| 500.061   | NM_003971 | 2150.648  | 1754.031  | NM_000727 | 1142.195  | 883.498   | M96843    | 4784.397  |
| 765.985   | AK026973  | 736.041   | 1504.571  | NM_005385 | 4347.087  | 4163.798  | NM_017791 | 1639.319  |
| 1161.294  | NM_005822 | 780.185   | 816.695   | NM_006074 | 7692.74   | 4086.01   | NM_005882 | 3710.342  |
| 11931.466 | U81002    | 3594.729  | 2551.104  | AF208232  | 1483.714  | 1763.061  | BC012304  | 3129.827  |
| 1229.792  | NM_016299 | 5845.955  | 4493.389  | NM_002988 | 1397.206  | 1309.983  | AB046815  | 1659.609  |
| 2876.657  | L38517    | 3253.536  | 5026.096  | NM_004186 | 493.3     | 374.442   | AF075085  | 26543.033 |
| 393.874   | NM_018291 | 3489.959  | 3242.396  | NM_016258 | 1548.575  | 955.388   | NM_005892 | 2322.964  |
| 3385.382  | NM_005530 | 3111.726  | 3070.921  | AF203032  | 2739.357  | 1709.954  | AF132734  | 5714.62   |
| 13767.784 | NM_006899 | 4279.51   | 4123.884  | AB014542  | 10113.98  | 3445.928  | NM_018379 | 1421.291  |
| 1185.057  | NM_012200 | 2580.01   | 2333.475  | Y10518    | 19626.842 | 15006.421 | NM_001921 | 3554.258  |
| 8758.629  | NM_001724 | 1491.901  | 1799.376  | AF155135  | 3288.451  | 2596.336  | NM_006230 | 4791.701  |
| 18716.207 | NM_000150 | 1102.364  | 1016.28   | NM_014790 | 652.004   | 506.987   | NM_014699 | 3378.885  |
| 1073.217  | AB023152  | 977.017   | 2465.459  | NM_003571 | 2921.952  | 1671.855  | NM_013400 | 3421.325  |
| 547.172   | NM_006212 | 1668.388  | 1707.667  | AB032965  | 14282.814 | 10569.972 | AK026257  | 1343.99   |
| 3947.758  | AK022872  | 4530.194  | 4810.403  | AF133424  | 1529.767  | 2255.281  | AK023836  | 2228.756  |
| 236.823   | AK024272  | 5572.573  | 7317.802  | NM_005003 | 9994.688  | 10767.919 | NM_018109 | 1408.737  |
| 3648.537  | NM_016381 | 2171.496  | 1651.85   | NM_002035 | 1999.704  | 2268.491  | NM_005076 | 5284.878  |
| 463.636   | AL591715  | 664.141   | 672.327   | NM_014900 | 433.618   | 385.642   | AF253321  | 594.138   |
| 4041.403  | NM_018042 | 2340.553  | 1850.673  | BF342908  | 728.617   | 1191.807  | U80735    | 1556.033  |
| 9349.874  | NM_014944 | 6308.26   | 5327.087  | AK023510  | 1417.421  | 1043.243  | NM_017850 | 1056.603  |
| 2036.155  | AF200348  | 2040.153  | 2113.343  | NM_004345 | 706.389   | 858.839   | NM_016522 | 646.048   |
| 1840.848  | Y11710    | 1633.374  | 1531.662  | NM_000702 | 8842.752  | 7090.978  | NM_002224 | 1429.509  |
| 480.308   | NM_002650 | 2156.021  | 2029.867  | X71490    | 4983.419  | 5879.639  | X07979    | 16209.221 |
| 24254.248 | NM_003260 | 6335.932  | 5481.921  | AF257081  | 760.068   | 760.201   | NM_000082 | 602.101   |
| 556.178   | AK024071  | 1799.756  | 2505.656  | NM_001688 | 16895.244 | 14376.97  | L13857    | 584.617   |
| 40063.629 | AF056490  | 1637.371  | 1212.038  | NM_002232 | 349.77    | 143.188   | NM_018098 | 1943.901  |
| 1871.75   | NM_005539 | 3171.568  | 1960.924  | NM_016106 | 1709.023  | 1443.14   | AF286164  | 482.393   |
| 3169.245  | BF341504  | 1460.324  | 2984.467  | NM_014570 | 1895.19   | 658.466   | AF055033  | 10774.901 |
| 3836.894  | NM_005541 | 10134.213 | 9487.748  | NM_014747 | 2617.836  | 1698.334  | NM_017700 | 794.672   |
| 12688.145 | AB002319  | 1776.935  | 1753.333  | Y19240    | 1685.513  | 1348.117  | M37191    | 4766.738  |
| 1640.554  | AF039942  | 3524.432  | 2017.419  | AF091029  | 3275.806  | 1971.958  | NM_003020 | 755.838   |
| 589.318   | NM_004421 | 2028.34   | 1148.78   | X97074    | 4292.145  | 2653.899  | X82240    | 1364.945  |
| 9149.26   | NM_018654 | 1174.897  | 2725.35   | NM_004135 | 2344.011  | 2628.188  | NM_013995 | 7702.516  |
| 1543.24   | AB046863  | 5815.535  | 5969.78   | NM_000465 | 948.596   | 1756.726  | NM_006010 | 11035.457 |
| 887.483   | M62403    | 9514.898  | 18212.881 | NM_000123 | 1820.766  | 2155.679  | K03191    | 1291.763  |
| 5042.755  | NM_017883 | 3332.639  | 4486.92   | BE858979  | 926.57    | 924.237   | NM_005079 | 1751.622  |
| 941.468   | AK025131  | 2378.092  | 2741.246  | NM_000122 | 808.801   | 752.706   | NM_005192 | 9670.893  |
| 43013.805 | NM_000754 | 22042.723 | 31774.803 | NM_006712 | 51509.422 | 58259.316 | NM_004585 | 346.815   |
| 680.739   | NM_014619 | 822.534   | 946.601   | NM_006240 | 1036.704  | 934.558   | NM_015032 | 3085.44   |
| 668.601   | NM_005629 | 9263.006  | 5003.473  | NM_007026 | 1369.633  | 1239.81   | AK022956  | 1683.158  |
| 26661.939 | J04621    | 2521.384  | 2632.079  | M37712    | 4275.806  | 3250.694  | AK023121  | 655.046   |
| 1739.231  | NM_000718 | 2603.721  | 2321.524  | NM_002648 | 281.063   | 220.173   | NM_014104 | 14891.476 |
| 1834.333  | NM_000161 | 5270.523  | 5365.517  | AF070670  | 1924.914  | 1524.129  | NM_002749 | 44517.395 |
| 2411.598  | NM_002634 | 12071.349 | 11666.876 | NM_016156 | 2089.562  | 1430.767  | NM_018216 | 1803.43   |
| 2463.679  | NM_017749 | 2760.727  | 3187.553  | NM_016528 | 624.389   | 487.632   | NM_003390 | 754.075   |
| 5530.906  | NM_001972 | 61021.988 | 58925.457 | NM_015974 | 963.944   | 483.027   | AL137747  | 2420.519  |
| 11746.589 | NM_002006 | 11009.073 | 10196.861 | NM_014384 | 801.882   | 794.142   | NM_012446 | 1514.54   |
| 27172.379 | NM_007111 | 4436.86   | 2572.3    | NM_002573 | 1231.984  | 1126.834  | NM_018338 | 535.273   |

|           |           |           |           |           |           |           |           |           |
|-----------|-----------|-----------|-----------|-----------|-----------|-----------|-----------|-----------|
| 8006.39   | NM_004702 | 864.862   | 310.681   | AL133037  | 368.369   | 700.994   | NM_018685 | 14457.657 |
| 29727.184 | NM_007109 | 1876.715  | 1280.552  | NM_020350 | 1728.211  | 2284.808  | NM_006984 | 977.039   |
| 1235.064  | AK023404  | 3227.852  | 2674.621  | NM_000350 | 891.903   | 708.472   | AF231919  | 713.744   |
| 2289.285  | NM_016004 | 4191.925  | 3320.637  | BE910395  | 264.306   | 353.333   | AL133644  | 9053.14   |
| 443.635   | NM_002655 | 1328.286  | 966.239   | N46828    | 696.245   | 729.667   | NM_002706 | 2536.026  |
| 14744.928 | AB028955  | 9121.02   | 8362.31   | BI908302  | 4195.042  | 9938.697  | NM_019023 | 55194.84  |
| 1487.005  | U66879    | 5979.375  | 6645.494  | AA460969  | 817.608   | 870.653   | NM_004420 | 682.154   |
| 5401.747  | NM_016022 | 14989.021 | 19257.717 | BG695859  | 291.543   | 266.298   | NM_002970 | 683.284   |
| 5577.188  | NM_004874 | 2011.653  | 3134.81   | M85079    | 1836.718  | 1910.044  | NM_005499 | 14615.35  |
| 1503.781  | NM_014204 | 2742.183  | 4303.845  | AA457671  | 4041.251  | 1875.352  | NM_015387 | 2389.793  |
| 1954.816  | S70385    | 20317.979 | 8957.421  | X07437    | 2137.438  | 1788.975  | NM_001733 | 3387.959  |
| 5266.407  | M34671    | 238.714   | 584.668   | NM_000641 | 714.104   | 549.702   | NM_017825 | 5163.253  |
| 2834.26   | NM_018509 | 9718.348  | 6399.288  | AE006466  | 779.852   | 480.91    | NM_014035 | 1811.494  |
| 1544.785  | NM_004086 | 984.885   | 2209.565  | BC008737  | 20970.408 | 11580.807 | NM_020122 | 8802.741  |
| 5917.068  | AL050199  | 862.195   | 729.291   | BC011655  | 1107.567  | 684.375   | NM_013432 | 9595.75   |
| 1776.255  | NM_001748 | 5918.737  | 12246.28  | BC002396  | 1693.01   | 1071.249  | NM_002299 | 38863.773 |
| 1025.309  | NM_001109 | 410.67    | 1318.429  | NM_022095 | 452.541   | 661.941   | NM_005479 | 6442.247  |
| 476.887   | AF176706  | 2535.229  | 2220.751  | AF112219  | 8137.031  | 4362.193  | NM_005730 | 23782.182 |
| 1246.245  | NM_014484 | 758.096   | 544.783   | Y10518    | 23642.271 | 28528.98  | NM_005392 | 1114.469  |
| 1319.469  | AF163762  | 1178.742  | 704.997   | AF155135  | 3675.074  | 5189.132  | AL133572  | 3028.378  |
| 581.301   | NM_014670 | 2486.335  | 2310.342  | NM_003571 | 3282.294  | 3056.482  | AK022500  | 1316.563  |
| 857.569   | NM_019048 | 4772.906  | 3536.106  | NM_020370 | 281.822   | 502.641   | U52096    | 3618.795  |
| 2233.228  | NM_000049 | 724.453   | 938.294   | NM_004767 | 461.882   | 451.497   | AB013897  | 742.683   |
| 810.842   | AB032996  | 30689.773 | 35710.039 | BF310159  | 1946.029  | 2348.667  | NM_005526 | 23604.396 |
| 646.079   | AB040881  | 3196.535  | 3165.812  | NM_018986 | 560.752   | 472.59    | AK001669  | 1459.515  |
| 1617.863  | AY007121  | 1502.717  | 1849.225  | U27655    | 1349.234  | 881.816   | NM_006195 | 5083.968  |
| 759.958   | NM_003372 | 8185.863  | 9728.154  | NM_003360 | 422.446   | 520.04    | NM_006190 | 4774.764  |
| 11976.979 | NM_003980 | 674.198   | 1063.494  | Z21965    | 7601.509  | 5749.664  | NM_006368 | 1676.763  |
| 1649.949  | NM_007317 | 4554.075  | 3707.427  | NM_012427 | 2412.232  | 2500.233  | NM_004133 | 493.907   |
| 683.77    | AB037826  | 31174.242 | 23124.273 | AF131857  | 2969.495  | 3238.857  | NM_001618 | 4617.743  |
| 1577.998  | AK021466  | 1892.479  | 1862.059  | NM_000852 | 3392.848  | 2422.923  | BC000401  | 5149.759  |
| 1766.954  | NM_006443 | 24935.053 | 15190.438 | NM_002402 | 1182.533  | 163.539   | NM_006425 | 3060.726  |
| 3047.987  | NM_004959 | 1208.602  | 717.06    | L09070    | 614.774   | 473.907   | BF344046  | 975.611   |
| 413.529   | AK026022  | 24089.768 | 16098.524 | NM_000062 | 1938.327  | 2575.959  | AF432218  | 5682.723  |
| 2056.265  | NM_003199 | 2436.291  | 1538.247  | NM_009590 | 1427.169  | 853.009   | NM_004286 | 3194.292  |
| 536.159   | NM_002938 | 5451.845  | 3439.55   | NM_016106 | 1944.303  | 3040.934  | AK025082  | 1237.139  |
| 1710.281  | AK023652  | 5721.167  | 6682.702  | NM_014570 | 2032.887  | 1388.35   | AF086535  | 517.294   |
| 857.647   | AF099032  | 974.245   | 1471.255  | NM_014747 | 2832.695  | 3526.153  | AB040901  | 940.124   |
| 1597.439  | NM_003070 | 5278.805  | 4647.847  | Y19240    | 1748.057  | 2138.308  | AL137406  | 2025.73   |
| 1133.215  | AL122101  | 1539.984  | 1165.958  | AF091029  | 4051.211  | 4180.094  | NM_012253 | 2741.421  |
| 17908.404 | NM_004780 | 2466.657  | 2980.977  | X97074    | 7605.259  | 7195.782  | NM_006876 | 1190.215  |
| 2536.832  | NM_016216 | 3159.95   | 2176.41   | AL117235  | 410.981   | 475.399   | NM_000293 | 827.364   |
| 2329.218  | AB018274  | 11537.91  | 5992.907  | NM_014822 | 3251.077  | 2064.565  | AF153821  | 1366.183  |
| 13457.543 | NM_005871 | 6154.244  | 3591.382  | NM_005296 | 1516.749  | 2117.191  | NM_013370 | 757.52    |
| 4984.75   | NM_007042 | 2409.375  | 2420.667  | NM_001337 | 211.811   | 920.245   | NM_003310 | 1871.49   |
| 675.008   | NM_016333 | 8541.777  | 7379.192  | NM_003611 | 3171.116  | 3694.808  | AK024461  | 1040.159  |
| 917.426   | BE875028  | 2654.95   | 2148.569  | AB014538  | 935.203   | 623.15    | NM_017635 | 855.242   |
| 5008.939  | AK000511  | 3243.598  | 3020.114  | NM_006209 | 463.799   | 490.116   | X62534    | 717.252   |
| 358.712   | AF121255  | 3970.058  | 5844.007  | AK025118  | 2450.76   | 2803.989  | AF027147  | 15932.965 |
| 916.665   | NM_005494 | 3974.963  | 7776.397  | NM_000727 | 1231.304  | 687.364   | M62399    | 2010.104  |
| 1356.026  | NM_017946 | 1336.1    | 932.014   | NM_005385 | 4644.714  | 4039.045  | NM_002357 | 733.874   |
| 1908.606  | NM_004953 | 5777.327  | 4416.444  | NM_018985 | 974.682   | 421.164   | U71600    | 985.769   |
| 1256.454  | AL049682  | 1357.779  | 1175.148  | NM_006074 | 9658.837  | 5123.624  | NM_004472 | 1064.131  |

|           |           |           |           |           |           |           |           |           |
|-----------|-----------|-----------|-----------|-----------|-----------|-----------|-----------|-----------|
| 780.081   | NM_005528 | 4016.611  | 3542.121  | AF208232  | 1861.56   | 1915.851  | AB037862  | 1695.38   |
| 4224.498  | AK022842  | 701.577   | 580.616   | NM_002988 | 1680.522  | 1452.133  | AK023887  | 889.092   |
| 980.385   | NM_007006 | 20857.889 | 15596.484 | NM_004186 | 679.065   | 612.201   | AF088022  | 4812.219  |
| 1407.766  | AL137346  | 2425.906  | 7154.95   | NM_016258 | 1795.605  | 1318.455  | AK026537  | 1053.394  |
| 2145.049  | NM_017756 | 19959.227 | 11637.935 | AF203032  | 2790.349  | 2057.88   | NM_015485 | 2360.666  |
| 6344.496  | NM_005793 | 5106.562  | 3438.971  | AB014542  | 10131.157 | 3381.45   | AF147411  | 412.966   |
| 960.274   | NM_004901 | 953.023   | 634.534   | AF070670  | 1714.757  | 2147.911  | NM_002666 | 2401.136  |
| 1124.956  | U77088    | 1466.776  | 1223.083  | NM_016156 | 2162.706  | 2659.173  | AF202145  | 1612.957  |
| 14371.739 | NM_006721 | 19068.232 | 16677.016 | NM_016528 | 666.588   | 1145.753  | AK026155  | 1366.139  |
| 818.724   | NM_016282 | 2590.713  | 2955.981  | NM_015974 | 1066.013  | 1226.26   | NM_018052 | 13716.942 |
| 1617.319  | NM_002765 | 2281.234  | 1450.738  | NM_014384 | 770.716   | 1289.515  | AK022386  | 2494.354  |
| 8302.25   | NM_001905 | 5292.691  | 1529.472  | NM_002573 | 1261.139  | 1975.534  | NM_002767 | 3047.511  |
| 1570.955  | AF292100  | 3662.667  | 4235.132  | AF133424  | 1310.297  | 1824.332  | AF131846  | 7016.07   |
| 6569.548  | NM_003434 | 41502.926 | 38273.148 | NM_005003 | 10901.164 | 8640.507  | AF088069  | 1344.334  |
| 983.533   | NM_018181 | 692.988   | 697.06    | AF084560  | 2631.048  | 3500.142  | AF086551  | 893.975   |
| 45466.836 | NM_005654 | 983.262   | 339.939   | NM_015715 | 1711.625  | 711.704   | NM_013393 | 4014.963  |
| 15752.458 | AF024698  | 62291.324 | 56400.414 | NM_000032 | 1981.158  | 2010.895  | AK025072  | 1161.245  |
| 4258.166  | BE904617  | 8921.983  | 11656.155 | NM_002083 | 1222.692  | 1527.248  | AK022410  | 916.075   |
| 14966.588 | AK024495  | 1235.481  | 837.499   | NM_002035 | 1991.303  | 1483.121  | L10378    | 9550.218  |
| 705.256   | AF024694  | 3115.939  | 2457.875  | BF342908  | 773.618   | 866.403   | AK022179  | 470.842   |
| 833.771   | AF091081  | 5826.955  | 5912.001  | AK023510  | 1347.632  | 967.912   | AJ227860  | 1043.531  |
| 9351.525  | AK001758  | 5591.283  | 3492.505  | NM_004345 | 769.482   | 980.031   | AL157448  | 918.847   |
| 700.319   | AK025076  | 672.418   | 434.503   | NM_000702 | 11444.517 | 9043.508  | AF026942  | 1250.043  |
| 1425.768  | AF086325  | 1615.422  | 1201.583  | X71490    | 6060.829  | 6816.646  | AJ276429  | 1745.94   |
| 1745.946  | NM_004928 | 742.103   | 931.644   | AF257081  | 1045.943  | 1004.663  | AL117657  | 801.16    |
| 1175.214  | AF147401  | 1455.157  | 856.701   | NM_001688 | 20805.404 | 16760.045 | AK021590  | 2968.664  |
| 928.316   | AF075022  | 1548.493  | 1675.46   | NM_002232 | 398.667   | 204.968   | AB002441  | 647.344   |
| 18717.246 | AF075060  | 2024.062  | 3617.571  | SB        | 1016.614  | 1222.644  | AK023998  | 934.483   |
| 1803.588  | AF147436  | 735.136   | 710.498   | NM_022095 | 471.538   | 1218.98   | U61086    | 292.644   |
| 17035.672 | AK021441  | 1730.135  | 1624.184  |           | 872.179   | 2589.043  | AK027147  | 4684.724  |
| 6110.811  | AK026018  | 2668.512  | 2457.792  | AF112219  | 10216.706 | 17317.029 | AK022415  | 18063.676 |
| 2021.842  | AF085846  | 4647.583  | 5103.044  | NM_002625 | 185.92    | 352.673   | AL137368  | 575.741   |
| 4076.234  | AL109705  | 959.829   | 882.203   | NM_004135 | 2165.897  | 2221.851  | AK021932  | 1236.854  |
| 3812.684  | AF147392  | 670.853   | 813.5     | NM_000203 | 306.196   | 352.881   | AK026787  | 2638.744  |
| 621.674   | AF088057  | 2762.439  | 2935.49   | NM_013443 | 1646.962  | 2422.549  | AK023542  | 1146.563  |
| 1139.23   | AF086255  | 5867.204  | 6345.161  | NM_000925 | 5046.396  | 4071.605  | AK000203  | 830.841   |
| 7499.573  | AK022660  | 1587.007  | 2184.817  | NM_000465 | 920.326   | 1857.898  | AK021845  | 2957.517  |
| 1587.467  | AF088051  | 1271.124  | 1483.835  | NM_000123 | 1688.45   | 1983.707  | NM_018592 | 1678.308  |
| 20710.002 | AK023883  | 645.807   | 929.057   | BE858979  | 863.641   | 804.918   | NM_018503 | 16623.25  |
| 329.203   | AF086366  | 862.55    | 804.697   | NM_000122 | 853.513   | 822.834   | NM_016449 | 7613.892  |
| 1241.132  | AF086360  | 3314.209  | 3392.042  | NM_006712 | 55304.137 | 61298.285 | AL049670  | 3632.316  |
| 52847.227 | AF086436  | 197.52    | 449.57    | NM_006240 | 1242.325  | 996.415   | NM_018512 | 6526.029  |
| 3368.797  | AF087993  | 2225.737  | 2424.568  | NM_007026 | 1757.743  | 1211.355  | AK023922  | 913.367   |
| 7656.002  | AF035282  | 1128.979  | 1707.88   | M37712    | 4777.299  | 3342.732  | AK022438  | 1481.757  |
| 3397.549  | AK021966  | 4528.466  | 3135.672  | NM_002648 | 386.078   | 279.5     | AK024082  | 782.451   |
| 714.686   | AB018292  | 6088.57   | 7019.875  | AW797282  | 289.412   | 340.691   | Z27405    | 20353.26  |
| 1017.231  | AF085971  | 1021.03   | 557.703   | NM_002402 | 1208.123  | 281.273   | AK023412  | 1366.317  |
| 1135.435  | AF147302  | 1856.02   | 2020.621  | L09070    | 547.135   | 703.686   | NM_014617 | 20616.66  |
| 9535.405  | AF085929  | 1511.771  | 1196.377  | NM_000062 | 1825.128  | 5429.44   | AK074682  | 3328.916  |
| 6904.577  | AK001126  | 1822.075  | 1537.887  | NM_017877 | 695.826   | 420.818   | X74605    | 840.493   |
| 780.666   | AF085976  | 2594.559  | 1836.494  | NM_009590 | 1703.37   | 1848.517  | AK024513  | 1130.551  |
| 1589.78   | AF075104  | 6255.208  | 6759.585  | AL133037  | 805.706   | 964.833   | BC036692  | 2239.315  |
| 1237.789  | AK021724  | 768.543   | 1081.544  | NM_020350 | 2144.938  | 2587.203  | AJ009640  | 2393.281  |



|           |           |           |           |           |           |           |             |           |
|-----------|-----------|-----------|-----------|-----------|-----------|-----------|-------------|-----------|
| 46485.555 | AL133025  | 1546.577  | 1890.682  | NM_000350 | 1076.946  | 815.339   | Y11163      | 683.035   |
| 16085.656 | AL137617  | 1527.803  | 1607.756  | X91103    | 4925.458  | 6625.789  | AK022026    | 543.224   |
| 1275.902  | AL359568  | 23225.383 | 21725.744 | AA419164  | 1945.293  | 1445.399  | AF147340    | 779.856   |
| 6379.45   | AL133564  | 3323.661  | 2947.095  | L35251    | 1872.812  | 2471.83   | AF035308    | 4413.885  |
| 6141.663  | AL137428  | 1393.887  | 1075.952  | BE910395  | 421.064   | 432.001   | AK022228    | 1363.578  |
| 6505.774  | NM_018190 | 27690.186 | 27449.568 | N46828    | 836.083   | 661.238   | AF086480    | 1516.967  |
| 3512.499  | AF086054  | 1096.653  | 993.537   | BI908302  | 4478.329  | 8688.635  | AK000806    | 36086.172 |
| 3527.742  | AK022259  | 59632.109 | 56099.801 | AA460969  | 890.781   | 712.625   | NM_016471   | 2948.525  |
| 1188.469  | AK022461  | 914.146   | 1058.256  | BG695859  | 205.469   | 214.052   | NM_005364   | 7661.349  |
| 7887.358  | NM_016010 | 2922.884  | 2517.376  | M85079    | 1734.526  | 1611.154  | AK023482    | 3537.992  |
| 848.13    | AL358312  | 791.727   | 1136.928  | AA457671  | 4034.298  | 1431.025  | AK022798    | 379.077   |
| 2290.449  | AF070647  | 15544.1   | 9845.543  | X07437    | 1505.219  | 1382.515  | AL157423    | 691.52    |
| 1384.73   | AF116649  | 520.744   | 669.381   | NM_000641 | 933.377   | 687.163   | AK023176    | 793.759   |
| 4636.086  | AF174394  | 3763.476  | 2832.122  | AE006466  | 705.539   | 542.629   | AL161991    | 10652.495 |
| 1933.211  | AF083121  | 933.568   | 398.948   | BC008737  | 23154.027 | 12419.298 | D17032      | 10208.006 |
| 1332.312  | AF144054  | 1347.082  | 1963.891  | BC011655  | 1122.234  | 641.833   | AL137292    | 639.778   |
| 1092.447  | AK025924  | 1823.509  | 1894.441  | BC002396  | 1418.39   | 1236.971  | AF118079    | 17334.752 |
| 970.8     | AK021876  | 4872.677  | 3915.849  | AF208232  | 1948.456  | 3196.838  | AF277572    | 1135.939  |
| 2241.554  | AK022017  | 942.141   | 1317.219  | NM_002988 | 1614.445  | 2328.377  | AL365413    | 5274.1    |
| 338.597   | AK022160  | 3728.029  | 3061.944  | NM_004186 | 657.96    | 954.383   | NM_005258   | 5169.638  |
| 10394.825 | AK022187  | 6034.563  | 6997.019  | NM_016258 | 1945.484  | 2182.949  | NM_000440   | 3789.532  |
| 4991.896  | AK022337  | 1543.519  | 1630.807  | AF203032  | 3213.346  | 3625.125  | NM_001297   | 2256.886  |
| 918.43    | AK026847  | 924.063   | 709.321   | AB014542  | 13444.84  | 8538.113  | NM_004403   | 3435.552  |
| 664.679   | AK023048  | 992.552   | 1030.378  | NM_014640 | 331.682   | 325.419   | X64993      | 708.725   |
| 2656.866  | AL359560  | 484.779   | 670.781   | Y10518    | 29172.305 | 27973.361 | NM_004434   | 6478.301  |
| 2891.382  | AK026891  | 2932.74   | 3135.391  | AF155135  | 4305.228  | 5097.709  | NM_006269   | 723.395   |
| 1672.999  | AK024595  | 365.508   | 642.735   | NM_014790 | 842.151   | 1042.276  | NM_016230   | 2001.271  |
| 788.157   | AL137562  | 3438.844  | 3613.787  | NM_003571 | 4653.674  | 4004.375  | NM_001083   | 1365.558  |
| 2112.969  | M90355    | 61517.039 | 54464.73  | AB032965  | 28010.273 | 26550.348 | AK023966    | 3486.263  |
| 1496.193  | AK022495  | 2245.627  | 1781.19   | NM_020370 | 385.84    | 430.761   | AK025702    | 1622.166  |
| 901.357   | AK021632  | 588.258   | 819.501   | NM_004767 | 424.543   | 493.061   | NM_018958   | 1226.195  |
| 3254.744  | AK026373  | 14205.895 | 19776.223 | BF310159  | 2139.871  | 2241.685  | AK022038    | 884.295   |
| 40068.793 | AF009277  | 1406.197  | 2053.76   | NM_018986 | 530.964   | 335.683   | AF085866    | 1257.827  |
| 7617.369  | AK021581  | 1546.058  | 1275.833  | U27655    | 1346.076  | 712.292   | CY3Cy5      | 2428.449  |
| 875.513   | AK021744  | 1104.847  | 1356.979  | NM_003360 | 457.318   | 369.585   | AA397813    | 17652.902 |
| 10129.893 | NM_018430 | 3970.09   | 3677.327  | Z21965    | 9927.568  | 7596.297  | W47350      | 359.893   |
| 3394.907  | AL110200  | 921.353   | 1129.95   | NM_012427 | 362.903   | 240.656   | N64384      | 840.989   |
| 105.56    | AL133640  | 2425.832  | 2869.673  | NM_000852 | 3128.643  | 2256.029  | H-X 53655 I | 867.339   |
| 1760.492  | AJ012502  | 9054.919  | 13325.041 | NM_000399 | 331.215   | 183.605   | H-U 05770 I | 3012.424  |
| 543.009   | AK024170  | 751.542   | 619.189   | AF257081  | 999.994   | 1880.743  | H-M 65199   | 2004.096  |
| 1126.136  | AK021722  | 1957.767  | 1289.84   | NM_001688 | 20745.592 | 28800.154 | H-M 32315   | 1369.708  |
| 1572.357  | AF147445  | 1928.482  | 2059.005  | NM_000219 | 301.384   | 259.376   | H-V00536M   | 724.788   |
| 568.214   | Y10508    | 14567.483 | 14761.704 | NM_002232 | 350.774   | 248.042   | H-D85429M   | 1928.622  |
| 1392.983  | NM_005182 | 47675.176 | 45530.699 | NM_016106 | 2447.319  | 2670.792  | BF439832    | 1182.313  |
| 6251.246  | D17074    | 1445.75   | 2816.896  | NM_014570 | 2546.339  | 1506.424  | BG819162    | 655.931   |
| 3725.919  | AF039944  | 15634.129 | 12663.915 | NM_014747 | 3137.058  | 3515.622  | NM_017532   | 2661.125  |
| 2195.644  | AJ276252  | 1040.877  | 2331.652  | Y19240    | 2023.139  | 2121.683  | SR6         | 1350.517  |
| 359.513   | AK021716  | 11005.542 | 12627.463 | AF091029  | 5050.818  | 4700.472  | SR8         | 4720.46   |
| 982.941   | AK002085  | 4653.27   | 4348.647  | X97074    | 9584.895  | 8626.747  | SR10        | 16080.438 |
| 26639.861 | AF086200  | 737.98    | 544.834   | AL117235  | 547.972   | 497.295   | CY3Cy5      | 2312.049  |
| 1136.512  | AL133618  | 3380.79   | 1925.818  | NM_014822 | 3712.03   | 1920.608  | NM_004447   | 2079.007  |
| 29487.799 | AF230314  | 758.135   | 949.183   | NM_005296 | 1558.559  | 1617.045  | NM_001204   | 827.509   |
| 905.28    | AK001086  | 849.347   | 753.462   | NM_001337 | 309.652   | 744.684   | NM_012116   | 1154.031  |

|           |                  |           |           |                  |           |           |                    |           |
|-----------|------------------|-----------|-----------|------------------|-----------|-----------|--------------------|-----------|
| 953.247   | <b>AJ131610</b>  | 4627.44   | 5780.031  | <b>NM_003611</b> | 3138.96   | 3644.211  | <b>NM_000020</b>   | 1687.64   |
| 491.36    | <b>S50207</b>    | 591.543   | 938.208   | <b>AB014538</b>  | 822.745   | 589.833   | <b>NM_000956</b>   | 461.805   |
| 2709.684  | <b>AF119872</b>  | 7877.59   | 9339.491  | <b>NM_006209</b> | 485.236   | 441.97    | <b>NM_002442</b>   | 1135.469  |
| 777.495   | <b>X99687</b>    | 448.605   | 673.408   | <b>AK025118</b>  | 2700.4    | 2608.422  | <b>AB033091</b>    | 6646.946  |
| 1334.276  | <b>AK023255</b>  | 35333.84  | 36670.574 | <b>NM_000727</b> | 1091.036  | 762.664   | <b>NM_004557</b>   | 2814.443  |
| 599.286   | <b>NM_002622</b> | 26298.873 | 29126.754 | <b>NM_018985</b> | 837.785   | 460.143   | <b>NM_014757</b>   | 1816.372  |
| 6624.799  | <b>AK024185</b>  | 1054.389  | 892.962   | <b>NM_006074</b> | 7580.592  | 3877.998  | <b>NM_017893</b>   | 313.03    |
| 10060.525 | <b>AK026101</b>  | 6469.638  | 7697.149  | <b>NM_006240</b> | 1369.501  | 1988.388  | <b>NM_001584</b>   | 938.131   |
| 1735.617  | <b>AK022194</b>  | 15768.734 | 15296.842 | <b>NM_007026</b> | 2055.157  | 2946.698  | <b>NM_012259</b>   | 18728.457 |
| 1974.192  | <b>AF085963</b>  | 1958.042  | 1418.783  | <b>M37712</b>    | 5077.076  | 6085.105  | <b>AF272357</b>    | 675.553   |
| 380.883   | <b>AK021436</b>  | 1153.37   | 1218.788  | <b>NM_002648</b> | 405.941   | 552.922   | <b>NM_016372</b>   | 17450.586 |
| 1304.194  | <b>U58664</b>    | 1269.745  | 1215.357  | <b>AF070670</b>  | 2922.831  | 2781.642  | <b>AB020705</b>    | 949.207   |
| 24431.248 | <b>AF085937</b>  | 725.829   | 675.399   | <b>NM_016156</b> | 2643.318  | 2561.577  | <b>NM_002980</b>   | 1155.02   |
| 675.996   | <b>AL137569</b>  | 3436.736  | 4433.042  | <b>NM_016528</b> | 814.41    | 1326.409  | <b>NM_015886</b>   | 886.331   |
| 476.036   | <b>AK021920</b>  | 5803.62   | 7960.447  | <b>NM_015974</b> | 1090.592  | 1013.576  | <b>NM_007102</b>   | 34350.742 |
| 3158.859  | <b>AL049415</b>  | 2410.07   | 2360.155  | <b>NM_014384</b> | 960.774   | 1346.358  | <b>BG491613</b>    | 3719.378  |
| 444.713   | <b>NM_003378</b> | 39315.531 | 24469.094 | <b>NM_002573</b> | 1511.168  | 1871.905  | <b>NM_002728</b>   | 506.803   |
| 503.464   | <b>AL110194</b>  | 9327.771  | 4003.919  | <b>AF133424</b>  | 1678.301  | 2059.625  | <b>NM_004513</b>   | 4726.275  |
| 2566.108  | <b>AF138860</b>  | 823.496   | 898.898   | <b>NM_005003</b> | 12466.802 | 8916.605  | <b>NM_001708</b>   | 8674.766  |
| 355.16    | <b>NM_006687</b> | 1527.605  | 1562.532  | <b>AF084560</b>  | 3153.758  | 3062.257  | <b>NM_017735</b>   | 1613.785  |
| 1615.661  | <b>NM_013301</b> | 1458.109  | 1116.873  | <b>NM_015715</b> | 1629.168  | 709.971   | <b>AB033044</b>    | 1799.666  |
| 2934.966  | <b>NM_017673</b> | 1025.905  | 1486.9    | <b>NM_000032</b> | 1763.641  | 1637.061  | <b>AB014564</b>    | 602.259   |
| 2324.889  | <b>AB046857</b>  | 1162.654  | 920.348   | <b>NM_002083</b> | 1013.456  | 1029.128  | <b>NM_020230</b>   | 2048.776  |
| 763.637   | <b>AK024408</b>  | 11803.812 | 15817.204 | <b>NM_002035</b> | 1582.018  | 1467.103  | <b>NM_006762</b>   | 25402.754 |
| 1847.436  | <b>AF270490</b>  | 78.559    | 836.835   | <b>NM_014900</b> | 381.878   | 397.619   | <b>NM_006352</b>   | 787.856   |
| 1529.915  | <b>AF086307</b>  | 8805.898  | 7860.838  | <b>BF342908</b>  | 629.449   | 892.368   | <b>BE382905</b>    | 590.906   |
| 2615.751  | <b>L19364</b>    | 2089.837  | 2238.912  | <b>AK023510</b>  | 1397.005  | 1065.95   | <b>AK022558</b>    | 2703.387  |
| 1666.3    | <b>NM_005390</b> | 1388.213  | 1459.141  | <b>NM_004345</b> | 830.378   | 943.658   | <b>NM_006476</b>   | 29334.973 |
| 1775.027  | <b>CY3Cy5</b>    | 3274.532  | 161.874   | <b>NM_000702</b> | 10557.737 | 7923.917  | <b>NM_005953</b>   | 13263.841 |
| 6021.944  | <b>L07738</b>    | 1000.153  | 1127.753  | <b>X71490</b>    | 5327.918  | 6362.766  | <b>AK023915</b>    | 2720.295  |
| 12501.744 | <b>Z48054</b>    | 1652.575  | 1856.615  | <b>NM_014273</b> | 7812.732  | 12492.249 | <b>AK026842</b>    | 494.757   |
| 1453.142  | <b>H90415</b>    | 1434.055  | 1174.27   | <b>NM_004680</b> | 440.815   | 588.665   | <b>NM_002395</b>   | 1915.059  |
| 1093.228  | <b>AA676470</b>  | 9290.965  | 9701.421  | <b>NM_005671</b> | 2581.969  | 6652.19   | <b>NM_016271</b>   | 2446.51   |
| 880.94    | <b>M38258</b>    | 615.219   | 965.153   | <b>NM_017409</b> | 424.854   | 846.079   | <b>NM_016619</b>   | 1756.036  |
| 378.021   | <b>AA457155</b>  | 6182.632  | 5343.002  | <b>NM_019625</b> | 3234.146  | 3570.543  | <b>NM_014481</b>   | 894.591   |
| 14777.782 | <b>BM014365</b>  | 1123.296  | 1254.962  | <b>NM_006729</b> | 2107.511  | 2005.246  | <b>U22172</b>      | 1950.573  |
| 500.383   | <b>U78045</b>    | 1533.283  | 1961.409  | <b>NM_006071</b> | 482.416   | 698.928   | <b>AB032960</b>    | 907.672   |
| 292.346   | <b>AA878561</b>  | 57223.824 | 57499.277 | <b>NM_012236</b> | 7668.792  | 8125.181  | <b>AF020089</b>    | 672.727   |
| 4759.033  | <b>BF688309</b>  | 449.637   | 448.135   | <b>AF112219</b>  | 9623.195  | 8252.038  | <b>NM_006257</b>   | 1175.847  |
| 1127.382  | <b>AI538525</b>  | 3169.099  | 2487.779  | <b>NM_004135</b> | 2180.064  | 1943.842  | <b>NM_016281</b>   | 5133.629  |
| 804.704   | <b>NM_000623</b> | 505.116   | 1049.039  | <b>NM_013443</b> | 1185.978  | 1370.49   | <b>NM_004734</b>   | 10288.547 |
| 3291.564  | <b>NM_000941</b> | 1202.179  | 1599.124  | <b>NM_000925</b> | 3952.172  | 3111.382  | <b>AK024793</b>    | 1002.163  |
| 4958.385  | <b>SR1</b>       | 55442.629 | 59484.844 | <b>NM_000465</b> | 912.383   | 1348.544  | <b>AF208291</b>    | 1117.131  |
| 2471.43   | <b>SR3</b>       | 51434.098 | 59432.613 | <b>NM_000123</b> | 2050.111  | 2076.286  | <b>NM_000276</b>   | 1102.205  |
| 905.404   | <b>SR5</b>       | 3096.427  | 3524.006  | <b>AL137501</b>  | 352.303   | 259.612   | <b>BG491613</b>    | 4567.827  |
| 2274.644  | <b>SR7</b>       | 5802.291  | 47596.563 | <b>BE858979</b>  | 988.172   | 844.292   | <b>W68291</b>      | 4898.03   |
| 1635.373  | <b>SR9</b>       | 17926.652 | 3621.358  | <b>NM_000122</b> | 956.669   | 775.503   | <b>N64384</b>      | 850.63    |
| 1052.806  | <b>CY3Cy5</b>    | 2797.234  | 127.69    | <b>U87223</b>    | 1474.218  | 1862.95   | <b>H-X 53655 I</b> | 798.454   |
| 2575.342  | <b>U62858</b>    | 5240.504  | 4712.95   | <b>X91348</b>    | 12959.161 | 15053.781 | <b>H-U 05770 I</b> | 2572.492  |
| 1953.043  | <b>AF035121</b>  | 767.306   | 509.472   | <b>Z36505</b>    | 749.136   | 939.854   | <b>H-M 65199</b>   | 1753.817  |
| 2800.469  | <b>NM_014432</b> | 2116.718  | 1893.103  | <b>NM_001854</b> | 1192.866  | 881.308   | <b>H-M 32315</b>   | 1087.597  |
| 662.767   | <b>NM_001558</b> | 651.559   | 4024.653  | <b>NM_017913</b> | 516.706   | 405.992   | <b>H-V00536M</b>   | 681.27    |
| 1859.154  | <b>NM_006953</b> | 1493.021  | 1594.837  | <b>NM_002755</b> | 3675.47   | 4855.923  | <b>H-D85429M</b>   | 1680.185  |

|           |           |           |           |           |           |           |           |           |
|-----------|-----------|-----------|-----------|-----------|-----------|-----------|-----------|-----------|
| 1176.208  | NM_002530 | 346.038   | 324.204   | NM_000924 | 2781.772  | 3441.101  | BF439832  | 997.477   |
| 714.662   | U96173    | 2367.536  | 2095.435  | NM_003330 | 3196.332  | 3923.098  | BG819162  | 534.239   |
| 1859.212  | NM_018941 | 990.99    | 1403.142  | NM_003647 | 608.123   | 821.294   | NM_017532 | 2284.294  |
| 892.83    | NM_001980 | 846.851   | 754.817   | NM_001699 | 34261.102 | 40239.465 | M38449    | 2004.41   |
| 567.125   | NM_005954 | 1260.812  | 1250.26   | NM_018351 | 633.451   | 410.993   | AB033044  | 1579.03   |
| 1648.897  | NM_012471 | 371.428   | 585.429   | NM_147171 | 2040.832  | 1719.848  | AB014564  | 562.943   |
| 2499.551  | NM_001321 | 2143.527  | 1451.929  | AF238083  | 4069.262  | 3550.626  | NM_020230 | 1943.202  |
| 960.22    | AB018264  | 3044.076  | 2649.678  | NM_016388 | 1268.957  | 1061.212  | NM_006352 | 1038.199  |
| 1718.268  | NM_006911 | 829.193   | 717.711   | AB046783  | 500.425   | 280.619   | NM_016430 | 667.362   |
| 7316.468  | U92544    | 1301.861  | 1330.754  | NM_000845 | 655.003   | 608.027   | NM_012116 | 1065.834  |
| 5306.158  | NM_019644 | 478.377   | 719.683   | NM_014965 | 2500.143  | 2106.322  | NM_000020 | 1343.128  |
| 2531.01   | NM_006791 | 3187.562  | 2863.679  | NM_004882 | 11128.642 | 7135.81   | NM_002442 | 1060.765  |
| 638.719   | AJ278348  | 9239.303  | 8125.127  | AL390148  | 6424.349  | 5339.255  | AB033091  | 6193.906  |
| 1236.698  | AI285199  | 1063.339  | 1065.935  | AK024055  | 933.747   | 735.024   | NM_004557 | 2129.565  |
| 1215.575  | AK023106  | 1442.593  | 1242.362  | U10485    | 316.955   | 406.162   | NM_014757 | 1596.582  |
| 24828.273 | NM_016730 | 11052.793 | 10788.112 | AK025326  | 5445.373  | 6113.496  | NM_001584 | 975.594   |
| 859.499   | AL035297  | 1234.364  | 1020.821  | NM_013376 | 557.375   | 1559.406  | NM_012259 | 16190.771 |
| 656.572   | NM_004408 | 2593.329  | 7373.746  | NM_017964 | 1081.423  | 1688.01   | AF272357  | 654.149   |
| 1443.246  | AJ131244  | 1526.221  | 1796.217  | NM_016428 | 968.93    | 869.627   | NM_016372 | 13786.105 |
| 1314.725  | NM_002532 | 5820.369  | 3788.921  | NM_016039 | 4905.254  | 4829.9    | AB020705  | 720.705   |
| 9422.893  | NM_012388 | 4026.105  | 3237.596  | NM_001184 | 1005.673  | 1935.738  | NM_002980 | 909.341   |
| 12545.691 | NM_016651 | 494.376   | 240.383   | NM_015530 | 4590.822  | 5077.624  | NM_005953 | 12305.393 |
| 1283.86   | NM_001671 | 437.412   | 543.444   | NM_016238 | 2653.853  | 4396.676  | NM_004513 | 3973.066  |
| 168.927   | NM_019843 | 2137.752  | 1766.329  | NM_001758 | 2238.86   | 1342.176  | NM_001708 | 7220.524  |
| 840.679   | NM_016192 | 5891.263  | 5011.23   | BE546276  | 807.799   | 629.178   | NM_017735 | 1169.899  |
| 394.4     | BE878426  | 56040.172 | 55453.875 | NM_004725 | 4060.191  | 3353.179  | AF208291  | 934.273   |
| 3214.983  | NM_001745 | 8433.432  | 9851.76   | NM_015997 | 3561.606  | 2991.343  | NM_004877 | 31146.135 |
| 885.668   | NM_003825 | 6661.091  | 7934.145  | NM_001167 | 4364.694  | 4382.699  | BE382905  | 694.02    |
| 3175.265  | AK025006  | 14908.732 | 7479.107  | NM_012115 | 2338.791  | 1819.971  | NM_001701 | 871.193   |
| 3251.103  | AF218014  | 3832.904  | 2742.349  | NM_004933 | 19815.715 | 22114.746 | AK022558  | 3314.254  |
| 718.315   | NM_006678 | 2461.933  | 1998.483  | M96577    | 5025.9    | 6495.436  | NM_017532 | 2282.991  |
| 1900.749  | AY007729  | 12934.928 | 14608.003 | NM_013258 | 17594.68  | 13798.824 | M38449    | 2091.837  |
| 1044.185  | NM_014424 | 468.533   | 752.556   | NM_003842 | 592.246   | 288.077   | AK026842  | 568.859   |
| 4494.909  | AF159092  | 573.801   | 678.095   | L11238    | 3467.89   | 2942.141  | NM_002395 | 2283.545  |
| 2808.061  | BC007318  | 1709.664  | 1711.993  | NM_012205 | 3550.758  | 2827.624  | NM_004259 | 1214.485  |
| 701.912   | M36693    | 1666.763  | 3162.999  | K02046    | 1165.045  | 1266.487  | NM_016271 | 2992.551  |
| 2665.636  | NM_016292 | 8078.479  | 1681.131  | AL110151  | 916.774   | 662.663   | NM_016619 | 2295.632  |
| 6351.305  | NM_002601 | 2764.81   | 2287.158  | AK024841  | 1317.378  | 1297.889  | NM_014481 | 563.77    |
| 9508.153  | NM_005898 | 14605.856 | 8318.918  | NM_004995 | 1724.138  | 2901.749  | U22172    | 1736.081  |
| 989.83    | NM_002889 | 26939.594 | 22264.176 | NM_000386 | 2427.922  | 2157.05   | AB032960  | 1616.113  |
| 34306.824 | AF078866  | 2566.866  | 1639.29   | NM_001190 | 1983.624  | 1682.299  | NM_014264 | 2096.471  |
| 1547.684  | BF311880  | 1636.948  | 1601.258  | NM_005271 | 4020.491  | 4300.429  | AF020089  | 1000.164  |
| 36329.949 | NM_000078 | 407.714   | 1060.619  | NM_015654 | 4125.155  | 3657.291  | NM_006257 | 1385.899  |
| 984.801   | NM_016075 | 1366.087  | 989.711   | NM_012244 | 1310.727  | 1192.758  | NM_016281 | 5126.774  |
| 1125.551  | NM_001360 | 12994.566 | 3374.121  | NM_004341 | 805.515   | 644.359   | NM_004734 | 10279.064 |
| 558.566   | AK026656  | 3755.893  | 3320.083  | AB082521  | 5954.057  | 5567.337  | AK024793  | 1258.589  |
| 4439.676  | AJ276207  | 6455.736  | 6497.909  | AL050182  | 811.842   | 870.246   | NM_012259 | 17063.783 |
| 13619.344 | AB011131  | 9590.316  | 12316.321 | NM_020040 | 628.114   | 808.134   | AF272357  | 540.169   |
| 421.285   | NM_000751 | 4557.237  | 5342.467  | NM_002374 | 1450.994  | 864.362   | NM_016372 | 16119.385 |
| 402.483   | NM_014849 | 1910.348  | 1860.049  | AK026940  | 1742.58   | 1148.542  | AB020705  | 816.928   |
| 8255.265  | NM_001042 | 5645.758  | 6293.31   | AF155117  | 2056.247  | 1384.522  | NM_002980 | 953.819   |
| 1459.154  | NM_020041 | 567.63    | 813.52    | AB014527  | 348.684   | 309.124   | NM_015886 | 767.943   |
| 1895.901  | NM_012229 | 4091.819  | 2543.409  | NM_004411 | 736.571   | 747.43    | NM_007102 | 39406.414 |

|           |           |           |           |           |           |           |             |           |
|-----------|-----------|-----------|-----------|-----------|-----------|-----------|-------------|-----------|
| 1097.502  | NM_005071 | 573.809   | 491.809   | NM_015938 | 3033.333  | 2313.66   | BG491613    | 4729.404  |
| 690.12    | AB023147  | 14353.541 | 14549.48  | AK025985  | 6012.476  | 19308.727 | AA397813    | 17643.227 |
| 605.441   | NM_016615 | 10406.828 | 5846.074  | NM_013256 | 1220.298  | 1536.52   | W47350      | 348.98    |
| 474.233   | NM_005630 | 1732.995  | 1148.055  | NM_004143 | 1056.869  | 1547.595  | W68291      | 5272.31   |
| 5031.727  | NM_012201 | 2088.615  | 2441.96   | X66087    | 393.717   | 473.121   | N64384      | 904.166   |
| 7740.882  | AB046774  | 569.218   | 1300.828  | NM_016328 | 5072.492  | 5379.667  | H-X 53655 I | 724.661   |
| 1693.92   | AK022385  | 12138.318 | 13888.635 | NM_017544 | 14197.086 | 14157.275 | H-U 05770 I | 2472.03   |
| 1887.757  | NM_002775 | 1872.904  | 583.697   | NM_016285 | 922.458   | 762.721   | H-M 65199   | 1736.809  |
| 582.573   | AK024584  | 4118.976  | 1513.676  | AF025771  | 1353.095  | 1297.414  | H-M 32315   | 992.409   |
| 1524.517  | NM_003504 | 5468.625  | 1426.339  | NM_005083 | 12212.433 | 9363.861  | H-V00536M   | 559.912   |
| 905.119   | NM_013298 | 4081.883  | 4018.979  | NM_007187 | 6475.625  | 8317.608  | H-D85429M   | 1834.084  |
| 783.626   | NM_007267 | 2913.197  | 3280.924  | NM_018983 | 5262.413  | 5017.503  | BF439832    | 950.908   |
| 2028.455  | Z36816    | 1615.664  | 1472.367  | NM_003096 | 2839.477  | 4180.555  | BG819162    | 502.151   |
| 904.451   | NM_005865 | 2919.165  | 2525.198  | NM_007279 | 2627.027  | 2332.929  | NM_002728   | 438.593   |
| 896.583   | NM_006413 | 5286.938  | 5186.465  | BE390833  | 10394.684 | 7910.583  | NM_004513   | 4447.527  |
| 2131.675  | NM_017684 | 1067.48   | 849.583   | NM_004730 | 7345.113  | 6745.885  | NM_001708   | 8359.216  |
| 3321.566  | AK025542  | 1785.718  | 1771.328  | NM_000801 | 1861.012  | 1584.67   | NM_017735   | 1450.397  |
| 556.524   | AF207547  | 689.335   | 529.051   | NM_006115 | 15334.322 | 10491.606 | AB033044    | 1979.947  |
| 966.883   | NM_002768 | 3028.509  | 3202.746  | NM_005801 | 1937.918  | 1786.824  | AB014564    | 686.5     |
| 500.209   | NM_003691 | 2643.489  | 2366.91   | NM_018198 | 708.242   | 538.646   | NM_020230   | 2119.149  |
| 2704.504  | NM_002950 | 21357.242 | 14127.02  | NM_001539 | 10704.607 | 13120.298 | NM_006762   | 25044.129 |
| 1504.101  | NM_002318 | 1750.92   | 2688.561  | AK027232  | 3191.208  | 4968.872  | NM_006352   | 1113.055  |
| 1369.728  | NM_001433 | 883.885   | 757.717   | NM_012204 | 389.081   | 481.82    | NM_016430   | 432.859   |
| 4521.324  | NM_003134 | 55304.785 | 50895.086 | AK091117  | 442.746   | 490.449   | NM_004447   | 2320.221  |
| 7243.621  | NM_004314 | 3168.935  | 3299.329  | NM_003613 | 735.837   | 959.988   | NM_001204   | 910.012   |
| 759.626   | NM_018247 | 6822.692  | 4763.616  | NM_000022 | 2224.695  | 1573.626  | BF131321    | 423.784   |
| 854.732   | NM_017979 | 4181.804  | 4207.704  | NM_016576 | 1425.589  | 1728.571  | NM_012116   | 1347.689  |
| 684.527   | NM_019644 | 470.158   | 679.81    | NM_004213 | 903.073   | 1119.724  | NM_000020   | 1699.178  |
| 4045.892  | NM_006791 | 3448.801  | 3977.83   | NM_001929 | 44562.793 | 50207.953 | NM_000956   | 4513.07   |
| 841.467   | AJ278348  | 8636.827  | 9472.72   | NM_000906 | 672.106   | 792.609   | NM_002442   | 917.183   |
| 1191.557  | NM_015872 | 286.674   | 657.832   | NM_000480 | 1503.996  | 1637.502  | AB033091    | 6710.119  |
| 3029.923  | AI285199  | 888.318   | 1780.816  | AF254084  | 12529.546 | 13056.912 | NM_004557   | 2999.956  |
| 1904.24   | L07738    | 1010.096  | 994.094   | AK022648  | 756.502   | 911.886   | NM_014757   | 1890.844  |
| 853.828   | Z48054    | 915.562   | 723.339   | AK022976  | 753.639   | 600.947   | NM_001584   | 1320.71   |
| 1707.754  | H90415    | 1313.049  | 1073.078  | AB048791  | 2301.765  | 2154.012  | NM_005953   | 13430.459 |
| 958.377   | AA676470  | 9309.849  | 10042.11  | NM_003107 | 589.53    | 447.462   | NM_014264   | 2302.552  |
| 802.123   | M38258    | 585.857   | 700.972   | NM_006874 | 2817.594  | 2974.522  | AF020089    | 866.099   |
| 2889.75   | AA457155  | 6401.154  | 4626.962  | AB046777  | 3733.019  | 7319.435  | NM_006257   | 1583.594  |
| 1377.169  | BM014365  | 1005.07   | 721.187   | AJ251844  | 6375.842  | 3447.73   | NM_016281   | 5191.211  |
| 1176.02   | H91842    | 661.472   | 395.315   | D16815    | 376.835   | 310.392   | NM_004734   | 10533.687 |
| 473.988   | U78045    | 1883.268  | 1832.385  | NM_001880 | 1893.136  | 1393.335  | AK024793    | 905.697   |
| 2460.471  | AA878561  | 60117.063 | 58726.801 | AB028943  | 1967.214  | 1509.181  | AF208291    | 1081.89   |
| 19440.479 | BF688309  | 522.989   | 418.745   | NM_006194 | 497.468   | 447.297   | M38449      | 2172.32   |
| 1329.993  | AI538525  | 3620.572  | 3267.735  | AK001603  | 3746.539  | 2639.118  | NM_016271   | 3085.793  |
| 685.946   | NM_000941 | 2388.586  | 3102.874  | U71601    | 1389.075  | 1013.872  | NM_016619   | 1962.824  |
| 532.989   | AF222980  | 3286.319  | 4083.725  | AF042838  | 2652.178  | 2422.11   | NM_014481   | 492.537   |
| 1266.511  | AK026758  | 1123.667  | 1339.398  | X91221    | 642.82    | 919.102   | AB032960    | 1269.699  |
| 1739.953  | NM_014424 | 482.222   | 606.739   | AF075031  | 524.348   | 714.246   | NM_017675   | 838.095   |
| 992.084   | AF159092  | 867.559   | 587.588   | AF075062  | 3248.728  | 3374.072  | NM_005562   | 663.912   |
| 3792.036  | BC007318  | 1566.073  | 1301.606  | NM_004188 | 935.948   | 1037.693  | NM_004932   | 4133.543  |
| 3836.868  | M36693    | 1639.181  | 2594.804  | AF147381  | 2001.74   | 2387.445  | NM_003266   | 480.262   |
| 1047.647  | NM_016292 | 8461.029  | 2266.009  | AB002452  | 451.9     | 948.275   | BF246606    | 1185.471  |
| 23516.629 | NM_002601 | 2382.306  | 2559.469  | AK027101  | 17895.588 | 13593.059 | U56387      | 803.476   |

|           |           |           |           |           |           |           |           |           |
|-----------|-----------|-----------|-----------|-----------|-----------|-----------|-----------|-----------|
| 16865.387 | U62858    | 5000.898  | 3238.079  | NM_014840 | 511.925   | 575.632   | NM_003657 | 637.891   |
| 841.881   | AF035121  | 459.736   | 209.136   | D17085    | 396.691   | 404.767   | AL049296  | 3370.994  |
| 20501.506 | NM_014432 | 1940.054  | 1577.589  | AF088075  | 650.197   | 649.641   | NM_014471 | 17494.555 |
| 2760.022  | NM_001558 | 809.75    | 3176.424  | AK026376  | 980.793   | 890.86    | NM_004397 | 1244.133  |
| 566.245   | NM_006953 | 1633.29   | 1602.19   | AF088061  | 2756.917  | 2098.196  | NM_018579 | 1561.063  |
| 1382.933  | U96173    | 2922.164  | 2531.676  | AF086286  | 1815.208  | 2317.947  | NM_006201 | 1820.475  |
| 1142.649  | NM_018941 | 1360.751  | 1573.507  | AF086376  | 1071.957  | 756.131   | NM_001255 | 11650.969 |
| 563.612   | NM_020241 | 438.114   | 660.231   | AF086410  | 425.606   | 313.702   | U50383    | 4919.297  |
| 299.794   | BE730585  | 577.237   | 562.334   | AK022997  | 2747.009  | 2636.362  | AK025085  | 4129.29   |
| 923.396   | NM_001980 | 682.828   | 968.746   | NM_017617 | 2362.631  | 1673.637  | NM_003680 | 31954.953 |
| 1331.163  | NM_005954 | 1833.57   | 2269.92   | AF131830  | 952.596   | 799.713   | AF118124  | 19292.648 |
| 703.731   | NM_012471 | 386.372   | 843.869   | NM_014811 | 354.503   | 226.971   | NM_004849 | 5169.783  |
| 462.533   | NM_001321 | 3518.213  | 3219.636  | AF147426  | 606.659   | 927.188   | AL137527  | 3625.45   |
| 345.25    | AB018264  | 4739.727  | 5314.27   | AF085941  | 4570.882  | 13253.714 | AK026068  | 696.314   |
| 10787.459 | NM_006911 | 1024.177  | 1086.7    | Z69892    | 1450.86   | 2511.954  | J04974    | 14942.743 |
| 16937.662 | U92544    | 1354.577  | 1977.841  | AK023590  | 450.473   | 519.831   | NM_007058 | 3016.907  |
| 9655.717  | NM_012229 | 4642.021  | 2818.308  | AF087961  | 454.673   | 664.515   | NM_000396 | 874.013   |
| 5342.608  | AB023147  | 14857.83  | 14449.444 | AL137309  | 1031.921  | 1142.875  | NM_001528 | 2107.307  |
| 1827.757  | NM_016615 | 10653.701 | 8130.132  | AL137475  | 971.725   | 1012.709  | NM_007014 | 988.684   |
| 2442.847  | NM_005630 | 2098.803  | 1588.766  | AL161956  | 2274.318  | 2540.563  | AL096740  | 612.985   |
| 8096.567  | AK023106  | 1588.481  | 1213.169  | AL390176  | 1569.186  | 1528.032  | AF191545  | 365.407   |
| 3535.169  | NM_016730 | 13346.946 | 9789.469  | AL137356  | 945.591   | 585.549   | NM_004652 | 705.252   |
| 36919.383 | AL035297  | 1685.145  | 1306.11   | AL137547  | 750.248   | 904.698   | AK025425  | 12843.428 |
| 621.724   | NM_004408 | 3464.138  | 10584.012 | AK021994  | 760.278   | 796.911   | NM_016532 | 1102.869  |
| 2766.461  | AJ131244  | 2042.531  | 2170.121  | Z70763    | 500.899   | 723.704   | NM_005781 | 2257.69   |
| 16229.546 | NM_002532 | 6895.935  | 5467.375  | AK023802  | 6628.11   | 5726.156  | BC036740  | 6670.781  |
| 770.065   | NM_012388 | 5156.253  | 5860.358  | AF086103  | 608.856   | 504.996   | NM_001747 | 7637.75   |
| 2094.739  | NM_001671 | 504.592   | 1023.953  | AK023158  | 568.918   | 256.636   | NM_001148 | 6629.846  |
| 5131.558  | NM_019843 | 3697.434  | 3195.654  | AF085852  | 1550.234  | 1237.242  | AF242522  | 2225.512  |
| 907.024   | NM_016192 | 8559.035  | 9542.398  | AK023952  | 1039.775  | 1498.921  | AJ008152  | 1112.276  |
| 15610.08  | BE878426  | 57184.984 | 56268.258 | AK000787  | 666.505   | 1119.55   | NM_004024 | 1800.622  |
| 49434.648 | NM_001745 | 7863.618  | 10285.032 | AF090885  | 4039.38   | 6782.787  | X52345    | 11057.707 |
| 901.345   | NM_003825 | 8288.917  | 11110.36  | AF161342  | 476.397   | 934.86    | NM_006965 | 4139.488  |
| 6973.014  | AK025006  | 20824.674 | 13226.469 | NM_016646 | 445.942   | 364.929   | AF027142  | 45799.074 |
| 6177.224  | AF218014  | 6342.49   | 4741.341  | NM_014082 | 809.861   | 857.738   | S67970    | 943.299   |
| 2466.551  | NM_006678 | 3427.189  | 3622.397  | AF100636  | 904.032   | 893.805   | AF221520  | 3010.511  |
| 2223.886  | AY007729  | 18634.438 | 25132.314 | AK022197  | 1637.39   | 1162.31   | NM_004349 | 1880.442  |
| 32777.344 | NM_001433 | 711.431   | 337.654   | AK021970  | 412.562   | 395.781   | AK021416  | 1035.21   |
| 3796.828  | NM_003134 | 53787.109 | 52488.457 | AK022066  | 51976.223 | 52522.473 | NM_018471 | 9611.263  |
| 33154.449 | NM_004314 | 4056.046  | 5777.36   | AK022224  | 1286.867  | 1493.905  | NM_016183 | 1270.88   |
| 2665.834  | NM_018247 | 8504.646  | 8059.238  | AK022359  | 872.999   | 1017.054  | NM_004872 | 3621.062  |
| 1811.885  | NM_017979 | 5210.427  | 8177.103  | AK022000  | 1007.58   | 1062.698  | NM_001958 | 38341.465 |
| 2445.194  | NM_005898 | 17656.252 | 13711.809 | AK022129  | 2366.419  | 1911.466  | NM_004757 | 2227.254  |
| 1261.639  | NM_002889 | 34057.613 | 38766.352 | AK022263  | 6718.835  | 9428.005  | NM_015904 | 4961.711  |
| 3263.821  | AF078866  | 4153.987  | 4355.392  | AK022384  | 711.599   | 724.422   | NM_001960 | 32320.063 |
| 5835.058  | BF311880  | 1905.114  | 1932.675  | AK024613  | 523.333   | 427.221   | NM_018122 | 2397.48   |
| 584.414   | NM_000078 | 852.033   | 1019.275  | AL117437  | 451.42    | 509.792   | AF035318  | 1051.025  |
| 3517.152  | NM_016075 | 1538.429  | 1351.007  | AK027198  | 1969.343  | 1466.855  | NM_015456 | 3980.55   |
| 4330.322  | NM_001360 | 15249.083 | 5376.857  | AK000257  | 755.129   | 1239.866  | AK025056  | 1534.368  |
| 1394.577  | AK026656  | 4847.512  | 4501.739  | NM_006160 | 9092.039  | 16233.678 | AF140710  | 3309.886  |
| 768.318   | AJ276207  | 7976.794  | 8107.159  | NM_000529 | 1130.583  | 2623.97   | NM_012088 | 6881.44   |
| 1162.355  | AB011131  | 11241.578 | 15079.688 | AL110159  | 617.809   | 1517.425  | NM_017947 | 794.033   |
| 1491.717  | NM_000749 | 648.287   | 529.094   | AF009259  | 684.324   | 1238.406  | NM_002494 | 2964.094  |

|           |           |           |           |           |           |           |           |           |
|-----------|-----------|-----------|-----------|-----------|-----------|-----------|-----------|-----------|
| 1069.205  | NM_000751 | 6569.726  | 10482.092 | AF009260  | 947.758   | 1233.6    | M58510    | 4098.63   |
| 3058.106  | NM_014849 | 2701.098  | 2994.813  | NM_003079 | 911.2     | 997.984   | NM_000782 | 715.107   |
| 410.617   | NM_001042 | 3484.308  | 3232.094  | NM_017902 | 1092.551  | 1715.277  | NM_003904 | 2950.609  |
| 1721.344  | NM_020041 | 856.237   | 970.162   | AK021981  | 268.589   | 272.735   | NM_006234 | 11035.692 |
| 713.098   | NM_000623 | 786.6     | 1115.383  | AL359567  | 1178.271  | 874.185   | AB028987  | 3033.829  |
| 3005.031  | NM_000941 | 2672.667  | 4130.528  | NM_017726 | 2580.72   | 2365.135  | NM_003594 | 761.309   |
| 8774.939  | AF222980  | 3137.299  | 6469.74   | AK026716  | 405.672   | 320.865   | NM_005521 | 2402.927  |
| 803.173   | AK026758  | 1207.075  | 1736.001  | AL049325  | 9309.492  | 6248.324  | AF164438  | 8759.204  |
| 574.322   | NM_012201 | 3451.555  | 4725.07   | AK024154  | 7079.626  | 13464.854 | AK022284  | 564.766   |
| 2068.658  | AB046774  | 1085.146  | 2177.741  | AF086341  | 800.891   | 1304.364  | AB040893  | 1788.235  |
| 2486.208  | AK022385  | 14861.878 | 12692.123 | AK026672  | 974.244   | 1477.503  | AK025844  | 1502.225  |
| 867.499   | NM_002775 | 1710.029  | 641.969   | S83282    | 39822.422 | 45382.133 | AL137727  | 883.449   |
| 563.63    | AK024584  | 4613.513  | 1045.882  | AK024164  | 24631.055 | 33842.57  | L17327    | 582.292   |
| 783.188   | NM_003504 | 5435.03   | 1233.658  | AF052130  | 3743.636  | 4147.358  | AF074986  | 845.108   |
| 413.237   | NM_013298 | 4444.052  | 3802.78   | AF130090  | 5451.344  | 7056.985  | AL049240  | 1380.519  |
| 1814.586  | NM_007267 | 3255.417  | 2888.615  | AL096727  | 907.938   | 1131.115  | U80773    | 1338.939  |
| 1657.333  | AK022830  | 732.738   | 681.268   | AL080110  | 1331.408  | 1570.405  | AK021745  | 1108.007  |
| 1521.237  | Z36816    | 1838.853  | 1407.594  | NM_020425 | 667.976   | 640.448   | L38937    | 3537.194  |
| 2800.406  | NM_005865 | 3272.121  | 2699.673  | AK024076  | 1265.24   | 1257.303  | AK000801  | 1661.756  |
| 836.727   | NM_006413 | 5985.951  | 4472.497  | M87940    | 1845.958  | 2359.088  | D85433    | 2668.673  |
| 481.36    | NM_017684 | 940.335   | 644.524   | L77588    | 1124.341  | 1176.15   | AF086184  | 4436.167  |
| 893.258   | AK025542  | 2208.232  | 1836.305  | AF086304  | 11895.767 | 14228.412 | NM_018275 | 3684.169  |
| 998.082   | AF207547  | 757.362   | 610.455   | U61094    | 1008.18   | 368.086   | AL049266  | 1407.341  |
| 3338.367  | NM_002768 | 4013.824  | 2819.989  | AB032976  | 1558.418  | 1197.553  | AF088045  | 3245.9    |
| 3146.728  | NM_003691 | 2807.734  | 2082.601  | AF301222  | 6782.602  | 6915.686  | AK021627  | 1026.544  |
| 1980.418  | NM_002950 | 22796.082 | 10946.317 | AF215981  | 6175.23   | 4942.289  | AF085859  | 4015.254  |
| 794.074   | NM_002318 | 2503.871  | 2122.288  | NM_000732 | 9699.585  | 8915.561  | AK026307  | 1661.605  |
| 524.828   | NM_005954 | 1610.512  | 1439.577  | AF130044  | 1577.752  | 1183.971  | AL080067  | 1052.715  |
| 822.261   | NM_012471 | 816.721   | 680.331   | AF087980  | 301.626   | 399.358   | AL080160  | 864.913   |
| 796.209   | NM_001321 | 2250.475  | 1402.459  | NM_013939 | 407.362   | 1010.38   | AL157477  | 2456.734  |
| 998.488   | AB018264  | 3593.182  | 2899.79   | AB038651  | 1070.366  | 1093.844  | AB002318  | 1402.356  |
| 866.657   | NM_006911 | 867.95    | 702.27    | AL359603  | 676.052   | 1104.838  | AL357535  | 3401.832  |
| 2777.328  | U92544    | 1282.252  | 1340.797  | NM_013940 | 652.135   | 1003.542  | AL049951  | 1165.204  |
| 1398.792  | NM_006791 | 3756.121  | 3341.845  | AL117643  | 720.365   | 880.815   | AK024963  | 1921.601  |
| 647.472   | AJ278348  | 10393.264 | 9724.211  | AF075063  | 636.786   | 426.135   | AK023725  | 753.104   |
| 1909.291  | NM_015872 | 397.328   | 534.963   | AF069135  | 3355.994  | 3702.274  | AK022936  | 1691.851  |
| 770.432   | AI285199  | 1110.559  | 949.725   | AK026524  | 1019.743  | 1358.33   | AK024385  | 2117.931  |
| 1547.555  | L07738    | 1170.897  | 969.75    | AB011157  | 2857.708  | 3386.583  | NM_017709 | 816.505   |
| 2261.056  | Z48054    | 874.624   | 808.766   | U17632    | 1543.786  | 2526.481  | AF049615  | 772.887   |
| 508.072   | H90415    | 1369.477  | 1298.023  | AK026764  | 1938.675  | 2424.219  | NM_014358 | 7574.626  |
| 1224.299  | AA676470  | 8247.326  | 9270.32   | AF113700  | 2256.719  | 1956.628  | AF009282  | 4317.566  |
| 577.917   | M38258    | 511.403   | 720.829   | NM_017835 | 6895.196  | 7836.23   | AF024704  | 5195.343  |
| 2122.237  | AA457155  | 6343.063  | 4259.533  | NM_018347 | 2393.326  | 2367.786  | AF056431  | 1302.666  |
| 4080.832  | BM014365  | 1031.129  | 898.693   | AK024986  | 673.705   | 644.202   | NM_016412 | 909.09    |
| 866.566   | H91842    | 635.834   | 461.69    | AK026730  | 343.299   | 352.843   | AF009293  | 1493.151  |
| 899.538   | U78045    | 1655.403  | 1414.804  | AK024739  | 878.684   | 1157.589  | AK021677  | 1715.866  |
| 6265.202  | AA878561  | 57417.563 | 59695.414 | AK098681  | 897.212   | 1186.788  | AK001057  | 918.618   |
| 2050.09   | AI538525  | 3465      | 3023.885  | AK026772  | 1125.843  | 1051.683  | AK001808  | 426.644   |
| 2588.974  | NM_003825 | 6974.935  | 10236.422 | NM_014260 | 9379.828  | 10641.266 | AK021709  | 745.476   |
| 703.355   | AK025006  | 16885.643 | 9244.274  | CY3Cy5    | 765.088   | 136.635   | AK025109  | 1120.31   |
| 789.635   | AF218014  | 4783.564  | 2976.521  | M23254    | 3415.298  | 2745.541  | AK026057  | 3634.67   |
| 819.835   | NM_006678 | 2556.953  | 2148.421  | R28062    | 1445.344  | 977.295   | AJ008117  | 7730.743  |
| 48117.359 | AY007729  | 13401.002 | 16003.494 | AI627464  | 1382.896  | 1184.223  | AJ008147  | 14562.203 |

|           |           |           |           |           |           |           |           |           |
|-----------|-----------|-----------|-----------|-----------|-----------|-----------|-----------|-----------|
| 4284.698  | NM_014424 | 732.708   | 916.67    | BI756258  | 708.782   | 502.147   | AK024369  | 2723.004  |
| 1005.05   | AF159092  | 785.476   | 1006.676  | AI342225  | 56079.148 | 39601.715 | L43345    | 1495.215  |
| 792.584   | BC007318  | 1904.638  | 2394.019  | AA634103  | 58337.25  | 60960.266 | AF180297  | 3345.886  |
| 320.611   | M36693    | 1754.287  | 3665.231  | AF110020  | 422.397   | 519.113   | AK023245  | 5292.038  |
| 663.37    | NM_016292 | 10135.053 | 3483.599  | AA608557  | 2397.482  | 3331.664  | AF147303  | 738.88    |
| 1258.027  | NM_002601 | 2501.306  | 3963.212  | AL050095  | 1264.888  | 851.627   | AK024509  | 903.673   |
| 1478.66   | U62858    | 5218.6    | 5275.184  | U03272    | 942.635   | 626.412   | NM_017847 | 2480.582  |
| 638.107   | NM_014432 | 1770.025  | 1596.295  | NM_000498 | 400.808   | 446.182   | AL049675  | 1999.214  |
| 352.397   | NM_001558 | 633.621   | 3869.399  | NM_000664 | 865.128   | 603.822   | AL050151  | 669.095   |
| 901.449   | NM_006953 | 1403.476  | 1279.756  | SR5       | 2903.604  | 2935.337  | NM_003537 | 18237.027 |
| 4977.356  | NM_002530 | 373.252   | 454.428   | SR7       | 3474.621  | 29195.957 | AF056419  | 21437.908 |
| 12798.878 | U96173    | 2287.293  | 2209.632  | SR9       | 10273.082 | 1642.169  | AF074983  | 1332.814  |
| 1701.501  | NM_018941 | 1339.636  | 1234.011  | CY3Cy5    | 3250.133  | 223.295   | AK024177  | 1722.067  |
| 573.387   | BE730585  | 424.68    | 450.289   | NM_014808 | 442.736   | 403.607   | AK024827  | 6945.798  |
| 2200.092  | NM_001980 | 782.854   | 859.728   | AB006627  | 1580.329  | 621.111   | AB023175  | 763.74    |
| 5733.091  | NM_000751 | 4996.951  | 6979.568  | NM_000416 | 1491.197  | 1265.026  | AL359563  | 620.473   |
| 990.293   | NM_014849 | 1883.859  | 2288.029  | NM_003382 | 362.233   | 307.911   | NM_005304 | 646.073   |
| 1055.894  | NM_001042 | 5533.469  | 5633.15   | NM_002965 | 2964.296  | 17392.527 | NM_014477 | 568.801   |
| 50876.785 | NM_012229 | 4838.122  | 4203.68   | AB007883  | 2041.519  | 877.91    | S71486    | 834.376   |
| 458.617   | NM_005071 | 655.585   | 574.988   | AK093780  | 1930.059  | 1523.945  | L33808    | 19462.158 |
| 1068.241  | AB023147  | 16720.605 | 19408.637 | NM_007037 | 7061.75   | 6287.114  | D31886    | 1698.808  |
| 1911.46   | NM_016615 | 12041.396 | 8399.958  | NM_001649 | 911.533   | 1475.471  | AK023330  | 2371.439  |
| 373.282   | NM_005630 | 2204.93   | 1983.998  | NM_005492 | 553.304   | 763.232   | AF075071  | 1639.271  |
| 1429.885  | AK023106  | 1856.387  | 1538.414  | AF038196  | 1592.829  | 962.501   | AF001892  | 678.503   |
| 466.113   | NM_016730 | 17889.416 | 18883.156 | NM_004859 | 3349.171  | 2379.604  | X93500    | 1957.919  |
| 2873.152  | AL035297  | 1579.945  | 1414.754  | NM_016352 | 471.129   | 357.979   | U79271    | 1713.064  |
| 2763.994  | NM_004408 | 2981.566  | 7458.243  | NM_000070 | 1363.833  | 1963.658  | NM_019888 | 538.733   |
| 747.56    | AJ131244  | 1355.174  | 1244.881  | AB037804  | 484.857   | 947.122   | AK024609  | 3834.679  |
| 9893.441  | NM_002532 | 5479.41   | 3572.815  | NM_003289 | 18218.822 | 15493.841 | NM_018120 | 5195.954  |
| 16446.941 | NM_012388 | 3775.718  | 3219.179  | AI200114  | 575.938   | 606.447   | AK026874  | 2303.757  |
| 877.401   | NM_016651 | 557.613   | 578.954   | NM_006323 | 2902.249  | 1773.029  | AF086408  | 18085.73  |
| 1123.299  | NM_001671 | 385.948   | 674.816   | NM_001493 | 2972.119  | 1779.569  | AK023979  | 2167.788  |
| 4082.729  | NM_019843 | 2711.253  | 2369.238  | NM_014841 | 386.881   | 300.439   | CY3Cy5    | 8232.517  |
| 741.434   | NM_016192 | 6640.583  | 5884.626  | NM_014426 | 2294.531  | 692.406   | H94487    | 618.983   |
| 711.139   | BE878426  | 53147.141 | 52444.555 | NM_006816 | 12249.422 | 7803.922  | BG681747  | 11909.302 |
| 431.171   | NM_001745 | 9121.397  | 10751.848 | NM_000258 | 3590.347  | 2697.74   | D45917    | 944.875   |
| 574.128   | AK025542  | 2488.694  | 2688.568  | AB033055  | 1650.497  | 1346.854  | X52001    | 1060.171  |
| 536.509   | AF207547  | 764.77    | 830.682   | AF311287  | 1028.695  | 932.477   | B1823872  | 2145.862  |
| 602.342   | NM_002768 | 3364.59   | 3983.263  | NM_014781 | 1447.403  | 1434.733  | AA430552  | 3980.223  |
| 883.683   | NM_003691 | 2632.162  | 2558.694  | X87896    | 543.713   | 432.042   | X66142    | 1945.43   |
| 9018.818  | NM_002950 | 22664.76  | 16480.674 | M88310    | 992.605   | 982.802   | R45054    | 788.574   |
| 937.447   | NM_002318 | 2194.699  | 3414.588  | NM_000042 | 769.148   | 838.788   | SR5       | 2844.341  |
| 21015.66  | NM_001433 | 667.851   | 743.854   | NM_005024 | 958.755   | 452.522   | SR7       | 2481.435  |
| 1349.427  | NM_003134 | 54043.246 | 53980.27  | NM_016335 | 277.109   | 239.917   | SR9       | 10431.965 |
| 490       | NM_004314 | 3758.492  | 4467.255  | NM_003165 | 1774.902  | 943.655   | CY3Cy5    | 5943.5    |
| 1554.363  | NM_018247 | 7320.305  | 7803.043  | NM_003906 | 3357.589  | 2102.433  | AF312769  | 475.446   |
| 708.744   | NM_017979 | 4294.457  | 5655.701  | AL359590  | 10495.441 | 7549.141  | AB020668  | 561.146   |
| 732.843   | NM_005898 | 13474.419 | 9958.107  | NM_002861 | 2888.786  | 1583.161  | NM_003605 | 1072.579  |
| 405.319   | NM_002889 | 33966.871 | 27353.371 | NM_003080 | 1654.314  | 1213.236  | NM_003993 | 2448.609  |
| 1297.542  | AF078866  | 2990.319  | 1932.017  | NM_002645 | 1003.27   | 1001.274  | NM_018961 | 430.636   |
| 1233.551  | BF311880  | 1984.4    | 1831.141  | AB033027  | 1340.441  | 1017.593  | NM_005586 | 1184.956  |
| 340.475   | NM_000078 | 525.766   | 795.399   | AK021805  | 2947.663  | 2173.604  | NM_012242 | 1283.897  |
| 1414.35   | NM_016075 | 955.295   | 1159.001  | AB014550  | 1129.323  | 1266.36   | NM_006896 | 318.303   |

|           |           |           |           |           |           |           |           |           |
|-----------|-----------|-----------|-----------|-----------|-----------|-----------|-----------|-----------|
| 563.944   | NM_00136C | 13429.385 | 4215.771  | AF320294  | 1760.895  | 1961.936  | NM_001130 | 42687.012 |
| 1105.556  | AK026656  | 3959.33   | 3721.919  | AF161436  | 3042.037  | 3004.417  | NM_002975 | 9854.396  |
| 450.127   | AJ276207  | 7007.503  | 5849.182  | NM_020402 | 2238.16   | 3629.96   | NM_014375 | 5828.868  |
| 199.389   | AB011131  | 9998.619  | 11784.392 | NM_004295 | 1645.9    | 1282.162  | NM_017812 | 7160.338  |
| 1552.428  | AF164794  | 6401.594  | 12390.676 | NM_001171 | 992.087   | 1435.854  | AF204173  | 883.67    |
| 2057.043  | AB020656  | 1037.579  | 1549.473  | NM_002250 | 1528.353  | 1891.8    | J03260    | 820.927   |
| 813.008   | AK023648  | 2891.762  | 2435.095  | AF132734  | 5116.235  | 2977.94   | AB014514  | 1371.95   |
| 440.639   | NM_000412 | 912.958   | 1258.905  | NM_018375 | 1119.924  | 824.773   | NM_002865 | 2043.008  |
| 506.516   | AF077033  | 2566.065  | 3933.908  | NM_016403 | 7368.851  | 4335.673  | NM_003566 | 786.071   |
| 584.807   | NM_004991 | 739.338   | 595.611   | NM_015603 | 627.988   | 333.186   | NM_003731 | 3082.615  |
| 17704.059 | AF222980  | 2856.806  | 4250.5    | NM_001921 | 2918.172  | 1576.56   | NM_005446 | 1250.709  |
| 3432.587  | AK026758  | 1236.518  | 1301.297  | NM_006230 | 3956.674  | 1867.7    | NM_013292 | 1148.911  |
| 1063.074  | NM_012201 | 2282.536  | 3178.007  | NM_014695 | 2229.71   | 1636.53   | NM_002387 | 917.979   |
| 524.898   | AB046774  | 583.986   | 1404.342  | NM_013400 | 2842.542  | 2006.723  | J02639    | 2088.328  |
| 49486.016 | AK022385  | 15532.824 | 14350.035 | AK026257  | 991.779   | 1024.547  | M58050    | 2603.347  |
| 1697.955  | NM_002775 | 1926.619  | 789.975   | AK023836  | 2131.37   | 1903.376  | NM_007263 | 6489.469  |
| 18546.729 | AK024584  | 4345.303  | 1422.718  | NM_018105 | 1832.655  | 1913.328  | AF206020  | 1703.411  |
| 1846.707  | NM_003504 | 6096.138  | 1796.498  | AJ299442  | 2811.815  | 2364.787  | NM_014410 | 1745.469  |
| 18966.908 | NM_013295 | 4670.618  | 4608.929  | NM_000125 | 478.506   | 347.978   | NM_002150 | 2069.972  |
| 1255.669  | NM_007267 | 3187.409  | 4668.01   | NM_003762 | 2004.64   | 1866.142  | NM_004595 | 2915.049  |
| 3867.877  | Z36816    | 1806.882  | 1471.108  | NM_018446 | 1775.503  | 2199.456  | NM_014754 | 4325.523  |
| 3058.457  | NM_005865 | 3264.534  | 3138.348  | NM_014465 | 969.738   | 929.897   | D49387    | 621.965   |
| 2609.454  | NM_006413 | 5732.603  | 5466.592  | D87292    | 3611.717  | 9231.431  | AF050146  | 2081.094  |
| 3658.245  | NM_017684 | 1314.747  | 1016.443  | NM_005495 | 1183.854  | 1400.487  | NM_000116 | 1599.369  |
| 2112.278  | AL049689  | 618.735   | 3059.18   | AB037804  | 481.531   | 392.885   | NM_006695 | 3899.013  |
| 907.738   | NM_000216 | 802.856   | 1340.245  | NM_003285 | 15008.998 | 9349.063  | NM_006804 | 3772.911  |
| 1887.004  | NM_002203 | 466.105   | 493.079   | M23254    | 3204.575  | 2271.642  | NM_015965 | 3811.662  |
| 2665.542  | AF135960  | 690.261   | 666.167   | R28062    | 1289.57   | 875.173   | NM_003051 | 2766.258  |
| 1312.997  | NM_014216 | 10903.593 | 18265.582 | AI627464  | 1269.657  | 1292.659  | NM_145342 | 3645.905  |
| 18426.328 | NM_003010 | 1600.348  | 1554.035  | BI756258  | 748.566   | 916.374   | AJ278917  | 3687.789  |
| 856.513   | NM_006871 | 1031.508  | 998.48    | J04599    | 320.847   | 452.207   | AK025886  | 889.964   |
| 603.109   | NM_019074 | 2925.352  | 3388.682  | AA608557  | 3011.152  | 4766.551  | NM_001720 | 2721.432  |
| 793.722   | NM_018494 | 27964.164 | 22406.049 | AL050095  | 986.543   | 923.168   | NM_018390 | 673.882   |
| 1457.004  | AK000006  | 704.952   | 384.582   | U03272    | 899.238   | 881.448   | AB037724  | 2028.517  |
| 13439.937 | NM_001115 | 1711.317  | 1923.069  | NM_000664 | 897.225   | 469.8     | AK026151  | 2884.175  |
| 577.994   | NM_014921 | 1286.107  | 763.381   | NM_000042 | 952.336   | 548.734   | NM_014140 | 827.886   |
| 2857.3    | NM_016581 | 35298.371 | 37174.629 | NM_005024 | 964.752   | 363.071   | NM_002916 | 905.406   |
| 2063.08   | NM_013255 | 1669.646  | 2397.08   | NM_014805 | 510.65    | 463.077   | M20700    | 1228.732  |
| 2287.759  | NM_007183 | 928.091   | 779.447   | AB006627  | 1704.946  | 504.238   | NM_001034 | 2449.059  |
| 2078.294  | AJ238243  | 4768.689  | 7187.549  | NM_000416 | 1653.031  | 1313.847  | NM_002685 | 496.09    |
| 1071.594  | J05046    | 12552.927 | 14352.559 | NM_002965 | 2973.948  | 20299.605 | NM_017686 | 1106.198  |
| 1156.604  | NM_012315 | 1595.775  | 1449.507  | AB007883  | 1789.858  | 1302.919  | AK000800  | 1559.358  |
| 48386.258 | NM_002751 | 2827.734  | 2669.139  | NM_007037 | 7507.647  | 8308.943  | NM_018154 | 993.475   |
| 11128.812 | NM_004291 | 982.969   | 950.76    | NM_001645 | 917.134   | 2153.839  | BC006287  | 3103.716  |
| 2013.641  | NM_003816 | 2577.015  | 2811.052  | NM_005492 | 728.448   | 908.682   | AB023198  | 2131.998  |
| 7867.421  | AK022635  | 701.529   | 333.354   | AF038196  | 1515.501  | 876.533   | NM_005231 | 4243.887  |
| 3472.871  | NM_004912 | 3668.767  | 4045.362  | NM_004855 | 3249.762  | 2485.458  | AF064729  | 876.857   |
| 616.527   | U79304    | 9330.128  | 11740.386 | NM_016352 | 437.643   | 345.081   | NM_005412 | 9054.081  |
| 2200.451  | NM_016267 | 2853.546  | 2720.578  | NM_002250 | 1173.899  | 761.666   | NM_014375 | 4468.97   |
| 2752.644  | NM_004671 | 2999.411  | 3255.436  | NM_006323 | 2801.736  | 1864.611  | NM_017812 | 5881.875  |
| 1283.856  | NM_007015 | 498.83    | 481.233   | NM_001493 | 2915.898  | 2314.842  | J03260    | 713.926   |
| 3634.651  | NM_005180 | 12661.053 | 13995.456 | NM_014841 | 374.362   | 501.252   | AF068236  | 12820.794 |
| 1743.435  | NM_006526 | 3301.523  | 4396.44   | NM_014426 | 2180.052  | 1021.146  | H94487    | 565.043   |



|           |           |           |           |           |           |           |           |           |
|-----------|-----------|-----------|-----------|-----------|-----------|-----------|-----------|-----------|
| 1301.846  | U35622    | 629.028   | 219.849   | NM_006816 | 13741.818 | 11801.834 | BG681747  | 14074.617 |
| 528.217   | NM_007045 | 2247.526  | 1153.037  | AK026518  | 13917.646 | 16108.443 | H63077    | 1017.696  |
| 678.086   | NM_003627 | 4366.565  | 2718.756  | NM_000258 | 3931.099  | 4594.035  | AA679352  | 8315.246  |
| 505.786   | NM_012145 | 16919.045 | 10064.321 | AB033055  | 1905.788  | 1877.558  | X04503    | 1913.632  |
| 1385.196  | AF305779  | 921.977   | 954.336   | AF311287  | 1120.452  | 1081.055  | D45917    | 979.295   |
| 4839.926  | AF225416  | 7691.863  | 8201.591  | NM_014781 | 1898.008  | 2032.698  | X52001    | 884.628   |
| 1613.805  | NM_016231 | 1290.741  | 1296.011  | BU629989  | 817.41    | 1572.81   | B1823872  | 2289.593  |
| 1421.519  | NM_002093 | 4376.25   | 4299.523  | NM_018446 | 1960.909  | 1302.937  | AA430552  | 1519.19   |
| 2146.187  | AB042555  | 4870.094  | 3931.15   | NM_014465 | 971.863   | 710.682   | X66142    | 813.188   |
| 4062.771  | NM_001729 | 324.898   | 492.993   | D87292    | 3610.229  | 4729.537  | R45054    | 979.386   |
| 385.479   | NM_017763 | 1365.955  | 1305.833  | NM_005498 | 995.809   | 529.243   | NM_000905 | 3857.807  |
| 840.514   | NM_013975 | 2184.76   | 1954.502  | NM_016335 | 539.611   | 536.128   | M58050    | 1527.859  |
| 9375.131  | NM_003843 | 4399.972  | 4786.505  | NM_003165 | 1710.912  | 1056.419  | NM_007263 | 4455.07   |
| 1460.483  | NM_012216 | 1117.87   | 868.99    | NM_003906 | 3449.4    | 2211.319  | AF206020  | 1463      |
| 3055.425  | NM_005338 | 977.473   | 2171.969  | AL359590  | 9601.573  | 9458.299  | NM_014410 | 1288.63   |
| 2856.369  | NM_020445 | 30079.133 | 32644.965 | NM_002861 | 2716.919  | 2339.96   | AB020668  | 539.063   |
| 5412.905  | NM_016376 | 6481.983  | 6799.493  | NM_003080 | 1984.596  | 1645.316  | NM_006203 | 5777.012  |
| 4517.363  | AB046848  | 3857.705  | 4125.947  | NM_002645 | 927.707   | 1335.791  | AF309553  | 1621.819  |
| 2977.5    | AL133057  | 5824.308  | 8181.877  | AB033027  | 1361.316  | 1806.722  | NM_003605 | 1142.618  |
| 1642.791  | U04845    | 2306.43   | 2850.251  | AK021805  | 4108.063  | 3608.451  | NM_000100 | 13457.565 |
| 1939.134  | NM_018103 | 7792.109  | 6921.862  | AB014550  | 1418.395  | 1275.314  | NM_001900 | 53951.102 |
| 4600.656  | AK026302  | 7214.553  | 5159.868  | AF320294  | 1982.65   | 2692.872  | NM_003993 | 1030.794  |
| 23675.652 | NM_012214 | 1888.697  | 3614.577  | AF161436  | 3366.859  | 5096.12   | NM_005586 | 1402.129  |
| 3003.675  | AF049656  | 8998      | 8879.406  | NM_020402 | 2533.316  | 8856.569  | AK025886  | 526.523   |
| 1257.46   | NM_000312 | 1206.942  | 856.389   | NM_000664 | 993.306   | 503.141   | AB014514  | 1416.723  |
| 3794.376  | NM_003963 | 432.614   | 489.481   | AF075085  | 22266.07  | 16689.65  | NM_002865 | 2106.744  |
| 1320.032  | AC009729  | 430.674   | 601.051   | NM_005892 | 2239.023  | 2374.859  | NM_003566 | 599.768   |
| 5742.345  | NM_016598 | 6199.521  | 3809.561  | AF132734  | 5020.693  | 3895.711  | NM_007159 | 5203.043  |
| 2224.092  | BE874867  | 29867.135 | 32353.977 | NM_018379 | 1208.193  | 819.317   | NM_003731 | 2566.392  |
| 1354.622  | AL136719  | 1462.834  | 1481.163  | NM_016403 | 6920.354  | 4700.787  | NM_005446 | 1306.963  |
| 2158.778  | NM_014109 | 5871.926  | 4450.157  | NM_015603 | 703.417   | 368.057   | NM_013292 | 1146.742  |
| 3068.301  | NM_012160 | 1594.625  | 1240.706  | NM_001921 | 2751.328  | 2209.677  | J02639    | 722.502   |
| 523.404   | NM_006357 | 52370.773 | 54310.5   | NM_006230 | 4330.586  | 2614.219  | NM_005231 | 2257.309  |
| 707.398   | NM_014248 | 39566.758 | 25651.83  | NM_014699 | 2565.243  | 3117.894  | AF064729  | 1016.262  |
| 968.611   | AK027070  | 795.631   | 755.013   | NM_013400 | 2750.896  | 2848.835  | NM_005412 | 5895.189  |
| 1923.694  | NM_003341 | 6673.354  | 8800.986  | AK026257  | 865.415   | 1242.95   | NM_012113 | 1368.378  |
| 5430.772  | NM_017785 | 925.751   | 2600.969  | AK023836  | 2953.62   | 3374.319  | NM_002150 | 2479.164  |
| 3476.563  | NM_006249 | 2733.923  | 2751.597  | AJ299442  | 3073.573  | 3068.251  | NM_004595 | 3378.121  |
| 5697.699  | NM_018318 | 5823.99   | 7750.511  | NM_000129 | 881.656   | 1375.464  | NM_020178 | 414.248   |
| 1972.689  | AB020640  | 1817.879  | 1717.796  | NM_003762 | 2187.098  | 5231.674  | AF050146  | 1621.873  |
| 548.063   | NM_006839 | 1818.8    | 1380.57   | NM_004859 | 2848.568  | 1212.365  | NM_000116 | 1490.255  |
| 11943.136 | NM_000223 | 675.229   | 646.017   | NM_016352 | 321.577   | 259.615   | NM_006698 | 3836.298  |
| 8679.938  | NM_005851 | 1011.197  | 956.599   | NM_000070 | 1364.011  | 1418.832  | NM_006804 | 3350.673  |
| 519.904   | AF119256  | 1428.745  | 1005.493  | AB037804  | 503.593   | 505.842   | NM_015969 | 3155.309  |
| 919.099   | X74497    | 1044.963  | 1249.289  | NM_003289 | 15357.363 | 10627.727 | NM_003051 | 3067.642  |
| 38858.164 | NM_012210 | 512.929   | 547.879   | M23254    | 2816.412  | 2728.221  | AJ278917  | 3697.068  |
| 1631.42   | U10072    | 1761.485  | 1618.956  | R28062    | 1192.826  | 1391.281  | AK025641  | 14154.791 |
| 18811.752 | AF222749  | 8318.525  | 6426.589  | AI627464  | 1027.688  | 1716.396  | NM_001720 | 3962.778  |
| 1024.779  | NM_003410 | 3428.992  | 3810.607  | BI756258  | 718.964   | 1344.944  | NM_018390 | 738.968   |
| 6892.905  | NM_007146 | 2532.754  | 3198.051  | AI342225  | 57956.695 | 61981.57  | NM_014140 | 1215.323  |
| 854.302   | NM_002229 | 843.08    | 1444.056  | AA634103  | 53620.398 | 62886.848 | NM_002916 | 1017.309  |
| 881.438   | S69027    | 1803.042  | 1396.02   | J04599    | 671.517   | 774.874   | M20700    | 1161.156  |
| 673.248   | NM_012119 | 3917.504  | 1259.369  | AF110020  | 494.741   | 1153.948  | NM_001034 | 2787.126  |

|           |           |           |           |           |           |           |           |           |
|-----------|-----------|-----------|-----------|-----------|-----------|-----------|-----------|-----------|
| 1626.935  | X99631    | 11952.735 | 16343.473 | AA707922  | 179.113   | 1208.567  | NM_002689 | 514.391   |
| 2361.778  | NM_001730 | 2232.664  | 1321.419  | AA608557  | 3009.019  | 7127.345  | NM_017686 | 868.885   |
| 2458.147  | AK026290  | 752.813   | 414.633   | AL050095  | 1243.816  | 2151.03   | AK000800  | 1501.425  |
| 54227.676 | AB014589  | 2172.354  | 2164.71   | U03272    | 1224.719  | 1775.897  | NM_018154 | 1123.999  |
| 2433.155  | AF248649  | 812.1     | 498.423   | NM_014781 | 1407.741  | 798.478   | BC006287  | 2087.919  |
| 5219.496  | U37146    | 9215.014  | 7615.668  | X87896    | 638.554   | 448.604   | AB023198  | 1919.266  |
| 2514.581  | NM_012086 | 3051.257  | 2339.736  | M88310    | 1065.661  | 1011.428  | AF304163  | 4785.312  |
| 2012.427  | AB040431  | 340.908   | 456.121   | NM_000042 | 851.893   | 861.833   | NM_002975 | 8348.945  |
| 505.475   | NM_000991 | 57032.082 | 60221.809 | NM_005024 | 878.06    | 415.533   | AK023511  | 1672.701  |
| 1672.867  | NM_016034 | 17812.85  | 6225.757  | AB006627  | 1886.617  | 1065.815  | NM_014556 | 1108.005  |
| 11541.155 | X69150    | 47925.035 | 51197.668 | NM_000416 | 1335.41   | 1777.884  | NM_014375 | 5514.299  |
| 2638.569  | NM_001025 | 55597.699 | 64213.922 | NM_002965 | 2849.906  | 30802.465 | NM_017812 | 6781.521  |
| 529.278   | NM_016067 | 51514.539 | 45699.18  | AB007883  | 1941.969  | 1727.963  | J03260    | 805.201   |
| 1641.368  | NM_018285 | 14093.785 | 5205.573  | NM_007037 | 9297.072  | 14574.494 | AF068236  | 14215.013 |
| 1157.664  | AK022393  | 10672.932 | 2699.311  | NM_001649 | 1250.746  | 3493.231  | H94487    | 655.172   |
| 579.695   | AK026654  | 1162.781  | 1047.963  | NM_005492 | 687.219   | 1281.197  | BG681747  | 14177.148 |
| 49438.227 | AB020643  | 551.251   | 824.408   | AF038196  | 1429.592  | 1682.103  | H63077    | 881.075   |
| 10863.833 | AK025245  | 1023.146  | 600.73    | AF320294  | 1117.885  | 774.25    | AA679352  | 8310.21   |
| 1684.246  | AK025496  | 3703.219  | 3239.545  | AF161436  | 2865.031  | 1838.552  | X04503    | 480.998   |
| 1068.83   | NM_005205 | 50788.344 | 50601.93  | NM_020402 | 1835.391  | 2244.579  | D45917    | 918.891   |
| 994.284   | NM_001966 | 1447.026  | 1136.487  | NM_004299 | 1616.637  | 803.468   | X52001    | 1510.145  |
| 2789.228  | NM_016138 | 1771.409  | 1918.564  | NM_001171 | 649.598   | 1132.687  | BI823872  | 2364.452  |
| 1461.07   | Z36833    | 56168.313 | 58331.918 | NM_002250 | 1319.886  | 1159.098  | AA430552  | 1397.892  |
| 3471.141  | NM_014355 | 1853.764  | 1768.029  | NM_006323 | 2929.186  | 2743.353  | X66142    | 548.763   |
| 2127.752  | M21191    | 44608.023 | 39501.902 | NM_016466 | 464.647   | 591.906   | R45054    | 870.208   |
| 1009.275  | AF072810  | 1910.225  | 1622.82   | NM_001493 | 3492.905  | 3171.542  | NM_002387 | 843.383   |
| 1457.767  | AF174482  | 8488.14   | 6168.963  | NM_014841 | 510.26    | 558.339   | AB023217  | 516.558   |
| 1208.464  | NM_003528 | 1111.331  | 4865.898  | NM_014426 | 2186.99   | 1724.6    | M58050    | 2453.506  |
| 1012.1    | NM_017769 | 780.466   | 809.223   | NM_006816 | 11957.406 | 15497.199 | NM_014410 | 1426.432  |
| 4159.358  | D85131    | 15350.352 | 8116.313  | AK026518  | 12293.847 | 15640.78  | AF305835  | 189.889   |
| 1024.031  | D30612    | 3912.625  | 2662.164  | NM_000258 | 2762.634  | 3295.644  | AF312769  | 450.452   |
| 13077.555 | NM_002163 | 19040.326 | 10750.009 | AB033055  | 1533.789  | 1467.455  | AB020668  | 751.447   |
| 4239.985  | U52097    | 14427.287 | 13216.046 | AF311287  | 817.365   | 892.666   | NM_006203 | 6209.616  |
| 3843.382  | NM_003416 | 2985.013  | 2069.958  | AJ299442  | 2478.065  | 1272.33   | AF309553  | 1192.674  |
| 4729.728  | NM_018484 | 841.138   | 762.599   | NM_000129 | 546.308   | 353.975   | NM_003605 | 734.648   |
| 461.409   | NM_017594 | 1671.929  | 2070.545  | NM_003762 | 1927.764  | 1631.223  | NM_000100 | 14721.651 |
| 1891.667  | AK027237  | 765.623   | 1220.634  | NM_018446 | 2079.772  | 1749.381  | NM_001900 | 58516.641 |
| 5404.275  | AK027104  | 1386.032  | 1546.072  | NM_000187 | 347.671   | 345.667   | NM_003993 | 1139.53   |
| 4933.797  | AL133090  | 18284.111 | 22248.018 | NM_014465 | 955.131   | 863.551   | NM_018961 | 557.487   |
| 3352.58   | AF085867  | 3792.757  | 6259.12   | D87292    | 3714.687  | 5008.037  | NM_005586 | 1306.217  |
| 3397.92   | AK026158  | 821.085   | 751.249   | NM_005498 | 708.016   | 822.094   | NM_003051 | 2328.724  |
| 5381.87   | AF086510  | 4094.398  | 4496.433  | NM_016335 | 550.186   | 765.453   | NM_145342 | 3365.351  |
| 7549.863  | Z36779    | 1475.165  | 1374.306  | NM_003165 | 2013.158  | 1842.948  | AJ278917  | 3025.155  |
| 19379.557 | NM_002816 | 2791.804  | 2817.497  | NM_003906 | 3998.207  | 3682.898  | AK025641  | 17116.525 |
| 3779.726  | NM_017513 | 567.913   | 451.193   | AL359590  | 9646.145  | 13208.202 | AK025886  | 847.482   |
| 6018.619  | NM_017822 | 7366.587  | 7324.538  | NM_002861 | 2932.05   | 2778.354  | AB014514  | 1548.471  |
| 5106.907  | AK026844  | 1523.424  | 1438.076  | NM_003080 | 2193.342  | 2497.077  | NM_002865 | 1714.025  |
| 1001.677  | AK026735  | 3235.532  | 2573.657  | NM_002645 | 1013.262  | 1710.577  | NM_003566 | 422.142   |
| 808.78    | AL110104  | 15531.095 | 16100.32  | AB033027  | 1418.059  | 1589.114  | NM_007159 | 5174.625  |
| 1510.966  | AF240633  | 939.079   | 1651.087  | AK021805  | 2804.627  | 2961.288  | NM_003731 | 3017.683  |
| 1079.998  | AK027056  | 4541.665  | 4501.396  | AB014550  | 1300.006  | 2193.981  | NM_005446 | 1126.219  |
| 2340.731  | AK024294  | 1381.187  | 833.15    | NM_006826 | 5119.535  | 3917.169  | NM_013292 | 969.92    |
| 1846.63   | AL110126  | 2307.12   | 2332.54   | AB007973  | 2262.173  | 1980.705  | AK000800  | 1368.753  |

|           |                  |           |           |                  |           |           |                  |           |
|-----------|------------------|-----------|-----------|------------------|-----------|-----------|------------------|-----------|
| 4681.435  | <b>AF052172</b>  | 12315.889 | 13979.981 | <b>M96843</b>    | 4918.426  | 5621.642  | <b>NM_018154</b> | 1075.614  |
| 438.732   | <b>AB014573</b>  | 3168.347  | 3594.327  | <b>NM_017791</b> | 931.985   | 988.84    | <b>BC006287</b>  | 2663.173  |
| 51828.434 | <b>AK025418</b>  | 493.848   | 541.671   | <b>NM_005882</b> | 2827.271  | 2650.181  | <b>AB023198</b>  | 2466.81   |
| 14459.711 | <b>AK091109</b>  | 20652.264 | 22907.307 | <b>BC012304</b>  | 3198.069  | 2789.418  | <b>AF304163</b>  | 5868.29   |
| 2902.349  | <b>AF032897</b>  | 694.772   | 470.974   | <b>AB046815</b>  | 1470.427  | 1762.805  | <b>NM_005231</b> | 3090.953  |
| 2282.379  | <b>NM_014967</b> | 2809.821  | 3766.917  | <b>AF075085</b>  | 13543.829 | 13406.744 | <b>AF064729</b>  | 419.305   |
| 1410.877  | <b>AK022915</b>  | 2984.209  | 2529.509  | <b>NM_005892</b> | 2732.098  | 4199.163  | <b>NM_005412</b> | 8490.769  |
| 15009.783 | <b>AK021736</b>  | 588.209   | 1081.323  | <b>AF132734</b>  | 4708.399  | 4918.632  | <b>NM_012113</b> | 1526.907  |
| 8708.008  | <b>AF131834</b>  | 980.929   | 988.702   | <b>NM_018379</b> | 1096.578  | 1522.869  | <b>NM_002150</b> | 2495.083  |
| 640.287   | <b>AL355711</b>  | 840.666   | 755.627   | <b>NM_016403</b> | 7090.174  | 7297.816  | <b>NM_004595</b> | 3547.969  |
| 2776.52   | <b>AK025851</b>  | 1386.612  | 2149.658  | <b>NM_001921</b> | 2845.486  | 2748.023  | <b>NM_002264</b> | 267.358   |
| 1423.513  | <b>AJ011409</b>  | 8981.522  | 11452.839 | <b>NM_006230</b> | 4197.97   | 3498.702  | <b>NM_014754</b> | 7400.338  |
| 1641.238  | <b>AJ227906</b>  | 925.279   | 850.432   | <b>NM_014699</b> | 2892.749  | 4707.522  | <b>D49387</b>    | 385.352   |
| 2239.889  | <b>V00541</b>    | 127.662   | 580.31    | <b>NM_013400</b> | 2824.31   | 4030.03   | <b>AF050146</b>  | 1167.783  |
| 2053.22   | <b>AJ011598</b>  | 450.866   | 526.989   | <b>AK026257</b>  | 957.257   | 1688.642  | <b>NM_000116</b> | 828.629   |
| 578.614   | <b>U17633</b>    | 621.845   | 557.766   | <b>AK023836</b>  | 2379.246  | 3161.826  | <b>NM_006698</b> | 2947.372  |
| 1265.522  | <b>L10404</b>    | 778.302   | 896.868   | <b>NM_018109</b> | 1088.963  | 1557.148  | <b>NM_006804</b> | 4181.912  |
| 820.669   | <b>AF283776</b>  | 8483.787  | 8070.183  | <b>NM_005076</b> | 5799.078  | 3425.189  | <b>NM_015969</b> | 3309.757  |
| 753.685   | <b>L10123</b>    | 15646.035 | 20608.129 | <b>AF253321</b>  | 679.139   | 648.997   | <b>NM_004517</b> | 1552.515  |
| 1034.971  | <b>D16877</b>    | 2134.594  | 2070.846  | <b>U80735</b>    | 1092.216  | 949.253   | <b>AI017418</b>  | 875.974   |
| 3710.557  | <b>L19363</b>    | 492.709   | 444.534   | <b>NM_017850</b> | 882.016   | 701.488   | <b>NM_000679</b> | 1026.925  |
| 5297.992  | <b>AL109781</b>  | 2446.062  | 2062.933  | <b>NM_002224</b> | 866.722   | 768.297   | <b>AF218006</b>  | 27577.539 |
| 6329.527  | <b>AK021895</b>  | 1447.938  | 1870.093  | <b>X07979</b>    | 20291.834 | 14884.579 | <b>AK026935</b>  | 6609.461  |
| 2427.479  | <b>AK024563</b>  | 221.326   | 722.883   | <b>L13857</b>    | 904.027   | 753.61    | <b>NM_020162</b> | 1997.674  |
| 669.12    | <b>AK000036</b>  | 3292.116  | 3733.015  | <b>NM_018098</b> | 1667.251  | 2366.513  | <b>AK027124</b>  | 8722.37   |
| 1808.538  | <b>AK000769</b>  | 425.505   | 678.46    | <b>AF146277</b>  | 3258.855  | 3251.565  | <b>M31212</b>    | 28000.383 |
| 18963.572 | <b>AK000924</b>  | 519.635   | 781.35    | <b>AF055033</b>  | 12783.934 | 10805.668 | <b>AL117398</b>  | 3853.676  |
| 941.178   | <b>AK022252</b>  | 1977.971  | 3097.679  | <b>NM_017700</b> | 602.509   | 1184.324  | <b>AY007158</b>  | 53903.727 |
| 1852.291  | <b>AK000114</b>  | 2836.775  | 3741.559  | <b>M37191</b>    | 4335.555  | 5663.731  | <b>NM_001720</b> | 3805.987  |
| 1403.167  | <b>AK000952</b>  | 1492.857  | 1266.85   | <b>NM_001114</b> | 1091.616  | 1929.911  | <b>NM_018390</b> | 789.923   |
| 12695.197 | <b>AK024520</b>  | 3016.644  | 3046.043  | <b>X82240</b>    | 1013.367  | 588.993   | <b>AB037724</b>  | 2838.289  |
| 59892.234 | <b>AK024592</b>  | 1643.709  | 1662.861  | <b>NM_013995</b> | 8442.746  | 7237.493  | <b>AK025086</b>  | 486.833   |
| 1293.563  | <b>AK024904</b>  | 1460.505  | 1597.273  | <b>NM_006010</b> | 8742.457  | 3606.097  | <b>AK026151</b>  | 3663.388  |
| 559.862   | <b>AK025030</b>  | 819       | 981.203   | <b>K03191</b>    | 1135.191  | 743.86    | <b>NM_014140</b> | 1387.945  |
| 2357.739  | <b>AK024542</b>  | 1955.763  | 2151.02   | <b>NM_005079</b> | 2603.869  | 2782.107  | <b>NM_002916</b> | 982.587   |
| 1111.697  | <b>AK024915</b>  | 503.349   | 269.144   | <b>NM_005192</b> | 9326.182  | 12152.082 | <b>M20700</b>    | 795.366   |
| 3322.509  | <b>AK024300</b>  | 715.892   | 887.104   | <b>NM_015032</b> | 2729.816  | 2068.003  | <b>NM_001034</b> | 1641.108  |
| 6161.094  | <b>L09092</b>    | 607.036   | 656.947   | <b>AK022956</b>  | 1717.031  | 1117.315  | <b>NM_017686</b> | 852.034   |
| 11299.36  | <b>NM_012132</b> | 814.601   | 788.069   | <b>AK023121</b>  | 521.694   | 878.214   | <b>NM_016645</b> | 1536.819  |
| 38300.113 | <b>NM_012129</b> | 1506.338  | 1406.714  | <b>NM_014104</b> | 21643.559 | 18403.975 | <b>L14723</b>    | 9372.43   |
| 925.886   | <b>AK024881</b>  | 351.499   | 477.001   | <b>NM_002749</b> | 41055.105 | 40461.547 | <b>NM_002206</b> | 739.083   |
| 2254.298  | <b>AK025716</b>  | 1263.456  | 1212.804  | <b>NM_018216</b> | 1801.465  | 2072.813  | <b>NM_002230</b> | 641.987   |
| 2501.208  | <b>AF086202</b>  | 8859.365  | 10322.787 | <b>NM_003390</b> | 615.374   | 548.921   | <b>NM_003815</b> | 1834.28   |
| 6004.17   | <b>AK023270</b>  | 1490.566  | 1882.386  | <b>AL137747</b>  | 2043.619  | 2471.307  | <b>NM_001430</b> | 1209.452  |
| 3901.381  | <b>AF085979</b>  | 20998.063 | 28120.865 | <b>NM_014755</b> | 4424.727  | 5637.205  | <b>U17989</b>    | 668.233   |
| 2139.558  | <b>AK023112</b>  | 1902.49   | 2324.371  | <b>AF077188</b>  | 9100.98   | 6964.742  | <b>NM_018028</b> | 422.612   |
| 1828.506  | <b>NM_017806</b> | 15393.777 | 15467.69  | <b>NM_012446</b> | 1339.541  | 936.012   | <b>AF249267</b>  | 20562.051 |
| 2102.665  | <b>AK001937</b>  | 34692.746 | 38751.484 | <b>NM_018338</b> | 443.926   | 864.471   | <b>X84939</b>    | 2095.324  |
| 1407.63   | <b>AF086494</b>  | 13875.739 | 17494.668 | <b>NM_018214</b> | 448.883   | 588.911   | <b>NM_018320</b> | 6149.311  |
| 3607.998  | <b>BI769977</b>  | 1161.781  | 1625.293  | <b>AL133644</b>  | 10679.697 | 6751.038  | <b>NM_002069</b> | 882.493   |
| 3243.372  | <b>AL137567</b>  | 455.945   | 438.504   | <b>NM_002706</b> | 2359.633  | 1492.226  | <b>NM_016056</b> | 8060.943  |
| 9382.557  | <b>AK024913</b>  | 3329.775  | 1590.608  | <b>NM_019023</b> | 53757.047 | 45704.715 | <b>M65066</b>    | 4086.26   |
| 3974.82   | <b>AB007961</b>  | 1757.299  | 2111.817  | <b>NM_004420</b> | 574.28    | 574.436   | <b>NM_016951</b> | 2049.046  |

|           |           |           |           |           |           |           |           |           |
|-----------|-----------|-----------|-----------|-----------|-----------|-----------|-----------|-----------|
| 933.249   | NM_005547 | 1322.902  | 1984.47   | NM_005499 | 12338.478 | 9451.904  | NM_013251 | 495.866   |
| 11774.987 | AF119862  | 7337.933  | 8664.535  | NM_015387 | 2201.381  | 3092.942  | NM_006099 | 2492.491  |
| 4958.624  | U17628    | 2388.732  | 3048.92   | NM_001733 | 3214.496  | 1678.51   | NM_016084 | 4703.168  |
| 4046.991  | AF119867  | 2052.896  | 2400.151  | NM_017825 | 4302.588  | 4574.477  | AF095289  | 4122.394  |
| 607.933   | AL357205  | 12319.78  | 14128.26  | NM_014035 | 2065.905  | 2959.181  | NM_005537 | 1370.695  |
| 738.822   | AF124819  | 675.509   | 476.453   | NM_013432 | 9562.183  | 9256.494  | NM_019003 | 1158.783  |
| 6864.144  | D17091    | 1103.306  | 921.512   | AB020716  | 331.186   | 705.812   | NM_015935 | 1965.521  |
| 5419.257  | AL133074  | 1430.155  | 3100.541  | AK027130  | 519.611   | 1414.512  | AF182412  | 998.232   |
| 7649.127  | AF086318  | 5305.517  | 5728.106  | NM_005479 | 6468.824  | 10308.946 | NM_006845 | 3837.804  |
| 5197.887  | AF088012  | 1501.601  | 1543.198  | NM_005730 | 38249.477 | 39562.738 | NM_004945 | 1992.768  |
| 1823.851  | NM_018121 | 1438.939  | 1474.947  | NM_005392 | 663.157   | 314.671   | NM_020242 | 576.035   |
| 751.673   | AK026708  | 2585.088  | 2997.232  | AL133572  | 2993.887  | 2001.821  | NM_001788 | 5222.079  |
| 1940.356  | NM_017903 | 6845.1    | 9109.589  | AK022500  | 910.191   | 801.949   | NM_007178 | 37627.867 |
| 25179.975 | NM_018074 | 1580.367  | 1670.613  | BC021298  | 481.406   | 276.972   | NM_002209 | 1327.942  |
| 13523.83  | NM_000909 | 1786.777  | 2000.765  | U52096    | 3450.801  | 3004.181  | AL137477  | 2693.599  |
| 2890.663  | AK024828  | 1198.259  | 2208.632  | AB013897  | 623.438   | 513.383   | NM_014256 | 1594.65   |
| 38819.074 | AF009315  | 1219.319  | 1593.244  | NM_005526 | 19511.861 | 14669.822 | NM_015967 | 1924.843  |
| 44095.426 | NM_019013 | 1302.185  | 1301.24   | AK001669  | 1207.576  | 1101.072  | NM_004994 | 5473.977  |
| 7467.332  | L37711    | 682.152   | 746.426   | NM_006195 | 3881.397  | 2983.009  | NM_006610 | 3964.738  |
| 56282.941 | S70313    | 6189.503  | 7827.212  | NM_006190 | 4231.948  | 4140.399  | NM_001333 | 385.958   |
| 10050.002 | AK021607  | 1145.933  | 1021.578  | NM_006368 | 1180.033  | 1035.495  | NM_003791 | 3096.441  |
| 991.652   | L09268    | 763.259   | 803.502   | NM_001618 | 3921.935  | 5333.314  | NM_018017 | 2269.982  |
| 4822.589  | NM_020186 | 7440.189  | 5437.595  | NM_006425 | 2732.088  | 3187.047  | AK001296  | 4334.487  |
| 1043.251  | AK022424  | 287.183   | 519.499   | AF432218  | 6132.637  | 9505.627  | AK000173  | 248.795   |
| 6823.07   | AF090947  | 1395.781  | 1716.602  | NM_004286 | 2060.778  | 2235.313  | NM_018365 | 1454.145  |
| 1707.471  | BC016962  | 404.751   | 451.506   | AK025082  | 984.852   | 486.163   | NM_006586 | 6600.893  |
| 1520.31   | AJ272196  | 5925.45   | 5954.581  | AF086535  | 604.357   | 313.714   | AJ272180  | 821.835   |
| 4047.737  | X58162    | 3589.022  | 5210.667  | AB040901  | 741.148   | 918.823   | AK025709  | 551.503   |
| 705.803   | AK022825  | 233.449   | 676.64    | AL137406  | 1737.547  | 1391.849  | NM_019016 | 5488.511  |
| 1119.509  | CY3Cy5    | 2726.23   | 153.367   | NM_012253 | 2141.858  | 1845.224  | NM_012261 | 4131.744  |
| 375.74    | L35251    | 2121.554  | 2781.222  | NM_006876 | 995.397   | 509.245   | NM_015556 | 1181.21   |
| 1133.748  | BE910395  | 550.433   | 605.32    | AF153821  | 1125.848  | 1144.356  | NM_018416 | 1072.778  |
| 14022.308 | N46828    | 3102.112  | 3941.847  | NM_013370 | 676.146   | 780.79    | NM_004606 | 2671.991  |
| 7860.581  | BI908302  | 9946.597  | 25818.105 | NM_003310 | 1690.292  | 2372.011  | D70833    | 63030.395 |
| 835.751   | AA460969  | 2185.785  | 2368.549  | AK024461  | 1136.355  | 1589.577  | NM_016621 | 1043.546  |
| 1988.251  | M85079    | 5634.535  | 10642.137 | NM_017635 | 992.045   | 853.731   | AK022643  | 1872.517  |
| 2132.852  | AA457671  | 13902.294 | 5121.186  | X62534    | 715.163   | 1048.845  | AB046808  | 1084.092  |
| 1255.325  | X07437    | 5061.883  | 7285.211  | AF027147  | 13449.882 | 14032.348 | AK026265  | 1092.235  |
| 1018.511  | NM_000641 | 2746.578  | 3527.357  | M62399    | 1933.733  | 2657.279  | AK027179  | 1667.464  |
| 818.508   | AE006466  | 2294.56   | 3365.454  | U71600    | 1176.704  | 1312.61   | NM_006466 | 354.33    |
| 47717.813 | BC008737  | 59728.988 | 63859.27  | NM_004472 | 840.296   | 1700.395  | NM_005681 | 781.81    |
| 2696.172  | BC011655  | 4427.778  | 4919.889  | AB037862  | 3156.641  | 6555.84   | NM_015156 | 3268.793  |
| 8092.564  | BC002396  | 4722.096  | 7816.423  | AF088022  | 5527.791  | 2481.791  | NM_012384 | 1897.527  |
| 6613.674  | SR6       | 2240.691  | 2024.275  | AK026537  | 868.39    | 1109.302  | NM_004653 | 968.103   |
| 4304.324  | SR8       | 7254.354  | 18676.75  | NM_015485 | 1937.017  | 2142.192  | AF233453  | 2596.876  |
| 2319.002  | SR10      | 27148.252 | 6563.547  | NM_002666 | 2258.83   | 2688.83   | D87454    | 3483.245  |
| 1043.121  | CY3Cy5    | 1871.902  | 129.14    | AF202145  | 1729.486  | 2117.264  | NM_007020 | 1113.639  |
| 1761.017  | NM_020370 | 764.3     | 3141.794  | AK026155  | 1437.6    | 2066.545  | NM_000713 | 2728.333  |
| 966.973   | NM_004767 | 626.887   | 749.84    | NM_018052 | 20566.535 | 21333.166 | NM_016055 | 1889.29   |
| 878.583   | BF310159  | 4597.568  | 3912.109  | AK022386  | 2617.116  | 2661.502  | NM_013291 | 2406.209  |
| 12871.546 | NM_000316 | 2038.201  | 844.364   | NM_002767 | 2571.059  | 3261.608  | NM_002936 | 3792.589  |
| 5175.773  | NM_018986 | 2099.694  | 1799.134  | AF131846  | 9987.964  | 8790.377  | NM_014161 | 1205.754  |
| 6531.075  | NM_003360 | 1046.31   | 1618.579  | AF088069  | 613.096   | 536.465   | AF086491  | 2643.379  |

|           |           |           |           |           |           |           |           |           |
|-----------|-----------|-----------|-----------|-----------|-----------|-----------|-----------|-----------|
| 2239.851  | Z21965    | 19746.076 | 22277.475 | AF086551  | 514.966   | 451.112   | NM_014856 | 826.217   |
| 1184.162  | NM_000852 | 12530.742 | 5980.029  | NM_013393 | 3634.76   | 6740.264  | AK021611  | 605.531   |
| 3743.108  | NM_000399 | 1126.381  | 1388.543  | AK025072  | 938.505   | 601.719   | NM_003492 | 776.5     |
| 871.799   | AW797282  | 667.984   | 865.97    | AK022410  | 542.107   | 502.22    | NM_003780 | 19619.275 |
| 3119.786  | NM_002402 | 3450.387  | 870.063   | L10378    | 7507.756  | 6402.199  | NM_000199 | 8178.652  |
| 5697.194  | L09070    | 2057.613  | 2986.096  | AJ227860  | 740.247   | 632.591   | NM_003778 | 57952.98  |
| 7764.338  | NM_009590 | 2490.667  | 2183.55   | AL157448  | 668.295   | 513.265   | AK023263  | 1758.107  |
| 1510.212  | AL133037  | 598.609   | 632.449   | AF026942  | 772.541   | 809.775   | NM_004622 | 1292.363  |
| 971.245   | NM_020350 | 3787.76   | 2550.575  | AJ276429  | 1919.785  | 1693.364  | AK021445  | 1482.755  |
| 4382.513  | NM_000350 | 910.419   | 504.522   | AL117657  | 557.877   | 433.471   | NM_017934 | 4357.542  |
| 50374.273 | X91103    | 5649.102  | 4668.688  | AK021590  | 2386.927  | 2667.162  | NM_014168 | 24846.598 |
| 1548.881  | AA419164  | 3117.957  | 1551.308  | AK023998  | 757.551   | 953.975   | AF211971  | 1869.049  |
| 617.782   | AL117235  | 949.496   | 1108.571  | AK021643  | 766.881   | 844.706   | NM_002931 | 836.131   |
| 3113.762  | NM_014822 | 6100.579  | 2778.373  | AK000872  | 1098.732  | 1186.386  | NM_013448 | 28854.531 |
| 3433.419  | NM_005296 | 2862.853  | 3447.306  | AK027147  | 3447.152  | 3949.048  | X65232    | 16931.453 |
| 1339.506  | NM_001337 | 450.106   | 3998.403  | AK022415  | 17116.09  | 12234.082 | M33782    | 567.271   |
| 988.663   | NM_003611 | 5954.104  | 6278.865  | AL137368  | 544.135   | 482.934   | NM_015696 | 2051.332  |
| 1465.048  | AB014538  | 1502.73   | 1696.489  | AK026787  | 4050.25   | 2521.299  | AK022551  | 746.914   |
| 5335.032  | NM_004154 | 473.204   | 893.899   | AK023542  | 1372.609  | 1097.708  | AF085968  | 1767.226  |
| 4656.76   | AK025118  | 6826.295  | 7113.024  | AK000203  | 642.708   | 675.533   | AK023665  | 649.968   |
| 3659.983  | NM_000727 | 2187.709  | 2584.608  | AK021845  | 6262.914  | 4456.848  | AB011136  | 928.619   |
| 2032.564  | NM_002621 | 686.021   | 6584.404  | AK022434  | 452.831   | 299.715   | AF085898  | 3524.106  |
| 10004.834 | NM_005385 | 7314.772  | 9881.771  | NM_018592 | 1111.727  | 1223.699  | AL442094  | 528.333   |
| 1659.188  | NM_006074 | 20672.482 | 14177.094 | NM_018503 | 25130.209 | 21628.027 | AL161960  | 2647.67   |
| 4275.667  | AF208232  | 2825.238  | 11394.094 | NM_016449 | 11364.471 | 11130.984 | AL049964  | 1745.799  |
| 802.836   | NM_002988 | 3473.605  | 6184.437  | AL049670  | 3339.068  | 2931.936  | AK023269  | 1808.481  |
| 11693.177 | NM_004186 | 1825.104  | 2331.728  | NM_018512 | 10013.001 | 11211.14  | AF070564  | 3472.485  |
| 5758.989  | NM_016258 | 5007.247  | 6558.721  | AK022412  | 1580.661  | 1314.047  | AL110111  | 1299.989  |
| 1943.708  | AB014542  | 19204.959 | 7787.213  | AK023073  | 5567.295  | 4365.166  | NM_014778 | 1514.879  |
| 1052.137  | NM_014640 | 673.495   | 475.398   | AK023697  | 423.043   | 819.008   | AK001171  | 6744.295  |
| 3018.855  | Y10518    | 27162.828 | 20684.566 | AK023922  | 675.169   | 783.505   | AK026273  | 6714.548  |
| 58800.613 | AF155135  | 4716.675  | 3986.883  | AK022438  | 1021.331  | 1337.243  | NM_020250 | 7902.453  |
| 1328.043  | NM_014790 | 1067.776  | 890.806   | AK023764  | 1263.883  | 2384.335  | AF055007  | 1385.099  |
| 1053.831  | NM_003571 | 4637.336  | 3258.18   | Z27405    | 15175.397 | 11478.315 | NM_012337 | 940.944   |
| 775.172   | AB032965  | 18778.367 | 17577.973 | AK023412  | 1159.846  | 780.209   | AL389879  | 3523.091  |
| 1143.322  | AF133424  | 1805.586  | 1310.699  | NM_014617 | 16244.104 | 13436.967 | AK022869  | 1622.688  |
| 637.58    | NM_005003 | 21547.178 | 11907.35  | AK074682  | 3682.11   | 3269.831  | NM_016111 | 5250.394  |
| 1774.195  | AF084560  | 2368.069  | 2985.872  | X74605    | 676.447   | 702.775   | AF085958  | 56609.574 |
| 1757.503  | NM_015715 | 2812.321  | 906.6     | AK024513  | 1112.882  | 828.235   | AF086021  | 1935.429  |
| 1055.926  | NM_000032 | 2254.138  | 2738.972  | BC036692  | 1310.3    | 1058.473  | AL117655  | 569.779   |
| 3061.032  | NM_002083 | 856.157   | 941.06    | AJ009640  | 2746.972  | 2457.499  | AK024472  | 752.332   |
| 3941.394  | NM_002035 | 3660.881  | 3753.212  | AF147340  | 839.023   | 1032.867  | AF087981  | 431.14    |
| 1657.506  | BF342908  | 728.939   | 1326.697  | AF035308  | 6092.644  | 6029.549  | NM_017976 | 2195.259  |
| 3814.139  | AK023510  | 2623.137  | 2705.247  | NM_014054 | 1723.222  | 1869.286  | U06700    | 901.229   |
| 1432.867  | NM_004345 | 1489.742  | 2988.797  | AK022228  | 856.394   | 2117.638  | AF086121  | 3563.897  |
| 2962.52   | X71490    | 10582.102 | 18181.9   | AF086480  | 1820.775  | 1142.851  | AF086140  | 1031.088  |
| 4539.192  | AF257081  | 1108.495  | 1697.618  | AK000806  | 37109.855 | 18878.924 | AK026915  | 895.079   |
| 1237.152  | NM_001688 | 54505.668 | 55752.953 | NM_016471 | 2508.287  | 2009.079  | AL110259  | 989.344   |
| 1178.657  | NM_002232 | 584.019   | 204.808   | NM_005364 | 7168.171  | 5414.408  | AB033100  | 4293.837  |
| 21759.625 | NM_016106 | 3635.656  | 2381.249  | AK023482  | 2921.621  | 2897.919  | AL390138  | 1850.89   |
| 8908.109  | NM_014570 | 3665.467  | 1954.009  | AK023176  | 660.508   | 1146.103  | AL137290  | 3589.486  |
| 43945.668 | NM_014747 | 2883.327  | 2133.951  | AL161991  | 10749.422 | 12226.142 | AK021606  | 549.333   |
| 2059.236  | Y19240    | 3025.482  | 2139.471  | D17032    | 10062.118 | 13164.583 | NM_014124 | 27757.973 |

|           |                  |           |           |                  |           |           |                  |           |
|-----------|------------------|-----------|-----------|------------------|-----------|-----------|------------------|-----------|
| 890.068   | <b>AF091029</b>  | 4620.967  | 3848.969  | <b>AL137292</b>  | 560.215   | 803.531   | <b>AK001551</b>  | 1159.466  |
| 3686.848  | <b>X97074</b>    | 7323.941  | 7425.025  | <b>NM_017941</b> | 1319.726  | 1879.454  | <b>AK001825</b>  | 694.185   |
| 9181.922  | <b>NM_004135</b> | 6384.368  | 4823.358  | <b>BE900527</b>  | 1030.731  | 805.026   | <b>AK024714</b>  | 540.769   |
| 1675.822  | <b>NM_000203</b> | 697.313   | 1149.401  | <b>AF118079</b>  | 13960.448 | 21498.105 | <b>AK022363</b>  | 893.363   |
| 811.967   | <b>NM_000925</b> | 9798.796  | 8235.245  | <b>AL365413</b>  | 3576.063  | 4747.052  | <b>AK023895</b>  | 718.51    |
| 41726.281 | <b>NM_000465</b> | 2583.943  | 1745.334  | <b>NM_005258</b> | 5734.408  | 4713.974  | <b>AK024206</b>  | 8185.383  |
| 21891.754 | <b>NM_000123</b> | 3861.89   | 3877.638  | <b>NM_000440</b> | 3154.212  | 2149.343  | <b>NM_006262</b> | 1369.832  |
| 936.505   | <b>AL137501</b>  | 595.451   | 979.033   | <b>NM_001297</b> | 1824.652  | 1634.951  | <b>AK026598</b>  | 2309.015  |
| 569.333   | <b>BE858979</b>  | 1670.791  | 2187.544  | <b>NM_004403</b> | 2581.801  | 3013.153  | <b>AK023602</b>  | 1291.074  |
| 3333.992  | <b>NM_006712</b> | 58977.957 | 64481.484 | <b>X64993</b>    | 648.855   | 775.664   | <b>NM_018097</b> | 10477.649 |
| 5136.063  | <b>NM_006240</b> | 2235.033  | 3001.15   | <b>NM_004434</b> | 4691.857  | 5500.045  | <b>AF130043</b>  | 505.893   |
| 1117.029  | <b>NM_007026</b> | 4331.956  | 5989.737  | <b>NM_006269</b> | 642.438   | 467.327   | <b>Y11167</b>    | 729.538   |
| 2056.102  | <b>NM_002648</b> | 810.787   | 463.521   | <b>NM_016230</b> | 1614.838  | 3346.689  | <b>AK026813</b>  | 504.197   |
| 2194.432  | <b>AF070670</b>  | 3604.669  | 1865.405  | <b>NM_001083</b> | 1117.284  | 1033.762  | <b>AK027225</b>  | 766.875   |
| 1425.893  | <b>NM_016156</b> | 3371.461  | 2879.448  | <b>AK023966</b>  | 3527.098  | 2995.904  | <b>AK023083</b>  | 1705.213  |
| 1221.246  | <b>NM_016528</b> | 1342.421  | 1256.892  | <b>AK025702</b>  | 1671.488  | 1441.394  | <b>AF130093</b>  | 267.439   |
| 7879.018  | <b>NM_015974</b> | 1996.357  | 1102.362  | <b>NM_018958</b> | 715.844   | 691.324   | <b>NM_005325</b> | 332.978   |
| 24296.461 | <b>NM_014384</b> | 1489.047  | 1435.455  | <b>AK022038</b>  | 816.403   | 1102.718  | <b>AF217967</b>  | 437.32    |
| 1546.104  | <b>NM_002573</b> | 2622.212  | 2034.442  | <b>AF085866</b>  | 2227.488  | 2108.431  | <b>NM_018150</b> | 4735      |
| 1035.974  | <b>AL133037</b>  | 1082.477  | 1026.479  | <b>CY3Cy5</b>    | 1410.72   | 139.735   | <b>NM_017918</b> | 513.904   |
| 1539.583  | <b>NM_020350</b> | 6959.824  | 9267.195  | <b>H-U 05770</b> | 2037.692  | 3398.292  | <b>AK026494</b>  | 1824.969  |
| 4745.412  | <b>NM_000350</b> | 2360.964  | 2776.641  | <b>H-M 65199</b> | 2338.557  | 2274.293  | <b>AK023508</b>  | 1324.084  |
| 27617.242 | <b>X91103</b>    | 9235.015  | 13258.541 | <b>H-M 32315</b> | 1337.155  | 1498.697  | <b>AK025840</b>  | 1537.587  |
| 12049.559 | <b>L35251</b>    | 3537.038  | 5950.942  | <b>H-D85429M</b> | 2794.472  | 4019.893  | <b>BC024009</b>  | 1737.824  |
| 1949.63   | <b>BE910395</b>  | 852.072   | 974.757   | <b>BF439832</b>  | 1608.089  | 1411.13   | <b>AF128543</b>  | 4302.581  |
| 2507.452  | <b>N46828</b>    | 1917.748  | 2001.812  | <b>BG819162</b>  | 694.395   | 635.036   | <b>NM_004189</b> | 1409.275  |
| 6244.895  | <b>BG695859</b>  | 922.617   | 3616.592  | <b>NM_017532</b> | 3824.641  | 4706.514  | <b>U84510</b>    | 2505.164  |
| 9860.429  | <b>M85079</b>    | 5312.677  | 8428.549  | <b>SR2</b>       | 44046.664 | 38535.668 | <b>S83198</b>    | 7702.621  |
| 31118.006 | <b>AA457671</b>  | 12781.423 | 5404.504  | <b>SR4</b>       | 9377.239  | 9231.396  | <b>AF052119</b>  | 9931.756  |
| 1715.022  | <b>X07437</b>    | 4597.978  | 6800.552  | <b>SR6</b>       | 1601.995  | 1173.405  | <b>X94290</b>    | 1864.425  |
| 1948.492  | <b>NM_000641</b> | 1938.121  | 3180.991  | <b>SR8</b>       | 4914.077  | 14423.398 | <b>AK026685</b>  | 20662.223 |
| 1756.726  | <b>AE006466</b>  | 2718.707  | 3214.967  | <b>SR10</b>      | 21192.674 | 9757.453  | <b>AF090927</b>  | 12836.453 |
| 1735.506  | <b>BC002396</b>  | 3471.75   | 2037.498  | <b>CY3Cy5</b>    | 941.563   | 115.972   | <b>AL137642</b>  | 738.481   |
| 4504.705  | <b>NM_022095</b> | 989.427   | 1373.061  | <b>NM_004447</b> | 2429.492  | 1939.313  | <b>AL133619</b>  | 1268.965  |
| 2283.638  | <b>AF112219</b>  | 15664.299 | 8888.227  | <b>NM_001204</b> | 1086.51   | 1100.949  | <b>AK025902</b>  | 1308.948  |
| 2837.174  | <b>NM_000521</b> | 42.071    | 1124.991  | <b>NM_012116</b> | 1163.609  | 1572.434  | <b>NM_005181</b> | 3348.178  |
| 514.81    | <b>NM_014640</b> | 1166.5    | 953.917   | <b>NM_004557</b> | 3312.429  | 2631.201  | <b>AF026945</b>  | 446.764   |
| 1933.336  | <b>Y10518</b>    | 38674.145 | 42552.602 | <b>NM_014757</b> | 2093.652  | 1988.237  | <b>AF143676</b>  | 2268.143  |
| 5988.085  | <b>AF155135</b>  | 8302.249  | 9957.672  | <b>NM_017893</b> | 722.313   | 896.005   | <b>U66044</b>    | 3452.71   |
| 925.453   | <b>NM_014790</b> | 1686.608  | 2253.906  | <b>NM_001584</b> | 961.617   | 934.295   | <b>NM_005247</b> | 25555.867 |
| 28632.131 | <b>NM_003571</b> | 6787.459  | 5882.803  | <b>NM_012259</b> | 29609.471 | 29862.387 | <b>NM_005283</b> | 1937.274  |
| 815.53    | <b>AB032965</b>  | 31230.525 | 38402.441 | <b>AF272357</b>  | 1021.126  | 1659.267  | <b>AL122089</b>  | 1426.498  |
| 10583.609 | <b>NM_020370</b> | 852.384   | 2895.293  | <b>NM_016372</b> | 28653.152 | 21364.549 | <b>AA203665</b>  | 2676.84   |
| 509.593   | <b>NM_004767</b> | 1741.563  | 1482.133  | <b>AB020705</b>  | 707.384   | 1272.01   | <b>U95646</b>    | 2085.356  |
| 3924.36   | <b>BF310159</b>  | 6672.606  | 6273.634  | <b>NM_002980</b> | 1113.939  | 792.078   | <b>Y16705</b>    | 1149.599  |
| 607.199   | <b>NM_018986</b> | 1679.232  | 2024.638  | <b>NM_007102</b> | 46995.258 | 48064.707 | <b>AF279775</b>  | 2847.635  |
| 4536.861  | <b>AB044934</b>  | 920.748   | 1388.916  | <b>BG491613</b>  | 4642.391  | 7778.807  | <b>NM_001821</b> | 1505.84   |
| 1038.204  | <b>U27655</b>    | 2991.467  | 4195.169  | <b>NM_006664</b> | 3387.319  | 4024.492  | <b>NM_005647</b> | 853.005   |
| 1710.86   | <b>NM_003360</b> | 1875.511  | 2727.325  | <b>NM_002728</b> | 768.841   | 819.895   | <b>X64978</b>    | 3750.005  |
| 1713.934  | <b>Z21965</b>    | 23432.43  | 31366.473 | <b>NM_004513</b> | 6408.173  | 11179.738 | <b>NM_000912</b> | 14082.708 |
| 1113.851  | <b>NM_012427</b> | 921.307   | 1507.163  | <b>NM_001708</b> | 10201.901 | 11581.835 | <b>NM_002345</b> | 640.668   |
| 4166.646  | <b>NM_002402</b> | 2078.968  | 219.373   | <b>NM_017735</b> | 2043.994  | 1853.433  | <b>U57971</b>    | 1376.053  |
| 647.316   | <b>L09070</b>    | 1338.108  | 863.637   | <b>AB033044</b>  | 2064.286  | 1614.532  | <b>X89673</b>    | 966.451   |

|           |           |           |           |             |           |           |             |           |
|-----------|-----------|-----------|-----------|-------------|-----------|-----------|-------------|-----------|
| 2861.589  | NM_000062 | 4035.764  | 3450.723  | AB014564    | 827.605   | 476.203   | AK024593    | 1284.151  |
| 2060.104  | NM_009590 | 2466.226  | 2340.029  | NM_020230   | 1928.778  | 1550.777  | Z83934      | 904.788   |
| 506.876   | NM_016106 | 4658.979  | 5047.775  | NM_006762   | 34746.547 | 34026.676 | NM_018359   | 1623.95   |
| 1114.971  | NM_014570 | 4786.94   | 3914.478  | NM_006352   | 1611.906  | 1178.062  | AK022020    | 1189.753  |
| 2090.934  | NM_014747 | 4748.25   | 4961.148  | NM_016430   | 509.874   | 803.772   | AK000263    | 3638.094  |
| 2312.412  | Y19240    | 4440.497  | 4641.475  | NM_005094   | 2030.076  | 3107.248  | Y13895      | 409.611   |
| 7896.951  | AF091029  | 7467.066  | 8687.845  | BE382905    | 780.226   | 448.288   | NM_017447   | 482.392   |
| 1117.212  | X97074    | 15139.534 | 13378.199 | NM_006476   | 27404.199 | 39109.355 | AL049452    | 1705.505  |
| 2089.082  | AL117235  | 1209.569  | 1177.425  | NM_002133   | 698.344   | 698.079   | BF345435    | 972.361   |
| 15443.447 | NM_014822 | 8801.829  | 4021.438  | NM_032943   | 1054.061  | 1315.121  | NM_016622   | 1573.026  |
| 43609.512 | NM_005296 | 4650.993  | 5529.84   | NM_007177   | 6739.595  | 9035.775  | AK026976    | 679.747   |
| 6308.237  | NM_001337 | 659.943   | 7087.936  | NM_000809   | 527.349   | 675.069   | AF070559    | 1953.901  |
| 45872.816 | NM_003611 | 8653.818  | 10251.563 | AL359592    | 1123.073  | 886.948   | D42043      | 3982.827  |
| 23744.549 | AB014538  | 2007.431  | 2875.237  | NM_006078   | 5639.973  | 5965.08   | CY3Cy5      | 1498.839  |
| 1570.82   | NM_004154 | 499.638   | 1805.729  | NM_005953   | 16343.917 | 3873.229  | BG744154    | 49868.992 |
| 1827.983  | NM_006209 | 1143.141  | 2022.105  | NM_016274   | 1367.785  | 1707.744  | Z11694      | 3795.719  |
| 1413.299  | AK025118  | 7909.224  | 8997.284  | NM_014946   | 507.652   | 424.555   | BF983177    | 537.228   |
| 4004.934  | NM_000727 | 3158.57   | 4622.067  | NM_014251   | 1432.105  | 1493.937  | Z26317      | 754.293   |
| 2095.792  | NM_002621 | 669.341   | 5874.618  | AK023915    | 2730.277  | 3192.038  | X16983      | 5397.858  |
| 4908.215  | NM_005385 | 8019.571  | 11568.161 | AB051453    | 1679.234  | 1754.147  | X56160      | 1271.242  |
| 1616.027  | NM_006074 | 12887.794 | 3744.263  | NM_014963   | 1601.405  | 1526.308  | BG679991    | 596.897   |
| 1644.15   | AF208232  | 1976.297  | 3831.551  | NM_016271   | 2533.153  | 1873.099  | H-Y 00097 I | 1932.365  |
| 1488.714  | NM_002988 | 2078.036  | 2395.552  | U22172      | 1547.249  | 1269.806  | H-X 16707 I | 1304.725  |
| 3159.186  | NM_004186 | 938.288   | 664.845   | AB032960    | 1447.387  | 1329.215  | AL038354    | 39254.723 |
| 4084.113  | NM_016258 | 3245.263  | 2226.353  | NM_014264   | 2675.235  | 2976.933  | R14607      | 1395.624  |
| 1535.665  | AF203032  | 3660.066  | 2648.646  | AF020089    | 1552.518  | 1761.908  | NM_021976   | 2597.84   |
| 4999.426  | AB014542  | 17551.504 | 7600.985  | NM_006257   | 1655.135  | 2212.648  | SR6         | 1509.98   |
| 24647.402 | AF070670  | 6845.645  | 7341.198  | NM_016281   | 7255.461  | 6259.803  | SR8         | 5194.76   |
| 1138.296  | NM_016156 | 5646.921  | 7385.065  | NM_004734   | 12670.153 | 11503.972 | SR10        | 18908.908 |
| 1375.265  | NM_016528 | 2085.104  | 3101.265  | AK024793    | 1279.208  | 1506.662  | CY3Cy5      | 1376.047  |
| 1594.587  | NM_015974 | 2850.804  | 2513.027  | AF208291    | 1373.417  | 1146.908  | NM_001284   | 26865.041 |
| 2408.472  | NM_014384 | 2461.917  | 2466.452  | NM_004877   | 40136.918 | 47318.148 | NM_001105   | 996.32    |
| 1563.441  | NM_002573 | 4107.405  | 3684.425  | L10284      | 70574.461 | 62601.883 | NM_005585   | 580.153   |
| 1661.74   | AF133424  | 1870.779  | 1886.517  | NM_000276   | 1260.099  | 695.877   | NM_002075   | 1155.64   |
| 1420.328  | AF084560  | 3789.165  | 4572.324  | NM_015886   | 422.99    | 357.937   | Y08756      | 5472.511  |
| 1695.347  | NM_015715 | 3218.393  | 878.84    | NM_007102   | 45757.496 | 42490.859 | NM_005563   | 4677.199  |
| 1036.399  | NM_000032 | 2567.076  | 2877.634  | BG491613    | 5219.512  | 7318.265  | NM_005102   | 2226.849  |
| 1606.09   | NM_002083 | 1062.232  | 1410.67   | AA397813    | 15472.024 | 20009.295 | NM_002719   | 2206.594  |
| 4697.988  | NM_002035 | 3761.837  | 4887.911  | W68291      | 4648.482  | 3097.973  | AV752086    | 834.006   |
| 144.047   | NM_014900 | 912.448   | 1568.045  | H-X 53655 I | 834.046   | 727.885   | NM_016102   | 3726.651  |
| 51052.645 | BF342908  | 835.548   | 1963.64   | H-U 05770 I | 3036.801  | 5930.386  | NM_004376   | 1172.873  |
| 4582.54   | AF118073  | 744.004   | 605.036   | H-M 65199   | 3313.292  | 3406.975  | NM_005603   | 14277.76  |
| 708.258   | AK023510  | 2859.564  | 3292.546  | H-M 32315   | 1726.108  | 2043.319  | NM_006834   | 2321.655  |
| 1114.916  | NM_004345 | 1198.384  | 3198.627  | H-V00536M   | 716.76    | 654.306   | AB011100    | 1400.302  |
| 6596.583  | X71490    | 8987.685  | 10063.311 | H-D85429M   | 2153.217  | 3123.964  | NM_012402   | 1760.602  |
| 1230.382  | AF257081  | 835.046   | 883.813   | BF439832    | 1303.56   | 1336.254  | M76676      | 1712.127  |
| 560.837   | NM_001688 | 37390.727 | 26131.92  | BG819162    | 680.87    | 583.131   | NM_003857   | 675.381   |
| 1287.002  | NM_000219 | 370.924   | 222.071   | NM_017532   | 3054.416  | 3290.443  | AL137690    | 433.646   |
| 604.331   | NM_002232 | 594.625   | 292.273   | M38449      | 2491.577  | 2612.722  | Z83804      | 1219.955  |
| 52364.445 | NM_022095 | 1065.612  | 1798.831  | AK025495    | 708.225   | 822.803   | NM_004386   | 1242.302  |
| 1092.189  | AF112219  | 16350.889 | 9346.843  | AB033044    | 1535.861  | 1200.582  | U67784      | 1134.543  |
| 22097.232 | NM_004135 | 7894.968  | 9227.154  | NM_020230   | 2195.972  | 2719.442  | NM_007366   | 1225.142  |
| 767.678   | NM_000203 | 718.791   | 1123.632  | NM_006762   | 33136.961 | 33208.23  | NM_000592   | 453.42    |

|           |           |           |           |           |           |           |           |           |
|-----------|-----------|-----------|-----------|-----------|-----------|-----------|-----------|-----------|
| 1622.101  | NM_013443 | 2727.715  | 3839.055  | NM_006352 | 779.496   | 610.109   | NM_016584 | 3395.471  |
| 37641.848 | NM_000925 | 10631.496 | 10352.18  | NM_001204 | 699.778   | 547.502   | NM_001815 | 865.005   |
| 7298.132  | NM_000465 | 1756.753  | 1378.424  | BF131321  | 686.171   | 1102.903  | NM_000064 | 3183.196  |
| 1173.684  | NM_000123 | 3718.894  | 4980.691  | NM_012116 | 1120.97   | 868.132   | NM_003264 | 2485.51   |
| 14850.365 | NM_000122 | 1869.166  | 1218.559  | NM_002442 | 1128.213  | 893.456   | NM_006725 | 1636.916  |
| 6891.48   | NM_006712 | 56961.492 | 62255.211 | AB033091  | 7124.044  | 10140.792 | NM_003326 | 1146.622  |
| 69.787    | NM_006240 | 1601.499  | 1144.356  | NM_004557 | 3151.947  | 2574.304  | NM_004568 | 15849.183 |
| 18348.242 | NM_007026 | 2631.355  | 1798.633  | NM_014757 | 1725.816  | 1705.156  | NM_000202 | 985.198   |
| 3964.68   | M37712    | 8451.301  | 6027.421  | NM_001584 | 726.987   | 734.983   | NM_005496 | 7864.895  |
| 326.466   | NM_002648 | 830.853   | 1143.227  | NM_012259 | 21173.67  | 17762.094 | NM_004817 | 835.317   |
| 453.05    | AW797282  | 463.567   | 425.03    | AF272357  | 608.586   | 709.445   | NM_018975 | 8149.452  |
| 1200.918  | NM_002402 | 3433.361  | 464.723   | NM_016372 | 21725.863 | 13714.559 | AB023215  | 5917.164  |
| 534.893   | L09070    | 1319.506  | 1837.375  | AB020705  | 618.004   | 1006.434  | NM_018073 | 848.571   |
| 1457.797  | NM_000062 | 6664.281  | 7966.446  | NM_002980 | 784.06    | 563.407   | AL137529  | 1431.589  |
| 6624.23   | NM_009590 | 2944.542  | 2769.603  | NM_005953 | 14487.571 | 2829.234  | NM_012332 | 1394.031  |
| 2532.708  | AL133037  | 735.314   | 634.505   | U53532    | 1531.154  | 1799.275  | AK026648  | 705.97    |
| 297.899   | NM_000350 | 1869.335  | 1552.24   | AL096732  | 859.749   | 602.914   | NM_000497 | 1030.972  |
| 983.682   | X91103    | 8212.221  | 11867.906 | AB006423  | 899.556   | 704.938   | NM_017421 | 617.574   |
| 466.6     | AA419164  | 5502.543  | 2930.915  | AJ132084  | 814.288   | 1181.719  | AK025977  | 7439.538  |
| 1550.649  | L35251    | 3754.782  | 6458.854  | NM_005719 | 59835.531 | 58480.379 | AK023130  | 3069.715  |
| 686.736   | BE910395  | 1221.462  | 1270.517  | NM_003462 | 10603.534 | 6716.485  | NM_000273 | 706.846   |
| 2307.355  | N46828    | 1675.703  | 2440.126  | NM_006093 | 1976.938  | 2001.884  | NM_002899 | 4298.745  |
| 1083.782  | BI908302  | 13090.58  | 44614.176 | NM_000139 | 924.038   | 742.831   | NM_000486 | 1909.798  |
| 7123.298  | AA460969  | 2874.432  | 5831.293  | NM_006664 | 2873.585  | 3458.539  | BE876237  | 857.241   |
| 387.617   | BG695859  | 994.374   | 4041.647  | NM_002728 | 402.989   | 480.668   | NM_005397 | 574.282   |
| 816.892   | AA457671  | 9595.704  | 1572.234  | NM_004513 | 4331.303  | 3823.268  | NM_000806 | 3971.216  |
| 622.929   | X07437    | 3558.399  | 2629.347  | NM_001708 | 6685.878  | 5890.613  | NM_006320 | 714.8     |
| 1781.129  | NM_000641 | 1783.254  | 1503.681  | NM_017735 | 1200.154  | 1094.286  | AB014511  | 2079.427  |
| 1342.187  | AE006466  | 1653.003  | 1172.059  | AF208291  | 1047.255  | 603.32    | NM_014252 | 3240.368  |
| 782.252   | BC008737  | 47408.883 | 31424.738 | NM_004877 | 39122.52  | 43980.633 | NM_001662 | 3271.67   |
| 295.514   | BC011655  | 3197.525  | 2008.011  | L10284    | 67946.992 | 65665.648 | NM_016131 | 5152.451  |
| 984.737   | BC002396  | 3647.164  | 6012.899  | NM_000276 | 1654.272  | 1409.425  | NM_006822 | 1163.758  |
| 1396.58   | AF208232  | 2498.235  | 7288.672  | NM_003742 | 1649.658  | 1615.757  | NM_012142 | 5467.27   |
| 934.885   | NM_002988 | 2786.782  | 4189.687  | NM_005094 | 1297.73   | 1726.158  | NM_016429 | 1050.417  |
| 1007.456  | NM_004186 | 1432.266  | 1510.719  | AK022558  | 2603.091  | 2116.206  | NM_018264 | 1182.772  |
| 578.438   | NM_016258 | 4782.375  | 4968.255  | NM_006476 | 28847.463 | 37632.93  | NM_014580 | 706.772   |
| 4545.662  | AF203032  | 4399.787  | 4325.91   | AK023787  | 1158.528  | 1388.792  | AB028998  | 440.594   |
| 1034.743  | AB014542  | 20432.211 | 11780.698 | NM_002133 | 936.516   | 1130.567  | NM_004111 | 2040.466  |
| 3122.351  | NM_014640 | 690.761   | 673.87    | NM_015697 | 2463.653  | 3124.414  | AF085966  | 3044.531  |
| 1220.13   | NM_014790 | 1495.829  | 2544.901  | NM_032943 | 665.57    | 959.122   | NM_005316 | 1169.599  |
| 1562.598  | NM_003571 | 7916.355  | 8226.166  | NM_007177 | 5492.146  | 10218.597 | NM_016316 | 1787.073  |
| 950.74    | AB032965  | 26686.322 | 36212.945 | AL359592  | 566.25    | 668.169   | NM_003369 | 4330.393  |
| 13007.3   | NM_020370 | 822.215   | 3652.639  | NM_006078 | 3942.029  | 3612.662  | NM_000057 | 1446.741  |
| 684.985   | NM_004767 | 681.197   | 1065.995  | NM_017532 | 3209.348  | 2972.735  | NM_018343 | 2097.402  |
| 6562.017  | BF310159  | 6455.077  | 10198.429 | M38449    | 2942.001  | 2816.08   | AK095793  | 897.247   |
| 629.773   | NM_000316 | 751.32    | 837.6     | AK025495  | 584.097   | 716.831   | NM_003177 | 2163.176  |
| 758.473   | U27655    | 2834.977  | 1575.877  | NM_001091 | 818.419   | 699.309   | NM_017719 | 661.898   |
| 7830.93   | NM_003360 | 1075.805  | 969.897   | AK026842  | 758.335   | 817.189   | AF064078  | 902.955   |
| 4943.829  | Z21965    | 16771.627 | 12382.432 | NM_002395 | 1683.767  | 1059.682  | AL049688  | 988.853   |
| 739.885   | NM_012427 | 493.647   | 744.307   | AB023203  | 645.312   | 1066.768  | NM_002737 | 1009.194  |
| 976.197   | NM_000852 | 9669.366  | 2780.565  | NM_014963 | 1629.518  | 1617.246  | Z25427    | 1795.636  |
| 1105.036  | NM_000399 | 808.699   | 504.379   | NM_004259 | 2072.821  | 3393.979  | NM_004672 | 4215.815  |
| 522.678   | AF257081  | 1509.823  | 2812.388  | NM_016271 | 3219.885  | 2402.061  | NM_001353 | 1216.045  |



|           |           |           |           |             |           |           |             |           |
|-----------|-----------|-----------|-----------|-------------|-----------|-----------|-------------|-----------|
| 783.272   | NM_001688 | 48410.914 | 51791.645 | NM_016619   | 2637.649  | 2848.314  | NM_006214   | 2118.496  |
| 352.777   | NM_000219 | 788.122   | 619.467   | NM_014481   | 553.108   | 955.758   | AJ010228    | 2265.932  |
| 7265.578  | NM_002232 | 1324.889  | 1440.373  | U22172      | 1213.142  | 1058.932  | NM_005198   | 1925.111  |
| 3175.27   | NM_016106 | 4673.424  | 5504.857  | AB032960    | 880.213   | 817.398   | NM_006061   | 2318.051  |
| 759.091   | AF091029  | 7448.641  | 10942.096 | NM_014264   | 2164.012  | 2381.987  | NM_006848   | 56027.703 |
| 4219.902  | X97074    | 14030.079 | 18641.631 | AF020089    | 996.198   | 696.969   | NM_005603   | 13826.45  |
| 1647.985  | AL117235  | 1632.529  | 3118.715  | NM_006257   | 1260.003  | 1333.163  | NM_001061   | 2200.57   |
| 949.033   | NM_014822 | 8509.813  | 5915.232  | NM_016281   | 5118.113  | 3981.887  | Z11694      | 4310.495  |
| 742.391   | AB014538  | 1764.197  | 1612.046  | NM_004734   | 10382.799 | 8953.849  | Z26317      | 764.078   |
| 2362.877  | NM_004154 | 1518.981  | 1060.479  | AK024793    | 929.882   | 912.382   | X16983      | 4701.895  |
| 606.87    | NM_006209 | 912.417   | 941.03    | NM_012259   | 20878.781 | 14600.079 | X56160      | 1216.684  |
| 1735.756  | AK025118  | 5204.598  | 4325.801  | AF272357    | 907.045   | 889.279   | H-Y 00097 I | 1653.275  |
| 2521.767  | NM_000727 | 2298.22   | 2098.718  | NM_016372   | 20501.648 | 11842.918 | H-M 59964   | 756.454   |
| 3192.772  | NM_002621 | 413.523   | 3077.115  | AB020705    | 844.7     | 1046.562  | H-Y 00711 I | 52589.094 |
| 4772.247  | NM_018985 | 2191.228  | 770.695   | NM_002980   | 983.687   | 756.756   | H-X 16707 I | 1328.757  |
| 1076.689  | NM_006074 | 15085.257 | 6379.322  | NM_015886   | 661.946   | 654.074   | AL038354    | 38064.848 |
| 5311.162  | NM_006712 | 55288.602 | 61822.313 | NM_007102   | 37526.281 | 43105.105 | R14607      | 931.358   |
| 1150.134  | NM_006240 | 1766.243  | 2173.221  | BG491613    | 3642.238  | 5697.107  | NM_021976   | 2240.614  |
| 517.812   | NM_007026 | 3525.294  | 3718.316  | AA397813    | 15185.152 | 21419.783 | NM_005718   | 7771.131  |
| 375.982   | M37712    | 9878.789  | 13731.701 | W68291      | 4122.47   | 2715.668  | NM_005496   | 3267.772  |
| 452.567   | NM_016528 | 1605.589  | 1645.509  | N64384      | 573.673   | 586.073   | NM_016608   | 1479.894  |
| 3026.893  | NM_000032 | 2569.65   | 4169.764  | H-X 53655 I | 852.97    | 596.165   | NM_002858   | 3671.258  |
| 239.615   | NM_002083 | 1454.295  | 1043.315  | H-U 05770 I | 2657.312  | 4705.687  | NM_018975   | 9034.724  |
| 2395.099  | NM_002035 | 3228.795  | 2653.56   | H-M 65199   | 1246.291  | 1411.779  | NM_001284   | 29582.588 |
| 2527.114  | NM_014900 | 542.589   | 689.301   | H-M 32315   | 1129.716  | 1348.657  | NM_003242   | 4591.636  |
| 1011.407  | BF342908  | 866.231   | 939.045   | H-D85429M   | 1654.89   | 2954.342  | U31099      | 237.068   |
| 1587.022  | AF118073  | 424.774   | 296.662   | BF439832    | 1050.635  | 941.444   | NM_001105   | 1005.719  |
| 3909.068  | AK023510  | 2460.622  | 1663.01   | BG819162    | 504.78    | 712.427   | NM_005585   | 725.662   |
| 1187.241  | NM_004345 | 1087.202  | 1586.091  | NM_004513   | 5387.678  | 5007.326  | NM_002075   | 1713.482  |
| 1500.967  | NM_000702 | 23509.275 | 19367.516 | NM_001708   | 8912.31   | 8250.838  | Y08756      | 4799.186  |
| 676.135   | X71490    | 9140.68   | 12499.877 | NM_017735   | 1488.782  | 1506.161  | NM_005563   | 3819.382  |
| 1903.138  | NM_014273 | 11334.362 | 14115.88  | AB033044    | 1544.281  | 1372.422  | NM_005102   | 1981.213  |
| 555.69    | AF039442  | 1738.225  | 2372.994  | NM_006762   | 24764.744 | 25771.992 | NM_002719   | 2042.352  |
| 704.03    | NM_004680 | 1099.103  | 1323.526  | NM_006352   | 815.858   | 605.107   | AV752086    | 656.901   |
| 693.359   | AF104260  | 490.226   | 617.441   | NM_004447   | 1600.42   | 2286.531  | NM_016102   | 2105.537  |
| 898.939   | NM_005671 | 4771.97   | 10842.085 | NM_001204   | 547.267   | 856.527   | NM_004376   | 1208.305  |
| 1465.547  | NM_017409 | 1341.428  | 2540.614  | BF131321    | 361.937   | 416.068   | NM_014252   | 1209.008  |
| 4067.58   | NM_006071 | 1137.286  | 974.867   | NM_012116   | 926.183   | 1051.633  | NM_001662   | 1581.852  |
| 1173.473  | NM_012236 | 10588.727 | 5260.647  | NM_000020   | 1466.37   | 1318.131  | NM_016131   | 2834.076  |
| 2149.965  | AF112219  | 19274.83  | 20577.242 | NM_002442   | 1179.554  | 1199.188  | NM_006822   | 862.223   |
| 2515.613  | NM_004135 | 8264.56   | 14082.503 | AB033091    | 5396.025  | 5350.003  | NM_012142   | 6121.185  |
| 2066.169  | NM_000203 | 739.811   | 880.22    | NM_004557   | 2602.299  | 2335.844  | NM_016429   | 970.095   |
| 63070.73  | NM_013443 | 2740.96   | 1576.38   | NM_014757   | 2045.22   | 2671.966  | NM_006834   | 2486.661  |
| 11686.841 | NM_000925 | 9373.061  | 6938.578  | NM_017893   | 501.233   | 1262.731  | AB011100    | 1309.372  |
| 478.391   | NM_000465 | 2139.737  | 671.457   | NM_001584   | 839.018   | 748.912   | U61741      | 732.766   |
| 418.784   | NM_000123 | 3552.51   | 3362.773  | AL359592    | 830.38    | 401.973   | NM_012402   | 1498.192  |
| 3333.805  | AL137501  | 507.855   | 398.989   | NM_006078   | 4192.554  | 3884.731  | M76676      | 1284.068  |
| 570.367   | BE858979  | 1321.371  | 894.13    | NM_000824   | 596.152   | 1117.47   | NM_003857   | 516.329   |
| 867.339   | NM_000122 | 2026.729  | 1599.912  | NM_005953   | 13381.439 | 3045.53   | AL137690    | 341.782   |
| 7205.576  | Z36505    | 1499.945  | 1092.454  | NM_016274   | 1098.881  | 1499.881  | Z83804      | 1219.704  |
| 1272.974  | NM_001854 | 2015.431  | 1992.301  | NM_014251   | 1109.509  | 1291.133  | NM_004386   | 1155.57   |
| 358.503   | NM_017913 | 1333.136  | 1805.528  | AK022750    | 2911.238  | 2997.201  | U67784      | 686.622   |
| 1479.467  | NM_002755 | 5816.826  | 10235.403 | NM_004251   | 4756.214  | 4800.938  | NM_007366   | 1158.656  |

|           |           |           |           |           |           |           |           |           |
|-----------|-----------|-----------|-----------|-----------|-----------|-----------|-----------|-----------|
| 683.286   | AK024799  | 19391.652 | 18213.098 | NM_012484 | 1969.511  | 4015.173  | NM_000592 | 734.699   |
| 52117.984 | NM_000924 | 5079.907  | 8463.088  | AL096732  | 681.517   | 728.055   | NM_016584 | 3647.383  |
| 1688.055  | NM_003330 | 6513.708  | 4980.882  | AB006423  | 663.48    | 728.154   | NM_001815 | 1149.215  |
| 1022.039  | NM_002481 | 630.807   | 616.526   | NM_005719 | 56338.496 | 57987.582 | NM_000064 | 3490.503  |
| 2394.073  | NM_003647 | 903.628   | 1186.204  | NM_003462 | 9878.807  | 6386.261  | NM_003264 | 1842.725  |
| 7825.164  | AB006589  | 357.477   | 265.224   | NM_006093 | 2368.893  | 1925.25   | NM_006725 | 1140.886  |
| 2551.763  | NM_018351 | 778.104   | 457.296   | NM_000139 | 1015.084  | 753.957   | NM_003326 | 1098.429  |
| 659.542   | NM_147171 | 2904.19   | 1696.074  | NM_006664 | 2727.074  | 3646.199  | NM_004568 | 15856.304 |
| 1936.931  | AF238083  | 4155.864  | 6929.539  | NM_014264 | 2350.835  | 2404.571  | NM_000202 | 624.923   |
| 687.917   | NM_016388 | 1799.366  | 1467.831  | AF020089  | 775.159   | 684.854   | NM_004672 | 2126.168  |
| 5981.063  | AB046783  | 687.184   | 683.073   | NM_006257 | 1505.616  | 1331.377  | AJ010228  | 3162.794  |
| 20061.764 | NM_000845 | 786.503   | 881.123   | NM_016281 | 4898.944  | 3902.21   | NM_005198 | 2464.361  |
| 3252.022  | NM_014965 | 3237.139  | 2707.023  | NM_004734 | 10427.671 | 7303.569  | AL137529  | 1226.919  |
| 492.453   | NM_004882 | 10197.491 | 6438.635  | AK024793  | 984.149   | 1105.66   | NM_012332 | 1382.182  |
| 1200.483  | AL390148  | 7457.125  | 6860.531  | AF208291  | 1072.182  | 1124.862  | AK026648  | 476.216   |
| 489.284   | AK024055  | 1284.136  | 1291.282  | NM_000019 | 65815.43  | 65452.539 | NM_000497 | 698.781   |
| 1677.645  | U10485    | 958.371   | 956.778   | NM_003742 | 1887.321  | 1884.314  | NM_017421 | 651.3     |
| 7790.162  | NM_013376 | 1025.42   | 2887.61   | NM_002152 | 5934.946  | 3482.124  | AK025977  | 6727.01   |
| 2861.958  | NM_017964 | 3333.007  | 3274.502  | AK022558  | 2528.082  | 2019.83   | AK023130  | 2937.542  |
| 480.243   | NM_016272 | 388.611   | 479.172   | NM_006476 | 28209.139 | 36696.434 | NM_000273 | 560.657   |
| 527.019   | NM_016428 | 1140.391  | 1426.541  | AK023787  | 1392.192  | 1172.164  | NM_002899 | 4300.05   |
| 2201.105  | NM_004083 | 14459.406 | 14215.778 | NM_002133 | 966.407   | 1312.449  | NM_000486 | 1930.701  |
| 845.048   | NM_016039 | 10277.966 | 12635.784 | NM_015697 | 3023.779  | 3185.204  | BE876237  | 1109.169  |
| 3160.559  | NM_001184 | 2037.115  | 2350.357  | NM_032943 | 969.427   | 1042.444  | NM_005397 | 661.182   |
| 1432.175  | NM_015530 | 8667.588  | 5648.782  | NM_007177 | 6567.585  | 12269.849 | NM_000806 | 2814.217  |
| 386.819   | NM_016238 | 5443.49   | 5352.464  | NM_000737 | 1275.218  | 1871.606  | NM_006320 | 1131.873  |
| 1975.137  | BE546276  | 1168.05   | 1571.74   | AL079273  | 1104.445  | 854.962   | AB014511  | 2047.738  |
| 2216.965  | NM_004725 | 7780.845  | 4265.657  | AK025495  | 382.638   | 882.363   | NM_021976 | 790.269   |
| 3677.593  | NM_012115 | 2864.824  | 2052.003  | NM_001091 | 574.704   | 801.765   | NM_005718 | 7650.973  |
| 1444.339  | M96577    | 5899.794  | 1942.486  | AK023915  | 2823.457  | 4000.66   | AB028998  | 313.661   |
| 4688.981  | NM_013258 | 19013.648 | 14681.659 | AB051453  | 1564.745  | 2102.241  | NM_000153 | 424.641   |
| 695.629   | NM_003842 | 1773.271  | 1860.426  | NM_002395 | 1801.345  | 931.118   | NM_002033 | 3637.473  |
| 1723.75   | L11238    | 6613.669  | 4950.441  | AB023203  | 825.944   | 1043.536  | AK091794  | 613.863   |
| 1428.826  | AK025684  | 439.459   | 498.702   | NM_014963 | 1701.674  | 1726.515  | NM_004111 | 1667.499  |
| 755.392   | NM_012205 | 4732.209  | 2868.182  | NM_016271 | 3519.08   | 2311.065  | AF085966  | 3139.621  |
| 1357.716  | K02046    | 2088.11   | 3539.162  | NM_016619 | 2359.479  | 2240.014  | NM_005316 | 1533.959  |
| 1318.814  | AL110151  | 1661.007  | 2328.628  | NM_014481 | 615.745   | 835.394   | NM_016316 | 1891.138  |
| 572.668   | AK024841  | 2287.352  | 2432.251  | U22172    | 1476.256  | 1546.967  | NM_003369 | 5067.843  |
| 327.273   | NM_004995 | 3869.507  | 7403.34   | AB032960  | 738.35    | 871.743   | NM_000057 | 1376.625  |
| 1270.807  | NM_000386 | 5857.838  | 4005.139  | NM_017675 | 688.277   | 745.171   | NM_018343 | 2349.346  |
| 1334.531  | NM_007231 | 722.148   | 656.355   | NM_015991 | 494.421   | 770.369   | AK095793  | 827.51    |
| 944.357   | NM_001190 | 3535.731  | 2275.817  | NM_005562 | 965.196   | 886.608   | NM_003177 | 1932.152  |
| 1123.252  | NM_005271 | 8219.063  | 10342.504 | NM_002342 | 1986.707  | 1386.205  | NM_017719 | 658.887   |
| 588.822   | NM_015654 | 7798.073  | 7947.395  | D13631    | 498.529   | 1131.751  | AF064078  | 677.482   |
| 5698.914  | NM_012244 | 2334.975  | 1922.294  | NM_003712 | 3659.91   | 4111.952  | AL049688  | 998.199   |
| 1249.183  | NM_004341 | 1831.036  | 816.222   | NM_002184 | 876.13    | 1104.822  | NM_002737 | 983.136   |
| 3535.714  | AB082521  | 6932.645  | 6810.592  | NM_014883 | 839.244   | 841.676   | NM_002719 | 823.751   |
| 2018.049  | AK026806  | 917.568   | 496.572   | NM_017805 | 2873.103  | 2623.178  | NM_016102 | 1528.631  |
| 2015.384  | AL050182  | 1411.969  | 1300.956  | M86841    | 1718.524  | 1778.159  | NM_004376 | 905.06    |
| 1269.998  | NM_002374 | 2037.182  | 493.438   | U56387    | 861.967   | 876.91    | NM_001061 | 473.857   |
| 16405.646 | AK026940  | 2716.105  | 1470.249  | AL049296  | 3306.117  | 1910.761  | Z11694    | 3037.971  |
| 879.126   | AF155117  | 2938.17   | 1460.938  | NM_014471 | 29868.639 | 21861.354 | BF983177  | 666.679   |
| 839.605   | AB014527  | 759.703   | 454.84    | NM_004397 | 1685.155  | 1446.905  | Z26317    | 829.408   |

|           |           |           |           |           |           |           |             |           |
|-----------|-----------|-----------|-----------|-----------|-----------|-----------|-------------|-----------|
| 2262.382  | NM_004411 | 1353.511  | 1079.326  | NM_020238 | 908.313   | 683.74    | X16983      | 4817.665  |
| 1462.351  | NM_015938 | 6203.498  | 3127.483  | AJ250475  | 2571.602  | 5003.893  | X56160      | 1234.626  |
| 1810.27   | NM_000740 | 641.444   | 470.463   | NM_018579 | 1398.138  | 1024.54   | BG679991    | 448.493   |
| 3137.864  | AK025985  | 1245.594  | 2408.238  | NM_006201 | 1646.75   | 1128.163  | H-Y 00097 I | 1828.368  |
| 2041.134  | NM_013256 | 2489.495  | 2246.858  | NM_007110 | 923.482   | 1043.47   | H-M 59964   | 956.183   |
| 900.305   | NM_004143 | 1462.232  | 1368.305  | NM_001255 | 9888.302  | 23242.881 | H-Y 00711 I | 53590.93  |
| 1259.437  | X66087    | 589.995   | 526.13    | U50383    | 3547.498  | 2873.243  | H-X 16707 I | 1174.462  |
| 1045.219  | NM_016328 | 7439.532  | 7640.321  | AK025085  | 2801.111  | 2808.768  | AL038354    | 35429.766 |
| 861.317   | NM_017544 | 20535.762 | 19877.318 | NM_006290 | 955.53    | 646.422   | R14607      | 824.834   |
| 327.423   | NM_003153 | 1515.991  | 2003.129  | AK022290  | 938.113   | 1467.229  | NM_000064   | 1459.975  |
| 8627.854  | NM_016285 | 1358.006  | 1488.001  | NM_003680 | 34027.277 | 22883.096 | NM_003264   | 704.212   |
| 3371.547  | AF025771  | 2556.692  | 2177.062  | AF118124  | 19282.773 | 22181.717 | NM_006725   | 696.958   |
| 918.323   | NM_018215 | 2154.818  | 2754.685  | NM_004849 | 4245.505  | 5840.82   | NM_003326   | 319.757   |
| 4943.755  | AB033110  | 1471.841  | 1845.261  | AL137527  | 3618.796  | 3212.389  | NM_004568   | 7026.812  |
| 2130.619  | NM_005083 | 13299.139 | 11184.169 | AK026068  | 455.209   | 881.961   | NM_005496   | 2820.137  |
| 1459.862  | NM_007187 | 10492.046 | 9735.572  | J04974    | 9242.6    | 6938.16   | NM_002858   | 3102.119  |
| 809.406   | NM_018983 | 7123.604  | 3420.732  | NM_007058 | 3908.195  | 4129.07   | NM_004817   | 682.896   |
| 2467.872  | NM_003096 | 6926.976  | 4648.401  | NM_000396 | 1070.899  | 6199.284  | NM_018975   | 7483.297  |
| 853.971   | BE390833  | 20595.607 | 16929.115 | NM_001528 | 2137.528  | 1999.424  | NM_001284   | 26852.123 |
| 2093.942  | NM_004730 | 13436.216 | 8432.072  | NM_007014 | 1482.08   | 1299.949  | NM_003242   | 3473.626  |
| 1489.576  | NM_000801 | 3510.49   | 1884.02   | AL096740  | 648.164   | 856.424   | U31099      | 478.464   |
| 5843.738  | NM_006115 | 21071.691 | 17381.984 | NM_014554 | 1329.194  | 1083.835  | NM_001105   | 1060.458  |
| 1130.916  | NM_005801 | 3418.938  | 2084.107  | AL137484  | 1571.964  | 1380.766  | NM_005585   | 401.935   |
| 480.608   | NM_018198 | 2316.152  | 1589.198  | AK023968  | 724.783   | 741.14    | NM_002075   | 1071.214  |
| 429.074   | NM_001539 | 17003.143 | 12153.238 | NM_004652 | 373.105   | 686.174   | Y08756      | 5266.964  |
| 2117.212  | AK027232  | 3106.958  | 2932.87   | AK025425  | 11327.877 | 11445.322 | NM_005563   | 4067.4    |
| 274.423   | NM_012204 | 931.693   | 938.506   | AK025974  | 13053.546 | 13468.759 | NM_005102   | 1988.106  |
| 2334.023  | AK091117  | 899.596   | 1140.869  | NM_016532 | 694.634   | 989.286   | NM_005397   | 366.766   |
| 2211.556  | NM_003613 | 1168.934  | 887.458   | NM_005781 | 2033.745  | 1763.548  | NM_000806   | 2341.708  |
| 1457.452  | NM_000022 | 4550.685  | 2863.213  | BC036740  | 6192.271  | 6019.088  | AB014511    | 1141.712  |
| 2538.266  | NM_016576 | 3070.409  | 2847.675  | NM_001747 | 7154.777  | 5131.207  | NM_014252   | 2009.924  |
| 4414.818  | NM_000906 | 1745.321  | 1853.732  | NM_001148 | 6248.726  | 7347.933  | NM_001662   | 2060.693  |
| 1249.656  | NM_000480 | 3099.979  | 2738.624  | AF242522  | 1792.664  | 1725.579  | NM_016131   | 6154.748  |
| 2005.973  | AF254084  | 25553.488 | 24845.355 | AJ008152  | 1404.977  | 1428.118  | NM_006822   | 1347.237  |
| 537.256   | AK022648  | 1795.611  | 2245.119  | NM_004024 | 2701.036  | 2184.251  | NM_012142   | 5932.953  |
| 1990.604  | AK022976  | 2451.07   | 2291.565  | X52345    | 17104.564 | 12866.152 | NM_016429   | 940.453   |
| 629.972   | AB048791  | 3848.526  | 3824.374  | NM_006965 | 4633.897  | 2481.606  | NM_006834   | 2278.01   |
| 625.77    | NM_003107 | 787.015   | 635.458   | AF027142  | 52798.199 | 45788.598 | AB011100    | 1262.814  |
| 829.49    | NM_006874 | 4042.917  | 3103.599  | S67970    | 984.849   | 647.563   | U61741      | 785.222   |
| 790.556   | AB046777  | 5678.679  | 5789.951  | AF221520  | 2136.077  | 1595.174  | NM_012402   | 1683.828  |
| 1676.815  | AJ251844  | 2048.103  | 1354.222  | NM_006941 | 17291.768 | 11726.37  | M76676      | 1502.834  |
| 888.503   | D16815    | 875.773   | 518.115   | NM_005360 | 685.621   | 573.636   | NM_003857   | 469.126   |
| 4160.175  | NM_001880 | 2360.491  | 1543.047  | NM_004349 | 2045.849  | 1585.922  | AL137690    | 396.024   |
| 903.137   | AB028943  | 2155.19   | 1239.38   | NM_002092 | 5618.353  | 3854.241  | Z83804      | 1410.991  |
| 59327.824 | NM_006194 | 662.717   | 504.693   | NM_018077 | 1138.599  | 928.251   | NM_004386   | 1636.805  |
| 14617.955 | AK001603  | 3851.598  | 2482.723  | NM_016839 | 21279.818 | 20473.242 | U67784      | 492.666   |
| 403.741   | U71601    | 2304.923  | 2226.744  | NM_005968 | 62939.656 | 58079.676 | NM_007366   | 1243.989  |
| 339.979   | AF042838  | 4453.082  | 4326.337  | NM_003819 | 11312.606 | 4756.031  | NM_016584   | 3081.999  |
| 47124.938 | AL137511  | 450.825   | 524.839   | NM_006560 | 1308.106  | 1139.794  | NM_001815   | 825.711   |
| 3694.075  | X91221    | 517.475   | 772.371   | NM_016183 | 1010.22   | 1053.668  | AK095793    | 1471.059  |
| 776.041   | AF075031  | 717.18    | 988.768   | NM_004872 | 3466.536  | 3457.625  | NM_002737   | 741.404   |
| 890.724   | AF075062  | 7705.573  | 5422.862  | NM_015904 | 4782.771  | 5014.469  | Z25427      | 999.482   |
| 6981.569  | NM_004188 | 892.404   | 1165.135  | NM_001960 | 38894.18  | 31751.389 | NM_004672   | 3103.966  |

|           |           |           |           |           |           |           |           |           |
|-----------|-----------|-----------|-----------|-----------|-----------|-----------|-----------|-----------|
| 1449.341  | AF147381  | 5027.603  | 5773.258  | NM_018122 | 3337.803  | 2605.505  | NM_001353 | 1360.241  |
| 523.768   | AK027101  | 18010.174 | 19289.566 | AF035318  | 1143.683  | 1503.06   | NM_006214 | 2005.685  |
| 1694.256  | AF010236  | 754.542   | 1078.242  | NM_015456 | 3864.051  | 3815.007  | AJ010228  | 2510.84   |
| 1066.03   | AK024358  | 591.491   | 637.594   | AK025056  | 2254.597  | 3241.69   | NM_005198 | 2414.601  |
| 55734.305 | D17085    | 1599.878  | 1226.977  | AF140710  | 4584.793  | 4807.287  | NM_018073 | 787.364   |
| 1481.599  | AF088075  | 1413.429  | 1110.696  | NM_012088 | 9199.942  | 6594.005  | AL137529  | 1473.113  |
| 35188.66  | AK026376  | 2296.619  | 3005.74   | NM_017947 | 487.232   | 609.82    | NM_012332 | 1136.437  |
| 884.32    | AF088061  | 4495.926  | 3915.826  | NM_002494 | 3213.385  | 2906.325  | AK026648  | 452.997   |
| 4111.738  | AF086286  | 2927.913  | 2264.239  | M58510    | 4229.217  | 3108.954  | NM_000497 | 1046.027  |
| 1453.104  | AF086376  | 1280.884  | 715.965   | NM_000782 | 699.412   | 680.975   | AK025977  | 7675.963  |
| 2988.079  | AF086410  | 692.162   | 665.433   | BE396003  | 743.739   | 859.84    | AK023130  | 3455.327  |
| 1137.472  | AK022997  | 4992.466  | 3894.389  | AK023300  | 1212.39   | 1153.986  | NM_002899 | 3729.461  |
| 10617.445 | NM_017617 | 2847.325  | 2860.556  | NM_018082 | 1787.929  | 1570.131  | NM_000486 | 1572.164  |
| 822.948   | AF131830  | 926.706   | 815.786   | NM_006234 | 11991.883 | 21118.783 | BE876237  | 745.517   |
| 5702.637  | NM_014811 | 951.597   | 663.99    | AB028987  | 2865.655  | 2783.747  | AB002339  | 530.188   |
| 1026.711  | AF147426  | 1040.124  | 1124.911  | NM_003594 | 840.594   | 1091.757  | NM_005104 | 2758.572  |
| 2931.395  | BC019667  | 18166.482 | 9459.668  | NM_005521 | 1945.909  | 1983.547  | NM_006888 | 10045.611 |
| 726.102   | AK026026  | 12887.309 | 8552.682  | AK025844  | 1798.915  | 1708.666  | AL137423  | 2465.397  |
| 5626.976  | AF085941  | 9299.728  | 9667.329  | AL137727  | 950.093   | 1336.87   | AB018322  | 805.57    |
| 6525.764  | Z69892    | 2161.568  | 2524.837  | AF074986  | 907.743   | 999.669   | NM_007068 | 4315.565  |
| 19336.703 | AK023590  | 537.388   | 855.382   | AL049240  | 1648.928  | 1709.747  | NM_005718 | 6767.803  |
| 4192.832  | AF087961  | 907.398   | 1353.828  | U80773    | 1077.49   | 983.053   | NM_018264 | 1310.709  |
| 582.987   | AL137475  | 1198.456  | 1480.085  | AK021745  | 1159.021  | 1160.776  | NM_014580 | 649.125   |
| 1429.796  | AL161956  | 4327.781  | 5394.976  | L38937    | 3375.402  | 3149.682  | NM_000153 | 470.214   |
| 615.07    | AL390176  | 2701.045  | 3336.907  | AK024327  | 728.02    | 720.546   | NM_002033 | 3532.172  |
| 1475.826  | AL137356  | 1773.144  | 1002.902  | AF086184  | 4930.85   | 4967.203  | AK091794  | 487.755   |
| 7391.131  | AL137547  | 1789.316  | 1404.802  | NM_018275 | 3744.969  | 3453.699  | NM_004111 | 2074.49   |
| 3851.712  | AK021994  | 2424.268  | 2127.145  | AL049266  | 1498.486  | 1542.666  | AF085966  | 3254.397  |
| 566.377   | Z70763    | 1643.353  | 1708.328  | AK021560  | 738.321   | 666.514   | NM_005316 | 1312.637  |
| 479.739   | AK023802  | 5617.264  | 4247.64   | AF007149  | 765.13    | 674.19    | NM_016316 | 1687.268  |
| 1881.495  | AF088013  | 504.124   | 381.514   | AK001469  | 643.577   | 942.721   | NM_003369 | 4258.63   |
| 444.029   | AF086103  | 511.723   | 379.314   | AK021627  | 634.184   | 548.639   | NM_000057 | 1508.74   |
| 734.362   | AK023158  | 587.633   | 346.491   | AF085859  | 3162.154  | 5483.625  | NM_018343 | 2259.849  |
| 4097.028  | AK000580  | 420.656   | 366.657   | AK026307  | 1752.534  | 1447.385  | AL137461  | 1222.302  |
| 547.656   | AF085852  | 2766.412  | 2052.288  | AL049975  | 1381.638  | 1133.627  | NM_018972 | 820.773   |
| 2120.832  | AK023952  | 1177.014  | 1706.627  | AL080067  | 592.442   | 682.36    | AB037786  | 1949.257  |
| 2412.65   | AK000787  | 821.215   | 928.332   | AL117464  | 2870.051  | 2345.362  | NM_003648 | 3954.187  |
| 2893.531  | AF090885  | 9928.594  | 9769.91   | AL080160  | 761.267   | 763.105   | AB037735  | 539.615   |
| 4566.451  | AF161342  | 438.828   | 532.013   | AL157477  | 2699.451  | 1615.006  | AK002177  | 3462.3    |
| 866.573   | NM_014082 | 1019.805  | 854.161   | AB002318  | 1418.589  | 841.574   | AK024429  | 1305.567  |
| 5045.363  | AF100636  | 965.663   | 1400.844  | AL357535  | 2960.493  | 2397.311  | AB000509  | 768.477   |
| 868.14    | AK022197  | 2630.797  | 2393.161  | AL049951  | 727.514   | 1079.327  | AB018314  | 1110.787  |
| 1795.318  | AK021970  | 1538.846  | 1403.969  | AK024963  | 871.773   | 1175.233  | NM_004378 | 845.923   |
| 1204.111  | AK022066  | 58050.461 | 57278.109 | AK023725  | 924.377   | 1301.999  | AJ238899  | 667.934   |
| 843.205   | AK022224  | 1920.906  | 2394.448  | AK022936  | 1625.74   | 1734.981  | NM_001110 | 2770.189  |
| 2042.028  | AK022000  | 1625.053  | 1984.399  | AK024385  | 2611.253  | 2539.262  | NM_003222 | 501.202   |
| 1480.589  | AK022263  | 7622.063  | 8891.98   | NM_017709 | 808.096   | 564.843   | NM_000841 | 3241.986  |
| 524.663   | AK022384  | 1807.928  | 1683.295  | AF049615  | 813.171   | 752.042   | NM_001245 | 2050.579  |
| 371.335   | AK027198  | 1806.597  | 2283.09   | NM_014358 | 8782.834  | 7622.612  | AJ008139  | 1593.095  |
| 1610.582  | AK000257  | 992.729   | 1151.456  | AF009282  | 3043.662  | 2533.294  | NM_004326 | 948.963   |
| 1569.345  | NM_006160 | 5704.336  | 5336.168  | AF024704  | 5453.957  | 3143.417  | NM_004577 | 1096.351  |
| 883.582   | NM_000529 | 726.202   | 746.356   | AF056431  | 1246.254  | 1025.296  | AF007157  | 9167.557  |
| 1426.504  | AL110159  | 597.667   | 681.196   | NM_016412 | 1533.719  | 1218.061  | D38553    | 1915.011  |

|           |           |           |           |           |           |           |           |           |
|-----------|-----------|-----------|-----------|-----------|-----------|-----------|-----------|-----------|
| 749.152   | AF009259  | 796.495   | 882.745   | AF009293  | 1037.645  | 806.205   | NM_00617C | 1654.873  |
| 5509.38   | AF009260  | 1250.072  | 2153.613  | NM_00415E | 61756.41  | 49403.859 | NM_01429E | 7206.415  |
| 995.419   | NM_00307E | 2179.764  | 2209.294  | AF056444  | 4069.565  | 2431.268  | AK001581  | 1247.144  |
| 851.718   | NM_017902 | 2247.113  | 2941.254  | AK000989  | 1178.832  | 847.022   | NM_005862 | 999.627   |
| 2233.833  | AL359567  | 1399.39   | 612.295   | AK002210  | 2293.536  | 2302.416  | NM_00054E | 2238.853  |
| 688.225   | NM_01772E | 1897.063  | 1379.922  | AK021677  | 860.668   | 616.591   | AB002297  | 1529.199  |
| 722.232   | AK026716  | 536.733   | 827.819   | AK001057  | 891.452   | 815.042   | NM_00502C | 11531.901 |
| 963.49    | AL049325  | 13380.71  | 6250.79   | AK021471  | 627.823   | 591.93    | NM_014077 | 2443.122  |
| 1561.488  | AK024154  | 9156.418  | 10866.693 | AK021709  | 537.096   | 767.889   | M14087    | 15788.844 |
| 1226.026  | AF086341  | 1230.745  | 1203.981  | AK025109  | 1316.669  | 1357.082  | AJ272324  | 694.029   |
| 3583.828  | AK026672  | 1677.789  | 1668.382  | AK026057  | 2475.355  | 1813.196  | NM_00088E | 2284.209  |
| 1719.884  | S83282    | 57218.918 | 36015.145 | AK026713  | 705.088   | 771.352   | M59040    | 1428.262  |
| 1714.007  | AK024164  | 19526.25  | 18404.855 | AJ008117  | 9687.081  | 7189.271  | NM_017582 | 7622.064  |
| 3295.013  | AF052130  | 5375.235  | 4746.067  | AJ008147  | 18032.213 | 16083.262 | NM_01523E | 508.853   |
| 2421.84   | AF130090  | 13237.645 | 12757.947 | AK024369  | 2214.375  | 2093.052  | AK026962  | 1360.945  |
| 896.117   | AL096727  | 1171.788  | 1334.596  | L43345    | 605.507   | 972.522   | X04366    | 1018.004  |
| 1366.253  | AL080110  | 2327.963  | 1881.762  | AF180297  | 3020.211  | 2723.848  | NM_00050E | 18517.574 |
| 1445.107  | NM_02042E | 1812.422  | 1431.838  | AK023245  | 5538.455  | 5376.273  | NM_00066E | 1518.958  |
| 636.509   | AK024076  | 2250.72   | 2951.528  | AF147303  | 580.633   | 870.928   | NM_003481 | 1564.699  |
| 791.509   | M87940    | 2965.615  | 3332.165  | S56365    | 64472.84  | 57911.75  | AB046814  | 407.979   |
| 666.777   | D55641    | 1469.963  | 1382.248  | AK023607  | 1170.351  | 948.694   | NM_017664 | 2100.225  |
| 9757.683  | AB032976  | 3145.157  | 3234.201  | AL049997  | 3680.85   | 3758.88   | AK025523  | 376.168   |
| 3829.144  | AF301222  | 9162.615  | 6528.672  | AK024118  | 738.534   | 820.859   | NM_00705E | 2352.848  |
| 840.237   | AF215981  | 4354.532  | 3227.412  | X89657    | 588.289   | 486.513   | L13283    | 601.397   |
| 5138.938  | NM_000732 | 16534.795 | 14898.192 | AK024509  | 1369.233  | 2032.717  | NM_013327 | 1796.13   |
| 2058.735  | AF130044  | 901.377   | 680.422   | NM_017847 | 2297.142  | 2491.418  | AF303888  | 2784.643  |
| 950.299   | AF087980  | 438.663   | 324.191   | AL049675  | 2785.356  | 2280.491  | NM_000077 | 501.82    |
| 1128.777  | NM_01393E | 521.589   | 645.169   | AL050151  | 623.358   | 277.865   | M97191    | 11705.83  |
| 787.661   | AB038651  | 2361.115  | 1186.871  | AK021549  | 576.053   | 645.724   | AK023015  | 794.4     |
| 639.829   | AL359603  | 1333.719  | 1197.123  | NM_003537 | 19029.5   | 21023.236 | NM_003457 | 7793.88   |
| 1103.292  | X84838    | 374.542   | 651.794   | AF056419  | 30688.613 | 28471.84  | NM_012391 | 1280.617  |
| 5325.825  | NM_01394C | 845.702   | 1224.883  | AF074983  | 1282.492  | 1312.886  | NM_005254 | 966.793   |
| 10316.569 | AL117643  | 860.705   | 1018.43   | AK024177  | 1396.953  | 1562.688  | NM_005611 | 586.299   |
| 2436.916  | AF075063  | 1603.211  | 837.711   | AK024827  | 6425.069  | 6667.035  | NM_00734E | 1190.796  |
| 959.342   | AF069135  | 3616.167  | 3339.825  | AK021952  | 876.779   | 783.118   | NM_00483C | 801.409   |
| 11501.385 | AK026524  | 1712.444  | 1642.7    | K01564    | 1238.18   | 1006.478  | NM_007007 | 4918.76   |
| 6625.687  | AB011157  | 5528.732  | 5342.244  | AB023175  | 670.113   | 501.002   | NM_00638E | 1078.445  |
| 917.846   | U17632    | 2392.362  | 4828.889  | NM_005304 | 337.585   | 704.02    | NM_00655E | 5440.807  |
| 842.498   | AK026764  | 4185.549  | 4954.329  | NM_014477 | 880.3     | 669.127   | NM_004501 | 29272.775 |
| 464.172   | AF113700  | 3245.309  | 2960.889  | L40521    | 1329.46   | 2234.438  | NM_00496E | 6792.691  |
| 628.695   | NM_01783E | 11329.937 | 11470.109 | AF086478  | 1783.758  | 3914.827  | NM_00670C | 1370.76   |
| 3784.904  | NM_018347 | 2556.364  | 3186.42   | AF086022  | 2910.391  | 3049.051  | NM_00644E | 6330.63   |
| 2855.899  | AK024986  | 1216.245  | 961.024   | AK021514  | 39992.516 | 42237.371 | NM_01210E | 7472.792  |
| 2982.448  | AK026730  | 607.955   | 507.232   | AJ008134  | 7252.4    | 6545.557  | AF019633  | 1220.263  |
| 1432.706  | AK024739  | 976.799   | 1300.943  | S71486    | 1084.592  | 1283.461  | AB002361  | 3860.132  |
| 2774.541  | AK026772  | 1269.534  | 1062.631  | L33808    | 24980.305 | 28984.93  | NM_01806C | 3419.587  |
| 5786.391  | NM_01426C | 13865.488 | 8300.479  | D31886    | 2150.024  | 1187.251  | NM_01423E | 1752.99   |
| 1378.494  | AK026458  | 377.581   | 428.239   | U92024    | 1026.679  | 434.052   | NM_017662 | 2835.807  |
| 2361.846  | CY3Cy5    | 1803.219  | 172.031   | AK023330  | 2328.666  | 1674.832  | U88837    | 1273.507  |
| 52077.902 | M23254    | 7331.284  | 12364.955 | AF075071  | 1197.717  | 1109.811  | NM_01744E | 8993.39   |
| 1555.627  | BE618539  | 804.003   | 1215.868  | X93500    | 1479.478  | 1489.121  | AK001478  | 3741.926  |
| 3783.192  | R28062    | 3349.005  | 1781.518  | U79271    | 1442.55   | 1416.443  | AK025697  | 1889.363  |
| 353.888   | U38545    | 706.471   | 704.412   | AK024609  | 4540.015  | 3314.734  | AK021734  | 838.345   |

|           |           |           |           |           |           |           |           |           |
|-----------|-----------|-----------|-----------|-----------|-----------|-----------|-----------|-----------|
| 1323.842  | AI627464  | 2961.037  | 2988.467  | AK023660  | 407.339   | 851.845   | D00265    | 14433.754 |
| 483.983   | BI756258  | 1927.567  | 1901.017  | NM_018120 | 5421.995  | 4264.368  | NM_004552 | 14193.211 |
| 658.525   | AI342225  | 64957.27  | 73357.625 | AK026874  | 2731.498  | 2734.627  | NM_000143 | 2027.417  |
| 2247.977  | AA634103  | 65616.602 | 77429.578 | D17217    | 1441.113  | 2001.398  | AL137294  | 1289.326  |
| 4404.731  | J04599    | 1113.771  | 1406.153  | AF088033  | 2814.605  | 4030.618  | NM_003743 | 686.059   |
| 523.776   | AF110020  | 769.557   | 1177.35   | NM_020422 | 1238.806  | 1035.787  | AB037797  | 171.64    |
| 3280.606  | AA608557  | 7609.977  | 9845.287  | AY007156  | 1456.921  | 1635.374  | NM_001520 | 709.153   |
| 1242.931  | AL050095  | 3406.885  | 3394.508  | AF086408  | 32062.223 | 31569.563 | NM_017870 | 1102.951  |
| 54683.16  | U03272    | 2024.52   | 2272.526  | AK023979  | 3153.745  | 1781.868  | AL133633  | 816.587   |
| 835.102   | NM_000495 | 673.683   | 1050.554  | CY3Cy5    | 7332.689  | 419.848   | NM_012252 | 962.989   |
| 1105.528  | NM_000664 | 2260.505  | 1183.713  | U13738    | 720.991   | 751.988   | AK026817  | 1311.435  |
| 960.006   | SR5       | 5577.368  | 7398.269  | H94487    | 1583.133  | 1792.221  | AL157442  | 12619.459 |
| 762.643   | SR7       | 5015.484  | 51663.777 | BG681747  | 21994.746 | 6237.431  | AB011148  | 1550.017  |
| 780.746   | SR9       | 23541.59  | 5827.621  | H63077    | 1201.511  | 1915.872  | AL389938  | 21042.648 |
| 3130.284  | CY3Cy5    | 2932.701  | 228.514   | AA679352  | 10741.703 | 5172.001  | NM_001945 | 21146.424 |
| 603.148   | NM_014805 | 1307.259  | 1258.006  | X04503    | 2511.49   | 2037.225  | NM_003507 | 639.778   |
| 3553.761  | AB006627  | 1794.99   | 1091.729  | D45917    | 1263.447  | 1931.953  | AK001889  | 1376.832  |
| 352.409   | NM_000416 | 2468.551  | 4381.523  | X52001    | 1602.386  | 1916.1    | AK025726  | 849.495   |
| 1554.148  | NM_003382 | 646.662   | 573.944   | BI823872  | 2731.485  | 2295.367  | AJ227869  | 1280.782  |
| 15440.26  | NM_002965 | 5464.147  | 37380.793 | AA430552  | 2133.608  | 2240.462  | AL117613  | 4487.6    |
| 30108.643 | AB007883  | 4097.884  | 2361.634  | X66142    | 806.097   | 518.964   | AL137753  | 1823.472  |
| 2645.685  | AK093780  | 6542.566  | 6067.129  | R45054    | 1246.74   | 1221.662  | AK021785  | 375.794   |
| 1533.419  | NM_001645 | 1346.068  | 2648.449  | SR9       | 12649.907 | 2403.32   | AL110262  | 6902.656  |
| 456.596   | NM_004855 | 9845.095  | 10200.928 | CY3Cy5    | 4328.051  | 191.47    | AK025627  | 6704.692  |
| 1191.75   | NM_016352 | 1358.245  | 1338.506  | AF312769  | 732.196   | 738.794   | AF216077  | 1813.514  |
| 466.396   | NM_006944 | 1266.052  | 1631.974  | AF309553  | 1890.762  | 1842.752  | AF086238  | 503.365   |
| 16187.116 | NM_004407 | 633.442   | 780.533   | NM_003605 | 911.982   | 715.417   | AK021612  | 11344.453 |
| 1997.109  | NM_000070 | 3520.341  | 4058.661  | NM_000100 | 17830.703 | 16967.406 | AF147342  | 618.354   |
| 1773.616  | NM_001202 | 853.627   | 1393.27   | NM_003993 | 1380.391  | 1748.775  | AK002025  | 18765.379 |
| 6327.363  | AB037804  | 1256.409  | 1901.977  | NM_018961 | 512.02    | 589.154   | AK026299  | 1003.435  |
| 875.989   | U34249    | 1196.749  | 1998.844  | NM_005586 | 1634.115  | 1643.123  | NM_017794 | 984.12    |
| 1364.687  | NM_003285 | 51085.668 | 56620.387 | NM_012242 | 1083.6    | 654.125   | AK025170  | 1805.896  |
| 2211.375  | AI200114  | 743.388   | 852.452   | NM_006896 | 480.977   | 534.44    | AB033031  | 1072.666  |
| 7254.311  | NM_006323 | 6200.324  | 4486.667  | NM_001130 | 55155.195 | 60952.121 | AF085872  | 4153.629  |
| 2206.419  | NM_016466 | 1020.103  | 1083.097  | NM_002975 | 13861.198 | 10547.229 | AK022538  | 7218.118  |
| 13749.559 | NM_001493 | 5016.763  | 4137.667  | NM_014556 | 1409.597  | 1281.863  | AL360257  | 847.459   |
| 2064.433  | NM_014841 | 723.588   | 798.668   | NM_017812 | 8219.025  | 6415.894  | AF147420  | 668.936   |
| 977.412   | NM_014426 | 4095.316  | 1779.941  | J03260    | 860.541   | 869.309   | AL049312  | 782.66    |
| 2267.863  | NM_006816 | 33684.98  | 26261.51  | NM_002865 | 2581.944  | 2592.046  | AL050072  | 1753.928  |
| 18532.551 | NM_000255 | 15548.371 | 15583.705 | NM_003566 | 1149.472  | 879.476   | AL080225  | 360.466   |
| 655.228   | NM_014781 | 3438.322  | 4436.877  | NM_003731 | 3398.842  | 3887.909  | AL049357  | 2479.499  |
| 2210.365  | X87896    | 1433.601  | 1668.58   | NM_005446 | 1606.466  | 1602.267  | AL050129  | 419.105   |
| 1555.649  | M88310    | 1902.487  | 2648.572  | NM_013292 | 1512.909  | 1422.14   | AL110223  | 578.16    |
| 10720.652 | D16856    | 130.909   | 651.922   | NM_002387 | 929.762   | 1039.029  | AK027180  | 5066.645  |
| 591.504   | NM_000042 | 1901.699  | 2014.46   | J02639    | 1808.913  | 1492.869  | NM_004544 | 7491.861  |
| 1798.286  | AF035787  | 384.752   | 644.565   | NM_007263 | 6459.951  | 4663.396  | AF086041  | 504.647   |
| 1395.373  | NM_005024 | 2959.345  | 1293.99   | AF206020  | 1312.292  | 1201.719  | Y15167    | 556.355   |
| 39576.5   | NM_003403 | 784.11    | 769.884   | NM_014410 | 937.93    | 721.89    | AL133080  | 1752.978  |
| 2912.185  | NM_016335 | 777.06    | 325.074   | NM_002150 | 3041.233  | 2345.962  | NM_017792 | 1435.755  |
| 1288.081  | NM_003165 | 3811.34   | 2929.234  | NM_004595 | 3996.555  | 3994.603  | AK025213  | 2429.835  |
| 441.87    | NM_003906 | 9523.318  | 7702.506  | NM_014754 | 9502.854  | 9519.94   | NM_014945 | 1531.265  |
| 318.154   | AL359590  | 19930.303 | 18032.482 | D49387    | 528.191   | 586.414   | AL080221  | 1171.459  |
| 2695.553  | NM_002861 | 8504.514  | 4282.297  | AF050146  | 1763.438  | 1628.595  | AL137370  | 865.633   |

|           |           |           |           |           |           |           |           |           |
|-----------|-----------|-----------|-----------|-----------|-----------|-----------|-----------|-----------|
| 558.622   | NM_00308C | 5599.142  | 6061.233  | NM_000116 | 1314.484  | 1132.461  | AF009306  | 361.804   |
| 1561.689  | NM_002645 | 1833.908  | 1776.967  | NM_00669E | 4145.093  | 5540.499  | AF050198  | 371.235   |
| 2973.608  | AB033027  | 2175.162  | 2805.08   | NM_006804 | 4473.139  | 4375.171  | AK024346  | 1290.92   |
| 3414.054  | AB014550  | 2168.157  | 1992.171  | NM_015969 | 4830.494  | 6453.792  | AF090892  | 512.022   |
| 1710.964  | NM_004299 | 3640.339  | 4533.313  | NM_003051 | 2595.503  | 2159.658  | AK001919  | 757.548   |
| 2431.881  | NM_001171 | 1248.575  | 2825.674  | NM_001133 | 1585.751  | 713.43    | AK021535  | 869.875   |
| 526.373   | NM_00225C | 3921.962  | 4217.116  | NM_145342 | 3630.587  | 3685.198  | AK021753  | 3223.362  |
| 999.601   | AF132734  | 8886.717  | 5602.967  | AK025886  | 646.592   | 473.499   | AK001139  | 1550.838  |
| 32650.189 | NM_018379 | 2391.557  | 2973.981  | NM_00172C | 4175.505  | 2227.711  | AK002090  | 993.805   |
| 997.07    | NM_016403 | 10330.278 | 7844.978  | NM_01839C | 690.456   | 642.229   | AK021822  | 789.321   |
| 11690.382 | NM_015603 | 1263.885  | 839.43    | AB037724  | 3297.442  | 2694.47   | AK025246  | 3903.141  |
| 1576.09   | NM_001921 | 5232.648  | 2981.624  | AK026151  | 3524.941  | 3155.858  | AK025847  | 2049.305  |
| 1339.646  | NM_00623C | 7852.768  | 2561.479  | NM_01414C | 1149.909  | 1461.274  | AK026442  | 1017.276  |
| 462.684   | NM_014699 | 5328.135  | 4824.474  | NM_002916 | 923.347   | 1105.823  | AK026816  | 593.443   |
| 956.267   | NM_01340C | 7405.448  | 5151.587  | M20700    | 1224.284  | 1346.294  | NM_014174 | 2949.867  |
| 592.559   | AK026257  | 1997.677  | 1688.729  | NM_001034 | 3296.532  | 3312.275  | AF147337  | 1751.768  |
| 636.005   | AJ299442  | 4868.349  | 6361.41   | NM_002689 | 581.741   | 828.818   | AK025203  | 40217.559 |
| 48529.484 | NM_003762 | 4967.144  | 7957.176  | NM_017686 | 1172.953  | 1645.726  | AK026981  | 1268.885  |
| 4792.512  | NM_018446 | 4864.936  | 9154.916  | AL096734  | 1884.12   | 2159.435  | AL133656  | 1469.725  |
| 1222.418  | NM_014465 | 1566.889  | 1724.938  | AK000800  | 2010.51   | 1235.283  | AL050037  | 3587.114  |
| 7298.429  | D87292    | 6761.705  | 10185.549 | NM_018154 | 1639.35   | 2739.145  | NM_001417 | 20094.166 |
| 21501.129 | NM_00549E | 1616.29   | 1068.501  | NM_005231 | 3520.283  | 2850.272  | AK022236  | 1546.516  |
| 8300.102  | NM_001202 | 927.361   | 928.286   | AF064729  | 816.257   | 618.133   | AK000618  | 723.275   |
| 1377.441  | AB037804  | 1279.9    | 1442.273  | NM_005412 | 9736.654  | 4252.779  | AK024773  | 624.922   |
| 6654.959  | U34249    | 1186.355  | 1012.757  | NM_012113 | 1700.706  | 1242.101  | AL390180  | 1039.61   |
| 4192.121  | NM_003289 | 50948.395 | 43705.238 | NM_002725 | 699.043   | 1027.923  | X60484    | 608.21    |
| 980.155   | AI200114  | 865.326   | 770.987   | NM_014375 | 7394.68   | 7638.247  | AF055019  | 500.766   |
| 3510.899  | M23254    | 7234.569  | 12234.671 | NM_017812 | 8086.694  | 5892.469  | NM_003525 | 3031.756  |
| 3002.952  | BE618539  | 882.458   | 1190.837  | J03260    | 507.913   | 639.951   | AK000229  | 295.653   |
| 1684.369  | R28062    | 3553.552  | 1839.745  | AF068236  | 25353.846 | 29357.217 | AF056432  | 850.923   |
| 2327.235  | U38545    | 637.705   | 422.396   | H94487    | 883.013   | 991.882   | AK001987  | 14788.422 |
| 756.479   | AI627464  | 2436.11   | 2718.846  | BG681747  | 14760.753 | 4306.115  | NM_013332 | 1025.133  |
| 7974.405  | BI756258  | 1685.884  | 2130.005  | H63077    | 1186.59   | 2415.604  | X56199    | 1371.086  |
| 5034.463  | AA608557  | 8020.15   | 20358.697 | AA679352  | 10286.668 | 4390.91   | NM_005193 | 1238.062  |
| 1873.26   | U03272    | 2408.178  | 2949.618  | X04503    | 2882.478  | 3370.978  | AL162006  | 618.579   |
| 1611.353  | NM_00049E | 826.171   | 921.939   | D45917    | 1308.167  | 1977.249  | NM_017971 | 20273.031 |
| 376.247   | NM_000664 | 2507.455  | 1790.361  | X52001    | 1686.813  | 1598.999  | AF090097  | 1486.48   |
| 16018.568 | AF075085  | 41938.082 | 50008.348 | BI823872  | 2647.118  | 2457.654  | AF054998  | 248.034   |
| 13229.106 | NM_005892 | 3120.311  | 2957.178  | AA430552  | 1792.911  | 2421.167  | AF116620  | 6620.443  |
| 1798.852  | NM_000042 | 1447.636  | 1264.418  | X66142    | 837.297   | 486.358   | AF293335  | 25711.471 |
| 38509.23  | NM_005024 | 2585.473  | 878.693   | R45054    | 1376.875  | 1198.641  | AK024431  | 3086.56   |
| 1434.634  | NM_003403 | 1027.961  | 736.015   | NM_000905 | 4876.2    | 4528.982  | X96644    | 2884.503  |
| 659.157   | NM_01480E | 1120.355  | 1288.501  | AL117398  | 3587.017  | 3240.125  | Z34281    | 10665.433 |
| 303.358   | AB006627  | 2058.512  | 1477.846  | AY007158  | 55215.625 | 47859.016 | NM_01867E | 42862.828 |
| 964.285   | NM_000416 | 2721.39   | 5045.901  | M58050    | 2859.309  | 1639.893  | AJ008122  | 14109.342 |
| 1195.768  | NM_003382 | 687.723   | 744.122   | NM_007263 | 5455.006  | 3687.454  | AK022667  | 8714.873  |
| 849.819   | NM_002965 | 5313.725  | 38980.934 | AF206020  | 1258.664  | 1137.616  | AK026667  | 616.602   |
| 1033.693  | AB007883  | 3944.776  | 3403.301  | NM_01441C | 756.678   | 722.724   | AF113211  | 986.327   |
| 1461.083  | AK093780  | 6596.115  | 8035.512  | AB020668  | 847.038   | 660.616   | AL117568  | 661.503   |
| 12252.571 | AY009397  | 59123.301 | 63405.824 | NM_006203 | 5328.669  | 3239.251  | S71805    | 851.061   |
| 1506.37   | NM_007037 | 19509.809 | 23246.504 | AF309553  | 1914.382  | 1839.38   | NM_018391 | 947.538   |
| 18543.742 | NM_001649 | 1329.997  | 3382.979  | NM_003605 | 990.887   | 667.198   | AK022140  | 1334.298  |
| 22927.721 | NM_005492 | 4777.674  | 6802.592  | NM_00010C | 19571.984 | 19183.68  | AK023372  | 14272.811 |

|           |           |           |           |           |           |           |           |           |
|-----------|-----------|-----------|-----------|-----------|-----------|-----------|-----------|-----------|
| 785.926   | AF038196  | 3760.752  | 3032.78   | NM_001900 | 64427.867 | 60313.043 | U21072    | 1430.001  |
| 883.469   | NM_004859 | 10338.68  | 9570.036  | NM_003993 | 1199.66   | 1176.646  | AK024377  | 427.945   |
| 2734.396  | NM_016352 | 1343.493  | 1528.465  | NM_018961 | 538.341   | 524.564   | AB032527  | 473.845   |
| 1683.307  | NM_005014 | 662.923   | 677.606   | NM_005586 | 1623.528  | 1675.011  | AK023557  | 838.557   |
| 1296.769  | NM_006944 | 463.145   | 698.83    | NM_012242 | 1090.025  | 688.678   | AK027107  | 644.541   |
| 253.901   | NM_004407 | 871.296   | 527.024   | NM_001130 | 42485.27  | 49279.664 | AB040887  | 1863.251  |
| 5373.62   | NM_000070 | 2758.579  | 2682.161  | NM_002975 | 12952.742 | 10426.222 | AK025196  | 2784.789  |
| 1969.368  | NM_002250 | 4080.725  | 3301.019  | AK023511  | 2415.15   | 1954.529  | AK000401  | 920.151   |
| 619.467   | NM_006323 | 6748.501  | 5828.934  | NM_014556 | 1534.765  | 1080.906  | AF305068  | 805.431   |
| 177.988   | NM_016466 | 1178.735  | 1266.478  | NM_001615 | 65462.281 | 59008.598 | D17231    | 18987.719 |
| 7374.456  | NM_001493 | 5134.153  | 4391.68   | AK025886  | 595.411   | 571.241   | AF531295  | 1092.159  |
| 13665.47  | NM_014426 | 4761.434  | 4692.973  | AB014514  | 1746.102  | 1453.468  | CY3Cy5    | 5108.457  |
| 2473.868  | NM_006816 | 30803.977 | 30435.855 | NM_002865 | 2400.721  | 2020.135  | BF974315  | 3672.51   |
| 654.795   | AK026518  | 46930.707 | 47179.207 | NM_003566 | 704.654   | 524.996   | AI652705  | 2570.128  |
| 8951.02   | NM_000258 | 13726.421 | 16064.914 | NM_007159 | 6425.915  | 6394.917  | AA973397  | 433.559   |
| 529.399   | AB033055  | 5982.632  | 5834      | NM_003731 | 3785.854  | 5462.716  | AA569974  | 2933.143  |
| 449.296   | AF311287  | 4273.725  | 4076.577  | NM_005446 | 1712.716  | 1564.168  | AA923615  | 202.353   |
| 19013.807 | NM_003098 | 889.351   | 1428.133  | NM_013292 | 1204.857  | 1348.931  | AA446028  | 1132.632  |
| 723.061   | NM_014781 | 3182.324  | 3444.481  | NM_002387 | 857.949   | 798.766   | M80583    | 1011.541  |
| 752.627   | BU629989  | 446.006   | 762.864   | J02639    | 1889.627  | 1365.488  | AW009565  | 2578.009  |
| 1388.405  | X87896    | 1167.012  | 1022.431  | NM_005231 | 3323.473  | 2448.238  | X07767    | 1617.972  |
| 1122.406  | M88310    | 1542.558  | 1523.615  | AF064729  | 868.905   | 824.588   | AF252284  | 1984.71   |
| 6789.855  | NM_018446 | 3724.161  | 3093.68   | NM_005412 | 9584.171  | 4013.425  | SR1       | 62232.449 |
| 8321.285  | NM_000187 | 601.405   | 597.587   | NM_012113 | 1462.788  | 1099.103  | SR3       | 35163.672 |
| 1098.545  | NM_014465 | 1052.164  | 1090.192  | NM_002150 | 2310.305  | 1613.226  | SR5       | 2889.014  |
| 896.28    | D87292    | 6136.074  | 8435.128  | NM_004595 | 3335.76   | 3587.498  | SR7       | 2975.291  |
| 1077.412  | NM_005498 | 1705.793  | 1036.65   | NM_014754 | 9269.642  | 8434.29   | SR9       | 10902.682 |
| 1451.166  | NM_016335 | 1262.556  | 701.036   | D49387    | 741.983   | 777.33    | CY3Cy5    | 6931.299  |
| 4020.656  | NM_003165 | 4782.611  | 3636.55   | AF050146  | 2431.885  | 1936.722  | NM_016511 | 13474.312 |
| 529.628   | NM_003906 | 10550.293 | 9240.45   | NM_000116 | 1918.268  | 1711.918  | NM_003559 | 1332.518  |
| 3126.51   | AL359590  | 20018.111 | 19219.301 | NM_006698 | 5889.314  | 7710.198  | M33197    | 72296.93  |
| 395.534   | NM_002861 | 7492.558  | 5026.127  | NM_006804 | 5623.836  | 6280.699  | NM_013229 | 836.706   |
| 588.68    | NM_003080 | 4033.535  | 4709.455  | NM_015969 | 5748.105  | 9113.405  | NM_016533 | 19546.936 |
| 533.551   | NM_013268 | 403.564   | 1162.477  | NM_003051 | 2452.835  | 2099.251  | NM_014751 | 2197.115  |
| 4323.503  | NM_002645 | 1442.226  | 2038.661  | NM_145342 | 4010.005  | 3069.06   | NM_002347 | 9713.349  |
| 372.213   | AB033027  | 2171.431  | 3514.586  | AJ278917  | 8534.772  | 7068.436  | AB046807  | 1754.7    |
| 4521.424  | AK021805  | 7226.511  | 10523.013 | AK025641  | 22839.492 | 21934.566 | M33197    | 59292.754 |
| 646.353   | AB014550  | 1897.697  | 1556.999  | NM_000905 | 4745.997  | 5060.882  | NM_014623 | 3542.902  |
| 635.087   | AF320294  | 2303.049  | 3628.911  | AL117398  | 3404.11   | 3609.83   | NM_007244 | 2624.397  |
| 1796.016  | AF161436  | 3437.773  | 3838.688  | AY007158  | 53837.734 | 50054.535 | M30629    | 1664.637  |
| 1238.272  | NM_020402 | 2597.38   | 3548.066  | NM_001720 | 3448.899  | 1788.351  | NM_004170 | 620.56    |
| 1923.504  | NM_004299 | 3233.481  | 2499.076  | NM_018390 | 716.973   | 453.363   | M33197    | 63089.875 |
| 1473.13   | NM_001171 | 1205.194  | 2302.257  | AB037724  | 3538.546  | 2854.476  | NM_015717 | 1415.916  |
| 1301.435  | NM_000498 | 816.788   | 551.749   | AK025086  | 476.838   | 438.916   | NM_015925 | 818.423   |
| 606.056   | NM_000664 | 1972.633  | 969.139   | AK026151  | 3962.9    | 3372.867  | NM_003665 | 865.451   |
| 3547.885  | AF075085  | 38617.523 | 27838.527 | NM_014140 | 1371.652  | 1669.805  | AF220217  | 550.149   |
| 418.326   | NM_005892 | 3638.802  | 3310.587  | NM_002916 | 1234.919  | 1112.153  | NM_013323 | 5396.379  |
| 874.519   | NM_006478 | 585.712   | 700.348   | M20700    | 1477.137  | 1981.444  | M33197    | 970.476   |
| 1326.459  | AF132734  | 9803.566  | 6944.853  | NM_001034 | 5149.854  | 9216.866  | NM_000853 | 1471.629  |
| 339.496   | NM_018379 | 2662.541  | 3230.375  | NM_002689 | 618.689   | 972.682   | AF016903  | 9011.1    |
| 776.785   | NM_016403 | 11301.668 | 9598.394  | NM_017686 | 1471.179  | 2194.648  | NM_015675 | 3795.88   |
| 782.492   | NM_015603 | 1395.626  | 1105.097  | AK000800  | 1956.231  | 1230.383  | NM_016040 | 984.749   |
| 653.936   | NM_001921 | 5316.948  | 4298.927  | NM_018154 | 1512.97   | 2538.526  | M33197    | 56469.672 |



|           |           |           |           |           |           |           |           |           |
|-----------|-----------|-----------|-----------|-----------|-----------|-----------|-----------|-----------|
| 793.122   | NM_00623C | 8013.789  | 2990.797  | BC006287  | 3643.221  | 4168.292  | AF031136  | 21930.932 |
| 847.94    | NM_014699 | 5423.384  | 6407.727  | AB023198  | 3209.984  | 3281.608  | NM_006597 | 28455.498 |
| 2929.891  | NM_01340C | 7608.483  | 6355.001  | AF304163  | 8935.359  | 11860.299 | NM_012483 | 3879.02   |
| 1865.365  | AK026257  | 2534.365  | 2199.795  | NM_006896 | 1638.811  | 1938.68   | NM_00349E | 1782.977  |
| 1088.307  | AK023836  | 5855.71   | 7439.496  | NM_001130 | 48360.09  | 54455.965 | AB023420  | 4785.234  |
| 947.948   | NM_018109 | 2453.528  | 1845.438  | NM_002975 | 10671.107 | 9138.976  | NM_007342 | 3478.806  |
| 3340.47   | AJ299442  | 4575.749  | 4359.513  | AK023511  | 1642.874  | 1656.587  | D25217    | 11876.592 |
| 1542.408  | NM_000129 | 1232.098  | 628.468   | NM_014556 | 1069.058  | 1048.664  | NM_006351 | 4292.499  |
| 369.34    | NM_003762 | 5695.749  | 5585.481  | NM_002725 | 705.719   | 632.463   | M33197    | 58706.387 |
| 2849.281  | NM_004859 | 9501.456  | 6525.788  | NM_014375 | 6485.004  | 7003.334  | M33197    | 45060.895 |
| 1851.366  | NM_016352 | 1454.98   | 1009.699  | NM_017812 | 6757.165  | 5409.413  | NM_001467 | 899.645   |
| 48572.02  | NM_005014 | 850.016   | 670.964   | J03260    | 678.82    | 762.887   | NM_018066 | 8111.076  |
| 2033.366  | NM_006944 | 512.393   | 688.378   | AF068236  | 28708.236 | 34990.012 | NM_006931 | 2433.998  |
| 399.037   | NM_004407 | 691.874   | 490.386   | H94487    | 1033.315  | 837.166   | NM_020344 | 3176.93   |
| 1589.477  | NM_00007C | 3835.739  | 3180.323  | BG681747  | 18635.324 | 5829.107  | AF119868  | 474.259   |
| 4351.899  | NM_001202 | 863.477   | 893.773   | H63077    | 1499.58   | 3731.775  | NM_00505C | 2009.732  |
| 14713.018 | AB037804  | 1055.136  | 1701.951  | AA679352  | 12073.765 | 6757.898  | M33197    | 63804.961 |
| 2465.848  | U34249    | 1079.313  | 1274.821  | X52001    | 1505.057  | 1335.685  | NM_018976 | 5806.449  |
| 493.875   | NM_003289 | 52941.355 | 46917.043 | BI823872  | 2431.842  | 2151.459  | NM_003355 | 3333.751  |
| 455.549   | AI200114  | 910.424   | 569.697   | AA430552  | 2270.138  | 2646.054  | NM_005074 | 712.444   |
| 534.359   | M23254    | 7418.028  | 15616.627 | X66142    | 818.344   | 679.453   | NM_00455E | 2897.992  |
| 862.987   | BE618539  | 868.197   | 1469.611  | R45054    | 1425.578  | 1243.653  | AL079296  | 1135.582  |
| 1298.795  | R28062    | 3360.5    | 1962.033  | NM_002387 | 780.88    | 856.173   | NM_01477C | 1636.742  |
| 3611.51   | U38545    | 841.23    | 558.243   | D45864    | 1603.75   | 1645.855  | AK023103  | 1839.902  |
| 1149.38   | AI627464  | 2897.903  | 3669.993  | M58050    | 2521.731  | 1386.438  | NM_01785E | 2349.438  |
| 18640.656 | BI756258  | 1852.922  | 2450.277  | NM_007263 | 5086.486  | 3728.068  | NM_019059 | 50610.59  |
| 963.078   | J04599    | 1051.894  | 1055.038  | AF206020  | 1321.824  | 1038.088  | AK001069  | 22439.455 |
| 1943.633  | NM_00309E | 755.441   | 740.022   | NM_01441C | 691.704   | 718.412   | M33197    | 62583.199 |
| 1693.198  | NM_014781 | 2864.492  | 2475.329  | AF305835  | 688.635   | 944.057   | NM_00093E | 1211.156  |
| 958.027   | BU629989  | 677.799   | 534.172   | AF312769  | 368.37    | 453.951   | NM_000359 | 5209.238  |
| 17308.766 | X87896    | 1846.969  | 1531.068  | AB020668  | 979.784   | 682.547   | NM_00639E | 3960.416  |
| 1490.928  | M88310    | 1751.675  | 1733.256  | NM_006203 | 10768.272 | 6802.194  | NM_014306 | 3357.176  |
| 316.981   | NM_000042 | 1589.4    | 1434.633  | AF309553  | 1690.334  | 1880.564  | NM_001084 | 2114.514  |
| 6716.376  | NM_005024 | 2858.523  | 1098.855  | NM_003605 | 1044.852  | 813.441   | NM_015983 | 1501.602  |
| 29164.414 | NM_003403 | 892.658   | 767.833   | NM_00010C | 18831.998 | 19358.84  | NM_018622 | 3174.603  |
| 715.146   | NM_01480E | 1504.447  | 1590.688  | NM_018961 | 506.504   | 398.444   | M33197    | 60339.496 |
| 3502.948  | AB006627  | 1585.825  | 1561.52   | NM_005586 | 1795.432  | 1440.891  | NM_005867 | 2571.369  |
| 651.057   | NM_000416 | 2574.21   | 5725.087  | NM_012242 | 1077.515  | 471.848   | AK026031  | 4922.444  |
| 3127.426  | NM_003382 | 603.941   | 675.323   | NM_003051 | 2033.656  | 1910.576  | NM_01646E | 2920.812  |
| 10513.195 | NM_002965 | 5055.694  | 42715.793 | NM_145342 | 3680.577  | 3168.75   | AF193873  | 2307.065  |
| 46309.293 | AB007883  | 3591.757  | 3038.303  | AJ278917  | 5175.642  | 4839.495  | NM_00262E | 1780.819  |
| 18779.6   | AK093780  | 6627.84   | 5852.74   | AK025641  | 21306.467 | 22002.033 | AA190729  | 963.946   |
| 7536.148  | AY009397  | 59878.355 | 60223.043 | AK025886  | 961.859   | 1175.015  | BF974315  | 3175.601  |
| 693.037   | NM_005492 | 6194.809  | 10694.038 | AB014514  | 2058.741  | 1985.112  | AI652705  | 2788.353  |
| 1496.53   | AF320294  | 2797.807  | 3001.837  | NM_002865 | 2782.874  | 2054.497  | AA569974  | 2660.908  |
| 1089.82   | AF161436  | 4358.728  | 3640.082  | NM_003566 | 714.138   | 546.549   | AA923615  | 170.176   |
| 589.869   | NM_020402 | 3729.694  | 5483.247  | NM_003731 | 3641.857  | 3899.895  | AA446028  | 1165.922  |
| 905.04    | NM_004299 | 3303.778  | 2066.999  | NM_005446 | 1555.806  | 1337.609  | M80583    | 1369.579  |
| 460.793   | NM_001171 | 1287.73   | 2117.209  | NM_013292 | 1457.752  | 1075.965  | AW009565  | 2042.694  |
| 1551.681  | NM_00225C | 3526.745  | 3388.367  | AK000800  | 1901.119  | 1043.797  | X07767    | 1719.326  |
| 21552.672 | NM_006323 | 7356.75   | 7132.887  | NM_018154 | 1406.297  | 2439.752  | AF252284  | 2159.623  |
| 333.978   | NM_016466 | 1003.39   | 1765.149  | AF304163  | 7199.731  | 11017.388 | M33197    | 3898.89   |
| 1397.481  | NM_001493 | 5449.943  | 5508.007  | NM_005231 | 3171.866  | 2360.098  | AL050139  | 2301.601  |

|           |           |           |           |           |           |           |           |           |
|-----------|-----------|-----------|-----------|-----------|-----------|-----------|-----------|-----------|
| 452.901   | NM_003716 | 391.772   | 1179.449  | AF064729  | 673.717   | 836.957   | U90878    | 1160.042  |
| 852.368   | NM_014841 | 698.965   | 1047.058  | NM_005412 | 9518.752  | 4439.584  | NM_006597 | 35763.074 |
| 734.056   | NM_014426 | 4436.879  | 2075.276  | NM_004179 | 362.112   | 2028.716  | NM_012483 | 6273.593  |
| 1877.768  | NM_000258 | 16653.17  | 20102.195 | NM_012113 | 2657.588  | 2684.203  | NM_003498 | 2522.098  |
| 3252.221  | AB033055  | 7587.424  | 8200.79   | NM_002150 | 2938.806  | 2414.01   | AB023420  | 6501.339  |
| 707.327   | AF311287  | 4636.2    | 5506.596  | NM_004595 | 3845.385  | 3275.543  | NM_016511 | 10267.826 |
| 977.663   | AJ299442  | 4412.497  | 3180.939  | NM_020178 | 346.076   | 428.034   | NM_003559 | 922.958   |
| 754.392   | NM_000129 | 1269.605  | 949.302   | NM_002264 | 361.134   | 274.923   | M33197    | 59136.895 |
| 17836.125 | NM_003762 | 4157.085  | 3650.318  | NM_014754 | 10358.492 | 10357.812 | NM_016533 | 15292.365 |
| 1094.757  | NM_018446 | 3696.003  | 3640.842  | D49387    | 891.701   | 876.82    | NM_014751 | 2125.596  |
| 572.422   | NM_000187 | 686.365   | 698.222   | AF050146  | 2547.989  | 2568.439  | NM_002347 | 9077.085  |
| 3514.416  | NM_014465 | 1039.794  | 1115.866  | NM_000116 | 2106.475  | 1827.89   | AB046807  | 1902.513  |
| 4301.106  | D87292    | 6264.558  | 9034.134  | NM_006698 | 5985.476  | 8281.615  | M33197    | 56857.66  |
| 703.477   | NM_005498 | 2007.56   | 1221.726  | NM_006804 | 7022.841  | 6321.709  | NM_014623 | 3585.815  |
| 3956.15   | NM_016335 | 1132.702  | 716.638   | NM_015969 | 4749.807  | 6046.605  | NM_007244 | 3089.196  |
| 858.452   | NM_003165 | 4926.993  | 4773.98   | NM_004517 | 2048.724  | 2612.8    | M30629    | 1659.301  |
| 2740.349  | NM_003906 | 11919.861 | 13704.701 | AF218006  | 45552.602 | 53260.176 | M33197    | 65618.914 |
| 3028.308  | AL359590  | 21617.936 | 25449.682 | NM_020162 | 1988.84   | 2111.165  | NM_018976 | 8918.022  |
| 3176.114  | NM_002861 | 8957.705  | 7813.534  | AK027124  | 29458.209 | 26036.084 | NM_003355 | 5657      |
| 1391.74   | NM_003080 | 4872.529  | 5600.904  | M31212    | 31779.529 | 55369.059 | NM_005074 | 1358.726  |
| 1608.22   | AB033027  | 2960.847  | 4985.37   | AL117398  | 3839.957  | 4119.563  | NM_013272 | 788.597   |
| 58637.977 | AK021805  | 8789.593  | 9127.895  | AY007158  | 58320.883 | 55944.23  | NM_018057 | 1056.122  |
| 16760.908 | AB014550  | 2423.325  | 2211.595  | NM_001720 | 3993.055  | 2302.061  | M33197    | 68441.656 |
| 1937.703  | NM_006826 | 9290.691  | 4370.438  | NM_018390 | 690.547   | 696.707   | NM_015717 | 1170.857  |
| 17458.596 | AB007973  | 4489.942  | 3864.246  | AB037724  | 5130.492  | 4203.356  | NM_013323 | 3892.509  |
| 1666.182  | M96843    | 7906.219  | 8326.619  | AK025086  | 594.35    | 744.587   | NM_017426 | 1239.723  |
| 924.466   | NM_017791 | 1863.291  | 1837.929  | AK026151  | 4823.242  | 4315.43   | NM_000853 | 1153.979  |
| 58911.266 | NM_005882 | 6650.077  | 6212.25   | NM_014140 | 1521.655  | 1804.291  | AF016903  | 10577.706 |
| 11807.781 | BC012304  | 5725.938  | 5039.116  | NM_002916 | 1130.744  | 1547.427  | NM_015675 | 2968.677  |
| 500.776   | AB046815  | 2396.972  | 3965.297  | M20700    | 1759.884  | 2486.758  | NM_016040 | 1135.988  |
| 12351.952 | AF075085  | 42351.914 | 38474.738 | NM_002689 | 847.683   | 1233.122  | M33197    | 59023.461 |
| 1136.981  | NM_005892 | 3111.931  | 3672.024  | NM_017686 | 1486.74   | 2053.326  | AF031136  | 26431.826 |
| 870.35    | NM_006478 | 581.59    | 919.395   | NM_016645 | 2103.135  | 1640.751  | NM_015983 | 2060.058  |
| 53909.941 | AF132734  | 10748.518 | 10243.483 | AK024462  | 12581.409 | 22354.623 | NM_018622 | 4837.622  |
| 916.953   | NM_018379 | 3619.672  | 10751.236 | NM_019601 | 958.309   | 902.954   | M33197    | 66808.258 |
| 17914.604 | NM_016403 | 12453.384 | 16887.209 | NM_002206 | 1505.134  | 2527.601  | NM_005867 | 6103.849  |
| 3146.17   | NM_015603 | 1415.589  | 1325.933  | NM_002230 | 478.71    | 341.559   | AK026031  | 8871.944  |
| 12615.407 | AK021788  | 496.467   | 925.902   | NM_003815 | 2138.617  | 1584.501  | NM_016468 | 4378.362  |
| 1935.338  | NM_001921 | 5933.976  | 4023.167  | NM_001430 | 1554.837  | 3200.711  | NM_007342 | 3648.173  |
| 48215.453 | NM_013400 | 10957.912 | 11954.719 | U17989    | 548.84    | 412.351   | D25217    | 10292.6   |
| 3200.848  | AK026257  | 3162.313  | 3708.182  | NM_018028 | 629.318   | 581.472   | NM_006351 | 4068.447  |
| 2779.908  | AK023836  | 7968.578  | 11281.329 | AF249267  | 33617.676 | 30039.951 | M33197    | 54059.914 |
| 1609.911  | NM_018109 | 3081.087  | 2595.947  | X84939    | 2434.704  | 1997.425  | NM_004683 | 9748.268  |
| 2034.43   | NM_005076 | 8811.188  | 6386.135  | NM_018320 | 10336.842 | 11433.437 | M33197    | 51496.332 |
| 911.515   | AF253321  | 979.145   | 873.96    | M65066    | 7208.425  | 9982.187  | NM_001467 | 931.23    |
| 1029.462  | U80735    | 2312.05   | 1850.83   | NM_016951 | 2704.502  | 2041.303  | NM_018066 | 8527.598  |
| 1219.319  | NM_017850 | 1502.098  | 1437.936  | NM_013251 | 1317.731  | 916.556   | NM_006931 | 2051.429  |
| 2085.819  | NM_016522 | 1158.664  | 1265.03   | NM_006099 | 1819.047  | 1540.132  | NM_020344 | 2854.21   |
| 62100.129 | NM_002224 | 2415.848  | 2364.824  | NM_012326 | 1738.747  | 1144.757  | NM_005050 | 1990.072  |
| 1990.608  | X07979    | 33084.66  | 30279.189 | NM_003085 | 12997.486 | 15627.446 | AF252284  | 3201.184  |
| 1302.971  | NM_000082 | 1105.06   | 1049.289  | NM_016084 | 4935.148  | 9034.981  | BU727558  | 792.833   |
| 809.133   | L13857    | 2033.515  | 1815.606  | AF095289  | 6908.237  | 16836.209 | M33197    | 6977.46   |
| 894.95    | NM_018098 | 3946.375  | 3942.587  | NM_005537 | 2302.139  | 2506.64   | AL050139  | 4055.627  |

|           |           |           |           |           |           |           |           |           |
|-----------|-----------|-----------|-----------|-----------|-----------|-----------|-----------|-----------|
| 7873.144  | AF286164  | 941.666   | 952.146   | NM_019003 | 773.79    | 706.277   | NM_00455E | 3431.655  |
| 3542.424  | AF146277  | 5364.333  | 5323.203  | NM_015935 | 3192.886  | 2602.277  | AL079296  | 1371.99   |
| 798.079   | AF055033  | 13631.382 | 10038.589 | AF182412  | 732.169   | 645.235   | NM_01477C | 1390.954  |
| 1078.427  | NM_01770C | 1497.216  | 1173.023  | AK027200  | 1003.14   | 1088.181  | M33197    | 73105.109 |
| 13879.049 | NM_005242 | 776.223   | 484.937   | U03106    | 3053.313  | 3246.07   | AK001069  | 35351.434 |
| 2241.482  | NM_00302C | 1367.965  | 1266.153  | NM_000075 | 6382.354  | 5520.654  | NM_000935 | 1158.762  |
| 651.775   | NM_003404 | 42528.961 | 47622.656 | NM_006845 | 5789.183  | 4532.302  | NM_000359 | 5406.244  |
| 1118.748  | NM_001114 | 2073.927  | 4004.024  | NM_004945 | 2488.478  | 3823.402  | NM_006395 | 3740.929  |
| 56715.199 | X82240    | 2096.178  | 1356.596  | NM_020242 | 1504.498  | 2661.348  | NM_014306 | 3344.58   |
| 26405.666 | NM_013995 | 17128.77  | 13437.452 | NM_002209 | 2031.082  | 2171.406  | NM_001084 | 2091.763  |
| 27248.365 | NM_004455 | 620.398   | 967.111   | AL137477  | 4514.921  | 4189.252  | M33197    | 62671.582 |
| 3043.985  | NM_00601C | 16446.377 | 4406.832  | AK024961  | 3159.018  | 2931.781  | NM_014623 | 5313.871  |
| 1479.259  | K03191    | 3038.884  | 2008.204  | NM_016068 | 2739.61   | 5249.198  | NM_007244 | 4306.547  |
| 4758.794  | NM_005079 | 7646.793  | 7777.986  | NM_014256 | 902.086   | 1073.617  | M30629    | 2446.702  |
| 3643.962  | NM_005192 | 14559.734 | 15164.651 | NM_015967 | 2039.955  | 1027.949  | AF193873  | 2190.03   |
| 497.905   | NM_015032 | 5922.074  | 3817.547  | NM_002409 | 525.446   | 659.54    | NM_00262E | 1675.701  |
| 8784.895  | AK022956  | 3493.732  | 3729.669  | NM_004994 | 7093.502  | 7478.559  | BF974315  | 2862.926  |
| 4756.975  | AK023121  | 781.718   | 428.617   | NM_00661C | 8491.73   | 5689.84   | AA569974  | 2556.833  |
| 40753.766 | NM_014104 | 42778.516 | 36759.945 | NM_003791 | 3080.52   | 3575.961  | AA923615  | 164.325   |
| 6043.77   | NM_002392 | 1396.542  | 1521.242  | NM_018017 | 2753.932  | 3143.402  | M80583    | 831.064   |
| 1626.552  | NM_002749 | 52103.254 | 50889.387 | AK001296  | 6340.253  | 5208.142  | X07767    | 1849.602  |
| 45172.395 | NM_018216 | 4840.825  | 5154.645  | AK000173  | 396.389   | 281.803   | AF016903  | 15353.243 |
| 1319.497  | NM_00339C | 1404.253  | 765.306   | NM_018365 | 1815.229  | 1566.966  | NM_015675 | 5316.44   |
| 10072.476 | AL137747  | 3808.541  | 3091.558  | NM_006586 | 10558.334 | 9750.998  | NM_01604C | 1742.34   |
| 1679.111  | NM_014755 | 8240.313  | 6573.112  | AJ272180  | 1388.923  | 1827.697  | NM_006597 | 32842.012 |
| 2354.021  | NM_012446 | 3536.643  | 2476.972  | AK025709  | 1181.058  | 1691.487  | NM_012483 | 5048.728  |
| 1283.668  | NM_018338 | 929.853   | 1180.443  | NM_019016 | 15233.207 | 15484.962 | NM_00349E | 2469.251  |
| 54080.949 | NM_018685 | 41223.645 | 48961.754 | NM_012261 | 8094.748  | 7267.434  | AB023420  | 5615.039  |
| 6037.61   | NM_006984 | 1774.768  | 2080.447  | NM_015556 | 2275.678  | 1857.879  | NM_016511 | 9162.018  |
| 4294.034  | AF231919  | 1600.949  | 1579.399  | NM_018416 | 1040.951  | 927.573   | NM_003559 | 848.077   |
| 1968.641  | NM_002706 | 4472.605  | 4077.957  | NM_004606 | 2948.2    | 2360.944  | M33197    | 59692.578 |
| 677.696   | NM_019023 | 54642.566 | 58032.715 | D70833    | 71845.266 | 61787.27  | NM_013229 | 965.825   |
| 868.926   | NM_00442C | 1268.077  | 1894.926  | NM_016621 | 1424.221  | 779.371   | NM_016533 | 14678.216 |
| 53723.164 | NM_00297C | 1288.482  | 1863.856  | AB046808  | 1343.072  | 1152.88   | NM_014751 | 2489.999  |
| 1884.201  | NM_005499 | 27314.459 | 18928.266 | AK026265  | 1493.142  | 1200.481  | NM_002347 | 9553.567  |
| 2331.286  | NM_015387 | 6206.313  | 7085.88   | AK027179  | 977.237   | 1557.937  | AB046807  | 1690.902  |
| 38313.93  | NM_001733 | 5865.081  | 4693.263  | NM_005681 | 1174.295  | 1373.657  | NM_01806E | 13796.956 |
| 1329.047  | NM_005065 | 1177.081  | 1030.488  | NM_015156 | 3541.372  | 4027.611  | NM_006931 | 3097.77   |
| 23875.041 | NM_017825 | 11815.024 | 11425.695 | NM_012384 | 1927.271  | 2559.857  | NM_020344 | 4646.512  |
| 52393.855 | NM_014035 | 4094.96   | 3716.741  | NM_004653 | 1197.225  | 1200.732  | M33197    | 67643.523 |
| 949.297   | NM_013432 | 35194.285 | 25909.541 | AF233453  | 2984.265  | 3524.44   | NM_018976 | 7899.332  |
| 2984.322  | AB020716  | 2644.67   | 2622.126  | D87454    | 3971.633  | 4408.38   | NM_003355 | 4479.471  |
| 2689.214  | NM_00229E | 51279.781 | 55386.559 | NM_00702C | 1017.141  | 1026.262  | NM_005074 | 1316.375  |
| 2989.327  | AK027130  | 1848.698  | 1246.793  | NM_000713 | 3415.748  | 2682.11   | NM_018057 | 605.47    |
| 2124.372  | NM_005479 | 11862.206 | 8854.07   | NM_016055 | 2632.401  | 2670.53   | M33197    | 65988.438 |
| 2922.153  | NM_00573C | 28888.652 | 22609.041 | NM_013291 | 3515.875  | 3805.749  | NM_015717 | 1062.188  |
| 48648.758 | NM_005392 | 1124.186  | 330.008   | NM_002936 | 6333.848  | 3036.393  | NM_015925 | 1435.052  |
| 3160.603  | AL133572  | 5223.991  | 3556.045  | NM_014161 | 1759.129  | 1442.633  | NM_013323 | 4085.219  |
| 3897.313  | AK022500  | 2231.109  | 1333.813  | BF312817  | 3746.776  | 1680.824  | NM_017426 | 1075.924  |
| 3975.171  | BC021298  | 817.947   | 317.437   | AF086491  | 2702.761  | 3262.437  | M33197    | 1078.589  |
| 1443.423  | U52096    | 7526.16   | 6637.813  | NM_014856 | 567.326   | 475.399   | NM_000853 | 1295.385  |
| 1138.468  | AB013897  | 1678.17   | 1595.932  | NM_00378C | 25436.479 | 21309.016 | NM_000935 | 1067.977  |
| 752.224   | NM_005526 | 23943.23  | 17124.328 | NM_00377E | 68864.789 | 60305.785 | NM_000359 | 9689.573  |

|           |           |           |           |           |           |           |           |           |
|-----------|-----------|-----------|-----------|-----------|-----------|-----------|-----------|-----------|
| 3042.858  | AK001669  | 3696.232  | 3821.092  | NM_001041 | 620.627   | 1013.033  | NM_006395 | 5928.689  |
| 2826.167  | NM_006195 | 10299.325 | 5755.946  | AK023263  | 1971.429  | 2543.965  | NM_014306 | 4592.341  |
| 473.93    | NM_006190 | 11439.529 | 13675.549 | NM_004622 | 1347.073  | 2875.92   | NM_001084 | 3199.037  |
| 2717.139  | NM_006368 | 2949.003  | 3698.047  | AK021445  | 1109.661  | 1549.012  | NM_015983 | 2368.667  |
| 1630.622  | NM_004133 | 764.354   | 1085.862  | U17630    | 953.279   | 1263.159  | NM_018622 | 4018.722  |
| 1466.957  | NM_001618 | 9562.153  | 5976.131  | M33782    | 684.069   | 434.922   | M33197    | 75415.859 |
| 2079.632  | BF344046  | 1641.461  | 1261.111  | NM_017755 | 3797.372  | 3397.254  | NM_005867 | 5432.333  |
| 1577.907  | AF432218  | 9729.617  | 10568.395 | AK022551  | 1008.329  | 1063.66   | AK026031  | 9714.817  |
| 1791.468  | NM_004286 | 4834.996  | 2863.783  | AF085968  | 2441.036  | 1396.286  | NM_016468 | 4536.458  |
| 3314.286  | AK025082  | 1361.202  | 1265.145  | AB011136  | 1317.215  | 1045.923  | NM_007342 | 3326.955  |
| 2453.2    | AF086535  | 696.413   | 430.405   | AL161960  | 3037.334  | 4985.939  | D25217    | 8791.828  |
| 7104.603  | AB040901  | 1186.476  | 763.797   | AK023269  | 3576.416  | 5123.259  | NM_006351 | 3390.938  |
| 2286.001  | AL137406  | 3173.316  | 2463.066  | AF070564  | 4836.739  | 6603.773  | M33197    | 49691.07  |
| 4613.505  | NM_012253 | 3873.155  | 2254.995  | AK021439  | 17186.373 | 23283.918 | NM_004683 | 7948.971  |
| 55811.703 | NM_006876 | 1174.151  | 509.911   | AF052099  | 1906.1    | 1763.828  | M33197    | 47370.238 |
| 5684.68   | NM_000293 | 1958.688  | 562.413   | AF070543  | 1090.669  | 969.454   | NM_001467 | 834.687   |
| 6773.677  | NM_003748 | 640.862   | 307.477   | NM_014778 | 2200.36   | 1649.198  | AB037725  | 603.102   |
| 960.843   | AF153821  | 2019.614  | 1670.746  | AK001171  | 10172.87  | 8579.951  | M33197    | 59379.051 |
| 825.781   | NM_013370 | 1227.829  | 1547.65   | NM_020250 | 11483.908 | 10868.132 | NM_004860 | 3182.625  |
| 50818.664 | NM_001374 | 3279.204  | 6384.754  | AF055007  | 1601.828  | 1165.77   | AF217190  | 4062.9    |
| 641.684   | NM_003310 | 2827.551  | 1858.877  | NM_012337 | 1136.72   | 1242.131  | AB028981  | 14137.128 |
| 9898.331  | AK024461  | 1956.833  | 1637.119  | AL389879  | 4875.664  | 4231.098  | NM_006800 | 3397.375  |
| 1972.632  | AK025485  | 912.239   | 507.517   | AK022869  | 1693.195  | 1576.433  | NM_002729 | 5500.754  |
| 9972.191  | NM_017635 | 2047.238  | 1990.475  | NM_016111 | 4673.912  | 3629.701  | M33197    | 6854.226  |
| 2092.39   | AF027147  | 25701.766 | 19694.76  | AF085958  | 61238.246 | 53956.121 | AL050139  | 4545.251  |
| 57675.016 | M62399    | 2380.281  | 3203.915  | AF086021  | 3006.925  | 2593.374  | NM_004558 | 2721.5    |
| 4854.663  | NM_002357 | 691.987   | 629.815   | AK024472  | 979.933   | 3213.651  | AL079296  | 1061.233  |
| 1547.8    | U71600    | 1500.54   | 1131.18   | AF087981  | 539.483   | 669.604   | NM_014770 | 1443.312  |
| 1147.143  | AB037862  | 5023.321  | 5458.92   | NM_017976 | 2288.081  | 3628.933  | AK023103  | 1576.768  |
| 55366.203 | AK023887  | 1158.298  | 1584.914  | U06700    | 1038.986  | 973.603   | NM_017858 | 1115.073  |
| 7392.664  | AF088022  | 9893.216  | 5588.428  | U63828    | 2010.637  | 1929.666  | D80008    | 1057.929  |
| 4360.969  | AK026537  | 1439.683  | 1874.3    | Z36794    | 1120.039  | 1234.852  | X56789    | 1142.035  |
| 1026.453  | NM_015485 | 3651.304  | 4974.489  | Z36828    | 6177.869  | 6931.872  | NM_004132 | 4516.22   |
| 831.769   | NM_002666 | 4179.503  | 3446.745  | AF086121  | 5402.986  | 4492.759  | NM_014844 | 3121.65   |
| 51770.449 | AF202145  | 2133.057  | 2605.532  | AF086140  | 643.544   | 672.116   | M33197    | 58955.141 |
| 930.437   | AK026155  | 2572.381  | 2434.029  | AK026915  | 873.929   | 917.272   | NM_018492 | 2766.381  |
| 968.686   | NM_018052 | 17849.592 | 17867.557 | AL110259  | 1153.569  | 1614.051  | NM_001346 | 2129.618  |
| 584.552   | AF143322  | 353.224   | 1001.863  | AB033100  | 5366.071  | 5078.527  | NM_003149 | 2162.146  |
| 3069.993  | AK022386  | 5014.714  | 6046.783  | AL390138  | 2399.152  | 2077.607  | NM_003377 | 7975.948  |
| 1047.273  | NM_002767 | 5934.212  | 5880.582  | AL137290  | 4923.74   | 4697.417  | NM_002220 | 3658.781  |
| 773.735   | AF131846  | 10074.242 | 9628.039  | AK021606  | 441.205   | 944.445   | AB033034  | 1478.091  |
| 757.413   | AF088069  | 1871.409  | 1315.016  | NM_014124 | 32632.727 | 28455.654 | D38169    | 3018.221  |
| 1299.716  | AF086551  | 751.794   | 1391.142  | AF119888  | 690.119   | 921.003   | M33197    | 64406.766 |
| 10205.046 | NM_013393 | 5755.507  | 5968.24   | AK001551  | 1213.323  | 1312.791  | NM_002447 | 5968.651  |
| 2784.489  | AK025072  | 2699.38   | 3689.512  | AK001825  | 1089.754  | 1256.191  | NM_014145 | 8484.769  |
| 788.735   | AK022410  | 1554.218  | 2270.997  | AK024714  | 998.603   | 1536.238  | NM_002223 | 1294.615  |
| 1575.741  | AF086541  | 444.176   | 1189.051  | AK022363  | 1095.741  | 1458.203  | M33197    | 58535.09  |
| 58116.496 | L10378    | 10681.275 | 8881.697  | AK023395  | 4854.103  | 6685.346  | NM_003151 | 1840.623  |
| 11089.748 | AK022179  | 894.322   | 687.727   | AK023818  | 10990.888 | 6240.131  | NM_006811 | 5412.615  |
| 1494.826  | AJ227860  | 985.97    | 661.88    | AK024139  | 769.635   | 936.913   | NM_004324 | 1016.519  |
| 2594.148  | AL157448  | 1014.677  | 766.938   | AK023895  | 824.943   | 853.404   | NM_005614 | 10144.652 |
| 54168.324 | AJ276429  | 1978.468  | 1785.226  | AK024206  | 10562.761 | 9457.087  | AK026270  | 1168.082  |
| 4039.803  | AL117657  | 1119.02   | 666.673   | NM_006262 | 2568.396  | 2954.328  | NM_004556 | 2895.14   |

|           |                  |           |           |                  |           |           |                  |           |
|-----------|------------------|-----------|-----------|------------------|-----------|-----------|------------------|-----------|
| 5260.329  | <b>AK021590</b>  | 2401.838  | 2118.464  | <b>AK026598</b>  | 3122.445  | 2748.194  | <b>D90075</b>    | 5860.259  |
| 2664.638  | <b>AB002441</b>  | 663.187   | 520.702   | <b>AK023602</b>  | 652.319   | 1235.972  | <b>M33197</b>    | 57267.594 |
| 2794.276  | <b>AK023998</b>  | 1236.005  | 268.268   | <b>NM_018097</b> | 11336.251 | 11395.627 | <b>AK023827</b>  | 3032.204  |
| 5658.106  | <b>AK021643</b>  | 839.573   | 756.902   | <b>AF130043</b>  | 600.928   | 665.324   | <b>AK021702</b>  | 1434.34   |
| 3105.902  | <b>U84507</b>    | 783.372   | 941.072   | <b>Y11167</b>    | 572.612   | 825.761   | <b>NM_003885</b> | 1576.09   |
| 43068.008 | <b>AK000872</b>  | 1624.354  | 2135.108  | <b>AK026813</b>  | 545.923   | 591.034   | <b>NM_016448</b> | 3048.532  |
| 3602.526  | <b>AK027147</b>  | 7809.386  | 8666.403  | <b>AK027225</b>  | 689.204   | 840.979   | <b>M33197</b>    | 59271.32  |
| 47814.664 | <b>AK022415</b>  | 14192.171 | 8838.066  | <b>AK023083</b>  | 2052.034  | 2053.443  | <b>NM_004415</b> | 1995.315  |
| 1591.13   | <b>AL137368</b>  | 757.167   | 347.714   | <b>NM_005325</b> | 1692.111  | 36550.48  | <b>NM_007278</b> | 8900.964  |
| 8620.134  | <b>AK021932</b>  | 991.497   | 987.979   | <b>AF217967</b>  | 853.484   | 1166.277  | <b>NM_005219</b> | 7037.65   |
| 1797.41   | <b>AK026787</b>  | 4407.72   | 2576.993  | <b>NM_018150</b> | 7099.871  | 5501.357  | <b>NM_004723</b> | 4146.066  |
| 3141.327  | <b>AK023542</b>  | 1457.09   | 1038.3    | <b>NM_017918</b> | 488.491   | 633.908   | <b>M33197</b>    | 56612.914 |
| 1352.914  | <b>AK000203</b>  | 1061.74   | 859.586   | <b>AB007954</b>  | 1331.23   | 1723.148  | <b>NM_018413</b> | 3072.192  |
| 1214.948  | <b>AK021845</b>  | 4669.566  | 4291.421  | <b>AK026494</b>  | 3786.02   | 1690.92   | <b>AB018299</b>  | 23721.516 |
| 2616.856  | <b>NM_018592</b> | 1370.972  | 1871.441  | <b>AK022067</b>  | 495.343   | 360.596   | <b>NM_005245</b> | 4391.76   |
| 3431.711  | <b>NM_018503</b> | 22475.08  | 20285.816 | <b>AK023508</b>  | 2049.637  | 1290.597  | <b>M33197</b>    | 60051.902 |
| 2042.568  | <b>NM_016449</b> | 15182.538 | 12217.294 | <b>AK025840</b>  | 1615.22   | 1585.529  | <b>NM_016219</b> | 8195.512  |
| 1638.407  | <b>AL049670</b>  | 5252.357  | 3039.915  | <b>BC024009</b>  | 4353.269  | 3495.051  | <b>NM_004751</b> | 833.552   |
| 1544.37   | <b>NM_018512</b> | 9437.862  | 9775.762  | <b>AF128543</b>  | 5855.609  | 4736.076  | <b>AK025605</b>  | 3109.852  |
| 873.27    | <b>AK022412</b>  | 4429.514  | 5393.861  | <b>NM_004189</b> | 1567.666  | 1238.648  | <b>NM_003783</b> | 676.528   |
| 54128     | <b>AK023073</b>  | 6050.422  | 5655.623  | <b>U84510</b>    | 3296.737  | 3133.209  | <b>NM_007000</b> | 5689.146  |
| 1844.762  | <b>AK023697</b>  | 626.273   | 1129.25   | <b>S83198</b>    | 14144.947 | 12117.066 | <b>M23161</b>    | 6035.473  |
| 1510.528  | <b>AK023922</b>  | 1614.321  | 2414.528  | <b>AF052119</b>  | 15186.845 | 17128.396 | <b>NM_003197</b> | 4289.868  |
| 45847.488 | <b>AK022438</b>  | 1855.416  | 2683.433  | <b>X94290</b>    | 1951.922  | 2046.005  | <b>AF176705</b>  | 2380.881  |
| 2150.577  | <b>AK023764</b>  | 1077.28   | 1144.364  | <b>AK026685</b>  | 38381.566 | 37581.52  | <b>D29012</b>    | 7187.199  |
| 4173.616  | <b>AK024082</b>  | 1033.348  | 516.035   | <b>AF090927</b>  | 28706.816 | 28031.031 | <b>NM_017414</b> | 825.253   |
| 3567.865  | <b>Z27405</b>    | 18418.941 | 12801.104 | <b>AL137642</b>  | 1492.019  | 1368.378  | <b>NM_012179</b> | 21934.688 |
| 2714.776  | <b>X74605</b>    | 1132.912  | 1097.536  | <b>AL133619</b>  | 2417.647  | 2399.48   | <b>NM_002793</b> | 3363.135  |
| 51433.648 | <b>AK024513</b>  | 1491.457  | 1069.257  | <b>AK025902</b>  | 3284.404  | 5457.221  | <b>NM_004788</b> | 1169.071  |
| 3036.627  | <b>BC036692</b>  | 2983.563  | 2268.962  | <b>NM_005181</b> | 5568.651  | 3758.885  | <b>M33197</b>    | 58673.555 |
| 3340.992  | <b>AJ009640</b>  | 6090.981  | 5556.877  | <b>AF143676</b>  | 2420.203  | 2530.159  | <b>AL442083</b>  | 1834.969  |
| 2024.875  | <b>Y11163</b>    | 891.085   | 1183.876  | <b>U66044</b>    | 5164.422  | 5007.288  | <b>D63487</b>    | 3209.078  |
| 2126.674  | <b>AF147340</b>  | 1156.799  | 2151.136  | <b>NM_005247</b> | 43210.07  | 37010.875 | <b>AK097791</b>  | 3942.408  |
| 1397.704  | <b>AF035308</b>  | 8076.306  | 6773.038  | <b>AL122089</b>  | 1799.472  | 1491.191  | <b>AK022705</b>  | 2012.902  |
| 2612.033  | <b>NM_014054</b> | 4469.31   | 3458.617  | <b>AA203665</b>  | 4666.225  | 3393.644  | <b>NM_016404</b> | 3698.63   |
| 2137.528  | <b>AK021840</b>  | 46676.691 | 43552.93  | <b>U95646</b>    | 1606.654  | 2132.659  | <b>L03426</b>    | 1813.59   |
| 2786.39   | <b>AK022228</b>  | 2224.621  | 2943.186  | <b>Y16705</b>    | 1572.668  | 1830.249  | <b>M33197</b>    | 53536.727 |
| 326.92    | <b>AF086480</b>  | 1399.167  | 1148.896  | <b>AF279775</b>  | 5205.587  | 5128.728  | <b>NM_020163</b> | 1442.078  |
| 1567.96   | <b>AK000806</b>  | 41861.707 | 20442.84  | <b>NM_001821</b> | 2684.181  | 3067.847  | <b>NM_006608</b> | 3310.547  |
| 1574.085  | <b>NM_016471</b> | 3595.004  | 3194.628  | <b>NM_005647</b> | 768.4     | 896.512   | <b>NM_000457</b> | 939.495   |
| 1774.61   | <b>Z11852</b>    | 1084.631  | 1351.383  | <b>X64978</b>    | 5236.253  | 5640.52   | <b>M34356</b>    | 2553.769  |
| 10550.256 | <b>AK022798</b>  | 1706.582  | 1447.918  | <b>NM_000912</b> | 33546.855 | 28505.641 | <b>AJ133115</b>  | 4008.406  |
| 2342.341  | <b>AL157423</b>  | 1169.144  | 1879.089  | <b>NM_002345</b> | 824.486   | 966.407   | <b>X51630</b>    | 6440.049  |
| 1127.481  | <b>AK023115</b>  | 796.584   | 1028      | <b>U57971</b>    | 1378.874  | 1048.245  | <b>NM_005056</b> | 2150.562  |
| 46961.352 | <b>AK023176</b>  | 1739.439  | 2687.708  | <b>X89673</b>    | 1422.953  | 1230.408  | <b>AF208502</b>  | 9291.395  |
| 29817.193 | <b>AL161991</b>  | 20498.031 | 21960.643 | <b>AK024593</b>  | 2579.642  | 2060.765  | <b>M33197</b>    | 54515.211 |
| 848.41    | <b>D17032</b>    | 19512.859 | 16440.375 | <b>Z83934</b>    | 844.301   | 699.445   | <b>AF264750</b>  | 11579.571 |
| 19329.762 | <b>AL137292</b>  | 631.414   | 840.631   | <b>NM_018359</b> | 2400.948  | 1855.918  | <b>NM_006980</b> | 1126.873  |
| 3550.165  | <b>NM_017941</b> | 1495.643  | 946.069   | <b>AK022020</b>  | 1994.673  | 2718.706  | <b>AK023904</b>  | 2721.582  |
| 1635.16   | <b>AF301016</b>  | 839.617   | 1033.371  | <b>AK000263</b>  | 5819.307  | 5989.101  | <b>NM_017956</b> | 3699.654  |
| 5718.43   | <b>BE900527</b>  | 1892.822  | 1616.981  | <b>NM_017447</b> | 694.371   | 749.372   | <b>NM_016496</b> | 1001.838  |
| 5668.41   | <b>D28384</b>    | 64680.262 | 66605.898 | <b>AL049452</b>  | 508.613   | 494.288   | <b>NM_014309</b> | 2006.56   |
| 58367.629 | <b>AF118079</b>  | 29079.092 | 21682.428 | <b>NM_016622</b> | 1794.929  | 2020.085  | <b>M33197</b>    | 32964.098 |

|           |             |           |           |             |           |           |           |           |
|-----------|-------------|-----------|-----------|-------------|-----------|-----------|-----------|-----------|
| 1268.379  | AF277572    | 1044.439  | 1018.735  | AK026976    | 907.831   | 1557.947  | NM_004094 | 1835.556  |
| 3095.354  | AL365413    | 5551.393  | 6114.485  | AF070559    | 2786.161  | 2027.158  | NM_020236 | 1491.294  |
| 1173.273  | NM_005258   | 8459.768  | 4676.713  | D42043      | 5539.402  | 5124.138  | AK027059  | 3545.586  |
| 7837.221  | NM_000440   | 5776.51   | 6574.533  | CY3Cy5      | 690.729   | 152.256   | AF151109  | 8195.58   |
| 1314.188  | NM_001297   | 3868.96   | 3413.621  | BG744154    | 57324.332 | 67000.875 | NM_015414 | 62960.723 |
| 9877.806  | NM_004403   | 5370.592  | 5398.321  | Z11694      | 3408.557  | 4520.803  | L34070    | 5565.168  |
| 1438.142  | X64993      | 1299.03   | 1811.161  | BF983177    | 798.864   | 615.738   | NM_016475 | 3106.757  |
| 2936.625  | NM_004434   | 9375.353  | 9081.148  | Z26317      | 876.647   | 759.577   | NM_001865 | 58889.305 |
| 1257.568  | NM_006269   | 1058.054  | 940.043   | X16983      | 5958.821  | 4415.833  | NM_006441 | 3669.797  |
| 55722.191 | NM_016230   | 2287.793  | 4023.624  | X56160      | 1890.486  | 2255.994  | NM_001918 | 1599.355  |
| 5768.108  | NM_001083   | 1831.678  | 1622.566  | BG679991    | 406.363   | 489.075   | NM_018245 | 3581      |
| 4060.497  | AK023966    | 6849.057  | 7471.514  | H-Y 00097 I | 1422.157  | 1288.751  | M33197    | 40610.543 |
| 902.453   | AK025702    | 3024.35   | 3404.324  | H-M 59964   | 561.562   | 368.046   | NM_012117 | 5360.452  |
| 1010.483  | NM_018958   | 1780.079  | 1866.182  | H-Y 00711 I | 72899.242 | 60536.609 | D17130    | 62008.816 |
| 58156.152 | NM_002367   | 679.032   | 596.103   | H-X 16707 I | 1421.377  | 1429.169  | X76302    | 4806.979  |
| 693.623   | AK022038    | 1487.617  | 1490.318  | AL038354    | 39557.875 | 18971.23  | AK026276  | 702.821   |
| 594.606   | AF085866    | 2857.742  | 2357.136  | R14607      | 1156.798  | 714.576   | M33197    | 61160.156 |
| 2713.665  | CY3Cy5      | 860.863   | 183.167   | NM_021976   | 2126.46   | 1535.279  | X52354    | 728.365   |
| 1156.056  | AA397813    | 22681.059 | 10658.483 | SR2         | 41116.965 | 25645.84  | NM_005413 | 1418.517  |
| 985.335   | W47350      | 1023.109  | 837.096   | SR4         | 9651.01   | 7379.05   | NM_002315 | 1178.579  |
| 60256.48  | AF097935    | 478.279   | 783.722   | SR6         | 1430.141  | 1030.728  | D83781    | 1191.435  |
| 3617.268  | W68291      | 18907.922 | 20991.123 | SR8         | 5250.964  | 11347.591 | AL832699  | 3586.597  |
| 2740.407  | N64384      | 1942.283  | 3583.818  | SR10        | 16714.348 | 4412.987  | NM_012191 | 1324.567  |
| 2862.219  | H-X 53655 I | 1215.578  | 1183.746  | CY3Cy5      | 245.109   | 109.642   | M33197    | 63982.891 |
| 2070.862  | H-U 05770 I | 5307.326  | 19056.906 | NM_001284   | 29881.076 | 28197.746 | AK000757  | 734.406   |
| 1051.986  | H-M 65199   | 5382.714  | 6288.586  | NM_003242   | 4311.189  | 4808.872  | AL359577  | 1364.289  |
| 3381.144  | H-M 32315   | 3541.991  | 5460.308  | NM_001105   | 1129.209  | 1049.849  | NM_018139 | 1627.99   |
| 51108.988 | H-V00536M   | 1446.561  | 1121.747  | NM_002075   | 1148.011  | 1386.639  | NM_014805 | 3743.966  |
| 4401.179  | H-D85429M   | 3683.601  | 3810.889  | Y08756      | 6802.156  | 5905.821  | AF052120  | 2185.098  |
| 6449.116  | BF439832    | 2526.223  | 2931.805  | NM_005563   | 3871.276  | 7032.891  | NM_014871 | 1569.438  |
| 3828.109  | BG819162    | 783.03    | 1013.046  | NM_005102   | 1929.768  | 2279.274  | M33197    | 60869.672 |
| 3290.841  | NM_017532   | 4611.826  | 6104.629  | NM_004518   | 660.179   | 664.91    | AL137552  | 1156.38   |
| 9182.394  | SR2         | 55798.355 | 60199.297 | NM_002719   | 1782.702  | 1354.073  | AK025794  | 2485.898  |
| 3954.763  | SR4         | 17629.52  | 21519.234 | AV752086    | 676.345   | 505.246   | AK024522  | 1565.496  |
| 44851.949 | SR6         | 2419.63   | 2907.676  | NM_016102   | 3087.269  | 2468.34   | NM_007198 | 4000.793  |
| 2729.591  | SR8         | 8789.111  | 36248.934 | NM_004376   | 1397.174  | 1263.434  | M33197    | 54459.695 |
| 174.598   | SR10        | 31336.564 | 13511.963 | NM_005603   | 14873.919 | 9383.633  | AK023220  | 559.707   |
| 33626.461 | CY3Cy5      | 1977.251  | 177.46    | NM_006834   | 2719.002  | 2204.422  | AK024566  | 930.23    |
| 4939.023  | NM_004447   | 4728.426  | 2866.839  | U61741      | 1071.376  | 1303.965  | M33197    | 47466.418 |
| 518.846   | NM_001204   | 1141.173  | 887.852   | NM_012402   | 1747.946  | 2757.858  | AK024981  | 14478.243 |
| 30605.137 | BF131321    | 1024.945  | 948.82    | M76676      | 1414.886  | 1014.787  | AK027246  | 885.263   |
| 1142.844  | NM_012116   | 2522.99   | 2124.335  | NM_003857   | 536.044   | 457.379   | U80766    | 3617.58   |
| 2595.026  | NM_000020   | 2308.668  | 1708.785  | AL137690    | 348.059   | 471.198   | AK001638  | 1376.566  |
| 26334.535 | NM_000956   | 758.988   | 531.403   | Z83804      | 827.039   | 1147.5    | AF161386  | 7217.411  |
| 1966.226  | NM_002442   | 2496.552  | 2817.262  | NM_004386   | 1103.097  | 720.491   | AL365369  | 3210.801  |
| 1346.309  | AB033091    | 8556.549  | 9231.265  | NM_007366   | 831.389   | 871.396   | AK025454  | 3369.407  |
| 4337.528  | NM_004557   | 9087.187  | 8886.58   | NM_000592   | 431.914   | 629.983   | M33197    | 57061.043 |
| 5667.087  | NM_014757   | 2833.871  | 3701.043  | NM_016584   | 5537.147  | 4876.33   | X05826    | 4706.805  |
| 2731.498  | NM_001584   | 1820.304  | 1383.373  | NM_001815   | 825.721   | 789.551   | AJ001872  | 3298.712  |
| 1841.175  | NM_012259   | 31735.488 | 27076.193 | NM_000064   | 3436.115  | 3207.116  | M33197    | 37440.754 |
| 914.151   | AF272357    | 1840.972  | 2043.368  | NM_003264   | 1880.517  | 1431.981  | NM_005598 | 1889.745  |
| 973.706   | NM_016372   | 29706.488 | 21486.184 | NM_006725   | 1043.097  | 884.36    | AK023636  | 4696.597  |
| 49465.547 | AB020705    | 1252.401  | 1250.093  | NM_003326   | 779.689   | 806.669   | D25272    | 2736.003  |

|           |           |           |           |           |           |           |           |           |
|-----------|-----------|-----------|-----------|-----------|-----------|-----------|-----------|-----------|
| 1747.408  | NM_00298C | 1755.334  | 1390.875  | NM_00456E | 13361.727 | 11580.047 | M33197    | 59640.168 |
| 1205.247  | NM_01588E | 1265.384  | 1375.601  | NM_00020Z | 602.506   | 637.869   | NM_02016E | 1319.618  |
| 34977.367 | NM_02035E | 673.751   | 528.482   | NM_00549E | 6520.53   | 4500.313  | AK025931  | 62147.523 |
| 4311.022  | NM_00426Z | 710.405   | 458.547   | NM_004817 | 466.249   | 319.875   | M33197    | 873.46    |
| 1868.506  | BG491613  | 8589.132  | 11632.764 | NM_01897E | 8192.369  | 5258.306  | AK02197Z  | 1440.261  |
| 53235.75  | BF337921  | 1214.865  | 1066.279  | AB023215  | 6074.493  | 3674.707  | M33197    | 59914.906 |
| 1600.195  | U53532    | 1494.611  | 1231.769  | NM_01807Z | 1059.72   | 1309.431  | AK001083  | 948.463   |
| 1437.287  | NM_012484 | 3330.305  | 5101.536  | AL137529  | 1244.683  | 1411.306  | AK000185  | 2101.72   |
| 589.419   | AL096732  | 1238.008  | 1250.106  | NM_01233Z | 1252.68   | 1202.513  | AK000865  | 878.041   |
| 2653.775  | AB006423  | 1375.35   | 1057.955  | AK026648  | 425.588   | 722.587   | M33197    | 44538.461 |
| 2362.656  | NM_00571E | 64901.934 | 66834.719 | NM_000497 | 698.792   | 649.218   | AK024779  | 1045.016  |
| 1088.597  | NM_00346Z | 18414.123 | 9327.02   | NM_017421 | 383.63    | 505.784   | AK024940  | 719.183   |
| 34666.457 | NM_00609Z | 4390.29   | 5691.426  | AK025977  | 8408.501  | 14067.706 | AK024406  | 1025.201  |
| 3280.355  | NM_00013E | 1523.844  | 1120.745  | AK023130  | 3656.535  | 3970.965  | AK024568  | 9115.252  |
| 6119.318  | NM_006664 | 4225.516  | 3312.582  | NM_00027Z | 366.176   | 577.456   | AK024873  | 676.844   |
| 2166.889  | NM_00272E | 760.859   | 832.013   | NM_00289E | 5374.791  | 5627.164  | NM_018381 | 594.868   |
| 52011.102 | NM_00045C | 393.244   | 601.752   | NM_00048E | 1068.336  | 765.157   | M33197    | 67055.68  |
| 2193.678  | NM_00451Z | 4679.751  | 5674.726  | BE876237  | 837.956   | 678.932   | AK026277  | 6438.884  |
| 1606.694  | NM_00170E | 18619.668 | 18243.023 | NM_005397 | 525.308   | 299.229   | U10509    | 1770.662  |
| 1073.859  | NM_01773E | 2158.935  | 1709      | NM_00080E | 5744.946  | 4230.349  | NM_00716E | 39990.875 |
| 6508.744  | AB033044  | 3454.925  | 3529.648  | NM_00632C | 534.362   | 427.461   | NM_01401E | 3043.936  |
| 2205.988  | AB014564  | 1560.67   | 1123.469  | AB014511  | 1931.486  | 1451.636  | AF085956  | 1694.582  |
| 2826.481  | NM_02023C | 2971.243  | 1998.629  | NM_01425Z | 2902.853  | 2163.326  | AF147318  | 1572.685  |
| 54642.086 | NM_00676Z | 38182.023 | 49987.551 | NM_00166Z | 3723.877  | 3730.647  | M33197    | 56676.594 |
| 531.217   | NM_01643C | 777.437   | 1173.437  | NM_016131 | 5480.665  | 3619.165  | AL137556  | 1212.651  |
| 1862.222  | NM_00374Z | 2803.326  | 2156.239  | NM_00682Z | 941.713   | 520.295   | NM_01469E | 8062.91   |
| 2930.566  | NM_005094 | 2288.312  | 2067.06   | NM_01214Z | 5951.833  | 5378.21   | AL359055  | 1583.406  |
| 49033.105 | NM_00215Z | 7570.406  | 6707.48   | NM_018264 | 1279.116  | 1323.297  | NM_01490E | 1318.067  |
| 1191.184  | NM_001701 | 545.85    | 617.259   | NM_01458C | 510.556   | 564.357   | AF086125  | 1898.396  |
| 5997.037  | AK022558  | 4999.186  | 4608.954  | NM_00203Z | 3928.876  | 3690.527  | AL079279  | 510.964   |
| 4332.515  | NM_00647E | 42131.297 | 41178.793 | NM_004111 | 1768.48   | 1543.637  | AK023547  | 940.177   |
| 4058.258  | AK023787  | 2327.255  | 3727.938  | AF085966  | 2882.983  | 1606.78   | U67847    | 2064.719  |
| 44865.645 | NM_00213Z | 1337.948  | 2249.47   | NM_00531E | 1331.415  | 1111.193  | AL137321  | 5782.897  |
| 60356.086 | NM_015697 | 3548.061  | 2853.274  | NM_01631E | 1859.6    | 2082.169  | M33197    | 60156.691 |
| 7989.803  | NM_03294Z | 1874.143  | 1789.529  | NM_00336E | 5932.107  | 4450.899  | AK024207  | 2336.945  |
| 4121.079  | NM_007177 | 6632.689  | 6249.735  | NM_000057 | 1168.67   | 1963.672  | AK021843  | 1243.786  |
| 1243.933  | AL359592  | 1100.261  | 1329.32   | NM_01834Z | 1976.211  | 1208.073  | AF075025  | 4107.89   |
| 6075.902  | NM_00607E | 5927.132  | 5866.783  | AK095793  | 804.238   | 1135.608  | AF116623  | 893.163   |
| 7111.208  | NM_00048Z | 601.931   | 842.486   | NM_003177 | 2260.873  | 2065.933  | AF088008  | 1609.523  |
| 633.759   | NM_00595Z | 16752.654 | 2912.713  | NM_01771E | 414.705   | 208.697   | AK023528  | 1812.544  |
| 2709.111  | NM_016274 | 1554.942  | 4432.304  | AF064078  | 597.83    | 429.759   | AK023043  | 667.15    |
| 3442.841  | NM_01494E | 1024.652  | 1162.49   | AL049688  | 771.676   | 434.757   | M33197    | 57604.617 |
| 346.414   | NM_014251 | 1933.418  | 2011.919  | NM_002737 | 1266.395  | 877.298   | AF147349  | 3716.276  |
| 12522.768 | AK022750  | 3624.681  | 4126.261  | Z25427    | 1416.458  | 958.45    | AL050346  | 16235.231 |
| 27069.707 | AK023915  | 2958.747  | 2657.466  | NM_00467Z | 4510.626  | 3773.293  | AK001520  | 3337.803  |
| 1718.032  | AB051453  | 2001.321  | 2274.201  | NM_00135Z | 1488.386  | 1056.022  | D90070    | 3887.056  |
| 4652.02   | AK026842  | 696.151   | 1208.333  | NM_006214 | 2253.553  | 1779.744  | M33197    | 39875.121 |
| 2012.443  | NM_00239E | 3958.383  | 3898.115  | AJ010228  | 1353.329  | 1062.514  | AK025807  | 1644.65   |
| 2434.381  | AB023203  | 1603.409  | 2209.757  | NM_00519E | 2234.244  | 1709.635  | M33197    | 65119.172 |
| 2059.799  | NM_01496Z | 2945.079  | 2564.134  | NM_00560Z | 24375.932 | 24041.686 | AK025266  | 4193.51   |
| 3687.915  | NM_00425E | 1000.457  | 463.565   | NM_001061 | 424.763   | 485.719   | AK001843  | 3647.996  |
| 2690.415  | NM_016271 | 3326.37   | 2341.889  | Z11694    | 4222.779  | 4874.579  | AK000548  | 43480.531 |
| 4378.667  | NM_01661E | 3585.71   | 2884.609  | BF983177  | 537.747   | 552.052   | NM_00392C | 12271.771 |

|           |             |           |           |             |           |           |           |           |
|-----------|-------------|-----------|-----------|-------------|-----------|-----------|-----------|-----------|
| 5871.684  | NM_014481   | 1086.878  | 1219.512  | Z26317      | 944.745   | 715.137   | NM_004787 | 16297.018 |
| 1562.237  | U22172      | 1602.297  | 1495.411  | X16983      | 5631.16   | 4168.635  | AF087984  | 4913.127  |
| 4551.333  | AB032960    | 1163.148  | 1059.352  | X56160      | 2035.38   | 2449.86   | M33197    | 57736.594 |
| 51356.086 | NM_014264   | 4271.545  | 3078.7    | BG679991    | 383.331   | 483.335   | AK022273  | 4499.95   |
| 7905.654  | NM_016281   | 6781.841  | 5884.241  | H-Y 00097 I | 1907.567  | 1350.431  | NM_015882 | 877.718   |
| 701.891   | NM_004734   | 13535.681 | 15090.594 | H-M 59964   | 602.994   | 331.465   | AK024271  | 1255.608  |
| 988.572   | AK024793    | 1578.154  | 2277.142  | H-Y 00711 I | 57561.906 | 52619.664 | AK021650  | 3215.553  |
| 4271.321  | AF208291    | 1171.682  | 1184.718  | H-X 16707 I | 1268.614  | 989.408   | AL050210  | 2657.28   |
| 833.355   | NM_000276   | 2006.443  | 1370.001  | AL038354    | 36853.266 | 17373.902 | L37699    | 1490.173  |
| 1346.012  | NM_000019   | 58459.602 | 60668.977 | R14607      | 975.84    | 577.494   | M33197    | 61806.301 |
| 3863.364  | AK023701    | 814.381   | 1011.989  | NM_021976   | 2292.154  | 1573.971  | AL050173  | 1925.943  |
| 24856.047 | NM_015886   | 2007.088  | 1550.184  | NM_005718   | 7283.271  | 6299.479  | D80002    | 1717.937  |
| 2515.53   | NM_020358   | 1118.678  | 1315.724  | NM_005496   | 8566.358  | 9073.946  | U17637    | 6472.695  |
| 773.308   | NM_004262   | 589.983   | 344.21    | NM_002858   | 3902.758  | 4895.945  | NM_003548 | 875.674   |
| 2314.696  | BG491613    | 9240.721  | 11917.393 | NM_004817   | 615.761   | 862.07    | M33197    | 48305.957 |
| 1176.324  | AA397813    | 25854.445 | 16318.318 | NM_018975   | 9768.042  | 10460.204 | NM_018272 | 4182.179  |
| 2811.595  | W47350      | 808.575   | 564.201   | NM_001284   | 31406.328 | 25430.111 | CY3Cy5    | 5029.369  |
| 45741.535 | W68291      | 21004.715 | 33565.988 | NM_003242   | 3204.9    | 2473.714  | R19938    | 2589.082  |
| 2120.923  | N64384      | 2013.315  | 3081.721  | NM_001105   | 1365.084  | 1148.074  | N94487    | 7285.67   |
| 1259.754  | H-X 53655 I | 1069.206  | 635.972   | NM_002075   | 1408.346  | 1456.951  | A1886795  | 1830.601  |
| 2253.46   | H-U 05770 I | 4968.992  | 12451.725 | Y08756      | 8479.955  | 5371.665  | D10495    | 2009.869  |
| 47211.754 | H-M 65199   | 5412.347  | 5909.117  | NM_005563   | 4402.107  | 7518.762  | BF344679  | 729.404   |
| 2082.434  | H-M 32315   | 4287.01   | 7009.937  | NM_005102   | 1772.256  | 1815.901  | M36634    | 822.942   |
| 45727     | H-V00536M   | 1446.319  | 1664.629  | NM_004518   | 620.521   | 1037.996  | M14156    | 3089.225  |
| 4756.984  | H-D85429M   | 4919.001  | 5887.113  | NM_002719   | 2255.292  | 1483.907  | U87939    | 1001.954  |
| 815.838   | BF439832    | 2543.815  | 3635.985  | AV752086    | 726.373   | 517.449   | U86961    | 800.479   |
| 49492.023 | BG819162    | 1060.09   | 1095.704  | NM_016102   | 3138.652  | 2608.413  | AK094237  | 1223.316  |
| 1358.937  | NM_017532   | 4501.258  | 6518.16   | NM_004376   | 1304.986  | 1114.747  | SR10      | 15114.514 |
| 1453.297  | M38449      | 5542.753  | 7551.579  | NM_014252   | 3643.975  | 4281.8    | CY3Cy5    | 6229.995  |
| 1257.613  | AK025495    | 831.598   | 3014.566  | NM_001662   | 4650.363  | 6174.403  | M33197    | 57331.719 |
| 1313.093  | AB033044    | 3484.023  | 2955.083  | NM_016131   | 6170.762  | 7378.14   | NM_007369 | 1006.246  |
| 1073.53   | AB014564    | 1871.269  | 1095.093  | NM_006822   | 1333.62   | 1082.758  | NM_014776 | 1872.151  |
| 2772.054  | NM_020230   | 3176.81   | 1812.497  | NM_012142   | 7021.445  | 10867.041 | NM_006480 | 8640.784  |
| 1263.108  | NM_006352   | 2680.961  | 1995.405  | NM_016429   | 990.048   | 1553.28   | NM_007223 | 14382.975 |
| 44103.27  | NM_016430   | 983.081   | 1503.579  | NM_006834   | 2883.052  | 2551.272  | NM_000145 | 737.093   |
| 1135.577  | NM_004447   | 4289.011  | 4997.021  | AB011100    | 1415.006  | 928.851   | AF030107  | 1254.218  |
| 3280.065  | NM_001204   | 1271.93   | 1182.251  | U61741      | 744.137   | 721.94    | NM_000871 | 1007.002  |
| 1767.854  | BF131321    | 645.171   | 724.161   | NM_012402   | 1649.968  | 1500.723  | M33197    | 57095.906 |
| 1401.787  | NM_012116   | 1782.608  | 2068.549  | M76676      | 1360.107  | 1141.099  | NM_018968 | 840.093   |
| 52957.75  | NM_000020   | 2425.175  | 2029.131  | NM_003857   | 424.469   | 491.147   | AF086924  | 21142.074 |
| 1630.21   | NM_000956   | 567.565   | 274.821   | Z83804      | 1096.08   | 1261.572  | AB058740  | 2927.173  |
| 1718.343  | NM_002442   | 2316.664  | 1995.803  | NM_004386   | 1341.508  | 1039.046  | NM_004392 | 892.54    |
| 5620.191  | AB033091    | 8743.045  | 8093.221  | U67784      | 652.756   | 574.314   | NM_015725 | 2221.552  |
| 860.347   | NM_004557   | 4897.278  | 4804.444  | NM_007366   | 957.218   | 961.137   | NM_012455 | 2424.741  |
| 55651.145 | NM_014757   | 3162.264  | 4053.657  | NM_000592   | 438.945   | 577.966   | NM_002806 | 5646.245  |
| 1261.547  | NM_001584   | 1921.363  | 2048.64   | NM_016584   | 5829.849  | 4726.086  | M33197    | 56960.125 |
| 1672.39   | NM_012259   | 30520.947 | 31179.148 | NM_001815   | 923.146   | 863.764   | NM_006564 | 2586.807  |
| 898.07    | AF272357    | 1543.118  | 2784.279  | NM_000064   | 4138.834  | 2972.468  | NM_004802 | 977.702   |
| 62865.105 | NM_016372   | 20615.953 | 20317.354 | NM_003264   | 2439.398  | 1791.528  | M33197    | 53839.324 |
| 15057.339 | AB020705    | 1445.211  | 2117.263  | NM_006725   | 1279.679  | 960.811   | NM_002983 | 661.774   |
| 1164.411  | NM_002980   | 1644.832  | 1630.9    | NM_003326   | 881.111   | 730.731   | NM_000074 | 3017.777  |
| 2122.934  | NM_000482   | 640.35    | 697.122   | NM_004568   | 14649.884 | 11348.104 | BF434335  | 16707.971 |
| 1404.246  | NM_005953   | 15676.663 | 1989.963  | Z25427      | 1711.839  | 1935.619  | M57627    | 332.819   |



|           |           |           |           |             |           |           |           |           |
|-----------|-----------|-----------|-----------|-------------|-----------|-----------|-----------|-----------|
| 7869.569  | NM_016274 | 1898.073  | 4629.409  | NM_004672   | 4802.877  | 6237.823  | NM_003192 | 3170.317  |
| 3274.373  | NM_014946 | 1249.272  | 919.555   | NM_001353   | 2112.44   | 2350.727  | NM_018449 | 2494.881  |
| 2323.161  | AK022750  | 4062.12   | 5037.992  | NM_006214   | 2599.021  | 3241.323  | NM_014458 | 2253.617  |
| 48416.695 | NM_004251 | 5373.582  | 6608.92   | AJ010228    | 3281.083  | 4122.909  | AF235049  | 2502.096  |
| 5713.917  | BF337921  | 1287.422  | 1336.611  | NM_005198   | 3178.582  | 3802.262  | NM_001995 | 938.627   |
| 3622.135  | U53532    | 1647.39   | 1865.06   | NM_018073   | 764.593   | 1076.727  | NM_000183 | 8492.78   |
| 1076.611  | NM_001740 | 3321.607  | 5735.507  | AL137529    | 1317.64   | 1313.404  | AY004175  | 1144.136  |
| 690.668   | NM_012484 | 3750.502  | 5013.703  | NM_012332   | 1109.245  | 1283.102  | M33197    | 59373.777 |
| 3154.11   | AL096732  | 943.309   | 1073.593  | AK026648    | 537.274   | 504.371   | NM_012327 | 2230.03   |
| 1520.956  | AB006423  | 1167.611  | 1345.629  | NM_000497   | 583.413   | 433.944   | NM_000904 | 829.477   |
| 1380.601  | NM_005719 | 65607.531 | 60944.184 | NM_017421   | 479.854   | 443.033   | NM_016048 | 1074.553  |
| 8694.332  | NM_003462 | 22052.732 | 11345.368 | AK025977    | 11091.199 | 11211.713 | NM_000375 | 6455.252  |
| 3878.936  | NM_006093 | 5701.741  | 6075.335  | AK023130    | 3932.937  | 4396.058  | NM_000265 | 3910.682  |
| 54250.629 | NM_000139 | 1602.096  | 1310.019  | NM_000273   | 891.72    | 605.505   | NM_018849 | 2434.87   |
| 2994.004  | NM_006664 | 4490.02   | 3898.987  | NM_002899   | 5437.06   | 4876.132  | M33197    | 36571.473 |
| 660.862   | NM_002728 | 809.948   | 1158.379  | NM_000486   | 1309.09   | 913.208   | NM_002236 | 1257.862  |
| 57414.586 | NM_000450 | 214.991   | 1179.006  | BE876237    | 861.941   | 908.885   | NM_012069 | 2102.61   |
| 1173.71   | NM_000448 | 408.064   | 369.491   | NM_005397   | 555.823   | 316.095   | NM_001689 | 38547.813 |
| 1375.888  | NM_004513 | 4586.824  | 5385.669  | NM_000806   | 6522.576  | 4350.884  | NM_016601 | 652.039   |
| 61965.922 | NM_001708 | 18603.127 | 19566.158 | NM_006320   | 774.255   | 571.281   | NM_017905 | 5924.333  |
| 928.117   | NM_017735 | 1807.671  | 1575.034  | AB014511    | 2125.209  | 1561.402  | M33197    | 55781.695 |
| 1605.95   | AF208291  | 1323.679  | 1051.381  | NM_021976   | 2281.455  | 2180.171  | NM_006815 | 10315.679 |
| 812.466   | NM_004877 | 46899.379 | 41488.109 | NM_005718   | 8157.688  | 11493.754 | NM_001663 | 3218.581  |
| 1489.643  | L10284    | 64135.84  | 56812.699 | NM_018264   | 1065.085  | 1288.847  | NM_004218 | 3967.721  |
| 59821.836 | NM_000276 | 2176.685  | 1562.786  | NM_014580   | 1564.446  | 2571.497  | NM_016530 | 381.786   |
| 1891.568  | AK023701  | 1147.841  | 645.798   | NM_000153   | 454.374   | 552.3     | NM_014804 | 637.96    |
| 1480.309  | NM_003742 | 3642.023  | 3326.772  | NM_002033   | 3578.025  | 2737.926  | L40520    | 1739.244  |
| 1164.245  | NM_005094 | 2571.82   | 2810.226  | NM_004111   | 2195.814  | 1460.529  | NM_002633 | 6249.762  |
| 17588.721 | NM_002335 | 698.956   | 398.598   | AF085966    | 2894.269  | 1717.015  | U11036    | 479.957   |
| 1365.324  | BE382905  | 775.121   | 864.63    | NM_005316   | 1321.186  | 1273.789  | M33197    | 53318.234 |
| 880.854   | NM_002152 | 6906.394  | 6148.302  | NM_016316   | 1954.469  | 1785.353  | NM_002878 | 1764.909  |
| 524.964   | NM_001701 | 375.021   | 721.551   | NM_003369   | 6208.058  | 4753.89   | NM_017723 | 1542.298  |
| 32164.279 | AK022558  | 4730.718  | 3697.369  | NM_000057   | 1561.483  | 1931.225  | AK022922  | 1414.817  |
| 3077.516  | NM_006476 | 44064.078 | 52063.035 | NM_018343   | 2235.349  | 1043.113  | NM_006462 | 2443.6    |
| 1138.707  | AK023787  | 2066.362  | 3794.967  | AK095793    | 692.684   | 1297.778  | AK024750  | 2247.112  |
| 20517.863 | NM_002133 | 1379.908  | 2330.245  | NM_003177   | 2431.778  | 2405.531  | NM_000400 | 10751.242 |
| 1460.35   | NM_015697 | 4144.33   | 3494.872  | NM_017719   | 591.4     | 415.797   | NM_002613 | 2101.118  |
| 964.585   | AF086489  | 331.193   | 465.318   | AF064078    | 731.905   | 534.428   | NM_004419 | 1593.17   |
| 50509.031 | NM_032943 | 1789.088  | 2105.985  | AL049688    | 998.976   | 563.004   | U47635    | 1847.318  |
| 1726.627  | NM_007177 | 5744.136  | 7344.061  | NM_002737   | 1270.965  | 732.019   | NM_018650 | 1448.494  |
| 11017.948 | NM_000809 | 324.546   | 749.979   | NM_002719   | 2241.121  | 1986.41   | AK026945  | 14945.199 |
| 1824.707  | AL359592  | 572.628   | 841.987   | AV752086    | 905.735   | 2217.53   | NM_002828 | 1171.159  |
| 1672.826  | NM_006078 | 6755.351  | 6478.556  | NM_016102   | 3534.649  | 5417.082  | NM_014369 | 1228.957  |
| 1943.529  | NM_017532 | 4574.719  | 5751.203  | NM_004376   | 1330.516  | 2112.385  | M33197    | 54522.734 |
| 909.406   | M38449    | 4647.439  | 4251.586  | NM_006848   | 62393.621 | 72452.789 | NM_001398 | 8538.335  |
| 2672.621  | AK025495  | 1233.901  | 2073.956  | NM_005603   | 15551.711 | 15548.662 | AB050049  | 1873.064  |
| 43518.063 | AK023915  | 3113.059  | 2676.99   | BG744154    | 50254.172 | 53227.422 | NM_015725 | 4164.741  |
| 1583.576  | AB051453  | 2383.242  | 2888.851  | Z11694      | 3478.743  | 4199.136  | R61452    | 1217.626  |
| 713.402   | AK026842  | 596.49    | 780.601   | BF983177    | 616.078   | 450.85    | R19938    | 3473.753  |
| 2225.055  | NM_002395 | 3712.136  | 3761.803  | Z26317      | 1221.924  | 842.307   | N94487    | 6517.502  |
| 608.242   | AB023203  | 988.137   | 1653.493  | X16983      | 6874.651  | 5300.059  | A1886795  | 1458.948  |
| 828.502   | NM_014963 | 2967.058  | 3214.788  | X56160      | 1630.924  | 1744.974  | D10495    | 1775.423  |
| 1175.851  | NM_016271 | 3840.428  | 2842.804  | H-Y 00097 I | 1944.341  | 1372.92   | M14156    | 913.795   |

|           |             |           |           |             |           |           |           |           |
|-----------|-------------|-----------|-----------|-------------|-----------|-----------|-----------|-----------|
| 51059.816 | NM_016619   | 3840.088  | 2881.825  | H-M 59964   | 850.468   | 646.21    | AK094237  | 1029.689  |
| 3389.265  | NM_014481   | 1165.972  | 1376.551  | H-Y 00711 I | 56865.578 | 49032.629 | L07592    | 1211.068  |
| 17802.193 | U22172      | 1814.286  | 1412.28   | H-X 16707 I | 1811.549  | 1408.708  | M33197    | 47824.492 |
| 4428.979  | AB032960    | 1317.891  | 1487.002  | AL038354    | 38914.125 | 17411.568 | AK027244  | 831.908   |
| 4097.044  | NM_014264   | 4286.743  | 4846.772  | R14607      | 1175.593  | 769.29    | NM_018449 | 3030.303  |
| 27875.307 | AF020089    | 1206.376  | 1007.509  | NM_000064   | 3618.652  | 4399.941  | D79994    | 767.885   |
| 1240.066  | NM_006257   | 2900.022  | 3217.194  | NM_003264   | 2237.753  | 2219.249  | NM_014458 | 2857.273  |
| 55740.477 | NM_016281   | 8083.404  | 6784.675  | NM_006725   | 1706.796  | 3727.95   | AF235049  | 4905.024  |
| 2245.931  | NM_004734   | 15522.963 | 15570.148 | NM_003326   | 761.457   | 1034.85   | M33197    | 55652.777 |
| 1304.274  | AK024793    | 1810.901  | 2199.805  | NM_004568   | 12407.586 | 15761.49  | NM_007369 | 1240.583  |
| 26981.686 | AF272357    | 1914.887  | 2496.374  | NM_000202   | 518.318   | 903.054   | NM_014776 | 1500.595  |
| 10237.619 | NM_016372   | 32238.775 | 19791.031 | NM_005496   | 7336.093  | 8765.969  | AF030107  | 698.143   |
| 18219.09  | AB020705    | 1410.004  | 1181.961  | NM_002858   | 3506.938  | 4212.823  | NM_000871 | 639.301   |
| 4633.368  | NM_002980   | 1844.192  | 1032.679  | NM_004817   | 548.151   | 443.189   | M33197    | 49842.754 |
| 49441.297 | NM_015886   | 1366.831  | 1202.47   | NM_018975   | 8267.313  | 8512.6    | AF086924  | 13810.65  |
| 3383.093  | NM_004262   | 579.153   | 746.026   | AB023215    | 5950.661  | 5464.994  | AB058740  | 2204.461  |
| 817.502   | NM_007102   | 47301.441 | 53577.789 | NM_001284   | 28105.504 | 22740.516 | M33197    | 48704.211 |
| 4390.635  | BG491613    | 7741.438  | 7724.531  | NM_003242   | 3568.786  | 2702.95   | NM_001154 | 3318.136  |
| 2462.225  | AA397813    | 24733.65  | 16197.595 | NM_001105   | 1224.614  | 1231.491  | NM_001819 | 989.719   |
| 1665.025  | W47350      | 1384.405  | 720.841   | NM_005585   | 427.5     | 228.575   | M33197    | 56722.914 |
| 44088.086 | W68291      | 17030.383 | 20719.27  | NM_002075   | 1706.436  | 1535.941  | NM_006815 | 12158.47  |
| 1922.532  | N64384      | 2013.199  | 3359.645  | Y08756      | 9489.31   | 6952.097  | NM_001663 | 4438.517  |
| 2397.758  | H-X 53655 I | 991.652   | 847.66    | NM_005563   | 4252.045  | 7413.784  | NM_004218 | 5473.868  |
| 9988.395  | H-U 05770 I | 5299.286  | 16269.187 | NM_005102   | 2037.278  | 2126.17   | NM_016530 | 1099.107  |
| 970.92    | H-M 65199   | 5187.635  | 6312.808  | NM_004518   | 1003.957  | 1162.014  | NM_014804 | 1217.263  |
| 642.267   | H-M 32315   | 3864.73   | 7374.37   | NM_005397   | 602.78    | 547.42    | NM_012455 | 3443.39   |
| 44746.328 | H-V00536M   | 1477.67   | 1321.085  | NM_000806   | 6474.513  | 8429.501  | NM_002806 | 5756.067  |
| 6707.394  | H-D85429M   | 4440.962  | 4440.939  | NM_006320   | 545.646   | 433.163   | NM_006564 | 1768.135  |
| 586.226   | BF439832    | 2691.533  | 3199.832  | AB014511    | 1700.702  | 2177.964  | M33197    | 48276.402 |
| 2144.841  | BG819162    | 952.075   | 1203.651  | NM_014252   | 3232.351  | 3660.179  | NM_002983 | 554.181   |
| 5447.638  | NM_000450   | 1586.489  | 1954.963  | NM_001662   | 3521.208  | 4163.962  | NM_000074 | 2373.664  |
| 863.212   | NM_004513   | 4432.386  | 3483.014  | NM_016131   | 5853.028  | 6766.711  | BF434335  | 13662.181 |
| 1434.995  | NM_001708   | 17218.445 | 13409.123 | NM_006822   | 1093.501  | 1077.929  | AK026946  | 2862.255  |
| 681.114   | NM_017735   | 2196.913  | 1338.947  | NM_012142   | 6520.405  | 9495.923  | M33197    | 34231.465 |
| 1255.558  | AB033044    | 3616.414  | 2985.516  | NM_016429   | 879.712   | 1597.027  | NM_003192 | 2890.004  |
| 1654.97   | AB014564    | 1295.73   | 847.121   | NM_006834   | 2260.135  | 2086.792  | NM_002828 | 1590.367  |
| 965.743   | NM_020230   | 3275.152  | 2113.845  | AB011100    | 1431.991  | 586.294   | NM_014369 | 1195.846  |
| 38475.496 | NM_006762   | 49574.219 | 54040.035 | U61741      | 688.442   | 817.766   | M33197    | 55855.988 |
| 10370.662 | NM_006352   | 1952.714  | 1695.44   | NM_012402   | 1430.209  | 1393.544  | NM_001398 | 11427.015 |
| 1151.154  | NM_016430   | 830.826   | 1426.23   | M76676      | 1588.68   | 1071.215  | AB050049  | 3342.305  |
| 7618.482  | NM_004447   | 4737.463  | 4008.093  | NM_003857   | 603.862   | 634.21    | J05125    | 636.249   |
| 1121.158  | NM_001204   | 1010.198  | 1224.477  | AL137690    | 317.684   | 347.405   | NM_001995 | 1031.963  |
| 203.608   | BF131321    | 709.886   | 713.015   | Z83804      | 1122.96   | 1171.771  | NM_000904 | 703.259   |
| 52129.719 | NM_012116   | 1815.745  | 1927.41   | NM_004386   | 1409.867  | 1055.356  | NM_000375 | 3376.224  |
| 456.33    | NM_000020   | 2180.984  | 2473.585  | U67784      | 861.526   | 761.441   | NM_000265 | 2747.363  |
| 657.272   | NM_000956   | 727.839   | 317.103   | NM_007366   | 1203.614  | 998.206   | NM_018849 | 1329.384  |
| 6682.587  | AB033091    | 7676.965  | 6595.742  | NM_000592   | 617.193   | 588.619   | M33197    | 30452.434 |
| 13448.364 | NM_004557   | 6826.397  | 5429.034  | NM_016584   | 8076.144  | 5540.557  | AF279890  | 1092.108  |
| 572.177   | NM_014757   | 3078.5    | 4208.025  | NM_001815   | 1293.202  | 955.718   | NM_002236 | 1281.937  |
| 415.742   | NM_017893   | 1023.12   | 1351.207  | AK095793    | 884.613   | 1813.999  | NM_012069 | 1294.448  |
| 623.508   | NM_001584   | 1874.37   | 2029.844  | NM_003177   | 2332.776  | 3349.288  | NM_001689 | 30307.406 |
| 44457.648 | AB018258    | 554.042   | 2038.17   | NM_017719   | 487.331   | 393.08    | NM_017905 | 2701.561  |
| 20532.498 | AL359592    | 870.74    | 470.609   | AF064078    | 585.398   | 691.083   | NM_006981 | 673.906   |

|           |           |           |           |           |           |           |           |           |
|-----------|-----------|-----------|-----------|-----------|-----------|-----------|-----------|-----------|
| 1366.176  | NM_006078 | 6166.104  | 5480.142  | AL049688  | 897.606   | 886.099   | M33197    | 58597.336 |
| 833.7     | NM_000482 | 1243.338  | 992.302   | NM_002737 | 1241.713  | 1455.17   | AK027244  | 1218.198  |
| 47667.363 | NM_005953 | 16238.701 | 2390.092  | Z25427    | 1566.863  | 1702.188  | L40520    | 1749.977  |
| 1075.233  | NM_016274 | 1761.622  | 4194.896  | NM_004672 | 4353.073  | 6878.286  | NM_002633 | 4041.146  |
| 1272.079  | NM_014946 | 1138.688  | 713.785   | NM_001353 | 1611.581  | 1606.994  | M33197    | 37874.773 |
| 3420.585  | NM_014251 | 1984.778  | 1409.19   | NM_006214 | 2097.079  | 2494.31   | NM_002878 | 1015.317  |
| 896.762   | AK022750  | 3485.835  | 3733.41   | AJ010228  | 2192.362  | 2734.747  | NM_017723 | 1062.418  |
| 2266.119  | NM_004251 | 3712.985  | 4756.36   | NM_005198 | 3087.994  | 2711.334  | AK022922  | 938.327   |
| 4728.282  | BF337921  | 939.035   | 872.55    | NM_018073 | 916.135   | 945.174   | NM_006462 | 1751.831  |
| 50915.613 | U53532    | 1273.193  | 1303.515  | AL137529  | 1268.375  | 1247.236  | AK024750  | 1556.548  |
| 555.616   | NM_001740 | 3221.209  | 4053.94   | NM_012332 | 1151.873  | 1169.267  | NM_000400 | 12213.602 |
| 596.949   | NM_012484 | 3878.439  | 5451.304  | AK026648  | 684.352   | 501.633   | M33197    | 51985.586 |
| 2071.227  | AB006423  | 1481.75   | 1282.801  | NM_000497 | 953.234   | 732.134   | NM_002613 | 1308.446  |
| 627.983   | NM_003462 | 11985.392 | 7825.229  | AK025977  | 13744.417 | 11570.997 | NM_004419 | 831.979   |
| 47243.781 | NM_006093 | 4578.884  | 5246.032  | AK023130  | 4739.772  | 5109.43   | U47635    | 893.712   |
| 2554.388  | NM_006664 | 5160.447  | 5389.786  | NM_000273 | 872.587   | 754.518   | NM_018650 | 774.166   |
| 9917.305  | NM_014264 | 5822.85   | 4524.776  | NM_002899 | 6466.158  | 5415.977  | AK026945  | 9324.651  |
| 445.504   | AF020089  | 1318.694  | 840.94    | NM_000486 | 1288.695  | 1157.715  | M33197    | 55365.754 |
| 1434.908  | NM_006257 | 3002.677  | 3125.536  | BE876237  | 1063.217  | 974.219   | NM_001154 | 3247.511  |
| 702.508   | NM_016281 | 7768.337  | 6361.849  | NM_014750 | 1260.13   | 2553.147  | NM_001819 | 1403.594  |
| 31013.078 | NM_004734 | 14265.635 | 14297.112 | NM_015912 | 463.287   | 515.156   | NM_015725 | 1982.475  |
| 1250.694  | AK024793  | 1675.372  | 2201.816  | NM_000460 | 1054.11   | 1335.845  | R61452    | 679.38    |
| 1152.408  | AF208291  | 1274.636  | 1353.644  | AB002339  | 964.346   | 1535.538  | AI886795  | 881.122   |
| 550.214   | NM_004877 | 45698.527 | 47402.781 | NM_005104 | 4887.026  | 5619.306  | BF344679  | 927.344   |
| 3030.556  | L10284    | 62707.664 | 51927.719 | NM_006888 | 12211.846 | 15634.691 | AK094237  | 740.996   |
| 2590.28   | NM_000276 | 1727.61   | 952.788   | AL137423  | 2230.07   | 1993.199  | BF434335  | 16369.849 |
| 634.667   | NM_000019 | 57546.898 | 58908.957 | AB018322  | 915.153   | 1126.627  | AK026946  | 1098.638  |
| 1097.646  | AK023701  | 802.793   | 730.411   | NM_007068 | 8594.519  | 10500.104 | M33197    | 51260.73  |
| 7243.297  | NM_003742 | 2835.38   | 3010.966  | NM_005718 | 7555.93   | 9847.768  | NM_003192 | 2846.321  |
| 617.235   | NM_005094 | 2556.464  | 3288.186  | NM_018264 | 1177.282  | 1320.243  | NM_018449 | 2020.506  |
| 17514.701 | BE382905  | 620.806   | 948.038   | NM_014580 | 486.007   | 715.439   | NM_014458 | 1004.78   |
| 1704.571  | NM_002152 | 7407.319  | 6267.885  | NM_000153 | 573.566   | 702.542   | NM_014776 | 1083.259  |
| 548.013   | AK022558  | 4291.908  | 3150.5    | NM_002033 | 4333.866  | 3065.894  | M33197    | 42085.398 |
| 421.61    | NM_006476 | 43923.285 | 48058.805 | NM_004111 | 2760.296  | 1817.518  | NM_018968 | 921.195   |
| 3054.926  | AK023787  | 2060.728  | 4188.202  | AF085966  | 3323.354  | 1869.571  | AF086924  | 12046.439 |
| 1975.411  | NM_002133 | 955.084   | 2509.959  | NM_005316 | 1558.373  | 1437.997  | AB058740  | 1269.548  |
| 26714.881 | NM_015697 | 3808.456  | 3761.558  | NM_016316 | 2022.166  | 2018.345  | AF279890  | 1344.749  |
| 1207.878  | NM_007177 | 7735.983  | 10022.688 | NM_003369 | 8045.644  | 5934.732  | NM_002236 | 951.649   |
| 637.895   | NM_000737 | 2035.959  | 1614.452  | NM_000057 | 2054.564  | 1921.503  | NM_012069 | 1351.806  |
| 2377.412  | NM_001290 | 902.998   | 883.997   | NM_018343 | 2332.949  | 1101.675  | NM_001689 | 37768.695 |
| 8907.713  | AL079273  | 2549.506  | 1759.607  | X15880    | 53298.613 | 62720.926 | NM_017905 | 3794.642  |
| 710.892   | AK026129  | 2217.95   | 2216.584  | AL137461  | 1421.423  | 1361.933  | M33197    | 51614.285 |
| 2622.387  | NM_001743 | 38315.137 | 35673.539 | AF114264  | 3226.637  | 2328.376  | NM_006815 | 7679.864  |
| 46951.754 | AK024200  | 1366.015  | 864.893   | NM_018972 | 1005.45   | 957.694   | NM_001663 | 1585.981  |
| 7397.003  | NM_003713 | 3319.646  | 3223.734  | AB023210  | 503.684   | 871.781   | NM_004218 | 3635.311  |
| 2033.009  | M38449    | 5180.813  | 6040.463  | AB037786  | 1673.871  | 2080.439  | NM_016530 | 719.259   |
| 3570.528  | AK025495  | 747.905   | 2541.639  | NM_003648 | 4796.427  | 6097.475  | NM_002806 | 3371.316  |
| 979.423   | NM_001091 | 830.382   | 1133.409  | AB037735  | 606.737   | 970.177   | M33197    | 52418.469 |
| 507.242   | AK023915  | 3556.896  | 4003.909  | AK002177  | 4071.222  | 2738.122  | NM_006564 | 1342.431  |
| 1378.271  | AB051453  | 2171.262  | 2709.613  | AK024429  | 1347.139  | 2325.355  | M33197    | 34721.473 |
| 3319.308  | AK026842  | 684.308   | 1454.445  | AB000509  | 638.846   | 770.683   | NM_000074 | 3700.673  |
| 26159.412 | NM_002395 | 3183.257  | 3001.326  | AB018314  | 873.054   | 1033.083  | M33197    | 53378.305 |
| 620.428   | AB023203  | 1474.444  | 2808.944  | NM_004378 | 950.622   | 869.195   | NM_002613 | 1970.312  |

|           |           |           |           |           |           |           |           |           |
|-----------|-----------|-----------|-----------|-----------|-----------|-----------|-----------|-----------|
| 952.811   | NM_014963 | 2904.581  | 3321.694  | AJ238899  | 635.265   | 666.929   | NM_004419 | 1262.381  |
| 659.691   | NM_004259 | 911.409   | 951.327   | NM_018037 | 484.62    | 306.605   | U47635    | 1863.741  |
| 1337.645  | NM_016271 | 3831.719  | 2928.026  | NM_001110 | 2987.58   | 1632.327  | NM_018650 | 1365.95   |
| 1187.564  | NM_016619 | 3858.582  | 3279.834  | NM_000841 | 4972.744  | 3631.938  | AK026945  | 11916.311 |
| 4140.811  | NM_014481 | 1458.644  | 1123.435  | NM_001245 | 1513.812  | 1180.429  | NM_002828 | 1256.255  |
| 13176.385 | AB032960  | 1716.766  | 1551.229  | NM_003672 | 20440.176 | 33476.832 | NM_014369 | 1220.202  |
| 1355.366  | NM_017675 | 1321.731  | 1472.602  | NM_002574 | 31700.053 | 52139.598 | M33197    | 59464.77  |
| 1468.568  | NM_015991 | 723.136   | 921.201   | AJ008139  | 2276.846  | 3240.722  | NM_001398 | 10834.843 |
| 1581.232  | NM_005562 | 1058.62   | 1109.768  | NM_004326 | 1136.105  | 1398.523  | AB050049  | 3057.271  |
| 1407.997  | NM_002350 | 2617.716  | 3957.874  | NM_004577 | 1246.753  | 1301.706  | J05125    | 1588.693  |
| 5510.398  | NM_012417 | 1216.714  | 1412.633  | AF007157  | 10401.537 | 10240.438 | NM_005164 | 980.009   |
| 860.276   | NM_002546 | 1255.982  | 1300.854  | D38553    | 1895.43   | 3589.705  | NM_001995 | 968.274   |
| 772.634   | NM_002342 | 3902.98   | 4686.05   | NM_006170 | 2027.996  | 2200.798  | NM_000183 | 7668.565  |
| 47613.355 | D13631    | 1191.405  | 3279.829  | NM_014298 | 9252.406  | 10339.568 | M33197    | 48946.406 |
| 10224.355 | NM_003712 | 3434.914  | 3358.472  | AK001581  | 1440.346  | 1734.657  | NM_012327 | 585.714   |
| 2308.077  | M86841    | 2202.099  | 2588.689  | NM_005862 | 1737.064  | 1306.989  | NM_000904 | 247.556   |
| 538.998   | U56387    | 1041.417  | 1067.976  | NM_000548 | 3199.923  | 3254.395  | NM_000375 | 3584.878  |
| 715.14    | NM_003657 | 749.392   | 545.916   | AB002297  | 1917.563  | 2051.687  | NM_000265 | 3641.812  |
| 594.214   | AL049296  | 4452.207  | 2564.838  | NM_005020 | 19146.113 | 15891.299 | NM_018849 | 2075.524  |
| 550.287   | NM_014471 | 21505.447 | 18345.486 | NM_014077 | 2069.239  | 3143.544  | M33197    | 40155.641 |
| 3744.19   | NM_004397 | 1065.106  | 1099.355  | NM_018412 | 1073.955  | 1054.193  | AF015910  | 17514.369 |
| 934.772   | NM_020238 | 3933.335  | 2556.198  | NM_012329 | 1948.168  | 1821.495  | BC009993  | 1455.321  |
| 1125.813  | D49356    | 635.853   | 739.844   | M14087    | 18773.354 | 17942.279 | M33197    | 55768.824 |
| 1588.307  | AJ250475  | 2499.833  | 1875.488  | AJ272324  | 625.959   | 820.807   | NM_003031 | 2535.49   |
| 447.691   | NM_018579 | 2879.051  | 2571.577  | NM_000885 | 3941.578  | 2344.816  | NM_007170 | 496.268   |
| 1418.68   | NM_006201 | 2945.015  | 1971.97   | M59040    | 2445.955  | 1386.439  | NM_003008 | 1035.32   |
| 696.959   | NM_007110 | 1649.342  | 2049.893  | NM_017582 | 14437.288 | 36575.988 | M33197    | 57857.73  |
| 1975.988  | NM_001255 | 18393.818 | 21618.545 | NM_015239 | 721.533   | 861.745   | AK027244  | 910.232   |
| 421.77    | U50383    | 8807.87   | 5784.27   | AK026962  | 1618.531  | 1855.636  | L40520    | 1153.938  |
| 1448.604  | AK025085  | 5300.536  | 3840.963  | X04366    | 1598.783  | 1836.115  | NM_002633 | 5755.797  |
| 704.174   | NM_016317 | 1193.432  | 972.338   | NM_000505 | 21023.186 | 21285.506 | M33197    | 23623.469 |
| 47780.363 | NM_006290 | 1886.42   | 1657.155  | NM_000666 | 2640.738  | 3226.596  | NM_002878 | 1701.353  |
| 771.703   | AK022290  | 1220.376  | 2057.014  | NM_003481 | 1735.359  | 2764.963  | NM_017723 | 1732.589  |
| 2922.121  | NM_004849 | 7446.725  | 10045.464 | AB046814  | 526.001   | 961.865   | AK022922  | 1963.408  |
| 1725.287  | AL137527  | 6761      | 6217.072  | NM_017664 | 2425.434  | 2545.319  | NM_006462 | 4018.772  |
| 47637.852 | AK026068  | 828.313   | 1907.48   | NM_007059 | 2214.267  | 3714.793  | NM_015885 | 2842.18   |
| 862.903   | J04974    | 13363.038 | 11386.561 | NM_006870 | 2912.298  | 2350.294  | NM_015889 | 47793.922 |
| 6007.002  | NM_007058 | 5171.061  | 3616.839  | NM_007359 | 3972.803  | 2950.929  | M33197    | 57739.309 |
| 3254.116  | NM_000396 | 1466.868  | 14743.36  | L13283    | 443.067   | 414.716   | NM_004276 | 1575.949  |
| 523.268   | NM_001528 | 1435.957  | 1476.073  | NM_013327 | 1669.065  | 1211.41   | NM_002332 | 2607.321  |
| 48950.297 | NM_007014 | 1911.754  | 1739.969  | AF303888  | 4113.301  | 3263.798  | NM_002859 | 1301.708  |
| 768.424   | AL096740  | 852.685   | 772.28    | NM_000077 | 614.917   | 514.038   | NM_005246 | 1426.077  |
| 515.068   | NM_014554 | 2179.633  | 1388.168  | NM_007084 | 1031.411  | 1821.216  | AF161339  | 2076.409  |
| 48470.656 | AK023968  | 1360.201  | 1331.128  | M97191    | 17387.654 | 19634.75  | AK000354  | 1669.239  |
| 2607.142  | NM_004652 | 961.521   | 1144.802  | AK023015  | 894.941   | 765.83    | NM_001510 | 847.088   |
| 2073.486  | NM_006102 | 1142.551  | 938.602   | NM_003457 | 8885.1    | 6948.737  | AK024474  | 5393.02   |
| 46847.277 | AK025425  | 27962.094 | 31485.908 | NM_012391 | 1313.857  | 1729.03   | NM_017901 | 1589.46   |
| 8428.069  | AK025974  | 17959.979 | 17263.906 | NM_005254 | 762.257   | 648.854   | AK023582  | 794.815   |
| 2450.512  | NM_016532 | 1890.6    | 3313.425  | NM_005611 | 606       | 604.519   | NM_000358 | 1216.815  |
| 2695.31   | NM_005781 | 3246.881  | 3655.057  | AF141655  | 844.157   | 936.002   | NM_001930 | 6310.486  |
| 356.515   | BC036740  | 11393.404 | 12344.888 | NM_007345 | 412.937   | 1074.593  | AK025270  | 917.048   |
| 1192.702  | NM_001747 | 27345.023 | 52219.66  | NM_007007 | 6303.555  | 7262.107  | NM_001564 | 1326.98   |
| 1410.039  | NM_001148 | 16291.544 | 18968.404 | NM_006386 | 1379.388  | 2339.968  | M33197    | 42126.348 |

|           |           |           |           |           |           |           |           |           |
|-----------|-----------|-----------|-----------|-----------|-----------|-----------|-----------|-----------|
| 43464.477 | AF242522  | 6408.19   | 6600.096  | NM_006559 | 10717.393 | 10294.123 | AF263537  | 4019.286  |
| 3471.774  | AJ008152  | 1641.972  | 1510.712  | NM_004501 | 37368.305 | 32565.289 | NM_015895 | 2414.635  |
| 15068.614 | NM_004024 | 1861.858  | 874.231   | NM_004966 | 9447.301  | 9415.177  | NM_013374 | 7120.514  |
| 184.076   | X52345    | 18015.457 | 14994.124 | NM_006700 | 1211.929  | 1304.872  | NM_003252 | 2625.151  |
| 1185.045  | NM_006965 | 5177.319  | 2842.267  | NM_006445 | 7436.86   | 9340.726  | NM_014245 | 10207.729 |
| 920.138   | AF027142  | 58954.035 | 49722.254 | NM_012109 | 7394.702  | 4486.511  | M33197    | 54780.828 |
| 47257.938 | S67970    | 1124.603  | 1043.165  | AF019633  | 1108.583  | 854.348   | AL110226  | 53780.027 |
| 2501.777  | AF221520  | 5188.539  | 5548.791  | AB002361  | 3843.073  | 2809.306  | AB046822  | 588.837   |
| 1239.528  | NM_006941 | 25753.717 | 16322.763 | NM_018060 | 3219.63   | 2566.793  | M33197    | 1673.571  |
| 8820.586  | AB037852  | 901.177   | 431.094   | NM_014239 | 1757.443  | 1528.526  | NM_000308 | 1431.858  |
| 876.056   | NM_004349 | 3963.477  | 2691.521  | NM_017662 | 2968.881  | 1647.749  | X69636    | 1209.805  |
| 551.201   | NM_002092 | 11159.983 | 10601.352 | U88837    | 886.054   | 594.247   | M33197    | 51871.66  |
| 28056.754 | NM_018077 | 2576.583  | 1818.502  | NM_017446 | 8527.265  | 3849      | NM_004173 | 5680.28   |
| 826.766   | NM_016839 | 19608.236 | 20306.16  | AK001478  | 5723.859  | 5965.542  | AK023708  | 1124.746  |
| 616.725   | NM_005968 | 58287.398 | 56398.77  | AK025697  | 2524.259  | 3260.752  | M33197    | 32593.082 |
| 4059.748  | AK021416  | 1454.475  | 2719.489  | AK021734  | 2067.883  | 1833.281  | NM_018464 | 9475.197  |
| 1995.484  | NM_018471 | 18745.438 | 20347.039 | BF245026  | 585.638   | 489.907   | D43948    | 1710.696  |
| 1386.571  | NM_003819 | 38024.469 | 14807.222 | D00265    | 18302.059 | 17830.846 | NM_012310 | 3299.652  |
| 3121.601  | NM_006560 | 2949.527  | 2867.371  | NM_004552 | 22577.025 | 31919.869 | BF382116  | 4400.099  |
| 34661.641 | NM_016183 | 2310.444  | 2051.814  | NM_000143 | 2036.891  | 3536.312  | NM_003193 | 9309.607  |
| 1668.068  | NM_004872 | 8117.079  | 9876.615  | AL137294  | 1850.792  | 2191.021  | AF113216  | 935.559   |
| 7600.128  | NM_001958 | 33855.867 | 36315.973 | NM_003743 | 876.401   | 1385.557  | NM_005197 | 3725.182  |
| 1027.58   | NM_004757 | 3880.576  | 1653.044  | NM_001520 | 737.597   | 1192.851  | AL137421  | 37912.012 |
| 37140.156 | NM_018122 | 4350.524  | 2812.487  | NM_017870 | 1233.67   | 1058.646  | M33197    | 51268.559 |
| 764.145   | AF035318  | 1421.019  | 1205.97   | AL133633  | 612.746   | 568.296   | NM_007241 | 744.372   |
| 2194.602  | NM_015456 | 4459.882  | 2648.397  | NM_012252 | 992.148   | 1427.14   | NM_000124 | 842.21    |
| 2426.902  | AK025056  | 3125.355  | 2994.653  | AK026817  | 995.14    | 765.291   | NM_014517 | 1176.334  |
| 1195.368  | AF140710  | 3243.631  | 2962.641  | AL157442  | 15420.933 | 12249.707 | AF288288  | 7419.074  |
| 12323.166 | NM_012088 | 12492.51  | 12390.472 | AB011148  | 1387.996  | 911.856   | NM_017646 | 2525.275  |
| 1348.533  | NM_017947 | 2112.124  | 2064.837  | AL389938  | 27013.326 | 17713.709 | NM_003092 | 6733.946  |
| 1553.071  | NM_002494 | 7189.224  | 6010.395  | NM_001949 | 21715.854 | 12100.385 | M33197    | 51676.996 |
| 1325.988  | M58510    | 6391.678  | 5014.394  | NM_003507 | 677.311   | 781.045   | NM_005861 | 1879.168  |
| 15077.847 | NM_000782 | 1376.598  | 1325.223  | AK026591  | 332.16    | 539.21    | NM_018848 | 2026.65   |
| 51673.109 | BE396003  | 1361.362  | 1161.689  | AK001889  | 1723.57   | 2066.125  | NM_003760 | 3109.405  |
| 1239.484  | AK023300  | 1301.583  | 865.619   | AK025726  | 1376.604  | 1987.064  | AB037759  | 645.748   |
| 704.31    | NM_018082 | 3122.929  | 2388.29   | AJ227869  | 1726.332  | 932.248   | AK025998  | 2182.412  |
| 941.348   | NM_003904 | 6352.772  | 2406.547  | AL117613  | 6732.963  | 8033.373  | AL080080  | 5816.382  |
| 441.999   | NM_006234 | 20033.602 | 33535.082 | AL137753  | 2598.04   | 4208.38   | NM_018482 | 1568.776  |
| 1382.629  | AB028987  | 4270.518  | 3450.997  | AL110262  | 12147.992 | 12871.315 | NM_017880 | 1196.37   |
| 1558.62   | NM_003594 | 1685.1    | 1291.698  | AK025627  | 16515.924 | 25359.395 | AF090945  | 2364.007  |
| 993.448   | NM_005521 | 3992.201  | 3589.882  | AF216077  | 2758.242  | 2586.415  | M33197    | 55250.094 |
| 987.561   | AF164438  | 8798.482  | 7760.428  | AF086238  | 734.319   | 638.111   | NM_004044 | 2313.403  |
| 1274.753  | AK022284  | 902.497   | 1007.509  | AK021612  | 12451.787 | 16077.027 | NM_000221 | 4330.743  |
| 1046.537  | AB040893  | 2237.645  | 1682.602  | AK002025  | 19235.244 | 17258.393 | H75678    | 1064.248  |
| 919.889   | AK025844  | 1086.113  | 1117.751  | AK026299  | 926.896   | 857.433   | NM_002535 | 193.307   |
| 7000.918  | AL137727  | 2368.969  | 2080.036  | NM_017794 | 1556.995  | 1532.873  | M33197    | 1249.759  |
| 16384.777 | L17327    | 1461.832  | 1452.602  | AK025170  | 2601.793  | 2662.962  | NM_002198 | 720.633   |
| 906.943   | AF074986  | 1132.665  | 1382.452  | AB033031  | 1261.948  | 1215.181  | AF024693  | 566.481   |
| 462.111   | AL049240  | 2887.712  | 2684.714  | AF085872  | 7527.312  | 8650.267  | AK025905  | 940.199   |
| 659.485   | U80773    | 2065.534  | 2078.227  | AK022538  | 10274.028 | 9119.318  | AL121733  | 793.82    |
| 592.25    | AK021745  | 1363.774  | 1008.007  | AF147420  | 808.076   | 1372.669  | BE958072  | 834.656   |
| 35380.449 | L38937    | 6204.351  | 5063.276  | AL049312  | 1249.601  | 1454.78   | M33197    | 37187.754 |
| 1429.3    | AK024327  | 1562.166  | 804.909   | AL050072  | 3123.895  | 4252.86   | NM_014480 | 1673.154  |

|           |           |           |           |           |           |           |           |           |
|-----------|-----------|-----------|-----------|-----------|-----------|-----------|-----------|-----------|
| 19203.971 | AK021700  | 508.391   | 504.057   | AL117590  | 671.916   | 714.117   | NM_00593E | 391.314   |
| 2819.498  | AK000801  | 2853.87   | 2407.7    | AL049357  | 4507.869  | 4785.264  | NM_01416E | 3936.295  |
| 1220.223  | D85433    | 4261.553  | 4344.725  | AL110223  | 468.583   | 510.703   | NM_004964 | 11339.785 |
| 921.143   | AF086184  | 6292.632  | 5144.077  | AK027180  | 5690.53   | 4670.155  | AL117497  | 1548.537  |
| 1602.941  | NM_01827E | 2937.306  | 2834.63   | NM_004544 | 6988.782  | 5213.455  | AF075016  | 982.729   |
| 10308.801 | AL049266  | 2497.544  | 2464.927  | AF086041  | 781.132   | 582.362   | M33197    | 53943.25  |
| 421.719   | AF007149  | 738.657   | 743.583   | Y15167    | 399.576   | 402.717   | AF147360  | 238.987   |
| 2100.771  | AK001469  | 1272.953  | 901.755   | AL133080  | 1984.266  | 1640.536  | AL137269  | 1593.673  |
| 40430.941 | AK021627  | 1433.179  | 1533.955  | NM_01779Z | 1453.333  | 1224.832  | Y11681    | 2223.865  |
| 3189.457  | NM_01959E | 694.992   | 544.19    | AK025213  | 3254.495  | 3892.26   | AL110135  | 6349.92   |
| 534.508   | AF085859  | 3263.307  | 4366.851  | NM_01494E | 1858.536  | 1127.545  | NM_00699Z | 3436.622  |
| 785.578   | AK026307  | 879.748   | 467.716   | AL080221  | 1182.946  | 941.311   | M33197    | 51717.23  |
| 2240.259  | AL049975  | 2892.899  | 1523.434  | AF009262  | 3465.991  | 4234.838  | AF086429  | 2102.828  |
| 3300.413  | AL080067  | 753.953   | 508.955   | AF050198  | 863.379   | 1525.507  | NM_01906C | 979.205   |
| 1048.906  | AL117464  | 4065.285  | 3082.482  | AK024346  | 1972.344  | 1748.087  | AF086377  | 1395.744  |
| 755.328   | AL080160  | 788.065   | 645.964   | AF056422  | 810.355   | 843.209   | AF086439  | 1852.971  |
| 4128.219  | L23849    | 515.023   | 749.88    | AF090892  | 735.937   | 1123.609  | M33197    | 55363.59  |
| 900.34    | AL157477  | 3125.98   | 3304.042  | AK001919  | 867.485   | 1318.252  | AF038171  | 678.139   |
| 46550.18  | AB002318  | 2282.842  | 1442.66   | AK021535  | 909.374   | 1145.017  | AF052160  | 891.208   |
| 2036.389  | AL357535  | 1824.716  | 1876.841  | AK021753  | 4598.471  | 4861.771  | AK026512  | 1751.442  |
| 46929.512 | AL049951  | 1205.442  | 1114.997  | AK001139  | 2124.019  | 3018.757  | M33197    | 56602.125 |
| 1507.261  | AK024963  | 776.628   | 1087.497  | AK002090  | 1066.541  | 916.439   | AF144233  | 2735.359  |
| 711.157   | AK023725  | 1649.449  | 2826.361  | AK021822  | 572.189   | 454.81    | M33197    | 46387.055 |
| 779.59    | AK022936  | 3294.622  | 2974.29   | AK025246  | 4643.421  | 4239.1    | AL137390  | 689.664   |
| 4715.338  | AK024385  | 1926.444  | 2233.339  | AK025847  | 2738.98   | 2660.986  | AL137611  | 1547.505  |
| 750.922   | NM_01770E | 942.426   | 564.316   | AK026442  | 595.525   | 612.21    | AL359566  | 9336.701  |
| 2451.047  | AF049615  | 825.645   | 427.37    | NM_014174 | 3827.175  | 5486.715  | AL137427  | 1748.496  |
| 776.486   | NM_01435E | 15027.329 | 10821.107 | AF147337  | 1953.876  | 3620.726  | AL157460  | 4093.281  |
| 730.854   | AF009282  | 3653.072  | 2360.232  | AK025203  | 45957.98  | 50205.555 | AL359595  | 411.83    |
| 3942.605  | AF024704  | 6318.957  | 4682.102  | AK026981  | 2107.046  | 3757.46   | M33197    | 49222.125 |
| 3852.394  | AF056431  | 1307.479  | 1018.902  | AK023819  | 545.263   | 1303.925  | AK026718  | 1062.94   |
| 46665.949 | AF009293  | 1274.917  | 741.766   | AL133656  | 1648.529  | 2178.415  | AF085899  | 626.885   |
| 2811.695  | NM_00415E | 62088.566 | 54192.727 | AL050037  | 6618.208  | 7886.47   | AK022035  | 9789.684  |
| 4937.68   | AF056444  | 3997.985  | 3343.107  | NM_001417 | 24569.424 | 14770.858 | M33197    | 57015.859 |
| 1254.264  | AK000989  | 1394.672  | 1596.654  | AK022236  | 2061.759  | 1972.964  | NM_004337 | 1227.794  |
| 1539.577  | AK002210  | 2594.964  | 3734.429  | AK000073  | 645.851   | 470.387   | AK022141  | 812.34    |
| 11505.792 | AK021677  | 1162.078  | 1695.968  | AK000618  | 883.177   | 615.13    | AK023942  | 30884.377 |
| 47520.254 | AK001057  | 1049.908  | 1306.88   | AK024773  | 463.238   | 642.888   | M33197    | 49755.949 |
| 1201.841  | AK001808  | 501.34    | 942.121   | AL390180  | 1329.78   | 1458.483  | AK027207  | 962.062   |
| 35360.418 | AK021471  | 733.963   | 823.174   | X60484    | 979.498   | 2440.739  | AF083120  | 740.975   |
| 633.538   | AK021709  | 631.404   | 635.453   | AF055019  | 1402.207  | 2509.499  | AJ227892  | 2943.322  |
| 983.207   | AK025109  | 2295.672  | 2801.736  | NM_00352E | 5865.727  | 54554.484 | M33197    | 31170.523 |
| 2274.019  | AK026267  | 2917.446  | 2602.972  | AK000229  | 761.013   | 1692.764  | AK022155  | 1181.432  |
| 39481.434 | AK026713  | 702.83    | 984.853   | AF056432  | 1342.698  | 1333.209  | AK022288  | 616.769   |
| 1699.116  | AJ008117  | 9990.191  | 7179.283  | AK001987  | 26808.537 | 24824.92  | AK021916  | 856.428   |
| 3283.23   | AJ008147  | 18333.762 | 12826.37  | NM_01333Z | 1357.953  | 1709.638  | AK024201  | 1462.409  |
| 42106.32  | AK024369  | 3104.536  | 1371.151  | X56199    | 2504.038  | 3806.713  | AK022174  | 1125.216  |
| 2263.159  | L43345    | 833.275   | 558.598   | NM_00519Z | 2246.671  | 2784.524  | M33197    | 55804.66  |
| 1121.311  | AF180297  | 4025.582  | 3318.369  | AL162006  | 994.236   | 1337.621  | AK021589  | 673.481   |
| 697.089   | AK023245  | 6858.864  | 5929.672  | NM_017971 | 27259.623 | 39198.289 | D17152    | 6502.167  |
| 996.579   | AF086224  | 936.814   | 628.678   | AF090097  | 1862.611  | 2708.086  | AK024464  | 8186.435  |
| 1303.992  | S56365    | 58516.59  | 59071.27  | AF116620  | 7927.85   | 4811.848  | AK025423  | 725.2     |
| 6187.149  | AK023607  | 2214.84   | 3043      | AF293335  | 36857.824 | 32125.748 | M33197    | 54783.629 |

|           |           |           |           |           |           |           |           |           |
|-----------|-----------|-----------|-----------|-----------|-----------|-----------|-----------|-----------|
| 1773.959  | AK024118  | 678.484   | 839.492   | AK024431  | 3997.58   | 4020.747  | AL080134  | 538.316   |
| 498.484   | X89657    | 1056.831  | 1286.478  | X96644    | 2857.666  | 1057.458  | AL049846  | 743.444   |
| 35793.898 | AK024509  | 1533.404  | 2291.09   | Z34281    | 14210.751 | 12303.934 | AK024161  | 428.997   |
| 1015.958  | NM_017847 | 3147.587  | 1928.928  | NM_018678 | 46002.512 | 44668.434 | AK021682  | 17757.311 |
| 16716.182 | AL049675  | 1955.06   | 1557.12   | AJ008122  | 25180.951 | 22568.49  | AJ012500  | 1566.753  |
| 360.595   | AL050151  | 1033.966  | 739.809   | AK022667  | 9599.436  | 12122.896 | U00944    | 631.898   |
| 1095.355  | NM_003537 | 30150.828 | 33381.926 | AK026667  | 467.486   | 595.642   | BC035058  | 1191.626  |
| 636.244   | AF056419  | 21226.115 | 19077.76  | AF113211  | 1561.566  | 2157.767  | X57566    | 2129.713  |
| 799.668   | AF074983  | 1510.361  | 1752.716  | AL117568  | 948.689   | 2014.082  | M33197    | 53399.305 |
| 1187.662  | AK021862  | 746.522   | 794.574   | S71805    | 541.523   | 510.957   | NM_018616 | 2653.508  |
| 450.828   | AK024177  | 2484.542  | 2851.335  | NM_018391 | 986.196   | 1880.229  | AK023809  | 902.152   |
| 2937.177  | AK024827  | 11839.435 | 18827.063 | AK022140  | 2101.463  | 1556.085  | M87943    | 56404.48  |
| 213.877   | AK021952  | 2152.548  | 1899.458  | AK023372  | 26065.248 | 25284.463 | U28131    | 40448.555 |
| 648.959   | K01564    | 1469.013  | 1362.99   | U21072    | 2396.875  | 3412.209  | AY007106  | 5974.593  |
| 47236.234 | AB023175  | 1031.845  | 662.474   | AK024377  | 626.856   | 1100.374  | M33197    | 54749.918 |
| 1299.685  | AL359563  | 922.044   | 902.37    | AK023557  | 535.209   | 747.354   | AL049299  | 614.866   |
| 780.727   | NM_005304 | 264.009   | 836.939   | AK027107  | 679.704   | 892.765   | NM_006088 | 42105.992 |
| 223.759   | NM_014477 | 1446.185  | 1848.668  | AB040887  | 2101.765  | 1731.097  | NM_018265 | 1030.505  |
| 25288.967 | AF086022  | 1396.463  | 1769.059  | AK025196  | 3324.399  | 2571.385  | AF130086  | 2198.736  |
| 1998.334  | AK021514  | 52689.281 | 49389.66  | AK000401  | 1026.136  | 709.081   | AK023858  | 5466.298  |
| 51279.563 | AJ008134  | 1580.824  | 2062.705  | AF305068  | 722.526   | 579.886   | M33197    | 51365.41  |
| 12780.506 | S71486    | 2056.088  | 2971.06   | D17231    | 19815.775 | 18886.301 | AF250920  | 2866.543  |
| 1151.837  | L33808    | 15871.687 | 23499.498 | AF531295  | 1099.041  | 1379.702  | NM_017733 | 1635.722  |
| 917.812   | D31886    | 2569.827  | 1523.057  | CY3Cy5    | 1062.249  | 108.042   | NM_014042 | 3266.421  |
| 2576.086  | AK023330  | 2872.598  | 2038.761  | BF974315  | 3005.441  | 1387.443  | M33197    | 53539.152 |
| 1160.417  | AF075071  | 1365.175  | 1705.442  | AI652705  | 1972.877  | 1786.235  | NM_003543 | 262.991   |
| 3314.114  | AF001892  | 848.631   | 1333.656  | AA569974  | 2750.971  | 1433.677  | M33197    | 51268.52  |
| 28004.375 | X93500    | 2326.88   | 2552.214  | AA446028  | 1266.549  | 830.109   | AK022372  | 1266.414  |
| 50242.445 | U79271    | 2082.007  | 1842.071  | M80583    | 977.417   | 1210.958  | NM_015916 | 2170.974  |
| 398.01    | NM_019888 | 1029.682  | 836.636   | AW009565  | 2500.28   | 4030.665  | NM_003520 | 431.3     |
| 24571.756 | AK024609  | 5750.381  | 4417.973  | X07767    | 2314.666  | 3986.048  | AL137380  | 1746.927  |
| 1072.476  | NM_018120 | 5217.994  | 5384.007  | AF252284  | 2351.937  | 3720.649  | M33197    | 56496.977 |
| 40757.156 | AK026874  | 3509.865  | 7174.613  | SR5       | 2146.35   | 2445.769  | AL137658  | 14027.232 |
| 7941.78   | AK024178  | 732.345   | 698.736   | SR7       | 2878.124  | 38319.137 | D16888    | 4204.728  |
| 534.375   | D17217    | 1541.944  | 1944.186  | SR9       | 8792.201  | 1358.65   | U79277    | 534.338   |
| 2283.409  | AF088033  | 1739.305  | 1734.779  | CY3Cy5    | 2209.256  | 140.125   | AF068298  | 3204.168  |
| 1208.597  | NM_020422 | 1826.88   | 2255.891  | NM_016511 | 8885.995  | 3780.564  | Z70770    | 3030.36   |
| 1146.571  | AJ227897  | 260.394   | 1002.254  | NM_003559 | 894.366   | 870.325   | AJ227900  | 4265.965  |
| 51113.855 | AY007156  | 1965.281  | 2648.54   | M33197    | 63141.758 | 57250.805 | M33197    | 54682.125 |
| 17887.213 | AF086408  | 47824.938 | 55899.547 | NM_013229 | 728.433   | 678.021   | AK024101  | 970.598   |
| 30961.576 | CY3Cy5    | 8199.793  | 630.315   | NM_016533 | 22495.615 | 19100.613 | B1762229  | 1544.615  |
| 511.101   | U13738    | 1220.654  | 1759.701  | NM_014751 | 6012.177  | 5861.92   | BG618320  | 874.493   |
| 666.816   | H94487    | 1642.026  | 1995.428  | NM_002347 | 16930.775 | 18356.055 | Y00787    | 824.724   |
| 589.043   | BG681747  | 26051.35  | 8294.205  | AB046807  | 1288.151  | 1352.277  | NM_007276 | 1222.724  |
| 1761.997  | H63077    | 2593.544  | 13166.078 | M33197    | 59215.375 | 63072.988 | N34462    | 939.433   |
| 7246.918  | AA679352  | 22148.939 | 10415.739 | M30629    | 1507.295  | 1227.396  | AI658778  | 887.64    |
| 2036.629  | AA437291  | 595.315   | 602.328   | AF193873  | 2411.24   | 2600.233  | L19067    | 1102.146  |
| 43289.008 | X04503    | 2532.093  | 2173.961  | NM_002628 | 1014.989  | 934.094   | W60413    | 447.062   |
| 765.777   | D45917    | 1699.466  | 3876.193  | M33197    | 60292.113 | 58156.934 | B1823365  | 542.17    |
| 816.088   | X52001    | 2316.339  | 3026.984  | NM_015717 | 1028.136  | 629.216   | X06318    | 1394.871  |
| 1014.863  | B1823872  | 9072.155  | 4073.021  | NM_013323 | 5217.857  | 5276.606  | AL834159  | 933.701   |
| 20103.186 | AA430552  | 2500.83   | 3218.207  | NM_017426 | 1186.869  | 1807.875  | NM_000164 | 4669.009  |
| 455.501   | X66142    | 2145.498  | 2334.221  | M33197    | 528.799   | 907.149   | SR5       | 3092.405  |

|           |           |           |           |           |           |           |           |           |
|-----------|-----------|-----------|-----------|-----------|-----------|-----------|-----------|-----------|
| 3949.277  | R45054    | 3553.459  | 3644.97   | NM_000853 | 1474.981  | 1030.004  | SR9       | 10561.447 |
| 463.296   | NM_000620 | 603.656   | 649.233   | AF016903  | 18117.637 | 22335.391 | CY3Cy5    | 5164.786  |
| 4490.811  | NM_000905 | 6843.37   | 8605.221  | NM_015675 | 4123.986  | 4600.503  | NM_001782 | 294.791   |
| 1650.706  | SR5       | 4764.364  | 5993.463  | NM_016040 | 1187.52   | 629.281   | NM_000797 | 1068.232  |
| 1207.868  | SR7       | 5909.294  | 57702.164 | NM_012483 | 5141.973  | 5175.03   | NM_014927 | 605.187   |
| 293.444   | SR9       | 21917.488 | 5647.672  | NM_003498 | 2044.664  | 2355.637  | NM_016293 | 5660.514  |
| 1041.455  | CY3Cy5    | 4283.104  | 190.193   | AB023420  | 4105.6    | 3930.533  | AL080148  | 2984.971  |
| 486.565   | AF312769  | 752.16    | 755.653   | NM_007342 | 2933.715  | 1744.868  | NM_014061 | 260.101   |
| 426.339   | AB020668  | 1535.439  | 1798.282  | D25217    | 8440.674  | 3997.08   | NM_004950 | 1169.746  |
| 694.22    | NM_013261 | 510.687   | 472.161   | NM_006351 | 3136.329  | 1476.019  | NM_000724 | 1761.632  |
| 9507.602  | AF309553  | 5658.91   | 4776.577  | M33197    | 42126.02  | 32061.373 | NM_003060 | 783.877   |
| 996.113   | NM_003605 | 4164.711  | 3981.942  | NM_004683 | 7781.354  | 3038.794  | NM_004317 | 1625.404  |
| 1383.849  | NM_003993 | 3806.488  | 3412.388  | M33197    | 41420.254 | 43379.852 | NM_014645 | 865.259   |
| 264.121   | NM_018961 | 977.291   | 1175.269  | NM_001467 | 1158.296  | 1125.999  | NM_014708 | 1216.754  |
| 707.779   | NM_005586 | 3227.814  | 3720.17   | NM_018066 | 20925.244 | 25677.809 | NM_003693 | 373.157   |
| 35226.121 | NM_012242 | 2770.789  | 1408.067  | NM_006931 | 2586.429  | 2575.214  | NM_000356 | 6241.271  |
| 1679.493  | NM_006896 | 806.549   | 966.73    | NM_020344 | 5152.581  | 5646.414  | NM_018134 | 10347.848 |
| 1051.767  | NM_001130 | 34503.762 | 41828.477 | NM_005050 | 2375.47   | 2749.893  | NM_013247 | 1446.084  |
| 4571.047  | NM_002975 | 25929.637 | 14641.04  | M33197    | 56853.664 | 59410.051 | NM_006770 | 732.962   |
| 9342.319  | AK023511  | 3969.09   | 4177.046  | NM_018976 | 6067.801  | 4021.356  | NM_004703 | 642.102   |
| 4882.536  | NM_014556 | 2615.218  | 2529.547  | NM_003355 | 3659.822  | 2475.964  | NM_001512 | 482.704   |
| 494.505   | NM_002725 | 747.863   | 602.31    | NM_005074 | 1375.307  | 1327.716  | NM_014706 | 1646.89   |
| 35776.895 | NM_014375 | 7907.592  | 6573.779  | NM_004558 | 2045.712  | 1121.907  | AJ001348  | 502.41    |
| 612.949   | NM_017812 | 10503.944 | 5239.052  | AL079296  | 776.41    | 541.42    | NM_014007 | 601.097   |
| 518.261   | AF204173  | 849.903   | 1156.061  | NM_014770 | 1491.581  | 1107.544  | AB033006  | 1869.02   |
| 29160.131 | J03260    | 1522.549  | 1809.61   | M33197    | 69172.281 | 62881.895 | AF020314  | 6475.953  |
| 42278.137 | AB014514  | 3119.979  | 3065.608  | AK023103  | 1584.352  | 1516.83   | NM_016332 | 2857.399  |
| 1813.358  | NM_002865 | 4097.14   | 4551.109  | NM_017858 | 1570.594  | 1802.209  | NM_006457 | 427.668   |
| 596.854   | NM_003566 | 1562.703  | 1163.209  | NM_019059 | 43179.262 | 24998.619 | NM_012105 | 608.557   |
| 39862.992 | NM_003731 | 7703.092  | 8541.299  | D80008    | 750.496   | 1146.011  | S82470    | 721.427   |
| 1687.22   | NM_005446 | 3587.999  | 3491.354  | AK001069  | 44521.984 | 42730.637 | AB028982  | 1360.604  |
| 6917.101  | NM_013292 | 3308.041  | 3049.154  | NM_000935 | 829.965   | 982.092   | NM_002004 | 1712.039  |
| 376.85    | NM_002387 | 2792.778  | 2511.45   | NM_000359 | 6485.403  | 7390.96   | NM_001643 | 4731.323  |
| 2194.907  | NM_000069 | 827.462   | 779.308   | NM_006395 | 3985.62   | 3645.021  | NM_020221 | 544.336   |
| 4478.927  | AB023217  | 790.218   | 669.326   | NM_014306 | 3051.55   | 3430.828  | NM_000747 | 1131.741  |
| 37129.469 | L08902    | 874.833   | 791.008   | NM_001084 | 1847.312  | 1584.977  | NM_005415 | 875.751   |
| 1957.393  | J02639    | 2468.959  | 2571.306  | NM_015983 | 1149.017  | 946.742   | AJ275973  | 4513.653  |
| 17871.549 | NM_007263 | 15828.134 | 8298.422  | NM_018622 | 3145.495  | 3852.646  | NM_006493 | 1380.021  |
| 1357.907  | AF206020  | 1568.661  | 1228.248  | M33197    | 59614.363 | 55735.359 | U76362    | 1326.438  |
| 27229.357 | NM_014410 | 2015.499  | 1804.95   | NM_005867 | 2521.593  | 2617.586  | AL832292  | 1960.833  |
| 14501.377 | AF305835  | 771.718   | 668.949   | AK026031  | 6667.127  | 5808.109  | NM_003045 | 2585.873  |
| 619.087   | NM_002150 | 3247.05   | 3593.698  | NM_016468 | 3296.976  | 2574.327  | NM_002618 | 979.488   |
| 891.371   | NM_004595 | 6307.387  | 5796.325  | AF193873  | 1541.754  | 900.258   | L27479    | 343.928   |
| 2897.624  | NM_020178 | 848.52    | 758.133   | NM_002628 | 856.561   | 598.795   | NM_002193 | 841.212   |
| 36506.078 | NM_002264 | 1588.232  | 1326.386  | BF974315  | 2594.049  | 1273.912  | NM_001388 | 3031.544  |
| 1169.745  | NM_014754 | 15439.05  | 12768.206 | AI652705  | 2098.63   | 1749.974  | X76770    | 1595.385  |
| 2515.472  | D49387    | 1326.468  | 1442.049  | AA569974  | 2572.702  | 1593.333  | AB037808  | 1473.812  |
| 518.984   | AF050146  | 2816.816  | 3128.564  | AA446028  | 1098.539  | 1156.215  | NM_016038 | 1244.578  |
| 30118.838 | NM_000116 | 2971.284  | 2280.777  | M80583    | 904.52    | 1235.034  | Z36821    | 1567.45   |
| 1019.762  | NM_006698 | 5840.566  | 10353.886 | X07767    | 1579.683  | 2854.943  | AF289485  | 1206.756  |
| 6169.852  | NM_006804 | 7689.853  | 8851.964  | AF252284  | 2238.823  | 2597.412  | AF130092  | 572.454   |
| 10308.308 | NM_015969 | 6050.006  | 6097.641  | M33197    | 2813.312  | 2905.418  | NM_016095 | 1252.848  |
| 601.752   | NM_003051 | 3105.03   | 3014.977  | AL050139  | 3693.288  | 3556.367  | AK024794  | 572.925   |



|           |           |           |           |           |           |           |           |           |
|-----------|-----------|-----------|-----------|-----------|-----------|-----------|-----------|-----------|
| 47075.773 | NM_001133 | 590.761   | 487.715   | NM_006597 | 27496.539 | 11551.076 | NM_019853 | 1174.226  |
| 6828.714  | NM_145342 | 4593.514  | 5209.269  | NM_012483 | 4092.337  | 3013.396  | NM_017992 | 2280.179  |
| 2582.352  | AJ278917  | 5271.229  | 6617.166  | NM_003498 | 2174.239  | 1590.779  | NM_007255 | 742.297   |
| 794.185   | AK025641  | 27193.438 | 29428.398 | AB023420  | 4255.34   | 3132.914  | NM_003668 | 3602.869  |
| 946.718   | AK025886  | 1384.563  | 1357.454  | NM_016511 | 9328.844  | 5235.112  | NM_013384 | 24753.918 |
| 679.232   | NM_001720 | 7807.042  | 4576.421  | NM_003559 | 767.848   | 1182.249  | NM_001187 | 597.518   |
| 875.004   | NM_018390 | 2424.197  | 1699.214  | M33197    | 63250.414 | 64563.012 | NM_018241 | 1174.671  |
| 25433.711 | AB037724  | 5282.449  | 7221.566  | NM_013229 | 696.447   | 1064.261  | NM_005834 | 1797.131  |
| 569.353   | AK025086  | 963.477   | 1293.595  | NM_016533 | 19706.197 | 26867.773 | NM_000724 | 955.892   |
| 594.161   | AK026151  | 4570.316  | 5865.235  | NM_014751 | 4084.386  | 2833.031  | NM_002557 | 2079.354  |
| 46450.012 | NM_014140 | 2556.177  | 3421.386  | NM_002347 | 10511.367 | 8376.901  | BI762229  | 1068.347  |
| 47320     | NM_002916 | 2127.886  | 1822.534  | AB046807  | 821.453   | 593.724   | BG618320  | 683.09    |
| 3567.639  | M20700    | 2430.938  | 3034.393  | M33197    | 55116.641 | 60759.043 | Y00787    | 623.811   |
| 47237.094 | NM_001034 | 5246.362  | 2358.594  | M30629    | 2283.766  | 3890.291  | NM_007276 | 1252.508  |
| 459.337   | NM_002689 | 1624.839  | 1545.626  | M33197    | 62664.094 | 44089.996 | N34462    | 573.292   |
| 36819.879 | NM_017686 | 1786.741  | 2927.861  | NM_018976 | 6400.187  | 2950.301  | AI658778  | 769.682   |
| 499.466   | AK000800  | 2904.448  | 2149.918  | NM_003355 | 4441.878  | 2250.321  | L19067    | 681.345   |
| 935.839   | NM_018154 | 2459.145  | 1728.187  | NM_005074 | 712.815   | 588.2     | Z48482    | 667.168   |
| 1578.958  | NM_005358 | 412.714   | 559.505   | NM_013272 | 472.904   | 377.507   | W60413    | 564.535   |
| 18826.227 | BC006287  | 5163.769  | 4101.087  | NM_018057 | 963.9     | 836.711   | BI823365  | 669.844   |
| 899.495   | AB023198  | 5755.617  | 6168.714  | NM_015717 | 1281.434  | 875.616   | X06318    | 1013.812  |
| 1340.373  | AF304163  | 18974.18  | 55998.383 | NM_015925 | 642.477   | 859.483   | AL834159  | 1493.728  |
| 347.61    | NM_005231 | 5711.672  | 3639.012  | NM_013323 | 6443.516  | 7481.168  | NM_000164 | 8394.946  |
| 46486.871 | AF064729  | 1364.61   | 1608.524  | NM_017426 | 1375.175  | 2066.711  | NM_016217 | 6928.68   |
| 1092.922  | NM_005412 | 20528.35  | 9302.482  | M33197    | 663.91    | 923.39    | AK025971  | 3141.82   |
| 725.916   | NM_012113 | 2138.492  | 2015.179  | NM_000853 | 1373.298  | 1173.181  | NM_014007 | 383.005   |
| 798.571   | NM_002725 | 751.128   | 814.397   | AF016903  | 9029.248  | 9068.929  | AB033006  | 1384.994  |
| 820.732   | NM_017812 | 11596.562 | 9276.969  | NM_015675 | 2550.375  | 2443.476  | AF020314  | 4491.528  |
| 40449.664 | AF204173  | 1023.306  | 1982.767  | AF031136  | 29415.74  | 40086.578 | NM_016332 | 2080.04   |
| 964.247   | J03260    | 1652.656  | 2191.822  | NM_015983 | 931.775   | 531.523   | NM_006314 | 1583.951  |
| 944.84    | U13738    | 855.802   | 1413.137  | NM_018622 | 3408.581  | 3010.271  | NM_000797 | 1259.122  |
| 177.251   | AF068236  | 26102.865 | 29142.949 | M33197    | 64162.848 | 53248.32  | NM_016293 | 6113.304  |
| 1246.967  | H94487    | 1150.339  | 1499.387  | NM_005867 | 3380.048  | 2831.892  | AF217525  | 722.404   |
| 44653.102 | BG681747  | 25077.998 | 7647.802  | AK026031  | 6598.66   | 4477.494  | AL080148  | 2471.701  |
| 9677.746  | H63077    | 2213.584  | 10547.41  | NM_016468 | 3312.741  | 2142.612  | NM_018487 | 196.894   |
| 2328.614  | AA679352  | 19263.967 | 8783.716  | NM_007342 | 3009.899  | 2980.068  | NM_020134 | 558.077   |
| 280.022   | AA437291  | 582.503   | 602.672   | NM_006351 | 3063.039  | 2020.192  | NM_014061 | 201.317   |
| 573.096   | X04503    | 2636.064  | 2250.749  | M33197    | 40505.141 | 42426.926 | BC034395  | 484.361   |
| 1697.064  | D45917    | 1803.506  | 3365.276  | NM_004683 | 8723.884  | 4504.401  | NM_000348 | 1921.851  |
| 1365.692  | X52001    | 2172.136  | 2627.264  | M33197    | 36427.66  | 29683.652 | NM_005059 | 660.246   |
| 45069.727 | BI823872  | 8012.384  | 3120.667  | NM_018066 | 12882.225 | 11469.984 | NM_004950 | 1253.847  |
| 374.53    | AA430552  | 1883.079  | 2084.57   | NM_006931 | 1737.484  | 1217.757  | NM_006493 | 909.242   |
| 800.867   | X66142    | 1727.944  | 1757.487  | NM_020344 | 3646.649  | 3384.226  | U76362    | 971.303   |
| 1835.907  | R45054    | 3365.34   | 3170.35   | NM_005050 | 2193.425  | 2945.167  | AL832292  | 1517.669  |
| 2719.398  | NM_000620 | 570.197   | 512.592   | AF252284  | 1679.687  | 869.453   | NM_003045 | 1871.503  |
| 1243.303  | NM_000905 | 7417.462  | 11347.995 | M33197    | 3917.102  | 2768.072  | NM_005662 | 16031.915 |
| 1536.189  | AL117398  | 5953.77   | 5165.519  | AL050139  | 2949.041  | 1895.059  | NM_003060 | 358.831   |
| 1756.203  | AY007158  | 51999.691 | 55039.621 | NM_004558 | 2258.517  | 1801.767  | NM_004317 | 1252.751  |
| 1551.88   | M58050    | 6267.219  | 4803.244  | AL079296  | 984.392   | 577.061   | NM_014645 | 920.83    |
| 1332.095  | AF206020  | 1551.281  | 1804.654  | NM_014770 | 1818.663  | 1448.991  | NM_014708 | 1051.916  |
| 598.594   | NM_014410 | 1916.331  | 2332.004  | AK023103  | 1860.984  | 2392.65   | NM_003693 | 871.258   |
| 487.696   | AF312769  | 604.633   | 677.299   | D80008    | 530.766   | 595.572   | NM_000356 | 5340.928  |
| 1745.296  | AB020668  | 1501.536  | 2060.589  | AK001069  | 37022.492 | 23761.744 | NM_018134 | 8237.17   |

|           |           |           |           |           |           |           |           |           |
|-----------|-----------|-----------|-----------|-----------|-----------|-----------|-----------|-----------|
| 2988.914  | NM_006203 | 10194.884 | 9451.142  | NM_000359 | 7573.122  | 8931.291  | NM_013247 | 1536.613  |
| 6010.439  | AF309553  | 4564.93   | 3936.61   | NM_006395 | 4858.805  | 5478.096  | NM_006770 | 1042.828  |
| 2295.361  | NM_003605 | 3130.213  | 3053.546  | NM_014306 | 3023.69   | 3898.674  | BE394704  | 461.881   |
| 18201.826 | NM_003993 | 3993.147  | 3130.289  | NM_001084 | 1714.977  | 2598.226  | NM_004703 | 1525.246  |
| 385.819   | NM_018961 | 958.225   | 1016.157  | M33197    | 59354.152 | 53634.195 | NM_001512 | 1035.48   |
| 526.211   | NM_005586 | 3326.77   | 3260.071  | NM_014623 | 3924.194  | 5765.749  | NM_014706 | 3102.123  |
| 330.265   | NM_012242 | 2488.319  | 1296.637  | NM_007244 | 2914.51   | 2421.14   | AF139768  | 475.015   |
| 2603.451  | NM_006896 | 765.404   | 1035.695  | M30629    | 1724.945  | 1332.307  | NM_007255 | 946.229   |
| 420.076   | NM_001130 | 35119.656 | 44584.203 | AF193873  | 1702.567  | 1392.636  | NM_003668 | 2734.529  |
| 625.249   | NM_002975 | 28592.822 | 18600.369 | NM_002628 | 968.208   | 688.974   | NM_013384 | 20551.857 |
| 3001.786  | AK023511  | 4290.957  | 4568.657  | BF974315  | 2698.074  | 1968.477  | NM_001187 | 449.627   |
| 442.842   | NM_014556 | 2681.282  | 2665.971  | AI652705  | 2875.384  | 3241.863  | NM_018241 | 804.225   |
| 6463.827  | AK025886  | 1143.216  | 1498.588  | AA569974  | 2611.559  | 1788.412  | NM_005834 | 1818.068  |
| 570.194   | AB014514  | 2655.266  | 2682.487  | AA446028  | 912.396   | 616.132   | AF000381  | 1872.861  |
| 3836.918  | NM_002865 | 3629.492  | 4368.75   | M80583    | 788.856   | 686.679   | NM_012105 | 464.334   |
| 379.558   | NM_003566 | 1396.975  | 828.176   | X07767    | 2317.496  | 5006.519  | S82470    | 704.906   |
| 1267.755  | NM_007159 | 15533.405 | 16949.748 | AF016903  | 9252.471  | 5213.422  | AB028982  | 995.228   |
| 429.524   | NM_003731 | 6474.011  | 6385.702  | NM_015675 | 3042.13   | 1654.476  | NM_002004 | 1556.233  |
| 395.775   | NM_005446 | 3474.779  | 3673.412  | NM_016040 | 1211.455  | 460.872   | NM_005121 | 511.446   |
| 2083.404  | NM_013292 | 3212.315  | 3419.143  | NM_006597 | 25921.506 | 13955.424 | NM_001643 | 7532.368  |
| 659.398   | NM_002387 | 2419.025  | 2584.332  | NM_012483 | 4343.123  | 3768.853  | NM_020221 | 983.852   |
| 1338.802  | NM_000069 | 671.166   | 687.809   | NM_003498 | 2152.321  | 2556.344  | NM_000747 | 1073.583  |
| 1390.048  | AB023217  | 853.718   | 732.407   | AB023420  | 4723.896  | 4717.695  | NM_005415 | 1911.641  |
| 1910.178  | L08902    | 686.539   | 856.211   | NM_016511 | 10720.84  | 6507.884  | AL137708  | 307.323   |
| 673.282   | NM_005231 | 5774.05   | 3649.783  | NM_003559 | 659.563   | 789.584   | AJ275973  | 10275.238 |
| 13444.979 | AF064729  | 1632.685  | 1461.163  | M33197    | 57684.031 | 51784.02  | AL834159  | 1877.475  |
| 527.568   | NM_005412 | 20642.504 | 10733.114 | NM_013229 | 894.348   | 1158.589  | NM_000164 | 3388.951  |
| 1958.92   | NM_012113 | 2304.465  | 2880.038  | NM_016533 | 26090.871 | 22615.766 | NM_016217 | 7795.144  |
| 1516.364  | NM_002150 | 3598.409  | 3917.743  | NM_014751 | 6311.235  | 5111.073  | AK025971  | 2584.476  |
| 2401.624  | NM_004595 | 5756.627  | 6168.607  | NM_002347 | 13194.11  | 15887.703 | NM_002618 | 980.649   |
| 848.02    | NM_020178 | 707.648   | 533.927   | AB046807  | 861.637   | 1506.089  | NM_002193 | 726.453   |
| 10763.385 | NM_002264 | 1173.814  | 1164.391  | NM_018066 | 11912.629 | 6812.815  | NM_001388 | 2644.544  |
| 13947.094 | NM_014754 | 12916.032 | 12566.027 | NM_006931 | 2085.275  | 857.127   | X76770    | 2044.991  |
| 1580.92   | D49387    | 720.802   | 1205.921  | NM_020344 | 4108.879  | 3043.312  | AB037808  | 777.101   |
| 1488.856  | AF050146  | 2651.225  | 3111.394  | NM_005050 | 2226.163  | 1352.745  | NM_016038 | 1331.197  |
| 1508.834  | NM_000116 | 2891.487  | 1901.923  | M33197    | 58633.285 | 59559.742 | Z36821    | 2119.02   |
| 573.265   | NM_006698 | 6052.666  | 11021.98  | NM_018976 | 6203.411  | 3037.057  | AF289485  | 1186.829  |
| 2404.485  | NM_006804 | 7269.665  | 10877.803 | NM_003355 | 3448.39   | 2234.248  | AF130092  | 736.596   |
| 692.096   | NM_015969 | 5441.051  | 6329.731  | NM_005074 | 817.703   | 766.782   | NM_016095 | 1711.289  |
| 1241.041  | NM_003051 | 3500.464  | 3912.387  | NM_018057 | 1109.814  | 1143.865  | AK024794  | 553.792   |
| 5033.541  | NM_145342 | 4854.129  | 6198.416  | M33197    | 62834.148 | 63162.52  | NM_019853 | 2640.378  |
| 2892.143  | AJ278917  | 6423.892  | 9475.991  | NM_015717 | 1113.738  | 649.689   | NM_017992 | 3531.542  |
| 907.927   | AK025641  | 32319.234 | 39656.641 | NM_003665 | 528.362   | 567.58    | AK023061  | 558.609   |
| 1195.237  | NM_000620 | 620.182   | 457.723   | NM_013323 | 5965.431  | 6975.278  | NM_000348 | 785.7     |
| 2417.836  | NM_000905 | 6810.316  | 10848.829 | NM_017426 | 760.656   | 1397.315  | NM_005059 | 382.952   |
| 2551.097  | NM_001720 | 8872.758  | 5865.779  | NM_000853 | 1615.034  | 1488.326  | NM_004950 | 868.271   |
| 522.104   | NM_018390 | 2300.402  | 1821.054  | NM_000935 | 557.954   | 356.049   | NM_000724 | 849.135   |
| 9684.224  | AB037724  | 4600.726  | 5047.732  | NM_000359 | 4763.961  | 3287.422  | NM_002557 | 988.317   |
| 1006.82   | AK025086  | 992.622   | 740.006   | NM_006395 | 3968.697  | 2392.85   | B1762229  | 616.063   |
| 1229.775  | AK026151  | 4404.946  | 4586.587  | NM_014306 | 3202.936  | 2486.936  | BG618320  | 743.16    |
| 1354.403  | NM_014140 | 2675.453  | 3435.216  | NM_001084 | 2454.036  | 1778.364  | Y00787    | 884.004   |
| 6191.921  | NM_002916 | 2143.982  | 1324.316  | NM_015983 | 1594.194  | 957.99    | NM_007276 | 1413.227  |
| 1058.222  | M20700    | 2650.388  | 3202.797  | NM_018622 | 3131.561  | 3869.228  | N34462    | 1127.831  |

|           |           |           |           |           |           |           |           |           |
|-----------|-----------|-----------|-----------|-----------|-----------|-----------|-----------|-----------|
| 1819.11   | NM_001034 | 6083.527  | 2940.572  | M33197    | 61785.133 | 47898.551 | AI658778  | 1221.409  |
| 771.623   | NM_002689 | 1883.746  | 1988.121  | NM_005867 | 3477.408  | 2599.563  | L19067    | 1448.566  |
| 622.763   | NM_017686 | 1804.704  | 3176.488  | AK026031  | 6399.713  | 4712.179  | Z48482    | 511.564   |
| 1884.065  | AL096734  | 723.279   | 712.376   | NM_016468 | 3210.497  | 2744.043  | W60413    | 621.319   |
| 4402.002  | AK000800  | 3199.078  | 2965.418  | NM_007342 | 2708.048  | 3268.899  | B1823365  | 929.779   |
| 1866.615  | NM_018154 | 2682.706  | 2041.74   | D25217    | 7400.898  | 2877.29   | X06318    | 2950.344  |
| 523.877   | NM_005358 | 526.777   | 669.397   | NM_006351 | 3908.266  | 2833.505  | NM_004703 | 810.815   |
| 811.549   | BC006287  | 5003.539  | 5289.512  | M33197    | 44471.914 | 44559.656 | NM_001512 | 642.319   |
| 4010.947  | AB023198  | 6170.663  | 6532.827  | NM_004683 | 7987.623  | 4539.82   | NM_014706 | 1432.604  |
| 2339.675  | AF304163  | 19780.678 | 57671.961 | M33197    | 44172.461 | 29127.791 | NM_014007 | 239.516   |
| 905.342   | NM_006896 | 850.076   | 812.207   | NM_004860 | 2188.282  | 2353.221  | AB033006  | 694.507   |
| 1606.464  | NM_001130 | 35103.695 | 45823.898 | AF217190  | 1690.37   | 1051.583  | AF020314  | 1784.461  |
| 8036.148  | NM_002975 | 28242.041 | 16603.889 | AB028981  | 28427.416 | 16625.488 | NM_016332 | 1972.863  |
| 1918.901  | AK023511  | 4482.232  | 5569.046  | NM_006800 | 2231.221  | 1646.285  | NM_006457 | 318.745   |
| 1665.79   | NM_014556 | 3228.015  | 3498.192  | NM_002729 | 3643.206  | 2952.854  | NM_006314 | 1097.233  |
| 2136.631  | NM_001615 | 64302.961 | 58812.508 | M33197    | 3347.159  | 2116.051  | NM_002754 | 268.138   |
| 1256.227  | NM_002725 | 820.03    | 769.156   | AL050139  | 2800.537  | 1572.478  | NM_000797 | 2021.694  |
| 1434.096  | NM_014375 | 7661.344  | 10784.925 | NM_004558 | 3463.646  | 4490.225  | NM_016293 | 6561.123  |
| 2117.297  | NM_017812 | 10772.471 | 8323.961  | AL079296  | 1504.333  | 2303.613  | AL080148  | 3144.092  |
| 998.272   | AF204173  | 770.949   | 1153.618  | NM_014770 | 1993.446  | 3087.129  | NM_018487 | 225.267   |
| 2523.572  | J03260    | 1442.086  | 1456.463  | NM_017858 | 1555.047  | 2586.531  | NM_020134 | 635.832   |
| 12153.379 | U13738    | 917.117   | 866.847   | D80008    | 720.667   | 1149.793  | NM_020221 | 905.115   |
| 559.251   | AF068236  | 27067.887 | 26609.09  | NM_004132 | 2546.097  | 1537.296  | AJ275973  | 3688.878  |
| 1045.858  | H94487    | 1348.187  | 1484.425  | NM_014844 | 1917.98   | 1166.786  | NM_006493 | 235.166   |
| 1575.47   | BG681747  | 26682.324 | 8225.206  | M33197    | 56140.48  | 43115.16  | AF040248  | 334.01    |
| 1489.541  | H63077    | 2373.466  | 12828.071 | NM_018492 | 1862.574  | 1796.528  | AL832292  | 2035.509  |
| 2913.946  | AA679352  | 20477.357 | 10353.329 | NM_001346 | 1340.338  | 963.695   | NM_003045 | 2654.896  |
| 372.584   | AA437291  | 467.201   | 821.44    | NM_003149 | 1409.803  | 876.532   | NM_005662 | 21499.348 |
| 198.826   | X04503    | 3365.529  | 3103.014  | NM_003377 | 3324.281  | 1310.653  | NM_004317 | 835.135   |
| 1533.965  | D45917    | 2837.613  | 5653.131  | AB033034  | 1782.112  | 2224.577  | NM_014645 | 880.836   |
| 2415.713  | X52001    | 2917.822  | 3654.86   | D38169    | 2748.292  | 2819.929  | NM_014708 | 1723.046  |
| 1464.478  | B1823872  | 9342.897  | 3974.732  | M33197    | 45300.082 | 54227.078 | NM_003693 | 644.374   |
| 1925.464  | AA430552  | 2620.396  | 3302.017  | NM_002447 | 7173.446  | 10746.985 | NM_000356 | 5935.268  |
| 2179.807  | X66142    | 2209.028  | 2425.024  | NM_014145 | 9358.772  | 10079.175 | NM_018134 | 11592.859 |
| 2122.541  | R45054    | 3919.63   | 4338.776  | NM_002223 | 1566.33   | 1465.356  | NM_013247 | 1691.126  |
| 1194.213  | NM_002387 | 2595.51   | 2464.427  | M33197    | 59481.512 | 61857.273 | NM_006770 | 1284.104  |
| 600.177   | NM_000069 | 838.075   | 800.458   | NM_003151 | 2413.198  | 3190.917  | NM_017992 | 4589.101  |
| 505.028   | AB023217  | 879.355   | 943.833   | NM_006811 | 6160.749  | 6141.81   | NM_007255 | 532.496   |
| 749.765   | L08902    | 609.256   | 1015.129  | NM_005601 | 2641.042  | 1926.129  | NM_001187 | 564.193   |
| 1158.486  | J02639    | 2757.726  | 3667.792  | NM_016151 | 3073.906  | 2161.312  | NM_018241 | 1044.322  |
| 6498.463  | M58050    | 6008.611  | 5128.1    | NM_004324 | 855.821   | 706.443   | NM_005834 | 1856.758  |
| 9451.223  | NM_007263 | 16360.76  | 12614.166 | NM_005614 | 5779.733  | 3039.257  | AF000381  | 1617.756  |
| 3045.228  | AF206020  | 1442.005  | 1480.588  | NM_004556 | 1773.116  | 2048.74   | NM_012105 | 477.836   |
| 821.387   | NM_014410 | 1722.295  | 2178.574  | D90075    | 4116.845  | 1817.841  | S82470    | 552.816   |
| 2080.262  | AF305835  | 548.172   | 772.958   | AK023827  | 3184.571  | 4490.044  | AB028982  | 1378.748  |
| 5850.935  | AF312769  | 681.357   | 752.213   | AK021702  | 2090.539  | 3108.724  | NM_002004 | 1492.65   |
| 3327.349  | AB020668  | 1365.057  | 1513.439  | NM_003885 | 1272.816  | 1385.698  | NM_005121 | 430.675   |
| 325.894   | NM_006203 | 8795.097  | 6444.751  | NM_016448 | 1558.521  | 1979.99   | NM_001643 | 8531.68   |
| 582.927   | AF309553  | 5121.817  | 5451.855  | NM_003936 | 790.755   | 989.333   | NM_019096 | 2523.329  |
| 497.286   | NM_003605 | 3860.445  | 3991.417  | M33197    | 31754.004 | 34428.246 | NM_006892 | 1179.751  |
| 2005.381  | NM_006139 | 247.764   | 456.484   | NM_002688 | 1238.131  | 1409.08   | NM_019117 | 599.807   |
| 2084.649  | NM_000100 | 30251.012 | 42829.906 | NM_004415 | 2630.13   | 4019.795  | NM_017658 | 1488.547  |
| 4027.285  | NM_001900 | 61610.227 | 59004.852 | NM_007278 | 8596.946  | 9718.377  | NM_018679 | 2941.078  |

|           |           |           |           |           |           |           |           |           |
|-----------|-----------|-----------|-----------|-----------|-----------|-----------|-----------|-----------|
| 677.688   | NM_003993 | 4064.91   | 3925.787  | NM_005219 | 6702.068  | 6905.088  | NM_006779 | 2271.252  |
| 395.892   | NM_018961 | 1073.895  | 1548.551  | NM_004723 | 6601.587  | 4259.216  | NM_016217 | 9415.513  |
| 4022.956  | NM_005586 | 3664.542  | 4567.023  | M33197    | 58333.059 | 64313.219 | AK025971  | 2870.598  |
| 403.994   | NM_012242 | 2539.642  | 1475.941  | NM_018413 | 4363.393  | 3647.627  | NM_002618 | 1168.005  |
| 9806.897  | NM_003051 | 3085.699  | 3416.113  | AB018299  | 33201.598 | 36537.652 | L27479    | 418.316   |
| 354.477   | NM_001133 | 128.754   | 854.017   | NM_005245 | 5458.337  | 5876.588  | NM_002193 | 733.604   |
| 2401.665  | NM_145342 | 4273.938  | 5602.711  | M33197    | 50044.91  | 18115.502 | NM_001388 | 2307.936  |
| 494.471   | AJ278917  | 5244.27   | 6223.334  | NM_016219 | 4835.79   | 1777.317  | X76770    | 1819.796  |
| 323.635   | AK025641  | 20330.396 | 26000.994 | AK025605  | 2516.595  | 3474.675  | AB037808  | 560.539   |
| 1828.255  | AK025886  | 907.374   | 1288.539  | NM_006100 | 552.523   | 926.563   | NM_016038 | 1229.693  |
| 611.786   | NM_003058 | 565.419   | 436.801   | NM_003197 | 3762.033  | 5616.917  | Z36821    | 3155.022  |
| 1662.976  | AB014514  | 3158.845  | 3282.67   | AF176705  | 1701.905  | 1951.008  | AF289485  | 1305.74   |
| 1257.856  | NM_002865 | 4178.981  | 5979.968  | D29012    | 5592.326  | 11224.528 | AF130092  | 749.271   |
| 3236.82   | NM_003566 | 1615.974  | 1193.201  | NM_017414 | 673.376   | 1115.767  | NM_016095 | 1820.901  |
| 820.553   | AK026315  | 437.309   | 647.141   | NM_012179 | 16804.139 | 19761.637 | AF300612  | 37033.184 |
| 831.864   | NM_007159 | 18619.559 | 22333.744 | NM_002793 | 1859.039  | 1666.095  | AB014557  | 499.158   |
| 1916.678  | NM_003731 | 8159.871  | 10550.882 | NM_004788 | 900.242   | 898.407   | NM_002953 | 6515.288  |
| 6377.515  | NM_005446 | 3573.886  | 4087.302  | M33197    | 38745.91  | 46800.832 | NM_002187 | 583.403   |
| 22519.92  | NM_013292 | 3034.81   | 3533.697  | AL442083  | 1655.333  | 2320.646  | NM_014246 | 3510.755  |
| 665.594   | AK000800  | 3112.311  | 2795.064  | D63487    | 2576.58   | 2137.341  | NM_014859 | 816.021   |
| 16868.996 | NM_018154 | 2594.72   | 2183.872  | AK097791  | 2785.581  | 2983.642  | NM_001116 | 950.992   |
| 558.635   | NM_005358 | 374.008   | 535.88    | AK022705  | 1501.303  | 1971.53   | BC035395  | 2808.686  |
| 582.786   | BC006287  | 4825.399  | 4912.82   | NM_016404 | 2896.015  | 3729.074  | NM_001703 | 3066.467  |
| 2605.361  | AB023198  | 6449.401  | 7364.315  | L03426    | 1918.161  | 2504.79   | NM_020126 | 1418.09   |
| 1386.656  | AF304163  | 18260.537 | 57031.664 | M33197    | 56376.223 | 60175.25  | NM_013982 | 2639.644  |
| 3114.537  | NM_005231 | 5718.018  | 3848.673  | NM_020163 | 1576.336  | 1594.136  | NM_005049 | 1029.152  |
| 987.596   | AF064729  | 1471.251  | 1398.394  | NM_006608 | 1647.777  | 553.948   | NM_004630 | 2632.741  |
| 16346.182 | NM_005412 | 18668.426 | 7389.818  | M34356    | 2130.806  | 2379.639  | AK023001  | 1781.069  |
| 8022.946  | NM_012113 | 2258.28   | 1814.961  | AJ133115  | 3226.496  | 3034.953  | NM_014826 | 2458.913  |
| 641.449   | NM_002150 | 3533.345  | 3629.437  | X51630    | 5855.005  | 8313.648  | AF201947  | 372.04    |
| 656.474   | NM_004595 | 6279.279  | 4159.586  | NM_005056 | 1771.284  | 1843.706  | U01147    | 744.724   |
| 529.088   | NM_020178 | 609.365   | 825.1     | AF208502  | 8777.392  | 5250.259  | NM_004040 | 3276.437  |
| 739.68    | NM_002264 | 1463.34   | 1476.927  | M33197    | 59937.652 | 63599.234 | NM_006116 | 1456.011  |
| 1569.157  | NM_014754 | 14640.611 | 14066.862 | AF264750  | 8567.138  | 10672.664 | NM_005456 | 1274.948  |
| 631.465   | D49387    | 828.503   | 1398.639  | NM_006980 | 917.759   | 1221.867  | NM_003587 | 10955.017 |
| 1395.067  | AF050146  | 3165.147  | 3135.77   | AK023904  | 2587.039  | 3366.873  | X90978    | 797.079   |
| 4470.005  | NM_000116 | 3766.689  | 2201.488  | NM_017956 | 5803.38   | 7382.343  | BF219403  | 8251.682  |
| 30504.084 | NM_006698 | 7309.358  | 9753.575  | NM_016496 | 1152.818  | 1703.973  | NM_001324 | 1693.978  |
| 785.006   | NM_006804 | 8620.878  | 7707.481  | NM_014309 | 2707.97   | 2322.268  | AB037795  | 1189.767  |
| 1510.535  | NM_015969 | 6034.72   | 4991.361  | M33197    | 27010.67  | 31483.904 | D43949    | 1160.413  |
| 2600.732  | NM_004517 | 4155.687  | 4759.123  | NM_004094 | 1578.263  | 1418.92   | AF111849  | 24321.588 |
| 4692.234  | AI017418  | 846.876   | 637.208   | NM_020236 | 1356.359  | 2679.475  | AK022975  | 556.23    |
| 494.034   | NM_000679 | 842.132   | 821.725   | AK027059  | 2677.859  | 2913.064  | NM_015344 | 1459.311  |
| 1147.162  | AF218006  | 44204.43  | 31126.49  | AF151109  | 7977.509  | 6806.233  | NM_004288 | 279.298   |
| 1249.175  | AK026935  | 8262.392  | 9492.237  | NM_015414 | 65493.516 | 74521.383 | D87458    | 564.327   |
| 2142.899  | NM_020162 | 4593.925  | 3239.669  | L34070    | 2799.005  | 2529.737  | AK021750  | 739.031   |
| 2979.344  | AK027124  | 34551.363 | 33274.727 | NM_016475 | 2454.438  | 1389.266  | AK023594  | 1840.063  |
| 4550.627  | M31212    | 48263.277 | 43145.816 | NM_001865 | 60492.031 | 61568.703 | AB010099  | 4464.271  |
| 292.933   | AL117398  | 5151.518  | 3850.799  | NM_006441 | 3547.357  | 4181.608  | AB039920  | 1719.147  |
| 1017.057  | AY007158  | 52042.844 | 48156.305 | NM_001918 | 1380.65   | 1465.859  | AB046782  | 1182.477  |
| 589.299   | NM_001720 | 8912.192  | 3876.987  | NM_018245 | 3361.547  | 4352.735  | NM_004190 | 6496.2    |
| 446.766   | NM_018390 | 2341.118  | 1076.763  | M33197    | 58485.633 | 61522.137 | NM_014275 | 2863.645  |
| 12287.477 | AB037724  | 6296.696  | 6004.3    | D17130    | 65362.965 | 67653.063 | NM_000409 | 1910.881  |

|           |                  |           |           |                  |           |           |                  |           |
|-----------|------------------|-----------|-----------|------------------|-----------|-----------|------------------|-----------|
| 4124.249  | <b>AK025086</b>  | 1074.033  | 1163.189  | <b>X76302</b>    | 4703.531  | 5505.441  | <b>AF208005</b>  | 720.601   |
| 15411.38  | <b>AK026151</b>  | 5270.725  | 4909.947  | <b>M33197</b>    | 24092.584 | 25916.457 | <b>NM_002231</b> | 2762.626  |
| 16591.146 | <b>NM_014140</b> | 2754.255  | 3039.976  | <b>X52354</b>    | 885.02    | 820.457   | <b>NM_020474</b> | 5571.917  |
| 4986.074  | <b>NM_002916</b> | 2441.732  | 1576.577  | <b>NM_005413</b> | 1107.956  | 1049.858  | <b>NM_002643</b> | 1894.891  |
| 2454.004  | <b>M20700</b>    | 3374.049  | 3652.731  | <b>NM_002315</b> | 1653.049  | 1922.326  | <b>NM_017807</b> | 2549.862  |
| 553.542   | <b>NM_001034</b> | 7170.997  | 3936.876  | <b>AK024191</b>  | 1310.465  | 1513.346  | <b>NM_014746</b> | 903.345   |
| 1061.923  | <b>NM_002689</b> | 2269.534  | 2627.191  | <b>D83781</b>    | 992.663   | 639.751   | <b>NM_002788</b> | 38092.82  |
| 3623.112  | <b>NM_017686</b> | 2480.191  | 3144.51   | <b>AL832699</b>  | 3475.149  | 9007.263  | <b>NM_000462</b> | 2963.283  |
| 2904.193  | <b>AL096734</b>  | 998.408   | 905.585   | <b>NM_012191</b> | 728.413   | 1232.887  | <b>NM_003336</b> | 2964.814  |
| 816.797   | <b>NM_016645</b> | 1897.464  | 1133.082  | <b>AK000757</b>  | 753.006   | 1222.572  | <b>NM_005805</b> | 7080.579  |
| 2193.608  | <b>L14723</b>    | 8099.326  | 7134.621  | <b>AL359577</b>  | 1172.356  | 1056.172  | <b>NM_004181</b> | 669.972   |
| 7638.003  | <b>AK024462</b>  | 9523.153  | 9873.992  | <b>NM_018139</b> | 1216.324  | 1352.651  | <b>NM_003900</b> | 3500.907  |
| 1266.205  | <b>NM_019601</b> | 903.177   | 722.718   | <b>NM_014805</b> | 2926.08   | 3297.901  | <b>NM_003337</b> | 1504.922  |
| 775.354   | <b>NM_002206</b> | 1630.888  | 1461.952  | <b>AF052120</b>  | 1551.842  | 1539.205  | <b>AF298152</b>  | 1728.42   |
| 929.654   | <b>NM_002230</b> | 1058.165  | 658.226   | <b>NM_014871</b> | 1245.402  | 1346.883  | <b>AF117233</b>  | 1212.268  |
| 404.99    | <b>NM_003815</b> | 2868.249  | 1434.664  | <b>AL137552</b>  | 1364.449  | 1808.452  | <b>M94362</b>    | 2912.892  |
| 2206.824  | <b>NM_001430</b> | 1994.439  | 4691.874  | <b>AK025794</b>  | 3074.318  | 6616.981  | <b>AK024707</b>  | 1137.919  |
| 1171.351  | <b>AB010098</b>  | 633.381   | 308.462   | <b>NM_003541</b> | 110.91    | 1212.052  | <b>NM_014255</b> | 808.167   |
| 610.36    | <b>U17989</b>    | 1120.291  | 697.321   | <b>AK024522</b>  | 1050.442  | 1655.206  | <b>AK022909</b>  | 3078.417  |
| 845.663   | <b>AL137595</b>  | 1093.186  | 588.67    | <b>NM_007198</b> | 4611.249  | 4305.887  | <b>NM_006530</b> | 2681.222  |
| 515.007   | <b>NM_018028</b> | 1849.875  | 1362.369  | <b>M33197</b>    | 55019.066 | 61135.938 | <b>AB033024</b>  | 1612.523  |
| 3705.59   | <b>AF249267</b>  | 40980.699 | 47019.504 | <b>AK024566</b>  | 1236.993  | 1275.166  | <b>NM_018942</b> | 2271.45   |
| 508.604   | <b>NM_004113</b> | 1048.661  | 976.512   | <b>M33197</b>    | 65265.465 | 71076.922 | <b>NM_005531</b> | 497.782   |
| 3115.581  | <b>X84939</b>    | 4950.629  | 4460.1    | <b>AK024981</b>  | 12077.029 | 22586.844 | <b>NM_006977</b> | 682.766   |
| 1525.325  | <b>NM_018320</b> | 9238.251  | 15872.409 | <b>AK027246</b>  | 1150.613  | 1829.239  | <b>AF217226</b>  | 3244.386  |
| 402.604   | <b>NM_002069</b> | 3859.124  | 3881.308  | <b>U80766</b>    | 3408.926  | 6096.645  | <b>AL359578</b>  | 306.061   |
| 2867.054  | <b>NM_016056</b> | 24675.996 | 11318.363 | <b>AK001638</b>  | 1071.093  | 2233.298  | <b>NM_005522</b> | 321.455   |
| 310.666   | <b>AF188492</b>  | 901.246   | 795.972   | <b>AF161386</b>  | 6468.896  | 7014.998  | <b>NM_005760</b> | 7834.134  |
| 1822.67   | <b>M65066</b>    | 17178.895 | 19912.451 | <b>AK025454</b>  | 3136.08   | 3683.929  | <b>NM_007265</b> | 1354.764  |
| 4545.633  | <b>NM_016951</b> | 6126.039  | 6944.761  | <b>M33197</b>    | 60450.25  | 62320.449 | <b>AK023639</b>  | 1836.027  |
| 566.099   | <b>NM_013251</b> | 1623.721  | 1974.361  | <b>X05826</b>    | 3449.188  | 4254.564  | <b>AL137700</b>  | 619.257   |
| 419.341   | <b>NM_006099</b> | 3750.024  | 2358.112  | <b>Y11608</b>    | 695.948   | 872.052   | <b>NM_003083</b> | 1618.073  |
| 786.955   | <b>AF272379</b>  | 3299.453  | 3300.325  | <b>AJ001872</b>  | 3093.38   | 3632.321  | <b>NM_006789</b> | 1741.638  |
| 660.963   | <b>NM_012326</b> | 1176.365  | 857.049   | <b>M33197</b>    | 61952.148 | 64940.168 | <b>NM_000982</b> | 1223.397  |
| 1067.31   | <b>NM_003085</b> | 9870.443  | 8648.272  | <b>NM_005598</b> | 2158.077  | 4061.993  | <b>AK026491</b>  | 2698.891  |
| 676.237   | <b>NM_016084</b> | 11335.3   | 12520.964 | <b>AK023636</b>  | 7209.115  | 8938.605  | <b>NM_001015</b> | 66661.484 |
| 776.056   | <b>AF095289</b>  | 10201.223 | 10363.837 | <b>D25272</b>    | 3923.869  | 2705.941  | <b>AL110170</b>  | 46440.809 |
| 1110.2    | <b>NM_005537</b> | 4405.195  | 4183.715  | <b>M33197</b>    | 59564.719 | 60434.406 | <b>AK021747</b>  | 733.136   |
| 2409.259  | <b>NM_019003</b> | 2372.756  | 2262.944  | <b>NM_020168</b> | 1424.47   | 1678.65   | <b>AK025640</b>  | 5753.906  |
| 905.725   | <b>NM_015935</b> | 2233.768  | 1972.573  | <b>AK025931</b>  | 57697.895 | 59185.66  | <b>AF131772</b>  | 396.357   |
| 1286.234  | <b>AF182412</b>  | 1038.74   | 781.522   | <b>AK021972</b>  | 888.972   | 1027.726  | <b>NM_019101</b> | 924.712   |
| 2991.55   | <b>AK027200</b>  | 1573.415  | 1120.739  | <b>M33197</b>    | 55998.891 | 61238.641 | <b>NM_000920</b> | 1278.518  |
| 278.763   | <b>S78372</b>    | 487.084   | 394.085   | <b>AK001083</b>  | 894.332   | 1508.539  | <b>NM_020375</b> | 1248.533  |
| 461.526   | <b>U03106</b>    | 6792.082  | 12086.803 | <b>AK000185</b>  | 1372.965  | 1151.891  | <b>NM_016049</b> | 3784.03   |
| 788.91    | <b>NM_000075</b> | 17999.791 | 16035.832 | <b>NM_017962</b> | 943.574   | 1284.396  | <b>NM_013311</b> | 2936.88   |
| 1931.811  | <b>NM_006845</b> | 6773.835  | 7405.541  | <b>NM_017834</b> | 871.189   | 1432.142  | <b>NM_000291</b> | 39753.313 |
| 7267.771  | <b>NM_014885</b> | 656.594   | 875.858   | <b>AK000865</b>  | 898.304   | 1205.263  | <b>NM_018081</b> | 1555.091  |
| 3560.99   | <b>NM_004945</b> | 4561.993  | 6959.459  | <b>M33197</b>    | 55022.703 | 62437.91  | <b>NM_014649</b> | 1592.921  |
| 219.224   | <b>NM_020242</b> | 2632.361  | 1635.687  | <b>AK024558</b>  | 2623.804  | 370.42    | <b>AL117488</b>  | 1313.887  |
| 513.205   | <b>NM_001788</b> | 13100.941 | 17254.486 | <b>AK024779</b>  | 2882.223  | 3082.56   | <b>NM_012240</b> | 490.971   |
| 544.731   | <b>NM_007178</b> | 54258.145 | 54081.113 | <b>AK024406</b>  | 2807.969  | 2694.749  | <b>NM_019005</b> | 1534.917  |
| 5389.763  | <b>NM_017682</b> | 826.675   | 693.606   | <b>AK024568</b>  | 9897.262  | 9105.403  | <b>NM_004739</b> | 1839.302  |
| 715.342   | <b>NM_002209</b> | 2927.402  | 3395.44   | <b>M33197</b>    | 70109.406 | 65056.512 | <b>NM_005341</b> | 556.555   |

|           |           |           |           |           |           |           |           |           |
|-----------|-----------|-----------|-----------|-----------|-----------|-----------|-----------|-----------|
| 842.609   | NM_002291 | 775.23    | 545.345   | AK026277  | 5413.412  | 8327.536  | NM_001934 | 1209.084  |
| 4267.221  | AL137477  | 7280.475  | 9618.416  | U10509    | 1559.92   | 1942.001  | AB011090  | 585.451   |
| 1224.688  | AF284580  | 1058.736  | 1193.227  | NM_007165 | 35839.004 | 43452.848 | NM_000209 | 691.619   |
| 1799.845  | AK024961  | 9675.165  | 6566.055  | NM_014018 | 3299.917  | 7289.887  | NM_018682 | 2329.036  |
| 3091.732  | NM_016068 | 3807.089  | 6889.754  | AF085956  | 1247.912  | 2908.498  | AK022090  | 198.501   |
| 1704.219  | NM_014256 | 1829.963  | 2411.784  | NM_019116 | 1158.632  | 967.867   | NM_006545 | 12774.14  |
| 16423.211 | NM_015967 | 3727.388  | 1836.098  | AF147318  | 867.29    | 1495.232  | NM_016534 | 906.787   |
| 1468.414  | NM_012237 | 485.698   | 365.138   | AL137556  | 3376.102  | 3857.08   | AB021923  | 706.41    |
| 3766.166  | NM_003595 | 852.138   | 542.824   | NM_014696 | 9051.131  | 8266.401  | AK024240  | 778.201   |
| 801.311   | NM_002409 | 1288.306  | 864.977   | AL359055  | 1813.409  | 3163.265  | NM_016456 | 26313.279 |
| 648.546   | NM_004994 | 20709.697 | 24204.688 | NM_014908 | 1423.238  | 2161.733  | AK022677  | 2446.087  |
| 2286.914  | NM_006610 | 7148.27   | 8793.521  | AF086125  | 1704.47   | 2741.804  | AK026141  | 1099.808  |
| 5341.333  | NM_001333 | 645.215   | 655.142   | U67847    | 1928.253  | 1609.158  | AK022894  | 1808.315  |
| 20482.604 | NM_003791 | 6522.387  | 5382.316  | AL137321  | 5017.885  | 6625.215  | AF217993  | 3006.634  |
| 745.619   | NM_018017 | 4472.591  | 5518.993  | M33197    | 58598.871 | 63491.941 | AF131823  | 475.132   |
| 788.083   | AK001296  | 7073.394  | 5503.447  | AK024207  | 2051.53   | 2212.64   | AK026324  | 3224.951  |
| 605.794   | AK000173  | 822.772   | 570.809   | AK021843  | 1527.987  | 1443.676  | AK025253  | 635.294   |
| 692.666   | NM_018365 | 3634.223  | 2993.233  | AF075025  | 4288.382  | 5826.458  | AK025004  | 1326.638  |
| 657.392   | NM_006586 | 10098.758 | 8497.849  | AF088008  | 1618.998  | 2038.445  | AF146798  | 977.836   |
| 407.625   | AJ272180  | 2448.872  | 2120.013  | AK023528  | 1750.494  | 2281.376  | AF086517  | 3697.102  |
| 7340.102  | AK025709  | 1656.875  | 1704.081  | AK023043  | 688.317   | 1585.659  | AK025740  | 4765.746  |
| 14330.339 | NM_019016 | 9697.662  | 7919.103  | M33197    | 60124.836 | 63532.965 | AK000311  | 1235.676  |
| 320.663   | NM_012261 | 10889.477 | 6259.243  | AF147349  | 4522.281  | 6899.63   | AK025346  | 36192.281 |
| 1322.799  | NM_015556 | 4113.562  | 1754.093  | AL050346  | 25302.203 | 27087.252 | AK022583  | 2802.686  |
| 921.77    | NM_018416 | 1993.507  | 1641.39   | AK001520  | 4402.194  | 6117.158  | AL137534  | 57751.93  |
| 564.742   | NM_004606 | 5538.408  | 3147.054  | AK021731  | 966.297   | 869.819   | AF052121  | 2696.572  |
| 3566.085  | D70833    | 65895.125 | 55549.555 | M33197    | 32502.9   | 45465.41  | AL359062  | 1550.143  |
| 2971.281  | NM_016621 | 1753.661  | 1056.575  | AK025807  | 1170.086  | 1372.085  | AK026869  | 1281.499  |
| 5660.565  | AB046808  | 3018.311  | 2719.873  | M33197    | 60172.457 | 65114.633 | AK023150  | 263.765   |
| 40707.121 | AK026265  | 3943.118  | 4026.878  | AK025266  | 3256.906  | 6258.32   | AJ227904  | 1515.763  |
| 862.652   | AF015313  | 739.359   | 769.604   | AK001843  | 3455.81   | 6137.768  | Y12020    | 11532.394 |
| 1408.398  | NM_006466 | 1279.365  | 666.844   | AK000548  | 39805.016 | 62001.004 | AJ001905  | 503.675   |
| 2241.548  | NM_005681 | 1334.699  | 944.32    | NM_003920 | 9739.765  | 15727.462 | U17635    | 1266.527  |
| 4062.866  | NM_015156 | 5045.446  | 3802.725  | NM_004787 | 19870.82  | 29569.521 | Z83946    | 675.958   |
| 1038.561  | NM_012384 | 3886.48   | 3984.021  | AF087984  | 4387.742  | 6400.564  | D55638    | 434.824   |
| 543.231   | NM_004653 | 3362.409  | 2885.825  | M33197    | 61625.445 | 62538.605 | L23870    | 259.685   |
| 1486.606  | AF233453  | 6272.498  | 8039.063  | AK022273  | 4593.53   | 5534.001  | AB007975  | 837.506   |
| 7197.546  | D87454    | 10918.602 | 9972.733  | NM_015882 | 1261.688  | 1061.365  | AK024152  | 521.738   |
| 1232.801  | NM_007020 | 3332.845  | 2287.879  | AK027161  | 615.503   | 953.574   | AK021821  | 533.603   |
| 999.546   | NM_000713 | 4318.808  | 3768.167  | AK024271  | 1327.376  | 2108.957  | AK000030  | 891.837   |
| 493.81    | NM_016055 | 1492.117  | 1455.018  | AK021650  | 6567.673  | 8205.522  | NM_017932 | 518.513   |
| 1427.903  | NM_013291 | 8248.492  | 5517.024  | AL050210  | 4065.134  | 4612.607  | AK000910  | 3364.735  |
| 1954.665  | NM_002936 | 8475.405  | 1751.039  | L37699    | 2139.786  | 2558.944  | AF252280  | 7276.407  |
| 609.597   | NM_014161 | 1862.069  | 315.579   | M33197    | 65471.207 | 72646.148 | AK000107  | 587.351   |
| 4163.997  | BF312817  | 2148.312  | 193.096   | AL050173  | 2057.086  | 3116.731  | AK000951  | 216.807   |
| 12516.234 | AF086491  | 2454.924  | 1740.535  | D80002    | 4128.904  | 3432.511  | AK024518  | 4326.432  |
| 4551.999  | NM_014856 | 1429.313  | 785.313   | U17637    | 7656.18   | 4213.971  | AK025017  | 1485.966  |
| 2407.047  | NM_003492 | 1149.399  | 696.445   | AF207831  | 804.755   | 787.448   | AK024534  | 615.648   |
| 1292.977  | NM_003780 | 18060.412 | 16039.235 | NM_003548 | 825.842   | 4306.045  | AK024616  | 1008.797  |
| 1128.048  | NM_000199 | 8999.843  | 7919.49   | M33197    | 46612.398 | 55729.086 | AK024914  | 1370.165  |
| 3729.73   | NM_003778 | 62604.734 | 55594.375 | NM_018272 | 4859.494  | 5911.302  | BC030949  | 1721.235  |
| 3370.442  | AK023263  | 2758.014  | 2354.912  | CY3Cy5    | 2577.569  | 75.814    | AF116615  | 1133.217  |
| 326.302   | NM_004622 | 1892.734  | 2202.021  | R19938    | 2310.429  | 2578.819  | U17636    | 30913.367 |

|           |                  |           |           |                  |           |           |                  |           |
|-----------|------------------|-----------|-----------|------------------|-----------|-----------|------------------|-----------|
| 673.423   | <b>AK021445</b>  | 1067.505  | 1164.747  | <b>N94487</b>    | 5390.129  | 5638.07   | <b>NM_018546</b> | 3588.632  |
| 4612.185  | <b>NM_017934</b> | 6867.135  | 5515.825  | <b>AI886795</b>  | 1719.559  | 1841.363  | <b>U52699</b>    | 10793.904 |
| 1283.258  | <b>NM_014166</b> | 30146.621 | 17833.992 | <b>D10495</b>    | 1700.526  | 1232.763  | <b>S71613</b>    | 7028.082  |
| 1180.474  | <b>AF211971</b>  | 4796.222  | 2981.021  | <b>BF344679</b>  | 803.148   | 2600.357  | <b>AK024378</b>  | 1609.746  |
| 989.709   | <b>NM_002931</b> | 2352.471  | 2294.473  | <b>M14156</b>    | 1410.571  | 1201.007  | <b>NM_014026</b> | 2955.929  |
| 26201.473 | <b>NM_013448</b> | 18390.035 | 14067.581 | <b>U87939</b>    | 575.598   | 824.826   | <b>D61703</b>    | 9486.131  |
| 660.594   | <b>X65232</b>    | 28127.182 | 25048.281 | <b>U86961</b>    | 814.824   | 910.53    | <b>AF086198</b>  | 4664.298  |
| 2632.049  | <b>U12767</b>    | 660.97    | 612.069   | <b>AK094237</b>  | 918.62    | 768.605   | <b>AL137382</b>  | 25940.383 |
| 5197.667  | <b>U17630</b>    | 566.531   | 346.198   | <b>L07592</b>    | 807.141   | 577.622   | <b>AK024599</b>  | 3372.337  |
| 8129.037  | <b>M33782</b>    | 741.772   | 165.325   | <b>NM_006981</b> | 584.156   | 807.061   | <b>AK024928</b>  | 551.666   |
| 6502.925  | <b>NM_017755</b> | 2685.736  | 292.725   | <b>SR2</b>       | 37389.406 | 39267.719 | <b>NM_014450</b> | 654.212   |
| 1087.37   | <b>NM_015696</b> | 4172.598  | 3683.312  | <b>SR4</b>       | 7587.697  | 8471.881  | <b>NM_017991</b> | 504.301   |
| 6698.519  | <b>AK022551</b>  | 1747.408  | 2017.802  | <b>SR6</b>       | 1311.708  | 1163.922  | <b>L37198</b>    | 2554.607  |
| 1549.99   | <b>AF085968</b>  | 3126.679  | 2560.99   | <b>SR8</b>       | 4618.542  | 16142.888 | <b>U67822</b>    | 613.944   |
| 548.255   | <b>AK023665</b>  | 884.877   | 806.493   | <b>SR10</b>      | 16925.482 | 5595.729  | <b>AK021921</b>  | 513.875   |
| 537.511   | <b>AB011136</b>  | 1635.558  | 1033.042  | <b>CY3Cy5</b>    | 2990.289  | 95.21     | <b>AK025431</b>  | 1202.571  |
| 1855.04   | <b>AF085898</b>  | 4662.246  | 5502.538  | <b>NM_014776</b> | 1796.354  | 1773.642  | <b>AK023662</b>  | 899.642   |
| 6466.882  | <b>AL442094</b>  | 396.391   | 663.865   | <b>NM_006480</b> | 11330.691 | 9814.648  | <b>AF086274</b>  | 18281.025 |
| 2339.435  | <b>AL161960</b>  | 5343.633  | 7505.176  | <b>NM_007223</b> | 16412.248 | 12741.282 | <b>AK023682</b>  | 968.483   |
| 3388.355  | <b>AL049964</b>  | 2990.665  | 3558.2    | <b>NM_000145</b> | 641.216   | 433.991   | <b>AK024024</b>  | 1264.085  |
| 1600.163  | <b>AK023269</b>  | 2807.572  | 1927.206  | <b>AF030107</b>  | 1105.194  | 1048.88   | <b>AF000991</b>  | 1368.635  |
| 887.313   | <b>AF070564</b>  | 3702.387  | 4618.975  | <b>NM_000871</b> | 746.224   | 1109.896  | <b>AK000685</b>  | 14009.321 |
| 2720.771  | <b>AK021439</b>  | 8209.705  | 7366.703  | <b>M33197</b>    | 60818.684 | 56854.707 | <b>D28381</b>    | 9673.3    |
| 1663.092  | <b>AF052099</b>  | 1483.521  | 2238.883  | <b>NM_018968</b> | 688.776   | 494.52    | <b>AK023543</b>  | 288.602   |
| 522.947   | <b>AL110111</b>  | 3072.626  | 3233.676  | <b>AF086924</b>  | 31228.404 | 28243.711 | <b>BE706519</b>  | 389.785   |
| 953.73    | <b>AF070543</b>  | 1287.436  | 842.144   | <b>AB058740</b>  | 2573.534  | 2047.942  | <b>AF130064</b>  | 15502.606 |
| 2814.247  | <b>AK026273</b>  | 5829.225  | 7359.612  | <b>M33197</b>    | 56894.113 | 63094.605 | <b>U17624</b>    | 543.108   |
| 998.659   | <b>NM_020250</b> | 7493.513  | 8888.818  | <b>NM_001154</b> | 3097.047  | 6040.054  | <b>D16988</b>    | 27344.189 |
| 1203.271  | <b>AF055007</b>  | 2233.81   | 864.912   | <b>NM_001819</b> | 1267.952  | 1562.378  | <b>AK001959</b>  | 1975.424  |
| 1365.345  | <b>NM_012337</b> | 1307.946  | 1453.942  | <b>NM_000175</b> | 5564.823  | 2679.192  | <b>U36217</b>    | 287.177   |
| 1166.821  | <b>AL389879</b>  | 4209.009  | 4222.576  | <b>NM_015725</b> | 4104.063  | 4498.369  | <b>AL389880</b>  | 613.032   |
| 535.2     | <b>AK022869</b>  | 1756.365  | 2416.897  | <b>R61452</b>    | 638.317   | 789.556   | <b>AL157452</b>  | 1219.52   |
| 1753.516  | <b>NM_016111</b> | 6264.44   | 8090.937  | <b>NM_012455</b> | 2751.155  | 3338.315  | <b>AK024155</b>  | 9468.574  |
| 814.62    | <b>AF085958</b>  | 59948.391 | 49866.457 | <b>M33197</b>    | 60159.93  | 60764.832 | <b>AL359334</b>  | 5279.953  |
| 6076.954  | <b>AF086021</b>  | 2701.231  | 3033.216  | <b>NM_001716</b> | 444.298   | 565.68    | <b>AK027095</b>  | 701.267   |
| 13440.235 | <b>AL117655</b>  | 504.734   | 698.587   | <b>NM_006564</b> | 3834.916  | 2809.319  | <b>AF062097</b>  | 724.95    |
| 630.153   | <b>AK024472</b>  | 1068.508  | 5482.186  | <b>NM_004802</b> | 1049.766  | 1142.064  | <b>NM_019847</b> | 767.518   |
| 1885.198  | <b>AF087981</b>  | 657.459   | 580.185   | <b>M33197</b>    | 59411.98  | 60290.406 | <b>D17093</b>    | 9541.276  |
| 1351.58   | <b>NM_017976</b> | 2796.904  | 4174.616  | <b>NM_002983</b> | 955.837   | 888.525   | <b>AK022784</b>  | 430.015   |
| 881.684   | <b>U06700</b>    | 811.731   | 1145.056  | <b>NM_000074</b> | 3480.938  | 2799.885  | <b>AL117521</b>  | 2531.036  |
| 2292.973  | <b>U63828</b>    | 1788.065  | 1993.091  | <b>BF434335</b>  | 12747.907 | 13152.77  | <b>NM_000731</b> | 459.963   |
| 8466.137  | <b>AK026915</b>  | 1371.06   | 1062.763  | <b>AK026946</b>  | 660.558   | 808.545   | <b>AK021913</b>  | 7174.109  |
| 2356.281  | <b>AL110259</b>  | 742.725   | 1062.972  | <b>M33197</b>    | 56219.852 | 62595.125 | <b>AL137489</b>  | 15476.112 |
| 1097.097  | <b>AB033100</b>  | 8780.114  | 11760.489 | <b>NM_003192</b> | 3675.269  | 4703.45   | <b>AF009311</b>  | 3312.565  |
| 2369.467  | <b>AL390138</b>  | 2144.268  | 2191.371  | <b>NM_018449</b> | 2886.567  | 4996.222  | <b>S73397</b>    | 1027.156  |
| 3452.895  | <b>AL137290</b>  | 5520.581  | 6567.333  | <b>D79994</b>    | 907.023   | 1489.392  | <b>AL050219</b>  | 1119.182  |
| 1734.988  | <b>AK021606</b>  | 619.382   | 917.028   | <b>NM_014458</b> | 2985.201  | 4765.658  | <b>AK024433</b>  | 3325.263  |
| 739.27    | <b>NM_014124</b> | 22946.449 | 23516.166 | <b>AF235049</b>  | 3516.416  | 3435.358  | <b>U82321</b>    | 880.951   |
| 37064.77  | <b>AK001551</b>  | 799.082   | 924.383   | <b>NM_001995</b> | 1046.349  | 900.958   | <b>AK023856</b>  | 493.086   |
| 2698.9    | <b>AK001825</b>  | 1103.02   | 984.573   | <b>NM_000183</b> | 7815.648  | 7545.783  | <b>AL050376</b>  | 534.996   |
| 4212.083  | <b>AK024714</b>  | 720.099   | 910.272   | <b>AY004175</b>  | 1153.19   | 998.619   | <b>AL359652</b>  | 441.688   |
| 12421.759 | <b>AK022363</b>  | 939.026   | 1562.671  | <b>M33197</b>    | 60461.504 | 58783.016 | <b>AK022423</b>  | 628.938   |
| 5050.884  | <b>AK022485</b>  | 345.211   | 557.945   | <b>NM_012327</b> | 2993.804  | 2843.781  | <b>AF088021</b>  | 1715.764  |

|           |                    |           |           |                  |           |           |                  |           |
|-----------|--------------------|-----------|-----------|------------------|-----------|-----------|------------------|-----------|
| 1830.942  | <b>AK023395</b>    | 1041.66   | 1340.827  | <b>NM_000904</b> | 859.382   | 1202.605  | <b>BF509267</b>  | 2358.943  |
| 1872.538  | <b>NM_006262</b>   | 3126.527  | 3840.572  | <b>NM_016048</b> | 1430.269  | 1701.74   | <b>NM_002455</b> | 2403.248  |
| 2415.85   | <b>AK026598</b>    | 3661.915  | 3810.728  | <b>NM_000375</b> | 7747.939  | 9511.837  | <b>NM_002959</b> | 8965.273  |
| 1426.337  | <b>AK023602</b>    | 640.655   | 1620.125  | <b>NM_000265</b> | 5635.857  | 18906.219 | <b>AK000899</b>  | 9632.459  |
| 2509.705  | <b>AF130043</b>    | 882.083   | 1353.472  | <b>NM_018849</b> | 3004.145  | 2937.092  | <b>CY3Cy5</b>    | 4686.194  |
| 1008.944  | <b>Y11167</b>      | 975.777   | 1715.648  | <b>M33197</b>    | 42210.633 | 43735.898 | <b>AW300857</b>  | 3679.516  |
| 1072.917  | <b>AK026813</b>    | 722.937   | 769.03    | <b>AF279890</b>  | 1583.393  | 1461.234  | <b>H85962</b>    | 4547.939  |
| 904.796   | <b>AK027225</b>    | 956.224   | 1092.111  | <b>NM_002236</b> | 1266.966  | 983.779   | <b>AA864554</b>  | 2067.604  |
| 5942.825  | <b>AK023083</b>    | 2658.8    | 3125.872  | <b>NM_012069</b> | 3462.325  | 3757.792  | <b>X66945</b>    | 503.401   |
| 835.294   | <b>AF130093</b>    | 488.6     | 796.239   | <b>NM_001689</b> | 41586.137 | 59021.543 | <b>X12830</b>    | 4458.402  |
| 2459.494  | <b>AF116622</b>    | 480.346   | 781.822   | <b>NM_016601</b> | 860.226   | 1040.897  | <b>U00482</b>    | 665.048   |
| 2912.866  | <b>NM_005325</b>   | 767.254   | 4541.137  | <b>NM_017905</b> | 6430.009  | 5267.269  | <b>K01904</b>    | 8782.689  |
| 359.977   | <b>AF217967</b>    | 773.386   | 572.481   | <b>M33197</b>    | 57339.117 | 60137.363 | <b>BE538886</b>  | 570.809   |
| 625.703   | <b>NM_018150</b>   | 5762.318  | 5759.802  | <b>NM_006815</b> | 13095.724 | 13164.599 | <b>NM_002228</b> | 515.211   |
| 2162.668  | <b>NM_017918</b>   | 540.526   | 654.256   | <b>NM_001663</b> | 4572.065  | 4252.532  | <b>M57650</b>    | 3311.064  |
| 3057.828  | <b>BC024009</b>    | 2520.966  | 2513.652  | <b>NM_004218</b> | 6190.239  | 10709.084 | <b>BC023978</b>  | 1191.375  |
| 1121.969  | <b>AF128543</b>    | 4661.544  | 4839.599  | <b>NM_016530</b> | 836.407   | 1391.618  | <b>M21302</b>    | 1265.775  |
| 45510.922 | <b>NM_004189</b>   | 2455.333  | 3592.309  | <b>NM_014804</b> | 873.296   | 1180.889  | <b>NM_016346</b> | 1795.594  |
| 13295.338 | <b>S83198</b>      | 12755.55  | 19610.283 | <b>L40520</b>    | 1704.903  | 2206.985  | <b>SR2</b>       | 42497.133 |
| 15908.526 | <b>AF052119</b>    | 16508.578 | 28678.785 | <b>NM_002633</b> | 6360.57   | 2743.424  | <b>SR4</b>       | 9386.496  |
| 3512.166  | <b>X94290</b>      | 1767.781  | 2955.053  | <b>M33197</b>    | 57203.121 | 54583.555 | <b>SR6</b>       | 1250.431  |
| 49445.652 | <b>AK026685</b>    | 8797.16   | 10892.24  | <b>NM_002878</b> | 3213.096  | 4105.551  | <b>SR8</b>       | 4867.182  |
| 8996.024  | <b>AF090927</b>    | 20372.348 | 18473.785 | <b>NM_017723</b> | 2403.233  | 2819.115  | <b>SR10</b>      | 18169.219 |
| 1615.997  | <b>AL137642</b>    | 1500.403  | 1829.495  | <b>AK022922</b>  | 1937.074  | 2406.783  | <b>CY3Cy5</b>    | 3810.995  |
| 3025.585  | <b>AL133619</b>    | 1583.156  | 1678.295  | <b>NM_006462</b> | 4510.334  | 3708.488  | <b>NM_001525</b> | 6422.119  |
| 3343.613  | <b>AL157496</b>    | 592.861   | 334.332   | <b>AK024750</b>  | 4192.17   | 3313.353  | <b>NM_006055</b> | 1402.251  |
| 37668.641 | <b>AK025902</b>    | 3388.752  | 4202.456  | <b>NM_000400</b> | 18437.648 | 21222.477 | <b>NM_004296</b> | 567.282   |
| 2133.481  | <b>NM_005181</b>   | 3114.103  | 2485.081  | <b>M33197</b>    | 55666.262 | 59262.531 | <b>NM_001060</b> | 1165.162  |
| 1682.951  | <b>AF026945</b>    | 684.752   | 681.867   | <b>NM_002613</b> | 2342.277  | 2298.947  | <b>AL133105</b>  | 1069.695  |
| 2170.677  | <b>AF143676</b>    | 2437.179  | 2576.556  | <b>NM_004419</b> | 1655.523  | 1375.863  | <b>AK022859</b>  | 811.675   |
| 949.003   | <b>U66044</b>      | 2581.607  | 2956.109  | <b>U47635</b>    | 1600.953  | 2034.592  | <b>NM_000214</b> | 2137.407  |
| 3248.456  | <b>NM_001821</b>   | 4092.331  | 5441.299  | <b>NM_018650</b> | 1613.43   | 2016.904  | <b>NM_014864</b> | 3504.945  |
| 4554.519  | <b>NM_005647</b>   | 1169.936  | 1172.284  | <b>AK026945</b>  | 16733.93  | 7907.836  | <b>NM_003728</b> | 4422.095  |
| 831.314   | <b>X64978</b>      | 5225.873  | 7636.539  | <b>NM_002828</b> | 1587.936  | 2129.503  | <b>NM_014352</b> | 4598.149  |
| 536.079   | <b>NM_000912</b>   | 24099.822 | 38127.281 | <b>NM_014369</b> | 1320.387  | 2457.576  | <b>NM_012481</b> | 650.403   |
| 1306.07   | <b>NM_002345</b>   | 1283.642  | 1583.531  | <b>M33197</b>    | 62947.277 | 61791.273 | <b>L09102</b>    | 10171.027 |
| 846.507   | <b>U57971</b>      | 1827.207  | 1746.892  | <b>NM_001398</b> | 13641.619 | 12713.568 | <b>U68488</b>    | 676.343   |
| 2075.909  | <b>X89673</b>      | 1159.549  | 1498.785  | <b>AB050049</b>  | 3429.333  | 4147.779  | <b>NM_012282</b> | 729.144   |
| 10216.533 | <b>AK024593</b>    | 1428.341  | 1891.729  | <b>NM_015725</b> | 4270.59   | 4380.171  | <b>NM_006710</b> | 470.118   |
| 2020.796  | <b>Z83934</b>      | 939.285   | 1047.268  | <b>R61452</b>    | 1223.964  | 1415.116  | <b>NM_003323</b> | 6322.388  |
| 2435.415  | <b>NM_018359</b>   | 3032.77   | 2317.83   | <b>R19938</b>    | 3490.619  | 5446.906  | <b>BG685310</b>  | 1003.22   |
| 5756.757  | <b>AK022020</b>    | 3015.371  | 4751.164  | <b>N94487</b>    | 8788.214  | 14924.178 | <b>NM_018668</b> | 2519.071  |
| 703.499   | <b>AK000263</b>    | 6531.671  | 6941.163  | <b>AI886795</b>  | 2541.807  | 3886.97   | <b>NM_004227</b> | 491.146   |
| 5848.352  | <b>Y13895</b>      | 612.277   | 734.005   | <b>D10495</b>    | 2190.481  | 2212.744  | <b>NM_005282</b> | 787.777   |
| 772.029   | <b>NM_017447</b>   | 1225.284  | 1509.567  | <b>BF344679</b>  | 1004.595  | 3793.571  | <b>NM_001736</b> | 1027.889  |
| 447.981   | <b>CY3Cy5</b>      | 1183.846  | 137.015   | <b>M36634</b>    | 723.9     | 575.326   | <b>AB028949</b>  | 943.83    |
| 4844.131  | <b>BF983177</b>    | 1183.426  | 1626.665  | <b>M14156</b>    | 1787.211  | 1652.032  | <b>AL137580</b>  | 556.84    |
| 2201.394  | <b>Z26317</b>      | 3068.19   | 2515.581  | <b>U87939</b>    | 884.401   | 1192.744  | <b>NM_004101</b> | 849.422   |
| 4758.821  | <b>X16983</b>      | 7274.763  | 6255.949  | <b>U86961</b>    | 716.455   | 764.481   | <b>NM_002995</b> | 13084.337 |
| 2630.974  | <b>X56160</b>      | 2615.033  | 3016.263  | <b>AK094237</b>  | 1019.542  | 1089.174  | <b>NM_015978</b> | 1671.116  |
| 43177.352 | <b>BG679991</b>    | 994.086   | 927.453   | <b>L07592</b>    | 985.61    | 932.375   | <b>NM_003810</b> | 2218.056  |
| 2397.312  | <b>H-Y 00097 I</b> | 3678.689  | 3478.826  | <b>NM_006981</b> | 576.972   | 960.146   | <b>NM_005212</b> | 2765.51   |
| 1640.856  | <b>H-M 59964</b>   | 1785.792  | 2157.163  | <b>M33197</b>    | 61675.539 | 61906.805 | <b>NM_006419</b> | 995.93    |



|           |             |           |           |           |           |           |           |           |
|-----------|-------------|-----------|-----------|-----------|-----------|-----------|-----------|-----------|
| 764.572   | H-Y 00711 I | 66954.039 | 66230.094 | AK027244  | 1119.008  | 968.452   | AK024715  | 831.506   |
| 25772.113 | H-X 16707 I | 2629.613  | 2629.202  | AF086129  | 1004.552  | 1207.671  | NM_014942 | 386.088   |
| 394.444   | AL038354    | 52403.992 | 27024.736 | NM_014458 | 3651.573  | 4712.57   | NM_018360 | 1230.044  |
| 17435.51  | R14607      | 932.833   | 695.985   | L10333    | 1176.258  | 1654.27   | AL365415  | 800.304   |
| 330.597   | W84867      | 1292.471  | 2603.61   | AF235049  | 4119.692  | 3760.895  | L29147    | 12288.683 |
| 944.894   | NM_021976   | 4502.903  | 2889.993  | M33197    | 62763.906 | 59538.59  | NM_020228 | 1714.943  |
| 2487.095  | SR2         | 52628.699 | 47176.508 | NM_007369 | 840.715   | 761.617   | AK024685  | 1507.833  |
| 1569.46   | SR4         | 14986.239 | 10569.493 | NM_014776 | 2244.725  | 2491.156  | NM_000688 | 2157.631  |
| 1133.518  | SR6         | 2004.209  | 1214.477  | NM_006480 | 18136.174 | 19907.988 | U39573    | 539.671   |
| 910.051   | SR8         | 6734.19   | 16433.523 | NM_007223 | 25029.064 | 21278.137 | D82061    | 2415.269  |
| 741.884   | SR10        | 25395.57  | 7892.77   | NM_000145 | 703.729   | 456.287   | AJ293009  | 917.787   |
| 781.553   | CY3Cy5      | 584.323   | 139.016   | AF030107  | 1496.238  | 1322.988  | NM_000374 | 2182.508  |
| 467.348   | NM_001284   | 43695.559 | 39581.141 | NM_000871 | 964.217   | 1190.651  | NM_000502 | 3908.745  |
| 1010.755  | U31099      | 485.002   | 783.171   | M33197    | 56766.922 | 56241.984 | NM_001359 | 10050.507 |
| 1482.81   | NM_001105   | 1477.648  | 2284.052  | NM_018968 | 598.58    | 464.725   | NM_005175 | 17500.748 |
| 561.336   | NM_005585   | 1148.412  | 464.522   | AF086924  | 29296.482 | 35574.797 | NM_001696 | 8520.874  |
| 3190.932  | NM_002075   | 2597.682  | 2811.65   | NM_000264 | 398.741   | 662.152   | NM_004975 | 2620.423  |
| 8338.189  | Y08756      | 6824.744  | 7115.053  | AB058740  | 3789.35   | 4083.881  | D87445    | 3708.098  |
| 1316.016  | NM_005563   | 6040.309  | 4366.963  | NM_003385 | 562.039   | 622.037   | NM_000238 | 2042.606  |
| 777.163   | NM_005102   | 3732.487  | 4613.187  | NM_004392 | 693.37    | 921.098   | NM_004980 | 4971.007  |
| 1049.17   | NM_002719   | 3986.708  | 3739.194  | M33197    | 55855.836 | 59372.797 | AB011094  | 6864.889  |
| 788.09    | AB035356    | 438.592   | 1607.944  | NM_001154 | 3825.273  | 6181.773  | NM_003224 | 1032.291  |
| 1279.806  | AV752086    | 1852.784  | 1323.563  | NM_001819 | 1386.65   | 1505.849  | NM_001658 | 57921.055 |
| 2435.871  | NM_016102   | 4008.926  | 3363.904  | M33197    | 58714.414 | 58571.219 | AK021761  | 3191.718  |
| 31535.135 | NM_004376   | 1950.924  | 1120.984  | NM_006815 | 17062.926 | 20234.814 | AK024536  | 865.585   |
| 1613.402  | NM_005603   | 10910.951 | 6066.622  | NM_001663 | 6755.768  | 7803.536  | NM_001483 | 926.186   |
| 11257.66  | NM_006834   | 4362.801  | 4770.474  | NM_004218 | 7604.829  | 12350.384 | NM_018973 | 4824.29   |
| 676.642   | AB011100    | 2453.08   | 2196.515  | NM_016530 | 3365.679  | 3808.26   | NM_002591 | 3565.119  |
| 10769.802 | NM_012402   | 3087.957  | 3863.818  | NM_014804 | 1195.478  | 874.297   | NM_020216 | 3663.427  |
| 986.507   | M76676      | 2716.605  | 2476.845  | NM_012455 | 4174.434  | 4210.882  | AK021860  | 635.108   |
| 1968.707  | NM_003857   | 1196.575  | 1107.376  | NM_002806 | 7201.867  | 8362.306  | AB046816  | 4697.832  |
| 5858.3    | AL137690    | 614.961   | 1349.863  | NM_001716 | 782.494   | 1030.731  | AL137266  | 1597.37   |
| 303.995   | Z83804      | 1977.273  | 2310.095  | NM_006564 | 4029.849  | 3644.365  | NM_016457 | 507.273   |
| 1076.915  | NM_004386   | 2206.081  | 2127.097  | NM_004802 | 1050.123  | 1180.115  | NM_005057 | 711.871   |
| 3684.373  | NM_007366   | 2092.466  | 2067.514  | M33197    | 56960.93  | 60790.336 | AF143321  | 712.666   |
| 527.872   | NM_000592   | 808.247   | 1297.398  | NM_002983 | 996.136   | 1388.918  | AB046842  | 1060.89   |
| 854.857   | NM_016584   | 7791.159  | 7772.726  | NM_000074 | 3857.895  | 4067.017  | NM_004850 | 1283.547  |
| 854.007   | NM_001815   | 1728.875  | 1826.619  | NM_020393 | 286.423   | 590.624   | NM_002822 | 2595.1    |
| 713.35    | NM_000064   | 7112.917  | 9162.171  | BF434335  | 17029.789 | 22364.75  | BF306955  | 1514.44   |
| 9851.526  | NM_003264   | 3914.245  | 6726.319  | M57627    | 362.998   | 393.27    | NM_001394 | 5437.95   |
| 1226.366  | NM_006725   | 2134.41   | 2820.255  | NM_002993 | 1525.279  | 1301.801  | NM_018441 | 5286.615  |
| 1910.464  | NM_003326   | 1677.527  | 1265.581  | AK026946  | 748.433   | 687.35    | NM_001609 | 695.553   |
| 1355.891  | NM_004568   | 22696.525 | 12878.803 | M33197    | 50780.57  | 55600.313 | BE733234  | 503.777   |
| 15522.551 | NM_000202   | 1608.021  | 799.923   | NM_003192 | 3520.649  | 3709.889  | NM_006710 | 259.488   |
| 12115.599 | NM_005496   | 9921.184  | 2252.002  | NM_002828 | 1339.748  | 1164.19   | NM_003323 | 3050.68   |
| 1227.371  | NM_016608   | 874.916   | 711.813   | NM_014369 | 1136.135  | 1171.426  | H85962    | 5805.214  |
| 17813.781 | NM_004817   | 844.116   | 359.668   | M33197    | 61439.535 | 59048.121 | BG742446  | 785.291   |
| 735.86    | NM_018975   | 9940.336  | 4918.898  | NM_001398 | 16147.993 | 13651.115 | AA864554  | 2364.104  |
| 532.56    | AB023215    | 6833.747  | 4886.66   | AB050049  | 4557.486  | 4316.416  | X66945    | 848.817   |
| 33039.539 | NM_018073   | 1705.671  | 2992.082  | J05125    | 1044.844  | 529.683   | X12830    | 4468.168  |
| 4699.046  | AL137529    | 2084.517  | 3186.325  | NM_001995 | 1425.344  | 1233.933  | U00482    | 650.956   |
| 950.831   | NM_012332   | 2434.625  | 3934.093  | AY004175  | 1561.582  | 1334.178  | Z80998    | 273.438   |
| 1151.162  | AK026648    | 821.406   | 997.429   | M33197    | 58237.809 | 59506.695 | K01904    | 7009.935  |

|           |             |           |           |           |           |           |           |           |
|-----------|-------------|-----------|-----------|-----------|-----------|-----------|-----------|-----------|
| 10819.283 | NM_000497   | 1375.656  | 1446.125  | NM_012327 | 3660.96   | 4287.317  | BE538886  | 738.604   |
| 786.417   | NM_017421   | 1001.081  | 756.415   | NM_000904 | 997.616   | 2151.626  | NM_00222E | 641.892   |
| 4853.067  | AK025977    | 8251.309  | 8927.144  | NM_01604E | 1146.462  | 1349.077  | M57650    | 2458.445  |
| 853.056   | AK023130    | 6042.061  | 5343.653  | NM_00037E | 6025.452  | 6603.583  | M21302    | 1290.435  |
| 9819.501  | NM_00289E   | 6249.89   | 8869.188  | NM_00026E | 4334.67   | 18033.447 | NM_01634E | 1838.672  |
| 10439.293 | NM_00048E   | 2632.593  | 3841.53   | NM_01884E | 2312.887  | 3321.491  | AK024865  | 453.171   |
| 3004.847  | NM_005397   | 1216.86   | 588.29    | M33197    | 43649.367 | 56888.934 | U90942    | 28781.08  |
| 683.381   | NM_00080E   | 6290.266  | 5320.653  | AF279890  | 2069.662  | 2189.319  | NM_01836C | 633.252   |
| 521.438   | NM_00632C   | 1202.63   | 393.608   | NM_00223E | 1712.227  | 1532.233  | NM_00152E | 5361.488  |
| 1153.208  | AB014511    | 4139.061  | 2630.988  | NM_01206E | 2977.087  | 3506.865  | NM_00605E | 1909.811  |
| 4312.603  | NM_01425E   | 4562.899  | 2998.807  | NM_00168E | 42425.938 | 51867.18  | NM_00429E | 696.124   |
| 1170.06   | NM_00166E   | 6423.196  | 3255.406  | NM_016601 | 561.639   | 847.364   | NM_00504E | 536.112   |
| 687.643   | NM_016131   | 6114.193  | 2588.379  | NM_01790E | 5880.495  | 3703.483  | NM_00106C | 1114.667  |
| 499.686   | NM_00682E   | 1043.643  | 505.631   | NM_006981 | 658.634   | 345.604   | AL133105  | 1168.739  |
| 1352.806  | NM_01214E   | 6853.968  | 5484.446  | M33197    | 60866.816 | 59789.262 | AK022859  | 644.964   |
| 1071.641  | NM_01642E   | 1418.164  | 1128.47   | AK027244  | 1367.855  | 970.054   | NM_014864 | 3533.58   |
| 8760.293  | NM_018264   | 2418.051  | 2382.883  | L40520    | 2640.327  | 3182.617  | NM_012481 | 1119.027  |
| 12099.208 | NM_01458C   | 743.769   | 1223.76   | NM_00263E | 7165.849  | 2865.342  | L09102    | 9677.695  |
| 1635.45   | AB028998    | 1106.514  | 1349.996  | M33197    | 51099.648 | 52027.859 | U68488    | 635.796   |
| 7850.109  | NM_00015E   | 734.075   | 1055.901  | NM_00287E | 1794.499  | 1888.62   | NM_00067E | 317.841   |
| 12584.447 | NM_00203E   | 5245.495  | 2979.998  | NM_01772E | 2026.982  | 2631.792  | NM_016247 | 2331.414  |
| 1110.338  | NM_004111   | 2596.01   | 1375.897  | AK022922  | 1930.512  | 2287.631  | AB011094  | 3843.637  |
| 2306.137  | AF085966    | 4688.638  | 2408.086  | NM_00646E | 3933.381  | 3680.486  | NM_00165E | 45195.375 |
| 1240.181  | NM_00531E   | 2174.817  | 1863.957  | AK024750  | 3795.323  | 2910.613  | NM_006827 | 6996.232  |
| 4484.25   | NM_01631E   | 3221.932  | 2494.615  | NM_00040C | 24742.947 | 23474.998 | AK021761  | 1412.566  |
| 673.414   | NM_00336E   | 7064.627  | 6706.553  | M33197    | 56342.605 | 59007.16  | AK024536  | 678.763   |
| 393.946   | NM_000057   | 1853.536  | 1350.468  | NM_00261E | 2110.592  | 1952.926  | NM_01866E | 2081.255  |
| 6865.192  | NM_01834E   | 3844.545  | 1944.415  | U47635    | 1726.295  | 1797.313  | NM_004227 | 690.577   |
| 605.919   | NM_01771E   | 2433.417  | 2074.836  | NM_01865C | 1514.367  | 1138.224  | NM_00528E | 1114.868  |
| 432.072   | NM_002737   | 2109.905  | 2989.83   | AK026945  | 15180.061 | 6205.498  | NM_00173E | 466.63    |
| 3633.179  | Z25427      | 3750.239  | 3579.991  | NM_00439E | 776.788   | 426.279   | AB028949  | 1116.725  |
| 1647.925  | NM_00467E   | 6731.227  | 4721.861  | M33197    | 61250.363 | 59174.855 | AL137580  | 504.613   |
| 2075.414  | NM_00135E   | 1199.292  | 381.078   | NM_001154 | 4974.103  | 6372.058  | NM_004101 | 733.672   |
| 43671.566 | NM_006214   | 2708.417  | 883.513   | NM_00181E | 1563.747  | 1628.361  | NM_00299E | 13399.894 |
| 10185.025 | AJ010228    | 3463.928  | 1792.386  | NM_00199E | 341.751   | 523.789   | NM_01597E | 1601.765  |
| 1508.389  | NM_00519E   | 2792.286  | 3254.69   | NM_01572E | 3313.489  | 2716.359  | NM_00381C | 1941.861  |
| 16037.878 | NM_00684E   | 73548.594 | 66310.82  | R61452    | 809.331   | 634.25    | NM_01444E | 1573.405  |
| 6289.437  | NM_00560E   | 17104.07  | 19992.629 | R19938    | 1918.59   | 2202.534  | NM_00521E | 3017.46   |
| 168.799   | NM_001061   | 617.361   | 872.163   | N94487    | 4591.945  | 4306.391  | M14584    | 686.032   |
| 8083.345  | Z11694      | 11723.303 | 20349.352 | AI886795  | 1616.802  | 1824.184  | NM_00641E | 930.472   |
| 2235.113  | BF983177    | 1127.713  | 1022.675  | D10495    | 1507.695  | 1722.378  | AF035035  | 272.772   |
| 723.517   | Z26317      | 2227.379  | 1617.289  | BF344679  | 853.781   | 2921.547  | AK024715  | 982.426   |
| 833.476   | X16983      | 7421.073  | 6648.876  | M14156    | 1667.343  | 1544.66   | BF306955  | 916.653   |
| 586.318   | X56160      | 2271.112  | 3174.419  | U87939    | 1173.426  | 1157.453  | NM_001394 | 2983.815  |
| 1310.242  | BG679991    | 883.448   | 1472.272  | U86961    | 962.559   | 881.156   | NM_018441 | 3080.929  |
| 642.148   | H-Y 00097 I | 2881.38   | 2390.071  | AK094237  | 1047.177  | 668.587   | NM_00077E | 2478.092  |
| 392.585   | H-M 59964   | 1472.667  | 1189.986  | L07592    | 981.547   | 557.726   | NM_02022E | 2547.919  |
| 1093.301  | H-Y 00711 I | 60590.492 | 54699.613 | BF434335  | 14471.083 | 13374.604 | AK024685  | 1055.798  |
| 787.915   | R14607      | 1244.265  | 802.302   | M57627    | 868.82    | 1191.464  | NM_00367E | 8172.087  |
| 529.472   | NM_02197E   | 3823.23   | 1319.766  | NM_00299E | 1188.434  | 822.508   | AF113007  | 1045.399  |
| 3332.952  | NM_00571E   | 11329.673 | 4191.743  | AK026946  | 1276.316  | 1077.307  | NM_00068E | 3280.347  |
| 8507.513  | NM_00549E   | 12228.114 | 6448.912  | M33197    | 56515.32  | 57085.176 | U39573    | 999.975   |
| 5459.805  | NM_01660E   | 1190.889  | 2375.456  | NM_00319E | 4860.113  | 3864.801  | D82061    | 1351.434  |

|           |           |           |           |           |           |           |           |           |
|-----------|-----------|-----------|-----------|-----------|-----------|-----------|-----------|-----------|
| 905.246   | NM_00285E | 5984.861  | 7113.497  | NM_01844E | 3491.565  | 4285.887  | AJ293009  | 1087.956  |
| 17075.727 | NM_004817 | 941.706   | 848.988   | AF086129  | 774.806   | 640.595   | NM_000374 | 1718.706  |
| 726.737   | NM_01897E | 11075.953 | 8949.76   | NM_01445E | 2758.368  | 2626.988  | NM_000502 | 3115.688  |
| 593.598   | NM_001284 | 41484.801 | 32128.549 | NM_00736E | 649.911   | 698.793   | NM_00135E | 9693.976  |
| 207.036   | NM_003242 | 5972.023  | 5432.017  | NM_01477E | 1403.501  | 1762.021  | NM_00169E | 8076.004  |
| 5645.751  | NM_001105 | 1223.125  | 1633.308  | NM_00648C | 9504.922  | 8077.009  | NM_00497E | 2804.464  |
| 899.272   | NM_00558E | 827.452   | 579.449   | NM_00722E | 14136.413 | 13238.122 | D87445    | 4077.922  |
| 2977.965  | NM_00207E | 1560.332  | 1522.981  | AF030107  | 1245.334  | 1104.163  | NM_00023E | 2633.304  |
| 2107.628  | Y08756    | 5689.523  | 3637.763  | NM_000871 | 660.868   | 632.202   | NM_002247 | 704.011   |
| 1474.061  | NM_00556E | 5833.349  | 2269.36   | M33197    | 55223.586 | 46397.379 | NM_00498C | 4680.232  |
| 534.827   | AV752086  | 956.569   | 803.673   | AF086924  | 22854.92  | 16847.412 | NM_01634E | 860.587   |
| 872.202   | NM_016102 | 3042.141  | 1267.906  | AB058740  | 2865.158  | 2050.625  | NM_00148E | 1226.443  |
| 619.103   | NM_00437E | 1788.76   | 706.009   | AF279890  | 2304.996  | 2148.17   | NM_01897E | 6706.87   |
| 616.464   | NM_014252 | 4362.295  | 3787.324  | NM_00223E | 2218.462  | 1000.564  | NM_002591 | 5742.42   |
| 19113.654 | NM_001662 | 6925.068  | 9103.333  | NM_01206E | 4796.196  | 5212.707  | NM_02021E | 3341.021  |
| 1500.631  | NM_016131 | 7804.11   | 8869.823  | NM_00168E | 52038.422 | 54803.262 | AK021860  | 836.68    |
| 2075.147  | NM_006822 | 1894.577  | 2029.66   | NM_016601 | 1227.036  | 1516.802  | AB046816  | 500.518   |
| 59372.809 | NM_012142 | 8625.994  | 12534.22  | NM_01790E | 9890.758  | 6569.992  | AL137266  | 1738.841  |
| 1442.1    | NM_01642E | 1871.632  | 1876.773  | M33197    | 57771.887 | 57971.895 | NM_016457 | 756.687   |
| 2494.597  | NM_006834 | 3839.944  | 3138.642  | NM_00681E | 12760.213 | 10216.739 | NM_005057 | 966.251   |
| 624.594   | AB011100  | 1918.07   | 1242.316  | NM_00166E | 3511.758  | 2459.227  | AF143321  | 653.548   |
| 967.937   | U61741    | 1257.306  | 2043.589  | NM_00421E | 5738.151  | 7012.619  | AB046842  | 1263.586  |
| 177.629   | M76676    | 2626.506  | 2970.79   | NM_01653C | 893.931   | 1083.908  | NM_00485C | 1332.725  |
| 657.21    | NM_003857 | 935.659   | 751.683   | NM_014804 | 824.853   | 990.707   | NM_002822 | 2579.114  |
| 952.565   | AL137690  | 610.137   | 817.088   | NM_01245E | 2318.006  | 3143.267  | NM_014352 | 3321.472  |
| 347.941   | Z83804    | 1941.011  | 1528.101  | NM_00280E | 5630.458  | 5827.583  | NM_012481 | 901.211   |
| 1357.106  | NM_00438E | 1923.569  | 956.061   | M33197    | 55578.387 | 57534.297 | L09102    | 6295.859  |
| 423.494   | NM_00736E | 2568.565  | 4184.301  | NM_006564 | 2515.495  | 1736.389  | NM_016247 | 1849.091  |
| 687.347   | NM_000592 | 2120.695  | 3462.443  | NM_00480E | 781.369   | 663.886   | NM_01228E | 590.654   |
| 7442.512  | NM_016584 | 6916.859  | 7507.797  | M33197    | 53462.098 | 46334.074 | NM_00332E | 5260.806  |
| 3549.445  | NM_00181E | 1583.645  | 2010.002  | NM_00298E | 737.791   | 493.488   | BG685310  | 1056.776  |
| 1055.661  | NM_000064 | 6143.31   | 11697.307 | NM_000074 | 2390.804  | 1563.768  | AW300857  | 4602.845  |
| 15161.818 | NM_003264 | 3926.31   | 4931.771  | NM_00261E | 3957.545  | 3788.465  | H85962    | 6748.902  |
| 639.57    | NM_00456E | 21449.807 | 8719.371  | NM_00441E | 2576.218  | 1555.534  | BG742446  | 735.726   |
| 1371.633  | NM_00020E | 771.23    | 816.939   | U47635    | 2222.93   | 1736.054  | AA864554  | 2358.189  |
| 1004.843  | Z25427    | 3059.99   | 4168.007  | NM_01865C | 2755.292  | 2802.288  | X66945    | 850.629   |
| 1501.671  | NM_00467E | 7662.293  | 8743.54   | AK026945  | 23881.574 | 9551.82   | X12830    | 4779.756  |
| 1463.32   | NM_00135E | 1979.654  | 2274.765  | NM_00282E | 2387.034  | 2079.744  | U00482    | 773.587   |
| 1799.202  | NM_006214 | 3302.832  | 4505.236  | NM_01436E | 1221.47   | 1414.564  | K01904    | 8166.325  |
| 5824.223  | AJ010228  | 4197.833  | 5011.185  | M33197    | 62953.484 | 60887.164 | BE538886  | 890.824   |
| 10900.183 | NM_00519E | 3563.078  | 6826.333  | NM_00139E | 13434.842 | 12685.672 | M57650    | 3209.258  |
| 13036.383 | NM_01807E | 674.407   | 828.133   | AB050049  | 3367.546  | 4236.581  | M21302    | 1210.511  |
| 5658.155  | AL137529  | 2753.784  | 3161.145  | J05125    | 652.637   | 653.267   | NM_00521E | 1782.743  |
| 1782.267  | AK026648  | 990.83    | 1270.57   | NM_00199E | 1099.735  | 920.179   | AK024715  | 577.73    |
| 3782.759  | NM_000497 | 1282.142  | 1392.394  | NM_00018E | 7647.251  | 7504.766  | U90942    | 34284.957 |
| 2073.716  | NM_017421 | 1038.542  | 653.621   | AY004175  | 976.984   | 690.084   | NM_01494E | 382.579   |
| 707.74    | AK025977  | 8114.688  | 8049.65   | M33197    | 55868.184 | 52855.996 | NM_01836C | 748.21    |
| 8312.562  | AK023130  | 6990.721  | 8955.326  | NM_012327 | 2343.315  | 2289.597  | AL365415  | 660.955   |
| 7523.379  | NM_00027E | 2435.846  | 18275.131 | NM_000904 | 777.094   | 810.627   | L29147    | 10190.067 |
| 1023.904  | NM_00289E | 6808.517  | 8479.933  | NM_01604E | 871.09    | 779.695   | NM_00152E | 8866.336  |
| 55631.074 | NM_00048E | 2105.287  | 2415.928  | NM_00037E | 5005.835  | 3206.257  | NM_00605E | 1786.132  |
| 10816.383 | BE876237  | 1173.144  | 1945.103  | NM_00026E | 3732.04   | 8441.123  | NM_00429E | 815.034   |
| 3767.45   | NM_005397 | 1004.959  | 1013.359  | NM_01884E | 1714.443  | 1279.193  | NM_00504E | 515.196   |

|           |             |           |           |           |           |           |           |           |
|-----------|-------------|-----------|-----------|-----------|-----------|-----------|-----------|-----------|
| 754.57    | NM_000806   | 7241.305  | 6763.048  | M33197    | 30746.264 | 28102.254 | NM_005972 | 578.055   |
| 988.719   | AB014511    | 2725.532  | 2320.688  | BC009993  | 2155.282  | 1415.252  | NM_001060 | 1344.366  |
| 3588.222  | NM_021976   | 5146.125  | 5201.104  | M33197    | 61200.199 | 59006.047 | NM_018841 | 802.225   |
| 7682.94   | NM_005718   | 15085.943 | 13448.058 | NM_003031 | 3147.588  | 2126.789  | AL133105  | 1005.732  |
| 1209.558  | NM_018264   | 2163.986  | 1513.57   | NM_007170 | 508.16    | 646.428   | AK022859  | 831.64    |
| 650.501   | AB028998    | 1010.865  | 1156.705  | NM_003008 | 1243.077  | 673.027   | NM_000214 | 591.34    |
| 8550.318  | NM_002033   | 6344.992  | 2411.834  | M33197    | 57073.957 | 55466.203 | NM_014864 | 3397.451  |
| 1193.051  | NM_004111   | 2908.521  | 1706.591  | AK027244  | 906.584   | 704.985   | NM_003728 | 3494.337  |
| 562.072   | AF085966    | 6028.957  | 4801.954  | L40520    | 1550.94   | 1618.914  | NM_004975 | 1752.524  |
| 754.126   | NM_016316   | 3280.928  | 4044.245  | NM_002633 | 6768.044  | 2963.256  | D87445    | 1157.245  |
| 498.24    | NM_003369   | 8044.963  | 8883.144  | M33197    | 52707.426 | 52305.293 | NM_000238 | 1231.775  |
| 1253.853  | NM_000057   | 2674.382  | 2713.271  | NM_002878 | 1773.827  | 1963.991  | NM_004980 | 4318.306  |
| 1556.419  | NM_003177   | 3449.651  | 3186.173  | NM_017723 | 3063.656  | 3074.35   | AB011094  | 5684.999  |
| 2179.296  | NM_017719   | 1042.046  | 577.047   | AK022922  | 3077.534  | 3475.467  | NM_003224 | 752.828   |
| 1341.821  | AF064078    | 895.616   | 934.556   | NM_006462 | 3770.291  | 2554.365  | NM_001658 | 49691.664 |
| 4518.64   | NM_002737   | 1085.068  | 918.921   | AK024750  | 2998.827  | 1913.976  | NM_006827 | 10508.647 |
| 4878.643  | NM_002719   | 3679.63   | 3699.154  | NM_000400 | 17968.732 | 13797.252 | AK021761  | 2686.785  |
| 7281.516  | AV752086    | 1118.696  | 1329.311  | NM_015885 | 3082.228  | 3087.228  | AK024536  | 1046.152  |
| 832.292   | NM_016102   | 3244.559  | 4133.788  | NM_015889 | 47452.781 | 38981.859 | NM_018668 | 3436.974  |
| 574.062   | NM_004376   | 2160.562  | 2348.275  | M33197    | 54847.84  | 51347.344 | NM_004227 | 914.498   |
| 848.499   | NM_006848   | 64277.055 | 69151.117 | NM_004276 | 1965.997  | 1022.546  | NM_005282 | 1317.655  |
| 1378.171  | NM_005603   | 18031.803 | 17897.186 | NM_002332 | 3745.391  | 3439.451  | NM_001736 | 516.345   |
| 439.401   | Z11694      | 11768.561 | 11365.234 | NM_002859 | 1261.312  | 1212.274  | AB028949  | 1245.529  |
| 6312.461  | BF983177    | 1189.96   | 1466.848  | NM_005246 | 1696.028  | 2147.369  | AL137580  | 703.272   |
| 11433.244 | X16983      | 7075.514  | 7281.211  | AF161339  | 3638.511  | 5717.027  | NM_004101 | 557.007   |
| 776.823   | X56160      | 1790.704  | 1829.148  | M33197    | 55267.797 | 47253.555 | NM_002995 | 12020.595 |
| 2298.268  | BG679991    | 821.995   | 1326.711  | AK000354  | 2180.695  | 1625.247  | AB033114  | 250.441   |
| 1001.2    | H-Y 00097 I | 3469.505  | 4450.765  | M33197    | 60315.629 | 57362.074 | NM_015978 | 1794.957  |
| 3509.957  | H-M 59964   | 2066.584  | 3234.507  | NM_001510 | 1453.296  | 1285.141  | NM_003810 | 2075.785  |
| 586.096   | H-X 16707 I | 2680.261  | 2295.362  | AK024474  | 6665.477  | 7067.014  | NM_014443 | 1434.049  |
| 6166.997  | AL038354    | 58487.422 | 38093.098 | NM_006862 | 1166.55   | 865.185   | NM_016457 | 423.679   |
| 817.43    | NM_000064   | 16062.991 | 23806.176 | NM_017901 | 1804.033  | 2139.952  | NM_004850 | 1421.837  |
| 439.451   | NM_003264   | 3341.256  | 4756.961  | NM_004272 | 1523.27   | 995.12    | NM_002822 | 2986.805  |
| 3245.204  | NM_006725   | 1824.257  | 1877.427  | NM_000358 | 892.677   | 713.137   | BF306955  | 1195.95   |
| 1296.886  | NM_003326   | 755.113   | 1097.322  | NM_001930 | 4968.058  | 2446.844  | NM_001394 | 4558.188  |
| 1971.259  | NM_004568   | 26573.18  | 25173.828 | AK025270  | 761.854   | 574.485   | NM_018441 | 5309.612  |
| 596.901   | NM_000202   | 1077.786  | 1739.625  | NM_001564 | 1191.388  | 1069.027  | NM_000778 | 5087.957  |
| 35441.688 | NM_005496   | 11614.068 | 5951.919  | M33197    | 48891.703 | 50323.363 | NM_001609 | 809.928   |
| 890.54    | NM_016608   | 735.763   | 1179.507  | AF263537  | 8546.843  | 10082.699 | BE733234  | 492.598   |
| 436.16    | NM_002858   | 7188.57   | 5485.956  | NM_015895 | 2655.912  | 3653.474  | NM_020228 | 2716.6    |
| 17866.637 | NM_004817   | 1337.766  | 821.783   | M33197    | 54620.492 | 47262.363 | AK024685  | 1220.707  |
| 7171.977  | NM_018975   | 12490.092 | 7177.542  | NM_013374 | 11125.28  | 8652.858  | NM_003676 | 9597.792  |
| 2224.125  | AB023215    | 9968.867  | 8921.789  | NM_003252 | 4492.809  | 2028.603  | AF113007  | 1297.065  |
| 813.877   | U31099      | 615.835   | 1165.981  | NM_001228 | 1020.433  | 596.244   | NM_000688 | 3765.562  |
| 657.861   | NM_001105   | 1271.616  | 1964.906  | NM_016561 | 5981.514  | 3029.054  | U39573    | 1104.967  |
| 558.488   | NM_005585   | 935.202   | 508.777   | NM_001225 | 2211.979  | 1129.442  | D82061    | 1364.539  |
| 1156.302  | NM_002075   | 1680.038  | 1941.68   | AL110226  | 59972.656 | 54080.652 | AJ293009  | 1239.477  |
| 586.684   | Y08756      | 7301.91   | 8202.063  | M33197    | 506.97    | 558.172   | NM_000374 | 2016.334  |
| 873.592   | NM_005102   | 3835.83   | 4799.171  | NM_000308 | 1253.493  | 2919.974  | NM_000502 | 3530.55   |
| 688.735   | NM_005397   | 797.574   | 494.251   | X69636    | 1725.948  | 1134.353  | NM_001359 | 10216.24  |
| 4154.289  | NM_000806   | 6642.2    | 4543.215  | M33197    | 53791.551 | 55125.715 | NM_001696 | 8778.498  |
| 6152.206  | NM_006320   | 1364.03   | 805.445   | NM_004173 | 11350.399 | 8380.557  | AF190900  | 1692.007  |
| 3998.341  | AB014511    | 3321.057  | 2465.516  | NM_013974 | 2091.955  | 1130.579  | NM_020404 | 3469.498  |

|           |           |           |           |           |           |           |           |           |
|-----------|-----------|-----------|-----------|-----------|-----------|-----------|-----------|-----------|
| 871.842   | NM_014252 | 4663.717  | 3107.039  | NM_003983 | 2516.906  | 1563.573  | BE972401  | 1327.025  |
| 11339.087 | NM_001662 | 8777.462  | 8290.662  | AK023708  | 861.758   | 828.372   | NM_017425 | 964.495   |
| 851.004   | NM_016131 | 9387.068  | 10701.988 | NM_002108 | 1227.016  | 957.127   | AB007922  | 654.946   |
| 454.215   | NM_006822 | 2374.411  | 2170.702  | M33197    | 48405.137 | 41847.613 | NM_015982 | 1420.411  |
| 1948.882  | NM_012142 | 11336.593 | 15972.439 | NM_018464 | 8733.126  | 5710.049  | NM_003746 | 14628.159 |
| 3716.563  | NM_016429 | 2726.352  | 2306.755  | D43948    | 1149.242  | 593.467   | NM_002910 | 20100.955 |
| 1284.356  | NM_006834 | 4678.907  | 3749.579  | NM_012310 | 2940.789  | 2356.149  | AC096970  | 14265.432 |
| 53516.012 | NM_012402 | 2783.858  | 3259.641  | BF382116  | 3167.897  | 3652.815  | AK024865  | 641.718   |
| 4528.913  | M76676    | 1893.181  | 1226.359  | NM_003193 | 6576.227  | 4777.195  | NM_007210 | 409.463   |
| 2400.473  | NM_003857 | 762.905   | 868.997   | AK055825  | 67237.07  | 71232.563 | NM_001483 | 1335.319  |
| 1077.011  | AL137690  | 614.428   | 1799.263  | M33197    | 50164.914 | 42859.07  | NM_018973 | 8274.524  |
| 3222.81   | U67784    | 722.34    | 743.082   | NM_005197 | 2775.11   | 2198.75   | NM_002591 | 8137.155  |
| 587.867   | NM_007366 | 1731.851  | 2213.512  | AL137421  | 42523.184 | 25132.023 | NM_020216 | 3716.281  |
| 1247.433  | NM_000592 | 945.381   | 802.658   | M33197    | 46732.422 | 46653.379 | AK021860  | 895.088   |
| 867.559   | NM_001815 | 1296.807  | 1490.046  | NM_007241 | 438.024   | 1000.762  | AL137266  | 1887.999  |
| 476.731   | AK095793  | 1342.672  | 2142.659  | NM_017996 | 2494.372  | 1515.297  | NM_014288 | 1555.649  |
| 344.161   | NM_003177 | 4106.894  | 3463.374  | NM_014517 | 1651.994  | 1756.57   | NM_017703 | 5707.362  |
| 16687.045 | NM_017719 | 882.707   | 484.648   | NM_005466 | 604.784   | 483.587   | NM_015320 | 1759.888  |
| 844.243   | AF064078  | 1046.06   | 767.644   | NM_004269 | 1044.874  | 1359.615  | NM_004055 | 895.848   |
| 1981.349  | AL049688  | 1432.018  | 1266.978  | D31765    | 1049.526  | 989.236   | AJ297349  | 1770.337  |
| 2319.505  | NM_002737 | 2304.836  | 3041.939  | NM_006107 | 3972.984  | 2277.51   | NM_005828 | 5141.911  |
| 622.164   | Z25427    | 3405.49   | 4208.138  | NM_004175 | 571.104   | 661.343   | NM_001619 | 2076.286  |
| 1482.381  | NM_004672 | 10749.52  | 12567.563 | AF288288  | 8740.909  | 6788.685  | NM_006599 | 1800.625  |
| 2613.106  | NM_001353 | 2708.33   | 2500.736  | NM_017646 | 3874.006  | 1940.62   | NM_004463 | 877.523   |
| 922.706   | NM_006214 | 4365.984  | 4089.755  | NM_003092 | 4593.918  | 3721.262  | NM_005936 | 742.128   |
| 310.467   | AJ010228  | 6430.009  | 5943.079  | M33197    | 50421.043 | 41261.203 | U43586    | 666.223   |
| 507.527   | NM_005198 | 6130.82   | 8015.604  | NM_005861 | 1374.476  | 641.989   | NM_006271 | 5513.019  |
| 688.021   | NM_018073 | 1722.946  | 1301.386  | NM_018848 | 1491.269  | 748.056   | NM_018647 | 1044.671  |
| 988.029   | NM_012332 | 2893.245  | 4649.643  | NM_003760 | 2055.612  | 962.2     | NM_000721 | 27835.43  |
| 4965.306  | AK026648  | 966.658   | 1114.661  | AK025998  | 1301.841  | 757.791   | NM_003933 | 1512.605  |
| 2213.105  | NM_000497 | 1264.796  | 1788.198  | AL080080  | 2050.542  | 1381.626  | NM_005095 | 3170.924  |
| 1809.809  | NM_017421 | 942.268   | 546.552   | NM_018482 | 1669.678  | 1390.698  | NM_003163 | 3799.326  |
| 952.856   | NM_002899 | 6195.46   | 6969.915  | NM_017880 | 1402.559  | 2086.838  | NM_019057 | 1641.983  |
| 277.109   | NM_000486 | 1728.107  | 1480.425  | AF090945  | 2790.111  | 2382.681  | NM_002677 | 883.254   |
| 3591.27   | BE876237  | 1159.875  | 1758.34   | M33197    | 57230.516 | 57240.949 | NM_016205 | 656.445   |
| 1495.718  | NM_000838 | 799.994   | 646.556   | NM_001161 | 4278.515  | 5413.853  | NM_005759 | 798.545   |
| 7435.704  | NM_014750 | 2611.514  | 3072.226  | NM_004044 | 6055.794  | 5223.318  | AF149724  | 1097.542  |
| 764.32    | NM_015912 | 926.265   | 958.804   | NM_000221 | 25413.072 | 17799.33  | BC020745  | 517.231   |
| 2422.617  | NM_000460 | 2867.216  | 3079.99   | H75678    | 900.698   | 748.445   | NM_004354 | 1558.525  |
| 929.03    | AB002339  | 2665.508  | 4777.621  | AB002359  | 2100.585  | 2993.777  | NM_004661 | 1491.422  |
| 1121.615  | NM_005104 | 13913.475 | 14594.625 | M33197    | 1531.31   | 1820.986  | NM_001610 | 1282.128  |
| 1249.01   | NM_006888 | 28192.434 | 34623.004 | AB007864  | 404.289   | 553.839   | NM_001241 | 780.382   |
| 1719.015  | AL137423  | 4792.313  | 3287.25   | NM_002198 | 1145.415  | 1421.857  | AF217504  | 1562.204  |
| 4325.955  | AB018322  | 1936.622  | 1632.608  | M33197    | 26418.344 | 22528.891 | AK027102  | 3951.698  |
| 10174.194 | NM_007068 | 4855.824  | 3072.394  | NM_014480 | 913.42    | 634.558   | NM_004632 | 1858.121  |
| 6804.19   | NM_005718 | 21351.611 | 19234.17  | NM_014169 | 2656.461  | 2499.596  | NM_017919 | 3127.276  |
| 2328.85   | NM_018264 | 2946.498  | 1755.792  | NM_004964 | 7580.268  | 12241.463 | NM_014456 | 3247.245  |
| 4191.66   | NM_014580 | 936.865   | 1098.621  | AL117497  | 1012.51   | 1844.138  | NM_004740 | 3386.588  |
| 1660.717  | AB028998  | 1079.128  | 1372.167  | AF075016  | 638.598   | 861.961   | NM_003805 | 1615.493  |
| 660.662   | NM_000153 | 1483.658  | 1932.108  | AK023612  | 1674.346  | 1323.476  | NM_019886 | 3413.924  |
| 3973.584  | NM_002033 | 5702.652  | 2402.085  | AF147437  | 2784.216  | 2095.623  | NM_003278 | 42466.871 |
| 2556.106  | AK091794  | 1049.22   | 1420.384  | M33197    | 55973.469 | 58400.199 | NM_000426 | 628.711   |
| 1005.71   | NM_004111 | 3057.061  | 2043.006  | AF147360  | 580.921   | 626.122   | AK021957  | 34208.711 |

|           |           |           |           |           |           |           |           |           |
|-----------|-----------|-----------|-----------|-----------|-----------|-----------|-----------|-----------|
| 609.306   | AF085966  | 4156.258  | 1959.424  | AL137269  | 3339.63   | 3022.437  | NM_016623 | 2598.95   |
| 4813.104  | NM_005316 | 1978.789  | 1060.528  | AK021983  | 1279.664  | 1494.304  | NM_001334 | 3004.868  |
| 6445.538  | NM_016316 | 3526.363  | 3322.682  | Y11681    | 7651.547  | 24660.883 | NM_004771 | 1295.617  |
| 3026.887  | NM_003369 | 6935.75   | 5391.216  | AL110135  | 17807.691 | 18179.852 | AL365514  | 788.794   |
| 786.557   | NM_000057 | 2618.539  | 1803.25   | NM_006993 | 8061.228  | 5727.333  | NM_002104 | 648.745   |
| 494.453   | X15880    | 57384.57  | 61740.508 | M33197    | 57584.66  | 60948.309 | NM_005504 | 4729.826  |
| 1961.396  | AL137461  | 4550.761  | 3219.924  | AF086429  | 1354.335  | 1066.76   | AF234654  | 771.152   |
| 646.344   | AF114264  | 1333.135  | 1000.52   | AF086439  | 1256.526  | 1418.094  | NM_000110 | 2589.527  |
| 631.26    | NM_017514 | 570.892   | 790.598   | M33197    | 50282.063 | 55838.445 | NM_016002 | 20231.275 |
| 583.384   | NM_018972 | 1867.457  | 2127.311  | AF052160  | 508.303   | 841.395   | NM_014549 | 703.383   |
| 1117.225  | AB037828  | 660.242   | 640.008   | AK026512  | 1064.281  | 1242.03   | NM_017832 | 5968.02   |
| 1274.094  | AB023210  | 1250.612  | 917.383   | M33197    | 52769.227 | 59489.516 | NM_001713 | 2056.656  |
| 2747.138  | AB037786  | 2097.77   | 1934.973  | AF144233  | 4012.701  | 4630.058  | NM_015367 | 4685.134  |
| 6130.721  | NM_003648 | 8982.185  | 8007.322  | AF085975  | 3555.779  | 3792.579  | NM_014498 | 3966.053  |
| 1438.712  | AB037735  | 847.45    | 1004.48   | AL137611  | 5490.618  | 7815.767  | NM_002375 | 9385.017  |
| 12386.12  | AK002177  | 5793.542  | 3969.522  | AL359566  | 24514.736 | 33955.574 | NM_001813 | 1648.344  |
| 389.203   | AK024429  | 2163.844  | 5177.938  | AL133110  | 357.194   | 526.509   | AF055016  | 2843.222  |
| 2023.804  | NM_003496 | 45583.598 | 44565.691 | AL137427  | 2873.145  | 2999.657  | NM_007234 | 7979.479  |
| 377.354   | AB000509  | 1149.288  | 1160.71   | AL157460  | 3853.249  | 3965.907  | NM_014567 | 3547.816  |
| 4590.656  | AB018314  | 1262.964  | 1736.126  | AL359595  | 447.968   | 572.575   | NM_017842 | 1173.863  |
| 705.73    | NM_004378 | 1243.595  | 1341.481  | M33197    | 41202.102 | 49745.379 | AB037809  | 872.57    |
| 7389.406  | NM_018037 | 755.236   | 580.078   | AK026718  | 669.372   | 732.455   | NM_014391 | 3080.5    |
| 13118.09  | NM_001110 | 5078.159  | 4035.474  | AF085899  | 305.954   | 501.162   | NM_004270 | 1160.412  |
| 884.055   | NM_003222 | 848.047   | 2627.456  | AK022035  | 6070.54   | 4858.685  | NM_012082 | 481.471   |
| 2647.919  | NM_000841 | 5889.092  | 6087.505  | M33197    | 50138.453 | 59202.27  | NM_001537 | 2392.486  |
| 1385.502  | NM_016563 | 484.083   | 257.371   | NM_004337 | 717.044   | 794.96    | U80743    | 796.353   |
| 5265.182  | NM_002574 | 47146.734 | 58635.66  | AK022141  | 999.77    | 1062.651  | NM_001352 | 2185.735  |
| 732.018   | AJ008139  | 5334.477  | 7276.238  | AK023942  | 40626.492 | 43106.895 | NM_006527 | 3374.959  |
| 2333.046  | NM_004326 | 2558.024  | 3217.053  | M33197    | 51754.824 | 56357.125 | NM_006627 | 1131.065  |
| 8379.472  | NM_000882 | 483.213   | 395.757   | AK027207  | 1169.337  | 811.516   | NM_007363 | 10428.411 |
| 754.439   | NM_004577 | 2617.906  | 1813.188  | AF083120  | 709.819   | 1272.701  | NM_003093 | 35337.871 |
| 351.25    | AF007157  | 13057.258 | 6688.569  | M33197    | 54343.57  | 57410.559 | U05589    | 706.891   |
| 2403.321  | D38553    | 2828.449  | 1305.233  | AK022013  | 1187.108  | 1953.993  | NM_014473 | 7795.009  |
| 496.045   | NM_006170 | 2839.488  | 1653.281  | AK022155  | 4155.462  | 3771.957  | NM_003095 | 57324.645 |
| 1339.917  | NM_014298 | 18277.443 | 14946.921 | AK022288  | 1397.179  | 1721.162  | NM_016389 | 1044.296  |
| 4408.673  | AK001581  | 1970.425  | 731.84    | AK021916  | 613.694   | 634.874   | NM_002295 | 57765.375 |
| 497.297   | NM_005862 | 1700.923  | 1194.877  | AK024201  | 720.563   | 627.739   | NM_001762 | 7310.018  |
| 393.305   | NM_000548 | 3085.346  | 2309.324  | M33197    | 52183.02  | 51193.766 | NM_016306 | 13781.172 |
| 37916.746 | AK022541  | 12357.486 | 12617.275 | AK021589  | 352.327   | 670.328   | NM_003755 | 756.918   |
| 785.055   | AB002297  | 3635.138  | 3771.531  | D17152    | 6931.788  | 10642.69  | BE258640  | 11272.333 |
| 591.531   | NM_005020 | 22518.111 | 22010.127 | AK024464  | 12362.929 | 14697.288 | NM_003314 | 3958.983  |
| 2886.516  | NM_014077 | 5492.59   | 6204.708  | AK023638  | 686.182   | 747.572   | AL355730  | 458.637   |
| 1040.322  | NM_018412 | 1724.021  | 791.009   | AK025423  | 674.614   | 1271.467  | U79273    | 785.798   |
| 992.362   | NM_012329 | 2749.992  | 3159.647  | NM_000739 | 2378.392  | 2946.938  | AK022050  | 4945.119  |
| 705.947   | M14087    | 37477.973 | 44104.133 | M33197    | 52363.156 | 55521.902 | NM_002512 | 46473.441 |
| 1805.181  | AJ272324  | 1784.319  | 2300.274  | AL049846  | 908.581   | 1074.859  | NM_001246 | 615.739   |
| 745.404   | NM_000885 | 4201.724  | 3208.002  | AK024161  | 350.278   | 563.832   | AL365411  | 2044.787  |
| 494.294   | NM_015239 | 1118.757  | 1023.565  | AK021682  | 17357.836 | 15597.397 | M24470    | 514.959   |
| 1665.598  | AK026962  | 3784.112  | 2034.236  | AJ012500  | 2774.688  | 2940.841  | NM_016066 | 2568.438  |
| 1040.487  | X04366    | 3335.627  | 3102.228  | U00944    | 853.788   | 1051.2    | NM_001249 | 720.741   |
| 573.032   | NM_000505 | 17057.563 | 11526.178 | BC035058  | 1257.606  | 1510.364  | AK024677  | 816.58    |
| 3739.943  | NM_000666 | 4035.485  | 3050.095  | X57566    | 3652.572  | 4118.191  | NM_000036 | 1135.552  |
| 4538.686  | NM_003481 | 2732.396  | 3619.15   | M33197    | 57159.148 | 59550.449 | AF254082  | 13052.094 |

|           |           |           |           |           |           |           |           |           |
|-----------|-----------|-----------|-----------|-----------|-----------|-----------|-----------|-----------|
| 3856.219  | AB046814  | 1046.98   | 611.858   | NM_018616 | 3582.207  | 4052.585  | AF205718  | 3418.509  |
| 3407.655  | NM_017778 | 664.056   | 747.385   | AK023809  | 1600.988  | 1187.259  | NM_003420 | 733.702   |
| 2922.961  | NM_017664 | 3099.29   | 2947.376  | AL137590  | 1177.313  | 2439.986  | AY004252  | 839.228   |
| 515.636   | NM_007059 | 3397.883  | 6341.862  | M87943    | 59102.777 | 60110.016 | NM_006261 | 2522.057  |
| 2845.309  | NM_006870 | 4392.797  | 3000.452  | AL360137  | 724.683   | 758.661   | AK027045  | 660.465   |
| 2158.211  | NM_007359 | 5533.822  | 7083.476  | U28131    | 58585.938 | 54146.844 | AF169796  | 1616.923  |
| 544.185   | L13283    | 571.054   | 710.27    | AY007106  | 6033.525  | 4982.99   | AK001814  | 2740.028  |
| 52766.922 | NM_013327 | 3768.953  | 3105.389  | M33197    | 56200.918 | 55558.813 | NM_007222 | 1710.756  |
| 7972.345  | AF303888  | 5562.435  | 9786.729  | NM_006088 | 36793.402 | 31078.477 | NM_003435 | 1575.391  |
| 3541.611  | NM_000077 | 1209.239  | 1702.657  | NM_018265 | 609.504   | 1161.126  | NM_016291 | 2782.77   |
| 1334.024  | M97191    | 12495.175 | 6035.201  | AF130086  | 1383.601  | 1096.962  | NM_003413 | 725.327   |
| 2611.473  | AK023015  | 1883.454  | 965.733   | AK023858  | 3495.826  | 4150.703  | NM_005937 | 45236.156 |
| 620.158   | NM_003457 | 10373.618 | 8508.55   | M33197    | 50421.652 | 54810.895 | AK023259  | 1809.89   |
| 1345.528  | NM_012391 | 2336.933  | 2038.465  | AF250920  | 3005.119  | 2163.035  | AK001503  | 1374.823  |
| 619.148   | NM_005254 | 2301.05   | 1397.915  | NM_017733 | 1711.541  | 2255.143  | AK022880  | 1678.899  |
| 1169.507  | NM_005611 | 1034.889  | 600.867   | NM_014042 | 2802.058  | 5438.788  | NM_003601 | 6377.386  |
| 529.416   | AF141655  | 1153.959  | 826.424   | M33197    | 58677.32  | 57485.258 | AK001228  | 2481.962  |
| 673.553   | NM_007345 | 1061.733  | 794.141   | NM_003543 | 229.664   | 1459.186  | AK026778  | 1050.949  |
| 21536.889 | NM_007007 | 9071.627  | 11429.096 | AK025416  | 416.376   | 708.918   | AF074987  | 2073.342  |
| 446.924   | NM_006386 | 1458.883  | 1520.392  | U58662    | 6005.923  | 19670.215 | AK001058  | 23019.949 |
| 2379.163  | NM_006559 | 14044.617 | 9378.835  | M33197    | 60370.492 | 58483.047 | AK026239  | 1284.897  |
| 2243.706  | NM_004501 | 48080.547 | 41661.16  | AK022372  | 2256.001  | 2412.176  | AF086283  | 669.165   |
| 57396.434 | NM_004966 | 17668.246 | 15551.893 | AJ227863  | 698.794   | 599.491   | AF088047  | 916.895   |
| 1202.492  | NM_006700 | 1694.176  | 1459.343  | NM_015916 | 1992.266  | 2748.208  | AF086281  | 1170.054  |
| 502.084   | NM_006445 | 9803.769  | 6101.503  | NM_003520 | 397.591   | 575.305   | AF086393  | 1638.46   |
| 716.402   | NM_012109 | 10089.161 | 9777.014  | AL137380  | 1699.643  | 1749.36   | AF086453  | 690.116   |
| 1101.603  | AF019633  | 2082.833  | 1200.431  | M33197    | 58848.137 | 57698.355 | AF070621  | 4341.538  |
| 1256.027  | AB002361  | 3517.762  | 5837.029  | AL137658  | 14298.71  | 16816.861 | NM_020240 | 1613.792  |
| 1913.234  | NM_018060 | 5270.373  | 3777.545  | D16888    | 3585.909  | 4430.745  | AK023678  | 6110.086  |
| 524.773   | NM_014239 | 4878.963  | 4918.798  | AF068298  | 2857.947  | 3186.432  | AF052090  | 3387.763  |
| 2506      | NM_017662 | 4019.872  | 2927.729  | Z70770    | 3655.027  | 3453.853  | AK023718  | 1393.73   |
| 4136.314  | U88837    | 1740.07   | 1856.296  | AJ227900  | 4166.519  | 4232.013  | AF075089  | 5130.95   |
| 3877.379  | NM_017446 | 12846.04  | 9123.626  | AK023242  | 1007.55   | 736.797   | AF086007  | 52797.855 |
| 580.303   | AK001478  | 5567.796  | 937.317   | M33197    | 59925.68  | 59216.156 | AK000803  | 1646.231  |
| 675.802   | AK025697  | 2783.135  | 863.034   | CY3Cy5    | 3397.645  | 129.503   | AK022374  | 841.032   |
| 3526.96   | AK021734  | 1033.569  | 867.677   | BI762229  | 1328.411  | 2053.372  | AF085926  | 9880.358  |
| 1411.182  | D00265    | 30307.564 | 16490.254 | BG618320  | 1359.318  | 1491.638  | AF085948  | 484.694   |
| 6925.948  | NM_004552 | 29943.201 | 21190.76  | Y00787    | 1043.214  | 1467.843  | AL137307  | 2435.072  |
| 871.007   | NM_000143 | 2997.154  | 1305.568  | NM_007276 | 1533.73   | 929.068   | AL137468  | 6407.269  |
| 2384.587  | AL137294  | 1897.363  | 663.262   | N34462    | 1152.962  | 1398.79   | AL162007  | 29070.232 |
| 1207.113  | NM_003743 | 1041.263  | 1116.603  | AI658778  | 1052.494  | 922.896   | AL390137  | 13761.847 |
| 1637.095  | AB037797  | 285.698   | 1728.376  | L19067    | 1389.783  | 1364.912  | AL137340  | 780.882   |
| 1609.782  | NM_017870 | 927.182   | 1221.677  | W60413    | 341.106   | 432.733   | AL137542  | 601.003   |
| 2407.405  | AL133633  | 1384.021  | 1129.264  | BI823365  | 687.013   | 546.792   | AL162045  | 1263.178  |
| 4415.563  | NM_012252 | 1737.337  | 1883.274  | X06318    | 2381.719  | 1738.024  | X92185    | 507.487   |
| 9003.584  | AK026817  | 1569.964  | 1291.473  | AL834159  | 2192.139  | 2422.689  | AK022437  | 10640.435 |
| 22187.514 | AL157442  | 27182.701 | 39637.633 | NM_000164 | 9031.755  | 11992.073 | AF086092  | 260.794   |
| 7736.169  | AB011148  | 2258.034  | 2157.887  | SR5       | 3547.623  | 3816.479  | AF086102  | 1886.001  |
| 1199.39   | AL389938  | 20397.994 | 27451.533 | SR7       | 4176.946  | 33646.105 | AF116682  | 14087.419 |
| 9764.7    | NM_001949 | 40739.645 | 47180.488 | SR9       | 11864.881 | 2167.684  | AL137259  | 2735.24   |
| 2300.873  | AK001889  | 2251.018  | 2543.013  | CY3Cy5    | 3214.767  | 132.07    | AL122107  | 3765.536  |
| 275.595   | AK025726  | 1265.321  | 1380.626  | NM_006314 | 4288.092  | 4158.492  | AF075021  | 588.012   |
| 605.566   | AJ227869  | 1947.28   | 1196.76   | NM_001782 | 617.207   | 468.95    | AK025140  | 8490.777  |

|           |           |           |           |           |           |           |           |           |
|-----------|-----------|-----------|-----------|-----------|-----------|-----------|-----------|-----------|
| 472.216   | AL117613  | 7031.312  | 5620.84   | NM_002754 | 250.16    | 471.94    | AK023394  | 1340.332  |
| 1239.555  | AL137753  | 3324.621  | 4175.767  | NM_000797 | 3546.756  | 2604.31   | AF090093  | 5456.852  |
| 12345.491 | AK021785  | 579.508   | 1055.423  | NM_016293 | 8201.134  | 5686.03   | AF161340  | 2954.357  |
| 25897.008 | AL110262  | 9736.72   | 8966.955  | AL080148  | 2936.359  | 5249.445  | AF242771  | 1020.002  |
| 18007.303 | AK025627  | 7253.814  | 8067.979  | NM_020134 | 471.451   | 339.787   | NM_018562 | 5229.989  |
| 962.252   | AK021612  | 9963.16   | 11623.939 | NM_014061 | 492.527   | 486.079   | AF098666  | 700.715   |
| 5645.672  | AK002025  | 42792.305 | 50119.367 | NM_000348 | 1480.688  | 1784.378  | AF161365  | 436.245   |
| 8926.254  | AK026299  | 1564.671  | 1780.079  | NM_005059 | 481.522   | 555.43    | AK021969  | 1465.111  |
| 1365.788  | NM_017794 | 1350.527  | 1756.58   | NM_004950 | 1831.599  | 2993.376  | AK022065  | 1941.088  |
| 4038.165  | AK025170  | 1855.47   | 3305.408  | NM_000724 | 1445.639  | 1870.209  | AK022221  | 3706.305  |
| 992.99    | AF085872  | 5424.456  | 6042.746  | NM_002557 | 1759.009  | 1624.999  | AK022356  | 1703.647  |
| 130.733   | AK022538  | 8407.845  | 7916.075  | NM_005662 | 17908.668 | 27795.934 | AK021998  | 2564.218  |
| 682.149   | AL360257  | 846.65    | 902.619   | AK021489  | 17093.389 | 20595.6   | AK022126  | 2300.454  |
| 1809.318  | AK022342  | 737.664   | 693.051   | NM_003895 | 340.211   | 607.075   | AK022256  | 867.717   |
| 369.061   | AF147420  | 878.848   | 995.95    | NM_004317 | 3011.456  | 4022.74   | AK022383  | 1400.18   |
| 3083.203  | AL049312  | 1369.111  | 1410.656  | NM_014645 | 1110.262  | 1401.156  | AK027041  | 2224.218  |
| 2915.728  | AL050072  | 2045.331  | 1754.039  | NM_014708 | 2276.826  | 2667.062  | NM_005355 | 17781.98  |
| 1950.548  | AL117590  | 569.011   | 672.101   | NM_003693 | 514.336   | 712.014   | AK000937  | 1104.116  |
| 1002.471  | AL049357  | 3396.667  | 2751.63   | NM_000356 | 10074.832 | 9409.692  | AF035306  | 879.882   |
| 4042.386  | AK027180  | 7850.057  | 3681.052  | NM_018134 | 15918.067 | 19822.063 | AK091662  | 1039.562  |
| 1307.109  | NM_004544 | 11572.995 | 10174.359 | NM_013247 | 1555.226  | 4397.455  | AB038318  | 479.823   |
| 3390.632  | AF086041  | 702.347   | 818.366   | NM_006770 | 729.669   | 1147.691  | NM_003954 | 1451.257  |
| 1338.175  | Y15167    | 949.837   | 1245.672  | BE394704  | 300.604   | 291.1     | NM_016345 | 838.7     |
| 1668.07   | AL133080  | 2744.739  | 5073.865  | NM_004703 | 1326.271  | 1338.073  | AK023877  | 759.422   |
| 785.404   | NM_017792 | 1855.072  | 3553.671  | NM_001512 | 497.728   | 428.148   | AK023640  | 518.603   |
| 589.373   | AK025213  | 3959.728  | 11187.208 | NM_014706 | 3236.122  | 5978.653  | AK024213  | 20498.631 |
| 4509.515  | NM_014949 | 2953.677  | 4069.776  | NM_014007 | 662.447   | 1086.872  | AK025093  | 527.15    |
| 538.867   | AL080221  | 2136.424  | 2339.039  | AB033006  | 1829.612  | 2509.577  | AK022184  | 1642.985  |
| 2792.773  | AF009262  | 5553.865  | 6588.532  | AF020314  | 6092.998  | 4702.854  | AB007959  | 826.516   |
| 33314.086 | AF050198  | 944.054   | 1270.403  | NM_016332 | 2445.438  | 4849.697  | AK026002  | 591.744   |
| 1142.834  | AK024346  | 2214.218  | 2610.181  | NM_006457 | 384.688   | 645.955   | AK024153  | 646.209   |
| 3218.735  | AF056422  | 626.543   | 796.022   | AF000381  | 2502.441  | 2899.587  | Y10516    | 1005.802  |
| 2253.274  | AF090892  | 753.187   | 1052.143  | NM_012105 | 718.283   | 747.819   | AF056451  | 1282.342  |
| 4210.861  | AK001089  | 412.688   | 798.394   | S82470    | 969.954   | 1333.616  | AF015039  | 2387.633  |
| 1275.547  | AK001919  | 1493.134  | 2407.163  | AB028982  | 1358.164  | 1355.686  | AB020632  | 1586.087  |
| 587.28    | AK021535  | 925.153   | 1193.881  | NM_002004 | 1774.658  | 2004.716  | NM_018614 | 28821.643 |
| 522.236   | AK021753  | 2315.13   | 2988.013  | NM_001643 | 7299.306  | 7578.587  | AL117549  | 1050.317  |
| 538.015   | AK001139  | 2454.41   | 2817.546  | NM_020221 | 788.86    | 944.291   | NM_005222 | 7835.105  |
| 34762.82  | AK002090  | 1420.412  | 2117.874  | NM_000747 | 984.415   | 1070.395  | BC024308  | 7012.398  |
| 23047.844 | AK025246  | 3839.534  | 7205.624  | NM_005415 | 1405.643  | 1847.59   | NM_000535 | 1833.682  |
| 1207.915  | AK025847  | 2002.807  | 2903.722  | AJ275973  | 11541.882 | 11625.413 | AK001838  | 52761.898 |
| 861.611   | AK026442  | 625.337   | 1735.776  | NM_006493 | 1192.858  | 1797.079  | NM_018295 | 1427.534  |
| 944.247   | AF147337  | 2456.479  | 2833.094  | U76362    | 1393.755  | 1937.581  | AF070574  | 631.342   |
| 2554.418  | AK025203  | 41999.055 | 52279.844 | AF040248  | 536.804   | 404.261   | AF086262  | 2436.005  |
| 550.555   | AK026981  | 2577.696  | 2398.131  | NM_014228 | 524.627   | 470.898   | AF086292  | 6292.97   |
| 1944.598  | AL133656  | 1380.464  | 1798.013  | AL832292  | 1973.982  | 804.12    | AK024342  | 8908.619  |
| 2926.778  | AL050037  | 7875.573  | 8724.355  | NM_003045 | 2901.77   | 1740.189  | AL137712  | 5058.796  |
| 2041.498  | NM_001417 | 29325.363 | 24506.189 | NM_002618 | 1077.111  | 830.71    | AL137606  | 395.393   |
| 2917.371  | AK022236  | 3054.5    | 4333.433  | L27479    | 243.458   | 455.691   | L77599    | 34930.32  |
| 1588.599  | AK000073  | 783.73    | 1141.353  | NM_002193 | 674.821   | 730.926   | AK021673  | 12485.808 |
| 2379.472  | AK000618  | 1046.975  | 1748.43   | NM_001388 | 3054.732  | 3085.552  | AB014543  | 1544.014  |
| 30590.738 | AK024773  | 792.856   | 1254.97   | X76770    | 2515.482  | 3344.696  | NM_018445 | 5719.578  |
| 23192.297 | AL390180  | 902.185   | 2655.318  | AB037808  | 707.517   | 671.292   | AK022743  | 5216.913  |



|           |                  |           |           |                  |           |           |                  |           |
|-----------|------------------|-----------|-----------|------------------|-----------|-----------|------------------|-----------|
| 4535.597  | <b>AF055019</b>  | 1458.152  | 1769.218  | <b>NM_01603E</b> | 1405.808  | 1747.026  | <b>NM_014627</b> | 1642.319  |
| 7801.861  | <b>NM_00352E</b> | 8830.93   | 19961.813 | <b>Z36821</b>    | 3815.811  | 3314.043  | <b>NM_01393E</b> | 5053.541  |
| 1550.232  | <b>AF056432</b>  | 1997.125  | 1610.293  | <b>AF289485</b>  | 1213.462  | 1448.558  | <b>NM_01398E</b> | 45066.332 |
| 662.264   | <b>AK001987</b>  | 26421.268 | 23014.063 | <b>AF130092</b>  | 1008.463  | 995.483   | <b>U55055</b>    | 493.814   |
| 603.568   | <b>NM_013332</b> | 1838.844  | 848.644   | <b>NM_01609E</b> | 1744.063  | 2418.738  | <b>AK022186</b>  | 344.008   |
| 2000.621  | <b>X56199</b>    | 1134.614  | 1633.549  | <b>AK024794</b>  | 494.796   | 780.195   | <b>AK021485</b>  | 1517.423  |
| 593.981   | <b>NM_00519E</b> | 1326.846  | 1620.306  | <b>NM_01985E</b> | 3934.715  | 3361.489  | <b>AB018319</b>  | 2011.255  |
| 4375.378  | <b>AL162006</b>  | 1280.256  | 1658.856  | <b>NM_01799E</b> | 3434.915  | 4174.671  | <b>AK001101</b>  | 2082.657  |
| 305.856   | <b>NM_017971</b> | 10654.662 | 11764.876 | <b>AK023061</b>  | 2675.053  | 4975.169  | <b>BM973473</b>  | 1147.461  |
| 383.901   | <b>AF090097</b>  | 1738.832  | 2428.514  | <b>NM_00725E</b> | 1217.227  | 1561.915  | <b>AK021637</b>  | 2085.931  |
| 4802.839  | <b>AF116620</b>  | 9720.03   | 8248.488  | <b>NM_00366E</b> | 5007.438  | 5226.009  | <b>AK021658</b>  | 786.394   |
| 1208.064  | <b>AF293335</b>  | 16727.426 | 19658.551 | <b>NM_013384</b> | 33056.961 | 28938.801 | <b>D61705</b>    | 324.1     |
| 3006.159  | <b>AK024431</b>  | 3891.525  | 8193.243  | <b>NM_001187</b> | 700.84    | 908.052   | <b>U17631</b>    | 1611.231  |
| 2502.482  | <b>X96644</b>    | 3653.807  | 3012.927  | <b>NM_018241</b> | 1198.375  | 1453.469  | <b>AL137723</b>  | 2047.229  |
| 4426.62   | <b>Z34281</b>    | 12109.079 | 10446.728 | <b>NM_005834</b> | 2202.615  | 2162.147  | <b>AK000774</b>  | 515.44    |
| 1345.037  | <b>NM_01867E</b> | 26487.238 | 33868.59  | <b>NM_000724</b> | 1258.56   | 1534.86   | <b>AK024046</b>  | 1770.524  |
| 4454.633  | <b>AJ008122</b>  | 19237.623 | 35373.965 | <b>NM_002557</b> | 2007.866  | 1742.507  | <b>NM_017931</b> | 2769.879  |
| 2021.033  | <b>NM_00622C</b> | 750.021   | 818.32    | <b>BI762229</b>  | 1140.777  | 1654.479  | <b>AK022793</b>  | 871.184   |
| 966.008   | <b>AK022667</b>  | 13429.287 | 25199.18  | <b>BG618320</b>  | 1044.183  | 1262.477  | <b>AJ227910</b>  | 844.799   |
| 733.235   | <b>S71805</b>    | 953.19    | 536.281   | <b>Y00787</b>    | 978.47    | 946.885   | <b>AF001893</b>  | 1237.588  |
| 788.667   | <b>NM_018391</b> | 1724.339  | 2096.656  | <b>NM_00727E</b> | 1475.38   | 800.458   | <b>X04236</b>    | 7376.266  |
| 3054.411  | <b>U90917</b>    | 432.305   | 602.834   | <b>N34462</b>    | 1009.788  | 1141.654  | <b>AK093746</b>  | 17596.867 |
| 1066.764  | <b>AK022140</b>  | 1997.557  | 1306.067  | <b>AI658778</b>  | 1106.781  | 890.888   | <b>D16875</b>    | 2214.148  |
| 248.19    | <b>AK023372</b>  | 19759.166 | 18822.918 | <b>L19067</b>    | 1399.017  | 1308.558  | <b>AK027171</b>  | 961.631   |
| 1153.509  | <b>AF086527</b>  | 633.62    | 554.725   | <b>Z48482</b>    | 517.801   | 349.31    | <b>AK021945</b>  | 3127.698  |
| 803.075   | <b>U21072</b>    | 2571.619  | 3364.112  | <b>BI823365</b>  | 691.35    | 708.912   | <b>L23545</b>    | 808.257   |
| 1088.922  | <b>AK024377</b>  | 551.094   | 1046.696  | <b>X06318</b>    | 2713.809  | 2307.919  | <b>CY3Cy5</b>    | 8258.521  |
| 1932.028  | <b>AK023557</b>  | 744.517   | 869.529   | <b>AL834159</b>  | 2326.073  | 2987.707  | <b>U13022</b>    | 1025.997  |
| 6464.779  | <b>AK027107</b>  | 627.417   | 590.327   | <b>NM_000164</b> | 9946.434  | 12947.397 | <b>R23251</b>    | 19805.172 |
| 23961.535 | <b>AB040887</b>  | 2532.809  | 1885.883  | <b>NM_016217</b> | 7234.612  | 7011.875  | <b>BG763477</b>  | 1203.348  |
| 893.944   | <b>AK025196</b>  | 1023.291  | 938.756   | <b>AK025971</b>  | 4175.226  | 3305.095  | <b>AA702640</b>  | 1201.973  |
| 4704.159  | <b>AK024800</b>  | 753.301   | 765.654   | <b>NM_014007</b> | 541.103   | 518.547   | <b>T68583</b>    | 1410.346  |
| 51601.547 | <b>AK000401</b>  | 1460.766  | 1802.951  | <b>AB033006</b>  | 1976.555  | 2371.412  | <b>AA481944</b>  | 9323.928  |
| 780.991   | <b>AF305068</b>  | 997.198   | 842.246   | <b>AF020314</b>  | 6013.879  | 4219.847  | <b>H00742</b>    | 1512.437  |
| 51677.125 | <b>D17231</b>    | 28516.916 | 26732.072 | <b>NM_01633E</b> | 2176.719  | 4458.777  | <b>AI366068</b>  | 16492.574 |
| 5559.729  | <b>AF531295</b>  | 1243.326  | 1254.351  | <b>NM_006457</b> | 457.852   | 774.963   | <b>AF080158</b>  | 1802.609  |
| 818.273   | <b>CY3Cy5</b>    | 6263.527  | 228.618   | <b>NM_00368E</b> | 392.911   | 297.205   | <b>BM664556</b>  | 1180.429  |
| 4092.83   | <b>BF974315</b>  | 6391.176  | 1990.528  | <b>NM_006314</b> | 2720.52   | 2633.848  | <b>SR5</b>       | 3264.45   |
| 4722.275  | <b>AI652705</b>  | 3694.663  | 3826.633  | <b>NM_00178E</b> | 395.505   | 364.471   | <b>SR7</b>       | 3277.997  |
| 709.597   | <b>AA973397</b>  | 731.977   | 1084.208  | <b>NM_000797</b> | 2802.68   | 1934.591  | <b>SR9</b>       | 10973.676 |
| 5015.445  | <b>AA569974</b>  | 6280.639  | 7051.125  | <b>NM_01629E</b> | 4807.546  | 3323.195  | <b>CY3Cy5</b>    | 10834.26  |
| 40638.887 | <b>AA923615</b>  | 345.489   | 4113.422  | <b>AL080148</b>  | 3064.368  | 5768.307  | <b>M33197</b>    | 75606.32  |
| 743.254   | <b>AA446028</b>  | 2294.806  | 2196.178  | <b>NM_020134</b> | 448.599   | 673.764   | <b>NM_007024</b> | 5574.806  |
| 1139.873  | <b>M80583</b>    | 2262.101  | 2276.531  | <b>NM_014061</b> | 506.186   | 639.443   | <b>NM_013231</b> | 1873.099  |
| 2110.594  | <b>AW009565</b>  | 5143.067  | 4055.343  | <b>NM_00034E</b> | 1605.367  | 1759.457  | <b>NM_01210E</b> | 2983.731  |
| 618.32    | <b>AW451878</b>  | 1718.066  | 2839.587  | <b>NM_00495C</b> | 1559.767  | 1352.185  | <b>NM_006254</b> | 4363.377  |
| 172.823   | <b>AI570478</b>  | 1190.8    | 1650.064  | <b>NM_00649E</b> | 1385.154  | 1639.718  | <b>X95425</b>    | 997.567   |
| 8444.755  | <b>X07767</b>    | 3649.945  | 5618.879  | <b>U76362</b>    | 1831.44   | 2126.743  | <b>NM_00442E</b> | 1165.905  |
| 3472.917  | <b>AF252284</b>  | 3199.62   | 4194.483  | <b>AF040248</b>  | 579       | 494.814   | <b>NM_01656E</b> | 892.783   |
| 628.582   | <b>BU727558</b>  | 1166.28   | 923.813   | <b>NM_01422E</b> | 524.224   | 361.617   | <b>M33197</b>    | 68261.734 |
| 2096.888  | <b>SR1</b>       | 57564.742 | 59964.863 | <b>AL832292</b>  | 2204.551  | 827.342   | <b>NM_00489E</b> | 5309.485  |
| 1386.458  | <b>SR3</b>       | 51277.051 | 58562.898 | <b>NM_00304E</b> | 3168.713  | 2110.546  | <b>NM_01430E</b> | 9479.763  |
| 373.26    | <b>SR5</b>       | 5433.839  | 10195.396 | <b>NM_00566E</b> | 21841.316 | 33656.902 | <b>NM_003118</b> | 2861.244  |

|           |           |           |           |           |           |           |           |           |
|-----------|-----------|-----------|-----------|-----------|-----------|-----------|-----------|-----------|
| 2161.392  | SR7       | 5015.958  | 52299.184 | AK021489  | 16416.725 | 19842.557 | L02922    | 6550.99   |
| 1639.533  | SR9       | 12793.235 | 3028.452  | NM_003895 | 329.672   | 373.703   | NM_003154 | 1796.164  |
| 1004.568  | CY3Cy5    | 3621.895  | 251.898   | NM_004317 | 2148.836  | 2615.001  | AK023459  | 2155.835  |
| 1650.142  | NM_016511 | 22427.504 | 12095.193 | NM_014645 | 811.311   | 1240.354  | NM_012139 | 2645.48   |
| 21036.039 | NM_003559 | 2420.194  | 2004.23   | NM_014708 | 1684.867  | 1801.23   | AF121856  | 2300.852  |
| 1474.371  | M55337    | 617.525   | 1091.057  | NM_003693 | 267.415   | 439.645   | NM_006421 | 2331.526  |
| 1774.549  | NM_013229 | 2157.474  | 3378.078  | NM_000356 | 9605.25   | 8150.21   | NM_017457 | 18506.5   |
| 4640.759  | NM_016533 | 51674.938 | 36699.117 | NM_018134 | 13720.06  | 18448.939 | NM_003765 | 5454.888  |
| 2382.859  | NM_014751 | 5528.856  | 4321.798  | NM_013247 | 1767.263  | 4680.048  | NM_018202 | 7045.923  |
| 690.855   | NM_002347 | 18948.475 | 18296.846 | NM_006770 | 756.491   | 1516.528  | AB023197  | 1649.406  |
| 354.451   | AB046807  | 2728.961  | 4481.852  | NM_004703 | 1514.56   | 1306.587  | NM_022173 | 2348.863  |
| 18360.416 | M33197    | 65540.742 | 66646.93  | NM_001512 | 645.677   | 578.138   | AB040970  | 1728.797  |
| 783.903   | M30629    | 5197.215  | 6699.871  | NM_014706 | 3627.997  | 5378.051  | NM_018330 | 1483.465  |
| 759.692   | BE539299  | 784.149   | 1235.862  | AJ001348  | 461.848   | 474.033   | M33197    | 44531.105 |
| 893.184   | AF193873  | 3387.256  | 3551.087  | NM_007255 | 1103.165  | 1436.46   | NM_000295 | 597.622   |
| 479.055   | NM_002628 | 1809.252  | 2670.111  | NM_003668 | 5029.979  | 4790.547  | NM_000717 | 1903.466  |
| 1542.342  | M23575    | 917.682   | 1490.128  | NM_013384 | 29643.742 | 27258.932 | M33197    | 69412.75  |
| 483.467   | AA190729  | 1833.386  | 2373.24   | NM_001187 | 657.496   | 549.849   | NM_004845 | 2206.235  |
| 4733.772  | NM_004170 | 1344.852  | 821.166   | NM_018241 | 1444.671  | 1761.086  | NM_007107 | 9405.898  |
| 1244.289  | M33197    | 65547.023 | 68252.094 | NM_005834 | 2106.671  | 2637.517  | NM_000047 | 6219.287  |
| 2133.157  | NM_015717 | 2099.263  | 823.286   | AF000381  | 3513.79   | 4604.149  | M68874    | 2287.162  |
| 2527.099  | NM_015925 | 1168.251  | 862.122   | NM_012105 | 756.57    | 651.276   | NM_006319 | 2615.896  |
| 35437.23  | NM_003665 | 1756.004  | 1427.427  | S82470    | 905.609   | 1004.934  | NM_018226 | 3764.921  |
| 853.951   | AF220217  | 1035.951  | 873.62    | AB028982  | 1123.403  | 1068.025  | Z36813    | 2944.229  |
| 718.323   | NM_013323 | 12435.792 | 12790.648 | NM_002004 | 1607.678  | 1575.901  | NM_006660 | 4377.166  |
| 7061.432  | M33197    | 2371.205  | 1817.483  | NM_001643 | 8291.08   | 8468.322  | NM_006685 | 42204.801 |
| 478.938   | NM_000853 | 2901.824  | 3085.716  | NM_020221 | 906.177   | 2051.418  | M33197    | 1904.425  |
| 923.26    | AF016903  | 19943.83  | 24090.672 | NM_000747 | 1053.081  | 1282.847  | NM_004045 | 4839.109  |
| 5286.245  | NM_015675 | 6792.785  | 6321.703  | NM_005415 | 1712.198  | 1802.254  | NM_001891 | 1329.66   |
| 12596.621 | AK022267  | 1347.269  | 1325.098  | AJ275973  | 12994.117 | 12648.467 | NM_001440 | 21066.547 |
| 3631.326  | NM_016040 | 2953.54   | 1661.829  | AL834159  | 2023.59   | 2882.391  | NM_016618 | 1717.411  |
| 363.38    | U90878    | 2245.997  | 1747.21   | NM_000164 | 9420.422  | 11132.28  | AB014568  | 17445.494 |
| 921.127   | NM_006597 | 42627.949 | 23299.182 | NM_016217 | 7687.697  | 9392.687  | NM_012249 | 2527.848  |
| 543.322   | NM_012483 | 11657.082 | 11566.407 | AK025971  | 4094.031  | 4399.837  | AK022546  | 5190.375  |
| 7222.392  | NM_003498 | 4089.21   | 4403.918  | NM_002618 | 1170.76   | 987.506   | NM_014067 | 4481.304  |
| 755.425   | AB023420  | 12133.623 | 12108.566 | L27479    | 455.333   | 640.63    | NM_002914 | 2957.451  |
| 14733.375 | NM_007342 | 6432.351  | 6867.058  | NM_002193 | 940.545   | 998.467   | NM_020385 | 1499.223  |
| 1487.358  | D25217    | 17160.348 | 2608.044  | NM_001388 | 3277.031  | 2989.631  | NM_006541 | 1598.361  |
| 2623.513  | NM_006351 | 6529.543  | 3817.323  | X76770    | 2336.356  | 2713.892  | NM_004328 | 1604.517  |
| 648.063   | M33197    | 66329.461 | 49521.234 | AB037808  | 582.203   | 510.347   | NM_004581 | 2152.264  |
| 8596.921  | NM_004683 | 15124.419 | 6701.681  | NM_016038 | 928.404   | 971.384   | NM_006817 | 10033.731 |
| 860.469   | NM_018066 | 18465.938 | 18147.748 | Z36821    | 3448.491  | 2943.531  | NM_007108 | 1406.509  |
| 1604.205  | NM_006931 | 2690.851  | 2284.951  | AF289485  | 1374.112  | 2054.042  | NM_015921 | 11328.887 |
| 5273.677  | NM_020344 | 5585.597  | 5454.623  | AF130092  | 1077.61   | 826.327   | AB040900  | 4904.831  |
| 1427.714  | AF119868  | 1044.216  | 639.95    | NM_016095 | 1983.552  | 2468.26   | NM_001797 | 1377.826  |
| 1618.595  | NM_005050 | 2729.418  | 3027.53   | AK024794  | 721.963   | 1401.182  | NM_003154 | 2534.637  |
| 454.654   | M33197    | 65446.094 | 68084.695 | NM_019853 | 4927.091  | 3632.195  | AK023459  | 3038.64   |
| 634.916   | NM_003355 | 7657.17   | 4359.591  | NM_017992 | 4133.658  | 4411.108  | U13022    | 2186.829  |
| 277.758   | NM_005074 | 1536.286  | 1938.635  | NM_014061 | 658.709   | 465.878   | R23251    | 17350.764 |
| 1027.526  | NM_013272 | 1259.563  | 1047.469  | NM_000348 | 1543.995  | 1461.491  | BG763477  | 1100.698  |
| 776.549   | NM_004558 | 3286.281  | 2728.593  | NM_005059 | 624.885   | 548.889   | AA702640  | 1090.842  |
| 2484.093  | AL079296  | 1085.021  | 970.72    | NM_004950 | 1145.151  | 1555.978  | T68583    | 1602.627  |
| 1133.775  | NM_014770 | 2292.75   | 2257.516  | NM_000724 | 1696.823  | 1805.128  | AA481944  | 12268.984 |

|           |           |           |           |           |           |           |           |           |
|-----------|-----------|-----------|-----------|-----------|-----------|-----------|-----------|-----------|
| 2404.68   | M33197    | 68345.961 | 64694.023 | NM_002557 | 2006.615  | 1575.042  | H00742    | 902.551   |
| 2085.939  | AK023103  | 2681.319  | 2797.716  | BI762229  | 1187.293  | 1050.101  | AI366068  | 16840.463 |
| 975.854   | NM_017858 | 1943.115  | 1669.903  | BG618320  | 1167.255  | 774.254   | AF080158  | 936.62    |
| 911.994   | NM_019059 | 59840.465 | 34624.156 | Y00787    | 1397.969  | 1111.848  | M33197    | 54930.016 |
| 1469.867  | D80008    | 1720.609  | 1054.284  | NM_007276 | 1888.865  | 950.791   | NM_000295 | 1091.143  |
| 806.001   | AK001069  | 39624.313 | 30201.471 | N34462    | 1521.277  | 1717.976  | AF103795  | 1049.565  |
| 614.453   | NM_000935 | 1464.443  | 715.304   | AI658778  | 1293.612  | 1266.163  | M33197    | 76681.68  |
| 8702.026  | NM_000359 | 10289.732 | 9499.226  | L19067    | 1569.639  | 1378.309  | NM_007024 | 6900.837  |
| 331.308   | NM_006395 | 5836.115  | 6333.098  | Z48482    | 689.378   | 271.086   | NM_013231 | 1736.208  |
| 1749.723  | NM_014306 | 5045.575  | 4509.562  | BI823365  | 983.971   | 580.695   | NM_012106 | 3186.24   |
| 1160.431  | NM_001084 | 4298.014  | 4139.399  | X06318    | 2868.657  | 2034.594  | NM_006254 | 3890.848  |
| 1385.42   | NM_015983 | 3228.208  | 3478.217  | NM_004703 | 1670.956  | 1037.694  | X95425    | 1266.47   |
| 265.198   | NM_018622 | 5001.19   | 9223.93   | NM_001512 | 623.199   | 368.751   | NM_004422 | 1307.04   |
| 401.397   | NM_005867 | 6716.993  | 6736.772  | NM_014706 | 3438.924  | 4187.474  | M33197    | 65287.734 |
| 250.68    | AK026031  | 11734.569 | 13763.118 | AJ001348  | 442.055   | 492.745   | AY009399  | 4223.458  |
| 443.655   | NM_016468 | 5890.226  | 5761.297  | NM_014007 | 706.106   | 589.905   | NM_004895 | 4621.6    |
| 14976.826 | BE539299  | 1006.963  | 1174.978  | AB033006  | 2069.565  | 2485.563  | NM_014303 | 7074.675  |
| 463.314   | AF193873  | 3761.195  | 3164.908  | AF020314  | 6292.311  | 3773.407  | M33197    | 50436.543 |
| 894.612   | NM_002628 | 2180.39   | 1780.134  | NM_016332 | 2898.513  | 3941.488  | M95610    | 12161.05  |
| 648.783   | M23575    | 1054.173  | 1162.243  | NM_006457 | 538.656   | 601.677   | NM_003118 | 2029.863  |
| 438.577   | AA190729  | 2167.649  | 1949.255  | NM_003682 | 401.944   | 432.561   | L02922    | 3924.504  |
| 809.869   | BF974315  | 7270.79   | 2907.673  | NM_006314 | 3392.445  | 2182.441  | M33197    | 11786.453 |
| 2770.419  | AI652705  | 3854.725  | 3655.32   | NM_000797 | 4091.095  | 2165.883  | NM_004045 | 8765.257  |
| 3544.09   | AA569974  | 6415.68   | 8747.28   | NM_016293 | 11247.778 | 5777.833  | NM_001891 | 1716.691  |
| 4252.463  | AA923615  | 592.29    | 5136.093  | AL080148  | 3424.336  | 5173.231  | NM_012139 | 2874.519  |
| 1689.236  | AA446028  | 2109.129  | 1579.6    | NM_018487 | 179.684   | 395.982   | AF121856  | 2066.929  |
| 921.107   | M80583    | 1890.497  | 994.902   | NM_020134 | 635.351   | 386.504   | NM_006421 | 2461.969  |
| 9688.162  | AF252284  | 3868.818  | 5558.345  | NM_020221 | 651.576   | 547.407   | NM_003765 | 5087.642  |
| 807.994   | BU727558  | 1487.985  | 1177.295  | NM_000747 | 747.051   | 661.535   | NM_018202 | 6049.072  |
| 5932.646  | M33197    | 10827.754 | 11049.372 | NM_005415 | 1415.183  | 1080.291  | AB023197  | 1328.152  |
| 4996.287  | AL050139  | 4733.142  | 5547.038  | AJ275973  | 13549.129 | 12133.888 | NM_022173 | 1600.814  |
| 1178.631  | U90878    | 2027.767  | 984.599   | NM_006493 | 1642.839  | 1619.357  | AB040970  | 1502.552  |
| 47725.766 | NM_006597 | 47132.797 | 23530.805 | U76362    | 2280.175  | 2263.73   | NM_018330 | 1749.644  |
| 1419.778  | NM_012483 | 14426.864 | 15535.639 | AF040248  | 735.021   | 391.059   | U50342    | 1139.218  |
| 771.394   | NM_003498 | 5349.601  | 5293.797  | NM_014228 | 360.493   | 363.72    | NM_015921 | 46414.563 |
| 2689.445  | AB023420  | 13892.019 | 12182.004 | AL832292  | 2240.021  | 473.263   | AB040900  | 8657.6    |
| 7962.968  | NM_016511 | 20801.262 | 13641.225 | NM_003045 | 3449.874  | 1765.078  | NM_001482 | 1499.386  |
| 611.417   | NM_003559 | 2692.17   | 2934.183  | NM_005662 | 23178.627 | 28521.137 | NM_000717 | 2066.137  |
| 14908.456 | NM_016533 | 50405.375 | 55345.949 | AK021489  | 18369.543 | 16023.026 | M33197    | 64635.91  |
| 5318.957  | NM_014751 | 5544.175  | 6309.241  | NM_004317 | 2184.438  | 2249.927  | NM_004845 | 2421.987  |
| 1063.789  | AB046807  | 2596.75   | 3641.255  | NM_014645 | 855.736   | 886.136   | M68874    | 1900.918  |
| 698.97    | M33197    | 65905.336 | 74125.906 | NM_014708 | 1935.623  | 1537.616  | NM_006319 | 1838.286  |
| 9071.699  | NM_014623 | 6645.987  | 20911.938 | NM_003693 | 604.141   | 672.038   | Z36813    | 2568.069  |
| 11828.402 | NM_007244 | 11034.438 | 10422.642 | NM_000356 | 11964.745 | 7874.792  | NM_006660 | 4333.035  |
| 1291.086  | M30629    | 4946.292  | 5625.771  | NM_018134 | 16265.858 | 16194.078 | NM_006685 | 25195.971 |
| 6035.044  | M33197    | 65742.102 | 68728.352 | NM_013247 | 1941.122  | 3521.137  | AF080158  | 2503.289  |
| 1554.654  | NM_018976 | 13076.254 | 14127.694 | NM_006770 | 1145.211  | 1217.222  | BM664556  | 1816.412  |
| 1732.997  | NM_003355 | 9426.219  | 6099.234  | AK024794  | 461.142   | 398.595   | M33197    | 64246.852 |
| 8537.363  | NM_005074 | 1809.78   | 1994.377  | NM_019853 | 2913.45   | 1832.647  | NM_016545 | 2260.12   |
| 53045.434 | NM_013272 | 1039.995  | 673.339   | NM_017992 | 2759.571  | 2401.139  | NM_001440 | 19288.596 |
| 1443.953  | NM_018057 | 1337.315  | 1035.101  | NM_007255 | 1451.589  | 1348.508  | NM_016618 | 2083.746  |
| 846.418   | NM_015717 | 1754.083  | 1070.191  | NM_003668 | 5305.775  | 4049.76   | AB014568  | 21693.461 |
| 355.475   | NM_015925 | 1219.881  | 1262.159  | NM_013384 | 35747.855 | 23481.035 | NM_012249 | 2488.394  |

|           |           |           |           |           |           |           |           |           |
|-----------|-----------|-----------|-----------|-----------|-----------|-----------|-----------|-----------|
| 1290.77   | NM_003665 | 1497.994  | 1385.329  | NM_018241 | 1389.235  | 720.71    | AK022546  | 4794.646  |
| 1664.721  | AF220217  | 998.162   | 1046.25   | NM_005834 | 2138.258  | 1836.998  | NM_014067 | 4053.255  |
| 1175.195  | NM_013323 | 12071.111 | 12886.195 | AF000381  | 3313.363  | 2622.971  | NM_002914 | 2211.93   |
| 1410.59   | NM_017426 | 2723.843  | 2713.33   | NM_012105 | 916.035   | 1046.711  | NM_020385 | 1543.67   |
| 630.758   | M33197    | 2781.506  | 3319.61   | S82470    | 922.357   | 665.572   | NM_006541 | 983.459   |
| 426.03    | NM_000853 | 3033.112  | 3956.897  | AB028982  | 1270.983  | 811.336   | NM_004581 | 1362.305  |
| 1725.185  | AF016903  | 19745.73  | 28187.285 | NM_002004 | 1720.635  | 1484.346  | NM_006817 | 6125.627  |
| 1278.715  | NM_015675 | 7103.495  | 8805.677  | NM_001643 | 8155.874  | 5869.988  | NM_007108 | 3659.032  |
| 745.928   | NM_016040 | 2976.583  | 1376.268  | NM_019096 | 1623.655  | 1388.913  | M33197    | 64668.879 |
| 1656.088  | NM_015983 | 3138.531  | 4288.474  | NM_014725 | 1212.88   | 954.881   | M95610    | 13507.958 |
| 4133.339  | NM_018622 | 6856.824  | 13393.578 | NM_006892 | 935.711   | 564.558   | L02922    | 11372.459 |
| 1270.057  | M33197    | 65299.75  | 65015.195 | NM_019117 | 499.18    | 355.665   | NM_001797 | 1593.127  |
| 1224.889  | NM_005867 | 8645.109  | 7313.212  | NM_018309 | 1349.872  | 1228.822  | NM_003154 | 2771.415  |
| 1338.501  | AK026031  | 11406.34  | 9430.578  | NM_017658 | 2451.175  | 1942.953  | NM_004235 | 903.791   |
| 9462.428  | NM_016468 | 5205.795  | 3408.904  | NM_018679 | 6424.51   | 4968.563  | AK023459  | 3530.396  |
| 9321.995  | NM_007342 | 5152.61   | 3712.49   | NM_016643 | 352.118   | 417.585   | U13022    | 868.419   |
| 2441.654  | NM_006351 | 4730.941  | 2366.989  | NM_006779 | 3536.466  | 2852.909  | R23251    | 17792.697 |
| 1095.973  | M33197    | 57717.07  | 42737.176 | NM_016217 | 8754.792  | 6485.435  | BG763477  | 1070.8    |
| 2557.357  | NM_004683 | 13045.976 | 6819.583  | AK025971  | 4481.081  | 3059.7    | AA702640  | 1113.149  |
| 563.343   | AK023226  | 370.218   | 1257.74   | NM_002618 | 1565.958  | 1095.939  | T68583    | 1160.28   |
| 394.498   | M33197    | 65284.723 | 64699.023 | NM_002193 | 1074.326  | 739.443   | AA481944  | 11886.812 |
| 416.749   | NM_001467 | 2319.319  | 2380.512  | NM_001388 | 3422.134  | 2108.405  | A1366068  | 10425.296 |
| 13155.593 | NM_018066 | 22375.838 | 27577.813 | X76770    | 2450.396  | 1712.538  | AB040970  | 3541.662  |
| 895.131   | NM_006931 | 2943.526  | 3466.134  | AB037808  | 651.285   | 358.534   | NM_018330 | 3012.114  |
| 1348.371  | NM_020344 | 5410.088  | 5968.019  | NM_016038 | 1547.818  | 1042.943  | U50342    | 2612.497  |
| 2649.871  | AF252284  | 4752.585  | 7597.598  | Z36821    | 3421.967  | 1870.428  | NM_000295 | 1466.152  |
| 9473.702  | BU727558  | 1560.986  | 1925.396  | AF289485  | 1397.493  | 1242.453  | AF103795  | 578.603   |
| 578.716   | M33197    | 7303.071  | 5774.265  | AF130092  | 946.773   | 523.669   | NM_013231 | 1282.638  |
| 602.626   | AL050139  | 4124.039  | 2986.913  | NM_016095 | 1702.477  | 1846.712  | NM_012106 | 2241.932  |
| 1439.698  | NM_004558 | 3295.245  | 3083.977  | AF300612  | 38938.313 | 37445.258 | NM_006254 | 3443.812  |
| 1681.463  | AL079296  | 1351.815  | 696.863   | AB014557  | 740.568   | 689.78    | M33197    | 63217.078 |
| 1207.849  | NM_014770 | 1820.263  | 1065.601  | NM_005578 | 5111.745  | 3188.724  | AY009399  | 4040.212  |
| 706.998   | M33197    | 70891.531 | 64495.773 | NM_003653 | 3693.039  | 3245.24   | NM_004895 | 3006.21   |
| 13357.292 | AK023103  | 2720.326  | 2737.289  | NM_018457 | 10601.716 | 7781.879  | NM_014303 | 6453.807  |
| 1515.176  | D80008    | 1350.966  | 1224.136  | NM_002953 | 7144.557  | 9825.585  | NM_006660 | 4500.33   |
| 1004.452  | X56789    | 1343.274  | 1664.313  | NM_002187 | 1190.822  | 1725.688  | M33197    | 9275.604  |
| 3847.27   | AK001069  | 44221.461 | 50448.844 | NM_014246 | 5632.479  | 8193.456  | NM_004045 | 6880.362  |
| 3016.934  | NM_000935 | 1698.249  | 1583.033  | NM_014859 | 1052.369  | 974.591   | NM_001891 | 1642.465  |
| 1352.916  | NM_000359 | 12106.194 | 14981.99  | NM_001116 | 836.337   | 480.697   | NM_012139 | 1961.723  |
| 62642.879 | NM_006395 | 6995.428  | 13071.722 | BC035395  | 3788.11   | 4408.685  | AF121856  | 2006.798  |
| 2379.295  | NM_001084 | 5552.045  | 6613.533  | NM_001703 | 10051.967 | 8863.73   | NM_006421 | 1235.784  |
| 1806.578  | NM_003508 | 787.684   | 895.648   | NM_020126 | 3295.538  | 3620.841  | NM_017457 | 9176.148  |
| 1817.833  | M33197    | 65772.289 | 72630.664 | NM_013982 | 3185.385  | 4520.911  | NM_003765 | 4680.204  |
| 2551.836  | NM_014623 | 6072.359  | 16765.027 | NM_005049 | 1259.211  | 646.648   | NM_018202 | 3719.201  |
| 1472.709  | NM_007244 | 9889.944  | 6061.713  | NM_003882 | 510.39    | 233.333   | AB023197  | 1171.593  |
| 1529.391  | M30629    | 4861.787  | 4241.857  | NM_004630 | 5146.513  | 2994.445  | NM_004328 | 2679.59   |
| 456.806   | BE539299  | 862.08    | 467.952   | AK023001  | 2809.157  | 1888.571  | NM_004581 | 4342.757  |
| 54046.824 | AF193873  | 3543.592  | 2324.269  | NM_014826 | 3188.97   | 2446.429  | NM_006817 | 19924.988 |
| 7468.334  | NM_002628 | 1891.408  | 1649.321  | AF201947  | 477.49    | 601.313   | NM_015921 | 43137.109 |
| 1086.214  | M23575    | 2091.772  | 1303.704  | U01147    | 1393.303  | 1254.705  | AB040900  | 14659.492 |
| 11069.347 | AA190729  | 4597.673  | 3414.509  | NM_004040 | 4344.503  | 2794.043  | NM_000717 | 1457.935  |
| 57451.305 | BF974315  | 6051.665  | 2100.12   | NM_006116 | 1382.991  | 788.352   | M33197    | 65230.641 |
| 7451.045  | AI652705  | 4060.25   | 3472.66   | NM_005456 | 1391.04   | 1266.522  | NM_004845 | 1734.358  |

|           |           |           |           |           |           |          |           |           |
|-----------|-----------|-----------|-----------|-----------|-----------|----------|-----------|-----------|
| 9200.476  | AA569974  | 6429.013  | 7782.405  | NM_003587 | 9273.664  | 6006.549 | NM_007107 | 6844.874  |
| 2430.606  | AA923615  | 407.409   | 5447.133  | X90978    | 651.916   | 402.466  | NM_000047 | 4210.443  |
| 1013.215  | AA446028  | 2129.882  | 2210.756  | BF219403  | 18184.652 | 20240.09 | M68874    | 1519.149  |
| 2014.936  | M80583    | 1737.491  | 1886.965  | NM_016119 | 1150.73   | 991.192  | NM_006319 | 1093.472  |
| 1404.614  | X65293    | 838.327   | 2120.03   | AK075450  | 2436.727  | 2552.984 | Z36813    | 1765.26   |
| 1485.535  | AF016903  | 27281.521 | 37725.23  | AF178983  | 4241.505  | 3617.237 | AF303889  | 1554.197  |
| 9482.035  | NM_015675 | 7673.169  | 8580.481  | NM_001324 | 2223.042  | 3048.284 | M33197    | 66342.508 |
| 4582.738  | AK022267  | 821.737   | 622.248   | AB037795  | 990.036   | 1432.161 | AK022649  | 4413.638  |
| 5429.487  | NM_016040 | 2752.447  | 1102.077  | D43949    | 1304.764  | 1115.932 | NM_016507 | 6296.573  |
| 1855.603  | U90878    | 2483.958  | 1223.823  | NM_015344 | 1432.908  | 1165.341 | NM_002024 | 6222.396  |
| 3041.361  | NM_006597 | 40457.777 | 17415.824 | NM_004288 | 399.176   | 640.875  | NM_002743 | 9198.725  |
| 1398.157  | NM_012483 | 12838.812 | 8709.208  | AL122055  | 5223.771  | 4570.952 | AF173358  | 11498.392 |
| 1344.135  | NM_003498 | 5124.859  | 5820.386  | NM_005132 | 11308.699 | 7825.029 | NM_016366 | 2413.56   |
| 45547.188 | AB023420  | 12575.172 | 9918.984  | X07695    | 468.855   | 410.589  | NM_016545 | 1829.391  |
| 1643.051  | NM_002262 | 1730.094  | 2854.149  | D87458    | 1243.633  | 1448.77  | NM_001440 | 6945.453  |
| 865.767   | NM_016511 | 23767.34  | 15769.44  | AK021750  | 1443.612  | 3036.011 | NM_016618 | 1784.242  |
| 1149.74   | NM_003559 | 2551.005  | 2643.294  | NM_003626 | 991.939   | 1140.944 | AB014568  | 15285.244 |
| 752.112   | M55337    | 993.984   | 1104.129  | AK023594  | 4465.447  | 3841.495 | NM_012249 | 2184.056  |
| 57771.234 | M33197    | 64049.156 | 64853.348 | AB046782  | 2397.321  | 2096.11  | AK022546  | 4138.635  |
| 1386.55   | NM_013229 | 2157.479  | 3349.682  | NM_004190 | 4554.196  | 3958.994 | NM_014067 | 3766.69   |
| 5203.924  | NM_016533 | 58800.289 | 62324.563 | NM_014275 | 1835.056  | 845.755  | NM_002914 | 1636.142  |
| 9138.514  | NM_014751 | 6835.052  | 8190.236  | NM_000409 | 1691.263  | 1093.719 | NM_020385 | 1478.944  |
| 1656.987  | NM_002347 | 21557.816 | 33250.672 | AF208005  | 502.29    | 457.048  | NM_006541 | 1551.913  |
| 1442.687  | AB046807  | 3760.419  | 5414.025  | NM_002231 | 3425.429  | 2723.364 | NM_018179 | 1442.214  |
| 2977.925  | NM_018066 | 22609.744 | 23850.814 | NM_020474 | 4557.959  | 2992.477 | NM_006197 | 6424.488  |
| 1962.716  | NM_006931 | 3433.34   | 3448.205  | NM_002643 | 1199.035  | 1057.67  | NM_014181 | 1012.641  |
| 3461.688  | NM_020344 | 6587.385  | 7675.044  | NM_017807 | 2127.838  | 1472.435 | M29273    | 5937.077  |
| 677.719   | AF119868  | 889.72    | 713.078   | NM_014746 | 481.655   | 420.231  | M33197    | 64733.699 |
| 5443.789  | NM_005050 | 3775.558  | 3782.894  | NM_000462 | 4164.565  | 2287.375 | NM_004854 | 4665.867  |
| 25000.422 | M33197    | 59522.34  | 62416.617 | NM_003336 | 3630.674  | 4136.229 | AJ245418  | 12043.71  |
| 775.076   | NM_018976 | 11511.185 | 8824.279  | NM_005805 | 10470.506 | 6499.328 | NM_006377 | 4951.734  |
| 818.31    | NM_003355 | 9298.553  | 5057.659  | NM_004181 | 976.336   | 425.9    | AK026427  | 1519.94   |
| 19347.824 | NM_005074 | 2424.603  | 2826.58   | NM_003900 | 5126.124  | 2147.204 | NM_018362 | 3380.924  |
| 1885.429  | NM_013272 | 1044.526  | 768.356   | NM_003337 | 1775.302  | 1887.95  | M33197    | 64285.168 |
| 4415.469  | NM_004170 | 1025.7    | 769.857   | AF298152  | 2138.596  | 1168.413 | NM_004755 | 945.604   |
| 4256.73   | NM_018057 | 1347.114  | 1596.792  | AF117233  | 2743.383  | 1663.346 | NM_002186 | 3757.915  |
| 1568.066  | M33197    | 65716.594 | 70754.906 | NM_015848 | 601.707   | 379.726  | NM_006182 | 666.882   |
| 857.61    | NM_015717 | 1839.084  | 1211.432  | NM_001723 | 1039.979  | 754.666  | AL137543  | 2409.913  |
| 732.773   | NM_015925 | 1220.969  | 1224.821  | NM_016018 | 1752.881  | 1437.903 | NM_004444 | 3956.796  |
| 58522.234 | NM_003665 | 1486.114  | 1750.399  | AK024707  | 1180.826  | 1180.719 | M33197    | 530.836   |
| 4282.525  | AF220217  | 1159.156  | 1323.713  | AK022909  | 1523.042  | 891.036  | NM_001957 | 1225.969  |
| 1329.836  | NM_013323 | 14333.474 | 20022.488 | NM_006530 | 3343.007  | 2555.753 | AK024533  | 7196.527  |
| 2220.121  | NM_014937 | 793.435   | 1541.289  | AB033024  | 1152.932  | 938.586  | NM_002736 | 8972.514  |
| 11534.923 | NM_017426 | 3401.869  | 3889.877  | NM_018942 | 648.336   | 587.434  | NM_004246 | 3466.903  |
| 23992.148 | M33197    | 3475.788  | 3529.196  | NM_005531 | 645.214   | 446.573  | NM_002285 | 3825.597  |
| 7343.149  | NM_000853 | 3143.141  | 4831.775  | AF217226  | 1036.502  | 898.063  | NM_006694 | 25337.293 |
| 2033.849  | NM_006820 | 1050.858  | 1658.335  | NM_005522 | 414.378   | 361.964  | NM_005207 | 1842.796  |
| 2003.866  | NM_000935 | 1506.534  | 1237.151  | NM_005760 | 7072.955  | 5375.438 | NM_003087 | 4809.306  |
| 1573.407  | NM_000359 | 13122.185 | 15510.214 | NM_007265 | 2157.579  | 1161.277 | NM_001630 | 6611.733  |
| 2173.656  | NM_006395 | 6617.517  | 8212.127  | AK023639  | 2065.219  | 1917.697 | M33197    | 64599.941 |
| 298.042   | NM_014306 | 5614.337  | 5082.643  | NM_003083 | 2474.43   | 1885.713 | AF305081  | 2719.552  |
| 636.722   | NM_001084 | 4824.825  | 4103.957  | NM_006789 | 2733.902  | 2172.426 | NM_004712 | 7991.909  |
| 10193.954 | NM_015983 | 3946.447  | 2916.246  | NM_000982 | 1643.393  | 1057.828 | AF118078  | 1757.039  |

|           |           |           |           |           |           |           |           |           |
|-----------|-----------|-----------|-----------|-----------|-----------|-----------|-----------|-----------|
| 626.672   | NM_018622 | 5497.136  | 8346.396  | AK026367  | 17385.973 | 9657.025  | AL157428  | 1022.266  |
| 1065.501  | M33197    | 65561.266 | 67206.859 | AK026491  | 10129.156 | 2863.7    | M33197    | 63251.469 |
| 1194.002  | NM_005867 | 8401.905  | 8269.403  | NM_001015 | 68963.469 | 73336.805 | NM_00585E | 1615.25   |
| 15093.576 | AK026031  | 13936.713 | 11003.542 | AL110170  | 53095.578 | 7411.771  | AK025163  | 1530.73   |
| 1078.261  | NM_01646E | 5572.641  | 3503.71   | AK021747  | 951.346   | 607.007   | NM_014931 | 2542.428  |
| 811.981   | NM_007342 | 4781.061  | 3933.38   | AK025640  | 4463.292  | 4194.387  | NM_014487 | 2110.972  |
| 16640.965 | D25217    | 18608.496 | 3548.446  | NM_019101 | 724.933   | 645.439   | NM_01807C | 2752.229  |
| 2423.399  | NM_006351 | 5173.851  | 2654.034  | NM_00092C | 910.332   | 465.995   | NM_002484 | 2753.549  |
| 822.929   | M33197    | 62291.652 | 63781.648 | NM_02037E | 895.897   | 875.852   | M33197    | 60170.48  |
| 869.514   | NM_00468E | 18976.186 | 12419.583 | NM_01604E | 2282.656  | 2086.721  | NM_01824C | 63710.125 |
| 510.016   | AK023226  | 566.819   | 1827.982  | NM_013311 | 3325.949  | 2409.365  | AK025941  | 1799.549  |
| 57859.465 | AK025263  | 1235.151  | 1832.633  | NM_01464E | 1857.962  | 2627.905  | M33197    | 63617.586 |
| 3888.892  | M33197    | 65404.773 | 67313.711 | AL117488  | 1426.491  | 1455.136  | NM_015914 | 2088.044  |
| 2961.287  | NM_001467 | 2463.784  | 2663.24   | NM_01224C | 773.418   | 676.298   | AF059531  | 11970.047 |
| 1304.969  | AB037725  | 1085.854  | 1395.541  | NM_01900E | 3813.925  | 2308.576  | NM_002707 | 8893.118  |
| 4508.429  | M33197    | 53575.875 | 50487.008 | NM_00473E | 5689.105  | 5594.545  | AF029777  | 1612.549  |
| 1082.846  | NM_00486C | 3250.464  | 3849.737  | AV752216  | 632.199   | 1275.755  | NM_00335E | 1021.44   |
| 801.819   | AF217190  | 4151.818  | 4105.966  | NM_005341 | 1594.283  | 1247.435  | AK026884  | 10719.638 |
| 53678.48  | AB028981  | 32572.588 | 26503.602 | AF181999  | 812.63    | 767.234   | S82198    | 2230.123  |
| 3307.474  | NM_00680C | 4199.716  | 3866.333  | NM_001934 | 2506.398  | 1404.772  | NM_002594 | 3634.725  |
| 5112.832  | NM_00247E | 915.771   | 1423.448  | AB011090  | 1368.523  | 1415.421  | NM_001159 | 1024.802  |
| 2276.6    | NM_00272E | 5217.318  | 7709.855  | NM_00020E | 879.203   | 408.187   | NM_031407 | 2291.453  |
| 16252.068 | M33197    | 8980.053  | 5682.864  | NM_01868E | 3029.527  | 1852.853  | M33197    | 57568.383 |
| 59308.977 | AL050139  | 4527.551  | 3362.762  | NM_00654E | 11823.342 | 10200.169 | AK000410  | 54540.512 |
| 8296.037  | NM_00455E | 4488.766  | 4656.178  | NM_016534 | 724.174   | 913.837   | NM_00561E | 1975.33   |
| 8417.821  | AL079296  | 1378.502  | 1559.291  | AB021923  | 405.726   | 424.035   | AK000332  | 4903.235  |
| 4733.117  | NM_01477C | 2094.515  | 1679.673  | NM_01645E | 18468.408 | 17193.418 | AL080156  | 1293.664  |
| 3449.545  | AB037737  | 1018.996  | 1059.733  | AK022677  | 1511.763  | 2088.647  | M33197    | 62234.863 |
| 971.426   | AK023103  | 3435.166  | 4930.951  | AL137645  | 7421.5    | 7117.51   | NM_00289E | 1102.918  |
| 3526.963  | NM_01785E | 2933.251  | 3823.033  | AK026141  | 792.647   | 1015.305  | NM_013351 | 32565.711 |
| 1393.733  | D80008    | 1263.045  | 891.878   | AK026324  | 5889.765  | 7478.354  | NM_01234C | 6655.856  |
| 1379.562  | X56789    | 1290.307  | 1848.246  | AK025253  | 718.412   | 876.981   | NM_00602E | 1388.686  |
| 8291.891  | AK001069  | 45953.594 | 48155.914 | AK025004  | 1649.056  | 1739.512  | AK025110  | 1801.704  |
| 3281.635  | NM_00413E | 2607.192  | 3081.543  | AL136818  | 809.218   | 1027.37   | X52339    | 47913.691 |
| 27401.984 | NM_014844 | 3669.474  | 3592.564  | AF146798  | 1591.965  | 1390.425  | M33197    | 56176.824 |
| 6356.53   | M33197    | 58581.582 | 61113.781 | AF086517  | 4601.971  | 6587.306  | AB046830  | 3339.656  |
| 1671.777  | NM_01849E | 3085.482  | 1761.883  | AK025740  | 5903.141  | 5991.295  | NM_00712E | 2439.136  |
| 3543.168  | NM_00134E | 2154.844  | 2500.89   | AK000311  | 2056.082  | 2092.544  | NM_01620E | 6347.535  |
| 850.434   | NM_003377 | 5069.865  | 4442.833  | AK025346  | 27281.557 | 29165.459 | NM_016604 | 795.684   |
| 740.525   | NM_00222C | 3560.621  | 3967.403  | AK022583  | 1757.6    | 2335.553  | M33197    | 41645.543 |
| 46956.566 | AB033034  | 1785.265  | 1259.521  | AL137534  | 63705.266 | 56804.805 | NM_00627E | 2545.899  |
| 17890.791 | D38169    | 4134.167  | 3314.299  | AF052121  | 2285.878  | 2611.74   | NM_003407 | 2741.714  |
| 8990.221  | NM_018171 | 951.162   | 1468.519  | AL359062  | 1243.023  | 1582.592  | NM_00720E | 57355.07  |
| 812.519   | NM_002447 | 12623.921 | 22935.25  | AK026869  | 850.269   | 1022.778  | NM_00372E | 1653.597  |
| 688.771   | NM_01414E | 13171.798 | 15489.07  | AK022192  | 389.251   | 555.713   | L05096    | 5492.941  |
| 1442.305  | NM_00222E | 3099.547  | 4589.855  | NM_01909E | 21703.484 | 28400.049 | BC015899  | 3293.99   |
| 39510.359 | M33197    | 57966.512 | 69277.516 | Y12020    | 13376.187 | 13389.864 | NM_01798E | 10014.21  |
| 1397.999  | NM_003151 | 3476.15   | 3953.736  | AJ001905  | 746.827   | 1676.495  | AK024846  | 2469.12   |
| 5345.295  | NM_006811 | 5605.165  | 6060.965  | U17635    | 1560.698  | 2008.255  | AK001451  | 5070.367  |
| 7432.396  | NM_005601 | 3131.95   | 4985.832  | AL049930  | 731.028   | 750.055   | M33197    | 42528.313 |
| 1053.905  | NM_016151 | 8892.523  | 12206.999 | L23870    | 515.473   | 896.992   | NM_00718C | 1380.097  |
| 1398.8    | NM_004324 | 1127.304  | 1162.557  | D55644    | 424.395   | 470.265   | NM_00547E | 6322.222  |
| 1809.971  | NM_005614 | 9673.797  | 8031.08   | D16951    | 515.487   | 617.109   | NM_00566C | 3446.477  |

|           |           |           |           |           |           |           |           |           |
|-----------|-----------|-----------|-----------|-----------|-----------|-----------|-----------|-----------|
| 2005.391  | AK026270  | 1337.769  | 820.243   | L19362    | 407.086   | 642.489   | AK023902  | 1525.109  |
| 54085.465 | NM_004556 | 2923.632  | 4301.159  | L33807    | 930.836   | 1443.376  | NM_005223 | 365.039   |
| 1625.193  | D90075    | 4622.334  | 2986.364  | AB007975  | 377.955   | 311.731   | AB011173  | 3590.274  |
| 1317.096  | M33197    | 62289.406 | 61934.215 | AL049328  | 590.243   | 1051.535  | AB006622  | 1227.418  |
| 57790.855 | AK023827  | 2654.456  | 1915.354  | AK000030  | 655.046   | 968.762   | M33197    | 55944.801 |
| 1167.114  | AK021702  | 2277.524  | 1651.905  | NM_017932 | 442.961   | 959.982   | AK097041  | 2363.149  |
| 11830.702 | NM_003885 | 2284.198  | 1488.452  | AK000910  | 2323.885  | 2843.137  | AF068744  | 17963.738 |
| 931.094   | NM_003936 | 1749.824  | 1536.406  | AF252280  | 7406.162  | 7284.489  | AJ345030  | 2991.27   |
| 1201.97   | M33197    | 50172.879 | 52964.016 | AK000107  | 290.339   | 554.632   | AK023472  | 12448     |
| 10098.262 | NM_002688 | 3013.332  | 2078.048  | AK000951  | 447.829   | 502.748   | AL109729  | 1299.102  |
| 1808.834  | NM_004415 | 3657.316  | 4483.126  | AK000951  | 447.829   | 502.748   | M33197    | 64199.48  |
| 3079.65   | NM_007278 | 18287.617 | 33575.031 | AK024518  | 5311.31   | 6892.382  | S79912    | 25198.461 |
| 3941.161  | NM_005219 | 14339.865 | 13387.17  | AK024586  | 473.009   | 442.121   | AK026892  | 1741.173  |
| 1591.048  | NM_004723 | 16302.933 | 13537.812 | AK025017  | 1918.006  | 2302.304  | AK024255  | 417.177   |
| 1392.74   | M33197    | 63826.207 | 64824.555 | AK024616  | 291.325   | 503.384   | AK024255  | 417.177   |
| 1005.789  | AB018299  | 42350.844 | 49461.145 | AK024914  | 2948.032  | 2867.134  | S83275    | 15826.244 |
| 63214.324 | NM_005245 | 8909.616  | 11436.765 | BC030949  | 1432.191  | 1547.823  | AL117427  | 5059.257  |
| 7190.927  | M33197    | 61720.512 | 60055.605 | AF116615  | 932.475   | 1019.382  | M33197    | 60814.43  |
| 1996.1    | NM_016219 | 9192.888  | 8256.377  | U17636    | 33772.344 | 39385.313 | AF052118  | 6146.451  |
| 4155.989  | NM_004751 | 1038.403  | 653.521   | NM_018546 | 3620.284  | 4351.093  | AK025166  | 4215.642  |
| 11632.633 | AK025605  | 2973.879  | 2774.852  | U52699    | 8092.868  | 8579.269  | AL359586  | 909.062   |
| 6450.13   | NM_007000 | 4704.123  | 4579.956  | S71613    | 638.265   | 699.065   | AF035290  | 1754.108  |
| 56716.652 | M23161    | 10573.136 | 8171.439  | AJ011910  | 13786.063 | 17359.52  | M33197    | 59314.988 |
| 7483.807  | NM_006100 | 428.846   | 1312.133  | AK024378  | 946.991   | 1021.899  | AK023288  | 875.998   |
| 1778.791  | NM_003197 | 4881.159  | 2308.167  | NM_014026 | 2438.028  | 2888.345  | M33197    | 70172.727 |
| 8728.854  | AF176705  | 2859.066  | 1682.098  | D61703    | 10078.999 | 7600.78   | AK022428  | 1241.423  |
| 2121.24   | D29012    | 7604.78   | 6556.211  | AF086198  | 6250.344  | 8006.675  | AK000788  | 1258.722  |
| 2523.09   | NM_017414 | 1043.337  | 1042.345  | AL137382  | 45079.215 | 41846.977 | AK023457  | 2018.349  |
| 565.281   | NM_012179 | 25171.596 | 21277.395 | AK024599  | 3676.283  | 3827.348  | AK025089  | 5038.256  |
| 1633.914  | NM_002793 | 5964.473  | 5372.209  | NM_014450 | 786.772   | 984.18    | M33197    | 58113.883 |
| 743.233   | NM_004788 | 2404.937  | 2677.713  | NM_017991 | 587.145   | 786.213   | AF085996  | 3226.319  |
| 6605.043  | M33197    | 65765.039 | 69254.789 | L37198    | 2987.598  | 3783.438  | AK001279  | 2158.723  |
| 500.839   | AL442083  | 3554.781  | 3294.766  | U67822    | 605.395   | 698.9     | AF086407  | 1239.321  |
| 988.249   | D63487    | 6927.985  | 4596.064  | AK021921  | 529.95    | 687.823   | AK001567  | 1722.808  |
| 1893.918  | AK097791  | 5495.397  | 7549.36   | AK025431  | 836.794   | 1845.183  | M33197    | 32935.785 |
| 12783.65  | NM_020367 | 2208.583  | 2291.283  | AK023662  | 678.638   | 787.506   | U52839    | 1584.478  |
| 19709.094 | AK022705  | 2957.488  | 6512.702  | AF086274  | 17621.803 | 25937.035 | M33197    | 49318.113 |
| 913.72    | NM_016404 | 4244.205  | 5553.681  | AK023682  | 765.16    | 1360.172  | AK026984  | 8960.316  |
| 3419.603  | M33197    | 65102.816 | 69963.609 | AK024024  | 1948.955  | 3029.06   | AK022088  | 1171.093  |
| 1846.7    | NM_020163 | 2610.624  | 2282.061  | AF000991  | 854.167   | 1002.646  | M33197    | 58806.199 |
| 42983.18  | NM_006608 | 2350.605  | 2796.805  | AK000685  | 16055.749 | 12019.563 | AL157466  | 2502.877  |
| 1869.787  | NM_000457 | 929.442   | 578.672   | D28381    | 10237.68  | 15817.018 | AK024336  | 1840.534  |
| 986.154   | M34356    | 2568.681  | 1919.666  | BE706519  | 431.115   | 864.607   | AK023862  | 707.486   |
| 50086.898 | AJ133115  | 4104.588  | 4797.898  | AF130064  | 15866.978 | 23067.709 | AK022016  | 1244.654  |
| 2432.123  | X51630    | 7681.613  | 4916.499  | U17624    | 551.996   | 568.969   | AK021628  | 744.738   |
| 2199.227  | NM_005056 | 2004.832  | 2069.49   | AK025184  | 463.672   | 326.597   | M33197    | 58173.832 |
| 2376.007  | NM_001965 | 1563.684  | 941.796   | D16988    | 43366.781 | 47833.684 | NM_018603 | 1613.646  |
| 2105.454  | AF208502  | 12651.826 | 5568.72   | AK001959  | 3082.096  | 3788.679  | AK022118  | 1254.228  |
| 2436.242  | M33197    | 53079.348 | 47411.152 | U36217    | 922.862   | 738.74    | AK026453  | 5158.393  |
| 997.386   | AF264750  | 15436.138 | 12660.843 | AL389880  | 1012.273  | 808.586   | AK025673  | 996.969   |
| 753.58    | NM_006980 | 1130.734  | 1147.494  | AL157452  | 2054.612  | 3699.982  | M33197    | 47695.016 |
| 39488.43  | AK023904  | 3560.059  | 2756.096  | AK024155  | 11118.435 | 12714.695 | AK022431  | 627.303   |
| 2795.884  | NM_017956 | 4794.2    | 4708.959  | AL359334  | 5044.875  | 7340.565  | AK023305  | 23571.113 |
|           |           |           |           | AK027095  | 754.805   | 1054.831  | AK023763  | 1439.862  |

|           |           |           |           |           |           |           |           |           |
|-----------|-----------|-----------|-----------|-----------|-----------|-----------|-----------|-----------|
| 1344.991  | NM_016496 | 2222.637  | 3103.128  | AF062097  | 772.033   | 880.999   | AK022729  | 2424.281  |
| 18120.727 | NM_014309 | 4873.579  | 4374.188  | NM_019847 | 497.115   | 863.655   | NM_00616E | 14689.61  |
| 4088.279  | M33197    | 50972.594 | 50934.508 | D17093    | 12637.111 | 20468.443 | AL050374  | 2979.36   |
| 503.774   | NM_004094 | 2720.022  | 2193.869  | AK022784  | 323.016   | 555.891   | M33197    | 60840.141 |
| 927.584   | NM_020236 | 2876.789  | 7307.791  | AL117521  | 2528.734  | 4228.63   | M28639    | 3722.11   |
| 51650.305 | AK027059  | 8509.447  | 9544.394  | AK021913  | 4681.633  | 6405.286  | AL122073  | 12379.94  |
| 4507.381  | AF151109  | 16667.715 | 13894.806 | AL137489  | 15081.485 | 17781.748 | AF116655  | 3344.003  |
| 3618.852  | NM_015414 | 65898.203 | 75282.766 | AF009311  | 3805.69   | 4674.822  | AJ243222  | 1644.575  |
| 1057.045  | L34070    | 9317.905  | 7442.305  | S73397    | 534.184   | 821.755   | AK026132  | 3078.698  |
| 3006.775  | AF038182  | 1153.42   | 704.923   | AL050219  | 538.331   | 511.995   | M33197    | 61211.031 |
| 1615.335  | NM_016475 | 2686.153  | 2222.456  | AK024433  | 2347.749  | 3792.758  | AF070584  | 1915.836  |
| 1403.934  | AF086472  | 366.719   | 1253.656  | AL050376  | 650.552   | 1832.177  | AF075006  | 690.66    |
| 8480.983  | NM_001865 | 54649.336 | 45742.367 | AL359652  | 897.706   | 1180.534  | M33197    | 49803.129 |
| 3798.999  | NM_006441 | 3431.53   | 2790.834  | AK022423  | 1095.708  | 1560.453  | AK000903  | 19213.744 |
| 978.332   | NM_00191E | 2026.115  | 1364.907  | AF088021  | 2513.624  | 3106.619  | AK023938  | 394.797   |
| 13029.375 | NM_018245 | 2696.522  | 2885.572  | BF509267  | 2644.197  | 3298.73   | L13743    | 3151.712  |
| 4935.632  | M33197    | 61004.707 | 60303.344 | NM_002455 | 3602.801  | 4569.127  | U84519    | 1583.927  |
| 1442.349  | NM_012117 | 6086.125  | 4748.078  | NM_002959 | 10943.301 | 9773.14   | Z11849    | 5888.177  |
| 3876.412  | D17130    | 61082.113 | 66008.844 | AK000899  | 9331.259  | 14006.012 | AJ002788  | 3442.584  |
| 57885.008 | X76302    | 5081.326  | 3890.549  | AK023377  | 592.989   | 688.873   | M33197    | 60891.082 |
| 5193.124  | AK026276  | 1018.156  | 801.453   | CY3Cy5    | 1833.964  | 128.268   | AF052103  | 2908.029  |
| 1511.089  | M33197    | 47713.738 | 48985.074 | AW300857  | 5679.383  | 5004.104  | AF075050  | 522.969   |
| 3063.38   | X52354    | 1934.977  | 1585.969  | H85962    | 7673.42   | 6473.766  | AK024842  | 1031.9    |
| 15053.946 | NM_005413 | 1569.372  | 1412.695  | X12830    | 9190.351  | 14639.545 | NM_018382 | 1393.277  |
| 5362.816  | NM_002315 | 1766.497  | 2499.669  | U00482    | 723.599   | 942.847   | BC022303  | 1747.831  |
| 18014.57  | AK024191  | 1282.277  | 1616.502  | K01904    | 10299.09  | 3330.28   | M33197    | 61380.277 |
| 8167.086  | D83781    | 1418.125  | 729.887   | BE538886  | 732.528   | 642.772   | D17203    | 47621.789 |
| 1076.677  | AL832699  | 3111.689  | 4110.527  | M57650    | 2564.994  | 2282.464  | NM_00649E | 4567.398  |
| 57983.797 | NM_012191 | 1216.363  | 1012.776  | M21302    | 1610.334  | 1269.645  | NM_00528E | 736.708   |
| 1746.43   | M33197    | 65466.684 | 66339.023 | NM_016346 | 1550.095  | 1530.869  | AK022101  | 1155.007  |
| 3534.599  | AK000757  | 2254.779  | 1672.857  | SR2       | 40512.316 | 29098.756 | NM_003251 | 3101.117  |
| 4192.111  | AL359577  | 1212.445  | 539.601   | SR4       | 9403.886  | 7421.435  | AF086203  | 826.058   |
| 363.242   | NM_018139 | 1672.245  | 1100.847  | SR6       | 1535.669  | 1413.8    | M33197    | 60672.855 |
| 892.349   | NM_014805 | 3301.04   | 2658.805  | SR8       | 5854.299  | 13592.122 | AL442080  | 642.885   |
| 1578.626  | AF052120  | 2177.371  | 1646.719  | SR10      | 20752.441 | 5035.411  | AY007143  | 9129.43   |
| 2616.212  | NM_014871 | 2300.745  | 1320.339  | CY3Cy5    | 490.226   | 124.377   | M33197    | 67326.133 |
| 1319.244  | AK026754  | 405.654   | 387.037   | NM_001525 | 7299.986  | 8102.2    | NM_001563 | 11373.832 |
| 761.064   | M33197    | 58938.219 | 57511.043 | NM_006055 | 1596.716  | 1286.371  | NM_000266 | 1384.167  |
| 33884.82  | AL137552  | 1423.669  | 1101.777  | NM_004296 | 1281.346  | 1608.48   | X89666    | 4530.002  |
| 1814.018  | AK025794  | 3606.346  | 4887.309  | NM_00504E | 882.182   | 1750.969  | NM_003104 | 8235.161  |
| 4278.68   | AK024522  | 1427.104  | 1703.531  | NM_00106C | 1733.07   | 2270.821  | NM_014581 | 2964.502  |
| 3158.785  | NM_00719E | 5882.088  | 5466.673  | AL133105  | 1309.13   | 1481.204  | M33197    | 59928.84  |
| 2948.543  | M33197    | 58080.887 | 58830.449 | AK022859  | 1179.033  | 1180.924  | AK024448  | 3029.145  |
| 7808.058  | AK023220  | 1027.85   | 1471.111  | NM_000214 | 580.308   | 498.936   | NM_01440E | 2015.969  |
| 2498.914  | AK024566  | 823.265   | 1079.199  | NM_014864 | 3758.115  | 4368.003  | Z11801    | 1399.571  |
| 49009.516 | AK025683  | 637.512   | 1106.509  | NM_00372E | 4829.153  | 4814.446  | S68954    | 8037.214  |
| 839.99    | M33197    | 65616.289 | 69408.438 | NM_014352 | 4736.716  | 4384.238  | S81335    | 3436.707  |
| 3870.675  | AK024981  | 17892.906 | 23353.254 | NM_012481 | 775.899   | 732.896   | AF052109  | 1812.964  |
| 1513.503  | AK027246  | 979.579   | 1298.815  | L09102    | 8993.071  | 6334.095  | M33197    | 26875.49  |
| 26163.443 | U80766    | 2488.407  | 3045.841  | U68488    | 607.094   | 553.876   | NM_003353 | 35541.977 |
| 2937.056  | AK001638  | 1453.008  | 3223.249  | NM_016247 | 2189.326  | 1699.215  | X82127    | 40359.008 |
| 1564.07   | AF161386  | 7225.375  | 3061.831  | NM_012282 | 546.871   | 415.026   | AL122044  | 2682.385  |
| 2015.333  | AL365369  | 4712.448  | 3089.615  | NM_003323 | 7436.215  | 4850.731  | NM_01829E | 1802.047  |



|           |                  |           |           |                  |           |           |                    |           |
|-----------|------------------|-----------|-----------|------------------|-----------|-----------|--------------------|-----------|
| 1788.723  | <b>AK025454</b>  | 4506.455  | 4499.66   | <b>BG685310</b>  | 1260.832  | 904.057   | <b>NM_005752</b>   | 1030.623  |
| 1286.402  | <b>M33197</b>    | 59706.414 | 54695.563 | <b>NM_018668</b> | 3090.533  | 3284.591  | <b>M33197</b>      | 60461.07  |
| 605.822   | <b>X05826</b>    | 5586.277  | 4896.269  | <b>NM_005282</b> | 840.387   | 962.066   | <b>CY3Cy5</b>      | 6701.684  |
| 1304.382  | <b>AJ001872</b>  | 2371.107  | 1816.958  | <b>NM_001736</b> | 702.91    | 1260.001  | <b>AA115473</b>    | 1383.071  |
| 705.65    | <b>M33197</b>    | 65402.883 | 69720.781 | <b>AB028949</b>  | 1214.763  | 1205.346  | <b>AA872397</b>    | 920.713   |
| 2062.053  | <b>NM_005598</b> | 1454.348  | 2075.552  | <b>AL137580</b>  | 713.786   | 1169.772  | <b>M24283</b>      | 610.839   |
| 2313.859  | <b>Y10515</b>    | 921.956   | 961.256   | <b>NM_004101</b> | 730.404   | 1882.69   | <b>AA709414</b>    | 1736.103  |
| 28500.813 | <b>AK023636</b>  | 9945.25   | 8366.722  | <b>NM_002995</b> | 15163.912 | 20847.006 | <b>D12676</b>      | 1405.927  |
| 3220.248  | <b>D25272</b>    | 3949.213  | 4150.842  | <b>NM_015978</b> | 1497.694  | 2040.316  | <b>NM_000939</b>   | 7276.884  |
| 6522.197  | <b>M33197</b>    | 65437.344 | 67981.992 | <b>NM_003810</b> | 2537.455  | 2886.548  | <b>NM_004295</b>   | 6726.555  |
| 1432.481  | <b>NM_020168</b> | 2099.893  | 2526.398  | <b>NM_016171</b> | 64595.41  | 69500.078 | <b>H-X 02812 I</b> | 1106.548  |
| 1192.398  | <b>AK025931</b>  | 37014.129 | 37794.43  | <b>NM_014443</b> | 2333.358  | 1147.303  | <b>U75898</b>      | 1549.884  |
| 844.172   | <b>M33197</b>    | 936.525   | 926.278   | <b>NM_005212</b> | 2823.545  | 2710.918  | <b>M29039</b>      | 489.953   |
| 856.848   | <b>AK021972</b>  | 1788.922  | 1365.967  | <b>NM_006419</b> | 521.467   | 318.527   | <b>M59815</b>      | 532.571   |
| 27783.383 | <b>M33197</b>    | 61108.688 | 59414.199 | <b>AK024715</b>  | 524.817   | 458.291   | <b>SR2</b>         | 39805.738 |
| 2324.31   | <b>AK001083</b>  | 1461.705  | 1667.955  | <b>U90942</b>    | 45558.984 | 27277.035 | <b>SR4</b>         | 8417.899  |
| 4852.014  | <b>AK000185</b>  | 1691.271  | 1276.354  | <b>NM_018360</b> | 1031.822  | 737.73    | <b>SR6</b>         | 1563.665  |
| 827.705   | <b>NM_017962</b> | 401.544   | 781.775   | <b>AL365415</b>  | 652.975   | 505.199   | <b>SR8</b>         | 4362.702  |
| 933.295   | <b>NM_017834</b> | 1081.303  | 2151.463  | <b>L29147</b>    | 18229.01  | 7953.845  | <b>SR10</b>        | 16534.699 |
| 2073.353  | <b>AK000865</b>  | 1157.856  | 1226.333  | <b>NM_020228</b> | 3360.641  | 2975.568  | <b>CY3Cy5</b>      | 5506.921  |
| 6677.143  | <b>M33197</b>    | 65635.633 | 72387.992 | <b>AK024685</b>  | 862.307   | 790.79    | <b>M33197</b>      | 51613.188 |
| 5952.106  | <b>AK024558</b>  | 1304.246  | 2004.525  | <b>NM_003676</b> | 9589.511  | 8682.306  | <b>NM_001203</b>   | 1037.004  |
| 2481.106  | <b>AK024779</b>  | 1081.656  | 1670.151  | <b>AF113007</b>  | 1548.609  | 3279.393  | <b>NM_004799</b>   | 5807.037  |
| 641.446   | <b>AK024406</b>  | 721.757   | 1197.878  | <b>NM_000688</b> | 3673.782  | 5311.147  | <b>NM_014047</b>   | 6016.733  |
| 1744.47   | <b>AK024568</b>  | 9096.279  | 10942.295 | <b>U39573</b>    | 1200.678  | 1693.519  | <b>AK022901</b>    | 1131.537  |
| 5100.019  | <b>AK024994</b>  | 995.002   | 2027.734  | <b>D82061</b>    | 1541.847  | 2400.404  | <b>M33197</b>      | 62879.875 |
| 853.004   | <b>M33197</b>    | 66056.117 | 65076.961 | <b>AJ293009</b>  | 1469.375  | 1506.216  | <b>AF037332</b>    | 1673.351  |
| 3341.562  | <b>AK026277</b>  | 5917.04   | 4113.825  | <b>NM_000374</b> | 2159.98   | 2955.754  | <b>AB040912</b>    | 4113.263  |
| 4237.833  | <b>U10509</b>    | 1934.429  | 923.067   | <b>NM_000502</b> | 4664.128  | 6698.022  | <b>NM_006243</b>   | 2999.893  |
| 53897.699 | <b>NM_007165</b> | 25428.18  | 18497.17  | <b>NM_001359</b> | 15077.883 | 18208.98  | <b>NM_007252</b>   | 683.435   |
| 695.435   | <b>NM_014018</b> | 2377.142  | 2583.169  | <b>NM_005175</b> | 21063.861 | 28727.289 | <b>M33197</b>      | 54223.164 |
| 3526.62   | <b>AF085956</b>  | 1479.947  | 1155.675  | <b>NM_001696</b> | 9503.414  | 11042.322 | <b>AJ011129</b>    | 1298.513  |
| 845.313   | <b>NM_019116</b> | 963.872   | 563.905   | <b>NM_004975</b> | 2752.35   | 1376.524  | <b>NM_006387</b>   | 2999.598  |
| 21750.381 | <b>M33197</b>    | 59401.332 | 64524.098 | <b>D87445</b>    | 3849.412  | 4422.425  | <b>NM_005646</b>   | 1498.1    |
| 990.209   | <b>AL137556</b>  | 1572.011  | 2188.653  | <b>NM_000238</b> | 1900.545  | 1225.774  | <b>NM_006639</b>   | 2793.802  |
| 1078.027  | <b>NM_014696</b> | 7661.332  | 9778.796  | <b>NM_004980</b> | 8251.399  | 5755.072  | <b>B1767871</b>    | 1996.003  |
| 846.309   | <b>AL359055</b>  | 1602.766  | 3115.922  | <b>AB011094</b>  | 6995.097  | 5960.791  | <b>NM_018034</b>   | 2503.888  |
| 23233.182 | <b>NM_014908</b> | 2125.812  | 4258.986  | <b>NM_003224</b> | 844.666   | 683.723   | <b>M33197</b>      | 53629.508 |
| 1448.751  | <b>AF086125</b>  | 1377.189  | 1114.493  | <b>NM_001658</b> | 61210.77  | 52123.629 | <b>NM_012103</b>   | 7043.516  |
| 26998.428 | <b>AK023547</b>  | 922.075   | 1341.313  | <b>AK021761</b>  | 4016.342  | 3398.859  | <b>AL122077</b>    | 6595.093  |
| 653.917   | <b>U67847</b>    | 1488.819  | 1501.949  | <b>AK024536</b>  | 888.464   | 635.013   | <b>NM_006422</b>   | 806.353   |
| 1178.047  | <b>AL137321</b>  | 4183.185  | 2082.706  | <b>NM_001483</b> | 903.025   | 1224.56   | <b>BE789195</b>    | 554.011   |
| 7535.847  | <b>M33197</b>    | 57076.992 | 46641.496 | <b>NM_018973</b> | 7190.596  | 7892.071  | <b>NM_016946</b>   | 1380.033  |
| 5958.148  | <b>AK024207</b>  | 2597.216  | 1934.97   | <b>NM_002591</b> | 6573.516  | 7593.283  | <b>M33197</b>      | 55410.332 |
| 1524.516  | <b>AK021843</b>  | 936.779   | 819.703   | <b>AB046816</b>  | 14907.066 | 23436.861 | <b>NM_007259</b>   | 1558.996  |
| 2651.361  | <b>AF075025</b>  | 4213.422  | 6017.397  | <b>AL137266</b>  | 1647.091  | 1817.306  | <b>NM_018402</b>   | 714.557   |
| 1681.778  | <b>AF088008</b>  | 1364.699  | 1804.627  | <b>NM_016457</b> | 543.958   | 864.858   | <b>NM_018009</b>   | 872.653   |
| 1163.199  | <b>AK023528</b>  | 1824.744  | 1847.09   | <b>NM_005057</b> | 711.416   | 730.697   | <b>AK075081</b>    | 2041.474  |
| 1174.738  | <b>M33197</b>    | 54930.926 | 58799.523 | <b>AB046842</b>  | 1033.131  | 1027.349  | <b>NM_000895</b>   | 3655.367  |
| 3090.277  | <b>AF147349</b>  | 6705.299  | 5856.594  | <b>NM_004850</b> | 1450.251  | 1839.141  | <b>NM_003820</b>   | 10999.582 |
| 38036.988 | <b>AL050346</b>  | 18454.189 | 15693.753 | <b>NM_002822</b> | 3206.135  | 3070.716  | <b>NM_015915</b>   | 2084.998  |
| 23180.611 | <b>AK001520</b>  | 6271.376  | 6988.112  | <b>BF306955</b>  | 1213.034  | 903.938   | <b>M33197</b>      | 42609.445 |
| 503.132   | <b>D90070</b>    | 5059.563  | 4257.264  | <b>NM_001394</b> | 4760.337  | 4307.727  | <b>NM_016518</b>   | 2525.852  |

|           |                  |           |           |                  |           |           |                  |           |
|-----------|------------------|-----------|-----------|------------------|-----------|-----------|------------------|-----------|
| 6028.267  | <b>M33197</b>    | 55308.703 | 56892.832 | <b>NM_018441</b> | 6464.011  | 5259.98   | <b>NM_006185</b> | 4424.042  |
| 38593.813 | <b>AF086179</b>  | 1417.322  | 1660.845  | <b>NM_001609</b> | 725.484   | 727.966   | <b>NM_014800</b> | 871.8     |
| 1316.66   | <b>AK025807</b>  | 2579.956  | 4568.437  | <b>NM_012282</b> | 397.877   | 491.194   | <b>NM_001557</b> | 1169.372  |
| 21616.375 | <b>M33197</b>    | 59230.758 | 60621.629 | <b>NM_003323</b> | 5734.499  | 3915.781  | <b>AF147311</b>  | 1950.511  |
| 5542.872  | <b>AK025266</b>  | 3955.836  | 5141.956  | <b>BG685310</b>  | 522.285   | 750.187   | <b>NM_002131</b> | 25371.34  |
| 1311.423  | <b>AK001843</b>  | 4516.402  | 6577.788  | <b>AW300857</b>  | 5144.494  | 3823.481  | <b>NM_017927</b> | 1391.347  |
| 492.046   | <b>AK000548</b>  | 47498.5   | 59096.113 | <b>H85962</b>    | 8326.754  | 6939.276  | <b>NM_020151</b> | 5152.954  |
| 16294.531 | <b>NM_003920</b> | 9136.31   | 6776.617  | <b>BG742446</b>  | 1011.472  | 1869.978  | <b>NM_005891</b> | 17061.223 |
| 55982.469 | <b>NM_004787</b> | 11698.894 | 6783.093  | <b>X66945</b>    | 777.937   | 1441.723  | <b>NM_001645</b> | 1208.792  |
| 1946.583  | <b>AF087984</b>  | 4892.708  | 3491.618  | <b>X12830</b>    | 7506.856  | 15067.201 | <b>NM_003956</b> | 1433.042  |
| 2608.923  | <b>M33197</b>    | 60382.617 | 58648.625 | <b>U00482</b>    | 709.778   | 668.112   | <b>M33197</b>    | 55306.258 |
| 2343.493  | <b>AK022273</b>  | 3179.83   | 3219.521  | <b>K01904</b>    | 7714.256  | 2435.465  | <b>NM_003500</b> | 1601.698  |
| 574.154   | <b>NM_015882</b> | 1097.69   | 1465.582  | <b>BE538886</b>  | 564.098   | 606.848   | <b>NM_014317</b> | 2085.324  |
| 30522.029 | <b>AK024271</b>  | 1114.623  | 1238.388  | <b>M57650</b>    | 2839.991  | 2536.688  | <b>L09234</b>    | 3602.591  |
| 1507.469  | <b>AK021650</b>  | 3654.339  | 3360.897  | <b>M21302</b>    | 1585.718  | 1432.238  | <b>NM_000059</b> | 739.903   |
| 23990.805 | <b>AL050210</b>  | 4727.367  | 5194.495  | <b>NM_016346</b> | 1649.402  | 1614.873  | <b>AK026740</b>  | 635.989   |
| 2306.356  | <b>L37699</b>    | 1820.855  | 1860.316  | <b>U90942</b>    | 45299.902 | 32534.326 | <b>NM_017881</b> | 2337.911  |
| 3687.943  | <b>M33197</b>    | 62583.926 | 65290.43  | <b>NM_018360</b> | 977.509   | 1394.887  | <b>M33197</b>    | 62802.75  |
| 3017.877  | <b>AL050173</b>  | 2419.166  | 2597.714  | <b>AL365415</b>  | 994.973   | 1593.507  | <b>NM_017634</b> | 3036.1    |
| 10955.94  | <b>D80002</b>    | 2006.634  | 1452.346  | <b>L29147</b>    | 16454.984 | 11466.302 | <b>NM_000813</b> | 762.357   |
| 745.97    | <b>U17637</b>    | 6330.729  | 4903.685  | <b>NM_001525</b> | 7968.146  | 10056.08  | <b>NM_018896</b> | 997.388   |
| 2377.945  | <b>AF207831</b>  | 1309.23   | 953.436   | <b>NM_006055</b> | 1478.088  | 1070.183  | <b>AJ300465</b>  | 2499.861  |
| 4309.956  | <b>AK023174</b>  | 537.784   | 560.584   | <b>NM_005048</b> | 463.69    | 1198.459  | <b>NM_000810</b> | 2186.153  |
| 38512.617 | <b>NM_003548</b> | 1640.168  | 5836.257  | <b>NM_005972</b> | 474.085   | 776.854   | <b>AF069307</b>  | 1956.485  |
| 1684.828  | <b>M33197</b>    | 58167.16  | 60169.047 | <b>NM_001060</b> | 2019.032  | 2839.299  | <b>M33197</b>    | 55823.961 |
| 1451.268  | <b>NM_018272</b> | 4741      | 10428.664 | <b>NM_018841</b> | 475.293   | 347.9     | <b>U92978</b>    | 1466.708  |
| 3322.749  | <b>CY3Cy5</b>    | 1947.095  | 145.095   | <b>AL133105</b>  | 1220.87   | 1219.725  | <b>NM_013389</b> | 4508.53   |
| 1359.286  | <b>R19938</b>    | 5277.052  | 6781.157  | <b>AK022859</b>  | 870.522   | 739.17    | <b>NM_005326</b> | 3073.093  |
| 1097.263  | <b>N94487</b>    | 11619.307 | 12242.697 | <b>NM_014864</b> | 3546.718  | 3605.009  | <b>NM_014069</b> | 734.975   |
| 852.112   | <b>A1886795</b>  | 5895.125  | 6757.238  | <b>NM_003728</b> | 5436.559  | 3999.238  | <b>AB035130</b>  | 648.281   |
| 12567.925 | <b>D10495</b>    | 6521.532  | 6955.558  | <b>NM_014352</b> | 5467.932  | 4759.229  | <b>NM_003359</b> | 1155.943  |
| 1232.956  | <b>BF344679</b>  | 2617.313  | 9502.257  | <b>NM_012481</b> | 1175.205  | 788.207   | <b>M33197</b>    | 24921.695 |
| 20535.666 | <b>M36634</b>    | 1124.955  | 1009.534  | <b>L09102</b>    | 9287.773  | 6685.92   | <b>AF119917</b>  | 876.207   |
| 2350.945  | <b>M14156</b>    | 3879.162  | 3473.288  | <b>U68488</b>    | 502.705   | 412.667   | <b>NM_017915</b> | 801.433   |
| 637.444   | <b>U87939</b>    | 1458.497  | 1082.347  | <b>NM_016247</b> | 2076.278  | 1815.542  | <b>NM_003579</b> | 1325.578  |
| 2202.444  | <b>U86961</b>    | 1032.042  | 858.928   | <b>AB011094</b>  | 5911.978  | 8431.012  | <b>AL049283</b>  | 1307.528  |
| 957.434   | <b>AK094237</b>  | 2904.959  | 2690.05   | <b>NM_003224</b> | 768.892   | 880.734   | <b>M33197</b>    | 50804.867 |
| 12526.193 | <b>L07592</b>    | 3504.093  | 2716.763  | <b>NM_001658</b> | 60810.902 | 63443.949 | <b>NM_002401</b> | 25398.127 |
| 1243.244  | <b>NM_006981</b> | 1147.126  | 1077.651  | <b>NM_006827</b> | 15054.165 | 17544.627 | <b>NM_001274</b> | 837.844   |
| 1178.573  | <b>SR2</b>       | 50731.563 | 63693.133 | <b>AK021761</b>  | 2619.402  | 3000.005  | <b>NM_003913</b> | 791.548   |
| 1071.375  | <b>SR4</b>       | 17527.016 | 21199.27  | <b>AK024536</b>  | 968.065   | 691.841   | <b>NM_002227</b> | 2051.373  |
| 32590.234 | <b>SR6</b>       | 2198.787  | 2998.417  | <b>NM_018668</b> | 3277.739  | 3920.74   | <b>NM_007199</b> | 3175.41   |
| 11896.7   | <b>SR8</b>       | 8328.846  | 32409.943 | <b>NM_005282</b> | 691.607   | 766.722   | <b>AB014530</b>  | 4391.629  |
| 919.803   | <b>SR10</b>      | 32052.707 | 13785.293 | <b>NM_001736</b> | 489.261   | 482.07    | <b>M33197</b>    | 55488.441 |
| 19747.385 | <b>CY3Cy5</b>    | 3415.941  | 224.163   | <b>AB028949</b>  | 1052.539  | 1204.865  | <b>NM_005989</b> | 2497.366  |
| 2702.166  | <b>M33197</b>    | 69709.547 | 65079.355 | <b>NM_004101</b> | 985.087   | 948.218   | <b>AB014607</b>  | 2829.35   |
| 43034.008 | <b>NM_007369</b> | 1162.595  | 708.462   | <b>NM_002995</b> | 14515.126 | 12848.081 | <b>AF134401</b>  | 1258.86   |
| 3149.74   | <b>NM_014776</b> | 2035.707  | 2468.74   | <b>NM_015978</b> | 1297.401  | 1345.41   | <b>NM_006387</b> | 2010.139  |
| 1491.408  | <b>NM_006480</b> | 23250.951 | 22945.006 | <b>NM_003810</b> | 1776.459  | 1818.313  | <b>NM_005646</b> | 1072.558  |
| 586.595   | <b>NM_007223</b> | 35170.148 | 29727.982 | <b>NM_014443</b> | 2433.055  | 1530.289  | <b>NM_006639</b> | 2232.895  |
| 1244.887  | <b>NM_000145</b> | 1280.759  | 1288.313  | <b>NM_005212</b> | 3050.963  | 2592.69   | <b>B1767871</b>  | 985.706   |
| 50425.156 | <b>AF030107</b>  | 1420.502  | 986.814   | <b>NM_006419</b> | 718.794   | 434.734   | <b>AA418907</b>  | 679.441   |
| 1149.551  | <b>NM_000871</b> | 1389.254  | 1325.019  | <b>BF306955</b>  | 1134.743  | 1220.603  | <b>AA115473</b>  | 1631.733  |

|           |           |           |           |           |           |           |             |           |
|-----------|-----------|-----------|-----------|-----------|-----------|-----------|-------------|-----------|
| 51809.914 | M33197    | 76533.836 | 65401.805 | NM_001394 | 3776.064  | 5109.613  | AA872397    | 1465.595  |
| 891.04    | AF086924  | 58778.43  | 51587.977 | NM_018441 | 7200.522  | 9212.629  | AA709414    | 2331.583  |
| 1569.031  | NM_000264 | 705.181   | 554.708   | NM_000778 | 5072.259  | 5706.407  | D12676      | 1188.171  |
| 1979.339  | AB058740  | 8648.661  | 7155.77   | BE733234  | 527.213   | 957.858   | NM_000939   | 8811.398  |
| 4427.619  | NM_004392 | 956.609   | 467.852   | NM_020228 | 2891.545  | 2979.093  | NM_004295   | 6160.241  |
| 34545.078 | M33197    | 65116.676 | 62284.391 | AK024685  | 768.239   | 811.835   | H-X 02812 I | 1041.445  |
| 1057.58   | NM_001154 | 9081.053  | 10857.139 | NM_003676 | 10668.598 | 12116.548 | U75898      | 1607.51   |
| 1174.916  | NM_001819 | 1958.403  | 2172.176  | AF113007  | 1213.779  | 1710.037  | M29039      | 522.685   |
| 871.075   | NM_015725 | 10796.521 | 11000.502 | NM_000688 | 3854.545  | 5151.177  | M59815      | 693.948   |
| 1630.692  | R61452    | 1991.185  | 2506.057  | U39573    | 937.404   | 1032.371  | NM_006917   | 677.475   |
| 11357.424 | NM_012455 | 5210.524  | 8329.011  | D82061    | 1948.557  | 2649.993  | AB011146    | 1016.861  |
| 1539.752  | NM_002806 | 10232.793 | 9546.723  | AJ293009  | 1612.006  | 2460.926  | NM_006185   | 3199.501  |
| 979.808   | M33197    | 66974.492 | 64246.73  | NM_000374 | 2276.433  | 2585.612  | NM_014800   | 627.752   |
| 45219.172 | NM_001716 | 751.967   | 990.016   | NM_000502 | 5855.717  | 7401.026  | NM_001557   | 652.063   |
| 11549.294 | NM_004951 | 381.936   | 1381.707  | NM_001359 | 18965.244 | 20599.996 | AF147311    | 1273.115  |
| 867.066   | NM_006564 | 8956.81   | 9389.817  | NM_001696 | 10789.07  | 10085.173 | NM_002131   | 21045.953 |
| 1090.374  | NM_004802 | 1721.194  | 2518.712  | NM_004975 | 3877.806  | 1372.989  | NM_017927   | 1039.454  |
| 53096.609 | M33197    | 61770.355 | 61919.027 | D87445    | 4891.778  | 4696.27   | M33197      | 56665.797 |
| 1682.705  | NM_002983 | 1237.56   | 7487.668  | NM_000238 | 2259.844  | 1444.708  | NM_001203   | 1224.124  |
| 1019.278  | NM_000074 | 5980.768  | 3858.46   | NM_002247 | 429.43    | 279.911   | NM_004799   | 8221.299  |
| 1159.864  | BF434335  | 24027.674 | 27706.148 | NM_004980 | 7759.755  | 4416.841  | NM_014047   | 6608.805  |
| 49612.52  | NM_002993 | 1701.974  | 975.691   | NM_016346 | 1130.796  | 1247.893  | AK022901    | 1344.519  |
| 1210.718  | AK026946  | 2026.901  | 2355.036  | AK024865  | 505.859   | 1021.317  | M33197      | 57637.254 |
| 1170.889  | M33197    | 64902.797 | 63794.703 | NM_001483 | 913.831   | 1079.263  | AF037332    | 1933.773  |
| 528.232   | NM_003192 | 6499.589  | 7255.157  | NM_018973 | 7152.11   | 7156.249  | AB040912    | 5133.612  |
| 31315.398 | NM_018449 | 4675.853  | 4838.807  | NM_002591 | 8479.178  | 6182.129  | NM_006243   | 2405.084  |
| 764.419   | AF086129  | 949.945   | 891.963   | NM_020216 | 3910.271  | 7490.341  | M33197      | 52452.965 |
| 51631.23  | D79994    | 1418.83   | 1575.86   | AK021860  | 604.471   | 713.111   | AJ011129    | 1277.764  |
| 2250.051  | NM_014458 | 5092.281  | 6635.1    | AL137266  | 1817.52   | 1861.273  | M33197      | 55390.48  |
| 1805.87   | AF235049  | 5826.251  | 5132.709  | NM_016457 | 864.893   | 718.503   | U92978      | 1453.385  |
| 10977.747 | NM_001995 | 1976.318  | 2322.862  | NM_005057 | 805.208   | 661.341   | NM_013389   | 2640.543  |
| 2479.51   | NM_000183 | 16389.547 | 11156.531 | AF143321  | 666.592   | 658.632   | AK022817    | 762.042   |
| 51900.594 | AY004175  | 1938.402  | 2540.565  | AB046842  | 822.711   | 961.228   | NM_018034   | 3327.761  |
| 2159.028  | M33197    | 71653.32  | 65370.398 | NM_004850 | 1505.362  | 1397.185  | M33197      | 47227.371 |
| 1398.214  | NM_012327 | 3971.049  | 3955.597  | NM_002822 | 2899.708  | 2279.307  | AB037831    | 952.605   |
| 353.692   | NM_000904 | 1440.246  | 3516.052  | NM_014352 | 4123.742  | 3990.388  | NM_012103   | 10037.076 |
| 457.543   | NM_016048 | 4004.364  | 2517.384  | NM_012481 | 704.741   | 660.346   | AL122077    | 6410.72   |
| 1271.148  | NM_000375 | 11011.029 | 9297.603  | L09102    | 10225.777 | 11380.174 | NM_014632   | 598.749   |
| 714.913   | NM_000265 | 8577.81   | 28523.838 | U68488    | 386.586   | 804.999   | NM_006422   | 889.602   |
| 41386.738 | NM_018849 | 6718.046  | 5903.499  | NM_016247 | 2051.299  | 2225.782  | NM_016946   | 1574.731  |
| 638.493   | AF279890  | 2358.961  | 2615.047  | NM_003323 | 5952.843  | 4463.061  | M33197      | 56074.32  |
| 30004.676 | NM_002236 | 1857.122  | 1514.126  | BG685310  | 806.785   | 806.04    | NM_007259   | 1576.674  |
| 5005.943  | NM_012069 | 1203.66   | 1746.238  | AW300857  | 6153.958  | 5617.347  | NM_018402   | 611.768   |
| 918.48    | NM_001689 | 55598.004 | 45703.379 | H85962    | 10641.198 | 7836.921  | NM_018009   | 369.304   |
| 475.122   | NM_016601 | 1568.092  | 1672.197  | BG742446  | 697.332   | 635.608   | AK075081    | 1578.035  |
| 587.473   | NM_017905 | 7552.757  | 6235.375  | AA864554  | 2568.556  | 18995.479 | NM_000895   | 2896.891  |
| 1403.081  | M33197    | 65181.445 | 64282.875 | X66945    | 918.833   | 1612.393  | NM_003820   | 10995.656 |
| 1671.527  | NM_006815 | 28941.838 | 22640.012 | X12830    | 6828.479  | 8394.584  | NM_015915   | 1250.717  |
| 5965.698  | NM_001663 | 6715.534  | 8016.432  | U00482    | 1089.113  | 1128.418  | M33197      | 34561.816 |
| 30864.902 | NM_004218 | 8808.306  | 11171.201 | K01904    | 9279.008  | 2575.471  | NM_016518   | 1708.628  |
| 898.88    | NM_016530 | 1764.483  | 2922.867  | BE538886  | 596.127   | 693.527   | AB002301    | 649.03    |
| 660.003   | NM_014804 | 1222.837  | 1879.582  | NM_002228 | 404.46    | 258.34    | AB014530    | 3725.142  |
| 45934.633 | L40520    | 5106.838  | 4587.748  | M57650    | 2698.875  | 1764.617  | M33197      | 56269.223 |

|           |           |           |           |           |           |           |             |           |
|-----------|-----------|-----------|-----------|-----------|-----------|-----------|-------------|-----------|
| 15722.486 | NM_002633 | 8810.414  | 2417.938  | M21302    | 1401.964  | 975.534   | NM_005989   | 1191.216  |
| 1056.42   | M33197    | 62406.871 | 59979.813 | NM_005212 | 2550.77   | 1940.684  | AB014607    | 1973.538  |
| 49753.965 | NM_002878 | 3975.663  | 3391.387  | NM_006419 | 430.939   | 366.183   | AF134401    | 1256.869  |
| 5798.604  | NM_017723 | 3559.843  | 3944.159  | AK024715  | 482.588   | 471.321   | NM_020151   | 6050.671  |
| 1004.222  | AK022922  | 2494.151  | 2000.029  | U90942    | 46406.102 | 28209.916 | NM_003956   | 1614.091  |
| 53328.637 | NM_006462 | 7211.727  | 6185.379  | NM_018360 | 884.047   | 705.048   | M33197      | 56830.84  |
| 14211.81  | NM_000400 | 18102.996 | 17407.654 | AL365415  | 612.231   | 441.967   | NM_003500   | 2253.95   |
| 2940.179  | M33197    | 61782.871 | 58847.16  | L29147    | 17268.176 | 11413.132 | NM_014317   | 2100.904  |
| 1550.05   | NM_002613 | 2853.096  | 3217.406  | NM_001525 | 9976.997  | 9082.753  | L09234      | 3906.99   |
| 3781.968  | NM_004419 | 2438.209  | 1685.585  | NM_006055 | 1732.789  | 1209.14   | NM_000059   | 848.228   |
| 1016.768  | U47635    | 2848.327  | 2668.561  | NM_004296 | 529.77    | 576.24    | AK026740    | 1055.748  |
| 48760.328 | NM_018650 | 1420.428  | 1793.978  | NM_001060 | 1630.672  | 1158.487  | NM_017881   | 1672.708  |
| 2241.872  | AK026945  | 36694.875 | 13501.628 | NM_018841 | 529.26    | 379.395   | M33197      | 57128.906 |
| 1019.061  | NM_002828 | 2265.736  | 2447.119  | AL133105  | 1176.254  | 1156.965  | NM_017634   | 3131.32   |
| 2045.435  | NM_014369 | 2991.892  | 4175.265  | AK022859  | 930.975   | 735.2     | NM_000813   | 345.894   |
| 899.051   | M33197    | 62603.633 | 62602.082 | NM_014864 | 3624.379  | 2681.094  | NM_018896   | 657.4     |
| 7529.292  | NM_001398 | 25702.883 | 16354.84  | NM_003728 | 3412.639  | 2201.145  | AJ300465    | 1889.881  |
| 33534.297 | AB050049  | 6463.248  | 5912.201  | NM_004975 | 2511.908  | 1009.659  | NM_000810   | 1456.914  |
| 19636.908 | J05125    | 794.608   | 687.909   | D87445    | 3704.806  | 5542.467  | AF069307    | 1154.608  |
| 426.052   | N94487    | 12906.464 | 12568.856 | NM_000238 | 1677.351  | 1442.265  | AB011146    | 1132.907  |
| 668.414   | A1886795  | 4895.71   | 4371.408  | NM_004980 | 6532.653  | 4100.6    | NM_005326   | 5007.698  |
| 50772.422 | D10495    | 6173.859  | 5726.56   | AB011094  | 6455.998  | 6641.129  | NM_014069   | 502.161   |
| 1116.858  | BF344679  | 2064.268  | 7635.2    | NM_003224 | 741.652   | 799.81    | AB035130    | 1323.327  |
| 525.568   | M36634    | 915.376   | 1003.864  | NM_001658 | 58016.527 | 60307.609 | M33197      | 26592.371 |
| 2803.27   | M14156    | 3340.026  | 2797.154  | NM_006827 | 14177.113 | 12991.023 | AF119917    | 1101.291  |
| 4316.507  | U87939    | 1317.062  | 1378.929  | AK021761  | 3205.493  | 3157.219  | AK021513    | 885.71    |
| 678.665   | U86961    | 1469.071  | 1670.921  | AK024536  | 779.366   | 843.226   | NM_003579   | 1426.578  |
| 970.525   | AK094237  | 2691.405  | 2375.85   | NM_018668 | 3676.635  | 3341.369  | AL049283    | 832.267   |
| 6294.837  | L07592    | 3267.78   | 2725.892  | NM_004227 | 561.721   | 380.288   | M33197      | 25640.139 |
| 10158.258 | NM_006981 | 1170.087  | 1327.737  | NM_005282 | 1103.813  | 1111.147  | NM_002401   | 14380.653 |
| 1338.875  | M33197    | 62034.625 | 61475.273 | NM_001736 | 342.456   | 393.187   | NM_001274   | 1225.294  |
| 551.91    | AK027244  | 3266.292  | 3022.652  | AB028949  | 966.368   | 565.358   | NM_003913   | 442.363   |
| 443.127   | NM_018449 | 5577.093  | 5219.69   | NM_004101 | 669.976   | 480.895   | NM_002227   | 1490.732  |
| 377.892   | AF086129  | 1664.278  | 1242.721  | NM_002995 | 17305.643 | 13491.636 | NM_007199   | 1634.216  |
| 13916.76  | D79994    | 1862.944  | 1842.262  | NM_015978 | 1384.395  | 1201.65   | M33197      | 53467.191 |
| 3989.621  | M33197    | 64493.332 | 64730.184 | NM_003810 | 2134.821  | 1653.036  | AJ011129    | 1116.635  |
| 445.323   | NM_014776 | 2290.282  | 2972.634  | NM_016171 | 61976.875 | 58968.254 | NM_006387   | 2719.154  |
| 3470.377  | NM_006480 | 23768.787 | 21781.061 | NM_014443 | 1363.121  | 579.275   | NM_005646   | 1819.937  |
| 1143.418  | NM_007223 | 35483.051 | 27617.988 | NM_016457 | 488.316   | 619.13    | NM_006639   | 2848.071  |
| 386.297   | NM_000145 | 947.05    | 868.377   | NM_005057 | 568.614   | 582.39    | B1767871    | 1207.226  |
| 17391.1   | AF030107  | 966.915   | 1003.227  | AF143321  | 795.414   | 1022.891  | AA418907    | 713.779   |
| 586.744   | NM_000871 | 1110.904  | 1100.019  | AB046842  | 944.135   | 807.619   | AA115473    | 1780.064  |
| 7360.914  | M33197    | 60438.914 | 58443.148 | NM_004850 | 1699.076  | 1976.638  | AA872397    | 2002.826  |
| 687.908   | NM_018968 | 871.97    | 879.448   | NM_002822 | 3358.338  | 2816.344  | AA709414    | 2080.876  |
| 40925.762 | AF086924  | 56501.406 | 49266.594 | BF306955  | 1301.987  | 1142.751  | D12676      | 867.019   |
| 1193.965  | NM_000264 | 824.832   | 747.916   | NM_001394 | 4733.153  | 4783.391  | BC012593    | 1081.266  |
| 314.054   | AB058740  | 8764.952  | 8226.026  | NM_018441 | 7725.082  | 7659.019  | NM_000939   | 5460.815  |
| 1457.354  | NM_004392 | 785.581   | 861.017   | NM_000778 | 5860.575  | 5619.11   | NM_004295   | 3141.066  |
| 570.919   | M33197    | 63137.332 | 64506.836 | NM_001609 | 872.277   | 849.633   | H-X 02812 I | 589.73    |
| 733.502   | NM_001154 | 8890.115  | 11350.236 | BE733234  | 496.945   | 342.327   | U75898      | 1126.091  |
| 40612.922 | NM_001819 | 2684.065  | 2380.923  | NM_020228 | 3532.607  | 3110.47   | M29039      | 349.26    |
| 548.029   | NM_016938 | 817.024   | 884.297   | AK024685  | 1352.445  | 1062.794  | AK075081    | 1799.405  |
| 1472.993  | M33197    | 71353.266 | 65146.016 | NM_003676 | 10474.322 | 10300.693 | NM_000895   | 3536.937  |

|           |           |           |           |           |           |           |           |           |
|-----------|-----------|-----------|-----------|-----------|-----------|-----------|-----------|-----------|
| 1399.035  | NM_00681E | 29243.725 | 21302.537 | AF113007  | 1183.048  | 1963.601  | NM_00382C | 9152.712  |
| 1422.238  | NM_00166E | 7476.809  | 8179.578  | NM_00068E | 3820.611  | 2902.25   | NM_01591E | 918.878   |
| 1297.116  | NM_01245E | 4284.337  | 5324.313  | U39573    | 1247.38   | 911.418   | M33197    | 25995.035 |
| 53372.328 | NM_00280E | 10834.908 | 11290.03  | D82061    | 1752.577  | 1604.347  | NM_01651E | 2568.183  |
| 1219.418  | M33197    | 69581.367 | 65318.125 | AJ293009  | 1412.733  | 1129.789  | NM_00618E | 3862.184  |
| 13880.71  | NM_00171E | 731.708   | 859.731   | NM_000374 | 2296.345  | 2343.62   | NM_01480C | 1038.374  |
| 14356.794 | NM_006564 | 5639.994  | 5282.005  | NM_000502 | 5369.56   | 5970.168  | NM_001557 | 1015.283  |
| 1033.741  | NM_004802 | 1508.407  | 2034.733  | NM_00135E | 19005.102 | 18733.086 | AF147311  | 2049.989  |
| 625.896   | M33197    | 62093.988 | 63107.488 | NM_00517E | 23227.887 | 24236.201 | NM_002131 | 25919.379 |
| 50102.758 | NM_00298E | 1873.316  | 11867.253 | NM_00169E | 9920.883  | 8484.644  | NM_017927 | 1333.95   |
| 1142.649  | NM_000074 | 6183.189  | 5506.258  | AF190900  | 3405.906  | 2247.889  | M33197    | 58743.227 |
| 303.735   | BF434335  | 22602.977 | 27971.992 | NM_020404 | 10808.625 | 6788.801  | NM_00120E | 1510.864  |
| 481.483   | NM_00299E | 1805.054  | 1333.855  | BE972401  | 7156.14   | 5775.834  | NM_00479E | 7925.372  |
| 967.231   | AK026946  | 1965.492  | 1741.879  | NM_01742E | 695.695   | 582.737   | NM_014047 | 4567.797  |
| 2211.481  | M33197    | 61038.496 | 61935.969 | AB007922  | 638.807   | 394.743   | AK022901  | 1121.412  |
| 12820.323 | NM_00319E | 7503.179  | 8144.543  | NM_01598E | 1745.594  | 1230.689  | M33197    | 46234.359 |
| 697.812   | NM_00282E | 2509.818  | 1966.91   | NM_00374E | 24481.064 | 7764.969  | AB040912  | 4524.551  |
| 15942.608 | NM_01436E | 3304.178  | 3852.476  | NM_00291C | 25685.426 | 21029.018 | NM_00081E | 799.571   |
| 3801.506  | M33197    | 62536.469 | 62191.223 | AC096970  | 18382.383 | 14059.271 | NM_01889E | 901.301   |
| 1371.82   | NM_00139E | 29589.248 | 20342.791 | AK024865  | 525.731   | 511.818   | AJ300465  | 1732.612  |
| 1488.176  | NM_00199E | 3048.085  | 2720.745  | NM_00148E | 1266.684  | 1490.691  | NM_00081C | 1832.256  |
| 1692.845  | NM_00018E | 15631.184 | 11983.493 | NM_01897E | 8238.405  | 7799.396  | AF069307  | 1572.417  |
| 14528.157 | AY004175  | 2232.971  | 2170.442  | NM_002591 | 10017.692 | 7122.872  | M33197    | 59089.895 |
| 1704.828  | M33197    | 63300.156 | 60585.242 | NM_02021E | 4765.255  | 8172.463  | U92978    | 1526.845  |
| 9222.749  | NM_012327 | 3567.773  | 3536.343  | AK021860  | 822.393   | 793.949   | NM_00573E | 627.328   |
| 26835.918 | NM_000904 | 1270.132  | 3701.424  | AB046816  | 625.858   | 590.61    | NM_01338E | 4728.896  |
| 2499.788  | NM_01604E | 2161.694  | 1447.968  | AL137266  | 1970.24   | 1726.263  | AB014567  | 1246.506  |
| 1753.286  | NM_00037E | 9454.589  | 8723.744  | NM_01428E | 4342.565  | 2857.772  | AK022817  | 925.81    |
| 53317.41  | NM_00026E | 8511.69   | 37355.715 | AF035300  | 623.493   | 620.996   | NM_018034 | 3954.993  |
| 2550.925  | NM_01884E | 8386.311  | 12355.741 | NM_01770E | 6368.766  | 6196.905  | M33197    | 54910.012 |
| 2408.876  | M33197    | 60975.359 | 59095.121 | NM_01532C | 2246.113  | 1772.528  | AB037831  | 951.976   |
| 570.06    | AF279890  | 2760.053  | 3441.467  | NM_00405E | 1149.647  | 688.603   | NM_01210E | 9342.421  |
| 2047.113  | NM_00223E | 2563.665  | 1949.658  | AJ297349  | 2492.461  | 1719.54   | AL122077  | 4370.69   |
| 51912.219 | NM_01206E | 1923.858  | 2938.436  | NM_00582E | 6005.755  | 7038.113  | BE789195  | 377.035   |
| 1843.86   | NM_00168E | 54303.691 | 54836.215 | NM_00161E | 2703.404  | 2748.821  | NM_01694E | 768.952   |
| 370.85    | NM_016601 | 828.929   | 1221.68   | NM_00659E | 3026.578  | 2760.822  | M33197    | 50963.82  |
| 880.443   | NM_01790E | 10957.294 | 9550.945  | NM_00446E | 1428.163  | 1280.808  | NM_00725E | 978.537   |
| 886.742   | NM_006981 | 1228.835  | 1185.66   | NM_00593E | 572.698   | 1134.347  | NM_01800E | 526.348   |
| 530.368   | M33197    | 60825.605 | 57802.281 | U43586    | 492.835   | 633.076   | M33197    | 51939.238 |
| 44135.305 | AK027244  | 3024.362  | 2593.144  | NM_006271 | 6055.455  | 4140.709  | NM_002401 | 20817.787 |
| 1582.902  | L40520    | 5542.228  | 4904.946  | NM_018647 | 1086.589  | 1089.945  | NM_001274 | 2581.354  |
| 347.412   | NM_00263E | 9689.773  | 2137.629  | NM_00302E | 447.809   | 575.035   | NM_002227 | 1919.343  |
| 661.042   | U11036    | 835.792   | 1260.998  | NM_000721 | 28794.715 | 28748.736 | NM_00719E | 2434.718  |
| 7662.38   | NM_00287E | 3488.591  | 3675.422  | NM_00393E | 1617.332  | 1576.637  | AB002301  | 391.722   |
| 740.657   | NM_01772E | 4106.521  | 6291.307  | NM_00509E | 3601.478  | 2922.733  | AB014530  | 4385.402  |
| 12921.671 | AK022922  | 3455.133  | 3685.512  | NM_00316E | 8354.896  | 4983.957  | M33197    | 58174.672 |
| 226.197   | NM_00646E | 8253.508  | 8112.247  | NM_019057 | 2426.769  | 2768.872  | NM_00598E | 2508.267  |
| 1068.344  | AK024750  | 5129.012  | 6116.402  | NM_002677 | 1071.874  | 1120.398  | AB014607  | 3164.344  |
| 1546.566  | NM_00040C | 17137.191 | 20667.016 | NM_01620E | 1424.42   | 1262.025  | AF134401  | 1542.222  |
| 1403.64   | M33197    | 61991.699 | 60914.422 | NM_00575E | 1396.615  | 1173.838  | NM_020151 | 7538.56   |
| 27783.943 | NM_00261E | 3652.448  | 3932.173  | AF149724  | 1327.015  | 1168.569  | NM_005891 | 25747.5   |
| 179.189   | NM_00441E | 3219.437  | 2976.434  | BC020745  | 1394.569  | 740.804   | NM_00164E | 1890.734  |
| 671.603   | U47635    | 3181.556  | 3043.664  | NM_006367 | 57294.418 | 63790.566 | NM_00395E | 1363.845  |

|           |           |           |           |           |           |           |           |           |
|-----------|-----------|-----------|-----------|-----------|-----------|-----------|-----------|-----------|
| 640.659   | NM_01865C | 1407.232  | 1667.489  | NM_004354 | 1745.358  | 1726.069  | M33197    | 54021.859 |
| 41720.23  | AK026945  | 40222.848 | 13463.361 | NM_004661 | 1345.896  | 1089.752  | NM_00350C | 1388.621  |
| 15681.244 | NM_004392 | 905.824   | 672.777   | NM_00161C | 1588.784  | 1371.573  | NM_014317 | 1508.799  |
| 468.705   | M33197    | 66613.039 | 62591.488 | NM_001241 | 983.626   | 724.718   | L09234    | 2468.333  |
| 982.005   | NM_001154 | 9937.836  | 12978.35  | AF217504  | 2354.728  | 1649.692  | NM_00005E | 1175.917  |
| 2483.757  | NM_00181E | 2768.231  | 2727.169  | AK027102  | 5968.854  | 5007.337  | AK026740  | 455.511   |
| 49234.547 | BF575833  | 637.068   | 884.642   | NM_004632 | 2191.315  | 1525.454  | NM_017881 | 1435.619  |
| 2784.268  | NM_01572E | 12387.637 | 10761.88  | NM_01791E | 2306.939  | 2381.032  | M33197    | 53936.742 |
| 4339.837  | R61452    | 2143.669  | 1635.377  | NM_01445E | 3319.343  | 4004.447  | NM_017634 | 2203.137  |
| 2247.619  | R19938    | 5575.33   | 9505.544  | NM_00474C | 3239.862  | 3982.908  | NM_017743 | 1323.261  |
| 3715.282  | A1886795  | 4756.881  | 5800.838  | NM_00380E | 2140.296  | 1596.425  | NM_00030C | 2661.393  |
| 2566.43   | D10495    | 7087.983  | 9923.01   | NM_01988E | 3003.833  | 2665.345  | M33197    | 59286.469 |
| 2936.701  | BF344679  | 2255.051  | 12415.529 | NM_00042E | 714.628   | 785.43    | AV756917  | 2536.406  |
| 1032.42   | M36634    | 1097.92   | 1407.403  | AK021957  | 39696.273 | 31336.418 | NM_01838C | 5963.56   |
| 2802.165  | M14156    | 4437.033  | 4553.085  | NM_016623 | 4180.895  | 5741.797  | AK001442  | 1222.103  |
| 861.425   | U87939    | 1708.331  | 1538.759  | NM_001334 | 5914.547  | 3485.104  | NM_01207C | 1898.256  |
| 424.533   | U86961    | 1398.638  | 1654.975  | NM_004771 | 1389.982  | 850.81    | NM_01903E | 1121.913  |
| 1294.999  | AK094237  | 2772.674  | 2349.672  | AL365514  | 612.145   | 411.516   | AF183423  | 3144.775  |
| 867.086   | L07592    | 3280.993  | 2583.113  | NM_01829E | 895.531   | 635.245   | M33197    | 843.806   |
| 497.3     | BF434335  | 29871.217 | 30454.932 | NM_005504 | 4270.42   | 2839.738  | AB011146  | 1301.97   |
| 243.242   | NM_002993 | 2497.442  | 1955.801  | AF234654  | 1856.188  | 2248.637  | NM_00532E | 6386.562  |
| 5405.14   | AK026946  | 3033.188  | 2786.249  | NM_00011C | 3241.314  | 4242.651  | NM_01406E | 1087.035  |
| 7504.998  | M33197    | 62189.371 | 62865.152 | NM_016002 | 35906.102 | 36389.262 | AB035130  | 1567.12   |
| 824.486   | NM_003192 | 8420.313  | 8911.269  | NM_01454E | 1273.78   | 1007.45   | NM_00335E | 771.473   |
| 572.186   | NM_01844E | 5430.188  | 5768.904  | NM_000531 | 390.801   | 519.303   | M33197    | 19123.898 |
| 226.126   | AF086129  | 1577.474  | 1162.237  | NM_017832 | 8895.504  | 13134.218 | AK021834  | 1168.938  |
| 322.29    | D79994    | 2376.218  | 2678.353  | NM_001713 | 2447.169  | 2103.159  | AK021513  | 704.441   |
| 2196.217  | NM_01445E | 5408.396  | 6729.231  | NM_015367 | 3843.983  | 3433.577  | NM_00357E | 1031.304  |
| 10925.256 | NM_00736E | 1353.169  | 1799.473  | NM_01449E | 4095.232  | 2924.194  | AL049283  | 835.737   |
| 1205.359  | NM_01477E | 2993.618  | 5508.755  | NM_00237E | 7071.436  | 6475.392  | AF005258  | 1161.15   |
| 1379.573  | NM_00014E | 1791.164  | 2484.584  | NM_001813 | 1397.776  | 2604.433  | NM_000887 | 570.818   |
| 2894.982  | AF030107  | 1926.375  | 2381.664  | AF055016  | 2701.41   | 3070.68   | M33197    | 63985.867 |
| 28506.959 | NM_000871 | 1568.674  | 1834.963  | NM_014567 | 4079.604  | 3395.802  | X99659    | 44325.141 |
| 1710.111  | M33197    | 64576.469 | 65420.973 | AB037809  | 1149.446  | 701.423   | NM_01541E | 3149.987  |
| 50713.547 | NM_01896E | 3668.907  | 3727.602  | AB011129  | 743.905   | 613.683   | NM_00389E | 4615.585  |
| 466.698   | NM_000264 | 652.901   | 632.688   | NM_014391 | 3099.652  | 2830.802  | X99662    | 2718.753  |
| 6014.428  | AB058740  | 10230.258 | 8209.547  | NM_00427C | 1264.086  | 1330.244  | NM_003473 | 40157.574 |
| 1880.455  | NM_00338E | 906.326   | 1120.864  | NM_001537 | 2332.051  | 3504.127  | NM_01432E | 1258.069  |
| 1628.897  | AF279890  | 3620.177  | 3736.054  | U80743    | 907.148   | 759.009   | M33197    | 59615.02  |
| 273.58    | NM_00223E | 2766.349  | 2326.752  | NM_001352 | 2226.245  | 1720.704  | NM_012453 | 872.113   |
| 47808.988 | NM_01206E | 2854.794  | 3322.61   | NM_006527 | 4100.37   | 4160.498  | NM_00601E | 35017.887 |
| 612.474   | NM_00168E | 60580.484 | 60107.992 | NM_006627 | 1537.111  | 1528.277  | NM_001242 | 1975.454  |
| 1063.959  | NM_016601 | 1569.072  | 1819.633  | NM_007363 | 18016.17  | 16865.262 | NM_014891 | 3261.123  |
| 500.679   | NM_01790E | 11708.159 | 9263.376  | NM_003093 | 44288.996 | 49823.621 | NM_013392 | 5519.721  |
| 3061.479  | M33197    | 62550.371 | 61744.445 | U05589    | 995.305   | 1626.084  | M33197    | 53001.469 |
| 332.363   | NM_00681E | 30177.842 | 20730.252 | NM_014473 | 10331.608 | 8961.928  | NM_00323E | 549.543   |
| 50605.207 | NM_001663 | 7225.41   | 6913.116  | NM_00309E | 59738.254 | 61087.719 | NM_00345E | 556.872   |
| 5462.371  | NM_00421E | 9914.861  | 11082.389 | NM_01638E | 1459.654  | 1351.785  | NM_00522E | 1256.912  |
| 1546.966  | NM_01653C | 1807.395  | 3152.858  | NM_00229E | 60845.996 | 64157.602 | NM_002354 | 854.201   |
| 1534.633  | NM_014804 | 1918.812  | 2724.111  | NM_001762 | 6394.381  | 5137.889  | NM_00017E | 1170.626  |
| 49090.176 | NM_00280E | 13268.823 | 23471.748 | NM_01630E | 15375.588 | 15599.029 | AF062739  | 1886.248  |
| 2530.219  | M33197    | 63659.141 | 69716.398 | NM_00375E | 840.92    | 674.026   | NM_006602 | 2781.575  |
| 624.598   | NM_00171E | 1555.843  | 1559.793  | BE258640  | 11674.558 | 9665.239  | M33197    | 56467.355 |

|           |           |           |           |           |           |           |           |           |
|-----------|-----------|-----------|-----------|-----------|-----------|-----------|-----------|-----------|
| 1114.288  | NM_006073 | 550.298   | 681.874   | NM_003314 | 5137.056  | 4215.013  | AL079314  | 4288.622  |
| 5161.824  | NM_004951 | 225.314   | 2090.86   | AL355730  | 576.625   | 533.092   | NM_001260 | 1772.352  |
| 783.094   | NM_006564 | 8021.497  | 8268.05   | U79273    | 1278.406  | 1371.027  | NM_001950 | 3496.085  |
| 1372.979  | NM_004802 | 1744.742  | 1902.041  | AK022050  | 4809.764  | 4618.539  | AK026364  | 799.39    |
| 948.869   | NM_002983 | 1322.186  | 8013.419  | NM_002512 | 49909.043 | 44820.445 | M33197    | 55143.52  |
| 31482.877 | NM_000074 | 7161.985  | 5564.702  | AL365411  | 2045.869  | 1744.924  | NM_004331 | 1999.207  |
| 771.604   | NM_020393 | 1639.798  | 1468.976  | M24470    | 578.79    | 513.03    | NM_015703 | 3242.441  |
| 1720.614  | M33197    | 59660.867 | 57530.02  | NM_016066 | 3074.741  | 3043.24   | AB018337  | 671.593   |
| 5393.628  | NM_002613 | 3487.724  | 3320.691  | NM_001249 | 1429.585  | 1804.502  | AK025273  | 1250.103  |
| 504.148   | NM_004419 | 3465.688  | 2492.467  | AK024677  | 623.267   | 685.792   | M33197    | 33203.199 |
| 47841.535 | U47635    | 3242.666  | 3055.92   | NM_000036 | 1268.707  | 1219.056  | NM_002205 | 2298.398  |
| 452.194   | NM_018650 | 2006.748  | 1903.121  | AF254082  | 17560.371 | 16654.996 | M33197    | 55326.512 |
| 265.688   | AK026945  | 45074.281 | 14257.899 | AF205718  | 7033.528  | 5292.027  | NM_000131 | 916.46    |
| 713.448   | NM_002828 | 2686.385  | 2016.447  | NM_003420 | 971.966   | 1198.26   | NM_001911 | 26106.889 |
| 2323.338  | NM_014369 | 3309.965  | 3389.258  | NM_006261 | 3921.757  | 4787.427  | NM_006503 | 1098.654  |
| 4072.347  | M33197    | 61521.898 | 65367.785 | AK027045  | 712.51    | 580.691   | M33197    | 885.108   |
| 29021.498 | NM_001398 | 24044.48  | 11863.461 | AF169796  | 2822.535  | 3248.311  | AB020698  | 573.385   |
| 4269.013  | AB050049  | 6529.602  | 6274.75   | AK026157  | 512.838   | 1095.145  | U68382    | 809.017   |
| 53814.867 | J05125    | 1089.367  | 1213.896  | AK001814  | 3326.973  | 3739.721  | NM_003969 | 1186.447  |
| 4659.476  | NM_005164 | 1032.837  | 993.414   | NM_007222 | 1865.187  | 2094.608  | NM_004651 | 1129.981  |
| 381.648   | NM_001995 | 5610.843  | 5101.775  | NM_003435 | 2218.534  | 3091.838  | M33197    | 47503.754 |
| 6601.751  | NM_000183 | 22275.428 | 22877.441 | NM_016291 | 3251.567  | 2950.649  | NM_017569 | 4602.225  |
| 52651.309 | AY004175  | 3304.973  | 3880.416  | AK023259  | 2686.119  | 1374.306  | NM_002906 | 909.026   |
| 4075.254  | M33197    | 53603.293 | 51236.566 | AK001503  | 2087.216  | 2340.351  | AK024480  | 941.396   |
| 4376.43   | NM_012327 | 3862.255  | 4227.264  | AK001058  | 34181.344 | 32434.436 | Y13871    | 5048.507  |
| 1917.55   | NM_000904 | 1258.155  | 3618.642  | AK026239  | 1847.566  | 2006.214  | AL137725  | 4260.443  |
| 7482.69   | NM_016048 | 1754.56   | 1202.552  | AF086283  | 1057.086  | 1523.584  | M33197    | 30712.377 |
| 4772.637  | NM_000375 | 10395.758 | 7715.773  | AF088047  | 552.578   | 559.904   | AJ008151  | 2241.274  |
| 284.431   | NM_000265 | 8929.011  | 32110.375 | AF086281  | 1705.485  | 1883.178  | AK024149  | 1362.952  |
| 611.974   | NM_018849 | 8438.749  | 8213.91   | AF086393  | 1542.375  | 1575.188  | AK023094  | 771.454   |
| 42166.789 | AF015910  | 24745.594 | 18774.529 | AF086453  | 930.043   | 1148.147  | M33197    | 48437.965 |
| 765.249   | BC009993  | 2399.986  | 1322.099  | AF070621  | 5936.605  | 7244.461  | NM_004091 | 2093.966  |
| 698.033   | M33197    | 62211.469 | 61280.445 | NM_020240 | 2288.107  | 3216.146  | X74070    | 59721.398 |
| 1323.488  | NM_003031 | 4718.563  | 5059.617  | AK023678  | 10761.177 | 20383.82  | AF027219  | 1586.184  |
| 53300.563 | NM_007170 | 930.966   | 1139.758  | AK023718  | 1890.753  | 1948.344  | NM_006333 | 2853.056  |
| 3652.646  | NM_003008 | 2940.614  | 4041.824  | AF075089  | 4250.485  | 4029.35   | M33197    | 49284.031 |
| 1203.322  | M33197    | 62232.707 | 62280.449 | AF241255  | 484.02    | 613.32    | NM_002898 | 4843.755  |
| 1768.725  | AK027244  | 4207.25   | 3859.826  | AF086007  | 60606.07  | 62076.711 | AK022749  | 3083.797  |
| 3944.626  | L40520    | 5583.716  | 6912.109  | AK000803  | 2248.722  | 1742.835  | BF031409  | 2711.062  |
| 1093.06   | NM_002633 | 10762.242 | 2678.951  | AK022374  | 1444.862  | 1340.346  | NM_007043 | 900.937   |
| 3986.793  | U11036    | 1158.346  | 1677.659  | AF085926  | 19081.875 | 21339.633 | NM_012322 | 2358.125  |
| 2699.444  | M33197    | 59671.246 | 58044.832 | AF085948  | 307.206   | 502.925   | M33197    | 35283.676 |
| 1094.277  | NM_002878 | 4246.644  | 3832.444  | AL137307  | 2312.787  | 2914.816  | NM_004889 | 21774.422 |
| 500.481   | NM_017723 | 5052.385  | 5643.563  | AL137468  | 6550.294  | 7995.601  | AK025314  | 891.052   |
| 1968.042  | AK022922  | 4318.519  | 6345.225  | AL162007  | 33185.883 | 46582.309 | NM_002109 | 1405.607  |
| 1996.283  | NM_006462 | 8748.123  | 8855.113  | AL390137  | 22634.551 | 20193.611 | NM_000984 | 65900.258 |
| 257.057   | NM_000400 | 27448.523 | 28256.52  | AL137340  | 837.967   | 729.227   | NM_002453 | 2576.789  |
| 6592.122  | NM_015885 | 4619.458  | 3150.029  | AL137542  | 712.144   | 828.973   | AK000780  | 11906.758 |
| 184.036   | NM_015889 | 59001.254 | 60815.723 | AL162045  | 1585.608  | 2290.34   | AK026721  | 1822.347  |
| 585.398   | M33197    | 57484.703 | 61273.316 | X92185    | 430.613   | 914.78    | AK023027  | 3489.87   |
| 1786.247  | NM_004276 | 3568.042  | 2340.721  | AK022437  | 9840.677  | 8958.675  | AB002348  | 35183.977 |
| 1000.808  | NM_002332 | 11039.243 | 11544.3   | AB042410  | 329.791   | 400.134   | M33197    | 26252.371 |
| 45774.668 | NM_002859 | 3116.025  | 4585.637  | AF086102  | 1851.402  | 1000.898  | AK026043  | 2486.698  |

|           |           |           |           |           |           |           |           |           |
|-----------|-----------|-----------|-----------|-----------|-----------|-----------|-----------|-----------|
| 44252.234 | NM_005246 | 4427.021  | 5999.403  | AF116682  | 15114.703 | 17201.779 | NM_005006 | 3957.194  |
| 1435.004  | AF161339  | 6820.781  | 28081.803 | AL137259  | 2908.668  | 3060.646  | AK027033  | 2169.422  |
| 1231.848  | M33197    | 62936.59  | 64412.762 | AL122107  | 4360.198  | 3428.715  | NM_000106 | 1463.95   |
| 2148.947  | AK000354  | 7875.301  | 7554.096  | AF075021  | 493.662   | 427.224   | NM_003000 | 7945.486  |
| 3443.985  | NM_003950 | 636.508   | 635.056   | AK025140  | 9561.287  | 10451.326 | NM_002495 | 13711.276 |
| 4231.918  | NM_014882 | 736.422   | 1790.141  | AK023394  | 1447.743  | 2579.637  | M33197    | 49684.34  |
| 357.809   | NM_000836 | 2213.879  | 1907.924  | AF090093  | 6138.128  | 7956.572  | NM_016284 | 1198.798  |
| 48226.441 | M33197    | 56162.215 | 62618.477 | AF161340  | 2663.565  | 2715.246  | NM_014593 | 1433.461  |
| 2454.692  | NM_001510 | 1749.139  | 1877.372  | AF242771  | 1654.496  | 2702.852  | NM_006833 | 3232.187  |
| 571.044   | AK024474  | 7014.57   | 8671.635  | NM_018562 | 5371.151  | 8387.179  | NM_012257 | 670.759   |
| 699.992   | NM_017901 | 2881.353  | 2698.384  | AF098666  | 1025.597  | 1138.425  | U37690    | 8621.711  |
| 2596.231  | NM_004272 | 2777.784  | 1702.499  | AF161365  | 517.783   | 508.734   | AB029012  | 4608.621  |
| 934.84    | AK023582  | 1101.363  | 1887.256  | AK021969  | 1216.578  | 2453.459  | M33197    | 49624.02  |
| 295.484   | NM_000358 | 4283.873  | 5224.054  | AK022065  | 2248.675  | 3811.792  | AF060936  | 3167.417  |
| 986.544   | NM_001930 | 10446.852 | 6021.512  | AK022221  | 6371.689  | 5511.449  | AL050088  | 1544.506  |
| 487.97    | AK025270  | 1291.249  | 1186.711  | AK022356  | 2165.843  | 2052.179  | AK024939  | 2350.129  |
| 393.226   | NM_001564 | 2732.798  | 1862.862  | AK021998  | 3059.939  | 3855.522  | AK001561  | 4174.335  |
| 2371.423  | NM_015895 | 6288.307  | 4799.352  | AK022126  | 2593.976  | 4750.906  | AB007880  | 2175.525  |
| 1927.864  | NM_000189 | 1062.888  | 781.887   | AK022256  | 875.962   | 972.862   | AK024950  | 1324.524  |
| 542.501   | AL050050  | 806.361   | 527.262   | AK022383  | 1565.906  | 1019.168  | M33197    | 59684.07  |
| 8010.799  | NM_004690 | 1856.237  | 1870.659  | AK027041  | 2096.479  | 1708.474  | NM_014146 | 6536.77   |
| 9114.773  | M33197    | 59563.742 | 63871.371 | NM_005355 | 23576.957 | 19199.371 | NM_018843 | 3765.187  |
| 1278.642  | NM_013374 | 30118.166 | 33317.676 | AK000937  | 841.168   | 769.918   | AK024275  | 676.906   |
| 2722.506  | NM_003252 | 8864.082  | 4941.882  | AF035306  | 1632.569  | 1907.894  | M33197    | 57018.723 |
| 715.74    | NM_001228 | 1820.805  | 2449.736  | AK091662  | 295.411   | 366.561   | AL109782  | 3087.951  |
| 1415.597  | AK026607  | 1130.225  | 1085.54   | NM_003954 | 1797.45   | 2711.438  | AF086225  | 368.535   |
| 2530.625  | NM_016561 | 18461.777 | 17013.463 | NM_016348 | 1615.775  | 2140.315  | NM_005844 | 3360.873  |
| 4688.119  | NM_001225 | 4433.268  | 5997.187  | AK023877  | 650.602   | 758.285   | AK024941  | 1981.414  |
| 26389.326 | NM_014245 | 29966.314 | 33804.332 | AK024213  | 19426.053 | 19130.086 | AF056434  | 1007.678  |
| 2221.874  | M33197    | 61353.676 | 63540.156 | AK022184  | 2011.568  | 1967.114  | M33197    | 19460.588 |
| 50128.027 | AB046822  | 1016.135  | 1649.388  | AB007959  | 819.009   | 1075.388  | AK025489  | 1329.743  |
| 3453.445  | M33197    | 1473.558  | 1660.799  | AK024153  | 970.134   | 1236.853  | AL390152  | 3519.283  |
| 5878.411  | NM_000308 | 6308.63   | 10920.833 | Y10516    | 2121.499  | 2766.969  | M33197    | 54441.043 |
| 1242.888  | X69636    | 4187.417  | 3264.94   | AF056451  | 3865.844  | 5965.745  | NM_018126 | 887.946   |
| 20324.023 | M33197    | 65048.648 | 66170.398 | AF015039  | 4523.214  | 7791.497  | AK024506  | 2280.356  |
| 518.348   | NM_004173 | 17475.33  | 19986.824 | U50528    | 1130.417  | 1990.36   | NM_014179 | 747.428   |
| 20222.898 | NM_013974 | 5159.463  | 3560.43   | AB020632  | 1622.789  | 1427.87   | AF086326  | 2963.233  |
| 6404.806  | NM_017547 | 2650.85   | 3123.429  | NM_018614 | 26826.783 | 40183.051 | M33197    | 57465.512 |
| 809.784   | NM_003983 | 8345.217  | 7677.754  | AL117549  | 981.377   | 1348.85   | AL080057  | 977.451   |
| 355.962   | AK023708  | 1407.221  | 1913.03   | NM_005222 | 7972.293  | 13238.393 | AL117528  | 859.317   |
| 9011.314  | NM_002108 | 1990.807  | 1959.456  | BC024308  | 6826.786  | 6888.369  | M33197    | 48287.344 |
| 2388.746  | M33197    | 60024.941 | 63122.445 | NM_000538 | 1967.217  | 2107.872  | AJ238555  | 856.646   |
| 541.434   | NM_018464 | 13516.329 | 15468.364 | AK001838  | 59075.871 | 70746.5   | AL353948  | 15401.785 |
| 52376.48  | D43948    | 1881.997  | 1404.62   | NM_018295 | 2054.223  | 2990.313  | M33197    | 48356.387 |
| 1853.447  | NM_012310 | 6382.958  | 5287.695  | AF070574  | 1254.81   | 1604.551  | AK025869  | 1175.103  |
| 5518.813  | BF382116  | 8726.573  | 8729.252  | AF086262  | 2709.356  | 2616.2    | M33197    | 43533.969 |
| 740.56    | NM_003193 | 11711.965 | 12821.571 | AF086292  | 10061.702 | 17932.914 | AF023203  | 696.021   |
| 943.266   | AK055825  | 59740.352 | 68025.977 | AK024342  | 14065.857 | 13814.792 | AF056430  | 1427.478  |
| 1680.292  | AF113216  | 1224.017  | 1725.422  | AL137712  | 6754.506  | 5633.801  | NM_014906 | 1115.985  |
| 2204.386  | NM_005197 | 8335.289  | 6844.086  | L77599    | 45399.613 | 35549.883 | AF009291  | 1725.296  |
| 1119.484  | AL137421  | 60681.461 | 41633.371 | AK021673  | 12377.707 | 10599.671 | AF040257  | 1050.561  |
| 2038.682  | M33197    | 61825.121 | 61575.543 | AB014543  | 1443.181  | 990.821   | AF056440  | 900.907   |
| 1862.423  | NM_007241 | 828.298   | 1054.134  | NM_018445 | 4680.566  | 3912.439  | M33197    | 56236.621 |



|           |           |           |           |           |           |           |           |           |
|-----------|-----------|-----------|-----------|-----------|-----------|-----------|-----------|-----------|
| 43644.68  | NM_000124 | 1708.634  | 1756.428  | AK022743  | 6880.887  | 6009.137  | NM_01805E | 2935.563  |
| 1114.617  | NM_01799E | 5155.939  | 3760.176  | NM_014627 | 1005.647  | 1550.378  | AK002199  | 2132.616  |
| 224.743   | NM_014517 | 3173.621  | 2416.186  | NM_01393E | 10380.249 | 22434.314 | AK021662  | 1146.75   |
| 3356.462  | NM_00546E | 1315.704  | 1156.832  | NM_01398E | 55685.727 | 59106.914 | AK001038  | 631.355   |
| 4298.418  | NM_00426E | 1468.662  | 1654.178  | U55055    | 853.417   | 1265.368  | AK001802  | 1480.826  |
| 51929.828 | D31765    | 1792.207  | 2016.969  | AB018319  | 1959.012  | 1636.331  | AK021469  | 1351.701  |
| 1088.474  | NM_006107 | 9882.042  | 7483.066  | AK001101  | 1601.392  | 2204.81   | AK021706  | 3875.379  |
| 10971.459 | NM_00417E | 1266.026  | 1315.389  | BM973473  | 1054.942  | 1876.1    | M33197    | 45970.223 |
| 23914.59  | AF288288  | 19765.723 | 21884.578 | AK021637  | 2113.604  | 3022.945  | AK026259  | 32017.195 |
| 1258.789  | NM_01764E | 6842.291  | 4135.211  | AK021658  | 1050.92   | 1982.142  | AJ008115  | 17969.018 |
| 923.612   | NM_003092 | 9587.198  | 7910.638  | D61705    | 529.268   | 1019.049  | U72851    | 786.032   |
| 909.093   | M33197    | 61169.809 | 63699.055 | U17631    | 2898.406  | 5758.202  | M33197    | 54911.621 |
| 1609.472  | NM_005861 | 4001.527  | 5006.263  | AL137723  | 2581.679  | 4364.867  | AK022970  | 850.117   |
| 56244.031 | NM_01884E | 3539.34   | 2586.55   | AK000774  | 842.808   | 849.244   | AK026212  | 1067.628  |
| 1301.642  | NM_00376C | 4677.305  | 3368.261  | AK024046  | 2501.006  | 4021.722  | AF086222  | 684.234   |
| 587.306   | AB037759  | 1775.672  | 1195.368  | NM_017931 | 3612.375  | 2572.332  | AF086415  | 1636.665  |
| 581.592   | AK025998  | 4274.482  | 3252.382  | AK022793  | 896.423   | 1077.588  | M33197    | 42007.016 |
| 46393.617 | AL080080  | 6532.444  | 3800.781  | AJ227910  | 796.023   | 1078.222  | AK024470  | 1511.608  |
| 28948.84  | NM_018482 | 2802.003  | 2318.085  | AF001893  | 1250.423  | 1099.839  | NM_01793E | 1082.693  |
| 1112.347  | NM_01788C | 1626.495  | 1259.904  | X04236    | 7012.56   | 5173.244  | NM_006432 | 8942.939  |
| 1882.436  | AF090945  | 4546.501  | 3956.933  | AK093746  | 18359.158 | 15535.002 | AF025441  | 1130.579  |
| 1501.57   | M33197    | 61476.859 | 60540.512 | D16875    | 2133.29   | 961.063   | U62823    | 2880.516  |
| 982.207   | NM_001161 | 7686.104  | 5934.637  | AK027171  | 772.689   | 933.754   | NM_00353E | 20342.553 |
| 38780.551 | NM_004044 | 9768.996  | 7245.335  | AK021945  | 2826.988  | 2659.931  | AK026768  | 1895.019  |
| 1328.749  | NM_000221 | 18219.895 | 12938.48  | L23545    | 1041.25   | 988.63    | M33197    | 60063.996 |
| 1932.181  | H75678    | 1519.079  | 1182.695  | CY3Cy5    | 7786.676  | 535.901   | AK000852  | 12015.366 |
| 6724.508  | AB002359  | 2700.55   | 2147.209  | U13022    | 682.372   | 1015.193  | AF251188  | 3517.137  |
| 22708.498 | M33197    | 3150.767  | 3353.52   | R23251    | 21384.018 | 20195.439 | AK026418  | 5723.902  |
| 2357.602  | AB007864  | 755.585   | 927.068   | BG763477  | 1145.501  | 8580.981  | AF086194  | 12230.117 |
| 2205.674  | NM_00219E | 2669.306  | 2999.654  | AA702640  | 1260.49   | 1717.087  | AK026811  | 3125.177  |
| 48850.707 | AF024693  | 771.169   | 768.747   | T68583    | 1879.507  | 2323.712  | M33197    | 53142.664 |
| 3312.471  | AK025905  | 1228.676  | 1013.294  | AA481944  | 16037.013 | 13432.023 | AK023633  | 1515.856  |
| 3170.344  | AL121733  | 951.556   | 807.305   | X14390    | 722.048   | 1689.166  | M84507    | 512.039   |
| 4854.343  | BE958072  | 1618.004  | 1498.839  | H00742    | 1798.199  | 2474.228  | NM_00617E | 1257.89   |
| 990.404   | M33197    | 60143.918 | 58351.52  | D42108    | 829.378   | 678.484   | AL360165  | 1168.55   |
| 1021.743  | NM_01448C | 3013.528  | 2923.616  | AI366068  | 22684.189 | 15775.857 | M33197    | 46900.414 |
| 3880.905  | NM_00593E | 697.353   | 1013.851  | N57553    | 1635.518  | 628.311   | AJ008132  | 2783.325  |
| 49793.668 | NM_01416E | 7114.913  | 7337.52   | AF080158  | 1183.453  | 1645.747  | NM_005281 | 5507.095  |
| 3674.743  | NM_004964 | 17266.338 | 22017.883 | BM664556  | 925.406   | 1185.42   | NM_00554E | 5000.52   |
| 1259.519  | AL117497  | 1543.81   | 1666.287  | SR5       | 3620.608  | 3503.04   | M33197    | 58225.082 |
| 3110.753  | AF075016  | 893.047   | 699.669   | SR7       | 3956      | 32509.688 | U12129    | 2427.704  |
| 51369.039 | AF147437  | 2412.726  | 2803.936  | SR9       | 13180.814 | 2098.613  | S81242    | 49223.004 |
| 2001.535  | M33197    | 62251.688 | 64736.16  | CY3Cy5    | 4331.524  | 125.289   | AF230801  | 965.962   |
| 7709.379  | AF147360  | 1884.642  | 1405.455  | NM_013231 | 2336.581  | 1734.274  | AF075072  | 2296.952  |
| 778.02    | AL137269  | 5166.129  | 4691.955  | NM_01210E | 2885.832  | 3743.764  | M33197    | 56925.801 |
| 631.942   | AK021983  | 2649.136  | 3200.658  | NM_006254 | 4842.179  | 4176.258  | NM_00250E | 3405.001  |
| 506.504   | Y11681    | 8201.901  | 7633.986  | X95425    | 1121.359  | 1113.453  | U38442    | 2038.582  |
| 766.207   | AL110135  | 25078.875 | 24155.379 | NM_004422 | 1799.716  | 2164.534  | AF110136  | 1052.448  |
| 13108.108 | NM_006993 | 9585.467  | 2647.321  | NM_016562 | 901.428   | 1434.155  | AK026706  | 3671.506  |
| 1093.955  | M33197    | 60628.297 | 62345.348 | M33197    | 70891.125 | 64792.691 | AB007936  | 25853.791 |
| 2219.333  | AF086354  | 922.139   | 640.821   | NM_00489E | 7396.661  | 7867.419  | D28391    | 14257.261 |
| 1286.393  | AF086429  | 1330.557  | 775.746   | U59748    | 914.305   | 959.359   | M33197    | 25299.018 |
| 28903.475 | NM_01906C | 703.444   | 755.839   | L32537    | 727.344   | 1019.955  | AK026859  | 802.178   |

|           |                  |           |           |                  |           |           |                  |           |
|-----------|------------------|-----------|-----------|------------------|-----------|-----------|------------------|-----------|
| 1216.97   | <b>AF086302</b>  | 949.652   | 1043.715  | <b>NM_014303</b> | 17388.24  | 20582.859 | <b>D86961</b>    | 802.552   |
| 372.301   | <b>AF086439</b>  | 1986.639  | 1793.236  | <b>NM_003118</b> | 2692.74   | 4421.009  | <b>AJ227896</b>  | 5434.032  |
| 615.032   | <b>M33197</b>    | 61311.746 | 59641.773 | <b>L02922</b>    | 8034.741  | 7447.08   | <b>L32841</b>    | 3817.078  |
| 1181.605  | <b>AF052160</b>  | 1653.341  | 977.569   | <b>NM_001797</b> | 1014.371  | 1332.868  | <b>M33197</b>    | 46152.813 |
| 635.629   | <b>AK026512</b>  | 2559.175  | 3152.211  | <b>NM_003154</b> | 1698.343  | 1771.077  | <b>AF131770</b>  | 1347.89   |
| 1106.611  | <b>M33197</b>    | 59904.559 | 60757.66  | <b>NM_004235</b> | 1889.179  | 1508.911  | <b>CY3Cy5</b>    | 5950.104  |
| 808.522   | <b>AF144233</b>  | 2872.026  | 3300.535  | <b>AK023459</b>  | 1778.922  | 1533.457  | <b>R71691</b>    | 758.683   |
| 1029.554  | <b>AF085975</b>  | 3840.365  | 3256.53   | <b>NM_012139</b> | 2878.217  | 2369.355  | <b>AW167715</b>  | 1050.131  |
| 1029.502  | <b>AF075103</b>  | 1385.806  | 2152.52   | <b>AF121856</b>  | 2307.552  | 2419.961  | <b>AA424735</b>  | 1323.682  |
| 1043.902  | <b>M33197</b>    | 61035.816 | 61122.043 | <b>NM_006421</b> | 2189.857  | 2666.265  | <b>U78294</b>    | 1071.131  |
| 728.896   | <b>AL137390</b>  | 1469.289  | 1970.032  | <b>NM_017457</b> | 22121.156 | 15803.104 | <b>B1760394</b>  | 1449.496  |
| 49243.66  | <b>AL137611</b>  | 5703.224  | 5367.449  | <b>NM_003765</b> | 8553.255  | 12927.413 | <b>AA555216</b>  | 596.582   |
| 28667.166 | <b>AL359566</b>  | 27428.145 | 28699.814 | <b>NM_018202</b> | 7851.888  | 9280.526  | <b>U09117</b>    | 4962.857  |
| 611.109   | <b>AL137427</b>  | 2669.751  | 2444.898  | <b>AB023197</b>  | 1917.974  | 2566.19   | <b>H66070</b>    | 3723.281  |
| 490.009   | <b>AL157460</b>  | 6539.66   | 6106.715  | <b>NM_022173</b> | 3131.818  | 3383.113  | <b>AA164741</b>  | 1270.422  |
| 1482.341  | <b>M33197</b>    | 57426.914 | 61743.094 | <b>AB040970</b>  | 2183.221  | 2670.072  | <b>AI189375</b>  | 570.989   |
| 1059.267  | <b>AK026718</b>  | 1326.095  | 1965.183  | <b>NM_018330</b> | 2224.787  | 2058.474  | <b>AI978885</b>  | 1862.767  |
| 13019.317 | <b>AK022035</b>  | 15013.446 | 17610.959 | <b>M33197</b>    | 37526.242 | 38683.793 | <b>AK054960</b>  | 5025.699  |
| 46492.75  | <b>M33197</b>    | 58485.816 | 64121.043 | <b>U50342</b>    | 1064.481  | 695.143   | <b>L15344</b>    | 762.474   |
| 819.474   | <b>NM_004337</b> | 1680.071  | 1406.177  | <b>AF026932</b>  | 1537.078  | 1558.05   | <b>SR5</b>       | 2044.365  |
| 523.733   | <b>AK022141</b>  | 1062.018  | 1113.183  | <b>NM_000717</b> | 1384.676  | 1688.437  | <b>SR7</b>       | 1883.391  |
| 29412.779 | <b>AK023942</b>  | 26951.988 | 31061.285 | <b>NM_004845</b> | 2717.017  | 2777.847  | <b>SR9</b>       | 7493.983  |
| 2574.052  | <b>M33197</b>    | 64843.824 | 66080.352 | <b>NM_007107</b> | 13143.991 | 8184.196  | <b>CY3Cy5</b>    | 4965.556  |
| 1401.793  | <b>AK027207</b>  | 1868.572  | 1749.628  | <b>M68874</b>    | 2735.477  | 4977.738  | <b>NM_000923</b> | 545.239   |
| 5972.426  | <b>AJ227892</b>  | 7288.008  | 7565.728  | <b>NM_006319</b> | 3034.877  | 5190.624  | <b>NM_018096</b> | 708.273   |
| 13301.37  | <b>M33197</b>    | 60821.688 | 58738.52  | <b>NM_018226</b> | 4266.253  | 4954.069  | <b>AL390078</b>  | 727.142   |
| 50391.555 | <b>AK022155</b>  | 2815.926  | 2984.482  | <b>Z36813</b>    | 5028.397  | 3540.07   | <b>NM_004036</b> | 1141.114  |
| 449.377   | <b>AK022288</b>  | 643.185   | 806.755   | <b>M33197</b>    | 4144.767  | 4661.998  | <b>NM_015986</b> | 740.053   |
| 1821.458  | <b>AK021916</b>  | 572.321   | 584.436   | <b>NM_004045</b> | 4985.417  | 6665.68   | <b>NM_006546</b> | 557.794   |
| 1556.485  | <b>AK024201</b>  | 1977.565  | 1785.707  | <b>NM_001891</b> | 1658.914  | 2030.185  | <b>NM_014959</b> | 1349.399  |
| 1605.719  | <b>AK022174</b>  | 683.51    | 995.879   | <b>AB037843</b>  | 1688.818  | 2850.263  | <b>NM_003992</b> | 1388.772  |
| 1126.752  | <b>M33197</b>    | 62505.086 | 62361.035 | <b>NM_016618</b> | 1637.206  | 1248.397  | <b>AF279265</b>  | 2523.6    |
| 1116.701  | <b>AK026878</b>  | 1536.15   | 1020.86   | <b>AB014568</b>  | 21700.389 | 21973.273 | <b>NM_005213</b> | 29075.352 |
| 1144.091  | <b>AK021589</b>  | 1097.665  | 1367.604  | <b>NM_012249</b> | 2474.565  | 1877.857  | <b>AB040914</b>  | 1125.845  |
| 625.85    | <b>D17152</b>    | 9933.063  | 19232.096 | <b>NM_002914</b> | 3647.458  | 5534.557  | <b>NM_002997</b> | 1255.436  |
| 623.484   | <b>AK024464</b>  | 13331.436 | 13295.346 | <b>NM_020385</b> | 2454.099  | 2817.263  | <b>NM_002379</b> | 4566.986  |
| 1026.041  | <b>AK023638</b>  | 779.109   | 733.533   | <b>NM_006541</b> | 3769.795  | 3608.171  | <b>AB007929</b>  | 4328.255  |
| 36896.281 | <b>M33197</b>    | 975.838   | 679.973   | <b>NM_004328</b> | 1694.907  | 765.36    | <b>NM_004579</b> | 1278.007  |
| 1701.099  | <b>AK025423</b>  | 2365.071  | 1720.169  | <b>NM_004581</b> | 2467.837  | 2469.152  | <b>AA203126</b>  | 1103.575  |
| 941.03    | <b>M33197</b>    | 61830.871 | 64377.07  | <b>NM_006817</b> | 13711.706 | 18118.104 | <b>L12347</b>    | 1187.193  |
| 1628.902  | <b>AL049846</b>  | 2185.249  | 2012.356  | <b>NM_015921</b> | 30765.115 | 32020.371 | <b>NM_001622</b> | 854.95    |
| 441.519   | <b>AK024161</b>  | 1027.221  | 1600.186  | <b>AB040900</b>  | 8523.357  | 7768.504  | <b>Z36788</b>    | 422.325   |
| 394.521   | <b>AK021682</b>  | 16573.996 | 17324.553 | <b>AK023459</b>  | 3123.407  | 3679.325  | <b>NM_018477</b> | 1346.05   |
| 353.196   | <b>AJ012500</b>  | 2222.714  | 1768.945  | <b>U13022</b>    | 818.668   | 802.171   | <b>U20536</b>    | 1334.304  |
| 47797.867 | <b>U00944</b>    | 1905.803  | 1933.663  | <b>BG763477</b>  | 1550.115  | 12056.677 | <b>AL133041</b>  | 769.805   |
| 3570.752  | <b>BC035058</b>  | 1530.959  | 1351.637  | <b>AA702640</b>  | 1651.99   | 2817.399  | <b>NM_001494</b> | 6695.482  |
| 725.508   | <b>X57566</b>    | 5611.956  | 4569.811  | <b>T68583</b>    | 3386.262  | 4338.401  | <b>NM_004206</b> | 899.996   |
| 9581.894  | <b>M33197</b>    | 61887.254 | 64271.344 | <b>AA481944</b>  | 22770.893 | 23764.984 | <b>NM_001939</b> | 1613.338  |
| 1353.311  | <b>NM_018616</b> | 6771.089  | 5598.56   | <b>X14390</b>    | 958.7     | 1857.341  | <b>NM_003279</b> | 9011.172  |
| 530.5     | <b>AK023809</b>  | 1503.775  | 886.524   | <b>AF038440</b>  | 929.999   | 1878.302  | <b>AB014599</b>  | 1531.854  |
| 2516.571  | <b>M87943</b>    | 60591.59  | 59897.828 | <b>M31158</b>    | 1851.24   | 1011.651  | <b>NM_004393</b> | 162.574   |
| 48011.535 | <b>U28131</b>    | 61823.828 | 58177.922 | <b>D42108</b>    | 892.109   | 581.828   | <b>NM_005832</b> | 738.431   |
| 657.993   | <b>AY007106</b>  | 11868.235 | 9443.45   | <b>AI366068</b>  | 17853.516 | 11637.575 | <b>AW407841</b>  | 760.89    |

|           |           |           |           |           |           |           |           |           |
|-----------|-----------|-----------|-----------|-----------|-----------|-----------|-----------|-----------|
| 4460.817  | M33197    | 59071.734 | 60901.586 | AF080158  | 1409.807  | 1683.474  | NM_001879 | 843.002   |
| 49997.145 | NM_006088 | 47735.184 | 46655.313 | BM664556  | 897.512   | 1022.826  | AF264014  | 2098.416  |
| 572.718   | NM_018265 | 2542.445  | 4816.277  | NM_016545 | 974.39    | 1035.253  | NM_004155 | 428.165   |
| 305.301   | AF130086  | 4433.696  | 4267.947  | NM_013231 | 3120.624  | 3803.581  | NM_000137 | 3563.046  |
| 7979.11   | AK023858  | 6380.181  | 9189.27   | NM_012106 | 3919.078  | 5719.698  | NM_012102 | 1745.147  |
| 318.107   | M33197    | 57349.68  | 56895.297 | NM_006254 | 4201.104  | 3577.537  | NM_005017 | 6532.554  |
| 621.631   | AF250920  | 7094.821  | 7292.313  | X95425    | 1309.093  | 1302.869  | AF163572  | 2991.65   |
| 373.603   | NM_017733 | 2874.726  | 4336.049  | NM_004422 | 2834.467  | 2325.92   | NM_000897 | 2035.578  |
| 384.209   | NM_014042 | 3456.371  | 4504.523  | NM_016562 | 806.391   | 759.925   | NM_000487 | 1071.741  |
| 48919.215 | M33197    | 56758.508 | 60142.309 | M33197    | 70669.961 | 64663.691 | NM_014182 | 1467.415  |
| 8980.537  | AF317550  | 773.34    | 859.815   | AY009399  | 5104.09   | 3867.6    | AB040884  | 577.706   |
| 783.41    | NM_003543 | 484.384   | 1960.491  | NM_004895 | 5716.987  | 5254.125  | NM_000492 | 3778.967  |
| 1686.722  | AK025416  | 705.717   | 1355.826  | M33197    | 64837.969 | 65917.859 | AK024382  | 904.392   |
| 2145.617  | AK022165  | 819.351   | 518.347   | L02922    | 5468.061  | 6617.874  | NM_001170 | 1743.364  |
| 22469.133 | M33197    | 60288.684 | 62483.004 | M33197    | 4487.414  | 1323.638  | AL137716  | 758.868   |
| 926.785   | AK022372  | 3111.305  | 2678.713  | NM_004045 | 7378.429  | 8469.743  | NM_004696 | 679.7     |
| 4921.265  | AJ227863  | 1124.925  | 1043.726  | NM_001891 | 1535.363  | 1930.78   | NM_014342 | 1024.429  |
| 47963.477 | NM_015916 | 3126.384  | 4897.31   | NM_012139 | 3295.947  | 3977.911  | AB043997  | 763.344   |
| 10356.729 | NM_003520 | 870.18    | 1111.533  | AF121856  | 2203.063  | 1921.364  | AF097645  | 354.747   |
| 737.89    | AL137380  | 4087.471  | 3700.173  | NM_006421 | 2479.847  | 3316.867  | NM_001773 | 710.66    |
| 255.837   | M33197    | 58319.461 | 63594.195 | NM_003765 | 6347.242  | 7175.792  | Z70704    | 684.069   |
| 17607.227 | AL137658  | 20493.545 | 20483.084 | NM_018202 | 6597.239  | 7190.964  | NM_014363 | 709.78    |
| 702.854   | D16888    | 6365.839  | 5502.593  | AB023197  | 1445.761  | 1970.255  | NM_000557 | 2098.944  |
| 49814.902 | AF068298  | 4552.812  | 5771.522  | U50342    | 1517.674  | 1714.936  | NM_003239 | 672.065   |
| 544.234   | Z70770    | 4742.257  | 6221.441  | NM_015921 | 30289.082 | 8652.746  | NM_001375 | 1752.895  |
| 688.986   | AJ227900  | 6095.207  | 8334.918  | AB040900  | 12077.418 | 13720.811 | NM_002312 | 1277.478  |
| 28314.883 | AK023242  | 1300.222  | 925.7     | NM_001482 | 1080.772  | 1151.337  | M20699    | 698.136   |
| 2228.967  | M33197    | 59537.164 | 63959.438 | NM_000717 | 1699.295  | 1735.179  | NM_002690 | 2163.697  |
| 3135.394  | CY3Cy5    | 5105.754  | 265.431   | M33197    | 65845.633 | 69011.094 | NM_012328 | 3170.146  |
| 1979.57   | AI417775  | 867.973   | 1134.355  | M68874    | 1964.794  | 2630.565  | NM_007341 | 976.421   |
| 1007.038  | BI762229  | 3229.535  | 3408.622  | NM_006319 | 2164.252  | 3210.833  | NM_016508 | 1274.335  |
| 2460.741  | BG618320  | 1715.775  | 1792.625  | Z36813    | 2887.252  | 2146.542  | NM_006456 | 4149.379  |
| 33416.535 | Y00787    | 1491.536  | 2165.964  | AF080158  | 1298.858  | 552.46    | AK026062  | 9086.841  |
| 18992.736 | NM_007276 | 2516.669  | 961.675   | BM664556  | 1472.647  | 1039.517  | AF047002  | 7073.629  |
| 2847.472  | N34462    | 1790.709  | 2410.308  | NM_016545 | 1735.236  | 1612.941  | AL050082  | 953.879   |
| 2482.314  | AI658778  | 2975.317  | 5074.645  | NM_001440 | 19717.393 | 24451.17  | NM_006623 | 20284.787 |
| 57141.016 | L19067    | 4042.912  | 5327.047  | NM_001201 | 805.021   | 1099.313  | NM_016588 | 865.3     |
| 5167.187  | Z48482    | 1187.589  | 786.093   | NM_016618 | 1615.771  | 1251.855  | NM_003135 | 1607.599  |
| 22066.592 | W60413    | 942.63    | 854.315   | NM_012249 | 3178.767  | 2854.145  | L12347    | 1077.168  |
| 1156.158  | BI823365  | 1401.539  | 1099.114  | AK022546  | 3692.257  | 4174.061  | NM_001622 | 1065.253  |
| 1145.091  | X06318    | 6065.981  | 5952.513  | NM_002914 | 2597.017  | 3707.547  | Z36788    | 569.96    |
| 24205.693 | AL834159  | 4070.354  | 7090.728  | NM_020385 | 1655.74   | 1310.243  | NM_018477 | 1985.895  |
| 13826.599 | NM_000164 | 9987.003  | 7367.873  | NM_004581 | 1581.659  | 2027.526  | U20536    | 58.098    |
| 1174.778  | CY3Cy5    | 876.482   | 91.263    | NM_006817 | 10347.334 | 17155.926 | AI298534  | 590.594   |
| 1734.659  | NM_003682 | 573.565   | 753.159   | L02922    | 12015.623 | 13287.933 | AW167715  | 727.987   |
| 555.449   | NM_006314 | 5608.768  | 5197.282  | NM_001797 | 1260.728  | 1476.121  | AA171613  | 242.141   |
| 1139.977  | NM_001782 | 732.42    | 747.831   | NM_003154 | 2333.335  | 2907.475  | BI760394  | 1069.685  |
| 5312.955  | NM_002754 | 431.474   | 914.285   | NM_004235 | 612.232   | 965.69    | AA555216  | 554.918   |
| 26766.162 | NM_016293 | 8925.218  | 7314.724  | R23251    | 16555.381 | 13233.661 | U09117    | 3343.202  |
| 495.86    | NM_006731 | 1055.127  | 683.028   | BG763477  | 868.595   | 6535.45   | M21054    | 457.643   |
| 1307.706  | NM_018487 | 629.926   | 1009.899  | AA702640  | 761.319   | 668.949   | M18468    | 682.813   |
| 3740.038  | NM_020134 | 1014.932  | 473.126   | T68583    | 1483.684  | 2087.451  | H66070    | 2887.917  |
| 584.001   | NM_014061 | 1062.22   | 935.872   | AA481944  | 13149.242 | 11513.936 | AA164741  | 1006.747  |

|           |           |           |           |           |           |           |           |           |
|-----------|-----------|-----------|-----------|-----------|-----------|-----------|-----------|-----------|
| 14130.142 | BC034395  | 528.367   | 538.246   | X14390    | 509.861   | 1118.873  | AI978885  | 1279.082  |
| 800.094   | NM_002479 | 590.222   | 859.856   | M31158    | 795.861   | 492.145   | AK054960  | 4284.952  |
| 13514.505 | NM_000348 | 5932.723  | 5743.171  | AI366068  | 15939.044 | 11729     | L15344    | 967.352   |
| 38941.219 | NM_005059 | 503.436   | 550.559   | AB040970  | 1903.655  | 632.669   | NM_001665 | 1717.058  |
| 627.472   | NM_005662 | 31165.6   | 35670.266 | NM_018330 | 1556.705  | 593.893   | NM_004155 | 583.577   |
| 2361.263  | NM_003895 | 1056.062  | 1132.139  | M33197    | 57440.266 | 59660.563 | NM_001831 | 853.603   |
| 5781.335  | NM_004317 | 4942.382  | 5409.802  | U50342    | 1638.731  | 1903.804  | NM_014586 | 1729.113  |
| 443.329   | NM_014645 | 1686.964  | 1583.772  | NM_000295 | 801.091   | 1003.196  | NM_014366 | 5645.804  |
| 3146.311  | NM_003693 | 938.135   | 1209.934  | AF103795  | 643.365   | 898.037   | NM_000923 | 624.818   |
| 1690.366  | NM_000356 | 15037.145 | 10999.551 | NM_013231 | 2142.838  | 1589.531  | NM_006453 | 479.595   |
| 806.72    | NM_018134 | 15672.56  | 16147.688 | NM_012106 | 2479.53   | 3382.917  | NM_018096 | 632.083   |
| 486.347   | BE394704  | 674.378   | 553.889   | NM_006254 | 3172.281  | 2997.755  | AL390078  | 518.283   |
| 39823.82  | NM_004703 | 2109.361  | 1775.563  | X95425    | 1081.378  | 849.857   | NM_004036 | 986.621   |
| 2144.834  | NM_001512 | 621.53    | 489.369   | NM_004422 | 1315.223  | 1376.676  | NM_015986 | 674.603   |
| 1466.132  | NM_014706 | 4967.245  | 4378.712  | NM_016562 | 833.116   | 894.927   | NM_014959 | 736.336   |
| 407.987   | AK023172  | 918.676   | 1193.268  | M33197    | 66714.703 | 64623.496 | NM_003992 | 1133.501  |
| 44302.855 | NM_014007 | 736.948   | 938.121   | AY009399  | 4734.959  | 3888.004  | AF279265  | 1905.845  |
| 2499.738  | AF000381  | 4191.904  | 4470.484  | NM_004895 | 4725.117  | 5116.347  | NM_005213 | 22594.355 |
| 596.803   | NM_012105 | 779.278   | 597.594   | L32537    | 1572.967  | 2290.623  | AB040914  | 571.593   |
| 6686.889  | S82470    | 2439.238  | 3903.072  | NM_014303 | 11849.611 | 16948.629 | NM_002997 | 833.512   |
| 1936.531  | AB028982  | 1704.098  | 1365.325  | NM_006660 | 4777.598  | 1735.787  | NM_002379 | 2777.353  |
| 1632.608  | NM_002004 | 5139.89   | 4516.408  | NM_001486 | 2012.767  | 869.851   | AB007929  | 2447.53   |
| 875.016   | NM_005121 | 992.788   | 490.768   | NM_006685 | 50184.73  | 60126.633 | NM_004579 | 639.223   |
| 1098.186  | NM_001643 | 18211.771 | 15270.567 | M33197    | 7470.614  | 7489.834  | AB043997  | 926.702   |
| 703.646   | NM_020221 | 1216.468  | 927.783   | NM_004045 | 8508.797  | 12981.849 | NM_001062 | 357.436   |
| 2718.198  | NM_000747 | 1868.939  | 1701.16   | NM_001891 | 1542.716  | 2906.846  | NM_000342 | 304.818   |
| 46767.539 | NM_005415 | 2992.504  | 2438.265  | NM_012139 | 2285.45   | 2032.127  | NM_004853 | 2735.365  |
| 472.543   | AJ275973  | 9942.964  | 5812.976  | AF121856  | 1805.405  | 1737.645  | NM_001494 | 6262.574  |
| 1116.814  | NM_006493 | 1109.581  | 665.321   | NM_006421 | 1657.466  | 1965.15   | NM_017707 | 726.91    |
| 480.493   | U76362    | 1070.357  | 710.648   | NM_003765 | 6691.543  | 6982.762  | NM_004206 | 738.069   |
| 1259.308  | AF040248  | 576.365   | 421.89    | M33197    | 30196.996 | 35202     | NM_004603 | 4998.828  |
| 21756.424 | AL832292  | 1034.61   | 256.478   | NM_018202 | 4918.819  | 5608.977  | AK022849  | 791.946   |
| 358.727   | NM_003045 | 1859.498  | 650.478   | AB023197  | 859.016   | 1817.62   | AF040964  | 1287.599  |
| 31646.256 | NM_002618 | 2039.699  | 2319.266  | NM_022173 | 1629.343  | 2688.456  | NM_001939 | 1147.797  |
| 587.386   | L27479    | 544.447   | 832.116   | M33197    | 72006.844 | 55477.848 | NM_003279 | 5675.185  |
| 632.431   | NM_002193 | 1014.905  | 708.781   | NM_005705 | 5155.144  | 2249.091  | AB014599  | 597.976   |
| 950.621   | NM_001388 | 6250.5    | 4655.297  | NM_004581 | 3158.224  | 4496.119  | NM_004393 | 440.893   |
| 721.315   | X76770    | 4138.703  | 4197.256  | NM_006817 | 18300.334 | 33370.012 | AL050082  | 635.804   |
| 33055.563 | AB037808  | 1546.998  | 1347.475  | NM_007108 | 8619.968  | 15330.376 | NM_006623 | 16078.955 |
| 5650.879  | NM_016038 | 3329.609  | 2915.958  | NM_015921 | 39935.078 | 53417.09  | NM_016588 | 638.621   |
| 818.928   | Z36821    | 3503.52   | 2687.719  | AB040900  | 4704.323  | 5275.741  | NM_003135 | 2164.809  |
| 15449.785 | AF289485  | 3150.923  | 3489.113  | NM_001482 | 3027.972  | 957.351   | NM_000137 | 2841.87   |
| 889.662   | AF130092  | 956.761   | 953.348   | NM_000717 | 1125.164  | 1407.158  | AF163572  | 3476.792  |
| 416.263   | NM_016095 | 3335.023  | 1591.899  | M33197    | 75144.461 | 64919.305 | NM_000897 | 2369.491  |
| 819.495   | AK024794  | 1251.938  | 1653.004  | NM_004845 | 1848.75   | 1705.995  | NM_014182 | 1278.031  |
| 490.869   | NM_019853 | 5853.453  | 5026.303  | M68874    | 1625.376  | 2285.76   | AB040884  | 300.278   |
| 37244.301 | NM_017992 | 6808.23   | 6271.202  | NM_006319 | 1694.648  | 2905.53   | NM_000492 | 2820.092  |
| 1728.886  | NM_005400 | 538.112   | 1033.809  | NM_018226 | 2689.221  | 2866.234  | NM_012089 | 357.353   |
| 1026.527  | NM_007255 | 1443.901  | 409.299   | AB018327  | 1346.254  | 530.988   | AK024382  | 931.664   |
| 609.08    | NM_003668 | 4098.378  | 1675.104  | AK022649  | 3715.443  | 7089.134  | NM_001170 | 996.3     |
| 390.493   | NM_013384 | 28783.664 | 8458.267  | NM_016507 | 6004.409  | 7189.661  | AL137716  | 519.378   |
| 596.721   | NM_018241 | 1156.504  | 501.937   | NM_002024 | 5087.215  | 5120.517  | NM_004696 | 554.359   |
| 517.158   | NM_005834 | 1938.229  | 974.239   | NM_002743 | 10160.913 | 8491.985  | NM_014342 | 588.439   |

|           |           |           |           |           |           |           |           |           |
|-----------|-----------|-----------|-----------|-----------|-----------|-----------|-----------|-----------|
| 1618.456  | NM_000724 | 2464.178  | 2451.032  | AF173358  | 13408.196 | 21317.586 | AK054960  | 3091.002  |
| 44584.66  | NM_002557 | 3605.278  | 2553.028  | NM_016366 | 4540.776  | 3302.382  | L15344    | 704.565   |
| 528.669   | B1762229  | 2673.847  | 2478.087  | M33197    | 65417.785 | 69166.969 | NM_001665 | 5591.333  |
| 672.688   | BG618320  | 1743.226  | 1800.631  | NM_016545 | 1400.814  | 934.888   | NM_001773 | 987.924   |
| 599.39    | Y00787    | 1534.508  | 2085.49   | NM_001440 | 15134.723 | 14102.564 | Z70704    | 1093.947  |
| 51452.762 | NM_007276 | 2604.002  | 1067.538  | NM_016618 | 1642.399  | 1057.279  | NM_001375 | 1759.399  |
| 736.151   | N34462    | 2293.684  | 2888.736  | AB014568  | 18220.904 | 16607.971 | NM_002312 | 904.196   |
| 11190.271 | AI658778  | 2733.781  | 4000.441  | NM_012249 | 1948.177  | 1649.155  | NM_016937 | 2485.325  |
| 29202.203 | L19067    | 3396.104  | 4923.997  | NM_014067 | 4226.614  | 3720.124  | NM_002690 | 954.592   |
| 285.728   | Z48482    | 1465.598  | 885.712   | NM_002914 | 2648.987  | 3418.264  | NM_012328 | 1248.348  |
| 444.675   | W60413    | 1324.838  | 2564.595  | NM_020385 | 1608.001  | 1616.377  | NM_007341 | 629.408   |
| 1129.024  | B1823365  | 1863.274  | 1806.078  | NM_006541 | 1154.654  | 1706.319  | NM_016508 | 317.761   |
| 30959.908 | X06318    | 5816.326  | 4193.76   | NM_018179 | 827.479   | 282.109   | NM_006456 | 3129.104  |
| 2259.727  | AL834159  | 2930.165  | 2363.264  | NM_006197 | 3465.633  | 976.909   | AK026062  | 6671.148  |
| 1220.425  | NM_000164 | 7090.596  | 2436.059  | NM_006377 | 4158.193  | 3976.981  | AF047002  | 6767.356  |
| 1137.312  | NM_016217 | 3297.84   | 1708.359  | NM_002436 | 2796.622  | 3063.455  | AB040914  | 275.372   |
| 458.33    | AK025971  | 3317.681  | 2442.198  | NM_018362 | 3033.317  | 2462.042  | NM_002997 | 611.743   |
| 818.304   | NM_014007 | 1017.69   | 1702.493  | M33197    | 62583.484 | 62058.082 | NM_002379 | 2731.165  |
| 4562.01   | AB033006  | 3058.212  | 3719.11   | NM_002186 | 3705.697  | 3070.422  | AB007929  | 2846.68   |
| 596.172   | AF020314  | 11986.562 | 7260.496  | NM_006182 | 1106.571  | 729.23    | NM_004579 | 947.222   |
| 762.817   | NM_016332 | 7576.291  | 14153.427 | AL137543  | 3148.058  | 3580.048  | AA203126  | 1093.57   |
| 12054.318 | NM_006457 | 814.755   | 1317.847  | NM_004444 | 7703.369  | 5813.709  | L12347    | 1176.425  |
| 759.137   | NM_003682 | 605.596   | 486.235   | NM_001957 | 1150.753  | 1463.294  | NM_001622 | 1458.064  |
| 29107.301 | NM_006314 | 4052.456  | 3410.405  | AK024533  | 13604.578 | 12640.169 | Z36788    | 1026.929  |
| 5006.721  | NM_001782 | 452.834   | 777.24    | NM_002736 | 8467.195  | 11477.971 | AI298534  | 476.008   |
| 729.317   | NM_002754 | 373.894   | 855.767   | NM_004246 | 1623.81   | 1880.471  | AW167715  | 470.081   |
| 1017.929  | NM_000797 | 1663.562  | 1537.351  | NM_002285 | 2307.873  | 1607.781  | B1760394  | 991.951   |
| 6668.503  | NM_016293 | 12386.897 | 12156.117 | NM_006694 | 16996.84  | 8277.746  | AA555216  | 386.626   |
| 636.364   | AL080148  | 8344.995  | 11109.695 | AF305081  | 2415.696  | 2957.622  | U09117    | 2715.565  |
| 24430.656 | NM_018487 | 487.848   | 1307.255  | NM_004712 | 8582.914  | 7085.57   | H66070    | 2444.075  |
| 482.847   | NM_014061 | 1392.931  | 1353.095  | AF118078  | 1357.389  | 1439.96   | AA164741  | 1274.848  |
| 563.949   | NM_002479 | 418.342   | 402.043   | M33197    | 63776.688 | 63301.797 | AI189375  | 423.2     |
| 382.109   | NM_000348 | 3432.44   | 1476.43   | NM_005858 | 2243.143  | 3556.503  | AI978885  | 1078.363  |
| 21857.549 | NM_006493 | 1711.342  | 2598.657  | AK025163  | 1496.66   | 1203.836  | AB014599  | 916.464   |
| 2721.939  | U76362    | 1500.587  | 2443.76   | NM_014931 | 2873.866  | 2077.909  | NM_004393 | 535.021   |
| 4983.589  | AF040248  | 651.54    | 748.835   | NM_014487 | 1440.503  | 1020.424  | AW407841  | 563.942   |
| 4071.196  | NM_014228 | 591.216   | 493.933   | NM_018070 | 3165.067  | 2785.716  | NM_001879 | 1359.845  |
| 42551.344 | AL832292  | 3104.474  | 933.607   | NM_002484 | 1878.865  | 2283.694  | NM_014586 | 1135.445  |
| 1217.391  | NM_003045 | 4065.395  | 2220.999  | AK025941  | 1881.002  | 1408.839  | NM_014366 | 4793.223  |
| 27243.938 | NM_005662 | 25165.33  | 24356.838 | M33197    | 57461.84  | 38538.008 | NM_000923 | 373.711   |
| 844.161   | AK021489  | 22898.176 | 26338.455 | NM_015914 | 999.415   | 751.843   | NM_014959 | 855.564   |
| 730.257   | NM_003895 | 776.616   | 1025.393  | AF059531  | 9081.944  | 9429.582  | NM_003992 | 1150.235  |
| 34744.688 | NM_004317 | 5047.603  | 4757.392  | NM_003352 | 639.546   | 990.62    | AF279265  | 2034.725  |
| 1541.605  | NM_014645 | 1635.395  | 2060.847  | AK026884  | 9878.355  | 9897.108  | NM_005213 | 22308.146 |
| 647.834   | NM_014708 | 3533.666  | 3727.906  | S82198    | 1160.934  | 1199.15   | AK024382  | 366.935   |
| 26760.297 | NM_003693 | 1369.679  | 1835.177  | NM_002594 | 3869.4    | 2638.408  | NM_004696 | 702.925   |
| 8803.839  | NM_018134 | 25190.686 | 38096.855 | NM_001159 | 1173.809  | 801.604   | NM_014342 | 1234.583  |
| 14009.021 | NM_006770 | 2783.604  | 8402.907  | NM_031407 | 2553.541  | 2783.959  | AB043997  | 820.488   |
| 409.553   | BE394704  | 669.662   | 1251.983  | M33197    | 61830.945 | 63032.141 | NM_004853 | 1979.635  |
| 494.02    | NM_004703 | 2261.83   | 2807.672  | AK000410  | 43133.922 | 32219.828 | NM_001494 | 4965.015  |
| 7115.052  | NM_014706 | 4439.348  | 2800.664  | NM_020193 | 794.407   | 1107.033  | AF040964  | 1448.649  |
| 2666.976  | AJ001348  | 1173.835  | 1411.865  | NM_005619 | 2082.086  | 2724.773  | NM_001939 | 1441.288  |
| 22125.162 | NM_007255 | 1841.602  | 1395.334  | D87440    | 1074.678  | 1497.18   | NM_003279 | 5849.584  |

|           |           |           |           |           |           |           |           |          |
|-----------|-----------|-----------|-----------|-----------|-----------|-----------|-----------|----------|
| 567.301   | NM_00366E | 6230.695  | 5299.973  | AK000332  | 6511.41   | 6062.87   | NM_01232E | 2319.436 |
| 465.848   | NM_013384 | 61719.785 | 54819.367 | NM_00673E | 719.954   | 646.628   | NM_00645E | 3543.202 |
| 866.482   | NM_001187 | 1035.301  | 819.599   | NM_013351 | 25122.717 | 36452.535 | AK026062  | 6287.825 |
| 766.242   | NM_018241 | 2110.676  | 1880.787  | NM_012340 | 6689.381  | 5850.55   | NM_000137 | 2738.645 |
| 796.016   | NM_005834 | 4056.407  | 3701.742  | NM_006022 | 1073.372  | 1048.325  | NM_012102 | 1224.773 |
| 1287.149  | AF000381  | 3625.382  | 2972.142  | AK025110  | 1406.737  | 1588.74   | NM_005017 | 4828.706 |
| 1096.609  | NM_012105 | 565.214   | 790.657   | X52339    | 44831.832 | 32431.559 | AF163572  | 1989.582 |
| 1240.278  | S82470    | 2570.786  | 4479.045  | M33197    | 53598.883 | 57940.656 | NM_000897 | 1881.15  |
| 498.102   | AB028982  | 5286.229  | 4990.011  | AB046830  | 2383.507  | 2292.924  | NM_000487 | 357.845  |
| 3860.863  | NM_001643 | 20485.84  | 21429.057 | NM_007122 | 2284.915  | 2652.964  | NM_014182 | 1439.745 |
| 529.334   | NM_020221 | 1127.312  | 1949.343  | NM_00148E | 368.29    | 852.861   | NM_000492 | 1910.273 |
| 877.04    | NM_000747 | 2053.149  | 3559.207  | NM_016202 | 7316.345  | 5463.878  | NM_01208E | 316.281  |
| 1327.391  | NM_005415 | 2921.847  | 3134.763  | NM_016604 | 746.731   | 1297.842  | AJ272057  | 2711.12  |
| 2739.719  | AL137708  | 462.2     | 1078.319  | M33197    | 55272.336 | 57538.332 | NM_004402 | 477.055  |
| 840.375   | AJ275973  | 16669.861 | 17207.691 | NM_00627E | 2227.75   | 1850.214  | AK024216  | 5969.685 |
| 24098.08  | AL834159  | 3581.076  | 6123.595  | NM_003407 | 3108.742  | 3050.87   | Y16752    | 3465.842 |
| 1840.398  | NM_000164 | 12548.068 | 12496.9   | NM_00720E | 61763.852 | 65882.688 | NM_014694 | 711.112  |
| 18557.471 | AK025971  | 5336.188  | 6546.111  | NM_00372E | 3021.897  | 1736.401  | NM_02015E | 982.062  |
| 1429.471  | NM_00261E | 1818.389  | 1935.079  | BC015899  | 3229.74   | 2556.135  | NM_00166E | 5931.973 |
| 323.448   | L27479    | 707.707   | 640.718   | NM_01798E | 7589.77   | 3911.036  | AF097645  | 381.928  |
| 1565.226  | NM_002193 | 1711.313  | 1474.007  | AK024846  | 1240.537  | 596.02    | NM_001773 | 768.03   |
| 6002.766  | NM_00138E | 9831.214  | 8138.469  | AK001451  | 2883.837  | 2170.245  | Z70704    | 825.088  |
| 845.021   | X76770    | 4539.497  | 5563.32   | M33197    | 29228.264 | 25449.736 | NM_014363 | 802.111  |
| 890.407   | AB037808  | 1679.195  | 1980.155  | NM_00547E | 5093.85   | 2852.172  | NM_000557 | 2003.951 |
| 680.698   | Z36821    | 4421.142  | 4094.665  | NM_00566C | 2593.86   | 2195.974  | NM_00323E | 212.072  |
| 671.964   | AF289485  | 4075.464  | 5361.731  | AK023902  | 806.015   | 755.253   | NM_00137E | 2052.875 |
| 794.541   | AF130092  | 1022.061  | 984.297   | AB011173  | 3435.958  | 1985.206  | NM_002312 | 923.391  |
| 446.724   | NM_01609E | 3342.876  | 1382.335  | AB023195  | 863.715   | 867.18    | NM_004774 | 3059.619 |
| 412.467   | AK024794  | 1440.292  | 1992.348  | U43431    | 1188.531  | 1126.469  | NM_016937 | 1805.009 |
| 862.385   | NM_019853 | 6332.046  | 6964.007  | AB006622  | 1358.434  | 801.401   | NM_00269C | 955.02   |
| 1088.51   | NM_017992 | 7416.957  | 8831.109  | M33197    | 50292.445 | 54873.648 | AB033086  | 497.5    |
| 2615.724  | NM_00540C | 583.397   | 754.404   | AK097041  | 2246.93   | 2579.648  | AK023755  | 386.106  |
| 12633.94  | AK023061  | 780.837   | 1213.247  | AF068744  | 8751.199  | 7864.974  | AB040877  | 1836.917 |
| 3286.788  | NM_014061 | 1185.557  | 1336.839  | AK000762  | 1589.293  | 1778.46   | NM_00628E | 2677.301 |
| 3163.128  | BC034395  | 1017.058  | 1210.026  | NM_004571 | 665.653   | 601.401   | AF251025  | 354.391  |
| 1529.211  | NM_00247E | 747.847   | 1041.934  | AJ345030  | 1913.684  | 1184.715  | NM_015677 | 1344.312 |
| 1548.977  | NM_00495C | 2491.813  | 2639.074  | AK023472  | 8256.498  | 5386.099  | NM_001772 | 3182.8   |
| 1940.248  | NM_000724 | 2419.199  | 2292.167  | M33197    | 58710.805 | 55562.691 | AB011087  | 539.815  |
| 710.371   | NM_002557 | 3849.178  | 3105.32   | S79912    | 24450.172 | 15841.506 | AF161341  | 4984.699 |
| 1589.623  | AI417775  | 1126.125  | 1857.168  | AK026892  | 1688.084  | 2616.224  | AJ249902  | 467.797  |
| 383.068   | BG618320  | 3013.058  | 4061.363  | S83275    | 23638.805 | 18494.496 | NM_004384 | 1356.354 |
| 2743.989  | Y00787    | 1948.081  | 3094.155  | AL117427  | 4897.092  | 3955.123  | L05500    | 2758.142 |
| 5881.969  | NM_00727E | 3128.484  | 1133.909  | M33197    | 64064.945 | 61858.148 | NM_01230E | 6226.575 |
| 422.51    | N34462    | 2426.704  | 2881.508  | AF052118  | 8190.208  | 6857.314  | AF222903  | 913.724  |
| 5853.134  | AI658778  | 2936.96   | 4404.418  | AK025166  | 4214.171  | 4830.331  | NM_00622E | 1379.356 |
| 883.718   | L19067    | 3206.281  | 4484.52   | AL359586  | 1031.674  | 1117.906  | L10374    | 4722.726 |
| 1165.91   | Z48482    | 1116.85   | 846.433   | AF035290  | 1559.562  | 1201.802  | AB016902  | 958.825  |
| 1060.883  | W60413    | 833.676   | 1465.393  | AK023216  | 1138.936  | 1571.028  | NM_00586C | 2096.216 |
| 690.314   | B1823365  | 1861.04   | 2866.515  | M33197    | 56907.5   | 57701.199 | AF095288  | 4910.593 |
| 459.757   | X06318    | 6842.078  | 8825.882  | AK023288  | 487.768   | 1146.203  | AK025116  | 466.283  |
| 378.989   | NM_004703 | 2636.204  | 3268.684  | AK022198  | 786.759   | 1246.535  | AF090895  | 852.125  |
| 2531.136  | NM_001512 | 2174.957  | 2029.874  | M33197    | 59191.813 | 49402.32  | AL133651  | 567.436  |
| 301.409   | NM_01470E | 5676.334  | 5133.441  | AK023457  | 1156.827  | 1652.023  | AB014532  | 2221.392 |

|           |           |           |           |           |           |           |           |           |
|-----------|-----------|-----------|-----------|-----------|-----------|-----------|-----------|-----------|
| 6044.393  | AK023172  | 408.13    | 578.688   | AK025089  | 3199.657  | 2814.497  | NM_00347E | 1960.739  |
| 2708.516  | AJ001348  | 728.609   | 732.173   | M33197    | 60942.813 | 55499.148 | NM_016237 | 3341.925  |
| 13713.872 | NM_014007 | 1212.664  | 1581.643  | AF085996  | 3096.856  | 2324.958  | NM_004924 | 4996.426  |
| 5152.928  | AB033006  | 4534.274  | 5369.611  | AK001279  | 1668.641  | 2106.291  | NM_00179E | 885.126   |
| 2431.251  | AF020314  | 12854.6   | 8962.209  | AF085949  | 805.838   | 563.037   | NM_001211 | 2206.085  |
| 672.765   | NM_016332 | 8594.921  | 15326.605 | AK001567  | 1184.869  | 1238.755  | NM_00650E | 337.662   |
| 10796.49  | NM_006457 | 1682.568  | 2595.277  | M33197    | 32613.566 | 29099.398 | AB033050  | 1454.929  |
| 1433.6    | NM_003682 | 967.819   | 981.681   | U52839    | 1579.873  | 1593.923  | NM_00435E | 5124.479  |
| 119.214   | NM_006314 | 6590.104  | 5823.596  | X78262    | 925.831   | 835.156   | BC015022  | 1292.146  |
| 605.717   | NM_001782 | 819.458   | 782.604   | M33197    | 38056.332 | 47456.59  | NM_006697 | 1315.281  |
| 369.007   | NM_002754 | 699.21    | 1110.025  | AK026984  | 10294.44  | 13454.713 | AK025707  | 323.072   |
| 629.526   | NM_000797 | 1628.613  | 1493.048  | M33197    | 55196.695 | 51309.773 | NM_00240E | 25853.66  |
| 482.557   | NM_016293 | 8316.625  | 6648.917  | AL157466  | 1381.397  | 1204.598  | U87169    | 435.154   |
| 1393.758  | AL080148  | 6956.361  | 7829.672  | AL389981  | 569.691   | 286.733   | NM_002073 | 575.365   |
| 2148.069  | NM_006731 | 998.881   | 571.076   | AK024336  | 1037.922  | 951.501   | AF117222  | 394.388   |
| 1304.7    | NM_018487 | 238.609   | 927.337   | NM_018621 | 1100.441  | 750.463   | AF090327  | 840.372   |
| 4066.361  | NM_020134 | 1122.958  | 663.464   | AK021628  | 864.521   | 526.006   | NM_003291 | 4174.625  |
| 510.18    | NM_020221 | 1759.907  | 1693.019  | M33197    | 51538.172 | 48719.25  | AK022950  | 1125.597  |
| 1996.154  | NM_000747 | 2118.094  | 2224.386  | AK022118  | 952.446   | 770.029   | S75755    | 872.426   |
| 1100.328  | NM_00541E | 2648.149  | 2397.673  | AK026453  | 3892.867  | 2771.555  | AB014576  | 3046.62   |
| 568.875   | AJ275973  | 14120.255 | 17818.797 | AK025673  | 883.288   | 916.319   | NM_019044 | 2077.933  |
| 3346.849  | NM_006493 | 2128.614  | 3761.797  | M33197    | 46373.48  | 42681.414 | AK000145  | 557.642   |
| 3244.483  | U76362    | 2563.973  | 3850.095  | AK023305  | 24595.916 | 28401.662 | AF174601  | 1116.406  |
| 666.316   | AF040248  | 888.447   | 1065.03   | AK022729  | 1459.674  | 936.468   | AF279865  | 455.99    |
| 415.371   | NM_01422E | 925.63    | 854.442   | NM_00616E | 9993.143  | 8380.429  | NM_01470C | 543.003   |
| 1144.522  | AL832292  | 3931.128  | 1833.052  | AL050374  | 1426.874  | 1039.057  | NM_014714 | 491.795   |
| 2600.194  | NM_00304E | 5528.007  | 3470.771  | M33197    | 56726.059 | 51609.215 | NM_005687 | 2279.498  |
| 2157.228  | NM_005662 | 29053.826 | 32111.008 | M28639    | 2540.266  | 2054.336  | NM_005983 | 1311.901  |
| 547.343   | NM_00306C | 470.599   | 432.492   | AL122073  | 9098.783  | 6454.94   | NM_017652 | 3690.859  |
| 23162.234 | AK021489  | 24762.014 | 28992.182 | AF116655  | 2118.63   | 1480.617  | X59268    | 961.566   |
| 842.22    | NM_00452E | 413       | 295.905   | AJ243222  | 916.819   | 1348.612  | D70832    | 27124.264 |
| 2408.466  | NM_00389E | 989.086   | 1099.549  | AK026132  | 2256.492  | 2127.349  | NM_00142E | 1591.549  |
| 4866.437  | NM_004317 | 5937.668  | 5955.567  | M33197    | 54355.934 | 53105.504 | M61870    | 592.915   |
| 2854.142  | NM_01464E | 1663.366  | 1370.818  | AF070584  | 1129.402  | 1015.915  | AK026980  | 435.585   |
| 1845.314  | NM_01470E | 2999.922  | 2309.678  | M33197    | 50589.305 | 53682.211 | NM_02036E | 692.469   |
| 3269.487  | NM_003693 | 1194.509  | 1458.857  | AK000903  | 21689.51  | 31568.938 | AF024708  | 4755.598  |
| 433.265   | NM_00035E | 15858.104 | 11763.712 | AK023938  | 751.618   | 1337.434  | NM_006467 | 1192.376  |
| 1100.723  | NM_018134 | 18786.615 | 19005.645 | L13743    | 1776.297  | 903.039   | NM_01756E | 935.349   |
| 151.966   | NM_013247 | 3462.433  | 7562.199  | U84519    | 811.781   | 756.96    | NM_006582 | 623.094   |
| 591.843   | NM_00677C | 1877.512  | 4213.312  | Z11849    | 3304.269  | 2533.486  | AB033019  | 3068.809  |
| 1091.213  | BE394704  | 682.4     | 686.323   | AJ002788  | 2238.007  | 943.682   | NM_001452 | 519.962   |
| 1179.669  | AK024794  | 1392.113  | 1662.079  | M33197    | 60734.227 | 58641.094 | NM_014764 | 2530.722  |
| 1499.86   | NM_019853 | 6517.964  | 5656.554  | AF052103  | 2007.263  | 1886.682  | NM_01807E | 1131.16   |
| 395.068   | NM_017992 | 6660.903  | 5622.054  | AK024842  | 568.268   | 760.951   | NM_00708C | 3956.208  |
| 2784.698  | NM_00540C | 811.585   | 784.573   | NM_018382 | 821.896   | 1050.222  | AK026912  | 2092.315  |
| 666.632   | BF851643  | 1280.502  | 1084.706  | M33197    | 61977.109 | 59857.012 | AK023531  | 3450.95   |
| 357.858   | AK023061  | 2066.772  | 1904.246  | D17203    | 41239.223 | 42458.137 | AK024298  | 851.375   |
| 437.68    | NM_00725E | 2295.119  | 2817.066  | NM_00649E | 3789.111  | 3169.961  | AB011128  | 2034.398  |
| 639.494   | NM_00366E | 7562.254  | 6029.475  | AK022101  | 1047.388  | 962.338   | AK025074  | 1584.676  |
| 551.994   | NM_013384 | 58989.836 | 53741.398 | NM_003251 | 2434.787  | 1803.572  | NM_000303 | 2574.588  |
| 5183.562  | NM_001187 | 1611.448  | 1454.535  | AB046772  | 545.579   | 1199.115  | NM_006242 | 853.275   |
| 2509.244  | NM_018241 | 2063.825  | 2676.721  | M33197    | 59234.582 | 61486.004 | NM_001497 | 752.245   |
| 429.44    | NM_005834 | 4656.697  | 5321.101  | AY007143  | 2935.778  | 3752.169  | NM_00413C | 2167.548  |

|           |           |           |           |             |           |           |           |           |
|-----------|-----------|-----------|-----------|-------------|-----------|-----------|-----------|-----------|
| 558.689   | AF000381  | 4952.038  | 5331.73   | L15557      | 832.008   | 807.298   | NM_00634E | 138.476   |
| 1890.584  | NM_01807E | 295.511   | 873.571   | M33197      | 64749.59  | 61238.855 | AF067972  | 3940.26   |
| 6476.938  | NM_01210E | 902.06    | 760.209   | NM_001563   | 8055.829  | 5936.24   | NM_00495E | 429.278   |
| 775.972   | S82470    | 2853.428  | 5085.685  | NM_00026E   | 604.017   | 865.631   | D87076    | 1024.021  |
| 857.422   | AB028982  | 1978.351  | 1679.789  | X89666      | 2755.995  | 2055.288  | NM_01414E | 1142.571  |
| 931.161   | NM_002004 | 6033.906  | 5707.974  | NM_003104   | 7049.438  | 4265.443  | AB020635  | 599.123   |
| 649.223   | NM_005121 | 860.05    | 482.852   | NM_014581   | 1970.027  | 1410.174  | NM_00651E | 389.644   |
| 1134.55   | NM_001643 | 20127.496 | 16683.754 | M33197      | 60164.758 | 56884.449 | NM_005224 | 473.135   |
| 400.051   | NM_01909E | 6898.075  | 8013.297  | AK024448    | 2763.058  | 2160.831  | NM_012144 | 3509.374  |
| 325.295   | NM_01472E | 2334.267  | 3230.972  | NM_01440E   | 1248.519  | 1545.065  | X65231    | 29738.227 |
| 478.809   | NM_006892 | 2197.349  | 2107.13   | Z11801      | 892.163   | 711.973   | NM_00290E | 628.894   |
| 1284.444  | NM_019117 | 1876.238  | 1668.568  | S68954      | 4980.786  | 994.781   | AF205632  | 834.217   |
| 23525.879 | NM_01830E | 2900.83   | 3880.91   | S81335      | 1482.318  | 1410.121  | NM_00537E | 10040.618 |
| 1226.315  | NM_01765E | 3807.728  | 4107.762  | AF052109    | 1528.677  | 1241.697  | NM_002397 | 2413.312  |
| 848.896   | NM_01867E | 6943.717  | 6948.051  | M33197      | 20612.648 | 16504.016 | AF000672  | 526.076   |
| 1148.852  | NM_016643 | 740.756   | 643.452   | NM_003353   | 29641.092 | 23274.518 | AF086128  | 935.937   |
| 983.653   | NM_00677E | 4502.174  | 5852.272  | X82127      | 36897.023 | 30707.111 | AK022850  | 754.806   |
| 1141.943  | NM_016217 | 13824.295 | 20381.479 | AL122044    | 1962.507  | 1437.705  | AF038193  | 580.319   |
| 1301.507  | AK025971  | 5924.669  | 6969.914  | M33197      | 61754.434 | 64526.43  | AL137498  | 859.638   |
| 2858.151  | NM_00261E | 2030.186  | 1642.206  | CY3Cy5      | 4820.495  | 198.271   | AK024289  | 679.792   |
| 7828.241  | L27479    | 548.372   | 766.015   | AA115473    | 4128.374  | 2713.645  | S66168    | 2329.129  |
| 728.121   | NM_002193 | 1745.956  | 1361.922  | AA872397    | 2067.03   | 1501.764  | AF131837  | 302.383   |
| 918.102   | NM_00138E | 7284.853  | 5071.16   | AA709414    | 1860.801  | 1867.481  | NM_003851 | 10876.567 |
| 438.115   | X76770    | 5120.783  | 5046.155  | D12676      | 1037.072  | 925.579   | AF070536  | 1594.025  |
| 2008.99   | AB037808  | 1650.726  | 1651.772  | BC012593    | 1099.826  | 719.718   | AK022297  | 488.895   |
| 610.808   | NM_01603E | 3658.743  | 3257.728  | NM_00093E   | 8453.838  | 5158.362  | U79300    | 753.883   |
| 843.179   | Z36821    | 5020.697  | 3893.662  | NM_00429E   | 11373.729 | 5927.975  | AK025151  | 5587.103  |
| 391.639   | AF289485  | 3618.142  | 3920.394  | H-X 02812 I | 919.861   | 868.627   | AK025550  | 1324.976  |
| 1054.881  | AF130092  | 1189.131  | 808.122   | U75898      | 1557.328  | 1047.97   | AF088076  | 3518.035  |
| 450.923   | NM_01609E | 3325.107  | 1308.836  | M59815      | 359.211   | 541.917   | AF086543  | 650.346   |
| 231.29    | AF300612  | 50162.477 | 54673.75  | NM_006917   | 736.318   | 471.037   | AB046797  | 784.648   |
| 33359.539 | AB014557  | 870.429   | 554.575   | SR2         | 48544.637 | 52134.855 | AK002098  | 1349.759  |
| 1412.63   | NM_00557E | 5860.102  | 4245.896  | SR4         | 10116.223 | 8663.796  | AK025156  | 2662.243  |
| 3014.963  | NM_003653 | 8399.91   | 6310.275  | SR6         | 1562.72   | 1480.255  | AK022116  | 1081.665  |
| 3546.786  | NM_018457 | 14509.48  | 14960.823 | SR8         | 6017.925  | 16697.266 | AK026207  | 265.236   |
| 2935.14   | NM_002953 | 11580.53  | 16611.063 | SR10        | 21447.289 | 6161.139  | AK024984  | 2156.076  |
| 10050.295 | NM_002187 | 1420.67   | 1348.392  | CY3Cy5      | 4890.367  | 221.613   | AF075106  | 1512.363  |
| 6688.245  | NM_01424E | 7480.832  | 6013.144  | NM_001203   | 896.497   | 750.787   | AK023339  | 1098.474  |
| 2240.104  | NM_01485E | 1239.638  | 1000.541  | NM_00479E   | 6139.677  | 4204.304  | AF085981  | 311.86    |
| 678.176   | AF311912  | 571.034   | 444.417   | NM_014047   | 6040.768  | 5949.856  | AF086008  | 911.823   |
| 6758.701  | NM_001116 | 935.716   | 589.588   | AK022901    | 1086.796  | 916.063   | AF087970  | 492.59    |
| 682.849   | BC035395  | 6007.292  | 5324.95   | M33197      | 63771.703 | 56659.141 | AF086029  | 566.123   |
| 503.452   | NM_001703 | 6933.858  | 6923.119  | AF037332    | 1759.365  | 1058.93   | U50524    | 535.598   |
| 377.579   | NM_02012E | 4078.866  | 4052.75   | AB040912    | 2673.799  | 2289.515  | U10515    | 434.481   |
| 1914.01   | NM_013982 | 5826.64   | 10137.039 | NM_006243   | 3085.643  | 2593.635  | U73799    | 595.465   |
| 258.301   | NM_00504E | 2129.462  | 1297.691  | M33197      | 67389.977 | 61306.426 | AK021668  | 11435.008 |
| 7094.755  | NM_003882 | 611.527   | 1132.951  | AJ011129    | 1714.187  | 1668.904  | AF086148  | 7029.251  |
| 1352.996  | NM_00463C | 8103.359  | 4396.965  | NM_006387   | 3466.028  | 4346.925  | AJ245433  | 3091.694  |
| 7093.298  | AK023001  | 7162.483  | 5817.328  | NM_00564E   | 2129.229  | 1857.575  | AK021942  | 890.757   |
| 393.766   | NM_01482E | 7703.424  | 7386.945  | NM_00663E   | 2554.822  | 2242.543  | NM_014127 | 868.573   |
| 783.632   | U01147    | 2344.855  | 2893.842  | BI767871    | 2167.724  | 1671.543  | AK021817  | 314.949   |
| 1677.216  | NM_00404C | 6704.118  | 5192.881  | AK022817    | 600.551   | 695.13    | AL080103  | 883.01    |
| 1519.371  | NM_006116 | 2359.025  | 1914.247  | M33197      | 57994.527 | 59894.703 | AK023217  | 1062.766  |



|          |           |           |           |           |           |           |           |           |
|----------|-----------|-----------|-----------|-----------|-----------|-----------|-----------|-----------|
| 4287.393 | NM_005456 | 1740.443  | 3795.684  | AB037831  | 553.135   | 441.274   | AF090902  | 1739.922  |
| 582.92   | NM_003587 | 8840.596  | 6418.865  | NM_012103 | 8003.05   | 4164.529  | AF119887  | 4615.271  |
| 2926.058 | X90978    | 976.773   | 875.645   | AL122077  | 7789.218  | 5366.983  | AK091038  | 503.878   |
| 1364.03  | BF219403  | 18216.145 | 15290.91  | NM_006422 | 758.12    | 692.805   | AK024193  | 416.631   |
| 825.199  | NM_016119 | 1657.256  | 2796.04   | NM_016946 | 1200.679  | 1721.351  | NM_018543 | 390.563   |
| 1973.622 | AK075450  | 2209.713  | 2288.278  | M33197    | 70345.07  | 63588.379 | AK024438  | 4157.358  |
| 1744.271 | AF178983  | 5477.846  | 4388.671  | NM_007259 | 1478.25   | 2341.33   | AF161337  | 317.075   |
| 1720.587 | NM_001324 | 4051.263  | 3552.889  | AK075081  | 2622.217  | 2629.111  | AK024135  | 774.683   |
| 2315.865 | AB037795  | 1966.395  | 3030.267  | NM_000895 | 5557.757  | 3336.191  | AK022803  | 1335.364  |
| 466.257  | D43949    | 2771.489  | 3163.091  | NM_003820 | 10231.931 | 9235.817  | AK023517  | 878.02    |
| 665.236  | AK022975  | 991.895   | 1265.001  | NM_015915 | 1211.324  | 1567.072  | AK023869  | 1921.369  |
| 1978.287 | NM_015344 | 2951.027  | 2136.192  | M33197    | 44842.109 | 46401.238 | NM_017728 | 786.491   |
| 1532.967 | NM_004288 | 1123.459  | 1850.899  | NM_016518 | 3294.963  | 3168.536  | AJ272177  | 419.976   |
| 2662.309 | AL122055  | 9511.141  | 8374.237  | NM_006185 | 7549.159  | 6008.614  | AK026402  | 1491.518  |
| 1465.489 | NM_005132 | 23384.75  | 19320.885 | NM_014800 | 728.12    | 929.109   | M11948    | 51880.047 |
| 3633.874 | D87458    | 1080.659  | 1177.048  | NM_001557 | 975.227   | 1338.829  | AK024618  | 428.022   |
| 3982.285 | AK021750  | 2001.344  | 4705.285  | AF147311  | 1857.55   | 1755.16   | AL049969  | 554.081   |
| 1590.561 | NM_003626 | 1822.6    | 1520.246  | NM_002131 | 26002.467 | 21187.363 | NM_005220 | 560.297   |
| 1796.249 | NM_006932 | 322.594   | 661.528   | NM_017927 | 1318.725  | 1400.094  | AK000208  | 297.689   |
| 3332     | AB010099  | 10623.063 | 10173.421 | NM_020151 | 8443.301  | 8444.721  | AK026366  | 16411.045 |
| 2246.012 | AB039920  | 6261.617  | 5604.728  | NM_005891 | 23849.414 | 11869.201 | AK024229  | 8463.563  |
| 1034.098 | AB046782  | 2219.284  | 2697.815  | NM_001645 | 1153.158  | 2552.125  | AK021467  | 4766.215  |
| 2961.279 | NM_004190 | 12519.566 | 11292.023 | NM_003956 | 1252.185  | 755.659   | NM_020371 | 1466.806  |
| 606.203  | NM_014275 | 4426.917  | 3243.203  | M33197    | 58821.418 | 54944.824 | AK022498  | 1561.802  |
| 1137.51  | NM_000409 | 3262.597  | 2884.601  | NM_003500 | 1768.295  | 1794.743  | U84506    | 1255.228  |
| 259.445  | AF208005  | 1333.591  | 1448.544  | NM_014317 | 1867.771  | 2285.935  | U21556    | 45023.48  |
| 1183.012 | NM_002231 | 6272.663  | 5923.083  | L09234    | 3869.067  | 3217.364  | AB002444  | 639.28    |
| 1373.277 | NM_020474 | 10376.238 | 6943.678  | NM_000059 | 708.754   | 1033.748  | AB002344  | 670.451   |
| 514.093  | NM_002643 | 2705.206  | 2378.19   | NM_017881 | 2528.538  | 1817.377  | NM_006829 | 449.578   |
| 3616.616 | NM_017807 | 3797.478  | 2376.538  | M33197    | 65946.203 | 56273.238 | NM_017669 | 2620.899  |
| 399.165  | NM_014746 | 1186.092  | 1958.826  | NM_017634 | 4459.486  | 4681.788  | AF147379  | 12977.963 |
| 801.82   | NM_000462 | 4354.278  | 3346.083  | NM_000813 | 581.237   | 598.097   | AK023760  | 885.379   |
| 3167.48  | NM_003336 | 7442.606  | 10044.125 | NM_018896 | 936.998   | 1007.867  | X98415    | 18198.822 |
| 450.519  | NM_005805 | 12424.104 | 8488.436  | AJ300465  | 2012.872  | 1766.787  | AK024205  | 918.434   |
| 1359.878 | NM_003900 | 10156.563 | 9247.363  | X86400    | 715.365   | 728.426   | AF086034  | 6989.16   |
| 605.583  | NM_003337 | 2993.5    | 3264.99   | NM_000810 | 2565.021  | 1983.366  | AK000174  | 694.644   |
| 770.227  | AF298152  | 3169.631  | 2589.833  | AF069307  | 1576.237  | 1555.44   | AF130071  | 575.666   |
| 250.705  | AF117233  | 2884.666  | 2404.262  | M33197    | 57809.824 | 55601.043 | AL390170  | 408.956   |
| 436.942  | NM_015848 | 872.099   | 966.402   | U92978    | 1796.101  | 1476.892  | AK022887  | 615.285   |
| 1789.096 | NM_001723 | 1801.004  | 1947.697  | NM_014488 | 429.215   | 327.694   | AK000745  | 9573.614  |
| 4098.785 | AK024707  | 1871.234  | 1613.578  | NM_005326 | 7694.833  | 5612.629  | NM_005299 | 359.305   |
| 670.201  | NM_014255 | 1780.428  | 2904.761  | AB035130  | 1379.393  | 1053.26   | NM_015901 | 819.02    |
| 578.889  | AK022909  | 1698.217  | 1509.041  | NM_003359 | 1577.997  | 1815.454  | Z83935    | 662.375   |
| 1592.191 | NM_006530 | 6001.994  | 3642.77   | M33197    | 24254.463 | 24285.037 | AF093744  | 813.329   |
| 6614.589 | AB033024  | 1862.707  | 2428.733  | NM_017915 | 592.146   | 631.589   | NM_018687 | 9834.743  |
| 816.994  | NM_018942 | 3556.35   | 3561.602  | AK021513  | 528.898   | 341.092   | M57417    | 28649.51  |
| 866.716  | NM_005531 | 671.167   | 1332.603  | NM_003579 | 1419.442  | 1573.616  | NM_020524 | 4270.401  |
| 605.406  | NM_006977 | 529.527   | 596.733   | AL049283  | 1014.46   | 839.751   | NM_001999 | 1877.016  |
| 579.31   | AF217226  | 4140.246  | 4250.312  | M33197    | 53615.387 | 54872.824 | X64977    | 569.931   |
| 429.299  | NM_005522 | 530.168   | 1691.871  | NM_002401 | 19413.275 | 17725.713 | NM_002602 | 1452.508  |
| 483.281  | NM_005760 | 7807.796  | 7044.748  | NM_001274 | 878.252   | 1033.762  | NM_003383 | 529.127   |
| 821.416  | NM_014212 | 1962.694  | 2255.519  | NM_003913 | 496.864   | 581.635   | D17271    | 1449.773  |
| 954.93   | NM_007265 | 3079.03   | 2110.433  | NM_002227 | 2918.62   | 2130.65   | AF282264  | 5710.25   |

|           |           |           |           |             |           |           |           |           |
|-----------|-----------|-----------|-----------|-------------|-----------|-----------|-----------|-----------|
| 3314.503  | AK023639  | 4922.343  | 4048.695  | NM_007199   | 2793.375  | 2308.047  | AF086322  | 989.873   |
| 438.581   | AL137700  | 459.103   | 693.996   | AB002301    | 2044.78   | 2280.68   | Z70717    | 628.605   |
| 2027.24   | NM_004904 | 957.499   | 879.067   | AB014530    | 3973.002  | 2797.898  | AK024736  | 476.131   |
| 968.07    | NM_003083 | 2586.293  | 2673.026  | M33197      | 59503.227 | 55032.484 | X79308    | 876.791   |
| 1162.183  | NM_006789 | 6019.067  | 4550.369  | NM_005989   | 1877.343  | 1778.914  | NM_017660 | 2967.963  |
| 1372.417  | NM_000982 | 2806.514  | 2038.57   | NM_006387   | 2479.726  | 3599.223  | AB011151  | 4352.147  |
| 354.291   | NM_001024 | 56230.984 | 60274.828 | NM_005646   | 1372.624  | 952.954   | U92995    | 1487.303  |
| 193.208   | AK026367  | 31054.365 | 23097.32  | NM_006639   | 1878.916  | 1472.808  | Z70769    | 723.239   |
| 805.659   | AK026491  | 17429.824 | 8205.154  | BI767871    | 1117.13   | 945.717   | NM_007106 | 1567.028  |
| 3780.759  | NM_001015 | 62581.637 | 63436.801 | AA115473    | 1255.897  | 1170.11   | AL137555  | 1943.943  |
| 11037.364 | AL110170  | 57750.676 | 17608.922 | AA872397    | 1506.702  | 1221.127  | AL133017  | 984.516   |
| 550.462   | AK021747  | 1276.385  | 997.015   | AA709414    | 1827.771  | 1913.428  | CY3Cy5    | 2956.928  |
| 984.438   | AK025640  | 7779.785  | 7993.06   | D12676      | 1464.775  | 884.133   | X00588    | 451.131   |
| 3400.861  | AF131772  | 721.783   | 641.043   | NM_000939   | 7966.538  | 6090.791  | AI359037  | 3262.892  |
| 440.751   | NM_019101 | 1591.609  | 966.937   | NM_004295   | 11896.243 | 6502.469  | BI754285  | 274.367   |
| 684.046   | NM_000920 | 2034.808  | 1432.711  | H-X 02812 I | 783.565   | 891.235   | X15998    | 3319.875  |
| 475.482   | NM_020375 | 2740.046  | 3677.598  | U75898      | 1552.072  | 1102.834  | M76482    | 466.631   |
| 1256.234  | NM_016049 | 5985.75   | 4645.605  | M29039      | 302.621   | 318.538   | X17519    | 215.394   |
| 3362.511  | NM_013311 | 6156.233  | 3308.697  | M59815      | 458.206   | 554.856   | NM_001883 | 1588.431  |
| 670.087   | NM_000291 | 55878.375 | 39093.949 | NM_006185   | 5126.401  | 3290.325  | NM_004628 | 1060.051  |
| 1214.716  | NM_018081 | 3106.023  | 2741.19   | NM_014800   | 487.426   | 652.138   | L31785    | 591.004   |
| 7204.779  | NM_014649 | 3913.75   | 3236.624  | NM_001557   | 715.647   | 873.839   | H-M 69043 | 1506.431  |
| 10041.473 | AL117488  | 2010.531  | 2184.318  | AF147311    | 1477.8    | 1242.195  | AF077374  | 781.406   |
| 9641.699  | NM_012240 | 1440.623  | 1479.338  | NM_002131   | 24705.811 | 18742.721 | X59065    | 397.296   |
| 1383.356  | NM_019005 | 4218.071  | 2188.933  | NM_017927   | 1182.376  | 957.469   | M59828    | 2047.744  |
| 28798.906 | NM_004739 | 6934.884  | 6076.32   | M33197      | 60342.758 | 60897.172 | NM_016134 | 1139.16   |
| 1241.285  | AV752216  | 1332.69   | 2018.121  | NM_001203   | 1053.711  | 1009.812  | SR2       | 38947.625 |
| 2791.231  | NM_005341 | 1725.645  | 1670.678  | NM_004799   | 10521.776 | 7519.224  | SR4       | 8665.015  |
| 2847.319  | AF181999  | 1586.428  | 1324.866  | NM_006733   | 1041.712  | 884.461   | SR6       | 1350.631  |
| 3312.732  | NM_001934 | 3759.079  | 2756.365  | NM_014047   | 8108.884  | 8340.93   | SR8       | 5060.455  |
| 16765.113 | AB011090  | 2944.656  | 1917.911  | AK022901    | 1015.161  | 915.138   | SR10      | 18612.34  |
| 5887.026  | NM_000209 | 1463.499  | 1555.12   | M33197      | 58321.195 | 58380.844 | CY3Cy5    | 3419.153  |
| 2542.884  | NM_018682 | 5452.377  | 4428.652  | AF037332    | 1655.957  | 1733.373  | NM_000612 | 988.583   |
| 8184.512  | NM_006545 | 14315.688 | 15529.937 | AB040912    | 5473.643  | 5216.562  | NM_004257 | 6885.183  |
| 486.838   | NM_016534 | 2158.85   | 2078.786  | NM_006243   | 3107.205  | 2527.227  | NM_000683 | 1784.02   |
| 1123.605  | AK024240  | 761.094   | 1214.02   | M33197      | 60754.023 | 60101.16  | NM_003629 | 1205.687  |
| 1747.242  | NM_016456 | 34866.609 | 38278.07  | AJ011129    | 972.409   | 982.768   | NM_005901 | 4091.677  |
| 6538.797  | AK022677  | 3636.936  | 4352.756  | M33197      | 62259.055 | 58049.363 | NM_004248 | 1018.741  |
| 5159.132  | AF035288  | 667.732   | 723.336   | U92978      | 1926.416  | 1941.823  | NM_001313 | 893.505   |
| 449.646   | AL137645  | 4385.39   | 3488.951  | NM_013389   | 2904.841  | 3299.81   | NM_004796 | 455.502   |
| 627.549   | AK026141  | 1529.475  | 1377.511  | NM_018034   | 3632.343  | 3097.122  | NM_000435 | 1493.14   |
| 1006.625  | AK022894  | 2826.875  | 2561.879  | M33197      | 60665.43  | 59970.957 | NM_001842 | 5053.002  |
| 1052.192  | AF217993  | 7433.703  | 12894.244 | NM_012103   | 9376.163  | 5839.803  | AL080170  | 887.872   |
| 2094.436  | AF131823  | 571.648   | 354.576   | AL122077    | 9769.602  | 7895.574  | AB039903  | 1858.384  |
| 395.81    | AK026324  | 9099.896  | 7868.514  | NM_006422   | 586.544   | 840.094   | NM_000542 | 5997.476  |
| 6943.706  | AK025253  | 1217.133  | 1214.574  | BE789195    | 561.248   | 868.036   | NM_006851 | 495.679   |
| 482.189   | AK025004  | 3680.168  | 3719.217  | NM_016946   | 1921.277  | 2595.014  | AK001560  | 716.579   |
| 1073.922  | AL136818  | 1566.189  | 1794.383  | NM_018402   | 779.185   | 1171.238  | AB001328  | 618.156   |
| 1979.77   | AF146798  | 2186.138  | 1787.292  | AK075081    | 2252.91   | 2399.964  | NM_000948 | 408.39    |
| 1481.691  | AK022049  | 472.584   | 432.064   | NM_000895   | 3790.1    | 3072.265  | H99588    | 1508.224  |
| 4333.098  | AF086517  | 6564.643  | 7541.595  | NM_003820   | 9951.909  | 9373.97   | AK022600  | 1234.584  |
| 601.869   | AK025740  | 11799.036 | 12012.557 | NM_015915   | 1160.503  | 1016.94   | AK023142  | 391.896   |
| 2834.889  | AK000311  | 4743.042  | 5315.967  | M33197      | 40955.211 | 42962.66  | U61740    | 3256.903  |

|           |                   |           |           |                  |           |           |                  |           |
|-----------|-------------------|-----------|-----------|------------------|-----------|-----------|------------------|-----------|
| 1956.359  | <b>AK025346</b>   | 54866.551 | 54509.379 | <b>NM_016518</b> | 2287.815  | 1900.401  | <b>NM_006409</b> | 48914.652 |
| 366.161   | <b>AK022583</b>   | 4429.573  | 5857.719  | <b>AB014530</b>  | 6077.251  | 4281.775  | <b>NM_013227</b> | 1093.687  |
| 2339.799  | <b>AL137534</b>   | 61514.277 | 59182.734 | <b>M33197</b>    | 58771.496 | 53801.77  | <b>Z83803</b>    | 726.628   |
| 1142.932  | <b>AF052121</b>   | 4061.013  | 4601.833  | <b>NM_005989</b> | 1530.319  | 1750.498  | <b>AF027205</b>  | 9943.075  |
| 821.679   | <b>AL359062</b>   | 1427.329  | 1380.891  | <b>AB014607</b>  | 2396.291  | 1975.031  | <b>AF075012</b>  | 1203.8    |
| 1147.645  | <b>AK026869</b>   | 1739.715  | 1532.173  | <b>AF134401</b>  | 1173.061  | 801.564   | <b>NM_001570</b> | 667.191   |
| 940.227   | <b>AK022192</b>   | 520.62    | 609.539   | <b>NM_020151</b> | 7192.537  | 6599.782  | <b>NM_015658</b> | 558.398   |
| 914.944   | <b>NM_019099</b>  | 38205.82  | 33890.688 | <b>NM_005891</b> | 25782.971 | 13031.827 | <b>NM_000589</b> | 1200.822  |
| 2164.928  | <b>Y12020</b>     | 11567.92  | 13301.339 | <b>NM_001645</b> | 1669.641  | 3195.214  | <b>NM_016546</b> | 6666.679  |
| 1006.768  | <b>AJ001905</b>   | 1465.612  | 1309.92   | <b>NM_003956</b> | 967.458   | 1138.046  | <b>AF309653</b>  | 3530.875  |
| 3774.259  | <b>U17635</b>     | 2674.547  | 2226.64   | <b>M33197</b>    | 57099.672 | 53816.793 | <b>NM_002620</b> | 3962.511  |
| 2252.312  | <b>AL049930</b>   | 620.085   | 636.22    | <b>NM_003500</b> | 1746.729  | 1913.939  | <b>S79267</b>    | 457.291   |
| 696.073   | <b>Z83946</b>     | 596.964   | 733.576   | <b>NM_014317</b> | 2276.253  | 2840.23   | <b>NM_001816</b> | 610.001   |
| 2331.645  | <b>L23870</b>     | 996.055   | 1143.356  | <b>L09234</b>    | 4849.108  | 7208.529  | <b>NM_003784</b> | 16339.169 |
| 7290.095  | <b>D55644</b>     | 1711.038  | 1873.494  | <b>NM_000059</b> | 2176.971  | 3191.257  | <b>NM_000195</b> | 8651.473  |
| 496.861   | <b>D16951</b>     | 899.555   | 772.365   | <b>AK026740</b>  | 2154.872  | 2539.139  | <b>NM_005445</b> | 4662.077  |
| 8103.286  | <b>L19362</b>     | 926.687   | 946.31    | <b>NM_017881</b> | 4140.177  | 5594.04   | <b>NM_014899</b> | 1284.851  |
| 882.261   | <b>L33807</b>     | 1712.207  | 1785.553  | <b>M33197</b>    | 60001.488 | 56483.871 | <b>NM_003630</b> | 2692.491  |
| 2109.401  | <b>AB007975</b>   | 1092.486  | 1021.044  | <b>NM_017634</b> | 4696.107  | 7040.279  | <b>NM_000046</b> | 2168.163  |
| 1695.959  | <b>AK021821</b>   | 486.038   | 569.222   | <b>NM_000813</b> | 607.04    | 805.122   | <b>NM_003219</b> | 1022.62   |
| 6017.89   | <b>AL049328</b>   | 1123.356  | 1153.288  | <b>NM_018896</b> | 1126.435  | 1022.403  | <b>NM_006709</b> | 2655.638  |
| 975.212   | <b>AK021415</b>   | 1670.198  | 1096.943  | <b>AJ300465</b>  | 1754.37   | 1612.307  | <b>NM_004910</b> | 586.932   |
| 2069.996  | <b>AK000030</b>   | 2327.875  | 1812.235  | <b>NM_000810</b> | 1699.012  | 1511.449  | <b>M93107</b>    | 2009.174  |
| 1887.838  | <b>NM_017932</b>  | 519.048   | 734.864   | <b>AF069307</b>  | 1669.706  | 1723.591  | <b>BC001479</b>  | 3649.565  |
| 19312.531 | <b>AK000910</b>   | 2947.997  | 2847.701  | <b>AB011146</b>  | 997.84    | 686.873   | <b>NM_005771</b> | 4950.739  |
| 2593.74   | <b>AF252280</b>   | 9127.35   | 6494.134  | <b>NM_005326</b> | 9864.433  | 8458.925  | <b>NM_016032</b> | 6540.51   |
| 738.389   | <b>AK000107</b>   | 1205.09   | 1529.518  | <b>AB035130</b>  | 913.236   | 998.947   | <b>NM_014324</b> | 52502.762 |
| 4660.213  | <b>AK000951</b>   | 1021.695  | 1438.688  | <b>NM_003359</b> | 1101.52   | 1179.156  | <b>NM_001687</b> | 12009.225 |
| 572.235   | <b>AK024518</b>   | 13448.289 | 14575.223 | <b>M33197</b>    | 26457.074 | 37777.25  | <b>AK026374</b>  | 842.054   |
| 728.198   | <b>AK024586</b>   | 593.374   | 615.126   | <b>AK021834</b>  | 1045.003  | 1251.119  | <b>NM_001169</b> | 672.801   |
| 3709.534  | <b>AK025017</b>   | 3846.308  | 4102.583  | <b>NM_017915</b> | 668.112   | 898.507   | <b>AK024648</b>  | 5467.438  |
| 3250.207  | <b>AK024534</b>   | 851.442   | 762.952   | <b>AL050097</b>  | 1111.565  | 930.943   | <b>NM_000719</b> | 412.659   |
| 900.688   | <b>AK024914</b>   | 4595.477  | 4881.16   | <b>AK021513</b>  | 644.125   | 786.706   | <b>NM_003459</b> | 2655.207  |
| 863.28    | <b>BC030949</b>   | 3875.283  | 3592.562  | <b>NM_003579</b> | 2588.21   | 3713.155  | <b>AB032526</b>  | 199.664   |
| 1218.856  | <b>AF116615</b>   | 1645.995  | 1209.718  | <b>AL049283</b>  | 1562.66   | 2311.076  | <b>NM_000171</b> | 1020.407  |
| 5906.377  | <b>U17636</b>     | 40383.617 | 38590.25  | <b>M33197</b>    | 56935.223 | 55316.48  | <b>AL354615</b>  | 841.632   |
| 1217.54   | <b>NM_018546</b>  | 6463.545  | 7461.354  | <b>NM_002401</b> | 20467.275 | 27979.693 | <b>NM_013349</b> | 18533.293 |
| 3079.587  | <b>U52699</b>     | 11214.496 | 12446.132 | <b>NM_001274</b> | 1523.215  | 1554.663  | <b>NM_003705</b> | 1889.388  |
| 5812.151  | <b>S71613</b>     | 817.149   | 505.902   | <b>NM_003913</b> | 1066.335  | 990.435   | <b>NM_006861</b> | 887.132   |
| 1486.642  | <b>AJ011910</b>   | 17305.01  | 18211.016 | <b>NM_002227</b> | 1885.382  | 1444.917  | <b>NM_005829</b> | 1651.751  |
| 3673.835  | <b>AK024378</b>   | 1010.391  | 827.63    | <b>NM_007199</b> | 2646.855  | 2773.128  | <b>NM_000466</b> | 769.67    |
| 961.622   | <b>NM_014026</b>  | 3148.858  | 1965.46   | <b>NM_006243</b> | 2777.235  | 2235.618  | <b>NM_015908</b> | 9495.795  |
| 2093.525  | <b>D61703</b>     | 15723.343 | 9827.213  | <b>M33197</b>    | 62728.035 | 58123.871 | <b>NM_000896</b> | 428.642   |
| 495.894   | <b>unknown (9</b> | 1985.325  | 2563.952  | <b>AJ011129</b>  | 946.907   | 1107.927  | <b>AB040672</b>  | 1047.678  |
| 2467.45   | <b>AF086198</b>   | 13744.983 | 15990.806 | <b>NM_006387</b> | 2376.359  | 3477.978  | <b>NM_002192</b> | 902.733   |
| 695.109   | <b>AL137382</b>   | 26324.377 | 30223.281 | <b>NM_005646</b> | 1309.303  | 1154.868  | <b>NM_005491</b> | 2626.423  |
| 907.944   | <b>AK024599</b>   | 5946.92   | 7036.845  | <b>NM_006639</b> | 1958.993  | 1949.305  | <b>NM_003869</b> | 1857.25   |
| 20282.842 | <b>AK024928</b>   | 336.214   | 577.438   | <b>BI767871</b>  | 1294.561  | 1026.249  | <b>AK025599</b>  | 379.525   |
| 1328.897  | <b>NM_014450</b>  | 1372.832  | 1678.37   | <b>AA115473</b>  | 2226.296  | 2980.296  | <b>X63417</b>    | 4447.321  |
| 443.75    | <b>NM_017991</b>  | 919.442   | 984.369   | <b>AA872397</b>  | 3359.883  | 3310.269  | <b>S94539</b>    | 16041.055 |
| 559.585   | <b>L37198</b>     | 3982.336  | 3504.985  | <b>AA709414</b>  | 2027.04   | 3985.497  | <b>NM_006402</b> | 473.326   |
| 9533.713  | <b>U67822</b>     | 1001.854  | 878.823   | <b>D12676</b>    | 1426.368  | 1597.26   | <b>NM_005785</b> | 1600.254  |
| 881.389   | <b>AK021921</b>   | 486.23    | 551.355   | <b>BC012593</b>  | 1027.96   | 853.036   | <b>NM_018248</b> | 1705.802  |

|           |                  |           |           |                   |           |           |                  |          |
|-----------|------------------|-----------|-----------|-------------------|-----------|-----------|------------------|----------|
| 5427.118  | <b>AK025431</b>  | 1243.239  | 2543.407  | <b>NM_000939</b>  | 11479.252 | 10195.902 | <b>AK001695</b>  | 4730.921 |
| 851.772   | <b>AK023662</b>  | 848.231   | 974.323   | <b>NM_004295</b>  | 11681.731 | 8572.319  | <b>NM_017886</b> | 2315.637 |
| 1485.247  | <b>AF086274</b>  | 31773.451 | 29007.334 | <b>H-X 028121</b> | 1441.518  | 2077.532  | <b>NM_006252</b> | 1220.964 |
| 477.738   | <b>AK023682</b>  | 1061.371  | 957.045   | <b>U75898</b>     | 2473.656  | 2747.481  | <b>NM_001721</b> | 414.433  |
| 5755.215  | <b>AK024024</b>  | 1779.583  | 2358.485  | <b>M29039</b>     | 949.472   | 1301.847  | <b>NM_014397</b> | 4172.087 |
| 3278.123  | <b>AF000991</b>  | 1107.891  | 1296.505  | <b>M59815</b>     | 760.119   | 1137.645  | <b>AB023182</b>  | 696.09   |
| 914.325   | <b>AK000685</b>  | 17201.336 | 11062.804 | <b>AK075081</b>   | 1905.185  | 1958.358  | <b>NM_003607</b> | 824.674  |
| 1626.932  | <b>D28381</b>    | 13746.057 | 20298.125 | <b>NM_000895</b>  | 4094.911  | 2400.789  | <b>NM_006575</b> | 1221.053 |
| 437.61    | <b>BE706519</b>  | 628.383   | 925.369   | <b>NM_003820</b>  | 10696.911 | 7899.315  | <b>NM_013254</b> | 2729.356 |
| 453.126   | <b>AF130064</b>  | 31230.316 | 33333.863 | <b>NM_015915</b>  | 841.889   | 857.702   | <b>NM_000437</b> | 6521.608 |
| 506.885   | <b>U17624</b>    | 926.627   | 1103.059  | <b>M33197</b>     | 42168.066 | 49286.57  | <b>AB046819</b>  | 4162.726 |
| 844.872   | <b>D16988</b>    | 51768.98  | 52678.031 | <b>NM_016518</b>  | 2172.96   | 2008.544  | <b>NM_006090</b> | 2709.517 |
| 987.108   | <b>AK001959</b>  | 5155.8    | 6086.663  | <b>NM_006185</b>  | 4351.536  | 3602.193  | <b>NM_002900</b> | 3769.909 |
| 6451.904  | <b>U36217</b>    | 1754.526  | 1670.649  | <b>NM_014800</b>  | 572.019   | 777.01    | <b>NM_006851</b> | 4330.302 |
| 1972.83   | <b>AL389880</b>  | 2012.123  | 2222.879  | <b>NM_001557</b>  | 731.394   | 1137.951  | <b>H99588</b>    | 1112.539 |
| 37942.59  | <b>AL157452</b>  | 4218.464  | 6452.283  | <b>AF147311</b>   | 1741.082  | 1568.836  | <b>X00588</b>    | 525.107  |
| 3268.249  | <b>AK024155</b>  | 19275.932 | 21019.154 | <b>NM_002131</b>  | 27056.922 | 20895.594 | <b>A1359037</b>  | 3187.131 |
| 1162.829  | <b>AL359334</b>  | 13637.714 | 13335.226 | <b>NM_017927</b>  | 1907.819  | 1525.057  | <b>B1754285</b>  | 413.145  |
| 831.377   | <b>AK027095</b>  | 1263.697  | 1677.853  | <b>NM_006733</b>  | 422.841   | 974.666   | <b>X15998</b>    | 2326.748 |
| 394.193   | <b>AF062097</b>  | 1401.333  | 1265.182  | <b>NM_002039</b>  | 1094.15   | 1263.37   | <b>M76482</b>    | 395.743  |
| 840.28    | <b>NM_019847</b> | 462.169   | 552.151   | <b>NM_014047</b>  | 9109.122  | 13672.61  | <b>NM_001883</b> | 1403.751 |
| 9611.199  | <b>D17093</b>    | 20784.072 | 15531.919 | <b>AK022901</b>   | 1563.397  | 1746.358  | <b>NM_004628</b> | 724.82   |
| 1953.786  | <b>AK022784</b>  | 950.184   | 1241.953  | <b>NM_001508</b>  | 1212.129  | 1159.549  | <b>L31785</b>    | 535.431  |
| 1196.504  | <b>AL117521</b>  | 3980.909  | 3731.182  | <b>AF037332</b>   | 1561.596  | 2330.325  | <b>H-M 69043</b> | 1793.016 |
| 674.191   | <b>NM_000731</b> | 376.6     | 186.741   | <b>AB040912</b>   | 6373.762  | 9569.344  | <b>AF077374</b>  | 552.825  |
| 4550.8    | <b>AK021913</b>  | 4372.584  | 5021.825  | <b>NM_000813</b>  | 379.04    | 421.837   | <b>U43901</b>    | 425.567  |
| 2630.502  | <b>AL137489</b>  | 22409.516 | 20322.912 | <b>NM_018896</b>  | 884.956   | 719.217   | <b>M59828</b>    | 2696.226 |
| 1655.771  | <b>AF009311</b>  | 3320.374  | 2821.775  | <b>AJ300465</b>   | 1753.551  | 1410.46   | <b>NM_016134</b> | 940.521  |
| 598.425   | <b>S73397</b>    | 951.839   | 848.626   | <b>X86400</b>     | 689.031   | 680.651   | <b>AJ010482</b>  | 1923.221 |
| 4205.429  | <b>AL050219</b>  | 541.108   | 717.979   | <b>NM_000810</b>  | 1678.176  | 1598.884  | <b>NM_005445</b> | 2633.242 |
| 1099.002  | <b>AK024433</b>  | 4273.415  | 4979.542  | <b>AF069307</b>   | 1555.073  | 1507.059  | <b>NM_014899</b> | 729.327  |
| 2524.158  | <b>U82321</b>    | 838.185   | 943.834   | <b>M33197</b>     | 59057.043 | 55731.949 | <b>NM_003630</b> | 1116.205 |
| 3717.418  | <b>AK023856</b>  | 842.018   | 1099.858  | <b>U92978</b>     | 1392.075  | 1728.911  | <b>NM_000046</b> | 1173.431 |
| 239.285   | <b>AL050376</b>  | 1036.636  | 1727.018  | <b>NM_013389</b>  | 3535.712  | 3564.705  | <b>NM_003219</b> | 871.658  |
| 3372.149  | <b>AL359652</b>  | 1679.74   | 1937.859  | <b>NM_018034</b>  | 5107.884  | 6108.405  | <b>NM_006709</b> | 1949.924 |
| 3568.136  | <b>AK022423</b>  | 1525.436  | 2049.279  | <b>M33197</b>     | 69116.609 | 71620.641 | <b>NM_000612</b> | 2223.31  |
| 1130.925  | <b>AF088021</b>  | 5243.126  | 6594.848  | <b>AB037831</b>   | 1107.634  | 1530.759  | <b>NM_004257</b> | 9160.336 |
| 703.672   | <b>BF509267</b>  | 8803.669  | 10323.059 | <b>NM_012103</b>  | 10334.74  | 9242.522  | <b>NM_000683</b> | 1467.803 |
| 944.124   | <b>NM_002455</b> | 6325.05   | 6644.76   | <b>AL122077</b>   | 13382.123 | 15279.317 | <b>NM_003629</b> | 910.198  |
| 1482.517  | <b>NM_002959</b> | 20441.432 | 18253.143 | <b>NM_006422</b>  | 1060.865  | 1106.668  | <b>NM_005901</b> | 3440.185 |
| 385.74    | <b>AK000899</b>  | 15254.582 | 23648.518 | <b>M33197</b>     | 65991.68  | 70264.852 | <b>NM_004248</b> | 497.056  |
| 5778.657  | <b>CY3Cy5</b>    | 338.688   | 118.556   | <b>NM_007259</b>  | 2101.988  | 4764.782  | <b>NM_000959</b> | 121.743  |
| 663.016   | <b>AW300857</b>  | 8284.204  | 8371.518  | <b>NM_018402</b>  | 1069.082  | 1155.997  | <b>NM_001313</b> | 778.962  |
| 1093.999  | <b>H85962</b>    | 14759.579 | 9751.431  | <b>NM_018009</b>  | 985.555   | 1011.8    | <b>NM_004796</b> | 574.486  |
| 1334.572  | <b>BG742446</b>  | 1046.101  | 708.523   | <b>M33197</b>     | 53581.121 | 52256.016 | <b>NM_000435</b> | 2652.254 |
| 763.171   | <b>AA864554</b>  | 5178.396  | 35380.648 | <b>NM_002401</b>  | 16323.124 | 13222.026 | <b>NM_001842</b> | 6841.756 |
| 784.878   | <b>X66945</b>    | 1077.644  | 2003.079  | <b>NM_001274</b>  | 923.371   | 1216      | <b>AB017169</b>  | 601.011  |
| 896.446   | <b>X12830</b>    | 10428.004 | 15533.314 | <b>NM_003913</b>  | 1176.119  | 1488.103  | <b>AL080170</b>  | 939.821  |
| 3796.2    | <b>U00482</b>    | 1118.676  | 1078.972  | <b>NM_002227</b>  | 2361.444  | 1525.031  | <b>AB039903</b>  | 2137.1   |
| 35326.855 | <b>K01904</b>    | 16899.438 | 4310.847  | <b>NM_007199</b>  | 3851.719  | 2515.863  | <b>NM_000542</b> | 7386.704 |
| 815.175   | <b>BE538886</b>  | 1266.822  | 1602.089  | <b>AB014530</b>   | 5101.65   | 3807.532  | <b>NM_003705</b> | 633.415  |
| 1589.819  | <b>NM_002228</b> | 756.865   | 1158.411  | <b>M33197</b>     | 63232.012 | 54972.004 | <b>NM_006861</b> | 699.546  |
| 8981.254  | <b>M57650</b>    | 3768.614  | 3816.251  | <b>NM_005989</b>  | 2313.442  | 2051.37   | <b>NM_005829</b> | 676.533  |

|           |                  |           |           |                  |           |           |                  |           |
|-----------|------------------|-----------|-----------|------------------|-----------|-----------|------------------|-----------|
| 1926.245  | <b>BC023978</b>  | 567.698   | 385.024   | <b>AB014607</b>  | 4237.511  | 3192.578  | <b>NM_000466</b> | 588.413   |
| 621.979   | <b>M21302</b>    | 1598.081  | 1379.194  | <b>AF134401</b>  | 1484.584  | 990.689   | <b>NM_015908</b> | 7806.422  |
| 857.47    | <b>NM_016346</b> | 2117.148  | 1784.457  | <b>NM_020151</b> | 9782.828  | 9691.768  | <b>AK022600</b>  | 1423.686  |
| 755.722   | <b>SR2</b>       | 49968.855 | 58440.918 | <b>NM_005891</b> | 33486.996 | 21921.273 | <b>AK023142</b>  | 1013.824  |
| 543.851   | <b>SR4</b>       | 15750.174 | 15980.797 | <b>NM_001645</b> | 2298.995  | 4972.366  | <b>U61740</b>    | 3947.965  |
| 1590.458  | <b>SR6</b>       | 2349.26   | 2768.46   | <b>NM_003956</b> | 1614.951  | 2321.069  | <b>NM_006409</b> | 51869     |
| 2532.296  | <b>SR8</b>       | 7878.544  | 31176.613 | <b>M33197</b>    | 57452.148 | 52543.426 | <b>AB049054</b>  | 1616.184  |
| 315.791   | <b>SR10</b>      | 24758.074 | 6468.648  | <b>NM_003500</b> | 2523.962  | 3618.752  | <b>NM_015071</b> | 1141.4    |
| 1092.195  | <b>CY3Cy5</b>    | 1205.794  | 147.003   | <b>NM_014317</b> | 2479.258  | 4560.278  | <b>NM_013227</b> | 979.265   |
| 1849.735  | <b>NM_001525</b> | 4679.44   | 3364.516  | <b>L09234</b>    | 4026.021  | 5728.282  | <b>AF027205</b>  | 8392.126  |
| 1012.933  | <b>NM_006055</b> | 2331.175  | 2081.502  | <b>NM_017881</b> | 2245.402  | 2676.061  | <b>AF075012</b>  | 1509.49   |
| 5875.627  | <b>NM_004296</b> | 628.953   | 514.916   | <b>M33197</b>    | 58069.984 | 55751.816 | <b>NM_001570</b> | 989.513   |
| 523.451   | <b>NM_005972</b> | 654.425   | 464.397   | <b>NM_017634</b> | 4768.964  | 6310.184  | <b>NM_000589</b> | 1575.493  |
| 16156.575 | <b>NM_001060</b> | 2905.007  | 1842.499  | <b>NM_017743</b> | 775.507   | 768.906   | <b>NM_016546</b> | 8823.271  |
| 1933.666  | <b>NM_018841</b> | 879.68    | 590.427   | <b>NM_000300</b> | 3172.495  | 3200.92   | <b>AF309653</b>  | 5503.701  |
| 1669.254  | <b>AL133105</b>  | 1731.571  | 1699.823  | <b>M33197</b>    | 68139.805 | 72113.391 | <b>NM_002620</b> | 4781.918  |
| 887.255   | <b>AK022859</b>  | 860.305   | 1092.717  | <b>AV756917</b>  | 3212.977  | 2624.341  | <b>S79267</b>    | 758.334   |
| 1628.361  | <b>NM_014864</b> | 5673.944  | 6062.964  | <b>NM_018380</b> | 6443.18   | 6589.951  | <b>NM_001816</b> | 875.213   |
| 6840.325  | <b>NM_003728</b> | 4472.824  | 4395.326  | <b>NM_012070</b> | 1459.177  | 1979.418  | <b>NM_003784</b> | 20905.107 |
| 1613.215  | <b>NM_014352</b> | 6469.761  | 4063.267  | <b>NM_019038</b> | 696.764   | 784.127   | <b>NM_000195</b> | 10961.786 |
| 8678.045  | <b>NM_012481</b> | 1240.838  | 866.174   | <b>AF183423</b>  | 2136.053  | 1192.9    | <b>NM_006575</b> | 964.016   |
| 853.672   | <b>L09102</b>    | 9203.555  | 7367.987  | <b>AB011146</b>  | 1219.464  | 1376.087  | <b>NM_013254</b> | 1691.975  |
| 570.992   | <b>U68488</b>    | 669.003   | 1374.934  | <b>NM_005326</b> | 15371.778 | 18957.592 | <b>NM_000437</b> | 2443.227  |
| 608.148   | <b>NM_016247</b> | 1912.443  | 2170.036  | <b>NM_014069</b> | 944.346   | 1278.962  | <b>AB046819</b>  | 2452.408  |
| 880.005   | <b>NM_003323</b> | 8918.886  | 6014.72   | <b>AB035130</b>  | 2407.76   | 3597.832  | <b>NM_006090</b> | 2010.18   |
| 3000.784  | <b>BG685310</b>  | 1282.952  | 982.517   | <b>NM_003359</b> | 1677.194  | 2606.255  | <b>NM_002900</b> | 2286.474  |
| 451.961   | <b>NM_018668</b> | 1390.479  | 879.955   | <b>M33197</b>    | 17386.359 | 24521.49  | <b>NM_004910</b> | 1047.626  |
| 13410.551 | <b>NM_005282</b> | 1354.905  | 1823.705  | <b>AF119917</b>  | 804.896   | 799.405   | <b>AB013452</b>  | 775.379   |
| 568.345   | <b>NM_001736</b> | 991.601   | 902.925   | <b>AL050097</b>  | 454.969   | 522.987   | <b>M93107</b>    | 2960.984  |
| 1022.925  | <b>AB028949</b>  | 1397.502  | 607.032   | <b>NM_003579</b> | 1562.959  | 1940.008  | <b>BC001479</b>  | 3895.383  |
| 817.248   | <b>NM_004101</b> | 616.189   | 1062.633  | <b>AL049283</b>  | 1092.205  | 1227.494  | <b>NM_002461</b> | 9728.42   |
| 2200.158  | <b>NM_002995</b> | 18771.465 | 17450.65  | <b>M33197</b>    | 63912.324 | 59603.949 | <b>NM_005771</b> | 3514.588  |
| 1437.417  | <b>NM_015978</b> | 1557.804  | 1925.139  | <b>X99659</b>    | 24143.492 | 22505.326 | <b>AB032986</b>  | 10895.798 |
| 553.546   | <b>NM_003810</b> | 2456.461  | 3561.455  | <b>NM_015416</b> | 2118.864  | 1636.218  | <b>NM_017528</b> | 11029.101 |
| 1871.599  | <b>NM_014443</b> | 2088.658  | 1426.944  | <b>NM_003899</b> | 1509.45   | 1360.153  | <b>NM_016032</b> | 5674.131  |
| 1131.156  | <b>NM_005212</b> | 3481.344  | 4234.974  | <b>X99662</b>    | 1204.798  | 1076.333  | <b>NM_014324</b> | 47969.449 |
| 890.686   | <b>M14584</b>    | 3462.88   | 2849.81   | <b>NM_003473</b> | 34971.832 | 32897.73  | <b>NM_001687</b> | 12160.106 |
| 618.756   | <b>NM_006419</b> | 849.928   | 412.426   | <b>NM_014325</b> | 1043.695  | 1258.151  | <b>AK026374</b>  | 1204.374  |
| 395.502   | <b>AB020676</b>  | 576.54    | 342.637   | <b>M33197</b>    | 59858.109 | 54531.398 | <b>NM_001169</b> | 1038.954  |
| 730.009   | <b>AK024715</b>  | 695.501   | 654.529   | <b>NM_006016</b> | 45811.332 | 46714.867 | <b>AK024648</b>  | 6569.228  |
| 9181.823  | <b>U90942</b>    | 54054.68  | 45954.934 | <b>NM_001242</b> | 3356.961  | 4245.144  | <b>NM_000719</b> | 373.15    |
| 1701.796  | <b>NM_018360</b> | 1496.135  | 1176.838  | <b>NM_014891</b> | 5009.133  | 7285.617  | <b>NM_003459</b> | 3434.184  |
| 6871.179  | <b>AL365415</b>  | 5500.847  | 5176.954  | <b>NM_013392</b> | 4827.04   | 6229.901  | <b>NM_000171</b> | 977.256   |
| 552.476   | <b>L29147</b>    | 11444.47  | 8864.4    | <b>M33197</b>    | 56685.188 | 58442.465 | <b>AL354615</b>  | 740.395   |
| 494.825   | <b>NM_020228</b> | 1323.774  | 749.478   | <b>NM_003236</b> | 684.638   | 726.485   | <b>NM_013349</b> | 21187.172 |
| 500.68    | <b>NM_003676</b> | 10038.185 | 13126.117 | <b>NM_003458</b> | 903.355   | 613.66    | <b>AJ010482</b>  | 1120.675  |
| 1359.62   | <b>AF113007</b>  | 1644.43   | 2733.423  | <b>AF052692</b>  | 1114.844  | 1109.729  | <b>NM_000896</b> | 625.374   |
| 749.323   | <b>NM_000688</b> | 6117.149  | 4236.281  | <b>NM_002820</b> | 822.862   | 832.452   | <b>AB040672</b>  | 3506.147  |
| 674.919   | <b>U39573</b>    | 794.833   | 968.915   | <b>NM_002354</b> | 847.867   | 1267.016  | <b>NM_002192</b> | 1799.168  |
| 2608.576  | <b>D82061</b>    | 1441.527  | 1327.679  | <b>AF062739</b>  | 1088.31   | 1311.305  | <b>NM_005491</b> | 2872.481  |
| 7462.853  | <b>AJ293009</b>  | 1290.475  | 1298.874  | <b>NM_006602</b> | 1707.826  | 1589.979  | <b>NM_003869</b> | 2590.615  |
| 259.64    | <b>NM_000374</b> | 2088.692  | 2345.872  | <b>M33197</b>    | 56428.043 | 55515.051 | <b>X63417</b>    | 2891.228  |
| 861.317   | <b>NM_000502</b> | 3158.134  | 3716.43   | <b>AL079314</b>  | 2962.653  | 2070.11   | <b>S94539</b>    | 15836.119 |

|           |           |           |           |           |           |           |           |           |
|-----------|-----------|-----------|-----------|-----------|-----------|-----------|-----------|-----------|
| 666.7     | NM_001359 | 13461.184 | 19021.016 | NM_001260 | 738.357   | 671.641   | NM_006402 | 592.009   |
| 551.321   | NM_001696 | 13034.843 | 16650.406 | NM_001950 | 2666.289  | 2228.637  | NM_005785 | 2021.621  |
| 10782.652 | NM_004975 | 1610.349  | 1371.741  | AK026364  | 471.207   | 733.345   | NM_018248 | 1789.195  |
| 448.295   | D87445    | 6592.275  | 5846.951  | M33197    | 61198.035 | 62728.57  | AK001695  | 5458.44   |
| 767.679   | NM_000238 | 3094.148  | 2007.633  | NM_004331 | 4313.261  | 6856.632  | NM_017886 | 2815.626  |
| 637.673   | NM_002247 | 534.206   | 480.727   | NM_015996 | 1227.074  | 1519.076  | NM_006252 | 1598.667  |
| 473.097   | NM_004980 | 7958.039  | 6186.668  | NM_015703 | 5204.296  | 14803.355 | NM_014397 | 4804.886  |
| 544.803   | AB011094  | 9762.401  | 9654.098  | AB018337  | 1178.483  | 1638.382  | AB023182  | 936.448   |
| 1700.141  | NM_003224 | 1335.965  | 1490.214  | NM_014489 | 632.698   | 714.331   | NM_003607 | 804.595   |
| 594.899   | NM_001658 | 55874.211 | 51474.727 | AK025273  | 2397.424  | 2161.899  | AL080170  | 501.182   |
| 450.322   | AK021761  | 4897.961  | 6741.843  | M33197    | 45706.68  | 51720.645 | AB039903  | 1249.338  |
| 562.413   | AK024536  | 525.721   | 478.968   | NM_002205 | 3526.6    | 3613.328  | NM_000542 | 4822.369  |
| 4017.638  | NM_001483 | 1225.31   | 363.15    | M33197    | 61033.852 | 58037.254 | NM_006851 | 539.077   |
| 453.739   | NM_018973 | 11881.457 | 6616.244  | NM_001836 | 1464.559  | 1015.881  | AB001328  | 585.713   |
| 46056.488 | NM_002591 | 4486.097  | 3930.393  | NM_001911 | 32214.586 | 21814.426 | H99588    | 1490.88   |
| 484.955   | NM_020216 | 5299.324  | 8012.294  | U68382    | 872.55    | 882.304   | X00588    | 622.514   |
| 865.316   | AK021860  | 1235.42   | 1558.633  | NM_003969 | 1071.365  | 1489.016  | A1359037  | 1812.516  |
| 347.218   | AL137266  | 2851.128  | 2646.375  | NM_004651 | 820.14    | 1390.651  | B1754285  | 521.095   |
| 1292.146  | NM_016457 | 1054.72   | 1145.317  | M33197    | 41072.07  | 56784.824 | X15998    | 2673.45   |
| 366.859   | NM_005057 | 1211.553  | 1162.06   | NM_017569 | 4568.295  | 6155.001  | M76482    | 559.973   |
| 16650.209 | AF143321  | 511.288   | 439.485   | NM_002906 | 1463.61   | 1370.89   | NM_001883 | 1815.291  |
| 8000.041  | AB046842  | 1061.28   | 965.174   | AK024480  | 1582.594  | 1699.03   | NM_004628 | 916.462   |
| 1932.144  | NM_004850 | 1879.992  | 1817.425  | Y13871    | 9781.631  | 12513.855 | L31785    | 389.415   |
| 630.766   | NM_002822 | 3511.675  | 3704.769  | AL137725  | 4358.106  | 5370.927  | H-M 69043 | 1976.001  |
| 410.002   | BF306955  | 1065.493  | 878.556   | M33197    | 51244.535 | 58389.074 | AF077374  | 973.551   |
| 1513.319  | NM_001394 | 8594.194  | 8182.404  | AJ008151  | 8852.893  | 9993.349  | U43901    | 525.63    |
| 975.792   | NM_018441 | 6551.819  | 6933.163  | AK024149  | 848.367   | 513.53    | X59065    | 445.012   |
| 1382.602  | NM_001609 | 1191.607  | 1385.146  | M33197    | 52038.262 | 53188.383 | M59828    | 3188.936  |
| 587.038   | BE733234  | 467.766   | 500.127   | NM_014009 | 1387.656  | 978.12    | AF309653  | 3630.992  |
| 2782.531  | NM_006710 | 728.353   | 1307.171  | NM_004091 | 1263.043  | 1200.653  | NM_002620 | 2496.217  |
| 21743.336 | NM_003323 | 9699.986  | 6465.99   | X74070    | 64087.754 | 56086.781 | S79267    | 455.763   |
| 983.756   | BG685310  | 1558.625  | 1137.998  | AF027219  | 908.338   | 653.549   | NM_001816 | 309.074   |
| 31809.42  | AW300857  | 11383.844 | 8707.017  | NM_006333 | 2419.964  | 3279.274  | NM_003784 | 9459.771  |
| 852.055   | H85962    | 14512.255 | 10386.483 | M33197    | 53436.23  | 55654.453 | NM_000195 | 6122.179  |
| 2939.985  | BG742446  | 1062.92   | 1155.327  | NM_002898 | 2406.049  | 2414.647  | NM_005445 | 4703.956  |
| 487.655   | AA864554  | 5679.525  | 40867.258 | AK022749  | 1872.282  | 2215.493  | NM_014899 | 393.887   |
| 809.159   | X66945    | 1398.86   | 2257.736  | BF031409  | 5138.51   | 5598.675  | NM_003630 | 1218.198  |
| 245.234   | X12830    | 11286.729 | 19042.646 | NM_007043 | 1388.51   | 2298.292  | NM_000046 | 610.105   |
| 376.066   | U00482    | 1026.674  | 1408.195  | BE378791  | 923.748   | 1052.506  | NM_003219 | 690.911   |
| 7065.889  | K01904    | 17827.943 | 4764.236  | NM_012322 | 2953.472  | 4493.224  | NM_006709 | 1319.113  |
| 501.594   | BE538886  | 877.931   | 838.425   | M33197    | 37275.066 | 54225.055 | NM_000612 | 2695.834  |
| 654.341   | NM_002228 | 934.165   | 859.459   | NM_004889 | 26338.256 | 50134.184 | NM_004257 | 10068.304 |
| 689.512   | M57650    | 4102.435  | 3896.757  | AK025314  | 1851.937  | 2283.57   | NM_003629 | 1085.875  |
| 530.85    | BC023978  | 440.415   | 313.346   | NM_002109 | 1649.807  | 2544.223  | NM_005901 | 4369.212  |
| 4396.004  | M21302    | 1497.4    | 1349.075  | NM_000984 | 69864.359 | 79229.266 | NM_004248 | 753.327   |
| 14214.023 | NM_016346 | 2238.679  | 2180.546  | NM_002453 | 5103.741  | 3484.762  | NM_001313 | 901.631   |
| 9475.695  | AK024865  | 646.886   | 998.397   | AK000780  | 7864.249  | 6541.902  | NM_004796 | 657.089   |
| 835.765   | NM_007210 | 433.908   | 634.306   | AK026721  | 1405.102  | 1120.6    | NM_000435 | 3358.368  |
| 952.587   | U90942    | 45879.156 | 21191.854 | AK023027  | 1776.525  | 1297.575  | NM_001842 | 11094.99  |
| 1482.426  | NM_014942 | 226.466   | 1266.189  | AB002348  | 30195.686 | 34153.617 | NM_000719 | 496.805   |
| 544.39    | NM_018360 | 1522.853  | 1610.462  | M33197    | 28050.541 | 36022.543 | NM_003459 | 2751.247  |
| 845.88    | L29147    | 17900.084 | 14626.306 | AK026043  | 2664.347  | 3920.674  | AB032526  | 189.111   |
| 1305.751  | NM_001525 | 17705.707 | 18144.455 | NM_005006 | 3978.897  | 6021.185  | AL354615  | 554.72    |

|           |           |           |           |           |           |           |           |           |
|-----------|-----------|-----------|-----------|-----------|-----------|-----------|-----------|-----------|
| 1786.175  | NM_006055 | 2986.015  | 2418.305  | AK027033  | 1880.782  | 1773.664  | NM_013349 | 12413.687 |
| 572.334   | NM_004296 | 915.758   | 899.323   | NM_000106 | 714.633   | 1051.029  | NM_003705 | 1556.607  |
| 644.481   | NM_005048 | 649.838   | 790.69    | NM_003000 | 9978.019  | 13599.128 | NM_006861 | 616.336   |
| 728.87    | NM_005972 | 528.111   | 628.086   | NM_002495 | 17687.314 | 16595.559 | NM_005829 | 613.212   |
| 603.859   | NM_001060 | 2882.775  | 3144.549  | M33197    | 54295.375 | 55299.535 | NM_000466 | 507.449   |
| 433.029   | NM_018841 | 1000.001  | 904.479   | NM_016284 | 1827.41   | 1445.56   | NM_015908 | 8158.612  |
| 2226.641  | NM_005226 | 500.507   | 358.443   | NM_014593 | 1406.698  | 1837.235  | AK022600  | 1931.07   |
| 4312.006  | AL133105  | 1726.78   | 1891.833  | NM_006833 | 5198.796  | 8180.556  | AK023142  | 640.64    |
| 941.359   | AK022859  | 1016.127  | 1089.654  | U37690    | 12626.328 | 25784.771 | U61740    | 6664.532  |
| 402.042   | NM_000214 | 344.544   | 427.78    | NM_005120 | 1274.732  | 1022.589  | NM_006409 | 49080.848 |
| 327.38    | NM_014864 | 5722.685  | 5049.677  | AB029012  | 12926.772 | 17095.67  | AB049054  | 1487.117  |
| 295.903   | NM_003728 | 3940.818  | 3112.895  | M33197    | 56638.328 | 56948.512 | NM_015071 | 1148.391  |
| 614.127   | NM_014352 | 4807.346  | 2711.298  | AJ010278  | 1467.768  | 2597.294  | NM_013227 | 912.643   |
| 2270.904  | NM_012481 | 1156.012  | 1186.273  | NM_006299 | 1925.046  | 1744.034  | Z83803    | 963.067   |
| 2392.459  | L09102    | 7980.988  | 7787.12   | AF060936  | 5443.25   | 4955.934  | AF027205  | 10202.796 |
| 1136.743  | U68488    | 739.079   | 1492.294  | NM_005568 | 601.69    | 1339.247  | AF075012  | 1390.571  |
| 460.071   | NM_016247 | 1941.992  | 2114.493  | NM_018167 | 913.714   | 933.073   | NM_001570 | 1179.724  |
| 330.402   | AB011094  | 8696.525  | 11800.628 | AL050088  | 1321.333  | 1222.552  | NM_015658 | 625.164   |
| 1436.662  | NM_003224 | 1434.206  | 2514.605  | AK024939  | 2716.187  | 2914.283  | NM_000589 | 2394.358  |
| 781.942   | NM_001658 | 55135.859 | 50463.746 | AK001561  | 3784.826  | 2967.946  | NM_016546 | 11395.369 |
| 689.371   | NM_006827 | 17813.875 | 18556.273 | AB007880  | 2408.707  | 2239.23   | NM_017886 | 1978.85   |
| 314.885   | AK021761  | 5593.243  | 8614.74   | AK024950  | 1008.232  | 1109.4    | NM_006252 | 850.431   |
| 2013.39   | AK024536  | 1051.383  | 1025.455  | M33197    | 65277.863 | 56461.527 | NM_014397 | 1957.825  |
| 738.752   | NM_018668 | 5367.363  | 5779.272  | NM_014146 | 10648.501 | 10406.208 | NM_003607 | 547.173   |
| 39850.578 | NM_004227 | 1047.498  | 856.484   | AF147356  | 1902.089  | 1666.688  | NM_006575 | 1004.483  |
| 8929.101  | NM_005282 | 1386.601  | 1633.144  | NM_018843 | 4878.433  | 5110.148  | NM_013254 | 1439.487  |
| 1753.519  | NM_001736 | 674.878   | 901.346   | M33197    | 54052.473 | 55785.551 | NM_000437 | 2527.417  |
| 17473.621 | AB028949  | 1337.372  | 851.208   | AL109782  | 3367.031  | 4709.339  | AB046819  | 3242.749  |
| 6879.322  | AL137580  | 648.879   | 682.369   | AF086225  | 896.118   | 1195.626  | NM_006090 | 2341.6    |
| 272.258   | NM_004101 | 649.678   | 1374.979  | NM_005844 | 7745.585  | 9007.524  | NM_002900 | 3102.346  |
| 1424.978  | NM_002995 | 20749.605 | 20972.197 | AK024941  | 4159.906  | 5499.152  | NM_004910 | 1359.136  |
| 7758.452  | NM_015978 | 1437.421  | 1494.357  | AF056434  | 1571.468  | 1572.563  | AB013452  | 377.766   |
| 1074.962  | NM_003810 | 2312.532  | 2675.761  | AF086199  | 877.218   | 1069.108  | M93107    | 4441.543  |
| 1634.823  | NM_014443 | 1829.329  | 1050.731  | AK025489  | 2093.265  | 2717.705  | BC001479  | 6088.531  |
| 525.464   | NM_005212 | 3203.824  | 2995.5    | AB075853  | 591.941   | 702.827   | NM_002461 | 10622.804 |
| 680.433   | NM_006419 | 1076.389  | 445.756   | M33197    | 61763.379 | 55716.66  | NM_005771 | 6324.582  |
| 618.128   | AB020676  | 509.121   | 366.076   | NM_018126 | 899.635   | 1283.138  | AB032986  | 21838.465 |
| 568.639   | AK024715  | 822.66    | 1035.001  | AK024506  | 2529.458  | 2358.188  | NM_017528 | 15880.952 |
| 2411.395  | BF306955  | 1263.036  | 2143.876  | NM_014179 | 1151.271  | 1293.409  | NM_016032 | 7059.153  |
| 7898.441  | NM_001609 | 1332.387  | 1748.817  | AF086326  | 5077.565  | 10473.789 | NM_014324 | 49372.445 |
| 496.102   | BE733234  | 956.583   | 1530.796  | AF147409  | 1126.349  | 1200.607  | NM_001687 | 15607.391 |
| 877.658   | NM_020228 | 2469.762  | 2917.611  | M33197    | 63185.715 | 61546.719 | AK026374  | 1183.629  |
| 1583.534  | AK024685  | 1214.608  | 849.33    | AL049937  | 1408.623  | 858.875   | NM_001169 | 1522.616  |
| 5698.604  | NM_003676 | 11539.87  | 11465.461 | AL080057  | 1684.426  | 2122.908  | AK024648  | 9419.294  |
| 579.867   | AF113007  | 1504.9    | 3646.875  | AL049287  | 2331.063  | 1074.953  | NM_000795 | 221.498   |
| 467.63    | NM_000688 | 5660.639  | 4933.806  | AL117528  | 944.423   | 1220.692  | AB037761  | 4643.834  |
| 1364.74   | U39573    | 1073.51   | 1497.565  | M33197    | 53908.676 | 56248.719 | NM_014008 | 17033.051 |
| 128.205   | D82061    | 1646.391  | 1908.201  | AK025948  | 757.249   | 1265.69   | NM_014731 | 1540.431  |
| 1229.379  | AJ293009  | 1761.492  | 1576.554  | AK000674  | 338.019   | 821.735   | AF035191  | 3808.834  |
| 1948.14   | NM_000374 | 2060.678  | 2522.373  | AJ238555  | 1078.927  | 1581.478  | NM_004058 | 623.266   |
| 425.024   | NM_000502 | 2824.787  | 3112.317  | AK025869  | 6661.083  | 9088.729  | NM_012062 | 3467.88   |
| 4229.483  | NM_001359 | 12722.251 | 15295.771 | M33197    | 50241.316 | 51967.473 | AJ010482  | 913.538   |
| 37364.863 | NM_001696 | 11986.571 | 13029.519 | AF056430  | 2140.623  | 2768.354  | NM_000896 | 655.489   |

|           |           |           |           |           |           |           |           |           |
|-----------|-----------|-----------|-----------|-----------|-----------|-----------|-----------|-----------|
| 1214.48   | NM_004975 | 1482.7    | 1134.38   | NM_014906 | 1376.929  | 1310.844  | NM_002192 | 2781.098  |
| 608.446   | D87445    | 7644.5    | 7583.907  | AF009291  | 1835.741  | 1766.726  | NM_005491 | 2925.754  |
| 6521.709  | NM_000238 | 2474.448  | 1834.878  | M33197    | 61772.184 | 54754.484 | NM_003869 | 1367.82   |
| 1040.224  | NM_002247 | 657.819   | 532.166   | AK002199  | 2636.695  | 2056.516  | X63417    | 5861.29   |
| 832.587   | NM_004980 | 6393.495  | 5040.762  | AK021662  | 1541.727  | 1283.492  | S94539    | 22983.605 |
| 593.334   | AK024865  | 881.866   | 1267.247  | AK001038  | 777.045   | 1188.828  | NM_006402 | 557.812   |
| 1050.346  | NM_007210 | 570.693   | 702.103   | AK001802  | 691.014   | 1155.208  | NM_005785 | 2436.635  |
| 7369.469  | NM_001483 | 2490.52   | 2571.5    | AK021469  | 1567.714  | 1840.971  | NM_018248 | 1614.271  |
| 4518.087  | NM_018973 | 14071.322 | 8854.26   | AK021706  | 2637.015  | 3038.091  | AK001695  | 6692.65   |
| 6836.885  | NM_002591 | 5308.075  | 5608.657  | M33197    | 59480.848 | 54524.516 | AB031547  | 767.332   |
| 847.389   | NM_020216 | 5550.821  | 7810.081  | AK026052  | 512.756   | 952.167   | AK022496  | 813.965   |
| 15150.25  | AK021860  | 1285.748  | 1244.433  | AK025387  | 1625.3    | 1931.519  | NM_002883 | 949.647   |
| 8576.117  | AB046816  | 657.468   | 519.915   | AK026701  | 960.168   | 1091.053  | NM_016150 | 2572.565  |
| 4460.657  | AL137266  | 3034.202  | 2371.563  | AJ008115  | 15470.87  | 21359.207 | U57058    | 470.204   |
| 1223.663  | NM_016457 | 735.085   | 1231.64   | AL049241  | 462.827   | 447.044   | AL137452  | 1158.874  |
| 2952.335  | NM_005057 | 1221.472  | 1086.895  | M33197    | 63627.188 | 55410.895 | NM_001347 | 2396.284  |
| 1777.869  | AB046842  | 1224.192  | 1234.557  | AF086415  | 3464.111  | 2614.134  | AK024549  | 14232.243 |
| 673.092   | NM_004850 | 1902.431  | 1854.276  | M33197    | 53732.684 | 54272.82  | NM_006338 | 5857.85   |
| 1559.449  | NM_002822 | 3550.904  | 4194.533  | AK024470  | 1590.352  | 1849.007  | NM_007164 | 4894.036  |
| 758.117   | NM_014352 | 4545.114  | 3942.086  | NM_017935 | 1359.157  | 742.614   | NM_000261 | 1406.702  |
| 366.158   | NM_012481 | 1075.919  | 1140.61   | NM_004226 | 2220.655  | 3188.701  | NM_002606 | 3558.452  |
| 1767.742  | U68488    | 1029.212  | 2756.925  | AL137436  | 1087.807  | 1247.508  | NM_002570 | 847.724   |
| 2625.824  | NM_000675 | 296.814   | 1244.467  | AK023400  | 1819.712  | 1938.546  | NM_003183 | 1299.153  |
| 6447.713  | NM_016247 | 2699.794  | 3083.574  | NM_006432 | 12265.214 | 10846.43  | NM_003585 | 597.095   |
| 2107.887  | NM_012282 | 715.108   | 552.454   | AK023897  | 389.14    | 510.048   | NM_019851 | 1570.155  |
| 3460.115  | NM_003323 | 9634.671  | 8698.778  | AF025441  | 1117.343  | 1893.419  | NM_003238 | 1280.007  |
| 9405.306  | BG685310  | 1588.906  | 1507.966  | U62823    | 2557.273  | 2842.177  | NM_018367 | 292.507   |
| 1213.799  | AW300857  | 14799.987 | 12231.14  | NM_003535 | 16572.668 | 29396.955 | NM_001363 | 5943.847  |
| 1453.672  | H85962    | 16241.043 | 12655.68  | M33197    | 61657.785 | 55089.629 | NM_014096 | 4987.218  |
| 5956.838  | BG742446  | 1966.5    | 1845.306  | AK000852  | 6911.076  | 6204.213  | NM_005706 | 1796.97   |
| 251.92    | AA864554  | 5601.275  | 46754.996 | AF251188  | 2709.126  | 3341.687  | NM_001261 | 1119.514  |
| 6056.747  | X66945    | 1210.945  | 2726.486  | AF086194  | 10069.685 | 11657.192 | NM_001977 | 494.968   |
| 916.151   | AI160703  | 561.537   | 710.062   | AK026811  | 2820.709  | 2864.095  | NM_007219 | 5152.51   |
| 709.732   | X12830    | 10151.681 | 13575.182 | M33197    | 54987.484 | 52335.98  | AK026854  | 1765.388  |
| 24466.926 | U00482    | 888.038   | 908.072   | AK023633  | 1204.022  | 1411.962  | NM_001269 | 640.129   |
| 1857.6    | K01904    | 16966.514 | 4305.526  | AF085967  | 1159.703  | 1155.379  | NM_002506 | 848.453   |
| 1218.067  | BE538886  | 1063.896  | 1103.592  | AJ008132  | 2805.45   | 4489.392  | NM_004906 | 1309.618  |
| 1091.292  | NM_002228 | 832.859   | 844.089   | NM_005281 | 5196.393  | 7081.354  | NM_012447 | 7349.455  |
| 600.549   | M57650    | 2822.036  | 2299.289  | NM_005549 | 7207.509  | 5970.619  | NM_006366 | 7853.243  |
| 8424.903  | BC023978  | 560.043   | 297.863   | M33197    | 58797.48  | 56345.773 | AK027013  | 27437.139 |
| 576.08    | M21302    | 1132.468  | 877.882   | U12129    | 926.573   | 879.622   | NM_001344 | 17328.936 |
| 3481.067  | NM_005212 | 3588.787  | 4693.621  | S81242    | 44871.078 | 38433.359 | NM_018294 | 1682.444  |
| 1350.953  | AF035035  | 703.326   | 683.933   | AF230801  | 1479.238  | 1548.245  | AL389934  | 3513.659  |
| 21667.457 | AB020676  | 968.818   | 738.181   | AF075072  | 912.794   | 599.424   | NM_004330 | 3781.577  |
| 725.318   | AK024715  | 1036.348  | 999.847   | M33197    | 61088.766 | 59326.969 | AF151802  | 4027.511  |
| 1957.218  | U90942    | 59782.973 | 58783.945 | NM_002509 | 3908.507  | 3296.896  | AB006746  | 971.624   |
| 1822.681  | NM_014942 | 574.22    | 768.655   | U38442    | 3962.413  | 2953.398  | NM_006498 | 1822.133  |
| 7608.936  | NM_018360 | 1716.511  | 1588.632  | AK001558  | 1566.39   | 864.659   | AB023233  | 1306.172  |
| 3267.107  | AL365415  | 1177.661  | 1169.945  | D28391    | 21282.748 | 24050.795 | AL133071  | 310.253   |
| 1503.769  | L29147    | 20772.947 | 17457.631 | M33197    | 23738.418 | 33818.375 | NM_004369 | 1411.28   |
| 473.881   | NM_001525 | 19272.48  | 18318.697 | AJ227885  | 2250.226  | 1718.596  | NM_018130 | 2630.304  |
| 4444.711  | NM_006055 | 3764.908  | 3380.555  | AF086086  | 900.79    | 664.035   | AF085878  | 544.194   |
| 922.354   | NM_004296 | 1020.769  | 1074.9    | AK026859  | 1997.907  | 1039.493  | AB006630  | 1262.745  |



|           |           |           |           |           |           |           |           |           |
|-----------|-----------|-----------|-----------|-----------|-----------|-----------|-----------|-----------|
| 887.499   | NM_005048 | 776.535   | 1155.785  | M33197    | 40842.16  | 36255.125 | NM_016155 | 764.209   |
| 1337.212  | NM_005972 | 662.343   | 594.418   | AF131770  | 1286.935  | 1701.373  | NM_001224 | 3054.567  |
| 2524.86   | NM_001060 | 2834.86   | 2360.952  | CY3Cy5    | 5493.718  | 203.935   | NM_017811 | 5384.267  |
| 6455.579  | NM_018841 | 1041.494  | 637.302   | AI298534  | 1024.284  | 266.165   | NM_001569 | 1538.398  |
| 2820.218  | AL133105  | 1834.052  | 1745.397  | AW167715  | 823.906   | 1816.924  | NM_004131 | 391.26    |
| 3263.241  | AK022859  | 1145.255  | 1274.703  | AA424735  | 1171.036  | 1078.853  | AK023284  | 996.664   |
| 1532.037  | NM_014864 | 5590.818  | 4053.612  | U78294    | 834.378   | 696.949   | NM_005101 | 1369.236  |
| 114.232   | NM_003728 | 4095.425  | 3550.581  | BI760394  | 879.801   | 792.958   | AF130060  | 16203.071 |
| 500.208   | NM_004975 | 1619.473  | 1431.669  | AA555216  | 89.464    | 411.594   | NM_007057 | 10667.255 |
| 133.579   | NM_000238 | 3144.789  | 2719.653  | U09117    | 5466.372  | 4271.357  | NM_000177 | 7798.13   |
| 486.553   | NM_002247 | 735.424   | 739.047   | AI978885  | 1819.712  | 2466.179  | NM_003387 | 8785.242  |
| 579.94    | NM_004980 | 9725.237  | 7631.018  | AK054960  | 7113.873  | 4658.447  | U60665    | 973.99    |
| 205.453   | AB011094  | 11758.031 | 13516.044 | L15344    | 1493.933  | 941.563   | NM_005507 | 25147.695 |
| 1476.689  | NM_003224 | 2128.099  | 2271.029  | SR1       | 60606.328 | 53998.906 | AL080133  | 2854.526  |
| 1314.436  | NM_001658 | 58458.73  | 59059.332 | SR3       | 38281.047 | 27220.281 | AY014403  | 636.494   |
| 721.551   | NM_006827 | 18147.109 | 18270.867 | SR7       | 3697.875  | 20482.438 | NM_006912 | 3762.562  |
| 1867.399  | AK021761  | 6546.416  | 9443.783  | SR9       | 11094.754 | 1164.838  | X12534    | 1477.89   |
| 351.322   | AK024536  | 730.238   | 783.198   | CY3Cy5    | 2852.188  | 76.553    | NM_003112 | 438.804   |
| 2772.331  | NM_018668 | 5500.326  | 5676.074  | NM_014586 | 1477.032  | 1379.426  | NM_018951 | 3608.27   |
| 1095.584  | NM_004227 | 1204.938  | 903.004   | NM_014366 | 8202.595  | 5819.329  | NM_014323 | 2729.86   |
| 1555.854  | NM_005282 | 2171.765  | 2317.934  | NM_000923 | 455.444   | 391.969   | NM_003205 | 1342.29   |
| 2262.467  | NM_001736 | 812.586   | 982.443   | NM_018096 | 881.747   | 198.737   | AB002324  | 1873.39   |
| 715.867   | AB028949  | 1632.76   | 638.892   | AL390078  | 487.749   | 872.433   | AK026231  | 1108.435  |
| 583.745   | AL137580  | 586.054   | 685.084   | NM_004036 | 717.77    | 948.902   | NM_002140 | 6937.842  |
| 627.026   | NM_004101 | 565.351   | 1102.135  | NM_015986 | 712.027   | 1130.472  | NM_020143 | 1271.168  |
| 985.952   | NM_002995 | 19244.805 | 16285.311 | NM_006546 | 874.63    | 559.412   | NM_012469 | 1759.241  |
| 4788.58   | NM_015978 | 1561.422  | 1885.143  | NM_014959 | 1189.165  | 1332.156  | NM_005131 | 932.775   |
| 1122.499  | NM_003810 | 2368.794  | 2923.656  | NM_003992 | 1931.236  | 2076.655  | NM_007056 | 1469.87   |
| 673.662   | NM_014443 | 1986.598  | 1476.551  | AF279265  | 3540.445  | 2477.015  | AF083383  | 1279.732  |
| 2464.061  | NM_016457 | 1114.745  | 2151.369  | NM_002997 | 2757.346  | 3297.907  | NM_006925 | 1855.984  |
| 1285.792  | NM_005057 | 1363.803  | 1625.838  | NM_002379 | 6476.566  | 4812.838  | NM_004890 | 46978.707 |
| 460.795   | AB046842  | 1324.233  | 1430.447  | AB007929  | 8227.56   | 6753.288  | AK023181  | 1654.833  |
| 1214.058  | NM_004850 | 1938.995  | 2260.643  | NM_004579 | 2681.459  | 2345.804  | NM_004294 | 1016.554  |
| 416.037   | NM_002822 | 4472.607  | 5478.574  | L12347    | 2457.769  | 1234.755  | NM_005051 | 16822.73  |
| 2409.115  | BF306955  | 2006.787  | 2243.235  | NM_001622 | 1744.616  | 1202.018  | AF264627  | 31996.23  |
| 11749.814 | NM_001394 | 12111.207 | 13218.384 | Z36788    | 1423.731  | 1332.774  | AL133053  | 925.901   |
| 421.41    | NM_000778 | 11676.245 | 8538.304  | NM_018477 | 2935.725  | 2985.261  | NM_018142 | 3819.403  |
| 921.778   | NM_001609 | 1408.724  | 1361.898  | NM_004853 | 2532.688  | 1441.693  | NM_017653 | 2071.606  |
| 1961.645  | BE733234  | 770.915   | 817.273   | NM_001494 | 7433.521  | 4062.87   | AL109695  | 7405.698  |
| 2712.936  | NM_020228 | 2434.773  | 2385.213  | NM_004206 | 936.366   | 844.529   | NM_002168 | 949.903   |
| 337.371   | AK024685  | 1358.957  | 1113.569  | NM_004603 | 6575.106  | 4513.798  | NM_004453 | 695.457   |
| 1156.388  | NM_003676 | 12839.781 | 12476.225 | AK022849  | 1123.568  | 788.297   | NM_016229 | 5196.473  |
| 449.825   | AF113007  | 1690.221  | 2931.557  | AF040964  | 1924.4    | 2264.568  | NM_018244 | 1051.845  |
| 270.946   | NM_000688 | 6013.342  | 3812.801  | NM_001939 | 2135.331  | 2392.99   | NM_002492 | 20031.098 |
| 195.487   | U39573    | 1121.779  | 1452.956  | NM_003279 | 13122.843 | 15201.783 | NM_005642 | 1869.042  |
| 4338.678  | D82061    | 1699.747  | 1488.673  | AB014599  | 2116.278  | 2222.755  | AK023452  | 2238.571  |
| 6126.204  | AJ293009  | 1475.482  | 1097.111  | NM_004393 | 634.433   | 452.727   | AF155065  | 324.642   |
| 311.576   | NM_000374 | 2291.576  | 2576.1    | AB018345  | 830.696   | 781.554   | NM_000332 | 1023.326  |
| 2226.707  | NM_000502 | 3316.177  | 4554.726  | NM_005832 | 604.451   | 485.032   | AK022215  | 1818.927  |
| 43744.512 | NM_001359 | 12240.25  | 15614.996 | AW407841  | 558.647   | 558.84    | NM_001527 | 10026.544 |
| 742.933   | NM_001696 | 11394.436 | 13058.728 | U15197    | 1350.155  | 718.569   | AK025269  | 4194.697  |
| 925.577   | AF190900  | 4743.869  | 6864.947  | AF264014  | 3018.575  | 2350.084  | NM_001438 | 520.307   |
| 955.797   | NM_020404 | 5491.111  | 5706.893  | NM_004155 | 305.139   | 619.424   | AB040971  | 1397.069  |

|           |           |           |           |           |           |           |           |           |
|-----------|-----------|-----------|-----------|-----------|-----------|-----------|-----------|-----------|
| 680.922   | BE972401  | 5359.012  | 5060.37   | NM_001831 | 630.398   | 520.749   | NM_006562 | 3039.831  |
| 4740.391  | U56725    | 281.91    | 998.409   | NM_000137 | 4003.998  | 2279.344  | AK024254  | 1130.027  |
| 1398.716  | NM_017425 | 1553.642  | 1365.198  | NM_012102 | 2306.752  | 2492.704  | NM_018456 | 3395.411  |
| 1038.844  | AB007922  | 901.994   | 845.324   | NM_005017 | 11182.097 | 8252.638  | NM_019021 | 592.023   |
| 395.856   | NM_015982 | 1948.552  | 1858.1    | AF163572  | 4289.058  | 2742.044  | AK002183  | 472.604   |
| 1215.186  | NM_003746 | 37225.523 | 17167.875 | NM_000897 | 1762.305  | 1341.446  | NM_018996 | 636.078   |
| 8616.02   | AC096970  | 14208.063 | 10912.146 | NM_000487 | 231.381   | 577.344   | AL137304  | 686.881   |
| 5812.669  | AK024865  | 764.324   | 1017.546  | NM_006411 | 13355.359 | 9947.942  | AL049274  | 354.37    |
| 5160.769  | NM_007210 | 648.531   | 800.526   | NM_014182 | 1251.841  | 2221.528  | NM_018279 | 302.105   |
| 793.324   | NM_001483 | 2566.745  | 3091.26   | AB040884  | 322.238   | 456.131   | AK026883  | 1377.296  |
| 807.143   | NM_018973 | 14393.133 | 6694.799  | NM_000492 | 6865.923  | 7954.814  | NM_014350 | 4907.284  |
| 20538.73  | NM_002591 | 6623.078  | 4981.078  | NM_012089 | 1730.191  | 2268.951  | U00925    | 3476.449  |
| 4651.053  | NM_020216 | 5453.483  | 6913.163  | NM_001170 | 3950.906  | 3549.884  | AL390185  | 1491.202  |
| 312.125   | AK021860  | 1200.573  | 1295.182  | AL137716  | 854.073   | 1057.523  | AF086235  | 2483.345  |
| 913.608   | AK000119  | 243.585   | 235.155   | NM_004696 | 643.654   | 502.303   | AF143886  | 1199.718  |
| 948.263   | AB046816  | 939.729   | 734.068   | NM_014342 | 2915.318  | 2659.143  | AK025053  | 247.038   |
| 832.522   | AL137266  | 3108.572  | 2294.489  | AB043997  | 1448.226  | 1182.203  | AK025975  | 1292.979  |
| 544.021   | NM_014288 | 4686.671  | 2250.223  | NM_001773 | 1498.936  | 1297.565  | NM_014664 | 1555.685  |
| 1255.983  | AF035300  | 1379.146  | 1680.428  | Z70704    | 987.304   | 806.078   | AL109788  | 696.146   |
| 1937.258  | AJ297349  | 4801.141  | 3241.933  | NM_014363 | 765.531   | 790.341   | NM_014952 | 38655.516 |
| 7351.7    | NM_005828 | 7803.968  | 8071.305  | NM_000557 | 2007.339  | 1516.153  | AK026720  | 372.187   |
| 4805.537  | NM_001619 | 2039.724  | 2714.752  | NM_001375 | 2082.362  | 1846.339  | AL137566  | 1142.749  |
| 13695.873 | NM_006599 | 2023.114  | 1942.514  | NM_002312 | 1193.851  | 1494.828  | AF087962  | 2699.718  |
| 12869.74  | U43586    | 857.371   | 675.537   | NM_016937 | 3078.993  | 4016.427  | AL050197  | 1440.635  |
| 5855.085  | NM_006271 | 8483.986  | 8554.748  | NM_007341 | 1724.522  | 1908.791  | AF085870  | 2332.883  |
| 42927.254 | NM_018647 | 941.81    | 669.997   | NM_016508 | 1478.94   | 1545.427  | AL117580  | 8895.776  |
| 8724.615  | NM_000721 | 41867.855 | 46277.781 | NM_006456 | 9649.484  | 6530.627  | AL110190  | 3417.783  |
| 1298.527  | NM_003933 | 1601.195  | 2071.429  | AK026062  | 16349.28  | 6280.222  | AL117656  | 1100.547  |
| 1059.023  | NM_005095 | 3637.381  | 3554.61   | AF047002  | 17009.406 | 22003.262 | AJ001893  | 891.649   |
| 8211.605  | NM_000055 | 304.397   | 312.353   | NM_006623 | 34717.781 | 15444.907 | NM_014819 | 6053.461  |
| 851.055   | NM_003163 | 3385.269  | 3341.35   | NM_016588 | 998.196   | 554.729   | NM_017609 | 407.185   |
| 5205.558  | NM_002677 | 877.065   | 760.858   | NM_003135 | 4415.541  | 2515.319  | AF086040  | 1510.532  |
| 333.057   | NM_016205 | 2174.193  | 2725.12   | L12347    | 1951.565  | 935.196   | AB032988  | 838.735   |
| 818.158   | AF149724  | 2085.932  | 2528.191  | NM_001622 | 1352.002  | 1025.252  | AK023559  | 4503.32   |
| 759.815   | NM_006367 | 64436.441 | 68645.406 | Z36788    | 717.017   | 284.314   | NM_017696 | 2625.285  |
| 18006.441 | NM_004354 | 2018.035  | 2881.508  | NM_018477 | 1971.898  | 1419.677  | AL050166  | 6633.354  |
| 826.971   | NM_004661 | 2408.865  | 1623.129  | U09117    | 10766.154 | 9463.799  | AK026705  | 812.704   |
| 135.451   | NM_001610 | 2219.955  | 2518.449  | M21054    | 984.315   | 1153.886  | NM_003602 | 1274.564  |
| 1751.98   | NM_001241 | 1660.896  | 1228.44   | M18468    | 1438.187  | 1066.415  | AF009258  | 11346.048 |
| 502.78    | AL109714  | 1068.087  | 888.575   | H66070    | 5896.422  | 8202.715  | AF009305  | 1580.548  |
| 1771.758  | NM_004632 | 3270.52   | 1478.023  | AA164741  | 2751.283  | 4760.094  | NM_006193 | 495.396   |
| 1882.697  | NM_017919 | 2938.612  | 3447.704  | AI189375  | 770.749   | 680.502   | AF009270  | 1243.739  |
| 4148.869  | NM_014456 | 5524.909  | 6510.898  | AI978885  | 2755.341  | 2543.205  | AF056421  | 872.892   |
| 23751.688 | NM_004740 | 3941.775  | 5440.363  | AK054960  | 8894.634  | 7652.837  | AF090889  | 495.565   |
| 1219.679  | NM_003805 | 2172.956  | 1673.69   | NM_001665 | 9822.398  | 9379.594  | AK001085  | 1226.071  |
| 2324.386  | NM_019886 | 4339.502  | 5635.131  | NM_001879 | 1723.925  | 1614.733  | AK001906  | 1610.122  |
| 1978.481  | NM_003278 | 43199.594 | 40793.504 | AF264014  | 2336.829  | 2129.366  | AK021528  | 661.575   |
| 5312.72   | NM_000426 | 607.094   | 515.947   | NM_015986 | 959.514   | 1896.817  | AK021746  | 3979.12   |
| 3564.108  | AK021957  | 25833.957 | 24423.021 | NM_006546 | 772.903   | 837.312   | AK001136  | 1202.476  |
| 993.811   | NM_001334 | 5191.996  | 4508.04   | NM_014959 | 1613.262  | 1493.573  | AK021617  | 588.209   |
| 488.089   | NM_004771 | 2530.75   | 3264.372  | NM_003992 | 2406.02   | 2222.705  | AK025214  | 692.232   |
| 4261.199  | NM_018299 | 1706.002  | 1340.194  | AF279265  | 3522.868  | 2781.888  | AK025846  | 2210.18   |
| 945.546   | NM_002104 | 810.944   | 774.124   | NM_005213 | 44493.75  | 18926.451 | AK026805  | 3590.789  |

|           |           |           |           |           |           |           |           |           |
|-----------|-----------|-----------|-----------|-----------|-----------|-----------|-----------|-----------|
| 805.701   | NM_005504 | 6492.171  | 3397.621  | AB040914  | 854.791   | 824.363   | AL389983  | 3584.48   |
| 726.851   | AF234654  | 1709.186  | 1353.511  | AB007929  | 6107.206  | 4599.677  | AJ008159  | 576.355   |
| 1631.637  | NM_017832 | 7500.801  | 5115.748  | NM_004579 | 2213.74   | 1237.641  | U00959    | 1677.092  |
| 4999.797  | NM_001713 | 2649.486  | 1894.14   | Z50169    | 1367.728  | 846.99    | NM_01457E | 2957.209  |
| 216.194   | NM_015367 | 5451.165  | 5607.516  | AB043997  | 1195.815  | 1391.086  | AF147306  | 1232.753  |
| 842.249   | NM_01449E | 3640.526  | 3198.553  | NM_004603 | 12490.168 | 9480.753  | AF086267  | 1456.884  |
| 929.544   | NM_00237E | 7759.602  | 6766.141  | AK022849  | 1154.962  | 1351.251  | X74606    | 430.619   |
| 2864.503  | AF055016  | 4043.472  | 3394.98   | AF040964  | 2827.828  | 3343.996  | NM_012183 | 1945.067  |
| 524.512   | NM_007234 | 11130.408 | 9557.098  | NM_001939 | 2761.818  | 2747.575  | AK026785  | 915.193   |
| 3657.304  | Y16704    | 63486.211 | 65901.063 | NM_003279 | 12003.407 | 12375.342 | NM_01822E | 8541.209  |
| 1661.554  | NM_014567 | 5097.096  | 4605.513  | AB014599  | 2325.872  | 1869.229  | AK025534  | 896.962   |
| 952.298   | NM_017842 | 1718.544  | 1334.008  | AB018345  | 760.327   | 560.085   | AF091526  | 1069.426  |
| 656.959   | AB037809  | 2208.446  | 2888.898  | NM_005832 | 896.644   | 1071.241  | M60749    | 1302.86   |
| 2307.473  | AB011129  | 2494.456  | 2541.516  | AW407841  | 810.263   | 159.953   | X79986    | 800.209   |
| 842.191   | NM_014391 | 5039.916  | 5873.827  | AL050082  | 1326.335  | 1306.047  | NM_003523 | 6073.862  |
| 708.803   | NM_004270 | 3510.668  | 3268.805  | NM_006623 | 30267.963 | 17385.086 | X01448    | 433.423   |
| 1968.154  | NM_001537 | 4391.567  | 6488.541  | NM_000487 | 1163.727  | 1084.197  | NM_016503 | 1877.917  |
| 2350.454  | NM_001352 | 3239.574  | 2781.305  | NM_006411 | 21457.967 | 21792.352 | AK056351  | 9556.021  |
| 4065.351  | D15050    | 610.514   | 365.926   | NM_014182 | 2066.078  | 3332.961  | NM_014690 | 2013.104  |
| 434.33    | NM_007363 | 27528.869 | 31702.994 | AB040884  | 576.386   | 867.451   | NM_01769E | 2161.728  |
| 386.759   | NM_003093 | 40680.281 | 41793.859 | NM_000492 | 4874.108  | 4570.875  | AF086490  | 561.391   |
| 7521.889  | U05589    | 933.99    | 932.607   | NM_012089 | 538.029   | 1051.988  | AF131738  | 23304.088 |
| 7542.006  | NM_014473 | 7155.397  | 6135.635  | NM_001170 | 2456.159  | 1851.867  | AK021666  | 2159.172  |
| 1277.684  | NM_00309E | 58262.156 | 48937.543 | AL137716  | 479.253   | 540.813   | AK024081  | 1102.344  |
| 1045.307  | NM_016389 | 1796.004  | 1431.962  | NM_004696 | 682.706   | 476.343   | AK024825  | 1537.469  |
| 992.108   | NM_016306 | 17015.082 | 14250.38  | NM_002312 | 1762.42   | 1858.305  | AF086317  | 3190.321  |
| 858.474   | NM_00375E | 1209.298  | 1049.392  | M20699    | 1203.377  | 1157.151  | U16850    | 3489.103  |
| 1849.381  | NM_01323E | 6309.097  | 5328.501  | NM_004774 | 5852.949  | 6376.671  | AL390178  | 1226.197  |
| 2912.372  | BE258640  | 14199.521 | 14331.846 | NM_016937 | 3661.606  | 5384.68   | NM_005383 | 276.387   |
| 14531.571 | NM_003314 | 6438.036  | 4285.676  | NM_002690 | 3218.088  | 2981.936  | Z36806    | 916.446   |
| 1455.415  | AL355730  | 659.904   | 684.332   | NM_01232E | 4202.552  | 1102.759  | NM_00536E | 417.941   |
| 1049.747  | U79273    | 1575.92   | 1811.861  | NM_01650E | 1392.873  | 1212.606  | AJ008121  | 12061.646 |
| 3722.356  | AK022050  | 4159.822  | 5073.936  | NM_006456 | 6754.56   | 5849.298  | AJ008153  | 1256.242  |
| 1534.182  | NM_002512 | 62350.574 | 62579.359 | AK026062  | 12148.864 | 5189.08   | AK023739  | 1218.539  |
| 952.042   | NM_001246 | 1335.41   | 1142.222  | NM_001622 | 1718.314  | 1334.363  | NM_005830 | 3634.136  |
| 671.675   | AL365411  | 3803.856  | 3384.514  | Z36788    | 862.726   | 829.891   | NM_001507 | 625.073   |
| 1492.82   | M24470    | 792.965   | 790.103   | NM_018477 | 2539.609  | 1898.521  | X92108    | 424.121   |
| 6643.46   | AK024677  | 1323.991  | 1070.906  | U20536    | 563.64    | 658.85    | AL389876  | 1586.846  |
| 3699.916  | NM_000036 | 1564.298  | 1181.441  | AW167715  | 788.371   | 1679.495  | AK022120  | 1224.691  |
| 540.869   | AF205718  | 6027.762  | 6419.023  | AA424735  | 1241.329  | 1279.279  | Z70762    | 742.766   |
| 731.794   | NM_003420 | 1200.744  | 1522.02   | U78294    | 1228.767  | 1529.464  | BF037206  | 2171.255  |
| 18554.414 | AY004252  | 835.213   | 1220.614  | BI760394  | 1298.081  | 1224.572  | AK021474  | 7493.982  |
| 629.493   | NM_006261 | 1581.649  | 1515.621  | AA555216  | 380.442   | 475.474   | AK023642  | 847.829   |
| 559.646   | AK027045  | 1060.999  | 849.413   | U09117    | 5169.798  | 4803.713  | AW511510  | 901.458   |
| 457.924   | AF169796  | 1688.911  | 1207.333  | M21054    | 399.099   | 442.769   | U52827    | 1560.924  |
| 4511.907  | AK001814  | 3952.186  | 3447.454  | M18468    | 886.718   | 572.208   | AL049466  | 7141.514  |
| 2866.933  | NM_007222 | 2010.608  | 1416.877  | H66070    | 3505.043  | 3712.3    | AB037802  | 997.341   |
| 1002.798  | NM_00343E | 1647.339  | 1343.132  | AA164741  | 1633.853  | 2223.405  | U17623    | 764.441   |
| 6566.271  | NM_016291 | 3113.617  | 2269.969  | AI978885  | 1367.109  | 1057.279  | AL137450  | 2784.268  |
| 41429.449 | NM_005937 | 27827.816 | 20812.602 | AF264014  | 3891.082  | 5242.895  | AK023058  | 1478.067  |
| 1901.571  | AK023259  | 4164.102  | 2065.018  | L09098    | 927.926   | 663.512   | AJ227878  | 315.114   |
| 995.778   | AK001503  | 1250.226  | 1296.898  | NM_00415E | 485.971   | 700.847   | NM_012064 | 3993.668  |
| 645.839   | AF085894  | 1958.251  | 1066.658  | NM_01458E | 1711.163  | 1694.305  | AK001460  | 754.783   |

|           |                  |           |           |                  |           |           |                  |           |
|-----------|------------------|-----------|-----------|------------------|-----------|-----------|------------------|-----------|
| 918.761   | <b>AK022880</b>  | 2726.214  | 2743.298  | <b>NM_014366</b> | 7945.729  | 5604.159  | <b>AK092508</b>  | 2122.198  |
| 10122.858 | <b>NM_003601</b> | 13164.854 | 13739.753 | <b>NM_000923</b> | 715.995   | 926.194   | <b>AK027111</b>  | 38152.359 |
| 1514.366  | <b>AK026778</b>  | 2159.359  | 2070.782  | <b>NM_006453</b> | 1007.594  | 1253.215  | <b>NM_00351E</b> | 559.955   |
| 913.519   | <b>AF074987</b>  | 3756.304  | 3627.477  | <b>NM_018096</b> | 1161.098  | 1105.76   |                  |           |
| 586.266   | <b>AK026239</b>  | 2468.69   | 3384.564  | <b>NM_006546</b> | 1124.737  | 586.528   |                  |           |
| 1431.907  | <b>AF086283</b>  | 1089.512  | 1012.491  | <b>NM_014959</b> | 983.48    | 848.816   |                  |           |
| 6032.728  | <b>AF086281</b>  | 1030.978  | 1045.314  | <b>NM_003992</b> | 1549.442  | 1251.907  |                  |           |
| 522.845   | <b>AF086393</b>  | 1709.962  | 844.239   | <b>AF279265</b>  | 2311.108  | 1417.133  |                  |           |
| 661.767   | <b>AF086453</b>  | 601.767   | 716.35    | <b>NM_005213</b> | 33387.297 | 7473.234  |                  |           |
| 2397.507  | <b>AF070621</b>  | 4835.165  | 4744.07   | <b>AB043997</b>  | 1290.794  | 1094.125  |                  |           |
| 397.67    | <b>NM_02024C</b> | 2152.692  | 1461.002  | <b>NM_004853</b> | 3480.13   | 3047.869  |                  |           |
| 389.523   | <b>AK023678</b>  | 7480.623  | 17350.527 | <b>NM_001494</b> | 7269.938  | 6441      |                  |           |
| 263.171   | <b>AF052090</b>  | 2322.328  | 1701.019  | <b>NM_004603</b> | 5234.122  | 3741.325  |                  |           |
| 1349.813  | <b>AK023718</b>  | 4147.113  | 4501.522  | <b>AK022849</b>  | 1189.308  | 1059.717  |                  |           |
| 1413.67   | <b>AF075089</b>  | 3806.16   | 3836.876  | <b>AF040964</b>  | 1793.066  | 1268.221  |                  |           |
| 2055.964  | <b>AF241255</b>  | 1426.489  | 1666.961  | <b>NM_001939</b> | 1687.898  | 1233.823  |                  |           |
| 3037.778  | <b>AF086007</b>  | 57173.531 | 58293.113 | <b>NM_003279</b> | 8163.309  | 9017.901  |                  |           |
| 1315.042  | <b>AK000803</b>  | 2851.464  | 2876.053  | <b>NM_01232E</b> | 4030.384  | 2105.797  |                  |           |
| 583.825   | <b>AK022374</b>  | 1056.161  | 1386.02   | <b>AL050082</b>  | 1416.339  | 1916.729  |                  |           |
| 3637.731  | <b>AF085926</b>  | 19323.361 | 20623.705 | <b>NM_006623</b> | 33393.914 | 16614.52  |                  |           |
| 5668.187  | <b>AF085948</b>  | 705.97    | 935.485   | <b>NM_01658E</b> | 1353.398  | 827.266   |                  |           |
| 8509.971  | <b>AL390137</b>  | 15992.743 | 13695.509 | <b>NM_003135</b> | 4377.868  | 3683.242  |                  |           |
| 5887.375  | <b>AL137340</b>  | 1108.265  | 1056.075  | <b>NM_000137</b> | 3288.409  | 2551.153  |                  |           |
| 19568.699 | <b>AL137542</b>  | 814.686   | 829.32    | <b>NM_012102</b> | 1803.453  | 2411.623  |                  |           |
| 8740.462  | <b>AL162045</b>  | 1143.76   | 1664.459  | <b>NM_000487</b> | 914.33    | 1441.532  |                  |           |
| 42390.5   | <b>X92185</b>    | 823.306   | 748.02    | <b>NM_006411</b> | 20071.521 | 17183.525 |                  |           |
| 12252.997 | <b>AK022437</b>  | 11604.365 | 15654.869 | <b>NM_014182</b> | 1791.86   | 2469.305  |                  |           |
| 1317.544  | <b>AB042410</b>  | 734.747   | 756.3     | <b>AB040884</b>  | 883.684   | 951.977   |                  |           |
| 1214.761  | <b>AF086102</b>  | 623.377   | 509.055   | <b>NM_000492</b> | 5405.286  | 3722.867  |                  |           |
| 8867.623  | <b>AF116682</b>  | 17669.117 | 17512.49  | <b>NM_012089</b> | 459.675   | 710.821   |                  |           |
| 1485.989  | <b>AL137259</b>  | 1993.754  | 2105.348  | <b>AJ272057</b>  | 6061.267  | 6258.712  |                  |           |
| 21938.697 | <b>AL122107</b>  | 2279.023  | 2013.607  | <b>NM_014694</b> | 525.446   | 667.574   |                  |           |
| 1074.911  | <b>AF075021</b>  | 1022.013  | 1011.88   | <b>NM_01483C</b> | 1364.402  | 735.188   |                  |           |
| 4779.958  | <b>AK025140</b>  | 9729.459  | 11645.263 | <b>AF355402</b>  | 2115.716  | 1940.791  |                  |           |
| 335.281   | <b>AK023394</b>  | 1907.884  | 1525.443  | <b>NM_001665</b> | 8723.862  | 8674.44   |                  |           |
| 640.832   | <b>AF090093</b>  | 10000.482 | 7989.908  | <b>NM_001773</b> | 813.453   | 902.121   |                  |           |
| 495.474   | <b>AF161340</b>  | 3916.093  | 3609.493  | <b>Z70704</b>    | 983.846   | 1115.445  |                  |           |
| 788.655   | <b>AF242771</b>  | 1022.758  | 1144.488  | <b>NM_014363</b> | 831.77    | 915.531   |                  |           |
| 528.524   | <b>NM_018562</b> | 9018.037  | 9394.224  | <b>NM_001375</b> | 3306.423  | 4195.733  |                  |           |
| 3040.42   | <b>AF098666</b>  | 978.475   | 1142.724  | <b>NM_002312</b> | 1687.471  | 1415.138  |                  |           |
| 2169.037  | <b>AK022065</b>  | 1289.703  | 1779.083  | <b>M20699</b>    | 979.306   | 1392.238  |                  |           |
| 3318.184  | <b>AK022221</b>  | 2749.949  | 3219.762  | <b>NM_004774</b> | 4817.907  | 4021.645  |                  |           |
| 3190.054  | <b>AK022356</b>  | 1193.421  | 1461.125  | <b>NM_016937</b> | 3641.792  | 3789.824  |                  |           |
| 3245.482  | <b>AK021998</b>  | 2404.731  | 2578.314  | <b>NM_00269C</b> | 1597.6    | 1312.434  |                  |           |
| 1175.768  | <b>AK022126</b>  | 2143.417  | 2712.319  | <b>NM_018239</b> | 868.269   | 1424.635  |                  |           |
| 2537.968  | <b>AK022256</b>  | 894.891   | 1502.346  | <b>U88892</b>    | 783.186   | 782.772   |                  |           |
| 2365.175  | <b>AK022383</b>  | 1458.995  | 1691.1    | <b>AK023755</b>  | 843.836   | 497.786   |                  |           |
| 6072.911  | <b>AK027041</b>  | 1544.309  | 1419.829  | <b>NM_005725</b> | 558.801   | 352.7     |                  |           |
| 331.105   | <b>NM_005355</b> | 15086.292 | 14268.019 | <b>NM_012211</b> | 555.926   | 808.309   |                  |           |
| 661.959   | <b>AK000937</b>  | 595.601   | 574.31    | <b>AB040877</b>  | 1172.132  | 1423.37   |                  |           |
| 503.475   | <b>AF035306</b>  | 2025.684  | 1948.695  | <b>NM_019067</b> | 2050.403  | 2577.902  |                  |           |
| 331.889   | <b>AK091662</b>  | 615.26    | 870.03    | <b>AF251025</b>  | 654.199   | 633.861   |                  |           |
| 302.222   | <b>NM_003954</b> | 1525.162  | 1823.851  | <b>NM_015677</b> | 1153.556  | 1641.816  |                  |           |

|           |           |           |           |           |           |           |
|-----------|-----------|-----------|-----------|-----------|-----------|-----------|
| 730.711   | NM_01634E | 1213.196  | 1205.002  | NM_001772 | 6289.458  | 5106.224  |
| 2766.479  | AK023877  | 718.608   | 765.65    | AJ249902  | 924.35    | 1051.257  |
| 541.419   | AK024213  | 19451.475 | 21226.605 | NM_004384 | 2721.907  | 2181.263  |
| 901.664   | AK022184  | 1260.716  | 733.654   | L05500    | 3635.283  | 3900.734  |
| 31820.371 | AB007959  | 659.983   | 475.866   | NM_012306 | 11891.205 | 11442.73  |
| 2849.447  | AK024153  | 1286.322  | 1193.198  | AF222903  | 1719.013  | 1824.398  |
| 18722.357 | Y10516    | 3112.152  | 2855.055  | NM_006226 | 2210.501  | 2045.249  |
| 7247.225  | AF056451  | 930.9     | 805.351   | L10374    | 1968.047  | 1145.342  |
| 5882.656  | AF015039  | 4045.192  | 3174.373  | AF272378  | 32736.326 | 34978.914 |
| 915.347   | U50528    | 951.852   | 1195.911  | NM_000249 | 3241.483  | 4153.538  |
| 1026.059  | AB020632  | 2230.64   | 1573.854  | NM_005860 | 4060.132  | 5722.73   |
| 1301.345  | NM_018614 | 40763.984 | 41253.262 | AF095288  | 8885.682  | 13315.824 |
| 768.102   | AL117549  | 1596.906  | 1559.194  | AK025116  | 1015.277  | 1201.482  |
| 2097.962  | NM_005222 | 5595.777  | 8251.678  | NM_005610 | 1131.659  | 617.983   |
| 1301.612  | BC024308  | 9653.184  | 8846.057  | AL133651  | 487.362   | 790.32    |
| 1236.201  | NM_018295 | 1397.906  | 2189.466  | NM_003478 | 1709.852  | 2450.616  |
| 1198.771  | AF070574  | 706.795   | 691.351   | NM_001211 | 4554.877  | 5801.96   |
| 1298.748  | AF086262  | 3986.975  | 4476.882  | NM_006505 | 310.362   | 652.644   |
| 2308.923  | AF086292  | 4299.041  | 7236.512  | AB033050  | 1918.953  | 1227.897  |
| 979.307   | AK024342  | 5378.844  | 6315.176  | NM_004356 | 5561.487  | 3920.262  |
| 905.547   | AL137712  | 4856.613  | 5871.82   | BC015022  | 2156.109  | 1869.07   |
| 1248.724  | L77599    | 37458.473 | 32414.016 | M19182    | 976.666   | 1149.364  |
| 10849.562 | AK021673  | 14876.679 | 11035.798 | AK025707  | 1041.746  | 1296.573  |
| 9195.706  | AB014543  | 1343.733  | 708.382   | NM_002406 | 49185.113 | 55214.48  |
| 23987.996 | NM_018445 | 6761.332  | 4530.418  | U87169    | 1248.285  | 1912.198  |
| 18562.891 | AK022743  | 3536.859  | 3423.846  | NM_002073 | 594.957   | 890.814   |
| 2169.889  | NM_014627 | 2484.378  | 3602.795  | AF174601  | 1961.949  | 1606.026  |
| 2833.417  | NM_013938 | 9336.8    | 8338.233  | AF279865  | 471.303   | 1323.163  |
| 795.167   | NM_013986 | 52683.477 | 51106.023 | NM_014700 | 491.343   | 633.058   |
| 1568.682  | U55055    | 1017.696  | 715.697   | NM_005687 | 1267.11   | 786.691   |
| 1298.791  | AB018319  | 2507.81   | 1755.083  | NM_005983 | 2218.791  | 1974.864  |
| 417.274   | AK001101  | 2799.018  | 3600.705  | X59268    | 3135.887  | 2755.632  |
| 1446.304  | BM973473  | 1482.758  | 1758.162  | D70832    | 48148.207 | 47821.488 |
| 508.061   | AK021637  | 1662.084  | 2155.037  | NM_001429 | 2844.317  | 4720.081  |
| 212.54    | AK021658  | 1018.077  | 1074.193  | AJ277915  | 383.347   | 896.952   |
| 449.738   | D61705    | 573.022   | 361.442   | NM_020368 | 1111.438  | 1471.176  |
| 2617.226  | U17631    | 2320.188  | 2334.884  | NM_014764 | 3463.857  | 3679.698  |
| 2489.666  | AL137723  | 3046.009  | 4202.125  | NM_018078 | 1305.62   | 1092.111  |
| 2394.939  | AK000774  | 975.784   | 777.442   | NM_007080 | 7833.97   | 7501.981  |
| 27748.209 | AK024046  | 2635.505  | 2105.028  | AK023531  | 5086.471  | 2343.784  |
| 3899.471  | NM_017931 | 3946.278  | 2997.137  | AB011128  | 3950.971  | 3981.248  |
| 7417.287  | AK022793  | 998.091   | 742.421   | X78712    | 803.242   | 922.522   |
| 1157.669  | AJ227910  | 1247.083  | 1219.895  | NM_001497 | 240.567   | 669.934   |
| 19555.967 | AF001893  | 1878.241  | 2192.009  | AB020635  | 778.134   | 870.748   |
| 3285.521  | X04236    | 8750.62   | 9769.376  | NM_006515 | 818.475   | 909.072   |
| 2574.987  | AK093746  | 13365.37  | 14119.53  | NM_005224 | 1038.967  | 305.959   |
| 865.856   | D16875    | 2336.231  | 1971.854  | NM_012144 | 3279.729  | 2281.403  |
| 895.777   | AK027171  | 1083.394  | 1110.201  | X65231    | 39995.949 | 38294.773 |
| 2296.274  | AK021945  | 2968.488  | 2906.076  | NM_002908 | 974.034   | 975.598   |
| 794.199   | L23545    | 1705.19   | 2153.071  | AF205632  | 1524.304  | 1317.265  |
| 1795.127  | CY3Cy5    | 4950.491  | 227.622   | NM_005378 | 12764.471 | 7940.988  |
| 330.212   | U13022    | 1675.595  | 825.239   | NM_002397 | 3050.149  | 2144.454  |
| 722.06    | R23251    | 21554.234 | 9528.861  | AF000672  | 1171.051  | 559.795   |

|           |                  |           |           |                   |           |           |
|-----------|------------------|-----------|-----------|-------------------|-----------|-----------|
| 7427.43   | <b>BG763477</b>  | 1939.828  | 16748.891 | <b>AJ227854</b>   | 1518.433  | 1169.611  |
| 1778.902  | <b>AA702640</b>  | 2518.491  | 2325.215  | <b>NM_016490</b>  | 1736.738  | 1712.807  |
| 2414.855  | <b>T68583</b>    | 3454.997  | 3067.718  | <b>AF038193</b>   | 927.653   | 800.216   |
| 1255.237  | <b>AA481944</b>  | 45595.371 | 31804.953 | <b>AK024289</b>   | 1236.143  | 1458.963  |
| 1167.045  | <b>X14390</b>    | 1056.826  | 778.49    | <b>S66168</b>     | 3720.663  | 4518.475  |
| 1280.913  | <b>AF038440</b>  | 579.417   | 911.146   | <b>AK024150</b>   | 1273.163  | 1512.119  |
| 2923.443  | <b>M31158</b>    | 1152.512  | 727.955   | <b>AF070536</b>   | 1723.663  | 1919.589  |
| 46212.57  | <b>H00742</b>    | 2460.152  | 2796.784  | <b>AK025151</b>   | 5534.796  | 5185.692  |
| 1698.338  | <b>D42108</b>    | 1884.509  | 1557.77   | <b>AK025550</b>   | 1612.921  | 1415.329  |
| 1249.223  | <b>BG700922</b>  | 778.131   | 795.727   | <b>AF088076</b>   | 9971.636  | 9585.291  |
| 12154.003 | <b>AI366068</b>  | 23573.775 | 7603.704  | <b>AF086543</b>   | 1740.174  | 1122.33   |
| 28112.383 | <b>N57553</b>    | 881.274   | 773.08    | <b>AB046797</b>   | 1284.253  | 867.633   |
| 644.482   | <b>AF080158</b>  | 2159.884  | 2162.66   | <b>AK002098</b>   | 1307.05   | 1806.446  |
| 2413.926  | <b>BM664556</b>  | 1379.303  | 1230.01   | <b>AK025156</b>   | 1654.207  | 1853.873  |
| 587.084   | <b>SR1</b>       | 65142.078 | 68326.688 | <b>AK022116</b>   | 9460.426  | 12566.646 |
| 697.816   | <b>SR3</b>       | 49799.699 | 61037.188 | <b>AF026526</b>   | 1169.94   | 1802.45   |
| 2382.023  | <b>SR5</b>       | 4745.896  | 7518.925  | <b>AK026207</b>   | 5356.707  | 5665.619  |
| 663.642   | <b>SR7</b>       | 6911.377  | 58998.051 | <b>AK024984</b>   | 14849.962 | 14158.878 |
| 23907.318 | <b>SR9</b>       | 26043.951 | 7792.846  | <b>AK000276</b>   | 252.174   | 639.971   |
| 3617.344  | <b>CY3Cy5</b>    | 7809.34   | 441.012   | <b>AL110236</b>   | 391.877   | 749.774   |
| 750.25    | <b>M33197</b>    | 72100.383 | 65275.504 | <b>AF075106</b>   | 1436.333  | 1893.28   |
| 2710.009  | <b>NM_007024</b> | 5145.817  | 3655.059  | <b>AK023339</b>   | 1665.666  | 2354.591  |
| 353.14    | <b>NM_013231</b> | 3592.614  | 2266.214  | <b>AF085981</b>   | 435.666   | 776.067   |
| 1275.883  | <b>NM_012106</b> | 3740.602  | 3864.468  | <b>AF086008</b>   | 804.549   | 863.823   |
| 2505.619  | <b>NM_006254</b> | 7510.98   | 5438.951  | <b>AF086029</b>   | 1141.121  | 1055.668  |
| 11013.888 | <b>X95425</b>    | 1969.81   | 1468.339  | <b>AF075115</b>   | 978.151   | 560.112   |
| 4420.123  | <b>NM_004422</b> | 2406.936  | 1889.799  | <b>AK021668</b>   | 16397.451 | 13975.495 |
| 728.582   | <b>M33197</b>    | 72948.867 | 65176.504 | <b>AF086148</b>   | 8935.017  | 7116.866  |
| 1624.833  | <b>NM_004895</b> | 9258.185  | 8656.311  | <b>NM_018363</b>  | 1069.351  | 810.408   |
| 3834.29   | <b>U59748</b>    | 1493.634  | 1109.277  | <b>AJ245433</b>   | 17117.994 | 26478.537 |
| 496.384   | <b>NM_014303</b> | 17091.254 | 9615.708  | <b>AK021878</b>   | 508.569   | 795.914   |
| 431.863   | <b>L02922</b>    | 25973.523 | 31446.311 | <b>AL080103</b>   | 554.802   | 776.036   |
| 879.754   | <b>NM_001797</b> | 2295.686  | 3848.721  | <b>AK023217</b>   | 455.725   | 781.935   |
| 1208.95   | <b>NM_003154</b> | 2584.181  | 3373.125  | <b>AK021883</b>   | 808.964   | 461.708   |
| 265.029   | <b>NM_004235</b> | 1036.367  | 1188.497  | <b>AF090902</b>   | 1838.371  | 2437.571  |
| 1301.447  | <b>AK023459</b>  | 4094.204  | 4418.108  | <b>AF119887</b>   | 10785.033 | 8844.278  |
| 6706.953  | <b>BI762154</b>  | 857.957   | 1261.556  | <b>AK091038</b>   | 480.208   | 470.973   |
| 3131.895  | <b>NM_012139</b> | 4257.472  | 2169.462  | <b>AK024193</b>   | 617.746   | 1064.073  |
| 1329.992  | <b>AF121856</b>  | 3207.151  | 2912.409  | <b>NM_018578</b>  | 534.72    | 487.637   |
| 1805.51   | <b>NM_006421</b> | 3224.368  | 2848.257  | <b>AK024438</b>   | 8473.949  | 10125.238 |
| 1790.05   | <b>NM_003765</b> | 12165.546 | 15949.953 | <b>AK022803</b>   | 933.593   | 952.982   |
| 781.162   | <b>NM_018202</b> | 18030.938 | 19634.521 | <b>AK023517</b>   | 744.89    | 974.746   |
| 2112.68   | <b>AB023197</b>  | 4894.137  | 4456.843  | <b>AK023869</b>   | 1995.307  | 1850.117  |
| 1823.652  | <b>NM_022173</b> | 6966.729  | 7179.396  | <b>NM_017728</b>  | 1034.032  | 996.565   |
| 1080.427  | <b>AB040970</b>  | 4354.794  | 4784.933  | <b>U80772</b>     | 720.033   | 707.392   |
| 44902.371 | <b>NM_018330</b> | 4228.235  | 5137.239  | <b>NM_006189</b>  | 1168.189  | 1450.803  |
| 638.28    | <b>AB023222</b>  | 1224.772  | 1111.203  | <b>AJ272177</b>   | 894.713   | 1103.513  |
| 1933.999  | <b>M33197</b>    | 71036.383 | 65040.352 | <b>AK026402</b>   | 9094.78   | 10766.026 |
| 1031.221  | <b>NM_000295</b> | 1686.027  | 2157.715  | <b>AF111846</b>   | 1072.698  | 704.421   |
| 5695.287  | <b>AF103795</b>  | 872.344   | 1047.959  | <b>M11948</b>     | 63934.594 | 51891.18  |
| 4647.103  | <b>NM_006215</b> | 701.966   | 734.516   | <b>Z36850</b>     | 681.954   | 966.43    |
| 1901.335  | <b>NM_000717</b> | 1864.639  | 733.206   | <b>AL049969</b>   | 849.118   | 1716.542  |
| 837.987   | <b>M33197</b>    | 74317.805 | 65226.379 | <b>unknown (S</b> | 1071.89   | 941.895   |

|           |           |           |           |           |           |           |
|-----------|-----------|-----------|-----------|-----------|-----------|-----------|
| 750.145   | NM_004845 | 3027.315  | 2823.482  | NM_015373 | 1166.184  | 986       |
| 5936.966  | NM_000047 | 11280.425 | 6893.427  | NM_014566 | 1486.016  | 1239.064  |
| 1255.981  | M68874    | 2783.605  | 3989.777  | AK026366  | 29777.738 | 37932.246 |
| 1022.478  | NM_006319 | 4758.83   | 8153.272  | AK024229  | 14713.493 | 14345.076 |
| 3779.266  | NM_018226 | 6947.326  | 5592.855  | AK021467  | 6119.13   | 4049.89   |
| 3892.873  | NM_004605 | 1266.934  | 1104.671  | NM_020371 | 1456.724  | 1653.052  |
| 2862.761  | Z36813    | 6787.254  | 5280.291  | AK022498  | 1438.814  | 1441.292  |
| 3052.627  | NM_006660 | 8746.176  | 13255.368 | U84506    | 1656.182  | 1421.257  |
| 805.036   | M33197    | 16390.734 | 15994.038 | U21556    | 62153.652 | 49288.469 |
| 435.541   | NM_004045 | 12510.912 | 15436.928 | AB002444  | 921.553   | 1069.752  |
| 4315.147  | NM_001891 | 2403.137  | 2404.157  | AB002344  | 1227.34   | 1215.366  |
| 1315.054  | NM_001440 | 25490.971 | 19416.969 | BF210352  | 645.965   | 961.629   |
| 468.864   | NM_016618 | 2298.44   | 1192.671  | NM_006829 | 1396.776  | 1662.692  |
| 868.929   | AB014568  | 22947.303 | 18069.268 | NM_017669 | 15148.973 | 18529.639 |
| 943.5     | NM_012249 | 4775.518  | 3665.428  | AF147379  | 39070.688 | 40739.34  |
| 477.299   | AK022546  | 6334.57   | 6894.694  | AK023760  | 6109.553  | 6458.348  |
| 558.657   | NM_014067 | 8931.651  | 7539.05   | AF086034  | 12204.848 | 20329.756 |
| 2062.108  | NM_002914 | 3466.454  | 2983.241  | AK000174  | 408.673   | 846.512   |
| 732.04    | NM_020385 | 2150.226  | 1512.153  | AF130071  | 1100.459  | 550.898   |
| 5037.641  | NM_014877 | 969.965   | 569.319   | AF130065  | 620.96    | 1032.222  |
| 1767.321  | NM_006541 | 1374.497  | 1226.995  | AF093744  | 1080.241  | 1095.678  |
| 653.323   | NM_004328 | 7385.553  | 5759.249  | NM_018687 | 13633.164 | 7949.301  |
| 1002.581  | NM_004581 | 4988.656  | 4857.896  | M57417    | 47870.895 | 43108.836 |
| 195.065   | NM_006817 | 24946.295 | 20536.631 | NM_020524 | 9276.338  | 8327.923  |
| 845.26    | NM_015921 | 48074.914 | 38620.121 | NM_001999 | 2789.132  | 2924.816  |
| 3237.247  | AB040900  | 9427.86   | 8915.718  | X64977    | 419.439   | 1193.101  |
| 3714.964  | NM_001482 | 1476.359  | 1393.791  | AF064851  | 1014.362  | 1125.723  |
| 1009.895  | NM_001797 | 2015.232  | 2996.679  | NM_002602 | 5235.438  | 6287.875  |
| 242.246   | NM_003154 | 2413.989  | 1814.012  | NM_016239 | 1476.259  | 1197.54   |
| 444.336   | NM_004235 | 662.35    | 387.599   | NM_003383 | 2793.817  | 1677.3    |
| 813.019   | AK023459  | 4053.594  | 3021.916  | D17271    | 6140      | 3691.613  |
| 8369.776  | U13022    | 2456.505  | 1867.856  | AF282264  | 11381.271 | 14156.877 |
| 1533.379  | BG763477  | 2176.645  | 19805.291 | AF086322  | 940.51    | 1683.37   |
| 2114.284  | AA702640  | 2554.961  | 2589.39   | Z70717    | 754.401   | 811.195   |
| 526.905   | T68583    | 3367.377  | 3668.703  | AK024736  | 1459.344  | 1036.011  |
| 1981.797  | AA481944  | 42618.496 | 36115.867 | NM_007106 | 2516.354  | 1994.208  |
| 174.204   | X14390    | 1066.79   | 1054.676  | AL137555  | 2000.314  | 1731.328  |
| 10565.08  | D42108    | 2533.581  | 2693.356  | AL133017  | 1462.273  | 1397.916  |
| 784.197   | BG700922  | 1073.505  | 1360.744  | CY3Cy5    | 2072.811  | 86.295    |
| 256.807   | AI366068  | 24705.066 | 8893.551  | X00588    | 667.486   | 958.6     |
| 1143.072  | N57553    | 991.392   | 1102.388  | AI359037  | 3488.703  | 6512.845  |
| 487.229   | AF080158  | 2619.344  | 3047.732  | X15998    | 1886.085  | 1789.528  |
| 411.585   | BM664556  | 1793.517  | 1814.416  | M76482    | 477.357   | 381.817   |
| 549.839   | NM_016545 | 2721.346  | 2811.672  | NM_001883 | 2144.88   | 3495.507  |
| 3749.542  | NM_000295 | 1076.947  | 1481.931  | NM_004628 | 1121.021  | 1631.904  |
| 349.188   | AF103795  | 1957.303  | 983.566   | H-M 69043 | 2689.995  | 4266.637  |
| 2342.196  | NM_006215 | 1708.787  | 868.888   | AF077374  | 1508.377  | 1485.646  |
| 7857.414  | NM_007024 | 5137.43   | 4957.24   | U43901    | 1191.448  | 852.255   |
| 1912.013  | NM_013231 | 3377.329  | 3111.646  | X59065    | 662.863   | 865.122   |
| 324.688   | NM_012106 | 3469.644  | 4530.881  | M59828    | 3622.615  | 2627.273  |
| 12417.526 | NM_006254 | 7126.838  | 6548.457  | NM_016134 | 1372.146  | 661.646   |
| 1730.542  | X95425    | 1861.08   | 1479.813  | SR2       | 41799.641 | 30444.037 |
| 490.562   | NM_004422 | 2161.074  | 1825.064  | SR4       | 10359.943 | 8927.51   |

|           |           |           |           |           |           |           |
|-----------|-----------|-----------|-----------|-----------|-----------|-----------|
| 1948.321  | NM_016562 | 1016.276  | 949.076   | SR6       | 1768.042  | 1275.892  |
| 4090.143  | M33197    | 70123.477 | 65256.25  | SR8       | 6055.46   | 16291.407 |
| 3252.707  | AY009399  | 11988.26  | 15561.92  | SR10      | 22734.861 | 5795.562  |
| 1133.382  | NM_004895 | 8583.025  | 8230.019  | CY3Cy5    | 1528.136  | 74.032    |
| 1935.925  | U59748    | 1399.529  | 1358.463  | NM_000612 | 2547.917  | 3414.397  |
| 861.562   | L32537    | 926.717   | 1051.506  | NM_004257 | 9258.412  | 6446.212  |
| 643.181   | NM_014303 | 15883.582 | 9550.304  | NM_000683 | 1987.957  | 2482.292  |
| 12645.105 | L02922    | 23908.645 | 38791.992 | NM_003629 | 681.128   | 944.322   |
| 2031.768  | M33197    | 16868.473 | 12143.349 | NM_005901 | 5220.697  | 4175.461  |
| 1572.961  | NM_001891 | 2497.018  | 2103.455  | NM_004248 | 1166.617  | 1451.607  |
| 4629.385  | NM_012139 | 3655.316  | 2889.547  | NM_000959 | 470.234   | 405.463   |
| 295.808   | NM_006421 | 3196.146  | 2483.35   | NM_001313 | 912.085   | 1523.504  |
| 1723.358  | NM_017457 | 18365.779 | 17305.295 | NM_004796 | 780.009   | 381.674   |
| 502.375   | NM_003765 | 11601.439 | 13322.121 | NM_000435 | 4310.546  | 3940.74   |
| 944.052   | M33197    | 64075.605 | 55941.246 | NM_001842 | 20045.654 | 18483.111 |
| 16557.943 | NM_018202 | 16356.821 | 14842.994 | AB017169  | 954.68    | 866.661   |
| 721.746   | AB023197  | 5033.211  | 4598.834  | AL080170  | 1416.857  | 1040.963  |
| 1773.877  | NM_022173 | 6644.046  | 6305.573  | AB039903  | 2289.055  | 1903.963  |
| 3530.058  | AB040970  | 4627.502  | 3906.642  | NM_000542 | 8858.082  | 6949.636  |
| 987.689   | NM_018330 | 3836.536  | 4565.866  | NM_006851 | 723.751   | 748.373   |
| 505.126   | AB023222  | 1553.601  | 1975.266  | AB001328  | 878.368   | 645.041   |
| 3312.074  | AB033088  | 1457.484  | 1159.492  | H99588    | 2684.663  | 2209.433  |
| 2048.6    | U50342    | 3524.927  | 3165.302  | AK022600  | 2228.145  | 2166.304  |
| 4234.171  | NM_015921 | 50000.84  | 30553.365 | AK023142  | 970.009   | 1398.237  |
| 890.618   | M33197    | 914.163   | 1766.134  | U61740    | 4426.374  | 4765.529  |
| 3020.718  | NM_001482 | 1437.966  | 1216.71   | NM_006409 | 50963.637 | 53186.848 |
| 39280.84  | NM_000717 | 1770.914  | 1279.866  | AB049054  | 2027.677  | 2229.282  |
| 930.063   | NM_004845 | 1899.756  | 1226.578  | NM_015071 | 1650.709  | 1641.22   |
|           | NM_007107 | 11669.901 | 5372.942  | NM_013227 | 1242.276  | 1144.463  |
|           | NM_000047 | 7711.155  | 4381.507  | Z83803    | 545.343   | 887.36    |
|           | M68874    | 2681.743  | 3096.679  | AF027205  | 12538.892 | 13534.717 |
|           | NM_006319 | 3980.018  | 5953.765  | AF075012  | 1928.395  | 3004.319  |
|           | NM_018226 | 6371.497  | 4439.782  | NM_001570 | 1229.591  | 1322.667  |
|           | NM_004605 | 1056.04   | 1283.681  | NM_015658 | 425.958   | 448.836   |
|           | Z36813    | 6014.756  | 4303.369  | NM_000589 | 1671.357  | 647.615   |
|           | NM_006660 | 7486.547  | 9263.767  | NM_016546 | 10675.373 | 10405.899 |
|           | NM_001486 | 668.533   | 1336.453  | AF309653  | 6874.956  | 2338.352  |
|           | AF080158  | 2737.763  | 2696.279  | NM_002620 | 13517.485 | 9655.437  |
|           | NM_001440 | 28358.313 | 24699.281 | S79267    | 1022.771  | 513.553   |
|           | NM_016618 | 2115.458  | 1160.584  | NM_001816 | 1003.115  | 878.387   |
|           | AB014568  | 19770.211 | 19082.914 | NM_003784 | 25386.064 | 21772.371 |
|           | NM_012249 | 3561.976  | 2005.78   | NM_000195 | 20431.68  | 18507.307 |
|           | AK022546  | 5980.799  | 5745.829  | NM_005445 | 8520.626  | 7325.639  |
|           | NM_014067 | 7533.981  | 6272.597  | NM_014899 | 2317.735  | 1829.107  |
|           | NM_002914 | 3154.036  | 2816.598  | NM_003630 | 3669.365  | 2480.4    |
|           | NM_020385 | 2090.838  | 1458.545  | NM_000046 | 2999.771  | 2828.422  |
|           | NM_006541 | 1080.711  | 1093.629  | NM_003219 | 1482.476  | 1063.778  |
|           | NM_005705 | 8335.539  | 13421.626 | NM_006709 | 3498.314  | 2259.096  |
|           | NM_004328 | 3252.736  | 1796.802  | NM_004910 | 1013.066  | 720.723   |
|           | NM_004581 | 5303.594  | 4803.481  | AB013452  | 608.676   | 498.243   |
|           | NM_006817 | 25145.846 | 18254.84  | M93107    | 3662.614  | 3685.909  |
|           | NM_001797 | 2016.623  | 3365.136  | BC001479  | 4228.323  | 4005.523  |
|           | NM_003154 | 2422.446  | 2288.856  | NM_002461 | 12455.301 | 14542.023 |



|           |           |           |           |           |           |
|-----------|-----------|-----------|-----------|-----------|-----------|
| AK023459  | 4075.338  | 3829.002  | NM_005771 | 5360.858  | 7635.734  |
| BI762154  | 765.657   | 1176.656  | AB032986  | 18997.57  | 26237.537 |
| U13022    | 1580.507  | 1129.041  | NM_017528 | 16190.765 | 24160.955 |
| R23251    | 20889.49  | 12003.648 | NM_016032 | 9769.418  | 14119.9   |
| BG763477  | 1858.38   | 24558.535 | NM_014324 | 53117.328 | 53142.086 |
| AA702640  | 2557.725  | 3531.855  | NM_001687 | 15841.69  | 25670.924 |
| T68583    | 3956.718  | 3470.379  | AK026374  | 1161.39   | 1973.942  |
| AA481944  | 45752.48  | 35056.516 | NM_001169 | 831.665   | 839.223   |
| X14390    | 1404.457  | 1060.447  | AK024648  | 8520.694  | 8636.818  |
| AF038440  | 733.425   | 1100.124  | NM_003459 | 5485.054  | 4598.688  |
| M31158    | 25163.977 | 17367.736 | AL354615  | 1411.559  | 1382.692  |
| D42108    | 1970.093  | 1945.422  | NM_013349 | 35140.711 | 30245.734 |
| BG700922  | 1445.42   | 1033.11   | NM_003705 | 3167.403  | 4063.589  |
| AI366068  | 23881.066 | 8476.283  | NM_006861 | 1990.603  | 2902.102  |
| N57553    | 883.14    | 936.168   | NM_005829 | 2374.275  | 2435.903  |
| AB040970  | 4991.922  | 3279.693  | NM_000466 | 1336.926  | 1644.454  |
| NM_018330 | 4428.756  | 3871.68   | NM_015908 | 15117.543 | 25932.402 |
| AB023222  | 1035.818  | 676.418   | NM_000896 | 584.772   | 550.419   |
| U50342    | 3291.083  | 2815.222  | AB040672  | 4368.652  | 2992.958  |
| NM_000295 | 936.488   | 1453.054  | NM_002192 | 1645.612  | 1974.847  |
| AF103795  | 1061.932  | 1358.393  | NM_005491 | 3093.757  | 4229.968  |
| NM_006215 | 853.489   | 576.034   | NM_003869 | 2920.825  | 3073.504  |
| M33197    | 67897.953 | 65262.074 | AK025599  | 303.463   | 298.369   |
| NM_007024 | 4846.122  | 5457.814  | X63417    | 7262.909  | 9676.369  |
| NM_013231 | 3490.304  | 3298.427  | S94539    | 24008.178 | 32675.482 |
| NM_012106 | 3863.764  | 4644.496  | NM_006402 | 808.856   | 1339.196  |
| NM_006254 | 7651.023  | 6687.747  | NM_005785 | 2021.551  | 1080.316  |
| X95425    | 2232.996  | 1801.598  | NM_018248 | 2012.066  | 2162.962  |
| NM_004422 | 2338.478  | 2540.338  | AK001695  | 6620.867  | 6432.892  |
| NM_016562 | 905.618   | 909.691   | NM_017886 | 2446.505  | 1984.295  |
| M33197    | 70486.563 | 65143.309 | NM_006252 | 2180.215  | 1392.714  |
| AY009399  | 11008.482 | 15641.259 | NM_001721 | 704.717   | 277.906   |
| U59748    | 1847.901  | 1570.014  | NM_014397 | 6204.561  | 3381.047  |
| L32537    | 1657.718  | 2111.583  | AB023182  | 1310.079  | 1249.729  |
| NM_014303 | 19406.303 | 11762.438 | NM_003607 | 1226.63   | 1172.317  |
| NM_006660 | 7627.49   | 6361.448  | NM_006575 | 2144.222  | 1818.388  |
| NM_006685 | 32590.836 | 29398.291 | NM_013254 | 3272.827  | 3658.072  |
| M33197    | 16488.52  | 14401.432 | NM_000437 | 9822.853  | 10074.418 |
| NM_004045 | 11251.449 | 8793.876  | AB046819  | 7147.259  | 7248.983  |
| NM_001891 | 2123.17   | 1726.922  | NM_006090 | 5419.099  | 4728.27   |
| NM_012139 | 4290.7    | 3377.77   | NM_002900 | 9597.518  | 8516.028  |
| AF121856  | 3021.413  | 3203.723  | AK001560  | 593.578   | 705.886   |
| NM_006421 | 3400.686  | 3277.889  | AB001328  | 575.434   | 468.149   |
| NM_017457 | 21751.734 | 29226.408 | H99588    | 1554.489  | 1902.563  |
| NM_003765 | 12187.15  | 19040.359 | X00588    | 633.64    | 868.087   |
| NM_018202 | 15593.882 | 16473.379 | AI359037  | 4434.426  | 9163.876  |
| AB023197  | 4267.954  | 4838.074  | BI754285  | 556.891   | 152.041   |
| NM_022173 | 6524.331  | 6915.588  | X15998    | 2273.374  | 2179.047  |
| NM_005705 | 6816.848  | 7670.92   | M76482    | 430.604   | 470.211   |
| NM_004328 | 2717.74   | 1252.447  | NM_001883 | 1953.855  | 2243.918  |
| NM_004581 | 5226.668  | 4058.963  | NM_004628 | 899.646   | 841.576   |
| NM_006817 | 25317.797 | 16412.193 | H-M 69043 | 2673.838  | 2138.012  |
| NM_007108 | 13576.532 | 11851.666 | AF077374  | 1068.221  | 484.181   |

|           |           |           |           |           |           |
|-----------|-----------|-----------|-----------|-----------|-----------|
| NM_015921 | 49081.238 | 38514.418 | X59065    | 793.232   | 812.567   |
| AB040900  | 18270.186 | 14691.837 | M59828    | 6533.532  | 5541.92   |
| NM_001482 | 1301.185  | 859.491   | NM_016134 | 2396.844  | 1643.713  |
| U80018    | 1139.653  | 1283.917  | AJ010482  | 1542.693  | 1053.183  |
| NM_000717 | 2071.055  | 1684.953  | NM_005445 | 3990.943  | 4666.1    |
| M33197    | 64888.719 | 65316.246 | NM_014899 | 889.742   | 1099.619  |
| NM_004845 | 2272.448  | 2224.753  | NM_003630 | 2589.395  | 2009.631  |
| NM_007107 | 13940.908 | 10638.422 | NM_000046 | 1537.21   | 1805.779  |
| NM_000047 | 9651.164  | 9836.047  | NM_003219 | 730.844   | 852.221   |
| M68874    | 2674.001  | 5132.713  | NM_006709 | 1937.629  | 2024.535  |
| NM_006319 | 4286.358  | 7314.243  | NM_000612 | 1808.854  | 3051.62   |
| NM_018226 | 7114.021  | 6282.918  | NM_004257 | 11245.175 | 9377.953  |
| NM_004605 | 1882.412  | 1278.624  | NM_002844 | 431.755   | 544.496   |
| Z36813    | 5949.672  | 6654.695  | NM_000683 | 1413.47   | 1564.825  |
| AF303889  | 1329.188  | 1162.375  | NM_003629 | 1378.449  | 1931.976  |
| M33197    | 65053.273 | 68000.422 | NM_005901 | 4888.361  | 3536.438  |
| AK022649  | 4870.802  | 4946.555  | NM_004248 | 1360.764  | 1175.801  |
| NM_016507 | 4192.979  | 4702.292  | NM_001313 | 814.185   | 761.222   |
| NM_002743 | 11590.522 | 9956.588  | NM_004796 | 1034.137  | 387.68    |
| AF173358  | 10714.627 | 13871.454 | NM_000435 | 5136.719  | 3471.697  |
| NM_016366 | 2794.478  | 3265.974  | NM_001842 | 26780.238 | 25238.412 |
| M33197    | 65023.352 | 72566.695 | AB017169  | 1345.494  | 1298.964  |
| NM_016545 | 2684.577  | 3271.053  | AL080170  | 1560.298  | 1878.784  |
| NM_001440 | 28034.4   | 36623.098 | AB039903  | 4240.726  | 3977.718  |
| NM_001201 | 3409.447  | 3185.635  | NM_000542 | 14704.28  | 14474.158 |
| NM_016618 | 2550.063  | 2231.452  | NM_003705 | 1099.867  | 1384.366  |
| AB014568  | 18906.174 | 23628.486 | NM_006861 | 825.797   | 1718.003  |
| NM_012249 | 4892.391  | 4796.729  | NM_005829 | 1262.896  | 1657.133  |
| AK022546  | 6436.163  | 9610.639  | NM_000466 | 707.314   | 728.581   |
| NM_014067 | 7476.459  | 10275.72  | NM_015908 | 10012.63  | 19828.189 |
| NM_002914 | 3374.157  | 3798.114  | AK022600  | 2390.649  | 3691.59   |
| NM_020385 | 2157.775  | 2310.23   | AK023142  | 834.262   | 1499.298  |
| NM_014877 | 1606.211  | 2321.061  | U61740    | 6831.599  | 7798.733  |
| NM_006541 | 3497.497  | 4150.439  | NM_006409 | 51498.207 | 52566.832 |
| NM_018179 | 1468.387  | 854.663   | AB049054  | 2438.881  | 1867.854  |
| NM_006197 | 6504.097  | 2132.62   | NM_015071 | 1844.916  | 2268.743  |
| NM_014181 | 946.579   | 771.988   | NM_013227 | 2492.011  | 3360.864  |
| M29273    | 4300.876  | 4375.948  | Z83803    | 781.748   | 667.267   |
| M33197    | 59572.324 | 63169.598 | AF027205  | 17076.119 | 9642.999  |
| NM_004854 | 3855.167  | 3673.958  | AF075012  | 2007.766  | 1904.592  |
| NM_006377 | 3070.432  | 3593.188  | NM_001570 | 1276.211  | 1103.78   |
| AK026427  | 1507.864  | 1181.125  | NM_015658 | 910.649   | 513.165   |
| NM_002436 | 2544.453  | 3747.489  | NM_000589 | 2373.016  | 1215.718  |
| NM_004755 | 2763.949  | 3673.48   | NM_016546 | 15976.439 | 14908.895 |
| NM_002186 | 3572.485  | 3511.07   | AF309653  | 8158.052  | 2685.256  |
| NM_006182 | 994.872   | 1484.094  | NM_002620 | 13842.118 | 9550.179  |
| AL137543  | 5595.854  | 8364.076  | S79267    | 904.488   | 453.669   |
| NM_004444 | 6030.67   | 7814.768  | NM_001816 | 1339.222  | 894.1     |
| M33197    | 1013.818  | 1611.531  | NM_003784 | 34881.453 | 40317.852 |
| NM_001957 | 1460.101  | 2039.88   | NM_000195 | 23868.719 | 23739.102 |
| AK024533  | 11239.934 | 12492.048 | NM_006575 | 1028.57   | 925.33    |
| NM_002736 | 16243.947 | 20486.705 | NM_013254 | 1436.815  | 1841.824  |
| NM_004246 | 5712.038  | 7834.658  | NM_000437 | 3864.905  | 4782.579  |

|           |           |           |           |           |           |
|-----------|-----------|-----------|-----------|-----------|-----------|
| NM_004961 | 627.709   | 1256.922  | AB046819  | 3920.538  | 3946.174  |
| NM_002285 | 3783.077  | 2930.19   | NM_006090 | 2245.668  | 2780.737  |
| NM_006694 | 28888.086 | 18182.848 | NM_002900 | 3871.653  | 4149.656  |
| NM_005207 | 2474.255  | 2082.243  | NM_004910 | 1232.18   | 1312.105  |
| NM_014467 | 1059.036  | 1079.64   | M93107    | 5023.697  | 7005.728  |
| NM_003087 | 2958.676  | 2399.588  | BC001479  | 5420.928  | 5747.661  |
| NM_001630 | 2605.554  | 2352.023  | NM_002461 | 17422.539 | 21584.189 |
| NM_002031 | 1228.355  | 1109.905  | NM_005771 | 5978.917  | 7882.158  |
| AF305081  | 3442.253  | 3238.836  | AB032986  | 23621.248 | 29752.256 |
| NM_004712 | 5590.959  | 6571.619  | NM_017528 | 23867.051 | 25871.459 |
| AF118078  | 1755.847  | 2013.204  | NM_016032 | 12311.485 | 7896.821  |
| AL157428  | 1297.236  | 1132.595  | NM_014324 | 51890.055 | 48972.195 |
| M33197    | 60639.891 | 63802.398 | NM_001687 | 20441.588 | 19959.826 |
| NM_005858 | 2556.186  | 3293.415  | AK026374  | 1980.983  | 2230.368  |
| AK025163  | 1511.966  | 1265.589  | NM_001169 | 1435.257  | 842.785   |
| NM_014931 | 5649.594  | 5003.095  | AK024648  | 9123.228  | 5088.722  |
| NM_014487 | 3750.761  | 3883.431  | NM_000719 | 802.911   | 292.106   |
| NM_018070 | 3945.838  | 5302.214  | NM_003459 | 5350.577  | 3362.855  |
| NM_002484 | 3908.487  | 4945.91   | NM_000171 | 1800.039  | 781.606   |
| M33197    | 62260.785 | 65184.359 | AL354615  | 1056.932  | 1086.112  |
| AK025941  | 3728.199  | 2210.22   | NM_013349 | 28296.631 | 18551.344 |
| M33197    | 61697.668 | 62673.09  | NM_016134 | 597.789   | 658.609   |
| NM_002848 | 984.17    | 649.783   | AJ010482  | 1379.694  | 1467.055  |
| NM_015914 | 2298.993  | 1916.006  | NM_000896 | 641.456   | 816.309   |
| AF059531  | 7015.17   | 7652.22   | AB040672  | 4596.727  | 2816.095  |
| NM_002707 | 10737.904 | 7848.465  | NM_002192 | 2341.61   | 2709.362  |
| AF029777  | 1600.133  | 1058.923  | NM_005491 | 4542.585  | 6552.329  |
| NM_003352 | 1328.993  | 1170.057  | NM_003869 | 3159.35   | 2796.244  |
| AK026884  | 10593.271 | 12185.602 | X63417    | 7455.771  | 7927.729  |
| S82198    | 1307.635  | 1718.685  | S94539    | 26602.947 | 21313.455 |
| NM_002594 | 2988.399  | 3453.188  | NM_006402 | 1175.878  | 1501.006  |
| NM_031407 | 2759.226  | 3096.28   | NM_005785 | 2226.457  | 652.029   |
| M33197    | 57617.379 | 62860.332 | NM_018248 | 2459.658  | 1991.638  |
| AK000410  | 44913.172 | 36601.688 | AK001695  | 7901.322  | 4863.979  |
| NM_020193 | 1639.678  | 1735.529  | NM_017886 | 2730.244  | 2111.245  |
| D86982    | 1295.48   | 1227.213  | NM_006252 | 1780.714  | 917.645   |
| NM_005619 | 2740.429  | 7367.395  | NM_001721 | 598.771   | 327.955   |
| D87440    | 1880.254  | 1520.141  | NM_014397 | 6318.88   | 4440.054  |
| AK000332  | 10401.775 | 11622.638 | NM_003607 | 887.755   | 1334.884  |
| NM_002895 | 1789.704  | 1235.174  | AB017169  | 556.894   | 444.203   |
| NM_013351 | 11140.887 | 14291.354 | AL080170  | 735.943   | 1105.111  |
| NM_012340 | 3193.922  | 2385.827  | AB039903  | 1553.635  | 1847.444  |
| NM_006022 | 1180.073  | 1287.179  | NM_000542 | 6409.195  | 8627.071  |
| AK025110  | 1964.151  | 1793.281  | NM_006851 | 424.589   | 651.547   |
| X52339    | 42533.492 | 33209.527 | AB001328  | 1066.272  | 1048.859  |
| M33197    | 56806.293 | 60937.668 | H99588    | 1699.799  | 2123.623  |
| AB046830  | 2627.171  | 2845.576  | X00588    | 704.414   | 649.524   |
| NM_007122 | 2747.314  | 3940.902  | AI359037  | 4152.651  | 5757.633  |
| NM_001488 | 841.515   | 813.178   | BI754285  | 1009.926  | 594.459   |
| NM_016202 | 6335.662  | 6099.888  | X15998    | 3160.437  | 1450.806  |
| NM_012476 | 962.43    | 863.682   | M76482    | 709.998   | 868.244   |
| NM_016604 | 2366.796  | 4199.45   | NM_001883 | 2245.078  | 2148.483  |
| M33197    | 65067.063 | 71173.445 | NM_004628 | 1065.32   | 939.322   |

|           |           |           |           |           |           |
|-----------|-----------|-----------|-----------|-----------|-----------|
| NM_006276 | 3766.267  | 3066.001  | L31785    | 977.841   | 118.501   |
| NM_003407 | 4772.87   | 11300.168 | H-M 69043 | 2348.948  | 2009.507  |
| NM_007209 | 63219.094 | 66874.094 | AF077374  | 1008.863  | 561.33    |
| NM_003729 | 6562.59   | 3770.467  | U43901    | 665.554   | 393.937   |
| BC015899  | 6297.128  | 4962.608  | X59065    | 861.098   | 667.185   |
| NM_017986 | 5752.518  | 4850.082  | M59828    | 4369.129  | 3463.811  |
| AK024846  | 2136.57   | 910.297   | AF309653  | 3920.775  | 1512.067  |
| AK001451  | 4137.815  | 3827.051  | NM_002620 | 5399.843  | 5542.253  |
| M33197    | 43636.766 | 36871.184 | S79267    | 470.434   | 766.084   |
| NM_007180 | 1155.339  | 1112.666  | NM_001816 | 524.98    | 420.754   |
| NM_005476 | 4794.092  | 2775.158  | NM_003784 | 14390.958 | 16971.932 |
| NM_005660 | 2294.995  | 2275.039  | NM_000195 | 15009.934 | 14793.686 |
| AK023902  | 1340.871  | 1408.153  | NM_005445 | 5309.187  | 5051.573  |
| AB011173  | 4848.817  | 1913.314  | NM_014899 | 1235.709  | 1404.542  |
| AB023195  | 1594.521  | 1838.733  | NM_003630 | 3577.578  | 3225.941  |
| U43431    | 2492.206  | 2146      | NM_000046 | 2351.477  | 3632.442  |
| AB006622  | 1695.287  | 1907.044  | NM_003219 | 1371.035  | 1400.889  |
| M33197    | 62581.484 | 65145.945 | NM_006709 | 2783.085  | 2208.178  |
| AK097041  | 3467.018  | 4629.125  | NM_000612 | 2311.2    | 2951.029  |
| AF068744  | 16941.623 | 19032.492 | NM_004257 | 18142.59  | 10376.475 |
| AK000762  | 2136.738  | 1505.006  | NM_002844 | 882.878   | 638.93    |
| NM_004571 | 836.805   | 496.838   | NM_000683 | 2417.099  | 2189.042  |
| AJ345030  | 1665.517  | 1600.375  | NM_005901 | 5305.082  | 3025.466  |
| AK023472  | 9988.759  | 9937.149  | NM_001313 | 757.366   | 792.987   |
| AL109729  | 941.959   | 1024.892  | NM_004796 | 996.393   | 137.363   |
| M33197    | 57386.313 | 57886.047 | NM_000435 | 3646.335  | 2630.051  |
| S79912    | 5014.917  | 4655.935  | NM_001842 | 19599.02  | 18986.242 |
| AL110283  | 868.046   | 1054.807  | NM_003459 | 4189.872  | 6306.479  |
| AK026892  | 2072.007  | 3350.736  | NM_000171 | 1049.789  | 859.916   |
| S83275    | 7148.068  | 7046.261  | AL354615  | 579.838   | 957.98    |
| AL117427  | 4110.718  | 4310.615  | NM_013349 | 22115.191 | 27717.762 |
| M33197    | 60593.934 | 61981.492 | NM_003705 | 992.246   | 1199.462  |
| AF052118  | 11291.608 | 15677.959 | NM_006861 | 698.298   | 1627.903  |
| AK025166  | 5038.287  | 7068.105  | NM_005829 | 1955.033  | 2986.215  |
| AL359586  | 2065.829  | 3921.506  | NM_000466 | 744.376   | 756.329   |
| AF147421  | 730.857   | 1158.522  | NM_015908 | 13595.572 | 26160.076 |
| AF035290  | 1943.823  | 2996.064  | AK022600  | 7266.942  | 8888.759  |
| AK023216  | 1464.486  | 2240.99   | AK023142  | 2351.402  | 2262.618  |
| M33197    | 58302.465 | 61075.121 | U61740    | 11837.972 | 10556.498 |
| AK023288  | 1380.951  | 1644.707  | NM_006409 | 53805.203 | 51772.992 |
| M33197    | 60706.758 | 61384.289 | AB049054  | 3345.442  | 2906.036  |
| AK022428  | 1428.13   | 885.047   | NM_015071 | 1499.337  | 1241.269  |
| AK023457  | 2321.327  | 2679.801  | NM_013227 | 1701.82   | 1633.342  |
| AK025089  | 5000.333  | 5995.295  | Z83803    | 660.953   | 624.157   |
| AK023298  | 742.14    | 856.38    | AF027205  | 15177.766 | 8571.863  |
| AK021431  | 685.276   | 823.16    | AF075012  | 1496.25   | 1261.493  |
| M33197    | 60352.5   | 63047.199 | NM_001570 | 1164.27   | 892.363   |
| AF085996  | 1175.982  | 1899.741  | NM_015658 | 629.13    | 391.479   |
| AK001279  | 2115.177  | 2595.703  | NM_000589 | 2109.765  | 860.528   |
| AF086407  | 1126.708  | 1318.134  | NM_016546 | 13357.636 | 11120.668 |
| AF085949  | 586.118   | 860.092   | NM_017886 | 1968.831  | 5474.204  |
| AK001567  | 1895.308  | 2378.656  | NM_006252 | 1324.37   | 1511.013  |
| M33197    | 50138.375 | 55512.711 | NM_001721 | 375.457   | 297.058   |

|           |           |           |           |           |           |
|-----------|-----------|-----------|-----------|-----------|-----------|
| U52839    | 2515.585  | 2598.992  | NM_014397 | 3936.441  | 3806.197  |
| M33197    | 56089.207 | 57480.16  | AB023182  | 872.927   | 1386.221  |
| AK026984  | 20536.031 | 21461.852 | NM_003607 | 812.691   | 976.036   |
| M33197    | 60465.016 | 58934.672 | NM_006575 | 2060.389  | 1872.621  |
| AL157466  | 2935.348  | 2499.847  | NM_013254 | 2619.918  | 2635.008  |
| AL389981  | 634.102   | 839.488   | NM_000437 | 8042.221  | 10432.939 |
| AK024336  | 1646.41   | 1709.428  | AB046819  | 6799.454  | 8969.65   |
| NM_018621 | 1698.136  | 1480.606  | NM_006090 | 1090.807  | 1212.345  |
| AK022016  | 1642.007  | 1577.436  | NM_002900 | 6222.127  | 6018.633  |
| AK021628  | 2470.486  | 2821.781  | NM_004910 | 1590.71   | 1584.808  |
| M33197    | 59834.543 | 62249.438 | AB013452  | 964.253   | 1122.315  |
| NM_018603 | 1178.244  | 1319.398  | M93107    | 5348.692  | 5889.279  |
| AK022118  | 933.956   | 905.394   | BC001479  | 7253.145  | 5301.184  |
| AK026453  | 4834.075  | 4456.258  | NM_002461 | 17254.273 | 12980.423 |
| AK025673  | 817.745   | 939.804   | NM_005771 | 6919.064  | 8127.279  |
| M33197    | 58062.004 | 59038.531 | AB032986  | 22951.793 | 19508.945 |
| AK022431  | 790.263   | 1153.846  | NM_017528 | 21291.246 | 18921.361 |
| AK023305  | 22734.793 | 24041.672 | NM_016032 | 8657.494  | 6365.131  |
| AK023763  | 929.539   | 1008.182  | NM_014324 | 53780.547 | 48835.648 |
| AK022729  | 1520.781  | 1078.762  | NM_001687 | 15944.641 | 11657.758 |
| NM_006168 | 5393.466  | 5101.027  | AK026374  | 1181.051  | 1456.796  |
| AL050374  | 1840.966  | 2002.713  | NM_001169 | 1216.404  | 871.184   |
| M33197    | 60996.844 | 60818.789 | AK024648  | 8639.137  | 7472.558  |
| M28639    | 4589.175  | 4790.982  | AB037761  | 7153.76   | 10335.927 |
| AL122073  | 14873.847 | 22076.732 | NM_014008 | 41932.582 | 44172.723 |
| AF116655  | 4099.281  | 6024.393  | NM_014731 | 4452.044  | 7044.634  |
| AJ243222  | 1432.894  | 2110.318  | AF035191  | 8888.805  | 13024.368 |
| AK026132  | 4002.629  | 3030.179  | NM_004058 | 1123.101  | 1190.819  |
| Y11162    | 914.066   | 1433.3    | NM_004527 | 1393.91   | 1191.193  |
| M33197    | 60033.012 | 59594.125 | NM_012062 | 9953.294  | 11561.702 |
| AF070584  | 2982.599  | 4015.026  | AK026717  | 867.597   | 1020.844  |
| AF075006  | 940.828   | 631.097   | AJ010482  | 1977.917  | 2098.005  |
| M33197    | 57882.078 | 59622.543 | NM_000896 | 938.574   | 1178.579  |
| AK000903  | 27977.346 | 30643.598 | AB040672  | 6781.354  | 3430.396  |
| AK026896  | 877.284   | 1106.096  | NM_005491 | 4269.465  | 3906.807  |
| AL110169  | 1095.833  | 1131.704  | NM_003869 | 2319.856  | 1713.723  |
| L13743    | 1418.414  | 801.388   | X63417    | 6829.302  | 5691.762  |
| Z11849    | 5039.049  | 4385.534  | S94539    | 24920.113 | 22447.32  |
| AJ002788  | 3673.467  | 1986.411  | NM_006402 | 877.099   | 882.657   |
| M33197    | 59737.566 | 60090.516 | NM_005785 | 2888.804  | 1213.17   |
| AF075050  | 888.515   | 888.37    | NM_018248 | 2489.867  | 2026.487  |
| AK024842  | 1106.42   | 2004.038  | AK001695  | 7804.859  | 5853.269  |
| AK022962  | 714.907   | 1111.961  | AB031547  | 1310.667  | 2445.237  |
| NM_018382 | 1320.934  | 2128.476  | NM_003970 | 692.845   | 735.412   |
| M33197    | 58000.734 | 64375.07  | AK022496  | 1385.869  | 1677.99   |
| D17203    | 48473.059 | 46825.285 | AB042636  | 649.573   | 830.382   |
| NM_006495 | 6657.254  | 12435.995 | AB033035  | 611.067   | 796.494   |
| AK022101  | 1238.832  | 1897.204  | NM_002883 | 2434.844  | 3857.692  |
| NM_003251 | 1123.034  | 1753.232  | NM_019012 | 494.609   | 608.131   |
| AB046772  | 672.582   | 1190.269  | NM_016150 | 2926.524  | 3306.016  |
| M33197    | 61986.477 | 59659.34  | U57058    | 1129.812  | 1513.197  |
| AL442080  | 876.227   | 1290.446  | AL137452  | 1513.58   | 2024.206  |
| AY007143  | 3473.088  | 2718.403  | NM_004312 | 38005.086 | 27625.717 |

|             |           |           |           |           |           |
|-------------|-----------|-----------|-----------|-----------|-----------|
| L15557      | 1159.711  | 785.042   | NM_001347 | 3606.396  | 3317.763  |
| M33197      | 64867.656 | 64771.879 | AK024549  | 13563.373 | 12072.529 |
| NM_001563   | 7941.574  | 7321.193  | NM_006338 | 8174.468  | 6109.154  |
| NM_000266   | 989.17    | 1200.866  | NM_007164 | 8338.833  | 7244.636  |
| X89666      | 3478.739  | 4214.492  | NM_000261 | 1418.452  | 821.8     |
| NM_003104   | 8003.686  | 5994.031  | NM_002606 | 3601.866  | 1651.238  |
| NM_014581   | 1165.445  | 1647.851  | NM_002570 | 1324.356  | 1373.456  |
| M33197      | 56066.34  | 60840.332 | NM_003183 | 1450.129  | 1476.777  |
| AK024448    | 3203.06   | 3674.178  | NM_001657 | 386.053   | 364.292   |
| NM_014406   | 2979.261  | 3360.819  | NM_003585 | 469.903   | 274.346   |
| S68954      | 8698.954  | 2042.765  | NM_019851 | 1909.66   | 1193.852  |
| S81335      | 1101.098  | 1532.024  | NM_003238 | 1538.163  | 914.324   |
| M33197      | 37602.293 | 35310.5   | NM_014096 | 8212.207  | 17863.021 |
| NM_003353   | 11380.646 | 17073.236 | NM_005706 | 2005.356  | 3332.194  |
| X82127      | 12788.146 | 11484.554 | NM_001261 | 1391.051  | 2708.457  |
| AL122044    | 1546.457  | 1186.814  | NM_001977 | 813.669   | 1505.391  |
| M33197      | 59949.711 | 62744.684 | NM_007219 | 7039.133  | 7422.266  |
| CY3Cy5      | 2765.162  | 182.383   | AK026854  | 2977.15   | 3466.266  |
| AA418907    | 1309.844  | 1650.683  | NM_001269 | 937.544   | 1533.62   |
| AA115473    | 4131.63   | 4589.737  | NM_004906 | 1922.766  | 1916.347  |
| AA872397    | 7459.982  | 8085.719  | X98261    | 353.728   | 772.404   |
| M24283      | 435.866   | 1121.252  | NM_012447 | 12397.249 | 15874.986 |
| AA709414    | 3585.495  | 3685.022  | AK027013  | 28501.736 | 26217.049 |
| D12676      | 2286.396  | 3305.758  | NM_001344 | 29918.324 | 30947.234 |
| BC012593    | 1419.448  | 714.349   | NM_018294 | 2107.188  | 1649.39   |
| NM_000939   | 34071.641 | 35091.02  | AL389934  | 3553.886  | 4371.809  |
| NM_004295   | 12733.352 | 12457.163 | NM_004330 | 3784.938  | 3307.372  |
| H-X 02812 I | 3070.457  | 5504.242  | AF151802  | 4423.353  | 4201.758  |
| U75898      | 3546.359  | 3259.198  | AB006746  | 1125.688  | 631.61    |
| M29039      | 969.978   | 1872.632  | NM_006498 | 3493.505  | 3013.549  |
| M59815      | 843.408   | 1202.259  | AB023233  | 1732.998  | 1176.338  |
| NM_006917   | 786.334   | 1262.336  | NM_004369 | 1752.06   | 809.468   |
| SR2         | 49190.473 | 62632.238 | NM_016155 | 1146.498  | 1908.361  |
| SR4         | 16115.024 | 20344.486 | NM_001224 | 3763.53   | 6905.371  |
| SR6         | 2261.184  | 2604.129  | NM_017811 | 7984.707  | 10149.983 |
| SR8         | 7761.312  | 29066.354 | NM_001569 | 1817.934  | 2208.694  |
| SR10        | 27956.057 | 10826.325 | NM_004131 | 273.694   | 487.382   |
| CY3Cy5      | 3169.382  | 244.978   | NM_004205 | 344.158   | 636.19    |
| NM_001203   | 2956.1    | 3547.445  | AF130060  | 22465.758 | 16315.737 |
| NM_004799   | 23079.941 | 26501.605 | NM_007057 | 10191.423 | 14554.374 |
| NM_006733   | 1510.048  | 1116.349  | NM_000177 | 9786.543  | 5677.328  |
| NM_014047   | 18092.959 | 22474.049 | NM_003387 | 7704.704  | 4582.583  |
| AK022901    | 2166.727  | 2001.012  | U60665    | 1209.105  | 947.722   |
| NM_006052   | 1243.713  | 1299.358  | NM_005507 | 36218.668 | 43150.941 |
| AB040912    | 25001.67  | 35227.285 | AL080133  | 4557.219  | 3426.21   |
| NM_003871   | 895.693   | 651.81    | AY014403  | 1306.01   | 917.945   |
| NM_006243   | 5132.448  | 6295.069  | NM_006912 | 4209.675  | 2745.467  |
| M33197      | 67864.086 | 65288.734 | X12534    | 1777.184  | 877.799   |
| AJ011129    | 2447.785  | 6151.542  | NM_018951 | 5188.783  | 5360.424  |
| NM_001039   | 808.665   | 648.456   | NM_014323 | 3434.751  | 4809.762  |
| NM_006387   | 4160.943  | 3744.727  | NM_003205 | 1983.778  | 2144.862  |
| NM_005646   | 3656.39   | 3267.357  | AB002324  | 2334.872  | 1800.563  |
| NM_006639   | 3063.685  | 3235.451  | AK026231  | 826.3     | 1523.126  |

|           |           |           |           |           |           |
|-----------|-----------|-----------|-----------|-----------|-----------|
| NM_001692 | 729.872   | 651.371   | NM_012469 | 2361.778  | 1936.379  |
| B1767871  | 2375.411  | 2738.135  | NM_005131 | 1369.011  | 1664.071  |
| AK022817  | 2353.203  | 1855.385  | NM_007056 | 1755.535  | 1304.073  |
| M33197    | 63197.172 | 63142.383 | AF083383  | 2081.217  | 2896.793  |
| AB037831  | 1831.311  | 2099.97   | NM_006925 | 2851.028  | 2114.91   |
| NM_012103 | 19930.197 | 14364.083 | NM_004890 | 51658.727 | 45763.219 |
| AL122077  | 19466.961 | 15723.679 | AK023181  | 2657.857  | 2382.103  |
| NM_014632 | 1312.4    | 1459.061  | NM_004294 | 1358.151  | 3066.014  |
| NM_006422 | 1787.58   | 2216.035  | NM_005051 | 21308.789 | 17533.982 |
| BE789195  | 707.497   | 1026.615  | NM_001968 | 13503.093 | 8600.659  |
| NM_007259 | 3696.75   | 6695.941  | D17259    | 53351.715 | 48714.039 |
| NM_018402 | 1084.122  | 1199.279  | AF264627  | 36166.324 | 14469.892 |
| NM_018009 | 1302.203  | 1546.512  | AL133053  | 1056.09   | 1160.579  |
| AK075081  | 2485.631  | 3143.43   | NM_018142 | 3683.011  | 3983.967  |
| NM_000895 | 6409.242  | 7813.953  | NM_002168 | 1693.471  | 2636.194  |
| NM_003820 | 24317.414 | 25049.805 | AK027115  | 131.707   | 283.921   |
| NM_015915 | 5659.439  | 5133.473  | NM_004453 | 1155.497  | 2653.693  |
| M33197    | 72013.797 | 65338.133 | NM_016229 | 1155.637  | 987.751   |
| NM_016518 | 5792.054  | 5032.931  | NM_018244 | 1460.618  | 2117.942  |
| NM_006185 | 11409.06  | 9362.305  | NM_005642 | 3311.27   | 2708.069  |
| NM_014800 | 1646.182  | 2025.254  | NM_018105 | 1470.806  | 1488      |
| NM_001557 | 1036.134  | 2118.308  | AK023452  | 3426.116  | 3937.696  |
| AF147311  | 2916.279  | 3058.317  | NM_000332 | 1552.046  | 1960.971  |
| NM_017927 | 2126.855  | 2888.871  | AK022215  | 2103.47   | 2114.956  |
| NM_020151 | 13708.188 | 17016.305 | U90305    | 496.296   | 427.423   |
| NM_005891 | 46112.086 | 21724.701 | NM_001527 | 9334.702  | 6135.194  |
| NM_001645 | 2841.966  | 29151.539 | AK025269  | 7045.656  | 4436.775  |
| NM_003956 | 2253.844  | 3198.029  | NM_001438 | 480.369   | 467.035   |
| M33197    | 68141.563 | 65467.91  | AB040971  | 1131.638  | 841.427   |
| NM_003500 | 4601.326  | 4115.266  | NM_006562 | 4128.955  | 2814.243  |
| NM_014317 | 3448.76   | 2565.923  | NM_018456 | 4723.273  | 7232.653  |
| L09234    | 9414.76   | 9879.966  | AK026883  | 939.045   | 513.278   |
| NM_000059 | 1115.231  | 1228.975  | NM_014350 | 7219.972  | 8200.129  |
| NM_017881 | 4206.877  | 4338.008  | U00925    | 4023.133  | 5201.192  |
| NM_000813 | 887.693   | 1264.463  | AF086235  | 3040.821  | 3934.291  |
| NM_018896 | 2418.647  | 2642.852  | AF143886  | 1671.545  | 1689.032  |
| AJ300465  | 2762.434  | 2811.978  | AK025975  | 1581.464  | 1520.184  |
| X86400    | 1515.236  | 1689.858  | AK025583  | 18276.873 | 15022.915 |
| NM_000810 | 3144.039  | 3420.178  | NM_014664 | 1306.882  | 1371.392  |
| AF069307  | 3302.522  | 3000.943  | AL109788  | 831.436   | 704.292   |
| M33197    | 61793.301 | 59070.914 | NM_014952 | 45437.609 | 34537.223 |
| U92978    | 3100.021  | 3102.744  | AK025068  | 627.626   | 911.726   |
| NM_014488 | 2654.978  | 2792.538  | AK026720  | 857.562   | 945.592   |
| AB014567  | 1821.031  | 1250.941  | AL137566  | 702.638   | 914.391   |
| NM_005326 | 12935.179 | 14739.367 | AF087962  | 1615.479  | 2090.167  |
| NM_014069 | 1295.744  | 596.634   | AF075039  | 128.341   | 352.332   |
| AB035130  | 1171.38   | 1355.651  | AL050197  | 1786.17   | 3535.419  |
| NM_003359 | 1770.505  | 1567.109  | AL050063  | 579.25    | 514.334   |
| M33197    | 47838.758 | 45037.957 | AL110190  | 1238.201  | 783.826   |
| NM_017915 | 564.657   | 519.68    | AJ001893  | 1020.079  | 1589.535  |
| AK021513  | 792.417   | 865.457   | NM_014819 | 6772.139  | 7084.165  |
| AL049283  | 5407.436  | 3020.616  | AF086040  | 1577.348  | 809.494   |
| M33197    | 59453.695 | 60412.742 | AB032988  | 823.47    | 964.232   |

|             |           |           |           |           |           |
|-------------|-----------|-----------|-----------|-----------|-----------|
| NM_002401   | 26804.08  | 25642.367 | AK023559  | 5226.077  | 4047.584  |
| NM_001274   | 1996.284  | 2182.105  | AB037859  | 58119.496 | 52608.449 |
| NM_002227   | 2173.083  | 2403.236  | AL049233  | 1861.792  | 1475.253  |
| NM_007199   | 4324.9    | 5573.417  | NM_017696 | 2883.17   | 1845.414  |
| AB014530    | 9281.259  | 7730.612  | AL050166  | 2873.815  | 2422.486  |
| M33197      | 64459.836 | 65806.516 | AK026705  | 483.169   | 1003.914  |
| NM_005989   | 3420.902  | 4147.231  | NM_003602 | 799.89    | 865.177   |
| AB014607    | 4484.421  | 4914.712  | AF009258  | 11934.991 | 19473.09  |
| AF134401    | 1617.721  | 1145.62   | AF009305  | 1042.862  | 1545.999  |
| NM_006387   | 5003.947  | 5031.205  | NM_006193 | 418.587   | 607.175   |
| NM_005646   | 3873.994  | 4259.421  | AF009270  | 302.181   | 546.536   |
| NM_006639   | 3663.79   | 3716.447  | AF009318  | 336.844   | 600.234   |
| NM_001692   | 1081.985  | 809.882   | AF056421  | 369.403   | 500.74    |
| BI767871    | 2425.962  | 2269.949  | AF090889  | 575.906   | 773.14    |
| AA418907    | 1406.265  | 1222.745  | AK001085  | 518.203   | 561.821   |
| AA115473    | 3200.154  | 3205.846  | AK001906  | 491.576   | 850.08    |
| AA872397    | 6739.321  | 6928.661  | AK021528  | 954.513   | 1751.968  |
| M24283      | 455.222   | 998.982   | AK021746  | 1190.401  | 1093.694  |
| AA709414    | 3197.899  | 2838.774  | AK001136  | 1660.896  | 1282.108  |
| D12676      | 2087.692  | 2035.879  | AK002066  | 114.971   | 144.128   |
| BC012593    | 1377.14   | 631.615   | AK021810  | 534.187   | 696.383   |
| NM_000939   | 31575.883 | 30571.986 | AK025214  | 888.92    | 358.996   |
| NM_004295   | 16984.674 | 11939.193 | AK025846  | 1280.185  | 1092.775  |
| H-X 02812 I | 4094.185  | 4994.583  | AK026805  | 3886.239  | 2808.448  |
| U75898      | 3092.405  | 2053.12   | AL389983  | 3910.103  | 4497.72   |
| M29039      | 897.733   | 1371.866  | AJ008159  | 422.122   | 444.174   |
| M59815      | 955.211   | 1387.552  | AK000995  | 392.994   | 609.725   |
| NM_006917   | 960.538   | 994.323   | U00959    | 1532.061  | 1292.954  |
| AB011146    | 1827.842  | 1735.642  | NM_014578 | 5198.818  | 9778.609  |
| NM_006185   | 15793.899 | 15742.197 | AF147306  | 1591.862  | 2146.085  |
| NM_014800   | 1845.392  | 1991.78   | AF086267  | 899.263   | 1218.43   |
| NM_001557   | 1518.559  | 2231.476  | X74606    | 708.098   | 578.176   |
| AF147311    | 4022.003  | 3373.534  | NM_012183 | 733.194   | 885.689   |
| NM_002131   | 49591.883 | 36561.781 | AK026785  | 798.442   | 1275.271  |
| NM_017927   | 2389.915  | 3105.754  | AK022994  | 749.318   | 892.289   |
| M33197      | 70228.211 | 65410.094 | NM_018225 | 10613.631 | 8699.705  |
| NM_001203   | 2972.65   | 2799.912  | AK025534  | 1209.481  | 1078.643  |
| NM_004799   | 18512.385 | 15149.968 | AF091526  | 1077.488  | 1003.793  |
| NM_006733   | 1202.283  | 826.711   | M60749    | 1135.896  | 1318.561  |
| NM_014047   | 11225.816 | 11780.55  | NM_003523 | 5615.964  | 31984.447 |
| AK022901    | 1781.236  | 1490.529  | X01448    | 338.893   | 661.099   |
| M33197      | 63655.836 | 61864.957 | NM_016503 | 2490.736  | 2756.397  |
| AF037332    | 4203.334  | 3726.596  | AK056351  | 10541.384 | 19606.547 |
| NM_014571   | 1143.04   | 1183.068  | NM_014690 | 2285.284  | 4269.418  |
| NM_006052   | 1121.49   | 1547.733  | NM_017698 | 2835.602  | 6257.563  |
| AB040912    | 26093.477 | 45804.258 | AF086490  | 799.325   | 1030.571  |
| NM_003871   | 1028.648  | 1033.074  | AF131738  | 23451.582 | 37986.926 |
| NM_006243   | 4688.712  | 6765.645  | AK021666  | 1132.59   | 1165.129  |
| NM_007252   | 234.27    | 773.543   | AK024825  | 2004.279  | 1433.585  |
| M33197      | 58721.977 | 63771.195 | AF086317  | 3651.324  | 3131.67   |
| AJ011129    | 2141.071  | 5122.558  | U16850    | 2979.176  | 3805.826  |
| M33197      | 66491.727 | 64837.059 | AL390178  | 484.572   | 793.157   |
| U92978      | 3400.383  | 3164.022  | Z36806    | 1010.395  | 668.363   |



|           |           |           |           |           |           |
|-----------|-----------|-----------|-----------|-----------|-----------|
| NM_014488 | 1486.475  | 1328.544  | NM_005368 | 397.765   | 330.613   |
| NM_013389 | 5268.841  | 9402.074  | NM_018618 | 602.867   | 647.195   |
| AB014567  | 730.493   | 774.122   | AJ008121  | 14269.404 | 11711.458 |
| AK022817  | 1604.43   | 2667.136  | AJ008153  | 1813.071  | 1457.834  |
| NM_018034 | 7321.064  | 5023.652  | AK023739  | 1580.028  | 1315      |
| M33197    | 61865.871 | 59246.461 | NM_005830 | 4446.926  | 3314.361  |
| AB037831  | 1361.559  | 1185.414  | NM_001507 | 409.87    | 636.995   |
| NM_012103 | 13563.288 | 7249.26   | X92108    | 303.557   | 823.18    |
| AL122077  | 15588.123 | 9726.813  | AL389876  | 821.075   | 434.984   |
| NM_014632 | 868.189   | 803.243   | AK022120  | 489.045   | 604.652   |
| NM_006422 | 1013.863  | 985.475   | Z70762    | 861.59    | 917.624   |
| BE789195  | 901.457   | 1607.741  | D17099    | 423.54    | 385.491   |
| NM_016946 | 3444.141  | 5500.904  | BF037206  | 907.676   | 456.113   |
| M33197    | 67818.719 | 65333.602 | AK021474  | 3144.933  | 2774.185  |
| NM_007259 | 3455.946  | 5070.478  | AK023642  | 1178.161  | 1044.546  |
| NM_018402 | 867.481   | 903.726   | AW511510  | 395.715   | 356.708   |
| NM_018009 | 2118.635  | 2568.739  | U52827    | 403.781   | 647.789   |
| AK075081  | 3627.998  | 4957.958  | AL049466  | 9879.145  | 18050.689 |
| NM_000895 | 5257.211  | 5365.857  | AB037802  | 1305.672  | 1578.145  |
| NM_003820 | 18736.396 | 16696.209 | U17623    | 552.688   | 604.647   |
| NM_015915 | 4743.485  | 3935.867  | AL137450  | 3940.697  | 3129.709  |
| M33197    | 69847.141 | 64473.805 | AK023058  | 2277.672  | 1736.93   |
| NM_016518 | 5190.703  | 4170.333  | NM_012064 | 6698.427  | 10332.744 |
| AB002301  | 1029.64   | 930.879   | AK001460  | 861.847   | 761.466   |
| AB014530  | 10529.277 | 8822.286  | AK092508  | 4642.225  | 2810.352  |
| M33197    | 64838.535 | 64792.324 | AK027111  | 37267.387 | 34429.543 |
| NM_005989 | 4425.139  | 4747.855  | NM_003518 | 969.224   | 2552.285  |
| AB014607  | 5212.909  | 4741.792  |           |           |           |
| AF134401  | 1595.544  | 1002.047  |           |           |           |
| NM_020151 | 13027.303 | 10979.365 |           |           |           |
| NM_005891 | 40443.238 | 13543.458 |           |           |           |
| NM_001645 | 2471.971  | 21016.387 |           |           |           |
| NM_003956 | 1777.932  | 2067.313  |           |           |           |
| M33197    | 60556.594 | 61292.402 |           |           |           |
| NM_003500 | 3454.861  | 3196.814  |           |           |           |
| NM_014317 | 2036.825  | 1209.438  |           |           |           |
| L09234    | 7509.321  | 6650.332  |           |           |           |
| NM_000059 | 1044.152  | 862.364   |           |           |           |
| AK026740  | 1051.647  | 1164.249  |           |           |           |
| NM_017881 | 4582.096  | 3767.982  |           |           |           |
| M33197    | 62686.34  | 63123.539 |           |           |           |
| NM_017634 | 5911.804  | 7392.734  |           |           |           |
| NM_000813 | 1056.184  | 1553.739  |           |           |           |
| NM_018896 | 1397.461  | 1495.1    |           |           |           |
| AJ300465  | 2180.713  | 1972.932  |           |           |           |
| X86400    | 1105.928  | 869.963   |           |           |           |
| NM_000810 | 2644.677  | 2199.562  |           |           |           |
| AF069307  | 3039.356  | 2017.498  |           |           |           |
| NM_006917 | 966.438   | 939.066   |           |           |           |
| M33197    | 1343.886  | 1038.648  |           |           |           |
| AB011146  | 2092.208  | 1785.125  |           |           |           |
| NM_005326 | 11086.572 | 11151.217 |           |           |           |
| NM_014069 | 898.49    | 489.225   |           |           |           |

|                    |           |           |
|--------------------|-----------|-----------|
| <b>AB035130</b>    | 1557.656  | 1609.541  |
| <b>NM_003359</b>   | 2014.238  | 1380.564  |
| <b>M33197</b>      | 40891.777 | 37576.449 |
| <b>NM_017915</b>   | 712.508   | 602.175   |
| <b>AK021513</b>    | 558.289   | 617.958   |
| <b>NM_003579</b>   | 2202.927  | 1993.363  |
| <b>AL049283</b>    | 2011.023  | 2149.357  |
| <b>M33197</b>      | 54373.598 | 58341.59  |
| <b>NM_002401</b>   | 31735.947 | 38564.762 |
| <b>NM_001274</b>   | 1684.896  | 2157.692  |
| <b>NM_002227</b>   | 2111.872  | 949.018   |
| <b>NM_007199</b>   | 2915.161  | 1021.245  |
| <b>NM_006243</b>   | 4920.613  | 5079.22   |
| <b>M33197</b>      | 62066.816 | 64334.207 |
| <b>AJ011129</b>    | 3403.044  | 8725.752  |
| <b>NM_001039</b>   | 1109.536  | 861.857   |
| <b>NM_006387</b>   | 4528.739  | 5203.506  |
| <b>NM_005646</b>   | 3943.464  | 3631.851  |
| <b>NM_006639</b>   | 3378.267  | 3785.028  |
| <b>NM_001692</b>   | 1192.526  | 659.146   |
| <b>BI767871</b>    | 2347.965  | 1959.51   |
| <b>AA418907</b>    | 1532.01   | 1162.653  |
| <b>AA115473</b>    | 3000.915  | 2594.958  |
| <b>AA872397</b>    | 6279.679  | 5249.297  |
| <b>AA709414</b>    | 3226.402  | 2834.623  |
| <b>D12676</b>      | 2173.38   | 2530.903  |
| <b>BC012593</b>    | 1091.569  | 329.109   |
| <b>NM_000939</b>   | 36400.73  | 31141.332 |
| <b>NM_004295</b>   | 21185.902 | 19584.566 |
| <b>H-X 02812 I</b> | 3290.081  | 5416.708  |
| <b>U75898</b>      | 2773.026  | 2626.995  |
| <b>M29039</b>      | 1053.497  | 1917.31   |
| <b>M59815</b>      | 947.244   | 1974.312  |
| <b>AK075081</b>    | 2904.227  | 2971.433  |
| <b>NM_000895</b>   | 6345.673  | 6258.205  |
| <b>NM_003820</b>   | 26417.316 | 26040.27  |
| <b>NM_015915</b>   | 7041.049  | 5968.526  |
| <b>M33197</b>      | 64976.281 | 70287.836 |
| <b>NM_016518</b>   | 7824.091  | 8094.208  |
| <b>NM_006185</b>   | 17495.314 | 18038.85  |
| <b>NM_014800</b>   | 1373.695  | 2030.752  |
| <b>NM_001557</b>   | 1497.321  | 2371.042  |
| <b>AF147311</b>    | 3548.16   | 2892.814  |
| <b>NM_002131</b>   | 48439.852 | 31056.021 |
| <b>NM_017927</b>   | 2460.323  | 2203.371  |
| <b>M33197</b>      | 64939.73  | 65319.188 |
| <b>NM_001203</b>   | 3257.765  | 3289.967  |
| <b>NM_004799</b>   | 24087.641 | 24044.295 |
| <b>NM_006733</b>   | 1147.151  | 877.036   |
| <b>NM_014047</b>   | 16120.433 | 17269.398 |
| <b>AK022901</b>    | 1911.514  | 2458.544  |
| <b>NM_001508</b>   | 639.811   | 982.858   |
| <b>AF037332</b>    | 5901.781  | 8175.05   |

|           |           |           |
|-----------|-----------|-----------|
| NM_014571 | 1195.747  | 1061.323  |
| NM_006052 | 1280.287  | 1381.835  |
| AB040912  | 20290.465 | 27511.533 |
| NM_000813 | 745.52    | 1312.309  |
| NM_018896 | 1648.971  | 1493.358  |
| AJ300465  | 3222.623  | 3415.934  |
| X86400    | 1931.483  | 2132.28   |
| NM_000810 | 2906.329  | 3594.841  |
| AF069307  | 3578.316  | 2864.048  |
| M33197    | 58853.371 | 59076.191 |
| U92978    | 2836.229  | 3055.185  |
| NM_014488 | 1014.484  | 1015.915  |
| NM_013389 | 5281.642  | 10492.521 |
| AK022817  | 1287.001  | 1188.395  |
| NM_018034 | 5301.654  | 3547.709  |
| M33197    | 59232.984 | 63963.137 |
| AB037831  | 1221.94   | 995.386   |
| NM_012103 | 13553.486 | 5960.263  |
| AL122077  | 15838.102 | 11556.801 |
| NM_014632 | 1246.359  | 1455.92   |
| NM_006422 | 1654.813  | 2026.27   |
| M33197    | 58926.094 | 65530.172 |
| NM_007259 | 3683.156  | 5381.808  |
| NM_018402 | 722.153   | 680.52    |
| NM_018009 | 1186.955  | 1632.334  |
| M33197    | 50707.848 | 54775.09  |
| NM_002401 | 32392.303 | 36330.926 |
| NM_003913 | 1268.943  | 1340.022  |
| NM_002227 | 2926.291  | 2674.044  |
| NM_007199 | 3423.967  | 3408.07   |
| AB014530  | 8903.501  | 5851.279  |
| M33197    | 61026.695 | 60746.148 |
| NM_005989 | 2400.119  | 2754.49   |
| AB014607  | 3987.115  | 3753.98   |
| AF134401  | 1354.546  | 576.387   |
| NM_020151 | 10190.474 | 8265.302  |
| NM_005891 | 32735.15  | 10986.783 |
| NM_001645 | 2145.835  | 16723.246 |
| NM_003956 | 1773.806  | 1774.954  |
| M33197    | 60624.762 | 63714.824 |
| NM_003500 | 4054.293  | 4955.652  |
| NM_014317 | 3613.999  | 2399.902  |
| L09234    | 8925.414  | 10004.499 |
| NM_000059 | 1116.044  | 1176.917  |
| AK026740  | 986.03    | 1760.563  |
| NM_017881 | 3907.635  | 3884.057  |
| M33197    | 59674.234 | 63262.629 |
| NM_017634 | 5290.006  | 6597.875  |
| AV756917  | 4752.211  | 4892.192  |
| NM_018380 | 11760.029 | 8636.662  |
| AK001442  | 1819.399  | 1658.234  |
| NM_012070 | 2248.34   | 2538.25   |
| NM_019038 | 1035.847  | 950.474   |

|           |           |           |
|-----------|-----------|-----------|
| AF183423  | 3657.45   | 1912.797  |
| M33197    | 772.11    | 727.797   |
| AB011146  | 1428.158  | 1211.988  |
| NM_005326 | 11237.485 | 10121.241 |
| NM_014069 | 1675.182  | 1364.531  |
| AB035130  | 2579.021  | 3377.067  |
| NM_003359 | 2268.938  | 2998.013  |
| M33197    | 48763.063 | 48658.797 |
| AF119917  | 1123.787  | 983.797   |
| NM_017915 | 881.627   | 977.937   |
| AK021513  | 463.205   | 903.494   |
| NM_003579 | 2255.526  | 2119.44   |
| AL049283  | 2077.045  | 1917.565  |
| NM_002214 | 1138.609  | 1239.848  |
| AF005258  | 2906.96   | 3297.011  |
| NM_000887 | 2275.928  | 4762.1    |
| M33197    | 60548.707 | 63141.711 |
| X99659    | 45373.75  | 41168.074 |
| NM_015416 | 4332.902  | 3852.716  |
| NM_003899 | 3899.911  | 3787.799  |
| X99662    | 6149.559  | 9767.654  |
| NM_003473 | 39063.754 | 30432.318 |
| NM_014325 | 2014.772  | 2180.517  |
| M33197    | 57642.395 | 57648.445 |
| NM_006016 | 51582.375 | 58407.59  |
| NM_001242 | 3740.553  | 3768.734  |
| NM_014891 | 8121.334  | 6343.021  |
| NM_013392 | 8063.507  | 8369.361  |
| M33197    | 58904.281 | 62391.113 |
| NM_003236 | 986.654   | 1290.061  |
| NM_003458 | 989.822   | 1251.297  |
| AF052692  | 1850.062  | 2147.838  |
| NM_002820 | 538.506   | 1610.673  |
| NM_005228 | 2210.305  | 2273.24   |
| NM_002354 | 1991.373  | 2409.274  |
| NM_000179 | 1765.379  | 803.007   |
| AF062739  | 3160.84   | 2943.219  |
| NM_006602 | 4115.884  | 2883.583  |
| M33197    | 60835.949 | 60385.801 |
| AL079314  | 6647.145  | 4577.935  |
| NM_001260 | 1942.339  | 1593.179  |
| NM_001950 | 4601.151  | 3188.835  |
| AK026364  | 2010.878  | 1594.693  |
| NM_018117 | 901.725   | 524.658   |
| M33197    | 62318.477 | 63373.176 |
| NM_004331 | 6323.288  | 9226.042  |
| NM_015996 | 836.251   | 979.223   |
| NM_015703 | 9955.71   | 11016.26  |
| AB018337  | 1894.666  | 1729.069  |
| NM_014489 | 984.648   | 521.398   |
| AK025273  | 4299.986  | 3584.629  |
| M33197    | 61811.457 | 60398.535 |
| NM_001794 | 1368.878  | 2017.608  |

|           |           |           |
|-----------|-----------|-----------|
| NM_002205 | 5583.444  | 4496.18   |
| M33197    | 60226.645 | 60023.543 |
| NM_000131 | 1093.381  | 1202.2    |
| NM_001836 | 1066.969  | 1102.951  |
| NM_001911 | 43924.602 | 7863.115  |
| NM_000537 | 1238.673  | 1390.328  |
| NM_006503 | 1540.042  | 1308.577  |
| AB002321  | 679.196   | 642.591   |
| M33197    | 724.06    | 951.973   |
| AB020698  | 1230.223  | 1085.861  |
| U68382    | 2937.382  | 4679.352  |
| NM_003969 | 3169.301  | 2419.521  |
| NM_004651 | 2195.358  | 3003.807  |
| NM_003363 | 1056.86   | 1773.614  |
| M33197    | 54742.16  | 61234.234 |
| NM_017569 | 5810.767  | 4806.876  |
| NM_002906 | 2337.566  | 949.793   |
| AK024480  | 1762.03   | 1409.895  |
| Y13871    | 17235.494 | 17137.525 |
| NM_012134 | 1195.262  | 1230.759  |
| AL137725  | 10164.733 | 11915.516 |
| AJ008151  | 18904.346 | 25270.615 |
| AK024149  | 1500.229  | 1380.625  |
| AK023094  | 1227.978  | 1045.259  |
| M33197    | 61335.535 | 60430.156 |
| NM_004091 | 6208.725  | 5101.798  |
| X74070    | 60844.449 | 60063.902 |
| AF027219  | 2156.729  | 1884.172  |
| NM_006333 | 4636.825  | 4620.622  |
| M33197    | 59143.922 | 59358.457 |
| NM_002898 | 13886.564 | 17677.26  |
| AK022749  | 7425.191  | 6475.574  |
| BF031409  | 7507.32   | 5621.635  |
| NM_007043 | 1667.889  | 1519.555  |
| U94388    | 1019.61   | 900.789   |
| NM_012322 | 3608.149  | 2075.117  |
| M33197    | 59071.238 | 60479     |
| NM_004889 | 40128.926 | 33166.438 |
| AK025314  | 1803.292  | 1101.154  |
| NM_002109 | 4386.711  | 3613.738  |
| NM_000984 | 65047.285 | 70230.148 |
| NM_002453 | 10298.315 | 9127.168  |
| AK026721  | 2385.262  | 1094.946  |
| AK023027  | 3208.415  | 3108.302  |
| AK025598  | 1402.115  | 1574.786  |
| AB002348  | 44002.305 | 41817.301 |
| M33197    | 52293.625 | 52458.766 |
| AK026043  | 4564.502  | 2804.23   |
| NM_005006 | 6857.785  | 5950.403  |
| AK027033  | 4095.497  | 3104.889  |
| NM_000106 | 1901.278  | 2211.632  |
| NM_003000 | 11306.84  | 13630.844 |
| NM_002495 | 19979.725 | 18426.957 |

|                  |           |           |
|------------------|-----------|-----------|
| <b>M33197</b>    | 59177.645 | 57652.168 |
| <b>NM_016284</b> | 2991.618  | 2207.517  |
| <b>NM_014593</b> | 3080.021  | 2414.913  |
| <b>NM_006833</b> | 9836.672  | 7396.043  |
| <b>NM_012257</b> | 1259.563  | 1538.748  |
| <b>U37690</b>    | 18202.535 | 19863.238 |
| <b>NM_005120</b> | 2112.488  | 1263.205  |
| <b>AB029012</b>  | 19557.973 | 20912.811 |
| <b>M33197</b>    | 46354.477 | 42321.172 |
| <b>AJ010278</b>  | 989.426   | 2062.424  |
| <b>NM_006299</b> | 2653.814  | 2189.872  |
| <b>AF060936</b>  | 8115.769  | 6864.364  |
| <b>NM_005568</b> | 939.202   | 1073.302  |
| <b>NM_018167</b> | 1012.381  | 1225.406  |
| <b>AL050088</b>  | 2235.84   | 2901.384  |
| <b>AK024939</b>  | 3203.567  | 3979.583  |
| <b>AK001561</b>  | 4471.318  | 4949.835  |
| <b>AB007880</b>  | 4717.709  | 4885.148  |
| <b>AK024950</b>  | 1527.749  | 1533.28   |
| <b>M33197</b>    | 62119.688 | 54168.352 |
| <b>NM_014146</b> | 13088.267 | 10374.592 |
| <b>NM_018843</b> | 6030.676  | 4696.614  |
| <b>AK024275</b>  | 758.558   | 659.271   |
| <b>M33197</b>    | 60442.145 | 53472.227 |
| <b>AL109782</b>  | 7907.25   | 5315.129  |
| <b>AF086225</b>  | 1160.049  | 900.393   |
| <b>NM_005844</b> | 4950.757  | 3715.708  |
| <b>AK024941</b>  | 4416.7    | 3593.978  |
| <b>M33197</b>    | 36020.324 | 34434.012 |
| <b>AK025489</b>  | 1358.787  | 1500.108  |
| <b>AL390152</b>  | 2955.018  | 2873.426  |
| <b>M33197</b>    | 57150.145 | 59482.934 |
| <b>NM_018126</b> | 1139.351  | 2013.815  |
| <b>AK024506</b>  | 4436.562  | 4339.438  |
| <b>NM_014179</b> | 1481.76   | 1510.416  |
| <b>AF086326</b>  | 5455.504  | 10101.438 |
| <b>M33197</b>    | 60640.715 | 59354.973 |
| <b>AL080057</b>  | 1108.205  | 1673.22   |
| <b>AL117528</b>  | 982.073   | 791.487   |
| <b>M33197</b>    | 59575.098 | 59865.203 |
| <b>AK025948</b>  | 1330.346  | 1083.191  |
| <b>AL353948</b>  | 14039.353 | 13404.865 |
| <b>AL122043</b>  | 1221.696  | 565.575   |
| <b>M33197</b>    | 59787.828 | 62071.707 |
| <b>AK025869</b>  | 4956.792  | 6440.316  |
| <b>M33197</b>    | 57564.5   | 55000.563 |
| <b>AF056430</b>  | 1747.388  | 1734.194  |
| <b>NM_014906</b> | 1550.006  | 830.406   |
| <b>AF009291</b>  | 1303.38   | 1621.188  |
| <b>M33197</b>    | 61251.887 | 58479.863 |
| <b>NM_018055</b> | 4241.52   | 5932.423  |
| <b>AK002199</b>  | 2312.338  | 1775.794  |
| <b>AK021662</b>  | 1261.061  | 790.488   |

|                  |           |           |
|------------------|-----------|-----------|
| <b>AK001802</b>  | 1482.467  | 1001.318  |
| <b>AK021469</b>  | 2275.217  | 1885.384  |
| <b>AK021706</b>  | 3310.38   | 2932.899  |
| <b>M33197</b>    | 61031.852 | 57761.566 |
| <b>AK025161</b>  | 535.526   | 861.807   |
| <b>AK026259</b>  | 28488.723 | 25963.789 |
| <b>AJ008115</b>  | 14373.812 | 18229.268 |
| <b>AF083125</b>  | 753.626   | 423.413   |
| <b>M33197</b>    | 60303.242 | 63753.582 |
| <b>AK022970</b>  | 1825.366  | 1940.58   |
| <b>AK026212</b>  | 1260.707  | 1238.799  |
| <b>AF086222</b>  | 676.587   | 1005.071  |
| <b>AF086415</b>  | 5289.5    | 4203.724  |
| <b>M33197</b>    | 58959.063 | 56549.867 |
| <b>AK024470</b>  | 2041.496  | 1645.228  |
| <b>NM_017935</b> | 1162.367  | 464.586   |
| <b>NM_004226</b> | 2306.603  | 2353.458  |
| <b>AK023400</b>  | 444.299   | 743.992   |
| <b>NM_006432</b> | 12002.585 | 13960.392 |
| <b>AF025441</b>  | 2328.701  | 1909.904  |
| <b>U62823</b>    | 5741.536  | 5033.71   |
| <b>NM_003535</b> | 38542.898 | 35973.441 |
| <b>AK026768</b>  | 3164.533  | 2284.646  |
| <b>M33197</b>    | 60875.609 | 56628.828 |
| <b>AK000852</b>  | 23767.061 | 25907.066 |
| <b>AF251188</b>  | 5727.156  | 6703.056  |
| <b>AK026418</b>  | 8853.431  | 10687.173 |
| <b>AF086194</b>  | 32231.525 | 38300.23  |
| <b>AK026811</b>  | 3150.67   | 3121.851  |
| <b>M33197</b>    | 61575.086 | 61174.363 |
| <b>AK023633</b>  | 3849.397  | 4463.276  |
| <b>NM_006179</b> | 1941.229  | 2293.543  |
| <b>AL360165</b>  | 2979.56   | 2142.806  |
| <b>AJ008132</b>  | 7481.699  | 8457.837  |
| <b>NM_005281</b> | 5301.59   | 8973.431  |
| <b>NM_005549</b> | 4423.107  | 5023.351  |
| <b>M33197</b>    | 56352.957 | 58341.102 |
| <b>U12129</b>    | 2370.553  | 1515.526  |
| <b>S81242</b>    | 52991.102 | 55239.746 |
| <b>AF230801</b>  | 2276.028  | 2027.307  |
| <b>AF075072</b>  | 3520.187  | 2277.444  |
| <b>M33197</b>    | 60710.59  | 58084.879 |
| <b>NM_002509</b> | 5173.648  | 3660.44   |
| <b>U38442</b>    | 2652.764  | 2975.366  |
| <b>AF110136</b>  | 1456.545  | 1263.631  |
| <b>AK026706</b>  | 4343.356  | 5100.652  |
| <b>AB007936</b>  | 41760.563 | 44521.969 |
| <b>D28391</b>    | 29900.711 | 25174.615 |
| <b>M33197</b>    | 51925.602 | 52810.07  |
| <b>AK026859</b>  | 768.906   | 803.763   |
| <b>D86961</b>    | 769.335   | 948.778   |
| <b>AJ227896</b>  | 5168.384  | 5064.16   |
| <b>M33197</b>    | 58405.703 | 62335.609 |

|                  |           |           |
|------------------|-----------|-----------|
| <b>AF131770</b>  | 1967.974  | 1969.82   |
| <b>CY3Cy5</b>    | 3448.122  | 104.884   |
| <b>AI298534</b>  | 646.455   | 806.787   |
| <b>R71691</b>    | 325.197   | 421.992   |
| <b>AW167715</b>  | 1166.672  | 2762.104  |
| <b>AA424735</b>  | 1621.399  | 1460.533  |
| <b>U78294</b>    | 967.653   | 1032.335  |
| <b>AA171613</b>  | 248.252   | 481.307   |
| <b>BI760394</b>  | 2047.609  | 3200.426  |
| <b>AA555216</b>  | 593.558   | 732.024   |
| <b>U09117</b>    | 8656.818  | 10451.975 |
| <b>M21054</b>    | 486.705   | 715.852   |
| <b>M18468</b>    | 1436.512  | 1108.017  |
| <b>H66070</b>    | 8834.598  | 8443.313  |
| <b>AA164741</b>  | 2981.268  | 25064.639 |
| <b>AI189375</b>  | 624.106   | 830.961   |
| <b>AI978885</b>  | 2210.42   | 2972.278  |
| <b>AK054960</b>  | 9173.638  | 10335.866 |
| <b>L15344</b>    | 2793.632  | 2737.406  |
| <b>SR1</b>       | 48405.109 | 55600.066 |
| <b>SR3</b>       | 43206.223 | 56553.418 |
| <b>SR5</b>       | 4637.772  | 4809.756  |
| <b>SR7</b>       | 5347.508  | 46801.086 |
| <b>CY3Cy5</b>    | 2865.637  | 204.724   |
| <b>NM_014586</b> | 3183.732  | 2864.223  |
| <b>NM_014366</b> | 9770.407  | 7624.503  |
| <b>NM_000923</b> | 740.594   | 1075.991  |
| <b>NM_006453</b> | 1274.075  | 890.278   |
| <b>NM_018096</b> | 996.719   | 581.996   |
| <b>AL390078</b>  | 615.797   | 601.906   |
| <b>NM_004036</b> | 2220.631  | 1791.42   |
| <b>NM_015986</b> | 818.066   | 1990.336  |
| <b>NM_006546</b> | 723.993   | 635.12    |
| <b>NM_014959</b> | 1755.863  | 2489.458  |
| <b>NM_003992</b> | 4918.26   | 5871.473  |
| <b>AF279265</b>  | 3215.093  | 3249.746  |
| <b>NM_005213</b> | 45648.949 | 26135.719 |
| <b>AB040914</b>  | 948.015   | 1032.854  |
| <b>NM_002997</b> | 4114.066  | 4179.406  |
| <b>NM_002379</b> | 10494.669 | 12456.526 |
| <b>AB007929</b>  | 9309.098  | 11546.764 |
| <b>NM_004579</b> | 3127.485  | 3233.488  |
| <b>AA203126</b>  | 2910.579  | 2226.55   |
| <b>L12347</b>    | 2517.806  | 2916.976  |
| <b>NM_001622</b> | 3634.688  | 4790.785  |
| <b>Z36788</b>    | 1518.317  | 2231.311  |
| <b>NM_004853</b> | 5062.076  | 6405.197  |
| <b>NM_001494</b> | 16656.811 | 17798.598 |
| <b>NM_017707</b> | 651.332   | 603.846   |
| <b>NM_004206</b> | 1379.108  | 1839.595  |
| <b>NM_004603</b> | 6708.839  | 5636.41   |
| <b>AK022849</b>  | 1590.698  | 1487.737  |
| <b>AF040964</b>  | 3568.509  | 3920.427  |



|                  |           |           |
|------------------|-----------|-----------|
| <b>NM_001939</b> | 2861.462  | 3178.308  |
| <b>NM_003279</b> | 7884.757  | 9506.828  |
| <b>AB014599</b>  | 3841.552  | 4063.78   |
| <b>NM_004393</b> | 832.357   | 1077.646  |
| <b>AB018345</b>  | 514.032   | 767.248   |
| <b>AW407841</b>  | 695.986   | 825.869   |
| <b>NM_001879</b> | 3279.309  | 3501.466  |
| <b>AF264014</b>  | 6716.744  | 7056.236  |
| <b>L09098</b>    | 974.603   | 704.004   |
| <b>NM_004155</b> | 546.956   | 1029.58   |
| <b>NM_001831</b> | 822.472   | 1033.459  |
| <b>NM_000137</b> | 6447.749  | 6705.727  |
| <b>NM_012102</b> | 5059.554  | 5041.95   |
| <b>NM_005017</b> | 18540.047 | 19203.766 |
| <b>AF163572</b>  | 9535.56   | 10303.061 |
| <b>NM_000897</b> | 2923.591  | 2661.874  |
| <b>NM_000487</b> | 768.165   | 1562.423  |
| <b>NM_006411</b> | 19702.811 | 21820.432 |
| <b>NM_014182</b> | 2497.586  | 6128.369  |
| <b>AB040884</b>  | 516.793   | 883.58    |
| <b>NM_000492</b> | 8342.609  | 8072.712  |
| <b>NM_012089</b> | 1359.327  | 1437.061  |
| <b>NM_001170</b> | 2862.729  | 2916.486  |
| <b>AL137716</b>  | 1251.282  | 1399.526  |
| <b>NM_004696</b> | 869.51    | 1227.608  |
| <b>NM_014342</b> | 1533.927  | 1385.317  |
| <b>Z50169</b>    | 688.123   | 568.15    |
| <b>AB043997</b>  | 1767.349  | 2064.739  |
| <b>AF097645</b>  | 786.195   | 1141.36   |
| <b>NM_001773</b> | 2319.719  | 1724.854  |
| <b>Z70704</b>    | 1902.991  | 2147.614  |
| <b>NM_014363</b> | 1366.444  | 1165.184  |
| <b>NM_000557</b> | 2489.469  | 2548.09   |
| <b>NM_003239</b> | 917.92    | 910.311   |
| <b>NM_001375</b> | 2894.334  | 3547.444  |
| <b>NM_002312</b> | 1859.124  | 4229.175  |
| <b>M20699</b>    | 1349.2    | 1471.707  |
| <b>NM_004774</b> | 5159.671  | 6351.466  |
| <b>NM_016937</b> | 3584.415  | 4865.83   |
| <b>NM_002690</b> | 2837.842  | 4740.445  |
| <b>NM_012328</b> | 4814.767  | 1898.702  |
| <b>NM_007341</b> | 938.607   | 943.129   |
| <b>NM_016508</b> | 1687.401  | 2202.517  |
| <b>NM_006456</b> | 7869.595  | 7072.421  |
| <b>AK026062</b>  | 13030.295 | 6942.286  |
| <b>AF047002</b>  | 16477.521 | 12661.955 |
| <b>AL050082</b>  | 1604.415  | 2259.297  |
| <b>NM_006623</b> | 42641.254 | 12499.282 |
| <b>NM_016588</b> | 1929.068  | 1653.912  |
| <b>NM_003135</b> | 7476.142  | 6986.978  |
| <b>L12347</b>    | 2311.698  | 3251.263  |
| <b>NM_001622</b> | 2284.07   | 2152.782  |
| <b>Z36788</b>    | 1211.036  | 1034.446  |

|                  |           |           |
|------------------|-----------|-----------|
| <b>NM_018477</b> | 2989.755  | 2417.846  |
| <b>U20536</b>    | 757.381   | 849.686   |
| <b>AI298534</b>  | 594.37    | 605.173   |
| <b>R71691</b>    | 419.446   | 571.32    |
| <b>AW167715</b>  | 1271.905  | 2856.829  |
| <b>AA424735</b>  | 1173.301  | 1252.196  |
| <b>U78294</b>    | 1013.528  | 1346.395  |
| <b>BI760394</b>  | 1441.001  | 2456.912  |
| <b>AA555216</b>  | 467.096   | 782.011   |
| <b>U09117</b>    | 7098.484  | 8640.742  |
| <b>M21054</b>    | 333.04    | 636.807   |
| <b>M18468</b>    | 934.698   | 1267.361  |
| <b>H66070</b>    | 8226.903  | 10024.379 |
| <b>AA164741</b>  | 2936.335  | 20600.004 |
| <b>AI189375</b>  | 664.018   | 707.028   |
| <b>AI978885</b>  | 1957.351  | 2410.355  |
| <b>AK054960</b>  | 10105.186 | 12383.03  |
| <b>L15344</b>    | 2108.8    | 1648.821  |
| <b>NM_001665</b> | 11993.116 | 14887.495 |
| <b>NM_001879</b> | 3459.778  | 2540.213  |
| <b>AF264014</b>  | 6014.125  | 5879.258  |
| <b>L09098</b>    | 730.83    | 592.159   |
| <b>NM_001831</b> | 266.933   | 405.705   |
| <b>NM_014586</b> | 3362.881  | 3919.183  |
| <b>NM_014366</b> | 6906.747  | 4927.298  |
| <b>NM_000923</b> | 762.182   | 983.666   |
| <b>NM_006453</b> | 1339.63   | 1233.393  |
| <b>NM_018096</b> | 901.316   | 667.807   |
| <b>AL390078</b>  | 693.753   | 512.746   |
| <b>NM_004036</b> | 1860.228  | 1572.047  |
| <b>NM_015986</b> | 712.471   | 1912.096  |
| <b>NM_006546</b> | 597.78    | 959.292   |
| <b>NM_014959</b> | 1469.222  | 2158.208  |
| <b>NM_003992</b> | 4124.073  | 4424.485  |
| <b>AF279265</b>  | 2824.466  | 3230.791  |
| <b>NM_005213</b> | 39780.77  | 18845.191 |
| <b>AB040914</b>  | 791.376   | 971.416   |
| <b>NM_002997</b> | 3720.252  | 2394.324  |
| <b>NM_002379</b> | 8755.023  | 6862.609  |
| <b>AB007929</b>  | 8067.353  | 9769.565  |
| <b>NM_004579</b> | 3527.911  | 5163.717  |
| <b>AA203126</b>  | 2934.074  | 2319.484  |
| <b>Z50169</b>    | 534.098   | 294.717   |
| <b>AB043997</b>  | 1129.716  | 1257.993  |
| <b>NM_004853</b> | 4581.662  | 4409.392  |
| <b>NM_001494</b> | 14189.838 | 13688.646 |
| <b>NM_017707</b> | 471.8     | 601.426   |
| <b>NM_004206</b> | 1333.187  | 1923.038  |
| <b>NM_004603</b> | 6164.923  | 5200.872  |
| <b>AK022849</b>  | 1336.789  | 1392.455  |
| <b>AF040964</b>  | 3177.796  | 3292.899  |
| <b>NM_001939</b> | 2673.88   | 2956.969  |
| <b>NM_003279</b> | 6962.599  | 8299.737  |

|           |           |           |
|-----------|-----------|-----------|
| AB014599  | 3584.913  | 3129.681  |
| NM_004393 | 850.522   | 759.563   |
| AB018345  | 577.585   | 469.688   |
| NM_005832 | 832.388   | 499.704   |
| AW407841  | 1070.425  | 1018.804  |
| U15197    | 168.159   | 466.897   |
| NM_007240 | 847.556   | 782.127   |
| AL050082  | 1682.472  | 1736.223  |
| NM_006623 | 33349.707 | 3648.572  |
| NM_016588 | 1156.032  | 595.621   |
| NM_003135 | 5289.97   | 3001.296  |
| NM_000137 | 5041.916  | 2456.259  |
| NM_012102 | 5096.147  | 4567.915  |
| NM_005017 | 14942.843 | 15366.453 |
| AF163572  | 8353.374  | 8809.14   |
| NM_000897 | 4024.604  | 3711.815  |
| NM_000487 | 670.193   | 1947.281  |
| NM_006411 | 16343.823 | 22174.223 |
| NM_014182 | 2579.061  | 6569.737  |
| AB040884  | 236.715   | 491.122   |
| NM_000492 | 7109.386  | 6687.131  |
| NM_012089 | 1386.717  | 1300.155  |
| AK024382  | 563.412   | 540.761   |
| NM_001170 | 3502.346  | 3436.316  |
| AL137716  | 1267.141  | 654.982   |
| NM_004696 | 929.538   | 351.725   |
| NM_014342 | 1750.723  | 1794.679  |
| AK054960  | 7853.389  | 6308.82   |
| L15344    | 2375.441  | 2013.133  |
| NM_014470 | 3724.495  | 6214.338  |
| AF097645  | 613.107   | 1040.643  |
| NM_001773 | 1159.322  | 1178.637  |
| Z70704    | 961.298   | 1129.008  |
| NM_014363 | 1346.515  | 1310.036  |
| NM_000557 | 3732.648  | 3226.725  |
| NM_003239 | 342.197   | 499.779   |
| NM_001375 | 3766.565  | 5401.179  |
| NM_002312 | 2335.835  | 4461.832  |
| M20699    | 1052.109  | 1374.123  |
| NM_004774 | 5081.945  | 5187.486  |
| NM_016937 | 3704.676  | 3984.392  |
| NM_002690 | 3262.923  | 4071.566  |
| NM_012328 | 5824.045  | 1611.249  |
| NM_007341 | 1100.316  | 588.886   |
| NM_016508 | 1611.886  | 1382.906  |
| NM_006456 | 9725.502  | 9403.905  |
| AK026062  | 20226.189 | 12510.728 |
| AF047002  | 20515.67  | 15988.348 |
| NM_002997 | 4051.656  | 3841.465  |
| NM_002379 | 9582.709  | 10375.059 |
| AB007929  | 9493.106  | 13973.553 |
| L12347    | 2338.239  | 2200.714  |
| NM_001622 | 2354.996  | 2444.666  |

|           |           |           |
|-----------|-----------|-----------|
| Z36788    | 1264.043  | 1421.68   |
| NM_018477 | 3539.681  | 2943.063  |
| U20536    | 887.185   | 1237.645  |
| AI298534  | 764.592   | 893.735   |
| R71691    | 368.667   | 438.986   |
| AW167715  | 1253.531  | 3924.604  |
| AA424735  | 1132.161  | 977.772   |
| U78294    | 809.176   | 634.891   |
| AA171613  | 558.114   | 546.96    |
| BI760394  | 1909.367  | 2661.645  |
| AA555216  | 630.307   | 893.694   |
| U09117    | 6841.831  | 5988.851  |
| M18468    | 1388.616  | 751.12    |
| H66070    | 4362.151  | 3586.45   |
| AA164741  | 2643.746  | 18225.744 |
| AI978885  | 2500.471  | 3290.748  |
| AB014599  | 3486.006  | 4137.206  |
| NM_004393 | 816.656   | 1066.986  |
| AB018345  | 725.514   | 571.322   |
| AW407841  | 1410.882  | 1226.638  |
| U15197    | 657.774   | 501.618   |
| NM_001879 | 3315.479  | 3012.371  |
| AF264014  | 5843.144  | 6339.334  |
| L09098    | 828.404   | 382.209   |
| NM_004155 | 635.86    | 328.9     |
| NM_001831 | 492.435   | 591.042   |
| NM_014586 | 3313.01   | 3656.202  |
| NM_014366 | 9348.667  | 6217.712  |
| NM_000923 | 669.341   | 584.332   |
| NM_006453 | 1049.932  | 772.587   |
| NM_018096 | 1143.476  | 414.412   |
| AL390078  | 463.446   | 938.929   |
| NM_004036 | 2096.425  | 2037.283  |
| NM_015986 | 997.57    | 1816.368  |
| NM_006546 | 702.178   | 858.412   |
| NM_014959 | 1655.518  | 1569.287  |
| NM_003992 | 3995.4    | 2387.727  |
| AF279265  | 3085.405  | 2883.882  |
| NM_005213 | 49925.125 | 31643.645 |
| AK024382  | 307.068   | 469.957   |
| NM_001170 | 2527.646  | 2904.386  |
| AL137716  | 1116.01   | 1219.776  |
| NM_004696 | 1145.492  | 1060.744  |
| NM_014342 | 1805.776  | 1650.269  |
| Z50169    | 733.14    | 620.466   |
| AB043997  | 1195.653  | 1856.786  |
| NM_004853 | 4164.577  | 4098.894  |
| NM_001494 | 16652.559 | 14331.893 |
| NM_017707 | 447.305   | 704.641   |
| NM_004206 | 1223.605  | 1576.547  |
| NM_004603 | 6126.829  | 3897.224  |
| AK022849  | 1560.012  | 1153.894  |
| AF040964  | 3762.895  | 3366.429  |

|           |           |           |
|-----------|-----------|-----------|
| NM_001939 | 4031.221  | 3697.681  |
| NM_003279 | 7209.597  | 8734.729  |
| NM_012328 | 4968.278  | 1829.381  |
| NM_007341 | 973.701   | 993.065   |
| NM_016508 | 1341.093  | 1416.981  |
| NM_006456 | 9311.51   | 10541.642 |
| AK026062  | 15588.166 | 12057.289 |
| AF047002  | 17354.688 | 15717.132 |
| AL050082  | 1644.562  | 1795.909  |
| NM_016588 | 1368.389  | 1714.8    |
| NM_003135 | 6472.76   | 6118.941  |
| NM_000137 | 5829.664  | 3817.643  |
| NM_012102 | 5041.617  | 5370.982  |
| NM_005017 | 18386.777 | 19027.516 |
| AF163572  | 8408.063  | 7024.978  |
| NM_000897 | 3289.274  | 2710.095  |
| NM_000487 | 614.608   | 1843.294  |
| NM_006411 | 17594.354 | 17017.904 |
| NM_014182 | 2738.464  | 4953.599  |
| AB040884  | 410.707   | 768.297   |
| NM_000492 | 8926.099  | 8258.753  |
| NM_012089 | 1637.608  | 1494.401  |
| AJ272057  | 6610.206  | 7000.588  |
| NM_004402 | 643.605   | 853.338   |
| AK024216  | 14877.622 | 18249.031 |
| Y16752    | 10266.618 | 7475.262  |
| NM_014694 | 1059.884  | 1082.22   |
| NM_020156 | 1175.279  | 898.924   |
| NM_014830 | 1436.679  | 1040.243  |
| AF355402  | 2679.518  | 2777.088  |
| NM_001665 | 10595.727 | 10237.309 |
| NM_001773 | 1049.875  | 1060.105  |
| Z70704    | 1808.657  | 1772.426  |
| NM_014363 | 1165.042  | 1104.835  |
| NM_000557 | 4213.84   | 3248.002  |
| NM_003239 | 565.468   | 299.566   |
| NM_001375 | 4253.536  | 4084.018  |
| NM_002312 | 2324.446  | 2956.807  |
| M20699    | 1135.736  | 958.061   |
| NM_004774 | 3125.643  | 2661.703  |
| NM_016937 | 3337.01   | 3175.867  |
| NM_002690 | 3672.379  | 3433.471  |
| AB033086  | 720.269   | 615.673   |
| NM_018239 | 1369.014  | 1733.458  |
| U88892    | 1164.4    | 1147.151  |
| AK023755  | 593.805   | 458.592   |
| NM_005725 | 787.633   | 708.51    |
| NM_012211 | 886.251   | 1009.466  |
| AB040877  | 3219.57   | 2803.99   |
| AB040927  | 570.394   | 786.658   |
| AK026737  | 1362.244  | 1401.263  |
| NM_006289 | 6633.155  | 6113.301  |
| NM_019067 | 3382.488  | 3008.828  |

|           |           |           |
|-----------|-----------|-----------|
| AF251025  | 623.188   | 603.611   |
| NM_015677 | 2316.92   | 1729.778  |
| NM_001772 | 9970.458  | 7598.053  |
| AB011087  | 1121.23   | 932.256   |
| AF161341  | 9105.289  | 7309.487  |
| AJ249902  | 715.853   | 468.919   |
| NM_004384 | 3346.775  | 2976.064  |
| L05500    | 6270.522  | 6906.134  |
| NM_012306 | 10690.685 | 10853.155 |
| AF222903  | 2390.168  | 2128.072  |
| NM_006226 | 2306.583  | 2324.285  |
| L10374    | 7479.031  | 5819.01   |
| AB016902  | 2563.633  | 2840.985  |
| AF272378  | 40091.84  | 32374.689 |
| NM_000249 | 5716.577  | 5013.603  |
| NM_014310 | 652.529   | 652.501   |
| NM_005860 | 6255.276  | 7979.895  |
| AF095288  | 11420.491 | 13081.956 |
| AF130114  | 324.725   | 535.384   |
| NM_001799 | 5684.11   | 5987.433  |
| AF090895  | 1440.091  | 1197.249  |
| NM_005610 | 1588.599  | 1091.67   |
| AL133651  | 900.635   | 999.325   |
| AB014532  | 4811.508  | 6300.475  |
| NM_003478 | 2345.395  | 1966.935  |
| NM_016237 | 6391.488  | 3514.235  |
| NM_004924 | 9242.172  | 9369.003  |
| NM_001798 | 1365.062  | 1201.811  |
| NM_001211 | 3157.407  | 3034.486  |
| NM_006505 | 972.213   | 475.612   |
| AB033050  | 2602.308  | 2504.322  |
| NM_004356 | 11439.695 | 6734.198  |
| BC015022  | 4738.176  | 3830.34   |
| NM_006697 | 4813.419  | 6695.364  |
| M19182    | 1302.63   | 1331.078  |
| AK025707  | 1006.618  | 1115.29   |
| NM_002406 | 44759.66  | 52164.922 |
| U87169    | 1955.028  | 1941.299  |
| NM_002073 | 985.481   | 1385.566  |
| AF117222  | 537.986   | 433.085   |
| NM_001749 | 625.316   | 533.289   |
| AK022950  | 1536.121  | 1306.454  |
| S75755    | 1260.275  | 1718.253  |
| AB014576  | 10451.059 | 11556.212 |
| NM_019044 | 4806.564  | 4548.128  |
| AK000145  | 703.234   | 1284.105  |
| AF174601  | 2777.473  | 2762.996  |
| AF279865  | 811.897   | 951.59    |
| NM_014700 | 901.415   | 720.057   |
| NM_005687 | 3310.473  | 1411.039  |
| NM_005983 | 4149.244  | 2221.94   |
| NM_017652 | 6457.945  | 8262.66   |
| X59268    | 4148.154  | 5472.808  |

|           |           |           |
|-----------|-----------|-----------|
| D70832    | 48175.734 | 50841.469 |
| NM_001429 | 6356.779  | 7893.969  |
| M61870    | 1777.092  | 1987.631  |
| AK026980  | 1158.951  | 978.598   |
| NM_020368 | 1739.681  | 1514.608  |
| NM_017566 | 2082.099  | 2031.443  |
| NM_006582 | 1481.781  | 1838.143  |
| AB033019  | 4686.688  | 5844.449  |
| NM_001452 | 946.03    | 784.291   |
| NM_006162 | 899.668   | 1053.539  |
| NM_014764 | 7892.402  | 7195.41   |
| NM_018078 | 1951.489  | 847.822   |
| NM_016013 | 565.391   | 474.877   |
| NM_016050 | 760.114   | 628.125   |
| NM_007080 | 10593.055 | 9495.803  |
| AK026912  | 3223.033  | 1363.721  |
| AK023531  | 7066.438  | 3519.48   |
| AK024298  | 211.119   | 514.513   |
| AB011128  | 5778.928  | 6371.443  |
| AK026742  | 828.821   | 258.118   |
| AK025074  | 4286.693  | 3002.72   |
| NM_000303 | 3709.1    | 4861.681  |
| NM_006242 | 666.831   | 728.881   |
| X78712    | 615.391   | 651.033   |
| NM_001497 | 1329.592  | 906.312   |
| NM_006348 | 992.565   | 933.997   |
| AF067972  | 9075.867  | 11394.382 |
| NM_004958 | 697.135   | 604.962   |
| D87076    | 2882.344  | 1821.776  |
| NM_014149 | 3908.818  | 3247.055  |
| AB020635  | 1440.216  | 2073.903  |
| NM_006515 | 1160.966  | 742.84    |
| NM_005224 | 1964.452  | 1423.484  |
| NM_012144 | 5266.385  | 3920.811  |
| X65231    | 53923.23  | 50755.348 |
| NM_002908 | 1766.329  | 1637.966  |
| AF205632  | 1720.638  | 1523.025  |
| NM_005378 | 15121.721 | 12186.879 |
| NM_002397 | 4850.922  | 4620.003  |
| AF000672  | 1556.67   | 1544.131  |
| AK002195  | 1135.576  | 1522.49   |
| AF086128  | 381.251   | 585.801   |
| AK022850  | 1411.732  | 1993.87   |
| NM_016490 | 1485.225  | 1214.26   |
| AF038193  | 733.205   | 843.895   |
| AK024289  | 1262.503  | 1002.219  |
| S66168    | 4120.427  | 3825.275  |
| AF131837  | 358.236   | 550.034   |
| NM_003851 | 22158.322 | 30417.242 |
| U79244    | 570.016   | 904.944   |
| AK024150  | 1786.159  | 2823.566  |
| AF070536  | 1966.8    | 2103.956  |
| AK022297  | 853.107   | 464.098   |

|                  |           |           |
|------------------|-----------|-----------|
| <b>U79300</b>    | 1515.688  | 1184.875  |
| <b>AK025151</b>  | 7796.316  | 6471.138  |
| <b>AK025550</b>  | 3484.31   | 2641.992  |
| <b>AF088076</b>  | 9316.348  | 8791.869  |
| <b>AF086543</b>  | 2327.49   | 1634.814  |
| <b>AB046797</b>  | 1268.73   | 1045.225  |
| <b>AK002098</b>  | 1428.477  | 2095.721  |
| <b>AK025156</b>  | 13200.079 | 15624.108 |
| <b>AK022116</b>  | 3636.465  | 3554.198  |
| <b>AF026526</b>  | 1054.67   | 767.999   |
| <b>AK026207</b>  | 5822.248  | 2500.004  |
| <b>AK024984</b>  | 10426.458 | 7473.659  |
| <b>AK000276</b>  | 470.998   | 506.291   |
| <b>AL110236</b>  | 647.542   | 363.677   |
| <b>AF085955</b>  | 541.416   | 669.076   |
| <b>AK023339</b>  | 1788.175  | 955.032   |
| <b>AF085981</b>  | 244.914   | 222.004   |
| <b>AF086008</b>  | 855.684   | 921.372   |
| <b>AF087970</b>  | 422.321   | 340.556   |
| <b>AF086029</b>  | 1156.54   | 1106.257  |
| <b>AF075115</b>  | 671.685   | 814.334   |
| <b>U05597</b>    | 973.841   | 1342.674  |
| <b>U50524</b>    | 790.36    | 755.028   |
| <b>U52050</b>    | 976.591   | 834.158   |
| <b>U73799</b>    | 1181.569  | 616.162   |
| <b>AK021668</b>  | 24381.91  | 29638.082 |
| <b>AF086148</b>  | 13372.479 | 13879.504 |
| <b>AJ245433</b>  | 4787.438  | 5884.852  |
| <b>AK021942</b>  | 18511.441 | 17877.033 |
| <b>NM_014127</b> | 633.732   | 625.473   |
| <b>AL360187</b>  | 634.423   | 804.43    |
| <b>AK021817</b>  | 1044.864  | 877.832   |
| <b>AK023217</b>  | 1131.994  | 1086.199  |
| <b>AF090902</b>  | 2201.651  | 1615.497  |
| <b>AF119887</b>  | 6497.966  | 5400.417  |
| <b>AK091038</b>  | 364.464   | 341.416   |
| <b>AK024193</b>  | 799.336   | 975.321   |
| <b>NM_018543</b> | 551.411   | 441.993   |
| <b>AK024438</b>  | 10641.897 | 12062.871 |
| <b>AK022482</b>  | 1363.675  | 1209.915  |
| <b>AK023382</b>  | 504.719   | 769.763   |
| <b>AK023811</b>  | 533.418   | 474.925   |
| <b>AK022803</b>  | 1332.359  | 1207.853  |
| <b>AK023517</b>  | 1396.73   | 1489.14   |
| <b>AK023869</b>  | 3444.575  | 3861.011  |
| <b>NM_017728</b> | 813.175   | 592.221   |
| <b>U80772</b>    | 668.727   | 537.707   |
| <b>NM_006189</b> | 979.888   | 1168.603  |
| <b>AJ272177</b>  | 1640.296  | 1382.623  |
| <b>AK026402</b>  | 9394.353  | 11768.797 |
| <b>AF111846</b>  | 770.97    | 817.307   |
| <b>M11948</b>    | 54069.219 | 56451.672 |
| <b>Z36850</b>    | 483.623   | 831.017   |



|                  |           |           |
|------------------|-----------|-----------|
| <b>AK024618</b>  | 910.803   | 683.467   |
| <b>AL049969</b>  | 585.294   | 682.862   |
| <b>NM_005220</b> | 1040.916  | 819.021   |
| <b>NM_018619</b> | 506.894   | 549.098   |
| <b>AK026366</b>  | 44272.484 | 44650.66  |
| <b>AK024229</b>  | 15416.224 | 16035.967 |
| <b>AK021467</b>  | 2282.759  | 1402.942  |
| <b>NM_020371</b> | 2281.313  | 2786.446  |
| <b>AK022498</b>  | 2354.834  | 1623.293  |
| <b>U84506</b>    | 1071.575  | 1210.854  |
| <b>U21556</b>    | 52518.516 | 51480.996 |
| <b>AB002444</b>  | 1007.217  | 850.547   |
| <b>AB002344</b>  | 1819.5    | 2133.227  |
| <b>BF210352</b>  | 1075.336  | 703.988   |
| <b>NM_006829</b> | 1447.428  | 890.095   |
| <b>NM_017669</b> | 6825.275  | 6677.116  |
| <b>AF147379</b>  | 33618.422 | 34967.961 |
| <b>AK023760</b>  | 3446.825  | 4089.916  |
| <b>X98415</b>    | 50433.926 | 56850.879 |
| <b>AF086034</b>  | 12242.531 | 15997.021 |
| <b>AK000174</b>  | 1507.571  | 1433.404  |
| <b>AF130071</b>  | 794.393   | 572.175   |
| <b>AL390170</b>  | 545.923   | 607.72    |
| <b>AK022887</b>  | 519.571   | 1143.864  |
| <b>AK000745</b>  | 14177.838 | 11111.851 |
| <b>NM_005299</b> | 417.068   | 637.453   |
| <b>NM_015901</b> | 1002.53   | 766.066   |
| <b>Z83935</b>    | 899.246   | 1039.197  |
| <b>AF093744</b>  | 1935.983  | 1647.105  |
| <b>NM_018687</b> | 11757.891 | 12100.434 |
| <b>M57417</b>    | 29232.986 | 28179.992 |
| <b>NM_020524</b> | 3078.918  | 5595.707  |
| <b>NM_001999</b> | 1866.058  | 2227.785  |
| <b>X64977</b>    | 637.766   | 706.682   |
| <b>AF064851</b>  | 479.804   | 541.346   |
| <b>NM_002602</b> | 4586.31   | 4340.813  |
| <b>NM_016239</b> | 412.819   | 520.655   |
| <b>NM_003383</b> | 2861.433  | 1060.109  |
| <b>D17271</b>    | 8879.935  | 5693.307  |
| <b>X91648</b>    | 1610.765  | 1559.186  |
| <b>AF282264</b>  | 13856.095 | 9559.111  |
| <b>AF086322</b>  | 1806.822  | 2023.333  |
| <b>Z70717</b>    | 1385.093  | 1401.495  |
| <b>AK024736</b>  | 844.573   | 741.55    |
| <b>X79308</b>    | 1379.861  | 1189.651  |
| <b>AF086476</b>  | 657.894   | 502.245   |
| <b>NM_017660</b> | 6597.685  | 5229.344  |
| <b>AB011151</b>  | 4927.044  | 3863.02   |
| <b>U92995</b>    | 3282.768  | 2997.711  |
| <b>Z70769</b>    | 1086.731  | 1088.046  |
| <b>NM_007106</b> | 2724.59   | 2738.533  |
| <b>AL137555</b>  | 2635.532  | 3638.405  |
| <b>AL133017</b>  | 1630.28   | 1077.124  |

|                  |           |           |
|------------------|-----------|-----------|
| <b>CY3Cy5</b>    | 1923.938  | 151.028   |
| <b>X00588</b>    | 831.639   | 803.48    |
| <b>AI359037</b>  | 4340.638  | 2191.802  |
| <b>BI754285</b>  | 796.179   | 564.092   |
| <b>X15998</b>    | 1990.293  | 1391.401  |
| <b>NM_004628</b> | 1559.031  | 2821.82   |
| <b>L31785</b>    | 1015.312  | 1048.421  |
| <b>H-M 69043</b> | 3430.75   | 9991.251  |
| <b>AF077374</b>  | 960.166   | 1258.204  |
| <b>U43901</b>    | 1259.229  | 1423.665  |
| <b>X59065</b>    | 657.092   | 511.561   |
| <b>M59828</b>    | 2793.076  | 2541.679  |
| <b>NM_016134</b> | 1288.211  | 1115.114  |
| <b>SR2</b>       | 34549.957 | 31356.266 |
| <b>SR4</b>       | 15982.447 | 18257.688 |
| <b>SR6</b>       | 2529.89   | 3134.637  |
| <b>SR8</b>       | 8198.947  | 34069.949 |
| <b>SR10</b>      | 34070.992 | 21366.348 |
| <b>CY3Cy5</b>    | 1144.148  | 73.666    |
| <b>NM_000612</b> | 3663.554  | 6270.181  |
| <b>NM_004257</b> | 14004.001 | 11281.164 |
| <b>NM_000683</b> | 1026.189  | 1057.452  |
| <b>NM_003629</b> | 1364.167  | 1205.82   |
| <b>NM_005901</b> | 6220.839  | 6265.116  |
| <b>NM_004248</b> | 1008.421  | 1153.094  |
| <b>NM_004796</b> | 922.433   | 452.035   |
| <b>NM_000435</b> | 2729.811  | 2472.935  |
| <b>NM_001842</b> | 8959.325  | 10383.541 |
| <b>AL080170</b>  | 1133.184  | 934.832   |
| <b>AB039903</b>  | 3022.242  | 2892.69   |
| <b>NM_000542</b> | 6915.905  | 6343.495  |
| <b>NM_006851</b> | 831.489   | 1572.792  |
| <b>AK001560</b>  | 1104.58   | 807.141   |
| <b>AB001328</b>  | 1069.918  | 1168.802  |
| <b>H99588</b>    | 2303.361  | 2770.144  |
| <b>AK022600</b>  | 3332.781  | 3786.719  |
| <b>AK023142</b>  | 1126.026  | 1342.684  |
| <b>U61740</b>    | 6721.294  | 7246.49   |
| <b>NM_006409</b> | 48403.91  | 51340.645 |
| <b>AB049054</b>  | 3130.533  | 3149.148  |
| <b>NM_015071</b> | 870.26    | 1205.479  |
| <b>NM_013227</b> | 987.409   | 1114.727  |
| <b>AF075012</b>  | 1563.393  | 2266.858  |
| <b>NM_001570</b> | 1081.216  | 1452.191  |
| <b>NM_015658</b> | 605.695   | 675.604   |
| <b>NM_000589</b> | 2204.044  | 1131.293  |
| <b>NM_016546</b> | 19189.18  | 30846.244 |
| <b>AF309653</b>  | 9477.803  | 5816.587  |
| <b>NM_002620</b> | 5918.592  | 6880.667  |
| <b>S79267</b>    | 579.423   | 440.744   |
| <b>NM_003784</b> | 26715.232 | 20733.471 |
| <b>NM_000195</b> | 9935.003  | 9479.801  |
| <b>NM_005445</b> | 7188.313  | 5666.789  |

|                  |           |           |
|------------------|-----------|-----------|
| <b>NM_01489</b>  | 2209.918  | 2842.873  |
| <b>NM_00363</b>  | 4533.958  | 4266.505  |
| <b>NM_00004</b>  | 4153.917  | 6469.619  |
| <b>NM_00321</b>  | 1780.546  | 1455.708  |
| <b>NM_00670</b>  | 3084.338  | 2377.887  |
| <b>NM_00491</b>  | 1780.353  | 3225.822  |
| <b>AB013452</b>  | 656.714   | 1513.448  |
| <b>M93107</b>    | 5013.74   | 6569.913  |
| <b>BC001479</b>  | 4686.485  | 4883.244  |
| <b>NM_002461</b> | 17300.105 | 17470.883 |
| <b>NM_005771</b> | 11364.289 | 18352.117 |
| <b>AB032986</b>  | 30919.85  | 26903.549 |
| <b>NM_01752</b>  | 20734.676 | 19521.701 |
| <b>NM_016032</b> | 7991.73   | 11471.292 |
| <b>NM_014324</b> | 55852.871 | 52327.512 |
| <b>NM_001687</b> | 25671.873 | 23912.285 |
| <b>AK026374</b>  | 1633.239  | 3035.176  |
| <b>NM_001169</b> | 1860.502  | 2170.703  |
| <b>AK024648</b>  | 10807.555 | 9034.273  |
| <b>NM_00071</b>  | 705.465   | 1320.442  |
| <b>NM_00345</b>  | 2088.592  | 2051.967  |
| <b>NM_000171</b> | 1070.225  | 746.818   |
| <b>AL354615</b>  | 1046.633  | 767.665   |
| <b>NM_01334</b>  | 26231.145 | 24727.131 |
| <b>NM_00370</b>  | 2685.87   | 3149.291  |
| <b>NM_006861</b> | 1874.203  | 2805.852  |
| <b>NM_00582</b>  | 2213.565  | 2455.571  |
| <b>NM_00046</b>  | 1261.024  | 1668.776  |
| <b>NM_01590</b>  | 12576.875 | 13538.751 |
| <b>NM_00089</b>  | 930.509   | 825.745   |
| <b>AB040672</b>  | 5012.814  | 4325.229  |
| <b>NM_002192</b> | 2131.799  | 1972.282  |
| <b>NM_005491</b> | 4770.985  | 3993.232  |
| <b>NM_00386</b>  | 2289.707  | 2494.044  |
| <b>X63417</b>    | 7121.383  | 6455.62   |
| <b>S94539</b>    | 16113.923 | 21616.256 |
| <b>NM_006402</b> | 1789.66   | 3001.631  |
| <b>NM_00578</b>  | 3823.826  | 3612.634  |
| <b>NM_01824</b>  | 3184.752  | 2310.376  |
| <b>AK001695</b>  | 6611.658  | 6517.964  |
| <b>NM_01788</b>  | 2499.565  | 2565.157  |
| <b>NM_006252</b> | 1335.926  | 983.85    |
| <b>NM_014397</b> | 4671.716  | 4376.087  |
| <b>AB023182</b>  | 698.666   | 1386.469  |
| <b>NM_003607</b> | 841.508   | 995.709   |
| <b>NM_00657</b>  | 1568.25   | 1361.465  |
| <b>NM_013254</b> | 2838.096  | 4150.578  |
| <b>NM_000437</b> | 11011.185 | 12784.749 |
| <b>AB046819</b>  | 6359.433  | 8591.634  |
| <b>NM_00609</b>  | 3707.073  | 4555.875  |
| <b>NM_00290</b>  | 4459.746  | 5381.879  |
| <b>NM_006851</b> | 512.86    | 1981.311  |
| <b>AB001328</b>  | 437.896   | 360.308   |

|                  |           |           |
|------------------|-----------|-----------|
| <b>H99588</b>    | 1973.845  | 2473.597  |
| <b>X00588</b>    | 872.755   | 915       |
| <b>AI359037</b>  | 4505.411  | 2374.412  |
| <b>BI754285</b>  | 787.719   | 921.834   |
| <b>X15998</b>    | 2296.526  | 2117.887  |
| <b>NM_001883</b> | 1729.275  | 1759.992  |
| <b>NM_004628</b> | 1118.343  | 1768.764  |
| <b>L31785</b>    | 703.776   | 575.405   |
| <b>H-M 69043</b> | 2348.087  | 7153.427  |
| <b>AF077374</b>  | 1138.667  | 863.989   |
| <b>X59065</b>    | 380.84    | 622.707   |
| <b>M59828</b>    | 3050.271  | 3281.229  |
| <b>NM_016134</b> | 1374.516  | 2041.472  |
| <b>AJ010482</b>  | 2488.725  | 2309.438  |
| <b>NM_005445</b> | 6828.503  | 4540.171  |
| <b>NM_014899</b> | 2247.457  | 2100.966  |
| <b>NM_003630</b> | 3394.831  | 2171.614  |
| <b>NM_000046</b> | 2784.907  | 3300.475  |
| <b>NM_003219</b> | 1115.582  | 638.143   |
| <b>NM_006709</b> | 2860.86   | 2041.821  |
| <b>NM_000612</b> | 4573.492  | 5691.897  |
| <b>NM_004257</b> | 14871.507 | 12547.131 |
| <b>NM_000683</b> | 1199.26   | 1222.626  |
| <b>NM_003629</b> | 1496.99   | 1781.657  |
| <b>NM_005901</b> | 5449.342  | 4473.029  |
| <b>NM_004248</b> | 780.115   | 838.041   |
| <b>NM_000959</b> | 179.631   | 244.552   |
| <b>NM_001313</b> | 329.447   | 655.711   |
| <b>NM_004796</b> | 865.009   | 313.667   |
| <b>NM_000435</b> | 2364.23   | 1332.54   |
| <b>NM_001842</b> | 8796.546  | 8469.388  |
| <b>AB017169</b>  | 697.367   | 764.935   |
| <b>AL080170</b>  | 1663.238  | 2695.578  |
| <b>AB039903</b>  | 4395.854  | 4582.166  |
| <b>NM_000542</b> | 5904.514  | 7836.718  |
| <b>NM_003705</b> | 1975.182  | 2226.688  |
| <b>NM_006861</b> | 1588.567  | 2138.806  |
| <b>NM_005829</b> | 1901.906  | 1909.249  |
| <b>NM_000466</b> | 912.47    | 842.526   |
| <b>NM_015908</b> | 12555.117 | 15391.721 |
| <b>AK022600</b>  | 2215.564  | 1173.601  |
| <b>U61740</b>    | 7337.511  | 6701.277  |
| <b>NM_006409</b> | 56395.375 | 51685.418 |
| <b>AB049054</b>  | 3141.761  | 3837.04   |
| <b>NM_015071</b> | 1079.436  | 1326.784  |
| <b>NM_013227</b> | 855.14    | 1014.875  |
| <b>AF027205</b>  | 15678.54  | 12424.254 |
| <b>AF075012</b>  | 1002.011  | 1376.56   |
| <b>NM_001570</b> | 837.211   | 1302.505  |
| <b>NM_015658</b> | 516.419   | 487.137   |
| <b>NM_000589</b> | 2941.309  | 1413.535  |
| <b>NM_016546</b> | 15847.573 | 20797.129 |
| <b>AF309653</b>  | 8972.27   | 4313.805  |

|           |           |           |
|-----------|-----------|-----------|
| NM_002620 | 7997.39   | 9054.323  |
| S79267    | 906.344   | 1050.491  |
| NM_001816 | 1001.599  | 1011.197  |
| NM_003784 | 33257.902 | 30083.725 |
| NM_000195 | 12409.683 | 10971.408 |
| NM_006575 | 1392.695  | 967.872   |
| NM_013254 | 3079.634  | 3997.879  |
| NM_000437 | 7661.538  | 7433.753  |
| AB046819  | 4040.368  | 4233.12   |
| NM_006090 | 3685.252  | 3849.948  |
| NM_002900 | 3820.838  | 5183.911  |
| NM_004910 | 1283.023  | 1389.159  |
| AB013452  | 508.365   | 882.517   |
| M93107    | 3902.46   | 4143.34   |
| BC001479  | 3899.854  | 4181.427  |
| NM_002461 | 18095.311 | 19238.809 |
| NM_005771 | 11733.671 | 19120.334 |
| AB032986  | 28917.236 | 25723.484 |
| NM_017528 | 19670.463 | 20550.92  |
| NM_016032 | 6476.11   | 9063.195  |
| NM_014324 | 50853.109 | 51386.258 |
| NM_001687 | 22774.66  | 17960.641 |
| AK026374  | 1932.42   | 3058.034  |
| NM_001169 | 1318.594  | 1542.371  |
| AK024648  | 9902.837  | 7826.177  |
| NM_000719 | 845.296   | 721.63    |
| NM_003459 | 2248.375  | 3154.439  |
| NM_000171 | 954.97    | 648.651   |
| AL354615  | 1049.771  | 700.143   |
| NM_013349 | 29087.629 | 23016.516 |
| NM_016134 | 1436.585  | 2187.982  |
| AJ010482  | 2067.003  | 1585.686  |
| NM_000896 | 430.605   | 530.897   |
| AB040672  | 3216.064  | 2211.832  |
| NM_002192 | 2032.521  | 1867.742  |
| NM_005491 | 4626.739  | 4557.964  |
| NM_003869 | 2887.098  | 2274.509  |
| X63417    | 7248.717  | 6454.814  |
| S94539    | 14592.437 | 21784.199 |
| NM_006402 | 1109.86   | 1299.614  |
| NM_005785 | 4155.212  | 3255.339  |
| NM_018248 | 2909.884  | 2601.91   |
| AK001695  | 7002.471  | 8457.984  |
| NM_017886 | 2800.6    | 3513.321  |
| NM_006252 | 1579.95   | 1744.162  |
| NM_014397 | 4586.521  | 4300.98   |
| AB023182  | 1113.819  | 914.935   |
| NM_003607 | 781.72    | 528.25    |
| AB017169  | 1057.248  | 961.396   |
| AL080170  | 1337.338  | 2092.357  |
| AB039903  | 3352.04   | 3911.55   |
| NM_000542 | 6735.558  | 6981.232  |
| NM_006851 | 605.43    | 1701.718  |

|                  |           |           |
|------------------|-----------|-----------|
| <b>AK001560</b>  | 637.072   | 733.518   |
| <b>AB001328</b>  | 451.948   | 609.24    |
| <b>H99588</b>    | 1720.355  | 1764.857  |
| <b>X00588</b>    | 1240.653  | 1381.962  |
| <b>AI359037</b>  | 5372.556  | 2587.585  |
| <b>J04513</b>    | 492.775   | 581.251   |
| <b>BI754285</b>  | 574.618   | 724.947   |
| <b>X15998</b>    | 2071.957  | 1691.933  |
| <b>M76482</b>    | 285.588   | 525.181   |
| <b>NM_001883</b> | 1408.476  | 1671.086  |
| <b>NM_004628</b> | 1239.808  | 2199.346  |
| <b>L31785</b>    | 841.42    | 931.079   |
| <b>H-M 69043</b> | 3735.654  | 13113.341 |
| <b>AF077374</b>  | 778.796   | 737.706   |
| <b>U43901</b>    | 528.77    | 201.165   |
| <b>X59065</b>    | 617.531   | 472.747   |
| <b>M59828</b>    | 2521.368  | 2024.202  |
| <b>AF309653</b>  | 9584.729  | 4869.196  |
| <b>NM_002620</b> | 7414.571  | 9727.38   |
| <b>S79267</b>    | 923.064   | 900.36    |
| <b>NM_001816</b> | 469.021   | 825.258   |
| <b>NM_003784</b> | 26157.504 | 25840.838 |
| <b>NM_000195</b> | 11781.619 | 12510.792 |
| <b>NM_005445</b> | 8018.283  | 5059.257  |
| <b>NM_014899</b> | 1671.319  | 1662.355  |
| <b>NM_003630</b> | 3115.623  | 2429.617  |
| <b>NM_000046</b> | 2600.602  | 2784.245  |
| <b>NM_003219</b> | 1114.613  | 476.52    |
| <b>NM_006709</b> | 2964.997  | 2105.356  |
| <b>NM_000612</b> | 4945.461  | 6573.095  |
| <b>NM_004257</b> | 16366.89  | 14425.877 |
| <b>NM_000683</b> | 843.194   | 1132.892  |
| <b>NM_003629</b> | 1714.122  | 1647.766  |
| <b>NM_005901</b> | 6415.628  | 5230.998  |
| <b>NM_004248</b> | 806.14    | 1019.416  |
| <b>NM_001313</b> | 736.343   | 1165.217  |
| <b>NM_004796</b> | 639.58    | 216.526   |
| <b>NM_000435</b> | 1702.783  | 729.523   |
| <b>NM_001842</b> | 7043.572  | 5389.983  |
| <b>NM_000719</b> | 486.125   | 874.855   |
| <b>NM_003459</b> | 2531.767  | 3828.904  |
| <b>NM_000171</b> | 1097.252  | 634.034   |
| <b>AL354615</b>  | 1222.309  | 859.101   |
| <b>NM_013349</b> | 26373.623 | 24788.406 |
| <b>NM_003705</b> | 2187.688  | 2811.753  |
| <b>NM_006861</b> | 1583.346  | 1779.915  |
| <b>NM_005829</b> | 1783.194  | 1430.079  |
| <b>NM_015908</b> | 12331.023 | 12159.509 |
| <b>AK022600</b>  | 1948.268  | 1374.468  |
| <b>AK023142</b>  | 743.414   | 1010.219  |
| <b>U61740</b>    | 8474.868  | 9735.125  |
| <b>NM_006409</b> | 46178.68  | 47884.047 |
| <b>AB049054</b>  | 3682.447  | 4001.175  |

|                  |           |           |
|------------------|-----------|-----------|
| <b>NM_015071</b> | 1186.024  | 1681.742  |
| <b>NM_013227</b> | 1158.383  | 2030.502  |
| <b>Z83803</b>    | 733.311   | 652.73    |
| <b>AF027205</b>  | 17645.113 | 14057.956 |
| <b>AF075012</b>  | 1136.234  | 1297.136  |
| <b>NM_001570</b> | 778.253   | 726.541   |
| <b>NM_000589</b> | 2132.21   | 691.11    |
| <b>NM_016546</b> | 13860.931 | 15087.947 |
| <b>NM_017886</b> | 3507.065  | 5008.396  |
| <b>NM_006252</b> | 1888.297  | 1810.63   |
| <b>NM_001721</b> | 634.841   | 640.813   |
| <b>NM_014397</b> | 5303.923  | 6464.424  |
| <b>AB023182</b>  | 976.684   | 1949.643  |
| <b>NM_003607</b> | 770.09    | 775.79    |
| <b>NM_006575</b> | 1176.911  | 913.997   |
| <b>NM_013254</b> | 2108.166  | 2563.486  |
| <b>NM_000437</b> | 7348.563  | 5837.864  |
| <b>AB046819</b>  | 3548.431  | 3042.974  |
| <b>NM_006090</b> | 3268.845  | 3216.32   |
| <b>NM_002900</b> | 3600.49   | 3656.044  |
| <b>NM_004910</b> | 1259.597  | 1850.657  |
| <b>AB013452</b>  | 556.069   | 1010.427  |
| <b>M93107</b>    | 4427.478  | 4706.726  |
| <b>BC001479</b>  | 5181.917  | 5975.722  |
| <b>NM_002461</b> | 23055.762 | 35215.168 |
| <b>NM_005771</b> | 11299.857 | 20615.1   |
| <b>AB032986</b>  | 33317.605 | 32616.008 |
| <b>NM_017528</b> | 20594.609 | 19164.133 |
| <b>NM_016032</b> | 6447.979  | 7234.958  |
| <b>NM_014324</b> | 52252.203 | 53288.23  |
| <b>NM_001687</b> | 14886.397 | 7408.487  |
| <b>AK026374</b>  | 1115.102  | 1424.126  |
| <b>NM_001169</b> | 1219.881  | 975.135   |
| <b>AK024648</b>  | 9545.559  | 4878.128  |
| <b>NM_000795</b> | 595.281   | 661.861   |
| <b>AB037761</b>  | 10883.079 | 10954.565 |
| <b>NM_014008</b> | 43142.426 | 52515.082 |
| <b>NM_014731</b> | 6283.024  | 11710.503 |
| <b>AF035191</b>  | 10212.666 | 5792.236  |
| <b>NM_004058</b> | 871.023   | 1473.397  |
| <b>NM_004527</b> | 670.388   | 455.558   |
| <b>NM_012062</b> | 7662.851  | 5977.534  |
| <b>AK026717</b>  | 655.08    | 422.044   |
| <b>AJ010482</b>  | 1851.9    | 1407.326  |
| <b>AB040672</b>  | 4739.81   | 3319.805  |
| <b>NM_002192</b> | 2520.154  | 2854.025  |
| <b>NM_005491</b> | 5640.225  | 8178.062  |
| <b>NM_003869</b> | 3888.685  | 4022.101  |
| <b>X63417</b>    | 8143.883  | 7497.201  |
| <b>S94539</b>    | 13774.074 | 15829.76  |
| <b>NM_006402</b> | 908.05    | 985.371   |
| <b>NM_005785</b> | 3087.085  | 1589.912  |
| <b>NM_018248</b> | 2414.153  | 1100.281  |

|           |           |           |
|-----------|-----------|-----------|
| AK001695  | 7823.887  | 7233.458  |
| AB040898  | 1332.491  | 1635.492  |
| AB031547  | 1708.944  | 1506.667  |
| NM_003970 | 729.306   | 652.612   |
| AK022496  | 2104.614  | 2495.009  |
| AB042636  | 675.524   | 844.263   |
| NM_002883 | 2951.939  | 2010.128  |
| NM_016150 | 1756.452  | 1328.213  |
| U57058    | 767.082   | 973.642   |
| AL137452  | 1276.718  | 1136.077  |
| NM_004312 | 34570.027 | 26673.867 |
| NM_001347 | 4191.639  | 5935.42   |
| AK024549  | 14546.174 | 15403.685 |
| NM_006338 | 4641.449  | 4568.946  |
| NM_007164 | 4616.117  | 4075.634  |
| NM_000261 | 1027.604  | 932.41    |
| NM_002606 | 3082.194  | 2943.999  |
| NM_002570 | 961.152   | 948.795   |
| NM_003183 | 2024.078  | 1831.862  |
| NM_019851 | 1425.353  | 1993.32   |
| NM_003238 | 1725.51   | 1276.507  |
| NM_018367 | 855.18    | 1292.279  |
| NM_001363 | 8734.684  | 4188.534  |
| NM_014096 | 9993.422  | 14154.276 |
| NM_005706 | 2519.65   | 2459.405  |
| NM_001261 | 2392.565  | 3090.075  |
| NM_001977 | 695.793   | 339.591   |
| NM_007219 | 8203.821  | 5533.539  |
| AK026854  | 3345.882  | 2405.841  |
| NM_001269 | 2130.064  | 1568.967  |
| NM_002506 | 646.222   | 619.171   |
| NM_004906 | 2564.779  | 1844.101  |
| NM_012447 | 17630.244 | 19406.695 |
| NM_006366 | 7292.427  | 11225.418 |
| AK027013  | 31751.576 | 28481.162 |
| NM_001344 | 35051.207 | 32109.195 |
| NM_018294 | 1992.829  | 1881.456  |
| AL389934  | 2943.228  | 2664.913  |
| NM_004330 | 5521.803  | 5546.215  |
| AF151802  | 5144.463  | 7060.196  |
| AB006746  | 750.624   | 608.54    |
| NM_006498 | 2203.225  | 1731.668  |
| AB023233  | 1604.428  | 1155.47   |
| NM_004369 | 1159.092  | 1088.62   |
| NM_018130 | 4908.839  | 5615.798  |
| AF085878  | 674.662   | 827.511   |
| AB006630  | 2034.333  | 649.372   |
| NM_016155 | 1657.968  | 1982.205  |
| NM_001224 | 6432.175  | 5451.74   |
| NM_017811 | 7492.946  | 7367.415  |
| NM_001569 | 3470.143  | 2374.697  |
| AK023284  | 2308.735  | 2112.161  |
| NM_005101 | 3267.865  | 13064.974 |



|           |           |           |
|-----------|-----------|-----------|
| NM_004205 | 526.997   | 348.946   |
| AF130060  | 7289.668  | 6339.943  |
| NM_007057 | 12194.271 | 7709.506  |
| NM_000177 | 15138.4   | 15652.58  |
| NM_003387 | 7328.875  | 7513.623  |
| U60665    | 1263.465  | 882.114   |
| NM_005507 | 42808.316 | 37475.219 |
| AL080133  | 3898.973  | 3544.472  |
| AY014403  | 876.266   | 911.023   |
| NM_006912 | 3192.395  | 2855.368  |
| X12534    | 1765.615  | 1124.405  |
| NM_003112 | 601.601   | 619.132   |
| NM_018951 | 7242.854  | 4670.332  |
| NM_014323 | 4950.7    | 4756.388  |
| NM_003205 | 3858.519  | 2815.001  |
| AB002324  | 2630.16   | 1361.593  |
| AK026231  | 1373.394  | 1001.777  |
| NM_002140 | 13473.111 | 9228.495  |
| NM_020143 | 2033.637  | 2054.603  |
| NM_012469 | 3591.674  | 4819.729  |
| NM_005131 | 1862.428  | 1357.029  |
| NM_007056 | 1907.483  | 1439.388  |
| AF083383  | 2183.846  | 1086.585  |
| NM_006925 | 2933.499  | 2268.508  |
| NM_004890 | 45972.816 | 50074.41  |
| AK023181  | 1691.202  | 1638.764  |
| NM_004294 | 1358.792  | 1106.795  |
| NM_005051 | 28463.701 | 28179.502 |
| NM_001968 | 20912.012 | 10466.149 |
| D17259    | 56192.957 | 55887.723 |
| AB002366  | 328.915   | 430.936   |
| AF264627  | 43427.336 | 27383.373 |
| AL133053  | 1183.865  | 1264.839  |
| NM_018142 | 4938.836  | 4046.693  |
| NM_017653 | 3375.521  | 3308.293  |
| AL109695  | 13612.781 | 13075.418 |
| NM_002168 | 2330.406  | 1971.448  |
| NM_004453 | 1302.729  | 1781.983  |
| NM_016229 | 5377.147  | 3681.285  |
| NM_018244 | 1775.005  | 1880.922  |
| NM_002492 | 32916.652 | 31779.41  |
| AB046855  | 323.665   | 462.608   |
| NM_005642 | 3505.666  | 4529.9    |
| NM_018105 | 1392.773  | 1178.605  |
| AK023452  | 3334.626  | 2527.265  |
| NM_000332 | 1652.433  | 1562.835  |
| AK022215  | 2229.23   | 2438.413  |
| NM_001527 | 12879.488 | 7869.176  |
| AK025269  | 5142.556  | 4491.614  |
| NM_001438 | 574.985   | 751.189   |
| AB040971  | 1291.086  | 1628.531  |
| NM_006562 | 3085.856  | 4055.083  |
| AK024254  | 1898.98   | 1646.309  |

|                  |           |           |
|------------------|-----------|-----------|
| <b>NM_018456</b> | 3187.627  | 1756.204  |
| <b>AK026697</b>  | 395.333   | 348.156   |
| <b>NM_019021</b> | 1234.253  | 1089.405  |
| <b>AK002183</b>  | 693.518   | 810.693   |
| <b>NM_018996</b> | 1035.837  | 834.906   |
| <b>AL137304</b>  | 2262.342  | 2369.289  |
| <b>AL049274</b>  | 400.333   | 368.557   |
| <b>NM_018279</b> | 512.408   | 1679.927  |
| <b>AK026883</b>  | 1300.548  | 1042.094  |
| <b>NM_014350</b> | 7898.72   | 5527.615  |
| <b>U00925</b>    | 3612.505  | 3719.563  |
| <b>AL390185</b>  | 930.396   | 836.666   |
| <b>AF086235</b>  | 2819.155  | 2856.545  |
| <b>AF143886</b>  | 1134.941  | 1002.221  |
| <b>AK025975</b>  | 806.713   | 741.359   |
| <b>AK025583</b>  | 32072.395 | 34366.047 |
| <b>NM_014664</b> | 2346.105  | 4181.079  |
| <b>AL109788</b>  | 832.446   | 2056.854  |
| <b>NM_014952</b> | 22148.09  | 28478.658 |
| <b>AB037765</b>  | 755.319   | 647.629   |
| <b>AK025068</b>  | 845.704   | 785.153   |
| <b>AK026720</b>  | 499.405   | 666.524   |
| <b>AL137566</b>  | 1887.055  | 1795.997  |
| <b>AF087962</b>  | 2567.048  | 3086.606  |
| <b>AL050197</b>  | 2484.155  | 2832.841  |
| <b>AF085870</b>  | 1442.407  | 989.747   |
| <b>AL117580</b>  | 6732.254  | 5209.97   |
| <b>AL110190</b>  | 4888.812  | 3937.114  |
| <b>AL117656</b>  | 436.926   | 574.277   |
| <b>AJ001893</b>  | 804.492   | 820.415   |
| <b>NM_014819</b> | 8735.774  | 5739.194  |
| <b>AF086040</b>  | 2295.12   | 1161.875  |
| <b>AB032988</b>  | 1077.999  | 837.639   |
| <b>AK023559</b>  | 3883.516  | 2677.987  |
| <b>AB037859</b>  | 51532.48  | 55133.875 |
| <b>AL049233</b>  | 1541.015  | 2037.224  |
| <b>NM_017696</b> | 1816.298  | 3011.344  |
| <b>AL050166</b>  | 4013.982  | 7271.848  |
| <b>AK026705</b>  | 1739.91   | 1705.456  |
| <b>NM_003602</b> | 1573.692  | 1705.357  |
| <b>AF009258</b>  | 23935.164 | 21709.457 |
| <b>AF009305</b>  | 1579.3    | 1637.339  |
| <b>NM_006193</b> | 422.263   | 393.813   |
| <b>AF009270</b>  | 859.447   | 823.096   |
| <b>AF009318</b>  | 1575.859  | 970.31    |
| <b>AF056421</b>  | 1100.09   | 941.025   |
| <b>AF090889</b>  | 512.685   | 551.445   |
| <b>AK001085</b>  | 749.688   | 839.239   |
| <b>AK001906</b>  | 1543.35   | 2194.987  |
| <b>AK021528</b>  | 757.933   | 844.547   |
| <b>AK021746</b>  | 4241.268  | 4653.098  |
| <b>AK001136</b>  | 1143.392  | 1411.515  |
| <b>AK021617</b>  | 238.194   | 636.712   |

|                  |           |           |
|------------------|-----------|-----------|
| <b>AK021810</b>  | 1056.89   | 799.73    |
| <b>AK026743</b>  | 769.632   | 551.938   |
| <b>AK025214</b>  | 528.019   | 966.538   |
| <b>AK025846</b>  | 1362.427  | 2306.81   |
| <b>AK026805</b>  | 2489.65   | 2187.529  |
| <b>AL389983</b>  | 5765.947  | 3046.867  |
| <b>AJ008159</b>  | 731.183   | 761.241   |
| <b>AK000995</b>  | 1246.328  | 1560.335  |
| <b>U00959</b>    | 3034.721  | 2208.874  |
| <b>NM_014578</b> | 8117.324  | 8351.251  |
| <b>AF147306</b>  | 2653.212  | 3927.318  |
| <b>AF086267</b>  | 2608.947  | 3449.089  |
| <b>X74606</b>    | 838.874   | 834.881   |
| <b>NM_012183</b> | 2148.465  | 1872.974  |
| <b>AK026785</b>  | 1543.746  | 1422.845  |
| <b>AK001938</b>  | 318.916   | 763.598   |
| <b>NM_018225</b> | 10150.036 | 9921.877  |
| <b>AK025534</b>  | 1149.438  | 1271.716  |
| <b>AF091526</b>  | 667.911   | 842.486   |
| <b>M60749</b>    | 2372.839  | 3327.451  |
| <b>X79986</b>    | 1226.919  | 2476.406  |
| <b>NM_003523</b> | 9968.408  | 18031.826 |
| <b>X01448</b>    | 635.313   | 860.45    |
| <b>NM_016503</b> | 5140.846  | 5741.993  |
| <b>AK056351</b>  | 22076.332 | 24454.672 |
| <b>NM_014690</b> | 4097.05   | 4227.174  |
| <b>NM_017698</b> | 5150.468  | 7098.881  |
| <b>AF086490</b>  | 882.914   | 1072.624  |
| <b>AF131738</b>  | 28841.908 | 31954.783 |
| <b>AK021666</b>  | 1803.448  | 1505.796  |
| <b>AK024081</b>  | 914.515   | 996.815   |
| <b>AK024825</b>  | 3385.961  | 1752.857  |
| <b>AF086317</b>  | 5268.499  | 4158.009  |
| <b>U16850</b>    | 4164.04   | 4981.044  |
| <b>AL390178</b>  | 986.698   | 1697.339  |
| <b>Z36806</b>    | 1109.021  | 741.283   |
| <b>NM_018618</b> | 755.867   | 903.265   |
| <b>AJ008121</b>  | 14655.979 | 11592.082 |
| <b>AJ008153</b>  | 1329.466  | 1219.074  |
| <b>AK023739</b>  | 1110.104  | 1202.286  |
| <b>NM_005830</b> | 4672.686  | 4606.478  |
| <b>NM_001507</b> | 1374.244  | 1338.044  |
| <b>AL389876</b>  | 1759.678  | 831.878   |
| <b>AK022120</b>  | 1709.599  | 1722.2    |
| <b>AL137363</b>  | 359.891   | 132.045   |
| <b>Z70762</b>    | 1237.056  | 937.591   |
| <b>D17099</b>    | 669.111   | 953.984   |
| <b>BF037206</b>  | 2903.117  | 2519.515  |
| <b>AK021474</b>  | 5440.155  | 5555.979  |
| <b>AK023642</b>  | 2238.16   | 1654.885  |
| <b>U52827</b>    | 1098.782  | 926.994   |
| <b>AL049466</b>  | 8684.207  | 13388.011 |
| <b>AB037802</b>  | 1621.768  | 2490.234  |

|                  |          |           |
|------------------|----------|-----------|
| <b>U17623</b>    | 1123.658 | 795.062   |
| <b>AL137450</b>  | 4862.059 | 5436.392  |
| <b>AK023058</b>  | 839.84   | 835.044   |
| <b>NM_012064</b> | 3340.699 | 3528.757  |
| <b>AK001460</b>  | 777.022  | 1424.229  |
| <b>AK092508</b>  | 2426.702 | 1708.962  |
| <b>AK027111</b>  | 48084.34 | 54181.781 |

Vertical line 1

Vertical line 2

Vertical line 3

Vertical line 1

Vertical line 2

Vertical line 3

Vertical line 1

Vertical line 2

Vertical line 3

Vertical line 1

Vertical line 2

Vertical line 3



Vertical line 1

Vertical line 2

Vertical line 3

Vertical line 1

Vertical line 2

Vertical line 3

Vertical line 1

Vertical line 2

Vertical line 3

Vertical line 1

Vertical line 2

Vertical line 3

Vertical line 1

Vertical line 2

Vertical line 3

Vertical line 1

Vertical line 2

Vertical line 3

Vertical line 1

Vertical line 2

Vertical line 3

Vertical line 1

Vertical line 2

Vertical line 3



Vertical line 1

Vertical line 2

Vertical line 3

Vertical line 1

Vertical line 2

Vertical line 3

Vertical line 1

Vertical line 2

Vertical line 3

Vertical line 1

Vertical line 2

Vertical line 3

Vertical line 1

Vertical line 2

Vertical line 3

Vertical line 1

Vertical line 2

Vertical line 3

Vertical line 1

Vertical line 2

Vertical line 3

Vertical line 1

Vertical line 2

Vertical line 3



Vertical line 1

Vertical line 2

Vertical line 3

Vertical line 1

Vertical line 2

Vertical line 3

Vertical line 1

Vertical line 2

Vertical line 3

Vertical line 1

Vertical line 2

Vertical line 3

Vertical line 1

Vertical line 2

Vertical line 3

Vertical line 1

Vertical line 2

Vertical line 3

Vertical line 1

Vertical line 2

Vertical line 3

Vertical line 1

Vertical line 2

Vertical line 3



Vertical line 1

Vertical line 2

Vertical line 3

Vertical line 1

Vertical line 2

Vertical line 3

Vertical line 1

Vertical line 2

Vertical line 3

Vertical line 1

Vertical line 2

Vertical line 3

Vertical line 1

Vertical line 2

Vertical line 3

Vertical line 1

Vertical line 2

Vertical line 3

Vertical line 1

Vertical line 2

Vertical line 3

Vertical line 1

Vertical line 2

Vertical line 3



**2uM TPEN  
AMPCH2**

510.599  
26315.047  
583.67  
1903.392  
7718.547  
4207.554  
1876.323  
2985.316  
6851.272  
3181.434  
7974.079  
6047.592  
998.347  
18972.186  
2456.794  
7506.769  
691.466  
9054.242  
1793.932  
794.412  
3179.465  
3672.373  
4129.503  
802.65  
952.324  
5813.354  
2514.318  
4569.373  
514.6  
890.731  
1377.17  
1083.878  
1057.4  
4541.66  
4294.148  
917.392  
7032.099  
1091.892  
2769.349  
1314.524  
7409.717  
1507.831  
6844.509  
1993.605  
2238.547  
1324.003  
2550.505  
1702.576  
1027.601

981.158  
1025.139  
57452.996  
889.138  
1130.386  
36489.398  
1741.14  
3955.893  
1517.035  
2024.059  
65621.18  
1291.433  
1701.817  
2199.614  
3297.732  
757.955  
478.362  
1947.188  
3851.966  
1146.977  
4162.067  
7072.341  
2936.835  
717.149  
1623.055  
1356.958  
5173.674  
16915.791  
5233.9  
1260.574  
8167.4  
784.806  
2691.918  
1483.309  
690.756  
4979.793  
2625.034  
9297.351  
3138.296  
623.451  
2027.189  
2231.4  
2817.403  
12453.614  
2264.068  
25948.209  
3261.674  
750.862  
518.075  
32218.375  
556.857  
4914.09  
3175.782

1112.834  
2169.993  
3529.009  
2055.479  
3367.263  
4186.767  
13225.406  
1808.251  
2766.772  
2681.76  
37751.586  
958.806  
1342.108  
41165.711  
933.868  
6237.659  
1613.833  
1612.094  
2701.88  
3040.496  
480.11  
676.793  
4988.689  
1934.274  
3244.81  
1985.576  
1058.981  
1204.882  
2057.387  
502.499  
1073.893  
1077.286  
4053.643  
5180.604  
781.44  
1455.163  
695.035  
2859.799  
1021.598  
3023.61  
1651.184  
2070.776  
1226.046  
2465.406  
1287.606  
785.028  
3243.057  
1036.228  
560.971  
1002.145  
1223.774  
2057.474  
6991.898

1270.967  
22437.848  
3048.654  
827.065  
1131.116  
56043.457  
865.187  
808.642  
3203.617  
1136.283  
593.714  
2492.293  
3373.705  
898.786  
3885.259  
5680.656  
9602.511  
1555.427  
1638.616  
768.621  
8589.51  
2652.945  
1070.444  
9155.758  
753.096  
2539.654  
2099.559  
647.026  
4835.139  
3037.946  
10278.254  
2785.206  
938.545  
2003.841  
1485.594  
729.902  
838.663  
3064.348  
1902.786  
183.102  
15370.839  
704.298  
3439.839  
4411.597  
1321.563  
1869.743  
2912.354  
1842.486  
3788.429  
6510.887  
541.332  
2542.344  
581.845

400.045  
588.028  
31388.656  
12733.925  
398.786  
2734.101  
786.771  
1741.089  
1676.038  
3856.395  
951.463  
393.263  
5903.825  
2175.771  
4551.487  
762.373  
1674.52  
2706.263  
2956.838  
3082.79  
1450.115  
195.658  
340.934  
2425.626  
3059.19  
344.339  
792.648  
604.954  
3047.995  
3939.357  
1723.63  
1641.845  
845.109  
3531.981  
4845.771  
2481.261  
8981.923  
2655.842  
401.547  
877.758  
874.674  
1706.441  
4771.544  
493.729  
9677.829  
1764.01  
831.26  
965.542  
54536.801  
625.706  
1026.396  
601.835  
2983.328

2965.222  
860.848  
1209.621  
805.53  
1103.605  
2228.108  
797.117  
720.837  
3026.767  
9211.427  
1893.514  
758.905  
7462.729  
2419.39  
795.608  
12441.659  
408.314  
3905.345  
3636.151  
1050.598  
608.599  
881.999  
495.072  
1969.721  
1960.682  
215.899  
455.978  
569.82  
540.423  
708.643  
1472.108  
1032.202  
1525.988  
2214.91  
2011.844  
6931.735  
12582.479  
4373.379  
1094.931  
1093.918  
1940.402  
431.596  
1161.251  
1372.939  
1724.211  
10389.961  
981.057  
1371.334  
2058.98  
778.533  
871.327  
1529.43  
2476.946

883.524  
380.295  
786.962  
1359.855  
2839.041  
618.05  
62124.324  
57589.574  
1032.761  
1166.226  
5007.551  
1176.472  
3214.781  
2164.981  
3536.195  
1758.064  
1129.971  
711.015  
3926.173  
1055.045  
741.914  
505.78  
1091.832  
1862.395  
720.623  
223.59  
1157.699  
1326.849  
1232.794  
1813.408  
843.526  
5172.783  
12593.962  
5653.773  
20310.041  
60588.504  
5105.874  
7843.451  
1245.835  
262.957  
828.268  
1422.601  
175.755  
59849.598  
478.48  
146.557  
859.993  
1425.796  
756.27  
590.984  
1823.823  
1995.502  
700.139

2808.078  
3579.699  
1001.599  
1424.893  
364.162  
305.877  
1185.529  
847.316  
1334.655  
1814.693  
14879.468  
3157.467  
1200.453  
282.382  
545.073  
1386.114  
2667.276  
1330.011  
2096.949  
1849.494  
3444.499  
459.889  
791.074  
829.342  
183.754  
9814.429  
400.914  
1334.431  
343.264  
13617.904  
215.203  
2175.284  
2732.805  
3421.456  
506.147  
288.328  
3514.17  
1522.326  
468.681  
2040.006  
9079.172  
537.408  
256.894  
308.662  
649.861  
461.865  
1251.86  
790.517  
2326.057  
11921.626  
402.127  
724.42  
240.118



1592.021  
2548.041  
2270.036  
1653.197  
684.827  
520.068  
928.183  
2527.313  
666.855  
629.094  
2235.153  
2216.3  
1954.728  
1491.521  
1087.604  
13777.377  
1309.898  
2406.993  
1477.859  
828.892  
1797.276  
1410.676  
824.437  
9038.385  
11999.084  
1072.973  
4223.938  
10225.154  
2499.328  
220.081  
3388.734  
2742  
984.632  
5650.909  
9390.082  
4473.474  
586.539  
358.102  
749.756  
845.21  
14926.74  
2349.527  
1142.747  
1143.892  
4428.068  
1653.579  
61658.961  
37594.641  
4074.018  
56594.375  
24279.727  
334.518  
1886.684

3019.859  
971.944  
2740.105  
3083.547  
1958.193  
702.229  
10942.757  
2230.186  
3344.276  
6113.138  
5303.501  
21413.652  
1467.737  
2937.879  
785.738  
4158.147  
9924.419  
4018.993  
2713.055  
4020.81  
4727.756  
832.14  
2901.721  
55093.621  
9013.102  
1650.114  
939.412  
3913.772  
1112.221  
1268.708  
3668.991  
1576.563  
771.14  
27147.656  
1893.876  
4050.096  
8388.939  
3927.772  
29160.057  
8439.89  
4009.863  
10139.148  
1527.226  
1529.608  
4593.942  
5803.322  
2697.259  
8708.165  
16121.687  
1215.144  
1454.624  
2730.885  
32039.309

997.258  
655.281  
813.147  
6826.751  
32549.188  
19906.01  
2857.791  
25316.734  
5264.764  
266.411  
3553.861  
53961.07  
15769.649  
12289.21  
2837.906  
830.248  
783.531  
9938.732  
1162.094  
526.902  
5319.469  
3162.539  
1859.661  
3731.132  
5824.068  
3033.771  
3615.406  
2578.66  
41330.625  
2739.028  
59369.422  
13590.18  
3245.139  
11950.315  
8943.449  
2509.905  
4196.798  
3966.894  
3586.193  
2029.293  
451.994  
3661.725  
8436.055  
4317.637  
658.163  
16912.582  
2721.998  
954.702  
908.204  
4588.604  
1249.063  
5844.221  
2565.112

5654.62  
1228.968  
1079.047  
2339.677  
1416.996  
2913.217  
628.593  
1810.238  
1136.386  
1308.335  
539.483  
6398.516  
1668.335  
2291.968  
5018.477  
4484.383  
19190.82  
1235.483  
2507.854  
1337.942  
593.506  
5564.417  
9220.437  
3976.626  
2515.063  
34975.719  
7557.315  
8714.199  
1620.638  
730.149  
54203.871  
9620.121  
1703.483  
1003.025  
964.472  
1528.011  
748.283  
707.453  
22844.398  
1769.688  
4128.971  
9813.995  
3152.619  
19767.646  
1801.282  
53916.738  
6111.96  
1912.259  
6373.032  
2664.776  
6040.372  
2207.189  
6314.824

11733.473  
1056.146  
1558.851  
3078.474  
23975.162  
1014.007  
1143.837  
1095.582  
6953.822  
26314.193  
16781.391  
2017.21  
14309.858  
6013.53  
371.157  
1234.888  
595.368  
9754.361  
9853.216  
1453.702  
652.349  
4235.393  
3422.647  
976.383  
2192.276  
2436.469  
2665.724  
2046.766  
1455.229  
21875.348  
2037.824  
552.393  
364.385  
2584.354  
5924.353  
2205.921  
2447.386  
2914.752  
1927.273  
853.505  
1403.983  
2859.639  
1830.849  
3205.634  
6615.622  
3481.468  
963.789  
754.43  
551.569  
1515.562  
2473.944  
4236.825  
3220.554

7100.928  
4950.528  
2935.944  
2643.838  
805.11  
1026.767  
1540.004  
2409.466  
696.432  
1064.361  
668.552  
4499.765  
8667.628  
927.035  
8249.909  
11140.115  
2272.042  
12215.769  
1855.342  
252.576  
1910.632  
23915.561  
4645.158  
6030.821  
674.085  
394.621  
1421.294  
18549.26  
1284.645  
1389.726  
1386.065  
14727.415  
2442.431  
4293.279  
1848.186  
6456.17  
4452.998  
6467.332  
2263.623  
6895.578  
13813.861  
537.634  
930.361  
1181.928  
595.328  
563.378  
5428.166  
989.777  
42541.379  
661.655  
1395.327  
952.827  
2462.435

1569.55  
2358.965  
4779.072  
946.613  
617.766  
2833.399  
1227.063  
581.528  
1408.959  
840.68  
2287.559  
409.615  
1405.917  
628.777  
1032.274  
1520.472  
1222.963  
1614.692  
9926.675  
3752.102  
2514.375  
1794.325  
3366.124  
891.94  
970.684  
1613.2  
1034.79  
2512.735  
966.183  
1303.61  
17086.738  
4982.116  
3115.94  
3932.304  
2496.349  
8336.653  
1726.479  
2369.348  
442.908  
427.503  
1688.816  
1209.617  
163.287  
970.579  
545.279  
792.601  
410.498  
2182.382  
1380.201  
773.214  
1800.213  
10871.199  
3149.087

1846.146  
829.385  
1003.131  
1443.35  
222.523  
657.295  
3078.171  
924.869  
1552.096  
3731.514  
1808.529  
47990.27  
1536.188  
1299.503  
2057.123  
2283.869  
3589.229  
7431.999  
9971.035  
1200.147  
1394.099  
2915.222  
1217.404  
1129.36  
691.382  
707.812  
1596.84  
2937.765  
2507.725  
835.071  
1437.005  
2189.32  
2907.146  
838.561  
1885.589  
868.284  
720.949  
1098.476  
731.017  
1264.293  
5406.845  
6142.333  
1251.731  
4710.908  
2112.458  
1489.108  
3096.515  
2381.834  
963.219  
875.451  
3353.696  
6661.129  
669.103



1193.088  
1751.425  
7116.092  
597.197  
904.501  
1824.682  
709.486  
252.969  
928.474  
2588.675  
325.013  
783.475  
955.958  
741.279  
2796.377  
1932.089  
637.848  
857.35  
1378.951  
3604.453  
884.967  
1107.206  
3055.446  
667.039  
219.764  
655.345  
424.449  
1968.06  
3533.63  
578.761  
10767.023  
1096.595  
723.381  
390.554  
5062.918  
793.408  
244.282  
1336.996  
212.095  
348.723  
805.73  
829.312  
255.304  
1643.043  
3273.706  
1586.914  
686.054  
394.725  
853.128  
1319.515  
557.339  
888.208  
2469.598

1444.431  
902.856  
973.7  
507.906  
1600.558  
1028.575  
9730.69  
908.39  
787.836  
2533.692  
3050.621  
1794.431  
5664.917  
4957.554  
38081.801  
2770.986  
55894.477  
8260.31  
1233.133  
9933.909  
424.342  
3033.519  
5039.494  
1735.032  
924.793  
2065.529  
1420.771  
1679.328  
6903.416  
3480.319  
3533.073  
5004.897  
2298.884  
1031.914  
1520.3  
1881.744  
4035.035  
1116.08  
1279.273  
9772.987  
1019.379  
2858.076  
8708.729  
642.881  
8857.114  
3961.044  
2515.665  
7028.424  
1080.425  
8097.598  
2373.319  
3202.068  
4648.951

13711.006  
2906.781  
2023.556  
1999.186  
1252.16  
26426.764  
3578.298  
7946.484  
20811.828  
10165.348  
471.968  
1472.744  
932.549  
1078.905  
2519.677  
9417.082  
2772.605  
1534.105  
1287.385  
1247.826  
1779.039  
1373.722  
2868.526  
668.806  
4678.268  
1771.209  
2284.755  
1835.708  
2369.995  
2139.215  
430.533  
2993.716  
1990.648  
7024.659  
25886.873  
13566.105  
3236.721  
12055.668  
2615.608  
3065.414  
1140.804  
1705.138  
903.269  
1878.336  
4722.792  
1093.1  
15451.209  
1921.924  
1285.158  
321.988  
4473.215  
2589.63  
3755.522

1539.528  
2564.467  
50561.914  
8918.796  
943.924  
1829.48  
2646.625  
1978.497  
1652.128  
30176.107  
644.372  
1806.761  
1134.701  
1423.46  
1156.544  
5528.656  
3109.598  
3493.686  
13661.748  
1188.111  
465.803  
1576.535  
2716.425  
2532.937  
403.466  
1457.507  
7495.236  
2147.317  
1311.811  
7041.172  
2043.614  
11549.661  
2888.089  
10310.309  
489.005  
453.893  
1033.294  
4352.844  
1229.443  
4890.921  
4904.116  
2964.297  
1017.399  
1082.167  
1243.145  
9223.146  
1267.409  
1097.752  
1530.532  
627.151  
939.903  
3082.696  
2090.731

955.269  
1895.08  
2978.425  
2554.862  
851.215  
4343.5  
22755.252  
13058.266  
2363.513  
2990.073  
929.205  
2250.486  
4940.216  
987.494  
1266.092  
585.361  
8661.454  
418.526  
574.647  
3625.338  
1087.921  
2110.288  
1763.746  
1225.242  
2975.47  
37517.383  
2230.414  
4335.013  
1626.24  
9789.583  
2053.547  
1129.251  
13077.97  
229.755  
1801.813  
934.626  
400.036  
1905.569  
1951.562  
687.016  
4507.528  
1986.56  
3910.367  
1774.476  
880.701  
2104.512  
793.949  
2048.243  
2535.689  
1517.883  
5597.744  
1341.44  
828.172

4333.167  
6207.835  
1961.384  
1517.735  
2922.451  
1168.232  
2898.142  
1910.501  
1295.907  
1946.42  
889.558  
1060.12  
465.722  
898.627  
566.093  
975.215  
8110.717  
2259.157  
1962.71  
7477.968  
1103.196  
1744.998  
1038.024  
6756.242  
56812.469  
2711.203  
594.726  
1837.457  
1507.327  
1286.441  
2379.132  
1603.551  
2928.435  
20006.549  
10488.047  
5824.791  
533.381  
677.333  
3717.048  
1050.993  
1034.805  
1501.456  
4201.353  
1616.001  
4038.95  
1868.64  
2356.617  
1143.076  
4109.036  
2613.146  
952.749  
18127.094  
1487.078

1275.343  
1192.949  
1644.816  
975.261  
728.175  
5057.434  
64361.309  
827.068  
179.322  
5732.849  
1138.45  
1325.089  
2010.927  
4160.335  
1575.942  
1589.098  
2418.047  
989.414  
8700.708  
615.907  
4646.529  
5948.861  
931.722  
879.489  
2380.86  
2290.704  
4388.836  
3417.509  
11007.553  
4105.143  
1681.824  
3861.977  
3549.728  
1698.852  
3220.627  
6584.22  
2657.344  
1990.66  
956.062  
302.626  
6770.334  
9832.521  
41748.176  
17787.914  
24544.346  
3680.295  
53887.996  
7817.986  
716.901  
1620.535  
22568.215  
1029.213  
46407.871

2016.861  
1034.822  
695.423  
1021.717  
3440.42  
354.312  
592.969  
13446.121  
861.509  
13408.348  
1957.115  
1009.071  
375.192  
1960.3  
982.793  
366.912  
875.7  
2760.498  
3300.197  
2221.597  
647.262  
3408.263  
12682.953  
5438.233  
1368.501  
1698.21  
871.255  
402.395  
3801.652  
1335.881  
416.475  
4091.591  
2713.802  
1854.758  
745.324  
1581.707  
1479.634  
991.973  
836.432  
666.31  
806.688  
2686.798  
1774.933  
880.18  
1687.821  
474.919  
1718.373  
485.902  
3160.247  
1008.377  
817.863  
1164.965  
1804.556



5927.452  
725.147  
1642.436  
13295.349  
6069.642  
1068.895  
3160.22  
2179.083  
1355.2  
1378.286  
4623.216  
2285.538  
664.519  
1986.829  
664.393  
603.3  
2930.027  
891.145  
13690.34  
2409.146  
18934.184  
3772.444  
2312.258  
2556.974  
593.832  
2268.53  
43633.355  
1903.29  
1462.433  
2245.163  
590.596  
4181.226  
354.25  
735.119  
2311.088  
8557.226  
1590.432  
945.868  
948.778  
1238.64  
1470.147  
1687.258  
17515.023  
8366.438  
502.79  
66.918  
10267.408  
2719.074  
1191.984  
3215.397  
7892.946  
1685.768  
2598.405

2360.744  
824.662  
5999.517  
12304.868  
19879.68  
1964.702  
10358.342  
6247.088  
62462.086  
24554.42  
5112.317  
56985.457  
29983.926  
304.629  
2174.902  
1346.225  
1843.981  
2116.703  
686.789  
25173.842  
2824.948  
4410.75  
20055.672  
12574.833  
4582.603  
2867.73  
5120.726  
856.726  
1032.277  
742.944  
9647.138  
2133.413  
1754.208  
10585.491  
13723.368  
7130.192  
11035.421  
1075.938  
2557.831  
1296.345  
704.535  
5161.091  
3014.01  
1997.921  
5867.318  
1378.789  
17302.891  
1828.703  
3243.793  
20328.635  
4107.998  
3563.681  
30404.262

3064.514  
16152.76  
4756.795  
4859.957  
1747.367  
727.511  
9634.98  
2537.294  
7715.524  
2900.281  
8256.837  
2461.988  
929.406  
3107.788  
5609.369  
22556.092  
12514.083  
1542.456  
6535.883  
6008.672  
4476.875  
8621.191  
4828.737  
5952.865  
1122.406  
1474.708  
1341.226  
3007.569  
18549.313  
59949.395  
3706.824  
1569.138  
4296.655  
13322.422  
3217.827  
2602.077  
25565.225  
1746.385  
2051.607  
3321.036  
4040.234  
1127.806  
10656.463  
2325.122  
3838.125  
12887.69  
3428.998  
8747.83  
2313.597  
2289.366  
2034.172  
857.153  
5112.257

9571.605  
12035.229  
1610.224  
3665.454  
2509.334  
3790.588  
36952.578  
4019.856  
32199.055  
1309.187  
981.131  
1643.744  
23276.928  
2553.661  
4664.114  
2843.94  
3703.761  
15125.877  
5374.825  
1217.461  
3624.969  
1847.324  
2180.434  
965.791  
998.85  
5462.608  
3380.974  
8453.315  
8322.415  
13084.92  
2034.462  
1862.445  
874.618  
1952.672  
3314.59  
1530.57  
1342.082  
3541.741  
26765.09  
17011.379  
2682.971  
4625.88  
4053.546  
21799.016  
1552.502  
3197.272  
14535.541  
4540.114  
4264.935  
1110.791  
5737.342  
2036.418  
7003.333

2155.835  
5883.509  
1786.658  
547.405  
1063.698  
3854.544  
26480.445  
40768.016  
2310.912  
10074.357  
2676.317  
7381.979  
674.441  
1428.729  
1244.121  
1521.467  
765.208  
1577.02  
6081.887  
1060.66  
581.368  
23192.408  
1532.482  
6702.054  
9810.894  
2383.239  
5569.995  
1166.768  
1630.419  
774.614  
1148.066  
10812.307  
2266.084  
2886.72  
6308.155  
6395.87  
1911.78  
774.68  
1774.816  
1279.86  
1787.672  
3945.755  
13628.805  
2714.028  
10022.015  
4223.522  
851.375  
14996.787  
2196.379  
4348.718  
2667.548  
3517.921  
21668.334

2587.614  
1339.386  
1109.265  
9291.651  
2884.56  
9605.464  
8485.27  
6183.154  
4559.168  
6781.763  
33640.91  
2229.857  
13097.129  
5552.672  
2559.492  
4988.267  
57816.027  
3391.761  
10136.713  
7459.423  
11578.709  
744.927  
937.901  
784.308  
1194.862  
1638.278  
886.244  
1476.973  
2765.591  
1893.985  
1143.942  
5509.208  
6550.106  
4868.908  
1231.5  
7439.852  
944.831  
3808.857  
11787.203  
3573.441  
3732.024  
941.964  
519.836  
4127.905  
1522.996  
5257.19  
1736.031  
5157.232  
951.429  
185.675  
889.116  
876.624  
5891.516

9947.324  
1079.584  
2329.652  
9763.921  
1027.309  
979.5  
2432.096  
2125.323  
56428.023  
406.066  
1381.509  
3960.958  
4597.523  
3932.708  
2942.733  
3055.337  
6446.71  
1583.161  
1170.596  
2306.693  
1455.481  
8046.182  
1741.652  
8340.104  
1867.362  
2629.289  
850.002  
2086.299  
1207.737  
587.622  
1184.339  
739.928  
10846.289  
2126.419  
3540.36  
1454.903  
8567.097  
2683.165  
4602.32  
1921.932  
3175.055  
1194.913  
415.629  
12196.376  
1098.882  
13796.606  
2144.694  
8067.349  
1661.186  
505.89  
1304.648  
2077.432  
1692.588

433.815  
70749.164  
1264.609  
1473.899  
3214.785  
8318.728  
3898.368  
8798.005  
42783.68  
3031.554  
1564.182  
6602.106  
7900.622  
10734.995  
6132.295  
2660.019  
6109.999  
449.417  
1007.615  
918.802  
1675.362  
7468.063  
35672.012  
1272.095  
1206.762  
15574.858  
2822.719  
1163.747  
2241.163  
3595.438  
1809.015  
12758.425  
6688.129  
2355.038  
1675.13  
2562.195  
2236.134  
10375.793  
937.633  
3664.198  
3050.872  
3671.15  
1284.822  
4749.395  
1767.011  
3276.686  
1764.924  
10083.156  
2668.941  
3320.159  
1345.752  
2213.571  
21179.053



1760.935  
3246.164  
1577.514  
789.192  
1357.214  
1800.413  
865.657  
2737.579  
1713.725  
5218.907  
1874.286  
912.759  
841.857  
1313.363  
3084.2  
10237.073  
5972.472  
2419.529  
2010.528  
1525.768  
3025.025  
1905.043  
4500.432  
856.612  
507.534  
868.703  
675.272  
577.841  
856.111  
1126.572  
615.622  
716.878  
1475.898  
3745.735  
1392.904  
1013.964  
1742.588  
1712.603  
32027.533  
6860.078  
6224.414  
2073.144  
10299.478  
1906.066  
1145.187  
649.531  
800.99  
1150.051  
1952.661  
864.291  
3031.625  
684.636  
3277.705

1989.565  
2777.367  
5639.833  
1480.099  
521.981  
3538.578  
7156.892  
316.908  
782.828  
934.393  
516.133  
1248.938  
677.008  
1863.229  
2242.84  
2278.988  
472.206  
1610.614  
404.496  
1233.133  
593.282  
8964.456  
1587.639  
2390.773  
606.425  
1565.299  
2399.069  
4058.751  
57925.777  
1708.355  
925.345  
2899.999  
2178.311  
4859.745  
1116.911  
1196.774  
1244.196  
12017.591  
6503.12  
18879.16  
1403.312  
6045.771  
897.437  
902.717  
3391.832  
3965.784  
18887.26  
834.317  
879.621  
961.804  
5200.245  
1940.016  
1460.202

3510.409  
1469.366  
6588.134  
852.453  
1038.058  
3789.834  
1178.325  
1008.368  
997.25  
8170.591  
58429.422  
5790.543  
333.28  
896.884  
11255.231  
1100.725  
1014.578  
3529.742  
3059.214  
8304.672  
1042.449  
852.625  
1101.548  
761.481  
567.368  
958.224  
513.684  
1349.141  
111.536  
3323.712  
373.009  
985.667  
1642.298  
384.15  
251.566  
592.554  
1693.47  
788.927  
3804.318  
1204.063  
1520.254  
785.286  
3586.59  
3124.999  
2407.045  
6279.801  
901.876  
345.055  
604.392  
3195.801  
3502.548  
952.872  
8582.264

255.793  
2331.487  
4938.243  
2077.316  
391.173  
658.22  
355.887  
5037.703  
709.886  
1016.633  
1472.606  
760.693  
2737.746  
444.767  
1477.366  
435.763  
1243.313  
254.327  
706.533  
288.825  
9834.808  
3324.26  
750.437  
582.734  
1108.645  
789.9  
3227.722  
821.747  
1938.458  
872.721  
942.82  
2717.062  
188.793  
1125.794  
718.344  
444.639  
601.22  
328.47  
878.483  
10620.063  
1090.965  
6498.248  
737.581  
445.33  
2599.527  
607.037  
5412.654  
994.221  
1397.632  
4228.927  
2438.454  
656.98  
909.449

812.589  
206.033  
1350.648  
1432.487  
3328.569  
894.693  
698.905  
480.19  
340.944  
483.317  
517.946  
97.649  
3425.422  
604.43  
283.732  
799.651  
1009.31  
1114.667  
1355.149  
470.531  
1231.274  
448.842  
603.841  
592.995  
456.774  
10239.258  
1955.461  
1235.208  
2942.099  
1773.963  
3351.218  
1593.184  
769.448  
394.891  
2563.319  
415.367  
1452.077  
731.368  
11830.776  
611.69  
1436.866  
387.646  
939.703  
1144.773  
551.931  
2272.778  
3872.311  
3603.464  
2124.375  
346.573  
4532.003  
682.76  
742.936

2858.343  
3792.282  
1463.89  
5933.737  
1057.616  
848.955  
1107.794  
244.344  
276.811  
789.475  
4705.83  
963.848  
1584.962  
4603.337  
6422.23  
315.599  
3336.508  
952.644  
637.012  
1550.856  
1698.711  
5093.763  
1482.846  
4473.787  
670.471  
565.169  
259.672  
411.462  
1245.618  
356.726  
1549.679  
772.195  
5156.249  
868.526  
537.495  
624.057  
461.939  
272.2  
648.909  
429.63  
1397.306  
371.676  
794.854  
819.263  
850.261  
1017.438  
1109.992  
929.514  
2612.556  
1955.682  
588.866  
400.87  
961.32

592.457  
390.396  
1604.349  
775.358  
8967.067  
16409.838  
3898.842  
6857.894  
2377.951  
205.972  
334.409  
2507.457  
2707.924  
15269.299  
496.468  
1364.873  
4723.466  
1712.128  
810.339  
2681.068  
1949.771  
610.24  
2609.325  
756.312  
1680.407  
9055.339  
136.83  
5583.915  
1296.26  
3992.064  
2083.533  
2080.42  
647.101  
984.635  
2334.828  
172.472  
1381.618  
1579.502  
2833.164  
13762.405  
975.555  
814.687  
871.352  
682.86  
737.442  
2130.988  
16327.585  
21511.287  
202.573  
2202.265  
1135.926  
2981.099  
2462.118

10557.264  
2095.728  
8458.424  
706.783  
3493.328  
1918.817  
1775.626  
660.212  
13287.141  
1576.052  
1357.411  
2577.124  
6005.682  
641.47  
9331.121  
1871.782  
4263.694  
4190.913  
3129.602  
1023.711  
1708.506  
1391.07  
2107.976  
922.838  
2864.938  
3623.917  
2444.898  
973.021  
757.487  
3320.567  
3352.24  
3744.464  
2937.165  
13024.231  
10337.744  
2687.877  
1770.635  
1136.417  
2414.145  
1392.352  
633.863  
1658.074  
3458.838  
372.875  
11128.238  
9555.923  
4608.434  
2331.553  
10598.186  
3451.839  
1734.428  
4681.336  
3288.179



1322.902  
1614.105  
3206.803  
11567.703  
1475.569  
1524.266  
1520.744  
1722.254  
1785.636  
834.454  
1659.038  
558.872  
1334.879  
1321.767  
912.528  
547.01  
62939.738  
1474.57  
4569.308  
3559.365  
6461.855  
935.302  
548.911  
6280.811  
11000.842  
648.921  
1082.744  
4450.539  
5144.399  
5105.288  
4205.414  
3871.6  
1108.598  
2366.166  
757.393  
3827.712  
3518.79  
3873.8  
1478.635  
1298.411  
1307.312  
2512.549  
2181.87  
573.398  
1682.816  
1255.685  
2468.656  
1331.73  
4975.347  
24515.598  
3206.896  
620.658  
946.227

6041.674  
894.387  
366.09  
1496.924  
3486.77  
869.345  
1262.772  
653.482  
7911.863  
6683.227  
2220.513  
43188.426  
1311.464  
7176.289  
5385.317  
7681.664  
2127.358  
957.733  
1334.002  
1277.823  
1682.648  
7946.458  
1222.782  
2138.128  
1260.541  
993.016  
2442.589  
3277.776  
5414.641  
5265.949  
1366.924  
1020.97  
1455.254  
1836.281  
784.431  
850.958  
400.072  
746.013  
2411.119  
51168.828  
2064.356  
32275.033  
1879.386  
573.77  
4667.972  
34222.492  
2468.828  
2211.62  
6683.509  
5223.403  
743.36  
261.018  
5675.933

9616.332  
591.316  
520.638  
2406.048  
2275.911  
334.637  
9609.042  
452.65  
2261.169  
1115.574  
194.346  
1669.599  
5227.356  
2007.24  
1375.561  
4277.483  
2067.712  
3150.698  
2734.026  
4502.191  
1649.139  
2340.921  
1604.022  
1510.178  
581.527  
2222.461  
2399.146  
1023.597  
1204.546  
1560.596  
2067.584  
767.267  
232.154  
1050.436  
7337.078  
1336.948  
1193.147  
4573.54  
930.552  
984.969  
1108.468  
3835.493  
370.689  
1456.142  
2622.264  
564.228  
1028.199  
736.018  
9369.003  
1962.258  
1086.883  
2210.204  
1359.455

591.205  
2104.892  
742.573  
3600.466  
1497.153  
826.288  
2744.169  
2139.491  
1433.872  
4792.177  
23702.967  
1179.221  
2328.075  
416.775  
760.423  
1735.912  
2298.492  
3247.556  
438.032  
13861.688  
1662.71  
8057.777  
1989.024  
503.604  
2395.121  
3954.547  
57528.699  
5985.674  
2770.863  
635.079  
516.936  
885.159  
1167.27  
1155.621  
8731.844  
1764.212  
464.236  
743.588  
984.414  
1245.366  
2174.631  
804.38  
3845.368  
3213.746  
2981.989  
1475.8  
2553.552  
331.836  
1278.897  
13180.568  
7450.183  
1382.928  
302.704

3697.414  
1462.228  
4187.681  
962.777  
3920.508  
1135.928  
6352.932  
1294.207  
3046.738  
981.237  
15017.483  
1217.84  
1939.147  
2415.985  
2973.17  
1621.464  
1975.707  
629.562  
477.032  
2295.446  
347.409  
2434.57  
3993.645  
707.24  
3401.08  
8017.892  
635.523  
408.22  
1522.436  
3825.851  
1465.847  
813.174  
1237.453  
1354.05  
2788.781  
761.149  
5589.081  
2383.311  
4269.713  
1631.418  
552.715  
287.643  
2652.417  
1977.032  
1533.012  
486.058  
526.17  
12889.227  
2999.617  
460.197  
16483.076  
2472.368  
1158.932

1269.094  
900.887  
1231.013  
5938.867  
598.62  
9925.858  
1759.037  
630.015  
2766.692  
1700.581  
2499.017  
1776.222  
755.872  
829.888  
1149.568  
1830.047  
1133.865  
8594.513  
5666.025  
1320.674  
4909.245  
9188.058  
468.728  
1122.471  
1539.661  
560.411  
737.542  
616.501  
1237.821  
401.964  
33933.188  
4727.074  
7218.797  
965.517  
712.563  
2093.127  
1308.576  
6567.268  
931.924  
5824.964  
1284.395  
4070.412  
1047.952  
3925.021  
8712.58  
495.687  
16421.354  
1863.396  
541.867  
714.619  
2688.664  
1225.681  
436.675

638.046  
1918.913  
1545.948  
2308.813  
1730.125  
355.338  
4586.661  
2209.059  
7815.807  
3293.863  
19462.922  
1373.305  
1517.855  
1544.765  
200.979  
22974.436  
68000.547  
2300.927  
709.6  
1528.032  
707.207  
918.759  
858.722  
9512.54  
836.42  
21417.346  
2235.486  
7502.791  
57560.516  
6940.526  
255.106  
2669.057  
3486.539  
610.772  
689.775  
1405.96  
2400.774  
3098.256  
1534.38  
751.697  
3125.763  
542.595  
13990.036  
1438.481  
3581.296  
3649.889  
1530.614  
4883.931  
937.702  
510.103  
866.439  
967.645  
1089.688

2587.286  
3857.44  
2282.385  
293.701  
494.989  
1355.053  
580.953  
3106.779  
8684.402  
1177.327  
4985.433  
212.535  
10362.847  
1905.47  
6128.239  
1189.79  
34299.191  
1475.513  
782.66  
2030.368  
3844.625  
10285.549  
3428.728  
5476.604  
1415.23  
2652.278  
1420.021  
975.733  
6146.618  
1104.783  
3131.721  
5763.173  
1059.093  
627.931  
4179.251  
1055.952  
1350.041  
3514.533  
1035.956  
2737.917  
4153.606  
2914.418  
8856.923  
4694.141  
9147.387  
1499.476  
13650.028  
4739.502  
5433.513  
1485.981  
2362.416  
8433.113  
2066.643



3845.586  
838.243  
903.362  
2472.931  
786.942  
19265.434  
947.176  
61610.707  
1646.979  
543.247  
1094.25  
597.561  
641.432  
456.943  
5910.495  
3596.816  
25957.533  
2432.661  
8878.94  
8717.724  
5657.7  
431.298  
2914.717  
2700.98  
4920.087  
770.677  
988.506  
448.128  
2057.547  
2873.487  
420.317  
1448.879  
956.79  
4929.972  
1161.819  
975.476  
12890.044  
1526.089  
3345.548  
3814.752  
1201.366  
494.32  
2064.936  
413.934  
1333.597  
720.136  
762.771  
2756.642  
3380.364  
1445.01  
1786.661  
458.138  
3159.802

2753.783  
820.385  
1671.813  
4919.268  
567.982  
2183.14  
9643.236  
2007.409  
3459.324  
1923.553  
20206.924  
949.6  
476.437  
757.543  
3803.448  
8064.355  
4305.056  
5140.898  
748.597  
2159.577  
12691.792  
719.717  
1381.378  
6548.245  
1202.102  
3140.377  
6615.026  
784.075  
2803.475  
772.593  
1084.531  
3012.279  
992.419  
1961.772  
1675.112  
5395.464  
10224.203  
5480.94  
13215.068  
2082.356  
8490.504  
3139.329  
507.393  
822.494  
13629.104  
1782.418  
2650.847  
2307.526  
1097.473  
3466.799  
643.608  
19241.256  
454.429

57571.977  
1700.324  
1337.094  
424.645  
1715.06  
719.888  
1153.807  
607.937  
13063.67  
3334.502  
1078.432  
797.887  
8839.322  
426.97  
840.427  
2677.65  
2310.625  
2724.805  
1044.454  
1659.172  
3573.253  
4074.191  
577.069  
1892.501  
815.882  
5041.256  
5115.743  
9892.775  
659.006  
1097.842  
1074.848  
743.632  
3248.658  
566.363  
1621.776  
3744.692  
2444.817  
584.167  
593.801  
12744.114  
7234.088  
16598.846  
2976.84  
14064.538  
3133.402  
4525.588  
1797.866  
2004.002  
5788.518  
1573.706  
8502.366  
20952.875  
1321.283

566.399  
1073.28  
5387.736  
7911.537  
17442.26  
29685.104  
2778.617  
2431.685  
5773.823  
1868.658  
1776.903  
4322.311  
1494.606  
3116.892  
5369.009  
4393.804  
1070.249  
1322.513  
3509.524  
927.519  
3229.241  
3856.143  
3982.35  
1494.418  
1078.262  
1276.195  
2468.679  
807.492  
1020.992  
1535.839  
6387.118  
2142.72  
3130.011  
2645.372  
11098.215  
2008.388  
1975.578  
33905.992  
504.132  
434.078  
3188.358  
13139.797  
989.336  
9899.79  
5957.774  
3440.327  
606.457  
22957.605  
21329.541  
694.125  
1813.775  
4996.506  
673.806

2738.253  
1099.97  
2245.435  
3599.882  
11886.785  
2748.88  
3441.646  
2214.373  
5706.607  
6094.119  
2624.211  
1215.109  
2201.156  
4554.807  
1504.207  
1116.716  
3569.762  
942.414  
591.028  
1950.381  
1756.088  
61561.164  
7726.876  
1100.809  
555.917  
1630.851  
1525.093  
3953.49  
6463.679  
1715.561  
4748.348  
1193.216  
698.162  
952.846  
9858.292  
2389.203  
757.233  
2477.395  
1222.269  
981.26  
999  
1482.261  
1266.989  
1446.738  
2763.612  
6417.671  
588.151  
1216.604  
4865.949  
14998.646  
960.297  
5101.71  
852.464

21371.705  
2982.088  
1164.036  
1056.386  
2207.8  
1637.477  
1096.114  
510.39  
514.554  
6003.906  
802.119  
575.339  
1608.513  
403.366  
810.868  
850.082  
942.331  
1348.358  
643.8  
4247.829  
840.028  
708.046  
2512.085  
806.761  
373.797  
6597.535  
384.207  
426.427  
2143.416  
1347.464  
1203.622  
588.665  
760.96  
941.278  
646.556  
967.248  
2370.519  
1418.722  
2000.388  
629.606  
1405.788  
1526.285  
3721.911  
409.262  
3031.591  
1131.464  
1700.553  
1097.875  
259.28  
3282.904  
2131.133  
2375.773  
335.889

949.986  
772.013  
5710.794  
2221.224  
2276.037  
4448.665  
2979.804  
837.579  
4788.131  
13024.417  
1565.394  
17473.982  
990.257  
2439.675  
1201.232  
1042.116  
3467.851  
977.196  
1634.083  
826.682  
820.372  
1093.079  
10014.036  
31457.342  
1096.469  
1082.636  
5959.242  
1604.685  
4144.985  
921.527  
1818.096  
1413.254  
1392.425  
426.227  
6207.222  
2789.662  
1414.017  
5077.762  
1654.87  
5489.675  
3762.639  
565.657  
1974.627  
1843.414  
12266.043  
868.73  
1931.784  
2667.019  
1930.896  
2206.612  
1376.801  
11308.997  
1228.284

922.957  
902.05  
785.335  
886.239  
1561.02  
27829.309  
1601.541  
6953.044  
68.208  
457.807  
573.75  
4140.097  
1092.357  
7912.329  
1927.599  
1600.743  
1315.275  
1047.03  
28620.844  
1131.617  
2435.486  
62822.75  
26151.496  
3268.148  
40559.691  
13714.196  
68.474  
798.098  
665.284  
1265.261  
1429.337  
2437.358  
3768.749  
11635.051  
1848.338  
3642.706  
754.192  
1862.559  
979.539  
1135.722  
844.991  
1362.331  
677.445  
908.636  
1961.882  
743.14  
22175.111  
2554.282  
2252.19  
2255.718  
22378.791  
1943.702  
1240.673



857.718  
33522.168  
672.982  
1360.539  
1322.348  
6270.509  
5890.662  
7081.852  
3961.036  
3841.102  
5833.098  
467.616  
2695.555  
5450.279  
1756.296  
606.32  
2542.393  
938.253  
1161.46  
2609.233  
764.608  
5627.795  
28050.357  
11726.698  
1388.86  
17682.777  
4222.822  
1210.668  
763.747  
4186.094  
1196.235  
7586.688  
1002.566  
1156.401  
6217.193  
6924.046  
1231.019  
693.868  
175.362  
1297.441  
16348.627  
4228.097  
5065.676  
16507.645  
887.649  
8033.743  
886.011  
3106.203  
5571.864  
1866.848  
8001.31  
8893.317  
1258.641

1891.157  
6801.031  
23500.939  
2293.61  
6218.018  
9506.21  
21104.605  
1256.646  
6665.643  
1145.595  
2673.691  
340.303  
1064.845  
937.345  
653.853  
5303.234  
1177.316  
8337.077  
1822.721  
2063.807  
1053.082  
751.122  
33540.082  
1494.74  
4074.81  
4337.75  
4258.473  
6133.586  
3274.196  
1092.098  
1596.271  
618.742  
944.727  
1378.572  
1515.001  
1359.831  
2963.305  
11675.646  
2924.096  
699.166  
5260.063  
988.124  
1534.057  
1757.416  
949.768  
1578.406  
9172.897  
1319.705  
1281.4  
8458.428  
1463.933  
2133.289  
677.46

36359.926  
2512.604  
1761.231  
21698.469  
999.826  
804.809  
556.516  
572.305  
2534.993  
1881.302  
8734.253  
9229.485  
2792.606  
7853.13  
10363.734  
1267.036  
7525.727  
5060.638  
1306.192  
693.73  
2250.972  
896.891  
952.813  
1693.39  
3163.032  
28715.24  
1165.96  
23325.631  
3813.086  
1102.19  
589.092  
1395.988  
2344.046  
406.798  
2104.811  
18745.775  
3360.871  
5141.572  
12553.282  
684.809  
4087.656  
2168.444  
4277.209  
1452.534  
7583.197  
13000.48  
1037.751  
1242.868  
5924.777  
15257.974  
523.232  
3300.216  
963.899

1204.335  
1233.952  
810.319  
1462.791  
1014.515  
1868.809  
1007.229  
984.53  
613.864  
2939.778  
1098.754  
5419.959  
1952.175  
1993.998  
1423.612  
776.096  
13945.134  
578.638  
2042.601  
1383.629  
7508.421  
5114.786  
4211.41  
5797.119  
492.739  
428.175  
3096.75  
576.713  
834.948  
1335.075  
1138.922  
838.483  
2350.212  
2821.881  
8193.276  
1448.226  
27278.877  
3769.935  
1443.311  
904.567  
4446.983  
1504.146  
7605.122  
1236.195  
1466.738  
8770.696  
8587.893  
1035.475  
1983.955  
627.335  
26100.441  
1406.096  
2298.633

2007.003  
23375.08  
1959.35  
1147.526  
742.379  
15568.182  
257.728  
13277.801  
1451.325  
2771.839  
7019.451  
2934.454  
5405.04  
9636.014  
31813.313  
1809.21  
8808.799  
4762.039  
1065.626  
977.264  
1365.583  
1227.662  
377.948  
3792.903  
23612.527  
9657.015  
1011.402  
531.471  
2029.18  
1791.84  
2500.194  
496.808  
2258.302  
660.351  
1587.862  
2747.049  
1114.639  
12510.656  
3254.603  
4868.844  
10023.933  
668.538  
6572.251  
530.532  
1812.716  
3427.66  
977.692  
5123.225  
1241.812  
715.642  
466.858  
1707.047  
1133.339

2918.47  
1012.021  
1265.574  
1172.311  
1261.186  
2883.574  
7263.966  
667.755  
543.585  
5799.567  
915.107  
6264.948  
840.906  
1427.706  
486.597  
1670.775  
463.472  
1712.762  
3433.43  
3304.717  
1295.941  
2602.644  
2691.583  
3240.317  
2487.712  
820.119  
7647.983  
811.316  
876.352  
9418.229  
749.226  
2173.973  
855.965  
655.098  
1051.476  
877.373  
272.856  
742.924  
750.069  
840.396  
15151.741  
818.697  
798.142  
1873.086  
9888.491  
1918.523  
1193.684  
4242.515  
3368.875  
861.833  
1675.095  
578.318  
824.067

1237.085  
1056.658  
2301.135  
888.255  
746.933  
2150.942  
7662.429  
1627.814  
15100.384  
497.19  
9931.127  
3516.186  
2515.23  
1567.957  
1389.448  
3461.084  
1314.622  
2761.106  
3222.202  
821.471  
6805.562  
1455.793  
1466.964  
6282.161  
11921.034  
1480.735  
10268.895  
10655.19  
55700.465  
14037.031  
1434.625  
698.327  
3127.95  
1288.377  
3614.722  
1045.831  
12072.744  
576.98  
887.516  
497.156  
2519.264  
2737.974  
2096.577  
1368.227  
2066.097  
4062.328  
2016.272  
1025.406  
1465.556  
2941.117  
545.616  
15396.935  
3587.346

665.298  
1092.524  
1099.539  
1017.464  
4134.239  
5638.723  
3606.172  
1392.02  
1396.272  
4698.477  
3523.17  
3609.323  
1313.464  
1676.355  
386.493  
7820.786  
7213.474  
1462.23  
2592.281  
1619.831  
1217.679  
1215.003  
2007.413  
1865.994  
735.717  
1139.392  
1153.109  
3360.425  
1298.029  
2321.357  
15167.598  
754.979  
1020.016  
835.652  
742.878  
2465.647  
589.273  
357.563  
4117.734  
25354.955  
962.975  
46697.207  
945.725  
15048.941  
5303.336  
1975.33  
3988.008  
4593.094  
1754.824  
7059.176  
1774.097  
1272.009  
4296.605



610.533  
1158.008  
1046.114  
1717.171  
3350.238  
2532.029  
497.898  
900.341  
745.5  
620.909  
3859.745  
10204.354  
1892.894  
343.845  
1124.415  
4925.554  
9664.697  
7324.85  
1050.071  
341.03  
2563.827  
5844.91  
1295.447  
722.063  
2396.762  
1880.275  
13995.696  
1590.314  
2102.848  
2563.458  
26229.813  
14820.939  
447.012  
1526.256  
645.508  
4515.576  
454.64  
13027.97  
1154.963  
1162.002  
130.378  
5390.676  
2475.902  
18966.129  
1195.33  
2982.438  
1860.447  
12452.773  
981.379  
2526.827  
7049.756  
50791.895  
2659.407

99.777  
501.272  
2749.681  
1237.675  
33959.648  
864.682  
4235.785  
2408.334  
5746.304  
1459.156  
841.565  
143.54  
1141.272  
261.444  
3502.226  
9031.931  
1648.658  
3506.335  
3924.552  
1882.874  
4645.979  
663.564  
894.615  
9364.704  
3690.469  
609.483  
1007.024  
2210.253  
4846.616  
1018.029  
2465.927  
61280.652  
3047.405  
218.673  
3550.119  
569.154  
8503.069  
8190.247  
1184.466  
2879.514  
1831.261  
2071.924  
974.729  
1108.866  
4600.923  
2678.806  
7947.461  
651.501  
1870.92  
7542.091  
12106.411  
5560.586  
1760.729

693.718  
5138.373  
25760.59  
2082.395  
1679.332  
2008.372  
2567.934  
739.916  
3806.092  
902.233  
1117.383  
864.161  
19910.352  
1089.539  
7856.763  
3991.991  
1053.513  
742.849  
17706.896  
536.745  
1562.27  
1641.08  
496.347  
8510.277  
975.524  
378.615  
838.732  
572.331  
1609.514  
1428.266  
53425.16  
2175.324  
1022.641  
783.328  
1928.575  
801.953  
1515.926  
4980.538  
1655.06  
41681.414  
3380.84  
2394.134  
627.397  
2147.059  
955.593  
386.96  
686.492  
181.629  
1058.515  
4912.049  
16233.911  
910.161  
1041.559

8714.588  
24486.752  
4186.114  
6957.02  
4767.667  
1816.088  
3400.946  
1063.081  
656.616  
3359.934  
1882.305  
1358.422  
609.521  
1079.735  
559.601  
603.844  
32284.484  
1126.957  
22503.65  
10330.986  
1560.949  
5052.649  
1607.324  
472.112  
323.533  
415.392  
1447.586  
4635.277  
765.538  
885.723  
1254.111  
3616.436  
1015.179  
5757.374  
14517.072  
15136.48  
28405.65  
1302.066  
352.272  
1746.584  
1057.655  
2438.048  
1039.071  
1278.679  
597.745  
629.71  
992.877  
704.829  
12260.122  
4945.059  
624.137  
8195.902  
405.075

1438.331  
947.588  
7429.692  
655.807  
1301.645  
5911.188  
981.203  
2102.637  
3898.592  
2626.345  
3782.396  
1215.996  
1446.046  
346.02  
1948.233  
939.221  
22242.59  
1837.192  
3046.572  
350.429  
2254.155  
1044.645  
3756.888  
676.023  
2422.119  
9392.075  
846.045  
1083.527  
4094.734  
8226.064  
2070.852  
3334.253  
1993.961  
889.645  
2708.425  
467.934  
640.646  
569.158  
973.817  
1557.573  
1201.12  
2075.326  
1177.915  
1115.634  
40950.824  
872.083  
10576.298  
892.005  
8512.816  
7324.748  
1398.947  
2272.792  
1924.875

304.881  
965.043  
815.356  
233.605  
1733.814  
1289.711  
980.226  
1535.402  
5308.474  
6807.832  
539.718  
1610.748  
2084.3  
9610.449  
7089.54  
15548.938  
1488.034  
2851.964  
2035.368  
650.905  
1282.985  
794.398  
729.974  
2011.457  
4086.567  
685.386  
401.488  
4558.654  
671.552  
4498.229  
465.862  
4520.303  
535.392  
37473.109  
578.117  
1335.844  
683.529  
3421.557  
1615.803  
809.59  
604.365  
2238.753  
1221.543  
705.126  
1565.799  
431.341  
1109.157  
1131.982  
2989.5  
747.045  
1117.397  
2815.362  
766.967

6212.108  
1282.204  
582.1  
782.97  
3966.996  
427.335  
1541.491  
1842.11  
3653.386  
414.3  
993.607  
1193.302  
1079.89  
3925.825  
1265.417  
443.362  
1914.013  
7460.705  
720.306  
3435.81  
1017.856  
1284.541  
1583.647  
1454.716  
433.736  
1593.706  
481.479  
27408.637  
226.902  
1597.402  
1114.984  
592.879  
1655.225  
1515.649  
1778.684  
1928.024  
3800.606  
38001.348  
24486.826  
988.095  
1019.094  
36949.555  
6307.579  
59535.941  
1216.797  
1762.882  
2053.669  
2774.475  
1290.328  
440.504  
4361.237  
447.588  
63413.496

633.224  
1142.066  
1385.155  
725.802  
2094.103  
1084.2  
1397.529  
421.735  
3382.254  
2476.231  
9930.731  
1018.051  
713.398  
8954.613  
252.283  
1047.109  
2183.319  
3578.722  
4626.221  
564.828  
866.451  
446.543  
1114.194  
846.317  
1427.11  
432.589  
599.171  
953.684  
1059.245  
4671.386  
1561.489  
724.761  
536.392  
5427.247  
2225.087  
615.496  
1974.941  
610.509  
697.369  
2599.698  
1117.168  
965.649  
489.794  
803.922  
941.788  
706.38  
569.7  
922.78  
2276.951  
828.459  
550.785  
550.29  
1552.163



1627.615  
383.907  
1568.823  
4959.134  
15206.213  
1246.941  
5580.445  
1513.471  
2469.323  
684.438  
7304.489  
897.309  
910.596  
5903.927  
1747.789  
4067.025  
5955.686  
1056.427  
2830.888  
7474.918  
1473.435  
2266.182  
2560.188  
231.095  
546.163  
799.161  
1202.313  
4958.762  
2526.032  
452.32  
108.007  
309.631  
5115.459  
10405.79  
1121.951  
607.698  
1822.747  
3351.109  
427.384  
506.078  
343.229  
995.325  
67708.82  
16026.91  
2184.149  
27446.291  
11313.514  
96.24  
1648.376  
796.614  
4424.615  
1232.793  
811.987

3540.848  
2200.305  
1120.681  
3613.18  
4300.412  
2097.076  
24780.668  
2989.025  
677.569  
2577.464  
3254.1  
12186.309  
1598.139  
1253.73  
1171.451  
7299.661  
1312.555  
1062.009  
31005.32  
7533.156  
34524.469  
3357.488  
3027.62  
17557.162  
3365.717  
2404.837  
2215.696  
2044.012  
5987.478  
3239.877  
1041.524  
6120.668  
5801.414  
2405.58  
1611.589  
3231.917  
6299.804  
745.19  
391.926  
3439.982  
1878.067  
4329.529  
1244.172  
1476.733  
6521.546  
2377.566  
1323.495  
1617.48  
6905.938  
959.801  
801.905  
1432.511  
5953.529

716.271  
1635.132  
992.857  
1323.149  
1762.63  
1341.014  
8933.851  
995.206  
3001.628  
2011.69  
5109.88  
1248.563  
1749.905  
661.693  
1215.35  
3873.462  
427.699  
4704.691  
581.262  
1749.086  
3824.074  
791.175  
659.644  
1947.354  
1143.706  
1044.67  
1263.449  
1595.491  
1063.844  
1160.773  
1587.397  
1060.613  
1589.121  
2929.301  
403.639  
216.162  
2848.396  
1159.92  
5253.411  
1788.597  
13840.064  
5227.132  
1730.582  
1716.322  
1097.075  
5709.412  
1646.633  
1889.475  
6980.213  
564.56  
649.886  
3857.764  
517.075

13246.125  
6600.617  
30455.873  
3995.195  
721.925  
1932.138  
935.72  
2769.161  
5579.397  
2294.791  
1066.375  
3524.697  
5119.647  
1349.575  
1347.567  
3880.399  
244.811  
399.945  
1474.301  
1007.667  
946.974  
3252.855  
488.744  
740.71  
1229.364  
910.348  
3754.182  
1046.946  
536.908  
902.09  
1480.227  
663.25  
4492.391  
4240.023  
926.467  
11220.451  
2532.421  
26778.902  
3188.743  
906.428  
1240.141  
5324.308  
5456.757  
592.849  
2182.757  
4321.609  
705.928  
520.838  
358.469  
1083.787  
909.299  
6338.341  
4613.414

1650.888  
9405.832  
2739.991  
1332.813  
2225.018  
1748.311  
1916.968  
567.247  
2881.561  
609.163  
333.67  
1893.358  
3491.945  
1307.297  
947.665  
4720.222  
4199.268  
657.812  
598.962  
4659.49  
514.257  
1598.96  
1611.681  
4204.369  
1075.441  
831.507  
4716.079  
568.103  
16882.975  
911.54  
1578.637  
12926.425  
410.718  
1414.448  
1044.501  
2142.337  
3969.471  
2554.608  
503.393  
2800.921  
4971.082  
1165.583  
2422.142  
3665.446  
388.368  
307.194  
1537.454  
5970.927  
3240.689  
2464.307  
3064.276  
3232.272  
5239.486

3031.492  
409.934  
964.662  
797.562  
3274.152  
868.036  
355.931  
7546.002  
3316.438  
3640.354  
1813.666  
4625.475  
1625.57  
1064.493  
2638.873  
1843.286  
652.679  
1549.569  
768.432  
703.836  
1061.378  
1146.629  
1045.998  
2353.136  
506.067  
4314.531  
1463.302  
1126.497  
1126.634  
18560.668  
1285.005  
451.862  
1054.343  
856.021  
530.467  
501.82  
2128.186  
383.532  
776.054  
760.762  
2259.118  
476.875  
1109.844  
812.687  
1424.268  
4524.475  
1289.776  
859.814  
257.627  
263.986  
746.177  
1177.202  
2086.387

773.192  
1825.753  
1570.201  
1996.669  
5968.214  
1100.368  
1033.625  
31121.566  
6425.569  
2384.991  
732.19  
679.255  
455.963  
1414.52  
1344.472  
3311.092  
1805.396  
711.602  
1607.258  
2226.639  
14811.62  
343.294  
16134.271  
4130.912  
706.965  
950.559  
3134.167  
8684.504  
1233.214  
26932.34  
2681.06  
292.705  
155.576  
777.726  
1077.779  
812.945  
1986.54  
1949.419  
1522.863  
992.458  
1757.49  
1518.917  
9885.745  
6326.538  
599.362  
1337.725  
478.067  
445.263  
1638.308  
949.916  
381.769  
1335.749  
731.12

996.885  
1054.873  
1910.612  
1401.94  
1156.537  
1257.289  
3133.093  
979.925  
972.879  
1373.397  
1373.713  
3252.605  
847.964  
1263.261  
1280.118  
1230.644  
8650.24  
3072.831  
857.392  
483.284  
795.077  
748.826  
1428.444  
753.037  
637.415  
894.162  
182.224  
564.473  
2297.582  
1010.885  
5048.287  
1051.599  
1159.762  
980.684  
365.986  
412.422  
876.363  
1373.798  
1515.125  
15833.435  
238.642  
2137.352  
1569.617  
431.49  
3265.198  
1047.012  
3352.834  
4206.241  
481.307  
1734.628  
1674.875  
1309.426  
802.066



216.118  
552.553  
1112.452  
1004.296  
1783.484  
1165.805  
1854.737  
514.888  
418.249  
38394.426  
933.857  
1647.277  
2210.751  
8853.267  
372.386  
830.298  
58825.98  
1402.729  
2017.962  
122.963  
1792.36  
3563.736  
1331.916  
281.331  
605.308  
1150.967  
3136.496  
1845.175  
5866.357  
5262.717  
171.219  
1177.645  
670.414  
16627.295  
249.801  
9438.583  
1424.265  
3367.311  
671.352  
1568.197  
6555.104  
1857.971  
2544.789  
4532.651  
3282.13  
998.561  
8300.494  
1133.143  
1535.716  
4486.764  
1560.55  
668.611  
663.316

9605.015  
1536.464  
7993.795  
2273.86  
693.768  
817.57  
2344.489  
1144.938  
2609.12  
1110.676  
1501.143  
1783.983  
2605.776  
1373.71  
3550.223  
2980.171  
1438.27  
7034.68  
754.024  
383.765  
4300.622  
2342.981  
689.344  
1461.626  
3919.653  
1030.083  
9156.136  
285.928  
936.961  
2537.66  
3893.862  
1228.573  
3698.835  
7921.46  
2101.404  
4623.739  
6513.114  
348.186  
5400.809  
441.943  
395.043  
681.879  
604.915  
1455.356  
1293.757  
2264.306  
1805.553  
962.131  
9396.614  
7400.262  
1266.014  
2686.578  
5048.829

1875.003  
696.241  
602.782  
1015.504  
4291.359  
2027.427  
3246.567  
2477.516  
713.558  
958.638  
1118.399  
1592.991  
3166.602  
1692.149  
1924.223  
1042.421  
22993.805  
539.637  
14395.98  
1158.785  
530.508  
1769.328  
3230.384  
1781.792  
5146.612  
2105.757  
1852.739  
5103.524  
948.905  
2892.887  
1092.91  
11228.332  
13963.057  
1719.676  
2282.2  
5456.313  
2042.186  
1355.358  
1406.237  
15959.995  
2350.897  
11611.363  
2393.181  
1141.363  
1246.444  
2631.7  
1227.8  
1846.824  
1434.055  
586.846  
1220.252  
1244.978  
2948.392

2643.808  
4615.287  
2684.323  
1079.537  
11107.743  
1444.955  
991.408  
8478.632  
3332.867  
943.229  
2217.374  
1781.91  
1251.774  
484.979  
615.803  
2997.069  
674.399  
2196.396  
5218.851  
2149.567  
2764.313  
4861.789  
558.947  
5806.776  
363.67  
402.393  
1431.028  
4302.451  
1010.123  
1516.138  
2255.198  
2754.011  
428.272  
7766.388  
5213.914  
2018.331  
220.595  
2730.707  
1457.807  
1280.068  
1631.439  
1952.719  
1000.822  
1646.432  
1790.371  
841.722  
1774.69  
1444.563  
969.967  
1222.387  
717.756  
22790.143  
785.867

998.759  
9787.956  
11973.374  
8470.327  
804.115  
1165.427  
1454.939  
640.121  
5046.857  
2134.257  
504.149  
1361.77  
2857.624  
996.636  
8182.363  
7891.328  
1438.371  
1990.302  
7493.361  
2114.542  
1432.625  
1454.472  
8256.032  
1741.17  
682.199  
925.789  
6162.714  
1172.642  
534.787  
1920.514  
880.549  
1615.679  
1258.426  
1754.957  
2355.914  
3500.92  
6811.201  
901.499  
2128.776  
6388.62  
1049.199  
19642.059  
23497.121  
2814.843  
536.845  
355.555  
877.331  
1164.423  
757.167  
2921.952  
6931.351  
2358.444  
3531.758

6480.154  
1610.734  
2264.765  
4107.624  
1076.203  
3926.726  
2680.865  
3041.681  
3076.392  
726.256  
1771.764  
576.805  
4351.784  
1279.776  
3928.909  
961.638  
706.41  
1360.466  
7547.927  
1832.344  
2057.53  
1001.129  
1059.026  
3889.659  
1110.756  
1100.446  
11101.563  
640.281  
1444.104  
811.919  
360.469  
4706.116  
777.58  
2555.565  
1187.929  
5836.977  
4675.299  
964.938  
904.877  
1304.21  
1337.051  
2298.929  
806.437  
8770.629  
11501.046  
1197.903  
412.528  
17508.393  
581.044  
2103.339  
2732.53  
1765.339  
4430.416

834.076  
2292.876  
1855.591  
5333.822  
829.679  
1394.812  
3155.409  
793.825  
447.551  
423.991  
832.184  
1906.372  
713.93  
625.605  
427.638  
549.857  
1122.926  
2914.901  
58211.742  
7276.733  
23325.789  
13886.914  
10090.711  
4626.617  
5626.922  
16950.635  
1674.269  
6067.589  
3492.551  
4010.103  
3874.108  
11693.674  
5124.009  
671.327  
13853.073  
8461.43  
1227.031  
4668.651  
4798.418  
1157.879  
2922.629  
1527.642  
19971.607  
519.897  
948.081  
2924.461  
3407.108  
1438.215  
6305.22  
2024.432  
290.347  
531.076  
1469.148

3708.987  
2590.734  
2073.689  
1395.173  
313.376  
913.456  
747.189  
3944.71  
1639.356  
351.504  
3079.885  
1295.322  
940.195  
373.151  
2071.411  
565.45  
931.082  
1053.209  
1198.535  
602.777  
4032.172  
567.813  
1156.582  
709.975  
412.248  
667.045  
957.368  
32227.082  
856.589  
13210.163  
5738.217  
4637.749  
1931.658  
1828.933  
6201.59  
846.158  
348.745  
954.506  
4339.571  
317.957  
447.007  
1478.821  
3871.184  
2484.238  
1080.322  
1198.892  
383.088  
3801.474  
1175.459  
16591.752  
2967.703  
497.281  
19652.232



1660.824  
1336.403  
585.502  
22019.158  
1541.513  
604.718  
10679.714  
40369.492  
7118.476  
1240.256  
1077.253  
1993.189  
1058.387  
4620.058  
1156.265  
9465.956  
13962.625  
1617.535  
2277.333  
1883.575  
910.286  
1810.858  
99.213  
4253.712  
1111.593  
988.239  
507.477  
1103.802  
2488.262  
7046.096  
4528.455  
7251.303  
1148.115  
672.422  
876.738  
2850.236  
38360.605  
13427.702  
50.052  
499.34  
3116.033  
972.281  
938.675  
5024.205  
1645.469  
2015.064  
1134.223  
13439.232  
1105.478  
2226.814  
841.379  
1432.297  
48618

3311.356  
2706.223  
621.623  
819.445  
4708.518  
4003.47  
22667.34  
3216.906  
554.99  
927.052  
5170.201  
568.503  
2645.915  
1651.006  
3872.941  
5519.667  
618.515  
9250.246  
2690.121  
861.609  
881.282  
5133.457  
3146.412  
15928.444  
1585.366  
782.491  
14592.354  
140.578  
1476.708  
5620.141  
1723.499  
12822.112  
6164.098  
16787.861  
2818.514  
57937.652  
1734.96  
3539.216  
2032.381  
1112.572  
4312.682  
7438.495  
1923.272  
388.085  
3539.068  
793.312  
496.258  
1204.11  
1592.254  
5223.184  
1955.743  
2567.764  
795.576

1426.407  
943.319  
439.751  
2691.742  
5613.567  
1177.608  
743.063  
2165.884  
3516.829  
1865.218  
280.117  
429.441  
3480.106  
1320.341  
1758.927  
791.539  
1201.209  
2759.807  
7045.003  
4627.664  
6397.797  
1106.075  
407.69  
2864.919  
353.241  
690.192  
802.29  
317.729  
378.088  
2824.313  
1850.805  
8735.506  
2527.154  
436.751  
437.211  
1897.943  
900.491  
651.473  
3430.462  
763.211  
8302.729  
2306.326  
888.925  
606.805  
1376.052  
46924.203  
1990.838  
2564.81  
2250.702  
1479.18  
2858.093  
5284.285  
1542.114

3507.236  
3066.229  
18353.102  
5438.387  
6864.597  
978.115  
3453.355  
783.681  
3993.495  
960.719  
585.081  
955.155  
2808.458  
1024.458  
4020.521  
754.379  
8216.6  
6579.569  
1156.277  
876.109  
2596.347  
4170.148  
1846.843  
2090.314  
1101.747  
19107.617  
51506.363  
1568.119  
4371.497  
3520.954  
8299.113  
1812.035  
12776.216  
4341.846  
258.109  
10846.354  
2103.221  
318.224  
59030.348  
1258.571  
2322.191  
922.143  
5649.829  
767.225  
2162.728  
2325.398  
441.008  
1616.607  
5145.389  
833.606  
2179.993  
4204.423  
1676.55

2115.897  
1635.655  
1086.481  
5257.821  
2125.084  
2879.792  
57785.965  
4783.358  
3612.263  
769.76  
872.003  
467.663  
1090.862  
9185.57  
2250.074  
1007.02  
1156.553  
2894.719  
776.178  
2395.703  
3283.109  
8862.131  
5475.398  
12018.358  
2633.566  
1024.168  
1425.301  
2230.517  
577.365  
6489.486  
772.456  
7566.525  
1777.991  
785.643  
860.88  
2804.152  
2715.359  
19572.447  
605.79  
5357.591  
1266.576  
866.484  
1795.585  
1100.779  
1138.229  
5492.76  
2623.05  
2879.58  
2514.615  
12951.961  
2966.19  
2458.125  
56641.832

1405.726  
1643.614  
1257.192  
872.98  
2955.864  
5848.54  
1537.35  
394.331  
1965.517  
2201.858  
10702.197  
2068.808  
2773.93  
918.654  
3414.318  
679.517  
1950.569  
9040.05  
760.673  
968.149  
1974.409  
957.619  
3359.073  
1251.927  
2212.187  
4878.196  
495.457  
523.628  
1468.347  
2159.2  
1523.581  
1240.501  
384.525  
3971.503  
13350.861  
870.206  
1439.173  
1336.782  
3248.635  
674.89  
10068.209  
4557.719  
13802.109  
5901.912  
2677.835  
374.515  
2433.096  
349.297  
513.623  
3883.223  
714.08  
253.6  
1556.362

422.323  
991.701  
1697.045  
423.144  
1230.826  
1351.746  
668.034  
965.154  
5660.27  
1369.399  
542.397  
726.295  
669.526  
469.086  
735.216  
2203.41  
1766.946  
1372.758  
854.558  
660.087  
1039.399  
4352.628  
1690.087  
7155.893  
518.019  
8842.669  
2394.204  
579.406  
830.854  
311.691  
2939.416  
415.222  
615.596  
2615.234  
1352.535  
1015.481  
1519.142  
4401.052  
963.219  
5646.323  
2107.934  
2659.544  
11253.165  
803.129  
1016.473  
441.29  
239.142  
685.993  
1379.503  
561.813  
1848.863  
3593.365  
489.547

750.749  
643.303  
1058.33  
1801.731  
555.652  
1348.438  
3993.874  
11198.808  
213.034  
3827.417  
22783.674  
668.993  
286.84  
4198.43  
5623.864  
3141.762  
1870.46  
2397.12  
1092.361  
1239.912  
1546.326  
2573.823  
959.428  
1332.281  
1738.316  
1359.314  
1920.61  
1505.273  
881.434  
3178.791  
954.549  
2637.995  
9337.106  
416.035  
5685.251  
1181.666  
6459.065  
3011.659  
2091.064  
2237.044  
310.099  
1253.657  
1891.605  
1145.151  
639.099  
2080.159  
706.16  
516.942  
1320.694  
815.481  
1127.449  
2036.504  
1567.422



3900.776  
1360.256  
474.224  
8170.749  
1532.349  
3558.857  
1150.097  
1372.27  
8880.792  
1293.754  
453.546  
1435.263  
2472.33  
545.255  
1027.961  
3140.026  
545.013  
1508.438  
1362.893  
1035.125  
2159.744  
837.177  
1523.699  
1672.228  
1813.431  
1194.315  
10965.167  
3041.678  
17224.891  
1459.707  
499.751  
769.223  
564.642  
504.025  
3230.742  
1927.515  
1494.171  
607.642  
1275.892  
2599.319  
481.922  
981.209  
725.178  
756.663  
1221.767  
2996.131  
572.148  
458.115  
1547.872  
154.418  
1588.968  
22620.619  
947.72

1830.414  
14084.833  
990.39  
1424.253  
345.054  
711.63  
1712.039  
3282.159  
1448.29  
1907.634  
12680.737  
1884.839  
5977.224  
801.835  
8007.056  
628.344  
5389.185  
4893.802  
1251.823  
1347.941  
2229.101  
959.194  
4075.755  
1509.458  
2391.824  
667.918  
511.541  
1289.049  
690.586  
3006.757  
2092.594  
8880.126  
3991.163  
1544.5  
1674.017  
1652.477  
9486.214  
7201.296  
1200.917  
1773.205  
646.195  
2169.904  
346.319  
964.797  
3969.263  
1030.981  
289.768  
684.955  
6928.577  
5377.738  
557.674  
1190.633  
550.154

985.509  
1091.885  
1491.794  
195.836  
1941.136  
1075.781  
397.22  
4026.318  
2669.818  
3180.983  
463.585  
5276.511  
902.321  
139.925  
628.754  
336.946  
619.591  
700.435  
826.557  
680.769  
3808.545  
2584.395  
1459.229  
609.401  
1015.96  
1390.962  
1158.912  
859.674  
1333.991  
335.729  
6031.631  
459.911  
2492.118  
5933.923  
2188.816  
232.677  
503.204  
724.361  
4080.428  
309.532  
196.444  
1076.28  
3094.462  
371.819  
3628.417  
385.345  
2839.524  
1157.958  
3942.008  
948.083  
658.532  
756.922  
4920.253

1348.393  
3393.525  
2175.553  
1129.972  
15050.198  
950.186  
289.577  
522.248  
480.945  
1448.331  
5245.521  
496.067  
9612.208  
278.695  
1156.974  
3831.884  
1058.787  
366.77  
5921.539  
4252.26  
1563.234  
345.038  
1340.138  
8875.298  
1486.702  
1230.228  
2171.186  
906.282  
1889.643  
920.513  
125.447  
685.41  
2995.844  
951.477  
2322.497  
663.154  
5102.466  
1441.181  
1811.081  
2038.25  
490.804  
1717.284  
3644.442  
1799.638  
1507.503  
359.352  
712.352  
1041.498  
613.451  
622.631  
939.223  
643.331  
1926.639

1673.722  
4119.891  
281.72  
3969.242  
591.409  
954.391  
332.44  
721.744  
3774.678  
754.182  
527.087  
514.848  
2555.862  
954.642  
564.957  
1772.052  
2097.696  
1112.431  
4648.654  
750.04  
1400.725  
2484.226  
1288.436  
470.202  
922.143  
3906.173  
381.27  
1514.252  
805.455  
611.815  
12367.932  
623.016  
201.378  
551.381  
911.599  
668.231  
981.886  
7600.538  
888.979  
3029.602  
984.941  
325.733  
4466.591  
2477.399  
248.359  
5442.749  
288.967  
772.213  
398.374  
1291.526  
1295.681  
787.597  
1389.89

655.493  
103.116  
811.444  
3077.746  
998.462  
1971.6  
179.062  
409.359  
4524.862  
715.123  
185.879  
4650.896  
421.753  
671.478  
38659.273  
385.76  
974.974  
3138.107  
3143.313  
1964.489  
453.374  
772.841  
1027.872  
928.88  
720.851  
1318.769  
591.847  
722.931  
1527.826  
2256.208  
1941.973  
933.838  
2264.542  
4128.818  
279.577  
120.703  
728.815  
3491.962  
367.524  
239.656  
986.535  
316.192  
3539.185  
2405.552  
5032.043  
6760.467  
1485.221  
1727.127  
1046.712  
2217.387  
2924.364  
298.656  
1114.391

2640.871  
577.698  
925.306  
941.521  
6034.708  
793.773  
1854.531  
2077.587  
1196.338  
20697.094  
1332.148  
110.924  
3684.601  
10441.296  
483.368  
2491.719  
1794.309  
268.011  
786.638  
2168.468  
955.826  
1055.962  
348.542  
10052.073  
1319.949  
501.845  
3647.084  
22343.629  
5446.477  
552.455  
1032.509  
755.174  
217.162  
3907.374  
539.46  
1106.347  
225.9  
2490.171  
2257.269  
7152.442  
796.52  
163.63  
623.48  
397.275  
14805.073  
1505.03  
3242.629  
1249.086  
521.16  
1713.044  
1688.61  
294.443  
7109.156

986.544  
672.216  
739.336  
492.74  
1389.882  
237.4  
341.722  
10384.275  
6114.173  
1163.483  
1140.227  
2506.953  
5091.574  
2224.409  
2306.104  
2967.339  
4174.204  
2785.662  
2568.027  
2737.139  
1126.868  
3955.928  
2745.963  
1469.688  
12936.712  
1802.445  
378.125  
196.809  
430.403  
260.013  
806.104  
731.787  
5415.011  
13110.979  
414.056  
1516.778  
2974.053  
581.69  
1283.211  
5401.978  
280.678  
4095.225  
407.561  
3098.285  
1514.481  
759.255  
320.178  
4223.686  
2035.869  
1669.71  
16324.456  
7074.003  
667.051



808.208  
4092.981  
9394.075  
816.593  
3366.57  
319.951  
283.855  
630.512  
387.804  
1522.074  
569.161  
903.582  
819.035  
1492.954  
1672.412  
1153.51  
1816.519  
230.717  
2312.761  
759.752  
733.525  
1196.2  
453.615  
543.009  
394.659  
1201.758  
1772.554  
1446.872  
4631.563  
786.299  
4617.654  
6253.069  
1002.858  
2485.485  
1347.427  
474.265  
137.163  
292.457  
1123.006  
576.454  
884.982  
1441.146  
1224.629  
769.451  
381.34  
422.248  
498.875  
244.823  
924.327  
1445.909  
53640.215  
11822.709  
1233.024

100.471  
861.04  
364.444  
590.638  
575.125  
4581.92  
438.078  
3740.18  
4412.407  
1105.005  
572.957  
757.073  
333.025  
1917.437  
589.588  
12533.732  
1395.597  
1383.149  
10733.006  
3995.367  
232.451  
7748.13  
9885.864  
164.747  
604.72  
547.057  
487.866  
3631.095  
11869.519  
2401.982  
2433.766  
884.85  
351.097  
1643.845  
852.245  
1498.254  
3108.572  
1446.217  
14671.358  
13496.428  
186.834  
2661.158  
7398.322  
364.265  
606.509  
740.291  
606.084  
592.193  
214.45  
1058.048  
1924.406  
614.43  
524.83

424.908  
417.439  
3298.867  
325.132  
440.598  
358.581  
236.658  
341.275  
1698.882  
1014.512  
874.208  
571.306  
959.487  
412.428  
404.469  
859.196  
2394.489  
590.815  
399.304  
570.979  
688.692  
539.757  
6235.895  
598.781  
218.558  
813.967  
3420.009  
856.408  
750.241  
3094.22  
1243.706  
2152.346  
2513.589  
2882.954  
865.116  
989.42  
636.212  
910.74  
495.852  
693.068  
520.654  
1702.808  
966.345  
1085.403  
117.756  
31050.557  
1017.496  
7421.681  
1517.732  
1544.891  
2651.12  
1078.648  
1155.466

1600.682  
8164.425  
794.25  
4633.431  
3087.293  
1755.377  
939.036  
579.823  
1630.81  
506.582  
8444.461  
1107.402  
2726.327  
1934.931  
1689.347  
1332.429  
3106.025  
3163.175  
5498.933  
1132.882  
849.798  
631.58  
797.998  
243.448  
336.667  
3322.092  
14789.139  
2889.472  
2906.716  
1274.648  
463.582  
2591.873  
1166.866  
1166.71  
837.53  
560.903  
240.928  
2543.164  
2250.564  
734.982  
7224.944  
3228.196  
125.422  
895.226  
324.837  
470.653  
240.191  
859.308  
2762.044  
277.845  
608.434  
2626.356  
1391.966

3834.143  
389.066  
97.854  
705.866  
5115.12  
995.048  
388.931  
785.538  
440.17  
873.221  
553.457  
1276.236  
963.801  
2548.708  
561.296  
731.064  
881.02  
625.226  
590.472  
232.664  
2355.834  
789.938  
14052.892  
1237.355  
881.577  
347.862  
17935.949  
6842.458  
152.522  
296.841  
1801.036  
572.787  
1283.43  
1655.152  
1336.356  
408.503  
233.48  
327.394  
1004.294  
256.026  
467.444  
981.936  
495.607  
2335.132  
1148.021  
1060.253  
15255.544  
265.803  
20875.725  
361.506  
3052.65  
1065.952  
758.153

1182.707  
368.419  
390.177  
802.258  
5128.386  
191.496  
247.528  
3983.185  
2378.854  
1175.709  
490.906  
372.043  
640.393  
837.933  
801.218  
1739.328  
1087.798  
1150.161  
1836.857  
2452.852  
3379.644  
1083.243  
676.148  
499.5  
930.923  
452.661  
634.797  
4392.928  
21669.24  
2339.75  
1872.471  
655.399  
2505.582  
4290.37  
867.52  
1745.331  
1194.902  
1351.248  
896.551  
8018.82  
1351.223  
567.904  
184.251  
2336.286  
2612.7  
334.205  
10633.144  
3677.688  
227.608  
2608.97  
1211.821  
700.229  
600.766

424.313  
764.716  
2286.004  
1312.106  
539.569  
6081.114  
1460.142  
10925.647  
813.145  
6212.092  
1436.605  
2338.057  
4746.495  
7001.535  
267.657  
106.491  
6676.839  
1355.286  
428.585  
774.361  
354.28  
985.419  
485.278  
638.719  
267.519  
2459.32  
1852.898  
392.308  
1634.256  
3095.808  
1220.38  
719.2  
1142.759  
3564.519  
1052.221  
486.512  
446.983  
6187.738  
3182.146  
616.97  
2255.073  
330.332  
1866.954  
543.806  
168.771  
933.896  
894.364  
1336.439  
601.912  
1829.987  
756.185  
2826.438  
1869.866

1218.839  
1292.965  
5690.01  
108.147  
2717.155  
826.756  
1057.283  
1552.153  
763.118  
3242.108  
1167.811  
290.779  
3777.146  
236.538  
1721.466  
4786.797  
433.159  
9002.825  
1844.046  
1890.654  
2493.286  
800.213  
494.508  
3925.038  
2642.978  
1352.35  
296.289  
447.411  
4007.321  
2359.154  
3854.545  
19064.953  
141.545  
193.463  
1816.724  
1305.875  
972.032  
88.797  
313.657  
4928.584  
15481.749  
463.61  
353.156  
3400.786  
1417.458  
1419.908  
1082.14  
1644.279  
1368.995  
3607.544  
2035.876  
1943.66  
927.609



677.46  
2275.149  
4953.849  
2508.542  
65725.914  
4831.623  
6068.582  
599.824  
11485.508  
614.376  
1176.384  
1079.307  
2929.666  
728.253  
1492.542  
5643.871  
464.486  
5995.603  
329.376  
1647.646  
477.652  
1342.569  
842.608  
343.102  
54837.641  
813.385  
2434.923  
827.438  
1817.741  
456.661  
594.465  
568.399  
706.545  
15406.524  
2167.989  
1250.399  
751.668  
1258.006  
281.05  
691.793  
827.308  
1104.937  
628.384  
195.386  
262.838  
638.947  
634.765  
329.537  
439.588  
1092.607  
223.612  
1065.469  
1439.687

3047.378  
455.737  
435.375  
792.695  
591.491  
457.906  
2101.296  
745.32  
7524.809  
1624.479  
238.629  
299.563  
819.753  
622.504  
1474.791  
1585.023  
3696.9  
596.144  
1719.389  
539.146  
878.656  
709.858  
303.417  
708.678  
491.187  
418.501  
921.592  
492.415  
6480.891  
1735.274  
631.767  
119.254  
371.761  
305.636  
380.137  
1880.196  
690.062  
360.979  
770.868  
1113.448  
900.704  
1838.984  
256.518  
239.056  
23643.439  
3132.402  
2523.412  
1118.335  
4666.495  
488.555  
2543.005  
343.302  
9781.065

865.507  
1685.951  
1846.894  
734.63  
4457.078  
963.804  
400.513  
250.702  
2741.817  
6882.486  
19257.553  
809.828  
869.894  
2168.775  
741.645  
1037.781  
1162.377  
309.171  
12000.691  
1068.66  
287.519  
1717.766  
3200.669  
950.005  
1125.184  
153.871  
2318.008  
1057.507  
641.828  
692.157  
46615.41  
34981.801  
882.814  
327.14  
618.531  
1251.998  
844.081  
3814.704  
852.504  
239.12  
2235.608  
420.77  
503.747  
3353.786  
18728.363  
5434.081  
3403.244  
1326.169  
955.391  
3645.081  
1338.655  
1159.444  
1497.974

15201.268  
1912.387  
4421.377  
1001.395  
481.074  
1182.082  
216.425  
275.738  
656.302  
1133.564  
614.044  
911.959  
28975.369  
3734.922  
2207.078  
609.81  
1428.094  
7651.613  
21971.852  
1416.396  
752.222  
1270.46  
4580.833  
6341.323  
1713.083  
551.004  
504.236  
1231.088  
813.785  
15070.081  
624.416  
445.329  
486.893  
2433.244  
291.95  
2728.474  
774.281  
435.981  
999.737  
620.987  
2474.971  
310.104  
364.318  
2248.574  
446.156  
14650.707  
1704.012  
16517.957  
2285.698  
1331.453  
574.886  
1386.912  
994.007

1421.319  
15087.695  
905.238  
6211.448  
2397.615  
474.169  
36591.867  
21880.777  
1582.368  
1734.03  
445.382  
2016.095  
803.133  
746.34  
1098.718  
1191.031  
19137.461  
3575.565  
1642.02  
744.625  
1163.515  
2351.489  
493.326  
757.818  
665.41  
3229.233  
4355.064  
1045.48  
552.23  
1103.596  
3247.612  
198.81  
1099.203  
4458.986  
1273.536  
398.147  
834.613  
1524.562  
929.829  
2588.912  
1458.311  
742.751  
4934.569  
1599.627  
9607.611  
12556.822  
776.12  
779.969  
1039.726  
2272.71  
1337.302  
588.862  
614.399

2873.779  
1208.907  
20363.633  
723.156  
652.786  
785.585  
7147.02  
1540.55  
3636.693  
193.558  
1661.812  
605.577  
432.132  
1241.619  
603.36  
251.594  
2031.012  
849.897  
22775.117  
2183.31  
15062.459  
730.732  
2098.261  
572.36  
927.705  
7724.718  
1094.791  
1846.159  
489.799  
61113.973  
674.066  
56221.977  
1242.258  
1176.911  
289.846  
16456.623  
4317.624  
567.134  
1099.193  
1929.12  
570.351  
700.865  
5983.375  
22049.678  
523.402  
972.116  
11809.865  
2322.344  
1402.518  
985.326  
563.004  
6859.595  
1166.056

3652.106  
1167.964  
1913.131  
1062.533  
1145.49  
681.71  
917.91  
3186.807  
292.616  
14050.214  
1323.567  
961.721  
351.824  
8098.705  
14384.309  
750.718  
225.266  
238.023  
2088.949  
6349.289  
3571.597  
1246.993  
1763.601  
776.448  
10707.19  
872.647  
1604.901  
2716.455  
4070.407  
519.683  
1323.044  
185.2  
1511.028  
193.497  
2002.247  
255.343  
1060.233  
580.125  
2852.906  
784.564  
611.278  
294.898  
1637.454  
854.545  
1078.682  
541.075  
3189.835  
285.091  
288.261  
726.535  
762.813  
5084.243  
2967.113

1105.891  
2776.568  
943.897  
911.733  
1709.528  
3745.225  
1422.51  
4047.852  
3300.944  
1894.812  
2755.788  
762.972  
449.746  
2198.505  
3165.635  
1045.928  
3515.353  
452.217  
1398.225  
2448.784  
1663.591  
892.507  
1449.127  
3609.348  
11763.998  
450.597  
6414.674  
1973.267  
1827.327  
2565.34  
1149.172  
1189.356  
23313.84  
943.488  
13104.767  
19181.287  
863.661  
418.7  
500.267  
660.487  
4698.574  
895.008  
884.817  
2154.413  
17380.279  
1838.054  
6864.172  
3989.056  
5419.514  
7331.389  
42875.48  
686.532  
856.697



2256.196  
730.044  
222.365  
15235.81  
1587.575  
6617.487  
316.063  
413.983  
487.535  
619.138  
6763.429  
3114.599  
429.915  
902.992  
7832.158  
1577.772  
1293.692  
869.172  
849.226  
1691.477  
593.784  
3691.638  
38626.59  
110.193  
1741.336  
1956.998  
8001.224  
5291.21  
599.735  
1443.264  
764.09  
1935.77  
1148.58  
6308.859  
559.908  
924.473  
943.914  
589.004  
681.249  
422.739  
426.929  
707.387  
3796.295  
492.223  
1601.531  
940.884  
537.456  
1186.041  
2457.857  
810.486  
831.162  
1045.881  
1367.51

715.665  
289.362  
584.826  
1762.635  
843.014  
2011.066  
660.073  
740.426  
2252.834  
678.581  
1329.15  
504.574  
737.528  
766.483  
966.752  
1146.867  
1285.935  
1263.347  
702.979  
1023.41  
2653.443  
2629.985  
348.333  
2663.241  
1252.119  
275.532  
1134.959  
525.208  
1773.766  
633.327  
1476.707  
2873.112  
2901.965  
22491.135  
1873.134  
3765.594  
2710.8  
920.458  
803.106  
3977.512  
1658.85  
3265.081  
4675.6  
1309.708  
5797.334  
473.162  
485.846  
681.227  
1173.536  
4528.963  
3855.744  
5831.902  
1611.407

6510.418  
161.132  
9006.074  
727.91  
13533.62  
3432.729  
1658.392  
5284.684  
1801.144  
756.191  
2908.321  
3505.423  
69555.961  
15578.084  
2375.748  
22250.621  
11989.186  
114.757  
3082.2  
503.523  
924.836  
855.188  
329.23  
972.228  
1149.752  
1597.274  
1411.818  
1912.3  
1336.518  
982.321  
1256.568  
568.96  
771.155  
1428.057  
3274.418  
1426.717  
1919.723  
643.76  
1671.293  
2670.203  
8081.753  
1962.091  
999.763  
6099.927  
2115.307  
445.224  
5371.854  
1033.267  
1421.009  
1317.505  
986.358  
7642.188  
4264.299

2023.528  
566.38  
3733.142  
2630.281  
6276.225  
1827.709  
346.86  
936.538  
1666.035  
5355.575  
1291.445  
1812.054  
2977.728  
4596.005  
1359.102  
820.105  
1934.058  
4069.755  
462.582  
1159.915  
5339.298  
22435.283  
3839.026  
9303.579  
2987.833  
747.303  
3911.474  
1293.323  
2607.24  
1009.557  
2074.728  
2017.405  
1399.899  
1074.124  
1418.806  
1892.431  
2386.753  
2020.666  
1605.906  
1301.82  
439.312  
1536.181  
2449.927  
1821.819  
1215.03  
662.949  
920.538  
1141.84  
3293.937  
402.538  
2481.121  
947.199  
609.296

3977.027  
1264.974  
387.897  
1638.633  
2040.381  
567.322  
1544.936  
9335.676  
7833.496  
1386.531  
1516.519  
477.983  
663.373  
1209.991  
699.737  
1159.986  
1177.547  
1722.343  
2556.365  
990.405  
1302.548  
4842.873  
2550.795  
18860.316  
440.86  
716.024  
1780.568  
380.274  
560.256  
352.171  
1205.876  
1639.036  
3562.811  
810.391  
524.808  
4941.016  
5583.829  
560.27  
1716.387  
348.841  
4491.395  
960.801  
1555.426  
1312.41  
1238.029  
2572.744  
10993.164  
1128.949  
1549.766  
2152.362  
1111.06  
2772.947  
6216.975

1238.47  
166.109  
513.667  
802.708  
2941.04  
1371.834  
1297.175  
5340.983  
14352.306  
881.3  
1083.203  
809.834  
871.892  
3223.002  
754.823  
415.494  
1804.893  
2568.001  
992.151  
554.415  
2569.834  
685.71  
316.437  
646.795  
1117.792  
1764.369  
2414.781  
2762.594  
4011.892  
1562.198  
3668.061  
2549.644  
2002.41  
1988.889  
2392.315  
1414.352  
2324.622  
2356.971  
535.879  
614.829  
1432.912  
2028.631  
521.637  
769.445  
1195.168  
1660.734  
191.273  
2708.901  
1310.485  
757.358  
773.428  
5211.602  
470.264

1942.683  
2460.061  
1123.014  
3055.262  
1286.206  
6818.92  
1660.21  
2305.477  
4075.477  
1729.174  
10303.3  
6536.322  
2389.7  
938.499  
522.372  
3236.443  
819.28  
530.373  
497.233  
809.646  
24838.754  
2101.255  
2451.535  
1384.461  
1038.48  
5309.758  
1073.112  
2203.847  
7927.235  
3361.199  
31584.574  
4816.14  
1631.03  
5086.623  
1685.665  
2359.001  
1078.988  
3116.705  
38353.203  
2470.12  
10070.799  
2427.138  
2793.632  
6163.562  
4688.909  
8207.999  
4635.655  
3659.128  
2546.004  
1490.259  
2254.992  
4401.588  
14880.454

2241.62  
4446.327  
3986.992  
10726.087  
17035.971  
5159.59  
752.619  
1245.64  
1840.179  
965.229  
2045.542  
8038.812  
3692.787  
2874.567  
8785.522  
1080.448  
3977.217  
8944.122  
579.398  
968.608  
13028.978  
3295.432  
1706.738  
3437.937  
5363.479  
1436.686  
18332.381  
5277.629  
2044.778  
1514.689  
7214.733  
2277.03  
790.163  
1644.289  
1590.098  
2519.763  
3819.435  
4938.349  
4647.957  
3881.796  
856.918  
394.772  
943.397  
5968.857  
1227.819  
2290.484  
916.326  
980.644  
569.514  
4752.986  
1855.415  
3552.765  
8639.037



1286.137  
606.859  
815.244  
517.656  
3193.308  
5813.301  
648.179  
428.601  
9873.967  
586.168  
2292.839  
950.567  
369.373  
3435.26  
1891.431  
1063.454  
2794.887  
2752.222  
947.879  
1235.647  
515.595  
41550.336  
1377.864  
2171.058  
3056.046  
2008.97  
516.252  
2242.712  
1091.861  
21739.559  
231.111  
657.451  
505.339  
1030.386  
1273.858  
1216.528  
1777.598  
18071.178  
570.053  
776.074  
3194.074  
275.357  
481.717  
633.054  
4836.614  
2478.428  
3107.011  
1137.429  
222.642  
462.891  
631.884  
916.419  
4137.915

6645.605  
2308.302  
1352.851  
442.778  
2812.682  
614.768  
11110.698  
3795.149  
1950.657  
7794.954  
1261.125  
2756.789  
913.444  
489.696  
1562.368  
3301.061  
898.593  
2417.115  
4201.594  
1851.889  
1578.489  
1150.778  
722.014  
3506.043  
1144.333  
828.342  
507.299  
955.821  
801.081  
367.094  
907.6  
905.055  
383.183  
3341.793  
803.973  
724.883  
661.377  
1116.858  
1550.68  
746.931  
644.317  
2224.792  
3039.698  
577.775  
865.009  
1161.057  
57827.871  
2135.98  
1104.319  
587.19  
5719.611  
341.019  
1312.95

1474.557  
2335.86  
943.879  
303.953  
212.575  
62138.195  
1390.846  
894.896  
923.711  
1468.932  
286.931  
1519.39  
460.359  
979.681  
656.304  
864.958  
1460.339  
1930.326  
947.503  
12700.674  
688.165  
498.007  
621.517  
710.969  
941.83  
196.543  
5231.165  
228.108  
996.219  
8109.605  
804.727  
494.772  
1973.344  
2630.913  
940.731  
2898.644  
5385.62  
1194.778  
3675.292  
719.149  
941.561  
10673.873  
356.357  
1315.595  
2294.336  
1028.133  
1584.057  
1422.562  
1938.781  
2333.335  
858.229  
2948.633  
8520.596

758.712  
1514.632  
406.875  
1604.355  
19419.088  
5901.548  
839.737  
9975.294  
2248.994  
3194.456  
2223.783  
19160.063  
799.877  
62242.734  
906.918  
2313.712  
5291.208  
1862.917  
657.912  
1298.239  
14098.095  
1744.514  
2144.89  
980.537  
759.007  
813.81  
2436.111  
176.376  
314.389  
2066.966  
3229.338  
334.682  
6824.527  
1410.379  
7044.917  
2440.153  
847.686  
1762.343  
317.52  
16449.398  
1510.833  
5639.795  
56539.473  
4533.792  
134.149  
534.748  
696.474  
7333.559  
611.627  
3346.941  
1410.391  
686.549  
1393.601

16471.189  
2280.885  
768.014  
2285.457  
953.514  
624.498  
2340.267  
1534.304  
494.064  
3442.393  
673.686  
10753.183  
1141.542  
611.55  
2676.895  
1905.55  
557.954  
758.485  
1011.401  
1485.443  
1006.086  
2659.088  
1154.386  
1260.662  
1333.73  
1025.48  
846.618  
2471.851  
772.114  
491.845  
589.873  
236.523  
1252.38  
1818.595  
557.926  
403.422  
531.792  
582.279  
530.242  
3179.643  
8506.147  
3191.526  
1186.79  
7778.388  
939.598  
1511.338  
820.702  
1368.287  
892.378  
1352.402  
3243.175  
4886.498  
2390.991

3277.992  
2614.638  
798.739  
395.674  
1884.647  
2832.767  
338.536  
1327.99  
9323.565  
3098.058  
596.363  
2253.129  
439.338  
14716.609  
869.969  
714.994  
573.87  
6243.99  
477.978  
877.967  
868.985  
479.141  
1003.041  
726.679  
5308.961  
1668.939  
691.236  
1148.032  
11514.651  
846.17  
373.875  
410.514  
143.979  
924.061  
742.748  
1998.796  
1686.311  
453.096  
473.362  
3486.167  
29643.145  
877.631  
1254.038  
302.969  
11795.897  
1365.955  
676.71  
4020.511  
1860.501  
1453.447  
1457.869  
508.14  
1400.533

2728.751  
2256.054  
1929.672  
1356.339  
4601.971  
1468.971  
1929.561  
4290.728  
1477.082  
495.871  
2402.435  
5581.288  
783.503  
908.626  
540.869  
903.134  
494.969  
2943.797  
802.392  
930.674  
814.808  
4051.791  
10736.206  
3990.244  
1003.867  
6449.161  
849.916  
1863.245  
641.303  
563.537  
879.414  
9170.49  
1664.63  
731.784  
4996.379  
2349.739  
839.812  
541.396  
3172.478  
209.293  
487.876  
8157.438  
1508.702  
9296.379  
2074.527  
556.63  
2319.891  
326.82  
13420.505  
2490.423  
1670.259  
1293.386  
825.26

8130.444  
602.315  
753.269  
1347.557  
962.479  
8246.658  
758.812  
1596.556  
587.978  
1829.021  
5211.775  
741.083  
236.034  
121.239  
843.283  
942.397  
1094.829  
3289.198  
1189.545  
2066.958  
630.836  
556.222  
3297.69  
26896.66  
1122.288  
13191.505  
1186.952  
819.949  
6352.322  
601.457  
1126.499  
773.615  
1745.108  
732.96  
1755.967  
3713.287  
3241.042  
2608.397  
1594.376  
2528.538  
1458.8  
1692.021  
1123.656  
1288.367  
725.094  
6276.047  
2478.149  
1185.123  
5285.681  
403.836  
1596.013  
10854.596  
1288.709



2339.437  
314.042  
455.161  
523.942  
672.128  
438.47  
3244.432  
9888.354  
381.595  
2907.335  
894.991  
390.372  
665.757  
650.096  
29259.326  
2071.942  
357.267  
1441.805  
3419.618  
8842.861  
12869.084  
1525.136  
362.423  
671.223  
1895.937  
1574.063  
1278.254  
442.685  
770.127  
4196.048  
537.518  
724.203  
737.031  
760.414  
917.77  
636.912  
807.771  
1789.222  
515.972  
1870.266  
803.892  
837.731  
901.175  
14702.55  
826.37  
1892.669  
2544.94  
656.109  
11326.236  
1255.749  
6460.86  
3425.113  
3724.215

2522.284  
3463.832  
941.956  
6254.399  
24681.906  
1889.892  
792.032  
1245.963  
498.475  
5461.306  
1896.163  
2619.102  
267.711  
2586.535  
1389.095  
569.609  
1105.068  
1877.682  
751.747  
823.729  
68151.258  
73108.406  
5728.312  
70768.055  
6396.575  
6526.93  
577.151  
190.543  
158.156  
439.876  
2083.888  
616.242  
8537.82  
2676.773  
18254.385  
529.504  
3006.345  
6544.705  
2534.411  
1127.495  
1507.185  
2366.297  
2571.513  
643.872  
2493.081  
1630.932  
998.343  
3189.362  
1060.133  
5650.826  
577.584  
1073.357  
1250.783

768.336  
441.121  
3889.009  
1639.091  
2055.419  
1227.785  
1150  
1106.644  
556.462  
2605.265  
2657.715  
812.36  
339.057  
1038.955  
872.016  
679.109  
1067.812  
1072.869  
840.656  
1115.105  
1519.944  
2822.849  
843.899  
970.973  
662.953  
3709.556  
820.497  
891.915  
1057.834  
2030.469  
3581.918  
850.947  
3509.015  
3510.188  
904.196  
1208.354  
3946.781  
199.469  
3138.115  
1588.393  
1306.778  
427.27  
1744.541  
1119.728  
1113.269  
4440.618  
4047.76  
441.512  
355.115  
5160.161  
673.928  
681.322  
145.494

3286.963  
1961.888  
362.666  
1283.163  
2089.992  
823.637  
907.73  
359.699  
3590.818  
549.008  
6565.117  
4822.695  
756.156  
1914.849  
3461.124  
2312.26  
1236.991  
170.502  
2531.467  
749.961  
627.475  
4806.945  
793.348  
558.241  
395.817  
1354.127  
13268.73  
1508.213  
900.503  
678.912  
5083.688  
55861.84  
12410.46  
1527.848  
20337.627  
8545.905  
139.772  
472.356  
460.536  
1272.095  
382.591  
182.249  
280.849  
249.405  
1238.701  
1406.376  
1106.789  
2442.865  
3684.199  
534.419  
185.686  
913.42  
2194.116

1408.872  
543.737  
3514.548  
366.677  
936.716  
1025.763  
6252.301  
470.574  
2690.755  
2954.172  
689.726  
379.131  
687.81  
578.489  
136.905  
551.199  
361.142  
722.879  
4777.013  
670.067  
2751.23  
450.434  
1171.978  
590.417  
656.914  
311.964  
22058.182  
738.499  
1072.348  
4470.206  
5925.171  
483.448  
1282.465  
1386.758  
3449.901  
517.339  
1943.028  
429.747  
237.299  
393.809  
5668.966  
19832.107  
1169.387  
579.348  
5755.302  
803.502  
225.255  
1719.415  
576.644  
605.319  
4192.327  
846.858  
690.027

684.353  
1380.567  
14019.698  
1541.692  
784.341  
346.699  
3016.597  
742.878  
3038.796  
986.868  
376.713  
512.042  
434.967  
348.744  
344.93  
1331.941  
213.164  
220.883  
189.57  
416.034  
459.397  
1255.001  
891.332  
961.233  
100.046  
797.487  
192.053  
1197.783  
2322.367  
2666.376  
5304.093  
7859.159  
576.742  
426.955  
1387.794  
944.036  
546.888  
2912.609  
327.019  
926.03  
584.416  
3406.323  
780.743  
1162.217  
1690.429  
1358.915  
224.051  
2432.837  
2732.264  
8316.075  
21006.215  
1200.219  
618.639

3013.72  
939.595  
3163.804  
573.362  
1132.251  
717.678  
13469.053  
2404.939  
1310.468  
15261.726  
7934.265  
1160.715  
1907.819  
1134.047  
605.049  
5447.21  
444.926  
4232.911  
564.342  
3267.442  
848.578  
2099.954  
319.398  
2064.609  
833.439  
283.226  
189.187  
1572.373  
712.681  
470.683  
5222.154  
782.164  
564.735  
1056.868  
12249.966  
1239.267  
858.358  
749.413  
7056.933  
3758.083  
807.788  
911.553  
1404.69  
676.576  
512.86  
651.702  
325.496  
945.905  
646.835  
228.246  
451.647  
1472.149  
350.552

31995.928  
381.12  
2139.283  
2426.954  
810.758  
690.817  
1285.736  
1171.398  
504.944  
3341.645  
560.185  
983.643  
792.021  
3526.176  
6011.252  
1036.48  
4626.794  
1624.021  
212.389  
451.956  
1004.81  
2178.857  
10344.11  
380.341  
26977.531  
1771.646  
712.837  
3549.216  
805.335  
3679.363  
569.865  
1345.074  
182.18  
1018.161  
17720.766  
5999.67  
1749.951  
257.036  
324.784  
1137.526  
1068.293  
1552.98  
250.618  
462.377  
1544.156  
1507.749  
2036.081  
799.511  
703.151  
212.068  
6915.047  
630.25  
407.297



490.171  
3171.948  
384.278  
875.866  
538.042  
6668.486  
1692.186  
1405.641  
16183.244  
775.82  
567.839  
1025.012  
4844.526  
1090.256  
1297.96  
9598.076  
451.964  
480.088  
5013.183  
614.963  
4806.34  
2212.475  
928.062  
1257.815  
316.284  
11594.939  
530.808  
1624.099  
1336.841  
3629.527  
1411.164  
1352.717  
1714.458  
426.65  
1025.337  
4033.559  
502.753  
546.008  
5486.288  
263.216  
223.625  
888.947  
3342.399  
877.758  
736.911  
511.753  
1635.011  
1801.044  
1581.281  
348.999  
1002.769  
1596.415  
1404.644

669.814  
6067.885  
681.794  
273.106  
304.281  
605.191  
1619.712  
406.883  
2190.219  
2081.577  
996.1  
1255.666  
3924.423  
2069.513  
7150.244  
1698.082  
775.021  
2992.93  
8856.688  
857.551  
12432.57  
565.35  
738.74  
305.766  
2721.37  
351.12  
348.883  
1294.773  
711.069  
881.711  
2151.38  
2085.438  
1377.292  
6299.332  
213.924  
857.57  
3450.523  
1425.699  
810.956  
1120.198  
1459.732  
365.204  
3483.389  
14133.729  
1449.387  
2635.594  
345.305  
931.905  
411.135  
825.45  
3328.127  
1444.631  
149.168

574.72  
1169.688  
377.75  
397.101  
1083.149  
8811.488  
406.671  
2598.665  
5112.518  
717.056  
828.223  
634.598  
205.296  
1266.312  
304.462  
1154.844  
1646.393  
1113.719  
1845.226  
486.236  
1142.834  
2164.573  
434.102  
1328.704  
632.877  
779.887  
781.441  
1602.745  
563.355  
1099.741  
1750.344  
322.455  
778.417  
3868.842  
394.783  
193.154  
512.898  
7485.339  
627.663  
616.608  
965.746  
406.507  
341.53  
985.524  
14547.137  
972.973  
7502.707  
1378.853  
47667.805  
696.308  
2462.686  
161.048  
130.705

5364.032  
5057.787  
301.268  
941.373  
766.444  
566.922  
1538.736  
257.634  
2197.841  
2026.62  
41744.633  
272.284  
1478.468  
3181.784  
777.844  
353.204  
2845.652  
848.34  
2551.619  
159.253  
913.525  
736.663  
717.486  
1572.869  
7096.391  
2534.068  
128.104  
3434.15  
627.679  
1013.097  
7742.382  
626.451  
5928.558  
378.913  
1176.79  
643.258  
1170.438  
662.63  
7823.422  
1578.151  
1317.817  
1560.188  
591.05  
1315.533  
462.042  
1239.355  
326.191  
806.301  
862.442  
798.886  
216.225  
482.518  
282.913

2271.531  
1572.475  
529.422  
9660.33  
5487.476  
39049.555  
640.756  
3255.342  
13130.463  
712.117  
4492.595  
1071.934  
3313.126  
2597.466  
649.545  
1898.311  
1811.635  
4383.789  
2253.249  
5280.998  
947.452  
849.609  
17432.508  
804.348  
2347.054  
553.075  
4955.544  
979.945  
748.869  
1082.375  
525.014  
498.886  
1094.197  
2214.087  
2708.914  
2833.002  
2105.899  
394.212  
612.063  
1207.08  
4076.281  
471.923  
374.807  
3114.961  
544.702  
1593.719  
9305.305  
1388.779  
1190.563  
977.636  
1679.053  
8517.692  
2284.778

39095.719  
3439.643  
2217.098  
28832.209  
4288.707  
1006.04  
345.883  
322.927  
2804.227  
872.697  
575.039  
24331.053  
4198.062  
1984.762  
1017.033  
2316.611  
1098.593  
9519.233  
2651.99  
1120.448  
2336.725  
2209.755  
2163.009  
1546.428  
624.344  
896.977  
173.839  
412.733  
697.671  
1132.683  
2086.149  
735.953  
2604.42  
2983.817  
361.124  
11947.301  
831.29  
1761.27  
1638.781  
2285.879  
722.288  
3315.253  
8877.637  
202.456  
2633.584  
7933.876  
1419.393  
6532.77  
4326.584  
561.2  
1812.365  
1134.831  
1412.726

7083.145  
994.621  
46817.043  
6572.479  
767.369  
658.276  
17279.533  
635.093  
2649.467  
1572.67  
8125.233  
6466.359  
1697.85  
1016.475  
915.126  
506.289  
1287.338  
8648.562  
1870.632  
1096.237  
292.912  
975.144  
2086.191  
1657.54  
337.418  
1621.395  
7747.54  
373.703  
1858.072  
1300.747  
830.707  
458.115  
2863.121  
620.6  
13003.544  
4554.913  
2907.126  
26982.799  
3022.979  
484.53  
304.656  
5044.435  
1814.668  
18567.586  
3409.252  
1677.388  
457.846  
944.212  
5432.722  
4782.755  
575.405  
1449.627  
1408.67

2959.9  
2011.49  
650.262  
1963.181  
1132.565  
377.928  
1674.664  
431.888  
1177.977  
593.816  
1044.812  
200.676  
1585.397  
688.973  
1219.804  
1988.368  
902.739  
734.418  
763.693  
382.443  
1078.617  
2808.319  
2644.355  
1661.567  
458.177  
2255.787  
3933.97  
1256.825  
6441.431  
806.589  
3432.995  
1524.181  
1477.647  
129.421  
3781.881  
483.993  
860.156  
37185.984  
4000.244  
603.241  
652.749  
1351.539  
5079.689  
990.492  
6637.071  
4086.488  
465.962  
1576.365  
874.105  
673.563  
998.077  
958.641  
467.138



2490.155  
1211.993  
491.095  
612.868  
386.538  
340.707  
424.821  
3385.505  
4972.487  
2299.467  
2999.379  
3381.296  
1128.89  
4090.044  
394.204  
1076.015  
609.698  
1120.232  
859.961  
1399.505  
654.058  
1129.24  
2453.922  
4410.878  
223.45  
255.058  
1430.234  
4670.7  
1066.435  
717.98  
502.063  
245.511  
474.256  
23227.869  
585.872  
1619.058  
471.657  
574.485  
1641.302  
619.828  
5915.801  
1777.926  
1479.491  
817.769  
66630.453  
1734.074  
847.836  
4478.614  
1254.6  
573.788  
281.613  
1057.615  
321.623

826.747  
494.17  
736.512  
2247.4  
3254.975  
6394.422  
1215.448  
549.625  
6954.202  
64937.48  
3392.527  
1016.031  
493.23  
755.613  
1240.139  
3195.086  
20430.861  
61586.797  
856.102  
2389.307  
758.333  
2385.157  
313.522  
1886.427  
597.11  
395.888  
2951.821  
497.644  
277.623  
458.801  
838.17  
612.755  
1730.763  
672.374  
737.937  
1186.589  
437.698  
7120.969  
556.115  
2353.399  
950.488  
2735.76  
671.437  
601.682  
728.044  
524.546  
4550.36  
2143.262  
419.302  
364.81  
358.755  
3147.309  
1345.279

3787.592  
278.483  
512.639  
601.103  
385.883  
523.912  
6677.031  
7433.906  
615.397  
1125.366  
4032.616  
605.966  
504.585  
283.256  
2455.07  
602.426  
1028.748  
648.05  
1114.469  
3303.636  
2575.238  
1468.534  
2238.359  
2275.511  
785.095  
1405.414  
2242.611  
896.604  
388.052  
292.52  
2045.077  
391.978  
15750.676  
1947.662  
452.987  
508.07  
491.824  
713.06  
1853.919  
1290.444  
1214.98  
1004.255  
1384.632  
373.251  
412.429  
614.711  
8933.421  
3954.233  
2803.662  
1118.225  
765.352  
18277.471  
71.904

929.559  
9284.078  
1097.369  
991.456  
254.991  
610.239  
7072.044  
1992.583  
453.431  
761.313  
113.137  
2763.008  
382.323  
1129.465  
1071.604  
835.016  
10472.368  
2294.774  
1283.02  
1103.423  
1005.342  
1656.577  
1478.335  
828.225  
466.889  
393.72  
1860.326  
22081.381  
8796.378  
146.943  
728.816  
2644.656  
1115.036  
661.933  
549.39  
4553.906  
497.203  
559.757  
697.033  
449.766  
1883.193  
871.72  
1145.519  
763.416  
993.874  
1513.285  
1855.161  
446.573  
700.034  
1063.902  
3261.538  
8062.632  
392.004

3910.225  
1098.879  
665.377  
2711.356  
72334.398  
719.693  
25666.795  
8632.951  
3194.008  
1520.489  
321.387  
11919.607  
1822.306  
1032.412  
641.953  
1309.489  
653.986  
1432.983  
1568.355  
1788.807  
1477.292  
9565.163  
3821.551  
1744.16  
789.913  
1789.821  
1857.615  
3429.115  
495.772  
1711.36  
1582.458  
1085.5  
1532.646  
1784.71  
219.796  
3816.284  
1181.37  
1666.179  
1003.025  
498.09  
907.435  
662.634  
2456.785  
901.872  
284.576  
1428.111  
2531.226  
2008.193  
22380.094  
1744.917  
1249.29  
4278.176  
2638.013

2025.214  
4616.24  
3607.811  
588.67  
3648.633  
1182.243  
1082.423  
1248.738  
3340.229  
15108.611  
4547.145  
713.47  
848.342  
679.851  
2206.076  
1782.991  
1350.062  
46862.75  
1177.295  
1191.249  
1199.532  
864.529  
420.538  
271.768  
705.168  
1174.69  
1218.177  
1397.87  
696.072  
1260.245  
1079.246  
540.347  
3051.196  
1331.948  
657.933  
942.724  
4551.126  
472.807  
961.089  
3666.3  
342.276  
1620.815  
621.663  
915.361  
826.607  
659.952  
1513.43  
1725.24  
2168.852  
387.206  
3838.904  
1293.949  
2234.865

985.206  
4710.784  
1660.322  
321.91  
805.351  
1962  
622.728  
19303.773  
475.287  
4446.86  
2298.115  
1352.399  
11425.038  
1705.618  
2246.48  
5417.756  
4533.062  
1131.988  
3451.175  
1303.965  
1569.7  
2965.778  
1949.064  
5973.779  
4023.208  
1983.233  
643.114  
2006.525  
2778.642  
381.066  
1690.022  
1008.645  
982.621  
1556.286  
361.267  
515.675  
1368.265  
607.966  
1636.778  
425.987  
1519.983  
980.951  
146.703  
1593.231  
2387.208  
1941.224  
20723.459  
1650.695  
887.452  
5207.794  
2238.23  
1350.923  
861.049

659.141  
2086.565  
1672.86  
808.667  
1343.619  
3306.138  
9454.674  
3157.056  
965.844  
646.337  
1067.208  
10454.704  
2001.216  
1511.65  
1214.662  
40414.355  
914.08  
1123.966  
1025.636  
786.309  
267.298  
2168.705  
1423.826  
421.554  
8888.589  
1671.635  
928.849  
650.49  
1778.493  
466.28  
1656.881  
724.583  
337.03  
2531.525  
1293.421  
790.95  
358.267  
4103.209  
367.627  
826.275  
3112.618  
294.275  
1526.302  
894.514  
1233.51  
705.084  
1922.704  
264.924  
1940.725  
347.84  
3876.407  
1061.212  
2252.823



1680.019  
467.395  
3874.807  
1073.479  
754.546  
1912.07  
244.209  
63901.91  
760.219  
19541.123  
310.012  
5071.182  
1750.507  
18935.26  
1482.946  
762.781  
7033.676  
2710.384  
2087.125  
4851.561  
864.528  
3679.87  
1893.277  
1869.257  
2711.932  
3801.724  
9203.563  
3578.554  
2533.205  
529.625  
1805.845  
1299.101  
2925.194  
528.085  
1733.668  
4683.226  
1130.273  
661.556  
361.715  
5177.842  
1656.06  
425.581  
1240.986  
702.61  
1101.109  
463.792  
1020.618  
568.892  
1508.238  
968.912  
1225.019  
2092.052  
1111.025

141.435  
1167.446  
214.929  
1848.612  
641.299  
622.002  
393.809  
4764.781  
598.394  
2567.623  
17935.154  
901.608  
849.811  
746.134  
455.808  
1973.211  
3064.887  
1987.77  
8413.473  
1142.549  
4688.467  
1163.891  
3462.42  
559.032  
754.03  
945.757  
1421.196  
1936.899  
4024.378  
1637.403  
2811.726  
356.348  
620.219  
612.958  
2611.52  
2678.308  
455.582  
461.465  
348.248  
627.206  
249.678  
10357.068  
2200.347  
16478.395  
629.53  
1427.548  
1850.779  
652.815  
458.725  
4461.569  
1175.597  
3250.278  
1434.185

1170.446  
2347.048  
69079.594  
2122.345  
8652.709  
321.579  
1696.751  
595.393  
620.347  
893.322  
6130.435  
1701.215  
1472.419  
2609.875  
3540.821  
1771.98  
4582.915  
1689.816  
595.254  
747.418  
6421.158  
1910.396  
6355.723  
303.586  
732.267  
2893.82  
9905.114  
979.527  
681.696  
822.583  
3544.038  
337.479  
231.99  
6025.066  
1027.205  
1318.915  
1858.009  
1963.456  
1463.616  
1915.948  
1553.52  
1068.218  
5851.082  
1912.865  
2833.772  
570.098  
1563.713  
5999.684  
6911.598  
2632.283  
1094.893  
408.762  
2120.901

4379.488  
2287.306  
467.069  
460.268  
514.055  
9168.774  
4436.563  
3163.399  
667.677  
952.84  
516.602  
358.641  
511.983  
774.374  
487.746  
748.351  
1087.754  
1675.232  
499.134  
1859.036  
495.122  
352.376  
54087.848  
3351.441  
203.332  
426.317  
3150.501  
4589.648  
592.546  
531.877  
460.953  
896.884  
477.369  
772.313  
909.777  
797.302  
527.663  
3681.548  
403.015  
2867.183  
2851.17  
11043.308  
2899.959  
525.411  
2282.953  
693.007  
1705.074  
442.01  
2778.451  
723.985  
1947.838  
546.607  
996.819

3406.069  
788.363  
376.357  
357.897  
3520.464  
350.417  
1395.922  
349.159  
2013.815  
812.828  
604.251  
1019.329  
1370.4  
656.324  
972.761  
1040.634  
2470.393  
1827.007  
859.144  
1696.742  
1939.611  
2839.242  
14174.795  
1146.803  
245.026  
1743.342  
28457.982  
43217.098  
1260.122  
941.335  
370.492  
664.863  
2724.702  
3652.961  
745.692  
231.958  
1552.035  
11721.133  
1203.238  
599.64  
484.881  
5881.617  
1301.029  
3467.006  
21468.861  
1859.076  
583.485  
2983.147  
668.47  
1369.05  
887.217  
3403.312  
1999.11

5132.658  
846.574  
10597.03  
392.731  
555.874  
877.528  
817.353  
1421.05  
2894.901  
2085.258  
1938.758  
2403.442  
1847.753  
715.977  
1809.544  
4186.791  
43164.313  
2386.143  
421.102  
2868.465  
643.732  
1104.649  
1248.315  
168.528  
4548.658  
776.759  
287.186  
1558.235  
446.511  
970.684  
263.077  
1955.396  
1650.349  
446.447  
725.318  
382.559  
2121.329  
969.718  
2234.298  
781.169  
8411.702  
3553.127  
2287.679  
1261.011  
473.989  
4686.513  
1117.177  
1081.905  
1158.117  
1901.754  
1289.256  
1547.521  
1839.169

1104.687  
4483.161  
465.881  
487.802  
759.106  
1207.688  
1516.278  
1324.211  
1800.257  
6305.165  
870.544  
535.452  
1102.95  
846.312  
2304.024  
6976.741  
672.262  
352.796  
4244.65  
321.869  
1722.71  
268.795  
1260.513  
1652.724  
1490.61  
66970.258  
543.929  
571.628  
1064.237  
2681.935  
2158.643  
2548.997  
2510.435  
596.608  
207.085  
734.932  
406.683  
2421.661  
2135.003  
299  
975.732  
436.764  
2310.489  
432.791  
2751.749  
4484.601  
701.058  
842.711  
2110.932  
1000.89  
3463.283  
2656.642  
390.424

128.178  
9922.717  
306.205  
573.66  
674.502  
1109.273  
222.093  
1819.681  
751.351  
1996.227  
1007.151  
8714.079  
2440.751  
1132.989  
515.27  
2626.443  
582.326  
5181.508  
763.952  
1440.869  
4103.978  
8534.925  
1940.017  
303.789  
1397.479  
1681.303  
769.988  
2382.271  
1422.674  
452.07  
4452.956  
4072.365  
1066.306  
1290.86  
2369.212  
1896.679  
5529.896  
522.529  
440.803  
320.733  
397.331  
1117.699  
2351.373  
828.466  
272.305  
343.606  
12975.26  
919.013  
1715.617  
596.05  
1112.066  
337.702  
1384.003



1328.472  
990.237  
1287.519  
1146.931  
1061.424  
1235.127  
968.495  
18560.049  
5305.072  
1519.838  
3166.814  
461.208  
1222.734  
495.139  
2172.454  
743.16  
819.666  
196.786  
3410.509  
519.865  
6023.71  
382.367  
650.51  
661.74  
1395.851  
252.031  
1162.355  
502.433  
5456.922  
2503.514  
1343.36  
1725.437  
1804.93  
4608.953  
1689.145  
550.541  
5776.164  
811.999  
2099.547  
3889.42  
4248.849  
897.255  
1007.216  
762.976  
16190.725  
9288.084  
671.422  
6101.921  
2353  
3911.827  
311.955  
1225.574  
2208.515

694.939  
565.204  
7999.629  
4972.525  
659.818  
747.86  
874.244  
1064.587  
4716.109  
582.048  
754.121  
8551.094  
883.91  
919.985  
8028.783  
1941.983  
796.167  
1018.24  
2779.805  
5217.139  
1059.986  
938.623  
643.744  
20902.611  
4178.476  
6420.365  
1812.482  
4527.495  
3117.956  
1247.37  
3851.626  
44835.422  
721.203  
743.675  
709.368  
1199.835  
4832.459  
21929.793  
1967.173  
1322.536  
1607.734  
1256.122  
331.518  
575.146  
1450.891  
476.974  
829.638  
21056.857  
797.976  
8080.212  
1120.024  
1753.72  
6056.845

1769.924  
990.036  
1078.639  
500.127  
204.225  
1016.829  
1383.002  
3240.903  
1327.945  
2721.511  
2355.443  
278.953  
1146.57  
814.054  
1223.197  
2569.635  
1203.808  
825.733  
5857.824  
935.499  
728.516  
254.108  
216.773  
1533.27  
10030.206  
2966.837  
4660.678  
3983.413  
2544.491  
850.157  
1631.675  
3291.428  
3748.957  
12311.994  
1225.193  
474.624  
2005.794  
25344.393  
2230.495  
253.126  
833.847  
693.847  
507.877  
1205.549  
716.93  
484.233  
996.327  
591.004  
1466.321  
1357.724  
494.101  
4193.554  
816.827

153.297  
1127.535  
1105.401  
1391.042  
352.759  
437.992  
624.868  
1020.047  
988.104  
937.147  
532.041  
982.815  
326.763  
1320.526  
344.971  
573.275  
541.472  
506.44  
4847.081  
1549.143  
909.646  
776.017  
1083.858  
505.014  
424.697  
500.06  
1444.496  
128.154  
814.526  
574.765  
902.763  
764.09  
1286.742  
6213.706  
319.751  
503.84  
578.965  
6513.583  
659.075  
560.623  
417.433  
378.824  
2981.404  
295.178  
878.082  
2395.21  
4874.176  
5275.138  
1202.536  
22378.607  
458.39  
1400.305  
1378.873

898.443  
688.148  
250.378  
1426.387  
475.348  
2487.685  
517.557  
2108.227  
221.166  
1560.773  
478.551  
4467.158  
763.516  
754.911  
595.129  
7192.985  
5027.642  
8827.896  
1896.574  
1153.529  
1290.021  
1127.008  
1973.877  
13198.609  
2751.737  
2622.063  
576.742  
1097.172  
672.176  
1028.865  
62768.934  
542.852  
486.348  
4713.424  
131.461  
140.648  
1977.779  
309.696  
1485.102  
1090.484  
3636.808  
724.72  
506.771  
3347.233  
2308.354  
1573.381  
24434.613  
3646.745  
144.231  
230.433  
524.981  
184.138  
993.531

31713.375  
757.944  
416.786  
3547.501  
1705.561  
790.625  
11211.661  
565.95  
804.657  
2038.779  
2640.743  
3572.086  
28090.004  
1479.914  
1853.323  
2141.446  
15965.863  
5611.059  
875.189  
2838.997  
1087.472  
988.632  
862.109  
279.676  
1595.491  
1118.101  
906.54  
859.275  
1184.836  
7445.833  
6144.08  
3679.894  
5593.622  
2099.908  
1108.95  
57871.609  
1360.067  
3343.767  
1024.133  
1617.122  
717.781  
1014.086  
497.437  
457.972  
979.335  
1772.623  
5613.775  
906.288  
1355.052  
2813.933  
576.631  
719.65  
3298.294

500.703  
1534.817  
834.488  
1510.435  
780.5  
2781.584  
881.2  
433.856  
2983.881  
2060.363  
152.59  
427.977  
2039.352  
460.792  
400.286  
410.047  
271.304  
1245.906  
326.11  
1565.213  
28130.113  
790.782  
847.922  
3025.443  
1155.255  
1202.517  
446.493  
2022.62  
842.416  
932.001  
711.683  
4284.553  
493.95  
5277.786  
833.748  
3734.169  
13382.561  
5641.832  
794.063  
335.09  
1068.509  
312.415  
605.792  
1181.155  
297.49  
450.33  
2178.56  
376.249  
1450.918  
692.19  
859.288  
918.784  
2153.925

6486.738  
1347.083  
424.786  
1162.654  
140.547  
2769.109  
45596.965  
869.444  
1697.116  
1527.27  
590.625  
1083.746  
1101.581  
1187.137  
1404.142  
1243.766  
2476.351  
891.633  
1034.421  
372.991  
566.004  
313.495  
684.741  
812.664  
643.104  
1713.926  
10722.643  
4047.05  
597.945  
168.479  
1740.245  
2714.953  
760.74  
1145.609  
1534.839  
854.883  
117.213  
676.279  
1074.37  
209.588  
3479.397  
180.482  
370.063  
2486.805  
1409.299  
560.496  
205.747  
2769.605  
5902.982  
1270.551  
484.511  
3064.405  
730.175



9842.857  
2681.906  
705.223  
889.765  
734.544  
812.985  
1649.428  
630.113  
1351.937  
2345.168  
946.293  
537.978  
853.25  
4399.366  
1056.463  
855.491  
537.23  
3299.847  
203.877  
619.251  
469.43  
3312.273  
19722.684  
842.219  
279.764  
643.356  
1597.55  
3015.717  
927.813  
1047.484  
3058.372  
177.389  
509.098  
7219.134  
56890.559  
790.581  
265.102  
469.049  
1472.706  
1897.958  
4050.599  
2063.146  
3274.753  
315.832  
780.586  
1128.96  
286.297  
2753.935  
1362.828  
696.4  
1158.855  
1831.684  
890.44

574.776  
6646.005  
804.966  
1328.952  
1030.241  
989.367  
1167.516  
5644.289  
322.217  
1336.721  
2120.78  
1000.648  
439.648  
1329.411  
1999.893  
1722.187  
983.339  
7092.336  
518.525  
2037.125  
1637.871  
4005.181  
6451.337  
1502.468  
1239.36  
1215.183  
3550.788  
2723.337  
553.703  
1688.311  
858.059  
1640.464  
631.914  
843.276  
1157.138  
520.726  
2232.687  
643.772  
904.283  
1924.644  
198.457  
9868.957  
7625.617  
4059.033  
1626.766  
1150.335  
1363.814  
1167.49  
1293.149  
839.005  
2728.257  
991.895  
635.886

633.465  
1132.4  
1139.223  
6596.413  
4087.478  
573.14  
2699.08  
389.176  
11237.763  
3073.085  
584.491  
7672.949  
232.423  
1299.227  
486.207  
4457.555  
2210.297  
5570.444  
6574.264  
666.318  
3274.686  
17928.143  
2510.49  
779.674  
416.595  
641.592  
601.776  
49796.254  
6535.469  
3149.241  
1207.759  
463.388  
33927.68  
1049.131  
748.514  
360.035  
1302.788  
2298.234  
408.019  
2086.908  
1193.777  
9104.652  
744.79  
2181.492  
1163.957  
2035.994  
3523.682  
732.823  
1279.321  
499.804  
512.045  
294.46  
682.642

2062.102  
388.436  
681.628  
2662.965  
1221.209  
1973.144  
302.038  
1170.365  
1954.252  
2778.988  
1513.646  
1045.844  
824.82  
515.987  
560.841  
639.328  
573.636  
147.416  
6763.144  
1596.934  
884.808  
459.337  
860.83  
1232.609  
450.927  
2408.971  
593.6  
2832.257  
257.263  
1986.127  
46748.824  
220.665  
1056.534  
929.639  
797.789  
294.82  
316.443  
966.139  
2096.727  
664.398  
1194.902  
1334.087  
5521.038  
1892.685  
1487.347  
2458.527  
15495.468  
7237.317  
1624.618  
542.788  
5122.333  
787.768  
11805.793

1200.849  
1538.854  
2631.637  
1215.984  
614.319  
1068.843  
898.195  
1153.266  
4945.265  
18566.533  
3047.316  
390.293  
3290.075  
763.86  
170.19  
2506.566  
1115.997  
297.024  
1488.379  
372.398  
420.036  
435.221  
13850.145  
480.823  
718.043  
1994.817  
1890.925  
48883  
4792.109  
158.387  
373.824  
1368.703  
270.978  
574.476  
4651.171  
327.206  
427.276  
10820.138  
1928.834  
1255.068  
1417.558  
5688.999  
456.36  
252.001  
3812.506  
560.998  
500.391  
974.272  
1248.513  
219.451  
282.678  
670.37  
725.139

424.757  
282.704  
394.403  
4033.562  
1974.548  
6030.613  
696.471  
737.42  
32547.338  
3096.99  
467.554  
420.258  
1183.651  
464.682  
2197.201  
748.873  
536.451  
882.472  
511.785  
1469.916  
1667.802  
677.395  
553.448  
807.918  
1185.602  
1976.17  
415.666  
2684.992  
1037.368  
1114.803  
3358.156  
2934.548  
1085.487  
324.431  
593.112  
202.458  
516.44  
779.701  
1508.585  
282.973  
28352.818  
719.38  
744.814  
2323.553  
4165.789  
770.643  
339.924  
3972.319  
1974.318  
4645.378  
1624.953  
1205.44  
219.639

2854.923  
255.808  
855.442  
889.459  
495.46  
10500.535  
3060.299  
757.662  
811.494  
1816.689  
2514.999  
613.154  
1137.304  
1813.553  
3403.295  
687.077  
801.841  
1058.629  
1307.51  
868.975  
2369.46  
80985.328  
896.756  
805.935  
44987.289  
39715.621  
869.163  
4388.946  
762.133  
1854.359  
2509.939  
638.226  
768.462  
807.722  
1275.352  
576.626  
3507.294  
1368.79  
819.119  
862.042  
1567.688  
577.413  
3972.397  
2306.913  
732.845  
788.873  
610.804  
620.162  
14862.854  
1986.111  
1701.577  
3324.843  
3398.103

1412.365  
361.6  
1885.423  
1106.207  
289.325  
1019.93  
2528.962  
37688.68  
524.716  
575.27  
658.876  
1797.822  
2851.34  
390.354  
3440.979  
1953.19  
3879.674  
1655.234  
1697.867  
447.839  
1285.049  
6944.881  
560.999  
646.927  
575.067  
902.027  
850.246  
3337.934  
1027.024  
6631.1  
512.565  
972.99  
2061.24  
2246.629  
153.11  
421.071  
619.789  
473.598  
3856.631  
1977.722  
1032.732  
1078.515  
1026.667  
870.308  
959.083  
2533.833  
1864.196  
1065.868  
2146.419  
585.652  
42246.91  
41831.535  
27947.807



2480.206  
2312.644  
3027.856  
2510.808  
934.798  
4996.002  
14337.384  
857.883  
813.87  
848.024  
1251.26  
1111.228  
5430.569  
1068.727  
688.335  
918.989  
1270.117  
734.29  
4424.215  
1683.783  
2511.47  
11815.673  
4926.8  
1854.673  
710.841  
2209.189  
5557.021  
495.616  
651.63  
1959.337  
4170.138  
1356.674  
1529.137  
689.169  
3020.605  
2279.728  
1126.697  
4812.486  
1927.56  
1358.973  
1699.348  
379.018  
962.985  
15069.287  
442.571  
1156.099  
2679.672  
71986.039  
703.277  
14212.33  
2359.441  
1401.144  
300.797

788.444  
258.288  
2220.421  
6142.073  
748.624  
5448.917  
7883.966  
1911.62  
2092.601  
347.903  
212.828  
7047.268  
1854.034  
1601.748  
947.879  
369.719  
1028.068  
1271.401  
1147.896  
2373.941  
1559.183  
1480.823  
943.517  
4139.952  
34637.559  
703.481  
4371.579  
14933.694  
881.351  
1776.596  
988.692  
2844.511  
1196.978  
1248.057  
363.807  
1960.748  
1257.64  
2668.231  
8532.604  
36098.813  
432.31  
5360.545  
30741.316  
4572.832  
445.768  
495.131  
866.271  
3985.516  
385.268  
826.323  
1264.746  
367.411  
3120.783

2532.024  
2434.558  
1026.074  
1284.767  
4474.613  
723.007  
1197.732  
780.633  
1751.731  
3002.978  
970.401  
1048.098  
1021.016  
3348.444  
1174.409  
1055.395  
790.615  
2174.932  
2907.24  
592.604  
810.479  
263.165  
405.258  
579.757  
1011.455  
17832.615  
1394.03  
312.738  
7688.97  
4725.918  
807.435  
2408.557  
792.903  
1645.798  
11667.594  
582.499  
1435.494  
528.526  
679.305  
2428.738  
3815.42  
470.217  
1619.428  
591.482  
601.706  
1139.416  
305.949  
1490.54  
3540.983  
641.594  
931.786  
451.165  
3255.121

593.208  
4787.597  
647.476  
827.932  
9840.181  
1813.775  
658.951  
598.948  
792.228  
412.405  
872.809  
1543.651  
938.612  
424.655  
373.157  
1023.374  
877.273  
14639.602  
1799.16  
3000.429  
12588.192  
9236.764  
6017.988  
697.283  
530.94  
699.54  
2694.983  
1357.35  
14602.075  
1486.818  
6536.414  
59456.645  
1660.543  
1065.843  
762.445  
2123.184  
272.259  
924.277  
1894.312  
1003.168  
4049.037  
1833.577  
793.322  
845.817  
605.935  
1986.005  
1057.538  
123.986  
2632.733  
14039.683  
27526.402  
2321.24  
271.648

859.133  
2009.253  
377.309  
771.711  
2064.287  
483.296  
618.453  
490.373  
1921.925  
487.424  
2598.269  
84309.992  
16765.854  
2267.195  
30906.863  
10859.417  
171.152  
2844.413  
3049.847  
735.989  
400.156  
576.132  
580.791  
2073.569  
1849.166  
482.725  
1494.699  
1847.909  
1080.395  
840.005  
497.395  
1388.213  
577.322  
13545.113  
918.836  
5208.946  
3807.262  
1487.411  
2976.356  
1715.232  
2127.674  
3781.719  
1078.768  
497.699  
501.975  
4043.251  
2445.221  
2500.115  
906.253  
1606.936  
6011.054  
895.608  
2569.171

33777.852  
2330.788  
13579.318  
4255.857  
1130.887  
1269.573  
2074.288  
2531.538  
3202.552  
935.185  
2077.049  
1960.579  
1367.467  
696.774  
891.453  
1502.064  
2448.415  
766.301  
509.29  
808.793  
9704.06  
2462.484  
978.737  
606.868  
6641.197  
3733.092  
1452.842  
2811.196  
1291.396  
1299.996  
2319.027  
1630.726  
10527.708  
3690.089  
45854.863  
1149.664  
3030.035  
1163.446  
5586.641  
372.769  
1202.184  
551.712  
963.66  
9209.728  
21024.457  
250.337  
427.338  
1734.093  
602.218  
733.819  
1264.067  
513.174  
747.574

597.645  
1167.155  
309.623  
2955.675  
478.43  
1723.543  
725.6  
1372.101  
4217.46  
836.609  
2808.926  
1099.321  
2075.123  
767.382  
367.978  
730.38  
604.035  
2328.719  
1471.64  
458.317  
1388.849  
1158.831  
933.935  
1055.952  
281.411  
353.468  
962.89  
2692.976  
15843.609  
2058.309  
3873.211  
840.367  
4775.865  
3859.265  
1630.115  
3038.87  
1913.646  
1734.706  
1947.251  
942.615  
291.868  
729.37  
1963.969  
624.453  
873.602  
700.108  
3418.322  
4902.676  
325.821  
19769.992  
2555.71  
1765.861  
19258.189

4047.393  
1498.873  
1335.169  
2595.312  
4163.305  
3165.18  
1798.847  
692.304  
1213.618  
1674.126  
1502.415  
674.196  
895.732  
3108.165  
2243.069  
275.569  
2419.601  
258.057  
9609.972  
963.118  
414.077  
6640.92  
3788.06  
1330.782  
1513.937  
2241.974  
405.841  
692.217  
1926.337  
1503.389  
12213.805  
4716.467  
38061.07  
959.855  
1053.149  
905.835  
620.2  
1028.022  
527.774  
865.495  
9902.249  
23932.777  
440.024  
707.798  
1557.802  
282.403  
708.564  
1359.031  
203.204  
722.623  
922.06  
1920.079  
485.577



723.248  
4349.013  
1867.786  
1959.278  
855.592  
1196.164  
3638.891  
744.041  
2570.324  
936.696  
2044.517  
763.758  
616.011  
705.442  
738.973  
1808.414  
1929.647  
473.118  
2142.091  
1947.643  
1920.412  
391.167  
906.209  
1540.165  
1500.24  
689.586  
2061.371  
6992.697  
1999.282  
3509.76  
1272.665  
4984.507  
3902.24  
1155.569  
4286.362  
1829.419  
1851.862  
3312.667  
1602.314  
832.266  
3114.044  
1417.767  
10452.615  
3504.806  
28096.313  
898.728  
1203.833  
462.806  
2413.531  
3724.265  
20429.082  
2826.412  
2080.581

15295.749  
4276.091  
1904.681  
1174.249  
2030.487  
1922.388  
2659.246  
50311.945  
1245.649  
2128.351  
3371.611  
994.261  
4637.618  
461.013  
1050.591  
739.458  
1187.759  
6190.412  
668.317  
392.181  
297.052  
8112.496  
1106.258  
803.198  
7224.651  
3679.347  
1286.012  
10275.737  
2714.847  
601.703  
1037.899  
4859.738  
1240.166  
343.195  
366.511  
769.034  
1305.146  
900.113  
436.655  
481.611  
4516.435  
884.111  
671.744  
7913.054  
5279.941  
2944.897  
21541.316  
1280.417  
1786.248  
3205.793  
2040.078  
4763.815  
459.85

271.351  
2479.371  
1086.553  
2703.935  
319.676  
642.411  
2085.185  
674.457  
533.759  
711.416  
1924.975  
1736.725  
2168.204  
398.693  
4934.509  
720.137  
1905.974  
5213.28  
716.84  
518.948  
422.305  
1088.726  
523.651  
454.348  
3912.462  
259.475  
719.701  
232.302  
22236.072  
776.857  
3855.93  
865.368  
591.841  
8878.612  
2500.326  
633.885  
12875.364  
3414.486  
2809.736  
1099.965  
365.877  
314.222  
1745.769  
773.795  
1644.025  
2820.897  
10658.035  
1021.172  
16974.023  
4302.921  
684.769  
674.755  
836.252

1696.82  
42012.766  
2360.991  
510.269  
1164.361  
4673.487  
373.632  
2829.007  
445.696  
4862.022  
590.703  
3345.182  
16989.818  
4949.98  
157.997  
2126.906  
1513.156  
2842.39  
600.183  
978.774  
396.603  
4420.307  
958.658  
2106.359  
1758.972  
634.994  
415.924  
2687.633  
1699.345  
655.753  
287.162  
2904.149  
765.942  
1869.177  
11203.163  
361.028  
753.235  
438.049  
270.464  
464.867  
776.868  
348.037  
1252.246  
4235.511  
771.926  
854.148  
1122.918  
334.106  
614.08  
6584.025  
8681.994  
2749.253  
454.036

11664.492  
1734.172  
806.462  
2383.217  
1700.69  
382.866  
1361.302  
1115.552  
841.797  
887.159  
238.345  
1800.435  
248.091  
510.752  
5897.278  
2449.744  
651.073  
1776.588  
1047.887  
14338.111  
365.407  
2462.241  
920.77  
2190.232  
2252.005  
1256.081  
1471.555  
1836.464  
621.461  
1139.35  
525.226  
852.926  
645.327  
1041.981  
1454.918  
1809.001  
2713.102  
2115.461  
1452.203  
1263.574  
3691.011  
20603.059  
1645.174  
456.196  
340.495  
3228.188  
1585.521  
1377.309  
7383.741  
23784.797  
1264.562  
1807.608  
316.981

3740.075  
1640.971  
497.02  
322.587  
7224.166  
1710.728  
1340.627  
57308.547  
1627.306  
11837.097  
4135.1  
1072.098  
1508.682  
1786.308  
1105.793  
797.317  
1943.014  
7073.133  
372.933  
3403.808  
4273.396  
1426.818  
1011.622  
15538.916  
3431.691  
142.275  
1046.807  
1893.727  
3226.734  
40373.336  
862.329  
1749.322  
1722.536  
85.66  
7274.735  
54850.043  
3526.763  
190.027  
4607.404  
3478.633  
1205.169  
563.294  
9140.696  
459.867  
251.385  
8164.921  
1860.844  
1326.996  
434.937  
1110.208  
21506.051  
2665.417  
585.21

2952.059  
514.526  
2639.84  
1570.505  
3437.986  
308.136  
842.075  
677.647  
1237.336  
452.356  
752.231  
9672.574  
1453.94  
1818.978  
253.586  
6868.106  
3596.041  
1579.315  
1374.095  
3137.273  
1897.323  
461.118  
1321.796  
281.37  
3511.075  
3747.648  
1999.92  
1284.133  
329.384  
970.583  
853.201  
912.966  
2696.417  
983.176  
254.666  
541.857  
515.506  
924.314  
4554.699  
1053.51  
610.578  
923.574  
8610.937  
2755.226  
630.171  
467.537  
10437.753  
3527.722  
574.752  
2054.35  
864.271  
1417.605  
2301.854

746.829  
1525.883  
1215.864  
1213.993  
909.323  
1143.596  
703.647  
547.977  
296.594  
399.568  
9994.786  
2420.107  
765.943  
16462.129  
1263.638  
378.789  
200.934  
1206.018  
1949.624  
1997.676  
218.142  
1063.52  
1036.601  
422.316  
1399.473  
234.146  
905.375  
4818.869  
642.455  
1784.976  
207.205  
5456.852  
1606.263  
449.754  
382.919  
1024.805  
961.021  
2531.088  
1750.779  
1488.165  
1268.586  
273.886  
4671.397  
3334.503  
2903.645  
879.927  
626.474  
381.719  
948.192  
2805.692  
1866.072  
2349.629  
2918.337



819.796  
754.11  
1115.759  
6222.444  
1289.078  
571.751  
742.671  
8212.743  
2860.226  
512.11  
6253.36  
628.684  
1433.85  
497.779  
541.168  
878.625  
789.676  
2583.746  
3889.044  
693.351  
1291.565  
2947.014  
509.658  
948.477  
26422.627  
7262.872  
208.008  
6460.019  
7434.994  
3450.272  
989.004  
360.075  
443.15  
8722.754  
1786.135  
1441.482  
468.589  
662.597  
4571.593  
3791.172  
4973.931  
525.944  
1593.208  
1397.985  
623.48  
1474.06  
659.727  
834.702  
335.91  
3404.379  
849.077  
316.867  
342.621

477.049  
7445.238  
2578.863  
531.222  
1572.422  
2857.944  
1739.619  
1546.934  
3352.508  
1943.829  
1325.143  
1298.047  
199.374  
3623.32  
3600.208  
439.268  
290.887  
469.491  
2536.703  
1096.249  
633.099  
1398.702  
852.711  
1204.949  
4345.215  
2499.284  
2169.072  
2625.168  
909.927  
585.523  
1024.221  
5168.061  
1422.368  
1133.891  
392.275  
629.761  
1878.381  
64276.441  
1332.485  
197.533  
798.194  
3237.64  
7611.742  
6305.739  
249.921  
13763.871  
1633.963  
810.642  
1007.084  
2140.083  
2069.333  
2359.865  
2628.687

2550.923  
693.45  
4390.432  
586.728  
5709.679  
4352.129  
1441.318  
1260.072  
258.567  
7568.274  
1750.154  
262.712  
1472.725  
329.182  
10781.634  
1049.869  
828.201  
449.712  
3827.37  
574.681  
2915.01  
1523.344  
5064.295  
729.466  
1661.38  
1950.52  
2751.679  
1939.065  
597.936  
3447.591  
5888.598  
518.584  
409.04  
2666.993  
5316.711  
5208.503  
1504.212  
1275.458  
4834.563  
9472.896  
4805.653  
6187.458  
1305.494  
1457.06  
5952.422  
893.542  
412.871  
2012.108  
4600.727  
336.258  
341.592  
919.118  
707.06

448.21  
2110.905  
987.994  
31903.736  
558.21  
5238.855  
3118.667  
9095.286  
6054.303  
4002.577  
977.402  
2681.122  
2386.57  
1574.726  
656.227  
213.217  
2392.725  
7728.193  
5604.666  
272.362  
910.554  
6237.299  
897.32  
899.358  
1683.777  
3523.087  
1257.503  
1879.41  
3870.583  
2358.145  
719.041  
1029.198  
649.722  
927.922  
20073.951  
704.693  
1366.289  
1110.028  
1189.009  
3705.717  
1163.119  
6414.694  
1928.651  
273.748  
2429.397  
1184.916  
1558.418  
1253.995  
442.808  
764.485  
2310.589  
1528.679  
827.802

726.265  
855.9  
457.849  
1063.765  
1128.342  
558.693  
1455.984  
261.632  
253.239  
4016.201  
420.078  
780.073  
839.439  
6917.672  
1047.258  
776.947  
1757.37  
546.051  
163.876  
1053.945  
5059.56  
289.585  
429.287  
2668.649  
337.208  
3673.909  
1231.338  
5720.958  
3735.089  
1863.606  
1719.022  
583.819  
239.975  
2638.221  
1464.607  
1408.096  
12974.145  
4252.324  
25057.953  
1158.365  
571.426  
722.381  
1495.221  
657.307  
468.495  
12594.962  
608.166  
7159.837  
657.741  
2224.436  
1682.201  
1662.164  
393.713

1424.594  
620.322  
1842.965  
2907.641  
2801.2  
574.066  
1067.916  
763.879  
1441.849  
1077.764  
219.072  
252.68  
5470.402  
868.365  
150.803  
395.936  
809.05  
6426.922  
9237.891  
2258.286  
534.111  
3972.807  
835.546  
500.816  
86.726  
1337.201  
592.282  
636.472  
6459.539  
7250.167  
1011.725  
2266.128  
520.864  
569.458  
1067.1  
9337.645  
181.306  
599.123  
403.387  
559.827  
906.771  
63077.609  
872.025  
534.505  
52472.855  
11637.63  
1701.321  
17324.787  
6631.23  
140.267  
399.968  
1296.666  
5293.709

629.841  
2354.29  
999.945  
537.506  
5253.189  
248.193  
810.391  
2702.83  
6371.857  
1428.547  
789.868  
2011.168  
263.534  
16018.901  
5895.5  
327.593  
303.575  
1121.142  
973.529  
5898.396  
468.86  
4788.066  
4020.585  
25919.018  
715.701  
1515.948  
627.383  
7949.429  
1361.067  
4873.751  
288.216  
1237.033  
491.748  
2153.112  
2164.545  
523.185  
1875.495  
603.859  
561.343  
243.895  
1853.773  
1486.57  
308.76  
5527.307  
1017.69  
6228.867  
1244.531  
4863.811  
1395.315  
10432.973  
347.178  
442.612  
578.297

804.051  
254.857  
847.452  
1179.379  
1307.233  
829.611  
623.183  
1370.56  
4315.131  
816.731  
1218.257  
723.431  
1872.564  
2386.254  
1033.792  
677.849  
843.856  
33190.133  
709.063  
1995.595  
438.237  
739.754  
2228.781  
565.773  
1042.102  
60796.703  
1137.492  
514.723  
645.478  
3294.133  
3327.491  
891.319  
1078.433  
482.854  
1624.216  
872.638  
4848.535  
1304.288  
499.716  
2126.091  
4953.338  
1256.783  
1011.047  
5981.542  
147.485  
653.558  
8982.07  
1401.942  
2412.034  
7395.933  
587.534  
5853.353  
5148.328



1090.983  
2471.559  
762.47  
1301.457  
1573.94  
604.168  
617.938  
552.748  
914.474  
395.587  
1882.139  
539.769  
778.524  
480.812  
2105.78  
1878.224  
583.141  
6215.796  
1344.563  
873.09  
816.796  
4866.241  
8050.137  
179.222  
604.637  
2118.236  
879.662  
838.368  
2669.736  
1462.209  
1196.006  
949.696  
1283.368  
1123.812  
3599.808  
832.297  
1257.071  
1730.563  
3664.654  
1258.411  
186.456  
34534.531  
476.581  
1369.851  
331.884  
1232.834  
601.993  
701.797  
5528.335  
1000.952  
479.832  
822.67  
62839.008

1171.075  
22214.842  
482.712  
946.413  
476.484  
4298.324  
1142.811  
2866.436  
471.646  
1224.077  
2915.598  
388.673  
14475.469  
1490.565  
3210.366  
923.727  
747.242  
7512.852  
364.266  
2815.179  
645.3  
3924.819  
510.521  
3272.385  
967.372  
6435.175  
14212.627  
3174.111  
872.656  
730.14  
296.492  
4606.213  
667.505  
545.489  
1689.574  
6812.778  
581.97  
5138.202  
4628.093  
1128.369  
2477.287  
791.026  
603.949  
1501.786  
1121.82  
716.527  
1369.071  
650.025  
2516.457  
1242.778  
1835.229  
1837.753  
1362.935

2377.999  
1617.236  
6239.851  
7074.312  
1184.114  
5522.359  
699.926  
1694.713  
200.766  
505.521  
2468.28  
1626.297  
769.556  
682.793  
890.942  
1374.831  
4512.604  
801.103  
1547.095  
1252.009  
2970.116  
3168.221  
2700.162  
40797.176  
14013.063  
2957.678  
3009.848  
5107.442  
4564.071  
582.993  
2266.949  
692.16  
2387.103  
678.211  
979.152  
7760.319  
499.539  
1991.135  
2778.227  
16035.319  
1536.262  
2024.076  
1733.247  
1770.635  
2247.54  
1770.527  
820.414  
609.001  
821.581  
1011.497  
1146.449  
1362.012  
1425.897

2335.679  
679.724  
879.445  
2183.703  
2322.056  
1566.608  
7130.096  
928.551  
1695.113  
1083.868  
649.758  
12102.444  
1136.823  
1531.19  
835.531  
249.06  
1982.63  
226.103  
389.991  
988.267  
23785.6  
3496.751  
3759.084  
598.879  
1380.342  
3351.748  
1011.843  
6971.745  
1876.274  
5203.377  
1357.909  
1944.464  
736.494  
330.083  
4511.109  
617.892  
958.802  
1046.657  
654.057  
1122.519  
2501.445  
482.942  
6415.337  
2334.697  
639.008  
4732.241  
1426.699  
1039.03  
5211.444  
498.394  
8872.873  
4025.363  
2500.24

851.896  
688.046  
1211.606  
727.094  
478.107  
355.49  
2358.724  
600.319  
701.21  
1782.697  
2884.536  
347.047  
546.987  
530.25  
569.131  
1141.236  
668.726  
680.147  
1676.198  
1577.436  
576.817  
680.879  
635.24  
453.139  
1739.106  
702.961  
817.023  
2041.366  
2926.276  
601.953  
613.842  
330.725  
473.043  
1020.847  
809.944  
2529.854  
3019.164  
549.193  
318.384  
705.618  
670.423  
851.386  
730.925  
2824.092  
572.704  
1863.155  
369.013  
375.304  
711.198  
737.005  
477.925  
682.961  
1637.322

595.19  
4776.703  
2181.41  
309.36  
1472.889  
1592.812  
777.586  
485.909  
1836.914  
1288.832  
1001.904  
6077.062  
469.714  
1134.104  
839.978  
5106.725  
1568.06  
592.454  
7703.717  
3023.468  
1896.43  
1199.181  
963.792  
2050.705  
2649.012  
274.324  
7620.897  
10214.088  
612.134  
665.251  
570.048  
5145.141  
672.937  
1337.824  
537.803  
360.347  
7539.382  
730.451  
426.902  
1176.448  
2540.13  
11166.178  
1309.752  
408.096  
1397.229  
838.038  
938.583  
98.564  
669.646  
380.789  
11485.747  
7053.99  
25510.91

2926.53  
828.8  
509.761  
3508.265  
1258.971  
692.487  
1165.923  
295.699  
2409.052  
7197.004  
3053.287  
69043.648  
48366.043  
6045.153  
45519.297  
2445.306  
67.321  
2878.573  
1036.031  
2913.512  
1981.949  
2296.655  
1164.479  
2114.556  
821.289  
1046.032  
1361.344  
1133.246  
497.484  
1279.579  
841.001  
3115.306  
1441.185  
5047.924  
673.857  
1125.721  
432.502  
1919.368  
5711.763  
757.742  
880.534  
525.752  
631.113  
1344.016  
268.733  
341.913  
1353.216  
8154.859  
1163.125  
11763.21  
1999.777  
622.132  
1326.929

1646.646  
511.542  
9695.188  
581.752  
1511.194  
937.231  
1193.937  
2367.947  
600.515  
334.172  
1181.041  
370.489  
1483.495  
2981.146  
826.16  
5014.238  
202.972  
24852.189  
1686.691  
5456.881  
1492.87  
5203.732  
751.261  
3447.815  
3829.617  
5052.196  
346.034  
742.165  
7574.922  
854.045  
18353.371  
756.673  
551.418  
1481.759  
6203.48  
720.243  
1627.661  
730.4  
621.696  
866.856  
14434.104  
9063.795  
23560.887  
3193.48  
878.051  
416.506  
4289.892  
1357.097  
377.843  
1257.309  
340.144  
2323.361  
7145.229



2921.283  
1071.853  
1353.046  
2040.792  
457.492  
4112.146  
1381.525  
4292.275  
2874.765  
2618.034  
1261.928  
2012.592  
476.103  
1121.548  
2234.779  
1227.568  
546.248  
1559.863  
962.086  
459.095  
239.777  
2151.936  
731.027  
869.155  
2763.114  
1107.163  
6645.853  
2158.422  
7953.323  
319.739  
1366.527  
885.276  
920.989  
1586.272  
222.896  
502.667  
1705.678  
10487.777  
1226.832  
11983.452  
1638.635  
542.763  
671.672  
26416.854  
1976.793  
664.446  
2205.181  
685.751  
1290.057  
912.83  
1140.095  
103.253  
910.557

478.047  
168.392  
1340.944  
213.444  
6746.63  
3965.09  
1433.957  
298.239  
24922.205  
1527.008  
6029.717  
1667.171  
1471.141  
826.922  
3725.617  
4290.956  
5508.824  
255.113  
770.354  
3212.468  
1182.068  
5201.145  
817.06  
2264.937  
784.956  
1058.523  
15246.725  
8527.757  
24657.176  
416.426  
4453.39  
1369.269  
507.269  
1307.548  
2001.254  
1329.205  
13895.549  
2018.842  
450.278  
1026.691  
2222.219  
460.917  
4725.034  
3078.51  
685.129  
3300.826  
1491.324  
2458.103  
792.339  
1412.651  
1630.048  
1486.294  
872.665

1329.795  
337.809  
284.924  
1390.692  
373.473  
1441.413  
3309.72  
862.148  
6647.667  
1308.884  
654.686  
603.456  
2644.72  
212.919  
1198.511  
348.13  
2374.26  
4015.815  
5766.688  
496.455  
969.186  
5548.363  
630.268  
11383.489  
880.112  
632.769  
736.2  
1874.441  
1014.612  
1147.013  
2028.63  
540.209  
7635.795  
2236.904  
1151.201  
339.83  
685.938  
9529.885  
735.929  
4296.242  
636.663  
624.404  
554.641  
1651.194  
5597.482  
1118.502  
4197.863  
1070.174  
566.012  
1078.052  
6411.318  
4119.318  
494.447

832.025  
2053.853  
755.312  
231.152  
20195.898  
3200.031  
1347.886  
5095.992  
3470.336  
2156.636  
3175.352  
1051.778  
10710.497  
3113.901  
513.516  
3816.212  
10717.722  
268.894  
7947.339  
8602.134  
434.719  
3329.077  
758.467  
319.283  
2707.534  
1026.998  
834.737  
1074.611  
4405.368  
3712.226  
775.14  
3593.957  
583.747  
4683.636  
541.44  
514.001  
506.832  
3847.438  
3838.106  
2006.474  
525.905  
538.271  
653.439  
11898.779  
1383.618  
454.807  
415.61  
871.032  
2626.773  
1188.87  
1463.004  
2640.597  
621.997

11150.243  
626.946  
1224.898  
831.729  
3443.347  
2764.069  
10043.111  
1165.7  
15624.686  
805.785  
690.592  
14842.838  
1176.919  
1905.6  
822.38  
1060.228  
1973.893  
608.308  
65166.93  
64175.398  
54303.695  
1743.984  
4016.101  
1057.597  
2729.375  
754.083  
3770.059  
5285.137  
1670.909  
6565.978  
916.094  
3361.307  
12787.036  
28272.904  
1477.126  
2592.743  
732.48  
7252.193  
155.819  
6877.655  
965.332  
3186.066  
459.179  
2810.764  
6800.31  
589.45  
517.695  
2430.811  
1768.203  
28032.703  
1095.371  
1368.432  
2825.41

465.941  
736.647  
597.58  
3595.459  
1127.416  
851.731  
357.257  
1896.856  
2053.09  
1243.856  
557.315  
4077.577  
1761.893  
3589.187  
689.116  
1001.314  
940.831  
682.948  
444.42  
993.925  
2051.066  
1762.204  
9069.654  
904.534  
2538.983  
10830.488  
3454.514  
1060.571  
925.048  
790.766  
789.686  
5557.796  
371.707  
2055.266  
418.37  
976.81  
1769.55  
10217.758  
907.791  
470.45  
2626.597  
800.875  
1005.334  
569.811  
542.8  
1351.555  
815.293  
3218.862  
729.844  
346.844  
1039.346  
537.863  
26292.043

737.455  
2918.26  
859.952  
1953.321  
1164.406  
17112.328  
1464.697  
997.741  
8190.309  
1754.902  
4397.175  
4627.016  
6427.01  
6655.463  
8506.947  
1281.14  
3354.227  
4242.703  
2285.114  
15885.311  
2177.358  
1339.179  
684.747  
4136.299  
3284.446  
1394.804  
3386.692  
631.385  
1584.875  
775.94  
743.373  
566.393  
3918.995  
400.701  
3317.663  
1394.482  
115.523  
1313.794  
1668.341  
1187.833  
19506.713  
477.514  
414.778  
4263.194  
729.425  
949.287  
571.148  
1200.568  
1373.916  
1302.833  
766.199  
1797.584  
5048.461

7976.28  
83.554  
823.697  
1558.446  
562.442  
543.805  
526.989  
818.219  
2618.293  
179.658  
337.688  
3006.195  
1127.266  
691.84  
735.64  
2313.752  
1718.71  
586.648  
1735.673  
4963.45  
3001.182  
984.816  
7693.761  
383.827  
1633.314  
843.373  
550.183  
2016.162  
182.238  
1515.319  
2283.436  
1456.001  
5665.703  
2566.986  
2503.19  
477.104  
647.89  
52052.414  
767.186  
556.117  
1199.138  
11535.627  
927.833  
10758.223  
45.816  
879.384  
597.088  
1279.507  
1491.046  
727.841  
1300.051  
3854.329  
2079.668



1899.597  
970.191  
2095.867  
1160.349  
1219.389  
287.32  
2819.897  
272.642  
3065.784  
736.576  
1296.183  
17815.068  
511.268  
867.483  
227.056  
3388.448  
988.998  
830.138  
566.342  
1335.626  
1453.136  
1315.159  
779.274  
2358.605  
5582.402  
756.891  
10949.553  
3299.285  
1108.08  
787.356  
583.605  
1400.17  
2462.544  
308.005  
705.038  
1250.042  
7356.18  
4284.582  
12421.135  
514.567  
608.466  
1530.015  
1533.911  
1575.873  
5027.986  
3427.482  
1462.563  
7898.415  
553.697  
1063.76  
1267.658  
3112.759  
2575.066

1910.853  
231.109  
2155.508  
1741.205  
1918.019  
1050.127  
5041.716  
3388.723  
1278.083  
355.505  
727.27  
37182.254  
294.066  
2212.797  
4270.545  
1532.584  
11929.678  
797.626  
652.04  
1208.7  
1718.875  
898.336  
1608.021  
3982.096  
1922.544  
2131.563  
1330.633  
1462.884  
1159.518  
226.484  
868.37  
389.971  
369.256  
4750.844  
781.339  
1267.412  
16419.848  
589.553  
1371.201  
382.862  
777.847  
967.436  
928.004  
1227.668  
1113.421  
630.465  
1059.042  
6414.521  
960.791  
1369.849  
1033.754  
11681.635  
3249.756

798.381  
1510.419  
436.465  
1240.004  
786.514  
260.185  
676.609  
1108.4  
1667.853  
554.525  
41381.445  
314.798  
538.821  
1481.074  
10392.289  
7543.625  
17035.408  
4740.367  
1184.912  
4356.988  
1381.285  
601.642  
629.29  
1809.331  
1500.604  
340.839  
1149.95  
4753.063  
2435.209  
2328.778  
1046.031  
1465.64  
1286.457  
1100.698  
956.429  
9824.469  
3086.336  
2740.111  
756.069  
3697.408  
3609.816  
1281.845  
1245.28  
4018.449  
2253.603  
1103.895  
236.956  
3783.798  
586.015  
2196.865  
534.069  
4051.507  
2485.44

2570.047  
1516.809  
2856.999  
480.21  
2500.766  
16910.646  
283.315  
749.132  
365.933  
1141.321  
1251.183  
518.693  
1547.272  
3035.419  
2140.817  
2692.091  
380.179  
1096.646  
325.214  
9718.396  
1318.986  
16252.464  
1252.018  
2372.352  
992.431  
5487.252  
2586.847  
4135.8  
866.945  
1105.88  
1828.429  
18099.934  
535.086  
1612.278  
744.655  
1356.772  
1240.617  
3773.247  
609.152  
10523.651  
3890.188  
582.095  
579.594  
1578.949  
841.519  
6259.666  
4870.328  
1380.889  
2685.028  
945.869  
838.454  
1704.625  
915.099

3013.716  
1619.229  
393.138  
6576.74  
273.599  
419.062  
1030.395  
3201.025  
600.553  
267.466  
1847.504  
9897.271  
3379.266  
422.32  
854.975  
5368.394  
2028.218  
2116.193  
500.035  
2925.879  
6318.987  
274.933  
2399.733  
7877.351  
910.543  
507.556  
2064.487  
3962.33  
144.108  
1537.379  
742.794  
1654.424  
716.503  
3110.55  
4412.632  
1450.247  
1698.543  
1674.203  
1203.892  
3242.417  
1534.173  
5262.11  
2058.36  
6411.219  
459.067  
3770.829  
4421.696  
5152.333  
20803.096  
859.652  
1595.633  
369.599  
3480.808

1367.578  
2636.62  
2013.165  
1880.161  
1102.163  
732.782  
1785.866  
360.311  
578.29  
610.3  
947.611  
883.988  
147.009  
7092.951  
715.631  
2181.915  
753.823  
3086.869  
2466.225  
10900.613  
21039.262  
2268.27  
2866.753  
1193.946  
707.417  
3733.079  
1500.927  
281.451  
2579.371  
612.13  
221.62  
915.644  
622.181  
8777.709  
1050.015  
738.006  
409.028  
1084.885  
525.251  
6750.346  
662.291  
516.994  
691.917  
887.826  
918.907  
13952.384  
876.559  
470.565  
736.496  
1791.848  
520.403  
558.755  
1206.56

1918.509  
1052.911  
736.985  
361.244  
393.049  
370.6  
2789.63  
880.568  
3998.334  
1580.74  
750.843  
1654.819  
4921.692  
364.506  
623.497  
1505.701  
591.466  
1046.073  
1409.719  
1836.297  
429.355  
1208.181  
388.739  
569.848  
392.978  
1265.744  
1831.39  
2866.492  
18722.957  
569.781  
533.3  
1476.078  
507.383  
824.084  
1123.421  
1341.649  
483.97  
506.844  
2775.876  
767.24  
36307.262  
3202.426  
3387.195  
1008.865  
2183.76  
596.953  
293.916  
3549.193  
383.758  
1187.239  
24370.66  
3036.299  
547.226

2505.515  
1581.092  
395.604  
345.741  
1200.789  
1072.919  
945.514  
379.809  
694.665  
485.931  
1044.687  
292.589  
2396.331  
417.901  
388.594  
2990.949  
1442.585  
25809.17  
1607.352  
915.13  
1552.391  
3075.543  
463.602  
1142.96  
871.312  
1671.462  
175.552  
1669.832  
274.08  
262.233  
14620.566  
10659.669  
1042.879  
6509.584  
1053.268  
3171.77  
1182.673  
1293.111  
5882.893  
54567.484  
3610.237  
127.144  
714.815  
2571.447  
2752.082  
900.931  
876.023  
469.709  
555.995  
1005.508  
198.593  
374.402  
1771.107



4675.428  
334.356  
715.819  
425.379  
317.886  
263.324  
1240.331  
711.732  
484.999  
2778.511  
1566.718  
891.257  
838.871  
442.085  
1275.837  
1095.398  
3580.601  
9101.972  
793.599  
2205.831  
347.083  
586.34  
1692.966  
2119.286  
3273.525  
3733.184  
929.543  
5868.876  
880.542  
1154.918  
2466.638  
10501.337  
3915.642  
913.29  
623.67  
854.359  
1597.175  
1248.949  
585.234  
4006.461  
2566.878  
641.649  
2644.495  
2430.723  
537.131  
1755.306  
1684.161  
358.493  
519.626  
11322.183  
2359.794  
3322.783  
1917.945

1353.233  
9491.912  
4605.914  
281.797  
192.058  
1811.212  
385.495  
1566.513  
7415.445  
1184.486  
639.623  
2778.731  
1189.61  
2588.626  
938.211  
513.06  
5889.088  
587.577  
2492.583  
1159.213  
2794.803  
3678.4  
1172.487  
1275.986  
760.37  
1286.608  
498.168  
362.746  
2150.497  
9243.506  
319.445  
535.285  
690.853  
515.35  
780.791  
639.31  
4078.42  
1836.823  
1093.83  
1119.84  
650.7  
1510.689  
185.078  
1003.581  
3882.663  
1833.993  
1002.264  
124.232  
823.961  
9043.565  
4344.461  
574.039  
3064.948

5099.777  
6767.659  
545.366  
5357.574  
1099.585  
1244.89  
2724.204  
12018.746  
5832.184  
1241.832  
19212.965  
578.276  
708.28  
1071.26  
3265.247  
997.987  
4465.612  
3460.676  
936.009  
1358.551  
471.369  
2000.666  
2076.519  
281.338  
778.097  
11956.582  
2363.001  
175.155  
179.82  
405.102  
186.433  
1773.554  
9173.574  
380.663  
343.103  
2309.434  
492.697  
17226.207  
13068.982  
1732.334  
7539.057  
1375.387  
3662.572  
1550.882  
289.991  
762.009  
1154.452  
2948.818  
6789.942  
656.213  
2996.84  
1951.015  
3515.074

3978.122  
1001.693  
1319.796  
1142.96  
408.013  
676.121  
1440.672  
1044.31  
1748.408  
213.385  
6215.58  
2091.112  
399.704  
661.884  
675.381  
580.337  
1455.006  
608.743  
687.067  
485.517  
5044.941  
2648.056  
1198.705  
920.139  
1378.923  
745.831  
355.461  
597.458  
10867.237  
1777.125  
2224.608  
1126.702  
853.429  
8643.813  
4744.977  
289.898  
580.526  
1751.384  
2857.68  
4665.903  
5898.6  
433.39  
6510.715  
1214.808  
421.595  
454.323  
242.042  
473.314  
1100.465  
3462.451  
547.39  
2324.958  
266.703

957.881  
603.046  
943.06  
1334.208  
2861.544  
1356.961  
711.085  
4668.708  
2846.287  
801.208  
3758.19  
2511.542  
711.758  
1886.555  
544.754  
668.426  
674.867  
277.587  
3276.148  
4464.903  
731.544  
3094.317  
6801.665  
1971.035  
1056.83  
4402.405  
666.221  
1401.525  
454.254  
1795.189  
1650.196  
664.692  
2939.451  
1011.865  
2936.5  
1635.622  
1102.745  
11239.253  
2057.753  
2021.179  
5093.392  
1490.007  
2082.848  
3216.898  
1202.81  
1481.913  
883.552  
517.614  
1684.845  
2069.971  
1036.059  
49718.48  
2072.212

6052.962  
2750.251  
1880.994  
1255.068  
1352.98  
3773.168  
768.868  
9843.926  
6433.374  
3827.999  
807.216  
1060.878  
1169.03  
1681.493  
6164.508  
1669.3  
1173.711  
2571.876  
922.075  
4331.41  
9200.775  
393.725  
1067.087  
4502.056  
3607.461  
953.622  
11250.227  
591.218  
254.678  
356.894  
866.227  
10141.079  
1427.369  
655.294  
3501.847  
612.757  
224.931  
5727.177  
973.654  
416.815  
1130.049  
2884.974  
309.014  
2349.255  
2061.39  
4668.137  
899.634  
1726.141  
2698.219  
1049.625  
1729.708  
5399.472  
668.408

1401.513  
2971.311  
3987.823  
11895.304  
570.709  
4466.229  
2275.685  
614.728  
780.443  
1138.78  
767.706  
428.886  
5350.327  
150.431  
1841.772  
5402.212  
1469.754  
17790.049  
1395.469  
898.623  
5472.259  
1448.239  
448.158  
1493.718  
429.048  
317.642  
294.686  
145.102  
456.84  
425.015  
692.61  
861.748  
1091.744  
1042.961  
632.837  
601.181  
7641.053  
1346.167  
1025.605  
908.646  
1590.31  
541.081  
651.202  
324.725  
679.437  
2635.684  
3126.723  
5496.084  
3684.416  
1286.553  
1528.475  
691.503  
723.308

601.936  
1509.147  
938.797  
928.516  
9386.949  
643.529  
8286.778  
465.845  
803.614  
611.504  
628.532  
4130.99  
4097.542  
4086.926  
948.179  
674.485  
2423.221  
1705.849  
544.363  
425.495  
864.493  
1137.928  
771.536  
2114.469  
23797.313  
5391.654  
521.687  
704.988  
13653.979  
1064.109  
15222.873  
476.135  
745.648  
1319.84  
3792.965  
3817.883  
622.039  
2395.391  
1406.432  
12346.268  
2568.164  
325.642  
1620.62  
1767.448  
1333.065  
6657.366  
1052.33  
1621.941  
1518.309  
4181.969  
899.732  
1324.596  
8462.909



1422.492  
1583.24  
1122.747  
13038.694  
1975.394  
617.998  
6250.269  
106.692  
2205.779  
1241.17  
935.534  
849.453  
543.13  
59863.473  
10938.312  
1858.775  
22027.324  
7915.498  
93.539  
1880.526  
547.188  
761.252  
2686.612  
3320.686  
937.83  
1128.472  
3136.823  
12860.925  
402.828  
2005.819  
522.537  
1825.586  
3145.616  
462.242  
99.367  
7278.072  
573.986  
9313.674  
1623.728  
665.471  
2255.845  
958.418  
778.831  
1552.338  
1616.318  
1407.323  
986.38  
555.494  
4522.181  
617.772  
448.991  
2068.15  
3529.931

1562.361  
1673.039  
29257.707  
1059.977  
5945.657  
1516.952  
1797.705  
1083.175  
886.123  
814.938  
1750.332  
1002.134  
1050.382  
1080.669  
5006.498  
1407.04  
1282.829  
860.27  
2566.74  
1372.716  
1896.424  
633.597  
1683.388  
518.722  
1157.493  
659.116  
3320.257  
2292.348  
2604.272  
2628.436  
786.426  
1338.228  
4465.547  
1187.902  
662.362  
1787.871  
385.275  
2604.502  
829.83  
1317.155  
1180.207  
656.864  
837.052  
2853.692  
385.517  
417.476  
1415.989  
3211.692  
243.054  
989.12  
4780.93  
622.773  
458.57

348.595  
2944.712  
1101.411  
765.373  
2502.063  
4498.531  
1001.162  
978.197  
3232.192  
13050.778  
823.548  
2688.432  
1017.014  
966.822  
755.803  
8783.178  
2577.095  
1050.219  
1060.007  
1183.675  
3753.324  
470.405  
560.695  
8100.285  
10835.436  
2224.607  
780.5  
1820.639  
944.359  
532.073  
1359.943  
4504.868  
1302.771  
958.436  
723.31  
972.016  
525.279  
2707.597  
735.805  
924.592  
1288.56  
1305.101  
5789.019  
2129.015  
1307.656  
2708.211  
4684.616  
1738.234  
1897.308  
36904.016  
1268.26  
7451.12  
1073.896

215.807  
2048.6  
869.633  
815.68  
665.448  
803.804  
2314.744  
4190.304  
521.321  
2040.613  
2016.012  
2536.255  
1681.727  
6640.816  
1651.826  
1091.845  
622.069  
2516.811  
1312.151  
1668.485  
443.225  
1756.033  
437.731  
1134.091  
649.042  
3561.127  
497.176  
2054.439  
3329.212  
3058.012  
1348.022  
339.923  
1631.531  
829.152  
674.775  
1219.829  
587.189  
2022.464  
286.503  
3776.716  
1239.524  
597.048  
1332.412  
681.011  
710.446  
611.187  
2050.812  
479.572  
292.549  
1107.557  
946.987  
880.144  
382.437

3179.255  
658.673  
402.649  
1548.313  
5388.305  
826.997  
455.784  
1742.299  
835.304  
817.54  
2400.43  
4166.438  
922.53  
980.028  
3125.716  
17249.826  
1045.407  
268.999  
600.839  
2872.123  
974.091  
3221.155  
5892.056  
422.846  
1908.019  
11255.182  
3521.565  
985.581  
1363.517  
777.835  
2687.252  
277.254  
687.031  
9955.434  
628.671  
9605.612  
2093.137  
715.139  
1839.227  
986.022  
591.214  
1694.765  
5005.775  
797.646  
1164.488  
4439.072  
395.343  
2398.477  
2986.281  
3232.587  
864.583  
2520.396  
1260.642

6764.827  
2801.567  
979.085  
2333.163  
3025.088  
1187.694  
2113.406  
40393.781  
1133.329  
12099.604  
1240.62  
2077.705  
1046.405  
1371.807  
907.046  
371.356  
633.286  
551.251  
246.069  
1366.843  
2626.39  
502.286  
2164.709  
6105.779  
1574.605  
1014.592  
830.681  
2954.738  
1969.394  
1531.125  
352.011  
2137.661  
690.63  
1539.969  
1057.001  
1164.033  
2184.044  
2504.355  
451.514  
2391.582  
1177.243  
678.062  
880.854  
2304.967  
6915.164  
635.134  
493.297  
888.755  
1243.451  
875.637  
4388.482  
711.36  
1110.847

3777.539  
933.213  
1091.115  
9967.526  
814.996  
2080.608  
3839.709  
1814.258  
1001.306  
5956.809  
2102.057  
950.761  
951.316  
2501.7  
1122.305  
1587.09  
1519.467  
5608.834  
944.595  
6114.865  
5791.827  
1284.768  
655.48  
2690.74  
508.117  
22453.4  
6046.123  
1220.931  
2695.786  
427.196  
4302.761  
1394.314  
206.751  
1379.437  
3296.892  
7339.208  
2240.677  
1881.134  
573.331  
4772.877  
7913.312  
601.042  
325.701  
1966.924  
49575.102  
691.502  
1236.983  
712.513  
3407.217  
6516.901  
3294.906  
1583.898  
938.34

1675.365  
3122.746  
717.578  
59729.484  
9238.471  
698.63  
8401.14  
3507.822  
3520.617  
367.497  
791.394  
511.919  
855.582  
503.02  
348.91  
3528.221  
4559.882  
4178.019  
391.303  
418.414  
618.901  
288.117  
2330.461  
434.4  
403.724  
1912.867  
468.802  
1471.432  
347.119  
18503.324  
2433.739  
1390.19  
1091.036  
2483.2  
1441.08  
221.077  
1104.243  
2742.795  
1247.939  
216.015  
2356.472  
4076.154  
1767.699  
876.251  
273.471  
1289.442  
1581.651  
818.347  
33180.68  
432.743  
1764.841  
1721.438  
4429.881



2367.64  
687.109  
6687.808  
313.625  
1097.684  
420.136  
928.311  
314.498  
694.904  
1494.325  
276.315  
4119.318  
1020.184  
6945.153  
698.989  
906.481  
747.703  
5750.608  
1350.821  
2409.49  
1470.404  
3414.884  
5687.438  
4118.676  
510.414  
1202.025  
1040.126  
1129.108  
684.316  
2683.629  
1064.625  
322.805  
656.519  
1357.584  
435.793  
503.309  
4657.305  
524.174  
1739.373  
1063.414  
1803.562  
263.332  
424.217  
6617.853  
19.937  
1125.896  
6157.737  
871.965  
706.031  
2236.123  
1577.404  
470.898  
324.097

2020.911  
495.898  
915.807  
760.611  
1254.201  
1153.461  
1056.017  
2313.692  
18046.422  
2689.308  
1238.16  
1156.612  
846.121  
1102.221  
411.581  
622.745  
723.6  
2376.325  
644.77  
906.498  
916.091  
342.109  
5831.931  
1015.564  
978.737  
4038.313  
3367.108  
247.199  
1053.148  
1403.497  
1635.05  
2109.68  
1297.533  
10165.227  
1315.648  
734.806  
1305.565  
16784.047  
4159.158  
24776.688  
1717.055  
117.529  
1436.742  
4902.271  
5500.973  
5512.692  
236.908  
697.326  
268.344  
871.974  
3922.048  
749.126  
749.701

1120.096  
1496.512  
1543.345  
591.645  
4100.672  
816.922  
476.853  
4452.169  
957.617  
1125.016  
4612.898  
203.16  
1415.505  
971.095  
469.649  
1321.318  
2843.81  
908.792  
23840.264  
1154.5  
3699.159  
1883.082  
911.346  
682.141  
608.148  
606.547  
2911.781  
668.793  
1579.13  
3150.48  
682.672  
1335.89  
499.862  
1941.748  
1213.129  
4031.851  
1189.172  
4259.092  
4367.292  
2571.967  
510.106  
10949.499  
1338.259  
2123.768  
3407.859  
2402.865  
1505.284  
264.419  
1475.794  
2051.603  
1782.602  
1377.096  
8900.306

1003.353  
490.575  
609.977  
8854.045  
2111.149  
38720.723  
21932.801  
1643.666  
1508.41  
378.129  
1516.286  
936.014  
680.134  
1077.212  
1466.592  
712.147  
5137.293  
5722.948  
4205.641  
584.588  
481.291  
534.523  
1347.808  
1562.039  
1143.275  
364.382  
3038.802  
2423.024  
693.258  
974.986  
3463.667  
739.997  
4607.868  
1092.894  
1000.902  
2692.626  
2025.812  
1094.059  
18575.271  
1100.405  
1986.522  
827.56  
288.129  
905.358  
510.126  
1444.414  
352.648  
2754.058  
674.781  
1644.75  
4089.249  
526.467  
1232.035

525.823  
1738.386  
1082.334  
3414.752  
856.274  
3733.059  
5467.604  
1755.014  
9016.198  
1191.556  
1155.243  
1793.481  
1562.833  
879.324  
427.137  
1594.189  
1399.897  
2740.757  
1963.985  
10525.87  
1410.701  
438.875  
912.98  
8761.422  
3186.163  
348.525  
839.315  
1435.55  
1129.685  
522.568  
673.579  
1069.524  
4823.497  
8671.347  
6624.255  
130.52  
331.345  
205.318  
661.776  
771.732  
772.054  
408.3  
1045.627  
1363.334  
566.939  
1438.708  
537.497  
6111.261  
499.918  
1029.143  
4432.61  
812.271  
810.799

3190.053  
1791.303  
4327.758  
1177.753  
4867.792  
4370.651  
3581.76  
896.685  
722.136  
2498.076  
2598.058  
1059.561  
1321.441  
3460.372  
219.745  
2947.491  
740.656  
3431.314  
1926.07  
1502.615  
1752.031  
2353.145  
1863.562  
1129.339  
2752.059  
286.101  
1487.989  
627.308  
3183.142  
891.642  
1572.746  
5644.98  
766  
1553.308  
6775.725  
775.046  
780.231  
1181.668  
1546.164  
1280.586  
1741.34  
1160.278  
1272.258  
1424.177  
13127.937  
1638.42  
1025.372  
597.892  
1160.351  
15142.591  
9184.856  
2808.051  
283.395

24152.58  
403.553  
10393.493  
19672.652  
1869.026  
3734.737  
1874.059  
1711.545  
874.484  
5429.155  
767.495  
2341.978  
1107.713  
531.552  
2275.34  
2982.79  
436.032  
417.362  
2477.703  
1241.467  
632.534  
605.482  
4147.081  
492.796  
2462.341  
11247.606  
67460.328  
757.254  
720  
1338.484  
238.895  
995.683  
70268.977  
2094.267  
2104.125  
730.981  
1294.384  
637.615  
365.979  
1391.348  
1455.959  
6076.191  
2768.588  
3608.681  
1162.592  
564.075  
595.739  
539.338  
1835.474  
10452.481  
474.833  
508.48  
2048.063

1823.061  
1418.669  
1073.549  
1351.066  
708.338  
1350.115  
1578.2  
1837.532  
2998.514  
4283.874  
1934.11  
3490.256  
4022.387  
1299.512  
1379.774  
1217.391  
1227.722  
2918.134  
268.807  
896.605  
670.992  
834.84  
1300.17  
1199.538  
660.054  
570.377  
1669.602  
516.859  
631.067  
1944.551  
1316.398  
2105.804  
3252.667  
1230.388  
844.085  
1214.484  
818.626  
1343.174  
2163.923  
677.146  
1800.732  
2212.812  
449.116  
1392.788  
8057.835  
859.932  
1281.958  
6960.378  
793.998  
1578.686  
1452.039  
1632.621  
927.004



668.981  
491.16  
554.051  
2049.514  
2783.46  
2593.427  
59096.98  
5430.415  
2915.025  
4263.293  
19820.559  
328.334  
837.382  
2918.238  
1294.885  
5732.434  
742.537  
1304.753  
1426.433  
1734.879  
1136.478  
1308.566  
785.324  
354.662  
1076.601  
606.267  
4304.473  
568.246  
471.453  
417.407  
3958.118  
6100.13  
24855.68  
118.294  
1334.616  
554.1  
1303.743  
323.809  
3808.183  
1294.384  
1360.866  
343.466  
5990.413  
1480.658  
1368.958  
8985.418  
762.02  
57588.75  
10329.233  
1576.669  
16939.889  
7249.701  
132.481

650.959  
755.095  
443.347  
489.389  
5679.56  
863.867  
1975.845  
859.886  
790.147  
2273.97  
644.082  
2597.843  
334.921  
1430.958  
4549.366  
1613.462  
2193.791  
2545.252  
604.478  
716.502  
692.965  
439.914  
985.074  
525.786  
586.406  
758.654  
1287.275  
390.707  
1680.468  
295.9  
395.475  
327.062  
2055.076  
2055.561  
294.473  
212.158  
432.995  
3017.609  
402.455  
1402.676  
4249.35  
1510.372  
2754.224  
1146.663  
1759.347  
7423.485  
539.322  
854.345  
1121.973  
3920.518  
976.126  
668.438  
3190.591

11343.307  
413.992  
214.232  
1939.33  
2330.784  
1129.643  
6910.572  
1598.819  
259.399  
6756.866  
1608.196  
1715.202  
5806.061  
2584.827  
1698.496  
804.663  
1495.989  
757.525  
825.663  
971.529  
456.389  
10731.217  
1220.776  
1100.262  
787.154  
862.459  
1354.028  
401.283  
3099.094  
4229.732  
2792.771  
1687.232  
6101.675  
1340.246  
1580.857  
907.184  
1627.939  
308.305  
432.106  
3312.684  
1025.026  
1333.967  
239.079  
6285.161  
1239.571  
881.314  
4124.037  
962.289  
532.652  
552.735  
3605.699  
414.229  
518.372

527.432  
545.483  
694.757  
6265.655  
733.398  
96.224  
2667.537  
859.117  
504.324  
1734.729  
571.242  
2276.691  
20072.182  
280.914  
2548.324  
2675.793  
2335.947  
11705.814  
2702.368  
577.523  
3117.286  
948.44  
1255.367  
277.684  
900.202  
383.644  
937.509  
469.75  
731.47  
634.516  
1043.543  
1856.833  
292.314  
285.223  
1989.281  
2215.799  
1684.242  
955.383  
1764.618  
500.212  
2885.597  
5714.692  
4008.555  
1621.12  
5907.055  
2143.924  
3645.368  
1408.659  
419.864  
1547.311  
6346.559  
263.417  
548.271

798.737  
1124.651  
4155.473  
889.033  
467.198  
3490.974  
12318.574  
458.684  
560.334  
8261.681  
1369.543  
10585.82  
2285.843  
1799.883  
6505.107  
2775.748  
1540.364  
886.348  
1377.85  
374.052  
721.884  
961.992  
975.706  
461.992  
9048.998  
1023.057  
1167.942  
1308.702  
5690.724  
801.517  
5146.225  
31877.092  
525.6  
3129.638  
7423.385  
2138.186  
2856.906  
1182.234  
488.835  
1698.154  
286.27  
3338.684  
1360.202  
1427.321  
369.808  
4584.295  
1316.71  
1613.284  
2494.254  
2699.461  
2163.617  
804.606  
541.322

729.732  
3681.508  
418.246  
879.906  
577.35  
318.699  
219.208  
5752.811  
300.503  
713.24  
151.123  
212.344  
1769.453  
759.23  
931.304  
1955.198  
580.047  
4926.645  
17462.486  
322.333  
556.885  
2611.056  
3598.823  
3402.52  
12528.512  
3209.984  
418.645  
3309.01  
710.441  
787.492  
873.087  
524.457  
896.576  
406.657  
637.351  
832.409  
1548.212  
1763.281  
1522.126  
692.303  
11632.345  
1714.531  
1124.499  
1314.528  
917.569  
2481.509  
656.053  
4439.921  
6529.314  
3888.572  
2019.629  
2601.595  
3860.156

1505.232  
2140.596  
10124.759  
927.36  
627.435  
921.688  
1175.009  
3820.153  
774.952  
3399.63  
4799.352  
10118.207  
4172.477  
1628.466  
1209.214  
1448.071  
2838.409  
733.3  
1480.034  
1646.529  
4673.031  
2284.723  
1727.931  
897.992  
2028.376  
391.649  
1161.135  
774.466  
789.737  
2368.789  
1521.353  
1971.528  
379.04  
502.067  
3880.622  
370.583  
1785.123  
10456.094  
1757.349  
2406.18  
376.681  
2229.612  
26975.902  
1353.735  
5384.867  
483.655  
783.469  
1229.205  
709.166  
309.308  
5965.259  
7327.404  
3226.32

3926.574  
9465.745  
2537.477  
1054.864  
3090.15  
1615.993  
1719.479  
1173.594  
2760.139  
2767.207  
2993.318  
1513.742  
1382.772  
431.53  
373.846  
563.946  
1856.96  
497.723  
1312.559  
674.31  
309.129  
387.464  
1173.956  
653.598  
224.309  
467.435  
1544.165  
11247.068  
764.644  
2614.864  
2870.785  
1978.627  
569.333  
1014.22  
770.207  
409.768  
4378.872  
2999.168  
4634.183  
4074.157  
1056.78  
4096.866  
783.606  
1117.719  
1537.023  
919.175  
23144.088  
807.832  
2402.698  
2051.905  
1264.885  
495.666  
274.452



819.473  
834.432  
11529.192  
1355.354  
1180.576  
17244.771  
66847.438  
10727.836  
447.383  
16171.28  
2818.475  
2085.254  
2419.974  
2930.665  
945.076  
1140.821  
1344.965  
1779.275  
805.604  
4889.431  
596.851  
572.837  
519.813  
193.599  
2577.383  
1045.33  
421.189  
824.991  
634.862  
695.914  
897.859  
810.564  
788.414  
1710.792  
1704.046  
1743.454  
1185.302  
4970.879  
1398.445  
4201.904  
1009.883  
1037.556  
1505.24  
4187.848  
556.28  
7846.827  
463.402  
2509.918  
819.172  
519.193  
2062.829  
2486.151  
1379.767

959.12  
797.264  
3697.221  
5994.608  
2163.458  
1320.309  
1117.353  
888.949  
3809.316  
2312.267  
1201.236  
1257.279  
2567.037  
3096.073  
385.401  
860.416  
1200.192  
744.074  
3993.629  
896.237  
653.9  
658.489  
436.19  
187.917  
1625.287  
1203.427  
6775.912  
1687.741  
1310.988  
598.946  
1251.817  
1698.885  
884.274  
1097.75  
15969.768  
2229.801  
415.229  
1351.504  
412.254  
980.865  
1136.635  
540.596  
874.302  
682.316  
1331.296  
8950.86  
1098.296  
1446.101  
25755.617  
1414.956  
1287.371  
3925.61  
495.263

4491.202  
922.404  
1067.157  
545.918  
910.612  
274.978  
2590.387  
639.064  
852.831  
7392.836  
685.278  
726.838  
4273.882  
1190.211  
894.626  
3767.335  
923.598  
579.596  
232.026  
379.134  
1975.78  
411.586  
4212.532  
725.221  
4637.456  
681.647  
470.243  
2281.6  
476.397  
559.955  
1038.678  
906.989  
5972.702  
1659.257  
112.867  
299.859  
1399.715  
396.957  
709.859  
1476.782  
1707.757  
1730.027  
312.224  
3897.758  
6648.251  
20401.037  
4915.259  
55416.758  
2170.684  
74.6  
2121.171  
1028.7  
2647.077

937.815  
505.312  
3425.514  
1191.563  
711.943  
1188.975  
533.797  
1271.373  
386.321  
5632.742  
3130.574  
719.906  
887.508  
622.181  
522.978  
937.168  
3558.928  
765.453  
1011.567  
360.588  
500.653  
888.244  
991.401  
550.693  
70796.695  
1623.812  
5661.374  
908.762  
1445.442  
498.486  
2340.125  
412.787  
1886.385  
712.292  
1167.556  
6893.791  
887.17  
11724.343  
4083.76  
5050.712  
639.011  
644.263  
707.197  
1006.429  
710.552  
2325.962  
471.85  
2449.975  
1269.03  
1183.851  
27309.893  
6165.964  
3870.898

2807.261  
1415.255  
54825.672  
695.276  
593.442  
634.757  
1817.63  
2946.586  
4426.04  
1139.091  
23365.93  
9379.868  
14100.06  
11959.35  
1922.876  
3573.663  
645.762  
753.738  
494.277  
1757.652  
469.049  
658.659  
1057.707  
1669.707  
1026.18  
1450.664  
17898.299  
462.484  
2440.505  
6802.215  
513.398  
1713.173  
659.843  
3647.545  
2506.048  
3541.413  
1058.838  
1146.24  
5772.696  
1802.24  
709.881  
665.288  
414.16  
1118.696  
1552.68  
480.202  
5833.15  
3821.463  
1325.058  
348.728  
2214.076  
279.035  
913.905

3186.609  
4840.522  
1040.218  
1557.164  
574.26  
704.592  
2682.382  
1545.834  
908.967  
68887.617  
2046.275  
6594.159  
1445.713  
1531.479  
685.508  
2060.92  
2097.586  
2673.637  
3899.059  
778.267  
18960.523  
7272.383  
9839.238  
8561.303  
1167.701  
6731.388  
823.825  
11215.599  
4621.228  
7471.004  
1042.36  
594.472  
16598.311  
836.819  
1704.191  
1275.998  
3049.22  
18868.531  
1347.317  
42154.523  
5581.57  
5913.003  
3147.917  
1548.018  
60503.996  
804.302  
872.805  
732.54  
1660.687  
1169.435  
2303.114  
5761.129  
2523.19

8421.698  
1094.74  
1096.573  
891.861  
381.019  
5587.413  
3376.179  
2101.534  
3467.203  
655.644  
782.361  
516.361  
897.231  
1914.57  
434.313  
1540.03  
1740.573  
689.274  
192.808  
1350.966  
2039.603  
520.288  
5734.588  
14145.938  
1115.73  
1407.979  
1419.049  
1689.728  
2108.482  
2333.317  
7841.254  
728.492  
276.705  
2125.173  
833.165  
4069.706  
2591.91  
1200.156  
872.666  
4775.629  
2075.807  
1132.31  
567.704  
1639.875  
855.706  
691.005  
3574.913  
2418.372  
2143.807  
1327.021  
557.785  
2393.39  
693.391

1334.715  
5110.759  
4830.588  
1034.358  
858.166  
616.014  
2222.712  
1297.44  
1821.719  
7488.776  
1665.299  
4834.4  
1269.297  
4494.853  
950.491  
4037.094  
541.192  
19883.311  
8151.998  
13688.522  
10832.373  
1607.365  
9958.284  
845.204  
13077.669  
4818.282  
1537.31  
8392.344  
1136.342  
550.74  
16342.147  
1030.021  
1823.23  
2312.374  
1319.879  
1059.343  
794.847  
5391.154  
658.703  
2469.348  
1256.08  
1625.253  
48164.125  
13802.289  
8558.322  
3597.007  
1923.216  
60259.75  
872.466  
1208.451  
837.527  
2148.063  
1725.476



3654.75  
1927.858  
454.629  
8557.688  
1523.731  
570.247  
1994.778  
3651.877  
2600.483  
1855.997  
6802.456  
826.886  
5292.137  
808.767  
584.292  
3477.358  
718.674  
45842.113  
4642.99  
945.459  
929.805  
1563.475  
709.589  
977.648  
2271.964  
347.32  
996.343  
3323.66  
621.531  
986.335  
15910.333  
6080.667  
446.769  
588.647  
1146.995  
420.162  
43240.324  
3188.409  
4380.917  
1685.239  
9939.105  
691.918  
754.976  
656.565  
3130.04  
1729.213  
681.926  
2618.805  
999.487  
12651.358  
16755.391  
5578.89  
1032.865

8845.883  
2108.486  
722.701  
1507.103  
877.774  
8258.665  
764.57  
9389.994  
12048.484  
5339.09  
806.952  
1499.155  
2211.167  
2635.82  
7390.146  
638.673  
5489.851  
744.94  
1491.566  
8032.945  
713.597  
18248.855  
1102.154  
559.502  
2788.678  
3090.579  
15710.309  
12486.909  
12556.504  
7304.728  
4394.28  
2101.86  
2329.979  
206.889  
1054.367  
5360.717  
151.585  
8501.464  
6237.296  
656.889  
1140.617  
852.565  
2321.75  
522.425  
953.016  
2831.789  
1783.926  
1489.039  
352.458  
1669.087  
502.825  
499.822  
1322.793

851.348  
21635.5  
1250.556  
812.799  
1850.271  
3956.069  
1834.73  
695.537  
705.807  
16795.672  
1666.663  
13373.294  
1914.747  
2019.749  
4550.615  
2512.923  
1791.176  
3486.491  
27189.703  
2078.784  
610.439  
2311.864  
473.231  
1022.706  
5098.386  
16894.23  
1883.269  
1614.242  
1203.736  
2207.221  
863.326  
1223.835  
2131.934  
1128.534  
1430.628  
12187.861  
1414.487  
5680.588  
678.523  
1742.059  
689.534  
1116.23  
695.341  
21727.727  
1754.689  
505.112  
663.609  
19698.738  
23051.377  
774.813  
18635.15  
1702.389  
15543.944

1358.471  
386.195  
10224.843  
667.413  
878.11  
17434.928  
12690.143  
12762.024  
345.334  
16126.208  
3303.284  
2168.999  
650.896  
11343.368  
1548.861  
822.591  
1002.939  
824.568  
14912.326  
1507.26  
1545.846  
709.645  
807.252  
2482.164  
1207.331  
1041.86  
1795.051  
458.505  
3695.703  
5620.347  
823.88  
3036.694  
1062.105  
4910.622  
770.769  
2808.393  
674.279  
2209.075  
1063.749  
101.769  
1303.841  
497.842  
4700.761  
1211.64  
2195.182  
295.014  
1387.782  
1183.976  
955.32  
2534.082  
6235.924  
1307.406  
2148.455

27208.652  
11124.396  
204.909  
4261.373  
1109.232  
839.157  
1497.504  
2319.208  
7019.241  
2269.144  
2045.503  
1069.367  
14790.771  
714.105  
2393.7  
2278.179  
985.801  
3273.746  
892.559  
5018.605  
768.161  
612.715  
726.591  
2262.491  
1446.116  
1978.446  
6905.675  
13923.931  
1162.063  
569.573  
960.141  
654.413  
4703.062  
536.906  
576.275  
1390.323  
5546.781  
1523.669  
1271.921  
1460.94  
1840.091  
16084.073  
2112.716  
2802.887  
23972.922  
971.674  
8975.397  
1549.458  
901.708  
3940.632  
1649.432  
8382.893  
1591.658

578.24  
5527.775  
68487.891  
694.216  
3298.223  
1679.162  
782.872  
1738.205  
1196.58  
1916.642  
887.885  
1040.729  
890.473  
2719.766  
5955.01  
1249.076  
334.26  
1497.678  
602.381  
8461.218  
2221.918  
1039.282  
2766.021  
5328.35  
1022.581  
2388.057  
1823.064  
4363.035  
1732.127  
902.715  
7016.274  
1307.306  
1999  
682.097  
472.003  
1756.521  
1298.502  
1553.639  
2561.463  
10490.774  
1483.943  
2627.238  
1602.01  
446.946  
1417.358  
3623.098  
1292.708  
2637.22  
5750.501  
74.408  
1007.267  
696.942  
1672.772

1632.4  
8673.903  
2501.83  
2345.095  
228.734  
1653.046  
23722.686  
566.845  
878.055  
727.913  
2523.987  
2073.047  
667.254  
6279.903  
1525.316  
1432.189  
1007.822  
6126.306  
987.378  
710.062  
674.402  
2788.684  
1636.229  
2180.031  
9308.772  
12113.676  
1436.933  
2082.171  
1074.464  
726.156  
4772.075  
689.662  
7207.083  
45062.836  
3774.259  
4937.476  
987.137  
2344.786  
2353.038  
21843.918  
3561.416  
3529.286  
1308.261  
9737.501  
2005.585  
710.662  
3601.666  
2176.865  
621.953  
2044.087  
1942.002  
1796.268  
1784.607

1499.914  
2396.907  
1581.691  
1011.664  
4704.706  
1007.863  
2474.51  
634.877  
772.134  
1455.324  
329.099  
934.476  
20852.68  
528.395  
938.584  
2785.915  
1875.963  
364.069  
4209.003  
1418.647  
4748.975  
1269.642  
1931.05  
486.133  
1667.34  
1007.548  
1094.612  
3032.999  
10198.126  
1501.749  
1038.47  
710.95  
819.756  
5507.807  
844.296  
433.465  
1303.47  
1613.464  
4565.776  
1306.832  
2077.516  
6826.606  
1153.276  
819.592  
1339.132  
2785.777  
2406.278  
2065.762  
6384.403  
61932.289  
899.562  
2459.966  
2928.05



647.279  
7822.329  
1679.069  
829.404  
920.378  
5417.743  
639.053  
484.434  
1535.468  
2465.042  
10460.937  
14715.01  
471.463  
17094.025  
2577.067  
873.391  
1093.962  
2498.812  
7509.017  
4084.474  
4935.992  
881.004  
2887.148  
1810.88  
25567.049  
2508.862  
907.77  
7117.682  
1945.654  
976.979  
3853.704  
2095.514  
10568.572  
1710.424  
12613.349  
354.942  
827.256  
616.851  
957.765  
880.546  
1671.941  
4288.31  
3277.343  
3791.972  
1217.123  
1589.204  
1126.873  
1715.868  
1434.818  
1009.012  
775.995  
2701.073  
3652.515

3414.466  
823.986  
2695.385  
509.125  
902.735  
524.075  
1399.74  
12902.307  
2152.337  
775.469  
924.829  
568.012  
4191.881  
716.858  
1070.238  
799.497  
1836.872  
7550.853  
14837.732  
1477.067  
1214.504  
11247.076  
747.509  
3330.724  
1724.864  
891.29  
2306.16  
4095.249  
1563.565  
27962.268  
7134.073  
831.409  
530.062  
4226.331  
355.482  
1852.881  
814.969  
8351.992  
4701.575  
7636.937  
724.354  
1789.228  
2295.232  
2908.297  
2114.077  
1236.068  
115.652  
5167.503  
1252.619  
1278.19  
402.525  
1545.209  
3142.54

3137.802  
649.535  
2243.394  
1960.057  
501.898  
23176.867  
2066.853  
1380.092  
4692.584  
931.87  
13141.782  
1206.965  
5770.354  
3017.906  
783.759  
14391.884  
1171.05  
3164.357  
4405.89  
589.965  
5019.37  
3417.876  
2094.568  
1913.159  
873.732  
2630.271  
2136.969  
1763.424  
1295.799  
4647.099  
1552.932  
2314.768  
3020.738  
1347.362  
467.149  
2688.479  
15623.027  
2645.355  
12109.718  
2619.467  
943.449  
307.527  
11950.202  
2367.146  
1436.348  
1059.14  
3704.414  
14939.503  
422.638  
57966.949  
9659.152  
475.896  
2291.503

1577.635  
671.759  
1924.889  
676.255  
1243.573  
1672.898  
5321.632  
947.891  
486.413  
521.946  
2125.993  
2412.206  
647.566  
2344.974  
8059.799  
828.591  
996.076  
1515.377  
1118.726  
1982.333  
8328.718  
458.663  
1488.709  
1336.979  
1966.513  
2290.372  
4179.945  
5818.587  
457.756  
12917.879  
1723.883  
951.507  
1256.296  
3185.809  
16138.127  
487.01  
455.732  
1012.409  
1406.824  
465.627  
1773.775  
806.389  
8485.988  
885.854  
3657.428  
1256.526  
982.339  
593.97  
581.29  
6240.103  
1973.097  
543.622  
1754.105

4679.658  
3251.797  
593.259  
3969.414  
1027.397  
1667.11  
45298.094  
1561.93  
522.45  
11757.122  
586.687  
874.832  
933.116  
2433.713  
744.243  
1815.295  
5107.667  
414.727  
1081.936  
1512.302  
9344.009  
40599.039  
651.912  
5813.047  
723.752  
8802.522  
9010.563  
2576.024  
2428.59  
2125.313  
1921.04  
9765.481  
1320.261  
7292.375  
1261.797  
13433.759  
12778.416  
1010.813  
583.026  
3473.381  
14455.901  
1581.469  
1591.109  
1091.44  
852.839  
2983.546  
7274.402  
1081.733  
879.508  
20037.178  
2804.377  
1238.293  
1000.767

1037.262  
1432.28  
390.318  
7433.749  
4647.523  
834.911  
1447.901  
396.521  
685.747  
438.347  
1055.643  
61488.348  
145.09  
1252.245  
1076.127  
4172.578  
40633.773  
2661.199  
92.549  
592.2  
217.483  
1180.364  
1948.302  
1507.343  
2061.98  
2860.743  
739.679  
636.145  
2660.187  
919.8  
435.507  
5362.564  
4003.44  
3911.586  
4820.317  
1647.324  
824.381  
11836.546  
395.006  
823.387  
1531.99  
1130.331  
1699.176  
1553.954  
2739.059  
235.584  
118.57  
1335.13  
9363.402  
3102.666  
1263.23  
4088.81  
1655.997

5713.128  
3048.049  
1135.247  
719.935  
737  
2936.584  
777.908  
685.463  
746.008  
1602.587  
612.55  
2035.952  
775.791  
4801.18  
1285.22  
32901.652  
1262.541  
2596.231  
355.128  
1837.997  
10255.216  
2302.336  
5433.349  
537.794  
1229.965  
59200.484  
427.636  
996.282  
799.795  
2951.161  
507.731  
802.895  
331.584  
383.281  
622.911  
1526.387  
946.84  
2259.623  
1049.241  
334.584  
923.658  
1457.222  
428.551  
1084.044  
3750.625  
1314.452  
499.083  
2734.175  
371.249  
1839.972  
989.936  
1347.114  
1072.842

1584.165  
1560.679  
45275.48  
6151.082  
4522.87  
4938.241  
1887.547  
1013.648  
12951.096  
26522.16  
1577.854  
865.084  
754.031  
870.033  
2241.446  
872.641  
699.332  
905.428  
2222.99  
2584.234  
8021.314  
3321.231  
4120.277  
1729.679  
3812.165  
629.624  
1117.209  
1263.584  
549.536  
641.538  
5151.808  
211.441  
534.678  
745.072  
3180.459  
1416.935  
451.874  
1937.502  
4587.024  
838.759  
300.579  
2234.944  
715.736  
5314.497  
1502.48  
635.309  
853.878  
983.583  
669.168  
2207.883  
636.958  
765.574  
512.302



6453.369  
4886.839  
273.907  
190.979  
1191.917  
3097.868  
4712.977  
967.51  
730.849  
6050.16  
585.621  
1049.159  
729.93  
1373.405  
1363.147  
614.964  
703.968  
1952.22  
414.225  
1255.492  
730.771  
2769.461  
1643.998  
6010.652  
1481.546  
1373.096  
2548.001  
1174.414  
820.777  
621.495  
14286.777  
596.894  
3376.449  
1135.002  
1654.568  
1180.524  
663.764  
957.774  
694.208  
49988.391  
7678.037  
382.186  
1326.104  
4726.273  
1893.631  
28273.639  
2481.232  
1553.597  
2421.31  
504.647  
1221.989  
627.357  
439.489

860.705  
2152.743  
2924.523  
9633.604  
2960.045  
2418.021  
819.488  
657.587  
1605.179  
12049.769  
520.564  
685.045  
786.708  
3269.296  
1522.652  
112.811  
2350.325  
2452.181  
1647.814  
761.524  
247.379  
5333.131  
10640.523  
553.531  
1203.415  
1237.864  
2186.735  
587.05  
1491.704  
7933.888  
3173.901  
5429.453  
7716.106  
1386.25  
1655.634  
386.083  
1116.895  
2766.96  
223.85  
1314.847  
23074.543  
3164.577  
2183.305  
3709.266  
5330.818  
7608.846  
3522.275  
3752.481  
758.163  
36504.227  
15297.2  
474.417  
2446.064

1114.053  
1799.677  
1028.953  
1007.402  
3715.774  
964.078  
428.785  
426.135  
391.572  
1094.367  
688.065  
648.506  
6484.866  
429.819  
61818.367  
2551.737  
56831.109  
61977.52  
10090.458  
2171.797  
1434.717  
1038.576  
844.387  
1911.763  
5228.337  
416.191  
2447.877  
1164.28  
3627.456  
10723.117  
909.736  
605.899  
1595.843  
929.592  
5870.543  
1253.482  
318.986  
1140.971  
911.964  
2308.708  
1797.465  
2214.125  
15667.681  
808.031  
1464.946  
11155.781  
2256.042  
1004.879  
501.975  
4192.881  
930.115  
453.586  
729.661

1035.262  
3869.063  
22230.938  
759.968  
2212.677  
1961.17  
1264.479  
569.926  
616.237  
945.647  
1239.911  
1851.637  
1723.507  
4376.502  
966.562  
719.195  
767.321  
819.959  
346.958  
908.411  
727.519  
4076.721  
1969.058  
27434.174  
1448.516  
9213.404  
29190.207  
882.355  
4951.428  
6393.829  
2305.172  
524.888  
417.289  
1979.554  
2722.113  
4799.574  
1834.093  
2306.961  
6072.638  
1843.263  
1577.864  
7487.378  
388.997  
687.59  
1178.469  
5636.776  
592.195  
801.327  
910.02  
1034.597  
517.81  
357.891  
3221.2

459.979  
2547.229  
1874.002  
1142.991  
7989.449  
711.069  
89.073  
2303.714  
982.821  
993.289  
10759.751  
1012.083  
693.014  
1380.409  
834.641  
2246.262  
1203.82  
792.099  
16682.068  
590.164  
919.189  
900.327  
4780.611  
28912.023  
8962.932  
138.079  
1693.975  
591.502  
1475.942  
426.507  
1074.636  
361.772  
4046.771  
1604.302  
2234.413  
805.623  
240.217  
291.698  
127.684  
965.002  
1475.571  
2206.321  
851.336  
2330.559  
868.461  
1135.329  
612.245  
2112.458  
2382.314  
4798.955  
2652.821  
857.484  
754.757

1811.962  
1402.688  
1128.354  
5271.08  
986.817  
5153.42  
2776.992  
1596.068  
526.203  
801.443  
2322.109  
2992.27  
17364.828  
4657.735  
1469.009  
20285.066  
1729.177  
6361.417  
4855.854  
682.506  
1930.093  
1326.093  
435.604  
1135.503  
1083.043  
1488.891  
8751.992  
6749.864  
1016.47  
14764.22  
567.291  
2678.866  
1692.148  
2251.042  
2823.339  
3343.803  
3839.697  
2716.536  
673.499  
2086.498  
3460.357  
341.215  
1890.894  
398.36  
2576.632  
850.06  
66073.117  
1372.221  
1558.462  
3036.749  
714.626  
1904.283  
2520.057

762.602  
1312.751  
1196.125  
1801.127  
858.166  
6706.122  
977.094  
565.478  
589.97  
12390.658  
1114.425  
875.95  
1969.838  
1377.726  
4029.504  
1486.512  
474.68  
14556.814  
355.201  
1606.556  
1099.493  
9411.366  
6674.829  
1485.876  
3907.719  
1447.053  
732.772  
1926.093  
328.897  
1265.843  
829.355  
4503.412  
364.337  
2521.059  
179.694  
244.656  
147.672  
142.732  
989.921  
2512.537  
1730.37  
2891.512  
1963.354  
3079.248  
2773.088  
4656.999  
7471.381  
661.955  
1668.204  
1532.229  
680.51  
875.329  
2069.592

1448.015  
1156.749  
4144.886  
420.753  
3028.895  
2426.117  
1535.777  
759.183  
1835.265  
3624.659  
4801.247  
3000.592  
3180.755  
857.845  
1290.558  
1338.057  
2682.799  
1620.257  
4446.246  
2557.082  
311.556  
1994.037  
1310.386  
2167.755  
553.289  
1023.555  
928.089  
1124.371  
8452.534  
5144.849  
677.716  
134.45  
21777.453  
1295.61  
9917.003  
347.589  
2149.951  
715.513  
3023.758  
8756.032  
1230.067  
697.929  
3386.321  
1381.378  
581.738  
49510.754  
1630.595  
2102.002  
5866.318  
710.229  
224.951  
1768.337  
2314.989



500.892  
2034.6  
584.534  
1793.407  
625.352  
4845.947  
1334.127  
1381.802  
29290.238  
2316.587  
865.39  
1598.401  
1663.585  
2076.13  
1445.754  
807.264  
20279.814  
1064.895  
2154.044  
4468.471  
2319.24  
958.863  
1553.568  
4000.508  
7067.278  
20881.012  
4399.733  
1164.666  
4433.896  
2550.769  
1122.692  
4795.132  
310.269  
488.533  
999.043  
381.486  
4032.298  
494.368  
1083.548  
601.681  
2286.802  
20299.74  
281.534  
2237.203  
1924.223  
2285.956  
1881.836  
3191.147  
6476.533  
701.446  
3066.406  
3148.351  
4400.742

2526.505  
801.749  
1187.515  
3149.254  
1854.429  
1880.397  
560.697  
4310.647  
2508.205  
2348.674  
6469.627  
759.805  
2155.515  
2676.932  
867.791  
1350.951  
1053.52  
1665.936  
1929.283  
6195.97  
3741.6  
602.924  
1847.601  
1112.334  
2082.361  
1459.848  
1278.309  
1023.743  
2107.185  
13999.41  
9206.376  
10497.721  
742.044  
522.199  
7926.566  
1226.108  
2249.336  
1762.699  
575.846  
6055.234  
8459.67  
581.198  
2588.757  
662.246  
2098.109  
2997.133  
569.263  
3029.83  
531.297  
2604.975  
887.99  
816.065  
12551.076

551.797  
820.078  
1019.819  
5352.847  
2913.611  
806.481  
769.012  
404.743  
1454.763  
6893.74  
499.946  
2464.585  
793.614  
1448.162  
8608.379  
1848.267  
4140.181  
2163.296  
1537.298  
941.684  
1518.454  
3779.931  
1164.142  
2221.533  
6339.631  
1299.737  
16109.909  
3134.22  
11747.495  
1672.558  
3896.168  
2073.716  
1610.483  
724.025  
1635.955  
1538.208  
1440.572  
3664.73  
2973.433  
6726.087  
923.487  
714.659  
2184.897  
1222.294  
1497.312  
905.798  
3798.259  
749.149  
5834.793  
1373.396  
681.31  
5847.408  
12578.982

455.147  
1024.911  
1650.246  
360.28  
707.083  
5726.856  
6429.869  
3765.821  
2570.683  
1836.461  
12314.227  
7193.952  
1988.242  
16181.654  
1547.614  
823.891  
15986.22  
2490.33  
484.158  
1199.203  
625.76  
1351.874  
1262.053  
633.674  
690.345  
1248.787  
10225.531  
997.844  
562.131  
1812.345  
363.792  
1794.91  
4028.933  
1889.629  
877.516  
1737.739  
1658.302  
764.788  
3088.947  
2111.421  
2306.281  
577.917  
976.301  
1029.489  
1236.897  
902.707  
2415.985  
596.581  
616.822  
563.729  
823.186  
1592.661  
2259.12

2039.506  
1036.346  
3853.399  
2983.154  
1808.429  
800.361  
558.23  
7315.411  
4312.669  
4520.43  
1507.097  
390.441  
1185.648  
1468.23  
1021.836  
4079.897  
2050.688  
751.995  
1022.795  
707.596  
620.04  
3363.814  
678.147  
586.38  
590.766  
1534.613  
5772.521  
828.021  
1197.345  
1185.445  
1377.621  
1045.313  
558.226  
966.79  
39052.141  
1263.516  
995.925  
622.655  
1459.219  
6181.409  
901.756  
497.117  
758.58  
1485.386  
1692.639  
1328.655  
2257.878  
513.443  
1266.922  
659.796  
583.492  
954.243  
546.771

850.525  
5345.678  
15542.251  
1051.059  
3514.025  
15355.794  
45660.617  
3598.946  
7027.132  
906.934  
1167.943  
540.73  
1404.562  
1803.322  
1070.08  
13283.769  
283.315  
836.314  
8726.992  
2007.033  
13693.46  
1696.224  
292.852  
635.955  
839.87  
1200.574  
990.472  
446.9  
1113.817  
880.715  
258.917  
3827.175  
912.358  
2633.646  
4173.798  
1939.726  
1892.043  
5581.939  
2171.488  
195.607  
242.959  
1927.354  
1264.543  
1471.548  
9718.69  
527.385  
1104.585  
185.496  
6303.763  
547.782  
654.812  
1692.788  
869.659

3119.758  
971.376  
736.319  
483.871  
5986.438  
55083.027  
3205.717  
192.331  
660.853  
520.403  
4352.742  
1357.939  
43983.461  
1206.948  
2231.485  
6403.615  
2831.417  
1319.291  
2472.204  
1409.449  
14188.258  
3281.967  
676.036  
2270.915  
688.876  
1155.335  
7823.328  
3332.407  
2348.132  
1283.728  
1570.926  
428.35  
1321.49  
1223.693  
1199.965  
577.349  
223.451  
807.108  
1255.749  
10720.817  
2137.075  
1946.734  
1275.798  
2039.647  
2336.992  
1159.889  
2679.219  
3363.009  
3933.773  
677.777  
1316.778  
1476.625  
2846.188

1751.661  
4518.118  
1758.932  
1692.047  
2695.157  
2658.452  
1256.293  
2565.685  
892.506  
2294.418  
504.543  
1732.357  
1712.988  
1392.377  
7666.852  
696.042  
1306.257  
11023.089  
6999.202  
350.843  
644.215  
1598.618  
963.169  
3322.122  
1039.578  
592.814  
611.026  
21534.844  
1597.993  
1048.983  
436.772  
725.316  
576.79  
4699.873  
41922.902  
1353.103  
1828.8  
21596.162  
6447.918  
3407.539  
720.902  
1810.06  
2133.807  
397.022  
1644.851  
2049.148  
68.902  
3829.431  
841.867  
3211.501  
512.753  
1211.575  
7223.498



12141.684  
3477.673  
1309.061  
882.167  
1591.094  
1637.45  
1504.286  
1496.296  
7829.676  
804.463  
483.621  
1313.628  
4191.246  
13094.95  
2370.305  
2750.531  
1225.264  
1934.141  
2040.994  
1687.925  
2371.323  
2950.752  
4487.713  
799.925  
1926.129  
633.26  
23764.873  
1605.34  
469.503  
3704.693  
2017.248  
5105.389  
962.533  
2005.527  
2618.049  
3502.305  
2395.248  
1178.157  
2412.77  
982.767  
2557.175  
901.467  
2395.268  
2476.917  
309.879  
1224.159  
576.359  
1335.936  
11953.562  
5712.878  
897.953  
649.443  
1823.702

950.311  
53338.469  
443.018  
8288.98  
1234.495  
652.544  
1528.932  
584.52  
1432.37  
1287.725  
363.166  
627.141  
605.037  
4545.67  
352.607  
40055.898  
1578.765  
2587.297  
37561.551  
10861.622  
3827.125  
856.09  
1288.573  
2041.508  
3031.941  
4183.093  
866.953  
1573.305  
1903.823  
3115.292  
2569.457  
557.567  
1334.774  
11867.065  
14774.059  
3874.147  
1299.767  
968.385  
2572  
511.921  
2122.537  
1874.461  
1458.211  
8338.383  
753.388  
470.899  
1155.97  
5491.733  
10561.986  
2116.814  
2869.542  
438.109  
9281.113

2241.468  
2522.393  
1099.206  
2756.68  
2457.739  
10563.933  
1272.648  
3267.805  
2559.719  
2589.242  
24847.361  
2099.883  
3621.782  
2042.696  
2042.122  
2735.077  
4597.514  
3144.717  
1453.143  
3086.935  
1038.814  
4626.375  
438.427  
1247.118  
837.556  
437.648  
1488.63  
21799.557  
427.899  
797.141  
2526.108  
485.347  
6918.642  
789.847  
5269.012  
571.52  
1308.568  
7237.757  
3004.853  
1211.053  
2266.36  
10897.775  
794.555  
1825.558  
2343.958  
481.249  
10163.865  
39048.785  
1760.211  
293.853  
3312.933  
703.71  
626.281

15450.201  
645.708  
404.954  
7355.103  
1800.159  
47367.207  
904.761  
1080.814  
9063.696  
2741  
1814.373  
6367.082  
1172.318  
9287.021  
4316.331  
32708.637  
7331.285  
18681.752  
470.823  
3295.856  
1146.969  
6059.955  
715.918  
27983.492  
1754.373  
1927.632  
4401.818  
1196.358  
474.671  
4760.068  
3213.016  
3706.257  
1100.141  
6706.739  
2822.565  
1655.743  
514.844  
1120.424  
2142.869  
3091.844  
843.174  
268.322  
1379.245  
1169.872  
1094.034  
1096.436  
620.859  
465.114  
14092.099  
2337.837  
900.919  
1177.098  
1822.483

3104.845  
1194.554  
3779.082  
3297.109  
1969.833  
567.187  
2456.785  
1745.605  
1389.356  
11466.01  
3198.387  
2776.598  
7449.301  
1530.996  
698.062  
4762.769  
1068.811  
305.252  
9552.511  
667.891  
890.283  
1323.325  
1393.472  
2163.341  
345.137  
3872.347  
635.183  
352.299  
639.169  
4606.475  
13142.729  
652.903  
1517.601  
1736.848  
1241.838  
823.952  
3181.787  
1199.233  
15803.949  
7240.759  
1863.041  
7668.222  
1371.269  
2163.1  
995.551  
17975.852  
1427.173  
19509.891  
4069.506  
915.338  
1104.131  
1975.422  
2513.817

497.244  
850.897  
1260.479  
3823.209  
1809.773  
942.485  
31410.963  
3248.677  
7603.743  
4119.74  
910.583  
937.799  
1233.913  
13153.301  
5126.925  
718.561  
16930.764  
1334.605  
5772.458  
3119.123  
3911.765  
1796.31  
2822.894  
706.404  
6676.258  
843.746  
4331.339  
1222.936  
3190.019  
1284.206  
1358.423  
666.773  
1183.147  
124.619  
9057.051  
694.862  
1394.892  
485.811  
6609.077  
1741.907  
1328.132  
459.99  
2659.439  
2379.169  
734.627  
4028.942  
1768.9  
22793.314  
7780.178  
103.371  
1287.048  
589.047  
1497.322

1663.704  
224.008  
1213.179  
5564.202  
1705.828  
1833.546  
670.059  
590.025  
11499.539  
874.201  
12115.016  
821.495  
311.371  
470.948  
31365.652  
1878.307  
598.567  
5449.845  
7079.671  
792.092  
1372.474  
167.396  
819.67  
26396.145  
540.379  
468.755  
1960.4  
21710.037  
5260.327  
2526.392  
611.243  
2211.433  
1818.663  
1216.399  
516.152  
1704.053  
1000.219  
690.858  
1116.245  
3518.861  
9467.018  
1128.047  
895.34  
625.501  
2485.736  
4033.811  
1604.947  
414.33  
5199.624  
1925.076  
1131.333  
584.584  
2406.754

2201.612  
590.59  
2956.594  
2060.6  
1170.189  
260.194  
853.939  
752.033  
733.478  
1422.041  
1043.154  
774.928  
5296.326  
2034.738  
1938.243  
1027.871  
11397.223  
622.005  
9338.932  
735.521  
451.54  
5079.733  
5413.079  
6120.591  
685.448  
613.009  
35349.93  
529.837  
1316.712  
2528.704  
2331.329  
2140.595  
747.222  
2068.279  
870.32  
2180.985  
2159.991  
791.648  
1542.658  
2384.206  
1975.082  
668.36  
1188.481  
3783.774  
12441.617  
1622.627  
11619.56  
1020.833  
9653.917  
629.53  
564.604  
1033.709  
39419.344



2819.132  
9311.748  
762.577  
5464.421  
1731.684  
318.715  
5352.753  
1623.941  
1145.717  
406.347  
2589.371  
2585.001  
550.021  
373.357  
5046.983  
7361.639  
1018.567  
1142.192  
342.312  
1203.764  
28672.199  
606.175  
811.309  
1706.688  
1119.99  
805.897  
1661.764  
1718.114  
4482.578  
828.285  
5491.083  
2368.667  
2292.331  
1123.519  
5697.997  
2253.997  
886.896  
1193.272  
4084.819  
11193.076  
1234.365  
1134.212  
2102.927  
2297.869  
1595.174  
537.362  
1560.598  
986.4  
1149.676  
5957.653  
1427.531  
1562.941  
895.67

322.9  
2107.824  
14028.56  
1410.047  
1058.964  
1155.29  
15465.409  
3730.196  
2802.783  
26823.912  
17156.34  
6894.484  
3055.579  
1072.559  
12544.797  
2349.585  
12773.979  
2479.623  
937.076  
1182.758  
744.743  
756.029  
14212.038  
2443.231  
2405.67  
5098.029  
4451.895  
5264.335  
1989.368  
1328.825  
932.461  
10591.519  
1921.547  
44589.082  
1344.625  
2379.678  
1354.57  
4548.339  
9393.914  
955.527  
3177.842  
27646.527  
860.206  
3657.775  
28953.133  
1771.231  
1004.297  
2184.674  
3466.314  
4761.688  
5718.403  
369.422  
2517.883

3183.616  
769.459  
1280.923  
26265.365  
3354.307  
512.27  
2400.225  
10994.347  
1022.912  
1607.433  
1950.304  
995.604  
503.395  
660.144  
1346.844  
1478.91  
1074.286  
4003.983  
1518.836  
2702.076  
3351.348  
3175.7  
914.541  
3325.798  
470.001  
9482.319  
1824.11  
1360  
789.446  
1447.298  
725.19  
3887.823  
558.391  
2883.525  
358.631  
1194  
2033.731  
1259.656  
881.905  
6485.077  
3812.841  
3550.794  
1202.2  
861.018  
1791.24  
2251.161  
986.999  
672.962  
1005.514  
859.034  
3545.178  
7931.916  
13937.456

2441.247  
1229.665  
3965.38  
4243.751  
1144.061  
1062.729  
2531.266  
2515.751  
549.903  
23688.762  
25950.928  
1525.826  
1991.524  
10213.182  
350.306  
759.081  
364.226  
597.438  
823.85  
25457.73  
733.634  
1574.27  
1867.563  
677.429  
2511.093  
2105.629  
877.47  
3182.805  
3010.578  
3543.493  
20494.592  
1246.401  
369.398  
1250.933  
3104.594  
1413.334  
1271.155  
466.55  
4314.679  
1379.185  
784.925  
4953.18  
38644.148  
3544.984  
225.584  
512.281  
431.667  
1392.763  
1947.034  
330.529  
1302.673  
412.961  
653.971

30301.432  
3866.729  
5997.046  
3186.575  
1039.712  
1037.758  
1128.495  
1978.693  
1038.618  
2347.925  
1041.134  
922.365  
702.237  
2078.794  
1657.361  
3088.42  
2040.921  
1474.834  
1836.803  
1783.807  
3119.163  
731.646  
2004.477  
1384.049  
5100.403  
3382.979  
3776.904  
2165.655  
3954.558  
3294.641  
899.792  
1022.412  
471.274  
1872.208  
3073.969  
1685.384  
632.776  
1066.337  
988.145  
467.03  
2285.482  
936.203  
771.731  
3064.148  
1903.367  
2521.133  
1057.59  
2802.163  
4112.063  
2528.893  
466.026  
12341.666  
1072.976

3316.503  
6202.84  
2592.558  
1111.811  
1514.166  
882.358  
477.406  
1519.824  
647.464  
773.177  
6873.916  
974.932  
2486.574  
1907.002  
1287.703  
376.884  
3706.778  
981.214  
612.952  
10878.806  
55429.988  
643.245  
1401.996  
379.851  
1228.225  
1918.655  
314.836  
4597.977  
1989.902  
911.721  
1083.804  
605.815  
994.574  
1249.936  
1963.611  
1649.365  
2270.887  
3293.173  
699.583  
1556.547  
1001.613  
5502.29  
3458.643  
3110.447  
2920.706  
2628.664  
11453.277  
1774.83  
608.71  
1792.678  
420.03  
1422.502  
1527.453

565.757  
2271.159  
1112.404  
1073.128  
2318.066  
1333.158  
13164.072  
4276.372  
1575.282  
1225.227  
6653.703  
3710.838  
960.05  
13194.273  
1225.218  
4740.749  
8799.25  
2562.753  
229.72  
1286.472  
1622.383  
685.876  
1636.776  
375.594  
654.827  
657.533  
1378.807  
1811.575  
1166.496  
575.765  
584.126  
513.419  
4238.092  
838.74  
462.892  
12786.765  
61114.965  
875.917  
347.231  
1297.756  
2094.132  
4400.854  
3302.935  
16580.127  
629.225  
1116.164  
2190.804  
286.006  
4793.145  
2438.407  
937.778  
757.951  
815.827

882.583  
2798.589  
2937.162  
21271.479  
1514.467  
435.472  
3108.585  
1480.11  
2250.889  
2217.517  
606.588  
6370.358  
824.442  
1617.311  
567.248  
4164.71  
5117.35  
3381.095  
1143.091  
1113.37  
1038.173  
21123.865  
8252.931  
2136.536  
8965.36  
24721.928  
3567.916  
58814.941  
1549.658  
721.945  
2636.986  
469.23  
4189.801  
1930.022  
576.938  
839.915  
919.276  
2683.715  
1970.976  
20445.115  
1024.164  
307.182  
1395.035  
4550.507  
409.042  
270.738  
22950.045  
2356.943  
7691.115  
913.656  
2186.798  
3733.888  
1254.395



1048.863  
1714.769  
5936.717  
2875.906  
1414.348  
1071.221  
1578.755  
2176.318  
3281.164  
2885.709  
362.022  
4790.027  
34757.738  
1448.33  
3003.617  
1757.24  
1146.524  
6340.652  
3014.64  
766.884  
2733.956  
3168.71  
3906.255  
676.175  
1143.424  
4036.078  
803.013  
373.777  
5965.107  
2901.162  
950.271  
1220.158  
2373.351  
66273.461  
623.621  
2197.92  
994.172  
1854.583  
2678.339  
134.666  
789.56  
3576.683  
2153.868  
950.336  
3205.466  
3552.215  
1178.323  
4244.227  
1955.447  
1933.342  
1925.512  
925.287  
2604.499

749.487  
1674.403  
951.788  
20347.17  
8014.031  
57341.969  
2094.398  
1493.473  
1592.287  
3846.232  
15190.212  
1123.414  
1000.365  
20615.055  
15694.843  
555.165  
1805.056  
1001.467  
1206.863  
738.721  
640.849  
4962.542  
342.215  
1530.403  
1174.381  
575.344  
4338.762  
1220.786  
1475.876  
6093.583  
8598.863  
8867.112  
710.497  
1057.66  
3027.06  
1047.07  
4640.839  
57234.695  
1614.467  
554.781  
2418.291  
304.159  
2757.817  
811.394  
2733.839  
1066.953  
1052.202  
1308.961  
4214.001  
1536.183  
3751.506  
971.048  
26923.006

1225.123  
681.791  
1125.903  
1359.363  
791.973  
8816.075  
1950.462  
2822.36  
1844.338  
11585.891  
550.278  
1178.282  
832.637  
1401.521  
2087.479  
608.407  
4560.821  
731.288  
3957.473  
782.207  
1124.879  
1198.214  
1989.615  
1853.996  
3126.859  
1208.616  
2495.243  
7638.726  
13963.684  
3063.578  
21351.338  
9948.817  
833.557  
1527.856  
1520.429  
2204.984  
528.952  
2227.973  
3761.142  
17121.061  
3056.372  
1375.097  
1637.656  
3358.216  
2023.595  
3806.224  
1563.211  
696.077  
4684.127  
12155.674  
638.375  
1058.186  
1035.842

948.596  
1357.14  
1139.744  
2432.431  
4135.02  
287.355  
637.938  
2017.465  
1247.907  
1627.629  
1073.59  
872.13  
3137.035  
113.039  
55259.594  
5129.185  
215.328  
370.846  
4012.972  
1575.214  
579.359  
1569.401  
1223.267  
16336.435  
1161.14  
1748.595  
2892.435  
33308.359  
12577.798  
118.736  
18342.188  
1257.36  
251.994  
1084.073  
3848.4  
1974.736  
2309.44  
1267.51  
623.765  
3470.02  
1093.616  
14326.499  
2475.167  
1065.832  
1617.884  
1112.733  
553.749  
761.324  
1305.442  
622.441  
1202.423  
1279.365  
451.457

2453.234  
631.341  
2810.43  
2123.43  
1282.634  
1060.773  
12591.597  
1023.438  
3706.575  
680.699  
7623.543  
5910.496  
1115.388  
1990.921  
1682.958  
409.005  
784.158  
474.578  
9473.979  
3308.414  
705.238  
4898.904  
1551.342  
772.471  
236.443  
2154.909  
414.512  
1718.526  
3572.094  
3239.351  
6353.538  
1474.607  
9710.73  
1184.994  
838.948  
704.418  
544.267  
1934.42  
1726.696  
1207.658  
1093.436  
3123.065  
710.19  
609.362  
1275.366  
1340.221  
451.495  
1148.849  
1073.158  
1382.484  
1870.656  
4780.983  
1446.468

1650.437  
2800.724  
4221.805  
641.242  
62716.477  
12370.136  
2983.167  
5660.931  
652.224  
3825.993  
1618.603  
2519.344  
736.953  
53516.156  
1217.212  
19425.398  
661.749  
2528.755  
5595.786  
1275.674  
1136.188  
3072.301  
6426.832  
22947.5  
3384.479  
583.304  
930.071  
546.951  
1901.684  
3982.687  
1849.586  
1698.171  
1604.641  
602.173  
2901.815  
1650.04  
769.934  
1076.374  
1890.566  
1057.438  
10054.333  
1217.089  
3315.424  
1050.154  
618.818  
1322.69  
1033.478  
398.503  
926.634  
1063.475  
971.24  
660.223  
1279.551

794.972  
2830.141  
1539.335  
4644.266  
2983.024  
1477.05  
1064.936  
16851.479  
943.233  
1783.791  
3641.654  
5102.382  
1598.419  
1351.99  
559.345  
512.104  
275.7  
6094.021  
2606.901  
572.105  
4701.876  
1626.443  
1082.247  
327.859  
2135.773  
475.473  
1489.259  
544.416  
4928.863  
427.075  
634.332  
1110.549  
698.933  
709.019  
1445.53  
953.385  
920.529  
3780.948  
840.849  
1470.297  
1475.99  
2079.863  
516.123  
871.91  
1108.522  
1239.486  
786.512  
1874.988  
774.5  
760.883  
3794.918  
274.612  
669.599

3303.276  
1415.384  
627.72  
1785.127  
673.121  
50226.051  
1465.259  
21665.037  
606.277  
1580.742  
637.797  
788.041  
483.385  
5624.052  
624.701  
2924.29  
1083.79  
8006.987  
19771.371  
1969.141  
366.93  
1232.549  
327.479  
1066.765  
4720.933  
1762.028  
2054.874  
432.973  
1743.281  
914.902  
1709.144  
1572.19  
6663.174  
2310.793  
13117.757  
1247.502  
2647.181  
480.21  
946.458  
1526.979  
1367.548  
398.624  
818.538  
1558.84  
1208.67  
865.278  
1470.26  
3537.4  
1180.198  
3674.615  
931.311  
806.985  
2940.202



1288.577  
1772.036  
3271.138  
4188.908  
1074.431  
1815.807  
1333.622  
452.998  
552.633  
9196.241  
3563.287  
5649.294  
2583.679  
1194.035  
1241.129  
2708.09  
9802.363  
1851.846  
988.058  
4536.775  
6249.711  
873.527  
770.282  
817.232  
1024.249  
426.568  
1275.658  
1449.478  
1536.755  
1172.293  
4854.226  
1317.613  
1290.715  
1444.924  
956.546  
2317.661  
4132.947  
1288.579  
2219.331  
1917.977  
804.092  
1278.032  
1094.938  
905.113  
2529.255  
2836.454  
3966.564  
2822.512  
1548.253  
1005.931  
643.127  
7749.024  
1576.197

1241.798  
5278.151  
625.032  
868.037  
2266.42  
1188.836  
8442.769  
3088.165  
25439.818  
644.49  
2117.725  
1372.618  
16508.25  
383.739  
1275.759  
938.461  
23287.598  
1432.763  
1471.571  
305.556  
2153.072  
263.928  
6677.845  
847.297  
1147.936  
6495.698  
798.893  
10942.395  
347.107  
5866.698  
1463.835  
265.082  
327.606  
2210.258  
998.71  
4628.413  
1097.307  
3121.434  
16282.072  
4199.401  
1441.476  
4603.53  
5449.608  
715.666  
3587.127  
3564.121  
1410.765  
2143.049  
821.809  
7333.228  
2563.278  
1431.467  
750.042

5104.266  
6579.249  
1361.625  
345.535  
649.808  
1381.09  
425.003  
838.712  
829.277  
1092.367  
939.226  
13565.812  
1558.94  
22364.438  
18044.242  
815.343  
2515.197  
1054.762  
755.785  
3470.124  
1543.024  
633.765  
5701.371  
5074.202  
1441.261  
571.363  
13419.054  
718.095  
13259.268  
700.348  
1047.693  
2729.855  
1534.088  
6467.067  
7965.397  
591.928  
738.485  
333.873  
1052.342  
786.393  
1954.525  
560.401  
582.863  
1652.158  
3354.644  
438.825  
474.006  
1363.807  
561.264  
1901.9  
2389.731  
628.179  
2612.53

4994.842  
733.095  
1091.422  
799.802  
861.139  
1146.734  
2791.095  
2276.731  
1252.267  
891.028  
3508.135  
2371.092  
2855.185  
1016.525  
1498.549  
2346.121  
42929.461  
1197.855  
1992.515  
6394.339  
15968.94  
1472.94  
762.695  
710.044  
4062.041  
1221.15  
829.018  
11433.747  
759.031  
631.987  
15669.278  
486.363  
1745.813  
1715.619  
1010.057  
23370.904  
1985.569  
968.522  
8946.797  
28337.412  
7122.29  
2395.162  
9958.096  
42456.875  
12387.475  
17168.973  
997.55  
1376.577  
280.954  
1238.265  
1345.973  
887.587  
11736.668

2361.141  
598.404  
5884.686  
749.401  
726.721  
2079.805  
3130.446  
380.066  
1191.959  
21870.992  
2476.912  
284.105  
1467.165  
3768.922  
841.637  
2544.555  
3238.85  
432.696  
355.905  
2467.261  
2583.618  
4104.966  
74614.945  
59189.121  
4946.252  
47777.699  
3818.827  
306.286  
9746.064  
1173.528  
65578.375  
1176.36  
15495.401  
1847.331  
12766.65  
2294.909  
60885.086  
8948.708  
2380.677  
1899.346  
577.999  
67422.609  
839.528  
897.659  
700.995  
815.511  
5891.096  
916.617  
1682.794  
11327.401  
5689.518  
338.091  
58262.293

17256.609  
12672.352  
4229.613  
2217.07  
5408.854  
2435.184  
1507.172  
2214.711  
50893.043  
41675.414  
848.925  
9573.972  
2671.63  
3949.782  
1181.086  
2048.804  
56112.309  
5419.143  
1096.222  
564.838  
2262.598  
1350.049  
1416.364  
2047.352  
1878.178  
34154.613  
22961.477  
68134.367  
1416.704  
5152.728  
4109.598  
2788.821  
1850.421  
1208.118  
4587.772  
53691.383  
2496.534  
4533.585  
1713.35  
2116.422  
1848.923  
862.536  
1253.607  
4015.213  
1927.212  
3591.305  
472.754  
685.878  
2405.909  
2355.577  
4397.104  
3614.092  
3642.578

369.35  
13602.509  
5484.5  
3336.492  
6924.108  
6317.874  
820.634  
64091.629  
11915.369  
1760.748  
13394.109  
1965.028  
65315.855  
8746.803  
2589.178  
2562.228  
68150.398  
6949.845  
2312.992  
1652.18  
485.893  
1173.925  
68327.805  
641.599  
4725.888  
1101.023  
1543.068  
12043.189  
5094.332  
469.124  
54865.297  
29347.557  
1306.595  
5119.527  
67185.422  
4944.632  
9409.072  
2342.736  
3054.583  
1783.741  
2369.199  
42381.809  
5304.322  
48885.496  
718.192  
8733.294  
1706.206  
3352.744  
2008.392  
4635.527  
508.945  
6276.189  
4661.838

2885.112  
1270.265  
911.703  
68131.336  
32138.32  
807.932  
5348.366  
3776.126  
2697.272  
2019.92  
67634.492  
12683.308  
4239.991  
2985.883  
2098.156  
1909.803  
950.852  
2250.624  
4000.037  
570.542  
2377.986  
16668.516  
6365.725  
503.004  
16548.266  
4595.818  
3058.912  
6643.053  
5183.634  
1015.502  
59238.668  
1298.655  
13288.505  
1614.679  
12161.318  
1988.653  
13809.468  
1743.93  
3874.25  
68095.445  
7075.297  
1714.543  
1633.68  
835.946  
66139.539  
675.339  
1552.118  
4480.054  
1207.836  
958.584  
1495.024  
783.107  
8066.813



5625.074  
3981.493  
3364.528  
1819.858  
5833.023  
67724.586  
4036.531  
7799.016  
2535.789  
3745.097  
1464.097  
1931.578  
41705.293  
4607.194  
35563.645  
826.801  
777.929  
49553.902  
4383.26  
4073.984  
10820.548  
3196.666  
6931.463  
5748.29  
5364.158  
3397.54  
1733.538  
1181.652  
1840.846  
1770.692  
718.87  
1504.373  
4139.345  
3212.963  
67945.758  
902.888  
1902.931  
1797.825  
6111.048  
3594.11  
1384.05  
2655.473  
67956.219  
8724.543  
10711.564  
2112.652  
66850.609  
2879.503  
8579.068  
589.931  
7228.177  
591.756  
5357.729

3217.205  
59345.344  
2029.063  
862.361  
1048.539  
1433.047  
66743.172  
2777.096  
12863.026  
4870.623  
2707.264  
65998.492  
4000.189  
20311.467  
6387.262  
60552.129  
5393.571  
538.363  
2728.143  
922.948  
6976.373  
4060.087  
2837.844  
1870.5  
4457.202  
3889.367  
24284.422  
4139.86  
2008.414  
67835.102  
2751.278  
3225.064  
5090.6  
5004.56  
5225.607  
2089.829  
65717.43  
1237.078  
2966.533  
912.327  
1363.908  
8458.71  
4253.633  
1338.909  
8139.847  
60180.961  
11686.147  
1665.32  
2734.921  
4201.031  
2497.008  
1398.558  
39094.789

1065.764  
4413.194  
3045.39  
6775.931  
66723.531  
3667.175  
2146.799  
43004.531  
7269.251  
1832.2  
3810.556  
41402.719  
5001.314  
70428.891  
3924.723  
1329.3  
65092.805  
714.244  
2161.08  
1432.586  
404.414  
3534.838  
1371.309  
58825.355  
1079.391  
945.099  
1065.801  
3271.858  
2160.505  
1118.961  
63626.742  
1838.182  
5346.972  
1680.332  
3402.259  
59754.98  
1382.854  
1058.013  
50141.887  
11003.575  
731.138  
3317.627  
2611.884  
5875.633  
2026.498  
3272.878  
59410.051  
4454.872  
2767.744  
45106.344  
2530.948  
3331.335  
2961.09

67213.875  
1595.917  
45744.34  
1116.717  
1269.882  
58890.969  
1359.027  
1006.213  
1241.893  
44356.43  
1395.665  
1272.175  
1720.237  
10224.602  
1369.518  
1383.476  
68061.211  
4613.449  
1609.469  
29437.074  
3949.591  
1278.906  
1113.431  
62339.977  
1355.146  
10823.271  
2682.337  
2467.582  
1287.462  
293.389  
1030.147  
1272.171  
4715.132  
61211.262  
2220.886  
1520.449  
9211.229  
1352.911  
2103.019  
2470.397  
424.734  
60887.617  
3340.051  
15384.141  
3023.355  
3874.546  
37322.57  
1612.448  
68351.25  
3401.403  
2965.234  
37050.066  
9996.93

13466.915  
3420.025  
61721.348  
4567.013  
558.063  
1316.914  
2857.55  
3488.39  
2049.145  
63897.227  
2041.284  
1244.943  
6375.954  
3987.696  
53316.453  
11730.739  
207.32  
3611.558  
9118.433  
1773.721  
1745.944  
4530.257  
377.484  
3034.14  
741.289  
649.188  
771.338  
8090.278  
266.941  
56406.652  
351.782  
2644.952  
6804.082  
11432.655  
727.683  
1393.454  
873.114  
61685  
743.902  
14532.108  
2153.108  
257.543  
1449.01  
2556.875  
7569.69  
58974.406  
2233.042  
1125.37  
62603.352  
1929.015  
2278.088  
17760.299  
403.464

3497.612  
2706.563  
2230.606  
2446.405  
818.425  
3607.887  
952.729  
60453.426  
2800.476  
2623.959  
317.155  
4614.273  
17963.098  
2634.538  
35293.789  
676.995  
2061.701  
24648.104  
694.847  
2698.831  
57490.496  
3594.689  
1543.32  
3330.46  
1256.412  
800.066  
1608.915  
831.756  
578.535  
53024.125  
1363.004  
2178.111  
1968.969  
3035.646  
2425.075  
12290.853  
2118.875  
937.158  
1512.082  
1677.639  
3129.462  
659.977  
1281.917  
56064.922  
4027.432  
1531.473  
3072.952  
941.405  
4422.589  
8800.613  
1702.286  
1255.591  
530.906

673.386  
345.62  
47316.199  
617.173  
2685.692  
625.929  
2688.863  
6142.92  
58836.754  
1195.821  
2195.718  
1001.693  
1706.814  
45173.785  
9659.529  
1685.909  
45998.113  
4750.854  
930.854  
56237.379  
6246.563  
2554.183  
4613.258  
2024.455  
1359.487  
3802.14  
7770.765  
1588.709  
52229.613  
1496.664  
1684.434  
14132.313  
3224.398  
25034.359  
2797.722  
940.694  
1386.969  
61057.336  
4090.97  
2227.869  
691.439  
1056.045  
1553.766  
2364.094  
11113.202  
1206.868  
24203.854  
814.087  
567.162  
1329.489  
16920.654  
1382.234  
687.071

50932.129  
718.342  
1487.343  
548.698  
27293.277  
602.155  
1356.2  
975.856  
1265.425  
1445.109  
11210.001  
38701.973  
782.271  
692.667  
665.896  
791.562  
1739.289  
52685.563  
4085.225  
1173.707  
1512.568  
405.696  
488.341  
2007.581  
448.781  
17915.088  
695.125  
40061.465  
2641.962  
2027.335  
1218.737  
1454.057  
29740.84  
390  
6720.94  
853.149  
1181.376  
629.337  
1082.386  
18736.348  
1427.408  
44678.129  
3145.538  
931.211  
3738.853  
1910.654  
3527.088  
47126.238  
652.452  
25159.104  
2279.014  
55929.566  
1818.939



931.106  
1281.267  
1411.149  
2913.909  
622.304  
1220.446  
61785.152  
7676.335  
4020.319  
2045.219  
1232.362  
826.6  
3751.723  
36785.086  
576.885  
343.679  
1667.164  
13029.231  
2236.877  
35827.172  
13810.904  
820.417  
57371.996  
2120.616  
547.237  
944.522  
58256.219  
619.626  
1061.116  
1120.653  
17443.129  
1040.436  
1961.32  
1921.554  
2997.503  
2049.118  
37747.211  
54403.363  
584.523  
3395.784  
1649.323  
1765.954  
4482.992  
1335.204  
512.142  
5969.98  
1584.006  
846.387  
990.887  
2852.263  
914.399  
616.638  
39967.418

4184.039  
1672.548  
5819.928  
1381.601  
9861.901  
60751.559  
60898.246  
1244.519  
1206.233  
3015.188  
688.36  
50942.055  
4098.458  
1594.558  
26434.123  
26577.648  
1148.14  
2436.341  
4245.011  
9821.027  
1644.041  
2814.769  
14901.588  
54957.039  
813.861  
1215.684  
591.424  
7111.042  
1321.572  
8255.758  
56418.332  
1158.402  
1016.968  
1407.944  
814.71  
2005.185  
4602.413  
1332.237  
1368.31  
2625.697  
56462.824  
1574.632  
1800.032  
881.76  
1181.211  
979.392  
1162.039  
1209.218  
837.461  
1304.5  
1187.974  
36291.27  
1431.23

1073.287  
4677.156  
24281.689  
1293.06  
1409.659  
58212.531  
919.177  
2081.144  
2057.561  
7649.519  
520.752  
52725.914  
1801.173  
1883.07  
1731.717  
1796.557  
59237.57  
902.205  
1576.221  
3065.937  
53115.102  
3740.298  
47218.438  
876.605  
2105.079  
10130.624  
1861.358  
6570.782  
733.818  
50369.539  
1330.301  
934.043  
17230.918  
62701.621  
1136.516  
1115.52  
34140.27  
41115.246  
707.755  
1013.009  
3128.287  
20792.273  
860.159  
496.261  
1043.048  
1668.179  
1247.974  
62291.996  
781.258  
17311.344  
10528.479  
589.631  
59700.469

820.632  
1040.391  
600.512  
19286.068  
1472.459  
870.902  
1081.878  
2966.009  
58328.172  
3566.909  
813.279  
61069.703  
41314.59  
4425.97  
56075.313  
1309.594  
49442.48  
2498.732  
2466.82  
9624.472  
55743.582  
2357.298  
2302.686  
3599.286  
58292.363  
1002.1  
58434.785  
1237.984  
3254.304  
1167.835  
2168.233  
61234.266  
20795.316  
4611.667  
809.46  
4131.225  
3758.749  
5285.714  
59581.801  
1447.383  
2236.45  
762.282  
2382.168  
402.747  
1055.018  
1364.305  
1266.412  
485.32  
293.082  
1189.078  
1174.814  
3961.458  
5557.108

3033.782  
138.48  
327.338  
651.624  
733.224  
3470.789  
2187.265  
484.918  
1163.731  
2189.045  
545.197  
1160.009  
879.096  
1046.443  
608.909  
4341.743  
7890.963  
4413.392  
1974.771  
509.807  
602.984  
1960.635  
1039.501  
962.266  
2666.467  
2142.627  
4697.42  
565.441  
689.176  
893.006  
1234.182  
1137.185  
4903.412  
839.464  
1284.069  
850.247  
6745.58  
1818.386  
2173.717  
225.084  
1271.187  
745.288  
184.643  
722.509  
1756.865  
1203.457  
1978.47  
989.711  
1326.075  
1077.938  
427.205  
642.633  
904.541

934.255  
1994.471  
691.784  
1963.186  
14744.859  
433.934  
975.547  
1394.411  
684.206  
1352.546  
1610.82  
647.663  
1734.551  
583.844  
783.837  
1012.043  
656.094  
974.138  
503.174  
397.665  
724.849  
1671.285  
8150.507  
9577.477  
2671.782  
566.006  
1592.797  
1448.297  
3472.213  
1025.56  
936.953  
3537.872  
1020.802  
1493.155  
257.074  
165.748  
419.066  
531.218  
1787.158  
639.07  
764.108  
1085.798  
1234.741  
342.537  
1004.163  
14820.507  
689.861  
920.29  
888.577  
826.689  
1001.335  
4352.086  
6651.195

4133.83  
2446.263  
491.208  
1576.501  
1190.012  
3469.613  
736.551  
847.587  
1355.597  
13622.956  
470.444  
983.858  
2037.48  
2290.11  
371.055  
851.653  
942.322  
1502.396  
401.148  
7910.749  
1286.795  
1009.73  
1698.153  
398.555  
15725.976  
2280.638  
2789.715  
9808.86  
2656.998  
745.401  
731.273  
1506.679  
1495.456  
1452.149  
919.36  
1431.829  
1140.256  
420.369  
590.551  
1244.796  
2078.41  
2977.675  
93.394  
504.195  
444.762  
621.465  
863.458  
723.551  
718.804  
580.43  
3404.585  
463.264  
1761.304

1595.773  
1191.294  
443.799  
732.51  
576.623  
2318.995  
270.089  
839.251  
1254.957  
438.491  
690.97  
383.714  
3005.654  
514.308  
792.975  
305.935  
1421.885  
3735.65  
2239.3  
410.603  
421.928  
844.531  
4829.31  
366.278  
313.12  
339.102  
1124.404  
17464.697  
654.548  
852.675  
2006.902  
664.151  
3723.139  
9758.333  
5246.469  
3367.713  
4592.782  
286.184  
363.339  
1231.148  
1559.13  
1390.781  
557.383  
410.128  
1252.175  
1121.29  
231.381  
5953.799  
2841.379  
1452.384  
632.176  
1921.274  
2550.46



2609.755  
14455.414  
3506.322  
929.87  
425.964  
623.446  
1337.074  
2240.525  
479.955  
800.436  
2042.556  
1222.949  
505.414  
718.555  
36437.602  
764.366  
10672.186  
662.564  
2892.332  
438.089  
889.759  
2477.187  
3226.453  
1733.267  
3697.012  
891.952  
1523.446  
1574.366  
1587.227  
238.635  
715.486  
2421.114  
782.112  
2028.126  
11449.637  
655.574  
8467.932  
2057.892  
2038.203  
1084.379  
12433.577  
705.841  
771.121  
1249.776  
721.493  
1460.359  
1019.274  
3473.109  
1633.797  
1264.15  
7276.166  
2133.394  
1412.929

567.094  
2627.002  
4318.689  
1730.062  
941.238  
853.507  
33058.129  
1999.905  
3976.233  
5302.479  
739.159  
2878.549  
1482.653  
1571.736  
935.497  
2545.262  
1012.678  
667.838  
292.345  
1104.137  
2090.558  
2325.501  
2384.93  
655.655  
4435.583  
348.812  
861.026  
7168.464  
801.975  
1527.846  
284.769  
972.556  
1205.408  
757.972  
690.003  
67688.094  
9244.373  
1276.873  
8638.642  
336.32  
2193.557  
702.133  
1906.924  
2610.927  
1886.268  
18661.463  
1531.171  
1417.465  
1125.681  
574.088  
860.961  
1606.906  
410.847

565.667  
283.155  
393.197  
885.141  
444.678  
15610.116  
1460.474  
602.433  
1552.417  
30664.773  
2930.931  
1194.052  
1916.462  
6578.64  
277.56  
5260.841  
710.979  
1112.795  
439.505  
3634.116  
3876.176  
1122.426  
41078.977  
4905.596  
57338.777  
2623.639  
1889.409  
1651.372  
619.766  
1645.078  
13469.521  
756.224  
1429.927  
1001.715  
578.179  
339.451  
874.903  
646.285  
469.445  
1300.854  
729.051  
3895.084  
5987.364  
584.012  
297.9  
3899.508  
1501.093  
733.897  
1461.965  
1543.561  
1464.487  
1328.388  
28112.256

3691.013  
12294.473  
7472.721  
1868.513  
2999.917  
6229.405  
4920.471  
27068.18  
5410.322  
797.168  
890.527  
602.698  
3197.575  
683.336  
560.17  
2331.379  
1021.284  
20034.893  
1290.141  
1907.872  
1847.16  
16213.468  
16987.533  
702.654  
1155.449  
17107.773  
478.462  
13250.315  
1731.928  
475.798  
188.578  
1789.986  
13815.214  
5821.528  
1244.064  
395.205  
846.571  
8213.636  
456.683  
3719.625  
655.682  
7449.082  
20131.572  
5263.629  
1119.732  
1461.73  
3824.937  
1366.534  
857.571  
925.34  
488.181  
662.54  
1425.12

2535.082  
3015.546  
4913.064  
20753.311  
153.12  
2667.554  
2943.392  
19615.412  
955.118  
6744.973  
773.317  
1801.313  
829.651  
477.985  
3373.49  
932.003  
1233.888  
1673.948  
65053.629  
14145.871  
1907.755  
24052.438  
10993.616  
242.067  
9148.383  
1634.74  
689.664  
584.062  
899.141  
811.432  
1825.853  
4424.881  
4031.573  
3463.182  
596.24  
8071.089  
802.156  
1148.076  
1251.694  
6538.415  
851.1  
2342.765  
551.773  
1078.367  
2492.988  
207.146  
584.713  
1085.922  
13813.479  
2056.27  
3530.703  
2601.733  
339.226

865.762  
926.039  
1633.247  
1007.943  
9186.312  
1613.38  
2318.952  
1249.396  
603.571  
2536.606  
1001.195  
2255.413  
4647.029  
10207.451  
11427.288  
10059.245  
1442.865  
3132.78  
1396.522  
3226.01  
6331.786  
1056.562  
62145.621  
7044.621  
706.335  
470.694  
2456.594  
2307.859  
4628.099  
863.555  
4430.795  
1041.843  
729.159  
392.349  
555.12  
1147.604  
995.274  
2649.374  
1351.284  
5294.103  
4704.497  
1010.96  
573.923  
388.256  
2016.202  
4629.275  
379.697  
33542.727  
2030.146  
6402.757  
590.663  
266.694  
1259.937

847.449  
549.015  
2376.906  
1202.461  
2245.476  
463.781  
16525.611  
478.776  
3746.566  
1394.336  
490.432  
849.598  
695.629  
896.153  
926.278  
2804.266  
874.794  
8943.758  
999.654  
366.773  
2838.665  
4535.278  
34027.883  
7459.757  
1598.843  
622.419  
1578.387  
783.378  
2220.075  
865.486  
373.828  
479.221  
723.248  
13848.487  
1896.986  
2124.882  
744.624  
4948.806  
666.882  
535.005  
452.391  
649.283  
748.892  
2656.637  
2442.336  
1233.223  
2369.998  
1175.731  
14860.623  
2357.54  
2652.751  
1265.1  
1172.029

942.734  
1851.612  
3763.694  
10368.403  
8968.845  
2455.218  
4117.077  
1893.79  
417.516  
2984.791  
924.937  
664.265  
3535.093  
3371.65  
3831.4  
714.153  
402.559  
1199.755  
792.134  
603.826  
745.914  
1689.001  
945.223  
2387.88  
2490.608  
325.709  
6090.371  
1944.5  
748.467  
3756.407  
296.499  
3144.538  
4428.577  
505.084  
26027.938  
1605.244  
6580.188  
715.02  
1694.932  
1190.585  
3308.238  
997.415  
3292.585  
642.861  
18479.691  
583.969  
596.151  
541.732  
7301.243  
8845.988  
1303.652  
473.783  
889.736



273.871  
919.75  
530.311  
1058.783  
919.189  
302.665  
3156.972  
2843.345  
1748.093  
884.674  
603.028  
4050.958  
7352.625  
624.322  
49771.84  
20915.527  
4895.333  
1102.235  
4142.301  
447.063  
1131.844  
753.909  
286.502  
446.701  
842.978  
13405.407  
377.983  
2109.139  
2648.943  
627.085  
630.604  
906.071  
4868.327  
1444.292  
4674.107  
5574.65  
4470.542  
807.335  
462.202  
3184.094  
818.796  
8205.944  
1477.218  
1997.613  
1310.818  
1704.029  
1319.682  
2721.372  
4177.042  
13561.678  
10964.783  
2391.603  
2218.795

1374.425  
544.665  
717.014  
1479.14  
2061.187  
17169.137  
11263.445  
722.096  
297.476  
937.828  
4676.943  
5240.059  
4448.859  
1135.82  
1232.844  
390.99  
6436.252  
2910.603  
853.784  
972.091  
3472.955  
2200.107  
1677.39  
571.242  
391.374  
493.73  
3171.34  
740.717  
28262.158  
2374.894  
3187.874  
2921.582  
1403.857  
1212.452  
860.723  
811.222  
1845.046  
1133.734  
2974.5  
916.569  
1071.376  
512.944  
718.154  
2931.289  
1068.339  
3238.198  
3161.467  
3777.281  
1226.335  
6087.016  
46887.742  
823.478  
33114.961

2966.863  
2007.1  
1712.77  
675.848  
732.596  
3952.615  
844.971  
4148.221  
21948.754  
746.36  
2834.676  
1568.77  
3797.861  
3930.63  
7742.588  
1701.2  
3880.499  
8300.05  
3042.413  
1131.953  
794.939  
1835.34  
1221.027  
678.615  
2966.07  
859.66  
2232.059  
2022.202  
1272.587  
8928.099  
22072.451  
558.883  
3595.492  
45219.59  
896.36  
59166.461  
3610.453  
13841.908  
812.819  
10702.05  
1215.459  
546.683  
1045.73  
7059.92  
47064.828  
761.318  
1337.183  
644.256  
2329.966  
841.598  
273.479  
490.359  
14926.28

3279.249  
657.102  
690.935  
3156.577  
711.647  
1403.279  
2489.113  
714.249  
1552.53  
1524.982  
544.028  
42023.395  
908.617  
1176.213  
1493.812  
5658.351  
2343.437  
1484.271  
2068.195  
29595.295  
1631.705  
787.545  
629.953  
1236.248  
1134.267  
860.048  
4978.675  
1456.002  
16763.746  
4926.91  
1088.396  
6226.331  
63159.297  
1884.039  
756.197  
11406.885  
610.484  
2941.99  
9890.741  
45368.664  
8692.208  
752.501  
606.495  
2330.896  
585.964  
8378.748  
367.579  
1093.073  
10737.141  
3075.98  
4501.544  
631.85  
15510.394

914.163  
6379.059  
3899.359  
1602.076  
5557.194  
1022.743  
452.568  
2224.429  
3199.779  
4431.769  
1502.634  
2944.974  
2338.73  
904.418  
1275.538  
1304.796  
15651.755  
1792.239  
1360.304  
1169.755  
825.52  
2585.407  
1358.573  
484.771  
609.54  
17519.629  
614.247  
1414.826  
912.374  
882.393  
689.755  
1535.336  
1344.85  
2138.426  
1561.742  
35060.996  
1225.123  
12097.938  
6303.094  
1708.776  
63482.313  
1940.581  
698.013  
2200.888  
6860.858  
7827.334  
4611.387  
404.489  
29911.357  
10599.999  
774.009  
5769.449  
7551.2

3497.832  
7316.398  
46932.504  
428.504  
566.573  
8125.956  
1784.688  
3544.323  
1765.823  
3799.931  
962.986  
628.066  
2176.042  
4416.051  
425.758  
1326.958  
2080.535  
1118.527  
1111.693  
1529.592  
9749.27  
21575.207  
1567.512  
1240.049  
3660.354  
1505.816  
316.813  
962.793  
8337.314  
20709.006  
1220.746  
1794.011  
7429.081  
1955.425  
7141.712  
2367.339  
1487.638  
6326.905  
60158.875  
4420.807  
661.036  
65438.609  
4793.423  
1604.185  
3265.3  
3307.453  
869.041  
1063.364  
1410.181  
64952.52  
6210.99  
4910.254  
12132.7

6434.926  
3143.342  
1445.868  
2202.384  
3025.667  
2092.12  
23483.777  
9570.79  
7566.198  
1791.703  
2407.913  
1696.882  
1613.269  
49364.727  
1085.674  
1649.353  
65766.461  
2158.913  
7181.585  
4201.87  
2848.336  
4679.799  
1917.595  
1866.228  
5656.081  
48849.742  
1027.467  
6381.474  
1433.846  
17575.316  
819.091  
18733.98  
1372.884  
5424.828  
3660.475  
2878.807  
1004.451  
2149.384  
718.204  
3066.006  
9696.811  
546.595  
11370.425  
3951.233  
1487.144  
2505.707  
1577.841  
2912.526  
8056.906  
15223.375  
1008.062  
2119.265  
10916.552

1649.074  
7885.621  
1273.232  
47459.484  
2037.677  
1242.446  
65439.453  
5984.677  
1218.412  
3165.415  
3771.79  
1199.244  
1684.64  
64496.086  
6686.202  
7309.185  
5102.546  
54225.066  
14742.142  
6468.779  
3326.357  
8668.105  
10287.045  
1762.146  
2180.796  
2987.955  
2063.919  
8741.369  
7019.959  
1132.7  
2063.042  
1628.257  
2014.45  
1188.428  
30818.254  
5947.92  
1021.393  
1694.193  
70601.805  
2458.413  
3098.905  
4487.992  
2552.279  
7743.426  
32184.242  
2238.219  
1637.59  
69977.758  
1541.612  
18027.943  
1142.419  
22827.826  
1512.084



6589.069  
3634.103  
2717.519  
1209.598  
1361.126  
2321.185  
4414.307  
2169.779  
76049.984  
17591.717  
8916.659  
1693.354  
2872.184  
904.636  
1949.141  
811.959  
9016.71  
19871.59  
1317.512  
1473.379  
10907.2  
3797.225  
2616.025  
2419.865  
2142.63  
1837.421  
683.546  
1355.133  
2184.008  
3340.358  
58718.273  
5246.387  
3782.817  
3451.608  
3892.351  
8309.18  
9385.444  
1696.244  
1675.886  
3003.594  
1206.308  
14172.796  
7722.25  
3616.646  
1035.765  
880.203  
3776.25  
14737.619  
31398.379  
10654.02  
1671.041  
66008.359  
1037.473

5685.385  
4003.395  
2321.027  
2329.077  
1370.72  
1257.795  
65763.109  
4604.532  
7148.747  
5793.729  
7221.148  
12157.566  
2288.036  
2078.172  
7247.682  
1045.772  
18641.682  
1221.702  
5656.113  
4333.406  
1584.641  
921.69  
1418.518  
1006.041  
1138.054  
787.395  
7525.232  
67951.875  
4055.18  
14428.574  
4319.159  
1414.18  
4751.661  
65735.594  
994.405  
4412.088  
946.693  
3765.417  
5674.337  
503.146  
735.748  
7900.172  
12144.855  
3975.056  
3404.216  
6949.151  
1326.225  
6055.428  
4707.626  
66820.609  
2212.841  
9457.739  
2416.519

627.311  
59683.465  
2260.59  
1343.362  
1274.947  
1991.035  
2453.159  
3017.031  
62828.227  
67784.656  
1178.238  
64435.297  
1146.838  
12130.779  
6235.276  
1206.021  
471.224  
11786.389  
2240.496  
3178.077  
941.42  
2468.586  
62894.797  
38561.746  
2845.631  
7464.85  
2621.623  
62834.621  
760.051  
31572.66  
7012.085  
1422.113  
2057.781  
43126.961  
63854.551  
3254.578  
3683.256  
9789.103  
1447.435  
47466.836  
1927.904  
4329.395  
57743.195  
1084.174  
3629.99  
1850.829  
9383.25  
1425.041  
5772.528  
32405.303  
1011.913  
2951.208  
2655.985

972.681  
744.023  
1244.396  
596.115  
46951.438  
1798.057  
13596.157  
2142.51  
9214.333  
1849.522  
60533.012  
23315.564  
1670.253  
1053.821  
15753.501  
4587.116  
63414.207  
6263.179  
5059.871  
1577.959  
1480.602  
61656.75  
276.479  
65205.551  
735.106  
873.091  
1430.958  
5028.017  
60339.594  
3441.897  
2807.525  
1728.966  
1877.786  
32846.77  
1893.93  
43302.242  
9753.404  
985.146  
56003.836  
2047.3  
1216.295  
860.803  
1473.756  
469.428  
56959.762  
2890.532  
1657.2  
5115.72  
1831.333  
45251.434  
836.485  
25031.07  
1315.696

2329.587  
14097.699  
2543.998  
62625.453  
2925.087  
14697.179  
5777.163  
2013.36  
1351.704  
64950.945  
2180.705  
1166.512  
53197.785  
25775.338  
1084.09  
1460.785  
1013.739  
3697.407  
695.752  
63225.262  
2144.99  
1617.94  
1690.623  
2460.655  
1373.193  
64284.766  
38942.863  
6531.146  
1424.56  
1835.791  
2795.981  
763.399  
62733.496  
1070.166  
8247.168  
65734.758  
11380.903  
882.82  
4705.026  
5948.128  
2563.212  
61879.039  
2947.006  
2714.289  
2118.3  
4477.266  
5415.926  
2112.283  
27875.693  
36202.227  
43737.754  
2644.57  
2096.865

1377.862  
63369.855  
241.559  
1255.46  
734.168  
814.113  
2261.146  
1665.769  
4385.943  
5362.126  
1480.15  
1031.089  
776.366  
661.15  
66015.602  
17032.371  
1876.976  
23218.209  
9188.705  
309.362  
45298.164  
866.409  
3785.35  
7100.416  
1244.289  
59374.262  
723.904  
5218.603  
2765.924  
1198.362  
52835.598  
1636.515  
3161.082  
1500.614  
2318.332  
2475.727  
2103.649  
49715.391  
3515.059  
5401.614  
1082.101  
835.951  
1590.219  
54174.238  
2348.787  
737.488  
323.108  
2791.634  
4289.385  
14500.863  
1673.108  
41558.879  
3380.38

4614.564  
1490.566  
2282.127  
2385.375  
20765.715  
1903.761  
4639.082  
4136.67  
10207.42  
2274.349  
56089.258  
1249.878  
1025.81  
3668.413  
1338.757  
566.345  
1722.366  
58915.891  
3508.054  
1011.306  
943.879  
2953.477  
3604.19  
1955.246  
56075.105  
1984.961  
8508.45  
2065.248  
679.204  
667.93  
560.705  
21632.719  
425.665  
373.851  
979.742  
620.269  
53881.949  
26686.975  
1121.426  
1245.974  
2602.613  
5154.397  
4033.257  
59881.828  
4167.34  
3985.07  
725.389  
1546.298  
727.765  
1805.351  
1232.305  
401.657  
1431.499

1517.46  
2792.724  
1631.155  
5223.447  
4681.239  
1274.396  
1526.874  
944.479  
890.469  
539.93  
1066.898  
2197.829  
547.997  
898.365  
1555.78  
11777.632  
1051.244  
54434.609  
985.311  
5316.436  
9344.735  
1247.456  
58746.523  
1037.542  
7841.049  
2621.68  
59591.797  
2610.466  
56352.852  
1237.059  
3209.846  
635.269  
2388.516  
48702.5  
970.628  
3976.715  
4979.784  
826.904  
791.553  
1599.358  
57955.984  
2627.657  
1007.853  
534.51  
3204.272  
3321.381  
14219.333  
1220.408  
42468.168  
1880.918  
784.877  
2244.675  
54318.063



934.374  
1012.24  
449.276  
5458.318  
2070.742  
56769.656  
1973.673  
1204.974  
2595.534  
1221.315  
874.855  
1564.554  
59802.695  
2824.822  
837.277  
626.747  
2564.868  
2671.123  
1179.363  
541.804  
5843.114  
596.585  
1361.317  
23127.098  
597.203  
1202.102  
1452.088  
863.967  
24817.508  
20251.875  
1446.233  
646.438  
1546.19  
2475.585  
42686.32  
1249.132  
3005.683  
1621.164  
2468.722  
1354.306  
709.368  
1387.104  
1809.335  
2081.343  
1362.469  
1119.894  
4585.003  
2588.843  
874.089  
943.346  
504.494  
2829.089  
2157.321

6766.738  
319.887  
19101.549  
2052.965  
3011.615  
1476.702  
2049.071  
1879.508  
16742.135  
1630.218  
52563.816  
1253.562  
6142.981  
5942.513  
1256.484  
53189.633  
6862.793  
927.57  
707.653  
1814.608  
2086.022  
1622.199  
57706.781  
1743.871  
530.869  
6471.156  
494.674  
831.237  
2726.628  
59308.309  
1059.211  
3870.173  
3661.868  
774.729  
949.774  
59522.816  
2124.954  
738.505  
51391.176  
18476.324  
266.736  
1378.305  
3209.85  
494.222  
3033.123  
58395.285  
2390.517  
2553.129  
737.655  
7417.439  
6965.195  
15161.366  
1862.819

54087.465  
1233.423  
1316.914  
2344.145  
1264.142  
610.742  
1698.559  
57799.293  
2724.968  
498.591  
3294.408  
57442.473  
1706.121  
3937.743  
831.697  
1871.405  
746.736  
1475.649  
260.351  
1046.043  
5783.756  
868.065  
1799.535  
816.433  
22744.957  
996.369  
749.768  
543.66  
803.632  
938.363  
1254.031  
61745.844  
44567.344  
4023.153  
3734.695  
3083.243  
31359.021  
1240.083  
56860.449  
996.313  
46746.68  
2152.607  
2577.594  
7199.776  
56838.34  
686.41  
586.743  
770.381  
960.644  
336.131  
2067.861  
2176.084  
50949.777

3077.327  
806.191  
1665.865  
1028.323  
54651.527  
2902.844  
3983.287  
842.29  
1152.429  
36477.598  
2237.307  
53753.004  
660.158  
4517.634  
1271.806  
569.125  
834.48  
1756.541  
766.993  
1239.383  
50571.188  
6405.374  
556.344  
1008  
5738.59  
5459.5  
34893.309  
1266.499  
524.977  
544.147  
47130.004  
1457.344  
60173.027  
1340.981  
2900.508  
50787.594  
6067.264  
2474.377  
1713.006  
976.153  
1521.545  
41750.355  
8774.4  
569.013  
1007.198  
67582.711  
2088.703  
10019.703  
1031.9  
2954.856  
31755.477  
22672.162  
2215.809

3752.816  
2101.116  
1313.128  
9407.307  
8980.908  
51523.891  
737.427  
2722.704  
4065.83  
657.014  
10997.752  
5200.081  
49318.039  
2995.479  
1390.877  
2259.069  
3962.198  
1763.457  
1119.183  
53761.504  
3733.732  
3339.119  
645.213  
57052.453  
3685.538  
348.328  
3128.525  
1906.634  
983.766  
22786.26  
1214.193  
2750.298  
54200.895  
1253.809  
1900.654  
933.751  
5368.71  
54201.176  
1039.918  
1385.909  
51839.633  
1022.02  
16444.063  
50051.051  
889.418  
39781.5  
953.435  
1412.639  
724.929  
1873.704  
711.981  
1346.33  
54358.965

3574.881  
3339.07  
1557.215  
619.194  
1292.128  
1915.445  
5691.81  
46981.918  
21002.607  
22503.762  
667.484  
45858.82  
504.732  
733.231  
928.03  
2186.538  
48018.652  
1554.917  
517.916  
8925.386  
1343.862  
3113.031  
17186.656  
1372.286  
58143.555  
8963.799  
3679.714  
5522.382  
18690.504  
5746.932  
53110.375  
1878.789  
686.136  
1111.402  
921.829  
47318.016  
2722.172  
8723.973  
6339.78  
56541.656  
1320.621  
49757.039  
730.034  
905.571  
55120.16  
2007.818  
1564.858  
1053.235  
2727.324  
28864.451  
11194.063  
30504.75  
1033.482

1067.517  
5274.862  
3772.496  
44922.141  
1157.663  
255.93  
1501.308  
3190.444  
1212.977  
1573.609  
1786.411  
1036.579  
7312.47  
3603.006  
8686.035  
690.19  
1318.521  
4585.167  
631.271  
3257.854  
28362.473  
1603.818  
146.221  
634.905  
396.173  
886.28  
707.473  
1805.924  
842.416  
1696.03  
1254.867  
1910.862  
13772.565  
748.794  
1091.611  
4800.48  
6847.941  
914.696  
924.422  
810.449  
600.643  
437.452  
603.429  
997.198  
556.27  
3620.071  
907.728  
1079.129  
9038.552  
1463.674  
595.812  
534.518  
372.789

689.706  
1914.336  
295.349  
2308.5  
1405.274  
4741.8  
2502.267  
1236.484  
1761.172  
2307.298  
4191.167  
3507.486  
695.08  
2069.171  
452.958  
666.31  
755.205  
766.64  
823.37  
626.961  
907.014  
655.562  
1927.481  
160.751  
2264.308  
2113.57  
891.295  
2205.147  
1348.859  
1013.217  
1237.641  
2879.13  
4443.684  
3427.404  
1202.032  
8265.739  
1111.069  
957.638  
942.265  
786.245  
623.879  
1481.368  
708.438  
689.079  
3175.739  
877.362  
1744.831  
682.176  
3977.581  
559.818  
459.087  
2183.847  
5215.448



1094.638  
3609.493  
910.065  
1095.645  
729.85  
768.117  
1283.636  
4174.288  
808.844  
451.516  
726.726  
618.735  
979.103  
1524.823  
664.326  
775.254  
1114.667  
8458.126  
325.603  
629.564  
2994.817  
3995.83  
682.679  
1456.878  
375.084  
484.566  
3402.62  
6436.042  
1054.748  
1250.785  
2371.878  
582.415  
1290.176  
886.556  
4663.936  
304.832  
349.338  
1394.274  
7332.656  
735.9  
2048.985  
2438.157  
3442.583  
2119.739  
1805.219  
244.029  
1890.346  
140.338  
822.722  
784.861  
576.349  
375.878  
289.985

3415.935  
637.497  
5898.238  
986.135  
1447.762  
3069.76  
1435.946  
2250.595  
901.485  
309.395  
471.502  
521.196  
3087.693  
3170.398  
3486.69  
655.412  
587.669  
3438.893  
5492.658  
907.915  
1100.524  
964.63  
1959.353  
1345.306  
719.531  
3123.106  
953.827  
257.743  
2124.341  
1916.286  
7268.737  
363.597  
727.692  
814.595  
372.811  
603.563  
1610.842  
1248.987  
3107.97  
705.997  
822.341  
823.412  
1422.578  
8363.027  
445.789  
606.965  
951.415  
1419.048  
2366.102  
4130.396  
1697.722  
1055.515  
6111.774

1307.019  
3738.979  
4540.917  
2666.53  
1662.431  
4988.628  
2088.285  
1479.127  
973.357  
2637.588  
1171.28  
323.393  
3593.797  
724.664  
8248.991  
2070.881  
452.08  
743.048  
7173.974  
1052.104  
892.367  
1544.854  
747.662  
2357.859  
397.184  
3079.693  
2004.388  
2635.31  
2178.99  
742.228  
497.828  
513.722  
1860.401  
2120.379  
573.571  
1361.523  
2387.277  
634.743  
5612.514  
794.523  
1905.511  
3310.069  
11323.877  
1092.23  
1412.771  
3127.042  
950.824  
3174.619  
4249.332  
753.253  
1212.035  
926.707  
2495.166

2203.015  
2435.222  
5477.067  
948.073  
2042.421  
515.307  
1316.307  
2430.206  
1060.276  
880.327  
648.99  
39820.859  
362.46  
793.061  
712.914  
944.54  
4223.55  
1101.703  
1136.916  
3746.002  
1761.554  
1022.297  
998.329  
346.373  
594.764  
206.206  
647.416  
439.306  
6086.683  
1503.633  
32226.568  
2168.163  
661.324  
145.514  
734.228  
5625.921  
1663.168  
773.023  
988.267  
5586.177  
305.706  
1993.983  
698.854  
1495.064  
1206.025  
1234.862  
324.924  
2312.932  
1285.357  
4690.687  
581.15  
778.642  
3344.745

470.757  
7417.87  
445.145  
867.041  
613.097  
1258.866  
227.473  
444.901  
3354.518  
37177.141  
781.636  
758.958  
5860.665  
985.029  
435.18  
533.805  
480.108  
643.438  
824.695  
735.05  
2219.494  
361.521  
15268.415  
2003.899  
247.508  
859.537  
7796.578  
937.211  
2351.402  
407.795  
646.052  
918.438  
2092.869  
682.212  
144.321  
1395.672  
1448.099  
609.249  
456.256  
1293.746  
607.227  
314.594  
750.691  
403.794  
307.338  
9410.443  
7396.482  
2099.94  
550.258  
945.692  
458.706  
844.622  
835.732

1325.247  
3759.448  
383.896  
271.606  
392.699  
6027.436  
459.762  
185.645  
952.335  
614.595  
1617.81  
504.114  
564.083  
745.395  
57208.992  
471.377  
499.243  
357.613  
557.397  
20121.531  
8788.813  
3057.818  
1527.703  
1678.508  
843.061  
35941.75  
692.154  
419.966  
336.1  
2025.874  
12694.285  
998.892  
24304.012  
929.026  
11624.829  
437.385  
764.999  
537.624  
605.043  
8978.37  
636.785  
828.525  
875.146  
537.988  
7002.135  
24525.811  
5342.295  
813.355  
563.787  
771.554  
135.827  
420.187  
3859.028

1018.889  
397.243  
887.882  
782.05  
3392.121  
4557.131  
1842.44  
613.956  
1032.375  
1941.813  
491.281  
139.098  
828.739  
1757.561  
276.955  
2632.863  
778.448  
456.618  
2075.723  
2383.602  
945.28  
6009.212  
626.907  
292.57  
1667.209  
580.036  
52391.316  
11850.472  
2080.693  
26461.313  
9933.021  
267.643  
814.531  
5661.424  
1777.285  
1242.92  
4117.798  
1344.499  
1902.029  
125.241  
570.753  
4644.294  
491.272  
1548.658  
6333.828  
1389.821  
701.919  
733.376  
589.692  
2535.454  
671.252  
504.063  
3445.553

51745.285  
1040.765  
1215.52  
6551.904  
1716.785  
1385.522  
167.152  
471.661  
4635.514  
1223.459  
3778.183  
396.893  
619.654  
13608.53  
6915.293  
2678.4  
1168.046  
1641.59  
1747.637  
914.747  
2645.943  
822.74  
2651.138  
3921.086  
9929.688  
7441.86  
51632.461  
5833.761  
1101.155  
620.029  
5240.355  
565.27  
3507.814  
435.732  
573.652  
408.425  
13836.899  
1386.553  
922.017  
1527.86  
1132.808  
13980.035  
406.716  
877.294  
699.084  
2132.414  
1657.725  
333.2  
4711.138  
19294.004  
893.989  
1176.916  
1978.382



5931.541  
2666.474  
1528.605  
545.923  
3732.729  
1457.883  
645.613  
783.95  
2336.032  
5476.557  
4530.047  
3479.17  
4904.981  
16833.502  
1463.494  
566.564  
1923.881  
253.048  
1480.761  
405.312  
1361.951  
1212.312  
590.341  
6285.946  
706.239  
385.013  
2774.723  
917.029  
2010.595  
1544.857  
806.804  
694.603  
1027.02  
376.198  
980.694  
2396.879  
6081.586  
1540.079  
914.818  
2959.807  
424.555  
534.582  
1573.29  
172.504  
1038.305  
4762.487  
460.523  
1088.801  
2405.731  
10784.464  
718.771  
911  
465.99

520.406  
7589.921  
851.404  
1116.914  
5270.356  
45750.453  
2023.257  
1518.526  
866.467  
4782.338  
1527.391  
1270.227  
785.3  
7682.248  
2296.561  
5060.104  
960.284  
1136.797  
27367.625  
11281.553  
837.118  
2039.425  
1964.091  
2678.112  
1013.503  
1824.527  
1007.911  
1449.663  
5809.773  
4961.686  
9832.893  
4860.908  
7535.91  
9450.094  
6713.324  
50423.949  
7710.68  
1389.102  
1072.224  
4710.978  
289.937  
4518.923  
697.804  
966.312  
20693.711  
657.473  
391.853  
2069.847  
1949.846  
2472.367  
1625.996  
2331.513  
18195.609

1486.057  
1088.87  
1413.748  
6528.235  
3184.097  
1209.278  
4599.56  
2647.357  
1388.814  
360.87  
986.401  
4692.49  
867.766  
215.31  
1534.413  
404.359  
692.03  
433.75  
2171.136  
675.095  
2378.91  
1556.516  
605.321  
5840.184  
864.965  
368.342  
848.854  
4213.729  
1562.854  
3049.402  
712.227  
887.935  
9078.579  
5690.113  
2600.264  
446.663  
433.05  
549.331  
545.09  
826.516  
2690.718  
7667.186  
1453.479  
4164.626  
1405.585  
1809.606  
424.951  
1992.738  
11940.533  
493.519  
4680.439  
369.999  
728.382

11311.298  
1275.909  
731.45  
555.417  
508.357  
10548.466  
1131.805  
882.216  
6408.389  
48242.816  
1766.258  
2099.564  
1051.01  
1172.247  
9007.974  
2264.225  
1556.445  
437.864  
1182.104  
13808.512  
1820.955  
626.777  
1581.417  
256.507  
546.837  
1714.244  
2128.346  
3144.147  
1815.525  
3307.676  
1677.926  
901.172  
5245.738  
6347.848  
10740.393  
10358.053  
20618.898  
14735.655  
8706.776  
51732.742  
7424.039  
1959.378  
2352.527  
10505.561  
291.869  
3866.673  
10562.737  
2770.485  
1335.344  
714.028  
1983.996  
539.838  
740.551

4071  
3355.408  
1340.039  
5663.066  
29806.814  
1231.418  
2128.57  
2575.365  
10368.529  
1051.047  
506.285  
711.75  
1672.074  
1041.693  
1152.967  
4263.474  
21580.672  
6961.262  
5841.455  
1752.932  
3212.673  
810.088  
1398.851  
604.098  
2609.554  
1317.822  
1034.16  
4180.694  
7375.417  
2166.294  
1675.526  
504.381  
3488.858  
1340.763  
835.184  
1082.57  
1011.235  
10501.373  
7409.175  
16668.1  
16147.047  
2648.32  
4694.709  
5288.357  
6774.199  
989.913  
3048.988  
1373.353  
504.668  
1559.546  
3479.065  
1281.531  
628.181

1424.399  
2874.974  
5479.85  
1210.481  
400.563  
1709.201  
29654.375  
18290.141  
12466.001  
6689.589  
12268.271  
1010.481  
22712.633  
3217.49  
804.46  
4918.933  
856.482  
546.906  
2358.676  
3590.318  
1043.379  
1587.379  
730.999  
4727.393  
1120.411  
1392.131  
748.865  
1067.478  
1023.013  
2168.38  
44500.348  
2412.08  
1409.977  
18809.408  
16989.436  
778.697  
2950.827  
1867.746  
7539.987  
1135.399  
1368.013  
2234.46  
1051.178  
20954.758  
2295.073  
2309.857  
398.899  
909.271  
3021.609  
5988.671  
3311.156  
618.423  
956.241

2019.533  
812.496  
1569.444  
669.807  
667.357  
649.068  
676.344  
316.758  
1282.019  
1160.067  
3090.423  
3424.334  
3178.776  
3104.551  
1377.966  
485.983  
1002.831  
1764.015  
506.202  
32719.217  
553.279  
961.756  
2981.573  
1784.193  
1036.281  
7388.548  
1771.109  
1448.15  
1216.402  
5976.876  
673.165  
985.517  
1091.628  
4490.871  
1704.976  
9063.406  
1294.323  
734.043  
8853.072  
1681.215  
426.123  
1554.819  
722.927  
302.456  
558.202  
1574.743  
683.585  
4308.207  
1046.336  
895.767  
659.055  
2017.65  
2879.276

2455.581  
461.475  
722.459  
2773.216  
1440.815  
1596.515  
437.213  
1708.535  
803.909  
9082.412  
947.236  
881.832  
1457.345  
953.907  
13642.689  
435.446  
1751.016  
15001.698  
3117.463  
2982.532  
735.776  
21749.35  
2446.876  
897.953  
847.789  
1822.767  
2348.768  
3018.455  
286.051  
279.536  
571.152  
10567.26  
994.7  
1641.583  
3376.244  
395.656  
282.792  
583.015  
1045.348  
353.56  
1388.564  
6727.98  
854.946  
567.505  
1313.04  
8496.263  
839.642  
313.114  
3512.084  
1338.746  
605.897  
4109.829  
937.926



2341.293  
41159.574  
3138.472

\_\_\_\_\_

\_\_\_\_\_

\_\_\_\_\_

\_\_\_\_\_

\_\_\_\_\_

\_\_\_\_\_

\_\_\_\_\_



\_\_\_\_\_

\_\_\_\_\_

\_\_\_\_\_

\_\_\_\_\_

\_\_\_\_\_

\_\_\_\_\_

\_\_\_\_\_

\_\_\_\_\_



\_\_\_\_\_

\_\_\_\_\_

\_\_\_\_\_

\_\_\_\_\_

\_\_\_\_\_

\_\_\_\_\_

\_\_\_\_\_

\_\_\_\_\_



\_\_\_\_\_

\_\_\_\_\_

\_\_\_\_\_

\_\_\_\_\_

\_\_\_\_\_

\_\_\_\_\_

\_\_\_\_\_

\_\_\_\_\_



\_\_\_\_\_

\_\_\_\_\_

\_\_\_\_\_

\_\_\_\_\_

\_\_\_\_\_

\_\_\_\_\_

\_\_\_\_\_

\_\_\_\_\_



\_\_\_\_\_

\_\_\_\_\_

\_\_\_\_\_

\_\_\_\_\_

\_\_\_\_\_

\_\_\_\_\_

\_\_\_\_\_

\_\_\_\_\_



\_\_\_\_\_

\_\_\_\_\_

\_\_\_\_\_

\_\_\_\_\_

\_\_\_\_\_

\_\_\_\_\_

\_\_\_\_\_

\_\_\_\_\_



\_\_\_\_\_

\_\_\_\_\_

\_\_\_\_\_

\_\_\_\_\_

\_\_\_\_\_

\_\_\_\_\_

\_\_\_\_\_

\_\_\_\_\_



\_\_\_\_\_

\_\_\_\_\_

\_\_\_\_\_

\_\_\_\_\_

\_\_\_\_\_

\_\_\_\_\_

\_\_\_\_\_

\_\_\_\_\_



\_\_\_\_\_

\_\_\_\_\_

\_\_\_\_\_

\_\_\_\_\_

\_\_\_\_\_
